# Supplementary material
Source: PubMed Central journal article supplement (PMC5467195)
Supplement: ml7b00037_si_003.pdf [file ml7b00037_si_003.pdf]

The following are coordinates and charges for the ligands.

**1**

```
CHARGE      0.00 ( 0 )
Formula: H15 C10 N1 O2
ATOM      1  C  LIG      1      57.008  39.654  43.171 -0.306900      ca
ATOM      2  C  LIG      1      56.650  39.865  44.504 -0.215700      ca
ATOM      3  C  LIG      1      55.977  38.875  45.207  0.182300      ca
ATOM      4  C  LIG      1      55.655  37.664  44.573  0.387300      ca
ATOM      5  C  LIG      1      56.010  37.462  43.243 -0.419100      ca
ATOM      6  C  LIG      1      56.690  38.458  42.524  0.136000      ca
ATOM      7  C  LIG      1      57.090  38.221  41.085  0.150400      c3
ATOM      8  N  LIG      1      56.846  39.366  40.181 -0.259200      n3
ATOM      9  C  LIG      1      58.073  39.651  39.431 -0.426800      c3
ATOM     10  C  LIG      1      55.761  39.067  39.242 -0.374400      c3
ATOM     11  O  LIG      1      54.992  36.760  45.370 -0.275700      os
ATOM     12  C  LIG      1      54.522  35.543  44.775 -0.093400      c3
ATOM     13  O  LIG      1      55.633  39.087  46.526 -0.625900      oh
ATOM     14  H  LIG      1      55.930  39.974  46.779  0.450900      ho
ATOM     15  H  LIG      1      57.538  40.426  42.633  0.174900      ha
ATOM     16  H  LIG      1      56.897  40.798  44.988  0.143200      ha
ATOM     17  H  LIG      1      55.760  36.530  42.759  0.155900      ha
ATOM     18  H  LIG      1      58.155  37.991  41.062  0.027200      h1
ATOM     19  H  LIG      1      56.540  37.358  40.709  0.032200      h1
ATOM     20  H  LIG      1      54.847  38.855  39.797  0.153000      h1
ATOM     21  H  LIG      1      55.598  39.925  38.590  0.163600      h1
ATOM     22  H  LIG      1      56.030  38.199  38.640  0.114700      h1
ATOM     23  H  LIG      1      57.903  40.494  38.761  0.174300      h1
ATOM     24  H  LIG      1      58.875  39.896  40.127  0.164500      h1
ATOM     25  H  LIG      1      58.354  38.774  38.847  0.126100      h1
ATOM     26  H  LIG      1      53.984  34.958  45.521  0.112800      h1
ATOM     27  H  LIG      1      55.371  34.968  44.406  0.067100      h1
ATOM     28  H  LIG      1      53.854  35.778  43.946  0.080800      h1
BOND      1  21  10      1      H      C
BOND      2  22  10      1      H      C
BOND      3  23   9      1      H      C
BOND      4  25   9      1      H      C
BOND      5  10  20      1      C      H
BOND      6  10   8      1      C      N
BOND      7   9  24      1      C      H
BOND      8   9   8      1      C      N
BOND      9   8   7      1      N      C
BOND     10  19   7      1      H      C
BOND     11  18   7      1      H      C
BOND     12   7   6      1      C      C
BOND     13   6   1     10      C      C
BOND     14   6   5     10      C      C
BOND     15  15   1      1      H      C
BOND     16  17   5      1      H      C
BOND     17   1   2     10      C      C
BOND     18   5   4     10      C      C
BOND     19  28  12      1      H      C
BOND     20  27  12      1      H      C
BOND     21   2  16      1      C      H
BOND     22   2   3     10      C      C
BOND     23   4   3     10      C      C
BOND     24   4  11      1      C      O
BOND     25  12  11      1      C      O
BOND     26  12  26      1      C      H
BOND     27   3  13      1      C      O
BOND     28  13  14      1      O      H
```

**2**

```
CHARGE      0.00 ( 0 )
Formula: H17 C12 N1 O2
ATOM      1  C  LIG      1      53.918  36.627  43.864  0.001300      ca
ATOM      2  C  LIG      1      54.427  37.125  45.064 -0.364100      ca
ATOM      3  C  LIG      1      55.129  38.321  45.077  0.411200      ca
```

|      |    |   |     |   |        |        |        |           |    |
|------|----|---|-----|---|--------|--------|--------|-----------|----|
| ATOM | 4  | C | LIG | 1 | 55.328 | 39.029 | 43.879 | 0.040400  | ca |
| ATOM | 5  | C | LIG | 1 | 54.818 | 38.526 | 42.686 | -0.128100 | ca |
| ATOM | 6  | C | LIG | 1 | 54.102 | 37.320 | 42.666 | -0.106900 | ca |
| ATOM | 7  | C | LIG | 1 | 53.540 | 36.786 | 41.366 | -0.147500 | c3 |
| ATOM | 8  | N | LIG | 1 | 52.104 | 36.467 | 41.419 | -0.315800 | n3 |
| ATOM | 9  | C | LIG | 1 | 51.528 | 36.360 | 40.065 | -0.024800 | c3 |
| ATOM | 10 | C | LIG | 1 | 50.011 | 36.414 | 40.293 | -0.013000 | c3 |
| ATOM | 11 | C | LIG | 1 | 49.854 | 37.207 | 41.621 | -0.103400 | c3 |
| ATOM | 12 | C | LIG | 1 | 51.294 | 37.533 | 42.039 | 0.068900  | c3 |
| ATOM | 13 | O | LIG | 1 | 56.041 | 40.195 | 44.015 | -0.390400 | os |
| ATOM | 14 | C | LIG | 1 | 57.471 | 40.134 | 43.918 | 0.071200  | c3 |
| ATOM | 15 | O | LIG | 1 | 55.632 | 38.805 | 46.267 | -0.601100 | oh |
| ATOM | 16 | H | LIG | 1 | 55.917 | 39.721 | 46.131 | 0.427000  | ho |
| ATOM | 17 | H | LIG | 1 | 53.375 | 35.694 | 43.862 | 0.104200  | ha |
| ATOM | 18 | H | LIG | 1 | 54.274 | 36.579 | 45.983 | 0.195700  | ha |
| ATOM | 19 | H | LIG | 1 | 54.975 | 39.070 | 41.766 | 0.170000  | ha |
| ATOM | 20 | H | LIG | 1 | 54.083 | 35.877 | 41.106 | 0.139800  | h1 |
| ATOM | 21 | H | LIG | 1 | 53.704 | 37.527 | 40.584 | 0.065400  | h1 |
| ATOM | 22 | H | LIG | 1 | 51.815 | 35.418 | 39.597 | 0.056400  | h1 |
| ATOM | 23 | H | LIG | 1 | 51.848 | 37.201 | 39.450 | 0.052900  | h1 |
| ATOM | 24 | H | LIG | 1 | 49.515 | 36.932 | 39.472 | 0.022900  | hc |
| ATOM | 25 | H | LIG | 1 | 49.609 | 35.407 | 40.403 | 0.028700  | hc |
| ATOM | 26 | H | LIG | 1 | 49.361 | 36.598 | 42.378 | 0.050800  | hc |
| ATOM | 27 | H | LIG | 1 | 49.293 | 38.126 | 41.449 | 0.032200  | hc |
| ATOM | 28 | H | LIG | 1 | 51.593 | 38.512 | 41.664 | 0.053700  | h1 |
| ATOM | 29 | H | LIG | 1 | 51.390 | 37.498 | 43.124 | 0.041400  | h1 |
| ATOM | 30 | H | LIG | 1 | 57.887 | 41.133 | 44.047 | 0.074300  | h1 |
| ATOM | 31 | H | LIG | 1 | 57.752 | 39.747 | 42.939 | 0.048400  | h1 |
| ATOM | 32 | H | LIG | 1 | 57.860 | 39.476 | 44.695 | 0.038500  | h1 |

|      |    |    |    |    |   |   |
|------|----|----|----|----|---|---|
| BOND | 1  | 23 | 9  | 1  | H | C |
| BOND | 2  | 24 | 10 | 1  | H | C |
| BOND | 3  | 22 | 9  | 1  | H | C |
| BOND | 4  | 9  | 10 | 1  | C | C |
| BOND | 5  | 9  | 8  | 1  | C | N |
| BOND | 6  | 10 | 25 | 1  | C | H |
| BOND | 7  | 10 | 11 | 1  | C | C |
| BOND | 8  | 21 | 7  | 1  | H | C |
| BOND | 9  | 20 | 7  | 1  | H | C |
| BOND | 10 | 7  | 8  | 1  | C | N |
| BOND | 11 | 7  | 6  | 1  | C | C |
| BOND | 12 | 8  | 12 | 1  | N | C |
| BOND | 13 | 27 | 11 | 1  | H | C |
| BOND | 14 | 11 | 12 | 1  | C | C |
| BOND | 15 | 11 | 26 | 1  | C | H |
| BOND | 16 | 28 | 12 | 1  | H | C |
| BOND | 17 | 19 | 5  | 1  | H | C |
| BOND | 18 | 12 | 29 | 1  | C | H |
| BOND | 19 | 6  | 5  | 10 | C | C |
| BOND | 20 | 6  | 1  | 10 | C | C |
| BOND | 21 | 5  | 4  | 10 | C | C |
| BOND | 22 | 31 | 14 | 1  | H | C |
| BOND | 23 | 17 | 1  | 1  | H | C |
| BOND | 24 | 1  | 2  | 10 | C | C |
| BOND | 25 | 4  | 13 | 1  | C | O |
| BOND | 26 | 4  | 3  | 10 | C | C |
| BOND | 27 | 14 | 13 | 1  | C | O |
| BOND | 28 | 14 | 30 | 1  | C | H |
| BOND | 29 | 14 | 32 | 1  | C | H |
| BOND | 30 | 2  | 3  | 10 | C | C |
| BOND | 31 | 2  | 18 | 1  | C | H |
| BOND | 32 | 3  | 15 | 1  | C | O |
| BOND | 33 | 16 | 15 | 1  | H | O |

**3**

CHARGE 0.00 ( 0 )  
Formula: H19 C13 N1 O2

|      |   |   |     |   |        |        |        |           |    |
|------|---|---|-----|---|--------|--------|--------|-----------|----|
| ATOM | 1 | C | LIG | 1 | 57.479 | 39.638 | 43.433 | -0.084100 | ca |
| ATOM | 2 | C | LIG | 1 | 56.936 | 39.853 | 44.701 | -0.374500 | ca |

|      |    |    |     |    |        |        |        |           |    |
|------|----|----|-----|----|--------|--------|--------|-----------|----|
| ATOM | 3  | C  | LIG | 1  | 56.162 | 38.869 | 45.302 | 0.291300  | ca |
| ATOM | 4  | C  | LIG | 1  | 55.936 | 37.655 | 44.634 | 0.325500  | ca |
| ATOM | 5  | C  | LIG | 1  | 56.474 | 37.452 | 43.366 | -0.357300 | ca |
| ATOM | 6  | C  | LIG | 1  | 57.249 | 38.443 | 42.747 | -0.012000 | ca |
| ATOM | 7  | C  | LIG | 1  | 57.844 | 38.194 | 41.376 | 0.087200  | c3 |
| ATOM | 8  | N  | LIG | 1  | 57.641 | 39.302 | 40.416 | -0.397800 | n3 |
| ATOM | 9  | C  | LIG | 1  | 56.313 | 39.287 | 39.770 | -0.138000 | c3 |
| ATOM | 10 | C  | LIG | 1  | 56.114 | 38.165 | 38.740 | 0.105700  | c3 |
| ATOM | 11 | C  | LIG | 1  | 57.223 | 38.195 | 37.679 | 0.036200  | c3 |
| ATOM | 12 | C  | LIG | 1  | 58.608 | 38.203 | 38.341 | 0.118800  | c3 |
| ATOM | 13 | C  | LIG | 1  | 58.700 | 39.325 | 39.387 | -0.185300 | c3 |
| ATOM | 14 | O  | LIG | 1  | 55.170 | 36.752 | 45.332 | -0.315100 | os |
| ATOM | 15 | C  | LIG | 1  | 54.423 | 35.776 | 44.591 | 0.013900  | c3 |
| ATOM | 16 | O  | LIG | 1  | 55.632 | 39.090 | 46.556 | -0.630700 | oh |
| ATOM | 17 | H  | LIG | 1  | 55.896 | 39.974 | 46.848 | 0.448000  | ho |
| ATOM | 18 | H  | LIG | 1  | 58.085 | 40.406 | 42.976 | 0.123100  | ha |
| ATOM | 19 | H  | LIG | 1  | 57.118 | 40.785 | 45.215 | 0.170600  | ha |
| ATOM | 20 | H  | LIG | 1  | 56.292 | 36.519 | 42.853 | 0.166400  | ha |
| ATOM | 21 | H  | LIG | 1  | 57.386 | 37.295 | 40.963 | 0.055700  | h1 |
| ATOM | 22 | H  | LIG | 1  | 58.914 | 38.020 | 41.487 | 0.072700  | h1 |
| ATOM | 23 | H  | LIG | 1  | 55.558 | 39.172 | 40.548 | 0.101400  | h1 |
| ATOM | 24 | H  | LIG | 1  | 56.157 | 40.245 | 39.274 | 0.098600  | h1 |
| ATOM | 25 | H  | LIG | 1  | 56.135 | 37.203 | 39.252 | -0.002500 | hc |
| ATOM | 26 | H  | LIG | 1  | 55.147 | 38.292 | 38.253 | -0.029700 | hc |
| ATOM | 27 | H  | LIG | 1  | 57.112 | 39.093 | 37.071 | 0.004300  | hc |
| ATOM | 28 | H  | LIG | 1  | 57.134 | 37.316 | 37.041 | -0.034600 | hc |
| ATOM | 29 | H  | LIG | 1  | 58.777 | 37.243 | 38.829 | -0.019300 | hc |
| ATOM | 30 | H  | LIG | 1  | 59.371 | 38.358 | 37.578 | -0.026300 | hc |
| ATOM | 31 | H  | LIG | 1  | 59.663 | 39.241 | 39.890 | 0.102000  | h1 |
| ATOM | 32 | H  | LIG | 1  | 58.661 | 40.284 | 38.871 | 0.105700  | h1 |
| ATOM | 33 | H  | LIG | 1  | 53.719 | 35.276 | 45.255 | 0.088400  | h1 |
| ATOM | 34 | H  | LIG | 1  | 53.876 | 36.270 | 43.788 | 0.054000  | h1 |
| ATOM | 35 | H  | LIG | 1  | 55.107 | 35.041 | 44.166 | 0.037800  | h1 |
| BOND | 1  | 28 | 11  | 1  | H      | C      |        |           |    |
| BOND | 2  | 27 | 11  | 1  | H      | C      |        |           |    |
| BOND | 3  | 30 | 12  | 1  | H      | C      |        |           |    |
| BOND | 4  | 11 | 12  | 1  | C      | C      |        |           |    |
| BOND | 5  | 11 | 10  | 1  | C      | C      |        |           |    |
| BOND | 6  | 26 | 10  | 1  | H      | C      |        |           |    |
| BOND | 7  | 12 | 29  | 1  | C      | H      |        |           |    |
| BOND | 8  | 12 | 13  | 1  | C      | C      |        |           |    |
| BOND | 9  | 10 | 25  | 1  | C      | H      |        |           |    |
| BOND | 10 | 10 | 9   | 1  | C      | C      |        |           |    |
| BOND | 11 | 32 | 13  | 1  | H      | C      |        |           |    |
| BOND | 12 | 24 | 9   | 1  | H      | C      |        |           |    |
| BOND | 13 | 13 | 31  | 1  | C      | H      |        |           |    |
| BOND | 14 | 13 | 8   | 1  | C      | N      |        |           |    |
| BOND | 15 | 9  | 8   | 1  | C      | N      |        |           |    |
| BOND | 16 | 9  | 23  | 1  | C      | H      |        |           |    |
| BOND | 17 | 8  | 7   | 1  | N      | C      |        |           |    |
| BOND | 18 | 21 | 7   | 1  | H      | C      |        |           |    |
| BOND | 19 | 7  | 22  | 1  | C      | H      |        |           |    |
| BOND | 20 | 7  | 6   | 1  | C      | C      |        |           |    |
| BOND | 21 | 6  | 5   | 10 | C      | C      |        |           |    |
| BOND | 22 | 6  | 1   | 10 | C      | C      |        |           |    |
| BOND | 23 | 20 | 5   | 1  | H      | C      |        |           |    |
| BOND | 24 | 18 | 1   | 1  | H      | C      |        |           |    |
| BOND | 25 | 5  | 4   | 10 | C      | C      |        |           |    |
| BOND | 26 | 1  | 2   | 10 | C      | C      |        |           |    |
| BOND | 27 | 34 | 15  | 1  | H      | C      |        |           |    |
| BOND | 28 | 35 | 15  | 1  | H      | C      |        |           |    |
| BOND | 29 | 15 | 33  | 1  | C      | H      |        |           |    |
| BOND | 30 | 15 | 14  | 1  | C      | O      |        |           |    |
| BOND | 31 | 4  | 3   | 10 | C      | C      |        |           |    |
| BOND | 32 | 4  | 14  | 1  | C      | O      |        |           |    |
| BOND | 33 | 2  | 19  | 1  | C      | H      |        |           |    |
| BOND | 34 | 2  | 3   | 10 | C      | C      |        |           |    |

BOND 35 3 16 1 C O  
 BOND 36 16 17 1 O H

4

CHARGE 0.00 ( 0 )  
 Formula: H17 C12 N1 O3

|      |    |    |     |    |        |        |        |           |    |
|------|----|----|-----|----|--------|--------|--------|-----------|----|
| ATOM | 1  | C  | LIG | 1  | 57.355 | 39.561 | 43.355 | -0.094500 | ca |
| ATOM | 2  | C  | LIG | 1  | 56.884 | 39.797 | 44.648 | -0.345000 | ca |
| ATOM | 3  | C  | LIG | 1  | 56.101 | 38.846 | 45.285 | 0.261200  | ca |
| ATOM | 4  | C  | LIG | 1  | 55.792 | 37.642 | 44.632 | 0.335300  | ca |
| ATOM | 5  | C  | LIG | 1  | 56.266 | 37.413 | 43.342 | -0.328300 | ca |
| ATOM | 6  | C  | LIG | 1  | 57.048 | 38.375 | 42.686 | -0.030400 | ca |
| ATOM | 7  | C  | LIG | 1  | 57.549 | 38.122 | 41.279 | 0.071200  | c3 |
| ATOM | 8  | N  | LIG | 1  | 57.294 | 39.250 | 40.348 | -0.370400 | n3 |
| ATOM | 9  | C  | LIG | 1  | 55.928 | 39.246 | 39.783 | -0.136400 | c3 |
| ATOM | 10 | C  | LIG | 1  | 55.700 | 38.172 | 38.723 | 0.252900  | c3 |
| ATOM | 11 | O  | LIG | 1  | 56.666 | 38.286 | 37.660 | -0.485100 | os |
| ATOM | 12 | C  | LIG | 1  | 58.007 | 38.193 | 38.176 | 0.267400  | c3 |
| ATOM | 13 | C  | LIG | 1  | 58.259 | 39.267 | 39.229 | -0.190700 | c3 |
| ATOM | 14 | O  | LIG | 1  | 55.018 | 36.775 | 45.365 | -0.282300 | os |
| ATOM | 15 | C  | LIG | 1  | 54.525 | 35.591 | 44.720 | -0.061700 | c3 |
| ATOM | 16 | O  | LIG | 1  | 55.636 | 39.088 | 46.562 | -0.636300 | oh |
| ATOM | 17 | H  | LIG | 1  | 55.974 | 39.950 | 46.851 | 0.455300  | ho |
| ATOM | 18 | H  | LIG | 1  | 57.965 | 40.306 | 42.866 | 0.125700  | ha |
| ATOM | 19 | H  | LIG | 1  | 57.129 | 40.720 | 45.152 | 0.164000  | ha |
| ATOM | 20 | H  | LIG | 1  | 56.029 | 36.486 | 42.842 | 0.144100  | ha |
| ATOM | 21 | H  | LIG | 1  | 58.624 | 37.947 | 41.322 | 0.075500  | h1 |
| ATOM | 22 | H  | LIG | 1  | 57.063 | 37.228 | 40.889 | 0.070300  | h1 |
| ATOM | 23 | H  | LIG | 1  | 55.741 | 40.220 | 39.330 | 0.117900  | h1 |
| ATOM | 24 | H  | LIG | 1  | 55.215 | 39.094 | 40.593 | 0.094700  | h1 |
| ATOM | 25 | H  | LIG | 1  | 55.792 | 37.189 | 39.185 | 0.009500  | h1 |
| ATOM | 26 | H  | LIG | 1  | 54.697 | 38.282 | 38.310 | 0.030200  | h1 |
| ATOM | 27 | H  | LIG | 1  | 58.149 | 37.211 | 38.627 | -0.012800 | h1 |
| ATOM | 28 | H  | LIG | 1  | 58.716 | 38.319 | 37.358 | 0.034800  | h1 |
| ATOM | 29 | H  | LIG | 1  | 58.204 | 40.242 | 38.744 | 0.126800  | h1 |
| ATOM | 30 | H  | LIG | 1  | 59.263 | 39.133 | 39.632 | 0.098200  | h1 |
| ATOM | 31 | H  | LIG | 1  | 53.886 | 35.040 | 45.410 | 0.107200  | h1 |
| ATOM | 32 | H  | LIG | 1  | 55.365 | 34.963 | 44.423 | 0.059900  | h1 |
| ATOM | 33 | H  | LIG | 1  | 53.951 | 35.871 | 43.837 | 0.071900  | h1 |
| BOND | 1  | 28 | 12  | 1  | H      | C      |        |           |    |
| BOND | 2  | 11 | 12  | 1  | O      | C      |        |           |    |
| BOND | 3  | 11 | 10  | 1  | O      | C      |        |           |    |
| BOND | 4  | 12 | 27  | 1  | C      | H      |        |           |    |
| BOND | 5  | 12 | 13  | 1  | C      | C      |        |           |    |
| BOND | 6  | 26 | 10  | 1  | H      | C      |        |           |    |
| BOND | 7  | 10 | 25  | 1  | C      | H      |        |           |    |
| BOND | 8  | 10 | 9   | 1  | C      | C      |        |           |    |
| BOND | 9  | 29 | 13  | 1  | H      | C      |        |           |    |
| BOND | 10 | 13 | 30  | 1  | C      | H      |        |           |    |
| BOND | 11 | 13 | 8   | 1  | C      | N      |        |           |    |
| BOND | 12 | 23 | 9   | 1  | H      | C      |        |           |    |
| BOND | 13 | 9  | 8   | 1  | C      | N      |        |           |    |
| BOND | 14 | 9  | 24  | 1  | C      | H      |        |           |    |
| BOND | 15 | 8  | 7   | 1  | N      | C      |        |           |    |
| BOND | 16 | 22 | 7   | 1  | H      | C      |        |           |    |
| BOND | 17 | 7  | 21  | 1  | C      | H      |        |           |    |
| BOND | 18 | 7  | 6   | 1  | C      | C      |        |           |    |
| BOND | 19 | 6  | 5   | 10 | C      | C      |        |           |    |
| BOND | 20 | 6  | 1   | 10 | C      | C      |        |           |    |
| BOND | 21 | 20 | 5   | 1  | H      | C      |        |           |    |
| BOND | 22 | 18 | 1   | 1  | H      | C      |        |           |    |
| BOND | 23 | 5  | 4   | 10 | C      | C      |        |           |    |
| BOND | 24 | 1  | 2   | 10 | C      | C      |        |           |    |
| BOND | 25 | 33 | 15  | 1  | H      | C      |        |           |    |
| BOND | 26 | 32 | 15  | 1  | H      | C      |        |           |    |
| BOND | 27 | 4  | 3   | 10 | C      | C      |        |           |    |
| BOND | 28 | 4  | 14  | 1  | C      | O      |        |           |    |
| BOND | 29 | 2  | 19  | 1  | C      | H      |        |           |    |



|      |    |    |    |    |   |   |
|------|----|----|----|----|---|---|
| BOND | 30 | 2  | 3  | 10 | C | C |
| BOND | 31 | 15 | 14 | 1  | C | O |
| BOND | 32 | 15 | 31 | 1  | C | H |
| BOND | 33 | 3  | 16 | 1  | C | O |
| BOND | 34 | 16 | 17 | 1  | O | H |

**1-HCl**

CHARGE 1.00 ( 1 )  
 Formula: H16 C10 N1 O2

|      |    |    |     |    |        |        |        |           |    |
|------|----|----|-----|----|--------|--------|--------|-----------|----|
| ATOM | 1  | C  | LIG | 1  | 54.839 | 37.349 | 41.675 | 0.233300  | ca |
| ATOM | 2  | C  | LIG | 1  | 55.023 | 38.706 | 42.006 | -0.419000 | ca |
| ATOM | 3  | C  | LIG | 1  | 55.143 | 39.088 | 43.336 | 0.313800  | ca |
| ATOM | 4  | C  | LIG | 1  | 55.068 | 38.115 | 44.362 | 0.160600  | ca |
| ATOM | 5  | C  | LIG | 1  | 54.872 | 36.779 | 44.035 | -0.106900 | ca |
| ATOM | 6  | C  | LIG | 1  | 54.760 | 36.397 | 42.696 | -0.336900 | ca |
| ATOM | 7  | C  | LIG | 1  | 54.719 | 36.945 | 40.234 | -0.299100 | c3 |
| ATOM | 8  | N  | LIG | 1  | 53.470 | 37.522 | 39.551 | -0.027000 | n4 |
| ATOM | 9  | C  | LIG | 1  | 52.212 | 36.974 | 40.163 | -0.315100 | c3 |
| ATOM | 10 | H  | LIG | 1  | 53.480 | 38.531 | 39.729 | 0.337100  | hn |
| ATOM | 11 | C  | LIG | 1  | 53.483 | 37.334 | 38.062 | -0.351900 | c3 |
| ATOM | 12 | O  | LIG | 1  | 55.323 | 40.359 | 43.801 | -0.265900 | os |
| ATOM | 13 | C  | LIG | 1  | 55.282 | 41.439 | 42.870 | -0.133100 | c3 |
| ATOM | 14 | O  | LIG | 1  | 55.178 | 38.494 | 45.662 | -0.483600 | oh |
| ATOM | 15 | H  | LIG | 1  | 55.354 | 39.453 | 45.673 | 0.399300  | ho |
| ATOM | 16 | H  | LIG | 1  | 55.071 | 39.450 | 41.225 | 0.165200  | ha |
| ATOM | 17 | H  | LIG | 1  | 54.806 | 36.036 | 44.816 | 0.189200  | ha |
| ATOM | 18 | H  | LIG | 1  | 54.611 | 35.357 | 42.447 | 0.179600  | ha |
| ATOM | 19 | H  | LIG | 1  | 54.672 | 35.857 | 40.181 | 0.184900  | hx |
| ATOM | 20 | H  | LIG | 1  | 55.604 | 37.287 | 39.697 | 0.175000  | hx |
| ATOM | 21 | H  | LIG | 1  | 54.407 | 37.742 | 37.652 | 0.176700  | hx |
| ATOM | 22 | H  | LIG | 1  | 52.631 | 37.853 | 37.623 | 0.180100  | hx |
| ATOM | 23 | H  | LIG | 1  | 53.420 | 36.271 | 37.829 | 0.191200  | hx |
| ATOM | 24 | H  | LIG | 1  | 52.236 | 37.127 | 41.242 | 0.146700  | hx |
| ATOM | 25 | H  | LIG | 1  | 51.349 | 37.490 | 39.742 | 0.172900  | hx |
| ATOM | 26 | H  | LIG | 1  | 52.138 | 35.908 | 39.949 | 0.191800  | hx |
| ATOM | 27 | H  | LIG | 1  | 55.398 | 42.383 | 43.403 | 0.152700  | h1 |
| ATOM | 28 | H  | LIG | 1  | 56.091 | 41.327 | 42.149 | 0.107600  | h1 |
| ATOM | 29 | H  | LIG | 1  | 54.326 | 41.432 | 42.347 | 0.080600  | h1 |
| BOND | 1  | 22 | 11  | 1  | H      | C      |        |           |    |
| BOND | 2  | 21 | 11  | 1  | H      | C      |        |           |    |
| BOND | 3  | 23 | 11  | 1  | H      | C      |        |           |    |
| BOND | 4  | 11 | 8   | 1  | C      | N      |        |           |    |
| BOND | 5  | 8  | 10  | 1  | N      | H      |        |           |    |
| BOND | 6  | 8  | 9   | 1  | N      | C      |        |           |    |
| BOND | 7  | 8  | 7   | 1  | N      | C      |        |           |    |
| BOND | 8  | 20 | 7   | 1  | H      | C      |        |           |    |
| BOND | 9  | 25 | 9   | 1  | H      | C      |        |           |    |
| BOND | 10 | 26 | 9   | 1  | H      | C      |        |           |    |
| BOND | 11 | 9  | 24  | 1  | C      | H      |        |           |    |
| BOND | 12 | 19 | 7   | 1  | H      | C      |        |           |    |
| BOND | 13 | 7  | 1   | 1  | C      | C      |        |           |    |
| BOND | 14 | 16 | 2   | 1  | H      | C      |        |           |    |
| BOND | 15 | 1  | 2   | 10 | C      | C      |        |           |    |
| BOND | 16 | 1  | 6   | 10 | C      | C      |        |           |    |
| BOND | 17 | 2  | 3   | 10 | C      | C      |        |           |    |
| BOND | 18 | 28 | 13  | 1  | H      | C      |        |           |    |
| BOND | 19 | 29 | 13  | 1  | H      | C      |        |           |    |
| BOND | 20 | 18 | 6   | 1  | H      | C      |        |           |    |
| BOND | 21 | 6  | 5   | 10 | C      | C      |        |           |    |
| BOND | 22 | 13 | 27  | 1  | C      | H      |        |           |    |
| BOND | 23 | 13 | 12  | 1  | C      | O      |        |           |    |
| BOND | 24 | 3  | 12  | 1  | C      | O      |        |           |    |
| BOND | 25 | 3  | 4   | 10 | C      | C      |        |           |    |
| BOND | 26 | 5  | 4   | 10 | C      | C      |        |           |    |
| BOND | 27 | 5  | 17  | 1  | C      | H      |        |           |    |
| BOND | 28 | 4  | 14  | 1  | C      | O      |        |           |    |
| BOND | 29 | 14 | 15  | 1  | O      | H      |        |           |    |

**2-HCl**

CHARGE 1.00 ( 1 )

Formula: H18 C12 N1 O2

|      |    |    |     |    |        |        |        |           |    |
|------|----|----|-----|----|--------|--------|--------|-----------|----|
| ATOM | 1  | C  | LIG | 1  | 45.156 | 38.235 | 36.942 | -0.170800 | ca |
| ATOM | 2  | C  | LIG | 1  | 46.381 | 37.794 | 37.451 | 0.165600  | ca |
| ATOM | 3  | C  | LIG | 1  | 47.560 | 38.013 | 36.711 | -0.337300 | ca |
| ATOM | 4  | C  | LIG | 1  | 47.501 | 38.677 | 35.491 | 0.122300  | ca |
| ATOM | 5  | C  | LIG | 1  | 46.258 | 39.125 | 34.988 | 0.387900  | ca |
| ATOM | 6  | C  | LIG | 1  | 45.095 | 38.896 | 35.712 | -0.287900 | ca |
| ATOM | 7  | C  | LIG | 1  | 46.452 | 37.091 | 38.778 | -0.369900 | c3 |
| ATOM | 8  | N  | LIG | 1  | 45.323 | 36.087 | 38.971 | -0.123700 | n4 |
| ATOM | 9  | H  | LIG | 1  | 44.443 | 36.610 | 38.913 | 0.346200  | hn |
| ATOM | 10 | C  | LIG | 1  | 45.355 | 35.382 | 40.321 | -0.026600 | c3 |
| ATOM | 11 | C  | LIG | 1  | 44.618 | 34.042 | 40.105 | -0.107100 | c3 |
| ATOM | 12 | C  | LIG | 1  | 44.268 | 33.993 | 38.596 | -0.008600 | c3 |
| ATOM | 13 | C  | LIG | 1  | 45.239 | 34.975 | 37.947 | 0.048000  | c3 |
| ATOM | 14 | O  | LIG | 1  | 48.556 | 38.957 | 34.670 | -0.351200 | os |
| ATOM | 15 | C  | LIG | 1  | 49.417 | 40.044 | 35.010 | 0.067100  | c3 |
| ATOM | 16 | O  | LIG | 1  | 46.206 | 39.767 | 33.790 | -0.524700 | oh |
| ATOM | 17 | H  | LIG | 1  | 46.930 | 39.416 | 33.239 | 0.403100  | ho |
| ATOM | 18 | H  | LIG | 1  | 44.250 | 38.064 | 37.504 | 0.123800  | ha |
| ATOM | 19 | H  | LIG | 1  | 48.509 | 37.665 | 37.091 | 0.223800  | ha |
| ATOM | 20 | H  | LIG | 1  | 44.143 | 39.229 | 35.325 | 0.200700  | ha |
| ATOM | 21 | H  | LIG | 1  | 46.395 | 37.837 | 39.571 | 0.187100  | hx |
| ATOM | 22 | H  | LIG | 1  | 47.406 | 36.569 | 38.851 | 0.190000  | hx |
| ATOM | 23 | H  | LIG | 1  | 46.384 | 35.204 | 40.633 | 0.115000  | hx |
| ATOM | 24 | H  | LIG | 1  | 44.834 | 35.980 | 41.069 | 0.098000  | hx |
| ATOM | 25 | H  | LIG | 1  | 43.710 | 34.007 | 40.707 | 0.077600  | hc |
| ATOM | 26 | H  | LIG | 1  | 45.272 | 33.209 | 40.365 | 0.085600  | hc |
| ATOM | 27 | H  | LIG | 1  | 44.414 | 32.988 | 38.199 | 0.065300  | hc |
| ATOM | 28 | H  | LIG | 1  | 43.240 | 34.317 | 38.436 | 0.044500  | hc |
| ATOM | 29 | H  | LIG | 1  | 44.849 | 35.343 | 36.998 | 0.038200  | hx |
| ATOM | 30 | H  | LIG | 1  | 46.215 | 34.511 | 37.805 | 0.114800  | hx |
| ATOM | 31 | H  | LIG | 1  | 50.203 | 40.134 | 34.260 | 0.088300  | h1 |
| ATOM | 32 | H  | LIG | 1  | 49.866 | 39.860 | 35.986 | 0.050100  | h1 |
| ATOM | 33 | H  | LIG | 1  | 48.840 | 40.968 | 35.044 | 0.065000  | h1 |
| BOND | 1  | 17 | 16  | 1  | H      | O      |        |           |    |
| BOND | 2  | 16 | 5   | 1  | O      | C      |        |           |    |
| BOND | 3  | 31 | 15  | 1  | H      | C      |        |           |    |
| BOND | 4  | 14 | 15  | 1  | O      | C      |        |           |    |
| BOND | 5  | 14 | 4   | 1  | O      | C      |        |           |    |
| BOND | 6  | 5  | 4   | 10 | C      | C      |        |           |    |
| BOND | 7  | 5  | 6   | 10 | C      | C      |        |           |    |
| BOND | 8  | 15 | 33  | 1  | C      | H      |        |           |    |
| BOND | 9  | 15 | 32  | 1  | C      | H      |        |           |    |
| BOND | 10 | 20 | 6   | 1  | H      | C      |        |           |    |
| BOND | 11 | 4  | 3   | 10 | C      | C      |        |           |    |
| BOND | 12 | 6  | 1   | 10 | C      | C      |        |           |    |
| BOND | 13 | 3  | 19  | 1  | C      | H      |        |           |    |
| BOND | 14 | 3  | 2   | 10 | C      | C      |        |           |    |
| BOND | 15 | 1  | 2   | 10 | C      | C      |        |           |    |
| BOND | 16 | 1  | 18  | 1  | C      | H      |        |           |    |
| BOND | 17 | 29 | 13  | 1  | H      | C      |        |           |    |
| BOND | 18 | 2  | 7   | 1  | C      | C      |        |           |    |
| BOND | 19 | 30 | 13  | 1  | H      | C      |        |           |    |
| BOND | 20 | 13 | 12  | 1  | C      | C      |        |           |    |
| BOND | 21 | 13 | 8   | 1  | C      | N      |        |           |    |
| BOND | 22 | 27 | 12  | 1  | H      | C      |        |           |    |
| BOND | 23 | 28 | 12  | 1  | H      | C      |        |           |    |
| BOND | 24 | 12 | 11  | 1  | C      | C      |        |           |    |
| BOND | 25 | 7  | 22  | 1  | C      | H      |        |           |    |
| BOND | 26 | 7  | 8   | 1  | C      | N      |        |           |    |
| BOND | 27 | 7  | 21  | 1  | C      | H      |        |           |    |
| BOND | 28 | 9  | 8   | 1  | H      | N      |        |           |    |
| BOND | 29 | 8  | 10  | 1  | N      | C      |        |           |    |
| BOND | 30 | 11 | 10  | 1  | C      | C      |        |           |    |

|      |    |    |    |   |   |   |
|------|----|----|----|---|---|---|
| BOND | 31 | 11 | 26 | 1 | C | H |
| BOND | 32 | 11 | 25 | 1 | C | H |
| BOND | 33 | 10 | 23 | 1 | C | H |
| BOND | 34 | 10 | 24 | 1 | C | H |

### 3-HCl

CHARGE 1.00 ( 1 )

Formula: H2O C13 N1 O2

|      |    |    |     |    |        |        |        |           |    |
|------|----|----|-----|----|--------|--------|--------|-----------|----|
| ATOM | 1  | C  | LIG | 1  | 54.346 | 37.500 | 41.936 | 0.277300  | ca |
| ATOM | 2  | C  | LIG | 1  | 54.669 | 38.852 | 42.172 | -0.396000 | ca |
| ATOM | 3  | C  | LIG | 1  | 55.098 | 39.255 | 43.430 | 0.298300  | ca |
| ATOM | 4  | C  | LIG | 1  | 55.199 | 38.312 | 44.480 | 0.166100  | ca |
| ATOM | 5  | C  | LIG | 1  | 54.867 | 36.982 | 44.249 | -0.123600 | ca |
| ATOM | 6  | C  | LIG | 1  | 54.443 | 36.577 | 42.980 | -0.387900 | ca |
| ATOM | 7  | C  | LIG | 1  | 53.887 | 37.076 | 40.569 | -0.339200 | c3 |
| ATOM | 8  | N  | LIG | 1  | 52.666 | 37.864 | 40.079 | 0.036800  | n4 |
| ATOM | 9  | H  | LIG | 1  | 52.980 | 38.833 | 39.955 | 0.297700  | hn |
| ATOM | 10 | C  | LIG | 1  | 51.560 | 37.870 | 41.131 | -0.021600 | c3 |
| ATOM | 11 | C  | LIG | 1  | 50.181 | 38.148 | 40.512 | -0.024700 | c3 |
| ATOM | 12 | C  | LIG | 1  | 50.289 | 39.073 | 39.294 | -0.043500 | c3 |
| ATOM | 13 | C  | LIG | 1  | 51.136 | 38.410 | 38.181 | -0.049500 | c3 |
| ATOM | 14 | C  | LIG | 1  | 52.146 | 37.397 | 38.740 | -0.116600 | c3 |
| ATOM | 15 | O  | LIG | 1  | 55.439 | 40.524 | 43.802 | -0.250200 | os |
| ATOM | 16 | C  | LIG | 1  | 55.036 | 41.611 | 42.968 | -0.177300 | c3 |
| ATOM | 17 | O  | LIG | 1  | 55.610 | 38.712 | 45.712 | -0.482900 | oh |
| ATOM | 18 | H  | LIG | 1  | 55.763 | 39.675 | 45.669 | 0.393000  | ho |
| ATOM | 19 | H  | LIG | 1  | 54.583 | 39.575 | 41.374 | 0.140000  | ha |
| ATOM | 20 | H  | LIG | 1  | 54.937 | 36.261 | 45.050 | 0.195500  | ha |
| ATOM | 21 | H  | LIG | 1  | 54.188 | 35.542 | 42.805 | 0.205800  | ha |
| ATOM | 22 | H  | LIG | 1  | 54.705 | 37.228 | 39.865 | 0.170000  | hx |
| ATOM | 23 | H  | LIG | 1  | 53.636 | 36.016 | 40.594 | 0.159400  | hx |
| ATOM | 24 | H  | LIG | 1  | 51.778 | 38.644 | 41.867 | 0.062900  | hx |
| ATOM | 25 | H  | LIG | 1  | 51.538 | 36.901 | 41.630 | 0.085100  | hx |
| ATOM | 26 | H  | LIG | 1  | 49.735 | 37.203 | 40.201 | 0.044500  | hc |
| ATOM | 27 | H  | LIG | 1  | 49.541 | 38.616 | 41.260 | 0.067100  | hc |
| ATOM | 28 | H  | LIG | 1  | 49.290 | 39.278 | 38.910 | 0.063400  | hc |
| ATOM | 29 | H  | LIG | 1  | 50.758 | 40.010 | 39.594 | 0.017900  | hc |
| ATOM | 30 | H  | LIG | 1  | 50.467 | 37.894 | 37.492 | 0.082300  | hc |
| ATOM | 31 | H  | LIG | 1  | 51.675 | 39.185 | 37.637 | 0.046200  | hc |
| ATOM | 32 | H  | LIG | 1  | 52.980 | 37.298 | 38.045 | 0.098300  | hx |
| ATOM | 33 | H  | LIG | 1  | 51.659 | 36.429 | 38.859 | 0.133400  | hx |
| ATOM | 34 | H  | LIG | 1  | 55.268 | 42.554 | 43.462 | 0.159200  | h1 |
| ATOM | 35 | H  | LIG | 1  | 53.963 | 41.550 | 42.786 | 0.095900  | h1 |
| ATOM | 36 | H  | LIG | 1  | 55.569 | 41.558 | 42.019 | 0.116800  | h1 |
| BOND | 1  | 30 | 13  | 1  | H      | C      |        |           |    |
| BOND | 2  | 31 | 13  | 1  | H      | C      |        |           |    |
| BOND | 3  | 32 | 14  | 1  | H      | C      |        |           |    |
| BOND | 4  | 13 | 14  | 1  | C      | C      |        |           |    |
| BOND | 5  | 13 | 12  | 1  | C      | C      |        |           |    |
| BOND | 6  | 14 | 33  | 1  | C      | H      |        |           |    |
| BOND | 7  | 14 | 8   | 1  | C      | N      |        |           |    |
| BOND | 8  | 28 | 12  | 1  | H      | C      |        |           |    |
| BOND | 9  | 12 | 29  | 1  | C      | H      |        |           |    |
| BOND | 10 | 12 | 11  | 1  | C      | C      |        |           |    |
| BOND | 11 | 22 | 7   | 1  | H      | C      |        |           |    |
| BOND | 12 | 9  | 8   | 1  | H      | N      |        |           |    |
| BOND | 13 | 8  | 7   | 1  | N      | C      |        |           |    |
| BOND | 14 | 8  | 10  | 1  | N      | C      |        |           |    |
| BOND | 15 | 26 | 11  | 1  | H      | C      |        |           |    |
| BOND | 16 | 11 | 10  | 1  | C      | C      |        |           |    |
| BOND | 17 | 11 | 27  | 1  | C      | H      |        |           |    |
| BOND | 18 | 7  | 23  | 1  | C      | H      |        |           |    |
| BOND | 19 | 7  | 1   | 1  | C      | C      |        |           |    |
| BOND | 20 | 10 | 25  | 1  | C      | H      |        |           |    |
| BOND | 21 | 10 | 24  | 1  | C      | H      |        |           |    |
| BOND | 22 | 19 | 2   | 1  | H      | C      |        |           |    |
| BOND | 23 | 1  | 2   | 10 | C      | C      |        |           |    |

|      |    |    |    |    |   |   |
|------|----|----|----|----|---|---|
| BOND | 24 | 1  | 6  | 10 | C | C |
| BOND | 25 | 36 | 16 | 1  | H | C |
| BOND | 26 | 2  | 3  | 10 | C | C |
| BOND | 27 | 35 | 16 | 1  | H | C |
| BOND | 28 | 21 | 6  | 1  | H | C |
| BOND | 29 | 16 | 34 | 1  | C | H |
| BOND | 30 | 16 | 15 | 1  | C | O |
| BOND | 31 | 6  | 5  | 10 | C | C |
| BOND | 32 | 3  | 15 | 1  | C | O |
| BOND | 33 | 3  | 4  | 10 | C | C |
| BOND | 34 | 5  | 4  | 10 | C | C |
| BOND | 35 | 5  | 20 | 1  | C | H |
| BOND | 36 | 4  | 17 | 1  | C | O |
| BOND | 37 | 18 | 17 | 1  | H | O |

#### 4-HCl

CHARGE 1.00 ( 1 )

Formula: H18 C12 N1 O3

|      |    |    |     |   |        |        |        |           |    |
|------|----|----|-----|---|--------|--------|--------|-----------|----|
| ATOM | 1  | C  | LIG | 1 | 54.305 | 37.465 | 41.942 | 0.218900  | ca |
| ATOM | 2  | C  | LIG | 1 | 54.616 | 38.822 | 42.165 | -0.349400 | ca |
| ATOM | 3  | C  | LIG | 1 | 55.061 | 39.235 | 43.415 | 0.306800  | ca |
| ATOM | 4  | C  | LIG | 1 | 55.193 | 38.297 | 44.467 | 0.159400  | ca |
| ATOM | 5  | C  | LIG | 1 | 54.874 | 36.962 | 44.247 | -0.104300 | ca |
| ATOM | 6  | C  | LIG | 1 | 54.433 | 36.548 | 42.987 | -0.367300 | ca |
| ATOM | 7  | C  | LIG | 1 | 53.834 | 37.026 | 40.584 | -0.270600 | c3 |
| ATOM | 8  | N  | LIG | 1 | 52.666 | 37.873 | 40.060 | -0.066500 | n4 |
| ATOM | 9  | C  | LIG | 1 | 52.153 | 37.412 | 38.715 | -0.262800 | c3 |
| ATOM | 10 | C  | LIG | 1 | 50.978 | 38.283 | 38.279 | 0.216900  | c3 |
| ATOM | 11 | O  | LIG | 1 | 49.936 | 38.265 | 39.244 | -0.439800 | os |
| ATOM | 12 | C  | LIG | 1 | 50.387 | 38.779 | 40.488 | 0.217500  | c3 |
| ATOM | 13 | C  | LIG | 1 | 51.529 | 37.941 | 41.056 | -0.170800 | c3 |
| ATOM | 14 | H  | LIG | 1 | 53.030 | 38.828 | 39.939 | 0.344100  | hn |
| ATOM | 15 | O  | LIG | 1 | 55.395 | 40.509 | 43.776 | -0.272200 | os |
| ATOM | 16 | C  | LIG | 1 | 55.030 | 41.583 | 42.907 | -0.124500 | c3 |
| ATOM | 17 | O  | LIG | 1 | 55.621 | 38.708 | 45.688 | -0.484000 | oh |
| ATOM | 18 | H  | LIG | 1 | 55.679 | 39.681 | 45.665 | 0.397400  | ho |
| ATOM | 19 | H  | LIG | 1 | 54.508 | 39.540 | 41.365 | 0.125000  | ha |
| ATOM | 20 | H  | LIG | 1 | 54.967 | 36.245 | 45.049 | 0.190800  | ha |
| ATOM | 21 | H  | LIG | 1 | 54.189 | 35.509 | 42.820 | 0.196700  | ha |
| ATOM | 22 | H  | LIG | 1 | 54.665 | 37.107 | 39.884 | 0.169600  | hx |
| ATOM | 23 | H  | LIG | 1 | 53.518 | 35.984 | 40.639 | 0.165000  | hx |
| ATOM | 24 | H  | LIG | 1 | 51.825 | 36.375 | 38.790 | 0.196100  | hx |
| ATOM | 25 | H  | LIG | 1 | 52.952 | 37.487 | 37.978 | 0.137300  | hx |
| ATOM | 26 | H  | LIG | 1 | 51.325 | 39.308 | 38.150 | 0.031800  | h1 |
| ATOM | 27 | H  | LIG | 1 | 50.592 | 37.914 | 37.329 | 0.112600  | h1 |
| ATOM | 28 | H  | LIG | 1 | 50.736 | 39.802 | 40.344 | 0.026600  | h1 |
| ATOM | 29 | H  | LIG | 1 | 49.558 | 38.780 | 41.196 | 0.109100  | h1 |
| ATOM | 30 | H  | LIG | 1 | 51.169 | 36.933 | 41.262 | 0.175800  | hx |
| ATOM | 31 | H  | LIG | 1 | 51.885 | 38.394 | 41.981 | 0.083400  | hx |
| ATOM | 32 | H  | LIG | 1 | 55.272 | 42.534 | 43.382 | 0.150800  | h1 |
| ATOM | 33 | H  | LIG | 1 | 53.959 | 41.540 | 42.706 | 0.077700  | h1 |
| ATOM | 34 | H  | LIG | 1 | 55.579 | 41.495 | 41.970 | 0.102700  | h1 |
| BOND | 1  | 27 | 10  | 1 | H      | C      |        |           |    |
| BOND | 2  | 25 | 9   | 1 | H      | C      |        |           |    |
| BOND | 3  | 26 | 10  | 1 | H      | C      |        |           |    |
| BOND | 4  | 10 | 9   | 1 | C      | C      |        |           |    |
| BOND | 5  | 10 | 11  | 1 | C      | O      |        |           |    |
| BOND | 6  | 9  | 24  | 1 | C      | H      |        |           |    |
| BOND | 7  | 9  | 8   | 1 | C      | N      |        |           |    |
| BOND | 8  | 11 | 12  | 1 | O      | C      |        |           |    |
| BOND | 9  | 22 | 7   | 1 | H      | C      |        |           |    |
| BOND | 10 | 14 | 8   | 1 | H      | N      |        |           |    |
| BOND | 11 | 8  | 7   | 1 | N      | C      |        |           |    |
| BOND | 12 | 8  | 13  | 1 | N      | C      |        |           |    |
| BOND | 13 | 28 | 12  | 1 | H      | C      |        |           |    |
| BOND | 14 | 12 | 13  | 1 | C      | C      |        |           |    |
| BOND | 15 | 12 | 29  | 1 | C      | H      |        |           |    |

|      |    |    |    |    |   |   |
|------|----|----|----|----|---|---|
| BOND | 16 | 7  | 23 | 1  | C | H |
| BOND | 17 | 7  | 1  | 1  | C | C |
| BOND | 18 | 13 | 30 | 1  | C | H |
| BOND | 19 | 13 | 31 | 1  | C | H |
| BOND | 20 | 19 | 2  | 1  | H | C |
| BOND | 21 | 1  | 2  | 10 | C | C |
| BOND | 22 | 1  | 6  | 10 | C | C |
| BOND | 23 | 34 | 16 | 1  | H | C |
| BOND | 24 | 2  | 3  | 10 | C | C |
| BOND | 25 | 33 | 16 | 1  | H | C |
| BOND | 26 | 21 | 6  | 1  | H | C |
| BOND | 27 | 16 | 32 | 1  | C | H |
| BOND | 28 | 16 | 15 | 1  | C | O |
| BOND | 29 | 6  | 5  | 10 | C | C |
| BOND | 30 | 3  | 15 | 1  | C | O |
| BOND | 31 | 3  | 4  | 10 | C | C |
| BOND | 32 | 5  | 4  | 10 | C | C |
| BOND | 33 | 5  | 20 | 1  | C | H |
| BOND | 34 | 4  | 17 | 1  | C | O |
| BOND | 35 | 18 | 17 | 1  | H | O |

The gaff<sup>1</sup> force field was used for each of the ligands. Modifications to that force field for the non-standard residue are shown below.

```
BOND
CT-c3  303.10  1.535      same as c3-c3
```

```
ANGLE
N -CT-c3  65.900      112.130  same as c3-c3-n
CT-c3-os  67.800      108.420  same as c3-c3-os
CT-c3-h1  46.400      110.070  same as c3-c3-h1
C -CT-c3  63.800      110.530  same as c -c3-c3
c3-CT-H1  46.400      110.050  same as c3-c3-hc
```

```
DIHE
N -CT-c3-os  1  0.156      0.000      3.000      same as X -c3-c3-X
N -CT-c3-h1  1  0.156      0.000      3.000      same as X -c3-c3-X
C -CT-c3-os  1  0.156      0.000      3.000      same as X -c3-c3-X
C -CT-c3-h1  1  0.156      0.000      3.000      same as X -c3-c3-X
O -C -CT-c3  1  0.000      180.000     2.000      same as X -c -c3-X
c3-CT-N -H   1  0.000      0.000      2.000      same as X -c3-n -X
os-c3-CT-H1  1  0.156      0.000      3.000      same as X -c3-c3-X
H1-CT-c3-h1  1  0.156      0.000      3.000      same as X -c3-c3-X
```

```
!!index array str
```

```
"XA1"
```

```
!entry.XA1.unit.atoms table str name str type int typex int resx int flags
```

```
int seq int elmnt dbl chg
"N" "N" 0 1 131072 1 7 -0.731900
"CA" "CT" 0 1 131072 2 6 0.291000
"C" "C" 0 1 131072 3 6 0.474400
"O" "O" 0 1 131072 4 8 -0.549900
"CB" "c3" 0 1 131072 5 6 0.367200
"OG" "os" 0 1 131072 6 8 -0.672200
"P1" "p5" 0 1 131072 7 15 1.419700
"O1" "o" 0 1 131072 8 8 -0.921300
"O2" "o" 0 1 131072 9 8 -0.889700
"C1" "c3" 0 1 131072 10 6 -0.478900
"H" "H" 0 1 131072 11 1 0.411300
"HA" "H1" 0 1 131072 12 1 0.010900
"HB2" "h1" 0 1 131072 13 1 0.006400
"HB3" "h1" 0 1 131072 14 1 -0.014300
"H11" "hc" 0 1 131072 15 1 0.109600
"H12" "hc" 0 1 131072 16 1 0.075700
```

<sup>1</sup> Wang, J.; Wolf, R.M.; Caldwell, J.W.; Kollman, P.A.; Case, D.A. "Development and testing of a general amber force field". *J. Comp. Chem.* **2004**, *25*, 1157-1174.

```

"H13" "hc" 0 1 131072 17 1 0.092000
!entry.XA1.unit.atomsptinfo table  str pname  str ptype  int ptypex  int
pelmnt  dbl pchg
"N" "N" 0 -1 0.0
"CA" "CT" 0 -1 0.0
"C" "C" 0 -1 0.0
"O" "O" 0 -1 0.0
"CB" "c3" 0 -1 0.0
"OG" "os" 0 -1 0.0
"P1" "p5" 0 -1 0.0
"O1" "o" 0 -1 0.0
"O2" "o" 0 -1 0.0
"C1" "c3" 0 -1 0.0
"H" "H" 0 -1 0.0
"HA" "H1" 0 -1 0.0
"HB2" "h1" 0 -1 0.0
"HB3" "h1" 0 -1 0.0
"H11" "hc" 0 -1 0.0
"H12" "hc" 0 -1 0.0
"H13" "hc" 0 -1 0.0
!entry.XA1.unit.boundbox array dbl
-1.000000
0.0
0.0
0.0
0.0
!entry.XA1.unit.childsequence single int
2
!entry.XA1.unit.connect array int
1
3
!entry.XA1.unit.connectivity table  int atom1x  int atom2x  int flags
1 11 1
1 2 1
2 12 1
2 3 1
2 5 1
3 4 2
5 14 1
5 13 1
5 6 1
6 7 1
7 10 1
7 9 1
7 8 1
10 17 1
10 16 1
10 15 1
!entry.XA1.unit.hierarchy table  str abovetype  int abovex  str belowtype  int
belowx
"U" 0 "R" 1
"R" 1 "A" 1
"R" 1 "A" 2
"R" 1 "A" 3
"R" 1 "A" 4
"R" 1 "A" 5
"R" 1 "A" 6
"R" 1 "A" 7
"R" 1 "A" 8
"R" 1 "A" 9
"R" 1 "A" 10
"R" 1 "A" 11
"R" 1 "A" 12
"R" 1 "A" 13
"R" 1 "A" 14
"R" 1 "A" 15
"R" 1 "A" 16

```

```

"R" 1 "A" 17
!entry.XA1.unit.name single str
"VXA"
!entry.XA1.unit.positions table  db l x   db l y   db l z
137.519000 122.824000 41.109000
138.352000 121.644000 41.212000
139.518000 121.716000 40.251000
140.322000 122.639000 40.295000
137.517000 120.396000 40.929000
138.062000 119.273000 41.592000
138.099000 117.896000 40.786000
138.474000 118.187000 39.237000
136.762000 117.229000 40.911000
139.411000 117.022000 41.542000
138.074600 123.646300 41.296700
138.741300 121.579800 42.228100
136.498000 120.559500 41.279800
137.502400 120.208300 39.855400
139.526000 116.050700 41.060900
140.334700 117.591000 41.436500
139.190700 116.879700 42.600000
!entry.XA1.unit.residueconnect table  int c1x   int c2x   int c3x   int c4x   int
c5x   int c6x
0 0 0 0 0 0
!entry.XA1.unit.residues table  str name   int seq   int childseq   int startatomx
str restype   int imagingx
"VXA1" 1 18 1 "?" 0
!entry.XA1.unit.residuesPdbSequenceNumber array int
0
!entry.XA1.unit.solventcap array db l
-1.000000
0.0
0.0
0.0
0.0
!entry.XA1.unit.velocities table  db l x   db l y   db l z
0.0 0.0 0.0
0.0 0.0 0.0
0.0 0.0 0.0
0.0 0.0 0.0
0.0 0.0 0.0
0.0 0.0 0.0
0.0 0.0 0.0
0.0 0.0 0.0
0.0 0.0 0.0
0.0 0.0 0.0
0.0 0.0 0.0
0.0 0.0 0.0
0.0 0.0 0.0
0.0 0.0 0.0
0.0 0.0 0.0
0.0 0.0 0.0
0.0 0.0 0.0
0.0 0.0 0.0
0.0 0.0 0.0
0.0 0.0 0.0
0.0 0.0 0.0
0.0 0.0 0.0

```

The following are coordinates at the conclusion of one of the MD simulations with Frame 0000 for each of our ligands.

1

|        |        |        |        |       |       |        |        |        |      |      |
|--------|--------|--------|--------|-------|-------|--------|--------|--------|------|------|
| CRYST1 | 84.275 | 84.275 | 84.275 | 90.00 | 90.00 | 90.00  | P 1    | 1      |      |      |
| ATOM   | 1      | N      | ASP    | X     | 1     | 49.960 | 77.224 | 29.499 | 0.00 | 0.00 |
| ATOM   | 2      | H1     | ASP    | X     | 1     | 49.499 | 77.628 | 30.301 | 0.00 | 0.00 |
| ATOM   | 3      | H2     | ASP    | X     | 1     | 50.840 | 77.696 | 29.348 | 0.00 | 0.00 |
| ATOM   | 4      | H3     | ASP    | X     | 1     | 50.108 | 76.251 | 29.728 | 0.00 | 0.00 |
| ATOM   | 5      | CA     | ASP    | X     | 1     | 49.107 | 77.270 | 28.299 | 0.00 | 0.00 |
| ATOM   | 6      | HA     | ASP    | X     | 1     | 48.877 | 78.336 | 28.286 | 0.00 | 0.00 |
| ATOM   | 7      | CB     | ASP    | X     | 1     | 49.756 | 76.902 | 27.026 | 0.00 | 0.00 |
| ATOM   | 8      | HB2    | ASP    | X     | 1     | 50.504 | 77.649 | 26.758 | 0.00 | 0.00 |
| ATOM   | 9      | HB3    | ASP    | X     | 1     | 50.117 | 75.889 | 27.205 | 0.00 | 0.00 |
| ATOM   | 10     | CG     | ASP    | X     | 1     | 48.784 | 76.918 | 25.867 | 0.00 | 0.00 |
| ATOM   | 11     | OD1    | ASP    | X     | 1     | 47.880 | 76.042 | 25.681 | 0.00 | 0.00 |
| ATOM   | 12     | OD2    | ASP    | X     | 1     | 48.808 | 77.890 | 25.112 | 0.00 | 0.00 |
| ATOM   | 13     | C      | ASP    | X     | 1     | 47.819 | 76.442 | 28.627 | 0.00 | 0.00 |
| ATOM   | 14     | O      | ASP    | X     | 1     | 47.908 | 75.410 | 29.254 | 0.00 | 0.00 |
| ATOM   | 15     | N      | ALA    | X     | 2     | 46.636 | 76.883 | 28.153 | 0.00 | 0.00 |
| ATOM   | 16     | H      | ALA    | X     | 2     | 46.644 | 77.799 | 27.726 | 0.00 | 0.00 |
| ATOM   | 17     | CA     | ALA    | X     | 2     | 45.405 | 76.252 | 28.614 | 0.00 | 0.00 |
| ATOM   | 18     | HA     | ALA    | X     | 2     | 45.346 | 76.207 | 29.701 | 0.00 | 0.00 |
| ATOM   | 19     | CB     | ALA    | X     | 2     | 44.302 | 77.211 | 28.204 | 0.00 | 0.00 |
| ATOM   | 20     | HB1    | ALA    | X     | 2     | 43.331 | 76.846 | 28.537 | 0.00 | 0.00 |
| ATOM   | 21     | HB2    | ALA    | X     | 2     | 44.555 | 78.119 | 28.752 | 0.00 | 0.00 |
| ATOM   | 22     | HB3    | ALA    | X     | 2     | 44.184 | 77.292 | 27.123 | 0.00 | 0.00 |
| ATOM   | 23     | C      | ALA    | X     | 2     | 45.032 | 74.893 | 28.120 | 0.00 | 0.00 |
| ATOM   | 24     | O      | ALA    | X     | 2     | 44.136 | 74.209 | 28.626 | 0.00 | 0.00 |
| ATOM   | 25     | N      | GLU    | X     | 3     | 45.825 | 74.437 | 27.197 | 0.00 | 0.00 |
| ATOM   | 26     | H      | GLU    | X     | 3     | 46.548 | 75.063 | 26.872 | 0.00 | 0.00 |
| ATOM   | 27     | CA     | GLU    | X     | 3     | 45.644 | 73.152 | 26.588 | 0.00 | 0.00 |
| ATOM   | 28     | HA     | GLU    | X     | 3     | 44.595 | 72.863 | 26.531 | 0.00 | 0.00 |
| ATOM   | 29     | CB     | GLU    | X     | 3     | 46.283 | 73.080 | 25.224 | 0.00 | 0.00 |
| ATOM   | 30     | HB2    | GLU    | X     | 3     | 46.153 | 74.054 | 24.752 | 0.00 | 0.00 |
| ATOM   | 31     | HB3    | GLU    | X     | 3     | 47.348 | 72.913 | 25.383 | 0.00 | 0.00 |
| ATOM   | 32     | CG     | GLU    | X     | 3     | 45.603 | 72.092 | 24.294 | 0.00 | 0.00 |
| ATOM   | 33     | HG2    | GLU    | X     | 3     | 46.304 | 71.860 | 23.492 | 0.00 | 0.00 |
| ATOM   | 34     | HG3    | GLU    | X     | 3     | 45.337 | 71.139 | 24.751 | 0.00 | 0.00 |
| ATOM   | 35     | CD     | GLU    | X     | 3     | 44.301 | 72.607 | 23.634 | 0.00 | 0.00 |
| ATOM   | 36     | OE1    | GLU    | X     | 3     | 44.435 | 73.234 | 22.530 | 0.00 | 0.00 |
| ATOM   | 37     | OE2    | GLU    | X     | 3     | 43.207 | 72.381 | 24.237 | 0.00 | 0.00 |
| ATOM   | 38     | C      | GLU    | X     | 3     | 46.219 | 72.071 | 27.548 | 0.00 | 0.00 |
| ATOM   | 39     | O      | GLU    | X     | 3     | 45.752 | 70.924 | 27.488 | 0.00 | 0.00 |
| ATOM   | 40     | N      | LEU    | X     | 4     | 47.119 | 72.467 | 28.515 | 0.00 | 0.00 |
| ATOM   | 41     | H      | LEU    | X     | 4     | 47.346 | 73.449 | 28.577 | 0.00 | 0.00 |
| ATOM   | 42     | CA     | LEU    | X     | 4     | 47.480 | 71.503 | 29.523 | 0.00 | 0.00 |
| ATOM   | 43     | HA     | LEU    | X     | 4     | 47.072 | 70.533 | 29.241 | 0.00 | 0.00 |
| ATOM   | 44     | CB     | LEU    | X     | 4     | 49.033 | 71.532 | 29.666 | 0.00 | 0.00 |
| ATOM   | 45     | HB2    | LEU    | X     | 4     | 49.407 | 72.525 | 29.914 | 0.00 | 0.00 |
| ATOM   | 46     | HB3    | LEU    | X     | 4     | 49.400 | 70.879 | 30.458 | 0.00 | 0.00 |
| ATOM   | 47     | CG     | LEU    | X     | 4     | 49.860 | 71.160 | 28.390 | 0.00 | 0.00 |
| ATOM   | 48     | HG     | LEU    | X     | 4     | 49.851 | 72.004 | 27.701 | 0.00 | 0.00 |
| ATOM   | 49     | CD1    | LEU    | X     | 4     | 51.375 | 71.029 | 28.721 | 0.00 | 0.00 |
| ATOM   | 50     | HD11   | LEU    | X     | 4     | 51.855 | 70.368 | 28.000 | 0.00 | 0.00 |
| ATOM   | 51     | HD12   | LEU    | X     | 4     | 51.883 | 71.993 | 28.765 | 0.00 | 0.00 |
| ATOM   | 52     | HD13   | LEU    | X     | 4     | 51.529 | 70.551 | 29.688 | 0.00 | 0.00 |
| ATOM   | 53     | CD2    | LEU    | X     | 4     | 49.530 | 69.788 | 27.759 | 0.00 | 0.00 |
| ATOM   | 54     | HD21   | LEU    | X     | 4     | 48.457 | 69.741 | 27.575 | 0.00 | 0.00 |
| ATOM   | 55     | HD22   | LEU    | X     | 4     | 49.977 | 69.683 | 26.770 | 0.00 | 0.00 |
| ATOM   | 56     | HD23   | LEU    | X     | 4     | 49.842 | 68.963 | 28.398 | 0.00 | 0.00 |
| ATOM   | 57     | C      | LEU    | X     | 4     | 46.781 | 71.817 | 30.887 | 0.00 | 0.00 |
| ATOM   | 58     | O      | LEU    | X     | 4     | 47.315 | 71.573 | 31.925 | 0.00 | 0.00 |
| ATOM   | 59     | N      | LEU    | X     | 5     | 45.470 | 72.285 | 30.844 | 0.00 | 0.00 |
| ATOM   | 60     | H      | LEU    | X     | 5     | 45.122 | 72.602 | 29.951 | 0.00 | 0.00 |
| ATOM   | 61     | CA     | LEU    | X     | 5     | 44.622 | 72.710 | 32.046 | 0.00 | 0.00 |
| ATOM   | 62     | HA     | LEU    | X     | 5     | 45.135 | 72.466 | 32.977 | 0.00 | 0.00 |
| ATOM   | 63     | CB     | LEU    | X     | 5     | 44.534 | 74.211 | 32.041 | 0.00 | 0.00 |
| ATOM   | 64     | HB2    | LEU    | X     | 5     | 45.481 | 74.750 | 32.065 | 0.00 | 0.00 |
| ATOM   | 65     | HB3    | LEU    | X     | 5     | 43.973 | 74.425 | 31.131 | 0.00 | 0.00 |
| ATOM   | 66     | CG     | LEU    | X     | 5     | 43.637 | 74.894 | 33.093 | 0.00 | 0.00 |
| ATOM   | 67     | HG     | LEU    | X     | 5     | 42.754 | 74.275 | 33.252 | 0.00 | 0.00 |
| ATOM   | 68     | CD1    | LEU    | X     | 5     | 44.439 | 74.784 | 34.398 | 0.00 | 0.00 |



|      |     |      |     |   |   |        |        |        |      |      |
|------|-----|------|-----|---|---|--------|--------|--------|------|------|
| ATOM | 69  | HD11 | LEU | X | 5 | 45.336 | 75.397 | 34.312 | 0.00 | 0.00 |
| ATOM | 70  | HD12 | LEU | X | 5 | 43.932 | 75.142 | 35.294 | 0.00 | 0.00 |
| ATOM | 71  | HD13 | LEU | X | 5 | 44.735 | 73.752 | 34.586 | 0.00 | 0.00 |
| ATOM | 72  | CD2  | LEU | X | 5 | 43.380 | 76.404 | 32.873 | 0.00 | 0.00 |
| ATOM | 73  | HD21 | LEU | X | 5 | 44.314 | 76.966 | 32.855 | 0.00 | 0.00 |
| ATOM | 74  | HD22 | LEU | X | 5 | 42.700 | 76.549 | 32.034 | 0.00 | 0.00 |
| ATOM | 75  | HD23 | LEU | X | 5 | 42.802 | 76.815 | 33.701 | 0.00 | 0.00 |
| ATOM | 76  | C    | LEU | X | 5 | 43.318 | 71.968 | 31.902 | 0.00 | 0.00 |
| ATOM | 77  | O    | LEU | X | 5 | 42.528 | 72.288 | 31.043 | 0.00 | 0.00 |
| ATOM | 78  | N    | VAL | X | 6 | 42.982 | 71.056 | 32.815 | 0.00 | 0.00 |
| ATOM | 79  | H    | VAL | X | 6 | 43.602 | 70.960 | 33.606 | 0.00 | 0.00 |
| ATOM | 80  | CA   | VAL | X | 6 | 41.602 | 70.367 | 32.851 | 0.00 | 0.00 |
| ATOM | 81  | HA   | VAL | X | 6 | 40.944 | 70.823 | 32.110 | 0.00 | 0.00 |
| ATOM | 82  | CB   | VAL | X | 6 | 41.652 | 68.861 | 32.285 | 0.00 | 0.00 |
| ATOM | 83  | HB   | VAL | X | 6 | 42.132 | 68.969 | 31.313 | 0.00 | 0.00 |
| ATOM | 84  | CG1  | VAL | X | 6 | 42.421 | 68.058 | 33.314 | 0.00 | 0.00 |
| ATOM | 85  | HG11 | VAL | X | 6 | 42.594 | 67.006 | 33.087 | 0.00 | 0.00 |
| ATOM | 86  | HG12 | VAL | X | 6 | 43.421 | 68.480 | 33.420 | 0.00 | 0.00 |
| ATOM | 87  | HG13 | VAL | X | 6 | 41.940 | 68.055 | 34.292 | 0.00 | 0.00 |
| ATOM | 88  | CG2  | VAL | X | 6 | 40.322 | 68.256 | 31.957 | 0.00 | 0.00 |
| ATOM | 89  | HG21 | VAL | X | 6 | 39.712 | 68.793 | 31.231 | 0.00 | 0.00 |
| ATOM | 90  | HG22 | VAL | X | 6 | 40.354 | 67.247 | 31.545 | 0.00 | 0.00 |
| ATOM | 91  | HG23 | VAL | X | 6 | 39.704 | 68.270 | 32.854 | 0.00 | 0.00 |
| ATOM | 92  | C    | VAL | X | 6 | 40.954 | 70.547 | 34.237 | 0.00 | 0.00 |
| ATOM | 93  | O    | VAL | X | 6 | 41.607 | 70.864 | 35.225 | 0.00 | 0.00 |
| ATOM | 94  | N    | THR | X | 7 | 39.617 | 70.483 | 34.372 | 0.00 | 0.00 |
| ATOM | 95  | H    | THR | X | 7 | 39.063 | 70.472 | 33.528 | 0.00 | 0.00 |
| ATOM | 96  | CA   | THR | X | 7 | 38.842 | 70.811 | 35.570 | 0.00 | 0.00 |
| ATOM | 97  | HA   | THR | X | 7 | 39.413 | 70.882 | 36.495 | 0.00 | 0.00 |
| ATOM | 98  | CB   | THR | X | 7 | 37.889 | 72.026 | 35.267 | 0.00 | 0.00 |
| ATOM | 99  | HB   | THR | X | 7 | 37.139 | 71.685 | 34.554 | 0.00 | 0.00 |
| ATOM | 100 | CG2  | THR | X | 7 | 37.095 | 72.341 | 36.531 | 0.00 | 0.00 |
| ATOM | 101 | HG21 | THR | X | 7 | 37.722 | 72.313 | 37.422 | 0.00 | 0.00 |
| ATOM | 102 | HG22 | THR | X | 7 | 36.638 | 73.329 | 36.571 | 0.00 | 0.00 |
| ATOM | 103 | HG23 | THR | X | 7 | 36.316 | 71.580 | 36.573 | 0.00 | 0.00 |
| ATOM | 104 | OG1  | THR | X | 7 | 38.604 | 73.275 | 34.787 | 0.00 | 0.00 |
| ATOM | 105 | HG1  | THR | X | 7 | 37.976 | 73.976 | 34.596 | 0.00 | 0.00 |
| ATOM | 106 | C    | THR | X | 7 | 37.855 | 69.686 | 35.943 | 0.00 | 0.00 |
| ATOM | 107 | O    | THR | X | 7 | 37.239 | 69.074 | 35.057 | 0.00 | 0.00 |
| ATOM | 108 | N    | VAL | X | 8 | 37.787 | 69.430 | 37.244 | 0.00 | 0.00 |
| ATOM | 109 | H    | VAL | X | 8 | 38.324 | 70.046 | 37.838 | 0.00 | 0.00 |
| ATOM | 110 | CA   | VAL | X | 8 | 37.030 | 68.326 | 37.912 | 0.00 | 0.00 |
| ATOM | 111 | HA   | VAL | X | 8 | 36.366 | 67.907 | 37.156 | 0.00 | 0.00 |
| ATOM | 112 | CB   | VAL | X | 8 | 37.952 | 67.139 | 38.328 | 0.00 | 0.00 |
| ATOM | 113 | HB   | VAL | X | 8 | 37.301 | 66.417 | 38.821 | 0.00 | 0.00 |
| ATOM | 114 | CG1  | VAL | X | 8 | 38.654 | 66.528 | 37.027 | 0.00 | 0.00 |
| ATOM | 115 | HG11 | VAL | X | 8 | 39.090 | 65.555 | 37.250 | 0.00 | 0.00 |
| ATOM | 116 | HG12 | VAL | X | 8 | 37.893 | 66.393 | 36.258 | 0.00 | 0.00 |
| ATOM | 117 | HG13 | VAL | X | 8 | 39.322 | 67.303 | 36.650 | 0.00 | 0.00 |
| ATOM | 118 | CG2  | VAL | X | 8 | 38.955 | 67.587 | 39.418 | 0.00 | 0.00 |
| ATOM | 119 | HG21 | VAL | X | 8 | 38.402 | 68.166 | 40.159 | 0.00 | 0.00 |
| ATOM | 120 | HG22 | VAL | X | 8 | 39.376 | 66.728 | 39.940 | 0.00 | 0.00 |
| ATOM | 121 | HG23 | VAL | X | 8 | 39.720 | 68.256 | 39.026 | 0.00 | 0.00 |
| ATOM | 122 | C    | VAL | X | 8 | 36.246 | 68.858 | 39.085 | 0.00 | 0.00 |
| ATOM | 123 | O    | VAL | X | 8 | 36.435 | 70.022 | 39.495 | 0.00 | 0.00 |
| ATOM | 124 | N    | ARG | X | 9 | 35.453 | 67.996 | 39.786 | 0.00 | 0.00 |
| ATOM | 125 | H    | ARG | X | 9 | 35.337 | 67.017 | 39.564 | 0.00 | 0.00 |
| ATOM | 126 | CA   | ARG | X | 9 | 34.522 | 68.267 | 40.868 | 0.00 | 0.00 |
| ATOM | 127 | HA   | ARG | X | 9 | 33.779 | 68.897 | 40.377 | 0.00 | 0.00 |
| ATOM | 128 | CB   | ARG | X | 9 | 33.865 | 66.947 | 41.259 | 0.00 | 0.00 |
| ATOM | 129 | HB2  | ARG | X | 9 | 33.779 | 66.408 | 40.315 | 0.00 | 0.00 |
| ATOM | 130 | HB3  | ARG | X | 9 | 34.621 | 66.524 | 41.920 | 0.00 | 0.00 |
| ATOM | 131 | CG   | ARG | X | 9 | 32.507 | 66.952 | 41.947 | 0.00 | 0.00 |
| ATOM | 132 | HG2  | ARG | X | 9 | 32.315 | 66.096 | 42.594 | 0.00 | 0.00 |
| ATOM | 133 | HG3  | ARG | X | 9 | 32.502 | 67.782 | 42.653 | 0.00 | 0.00 |
| ATOM | 134 | CD   | ARG | X | 9 | 31.362 | 67.138 | 40.876 | 0.00 | 0.00 |
| ATOM | 135 | HD2  | ARG | X | 9 | 31.305 | 68.159 | 40.498 | 0.00 | 0.00 |
| ATOM | 136 | HD3  | ARG | X | 9 | 31.632 | 66.430 | 40.092 | 0.00 | 0.00 |
| ATOM | 137 | NE   | ARG | X | 9 | 30.048 | 66.681 | 41.278 | 0.00 | 0.00 |
| ATOM | 138 | HE   | ARG | X | 9 | 29.630 | 66.056 | 40.604 | 0.00 | 0.00 |

|      |     |      |     |   |    |        |        |        |      |      |
|------|-----|------|-----|---|----|--------|--------|--------|------|------|
| ATOM | 139 | CZ   | ARG | X | 9  | 29.333 | 67.163 | 42.296 | 0.00 | 0.00 |
| ATOM | 140 | NH1  | ARG | X | 9  | 29.755 | 68.210 | 42.967 | 0.00 | 0.00 |
| ATOM | 141 | HH11 | ARG | X | 9  | 30.445 | 68.825 | 42.558 | 0.00 | 0.00 |
| ATOM | 142 | HH12 | ARG | X | 9  | 29.180 | 68.571 | 43.714 | 0.00 | 0.00 |
| ATOM | 143 | NH2  | ARG | X | 9  | 28.236 | 66.506 | 42.700 | 0.00 | 0.00 |
| ATOM | 144 | HH21 | ARG | X | 9  | 27.945 | 65.613 | 42.329 | 0.00 | 0.00 |
| ATOM | 145 | HH22 | ARG | X | 9  | 27.821 | 66.901 | 43.531 | 0.00 | 0.00 |
| ATOM | 146 | C    | ARG | X | 9  | 35.129 | 68.996 | 42.035 | 0.00 | 0.00 |
| ATOM | 147 | O    | ARG | X | 9  | 34.552 | 69.936 | 42.558 | 0.00 | 0.00 |
| ATOM | 148 | N    | GLY | X | 10 | 36.378 | 68.644 | 42.376 | 0.00 | 0.00 |
| ATOM | 149 | H    | GLY | X | 10 | 36.774 | 67.835 | 41.919 | 0.00 | 0.00 |
| ATOM | 150 | CA   | GLY | X | 10 | 37.278 | 69.285 | 43.362 | 0.00 | 0.00 |
| ATOM | 151 | HA2  | GLY | X | 10 | 36.740 | 69.470 | 44.280 | 0.00 | 0.00 |
| ATOM | 152 | HA3  | GLY | X | 10 | 38.116 | 68.661 | 43.597 | 0.00 | 0.00 |
| ATOM | 153 | C    | GLY | X | 10 | 37.885 | 70.612 | 42.857 | 0.00 | 0.00 |
| ATOM | 154 | O    | GLY | X | 10 | 38.117 | 71.522 | 43.660 | 0.00 | 0.00 |
| ATOM | 155 | N    | GLY | X | 11 | 38.131 | 70.822 | 41.544 | 0.00 | 0.00 |
| ATOM | 156 | H    | GLY | X | 11 | 37.954 | 70.123 | 40.836 | 0.00 | 0.00 |
| ATOM | 157 | CA   | GLY | X | 11 | 38.857 | 72.005 | 41.021 | 0.00 | 0.00 |
| ATOM | 158 | HA2  | GLY | X | 11 | 38.235 | 72.924 | 40.962 | 0.00 | 0.00 |
| ATOM | 159 | HA3  | GLY | X | 11 | 39.623 | 72.251 | 41.790 | 0.00 | 0.00 |
| ATOM | 160 | C    | GLY | X | 11 | 39.629 | 71.767 | 39.712 | 0.00 | 0.00 |
| ATOM | 161 | O    | GLY | X | 11 | 39.477 | 70.809 | 38.955 | 0.00 | 0.00 |
| ATOM | 162 | N    | ARG | X | 12 | 40.498 | 72.727 | 39.486 | 0.00 | 0.00 |
| ATOM | 163 | H    | ARG | X | 12 | 40.540 | 73.495 | 40.140 | 0.00 | 0.00 |
| ATOM | 164 | CA   | ARG | X | 12 | 41.461 | 72.655 | 38.344 | 0.00 | 0.00 |
| ATOM | 165 | HA   | ARG | X | 12 | 40.941 | 72.305 | 37.452 | 0.00 | 0.00 |
| ATOM | 166 | CB   | ARG | X | 12 | 41.904 | 74.097 | 38.119 | 0.00 | 0.00 |
| ATOM | 167 | HB2  | ARG | X | 12 | 42.090 | 74.680 | 39.021 | 0.00 | 0.00 |
| ATOM | 168 | HB3  | ARG | X | 12 | 42.784 | 74.190 | 37.482 | 0.00 | 0.00 |
| ATOM | 169 | CG   | ARG | X | 12 | 40.814 | 74.790 | 37.350 | 0.00 | 0.00 |
| ATOM | 170 | HG2  | ARG | X | 12 | 40.586 | 74.210 | 36.455 | 0.00 | 0.00 |
| ATOM | 171 | HG3  | ARG | X | 12 | 39.875 | 74.848 | 37.900 | 0.00 | 0.00 |
| ATOM | 172 | CD   | ARG | X | 12 | 41.171 | 76.220 | 37.013 | 0.00 | 0.00 |
| ATOM | 173 | HD2  | ARG | X | 12 | 41.408 | 76.760 | 37.930 | 0.00 | 0.00 |
| ATOM | 174 | HD3  | ARG | X | 12 | 42.158 | 76.216 | 36.551 | 0.00 | 0.00 |
| ATOM | 175 | NE   | ARG | X | 12 | 40.153 | 76.858 | 36.229 | 0.00 | 0.00 |
| ATOM | 176 | HE   | ARG | X | 12 | 39.735 | 76.303 | 35.496 | 0.00 | 0.00 |
| ATOM | 177 | CZ   | ARG | X | 12 | 39.638 | 78.080 | 36.218 | 0.00 | 0.00 |
| ATOM | 178 | NH1  | ARG | X | 12 | 39.915 | 79.013 | 37.081 | 0.00 | 0.00 |
| ATOM | 179 | HH11 | ARG | X | 12 | 40.486 | 78.915 | 37.908 | 0.00 | 0.00 |
| ATOM | 180 | HH12 | ARG | X | 12 | 39.545 | 79.942 | 36.941 | 0.00 | 0.00 |
| ATOM | 181 | NH2  | ARG | X | 12 | 38.884 | 78.314 | 35.212 | 0.00 | 0.00 |
| ATOM | 182 | HH21 | ARG | X | 12 | 38.781 | 77.732 | 34.393 | 0.00 | 0.00 |
| ATOM | 183 | HH22 | ARG | X | 12 | 38.557 | 79.262 | 35.086 | 0.00 | 0.00 |
| ATOM | 184 | C    | ARG | X | 12 | 42.602 | 71.647 | 38.563 | 0.00 | 0.00 |
| ATOM | 185 | O    | ARG | X | 12 | 43.090 | 71.476 | 39.707 | 0.00 | 0.00 |
| ATOM | 186 | N    | LEU | X | 13 | 43.170 | 71.200 | 37.441 | 0.00 | 0.00 |
| ATOM | 187 | H    | LEU | X | 13 | 42.687 | 71.517 | 36.613 | 0.00 | 0.00 |
| ATOM | 188 | CA   | LEU | X | 13 | 44.312 | 70.233 | 37.285 | 0.00 | 0.00 |
| ATOM | 189 | HA   | LEU | X | 13 | 44.832 | 70.251 | 38.242 | 0.00 | 0.00 |
| ATOM | 190 | CB   | LEU | X | 13 | 43.790 | 68.851 | 36.937 | 0.00 | 0.00 |
| ATOM | 191 | HB2  | LEU | X | 13 | 43.396 | 68.783 | 35.923 | 0.00 | 0.00 |
| ATOM | 192 | HB3  | LEU | X | 13 | 44.620 | 68.144 | 36.933 | 0.00 | 0.00 |
| ATOM | 193 | CG   | LEU | X | 13 | 42.891 | 68.148 | 38.043 | 0.00 | 0.00 |
| ATOM | 194 | HG   | LEU | X | 13 | 42.130 | 68.839 | 38.405 | 0.00 | 0.00 |
| ATOM | 195 | CD1  | LEU | X | 13 | 42.284 | 66.863 | 37.535 | 0.00 | 0.00 |
| ATOM | 196 | HD11 | LEU | X | 13 | 41.385 | 66.573 | 38.078 | 0.00 | 0.00 |
| ATOM | 197 | HD12 | LEU | X | 13 | 41.853 | 67.099 | 36.563 | 0.00 | 0.00 |
| ATOM | 198 | HD13 | LEU | X | 13 | 43.067 | 66.114 | 37.414 | 0.00 | 0.00 |
| ATOM | 199 | CD2  | LEU | X | 13 | 43.737 | 67.802 | 39.323 | 0.00 | 0.00 |
| ATOM | 200 | HD21 | LEU | X | 13 | 43.039 | 67.580 | 40.131 | 0.00 | 0.00 |
| ATOM | 201 | HD22 | LEU | X | 13 | 44.476 | 67.029 | 39.114 | 0.00 | 0.00 |
| ATOM | 202 | HD23 | LEU | X | 13 | 44.247 | 68.706 | 39.654 | 0.00 | 0.00 |
| ATOM | 203 | C    | LEU | X | 13 | 45.214 | 70.751 | 36.121 | 0.00 | 0.00 |
| ATOM | 204 | O    | LEU | X | 13 | 44.704 | 71.168 | 35.124 | 0.00 | 0.00 |
| ATOM | 205 | N    | ARG | X | 14 | 46.520 | 70.701 | 36.302 | 0.00 | 0.00 |
| ATOM | 206 | H    | ARG | X | 14 | 46.832 | 70.235 | 37.142 | 0.00 | 0.00 |
| ATOM | 207 | CA   | ARG | X | 14 | 47.583 | 70.984 | 35.302 | 0.00 | 0.00 |
| ATOM | 208 | HA   | ARG | X | 14 | 47.099 | 71.278 | 34.372 | 0.00 | 0.00 |

|      |     |      |     |   |    |        |        |        |      |      |
|------|-----|------|-----|---|----|--------|--------|--------|------|------|
| ATOM | 209 | CB   | ARG | X | 14 | 48.539 | 72.048 | 35.830 | 0.00 | 0.00 |
| ATOM | 210 | HB2  | ARG | X | 14 | 48.023 | 72.917 | 36.238 | 0.00 | 0.00 |
| ATOM | 211 | HB3  | ARG | X | 14 | 49.072 | 71.671 | 36.703 | 0.00 | 0.00 |
| ATOM | 212 | CG   | ARG | X | 14 | 49.666 | 72.452 | 34.854 | 0.00 | 0.00 |
| ATOM | 213 | HG2  | ARG | X | 14 | 50.096 | 71.510 | 34.514 | 0.00 | 0.00 |
| ATOM | 214 | HG3  | ARG | X | 14 | 49.235 | 73.024 | 34.032 | 0.00 | 0.00 |
| ATOM | 215 | CD   | ARG | X | 14 | 50.797 | 73.258 | 35.462 | 0.00 | 0.00 |
| ATOM | 216 | HD2  | ARG | X | 14 | 51.446 | 72.707 | 36.143 | 0.00 | 0.00 |
| ATOM | 217 | HD3  | ARG | X | 14 | 51.333 | 73.545 | 34.558 | 0.00 | 0.00 |
| ATOM | 218 | NE   | ARG | X | 14 | 50.277 | 74.542 | 36.018 | 0.00 | 0.00 |
| ATOM | 219 | HE   | ARG | X | 14 | 50.136 | 75.248 | 35.311 | 0.00 | 0.00 |
| ATOM | 220 | CZ   | ARG | X | 14 | 50.198 | 74.992 | 37.271 | 0.00 | 0.00 |
| ATOM | 221 | NH1  | ARG | X | 14 | 50.623 | 74.245 | 38.205 | 0.00 | 0.00 |
| ATOM | 222 | HH11 | ARG | X | 14 | 50.982 | 73.310 | 38.070 | 0.00 | 0.00 |
| ATOM | 223 | HH12 | ARG | X | 14 | 50.572 | 74.568 | 39.160 | 0.00 | 0.00 |
| ATOM | 224 | NH2  | ARG | X | 14 | 49.820 | 76.209 | 37.562 | 0.00 | 0.00 |
| ATOM | 225 | HH21 | ARG | X | 14 | 49.537 | 76.752 | 36.759 | 0.00 | 0.00 |
| ATOM | 226 | HH22 | ARG | X | 14 | 50.075 | 76.646 | 38.435 | 0.00 | 0.00 |
| ATOM | 227 | C    | ARG | X | 14 | 48.277 | 69.695 | 35.059 | 0.00 | 0.00 |
| ATOM | 228 | O    | ARG | X | 14 | 48.889 | 69.073 | 35.947 | 0.00 | 0.00 |
| ATOM | 229 | N    | GLY | X | 15 | 48.346 | 69.299 | 33.776 | 0.00 | 0.00 |
| ATOM | 230 | H    | GLY | X | 15 | 48.097 | 70.014 | 33.108 | 0.00 | 0.00 |
| ATOM | 231 | CA   | GLY | X | 15 | 49.123 | 68.097 | 33.382 | 0.00 | 0.00 |
| ATOM | 232 | HA2  | GLY | X | 15 | 49.438 | 67.517 | 34.265 | 0.00 | 0.00 |
| ATOM | 233 | HA3  | GLY | X | 15 | 48.533 | 67.369 | 32.857 | 0.00 | 0.00 |
| ATOM | 234 | C    | GLY | X | 15 | 50.388 | 68.212 | 32.538 | 0.00 | 0.00 |
| ATOM | 235 | O    | GLY | X | 15 | 51.078 | 69.227 | 32.649 | 0.00 | 0.00 |
| ATOM | 236 | N    | ILE | X | 16 | 50.688 | 67.208 | 31.718 | 0.00 | 0.00 |
| ATOM | 237 | H    | ILE | X | 16 | 50.040 | 66.452 | 31.552 | 0.00 | 0.00 |
| ATOM | 238 | CA   | ILE | X | 16 | 51.894 | 67.124 | 30.788 | 0.00 | 0.00 |
| ATOM | 239 | HA   | ILE | X | 16 | 52.247 | 68.150 | 30.686 | 0.00 | 0.00 |
| ATOM | 240 | CB   | ILE | X | 16 | 52.975 | 66.350 | 31.509 | 0.00 | 0.00 |
| ATOM | 241 | HB   | ILE | X | 16 | 53.815 | 66.250 | 30.822 | 0.00 | 0.00 |
| ATOM | 242 | CG2  | ILE | X | 16 | 53.510 | 66.979 | 32.851 | 0.00 | 0.00 |
| ATOM | 243 | HG21 | ILE | X | 16 | 52.770 | 66.847 | 33.641 | 0.00 | 0.00 |
| ATOM | 244 | HG22 | ILE | X | 16 | 54.452 | 66.478 | 33.072 | 0.00 | 0.00 |
| ATOM | 245 | HG23 | ILE | X | 16 | 53.705 | 68.036 | 32.674 | 0.00 | 0.00 |
| ATOM | 246 | CG1  | ILE | X | 16 | 52.512 | 64.924 | 31.869 | 0.00 | 0.00 |
| ATOM | 247 | HG12 | ILE | X | 16 | 51.780 | 64.980 | 32.675 | 0.00 | 0.00 |
| ATOM | 248 | HG13 | ILE | X | 16 | 52.109 | 64.423 | 30.989 | 0.00 | 0.00 |
| ATOM | 249 | CD1  | ILE | X | 16 | 53.592 | 64.006 | 32.437 | 0.00 | 0.00 |
| ATOM | 250 | HD11 | ILE | X | 16 | 54.507 | 64.412 | 32.006 | 0.00 | 0.00 |
| ATOM | 251 | HD12 | ILE | X | 16 | 53.679 | 64.279 | 33.489 | 0.00 | 0.00 |
| ATOM | 252 | HD13 | ILE | X | 16 | 53.454 | 62.933 | 32.298 | 0.00 | 0.00 |
| ATOM | 253 | C    | ILE | X | 16 | 51.566 | 66.615 | 29.397 | 0.00 | 0.00 |
| ATOM | 254 | O    | ILE | X | 16 | 50.617 | 65.866 | 29.193 | 0.00 | 0.00 |
| ATOM | 255 | N    | ARG | X | 17 | 52.440 | 66.937 | 28.359 | 0.00 | 0.00 |
| ATOM | 256 | H    | ARG | X | 17 | 53.142 | 67.648 | 28.511 | 0.00 | 0.00 |
| ATOM | 257 | CA   | ARG | X | 17 | 52.341 | 66.401 | 26.998 | 0.00 | 0.00 |
| ATOM | 258 | HA   | ARG | X | 17 | 51.393 | 65.884 | 26.843 | 0.00 | 0.00 |
| ATOM | 259 | CB   | ARG | X | 17 | 52.423 | 67.526 | 25.923 | 0.00 | 0.00 |
| ATOM | 260 | HB2  | ARG | X | 17 | 51.484 | 68.071 | 26.020 | 0.00 | 0.00 |
| ATOM | 261 | HB3  | ARG | X | 17 | 53.312 | 68.137 | 26.080 | 0.00 | 0.00 |
| ATOM | 262 | CG   | ARG | X | 17 | 52.382 | 67.170 | 24.443 | 0.00 | 0.00 |
| ATOM | 263 | HG2  | ARG | X | 17 | 53.008 | 66.319 | 24.173 | 0.00 | 0.00 |
| ATOM | 264 | HG3  | ARG | X | 17 | 51.359 | 66.837 | 24.268 | 0.00 | 0.00 |
| ATOM | 265 | CD   | ARG | X | 17 | 52.763 | 68.384 | 23.625 | 0.00 | 0.00 |
| ATOM | 266 | HD2  | ARG | X | 17 | 52.527 | 68.098 | 22.600 | 0.00 | 0.00 |
| ATOM | 267 | HD3  | ARG | X | 17 | 52.267 | 69.269 | 24.022 | 0.00 | 0.00 |
| ATOM | 268 | NE   | ARG | X | 17 | 54.224 | 68.599 | 23.580 | 0.00 | 0.00 |
| ATOM | 269 | HE   | ARG | X | 17 | 54.769 | 68.228 | 24.346 | 0.00 | 0.00 |
| ATOM | 270 | CZ   | ARG | X | 17 | 54.929 | 69.329 | 22.782 | 0.00 | 0.00 |
| ATOM | 271 | NH1  | ARG | X | 17 | 54.373 | 69.800 | 21.693 | 0.00 | 0.00 |
| ATOM | 272 | HH11 | ARG | X | 17 | 53.367 | 69.725 | 21.652 | 0.00 | 0.00 |
| ATOM | 273 | HH12 | ARG | X | 17 | 54.847 | 70.265 | 20.933 | 0.00 | 0.00 |
| ATOM | 274 | NH2  | ARG | X | 17 | 56.192 | 69.389 | 22.967 | 0.00 | 0.00 |
| ATOM | 275 | HH21 | ARG | X | 17 | 56.622 | 68.681 | 23.545 | 0.00 | 0.00 |
| ATOM | 276 | HH22 | ARG | X | 17 | 56.804 | 69.807 | 22.281 | 0.00 | 0.00 |
| ATOM | 277 | C    | ARG | X | 17 | 53.412 | 65.319 | 26.741 | 0.00 | 0.00 |
| ATOM | 278 | O    | ARG | X | 17 | 54.593 | 65.622 | 26.475 | 0.00 | 0.00 |

|      |     |      |     |   |    |        |        |        |      |      |
|------|-----|------|-----|---|----|--------|--------|--------|------|------|
| ATOM | 279 | N    | LEU | X | 18 | 52.947 | 64.088 | 26.989 | 0.00 | 0.00 |
| ATOM | 280 | H    | LEU | X | 18 | 51.940 | 64.027 | 27.017 | 0.00 | 0.00 |
| ATOM | 281 | CA   | LEU | X | 18 | 53.757 | 62.943 | 26.550 | 0.00 | 0.00 |
| ATOM | 282 | HA   | LEU | X | 18 | 54.760 | 63.168 | 26.913 | 0.00 | 0.00 |
| ATOM | 283 | CB   | LEU | X | 18 | 53.303 | 61.626 | 27.167 | 0.00 | 0.00 |
| ATOM | 284 | HB2  | LEU | X | 18 | 52.274 | 61.486 | 26.837 | 0.00 | 0.00 |
| ATOM | 285 | HB3  | LEU | X | 18 | 53.916 | 60.776 | 26.868 | 0.00 | 0.00 |
| ATOM | 286 | CG   | LEU | X | 18 | 53.399 | 61.625 | 28.727 | 0.00 | 0.00 |
| ATOM | 287 | HG   | LEU | X | 18 | 52.749 | 62.420 | 29.093 | 0.00 | 0.00 |
| ATOM | 288 | CD1  | LEU | X | 18 | 52.796 | 60.330 | 29.286 | 0.00 | 0.00 |
| ATOM | 289 | HD11 | LEU | X | 18 | 53.476 | 59.529 | 28.997 | 0.00 | 0.00 |
| ATOM | 290 | HD12 | LEU | X | 18 | 52.916 | 60.333 | 30.370 | 0.00 | 0.00 |
| ATOM | 291 | HD13 | LEU | X | 18 | 51.816 | 60.129 | 28.854 | 0.00 | 0.00 |
| ATOM | 292 | CD2  | LEU | X | 18 | 54.780 | 61.872 | 29.366 | 0.00 | 0.00 |
| ATOM | 293 | HD21 | LEU | X | 18 | 54.728 | 61.919 | 30.454 | 0.00 | 0.00 |
| ATOM | 294 | HD22 | LEU | X | 18 | 55.393 | 60.992 | 29.170 | 0.00 | 0.00 |
| ATOM | 295 | HD23 | LEU | X | 18 | 55.357 | 62.696 | 28.947 | 0.00 | 0.00 |
| ATOM | 296 | C    | LEU | X | 18 | 53.969 | 62.877 | 24.983 | 0.00 | 0.00 |
| ATOM | 297 | O    | LEU | X | 18 | 53.037 | 62.797 | 24.201 | 0.00 | 0.00 |
| ATOM | 298 | N    | LYS | X | 19 | 55.224 | 62.996 | 24.509 | 0.00 | 0.00 |
| ATOM | 299 | H    | LYS | X | 19 | 55.922 | 63.014 | 25.239 | 0.00 | 0.00 |
| ATOM | 300 | CA   | LYS | X | 19 | 55.644 | 62.761 | 23.160 | 0.00 | 0.00 |
| ATOM | 301 | HA   | LYS | X | 19 | 54.908 | 63.226 | 22.504 | 0.00 | 0.00 |
| ATOM | 302 | CB   | LYS | X | 19 | 56.794 | 63.658 | 22.734 | 0.00 | 0.00 |
| ATOM | 303 | HB2  | LYS | X | 19 | 57.667 | 63.434 | 23.347 | 0.00 | 0.00 |
| ATOM | 304 | HB3  | LYS | X | 19 | 57.150 | 63.313 | 21.763 | 0.00 | 0.00 |
| ATOM | 305 | CG   | LYS | X | 19 | 56.530 | 65.179 | 22.856 | 0.00 | 0.00 |
| ATOM | 306 | HG2  | LYS | X | 19 | 55.574 | 65.527 | 22.466 | 0.00 | 0.00 |
| ATOM | 307 | HG3  | LYS | X | 19 | 56.317 | 65.328 | 23.914 | 0.00 | 0.00 |
| ATOM | 308 | CD   | LYS | X | 19 | 57.629 | 66.076 | 22.343 | 0.00 | 0.00 |
| ATOM | 309 | HD2  | LYS | X | 19 | 57.355 | 67.130 | 22.387 | 0.00 | 0.00 |
| ATOM | 310 | HD3  | LYS | X | 19 | 58.504 | 65.925 | 22.974 | 0.00 | 0.00 |
| ATOM | 311 | CE   | LYS | X | 19 | 57.889 | 65.699 | 20.898 | 0.00 | 0.00 |
| ATOM | 312 | HE2  | LYS | X | 19 | 58.042 | 64.625 | 20.790 | 0.00 | 0.00 |
| ATOM | 313 | HE3  | LYS | X | 19 | 56.985 | 65.954 | 20.345 | 0.00 | 0.00 |
| ATOM | 314 | NZ   | LYS | X | 19 | 58.985 | 66.464 | 20.231 | 0.00 | 0.00 |
| ATOM | 315 | HZ1  | LYS | X | 19 | 58.788 | 66.351 | 19.246 | 0.00 | 0.00 |
| ATOM | 316 | HZ2  | LYS | X | 19 | 58.909 | 67.434 | 20.500 | 0.00 | 0.00 |
| ATOM | 317 | HZ3  | LYS | X | 19 | 59.871 | 66.007 | 20.395 | 0.00 | 0.00 |
| ATOM | 318 | C    | LYS | X | 19 | 55.696 | 61.255 | 22.815 | 0.00 | 0.00 |
| ATOM | 319 | O    | LYS | X | 19 | 56.047 | 60.446 | 23.632 | 0.00 | 0.00 |
| ATOM | 320 | N    | THR | X | 20 | 55.369 | 60.905 | 21.581 | 0.00 | 0.00 |
| ATOM | 321 | H    | THR | X | 20 | 55.027 | 61.629 | 20.964 | 0.00 | 0.00 |
| ATOM | 322 | CA   | THR | X | 20 | 55.540 | 59.546 | 21.069 | 0.00 | 0.00 |
| ATOM | 323 | HA   | THR | X | 20 | 56.456 | 59.223 | 21.563 | 0.00 | 0.00 |
| ATOM | 324 | CB   | THR | X | 20 | 54.397 | 58.658 | 21.496 | 0.00 | 0.00 |
| ATOM | 325 | HB   | THR | X | 20 | 54.295 | 57.863 | 20.757 | 0.00 | 0.00 |
| ATOM | 326 | CG2  | THR | X | 20 | 54.796 | 57.778 | 22.684 | 0.00 | 0.00 |
| ATOM | 327 | HG21 | THR | X | 20 | 55.144 | 58.276 | 23.590 | 0.00 | 0.00 |
| ATOM | 328 | HG22 | THR | X | 20 | 53.918 | 57.217 | 23.002 | 0.00 | 0.00 |
| ATOM | 329 | HG23 | THR | X | 20 | 55.690 | 57.192 | 22.471 | 0.00 | 0.00 |
| ATOM | 330 | OG1  | THR | X | 20 | 53.190 | 59.276 | 21.925 | 0.00 | 0.00 |
| ATOM | 331 | HG1  | THR | X | 20 | 52.905 | 59.756 | 21.144 | 0.00 | 0.00 |
| ATOM | 332 | C    | THR | X | 20 | 55.760 | 59.496 | 19.586 | 0.00 | 0.00 |
| ATOM | 333 | O    | THR | X | 20 | 55.638 | 60.520 | 18.915 | 0.00 | 0.00 |
| ATOM | 334 | N    | PRO | X | 21 | 56.051 | 58.347 | 18.950 | 0.00 | 0.00 |
| ATOM | 335 | CD   | PRO | X | 21 | 56.598 | 57.087 | 19.379 | 0.00 | 0.00 |
| ATOM | 336 | HD2  | PRO | X | 21 | 55.863 | 56.313 | 19.601 | 0.00 | 0.00 |
| ATOM | 337 | HD3  | PRO | X | 21 | 57.147 | 57.105 | 20.320 | 0.00 | 0.00 |
| ATOM | 338 | CG   | PRO | X | 21 | 57.567 | 56.596 | 18.303 | 0.00 | 0.00 |
| ATOM | 339 | HG2  | PRO | X | 21 | 57.750 | 55.522 | 18.350 | 0.00 | 0.00 |
| ATOM | 340 | HG3  | PRO | X | 21 | 58.509 | 57.136 | 18.396 | 0.00 | 0.00 |
| ATOM | 341 | CB   | PRO | X | 21 | 56.757 | 56.996 | 17.077 | 0.00 | 0.00 |
| ATOM | 342 | HB2  | PRO | X | 21 | 55.956 | 56.319 | 16.781 | 0.00 | 0.00 |
| ATOM | 343 | HB3  | PRO | X | 21 | 57.437 | 57.072 | 16.228 | 0.00 | 0.00 |
| ATOM | 344 | CA   | PRO | X | 21 | 56.229 | 58.358 | 17.463 | 0.00 | 0.00 |
| ATOM | 345 | HA   | PRO | X | 21 | 57.064 | 59.029 | 17.263 | 0.00 | 0.00 |
| ATOM | 346 | C    | PRO | X | 21 | 55.066 | 58.817 | 16.630 | 0.00 | 0.00 |
| ATOM | 347 | O    | PRO | X | 21 | 55.188 | 59.487 | 15.596 | 0.00 | 0.00 |
| ATOM | 348 | N    | GLY | X | 22 | 53.912 | 58.303 | 17.106 | 0.00 | 0.00 |

|      |     |      |     |   |    |        |        |        |      |      |
|------|-----|------|-----|---|----|--------|--------|--------|------|------|
| ATOM | 349 | H    | GLY | X | 22 | 53.990 | 57.564 | 17.790 | 0.00 | 0.00 |
| ATOM | 350 | CA   | GLY | X | 22 | 52.577 | 58.524 | 16.578 | 0.00 | 0.00 |
| ATOM | 351 | HA2  | GLY | X | 22 | 52.592 | 58.247 | 15.521 | 0.00 | 0.00 |
| ATOM | 352 | HA3  | GLY | X | 22 | 51.865 | 57.853 | 17.107 | 0.00 | 0.00 |
| ATOM | 353 | C    | GLY | X | 22 | 51.965 | 59.883 | 16.997 | 0.00 | 0.00 |
| ATOM | 354 | O    | GLY | X | 22 | 50.744 | 59.955 | 17.052 | 0.00 | 0.00 |
| ATOM | 355 | N    | GLY | X | 23 | 52.820 | 60.873 | 17.354 | 0.00 | 0.00 |
| ATOM | 356 | H    | GLY | X | 23 | 53.799 | 60.726 | 17.156 | 0.00 | 0.00 |
| ATOM | 357 | CA   | GLY | X | 23 | 52.432 | 62.149 | 17.861 | 0.00 | 0.00 |
| ATOM | 358 | HA2  | GLY | X | 23 | 53.249 | 62.955 | 17.714 | 0.00 | 0.00 |
| ATOM | 359 | HA3  | GLY | X | 23 | 51.448 | 62.440 | 17.486 | 0.00 | 0.00 |
| ATOM | 360 | C    | GLY | X | 23 | 52.086 | 62.030 | 19.361 | 0.00 | 0.00 |
| ATOM | 361 | O    | GLY | X | 23 | 51.949 | 60.916 | 19.942 | 0.00 | 0.00 |
| ATOM | 362 | N    | PRO | X | 24 | 51.752 | 63.193 | 19.965 | 0.00 | 0.00 |
| ATOM | 363 | CD   | PRO | X | 24 | 51.828 | 64.523 | 19.391 | 0.00 | 0.00 |
| ATOM | 364 | HD2  | PRO | X | 24 | 51.440 | 64.683 | 18.385 | 0.00 | 0.00 |
| ATOM | 365 | HD3  | PRO | X | 24 | 52.888 | 64.714 | 19.226 | 0.00 | 0.00 |
| ATOM | 366 | CG   | PRO | X | 24 | 51.318 | 65.473 | 20.493 | 0.00 | 0.00 |
| ATOM | 367 | HG2  | PRO | X | 24 | 50.239 | 65.427 | 20.640 | 0.00 | 0.00 |
| ATOM | 368 | HG3  | PRO | X | 24 | 51.775 | 66.460 | 20.418 | 0.00 | 0.00 |
| ATOM | 369 | CB   | PRO | X | 24 | 51.803 | 64.773 | 21.786 | 0.00 | 0.00 |
| ATOM | 370 | HB2  | PRO | X | 24 | 51.249 | 65.154 | 22.644 | 0.00 | 0.00 |
| ATOM | 371 | HB3  | PRO | X | 24 | 52.820 | 65.110 | 21.984 | 0.00 | 0.00 |
| ATOM | 372 | CA   | PRO | X | 24 | 51.637 | 63.320 | 21.406 | 0.00 | 0.00 |
| ATOM | 373 | HA   | PRO | X | 24 | 52.414 | 62.761 | 21.928 | 0.00 | 0.00 |
| ATOM | 374 | C    | PRO | X | 24 | 50.280 | 62.817 | 21.925 | 0.00 | 0.00 |
| ATOM | 375 | O    | PRO | X | 24 | 49.329 | 62.827 | 21.250 | 0.00 | 0.00 |
| ATOM | 376 | N    | VAL | X | 25 | 50.269 | 62.465 | 23.221 | 0.00 | 0.00 |
| ATOM | 377 | H    | VAL | X | 25 | 51.150 | 62.690 | 23.661 | 0.00 | 0.00 |
| ATOM | 378 | CA   | VAL | X | 25 | 49.107 | 62.316 | 24.233 | 0.00 | 0.00 |
| ATOM | 379 | HA   | VAL | X | 25 | 48.200 | 62.590 | 23.693 | 0.00 | 0.00 |
| ATOM | 380 | CB   | VAL | X | 25 | 48.961 | 60.961 | 24.739 | 0.00 | 0.00 |
| ATOM | 381 | HB   | VAL | X | 25 | 47.964 | 60.850 | 25.164 | 0.00 | 0.00 |
| ATOM | 382 | CG1  | VAL | X | 25 | 48.807 | 59.979 | 23.422 | 0.00 | 0.00 |
| ATOM | 383 | HG11 | VAL | X | 25 | 48.229 | 59.109 | 23.731 | 0.00 | 0.00 |
| ATOM | 384 | HG12 | VAL | X | 25 | 48.157 | 60.538 | 22.749 | 0.00 | 0.00 |
| ATOM | 385 | HG13 | VAL | X | 25 | 49.748 | 59.781 | 22.909 | 0.00 | 0.00 |
| ATOM | 386 | CG2  | VAL | X | 25 | 49.937 | 60.384 | 25.728 | 0.00 | 0.00 |
| ATOM | 387 | HG21 | VAL | X | 25 | 50.853 | 60.144 | 25.188 | 0.00 | 0.00 |
| ATOM | 388 | HG22 | VAL | X | 25 | 50.265 | 61.093 | 26.489 | 0.00 | 0.00 |
| ATOM | 389 | HG23 | VAL | X | 25 | 49.491 | 59.521 | 26.222 | 0.00 | 0.00 |
| ATOM | 390 | C    | VAL | X | 25 | 49.331 | 63.243 | 25.442 | 0.00 | 0.00 |
| ATOM | 391 | O    | VAL | X | 25 | 50.406 | 63.867 | 25.497 | 0.00 | 0.00 |
| ATOM | 392 | N    | SER | X | 26 | 48.323 | 63.465 | 26.312 | 0.00 | 0.00 |
| ATOM | 393 | H    | SER | X | 26 | 47.510 | 62.870 | 26.246 | 0.00 | 0.00 |
| ATOM | 394 | CA   | SER | X | 26 | 48.495 | 64.249 | 27.579 | 0.00 | 0.00 |
| ATOM | 395 | HA   | SER | X | 26 | 49.483 | 64.706 | 27.527 | 0.00 | 0.00 |
| ATOM | 396 | CB   | SER | X | 26 | 47.538 | 65.412 | 27.734 | 0.00 | 0.00 |
| ATOM | 397 | HB2  | SER | X | 26 | 47.568 | 65.857 | 28.728 | 0.00 | 0.00 |
| ATOM | 398 | HB3  | SER | X | 26 | 47.839 | 66.210 | 27.054 | 0.00 | 0.00 |
| ATOM | 399 | OG   | SER | X | 26 | 46.204 | 65.029 | 27.336 | 0.00 | 0.00 |
| ATOM | 400 | HG   | SER | X | 26 | 46.126 | 64.320 | 26.694 | 0.00 | 0.00 |
| ATOM | 401 | C    | SER | X | 26 | 48.271 | 63.445 | 28.849 | 0.00 | 0.00 |
| ATOM | 402 | O    | SER | X | 26 | 47.481 | 62.480 | 28.805 | 0.00 | 0.00 |
| ATOM | 403 | N    | ALA | X | 27 | 49.047 | 63.666 | 29.892 | 0.00 | 0.00 |
| ATOM | 404 | H    | ALA | X | 27 | 49.648 | 64.475 | 29.962 | 0.00 | 0.00 |
| ATOM | 405 | CA   | ALA | X | 27 | 48.829 | 62.886 | 31.071 | 0.00 | 0.00 |
| ATOM | 406 | HA   | ALA | X | 27 | 47.939 | 62.258 | 31.021 | 0.00 | 0.00 |
| ATOM | 407 | CB   | ALA | X | 27 | 49.988 | 61.809 | 31.183 | 0.00 | 0.00 |
| ATOM | 408 | HB1  | ALA | X | 27 | 50.956 | 62.213 | 31.480 | 0.00 | 0.00 |
| ATOM | 409 | HB2  | ALA | X | 27 | 49.695 | 61.101 | 31.957 | 0.00 | 0.00 |
| ATOM | 410 | HB3  | ALA | X | 27 | 50.066 | 61.218 | 30.270 | 0.00 | 0.00 |
| ATOM | 411 | C    | ALA | X | 27 | 48.692 | 63.793 | 32.304 | 0.00 | 0.00 |
| ATOM | 412 | O    | ALA | X | 27 | 49.098 | 64.974 | 32.301 | 0.00 | 0.00 |
| ATOM | 413 | N    | PHE | X | 28 | 47.993 | 63.213 | 33.261 | 0.00 | 0.00 |
| ATOM | 414 | H    | PHE | X | 28 | 47.837 | 62.215 | 33.244 | 0.00 | 0.00 |
| ATOM | 415 | CA   | PHE | X | 28 | 47.525 | 63.746 | 34.477 | 0.00 | 0.00 |
| ATOM | 416 | HA   | PHE | X | 28 | 48.051 | 64.684 | 34.654 | 0.00 | 0.00 |
| ATOM | 417 | CB   | PHE | X | 28 | 46.018 | 64.055 | 34.267 | 0.00 | 0.00 |
| ATOM | 418 | HB2  | PHE | X | 28 | 45.551 | 63.121 | 33.955 | 0.00 | 0.00 |

|      |     |      |     |   |    |        |        |        |      |      |
|------|-----|------|-----|---|----|--------|--------|--------|------|------|
| ATOM | 419 | HB3  | PHE | X | 28 | 45.550 | 64.492 | 35.149 | 0.00 | 0.00 |
| ATOM | 420 | CG   | PHE | X | 28 | 45.740 | 65.008 | 33.083 | 0.00 | 0.00 |
| ATOM | 421 | CD1  | PHE | X | 28 | 45.220 | 64.625 | 31.843 | 0.00 | 0.00 |
| ATOM | 422 | HD1  | PHE | X | 28 | 44.844 | 63.622 | 31.707 | 0.00 | 0.00 |
| ATOM | 423 | CE1  | PHE | X | 28 | 45.129 | 65.466 | 30.741 | 0.00 | 0.00 |
| ATOM | 424 | HE1  | PHE | X | 28 | 44.944 | 65.041 | 29.766 | 0.00 | 0.00 |
| ATOM | 425 | CZ   | PHE | X | 28 | 45.393 | 66.818 | 30.968 | 0.00 | 0.00 |
| ATOM | 426 | HZ   | PHE | X | 28 | 45.363 | 67.517 | 30.146 | 0.00 | 0.00 |
| ATOM | 427 | CE2  | PHE | X | 28 | 45.634 | 67.302 | 32.242 | 0.00 | 0.00 |
| ATOM | 428 | HE2  | PHE | X | 28 | 45.824 | 68.339 | 32.476 | 0.00 | 0.00 |
| ATOM | 429 | CD2  | PHE | X | 28 | 45.958 | 66.335 | 33.239 | 0.00 | 0.00 |
| ATOM | 430 | HD2  | PHE | X | 28 | 46.289 | 66.673 | 34.210 | 0.00 | 0.00 |
| ATOM | 431 | C    | PHE | X | 28 | 47.758 | 62.656 | 35.626 | 0.00 | 0.00 |
| ATOM | 432 | O    | PHE | X | 28 | 47.161 | 61.582 | 35.511 | 0.00 | 0.00 |
| ATOM | 433 | N    | LEU | X | 29 | 48.601 | 62.858 | 36.648 | 0.00 | 0.00 |
| ATOM | 434 | H    | LEU | X | 29 | 49.089 | 63.742 | 36.621 | 0.00 | 0.00 |
| ATOM | 435 | CA   | LEU | X | 29 | 49.013 | 61.841 | 37.657 | 0.00 | 0.00 |
| ATOM | 436 | HA   | LEU | X | 29 | 48.371 | 60.979 | 37.478 | 0.00 | 0.00 |
| ATOM | 437 | CB   | LEU | X | 29 | 50.463 | 61.386 | 37.362 | 0.00 | 0.00 |
| ATOM | 438 | HB2  | LEU | X | 29 | 51.122 | 62.254 | 37.398 | 0.00 | 0.00 |
| ATOM | 439 | HB3  | LEU | X | 29 | 50.876 | 60.747 | 38.143 | 0.00 | 0.00 |
| ATOM | 440 | CG   | LEU | X | 29 | 50.632 | 60.855 | 35.894 | 0.00 | 0.00 |
| ATOM | 441 | HG   | LEU | X | 29 | 49.699 | 60.644 | 35.371 | 0.00 | 0.00 |
| ATOM | 442 | CD1  | LEU | X | 29 | 51.385 | 61.878 | 34.997 | 0.00 | 0.00 |
| ATOM | 443 | HD11 | LEU | X | 29 | 50.640 | 62.606 | 34.675 | 0.00 | 0.00 |
| ATOM | 444 | HD12 | LEU | X | 29 | 52.264 | 62.236 | 35.533 | 0.00 | 0.00 |
| ATOM | 445 | HD13 | LEU | X | 29 | 51.646 | 61.348 | 34.081 | 0.00 | 0.00 |
| ATOM | 446 | CD2  | LEU | X | 29 | 51.474 | 59.608 | 35.931 | 0.00 | 0.00 |
| ATOM | 447 | HD21 | LEU | X | 29 | 52.443 | 59.706 | 36.422 | 0.00 | 0.00 |
| ATOM | 448 | HD22 | LEU | X | 29 | 50.834 | 58.935 | 36.501 | 0.00 | 0.00 |
| ATOM | 449 | HD23 | LEU | X | 29 | 51.549 | 59.160 | 34.940 | 0.00 | 0.00 |
| ATOM | 450 | C    | LEU | X | 29 | 48.942 | 62.438 | 39.086 | 0.00 | 0.00 |
| ATOM | 451 | O    | LEU | X | 29 | 49.133 | 63.648 | 39.228 | 0.00 | 0.00 |
| ATOM | 452 | N    | GLY | X | 30 | 48.564 | 61.618 | 40.040 | 0.00 | 0.00 |
| ATOM | 453 | H    | GLY | X | 30 | 48.389 | 60.640 | 39.860 | 0.00 | 0.00 |
| ATOM | 454 | CA   | GLY | X | 30 | 48.485 | 62.065 | 41.391 | 0.00 | 0.00 |
| ATOM | 455 | HA2  | GLY | X | 30 | 48.263 | 61.153 | 42.023 | 0.00 | 0.00 |
| ATOM | 456 | HA3  | GLY | X | 30 | 49.408 | 62.616 | 41.624 | 0.00 | 0.00 |
| ATOM | 457 | C    | GLY | X | 30 | 47.336 | 62.982 | 41.644 | 0.00 | 0.00 |
| ATOM | 458 | O    | GLY | X | 30 | 47.487 | 63.964 | 42.362 | 0.00 | 0.00 |
| ATOM | 459 | N    | ILE | X | 31 | 46.233 | 62.618 | 41.099 | 0.00 | 0.00 |
| ATOM | 460 | H    | ILE | X | 31 | 46.273 | 61.720 | 40.637 | 0.00 | 0.00 |
| ATOM | 461 | CA   | ILE | X | 31 | 44.977 | 63.340 | 41.251 | 0.00 | 0.00 |
| ATOM | 462 | HA   | ILE | X | 31 | 45.227 | 64.401 | 41.217 | 0.00 | 0.00 |
| ATOM | 463 | CB   | ILE | X | 31 | 44.089 | 63.050 | 40.020 | 0.00 | 0.00 |
| ATOM | 464 | HB   | ILE | X | 31 | 44.068 | 61.965 | 39.918 | 0.00 | 0.00 |
| ATOM | 465 | CG2  | ILE | X | 31 | 42.674 | 63.586 | 40.227 | 0.00 | 0.00 |
| ATOM | 466 | HG21 | ILE | X | 31 | 42.042 | 63.179 | 39.438 | 0.00 | 0.00 |
| ATOM | 467 | HG22 | ILE | X | 31 | 42.186 | 63.202 | 41.123 | 0.00 | 0.00 |
| ATOM | 468 | HG23 | ILE | X | 31 | 42.593 | 64.670 | 40.314 | 0.00 | 0.00 |
| ATOM | 469 | CG1  | ILE | X | 31 | 44.606 | 63.744 | 38.664 | 0.00 | 0.00 |
| ATOM | 470 | HG12 | ILE | X | 31 | 44.429 | 64.816 | 38.745 | 0.00 | 0.00 |
| ATOM | 471 | HG13 | ILE | X | 31 | 45.678 | 63.626 | 38.507 | 0.00 | 0.00 |
| ATOM | 472 | CD1  | ILE | X | 31 | 43.954 | 63.092 | 37.432 | 0.00 | 0.00 |
| ATOM | 473 | HD11 | ILE | X | 31 | 44.537 | 63.273 | 36.528 | 0.00 | 0.00 |
| ATOM | 474 | HD12 | ILE | X | 31 | 43.798 | 62.021 | 37.567 | 0.00 | 0.00 |
| ATOM | 475 | HD13 | ILE | X | 31 | 42.988 | 63.513 | 37.155 | 0.00 | 0.00 |
| ATOM | 476 | C    | ILE | X | 31 | 44.325 | 62.922 | 42.556 | 0.00 | 0.00 |
| ATOM | 477 | O    | ILE | X | 31 | 44.056 | 61.744 | 42.784 | 0.00 | 0.00 |
| ATOM | 478 | N    | PRO | X | 32 | 43.999 | 63.840 | 43.470 | 0.00 | 0.00 |
| ATOM | 479 | CD   | PRO | X | 32 | 44.305 | 65.264 | 43.320 | 0.00 | 0.00 |
| ATOM | 480 | HD2  | PRO | X | 32 | 43.890 | 65.819 | 42.479 | 0.00 | 0.00 |
| ATOM | 481 | HD3  | PRO | X | 32 | 45.376 | 65.461 | 43.366 | 0.00 | 0.00 |
| ATOM | 482 | CG   | PRO | X | 32 | 43.795 | 65.921 | 44.594 | 0.00 | 0.00 |
| ATOM | 483 | HG2  | PRO | X | 32 | 42.766 | 66.245 | 44.439 | 0.00 | 0.00 |
| ATOM | 484 | HG3  | PRO | X | 32 | 44.463 | 66.733 | 44.884 | 0.00 | 0.00 |
| ATOM | 485 | CB   | PRO | X | 32 | 43.710 | 64.737 | 45.600 | 0.00 | 0.00 |
| ATOM | 486 | HB2  | PRO | X | 32 | 42.952 | 64.984 | 46.343 | 0.00 | 0.00 |
| ATOM | 487 | HB3  | PRO | X | 32 | 44.670 | 64.531 | 46.075 | 0.00 | 0.00 |
| ATOM | 488 | CA   | PRO | X | 32 | 43.396 | 63.513 | 44.760 | 0.00 | 0.00 |

|      |     |     |     |   |    |        |        |        |      |      |
|------|-----|-----|-----|---|----|--------|--------|--------|------|------|
| ATOM | 489 | HA  | PRO | X | 32 | 43.887 | 62.690 | 45.280 | 0.00 | 0.00 |
| ATOM | 490 | C   | PRO | X | 32 | 41.891 | 63.211 | 44.686 | 0.00 | 0.00 |
| ATOM | 491 | O   | PRO | X | 32 | 41.068 | 64.162 | 44.626 | 0.00 | 0.00 |
| ATOM | 492 | N   | PHE | X | 33 | 41.484 | 61.913 | 44.831 | 0.00 | 0.00 |
| ATOM | 493 | H   | PHE | X | 33 | 42.233 | 61.236 | 44.858 | 0.00 | 0.00 |
| ATOM | 494 | CA  | PHE | X | 33 | 40.066 | 61.518 | 44.821 | 0.00 | 0.00 |
| ATOM | 495 | HA  | PHE | X | 33 | 39.441 | 62.248 | 44.308 | 0.00 | 0.00 |
| ATOM | 496 | CB  | PHE | X | 33 | 39.813 | 60.182 | 44.070 | 0.00 | 0.00 |
| ATOM | 497 | HB2 | PHE | X | 33 | 38.737 | 60.271 | 43.927 | 0.00 | 0.00 |
| ATOM | 498 | HB3 | PHE | X | 33 | 40.339 | 60.264 | 43.119 | 0.00 | 0.00 |
| ATOM | 499 | CG  | PHE | X | 33 | 40.086 | 58.801 | 44.648 | 0.00 | 0.00 |
| ATOM | 500 | CD1 | PHE | X | 33 | 39.366 | 58.298 | 45.714 | 0.00 | 0.00 |
| ATOM | 501 | HD1 | PHE | X | 33 | 38.482 | 58.788 | 46.094 | 0.00 | 0.00 |
| ATOM | 502 | CE1 | PHE | X | 33 | 39.706 | 57.085 | 46.372 | 0.00 | 0.00 |
| ATOM | 503 | HE1 | PHE | X | 33 | 39.142 | 56.688 | 47.204 | 0.00 | 0.00 |
| ATOM | 504 | CZ  | PHE | X | 33 | 40.800 | 56.364 | 45.874 | 0.00 | 0.00 |
| ATOM | 505 | HZ  | PHE | X | 33 | 40.956 | 55.417 | 46.369 | 0.00 | 0.00 |
| ATOM | 506 | CE2 | PHE | X | 33 | 41.518 | 56.847 | 44.801 | 0.00 | 0.00 |
| ATOM | 507 | HE2 | PHE | X | 33 | 42.360 | 56.268 | 44.452 | 0.00 | 0.00 |
| ATOM | 508 | CD2 | PHE | X | 33 | 41.183 | 58.041 | 44.217 | 0.00 | 0.00 |
| ATOM | 509 | HD2 | PHE | X | 33 | 41.764 | 58.374 | 43.369 | 0.00 | 0.00 |
| ATOM | 510 | C   | PHE | X | 33 | 39.397 | 61.467 | 46.215 | 0.00 | 0.00 |
| ATOM | 511 | O   | PHE | X | 33 | 38.210 | 61.680 | 46.320 | 0.00 | 0.00 |
| ATOM | 512 | N   | ALA | X | 34 | 40.151 | 61.357 | 47.328 | 0.00 | 0.00 |
| ATOM | 513 | H   | ALA | X | 34 | 41.138 | 61.154 | 47.254 | 0.00 | 0.00 |
| ATOM | 514 | CA  | ALA | X | 34 | 39.665 | 61.197 | 48.702 | 0.00 | 0.00 |
| ATOM | 515 | HA  | ALA | X | 34 | 38.619 | 61.494 | 48.768 | 0.00 | 0.00 |
| ATOM | 516 | CB  | ALA | X | 34 | 39.711 | 59.685 | 48.935 | 0.00 | 0.00 |
| ATOM | 517 | HB1 | ALA | X | 34 | 38.973 | 59.229 | 48.274 | 0.00 | 0.00 |
| ATOM | 518 | HB2 | ALA | X | 34 | 40.544 | 59.052 | 48.630 | 0.00 | 0.00 |
| ATOM | 519 | HB3 | ALA | X | 34 | 39.510 | 59.500 | 49.990 | 0.00 | 0.00 |
| ATOM | 520 | C   | ALA | X | 34 | 40.514 | 61.849 | 49.737 | 0.00 | 0.00 |
| ATOM | 521 | O   | ALA | X | 34 | 41.742 | 62.057 | 49.631 | 0.00 | 0.00 |
| ATOM | 522 | N   | GLU | X | 35 | 39.919 | 62.107 | 50.879 | 0.00 | 0.00 |
| ATOM | 523 | H   | GLU | X | 35 | 39.141 | 61.488 | 51.058 | 0.00 | 0.00 |
| ATOM | 524 | CA  | GLU | X | 35 | 40.596 | 62.743 | 52.068 | 0.00 | 0.00 |
| ATOM | 525 | HA  | GLU | X | 35 | 41.212 | 63.582 | 51.742 | 0.00 | 0.00 |
| ATOM | 526 | CB  | GLU | X | 35 | 39.493 | 63.144 | 53.044 | 0.00 | 0.00 |
| ATOM | 527 | HB2 | GLU | X | 35 | 38.898 | 62.289 | 53.368 | 0.00 | 0.00 |
| ATOM | 528 | HB3 | GLU | X | 35 | 39.908 | 63.518 | 53.980 | 0.00 | 0.00 |
| ATOM | 529 | CG  | GLU | X | 35 | 38.588 | 64.284 | 52.506 | 0.00 | 0.00 |
| ATOM | 530 | HG2 | GLU | X | 35 | 38.281 | 64.061 | 51.484 | 0.00 | 0.00 |
| ATOM | 531 | HG3 | GLU | X | 35 | 37.849 | 64.298 | 53.307 | 0.00 | 0.00 |
| ATOM | 532 | CD  | GLU | X | 35 | 39.217 | 65.622 | 52.532 | 0.00 | 0.00 |
| ATOM | 533 | OE1 | GLU | X | 35 | 39.577 | 66.200 | 53.560 | 0.00 | 0.00 |
| ATOM | 534 | OE2 | GLU | X | 35 | 39.228 | 66.175 | 51.432 | 0.00 | 0.00 |
| ATOM | 535 | C   | GLU | X | 35 | 41.426 | 61.603 | 52.711 | 0.00 | 0.00 |
| ATOM | 536 | O   | GLU | X | 35 | 40.849 | 60.536 | 52.953 | 0.00 | 0.00 |
| ATOM | 537 | N   | PRO | X | 36 | 42.728 | 61.852 | 52.958 | 0.00 | 0.00 |
| ATOM | 538 | CD  | PRO | X | 36 | 43.404 | 63.044 | 52.724 | 0.00 | 0.00 |
| ATOM | 539 | HD2 | PRO | X | 36 | 43.112 | 63.874 | 53.368 | 0.00 | 0.00 |
| ATOM | 540 | HD3 | PRO | X | 36 | 43.361 | 63.278 | 51.660 | 0.00 | 0.00 |
| ATOM | 541 | CG  | PRO | X | 36 | 44.825 | 62.748 | 53.008 | 0.00 | 0.00 |
| ATOM | 542 | HG2 | PRO | X | 36 | 45.350 | 63.672 | 53.253 | 0.00 | 0.00 |
| ATOM | 543 | HG3 | PRO | X | 36 | 45.403 | 62.277 | 52.214 | 0.00 | 0.00 |
| ATOM | 544 | CB  | PRO | X | 36 | 44.757 | 61.726 | 54.190 | 0.00 | 0.00 |
| ATOM | 545 | HB2 | PRO | X | 36 | 44.577 | 62.372 | 55.050 | 0.00 | 0.00 |
| ATOM | 546 | HB3 | PRO | X | 36 | 45.726 | 61.233 | 54.272 | 0.00 | 0.00 |
| ATOM | 547 | CA  | PRO | X | 36 | 43.595 | 60.878 | 53.539 | 0.00 | 0.00 |
| ATOM | 548 | HA  | PRO | X | 36 | 44.211 | 60.348 | 52.813 | 0.00 | 0.00 |
| ATOM | 549 | C   | PRO | X | 36 | 42.941 | 60.003 | 54.603 | 0.00 | 0.00 |
| ATOM | 550 | O   | PRO | X | 36 | 42.536 | 60.529 | 55.621 | 0.00 | 0.00 |
| ATOM | 551 | N   | PRO | X | 37 | 42.994 | 58.623 | 54.405 | 0.00 | 0.00 |
| ATOM | 552 | CD  | PRO | X | 37 | 43.442 | 58.009 | 53.217 | 0.00 | 0.00 |
| ATOM | 553 | HD2 | PRO | X | 37 | 44.431 | 58.416 | 53.008 | 0.00 | 0.00 |
| ATOM | 554 | HD3 | PRO | X | 37 | 42.819 | 58.116 | 52.329 | 0.00 | 0.00 |
| ATOM | 555 | CG  | PRO | X | 37 | 43.629 | 56.552 | 53.522 | 0.00 | 0.00 |
| ATOM | 556 | HG2 | PRO | X | 37 | 44.623 | 56.375 | 53.933 | 0.00 | 0.00 |
| ATOM | 557 | HG3 | PRO | X | 37 | 43.515 | 55.987 | 52.598 | 0.00 | 0.00 |
| ATOM | 558 | CB  | PRO | X | 37 | 42.536 | 56.277 | 54.558 | 0.00 | 0.00 |

|      |     |      |     |   |    |        |        |        |      |      |
|------|-----|------|-----|---|----|--------|--------|--------|------|------|
| ATOM | 559 | HB2  | PRO | X | 37 | 42.949 | 55.480 | 55.176 | 0.00 | 0.00 |
| ATOM | 560 | HB3  | PRO | X | 37 | 41.558 | 56.172 | 54.089 | 0.00 | 0.00 |
| ATOM | 561 | CA   | PRO | X | 37 | 42.564 | 57.579 | 55.340 | 0.00 | 0.00 |
| ATOM | 562 | HA   | PRO | X | 37 | 41.552 | 57.943 | 55.517 | 0.00 | 0.00 |
| ATOM | 563 | C    | PRO | X | 37 | 43.343 | 57.511 | 56.667 | 0.00 | 0.00 |
| ATOM | 564 | O    | PRO | X | 37 | 43.269 | 56.511 | 57.417 | 0.00 | 0.00 |
| ATOM | 565 | N    | MET | X | 38 | 44.276 | 58.416 | 56.955 | 0.00 | 0.00 |
| ATOM | 566 | H    | MET | X | 38 | 44.328 | 59.221 | 56.346 | 0.00 | 0.00 |
| ATOM | 567 | CA   | MET | X | 38 | 45.053 | 58.426 | 58.212 | 0.00 | 0.00 |
| ATOM | 568 | HA   | MET | X | 38 | 45.634 | 57.505 | 58.246 | 0.00 | 0.00 |
| ATOM | 569 | CB   | MET | X | 38 | 46.077 | 59.628 | 58.226 | 0.00 | 0.00 |
| ATOM | 570 | HB2  | MET | X | 38 | 46.583 | 59.642 | 59.191 | 0.00 | 0.00 |
| ATOM | 571 | HB3  | MET | X | 38 | 46.814 | 59.484 | 57.436 | 0.00 | 0.00 |
| ATOM | 572 | CG   | MET | X | 38 | 45.414 | 60.991 | 57.909 | 0.00 | 0.00 |
| ATOM | 573 | HG2  | MET | X | 38 | 44.839 | 60.912 | 56.986 | 0.00 | 0.00 |
| ATOM | 574 | HG3  | MET | X | 38 | 44.644 | 61.137 | 58.667 | 0.00 | 0.00 |
| ATOM | 575 | SD   | MET | X | 38 | 46.514 | 62.394 | 57.872 | 0.00 | 0.00 |
| ATOM | 576 | CE   | MET | X | 38 | 46.988 | 62.469 | 59.566 | 0.00 | 0.00 |
| ATOM | 577 | HE1  | MET | X | 38 | 47.565 | 63.387 | 59.677 | 0.00 | 0.00 |
| ATOM | 578 | HE2  | MET | X | 38 | 46.086 | 62.503 | 60.176 | 0.00 | 0.00 |
| ATOM | 579 | HE3  | MET | X | 38 | 47.614 | 61.605 | 59.786 | 0.00 | 0.00 |
| ATOM | 580 | C    | MET | X | 38 | 44.200 | 58.572 | 59.499 | 0.00 | 0.00 |
| ATOM | 581 | O    | MET | X | 38 | 43.186 | 59.303 | 59.451 | 0.00 | 0.00 |
| ATOM | 582 | N    | GLY | X | 39 | 44.617 | 57.995 | 60.633 | 0.00 | 0.00 |
| ATOM | 583 | H    | GLY | X | 39 | 45.521 | 57.550 | 60.571 | 0.00 | 0.00 |
| ATOM | 584 | CA   | GLY | X | 39 | 44.027 | 58.187 | 61.960 | 0.00 | 0.00 |
| ATOM | 585 | HA2  | GLY | X | 39 | 44.808 | 57.889 | 62.714 | 0.00 | 0.00 |
| ATOM | 586 | HA3  | GLY | X | 39 | 43.867 | 59.246 | 62.010 | 0.00 | 0.00 |
| ATOM | 587 | C    | GLY | X | 39 | 42.786 | 57.310 | 62.181 | 0.00 | 0.00 |
| ATOM | 588 | O    | GLY | X | 39 | 42.868 | 56.097 | 62.007 | 0.00 | 0.00 |
| ATOM | 589 | N    | PRO | X | 40 | 41.646 | 57.789 | 62.639 | 0.00 | 0.00 |
| ATOM | 590 | CD   | PRO | X | 40 | 41.407 | 59.207 | 63.017 | 0.00 | 0.00 |
| ATOM | 591 | HD2  | PRO | X | 40 | 41.288 | 59.866 | 62.157 | 0.00 | 0.00 |
| ATOM | 592 | HD3  | PRO | X | 40 | 42.248 | 59.485 | 63.652 | 0.00 | 0.00 |
| ATOM | 593 | CG   | PRO | X | 40 | 40.118 | 59.198 | 63.879 | 0.00 | 0.00 |
| ATOM | 594 | HG2  | PRO | X | 40 | 39.495 | 60.089 | 63.801 | 0.00 | 0.00 |
| ATOM | 595 | HG3  | PRO | X | 40 | 40.522 | 58.931 | 64.856 | 0.00 | 0.00 |
| ATOM | 596 | CB   | PRO | X | 40 | 39.378 | 57.963 | 63.363 | 0.00 | 0.00 |
| ATOM | 597 | HB2  | PRO | X | 40 | 38.751 | 58.379 | 62.574 | 0.00 | 0.00 |
| ATOM | 598 | HB3  | PRO | X | 40 | 38.728 | 57.544 | 64.131 | 0.00 | 0.00 |
| ATOM | 599 | CA   | PRO | X | 40 | 40.452 | 57.005 | 62.833 | 0.00 | 0.00 |
| ATOM | 600 | HA   | PRO | X | 40 | 40.786 | 56.291 | 63.586 | 0.00 | 0.00 |
| ATOM | 601 | C    | PRO | X | 40 | 39.896 | 56.283 | 61.540 | 0.00 | 0.00 |
| ATOM | 602 | O    | PRO | X | 40 | 39.375 | 55.171 | 61.616 | 0.00 | 0.00 |
| ATOM | 603 | N    | ARG | X | 41 | 40.156 | 56.915 | 60.371 | 0.00 | 0.00 |
| ATOM | 604 | H    | ARG | X | 41 | 40.679 | 57.779 | 60.358 | 0.00 | 0.00 |
| ATOM | 605 | CA   | ARG | X | 41 | 39.844 | 56.304 | 59.102 | 0.00 | 0.00 |
| ATOM | 606 | HA   | ARG | X | 41 | 38.768 | 56.161 | 59.005 | 0.00 | 0.00 |
| ATOM | 607 | CB   | ARG | X | 41 | 40.255 | 57.418 | 58.135 | 0.00 | 0.00 |
| ATOM | 608 | HB2  | ARG | X | 41 | 41.189 | 57.926 | 58.376 | 0.00 | 0.00 |
| ATOM | 609 | HB3  | ARG | X | 41 | 40.513 | 56.875 | 57.226 | 0.00 | 0.00 |
| ATOM | 610 | CG   | ARG | X | 41 | 39.235 | 58.539 | 58.029 | 0.00 | 0.00 |
| ATOM | 611 | HG2  | ARG | X | 41 | 38.394 | 58.190 | 57.430 | 0.00 | 0.00 |
| ATOM | 612 | HG3  | ARG | X | 41 | 38.820 | 58.913 | 58.965 | 0.00 | 0.00 |
| ATOM | 613 | CD   | ARG | X | 41 | 39.905 | 59.730 | 57.371 | 0.00 | 0.00 |
| ATOM | 614 | HD2  | ARG | X | 41 | 40.770 | 60.059 | 57.947 | 0.00 | 0.00 |
| ATOM | 615 | HD3  | ARG | X | 41 | 40.309 | 59.348 | 56.433 | 0.00 | 0.00 |
| ATOM | 616 | NE   | ARG | X | 41 | 38.947 | 60.784 | 57.158 | 0.00 | 0.00 |
| ATOM | 617 | HE   | ARG | X | 41 | 37.966 | 60.551 | 57.225 | 0.00 | 0.00 |
| ATOM | 618 | CZ   | ARG | X | 41 | 39.271 | 61.992 | 56.667 | 0.00 | 0.00 |
| ATOM | 619 | NH1  | ARG | X | 41 | 40.521 | 62.399 | 56.428 | 0.00 | 0.00 |
| ATOM | 620 | HH11 | ARG | X | 41 | 41.266 | 61.741 | 56.605 | 0.00 | 0.00 |
| ATOM | 621 | HH12 | ARG | X | 41 | 40.694 | 63.302 | 56.010 | 0.00 | 0.00 |
| ATOM | 622 | NH2  | ARG | X | 41 | 38.268 | 62.754 | 56.377 | 0.00 | 0.00 |
| ATOM | 623 | HH21 | ARG | X | 41 | 37.327 | 62.500 | 56.641 | 0.00 | 0.00 |
| ATOM | 624 | HH22 | ARG | X | 41 | 38.499 | 63.676 | 56.036 | 0.00 | 0.00 |
| ATOM | 625 | C    | ARG | X | 41 | 40.525 | 54.985 | 58.786 | 0.00 | 0.00 |
| ATOM | 626 | O    | ARG | X | 41 | 40.116 | 54.317 | 57.874 | 0.00 | 0.00 |
| ATOM | 627 | N    | ARG | X | 42 | 41.549 | 54.557 | 59.508 | 0.00 | 0.00 |
| ATOM | 628 | H    | ARG | X | 42 | 41.780 | 55.170 | 60.277 | 0.00 | 0.00 |



|      |     |      |     |   |    |        |        |        |      |      |
|------|-----|------|-----|---|----|--------|--------|--------|------|------|
| ATOM | 629 | CA   | ARG | X | 42 | 42.262 | 53.262 | 59.352 | 0.00 | 0.00 |
| ATOM | 630 | HA   | ARG | X | 42 | 42.601 | 53.173 | 58.320 | 0.00 | 0.00 |
| ATOM | 631 | CB   | ARG | X | 42 | 43.537 | 53.256 | 60.250 | 0.00 | 0.00 |
| ATOM | 632 | HB2  | ARG | X | 42 | 44.129 | 54.052 | 59.799 | 0.00 | 0.00 |
| ATOM | 633 | HB3  | ARG | X | 42 | 43.307 | 53.591 | 61.262 | 0.00 | 0.00 |
| ATOM | 634 | CG   | ARG | X | 42 | 44.259 | 51.881 | 60.221 | 0.00 | 0.00 |
| ATOM | 635 | HG2  | ARG | X | 42 | 43.523 | 51.110 | 60.451 | 0.00 | 0.00 |
| ATOM | 636 | HG3  | ARG | X | 42 | 44.557 | 51.693 | 59.190 | 0.00 | 0.00 |
| ATOM | 637 | CD   | ARG | X | 42 | 45.459 | 51.781 | 61.168 | 0.00 | 0.00 |
| ATOM | 638 | HD2  | ARG | X | 42 | 45.191 | 51.934 | 62.214 | 0.00 | 0.00 |
| ATOM | 639 | HD3  | ARG | X | 42 | 45.865 | 50.770 | 61.122 | 0.00 | 0.00 |
| ATOM | 640 | NE   | ARG | X | 42 | 46.501 | 52.694 | 60.808 | 0.00 | 0.00 |
| ATOM | 641 | HE   | ARG | X | 42 | 46.385 | 53.367 | 60.064 | 0.00 | 0.00 |
| ATOM | 642 | CZ   | ARG | X | 42 | 47.481 | 53.028 | 61.657 | 0.00 | 0.00 |
| ATOM | 643 | NH1  | ARG | X | 42 | 47.808 | 52.253 | 62.715 | 0.00 | 0.00 |
| ATOM | 644 | HH11 | ARG | X | 42 | 47.297 | 51.415 | 62.952 | 0.00 | 0.00 |
| ATOM | 645 | HH12 | ARG | X | 42 | 48.446 | 52.653 | 63.388 | 0.00 | 0.00 |
| ATOM | 646 | NH2  | ARG | X | 42 | 48.138 | 54.076 | 61.527 | 0.00 | 0.00 |
| ATOM | 647 | HH21 | ARG | X | 42 | 47.923 | 54.510 | 60.641 | 0.00 | 0.00 |
| ATOM | 648 | HH22 | ARG | X | 42 | 48.854 | 54.391 | 62.167 | 0.00 | 0.00 |
| ATOM | 649 | C    | ARG | X | 42 | 41.274 | 52.110 | 59.656 | 0.00 | 0.00 |
| ATOM | 650 | O    | ARG | X | 42 | 40.678 | 52.143 | 60.726 | 0.00 | 0.00 |
| ATOM | 651 | N    | PHE | X | 43 | 41.008 | 51.246 | 58.715 | 0.00 | 0.00 |
| ATOM | 652 | H    | PHE | X | 43 | 41.358 | 51.430 | 57.785 | 0.00 | 0.00 |
| ATOM | 653 | CA   | PHE | X | 43 | 40.029 | 50.131 | 58.662 | 0.00 | 0.00 |
| ATOM | 654 | HA   | PHE | X | 43 | 40.319 | 49.433 | 57.876 | 0.00 | 0.00 |
| ATOM | 655 | CB   | PHE | X | 43 | 40.109 | 49.267 | 59.904 | 0.00 | 0.00 |
| ATOM | 656 | HB2  | PHE | X | 43 | 39.506 | 49.805 | 60.635 | 0.00 | 0.00 |
| ATOM | 657 | HB3  | PHE | X | 43 | 39.573 | 48.325 | 59.791 | 0.00 | 0.00 |
| ATOM | 658 | CG   | PHE | X | 43 | 41.467 | 48.971 | 60.449 | 0.00 | 0.00 |
| ATOM | 659 | CD1  | PHE | X | 43 | 42.450 | 48.372 | 59.610 | 0.00 | 0.00 |
| ATOM | 660 | HD1  | PHE | X | 43 | 42.109 | 48.066 | 58.632 | 0.00 | 0.00 |
| ATOM | 661 | CE1  | PHE | X | 43 | 43.659 | 48.090 | 60.173 | 0.00 | 0.00 |
| ATOM | 662 | HE1  | PHE | X | 43 | 44.379 | 47.545 | 59.580 | 0.00 | 0.00 |
| ATOM | 663 | CZ   | PHE | X | 43 | 44.024 | 48.322 | 61.553 | 0.00 | 0.00 |
| ATOM | 664 | HZ   | PHE | X | 43 | 45.002 | 48.193 | 61.992 | 0.00 | 0.00 |
| ATOM | 665 | CE2  | PHE | X | 43 | 42.998 | 49.012 | 62.292 | 0.00 | 0.00 |
| ATOM | 666 | HE2  | PHE | X | 43 | 43.224 | 49.402 | 63.273 | 0.00 | 0.00 |
| ATOM | 667 | CD2  | PHE | X | 43 | 41.719 | 49.352 | 61.766 | 0.00 | 0.00 |
| ATOM | 668 | HD2  | PHE | X | 43 | 41.038 | 49.934 | 62.368 | 0.00 | 0.00 |
| ATOM | 669 | C    | PHE | X | 43 | 38.572 | 50.501 | 58.404 | 0.00 | 0.00 |
| ATOM | 670 | O    | PHE | X | 43 | 37.599 | 49.749 | 58.475 | 0.00 | 0.00 |
| ATOM | 671 | N    | LEU | X | 44 | 38.367 | 51.787 | 58.001 | 0.00 | 0.00 |
| ATOM | 672 | H    | LEU | X | 44 | 39.137 | 52.442 | 57.994 | 0.00 | 0.00 |
| ATOM | 673 | CA   | LEU | X | 44 | 37.041 | 52.379 | 57.696 | 0.00 | 0.00 |
| ATOM | 674 | HA   | LEU | X | 44 | 36.288 | 51.600 | 57.812 | 0.00 | 0.00 |
| ATOM | 675 | CB   | LEU | X | 44 | 36.765 | 53.514 | 58.756 | 0.00 | 0.00 |
| ATOM | 676 | HB2  | LEU | X | 44 | 37.671 | 54.119 | 58.771 | 0.00 | 0.00 |
| ATOM | 677 | HB3  | LEU | X | 44 | 35.878 | 54.092 | 58.495 | 0.00 | 0.00 |
| ATOM | 678 | CG   | LEU | X | 44 | 36.340 | 52.986 | 60.174 | 0.00 | 0.00 |
| ATOM | 679 | HG   | LEU | X | 44 | 37.094 | 52.254 | 60.466 | 0.00 | 0.00 |
| ATOM | 680 | CD1  | LEU | X | 44 | 36.188 | 54.126 | 61.182 | 0.00 | 0.00 |
| ATOM | 681 | HD11 | LEU | X | 44 | 35.786 | 53.835 | 62.153 | 0.00 | 0.00 |
| ATOM | 682 | HD12 | LEU | X | 44 | 37.136 | 54.620 | 61.393 | 0.00 | 0.00 |
| ATOM | 683 | HD13 | LEU | X | 44 | 35.550 | 54.914 | 60.782 | 0.00 | 0.00 |
| ATOM | 684 | CD2  | LEU | X | 44 | 35.001 | 52.275 | 60.190 | 0.00 | 0.00 |
| ATOM | 685 | HD21 | LEU | X | 44 | 34.974 | 51.844 | 61.191 | 0.00 | 0.00 |
| ATOM | 686 | HD22 | LEU | X | 44 | 34.150 | 52.926 | 59.995 | 0.00 | 0.00 |
| ATOM | 687 | HD23 | LEU | X | 44 | 34.977 | 51.476 | 59.449 | 0.00 | 0.00 |
| ATOM | 688 | C    | LEU | X | 44 | 36.980 | 52.978 | 56.262 | 0.00 | 0.00 |
| ATOM | 689 | O    | LEU | X | 44 | 38.021 | 53.069 | 55.648 | 0.00 | 0.00 |
| ATOM | 690 | N    | PRO | X | 45 | 35.781 | 53.276 | 55.734 | 0.00 | 0.00 |
| ATOM | 691 | CD   | PRO | X | 45 | 34.388 | 53.046 | 56.285 | 0.00 | 0.00 |
| ATOM | 692 | HD2  | PRO | X | 45 | 34.244 | 53.659 | 57.175 | 0.00 | 0.00 |
| ATOM | 693 | HD3  | PRO | X | 45 | 34.303 | 52.016 | 56.632 | 0.00 | 0.00 |
| ATOM | 694 | CG   | PRO | X | 45 | 33.318 | 53.363 | 55.141 | 0.00 | 0.00 |
| ATOM | 695 | HG2  | PRO | X | 45 | 32.386 | 53.822 | 55.474 | 0.00 | 0.00 |
| ATOM | 696 | HG3  | PRO | X | 45 | 33.136 | 52.497 | 54.505 | 0.00 | 0.00 |
| ATOM | 697 | CB   | PRO | X | 45 | 34.163 | 54.381 | 54.337 | 0.00 | 0.00 |
| ATOM | 698 | HB2  | PRO | X | 45 | 34.022 | 55.358 | 54.799 | 0.00 | 0.00 |

|      |     |     |     |   |    |        |        |        |      |      |
|------|-----|-----|-----|---|----|--------|--------|--------|------|------|
| ATOM | 699 | HB3 | PRO | X | 45 | 34.025 | 54.499 | 53.262 | 0.00 | 0.00 |
| ATOM | 700 | CA  | PRO | X | 45 | 35.659 | 54.073 | 54.468 | 0.00 | 0.00 |
| ATOM | 701 | HA  | PRO | X | 45 | 35.910 | 53.488 | 53.583 | 0.00 | 0.00 |
| ATOM | 702 | C   | PRO | X | 45 | 36.454 | 55.344 | 54.433 | 0.00 | 0.00 |
| ATOM | 703 | O   | PRO | X | 45 | 36.667 | 55.917 | 55.509 | 0.00 | 0.00 |
| ATOM | 704 | N   | PRO | X | 46 | 36.898 | 55.739 | 53.270 | 0.00 | 0.00 |
| ATOM | 705 | CD  | PRO | X | 46 | 36.775 | 55.004 | 52.040 | 0.00 | 0.00 |
| ATOM | 706 | HD2 | PRO | X | 46 | 35.741 | 54.724 | 51.839 | 0.00 | 0.00 |
| ATOM | 707 | HD3 | PRO | X | 46 | 37.473 | 54.174 | 52.152 | 0.00 | 0.00 |
| ATOM | 708 | CG  | PRO | X | 46 | 37.331 | 55.890 | 51.008 | 0.00 | 0.00 |
| ATOM | 709 | HG2 | PRO | X | 46 | 36.604 | 56.519 | 50.495 | 0.00 | 0.00 |
| ATOM | 710 | HG3 | PRO | X | 46 | 37.965 | 55.283 | 50.362 | 0.00 | 0.00 |
| ATOM | 711 | CB  | PRO | X | 46 | 38.190 | 56.865 | 51.768 | 0.00 | 0.00 |
| ATOM | 712 | HB2 | PRO | X | 46 | 38.314 | 57.864 | 51.353 | 0.00 | 0.00 |
| ATOM | 713 | HB3 | PRO | X | 46 | 39.168 | 56.466 | 52.038 | 0.00 | 0.00 |
| ATOM | 714 | CA  | PRO | X | 46 | 37.417 | 57.055 | 53.017 | 0.00 | 0.00 |
| ATOM | 715 | HA  | PRO | X | 46 | 38.117 | 57.286 | 53.819 | 0.00 | 0.00 |
| ATOM | 716 | C   | PRO | X | 46 | 36.250 | 58.110 | 52.910 | 0.00 | 0.00 |
| ATOM | 717 | O   | PRO | X | 46 | 35.124 | 57.879 | 53.342 | 0.00 | 0.00 |
| ATOM | 718 | N   | GLU | X | 47 | 36.521 | 59.259 | 52.319 | 0.00 | 0.00 |
| ATOM | 719 | H   | GLU | X | 47 | 37.449 | 59.498 | 52.000 | 0.00 | 0.00 |
| ATOM | 720 | CA  | GLU | X | 47 | 35.665 | 60.427 | 52.200 | 0.00 | 0.00 |
| ATOM | 721 | HA  | GLU | X | 47 | 34.653 | 60.089 | 51.976 | 0.00 | 0.00 |
| ATOM | 722 | CB  | GLU | X | 47 | 35.678 | 61.332 | 53.389 | 0.00 | 0.00 |
| ATOM | 723 | HB2 | GLU | X | 47 | 36.701 | 61.603 | 53.652 | 0.00 | 0.00 |
| ATOM | 724 | HB3 | GLU | X | 47 | 35.123 | 62.219 | 53.084 | 0.00 | 0.00 |
| ATOM | 725 | CG  | GLU | X | 47 | 35.099 | 60.770 | 54.670 | 0.00 | 0.00 |
| ATOM | 726 | HG2 | GLU | X | 47 | 34.059 | 60.453 | 54.593 | 0.00 | 0.00 |
| ATOM | 727 | HG3 | GLU | X | 47 | 35.612 | 59.855 | 54.966 | 0.00 | 0.00 |
| ATOM | 728 | CD  | GLU | X | 47 | 35.213 | 61.809 | 55.822 | 0.00 | 0.00 |
| ATOM | 729 | OE1 | GLU | X | 47 | 34.576 | 62.878 | 55.797 | 0.00 | 0.00 |
| ATOM | 730 | OE2 | GLU | X | 47 | 35.994 | 61.525 | 56.772 | 0.00 | 0.00 |
| ATOM | 731 | C   | GLU | X | 47 | 36.146 | 61.110 | 50.910 | 0.00 | 0.00 |
| ATOM | 732 | O   | GLU | X | 47 | 37.288 | 60.996 | 50.639 | 0.00 | 0.00 |
| ATOM | 733 | N   | PRO | X | 48 | 35.166 | 61.645 | 50.148 | 0.00 | 0.00 |
| ATOM | 734 | CD  | PRO | X | 48 | 33.707 | 61.495 | 50.092 | 0.00 | 0.00 |
| ATOM | 735 | HD2 | PRO | X | 48 | 33.284 | 62.200 | 50.807 | 0.00 | 0.00 |
| ATOM | 736 | HD3 | PRO | X | 48 | 33.448 | 60.493 | 50.435 | 0.00 | 0.00 |
| ATOM | 737 | CG  | PRO | X | 48 | 33.169 | 61.712 | 48.690 | 0.00 | 0.00 |
| ATOM | 738 | HG2 | PRO | X | 48 | 32.163 | 62.120 | 48.585 | 0.00 | 0.00 |
| ATOM | 739 | HG3 | PRO | X | 48 | 33.253 | 60.820 | 48.068 | 0.00 | 0.00 |
| ATOM | 740 | CB  | PRO | X | 48 | 34.239 | 62.613 | 48.128 | 0.00 | 0.00 |
| ATOM | 741 | HB2 | PRO | X | 48 | 33.888 | 63.626 | 48.323 | 0.00 | 0.00 |
| ATOM | 742 | HB3 | PRO | X | 48 | 34.292 | 62.552 | 47.041 | 0.00 | 0.00 |
| ATOM | 743 | CA  | PRO | X | 48 | 35.523 | 62.346 | 48.893 | 0.00 | 0.00 |
| ATOM | 744 | HA  | PRO | X | 48 | 36.112 | 61.668 | 48.274 | 0.00 | 0.00 |
| ATOM | 745 | C   | PRO | X | 48 | 36.308 | 63.676 | 49.183 | 0.00 | 0.00 |
| ATOM | 746 | O   | PRO | X | 48 | 35.907 | 64.569 | 49.878 | 0.00 | 0.00 |
| ATOM | 747 | N   | LYS | X | 49 | 37.347 | 63.845 | 48.386 | 0.00 | 0.00 |
| ATOM | 748 | H   | LYS | X | 49 | 37.538 | 63.191 | 47.640 | 0.00 | 0.00 |
| ATOM | 749 | CA  | LYS | X | 49 | 38.254 | 64.917 | 48.459 | 0.00 | 0.00 |
| ATOM | 750 | HA  | LYS | X | 49 | 38.595 | 64.929 | 49.494 | 0.00 | 0.00 |
| ATOM | 751 | CB  | LYS | X | 49 | 39.395 | 64.712 | 47.441 | 0.00 | 0.00 |
| ATOM | 752 | HB2 | LYS | X | 49 | 39.914 | 63.754 | 47.462 | 0.00 | 0.00 |
| ATOM | 753 | HB3 | LYS | X | 49 | 38.921 | 64.683 | 46.460 | 0.00 | 0.00 |
| ATOM | 754 | CG  | LYS | X | 49 | 40.418 | 65.826 | 47.541 | 0.00 | 0.00 |
| ATOM | 755 | HG2 | LYS | X | 49 | 40.952 | 65.757 | 46.594 | 0.00 | 0.00 |
| ATOM | 756 | HG3 | LYS | X | 49 | 40.055 | 66.852 | 47.469 | 0.00 | 0.00 |
| ATOM | 757 | CD  | LYS | X | 49 | 41.356 | 65.593 | 48.641 | 0.00 | 0.00 |
| ATOM | 758 | HD2 | LYS | X | 49 | 40.776 | 65.676 | 49.560 | 0.00 | 0.00 |
| ATOM | 759 | HD3 | LYS | X | 49 | 41.794 | 64.595 | 48.667 | 0.00 | 0.00 |
| ATOM | 760 | CE  | LYS | X | 49 | 42.440 | 66.699 | 48.809 | 0.00 | 0.00 |
| ATOM | 761 | HE2 | LYS | X | 49 | 43.081 | 66.858 | 47.941 | 0.00 | 0.00 |
| ATOM | 762 | HE3 | LYS | X | 49 | 41.975 | 67.622 | 49.157 | 0.00 | 0.00 |
| ATOM | 763 | NZ  | LYS | X | 49 | 43.416 | 66.181 | 49.819 | 0.00 | 0.00 |
| ATOM | 764 | HZ1 | LYS | X | 49 | 43.731 | 65.264 | 49.533 | 0.00 | 0.00 |
| ATOM | 765 | HZ2 | LYS | X | 49 | 44.244 | 66.758 | 49.842 | 0.00 | 0.00 |
| ATOM | 766 | HZ3 | LYS | X | 49 | 43.083 | 66.180 | 50.773 | 0.00 | 0.00 |
| ATOM | 767 | C   | LYS | X | 49 | 37.508 | 66.237 | 48.342 | 0.00 | 0.00 |
| ATOM | 768 | O   | LYS | X | 49 | 36.905 | 66.636 | 47.277 | 0.00 | 0.00 |

|      |     |      |     |   |    |        |        |        |      |      |
|------|-----|------|-----|---|----|--------|--------|--------|------|------|
| ATOM | 769 | N    | GLN | X | 50 | 37.586 | 66.996 | 49.421 | 0.00 | 0.00 |
| ATOM | 770 | H    | GLN | X | 50 | 38.103 | 66.692 | 50.234 | 0.00 | 0.00 |
| ATOM | 771 | CA   | GLN | X | 50 | 36.977 | 68.273 | 49.490 | 0.00 | 0.00 |
| ATOM | 772 | HA   | GLN | X | 50 | 35.930 | 68.100 | 49.239 | 0.00 | 0.00 |
| ATOM | 773 | CB   | GLN | X | 50 | 36.958 | 68.917 | 50.847 | 0.00 | 0.00 |
| ATOM | 774 | HB2  | GLN | X | 50 | 38.011 | 68.964 | 51.123 | 0.00 | 0.00 |
| ATOM | 775 | HB3  | GLN | X | 50 | 36.641 | 69.960 | 50.839 | 0.00 | 0.00 |
| ATOM | 776 | CG   | GLN | X | 50 | 36.133 | 68.298 | 51.957 | 0.00 | 0.00 |
| ATOM | 777 | HG2  | GLN | X | 50 | 35.092 | 68.593 | 51.826 | 0.00 | 0.00 |
| ATOM | 778 | HG3  | GLN | X | 50 | 36.259 | 67.230 | 52.137 | 0.00 | 0.00 |
| ATOM | 779 | CD   | GLN | X | 50 | 36.357 | 68.899 | 53.364 | 0.00 | 0.00 |
| ATOM | 780 | OE1  | GLN | X | 50 | 35.418 | 69.320 | 54.024 | 0.00 | 0.00 |
| ATOM | 781 | NE2  | GLN | X | 50 | 37.590 | 68.840 | 53.832 | 0.00 | 0.00 |
| ATOM | 782 | HE21 | GLN | X | 50 | 37.751 | 69.221 | 54.753 | 0.00 | 0.00 |
| ATOM | 783 | HE22 | GLN | X | 50 | 38.380 | 68.510 | 53.296 | 0.00 | 0.00 |
| ATOM | 784 | C    | GLN | X | 50 | 37.738 | 69.280 | 48.432 | 0.00 | 0.00 |
| ATOM | 785 | O    | GLN | X | 50 | 38.945 | 69.318 | 48.506 | 0.00 | 0.00 |
| ATOM | 786 | N    | PRO | X | 51 | 36.965 | 70.158 | 47.831 | 0.00 | 0.00 |
| ATOM | 787 | CD   | PRO | X | 51 | 35.510 | 70.233 | 47.966 | 0.00 | 0.00 |
| ATOM | 788 | HD2  | PRO | X | 51 | 35.213 | 70.285 | 49.013 | 0.00 | 0.00 |
| ATOM | 789 | HD3  | PRO | X | 51 | 35.077 | 69.395 | 47.420 | 0.00 | 0.00 |
| ATOM | 790 | CG   | PRO | X | 51 | 35.197 | 71.522 | 47.303 | 0.00 | 0.00 |
| ATOM | 791 | HG2  | PRO | X | 51 | 35.346 | 72.368 | 47.973 | 0.00 | 0.00 |
| ATOM | 792 | HG3  | PRO | X | 51 | 34.163 | 71.422 | 46.974 | 0.00 | 0.00 |
| ATOM | 793 | CB   | PRO | X | 51 | 36.139 | 71.490 | 46.066 | 0.00 | 0.00 |
| ATOM | 794 | HB2  | PRO | X | 51 | 36.245 | 72.435 | 45.534 | 0.00 | 0.00 |
| ATOM | 795 | HB3  | PRO | X | 51 | 35.753 | 70.715 | 45.403 | 0.00 | 0.00 |
| ATOM | 796 | CA   | PRO | X | 51 | 37.433 | 71.023 | 46.752 | 0.00 | 0.00 |
| ATOM | 797 | HA   | PRO | X | 51 | 37.943 | 70.469 | 45.963 | 0.00 | 0.00 |
| ATOM | 798 | C    | PRO | X | 51 | 38.456 | 72.115 | 47.173 | 0.00 | 0.00 |
| ATOM | 799 | O    | PRO | X | 51 | 38.569 | 72.549 | 48.379 | 0.00 | 0.00 |
| ATOM | 800 | N    | TRP | X | 52 | 39.261 | 72.577 | 46.217 | 0.00 | 0.00 |
| ATOM | 801 | H    | TRP | X | 52 | 39.056 | 72.347 | 45.255 | 0.00 | 0.00 |
| ATOM | 802 | CA   | TRP | X | 52 | 40.501 | 73.360 | 46.367 | 0.00 | 0.00 |
| ATOM | 803 | HA   | TRP | X | 52 | 40.643 | 73.627 | 47.414 | 0.00 | 0.00 |
| ATOM | 804 | CB   | TRP | X | 52 | 41.744 | 72.552 | 45.911 | 0.00 | 0.00 |
| ATOM | 805 | HB2  | TRP | X | 52 | 42.656 | 73.138 | 45.797 | 0.00 | 0.00 |
| ATOM | 806 | HB3  | TRP | X | 52 | 41.940 | 71.853 | 46.725 | 0.00 | 0.00 |
| ATOM | 807 | CG   | TRP | X | 52 | 41.655 | 71.902 | 44.580 | 0.00 | 0.00 |
| ATOM | 808 | CD1  | TRP | X | 52 | 42.025 | 72.454 | 43.386 | 0.00 | 0.00 |
| ATOM | 809 | HD1  | TRP | X | 52 | 42.359 | 73.475 | 43.276 | 0.00 | 0.00 |
| ATOM | 810 | NE1  | TRP | X | 52 | 41.929 | 71.501 | 42.374 | 0.00 | 0.00 |
| ATOM | 811 | HE1  | TRP | X | 52 | 42.231 | 71.666 | 41.424 | 0.00 | 0.00 |
| ATOM | 812 | CE2  | TRP | X | 52 | 41.503 | 70.331 | 42.863 | 0.00 | 0.00 |
| ATOM | 813 | CZ2  | TRP | X | 52 | 41.247 | 69.074 | 42.236 | 0.00 | 0.00 |
| ATOM | 814 | HZ2  | TRP | X | 52 | 41.417 | 68.824 | 41.199 | 0.00 | 0.00 |
| ATOM | 815 | CH2  | TRP | X | 52 | 40.765 | 67.969 | 42.995 | 0.00 | 0.00 |
| ATOM | 816 | HH2  | TRP | X | 52 | 40.466 | 67.042 | 42.528 | 0.00 | 0.00 |
| ATOM | 817 | CZ3  | TRP | X | 52 | 40.553 | 68.150 | 44.384 | 0.00 | 0.00 |
| ATOM | 818 | HZ3  | TRP | X | 52 | 40.371 | 67.251 | 44.955 | 0.00 | 0.00 |
| ATOM | 819 | CE3  | TRP | X | 52 | 40.762 | 69.382 | 45.000 | 0.00 | 0.00 |
| ATOM | 820 | HE3  | TRP | X | 52 | 40.664 | 69.478 | 46.071 | 0.00 | 0.00 |
| ATOM | 821 | CD2  | TRP | X | 52 | 41.205 | 70.516 | 44.219 | 0.00 | 0.00 |
| ATOM | 822 | C    | TRP | X | 52 | 40.316 | 74.669 | 45.481 | 0.00 | 0.00 |
| ATOM | 823 | O    | TRP | X | 52 | 39.756 | 74.705 | 44.363 | 0.00 | 0.00 |
| ATOM | 824 | N    | SER | X | 53 | 40.909 | 75.724 | 45.987 | 0.00 | 0.00 |
| ATOM | 825 | H    | SER | X | 53 | 41.152 | 75.681 | 46.967 | 0.00 | 0.00 |
| ATOM | 826 | CA   | SER | X | 53 | 41.390 | 76.854 | 45.189 | 0.00 | 0.00 |
| ATOM | 827 | HA   | SER | X | 53 | 40.672 | 77.107 | 44.409 | 0.00 | 0.00 |
| ATOM | 828 | CB   | SER | X | 53 | 41.720 | 78.051 | 46.159 | 0.00 | 0.00 |
| ATOM | 829 | HB2  | SER | X | 53 | 42.326 | 77.689 | 46.989 | 0.00 | 0.00 |
| ATOM | 830 | HB3  | SER | X | 53 | 42.146 | 78.922 | 45.662 | 0.00 | 0.00 |
| ATOM | 831 | OG   | SER | X | 53 | 40.508 | 78.574 | 46.710 | 0.00 | 0.00 |
| ATOM | 832 | HG   | SER | X | 53 | 40.726 | 79.387 | 47.171 | 0.00 | 0.00 |
| ATOM | 833 | C    | SER | X | 53 | 42.645 | 76.507 | 44.357 | 0.00 | 0.00 |
| ATOM | 834 | O    | SER | X | 53 | 43.283 | 75.527 | 44.633 | 0.00 | 0.00 |
| ATOM | 835 | N    | GLY | X | 54 | 42.883 | 77.260 | 43.283 | 0.00 | 0.00 |
| ATOM | 836 | H    | GLY | X | 54 | 42.198 | 77.911 | 42.927 | 0.00 | 0.00 |
| ATOM | 837 | CA   | GLY | X | 54 | 44.120 | 77.312 | 42.529 | 0.00 | 0.00 |
| ATOM | 838 | HA2  | GLY | X | 54 | 44.139 | 78.330 | 42.085 | 0.00 | 0.00 |

|      |     |      |     |   |    |        |        |        |      |      |
|------|-----|------|-----|---|----|--------|--------|--------|------|------|
| ATOM | 839 | HA3  | GLY | X | 54 | 44.991 | 77.258 | 43.097 | 0.00 | 0.00 |
| ATOM | 840 | C    | GLY | X | 54 | 44.105 | 76.345 | 41.373 | 0.00 | 0.00 |
| ATOM | 841 | O    | GLY | X | 54 | 43.260 | 76.388 | 40.482 | 0.00 | 0.00 |
| ATOM | 842 | N    | VAL | X | 55 | 45.078 | 75.432 | 41.309 | 0.00 | 0.00 |
| ATOM | 843 | H    | VAL | X | 55 | 45.859 | 75.574 | 41.935 | 0.00 | 0.00 |
| ATOM | 844 | CA   | VAL | X | 55 | 45.169 | 74.319 | 40.321 | 0.00 | 0.00 |
| ATOM | 845 | HA   | VAL | X | 55 | 44.170 | 73.893 | 40.225 | 0.00 | 0.00 |
| ATOM | 846 | CB   | VAL | X | 55 | 45.585 | 74.981 | 38.952 | 0.00 | 0.00 |
| ATOM | 847 | HB   | VAL | X | 55 | 44.740 | 75.550 | 38.565 | 0.00 | 0.00 |
| ATOM | 848 | CG1  | VAL | X | 55 | 46.868 | 75.913 | 39.122 | 0.00 | 0.00 |
| ATOM | 849 | HG11 | VAL | X | 55 | 47.666 | 75.306 | 39.548 | 0.00 | 0.00 |
| ATOM | 850 | HG12 | VAL | X | 55 | 47.147 | 76.330 | 38.155 | 0.00 | 0.00 |
| ATOM | 851 | HG13 | VAL | X | 55 | 46.678 | 76.847 | 39.651 | 0.00 | 0.00 |
| ATOM | 852 | CG2  | VAL | X | 55 | 45.988 | 73.893 | 37.897 | 0.00 | 0.00 |
| ATOM | 853 | HG21 | VAL | X | 55 | 46.006 | 74.360 | 36.913 | 0.00 | 0.00 |
| ATOM | 854 | HG22 | VAL | X | 55 | 46.897 | 73.403 | 38.247 | 0.00 | 0.00 |
| ATOM | 855 | HG23 | VAL | X | 55 | 45.168 | 73.177 | 37.847 | 0.00 | 0.00 |
| ATOM | 856 | C    | VAL | X | 55 | 46.134 | 73.258 | 40.798 | 0.00 | 0.00 |
| ATOM | 857 | O    | VAL | X | 55 | 47.374 | 73.469 | 40.923 | 0.00 | 0.00 |
| ATOM | 858 | N    | VAL | X | 56 | 45.733 | 71.986 | 40.893 | 0.00 | 0.00 |
| ATOM | 859 | H    | VAL | X | 56 | 44.740 | 71.912 | 40.720 | 0.00 | 0.00 |
| ATOM | 860 | CA   | VAL | X | 56 | 46.476 | 70.838 | 41.454 | 0.00 | 0.00 |
| ATOM | 861 | HA   | VAL | X | 56 | 47.103 | 71.166 | 42.283 | 0.00 | 0.00 |
| ATOM | 862 | CB   | VAL | X | 56 | 45.575 | 69.704 | 42.102 | 0.00 | 0.00 |
| ATOM | 863 | HB   | VAL | X | 56 | 44.677 | 69.781 | 41.489 | 0.00 | 0.00 |
| ATOM | 864 | CG1  | VAL | X | 56 | 46.204 | 68.335 | 42.074 | 0.00 | 0.00 |
| ATOM | 865 | HG11 | VAL | X | 56 | 47.160 | 68.498 | 42.572 | 0.00 | 0.00 |
| ATOM | 866 | HG12 | VAL | X | 56 | 45.576 | 67.729 | 42.727 | 0.00 | 0.00 |
| ATOM | 867 | HG13 | VAL | X | 56 | 46.214 | 67.955 | 41.052 | 0.00 | 0.00 |
| ATOM | 868 | CG2  | VAL | X | 56 | 45.239 | 69.939 | 43.626 | 0.00 | 0.00 |
| ATOM | 869 | HG21 | VAL | X | 56 | 44.729 | 70.897 | 43.729 | 0.00 | 0.00 |
| ATOM | 870 | HG22 | VAL | X | 56 | 44.704 | 69.099 | 44.069 | 0.00 | 0.00 |
| ATOM | 871 | HG23 | VAL | X | 56 | 46.150 | 69.938 | 44.224 | 0.00 | 0.00 |
| ATOM | 872 | C    | VAL | X | 56 | 47.467 | 70.332 | 40.347 | 0.00 | 0.00 |
| ATOM | 873 | O    | VAL | X | 56 | 47.045 | 69.885 | 39.296 | 0.00 | 0.00 |
| ATOM | 874 | N    | ASP | X | 57 | 48.761 | 70.341 | 40.676 | 0.00 | 0.00 |
| ATOM | 875 | H    | ASP | X | 57 | 48.901 | 70.642 | 41.630 | 0.00 | 0.00 |
| ATOM | 876 | CA   | ASP | X | 57 | 49.895 | 69.954 | 39.749 | 0.00 | 0.00 |
| ATOM | 877 | HA   | ASP | X | 57 | 49.743 | 70.341 | 38.742 | 0.00 | 0.00 |
| ATOM | 878 | CB   | ASP | X | 57 | 51.187 | 70.427 | 40.406 | 0.00 | 0.00 |
| ATOM | 879 | HB2  | ASP | X | 57 | 50.992 | 71.362 | 40.931 | 0.00 | 0.00 |
| ATOM | 880 | HB3  | ASP | X | 57 | 51.362 | 69.688 | 41.187 | 0.00 | 0.00 |
| ATOM | 881 | CG   | ASP | X | 57 | 52.347 | 70.619 | 39.372 | 0.00 | 0.00 |
| ATOM | 882 | OD1  | ASP | X | 57 | 52.364 | 71.620 | 38.587 | 0.00 | 0.00 |
| ATOM | 883 | OD2  | ASP | X | 57 | 53.238 | 69.728 | 39.278 | 0.00 | 0.00 |
| ATOM | 884 | C    | ASP | X | 57 | 49.830 | 68.329 | 39.584 | 0.00 | 0.00 |
| ATOM | 885 | O    | ASP | X | 57 | 50.347 | 67.568 | 40.444 | 0.00 | 0.00 |
| ATOM | 886 | N    | ALA | X | 58 | 49.061 | 67.933 | 38.571 | 0.00 | 0.00 |
| ATOM | 887 | H    | ALA | X | 58 | 48.736 | 68.659 | 37.948 | 0.00 | 0.00 |
| ATOM | 888 | CA   | ALA | X | 58 | 48.777 | 66.551 | 38.206 | 0.00 | 0.00 |
| ATOM | 889 | HA   | ALA | X | 58 | 48.874 | 65.982 | 39.131 | 0.00 | 0.00 |
| ATOM | 890 | CB   | ALA | X | 58 | 47.404 | 66.549 | 37.550 | 0.00 | 0.00 |
| ATOM | 891 | HB1  | ALA | X | 58 | 46.723 | 67.225 | 38.068 | 0.00 | 0.00 |
| ATOM | 892 | HB2  | ALA | X | 58 | 47.369 | 66.781 | 36.486 | 0.00 | 0.00 |
| ATOM | 893 | HB3  | ALA | X | 58 | 47.037 | 65.523 | 37.552 | 0.00 | 0.00 |
| ATOM | 894 | C    | ALA | X | 58 | 49.901 | 66.020 | 37.310 | 0.00 | 0.00 |
| ATOM | 895 | O    | ALA | X | 58 | 49.658 | 65.440 | 36.267 | 0.00 | 0.00 |
| ATOM | 896 | N    | THR | X | 59 | 51.148 | 66.201 | 37.780 | 0.00 | 0.00 |
| ATOM | 897 | H    | THR | X | 59 | 51.315 | 66.754 | 38.608 | 0.00 | 0.00 |
| ATOM | 898 | CA   | THR | X | 59 | 52.389 | 65.841 | 37.019 | 0.00 | 0.00 |
| ATOM | 899 | HA   | THR | X | 59 | 52.019 | 65.695 | 36.004 | 0.00 | 0.00 |
| ATOM | 900 | CB   | THR | X | 59 | 53.375 | 67.039 | 36.907 | 0.00 | 0.00 |
| ATOM | 901 | HB   | THR | X | 59 | 54.258 | 66.815 | 36.309 | 0.00 | 0.00 |
| ATOM | 902 | CG2  | THR | X | 59 | 52.795 | 68.309 | 36.391 | 0.00 | 0.00 |
| ATOM | 903 | HG21 | THR | X | 59 | 53.602 | 69.040 | 36.348 | 0.00 | 0.00 |
| ATOM | 904 | HG22 | THR | X | 59 | 52.363 | 68.221 | 35.394 | 0.00 | 0.00 |
| ATOM | 905 | HG23 | THR | X | 59 | 52.060 | 68.692 | 37.100 | 0.00 | 0.00 |
| ATOM | 906 | OG1  | THR | X | 59 | 53.748 | 67.305 | 38.283 | 0.00 | 0.00 |
| ATOM | 907 | HG1  | THR | X | 59 | 53.646 | 68.213 | 38.577 | 0.00 | 0.00 |
| ATOM | 908 | C    | THR | X | 59 | 53.130 | 64.650 | 37.505 | 0.00 | 0.00 |

|      |     |      |     |   |    |        |        |        |      |      |
|------|-----|------|-----|---|----|--------|--------|--------|------|------|
| ATOM | 909 | O    | THR | X | 59 | 54.010 | 64.167 | 36.861 | 0.00 | 0.00 |
| ATOM | 910 | N    | THR | X | 60 | 52.705 | 64.169 | 38.648 | 0.00 | 0.00 |
| ATOM | 911 | H    | THR | X | 60 | 51.920 | 64.683 | 39.021 | 0.00 | 0.00 |
| ATOM | 912 | CA   | THR | X | 60 | 53.436 | 63.178 | 39.428 | 0.00 | 0.00 |
| ATOM | 913 | HA   | THR | X | 60 | 53.734 | 62.406 | 38.718 | 0.00 | 0.00 |
| ATOM | 914 | CB   | THR | X | 60 | 54.638 | 63.869 | 40.096 | 0.00 | 0.00 |
| ATOM | 915 | HB   | THR | X | 60 | 55.252 | 64.325 | 39.319 | 0.00 | 0.00 |
| ATOM | 916 | CG2  | THR | X | 60 | 54.333 | 64.859 | 41.204 | 0.00 | 0.00 |
| ATOM | 917 | HG21 | THR | X | 60 | 53.725 | 65.623 | 40.721 | 0.00 | 0.00 |
| ATOM | 918 | HG22 | THR | X | 60 | 53.844 | 64.350 | 42.035 | 0.00 | 0.00 |
| ATOM | 919 | HG23 | THR | X | 60 | 55.278 | 65.261 | 41.569 | 0.00 | 0.00 |
| ATOM | 920 | OG1  | THR | X | 60 | 55.531 | 62.927 | 40.669 | 0.00 | 0.00 |
| ATOM | 921 | HG1  | THR | X | 60 | 56.376 | 63.345 | 40.847 | 0.00 | 0.00 |
| ATOM | 922 | C    | THR | X | 60 | 52.580 | 62.526 | 40.421 | 0.00 | 0.00 |
| ATOM | 923 | O    | THR | X | 60 | 51.629 | 63.069 | 40.862 | 0.00 | 0.00 |
| ATOM | 924 | N    | PHE | X | 61 | 52.936 | 61.338 | 40.943 | 0.00 | 0.00 |
| ATOM | 925 | H    | PHE | X | 61 | 53.865 | 61.117 | 40.613 | 0.00 | 0.00 |
| ATOM | 926 | CA   | PHE | X | 61 | 52.299 | 60.632 | 42.116 | 0.00 | 0.00 |
| ATOM | 927 | HA   | PHE | X | 61 | 51.268 | 60.975 | 42.200 | 0.00 | 0.00 |
| ATOM | 928 | CB   | PHE | X | 61 | 52.292 | 59.148 | 41.877 | 0.00 | 0.00 |
| ATOM | 929 | HB2  | PHE | X | 61 | 52.112 | 58.959 | 40.819 | 0.00 | 0.00 |
| ATOM | 930 | HB3  | PHE | X | 61 | 53.306 | 58.826 | 42.111 | 0.00 | 0.00 |
| ATOM | 931 | CG   | PHE | X | 61 | 51.284 | 58.344 | 42.603 | 0.00 | 0.00 |
| ATOM | 932 | CD1  | PHE | X | 61 | 51.539 | 57.739 | 43.844 | 0.00 | 0.00 |
| ATOM | 933 | HD1  | PHE | X | 61 | 52.538 | 57.712 | 44.253 | 0.00 | 0.00 |
| ATOM | 934 | CE1  | PHE | X | 61 | 50.500 | 57.164 | 44.611 | 0.00 | 0.00 |
| ATOM | 935 | HE1  | PHE | X | 61 | 50.669 | 56.589 | 45.509 | 0.00 | 0.00 |
| ATOM | 936 | CZ   | PHE | X | 61 | 49.160 | 57.211 | 44.122 | 0.00 | 0.00 |
| ATOM | 937 | HZ   | PHE | X | 61 | 48.373 | 56.732 | 44.686 | 0.00 | 0.00 |
| ATOM | 938 | CE2  | PHE | X | 61 | 48.948 | 57.734 | 42.834 | 0.00 | 0.00 |
| ATOM | 939 | HE2  | PHE | X | 61 | 47.990 | 57.569 | 42.362 | 0.00 | 0.00 |
| ATOM | 940 | CD2  | PHE | X | 61 | 49.981 | 58.313 | 42.114 | 0.00 | 0.00 |
| ATOM | 941 | HD2  | PHE | X | 61 | 49.700 | 58.767 | 41.176 | 0.00 | 0.00 |
| ATOM | 942 | C    | PHE | X | 61 | 52.876 | 61.134 | 43.434 | 0.00 | 0.00 |
| ATOM | 943 | O    | PHE | X | 61 | 53.740 | 61.976 | 43.428 | 0.00 | 0.00 |
| ATOM | 944 | N    | GLN | X | 62 | 52.337 | 60.591 | 44.561 | 0.00 | 0.00 |
| ATOM | 945 | H    | GLN | X | 62 | 51.682 | 59.824 | 44.515 | 0.00 | 0.00 |
| ATOM | 946 | CA   | GLN | X | 62 | 52.884 | 60.963 | 45.878 | 0.00 | 0.00 |
| ATOM | 947 | HA   | GLN | X | 62 | 53.804 | 61.543 | 45.799 | 0.00 | 0.00 |
| ATOM | 948 | CB   | GLN | X | 62 | 51.833 | 61.714 | 46.696 | 0.00 | 0.00 |
| ATOM | 949 | HB2  | GLN | X | 62 | 50.978 | 61.040 | 46.744 | 0.00 | 0.00 |
| ATOM | 950 | HB3  | GLN | X | 62 | 52.230 | 61.995 | 47.671 | 0.00 | 0.00 |
| ATOM | 951 | CG   | GLN | X | 62 | 51.366 | 62.990 | 45.967 | 0.00 | 0.00 |
| ATOM | 952 | HG2  | GLN | X | 62 | 51.124 | 62.871 | 44.910 | 0.00 | 0.00 |
| ATOM | 953 | HG3  | GLN | X | 62 | 50.435 | 63.320 | 46.426 | 0.00 | 0.00 |
| ATOM | 954 | CD   | GLN | X | 62 | 52.267 | 64.231 | 46.021 | 0.00 | 0.00 |
| ATOM | 955 | OE1  | GLN | X | 62 | 52.210 | 64.986 | 46.987 | 0.00 | 0.00 |
| ATOM | 956 | NE2  | GLN | X | 62 | 53.120 | 64.276 | 45.076 | 0.00 | 0.00 |
| ATOM | 957 | HE21 | GLN | X | 62 | 53.763 | 65.047 | 44.966 | 0.00 | 0.00 |
| ATOM | 958 | HE22 | GLN | X | 62 | 53.171 | 63.629 | 44.302 | 0.00 | 0.00 |
| ATOM | 959 | C    | GLN | X | 62 | 53.322 | 59.677 | 46.610 | 0.00 | 0.00 |
| ATOM | 960 | O    | GLN | X | 62 | 53.836 | 58.764 | 46.019 | 0.00 | 0.00 |
| ATOM | 961 | N    | SER | X | 63 | 53.015 | 59.481 | 47.909 | 0.00 | 0.00 |
| ATOM | 962 | H    | SER | X | 63 | 52.667 | 60.323 | 48.346 | 0.00 | 0.00 |
| ATOM | 963 | CA   | SER | X | 63 | 53.037 | 58.251 | 48.628 | 0.00 | 0.00 |
| ATOM | 964 | HA   | SER | X | 63 | 54.046 | 57.921 | 48.381 | 0.00 | 0.00 |
| ATOM | 965 | CB   | SER | X | 63 | 53.076 | 58.485 | 50.152 | 0.00 | 0.00 |
| ATOM | 966 | HB2  | SER | X | 63 | 52.009 | 58.608 | 50.336 | 0.00 | 0.00 |
| ATOM | 967 | HB3  | SER | X | 63 | 53.417 | 57.547 | 50.590 | 0.00 | 0.00 |
| ATOM | 968 | OG   | SER | X | 63 | 53.938 | 59.618 | 50.406 | 0.00 | 0.00 |
| ATOM | 969 | HG   | SER | X | 63 | 53.518 | 60.298 | 50.937 | 0.00 | 0.00 |
| ATOM | 970 | C    | SER | X | 63 | 52.043 | 57.154 | 48.152 | 0.00 | 0.00 |
| ATOM | 971 | O    | SER | X | 63 | 50.839 | 57.355 | 47.825 | 0.00 | 0.00 |
| ATOM | 972 | N    | VAL | X | 64 | 52.461 | 55.886 | 48.185 | 0.00 | 0.00 |
| ATOM | 973 | H    | VAL | X | 64 | 53.385 | 55.710 | 48.551 | 0.00 | 0.00 |
| ATOM | 974 | CA   | VAL | X | 64 | 51.520 | 54.760 | 48.016 | 0.00 | 0.00 |
| ATOM | 975 | HA   | VAL | X | 64 | 50.600 | 55.000 | 47.482 | 0.00 | 0.00 |
| ATOM | 976 | CB   | VAL | X | 64 | 52.187 | 53.637 | 47.152 | 0.00 | 0.00 |
| ATOM | 977 | HB   | VAL | X | 64 | 53.170 | 53.450 | 47.584 | 0.00 | 0.00 |
| ATOM | 978 | CG1  | VAL | X | 64 | 51.424 | 52.301 | 47.041 | 0.00 | 0.00 |

|      |      |      |     |   |    |        |        |        |      |      |
|------|------|------|-----|---|----|--------|--------|--------|------|------|
| ATOM | 979  | HG11 | VAL | X | 64 | 51.567 | 51.838 | 48.017 | 0.00 | 0.00 |
| ATOM | 980  | HG12 | VAL | X | 64 | 50.410 | 52.488 | 46.689 | 0.00 | 0.00 |
| ATOM | 981  | HG13 | VAL | X | 64 | 51.868 | 51.658 | 46.281 | 0.00 | 0.00 |
| ATOM | 982  | CG2  | VAL | X | 64 | 52.347 | 54.198 | 45.673 | 0.00 | 0.00 |
| ATOM | 983  | HG21 | VAL | X | 64 | 51.388 | 54.524 | 45.270 | 0.00 | 0.00 |
| ATOM | 984  | HG22 | VAL | X | 64 | 53.004 | 55.059 | 45.794 | 0.00 | 0.00 |
| ATOM | 985  | HG23 | VAL | X | 64 | 52.736 | 53.394 | 45.049 | 0.00 | 0.00 |
| ATOM | 986  | C    | VAL | X | 64 | 51.089 | 54.299 | 49.423 | 0.00 | 0.00 |
| ATOM | 987  | O    | VAL | X | 64 | 51.745 | 54.605 | 50.389 | 0.00 | 0.00 |
| ATOM | 988  | N    | CYX | X | 65 | 49.914 | 53.635 | 49.467 | 0.00 | 0.00 |
| ATOM | 989  | H    | CYX | X | 65 | 49.616 | 53.341 | 48.548 | 0.00 | 0.00 |
| ATOM | 990  | CA   | CYX | X | 65 | 49.365 | 53.164 | 50.737 | 0.00 | 0.00 |
| ATOM | 991  | HA   | CYX | X | 65 | 49.335 | 54.044 | 51.380 | 0.00 | 0.00 |
| ATOM | 992  | CB   | CYX | X | 65 | 47.947 | 52.568 | 50.709 | 0.00 | 0.00 |
| ATOM | 993  | HB2  | CYX | X | 65 | 48.052 | 51.648 | 50.135 | 0.00 | 0.00 |
| ATOM | 994  | HB3  | CYX | X | 65 | 47.648 | 52.370 | 51.738 | 0.00 | 0.00 |
| ATOM | 995  | SG   | CYX | X | 65 | 46.741 | 53.645 | 49.798 | 0.00 | 0.00 |
| ATOM | 996  | C    | CYX | X | 65 | 50.280 | 52.140 | 51.356 | 0.00 | 0.00 |
| ATOM | 997  | O    | CYX | X | 65 | 50.731 | 51.185 | 50.659 | 0.00 | 0.00 |
| ATOM | 998  | N    | TYR | X | 66 | 50.555 | 52.261 | 52.699 | 0.00 | 0.00 |
| ATOM | 999  | H    | TYR | X | 66 | 50.148 | 53.074 | 53.139 | 0.00 | 0.00 |
| ATOM | 1000 | CA   | TYR | X | 66 | 51.145 | 51.263 | 53.584 | 0.00 | 0.00 |
| ATOM | 1001 | HA   | TYR | X | 66 | 52.232 | 51.251 | 53.504 | 0.00 | 0.00 |
| ATOM | 1002 | CB   | TYR | X | 66 | 50.872 | 51.682 | 55.066 | 0.00 | 0.00 |
| ATOM | 1003 | HB2  | TYR | X | 66 | 50.002 | 52.330 | 55.172 | 0.00 | 0.00 |
| ATOM | 1004 | HB3  | TYR | X | 66 | 50.680 | 50.758 | 55.611 | 0.00 | 0.00 |
| ATOM | 1005 | CG   | TYR | X | 66 | 52.097 | 52.336 | 55.566 | 0.00 | 0.00 |
| ATOM | 1006 | CD1  | TYR | X | 66 | 52.149 | 53.736 | 55.715 | 0.00 | 0.00 |
| ATOM | 1007 | HD1  | TYR | X | 66 | 51.243 | 54.290 | 55.517 | 0.00 | 0.00 |
| ATOM | 1008 | CE1  | TYR | X | 66 | 53.313 | 54.350 | 56.201 | 0.00 | 0.00 |
| ATOM | 1009 | HE1  | TYR | X | 66 | 53.338 | 55.424 | 56.303 | 0.00 | 0.00 |
| ATOM | 1010 | CZ   | TYR | X | 66 | 54.410 | 53.590 | 56.545 | 0.00 | 0.00 |
| ATOM | 1011 | OH   | TYR | X | 66 | 55.388 | 54.268 | 57.087 | 0.00 | 0.00 |
| ATOM | 1012 | HH   | TYR | X | 66 | 55.375 | 55.205 | 56.878 | 0.00 | 0.00 |
| ATOM | 1013 | CE2  | TYR | X | 66 | 54.440 | 52.182 | 56.427 | 0.00 | 0.00 |
| ATOM | 1014 | HE2  | TYR | X | 66 | 55.226 | 51.606 | 56.891 | 0.00 | 0.00 |
| ATOM | 1015 | CD2  | TYR | X | 66 | 53.262 | 51.573 | 55.889 | 0.00 | 0.00 |
| ATOM | 1016 | HD2  | TYR | X | 66 | 53.335 | 50.519 | 55.664 | 0.00 | 0.00 |
| ATOM | 1017 | C    | TYR | X | 66 | 50.580 | 49.813 | 53.241 | 0.00 | 0.00 |
| ATOM | 1018 | O    | TYR | X | 66 | 49.380 | 49.739 | 52.957 | 0.00 | 0.00 |
| ATOM | 1019 | N    | GLN | X | 67 | 51.428 | 48.825 | 53.466 | 0.00 | 0.00 |
| ATOM | 1020 | H    | GLN | X | 67 | 52.175 | 48.979 | 54.129 | 0.00 | 0.00 |
| ATOM | 1021 | CA   | GLN | X | 67 | 51.516 | 47.441 | 52.882 | 0.00 | 0.00 |
| ATOM | 1022 | HA   | GLN | X | 67 | 50.623 | 46.862 | 53.117 | 0.00 | 0.00 |
| ATOM | 1023 | CB   | GLN | X | 67 | 51.605 | 47.488 | 51.402 | 0.00 | 0.00 |
| ATOM | 1024 | HB2  | GLN | X | 67 | 51.611 | 46.456 | 51.052 | 0.00 | 0.00 |
| ATOM | 1025 | HB3  | GLN | X | 67 | 50.665 | 47.929 | 51.069 | 0.00 | 0.00 |
| ATOM | 1026 | CG   | GLN | X | 67 | 52.856 | 48.240 | 50.845 | 0.00 | 0.00 |
| ATOM | 1027 | HG2  | GLN | X | 67 | 52.791 | 49.296 | 51.107 | 0.00 | 0.00 |
| ATOM | 1028 | HG3  | GLN | X | 67 | 53.777 | 47.758 | 51.172 | 0.00 | 0.00 |
| ATOM | 1029 | CD   | GLN | X | 67 | 52.728 | 48.151 | 49.254 | 0.00 | 0.00 |
| ATOM | 1030 | OE1  | GLN | X | 67 | 53.203 | 47.215 | 48.560 | 0.00 | 0.00 |
| ATOM | 1031 | NE2  | GLN | X | 67 | 52.031 | 49.087 | 48.640 | 0.00 | 0.00 |
| ATOM | 1032 | HE21 | GLN | X | 67 | 51.892 | 49.000 | 47.643 | 0.00 | 0.00 |
| ATOM | 1033 | HE22 | GLN | X | 67 | 51.650 | 49.802 | 49.242 | 0.00 | 0.00 |
| ATOM | 1034 | C    | GLN | X | 67 | 52.702 | 46.702 | 53.531 | 0.00 | 0.00 |
| ATOM | 1035 | O    | GLN | X | 67 | 53.499 | 47.403 | 54.127 | 0.00 | 0.00 |
| ATOM | 1036 | N    | TYR | X | 68 | 52.830 | 45.369 | 53.354 | 0.00 | 0.00 |
| ATOM | 1037 | H    | TYR | X | 68 | 52.153 | 44.779 | 52.893 | 0.00 | 0.00 |
| ATOM | 1038 | CA   | TYR | X | 68 | 54.076 | 44.642 | 53.787 | 0.00 | 0.00 |
| ATOM | 1039 | HA   | TYR | X | 68 | 54.611 | 45.249 | 54.518 | 0.00 | 0.00 |
| ATOM | 1040 | CB   | TYR | X | 68 | 53.557 | 43.338 | 54.492 | 0.00 | 0.00 |
| ATOM | 1041 | HB2  | TYR | X | 68 | 52.973 | 43.698 | 55.339 | 0.00 | 0.00 |
| ATOM | 1042 | HB3  | TYR | X | 68 | 53.083 | 42.679 | 53.765 | 0.00 | 0.00 |
| ATOM | 1043 | CG   | TYR | X | 68 | 54.572 | 42.419 | 55.149 | 0.00 | 0.00 |
| ATOM | 1044 | CD1  | TYR | X | 68 | 54.955 | 42.513 | 56.526 | 0.00 | 0.00 |
| ATOM | 1045 | HD1  | TYR | X | 68 | 54.560 | 43.352 | 57.080 | 0.00 | 0.00 |
| ATOM | 1046 | CE1  | TYR | X | 68 | 55.788 | 41.558 | 57.115 | 0.00 | 0.00 |
| ATOM | 1047 | HE1  | TYR | X | 68 | 56.011 | 41.648 | 58.168 | 0.00 | 0.00 |
| ATOM | 1048 | CZ   | TYR | X | 68 | 56.354 | 40.561 | 56.320 | 0.00 | 0.00 |

|      |      |      |     |   |    |        |        |        |      |      |
|------|------|------|-----|---|----|--------|--------|--------|------|------|
| ATOM | 1049 | OH   | TYR | X | 68 | 57.226 | 39.526 | 56.637 | 0.00 | 0.00 |
| ATOM | 1050 | HH   | TYR | X | 68 | 57.539 | 39.544 | 57.544 | 0.00 | 0.00 |
| ATOM | 1051 | CE2  | TYR | X | 68 | 56.104 | 40.508 | 54.915 | 0.00 | 0.00 |
| ATOM | 1052 | HE2  | TYR | X | 68 | 56.574 | 39.739 | 54.320 | 0.00 | 0.00 |
| ATOM | 1053 | CD2  | TYR | X | 68 | 55.217 | 41.444 | 54.316 | 0.00 | 0.00 |
| ATOM | 1054 | HD2  | TYR | X | 68 | 54.950 | 41.314 | 53.277 | 0.00 | 0.00 |
| ATOM | 1055 | C    | TYR | X | 68 | 54.979 | 44.424 | 52.593 | 0.00 | 0.00 |
| ATOM | 1056 | O    | TYR | X | 68 | 54.574 | 44.031 | 51.474 | 0.00 | 0.00 |
| ATOM | 1057 | N    | VAL | X | 69 | 56.257 | 44.728 | 52.729 | 0.00 | 0.00 |
| ATOM | 1058 | H    | VAL | X | 69 | 56.573 | 45.063 | 53.628 | 0.00 | 0.00 |
| ATOM | 1059 | CA   | VAL | X | 69 | 57.251 | 44.252 | 51.704 | 0.00 | 0.00 |
| ATOM | 1060 | HA   | VAL | X | 69 | 56.777 | 44.355 | 50.728 | 0.00 | 0.00 |
| ATOM | 1061 | CB   | VAL | X | 69 | 58.372 | 45.330 | 51.496 | 0.00 | 0.00 |
| ATOM | 1062 | HB   | VAL | X | 69 | 59.142 | 44.836 | 50.902 | 0.00 | 0.00 |
| ATOM | 1063 | CG1  | VAL | X | 69 | 57.952 | 46.512 | 50.596 | 0.00 | 0.00 |
| ATOM | 1064 | HG11 | VAL | X | 69 | 57.638 | 46.221 | 49.593 | 0.00 | 0.00 |
| ATOM | 1065 | HG12 | VAL | X | 69 | 57.085 | 46.976 | 51.066 | 0.00 | 0.00 |
| ATOM | 1066 | HG13 | VAL | X | 69 | 58.768 | 47.228 | 50.495 | 0.00 | 0.00 |
| ATOM | 1067 | CG2  | VAL | X | 69 | 59.037 | 45.691 | 52.867 | 0.00 | 0.00 |
| ATOM | 1068 | HG21 | VAL | X | 69 | 59.044 | 44.873 | 53.589 | 0.00 | 0.00 |
| ATOM | 1069 | HG22 | VAL | X | 69 | 60.027 | 46.067 | 52.613 | 0.00 | 0.00 |
| ATOM | 1070 | HG23 | VAL | X | 69 | 58.441 | 46.480 | 53.326 | 0.00 | 0.00 |
| ATOM | 1071 | C    | VAL | X | 69 | 57.934 | 42.866 | 52.008 | 0.00 | 0.00 |
| ATOM | 1072 | O    | VAL | X | 69 | 58.244 | 42.633 | 53.171 | 0.00 | 0.00 |
| ATOM | 1073 | N    | ASP | X | 70 | 58.228 | 42.064 | 50.969 | 0.00 | 0.00 |
| ATOM | 1074 | H    | ASP | X | 70 | 57.828 | 42.314 | 50.076 | 0.00 | 0.00 |
| ATOM | 1075 | CA   | ASP | X | 70 | 58.915 | 40.767 | 50.998 | 0.00 | 0.00 |
| ATOM | 1076 | HA   | ASP | X | 70 | 58.285 | 39.994 | 51.440 | 0.00 | 0.00 |
| ATOM | 1077 | CB   | ASP | X | 70 | 59.139 | 40.375 | 49.571 | 0.00 | 0.00 |
| ATOM | 1078 | HB2  | ASP | X | 70 | 58.135 | 40.361 | 49.147 | 0.00 | 0.00 |
| ATOM | 1079 | HB3  | ASP | X | 70 | 59.782 | 41.123 | 49.106 | 0.00 | 0.00 |
| ATOM | 1080 | CG   | ASP | X | 70 | 59.740 | 38.990 | 49.278 | 0.00 | 0.00 |
| ATOM | 1081 | OD1  | ASP | X | 70 | 60.049 | 38.241 | 50.200 | 0.00 | 0.00 |
| ATOM | 1082 | OD2  | ASP | X | 70 | 59.855 | 38.746 | 48.092 | 0.00 | 0.00 |
| ATOM | 1083 | C    | ASP | X | 70 | 60.184 | 40.616 | 51.827 | 0.00 | 0.00 |
| ATOM | 1084 | O    | ASP | X | 70 | 61.342 | 40.990 | 51.406 | 0.00 | 0.00 |
| ATOM | 1085 | N    | THR | X | 71 | 60.051 | 39.994 | 53.034 | 0.00 | 0.00 |
| ATOM | 1086 | H    | THR | X | 71 | 59.118 | 39.903 | 53.409 | 0.00 | 0.00 |
| ATOM | 1087 | CA   | THR | X | 71 | 61.188 | 39.661 | 53.927 | 0.00 | 0.00 |
| ATOM | 1088 | HA   | THR | X | 71 | 62.000 | 40.386 | 53.963 | 0.00 | 0.00 |
| ATOM | 1089 | CB   | THR | X | 71 | 60.675 | 39.665 | 55.403 | 0.00 | 0.00 |
| ATOM | 1090 | HB   | THR | X | 71 | 61.582 | 39.490 | 55.983 | 0.00 | 0.00 |
| ATOM | 1091 | CG2  | THR | X | 71 | 60.070 | 40.982 | 55.959 | 0.00 | 0.00 |
| ATOM | 1092 | HG21 | THR | X | 71 | 60.756 | 41.811 | 55.785 | 0.00 | 0.00 |
| ATOM | 1093 | HG22 | THR | X | 71 | 59.216 | 41.244 | 55.333 | 0.00 | 0.00 |
| ATOM | 1094 | HG23 | THR | X | 71 | 60.026 | 40.952 | 57.048 | 0.00 | 0.00 |
| ATOM | 1095 | OG1  | THR | X | 71 | 59.738 | 38.587 | 55.593 | 0.00 | 0.00 |
| ATOM | 1096 | HG1  | THR | X | 71 | 58.962 | 38.838 | 56.099 | 0.00 | 0.00 |
| ATOM | 1097 | C    | THR | X | 71 | 61.974 | 38.399 | 53.651 | 0.00 | 0.00 |
| ATOM | 1098 | O    | THR | X | 71 | 63.008 | 38.178 | 54.255 | 0.00 | 0.00 |
| ATOM | 1099 | N    | LEU | X | 72 | 61.638 | 37.686 | 52.539 | 0.00 | 0.00 |
| ATOM | 1100 | H    | LEU | X | 72 | 60.907 | 38.027 | 51.932 | 0.00 | 0.00 |
| ATOM | 1101 | CA   | LEU | X | 72 | 62.230 | 36.411 | 52.156 | 0.00 | 0.00 |
| ATOM | 1102 | HA   | LEU | X | 72 | 62.789 | 36.155 | 53.056 | 0.00 | 0.00 |
| ATOM | 1103 | CB   | LEU | X | 72 | 61.320 | 35.320 | 51.679 | 0.00 | 0.00 |
| ATOM | 1104 | HB2  | LEU | X | 72 | 60.424 | 35.269 | 52.298 | 0.00 | 0.00 |
| ATOM | 1105 | HB3  | LEU | X | 72 | 60.943 | 35.532 | 50.678 | 0.00 | 0.00 |
| ATOM | 1106 | CG   | LEU | X | 72 | 62.129 | 33.942 | 51.714 | 0.00 | 0.00 |
| ATOM | 1107 | HG   | LEU | X | 72 | 63.149 | 33.938 | 51.332 | 0.00 | 0.00 |
| ATOM | 1108 | CD1  | LEU | X | 72 | 62.066 | 33.267 | 53.090 | 0.00 | 0.00 |
| ATOM | 1109 | HD11 | LEU | X | 72 | 62.238 | 33.945 | 53.926 | 0.00 | 0.00 |
| ATOM | 1110 | HD12 | LEU | X | 72 | 61.047 | 32.884 | 53.133 | 0.00 | 0.00 |
| ATOM | 1111 | HD13 | LEU | X | 72 | 62.706 | 32.388 | 53.158 | 0.00 | 0.00 |
| ATOM | 1112 | CD2  | LEU | X | 72 | 61.407 | 33.052 | 50.660 | 0.00 | 0.00 |
| ATOM | 1113 | HD21 | LEU | X | 72 | 61.852 | 32.062 | 50.550 | 0.00 | 0.00 |
| ATOM | 1114 | HD22 | LEU | X | 72 | 60.356 | 32.896 | 50.902 | 0.00 | 0.00 |
| ATOM | 1115 | HD23 | LEU | X | 72 | 61.409 | 33.594 | 49.714 | 0.00 | 0.00 |
| ATOM | 1116 | C    | LEU | X | 72 | 63.356 | 36.726 | 51.148 | 0.00 | 0.00 |
| ATOM | 1117 | O    | LEU | X | 72 | 64.529 | 36.437 | 51.350 | 0.00 | 0.00 |
| ATOM | 1118 | N    | TYR | X | 73 | 62.944 | 37.396 | 50.037 | 0.00 | 0.00 |

|      |      |     |     |   |    |        |        |        |      |      |
|------|------|-----|-----|---|----|--------|--------|--------|------|------|
| ATOM | 1119 | H   | TYR | X | 73 | 61.948 | 37.558 | 49.985 | 0.00 | 0.00 |
| ATOM | 1120 | CA  | TYR | X | 73 | 63.819 | 37.864 | 48.987 | 0.00 | 0.00 |
| ATOM | 1121 | HA  | TYR | X | 73 | 64.832 | 37.607 | 49.297 | 0.00 | 0.00 |
| ATOM | 1122 | CB  | TYR | X | 73 | 63.414 | 37.060 | 47.696 | 0.00 | 0.00 |
| ATOM | 1123 | HB2 | TYR | X | 73 | 62.496 | 37.425 | 47.235 | 0.00 | 0.00 |
| ATOM | 1124 | HB3 | TYR | X | 73 | 64.179 | 37.277 | 46.951 | 0.00 | 0.00 |
| ATOM | 1125 | CG  | TYR | X | 73 | 63.395 | 35.543 | 47.854 | 0.00 | 0.00 |
| ATOM | 1126 | CD1 | TYR | X | 73 | 64.561 | 34.883 | 48.262 | 0.00 | 0.00 |
| ATOM | 1127 | HD1 | TYR | X | 73 | 65.399 | 35.451 | 48.639 | 0.00 | 0.00 |
| ATOM | 1128 | CE1 | TYR | X | 73 | 64.463 | 33.450 | 48.173 | 0.00 | 0.00 |
| ATOM | 1129 | HE1 | TYR | X | 73 | 65.225 | 32.852 | 48.650 | 0.00 | 0.00 |
| ATOM | 1130 | CZ  | TYR | X | 73 | 63.387 | 32.722 | 47.658 | 0.00 | 0.00 |
| ATOM | 1131 | OH  | TYR | X | 73 | 63.427 | 31.350 | 47.665 | 0.00 | 0.00 |
| ATOM | 1132 | HH  | TYR | X | 73 | 62.575 | 31.046 | 47.345 | 0.00 | 0.00 |
| ATOM | 1133 | CE2 | TYR | X | 73 | 62.246 | 33.438 | 47.189 | 0.00 | 0.00 |
| ATOM | 1134 | HE2 | TYR | X | 73 | 61.429 | 32.970 | 46.662 | 0.00 | 0.00 |
| ATOM | 1135 | CD2 | TYR | X | 73 | 62.319 | 34.848 | 47.337 | 0.00 | 0.00 |
| ATOM | 1136 | HD2 | TYR | X | 73 | 61.516 | 35.515 | 47.059 | 0.00 | 0.00 |
| ATOM | 1137 | C   | TYR | X | 73 | 63.640 | 39.423 | 48.860 | 0.00 | 0.00 |
| ATOM | 1138 | O   | TYR | X | 73 | 62.919 | 39.869 | 47.955 | 0.00 | 0.00 |
| ATOM | 1139 | N   | PRO | X | 74 | 64.093 | 40.334 | 49.802 | 0.00 | 0.00 |
| ATOM | 1140 | CD  | PRO | X | 74 | 64.736 | 40.005 | 51.045 | 0.00 | 0.00 |
| ATOM | 1141 | HD2 | PRO | X | 74 | 65.784 | 39.756 | 50.883 | 0.00 | 0.00 |
| ATOM | 1142 | HD3 | PRO | X | 74 | 64.214 | 39.249 | 51.632 | 0.00 | 0.00 |
| ATOM | 1143 | CG  | PRO | X | 74 | 64.708 | 41.337 | 51.859 | 0.00 | 0.00 |
| ATOM | 1144 | HG2 | PRO | X | 74 | 65.509 | 41.369 | 52.598 | 0.00 | 0.00 |
| ATOM | 1145 | HG3 | PRO | X | 74 | 63.748 | 41.417 | 52.369 | 0.00 | 0.00 |
| ATOM | 1146 | CB  | PRO | X | 74 | 64.916 | 42.381 | 50.731 | 0.00 | 0.00 |
| ATOM | 1147 | HB2 | PRO | X | 74 | 65.971 | 42.447 | 50.465 | 0.00 | 0.00 |
| ATOM | 1148 | HB3 | PRO | X | 74 | 64.520 | 43.381 | 50.906 | 0.00 | 0.00 |
| ATOM | 1149 | CA  | PRO | X | 74 | 64.167 | 41.770 | 49.498 | 0.00 | 0.00 |
| ATOM | 1150 | HA  | PRO | X | 74 | 63.087 | 41.915 | 49.462 | 0.00 | 0.00 |
| ATOM | 1151 | C   | PRO | X | 74 | 64.851 | 42.063 | 48.185 | 0.00 | 0.00 |
| ATOM | 1152 | O   | PRO | X | 74 | 65.865 | 41.446 | 47.828 | 0.00 | 0.00 |
| ATOM | 1153 | N   | GLY | X | 75 | 64.284 | 42.998 | 47.538 | 0.00 | 0.00 |
| ATOM | 1154 | H   | GLY | X | 75 | 63.460 | 43.399 | 47.964 | 0.00 | 0.00 |
| ATOM | 1155 | CA  | GLY | X | 75 | 64.859 | 43.670 | 46.386 | 0.00 | 0.00 |
| ATOM | 1156 | HA2 | GLY | X | 75 | 64.196 | 44.489 | 46.242 | 0.00 | 0.00 |
| ATOM | 1157 | HA3 | GLY | X | 75 | 65.833 | 44.075 | 46.543 | 0.00 | 0.00 |
| ATOM | 1158 | C   | GLY | X | 75 | 64.795 | 42.753 | 45.162 | 0.00 | 0.00 |
| ATOM | 1159 | O   | GLY | X | 75 | 65.602 | 42.884 | 44.276 | 0.00 | 0.00 |
| ATOM | 1160 | N   | PHE | X | 76 | 63.885 | 41.804 | 45.096 | 0.00 | 0.00 |
| ATOM | 1161 | H   | PHE | X | 76 | 63.280 | 41.694 | 45.898 | 0.00 | 0.00 |
| ATOM | 1162 | CA  | PHE | X | 76 | 63.844 | 40.689 | 44.092 | 0.00 | 0.00 |
| ATOM | 1163 | HA  | PHE | X | 76 | 64.772 | 40.716 | 43.520 | 0.00 | 0.00 |
| ATOM | 1164 | CB  | PHE | X | 76 | 63.666 | 39.329 | 44.721 | 0.00 | 0.00 |
| ATOM | 1165 | HB2 | PHE | X | 76 | 64.662 | 39.088 | 45.093 | 0.00 | 0.00 |
| ATOM | 1166 | HB3 | PHE | X | 76 | 62.962 | 39.371 | 45.552 | 0.00 | 0.00 |
| ATOM | 1167 | CG  | PHE | X | 76 | 63.240 | 38.194 | 43.804 | 0.00 | 0.00 |
| ATOM | 1168 | CD1 | PHE | X | 76 | 64.111 | 37.680 | 42.756 | 0.00 | 0.00 |
| ATOM | 1169 | HD1 | PHE | X | 76 | 65.148 | 37.981 | 42.745 | 0.00 | 0.00 |
| ATOM | 1170 | CE1 | PHE | X | 76 | 63.666 | 36.547 | 42.054 | 0.00 | 0.00 |
| ATOM | 1171 | HE1 | PHE | X | 76 | 64.295 | 36.086 | 41.307 | 0.00 | 0.00 |
| ATOM | 1172 | CZ  | PHE | X | 76 | 62.331 | 36.067 | 42.187 | 0.00 | 0.00 |
| ATOM | 1173 | HZ  | PHE | X | 76 | 61.963 | 35.371 | 41.447 | 0.00 | 0.00 |
| ATOM | 1174 | CE2 | PHE | X | 76 | 61.454 | 36.613 | 43.076 | 0.00 | 0.00 |
| ATOM | 1175 | HE2 | PHE | X | 76 | 60.411 | 36.345 | 43.156 | 0.00 | 0.00 |
| ATOM | 1176 | CD2 | PHE | X | 76 | 61.964 | 37.623 | 43.947 | 0.00 | 0.00 |
| ATOM | 1177 | HD2 | PHE | X | 76 | 61.301 | 38.038 | 44.692 | 0.00 | 0.00 |
| ATOM | 1178 | C   | PHE | X | 76 | 62.640 | 40.951 | 43.049 | 0.00 | 0.00 |
| ATOM | 1179 | O   | PHE | X | 76 | 61.502 | 41.307 | 43.438 | 0.00 | 0.00 |
| ATOM | 1180 | N   | GLU | X | 77 | 62.856 | 40.717 | 41.752 | 0.00 | 0.00 |
| ATOM | 1181 | H   | GLU | X | 77 | 63.839 | 40.634 | 41.536 | 0.00 | 0.00 |
| ATOM | 1182 | CA  | GLU | X | 77 | 61.972 | 41.082 | 40.647 | 0.00 | 0.00 |
| ATOM | 1183 | HA  | GLU | X | 77 | 61.910 | 42.170 | 40.618 | 0.00 | 0.00 |
| ATOM | 1184 | CB  | GLU | X | 77 | 62.532 | 40.595 | 39.354 | 0.00 | 0.00 |
| ATOM | 1185 | HB2 | GLU | X | 77 | 62.883 | 39.581 | 39.546 | 0.00 | 0.00 |
| ATOM | 1186 | HB3 | GLU | X | 77 | 61.716 | 40.629 | 38.631 | 0.00 | 0.00 |
| ATOM | 1187 | CG  | GLU | X | 77 | 63.657 | 41.538 | 38.945 | 0.00 | 0.00 |
| ATOM | 1188 | HG2 | GLU | X | 77 | 63.308 | 42.535 | 38.677 | 0.00 | 0.00 |



|      |      |      |     |   |    |        |        |        |      |      |
|------|------|------|-----|---|----|--------|--------|--------|------|------|
| ATOM | 1189 | HG3  | GLU | X | 77 | 64.266 | 41.682 | 39.837 | 0.00 | 0.00 |
| ATOM | 1190 | CD   | GLU | X | 77 | 64.417 | 40.915 | 37.693 | 0.00 | 0.00 |
| ATOM | 1191 | OE1  | GLU | X | 77 | 64.688 | 39.684 | 37.717 | 0.00 | 0.00 |
| ATOM | 1192 | OE2  | GLU | X | 77 | 64.643 | 41.611 | 36.688 | 0.00 | 0.00 |
| ATOM | 1193 | C    | GLU | X | 77 | 60.554 | 40.535 | 40.821 | 0.00 | 0.00 |
| ATOM | 1194 | O    | GLU | X | 77 | 59.656 | 41.320 | 40.593 | 0.00 | 0.00 |
| ATOM | 1195 | N    | GLY | X | 78 | 60.321 | 39.317 | 41.271 | 0.00 | 0.00 |
| ATOM | 1196 | H    | GLY | X | 78 | 61.093 | 38.760 | 41.610 | 0.00 | 0.00 |
| ATOM | 1197 | CA   | GLY | X | 78 | 58.936 | 38.788 | 41.389 | 0.00 | 0.00 |
| ATOM | 1198 | HA2  | GLY | X | 78 | 58.522 | 38.896 | 40.430 | 0.00 | 0.00 |
| ATOM | 1199 | HA3  | GLY | X | 78 | 59.094 | 37.694 | 41.579 | 0.00 | 0.00 |
| ATOM | 1200 | C    | GLY | X | 78 | 57.980 | 39.361 | 42.413 | 0.00 | 0.00 |
| ATOM | 1201 | O    | GLY | X | 78 | 56.814 | 39.071 | 42.312 | 0.00 | 0.00 |
| ATOM | 1202 | N    | THR | X | 79 | 58.499 | 40.234 | 43.266 | 0.00 | 0.00 |
| ATOM | 1203 | H    | THR | X | 79 | 59.507 | 40.301 | 43.252 | 0.00 | 0.00 |
| ATOM | 1204 | CA   | THR | X | 79 | 57.689 | 41.033 | 44.226 | 0.00 | 0.00 |
| ATOM | 1205 | HA   | THR | X | 79 | 56.621 | 40.968 | 44.018 | 0.00 | 0.00 |
| ATOM | 1206 | CB   | THR | X | 79 | 58.029 | 40.552 | 45.632 | 0.00 | 0.00 |
| ATOM | 1207 | HB   | THR | X | 79 | 57.825 | 41.346 | 46.350 | 0.00 | 0.00 |
| ATOM | 1208 | CG2  | THR | X | 79 | 57.145 | 39.339 | 45.932 | 0.00 | 0.00 |
| ATOM | 1209 | HG21 | THR | X | 79 | 56.103 | 39.649 | 46.013 | 0.00 | 0.00 |
| ATOM | 1210 | HG22 | THR | X | 79 | 57.049 | 38.638 | 45.102 | 0.00 | 0.00 |
| ATOM | 1211 | HG23 | THR | X | 79 | 57.447 | 38.820 | 46.841 | 0.00 | 0.00 |
| ATOM | 1212 | OG1  | THR | X | 79 | 59.424 | 40.183 | 45.641 | 0.00 | 0.00 |
| ATOM | 1213 | HG1  | THR | X | 79 | 59.630 | 39.513 | 46.297 | 0.00 | 0.00 |
| ATOM | 1214 | C    | THR | X | 79 | 57.963 | 42.532 | 44.058 | 0.00 | 0.00 |
| ATOM | 1215 | O    | THR | X | 79 | 57.032 | 43.317 | 44.187 | 0.00 | 0.00 |
| ATOM | 1216 | N    | GLU | X | 80 | 59.143 | 42.984 | 43.550 | 0.00 | 0.00 |
| ATOM | 1217 | H    | GLU | X | 80 | 59.919 | 42.347 | 43.438 | 0.00 | 0.00 |
| ATOM | 1218 | CA   | GLU | X | 80 | 59.385 | 44.384 | 43.181 | 0.00 | 0.00 |
| ATOM | 1219 | HA   | GLU | X | 80 | 59.042 | 45.047 | 43.976 | 0.00 | 0.00 |
| ATOM | 1220 | CB   | GLU | X | 80 | 60.876 | 44.561 | 42.845 | 0.00 | 0.00 |
| ATOM | 1221 | HB2  | GLU | X | 80 | 61.177 | 43.676 | 42.285 | 0.00 | 0.00 |
| ATOM | 1222 | HB3  | GLU | X | 80 | 60.977 | 45.477 | 42.263 | 0.00 | 0.00 |
| ATOM | 1223 | CG   | GLU | X | 80 | 61.734 | 44.648 | 44.021 | 0.00 | 0.00 |
| ATOM | 1224 | HG2  | GLU | X | 80 | 61.397 | 43.937 | 44.775 | 0.00 | 0.00 |
| ATOM | 1225 | HG3  | GLU | X | 80 | 62.758 | 44.350 | 43.793 | 0.00 | 0.00 |
| ATOM | 1226 | CD   | GLU | X | 80 | 61.814 | 46.044 | 44.683 | 0.00 | 0.00 |
| ATOM | 1227 | OE1  | GLU | X | 80 | 62.948 | 46.587 | 44.642 | 0.00 | 0.00 |
| ATOM | 1228 | OE2  | GLU | X | 80 | 60.841 | 46.612 | 45.247 | 0.00 | 0.00 |
| ATOM | 1229 | C    | GLU | X | 80 | 58.568 | 44.843 | 42.021 | 0.00 | 0.00 |
| ATOM | 1230 | O    | GLU | X | 80 | 58.528 | 45.989 | 41.640 | 0.00 | 0.00 |
| ATOM | 1231 | N    | MET | X | 81 | 57.850 | 43.942 | 41.326 | 0.00 | 0.00 |
| ATOM | 1232 | H    | MET | X | 81 | 58.268 | 43.030 | 41.442 | 0.00 | 0.00 |
| ATOM | 1233 | CA   | MET | X | 81 | 56.837 | 44.233 | 40.293 | 0.00 | 0.00 |
| ATOM | 1234 | HA   | MET | X | 81 | 57.201 | 44.999 | 39.608 | 0.00 | 0.00 |
| ATOM | 1235 | CB   | MET | X | 81 | 56.514 | 42.982 | 39.387 | 0.00 | 0.00 |
| ATOM | 1236 | HB2  | MET | X | 81 | 55.821 | 43.278 | 38.599 | 0.00 | 0.00 |
| ATOM | 1237 | HB3  | MET | X | 81 | 57.377 | 42.530 | 38.899 | 0.00 | 0.00 |
| ATOM | 1238 | CG   | MET | X | 81 | 55.835 | 41.793 | 40.142 | 0.00 | 0.00 |
| ATOM | 1239 | HG2  | MET | X | 81 | 56.299 | 41.700 | 41.124 | 0.00 | 0.00 |
| ATOM | 1240 | HG3  | MET | X | 81 | 54.841 | 41.953 | 40.561 | 0.00 | 0.00 |
| ATOM | 1241 | SD   | MET | X | 81 | 55.867 | 40.219 | 39.333 | 0.00 | 0.00 |
| ATOM | 1242 | CE   | MET | X | 81 | 54.448 | 39.589 | 40.247 | 0.00 | 0.00 |
| ATOM | 1243 | HE1  | MET | X | 81 | 54.751 | 39.646 | 41.293 | 0.00 | 0.00 |
| ATOM | 1244 | HE2  | MET | X | 81 | 53.543 | 40.114 | 39.942 | 0.00 | 0.00 |
| ATOM | 1245 | HE3  | MET | X | 81 | 54.351 | 38.513 | 40.104 | 0.00 | 0.00 |
| ATOM | 1246 | C    | MET | X | 81 | 55.470 | 44.838 | 40.826 | 0.00 | 0.00 |
| ATOM | 1247 | O    | MET | X | 81 | 54.733 | 45.453 | 40.049 | 0.00 | 0.00 |
| ATOM | 1248 | N    | TRP | X | 82 | 55.285 | 44.622 | 42.125 | 0.00 | 0.00 |
| ATOM | 1249 | H    | TRP | X | 82 | 56.073 | 44.131 | 42.521 | 0.00 | 0.00 |
| ATOM | 1250 | CA   | TRP | X | 82 | 54.085 | 45.047 | 42.877 | 0.00 | 0.00 |
| ATOM | 1251 | HA   | TRP | X | 82 | 53.459 | 45.759 | 42.341 | 0.00 | 0.00 |
| ATOM | 1252 | CB   | TRP | X | 82 | 53.233 | 43.845 | 43.330 | 0.00 | 0.00 |
| ATOM | 1253 | HB2  | TRP | X | 82 | 53.934 | 43.160 | 43.808 | 0.00 | 0.00 |
| ATOM | 1254 | HB3  | TRP | X | 82 | 52.399 | 44.032 | 44.006 | 0.00 | 0.00 |
| ATOM | 1255 | CG   | TRP | X | 82 | 52.580 | 42.988 | 42.284 | 0.00 | 0.00 |
| ATOM | 1256 | CD1  | TRP | X | 82 | 52.345 | 41.654 | 42.492 | 0.00 | 0.00 |
| ATOM | 1257 | HD1  | TRP | X | 82 | 52.727 | 41.097 | 43.334 | 0.00 | 0.00 |
| ATOM | 1258 | NE1  | TRP | X | 82 | 51.530 | 41.207 | 41.517 | 0.00 | 0.00 |

|      |      |      |     |   |    |        |        |        |      |      |
|------|------|------|-----|---|----|--------|--------|--------|------|------|
| ATOM | 1259 | HE1  | TRP | X | 82 | 51.306 | 40.225 | 41.449 | 0.00 | 0.00 |
| ATOM | 1260 | CE2  | TRP | X | 82 | 51.134 | 42.174 | 40.640 | 0.00 | 0.00 |
| ATOM | 1261 | CZ2  | TRP | X | 82 | 50.288 | 42.210 | 39.551 | 0.00 | 0.00 |
| ATOM | 1262 | HZ2  | TRP | X | 82 | 49.826 | 41.278 | 39.258 | 0.00 | 0.00 |
| ATOM | 1263 | CH2  | TRP | X | 82 | 49.989 | 43.415 | 38.952 | 0.00 | 0.00 |
| ATOM | 1264 | HH2  | TRP | X | 82 | 49.301 | 43.407 | 38.119 | 0.00 | 0.00 |
| ATOM | 1265 | CZ3  | TRP | X | 82 | 50.748 | 44.508 | 39.249 | 0.00 | 0.00 |
| ATOM | 1266 | HZ3  | TRP | X | 82 | 50.631 | 45.442 | 38.719 | 0.00 | 0.00 |
| ATOM | 1267 | CE3  | TRP | X | 82 | 51.612 | 44.544 | 40.390 | 0.00 | 0.00 |
| ATOM | 1268 | HE3  | TRP | X | 82 | 52.065 | 45.498 | 40.617 | 0.00 | 0.00 |
| ATOM | 1269 | CD2  | TRP | X | 82 | 51.815 | 43.336 | 41.126 | 0.00 | 0.00 |
| ATOM | 1270 | C    | TRP | X | 82 | 54.514 | 45.980 | 43.988 | 0.00 | 0.00 |
| ATOM | 1271 | O    | TRP | X | 82 | 53.828 | 46.987 | 44.181 | 0.00 | 0.00 |
| ATOM | 1272 | N    | ASN | X | 83 | 55.506 | 45.644 | 44.800 | 0.00 | 0.00 |
| ATOM | 1273 | H    | ASN | X | 83 | 55.927 | 44.726 | 44.815 | 0.00 | 0.00 |
| ATOM | 1274 | CA   | ASN | X | 83 | 56.009 | 46.604 | 45.742 | 0.00 | 0.00 |
| ATOM | 1275 | HA   | ASN | X | 83 | 55.237 | 46.811 | 46.483 | 0.00 | 0.00 |
| ATOM | 1276 | CB   | ASN | X | 83 | 57.089 | 45.949 | 46.531 | 0.00 | 0.00 |
| ATOM | 1277 | HB2  | ASN | X | 83 | 57.819 | 45.471 | 45.878 | 0.00 | 0.00 |
| ATOM | 1278 | HB3  | ASN | X | 83 | 57.653 | 46.688 | 47.100 | 0.00 | 0.00 |
| ATOM | 1279 | CG   | ASN | X | 83 | 56.510 | 44.922 | 47.636 | 0.00 | 0.00 |
| ATOM | 1280 | OD1  | ASN | X | 83 | 57.215 | 43.894 | 47.789 | 0.00 | 0.00 |
| ATOM | 1281 | ND2  | ASN | X | 83 | 55.404 | 45.163 | 48.382 | 0.00 | 0.00 |
| ATOM | 1282 | HD21 | ASN | X | 83 | 55.051 | 44.496 | 49.054 | 0.00 | 0.00 |
| ATOM | 1283 | HD22 | ASN | X | 83 | 54.875 | 46.018 | 48.290 | 0.00 | 0.00 |
| ATOM | 1284 | C    | ASN | X | 83 | 56.359 | 47.964 | 45.026 | 0.00 | 0.00 |
| ATOM | 1285 | O    | ASN | X | 83 | 56.852 | 47.991 | 43.905 | 0.00 | 0.00 |
| ATOM | 1286 | N    | PRO | X | 84 | 56.065 | 49.121 | 45.652 | 0.00 | 0.00 |
| ATOM | 1287 | CD   | PRO | X | 84 | 55.521 | 49.323 | 47.011 | 0.00 | 0.00 |
| ATOM | 1288 | HD2  | PRO | X | 84 | 56.209 | 48.961 | 47.775 | 0.00 | 0.00 |
| ATOM | 1289 | HD3  | PRO | X | 84 | 54.579 | 48.814 | 47.217 | 0.00 | 0.00 |
| ATOM | 1290 | CG   | PRO | X | 84 | 55.417 | 50.814 | 47.229 | 0.00 | 0.00 |
| ATOM | 1291 | HG2  | PRO | X | 84 | 56.383 | 51.193 | 47.563 | 0.00 | 0.00 |
| ATOM | 1292 | HG3  | PRO | X | 84 | 54.588 | 51.127 | 47.863 | 0.00 | 0.00 |
| ATOM | 1293 | CB   | PRO | X | 84 | 55.267 | 51.321 | 45.810 | 0.00 | 0.00 |
| ATOM | 1294 | HB2  | PRO | X | 84 | 55.650 | 52.339 | 45.734 | 0.00 | 0.00 |
| ATOM | 1295 | HB3  | PRO | X | 84 | 54.215 | 51.253 | 45.532 | 0.00 | 0.00 |
| ATOM | 1296 | CA   | PRO | X | 84 | 56.105 | 50.397 | 44.916 | 0.00 | 0.00 |
| ATOM | 1297 | HA   | PRO | X | 84 | 55.564 | 50.319 | 43.973 | 0.00 | 0.00 |
| ATOM | 1298 | C    | PRO | X | 84 | 57.491 | 50.931 | 44.758 | 0.00 | 0.00 |
| ATOM | 1299 | O    | PRO | X | 84 | 58.340 | 50.658 | 45.527 | 0.00 | 0.00 |
| ATOM | 1300 | N    | ASN | X | 85 | 57.653 | 51.739 | 43.758 | 0.00 | 0.00 |
| ATOM | 1301 | H    | ASN | X | 85 | 56.878 | 51.923 | 43.138 | 0.00 | 0.00 |
| ATOM | 1302 | CA   | ASN | X | 85 | 58.868 | 52.546 | 43.595 | 0.00 | 0.00 |
| ATOM | 1303 | HA   | ASN | X | 85 | 59.706 | 51.970 | 43.985 | 0.00 | 0.00 |
| ATOM | 1304 | CB   | ASN | X | 85 | 58.946 | 52.661 | 42.008 | 0.00 | 0.00 |
| ATOM | 1305 | HB2  | ASN | X | 85 | 59.936 | 53.081 | 41.830 | 0.00 | 0.00 |
| ATOM | 1306 | HB3  | ASN | X | 85 | 58.933 | 51.666 | 41.563 | 0.00 | 0.00 |
| ATOM | 1307 | CG   | ASN | X | 85 | 57.921 | 53.573 | 41.381 | 0.00 | 0.00 |
| ATOM | 1308 | OD1  | ASN | X | 85 | 56.713 | 53.330 | 41.526 | 0.00 | 0.00 |
| ATOM | 1309 | ND2  | ASN | X | 85 | 58.322 | 54.633 | 40.713 | 0.00 | 0.00 |
| ATOM | 1310 | HD21 | ASN | X | 85 | 57.656 | 55.308 | 40.366 | 0.00 | 0.00 |
| ATOM | 1311 | HD22 | ASN | X | 85 | 59.291 | 54.869 | 40.551 | 0.00 | 0.00 |
| ATOM | 1312 | C    | ASN | X | 85 | 58.742 | 54.013 | 44.236 | 0.00 | 0.00 |
| ATOM | 1313 | O    | ASN | X | 85 | 59.553 | 54.858 | 44.029 | 0.00 | 0.00 |
| ATOM | 1314 | N    | ARG | X | 86 | 57.628 | 54.288 | 44.905 | 0.00 | 0.00 |
| ATOM | 1315 | H    | ARG | X | 86 | 56.961 | 53.531 | 44.955 | 0.00 | 0.00 |
| ATOM | 1316 | CA   | ARG | X | 86 | 57.346 | 55.552 | 45.733 | 0.00 | 0.00 |
| ATOM | 1317 | HA   | ARG | X | 86 | 58.038 | 56.346 | 45.451 | 0.00 | 0.00 |
| ATOM | 1318 | CB   | ARG | X | 86 | 55.887 | 56.097 | 45.499 | 0.00 | 0.00 |
| ATOM | 1319 | HB2  | ARG | X | 86 | 55.234 | 55.224 | 45.490 | 0.00 | 0.00 |
| ATOM | 1320 | HB3  | ARG | X | 86 | 55.518 | 56.789 | 46.256 | 0.00 | 0.00 |
| ATOM | 1321 | CG   | ARG | X | 86 | 55.661 | 56.655 | 44.070 | 0.00 | 0.00 |
| ATOM | 1322 | HG2  | ARG | X | 86 | 55.772 | 55.880 | 43.312 | 0.00 | 0.00 |
| ATOM | 1323 | HG3  | ARG | X | 86 | 54.640 | 57.029 | 43.995 | 0.00 | 0.00 |
| ATOM | 1324 | CD   | ARG | X | 86 | 56.527 | 57.787 | 43.740 | 0.00 | 0.00 |
| ATOM | 1325 | HD2  | ARG | X | 86 | 57.597 | 57.586 | 43.785 | 0.00 | 0.00 |
| ATOM | 1326 | HD3  | ARG | X | 86 | 56.265 | 58.143 | 42.743 | 0.00 | 0.00 |
| ATOM | 1327 | NE   | ARG | X | 86 | 56.390 | 58.940 | 44.689 | 0.00 | 0.00 |
| ATOM | 1328 | HE   | ARG | X | 86 | 56.034 | 58.673 | 45.595 | 0.00 | 0.00 |

|      |      |      |     |   |    |        |        |        |      |      |
|------|------|------|-----|---|----|--------|--------|--------|------|------|
| ATOM | 1329 | CZ   | ARG | X | 86 | 56.576 | 60.247 | 44.543 | 0.00 | 0.00 |
| ATOM | 1330 | NH1  | ARG | X | 86 | 56.709 | 60.747 | 43.356 | 0.00 | 0.00 |
| ATOM | 1331 | HH11 | ARG | X | 86 | 56.768 | 60.049 | 42.628 | 0.00 | 0.00 |
| ATOM | 1332 | HH12 | ARG | X | 86 | 56.787 | 61.744 | 43.220 | 0.00 | 0.00 |
| ATOM | 1333 | NH2  | ARG | X | 86 | 56.459 | 61.116 | 45.554 | 0.00 | 0.00 |
| ATOM | 1334 | HH21 | ARG | X | 86 | 56.346 | 60.746 | 46.487 | 0.00 | 0.00 |
| ATOM | 1335 | HH22 | ARG | X | 86 | 56.590 | 62.108 | 45.411 | 0.00 | 0.00 |
| ATOM | 1336 | C    | ARG | X | 86 | 57.514 | 55.309 | 47.253 | 0.00 | 0.00 |
| ATOM | 1337 | O    | ARG | X | 86 | 57.431 | 54.160 | 47.666 | 0.00 | 0.00 |
| ATOM | 1338 | N    | GLU | X | 87 | 57.558 | 56.322 | 48.119 | 0.00 | 0.00 |
| ATOM | 1339 | H    | GLU | X | 87 | 57.630 | 57.265 | 47.763 | 0.00 | 0.00 |
| ATOM | 1340 | CA   | GLU | X | 87 | 57.426 | 56.137 | 49.550 | 0.00 | 0.00 |
| ATOM | 1341 | HA   | GLU | X | 87 | 58.115 | 55.386 | 49.937 | 0.00 | 0.00 |
| ATOM | 1342 | CB   | GLU | X | 87 | 57.865 | 57.433 | 50.296 | 0.00 | 0.00 |
| ATOM | 1343 | HB2  | GLU | X | 87 | 57.398 | 58.215 | 49.698 | 0.00 | 0.00 |
| ATOM | 1344 | HB3  | GLU | X | 87 | 57.515 | 57.390 | 51.328 | 0.00 | 0.00 |
| ATOM | 1345 | CG   | GLU | X | 87 | 59.372 | 57.649 | 50.219 | 0.00 | 0.00 |
| ATOM | 1346 | HG2  | GLU | X | 87 | 59.942 | 56.815 | 50.630 | 0.00 | 0.00 |
| ATOM | 1347 | HG3  | GLU | X | 87 | 59.599 | 57.748 | 49.157 | 0.00 | 0.00 |
| ATOM | 1348 | CD   | GLU | X | 87 | 59.765 | 58.888 | 50.963 | 0.00 | 0.00 |
| ATOM | 1349 | OE1  | GLU | X | 87 | 60.213 | 59.884 | 50.318 | 0.00 | 0.00 |
| ATOM | 1350 | OE2  | GLU | X | 87 | 59.545 | 58.885 | 52.224 | 0.00 | 0.00 |
| ATOM | 1351 | C    | GLU | X | 87 | 56.006 | 55.780 | 50.069 | 0.00 | 0.00 |
| ATOM | 1352 | O    | GLU | X | 87 | 55.020 | 55.903 | 49.319 | 0.00 | 0.00 |
| ATOM | 1353 | N    | LEU | X | 88 | 55.890 | 55.362 | 51.359 | 0.00 | 0.00 |
| ATOM | 1354 | H    | LEU | X | 88 | 56.658 | 55.345 | 52.016 | 0.00 | 0.00 |
| ATOM | 1355 | CA   | LEU | X | 88 | 54.640 | 54.948 | 51.943 | 0.00 | 0.00 |
| ATOM | 1356 | HA   | LEU | X | 88 | 53.889 | 54.827 | 51.162 | 0.00 | 0.00 |
| ATOM | 1357 | CB   | LEU | X | 88 | 54.832 | 53.600 | 52.713 | 0.00 | 0.00 |
| ATOM | 1358 | HB2  | LEU | X | 88 | 55.408 | 53.716 | 53.632 | 0.00 | 0.00 |
| ATOM | 1359 | HB3  | LEU | X | 88 | 53.847 | 53.297 | 53.067 | 0.00 | 0.00 |
| ATOM | 1360 | CG   | LEU | X | 88 | 55.319 | 52.404 | 51.840 | 0.00 | 0.00 |
| ATOM | 1361 | HG   | LEU | X | 88 | 56.230 | 52.698 | 51.318 | 0.00 | 0.00 |
| ATOM | 1362 | CD1  | LEU | X | 88 | 55.421 | 51.130 | 52.626 | 0.00 | 0.00 |
| ATOM | 1363 | HD11 | LEU | X | 88 | 55.703 | 50.268 | 52.021 | 0.00 | 0.00 |
| ATOM | 1364 | HD12 | LEU | X | 88 | 56.121 | 51.232 | 53.456 | 0.00 | 0.00 |
| ATOM | 1365 | HD13 | LEU | X | 88 | 54.465 | 50.874 | 53.082 | 0.00 | 0.00 |
| ATOM | 1366 | CD2  | LEU | X | 88 | 54.326 | 52.118 | 50.767 | 0.00 | 0.00 |
| ATOM | 1367 | HD21 | LEU | X | 88 | 54.357 | 52.882 | 49.990 | 0.00 | 0.00 |
| ATOM | 1368 | HD22 | LEU | X | 88 | 54.452 | 51.138 | 50.306 | 0.00 | 0.00 |
| ATOM | 1369 | HD23 | LEU | X | 88 | 53.334 | 52.161 | 51.217 | 0.00 | 0.00 |
| ATOM | 1370 | C    | LEU | X | 88 | 54.017 | 55.937 | 52.891 | 0.00 | 0.00 |
| ATOM | 1371 | O    | LEU | X | 88 | 54.688 | 56.720 | 53.529 | 0.00 | 0.00 |
| ATOM | 1372 | N    | SER | X | 89 | 52.659 | 56.009 | 52.905 | 0.00 | 0.00 |
| ATOM | 1373 | H    | SER | X | 89 | 52.279 | 55.378 | 52.214 | 0.00 | 0.00 |
| ATOM | 1374 | CA   | SER | X | 89 | 51.837 | 56.803 | 53.835 | 0.00 | 0.00 |
| ATOM | 1375 | HA   | SER | X | 89 | 52.276 | 56.634 | 54.818 | 0.00 | 0.00 |
| ATOM | 1376 | CB   | SER | X | 89 | 52.028 | 58.313 | 53.545 | 0.00 | 0.00 |
| ATOM | 1377 | HB2  | SER | X | 89 | 53.090 | 58.533 | 53.651 | 0.00 | 0.00 |
| ATOM | 1378 | HB3  | SER | X | 89 | 51.666 | 58.578 | 52.552 | 0.00 | 0.00 |
| ATOM | 1379 | OG   | SER | X | 89 | 51.349 | 59.125 | 54.558 | 0.00 | 0.00 |
| ATOM | 1380 | HG   | SER | X | 89 | 51.745 | 59.994 | 54.467 | 0.00 | 0.00 |
| ATOM | 1381 | C    | SER | X | 89 | 50.374 | 56.296 | 53.861 | 0.00 | 0.00 |
| ATOM | 1382 | O    | SER | X | 89 | 49.984 | 55.391 | 53.137 | 0.00 | 0.00 |
| ATOM | 1383 | N    | GLU | X | 90 | 49.533 | 56.915 | 54.673 | 0.00 | 0.00 |
| ATOM | 1384 | H    | GLU | X | 90 | 49.881 | 57.680 | 55.234 | 0.00 | 0.00 |
| ATOM | 1385 | CA   | GLU | X | 90 | 48.050 | 56.772 | 54.695 | 0.00 | 0.00 |
| ATOM | 1386 | HA   | GLU | X | 90 | 47.826 | 55.930 | 54.040 | 0.00 | 0.00 |
| ATOM | 1387 | CB   | GLU | X | 90 | 47.584 | 56.380 | 56.104 | 0.00 | 0.00 |
| ATOM | 1388 | HB2  | GLU | X | 90 | 47.922 | 57.113 | 56.837 | 0.00 | 0.00 |
| ATOM | 1389 | HB3  | GLU | X | 90 | 46.500 | 56.440 | 56.193 | 0.00 | 0.00 |
| ATOM | 1390 | CG   | GLU | X | 90 | 47.876 | 54.910 | 56.518 | 0.00 | 0.00 |
| ATOM | 1391 | HG2  | GLU | X | 90 | 47.217 | 54.281 | 55.919 | 0.00 | 0.00 |
| ATOM | 1392 | HG3  | GLU | X | 90 | 48.928 | 54.640 | 56.432 | 0.00 | 0.00 |
| ATOM | 1393 | CD   | GLU | X | 90 | 47.565 | 54.707 | 58.031 | 0.00 | 0.00 |
| ATOM | 1394 | OE1  | GLU | X | 90 | 46.504 | 54.078 | 58.368 | 0.00 | 0.00 |
| ATOM | 1395 | OE2  | GLU | X | 90 | 48.299 | 55.146 | 58.940 | 0.00 | 0.00 |
| ATOM | 1396 | C    | GLU | X | 90 | 47.445 | 58.092 | 54.139 | 0.00 | 0.00 |
| ATOM | 1397 | O    | GLU | X | 90 | 46.273 | 58.396 | 54.358 | 0.00 | 0.00 |
| ATOM | 1398 | N    | ASP | X | 91 | 48.251 | 58.894 | 53.466 | 0.00 | 0.00 |

|      |      |      |     |   |    |        |        |        |      |      |
|------|------|------|-----|---|----|--------|--------|--------|------|------|
| ATOM | 1399 | H    | ASP | X | 91 | 49.219 | 58.605 | 53.486 | 0.00 | 0.00 |
| ATOM | 1400 | CA   | ASP | X | 91 | 47.859 | 59.903 | 52.427 | 0.00 | 0.00 |
| ATOM | 1401 | HA   | ASP | X | 91 | 46.778 | 59.803 | 52.323 | 0.00 | 0.00 |
| ATOM | 1402 | CB   | ASP | X | 91 | 48.421 | 61.280 | 52.803 | 0.00 | 0.00 |
| ATOM | 1403 | HB2  | ASP | X | 91 | 47.989 | 61.600 | 53.751 | 0.00 | 0.00 |
| ATOM | 1404 | HB3  | ASP | X | 91 | 49.507 | 61.190 | 52.824 | 0.00 | 0.00 |
| ATOM | 1405 | CG   | ASP | X | 91 | 48.146 | 62.367 | 51.715 | 0.00 | 0.00 |
| ATOM | 1406 | OD1  | ASP | X | 91 | 48.840 | 63.371 | 51.789 | 0.00 | 0.00 |
| ATOM | 1407 | OD2  | ASP | X | 91 | 47.234 | 62.236 | 50.871 | 0.00 | 0.00 |
| ATOM | 1408 | C    | ASP | X | 91 | 48.343 | 59.311 | 51.034 | 0.00 | 0.00 |
| ATOM | 1409 | O    | ASP | X | 91 | 49.535 | 59.383 | 50.879 | 0.00 | 0.00 |
| ATOM | 1410 | N    | CYX | X | 92 | 47.476 | 58.617 | 50.350 | 0.00 | 0.00 |
| ATOM | 1411 | H    | CYX | X | 92 | 46.505 | 58.736 | 50.600 | 0.00 | 0.00 |
| ATOM | 1412 | CA   | CYX | X | 92 | 47.899 | 57.601 | 49.334 | 0.00 | 0.00 |
| ATOM | 1413 | HA   | CYX | X | 92 | 48.790 | 57.961 | 48.821 | 0.00 | 0.00 |
| ATOM | 1414 | CB   | CYX | X | 92 | 48.280 | 56.363 | 50.137 | 0.00 | 0.00 |
| ATOM | 1415 | HB2  | CYX | X | 92 | 48.929 | 55.736 | 49.527 | 0.00 | 0.00 |
| ATOM | 1416 | HB3  | CYX | X | 92 | 48.910 | 56.661 | 50.976 | 0.00 | 0.00 |
| ATOM | 1417 | SG   | CYX | X | 92 | 46.901 | 55.387 | 50.807 | 0.00 | 0.00 |
| ATOM | 1418 | C    | CYX | X | 92 | 46.813 | 57.319 | 48.338 | 0.00 | 0.00 |
| ATOM | 1419 | O    | CYX | X | 92 | 47.161 | 56.682 | 47.290 | 0.00 | 0.00 |
| ATOM | 1420 | N    | LEU | X | 93 | 45.497 | 57.784 | 48.537 | 0.00 | 0.00 |
| ATOM | 1421 | H    | LEU | X | 93 | 45.325 | 58.407 | 49.313 | 0.00 | 0.00 |
| ATOM | 1422 | CA   | LEU | X | 93 | 44.289 | 57.464 | 47.794 | 0.00 | 0.00 |
| ATOM | 1423 | HA   | LEU | X | 93 | 44.319 | 56.527 | 47.237 | 0.00 | 0.00 |
| ATOM | 1424 | CB   | LEU | X | 93 | 43.085 | 57.537 | 48.714 | 0.00 | 0.00 |
| ATOM | 1425 | HB2  | LEU | X | 93 | 43.197 | 58.475 | 49.258 | 0.00 | 0.00 |
| ATOM | 1426 | HB3  | LEU | X | 93 | 42.207 | 57.616 | 48.074 | 0.00 | 0.00 |
| ATOM | 1427 | CG   | LEU | X | 93 | 43.042 | 56.422 | 49.726 | 0.00 | 0.00 |
| ATOM | 1428 | HG   | LEU | X | 93 | 43.812 | 56.454 | 50.497 | 0.00 | 0.00 |
| ATOM | 1429 | CD1  | LEU | X | 93 | 41.606 | 56.570 | 50.318 | 0.00 | 0.00 |
| ATOM | 1430 | HD11 | LEU | X | 93 | 41.422 | 57.511 | 50.836 | 0.00 | 0.00 |
| ATOM | 1431 | HD12 | LEU | X | 93 | 40.889 | 56.481 | 49.501 | 0.00 | 0.00 |
| ATOM | 1432 | HD13 | LEU | X | 93 | 41.468 | 55.869 | 51.141 | 0.00 | 0.00 |
| ATOM | 1433 | CD2  | LEU | X | 93 | 43.280 | 55.024 | 49.169 | 0.00 | 0.00 |
| ATOM | 1434 | HD21 | LEU | X | 93 | 44.201 | 54.982 | 48.587 | 0.00 | 0.00 |
| ATOM | 1435 | HD22 | LEU | X | 93 | 43.235 | 54.323 | 50.002 | 0.00 | 0.00 |
| ATOM | 1436 | HD23 | LEU | X | 93 | 42.580 | 54.649 | 48.422 | 0.00 | 0.00 |
| ATOM | 1437 | C    | LEU | X | 93 | 44.180 | 58.469 | 46.623 | 0.00 | 0.00 |
| ATOM | 1438 | O    | LEU | X | 93 | 43.237 | 59.319 | 46.568 | 0.00 | 0.00 |
| ATOM | 1439 | N    | TYR | X | 94 | 45.094 | 58.516 | 45.679 | 0.00 | 0.00 |
| ATOM | 1440 | H    | TYR | X | 94 | 45.820 | 57.828 | 45.820 | 0.00 | 0.00 |
| ATOM | 1441 | CA   | TYR | X | 94 | 45.126 | 59.281 | 44.509 | 0.00 | 0.00 |
| ATOM | 1442 | HA   | TYR | X | 94 | 44.439 | 60.104 | 44.707 | 0.00 | 0.00 |
| ATOM | 1443 | CB   | TYR | X | 94 | 46.555 | 59.826 | 44.278 | 0.00 | 0.00 |
| ATOM | 1444 | HB2  | TYR | X | 94 | 47.316 | 59.045 | 44.275 | 0.00 | 0.00 |
| ATOM | 1445 | HB3  | TYR | X | 94 | 46.674 | 60.158 | 43.246 | 0.00 | 0.00 |
| ATOM | 1446 | CG   | TYR | X | 94 | 46.941 | 60.849 | 45.346 | 0.00 | 0.00 |
| ATOM | 1447 | CD1  | TYR | X | 94 | 46.804 | 62.225 | 45.127 | 0.00 | 0.00 |
| ATOM | 1448 | HD1  | TYR | X | 94 | 46.446 | 62.679 | 44.215 | 0.00 | 0.00 |
| ATOM | 1449 | CE1  | TYR | X | 94 | 47.008 | 63.160 | 46.148 | 0.00 | 0.00 |
| ATOM | 1450 | HE1  | TYR | X | 94 | 46.897 | 64.231 | 46.064 | 0.00 | 0.00 |
| ATOM | 1451 | CZ   | TYR | X | 94 | 47.362 | 62.660 | 47.405 | 0.00 | 0.00 |
| ATOM | 1452 | OH   | TYR | X | 94 | 47.444 | 63.542 | 48.468 | 0.00 | 0.00 |
| ATOM | 1453 | HH   | TYR | X | 94 | 47.520 | 63.169 | 49.350 | 0.00 | 0.00 |
| ATOM | 1454 | CE2  | TYR | X | 94 | 47.480 | 61.308 | 47.677 | 0.00 | 0.00 |
| ATOM | 1455 | HE2  | TYR | X | 94 | 47.764 | 60.979 | 48.666 | 0.00 | 0.00 |
| ATOM | 1456 | CD2  | TYR | X | 94 | 47.276 | 60.434 | 46.616 | 0.00 | 0.00 |
| ATOM | 1457 | HD2  | TYR | X | 94 | 47.337 | 59.381 | 46.847 | 0.00 | 0.00 |
| ATOM | 1458 | C    | TYR | X | 94 | 44.745 | 58.481 | 43.340 | 0.00 | 0.00 |
| ATOM | 1459 | O    | TYR | X | 94 | 44.660 | 57.255 | 43.368 | 0.00 | 0.00 |
| ATOM | 1460 | N    | LEU | X | 95 | 44.654 | 59.035 | 42.052 | 0.00 | 0.00 |
| ATOM | 1461 | H    | LEU | X | 95 | 44.653 | 60.041 | 41.962 | 0.00 | 0.00 |
| ATOM | 1462 | CA   | LEU | X | 95 | 44.523 | 58.278 | 40.821 | 0.00 | 0.00 |
| ATOM | 1463 | HA   | LEU | X | 95 | 45.143 | 57.388 | 40.929 | 0.00 | 0.00 |
| ATOM | 1464 | CB   | LEU | X | 95 | 43.131 | 57.789 | 40.665 | 0.00 | 0.00 |
| ATOM | 1465 | HB2  | LEU | X | 95 | 43.118 | 57.017 | 39.895 | 0.00 | 0.00 |
| ATOM | 1466 | HB3  | LEU | X | 95 | 42.908 | 57.315 | 41.620 | 0.00 | 0.00 |
| ATOM | 1467 | CG   | LEU | X | 95 | 41.992 | 58.834 | 40.240 | 0.00 | 0.00 |
| ATOM | 1468 | HG   | LEU | X | 95 | 41.903 | 59.614 | 40.997 | 0.00 | 0.00 |

|      |      |      |     |   |    |        |        |        |      |      |
|------|------|------|-----|---|----|--------|--------|--------|------|------|
| ATOM | 1469 | CD1  | LEU | X | 95 | 42.173 | 59.571 | 38.936 | 0.00 | 0.00 |
| ATOM | 1470 | HD11 | LEU | X | 95 | 43.161 | 60.014 | 38.808 | 0.00 | 0.00 |
| ATOM | 1471 | HD12 | LEU | X | 95 | 41.994 | 58.889 | 38.105 | 0.00 | 0.00 |
| ATOM | 1472 | HD13 | LEU | X | 95 | 41.391 | 60.326 | 38.870 | 0.00 | 0.00 |
| ATOM | 1473 | CD2  | LEU | X | 95 | 40.667 | 58.099 | 40.181 | 0.00 | 0.00 |
| ATOM | 1474 | HD21 | LEU | X | 95 | 39.811 | 58.772 | 40.126 | 0.00 | 0.00 |
| ATOM | 1475 | HD22 | LEU | X | 95 | 40.578 | 57.459 | 39.303 | 0.00 | 0.00 |
| ATOM | 1476 | HD23 | LEU | X | 95 | 40.508 | 57.669 | 41.170 | 0.00 | 0.00 |
| ATOM | 1477 | C    | LEU | X | 95 | 45.242 | 58.959 | 39.630 | 0.00 | 0.00 |
| ATOM | 1478 | O    | LEU | X | 95 | 45.841 | 60.020 | 39.867 | 0.00 | 0.00 |
| ATOM | 1479 | N    | ASN | X | 96 | 45.203 | 58.443 | 38.446 | 0.00 | 0.00 |
| ATOM | 1480 | H    | ASN | X | 96 | 44.892 | 57.483 | 38.414 | 0.00 | 0.00 |
| ATOM | 1481 | CA   | ASN | X | 96 | 45.924 | 58.954 | 37.230 | 0.00 | 0.00 |
| ATOM | 1482 | HA   | ASN | X | 96 | 46.261 | 59.986 | 37.322 | 0.00 | 0.00 |
| ATOM | 1483 | CB   | ASN | X | 96 | 47.183 | 58.047 | 36.972 | 0.00 | 0.00 |
| ATOM | 1484 | HB2  | ASN | X | 96 | 46.837 | 57.074 | 36.624 | 0.00 | 0.00 |
| ATOM | 1485 | HB3  | ASN | X | 96 | 47.727 | 58.441 | 36.113 | 0.00 | 0.00 |
| ATOM | 1486 | CG   | ASN | X | 96 | 48.033 | 57.914 | 38.197 | 0.00 | 0.00 |
| ATOM | 1487 | OD1  | ASN | X | 96 | 48.843 | 58.744 | 38.542 | 0.00 | 0.00 |
| ATOM | 1488 | ND2  | ASN | X | 96 | 47.748 | 56.854 | 38.967 | 0.00 | 0.00 |
| ATOM | 1489 | HD21 | ASN | X | 96 | 48.310 | 56.777 | 39.803 | 0.00 | 0.00 |
| ATOM | 1490 | HD22 | ASN | X | 96 | 47.131 | 56.126 | 38.638 | 0.00 | 0.00 |
| ATOM | 1491 | C    | ASN | X | 96 | 44.987 | 58.863 | 35.994 | 0.00 | 0.00 |
| ATOM | 1492 | O    | ASN | X | 96 | 44.042 | 58.117 | 36.096 | 0.00 | 0.00 |
| ATOM | 1493 | N    | VAL | X | 97 | 45.294 | 59.599 | 34.926 | 0.00 | 0.00 |
| ATOM | 1494 | H    | VAL | X | 97 | 46.017 | 60.296 | 35.032 | 0.00 | 0.00 |
| ATOM | 1495 | CA   | VAL | X | 97 | 44.621 | 59.551 | 33.570 | 0.00 | 0.00 |
| ATOM | 1496 | HA   | VAL | X | 97 | 44.306 | 58.517 | 33.434 | 0.00 | 0.00 |
| ATOM | 1497 | CB   | VAL | X | 97 | 43.478 | 60.535 | 33.516 | 0.00 | 0.00 |
| ATOM | 1498 | HB   | VAL | X | 97 | 43.932 | 61.522 | 33.431 | 0.00 | 0.00 |
| ATOM | 1499 | CG1  | VAL | X | 97 | 42.516 | 60.322 | 32.308 | 0.00 | 0.00 |
| ATOM | 1500 | HG11 | VAL | X | 97 | 43.050 | 60.358 | 31.358 | 0.00 | 0.00 |
| ATOM | 1501 | HG12 | VAL | X | 97 | 42.177 | 59.288 | 32.367 | 0.00 | 0.00 |
| ATOM | 1502 | HG13 | VAL | X | 97 | 41.639 | 60.966 | 32.370 | 0.00 | 0.00 |
| ATOM | 1503 | CG2  | VAL | X | 97 | 42.541 | 60.567 | 34.769 | 0.00 | 0.00 |
| ATOM | 1504 | HG21 | VAL | X | 97 | 43.047 | 60.805 | 35.705 | 0.00 | 0.00 |
| ATOM | 1505 | HG22 | VAL | X | 97 | 41.869 | 61.406 | 34.586 | 0.00 | 0.00 |
| ATOM | 1506 | HG23 | VAL | X | 97 | 41.996 | 59.632 | 34.895 | 0.00 | 0.00 |
| ATOM | 1507 | C    | VAL | X | 97 | 45.655 | 59.915 | 32.467 | 0.00 | 0.00 |
| ATOM | 1508 | O    | VAL | X | 97 | 46.360 | 60.877 | 32.626 | 0.00 | 0.00 |
| ATOM | 1509 | N    | TRP | X | 98 | 45.659 | 59.078 | 31.425 | 0.00 | 0.00 |
| ATOM | 1510 | H    | TRP | X | 98 | 44.998 | 58.315 | 31.391 | 0.00 | 0.00 |
| ATOM | 1511 | CA   | TRP | X | 98 | 46.237 | 59.333 | 30.121 | 0.00 | 0.00 |
| ATOM | 1512 | HA   | TRP | X | 98 | 46.821 | 60.251 | 30.184 | 0.00 | 0.00 |
| ATOM | 1513 | CB   | TRP | X | 98 | 47.240 | 58.193 | 29.801 | 0.00 | 0.00 |
| ATOM | 1514 | HB2  | TRP | X | 98 | 46.659 | 57.274 | 29.882 | 0.00 | 0.00 |
| ATOM | 1515 | HB3  | TRP | X | 98 | 47.708 | 58.284 | 28.821 | 0.00 | 0.00 |
| ATOM | 1516 | CG   | TRP | X | 98 | 48.538 | 58.005 | 30.654 | 0.00 | 0.00 |
| ATOM | 1517 | CD1  | TRP | X | 98 | 49.827 | 58.251 | 30.272 | 0.00 | 0.00 |
| ATOM | 1518 | HD1  | TRP | X | 98 | 50.095 | 58.579 | 29.278 | 0.00 | 0.00 |
| ATOM | 1519 | NE1  | TRP | X | 98 | 50.684 | 57.751 | 31.239 | 0.00 | 0.00 |
| ATOM | 1520 | HE1  | TRP | X | 98 | 51.691 | 57.680 | 31.215 | 0.00 | 0.00 |
| ATOM | 1521 | CE2  | TRP | X | 98 | 49.983 | 57.301 | 32.322 | 0.00 | 0.00 |
| ATOM | 1522 | CZ2  | TRP | X | 98 | 50.407 | 56.714 | 33.540 | 0.00 | 0.00 |
| ATOM | 1523 | HZ2  | TRP | X | 98 | 51.453 | 56.644 | 33.799 | 0.00 | 0.00 |
| ATOM | 1524 | CH2  | TRP | X | 98 | 49.454 | 56.225 | 34.441 | 0.00 | 0.00 |
| ATOM | 1525 | HH2  | TRP | X | 98 | 49.725 | 55.787 | 35.390 | 0.00 | 0.00 |
| ATOM | 1526 | CZ3  | TRP | X | 98 | 48.077 | 56.240 | 34.076 | 0.00 | 0.00 |
| ATOM | 1527 | HZ3  | TRP | X | 98 | 47.420 | 55.828 | 34.828 | 0.00 | 0.00 |
| ATOM | 1528 | CE3  | TRP | X | 98 | 47.717 | 56.807 | 32.804 | 0.00 | 0.00 |
| ATOM | 1529 | HE3  | TRP | X | 98 | 46.701 | 56.892 | 32.450 | 0.00 | 0.00 |
| ATOM | 1530 | CD2  | TRP | X | 98 | 48.660 | 57.331 | 31.894 | 0.00 | 0.00 |
| ATOM | 1531 | C    | TRP | X | 98 | 45.186 | 59.348 | 29.039 | 0.00 | 0.00 |
| ATOM | 1532 | O    | TRP | X | 98 | 44.328 | 58.465 | 28.975 | 0.00 | 0.00 |
| ATOM | 1533 | N    | THR | X | 99 | 45.311 | 60.315 | 28.109 | 0.00 | 0.00 |
| ATOM | 1534 | H    | THR | X | 99 | 46.036 | 61.018 | 28.087 | 0.00 | 0.00 |
| ATOM | 1535 | CA   | THR | X | 99 | 44.270 | 60.712 | 27.125 | 0.00 | 0.00 |
| ATOM | 1536 | HA   | THR | X | 99 | 43.879 | 59.757 | 26.774 | 0.00 | 0.00 |
| ATOM | 1537 | CB   | THR | X | 99 | 43.108 | 61.519 | 27.937 | 0.00 | 0.00 |
| ATOM | 1538 | HB   | THR | X | 99 | 42.584 | 60.893 | 28.659 | 0.00 | 0.00 |

|      |      |      |     |   |     |        |        |        |      |      |
|------|------|------|-----|---|-----|--------|--------|--------|------|------|
| ATOM | 1539 | CG2  | THR | X | 99  | 43.574 | 62.853 | 28.459 | 0.00 | 0.00 |
| ATOM | 1540 | HG21 | THR | X | 99  | 44.119 | 63.442 | 27.721 | 0.00 | 0.00 |
| ATOM | 1541 | HG22 | THR | X | 99  | 42.835 | 63.392 | 29.050 | 0.00 | 0.00 |
| ATOM | 1542 | HG23 | THR | X | 99  | 44.293 | 62.661 | 29.256 | 0.00 | 0.00 |
| ATOM | 1543 | OG1  | THR | X | 99  | 42.158 | 61.877 | 26.966 | 0.00 | 0.00 |
| ATOM | 1544 | HG1  | THR | X | 99  | 41.306 | 61.820 | 27.405 | 0.00 | 0.00 |
| ATOM | 1545 | C    | THR | X | 99  | 44.922 | 61.489 | 26.006 | 0.00 | 0.00 |
| ATOM | 1546 | O    | THR | X | 99  | 45.934 | 62.086 | 26.347 | 0.00 | 0.00 |
| ATOM | 1547 | N    | PRO | X | 100 | 44.455 | 61.488 | 24.749 | 0.00 | 0.00 |
| ATOM | 1548 | CD   | PRO | X | 100 | 43.303 | 60.787 | 24.223 | 0.00 | 0.00 |
| ATOM | 1549 | HD2  | PRO | X | 100 | 42.459 | 61.474 | 24.168 | 0.00 | 0.00 |
| ATOM | 1550 | HD3  | PRO | X | 100 | 43.195 | 59.913 | 24.865 | 0.00 | 0.00 |
| ATOM | 1551 | CG   | PRO | X | 100 | 43.837 | 60.398 | 22.890 | 0.00 | 0.00 |
| ATOM | 1552 | HG2  | PRO | X | 100 | 43.151 | 59.964 | 22.162 | 0.00 | 0.00 |
| ATOM | 1553 | HG3  | PRO | X | 100 | 44.576 | 59.608 | 23.017 | 0.00 | 0.00 |
| ATOM | 1554 | CB   | PRO | X | 100 | 44.613 | 61.627 | 22.362 | 0.00 | 0.00 |
| ATOM | 1555 | HB2  | PRO | X | 100 | 44.006 | 62.378 | 21.855 | 0.00 | 0.00 |
| ATOM | 1556 | HB3  | PRO | X | 100 | 45.381 | 61.245 | 21.689 | 0.00 | 0.00 |
| ATOM | 1557 | CA   | PRO | X | 100 | 45.166 | 62.127 | 23.659 | 0.00 | 0.00 |
| ATOM | 1558 | HA   | PRO | X | 100 | 46.194 | 61.766 | 23.709 | 0.00 | 0.00 |
| ATOM | 1559 | C    | PRO | X | 100 | 45.212 | 63.719 | 23.734 | 0.00 | 0.00 |
| ATOM | 1560 | O    | PRO | X | 100 | 44.384 | 64.310 | 24.430 | 0.00 | 0.00 |
| ATOM | 1561 | N    | TYR | X | 101 | 46.156 | 64.353 | 23.052 | 0.00 | 0.00 |
| ATOM | 1562 | H    | TYR | X | 101 | 46.796 | 63.754 | 22.551 | 0.00 | 0.00 |
| ATOM | 1563 | CA   | TYR | X | 101 | 46.301 | 65.824 | 22.995 | 0.00 | 0.00 |
| ATOM | 1564 | HA   | TYR | X | 101 | 45.542 | 66.221 | 23.669 | 0.00 | 0.00 |
| ATOM | 1565 | CB   | TYR | X | 101 | 47.696 | 66.191 | 23.609 | 0.00 | 0.00 |
| ATOM | 1566 | HB2  | TYR | X | 101 | 47.813 | 65.798 | 24.619 | 0.00 | 0.00 |
| ATOM | 1567 | HB3  | TYR | X | 101 | 48.498 | 65.669 | 23.086 | 0.00 | 0.00 |
| ATOM | 1568 | CG   | TYR | X | 101 | 48.072 | 67.622 | 23.612 | 0.00 | 0.00 |
| ATOM | 1569 | CD1  | TYR | X | 101 | 48.743 | 68.108 | 22.519 | 0.00 | 0.00 |
| ATOM | 1570 | HD1  | TYR | X | 101 | 49.079 | 67.412 | 21.764 | 0.00 | 0.00 |
| ATOM | 1571 | CE1  | TYR | X | 101 | 49.235 | 69.456 | 22.528 | 0.00 | 0.00 |
| ATOM | 1572 | HE1  | TYR | X | 101 | 49.830 | 69.761 | 21.680 | 0.00 | 0.00 |
| ATOM | 1573 | CZ   | TYR | X | 101 | 48.930 | 70.330 | 23.613 | 0.00 | 0.00 |
| ATOM | 1574 | OH   | TYR | X | 101 | 49.357 | 71.566 | 23.629 | 0.00 | 0.00 |
| ATOM | 1575 | HH   | TYR | X | 101 | 49.661 | 71.980 | 22.819 | 0.00 | 0.00 |
| ATOM | 1576 | CE2  | TYR | X | 101 | 48.271 | 69.770 | 24.691 | 0.00 | 0.00 |
| ATOM | 1577 | HE2  | TYR | X | 101 | 48.026 | 70.373 | 25.553 | 0.00 | 0.00 |
| ATOM | 1578 | CD2  | TYR | X | 101 | 47.799 | 68.455 | 24.702 | 0.00 | 0.00 |
| ATOM | 1579 | HD2  | TYR | X | 101 | 47.295 | 68.076 | 25.578 | 0.00 | 0.00 |
| ATOM | 1580 | C    | TYR | X | 101 | 46.366 | 66.417 | 21.622 | 0.00 | 0.00 |
| ATOM | 1581 | O    | TYR | X | 101 | 47.085 | 65.852 | 20.752 | 0.00 | 0.00 |
| ATOM | 1582 | N    | PRO | X | 102 | 45.629 | 67.439 | 21.252 | 0.00 | 0.00 |
| ATOM | 1583 | CD   | PRO | X | 102 | 45.614 | 68.064 | 19.916 | 0.00 | 0.00 |
| ATOM | 1584 | HD2  | PRO | X | 102 | 45.407 | 67.290 | 19.176 | 0.00 | 0.00 |
| ATOM | 1585 | HD3  | PRO | X | 102 | 46.533 | 68.604 | 19.690 | 0.00 | 0.00 |
| ATOM | 1586 | CG   | PRO | X | 102 | 44.375 | 69.102 | 19.945 | 0.00 | 0.00 |
| ATOM | 1587 | HG2  | PRO | X | 102 | 43.522 | 68.585 | 19.504 | 0.00 | 0.00 |
| ATOM | 1588 | HG3  | PRO | X | 102 | 44.575 | 70.078 | 19.503 | 0.00 | 0.00 |
| ATOM | 1589 | CB   | PRO | X | 102 | 44.164 | 69.314 | 21.435 | 0.00 | 0.00 |
| ATOM | 1590 | HB2  | PRO | X | 102 | 43.138 | 69.624 | 21.632 | 0.00 | 0.00 |
| ATOM | 1591 | HB3  | PRO | X | 102 | 44.872 | 70.054 | 21.808 | 0.00 | 0.00 |
| ATOM | 1592 | CA   | PRO | X | 102 | 44.574 | 67.935 | 22.014 | 0.00 | 0.00 |
| ATOM | 1593 | HA   | PRO | X | 102 | 44.873 | 68.173 | 23.034 | 0.00 | 0.00 |
| ATOM | 1594 | C    | PRO | X | 102 | 43.431 | 66.915 | 22.130 | 0.00 | 0.00 |
| ATOM | 1595 | O    | PRO | X | 102 | 43.488 | 65.920 | 21.377 | 0.00 | 0.00 |
| ATOM | 1596 | N    | ARG | X | 103 | 42.639 | 67.022 | 23.199 | 0.00 | 0.00 |
| ATOM | 1597 | H    | ARG | X | 103 | 42.755 | 67.892 | 23.699 | 0.00 | 0.00 |
| ATOM | 1598 | CA   | ARG | X | 103 | 41.636 | 66.018 | 23.504 | 0.00 | 0.00 |
| ATOM | 1599 | HA   | ARG | X | 103 | 42.195 | 65.094 | 23.649 | 0.00 | 0.00 |
| ATOM | 1600 | CB   | ARG | X | 103 | 40.941 | 66.266 | 24.936 | 0.00 | 0.00 |
| ATOM | 1601 | HB2  | ARG | X | 103 | 40.907 | 67.318 | 25.220 | 0.00 | 0.00 |
| ATOM | 1602 | HB3  | ARG | X | 103 | 39.932 | 65.853 | 24.913 | 0.00 | 0.00 |
| ATOM | 1603 | CG   | ARG | X | 103 | 41.513 | 65.506 | 26.164 | 0.00 | 0.00 |
| ATOM | 1604 | HG2  | ARG | X | 103 | 40.823 | 65.517 | 27.008 | 0.00 | 0.00 |
| ATOM | 1605 | HG3  | ARG | X | 103 | 41.789 | 64.466 | 25.994 | 0.00 | 0.00 |
| ATOM | 1606 | CD   | ARG | X | 103 | 42.788 | 66.055 | 26.659 | 0.00 | 0.00 |
| ATOM | 1607 | HD2  | ARG | X | 103 | 43.284 | 65.363 | 27.339 | 0.00 | 0.00 |
| ATOM | 1608 | HD3  | ARG | X | 103 | 43.483 | 66.172 | 25.827 | 0.00 | 0.00 |

|      |      |      |     |   |     |        |        |        |      |      |
|------|------|------|-----|---|-----|--------|--------|--------|------|------|
| ATOM | 1609 | NE   | ARG | X | 103 | 42.615 | 67.493 | 27.270 | 0.00 | 0.00 |
| ATOM | 1610 | HE   | ARG | X | 103 | 41.644 | 67.740 | 27.395 | 0.00 | 0.00 |
| ATOM | 1611 | CZ   | ARG | X | 103 | 43.498 | 68.470 | 27.354 | 0.00 | 0.00 |
| ATOM | 1612 | NH1  | ARG | X | 103 | 44.800 | 68.265 | 27.070 | 0.00 | 0.00 |
| ATOM | 1613 | HH11 | ARG | X | 103 | 45.084 | 67.302 | 26.962 | 0.00 | 0.00 |
| ATOM | 1614 | HH12 | ARG | X | 103 | 45.514 | 68.976 | 27.141 | 0.00 | 0.00 |
| ATOM | 1615 | NH2  | ARG | X | 103 | 43.196 | 69.697 | 27.705 | 0.00 | 0.00 |
| ATOM | 1616 | HH21 | ARG | X | 103 | 42.309 | 69.960 | 28.111 | 0.00 | 0.00 |
| ATOM | 1617 | HH22 | ARG | X | 103 | 43.935 | 70.363 | 27.531 | 0.00 | 0.00 |
| ATOM | 1618 | C    | ARG | X | 103 | 40.536 | 65.845 | 22.437 | 0.00 | 0.00 |
| ATOM | 1619 | O    | ARG | X | 103 | 40.068 | 66.894 | 21.931 | 0.00 | 0.00 |
| ATOM | 1620 | N    | PRO | X | 104 | 40.106 | 64.618 | 22.143 | 0.00 | 0.00 |
| ATOM | 1621 | CD   | PRO | X | 104 | 40.662 | 63.388 | 22.692 | 0.00 | 0.00 |
| ATOM | 1622 | HD2  | PRO | X | 104 | 40.607 | 63.410 | 23.781 | 0.00 | 0.00 |
| ATOM | 1623 | HD3  | PRO | X | 104 | 41.695 | 63.184 | 22.408 | 0.00 | 0.00 |
| ATOM | 1624 | CG   | PRO | X | 104 | 39.793 | 62.237 | 22.114 | 0.00 | 0.00 |
| ATOM | 1625 | HG2  | PRO | X | 104 | 38.958 | 62.160 | 22.810 | 0.00 | 0.00 |
| ATOM | 1626 | HG3  | PRO | X | 104 | 40.378 | 61.339 | 21.918 | 0.00 | 0.00 |
| ATOM | 1627 | CB   | PRO | X | 104 | 39.420 | 62.794 | 20.699 | 0.00 | 0.00 |
| ATOM | 1628 | HB2  | PRO | X | 104 | 38.471 | 62.419 | 20.316 | 0.00 | 0.00 |
| ATOM | 1629 | HB3  | PRO | X | 104 | 40.273 | 62.683 | 20.029 | 0.00 | 0.00 |
| ATOM | 1630 | CA   | PRO | X | 104 | 39.343 | 64.324 | 20.919 | 0.00 | 0.00 |
| ATOM | 1631 | HA   | PRO | X | 104 | 39.863 | 64.738 | 20.056 | 0.00 | 0.00 |
| ATOM | 1632 | C    | PRO | X | 104 | 37.927 | 64.811 | 21.169 | 0.00 | 0.00 |
| ATOM | 1633 | O    | PRO | X | 104 | 37.253 | 64.557 | 22.199 | 0.00 | 0.00 |
| ATOM | 1634 | N    | THR | X | 105 | 37.375 | 65.501 | 20.166 | 0.00 | 0.00 |
| ATOM | 1635 | H    | THR | X | 105 | 37.979 | 65.893 | 19.458 | 0.00 | 0.00 |
| ATOM | 1636 | CA   | THR | X | 105 | 36.035 | 65.916 | 20.038 | 0.00 | 0.00 |
| ATOM | 1637 | HA   | THR | X | 105 | 35.815 | 66.464 | 20.955 | 0.00 | 0.00 |
| ATOM | 1638 | CB   | THR | X | 105 | 35.944 | 67.027 | 18.989 | 0.00 | 0.00 |
| ATOM | 1639 | HB   | THR | X | 105 | 34.896 | 67.314 | 18.898 | 0.00 | 0.00 |
| ATOM | 1640 | CG2  | THR | X | 105 | 36.884 | 68.158 | 19.295 | 0.00 | 0.00 |
| ATOM | 1641 | HG21 | THR | X | 105 | 37.918 | 67.992 | 18.992 | 0.00 | 0.00 |
| ATOM | 1642 | HG22 | THR | X | 105 | 36.623 | 69.068 | 18.756 | 0.00 | 0.00 |
| ATOM | 1643 | HG23 | THR | X | 105 | 36.894 | 68.376 | 20.363 | 0.00 | 0.00 |
| ATOM | 1644 | OG1  | THR | X | 105 | 36.335 | 66.466 | 17.784 | 0.00 | 0.00 |
| ATOM | 1645 | HG1  | THR | X | 105 | 36.408 | 67.214 | 17.186 | 0.00 | 0.00 |
| ATOM | 1646 | C    | THR | X | 105 | 34.982 | 64.810 | 19.769 | 0.00 | 0.00 |
| ATOM | 1647 | O    | THR | X | 105 | 33.944 | 64.981 | 19.197 | 0.00 | 0.00 |
| ATOM | 1648 | N    | SER | X | 106 | 35.235 | 63.686 | 20.324 | 0.00 | 0.00 |
| ATOM | 1649 | H    | SER | X | 106 | 36.019 | 63.651 | 20.960 | 0.00 | 0.00 |
| ATOM | 1650 | CA   | SER | X | 106 | 34.426 | 62.485 | 20.228 | 0.00 | 0.00 |
| ATOM | 1651 | HA   | SER | X | 106 | 33.408 | 62.865 | 20.317 | 0.00 | 0.00 |
| ATOM | 1652 | CB   | SER | X | 106 | 34.674 | 61.838 | 18.917 | 0.00 | 0.00 |
| ATOM | 1653 | HB2  | SER | X | 106 | 34.230 | 60.845 | 18.991 | 0.00 | 0.00 |
| ATOM | 1654 | HB3  | SER | X | 106 | 34.170 | 62.404 | 18.134 | 0.00 | 0.00 |
| ATOM | 1655 | OG   | SER | X | 106 | 36.068 | 61.815 | 18.550 | 0.00 | 0.00 |
| ATOM | 1656 | HG   | SER | X | 106 | 36.118 | 61.151 | 17.858 | 0.00 | 0.00 |
| ATOM | 1657 | C    | SER | X | 106 | 34.698 | 61.513 | 21.330 | 0.00 | 0.00 |
| ATOM | 1658 | O    | SER | X | 106 | 35.817 | 61.546 | 21.841 | 0.00 | 0.00 |
| ATOM | 1659 | N    | PRO | X | 107 | 33.728 | 60.793 | 21.863 | 0.00 | 0.00 |
| ATOM | 1660 | CD   | PRO | X | 107 | 32.362 | 60.950 | 21.617 | 0.00 | 0.00 |
| ATOM | 1661 | HD2  | PRO | X | 107 | 32.152 | 60.796 | 20.558 | 0.00 | 0.00 |
| ATOM | 1662 | HD3  | PRO | X | 107 | 32.178 | 61.979 | 21.924 | 0.00 | 0.00 |
| ATOM | 1663 | CG   | PRO | X | 107 | 31.767 | 59.802 | 22.396 | 0.00 | 0.00 |
| ATOM | 1664 | HG2  | PRO | X | 107 | 31.791 | 58.910 | 21.771 | 0.00 | 0.00 |
| ATOM | 1665 | HG3  | PRO | X | 107 | 30.717 | 60.070 | 22.513 | 0.00 | 0.00 |
| ATOM | 1666 | CB   | PRO | X | 107 | 32.554 | 59.579 | 23.633 | 0.00 | 0.00 |
| ATOM | 1667 | HB2  | PRO | X | 107 | 32.536 | 58.581 | 24.070 | 0.00 | 0.00 |
| ATOM | 1668 | HB3  | PRO | X | 107 | 32.296 | 60.238 | 24.462 | 0.00 | 0.00 |
| ATOM | 1669 | CA   | PRO | X | 107 | 33.987 | 59.930 | 23.036 | 0.00 | 0.00 |
| ATOM | 1670 | HA   | PRO | X | 107 | 34.590 | 60.511 | 23.734 | 0.00 | 0.00 |
| ATOM | 1671 | C    | PRO | X | 107 | 34.775 | 58.668 | 22.789 | 0.00 | 0.00 |
| ATOM | 1672 | O    | PRO | X | 107 | 34.923 | 58.257 | 21.628 | 0.00 | 0.00 |
| ATOM | 1673 | N    | THR | X | 108 | 35.305 | 57.993 | 23.859 | 0.00 | 0.00 |
| ATOM | 1674 | H    | THR | X | 108 | 35.135 | 58.329 | 24.797 | 0.00 | 0.00 |
| ATOM | 1675 | CA   | THR | X | 108 | 36.216 | 56.848 | 23.654 | 0.00 | 0.00 |
| ATOM | 1676 | HA   | THR | X | 108 | 35.962 | 56.302 | 22.746 | 0.00 | 0.00 |
| ATOM | 1677 | CB   | THR | X | 108 | 37.652 | 57.423 | 23.339 | 0.00 | 0.00 |
| ATOM | 1678 | HB   | THR | X | 108 | 37.717 | 57.944 | 22.384 | 0.00 | 0.00 |

|      |      |      |     |   |     |        |        |        |      |      |
|------|------|------|-----|---|-----|--------|--------|--------|------|------|
| ATOM | 1679 | CG2  | THR | X | 108 | 38.199 | 58.409 | 24.400 | 0.00 | 0.00 |
| ATOM | 1680 | HG21 | THR | X | 108 | 37.457 | 59.194 | 24.549 | 0.00 | 0.00 |
| ATOM | 1681 | HG22 | THR | X | 108 | 38.378 | 57.761 | 25.257 | 0.00 | 0.00 |
| ATOM | 1682 | HG23 | THR | X | 108 | 39.121 | 58.877 | 24.055 | 0.00 | 0.00 |
| ATOM | 1683 | OG1  | THR | X | 108 | 38.552 | 56.380 | 23.274 | 0.00 | 0.00 |
| ATOM | 1684 | HG1  | THR | X | 108 | 39.433 | 56.636 | 22.993 | 0.00 | 0.00 |
| ATOM | 1685 | C    | THR | X | 108 | 36.217 | 56.102 | 24.961 | 0.00 | 0.00 |
| ATOM | 1686 | O    | THR | X | 108 | 36.119 | 56.784 | 25.974 | 0.00 | 0.00 |
| ATOM | 1687 | N    | PRO | X | 109 | 36.283 | 54.765 | 24.919 | 0.00 | 0.00 |
| ATOM | 1688 | CD   | PRO | X | 109 | 36.395 | 53.964 | 23.671 | 0.00 | 0.00 |
| ATOM | 1689 | HD2  | PRO | X | 109 | 37.403 | 53.983 | 23.255 | 0.00 | 0.00 |
| ATOM | 1690 | HD3  | PRO | X | 109 | 35.702 | 54.354 | 22.926 | 0.00 | 0.00 |
| ATOM | 1691 | CG   | PRO | X | 109 | 36.153 | 52.452 | 24.094 | 0.00 | 0.00 |
| ATOM | 1692 | HG2  | PRO | X | 109 | 36.758 | 51.708 | 23.576 | 0.00 | 0.00 |
| ATOM | 1693 | HG3  | PRO | X | 109 | 35.084 | 52.330 | 23.918 | 0.00 | 0.00 |
| ATOM | 1694 | CB   | PRO | X | 109 | 36.542 | 52.505 | 25.577 | 0.00 | 0.00 |
| ATOM | 1695 | HB2  | PRO | X | 109 | 37.517 | 52.063 | 25.782 | 0.00 | 0.00 |
| ATOM | 1696 | HB3  | PRO | X | 109 | 35.974 | 51.803 | 26.187 | 0.00 | 0.00 |
| ATOM | 1697 | CA   | PRO | X | 109 | 36.328 | 53.928 | 26.096 | 0.00 | 0.00 |
| ATOM | 1698 | HA   | PRO | X | 109 | 35.332 | 53.907 | 26.539 | 0.00 | 0.00 |
| ATOM | 1699 | C    | PRO | X | 109 | 37.338 | 54.313 | 27.132 | 0.00 | 0.00 |
| ATOM | 1700 | O    | PRO | X | 109 | 38.403 | 54.857 | 26.905 | 0.00 | 0.00 |
| ATOM | 1701 | N    | VAL | X | 110 | 37.041 | 53.908 | 28.401 | 0.00 | 0.00 |
| ATOM | 1702 | H    | VAL | X | 110 | 36.150 | 53.436 | 28.473 | 0.00 | 0.00 |
| ATOM | 1703 | CA   | VAL | X | 110 | 37.843 | 54.079 | 29.618 | 0.00 | 0.00 |
| ATOM | 1704 | HA   | VAL | X | 110 | 38.736 | 54.671 | 29.418 | 0.00 | 0.00 |
| ATOM | 1705 | CB   | VAL | X | 110 | 37.026 | 54.647 | 30.855 | 0.00 | 0.00 |
| ATOM | 1706 | HB   | VAL | X | 110 | 36.249 | 53.901 | 31.017 | 0.00 | 0.00 |
| ATOM | 1707 | CG1  | VAL | X | 110 | 37.750 | 54.759 | 32.152 | 0.00 | 0.00 |
| ATOM | 1708 | HG11 | VAL | X | 110 | 38.287 | 53.813 | 32.211 | 0.00 | 0.00 |
| ATOM | 1709 | HG12 | VAL | X | 110 | 38.503 | 55.547 | 32.160 | 0.00 | 0.00 |
| ATOM | 1710 | HG13 | VAL | X | 110 | 36.960 | 54.753 | 32.903 | 0.00 | 0.00 |
| ATOM | 1711 | CG2  | VAL | X | 110 | 36.383 | 56.044 | 30.509 | 0.00 | 0.00 |
| ATOM | 1712 | HG21 | VAL | X | 110 | 35.526 | 56.103 | 31.180 | 0.00 | 0.00 |
| ATOM | 1713 | HG22 | VAL | X | 110 | 37.136 | 56.821 | 30.643 | 0.00 | 0.00 |
| ATOM | 1714 | HG23 | VAL | X | 110 | 35.951 | 56.121 | 29.511 | 0.00 | 0.00 |
| ATOM | 1715 | C    | VAL | X | 110 | 38.289 | 52.674 | 29.901 | 0.00 | 0.00 |
| ATOM | 1716 | O    | VAL | X | 110 | 37.556 | 51.683 | 29.679 | 0.00 | 0.00 |
| ATOM | 1717 | N    | LEU | X | 111 | 39.508 | 52.565 | 30.391 | 0.00 | 0.00 |
| ATOM | 1718 | H    | LEU | X | 111 | 39.992 | 53.438 | 30.547 | 0.00 | 0.00 |
| ATOM | 1719 | CA   | LEU | X | 111 | 40.158 | 51.296 | 30.733 | 0.00 | 0.00 |
| ATOM | 1720 | HA   | LEU | X | 111 | 39.404 | 50.530 | 30.915 | 0.00 | 0.00 |
| ATOM | 1721 | CB   | LEU | X | 111 | 41.093 | 50.849 | 29.620 | 0.00 | 0.00 |
| ATOM | 1722 | HB2  | LEU | X | 111 | 40.598 | 50.992 | 28.660 | 0.00 | 0.00 |
| ATOM | 1723 | HB3  | LEU | X | 111 | 41.884 | 51.589 | 29.497 | 0.00 | 0.00 |
| ATOM | 1724 | CG   | LEU | X | 111 | 41.797 | 49.502 | 29.616 | 0.00 | 0.00 |
| ATOM | 1725 | HG   | LEU | X | 111 | 42.489 | 49.533 | 30.457 | 0.00 | 0.00 |
| ATOM | 1726 | CD1  | LEU | X | 111 | 40.871 | 48.280 | 29.838 | 0.00 | 0.00 |
| ATOM | 1727 | HD11 | LEU | X | 111 | 40.517 | 48.115 | 30.856 | 0.00 | 0.00 |
| ATOM | 1728 | HD12 | LEU | X | 111 | 40.002 | 48.405 | 29.192 | 0.00 | 0.00 |
| ATOM | 1729 | HD13 | LEU | X | 111 | 41.473 | 47.393 | 29.644 | 0.00 | 0.00 |
| ATOM | 1730 | CD2  | LEU | X | 111 | 42.599 | 49.412 | 28.222 | 0.00 | 0.00 |
| ATOM | 1731 | HD21 | LEU | X | 111 | 43.244 | 48.533 | 28.239 | 0.00 | 0.00 |
| ATOM | 1732 | HD22 | LEU | X | 111 | 41.934 | 49.432 | 27.359 | 0.00 | 0.00 |
| ATOM | 1733 | HD23 | LEU | X | 111 | 43.345 | 50.206 | 28.184 | 0.00 | 0.00 |
| ATOM | 1734 | C    | LEU | X | 111 | 40.873 | 51.554 | 32.050 | 0.00 | 0.00 |
| ATOM | 1735 | O    | LEU | X | 111 | 41.764 | 52.386 | 32.197 | 0.00 | 0.00 |
| ATOM | 1736 | N    | VAL | X | 112 | 40.403 | 50.882 | 33.054 | 0.00 | 0.00 |
| ATOM | 1737 | H    | VAL | X | 112 | 39.646 | 50.225 | 32.929 | 0.00 | 0.00 |
| ATOM | 1738 | CA   | VAL | X | 112 | 40.756 | 51.158 | 34.462 | 0.00 | 0.00 |
| ATOM | 1739 | HA   | VAL | X | 112 | 41.370 | 52.056 | 34.516 | 0.00 | 0.00 |
| ATOM | 1740 | CB   | VAL | X | 112 | 39.545 | 51.231 | 35.360 | 0.00 | 0.00 |
| ATOM | 1741 | HB   | VAL | X | 112 | 39.033 | 50.269 | 35.368 | 0.00 | 0.00 |
| ATOM | 1742 | CG1  | VAL | X | 112 | 39.898 | 51.679 | 36.842 | 0.00 | 0.00 |
| ATOM | 1743 | HG11 | VAL | X | 112 | 38.945 | 51.868 | 37.336 | 0.00 | 0.00 |
| ATOM | 1744 | HG12 | VAL | X | 112 | 40.345 | 50.839 | 37.373 | 0.00 | 0.00 |
| ATOM | 1745 | HG13 | VAL | X | 112 | 40.531 | 52.564 | 36.777 | 0.00 | 0.00 |
| ATOM | 1746 | CG2  | VAL | X | 112 | 38.517 | 52.265 | 34.807 | 0.00 | 0.00 |
| ATOM | 1747 | HG21 | VAL | X | 112 | 37.773 | 52.534 | 35.557 | 0.00 | 0.00 |
| ATOM | 1748 | HG22 | VAL | X | 112 | 39.063 | 53.162 | 34.513 | 0.00 | 0.00 |



|      |      |      |     |   |     |        |        |        |      |      |
|------|------|------|-----|---|-----|--------|--------|--------|------|------|
| ATOM | 1749 | HG23 | VAL | X | 112 | 38.041 | 51.884 | 33.903 | 0.00 | 0.00 |
| ATOM | 1750 | C    | VAL | X | 112 | 41.599 | 49.969 | 34.894 | 0.00 | 0.00 |
| ATOM | 1751 | O    | VAL | X | 112 | 41.062 | 48.855 | 34.906 | 0.00 | 0.00 |
| ATOM | 1752 | N    | TRP | X | 113 | 42.906 | 50.206 | 35.193 | 0.00 | 0.00 |
| ATOM | 1753 | H    | TRP | X | 113 | 43.302 | 51.116 | 35.003 | 0.00 | 0.00 |
| ATOM | 1754 | CA   | TRP | X | 113 | 43.836 | 49.321 | 35.802 | 0.00 | 0.00 |
| ATOM | 1755 | HA   | TRP | X | 113 | 43.689 | 48.361 | 35.307 | 0.00 | 0.00 |
| ATOM | 1756 | CB   | TRP | X | 113 | 45.229 | 49.794 | 35.442 | 0.00 | 0.00 |
| ATOM | 1757 | HB2  | TRP | X | 113 | 45.323 | 49.677 | 34.363 | 0.00 | 0.00 |
| ATOM | 1758 | HB3  | TRP | X | 113 | 45.333 | 50.812 | 35.817 | 0.00 | 0.00 |
| ATOM | 1759 | CG   | TRP | X | 113 | 46.377 | 49.092 | 36.089 | 0.00 | 0.00 |
| ATOM | 1760 | CD1  | TRP | X | 113 | 47.317 | 49.710 | 36.819 | 0.00 | 0.00 |
| ATOM | 1761 | HD1  | TRP | X | 113 | 47.404 | 50.785 | 36.860 | 0.00 | 0.00 |
| ATOM | 1762 | NE1  | TRP | X | 113 | 48.273 | 48.814 | 37.186 | 0.00 | 0.00 |
| ATOM | 1763 | HE1  | TRP | X | 113 | 49.179 | 49.032 | 37.574 | 0.00 | 0.00 |
| ATOM | 1764 | CE2  | TRP | X | 113 | 47.895 | 47.544 | 36.793 | 0.00 | 0.00 |
| ATOM | 1765 | CZ2  | TRP | X | 113 | 48.556 | 46.296 | 36.798 | 0.00 | 0.00 |
| ATOM | 1766 | HZ2  | TRP | X | 113 | 49.574 | 46.171 | 37.136 | 0.00 | 0.00 |
| ATOM | 1767 | CH2  | TRP | X | 113 | 47.900 | 45.135 | 36.359 | 0.00 | 0.00 |
| ATOM | 1768 | HH2  | TRP | X | 113 | 48.458 | 44.211 | 36.378 | 0.00 | 0.00 |
| ATOM | 1769 | CZ3  | TRP | X | 113 | 46.739 | 45.283 | 35.579 | 0.00 | 0.00 |
| ATOM | 1770 | HZ3  | TRP | X | 113 | 46.264 | 44.479 | 35.037 | 0.00 | 0.00 |
| ATOM | 1771 | CE3  | TRP | X | 113 | 46.209 | 46.590 | 35.290 | 0.00 | 0.00 |
| ATOM | 1772 | HE3  | TRP | X | 113 | 45.333 | 46.691 | 34.667 | 0.00 | 0.00 |
| ATOM | 1773 | CD2  | TRP | X | 113 | 46.737 | 47.695 | 36.038 | 0.00 | 0.00 |
| ATOM | 1774 | C    | TRP | X | 113 | 43.593 | 49.219 | 37.367 | 0.00 | 0.00 |
| ATOM | 1775 | O    | TRP | X | 113 | 43.661 | 50.254 | 38.035 | 0.00 | 0.00 |
| ATOM | 1776 | N    | ILE | X | 114 | 43.507 | 47.996 | 37.852 | 0.00 | 0.00 |
| ATOM | 1777 | H    | ILE | X | 114 | 43.356 | 47.255 | 37.183 | 0.00 | 0.00 |
| ATOM | 1778 | CA   | ILE | X | 114 | 43.423 | 47.704 | 39.291 | 0.00 | 0.00 |
| ATOM | 1779 | HA   | ILE | X | 114 | 43.782 | 48.472 | 39.976 | 0.00 | 0.00 |
| ATOM | 1780 | CB   | ILE | X | 114 | 41.991 | 47.220 | 39.666 | 0.00 | 0.00 |
| ATOM | 1781 | HB   | ILE | X | 114 | 41.844 | 46.253 | 39.185 | 0.00 | 0.00 |
| ATOM | 1782 | CG2  | ILE | X | 114 | 41.854 | 46.883 | 41.204 | 0.00 | 0.00 |
| ATOM | 1783 | HG21 | ILE | X | 114 | 40.836 | 46.545 | 41.395 | 0.00 | 0.00 |
| ATOM | 1784 | HG22 | ILE | X | 114 | 42.579 | 46.098 | 41.420 | 0.00 | 0.00 |
| ATOM | 1785 | HG23 | ILE | X | 114 | 42.125 | 47.771 | 41.774 | 0.00 | 0.00 |
| ATOM | 1786 | CG1  | ILE | X | 114 | 40.886 | 48.214 | 39.209 | 0.00 | 0.00 |
| ATOM | 1787 | HG12 | ILE | X | 114 | 41.151 | 49.169 | 39.663 | 0.00 | 0.00 |
| ATOM | 1788 | HG13 | ILE | X | 114 | 40.931 | 48.169 | 38.121 | 0.00 | 0.00 |
| ATOM | 1789 | CD1  | ILE | X | 114 | 39.457 | 47.891 | 39.657 | 0.00 | 0.00 |
| ATOM | 1790 | HD11 | ILE | X | 114 | 39.173 | 46.840 | 39.694 | 0.00 | 0.00 |
| ATOM | 1791 | HD12 | ILE | X | 114 | 39.277 | 48.327 | 40.640 | 0.00 | 0.00 |
| ATOM | 1792 | HD13 | ILE | X | 114 | 38.691 | 48.348 | 39.030 | 0.00 | 0.00 |
| ATOM | 1793 | C    | ILE | X | 114 | 44.509 | 46.596 | 39.453 | 0.00 | 0.00 |
| ATOM | 1794 | O    | ILE | X | 114 | 44.360 | 45.613 | 38.752 | 0.00 | 0.00 |
| ATOM | 1795 | N    | TYR | X | 115 | 45.497 | 46.810 | 40.321 | 0.00 | 0.00 |
| ATOM | 1796 | H    | TYR | X | 115 | 45.560 | 47.693 | 40.808 | 0.00 | 0.00 |
| ATOM | 1797 | CA   | TYR | X | 115 | 46.746 | 45.919 | 40.377 | 0.00 | 0.00 |
| ATOM | 1798 | HA   | TYR | X | 115 | 46.982 | 45.523 | 39.389 | 0.00 | 0.00 |
| ATOM | 1799 | CB   | TYR | X | 115 | 48.015 | 46.737 | 40.688 | 0.00 | 0.00 |
| ATOM | 1800 | HB2  | TYR | X | 115 | 48.857 | 46.054 | 40.800 | 0.00 | 0.00 |
| ATOM | 1801 | HB3  | TYR | X | 115 | 48.291 | 47.349 | 39.829 | 0.00 | 0.00 |
| ATOM | 1802 | CG   | TYR | X | 115 | 47.819 | 47.611 | 41.963 | 0.00 | 0.00 |
| ATOM | 1803 | CD1  | TYR | X | 115 | 47.735 | 47.068 | 43.269 | 0.00 | 0.00 |
| ATOM | 1804 | HD1  | TYR | X | 115 | 47.957 | 46.016 | 43.371 | 0.00 | 0.00 |
| ATOM | 1805 | CE1  | TYR | X | 115 | 47.457 | 47.838 | 44.428 | 0.00 | 0.00 |
| ATOM | 1806 | HE1  | TYR | X | 115 | 47.316 | 47.406 | 45.407 | 0.00 | 0.00 |
| ATOM | 1807 | CZ   | TYR | X | 115 | 47.403 | 49.244 | 44.298 | 0.00 | 0.00 |
| ATOM | 1808 | OH   | TYR | X | 115 | 47.184 | 50.106 | 45.371 | 0.00 | 0.00 |
| ATOM | 1809 | HH   | TYR | X | 115 | 47.516 | 50.994 | 45.219 | 0.00 | 0.00 |
| ATOM | 1810 | CE2  | TYR | X | 115 | 47.386 | 49.733 | 43.000 | 0.00 | 0.00 |
| ATOM | 1811 | HE2  | TYR | X | 115 | 47.134 | 50.780 | 42.908 | 0.00 | 0.00 |
| ATOM | 1812 | CD2  | TYR | X | 115 | 47.499 | 48.998 | 41.847 | 0.00 | 0.00 |
| ATOM | 1813 | HD2  | TYR | X | 115 | 47.600 | 49.503 | 40.898 | 0.00 | 0.00 |
| ATOM | 1814 | C    | TYR | X | 115 | 46.650 | 44.726 | 41.280 | 0.00 | 0.00 |
| ATOM | 1815 | O    | TYR | X | 115 | 45.793 | 44.602 | 42.184 | 0.00 | 0.00 |
| ATOM | 1816 | N    | GLY | X | 116 | 47.630 | 43.786 | 41.124 | 0.00 | 0.00 |
| ATOM | 1817 | H    | GLY | X | 116 | 48.358 | 44.089 | 40.493 | 0.00 | 0.00 |
| ATOM | 1818 | CA   | GLY | X | 116 | 47.938 | 42.666 | 42.018 | 0.00 | 0.00 |

|      |      |     |     |   |     |        |        |        |      |      |
|------|------|-----|-----|---|-----|--------|--------|--------|------|------|
| ATOM | 1819 | HA2 | GLY | X | 116 | 47.178 | 42.283 | 42.581 | 0.00 | 0.00 |
| ATOM | 1820 | HA3 | GLY | X | 116 | 48.361 | 41.923 | 41.403 | 0.00 | 0.00 |
| ATOM | 1821 | C   | GLY | X | 116 | 49.015 | 42.997 | 43.024 | 0.00 | 0.00 |
| ATOM | 1822 | O   | GLY | X | 116 | 49.563 | 44.077 | 42.943 | 0.00 | 0.00 |
| ATOM | 1823 | N   | GLY | X | 117 | 49.170 | 42.004 | 43.985 | 0.00 | 0.00 |
| ATOM | 1824 | H   | GLY | X | 117 | 48.742 | 41.115 | 43.767 | 0.00 | 0.00 |
| ATOM | 1825 | CA  | GLY | X | 117 | 50.079 | 41.968 | 45.156 | 0.00 | 0.00 |
| ATOM | 1826 | HA2 | GLY | X | 117 | 51.105 | 41.651 | 44.859 | 0.00 | 0.00 |
| ATOM | 1827 | HA3 | GLY | X | 117 | 50.156 | 42.997 | 45.447 | 0.00 | 0.00 |
| ATOM | 1828 | C   | GLY | X | 117 | 49.475 | 41.134 | 46.316 | 0.00 | 0.00 |
| ATOM | 1829 | O   | GLY | X | 117 | 49.747 | 41.420 | 47.454 | 0.00 | 0.00 |
| ATOM | 1830 | N   | GLY | X | 118 | 48.645 | 40.169 | 46.082 | 0.00 | 0.00 |
| ATOM | 1831 | H   | GLY | X | 118 | 48.602 | 39.908 | 45.107 | 0.00 | 0.00 |
| ATOM | 1832 | CA  | GLY | X | 118 | 48.170 | 39.226 | 47.132 | 0.00 | 0.00 |
| ATOM | 1833 | HA2 | GLY | X | 118 | 47.711 | 38.393 | 46.514 | 0.00 | 0.00 |
| ATOM | 1834 | HA3 | GLY | X | 118 | 49.048 | 38.832 | 47.608 | 0.00 | 0.00 |
| ATOM | 1835 | C   | GLY | X | 118 | 47.158 | 39.872 | 48.086 | 0.00 | 0.00 |
| ATOM | 1836 | O   | GLY | X | 118 | 46.861 | 39.309 | 49.147 | 0.00 | 0.00 |
| ATOM | 1837 | N   | PHE | X | 119 | 46.628 | 41.085 | 47.756 | 0.00 | 0.00 |
| ATOM | 1838 | H   | PHE | X | 119 | 46.957 | 41.432 | 46.866 | 0.00 | 0.00 |
| ATOM | 1839 | CA  | PHE | X | 119 | 45.813 | 41.997 | 48.530 | 0.00 | 0.00 |
| ATOM | 1840 | HA  | PHE | X | 119 | 45.405 | 42.788 | 47.901 | 0.00 | 0.00 |
| ATOM | 1841 | CB  | PHE | X | 119 | 44.503 | 41.328 | 48.993 | 0.00 | 0.00 |
| ATOM | 1842 | HB2 | PHE | X | 119 | 44.863 | 40.543 | 49.658 | 0.00 | 0.00 |
| ATOM | 1843 | HB3 | PHE | X | 119 | 44.004 | 42.055 | 49.634 | 0.00 | 0.00 |
| ATOM | 1844 | CG  | PHE | X | 119 | 43.539 | 40.950 | 47.912 | 0.00 | 0.00 |
| ATOM | 1845 | CD1 | PHE | X | 119 | 42.593 | 41.923 | 47.489 | 0.00 | 0.00 |
| ATOM | 1846 | HD1 | PHE | X | 119 | 42.659 | 42.938 | 47.850 | 0.00 | 0.00 |
| ATOM | 1847 | CE1 | PHE | X | 119 | 41.601 | 41.565 | 46.526 | 0.00 | 0.00 |
| ATOM | 1848 | HE1 | PHE | X | 119 | 40.907 | 42.326 | 46.200 | 0.00 | 0.00 |
| ATOM | 1849 | CZ  | PHE | X | 119 | 41.566 | 40.239 | 45.991 | 0.00 | 0.00 |
| ATOM | 1850 | HZ  | PHE | X | 119 | 40.949 | 40.133 | 45.111 | 0.00 | 0.00 |
| ATOM | 1851 | CE2 | PHE | X | 119 | 42.535 | 39.308 | 46.434 | 0.00 | 0.00 |
| ATOM | 1852 | HE2 | PHE | X | 119 | 42.612 | 38.317 | 46.013 | 0.00 | 0.00 |
| ATOM | 1853 | CD2 | PHE | X | 119 | 43.432 | 39.625 | 47.486 | 0.00 | 0.00 |
| ATOM | 1854 | HD2 | PHE | X | 119 | 44.169 | 38.947 | 47.890 | 0.00 | 0.00 |
| ATOM | 1855 | C   | PHE | X | 119 | 46.597 | 42.505 | 49.755 | 0.00 | 0.00 |
| ATOM | 1856 | O   | PHE | X | 119 | 46.095 | 43.434 | 50.353 | 0.00 | 0.00 |
| ATOM | 1857 | N   | TYR | X | 120 | 47.786 | 41.993 | 50.083 | 0.00 | 0.00 |
| ATOM | 1858 | H   | TYR | X | 120 | 48.054 | 41.139 | 49.615 | 0.00 | 0.00 |
| ATOM | 1859 | CA  | TYR | X | 120 | 48.717 | 42.438 | 51.049 | 0.00 | 0.00 |
| ATOM | 1860 | HA  | TYR | X | 120 | 48.234 | 42.875 | 51.922 | 0.00 | 0.00 |
| ATOM | 1861 | CB  | TYR | X | 120 | 49.298 | 41.131 | 51.540 | 0.00 | 0.00 |
| ATOM | 1862 | HB2 | TYR | X | 120 | 49.504 | 41.224 | 52.607 | 0.00 | 0.00 |
| ATOM | 1863 | HB3 | TYR | X | 120 | 48.611 | 40.289 | 51.456 | 0.00 | 0.00 |
| ATOM | 1864 | CG  | TYR | X | 120 | 50.611 | 40.615 | 50.880 | 0.00 | 0.00 |
| ATOM | 1865 | CD1 | TYR | X | 120 | 51.867 | 41.012 | 51.349 | 0.00 | 0.00 |
| ATOM | 1866 | HD1 | TYR | X | 120 | 51.958 | 41.716 | 52.163 | 0.00 | 0.00 |
| ATOM | 1867 | CE1 | TYR | X | 120 | 53.033 | 40.564 | 50.767 | 0.00 | 0.00 |
| ATOM | 1868 | HE1 | TYR | X | 120 | 53.941 | 40.936 | 51.219 | 0.00 | 0.00 |
| ATOM | 1869 | CZ  | TYR | X | 120 | 53.009 | 39.739 | 49.655 | 0.00 | 0.00 |
| ATOM | 1870 | OH  | TYR | X | 120 | 54.133 | 39.412 | 48.950 | 0.00 | 0.00 |
| ATOM | 1871 | HH  | TYR | X | 120 | 54.923 | 39.882 | 49.225 | 0.00 | 0.00 |
| ATOM | 1872 | CE2 | TYR | X | 120 | 51.746 | 39.219 | 49.252 | 0.00 | 0.00 |
| ATOM | 1873 | HE2 | TYR | X | 120 | 51.758 | 38.553 | 48.403 | 0.00 | 0.00 |
| ATOM | 1874 | CD2 | TYR | X | 120 | 50.589 | 39.709 | 49.829 | 0.00 | 0.00 |
| ATOM | 1875 | HD2 | TYR | X | 120 | 49.673 | 39.182 | 49.604 | 0.00 | 0.00 |
| ATOM | 1876 | C   | TYR | X | 120 | 49.754 | 43.410 | 50.470 | 0.00 | 0.00 |
| ATOM | 1877 | O   | TYR | X | 120 | 50.593 | 43.887 | 51.209 | 0.00 | 0.00 |
| ATOM | 1878 | N   | SER | X | 121 | 49.772 | 43.783 | 49.225 | 0.00 | 0.00 |
| ATOM | 1879 | H   | SER | X | 121 | 49.067 | 43.325 | 48.665 | 0.00 | 0.00 |
| ATOM | 1880 | CA  | SER | X | 121 | 50.814 | 44.604 | 48.551 | 0.00 | 0.00 |
| ATOM | 1881 | HA  | SER | X | 121 | 50.925 | 45.511 | 49.145 | 0.00 | 0.00 |
| ATOM | 1882 | CB  | SER | X | 121 | 52.120 | 43.837 | 48.520 | 0.00 | 0.00 |
| ATOM | 1883 | HB2 | SER | X | 121 | 52.902 | 44.589 | 48.413 | 0.00 | 0.00 |
| ATOM | 1884 | HB3 | SER | X | 121 | 52.322 | 43.402 | 49.499 | 0.00 | 0.00 |
| ATOM | 1885 | OG  | SER | X | 121 | 52.072 | 42.842 | 47.517 | 0.00 | 0.00 |
| ATOM | 1886 | HG  | SER | X | 121 | 51.285 | 42.300 | 47.616 | 0.00 | 0.00 |
| ATOM | 1887 | C   | SER | X | 121 | 50.377 | 45.120 | 47.127 | 0.00 | 0.00 |
| ATOM | 1888 | O   | SER | X | 121 | 49.254 | 44.752 | 46.749 | 0.00 | 0.00 |

|      |      |      |     |   |     |        |        |        |      |      |
|------|------|------|-----|---|-----|--------|--------|--------|------|------|
| ATOM | 1889 | N    | GLY | X | 122 | 51.099 | 45.901 | 46.334 | 0.00 | 0.00 |
| ATOM | 1890 | H    | GLY | X | 122 | 51.959 | 46.307 | 46.675 | 0.00 | 0.00 |
| ATOM | 1891 | CA   | GLY | X | 122 | 50.645 | 46.348 | 45.039 | 0.00 | 0.00 |
| ATOM | 1892 | HA2  | GLY | X | 122 | 51.292 | 45.924 | 44.223 | 0.00 | 0.00 |
| ATOM | 1893 | HA3  | GLY | X | 122 | 49.607 | 46.092 | 44.858 | 0.00 | 0.00 |
| ATOM | 1894 | C    | GLY | X | 122 | 50.840 | 47.861 | 44.977 | 0.00 | 0.00 |
| ATOM | 1895 | O    | GLY | X | 122 | 51.200 | 48.560 | 45.920 | 0.00 | 0.00 |
| ATOM | 1896 | N    | ALA | X | 123 | 50.765 | 48.404 | 43.721 | 0.00 | 0.00 |
| ATOM | 1897 | H    | ALA | X | 123 | 50.474 | 47.737 | 43.021 | 0.00 | 0.00 |
| ATOM | 1898 | CA   | ALA | X | 123 | 51.040 | 49.829 | 43.357 | 0.00 | 0.00 |
| ATOM | 1899 | HA   | ALA | X | 123 | 50.377 | 50.421 | 43.988 | 0.00 | 0.00 |
| ATOM | 1900 | CB   | ALA | X | 123 | 52.506 | 50.292 | 43.622 | 0.00 | 0.00 |
| ATOM | 1901 | HB1  | ALA | X | 123 | 52.622 | 51.340 | 43.347 | 0.00 | 0.00 |
| ATOM | 1902 | HB2  | ALA | X | 123 | 52.644 | 50.100 | 44.686 | 0.00 | 0.00 |
| ATOM | 1903 | HB3  | ALA | X | 123 | 53.158 | 49.619 | 43.064 | 0.00 | 0.00 |
| ATOM | 1904 | C    | ALA | X | 123 | 50.699 | 50.150 | 41.869 | 0.00 | 0.00 |
| ATOM | 1905 | O    | ALA | X | 123 | 51.245 | 49.538 | 40.980 | 0.00 | 0.00 |
| ATOM | 1906 | N    | SER | X | 124 | 50.095 | 51.294 | 41.641 | 0.00 | 0.00 |
| ATOM | 1907 | H    | SER | X | 124 | 49.798 | 51.887 | 42.403 | 0.00 | 0.00 |
| ATOM | 1908 | CA   | SER | X | 124 | 49.892 | 51.866 | 40.309 | 0.00 | 0.00 |
| ATOM | 1909 | HA   | SER | X | 124 | 49.990 | 51.063 | 39.578 | 0.00 | 0.00 |
| ATOM | 1910 | CB   | SER | X | 124 | 48.452 | 52.416 | 40.152 | 0.00 | 0.00 |
| ATOM | 1911 | HB2  | SER | X | 124 | 48.334 | 52.894 | 39.180 | 0.00 | 0.00 |
| ATOM | 1912 | HB3  | SER | X | 124 | 47.610 | 51.726 | 40.215 | 0.00 | 0.00 |
| ATOM | 1913 | OG   | SER | X | 124 | 48.162 | 53.434 | 41.101 | 0.00 | 0.00 |
| ATOM | 1914 | HG   | SER | X | 124 | 47.285 | 53.206 | 41.418 | 0.00 | 0.00 |
| ATOM | 1915 | C    | SER | X | 124 | 50.824 | 52.973 | 39.854 | 0.00 | 0.00 |
| ATOM | 1916 | O    | SER | X | 124 | 50.831 | 53.336 | 38.718 | 0.00 | 0.00 |
| ATOM | 1917 | N    | SER | X | 125 | 51.661 | 53.475 | 40.745 | 0.00 | 0.00 |
| ATOM | 1918 | H    | SER | X | 125 | 51.712 | 53.026 | 41.648 | 0.00 | 0.00 |
| ATOM | 1919 | CA   | SER | X | 125 | 52.604 | 54.558 | 40.395 | 0.00 | 0.00 |
| ATOM | 1920 | HA   | SER | X | 125 | 52.008 | 55.436 | 40.144 | 0.00 | 0.00 |
| ATOM | 1921 | CB   | SER | X | 125 | 53.256 | 55.051 | 41.698 | 0.00 | 0.00 |
| ATOM | 1922 | HB2  | SER | X | 125 | 53.792 | 55.986 | 41.533 | 0.00 | 0.00 |
| ATOM | 1923 | HB3  | SER | X | 125 | 52.558 | 55.177 | 42.526 | 0.00 | 0.00 |
| ATOM | 1924 | OG   | SER | X | 125 | 54.269 | 54.172 | 42.096 | 0.00 | 0.00 |
| ATOM | 1925 | HG   | SER | X | 125 | 55.053 | 54.370 | 41.578 | 0.00 | 0.00 |
| ATOM | 1926 | C    | SER | X | 125 | 53.609 | 54.292 | 39.331 | 0.00 | 0.00 |
| ATOM | 1927 | O    | SER | X | 125 | 54.223 | 55.252 | 38.887 | 0.00 | 0.00 |
| ATOM | 1928 | N    | LEU | X | 126 | 53.863 | 53.052 | 38.910 | 0.00 | 0.00 |
| ATOM | 1929 | H    | LEU | X | 126 | 53.279 | 52.344 | 39.330 | 0.00 | 0.00 |
| ATOM | 1930 | CA   | LEU | X | 126 | 55.022 | 52.694 | 38.096 | 0.00 | 0.00 |
| ATOM | 1931 | HA   | LEU | X | 126 | 55.949 | 53.097 | 38.504 | 0.00 | 0.00 |
| ATOM | 1932 | CB   | LEU | X | 126 | 55.195 | 51.176 | 38.254 | 0.00 | 0.00 |
| ATOM | 1933 | HB2  | LEU | X | 126 | 54.238 | 50.742 | 37.963 | 0.00 | 0.00 |
| ATOM | 1934 | HB3  | LEU | X | 126 | 55.977 | 50.955 | 37.528 | 0.00 | 0.00 |
| ATOM | 1935 | CG   | LEU | X | 126 | 55.653 | 50.690 | 39.629 | 0.00 | 0.00 |
| ATOM | 1936 | HG   | LEU | X | 126 | 56.371 | 51.426 | 39.993 | 0.00 | 0.00 |
| ATOM | 1937 | CD1  | LEU | X | 126 | 54.520 | 50.638 | 40.656 | 0.00 | 0.00 |
| ATOM | 1938 | HD11 | LEU | X | 126 | 53.610 | 50.249 | 40.200 | 0.00 | 0.00 |
| ATOM | 1939 | HD12 | LEU | X | 126 | 54.844 | 49.971 | 41.455 | 0.00 | 0.00 |
| ATOM | 1940 | HD13 | LEU | X | 126 | 54.286 | 51.645 | 40.999 | 0.00 | 0.00 |
| ATOM | 1941 | CD2  | LEU | X | 126 | 56.216 | 49.301 | 39.461 | 0.00 | 0.00 |
| ATOM | 1942 | HD21 | LEU | X | 126 | 56.821 | 49.410 | 38.561 | 0.00 | 0.00 |
| ATOM | 1943 | HD22 | LEU | X | 126 | 56.820 | 48.955 | 40.300 | 0.00 | 0.00 |
| ATOM | 1944 | HD23 | LEU | X | 126 | 55.382 | 48.629 | 39.263 | 0.00 | 0.00 |
| ATOM | 1945 | C    | LEU | X | 126 | 54.883 | 53.047 | 36.559 | 0.00 | 0.00 |
| ATOM | 1946 | O    | LEU | X | 126 | 53.783 | 53.114 | 36.011 | 0.00 | 0.00 |
| ATOM | 1947 | N    | ASP | X | 127 | 56.060 | 52.904 | 35.904 | 0.00 | 0.00 |
| ATOM | 1948 | H    | ASP | X | 127 | 56.894 | 52.892 | 36.474 | 0.00 | 0.00 |
| ATOM | 1949 | CA   | ASP | X | 127 | 56.290 | 53.320 | 34.487 | 0.00 | 0.00 |
| ATOM | 1950 | HA   | ASP | X | 127 | 55.540 | 54.021 | 34.120 | 0.00 | 0.00 |
| ATOM | 1951 | CB   | ASP | X | 127 | 57.735 | 53.858 | 34.496 | 0.00 | 0.00 |
| ATOM | 1952 | HB2  | ASP | X | 127 | 57.914 | 54.633 | 35.242 | 0.00 | 0.00 |
| ATOM | 1953 | HB3  | ASP | X | 127 | 58.335 | 52.987 | 34.758 | 0.00 | 0.00 |
| ATOM | 1954 | CG   | ASP | X | 127 | 58.127 | 54.281 | 33.095 | 0.00 | 0.00 |
| ATOM | 1955 | OD1  | ASP | X | 127 | 58.835 | 53.479 | 32.470 | 0.00 | 0.00 |
| ATOM | 1956 | OD2  | ASP | X | 127 | 57.764 | 55.409 | 32.696 | 0.00 | 0.00 |
| ATOM | 1957 | C    | ASP | X | 127 | 56.118 | 52.127 | 33.593 | 0.00 | 0.00 |
| ATOM | 1958 | O    | ASP | X | 127 | 55.616 | 52.251 | 32.475 | 0.00 | 0.00 |

|      |      |      |     |   |     |        |        |        |      |      |
|------|------|------|-----|---|-----|--------|--------|--------|------|------|
| ATOM | 1959 | N    | VAL | X | 128 | 56.453 | 50.930 | 34.019 | 0.00 | 0.00 |
| ATOM | 1960 | H    | VAL | X | 128 | 57.104 | 50.958 | 34.791 | 0.00 | 0.00 |
| ATOM | 1961 | CA   | VAL | X | 128 | 56.038 | 49.652 | 33.438 | 0.00 | 0.00 |
| ATOM | 1962 | HA   | VAL | X | 128 | 56.382 | 49.508 | 32.414 | 0.00 | 0.00 |
| ATOM | 1963 | CB   | VAL | X | 128 | 56.762 | 48.475 | 34.091 | 0.00 | 0.00 |
| ATOM | 1964 | HB   | VAL | X | 128 | 57.797 | 48.733 | 34.312 | 0.00 | 0.00 |
| ATOM | 1965 | CG1  | VAL | X | 128 | 56.264 | 48.278 | 35.555 | 0.00 | 0.00 |
| ATOM | 1966 | HG11 | VAL | X | 128 | 56.733 | 47.434 | 36.060 | 0.00 | 0.00 |
| ATOM | 1967 | HG12 | VAL | X | 128 | 56.467 | 49.182 | 36.131 | 0.00 | 0.00 |
| ATOM | 1968 | HG13 | VAL | X | 128 | 55.195 | 48.075 | 35.619 | 0.00 | 0.00 |
| ATOM | 1969 | CG2  | VAL | X | 128 | 56.725 | 47.154 | 33.307 | 0.00 | 0.00 |
| ATOM | 1970 | HG21 | VAL | X | 128 | 55.690 | 46.811 | 33.334 | 0.00 | 0.00 |
| ATOM | 1971 | HG22 | VAL | X | 128 | 57.019 | 47.328 | 32.272 | 0.00 | 0.00 |
| ATOM | 1972 | HG23 | VAL | X | 128 | 57.444 | 46.446 | 33.718 | 0.00 | 0.00 |
| ATOM | 1973 | C    | VAL | X | 128 | 54.440 | 49.528 | 33.342 | 0.00 | 0.00 |
| ATOM | 1974 | O    | VAL | X | 128 | 54.017 | 48.815 | 32.444 | 0.00 | 0.00 |
| ATOM | 1975 | N    | TYR | X | 129 | 53.683 | 50.303 | 34.119 | 0.00 | 0.00 |
| ATOM | 1976 | H    | TYR | X | 129 | 54.180 | 50.844 | 34.811 | 0.00 | 0.00 |
| ATOM | 1977 | CA   | TYR | X | 129 | 52.180 | 50.423 | 34.156 | 0.00 | 0.00 |
| ATOM | 1978 | HA   | TYR | X | 129 | 51.811 | 49.750 | 33.382 | 0.00 | 0.00 |
| ATOM | 1979 | CB   | TYR | X | 129 | 51.517 | 49.923 | 35.582 | 0.00 | 0.00 |
| ATOM | 1980 | HB2  | TYR | X | 129 | 51.775 | 50.625 | 36.376 | 0.00 | 0.00 |
| ATOM | 1981 | HB3  | TYR | X | 129 | 50.440 | 49.778 | 35.506 | 0.00 | 0.00 |
| ATOM | 1982 | CG   | TYR | X | 129 | 52.102 | 48.580 | 36.092 | 0.00 | 0.00 |
| ATOM | 1983 | CD1  | TYR | X | 129 | 52.286 | 47.516 | 35.205 | 0.00 | 0.00 |
| ATOM | 1984 | HD1  | TYR | X | 129 | 52.072 | 47.678 | 34.159 | 0.00 | 0.00 |
| ATOM | 1985 | CE1  | TYR | X | 129 | 52.724 | 46.288 | 35.603 | 0.00 | 0.00 |
| ATOM | 1986 | HE1  | TYR | X | 129 | 52.790 | 45.481 | 34.888 | 0.00 | 0.00 |
| ATOM | 1987 | CZ   | TYR | X | 129 | 53.112 | 46.100 | 36.924 | 0.00 | 0.00 |
| ATOM | 1988 | OH   | TYR | X | 129 | 53.554 | 44.876 | 37.339 | 0.00 | 0.00 |
| ATOM | 1989 | HH   | TYR | X | 129 | 53.647 | 44.838 | 38.294 | 0.00 | 0.00 |
| ATOM | 1990 | CE2  | TYR | X | 129 | 52.907 | 47.144 | 37.886 | 0.00 | 0.00 |
| ATOM | 1991 | HE2  | TYR | X | 129 | 52.935 | 46.873 | 38.931 | 0.00 | 0.00 |
| ATOM | 1992 | CD2  | TYR | X | 129 | 52.403 | 48.378 | 37.486 | 0.00 | 0.00 |
| ATOM | 1993 | HD2  | TYR | X | 129 | 52.188 | 49.155 | 38.205 | 0.00 | 0.00 |
| ATOM | 1994 | C    | TYR | X | 129 | 51.762 | 51.836 | 33.717 | 0.00 | 0.00 |
| ATOM | 1995 | O    | TYR | X | 129 | 50.732 | 52.282 | 34.045 | 0.00 | 0.00 |
| ATOM | 1996 | N    | ASP | X | 130 | 52.581 | 52.626 | 32.925 | 0.00 | 0.00 |
| ATOM | 1997 | H    | ASP | X | 130 | 53.443 | 52.157 | 32.684 | 0.00 | 0.00 |
| ATOM | 1998 | CA   | ASP | X | 130 | 52.277 | 53.890 | 32.366 | 0.00 | 0.00 |
| ATOM | 1999 | HA   | ASP | X | 130 | 51.632 | 54.471 | 33.026 | 0.00 | 0.00 |
| ATOM | 2000 | CB   | ASP | X | 130 | 53.544 | 54.687 | 32.083 | 0.00 | 0.00 |
| ATOM | 2001 | HB2  | ASP | X | 130 | 54.016 | 54.896 | 33.043 | 0.00 | 0.00 |
| ATOM | 2002 | HB3  | ASP | X | 130 | 54.193 | 54.086 | 31.445 | 0.00 | 0.00 |
| ATOM | 2003 | CG   | ASP | X | 130 | 53.342 | 55.979 | 31.254 | 0.00 | 0.00 |
| ATOM | 2004 | OD1  | ASP | X | 130 | 52.843 | 55.978 | 30.072 | 0.00 | 0.00 |
| ATOM | 2005 | OD2  | ASP | X | 130 | 53.432 | 57.077 | 31.791 | 0.00 | 0.00 |
| ATOM | 2006 | C    | ASP | X | 130 | 51.557 | 53.660 | 31.029 | 0.00 | 0.00 |
| ATOM | 2007 | O    | ASP | X | 130 | 51.944 | 52.716 | 30.349 | 0.00 | 0.00 |
| ATOM | 2008 | N    | GLY | X | 131 | 50.572 | 54.471 | 30.682 | 0.00 | 0.00 |
| ATOM | 2009 | H    | GLY | X | 131 | 50.241 | 55.151 | 31.352 | 0.00 | 0.00 |
| ATOM | 2010 | CA   | GLY | X | 131 | 49.612 | 54.211 | 29.658 | 0.00 | 0.00 |
| ATOM | 2011 | HA2  | GLY | X | 131 | 49.406 | 53.148 | 29.605 | 0.00 | 0.00 |
| ATOM | 2012 | HA3  | GLY | X | 131 | 48.755 | 54.784 | 29.975 | 0.00 | 0.00 |
| ATOM | 2013 | C    | GLY | X | 131 | 49.850 | 54.633 | 28.252 | 0.00 | 0.00 |
| ATOM | 2014 | O    | GLY | X | 131 | 49.093 | 54.232 | 27.301 | 0.00 | 0.00 |
| ATOM | 2015 | N    | ARG | X | 132 | 50.833 | 55.476 | 28.010 | 0.00 | 0.00 |
| ATOM | 2016 | H    | ARG | X | 132 | 51.371 | 55.772 | 28.811 | 0.00 | 0.00 |
| ATOM | 2017 | CA   | ARG | X | 132 | 50.994 | 56.257 | 26.763 | 0.00 | 0.00 |
| ATOM | 2018 | HA   | ARG | X | 132 | 50.176 | 56.977 | 26.736 | 0.00 | 0.00 |
| ATOM | 2019 | CB   | ARG | X | 132 | 52.322 | 57.048 | 26.852 | 0.00 | 0.00 |
| ATOM | 2020 | HB2  | ARG | X | 132 | 52.160 | 57.870 | 26.154 | 0.00 | 0.00 |
| ATOM | 2021 | HB3  | ARG | X | 132 | 52.409 | 57.444 | 27.864 | 0.00 | 0.00 |
| ATOM | 2022 | CG   | ARG | X | 132 | 53.651 | 56.327 | 26.540 | 0.00 | 0.00 |
| ATOM | 2023 | HG2  | ARG | X | 132 | 53.641 | 55.420 | 27.145 | 0.00 | 0.00 |
| ATOM | 2024 | HG3  | ARG | X | 132 | 53.779 | 56.083 | 25.486 | 0.00 | 0.00 |
| ATOM | 2025 | CD   | ARG | X | 132 | 54.965 | 56.933 | 26.979 | 0.00 | 0.00 |
| ATOM | 2026 | HD2  | ARG | X | 132 | 55.836 | 56.301 | 26.811 | 0.00 | 0.00 |
| ATOM | 2027 | HD3  | ARG | X | 132 | 54.991 | 57.971 | 26.647 | 0.00 | 0.00 |
| ATOM | 2028 | NE   | ARG | X | 132 | 54.951 | 57.172 | 28.479 | 0.00 | 0.00 |

|      |      |      |     |   |     |        |        |        |      |      |
|------|------|------|-----|---|-----|--------|--------|--------|------|------|
| ATOM | 2029 | HE   | ARG | X | 132 | 54.177 | 56.764 | 28.984 | 0.00 | 0.00 |
| ATOM | 2030 | CZ   | ARG | X | 132 | 55.855 | 57.835 | 29.164 | 0.00 | 0.00 |
| ATOM | 2031 | NH1  | ARG | X | 132 | 56.957 | 58.220 | 28.490 | 0.00 | 0.00 |
| ATOM | 2032 | HH11 | ARG | X | 132 | 56.882 | 58.229 | 27.483 | 0.00 | 0.00 |
| ATOM | 2033 | HH12 | ARG | X | 132 | 57.568 | 58.905 | 28.913 | 0.00 | 0.00 |
| ATOM | 2034 | NH2  | ARG | X | 132 | 55.717 | 57.942 | 30.500 | 0.00 | 0.00 |
| ATOM | 2035 | HH21 | ARG | X | 132 | 54.809 | 57.818 | 30.926 | 0.00 | 0.00 |
| ATOM | 2036 | HH22 | ARG | X | 132 | 56.522 | 58.293 | 30.999 | 0.00 | 0.00 |
| ATOM | 2037 | C    | ARG | X | 132 | 50.943 | 55.535 | 25.385 | 0.00 | 0.00 |
| ATOM | 2038 | O    | ARG | X | 132 | 50.339 | 55.975 | 24.436 | 0.00 | 0.00 |
| ATOM | 2039 | N    | PHE | X | 133 | 51.630 | 54.368 | 25.436 | 0.00 | 0.00 |
| ATOM | 2040 | H    | PHE | X | 133 | 52.001 | 54.033 | 26.313 | 0.00 | 0.00 |
| ATOM | 2041 | CA   | PHE | X | 133 | 51.853 | 53.660 | 24.157 | 0.00 | 0.00 |
| ATOM | 2042 | HA   | PHE | X | 133 | 52.236 | 54.370 | 23.424 | 0.00 | 0.00 |
| ATOM | 2043 | CB   | PHE | X | 133 | 53.008 | 52.571 | 24.280 | 0.00 | 0.00 |
| ATOM | 2044 | HB2  | PHE | X | 133 | 52.731 | 51.733 | 24.919 | 0.00 | 0.00 |
| ATOM | 2045 | HB3  | PHE | X | 133 | 53.142 | 52.189 | 23.267 | 0.00 | 0.00 |
| ATOM | 2046 | CG   | PHE | X | 133 | 54.385 | 53.018 | 24.760 | 0.00 | 0.00 |
| ATOM | 2047 | CD1  | PHE | X | 133 | 54.954 | 52.421 | 25.849 | 0.00 | 0.00 |
| ATOM | 2048 | HD1  | PHE | X | 133 | 54.533 | 51.585 | 26.386 | 0.00 | 0.00 |
| ATOM | 2049 | CE1  | PHE | X | 133 | 56.241 | 52.737 | 26.249 | 0.00 | 0.00 |
| ATOM | 2050 | HE1  | PHE | X | 133 | 56.665 | 52.232 | 27.104 | 0.00 | 0.00 |
| ATOM | 2051 | CZ   | PHE | X | 133 | 56.928 | 53.841 | 25.706 | 0.00 | 0.00 |
| ATOM | 2052 | HZ   | PHE | X | 133 | 57.925 | 54.111 | 26.021 | 0.00 | 0.00 |
| ATOM | 2053 | CE2  | PHE | X | 133 | 56.335 | 54.479 | 24.630 | 0.00 | 0.00 |
| ATOM | 2054 | HE2  | PHE | X | 133 | 56.806 | 55.315 | 24.133 | 0.00 | 0.00 |
| ATOM | 2055 | CD2  | PHE | X | 133 | 55.072 | 54.110 | 24.174 | 0.00 | 0.00 |
| ATOM | 2056 | HD2  | PHE | X | 133 | 54.544 | 54.649 | 23.401 | 0.00 | 0.00 |
| ATOM | 2057 | C    | PHE | X | 133 | 50.561 | 52.948 | 23.743 | 0.00 | 0.00 |
| ATOM | 2058 | O    | PHE | X | 133 | 50.258 | 52.954 | 22.568 | 0.00 | 0.00 |
| ATOM | 2059 | N    | LEU | X | 134 | 49.758 | 52.383 | 24.706 | 0.00 | 0.00 |
| ATOM | 2060 | H    | LEU | X | 134 | 50.131 | 52.405 | 25.644 | 0.00 | 0.00 |
| ATOM | 2061 | CA   | LEU | X | 134 | 48.317 | 52.051 | 24.465 | 0.00 | 0.00 |
| ATOM | 2062 | HA   | LEU | X | 134 | 48.298 | 51.279 | 23.696 | 0.00 | 0.00 |
| ATOM | 2063 | CB   | LEU | X | 134 | 47.616 | 51.420 | 25.671 | 0.00 | 0.00 |
| ATOM | 2064 | HB2  | LEU | X | 134 | 48.211 | 50.523 | 25.839 | 0.00 | 0.00 |
| ATOM | 2065 | HB3  | LEU | X | 134 | 47.718 | 51.957 | 26.614 | 0.00 | 0.00 |
| ATOM | 2066 | CG   | LEU | X | 134 | 46.163 | 50.923 | 25.431 | 0.00 | 0.00 |
| ATOM | 2067 | HG   | LEU | X | 134 | 45.879 | 50.869 | 24.380 | 0.00 | 0.00 |
| ATOM | 2068 | CD1  | LEU | X | 134 | 46.048 | 49.575 | 26.090 | 0.00 | 0.00 |
| ATOM | 2069 | HD11 | LEU | X | 134 | 46.591 | 48.806 | 25.541 | 0.00 | 0.00 |
| ATOM | 2070 | HD12 | LEU | X | 134 | 46.442 | 49.561 | 27.106 | 0.00 | 0.00 |
| ATOM | 2071 | HD13 | LEU | X | 134 | 44.988 | 49.358 | 26.224 | 0.00 | 0.00 |
| ATOM | 2072 | CD2  | LEU | X | 134 | 45.286 | 52.023 | 26.123 | 0.00 | 0.00 |
| ATOM | 2073 | HD21 | LEU | X | 134 | 45.502 | 52.085 | 27.190 | 0.00 | 0.00 |
| ATOM | 2074 | HD22 | LEU | X | 134 | 45.564 | 52.981 | 25.682 | 0.00 | 0.00 |
| ATOM | 2075 | HD23 | LEU | X | 134 | 44.260 | 51.759 | 25.866 | 0.00 | 0.00 |
| ATOM | 2076 | C    | LEU | X | 134 | 47.502 | 53.179 | 23.909 | 0.00 | 0.00 |
| ATOM | 2077 | O    | LEU | X | 134 | 46.723 | 52.995 | 22.957 | 0.00 | 0.00 |
| ATOM | 2078 | N    | VAL | X | 135 | 47.669 | 54.372 | 24.498 | 0.00 | 0.00 |
| ATOM | 2079 | H    | VAL | X | 135 | 48.108 | 54.380 | 25.408 | 0.00 | 0.00 |
| ATOM | 2080 | CA   | VAL | X | 135 | 46.748 | 55.472 | 24.257 | 0.00 | 0.00 |
| ATOM | 2081 | HA   | VAL | X | 135 | 45.751 | 55.101 | 24.017 | 0.00 | 0.00 |
| ATOM | 2082 | CB   | VAL | X | 135 | 46.595 | 56.522 | 25.477 | 0.00 | 0.00 |
| ATOM | 2083 | HB   | VAL | X | 135 | 47.567 | 56.964 | 25.695 | 0.00 | 0.00 |
| ATOM | 2084 | CG1  | VAL | X | 135 | 45.799 | 57.793 | 25.229 | 0.00 | 0.00 |
| ATOM | 2085 | HG11 | VAL | X | 135 | 46.210 | 58.478 | 24.488 | 0.00 | 0.00 |
| ATOM | 2086 | HG12 | VAL | X | 135 | 44.776 | 57.589 | 24.914 | 0.00 | 0.00 |
| ATOM | 2087 | HG13 | VAL | X | 135 | 45.702 | 58.416 | 26.119 | 0.00 | 0.00 |
| ATOM | 2088 | CG2  | VAL | X | 135 | 46.107 | 55.886 | 26.801 | 0.00 | 0.00 |
| ATOM | 2089 | HG21 | VAL | X | 135 | 45.018 | 55.867 | 26.754 | 0.00 | 0.00 |
| ATOM | 2090 | HG22 | VAL | X | 135 | 46.671 | 54.981 | 27.028 | 0.00 | 0.00 |
| ATOM | 2091 | HG23 | VAL | X | 135 | 46.433 | 56.595 | 27.562 | 0.00 | 0.00 |
| ATOM | 2092 | C    | VAL | X | 135 | 47.132 | 56.189 | 22.941 | 0.00 | 0.00 |
| ATOM | 2093 | O    | VAL | X | 135 | 46.229 | 56.719 | 22.305 | 0.00 | 0.00 |
| ATOM | 2094 | N    | GLN | X | 136 | 48.353 | 56.152 | 22.516 | 0.00 | 0.00 |
| ATOM | 2095 | H    | GLN | X | 136 | 49.087 | 55.787 | 23.107 | 0.00 | 0.00 |
| ATOM | 2096 | CA   | GLN | X | 136 | 48.703 | 56.565 | 21.129 | 0.00 | 0.00 |
| ATOM | 2097 | HA   | GLN | X | 136 | 48.092 | 57.457 | 20.989 | 0.00 | 0.00 |
| ATOM | 2098 | CB   | GLN | X | 136 | 50.203 | 56.941 | 21.067 | 0.00 | 0.00 |

|      |      |      |     |   |     |        |        |        |      |      |
|------|------|------|-----|---|-----|--------|--------|--------|------|------|
| ATOM | 2099 | HB2  | GLN | X | 136 | 50.407 | 57.806 | 21.697 | 0.00 | 0.00 |
| ATOM | 2100 | HB3  | GLN | X | 136 | 50.795 | 56.080 | 21.380 | 0.00 | 0.00 |
| ATOM | 2101 | CG   | GLN | X | 136 | 50.622 | 57.422 | 19.661 | 0.00 | 0.00 |
| ATOM | 2102 | HG2  | GLN | X | 136 | 49.838 | 57.726 | 18.968 | 0.00 | 0.00 |
| ATOM | 2103 | HG3  | GLN | X | 136 | 51.326 | 58.232 | 19.848 | 0.00 | 0.00 |
| ATOM | 2104 | CD   | GLN | X | 136 | 51.461 | 56.324 | 18.984 | 0.00 | 0.00 |
| ATOM | 2105 | OE1  | GLN | X | 136 | 52.623 | 56.089 | 19.218 | 0.00 | 0.00 |
| ATOM | 2106 | NE2  | GLN | X | 136 | 50.846 | 55.450 | 18.207 | 0.00 | 0.00 |
| ATOM | 2107 | HE21 | GLN | X | 136 | 51.345 | 54.821 | 17.595 | 0.00 | 0.00 |
| ATOM | 2108 | HE22 | GLN | X | 136 | 49.887 | 55.652 | 17.964 | 0.00 | 0.00 |
| ATOM | 2109 | C    | GLN | X | 136 | 48.367 | 55.474 | 20.058 | 0.00 | 0.00 |
| ATOM | 2110 | O    | GLN | X | 136 | 48.015 | 55.896 | 18.966 | 0.00 | 0.00 |
| ATOM | 2111 | N    | ALA | X | 137 | 48.353 | 54.199 | 20.323 | 0.00 | 0.00 |
| ATOM | 2112 | H    | ALA | X | 137 | 48.687 | 53.833 | 21.203 | 0.00 | 0.00 |
| ATOM | 2113 | CA   | ALA | X | 137 | 47.982 | 53.275 | 19.237 | 0.00 | 0.00 |
| ATOM | 2114 | HA   | ALA | X | 137 | 48.316 | 53.622 | 18.259 | 0.00 | 0.00 |
| ATOM | 2115 | CB   | ALA | X | 137 | 48.749 | 51.962 | 19.552 | 0.00 | 0.00 |
| ATOM | 2116 | HB1  | ALA | X | 137 | 48.517 | 51.139 | 18.875 | 0.00 | 0.00 |
| ATOM | 2117 | HB2  | ALA | X | 137 | 49.826 | 52.109 | 19.476 | 0.00 | 0.00 |
| ATOM | 2118 | HB3  | ALA | X | 137 | 48.639 | 51.672 | 20.597 | 0.00 | 0.00 |
| ATOM | 2119 | C    | ALA | X | 137 | 46.446 | 53.130 | 19.156 | 0.00 | 0.00 |
| ATOM | 2120 | O    | ALA | X | 137 | 45.903 | 53.299 | 18.060 | 0.00 | 0.00 |
| ATOM | 2121 | N    | GLU | X | 138 | 45.775 | 52.908 | 20.280 | 0.00 | 0.00 |
| ATOM | 2122 | H    | GLU | X | 138 | 46.267 | 52.769 | 21.151 | 0.00 | 0.00 |
| ATOM | 2123 | CA   | GLU | X | 138 | 44.414 | 52.571 | 20.327 | 0.00 | 0.00 |
| ATOM | 2124 | HA   | GLU | X | 138 | 43.984 | 52.459 | 19.331 | 0.00 | 0.00 |
| ATOM | 2125 | CB   | GLU | X | 138 | 44.209 | 51.299 | 21.207 | 0.00 | 0.00 |
| ATOM | 2126 | HB2  | GLU | X | 138 | 44.598 | 51.470 | 22.211 | 0.00 | 0.00 |
| ATOM | 2127 | HB3  | GLU | X | 138 | 43.149 | 51.100 | 21.364 | 0.00 | 0.00 |
| ATOM | 2128 | CG   | GLU | X | 138 | 44.978 | 50.022 | 20.635 | 0.00 | 0.00 |
| ATOM | 2129 | HG2  | GLU | X | 138 | 46.056 | 50.144 | 20.741 | 0.00 | 0.00 |
| ATOM | 2130 | HG3  | GLU | X | 138 | 44.672 | 49.128 | 21.179 | 0.00 | 0.00 |
| ATOM | 2131 | CD   | GLU | X | 138 | 44.568 | 49.888 | 19.150 | 0.00 | 0.00 |
| ATOM | 2132 | OE1  | GLU | X | 138 | 43.336 | 49.978 | 18.917 | 0.00 | 0.00 |
| ATOM | 2133 | OE2  | GLU | X | 138 | 45.393 | 49.588 | 18.251 | 0.00 | 0.00 |
| ATOM | 2134 | C    | GLU | X | 138 | 43.497 | 53.671 | 20.931 | 0.00 | 0.00 |
| ATOM | 2135 | O    | GLU | X | 138 | 42.237 | 53.620 | 20.752 | 0.00 | 0.00 |
| ATOM | 2136 | N    | ARG | X | 139 | 43.940 | 54.534 | 21.788 | 0.00 | 0.00 |
| ATOM | 2137 | H    | ARG | X | 139 | 44.943 | 54.591 | 21.893 | 0.00 | 0.00 |
| ATOM | 2138 | CA   | ARG | X | 139 | 43.208 | 55.800 | 22.042 | 0.00 | 0.00 |
| ATOM | 2139 | HA   | ARG | X | 139 | 43.901 | 56.409 | 22.623 | 0.00 | 0.00 |
| ATOM | 2140 | CB   | ARG | X | 139 | 42.958 | 56.580 | 20.717 | 0.00 | 0.00 |
| ATOM | 2141 | HB2  | ARG | X | 139 | 42.178 | 56.100 | 20.126 | 0.00 | 0.00 |
| ATOM | 2142 | HB3  | ARG | X | 139 | 42.574 | 57.513 | 21.131 | 0.00 | 0.00 |
| ATOM | 2143 | CG   | ARG | X | 139 | 44.141 | 56.867 | 19.873 | 0.00 | 0.00 |
| ATOM | 2144 | HG2  | ARG | X | 139 | 44.790 | 57.554 | 20.416 | 0.00 | 0.00 |
| ATOM | 2145 | HG3  | ARG | X | 139 | 44.739 | 55.988 | 19.636 | 0.00 | 0.00 |
| ATOM | 2146 | CD   | ARG | X | 139 | 43.689 | 57.439 | 18.514 | 0.00 | 0.00 |
| ATOM | 2147 | HD2  | ARG | X | 139 | 44.513 | 57.462 | 17.801 | 0.00 | 0.00 |
| ATOM | 2148 | HD3  | ARG | X | 139 | 42.924 | 56.779 | 18.106 | 0.00 | 0.00 |
| ATOM | 2149 | NE   | ARG | X | 139 | 43.165 | 58.854 | 18.617 | 0.00 | 0.00 |
| ATOM | 2150 | HE   | ARG | X | 139 | 42.165 | 58.986 | 18.674 | 0.00 | 0.00 |
| ATOM | 2151 | CZ   | ARG | X | 139 | 43.831 | 59.996 | 18.785 | 0.00 | 0.00 |
| ATOM | 2152 | NH1  | ARG | X | 139 | 45.097 | 60.028 | 19.071 | 0.00 | 0.00 |
| ATOM | 2153 | HH11 | ARG | X | 139 | 45.611 | 59.162 | 19.000 | 0.00 | 0.00 |
| ATOM | 2154 | HH12 | ARG | X | 139 | 45.602 | 60.887 | 19.235 | 0.00 | 0.00 |
| ATOM | 2155 | NH2  | ARG | X | 139 | 43.194 | 61.185 | 18.771 | 0.00 | 0.00 |
| ATOM | 2156 | HH21 | ARG | X | 139 | 42.249 | 61.215 | 18.417 | 0.00 | 0.00 |
| ATOM | 2157 | HH22 | ARG | X | 139 | 43.749 | 62.018 | 18.904 | 0.00 | 0.00 |
| ATOM | 2158 | C    | ARG | X | 139 | 42.027 | 55.632 | 23.015 | 0.00 | 0.00 |
| ATOM | 2159 | O    | ARG | X | 139 | 41.342 | 56.579 | 23.350 | 0.00 | 0.00 |
| ATOM | 2160 | N    | THR | X | 140 | 41.857 | 54.433 | 23.551 | 0.00 | 0.00 |
| ATOM | 2161 | H    | THR | X | 140 | 42.507 | 53.698 | 23.308 | 0.00 | 0.00 |
| ATOM | 2162 | CA   | THR | X | 140 | 41.018 | 54.128 | 24.752 | 0.00 | 0.00 |
| ATOM | 2163 | HA   | THR | X | 140 | 40.012 | 54.545 | 24.728 | 0.00 | 0.00 |
| ATOM | 2164 | CB   | THR | X | 140 | 40.837 | 52.631 | 24.871 | 0.00 | 0.00 |
| ATOM | 2165 | HB   | THR | X | 140 | 40.167 | 52.427 | 25.706 | 0.00 | 0.00 |
| ATOM | 2166 | CG2  | THR | X | 140 | 40.050 | 52.114 | 23.641 | 0.00 | 0.00 |
| ATOM | 2167 | HG21 | THR | X | 140 | 39.196 | 52.771 | 23.478 | 0.00 | 0.00 |
| ATOM | 2168 | HG22 | THR | X | 140 | 40.605 | 52.213 | 22.708 | 0.00 | 0.00 |

|      |      |      |     |   |     |        |        |        |      |      |
|------|------|------|-----|---|-----|--------|--------|--------|------|------|
| ATOM | 2169 | HG23 | THR | X | 140 | 39.713 | 51.095 | 23.829 | 0.00 | 0.00 |
| ATOM | 2170 | OG1  | THR | X | 140 | 42.097 | 51.938 | 24.920 | 0.00 | 0.00 |
| ATOM | 2171 | HG1  | THR | X | 140 | 42.572 | 52.259 | 25.690 | 0.00 | 0.00 |
| ATOM | 2172 | C    | THR | X | 140 | 41.783 | 54.712 | 26.010 | 0.00 | 0.00 |
| ATOM | 2173 | O    | THR | X | 140 | 42.939 | 54.406 | 26.293 | 0.00 | 0.00 |
| ATOM | 2174 | N    | VAL | X | 141 | 41.098 | 55.570 | 26.717 | 0.00 | 0.00 |
| ATOM | 2175 | H    | VAL | X | 141 | 40.108 | 55.718 | 26.581 | 0.00 | 0.00 |
| ATOM | 2176 | CA   | VAL | X | 141 | 41.658 | 56.341 | 27.916 | 0.00 | 0.00 |
| ATOM | 2177 | HA   | VAL | X | 141 | 42.517 | 56.934 | 27.603 | 0.00 | 0.00 |
| ATOM | 2178 | CB   | VAL | X | 141 | 40.457 | 57.268 | 28.481 | 0.00 | 0.00 |
| ATOM | 2179 | HB   | VAL | X | 141 | 39.515 | 56.739 | 28.627 | 0.00 | 0.00 |
| ATOM | 2180 | CG1  | VAL | X | 141 | 40.729 | 57.763 | 29.930 | 0.00 | 0.00 |
| ATOM | 2181 | HG11 | VAL | X | 141 | 41.811 | 57.866 | 30.011 | 0.00 | 0.00 |
| ATOM | 2182 | HG12 | VAL | X | 141 | 40.236 | 58.714 | 30.133 | 0.00 | 0.00 |
| ATOM | 2183 | HG13 | VAL | X | 141 | 40.364 | 56.983 | 30.599 | 0.00 | 0.00 |
| ATOM | 2184 | CG2  | VAL | X | 141 | 40.337 | 58.410 | 27.490 | 0.00 | 0.00 |
| ATOM | 2185 | HG21 | VAL | X | 141 | 41.185 | 59.095 | 27.499 | 0.00 | 0.00 |
| ATOM | 2186 | HG22 | VAL | X | 141 | 40.164 | 58.060 | 26.472 | 0.00 | 0.00 |
| ATOM | 2187 | HG23 | VAL | X | 141 | 39.427 | 58.937 | 27.777 | 0.00 | 0.00 |
| ATOM | 2188 | C    | VAL | X | 141 | 42.105 | 55.271 | 28.939 | 0.00 | 0.00 |
| ATOM | 2189 | O    | VAL | X | 141 | 41.282 | 54.394 | 29.350 | 0.00 | 0.00 |
| ATOM | 2190 | N    | LEU | X | 142 | 43.404 | 55.339 | 29.276 | 0.00 | 0.00 |
| ATOM | 2191 | H    | LEU | X | 142 | 44.001 | 56.099 | 28.986 | 0.00 | 0.00 |
| ATOM | 2192 | CA   | LEU | X | 142 | 43.920 | 54.516 | 30.428 | 0.00 | 0.00 |
| ATOM | 2193 | HA   | LEU | X | 142 | 43.219 | 53.695 | 30.579 | 0.00 | 0.00 |
| ATOM | 2194 | CB   | LEU | X | 142 | 45.305 | 53.953 | 30.096 | 0.00 | 0.00 |
| ATOM | 2195 | HB2  | LEU | X | 142 | 45.212 | 53.481 | 29.118 | 0.00 | 0.00 |
| ATOM | 2196 | HB3  | LEU | X | 142 | 45.978 | 54.801 | 29.965 | 0.00 | 0.00 |
| ATOM | 2197 | CG   | LEU | X | 142 | 45.860 | 52.942 | 31.053 | 0.00 | 0.00 |
| ATOM | 2198 | HG   | LEU | X | 142 | 46.638 | 52.425 | 30.490 | 0.00 | 0.00 |
| ATOM | 2199 | CD1  | LEU | X | 142 | 46.529 | 53.724 | 32.258 | 0.00 | 0.00 |
| ATOM | 2200 | HD11 | LEU | X | 142 | 46.826 | 52.972 | 32.990 | 0.00 | 0.00 |
| ATOM | 2201 | HD12 | LEU | X | 142 | 47.424 | 54.153 | 31.807 | 0.00 | 0.00 |
| ATOM | 2202 | HD13 | LEU | X | 142 | 45.851 | 54.459 | 32.692 | 0.00 | 0.00 |
| ATOM | 2203 | CD2  | LEU | X | 142 | 44.895 | 51.819 | 31.470 | 0.00 | 0.00 |
| ATOM | 2204 | HD21 | LEU | X | 142 | 44.068 | 52.300 | 31.992 | 0.00 | 0.00 |
| ATOM | 2205 | HD22 | LEU | X | 142 | 44.616 | 51.173 | 30.637 | 0.00 | 0.00 |
| ATOM | 2206 | HD23 | LEU | X | 142 | 45.300 | 51.222 | 32.286 | 0.00 | 0.00 |
| ATOM | 2207 | C    | LEU | X | 142 | 43.740 | 55.348 | 31.691 | 0.00 | 0.00 |
| ATOM | 2208 | O    | LEU | X | 142 | 44.274 | 56.443 | 31.821 | 0.00 | 0.00 |
| ATOM | 2209 | N    | VAL | X | 143 | 43.035 | 54.850 | 32.705 | 0.00 | 0.00 |
| ATOM | 2210 | H    | VAL | X | 143 | 42.453 | 54.053 | 32.490 | 0.00 | 0.00 |
| ATOM | 2211 | CA   | VAL | X | 143 | 43.018 | 55.396 | 34.052 | 0.00 | 0.00 |
| ATOM | 2212 | HA   | VAL | X | 143 | 43.523 | 56.360 | 34.109 | 0.00 | 0.00 |
| ATOM | 2213 | CB   | VAL | X | 143 | 41.531 | 55.621 | 34.527 | 0.00 | 0.00 |
| ATOM | 2214 | HB   | VAL | X | 143 | 41.058 | 54.645 | 34.422 | 0.00 | 0.00 |
| ATOM | 2215 | CG1  | VAL | X | 143 | 41.477 | 56.046 | 35.991 | 0.00 | 0.00 |
| ATOM | 2216 | HG11 | VAL | X | 143 | 41.841 | 55.298 | 36.695 | 0.00 | 0.00 |
| ATOM | 2217 | HG12 | VAL | X | 143 | 42.064 | 56.955 | 36.126 | 0.00 | 0.00 |
| ATOM | 2218 | HG13 | VAL | X | 143 | 40.468 | 56.324 | 36.296 | 0.00 | 0.00 |
| ATOM | 2219 | CG2  | VAL | X | 143 | 40.712 | 56.542 | 33.657 | 0.00 | 0.00 |
| ATOM | 2220 | HG21 | VAL | X | 143 | 41.146 | 57.534 | 33.789 | 0.00 | 0.00 |
| ATOM | 2221 | HG22 | VAL | X | 143 | 40.688 | 56.182 | 32.628 | 0.00 | 0.00 |
| ATOM | 2222 | HG23 | VAL | X | 143 | 39.713 | 56.631 | 34.084 | 0.00 | 0.00 |
| ATOM | 2223 | C    | VAL | X | 143 | 43.657 | 54.321 | 34.948 | 0.00 | 0.00 |
| ATOM | 2224 | O    | VAL | X | 143 | 43.605 | 53.154 | 34.719 | 0.00 | 0.00 |
| ATOM | 2225 | N    | SER | X | 144 | 44.343 | 54.758 | 36.051 | 0.00 | 0.00 |
| ATOM | 2226 | H    | SER | X | 144 | 44.352 | 55.740 | 36.288 | 0.00 | 0.00 |
| ATOM | 2227 | CA   | SER | X | 144 | 44.717 | 53.821 | 37.099 | 0.00 | 0.00 |
| ATOM | 2228 | HA   | SER | X | 144 | 44.092 | 52.929 | 37.048 | 0.00 | 0.00 |
| ATOM | 2229 | CB   | SER | X | 144 | 46.112 | 53.301 | 36.847 | 0.00 | 0.00 |
| ATOM | 2230 | HB2  | SER | X | 144 | 46.245 | 52.560 | 37.636 | 0.00 | 0.00 |
| ATOM | 2231 | HB3  | SER | X | 144 | 46.358 | 52.807 | 35.907 | 0.00 | 0.00 |
| ATOM | 2232 | OG   | SER | X | 144 | 47.101 | 54.263 | 36.943 | 0.00 | 0.00 |
| ATOM | 2233 | HG   | SER | X | 144 | 47.947 | 53.837 | 36.788 | 0.00 | 0.00 |
| ATOM | 2234 | C    | SER | X | 144 | 44.510 | 54.424 | 38.550 | 0.00 | 0.00 |
| ATOM | 2235 | O    | SER | X | 144 | 44.814 | 55.554 | 38.767 | 0.00 | 0.00 |
| ATOM | 2236 | N    | MET | X | 145 | 44.090 | 53.570 | 39.507 | 0.00 | 0.00 |
| ATOM | 2237 | H    | MET | X | 145 | 44.041 | 52.581 | 39.304 | 0.00 | 0.00 |
| ATOM | 2238 | CA   | MET | X | 145 | 43.777 | 53.968 | 40.904 | 0.00 | 0.00 |

|      |      |      |     |   |     |        |        |        |      |      |
|------|------|------|-----|---|-----|--------|--------|--------|------|------|
| ATOM | 2239 | HA   | MET | X | 145 | 43.728 | 55.054 | 40.985 | 0.00 | 0.00 |
| ATOM | 2240 | CB   | MET | X | 145 | 42.334 | 53.395 | 41.307 | 0.00 | 0.00 |
| ATOM | 2241 | HB2  | MET | X | 145 | 42.200 | 53.454 | 42.387 | 0.00 | 0.00 |
| ATOM | 2242 | HB3  | MET | X | 145 | 41.529 | 53.937 | 40.811 | 0.00 | 0.00 |
| ATOM | 2243 | CG   | MET | X | 145 | 42.100 | 51.977 | 40.931 | 0.00 | 0.00 |
| ATOM | 2244 | HG2  | MET | X | 145 | 41.967 | 51.969 | 39.849 | 0.00 | 0.00 |
| ATOM | 2245 | HG3  | MET | X | 145 | 42.974 | 51.384 | 41.198 | 0.00 | 0.00 |
| ATOM | 2246 | SD   | MET | X | 145 | 40.639 | 51.316 | 41.699 | 0.00 | 0.00 |
| ATOM | 2247 | CE   | MET | X | 145 | 39.367 | 51.700 | 40.448 | 0.00 | 0.00 |
| ATOM | 2248 | HE1  | MET | X | 145 | 39.366 | 50.887 | 39.723 | 0.00 | 0.00 |
| ATOM | 2249 | HE2  | MET | X | 145 | 38.399 | 51.959 | 40.877 | 0.00 | 0.00 |
| ATOM | 2250 | HE3  | MET | X | 145 | 39.690 | 52.532 | 39.822 | 0.00 | 0.00 |
| ATOM | 2251 | C    | MET | X | 145 | 44.827 | 53.571 | 41.963 | 0.00 | 0.00 |
| ATOM | 2252 | O    | MET | X | 145 | 45.717 | 52.792 | 41.626 | 0.00 | 0.00 |
| ATOM | 2253 | N    | ASN | X | 146 | 44.664 | 53.923 | 43.177 | 0.00 | 0.00 |
| ATOM | 2254 | H    | ASN | X | 146 | 43.978 | 54.610 | 43.455 | 0.00 | 0.00 |
| ATOM | 2255 | CA   | ASN | X | 146 | 45.480 | 53.405 | 44.231 | 0.00 | 0.00 |
| ATOM | 2256 | HA   | ASN | X | 146 | 45.794 | 52.424 | 43.874 | 0.00 | 0.00 |
| ATOM | 2257 | CB   | ASN | X | 146 | 46.801 | 54.220 | 44.303 | 0.00 | 0.00 |
| ATOM | 2258 | HB2  | ASN | X | 146 | 47.265 | 54.465 | 43.348 | 0.00 | 0.00 |
| ATOM | 2259 | HB3  | ASN | X | 146 | 46.558 | 55.140 | 44.835 | 0.00 | 0.00 |
| ATOM | 2260 | CG   | ASN | X | 146 | 47.854 | 53.535 | 45.218 | 0.00 | 0.00 |
| ATOM | 2261 | OD1  | ASN | X | 146 | 48.264 | 52.452 | 44.853 | 0.00 | 0.00 |
| ATOM | 2262 | ND2  | ASN | X | 146 | 48.310 | 54.068 | 46.291 | 0.00 | 0.00 |
| ATOM | 2263 | HD21 | ASN | X | 146 | 49.204 | 53.676 | 46.548 | 0.00 | 0.00 |
| ATOM | 2264 | HD22 | ASN | X | 146 | 47.897 | 54.892 | 46.706 | 0.00 | 0.00 |
| ATOM | 2265 | C    | ASN | X | 146 | 44.680 | 53.317 | 45.555 | 0.00 | 0.00 |
| ATOM | 2266 | O    | ASN | X | 146 | 43.750 | 54.083 | 45.720 | 0.00 | 0.00 |
| ATOM | 2267 | N    | TYR | X | 147 | 44.962 | 52.409 | 46.450 | 0.00 | 0.00 |
| ATOM | 2268 | H    | TYR | X | 147 | 45.862 | 51.964 | 46.335 | 0.00 | 0.00 |
| ATOM | 2269 | CA   | TYR | X | 147 | 44.120 | 51.892 | 47.492 | 0.00 | 0.00 |
| ATOM | 2270 | HA   | TYR | X | 147 | 43.629 | 52.785 | 47.877 | 0.00 | 0.00 |
| ATOM | 2271 | CB   | TYR | X | 147 | 42.895 | 51.107 | 46.885 | 0.00 | 0.00 |
| ATOM | 2272 | HB2  | TYR | X | 147 | 42.284 | 50.759 | 47.718 | 0.00 | 0.00 |
| ATOM | 2273 | HB3  | TYR | X | 147 | 42.263 | 51.886 | 46.458 | 0.00 | 0.00 |
| ATOM | 2274 | CG   | TYR | X | 147 | 43.305 | 50.108 | 45.807 | 0.00 | 0.00 |
| ATOM | 2275 | CD1  | TYR | X | 147 | 43.298 | 50.525 | 44.455 | 0.00 | 0.00 |
| ATOM | 2276 | HD1  | TYR | X | 147 | 42.996 | 51.543 | 44.259 | 0.00 | 0.00 |
| ATOM | 2277 | CE1  | TYR | X | 147 | 43.760 | 49.577 | 43.531 | 0.00 | 0.00 |
| ATOM | 2278 | HE1  | TYR | X | 147 | 43.760 | 49.809 | 42.476 | 0.00 | 0.00 |
| ATOM | 2279 | CZ   | TYR | X | 147 | 44.139 | 48.286 | 43.886 | 0.00 | 0.00 |
| ATOM | 2280 | OH   | TYR | X | 147 | 44.572 | 47.434 | 42.980 | 0.00 | 0.00 |
| ATOM | 2281 | HH   | TYR | X | 147 | 44.890 | 46.558 | 43.210 | 0.00 | 0.00 |
| ATOM | 2282 | CE2  | TYR | X | 147 | 44.049 | 47.918 | 45.236 | 0.00 | 0.00 |
| ATOM | 2283 | HE2  | TYR | X | 147 | 44.281 | 46.945 | 45.641 | 0.00 | 0.00 |
| ATOM | 2284 | CD2  | TYR | X | 147 | 43.559 | 48.826 | 46.173 | 0.00 | 0.00 |
| ATOM | 2285 | HD2  | TYR | X | 147 | 43.413 | 48.536 | 47.203 | 0.00 | 0.00 |
| ATOM | 2286 | C    | TYR | X | 147 | 44.913 | 51.056 | 48.537 | 0.00 | 0.00 |
| ATOM | 2287 | O    | TYR | X | 147 | 46.057 | 50.677 | 48.315 | 0.00 | 0.00 |
| ATOM | 2288 | N    | ARG | X | 148 | 44.230 | 50.961 | 49.661 | 0.00 | 0.00 |
| ATOM | 2289 | H    | ARG | X | 148 | 43.364 | 51.460 | 49.809 | 0.00 | 0.00 |
| ATOM | 2290 | CA   | ARG | X | 148 | 44.811 | 50.293 | 50.813 | 0.00 | 0.00 |
| ATOM | 2291 | HA   | ARG | X | 148 | 45.830 | 50.593 | 51.060 | 0.00 | 0.00 |
| ATOM | 2292 | CB   | ARG | X | 148 | 44.057 | 50.694 | 52.081 | 0.00 | 0.00 |
| ATOM | 2293 | HB2  | ARG | X | 148 | 43.010 | 50.410 | 51.972 | 0.00 | 0.00 |
| ATOM | 2294 | HB3  | ARG | X | 148 | 44.518 | 50.143 | 52.900 | 0.00 | 0.00 |
| ATOM | 2295 | CG   | ARG | X | 148 | 44.318 | 52.173 | 52.406 | 0.00 | 0.00 |
| ATOM | 2296 | HG2  | ARG | X | 148 | 45.279 | 52.326 | 52.897 | 0.00 | 0.00 |
| ATOM | 2297 | HG3  | ARG | X | 148 | 44.150 | 52.832 | 51.554 | 0.00 | 0.00 |
| ATOM | 2298 | CD   | ARG | X | 148 | 43.329 | 52.568 | 53.528 | 0.00 | 0.00 |
| ATOM | 2299 | HD2  | ARG | X | 148 | 43.574 | 52.026 | 54.441 | 0.00 | 0.00 |
| ATOM | 2300 | HD3  | ARG | X | 148 | 43.537 | 53.591 | 53.844 | 0.00 | 0.00 |
| ATOM | 2301 | NE   | ARG | X | 148 | 41.964 | 52.456 | 53.108 | 0.00 | 0.00 |
| ATOM | 2302 | HE   | ARG | X | 148 | 41.772 | 52.358 | 52.121 | 0.00 | 0.00 |
| ATOM | 2303 | CZ   | ARG | X | 148 | 40.905 | 52.685 | 53.899 | 0.00 | 0.00 |
| ATOM | 2304 | NH1  | ARG | X | 148 | 40.956 | 52.979 | 55.153 | 0.00 | 0.00 |
| ATOM | 2305 | HH11 | ARG | X | 148 | 41.892 | 53.006 | 55.530 | 0.00 | 0.00 |
| ATOM | 2306 | HH12 | ARG | X | 148 | 40.139 | 53.149 | 55.722 | 0.00 | 0.00 |
| ATOM | 2307 | NH2  | ARG | X | 148 | 39.730 | 52.689 | 53.379 | 0.00 | 0.00 |
| ATOM | 2308 | HH21 | ARG | X | 148 | 39.608 | 52.625 | 52.378 | 0.00 | 0.00 |



|      |      |      |     |   |     |        |        |        |      |      |
|------|------|------|-----|---|-----|--------|--------|--------|------|------|
| ATOM | 2309 | HH22 | ARG | X | 148 | 38.857 | 52.845 | 53.861 | 0.00 | 0.00 |
| ATOM | 2310 | C    | ARG | X | 148 | 44.786 | 48.778 | 50.646 | 0.00 | 0.00 |
| ATOM | 2311 | O    | ARG | X | 148 | 43.804 | 48.124 | 50.306 | 0.00 | 0.00 |
| ATOM | 2312 | N    | VAL | X | 149 | 45.971 | 48.290 | 50.920 | 0.00 | 0.00 |
| ATOM | 2313 | H    | VAL | X | 149 | 46.738 | 48.942 | 50.837 | 0.00 | 0.00 |
| ATOM | 2314 | CA   | VAL | X | 149 | 46.391 | 46.833 | 50.864 | 0.00 | 0.00 |
| ATOM | 2315 | HA   | VAL | X | 149 | 45.500 | 46.230 | 50.687 | 0.00 | 0.00 |
| ATOM | 2316 | CB   | VAL | X | 149 | 47.272 | 46.507 | 49.678 | 0.00 | 0.00 |
| ATOM | 2317 | HB   | VAL | X | 149 | 47.756 | 45.558 | 49.905 | 0.00 | 0.00 |
| ATOM | 2318 | CG1  | VAL | X | 149 | 46.417 | 46.245 | 48.387 | 0.00 | 0.00 |
| ATOM | 2319 | HG11 | VAL | X | 149 | 45.519 | 45.703 | 48.684 | 0.00 | 0.00 |
| ATOM | 2320 | HG12 | VAL | X | 149 | 45.981 | 47.099 | 47.867 | 0.00 | 0.00 |
| ATOM | 2321 | HG13 | VAL | X | 149 | 47.014 | 45.693 | 47.662 | 0.00 | 0.00 |
| ATOM | 2322 | CG2  | VAL | X | 149 | 48.386 | 47.519 | 49.457 | 0.00 | 0.00 |
| ATOM | 2323 | HG21 | VAL | X | 149 | 49.158 | 47.025 | 48.866 | 0.00 | 0.00 |
| ATOM | 2324 | HG22 | VAL | X | 149 | 47.968 | 48.305 | 48.830 | 0.00 | 0.00 |
| ATOM | 2325 | HG23 | VAL | X | 149 | 48.664 | 47.903 | 50.439 | 0.00 | 0.00 |
| ATOM | 2326 | C    | VAL | X | 149 | 47.014 | 46.407 | 52.197 | 0.00 | 0.00 |
| ATOM | 2327 | O    | VAL | X | 149 | 47.342 | 47.285 | 53.013 | 0.00 | 0.00 |
| ATOM | 2328 | N    | GLY | X | 150 | 47.126 | 45.089 | 52.480 | 0.00 | 0.00 |
| ATOM | 2329 | H    | GLY | X | 150 | 46.719 | 44.413 | 51.850 | 0.00 | 0.00 |
| ATOM | 2330 | CA   | GLY | X | 150 | 47.480 | 44.676 | 53.822 | 0.00 | 0.00 |
| ATOM | 2331 | HA2  | GLY | X | 150 | 47.557 | 43.599 | 53.824 | 0.00 | 0.00 |
| ATOM | 2332 | HA3  | GLY | X | 150 | 48.359 | 45.161 | 54.194 | 0.00 | 0.00 |
| ATOM | 2333 | C    | GLY | X | 150 | 46.315 | 44.891 | 54.743 | 0.00 | 0.00 |
| ATOM | 2334 | O    | GLY | X | 150 | 45.150 | 45.102 | 54.385 | 0.00 | 0.00 |
| ATOM | 2335 | N    | ALA | X | 151 | 46.612 | 44.803 | 55.992 | 0.00 | 0.00 |
| ATOM | 2336 | H    | ALA | X | 151 | 47.601 | 44.625 | 56.094 | 0.00 | 0.00 |
| ATOM | 2337 | CA   | ALA | X | 151 | 45.708 | 45.152 | 57.121 | 0.00 | 0.00 |
| ATOM | 2338 | HA   | ALA | X | 151 | 44.949 | 44.371 | 57.097 | 0.00 | 0.00 |
| ATOM | 2339 | CB   | ALA | X | 151 | 46.533 | 45.041 | 58.407 | 0.00 | 0.00 |
| ATOM | 2340 | HB1  | ALA | X | 151 | 47.119 | 45.918 | 58.683 | 0.00 | 0.00 |
| ATOM | 2341 | HB2  | ALA | X | 151 | 45.770 | 44.837 | 59.158 | 0.00 | 0.00 |
| ATOM | 2342 | HB3  | ALA | X | 151 | 47.181 | 44.170 | 58.499 | 0.00 | 0.00 |
| ATOM | 2343 | C    | ALA | X | 151 | 44.922 | 46.426 | 56.962 | 0.00 | 0.00 |
| ATOM | 2344 | O    | ALA | X | 151 | 43.784 | 46.435 | 57.325 | 0.00 | 0.00 |
| ATOM | 2345 | N    | PHE | X | 152 | 45.537 | 47.516 | 56.328 | 0.00 | 0.00 |
| ATOM | 2346 | H    | PHE | X | 152 | 46.518 | 47.359 | 56.144 | 0.00 | 0.00 |
| ATOM | 2347 | CA   | PHE | X | 152 | 44.854 | 48.830 | 56.163 | 0.00 | 0.00 |
| ATOM | 2348 | HA   | PHE | X | 152 | 44.581 | 49.322 | 57.097 | 0.00 | 0.00 |
| ATOM | 2349 | CB   | PHE | X | 152 | 45.922 | 49.788 | 55.478 | 0.00 | 0.00 |
| ATOM | 2350 | HB2  | PHE | X | 152 | 46.202 | 49.332 | 54.529 | 0.00 | 0.00 |
| ATOM | 2351 | HB3  | PHE | X | 152 | 45.315 | 50.666 | 55.256 | 0.00 | 0.00 |
| ATOM | 2352 | CG   | PHE | X | 152 | 47.195 | 50.038 | 56.323 | 0.00 | 0.00 |
| ATOM | 2353 | CD1  | PHE | X | 152 | 48.323 | 49.150 | 56.160 | 0.00 | 0.00 |
| ATOM | 2354 | HD1  | PHE | X | 152 | 48.377 | 48.398 | 55.386 | 0.00 | 0.00 |
| ATOM | 2355 | CE1  | PHE | X | 152 | 49.336 | 49.084 | 57.153 | 0.00 | 0.00 |
| ATOM | 2356 | HE1  | PHE | X | 152 | 50.110 | 48.344 | 57.014 | 0.00 | 0.00 |
| ATOM | 2357 | CZ   | PHE | X | 152 | 49.416 | 50.113 | 58.142 | 0.00 | 0.00 |
| ATOM | 2358 | HZ   | PHE | X | 152 | 50.210 | 50.266 | 58.858 | 0.00 | 0.00 |
| ATOM | 2359 | CE2  | PHE | X | 152 | 48.391 | 51.140 | 58.151 | 0.00 | 0.00 |
| ATOM | 2360 | HE2  | PHE | X | 152 | 48.544 | 52.001 | 58.785 | 0.00 | 0.00 |
| ATOM | 2361 | CD2  | PHE | X | 152 | 47.265 | 51.027 | 57.335 | 0.00 | 0.00 |
| ATOM | 2362 | HD2  | PHE | X | 152 | 46.459 | 51.745 | 57.339 | 0.00 | 0.00 |
| ATOM | 2363 | C    | PHE | X | 152 | 43.620 | 48.772 | 55.222 | 0.00 | 0.00 |
| ATOM | 2364 | O    | PHE | X | 152 | 42.958 | 49.770 | 55.119 | 0.00 | 0.00 |
| ATOM | 2365 | N    | GLY | X | 153 | 43.362 | 47.615 | 54.569 | 0.00 | 0.00 |
| ATOM | 2366 | H    | GLY | X | 153 | 44.021 | 46.851 | 54.609 | 0.00 | 0.00 |
| ATOM | 2367 | CA   | GLY | X | 153 | 42.134 | 47.460 | 53.657 | 0.00 | 0.00 |
| ATOM | 2368 | HA2  | GLY | X | 153 | 41.656 | 48.413 | 53.493 | 0.00 | 0.00 |
| ATOM | 2369 | HA3  | GLY | X | 153 | 42.502 | 46.960 | 52.708 | 0.00 | 0.00 |
| ATOM | 2370 | C    | GLY | X | 153 | 41.215 | 46.344 | 54.176 | 0.00 | 0.00 |
| ATOM | 2371 | O    | GLY | X | 153 | 40.027 | 46.387 | 53.794 | 0.00 | 0.00 |
| ATOM | 2372 | N    | PHE | X | 154 | 41.809 | 45.343 | 54.835 | 0.00 | 0.00 |
| ATOM | 2373 | H    | PHE | X | 154 | 42.794 | 45.506 | 54.986 | 0.00 | 0.00 |
| ATOM | 2374 | CA   | PHE | X | 154 | 41.374 | 43.959 | 54.874 | 0.00 | 0.00 |
| ATOM | 2375 | HA   | PHE | X | 154 | 40.315 | 43.858 | 54.637 | 0.00 | 0.00 |
| ATOM | 2376 | CB   | PHE | X | 154 | 42.163 | 43.207 | 53.787 | 0.00 | 0.00 |
| ATOM | 2377 | HB2  | PHE | X | 154 | 43.233 | 43.294 | 53.980 | 0.00 | 0.00 |
| ATOM | 2378 | HB3  | PHE | X | 154 | 41.776 | 42.191 | 53.855 | 0.00 | 0.00 |

|      |      |      |     |   |     |        |        |        |      |      |
|------|------|------|-----|---|-----|--------|--------|--------|------|------|
| ATOM | 2379 | CG   | PHE | X | 154 | 41.882 | 43.632 | 52.340 | 0.00 | 0.00 |
| ATOM | 2380 | CD1  | PHE | X | 154 | 42.886 | 44.197 | 51.516 | 0.00 | 0.00 |
| ATOM | 2381 | HD1  | PHE | X | 154 | 43.907 | 44.207 | 51.866 | 0.00 | 0.00 |
| ATOM | 2382 | CE1  | PHE | X | 154 | 42.587 | 44.801 | 50.240 | 0.00 | 0.00 |
| ATOM | 2383 | HE1  | PHE | X | 154 | 43.394 | 45.270 | 49.695 | 0.00 | 0.00 |
| ATOM | 2384 | CZ   | PHE | X | 154 | 41.264 | 44.766 | 49.858 | 0.00 | 0.00 |
| ATOM | 2385 | HZ   | PHE | X | 154 | 41.017 | 45.167 | 48.886 | 0.00 | 0.00 |
| ATOM | 2386 | CE2  | PHE | X | 154 | 40.299 | 44.207 | 50.665 | 0.00 | 0.00 |
| ATOM | 2387 | HE2  | PHE | X | 154 | 39.278 | 44.299 | 50.326 | 0.00 | 0.00 |
| ATOM | 2388 | CD2  | PHE | X | 154 | 40.571 | 43.518 | 51.849 | 0.00 | 0.00 |
| ATOM | 2389 | HD2  | PHE | X | 154 | 39.719 | 43.135 | 52.391 | 0.00 | 0.00 |
| ATOM | 2390 | C    | PHE | X | 154 | 41.635 | 43.314 | 56.258 | 0.00 | 0.00 |
| ATOM | 2391 | O    | PHE | X | 154 | 41.362 | 42.140 | 56.321 | 0.00 | 0.00 |
| ATOM | 2392 | N    | LEU | X | 155 | 42.019 | 44.017 | 57.314 | 0.00 | 0.00 |
| ATOM | 2393 | H    | LEU | X | 155 | 42.139 | 45.014 | 57.207 | 0.00 | 0.00 |
| ATOM | 2394 | CA   | LEU | X | 155 | 41.738 | 43.653 | 58.699 | 0.00 | 0.00 |
| ATOM | 2395 | HA   | LEU | X | 155 | 41.980 | 42.600 | 58.844 | 0.00 | 0.00 |
| ATOM | 2396 | CB   | LEU | X | 155 | 42.568 | 44.590 | 59.507 | 0.00 | 0.00 |
| ATOM | 2397 | HB2  | LEU | X | 155 | 43.599 | 44.394 | 59.212 | 0.00 | 0.00 |
| ATOM | 2398 | HB3  | LEU | X | 155 | 42.361 | 45.628 | 59.247 | 0.00 | 0.00 |
| ATOM | 2399 | CG   | LEU | X | 155 | 42.610 | 44.195 | 60.983 | 0.00 | 0.00 |
| ATOM | 2400 | HG   | LEU | X | 155 | 42.286 | 43.172 | 61.173 | 0.00 | 0.00 |
| ATOM | 2401 | CD1  | LEU | X | 155 | 44.063 | 44.369 | 61.652 | 0.00 | 0.00 |
| ATOM | 2402 | HD11 | LEU | X | 155 | 44.557 | 43.433 | 61.391 | 0.00 | 0.00 |
| ATOM | 2403 | HD12 | LEU | X | 155 | 44.491 | 45.282 | 61.238 | 0.00 | 0.00 |
| ATOM | 2404 | HD13 | LEU | X | 155 | 44.089 | 44.455 | 62.738 | 0.00 | 0.00 |
| ATOM | 2405 | CD2  | LEU | X | 155 | 41.715 | 45.132 | 61.727 | 0.00 | 0.00 |
| ATOM | 2406 | HD21 | LEU | X | 155 | 41.675 | 44.895 | 62.790 | 0.00 | 0.00 |
| ATOM | 2407 | HD22 | LEU | X | 155 | 42.031 | 46.162 | 61.564 | 0.00 | 0.00 |
| ATOM | 2408 | HD23 | LEU | X | 155 | 40.716 | 44.997 | 61.312 | 0.00 | 0.00 |
| ATOM | 2409 | C    | LEU | X | 155 | 40.264 | 43.873 | 59.037 | 0.00 | 0.00 |
| ATOM | 2410 | O    | LEU | X | 155 | 39.600 | 44.855 | 58.606 | 0.00 | 0.00 |
| ATOM | 2411 | N    | ALA | X | 156 | 39.702 | 42.980 | 59.858 | 0.00 | 0.00 |
| ATOM | 2412 | H    | ALA | X | 156 | 40.330 | 42.256 | 60.178 | 0.00 | 0.00 |
| ATOM | 2413 | CA   | ALA | X | 156 | 38.340 | 42.978 | 60.328 | 0.00 | 0.00 |
| ATOM | 2414 | HA   | ALA | X | 156 | 37.989 | 44.010 | 60.303 | 0.00 | 0.00 |
| ATOM | 2415 | CB   | ALA | X | 156 | 37.551 | 42.140 | 59.360 | 0.00 | 0.00 |
| ATOM | 2416 | HB1  | ALA | X | 156 | 36.517 | 42.158 | 59.707 | 0.00 | 0.00 |
| ATOM | 2417 | HB2  | ALA | X | 156 | 37.509 | 42.606 | 58.376 | 0.00 | 0.00 |
| ATOM | 2418 | HB3  | ALA | X | 156 | 37.856 | 41.094 | 59.392 | 0.00 | 0.00 |
| ATOM | 2419 | C    | ALA | X | 156 | 38.291 | 42.509 | 61.754 | 0.00 | 0.00 |
| ATOM | 2420 | O    | ALA | X | 156 | 38.841 | 41.496 | 62.185 | 0.00 | 0.00 |
| ATOM | 2421 | N    | LEU | X | 157 | 37.269 | 43.033 | 62.466 | 0.00 | 0.00 |
| ATOM | 2422 | H    | LEU | X | 157 | 36.768 | 43.820 | 62.080 | 0.00 | 0.00 |
| ATOM | 2423 | CA   | LEU | X | 157 | 36.741 | 42.495 | 63.674 | 0.00 | 0.00 |
| ATOM | 2424 | HA   | LEU | X | 157 | 37.109 | 41.475 | 63.782 | 0.00 | 0.00 |
| ATOM | 2425 | CB   | LEU | X | 157 | 37.259 | 43.408 | 64.793 | 0.00 | 0.00 |
| ATOM | 2426 | HB2  | LEU | X | 157 | 38.344 | 43.474 | 64.710 | 0.00 | 0.00 |
| ATOM | 2427 | HB3  | LEU | X | 157 | 36.907 | 44.420 | 64.591 | 0.00 | 0.00 |
| ATOM | 2428 | CG   | LEU | X | 157 | 36.733 | 42.956 | 66.182 | 0.00 | 0.00 |
| ATOM | 2429 | HG   | LEU | X | 157 | 35.679 | 42.678 | 66.198 | 0.00 | 0.00 |
| ATOM | 2430 | CD1  | LEU | X | 157 | 37.546 | 41.674 | 66.574 | 0.00 | 0.00 |
| ATOM | 2431 | HD11 | LEU | X | 157 | 37.237 | 41.403 | 67.584 | 0.00 | 0.00 |
| ATOM | 2432 | HD12 | LEU | X | 157 | 37.369 | 40.879 | 65.850 | 0.00 | 0.00 |
| ATOM | 2433 | HD13 | LEU | X | 157 | 38.586 | 41.999 | 66.583 | 0.00 | 0.00 |
| ATOM | 2434 | CD2  | LEU | X | 157 | 36.981 | 44.026 | 67.210 | 0.00 | 0.00 |
| ATOM | 2435 | HD21 | LEU | X | 157 | 36.679 | 43.714 | 68.209 | 0.00 | 0.00 |
| ATOM | 2436 | HD22 | LEU | X | 157 | 38.051 | 44.233 | 67.182 | 0.00 | 0.00 |
| ATOM | 2437 | HD23 | LEU | X | 157 | 36.404 | 44.931 | 67.022 | 0.00 | 0.00 |
| ATOM | 2438 | C    | LEU | X | 157 | 35.259 | 42.454 | 63.454 | 0.00 | 0.00 |
| ATOM | 2439 | O    | LEU | X | 157 | 34.621 | 43.491 | 63.242 | 0.00 | 0.00 |
| ATOM | 2440 | N    | PRO | X | 158 | 34.656 | 41.222 | 63.564 | 0.00 | 0.00 |
| ATOM | 2441 | CD   | PRO | X | 158 | 35.190 | 39.891 | 63.872 | 0.00 | 0.00 |
| ATOM | 2442 | HD2  | PRO | X | 158 | 35.551 | 39.849 | 64.899 | 0.00 | 0.00 |
| ATOM | 2443 | HD3  | PRO | X | 158 | 36.040 | 39.633 | 63.240 | 0.00 | 0.00 |
| ATOM | 2444 | CG   | PRO | X | 158 | 34.030 | 38.913 | 63.574 | 0.00 | 0.00 |
| ATOM | 2445 | HG2  | PRO | X | 158 | 33.447 | 38.702 | 64.471 | 0.00 | 0.00 |
| ATOM | 2446 | HG3  | PRO | X | 158 | 34.398 | 37.961 | 63.190 | 0.00 | 0.00 |
| ATOM | 2447 | CB   | PRO | X | 158 | 33.097 | 39.687 | 62.654 | 0.00 | 0.00 |
| ATOM | 2448 | HB2  | PRO | X | 158 | 32.150 | 39.150 | 62.715 | 0.00 | 0.00 |

|      |      |      |     |   |     |        |        |        |      |      |
|------|------|------|-----|---|-----|--------|--------|--------|------|------|
| ATOM | 2449 | HB3  | PRO | X | 158 | 33.613 | 39.526 | 61.708 | 0.00 | 0.00 |
| ATOM | 2450 | CA   | PRO | X | 158 | 33.232 | 41.107 | 63.247 | 0.00 | 0.00 |
| ATOM | 2451 | HA   | PRO | X | 158 | 32.960 | 41.878 | 62.527 | 0.00 | 0.00 |
| ATOM | 2452 | C    | PRO | X | 158 | 32.474 | 41.377 | 64.580 | 0.00 | 0.00 |
| ATOM | 2453 | O    | PRO | X | 158 | 32.916 | 41.097 | 65.673 | 0.00 | 0.00 |
| ATOM | 2454 | N    | GLY | X | 159 | 31.263 | 41.830 | 64.411 | 0.00 | 0.00 |
| ATOM | 2455 | H    | GLY | X | 159 | 30.903 | 42.039 | 63.491 | 0.00 | 0.00 |
| ATOM | 2456 | CA   | GLY | X | 159 | 30.439 | 42.309 | 65.451 | 0.00 | 0.00 |
| ATOM | 2457 | HA2  | GLY | X | 159 | 29.355 | 42.137 | 65.251 | 0.00 | 0.00 |
| ATOM | 2458 | HA3  | GLY | X | 159 | 30.773 | 41.767 | 66.401 | 0.00 | 0.00 |
| ATOM | 2459 | C    | GLY | X | 159 | 30.766 | 43.769 | 65.748 | 0.00 | 0.00 |
| ATOM | 2460 | O    | GLY | X | 159 | 30.083 | 44.327 | 66.641 | 0.00 | 0.00 |
| ATOM | 2461 | N    | SER | X | 160 | 31.755 | 44.444 | 65.085 | 0.00 | 0.00 |
| ATOM | 2462 | H    | SER | X | 160 | 32.307 | 43.964 | 64.389 | 0.00 | 0.00 |
| ATOM | 2463 | CA   | SER | X | 160 | 32.407 | 45.673 | 65.507 | 0.00 | 0.00 |
| ATOM | 2464 | HA   | SER | X | 160 | 31.719 | 46.148 | 66.206 | 0.00 | 0.00 |
| ATOM | 2465 | CB   | SER | X | 160 | 33.723 | 45.221 | 66.205 | 0.00 | 0.00 |
| ATOM | 2466 | HB2  | SER | X | 160 | 34.319 | 44.555 | 65.580 | 0.00 | 0.00 |
| ATOM | 2467 | HB3  | SER | X | 160 | 34.230 | 46.141 | 66.498 | 0.00 | 0.00 |
| ATOM | 2468 | OG   | SER | X | 160 | 33.512 | 44.371 | 67.363 | 0.00 | 0.00 |
| ATOM | 2469 | HG   | SER | X | 160 | 33.309 | 45.004 | 68.055 | 0.00 | 0.00 |
| ATOM | 2470 | C    | SER | X | 160 | 32.554 | 46.623 | 64.345 | 0.00 | 0.00 |
| ATOM | 2471 | O    | SER | X | 160 | 33.510 | 46.607 | 63.557 | 0.00 | 0.00 |
| ATOM | 2472 | N    | ARG | X | 161 | 31.523 | 47.477 | 64.196 | 0.00 | 0.00 |
| ATOM | 2473 | H    | ARG | X | 161 | 30.877 | 47.505 | 64.973 | 0.00 | 0.00 |
| ATOM | 2474 | CA   | ARG | X | 161 | 31.214 | 48.428 | 63.086 | 0.00 | 0.00 |
| ATOM | 2475 | HA   | ARG | X | 161 | 31.000 | 47.842 | 62.192 | 0.00 | 0.00 |
| ATOM | 2476 | CB   | ARG | X | 161 | 29.765 | 49.083 | 63.265 | 0.00 | 0.00 |
| ATOM | 2477 | HB2  | ARG | X | 161 | 29.310 | 48.592 | 64.125 | 0.00 | 0.00 |
| ATOM | 2478 | HB3  | ARG | X | 161 | 29.774 | 50.117 | 63.610 | 0.00 | 0.00 |
| ATOM | 2479 | CG   | ARG | X | 161 | 28.803 | 48.997 | 62.079 | 0.00 | 0.00 |
| ATOM | 2480 | HG2  | ARG | X | 161 | 29.086 | 49.622 | 61.232 | 0.00 | 0.00 |
| ATOM | 2481 | HG3  | ARG | X | 161 | 28.831 | 48.027 | 61.583 | 0.00 | 0.00 |
| ATOM | 2482 | CD   | ARG | X | 161 | 27.369 | 49.449 | 62.425 | 0.00 | 0.00 |
| ATOM | 2483 | HD2  | ARG | X | 161 | 27.414 | 50.520 | 62.621 | 0.00 | 0.00 |
| ATOM | 2484 | HD3  | ARG | X | 161 | 26.659 | 49.350 | 61.604 | 0.00 | 0.00 |
| ATOM | 2485 | NE   | ARG | X | 161 | 26.847 | 48.827 | 63.690 | 0.00 | 0.00 |
| ATOM | 2486 | HE   | ARG | X | 161 | 27.414 | 48.089 | 64.083 | 0.00 | 0.00 |
| ATOM | 2487 | CZ   | ARG | X | 161 | 25.727 | 49.035 | 64.264 | 0.00 | 0.00 |
| ATOM | 2488 | NH1  | ARG | X | 161 | 24.767 | 49.767 | 63.714 | 0.00 | 0.00 |
| ATOM | 2489 | HH11 | ARG | X | 161 | 25.024 | 50.205 | 62.841 | 0.00 | 0.00 |
| ATOM | 2490 | HH12 | ARG | X | 161 | 23.866 | 49.978 | 64.120 | 0.00 | 0.00 |
| ATOM | 2491 | NH2  | ARG | X | 161 | 25.549 | 48.482 | 65.419 | 0.00 | 0.00 |
| ATOM | 2492 | HH21 | ARG | X | 161 | 26.227 | 47.844 | 65.811 | 0.00 | 0.00 |
| ATOM | 2493 | HH22 | ARG | X | 161 | 24.699 | 48.615 | 65.947 | 0.00 | 0.00 |
| ATOM | 2494 | C    | ARG | X | 161 | 32.285 | 49.480 | 62.870 | 0.00 | 0.00 |
| ATOM | 2495 | O    | ARG | X | 161 | 32.257 | 50.226 | 61.883 | 0.00 | 0.00 |
| ATOM | 2496 | N    | GLU | X | 162 | 33.251 | 49.576 | 63.801 | 0.00 | 0.00 |
| ATOM | 2497 | H    | GLU | X | 162 | 33.206 | 49.073 | 64.675 | 0.00 | 0.00 |
| ATOM | 2498 | CA   | GLU | X | 162 | 34.432 | 50.453 | 63.682 | 0.00 | 0.00 |
| ATOM | 2499 | HA   | GLU | X | 162 | 34.226 | 51.375 | 63.138 | 0.00 | 0.00 |
| ATOM | 2500 | CB   | GLU | X | 162 | 34.867 | 50.887 | 65.056 | 0.00 | 0.00 |
| ATOM | 2501 | HB2  | GLU | X | 162 | 35.788 | 51.431 | 64.848 | 0.00 | 0.00 |
| ATOM | 2502 | HB3  | GLU | X | 162 | 34.182 | 51.630 | 65.464 | 0.00 | 0.00 |
| ATOM | 2503 | CG   | GLU | X | 162 | 35.080 | 49.690 | 66.034 | 0.00 | 0.00 |
| ATOM | 2504 | HG2  | GLU | X | 162 | 35.519 | 48.806 | 65.570 | 0.00 | 0.00 |
| ATOM | 2505 | HG3  | GLU | X | 162 | 35.905 | 50.011 | 66.669 | 0.00 | 0.00 |
| ATOM | 2506 | CD   | GLU | X | 162 | 33.905 | 49.398 | 66.901 | 0.00 | 0.00 |
| ATOM | 2507 | OE1  | GLU | X | 162 | 32.927 | 48.804 | 66.380 | 0.00 | 0.00 |
| ATOM | 2508 | OE2  | GLU | X | 162 | 33.843 | 49.881 | 68.065 | 0.00 | 0.00 |
| ATOM | 2509 | C    | GLU | X | 162 | 35.576 | 49.676 | 63.034 | 0.00 | 0.00 |
| ATOM | 2510 | O    | GLU | X | 162 | 36.526 | 50.353 | 62.621 | 0.00 | 0.00 |
| ATOM | 2511 | N    | ALA | X | 163 | 35.586 | 48.359 | 62.821 | 0.00 | 0.00 |
| ATOM | 2512 | H    | ALA | X | 163 | 34.811 | 47.851 | 63.223 | 0.00 | 0.00 |
| ATOM | 2513 | CA   | ALA | X | 163 | 36.607 | 47.617 | 62.056 | 0.00 | 0.00 |
| ATOM | 2514 | HA   | ALA | X | 163 | 36.950 | 48.286 | 61.266 | 0.00 | 0.00 |
| ATOM | 2515 | CB   | ALA | X | 163 | 37.783 | 47.212 | 62.950 | 0.00 | 0.00 |
| ATOM | 2516 | HB1  | ALA | X | 163 | 38.536 | 46.670 | 62.377 | 0.00 | 0.00 |
| ATOM | 2517 | HB2  | ALA | X | 163 | 38.220 | 48.059 | 63.479 | 0.00 | 0.00 |
| ATOM | 2518 | HB3  | ALA | X | 163 | 37.227 | 46.600 | 63.660 | 0.00 | 0.00 |

|      |      |      |     |   |     |        |        |        |      |      |
|------|------|------|-----|---|-----|--------|--------|--------|------|------|
| ATOM | 2519 | C    | ALA | X | 163 | 35.973 | 46.541 | 61.173 | 0.00 | 0.00 |
| ATOM | 2520 | O    | ALA | X | 163 | 36.148 | 45.317 | 61.340 | 0.00 | 0.00 |
| ATOM | 2521 | N    | PRO | X | 164 | 35.138 | 47.028 | 60.147 | 0.00 | 0.00 |
| ATOM | 2522 | CD   | PRO | X | 164 | 34.856 | 48.393 | 59.821 | 0.00 | 0.00 |
| ATOM | 2523 | HD2  | PRO | X | 164 | 35.751 | 49.009 | 59.727 | 0.00 | 0.00 |
| ATOM | 2524 | HD3  | PRO | X | 164 | 34.192 | 48.877 | 60.536 | 0.00 | 0.00 |
| ATOM | 2525 | CG   | PRO | X | 164 | 34.163 | 48.558 | 58.462 | 0.00 | 0.00 |
| ATOM | 2526 | HG2  | PRO | X | 164 | 34.971 | 48.500 | 57.733 | 0.00 | 0.00 |
| ATOM | 2527 | HG3  | PRO | X | 164 | 33.549 | 49.456 | 58.521 | 0.00 | 0.00 |
| ATOM | 2528 | CB   | PRO | X | 164 | 33.363 | 47.276 | 58.635 | 0.00 | 0.00 |
| ATOM | 2529 | HB2  | PRO | X | 164 | 32.980 | 46.870 | 57.699 | 0.00 | 0.00 |
| ATOM | 2530 | HB3  | PRO | X | 164 | 32.475 | 47.487 | 59.231 | 0.00 | 0.00 |
| ATOM | 2531 | CA   | PRO | X | 164 | 34.193 | 46.249 | 59.358 | 0.00 | 0.00 |
| ATOM | 2532 | HA   | PRO | X | 164 | 33.591 | 45.599 | 59.993 | 0.00 | 0.00 |
| ATOM | 2533 | C    | PRO | X | 164 | 34.844 | 45.255 | 58.357 | 0.00 | 0.00 |
| ATOM | 2534 | O    | PRO | X | 164 | 34.172 | 44.277 | 58.012 | 0.00 | 0.00 |
| ATOM | 2535 | N    | GLY | X | 165 | 36.083 | 45.529 | 57.926 | 0.00 | 0.00 |
| ATOM | 2536 | H    | GLY | X | 165 | 36.593 | 46.325 | 58.282 | 0.00 | 0.00 |
| ATOM | 2537 | CA   | GLY | X | 165 | 36.700 | 44.718 | 56.872 | 0.00 | 0.00 |
| ATOM | 2538 | HA2  | GLY | X | 165 | 37.799 | 44.720 | 56.892 | 0.00 | 0.00 |
| ATOM | 2539 | HA3  | GLY | X | 165 | 36.344 | 43.718 | 57.045 | 0.00 | 0.00 |
| ATOM | 2540 | C    | GLY | X | 165 | 36.407 | 45.179 | 55.387 | 0.00 | 0.00 |
| ATOM | 2541 | O    | GLY | X | 165 | 35.464 | 45.963 | 55.226 | 0.00 | 0.00 |
| ATOM | 2542 | N    | ASN | X | 166 | 37.160 | 44.699 | 54.382 | 0.00 | 0.00 |
| ATOM | 2543 | H    | ASN | X | 166 | 37.906 | 44.069 | 54.640 | 0.00 | 0.00 |
| ATOM | 2544 | CA   | ASN | X | 166 | 36.985 | 44.953 | 52.961 | 0.00 | 0.00 |
| ATOM | 2545 | HA   | ASN | X | 166 | 37.754 | 44.417 | 52.405 | 0.00 | 0.00 |
| ATOM | 2546 | CB   | ASN | X | 166 | 35.635 | 44.356 | 52.491 | 0.00 | 0.00 |
| ATOM | 2547 | HB2  | ASN | X | 166 | 34.764 | 44.877 | 52.886 | 0.00 | 0.00 |
| ATOM | 2548 | HB3  | ASN | X | 166 | 35.552 | 44.434 | 51.407 | 0.00 | 0.00 |
| ATOM | 2549 | CG   | ASN | X | 166 | 35.536 | 42.836 | 52.799 | 0.00 | 0.00 |
| ATOM | 2550 | OD1  | ASN | X | 166 | 36.557 | 42.156 | 52.901 | 0.00 | 0.00 |
| ATOM | 2551 | ND2  | ASN | X | 166 | 34.413 | 42.283 | 53.132 | 0.00 | 0.00 |
| ATOM | 2552 | HD21 | ASN | X | 166 | 34.405 | 41.284 | 53.283 | 0.00 | 0.00 |
| ATOM | 2553 | HD22 | ASN | X | 166 | 33.576 | 42.846 | 53.188 | 0.00 | 0.00 |
| ATOM | 2554 | C    | ASN | X | 166 | 37.064 | 46.421 | 52.513 | 0.00 | 0.00 |
| ATOM | 2555 | O    | ASN | X | 166 | 37.009 | 46.642 | 51.318 | 0.00 | 0.00 |
| ATOM | 2556 | N    | VAL | X | 167 | 37.264 | 47.459 | 53.362 | 0.00 | 0.00 |
| ATOM | 2557 | H    | VAL | X | 167 | 37.237 | 47.371 | 54.368 | 0.00 | 0.00 |
| ATOM | 2558 | CA   | VAL | X | 167 | 37.424 | 48.830 | 52.978 | 0.00 | 0.00 |
| ATOM | 2559 | HA   | VAL | X | 167 | 36.428 | 48.976 | 52.561 | 0.00 | 0.00 |
| ATOM | 2560 | CB   | VAL | X | 167 | 37.549 | 49.845 | 54.113 | 0.00 | 0.00 |
| ATOM | 2561 | HB   | VAL | X | 167 | 37.656 | 50.852 | 53.709 | 0.00 | 0.00 |
| ATOM | 2562 | CG1  | VAL | X | 167 | 36.206 | 49.772 | 54.894 | 0.00 | 0.00 |
| ATOM | 2563 | HG11 | VAL | X | 167 | 35.984 | 48.738 | 55.159 | 0.00 | 0.00 |
| ATOM | 2564 | HG12 | VAL | X | 167 | 36.293 | 50.321 | 55.831 | 0.00 | 0.00 |
| ATOM | 2565 | HG13 | VAL | X | 167 | 35.296 | 50.194 | 54.467 | 0.00 | 0.00 |
| ATOM | 2566 | CG2  | VAL | X | 167 | 38.751 | 49.540 | 55.037 | 0.00 | 0.00 |
| ATOM | 2567 | HG21 | VAL | X | 167 | 39.638 | 49.465 | 54.407 | 0.00 | 0.00 |
| ATOM | 2568 | HG22 | VAL | X | 167 | 38.919 | 50.386 | 55.704 | 0.00 | 0.00 |
| ATOM | 2569 | HG23 | VAL | X | 167 | 38.565 | 48.677 | 55.676 | 0.00 | 0.00 |
| ATOM | 2570 | C    | VAL | X | 167 | 38.480 | 49.121 | 51.864 | 0.00 | 0.00 |
| ATOM | 2571 | O    | VAL | X | 167 | 38.501 | 50.271 | 51.420 | 0.00 | 0.00 |
| ATOM | 2572 | N    | GLY | X | 168 | 39.468 | 48.228 | 51.675 | 0.00 | 0.00 |
| ATOM | 2573 | H    | GLY | X | 168 | 39.492 | 47.380 | 52.224 | 0.00 | 0.00 |
| ATOM | 2574 | CA   | GLY | X | 168 | 40.321 | 48.185 | 50.494 | 0.00 | 0.00 |
| ATOM | 2575 | HA2  | GLY | X | 168 | 40.922 | 49.118 | 50.420 | 0.00 | 0.00 |
| ATOM | 2576 | HA3  | GLY | X | 168 | 40.976 | 47.324 | 50.622 | 0.00 | 0.00 |
| ATOM | 2577 | C    | GLY | X | 168 | 39.593 | 47.987 | 49.183 | 0.00 | 0.00 |
| ATOM | 2578 | O    | GLY | X | 168 | 40.025 | 48.529 | 48.133 | 0.00 | 0.00 |
| ATOM | 2579 | N    | LEU | X | 169 | 38.475 | 47.270 | 49.149 | 0.00 | 0.00 |
| ATOM | 2580 | H    | LEU | X | 169 | 38.027 | 46.934 | 49.990 | 0.00 | 0.00 |
| ATOM | 2581 | CA   | LEU | X | 169 | 37.612 | 47.260 | 47.919 | 0.00 | 0.00 |
| ATOM | 2582 | HA   | LEU | X | 169 | 38.257 | 47.182 | 47.044 | 0.00 | 0.00 |
| ATOM | 2583 | CB   | LEU | X | 169 | 36.682 | 45.974 | 48.023 | 0.00 | 0.00 |
| ATOM | 2584 | HB2  | LEU | X | 169 | 36.209 | 46.047 | 49.002 | 0.00 | 0.00 |
| ATOM | 2585 | HB3  | LEU | X | 169 | 35.896 | 45.926 | 47.268 | 0.00 | 0.00 |
| ATOM | 2586 | CG   | LEU | X | 169 | 37.441 | 44.634 | 47.836 | 0.00 | 0.00 |
| ATOM | 2587 | HG   | LEU | X | 169 | 38.262 | 44.580 | 48.551 | 0.00 | 0.00 |
| ATOM | 2588 | CD1  | LEU | X | 169 | 36.389 | 43.504 | 48.116 | 0.00 | 0.00 |

|      |      |      |     |   |     |        |        |        |      |      |
|------|------|------|-----|---|-----|--------|--------|--------|------|------|
| ATOM | 2589 | HD11 | LEU | X | 169 | 35.553 | 43.583 | 47.421 | 0.00 | 0.00 |
| ATOM | 2590 | HD12 | LEU | X | 169 | 36.863 | 42.523 | 48.093 | 0.00 | 0.00 |
| ATOM | 2591 | HD13 | LEU | X | 169 | 35.962 | 43.563 | 49.117 | 0.00 | 0.00 |
| ATOM | 2592 | CD2  | LEU | X | 169 | 38.102 | 44.411 | 46.489 | 0.00 | 0.00 |
| ATOM | 2593 | HD21 | LEU | X | 169 | 38.729 | 43.542 | 46.685 | 0.00 | 0.00 |
| ATOM | 2594 | HD22 | LEU | X | 169 | 37.409 | 44.190 | 45.677 | 0.00 | 0.00 |
| ATOM | 2595 | HD23 | LEU | X | 169 | 38.681 | 45.301 | 46.240 | 0.00 | 0.00 |
| ATOM | 2596 | C    | LEU | X | 169 | 36.734 | 48.479 | 47.839 | 0.00 | 0.00 |
| ATOM | 2597 | O    | LEU | X | 169 | 36.394 | 48.896 | 46.753 | 0.00 | 0.00 |
| ATOM | 2598 | N    | LEU | X | 170 | 36.324 | 49.019 | 48.990 | 0.00 | 0.00 |
| ATOM | 2599 | H    | LEU | X | 170 | 36.686 | 48.723 | 49.885 | 0.00 | 0.00 |
| ATOM | 2600 | CA   | LEU | X | 170 | 35.452 | 50.191 | 49.076 | 0.00 | 0.00 |
| ATOM | 2601 | HA   | LEU | X | 170 | 34.658 | 49.971 | 48.363 | 0.00 | 0.00 |
| ATOM | 2602 | CB   | LEU | X | 170 | 34.830 | 50.223 | 50.517 | 0.00 | 0.00 |
| ATOM | 2603 | HB2  | LEU | X | 170 | 34.331 | 49.260 | 50.627 | 0.00 | 0.00 |
| ATOM | 2604 | HB3  | LEU | X | 170 | 35.608 | 50.372 | 51.266 | 0.00 | 0.00 |
| ATOM | 2605 | CG   | LEU | X | 170 | 33.718 | 51.203 | 50.732 | 0.00 | 0.00 |
| ATOM | 2606 | HG   | LEU | X | 170 | 34.012 | 52.246 | 50.625 | 0.00 | 0.00 |
| ATOM | 2607 | CD1  | LEU | X | 170 | 32.558 | 50.888 | 49.769 | 0.00 | 0.00 |
| ATOM | 2608 | HD11 | LEU | X | 170 | 32.880 | 51.001 | 48.733 | 0.00 | 0.00 |
| ATOM | 2609 | HD12 | LEU | X | 170 | 32.046 | 49.937 | 49.913 | 0.00 | 0.00 |
| ATOM | 2610 | HD13 | LEU | X | 170 | 31.731 | 51.562 | 49.990 | 0.00 | 0.00 |
| ATOM | 2611 | CD2  | LEU | X | 170 | 33.169 | 51.033 | 52.181 | 0.00 | 0.00 |
| ATOM | 2612 | HD21 | LEU | X | 170 | 32.799 | 50.012 | 52.279 | 0.00 | 0.00 |
| ATOM | 2613 | HD22 | LEU | X | 170 | 33.968 | 51.127 | 52.916 | 0.00 | 0.00 |
| ATOM | 2614 | HD23 | LEU | X | 170 | 32.335 | 51.704 | 52.389 | 0.00 | 0.00 |
| ATOM | 2615 | C    | LEU | X | 170 | 36.125 | 51.460 | 48.541 | 0.00 | 0.00 |
| ATOM | 2616 | O    | LEU | X | 170 | 35.460 | 52.238 | 47.848 | 0.00 | 0.00 |
| ATOM | 2617 | N    | ASP | X | 171 | 37.428 | 51.588 | 48.805 | 0.00 | 0.00 |
| ATOM | 2618 | H    | ASP | X | 171 | 37.860 | 51.015 | 49.516 | 0.00 | 0.00 |
| ATOM | 2619 | CA   | ASP | X | 171 | 38.308 | 52.527 | 48.083 | 0.00 | 0.00 |
| ATOM | 2620 | HA   | ASP | X | 171 | 37.995 | 53.536 | 48.350 | 0.00 | 0.00 |
| ATOM | 2621 | CB   | ASP | X | 171 | 39.807 | 52.291 | 48.416 | 0.00 | 0.00 |
| ATOM | 2622 | HB2  | ASP | X | 171 | 40.080 | 51.283 | 48.102 | 0.00 | 0.00 |
| ATOM | 2623 | HB3  | ASP | X | 171 | 40.376 | 52.975 | 47.787 | 0.00 | 0.00 |
| ATOM | 2624 | CG   | ASP | X | 171 | 40.279 | 52.446 | 49.909 | 0.00 | 0.00 |
| ATOM | 2625 | OD1  | ASP | X | 171 | 39.541 | 53.124 | 50.679 | 0.00 | 0.00 |
| ATOM | 2626 | OD2  | ASP | X | 171 | 41.473 | 52.028 | 50.214 | 0.00 | 0.00 |
| ATOM | 2627 | C    | ASP | X | 171 | 38.189 | 52.484 | 46.536 | 0.00 | 0.00 |
| ATOM | 2628 | O    | ASP | X | 171 | 37.963 | 53.549 | 45.843 | 0.00 | 0.00 |
| ATOM | 2629 | N    | GLN | X | 172 | 38.445 | 51.270 | 45.943 | 0.00 | 0.00 |
| ATOM | 2630 | H    | GLN | X | 172 | 38.655 | 50.496 | 46.557 | 0.00 | 0.00 |
| ATOM | 2631 | CA   | GLN | X | 172 | 38.310 | 51.028 | 44.458 | 0.00 | 0.00 |
| ATOM | 2632 | HA   | GLN | X | 172 | 39.033 | 51.462 | 43.767 | 0.00 | 0.00 |
| ATOM | 2633 | CB   | GLN | X | 172 | 38.605 | 49.574 | 44.140 | 0.00 | 0.00 |
| ATOM | 2634 | HB2  | GLN | X | 172 | 37.865 | 48.907 | 44.581 | 0.00 | 0.00 |
| ATOM | 2635 | HB3  | GLN | X | 172 | 38.407 | 49.336 | 43.094 | 0.00 | 0.00 |
| ATOM | 2636 | CG   | GLN | X | 172 | 39.951 | 49.084 | 44.536 | 0.00 | 0.00 |
| ATOM | 2637 | HG2  | GLN | X | 172 | 40.665 | 49.577 | 43.876 | 0.00 | 0.00 |
| ATOM | 2638 | HG3  | GLN | X | 172 | 40.215 | 49.500 | 45.508 | 0.00 | 0.00 |
| ATOM | 2639 | CD   | GLN | X | 172 | 40.002 | 47.533 | 44.371 | 0.00 | 0.00 |
| ATOM | 2640 | OE1  | GLN | X | 172 | 39.303 | 46.957 | 43.536 | 0.00 | 0.00 |
| ATOM | 2641 | NE2  | GLN | X | 172 | 40.801 | 46.810 | 45.139 | 0.00 | 0.00 |
| ATOM | 2642 | HE21 | GLN | X | 172 | 40.684 | 45.821 | 44.972 | 0.00 | 0.00 |
| ATOM | 2643 | HE22 | GLN | X | 172 | 41.511 | 47.117 | 45.788 | 0.00 | 0.00 |
| ATOM | 2644 | C    | GLN | X | 172 | 36.912 | 51.434 | 43.948 | 0.00 | 0.00 |
| ATOM | 2645 | O    | GLN | X | 172 | 36.817 | 51.972 | 42.838 | 0.00 | 0.00 |
| ATOM | 2646 | N    | ARG | X | 173 | 35.888 | 51.327 | 44.844 | 0.00 | 0.00 |
| ATOM | 2647 | H    | ARG | X | 173 | 36.173 | 51.070 | 45.779 | 0.00 | 0.00 |
| ATOM | 2648 | CA   | ARG | X | 173 | 34.440 | 51.620 | 44.453 | 0.00 | 0.00 |
| ATOM | 2649 | HA   | ARG | X | 173 | 34.155 | 51.188 | 43.494 | 0.00 | 0.00 |
| ATOM | 2650 | CB   | ARG | X | 173 | 33.505 | 50.942 | 45.453 | 0.00 | 0.00 |
| ATOM | 2651 | HB2  | ARG | X | 173 | 33.829 | 49.909 | 45.577 | 0.00 | 0.00 |
| ATOM | 2652 | HB3  | ARG | X | 173 | 33.610 | 51.457 | 46.407 | 0.00 | 0.00 |
| ATOM | 2653 | CG   | ARG | X | 173 | 32.000 | 51.107 | 44.986 | 0.00 | 0.00 |
| ATOM | 2654 | HG2  | ARG | X | 173 | 31.862 | 52.159 | 44.736 | 0.00 | 0.00 |
| ATOM | 2655 | HG3  | ARG | X | 173 | 31.794 | 50.596 | 44.046 | 0.00 | 0.00 |
| ATOM | 2656 | CD   | ARG | X | 173 | 30.988 | 50.661 | 46.085 | 0.00 | 0.00 |
| ATOM | 2657 | HD2  | ARG | X | 173 | 31.337 | 50.996 | 47.062 | 0.00 | 0.00 |
| ATOM | 2658 | HD3  | ARG | X | 173 | 30.004 | 51.129 | 46.053 | 0.00 | 0.00 |

|      |      |      |     |   |     |        |        |        |      |      |
|------|------|------|-----|---|-----|--------|--------|--------|------|------|
| ATOM | 2659 | NE   | ARG | X | 173 | 30.782 | 49.182 | 46.091 | 0.00 | 0.00 |
| ATOM | 2660 | HE   | ARG | X | 173 | 31.267 | 48.684 | 45.359 | 0.00 | 0.00 |
| ATOM | 2661 | CZ   | ARG | X | 173 | 30.061 | 48.461 | 46.986 | 0.00 | 0.00 |
| ATOM | 2662 | NH1  | ARG | X | 173 | 29.502 | 49.069 | 48.036 | 0.00 | 0.00 |
| ATOM | 2663 | HH11 | ARG | X | 173 | 29.493 | 50.075 | 48.119 | 0.00 | 0.00 |
| ATOM | 2664 | HH12 | ARG | X | 173 | 28.967 | 48.540 | 48.710 | 0.00 | 0.00 |
| ATOM | 2665 | NH2  | ARG | X | 173 | 29.980 | 47.142 | 46.903 | 0.00 | 0.00 |
| ATOM | 2666 | HH21 | ARG | X | 173 | 30.459 | 46.696 | 46.133 | 0.00 | 0.00 |
| ATOM | 2667 | HH22 | ARG | X | 173 | 29.564 | 46.548 | 47.606 | 0.00 | 0.00 |
| ATOM | 2668 | C    | ARG | X | 173 | 34.264 | 53.148 | 44.292 | 0.00 | 0.00 |
| ATOM | 2669 | O    | ARG | X | 173 | 33.696 | 53.598 | 43.287 | 0.00 | 0.00 |
| ATOM | 2670 | N    | LEU | X | 174 | 34.725 | 53.887 | 45.274 | 0.00 | 0.00 |
| ATOM | 2671 | H    | LEU | X | 174 | 35.208 | 53.430 | 46.034 | 0.00 | 0.00 |
| ATOM | 2672 | CA   | LEU | X | 174 | 34.652 | 55.371 | 45.303 | 0.00 | 0.00 |
| ATOM | 2673 | HA   | LEU | X | 174 | 33.662 | 55.707 | 44.997 | 0.00 | 0.00 |
| ATOM | 2674 | CB   | LEU | X | 174 | 35.113 | 55.878 | 46.705 | 0.00 | 0.00 |
| ATOM | 2675 | HB2  | LEU | X | 174 | 34.404 | 55.445 | 47.411 | 0.00 | 0.00 |
| ATOM | 2676 | HB3  | LEU | X | 174 | 36.096 | 55.431 | 46.851 | 0.00 | 0.00 |
| ATOM | 2677 | CG   | LEU | X | 174 | 35.326 | 57.379 | 46.867 | 0.00 | 0.00 |
| ATOM | 2678 | HG   | LEU | X | 174 | 35.814 | 57.810 | 45.994 | 0.00 | 0.00 |
| ATOM | 2679 | CD1  | LEU | X | 174 | 33.932 | 57.990 | 46.958 | 0.00 | 0.00 |
| ATOM | 2680 | HD11 | LEU | X | 174 | 34.088 | 59.048 | 46.749 | 0.00 | 0.00 |
| ATOM | 2681 | HD12 | LEU | X | 174 | 33.255 | 57.568 | 46.214 | 0.00 | 0.00 |
| ATOM | 2682 | HD13 | LEU | X | 174 | 33.490 | 57.887 | 47.949 | 0.00 | 0.00 |
| ATOM | 2683 | CD2  | LEU | X | 174 | 36.167 | 57.820 | 48.098 | 0.00 | 0.00 |
| ATOM | 2684 | HD21 | LEU | X | 174 | 37.161 | 57.371 | 48.091 | 0.00 | 0.00 |
| ATOM | 2685 | HD22 | LEU | X | 174 | 36.273 | 58.904 | 48.067 | 0.00 | 0.00 |
| ATOM | 2686 | HD23 | LEU | X | 174 | 35.681 | 57.473 | 49.010 | 0.00 | 0.00 |
| ATOM | 2687 | C    | LEU | X | 174 | 35.547 | 55.910 | 44.222 | 0.00 | 0.00 |
| ATOM | 2688 | O    | LEU | X | 174 | 35.222 | 56.847 | 43.544 | 0.00 | 0.00 |
| ATOM | 2689 | N    | ALA | X | 175 | 36.664 | 55.256 | 43.885 | 0.00 | 0.00 |
| ATOM | 2690 | H    | ALA | X | 175 | 36.812 | 54.357 | 44.321 | 0.00 | 0.00 |
| ATOM | 2691 | CA   | ALA | X | 175 | 37.433 | 55.563 | 42.718 | 0.00 | 0.00 |
| ATOM | 2692 | HA   | ALA | X | 175 | 37.649 | 56.632 | 42.740 | 0.00 | 0.00 |
| ATOM | 2693 | CB   | ALA | X | 175 | 38.763 | 54.737 | 42.888 | 0.00 | 0.00 |
| ATOM | 2694 | HB1  | ALA | X | 175 | 38.565 | 53.671 | 42.777 | 0.00 | 0.00 |
| ATOM | 2695 | HB2  | ALA | X | 175 | 39.444 | 55.033 | 42.090 | 0.00 | 0.00 |
| ATOM | 2696 | HB3  | ALA | X | 175 | 39.256 | 54.826 | 43.856 | 0.00 | 0.00 |
| ATOM | 2697 | C    | ALA | X | 175 | 36.672 | 55.307 | 41.389 | 0.00 | 0.00 |
| ATOM | 2698 | O    | ALA | X | 175 | 36.695 | 56.140 | 40.531 | 0.00 | 0.00 |
| ATOM | 2699 | N    | LEU | X | 176 | 35.906 | 54.281 | 41.220 | 0.00 | 0.00 |
| ATOM | 2700 | H    | LEU | X | 176 | 35.957 | 53.544 | 41.909 | 0.00 | 0.00 |
| ATOM | 2701 | CA   | LEU | X | 176 | 34.901 | 54.099 | 40.038 | 0.00 | 0.00 |
| ATOM | 2702 | HA   | LEU | X | 176 | 35.533 | 54.201 | 39.156 | 0.00 | 0.00 |
| ATOM | 2703 | CB   | LEU | X | 176 | 34.224 | 52.698 | 39.969 | 0.00 | 0.00 |
| ATOM | 2704 | HB2  | LEU | X | 176 | 33.678 | 52.550 | 40.901 | 0.00 | 0.00 |
| ATOM | 2705 | HB3  | LEU | X | 176 | 33.489 | 52.769 | 39.167 | 0.00 | 0.00 |
| ATOM | 2706 | CG   | LEU | X | 176 | 35.172 | 51.481 | 39.734 | 0.00 | 0.00 |
| ATOM | 2707 | HG   | LEU | X | 176 | 35.809 | 51.354 | 40.610 | 0.00 | 0.00 |
| ATOM | 2708 | CD1  | LEU | X | 176 | 34.406 | 50.161 | 39.510 | 0.00 | 0.00 |
| ATOM | 2709 | HD11 | LEU | X | 176 | 34.015 | 50.121 | 38.494 | 0.00 | 0.00 |
| ATOM | 2710 | HD12 | LEU | X | 176 | 34.923 | 49.291 | 39.915 | 0.00 | 0.00 |
| ATOM | 2711 | HD13 | LEU | X | 176 | 33.517 | 50.186 | 40.141 | 0.00 | 0.00 |
| ATOM | 2712 | CD2  | LEU | X | 176 | 36.139 | 51.790 | 38.548 | 0.00 | 0.00 |
| ATOM | 2713 | HD21 | LEU | X | 176 | 36.849 | 52.499 | 38.973 | 0.00 | 0.00 |
| ATOM | 2714 | HD22 | LEU | X | 176 | 36.708 | 50.885 | 38.335 | 0.00 | 0.00 |
| ATOM | 2715 | HD23 | LEU | X | 176 | 35.596 | 52.075 | 37.647 | 0.00 | 0.00 |
| ATOM | 2716 | C    | LEU | X | 176 | 33.898 | 55.179 | 40.023 | 0.00 | 0.00 |
| ATOM | 2717 | O    | LEU | X | 176 | 33.562 | 55.647 | 38.987 | 0.00 | 0.00 |
| ATOM | 2718 | N    | GLN | X | 177 | 33.404 | 55.607 | 41.162 | 0.00 | 0.00 |
| ATOM | 2719 | H    | GLN | X | 177 | 33.623 | 55.144 | 42.032 | 0.00 | 0.00 |
| ATOM | 2720 | CA   | GLN | X | 177 | 32.444 | 56.741 | 41.273 | 0.00 | 0.00 |
| ATOM | 2721 | HA   | GLN | X | 177 | 31.621 | 56.576 | 40.578 | 0.00 | 0.00 |
| ATOM | 2722 | CB   | GLN | X | 177 | 31.877 | 56.896 | 42.696 | 0.00 | 0.00 |
| ATOM | 2723 | HB2  | GLN | X | 177 | 32.698 | 57.031 | 43.400 | 0.00 | 0.00 |
| ATOM | 2724 | HB3  | GLN | X | 177 | 31.240 | 57.766 | 42.542 | 0.00 | 0.00 |
| ATOM | 2725 | CG   | GLN | X | 177 | 30.900 | 55.728 | 43.149 | 0.00 | 0.00 |
| ATOM | 2726 | HG2  | GLN | X | 177 | 30.118 | 55.469 | 42.436 | 0.00 | 0.00 |
| ATOM | 2727 | HG3  | GLN | X | 177 | 31.467 | 54.811 | 43.315 | 0.00 | 0.00 |
| ATOM | 2728 | CD   | GLN | X | 177 | 30.196 | 56.124 | 44.461 | 0.00 | 0.00 |

|      |      |      |     |   |     |        |        |        |      |      |
|------|------|------|-----|---|-----|--------|--------|--------|------|------|
| ATOM | 2729 | OE1  | GLN | X | 177 | 30.720 | 55.943 | 45.557 | 0.00 | 0.00 |
| ATOM | 2730 | NE2  | GLN | X | 177 | 28.946 | 56.490 | 44.455 | 0.00 | 0.00 |
| ATOM | 2731 | HE21 | GLN | X | 177 | 28.548 | 56.762 | 45.342 | 0.00 | 0.00 |
| ATOM | 2732 | HE22 | GLN | X | 177 | 28.434 | 56.436 | 43.586 | 0.00 | 0.00 |
| ATOM | 2733 | C    | GLN | X | 177 | 33.108 | 57.994 | 40.710 | 0.00 | 0.00 |
| ATOM | 2734 | O    | GLN | X | 177 | 32.443 | 58.789 | 39.992 | 0.00 | 0.00 |
| ATOM | 2735 | N    | TRP | X | 178 | 34.333 | 58.301 | 41.076 | 0.00 | 0.00 |
| ATOM | 2736 | H    | TRP | X | 178 | 34.756 | 57.720 | 41.786 | 0.00 | 0.00 |
| ATOM | 2737 | CA   | TRP | X | 178 | 35.206 | 59.324 | 40.416 | 0.00 | 0.00 |
| ATOM | 2738 | HA   | TRP | X | 178 | 34.923 | 60.358 | 40.611 | 0.00 | 0.00 |
| ATOM | 2739 | CB   | TRP | X | 178 | 36.697 | 59.400 | 40.998 | 0.00 | 0.00 |
| ATOM | 2740 | HB2  | TRP | X | 178 | 36.625 | 59.424 | 42.085 | 0.00 | 0.00 |
| ATOM | 2741 | HB3  | TRP | X | 178 | 37.310 | 58.551 | 40.696 | 0.00 | 0.00 |
| ATOM | 2742 | CG   | TRP | X | 178 | 37.396 | 60.617 | 40.547 | 0.00 | 0.00 |
| ATOM | 2743 | CD1  | TRP | X | 178 | 37.550 | 61.730 | 41.262 | 0.00 | 0.00 |
| ATOM | 2744 | HD1  | TRP | X | 178 | 37.133 | 61.886 | 42.245 | 0.00 | 0.00 |
| ATOM | 2745 | NE1  | TRP | X | 178 | 38.223 | 62.649 | 40.515 | 0.00 | 0.00 |
| ATOM | 2746 | HE1  | TRP | X | 178 | 38.505 | 63.557 | 40.854 | 0.00 | 0.00 |
| ATOM | 2747 | CE2  | TRP | X | 178 | 38.539 | 62.158 | 39.302 | 0.00 | 0.00 |
| ATOM | 2748 | CZ2  | TRP | X | 178 | 39.330 | 62.721 | 38.302 | 0.00 | 0.00 |
| ATOM | 2749 | HZ2  | TRP | X | 178 | 39.621 | 63.753 | 38.430 | 0.00 | 0.00 |
| ATOM | 2750 | CH2  | TRP | X | 178 | 39.729 | 61.933 | 37.238 | 0.00 | 0.00 |
| ATOM | 2751 | HH2  | TRP | X | 178 | 40.421 | 62.390 | 36.547 | 0.00 | 0.00 |
| ATOM | 2752 | CZ3  | TRP | X | 178 | 39.368 | 60.600 | 37.103 | 0.00 | 0.00 |
| ATOM | 2753 | HZ3  | TRP | X | 178 | 39.614 | 59.982 | 36.252 | 0.00 | 0.00 |
| ATOM | 2754 | CE3  | TRP | X | 178 | 38.523 | 60.110 | 38.131 | 0.00 | 0.00 |
| ATOM | 2755 | HE3  | TRP | X | 178 | 38.224 | 59.073 | 38.107 | 0.00 | 0.00 |
| ATOM | 2756 | CD2  | TRP | X | 178 | 38.054 | 60.888 | 39.273 | 0.00 | 0.00 |
| ATOM | 2757 | C    | TRP | X | 178 | 35.335 | 59.109 | 38.886 | 0.00 | 0.00 |
| ATOM | 2758 | O    | TRP | X | 178 | 35.155 | 60.148 | 38.155 | 0.00 | 0.00 |
| ATOM | 2759 | N    | VAL | X | 179 | 35.675 | 57.945 | 38.363 | 0.00 | 0.00 |
| ATOM | 2760 | H    | VAL | X | 179 | 35.926 | 57.215 | 39.014 | 0.00 | 0.00 |
| ATOM | 2761 | CA   | VAL | X | 179 | 35.606 | 57.755 | 36.907 | 0.00 | 0.00 |
| ATOM | 2762 | HA   | VAL | X | 179 | 36.366 | 58.354 | 36.405 | 0.00 | 0.00 |
| ATOM | 2763 | CB   | VAL | X | 179 | 35.950 | 56.316 | 36.544 | 0.00 | 0.00 |
| ATOM | 2764 | HB   | VAL | X | 179 | 35.277 | 55.622 | 37.047 | 0.00 | 0.00 |
| ATOM | 2765 | CG1  | VAL | X | 179 | 35.824 | 55.953 | 35.083 | 0.00 | 0.00 |
| ATOM | 2766 | HG11 | VAL | X | 179 | 36.012 | 54.884 | 34.987 | 0.00 | 0.00 |
| ATOM | 2767 | HG12 | VAL | X | 179 | 34.865 | 56.182 | 34.620 | 0.00 | 0.00 |
| ATOM | 2768 | HG13 | VAL | X | 179 | 36.470 | 56.599 | 34.488 | 0.00 | 0.00 |
| ATOM | 2769 | CG2  | VAL | X | 179 | 37.419 | 55.990 | 36.909 | 0.00 | 0.00 |
| ATOM | 2770 | HG21 | VAL | X | 179 | 37.527 | 56.034 | 37.993 | 0.00 | 0.00 |
| ATOM | 2771 | HG22 | VAL | X | 179 | 37.703 | 54.986 | 36.596 | 0.00 | 0.00 |
| ATOM | 2772 | HG23 | VAL | X | 179 | 38.093 | 56.658 | 36.373 | 0.00 | 0.00 |
| ATOM | 2773 | C    | VAL | X | 179 | 34.239 | 58.053 | 36.253 | 0.00 | 0.00 |
| ATOM | 2774 | O    | VAL | X | 179 | 34.128 | 58.713 | 35.264 | 0.00 | 0.00 |
| ATOM | 2775 | N    | GLN | X | 180 | 33.206 | 57.724 | 37.018 | 0.00 | 0.00 |
| ATOM | 2776 | H    | GLN | X | 180 | 33.327 | 57.128 | 37.824 | 0.00 | 0.00 |
| ATOM | 2777 | CA   | GLN | X | 180 | 31.835 | 58.064 | 36.532 | 0.00 | 0.00 |
| ATOM | 2778 | HA   | GLN | X | 180 | 31.784 | 57.895 | 35.456 | 0.00 | 0.00 |
| ATOM | 2779 | CB   | GLN | X | 180 | 30.811 | 57.157 | 37.315 | 0.00 | 0.00 |
| ATOM | 2780 | HB2  | GLN | X | 180 | 31.024 | 57.121 | 38.384 | 0.00 | 0.00 |
| ATOM | 2781 | HB3  | GLN | X | 180 | 29.817 | 57.604 | 37.320 | 0.00 | 0.00 |
| ATOM | 2782 | CG   | GLN | X | 180 | 30.871 | 55.758 | 36.751 | 0.00 | 0.00 |
| ATOM | 2783 | HG2  | GLN | X | 180 | 31.876 | 55.352 | 36.872 | 0.00 | 0.00 |
| ATOM | 2784 | HG3  | GLN | X | 180 | 30.316 | 55.076 | 37.395 | 0.00 | 0.00 |
| ATOM | 2785 | CD   | GLN | X | 180 | 30.418 | 55.731 | 35.324 | 0.00 | 0.00 |
| ATOM | 2786 | OE1  | GLN | X | 180 | 29.913 | 56.721 | 34.805 | 0.00 | 0.00 |
| ATOM | 2787 | NE2  | GLN | X | 180 | 30.614 | 54.704 | 34.558 | 0.00 | 0.00 |
| ATOM | 2788 | HE21 | GLN | X | 180 | 30.584 | 54.900 | 33.568 | 0.00 | 0.00 |
| ATOM | 2789 | HE22 | GLN | X | 180 | 31.063 | 53.870 | 34.908 | 0.00 | 0.00 |
| ATOM | 2790 | C    | GLN | X | 180 | 31.452 | 59.535 | 36.736 | 0.00 | 0.00 |
| ATOM | 2791 | O    | GLN | X | 180 | 30.598 | 59.979 | 35.952 | 0.00 | 0.00 |
| ATOM | 2792 | N    | GLU | X | 181 | 32.018 | 60.280 | 37.647 | 0.00 | 0.00 |
| ATOM | 2793 | H    | GLU | X | 181 | 32.721 | 59.861 | 38.240 | 0.00 | 0.00 |
| ATOM | 2794 | CA   | GLU | X | 181 | 31.762 | 61.786 | 37.828 | 0.00 | 0.00 |
| ATOM | 2795 | HA   | GLU | X | 181 | 30.682 | 61.909 | 37.751 | 0.00 | 0.00 |
| ATOM | 2796 | CB   | GLU | X | 181 | 32.010 | 62.080 | 39.319 | 0.00 | 0.00 |
| ATOM | 2797 | HB2  | GLU | X | 181 | 31.518 | 61.314 | 39.918 | 0.00 | 0.00 |
| ATOM | 2798 | HB3  | GLU | X | 181 | 33.066 | 61.845 | 39.455 | 0.00 | 0.00 |

|      |      |      |     |   |     |        |        |        |      |      |
|------|------|------|-----|---|-----|--------|--------|--------|------|------|
| ATOM | 2799 | CG   | GLU | X | 181 | 31.623 | 63.446 | 39.799 | 0.00 | 0.00 |
| ATOM | 2800 | HG2  | GLU | X | 181 | 32.244 | 64.258 | 39.423 | 0.00 | 0.00 |
| ATOM | 2801 | HG3  | GLU | X | 181 | 30.588 | 63.613 | 39.500 | 0.00 | 0.00 |
| ATOM | 2802 | CD   | GLU | X | 181 | 31.749 | 63.456 | 41.339 | 0.00 | 0.00 |
| ATOM | 2803 | OE1  | GLU | X | 181 | 32.868 | 63.790 | 41.808 | 0.00 | 0.00 |
| ATOM | 2804 | OE2  | GLU | X | 181 | 30.729 | 63.146 | 42.006 | 0.00 | 0.00 |
| ATOM | 2805 | C    | GLU | X | 181 | 32.486 | 62.673 | 36.855 | 0.00 | 0.00 |
| ATOM | 2806 | O    | GLU | X | 181 | 31.974 | 63.643 | 36.385 | 0.00 | 0.00 |
| ATOM | 2807 | N    | ASN | X | 182 | 33.831 | 62.443 | 36.706 | 0.00 | 0.00 |
| ATOM | 2808 | H    | ASN | X | 182 | 34.278 | 61.644 | 37.133 | 0.00 | 0.00 |
| ATOM | 2809 | CA   | ASN | X | 182 | 34.794 | 63.451 | 36.205 | 0.00 | 0.00 |
| ATOM | 2810 | HA   | ASN | X | 182 | 34.278 | 64.405 | 36.096 | 0.00 | 0.00 |
| ATOM | 2811 | CB   | ASN | X | 182 | 35.917 | 63.638 | 37.226 | 0.00 | 0.00 |
| ATOM | 2812 | HB2  | ASN | X | 182 | 36.426 | 62.736 | 37.564 | 0.00 | 0.00 |
| ATOM | 2813 | HB3  | ASN | X | 182 | 36.675 | 64.277 | 36.773 | 0.00 | 0.00 |
| ATOM | 2814 | CG   | ASN | X | 182 | 35.432 | 64.366 | 38.464 | 0.00 | 0.00 |
| ATOM | 2815 | OD1  | ASN | X | 182 | 35.075 | 65.552 | 38.331 | 0.00 | 0.00 |
| ATOM | 2816 | ND2  | ASN | X | 182 | 35.309 | 63.677 | 39.581 | 0.00 | 0.00 |
| ATOM | 2817 | HD21 | ASN | X | 182 | 34.926 | 64.083 | 40.423 | 0.00 | 0.00 |
| ATOM | 2818 | HD22 | ASN | X | 182 | 35.719 | 62.758 | 39.664 | 0.00 | 0.00 |
| ATOM | 2819 | C    | ASN | X | 182 | 35.433 | 63.090 | 34.806 | 0.00 | 0.00 |
| ATOM | 2820 | O    | ASN | X | 182 | 35.885 | 63.961 | 34.053 | 0.00 | 0.00 |
| ATOM | 2821 | N    | VAL | X | 183 | 35.379 | 61.824 | 34.354 | 0.00 | 0.00 |
| ATOM | 2822 | H    | VAL | X | 183 | 34.646 | 61.215 | 34.687 | 0.00 | 0.00 |
| ATOM | 2823 | CA   | VAL | X | 183 | 36.252 | 61.352 | 33.296 | 0.00 | 0.00 |
| ATOM | 2824 | HA   | VAL | X | 183 | 37.218 | 61.754 | 33.602 | 0.00 | 0.00 |
| ATOM | 2825 | CB   | VAL | X | 183 | 36.360 | 59.823 | 33.192 | 0.00 | 0.00 |
| ATOM | 2826 | HB   | VAL | X | 183 | 36.418 | 59.446 | 34.213 | 0.00 | 0.00 |
| ATOM | 2827 | CG1  | VAL | X | 183 | 35.256 | 59.166 | 32.333 | 0.00 | 0.00 |
| ATOM | 2828 | HG11 | VAL | X | 183 | 35.417 | 59.343 | 31.270 | 0.00 | 0.00 |
| ATOM | 2829 | HG12 | VAL | X | 183 | 35.449 | 58.104 | 32.486 | 0.00 | 0.00 |
| ATOM | 2830 | HG13 | VAL | X | 183 | 34.257 | 59.351 | 32.727 | 0.00 | 0.00 |
| ATOM | 2831 | CG2  | VAL | X | 183 | 37.805 | 59.470 | 32.779 | 0.00 | 0.00 |
| ATOM | 2832 | HG21 | VAL | X | 183 | 37.887 | 58.384 | 32.817 | 0.00 | 0.00 |
| ATOM | 2833 | HG22 | VAL | X | 183 | 37.979 | 59.910 | 31.797 | 0.00 | 0.00 |
| ATOM | 2834 | HG23 | VAL | X | 183 | 38.498 | 59.855 | 33.527 | 0.00 | 0.00 |
| ATOM | 2835 | C    | VAL | X | 183 | 35.947 | 61.989 | 31.945 | 0.00 | 0.00 |
| ATOM | 2836 | O    | VAL | X | 183 | 36.860 | 62.099 | 31.147 | 0.00 | 0.00 |
| ATOM | 2837 | N    | ALA | X | 184 | 34.719 | 62.529 | 31.758 | 0.00 | 0.00 |
| ATOM | 2838 | H    | ALA | X | 184 | 34.071 | 62.601 | 32.529 | 0.00 | 0.00 |
| ATOM | 2839 | CA   | ALA | X | 184 | 34.349 | 63.232 | 30.485 | 0.00 | 0.00 |
| ATOM | 2840 | HA   | ALA | X | 184 | 34.650 | 62.519 | 29.718 | 0.00 | 0.00 |
| ATOM | 2841 | CB   | ALA | X | 184 | 32.817 | 63.355 | 30.532 | 0.00 | 0.00 |
| ATOM | 2842 | HB1  | ALA | X | 184 | 32.469 | 63.735 | 31.493 | 0.00 | 0.00 |
| ATOM | 2843 | HB2  | ALA | X | 184 | 32.408 | 64.009 | 29.763 | 0.00 | 0.00 |
| ATOM | 2844 | HB3  | ALA | X | 184 | 32.522 | 62.306 | 30.494 | 0.00 | 0.00 |
| ATOM | 2845 | C    | ALA | X | 184 | 35.051 | 64.568 | 30.198 | 0.00 | 0.00 |
| ATOM | 2846 | O    | ALA | X | 184 | 35.178 | 64.938 | 29.010 | 0.00 | 0.00 |
| ATOM | 2847 | N    | ALA | X | 185 | 35.641 | 65.165 | 31.285 | 0.00 | 0.00 |
| ATOM | 2848 | H    | ALA | X | 185 | 35.358 | 64.799 | 32.183 | 0.00 | 0.00 |
| ATOM | 2849 | CA   | ALA | X | 185 | 36.587 | 66.292 | 31.189 | 0.00 | 0.00 |
| ATOM | 2850 | HA   | ALA | X | 185 | 36.069 | 67.147 | 30.753 | 0.00 | 0.00 |
| ATOM | 2851 | CB   | ALA | X | 185 | 36.991 | 66.710 | 32.669 | 0.00 | 0.00 |
| ATOM | 2852 | HB1  | ALA | X | 185 | 36.050 | 66.730 | 33.218 | 0.00 | 0.00 |
| ATOM | 2853 | HB2  | ALA | X | 185 | 37.718 | 66.001 | 33.064 | 0.00 | 0.00 |
| ATOM | 2854 | HB3  | ALA | X | 185 | 37.365 | 67.733 | 32.622 | 0.00 | 0.00 |
| ATOM | 2855 | C    | ALA | X | 185 | 37.814 | 65.921 | 30.318 | 0.00 | 0.00 |
| ATOM | 2856 | O    | ALA | X | 185 | 38.243 | 66.727 | 29.518 | 0.00 | 0.00 |
| ATOM | 2857 | N    | PHE | X | 186 | 38.272 | 64.668 | 30.493 | 0.00 | 0.00 |
| ATOM | 2858 | H    | PHE | X | 186 | 37.754 | 64.003 | 31.050 | 0.00 | 0.00 |
| ATOM | 2859 | CA   | PHE | X | 186 | 39.446 | 64.114 | 29.808 | 0.00 | 0.00 |
| ATOM | 2860 | HA   | PHE | X | 186 | 40.140 | 64.933 | 29.618 | 0.00 | 0.00 |
| ATOM | 2861 | CB   | PHE | X | 186 | 40.144 | 63.181 | 30.779 | 0.00 | 0.00 |
| ATOM | 2862 | HB2  | PHE | X | 186 | 39.566 | 62.264 | 30.892 | 0.00 | 0.00 |
| ATOM | 2863 | HB3  | PHE | X | 186 | 41.119 | 62.856 | 30.417 | 0.00 | 0.00 |
| ATOM | 2864 | CG   | PHE | X | 186 | 40.344 | 63.693 | 32.165 | 0.00 | 0.00 |
| ATOM | 2865 | CD1  | PHE | X | 186 | 39.464 | 63.540 | 33.192 | 0.00 | 0.00 |
| ATOM | 2866 | HD1  | PHE | X | 186 | 38.478 | 63.153 | 32.982 | 0.00 | 0.00 |
| ATOM | 2867 | CE1  | PHE | X | 186 | 39.600 | 64.052 | 34.448 | 0.00 | 0.00 |
| ATOM | 2868 | HE1  | PHE | X | 186 | 38.809 | 64.033 | 35.183 | 0.00 | 0.00 |



|      |      |      |     |   |     |        |        |        |      |      |
|------|------|------|-----|---|-----|--------|--------|--------|------|------|
| ATOM | 2869 | CZ   | PHE | X | 186 | 40.845 | 64.620 | 34.827 | 0.00 | 0.00 |
| ATOM | 2870 | HZ   | PHE | X | 186 | 41.031 | 65.062 | 35.795 | 0.00 | 0.00 |
| ATOM | 2871 | CE2  | PHE | X | 186 | 41.839 | 64.750 | 33.804 | 0.00 | 0.00 |
| ATOM | 2872 | HE2  | PHE | X | 186 | 42.824 | 65.102 | 34.073 | 0.00 | 0.00 |
| ATOM | 2873 | CD2  | PHE | X | 186 | 41.579 | 64.307 | 32.503 | 0.00 | 0.00 |
| ATOM | 2874 | HD2  | PHE | X | 186 | 42.413 | 64.413 | 31.825 | 0.00 | 0.00 |
| ATOM | 2875 | C    | PHE | X | 186 | 39.080 | 63.347 | 28.537 | 0.00 | 0.00 |
| ATOM | 2876 | O    | PHE | X | 186 | 39.855 | 62.463 | 28.130 | 0.00 | 0.00 |
| ATOM | 2877 | N    | GLY | X | 187 | 37.860 | 63.543 | 28.140 | 0.00 | 0.00 |
| ATOM | 2878 | H    | GLY | X | 187 | 37.332 | 64.284 | 28.576 | 0.00 | 0.00 |
| ATOM | 2879 | CA   | GLY | X | 187 | 37.308 | 62.977 | 26.933 | 0.00 | 0.00 |
| ATOM | 2880 | HA2  | GLY | X | 187 | 36.374 | 63.549 | 26.808 | 0.00 | 0.00 |
| ATOM | 2881 | HA3  | GLY | X | 187 | 38.093 | 62.950 | 26.142 | 0.00 | 0.00 |
| ATOM | 2882 | C    | GLY | X | 187 | 36.882 | 61.501 | 27.011 | 0.00 | 0.00 |
| ATOM | 2883 | O    | GLY | X | 187 | 36.322 | 61.044 | 26.035 | 0.00 | 0.00 |
| ATOM | 2884 | N    | GLY | X | 188 | 37.161 | 60.814 | 28.091 | 0.00 | 0.00 |
| ATOM | 2885 | H    | GLY | X | 188 | 37.396 | 61.350 | 28.915 | 0.00 | 0.00 |
| ATOM | 2886 | CA   | GLY | X | 188 | 36.719 | 59.381 | 28.215 | 0.00 | 0.00 |
| ATOM | 2887 | HA2  | GLY | X | 188 | 36.904 | 58.921 | 27.239 | 0.00 | 0.00 |
| ATOM | 2888 | HA3  | GLY | X | 188 | 37.171 | 58.794 | 29.003 | 0.00 | 0.00 |
| ATOM | 2889 | C    | GLY | X | 188 | 35.194 | 59.195 | 28.406 | 0.00 | 0.00 |
| ATOM | 2890 | O    | GLY | X | 188 | 34.567 | 60.142 | 28.837 | 0.00 | 0.00 |
| ATOM | 2891 | N    | ASP | X | 189 | 34.640 | 58.075 | 28.000 | 0.00 | 0.00 |
| ATOM | 2892 | H    | ASP | X | 189 | 35.236 | 57.444 | 27.483 | 0.00 | 0.00 |
| ATOM | 2893 | CA   | ASP | X | 189 | 33.203 | 57.792 | 27.941 | 0.00 | 0.00 |
| ATOM | 2894 | HA   | ASP | X | 189 | 32.589 | 58.688 | 28.035 | 0.00 | 0.00 |
| ATOM | 2895 | CB   | ASP | X | 189 | 32.964 | 57.003 | 26.614 | 0.00 | 0.00 |
| ATOM | 2896 | HB2  | ASP | X | 189 | 33.187 | 57.794 | 25.898 | 0.00 | 0.00 |
| ATOM | 2897 | HB3  | ASP | X | 189 | 33.604 | 56.132 | 26.470 | 0.00 | 0.00 |
| ATOM | 2898 | CG   | ASP | X | 189 | 31.530 | 56.639 | 26.363 | 0.00 | 0.00 |
| ATOM | 2899 | OD1  | ASP | X | 189 | 31.107 | 55.838 | 25.482 | 0.00 | 0.00 |
| ATOM | 2900 | OD2  | ASP | X | 189 | 30.755 | 57.271 | 27.102 | 0.00 | 0.00 |
| ATOM | 2901 | C    | ASP | X | 189 | 32.735 | 57.048 | 29.147 | 0.00 | 0.00 |
| ATOM | 2902 | O    | ASP | X | 189 | 32.795 | 55.780 | 29.230 | 0.00 | 0.00 |
| ATOM | 2903 | N    | PRO | X | 190 | 32.148 | 57.679 | 30.149 | 0.00 | 0.00 |
| ATOM | 2904 | CD   | PRO | X | 190 | 31.962 | 59.134 | 30.310 | 0.00 | 0.00 |
| ATOM | 2905 | HD2  | PRO | X | 190 | 31.604 | 59.586 | 29.385 | 0.00 | 0.00 |
| ATOM | 2906 | HD3  | PRO | X | 190 | 32.876 | 59.491 | 30.783 | 0.00 | 0.00 |
| ATOM | 2907 | CG   | PRO | X | 190 | 30.882 | 59.397 | 31.347 | 0.00 | 0.00 |
| ATOM | 2908 | HG2  | PRO | X | 190 | 29.909 | 59.600 | 30.899 | 0.00 | 0.00 |
| ATOM | 2909 | HG3  | PRO | X | 190 | 31.233 | 60.278 | 31.884 | 0.00 | 0.00 |
| ATOM | 2910 | CB   | PRO | X | 190 | 30.988 | 58.182 | 32.247 | 0.00 | 0.00 |
| ATOM | 2911 | HB2  | PRO | X | 190 | 30.005 | 57.994 | 32.680 | 0.00 | 0.00 |
| ATOM | 2912 | HB3  | PRO | X | 190 | 31.766 | 58.256 | 33.006 | 0.00 | 0.00 |
| ATOM | 2913 | CA   | PRO | X | 190 | 31.545 | 57.006 | 31.324 | 0.00 | 0.00 |
| ATOM | 2914 | HA   | PRO | X | 190 | 32.354 | 56.557 | 31.900 | 0.00 | 0.00 |
| ATOM | 2915 | C    | PRO | X | 190 | 30.400 | 55.993 | 30.940 | 0.00 | 0.00 |
| ATOM | 2916 | O    | PRO | X | 190 | 29.851 | 55.468 | 31.916 | 0.00 | 0.00 |
| ATOM | 2917 | N    | THR | X | 191 | 30.053 | 55.846 | 29.639 | 0.00 | 0.00 |
| ATOM | 2918 | H    | THR | X | 191 | 30.591 | 56.415 | 29.001 | 0.00 | 0.00 |
| ATOM | 2919 | CA   | THR | X | 191 | 29.055 | 54.865 | 29.167 | 0.00 | 0.00 |
| ATOM | 2920 | HA   | THR | X | 191 | 28.508 | 54.493 | 30.033 | 0.00 | 0.00 |
| ATOM | 2921 | CB   | THR | X | 191 | 27.915 | 55.503 | 28.315 | 0.00 | 0.00 |
| ATOM | 2922 | HB   | THR | X | 191 | 27.156 | 54.735 | 28.165 | 0.00 | 0.00 |
| ATOM | 2923 | CG2  | THR | X | 191 | 27.343 | 56.654 | 29.117 | 0.00 | 0.00 |
| ATOM | 2924 | HG21 | THR | X | 191 | 28.061 | 57.464 | 29.244 | 0.00 | 0.00 |
| ATOM | 2925 | HG22 | THR | X | 191 | 26.579 | 57.128 | 28.500 | 0.00 | 0.00 |
| ATOM | 2926 | HG23 | THR | X | 191 | 26.903 | 56.226 | 30.017 | 0.00 | 0.00 |
| ATOM | 2927 | OG1  | THR | X | 191 | 28.315 | 55.934 | 27.027 | 0.00 | 0.00 |
| ATOM | 2928 | HG1  | THR | X | 191 | 29.143 | 56.417 | 27.076 | 0.00 | 0.00 |
| ATOM | 2929 | C    | THR | X | 191 | 29.823 | 53.634 | 28.504 | 0.00 | 0.00 |
| ATOM | 2930 | O    | THR | X | 191 | 29.177 | 52.678 | 28.151 | 0.00 | 0.00 |
| ATOM | 2931 | N    | SER | X | 192 | 31.204 | 53.655 | 28.559 | 0.00 | 0.00 |
| ATOM | 2932 | H    | SER | X | 192 | 31.697 | 54.464 | 28.909 | 0.00 | 0.00 |
| ATOM | 2933 | CA   | SER | X | 192 | 32.088 | 52.615 | 28.053 | 0.00 | 0.00 |
| ATOM | 2934 | HA   | SER | X | 192 | 31.485 | 51.709 | 27.992 | 0.00 | 0.00 |
| ATOM | 2935 | CB   | SER | X | 192 | 32.623 | 52.917 | 26.619 | 0.00 | 0.00 |
| ATOM | 2936 | HB2  | SER | X | 192 | 33.262 | 53.800 | 26.613 | 0.00 | 0.00 |
| ATOM | 2937 | HB3  | SER | X | 192 | 33.168 | 52.086 | 26.171 | 0.00 | 0.00 |
| ATOM | 2938 | OG   | SER | X | 192 | 31.514 | 53.174 | 25.786 | 0.00 | 0.00 |

|      |      |      |     |   |     |        |        |        |      |      |
|------|------|------|-----|---|-----|--------|--------|--------|------|------|
| ATOM | 2939 | HG   | SER | X | 192 | 31.286 | 54.106 | 25.753 | 0.00 | 0.00 |
| ATOM | 2940 | C    | SER | X | 192 | 33.291 | 52.369 | 28.931 | 0.00 | 0.00 |
| ATOM | 2941 | O    | SER | X | 192 | 34.409 | 52.530 | 28.479 | 0.00 | 0.00 |
| ATOM | 2942 | N    | VAL | X | 193 | 33.044 | 52.147 | 30.227 | 0.00 | 0.00 |
| ATOM | 2943 | H    | VAL | X | 193 | 32.067 | 52.039 | 30.459 | 0.00 | 0.00 |
| ATOM | 2944 | CA   | VAL | X | 193 | 33.910 | 51.736 | 31.293 | 0.00 | 0.00 |
| ATOM | 2945 | HA   | VAL | X | 193 | 34.896 | 52.128 | 31.041 | 0.00 | 0.00 |
| ATOM | 2946 | CB   | VAL | X | 193 | 33.569 | 52.280 | 32.695 | 0.00 | 0.00 |
| ATOM | 2947 | HB   | VAL | X | 193 | 32.610 | 51.837 | 32.965 | 0.00 | 0.00 |
| ATOM | 2948 | CG1  | VAL | X | 193 | 34.614 | 51.960 | 33.850 | 0.00 | 0.00 |
| ATOM | 2949 | HG11 | VAL | X | 193 | 34.089 | 51.986 | 34.805 | 0.00 | 0.00 |
| ATOM | 2950 | HG12 | VAL | X | 193 | 35.035 | 50.964 | 33.709 | 0.00 | 0.00 |
| ATOM | 2951 | HG13 | VAL | X | 193 | 35.440 | 52.669 | 33.791 | 0.00 | 0.00 |
| ATOM | 2952 | CG2  | VAL | X | 193 | 33.252 | 53.838 | 32.746 | 0.00 | 0.00 |
| ATOM | 2953 | HG21 | VAL | X | 193 | 32.424 | 54.189 | 32.130 | 0.00 | 0.00 |
| ATOM | 2954 | HG22 | VAL | X | 193 | 33.039 | 54.035 | 33.797 | 0.00 | 0.00 |
| ATOM | 2955 | HG23 | VAL | X | 193 | 34.145 | 54.381 | 32.438 | 0.00 | 0.00 |
| ATOM | 2956 | C    | VAL | X | 193 | 34.137 | 50.244 | 31.249 | 0.00 | 0.00 |
| ATOM | 2957 | O    | VAL | X | 193 | 33.277 | 49.390 | 31.336 | 0.00 | 0.00 |
| ATOM | 2958 | N    | THR | X | 194 | 35.461 | 49.997 | 31.137 | 0.00 | 0.00 |
| ATOM | 2959 | H    | THR | X | 194 | 36.055 | 50.813 | 31.091 | 0.00 | 0.00 |
| ATOM | 2960 | CA   | THR | X | 194 | 36.135 | 48.747 | 31.074 | 0.00 | 0.00 |
| ATOM | 2961 | HA   | THR | X | 194 | 35.368 | 47.973 | 31.116 | 0.00 | 0.00 |
| ATOM | 2962 | CB   | THR | X | 194 | 36.943 | 48.492 | 29.743 | 0.00 | 0.00 |
| ATOM | 2963 | HB   | THR | X | 194 | 37.895 | 49.011 | 29.852 | 0.00 | 0.00 |
| ATOM | 2964 | CG2  | THR | X | 194 | 37.244 | 47.043 | 29.529 | 0.00 | 0.00 |
| ATOM | 2965 | HG21 | THR | X | 194 | 37.975 | 46.944 | 28.727 | 0.00 | 0.00 |
| ATOM | 2966 | HG22 | THR | X | 194 | 37.769 | 46.681 | 30.413 | 0.00 | 0.00 |
| ATOM | 2967 | HG23 | THR | X | 194 | 36.332 | 46.460 | 29.398 | 0.00 | 0.00 |
| ATOM | 2968 | OG1  | THR | X | 194 | 36.221 | 48.964 | 28.616 | 0.00 | 0.00 |
| ATOM | 2969 | HG1  | THR | X | 194 | 36.457 | 49.890 | 28.525 | 0.00 | 0.00 |
| ATOM | 2970 | C    | THR | X | 194 | 37.035 | 48.588 | 32.317 | 0.00 | 0.00 |
| ATOM | 2971 | O    | THR | X | 194 | 37.811 | 49.503 | 32.569 | 0.00 | 0.00 |
| ATOM | 2972 | N    | LEU | X | 195 | 36.987 | 47.480 | 33.069 | 0.00 | 0.00 |
| ATOM | 2973 | H    | LEU | X | 195 | 36.423 | 46.674 | 32.839 | 0.00 | 0.00 |
| ATOM | 2974 | CA   | LEU | X | 195 | 37.938 | 47.224 | 34.131 | 0.00 | 0.00 |
| ATOM | 2975 | HA   | LEU | X | 195 | 38.480 | 48.122 | 34.428 | 0.00 | 0.00 |
| ATOM | 2976 | CB   | LEU | X | 195 | 37.230 | 46.699 | 35.314 | 0.00 | 0.00 |
| ATOM | 2977 | HB2  | LEU | X | 195 | 36.826 | 45.703 | 35.133 | 0.00 | 0.00 |
| ATOM | 2978 | HB3  | LEU | X | 195 | 37.966 | 46.586 | 36.110 | 0.00 | 0.00 |
| ATOM | 2979 | CG   | LEU | X | 195 | 36.089 | 47.545 | 35.997 | 0.00 | 0.00 |
| ATOM | 2980 | HG   | LEU | X | 195 | 35.190 | 47.374 | 35.405 | 0.00 | 0.00 |
| ATOM | 2981 | CD1  | LEU | X | 195 | 35.695 | 47.202 | 37.458 | 0.00 | 0.00 |
| ATOM | 2982 | HD11 | LEU | X | 195 | 36.441 | 47.194 | 38.253 | 0.00 | 0.00 |
| ATOM | 2983 | HD12 | LEU | X | 195 | 34.984 | 47.938 | 37.836 | 0.00 | 0.00 |
| ATOM | 2984 | HD13 | LEU | X | 195 | 35.348 | 46.170 | 37.512 | 0.00 | 0.00 |
| ATOM | 2985 | CD2  | LEU | X | 195 | 36.496 | 49.027 | 36.033 | 0.00 | 0.00 |
| ATOM | 2986 | HD21 | LEU | X | 195 | 37.356 | 49.221 | 36.674 | 0.00 | 0.00 |
| ATOM | 2987 | HD22 | LEU | X | 195 | 36.608 | 49.477 | 35.046 | 0.00 | 0.00 |
| ATOM | 2988 | HD23 | LEU | X | 195 | 35.653 | 49.608 | 36.405 | 0.00 | 0.00 |
| ATOM | 2989 | C    | LEU | X | 195 | 39.046 | 46.250 | 33.629 | 0.00 | 0.00 |
| ATOM | 2990 | O    | LEU | X | 195 | 38.700 | 45.410 | 32.859 | 0.00 | 0.00 |
| ATOM | 2991 | N    | PHE | X | 196 | 40.248 | 46.311 | 34.188 | 0.00 | 0.00 |
| ATOM | 2992 | H    | PHE | X | 196 | 40.329 | 46.954 | 34.963 | 0.00 | 0.00 |
| ATOM | 2993 | CA   | PHE | X | 196 | 41.408 | 45.589 | 33.725 | 0.00 | 0.00 |
| ATOM | 2994 | HA   | PHE | X | 196 | 41.159 | 44.635 | 33.261 | 0.00 | 0.00 |
| ATOM | 2995 | CB   | PHE | X | 196 | 42.119 | 46.411 | 32.612 | 0.00 | 0.00 |
| ATOM | 2996 | HB2  | PHE | X | 196 | 41.652 | 46.387 | 31.627 | 0.00 | 0.00 |
| ATOM | 2997 | HB3  | PHE | X | 196 | 42.061 | 47.447 | 32.947 | 0.00 | 0.00 |
| ATOM | 2998 | CG   | PHE | X | 196 | 43.628 | 46.318 | 32.350 | 0.00 | 0.00 |
| ATOM | 2999 | CD1  | PHE | X | 196 | 44.480 | 47.461 | 32.437 | 0.00 | 0.00 |
| ATOM | 3000 | HD1  | PHE | X | 196 | 44.147 | 48.456 | 32.690 | 0.00 | 0.00 |
| ATOM | 3001 | CE1  | PHE | X | 196 | 45.854 | 47.300 | 32.050 | 0.00 | 0.00 |
| ATOM | 3002 | HE1  | PHE | X | 196 | 46.456 | 48.191 | 32.140 | 0.00 | 0.00 |
| ATOM | 3003 | CZ   | PHE | X | 196 | 46.324 | 46.131 | 31.532 | 0.00 | 0.00 |
| ATOM | 3004 | HZ   | PHE | X | 196 | 47.351 | 45.999 | 31.224 | 0.00 | 0.00 |
| ATOM | 3005 | CE2  | PHE | X | 196 | 45.493 | 45.024 | 31.665 | 0.00 | 0.00 |
| ATOM | 3006 | HE2  | PHE | X | 196 | 45.838 | 44.027 | 31.433 | 0.00 | 0.00 |
| ATOM | 3007 | CD2  | PHE | X | 196 | 44.095 | 45.106 | 31.925 | 0.00 | 0.00 |
| ATOM | 3008 | HD2  | PHE | X | 196 | 43.447 | 44.250 | 31.805 | 0.00 | 0.00 |

|      |      |     |     |   |     |        |        |        |      |      |
|------|------|-----|-----|---|-----|--------|--------|--------|------|------|
| ATOM | 3009 | C   | PHE | X | 196 | 42.399 | 45.336 | 34.901 | 0.00 | 0.00 |
| ATOM | 3010 | O   | PHE | X | 196 | 42.763 | 46.290 | 35.627 | 0.00 | 0.00 |
| ATOM | 3011 | N   | GLY | X | 197 | 42.553 | 44.069 | 35.268 | 0.00 | 0.00 |
| ATOM | 3012 | H   | GLY | X | 197 | 42.198 | 43.312 | 34.700 | 0.00 | 0.00 |
| ATOM | 3013 | CA  | GLY | X | 197 | 43.316 | 43.677 | 36.357 | 0.00 | 0.00 |
| ATOM | 3014 | HA2 | GLY | X | 197 | 44.049 | 44.447 | 36.660 | 0.00 | 0.00 |
| ATOM | 3015 | HA3 | GLY | X | 197 | 42.639 | 43.563 | 37.240 | 0.00 | 0.00 |
| ATOM | 3016 | C   | GLY | X | 197 | 44.033 | 42.346 | 36.068 | 0.00 | 0.00 |
| ATOM | 3017 | O   | GLY | X | 197 | 43.662 | 41.515 | 35.220 | 0.00 | 0.00 |
| ATOM | 3018 | N   | GLU | X | 198 | 45.074 | 42.177 | 36.856 | 0.00 | 0.00 |
| ATOM | 3019 | H   | GLU | X | 198 | 45.374 | 42.900 | 37.494 | 0.00 | 0.00 |
| ATOM | 3020 | CA  | GLU | X | 198 | 45.836 | 40.901 | 37.015 | 0.00 | 0.00 |
| ATOM | 3021 | HA  | GLU | X | 198 | 45.437 | 40.147 | 36.336 | 0.00 | 0.00 |
| ATOM | 3022 | CB  | GLU | X | 198 | 47.321 | 41.033 | 36.407 | 0.00 | 0.00 |
| ATOM | 3023 | HB2 | GLU | X | 198 | 47.263 | 41.635 | 35.500 | 0.00 | 0.00 |
| ATOM | 3024 | HB3 | GLU | X | 198 | 47.990 | 41.651 | 37.006 | 0.00 | 0.00 |
| ATOM | 3025 | CG  | GLU | X | 198 | 47.942 | 39.692 | 36.034 | 0.00 | 0.00 |
| ATOM | 3026 | HG2 | GLU | X | 198 | 47.376 | 38.891 | 36.511 | 0.00 | 0.00 |
| ATOM | 3027 | HG3 | GLU | X | 198 | 47.887 | 39.559 | 34.953 | 0.00 | 0.00 |
| ATOM | 3028 | CD  | GLU | X | 198 | 49.363 | 39.606 | 36.517 | 0.00 | 0.00 |
| ATOM | 3029 | OE1 | GLU | X | 198 | 50.295 | 39.761 | 35.696 | 0.00 | 0.00 |
| ATOM | 3030 | OE2 | GLU | X | 198 | 49.662 | 39.219 | 37.655 | 0.00 | 0.00 |
| ATOM | 3031 | C   | GLU | X | 198 | 45.902 | 40.395 | 38.435 | 0.00 | 0.00 |
| ATOM | 3032 | O   | GLU | X | 198 | 46.102 | 41.213 | 39.393 | 0.00 | 0.00 |
| ATOM | 3033 | N   | XA1 | X | 199 | 45.845 | 39.106 | 38.601 | 0.00 | 0.00 |
| ATOM | 3034 | CA  | XA1 | X | 199 | 46.050 | 38.484 | 39.942 | 0.00 | 0.00 |
| ATOM | 3035 | C   | XA1 | X | 199 | 45.006 | 38.902 | 40.966 | 0.00 | 0.00 |
| ATOM | 3036 | O   | XA1 | X | 199 | 43.833 | 38.972 | 40.606 | 0.00 | 0.00 |
| ATOM | 3037 | CB  | XA1 | X | 199 | 47.529 | 38.635 | 40.407 | 0.00 | 0.00 |
| ATOM | 3038 | OG  | XA1 | X | 199 | 47.673 | 37.656 | 41.488 | 0.00 | 0.00 |
| ATOM | 3039 | P1  | XA1 | X | 199 | 48.742 | 38.217 | 42.533 | 0.00 | 0.00 |
| ATOM | 3040 | O1  | XA1 | X | 199 | 48.430 | 39.565 | 43.089 | 0.00 | 0.00 |
| ATOM | 3041 | O2  | XA1 | X | 199 | 49.941 | 38.031 | 41.771 | 0.00 | 0.00 |
| ATOM | 3042 | C1  | XA1 | X | 199 | 48.483 | 36.874 | 43.648 | 0.00 | 0.00 |
| ATOM | 3043 | H   | XA1 | X | 199 | 45.802 | 38.495 | 37.799 | 0.00 | 0.00 |
| ATOM | 3044 | HA  | XA1 | X | 199 | 45.811 | 37.427 | 39.821 | 0.00 | 0.00 |
| ATOM | 3045 | HB2 | XA1 | X | 199 | 48.296 | 38.522 | 39.637 | 0.00 | 0.00 |
| ATOM | 3046 | HB3 | XA1 | X | 199 | 47.638 | 39.676 | 40.724 | 0.00 | 0.00 |
| ATOM | 3047 | H11 | XA1 | X | 199 | 48.618 | 35.900 | 43.173 | 0.00 | 0.00 |
| ATOM | 3048 | H12 | XA1 | X | 199 | 49.169 | 37.009 | 44.487 | 0.00 | 0.00 |
| ATOM | 3049 | H13 | XA1 | X | 199 | 47.446 | 37.004 | 43.964 | 0.00 | 0.00 |
| ATOM | 3050 | N   | ALA | X | 200 | 45.431 | 39.343 | 42.197 | 0.00 | 0.00 |
| ATOM | 3051 | H   | ALA | X | 200 | 46.405 | 39.199 | 42.422 | 0.00 | 0.00 |
| ATOM | 3052 | CA  | ALA | X | 200 | 44.695 | 40.103 | 43.225 | 0.00 | 0.00 |
| ATOM | 3053 | HA  | ALA | X | 200 | 43.930 | 39.449 | 43.645 | 0.00 | 0.00 |
| ATOM | 3054 | CB  | ALA | X | 200 | 45.631 | 40.581 | 44.372 | 0.00 | 0.00 |
| ATOM | 3055 | HB1 | ALA | X | 200 | 45.009 | 41.134 | 45.076 | 0.00 | 0.00 |
| ATOM | 3056 | HB2 | ALA | X | 200 | 46.121 | 39.721 | 44.829 | 0.00 | 0.00 |
| ATOM | 3057 | HB3 | ALA | X | 200 | 46.338 | 41.336 | 44.028 | 0.00 | 0.00 |
| ATOM | 3058 | C   | ALA | X | 200 | 43.900 | 41.280 | 42.560 | 0.00 | 0.00 |
| ATOM | 3059 | O   | ALA | X | 200 | 42.845 | 41.639 | 43.033 | 0.00 | 0.00 |
| ATOM | 3060 | N   | GLY | X | 201 | 44.433 | 41.904 | 41.487 | 0.00 | 0.00 |
| ATOM | 3061 | H   | GLY | X | 201 | 45.266 | 41.595 | 41.007 | 0.00 | 0.00 |
| ATOM | 3062 | CA  | GLY | X | 201 | 43.709 | 42.992 | 40.814 | 0.00 | 0.00 |
| ATOM | 3063 | HA2 | GLY | X | 201 | 43.265 | 43.737 | 41.442 | 0.00 | 0.00 |
| ATOM | 3064 | HA3 | GLY | X | 201 | 44.403 | 43.500 | 40.081 | 0.00 | 0.00 |
| ATOM | 3065 | C   | GLY | X | 201 | 42.595 | 42.392 | 40.007 | 0.00 | 0.00 |
| ATOM | 3066 | O   | GLY | X | 201 | 41.564 | 42.973 | 40.064 | 0.00 | 0.00 |
| ATOM | 3067 | N   | ALA | X | 202 | 42.796 | 41.240 | 39.271 | 0.00 | 0.00 |
| ATOM | 3068 | H   | ALA | X | 202 | 43.574 | 40.663 | 39.557 | 0.00 | 0.00 |
| ATOM | 3069 | CA  | ALA | X | 202 | 41.734 | 40.573 | 38.565 | 0.00 | 0.00 |
| ATOM | 3070 | HA  | ALA | X | 202 | 41.217 | 41.282 | 37.919 | 0.00 | 0.00 |
| ATOM | 3071 | CB  | ALA | X | 202 | 42.336 | 39.487 | 37.655 | 0.00 | 0.00 |
| ATOM | 3072 | HB1 | ALA | X | 202 | 41.649 | 39.074 | 36.918 | 0.00 | 0.00 |
| ATOM | 3073 | HB2 | ALA | X | 202 | 43.155 | 39.862 | 37.041 | 0.00 | 0.00 |
| ATOM | 3074 | HB3 | ALA | X | 202 | 42.721 | 38.612 | 38.178 | 0.00 | 0.00 |
| ATOM | 3075 | C   | ALA | X | 202 | 40.614 | 39.965 | 39.472 | 0.00 | 0.00 |
| ATOM | 3076 | O   | ALA | X | 202 | 39.413 | 39.920 | 39.160 | 0.00 | 0.00 |
| ATOM | 3077 | N   | ALA | X | 203 | 41.026 | 39.469 | 40.640 | 0.00 | 0.00 |
| ATOM | 3078 | H   | ALA | X | 203 | 42.016 | 39.445 | 40.840 | 0.00 | 0.00 |

|      |      |      |     |   |     |        |        |        |      |      |
|------|------|------|-----|---|-----|--------|--------|--------|------|------|
| ATOM | 3079 | CA   | ALA | X | 203 | 40.204 | 39.036 | 41.675 | 0.00 | 0.00 |
| ATOM | 3080 | HA   | ALA | X | 203 | 39.432 | 38.320 | 41.394 | 0.00 | 0.00 |
| ATOM | 3081 | CB   | ALA | X | 203 | 41.088 | 38.418 | 42.784 | 0.00 | 0.00 |
| ATOM | 3082 | HB1  | ALA | X | 203 | 41.982 | 37.975 | 42.346 | 0.00 | 0.00 |
| ATOM | 3083 | HB2  | ALA | X | 203 | 41.646 | 39.157 | 43.360 | 0.00 | 0.00 |
| ATOM | 3084 | HB3  | ALA | X | 203 | 40.638 | 37.778 | 43.543 | 0.00 | 0.00 |
| ATOM | 3085 | C    | ALA | X | 203 | 39.389 | 40.193 | 42.280 | 0.00 | 0.00 |
| ATOM | 3086 | O    | ALA | X | 203 | 38.149 | 40.095 | 42.397 | 0.00 | 0.00 |
| ATOM | 3087 | N    | SER | X | 204 | 40.000 | 41.398 | 42.427 | 0.00 | 0.00 |
| ATOM | 3088 | H    | SER | X | 204 | 41.000 | 41.307 | 42.315 | 0.00 | 0.00 |
| ATOM | 3089 | CA   | SER | X | 204 | 39.237 | 42.615 | 42.805 | 0.00 | 0.00 |
| ATOM | 3090 | HA   | SER | X | 204 | 38.738 | 42.517 | 43.769 | 0.00 | 0.00 |
| ATOM | 3091 | CB   | SER | X | 204 | 40.266 | 43.802 | 42.928 | 0.00 | 0.00 |
| ATOM | 3092 | HB2  | SER | X | 204 | 40.835 | 43.934 | 42.008 | 0.00 | 0.00 |
| ATOM | 3093 | HB3  | SER | X | 204 | 39.688 | 44.675 | 43.231 | 0.00 | 0.00 |
| ATOM | 3094 | OG   | SER | X | 204 | 41.222 | 43.674 | 43.990 | 0.00 | 0.00 |
| ATOM | 3095 | HG   | SER | X | 204 | 41.955 | 43.159 | 43.646 | 0.00 | 0.00 |
| ATOM | 3096 | C    | SER | X | 204 | 38.110 | 42.985 | 41.806 | 0.00 | 0.00 |
| ATOM | 3097 | O    | SER | X | 204 | 36.914 | 43.159 | 42.167 | 0.00 | 0.00 |
| ATOM | 3098 | N    | VAL | X | 205 | 38.525 | 43.193 | 40.488 | 0.00 | 0.00 |
| ATOM | 3099 | H    | VAL | X | 205 | 39.488 | 43.090 | 40.199 | 0.00 | 0.00 |
| ATOM | 3100 | CA   | VAL | X | 205 | 37.609 | 43.441 | 39.370 | 0.00 | 0.00 |
| ATOM | 3101 | HA   | VAL | X | 205 | 37.274 | 44.478 | 39.415 | 0.00 | 0.00 |
| ATOM | 3102 | CB   | VAL | X | 205 | 38.394 | 43.321 | 38.004 | 0.00 | 0.00 |
| ATOM | 3103 | HB   | VAL | X | 205 | 38.962 | 42.395 | 38.089 | 0.00 | 0.00 |
| ATOM | 3104 | CG1  | VAL | X | 205 | 37.478 | 43.167 | 36.793 | 0.00 | 0.00 |
| ATOM | 3105 | HG11 | VAL | X | 205 | 36.613 | 43.819 | 36.917 | 0.00 | 0.00 |
| ATOM | 3106 | HG12 | VAL | X | 205 | 38.024 | 43.284 | 35.857 | 0.00 | 0.00 |
| ATOM | 3107 | HG13 | VAL | X | 205 | 37.088 | 42.158 | 36.927 | 0.00 | 0.00 |
| ATOM | 3108 | CG2  | VAL | X | 205 | 39.376 | 44.470 | 37.818 | 0.00 | 0.00 |
| ATOM | 3109 | HG21 | VAL | X | 205 | 38.766 | 45.364 | 37.689 | 0.00 | 0.00 |
| ATOM | 3110 | HG22 | VAL | X | 205 | 40.195 | 44.511 | 38.536 | 0.00 | 0.00 |
| ATOM | 3111 | HG23 | VAL | X | 205 | 39.741 | 44.325 | 36.801 | 0.00 | 0.00 |
| ATOM | 3112 | C    | VAL | X | 205 | 36.417 | 42.438 | 39.375 | 0.00 | 0.00 |
| ATOM | 3113 | O    | VAL | X | 205 | 35.258 | 42.771 | 39.151 | 0.00 | 0.00 |
| ATOM | 3114 | N    | GLY | X | 206 | 36.704 | 41.148 | 39.711 | 0.00 | 0.00 |
| ATOM | 3115 | H    | GLY | X | 206 | 37.679 | 40.884 | 39.727 | 0.00 | 0.00 |
| ATOM | 3116 | CA   | GLY | X | 206 | 35.705 | 40.055 | 39.739 | 0.00 | 0.00 |
| ATOM | 3117 | HA2  | GLY | X | 206 | 35.216 | 40.064 | 38.721 | 0.00 | 0.00 |
| ATOM | 3118 | HA3  | GLY | X | 206 | 36.168 | 39.074 | 39.910 | 0.00 | 0.00 |
| ATOM | 3119 | C    | GLY | X | 206 | 34.683 | 40.208 | 40.903 | 0.00 | 0.00 |
| ATOM | 3120 | O    | GLY | X | 206 | 33.539 | 39.714 | 40.795 | 0.00 | 0.00 |
| ATOM | 3121 | N    | MET | X | 207 | 35.149 | 40.900 | 41.959 | 0.00 | 0.00 |
| ATOM | 3122 | H    | MET | X | 207 | 36.041 | 41.373 | 41.987 | 0.00 | 0.00 |
| ATOM | 3123 | CA   | MET | X | 207 | 34.324 | 41.033 | 43.218 | 0.00 | 0.00 |
| ATOM | 3124 | HA   | MET | X | 207 | 33.758 | 40.111 | 43.352 | 0.00 | 0.00 |
| ATOM | 3125 | CB   | MET | X | 207 | 35.060 | 41.385 | 44.472 | 0.00 | 0.00 |
| ATOM | 3126 | HB2  | MET | X | 207 | 35.651 | 42.234 | 44.129 | 0.00 | 0.00 |
| ATOM | 3127 | HB3  | MET | X | 207 | 34.348 | 41.633 | 45.260 | 0.00 | 0.00 |
| ATOM | 3128 | CG   | MET | X | 207 | 36.033 | 40.383 | 44.933 | 0.00 | 0.00 |
| ATOM | 3129 | HG2  | MET | X | 207 | 36.649 | 40.179 | 44.057 | 0.00 | 0.00 |
| ATOM | 3130 | HG3  | MET | X | 207 | 36.757 | 40.881 | 45.578 | 0.00 | 0.00 |
| ATOM | 3131 | SD   | MET | X | 207 | 35.424 | 38.824 | 45.647 | 0.00 | 0.00 |
| ATOM | 3132 | CE   | MET | X | 207 | 37.150 | 38.352 | 46.020 | 0.00 | 0.00 |
| ATOM | 3133 | HE1  | MET | X | 207 | 37.623 | 39.177 | 46.553 | 0.00 | 0.00 |
| ATOM | 3134 | HE2  | MET | X | 207 | 37.166 | 37.466 | 46.655 | 0.00 | 0.00 |
| ATOM | 3135 | HE3  | MET | X | 207 | 37.665 | 38.011 | 45.123 | 0.00 | 0.00 |
| ATOM | 3136 | C    | MET | X | 207 | 33.334 | 42.116 | 42.758 | 0.00 | 0.00 |
| ATOM | 3137 | O    | MET | X | 207 | 32.139 | 42.018 | 42.975 | 0.00 | 0.00 |
| ATOM | 3138 | N    | HIE | X | 208 | 33.849 | 43.162 | 42.127 | 0.00 | 0.00 |
| ATOM | 3139 | H    | HIE | X | 208 | 34.845 | 43.328 | 42.081 | 0.00 | 0.00 |
| ATOM | 3140 | CA   | HIE | X | 208 | 33.066 | 44.191 | 41.471 | 0.00 | 0.00 |
| ATOM | 3141 | HA   | HIE | X | 208 | 32.469 | 44.605 | 42.284 | 0.00 | 0.00 |
| ATOM | 3142 | CB   | HIE | X | 208 | 33.952 | 45.294 | 40.939 | 0.00 | 0.00 |
| ATOM | 3143 | HB2  | HIE | X | 208 | 34.594 | 44.840 | 40.184 | 0.00 | 0.00 |
| ATOM | 3144 | HB3  | HIE | X | 208 | 33.370 | 46.082 | 40.460 | 0.00 | 0.00 |
| ATOM | 3145 | CG   | HIE | X | 208 | 34.793 | 46.055 | 41.927 | 0.00 | 0.00 |
| ATOM | 3146 | ND1  | HIE | X | 208 | 34.370 | 46.530 | 43.193 | 0.00 | 0.00 |
| ATOM | 3147 | CE1  | HIE | X | 208 | 35.546 | 47.089 | 43.658 | 0.00 | 0.00 |
| ATOM | 3148 | HE1  | HIE | X | 208 | 35.674 | 47.646 | 44.575 | 0.00 | 0.00 |

|      |      |      |     |   |     |        |        |        |      |      |
|------|------|------|-----|---|-----|--------|--------|--------|------|------|
| ATOM | 3149 | NE2  | HIE | X | 208 | 36.591 | 46.976 | 42.869 | 0.00 | 0.00 |
| ATOM | 3150 | HE2  | HIE | X | 208 | 37.511 | 47.328 | 43.095 | 0.00 | 0.00 |
| ATOM | 3151 | CD2  | HIE | X | 208 | 36.108 | 46.336 | 41.732 | 0.00 | 0.00 |
| ATOM | 3152 | HD2  | HIE | X | 208 | 36.757 | 46.031 | 40.925 | 0.00 | 0.00 |
| ATOM | 3153 | C    | HIE | X | 208 | 32.032 | 43.565 | 40.398 | 0.00 | 0.00 |
| ATOM | 3154 | O    | HIE | X | 208 | 30.852 | 44.085 | 40.399 | 0.00 | 0.00 |
| ATOM | 3155 | N    | LEU | X | 209 | 32.412 | 42.465 | 39.742 | 0.00 | 0.00 |
| ATOM | 3156 | H    | LEU | X | 209 | 33.376 | 42.168 | 39.711 | 0.00 | 0.00 |
| ATOM | 3157 | CA   | LEU | X | 209 | 31.519 | 41.830 | 38.721 | 0.00 | 0.00 |
| ATOM | 3158 | HA   | LEU | X | 209 | 30.999 | 42.659 | 38.239 | 0.00 | 0.00 |
| ATOM | 3159 | CB   | LEU | X | 209 | 32.511 | 41.047 | 37.803 | 0.00 | 0.00 |
| ATOM | 3160 | HB2  | LEU | X | 209 | 33.138 | 41.835 | 37.386 | 0.00 | 0.00 |
| ATOM | 3161 | HB3  | LEU | X | 209 | 32.939 | 40.235 | 38.391 | 0.00 | 0.00 |
| ATOM | 3162 | CG   | LEU | X | 209 | 31.892 | 40.391 | 36.536 | 0.00 | 0.00 |
| ATOM | 3163 | HG   | LEU | X | 209 | 31.131 | 39.667 | 36.828 | 0.00 | 0.00 |
| ATOM | 3164 | CD1  | LEU | X | 209 | 31.262 | 41.418 | 35.569 | 0.00 | 0.00 |
| ATOM | 3165 | HD11 | LEU | X | 209 | 30.521 | 42.039 | 36.071 | 0.00 | 0.00 |
| ATOM | 3166 | HD12 | LEU | X | 209 | 32.039 | 42.076 | 35.180 | 0.00 | 0.00 |
| ATOM | 3167 | HD13 | LEU | X | 209 | 30.879 | 40.848 | 34.723 | 0.00 | 0.00 |
| ATOM | 3168 | CD2  | LEU | X | 209 | 32.976 | 39.529 | 35.876 | 0.00 | 0.00 |
| ATOM | 3169 | HD21 | LEU | X | 209 | 33.959 | 39.995 | 35.944 | 0.00 | 0.00 |
| ATOM | 3170 | HD22 | LEU | X | 209 | 32.952 | 38.598 | 36.442 | 0.00 | 0.00 |
| ATOM | 3171 | HD23 | LEU | X | 209 | 32.772 | 39.250 | 34.842 | 0.00 | 0.00 |
| ATOM | 3172 | C    | LEU | X | 209 | 30.417 | 41.004 | 39.365 | 0.00 | 0.00 |
| ATOM | 3173 | O    | LEU | X | 209 | 29.492 | 40.630 | 38.688 | 0.00 | 0.00 |
| ATOM | 3174 | N    | LEU | X | 210 | 30.557 | 40.738 | 40.633 | 0.00 | 0.00 |
| ATOM | 3175 | H    | LEU | X | 210 | 31.397 | 41.079 | 41.078 | 0.00 | 0.00 |
| ATOM | 3176 | CA   | LEU | X | 210 | 29.490 | 40.069 | 41.459 | 0.00 | 0.00 |
| ATOM | 3177 | HA   | LEU | X | 210 | 28.775 | 39.602 | 40.782 | 0.00 | 0.00 |
| ATOM | 3178 | CB   | LEU | X | 210 | 30.126 | 38.998 | 42.443 | 0.00 | 0.00 |
| ATOM | 3179 | HB2  | LEU | X | 210 | 30.884 | 39.564 | 42.986 | 0.00 | 0.00 |
| ATOM | 3180 | HB3  | LEU | X | 210 | 29.399 | 38.647 | 43.175 | 0.00 | 0.00 |
| ATOM | 3181 | CG   | LEU | X | 210 | 30.897 | 37.791 | 41.952 | 0.00 | 0.00 |
| ATOM | 3182 | HG   | LEU | X | 210 | 31.625 | 38.020 | 41.173 | 0.00 | 0.00 |
| ATOM | 3183 | CD1  | LEU | X | 210 | 31.667 | 37.208 | 43.151 | 0.00 | 0.00 |
| ATOM | 3184 | HD11 | LEU | X | 210 | 31.994 | 36.188 | 42.950 | 0.00 | 0.00 |
| ATOM | 3185 | HD12 | LEU | X | 210 | 32.521 | 37.858 | 43.342 | 0.00 | 0.00 |
| ATOM | 3186 | HD13 | LEU | X | 210 | 31.079 | 37.052 | 44.056 | 0.00 | 0.00 |
| ATOM | 3187 | CD2  | LEU | X | 210 | 29.996 | 36.650 | 41.435 | 0.00 | 0.00 |
| ATOM | 3188 | HD21 | LEU | X | 210 | 29.135 | 36.330 | 42.021 | 0.00 | 0.00 |
| ATOM | 3189 | HD22 | LEU | X | 210 | 29.588 | 36.897 | 40.455 | 0.00 | 0.00 |
| ATOM | 3190 | HD23 | LEU | X | 210 | 30.542 | 35.748 | 41.159 | 0.00 | 0.00 |
| ATOM | 3191 | C    | LEU | X | 210 | 28.720 | 41.032 | 42.380 | 0.00 | 0.00 |
| ATOM | 3192 | O    | LEU | X | 210 | 27.512 | 40.905 | 42.497 | 0.00 | 0.00 |
| ATOM | 3193 | N    | SER | X | 211 | 29.335 | 41.947 | 42.977 | 0.00 | 0.00 |
| ATOM | 3194 | H    | SER | X | 211 | 30.298 | 42.046 | 42.689 | 0.00 | 0.00 |
| ATOM | 3195 | CA   | SER | X | 211 | 28.823 | 42.957 | 43.920 | 0.00 | 0.00 |
| ATOM | 3196 | HA   | SER | X | 211 | 28.294 | 42.375 | 44.675 | 0.00 | 0.00 |
| ATOM | 3197 | CB   | SER | X | 211 | 30.016 | 43.732 | 44.438 | 0.00 | 0.00 |
| ATOM | 3198 | HB2  | SER | X | 211 | 30.778 | 43.016 | 44.749 | 0.00 | 0.00 |
| ATOM | 3199 | HB3  | SER | X | 211 | 30.402 | 44.378 | 43.649 | 0.00 | 0.00 |
| ATOM | 3200 | OG   | SER | X | 211 | 29.634 | 44.540 | 45.507 | 0.00 | 0.00 |
| ATOM | 3201 | HG   | SER | X | 211 | 28.913 | 44.097 | 45.961 | 0.00 | 0.00 |
| ATOM | 3202 | C    | SER | X | 211 | 27.911 | 44.065 | 43.357 | 0.00 | 0.00 |
| ATOM | 3203 | O    | SER | X | 211 | 28.414 | 44.842 | 42.571 | 0.00 | 0.00 |
| ATOM | 3204 | N    | PRO | X | 212 | 26.557 | 44.067 | 43.593 | 0.00 | 0.00 |
| ATOM | 3205 | CD   | PRO | X | 212 | 25.843 | 43.058 | 44.367 | 0.00 | 0.00 |
| ATOM | 3206 | HD2  | PRO | X | 212 | 25.876 | 43.446 | 45.386 | 0.00 | 0.00 |
| ATOM | 3207 | HD3  | PRO | X | 212 | 26.292 | 42.069 | 44.277 | 0.00 | 0.00 |
| ATOM | 3208 | CG   | PRO | X | 212 | 24.434 | 43.112 | 43.916 | 0.00 | 0.00 |
| ATOM | 3209 | HG2  | PRO | X | 212 | 23.753 | 42.756 | 44.689 | 0.00 | 0.00 |
| ATOM | 3210 | HG3  | PRO | X | 212 | 24.268 | 42.506 | 43.026 | 0.00 | 0.00 |
| ATOM | 3211 | CB   | PRO | X | 212 | 24.296 | 44.606 | 43.564 | 0.00 | 0.00 |
| ATOM | 3212 | HB2  | PRO | X | 212 | 24.202 | 45.218 | 44.461 | 0.00 | 0.00 |
| ATOM | 3213 | HB3  | PRO | X | 212 | 23.453 | 44.738 | 42.885 | 0.00 | 0.00 |
| ATOM | 3214 | CA   | PRO | X | 212 | 25.614 | 44.919 | 42.924 | 0.00 | 0.00 |
| ATOM | 3215 | HA   | PRO | X | 212 | 25.400 | 44.634 | 41.894 | 0.00 | 0.00 |
| ATOM | 3216 | C    | PRO | X | 212 | 25.952 | 46.403 | 42.979 | 0.00 | 0.00 |
| ATOM | 3217 | O    | PRO | X | 212 | 25.834 | 47.002 | 41.894 | 0.00 | 0.00 |
| ATOM | 3218 | N    | PRO | X | 213 | 26.460 | 47.000 | 44.100 | 0.00 | 0.00 |

|      |      |      |     |   |     |        |        |        |      |      |
|------|------|------|-----|---|-----|--------|--------|--------|------|------|
| ATOM | 3219 | CD   | PRO | X | 213 | 26.442 | 46.462 | 45.476 | 0.00 | 0.00 |
| ATOM | 3220 | HD2  | PRO | X | 213 | 27.384 | 45.951 | 45.676 | 0.00 | 0.00 |
| ATOM | 3221 | HD3  | PRO | X | 213 | 25.558 | 45.849 | 45.655 | 0.00 | 0.00 |
| ATOM | 3222 | CG   | PRO | X | 213 | 26.291 | 47.705 | 46.344 | 0.00 | 0.00 |
| ATOM | 3223 | HG2  | PRO | X | 213 | 26.688 | 47.561 | 47.349 | 0.00 | 0.00 |
| ATOM | 3224 | HG3  | PRO | X | 213 | 25.213 | 47.864 | 46.340 | 0.00 | 0.00 |
| ATOM | 3225 | CB   | PRO | X | 213 | 26.939 | 48.808 | 45.498 | 0.00 | 0.00 |
| ATOM | 3226 | HB2  | PRO | X | 213 | 28.007 | 48.897 | 45.692 | 0.00 | 0.00 |
| ATOM | 3227 | HB3  | PRO | X | 213 | 26.494 | 49.779 | 45.717 | 0.00 | 0.00 |
| ATOM | 3228 | CA   | PRO | X | 213 | 26.669 | 48.438 | 44.086 | 0.00 | 0.00 |
| ATOM | 3229 | HA   | PRO | X | 213 | 25.740 | 48.941 | 43.820 | 0.00 | 0.00 |
| ATOM | 3230 | C    | PRO | X | 213 | 27.858 | 48.840 | 43.247 | 0.00 | 0.00 |
| ATOM | 3231 | O    | PRO | X | 213 | 27.825 | 49.943 | 42.737 | 0.00 | 0.00 |
| ATOM | 3232 | N    | SER | X | 214 | 28.903 | 47.977 | 43.128 | 0.00 | 0.00 |
| ATOM | 3233 | H    | SER | X | 214 | 28.862 | 46.996 | 43.363 | 0.00 | 0.00 |
| ATOM | 3234 | CA   | SER | X | 214 | 30.004 | 48.373 | 42.177 | 0.00 | 0.00 |
| ATOM | 3235 | HA   | SER | X | 214 | 30.283 | 49.382 | 42.483 | 0.00 | 0.00 |
| ATOM | 3236 | CB   | SER | X | 214 | 31.220 | 47.449 | 42.453 | 0.00 | 0.00 |
| ATOM | 3237 | HB2  | SER | X | 214 | 30.865 | 46.423 | 42.354 | 0.00 | 0.00 |
| ATOM | 3238 | HB3  | SER | X | 214 | 32.028 | 47.623 | 41.743 | 0.00 | 0.00 |
| ATOM | 3239 | OG   | SER | X | 214 | 31.799 | 47.768 | 43.710 | 0.00 | 0.00 |
| ATOM | 3240 | HG   | SER | X | 214 | 32.712 | 47.487 | 43.802 | 0.00 | 0.00 |
| ATOM | 3241 | C    | SER | X | 214 | 29.630 | 48.204 | 40.734 | 0.00 | 0.00 |
| ATOM | 3242 | O    | SER | X | 214 | 30.023 | 49.049 | 39.906 | 0.00 | 0.00 |
| ATOM | 3243 | N    | ARG | X | 215 | 28.876 | 47.132 | 40.478 | 0.00 | 0.00 |
| ATOM | 3244 | H    | ARG | X | 215 | 28.646 | 46.485 | 41.218 | 0.00 | 0.00 |
| ATOM | 3245 | CA   | ARG | X | 215 | 28.419 | 46.763 | 39.087 | 0.00 | 0.00 |
| ATOM | 3246 | HA   | ARG | X | 215 | 29.356 | 46.638 | 38.544 | 0.00 | 0.00 |
| ATOM | 3247 | CB   | ARG | X | 215 | 27.580 | 45.482 | 39.091 | 0.00 | 0.00 |
| ATOM | 3248 | HB2  | ARG | X | 215 | 27.889 | 44.877 | 39.943 | 0.00 | 0.00 |
| ATOM | 3249 | HB3  | ARG | X | 215 | 26.527 | 45.723 | 39.232 | 0.00 | 0.00 |
| ATOM | 3250 | CG   | ARG | X | 215 | 27.822 | 44.720 | 37.771 | 0.00 | 0.00 |
| ATOM | 3251 | HG2  | ARG | X | 215 | 27.296 | 45.202 | 36.947 | 0.00 | 0.00 |
| ATOM | 3252 | HG3  | ARG | X | 215 | 28.874 | 44.871 | 37.528 | 0.00 | 0.00 |
| ATOM | 3253 | CD   | ARG | X | 215 | 27.697 | 43.246 | 38.062 | 0.00 | 0.00 |
| ATOM | 3254 | HD2  | ARG | X | 215 | 28.203 | 42.651 | 37.301 | 0.00 | 0.00 |
| ATOM | 3255 | HD3  | ARG | X | 215 | 28.261 | 43.002 | 38.962 | 0.00 | 0.00 |
| ATOM | 3256 | NE   | ARG | X | 215 | 26.271 | 42.788 | 38.253 | 0.00 | 0.00 |
| ATOM | 3257 | HE   | ARG | X | 215 | 25.492 | 43.430 | 38.249 | 0.00 | 0.00 |
| ATOM | 3258 | CZ   | ARG | X | 215 | 25.933 | 41.499 | 38.517 | 0.00 | 0.00 |
| ATOM | 3259 | NH1  | ARG | X | 215 | 26.778 | 40.478 | 38.750 | 0.00 | 0.00 |
| ATOM | 3260 | HH11 | ARG | X | 215 | 27.778 | 40.570 | 38.645 | 0.00 | 0.00 |
| ATOM | 3261 | HH12 | ARG | X | 215 | 26.433 | 39.553 | 38.965 | 0.00 | 0.00 |
| ATOM | 3262 | NH2  | ARG | X | 215 | 24.717 | 41.125 | 38.635 | 0.00 | 0.00 |
| ATOM | 3263 | HH21 | ARG | X | 215 | 23.968 | 41.640 | 38.196 | 0.00 | 0.00 |
| ATOM | 3264 | HH22 | ARG | X | 215 | 24.525 | 40.144 | 38.783 | 0.00 | 0.00 |
| ATOM | 3265 | C    | ARG | X | 215 | 27.569 | 47.811 | 38.242 | 0.00 | 0.00 |
| ATOM | 3266 | O    | ARG | X | 215 | 27.665 | 47.774 | 37.047 | 0.00 | 0.00 |
| ATOM | 3267 | N    | GLY | X | 216 | 26.850 | 48.734 | 38.870 | 0.00 | 0.00 |
| ATOM | 3268 | H    | GLY | X | 216 | 26.694 | 48.712 | 39.867 | 0.00 | 0.00 |
| ATOM | 3269 | CA   | GLY | X | 216 | 26.186 | 49.892 | 38.172 | 0.00 | 0.00 |
| ATOM | 3270 | HA2  | GLY | X | 216 | 26.023 | 49.585 | 37.112 | 0.00 | 0.00 |
| ATOM | 3271 | HA3  | GLY | X | 216 | 25.298 | 50.219 | 38.664 | 0.00 | 0.00 |
| ATOM | 3272 | C    | GLY | X | 216 | 27.109 | 51.054 | 37.873 | 0.00 | 0.00 |
| ATOM | 3273 | O    | GLY | X | 216 | 26.668 | 52.163 | 37.575 | 0.00 | 0.00 |
| ATOM | 3274 | N    | LEU | X | 217 | 28.455 | 50.877 | 37.904 | 0.00 | 0.00 |
| ATOM | 3275 | H    | LEU | X | 217 | 28.841 | 50.014 | 38.257 | 0.00 | 0.00 |
| ATOM | 3276 | CA   | LEU | X | 217 | 29.505 | 51.826 | 37.557 | 0.00 | 0.00 |
| ATOM | 3277 | HA   | LEU | X | 217 | 29.086 | 52.826 | 37.446 | 0.00 | 0.00 |
| ATOM | 3278 | CB   | LEU | X | 217 | 30.528 | 52.012 | 38.731 | 0.00 | 0.00 |
| ATOM | 3279 | HB2  | LEU | X | 217 | 31.150 | 51.117 | 38.746 | 0.00 | 0.00 |
| ATOM | 3280 | HB3  | LEU | X | 217 | 31.111 | 52.918 | 38.570 | 0.00 | 0.00 |
| ATOM | 3281 | CG   | LEU | X | 217 | 29.873 | 52.242 | 40.165 | 0.00 | 0.00 |
| ATOM | 3282 | HG   | LEU | X | 217 | 29.250 | 51.373 | 40.378 | 0.00 | 0.00 |
| ATOM | 3283 | CD1  | LEU | X | 217 | 30.915 | 52.266 | 41.233 | 0.00 | 0.00 |
| ATOM | 3284 | HD11 | LEU | X | 217 | 30.519 | 52.223 | 42.247 | 0.00 | 0.00 |
| ATOM | 3285 | HD12 | LEU | X | 217 | 31.545 | 51.394 | 41.055 | 0.00 | 0.00 |
| ATOM | 3286 | HD13 | LEU | X | 217 | 31.496 | 53.181 | 41.118 | 0.00 | 0.00 |
| ATOM | 3287 | CD2  | LEU | X | 217 | 28.969 | 53.451 | 40.239 | 0.00 | 0.00 |
| ATOM | 3288 | HD21 | LEU | X | 217 | 29.283 | 54.282 | 39.607 | 0.00 | 0.00 |

|      |      |      |     |   |     |        |        |        |      |      |
|------|------|------|-----|---|-----|--------|--------|--------|------|------|
| ATOM | 3289 | HD22 | LEU | X | 217 | 28.021 | 53.120 | 39.814 | 0.00 | 0.00 |
| ATOM | 3290 | HD23 | LEU | X | 217 | 28.866 | 53.850 | 41.249 | 0.00 | 0.00 |
| ATOM | 3291 | C    | LEU | X | 217 | 30.217 | 51.451 | 36.278 | 0.00 | 0.00 |
| ATOM | 3292 | O    | LEU | X | 217 | 30.960 | 52.271 | 35.794 | 0.00 | 0.00 |
| ATOM | 3293 | N    | PHE | X | 218 | 30.079 | 50.268 | 35.735 | 0.00 | 0.00 |
| ATOM | 3294 | H    | PHE | X | 218 | 29.601 | 49.623 | 36.347 | 0.00 | 0.00 |
| ATOM | 3295 | CA   | PHE | X | 218 | 30.916 | 49.756 | 34.692 | 0.00 | 0.00 |
| ATOM | 3296 | HA   | PHE | X | 218 | 31.010 | 50.589 | 33.996 | 0.00 | 0.00 |
| ATOM | 3297 | CB   | PHE | X | 218 | 32.227 | 49.310 | 35.218 | 0.00 | 0.00 |
| ATOM | 3298 | HB2  | PHE | X | 218 | 32.877 | 49.209 | 34.348 | 0.00 | 0.00 |
| ATOM | 3299 | HB3  | PHE | X | 218 | 32.714 | 50.048 | 35.855 | 0.00 | 0.00 |
| ATOM | 3300 | CG   | PHE | X | 218 | 32.224 | 47.990 | 36.041 | 0.00 | 0.00 |
| ATOM | 3301 | CD1  | PHE | X | 218 | 32.015 | 47.994 | 37.407 | 0.00 | 0.00 |
| ATOM | 3302 | HD1  | PHE | X | 218 | 31.755 | 48.937 | 37.865 | 0.00 | 0.00 |
| ATOM | 3303 | CE1  | PHE | X | 218 | 32.040 | 46.770 | 38.124 | 0.00 | 0.00 |
| ATOM | 3304 | HE1  | PHE | X | 218 | 31.893 | 46.829 | 39.193 | 0.00 | 0.00 |
| ATOM | 3305 | CZ   | PHE | X | 218 | 32.202 | 45.550 | 37.412 | 0.00 | 0.00 |
| ATOM | 3306 | HZ   | PHE | X | 218 | 32.200 | 44.621 | 37.963 | 0.00 | 0.00 |
| ATOM | 3307 | CE2  | PHE | X | 218 | 32.297 | 45.514 | 36.032 | 0.00 | 0.00 |
| ATOM | 3308 | HE2  | PHE | X | 218 | 32.416 | 44.533 | 35.597 | 0.00 | 0.00 |
| ATOM | 3309 | CD2  | PHE | X | 218 | 32.353 | 46.757 | 35.353 | 0.00 | 0.00 |
| ATOM | 3310 | HD2  | PHE | X | 218 | 32.480 | 46.739 | 34.281 | 0.00 | 0.00 |
| ATOM | 3311 | C    | PHE | X | 218 | 30.335 | 48.640 | 33.854 | 0.00 | 0.00 |
| ATOM | 3312 | O    | PHE | X | 218 | 29.634 | 47.774 | 34.365 | 0.00 | 0.00 |
| ATOM | 3313 | N    | HIE | X | 219 | 30.712 | 48.545 | 32.630 | 0.00 | 0.00 |
| ATOM | 3314 | H    | HIE | X | 219 | 31.313 | 49.256 | 32.238 | 0.00 | 0.00 |
| ATOM | 3315 | CA   | HIE | X | 219 | 29.997 | 47.753 | 31.597 | 0.00 | 0.00 |
| ATOM | 3316 | HA   | HIE | X | 219 | 28.940 | 47.637 | 31.834 | 0.00 | 0.00 |
| ATOM | 3317 | CB   | HIE | X | 219 | 30.029 | 48.630 | 30.338 | 0.00 | 0.00 |
| ATOM | 3318 | HB2  | HIE | X | 219 | 30.968 | 48.786 | 29.808 | 0.00 | 0.00 |
| ATOM | 3319 | HB3  | HIE | X | 219 | 29.286 | 48.166 | 29.689 | 0.00 | 0.00 |
| ATOM | 3320 | CG   | HIE | X | 219 | 29.551 | 50.049 | 30.655 | 0.00 | 0.00 |
| ATOM | 3321 | ND1  | HIE | X | 219 | 30.424 | 51.094 | 30.969 | 0.00 | 0.00 |
| ATOM | 3322 | CE1  | HIE | X | 219 | 29.684 | 52.076 | 31.513 | 0.00 | 0.00 |
| ATOM | 3323 | HE1  | HIE | X | 219 | 30.092 | 53.017 | 31.850 | 0.00 | 0.00 |
| ATOM | 3324 | NE2  | HIE | X | 219 | 28.457 | 51.728 | 31.597 | 0.00 | 0.00 |
| ATOM | 3325 | HE2  | HIE | X | 219 | 27.738 | 52.255 | 32.072 | 0.00 | 0.00 |
| ATOM | 3326 | CD2  | HIE | X | 219 | 28.274 | 50.466 | 31.069 | 0.00 | 0.00 |
| ATOM | 3327 | HD2  | HIE | X | 219 | 27.402 | 49.831 | 31.128 | 0.00 | 0.00 |
| ATOM | 3328 | C    | HIE | X | 219 | 30.486 | 46.371 | 31.204 | 0.00 | 0.00 |
| ATOM | 3329 | O    | HIE | X | 219 | 29.713 | 45.640 | 30.542 | 0.00 | 0.00 |
| ATOM | 3330 | N    | ARG | X | 220 | 31.828 | 46.317 | 31.297 | 0.00 | 0.00 |
| ATOM | 3331 | H    | ARG | X | 220 | 32.269 | 47.026 | 31.866 | 0.00 | 0.00 |
| ATOM | 3332 | CA   | ARG | X | 220 | 32.737 | 45.278 | 30.792 | 0.00 | 0.00 |
| ATOM | 3333 | HA   | ARG | X | 220 | 32.187 | 44.343 | 30.685 | 0.00 | 0.00 |
| ATOM | 3334 | CB   | ARG | X | 220 | 33.367 | 45.655 | 29.362 | 0.00 | 0.00 |
| ATOM | 3335 | HB2  | ARG | X | 220 | 33.872 | 46.621 | 29.374 | 0.00 | 0.00 |
| ATOM | 3336 | HB3  | ARG | X | 220 | 34.094 | 44.983 | 28.906 | 0.00 | 0.00 |
| ATOM | 3337 | CG   | ARG | X | 220 | 32.169 | 45.824 | 28.310 | 0.00 | 0.00 |
| ATOM | 3338 | HG2  | ARG | X | 220 | 31.534 | 44.938 | 28.339 | 0.00 | 0.00 |
| ATOM | 3339 | HG3  | ARG | X | 220 | 31.521 | 46.615 | 28.687 | 0.00 | 0.00 |
| ATOM | 3340 | CD   | ARG | X | 220 | 32.659 | 46.001 | 26.948 | 0.00 | 0.00 |
| ATOM | 3341 | HD2  | ARG | X | 220 | 33.266 | 46.897 | 26.819 | 0.00 | 0.00 |
| ATOM | 3342 | HD3  | ARG | X | 220 | 33.185 | 45.122 | 26.575 | 0.00 | 0.00 |
| ATOM | 3343 | NE   | ARG | X | 220 | 31.557 | 46.188 | 25.964 | 0.00 | 0.00 |
| ATOM | 3344 | HE   | ARG | X | 220 | 31.176 | 45.383 | 25.489 | 0.00 | 0.00 |
| ATOM | 3345 | CZ   | ARG | X | 220 | 30.866 | 47.337 | 25.866 | 0.00 | 0.00 |
| ATOM | 3346 | NH1  | ARG | X | 220 | 31.238 | 48.457 | 26.490 | 0.00 | 0.00 |
| ATOM | 3347 | HH11 | ARG | X | 220 | 32.102 | 48.459 | 27.014 | 0.00 | 0.00 |
| ATOM | 3348 | HH12 | ARG | X | 220 | 30.728 | 49.300 | 26.266 | 0.00 | 0.00 |
| ATOM | 3349 | NH2  | ARG | X | 220 | 29.830 | 47.314 | 25.061 | 0.00 | 0.00 |
| ATOM | 3350 | HH21 | ARG | X | 220 | 29.787 | 46.523 | 24.435 | 0.00 | 0.00 |
| ATOM | 3351 | HH22 | ARG | X | 220 | 29.133 | 48.025 | 25.229 | 0.00 | 0.00 |
| ATOM | 3352 | C    | ARG | X | 220 | 33.890 | 45.123 | 31.788 | 0.00 | 0.00 |
| ATOM | 3353 | O    | ARG | X | 220 | 34.373 | 46.115 | 32.348 | 0.00 | 0.00 |
| ATOM | 3354 | N    | ALA | X | 221 | 34.534 | 43.949 | 31.787 | 0.00 | 0.00 |
| ATOM | 3355 | H    | ALA | X | 221 | 34.149 | 43.153 | 31.300 | 0.00 | 0.00 |
| ATOM | 3356 | CA   | ALA | X | 221 | 35.709 | 43.609 | 32.613 | 0.00 | 0.00 |
| ATOM | 3357 | HA   | ALA | X | 221 | 36.328 | 44.445 | 32.938 | 0.00 | 0.00 |
| ATOM | 3358 | CB   | ALA | X | 221 | 35.104 | 42.974 | 33.937 | 0.00 | 0.00 |

|      |      |      |     |   |     |        |        |        |      |      |
|------|------|------|-----|---|-----|--------|--------|--------|------|------|
| ATOM | 3359 | HB1  | ALA | X | 221 | 34.611 | 43.784 | 34.473 | 0.00 | 0.00 |
| ATOM | 3360 | HB2  | ALA | X | 221 | 34.368 | 42.209 | 33.687 | 0.00 | 0.00 |
| ATOM | 3361 | HB3  | ALA | X | 221 | 35.836 | 42.472 | 34.570 | 0.00 | 0.00 |
| ATOM | 3362 | C    | ALA | X | 221 | 36.674 | 42.572 | 31.978 | 0.00 | 0.00 |
| ATOM | 3363 | O    | ALA | X | 221 | 36.334 | 41.717 | 31.183 | 0.00 | 0.00 |
| ATOM | 3364 | N    | VAL | X | 222 | 37.984 | 42.813 | 32.261 | 0.00 | 0.00 |
| ATOM | 3365 | H    | VAL | X | 222 | 38.271 | 43.517 | 32.926 | 0.00 | 0.00 |
| ATOM | 3366 | CA   | VAL | X | 222 | 39.032 | 41.926 | 31.897 | 0.00 | 0.00 |
| ATOM | 3367 | HA   | VAL | X | 222 | 38.670 | 41.118 | 31.261 | 0.00 | 0.00 |
| ATOM | 3368 | CB   | VAL | X | 222 | 40.008 | 42.789 | 31.064 | 0.00 | 0.00 |
| ATOM | 3369 | HB   | VAL | X | 222 | 40.406 | 43.650 | 31.602 | 0.00 | 0.00 |
| ATOM | 3370 | CG1  | VAL | X | 222 | 41.299 | 41.981 | 30.633 | 0.00 | 0.00 |
| ATOM | 3371 | HG11 | VAL | X | 222 | 41.608 | 41.261 | 31.391 | 0.00 | 0.00 |
| ATOM | 3372 | HG12 | VAL | X | 222 | 41.134 | 41.384 | 29.736 | 0.00 | 0.00 |
| ATOM | 3373 | HG13 | VAL | X | 222 | 42.184 | 42.594 | 30.464 | 0.00 | 0.00 |
| ATOM | 3374 | CG2  | VAL | X | 222 | 39.370 | 43.565 | 29.756 | 0.00 | 0.00 |
| ATOM | 3375 | HG21 | VAL | X | 222 | 38.992 | 42.756 | 29.130 | 0.00 | 0.00 |
| ATOM | 3376 | HG22 | VAL | X | 222 | 38.603 | 44.267 | 30.083 | 0.00 | 0.00 |
| ATOM | 3377 | HG23 | VAL | X | 222 | 40.170 | 44.118 | 29.264 | 0.00 | 0.00 |
| ATOM | 3378 | C    | VAL | X | 222 | 39.623 | 41.307 | 33.141 | 0.00 | 0.00 |
| ATOM | 3379 | O    | VAL | X | 222 | 39.762 | 42.041 | 34.180 | 0.00 | 0.00 |
| ATOM | 3380 | N    | LEU | X | 223 | 39.950 | 40.006 | 33.100 | 0.00 | 0.00 |
| ATOM | 3381 | H    | LEU | X | 223 | 39.718 | 39.431 | 32.302 | 0.00 | 0.00 |
| ATOM | 3382 | CA   | LEU | X | 223 | 40.632 | 39.309 | 34.162 | 0.00 | 0.00 |
| ATOM | 3383 | HA   | LEU | X | 223 | 41.101 | 40.007 | 34.855 | 0.00 | 0.00 |
| ATOM | 3384 | CB   | LEU | X | 223 | 39.702 | 38.383 | 34.875 | 0.00 | 0.00 |
| ATOM | 3385 | HB2  | LEU | X | 223 | 39.115 | 37.696 | 34.266 | 0.00 | 0.00 |
| ATOM | 3386 | HB3  | LEU | X | 223 | 40.331 | 37.741 | 35.492 | 0.00 | 0.00 |
| ATOM | 3387 | CG   | LEU | X | 223 | 38.637 | 39.123 | 35.739 | 0.00 | 0.00 |
| ATOM | 3388 | HG   | LEU | X | 223 | 39.009 | 40.061 | 36.150 | 0.00 | 0.00 |
| ATOM | 3389 | CD1  | LEU | X | 223 | 37.348 | 39.401 | 34.982 | 0.00 | 0.00 |
| ATOM | 3390 | HD11 | LEU | X | 223 | 36.618 | 39.542 | 35.778 | 0.00 | 0.00 |
| ATOM | 3391 | HD12 | LEU | X | 223 | 37.375 | 40.250 | 34.299 | 0.00 | 0.00 |
| ATOM | 3392 | HD13 | LEU | X | 223 | 37.049 | 38.500 | 34.446 | 0.00 | 0.00 |
| ATOM | 3393 | CD2  | LEU | X | 223 | 38.241 | 38.083 | 36.859 | 0.00 | 0.00 |
| ATOM | 3394 | HD21 | LEU | X | 223 | 37.836 | 37.236 | 36.305 | 0.00 | 0.00 |
| ATOM | 3395 | HD22 | LEU | X | 223 | 39.142 | 37.887 | 37.441 | 0.00 | 0.00 |
| ATOM | 3396 | HD23 | LEU | X | 223 | 37.566 | 38.606 | 37.536 | 0.00 | 0.00 |
| ATOM | 3397 | C    | LEU | X | 223 | 41.692 | 38.463 | 33.495 | 0.00 | 0.00 |
| ATOM | 3398 | O    | LEU | X | 223 | 41.390 | 37.766 | 32.490 | 0.00 | 0.00 |
| ATOM | 3399 | N    | GLN | X | 224 | 42.879 | 38.425 | 34.123 | 0.00 | 0.00 |
| ATOM | 3400 | H    | GLN | X | 224 | 42.962 | 38.946 | 34.984 | 0.00 | 0.00 |
| ATOM | 3401 | CA   | GLN | X | 224 | 44.135 | 37.879 | 33.702 | 0.00 | 0.00 |
| ATOM | 3402 | HA   | GLN | X | 224 | 43.919 | 37.053 | 33.024 | 0.00 | 0.00 |
| ATOM | 3403 | CB   | GLN | X | 224 | 45.002 | 38.945 | 32.937 | 0.00 | 0.00 |
| ATOM | 3404 | HB2  | GLN | X | 224 | 45.296 | 39.520 | 33.816 | 0.00 | 0.00 |
| ATOM | 3405 | HB3  | GLN | X | 224 | 45.828 | 38.363 | 32.527 | 0.00 | 0.00 |
| ATOM | 3406 | CG   | GLN | X | 224 | 44.282 | 39.824 | 31.890 | 0.00 | 0.00 |
| ATOM | 3407 | HG2  | GLN | X | 224 | 43.837 | 39.156 | 31.152 | 0.00 | 0.00 |
| ATOM | 3408 | HG3  | GLN | X | 224 | 43.473 | 40.447 | 32.269 | 0.00 | 0.00 |
| ATOM | 3409 | CD   | GLN | X | 224 | 45.152 | 40.772 | 31.153 | 0.00 | 0.00 |
| ATOM | 3410 | OE1  | GLN | X | 224 | 44.725 | 41.909 | 30.913 | 0.00 | 0.00 |
| ATOM | 3411 | NE2  | GLN | X | 224 | 46.330 | 40.392 | 30.722 | 0.00 | 0.00 |
| ATOM | 3412 | HE21 | GLN | X | 224 | 46.736 | 41.045 | 30.067 | 0.00 | 0.00 |
| ATOM | 3413 | HE22 | GLN | X | 224 | 46.596 | 39.423 | 30.823 | 0.00 | 0.00 |
| ATOM | 3414 | C    | GLN | X | 224 | 44.902 | 37.216 | 34.886 | 0.00 | 0.00 |
| ATOM | 3415 | O    | GLN | X | 224 | 45.088 | 37.816 | 35.958 | 0.00 | 0.00 |
| ATOM | 3416 | N    | SER | X | 225 | 45.362 | 35.971 | 34.715 | 0.00 | 0.00 |
| ATOM | 3417 | H    | SER | X | 225 | 45.252 | 35.469 | 33.846 | 0.00 | 0.00 |
| ATOM | 3418 | CA   | SER | X | 225 | 46.094 | 35.210 | 35.750 | 0.00 | 0.00 |
| ATOM | 3419 | HA   | SER | X | 225 | 46.087 | 34.155 | 35.476 | 0.00 | 0.00 |
| ATOM | 3420 | CB   | SER | X | 225 | 47.571 | 35.583 | 35.873 | 0.00 | 0.00 |
| ATOM | 3421 | HB2  | SER | X | 225 | 47.708 | 36.663 | 35.817 | 0.00 | 0.00 |
| ATOM | 3422 | HB3  | SER | X | 225 | 47.988 | 35.318 | 36.844 | 0.00 | 0.00 |
| ATOM | 3423 | OG   | SER | X | 225 | 48.418 | 35.018 | 34.918 | 0.00 | 0.00 |
| ATOM | 3424 | HG   | SER | X | 225 | 48.497 | 34.064 | 34.989 | 0.00 | 0.00 |
| ATOM | 3425 | C    | SER | X | 225 | 45.434 | 35.146 | 37.199 | 0.00 | 0.00 |
| ATOM | 3426 | O    | SER | X | 225 | 45.926 | 35.088 | 38.274 | 0.00 | 0.00 |
| ATOM | 3427 | N    | GLY | X | 226 | 44.121 | 34.995 | 37.178 | 0.00 | 0.00 |
| ATOM | 3428 | H    | GLY | X | 226 | 43.690 | 34.955 | 36.266 | 0.00 | 0.00 |



|      |      |      |     |   |     |        |        |        |      |      |
|------|------|------|-----|---|-----|--------|--------|--------|------|------|
| ATOM | 3429 | CA   | GLY | X | 226 | 43.313 | 35.308 | 38.320 | 0.00 | 0.00 |
| ATOM | 3430 | HA2  | GLY | X | 226 | 43.417 | 34.472 | 39.045 | 0.00 | 0.00 |
| ATOM | 3431 | HA3  | GLY | X | 226 | 43.599 | 36.199 | 38.834 | 0.00 | 0.00 |
| ATOM | 3432 | C    | GLY | X | 226 | 41.834 | 35.223 | 37.957 | 0.00 | 0.00 |
| ATOM | 3433 | O    | GLY | X | 226 | 41.428 | 35.616 | 36.871 | 0.00 | 0.00 |
| ATOM | 3434 | N    | ALA | X | 227 | 41.068 | 34.700 | 38.854 | 0.00 | 0.00 |
| ATOM | 3435 | H    | ALA | X | 227 | 41.412 | 34.310 | 39.720 | 0.00 | 0.00 |
| ATOM | 3436 | CA   | ALA | X | 227 | 39.638 | 34.831 | 39.008 | 0.00 | 0.00 |
| ATOM | 3437 | HA   | ALA | X | 227 | 39.268 | 35.663 | 38.410 | 0.00 | 0.00 |
| ATOM | 3438 | CB   | ALA | X | 227 | 38.941 | 33.601 | 38.460 | 0.00 | 0.00 |
| ATOM | 3439 | HB1  | ALA | X | 227 | 39.128 | 32.773 | 39.145 | 0.00 | 0.00 |
| ATOM | 3440 | HB2  | ALA | X | 227 | 37.854 | 33.659 | 38.513 | 0.00 | 0.00 |
| ATOM | 3441 | HB3  | ALA | X | 227 | 39.248 | 33.287 | 37.463 | 0.00 | 0.00 |
| ATOM | 3442 | C    | ALA | X | 227 | 39.134 | 35.029 | 40.466 | 0.00 | 0.00 |
| ATOM | 3443 | O    | ALA | X | 227 | 39.831 | 34.493 | 41.354 | 0.00 | 0.00 |
| ATOM | 3444 | N    | PRO | X | 228 | 37.948 | 35.684 | 40.830 | 0.00 | 0.00 |
| ATOM | 3445 | CD   | PRO | X | 228 | 36.944 | 36.149 | 39.956 | 0.00 | 0.00 |
| ATOM | 3446 | HD2  | PRO | X | 228 | 36.681 | 35.472 | 39.143 | 0.00 | 0.00 |
| ATOM | 3447 | HD3  | PRO | X | 228 | 37.251 | 37.065 | 39.451 | 0.00 | 0.00 |
| ATOM | 3448 | CG   | PRO | X | 228 | 35.708 | 36.410 | 40.907 | 0.00 | 0.00 |
| ATOM | 3449 | HG2  | PRO | X | 228 | 35.098 | 35.542 | 41.157 | 0.00 | 0.00 |
| ATOM | 3450 | HG3  | PRO | X | 228 | 35.023 | 37.180 | 40.552 | 0.00 | 0.00 |
| ATOM | 3451 | CB   | PRO | X | 228 | 36.453 | 36.862 | 42.172 | 0.00 | 0.00 |
| ATOM | 3452 | HB2  | PRO | X | 228 | 35.811 | 36.815 | 43.052 | 0.00 | 0.00 |
| ATOM | 3453 | HB3  | PRO | X | 228 | 36.744 | 37.906 | 42.056 | 0.00 | 0.00 |
| ATOM | 3454 | CA   | PRO | X | 228 | 37.605 | 35.950 | 42.227 | 0.00 | 0.00 |
| ATOM | 3455 | HA   | PRO | X | 228 | 38.398 | 36.469 | 42.766 | 0.00 | 0.00 |
| ATOM | 3456 | C    | PRO | X | 228 | 37.234 | 34.732 | 43.033 | 0.00 | 0.00 |
| ATOM | 3457 | O    | PRO | X | 228 | 37.498 | 34.707 | 44.251 | 0.00 | 0.00 |
| ATOM | 3458 | N    | ASN | X | 229 | 36.739 | 33.733 | 42.338 | 0.00 | 0.00 |
| ATOM | 3459 | H    | ASN | X | 229 | 36.806 | 33.723 | 41.331 | 0.00 | 0.00 |
| ATOM | 3460 | CA   | ASN | X | 229 | 36.420 | 32.401 | 42.868 | 0.00 | 0.00 |
| ATOM | 3461 | HA   | ASN | X | 229 | 36.047 | 32.554 | 43.881 | 0.00 | 0.00 |
| ATOM | 3462 | CB   | ASN | X | 229 | 35.343 | 31.739 | 42.027 | 0.00 | 0.00 |
| ATOM | 3463 | HB2  | ASN | X | 229 | 34.996 | 30.827 | 42.513 | 0.00 | 0.00 |
| ATOM | 3464 | HB3  | ASN | X | 229 | 34.502 | 32.431 | 42.072 | 0.00 | 0.00 |
| ATOM | 3465 | CG   | ASN | X | 229 | 35.722 | 31.529 | 40.522 | 0.00 | 0.00 |
| ATOM | 3466 | OD1  | ASN | X | 229 | 35.292 | 32.294 | 39.652 | 0.00 | 0.00 |
| ATOM | 3467 | ND2  | ASN | X | 229 | 36.208 | 30.358 | 40.180 | 0.00 | 0.00 |
| ATOM | 3468 | HD21 | ASN | X | 229 | 36.298 | 30.151 | 39.195 | 0.00 | 0.00 |
| ATOM | 3469 | HD22 | ASN | X | 229 | 36.244 | 29.572 | 40.813 | 0.00 | 0.00 |
| ATOM | 3470 | C    | ASN | X | 229 | 37.653 | 31.485 | 43.144 | 0.00 | 0.00 |
| ATOM | 3471 | O    | ASN | X | 229 | 37.410 | 30.378 | 43.617 | 0.00 | 0.00 |
| ATOM | 3472 | N    | GLY | X | 230 | 38.877 | 32.041 | 43.030 | 0.00 | 0.00 |
| ATOM | 3473 | H    | GLY | X | 230 | 38.940 | 32.922 | 42.542 | 0.00 | 0.00 |
| ATOM | 3474 | CA   | GLY | X | 230 | 40.119 | 31.455 | 43.446 | 0.00 | 0.00 |
| ATOM | 3475 | HA2  | GLY | X | 230 | 40.231 | 30.369 | 43.192 | 0.00 | 0.00 |
| ATOM | 3476 | HA3  | GLY | X | 230 | 40.983 | 31.921 | 43.002 | 0.00 | 0.00 |
| ATOM | 3477 | C    | GLY | X | 230 | 40.320 | 31.616 | 44.991 | 0.00 | 0.00 |
| ATOM | 3478 | O    | GLY | X | 230 | 40.025 | 32.696 | 45.490 | 0.00 | 0.00 |
| ATOM | 3479 | N    | PRO | X | 231 | 40.725 | 30.567 | 45.731 | 0.00 | 0.00 |
| ATOM | 3480 | CD   | PRO | X | 231 | 41.479 | 29.409 | 45.210 | 0.00 | 0.00 |
| ATOM | 3481 | HD2  | PRO | X | 231 | 42.326 | 29.751 | 44.614 | 0.00 | 0.00 |
| ATOM | 3482 | HD3  | PRO | X | 231 | 40.792 | 28.863 | 44.564 | 0.00 | 0.00 |
| ATOM | 3483 | CG   | PRO | X | 231 | 41.936 | 28.602 | 46.430 | 0.00 | 0.00 |
| ATOM | 3484 | HG2  | PRO | X | 231 | 42.945 | 28.837 | 46.767 | 0.00 | 0.00 |
| ATOM | 3485 | HG3  | PRO | X | 231 | 41.756 | 27.540 | 46.259 | 0.00 | 0.00 |
| ATOM | 3486 | CB   | PRO | X | 231 | 40.928 | 29.047 | 47.489 | 0.00 | 0.00 |
| ATOM | 3487 | HB2  | PRO | X | 231 | 41.304 | 28.851 | 48.493 | 0.00 | 0.00 |
| ATOM | 3488 | HB3  | PRO | X | 231 | 40.087 | 28.361 | 47.387 | 0.00 | 0.00 |
| ATOM | 3489 | CA   | PRO | X | 231 | 40.602 | 30.521 | 47.173 | 0.00 | 0.00 |
| ATOM | 3490 | HA   | PRO | X | 231 | 39.583 | 30.603 | 47.553 | 0.00 | 0.00 |
| ATOM | 3491 | C    | PRO | X | 231 | 41.516 | 31.422 | 47.970 | 0.00 | 0.00 |
| ATOM | 3492 | O    | PRO | X | 231 | 41.222 | 31.727 | 49.068 | 0.00 | 0.00 |
| ATOM | 3493 | N    | TRP | X | 232 | 42.634 | 31.829 | 47.395 | 0.00 | 0.00 |
| ATOM | 3494 | H    | TRP | X | 232 | 42.722 | 31.667 | 46.402 | 0.00 | 0.00 |
| ATOM | 3495 | CA   | TRP | X | 232 | 43.597 | 32.757 | 48.056 | 0.00 | 0.00 |
| ATOM | 3496 | HA   | TRP | X | 232 | 43.708 | 32.409 | 49.083 | 0.00 | 0.00 |
| ATOM | 3497 | CB   | TRP | X | 232 | 44.877 | 32.696 | 47.146 | 0.00 | 0.00 |
| ATOM | 3498 | HB2  | TRP | X | 232 | 45.629 | 33.394 | 47.513 | 0.00 | 0.00 |

|      |      |      |     |   |     |        |        |        |      |      |
|------|------|------|-----|---|-----|--------|--------|--------|------|------|
| ATOM | 3499 | HB3  | TRP | X | 232 | 45.198 | 31.660 | 47.252 | 0.00 | 0.00 |
| ATOM | 3500 | CG   | TRP | X | 232 | 44.603 | 32.901 | 45.687 | 0.00 | 0.00 |
| ATOM | 3501 | CD1  | TRP | X | 232 | 44.415 | 31.899 | 44.735 | 0.00 | 0.00 |
| ATOM | 3502 | HD1  | TRP | X | 232 | 44.588 | 30.854 | 44.947 | 0.00 | 0.00 |
| ATOM | 3503 | NE1  | TRP | X | 232 | 43.944 | 32.481 | 43.559 | 0.00 | 0.00 |
| ATOM | 3504 | HE1  | TRP | X | 232 | 43.709 | 31.926 | 42.748 | 0.00 | 0.00 |
| ATOM | 3505 | CE2  | TRP | X | 232 | 43.969 | 33.859 | 43.673 | 0.00 | 0.00 |
| ATOM | 3506 | CZ2  | TRP | X | 232 | 43.766 | 34.838 | 42.770 | 0.00 | 0.00 |
| ATOM | 3507 | HZ2  | TRP | X | 232 | 43.464 | 34.476 | 41.798 | 0.00 | 0.00 |
| ATOM | 3508 | CH2  | TRP | X | 232 | 44.154 | 36.157 | 43.061 | 0.00 | 0.00 |
| ATOM | 3509 | HH2  | TRP | X | 232 | 44.170 | 36.957 | 42.335 | 0.00 | 0.00 |
| ATOM | 3510 | CZ3  | TRP | X | 232 | 44.591 | 36.518 | 44.367 | 0.00 | 0.00 |
| ATOM | 3511 | HZ3  | TRP | X | 232 | 44.872 | 37.523 | 44.645 | 0.00 | 0.00 |
| ATOM | 3512 | CE3  | TRP | X | 232 | 44.613 | 35.455 | 45.347 | 0.00 | 0.00 |
| ATOM | 3513 | HE3  | TRP | X | 232 | 44.844 | 35.677 | 46.378 | 0.00 | 0.00 |
| ATOM | 3514 | CD2  | TRP | X | 232 | 44.414 | 34.106 | 45.015 | 0.00 | 0.00 |
| ATOM | 3515 | C    | TRP | X | 232 | 43.104 | 34.232 | 48.087 | 0.00 | 0.00 |
| ATOM | 3516 | O    | TRP | X | 232 | 43.616 | 35.085 | 48.830 | 0.00 | 0.00 |
| ATOM | 3517 | N    | ALA | X | 233 | 42.087 | 34.454 | 47.273 | 0.00 | 0.00 |
| ATOM | 3518 | H    | ALA | X | 233 | 41.700 | 33.726 | 46.690 | 0.00 | 0.00 |
| ATOM | 3519 | CA   | ALA | X | 233 | 41.402 | 35.792 | 47.253 | 0.00 | 0.00 |
| ATOM | 3520 | HA   | ALA | X | 233 | 42.242 | 36.467 | 47.416 | 0.00 | 0.00 |
| ATOM | 3521 | CB   | ALA | X | 233 | 40.911 | 35.966 | 45.846 | 0.00 | 0.00 |
| ATOM | 3522 | HB1  | ALA | X | 233 | 40.421 | 36.911 | 45.612 | 0.00 | 0.00 |
| ATOM | 3523 | HB2  | ALA | X | 233 | 41.790 | 35.932 | 45.202 | 0.00 | 0.00 |
| ATOM | 3524 | HB3  | ALA | X | 233 | 40.202 | 35.158 | 45.667 | 0.00 | 0.00 |
| ATOM | 3525 | C    | ALA | X | 233 | 40.350 | 36.086 | 48.318 | 0.00 | 0.00 |
| ATOM | 3526 | O    | ALA | X | 233 | 39.645 | 37.069 | 48.229 | 0.00 | 0.00 |
| ATOM | 3527 | N    | THR | X | 234 | 40.025 | 35.126 | 49.265 | 0.00 | 0.00 |
| ATOM | 3528 | H    | THR | X | 234 | 40.525 | 34.249 | 49.296 | 0.00 | 0.00 |
| ATOM | 3529 | CA   | THR | X | 234 | 38.979 | 35.431 | 50.312 | 0.00 | 0.00 |
| ATOM | 3530 | HA   | THR | X | 234 | 39.003 | 36.515 | 50.426 | 0.00 | 0.00 |
| ATOM | 3531 | CB   | THR | X | 234 | 37.553 | 34.966 | 49.831 | 0.00 | 0.00 |
| ATOM | 3532 | HB   | THR | X | 234 | 37.410 | 33.885 | 49.813 | 0.00 | 0.00 |
| ATOM | 3533 | CG2  | THR | X | 234 | 36.314 | 35.535 | 50.603 | 0.00 | 0.00 |
| ATOM | 3534 | HG21 | THR | X | 234 | 36.113 | 34.901 | 51.467 | 0.00 | 0.00 |
| ATOM | 3535 | HG22 | THR | X | 234 | 36.437 | 36.565 | 50.937 | 0.00 | 0.00 |
| ATOM | 3536 | HG23 | THR | X | 234 | 35.387 | 35.460 | 50.033 | 0.00 | 0.00 |
| ATOM | 3537 | OG1  | THR | X | 234 | 37.425 | 35.453 | 48.545 | 0.00 | 0.00 |
| ATOM | 3538 | HG1  | THR | X | 234 | 38.158 | 36.067 | 48.458 | 0.00 | 0.00 |
| ATOM | 3539 | C    | THR | X | 234 | 39.375 | 34.651 | 51.600 | 0.00 | 0.00 |
| ATOM | 3540 | O    | THR | X | 234 | 40.196 | 33.768 | 51.576 | 0.00 | 0.00 |
| ATOM | 3541 | N    | VAL | X | 235 | 38.616 | 34.978 | 52.648 | 0.00 | 0.00 |
| ATOM | 3542 | H    | VAL | X | 235 | 38.041 | 35.792 | 52.487 | 0.00 | 0.00 |
| ATOM | 3543 | CA   | VAL | X | 235 | 38.485 | 34.200 | 53.892 | 0.00 | 0.00 |
| ATOM | 3544 | HA   | VAL | X | 235 | 38.539 | 33.158 | 53.577 | 0.00 | 0.00 |
| ATOM | 3545 | CB   | VAL | X | 235 | 39.732 | 34.506 | 54.786 | 0.00 | 0.00 |
| ATOM | 3546 | HB   | VAL | X | 235 | 40.566 | 34.570 | 54.087 | 0.00 | 0.00 |
| ATOM | 3547 | CG1  | VAL | X | 235 | 39.476 | 35.871 | 55.461 | 0.00 | 0.00 |
| ATOM | 3548 | HG11 | VAL | X | 235 | 39.124 | 36.584 | 54.715 | 0.00 | 0.00 |
| ATOM | 3549 | HG12 | VAL | X | 235 | 38.661 | 35.804 | 56.181 | 0.00 | 0.00 |
| ATOM | 3550 | HG13 | VAL | X | 235 | 40.386 | 36.252 | 55.924 | 0.00 | 0.00 |
| ATOM | 3551 | CG2  | VAL | X | 235 | 40.124 | 33.437 | 55.782 | 0.00 | 0.00 |
| ATOM | 3552 | HG21 | VAL | X | 235 | 39.390 | 33.490 | 56.585 | 0.00 | 0.00 |
| ATOM | 3553 | HG22 | VAL | X | 235 | 39.963 | 32.434 | 55.387 | 0.00 | 0.00 |
| ATOM | 3554 | HG23 | VAL | X | 235 | 41.127 | 33.550 | 56.194 | 0.00 | 0.00 |
| ATOM | 3555 | C    | VAL | X | 235 | 37.192 | 34.416 | 54.581 | 0.00 | 0.00 |
| ATOM | 3556 | O    | VAL | X | 235 | 36.492 | 35.400 | 54.269 | 0.00 | 0.00 |
| ATOM | 3557 | N    | GLY | X | 236 | 36.911 | 33.542 | 55.550 | 0.00 | 0.00 |
| ATOM | 3558 | H    | GLY | X | 236 | 37.633 | 32.875 | 55.782 | 0.00 | 0.00 |
| ATOM | 3559 | CA   | GLY | X | 236 | 35.775 | 33.767 | 56.428 | 0.00 | 0.00 |
| ATOM | 3560 | HA2  | GLY | X | 236 | 34.929 | 34.310 | 56.020 | 0.00 | 0.00 |
| ATOM | 3561 | HA3  | GLY | X | 236 | 35.387 | 32.767 | 56.810 | 0.00 | 0.00 |
| ATOM | 3562 | C    | GLY | X | 236 | 36.095 | 34.514 | 57.652 | 0.00 | 0.00 |
| ATOM | 3563 | O    | GLY | X | 236 | 37.254 | 34.633 | 58.045 | 0.00 | 0.00 |
| ATOM | 3564 | N    | MET | X | 237 | 35.136 | 35.211 | 58.235 | 0.00 | 0.00 |
| ATOM | 3565 | H    | MET | X | 237 | 34.215 | 35.263 | 57.826 | 0.00 | 0.00 |
| ATOM | 3566 | CA   | MET | X | 237 | 35.347 | 36.167 | 59.262 | 0.00 | 0.00 |
| ATOM | 3567 | HA   | MET | X | 237 | 35.966 | 36.951 | 58.826 | 0.00 | 0.00 |
| ATOM | 3568 | CB   | MET | X | 237 | 34.034 | 36.814 | 59.578 | 0.00 | 0.00 |

|      |      |      |     |   |     |        |        |        |      |      |
|------|------|------|-----|---|-----|--------|--------|--------|------|------|
| ATOM | 3569 | HB2  | MET | X | 237 | 34.272 | 37.495 | 60.396 | 0.00 | 0.00 |
| ATOM | 3570 | HB3  | MET | X | 237 | 33.821 | 37.532 | 58.786 | 0.00 | 0.00 |
| ATOM | 3571 | CG   | MET | X | 237 | 32.813 | 35.921 | 59.996 | 0.00 | 0.00 |
| ATOM | 3572 | HG2  | MET | X | 237 | 32.529 | 35.185 | 59.244 | 0.00 | 0.00 |
| ATOM | 3573 | HG3  | MET | X | 237 | 33.016 | 35.314 | 60.879 | 0.00 | 0.00 |
| ATOM | 3574 | SD   | MET | X | 237 | 31.372 | 36.891 | 60.525 | 0.00 | 0.00 |
| ATOM | 3575 | CE   | MET | X | 237 | 31.063 | 37.852 | 59.061 | 0.00 | 0.00 |
| ATOM | 3576 | HE1  | MET | X | 237 | 30.277 | 38.596 | 59.183 | 0.00 | 0.00 |
| ATOM | 3577 | HE2  | MET | X | 237 | 31.958 | 38.369 | 58.713 | 0.00 | 0.00 |
| ATOM | 3578 | HE3  | MET | X | 237 | 30.596 | 37.241 | 58.289 | 0.00 | 0.00 |
| ATOM | 3579 | C    | MET | X | 237 | 36.072 | 35.745 | 60.568 | 0.00 | 0.00 |
| ATOM | 3580 | O    | MET | X | 237 | 36.641 | 36.556 | 61.277 | 0.00 | 0.00 |
| ATOM | 3581 | N    | GLY | X | 238 | 36.047 | 34.467 | 60.929 | 0.00 | 0.00 |
| ATOM | 3582 | H    | GLY | X | 238 | 35.522 | 33.816 | 60.364 | 0.00 | 0.00 |
| ATOM | 3583 | CA   | GLY | X | 238 | 36.814 | 33.827 | 61.965 | 0.00 | 0.00 |
| ATOM | 3584 | HA2  | GLY | X | 238 | 36.460 | 34.156 | 62.931 | 0.00 | 0.00 |
| ATOM | 3585 | HA3  | GLY | X | 238 | 36.538 | 32.789 | 61.990 | 0.00 | 0.00 |
| ATOM | 3586 | C    | GLY | X | 238 | 38.342 | 34.024 | 61.891 | 0.00 | 0.00 |
| ATOM | 3587 | O    | GLY | X | 238 | 38.889 | 34.665 | 62.797 | 0.00 | 0.00 |
| ATOM | 3588 | N    | GLU | X | 239 | 39.019 | 33.650 | 60.778 | 0.00 | 0.00 |
| ATOM | 3589 | H    | GLU | X | 239 | 38.592 | 32.992 | 60.142 | 0.00 | 0.00 |
| ATOM | 3590 | CA   | GLU | X | 239 | 40.440 | 33.949 | 60.606 | 0.00 | 0.00 |
| ATOM | 3591 | HA   | GLU | X | 239 | 40.966 | 33.507 | 61.452 | 0.00 | 0.00 |
| ATOM | 3592 | CB   | GLU | X | 239 | 40.920 | 33.430 | 59.209 | 0.00 | 0.00 |
| ATOM | 3593 | HB2  | GLU | X | 239 | 40.158 | 33.557 | 58.439 | 0.00 | 0.00 |
| ATOM | 3594 | HB3  | GLU | X | 239 | 41.739 | 34.038 | 58.824 | 0.00 | 0.00 |
| ATOM | 3595 | CG   | GLU | X | 239 | 41.234 | 31.949 | 59.234 | 0.00 | 0.00 |
| ATOM | 3596 | HG2  | GLU | X | 239 | 40.497 | 31.403 | 59.823 | 0.00 | 0.00 |
| ATOM | 3597 | HG3  | GLU | X | 239 | 41.360 | 31.502 | 58.248 | 0.00 | 0.00 |
| ATOM | 3598 | CD   | GLU | X | 239 | 42.678 | 31.786 | 59.731 | 0.00 | 0.00 |
| ATOM | 3599 | OE1  | GLU | X | 239 | 43.697 | 32.340 | 59.227 | 0.00 | 0.00 |
| ATOM | 3600 | OE2  | GLU | X | 239 | 42.793 | 31.217 | 60.842 | 0.00 | 0.00 |
| ATOM | 3601 | C    | GLU | X | 239 | 40.614 | 35.429 | 60.530 | 0.00 | 0.00 |
| ATOM | 3602 | O    | GLU | X | 239 | 41.562 | 35.963 | 61.076 | 0.00 | 0.00 |
| ATOM | 3603 | N    | ALA | X | 240 | 39.704 | 36.260 | 60.000 | 0.00 | 0.00 |
| ATOM | 3604 | H    | ALA | X | 240 | 38.920 | 35.791 | 59.570 | 0.00 | 0.00 |
| ATOM | 3605 | CA   | ALA | X | 240 | 39.720 | 37.705 | 59.919 | 0.00 | 0.00 |
| ATOM | 3606 | HA   | ALA | X | 240 | 40.642 | 37.935 | 59.385 | 0.00 | 0.00 |
| ATOM | 3607 | CB   | ALA | X | 240 | 38.589 | 38.234 | 59.106 | 0.00 | 0.00 |
| ATOM | 3608 | HB1  | ALA | X | 240 | 37.743 | 38.300 | 59.790 | 0.00 | 0.00 |
| ATOM | 3609 | HB2  | ALA | X | 240 | 38.799 | 39.271 | 58.844 | 0.00 | 0.00 |
| ATOM | 3610 | HB3  | ALA | X | 240 | 38.335 | 37.673 | 58.207 | 0.00 | 0.00 |
| ATOM | 3611 | C    | ALA | X | 240 | 39.832 | 38.206 | 61.360 | 0.00 | 0.00 |
| ATOM | 3612 | O    | ALA | X | 240 | 40.758 | 38.978 | 61.609 | 0.00 | 0.00 |
| ATOM | 3613 | N    | ARG | X | 241 | 38.909 | 37.811 | 62.281 | 0.00 | 0.00 |
| ATOM | 3614 | H    | ARG | X | 241 | 38.298 | 37.056 | 62.004 | 0.00 | 0.00 |
| ATOM | 3615 | CA   | ARG | X | 241 | 38.896 | 38.122 | 63.706 | 0.00 | 0.00 |
| ATOM | 3616 | HA   | ARG | X | 241 | 38.703 | 39.187 | 63.832 | 0.00 | 0.00 |
| ATOM | 3617 | CB   | ARG | X | 241 | 37.732 | 37.332 | 64.364 | 0.00 | 0.00 |
| ATOM | 3618 | HB2  | ARG | X | 241 | 36.818 | 37.702 | 63.900 | 0.00 | 0.00 |
| ATOM | 3619 | HB3  | ARG | X | 241 | 37.850 | 36.285 | 64.084 | 0.00 | 0.00 |
| ATOM | 3620 | CG   | ARG | X | 241 | 37.627 | 37.335 | 65.892 | 0.00 | 0.00 |
| ATOM | 3621 | HG2  | ARG | X | 241 | 38.395 | 36.692 | 66.321 | 0.00 | 0.00 |
| ATOM | 3622 | HG3  | ARG | X | 241 | 37.747 | 38.380 | 66.177 | 0.00 | 0.00 |
| ATOM | 3623 | CD   | ARG | X | 241 | 36.278 | 36.810 | 66.431 | 0.00 | 0.00 |
| ATOM | 3624 | HD2  | ARG | X | 241 | 36.341 | 36.789 | 67.519 | 0.00 | 0.00 |
| ATOM | 3625 | HD3  | ARG | X | 241 | 35.447 | 37.454 | 66.144 | 0.00 | 0.00 |
| ATOM | 3626 | NE   | ARG | X | 241 | 35.955 | 35.522 | 65.887 | 0.00 | 0.00 |
| ATOM | 3627 | HE   | ARG | X | 241 | 36.743 | 34.920 | 65.694 | 0.00 | 0.00 |
| ATOM | 3628 | CZ   | ARG | X | 241 | 34.719 | 35.054 | 65.496 | 0.00 | 0.00 |
| ATOM | 3629 | NH1  | ARG | X | 241 | 33.574 | 35.772 | 65.472 | 0.00 | 0.00 |
| ATOM | 3630 | HH11 | ARG | X | 241 | 33.546 | 36.608 | 66.038 | 0.00 | 0.00 |
| ATOM | 3631 | HH12 | ARG | X | 241 | 32.719 | 35.439 | 65.050 | 0.00 | 0.00 |
| ATOM | 3632 | NH2  | ARG | X | 241 | 34.659 | 33.808 | 64.980 | 0.00 | 0.00 |
| ATOM | 3633 | HH21 | ARG | X | 241 | 35.511 | 33.274 | 64.882 | 0.00 | 0.00 |
| ATOM | 3634 | HH22 | ARG | X | 241 | 33.762 | 33.429 | 64.712 | 0.00 | 0.00 |
| ATOM | 3635 | C    | ARG | X | 241 | 40.226 | 37.697 | 64.290 | 0.00 | 0.00 |
| ATOM | 3636 | O    | ARG | X | 241 | 40.929 | 38.562 | 64.792 | 0.00 | 0.00 |
| ATOM | 3637 | N    | ARG | X | 242 | 40.585 | 36.461 | 64.210 | 0.00 | 0.00 |
| ATOM | 3638 | H    | ARG | X | 242 | 39.872 | 35.843 | 63.849 | 0.00 | 0.00 |

|      |      |      |     |   |     |        |        |        |      |      |
|------|------|------|-----|---|-----|--------|--------|--------|------|------|
| ATOM | 3639 | CA   | ARG | X | 242 | 41.801 | 35.878 | 64.777 | 0.00 | 0.00 |
| ATOM | 3640 | HA   | ARG | X | 242 | 41.720 | 35.776 | 65.859 | 0.00 | 0.00 |
| ATOM | 3641 | CB   | ARG | X | 242 | 41.873 | 34.438 | 64.183 | 0.00 | 0.00 |
| ATOM | 3642 | HB2  | ARG | X | 242 | 40.918 | 33.920 | 64.276 | 0.00 | 0.00 |
| ATOM | 3643 | HB3  | ARG | X | 242 | 42.155 | 34.355 | 63.133 | 0.00 | 0.00 |
| ATOM | 3644 | CG   | ARG | X | 242 | 42.957 | 33.645 | 65.002 | 0.00 | 0.00 |
| ATOM | 3645 | HG2  | ARG | X | 242 | 43.867 | 34.224 | 65.158 | 0.00 | 0.00 |
| ATOM | 3646 | HG3  | ARG | X | 242 | 42.500 | 33.422 | 65.967 | 0.00 | 0.00 |
| ATOM | 3647 | CD   | ARG | X | 242 | 43.397 | 32.358 | 64.249 | 0.00 | 0.00 |
| ATOM | 3648 | HD2  | ARG | X | 242 | 44.231 | 31.922 | 64.800 | 0.00 | 0.00 |
| ATOM | 3649 | HD3  | ARG | X | 242 | 42.546 | 31.687 | 64.137 | 0.00 | 0.00 |
| ATOM | 3650 | NE   | ARG | X | 242 | 43.972 | 32.608 | 62.896 | 0.00 | 0.00 |
| ATOM | 3651 | HE   | ARG | X | 242 | 43.428 | 32.212 | 62.142 | 0.00 | 0.00 |
| ATOM | 3652 | CZ   | ARG | X | 242 | 45.160 | 33.190 | 62.553 | 0.00 | 0.00 |
| ATOM | 3653 | NH1  | ARG | X | 242 | 46.006 | 33.605 | 63.497 | 0.00 | 0.00 |
| ATOM | 3654 | HH11 | ARG | X | 242 | 45.704 | 33.761 | 64.448 | 0.00 | 0.00 |
| ATOM | 3655 | HH12 | ARG | X | 242 | 46.953 | 33.907 | 63.321 | 0.00 | 0.00 |
| ATOM | 3656 | NH2  | ARG | X | 242 | 45.570 | 33.287 | 61.313 | 0.00 | 0.00 |
| ATOM | 3657 | HH21 | ARG | X | 242 | 44.971 | 33.028 | 60.542 | 0.00 | 0.00 |
| ATOM | 3658 | HH22 | ARG | X | 242 | 46.544 | 33.519 | 61.179 | 0.00 | 0.00 |
| ATOM | 3659 | C    | ARG | X | 242 | 43.077 | 36.626 | 64.494 | 0.00 | 0.00 |
| ATOM | 3660 | O    | ARG | X | 242 | 43.902 | 36.824 | 65.410 | 0.00 | 0.00 |
| ATOM | 3661 | N    | ARG | X | 243 | 43.199 | 36.951 | 63.158 | 0.00 | 0.00 |
| ATOM | 3662 | H    | ARG | X | 243 | 42.451 | 36.595 | 62.581 | 0.00 | 0.00 |
| ATOM | 3663 | CA   | ARG | X | 243 | 44.313 | 37.777 | 62.692 | 0.00 | 0.00 |
| ATOM | 3664 | HA   | ARG | X | 243 | 45.161 | 37.302 | 63.184 | 0.00 | 0.00 |
| ATOM | 3665 | CB   | ARG | X | 243 | 44.402 | 37.844 | 61.149 | 0.00 | 0.00 |
| ATOM | 3666 | HB2  | ARG | X | 243 | 43.423 | 38.130 | 60.764 | 0.00 | 0.00 |
| ATOM | 3667 | HB3  | ARG | X | 243 | 45.125 | 38.582 | 60.802 | 0.00 | 0.00 |
| ATOM | 3668 | CG   | ARG | X | 243 | 44.623 | 36.435 | 60.556 | 0.00 | 0.00 |
| ATOM | 3669 | HG2  | ARG | X | 243 | 45.553 | 36.066 | 60.988 | 0.00 | 0.00 |
| ATOM | 3670 | HG3  | ARG | X | 243 | 43.927 | 35.709 | 60.975 | 0.00 | 0.00 |
| ATOM | 3671 | CD   | ARG | X | 243 | 44.696 | 36.324 | 59.072 | 0.00 | 0.00 |
| ATOM | 3672 | HD2  | ARG | X | 243 | 43.920 | 36.942 | 58.620 | 0.00 | 0.00 |
| ATOM | 3673 | HD3  | ARG | X | 243 | 45.650 | 36.777 | 58.800 | 0.00 | 0.00 |
| ATOM | 3674 | NE   | ARG | X | 243 | 44.583 | 34.966 | 58.564 | 0.00 | 0.00 |
| ATOM | 3675 | HE   | ARG | X | 243 | 44.359 | 34.234 | 59.222 | 0.00 | 0.00 |
| ATOM | 3676 | CZ   | ARG | X | 243 | 44.759 | 34.629 | 57.301 | 0.00 | 0.00 |
| ATOM | 3677 | NH1  | ARG | X | 243 | 45.285 | 35.412 | 56.425 | 0.00 | 0.00 |
| ATOM | 3678 | HH11 | ARG | X | 243 | 45.653 | 36.301 | 56.734 | 0.00 | 0.00 |
| ATOM | 3679 | HH12 | ARG | X | 243 | 45.615 | 35.030 | 55.551 | 0.00 | 0.00 |
| ATOM | 3680 | NH2  | ARG | X | 243 | 44.404 | 33.415 | 56.905 | 0.00 | 0.00 |
| ATOM | 3681 | HH21 | ARG | X | 243 | 43.861 | 32.966 | 57.628 | 0.00 | 0.00 |
| ATOM | 3682 | HH22 | ARG | X | 243 | 44.478 | 32.843 | 56.076 | 0.00 | 0.00 |
| ATOM | 3683 | C    | ARG | X | 243 | 44.268 | 39.210 | 63.152 | 0.00 | 0.00 |
| ATOM | 3684 | O    | ARG | X | 243 | 45.223 | 39.553 | 63.873 | 0.00 | 0.00 |
| ATOM | 3685 | N    | ALA | X | 244 | 43.132 | 39.949 | 63.112 | 0.00 | 0.00 |
| ATOM | 3686 | H    | ALA | X | 244 | 42.338 | 39.577 | 62.610 | 0.00 | 0.00 |
| ATOM | 3687 | CA   | ALA | X | 244 | 42.940 | 41.141 | 63.975 | 0.00 | 0.00 |
| ATOM | 3688 | HA   | ALA | X | 244 | 43.487 | 41.924 | 63.450 | 0.00 | 0.00 |
| ATOM | 3689 | CB   | ALA | X | 244 | 41.488 | 41.649 | 64.004 | 0.00 | 0.00 |
| ATOM | 3690 | HB1  | ALA | X | 244 | 41.200 | 41.774 | 62.960 | 0.00 | 0.00 |
| ATOM | 3691 | HB2  | ALA | X | 244 | 40.866 | 40.840 | 64.384 | 0.00 | 0.00 |
| ATOM | 3692 | HB3  | ALA | X | 244 | 41.393 | 42.509 | 64.667 | 0.00 | 0.00 |
| ATOM | 3693 | C    | ALA | X | 244 | 43.482 | 41.102 | 65.411 | 0.00 | 0.00 |
| ATOM | 3694 | O    | ALA | X | 244 | 44.193 | 42.023 | 65.871 | 0.00 | 0.00 |
| ATOM | 3695 | N    | THR | X | 245 | 43.020 | 40.068 | 66.195 | 0.00 | 0.00 |
| ATOM | 3696 | H    | THR | X | 245 | 42.306 | 39.406 | 65.923 | 0.00 | 0.00 |
| ATOM | 3697 | CA   | THR | X | 245 | 43.432 | 39.818 | 67.537 | 0.00 | 0.00 |
| ATOM | 3698 | HA   | THR | X | 245 | 43.280 | 40.726 | 68.120 | 0.00 | 0.00 |
| ATOM | 3699 | CB   | THR | X | 245 | 42.608 | 38.707 | 68.124 | 0.00 | 0.00 |
| ATOM | 3700 | HB   | THR | X | 245 | 42.804 | 37.774 | 67.596 | 0.00 | 0.00 |
| ATOM | 3701 | CG2  | THR | X | 245 | 43.020 | 38.450 | 69.602 | 0.00 | 0.00 |
| ATOM | 3702 | HG21 | THR | X | 245 | 42.343 | 37.726 | 70.056 | 0.00 | 0.00 |
| ATOM | 3703 | HG22 | THR | X | 245 | 44.055 | 38.118 | 69.693 | 0.00 | 0.00 |
| ATOM | 3704 | HG23 | THR | X | 245 | 42.844 | 39.367 | 70.164 | 0.00 | 0.00 |
| ATOM | 3705 | OG1  | THR | X | 245 | 41.238 | 39.006 | 68.053 | 0.00 | 0.00 |
| ATOM | 3706 | HG1  | THR | X | 245 | 40.825 | 38.298 | 68.553 | 0.00 | 0.00 |
| ATOM | 3707 | C    | THR | X | 245 | 44.890 | 39.549 | 67.698 | 0.00 | 0.00 |
| ATOM | 3708 | O    | THR | X | 245 | 45.582 | 40.096 | 68.602 | 0.00 | 0.00 |

|      |      |      |     |   |     |        |        |        |      |      |
|------|------|------|-----|---|-----|--------|--------|--------|------|------|
| ATOM | 3709 | N    | GLN | X | 246 | 45.474 | 38.759 | 66.843 | 0.00 | 0.00 |
| ATOM | 3710 | H    | GLN | X | 246 | 44.932 | 38.224 | 66.180 | 0.00 | 0.00 |
| ATOM | 3711 | CA   | GLN | X | 246 | 46.923 | 38.435 | 66.870 | 0.00 | 0.00 |
| ATOM | 3712 | HA   | GLN | X | 246 | 47.255 | 38.053 | 67.835 | 0.00 | 0.00 |
| ATOM | 3713 | CB   | GLN | X | 246 | 47.175 | 37.228 | 65.917 | 0.00 | 0.00 |
| ATOM | 3714 | HB2  | GLN | X | 246 | 46.632 | 36.403 | 66.378 | 0.00 | 0.00 |
| ATOM | 3715 | HB3  | GLN | X | 246 | 46.732 | 37.496 | 64.958 | 0.00 | 0.00 |
| ATOM | 3716 | CG   | GLN | X | 246 | 48.653 | 36.802 | 65.913 | 0.00 | 0.00 |
| ATOM | 3717 | HG2  | GLN | X | 246 | 49.190 | 37.361 | 65.146 | 0.00 | 0.00 |
| ATOM | 3718 | HG3  | GLN | X | 246 | 49.208 | 36.884 | 66.847 | 0.00 | 0.00 |
| ATOM | 3719 | CD   | GLN | X | 246 | 48.960 | 35.385 | 65.455 | 0.00 | 0.00 |
| ATOM | 3720 | OE1  | GLN | X | 246 | 48.282 | 34.800 | 64.651 | 0.00 | 0.00 |
| ATOM | 3721 | NE2  | GLN | X | 246 | 49.986 | 34.769 | 65.923 | 0.00 | 0.00 |
| ATOM | 3722 | HE21 | GLN | X | 246 | 50.317 | 33.922 | 65.482 | 0.00 | 0.00 |
| ATOM | 3723 | HE22 | GLN | X | 246 | 50.660 | 35.250 | 66.502 | 0.00 | 0.00 |
| ATOM | 3724 | C    | GLN | X | 246 | 47.869 | 39.547 | 66.453 | 0.00 | 0.00 |
| ATOM | 3725 | O    | GLN | X | 246 | 48.914 | 39.818 | 67.067 | 0.00 | 0.00 |
| ATOM | 3726 | N    | LEU | X | 247 | 47.386 | 40.458 | 65.534 | 0.00 | 0.00 |
| ATOM | 3727 | H    | LEU | X | 247 | 46.472 | 40.412 | 65.107 | 0.00 | 0.00 |
| ATOM | 3728 | CA   | LEU | X | 247 | 48.237 | 41.638 | 65.163 | 0.00 | 0.00 |
| ATOM | 3729 | HA   | LEU | X | 247 | 49.231 | 41.227 | 64.986 | 0.00 | 0.00 |
| ATOM | 3730 | CB   | LEU | X | 247 | 47.814 | 42.339 | 63.895 | 0.00 | 0.00 |
| ATOM | 3731 | HB2  | LEU | X | 247 | 47.811 | 41.628 | 63.069 | 0.00 | 0.00 |
| ATOM | 3732 | HB3  | LEU | X | 247 | 46.759 | 42.611 | 63.917 | 0.00 | 0.00 |
| ATOM | 3733 | CG   | LEU | X | 247 | 48.604 | 43.574 | 63.587 | 0.00 | 0.00 |
| ATOM | 3734 | HG   | LEU | X | 247 | 48.454 | 44.245 | 64.433 | 0.00 | 0.00 |
| ATOM | 3735 | CD1  | LEU | X | 247 | 50.079 | 43.395 | 63.519 | 0.00 | 0.00 |
| ATOM | 3736 | HD11 | LEU | X | 247 | 50.566 | 43.233 | 64.481 | 0.00 | 0.00 |
| ATOM | 3737 | HD12 | LEU | X | 247 | 50.280 | 42.633 | 62.766 | 0.00 | 0.00 |
| ATOM | 3738 | HD13 | LEU | X | 247 | 50.585 | 44.222 | 63.021 | 0.00 | 0.00 |
| ATOM | 3739 | CD2  | LEU | X | 247 | 48.132 | 44.138 | 62.260 | 0.00 | 0.00 |
| ATOM | 3740 | HD21 | LEU | X | 247 | 47.072 | 44.390 | 62.240 | 0.00 | 0.00 |
| ATOM | 3741 | HD22 | LEU | X | 247 | 48.713 | 44.965 | 61.852 | 0.00 | 0.00 |
| ATOM | 3742 | HD23 | LEU | X | 247 | 48.264 | 43.290 | 61.588 | 0.00 | 0.00 |
| ATOM | 3743 | C    | LEU | X | 247 | 48.234 | 42.539 | 66.434 | 0.00 | 0.00 |
| ATOM | 3744 | O    | LEU | X | 247 | 49.263 | 43.054 | 66.835 | 0.00 | 0.00 |
| ATOM | 3745 | N    | ALA | X | 248 | 47.024 | 42.713 | 66.960 | 0.00 | 0.00 |
| ATOM | 3746 | H    | ALA | X | 248 | 46.254 | 42.136 | 66.655 | 0.00 | 0.00 |
| ATOM | 3747 | CA   | ALA | X | 248 | 46.847 | 43.575 | 68.177 | 0.00 | 0.00 |
| ATOM | 3748 | HA   | ALA | X | 248 | 47.170 | 44.565 | 67.855 | 0.00 | 0.00 |
| ATOM | 3749 | CB   | ALA | X | 248 | 45.411 | 43.668 | 68.615 | 0.00 | 0.00 |
| ATOM | 3750 | HB1  | ALA | X | 248 | 45.343 | 44.086 | 69.619 | 0.00 | 0.00 |
| ATOM | 3751 | HB2  | ALA | X | 248 | 44.810 | 44.281 | 67.943 | 0.00 | 0.00 |
| ATOM | 3752 | HB3  | ALA | X | 248 | 44.962 | 42.684 | 68.749 | 0.00 | 0.00 |
| ATOM | 3753 | C    | ALA | X | 248 | 47.670 | 43.216 | 69.415 | 0.00 | 0.00 |
| ATOM | 3754 | O    | ALA | X | 248 | 48.432 | 44.000 | 69.947 | 0.00 | 0.00 |
| ATOM | 3755 | N    | HIE | X | 249 | 47.692 | 41.920 | 69.788 | 0.00 | 0.00 |
| ATOM | 3756 | H    | HIE | X | 249 | 46.961 | 41.361 | 69.371 | 0.00 | 0.00 |
| ATOM | 3757 | CA   | HIE | X | 249 | 48.536 | 41.228 | 70.728 | 0.00 | 0.00 |
| ATOM | 3758 | HA   | HIE | X | 249 | 48.455 | 41.751 | 71.681 | 0.00 | 0.00 |
| ATOM | 3759 | CB   | HIE | X | 249 | 48.085 | 39.749 | 70.920 | 0.00 | 0.00 |
| ATOM | 3760 | HB2  | HIE | X | 249 | 48.077 | 39.171 | 69.996 | 0.00 | 0.00 |
| ATOM | 3761 | HB3  | HIE | X | 249 | 48.753 | 39.191 | 71.576 | 0.00 | 0.00 |
| ATOM | 3762 | CG   | HIE | X | 249 | 46.779 | 39.459 | 71.572 | 0.00 | 0.00 |
| ATOM | 3763 | ND1  | HIE | X | 249 | 46.247 | 38.209 | 71.762 | 0.00 | 0.00 |
| ATOM | 3764 | CE1  | HIE | X | 249 | 45.028 | 38.361 | 72.318 | 0.00 | 0.00 |
| ATOM | 3765 | HE1  | HIE | X | 249 | 44.440 | 37.504 | 72.612 | 0.00 | 0.00 |
| ATOM | 3766 | NE2  | HIE | X | 249 | 44.799 | 39.631 | 72.593 | 0.00 | 0.00 |
| ATOM | 3767 | HE2  | HIE | X | 249 | 43.903 | 40.015 | 72.857 | 0.00 | 0.00 |
| ATOM | 3768 | CD2  | HIE | X | 249 | 45.905 | 40.370 | 72.226 | 0.00 | 0.00 |
| ATOM | 3769 | HD2  | HIE | X | 249 | 46.086 | 41.434 | 72.191 | 0.00 | 0.00 |
| ATOM | 3770 | C    | HIE | X | 249 | 50.053 | 41.467 | 70.581 | 0.00 | 0.00 |
| ATOM | 3771 | O    | HIE | X | 249 | 50.737 | 41.620 | 71.615 | 0.00 | 0.00 |
| ATOM | 3772 | N    | LEU | X | 250 | 50.451 | 41.595 | 69.291 | 0.00 | 0.00 |
| ATOM | 3773 | H    | LEU | X | 250 | 49.874 | 41.176 | 68.575 | 0.00 | 0.00 |
| ATOM | 3774 | CA   | LEU | X | 250 | 51.832 | 41.781 | 68.870 | 0.00 | 0.00 |
| ATOM | 3775 | HA   | LEU | X | 250 | 52.480 | 41.200 | 69.526 | 0.00 | 0.00 |
| ATOM | 3776 | CB   | LEU | X | 250 | 52.095 | 41.275 | 67.435 | 0.00 | 0.00 |
| ATOM | 3777 | HB2  | LEU | X | 250 | 51.189 | 41.520 | 66.880 | 0.00 | 0.00 |
| ATOM | 3778 | HB3  | LEU | X | 250 | 52.945 | 41.790 | 66.986 | 0.00 | 0.00 |

|      |      |      |     |   |     |        |        |        |      |      |
|------|------|------|-----|---|-----|--------|--------|--------|------|------|
| ATOM | 3779 | CG   | LEU | X | 250 | 52.260 | 39.779 | 67.262 | 0.00 | 0.00 |
| ATOM | 3780 | HG   | LEU | X | 250 | 51.473 | 39.297 | 67.841 | 0.00 | 0.00 |
| ATOM | 3781 | CD1  | LEU | X | 250 | 51.986 | 39.434 | 65.802 | 0.00 | 0.00 |
| ATOM | 3782 | HD11 | LEU | X | 250 | 52.667 | 40.011 | 65.175 | 0.00 | 0.00 |
| ATOM | 3783 | HD12 | LEU | X | 250 | 52.020 | 38.365 | 65.593 | 0.00 | 0.00 |
| ATOM | 3784 | HD13 | LEU | X | 250 | 50.970 | 39.752 | 65.568 | 0.00 | 0.00 |
| ATOM | 3785 | CD2  | LEU | X | 250 | 53.598 | 39.218 | 67.776 | 0.00 | 0.00 |
| ATOM | 3786 | HD21 | LEU | X | 250 | 53.481 | 39.049 | 68.846 | 0.00 | 0.00 |
| ATOM | 3787 | HD22 | LEU | X | 250 | 53.610 | 38.233 | 67.309 | 0.00 | 0.00 |
| ATOM | 3788 | HD23 | LEU | X | 250 | 54.464 | 39.767 | 67.406 | 0.00 | 0.00 |
| ATOM | 3789 | C    | LEU | X | 250 | 52.165 | 43.263 | 69.015 | 0.00 | 0.00 |
| ATOM | 3790 | O    | LEU | X | 250 | 53.174 | 43.629 | 69.628 | 0.00 | 0.00 |
| ATOM | 3791 | N    | VAL | X | 251 | 51.345 | 44.192 | 68.511 | 0.00 | 0.00 |
| ATOM | 3792 | H    | VAL | X | 251 | 50.592 | 43.820 | 67.951 | 0.00 | 0.00 |
| ATOM | 3793 | CA   | VAL | X | 251 | 51.584 | 45.612 | 68.690 | 0.00 | 0.00 |
| ATOM | 3794 | HA   | VAL | X | 251 | 52.619 | 45.856 | 68.452 | 0.00 | 0.00 |
| ATOM | 3795 | CB   | VAL | X | 251 | 50.720 | 46.499 | 67.693 | 0.00 | 0.00 |
| ATOM | 3796 | HB   | VAL | X | 251 | 50.724 | 46.017 | 66.715 | 0.00 | 0.00 |
| ATOM | 3797 | CG1  | VAL | X | 251 | 49.199 | 46.730 | 68.022 | 0.00 | 0.00 |
| ATOM | 3798 | HG11 | VAL | X | 251 | 49.115 | 47.109 | 69.041 | 0.00 | 0.00 |
| ATOM | 3799 | HG12 | VAL | X | 251 | 48.678 | 47.321 | 67.269 | 0.00 | 0.00 |
| ATOM | 3800 | HG13 | VAL | X | 251 | 48.827 | 45.712 | 68.132 | 0.00 | 0.00 |
| ATOM | 3801 | CG2  | VAL | X | 251 | 51.238 | 47.899 | 67.418 | 0.00 | 0.00 |
| ATOM | 3802 | HG21 | VAL | X | 251 | 50.962 | 48.081 | 66.379 | 0.00 | 0.00 |
| ATOM | 3803 | HG22 | VAL | X | 251 | 50.647 | 48.654 | 67.937 | 0.00 | 0.00 |
| ATOM | 3804 | HG23 | VAL | X | 251 | 52.279 | 48.187 | 67.560 | 0.00 | 0.00 |
| ATOM | 3805 | C    | VAL | X | 251 | 51.520 | 46.055 | 70.166 | 0.00 | 0.00 |
| ATOM | 3806 | O    | VAL | X | 251 | 52.178 | 47.055 | 70.599 | 0.00 | 0.00 |
| ATOM | 3807 | N    | GLY | X | 252 | 50.767 | 45.277 | 70.957 | 0.00 | 0.00 |
| ATOM | 3808 | H    | GLY | X | 252 | 50.217 | 44.580 | 70.476 | 0.00 | 0.00 |
| ATOM | 3809 | CA   | GLY | X | 252 | 50.573 | 45.467 | 72.399 | 0.00 | 0.00 |
| ATOM | 3810 | HA2  | GLY | X | 252 | 50.579 | 44.448 | 72.749 | 0.00 | 0.00 |
| ATOM | 3811 | HA3  | GLY | X | 252 | 51.408 | 46.012 | 72.874 | 0.00 | 0.00 |
| ATOM | 3812 | C    | GLY | X | 252 | 49.243 | 46.098 | 72.879 | 0.00 | 0.00 |
| ATOM | 3813 | O    | GLY | X | 252 | 49.052 | 46.310 | 74.080 | 0.00 | 0.00 |
| ATOM | 3814 | N    | CYX | X | 253 | 48.264 | 46.292 | 71.942 | 0.00 | 0.00 |
| ATOM | 3815 | H    | CYX | X | 253 | 48.520 | 46.011 | 71.006 | 0.00 | 0.00 |
| ATOM | 3816 | CA   | CYX | X | 253 | 46.864 | 46.571 | 72.195 | 0.00 | 0.00 |
| ATOM | 3817 | HA   | CYX | X | 253 | 46.838 | 47.457 | 72.829 | 0.00 | 0.00 |
| ATOM | 3818 | CB   | CYX | X | 253 | 46.227 | 46.949 | 70.825 | 0.00 | 0.00 |
| ATOM | 3819 | HB2  | CYX | X | 253 | 46.390 | 46.132 | 70.121 | 0.00 | 0.00 |
| ATOM | 3820 | HB3  | CYX | X | 253 | 45.200 | 47.172 | 71.114 | 0.00 | 0.00 |
| ATOM | 3821 | SG   | CYX | X | 253 | 47.066 | 48.512 | 70.225 | 0.00 | 0.00 |
| ATOM | 3822 | C    | CYX | X | 253 | 46.116 | 45.417 | 72.919 | 0.00 | 0.00 |
| ATOM | 3823 | O    | CYX | X | 253 | 46.551 | 44.212 | 72.691 | 0.00 | 0.00 |
| ATOM | 3824 | N    | PRO | X | 254 | 44.966 | 45.639 | 73.596 | 0.00 | 0.00 |
| ATOM | 3825 | CD   | PRO | X | 254 | 44.109 | 44.586 | 74.111 | 0.00 | 0.00 |
| ATOM | 3826 | HD2  | PRO | X | 254 | 44.533 | 43.806 | 74.744 | 0.00 | 0.00 |
| ATOM | 3827 | HD3  | PRO | X | 254 | 43.673 | 44.076 | 73.252 | 0.00 | 0.00 |
| ATOM | 3828 | CG   | PRO | X | 254 | 42.956 | 45.256 | 74.754 | 0.00 | 0.00 |
| ATOM | 3829 | HG2  | PRO | X | 254 | 42.811 | 45.014 | 75.807 | 0.00 | 0.00 |
| ATOM | 3830 | HG3  | PRO | X | 254 | 42.103 | 45.096 | 74.095 | 0.00 | 0.00 |
| ATOM | 3831 | CB   | PRO | X | 254 | 43.230 | 46.768 | 74.579 | 0.00 | 0.00 |
| ATOM | 3832 | HB2  | PRO | X | 254 | 43.103 | 47.365 | 75.482 | 0.00 | 0.00 |
| ATOM | 3833 | HB3  | PRO | X | 254 | 42.499 | 47.077 | 73.832 | 0.00 | 0.00 |
| ATOM | 3834 | CA   | PRO | X | 254 | 44.593 | 46.935 | 74.013 | 0.00 | 0.00 |
| ATOM | 3835 | HA   | PRO | X | 254 | 44.428 | 47.562 | 73.137 | 0.00 | 0.00 |
| ATOM | 3836 | C    | PRO | X | 254 | 45.561 | 47.588 | 75.068 | 0.00 | 0.00 |
| ATOM | 3837 | O    | PRO | X | 254 | 46.437 | 46.840 | 75.615 | 0.00 | 0.00 |
| ATOM | 3838 | N    | PRO | X | 255 | 45.308 | 48.880 | 75.404 | 0.00 | 0.00 |
| ATOM | 3839 | CD   | PRO | X | 255 | 44.406 | 49.762 | 74.793 | 0.00 | 0.00 |
| ATOM | 3840 | HD2  | PRO | X | 255 | 43.403 | 49.385 | 74.992 | 0.00 | 0.00 |
| ATOM | 3841 | HD3  | PRO | X | 255 | 44.652 | 49.784 | 73.731 | 0.00 | 0.00 |
| ATOM | 3842 | CG   | PRO | X | 255 | 44.651 | 51.233 | 75.246 | 0.00 | 0.00 |
| ATOM | 3843 | HG2  | PRO | X | 255 | 43.696 | 51.754 | 75.178 | 0.00 | 0.00 |
| ATOM | 3844 | HG3  | PRO | X | 255 | 45.503 | 51.640 | 74.703 | 0.00 | 0.00 |
| ATOM | 3845 | CB   | PRO | X | 255 | 45.059 | 51.006 | 76.738 | 0.00 | 0.00 |
| ATOM | 3846 | HB2  | PRO | X | 255 | 44.227 | 50.935 | 77.438 | 0.00 | 0.00 |
| ATOM | 3847 | HB3  | PRO | X | 255 | 45.706 | 51.794 | 77.123 | 0.00 | 0.00 |
| ATOM | 3848 | CA   | PRO | X | 255 | 45.854 | 49.646 | 76.604 | 0.00 | 0.00 |

|      |      |      |     |   |     |        |        |        |      |      |
|------|------|------|-----|---|-----|--------|--------|--------|------|------|
| ATOM | 3849 | HA   | PRO | X | 255 | 46.820 | 50.068 | 76.329 | 0.00 | 0.00 |
| ATOM | 3850 | C    | PRO | X | 255 | 46.032 | 48.886 | 77.919 | 0.00 | 0.00 |
| ATOM | 3851 | O    | PRO | X | 255 | 45.275 | 47.992 | 78.254 | 0.00 | 0.00 |
| ATOM | 3852 | N    | GLY | X | 256 | 47.023 | 49.344 | 78.645 | 0.00 | 0.00 |
| ATOM | 3853 | H    | GLY | X | 256 | 47.680 | 49.998 | 78.244 | 0.00 | 0.00 |
| ATOM | 3854 | CA   | GLY | X | 256 | 47.499 | 48.618 | 79.797 | 0.00 | 0.00 |
| ATOM | 3855 | HA2  | GLY | X | 256 | 47.580 | 47.595 | 79.661 | 0.00 | 0.00 |
| ATOM | 3856 | HA3  | GLY | X | 256 | 48.571 | 48.960 | 80.010 | 0.00 | 0.00 |
| ATOM | 3857 | C    | GLY | X | 256 | 46.649 | 48.846 | 81.167 | 0.00 | 0.00 |
| ATOM | 3858 | O    | GLY | X | 256 | 47.240 | 48.949 | 82.259 | 0.00 | 0.00 |
| ATOM | 3859 | N    | GLY | X | 257 | 45.317 | 48.929 | 81.078 | 0.00 | 0.00 |
| ATOM | 3860 | H    | GLY | X | 257 | 44.801 | 48.927 | 80.210 | 0.00 | 0.00 |
| ATOM | 3861 | CA   | GLY | X | 257 | 44.514 | 48.797 | 82.232 | 0.00 | 0.00 |
| ATOM | 3862 | HA2  | GLY | X | 257 | 45.077 | 48.873 | 83.122 | 0.00 | 0.00 |
| ATOM | 3863 | HA3  | GLY | X | 257 | 43.759 | 49.544 | 82.231 | 0.00 | 0.00 |
| ATOM | 3864 | C    | GLY | X | 257 | 43.905 | 47.413 | 82.247 | 0.00 | 0.00 |
| ATOM | 3865 | O    | GLY | X | 257 | 44.187 | 46.525 | 81.392 | 0.00 | 0.00 |
| ATOM | 3866 | N    | THR | X | 258 | 42.944 | 47.222 | 83.141 | 0.00 | 0.00 |
| ATOM | 3867 | H    | THR | X | 258 | 42.916 | 47.850 | 83.931 | 0.00 | 0.00 |
| ATOM | 3868 | CA   | THR | X | 258 | 41.963 | 46.063 | 83.057 | 0.00 | 0.00 |
| ATOM | 3869 | HA   | THR | X | 258 | 42.527 | 45.165 | 82.804 | 0.00 | 0.00 |
| ATOM | 3870 | CB   | THR | X | 258 | 41.245 | 45.854 | 84.389 | 0.00 | 0.00 |
| ATOM | 3871 | HB   | THR | X | 258 | 40.440 | 45.153 | 84.164 | 0.00 | 0.00 |
| ATOM | 3872 | CG2  | THR | X | 258 | 42.298 | 45.279 | 85.328 | 0.00 | 0.00 |
| ATOM | 3873 | HG21 | THR | X | 258 | 43.075 | 46.035 | 85.437 | 0.00 | 0.00 |
| ATOM | 3874 | HG22 | THR | X | 258 | 41.798 | 45.270 | 86.297 | 0.00 | 0.00 |
| ATOM | 3875 | HG23 | THR | X | 258 | 42.627 | 44.302 | 84.974 | 0.00 | 0.00 |
| ATOM | 3876 | OG1  | THR | X | 258 | 40.785 | 47.148 | 84.754 | 0.00 | 0.00 |
| ATOM | 3877 | HG1  | THR | X | 258 | 40.577 | 47.249 | 85.686 | 0.00 | 0.00 |
| ATOM | 3878 | C    | THR | X | 258 | 41.057 | 46.175 | 81.859 | 0.00 | 0.00 |
| ATOM | 3879 | O    | THR | X | 258 | 40.995 | 47.309 | 81.281 | 0.00 | 0.00 |
| ATOM | 3880 | N    | GLY | X | 259 | 40.431 | 45.028 | 81.439 | 0.00 | 0.00 |
| ATOM | 3881 | H    | GLY | X | 259 | 40.491 | 44.216 | 82.036 | 0.00 | 0.00 |
| ATOM | 3882 | CA   | GLY | X | 259 | 39.440 | 45.032 | 80.335 | 0.00 | 0.00 |
| ATOM | 3883 | HA2  | GLY | X | 259 | 38.798 | 44.177 | 80.599 | 0.00 | 0.00 |
| ATOM | 3884 | HA3  | GLY | X | 259 | 38.789 | 45.868 | 80.320 | 0.00 | 0.00 |
| ATOM | 3885 | C    | GLY | X | 259 | 39.961 | 44.869 | 78.922 | 0.00 | 0.00 |
| ATOM | 3886 | O    | GLY | X | 259 | 41.055 | 45.375 | 78.630 | 0.00 | 0.00 |
| ATOM | 3887 | N    | GLY | X | 260 | 39.113 | 44.183 | 78.150 | 0.00 | 0.00 |
| ATOM | 3888 | H    | GLY | X | 260 | 38.359 | 43.701 | 78.619 | 0.00 | 0.00 |
| ATOM | 3889 | CA   | GLY | X | 260 | 39.393 | 43.994 | 76.725 | 0.00 | 0.00 |
| ATOM | 3890 | HA2  | GLY | X | 260 | 40.289 | 44.549 | 76.503 | 0.00 | 0.00 |
| ATOM | 3891 | HA3  | GLY | X | 260 | 39.484 | 42.886 | 76.555 | 0.00 | 0.00 |
| ATOM | 3892 | C    | GLY | X | 260 | 38.217 | 44.560 | 75.738 | 0.00 | 0.00 |
| ATOM | 3893 | O    | GLY | X | 260 | 37.615 | 43.786 | 74.971 | 0.00 | 0.00 |
| ATOM | 3894 | N    | ASN | X | 261 | 37.923 | 45.846 | 75.838 | 0.00 | 0.00 |
| ATOM | 3895 | H    | ASN | X | 261 | 38.501 | 46.482 | 76.368 | 0.00 | 0.00 |
| ATOM | 3896 | CA   | ASN | X | 261 | 36.823 | 46.402 | 75.023 | 0.00 | 0.00 |
| ATOM | 3897 | HA   | ASN | X | 261 | 36.011 | 45.676 | 75.066 | 0.00 | 0.00 |
| ATOM | 3898 | CB   | ASN | X | 261 | 36.348 | 47.695 | 75.712 | 0.00 | 0.00 |
| ATOM | 3899 | HB2  | ASN | X | 261 | 35.811 | 47.433 | 76.623 | 0.00 | 0.00 |
| ATOM | 3900 | HB3  | ASN | X | 261 | 37.196 | 48.314 | 76.004 | 0.00 | 0.00 |
| ATOM | 3901 | CG   | ASN | X | 261 | 35.412 | 48.414 | 74.722 | 0.00 | 0.00 |
| ATOM | 3902 | OD1  | ASN | X | 261 | 35.810 | 49.047 | 73.766 | 0.00 | 0.00 |
| ATOM | 3903 | ND2  | ASN | X | 261 | 34.121 | 48.534 | 75.072 | 0.00 | 0.00 |
| ATOM | 3904 | HD21 | ASN | X | 261 | 33.541 | 49.077 | 74.449 | 0.00 | 0.00 |
| ATOM | 3905 | HD22 | ASN | X | 261 | 33.815 | 48.193 | 75.972 | 0.00 | 0.00 |
| ATOM | 3906 | C    | ASN | X | 261 | 37.366 | 46.612 | 73.583 | 0.00 | 0.00 |
| ATOM | 3907 | O    | ASN | X | 261 | 38.351 | 47.337 | 73.374 | 0.00 | 0.00 |
| ATOM | 3908 | N    | ASP | X | 262 | 36.586 | 46.036 | 72.650 | 0.00 | 0.00 |
| ATOM | 3909 | H    | ASP | X | 262 | 35.912 | 45.391 | 73.036 | 0.00 | 0.00 |
| ATOM | 3910 | CA   | ASP | X | 262 | 36.698 | 46.068 | 71.177 | 0.00 | 0.00 |
| ATOM | 3911 | HA   | ASP | X | 262 | 37.589 | 45.448 | 71.076 | 0.00 | 0.00 |
| ATOM | 3912 | CB   | ASP | X | 262 | 35.512 | 45.299 | 70.527 | 0.00 | 0.00 |
| ATOM | 3913 | HB2  | ASP | X | 262 | 35.763 | 45.238 | 69.469 | 0.00 | 0.00 |
| ATOM | 3914 | HB3  | ASP | X | 262 | 35.378 | 44.327 | 71.002 | 0.00 | 0.00 |
| ATOM | 3915 | CG   | ASP | X | 262 | 34.098 | 45.934 | 70.643 | 0.00 | 0.00 |
| ATOM | 3916 | OD1  | ASP | X | 262 | 33.847 | 46.687 | 71.593 | 0.00 | 0.00 |
| ATOM | 3917 | OD2  | ASP | X | 262 | 33.203 | 45.585 | 69.830 | 0.00 | 0.00 |
| ATOM | 3918 | C    | ASP | X | 262 | 36.987 | 47.422 | 70.594 | 0.00 | 0.00 |

|      |      |      |     |   |     |        |        |        |      |      |
|------|------|------|-----|---|-----|--------|--------|--------|------|------|
| ATOM | 3919 | O    | ASP | X | 262 | 37.968 | 47.550 | 69.846 | 0.00 | 0.00 |
| ATOM | 3920 | N    | THR | X | 263 | 36.211 | 48.513 | 70.874 | 0.00 | 0.00 |
| ATOM | 3921 | H    | THR | X | 263 | 35.493 | 48.316 | 71.556 | 0.00 | 0.00 |
| ATOM | 3922 | CA   | THR | X | 263 | 36.422 | 49.867 | 70.451 | 0.00 | 0.00 |
| ATOM | 3923 | HA   | THR | X | 263 | 36.428 | 49.951 | 69.364 | 0.00 | 0.00 |
| ATOM | 3924 | CB   | THR | X | 263 | 35.373 | 50.881 | 70.909 | 0.00 | 0.00 |
| ATOM | 3925 | HB   | THR | X | 263 | 35.376 | 51.103 | 71.976 | 0.00 | 0.00 |
| ATOM | 3926 | CG2  | THR | X | 263 | 35.412 | 52.216 | 70.047 | 0.00 | 0.00 |
| ATOM | 3927 | HG21 | THR | X | 263 | 36.370 | 52.735 | 70.096 | 0.00 | 0.00 |
| ATOM | 3928 | HG22 | THR | X | 263 | 35.376 | 51.788 | 69.045 | 0.00 | 0.00 |
| ATOM | 3929 | HG23 | THR | X | 263 | 34.535 | 52.860 | 70.111 | 0.00 | 0.00 |
| ATOM | 3930 | OG1  | THR | X | 263 | 34.040 | 50.468 | 70.580 | 0.00 | 0.00 |
| ATOM | 3931 | HG1  | THR | X | 263 | 34.036 | 50.138 | 69.679 | 0.00 | 0.00 |
| ATOM | 3932 | C    | THR | X | 263 | 37.823 | 50.447 | 70.902 | 0.00 | 0.00 |
| ATOM | 3933 | O    | THR | X | 263 | 38.607 | 51.000 | 70.095 | 0.00 | 0.00 |
| ATOM | 3934 | N    | GLU | X | 264 | 38.132 | 50.277 | 72.199 | 0.00 | 0.00 |
| ATOM | 3935 | H    | GLU | X | 264 | 37.483 | 49.738 | 72.756 | 0.00 | 0.00 |
| ATOM | 3936 | CA   | GLU | X | 264 | 39.411 | 50.608 | 72.736 | 0.00 | 0.00 |
| ATOM | 3937 | HA   | GLU | X | 264 | 39.482 | 51.678 | 72.542 | 0.00 | 0.00 |
| ATOM | 3938 | CB   | GLU | X | 264 | 39.363 | 50.432 | 74.233 | 0.00 | 0.00 |
| ATOM | 3939 | HB2  | GLU | X | 264 | 38.455 | 50.869 | 74.647 | 0.00 | 0.00 |
| ATOM | 3940 | HB3  | GLU | X | 264 | 39.496 | 49.388 | 74.519 | 0.00 | 0.00 |
| ATOM | 3941 | CG   | GLU | X | 264 | 40.509 | 51.241 | 74.851 | 0.00 | 0.00 |
| ATOM | 3942 | HG2  | GLU | X | 264 | 41.484 | 50.758 | 74.785 | 0.00 | 0.00 |
| ATOM | 3943 | HG3  | GLU | X | 264 | 40.544 | 52.165 | 74.272 | 0.00 | 0.00 |
| ATOM | 3944 | CD   | GLU | X | 264 | 40.285 | 51.530 | 76.312 | 0.00 | 0.00 |
| ATOM | 3945 | OE1  | GLU | X | 264 | 39.958 | 50.521 | 76.990 | 0.00 | 0.00 |
| ATOM | 3946 | OE2  | GLU | X | 264 | 40.378 | 52.697 | 76.804 | 0.00 | 0.00 |
| ATOM | 3947 | C    | GLU | X | 264 | 40.604 | 49.891 | 72.068 | 0.00 | 0.00 |
| ATOM | 3948 | O    | GLU | X | 264 | 41.605 | 50.455 | 71.656 | 0.00 | 0.00 |
| ATOM | 3949 | N    | LEU | X | 265 | 40.408 | 48.560 | 71.819 | 0.00 | 0.00 |
| ATOM | 3950 | H    | LEU | X | 265 | 39.645 | 48.059 | 72.252 | 0.00 | 0.00 |
| ATOM | 3951 | CA   | LEU | X | 265 | 41.378 | 47.785 | 71.046 | 0.00 | 0.00 |
| ATOM | 3952 | HA   | LEU | X | 265 | 42.370 | 47.854 | 71.492 | 0.00 | 0.00 |
| ATOM | 3953 | CB   | LEU | X | 265 | 40.856 | 46.283 | 71.011 | 0.00 | 0.00 |
| ATOM | 3954 | HB2  | LEU | X | 265 | 40.895 | 45.812 | 71.994 | 0.00 | 0.00 |
| ATOM | 3955 | HB3  | LEU | X | 265 | 39.811 | 46.323 | 70.706 | 0.00 | 0.00 |
| ATOM | 3956 | CG   | LEU | X | 265 | 41.561 | 45.402 | 69.926 | 0.00 | 0.00 |
| ATOM | 3957 | HG   | LEU | X | 265 | 41.929 | 45.967 | 69.069 | 0.00 | 0.00 |
| ATOM | 3958 | CD1  | LEU | X | 265 | 42.716 | 44.711 | 70.659 | 0.00 | 0.00 |
| ATOM | 3959 | HD11 | LEU | X | 265 | 43.490 | 45.475 | 70.732 | 0.00 | 0.00 |
| ATOM | 3960 | HD12 | LEU | X | 265 | 42.359 | 44.477 | 71.662 | 0.00 | 0.00 |
| ATOM | 3961 | HD13 | LEU | X | 265 | 43.155 | 43.810 | 70.230 | 0.00 | 0.00 |
| ATOM | 3962 | CD2  | LEU | X | 265 | 40.676 | 44.261 | 69.427 | 0.00 | 0.00 |
| ATOM | 3963 | HD21 | LEU | X | 265 | 40.053 | 43.742 | 70.156 | 0.00 | 0.00 |
| ATOM | 3964 | HD22 | LEU | X | 265 | 39.994 | 44.572 | 68.636 | 0.00 | 0.00 |
| ATOM | 3965 | HD23 | LEU | X | 265 | 41.340 | 43.551 | 68.935 | 0.00 | 0.00 |
| ATOM | 3966 | C    | LEU | X | 265 | 41.663 | 48.271 | 69.568 | 0.00 | 0.00 |
| ATOM | 3967 | O    | LEU | X | 265 | 42.790 | 48.469 | 69.184 | 0.00 | 0.00 |
| ATOM | 3968 | N    | VAL | X | 266 | 40.560 | 48.614 | 68.848 | 0.00 | 0.00 |
| ATOM | 3969 | H    | VAL | X | 266 | 39.716 | 48.275 | 69.286 | 0.00 | 0.00 |
| ATOM | 3970 | CA   | VAL | X | 266 | 40.526 | 49.308 | 67.557 | 0.00 | 0.00 |
| ATOM | 3971 | HA   | VAL | X | 266 | 41.212 | 48.706 | 66.961 | 0.00 | 0.00 |
| ATOM | 3972 | CB   | VAL | X | 266 | 39.100 | 49.172 | 66.873 | 0.00 | 0.00 |
| ATOM | 3973 | HB   | VAL | X | 266 | 38.317 | 49.446 | 67.580 | 0.00 | 0.00 |
| ATOM | 3974 | CG1  | VAL | X | 266 | 38.973 | 50.029 | 65.623 | 0.00 | 0.00 |
| ATOM | 3975 | HG11 | VAL | X | 266 | 38.974 | 51.067 | 65.956 | 0.00 | 0.00 |
| ATOM | 3976 | HG12 | VAL | X | 266 | 39.777 | 49.743 | 64.944 | 0.00 | 0.00 |
| ATOM | 3977 | HG13 | VAL | X | 266 | 38.099 | 49.771 | 65.024 | 0.00 | 0.00 |
| ATOM | 3978 | CG2  | VAL | X | 266 | 38.927 | 47.660 | 66.524 | 0.00 | 0.00 |
| ATOM | 3979 | HG21 | VAL | X | 266 | 39.082 | 47.043 | 67.410 | 0.00 | 0.00 |
| ATOM | 3980 | HG22 | VAL | X | 266 | 37.947 | 47.416 | 66.114 | 0.00 | 0.00 |
| ATOM | 3981 | HG23 | VAL | X | 266 | 39.662 | 47.302 | 65.804 | 0.00 | 0.00 |
| ATOM | 3982 | C    | VAL | X | 266 | 40.991 | 50.803 | 67.530 | 0.00 | 0.00 |
| ATOM | 3983 | O    | VAL | X | 266 | 41.478 | 51.201 | 66.434 | 0.00 | 0.00 |
| ATOM | 3984 | N    | ALA | X | 267 | 40.928 | 51.512 | 68.653 | 0.00 | 0.00 |
| ATOM | 3985 | H    | ALA | X | 267 | 40.605 | 51.143 | 69.536 | 0.00 | 0.00 |
| ATOM | 3986 | CA   | ALA | X | 267 | 41.535 | 52.868 | 68.739 | 0.00 | 0.00 |
| ATOM | 3987 | HA   | ALA | X | 267 | 41.507 | 53.448 | 67.817 | 0.00 | 0.00 |
| ATOM | 3988 | CB   | ALA | X | 267 | 40.954 | 53.623 | 69.910 | 0.00 | 0.00 |



|      |      |      |     |   |     |        |        |        |      |      |
|------|------|------|-----|---|-----|--------|--------|--------|------|------|
| ATOM | 3989 | HB1  | ALA | X | 267 | 41.374 | 54.589 | 70.189 | 0.00 | 0.00 |
| ATOM | 3990 | HB2  | ALA | X | 267 | 39.873 | 53.672 | 69.774 | 0.00 | 0.00 |
| ATOM | 3991 | HB3  | ALA | X | 267 | 41.111 | 53.006 | 70.794 | 0.00 | 0.00 |
| ATOM | 3992 | C    | ALA | X | 267 | 43.044 | 52.848 | 68.928 | 0.00 | 0.00 |
| ATOM | 3993 | O    | ALA | X | 267 | 43.859 | 53.405 | 68.130 | 0.00 | 0.00 |
| ATOM | 3994 | N    | CYX | X | 268 | 43.511 | 52.034 | 69.881 | 0.00 | 0.00 |
| ATOM | 3995 | H    | CYX | X | 268 | 42.843 | 51.536 | 70.453 | 0.00 | 0.00 |
| ATOM | 3996 | CA   | CYX | X | 268 | 44.880 | 51.613 | 70.026 | 0.00 | 0.00 |
| ATOM | 3997 | HA   | CYX | X | 268 | 45.556 | 52.396 | 70.371 | 0.00 | 0.00 |
| ATOM | 3998 | CB   | CYX | X | 268 | 44.962 | 50.480 | 71.131 | 0.00 | 0.00 |
| ATOM | 3999 | HB2  | CYX | X | 268 | 44.263 | 50.741 | 71.926 | 0.00 | 0.00 |
| ATOM | 4000 | HB3  | CYX | X | 268 | 44.501 | 49.573 | 70.740 | 0.00 | 0.00 |
| ATOM | 4001 | SG   | CYX | X | 268 | 46.586 | 49.992 | 71.697 | 0.00 | 0.00 |
| ATOM | 4002 | C    | CYX | X | 268 | 45.523 | 51.232 | 68.689 | 0.00 | 0.00 |
| ATOM | 4003 | O    | CYX | X | 268 | 46.597 | 51.716 | 68.327 | 0.00 | 0.00 |
| ATOM | 4004 | N    | LEU | X | 269 | 44.913 | 50.363 | 67.891 | 0.00 | 0.00 |
| ATOM | 4005 | H    | LEU | X | 269 | 44.086 | 49.875 | 68.205 | 0.00 | 0.00 |
| ATOM | 4006 | CA   | LEU | X | 269 | 45.374 | 49.873 | 66.611 | 0.00 | 0.00 |
| ATOM | 4007 | HA   | LEU | X | 269 | 46.358 | 49.458 | 66.830 | 0.00 | 0.00 |
| ATOM | 4008 | CB   | LEU | X | 269 | 44.457 | 48.729 | 66.161 | 0.00 | 0.00 |
| ATOM | 4009 | HB2  | LEU | X | 269 | 44.064 | 48.262 | 67.064 | 0.00 | 0.00 |
| ATOM | 4010 | HB3  | LEU | X | 269 | 43.525 | 49.085 | 65.720 | 0.00 | 0.00 |
| ATOM | 4011 | CG   | LEU | X | 269 | 45.089 | 47.719 | 65.241 | 0.00 | 0.00 |
| ATOM | 4012 | HG   | LEU | X | 269 | 45.544 | 48.161 | 64.355 | 0.00 | 0.00 |
| ATOM | 4013 | CD1  | LEU | X | 269 | 46.111 | 46.827 | 65.948 | 0.00 | 0.00 |
| ATOM | 4014 | HD11 | LEU | X | 269 | 47.071 | 47.265 | 66.221 | 0.00 | 0.00 |
| ATOM | 4015 | HD12 | LEU | X | 269 | 45.769 | 46.537 | 66.941 | 0.00 | 0.00 |
| ATOM | 4016 | HD13 | LEU | X | 269 | 46.336 | 45.957 | 65.331 | 0.00 | 0.00 |
| ATOM | 4017 | CD2  | LEU | X | 269 | 43.911 | 46.762 | 64.882 | 0.00 | 0.00 |
| ATOM | 4018 | HD21 | LEU | X | 269 | 43.705 | 46.008 | 65.642 | 0.00 | 0.00 |
| ATOM | 4019 | HD22 | LEU | X | 269 | 42.976 | 47.266 | 64.636 | 0.00 | 0.00 |
| ATOM | 4020 | HD23 | LEU | X | 269 | 44.221 | 46.195 | 64.004 | 0.00 | 0.00 |
| ATOM | 4021 | C    | LEU | X | 269 | 45.594 | 50.944 | 65.597 | 0.00 | 0.00 |
| ATOM | 4022 | O    | LEU | X | 269 | 46.249 | 50.764 | 64.582 | 0.00 | 0.00 |
| ATOM | 4023 | N    | ARG | X | 270 | 44.962 | 52.145 | 65.835 | 0.00 | 0.00 |
| ATOM | 4024 | H    | ARG | X | 270 | 44.374 | 52.209 | 66.653 | 0.00 | 0.00 |
| ATOM | 4025 | CA   | ARG | X | 270 | 45.054 | 53.354 | 64.902 | 0.00 | 0.00 |
| ATOM | 4026 | HA   | ARG | X | 270 | 45.441 | 53.128 | 63.908 | 0.00 | 0.00 |
| ATOM | 4027 | CB   | ARG | X | 270 | 43.647 | 53.873 | 64.755 | 0.00 | 0.00 |
| ATOM | 4028 | HB2  | ARG | X | 270 | 43.149 | 54.064 | 65.706 | 0.00 | 0.00 |
| ATOM | 4029 | HB3  | ARG | X | 270 | 43.706 | 54.808 | 64.199 | 0.00 | 0.00 |
| ATOM | 4030 | CG   | ARG | X | 270 | 42.642 | 52.886 | 64.081 | 0.00 | 0.00 |
| ATOM | 4031 | HG2  | ARG | X | 270 | 43.039 | 52.417 | 63.181 | 0.00 | 0.00 |
| ATOM | 4032 | HG3  | ARG | X | 270 | 42.816 | 51.925 | 64.564 | 0.00 | 0.00 |
| ATOM | 4033 | CD   | ARG | X | 270 | 41.190 | 53.335 | 63.726 | 0.00 | 0.00 |
| ATOM | 4034 | HD2  | ARG | X | 270 | 41.266 | 54.171 | 63.030 | 0.00 | 0.00 |
| ATOM | 4035 | HD3  | ARG | X | 270 | 40.816 | 52.430 | 63.247 | 0.00 | 0.00 |
| ATOM | 4036 | NE   | ARG | X | 270 | 40.452 | 53.749 | 64.875 | 0.00 | 0.00 |
| ATOM | 4037 | HE   | ARG | X | 270 | 41.057 | 54.223 | 65.530 | 0.00 | 0.00 |
| ATOM | 4038 | CZ   | ARG | X | 270 | 39.192 | 53.849 | 65.155 | 0.00 | 0.00 |
| ATOM | 4039 | NH1  | ARG | X | 270 | 38.188 | 53.454 | 64.393 | 0.00 | 0.00 |
| ATOM | 4040 | HH11 | ARG | X | 270 | 38.389 | 53.039 | 63.495 | 0.00 | 0.00 |
| ATOM | 4041 | HH12 | ARG | X | 270 | 37.269 | 53.402 | 64.809 | 0.00 | 0.00 |
| ATOM | 4042 | NH2  | ARG | X | 270 | 38.895 | 54.443 | 66.283 | 0.00 | 0.00 |
| ATOM | 4043 | HH21 | ARG | X | 270 | 39.576 | 54.849 | 66.908 | 0.00 | 0.00 |
| ATOM | 4044 | HH22 | ARG | X | 270 | 37.941 | 54.468 | 66.614 | 0.00 | 0.00 |
| ATOM | 4045 | C    | ARG | X | 270 | 45.932 | 54.470 | 65.325 | 0.00 | 0.00 |
| ATOM | 4046 | O    | ARG | X | 270 | 46.558 | 55.079 | 64.482 | 0.00 | 0.00 |
| ATOM | 4047 | N    | THR | X | 271 | 45.968 | 54.715 | 66.629 | 0.00 | 0.00 |
| ATOM | 4048 | H    | THR | X | 271 | 45.288 | 54.278 | 67.234 | 0.00 | 0.00 |
| ATOM | 4049 | CA   | THR | X | 271 | 46.814 | 55.708 | 67.237 | 0.00 | 0.00 |
| ATOM | 4050 | HA   | THR | X | 271 | 46.645 | 56.683 | 66.779 | 0.00 | 0.00 |
| ATOM | 4051 | CB   | THR | X | 271 | 46.531 | 55.827 | 68.749 | 0.00 | 0.00 |
| ATOM | 4052 | HB   | THR | X | 271 | 47.229 | 56.512 | 69.231 | 0.00 | 0.00 |
| ATOM | 4053 | CG2  | THR | X | 271 | 45.104 | 56.396 | 69.061 | 0.00 | 0.00 |
| ATOM | 4054 | HG21 | THR | X | 271 | 44.956 | 57.290 | 68.456 | 0.00 | 0.00 |
| ATOM | 4055 | HG22 | THR | X | 271 | 44.310 | 55.672 | 68.880 | 0.00 | 0.00 |
| ATOM | 4056 | HG23 | THR | X | 271 | 45.104 | 56.525 | 70.144 | 0.00 | 0.00 |
| ATOM | 4057 | OG1  | THR | X | 271 | 46.706 | 54.543 | 69.383 | 0.00 | 0.00 |
| ATOM | 4058 | HG1  | THR | X | 271 | 46.866 | 54.736 | 70.310 | 0.00 | 0.00 |

|      |      |      |     |   |     |        |        |        |      |      |
|------|------|------|-----|---|-----|--------|--------|--------|------|------|
| ATOM | 4059 | C    | THR | X | 271 | 48.291 | 55.301 | 67.049 | 0.00 | 0.00 |
| ATOM | 4060 | O    | THR | X | 271 | 49.125 | 56.269 | 66.987 | 0.00 | 0.00 |
| ATOM | 4061 | N    | ARG | X | 272 | 48.672 | 54.045 | 66.974 | 0.00 | 0.00 |
| ATOM | 4062 | H    | ARG | X | 272 | 47.909 | 53.409 | 67.159 | 0.00 | 0.00 |
| ATOM | 4063 | CA   | ARG | X | 272 | 50.025 | 53.490 | 66.784 | 0.00 | 0.00 |
| ATOM | 4064 | HA   | ARG | X | 272 | 50.696 | 54.000 | 67.475 | 0.00 | 0.00 |
| ATOM | 4065 | CB   | ARG | X | 272 | 50.156 | 52.066 | 67.073 | 0.00 | 0.00 |
| ATOM | 4066 | HB2  | ARG | X | 272 | 49.447 | 51.508 | 66.463 | 0.00 | 0.00 |
| ATOM | 4067 | HB3  | ARG | X | 272 | 51.169 | 51.766 | 66.805 | 0.00 | 0.00 |
| ATOM | 4068 | CG   | ARG | X | 272 | 50.031 | 51.844 | 68.616 | 0.00 | 0.00 |
| ATOM | 4069 | HG2  | ARG | X | 272 | 49.193 | 52.358 | 69.086 | 0.00 | 0.00 |
| ATOM | 4070 | HG3  | ARG | X | 272 | 50.005 | 50.781 | 68.858 | 0.00 | 0.00 |
| ATOM | 4071 | CD   | ARG | X | 272 | 51.259 | 52.271 | 69.462 | 0.00 | 0.00 |
| ATOM | 4072 | HD2  | ARG | X | 272 | 52.019 | 51.550 | 69.163 | 0.00 | 0.00 |
| ATOM | 4073 | HD3  | ARG | X | 272 | 51.487 | 53.312 | 69.231 | 0.00 | 0.00 |
| ATOM | 4074 | NE   | ARG | X | 272 | 51.000 | 52.186 | 70.916 | 0.00 | 0.00 |
| ATOM | 4075 | HE   | ARG | X | 272 | 50.676 | 53.036 | 71.354 | 0.00 | 0.00 |
| ATOM | 4076 | CZ   | ARG | X | 272 | 50.904 | 51.066 | 71.616 | 0.00 | 0.00 |
| ATOM | 4077 | NH1  | ARG | X | 272 | 51.609 | 50.027 | 71.292 | 0.00 | 0.00 |
| ATOM | 4078 | HH11 | ARG | X | 272 | 52.219 | 50.027 | 70.487 | 0.00 | 0.00 |
| ATOM | 4079 | HH12 | ARG | X | 272 | 51.634 | 49.250 | 71.938 | 0.00 | 0.00 |
| ATOM | 4080 | NH2  | ARG | X | 272 | 50.238 | 51.046 | 72.706 | 0.00 | 0.00 |
| ATOM | 4081 | HH21 | ARG | X | 272 | 49.621 | 51.805 | 72.955 | 0.00 | 0.00 |
| ATOM | 4082 | HH22 | ARG | X | 272 | 50.339 | 50.194 | 73.239 | 0.00 | 0.00 |
| ATOM | 4083 | C    | ARG | X | 272 | 50.480 | 53.760 | 65.317 | 0.00 | 0.00 |
| ATOM | 4084 | O    | ARG | X | 272 | 49.628 | 53.621 | 64.377 | 0.00 | 0.00 |
| ATOM | 4085 | N    | PRO | X | 273 | 51.769 | 54.079 | 65.141 | 0.00 | 0.00 |
| ATOM | 4086 | CD   | PRO | X | 273 | 52.910 | 53.852 | 66.004 | 0.00 | 0.00 |
| ATOM | 4087 | HD2  | PRO | X | 273 | 53.267 | 52.823 | 65.975 | 0.00 | 0.00 |
| ATOM | 4088 | HD3  | PRO | X | 273 | 52.686 | 54.028 | 67.056 | 0.00 | 0.00 |
| ATOM | 4089 | CG   | PRO | X | 273 | 53.922 | 54.913 | 65.521 | 0.00 | 0.00 |
| ATOM | 4090 | HG2  | PRO | X | 273 | 54.934 | 54.554 | 65.708 | 0.00 | 0.00 |
| ATOM | 4091 | HG3  | PRO | X | 273 | 53.685 | 55.885 | 65.954 | 0.00 | 0.00 |
| ATOM | 4092 | CB   | PRO | X | 273 | 53.655 | 54.987 | 64.008 | 0.00 | 0.00 |
| ATOM | 4093 | HB2  | PRO | X | 273 | 54.417 | 54.383 | 63.513 | 0.00 | 0.00 |
| ATOM | 4094 | HB3  | PRO | X | 273 | 53.775 | 56.032 | 63.724 | 0.00 | 0.00 |
| ATOM | 4095 | CA   | PRO | X | 273 | 52.259 | 54.364 | 63.823 | 0.00 | 0.00 |
| ATOM | 4096 | HA   | PRO | X | 273 | 51.623 | 55.165 | 63.446 | 0.00 | 0.00 |
| ATOM | 4097 | C    | PRO | X | 273 | 52.210 | 53.184 | 62.875 | 0.00 | 0.00 |
| ATOM | 4098 | O    | PRO | X | 273 | 52.335 | 52.006 | 63.230 | 0.00 | 0.00 |
| ATOM | 4099 | N    | ALA | X | 274 | 52.107 | 53.559 | 61.574 | 0.00 | 0.00 |
| ATOM | 4100 | H    | ALA | X | 274 | 51.897 | 54.525 | 61.370 | 0.00 | 0.00 |
| ATOM | 4101 | CA   | ALA | X | 274 | 51.794 | 52.639 | 60.461 | 0.00 | 0.00 |
| ATOM | 4102 | HA   | ALA | X | 274 | 50.834 | 52.141 | 60.598 | 0.00 | 0.00 |
| ATOM | 4103 | CB   | ALA | X | 274 | 51.674 | 53.456 | 59.186 | 0.00 | 0.00 |
| ATOM | 4104 | HB1  | ALA | X | 274 | 52.593 | 53.924 | 58.832 | 0.00 | 0.00 |
| ATOM | 4105 | HB2  | ALA | X | 274 | 51.253 | 52.744 | 58.476 | 0.00 | 0.00 |
| ATOM | 4106 | HB3  | ALA | X | 274 | 50.819 | 54.130 | 59.246 | 0.00 | 0.00 |
| ATOM | 4107 | C    | ALA | X | 274 | 53.010 | 51.662 | 60.269 | 0.00 | 0.00 |
| ATOM | 4108 | O    | ALA | X | 274 | 52.843 | 50.445 | 60.177 | 0.00 | 0.00 |
| ATOM | 4109 | N    | GLN | X | 275 | 54.195 | 52.169 | 60.298 | 0.00 | 0.00 |
| ATOM | 4110 | H    | GLN | X | 275 | 54.284 | 53.175 | 60.317 | 0.00 | 0.00 |
| ATOM | 4111 | CA   | GLN | X | 275 | 55.459 | 51.391 | 60.124 | 0.00 | 0.00 |
| ATOM | 4112 | HA   | GLN | X | 275 | 55.538 | 50.834 | 59.191 | 0.00 | 0.00 |
| ATOM | 4113 | CB   | GLN | X | 275 | 56.774 | 52.277 | 60.090 | 0.00 | 0.00 |
| ATOM | 4114 | HB2  | GLN | X | 275 | 56.689 | 52.991 | 59.270 | 0.00 | 0.00 |
| ATOM | 4115 | HB3  | GLN | X | 275 | 56.993 | 52.908 | 60.951 | 0.00 | 0.00 |
| ATOM | 4116 | CG   | GLN | X | 275 | 57.994 | 51.399 | 59.702 | 0.00 | 0.00 |
| ATOM | 4117 | HG2  | GLN | X | 275 | 58.808 | 52.121 | 59.774 | 0.00 | 0.00 |
| ATOM | 4118 | HG3  | GLN | X | 275 | 58.195 | 50.629 | 60.447 | 0.00 | 0.00 |
| ATOM | 4119 | CD   | GLN | X | 275 | 57.819 | 50.796 | 58.256 | 0.00 | 0.00 |
| ATOM | 4120 | OE1  | GLN | X | 275 | 57.812 | 51.507 | 57.288 | 0.00 | 0.00 |
| ATOM | 4121 | NE2  | GLN | X | 275 | 57.581 | 49.466 | 58.123 | 0.00 | 0.00 |
| ATOM | 4122 | HE21 | GLN | X | 275 | 57.458 | 49.225 | 57.149 | 0.00 | 0.00 |
| ATOM | 4123 | HE22 | GLN | X | 275 | 57.720 | 48.820 | 58.886 | 0.00 | 0.00 |
| ATOM | 4124 | C    | GLN | X | 275 | 55.695 | 50.283 | 61.212 | 0.00 | 0.00 |
| ATOM | 4125 | O    | GLN | X | 275 | 55.884 | 49.089 | 60.942 | 0.00 | 0.00 |
| ATOM | 4126 | N    | VAL | X | 276 | 55.592 | 50.725 | 62.495 | 0.00 | 0.00 |
| ATOM | 4127 | H    | VAL | X | 276 | 55.333 | 51.692 | 62.626 | 0.00 | 0.00 |
| ATOM | 4128 | CA   | VAL | X | 276 | 55.599 | 49.898 | 63.703 | 0.00 | 0.00 |

|      |      |      |     |   |     |        |        |        |      |      |
|------|------|------|-----|---|-----|--------|--------|--------|------|------|
| ATOM | 4129 | HA   | VAL | X | 276 | 56.587 | 49.462 | 63.854 | 0.00 | 0.00 |
| ATOM | 4130 | CB   | VAL | X | 276 | 55.286 | 50.718 | 64.981 | 0.00 | 0.00 |
| ATOM | 4131 | HB   | VAL | X | 276 | 54.322 | 51.186 | 64.780 | 0.00 | 0.00 |
| ATOM | 4132 | CG1  | VAL | X | 276 | 55.013 | 50.000 | 66.281 | 0.00 | 0.00 |
| ATOM | 4133 | HG11 | VAL | X | 276 | 54.219 | 49.273 | 66.112 | 0.00 | 0.00 |
| ATOM | 4134 | HG12 | VAL | X | 276 | 55.886 | 49.477 | 66.672 | 0.00 | 0.00 |
| ATOM | 4135 | HG13 | VAL | X | 276 | 54.692 | 50.799 | 66.949 | 0.00 | 0.00 |
| ATOM | 4136 | CG2  | VAL | X | 276 | 56.343 | 51.758 | 65.195 | 0.00 | 0.00 |
| ATOM | 4137 | HG21 | VAL | X | 276 | 55.978 | 52.434 | 65.967 | 0.00 | 0.00 |
| ATOM | 4138 | HG22 | VAL | X | 276 | 57.255 | 51.258 | 65.521 | 0.00 | 0.00 |
| ATOM | 4139 | HG23 | VAL | X | 276 | 56.520 | 52.319 | 64.277 | 0.00 | 0.00 |
| ATOM | 4140 | C    | VAL | X | 276 | 54.566 | 48.705 | 63.648 | 0.00 | 0.00 |
| ATOM | 4141 | O    | VAL | X | 276 | 54.830 | 47.649 | 64.134 | 0.00 | 0.00 |
| ATOM | 4142 | N    | LEU | X | 277 | 53.335 | 48.982 | 63.073 | 0.00 | 0.00 |
| ATOM | 4143 | H    | LEU | X | 277 | 53.219 | 49.897 | 62.660 | 0.00 | 0.00 |
| ATOM | 4144 | CA   | LEU | X | 277 | 52.321 | 47.991 | 62.806 | 0.00 | 0.00 |
| ATOM | 4145 | HA   | LEU | X | 277 | 52.230 | 47.348 | 63.681 | 0.00 | 0.00 |
| ATOM | 4146 | CB   | LEU | X | 277 | 50.949 | 48.712 | 62.532 | 0.00 | 0.00 |
| ATOM | 4147 | HB2  | LEU | X | 277 | 50.829 | 49.421 | 63.351 | 0.00 | 0.00 |
| ATOM | 4148 | HB3  | LEU | X | 277 | 51.062 | 49.226 | 61.578 | 0.00 | 0.00 |
| ATOM | 4149 | CG   | LEU | X | 277 | 49.673 | 47.842 | 62.487 | 0.00 | 0.00 |
| ATOM | 4150 | HG   | LEU | X | 277 | 49.862 | 46.991 | 61.834 | 0.00 | 0.00 |
| ATOM | 4151 | CD1  | LEU | X | 277 | 49.313 | 47.482 | 63.951 | 0.00 | 0.00 |
| ATOM | 4152 | HD11 | LEU | X | 277 | 49.249 | 48.308 | 64.660 | 0.00 | 0.00 |
| ATOM | 4153 | HD12 | LEU | X | 277 | 48.379 | 46.924 | 63.900 | 0.00 | 0.00 |
| ATOM | 4154 | HD13 | LEU | X | 277 | 49.983 | 46.686 | 64.277 | 0.00 | 0.00 |
| ATOM | 4155 | CD2  | LEU | X | 277 | 48.398 | 48.623 | 61.960 | 0.00 | 0.00 |
| ATOM | 4156 | HD21 | LEU | X | 277 | 47.556 | 47.931 | 61.948 | 0.00 | 0.00 |
| ATOM | 4157 | HD22 | LEU | X | 277 | 48.269 | 49.533 | 62.546 | 0.00 | 0.00 |
| ATOM | 4158 | HD23 | LEU | X | 277 | 48.496 | 49.026 | 60.953 | 0.00 | 0.00 |
| ATOM | 4159 | C    | LEU | X | 277 | 52.785 | 47.027 | 61.644 | 0.00 | 0.00 |
| ATOM | 4160 | O    | LEU | X | 277 | 52.727 | 45.754 | 61.797 | 0.00 | 0.00 |
| ATOM | 4161 | N    | VAL | X | 278 | 53.375 | 47.584 | 60.592 | 0.00 | 0.00 |
| ATOM | 4162 | H    | VAL | X | 278 | 53.331 | 48.588 | 60.491 | 0.00 | 0.00 |
| ATOM | 4163 | CA   | VAL | X | 278 | 53.926 | 46.783 | 59.548 | 0.00 | 0.00 |
| ATOM | 4164 | HA   | VAL | X | 278 | 53.170 | 46.100 | 59.162 | 0.00 | 0.00 |
| ATOM | 4165 | CB   | VAL | X | 278 | 54.224 | 47.695 | 58.290 | 0.00 | 0.00 |
| ATOM | 4166 | HB   | VAL | X | 278 | 54.824 | 48.528 | 58.656 | 0.00 | 0.00 |
| ATOM | 4167 | CG1  | VAL | X | 278 | 54.926 | 46.825 | 57.191 | 0.00 | 0.00 |
| ATOM | 4168 | HG11 | VAL | X | 278 | 54.398 | 45.965 | 56.778 | 0.00 | 0.00 |
| ATOM | 4169 | HG12 | VAL | X | 278 | 54.978 | 47.370 | 56.248 | 0.00 | 0.00 |
| ATOM | 4170 | HG13 | VAL | X | 278 | 55.937 | 46.584 | 57.518 | 0.00 | 0.00 |
| ATOM | 4171 | CG2  | VAL | X | 278 | 52.938 | 48.227 | 57.722 | 0.00 | 0.00 |
| ATOM | 4172 | HG21 | VAL | X | 278 | 52.410 | 48.807 | 58.479 | 0.00 | 0.00 |
| ATOM | 4173 | HG22 | VAL | X | 278 | 53.035 | 48.655 | 56.724 | 0.00 | 0.00 |
| ATOM | 4174 | HG23 | VAL | X | 278 | 52.334 | 47.335 | 57.555 | 0.00 | 0.00 |
| ATOM | 4175 | C    | VAL | X | 278 | 55.028 | 45.759 | 59.871 | 0.00 | 0.00 |
| ATOM | 4176 | O    | VAL | X | 278 | 54.900 | 44.583 | 59.530 | 0.00 | 0.00 |
| ATOM | 4177 | N    | ASN | X | 279 | 55.955 | 46.189 | 60.775 | 0.00 | 0.00 |
| ATOM | 4178 | H    | ASN | X | 279 | 55.907 | 47.170 | 61.011 | 0.00 | 0.00 |
| ATOM | 4179 | CA   | ASN | X | 279 | 57.094 | 45.310 | 61.254 | 0.00 | 0.00 |
| ATOM | 4180 | HA   | ASN | X | 279 | 57.685 | 44.955 | 60.410 | 0.00 | 0.00 |
| ATOM | 4181 | CB   | ASN | X | 279 | 57.987 | 46.155 | 62.148 | 0.00 | 0.00 |
| ATOM | 4182 | HB2  | ASN | X | 279 | 57.505 | 47.008 | 62.627 | 0.00 | 0.00 |
| ATOM | 4183 | HB3  | ASN | X | 279 | 58.582 | 45.623 | 62.891 | 0.00 | 0.00 |
| ATOM | 4184 | CG   | ASN | X | 279 | 59.075 | 46.820 | 61.423 | 0.00 | 0.00 |
| ATOM | 4185 | OD1  | ASN | X | 279 | 58.899 | 47.456 | 60.342 | 0.00 | 0.00 |
| ATOM | 4186 | ND2  | ASN | X | 279 | 60.331 | 46.713 | 61.868 | 0.00 | 0.00 |
| ATOM | 4187 | HD21 | ASN | X | 279 | 60.966 | 47.278 | 61.323 | 0.00 | 0.00 |
| ATOM | 4188 | HD22 | ASN | X | 279 | 60.421 | 46.479 | 62.846 | 0.00 | 0.00 |
| ATOM | 4189 | C    | ASN | X | 279 | 56.613 | 43.978 | 61.897 | 0.00 | 0.00 |
| ATOM | 4190 | O    | ASN | X | 279 | 57.395 | 43.051 | 61.947 | 0.00 | 0.00 |
| ATOM | 4191 | N    | HIE | X | 280 | 55.346 | 43.868 | 62.223 | 0.00 | 0.00 |
| ATOM | 4192 | H    | HIE | X | 280 | 54.781 | 44.694 | 62.089 | 0.00 | 0.00 |
| ATOM | 4193 | CA   | HIE | X | 280 | 54.733 | 42.590 | 62.612 | 0.00 | 0.00 |
| ATOM | 4194 | HA   | HIE | X | 280 | 55.512 | 41.942 | 63.014 | 0.00 | 0.00 |
| ATOM | 4195 | CB   | HIE | X | 280 | 53.693 | 42.956 | 63.760 | 0.00 | 0.00 |
| ATOM | 4196 | HB2  | HIE | X | 280 | 52.768 | 43.421 | 63.419 | 0.00 | 0.00 |
| ATOM | 4197 | HB3  | HIE | X | 280 | 53.343 | 42.050 | 64.254 | 0.00 | 0.00 |
| ATOM | 4198 | CG   | HIE | X | 280 | 54.268 | 43.772 | 64.910 | 0.00 | 0.00 |

|      |      |     |     |   |     |        |        |        |      |      |
|------|------|-----|-----|---|-----|--------|--------|--------|------|------|
| ATOM | 4199 | ND1 | HIE | X | 280 | 55.402 | 43.461 | 65.705 | 0.00 | 0.00 |
| ATOM | 4200 | CE1 | HIE | X | 280 | 55.453 | 44.423 | 66.632 | 0.00 | 0.00 |
| ATOM | 4201 | HE1 | HIE | X | 280 | 56.304 | 44.499 | 67.293 | 0.00 | 0.00 |
| ATOM | 4202 | NE2 | HIE | X | 280 | 54.456 | 45.308 | 66.463 | 0.00 | 0.00 |
| ATOM | 4203 | HE2 | HIE | X | 280 | 54.406 | 46.281 | 66.727 | 0.00 | 0.00 |
| ATOM | 4204 | CD2 | HIE | X | 280 | 53.789 | 44.887 | 65.391 | 0.00 | 0.00 |
| ATOM | 4205 | HD2 | HIE | X | 280 | 52.918 | 45.343 | 64.943 | 0.00 | 0.00 |
| ATOM | 4206 | C   | HIE | X | 280 | 53.933 | 41.837 | 61.535 | 0.00 | 0.00 |
| ATOM | 4207 | O   | HIE | X | 280 | 53.969 | 40.573 | 61.560 | 0.00 | 0.00 |
| ATOM | 4208 | N   | GLU | X | 281 | 53.193 | 42.510 | 60.655 | 0.00 | 0.00 |
| ATOM | 4209 | H   | GLU | X | 281 | 53.227 | 43.519 | 60.647 | 0.00 | 0.00 |
| ATOM | 4210 | CA  | GLU | X | 281 | 51.970 | 41.987 | 59.985 | 0.00 | 0.00 |
| ATOM | 4211 | HA  | GLU | X | 281 | 51.086 | 42.179 | 60.593 | 0.00 | 0.00 |
| ATOM | 4212 | CB  | GLU | X | 281 | 51.695 | 42.674 | 58.591 | 0.00 | 0.00 |
| ATOM | 4213 | HB2 | GLU | X | 281 | 52.064 | 43.693 | 58.712 | 0.00 | 0.00 |
| ATOM | 4214 | HB3 | GLU | X | 281 | 52.319 | 42.276 | 57.790 | 0.00 | 0.00 |
| ATOM | 4215 | CG  | GLU | X | 281 | 50.201 | 42.497 | 58.236 | 0.00 | 0.00 |
| ATOM | 4216 | HG2 | GLU | X | 281 | 49.964 | 41.445 | 58.396 | 0.00 | 0.00 |
| ATOM | 4217 | HG3 | GLU | X | 281 | 49.518 | 43.067 | 58.867 | 0.00 | 0.00 |
| ATOM | 4218 | CD  | GLU | X | 281 | 49.978 | 42.810 | 56.715 | 0.00 | 0.00 |
| ATOM | 4219 | OE1 | GLU | X | 281 | 49.407 | 43.904 | 56.439 | 0.00 | 0.00 |
| ATOM | 4220 | OE2 | GLU | X | 281 | 50.247 | 41.945 | 55.913 | 0.00 | 0.00 |
| ATOM | 4221 | C   | GLU | X | 281 | 51.886 | 40.414 | 59.725 | 0.00 | 0.00 |
| ATOM | 4222 | O   | GLU | X | 281 | 51.073 | 39.696 | 60.298 | 0.00 | 0.00 |
| ATOM | 4223 | N   | TRP | X | 282 | 52.775 | 39.887 | 58.862 | 0.00 | 0.00 |
| ATOM | 4224 | H   | TRP | X | 282 | 53.502 | 40.528 | 58.577 | 0.00 | 0.00 |
| ATOM | 4225 | CA  | TRP | X | 282 | 52.813 | 38.467 | 58.459 | 0.00 | 0.00 |
| ATOM | 4226 | HA  | TRP | X | 282 | 51.807 | 38.379 | 58.048 | 0.00 | 0.00 |
| ATOM | 4227 | CB  | TRP | X | 282 | 53.937 | 38.233 | 57.459 | 0.00 | 0.00 |
| ATOM | 4228 | HB2 | TRP | X | 282 | 54.698 | 39.007 | 57.566 | 0.00 | 0.00 |
| ATOM | 4229 | HB3 | TRP | X | 282 | 54.430 | 37.285 | 57.672 | 0.00 | 0.00 |
| ATOM | 4230 | CG  | TRP | X | 282 | 53.397 | 38.384 | 56.040 | 0.00 | 0.00 |
| ATOM | 4231 | CD1 | TRP | X | 282 | 52.931 | 39.565 | 55.520 | 0.00 | 0.00 |
| ATOM | 4232 | HD1 | TRP | X | 282 | 52.931 | 40.510 | 56.044 | 0.00 | 0.00 |
| ATOM | 4233 | NE1 | TRP | X | 282 | 52.449 | 39.345 | 54.201 | 0.00 | 0.00 |
| ATOM | 4234 | HE1 | TRP | X | 282 | 52.085 | 40.048 | 53.574 | 0.00 | 0.00 |
| ATOM | 4235 | CE2 | TRP | X | 282 | 52.452 | 37.998 | 53.956 | 0.00 | 0.00 |
| ATOM | 4236 | CZ2 | TRP | X | 282 | 52.037 | 37.289 | 52.819 | 0.00 | 0.00 |
| ATOM | 4237 | HZ2 | TRP | X | 282 | 51.540 | 37.854 | 52.044 | 0.00 | 0.00 |
| ATOM | 4238 | CH2 | TRP | X | 282 | 52.331 | 35.912 | 52.719 | 0.00 | 0.00 |
| ATOM | 4239 | HH2 | TRP | X | 282 | 52.035 | 35.371 | 51.832 | 0.00 | 0.00 |
| ATOM | 4240 | CZ3 | TRP | X | 282 | 53.043 | 35.237 | 53.733 | 0.00 | 0.00 |
| ATOM | 4241 | HZ3 | TRP | X | 282 | 53.273 | 34.185 | 53.650 | 0.00 | 0.00 |
| ATOM | 4242 | CE3 | TRP | X | 282 | 53.478 | 35.955 | 54.909 | 0.00 | 0.00 |
| ATOM | 4243 | HE3 | TRP | X | 282 | 53.962 | 35.335 | 55.649 | 0.00 | 0.00 |
| ATOM | 4244 | CD2 | TRP | X | 282 | 53.183 | 37.346 | 55.038 | 0.00 | 0.00 |
| ATOM | 4245 | C   | TRP | X | 282 | 52.868 | 37.499 | 59.545 | 0.00 | 0.00 |
| ATOM | 4246 | O   | TRP | X | 282 | 52.486 | 36.340 | 59.448 | 0.00 | 0.00 |
| ATOM | 4247 | N   | HIE | X | 283 | 53.229 | 37.853 | 60.784 | 0.00 | 0.00 |
| ATOM | 4248 | H   | HIE | X | 283 | 53.633 | 38.768 | 60.922 | 0.00 | 0.00 |
| ATOM | 4249 | CA  | HIE | X | 283 | 53.133 | 37.046 | 61.941 | 0.00 | 0.00 |
| ATOM | 4250 | HA  | HIE | X | 283 | 53.738 | 36.140 | 61.899 | 0.00 | 0.00 |
| ATOM | 4251 | CB  | HIE | X | 283 | 53.580 | 37.886 | 63.175 | 0.00 | 0.00 |
| ATOM | 4252 | HB2 | HIE | X | 283 | 52.947 | 38.774 | 63.198 | 0.00 | 0.00 |
| ATOM | 4253 | HB3 | HIE | X | 283 | 53.564 | 37.248 | 64.058 | 0.00 | 0.00 |
| ATOM | 4254 | CG  | HIE | X | 283 | 55.036 | 38.367 | 63.132 | 0.00 | 0.00 |
| ATOM | 4255 | ND1 | HIE | X | 283 | 55.512 | 39.265 | 64.048 | 0.00 | 0.00 |
| ATOM | 4256 | CE1 | HIE | X | 283 | 56.859 | 39.388 | 63.720 | 0.00 | 0.00 |
| ATOM | 4257 | HE1 | HIE | X | 283 | 57.423 | 40.212 | 64.133 | 0.00 | 0.00 |
| ATOM | 4258 | NE2 | HIE | X | 283 | 57.192 | 38.617 | 62.695 | 0.00 | 0.00 |
| ATOM | 4259 | HE2 | HIE | X | 283 | 58.103 | 38.624 | 62.259 | 0.00 | 0.00 |
| ATOM | 4260 | CD2 | HIE | X | 283 | 56.076 | 38.039 | 62.297 | 0.00 | 0.00 |
| ATOM | 4261 | HD2 | HIE | X | 283 | 56.063 | 37.338 | 61.475 | 0.00 | 0.00 |
| ATOM | 4262 | C   | HIE | X | 283 | 51.744 | 36.565 | 62.213 | 0.00 | 0.00 |
| ATOM | 4263 | O   | HIE | X | 283 | 51.522 | 35.565 | 62.929 | 0.00 | 0.00 |
| ATOM | 4264 | N   | VAL | X | 284 | 50.743 | 37.259 | 61.707 | 0.00 | 0.00 |
| ATOM | 4265 | H   | VAL | X | 284 | 50.933 | 38.185 | 61.350 | 0.00 | 0.00 |
| ATOM | 4266 | CA  | VAL | X | 284 | 49.321 | 36.772 | 61.726 | 0.00 | 0.00 |
| ATOM | 4267 | HA  | VAL | X | 284 | 49.037 | 36.521 | 62.748 | 0.00 | 0.00 |
| ATOM | 4268 | CB  | VAL | X | 284 | 48.366 | 37.964 | 61.381 | 0.00 | 0.00 |

|      |      |      |     |   |     |        |        |        |      |      |
|------|------|------|-----|---|-----|--------|--------|--------|------|------|
| ATOM | 4269 | HB   | VAL | X | 284 | 47.393 | 37.523 | 61.599 | 0.00 | 0.00 |
| ATOM | 4270 | CG1  | VAL | X | 284 | 48.515 | 39.148 | 62.291 | 0.00 | 0.00 |
| ATOM | 4271 | HG11 | VAL | X | 284 | 47.679 | 39.794 | 62.025 | 0.00 | 0.00 |
| ATOM | 4272 | HG12 | VAL | X | 284 | 48.440 | 38.798 | 63.320 | 0.00 | 0.00 |
| ATOM | 4273 | HG13 | VAL | X | 284 | 49.428 | 39.728 | 62.152 | 0.00 | 0.00 |
| ATOM | 4274 | CG2  | VAL | X | 284 | 48.292 | 38.224 | 59.842 | 0.00 | 0.00 |
| ATOM | 4275 | HG21 | VAL | X | 284 | 49.266 | 38.559 | 59.488 | 0.00 | 0.00 |
| ATOM | 4276 | HG22 | VAL | X | 284 | 48.064 | 37.322 | 59.273 | 0.00 | 0.00 |
| ATOM | 4277 | HG23 | VAL | X | 284 | 47.498 | 38.954 | 59.686 | 0.00 | 0.00 |
| ATOM | 4278 | C    | VAL | X | 284 | 49.008 | 35.503 | 60.878 | 0.00 | 0.00 |
| ATOM | 4279 | O    | VAL | X | 284 | 48.073 | 34.764 | 61.084 | 0.00 | 0.00 |
| ATOM | 4280 | N    | LEU | X | 285 | 49.849 | 35.250 | 59.875 | 0.00 | 0.00 |
| ATOM | 4281 | H    | LEU | X | 285 | 50.585 | 35.933 | 59.764 | 0.00 | 0.00 |
| ATOM | 4282 | CA   | LEU | X | 285 | 49.827 | 34.059 | 59.037 | 0.00 | 0.00 |
| ATOM | 4283 | HA   | LEU | X | 285 | 48.864 | 33.577 | 59.200 | 0.00 | 0.00 |
| ATOM | 4284 | CB   | LEU | X | 285 | 50.047 | 34.536 | 57.580 | 0.00 | 0.00 |
| ATOM | 4285 | HB2  | LEU | X | 285 | 49.573 | 35.490 | 57.349 | 0.00 | 0.00 |
| ATOM | 4286 | HB3  | LEU | X | 285 | 51.110 | 34.762 | 57.497 | 0.00 | 0.00 |
| ATOM | 4287 | CG   | LEU | X | 285 | 49.556 | 33.470 | 56.622 | 0.00 | 0.00 |
| ATOM | 4288 | HG   | LEU | X | 285 | 49.995 | 32.567 | 57.048 | 0.00 | 0.00 |
| ATOM | 4289 | CD1  | LEU | X | 285 | 48.050 | 33.493 | 56.407 | 0.00 | 0.00 |
| ATOM | 4290 | HD11 | LEU | X | 285 | 47.739 | 34.468 | 56.033 | 0.00 | 0.00 |
| ATOM | 4291 | HD12 | LEU | X | 285 | 47.756 | 32.681 | 55.742 | 0.00 | 0.00 |
| ATOM | 4292 | HD13 | LEU | X | 285 | 47.621 | 33.313 | 57.393 | 0.00 | 0.00 |
| ATOM | 4293 | CD2  | LEU | X | 285 | 50.090 | 33.578 | 55.203 | 0.00 | 0.00 |
| ATOM | 4294 | HD21 | LEU | X | 285 | 49.461 | 34.218 | 54.584 | 0.00 | 0.00 |
| ATOM | 4295 | HD22 | LEU | X | 285 | 51.120 | 33.933 | 55.220 | 0.00 | 0.00 |
| ATOM | 4296 | HD23 | LEU | X | 285 | 50.054 | 32.638 | 54.653 | 0.00 | 0.00 |
| ATOM | 4297 | C    | LEU | X | 285 | 50.848 | 33.010 | 59.556 | 0.00 | 0.00 |
| ATOM | 4298 | O    | LEU | X | 285 | 52.014 | 33.241 | 59.547 | 0.00 | 0.00 |
| ATOM | 4299 | N    | PRO | X | 286 | 50.348 | 31.767 | 59.966 | 0.00 | 0.00 |
| ATOM | 4300 | CD   | PRO | X | 286 | 48.940 | 31.431 | 60.119 | 0.00 | 0.00 |
| ATOM | 4301 | HD2  | PRO | X | 286 | 48.380 | 31.632 | 59.205 | 0.00 | 0.00 |
| ATOM | 4302 | HD3  | PRO | X | 286 | 48.498 | 32.049 | 60.901 | 0.00 | 0.00 |
| ATOM | 4303 | CG   | PRO | X | 286 | 48.853 | 29.945 | 60.548 | 0.00 | 0.00 |
| ATOM | 4304 | HG2  | PRO | X | 286 | 48.717 | 29.370 | 59.633 | 0.00 | 0.00 |
| ATOM | 4305 | HG3  | PRO | X | 286 | 48.065 | 29.738 | 61.272 | 0.00 | 0.00 |
| ATOM | 4306 | CB   | PRO | X | 286 | 50.231 | 29.574 | 61.059 | 0.00 | 0.00 |
| ATOM | 4307 | HB2  | PRO | X | 286 | 50.540 | 28.565 | 60.786 | 0.00 | 0.00 |
| ATOM | 4308 | HB3  | PRO | X | 286 | 50.451 | 29.824 | 62.097 | 0.00 | 0.00 |
| ATOM | 4309 | CA   | PRO | X | 286 | 51.111 | 30.464 | 60.198 | 0.00 | 0.00 |
| ATOM | 4310 | HA   | PRO | X | 286 | 52.048 | 30.529 | 60.751 | 0.00 | 0.00 |
| ATOM | 4311 | C    | PRO | X | 286 | 51.540 | 29.822 | 58.820 | 0.00 | 0.00 |
| ATOM | 4312 | O    | PRO | X | 286 | 50.817 | 29.922 | 57.802 | 0.00 | 0.00 |
| ATOM | 4313 | N    | GLN | X | 287 | 52.700 | 29.090 | 58.918 | 0.00 | 0.00 |
| ATOM | 4314 | H    | GLN | X | 287 | 53.069 | 28.849 | 59.826 | 0.00 | 0.00 |
| ATOM | 4315 | CA   | GLN | X | 287 | 53.149 | 28.253 | 57.837 | 0.00 | 0.00 |
| ATOM | 4316 | HA   | GLN | X | 287 | 52.908 | 28.793 | 56.921 | 0.00 | 0.00 |
| ATOM | 4317 | CB   | GLN | X | 287 | 54.590 | 27.865 | 57.981 | 0.00 | 0.00 |
| ATOM | 4318 | HB2  | GLN | X | 287 | 54.730 | 27.221 | 58.849 | 0.00 | 0.00 |
| ATOM | 4319 | HB3  | GLN | X | 287 | 54.934 | 27.146 | 57.238 | 0.00 | 0.00 |
| ATOM | 4320 | CG   | GLN | X | 287 | 55.372 | 29.205 | 57.819 | 0.00 | 0.00 |
| ATOM | 4321 | HG2  | GLN | X | 287 | 55.034 | 29.693 | 56.905 | 0.00 | 0.00 |
| ATOM | 4322 | HG3  | GLN | X | 287 | 55.232 | 29.931 | 58.620 | 0.00 | 0.00 |
| ATOM | 4323 | CD   | GLN | X | 287 | 56.887 | 28.950 | 57.623 | 0.00 | 0.00 |
| ATOM | 4324 | OE1  | GLN | X | 287 | 57.400 | 27.927 | 57.985 | 0.00 | 0.00 |
| ATOM | 4325 | NE2  | GLN | X | 287 | 57.677 | 29.809 | 57.073 | 0.00 | 0.00 |
| ATOM | 4326 | HE21 | GLN | X | 287 | 58.639 | 29.502 | 57.075 | 0.00 | 0.00 |
| ATOM | 4327 | HE22 | GLN | X | 287 | 57.323 | 30.675 | 56.691 | 0.00 | 0.00 |
| ATOM | 4328 | C    | GLN | X | 287 | 52.316 | 26.934 | 57.923 | 0.00 | 0.00 |
| ATOM | 4329 | O    | GLN | X | 287 | 51.981 | 26.511 | 59.031 | 0.00 | 0.00 |
| ATOM | 4330 | N    | GLU | X | 288 | 51.855 | 26.448 | 56.761 | 0.00 | 0.00 |
| ATOM | 4331 | H    | GLU | X | 288 | 52.235 | 26.944 | 55.967 | 0.00 | 0.00 |
| ATOM | 4332 | CA   | GLU | X | 288 | 51.102 | 25.185 | 56.528 | 0.00 | 0.00 |
| ATOM | 4333 | HA   | GLU | X | 288 | 51.536 | 24.372 | 57.110 | 0.00 | 0.00 |
| ATOM | 4334 | CB   | GLU | X | 288 | 49.632 | 25.346 | 57.089 | 0.00 | 0.00 |
| ATOM | 4335 | HB2  | GLU | X | 288 | 49.608 | 25.584 | 58.152 | 0.00 | 0.00 |
| ATOM | 4336 | HB3  | GLU | X | 288 | 49.137 | 26.160 | 56.559 | 0.00 | 0.00 |
| ATOM | 4337 | CG   | GLU | X | 288 | 48.719 | 24.154 | 57.015 | 0.00 | 0.00 |
| ATOM | 4338 | HG2  | GLU | X | 288 | 48.498 | 23.820 | 56.001 | 0.00 | 0.00 |

|      |      |      |     |   |     |        |        |        |      |      |
|------|------|------|-----|---|-----|--------|--------|--------|------|------|
| ATOM | 4339 | HG3  | GLU | X | 288 | 49.124 | 23.337 | 57.611 | 0.00 | 0.00 |
| ATOM | 4340 | CD   | GLU | X | 288 | 47.314 | 24.306 | 57.654 | 0.00 | 0.00 |
| ATOM | 4341 | OE1  | GLU | X | 288 | 46.297 | 24.148 | 56.908 | 0.00 | 0.00 |
| ATOM | 4342 | OE2  | GLU | X | 288 | 47.215 | 24.331 | 58.879 | 0.00 | 0.00 |
| ATOM | 4343 | C    | GLU | X | 288 | 51.029 | 24.770 | 55.024 | 0.00 | 0.00 |
| ATOM | 4344 | O    | GLU | X | 288 | 51.220 | 23.626 | 54.672 | 0.00 | 0.00 |
| ATOM | 4345 | N    | SER | X | 289 | 50.815 | 25.622 | 54.097 | 0.00 | 0.00 |
| ATOM | 4346 | H    | SER | X | 289 | 50.495 | 26.558 | 54.302 | 0.00 | 0.00 |
| ATOM | 4347 | CA   | SER | X | 289 | 50.651 | 25.262 | 52.671 | 0.00 | 0.00 |
| ATOM | 4348 | HA   | SER | X | 289 | 51.149 | 24.307 | 52.502 | 0.00 | 0.00 |
| ATOM | 4349 | CB   | SER | X | 289 | 49.080 | 25.075 | 52.283 | 0.00 | 0.00 |
| ATOM | 4350 | HB2  | SER | X | 289 | 48.980 | 24.411 | 51.424 | 0.00 | 0.00 |
| ATOM | 4351 | HB3  | SER | X | 289 | 48.698 | 24.387 | 53.036 | 0.00 | 0.00 |
| ATOM | 4352 | OG   | SER | X | 289 | 48.348 | 26.249 | 52.131 | 0.00 | 0.00 |
| ATOM | 4353 | HG   | SER | X | 289 | 47.759 | 26.394 | 52.875 | 0.00 | 0.00 |
| ATOM | 4354 | C    | SER | X | 289 | 51.422 | 26.259 | 51.753 | 0.00 | 0.00 |
| ATOM | 4355 | O    | SER | X | 289 | 52.638 | 26.298 | 51.740 | 0.00 | 0.00 |
| ATOM | 4356 | N    | VAL | X | 290 | 50.719 | 26.998 | 50.934 | 0.00 | 0.00 |
| ATOM | 4357 | H    | VAL | X | 290 | 49.721 | 26.845 | 50.909 | 0.00 | 0.00 |
| ATOM | 4358 | CA   | VAL | X | 290 | 51.196 | 27.699 | 49.739 | 0.00 | 0.00 |
| ATOM | 4359 | HA   | VAL | X | 290 | 52.001 | 28.301 | 50.160 | 0.00 | 0.00 |
| ATOM | 4360 | CB   | VAL | X | 290 | 51.617 | 26.834 | 48.550 | 0.00 | 0.00 |
| ATOM | 4361 | HB   | VAL | X | 290 | 52.147 | 25.945 | 48.891 | 0.00 | 0.00 |
| ATOM | 4362 | CG1  | VAL | X | 290 | 50.586 | 26.478 | 47.400 | 0.00 | 0.00 |
| ATOM | 4363 | HG11 | VAL | X | 290 | 50.511 | 27.275 | 46.660 | 0.00 | 0.00 |
| ATOM | 4364 | HG12 | VAL | X | 290 | 50.964 | 25.593 | 46.887 | 0.00 | 0.00 |
| ATOM | 4365 | HG13 | VAL | X | 290 | 49.582 | 26.203 | 47.723 | 0.00 | 0.00 |
| ATOM | 4366 | CG2  | VAL | X | 290 | 52.832 | 27.512 | 47.927 | 0.00 | 0.00 |
| ATOM | 4367 | HG21 | VAL | X | 290 | 53.659 | 27.450 | 48.633 | 0.00 | 0.00 |
| ATOM | 4368 | HG22 | VAL | X | 290 | 53.166 | 26.938 | 47.063 | 0.00 | 0.00 |
| ATOM | 4369 | HG23 | VAL | X | 290 | 52.690 | 28.499 | 47.486 | 0.00 | 0.00 |
| ATOM | 4370 | C    | VAL | X | 290 | 50.133 | 28.769 | 49.313 | 0.00 | 0.00 |
| ATOM | 4371 | O    | VAL | X | 290 | 48.942 | 28.478 | 49.484 | 0.00 | 0.00 |
| ATOM | 4372 | N    | PHE | X | 291 | 50.554 | 29.926 | 48.689 | 0.00 | 0.00 |
| ATOM | 4373 | H    | PHE | X | 291 | 51.553 | 29.979 | 48.548 | 0.00 | 0.00 |
| ATOM | 4374 | CA   | PHE | X | 291 | 49.718 | 30.970 | 48.104 | 0.00 | 0.00 |
| ATOM | 4375 | HA   | PHE | X | 291 | 50.358 | 31.819 | 47.867 | 0.00 | 0.00 |
| ATOM | 4376 | CB   | PHE | X | 291 | 49.185 | 30.390 | 46.742 | 0.00 | 0.00 |
| ATOM | 4377 | HB2  | PHE | X | 291 | 50.033 | 29.923 | 46.241 | 0.00 | 0.00 |
| ATOM | 4378 | HB3  | PHE | X | 291 | 48.447 | 29.624 | 46.980 | 0.00 | 0.00 |
| ATOM | 4379 | CG   | PHE | X | 291 | 48.584 | 31.252 | 45.583 | 0.00 | 0.00 |
| ATOM | 4380 | CD1  | PHE | X | 291 | 48.168 | 32.547 | 45.911 | 0.00 | 0.00 |
| ATOM | 4381 | HD1  | PHE | X | 291 | 48.302 | 33.114 | 46.820 | 0.00 | 0.00 |
| ATOM | 4382 | CE1  | PHE | X | 291 | 47.572 | 33.267 | 44.854 | 0.00 | 0.00 |
| ATOM | 4383 | HE1  | PHE | X | 291 | 47.267 | 34.291 | 45.008 | 0.00 | 0.00 |
| ATOM | 4384 | CZ   | PHE | X | 291 | 47.522 | 32.716 | 43.576 | 0.00 | 0.00 |
| ATOM | 4385 | HZ   | PHE | X | 291 | 47.207 | 33.321 | 42.739 | 0.00 | 0.00 |
| ATOM | 4386 | CE2  | PHE | X | 291 | 48.046 | 31.425 | 43.366 | 0.00 | 0.00 |
| ATOM | 4387 | HE2  | PHE | X | 291 | 48.036 | 30.875 | 42.437 | 0.00 | 0.00 |
| ATOM | 4388 | CD2  | PHE | X | 291 | 48.560 | 30.669 | 44.359 | 0.00 | 0.00 |
| ATOM | 4389 | HD2  | PHE | X | 291 | 48.996 | 29.709 | 44.125 | 0.00 | 0.00 |
| ATOM | 4390 | C    | PHE | X | 291 | 48.601 | 31.479 | 49.045 | 0.00 | 0.00 |
| ATOM | 4391 | O    | PHE | X | 291 | 47.517 | 31.862 | 48.636 | 0.00 | 0.00 |
| ATOM | 4392 | N    | ARG | X | 292 | 48.897 | 31.420 | 50.359 | 0.00 | 0.00 |
| ATOM | 4393 | H    | ARG | X | 292 | 49.816 | 31.109 | 50.641 | 0.00 | 0.00 |
| ATOM | 4394 | CA   | ARG | X | 292 | 48.086 | 32.005 | 51.441 | 0.00 | 0.00 |
| ATOM | 4395 | HA   | ARG | X | 292 | 47.058 | 32.139 | 51.107 | 0.00 | 0.00 |
| ATOM | 4396 | CB   | ARG | X | 292 | 48.033 | 31.004 | 52.630 | 0.00 | 0.00 |
| ATOM | 4397 | HB2  | ARG | X | 292 | 48.968 | 30.960 | 53.188 | 0.00 | 0.00 |
| ATOM | 4398 | HB3  | ARG | X | 292 | 47.267 | 31.383 | 53.306 | 0.00 | 0.00 |
| ATOM | 4399 | CG   | ARG | X | 292 | 47.645 | 29.596 | 52.395 | 0.00 | 0.00 |
| ATOM | 4400 | HG2  | ARG | X | 292 | 48.497 | 29.042 | 52.002 | 0.00 | 0.00 |
| ATOM | 4401 | HG3  | ARG | X | 292 | 47.508 | 29.131 | 53.371 | 0.00 | 0.00 |
| ATOM | 4402 | CD   | ARG | X | 292 | 46.326 | 29.251 | 51.646 | 0.00 | 0.00 |
| ATOM | 4403 | HD2  | ARG | X | 292 | 46.069 | 28.235 | 51.945 | 0.00 | 0.00 |
| ATOM | 4404 | HD3  | ARG | X | 292 | 45.500 | 29.893 | 51.953 | 0.00 | 0.00 |
| ATOM | 4405 | NE   | ARG | X | 292 | 46.461 | 29.356 | 50.218 | 0.00 | 0.00 |
| ATOM | 4406 | HE   | ARG | X | 292 | 47.211 | 29.941 | 49.878 | 0.00 | 0.00 |
| ATOM | 4407 | CZ   | ARG | X | 292 | 45.700 | 28.764 | 49.244 | 0.00 | 0.00 |
| ATOM | 4408 | NH1  | ARG | X | 292 | 44.590 | 28.114 | 49.580 | 0.00 | 0.00 |

|      |      |      |     |   |     |        |        |        |      |      |
|------|------|------|-----|---|-----|--------|--------|--------|------|------|
| ATOM | 4409 | HH11 | ARG | X | 292 | 44.279 | 28.021 | 50.536 | 0.00 | 0.00 |
| ATOM | 4410 | HH12 | ARG | X | 292 | 44.254 | 27.452 | 48.895 | 0.00 | 0.00 |
| ATOM | 4411 | NH2  | ARG | X | 292 | 46.057 | 28.719 | 47.937 | 0.00 | 0.00 |
| ATOM | 4412 | HH21 | ARG | X | 292 | 46.981 | 28.995 | 47.636 | 0.00 | 0.00 |
| ATOM | 4413 | HH22 | ARG | X | 292 | 45.477 | 28.289 | 47.231 | 0.00 | 0.00 |
| ATOM | 4414 | C    | ARG | X | 292 | 48.685 | 33.342 | 51.863 | 0.00 | 0.00 |
| ATOM | 4415 | O    | ARG | X | 292 | 49.855 | 33.521 | 51.966 | 0.00 | 0.00 |
| ATOM | 4416 | N    | PHE | X | 293 | 47.854 | 34.383 | 52.122 | 0.00 | 0.00 |
| ATOM | 4417 | H    | PHE | X | 293 | 46.913 | 34.326 | 51.760 | 0.00 | 0.00 |
| ATOM | 4418 | CA   | PHE | X | 293 | 48.313 | 35.764 | 52.409 | 0.00 | 0.00 |
| ATOM | 4419 | HA   | PHE | X | 293 | 49.403 | 35.781 | 52.400 | 0.00 | 0.00 |
| ATOM | 4420 | CB   | PHE | X | 293 | 47.804 | 36.689 | 51.344 | 0.00 | 0.00 |
| ATOM | 4421 | HB2  | PHE | X | 293 | 46.721 | 36.781 | 51.270 | 0.00 | 0.00 |
| ATOM | 4422 | HB3  | PHE | X | 293 | 48.197 | 37.695 | 51.491 | 0.00 | 0.00 |
| ATOM | 4423 | CG   | PHE | X | 293 | 48.286 | 36.163 | 50.028 | 0.00 | 0.00 |
| ATOM | 4424 | CD1  | PHE | X | 293 | 49.682 | 36.065 | 49.740 | 0.00 | 0.00 |
| ATOM | 4425 | HD1  | PHE | X | 293 | 50.545 | 36.212 | 50.374 | 0.00 | 0.00 |
| ATOM | 4426 | CE1  | PHE | X | 293 | 50.118 | 35.707 | 48.472 | 0.00 | 0.00 |
| ATOM | 4427 | HE1  | PHE | X | 293 | 51.185 | 35.623 | 48.329 | 0.00 | 0.00 |
| ATOM | 4428 | CZ   | PHE | X | 293 | 49.199 | 35.519 | 47.380 | 0.00 | 0.00 |
| ATOM | 4429 | HZ   | PHE | X | 293 | 49.491 | 35.333 | 46.357 | 0.00 | 0.00 |
| ATOM | 4430 | CE2  | PHE | X | 293 | 47.795 | 35.569 | 47.659 | 0.00 | 0.00 |
| ATOM | 4431 | HE2  | PHE | X | 293 | 47.046 | 35.548 | 46.880 | 0.00 | 0.00 |
| ATOM | 4432 | CD2  | PHE | X | 293 | 47.404 | 35.880 | 48.938 | 0.00 | 0.00 |
| ATOM | 4433 | HD2  | PHE | X | 293 | 46.365 | 36.116 | 49.117 | 0.00 | 0.00 |
| ATOM | 4434 | C    | PHE | X | 293 | 47.675 | 36.333 | 53.652 | 0.00 | 0.00 |
| ATOM | 4435 | O    | PHE | X | 293 | 46.603 | 35.912 | 54.053 | 0.00 | 0.00 |
| ATOM | 4436 | N    | SER | X | 294 | 48.339 | 37.358 | 54.232 | 0.00 | 0.00 |
| ATOM | 4437 | H    | SER | X | 294 | 49.170 | 37.786 | 53.850 | 0.00 | 0.00 |
| ATOM | 4438 | CA   | SER | X | 294 | 48.156 | 37.846 | 55.612 | 0.00 | 0.00 |
| ATOM | 4439 | HA   | SER | X | 294 | 48.141 | 36.980 | 56.273 | 0.00 | 0.00 |
| ATOM | 4440 | CB   | SER | X | 294 | 49.286 | 38.823 | 55.970 | 0.00 | 0.00 |
| ATOM | 4441 | HB2  | SER | X | 294 | 49.006 | 39.482 | 56.792 | 0.00 | 0.00 |
| ATOM | 4442 | HB3  | SER | X | 294 | 50.139 | 38.216 | 56.271 | 0.00 | 0.00 |
| ATOM | 4443 | OG   | SER | X | 294 | 49.596 | 39.608 | 54.857 | 0.00 | 0.00 |
| ATOM | 4444 | HG   | SER | X | 294 | 49.896 | 40.463 | 55.174 | 0.00 | 0.00 |
| ATOM | 4445 | C    | SER | X | 294 | 46.840 | 38.509 | 55.908 | 0.00 | 0.00 |
| ATOM | 4446 | O    | SER | X | 294 | 46.205 | 38.145 | 56.968 | 0.00 | 0.00 |
| ATOM | 4447 | N    | PHE | X | 295 | 46.351 | 39.412 | 55.013 | 0.00 | 0.00 |
| ATOM | 4448 | H    | PHE | X | 295 | 46.993 | 39.826 | 54.352 | 0.00 | 0.00 |
| ATOM | 4449 | CA   | PHE | X | 295 | 44.971 | 39.958 | 55.094 | 0.00 | 0.00 |
| ATOM | 4450 | HA   | PHE | X | 295 | 44.263 | 39.310 | 55.610 | 0.00 | 0.00 |
| ATOM | 4451 | CB   | PHE | X | 295 | 45.067 | 41.343 | 55.798 | 0.00 | 0.00 |
| ATOM | 4452 | HB2  | PHE | X | 295 | 45.941 | 41.860 | 55.401 | 0.00 | 0.00 |
| ATOM | 4453 | HB3  | PHE | X | 295 | 44.287 | 42.085 | 55.626 | 0.00 | 0.00 |
| ATOM | 4454 | CG   | PHE | X | 295 | 45.189 | 41.350 | 57.354 | 0.00 | 0.00 |
| ATOM | 4455 | CD1  | PHE | X | 295 | 44.059 | 41.099 | 58.164 | 0.00 | 0.00 |
| ATOM | 4456 | HD1  | PHE | X | 295 | 43.059 | 40.931 | 57.792 | 0.00 | 0.00 |
| ATOM | 4457 | CE1  | PHE | X | 295 | 44.224 | 41.004 | 59.543 | 0.00 | 0.00 |
| ATOM | 4458 | HE1  | PHE | X | 295 | 43.370 | 40.728 | 60.143 | 0.00 | 0.00 |
| ATOM | 4459 | CZ   | PHE | X | 295 | 45.498 | 41.177 | 60.103 | 0.00 | 0.00 |
| ATOM | 4460 | HZ   | PHE | X | 295 | 45.666 | 41.115 | 61.168 | 0.00 | 0.00 |
| ATOM | 4461 | CE2  | PHE | X | 295 | 46.622 | 41.454 | 59.269 | 0.00 | 0.00 |
| ATOM | 4462 | HE2  | PHE | X | 295 | 47.549 | 41.673 | 59.779 | 0.00 | 0.00 |
| ATOM | 4463 | CD2  | PHE | X | 295 | 46.476 | 41.533 | 57.863 | 0.00 | 0.00 |
| ATOM | 4464 | HD2  | PHE | X | 295 | 47.316 | 41.717 | 57.209 | 0.00 | 0.00 |
| ATOM | 4465 | C    | PHE | X | 295 | 44.363 | 40.092 | 53.645 | 0.00 | 0.00 |
| ATOM | 4466 | O    | PHE | X | 295 | 45.040 | 40.708 | 52.848 | 0.00 | 0.00 |
| ATOM | 4467 | N    | VAL | X | 296 | 43.149 | 39.566 | 53.412 | 0.00 | 0.00 |
| ATOM | 4468 | H    | VAL | X | 296 | 42.671 | 39.070 | 54.151 | 0.00 | 0.00 |
| ATOM | 4469 | CA   | VAL | X | 296 | 42.464 | 39.529 | 52.106 | 0.00 | 0.00 |
| ATOM | 4470 | HA   | VAL | X | 296 | 42.756 | 40.386 | 51.499 | 0.00 | 0.00 |
| ATOM | 4471 | CB   | VAL | X | 296 | 42.853 | 38.142 | 51.536 | 0.00 | 0.00 |
| ATOM | 4472 | HB   | VAL | X | 296 | 42.287 | 37.977 | 50.619 | 0.00 | 0.00 |
| ATOM | 4473 | CG1  | VAL | X | 296 | 44.305 | 38.038 | 51.122 | 0.00 | 0.00 |
| ATOM | 4474 | HG11 | VAL | X | 296 | 44.608 | 39.022 | 50.765 | 0.00 | 0.00 |
| ATOM | 4475 | HG12 | VAL | X | 296 | 44.966 | 37.868 | 51.972 | 0.00 | 0.00 |
| ATOM | 4476 | HG13 | VAL | X | 296 | 44.422 | 37.292 | 50.336 | 0.00 | 0.00 |
| ATOM | 4477 | CG2  | VAL | X | 296 | 42.525 | 37.021 | 52.500 | 0.00 | 0.00 |
| ATOM | 4478 | HG21 | VAL | X | 296 | 43.180 | 36.923 | 53.365 | 0.00 | 0.00 |

|      |      |      |     |   |     |        |        |        |      |      |
|------|------|------|-----|---|-----|--------|--------|--------|------|------|
| ATOM | 4479 | HG22 | VAL | X | 296 | 41.594 | 37.188 | 53.041 | 0.00 | 0.00 |
| ATOM | 4480 | HG23 | VAL | X | 296 | 42.426 | 36.084 | 51.952 | 0.00 | 0.00 |
| ATOM | 4481 | C    | VAL | X | 296 | 40.911 | 39.657 | 52.420 | 0.00 | 0.00 |
| ATOM | 4482 | O    | VAL | X | 296 | 40.554 | 39.846 | 53.564 | 0.00 | 0.00 |
| ATOM | 4483 | N    | PRO | X | 297 | 40.145 | 39.763 | 51.359 | 0.00 | 0.00 |
| ATOM | 4484 | CD   | PRO | X | 297 | 40.533 | 39.817 | 49.979 | 0.00 | 0.00 |
| ATOM | 4485 | HD2  | PRO | X | 297 | 40.633 | 38.759 | 49.739 | 0.00 | 0.00 |
| ATOM | 4486 | HD3  | PRO | X | 297 | 41.439 | 40.367 | 49.727 | 0.00 | 0.00 |
| ATOM | 4487 | CG   | PRO | X | 297 | 39.316 | 40.415 | 49.226 | 0.00 | 0.00 |
| ATOM | 4488 | HG2  | PRO | X | 297 | 39.199 | 39.868 | 48.290 | 0.00 | 0.00 |
| ATOM | 4489 | HG3  | PRO | X | 297 | 39.439 | 41.489 | 49.087 | 0.00 | 0.00 |
| ATOM | 4490 | CB   | PRO | X | 297 | 38.071 | 40.029 | 50.081 | 0.00 | 0.00 |
| ATOM | 4491 | HB2  | PRO | X | 297 | 37.720 | 39.020 | 49.863 | 0.00 | 0.00 |
| ATOM | 4492 | HB3  | PRO | X | 297 | 37.271 | 40.751 | 49.917 | 0.00 | 0.00 |
| ATOM | 4493 | CA   | PRO | X | 297 | 38.704 | 40.012 | 51.456 | 0.00 | 0.00 |
| ATOM | 4494 | HA   | PRO | X | 297 | 38.602 | 41.020 | 51.859 | 0.00 | 0.00 |
| ATOM | 4495 | C    | PRO | X | 297 | 37.987 | 38.978 | 52.365 | 0.00 | 0.00 |
| ATOM | 4496 | O    | PRO | X | 297 | 38.408 | 37.834 | 52.433 | 0.00 | 0.00 |
| ATOM | 4497 | N    | VAL | X | 298 | 36.956 | 39.452 | 53.032 | 0.00 | 0.00 |
| ATOM | 4498 | H    | VAL | X | 298 | 36.727 | 40.426 | 52.899 | 0.00 | 0.00 |
| ATOM | 4499 | CA   | VAL | X | 298 | 36.225 | 38.685 | 53.980 | 0.00 | 0.00 |
| ATOM | 4500 | HA   | VAL | X | 298 | 36.541 | 37.652 | 54.120 | 0.00 | 0.00 |
| ATOM | 4501 | CB   | VAL | X | 298 | 36.302 | 39.362 | 55.411 | 0.00 | 0.00 |
| ATOM | 4502 | HB   | VAL | X | 298 | 35.933 | 40.386 | 55.353 | 0.00 | 0.00 |
| ATOM | 4503 | CG1  | VAL | X | 298 | 35.522 | 38.669 | 56.484 | 0.00 | 0.00 |
| ATOM | 4504 | HG11 | VAL | X | 298 | 35.487 | 37.596 | 56.294 | 0.00 | 0.00 |
| ATOM | 4505 | HG12 | VAL | X | 298 | 36.067 | 38.761 | 57.424 | 0.00 | 0.00 |
| ATOM | 4506 | HG13 | VAL | X | 298 | 34.501 | 39.044 | 56.555 | 0.00 | 0.00 |
| ATOM | 4507 | CG2  | VAL | X | 298 | 37.806 | 39.414 | 55.717 | 0.00 | 0.00 |
| ATOM | 4508 | HG21 | VAL | X | 298 | 38.016 | 39.814 | 56.708 | 0.00 | 0.00 |
| ATOM | 4509 | HG22 | VAL | X | 298 | 38.190 | 38.394 | 55.727 | 0.00 | 0.00 |
| ATOM | 4510 | HG23 | VAL | X | 298 | 38.345 | 39.973 | 54.952 | 0.00 | 0.00 |
| ATOM | 4511 | C    | VAL | X | 298 | 34.772 | 38.455 | 53.664 | 0.00 | 0.00 |
| ATOM | 4512 | O    | VAL | X | 298 | 34.082 | 39.367 | 53.214 | 0.00 | 0.00 |
| ATOM | 4513 | N    | VAL | X | 299 | 34.254 | 37.291 | 53.922 | 0.00 | 0.00 |
| ATOM | 4514 | H    | VAL | X | 299 | 34.921 | 36.704 | 54.403 | 0.00 | 0.00 |
| ATOM | 4515 | CA   | VAL | X | 299 | 32.830 | 37.001 | 53.776 | 0.00 | 0.00 |
| ATOM | 4516 | HA   | VAL | X | 299 | 32.523 | 37.422 | 52.819 | 0.00 | 0.00 |
| ATOM | 4517 | CB   | VAL | X | 299 | 32.429 | 35.531 | 53.831 | 0.00 | 0.00 |
| ATOM | 4518 | HB   | VAL | X | 299 | 32.702 | 35.091 | 54.790 | 0.00 | 0.00 |
| ATOM | 4519 | CG1  | VAL | X | 299 | 30.886 | 35.455 | 53.759 | 0.00 | 0.00 |
| ATOM | 4520 | HG11 | VAL | X | 299 | 30.374 | 35.851 | 54.636 | 0.00 | 0.00 |
| ATOM | 4521 | HG12 | VAL | X | 299 | 30.465 | 35.968 | 52.894 | 0.00 | 0.00 |
| ATOM | 4522 | HG13 | VAL | X | 299 | 30.670 | 34.388 | 53.710 | 0.00 | 0.00 |
| ATOM | 4523 | CG2  | VAL | X | 299 | 33.068 | 34.717 | 52.665 | 0.00 | 0.00 |
| ATOM | 4524 | HG21 | VAL | X | 299 | 32.565 | 33.752 | 52.604 | 0.00 | 0.00 |
| ATOM | 4525 | HG22 | VAL | X | 299 | 32.998 | 35.139 | 51.662 | 0.00 | 0.00 |
| ATOM | 4526 | HG23 | VAL | X | 299 | 34.115 | 34.601 | 52.945 | 0.00 | 0.00 |
| ATOM | 4527 | C    | VAL | X | 299 | 32.246 | 37.764 | 54.958 | 0.00 | 0.00 |
| ATOM | 4528 | O    | VAL | X | 299 | 32.650 | 37.436 | 56.065 | 0.00 | 0.00 |
| ATOM | 4529 | N    | ASP | X | 300 | 31.429 | 38.765 | 54.762 | 0.00 | 0.00 |
| ATOM | 4530 | H    | ASP | X | 300 | 30.941 | 38.816 | 53.880 | 0.00 | 0.00 |
| ATOM | 4531 | CA   | ASP | X | 300 | 31.050 | 39.897 | 55.747 | 0.00 | 0.00 |
| ATOM | 4532 | HA   | ASP | X | 300 | 31.425 | 39.645 | 56.739 | 0.00 | 0.00 |
| ATOM | 4533 | CB   | ASP | X | 300 | 31.807 | 41.170 | 55.366 | 0.00 | 0.00 |
| ATOM | 4534 | HB2  | ASP | X | 300 | 31.644 | 41.974 | 56.084 | 0.00 | 0.00 |
| ATOM | 4535 | HB3  | ASP | X | 300 | 32.860 | 40.911 | 55.258 | 0.00 | 0.00 |
| ATOM | 4536 | CG   | ASP | X | 300 | 31.487 | 41.821 | 53.998 | 0.00 | 0.00 |
| ATOM | 4537 | OD1  | ASP | X | 300 | 30.779 | 41.246 | 53.171 | 0.00 | 0.00 |
| ATOM | 4538 | OD2  | ASP | X | 300 | 31.829 | 43.049 | 53.831 | 0.00 | 0.00 |
| ATOM | 4539 | C    | ASP | X | 300 | 29.549 | 40.170 | 55.809 | 0.00 | 0.00 |
| ATOM | 4540 | O    | ASP | X | 300 | 29.040 | 40.725 | 56.790 | 0.00 | 0.00 |
| ATOM | 4541 | N    | GLY | X | 301 | 28.813 | 39.779 | 54.770 | 0.00 | 0.00 |
| ATOM | 4542 | H    | GLY | X | 301 | 29.349 | 39.589 | 53.936 | 0.00 | 0.00 |
| ATOM | 4543 | CA   | GLY | X | 301 | 27.375 | 40.156 | 54.626 | 0.00 | 0.00 |
| ATOM | 4544 | HA2  | GLY | X | 301 | 26.770 | 39.331 | 54.122 | 0.00 | 0.00 |
| ATOM | 4545 | HA3  | GLY | X | 301 | 27.059 | 40.346 | 55.622 | 0.00 | 0.00 |
| ATOM | 4546 | C    | GLY | X | 301 | 27.062 | 41.408 | 53.847 | 0.00 | 0.00 |
| ATOM | 4547 | O    | GLY | X | 301 | 25.890 | 41.697 | 53.656 | 0.00 | 0.00 |
| ATOM | 4548 | N    | ASP | X | 302 | 28.038 | 42.029 | 53.200 | 0.00 | 0.00 |



|      |      |      |     |   |     |        |        |        |      |      |
|------|------|------|-----|---|-----|--------|--------|--------|------|------|
| ATOM | 4549 | H    | ASP | X | 302 | 28.958 | 41.625 | 53.293 | 0.00 | 0.00 |
| ATOM | 4550 | CA   | ASP | X | 302 | 27.844 | 43.251 | 52.348 | 0.00 | 0.00 |
| ATOM | 4551 | HA   | ASP | X | 302 | 26.801 | 43.534 | 52.207 | 0.00 | 0.00 |
| ATOM | 4552 | CB   | ASP | X | 302 | 28.255 | 44.463 | 53.137 | 0.00 | 0.00 |
| ATOM | 4553 | HB2  | ASP | X | 302 | 27.621 | 44.574 | 54.017 | 0.00 | 0.00 |
| ATOM | 4554 | HB3  | ASP | X | 302 | 29.251 | 44.341 | 53.564 | 0.00 | 0.00 |
| ATOM | 4555 | CG   | ASP | X | 302 | 28.359 | 45.791 | 52.322 | 0.00 | 0.00 |
| ATOM | 4556 | OD1  | ASP | X | 302 | 27.315 | 46.506 | 52.187 | 0.00 | 0.00 |
| ATOM | 4557 | OD2  | ASP | X | 302 | 29.466 | 45.950 | 51.759 | 0.00 | 0.00 |
| ATOM | 4558 | C    | ASP | X | 302 | 28.480 | 43.160 | 50.940 | 0.00 | 0.00 |
| ATOM | 4559 | O    | ASP | X | 302 | 27.794 | 43.146 | 49.879 | 0.00 | 0.00 |
| ATOM | 4560 | N    | PHE | X | 303 | 29.827 | 43.052 | 50.958 | 0.00 | 0.00 |
| ATOM | 4561 | H    | PHE | X | 303 | 30.325 | 42.935 | 51.828 | 0.00 | 0.00 |
| ATOM | 4562 | CA   | PHE | X | 303 | 30.537 | 42.936 | 49.674 | 0.00 | 0.00 |
| ATOM | 4563 | HA   | PHE | X | 303 | 30.053 | 43.478 | 48.861 | 0.00 | 0.00 |
| ATOM | 4564 | CB   | PHE | X | 303 | 31.927 | 43.372 | 49.764 | 0.00 | 0.00 |
| ATOM | 4565 | HB2  | PHE | X | 303 | 32.131 | 43.974 | 50.649 | 0.00 | 0.00 |
| ATOM | 4566 | HB3  | PHE | X | 303 | 32.556 | 42.482 | 49.762 | 0.00 | 0.00 |
| ATOM | 4567 | CG   | PHE | X | 303 | 32.496 | 44.217 | 48.627 | 0.00 | 0.00 |
| ATOM | 4568 | CD1  | PHE | X | 303 | 32.803 | 43.587 | 47.445 | 0.00 | 0.00 |
| ATOM | 4569 | HD1  | PHE | X | 303 | 32.817 | 42.524 | 47.259 | 0.00 | 0.00 |
| ATOM | 4570 | CE1  | PHE | X | 303 | 33.156 | 44.371 | 46.347 | 0.00 | 0.00 |
| ATOM | 4571 | HE1  | PHE | X | 303 | 33.400 | 43.947 | 45.384 | 0.00 | 0.00 |
| ATOM | 4572 | CZ   | PHE | X | 303 | 33.225 | 45.789 | 46.439 | 0.00 | 0.00 |
| ATOM | 4573 | HZ   | PHE | X | 303 | 33.487 | 46.395 | 45.585 | 0.00 | 0.00 |
| ATOM | 4574 | CE2  | PHE | X | 303 | 32.985 | 46.415 | 47.704 | 0.00 | 0.00 |
| ATOM | 4575 | HE2  | PHE | X | 303 | 33.096 | 47.475 | 47.878 | 0.00 | 0.00 |
| ATOM | 4576 | CD2  | PHE | X | 303 | 32.669 | 45.584 | 48.789 | 0.00 | 0.00 |
| ATOM | 4577 | HD2  | PHE | X | 303 | 32.474 | 46.065 | 49.736 | 0.00 | 0.00 |
| ATOM | 4578 | C    | PHE | X | 303 | 30.382 | 41.432 | 49.272 | 0.00 | 0.00 |
| ATOM | 4579 | O    | PHE | X | 303 | 30.360 | 41.169 | 48.056 | 0.00 | 0.00 |
| ATOM | 4580 | N    | LEU | X | 304 | 30.234 | 40.557 | 50.324 | 0.00 | 0.00 |
| ATOM | 4581 | H    | LEU | X | 304 | 29.946 | 40.812 | 51.258 | 0.00 | 0.00 |
| ATOM | 4582 | CA   | LEU | X | 304 | 30.229 | 39.044 | 50.111 | 0.00 | 0.00 |
| ATOM | 4583 | HA   | LEU | X | 304 | 29.870 | 38.764 | 49.120 | 0.00 | 0.00 |
| ATOM | 4584 | CB   | LEU | X | 304 | 31.596 | 38.496 | 50.437 | 0.00 | 0.00 |
| ATOM | 4585 | HB2  | LEU | X | 304 | 31.901 | 39.040 | 51.331 | 0.00 | 0.00 |
| ATOM | 4586 | HB3  | LEU | X | 304 | 31.674 | 37.424 | 50.617 | 0.00 | 0.00 |
| ATOM | 4587 | CG   | LEU | X | 304 | 32.728 | 38.764 | 49.421 | 0.00 | 0.00 |
| ATOM | 4588 | HG   | LEU | X | 304 | 32.938 | 39.833 | 49.381 | 0.00 | 0.00 |
| ATOM | 4589 | CD1  | LEU | X | 304 | 34.048 | 37.979 | 49.851 | 0.00 | 0.00 |
| ATOM | 4590 | HD11 | LEU | X | 304 | 34.300 | 38.478 | 50.787 | 0.00 | 0.00 |
| ATOM | 4591 | HD12 | LEU | X | 304 | 33.816 | 36.933 | 50.050 | 0.00 | 0.00 |
| ATOM | 4592 | HD13 | LEU | X | 304 | 34.811 | 38.210 | 49.108 | 0.00 | 0.00 |
| ATOM | 4593 | CD2  | LEU | X | 304 | 32.414 | 38.191 | 47.975 | 0.00 | 0.00 |
| ATOM | 4594 | HD21 | LEU | X | 304 | 33.170 | 38.328 | 47.203 | 0.00 | 0.00 |
| ATOM | 4595 | HD22 | LEU | X | 304 | 32.244 | 37.126 | 48.134 | 0.00 | 0.00 |
| ATOM | 4596 | HD23 | LEU | X | 304 | 31.561 | 38.661 | 47.486 | 0.00 | 0.00 |
| ATOM | 4597 | C    | LEU | X | 304 | 29.195 | 38.431 | 51.074 | 0.00 | 0.00 |
| ATOM | 4598 | O    | LEU | X | 304 | 29.466 | 38.434 | 52.257 | 0.00 | 0.00 |
| ATOM | 4599 | N    | SER | X | 305 | 28.018 | 37.960 | 50.569 | 0.00 | 0.00 |
| ATOM | 4600 | H    | SER | X | 305 | 27.710 | 38.096 | 49.617 | 0.00 | 0.00 |
| ATOM | 4601 | CA   | SER | X | 305 | 27.000 | 37.339 | 51.370 | 0.00 | 0.00 |
| ATOM | 4602 | HA   | SER | X | 305 | 27.147 | 37.573 | 52.425 | 0.00 | 0.00 |
| ATOM | 4603 | CB   | SER | X | 305 | 25.531 | 37.743 | 50.951 | 0.00 | 0.00 |
| ATOM | 4604 | HB2  | SER | X | 305 | 25.295 | 37.422 | 49.936 | 0.00 | 0.00 |
| ATOM | 4605 | HB3  | SER | X | 305 | 24.753 | 37.288 | 51.564 | 0.00 | 0.00 |
| ATOM | 4606 | OG   | SER | X | 305 | 25.404 | 39.158 | 51.042 | 0.00 | 0.00 |
| ATOM | 4607 | HG   | SER | X | 305 | 24.775 | 39.270 | 51.759 | 0.00 | 0.00 |
| ATOM | 4608 | C    | SER | X | 305 | 27.100 | 35.847 | 51.220 | 0.00 | 0.00 |
| ATOM | 4609 | O    | SER | X | 305 | 26.290 | 35.073 | 51.713 | 0.00 | 0.00 |
| ATOM | 4610 | N    | ASP | X | 306 | 28.193 | 35.395 | 50.608 | 0.00 | 0.00 |
| ATOM | 4611 | H    | ASP | X | 306 | 28.869 | 36.064 | 50.268 | 0.00 | 0.00 |
| ATOM | 4612 | CA   | ASP | X | 306 | 28.567 | 33.965 | 50.498 | 0.00 | 0.00 |
| ATOM | 4613 | HA   | ASP | X | 306 | 28.728 | 33.452 | 51.446 | 0.00 | 0.00 |
| ATOM | 4614 | CB   | ASP | X | 306 | 27.632 | 33.128 | 49.592 | 0.00 | 0.00 |
| ATOM | 4615 | HB2  | ASP | X | 306 | 26.636 | 33.565 | 49.520 | 0.00 | 0.00 |
| ATOM | 4616 | HB3  | ASP | X | 306 | 28.013 | 33.084 | 48.572 | 0.00 | 0.00 |
| ATOM | 4617 | CG   | ASP | X | 306 | 27.500 | 31.728 | 50.155 | 0.00 | 0.00 |
| ATOM | 4618 | OD1  | ASP | X | 306 | 28.440 | 31.144 | 50.703 | 0.00 | 0.00 |

|      |      |      |     |   |     |        |        |        |      |      |
|------|------|------|-----|---|-----|--------|--------|--------|------|------|
| ATOM | 4619 | OD2  | ASP | X | 306 | 26.318 | 31.334 | 50.007 | 0.00 | 0.00 |
| ATOM | 4620 | C    | ASP | X | 306 | 30.061 | 33.920 | 49.986 | 0.00 | 0.00 |
| ATOM | 4621 | O    | ASP | X | 306 | 30.573 | 34.991 | 49.565 | 0.00 | 0.00 |
| ATOM | 4622 | N    | THR | X | 307 | 30.693 | 32.761 | 49.954 | 0.00 | 0.00 |
| ATOM | 4623 | H    | THR | X | 307 | 30.172 | 31.902 | 50.057 | 0.00 | 0.00 |
| ATOM | 4624 | CA   | THR | X | 307 | 32.033 | 32.615 | 49.333 | 0.00 | 0.00 |
| ATOM | 4625 | HA   | THR | X | 307 | 32.606 | 33.415 | 49.802 | 0.00 | 0.00 |
| ATOM | 4626 | CB   | THR | X | 307 | 32.677 | 31.310 | 49.690 | 0.00 | 0.00 |
| ATOM | 4627 | HB   | THR | X | 307 | 33.431 | 31.057 | 48.945 | 0.00 | 0.00 |
| ATOM | 4628 | CG2  | THR | X | 307 | 33.352 | 31.269 | 51.047 | 0.00 | 0.00 |
| ATOM | 4629 | HG21 | THR | X | 307 | 33.721 | 30.293 | 51.363 | 0.00 | 0.00 |
| ATOM | 4630 | HG22 | THR | X | 307 | 34.175 | 31.969 | 51.188 | 0.00 | 0.00 |
| ATOM | 4631 | HG23 | THR | X | 307 | 32.569 | 31.616 | 51.721 | 0.00 | 0.00 |
| ATOM | 4632 | OG1  | THR | X | 307 | 31.716 | 30.352 | 49.590 | 0.00 | 0.00 |
| ATOM | 4633 | HG1  | THR | X | 307 | 32.190 | 29.543 | 49.793 | 0.00 | 0.00 |
| ATOM | 4634 | C    | THR | X | 307 | 31.865 | 32.945 | 47.817 | 0.00 | 0.00 |
| ATOM | 4635 | O    | THR | X | 307 | 30.865 | 32.544 | 47.222 | 0.00 | 0.00 |
| ATOM | 4636 | N    | PRO | X | 308 | 32.802 | 33.660 | 47.218 | 0.00 | 0.00 |
| ATOM | 4637 | CD   | PRO | X | 308 | 33.882 | 34.468 | 47.823 | 0.00 | 0.00 |
| ATOM | 4638 | HD2  | PRO | X | 308 | 34.603 | 33.762 | 48.235 | 0.00 | 0.00 |
| ATOM | 4639 | HD3  | PRO | X | 308 | 33.382 | 35.172 | 48.488 | 0.00 | 0.00 |
| ATOM | 4640 | CG   | PRO | X | 308 | 34.369 | 35.380 | 46.715 | 0.00 | 0.00 |
| ATOM | 4641 | HG2  | PRO | X | 308 | 35.449 | 35.499 | 46.807 | 0.00 | 0.00 |
| ATOM | 4642 | HG3  | PRO | X | 308 | 33.837 | 36.332 | 46.710 | 0.00 | 0.00 |
| ATOM | 4643 | CB   | PRO | X | 308 | 34.101 | 34.542 | 45.530 | 0.00 | 0.00 |
| ATOM | 4644 | HB2  | PRO | X | 308 | 34.908 | 33.810 | 45.524 | 0.00 | 0.00 |
| ATOM | 4645 | HB3  | PRO | X | 308 | 34.029 | 35.093 | 44.592 | 0.00 | 0.00 |
| ATOM | 4646 | CA   | PRO | X | 308 | 32.729 | 33.936 | 45.825 | 0.00 | 0.00 |
| ATOM | 4647 | HA   | PRO | X | 308 | 31.951 | 34.664 | 45.597 | 0.00 | 0.00 |
| ATOM | 4648 | C    | PRO | X | 308 | 32.411 | 32.754 | 44.902 | 0.00 | 0.00 |
| ATOM | 4649 | O    | PRO | X | 308 | 31.714 | 32.936 | 43.938 | 0.00 | 0.00 |
| ATOM | 4650 | N    | GLU | X | 309 | 32.876 | 31.572 | 45.299 | 0.00 | 0.00 |
| ATOM | 4651 | H    | GLU | X | 309 | 33.457 | 31.569 | 46.126 | 0.00 | 0.00 |
| ATOM | 4652 | CA   | GLU | X | 309 | 32.597 | 30.280 | 44.600 | 0.00 | 0.00 |
| ATOM | 4653 | HA   | GLU | X | 309 | 32.827 | 30.452 | 43.549 | 0.00 | 0.00 |
| ATOM | 4654 | CB   | GLU | X | 309 | 33.568 | 29.254 | 45.166 | 0.00 | 0.00 |
| ATOM | 4655 | HB2  | GLU | X | 309 | 34.532 | 29.758 | 45.236 | 0.00 | 0.00 |
| ATOM | 4656 | HB3  | GLU | X | 309 | 33.247 | 28.712 | 46.056 | 0.00 | 0.00 |
| ATOM | 4657 | CG   | GLU | X | 309 | 33.870 | 28.194 | 44.169 | 0.00 | 0.00 |
| ATOM | 4658 | HG2  | GLU | X | 309 | 32.917 | 27.740 | 43.900 | 0.00 | 0.00 |
| ATOM | 4659 | HG3  | GLU | X | 309 | 34.293 | 28.663 | 43.281 | 0.00 | 0.00 |
| ATOM | 4660 | CD   | GLU | X | 309 | 34.729 | 27.023 | 44.783 | 0.00 | 0.00 |
| ATOM | 4661 | OE1  | GLU | X | 309 | 35.782 | 26.648 | 44.199 | 0.00 | 0.00 |
| ATOM | 4662 | OE2  | GLU | X | 309 | 34.384 | 26.444 | 45.894 | 0.00 | 0.00 |
| ATOM | 4663 | C    | GLU | X | 309 | 31.057 | 29.814 | 44.611 | 0.00 | 0.00 |
| ATOM | 4664 | O    | GLU | X | 309 | 30.675 | 29.134 | 43.747 | 0.00 | 0.00 |
| ATOM | 4665 | N    | ALA | X | 310 | 30.327 | 30.351 | 45.581 | 0.00 | 0.00 |
| ATOM | 4666 | H    | ALA | X | 310 | 30.695 | 30.966 | 46.292 | 0.00 | 0.00 |
| ATOM | 4667 | CA   | ALA | X | 310 | 28.861 | 30.076 | 45.594 | 0.00 | 0.00 |
| ATOM | 4668 | HA   | ALA | X | 310 | 28.634 | 29.188 | 45.003 | 0.00 | 0.00 |
| ATOM | 4669 | CB   | ALA | X | 310 | 28.437 | 29.760 | 47.025 | 0.00 | 0.00 |
| ATOM | 4670 | HB1  | ALA | X | 310 | 29.212 | 29.283 | 47.626 | 0.00 | 0.00 |
| ATOM | 4671 | HB2  | ALA | X | 310 | 28.152 | 30.635 | 47.609 | 0.00 | 0.00 |
| ATOM | 4672 | HB3  | ALA | X | 310 | 27.739 | 28.923 | 47.028 | 0.00 | 0.00 |
| ATOM | 4673 | C    | ALA | X | 310 | 28.096 | 31.380 | 45.074 | 0.00 | 0.00 |
| ATOM | 4674 | O    | ALA | X | 310 | 27.031 | 31.341 | 44.425 | 0.00 | 0.00 |
| ATOM | 4675 | N    | LEU | X | 311 | 28.617 | 32.591 | 45.381 | 0.00 | 0.00 |
| ATOM | 4676 | H    | LEU | X | 311 | 29.434 | 32.589 | 45.974 | 0.00 | 0.00 |
| ATOM | 4677 | CA   | LEU | X | 311 | 28.086 | 33.841 | 44.819 | 0.00 | 0.00 |
| ATOM | 4678 | HA   | LEU | X | 311 | 27.044 | 33.924 | 45.126 | 0.00 | 0.00 |
| ATOM | 4679 | CB   | LEU | X | 311 | 28.842 | 35.091 | 45.287 | 0.00 | 0.00 |
| ATOM | 4680 | HB2  | LEU | X | 311 | 29.925 | 35.046 | 45.168 | 0.00 | 0.00 |
| ATOM | 4681 | HB3  | LEU | X | 311 | 28.556 | 35.959 | 44.694 | 0.00 | 0.00 |
| ATOM | 4682 | CG   | LEU | X | 311 | 28.530 | 35.581 | 46.722 | 0.00 | 0.00 |
| ATOM | 4683 | HG   | LEU | X | 311 | 28.698 | 34.744 | 47.399 | 0.00 | 0.00 |
| ATOM | 4684 | CD1  | LEU | X | 311 | 29.488 | 36.699 | 47.163 | 0.00 | 0.00 |
| ATOM | 4685 | HD11 | LEU | X | 311 | 29.205 | 36.995 | 48.173 | 0.00 | 0.00 |
| ATOM | 4686 | HD12 | LEU | X | 311 | 30.485 | 36.270 | 47.271 | 0.00 | 0.00 |
| ATOM | 4687 | HD13 | LEU | X | 311 | 29.463 | 37.638 | 46.611 | 0.00 | 0.00 |
| ATOM | 4688 | CD2  | LEU | X | 311 | 27.043 | 36.056 | 46.904 | 0.00 | 0.00 |

|      |      |      |     |   |     |        |        |        |      |      |
|------|------|------|-----|---|-----|--------|--------|--------|------|------|
| ATOM | 4689 | HD21 | LEU | X | 311 | 27.054 | 36.999 | 46.357 | 0.00 | 0.00 |
| ATOM | 4690 | HD22 | LEU | X | 311 | 26.381 | 35.294 | 46.493 | 0.00 | 0.00 |
| ATOM | 4691 | HD23 | LEU | X | 311 | 26.721 | 36.289 | 47.919 | 0.00 | 0.00 |
| ATOM | 4692 | C    | LEU | X | 311 | 28.193 | 33.821 | 43.231 | 0.00 | 0.00 |
| ATOM | 4693 | O    | LEU | X | 311 | 27.284 | 34.292 | 42.543 | 0.00 | 0.00 |
| ATOM | 4694 | N    | ILE | X | 312 | 29.267 | 33.267 | 42.625 | 0.00 | 0.00 |
| ATOM | 4695 | H    | ILE | X | 312 | 29.954 | 32.912 | 43.273 | 0.00 | 0.00 |
| ATOM | 4696 | CA   | ILE | X | 312 | 29.347 | 32.997 | 41.180 | 0.00 | 0.00 |
| ATOM | 4697 | HA   | ILE | X | 312 | 29.043 | 33.931 | 40.707 | 0.00 | 0.00 |
| ATOM | 4698 | CB   | ILE | X | 312 | 30.802 | 32.746 | 40.797 | 0.00 | 0.00 |
| ATOM | 4699 | HB   | ILE | X | 312 | 31.407 | 33.537 | 41.239 | 0.00 | 0.00 |
| ATOM | 4700 | CG2  | ILE | X | 312 | 31.358 | 31.392 | 41.300 | 0.00 | 0.00 |
| ATOM | 4701 | HG21 | ILE | X | 312 | 32.432 | 31.564 | 41.379 | 0.00 | 0.00 |
| ATOM | 4702 | HG22 | ILE | X | 312 | 30.947 | 31.363 | 42.309 | 0.00 | 0.00 |
| ATOM | 4703 | HG23 | ILE | X | 312 | 30.998 | 30.541 | 40.721 | 0.00 | 0.00 |
| ATOM | 4704 | CG1  | ILE | X | 312 | 30.914 | 32.904 | 39.255 | 0.00 | 0.00 |
| ATOM | 4705 | HG12 | ILE | X | 312 | 30.313 | 32.210 | 38.667 | 0.00 | 0.00 |
| ATOM | 4706 | HG13 | ILE | X | 312 | 30.615 | 33.867 | 38.842 | 0.00 | 0.00 |
| ATOM | 4707 | CD1  | ILE | X | 312 | 32.346 | 32.707 | 38.797 | 0.00 | 0.00 |
| ATOM | 4708 | HD11 | ILE | X | 312 | 32.386 | 33.069 | 37.770 | 0.00 | 0.00 |
| ATOM | 4709 | HD12 | ILE | X | 312 | 32.970 | 33.277 | 39.485 | 0.00 | 0.00 |
| ATOM | 4710 | HD13 | ILE | X | 312 | 32.572 | 31.641 | 38.846 | 0.00 | 0.00 |
| ATOM | 4711 | C    | ILE | X | 312 | 28.382 | 31.899 | 40.694 | 0.00 | 0.00 |
| ATOM | 4712 | O    | ILE | X | 312 | 27.993 | 31.972 | 39.566 | 0.00 | 0.00 |
| ATOM | 4713 | N    | ASN | X | 313 | 28.088 | 30.919 | 41.587 | 0.00 | 0.00 |
| ATOM | 4714 | H    | ASN | X | 313 | 28.720 | 30.774 | 42.361 | 0.00 | 0.00 |
| ATOM | 4715 | CA   | ASN | X | 313 | 27.018 | 29.914 | 41.415 | 0.00 | 0.00 |
| ATOM | 4716 | HA   | ASN | X | 313 | 27.054 | 29.503 | 40.406 | 0.00 | 0.00 |
| ATOM | 4717 | CB   | ASN | X | 313 | 27.245 | 28.770 | 42.437 | 0.00 | 0.00 |
| ATOM | 4718 | HB2  | ASN | X | 313 | 28.290 | 28.491 | 42.571 | 0.00 | 0.00 |
| ATOM | 4719 | HB3  | ASN | X | 313 | 26.855 | 29.144 | 43.383 | 0.00 | 0.00 |
| ATOM | 4720 | CG   | ASN | X | 313 | 26.561 | 27.459 | 42.081 | 0.00 | 0.00 |
| ATOM | 4721 | OD1  | ASN | X | 313 | 25.983 | 27.128 | 41.038 | 0.00 | 0.00 |
| ATOM | 4722 | ND2  | ASN | X | 313 | 26.521 | 26.537 | 43.033 | 0.00 | 0.00 |
| ATOM | 4723 | HD21 | ASN | X | 313 | 25.942 | 25.754 | 42.763 | 0.00 | 0.00 |
| ATOM | 4724 | HD22 | ASN | X | 313 | 27.022 | 26.624 | 43.905 | 0.00 | 0.00 |
| ATOM | 4725 | C    | ASN | X | 313 | 25.586 | 30.434 | 41.436 | 0.00 | 0.00 |
| ATOM | 4726 | O    | ASN | X | 313 | 24.661 | 29.719 | 41.047 | 0.00 | 0.00 |
| ATOM | 4727 | N    | ALA | X | 314 | 25.350 | 31.626 | 41.832 | 0.00 | 0.00 |
| ATOM | 4728 | H    | ALA | X | 314 | 26.192 | 32.120 | 42.089 | 0.00 | 0.00 |
| ATOM | 4729 | CA   | ALA | X | 314 | 24.055 | 32.271 | 42.243 | 0.00 | 0.00 |
| ATOM | 4730 | HA   | ALA | X | 314 | 23.217 | 31.643 | 41.942 | 0.00 | 0.00 |
| ATOM | 4731 | CB   | ALA | X | 314 | 24.103 | 32.327 | 43.789 | 0.00 | 0.00 |
| ATOM | 4732 | HB1  | ALA | X | 314 | 24.225 | 31.374 | 44.304 | 0.00 | 0.00 |
| ATOM | 4733 | HB2  | ALA | X | 314 | 24.768 | 33.061 | 44.244 | 0.00 | 0.00 |
| ATOM | 4734 | HB3  | ALA | X | 314 | 23.167 | 32.776 | 44.120 | 0.00 | 0.00 |
| ATOM | 4735 | C    | ALA | X | 314 | 23.799 | 33.667 | 41.576 | 0.00 | 0.00 |
| ATOM | 4736 | O    | ALA | X | 314 | 22.754 | 34.271 | 41.685 | 0.00 | 0.00 |
| ATOM | 4737 | N    | GLY | X | 315 | 24.773 | 34.172 | 40.785 | 0.00 | 0.00 |
| ATOM | 4738 | H    | GLY | X | 315 | 25.646 | 33.677 | 40.667 | 0.00 | 0.00 |
| ATOM | 4739 | CA   | GLY | X | 315 | 24.707 | 35.528 | 40.149 | 0.00 | 0.00 |
| ATOM | 4740 | HA2  | GLY | X | 315 | 23.987 | 36.141 | 40.686 | 0.00 | 0.00 |
| ATOM | 4741 | HA3  | GLY | X | 315 | 25.689 | 35.996 | 40.228 | 0.00 | 0.00 |
| ATOM | 4742 | C    | GLY | X | 315 | 24.195 | 35.485 | 38.666 | 0.00 | 0.00 |
| ATOM | 4743 | O    | GLY | X | 315 | 24.264 | 34.441 | 37.966 | 0.00 | 0.00 |
| ATOM | 4744 | N    | ASP | X | 316 | 23.559 | 36.559 | 38.294 | 0.00 | 0.00 |
| ATOM | 4745 | H    | ASP | X | 316 | 23.286 | 37.222 | 39.006 | 0.00 | 0.00 |
| ATOM | 4746 | CA   | ASP | X | 316 | 23.041 | 36.710 | 36.978 | 0.00 | 0.00 |
| ATOM | 4747 | HA   | ASP | X | 316 | 23.053 | 35.786 | 36.400 | 0.00 | 0.00 |
| ATOM | 4748 | CB   | ASP | X | 316 | 21.677 | 37.297 | 37.122 | 0.00 | 0.00 |
| ATOM | 4749 | HB2  | ASP | X | 316 | 20.976 | 36.672 | 37.676 | 0.00 | 0.00 |
| ATOM | 4750 | HB3  | ASP | X | 316 | 21.769 | 38.233 | 37.672 | 0.00 | 0.00 |
| ATOM | 4751 | CG   | ASP | X | 316 | 21.127 | 37.454 | 35.705 | 0.00 | 0.00 |
| ATOM | 4752 | OD1  | ASP | X | 316 | 20.689 | 36.498 | 35.062 | 0.00 | 0.00 |
| ATOM | 4753 | OD2  | ASP | X | 316 | 21.208 | 38.581 | 35.146 | 0.00 | 0.00 |
| ATOM | 4754 | C    | ASP | X | 316 | 23.974 | 37.752 | 36.245 | 0.00 | 0.00 |
| ATOM | 4755 | O    | ASP | X | 316 | 24.114 | 38.885 | 36.774 | 0.00 | 0.00 |
| ATOM | 4756 | N    | PHE | X | 317 | 24.439 | 37.323 | 35.091 | 0.00 | 0.00 |
| ATOM | 4757 | H    | PHE | X | 317 | 24.276 | 36.449 | 34.612 | 0.00 | 0.00 |
| ATOM | 4758 | CA   | PHE | X | 317 | 25.460 | 38.087 | 34.330 | 0.00 | 0.00 |

|      |      |      |     |   |     |        |        |        |      |      |
|------|------|------|-----|---|-----|--------|--------|--------|------|------|
| ATOM | 4759 | HA   | PHE | X | 317 | 25.687 | 39.015 | 34.854 | 0.00 | 0.00 |
| ATOM | 4760 | CB   | PHE | X | 317 | 26.762 | 37.293 | 34.321 | 0.00 | 0.00 |
| ATOM | 4761 | HB2  | PHE | X | 317 | 26.628 | 36.358 | 33.776 | 0.00 | 0.00 |
| ATOM | 4762 | HB3  | PHE | X | 317 | 27.583 | 37.809 | 33.823 | 0.00 | 0.00 |
| ATOM | 4763 | CG   | PHE | X | 317 | 27.383 | 36.913 | 35.637 | 0.00 | 0.00 |
| ATOM | 4764 | CD1  | PHE | X | 317 | 28.008 | 37.806 | 36.484 | 0.00 | 0.00 |
| ATOM | 4765 | HD1  | PHE | X | 317 | 27.985 | 38.870 | 36.295 | 0.00 | 0.00 |
| ATOM | 4766 | CE1  | PHE | X | 317 | 28.683 | 37.347 | 37.621 | 0.00 | 0.00 |
| ATOM | 4767 | HE1  | PHE | X | 317 | 29.359 | 38.000 | 38.154 | 0.00 | 0.00 |
| ATOM | 4768 | CZ   | PHE | X | 317 | 28.632 | 35.998 | 37.968 | 0.00 | 0.00 |
| ATOM | 4769 | HZ   | PHE | X | 317 | 29.316 | 35.642 | 38.725 | 0.00 | 0.00 |
| ATOM | 4770 | CE2  | PHE | X | 317 | 27.970 | 35.056 | 37.182 | 0.00 | 0.00 |
| ATOM | 4771 | HE2  | PHE | X | 317 | 27.832 | 34.028 | 37.483 | 0.00 | 0.00 |
| ATOM | 4772 | CD2  | PHE | X | 317 | 27.254 | 35.562 | 36.104 | 0.00 | 0.00 |
| ATOM | 4773 | HD2  | PHE | X | 317 | 26.622 | 34.889 | 35.544 | 0.00 | 0.00 |
| ATOM | 4774 | C    | PHE | X | 317 | 24.918 | 38.555 | 32.943 | 0.00 | 0.00 |
| ATOM | 4775 | O    | PHE | X | 317 | 25.653 | 38.858 | 32.013 | 0.00 | 0.00 |
| ATOM | 4776 | N    | HIE | X | 318 | 23.610 | 38.602 | 32.812 | 0.00 | 0.00 |
| ATOM | 4777 | H    | HIE | X | 318 | 23.126 | 38.302 | 33.647 | 0.00 | 0.00 |
| ATOM | 4778 | CA   | HIE | X | 318 | 22.929 | 38.739 | 31.499 | 0.00 | 0.00 |
| ATOM | 4779 | HA   | HIE | X | 318 | 23.374 | 37.964 | 30.875 | 0.00 | 0.00 |
| ATOM | 4780 | CB   | HIE | X | 318 | 21.465 | 38.335 | 31.603 | 0.00 | 0.00 |
| ATOM | 4781 | HB2  | HIE | X | 318 | 21.393 | 37.272 | 31.832 | 0.00 | 0.00 |
| ATOM | 4782 | HB3  | HIE | X | 318 | 20.907 | 39.003 | 32.259 | 0.00 | 0.00 |
| ATOM | 4783 | CG   | HIE | X | 318 | 20.848 | 38.396 | 30.223 | 0.00 | 0.00 |
| ATOM | 4784 | ND1  | HIE | X | 318 | 20.390 | 39.517 | 29.548 | 0.00 | 0.00 |
| ATOM | 4785 | CE1  | HIE | X | 318 | 20.104 | 39.151 | 28.288 | 0.00 | 0.00 |
| ATOM | 4786 | HE1  | HIE | X | 318 | 19.688 | 39.904 | 27.636 | 0.00 | 0.00 |
| ATOM | 4787 | NE2  | HIE | X | 318 | 20.223 | 37.835 | 28.120 | 0.00 | 0.00 |
| ATOM | 4788 | HE2  | HIE | X | 318 | 20.052 | 37.331 | 27.262 | 0.00 | 0.00 |
| ATOM | 4789 | CD2  | HIE | X | 318 | 20.779 | 37.371 | 29.307 | 0.00 | 0.00 |
| ATOM | 4790 | HD2  | HIE | X | 318 | 21.087 | 36.370 | 29.573 | 0.00 | 0.00 |
| ATOM | 4791 | C    | HIE | X | 318 | 23.173 | 40.069 | 30.796 | 0.00 | 0.00 |
| ATOM | 4792 | O    | HIE | X | 318 | 23.049 | 41.147 | 31.423 | 0.00 | 0.00 |
| ATOM | 4793 | N    | GLY | X | 319 | 23.543 | 40.060 | 29.464 | 0.00 | 0.00 |
| ATOM | 4794 | H    | GLY | X | 319 | 23.579 | 39.215 | 28.912 | 0.00 | 0.00 |
| ATOM | 4795 | CA   | GLY | X | 319 | 23.851 | 41.324 | 28.776 | 0.00 | 0.00 |
| ATOM | 4796 | HA2  | GLY | X | 319 | 23.577 | 41.110 | 27.704 | 0.00 | 0.00 |
| ATOM | 4797 | HA3  | GLY | X | 319 | 23.329 | 42.166 | 29.228 | 0.00 | 0.00 |
| ATOM | 4798 | C    | GLY | X | 319 | 25.300 | 41.874 | 28.761 | 0.00 | 0.00 |
| ATOM | 4799 | O    | GLY | X | 319 | 25.514 | 42.920 | 28.114 | 0.00 | 0.00 |
| ATOM | 4800 | N    | LEU | X | 320 | 26.212 | 41.241 | 29.495 | 0.00 | 0.00 |
| ATOM | 4801 | H    | LEU | X | 320 | 25.846 | 40.637 | 30.217 | 0.00 | 0.00 |
| ATOM | 4802 | CA   | LEU | X | 320 | 27.525 | 41.768 | 29.747 | 0.00 | 0.00 |
| ATOM | 4803 | HA   | LEU | X | 320 | 27.633 | 42.769 | 29.330 | 0.00 | 0.00 |
| ATOM | 4804 | CB   | LEU | X | 320 | 27.915 | 41.697 | 31.258 | 0.00 | 0.00 |
| ATOM | 4805 | HB2  | LEU | X | 320 | 28.162 | 40.660 | 31.483 | 0.00 | 0.00 |
| ATOM | 4806 | HB3  | LEU | X | 320 | 28.873 | 42.161 | 31.491 | 0.00 | 0.00 |
| ATOM | 4807 | CG   | LEU | X | 320 | 26.979 | 42.246 | 32.257 | 0.00 | 0.00 |
| ATOM | 4808 | HG   | LEU | X | 320 | 25.940 | 41.967 | 32.081 | 0.00 | 0.00 |
| ATOM | 4809 | CD1  | LEU | X | 320 | 27.458 | 41.710 | 33.695 | 0.00 | 0.00 |
| ATOM | 4810 | HD11 | LEU | X | 320 | 27.139 | 42.330 | 34.533 | 0.00 | 0.00 |
| ATOM | 4811 | HD12 | LEU | X | 320 | 27.072 | 40.700 | 33.826 | 0.00 | 0.00 |
| ATOM | 4812 | HD13 | LEU | X | 320 | 28.538 | 41.738 | 33.838 | 0.00 | 0.00 |
| ATOM | 4813 | CD2  | LEU | X | 320 | 27.139 | 43.778 | 32.271 | 0.00 | 0.00 |
| ATOM | 4814 | HD21 | LEU | X | 320 | 28.052 | 43.983 | 32.830 | 0.00 | 0.00 |
| ATOM | 4815 | HD22 | LEU | X | 320 | 27.464 | 44.140 | 31.296 | 0.00 | 0.00 |
| ATOM | 4816 | HD23 | LEU | X | 320 | 26.237 | 44.257 | 32.653 | 0.00 | 0.00 |
| ATOM | 4817 | C    | LEU | X | 320 | 28.579 | 41.040 | 28.877 | 0.00 | 0.00 |
| ATOM | 4818 | O    | LEU | X | 320 | 28.162 | 40.205 | 28.011 | 0.00 | 0.00 |
| ATOM | 4819 | N    | GLN | X | 321 | 29.805 | 41.441 | 28.953 | 0.00 | 0.00 |
| ATOM | 4820 | H    | GLN | X | 321 | 30.084 | 42.157 | 29.608 | 0.00 | 0.00 |
| ATOM | 4821 | CA   | GLN | X | 321 | 30.936 | 40.864 | 28.272 | 0.00 | 0.00 |
| ATOM | 4822 | HA   | GLN | X | 321 | 30.662 | 39.830 | 28.063 | 0.00 | 0.00 |
| ATOM | 4823 | CB   | GLN | X | 321 | 31.284 | 41.576 | 26.976 | 0.00 | 0.00 |
| ATOM | 4824 | HB2  | GLN | X | 321 | 31.710 | 42.564 | 27.151 | 0.00 | 0.00 |
| ATOM | 4825 | HB3  | GLN | X | 321 | 32.079 | 40.991 | 26.515 | 0.00 | 0.00 |
| ATOM | 4826 | CG   | GLN | X | 321 | 30.126 | 41.814 | 25.936 | 0.00 | 0.00 |
| ATOM | 4827 | HG2  | GLN | X | 321 | 30.478 | 42.233 | 24.993 | 0.00 | 0.00 |
| ATOM | 4828 | HG3  | GLN | X | 321 | 29.548 | 40.924 | 25.685 | 0.00 | 0.00 |

|      |      |      |     |   |     |        |        |        |      |      |
|------|------|------|-----|---|-----|--------|--------|--------|------|------|
| ATOM | 4829 | CD   | GLN | X | 321 | 29.204 | 42.979 | 26.437 | 0.00 | 0.00 |
| ATOM | 4830 | OE1  | GLN | X | 321 | 29.709 | 43.981 | 26.951 | 0.00 | 0.00 |
| ATOM | 4831 | NE2  | GLN | X | 321 | 27.880 | 42.908 | 26.127 | 0.00 | 0.00 |
| ATOM | 4832 | HE21 | GLN | X | 321 | 27.284 | 43.622 | 26.522 | 0.00 | 0.00 |
| ATOM | 4833 | HE22 | GLN | X | 321 | 27.573 | 42.367 | 25.332 | 0.00 | 0.00 |
| ATOM | 4834 | C    | GLN | X | 321 | 32.091 | 40.861 | 29.258 | 0.00 | 0.00 |
| ATOM | 4835 | O    | GLN | X | 321 | 32.216 | 41.792 | 30.055 | 0.00 | 0.00 |
| ATOM | 4836 | N    | VAL | X | 322 | 32.866 | 39.754 | 29.273 | 0.00 | 0.00 |
| ATOM | 4837 | H    | VAL | X | 322 | 32.667 | 38.970 | 28.668 | 0.00 | 0.00 |
| ATOM | 4838 | CA   | VAL | X | 322 | 34.062 | 39.574 | 30.125 | 0.00 | 0.00 |
| ATOM | 4839 | HA   | VAL | X | 322 | 34.459 | 40.519 | 30.498 | 0.00 | 0.00 |
| ATOM | 4840 | CB   | VAL | X | 322 | 33.789 | 38.700 | 31.380 | 0.00 | 0.00 |
| ATOM | 4841 | HB   | VAL | X | 322 | 33.936 | 37.699 | 30.975 | 0.00 | 0.00 |
| ATOM | 4842 | CG1  | VAL | X | 322 | 34.976 | 38.889 | 32.430 | 0.00 | 0.00 |
| ATOM | 4843 | HG11 | VAL | X | 322 | 34.885 | 38.091 | 33.168 | 0.00 | 0.00 |
| ATOM | 4844 | HG12 | VAL | X | 322 | 35.964 | 38.935 | 31.973 | 0.00 | 0.00 |
| ATOM | 4845 | HG13 | VAL | X | 322 | 34.849 | 39.848 | 32.931 | 0.00 | 0.00 |
| ATOM | 4846 | CG2  | VAL | X | 322 | 32.452 | 38.988 | 32.071 | 0.00 | 0.00 |
| ATOM | 4847 | HG21 | VAL | X | 322 | 32.405 | 40.029 | 32.389 | 0.00 | 0.00 |
| ATOM | 4848 | HG22 | VAL | X | 322 | 31.582 | 38.777 | 31.449 | 0.00 | 0.00 |
| ATOM | 4849 | HG23 | VAL | X | 322 | 32.488 | 38.337 | 32.945 | 0.00 | 0.00 |
| ATOM | 4850 | C    | VAL | X | 322 | 35.164 | 38.884 | 29.263 | 0.00 | 0.00 |
| ATOM | 4851 | O    | VAL | X | 322 | 34.828 | 38.015 | 28.450 | 0.00 | 0.00 |
| ATOM | 4852 | N    | LEU | X | 323 | 36.445 | 39.206 | 29.453 | 0.00 | 0.00 |
| ATOM | 4853 | H    | LEU | X | 323 | 36.538 | 40.020 | 30.043 | 0.00 | 0.00 |
| ATOM | 4854 | CA   | LEU | X | 323 | 37.605 | 38.547 | 28.862 | 0.00 | 0.00 |
| ATOM | 4855 | HA   | LEU | X | 323 | 37.336 | 37.775 | 28.141 | 0.00 | 0.00 |
| ATOM | 4856 | CB   | LEU | X | 323 | 38.402 | 39.649 | 28.164 | 0.00 | 0.00 |
| ATOM | 4857 | HB2  | LEU | X | 323 | 37.713 | 40.167 | 27.497 | 0.00 | 0.00 |
| ATOM | 4858 | HB3  | LEU | X | 323 | 38.753 | 40.379 | 28.893 | 0.00 | 0.00 |
| ATOM | 4859 | CG   | LEU | X | 323 | 39.522 | 39.187 | 27.299 | 0.00 | 0.00 |
| ATOM | 4860 | HG   | LEU | X | 323 | 39.120 | 38.493 | 26.561 | 0.00 | 0.00 |
| ATOM | 4861 | CD1  | LEU | X | 323 | 40.065 | 40.401 | 26.467 | 0.00 | 0.00 |
| ATOM | 4862 | HD11 | LEU | X | 323 | 39.308 | 40.700 | 25.742 | 0.00 | 0.00 |
| ATOM | 4863 | HD12 | LEU | X | 323 | 40.241 | 41.312 | 27.039 | 0.00 | 0.00 |
| ATOM | 4864 | HD13 | LEU | X | 323 | 40.881 | 40.121 | 25.800 | 0.00 | 0.00 |
| ATOM | 4865 | CD2  | LEU | X | 323 | 40.683 | 38.474 | 28.045 | 0.00 | 0.00 |
| ATOM | 4866 | HD21 | LEU | X | 323 | 40.506 | 37.405 | 28.169 | 0.00 | 0.00 |
| ATOM | 4867 | HD22 | LEU | X | 323 | 41.512 | 38.466 | 27.338 | 0.00 | 0.00 |
| ATOM | 4868 | HD23 | LEU | X | 323 | 41.011 | 38.967 | 28.960 | 0.00 | 0.00 |
| ATOM | 4869 | C    | LEU | X | 323 | 38.351 | 37.957 | 30.109 | 0.00 | 0.00 |
| ATOM | 4870 | O    | LEU | X | 323 | 38.523 | 38.588 | 31.201 | 0.00 | 0.00 |
| ATOM | 4871 | N    | VAL | X | 324 | 38.800 | 36.724 | 29.993 | 0.00 | 0.00 |
| ATOM | 4872 | H    | VAL | X | 324 | 38.767 | 36.229 | 29.113 | 0.00 | 0.00 |
| ATOM | 4873 | CA   | VAL | X | 324 | 39.278 | 35.877 | 31.105 | 0.00 | 0.00 |
| ATOM | 4874 | HA   | VAL | X | 324 | 39.663 | 36.534 | 31.885 | 0.00 | 0.00 |
| ATOM | 4875 | CB   | VAL | X | 324 | 38.186 | 34.998 | 31.749 | 0.00 | 0.00 |
| ATOM | 4876 | HB   | VAL | X | 324 | 38.597 | 34.393 | 32.558 | 0.00 | 0.00 |
| ATOM | 4877 | CG1  | VAL | X | 324 | 36.866 | 35.801 | 32.067 | 0.00 | 0.00 |
| ATOM | 4878 | HG11 | VAL | X | 324 | 37.181 | 36.747 | 32.506 | 0.00 | 0.00 |
| ATOM | 4879 | HG12 | VAL | X | 324 | 36.320 | 36.010 | 31.147 | 0.00 | 0.00 |
| ATOM | 4880 | HG13 | VAL | X | 324 | 36.180 | 35.334 | 32.774 | 0.00 | 0.00 |
| ATOM | 4881 | CG2  | VAL | X | 324 | 37.755 | 33.876 | 30.758 | 0.00 | 0.00 |
| ATOM | 4882 | HG21 | VAL | X | 324 | 37.546 | 34.332 | 29.790 | 0.00 | 0.00 |
| ATOM | 4883 | HG22 | VAL | X | 324 | 38.554 | 33.151 | 30.600 | 0.00 | 0.00 |
| ATOM | 4884 | HG23 | VAL | X | 324 | 36.838 | 33.424 | 31.133 | 0.00 | 0.00 |
| ATOM | 4885 | C    | VAL | X | 324 | 40.485 | 35.137 | 30.683 | 0.00 | 0.00 |
| ATOM | 4886 | O    | VAL | X | 324 | 40.521 | 34.680 | 29.576 | 0.00 | 0.00 |
| ATOM | 4887 | N    | GLY | X | 325 | 41.523 | 34.883 | 31.466 | 0.00 | 0.00 |
| ATOM | 4888 | H    | GLY | X | 325 | 41.616 | 35.561 | 32.209 | 0.00 | 0.00 |
| ATOM | 4889 | CA   | GLY | X | 325 | 42.634 | 33.990 | 31.102 | 0.00 | 0.00 |
| ATOM | 4890 | HA2  | GLY | X | 325 | 42.246 | 33.024 | 30.878 | 0.00 | 0.00 |
| ATOM | 4891 | HA3  | GLY | X | 325 | 43.075 | 34.210 | 30.150 | 0.00 | 0.00 |
| ATOM | 4892 | C    | GLY | X | 325 | 43.792 | 33.896 | 32.085 | 0.00 | 0.00 |
| ATOM | 4893 | O    | GLY | X | 325 | 43.635 | 34.220 | 33.232 | 0.00 | 0.00 |
| ATOM | 4894 | N    | VAL | X | 326 | 44.892 | 33.335 | 31.588 | 0.00 | 0.00 |
| ATOM | 4895 | H    | VAL | X | 326 | 44.846 | 32.996 | 30.638 | 0.00 | 0.00 |
| ATOM | 4896 | CA   | VAL | X | 326 | 46.041 | 32.836 | 32.371 | 0.00 | 0.00 |
| ATOM | 4897 | HA   | VAL | X | 326 | 46.276 | 33.503 | 33.200 | 0.00 | 0.00 |
| ATOM | 4898 | CB   | VAL | X | 326 | 45.873 | 31.437 | 32.967 | 0.00 | 0.00 |

|      |      |      |     |   |     |        |        |        |      |      |
|------|------|------|-----|---|-----|--------|--------|--------|------|------|
| ATOM | 4899 | HB   | VAL | X | 326 | 46.765 | 30.850 | 33.186 | 0.00 | 0.00 |
| ATOM | 4900 | CG1  | VAL | X | 326 | 44.910 | 31.485 | 34.168 | 0.00 | 0.00 |
| ATOM | 4901 | HG11 | VAL | X | 326 | 43.906 | 31.723 | 33.817 | 0.00 | 0.00 |
| ATOM | 4902 | HG12 | VAL | X | 326 | 44.934 | 30.615 | 34.824 | 0.00 | 0.00 |
| ATOM | 4903 | HG13 | VAL | X | 326 | 45.226 | 32.290 | 34.833 | 0.00 | 0.00 |
| ATOM | 4904 | CG2  | VAL | X | 326 | 45.243 | 30.503 | 31.843 | 0.00 | 0.00 |
| ATOM | 4905 | HG21 | VAL | X | 326 | 45.222 | 29.476 | 32.207 | 0.00 | 0.00 |
| ATOM | 4906 | HG22 | VAL | X | 326 | 44.181 | 30.747 | 31.822 | 0.00 | 0.00 |
| ATOM | 4907 | HG23 | VAL | X | 326 | 45.760 | 30.477 | 30.884 | 0.00 | 0.00 |
| ATOM | 4908 | C    | VAL | X | 326 | 47.286 | 32.829 | 31.517 | 0.00 | 0.00 |
| ATOM | 4909 | O    | VAL | X | 326 | 47.142 | 32.908 | 30.315 | 0.00 | 0.00 |
| ATOM | 4910 | N    | VAL | X | 327 | 48.424 | 32.613 | 32.130 | 0.00 | 0.00 |
| ATOM | 4911 | H    | VAL | X | 327 | 48.377 | 32.651 | 33.138 | 0.00 | 0.00 |
| ATOM | 4912 | CA   | VAL | X | 327 | 49.622 | 32.119 | 31.431 | 0.00 | 0.00 |
| ATOM | 4913 | HA   | VAL | X | 327 | 49.584 | 32.397 | 30.378 | 0.00 | 0.00 |
| ATOM | 4914 | CB   | VAL | X | 327 | 50.980 | 32.761 | 32.019 | 0.00 | 0.00 |
| ATOM | 4915 | HB   | VAL | X | 327 | 51.784 | 32.318 | 31.432 | 0.00 | 0.00 |
| ATOM | 4916 | CG1  | VAL | X | 327 | 50.962 | 34.272 | 31.871 | 0.00 | 0.00 |
| ATOM | 4917 | HG11 | VAL | X | 327 | 50.110 | 34.749 | 32.354 | 0.00 | 0.00 |
| ATOM | 4918 | HG12 | VAL | X | 327 | 51.908 | 34.609 | 32.295 | 0.00 | 0.00 |
| ATOM | 4919 | HG13 | VAL | X | 327 | 50.825 | 34.514 | 30.817 | 0.00 | 0.00 |
| ATOM | 4920 | CG2  | VAL | X | 327 | 51.238 | 32.554 | 33.537 | 0.00 | 0.00 |
| ATOM | 4921 | HG21 | VAL | X | 327 | 52.217 | 32.988 | 33.739 | 0.00 | 0.00 |
| ATOM | 4922 | HG22 | VAL | X | 327 | 50.422 | 33.036 | 34.075 | 0.00 | 0.00 |
| ATOM | 4923 | HG23 | VAL | X | 327 | 51.336 | 31.509 | 33.830 | 0.00 | 0.00 |
| ATOM | 4924 | C    | VAL | X | 327 | 49.700 | 30.598 | 31.475 | 0.00 | 0.00 |
| ATOM | 4925 | O    | VAL | X | 327 | 48.921 | 29.964 | 32.145 | 0.00 | 0.00 |
| ATOM | 4926 | N    | LYS | X | 328 | 50.695 | 30.059 | 30.797 | 0.00 | 0.00 |
| ATOM | 4927 | H    | LYS | X | 328 | 51.318 | 30.612 | 30.226 | 0.00 | 0.00 |
| ATOM | 4928 | CA   | LYS | X | 328 | 51.081 | 28.615 | 30.680 | 0.00 | 0.00 |
| ATOM | 4929 | HA   | LYS | X | 328 | 50.207 | 28.153 | 30.219 | 0.00 | 0.00 |
| ATOM | 4930 | CB   | LYS | X | 328 | 52.336 | 28.641 | 29.727 | 0.00 | 0.00 |
| ATOM | 4931 | HB2  | LYS | X | 328 | 52.251 | 29.196 | 28.793 | 0.00 | 0.00 |
| ATOM | 4932 | HB3  | LYS | X | 328 | 53.164 | 29.017 | 30.329 | 0.00 | 0.00 |
| ATOM | 4933 | CG   | LYS | X | 328 | 52.627 | 27.198 | 29.321 | 0.00 | 0.00 |
| ATOM | 4934 | HG2  | LYS | X | 328 | 52.655 | 26.626 | 30.249 | 0.00 | 0.00 |
| ATOM | 4935 | HG3  | LYS | X | 328 | 51.816 | 26.910 | 28.652 | 0.00 | 0.00 |
| ATOM | 4936 | CD   | LYS | X | 328 | 53.930 | 27.136 | 28.496 | 0.00 | 0.00 |
| ATOM | 4937 | HD2  | LYS | X | 328 | 53.684 | 27.428 | 27.475 | 0.00 | 0.00 |
| ATOM | 4938 | HD3  | LYS | X | 328 | 54.532 | 27.976 | 28.841 | 0.00 | 0.00 |
| ATOM | 4939 | CE   | LYS | X | 328 | 54.857 | 25.933 | 28.628 | 0.00 | 0.00 |
| ATOM | 4940 | HE2  | LYS | X | 328 | 54.513 | 25.079 | 28.044 | 0.00 | 0.00 |
| ATOM | 4941 | HE3  | LYS | X | 328 | 55.853 | 26.282 | 28.355 | 0.00 | 0.00 |
| ATOM | 4942 | NZ   | LYS | X | 328 | 54.879 | 25.478 | 30.035 | 0.00 | 0.00 |
| ATOM | 4943 | HZ1  | LYS | X | 328 | 54.021 | 25.029 | 30.323 | 0.00 | 0.00 |
| ATOM | 4944 | HZ2  | LYS | X | 328 | 55.721 | 24.963 | 30.246 | 0.00 | 0.00 |
| ATOM | 4945 | HZ3  | LYS | X | 328 | 54.960 | 26.259 | 30.670 | 0.00 | 0.00 |
| ATOM | 4946 | C    | LYS | X | 328 | 51.441 | 27.992 | 32.065 | 0.00 | 0.00 |
| ATOM | 4947 | O    | LYS | X | 328 | 51.044 | 26.803 | 32.266 | 0.00 | 0.00 |
| ATOM | 4948 | N    | ASP | X | 329 | 52.215 | 28.639 | 32.954 | 0.00 | 0.00 |
| ATOM | 4949 | H    | ASP | X | 329 | 52.599 | 29.512 | 32.623 | 0.00 | 0.00 |
| ATOM | 4950 | CA   | ASP | X | 329 | 52.745 | 28.112 | 34.207 | 0.00 | 0.00 |
| ATOM | 4951 | HA   | ASP | X | 329 | 52.455 | 27.098 | 34.479 | 0.00 | 0.00 |
| ATOM | 4952 | CB   | ASP | X | 329 | 54.281 | 27.935 | 34.064 | 0.00 | 0.00 |
| ATOM | 4953 | HB2  | ASP | X | 329 | 54.781 | 28.885 | 33.873 | 0.00 | 0.00 |
| ATOM | 4954 | HB3  | ASP | X | 329 | 54.660 | 27.515 | 34.995 | 0.00 | 0.00 |
| ATOM | 4955 | CG   | ASP | X | 329 | 54.610 | 27.093 | 32.852 | 0.00 | 0.00 |
| ATOM | 4956 | OD1  | ASP | X | 329 | 54.322 | 25.877 | 32.714 | 0.00 | 0.00 |
| ATOM | 4957 | OD2  | ASP | X | 329 | 55.229 | 27.712 | 31.906 | 0.00 | 0.00 |
| ATOM | 4958 | C    | ASP | X | 329 | 52.304 | 28.974 | 35.412 | 0.00 | 0.00 |
| ATOM | 4959 | O    | ASP | X | 329 | 53.104 | 29.528 | 36.146 | 0.00 | 0.00 |
| ATOM | 4960 | N    | GLU | X | 330 | 51.047 | 28.925 | 35.749 | 0.00 | 0.00 |
| ATOM | 4961 | H    | GLU | X | 330 | 50.457 | 28.357 | 35.158 | 0.00 | 0.00 |
| ATOM | 4962 | CA   | GLU | X | 330 | 50.501 | 29.609 | 36.862 | 0.00 | 0.00 |
| ATOM | 4963 | HA   | GLU | X | 330 | 50.788 | 30.657 | 36.768 | 0.00 | 0.00 |
| ATOM | 4964 | CB   | GLU | X | 330 | 48.991 | 29.488 | 36.946 | 0.00 | 0.00 |
| ATOM | 4965 | HB2  | GLU | X | 330 | 48.732 | 28.444 | 36.774 | 0.00 | 0.00 |
| ATOM | 4966 | HB3  | GLU | X | 330 | 48.566 | 29.747 | 37.917 | 0.00 | 0.00 |
| ATOM | 4967 | CG   | GLU | X | 330 | 48.205 | 30.164 | 35.809 | 0.00 | 0.00 |
| ATOM | 4968 | HG2  | GLU | X | 330 | 48.607 | 29.921 | 34.825 | 0.00 | 0.00 |

|      |      |     |     |   |     |        |        |        |      |      |
|------|------|-----|-----|---|-----|--------|--------|--------|------|------|
| ATOM | 4969 | HG3 | GLU | X | 330 | 47.169 | 29.853 | 35.943 | 0.00 | 0.00 |
| ATOM | 4970 | CD  | GLU | X | 330 | 48.291 | 31.667 | 35.902 | 0.00 | 0.00 |
| ATOM | 4971 | OE1 | GLU | X | 330 | 48.639 | 32.227 | 36.963 | 0.00 | 0.00 |
| ATOM | 4972 | OE2 | GLU | X | 330 | 48.059 | 32.418 | 34.940 | 0.00 | 0.00 |
| ATOM | 4973 | C   | GLU | X | 330 | 51.115 | 29.092 | 38.188 | 0.00 | 0.00 |
| ATOM | 4974 | O   | GLU | X | 330 | 51.341 | 29.926 | 39.030 | 0.00 | 0.00 |
| ATOM | 4975 | N   | GLY | X | 331 | 51.398 | 27.736 | 38.397 | 0.00 | 0.00 |
| ATOM | 4976 | H   | GLY | X | 331 | 51.412 | 27.118 | 37.598 | 0.00 | 0.00 |
| ATOM | 4977 | CA  | GLY | X | 331 | 51.811 | 27.168 | 39.679 | 0.00 | 0.00 |
| ATOM | 4978 | HA2 | GLY | X | 331 | 51.345 | 27.652 | 40.500 | 0.00 | 0.00 |
| ATOM | 4979 | HA3 | GLY | X | 331 | 51.533 | 26.143 | 39.666 | 0.00 | 0.00 |
| ATOM | 4980 | C   | GLY | X | 331 | 53.323 | 27.213 | 39.975 | 0.00 | 0.00 |
| ATOM | 4981 | O   | GLY | X | 331 | 53.678 | 27.016 | 41.120 | 0.00 | 0.00 |
| ATOM | 4982 | N   | SER | X | 332 | 54.242 | 27.471 | 39.048 | 0.00 | 0.00 |
| ATOM | 4983 | H   | SER | X | 332 | 53.872 | 27.724 | 38.143 | 0.00 | 0.00 |
| ATOM | 4984 | CA  | SER | X | 332 | 55.648 | 27.627 | 39.371 | 0.00 | 0.00 |
| ATOM | 4985 | HA  | SER | X | 332 | 55.988 | 26.763 | 39.942 | 0.00 | 0.00 |
| ATOM | 4986 | CB  | SER | X | 332 | 56.500 | 27.643 | 38.101 | 0.00 | 0.00 |
| ATOM | 4987 | HB2 | SER | X | 332 | 57.522 | 27.752 | 38.463 | 0.00 | 0.00 |
| ATOM | 4988 | HB3 | SER | X | 332 | 56.422 | 26.700 | 37.559 | 0.00 | 0.00 |
| ATOM | 4989 | OG  | SER | X | 332 | 56.123 | 28.712 | 37.225 | 0.00 | 0.00 |
| ATOM | 4990 | HG  | SER | X | 332 | 56.781 | 28.604 | 36.534 | 0.00 | 0.00 |
| ATOM | 4991 | C   | SER | X | 332 | 55.866 | 28.905 | 40.356 | 0.00 | 0.00 |
| ATOM | 4992 | O   | SER | X | 332 | 56.601 | 28.760 | 41.309 | 0.00 | 0.00 |
| ATOM | 4993 | N   | TYR | X | 333 | 55.254 | 30.084 | 40.120 | 0.00 | 0.00 |
| ATOM | 4994 | H   | TYR | X | 333 | 54.803 | 30.179 | 39.221 | 0.00 | 0.00 |
| ATOM | 4995 | CA  | TYR | X | 333 | 55.577 | 31.313 | 40.887 | 0.00 | 0.00 |
| ATOM | 4996 | HA  | TYR | X | 333 | 56.587 | 31.631 | 40.628 | 0.00 | 0.00 |
| ATOM | 4997 | CB  | TYR | X | 333 | 54.592 | 32.426 | 40.399 | 0.00 | 0.00 |
| ATOM | 4998 | HB2 | TYR | X | 333 | 54.716 | 32.592 | 39.329 | 0.00 | 0.00 |
| ATOM | 4999 | HB3 | TYR | X | 333 | 53.570 | 32.079 | 40.552 | 0.00 | 0.00 |
| ATOM | 5000 | CG  | TYR | X | 333 | 54.795 | 33.687 | 41.153 | 0.00 | 0.00 |
| ATOM | 5001 | CD1 | TYR | X | 333 | 55.376 | 34.822 | 40.555 | 0.00 | 0.00 |
| ATOM | 5002 | HD1 | TYR | X | 333 | 55.766 | 34.766 | 39.550 | 0.00 | 0.00 |
| ATOM | 5003 | CE1 | TYR | X | 333 | 55.373 | 36.107 | 41.168 | 0.00 | 0.00 |
| ATOM | 5004 | HE1 | TYR | X | 333 | 55.904 | 36.948 | 40.748 | 0.00 | 0.00 |
| ATOM | 5005 | CZ  | TYR | X | 333 | 54.882 | 36.224 | 42.518 | 0.00 | 0.00 |
| ATOM | 5006 | OH  | TYR | X | 333 | 55.145 | 37.325 | 43.289 | 0.00 | 0.00 |
| ATOM | 5007 | HH  | TYR | X | 333 | 55.754 | 37.912 | 42.834 | 0.00 | 0.00 |
| ATOM | 5008 | CE2 | TYR | X | 333 | 54.323 | 35.088 | 43.107 | 0.00 | 0.00 |
| ATOM | 5009 | HE2 | TYR | X | 333 | 53.784 | 35.149 | 44.041 | 0.00 | 0.00 |
| ATOM | 5010 | CD2 | TYR | X | 333 | 54.144 | 33.840 | 42.398 | 0.00 | 0.00 |
| ATOM | 5011 | HD2 | TYR | X | 333 | 53.688 | 33.037 | 42.958 | 0.00 | 0.00 |
| ATOM | 5012 | C   | TYR | X | 333 | 55.464 | 31.124 | 42.390 | 0.00 | 0.00 |
| ATOM | 5013 | O   | TYR | X | 333 | 56.336 | 31.559 | 43.172 | 0.00 | 0.00 |
| ATOM | 5014 | N   | PHE | X | 334 | 54.488 | 30.379 | 42.892 | 0.00 | 0.00 |
| ATOM | 5015 | H   | PHE | X | 334 | 53.879 | 29.855 | 42.281 | 0.00 | 0.00 |
| ATOM | 5016 | CA  | PHE | X | 334 | 54.242 | 30.184 | 44.292 | 0.00 | 0.00 |
| ATOM | 5017 | HA  | PHE | X | 334 | 54.311 | 31.159 | 44.775 | 0.00 | 0.00 |
| ATOM | 5018 | CB  | PHE | X | 334 | 52.740 | 29.855 | 44.368 | 0.00 | 0.00 |
| ATOM | 5019 | HB2 | PHE | X | 334 | 52.456 | 28.983 | 43.780 | 0.00 | 0.00 |
| ATOM | 5020 | HB3 | PHE | X | 334 | 52.444 | 29.758 | 45.412 | 0.00 | 0.00 |
| ATOM | 5021 | CG  | PHE | X | 334 | 51.917 | 31.069 | 43.886 | 0.00 | 0.00 |
| ATOM | 5022 | CD1 | PHE | X | 334 | 51.463 | 31.070 | 42.519 | 0.00 | 0.00 |
| ATOM | 5023 | HD1 | PHE | X | 334 | 51.508 | 30.225 | 41.848 | 0.00 | 0.00 |
| ATOM | 5024 | CE1 | PHE | X | 334 | 50.868 | 32.237 | 41.970 | 0.00 | 0.00 |
| ATOM | 5025 | HE1 | PHE | X | 334 | 50.564 | 32.202 | 40.935 | 0.00 | 0.00 |
| ATOM | 5026 | CZ  | PHE | X | 334 | 50.592 | 33.346 | 42.814 | 0.00 | 0.00 |
| ATOM | 5027 | HZ  | PHE | X | 334 | 50.063 | 34.171 | 42.360 | 0.00 | 0.00 |
| ATOM | 5028 | CE2 | PHE | X | 334 | 50.944 | 33.269 | 44.188 | 0.00 | 0.00 |
| ATOM | 5029 | HE2 | PHE | X | 334 | 50.641 | 34.115 | 44.788 | 0.00 | 0.00 |
| ATOM | 5030 | CD2 | PHE | X | 334 | 51.642 | 32.167 | 44.726 | 0.00 | 0.00 |
| ATOM | 5031 | HD2 | PHE | X | 334 | 51.773 | 32.171 | 45.798 | 0.00 | 0.00 |
| ATOM | 5032 | C   | PHE | X | 334 | 55.237 | 29.280 | 45.009 | 0.00 | 0.00 |
| ATOM | 5033 | O   | PHE | X | 334 | 55.448 | 29.203 | 46.217 | 0.00 | 0.00 |
| ATOM | 5034 | N   | LEU | X | 335 | 55.987 | 28.459 | 44.189 | 0.00 | 0.00 |
| ATOM | 5035 | H   | LEU | X | 335 | 55.631 | 28.357 | 43.250 | 0.00 | 0.00 |
| ATOM | 5036 | CA  | LEU | X | 335 | 56.910 | 27.432 | 44.755 | 0.00 | 0.00 |
| ATOM | 5037 | HA  | LEU | X | 335 | 56.394 | 26.910 | 45.561 | 0.00 | 0.00 |
| ATOM | 5038 | CB  | LEU | X | 335 | 57.198 | 26.411 | 43.656 | 0.00 | 0.00 |

|      |      |      |     |   |     |        |        |        |      |      |
|------|------|------|-----|---|-----|--------|--------|--------|------|------|
| ATOM | 5039 | HB2  | LEU | X | 335 | 57.584 | 26.830 | 42.727 | 0.00 | 0.00 |
| ATOM | 5040 | HB3  | LEU | X | 335 | 58.016 | 25.776 | 43.997 | 0.00 | 0.00 |
| ATOM | 5041 | CG   | LEU | X | 335 | 56.001 | 25.635 | 43.174 | 0.00 | 0.00 |
| ATOM | 5042 | HG   | LEU | X | 335 | 55.229 | 26.316 | 42.816 | 0.00 | 0.00 |
| ATOM | 5043 | CD1  | LEU | X | 335 | 56.304 | 24.647 | 41.995 | 0.00 | 0.00 |
| ATOM | 5044 | HD11 | LEU | X | 335 | 55.487 | 23.981 | 41.716 | 0.00 | 0.00 |
| ATOM | 5045 | HD12 | LEU | X | 335 | 56.652 | 25.121 | 41.077 | 0.00 | 0.00 |
| ATOM | 5046 | HD13 | LEU | X | 335 | 57.143 | 23.987 | 42.212 | 0.00 | 0.00 |
| ATOM | 5047 | CD2  | LEU | X | 335 | 55.355 | 24.796 | 44.368 | 0.00 | 0.00 |
| ATOM | 5048 | HD21 | LEU | X | 335 | 56.123 | 24.218 | 44.883 | 0.00 | 0.00 |
| ATOM | 5049 | HD22 | LEU | X | 335 | 54.839 | 25.462 | 45.060 | 0.00 | 0.00 |
| ATOM | 5050 | HD23 | LEU | X | 335 | 54.715 | 24.034 | 43.922 | 0.00 | 0.00 |
| ATOM | 5051 | C    | LEU | X | 335 | 58.200 | 27.938 | 45.389 | 0.00 | 0.00 |
| ATOM | 5052 | O    | LEU | X | 335 | 58.619 | 27.322 | 46.339 | 0.00 | 0.00 |
| ATOM | 5053 | N    | VAL | X | 336 | 58.795 | 28.999 | 44.913 | 0.00 | 0.00 |
| ATOM | 5054 | H    | VAL | X | 336 | 58.331 | 29.404 | 44.112 | 0.00 | 0.00 |
| ATOM | 5055 | CA   | VAL | X | 336 | 60.107 | 29.533 | 45.349 | 0.00 | 0.00 |
| ATOM | 5056 | HA   | VAL | X | 336 | 60.715 | 28.669 | 45.618 | 0.00 | 0.00 |
| ATOM | 5057 | CB   | VAL | X | 336 | 60.888 | 30.376 | 44.250 | 0.00 | 0.00 |
| ATOM | 5058 | HB   | VAL | X | 336 | 61.891 | 30.605 | 44.607 | 0.00 | 0.00 |
| ATOM | 5059 | CG1  | VAL | X | 336 | 61.166 | 29.557 | 42.924 | 0.00 | 0.00 |
| ATOM | 5060 | HG11 | VAL | X | 336 | 61.654 | 28.621 | 43.194 | 0.00 | 0.00 |
| ATOM | 5061 | HG12 | VAL | X | 336 | 60.189 | 29.400 | 42.466 | 0.00 | 0.00 |
| ATOM | 5062 | HG13 | VAL | X | 336 | 61.732 | 30.125 | 42.186 | 0.00 | 0.00 |
| ATOM | 5063 | CG2  | VAL | X | 336 | 60.291 | 31.732 | 43.748 | 0.00 | 0.00 |
| ATOM | 5064 | HG21 | VAL | X | 336 | 61.037 | 32.256 | 43.151 | 0.00 | 0.00 |
| ATOM | 5065 | HG22 | VAL | X | 336 | 59.348 | 31.573 | 43.225 | 0.00 | 0.00 |
| ATOM | 5066 | HG23 | VAL | X | 336 | 60.219 | 32.438 | 44.575 | 0.00 | 0.00 |
| ATOM | 5067 | C    | VAL | X | 336 | 59.958 | 30.297 | 46.617 | 0.00 | 0.00 |
| ATOM | 5068 | O    | VAL | X | 336 | 60.918 | 30.422 | 47.308 | 0.00 | 0.00 |
| ATOM | 5069 | N    | TYR | X | 337 | 58.703 | 30.617 | 47.054 | 0.00 | 0.00 |
| ATOM | 5070 | H    | TYR | X | 337 | 57.913 | 30.438 | 46.450 | 0.00 | 0.00 |
| ATOM | 5071 | CA   | TYR | X | 337 | 58.371 | 31.116 | 48.391 | 0.00 | 0.00 |
| ATOM | 5072 | HA   | TYR | X | 337 | 59.290 | 31.560 | 48.773 | 0.00 | 0.00 |
| ATOM | 5073 | CB   | TYR | X | 337 | 57.227 | 32.150 | 48.301 | 0.00 | 0.00 |
| ATOM | 5074 | HB2  | TYR | X | 337 | 56.401 | 31.621 | 47.825 | 0.00 | 0.00 |
| ATOM | 5075 | HB3  | TYR | X | 337 | 57.013 | 32.395 | 49.342 | 0.00 | 0.00 |
| ATOM | 5076 | CG   | TYR | X | 337 | 57.583 | 33.450 | 47.606 | 0.00 | 0.00 |
| ATOM | 5077 | CD1  | TYR | X | 337 | 58.212 | 34.452 | 48.432 | 0.00 | 0.00 |
| ATOM | 5078 | HD1  | TYR | X | 337 | 58.425 | 34.199 | 49.460 | 0.00 | 0.00 |
| ATOM | 5079 | CE1  | TYR | X | 337 | 58.624 | 35.639 | 47.878 | 0.00 | 0.00 |
| ATOM | 5080 | HE1  | TYR | X | 337 | 59.168 | 36.282 | 48.554 | 0.00 | 0.00 |
| ATOM | 5081 | CZ   | TYR | X | 337 | 58.516 | 35.949 | 46.469 | 0.00 | 0.00 |
| ATOM | 5082 | OH   | TYR | X | 337 | 59.062 | 37.102 | 46.003 | 0.00 | 0.00 |
| ATOM | 5083 | HH   | TYR | X | 337 | 59.391 | 37.589 | 46.762 | 0.00 | 0.00 |
| ATOM | 5084 | CE2  | TYR | X | 337 | 58.026 | 34.873 | 45.657 | 0.00 | 0.00 |
| ATOM | 5085 | HE2  | TYR | X | 337 | 57.996 | 34.921 | 44.578 | 0.00 | 0.00 |
| ATOM | 5086 | CD2  | TYR | X | 337 | 57.565 | 33.687 | 46.234 | 0.00 | 0.00 |
| ATOM | 5087 | HD2  | TYR | X | 337 | 57.157 | 32.939 | 45.570 | 0.00 | 0.00 |
| ATOM | 5088 | C    | TYR | X | 337 | 57.955 | 30.142 | 49.461 | 0.00 | 0.00 |
| ATOM | 5089 | O    | TYR | X | 337 | 57.779 | 30.543 | 50.626 | 0.00 | 0.00 |
| ATOM | 5090 | N    | GLY | X | 338 | 57.712 | 28.889 | 49.048 | 0.00 | 0.00 |
| ATOM | 5091 | H    | GLY | X | 338 | 57.682 | 28.796 | 48.043 | 0.00 | 0.00 |
| ATOM | 5092 | CA   | GLY | X | 338 | 56.935 | 27.929 | 49.887 | 0.00 | 0.00 |
| ATOM | 5093 | HA2  | GLY | X | 338 | 57.061 | 28.320 | 50.960 | 0.00 | 0.00 |
| ATOM | 5094 | HA3  | GLY | X | 338 | 55.909 | 27.937 | 49.486 | 0.00 | 0.00 |
| ATOM | 5095 | C    | GLY | X | 338 | 57.289 | 26.448 | 49.926 | 0.00 | 0.00 |
| ATOM | 5096 | O    | GLY | X | 338 | 56.752 | 25.749 | 50.804 | 0.00 | 0.00 |
| ATOM | 5097 | N    | ALA | X | 339 | 57.999 | 25.941 | 48.926 | 0.00 | 0.00 |
| ATOM | 5098 | H    | ALA | X | 339 | 58.298 | 26.574 | 48.198 | 0.00 | 0.00 |
| ATOM | 5099 | CA   | ALA | X | 339 | 58.088 | 24.510 | 48.616 | 0.00 | 0.00 |
| ATOM | 5100 | HA   | ALA | X | 339 | 57.285 | 24.052 | 49.194 | 0.00 | 0.00 |
| ATOM | 5101 | CB   | ALA | X | 339 | 57.711 | 24.418 | 47.166 | 0.00 | 0.00 |
| ATOM | 5102 | HB1  | ALA | X | 339 | 57.744 | 23.338 | 47.022 | 0.00 | 0.00 |
| ATOM | 5103 | HB2  | ALA | X | 339 | 56.696 | 24.816 | 47.163 | 0.00 | 0.00 |
| ATOM | 5104 | HB3  | ALA | X | 339 | 58.345 | 25.019 | 46.512 | 0.00 | 0.00 |
| ATOM | 5105 | C    | ALA | X | 339 | 59.470 | 23.943 | 49.024 | 0.00 | 0.00 |
| ATOM | 5106 | O    | ALA | X | 339 | 60.492 | 24.609 | 49.060 | 0.00 | 0.00 |
| ATOM | 5107 | N    | PRO | X | 340 | 59.447 | 22.620 | 49.339 | 0.00 | 0.00 |
| ATOM | 5108 | CD   | PRO | X | 340 | 58.302 | 21.754 | 49.271 | 0.00 | 0.00 |



|      |      |     |     |   |     |        |        |        |      |      |
|------|------|-----|-----|---|-----|--------|--------|--------|------|------|
| ATOM | 5109 | HD2 | PRO | X | 340 | 57.897 | 21.586 | 48.273 | 0.00 | 0.00 |
| ATOM | 5110 | HD3 | PRO | X | 340 | 57.467 | 22.150 | 49.849 | 0.00 | 0.00 |
| ATOM | 5111 | CG  | PRO | X | 340 | 58.751 | 20.433 | 49.859 | 0.00 | 0.00 |
| ATOM | 5112 | HG2 | PRO | X | 340 | 58.920 | 19.753 | 49.025 | 0.00 | 0.00 |
| ATOM | 5113 | HG3 | PRO | X | 340 | 57.986 | 19.937 | 50.456 | 0.00 | 0.00 |
| ATOM | 5114 | CB  | PRO | X | 340 | 59.969 | 20.787 | 50.703 | 0.00 | 0.00 |
| ATOM | 5115 | HB2 | PRO | X | 340 | 60.729 | 20.006 | 50.737 | 0.00 | 0.00 |
| ATOM | 5116 | HB3 | PRO | X | 340 | 59.538 | 21.015 | 51.677 | 0.00 | 0.00 |
| ATOM | 5117 | CA  | PRO | X | 340 | 60.523 | 22.046 | 50.051 | 0.00 | 0.00 |
| ATOM | 5118 | HA  | PRO | X | 340 | 60.812 | 22.725 | 50.853 | 0.00 | 0.00 |
| ATOM | 5119 | C   | PRO | X | 340 | 61.621 | 21.696 | 49.074 | 0.00 | 0.00 |
| ATOM | 5120 | O   | PRO | X | 340 | 61.530 | 20.741 | 48.354 | 0.00 | 0.00 |
| ATOM | 5121 | N   | GLY | X | 341 | 62.716 | 22.488 | 49.177 | 0.00 | 0.00 |
| ATOM | 5122 | H   | GLY | X | 341 | 62.742 | 23.121 | 49.963 | 0.00 | 0.00 |
| ATOM | 5123 | CA  | GLY | X | 341 | 63.815 | 22.484 | 48.228 | 0.00 | 0.00 |
| ATOM | 5124 | HA2 | GLY | X | 341 | 64.633 | 22.852 | 48.934 | 0.00 | 0.00 |
| ATOM | 5125 | HA3 | GLY | X | 341 | 63.950 | 21.465 | 47.886 | 0.00 | 0.00 |
| ATOM | 5126 | C   | GLY | X | 341 | 63.678 | 23.362 | 47.036 | 0.00 | 0.00 |
| ATOM | 5127 | O   | GLY | X | 341 | 64.494 | 23.277 | 46.067 | 0.00 | 0.00 |
| ATOM | 5128 | N   | PHE | X | 342 | 62.899 | 24.453 | 47.094 | 0.00 | 0.00 |
| ATOM | 5129 | H   | PHE | X | 342 | 62.449 | 24.571 | 47.990 | 0.00 | 0.00 |
| ATOM | 5130 | CA  | PHE | X | 342 | 62.703 | 25.368 | 45.919 | 0.00 | 0.00 |
| ATOM | 5131 | HA  | PHE | X | 342 | 63.299 | 25.149 | 45.033 | 0.00 | 0.00 |
| ATOM | 5132 | CB  | PHE | X | 342 | 61.250 | 25.347 | 45.571 | 0.00 | 0.00 |
| ATOM | 5133 | HB2 | PHE | X | 342 | 60.653 | 25.731 | 46.398 | 0.00 | 0.00 |
| ATOM | 5134 | HB3 | PHE | X | 342 | 61.148 | 26.121 | 44.810 | 0.00 | 0.00 |
| ATOM | 5135 | CG  | PHE | X | 342 | 60.606 | 24.084 | 44.984 | 0.00 | 0.00 |
| ATOM | 5136 | CD1 | PHE | X | 342 | 60.257 | 24.046 | 43.647 | 0.00 | 0.00 |
| ATOM | 5137 | HD1 | PHE | X | 342 | 60.324 | 24.944 | 43.051 | 0.00 | 0.00 |
| ATOM | 5138 | CE1 | PHE | X | 342 | 59.659 | 22.865 | 43.038 | 0.00 | 0.00 |
| ATOM | 5139 | HE1 | PHE | X | 342 | 59.307 | 22.860 | 42.017 | 0.00 | 0.00 |
| ATOM | 5140 | CZ  | PHE | X | 342 | 59.463 | 21.717 | 43.875 | 0.00 | 0.00 |
| ATOM | 5141 | HZ  | PHE | X | 342 | 58.965 | 20.894 | 43.382 | 0.00 | 0.00 |
| ATOM | 5142 | CE2 | PHE | X | 342 | 59.819 | 21.695 | 45.226 | 0.00 | 0.00 |
| ATOM | 5143 | HE2 | PHE | X | 342 | 59.775 | 20.868 | 45.919 | 0.00 | 0.00 |
| ATOM | 5144 | CD2 | PHE | X | 342 | 60.442 | 22.875 | 45.806 | 0.00 | 0.00 |
| ATOM | 5145 | HD2 | PHE | X | 342 | 60.697 | 22.877 | 46.856 | 0.00 | 0.00 |
| ATOM | 5146 | C   | PHE | X | 342 | 63.086 | 26.791 | 46.323 | 0.00 | 0.00 |
| ATOM | 5147 | O   | PHE | X | 342 | 62.722 | 27.231 | 47.395 | 0.00 | 0.00 |
| ATOM | 5148 | N   | SER | X | 343 | 63.799 | 27.497 | 45.458 | 0.00 | 0.00 |
| ATOM | 5149 | H   | SER | X | 343 | 64.083 | 27.097 | 44.576 | 0.00 | 0.00 |
| ATOM | 5150 | CA  | SER | X | 343 | 64.281 | 28.832 | 45.762 | 0.00 | 0.00 |
| ATOM | 5151 | HA  | SER | X | 343 | 63.472 | 29.475 | 46.108 | 0.00 | 0.00 |
| ATOM | 5152 | CB  | SER | X | 343 | 65.255 | 28.800 | 46.921 | 0.00 | 0.00 |
| ATOM | 5153 | HB2 | SER | X | 343 | 64.788 | 28.719 | 47.902 | 0.00 | 0.00 |
| ATOM | 5154 | HB3 | SER | X | 343 | 65.874 | 27.908 | 46.822 | 0.00 | 0.00 |
| ATOM | 5155 | OG  | SER | X | 343 | 66.138 | 29.891 | 46.949 | 0.00 | 0.00 |
| ATOM | 5156 | HG  | SER | X | 343 | 66.606 | 29.944 | 47.786 | 0.00 | 0.00 |
| ATOM | 5157 | C   | SER | X | 343 | 64.689 | 29.495 | 44.447 | 0.00 | 0.00 |
| ATOM | 5158 | O   | SER | X | 343 | 65.395 | 28.917 | 43.629 | 0.00 | 0.00 |
| ATOM | 5159 | N   | LYS | X | 344 | 64.545 | 30.813 | 44.308 | 0.00 | 0.00 |
| ATOM | 5160 | H   | LYS | X | 344 | 63.880 | 31.335 | 44.861 | 0.00 | 0.00 |
| ATOM | 5161 | CA  | LYS | X | 344 | 65.030 | 31.558 | 43.147 | 0.00 | 0.00 |
| ATOM | 5162 | HA  | LYS | X | 344 | 64.730 | 31.043 | 42.235 | 0.00 | 0.00 |
| ATOM | 5163 | CB  | LYS | X | 344 | 64.405 | 33.002 | 43.172 | 0.00 | 0.00 |
| ATOM | 5164 | HB2 | LYS | X | 344 | 64.633 | 33.315 | 42.153 | 0.00 | 0.00 |
| ATOM | 5165 | HB3 | LYS | X | 344 | 63.320 | 32.925 | 43.233 | 0.00 | 0.00 |
| ATOM | 5166 | CG  | LYS | X | 344 | 64.821 | 34.018 | 44.318 | 0.00 | 0.00 |
| ATOM | 5167 | HG2 | LYS | X | 344 | 64.065 | 34.778 | 44.511 | 0.00 | 0.00 |
| ATOM | 5168 | HG3 | LYS | X | 344 | 64.945 | 33.474 | 45.254 | 0.00 | 0.00 |
| ATOM | 5169 | CD  | LYS | X | 344 | 66.037 | 34.833 | 44.029 | 0.00 | 0.00 |
| ATOM | 5170 | HD2 | LYS | X | 344 | 66.940 | 34.229 | 44.116 | 0.00 | 0.00 |
| ATOM | 5171 | HD3 | LYS | X | 344 | 65.752 | 35.409 | 43.149 | 0.00 | 0.00 |
| ATOM | 5172 | CE  | LYS | X | 344 | 66.187 | 35.899 | 45.175 | 0.00 | 0.00 |
| ATOM | 5173 | HE2 | LYS | X | 344 | 65.197 | 36.287 | 45.415 | 0.00 | 0.00 |
| ATOM | 5174 | HE3 | LYS | X | 344 | 66.499 | 35.434 | 46.110 | 0.00 | 0.00 |
| ATOM | 5175 | NZ  | LYS | X | 344 | 67.232 | 36.913 | 44.889 | 0.00 | 0.00 |
| ATOM | 5176 | HZ1 | LYS | X | 344 | 67.027 | 37.488 | 44.084 | 0.00 | 0.00 |
| ATOM | 5177 | HZ2 | LYS | X | 344 | 67.318 | 37.644 | 45.581 | 0.00 | 0.00 |
| ATOM | 5178 | HZ3 | LYS | X | 344 | 68.138 | 36.523 | 44.672 | 0.00 | 0.00 |

|      |      |      |     |   |     |        |        |        |      |      |
|------|------|------|-----|---|-----|--------|--------|--------|------|------|
| ATOM | 5179 | C    | LYS | X | 344 | 66.621 | 31.602 | 43.159 | 0.00 | 0.00 |
| ATOM | 5180 | O    | LYS | X | 344 | 67.215 | 31.982 | 42.143 | 0.00 | 0.00 |
| ATOM | 5181 | N    | ASP | X | 345 | 67.290 | 31.208 | 44.223 | 0.00 | 0.00 |
| ATOM | 5182 | H    | ASP | X | 345 | 66.721 | 30.963 | 45.020 | 0.00 | 0.00 |
| ATOM | 5183 | CA   | ASP | X | 345 | 68.782 | 31.265 | 44.314 | 0.00 | 0.00 |
| ATOM | 5184 | HA   | ASP | X | 345 | 69.188 | 32.049 | 43.675 | 0.00 | 0.00 |
| ATOM | 5185 | CB   | ASP | X | 345 | 69.098 | 31.554 | 45.808 | 0.00 | 0.00 |
| ATOM | 5186 | HB2  | ASP | X | 345 | 68.538 | 32.399 | 46.208 | 0.00 | 0.00 |
| ATOM | 5187 | HB3  | ASP | X | 345 | 68.901 | 30.688 | 46.439 | 0.00 | 0.00 |
| ATOM | 5188 | CG   | ASP | X | 345 | 70.595 | 31.780 | 46.025 | 0.00 | 0.00 |
| ATOM | 5189 | OD1  | ASP | X | 345 | 71.047 | 32.754 | 45.455 | 0.00 | 0.00 |
| ATOM | 5190 | OD2  | ASP | X | 345 | 71.241 | 31.191 | 46.920 | 0.00 | 0.00 |
| ATOM | 5191 | C    | ASP | X | 345 | 69.468 | 29.866 | 44.045 | 0.00 | 0.00 |
| ATOM | 5192 | O    | ASP | X | 345 | 70.623 | 29.858 | 43.645 | 0.00 | 0.00 |
| ATOM | 5193 | N    | ASN | X | 346 | 68.751 | 28.751 | 44.380 | 0.00 | 0.00 |
| ATOM | 5194 | H    | ASN | X | 346 | 67.776 | 28.892 | 44.605 | 0.00 | 0.00 |
| ATOM | 5195 | CA   | ASN | X | 346 | 69.318 | 27.409 | 44.345 | 0.00 | 0.00 |
| ATOM | 5196 | HA   | ASN | X | 346 | 70.407 | 27.401 | 44.370 | 0.00 | 0.00 |
| ATOM | 5197 | CB   | ASN | X | 346 | 68.834 | 26.643 | 45.646 | 0.00 | 0.00 |
| ATOM | 5198 | HB2  | ASN | X | 346 | 69.474 | 25.783 | 45.842 | 0.00 | 0.00 |
| ATOM | 5199 | HB3  | ASN | X | 346 | 68.901 | 27.355 | 46.468 | 0.00 | 0.00 |
| ATOM | 5200 | CG   | ASN | X | 346 | 67.385 | 26.105 | 45.528 | 0.00 | 0.00 |
| ATOM | 5201 | OD1  | ASN | X | 346 | 66.687 | 26.427 | 44.577 | 0.00 | 0.00 |
| ATOM | 5202 | ND2  | ASN | X | 346 | 66.890 | 25.399 | 46.519 | 0.00 | 0.00 |
| ATOM | 5203 | HD21 | ASN | X | 346 | 65.902 | 25.193 | 46.565 | 0.00 | 0.00 |
| ATOM | 5204 | HD22 | ASN | X | 346 | 67.484 | 25.265 | 47.325 | 0.00 | 0.00 |
| ATOM | 5205 | C    | ASN | X | 346 | 68.917 | 26.682 | 42.985 | 0.00 | 0.00 |
| ATOM | 5206 | O    | ASN | X | 346 | 68.317 | 27.329 | 42.119 | 0.00 | 0.00 |
| ATOM | 5207 | N    | GLU | X | 347 | 69.199 | 25.377 | 42.811 | 0.00 | 0.00 |
| ATOM | 5208 | H    | GLU | X | 347 | 69.563 | 24.979 | 43.665 | 0.00 | 0.00 |
| ATOM | 5209 | CA   | GLU | X | 347 | 68.833 | 24.534 | 41.660 | 0.00 | 0.00 |
| ATOM | 5210 | HA   | GLU | X | 347 | 68.828 | 25.219 | 40.812 | 0.00 | 0.00 |
| ATOM | 5211 | CB   | GLU | X | 347 | 69.888 | 23.416 | 41.472 | 0.00 | 0.00 |
| ATOM | 5212 | HB2  | GLU | X | 347 | 69.988 | 22.781 | 42.352 | 0.00 | 0.00 |
| ATOM | 5213 | HB3  | GLU | X | 347 | 69.482 | 22.742 | 40.718 | 0.00 | 0.00 |
| ATOM | 5214 | CG   | GLU | X | 347 | 71.274 | 23.957 | 41.070 | 0.00 | 0.00 |
| ATOM | 5215 | HG2  | GLU | X | 347 | 71.913 | 23.225 | 40.577 | 0.00 | 0.00 |
| ATOM | 5216 | HG3  | GLU | X | 347 | 71.136 | 24.685 | 40.271 | 0.00 | 0.00 |
| ATOM | 5217 | CD   | GLU | X | 347 | 72.072 | 24.502 | 42.245 | 0.00 | 0.00 |
| ATOM | 5218 | OE1  | GLU | X | 347 | 72.207 | 23.745 | 43.231 | 0.00 | 0.00 |
| ATOM | 5219 | OE2  | GLU | X | 347 | 72.541 | 25.660 | 42.157 | 0.00 | 0.00 |
| ATOM | 5220 | C    | GLU | X | 347 | 67.448 | 23.909 | 41.696 | 0.00 | 0.00 |
| ATOM | 5221 | O    | GLU | X | 347 | 67.099 | 23.221 | 40.683 | 0.00 | 0.00 |
| ATOM | 5222 | N    | SER | X | 348 | 66.668 | 24.084 | 42.765 | 0.00 | 0.00 |
| ATOM | 5223 | H    | SER | X | 348 | 67.010 | 24.570 | 43.581 | 0.00 | 0.00 |
| ATOM | 5224 | CA   | SER | X | 348 | 65.338 | 23.418 | 42.911 | 0.00 | 0.00 |
| ATOM | 5225 | HA   | SER | X | 348 | 65.063 | 23.554 | 43.957 | 0.00 | 0.00 |
| ATOM | 5226 | CB   | SER | X | 348 | 64.186 | 24.025 | 42.078 | 0.00 | 0.00 |
| ATOM | 5227 | HB2  | SER | X | 348 | 64.356 | 23.985 | 41.002 | 0.00 | 0.00 |
| ATOM | 5228 | HB3  | SER | X | 348 | 63.333 | 23.414 | 42.371 | 0.00 | 0.00 |
| ATOM | 5229 | OG   | SER | X | 348 | 64.066 | 25.381 | 42.463 | 0.00 | 0.00 |
| ATOM | 5230 | HG   | SER | X | 348 | 64.882 | 25.756 | 42.124 | 0.00 | 0.00 |
| ATOM | 5231 | C    | SER | X | 348 | 65.324 | 21.864 | 42.682 | 0.00 | 0.00 |
| ATOM | 5232 | O    | SER | X | 348 | 64.372 | 21.310 | 42.104 | 0.00 | 0.00 |
| ATOM | 5233 | N    | LEU | X | 349 | 66.390 | 21.100 | 43.027 | 0.00 | 0.00 |
| ATOM | 5234 | H    | LEU | X | 349 | 67.100 | 21.510 | 43.617 | 0.00 | 0.00 |
| ATOM | 5235 | CA   | LEU | X | 349 | 66.503 | 19.655 | 42.896 | 0.00 | 0.00 |
| ATOM | 5236 | HA   | LEU | X | 349 | 66.008 | 19.419 | 41.954 | 0.00 | 0.00 |
| ATOM | 5237 | CB   | LEU | X | 349 | 68.065 | 19.298 | 42.996 | 0.00 | 0.00 |
| ATOM | 5238 | HB2  | LEU | X | 349 | 68.664 | 19.812 | 42.245 | 0.00 | 0.00 |
| ATOM | 5239 | HB3  | LEU | X | 349 | 68.448 | 19.660 | 43.950 | 0.00 | 0.00 |
| ATOM | 5240 | CG   | LEU | X | 349 | 68.445 | 17.730 | 42.866 | 0.00 | 0.00 |
| ATOM | 5241 | HG   | LEU | X | 349 | 69.534 | 17.729 | 42.836 | 0.00 | 0.00 |
| ATOM | 5242 | CD1  | LEU | X | 349 | 68.140 | 16.907 | 44.127 | 0.00 | 0.00 |
| ATOM | 5243 | HD11 | LEU | X | 349 | 67.073 | 16.685 | 44.101 | 0.00 | 0.00 |
| ATOM | 5244 | HD12 | LEU | X | 349 | 68.707 | 15.980 | 44.047 | 0.00 | 0.00 |
| ATOM | 5245 | HD13 | LEU | X | 349 | 68.408 | 17.579 | 44.942 | 0.00 | 0.00 |
| ATOM | 5246 | CD2  | LEU | X | 349 | 67.863 | 17.065 | 41.628 | 0.00 | 0.00 |
| ATOM | 5247 | HD21 | LEU | X | 349 | 66.838 | 16.737 | 41.801 | 0.00 | 0.00 |
| ATOM | 5248 | HD22 | LEU | X | 349 | 67.826 | 17.628 | 40.695 | 0.00 | 0.00 |

|      |      |      |     |   |     |        |        |        |      |      |
|------|------|------|-----|---|-----|--------|--------|--------|------|------|
| ATOM | 5249 | HD23 | LEU | X | 349 | 68.261 | 16.065 | 41.459 | 0.00 | 0.00 |
| ATOM | 5250 | C    | LEU | X | 349 | 65.661 | 18.994 | 44.010 | 0.00 | 0.00 |
| ATOM | 5251 | O    | LEU | X | 349 | 65.897 | 19.387 | 45.171 | 0.00 | 0.00 |
| ATOM | 5252 | N    | ILE | X | 350 | 64.830 | 18.032 | 43.696 | 0.00 | 0.00 |
| ATOM | 5253 | H    | ILE | X | 350 | 64.788 | 17.757 | 42.725 | 0.00 | 0.00 |
| ATOM | 5254 | CA   | ILE | X | 350 | 64.148 | 17.181 | 44.625 | 0.00 | 0.00 |
| ATOM | 5255 | HA   | ILE | X | 350 | 64.692 | 17.235 | 45.567 | 0.00 | 0.00 |
| ATOM | 5256 | CB   | ILE | X | 350 | 62.715 | 17.639 | 44.924 | 0.00 | 0.00 |
| ATOM | 5257 | HB   | ILE | X | 350 | 62.411 | 16.993 | 45.748 | 0.00 | 0.00 |
| ATOM | 5258 | CG2  | ILE | X | 350 | 62.637 | 19.054 | 45.514 | 0.00 | 0.00 |
| ATOM | 5259 | HG21 | ILE | X | 350 | 63.297 | 19.105 | 46.380 | 0.00 | 0.00 |
| ATOM | 5260 | HG22 | ILE | X | 350 | 62.890 | 19.757 | 44.720 | 0.00 | 0.00 |
| ATOM | 5261 | HG23 | ILE | X | 350 | 61.630 | 19.411 | 45.730 | 0.00 | 0.00 |
| ATOM | 5262 | CG1  | ILE | X | 350 | 61.704 | 17.440 | 43.748 | 0.00 | 0.00 |
| ATOM | 5263 | HG12 | ILE | X | 350 | 62.223 | 17.849 | 42.881 | 0.00 | 0.00 |
| ATOM | 5264 | HG13 | ILE | X | 350 | 61.609 | 16.364 | 43.604 | 0.00 | 0.00 |
| ATOM | 5265 | CD1  | ILE | X | 350 | 60.314 | 18.067 | 43.882 | 0.00 | 0.00 |
| ATOM | 5266 | HD11 | ILE | X | 350 | 59.952 | 17.817 | 44.880 | 0.00 | 0.00 |
| ATOM | 5267 | HD12 | ILE | X | 350 | 60.414 | 19.145 | 43.761 | 0.00 | 0.00 |
| ATOM | 5268 | HD13 | ILE | X | 350 | 59.660 | 17.621 | 43.132 | 0.00 | 0.00 |
| ATOM | 5269 | C    | ILE | X | 350 | 64.184 | 15.691 | 44.264 | 0.00 | 0.00 |
| ATOM | 5270 | O    | ILE | X | 350 | 64.199 | 15.384 | 43.022 | 0.00 | 0.00 |
| ATOM | 5271 | N    | SER | X | 351 | 64.162 | 14.786 | 45.227 | 0.00 | 0.00 |
| ATOM | 5272 | H    | SER | X | 351 | 64.221 | 15.146 | 46.169 | 0.00 | 0.00 |
| ATOM | 5273 | CA   | SER | X | 351 | 63.888 | 13.363 | 45.184 | 0.00 | 0.00 |
| ATOM | 5274 | HA   | SER | X | 351 | 64.060 | 13.039 | 44.158 | 0.00 | 0.00 |
| ATOM | 5275 | CB   | SER | X | 351 | 64.859 | 12.567 | 46.097 | 0.00 | 0.00 |
| ATOM | 5276 | HB2  | SER | X | 351 | 64.836 | 11.523 | 45.785 | 0.00 | 0.00 |
| ATOM | 5277 | HB3  | SER | X | 351 | 65.853 | 12.954 | 45.874 | 0.00 | 0.00 |
| ATOM | 5278 | OG   | SER | X | 351 | 64.784 | 12.710 | 47.473 | 0.00 | 0.00 |
| ATOM | 5279 | HG   | SER | X | 351 | 64.703 | 13.634 | 47.720 | 0.00 | 0.00 |
| ATOM | 5280 | C    | SER | X | 351 | 62.439 | 13.081 | 45.549 | 0.00 | 0.00 |
| ATOM | 5281 | O    | SER | X | 351 | 61.661 | 13.928 | 46.107 | 0.00 | 0.00 |
| ATOM | 5282 | N    | ARG | X | 352 | 62.002 | 11.789 | 45.348 | 0.00 | 0.00 |
| ATOM | 5283 | H    | ARG | X | 352 | 62.619 | 11.084 | 44.969 | 0.00 | 0.00 |
| ATOM | 5284 | CA   | ARG | X | 352 | 60.646 | 11.356 | 45.647 | 0.00 | 0.00 |
| ATOM | 5285 | HA   | ARG | X | 352 | 59.953 | 11.876 | 44.986 | 0.00 | 0.00 |
| ATOM | 5286 | CB   | ARG | X | 352 | 60.548 | 9.795  | 45.493 | 0.00 | 0.00 |
| ATOM | 5287 | HB2  | ARG | X | 352 | 61.071 | 9.436  | 44.607 | 0.00 | 0.00 |
| ATOM | 5288 | HB3  | ARG | X | 352 | 60.984 | 9.268  | 46.342 | 0.00 | 0.00 |
| ATOM | 5289 | CG   | ARG | X | 352 | 59.101 | 9.309  | 45.285 | 0.00 | 0.00 |
| ATOM | 5290 | HG2  | ARG | X | 352 | 59.090 | 8.219  | 45.289 | 0.00 | 0.00 |
| ATOM | 5291 | HG3  | ARG | X | 352 | 58.547 | 9.622  | 46.169 | 0.00 | 0.00 |
| ATOM | 5292 | CD   | ARG | X | 352 | 58.393 | 9.925  | 44.108 | 0.00 | 0.00 |
| ATOM | 5293 | HD2  | ARG | X | 352 | 58.368 | 11.004 | 44.258 | 0.00 | 0.00 |
| ATOM | 5294 | HD3  | ARG | X | 352 | 58.979 | 9.631  | 43.237 | 0.00 | 0.00 |
| ATOM | 5295 | NE   | ARG | X | 352 | 57.064 | 9.346  | 44.080 | 0.00 | 0.00 |
| ATOM | 5296 | HE   | ARG | X | 352 | 56.549 | 9.163  | 44.929 | 0.00 | 0.00 |
| ATOM | 5297 | CZ   | ARG | X | 352 | 56.406 | 9.057  | 42.943 | 0.00 | 0.00 |
| ATOM | 5298 | NH1  | ARG | X | 352 | 56.858 | 9.099  | 41.759 | 0.00 | 0.00 |
| ATOM | 5299 | HH11 | ARG | X | 352 | 57.837 | 9.216  | 41.537 | 0.00 | 0.00 |
| ATOM | 5300 | HH12 | ARG | X | 352 | 56.252 | 8.726  | 41.042 | 0.00 | 0.00 |
| ATOM | 5301 | NH2  | ARG | X | 352 | 55.108 | 8.824  | 43.115 | 0.00 | 0.00 |
| ATOM | 5302 | HH21 | ARG | X | 352 | 54.798 | 8.832  | 44.076 | 0.00 | 0.00 |
| ATOM | 5303 | HH22 | ARG | X | 352 | 54.405 | 8.606  | 42.423 | 0.00 | 0.00 |
| ATOM | 5304 | C    | ARG | X | 352 | 60.176 | 11.787 | 47.118 | 0.00 | 0.00 |
| ATOM | 5305 | O    | ARG | X | 352 | 59.036 | 12.210 | 47.234 | 0.00 | 0.00 |
| ATOM | 5306 | N    | ALA | X | 353 | 60.983 | 11.637 | 48.161 | 0.00 | 0.00 |
| ATOM | 5307 | H    | ALA | X | 353 | 61.832 | 11.108 | 48.020 | 0.00 | 0.00 |
| ATOM | 5308 | CA   | ALA | X | 353 | 60.584 | 11.876 | 49.591 | 0.00 | 0.00 |
| ATOM | 5309 | HA   | ALA | X | 353 | 59.656 | 11.317 | 49.709 | 0.00 | 0.00 |
| ATOM | 5310 | CB   | ALA | X | 353 | 61.712 | 11.268 | 50.480 | 0.00 | 0.00 |
| ATOM | 5311 | HB1  | ALA | X | 353 | 62.668 | 11.579 | 50.059 | 0.00 | 0.00 |
| ATOM | 5312 | HB2  | ALA | X | 353 | 61.556 | 11.637 | 51.494 | 0.00 | 0.00 |
| ATOM | 5313 | HB3  | ALA | X | 353 | 61.734 | 10.189 | 50.627 | 0.00 | 0.00 |
| ATOM | 5314 | C    | ALA | X | 353 | 60.235 | 13.340 | 49.828 | 0.00 | 0.00 |
| ATOM | 5315 | O    | ALA | X | 353 | 59.269 | 13.618 | 50.555 | 0.00 | 0.00 |
| ATOM | 5316 | N    | GLU | X | 354 | 60.885 | 14.237 | 49.043 | 0.00 | 0.00 |
| ATOM | 5317 | H    | GLU | X | 354 | 61.416 | 13.934 | 48.239 | 0.00 | 0.00 |
| ATOM | 5318 | CA   | GLU | X | 354 | 60.755 | 15.741 | 49.185 | 0.00 | 0.00 |

|      |      |      |     |   |     |        |        |        |      |      |
|------|------|------|-----|---|-----|--------|--------|--------|------|------|
| ATOM | 5319 | HA   | GLU | X | 354 | 60.560 | 16.044 | 50.213 | 0.00 | 0.00 |
| ATOM | 5320 | CB   | GLU | X | 354 | 62.069 | 16.482 | 48.729 | 0.00 | 0.00 |
| ATOM | 5321 | HB2  | GLU | X | 354 | 62.291 | 15.979 | 47.788 | 0.00 | 0.00 |
| ATOM | 5322 | HB3  | GLU | X | 354 | 61.752 | 17.514 | 48.580 | 0.00 | 0.00 |
| ATOM | 5323 | CG   | GLU | X | 354 | 63.271 | 16.250 | 49.667 | 0.00 | 0.00 |
| ATOM | 5324 | HG2  | GLU | X | 354 | 63.308 | 16.959 | 50.494 | 0.00 | 0.00 |
| ATOM | 5325 | HG3  | GLU | X | 354 | 63.218 | 15.219 | 50.019 | 0.00 | 0.00 |
| ATOM | 5326 | CD   | GLU | X | 354 | 64.593 | 16.344 | 48.819 | 0.00 | 0.00 |
| ATOM | 5327 | OE1  | GLU | X | 354 | 64.848 | 15.411 | 48.029 | 0.00 | 0.00 |
| ATOM | 5328 | OE2  | GLU | X | 354 | 65.408 | 17.276 | 49.023 | 0.00 | 0.00 |
| ATOM | 5329 | C    | GLU | X | 354 | 59.606 | 16.230 | 48.305 | 0.00 | 0.00 |
| ATOM | 5330 | O    | GLU | X | 354 | 58.728 | 16.943 | 48.738 | 0.00 | 0.00 |
| ATOM | 5331 | N    | PHE | X | 355 | 59.455 | 15.706 | 47.063 | 0.00 | 0.00 |
| ATOM | 5332 | H    | PHE | X | 355 | 60.155 | 15.074 | 46.702 | 0.00 | 0.00 |
| ATOM | 5333 | CA   | PHE | X | 355 | 58.262 | 15.818 | 46.197 | 0.00 | 0.00 |
| ATOM | 5334 | HA   | PHE | X | 355 | 58.243 | 16.881 | 45.959 | 0.00 | 0.00 |
| ATOM | 5335 | CB   | PHE | X | 355 | 58.479 | 14.852 | 45.041 | 0.00 | 0.00 |
| ATOM | 5336 | HB2  | PHE | X | 355 | 59.292 | 15.265 | 44.445 | 0.00 | 0.00 |
| ATOM | 5337 | HB3  | PHE | X | 355 | 58.804 | 13.917 | 45.498 | 0.00 | 0.00 |
| ATOM | 5338 | CG   | PHE | X | 355 | 57.198 | 14.749 | 44.263 | 0.00 | 0.00 |
| ATOM | 5339 | CD1  | PHE | X | 355 | 56.753 | 15.848 | 43.457 | 0.00 | 0.00 |
| ATOM | 5340 | HD1  | PHE | X | 355 | 57.194 | 16.834 | 43.447 | 0.00 | 0.00 |
| ATOM | 5341 | CE1  | PHE | X | 355 | 55.524 | 15.723 | 42.759 | 0.00 | 0.00 |
| ATOM | 5342 | HE1  | PHE | X | 355 | 55.107 | 16.595 | 42.277 | 0.00 | 0.00 |
| ATOM | 5343 | CZ   | PHE | X | 355 | 54.841 | 14.476 | 42.851 | 0.00 | 0.00 |
| ATOM | 5344 | HZ   | PHE | X | 355 | 53.794 | 14.452 | 42.589 | 0.00 | 0.00 |
| ATOM | 5345 | CE2  | PHE | X | 355 | 55.344 | 13.392 | 43.573 | 0.00 | 0.00 |
| ATOM | 5346 | HE2  | PHE | X | 355 | 54.780 | 12.481 | 43.711 | 0.00 | 0.00 |
| ATOM | 5347 | CD2  | PHE | X | 355 | 56.548 | 13.509 | 44.326 | 0.00 | 0.00 |
| ATOM | 5348 | HD2  | PHE | X | 355 | 56.944 | 12.674 | 44.885 | 0.00 | 0.00 |
| ATOM | 5349 | C    | PHE | X | 355 | 56.960 | 15.546 | 46.863 | 0.00 | 0.00 |
| ATOM | 5350 | O    | PHE | X | 355 | 55.979 | 16.280 | 46.540 | 0.00 | 0.00 |
| ATOM | 5351 | N    | LEU | X | 356 | 56.815 | 14.507 | 47.694 | 0.00 | 0.00 |
| ATOM | 5352 | H    | LEU | X | 356 | 57.729 | 14.088 | 47.788 | 0.00 | 0.00 |
| ATOM | 5353 | CA   | LEU | X | 356 | 55.579 | 14.071 | 48.392 | 0.00 | 0.00 |
| ATOM | 5354 | HA   | LEU | X | 356 | 54.804 | 14.133 | 47.628 | 0.00 | 0.00 |
| ATOM | 5355 | CB   | LEU | X | 356 | 55.862 | 12.666 | 48.934 | 0.00 | 0.00 |
| ATOM | 5356 | HB2  | LEU | X | 356 | 56.109 | 12.153 | 48.004 | 0.00 | 0.00 |
| ATOM | 5357 | HB3  | LEU | X | 356 | 56.728 | 12.714 | 49.594 | 0.00 | 0.00 |
| ATOM | 5358 | CG   | LEU | X | 356 | 54.735 | 12.017 | 49.792 | 0.00 | 0.00 |
| ATOM | 5359 | HG   | LEU | X | 356 | 54.543 | 12.638 | 50.668 | 0.00 | 0.00 |
| ATOM | 5360 | CD1  | LEU | X | 356 | 53.347 | 11.995 | 49.086 | 0.00 | 0.00 |
| ATOM | 5361 | HD11 | LEU | X | 356 | 53.420 | 11.261 | 48.284 | 0.00 | 0.00 |
| ATOM | 5362 | HD12 | LEU | X | 356 | 52.630 | 11.647 | 49.830 | 0.00 | 0.00 |
| ATOM | 5363 | HD13 | LEU | X | 356 | 53.088 | 12.977 | 48.691 | 0.00 | 0.00 |
| ATOM | 5364 | CD2  | LEU | X | 356 | 55.050 | 10.598 | 50.257 | 0.00 | 0.00 |
| ATOM | 5365 | HD21 | LEU | X | 356 | 54.935 | 9.842  | 49.480 | 0.00 | 0.00 |
| ATOM | 5366 | HD22 | LEU | X | 356 | 56.014 | 10.407 | 50.729 | 0.00 | 0.00 |
| ATOM | 5367 | HD23 | LEU | X | 356 | 54.351 | 10.311 | 51.042 | 0.00 | 0.00 |
| ATOM | 5368 | C    | LEU | X | 356 | 55.133 | 15.150 | 49.431 | 0.00 | 0.00 |
| ATOM | 5369 | O    | LEU | X | 356 | 54.065 | 15.665 | 49.404 | 0.00 | 0.00 |
| ATOM | 5370 | N    | ALA | X | 357 | 56.127 | 15.609 | 50.265 | 0.00 | 0.00 |
| ATOM | 5371 | H    | ALA | X | 357 | 57.017 | 15.337 | 49.873 | 0.00 | 0.00 |
| ATOM | 5372 | CA   | ALA | X | 357 | 55.944 | 16.762 | 51.118 | 0.00 | 0.00 |
| ATOM | 5373 | HA   | ALA | X | 357 | 55.140 | 16.554 | 51.823 | 0.00 | 0.00 |
| ATOM | 5374 | CB   | ALA | X | 357 | 57.193 | 16.989 | 51.898 | 0.00 | 0.00 |
| ATOM | 5375 | HB1  | ALA | X | 357 | 57.599 | 16.069 | 52.319 | 0.00 | 0.00 |
| ATOM | 5376 | HB2  | ALA | X | 357 | 57.988 | 17.373 | 51.259 | 0.00 | 0.00 |
| ATOM | 5377 | HB3  | ALA | X | 357 | 57.037 | 17.770 | 52.641 | 0.00 | 0.00 |
| ATOM | 5378 | C    | ALA | X | 357 | 55.562 | 18.067 | 50.300 | 0.00 | 0.00 |
| ATOM | 5379 | O    | ALA | X | 357 | 54.743 | 18.920 | 50.687 | 0.00 | 0.00 |
| ATOM | 5380 | N    | GLY | X | 358 | 56.139 | 18.205 | 49.085 | 0.00 | 0.00 |
| ATOM | 5381 | H    | GLY | X | 358 | 56.742 | 17.463 | 48.759 | 0.00 | 0.00 |
| ATOM | 5382 | CA   | GLY | X | 358 | 55.789 | 19.342 | 48.249 | 0.00 | 0.00 |
| ATOM | 5383 | HA2  | GLY | X | 358 | 56.164 | 20.296 | 48.767 | 0.00 | 0.00 |
| ATOM | 5384 | HA3  | GLY | X | 358 | 56.419 | 19.410 | 47.316 | 0.00 | 0.00 |
| ATOM | 5385 | C    | GLY | X | 358 | 54.310 | 19.389 | 47.673 | 0.00 | 0.00 |
| ATOM | 5386 | O    | GLY | X | 358 | 53.727 | 20.453 | 47.665 | 0.00 | 0.00 |
| ATOM | 5387 | N    | VAL | X | 359 | 53.805 | 18.225 | 47.334 | 0.00 | 0.00 |
| ATOM | 5388 | H    | VAL | X | 359 | 54.391 | 17.403 | 47.301 | 0.00 | 0.00 |

|      |      |      |     |   |     |        |        |        |      |      |
|------|------|------|-----|---|-----|--------|--------|--------|------|------|
| ATOM | 5389 | CA   | VAL | X | 359 | 52.343 | 18.107 | 47.278 | 0.00 | 0.00 |
| ATOM | 5390 | HA   | VAL | X | 359 | 51.934 | 18.906 | 46.659 | 0.00 | 0.00 |
| ATOM | 5391 | CB   | VAL | X | 359 | 51.851 | 16.755 | 46.577 | 0.00 | 0.00 |
| ATOM | 5392 | HB   | VAL | X | 359 | 52.397 | 15.940 | 47.051 | 0.00 | 0.00 |
| ATOM | 5393 | CG1  | VAL | X | 359 | 50.356 | 16.413 | 46.617 | 0.00 | 0.00 |
| ATOM | 5394 | HG11 | VAL | X | 359 | 49.682 | 17.168 | 46.213 | 0.00 | 0.00 |
| ATOM | 5395 | HG12 | VAL | X | 359 | 50.283 | 15.476 | 46.066 | 0.00 | 0.00 |
| ATOM | 5396 | HG13 | VAL | X | 359 | 50.137 | 16.302 | 47.679 | 0.00 | 0.00 |
| ATOM | 5397 | CG2  | VAL | X | 359 | 52.331 | 16.672 | 45.081 | 0.00 | 0.00 |
| ATOM | 5398 | HG21 | VAL | X | 359 | 52.022 | 17.596 | 44.592 | 0.00 | 0.00 |
| ATOM | 5399 | HG22 | VAL | X | 359 | 53.419 | 16.731 | 45.030 | 0.00 | 0.00 |
| ATOM | 5400 | HG23 | VAL | X | 359 | 52.000 | 15.812 | 44.499 | 0.00 | 0.00 |
| ATOM | 5401 | C    | VAL | X | 359 | 51.767 | 18.340 | 48.626 | 0.00 | 0.00 |
| ATOM | 5402 | O    | VAL | X | 359 | 50.727 | 19.057 | 48.583 | 0.00 | 0.00 |
| ATOM | 5403 | N    | ARG | X | 360 | 52.289 | 17.900 | 49.813 | 0.00 | 0.00 |
| ATOM | 5404 | H    | ARG | X | 360 | 53.092 | 17.288 | 49.837 | 0.00 | 0.00 |
| ATOM | 5405 | CA   | ARG | X | 360 | 51.505 | 18.108 | 51.038 | 0.00 | 0.00 |
| ATOM | 5406 | HA   | ARG | X | 360 | 50.512 | 17.711 | 50.828 | 0.00 | 0.00 |
| ATOM | 5407 | CB   | ARG | X | 360 | 52.200 | 17.422 | 52.229 | 0.00 | 0.00 |
| ATOM | 5408 | HB2  | ARG | X | 360 | 53.241 | 17.714 | 52.367 | 0.00 | 0.00 |
| ATOM | 5409 | HB3  | ARG | X | 360 | 51.615 | 17.728 | 53.096 | 0.00 | 0.00 |
| ATOM | 5410 | CG   | ARG | X | 360 | 52.080 | 15.940 | 52.166 | 0.00 | 0.00 |
| ATOM | 5411 | HG2  | ARG | X | 360 | 52.295 | 15.532 | 51.179 | 0.00 | 0.00 |
| ATOM | 5412 | HG3  | ARG | X | 360 | 52.932 | 15.543 | 52.719 | 0.00 | 0.00 |
| ATOM | 5413 | CD   | ARG | X | 360 | 50.695 | 15.370 | 52.511 | 0.00 | 0.00 |
| ATOM | 5414 | HD2  | ARG | X | 360 | 49.997 | 16.039 | 52.007 | 0.00 | 0.00 |
| ATOM | 5415 | HD3  | ARG | X | 360 | 50.617 | 14.317 | 52.241 | 0.00 | 0.00 |
| ATOM | 5416 | NE   | ARG | X | 360 | 50.316 | 15.467 | 53.951 | 0.00 | 0.00 |
| ATOM | 5417 | HE   | ARG | X | 360 | 49.827 | 16.301 | 54.244 | 0.00 | 0.00 |
| ATOM | 5418 | CZ   | ARG | X | 360 | 50.372 | 14.481 | 54.821 | 0.00 | 0.00 |
| ATOM | 5419 | NH1  | ARG | X | 360 | 50.815 | 13.257 | 54.603 | 0.00 | 0.00 |
| ATOM | 5420 | HH11 | ARG | X | 360 | 51.191 | 12.934 | 53.722 | 0.00 | 0.00 |
| ATOM | 5421 | HH12 | ARG | X | 360 | 50.864 | 12.679 | 55.429 | 0.00 | 0.00 |
| ATOM | 5422 | NH2  | ARG | X | 360 | 49.977 | 14.653 | 56.066 | 0.00 | 0.00 |
| ATOM | 5423 | HH21 | ARG | X | 360 | 49.768 | 15.596 | 56.362 | 0.00 | 0.00 |
| ATOM | 5424 | HH22 | ARG | X | 360 | 50.234 | 13.996 | 56.788 | 0.00 | 0.00 |
| ATOM | 5425 | C    | ARG | X | 360 | 51.282 | 19.568 | 51.405 | 0.00 | 0.00 |
| ATOM | 5426 | O    | ARG | X | 360 | 50.263 | 19.914 | 52.098 | 0.00 | 0.00 |
| ATOM | 5427 | N    | VAL | X | 361 | 52.326 | 20.451 | 51.123 | 0.00 | 0.00 |
| ATOM | 5428 | H    | VAL | X | 361 | 53.181 | 20.014 | 50.811 | 0.00 | 0.00 |
| ATOM | 5429 | CA   | VAL | X | 361 | 52.194 | 21.925 | 51.176 | 0.00 | 0.00 |
| ATOM | 5430 | HA   | VAL | X | 361 | 51.496 | 22.209 | 51.964 | 0.00 | 0.00 |
| ATOM | 5431 | CB   | VAL | X | 361 | 53.610 | 22.615 | 51.508 | 0.00 | 0.00 |
| ATOM | 5432 | HB   | VAL | X | 361 | 53.517 | 23.695 | 51.624 | 0.00 | 0.00 |
| ATOM | 5433 | CG1  | VAL | X | 361 | 54.217 | 22.159 | 52.833 | 0.00 | 0.00 |
| ATOM | 5434 | HG11 | VAL | X | 361 | 55.248 | 22.497 | 52.946 | 0.00 | 0.00 |
| ATOM | 5435 | HG12 | VAL | X | 361 | 53.627 | 22.467 | 53.696 | 0.00 | 0.00 |
| ATOM | 5436 | HG13 | VAL | X | 361 | 54.194 | 21.080 | 52.679 | 0.00 | 0.00 |
| ATOM | 5437 | CG2  | VAL | X | 361 | 54.603 | 22.575 | 50.321 | 0.00 | 0.00 |
| ATOM | 5438 | HG21 | VAL | X | 361 | 55.541 | 23.026 | 50.645 | 0.00 | 0.00 |
| ATOM | 5439 | HG22 | VAL | X | 361 | 54.820 | 21.514 | 50.199 | 0.00 | 0.00 |
| ATOM | 5440 | HG23 | VAL | X | 361 | 54.194 | 23.006 | 49.407 | 0.00 | 0.00 |
| ATOM | 5441 | C    | VAL | X | 361 | 51.497 | 22.568 | 49.944 | 0.00 | 0.00 |
| ATOM | 5442 | O    | VAL | X | 361 | 50.826 | 23.588 | 50.053 | 0.00 | 0.00 |
| ATOM | 5443 | N    | GLY | X | 362 | 51.555 | 21.938 | 48.744 | 0.00 | 0.00 |
| ATOM | 5444 | H    | GLY | X | 362 | 52.171 | 21.139 | 48.697 | 0.00 | 0.00 |
| ATOM | 5445 | CA   | GLY | X | 362 | 51.092 | 22.624 | 47.493 | 0.00 | 0.00 |
| ATOM | 5446 | HA2  | GLY | X | 362 | 51.658 | 23.538 | 47.335 | 0.00 | 0.00 |
| ATOM | 5447 | HA3  | GLY | X | 362 | 51.416 | 21.881 | 46.719 | 0.00 | 0.00 |
| ATOM | 5448 | C    | GLY | X | 362 | 49.662 | 22.791 | 47.353 | 0.00 | 0.00 |
| ATOM | 5449 | O    | GLY | X | 362 | 49.136 | 23.477 | 46.479 | 0.00 | 0.00 |
| ATOM | 5450 | N    | VAL | X | 363 | 48.848 | 22.084 | 48.169 | 0.00 | 0.00 |
| ATOM | 5451 | H    | VAL | X | 363 | 49.293 | 21.692 | 48.986 | 0.00 | 0.00 |
| ATOM | 5452 | CA   | VAL | X | 363 | 47.400 | 22.006 | 48.283 | 0.00 | 0.00 |
| ATOM | 5453 | HA   | VAL | X | 363 | 46.988 | 22.818 | 47.683 | 0.00 | 0.00 |
| ATOM | 5454 | CB   | VAL | X | 363 | 46.748 | 20.748 | 47.612 | 0.00 | 0.00 |
| ATOM | 5455 | HB   | VAL | X | 363 | 46.737 | 20.020 | 48.423 | 0.00 | 0.00 |
| ATOM | 5456 | CG1  | VAL | X | 363 | 45.327 | 20.949 | 47.154 | 0.00 | 0.00 |
| ATOM | 5457 | HG11 | VAL | X | 363 | 45.008 | 20.018 | 46.686 | 0.00 | 0.00 |
| ATOM | 5458 | HG12 | VAL | X | 363 | 44.684 | 21.143 | 48.013 | 0.00 | 0.00 |

|      |      |      |     |   |     |        |        |        |      |      |
|------|------|------|-----|---|-----|--------|--------|--------|------|------|
| ATOM | 5459 | HG13 | VAL | X | 363 | 45.247 | 21.774 | 46.447 | 0.00 | 0.00 |
| ATOM | 5460 | CG2  | VAL | X | 363 | 47.648 | 20.287 | 46.441 | 0.00 | 0.00 |
| ATOM | 5461 | HG21 | VAL | X | 363 | 47.178 | 19.395 | 46.025 | 0.00 | 0.00 |
| ATOM | 5462 | HG22 | VAL | X | 363 | 47.636 | 21.109 | 45.726 | 0.00 | 0.00 |
| ATOM | 5463 | HG23 | VAL | X | 363 | 48.607 | 20.059 | 46.907 | 0.00 | 0.00 |
| ATOM | 5464 | C    | VAL | X | 363 | 47.134 | 22.081 | 49.808 | 0.00 | 0.00 |
| ATOM | 5465 | O    | VAL | X | 363 | 47.874 | 21.491 | 50.603 | 0.00 | 0.00 |
| ATOM | 5466 | N    | PRO | X | 364 | 46.054 | 22.850 | 50.178 | 0.00 | 0.00 |
| ATOM | 5467 | CD   | PRO | X | 364 | 45.137 | 23.638 | 49.261 | 0.00 | 0.00 |
| ATOM | 5468 | HD2  | PRO | X | 364 | 44.597 | 22.930 | 48.632 | 0.00 | 0.00 |
| ATOM | 5469 | HD3  | PRO | X | 364 | 45.795 | 24.342 | 48.753 | 0.00 | 0.00 |
| ATOM | 5470 | CG   | PRO | X | 364 | 44.208 | 24.452 | 50.148 | 0.00 | 0.00 |
| ATOM | 5471 | HG2  | PRO | X | 364 | 43.197 | 24.059 | 50.041 | 0.00 | 0.00 |
| ATOM | 5472 | HG3  | PRO | X | 364 | 44.105 | 25.527 | 49.994 | 0.00 | 0.00 |
| ATOM | 5473 | CB   | PRO | X | 364 | 44.710 | 24.270 | 51.568 | 0.00 | 0.00 |
| ATOM | 5474 | HB2  | PRO | X | 364 | 43.909 | 24.372 | 52.300 | 0.00 | 0.00 |
| ATOM | 5475 | HB3  | PRO | X | 364 | 45.409 | 25.095 | 51.705 | 0.00 | 0.00 |
| ATOM | 5476 | CA   | PRO | X | 364 | 45.502 | 22.968 | 51.531 | 0.00 | 0.00 |
| ATOM | 5477 | HA   | PRO | X | 364 | 46.337 | 23.065 | 52.225 | 0.00 | 0.00 |
| ATOM | 5478 | C    | PRO | X | 364 | 44.519 | 21.901 | 51.934 | 0.00 | 0.00 |
| ATOM | 5479 | O    | PRO | X | 364 | 43.888 | 21.300 | 51.059 | 0.00 | 0.00 |
| ATOM | 5480 | N    | GLN | X | 365 | 44.518 | 21.547 | 53.223 | 0.00 | 0.00 |
| ATOM | 5481 | H    | GLN | X | 365 | 45.164 | 22.054 | 53.810 | 0.00 | 0.00 |
| ATOM | 5482 | CA   | GLN | X | 365 | 43.712 | 20.500 | 53.895 | 0.00 | 0.00 |
| ATOM | 5483 | HA   | GLN | X | 365 | 43.854 | 20.563 | 54.974 | 0.00 | 0.00 |
| ATOM | 5484 | CB   | GLN | X | 365 | 42.228 | 20.670 | 53.563 | 0.00 | 0.00 |
| ATOM | 5485 | HB2  | GLN | X | 365 | 42.017 | 21.708 | 53.817 | 0.00 | 0.00 |
| ATOM | 5486 | HB3  | GLN | X | 365 | 42.033 | 20.585 | 52.494 | 0.00 | 0.00 |
| ATOM | 5487 | CG   | GLN | X | 365 | 41.219 | 19.711 | 54.363 | 0.00 | 0.00 |
| ATOM | 5488 | HG2  | GLN | X | 365 | 41.215 | 18.651 | 54.111 | 0.00 | 0.00 |
| ATOM | 5489 | HG3  | GLN | X | 365 | 41.454 | 19.888 | 55.412 | 0.00 | 0.00 |
| ATOM | 5490 | CD   | GLN | X | 365 | 39.766 | 20.061 | 54.248 | 0.00 | 0.00 |
| ATOM | 5491 | OE1  | GLN | X | 365 | 39.402 | 20.792 | 53.392 | 0.00 | 0.00 |
| ATOM | 5492 | NE2  | GLN | X | 365 | 38.925 | 19.594 | 55.101 | 0.00 | 0.00 |
| ATOM | 5493 | HE21 | GLN | X | 365 | 37.960 | 19.848 | 54.943 | 0.00 | 0.00 |
| ATOM | 5494 | HE22 | GLN | X | 365 | 39.260 | 18.999 | 55.845 | 0.00 | 0.00 |
| ATOM | 5495 | C    | GLN | X | 365 | 44.201 | 19.084 | 53.557 | 0.00 | 0.00 |
| ATOM | 5496 | O    | GLN | X | 365 | 44.013 | 18.201 | 54.360 | 0.00 | 0.00 |
| ATOM | 5497 | N    | VAL | X | 366 | 44.693 | 18.846 | 52.345 | 0.00 | 0.00 |
| ATOM | 5498 | H    | VAL | X | 366 | 44.724 | 19.665 | 51.755 | 0.00 | 0.00 |
| ATOM | 5499 | CA   | VAL | X | 366 | 45.230 | 17.630 | 51.684 | 0.00 | 0.00 |
| ATOM | 5500 | HA   | VAL | X | 366 | 44.387 | 17.145 | 51.192 | 0.00 | 0.00 |
| ATOM | 5501 | CB   | VAL | X | 366 | 46.377 | 17.952 | 50.636 | 0.00 | 0.00 |
| ATOM | 5502 | HB   | VAL | X | 366 | 46.107 | 18.800 | 50.007 | 0.00 | 0.00 |
| ATOM | 5503 | CG1  | VAL | X | 366 | 47.741 | 18.435 | 51.201 | 0.00 | 0.00 |
| ATOM | 5504 | HG11 | VAL | X | 366 | 48.333 | 18.778 | 50.352 | 0.00 | 0.00 |
| ATOM | 5505 | HG12 | VAL | X | 366 | 47.691 | 19.271 | 51.899 | 0.00 | 0.00 |
| ATOM | 5506 | HG13 | VAL | X | 366 | 48.264 | 17.665 | 51.768 | 0.00 | 0.00 |
| ATOM | 5507 | CG2  | VAL | X | 366 | 46.615 | 16.759 | 49.732 | 0.00 | 0.00 |
| ATOM | 5508 | HG21 | VAL | X | 366 | 47.635 | 16.741 | 49.348 | 0.00 | 0.00 |
| ATOM | 5509 | HG22 | VAL | X | 366 | 46.473 | 15.803 | 50.236 | 0.00 | 0.00 |
| ATOM | 5510 | HG23 | VAL | X | 366 | 45.867 | 16.859 | 48.946 | 0.00 | 0.00 |
| ATOM | 5511 | C    | VAL | X | 366 | 45.752 | 16.519 | 52.714 | 0.00 | 0.00 |
| ATOM | 5512 | O    | VAL | X | 366 | 46.701 | 16.716 | 53.509 | 0.00 | 0.00 |
| ATOM | 5513 | N    | SER | X | 367 | 45.059 | 15.358 | 52.735 | 0.00 | 0.00 |
| ATOM | 5514 | H    | SER | X | 367 | 44.292 | 15.215 | 52.094 | 0.00 | 0.00 |
| ATOM | 5515 | CA   | SER | X | 367 | 45.358 | 14.222 | 53.630 | 0.00 | 0.00 |
| ATOM | 5516 | HA   | SER | X | 367 | 45.663 | 14.587 | 54.610 | 0.00 | 0.00 |
| ATOM | 5517 | CB   | SER | X | 367 | 44.127 | 13.326 | 53.821 | 0.00 | 0.00 |
| ATOM | 5518 | HB2  | SER | X | 367 | 44.242 | 12.547 | 54.575 | 0.00 | 0.00 |
| ATOM | 5519 | HB3  | SER | X | 367 | 43.280 | 13.956 | 54.091 | 0.00 | 0.00 |
| ATOM | 5520 | OG   | SER | X | 367 | 43.685 | 12.589 | 52.652 | 0.00 | 0.00 |
| ATOM | 5521 | HG   | SER | X | 367 | 42.814 | 12.254 | 52.876 | 0.00 | 0.00 |
| ATOM | 5522 | C    | SER | X | 367 | 46.557 | 13.384 | 53.039 | 0.00 | 0.00 |
| ATOM | 5523 | O    | SER | X | 367 | 47.076 | 13.769 | 51.988 | 0.00 | 0.00 |
| ATOM | 5524 | N    | ASP | X | 368 | 47.057 | 12.298 | 53.702 | 0.00 | 0.00 |
| ATOM | 5525 | H    | ASP | X | 368 | 46.651 | 12.113 | 54.608 | 0.00 | 0.00 |
| ATOM | 5526 | CA   | ASP | X | 368 | 48.045 | 11.352 | 53.113 | 0.00 | 0.00 |
| ATOM | 5527 | HA   | ASP | X | 368 | 48.932 | 11.947 | 52.893 | 0.00 | 0.00 |
| ATOM | 5528 | CB   | ASP | X | 368 | 48.489 | 10.394 | 54.231 | 0.00 | 0.00 |

|      |      |      |     |   |     |        |        |        |      |      |
|------|------|------|-----|---|-----|--------|--------|--------|------|------|
| ATOM | 5529 | HB2  | ASP | X | 368 | 48.871 | 11.122 | 54.947 | 0.00 | 0.00 |
| ATOM | 5530 | HB3  | ASP | X | 368 | 47.543 | 10.032 | 54.632 | 0.00 | 0.00 |
| ATOM | 5531 | CG   | ASP | X | 368 | 49.500 | 9.301  | 53.911 | 0.00 | 0.00 |
| ATOM | 5532 | OD1  | ASP | X | 368 | 49.319 | 8.166  | 54.303 | 0.00 | 0.00 |
| ATOM | 5533 | OD2  | ASP | X | 368 | 50.445 | 9.646  | 53.185 | 0.00 | 0.00 |
| ATOM | 5534 | C    | ASP | X | 368 | 47.473 | 10.632 | 51.848 | 0.00 | 0.00 |
| ATOM | 5535 | O    | ASP | X | 368 | 48.160 | 10.279 | 50.916 | 0.00 | 0.00 |
| ATOM | 5536 | N    | LEU | X | 369 | 46.135 | 10.404 | 51.914 | 0.00 | 0.00 |
| ATOM | 5537 | H    | LEU | X | 369 | 45.659 | 10.974 | 52.599 | 0.00 | 0.00 |
| ATOM | 5538 | CA   | LEU | X | 369 | 45.325 | 9.800  | 50.821 | 0.00 | 0.00 |
| ATOM | 5539 | HA   | LEU | X | 369 | 46.002 | 9.029  | 50.455 | 0.00 | 0.00 |
| ATOM | 5540 | CB   | LEU | X | 369 | 44.008 | 9.099  | 51.451 | 0.00 | 0.00 |
| ATOM | 5541 | HB2  | LEU | X | 369 | 43.327 | 9.819  | 51.904 | 0.00 | 0.00 |
| ATOM | 5542 | HB3  | LEU | X | 369 | 43.487 | 8.704  | 50.579 | 0.00 | 0.00 |
| ATOM | 5543 | CG   | LEU | X | 369 | 44.305 | 8.041  | 52.463 | 0.00 | 0.00 |
| ATOM | 5544 | HG   | LEU | X | 369 | 43.421 | 7.416  | 52.594 | 0.00 | 0.00 |
| ATOM | 5545 | CD1  | LEU | X | 369 | 45.389 | 7.087  | 51.999 | 0.00 | 0.00 |
| ATOM | 5546 | HD11 | LEU | X | 369 | 45.239 | 6.837  | 50.949 | 0.00 | 0.00 |
| ATOM | 5547 | HD12 | LEU | X | 369 | 46.356 | 7.560  | 52.170 | 0.00 | 0.00 |
| ATOM | 5548 | HD13 | LEU | X | 369 | 45.315 | 6.187  | 52.610 | 0.00 | 0.00 |
| ATOM | 5549 | CD2  | LEU | X | 369 | 44.587 | 8.455  | 53.959 | 0.00 | 0.00 |
| ATOM | 5550 | HD21 | LEU | X | 369 | 43.784 | 9.112  | 54.291 | 0.00 | 0.00 |
| ATOM | 5551 | HD22 | LEU | X | 369 | 44.848 | 7.562  | 54.527 | 0.00 | 0.00 |
| ATOM | 5552 | HD23 | LEU | X | 369 | 45.456 | 9.107  | 54.043 | 0.00 | 0.00 |
| ATOM | 5553 | C    | LEU | X | 369 | 44.891 | 10.740 | 49.730 | 0.00 | 0.00 |
| ATOM | 5554 | O    | LEU | X | 369 | 44.801 | 10.242 | 48.612 | 0.00 | 0.00 |
| ATOM | 5555 | N    | ALA | X | 370 | 44.748 | 12.025 | 50.052 | 0.00 | 0.00 |
| ATOM | 5556 | H    | ALA | X | 370 | 44.750 | 12.275 | 51.031 | 0.00 | 0.00 |
| ATOM | 5557 | CA   | ALA | X | 370 | 44.540 | 13.047 | 49.023 | 0.00 | 0.00 |
| ATOM | 5558 | HA   | ALA | X | 370 | 43.924 | 12.664 | 48.210 | 0.00 | 0.00 |
| ATOM | 5559 | CB   | ALA | X | 370 | 43.698 | 14.107 | 49.637 | 0.00 | 0.00 |
| ATOM | 5560 | HB1  | ALA | X | 370 | 42.787 | 13.739 | 50.111 | 0.00 | 0.00 |
| ATOM | 5561 | HB2  | ALA | X | 370 | 44.303 | 14.691 | 50.329 | 0.00 | 0.00 |
| ATOM | 5562 | HB3  | ALA | X | 370 | 43.382 | 14.796 | 48.854 | 0.00 | 0.00 |
| ATOM | 5563 | C    | ALA | X | 370 | 45.783 | 13.572 | 48.310 | 0.00 | 0.00 |
| ATOM | 5564 | O    | ALA | X | 370 | 45.815 | 13.813 | 47.072 | 0.00 | 0.00 |
| ATOM | 5565 | N    | ALA | X | 371 | 46.907 | 13.523 | 49.037 | 0.00 | 0.00 |
| ATOM | 5566 | H    | ALA | X | 371 | 46.798 | 13.280 | 50.011 | 0.00 | 0.00 |
| ATOM | 5567 | CA   | ALA | X | 371 | 48.230 | 13.545 | 48.424 | 0.00 | 0.00 |
| ATOM | 5568 | HA   | ALA | X | 371 | 48.300 | 14.396 | 47.747 | 0.00 | 0.00 |
| ATOM | 5569 | CB   | ALA | X | 371 | 49.288 | 13.690 | 49.476 | 0.00 | 0.00 |
| ATOM | 5570 | HB1  | ALA | X | 371 | 49.072 | 14.530 | 50.137 | 0.00 | 0.00 |
| ATOM | 5571 | HB2  | ALA | X | 371 | 49.410 | 12.756 | 50.025 | 0.00 | 0.00 |
| ATOM | 5572 | HB3  | ALA | X | 371 | 50.222 | 13.891 | 48.952 | 0.00 | 0.00 |
| ATOM | 5573 | C    | ALA | X | 371 | 48.414 | 12.213 | 47.608 | 0.00 | 0.00 |
| ATOM | 5574 | O    | ALA | X | 371 | 48.570 | 12.293 | 46.406 | 0.00 | 0.00 |
| ATOM | 5575 | N    | GLU | X | 372 | 48.312 | 10.983 | 48.129 | 0.00 | 0.00 |
| ATOM | 5576 | H    | GLU | X | 372 | 48.018 | 10.957 | 49.094 | 0.00 | 0.00 |
| ATOM | 5577 | CA   | GLU | X | 372 | 48.380 | 9.800  | 47.266 | 0.00 | 0.00 |
| ATOM | 5578 | HA   | GLU | X | 372 | 49.388 | 9.785  | 46.849 | 0.00 | 0.00 |
| ATOM | 5579 | CB   | GLU | X | 372 | 48.223 | 8.575  | 48.178 | 0.00 | 0.00 |
| ATOM | 5580 | HB2  | GLU | X | 372 | 49.083 | 8.529  | 48.845 | 0.00 | 0.00 |
| ATOM | 5581 | HB3  | GLU | X | 372 | 47.320 | 8.683  | 48.780 | 0.00 | 0.00 |
| ATOM | 5582 | CG   | GLU | X | 372 | 48.003 | 7.190  | 47.425 | 0.00 | 0.00 |
| ATOM | 5583 | HG2  | GLU | X | 372 | 47.033 | 7.300  | 46.940 | 0.00 | 0.00 |
| ATOM | 5584 | HG3  | GLU | X | 372 | 48.816 | 7.135  | 46.700 | 0.00 | 0.00 |
| ATOM | 5585 | CD   | GLU | X | 372 | 48.081 | 5.949  | 48.274 | 0.00 | 0.00 |
| ATOM | 5586 | OE1  | GLU | X | 372 | 49.194 | 5.665  | 48.781 | 0.00 | 0.00 |
| ATOM | 5587 | OE2  | GLU | X | 372 | 47.052 | 5.264  | 48.368 | 0.00 | 0.00 |
| ATOM | 5588 | C    | GLU | X | 372 | 47.401 | 9.724  | 46.014 | 0.00 | 0.00 |
| ATOM | 5589 | O    | GLU | X | 372 | 47.871 | 9.332  | 44.885 | 0.00 | 0.00 |
| ATOM | 5590 | N    | ALA | X | 373 | 46.164 | 10.232 | 46.127 | 0.00 | 0.00 |
| ATOM | 5591 | H    | ALA | X | 373 | 45.868 | 10.479 | 47.060 | 0.00 | 0.00 |
| ATOM | 5592 | CA   | ALA | X | 373 | 45.312 | 10.418 | 44.888 | 0.00 | 0.00 |
| ATOM | 5593 | HA   | ALA | X | 373 | 45.210 | 9.485  | 44.333 | 0.00 | 0.00 |
| ATOM | 5594 | CB   | ALA | X | 373 | 43.883 | 10.880 | 45.270 | 0.00 | 0.00 |
| ATOM | 5595 | HB1  | ALA | X | 373 | 43.863 | 11.880 | 45.702 | 0.00 | 0.00 |
| ATOM | 5596 | HB2  | ALA | X | 373 | 43.219 | 10.866 | 44.406 | 0.00 | 0.00 |
| ATOM | 5597 | HB3  | ALA | X | 373 | 43.493 | 10.085 | 45.905 | 0.00 | 0.00 |
| ATOM | 5598 | C    | ALA | X | 373 | 45.907 | 11.394 | 43.907 | 0.00 | 0.00 |

|      |      |      |     |   |     |        |        |        |      |      |
|------|------|------|-----|---|-----|--------|--------|--------|------|------|
| ATOM | 5599 | O    | ALA | X | 373 | 45.921 | 11.152 | 42.696 | 0.00 | 0.00 |
| ATOM | 5600 | N    | VAL | X | 374 | 46.326 | 12.610 | 44.350 | 0.00 | 0.00 |
| ATOM | 5601 | H    | VAL | X | 374 | 46.201 | 12.808 | 45.333 | 0.00 | 0.00 |
| ATOM | 5602 | CA   | VAL | X | 374 | 46.951 | 13.681 | 43.566 | 0.00 | 0.00 |
| ATOM | 5603 | HA   | VAL | X | 374 | 46.370 | 13.987 | 42.696 | 0.00 | 0.00 |
| ATOM | 5604 | CB   | VAL | X | 374 | 47.161 | 14.984 | 44.452 | 0.00 | 0.00 |
| ATOM | 5605 | HB   | VAL | X | 374 | 47.680 | 14.701 | 45.368 | 0.00 | 0.00 |
| ATOM | 5606 | CG1  | VAL | X | 374 | 48.071 | 15.956 | 43.660 | 0.00 | 0.00 |
| ATOM | 5607 | HG11 | VAL | X | 374 | 47.613 | 16.242 | 42.713 | 0.00 | 0.00 |
| ATOM | 5608 | HG12 | VAL | X | 374 | 48.150 | 16.877 | 44.238 | 0.00 | 0.00 |
| ATOM | 5609 | HG13 | VAL | X | 374 | 49.059 | 15.519 | 43.513 | 0.00 | 0.00 |
| ATOM | 5610 | CG2  | VAL | X | 374 | 45.921 | 15.750 | 44.771 | 0.00 | 0.00 |
| ATOM | 5611 | HG21 | VAL | X | 374 | 45.527 | 16.035 | 43.795 | 0.00 | 0.00 |
| ATOM | 5612 | HG22 | VAL | X | 374 | 45.108 | 15.139 | 45.163 | 0.00 | 0.00 |
| ATOM | 5613 | HG23 | VAL | X | 374 | 46.168 | 16.693 | 45.258 | 0.00 | 0.00 |
| ATOM | 5614 | C    | VAL | X | 374 | 48.279 | 13.131 | 42.971 | 0.00 | 0.00 |
| ATOM | 5615 | O    | VAL | X | 374 | 48.409 | 13.229 | 41.769 | 0.00 | 0.00 |
| ATOM | 5616 | N    | VAL | X | 375 | 49.114 | 12.478 | 43.682 | 0.00 | 0.00 |
| ATOM | 5617 | H    | VAL | X | 375 | 48.940 | 12.576 | 44.672 | 0.00 | 0.00 |
| ATOM | 5618 | CA   | VAL | X | 375 | 50.268 | 11.726 | 43.209 | 0.00 | 0.00 |
| ATOM | 5619 | HA   | VAL | X | 375 | 50.819 | 12.444 | 42.603 | 0.00 | 0.00 |
| ATOM | 5620 | CB   | VAL | X | 375 | 51.232 | 11.241 | 44.392 | 0.00 | 0.00 |
| ATOM | 5621 | HB   | VAL | X | 375 | 50.761 | 10.489 | 45.025 | 0.00 | 0.00 |
| ATOM | 5622 | CG1  | VAL | X | 375 | 52.418 | 10.498 | 43.757 | 0.00 | 0.00 |
| ATOM | 5623 | HG11 | VAL | X | 375 | 53.147 | 10.466 | 44.567 | 0.00 | 0.00 |
| ATOM | 5624 | HG12 | VAL | X | 375 | 52.136 | 9.509  | 43.394 | 0.00 | 0.00 |
| ATOM | 5625 | HG13 | VAL | X | 375 | 52.843 | 11.045 | 42.915 | 0.00 | 0.00 |
| ATOM | 5626 | CG2  | VAL | X | 375 | 51.863 | 12.413 | 45.236 | 0.00 | 0.00 |
| ATOM | 5627 | HG21 | VAL | X | 375 | 52.529 | 11.952 | 45.965 | 0.00 | 0.00 |
| ATOM | 5628 | HG22 | VAL | X | 375 | 52.429 | 13.105 | 44.613 | 0.00 | 0.00 |
| ATOM | 5629 | HG23 | VAL | X | 375 | 51.064 | 12.957 | 45.740 | 0.00 | 0.00 |
| ATOM | 5630 | C    | VAL | X | 375 | 49.993 | 10.684 | 42.141 | 0.00 | 0.00 |
| ATOM | 5631 | O    | VAL | X | 375 | 50.780 | 10.472 | 41.176 | 0.00 | 0.00 |
| ATOM | 5632 | N    | LEU | X | 376 | 48.848 | 10.003 | 42.225 | 0.00 | 0.00 |
| ATOM | 5633 | H    | LEU | X | 376 | 48.261 | 10.151 | 43.033 | 0.00 | 0.00 |
| ATOM | 5634 | CA   | LEU | X | 376 | 48.390 | 9.072  | 41.179 | 0.00 | 0.00 |
| ATOM | 5635 | HA   | LEU | X | 376 | 49.344 | 8.579  | 40.993 | 0.00 | 0.00 |
| ATOM | 5636 | CB   | LEU | X | 376 | 47.428 | 8.117  | 41.901 | 0.00 | 0.00 |
| ATOM | 5637 | HB2  | LEU | X | 376 | 47.906 | 7.703  | 42.788 | 0.00 | 0.00 |
| ATOM | 5638 | HB3  | LEU | X | 376 | 46.538 | 8.698  | 42.142 | 0.00 | 0.00 |
| ATOM | 5639 | CG   | LEU | X | 376 | 47.111 | 6.880  | 41.013 | 0.00 | 0.00 |
| ATOM | 5640 | HG   | LEU | X | 376 | 46.556 | 7.285  | 40.167 | 0.00 | 0.00 |
| ATOM | 5641 | CD1  | LEU | X | 376 | 48.350 | 6.133  | 40.495 | 0.00 | 0.00 |
| ATOM | 5642 | HD11 | LEU | X | 376 | 48.867 | 5.800  | 41.395 | 0.00 | 0.00 |
| ATOM | 5643 | HD12 | LEU | X | 376 | 48.081 | 5.220  | 39.963 | 0.00 | 0.00 |
| ATOM | 5644 | HD13 | LEU | X | 376 | 49.074 | 6.708  | 39.917 | 0.00 | 0.00 |
| ATOM | 5645 | CD2  | LEU | X | 376 | 46.219 | 5.860  | 41.783 | 0.00 | 0.00 |
| ATOM | 5646 | HD21 | LEU | X | 376 | 45.958 | 5.112  | 41.035 | 0.00 | 0.00 |
| ATOM | 5647 | HD22 | LEU | X | 376 | 46.673 | 5.453  | 42.687 | 0.00 | 0.00 |
| ATOM | 5648 | HD23 | LEU | X | 376 | 45.369 | 6.421  | 42.171 | 0.00 | 0.00 |
| ATOM | 5649 | C    | LEU | X | 376 | 47.913 | 9.687  | 39.869 | 0.00 | 0.00 |
| ATOM | 5650 | O    | LEU | X | 376 | 48.142 | 9.154  | 38.761 | 0.00 | 0.00 |
| ATOM | 5651 | N    | HIE | X | 377 | 47.166 | 10.778 | 40.047 | 0.00 | 0.00 |
| ATOM | 5652 | H    | HIE | X | 377 | 47.179 | 11.231 | 40.950 | 0.00 | 0.00 |
| ATOM | 5653 | CA   | HIE | X | 377 | 46.474 | 11.361 | 38.914 | 0.00 | 0.00 |
| ATOM | 5654 | HA   | HIE | X | 377 | 46.121 | 10.514 | 38.326 | 0.00 | 0.00 |
| ATOM | 5655 | CB   | HIE | X | 377 | 45.314 | 12.206 | 39.298 | 0.00 | 0.00 |
| ATOM | 5656 | HB2  | HIE | X | 377 | 44.724 | 11.602 | 39.987 | 0.00 | 0.00 |
| ATOM | 5657 | HB3  | HIE | X | 377 | 45.700 | 13.098 | 39.792 | 0.00 | 0.00 |
| ATOM | 5658 | CG   | HIE | X | 377 | 44.345 | 12.531 | 38.140 | 0.00 | 0.00 |
| ATOM | 5659 | ND1  | HIE | X | 377 | 44.243 | 13.799 | 37.666 | 0.00 | 0.00 |
| ATOM | 5660 | CE1  | HIE | X | 377 | 43.475 | 13.701 | 36.480 | 0.00 | 0.00 |
| ATOM | 5661 | HE1  | HIE | X | 377 | 43.141 | 14.576 | 35.942 | 0.00 | 0.00 |
| ATOM | 5662 | NE2  | HIE | X | 377 | 43.184 | 12.423 | 36.251 | 0.00 | 0.00 |
| ATOM | 5663 | HE2  | HIE | X | 377 | 42.627 | 12.057 | 35.492 | 0.00 | 0.00 |
| ATOM | 5664 | CD2  | HIE | X | 377 | 43.730 | 11.707 | 37.271 | 0.00 | 0.00 |
| ATOM | 5665 | HD2  | HIE | X | 377 | 43.689 | 10.635 | 37.399 | 0.00 | 0.00 |
| ATOM | 5666 | C    | HIE | X | 377 | 47.482 | 12.162 | 37.948 | 0.00 | 0.00 |
| ATOM | 5667 | O    | HIE | X | 377 | 47.365 | 12.030 | 36.747 | 0.00 | 0.00 |
| ATOM | 5668 | N    | TYR | X | 378 | 48.446 | 12.906 | 38.616 | 0.00 | 0.00 |



|      |      |      |     |   |     |        |        |        |      |      |
|------|------|------|-----|---|-----|--------|--------|--------|------|------|
| ATOM | 5669 | H    | TYR | X | 378 | 48.246 | 12.936 | 39.605 | 0.00 | 0.00 |
| ATOM | 5670 | CA   | TYR | X | 378 | 49.468 | 13.743 | 38.055 | 0.00 | 0.00 |
| ATOM | 5671 | HA   | TYR | X | 378 | 49.109 | 14.154 | 37.112 | 0.00 | 0.00 |
| ATOM | 5672 | CB   | TYR | X | 378 | 49.707 | 14.880 | 39.018 | 0.00 | 0.00 |
| ATOM | 5673 | HB2  | TYR | X | 378 | 49.939 | 14.523 | 40.021 | 0.00 | 0.00 |
| ATOM | 5674 | HB3  | TYR | X | 378 | 50.571 | 15.508 | 38.800 | 0.00 | 0.00 |
| ATOM | 5675 | CG   | TYR | X | 378 | 48.546 | 15.917 | 39.003 | 0.00 | 0.00 |
| ATOM | 5676 | CD1  | TYR | X | 378 | 48.641 | 16.968 | 38.106 | 0.00 | 0.00 |
| ATOM | 5677 | HD1  | TYR | X | 378 | 49.478 | 17.093 | 37.435 | 0.00 | 0.00 |
| ATOM | 5678 | CE1  | TYR | X | 378 | 47.672 | 17.954 | 38.020 | 0.00 | 0.00 |
| ATOM | 5679 | HE1  | TYR | X | 378 | 47.935 | 18.868 | 37.509 | 0.00 | 0.00 |
| ATOM | 5680 | CZ   | TYR | X | 378 | 46.523 | 17.868 | 38.793 | 0.00 | 0.00 |
| ATOM | 5681 | OH   | TYR | X | 378 | 45.628 | 18.872 | 38.767 | 0.00 | 0.00 |
| ATOM | 5682 | HH   | TYR | X | 378 | 45.905 | 19.652 | 38.281 | 0.00 | 0.00 |
| ATOM | 5683 | CE2  | TYR | X | 378 | 46.351 | 16.789 | 39.690 | 0.00 | 0.00 |
| ATOM | 5684 | HE2  | TYR | X | 378 | 45.665 | 16.852 | 40.522 | 0.00 | 0.00 |
| ATOM | 5685 | CD2  | TYR | X | 378 | 47.345 | 15.789 | 39.689 | 0.00 | 0.00 |
| ATOM | 5686 | HD2  | TYR | X | 378 | 47.166 | 15.023 | 40.430 | 0.00 | 0.00 |
| ATOM | 5687 | C    | TYR | X | 378 | 50.812 | 13.017 | 37.692 | 0.00 | 0.00 |
| ATOM | 5688 | O    | TYR | X | 378 | 51.398 | 13.312 | 36.681 | 0.00 | 0.00 |
| ATOM | 5689 | N    | THR | X | 379 | 51.333 | 12.196 | 38.600 | 0.00 | 0.00 |
| ATOM | 5690 | H    | THR | X | 379 | 50.825 | 11.914 | 39.427 | 0.00 | 0.00 |
| ATOM | 5691 | CA   | THR | X | 379 | 52.688 | 11.771 | 38.469 | 0.00 | 0.00 |
| ATOM | 5692 | HA   | THR | X | 379 | 53.265 | 12.556 | 37.981 | 0.00 | 0.00 |
| ATOM | 5693 | CB   | THR | X | 379 | 53.362 | 11.633 | 39.864 | 0.00 | 0.00 |
| ATOM | 5694 | HB   | THR | X | 379 | 53.127 | 10.726 | 40.421 | 0.00 | 0.00 |
| ATOM | 5695 | CG2  | THR | X | 379 | 54.876 | 11.670 | 39.783 | 0.00 | 0.00 |
| ATOM | 5696 | HG21 | THR | X | 379 | 55.345 | 12.520 | 39.288 | 0.00 | 0.00 |
| ATOM | 5697 | HG22 | THR | X | 379 | 55.199 | 11.725 | 40.823 | 0.00 | 0.00 |
| ATOM | 5698 | HG23 | THR | X | 379 | 55.257 | 10.727 | 39.390 | 0.00 | 0.00 |
| ATOM | 5699 | OG1  | THR | X | 379 | 52.869 | 12.628 | 40.768 | 0.00 | 0.00 |
| ATOM | 5700 | HG1  | THR | X | 379 | 52.178 | 12.330 | 41.364 | 0.00 | 0.00 |
| ATOM | 5701 | C    | THR | X | 379 | 52.795 | 10.366 | 37.687 | 0.00 | 0.00 |
| ATOM | 5702 | O    | THR | X | 379 | 52.066 | 9.402  | 37.969 | 0.00 | 0.00 |
| ATOM | 5703 | N    | ASP | X | 380 | 53.698 | 10.284 | 36.694 | 0.00 | 0.00 |
| ATOM | 5704 | H    | ASP | X | 380 | 54.147 | 11.157 | 36.455 | 0.00 | 0.00 |
| ATOM | 5705 | CA   | ASP | X | 380 | 53.929 | 9.143  | 35.902 | 0.00 | 0.00 |
| ATOM | 5706 | HA   | ASP | X | 380 | 52.925 | 8.745  | 35.753 | 0.00 | 0.00 |
| ATOM | 5707 | CB   | ASP | X | 380 | 54.416 | 9.640  | 34.588 | 0.00 | 0.00 |
| ATOM | 5708 | HB2  | ASP | X | 380 | 53.765 | 10.438 | 34.231 | 0.00 | 0.00 |
| ATOM | 5709 | HB3  | ASP | X | 380 | 55.375 | 10.154 | 34.651 | 0.00 | 0.00 |
| ATOM | 5710 | CG   | ASP | X | 380 | 54.516 | 8.652  | 33.487 | 0.00 | 0.00 |
| ATOM | 5711 | OD1  | ASP | X | 380 | 55.632 | 8.139  | 33.252 | 0.00 | 0.00 |
| ATOM | 5712 | OD2  | ASP | X | 380 | 53.487 | 8.280  | 32.908 | 0.00 | 0.00 |
| ATOM | 5713 | C    | ASP | X | 380 | 54.913 | 8.123  | 36.496 | 0.00 | 0.00 |
| ATOM | 5714 | O    | ASP | X | 380 | 55.857 | 8.516  | 37.180 | 0.00 | 0.00 |
| ATOM | 5715 | N    | TRP | X | 381 | 54.740 | 6.809  | 36.179 | 0.00 | 0.00 |
| ATOM | 5716 | H    | TRP | X | 381 | 53.941 | 6.531  | 35.628 | 0.00 | 0.00 |
| ATOM | 5717 | CA   | TRP | X | 381 | 55.363 | 5.725  | 36.887 | 0.00 | 0.00 |
| ATOM | 5718 | HA   | TRP | X | 381 | 55.894 | 6.150  | 37.739 | 0.00 | 0.00 |
| ATOM | 5719 | CB   | TRP | X | 381 | 54.379 | 4.701  | 37.446 | 0.00 | 0.00 |
| ATOM | 5720 | HB2  | TRP | X | 381 | 53.838 | 4.229  | 36.626 | 0.00 | 0.00 |
| ATOM | 5721 | HB3  | TRP | X | 381 | 54.943 | 3.936  | 37.979 | 0.00 | 0.00 |
| ATOM | 5722 | CG   | TRP | X | 381 | 53.484 | 5.425  | 38.388 | 0.00 | 0.00 |
| ATOM | 5723 | CD1  | TRP | X | 381 | 52.244 | 5.867  | 38.271 | 0.00 | 0.00 |
| ATOM | 5724 | HD1  | TRP | X | 381 | 51.754 | 5.804  | 37.311 | 0.00 | 0.00 |
| ATOM | 5725 | NE1  | TRP | X | 381 | 51.793 | 6.378  | 39.455 | 0.00 | 0.00 |
| ATOM | 5726 | HE1  | TRP | X | 381 | 50.867 | 6.749  | 39.611 | 0.00 | 0.00 |
| ATOM | 5727 | CE2  | TRP | X | 381 | 52.730 | 6.261  | 40.439 | 0.00 | 0.00 |
| ATOM | 5728 | CZ2  | TRP | X | 381 | 52.637 | 6.590  | 41.817 | 0.00 | 0.00 |
| ATOM | 5729 | HZ2  | TRP | X | 381 | 51.796 | 7.118  | 42.241 | 0.00 | 0.00 |
| ATOM | 5730 | CH2  | TRP | X | 381 | 53.768 | 6.177  | 42.610 | 0.00 | 0.00 |
| ATOM | 5731 | HH2  | TRP | X | 381 | 53.658 | 6.286  | 43.679 | 0.00 | 0.00 |
| ATOM | 5732 | CZ3  | TRP | X | 381 | 54.891 | 5.500  | 42.075 | 0.00 | 0.00 |
| ATOM | 5733 | HZ3  | TRP | X | 381 | 55.663 | 5.184  | 42.760 | 0.00 | 0.00 |
| ATOM | 5734 | CE3  | TRP | X | 381 | 54.875 | 5.239  | 40.670 | 0.00 | 0.00 |
| ATOM | 5735 | HE3  | TRP | X | 381 | 55.729 | 4.820  | 40.158 | 0.00 | 0.00 |
| ATOM | 5736 | CD2  | TRP | X | 381 | 53.782 | 5.528  | 39.845 | 0.00 | 0.00 |
| ATOM | 5737 | C    | TRP | X | 381 | 56.525 | 5.036  | 36.058 | 0.00 | 0.00 |
| ATOM | 5738 | O    | TRP | X | 381 | 57.193 | 4.119  | 36.615 | 0.00 | 0.00 |

|      |      |      |     |   |     |        |        |        |      |      |
|------|------|------|-----|---|-----|--------|--------|--------|------|------|
| ATOM | 5739 | N    | LEU | X | 382 | 56.832 | 5.439  | 34.811 | 0.00 | 0.00 |
| ATOM | 5740 | H    | LEU | X | 382 | 56.346 | 6.218  | 34.391 | 0.00 | 0.00 |
| ATOM | 5741 | CA   | LEU | X | 382 | 58.006 | 4.918  | 34.053 | 0.00 | 0.00 |
| ATOM | 5742 | HA   | LEU | X | 382 | 57.963 | 3.829  | 34.057 | 0.00 | 0.00 |
| ATOM | 5743 | CB   | LEU | X | 382 | 58.047 | 5.545  | 32.666 | 0.00 | 0.00 |
| ATOM | 5744 | HB2  | LEU | X | 382 | 57.132 | 5.166  | 32.212 | 0.00 | 0.00 |
| ATOM | 5745 | HB3  | LEU | X | 382 | 58.024 | 6.629  | 32.770 | 0.00 | 0.00 |
| ATOM | 5746 | CG   | LEU | X | 382 | 59.220 | 5.105  | 31.716 | 0.00 | 0.00 |
| ATOM | 5747 | HG   | LEU | X | 382 | 60.149 | 5.404  | 32.201 | 0.00 | 0.00 |
| ATOM | 5748 | CD1  | LEU | X | 382 | 59.432 | 3.604  | 31.499 | 0.00 | 0.00 |
| ATOM | 5749 | HD11 | LEU | X | 382 | 60.306 | 3.361  | 30.894 | 0.00 | 0.00 |
| ATOM | 5750 | HD12 | LEU | X | 382 | 59.669 | 3.145  | 32.459 | 0.00 | 0.00 |
| ATOM | 5751 | HD13 | LEU | X | 382 | 58.557 | 3.196  | 30.993 | 0.00 | 0.00 |
| ATOM | 5752 | CD2  | LEU | X | 382 | 59.164 | 5.894  | 30.405 | 0.00 | 0.00 |
| ATOM | 5753 | HD21 | LEU | X | 382 | 59.940 | 5.587  | 29.704 | 0.00 | 0.00 |
| ATOM | 5754 | HD22 | LEU | X | 382 | 58.227 | 5.674  | 29.892 | 0.00 | 0.00 |
| ATOM | 5755 | HD23 | LEU | X | 382 | 59.179 | 6.957  | 30.644 | 0.00 | 0.00 |
| ATOM | 5756 | C    | LEU | X | 382 | 59.301 | 5.341  | 34.719 | 0.00 | 0.00 |
| ATOM | 5757 | O    | LEU | X | 382 | 60.084 | 4.459  | 35.182 | 0.00 | 0.00 |
| ATOM | 5758 | N    | HIE | X | 383 | 59.582 | 6.597  | 34.921 | 0.00 | 0.00 |
| ATOM | 5759 | H    | HIE | X | 383 | 58.884 | 7.268  | 34.634 | 0.00 | 0.00 |
| ATOM | 5760 | CA   | HIE | X | 383 | 60.745 | 7.221  | 35.640 | 0.00 | 0.00 |
| ATOM | 5761 | HA   | HIE | X | 383 | 61.478 | 6.513  | 36.025 | 0.00 | 0.00 |
| ATOM | 5762 | CB   | HIE | X | 383 | 61.433 | 8.157  | 34.592 | 0.00 | 0.00 |
| ATOM | 5763 | HB2  | HIE | X | 383 | 60.783 | 9.007  | 34.384 | 0.00 | 0.00 |
| ATOM | 5764 | HB3  | HIE | X | 383 | 62.357 | 8.563  | 35.002 | 0.00 | 0.00 |
| ATOM | 5765 | CG   | HIE | X | 383 | 61.902 | 7.564  | 33.299 | 0.00 | 0.00 |
| ATOM | 5766 | ND1  | HIE | X | 383 | 61.984 | 8.193  | 32.066 | 0.00 | 0.00 |
| ATOM | 5767 | CE1  | HIE | X | 383 | 62.276 | 7.217  | 31.169 | 0.00 | 0.00 |
| ATOM | 5768 | HE1  | HIE | X | 383 | 62.511 | 7.342  | 30.122 | 0.00 | 0.00 |
| ATOM | 5769 | NE2  | HIE | X | 383 | 62.446 | 6.086  | 31.774 | 0.00 | 0.00 |
| ATOM | 5770 | HE2  | HIE | X | 383 | 62.531 | 5.159  | 31.382 | 0.00 | 0.00 |
| ATOM | 5771 | CD2  | HIE | X | 383 | 62.324 | 6.304  | 33.127 | 0.00 | 0.00 |
| ATOM | 5772 | HD2  | HIE | X | 383 | 62.431 | 5.635  | 33.968 | 0.00 | 0.00 |
| ATOM | 5773 | C    | HIE | X | 383 | 60.199 | 8.048  | 36.845 | 0.00 | 0.00 |
| ATOM | 5774 | O    | HIE | X | 383 | 59.941 | 9.267  | 36.810 | 0.00 | 0.00 |
| ATOM | 5775 | N    | PRO | X | 384 | 59.914 | 7.331  | 37.942 | 0.00 | 0.00 |
| ATOM | 5776 | CD   | PRO | X | 384 | 59.966 | 5.926  | 38.175 | 0.00 | 0.00 |
| ATOM | 5777 | HD2  | PRO | X | 384 | 60.984 | 5.608  | 37.952 | 0.00 | 0.00 |
| ATOM | 5778 | HD3  | PRO | X | 384 | 59.283 | 5.392  | 37.514 | 0.00 | 0.00 |
| ATOM | 5779 | CG   | PRO | X | 384 | 59.587 | 5.681  | 39.655 | 0.00 | 0.00 |
| ATOM | 5780 | HG2  | PRO | X | 384 | 60.490 | 5.870  | 40.237 | 0.00 | 0.00 |
| ATOM | 5781 | HG3  | PRO | X | 384 | 59.107 | 4.704  | 39.706 | 0.00 | 0.00 |
| ATOM | 5782 | CB   | PRO | X | 384 | 58.540 | 6.740  | 39.790 | 0.00 | 0.00 |
| ATOM | 5783 | HB2  | PRO | X | 384 | 58.306 | 6.841  | 40.849 | 0.00 | 0.00 |
| ATOM | 5784 | HB3  | PRO | X | 384 | 57.671 | 6.391  | 39.232 | 0.00 | 0.00 |
| ATOM | 5785 | CA   | PRO | X | 384 | 59.278 | 7.907  | 39.095 | 0.00 | 0.00 |
| ATOM | 5786 | HA   | PRO | X | 384 | 58.490 | 8.611  | 38.828 | 0.00 | 0.00 |
| ATOM | 5787 | C    | PRO | X | 384 | 60.256 | 8.625  | 40.069 | 0.00 | 0.00 |
| ATOM | 5788 | O    | PRO | X | 384 | 59.713 | 9.148  | 40.981 | 0.00 | 0.00 |
| ATOM | 5789 | N    | GLU | X | 385 | 61.561 | 8.760  | 39.795 | 0.00 | 0.00 |
| ATOM | 5790 | H    | GLU | X | 385 | 61.855 | 8.223  | 38.992 | 0.00 | 0.00 |
| ATOM | 5791 | CA   | GLU | X | 385 | 62.556 | 9.473  | 40.595 | 0.00 | 0.00 |
| ATOM | 5792 | HA   | GLU | X | 385 | 61.889 | 10.064 | 41.221 | 0.00 | 0.00 |
| ATOM | 5793 | CB   | GLU | X | 385 | 63.341 | 8.445  | 41.308 | 0.00 | 0.00 |
| ATOM | 5794 | HB2  | GLU | X | 385 | 63.891 | 7.817  | 40.607 | 0.00 | 0.00 |
| ATOM | 5795 | HB3  | GLU | X | 385 | 64.154 | 8.995  | 41.780 | 0.00 | 0.00 |
| ATOM | 5796 | CG   | GLU | X | 385 | 62.579 | 7.575  | 42.336 | 0.00 | 0.00 |
| ATOM | 5797 | HG2  | GLU | X | 385 | 62.189 | 8.227  | 43.118 | 0.00 | 0.00 |
| ATOM | 5798 | HG3  | GLU | X | 385 | 61.752 | 7.047  | 41.861 | 0.00 | 0.00 |
| ATOM | 5799 | CD   | GLU | X | 385 | 63.659 | 6.676  | 42.987 | 0.00 | 0.00 |
| ATOM | 5800 | OE1  | GLU | X | 385 | 63.862 | 5.531  | 42.462 | 0.00 | 0.00 |
| ATOM | 5801 | OE2  | GLU | X | 385 | 64.410 | 7.189  | 43.902 | 0.00 | 0.00 |
| ATOM | 5802 | C    | GLU | X | 385 | 63.294 | 10.578 | 39.807 | 0.00 | 0.00 |
| ATOM | 5803 | O    | GLU | X | 385 | 64.499 | 10.870 | 40.091 | 0.00 | 0.00 |
| ATOM | 5804 | N    | ASP | X | 386 | 62.694 | 11.232 | 38.779 | 0.00 | 0.00 |
| ATOM | 5805 | H    | ASP | X | 386 | 61.788 | 10.886 | 38.498 | 0.00 | 0.00 |
| ATOM | 5806 | CA   | ASP | X | 386 | 63.294 | 12.228 | 37.915 | 0.00 | 0.00 |
| ATOM | 5807 | HA   | ASP | X | 386 | 64.356 | 11.995 | 37.995 | 0.00 | 0.00 |
| ATOM | 5808 | CB   | ASP | X | 386 | 62.876 | 12.144 | 36.443 | 0.00 | 0.00 |

|      |      |      |     |   |     |        |        |        |      |      |
|------|------|------|-----|---|-----|--------|--------|--------|------|------|
| ATOM | 5809 | HB2  | ASP | X | 386 | 62.759 | 11.136 | 36.045 | 0.00 | 0.00 |
| ATOM | 5810 | HB3  | ASP | X | 386 | 61.914 | 12.606 | 36.224 | 0.00 | 0.00 |
| ATOM | 5811 | CG   | ASP | X | 386 | 63.961 | 12.878 | 35.527 | 0.00 | 0.00 |
| ATOM | 5812 | OD1  | ASP | X | 386 | 64.113 | 14.102 | 35.705 | 0.00 | 0.00 |
| ATOM | 5813 | OD2  | ASP | X | 386 | 64.604 | 12.204 | 34.676 | 0.00 | 0.00 |
| ATOM | 5814 | C    | ASP | X | 386 | 62.997 | 13.632 | 38.464 | 0.00 | 0.00 |
| ATOM | 5815 | O    | ASP | X | 386 | 61.781 | 13.906 | 38.596 | 0.00 | 0.00 |
| ATOM | 5816 | N    | PRO | X | 387 | 63.973 | 14.480 | 38.852 | 0.00 | 0.00 |
| ATOM | 5817 | CD   | PRO | X | 387 | 65.355 | 14.137 | 38.915 | 0.00 | 0.00 |
| ATOM | 5818 | HD2  | PRO | X | 387 | 65.812 | 14.231 | 37.931 | 0.00 | 0.00 |
| ATOM | 5819 | HD3  | PRO | X | 387 | 65.464 | 13.122 | 39.299 | 0.00 | 0.00 |
| ATOM | 5820 | CG   | PRO | X | 387 | 66.028 | 15.184 | 39.822 | 0.00 | 0.00 |
| ATOM | 5821 | HG2  | PRO | X | 387 | 67.089 | 15.315 | 39.611 | 0.00 | 0.00 |
| ATOM | 5822 | HG3  | PRO | X | 387 | 65.812 | 14.925 | 40.859 | 0.00 | 0.00 |
| ATOM | 5823 | CB   | PRO | X | 387 | 65.142 | 16.380 | 39.516 | 0.00 | 0.00 |
| ATOM | 5824 | HB2  | PRO | X | 387 | 65.387 | 16.801 | 38.541 | 0.00 | 0.00 |
| ATOM | 5825 | HB3  | PRO | X | 387 | 65.033 | 17.140 | 40.289 | 0.00 | 0.00 |
| ATOM | 5826 | CA   | PRO | X | 387 | 63.768 | 15.765 | 39.377 | 0.00 | 0.00 |
| ATOM | 5827 | HA   | PRO | X | 387 | 63.395 | 15.592 | 40.387 | 0.00 | 0.00 |
| ATOM | 5828 | C    | PRO | X | 387 | 62.904 | 16.692 | 38.595 | 0.00 | 0.00 |
| ATOM | 5829 | O    | PRO | X | 387 | 62.185 | 17.503 | 39.118 | 0.00 | 0.00 |
| ATOM | 5830 | N    | ALA | X | 388 | 62.970 | 16.533 | 37.281 | 0.00 | 0.00 |
| ATOM | 5831 | H    | ALA | X | 388 | 63.608 | 15.839 | 36.918 | 0.00 | 0.00 |
| ATOM | 5832 | CA   | ALA | X | 388 | 62.206 | 17.278 | 36.304 | 0.00 | 0.00 |
| ATOM | 5833 | HA   | ALA | X | 388 | 62.195 | 18.329 | 36.593 | 0.00 | 0.00 |
| ATOM | 5834 | CB   | ALA | X | 388 | 62.890 | 17.124 | 34.905 | 0.00 | 0.00 |
| ATOM | 5835 | HB1  | ALA | X | 388 | 63.926 | 17.451 | 34.989 | 0.00 | 0.00 |
| ATOM | 5836 | HB2  | ALA | X | 388 | 62.996 | 16.089 | 34.579 | 0.00 | 0.00 |
| ATOM | 5837 | HB3  | ALA | X | 388 | 62.292 | 17.726 | 34.220 | 0.00 | 0.00 |
| ATOM | 5838 | C    | ALA | X | 388 | 60.719 | 16.866 | 36.300 | 0.00 | 0.00 |
| ATOM | 5839 | O    | ALA | X | 388 | 59.896 | 17.768 | 36.451 | 0.00 | 0.00 |
| ATOM | 5840 | N    | ARG | X | 389 | 60.381 | 15.609 | 36.071 | 0.00 | 0.00 |
| ATOM | 5841 | H    | ARG | X | 389 | 61.116 | 14.961 | 35.828 | 0.00 | 0.00 |
| ATOM | 5842 | CA   | ARG | X | 389 | 58.990 | 15.249 | 36.103 | 0.00 | 0.00 |
| ATOM | 5843 | HA   | ARG | X | 389 | 58.515 | 15.794 | 35.288 | 0.00 | 0.00 |
| ATOM | 5844 | CB   | ARG | X | 389 | 58.828 | 13.739 | 35.848 | 0.00 | 0.00 |
| ATOM | 5845 | HB2  | ARG | X | 389 | 58.996 | 13.104 | 36.718 | 0.00 | 0.00 |
| ATOM | 5846 | HB3  | ARG | X | 389 | 57.753 | 13.626 | 35.708 | 0.00 | 0.00 |
| ATOM | 5847 | CG   | ARG | X | 389 | 59.488 | 13.190 | 34.610 | 0.00 | 0.00 |
| ATOM | 5848 | HG2  | ARG | X | 389 | 59.041 | 13.751 | 33.790 | 0.00 | 0.00 |
| ATOM | 5849 | HG3  | ARG | X | 389 | 60.570 | 13.313 | 34.648 | 0.00 | 0.00 |
| ATOM | 5850 | CD   | ARG | X | 389 | 59.165 | 11.716 | 34.467 | 0.00 | 0.00 |
| ATOM | 5851 | HD2  | ARG | X | 389 | 59.518 | 11.203 | 35.361 | 0.00 | 0.00 |
| ATOM | 5852 | HD3  | ARG | X | 389 | 58.081 | 11.621 | 34.395 | 0.00 | 0.00 |
| ATOM | 5853 | NE   | ARG | X | 389 | 59.872 | 11.233 | 33.236 | 0.00 | 0.00 |
| ATOM | 5854 | HE   | ARG | X | 389 | 60.821 | 10.943 | 33.424 | 0.00 | 0.00 |
| ATOM | 5855 | CZ   | ARG | X | 389 | 59.370 | 11.030 | 32.050 | 0.00 | 0.00 |
| ATOM | 5856 | NH1  | ARG | X | 389 | 58.189 | 11.384 | 31.744 | 0.00 | 0.00 |
| ATOM | 5857 | HH11 | ARG | X | 389 | 57.671 | 11.975 | 32.379 | 0.00 | 0.00 |
| ATOM | 5858 | HH12 | ARG | X | 389 | 57.731 | 11.074 | 30.899 | 0.00 | 0.00 |
| ATOM | 5859 | NH2  | ARG | X | 389 | 60.064 | 10.431 | 31.198 | 0.00 | 0.00 |
| ATOM | 5860 | HH21 | ARG | X | 389 | 60.953 | 10.064 | 31.506 | 0.00 | 0.00 |
| ATOM | 5861 | HH22 | ARG | X | 389 | 59.908 | 10.458 | 30.201 | 0.00 | 0.00 |
| ATOM | 5862 | C    | ARG | X | 389 | 58.287 | 15.604 | 37.426 | 0.00 | 0.00 |
| ATOM | 5863 | O    | ARG | X | 389 | 57.076 | 15.801 | 37.446 | 0.00 | 0.00 |
| ATOM | 5864 | N    | LEU | X | 390 | 59.006 | 15.714 | 38.540 | 0.00 | 0.00 |
| ATOM | 5865 | H    | LEU | X | 390 | 60.007 | 15.580 | 38.545 | 0.00 | 0.00 |
| ATOM | 5866 | CA   | LEU | X | 390 | 58.518 | 15.844 | 39.881 | 0.00 | 0.00 |
| ATOM | 5867 | HA   | LEU | X | 390 | 57.524 | 15.404 | 39.956 | 0.00 | 0.00 |
| ATOM | 5868 | CB   | LEU | X | 390 | 59.415 | 15.139 | 40.958 | 0.00 | 0.00 |
| ATOM | 5869 | HB2  | LEU | X | 390 | 60.461 | 15.434 | 40.872 | 0.00 | 0.00 |
| ATOM | 5870 | HB3  | LEU | X | 390 | 59.073 | 15.443 | 41.947 | 0.00 | 0.00 |
| ATOM | 5871 | CG   | LEU | X | 390 | 59.493 | 13.587 | 40.914 | 0.00 | 0.00 |
| ATOM | 5872 | HG   | LEU | X | 390 | 59.988 | 13.288 | 39.989 | 0.00 | 0.00 |
| ATOM | 5873 | CD1  | LEU | X | 390 | 60.457 | 13.123 | 42.103 | 0.00 | 0.00 |
| ATOM | 5874 | HD11 | LEU | X | 390 | 59.902 | 13.298 | 43.025 | 0.00 | 0.00 |
| ATOM | 5875 | HD12 | LEU | X | 390 | 60.773 | 12.083 | 42.022 | 0.00 | 0.00 |
| ATOM | 5876 | HD13 | LEU | X | 390 | 61.346 | 13.754 | 42.067 | 0.00 | 0.00 |
| ATOM | 5877 | CD2  | LEU | X | 390 | 58.201 | 12.847 | 41.062 | 0.00 | 0.00 |
| ATOM | 5878 | HD21 | LEU | X | 390 | 58.511 | 11.803 | 41.013 | 0.00 | 0.00 |

|      |      |      |     |   |     |        |        |        |      |      |
|------|------|------|-----|---|-----|--------|--------|--------|------|------|
| ATOM | 5879 | HD22 | LEU | X | 390 | 57.676 | 13.122 | 41.977 | 0.00 | 0.00 |
| ATOM | 5880 | HD23 | LEU | X | 390 | 57.503 | 13.063 | 40.253 | 0.00 | 0.00 |
| ATOM | 5881 | C    | LEU | X | 390 | 58.237 | 17.332 | 40.207 | 0.00 | 0.00 |
| ATOM | 5882 | O    | LEU | X | 390 | 57.178 | 17.687 | 40.619 | 0.00 | 0.00 |
| ATOM | 5883 | N    | ARG | X | 391 | 59.223 | 18.163 | 39.799 | 0.00 | 0.00 |
| ATOM | 5884 | H    | ARG | X | 391 | 60.111 | 17.773 | 39.516 | 0.00 | 0.00 |
| ATOM | 5885 | CA   | ARG | X | 391 | 59.115 | 19.639 | 39.903 | 0.00 | 0.00 |
| ATOM | 5886 | HA   | ARG | X | 391 | 58.941 | 19.931 | 40.939 | 0.00 | 0.00 |
| ATOM | 5887 | CB   | ARG | X | 391 | 60.515 | 20.156 | 39.368 | 0.00 | 0.00 |
| ATOM | 5888 | HB2  | ARG | X | 391 | 61.222 | 19.628 | 40.009 | 0.00 | 0.00 |
| ATOM | 5889 | HB3  | ARG | X | 391 | 60.835 | 19.777 | 38.398 | 0.00 | 0.00 |
| ATOM | 5890 | CG   | ARG | X | 391 | 60.649 | 21.670 | 39.430 | 0.00 | 0.00 |
| ATOM | 5891 | HG2  | ARG | X | 391 | 59.824 | 22.069 | 38.840 | 0.00 | 0.00 |
| ATOM | 5892 | HG3  | ARG | X | 391 | 60.492 | 21.929 | 40.477 | 0.00 | 0.00 |
| ATOM | 5893 | CD   | ARG | X | 391 | 62.009 | 22.251 | 39.015 | 0.00 | 0.00 |
| ATOM | 5894 | HD2  | ARG | X | 391 | 61.904 | 22.229 | 37.930 | 0.00 | 0.00 |
| ATOM | 5895 | HD3  | ARG | X | 391 | 62.142 | 23.276 | 39.363 | 0.00 | 0.00 |
| ATOM | 5896 | NE   | ARG | X | 391 | 63.193 | 21.474 | 39.502 | 0.00 | 0.00 |
| ATOM | 5897 | HE   | ARG | X | 391 | 63.294 | 21.374 | 40.502 | 0.00 | 0.00 |
| ATOM | 5898 | CZ   | ARG | X | 391 | 64.229 | 21.295 | 38.758 | 0.00 | 0.00 |
| ATOM | 5899 | NH1  | ARG | X | 391 | 64.267 | 21.597 | 37.488 | 0.00 | 0.00 |
| ATOM | 5900 | HH11 | ARG | X | 391 | 63.374 | 21.718 | 37.032 | 0.00 | 0.00 |
| ATOM | 5901 | HH12 | ARG | X | 391 | 65.143 | 21.651 | 36.988 | 0.00 | 0.00 |
| ATOM | 5902 | NH2  | ARG | X | 391 | 65.336 | 21.011 | 39.339 | 0.00 | 0.00 |
| ATOM | 5903 | HH21 | ARG | X | 391 | 65.304 | 20.753 | 40.315 | 0.00 | 0.00 |
| ATOM | 5904 | HH22 | ARG | X | 391 | 66.199 | 20.922 | 38.823 | 0.00 | 0.00 |
| ATOM | 5905 | C    | ARG | X | 391 | 57.997 | 20.096 | 38.930 | 0.00 | 0.00 |
| ATOM | 5906 | O    | ARG | X | 391 | 57.175 | 20.984 | 39.298 | 0.00 | 0.00 |
| ATOM | 5907 | N    | GLU | X | 392 | 57.952 | 19.586 | 37.676 | 0.00 | 0.00 |
| ATOM | 5908 | H    | GLU | X | 392 | 58.760 | 19.005 | 37.505 | 0.00 | 0.00 |
| ATOM | 5909 | CA   | GLU | X | 392 | 57.010 | 19.791 | 36.617 | 0.00 | 0.00 |
| ATOM | 5910 | HA   | GLU | X | 392 | 57.082 | 20.868 | 36.464 | 0.00 | 0.00 |
| ATOM | 5911 | CB   | GLU | X | 392 | 57.408 | 19.138 | 35.282 | 0.00 | 0.00 |
| ATOM | 5912 | HB2  | GLU | X | 392 | 58.494 | 19.211 | 35.220 | 0.00 | 0.00 |
| ATOM | 5913 | HB3  | GLU | X | 392 | 57.205 | 18.067 | 35.251 | 0.00 | 0.00 |
| ATOM | 5914 | CG   | GLU | X | 392 | 56.801 | 19.837 | 34.055 | 0.00 | 0.00 |
| ATOM | 5915 | HG2  | GLU | X | 392 | 57.024 | 19.276 | 33.147 | 0.00 | 0.00 |
| ATOM | 5916 | HG3  | GLU | X | 392 | 55.713 | 19.780 | 34.021 | 0.00 | 0.00 |
| ATOM | 5917 | CD   | GLU | X | 392 | 57.321 | 21.277 | 33.954 | 0.00 | 0.00 |
| ATOM | 5918 | OE1  | GLU | X | 392 | 56.541 | 22.172 | 33.790 | 0.00 | 0.00 |
| ATOM | 5919 | OE2  | GLU | X | 392 | 58.576 | 21.404 | 34.071 | 0.00 | 0.00 |
| ATOM | 5920 | C    | GLU | X | 392 | 55.617 | 19.385 | 37.047 | 0.00 | 0.00 |
| ATOM | 5921 | O    | GLU | X | 392 | 54.709 | 20.234 | 37.043 | 0.00 | 0.00 |
| ATOM | 5922 | N    | ALA | X | 393 | 55.401 | 18.133 | 37.508 | 0.00 | 0.00 |
| ATOM | 5923 | H    | ALA | X | 393 | 56.069 | 17.376 | 37.521 | 0.00 | 0.00 |
| ATOM | 5924 | CA   | ALA | X | 393 | 54.068 | 17.784 | 38.135 | 0.00 | 0.00 |
| ATOM | 5925 | HA   | ALA | X | 393 | 53.241 | 17.861 | 37.428 | 0.00 | 0.00 |
| ATOM | 5926 | CB   | ALA | X | 393 | 54.024 | 16.322 | 38.733 | 0.00 | 0.00 |
| ATOM | 5927 | HB1  | ALA | X | 393 | 54.091 | 15.505 | 38.015 | 0.00 | 0.00 |
| ATOM | 5928 | HB2  | ALA | X | 393 | 54.902 | 16.174 | 39.362 | 0.00 | 0.00 |
| ATOM | 5929 | HB3  | ALA | X | 393 | 53.103 | 16.098 | 39.271 | 0.00 | 0.00 |
| ATOM | 5930 | C    | ALA | X | 393 | 53.650 | 18.751 | 39.266 | 0.00 | 0.00 |
| ATOM | 5931 | O    | ALA | X | 393 | 52.510 | 18.998 | 39.527 | 0.00 | 0.00 |
| ATOM | 5932 | N    | LEU | X | 394 | 54.612 | 19.219 | 40.120 | 0.00 | 0.00 |
| ATOM | 5933 | H    | LEU | X | 394 | 55.576 | 18.917 | 40.085 | 0.00 | 0.00 |
| ATOM | 5934 | CA   | LEU | X | 394 | 54.235 | 20.124 | 41.238 | 0.00 | 0.00 |
| ATOM | 5935 | HA   | LEU | X | 394 | 53.343 | 19.707 | 41.706 | 0.00 | 0.00 |
| ATOM | 5936 | CB   | LEU | X | 394 | 55.293 | 20.139 | 42.374 | 0.00 | 0.00 |
| ATOM | 5937 | HB2  | LEU | X | 394 | 55.486 | 19.133 | 42.747 | 0.00 | 0.00 |
| ATOM | 5938 | HB3  | LEU | X | 394 | 56.180 | 20.743 | 42.181 | 0.00 | 0.00 |
| ATOM | 5939 | CG   | LEU | X | 394 | 54.726 | 20.822 | 43.643 | 0.00 | 0.00 |
| ATOM | 5940 | HG   | LEU | X | 394 | 54.437 | 21.847 | 43.411 | 0.00 | 0.00 |
| ATOM | 5941 | CD1  | LEU | X | 394 | 53.482 | 20.128 | 44.115 | 0.00 | 0.00 |
| ATOM | 5942 | HD11 | LEU | X | 394 | 53.678 | 19.062 | 44.230 | 0.00 | 0.00 |
| ATOM | 5943 | HD12 | LEU | X | 394 | 53.142 | 20.433 | 45.105 | 0.00 | 0.00 |
| ATOM | 5944 | HD13 | LEU | X | 394 | 52.628 | 20.197 | 43.442 | 0.00 | 0.00 |
| ATOM | 5945 | CD2  | LEU | X | 394 | 55.727 | 20.962 | 44.738 | 0.00 | 0.00 |
| ATOM | 5946 | HD21 | LEU | X | 394 | 56.165 | 19.966 | 44.795 | 0.00 | 0.00 |
| ATOM | 5947 | HD22 | LEU | X | 394 | 56.497 | 21.644 | 44.378 | 0.00 | 0.00 |
| ATOM | 5948 | HD23 | LEU | X | 394 | 55.240 | 21.332 | 45.641 | 0.00 | 0.00 |

|      |      |      |     |   |     |        |        |        |      |      |
|------|------|------|-----|---|-----|--------|--------|--------|------|------|
| ATOM | 5949 | C    | LEU | X | 394 | 53.809 | 21.541 | 40.747 | 0.00 | 0.00 |
| ATOM | 5950 | O    | LEU | X | 394 | 52.888 | 22.115 | 41.329 | 0.00 | 0.00 |
| ATOM | 5951 | N    | SER | X | 395 | 54.365 | 21.979 | 39.634 | 0.00 | 0.00 |
| ATOM | 5952 | H    | SER | X | 395 | 55.040 | 21.356 | 39.217 | 0.00 | 0.00 |
| ATOM | 5953 | CA   | SER | X | 395 | 54.080 | 23.229 | 39.006 | 0.00 | 0.00 |
| ATOM | 5954 | HA   | SER | X | 395 | 54.040 | 24.031 | 39.743 | 0.00 | 0.00 |
| ATOM | 5955 | CB   | SER | X | 395 | 55.237 | 23.568 | 38.057 | 0.00 | 0.00 |
| ATOM | 5956 | HB2  | SER | X | 395 | 55.286 | 22.751 | 37.338 | 0.00 | 0.00 |
| ATOM | 5957 | HB3  | SER | X | 395 | 55.036 | 24.491 | 37.514 | 0.00 | 0.00 |
| ATOM | 5958 | OG   | SER | X | 395 | 56.496 | 23.687 | 38.698 | 0.00 | 0.00 |
| ATOM | 5959 | HG   | SER | X | 395 | 56.611 | 22.869 | 39.187 | 0.00 | 0.00 |
| ATOM | 5960 | C    | SER | X | 395 | 52.708 | 23.165 | 38.317 | 0.00 | 0.00 |
| ATOM | 5961 | O    | SER | X | 395 | 52.015 | 24.156 | 38.186 | 0.00 | 0.00 |
| ATOM | 5962 | N    | ASP | X | 396 | 52.347 | 21.933 | 37.880 | 0.00 | 0.00 |
| ATOM | 5963 | H    | ASP | X | 396 | 53.076 | 21.241 | 37.776 | 0.00 | 0.00 |
| ATOM | 5964 | CA   | ASP | X | 396 | 51.087 | 21.627 | 37.206 | 0.00 | 0.00 |
| ATOM | 5965 | HA   | ASP | X | 396 | 50.997 | 22.493 | 36.550 | 0.00 | 0.00 |
| ATOM | 5966 | CB   | ASP | X | 396 | 51.208 | 20.241 | 36.525 | 0.00 | 0.00 |
| ATOM | 5967 | HB2  | ASP | X | 396 | 52.240 | 20.069 | 36.221 | 0.00 | 0.00 |
| ATOM | 5968 | HB3  | ASP | X | 396 | 51.010 | 19.434 | 37.230 | 0.00 | 0.00 |
| ATOM | 5969 | CG   | ASP | X | 396 | 50.274 | 20.051 | 35.339 | 0.00 | 0.00 |
| ATOM | 5970 | OD1  | ASP | X | 396 | 50.393 | 20.822 | 34.414 | 0.00 | 0.00 |
| ATOM | 5971 | OD2  | ASP | X | 396 | 49.624 | 18.976 | 35.202 | 0.00 | 0.00 |
| ATOM | 5972 | C    | ASP | X | 396 | 49.886 | 21.704 | 38.186 | 0.00 | 0.00 |
| ATOM | 5973 | O    | ASP | X | 396 | 48.893 | 22.419 | 37.905 | 0.00 | 0.00 |
| ATOM | 5974 | N    | VAL | X | 397 | 50.120 | 21.059 | 39.349 | 0.00 | 0.00 |
| ATOM | 5975 | H    | VAL | X | 397 | 51.014 | 20.590 | 39.398 | 0.00 | 0.00 |
| ATOM | 5976 | CA   | VAL | X | 397 | 49.174 | 20.936 | 40.489 | 0.00 | 0.00 |
| ATOM | 5977 | HA   | VAL | X | 397 | 48.267 | 20.528 | 40.042 | 0.00 | 0.00 |
| ATOM | 5978 | CB   | VAL | X | 397 | 49.635 | 19.889 | 41.570 | 0.00 | 0.00 |
| ATOM | 5979 | HB   | VAL | X | 397 | 50.625 | 20.235 | 41.864 | 0.00 | 0.00 |
| ATOM | 5980 | CG1  | VAL | X | 397 | 48.722 | 19.918 | 42.829 | 0.00 | 0.00 |
| ATOM | 5981 | HG11 | VAL | X | 397 | 49.164 | 19.297 | 43.608 | 0.00 | 0.00 |
| ATOM | 5982 | HG12 | VAL | X | 397 | 48.524 | 20.923 | 43.201 | 0.00 | 0.00 |
| ATOM | 5983 | HG13 | VAL | X | 397 | 47.735 | 19.486 | 42.666 | 0.00 | 0.00 |
| ATOM | 5984 | CG2  | VAL | X | 397 | 49.552 | 18.430 | 41.124 | 0.00 | 0.00 |
| ATOM | 5985 | HG21 | VAL | X | 397 | 48.564 | 18.122 | 40.782 | 0.00 | 0.00 |
| ATOM | 5986 | HG22 | VAL | X | 397 | 50.180 | 18.378 | 40.235 | 0.00 | 0.00 |
| ATOM | 5987 | HG23 | VAL | X | 397 | 50.014 | 17.857 | 41.928 | 0.00 | 0.00 |
| ATOM | 5988 | C    | VAL | X | 397 | 48.859 | 22.337 | 41.145 | 0.00 | 0.00 |
| ATOM | 5989 | O    | VAL | X | 397 | 47.702 | 22.635 | 41.392 | 0.00 | 0.00 |
| ATOM | 5990 | N    | VAL | X | 398 | 49.911 | 23.116 | 41.363 | 0.00 | 0.00 |
| ATOM | 5991 | H    | VAL | X | 398 | 50.804 | 22.694 | 41.153 | 0.00 | 0.00 |
| ATOM | 5992 | CA   | VAL | X | 398 | 49.733 | 24.351 | 42.148 | 0.00 | 0.00 |
| ATOM | 5993 | HA   | VAL | X | 398 | 49.056 | 24.010 | 42.931 | 0.00 | 0.00 |
| ATOM | 5994 | CB   | VAL | X | 398 | 51.149 | 24.790 | 42.676 | 0.00 | 0.00 |
| ATOM | 5995 | HB   | VAL | X | 398 | 51.858 | 24.862 | 41.852 | 0.00 | 0.00 |
| ATOM | 5996 | CG1  | VAL | X | 398 | 51.168 | 26.158 | 43.329 | 0.00 | 0.00 |
| ATOM | 5997 | HG11 | VAL | X | 398 | 52.230 | 26.374 | 43.442 | 0.00 | 0.00 |
| ATOM | 5998 | HG12 | VAL | X | 398 | 50.753 | 26.934 | 42.686 | 0.00 | 0.00 |
| ATOM | 5999 | HG13 | VAL | X | 398 | 50.893 | 26.172 | 44.384 | 0.00 | 0.00 |
| ATOM | 6000 | CG2  | VAL | X | 398 | 51.656 | 23.789 | 43.733 | 0.00 | 0.00 |
| ATOM | 6001 | HG21 | VAL | X | 398 | 51.602 | 22.747 | 43.417 | 0.00 | 0.00 |
| ATOM | 6002 | HG22 | VAL | X | 398 | 52.691 | 24.073 | 43.924 | 0.00 | 0.00 |
| ATOM | 6003 | HG23 | VAL | X | 398 | 51.092 | 23.880 | 44.662 | 0.00 | 0.00 |
| ATOM | 6004 | C    | VAL | X | 398 | 48.999 | 25.479 | 41.355 | 0.00 | 0.00 |
| ATOM | 6005 | O    | VAL | X | 398 | 48.582 | 26.478 | 41.854 | 0.00 | 0.00 |
| ATOM | 6006 | N    | GLY | X | 399 | 48.891 | 25.265 | 40.034 | 0.00 | 0.00 |
| ATOM | 6007 | H    | GLY | X | 399 | 49.488 | 24.611 | 39.548 | 0.00 | 0.00 |
| ATOM | 6008 | CA   | GLY | X | 399 | 48.025 | 26.101 | 39.237 | 0.00 | 0.00 |
| ATOM | 6009 | HA2  | GLY | X | 399 | 48.212 | 27.163 | 39.528 | 0.00 | 0.00 |
| ATOM | 6010 | HA3  | GLY | X | 399 | 48.319 | 25.973 | 38.220 | 0.00 | 0.00 |
| ATOM | 6011 | C    | GLY | X | 399 | 46.551 | 25.869 | 39.289 | 0.00 | 0.00 |
| ATOM | 6012 | O    | GLY | X | 399 | 45.833 | 26.800 | 39.407 | 0.00 | 0.00 |
| ATOM | 6013 | N    | ASP | X | 400 | 46.117 | 24.611 | 39.259 | 0.00 | 0.00 |
| ATOM | 6014 | H    | ASP | X | 400 | 46.824 | 23.897 | 39.362 | 0.00 | 0.00 |
| ATOM | 6015 | CA   | ASP | X | 400 | 44.720 | 24.272 | 38.977 | 0.00 | 0.00 |
| ATOM | 6016 | HA   | ASP | X | 400 | 44.375 | 24.796 | 38.085 | 0.00 | 0.00 |
| ATOM | 6017 | CB   | ASP | X | 400 | 44.704 | 22.785 | 38.749 | 0.00 | 0.00 |
| ATOM | 6018 | HB2  | ASP | X | 400 | 45.334 | 22.222 | 39.438 | 0.00 | 0.00 |

|      |      |      |     |   |     |        |        |        |      |      |
|------|------|------|-----|---|-----|--------|--------|--------|------|------|
| ATOM | 6019 | HB3  | ASP | X | 400 | 43.708 | 22.383 | 38.933 | 0.00 | 0.00 |
| ATOM | 6020 | CG   | ASP | X | 400 | 45.182 | 22.284 | 37.357 | 0.00 | 0.00 |
| ATOM | 6021 | OD1  | ASP | X | 400 | 44.814 | 22.963 | 36.405 | 0.00 | 0.00 |
| ATOM | 6022 | OD2  | ASP | X | 400 | 45.604 | 21.154 | 37.230 | 0.00 | 0.00 |
| ATOM | 6023 | C    | ASP | X | 400 | 43.790 | 24.710 | 40.087 | 0.00 | 0.00 |
| ATOM | 6024 | O    | ASP | X | 400 | 42.990 | 25.617 | 39.925 | 0.00 | 0.00 |
| ATOM | 6025 | N    | HIE | X | 401 | 44.059 | 24.285 | 41.310 | 0.00 | 0.00 |
| ATOM | 6026 | H    | HIE | X | 401 | 44.898 | 23.729 | 41.385 | 0.00 | 0.00 |
| ATOM | 6027 | CA   | HIE | X | 401 | 43.181 | 24.670 | 42.472 | 0.00 | 0.00 |
| ATOM | 6028 | HA   | HIE | X | 401 | 42.180 | 24.519 | 42.069 | 0.00 | 0.00 |
| ATOM | 6029 | CB   | HIE | X | 401 | 43.379 | 23.694 | 43.599 | 0.00 | 0.00 |
| ATOM | 6030 | HB2  | HIE | X | 401 | 42.582 | 23.876 | 44.320 | 0.00 | 0.00 |
| ATOM | 6031 | HB3  | HIE | X | 401 | 43.345 | 22.625 | 43.393 | 0.00 | 0.00 |
| ATOM | 6032 | CG   | HIE | X | 401 | 44.653 | 23.911 | 44.428 | 0.00 | 0.00 |
| ATOM | 6033 | ND1  | HIE | X | 401 | 44.750 | 24.813 | 45.517 | 0.00 | 0.00 |
| ATOM | 6034 | CE1  | HIE | X | 401 | 46.061 | 24.670 | 45.825 | 0.00 | 0.00 |
| ATOM | 6035 | HE1  | HIE | X | 401 | 46.578 | 25.161 | 46.637 | 0.00 | 0.00 |
| ATOM | 6036 | NE2  | HIE | X | 401 | 46.694 | 23.741 | 45.114 | 0.00 | 0.00 |
| ATOM | 6037 | HE2  | HIE | X | 401 | 47.662 | 23.462 | 45.191 | 0.00 | 0.00 |
| ATOM | 6038 | CD2  | HIE | X | 401 | 45.834 | 23.217 | 44.256 | 0.00 | 0.00 |
| ATOM | 6039 | HD2  | HIE | X | 401 | 46.076 | 22.399 | 43.594 | 0.00 | 0.00 |
| ATOM | 6040 | C    | HIE | X | 401 | 43.117 | 26.129 | 42.885 | 0.00 | 0.00 |
| ATOM | 6041 | O    | HIE | X | 401 | 42.126 | 26.489 | 43.476 | 0.00 | 0.00 |
| ATOM | 6042 | N    | ASN | X | 402 | 44.172 | 26.876 | 42.412 | 0.00 | 0.00 |
| ATOM | 6043 | H    | ASN | X | 402 | 44.908 | 26.424 | 41.888 | 0.00 | 0.00 |
| ATOM | 6044 | CA   | ASN | X | 402 | 44.370 | 28.324 | 42.748 | 0.00 | 0.00 |
| ATOM | 6045 | HA   | ASN | X | 402 | 43.759 | 28.493 | 43.635 | 0.00 | 0.00 |
| ATOM | 6046 | CB   | ASN | X | 402 | 45.879 | 28.516 | 43.111 | 0.00 | 0.00 |
| ATOM | 6047 | HB2  | ASN | X | 402 | 46.510 | 28.272 | 42.256 | 0.00 | 0.00 |
| ATOM | 6048 | HB3  | ASN | X | 402 | 46.140 | 29.560 | 43.286 | 0.00 | 0.00 |
| ATOM | 6049 | CG   | ASN | X | 402 | 46.316 | 27.751 | 44.326 | 0.00 | 0.00 |
| ATOM | 6050 | OD1  | ASN | X | 402 | 45.637 | 27.757 | 45.348 | 0.00 | 0.00 |
| ATOM | 6051 | ND2  | ASN | X | 402 | 47.485 | 27.188 | 44.373 | 0.00 | 0.00 |
| ATOM | 6052 | HD21 | ASN | X | 402 | 47.671 | 26.696 | 45.236 | 0.00 | 0.00 |
| ATOM | 6053 | HD22 | ASN | X | 402 | 48.068 | 27.098 | 43.554 | 0.00 | 0.00 |
| ATOM | 6054 | C    | ASN | X | 402 | 43.889 | 29.251 | 41.671 | 0.00 | 0.00 |
| ATOM | 6055 | O    | ASN | X | 402 | 43.242 | 30.275 | 41.995 | 0.00 | 0.00 |
| ATOM | 6056 | N    | VAL | X | 403 | 44.194 | 28.889 | 40.403 | 0.00 | 0.00 |
| ATOM | 6057 | H    | VAL | X | 403 | 44.528 | 27.942 | 40.288 | 0.00 | 0.00 |
| ATOM | 6058 | CA   | VAL | X | 403 | 43.861 | 29.720 | 39.234 | 0.00 | 0.00 |
| ATOM | 6059 | HA   | VAL | X | 403 | 43.199 | 30.496 | 39.619 | 0.00 | 0.00 |
| ATOM | 6060 | CB   | VAL | X | 403 | 45.119 | 30.507 | 38.757 | 0.00 | 0.00 |
| ATOM | 6061 | HB   | VAL | X | 403 | 45.789 | 29.827 | 38.230 | 0.00 | 0.00 |
| ATOM | 6062 | CG1  | VAL | X | 403 | 44.729 | 31.553 | 37.688 | 0.00 | 0.00 |
| ATOM | 6063 | HG11 | VAL | X | 403 | 45.634 | 32.090 | 37.405 | 0.00 | 0.00 |
| ATOM | 6064 | HG12 | VAL | X | 403 | 44.341 | 31.028 | 36.814 | 0.00 | 0.00 |
| ATOM | 6065 | HG13 | VAL | X | 403 | 43.924 | 32.113 | 38.165 | 0.00 | 0.00 |
| ATOM | 6066 | CG2  | VAL | X | 403 | 45.931 | 31.219 | 39.849 | 0.00 | 0.00 |
| ATOM | 6067 | HG21 | VAL | X | 403 | 46.846 | 31.640 | 39.434 | 0.00 | 0.00 |
| ATOM | 6068 | HG22 | VAL | X | 403 | 45.273 | 31.950 | 40.320 | 0.00 | 0.00 |
| ATOM | 6069 | HG23 | VAL | X | 403 | 46.280 | 30.501 | 40.591 | 0.00 | 0.00 |
| ATOM | 6070 | C    | VAL | X | 403 | 43.200 | 28.949 | 38.120 | 0.00 | 0.00 |
| ATOM | 6071 | O    | VAL | X | 403 | 42.115 | 29.338 | 37.698 | 0.00 | 0.00 |
| ATOM | 6072 | N    | VAL | X | 404 | 43.720 | 27.855 | 37.529 | 0.00 | 0.00 |
| ATOM | 6073 | H    | VAL | X | 404 | 44.564 | 27.369 | 37.798 | 0.00 | 0.00 |
| ATOM | 6074 | CA   | VAL | X | 404 | 43.234 | 27.279 | 36.254 | 0.00 | 0.00 |
| ATOM | 6075 | HA   | VAL | X | 404 | 42.994 | 28.114 | 35.596 | 0.00 | 0.00 |
| ATOM | 6076 | CB   | VAL | X | 404 | 44.338 | 26.492 | 35.453 | 0.00 | 0.00 |
| ATOM | 6077 | HB   | VAL | X | 404 | 44.730 | 25.738 | 36.135 | 0.00 | 0.00 |
| ATOM | 6078 | CG1  | VAL | X | 404 | 43.909 | 25.897 | 34.120 | 0.00 | 0.00 |
| ATOM | 6079 | HG11 | VAL | X | 404 | 43.120 | 25.169 | 34.312 | 0.00 | 0.00 |
| ATOM | 6080 | HG12 | VAL | X | 404 | 43.653 | 26.688 | 33.416 | 0.00 | 0.00 |
| ATOM | 6081 | HG13 | VAL | X | 404 | 44.818 | 25.374 | 33.822 | 0.00 | 0.00 |
| ATOM | 6082 | CG2  | VAL | X | 404 | 45.538 | 27.417 | 35.190 | 0.00 | 0.00 |
| ATOM | 6083 | HG21 | VAL | X | 404 | 45.151 | 28.053 | 34.394 | 0.00 | 0.00 |
| ATOM | 6084 | HG22 | VAL | X | 404 | 45.911 | 27.994 | 36.037 | 0.00 | 0.00 |
| ATOM | 6085 | HG23 | VAL | X | 404 | 46.356 | 26.845 | 34.752 | 0.00 | 0.00 |
| ATOM | 6086 | C    | VAL | X | 404 | 41.928 | 26.482 | 36.324 | 0.00 | 0.00 |
| ATOM | 6087 | O    | VAL | X | 404 | 41.177 | 26.655 | 35.351 | 0.00 | 0.00 |
| ATOM | 6088 | N    | CYX | X | 405 | 41.539 | 25.925 | 37.468 | 0.00 | 0.00 |

|      |      |      |     |   |     |        |        |        |      |      |
|------|------|------|-----|---|-----|--------|--------|--------|------|------|
| ATOM | 6089 | H    | CYX | X | 405 | 42.107 | 25.923 | 38.303 | 0.00 | 0.00 |
| ATOM | 6090 | CA   | CYX | X | 405 | 40.176 | 25.361 | 37.584 | 0.00 | 0.00 |
| ATOM | 6091 | HA   | CYX | X | 405 | 39.848 | 24.911 | 36.647 | 0.00 | 0.00 |
| ATOM | 6092 | CB   | CYX | X | 405 | 40.195 | 24.174 | 38.492 | 0.00 | 0.00 |
| ATOM | 6093 | HB2  | CYX | X | 405 | 40.590 | 24.529 | 39.444 | 0.00 | 0.00 |
| ATOM | 6094 | HB3  | CYX | X | 405 | 39.171 | 23.880 | 38.724 | 0.00 | 0.00 |
| ATOM | 6095 | SG   | CYX | X | 405 | 41.071 | 22.791 | 37.797 | 0.00 | 0.00 |
| ATOM | 6096 | C    | CYX | X | 405 | 39.179 | 26.536 | 37.926 | 0.00 | 0.00 |
| ATOM | 6097 | O    | CYX | X | 405 | 38.101 | 26.552 | 37.334 | 0.00 | 0.00 |
| ATOM | 6098 | N    | PRO | X | 406 | 39.397 | 27.454 | 38.847 | 0.00 | 0.00 |
| ATOM | 6099 | CD   | PRO | X | 406 | 40.425 | 27.510 | 39.836 | 0.00 | 0.00 |
| ATOM | 6100 | HD2  | PRO | X | 406 | 41.332 | 27.907 | 39.378 | 0.00 | 0.00 |
| ATOM | 6101 | HD3  | PRO | X | 406 | 40.578 | 26.504 | 40.226 | 0.00 | 0.00 |
| ATOM | 6102 | CG   | PRO | X | 406 | 39.948 | 28.383 | 40.966 | 0.00 | 0.00 |
| ATOM | 6103 | HG2  | PRO | X | 406 | 40.749 | 28.804 | 41.573 | 0.00 | 0.00 |
| ATOM | 6104 | HG3  | PRO | X | 406 | 39.092 | 27.981 | 41.510 | 0.00 | 0.00 |
| ATOM | 6105 | CB   | PRO | X | 406 | 39.351 | 29.457 | 40.052 | 0.00 | 0.00 |
| ATOM | 6106 | HB2  | PRO | X | 406 | 40.073 | 30.072 | 39.514 | 0.00 | 0.00 |
| ATOM | 6107 | HB3  | PRO | X | 406 | 38.749 | 30.142 | 40.650 | 0.00 | 0.00 |
| ATOM | 6108 | CA   | PRO | X | 406 | 38.690 | 28.698 | 38.985 | 0.00 | 0.00 |
| ATOM | 6109 | HA   | PRO | X | 406 | 37.723 | 28.445 | 39.419 | 0.00 | 0.00 |
| ATOM | 6110 | C    | PRO | X | 406 | 38.422 | 29.541 | 37.702 | 0.00 | 0.00 |
| ATOM | 6111 | O    | PRO | X | 406 | 37.323 | 29.834 | 37.304 | 0.00 | 0.00 |
| ATOM | 6112 | N    | VAL | X | 407 | 39.482 | 29.738 | 36.882 | 0.00 | 0.00 |
| ATOM | 6113 | H    | VAL | X | 407 | 40.351 | 29.367 | 37.239 | 0.00 | 0.00 |
| ATOM | 6114 | CA   | VAL | X | 407 | 39.427 | 30.364 | 35.536 | 0.00 | 0.00 |
| ATOM | 6115 | HA   | VAL | X | 407 | 38.733 | 31.186 | 35.714 | 0.00 | 0.00 |
| ATOM | 6116 | CB   | VAL | X | 407 | 40.836 | 30.872 | 35.017 | 0.00 | 0.00 |
| ATOM | 6117 | HB   | VAL | X | 407 | 41.508 | 30.016 | 35.069 | 0.00 | 0.00 |
| ATOM | 6118 | CG1  | VAL | X | 407 | 40.716 | 31.455 | 33.618 | 0.00 | 0.00 |
| ATOM | 6119 | HG11 | VAL | X | 407 | 41.643 | 31.995 | 33.426 | 0.00 | 0.00 |
| ATOM | 6120 | HG12 | VAL | X | 407 | 40.609 | 30.620 | 32.926 | 0.00 | 0.00 |
| ATOM | 6121 | HG13 | VAL | X | 407 | 39.874 | 32.146 | 33.581 | 0.00 | 0.00 |
| ATOM | 6122 | CG2  | VAL | X | 407 | 41.334 | 31.988 | 35.998 | 0.00 | 0.00 |
| ATOM | 6123 | HG21 | VAL | X | 407 | 40.687 | 32.859 | 35.896 | 0.00 | 0.00 |
| ATOM | 6124 | HG22 | VAL | X | 407 | 41.574 | 31.587 | 36.983 | 0.00 | 0.00 |
| ATOM | 6125 | HG23 | VAL | X | 407 | 42.295 | 32.365 | 35.649 | 0.00 | 0.00 |
| ATOM | 6126 | C    | VAL | X | 407 | 38.623 | 29.538 | 34.466 | 0.00 | 0.00 |
| ATOM | 6127 | O    | VAL | X | 407 | 37.851 | 30.186 | 33.798 | 0.00 | 0.00 |
| ATOM | 6128 | N    | ALA | X | 408 | 38.653 | 28.167 | 34.357 | 0.00 | 0.00 |
| ATOM | 6129 | H    | ALA | X | 408 | 39.303 | 27.691 | 34.967 | 0.00 | 0.00 |
| ATOM | 6130 | CA   | ALA | X | 408 | 37.676 | 27.441 | 33.571 | 0.00 | 0.00 |
| ATOM | 6131 | HA   | ALA | X | 408 | 37.705 | 27.746 | 32.525 | 0.00 | 0.00 |
| ATOM | 6132 | CB   | ALA | X | 408 | 38.119 | 25.922 | 33.546 | 0.00 | 0.00 |
| ATOM | 6133 | HB1  | ALA | X | 408 | 37.987 | 25.482 | 34.535 | 0.00 | 0.00 |
| ATOM | 6134 | HB2  | ALA | X | 408 | 37.635 | 25.367 | 32.743 | 0.00 | 0.00 |
| ATOM | 6135 | HB3  | ALA | X | 408 | 39.177 | 25.979 | 33.289 | 0.00 | 0.00 |
| ATOM | 6136 | C    | ALA | X | 408 | 36.227 | 27.584 | 34.294 | 0.00 | 0.00 |
| ATOM | 6137 | O    | ALA | X | 408 | 35.203 | 27.427 | 33.634 | 0.00 | 0.00 |
| ATOM | 6138 | N    | GLN | X | 409 | 36.077 | 27.787 | 35.585 | 0.00 | 0.00 |
| ATOM | 6139 | H    | GLN | X | 409 | 36.869 | 27.998 | 36.176 | 0.00 | 0.00 |
| ATOM | 6140 | CA   | GLN | X | 409 | 34.735 | 27.843 | 36.153 | 0.00 | 0.00 |
| ATOM | 6141 | HA   | GLN | X | 409 | 34.125 | 27.065 | 35.694 | 0.00 | 0.00 |
| ATOM | 6142 | CB   | GLN | X | 409 | 34.878 | 27.438 | 37.606 | 0.00 | 0.00 |
| ATOM | 6143 | HB2  | GLN | X | 409 | 35.143 | 26.384 | 37.689 | 0.00 | 0.00 |
| ATOM | 6144 | HB3  | GLN | X | 409 | 35.652 | 27.961 | 38.168 | 0.00 | 0.00 |
| ATOM | 6145 | CG   | GLN | X | 409 | 33.563 | 27.626 | 38.487 | 0.00 | 0.00 |
| ATOM | 6146 | HG2  | GLN | X | 409 | 33.478 | 28.699 | 38.660 | 0.00 | 0.00 |
| ATOM | 6147 | HG3  | GLN | X | 409 | 32.709 | 27.191 | 37.967 | 0.00 | 0.00 |
| ATOM | 6148 | CD   | GLN | X | 409 | 33.761 | 26.938 | 39.812 | 0.00 | 0.00 |
| ATOM | 6149 | OE1  | GLN | X | 409 | 33.694 | 27.499 | 40.877 | 0.00 | 0.00 |
| ATOM | 6150 | NE2  | GLN | X | 409 | 34.006 | 25.634 | 39.875 | 0.00 | 0.00 |
| ATOM | 6151 | HE21 | GLN | X | 409 | 34.219 | 25.178 | 40.750 | 0.00 | 0.00 |
| ATOM | 6152 | HE22 | GLN | X | 409 | 34.002 | 25.107 | 39.013 | 0.00 | 0.00 |
| ATOM | 6153 | C    | GLN | X | 409 | 34.172 | 29.246 | 35.954 | 0.00 | 0.00 |
| ATOM | 6154 | O    | GLN | X | 409 | 32.944 | 29.402 | 35.868 | 0.00 | 0.00 |
| ATOM | 6155 | N    | LEU | X | 410 | 34.975 | 30.319 | 35.918 | 0.00 | 0.00 |
| ATOM | 6156 | H    | LEU | X | 410 | 35.970 | 30.148 | 35.953 | 0.00 | 0.00 |
| ATOM | 6157 | CA   | LEU | X | 410 | 34.479 | 31.698 | 35.741 | 0.00 | 0.00 |
| ATOM | 6158 | HA   | LEU | X | 410 | 33.839 | 32.067 | 36.543 | 0.00 | 0.00 |

|      |      |      |     |   |     |        |        |        |      |      |
|------|------|------|-----|---|-----|--------|--------|--------|------|------|
| ATOM | 6159 | CB   | LEU | X | 410 | 35.659 | 32.570 | 35.853 | 0.00 | 0.00 |
| ATOM | 6160 | HB2  | LEU | X | 410 | 36.003 | 32.492 | 36.884 | 0.00 | 0.00 |
| ATOM | 6161 | HB3  | LEU | X | 410 | 36.505 | 32.098 | 35.354 | 0.00 | 0.00 |
| ATOM | 6162 | CG   | LEU | X | 410 | 35.563 | 34.059 | 35.504 | 0.00 | 0.00 |
| ATOM | 6163 | HG   | LEU | X | 410 | 35.166 | 34.072 | 34.489 | 0.00 | 0.00 |
| ATOM | 6164 | CD1  | LEU | X | 410 | 34.668 | 34.842 | 36.553 | 0.00 | 0.00 |
| ATOM | 6165 | HD11 | LEU | X | 410 | 33.659 | 34.429 | 36.551 | 0.00 | 0.00 |
| ATOM | 6166 | HD12 | LEU | X | 410 | 35.030 | 34.808 | 37.580 | 0.00 | 0.00 |
| ATOM | 6167 | HD13 | LEU | X | 410 | 34.515 | 35.862 | 36.202 | 0.00 | 0.00 |
| ATOM | 6168 | CD2  | LEU | X | 410 | 36.952 | 34.692 | 35.468 | 0.00 | 0.00 |
| ATOM | 6169 | HD21 | LEU | X | 410 | 37.212 | 34.855 | 36.514 | 0.00 | 0.00 |
| ATOM | 6170 | HD22 | LEU | X | 410 | 37.746 | 34.102 | 35.009 | 0.00 | 0.00 |
| ATOM | 6171 | HD23 | LEU | X | 410 | 36.925 | 35.576 | 34.831 | 0.00 | 0.00 |
| ATOM | 6172 | C    | LEU | X | 410 | 33.930 | 31.775 | 34.296 | 0.00 | 0.00 |
| ATOM | 6173 | O    | LEU | X | 410 | 32.842 | 32.262 | 34.099 | 0.00 | 0.00 |
| ATOM | 6174 | N    | ALA | X | 411 | 34.682 | 31.171 | 33.310 | 0.00 | 0.00 |
| ATOM | 6175 | H    | ALA | X | 411 | 35.600 | 30.806 | 33.521 | 0.00 | 0.00 |
| ATOM | 6176 | CA   | ALA | X | 411 | 34.131 | 31.093 | 31.920 | 0.00 | 0.00 |
| ATOM | 6177 | HA   | ALA | X | 411 | 33.872 | 32.126 | 31.684 | 0.00 | 0.00 |
| ATOM | 6178 | CB   | ALA | X | 411 | 35.205 | 30.483 | 30.984 | 0.00 | 0.00 |
| ATOM | 6179 | HB1  | ALA | X | 411 | 35.866 | 31.309 | 30.721 | 0.00 | 0.00 |
| ATOM | 6180 | HB2  | ALA | X | 411 | 35.607 | 29.639 | 31.544 | 0.00 | 0.00 |
| ATOM | 6181 | HB3  | ALA | X | 411 | 34.661 | 30.220 | 30.077 | 0.00 | 0.00 |
| ATOM | 6182 | C    | ALA | X | 411 | 32.800 | 30.348 | 31.878 | 0.00 | 0.00 |
| ATOM | 6183 | O    | ALA | X | 411 | 31.749 | 30.788 | 31.270 | 0.00 | 0.00 |
| ATOM | 6184 | N    | GLY | X | 412 | 32.749 | 29.269 | 32.607 | 0.00 | 0.00 |
| ATOM | 6185 | H    | GLY | X | 412 | 33.539 | 28.948 | 33.148 | 0.00 | 0.00 |
| ATOM | 6186 | CA   | GLY | X | 412 | 31.587 | 28.339 | 32.576 | 0.00 | 0.00 |
| ATOM | 6187 | HA2  | GLY | X | 412 | 31.347 | 28.147 | 31.443 | 0.00 | 0.00 |
| ATOM | 6188 | HA3  | GLY | X | 412 | 32.011 | 27.528 | 33.206 | 0.00 | 0.00 |
| ATOM | 6189 | C    | GLY | X | 412 | 30.335 | 28.725 | 33.284 | 0.00 | 0.00 |
| ATOM | 6190 | O    | GLY | X | 412 | 29.232 | 28.467 | 32.731 | 0.00 | 0.00 |
| ATOM | 6191 | N    | ARG | X | 413 | 30.481 | 29.424 | 34.480 | 0.00 | 0.00 |
| ATOM | 6192 | H    | ARG | X | 413 | 31.381 | 29.388 | 34.937 | 0.00 | 0.00 |
| ATOM | 6193 | CA   | ARG | X | 413 | 29.352 | 30.101 | 35.162 | 0.00 | 0.00 |
| ATOM | 6194 | HA   | ARG | X | 413 | 28.533 | 29.391 | 35.275 | 0.00 | 0.00 |
| ATOM | 6195 | CB   | ARG | X | 413 | 29.886 | 30.624 | 36.535 | 0.00 | 0.00 |
| ATOM | 6196 | HB2  | ARG | X | 413 | 30.774 | 31.255 | 36.486 | 0.00 | 0.00 |
| ATOM | 6197 | HB3  | ARG | X | 413 | 28.963 | 30.965 | 37.002 | 0.00 | 0.00 |
| ATOM | 6198 | CG   | ARG | X | 413 | 30.302 | 29.405 | 37.360 | 0.00 | 0.00 |
| ATOM | 6199 | HG2  | ARG | X | 413 | 30.912 | 28.685 | 36.814 | 0.00 | 0.00 |
| ATOM | 6200 | HG3  | ARG | X | 413 | 30.802 | 29.741 | 38.269 | 0.00 | 0.00 |
| ATOM | 6201 | CD   | ARG | X | 413 | 29.025 | 28.550 | 37.750 | 0.00 | 0.00 |
| ATOM | 6202 | HD2  | ARG | X | 413 | 28.203 | 29.178 | 38.094 | 0.00 | 0.00 |
| ATOM | 6203 | HD3  | ARG | X | 413 | 28.759 | 28.032 | 36.829 | 0.00 | 0.00 |
| ATOM | 6204 | NE   | ARG | X | 413 | 29.224 | 27.656 | 38.914 | 0.00 | 0.00 |
| ATOM | 6205 | HE   | ARG | X | 413 | 29.579 | 28.017 | 39.788 | 0.00 | 0.00 |
| ATOM | 6206 | CZ   | ARG | X | 413 | 28.850 | 26.361 | 39.022 | 0.00 | 0.00 |
| ATOM | 6207 | NH1  | ARG | X | 413 | 28.175 | 25.691 | 38.101 | 0.00 | 0.00 |
| ATOM | 6208 | HH11 | ARG | X | 413 | 27.769 | 26.253 | 37.366 | 0.00 | 0.00 |
| ATOM | 6209 | HH12 | ARG | X | 413 | 27.833 | 24.754 | 38.260 | 0.00 | 0.00 |
| ATOM | 6210 | NH2  | ARG | X | 413 | 29.114 | 25.722 | 40.145 | 0.00 | 0.00 |
| ATOM | 6211 | HH21 | ARG | X | 413 | 29.708 | 26.137 | 40.848 | 0.00 | 0.00 |
| ATOM | 6212 | HH22 | ARG | X | 413 | 28.681 | 24.817 | 40.261 | 0.00 | 0.00 |
| ATOM | 6213 | C    | ARG | X | 413 | 28.844 | 31.251 | 34.254 | 0.00 | 0.00 |
| ATOM | 6214 | O    | ARG | X | 413 | 27.703 | 31.222 | 33.829 | 0.00 | 0.00 |
| ATOM | 6215 | N    | LEU | X | 414 | 29.740 | 32.080 | 33.739 | 0.00 | 0.00 |
| ATOM | 6216 | H    | LEU | X | 414 | 30.720 | 32.042 | 33.982 | 0.00 | 0.00 |
| ATOM | 6217 | CA   | LEU | X | 414 | 29.430 | 33.234 | 32.897 | 0.00 | 0.00 |
| ATOM | 6218 | HA   | LEU | X | 414 | 28.781 | 33.881 | 33.486 | 0.00 | 0.00 |
| ATOM | 6219 | CB   | LEU | X | 414 | 30.745 | 34.018 | 32.574 | 0.00 | 0.00 |
| ATOM | 6220 | HB2  | LEU | X | 414 | 31.421 | 33.354 | 32.033 | 0.00 | 0.00 |
| ATOM | 6221 | HB3  | LEU | X | 414 | 30.580 | 34.768 | 31.801 | 0.00 | 0.00 |
| ATOM | 6222 | CG   | LEU | X | 414 | 31.337 | 34.771 | 33.818 | 0.00 | 0.00 |
| ATOM | 6223 | HG   | LEU | X | 414 | 31.470 | 34.161 | 34.711 | 0.00 | 0.00 |
| ATOM | 6224 | CD1  | LEU | X | 414 | 32.749 | 35.363 | 33.427 | 0.00 | 0.00 |
| ATOM | 6225 | HD11 | LEU | X | 414 | 33.434 | 34.532 | 33.256 | 0.00 | 0.00 |
| ATOM | 6226 | HD12 | LEU | X | 414 | 32.658 | 35.982 | 32.535 | 0.00 | 0.00 |
| ATOM | 6227 | HD13 | LEU | X | 414 | 33.059 | 36.162 | 34.100 | 0.00 | 0.00 |
| ATOM | 6228 | CD2  | LEU | X | 414 | 30.546 | 35.938 | 34.330 | 0.00 | 0.00 |



|      |      |      |     |   |     |        |        |        |      |      |
|------|------|------|-----|---|-----|--------|--------|--------|------|------|
| ATOM | 6229 | HD21 | LEU | X | 414 | 30.694 | 36.672 | 33.538 | 0.00 | 0.00 |
| ATOM | 6230 | HD22 | LEU | X | 414 | 29.473 | 35.772 | 34.436 | 0.00 | 0.00 |
| ATOM | 6231 | HD23 | LEU | X | 414 | 30.939 | 36.343 | 35.263 | 0.00 | 0.00 |
| ATOM | 6232 | C    | LEU | X | 414 | 28.608 | 32.960 | 31.604 | 0.00 | 0.00 |
| ATOM | 6233 | O    | LEU | X | 414 | 27.511 | 33.493 | 31.422 | 0.00 | 0.00 |
| ATOM | 6234 | N    | ALA | X | 415 | 29.179 | 32.068 | 30.816 | 0.00 | 0.00 |
| ATOM | 6235 | H    | ALA | X | 415 | 30.132 | 31.778 | 30.980 | 0.00 | 0.00 |
| ATOM | 6236 | CA   | ALA | X | 415 | 28.650 | 31.702 | 29.513 | 0.00 | 0.00 |
| ATOM | 6237 | HA   | ALA | X | 415 | 28.481 | 32.589 | 28.902 | 0.00 | 0.00 |
| ATOM | 6238 | CB   | ALA | X | 415 | 29.714 | 30.869 | 28.703 | 0.00 | 0.00 |
| ATOM | 6239 | HB1  | ALA | X | 415 | 29.332 | 30.787 | 27.686 | 0.00 | 0.00 |
| ATOM | 6240 | HB2  | ALA | X | 415 | 30.684 | 31.366 | 28.714 | 0.00 | 0.00 |
| ATOM | 6241 | HB3  | ALA | X | 415 | 29.821 | 29.855 | 29.088 | 0.00 | 0.00 |
| ATOM | 6242 | C    | ALA | X | 415 | 27.258 | 31.023 | 29.542 | 0.00 | 0.00 |
| ATOM | 6243 | O    | ALA | X | 415 | 26.439 | 31.357 | 28.705 | 0.00 | 0.00 |
| ATOM | 6244 | N    | ALA | X | 416 | 26.863 | 30.385 | 30.614 | 0.00 | 0.00 |
| ATOM | 6245 | H    | ALA | X | 416 | 27.570 | 30.005 | 31.227 | 0.00 | 0.00 |
| ATOM | 6246 | CA   | ALA | X | 416 | 25.529 | 30.007 | 30.869 | 0.00 | 0.00 |
| ATOM | 6247 | HA   | ALA | X | 416 | 25.049 | 29.646 | 29.959 | 0.00 | 0.00 |
| ATOM | 6248 | CB   | ALA | X | 416 | 25.500 | 28.690 | 31.748 | 0.00 | 0.00 |
| ATOM | 6249 | HB1  | ALA | X | 416 | 24.508 | 28.254 | 31.639 | 0.00 | 0.00 |
| ATOM | 6250 | HB2  | ALA | X | 416 | 26.291 | 27.998 | 31.460 | 0.00 | 0.00 |
| ATOM | 6251 | HB3  | ALA | X | 416 | 25.618 | 28.905 | 32.810 | 0.00 | 0.00 |
| ATOM | 6252 | C    | ALA | X | 416 | 24.613 | 31.088 | 31.448 | 0.00 | 0.00 |
| ATOM | 6253 | O    | ALA | X | 416 | 23.453 | 31.149 | 31.089 | 0.00 | 0.00 |
| ATOM | 6254 | N    | GLN | X | 417 | 25.146 | 31.696 | 32.493 | 0.00 | 0.00 |
| ATOM | 6255 | H    | GLN | X | 417 | 26.098 | 31.557 | 32.798 | 0.00 | 0.00 |
| ATOM | 6256 | CA   | GLN | X | 417 | 24.359 | 32.658 | 33.363 | 0.00 | 0.00 |
| ATOM | 6257 | HA   | GLN | X | 417 | 23.345 | 32.275 | 33.479 | 0.00 | 0.00 |
| ATOM | 6258 | CB   | GLN | X | 417 | 24.920 | 32.617 | 34.795 | 0.00 | 0.00 |
| ATOM | 6259 | HB2  | GLN | X | 417 | 26.003 | 32.718 | 34.870 | 0.00 | 0.00 |
| ATOM | 6260 | HB3  | GLN | X | 417 | 24.493 | 33.490 | 35.289 | 0.00 | 0.00 |
| ATOM | 6261 | CG   | GLN | X | 417 | 24.583 | 31.323 | 35.500 | 0.00 | 0.00 |
| ATOM | 6262 | HG2  | GLN | X | 417 | 23.587 | 31.339 | 35.942 | 0.00 | 0.00 |
| ATOM | 6263 | HG3  | GLN | X | 417 | 24.642 | 30.504 | 34.783 | 0.00 | 0.00 |
| ATOM | 6264 | CD   | GLN | X | 417 | 25.537 | 31.043 | 36.602 | 0.00 | 0.00 |
| ATOM | 6265 | OE1  | GLN | X | 417 | 26.055 | 29.946 | 36.796 | 0.00 | 0.00 |
| ATOM | 6266 | NE2  | GLN | X | 417 | 25.882 | 31.942 | 37.542 | 0.00 | 0.00 |
| ATOM | 6267 | HE21 | GLN | X | 417 | 26.682 | 31.781 | 38.138 | 0.00 | 0.00 |
| ATOM | 6268 | HE22 | GLN | X | 417 | 25.429 | 32.842 | 37.477 | 0.00 | 0.00 |
| ATOM | 6269 | C    | GLN | X | 417 | 24.226 | 34.082 | 32.710 | 0.00 | 0.00 |
| ATOM | 6270 | O    | GLN | X | 417 | 23.579 | 34.885 | 33.319 | 0.00 | 0.00 |
| ATOM | 6271 | N    | GLY | X | 418 | 24.820 | 34.352 | 31.526 | 0.00 | 0.00 |
| ATOM | 6272 | H    | GLY | X | 418 | 25.383 | 33.598 | 31.158 | 0.00 | 0.00 |
| ATOM | 6273 | CA   | GLY | X | 418 | 24.340 | 35.299 | 30.534 | 0.00 | 0.00 |
| ATOM | 6274 | HA2  | GLY | X | 418 | 24.008 | 34.760 | 29.679 | 0.00 | 0.00 |
| ATOM | 6275 | HA3  | GLY | X | 418 | 23.368 | 35.781 | 30.983 | 0.00 | 0.00 |
| ATOM | 6276 | C    | GLY | X | 418 | 25.321 | 36.299 | 29.956 | 0.00 | 0.00 |
| ATOM | 6277 | O    | GLY | X | 418 | 24.963 | 37.199 | 29.171 | 0.00 | 0.00 |
| ATOM | 6278 | N    | ALA | X | 419 | 26.625 | 36.154 | 30.416 | 0.00 | 0.00 |
| ATOM | 6279 | H    | ALA | X | 419 | 26.932 | 35.393 | 31.004 | 0.00 | 0.00 |
| ATOM | 6280 | CA   | ALA | X | 419 | 27.694 | 36.977 | 29.870 | 0.00 | 0.00 |
| ATOM | 6281 | HA   | ALA | X | 419 | 27.207 | 37.932 | 29.671 | 0.00 | 0.00 |
| ATOM | 6282 | CB   | ALA | X | 419 | 28.788 | 37.249 | 30.879 | 0.00 | 0.00 |
| ATOM | 6283 | HB1  | ALA | X | 419 | 28.375 | 37.458 | 31.865 | 0.00 | 0.00 |
| ATOM | 6284 | HB2  | ALA | X | 419 | 29.344 | 36.386 | 31.245 | 0.00 | 0.00 |
| ATOM | 6285 | HB3  | ALA | X | 419 | 29.423 | 38.080 | 30.571 | 0.00 | 0.00 |
| ATOM | 6286 | C    | ALA | X | 419 | 28.369 | 36.241 | 28.683 | 0.00 | 0.00 |
| ATOM | 6287 | O    | ALA | X | 419 | 28.370 | 34.986 | 28.541 | 0.00 | 0.00 |
| ATOM | 6288 | N    | ARG | X | 420 | 29.025 | 37.173 | 27.913 | 0.00 | 0.00 |
| ATOM | 6289 | H    | ARG | X | 420 | 28.931 | 38.160 | 28.105 | 0.00 | 0.00 |
| ATOM | 6290 | CA   | ARG | X | 420 | 29.881 | 36.824 | 26.818 | 0.00 | 0.00 |
| ATOM | 6291 | HA   | ARG | X | 420 | 29.552 | 35.860 | 26.431 | 0.00 | 0.00 |
| ATOM | 6292 | CB   | ARG | X | 420 | 29.660 | 37.956 | 25.832 | 0.00 | 0.00 |
| ATOM | 6293 | HB2  | ARG | X | 420 | 28.608 | 38.132 | 25.609 | 0.00 | 0.00 |
| ATOM | 6294 | HB3  | ARG | X | 420 | 30.100 | 38.884 | 26.197 | 0.00 | 0.00 |
| ATOM | 6295 | CG   | ARG | X | 420 | 30.387 | 37.728 | 24.534 | 0.00 | 0.00 |
| ATOM | 6296 | HG2  | ARG | X | 420 | 31.459 | 37.635 | 24.707 | 0.00 | 0.00 |
| ATOM | 6297 | HG3  | ARG | X | 420 | 29.997 | 36.822 | 24.071 | 0.00 | 0.00 |
| ATOM | 6298 | CD   | ARG | X | 420 | 30.087 | 38.914 | 23.614 | 0.00 | 0.00 |

|      |      |      |     |   |     |        |        |        |      |      |
|------|------|------|-----|---|-----|--------|--------|--------|------|------|
| ATOM | 6299 | HD2  | ARG | X | 420 | 29.024 | 39.144 | 23.546 | 0.00 | 0.00 |
| ATOM | 6300 | HD3  | ARG | X | 420 | 30.580 | 39.809 | 23.993 | 0.00 | 0.00 |
| ATOM | 6301 | NE   | ARG | X | 420 | 30.531 | 38.722 | 22.187 | 0.00 | 0.00 |
| ATOM | 6302 | HE   | ARG | X | 420 | 31.180 | 39.353 | 21.739 | 0.00 | 0.00 |
| ATOM | 6303 | CZ   | ARG | X | 420 | 29.784 | 38.101 | 21.266 | 0.00 | 0.00 |
| ATOM | 6304 | NH1  | ARG | X | 420 | 28.793 | 37.347 | 21.651 | 0.00 | 0.00 |
| ATOM | 6305 | HH11 | ARG | X | 420 | 28.452 | 37.394 | 22.600 | 0.00 | 0.00 |
| ATOM | 6306 | HH12 | ARG | X | 420 | 28.344 | 36.709 | 21.009 | 0.00 | 0.00 |
| ATOM | 6307 | NH2  | ARG | X | 420 | 30.090 | 38.227 | 19.988 | 0.00 | 0.00 |
| ATOM | 6308 | HH21 | ARG | X | 420 | 30.832 | 38.847 | 19.696 | 0.00 | 0.00 |
| ATOM | 6309 | HH22 | ARG | X | 420 | 29.509 | 37.787 | 19.288 | 0.00 | 0.00 |
| ATOM | 6310 | C    | ARG | X | 420 | 31.311 | 36.700 | 27.350 | 0.00 | 0.00 |
| ATOM | 6311 | O    | ARG | X | 420 | 31.840 | 37.676 | 27.828 | 0.00 | 0.00 |
| ATOM | 6312 | N    | VAL | X | 421 | 32.015 | 35.626 | 27.140 | 0.00 | 0.00 |
| ATOM | 6313 | H    | VAL | X | 421 | 31.535 | 34.845 | 26.718 | 0.00 | 0.00 |
| ATOM | 6314 | CA   | VAL | X | 421 | 33.343 | 35.245 | 27.673 | 0.00 | 0.00 |
| ATOM | 6315 | HA   | VAL | X | 421 | 33.636 | 35.978 | 28.425 | 0.00 | 0.00 |
| ATOM | 6316 | CB   | VAL | X | 421 | 33.348 | 33.851 | 28.379 | 0.00 | 0.00 |
| ATOM | 6317 | HB   | VAL | X | 421 | 32.800 | 33.152 | 27.748 | 0.00 | 0.00 |
| ATOM | 6318 | CG1  | VAL | X | 421 | 34.768 | 33.413 | 28.653 | 0.00 | 0.00 |
| ATOM | 6319 | HG11 | VAL | X | 421 | 35.265 | 34.187 | 29.238 | 0.00 | 0.00 |
| ATOM | 6320 | HG12 | VAL | X | 421 | 34.681 | 32.536 | 29.294 | 0.00 | 0.00 |
| ATOM | 6321 | HG13 | VAL | X | 421 | 35.291 | 32.969 | 27.806 | 0.00 | 0.00 |
| ATOM | 6322 | CG2  | VAL | X | 421 | 32.544 | 33.985 | 29.702 | 0.00 | 0.00 |
| ATOM | 6323 | HG21 | VAL | X | 421 | 33.015 | 34.692 | 30.385 | 0.00 | 0.00 |
| ATOM | 6324 | HG22 | VAL | X | 421 | 31.501 | 34.270 | 29.558 | 0.00 | 0.00 |
| ATOM | 6325 | HG23 | VAL | X | 421 | 32.543 | 33.010 | 30.189 | 0.00 | 0.00 |
| ATOM | 6326 | C    | VAL | X | 421 | 34.242 | 35.158 | 26.453 | 0.00 | 0.00 |
| ATOM | 6327 | O    | VAL | X | 421 | 33.830 | 34.571 | 25.428 | 0.00 | 0.00 |
| ATOM | 6328 | N    | TYR | X | 422 | 35.507 | 35.624 | 26.662 | 0.00 | 0.00 |
| ATOM | 6329 | H    | TYR | X | 422 | 35.692 | 36.135 | 27.514 | 0.00 | 0.00 |
| ATOM | 6330 | CA   | TYR | X | 422 | 36.623 | 35.479 | 25.753 | 0.00 | 0.00 |
| ATOM | 6331 | HA   | TYR | X | 422 | 36.386 | 34.802 | 24.932 | 0.00 | 0.00 |
| ATOM | 6332 | CB   | TYR | X | 422 | 36.875 | 36.786 | 24.985 | 0.00 | 0.00 |
| ATOM | 6333 | HB2  | TYR | X | 422 | 36.936 | 37.626 | 25.677 | 0.00 | 0.00 |
| ATOM | 6334 | HB3  | TYR | X | 422 | 37.863 | 36.660 | 24.544 | 0.00 | 0.00 |
| ATOM | 6335 | CG   | TYR | X | 422 | 35.815 | 37.056 | 24.023 | 0.00 | 0.00 |
| ATOM | 6336 | CD1  | TYR | X | 422 | 35.919 | 36.469 | 22.775 | 0.00 | 0.00 |
| ATOM | 6337 | HD1  | TYR | X | 422 | 36.847 | 35.983 | 22.509 | 0.00 | 0.00 |
| ATOM | 6338 | CE1  | TYR | X | 422 | 34.916 | 36.775 | 21.774 | 0.00 | 0.00 |
| ATOM | 6339 | HE1  | TYR | X | 422 | 35.060 | 36.414 | 20.766 | 0.00 | 0.00 |
| ATOM | 6340 | CZ   | TYR | X | 422 | 33.915 | 37.732 | 22.020 | 0.00 | 0.00 |
| ATOM | 6341 | OH   | TYR | X | 422 | 33.078 | 38.096 | 21.066 | 0.00 | 0.00 |
| ATOM | 6342 | HH   | TYR | X | 422 | 33.018 | 37.574 | 20.263 | 0.00 | 0.00 |
| ATOM | 6343 | CE2  | TYR | X | 422 | 33.804 | 38.301 | 23.332 | 0.00 | 0.00 |
| ATOM | 6344 | HE2  | TYR | X | 422 | 32.944 | 38.934 | 23.492 | 0.00 | 0.00 |
| ATOM | 6345 | CD2  | TYR | X | 422 | 34.727 | 37.916 | 24.307 | 0.00 | 0.00 |
| ATOM | 6346 | HD2  | TYR | X | 422 | 34.562 | 38.433 | 25.241 | 0.00 | 0.00 |
| ATOM | 6347 | C    | TYR | X | 422 | 37.740 | 34.861 | 26.508 | 0.00 | 0.00 |
| ATOM | 6348 | O    | TYR | X | 422 | 38.438 | 35.617 | 27.249 | 0.00 | 0.00 |
| ATOM | 6349 | N    | ALA | X | 423 | 38.101 | 33.568 | 26.315 | 0.00 | 0.00 |
| ATOM | 6350 | H    | ALA | X | 423 | 37.760 | 33.076 | 25.501 | 0.00 | 0.00 |
| ATOM | 6351 | CA   | ALA | X | 423 | 39.208 | 32.875 | 27.040 | 0.00 | 0.00 |
| ATOM | 6352 | HA   | ALA | X | 423 | 39.492 | 33.342 | 27.984 | 0.00 | 0.00 |
| ATOM | 6353 | CB   | ALA | X | 423 | 38.767 | 31.440 | 27.241 | 0.00 | 0.00 |
| ATOM | 6354 | HB1  | ALA | X | 423 | 38.557 | 30.909 | 26.313 | 0.00 | 0.00 |
| ATOM | 6355 | HB2  | ALA | X | 423 | 39.488 | 30.877 | 27.835 | 0.00 | 0.00 |
| ATOM | 6356 | HB3  | ALA | X | 423 | 37.875 | 31.551 | 27.857 | 0.00 | 0.00 |
| ATOM | 6357 | C    | ALA | X | 423 | 40.528 | 32.814 | 26.200 | 0.00 | 0.00 |
| ATOM | 6358 | O    | ALA | X | 423 | 40.487 | 32.641 | 25.009 | 0.00 | 0.00 |
| ATOM | 6359 | N    | TYR | X | 424 | 41.672 | 32.802 | 26.864 | 0.00 | 0.00 |
| ATOM | 6360 | H    | TYR | X | 424 | 41.642 | 32.877 | 27.871 | 0.00 | 0.00 |
| ATOM | 6361 | CA   | TYR | X | 424 | 42.979 | 32.634 | 26.303 | 0.00 | 0.00 |
| ATOM | 6362 | HA   | TYR | X | 424 | 42.842 | 31.872 | 25.536 | 0.00 | 0.00 |
| ATOM | 6363 | CB   | TYR | X | 424 | 43.626 | 33.978 | 25.779 | 0.00 | 0.00 |
| ATOM | 6364 | HB2  | TYR | X | 424 | 44.453 | 33.940 | 25.069 | 0.00 | 0.00 |
| ATOM | 6365 | HB3  | TYR | X | 424 | 42.876 | 34.462 | 25.154 | 0.00 | 0.00 |
| ATOM | 6366 | CG   | TYR | X | 424 | 44.079 | 34.975 | 26.900 | 0.00 | 0.00 |
| ATOM | 6367 | CD1  | TYR | X | 424 | 45.409 | 35.133 | 27.382 | 0.00 | 0.00 |
| ATOM | 6368 | HD1  | TYR | X | 424 | 46.237 | 34.709 | 26.835 | 0.00 | 0.00 |

|      |      |      |     |   |     |        |        |        |      |      |
|------|------|------|-----|---|-----|--------|--------|--------|------|------|
| ATOM | 6369 | CE1  | TYR | X | 424 | 45.671 | 35.718 | 28.626 | 0.00 | 0.00 |
| ATOM | 6370 | HE1  | TYR | X | 424 | 46.684 | 35.880 | 28.962 | 0.00 | 0.00 |
| ATOM | 6371 | CZ   | TYR | X | 424 | 44.692 | 36.411 | 29.272 | 0.00 | 0.00 |
| ATOM | 6372 | OH   | TYR | X | 424 | 44.989 | 37.119 | 30.401 | 0.00 | 0.00 |
| ATOM | 6373 | HH   | TYR | X | 424 | 45.923 | 37.340 | 30.446 | 0.00 | 0.00 |
| ATOM | 6374 | CE2  | TYR | X | 424 | 43.351 | 36.312 | 28.824 | 0.00 | 0.00 |
| ATOM | 6375 | HE2  | TYR | X | 424 | 42.549 | 36.800 | 29.357 | 0.00 | 0.00 |
| ATOM | 6376 | CD2  | TYR | X | 424 | 43.073 | 35.442 | 27.736 | 0.00 | 0.00 |
| ATOM | 6377 | HD2  | TYR | X | 424 | 42.039 | 35.339 | 27.443 | 0.00 | 0.00 |
| ATOM | 6378 | C    | TYR | X | 424 | 44.034 | 31.954 | 27.226 | 0.00 | 0.00 |
| ATOM | 6379 | O    | TYR | X | 424 | 44.050 | 32.025 | 28.459 | 0.00 | 0.00 |
| ATOM | 6380 | N    | VAL | X | 425 | 44.996 | 31.279 | 26.665 | 0.00 | 0.00 |
| ATOM | 6381 | H    | VAL | X | 425 | 44.862 | 30.990 | 25.706 | 0.00 | 0.00 |
| ATOM | 6382 | CA   | VAL | X | 425 | 46.348 | 31.049 | 27.221 | 0.00 | 0.00 |
| ATOM | 6383 | HA   | VAL | X | 425 | 46.391 | 31.453 | 28.233 | 0.00 | 0.00 |
| ATOM | 6384 | CB   | VAL | X | 425 | 46.519 | 29.521 | 27.346 | 0.00 | 0.00 |
| ATOM | 6385 | HB   | VAL | X | 425 | 46.374 | 29.128 | 26.340 | 0.00 | 0.00 |
| ATOM | 6386 | CG1  | VAL | X | 425 | 47.969 | 29.219 | 27.772 | 0.00 | 0.00 |
| ATOM | 6387 | HG11 | VAL | X | 425 | 48.035 | 28.193 | 28.132 | 0.00 | 0.00 |
| ATOM | 6388 | HG12 | VAL | X | 425 | 48.693 | 29.445 | 26.989 | 0.00 | 0.00 |
| ATOM | 6389 | HG13 | VAL | X | 425 | 48.206 | 29.829 | 28.643 | 0.00 | 0.00 |
| ATOM | 6390 | CG2  | VAL | X | 425 | 45.499 | 28.818 | 28.361 | 0.00 | 0.00 |
| ATOM | 6391 | HG21 | VAL | X | 425 | 46.041 | 28.067 | 28.935 | 0.00 | 0.00 |
| ATOM | 6392 | HG22 | VAL | X | 425 | 44.903 | 29.556 | 28.897 | 0.00 | 0.00 |
| ATOM | 6393 | HG23 | VAL | X | 425 | 44.821 | 28.172 | 27.802 | 0.00 | 0.00 |
| ATOM | 6394 | C    | VAL | X | 425 | 47.432 | 31.791 | 26.439 | 0.00 | 0.00 |
| ATOM | 6395 | O    | VAL | X | 425 | 47.509 | 31.810 | 25.233 | 0.00 | 0.00 |
| ATOM | 6396 | N    | PHE | X | 426 | 48.331 | 32.355 | 27.191 | 0.00 | 0.00 |
| ATOM | 6397 | H    | PHE | X | 426 | 48.322 | 32.291 | 28.199 | 0.00 | 0.00 |
| ATOM | 6398 | CA   | PHE | X | 426 | 49.584 | 33.004 | 26.728 | 0.00 | 0.00 |
| ATOM | 6399 | HA   | PHE | X | 426 | 49.548 | 33.343 | 25.692 | 0.00 | 0.00 |
| ATOM | 6400 | CB   | PHE | X | 426 | 49.669 | 34.366 | 27.477 | 0.00 | 0.00 |
| ATOM | 6401 | HB2  | PHE | X | 426 | 48.817 | 34.985 | 27.196 | 0.00 | 0.00 |
| ATOM | 6402 | HB3  | PHE | X | 426 | 49.622 | 34.052 | 28.520 | 0.00 | 0.00 |
| ATOM | 6403 | CG   | PHE | X | 426 | 50.791 | 35.365 | 27.263 | 0.00 | 0.00 |
| ATOM | 6404 | CD1  | PHE | X | 426 | 50.663 | 36.435 | 26.403 | 0.00 | 0.00 |
| ATOM | 6405 | HD1  | PHE | X | 426 | 49.691 | 36.590 | 25.960 | 0.00 | 0.00 |
| ATOM | 6406 | CE1  | PHE | X | 426 | 51.728 | 37.243 | 25.999 | 0.00 | 0.00 |
| ATOM | 6407 | HE1  | PHE | X | 426 | 51.570 | 38.040 | 25.288 | 0.00 | 0.00 |
| ATOM | 6408 | CZ   | PHE | X | 426 | 52.981 | 36.912 | 26.515 | 0.00 | 0.00 |
| ATOM | 6409 | HZ   | PHE | X | 426 | 53.879 | 37.496 | 26.375 | 0.00 | 0.00 |
| ATOM | 6410 | CE2  | PHE | X | 426 | 53.105 | 35.940 | 27.534 | 0.00 | 0.00 |
| ATOM | 6411 | HE2  | PHE | X | 426 | 54.097 | 35.640 | 27.837 | 0.00 | 0.00 |
| ATOM | 6412 | CD2  | PHE | X | 426 | 52.028 | 35.153 | 27.981 | 0.00 | 0.00 |
| ATOM | 6413 | HD2  | PHE | X | 426 | 52.249 | 34.339 | 28.655 | 0.00 | 0.00 |
| ATOM | 6414 | C    | PHE | X | 426 | 50.789 | 32.133 | 26.853 | 0.00 | 0.00 |
| ATOM | 6415 | O    | PHE | X | 426 | 51.094 | 31.597 | 27.967 | 0.00 | 0.00 |
| ATOM | 6416 | N    | GLU | X | 427 | 51.321 | 31.687 | 25.675 | 0.00 | 0.00 |
| ATOM | 6417 | H    | GLU | X | 427 | 50.988 | 32.027 | 24.784 | 0.00 | 0.00 |
| ATOM | 6418 | CA   | GLU | X | 427 | 52.295 | 30.614 | 25.597 | 0.00 | 0.00 |
| ATOM | 6419 | HA   | GLU | X | 427 | 52.457 | 30.240 | 26.608 | 0.00 | 0.00 |
| ATOM | 6420 | CB   | GLU | X | 427 | 51.754 | 29.536 | 24.593 | 0.00 | 0.00 |
| ATOM | 6421 | HB2  | GLU | X | 427 | 51.750 | 29.909 | 23.569 | 0.00 | 0.00 |
| ATOM | 6422 | HB3  | GLU | X | 427 | 52.556 | 28.805 | 24.696 | 0.00 | 0.00 |
| ATOM | 6423 | CG   | GLU | X | 427 | 50.462 | 28.921 | 25.009 | 0.00 | 0.00 |
| ATOM | 6424 | HG2  | GLU | X | 427 | 50.552 | 28.707 | 26.074 | 0.00 | 0.00 |
| ATOM | 6425 | HG3  | GLU | X | 427 | 49.606 | 29.568 | 24.818 | 0.00 | 0.00 |
| ATOM | 6426 | CD   | GLU | X | 427 | 50.144 | 27.526 | 24.278 | 0.00 | 0.00 |
| ATOM | 6427 | OE1  | GLU | X | 427 | 50.340 | 27.435 | 23.040 | 0.00 | 0.00 |
| ATOM | 6428 | OE2  | GLU | X | 427 | 49.741 | 26.617 | 25.041 | 0.00 | 0.00 |
| ATOM | 6429 | C    | GLU | X | 427 | 53.743 | 31.136 | 25.135 | 0.00 | 0.00 |
| ATOM | 6430 | O    | GLU | X | 427 | 54.691 | 30.346 | 25.035 | 0.00 | 0.00 |
| ATOM | 6431 | N    | HIE | X | 428 | 53.799 | 32.449 | 24.805 | 0.00 | 0.00 |
| ATOM | 6432 | H    | HIE | X | 428 | 52.983 | 33.045 | 24.778 | 0.00 | 0.00 |
| ATOM | 6433 | CA   | HIE | X | 428 | 55.177 | 33.030 | 24.471 | 0.00 | 0.00 |
| ATOM | 6434 | HA   | HIE | X | 428 | 55.723 | 32.284 | 23.893 | 0.00 | 0.00 |
| ATOM | 6435 | CB   | HIE | X | 428 | 55.111 | 34.323 | 23.663 | 0.00 | 0.00 |
| ATOM | 6436 | HB2  | HIE | X | 428 | 54.814 | 34.090 | 22.641 | 0.00 | 0.00 |
| ATOM | 6437 | HB3  | HIE | X | 428 | 54.411 | 35.000 | 24.153 | 0.00 | 0.00 |
| ATOM | 6438 | CG   | HIE | X | 428 | 56.480 | 34.973 | 23.370 | 0.00 | 0.00 |

|      |      |      |     |   |     |        |        |        |      |      |
|------|------|------|-----|---|-----|--------|--------|--------|------|------|
| ATOM | 6439 | ND1  | HIE | X | 428 | 57.532 | 34.291 | 22.699 | 0.00 | 0.00 |
| ATOM | 6440 | CE1  | HIE | X | 428 | 58.566 | 35.155 | 22.682 | 0.00 | 0.00 |
| ATOM | 6441 | HE1  | HIE | X | 428 | 59.558 | 34.828 | 22.406 | 0.00 | 0.00 |
| ATOM | 6442 | NE2  | HIE | X | 428 | 58.235 | 36.332 | 23.297 | 0.00 | 0.00 |
| ATOM | 6443 | HE2  | HIE | X | 428 | 58.786 | 37.153 | 23.504 | 0.00 | 0.00 |
| ATOM | 6444 | CD2  | HIE | X | 428 | 56.930 | 36.178 | 23.805 | 0.00 | 0.00 |
| ATOM | 6445 | HD2  | HIE | X | 428 | 56.334 | 36.906 | 24.336 | 0.00 | 0.00 |
| ATOM | 6446 | C    | HIE | X | 428 | 56.077 | 33.148 | 25.699 | 0.00 | 0.00 |
| ATOM | 6447 | O    | HIE | X | 428 | 55.605 | 33.815 | 26.656 | 0.00 | 0.00 |
| ATOM | 6448 | N    | ARG | X | 429 | 57.323 | 32.647 | 25.710 | 0.00 | 0.00 |
| ATOM | 6449 | H    | ARG | X | 429 | 57.574 | 31.980 | 24.994 | 0.00 | 0.00 |
| ATOM | 6450 | CA   | ARG | X | 429 | 58.297 | 33.020 | 26.701 | 0.00 | 0.00 |
| ATOM | 6451 | HA   | ARG | X | 429 | 57.786 | 33.353 | 27.604 | 0.00 | 0.00 |
| ATOM | 6452 | CB   | ARG | X | 429 | 59.114 | 31.817 | 27.220 | 0.00 | 0.00 |
| ATOM | 6453 | HB2  | ARG | X | 429 | 58.502 | 31.066 | 27.720 | 0.00 | 0.00 |
| ATOM | 6454 | HB3  | ARG | X | 429 | 59.653 | 31.386 | 26.377 | 0.00 | 0.00 |
| ATOM | 6455 | CG   | ARG | X | 429 | 60.156 | 32.308 | 28.259 | 0.00 | 0.00 |
| ATOM | 6456 | HG2  | ARG | X | 429 | 60.977 | 32.954 | 27.947 | 0.00 | 0.00 |
| ATOM | 6457 | HG3  | ARG | X | 429 | 59.591 | 32.967 | 28.919 | 0.00 | 0.00 |
| ATOM | 6458 | CD   | ARG | X | 429 | 60.777 | 31.114 | 29.000 | 0.00 | 0.00 |
| ATOM | 6459 | HD2  | ARG | X | 429 | 59.965 | 30.426 | 29.237 | 0.00 | 0.00 |
| ATOM | 6460 | HD3  | ARG | X | 429 | 61.488 | 30.567 | 28.380 | 0.00 | 0.00 |
| ATOM | 6461 | NE   | ARG | X | 429 | 61.420 | 31.509 | 30.267 | 0.00 | 0.00 |
| ATOM | 6462 | HE   | ARG | X | 429 | 60.973 | 31.266 | 31.140 | 0.00 | 0.00 |
| ATOM | 6463 | CZ   | ARG | X | 429 | 62.610 | 32.040 | 30.430 | 0.00 | 0.00 |
| ATOM | 6464 | NH1  | ARG | X | 429 | 63.407 | 32.279 | 29.429 | 0.00 | 0.00 |
| ATOM | 6465 | HH11 | ARG | X | 429 | 63.155 | 32.085 | 28.471 | 0.00 | 0.00 |
| ATOM | 6466 | HH12 | ARG | X | 429 | 64.281 | 32.705 | 29.700 | 0.00 | 0.00 |
| ATOM | 6467 | NH2  | ARG | X | 429 | 63.112 | 32.352 | 31.618 | 0.00 | 0.00 |
| ATOM | 6468 | HH21 | ARG | X | 429 | 62.569 | 32.014 | 32.400 | 0.00 | 0.00 |
| ATOM | 6469 | HH22 | ARG | X | 429 | 64.053 | 32.715 | 31.681 | 0.00 | 0.00 |
| ATOM | 6470 | C    | ARG | X | 429 | 59.155 | 34.192 | 26.196 | 0.00 | 0.00 |
| ATOM | 6471 | O    | ARG | X | 429 | 59.964 | 34.010 | 25.279 | 0.00 | 0.00 |
| ATOM | 6472 | N    | ALA | X | 430 | 58.982 | 35.383 | 26.822 | 0.00 | 0.00 |
| ATOM | 6473 | H    | ALA | X | 430 | 58.232 | 35.367 | 27.498 | 0.00 | 0.00 |
| ATOM | 6474 | CA   | ALA | X | 430 | 59.561 | 36.677 | 26.465 | 0.00 | 0.00 |
| ATOM | 6475 | HA   | ALA | X | 430 | 59.282 | 36.934 | 25.444 | 0.00 | 0.00 |
| ATOM | 6476 | CB   | ALA | X | 430 | 58.974 | 37.794 | 27.253 | 0.00 | 0.00 |
| ATOM | 6477 | HB1  | ALA | X | 430 | 57.886 | 37.819 | 27.308 | 0.00 | 0.00 |
| ATOM | 6478 | HB2  | ALA | X | 430 | 59.389 | 37.707 | 28.258 | 0.00 | 0.00 |
| ATOM | 6479 | HB3  | ALA | X | 430 | 59.342 | 38.734 | 26.841 | 0.00 | 0.00 |
| ATOM | 6480 | C    | ALA | X | 430 | 61.153 | 36.590 | 26.468 | 0.00 | 0.00 |
| ATOM | 6481 | O    | ALA | X | 430 | 61.816 | 35.985 | 27.298 | 0.00 | 0.00 |
| ATOM | 6482 | N    | SER | X | 431 | 61.776 | 37.388 | 25.577 | 0.00 | 0.00 |
| ATOM | 6483 | H    | SER | X | 431 | 61.170 | 37.899 | 24.951 | 0.00 | 0.00 |
| ATOM | 6484 | CA   | SER | X | 431 | 63.213 | 37.723 | 25.555 | 0.00 | 0.00 |
| ATOM | 6485 | HA   | SER | X | 431 | 63.750 | 36.800 | 25.339 | 0.00 | 0.00 |
| ATOM | 6486 | CB   | SER | X | 431 | 63.647 | 38.738 | 24.426 | 0.00 | 0.00 |
| ATOM | 6487 | HB2  | SER | X | 431 | 64.728 | 38.870 | 24.383 | 0.00 | 0.00 |
| ATOM | 6488 | HB3  | SER | X | 431 | 63.399 | 38.343 | 23.440 | 0.00 | 0.00 |
| ATOM | 6489 | OG   | SER | X | 431 | 63.070 | 40.030 | 24.671 | 0.00 | 0.00 |
| ATOM | 6490 | HG   | SER | X | 431 | 62.339 | 40.153 | 24.062 | 0.00 | 0.00 |
| ATOM | 6491 | C    | SER | X | 431 | 63.700 | 38.252 | 26.970 | 0.00 | 0.00 |
| ATOM | 6492 | O    | SER | X | 431 | 64.729 | 37.817 | 27.467 | 0.00 | 0.00 |
| ATOM | 6493 | N    | THR | X | 432 | 63.008 | 39.256 | 27.436 | 0.00 | 0.00 |
| ATOM | 6494 | H    | THR | X | 432 | 62.187 | 39.549 | 26.926 | 0.00 | 0.00 |
| ATOM | 6495 | CA   | THR | X | 432 | 63.121 | 39.876 | 28.800 | 0.00 | 0.00 |
| ATOM | 6496 | HA   | THR | X | 432 | 64.124 | 40.270 | 28.968 | 0.00 | 0.00 |
| ATOM | 6497 | CB   | THR | X | 432 | 62.149 | 40.995 | 29.031 | 0.00 | 0.00 |
| ATOM | 6498 | HB   | THR | X | 432 | 62.285 | 41.344 | 30.054 | 0.00 | 0.00 |
| ATOM | 6499 | CG2  | THR | X | 432 | 62.596 | 42.213 | 28.234 | 0.00 | 0.00 |
| ATOM | 6500 | HG21 | THR | X | 432 | 63.659 | 42.433 | 28.327 | 0.00 | 0.00 |
| ATOM | 6501 | HG22 | THR | X | 432 | 62.417 | 42.040 | 27.173 | 0.00 | 0.00 |
| ATOM | 6502 | HG23 | THR | X | 432 | 62.056 | 43.131 | 28.463 | 0.00 | 0.00 |
| ATOM | 6503 | OG1  | THR | X | 432 | 60.776 | 40.655 | 28.750 | 0.00 | 0.00 |
| ATOM | 6504 | HG1  | THR | X | 432 | 60.261 | 41.435 | 28.967 | 0.00 | 0.00 |
| ATOM | 6505 | C    | THR | X | 432 | 62.773 | 38.912 | 29.987 | 0.00 | 0.00 |
| ATOM | 6506 | O    | THR | X | 432 | 63.215 | 39.235 | 31.115 | 0.00 | 0.00 |
| ATOM | 6507 | N    | LEU | X | 433 | 62.163 | 37.706 | 29.844 | 0.00 | 0.00 |
| ATOM | 6508 | H    | LEU | X | 433 | 62.005 | 37.354 | 28.911 | 0.00 | 0.00 |

|      |      |      |     |   |     |        |        |        |      |      |
|------|------|------|-----|---|-----|--------|--------|--------|------|------|
| ATOM | 6509 | CA   | LEU | X | 433 | 61.695 | 36.945 | 31.011 | 0.00 | 0.00 |
| ATOM | 6510 | HA   | LEU | X | 433 | 61.228 | 37.682 | 31.664 | 0.00 | 0.00 |
| ATOM | 6511 | CB   | LEU | X | 433 | 60.654 | 35.952 | 30.564 | 0.00 | 0.00 |
| ATOM | 6512 | HB2  | LEU | X | 433 | 60.056 | 36.490 | 29.828 | 0.00 | 0.00 |
| ATOM | 6513 | HB3  | LEU | X | 433 | 61.028 | 35.068 | 30.048 | 0.00 | 0.00 |
| ATOM | 6514 | CG   | LEU | X | 433 | 59.840 | 35.594 | 31.816 | 0.00 | 0.00 |
| ATOM | 6515 | HG   | LEU | X | 433 | 59.839 | 36.498 | 32.424 | 0.00 | 0.00 |
| ATOM | 6516 | CD1  | LEU | X | 433 | 58.433 | 35.197 | 31.213 | 0.00 | 0.00 |
| ATOM | 6517 | HD11 | LEU | X | 433 | 57.689 | 35.075 | 32.000 | 0.00 | 0.00 |
| ATOM | 6518 | HD12 | LEU | X | 433 | 58.048 | 36.049 | 30.651 | 0.00 | 0.00 |
| ATOM | 6519 | HD13 | LEU | X | 433 | 58.392 | 34.209 | 30.754 | 0.00 | 0.00 |
| ATOM | 6520 | CD2  | LEU | X | 433 | 60.323 | 34.524 | 32.778 | 0.00 | 0.00 |
| ATOM | 6521 | HD21 | LEU | X | 433 | 59.489 | 34.349 | 33.458 | 0.00 | 0.00 |
| ATOM | 6522 | HD22 | LEU | X | 433 | 60.503 | 33.519 | 32.395 | 0.00 | 0.00 |
| ATOM | 6523 | HD23 | LEU | X | 433 | 61.162 | 34.927 | 33.344 | 0.00 | 0.00 |
| ATOM | 6524 | C    | LEU | X | 433 | 62.885 | 36.265 | 31.690 | 0.00 | 0.00 |
| ATOM | 6525 | O    | LEU | X | 433 | 63.674 | 35.573 | 31.062 | 0.00 | 0.00 |
| ATOM | 6526 | N    | SER | X | 434 | 63.115 | 36.553 | 32.994 | 0.00 | 0.00 |
| ATOM | 6527 | H    | SER | X | 434 | 62.445 | 37.162 | 33.441 | 0.00 | 0.00 |
| ATOM | 6528 | CA   | SER | X | 434 | 64.455 | 36.238 | 33.615 | 0.00 | 0.00 |
| ATOM | 6529 | HA   | SER | X | 434 | 64.941 | 35.551 | 32.922 | 0.00 | 0.00 |
| ATOM | 6530 | CB   | SER | X | 434 | 65.201 | 37.504 | 33.786 | 0.00 | 0.00 |
| ATOM | 6531 | HB2  | SER | X | 434 | 64.595 | 38.189 | 34.378 | 0.00 | 0.00 |
| ATOM | 6532 | HB3  | SER | X | 434 | 66.157 | 37.348 | 34.285 | 0.00 | 0.00 |
| ATOM | 6533 | OG   | SER | X | 434 | 65.442 | 38.136 | 32.525 | 0.00 | 0.00 |
| ATOM | 6534 | HG   | SER | X | 434 | 64.557 | 38.459 | 32.340 | 0.00 | 0.00 |
| ATOM | 6535 | C    | SER | X | 434 | 64.355 | 35.481 | 34.940 | 0.00 | 0.00 |
| ATOM | 6536 | O    | SER | X | 434 | 65.281 | 35.420 | 35.732 | 0.00 | 0.00 |
| ATOM | 6537 | N    | TRP | X | 435 | 63.210 | 34.782 | 35.077 | 0.00 | 0.00 |
| ATOM | 6538 | H    | TRP | X | 435 | 62.495 | 35.033 | 34.408 | 0.00 | 0.00 |
| ATOM | 6539 | CA   | TRP | X | 435 | 62.982 | 33.789 | 36.120 | 0.00 | 0.00 |
| ATOM | 6540 | HA   | TRP | X | 435 | 63.239 | 34.215 | 37.090 | 0.00 | 0.00 |
| ATOM | 6541 | CB   | TRP | X | 435 | 61.489 | 33.424 | 36.132 | 0.00 | 0.00 |
| ATOM | 6542 | HB2  | TRP | X | 435 | 61.036 | 33.374 | 35.142 | 0.00 | 0.00 |
| ATOM | 6543 | HB3  | TRP | X | 435 | 61.328 | 32.433 | 36.556 | 0.00 | 0.00 |
| ATOM | 6544 | CG   | TRP | X | 435 | 60.446 | 34.402 | 36.745 | 0.00 | 0.00 |
| ATOM | 6545 | CD1  | TRP | X | 435 | 59.895 | 35.472 | 36.140 | 0.00 | 0.00 |
| ATOM | 6546 | HD1  | TRP | X | 435 | 60.055 | 35.785 | 35.119 | 0.00 | 0.00 |
| ATOM | 6547 | NE1  | TRP | X | 435 | 58.938 | 36.005 | 36.963 | 0.00 | 0.00 |
| ATOM | 6548 | HE1  | TRP | X | 435 | 58.256 | 36.713 | 36.735 | 0.00 | 0.00 |
| ATOM | 6549 | CE2  | TRP | X | 435 | 58.963 | 35.430 | 38.226 | 0.00 | 0.00 |
| ATOM | 6550 | CZ2  | TRP | X | 435 | 58.312 | 35.787 | 39.391 | 0.00 | 0.00 |
| ATOM | 6551 | HZ2  | TRP | X | 435 | 57.642 | 36.631 | 39.466 | 0.00 | 0.00 |
| ATOM | 6552 | CH2  | TRP | X | 435 | 58.629 | 34.996 | 40.551 | 0.00 | 0.00 |
| ATOM | 6553 | HH2  | TRP | X | 435 | 58.162 | 35.119 | 41.516 | 0.00 | 0.00 |
| ATOM | 6554 | CZ3  | TRP | X | 435 | 59.591 | 33.965 | 40.415 | 0.00 | 0.00 |
| ATOM | 6555 | HZ3  | TRP | X | 435 | 59.801 | 33.379 | 41.297 | 0.00 | 0.00 |
| ATOM | 6556 | CE3  | TRP | X | 435 | 60.319 | 33.732 | 39.234 | 0.00 | 0.00 |
| ATOM | 6557 | HE3  | TRP | X | 435 | 61.080 | 32.966 | 39.219 | 0.00 | 0.00 |
| ATOM | 6558 | CD2  | TRP | X | 435 | 59.934 | 34.392 | 38.079 | 0.00 | 0.00 |
| ATOM | 6559 | C    | TRP | X | 435 | 63.880 | 32.541 | 35.857 | 0.00 | 0.00 |
| ATOM | 6560 | O    | TRP | X | 435 | 64.254 | 32.316 | 34.697 | 0.00 | 0.00 |
| ATOM | 6561 | N    | PRO | X | 436 | 64.089 | 31.677 | 36.895 | 0.00 | 0.00 |
| ATOM | 6562 | CD   | PRO | X | 436 | 63.922 | 31.978 | 38.315 | 0.00 | 0.00 |
| ATOM | 6563 | HD2  | PRO | X | 436 | 62.871 | 32.122 | 38.567 | 0.00 | 0.00 |
| ATOM | 6564 | HD3  | PRO | X | 436 | 64.626 | 32.756 | 38.609 | 0.00 | 0.00 |
| ATOM | 6565 | CG   | PRO | X | 436 | 64.441 | 30.779 | 39.173 | 0.00 | 0.00 |
| ATOM | 6566 | HG2  | PRO | X | 436 | 63.715 | 30.555 | 39.954 | 0.00 | 0.00 |
| ATOM | 6567 | HG3  | PRO | X | 436 | 65.382 | 30.993 | 39.680 | 0.00 | 0.00 |
| ATOM | 6568 | CB   | PRO | X | 436 | 64.597 | 29.660 | 38.147 | 0.00 | 0.00 |
| ATOM | 6569 | HB2  | PRO | X | 436 | 63.661 | 29.148 | 37.920 | 0.00 | 0.00 |
| ATOM | 6570 | HB3  | PRO | X | 436 | 65.465 | 29.031 | 38.342 | 0.00 | 0.00 |
| ATOM | 6571 | CA   | PRO | X | 436 | 64.811 | 30.413 | 36.798 | 0.00 | 0.00 |
| ATOM | 6572 | HA   | PRO | X | 436 | 65.884 | 30.510 | 36.636 | 0.00 | 0.00 |
| ATOM | 6573 | C    | PRO | X | 436 | 64.180 | 29.746 | 35.646 | 0.00 | 0.00 |
| ATOM | 6574 | O    | PRO | X | 436 | 62.954 | 29.688 | 35.525 | 0.00 | 0.00 |
| ATOM | 6575 | N    | LEU | X | 437 | 65.026 | 29.116 | 34.844 | 0.00 | 0.00 |
| ATOM | 6576 | H    | LEU | X | 437 | 65.999 | 29.023 | 35.098 | 0.00 | 0.00 |
| ATOM | 6577 | CA   | LEU | X | 437 | 64.613 | 28.513 | 33.586 | 0.00 | 0.00 |
| ATOM | 6578 | HA   | LEU | X | 437 | 64.124 | 29.302 | 33.014 | 0.00 | 0.00 |

|      |      |      |     |   |     |        |        |        |      |      |
|------|------|------|-----|---|-----|--------|--------|--------|------|------|
| ATOM | 6579 | CB   | LEU | X | 437 | 65.850 | 28.027 | 32.887 | 0.00 | 0.00 |
| ATOM | 6580 | HB2  | LEU | X | 437 | 66.433 | 27.409 | 33.570 | 0.00 | 0.00 |
| ATOM | 6581 | HB3  | LEU | X | 437 | 65.637 | 27.400 | 32.021 | 0.00 | 0.00 |
| ATOM | 6582 | CG   | LEU | X | 437 | 66.864 | 29.073 | 32.245 | 0.00 | 0.00 |
| ATOM | 6583 | HG   | LEU | X | 437 | 67.099 | 29.894 | 32.923 | 0.00 | 0.00 |
| ATOM | 6584 | CD1  | LEU | X | 437 | 68.244 | 28.469 | 31.758 | 0.00 | 0.00 |
| ATOM | 6585 | HD11 | LEU | X | 437 | 68.884 | 29.171 | 31.224 | 0.00 | 0.00 |
| ATOM | 6586 | HD12 | LEU | X | 437 | 68.551 | 28.164 | 32.759 | 0.00 | 0.00 |
| ATOM | 6587 | HD13 | LEU | X | 437 | 68.135 | 27.616 | 31.088 | 0.00 | 0.00 |
| ATOM | 6588 | CD2  | LEU | X | 437 | 66.220 | 29.740 | 30.996 | 0.00 | 0.00 |
| ATOM | 6589 | HD21 | LEU | X | 437 | 66.671 | 29.418 | 30.057 | 0.00 | 0.00 |
| ATOM | 6590 | HD22 | LEU | X | 437 | 65.148 | 29.542 | 30.988 | 0.00 | 0.00 |
| ATOM | 6591 | HD23 | LEU | X | 437 | 66.341 | 30.823 | 31.030 | 0.00 | 0.00 |
| ATOM | 6592 | C    | LEU | X | 437 | 63.563 | 27.355 | 33.653 | 0.00 | 0.00 |
| ATOM | 6593 | O    | LEU | X | 437 | 62.671 | 27.152 | 32.789 | 0.00 | 0.00 |
| ATOM | 6594 | N    | TRP | X | 438 | 63.669 | 26.530 | 34.686 | 0.00 | 0.00 |
| ATOM | 6595 | H    | TRP | X | 438 | 64.349 | 26.721 | 35.408 | 0.00 | 0.00 |
| ATOM | 6596 | CA   | TRP | X | 438 | 62.644 | 25.472 | 34.884 | 0.00 | 0.00 |
| ATOM | 6597 | HA   | TRP | X | 438 | 62.650 | 24.764 | 34.055 | 0.00 | 0.00 |
| ATOM | 6598 | CB   | TRP | X | 438 | 63.012 | 24.729 | 36.137 | 0.00 | 0.00 |
| ATOM | 6599 | HB2  | TRP | X | 438 | 62.240 | 23.977 | 36.297 | 0.00 | 0.00 |
| ATOM | 6600 | HB3  | TRP | X | 438 | 63.947 | 24.202 | 35.944 | 0.00 | 0.00 |
| ATOM | 6601 | CG   | TRP | X | 438 | 63.041 | 25.545 | 37.481 | 0.00 | 0.00 |
| ATOM | 6602 | CD1  | TRP | X | 438 | 64.078 | 26.197 | 38.019 | 0.00 | 0.00 |
| ATOM | 6603 | HD1  | TRP | X | 438 | 65.129 | 26.154 | 37.775 | 0.00 | 0.00 |
| ATOM | 6604 | NE1  | TRP | X | 438 | 63.779 | 26.788 | 39.260 | 0.00 | 0.00 |
| ATOM | 6605 | HE1  | TRP | X | 438 | 64.482 | 27.192 | 39.862 | 0.00 | 0.00 |
| ATOM | 6606 | CE2  | TRP | X | 438 | 62.423 | 26.551 | 39.530 | 0.00 | 0.00 |
| ATOM | 6607 | CZ2  | TRP | X | 438 | 61.620 | 26.839 | 40.676 | 0.00 | 0.00 |
| ATOM | 6608 | HZ2  | TRP | X | 438 | 62.132 | 27.280 | 41.519 | 0.00 | 0.00 |
| ATOM | 6609 | CH2  | TRP | X | 438 | 60.249 | 26.509 | 40.690 | 0.00 | 0.00 |
| ATOM | 6610 | HH2  | TRP | X | 438 | 59.610 | 26.802 | 41.509 | 0.00 | 0.00 |
| ATOM | 6611 | CZ3  | TRP | X | 438 | 59.720 | 25.774 | 39.569 | 0.00 | 0.00 |
| ATOM | 6612 | HZ3  | TRP | X | 438 | 58.650 | 25.649 | 39.488 | 0.00 | 0.00 |
| ATOM | 6613 | CE3  | TRP | X | 438 | 60.582 | 25.302 | 38.542 | 0.00 | 0.00 |
| ATOM | 6614 | HE3  | TRP | X | 438 | 60.159 | 24.713 | 37.742 | 0.00 | 0.00 |
| ATOM | 6615 | CD2  | TRP | X | 438 | 61.912 | 25.734 | 38.380 | 0.00 | 0.00 |
| ATOM | 6616 | C    | TRP | X | 438 | 61.187 | 26.002 | 35.005 | 0.00 | 0.00 |
| ATOM | 6617 | O    | TRP | X | 438 | 60.218 | 25.235 | 34.781 | 0.00 | 0.00 |
| ATOM | 6618 | N    | MET | X | 439 | 60.992 | 27.289 | 35.387 | 0.00 | 0.00 |
| ATOM | 6619 | H    | MET | X | 439 | 61.857 | 27.758 | 35.617 | 0.00 | 0.00 |
| ATOM | 6620 | CA   | MET | X | 439 | 59.636 | 27.816 | 35.693 | 0.00 | 0.00 |
| ATOM | 6621 | HA   | MET | X | 439 | 59.023 | 27.137 | 36.285 | 0.00 | 0.00 |
| ATOM | 6622 | CB   | MET | X | 439 | 59.738 | 29.063 | 36.546 | 0.00 | 0.00 |
| ATOM | 6623 | HB2  | MET | X | 439 | 60.237 | 29.865 | 36.003 | 0.00 | 0.00 |
| ATOM | 6624 | HB3  | MET | X | 439 | 58.777 | 29.489 | 36.836 | 0.00 | 0.00 |
| ATOM | 6625 | CG   | MET | X | 439 | 60.541 | 28.836 | 37.779 | 0.00 | 0.00 |
| ATOM | 6626 | HG2  | MET | X | 439 | 59.986 | 28.092 | 38.351 | 0.00 | 0.00 |
| ATOM | 6627 | HG3  | MET | X | 439 | 61.535 | 28.461 | 37.537 | 0.00 | 0.00 |
| ATOM | 6628 | SD   | MET | X | 439 | 60.585 | 30.267 | 38.829 | 0.00 | 0.00 |
| ATOM | 6629 | CE   | MET | X | 439 | 58.919 | 30.490 | 39.505 | 0.00 | 0.00 |
| ATOM | 6630 | HE1  | MET | X | 439 | 58.863 | 31.335 | 40.191 | 0.00 | 0.00 |
| ATOM | 6631 | HE2  | MET | X | 439 | 58.181 | 30.759 | 38.749 | 0.00 | 0.00 |
| ATOM | 6632 | HE3  | MET | X | 439 | 58.659 | 29.515 | 39.915 | 0.00 | 0.00 |
| ATOM | 6633 | C    | MET | X | 439 | 58.718 | 28.128 | 34.509 | 0.00 | 0.00 |
| ATOM | 6634 | O    | MET | X | 439 | 57.529 | 28.322 | 34.737 | 0.00 | 0.00 |
| ATOM | 6635 | N    | GLY | X | 440 | 59.176 | 27.895 | 33.246 | 0.00 | 0.00 |
| ATOM | 6636 | H    | GLY | X | 440 | 60.100 | 27.498 | 33.153 | 0.00 | 0.00 |
| ATOM | 6637 | CA   | GLY | X | 440 | 58.363 | 28.047 | 32.084 | 0.00 | 0.00 |
| ATOM | 6638 | HA2  | GLY | X | 440 | 58.893 | 27.738 | 31.229 | 0.00 | 0.00 |
| ATOM | 6639 | HA3  | GLY | X | 440 | 57.525 | 27.387 | 32.160 | 0.00 | 0.00 |
| ATOM | 6640 | C    | GLY | X | 440 | 58.088 | 29.550 | 31.943 | 0.00 | 0.00 |
| ATOM | 6641 | O    | GLY | X | 440 | 58.978 | 30.403 | 31.882 | 0.00 | 0.00 |
| ATOM | 6642 | N    | VAL | X | 441 | 56.810 | 29.850 | 31.936 | 0.00 | 0.00 |
| ATOM | 6643 | H    | VAL | X | 441 | 56.206 | 29.058 | 32.104 | 0.00 | 0.00 |
| ATOM | 6644 | CA   | VAL | X | 441 | 56.215 | 31.185 | 31.747 | 0.00 | 0.00 |
| ATOM | 6645 | HA   | VAL | X | 441 | 56.974 | 31.966 | 31.688 | 0.00 | 0.00 |
| ATOM | 6646 | CB   | VAL | X | 441 | 55.325 | 31.354 | 30.479 | 0.00 | 0.00 |
| ATOM | 6647 | HB   | VAL | X | 441 | 54.382 | 30.810 | 30.519 | 0.00 | 0.00 |
| ATOM | 6648 | CG1  | VAL | X | 441 | 54.932 | 32.834 | 30.374 | 0.00 | 0.00 |

|      |      |      |     |   |     |        |        |        |      |      |
|------|------|------|-----|---|-----|--------|--------|--------|------|------|
| ATOM | 6649 | HG11 | VAL | X | 441 | 54.352 | 33.035 | 29.473 | 0.00 | 0.00 |
| ATOM | 6650 | HG12 | VAL | X | 441 | 54.271 | 33.072 | 31.207 | 0.00 | 0.00 |
| ATOM | 6651 | HG13 | VAL | X | 441 | 55.815 | 33.467 | 30.467 | 0.00 | 0.00 |
| ATOM | 6652 | CG2  | VAL | X | 441 | 55.987 | 30.898 | 29.197 | 0.00 | 0.00 |
| ATOM | 6653 | HG21 | VAL | X | 441 | 56.158 | 29.827 | 29.303 | 0.00 | 0.00 |
| ATOM | 6654 | HG22 | VAL | X | 441 | 55.376 | 31.205 | 28.349 | 0.00 | 0.00 |
| ATOM | 6655 | HG23 | VAL | X | 441 | 56.967 | 31.363 | 29.305 | 0.00 | 0.00 |
| ATOM | 6656 | C    | VAL | X | 441 | 55.343 | 31.375 | 33.006 | 0.00 | 0.00 |
| ATOM | 6657 | O    | VAL | X | 441 | 54.140 | 31.162 | 32.874 | 0.00 | 0.00 |
| ATOM | 6658 | N    | PRO | X | 442 | 55.997 | 31.792 | 34.096 | 0.00 | 0.00 |
| ATOM | 6659 | CD   | PRO | X | 442 | 57.274 | 32.461 | 34.090 | 0.00 | 0.00 |
| ATOM | 6660 | HD2  | PRO | X | 442 | 57.277 | 33.344 | 33.452 | 0.00 | 0.00 |
| ATOM | 6661 | HD3  | PRO | X | 442 | 57.959 | 31.654 | 33.829 | 0.00 | 0.00 |
| ATOM | 6662 | CG   | PRO | X | 442 | 57.553 | 32.799 | 35.550 | 0.00 | 0.00 |
| ATOM | 6663 | HG2  | PRO | X | 442 | 57.472 | 33.875 | 35.704 | 0.00 | 0.00 |
| ATOM | 6664 | HG3  | PRO | X | 442 | 58.551 | 32.451 | 35.817 | 0.00 | 0.00 |
| ATOM | 6665 | CB   | PRO | X | 442 | 56.579 | 31.980 | 36.392 | 0.00 | 0.00 |
| ATOM | 6666 | HB2  | PRO | X | 442 | 56.293 | 32.480 | 37.318 | 0.00 | 0.00 |
| ATOM | 6667 | HB3  | PRO | X | 442 | 56.904 | 30.955 | 36.569 | 0.00 | 0.00 |
| ATOM | 6668 | CA   | PRO | X | 442 | 55.418 | 31.799 | 35.414 | 0.00 | 0.00 |
| ATOM | 6669 | HA   | PRO | X | 442 | 55.057 | 30.806 | 35.685 | 0.00 | 0.00 |
| ATOM | 6670 | C    | PRO | X | 442 | 54.309 | 32.877 | 35.543 | 0.00 | 0.00 |
| ATOM | 6671 | O    | PRO | X | 442 | 54.346 | 33.885 | 34.822 | 0.00 | 0.00 |
| ATOM | 6672 | N    | HIP | X | 443 | 53.347 | 32.757 | 36.454 | 0.00 | 0.00 |
| ATOM | 6673 | H    | HIP | X | 443 | 53.184 | 31.812 | 36.772 | 0.00 | 0.00 |
| ATOM | 6674 | CA   | HIP | X | 443 | 52.162 | 33.592 | 36.733 | 0.00 | 0.00 |
| ATOM | 6675 | HA   | HIP | X | 443 | 51.433 | 33.157 | 36.048 | 0.00 | 0.00 |
| ATOM | 6676 | CB   | HIP | X | 443 | 52.012 | 33.528 | 38.263 | 0.00 | 0.00 |
| ATOM | 6677 | HB2  | HIP | X | 443 | 52.012 | 32.490 | 38.597 | 0.00 | 0.00 |
| ATOM | 6678 | HB3  | HIP | X | 443 | 52.967 | 33.844 | 38.685 | 0.00 | 0.00 |
| ATOM | 6679 | CG   | HIP | X | 443 | 50.850 | 34.333 | 38.773 | 0.00 | 0.00 |
| ATOM | 6680 | ND1  | HIP | X | 443 | 49.522 | 34.062 | 38.728 | 0.00 | 0.00 |
| ATOM | 6681 | HD1  | HIP | X | 443 | 49.188 | 33.196 | 38.330 | 0.00 | 0.00 |
| ATOM | 6682 | CE1  | HIP | X | 443 | 48.839 | 35.006 | 39.477 | 0.00 | 0.00 |
| ATOM | 6683 | HE1  | HIP | X | 443 | 47.776 | 35.135 | 39.614 | 0.00 | 0.00 |
| ATOM | 6684 | NE2  | HIP | X | 443 | 49.794 | 35.748 | 40.097 | 0.00 | 0.00 |
| ATOM | 6685 | HE2  | HIP | X | 443 | 49.741 | 36.439 | 40.833 | 0.00 | 0.00 |
| ATOM | 6686 | CD2  | HIP | X | 443 | 51.046 | 35.414 | 39.592 | 0.00 | 0.00 |
| ATOM | 6687 | HD2  | HIP | X | 443 | 51.971 | 35.882 | 39.895 | 0.00 | 0.00 |
| ATOM | 6688 | C    | HIP | X | 443 | 52.280 | 35.014 | 36.249 | 0.00 | 0.00 |
| ATOM | 6689 | O    | HIP | X | 443 | 53.050 | 35.818 | 36.722 | 0.00 | 0.00 |
| ATOM | 6690 | N    | GLY | X | 444 | 51.475 | 35.421 | 35.211 | 0.00 | 0.00 |
| ATOM | 6691 | H    | GLY | X | 444 | 50.870 | 34.697 | 34.851 | 0.00 | 0.00 |
| ATOM | 6692 | CA   | GLY | X | 444 | 51.238 | 36.736 | 34.630 | 0.00 | 0.00 |
| ATOM | 6693 | HA2  | GLY | X | 444 | 50.400 | 36.712 | 33.920 | 0.00 | 0.00 |
| ATOM | 6694 | HA3  | GLY | X | 444 | 51.045 | 37.385 | 35.449 | 0.00 | 0.00 |
| ATOM | 6695 | C    | GLY | X | 444 | 52.429 | 37.335 | 33.897 | 0.00 | 0.00 |
| ATOM | 6696 | O    | GLY | X | 444 | 53.525 | 37.528 | 34.455 | 0.00 | 0.00 |
| ATOM | 6697 | N    | TYR | X | 445 | 52.215 | 37.654 | 32.614 | 0.00 | 0.00 |
| ATOM | 6698 | H    | TYR | X | 445 | 51.268 | 37.573 | 32.272 | 0.00 | 0.00 |
| ATOM | 6699 | CA   | TYR | X | 445 | 53.154 | 38.414 | 31.798 | 0.00 | 0.00 |
| ATOM | 6700 | HA   | TYR | X | 445 | 53.623 | 39.132 | 32.472 | 0.00 | 0.00 |
| ATOM | 6701 | CB   | TYR | X | 445 | 54.160 | 37.394 | 31.219 | 0.00 | 0.00 |
| ATOM | 6702 | HB2  | TYR | X | 445 | 54.227 | 36.533 | 31.885 | 0.00 | 0.00 |
| ATOM | 6703 | HB3  | TYR | X | 445 | 53.877 | 37.045 | 30.227 | 0.00 | 0.00 |
| ATOM | 6704 | CG   | TYR | X | 445 | 55.510 | 38.152 | 31.124 | 0.00 | 0.00 |
| ATOM | 6705 | CD1  | TYR | X | 445 | 56.158 | 38.678 | 29.977 | 0.00 | 0.00 |
| ATOM | 6706 | HD1  | TYR | X | 445 | 55.654 | 38.896 | 29.047 | 0.00 | 0.00 |
| ATOM | 6707 | CE1  | TYR | X | 445 | 57.482 | 39.157 | 30.006 | 0.00 | 0.00 |
| ATOM | 6708 | HE1  | TYR | X | 445 | 57.966 | 39.619 | 29.158 | 0.00 | 0.00 |
| ATOM | 6709 | CZ   | TYR | X | 445 | 58.257 | 39.085 | 31.178 | 0.00 | 0.00 |
| ATOM | 6710 | OH   | TYR | X | 445 | 59.496 | 39.448 | 31.171 | 0.00 | 0.00 |
| ATOM | 6711 | HH   | TYR | X | 445 | 59.813 | 39.737 | 30.312 | 0.00 | 0.00 |
| ATOM | 6712 | CE2  | TYR | X | 445 | 57.677 | 38.524 | 32.334 | 0.00 | 0.00 |
| ATOM | 6713 | HE2  | TYR | X | 445 | 58.262 | 38.266 | 33.205 | 0.00 | 0.00 |
| ATOM | 6714 | CD2  | TYR | X | 445 | 56.371 | 38.092 | 32.278 | 0.00 | 0.00 |
| ATOM | 6715 | HD2  | TYR | X | 445 | 55.938 | 37.586 | 33.129 | 0.00 | 0.00 |
| ATOM | 6716 | C    | TYR | X | 445 | 52.623 | 39.371 | 30.667 | 0.00 | 0.00 |
| ATOM | 6717 | O    | TYR | X | 445 | 53.227 | 40.320 | 30.250 | 0.00 | 0.00 |
| ATOM | 6718 | N    | GLU | X | 446 | 51.394 | 39.187 | 30.338 | 0.00 | 0.00 |

|      |      |      |     |   |     |        |        |        |      |      |
|------|------|------|-----|---|-----|--------|--------|--------|------|------|
| ATOM | 6719 | H    | GLU | X | 446 | 50.890 | 38.471 | 30.843 | 0.00 | 0.00 |
| ATOM | 6720 | CA   | GLU | X | 446 | 50.735 | 39.913 | 29.306 | 0.00 | 0.00 |
| ATOM | 6721 | HA   | GLU | X | 446 | 51.403 | 39.912 | 28.445 | 0.00 | 0.00 |
| ATOM | 6722 | CB   | GLU | X | 446 | 49.508 | 39.232 | 28.769 | 0.00 | 0.00 |
| ATOM | 6723 | HB2  | GLU | X | 446 | 48.606 | 39.794 | 29.010 | 0.00 | 0.00 |
| ATOM | 6724 | HB3  | GLU | X | 446 | 49.580 | 39.272 | 27.682 | 0.00 | 0.00 |
| ATOM | 6725 | CG   | GLU | X | 446 | 49.371 | 37.816 | 29.241 | 0.00 | 0.00 |
| ATOM | 6726 | HG2  | GLU | X | 446 | 48.737 | 37.318 | 28.507 | 0.00 | 0.00 |
| ATOM | 6727 | HG3  | GLU | X | 446 | 50.323 | 37.288 | 29.299 | 0.00 | 0.00 |
| ATOM | 6728 | CD   | GLU | X | 446 | 48.725 | 37.785 | 30.687 | 0.00 | 0.00 |
| ATOM | 6729 | OE1  | GLU | X | 446 | 47.460 | 37.885 | 30.665 | 0.00 | 0.00 |
| ATOM | 6730 | OE2  | GLU | X | 446 | 49.431 | 37.627 | 31.678 | 0.00 | 0.00 |
| ATOM | 6731 | C    | GLU | X | 446 | 50.497 | 41.443 | 29.552 | 0.00 | 0.00 |
| ATOM | 6732 | O    | GLU | X | 446 | 50.665 | 42.173 | 28.616 | 0.00 | 0.00 |
| ATOM | 6733 | N    | ILE | X | 447 | 50.266 | 41.937 | 30.794 | 0.00 | 0.00 |
| ATOM | 6734 | H    | ILE | X | 447 | 50.310 | 41.374 | 31.630 | 0.00 | 0.00 |
| ATOM | 6735 | CA   | ILE | X | 447 | 50.046 | 43.383 | 31.083 | 0.00 | 0.00 |
| ATOM | 6736 | HA   | ILE | X | 447 | 49.093 | 43.728 | 30.682 | 0.00 | 0.00 |
| ATOM | 6737 | CB   | ILE | X | 447 | 49.979 | 43.712 | 32.624 | 0.00 | 0.00 |
| ATOM | 6738 | HB   | ILE | X | 447 | 49.872 | 44.795 | 32.694 | 0.00 | 0.00 |
| ATOM | 6739 | CG2  | ILE | X | 447 | 48.773 | 43.030 | 33.163 | 0.00 | 0.00 |
| ATOM | 6740 | HG21 | ILE | X | 447 | 48.859 | 41.948 | 33.262 | 0.00 | 0.00 |
| ATOM | 6741 | HG22 | ILE | X | 447 | 48.380 | 43.317 | 34.138 | 0.00 | 0.00 |
| ATOM | 6742 | HG23 | ILE | X | 447 | 48.000 | 43.243 | 32.425 | 0.00 | 0.00 |
| ATOM | 6743 | CG1  | ILE | X | 447 | 51.210 | 43.400 | 33.460 | 0.00 | 0.00 |
| ATOM | 6744 | HG12 | ILE | X | 447 | 51.439 | 42.347 | 33.293 | 0.00 | 0.00 |
| ATOM | 6745 | HG13 | ILE | X | 447 | 52.010 | 44.087 | 33.184 | 0.00 | 0.00 |
| ATOM | 6746 | CD1  | ILE | X | 447 | 50.994 | 43.660 | 34.936 | 0.00 | 0.00 |
| ATOM | 6747 | HD11 | ILE | X | 447 | 50.217 | 42.990 | 35.305 | 0.00 | 0.00 |
| ATOM | 6748 | HD12 | ILE | X | 447 | 51.982 | 43.471 | 35.357 | 0.00 | 0.00 |
| ATOM | 6749 | HD13 | ILE | X | 447 | 50.583 | 44.664 | 35.036 | 0.00 | 0.00 |
| ATOM | 6750 | C    | ILE | X | 447 | 51.023 | 44.259 | 30.371 | 0.00 | 0.00 |
| ATOM | 6751 | O    | ILE | X | 447 | 50.625 | 45.248 | 29.799 | 0.00 | 0.00 |
| ATOM | 6752 | N    | GLU | X | 448 | 52.299 | 43.862 | 30.137 | 0.00 | 0.00 |
| ATOM | 6753 | H    | GLU | X | 448 | 52.661 | 43.078 | 30.661 | 0.00 | 0.00 |
| ATOM | 6754 | CA   | GLU | X | 448 | 53.311 | 44.522 | 29.390 | 0.00 | 0.00 |
| ATOM | 6755 | HA   | GLU | X | 448 | 53.383 | 45.561 | 29.711 | 0.00 | 0.00 |
| ATOM | 6756 | CB   | GLU | X | 448 | 54.726 | 43.954 | 29.601 | 0.00 | 0.00 |
| ATOM | 6757 | HB2  | GLU | X | 448 | 54.756 | 42.866 | 29.533 | 0.00 | 0.00 |
| ATOM | 6758 | HB3  | GLU | X | 448 | 55.239 | 44.398 | 28.748 | 0.00 | 0.00 |
| ATOM | 6759 | CG   | GLU | X | 448 | 55.299 | 44.436 | 30.978 | 0.00 | 0.00 |
| ATOM | 6760 | HG2  | GLU | X | 448 | 55.420 | 45.519 | 30.951 | 0.00 | 0.00 |
| ATOM | 6761 | HG3  | GLU | X | 448 | 54.604 | 44.067 | 31.732 | 0.00 | 0.00 |
| ATOM | 6762 | CD   | GLU | X | 448 | 56.649 | 43.785 | 31.091 | 0.00 | 0.00 |
| ATOM | 6763 | OE1  | GLU | X | 448 | 57.597 | 44.048 | 30.321 | 0.00 | 0.00 |
| ATOM | 6764 | OE2  | GLU | X | 448 | 56.747 | 43.047 | 32.072 | 0.00 | 0.00 |
| ATOM | 6765 | C    | GLU | X | 448 | 53.006 | 44.713 | 27.871 | 0.00 | 0.00 |
| ATOM | 6766 | O    | GLU | X | 448 | 53.126 | 45.815 | 27.375 | 0.00 | 0.00 |
| ATOM | 6767 | N    | PHE | X | 449 | 52.615 | 43.643 | 27.187 | 0.00 | 0.00 |
| ATOM | 6768 | H    | PHE | X | 449 | 52.521 | 42.791 | 27.722 | 0.00 | 0.00 |
| ATOM | 6769 | CA   | PHE | X | 449 | 52.097 | 43.712 | 25.858 | 0.00 | 0.00 |
| ATOM | 6770 | HA   | PHE | X | 449 | 52.808 | 44.112 | 25.134 | 0.00 | 0.00 |
| ATOM | 6771 | CB   | PHE | X | 449 | 51.823 | 42.314 | 25.322 | 0.00 | 0.00 |
| ATOM | 6772 | HB2  | PHE | X | 449 | 51.154 | 41.804 | 26.015 | 0.00 | 0.00 |
| ATOM | 6773 | HB3  | PHE | X | 449 | 51.329 | 42.504 | 24.369 | 0.00 | 0.00 |
| ATOM | 6774 | CG   | PHE | X | 449 | 53.076 | 41.436 | 25.169 | 0.00 | 0.00 |
| ATOM | 6775 | CD1  | PHE | X | 449 | 53.701 | 40.857 | 26.332 | 0.00 | 0.00 |
| ATOM | 6776 | HD1  | PHE | X | 449 | 53.213 | 40.888 | 27.295 | 0.00 | 0.00 |
| ATOM | 6777 | CE1  | PHE | X | 449 | 54.932 | 40.238 | 26.178 | 0.00 | 0.00 |
| ATOM | 6778 | HE1  | PHE | X | 449 | 55.426 | 39.867 | 27.063 | 0.00 | 0.00 |
| ATOM | 6779 | CZ   | PHE | X | 449 | 55.428 | 39.980 | 24.906 | 0.00 | 0.00 |
| ATOM | 6780 | HZ   | PHE | X | 449 | 56.372 | 39.464 | 24.813 | 0.00 | 0.00 |
| ATOM | 6781 | CE2  | PHE | X | 449 | 54.771 | 40.404 | 23.774 | 0.00 | 0.00 |
| ATOM | 6782 | HE2  | PHE | X | 449 | 55.243 | 40.259 | 22.814 | 0.00 | 0.00 |
| ATOM | 6783 | CD2  | PHE | X | 449 | 53.574 | 41.190 | 23.892 | 0.00 | 0.00 |
| ATOM | 6784 | HD2  | PHE | X | 449 | 53.150 | 41.671 | 23.022 | 0.00 | 0.00 |
| ATOM | 6785 | C    | PHE | X | 449 | 50.825 | 44.594 | 25.709 | 0.00 | 0.00 |
| ATOM | 6786 | O    | PHE | X | 449 | 50.616 | 45.332 | 24.707 | 0.00 | 0.00 |
| ATOM | 6787 | N    | ILE | X | 450 | 50.011 | 44.560 | 26.774 | 0.00 | 0.00 |
| ATOM | 6788 | H    | ILE | X | 450 | 50.210 | 43.884 | 27.497 | 0.00 | 0.00 |



|      |      |      |     |   |     |        |        |        |      |      |
|------|------|------|-----|---|-----|--------|--------|--------|------|------|
| ATOM | 6789 | CA   | ILE | X | 450 | 48.732 | 45.248 | 26.777 | 0.00 | 0.00 |
| ATOM | 6790 | HA   | ILE | X | 450 | 48.185 | 45.208 | 25.835 | 0.00 | 0.00 |
| ATOM | 6791 | CB   | ILE | X | 450 | 47.731 | 44.702 | 27.811 | 0.00 | 0.00 |
| ATOM | 6792 | HB   | ILE | X | 450 | 48.184 | 44.732 | 28.802 | 0.00 | 0.00 |
| ATOM | 6793 | CG2  | ILE | X | 450 | 46.430 | 45.426 | 27.952 | 0.00 | 0.00 |
| ATOM | 6794 | HG21 | ILE | X | 450 | 46.638 | 46.472 | 28.176 | 0.00 | 0.00 |
| ATOM | 6795 | HG22 | ILE | X | 450 | 45.869 | 45.441 | 27.017 | 0.00 | 0.00 |
| ATOM | 6796 | HG23 | ILE | X | 450 | 45.815 | 44.973 | 28.730 | 0.00 | 0.00 |
| ATOM | 6797 | CG1  | ILE | X | 450 | 47.468 | 43.237 | 27.516 | 0.00 | 0.00 |
| ATOM | 6798 | HG12 | ILE | X | 450 | 48.172 | 42.631 | 28.086 | 0.00 | 0.00 |
| ATOM | 6799 | HG13 | ILE | X | 450 | 46.521 | 42.909 | 27.943 | 0.00 | 0.00 |
| ATOM | 6800 | CD1  | ILE | X | 450 | 47.351 | 42.865 | 26.074 | 0.00 | 0.00 |
| ATOM | 6801 | HD11 | ILE | X | 450 | 47.028 | 41.833 | 25.942 | 0.00 | 0.00 |
| ATOM | 6802 | HD12 | ILE | X | 450 | 46.584 | 43.480 | 25.604 | 0.00 | 0.00 |
| ATOM | 6803 | HD13 | ILE | X | 450 | 48.340 | 42.943 | 25.622 | 0.00 | 0.00 |
| ATOM | 6804 | C    | ILE | X | 450 | 48.895 | 46.812 | 27.001 | 0.00 | 0.00 |
| ATOM | 6805 | O    | ILE | X | 450 | 48.238 | 47.537 | 26.265 | 0.00 | 0.00 |
| ATOM | 6806 | N    | PHE | X | 451 | 49.708 | 47.277 | 27.910 | 0.00 | 0.00 |
| ATOM | 6807 | H    | PHE | X | 451 | 50.139 | 46.541 | 28.451 | 0.00 | 0.00 |
| ATOM | 6808 | CA   | PHE | X | 451 | 50.148 | 48.695 | 28.010 | 0.00 | 0.00 |
| ATOM | 6809 | HA   | PHE | X | 451 | 49.253 | 49.317 | 28.015 | 0.00 | 0.00 |
| ATOM | 6810 | CB   | PHE | X | 451 | 50.911 | 48.854 | 29.287 | 0.00 | 0.00 |
| ATOM | 6811 | HB2  | PHE | X | 451 | 51.517 | 47.948 | 29.301 | 0.00 | 0.00 |
| ATOM | 6812 | HB3  | PHE | X | 451 | 51.532 | 49.740 | 29.158 | 0.00 | 0.00 |
| ATOM | 6813 | CG   | PHE | X | 451 | 50.120 | 48.949 | 30.622 | 0.00 | 0.00 |
| ATOM | 6814 | CD1  | PHE | X | 451 | 50.268 | 47.951 | 31.562 | 0.00 | 0.00 |
| ATOM | 6815 | HD1  | PHE | X | 451 | 50.875 | 47.082 | 31.353 | 0.00 | 0.00 |
| ATOM | 6816 | CE1  | PHE | X | 451 | 49.502 | 47.955 | 32.716 | 0.00 | 0.00 |
| ATOM | 6817 | HE1  | PHE | X | 451 | 49.638 | 47.153 | 33.426 | 0.00 | 0.00 |
| ATOM | 6818 | CZ   | PHE | X | 451 | 48.677 | 49.105 | 33.005 | 0.00 | 0.00 |
| ATOM | 6819 | HZ   | PHE | X | 451 | 48.101 | 49.177 | 33.916 | 0.00 | 0.00 |
| ATOM | 6820 | CE2  | PHE | X | 451 | 48.577 | 50.174 | 32.035 | 0.00 | 0.00 |
| ATOM | 6821 | HE2  | PHE | X | 451 | 48.073 | 51.113 | 32.203 | 0.00 | 0.00 |
| ATOM | 6822 | CD2  | PHE | X | 451 | 49.315 | 50.103 | 30.828 | 0.00 | 0.00 |
| ATOM | 6823 | HD2  | PHE | X | 451 | 49.294 | 50.846 | 30.044 | 0.00 | 0.00 |
| ATOM | 6824 | C    | PHE | X | 451 | 50.976 | 49.226 | 26.802 | 0.00 | 0.00 |
| ATOM | 6825 | O    | PHE | X | 451 | 51.227 | 50.416 | 26.699 | 0.00 | 0.00 |
| ATOM | 6826 | N    | GLY | X | 452 | 51.392 | 48.319 | 25.883 | 0.00 | 0.00 |
| ATOM | 6827 | H    | GLY | X | 452 | 51.083 | 47.361 | 25.974 | 0.00 | 0.00 |
| ATOM | 6828 | CA   | GLY | X | 452 | 52.327 | 48.582 | 24.809 | 0.00 | 0.00 |
| ATOM | 6829 | HA2  | GLY | X | 452 | 52.250 | 47.697 | 24.127 | 0.00 | 0.00 |
| ATOM | 6830 | HA3  | GLY | X | 452 | 52.096 | 49.473 | 24.341 | 0.00 | 0.00 |
| ATOM | 6831 | C    | GLY | X | 452 | 53.834 | 48.704 | 25.183 | 0.00 | 0.00 |
| ATOM | 6832 | O    | GLY | X | 452 | 54.586 | 49.225 | 24.428 | 0.00 | 0.00 |
| ATOM | 6833 | N    | ILE | X | 453 | 54.303 | 48.279 | 26.371 | 0.00 | 0.00 |
| ATOM | 6834 | H    | ILE | X | 453 | 53.666 | 47.754 | 26.953 | 0.00 | 0.00 |
| ATOM | 6835 | CA   | ILE | X | 453 | 55.711 | 48.482 | 26.949 | 0.00 | 0.00 |
| ATOM | 6836 | HA   | ILE | X | 453 | 55.860 | 49.561 | 26.914 | 0.00 | 0.00 |
| ATOM | 6837 | CB   | ILE | X | 453 | 55.842 | 47.857 | 28.305 | 0.00 | 0.00 |
| ATOM | 6838 | HB   | ILE | X | 453 | 55.704 | 46.776 | 28.321 | 0.00 | 0.00 |
| ATOM | 6839 | CG2  | ILE | X | 453 | 57.259 | 48.054 | 28.832 | 0.00 | 0.00 |
| ATOM | 6840 | HG21 | ILE | X | 453 | 58.042 | 47.559 | 28.258 | 0.00 | 0.00 |
| ATOM | 6841 | HG22 | ILE | X | 453 | 57.383 | 49.137 | 28.826 | 0.00 | 0.00 |
| ATOM | 6842 | HG23 | ILE | X | 453 | 57.330 | 47.828 | 29.896 | 0.00 | 0.00 |
| ATOM | 6843 | CG1  | ILE | X | 453 | 54.853 | 48.381 | 29.335 | 0.00 | 0.00 |
| ATOM | 6844 | HG12 | ILE | X | 453 | 53.848 | 48.023 | 29.113 | 0.00 | 0.00 |
| ATOM | 6845 | HG13 | ILE | X | 453 | 55.125 | 47.888 | 30.268 | 0.00 | 0.00 |
| ATOM | 6846 | CD1  | ILE | X | 453 | 54.674 | 49.901 | 29.439 | 0.00 | 0.00 |
| ATOM | 6847 | HD11 | ILE | X | 453 | 55.642 | 50.323 | 29.711 | 0.00 | 0.00 |
| ATOM | 6848 | HD12 | ILE | X | 453 | 54.266 | 50.236 | 28.486 | 0.00 | 0.00 |
| ATOM | 6849 | HD13 | ILE | X | 453 | 53.960 | 50.141 | 30.226 | 0.00 | 0.00 |
| ATOM | 6850 | C    | ILE | X | 453 | 56.803 | 47.998 | 25.971 | 0.00 | 0.00 |
| ATOM | 6851 | O    | ILE | X | 453 | 57.801 | 48.723 | 25.886 | 0.00 | 0.00 |
| ATOM | 6852 | N    | PRO | X | 454 | 56.694 | 46.895 | 25.180 | 0.00 | 0.00 |
| ATOM | 6853 | CD   | PRO | X | 454 | 55.757 | 45.817 | 25.324 | 0.00 | 0.00 |
| ATOM | 6854 | HD2  | PRO | X | 454 | 54.762 | 46.042 | 24.938 | 0.00 | 0.00 |
| ATOM | 6855 | HD3  | PRO | X | 454 | 55.586 | 45.550 | 26.367 | 0.00 | 0.00 |
| ATOM | 6856 | CG   | PRO | X | 454 | 56.300 | 44.621 | 24.541 | 0.00 | 0.00 |
| ATOM | 6857 | HG2  | PRO | X | 454 | 55.552 | 43.980 | 24.074 | 0.00 | 0.00 |
| ATOM | 6858 | HG3  | PRO | X | 454 | 56.892 | 43.939 | 25.151 | 0.00 | 0.00 |

|      |      |      |     |   |     |        |        |        |      |      |
|------|------|------|-----|---|-----|--------|--------|--------|------|------|
| ATOM | 6859 | CB   | PRO | X | 454 | 57.150 | 45.368 | 23.476 | 0.00 | 0.00 |
| ATOM | 6860 | HB2  | PRO | X | 454 | 56.459 | 45.577 | 22.659 | 0.00 | 0.00 |
| ATOM | 6861 | HB3  | PRO | X | 454 | 57.905 | 44.759 | 22.979 | 0.00 | 0.00 |
| ATOM | 6862 | CA   | PRO | X | 454 | 57.656 | 46.614 | 24.131 | 0.00 | 0.00 |
| ATOM | 6863 | HA   | PRO | X | 454 | 58.525 | 46.383 | 24.748 | 0.00 | 0.00 |
| ATOM | 6864 | C    | PRO | X | 454 | 57.932 | 47.752 | 23.019 | 0.00 | 0.00 |
| ATOM | 6865 | O    | PRO | X | 454 | 58.977 | 47.652 | 22.433 | 0.00 | 0.00 |
| ATOM | 6866 | N    | LEU | X | 455 | 57.058 | 48.716 | 22.767 | 0.00 | 0.00 |
| ATOM | 6867 | H    | LEU | X | 455 | 56.297 | 48.813 | 23.423 | 0.00 | 0.00 |
| ATOM | 6868 | CA   | LEU | X | 455 | 57.279 | 49.763 | 21.907 | 0.00 | 0.00 |
| ATOM | 6869 | HA   | LEU | X | 455 | 57.744 | 49.363 | 21.005 | 0.00 | 0.00 |
| ATOM | 6870 | CB   | LEU | X | 455 | 55.818 | 50.375 | 21.551 | 0.00 | 0.00 |
| ATOM | 6871 | HB2  | LEU | X | 455 | 55.323 | 50.681 | 22.473 | 0.00 | 0.00 |
| ATOM | 6872 | HB3  | LEU | X | 455 | 56.022 | 51.323 | 21.056 | 0.00 | 0.00 |
| ATOM | 6873 | CG   | LEU | X | 455 | 55.073 | 49.550 | 20.541 | 0.00 | 0.00 |
| ATOM | 6874 | HG   | LEU | X | 455 | 55.634 | 49.481 | 19.609 | 0.00 | 0.00 |
| ATOM | 6875 | CD1  | LEU | X | 455 | 54.589 | 48.268 | 21.152 | 0.00 | 0.00 |
| ATOM | 6876 | HD11 | LEU | X | 455 | 53.870 | 47.799 | 20.481 | 0.00 | 0.00 |
| ATOM | 6877 | HD12 | LEU | X | 455 | 55.422 | 47.570 | 21.249 | 0.00 | 0.00 |
| ATOM | 6878 | HD13 | LEU | X | 455 | 54.037 | 48.447 | 22.074 | 0.00 | 0.00 |
| ATOM | 6879 | CD2  | LEU | X | 455 | 53.803 | 50.338 | 20.180 | 0.00 | 0.00 |
| ATOM | 6880 | HD21 | LEU | X | 455 | 53.245 | 50.406 | 21.115 | 0.00 | 0.00 |
| ATOM | 6881 | HD22 | LEU | X | 455 | 54.004 | 51.363 | 19.869 | 0.00 | 0.00 |
| ATOM | 6882 | HD23 | LEU | X | 455 | 53.324 | 49.742 | 19.403 | 0.00 | 0.00 |
| ATOM | 6883 | C    | LEU | X | 455 | 58.265 | 50.859 | 22.434 | 0.00 | 0.00 |
| ATOM | 6884 | O    | LEU | X | 455 | 58.609 | 51.770 | 21.727 | 0.00 | 0.00 |
| ATOM | 6885 | N    | ASP | X | 456 | 58.672 | 50.772 | 23.717 | 0.00 | 0.00 |
| ATOM | 6886 | H    | ASP | X | 456 | 58.344 | 49.966 | 24.230 | 0.00 | 0.00 |
| ATOM | 6887 | CA   | ASP | X | 456 | 59.535 | 51.790 | 24.318 | 0.00 | 0.00 |
| ATOM | 6888 | HA   | ASP | X | 456 | 59.077 | 52.777 | 24.250 | 0.00 | 0.00 |
| ATOM | 6889 | CB   | ASP | X | 456 | 59.643 | 51.510 | 25.806 | 0.00 | 0.00 |
| ATOM | 6890 | HB2  | ASP | X | 456 | 58.622 | 51.443 | 26.182 | 0.00 | 0.00 |
| ATOM | 6891 | HB3  | ASP | X | 456 | 60.038 | 50.501 | 25.923 | 0.00 | 0.00 |
| ATOM | 6892 | CG   | ASP | X | 456 | 60.589 | 52.404 | 26.617 | 0.00 | 0.00 |
| ATOM | 6893 | OD1  | ASP | X | 456 | 61.781 | 52.311 | 26.468 | 0.00 | 0.00 |
| ATOM | 6894 | OD2  | ASP | X | 456 | 60.135 | 53.208 | 27.434 | 0.00 | 0.00 |
| ATOM | 6895 | C    | ASP | X | 456 | 60.944 | 51.902 | 23.670 | 0.00 | 0.00 |
| ATOM | 6896 | O    | ASP | X | 456 | 61.473 | 50.902 | 23.081 | 0.00 | 0.00 |
| ATOM | 6897 | N    | PRO | X | 457 | 61.610 | 53.106 | 23.687 | 0.00 | 0.00 |
| ATOM | 6898 | CD   | PRO | X | 457 | 60.968 | 54.423 | 24.078 | 0.00 | 0.00 |
| ATOM | 6899 | HD2  | PRO | X | 457 | 60.465 | 54.445 | 25.045 | 0.00 | 0.00 |
| ATOM | 6900 | HD3  | PRO | X | 457 | 60.324 | 54.668 | 23.233 | 0.00 | 0.00 |
| ATOM | 6901 | CG   | PRO | X | 457 | 62.140 | 55.330 | 24.001 | 0.00 | 0.00 |
| ATOM | 6902 | HG2  | PRO | X | 457 | 62.671 | 55.155 | 24.937 | 0.00 | 0.00 |
| ATOM | 6903 | HG3  | PRO | X | 457 | 62.042 | 56.415 | 23.950 | 0.00 | 0.00 |
| ATOM | 6904 | CB   | PRO | X | 457 | 62.946 | 54.845 | 22.801 | 0.00 | 0.00 |
| ATOM | 6905 | HB2  | PRO | X | 457 | 63.967 | 55.217 | 22.715 | 0.00 | 0.00 |
| ATOM | 6906 | HB3  | PRO | X | 457 | 62.389 | 55.089 | 21.897 | 0.00 | 0.00 |
| ATOM | 6907 | CA   | PRO | X | 457 | 62.829 | 53.338 | 22.949 | 0.00 | 0.00 |
| ATOM | 6908 | HA   | PRO | X | 457 | 62.821 | 52.839 | 21.980 | 0.00 | 0.00 |
| ATOM | 6909 | C    | PRO | X | 457 | 64.164 | 52.900 | 23.603 | 0.00 | 0.00 |
| ATOM | 6910 | O    | PRO | X | 457 | 65.142 | 52.878 | 22.902 | 0.00 | 0.00 |
| ATOM | 6911 | N    | SER | X | 458 | 64.170 | 52.592 | 24.966 | 0.00 | 0.00 |
| ATOM | 6912 | H    | SER | X | 458 | 63.341 | 52.696 | 25.535 | 0.00 | 0.00 |
| ATOM | 6913 | CA   | SER | X | 458 | 65.313 | 52.048 | 25.652 | 0.00 | 0.00 |
| ATOM | 6914 | HA   | SER | X | 458 | 66.105 | 51.980 | 24.907 | 0.00 | 0.00 |
| ATOM | 6915 | CB   | SER | X | 458 | 65.873 | 52.817 | 26.917 | 0.00 | 0.00 |
| ATOM | 6916 | HB2  | SER | X | 458 | 65.236 | 52.645 | 27.784 | 0.00 | 0.00 |
| ATOM | 6917 | HB3  | SER | X | 458 | 66.821 | 52.379 | 27.230 | 0.00 | 0.00 |
| ATOM | 6918 | OG   | SER | X | 458 | 66.207 | 54.157 | 26.809 | 0.00 | 0.00 |
| ATOM | 6919 | HG   | SER | X | 458 | 66.416 | 54.370 | 25.896 | 0.00 | 0.00 |
| ATOM | 6920 | C    | SER | X | 458 | 65.182 | 50.611 | 25.965 | 0.00 | 0.00 |
| ATOM | 6921 | O    | SER | X | 458 | 66.227 | 49.882 | 25.959 | 0.00 | 0.00 |
| ATOM | 6922 | N    | ARG | X | 459 | 63.976 | 50.143 | 26.292 | 0.00 | 0.00 |
| ATOM | 6923 | H    | ARG | X | 459 | 63.161 | 50.693 | 26.063 | 0.00 | 0.00 |
| ATOM | 6924 | CA   | ARG | X | 459 | 63.734 | 48.850 | 26.891 | 0.00 | 0.00 |
| ATOM | 6925 | HA   | ARG | X | 459 | 64.524 | 48.726 | 27.632 | 0.00 | 0.00 |
| ATOM | 6926 | CB   | ARG | X | 459 | 62.421 | 48.920 | 27.803 | 0.00 | 0.00 |
| ATOM | 6927 | HB2  | ARG | X | 459 | 61.515 | 49.133 | 27.236 | 0.00 | 0.00 |
| ATOM | 6928 | HB3  | ARG | X | 459 | 62.372 | 47.903 | 28.192 | 0.00 | 0.00 |

|      |      |      |     |   |     |        |        |        |      |      |
|------|------|------|-----|---|-----|--------|--------|--------|------|------|
| ATOM | 6929 | CG   | ARG | X | 459 | 62.417 | 50.066 | 28.925 | 0.00 | 0.00 |
| ATOM | 6930 | HG2  | ARG | X | 459 | 63.246 | 49.835 | 29.594 | 0.00 | 0.00 |
| ATOM | 6931 | HG3  | ARG | X | 459 | 62.494 | 51.057 | 28.477 | 0.00 | 0.00 |
| ATOM | 6932 | CD   | ARG | X | 459 | 61.178 | 50.015 | 29.832 | 0.00 | 0.00 |
| ATOM | 6933 | HD2  | ARG | X | 459 | 60.671 | 49.074 | 29.618 | 0.00 | 0.00 |
| ATOM | 6934 | HD3  | ARG | X | 459 | 61.595 | 50.106 | 30.835 | 0.00 | 0.00 |
| ATOM | 6935 | NE   | ARG | X | 459 | 60.198 | 51.119 | 29.659 | 0.00 | 0.00 |
| ATOM | 6936 | HE   | ARG | X | 459 | 60.574 | 51.902 | 29.144 | 0.00 | 0.00 |
| ATOM | 6937 | CZ   | ARG | X | 459 | 59.028 | 51.223 | 30.146 | 0.00 | 0.00 |
| ATOM | 6938 | NH1  | ARG | X | 459 | 58.534 | 50.540 | 31.171 | 0.00 | 0.00 |
| ATOM | 6939 | HH11 | ARG | X | 459 | 59.087 | 49.800 | 31.580 | 0.00 | 0.00 |
| ATOM | 6940 | HH12 | ARG | X | 459 | 57.641 | 50.787 | 31.573 | 0.00 | 0.00 |
| ATOM | 6941 | NH2  | ARG | X | 459 | 58.284 | 52.134 | 29.490 | 0.00 | 0.00 |
| ATOM | 6942 | HH21 | ARG | X | 459 | 58.604 | 52.730 | 28.740 | 0.00 | 0.00 |
| ATOM | 6943 | HH22 | ARG | X | 459 | 57.329 | 52.335 | 29.748 | 0.00 | 0.00 |
| ATOM | 6944 | C    | ARG | X | 459 | 63.902 | 47.726 | 25.850 | 0.00 | 0.00 |
| ATOM | 6945 | O    | ARG | X | 459 | 63.162 | 47.672 | 24.847 | 0.00 | 0.00 |
| ATOM | 6946 | N    | ASN | X | 460 | 64.891 | 46.802 | 26.133 | 0.00 | 0.00 |
| ATOM | 6947 | H    | ASN | X | 460 | 65.452 | 47.078 | 26.926 | 0.00 | 0.00 |
| ATOM | 6948 | CA   | ASN | X | 460 | 65.212 | 45.753 | 25.192 | 0.00 | 0.00 |
| ATOM | 6949 | HA   | ASN | X | 460 | 65.418 | 46.277 | 24.258 | 0.00 | 0.00 |
| ATOM | 6950 | CB   | ASN | X | 460 | 66.484 | 45.081 | 25.664 | 0.00 | 0.00 |
| ATOM | 6951 | HB2  | ASN | X | 460 | 67.171 | 45.849 | 26.020 | 0.00 | 0.00 |
| ATOM | 6952 | HB3  | ASN | X | 460 | 66.267 | 44.419 | 26.502 | 0.00 | 0.00 |
| ATOM | 6953 | CG   | ASN | X | 460 | 67.333 | 44.378 | 24.583 | 0.00 | 0.00 |
| ATOM | 6954 | OD1  | ASN | X | 460 | 66.926 | 44.242 | 23.440 | 0.00 | 0.00 |
| ATOM | 6955 | ND2  | ASN | X | 460 | 68.591 | 43.959 | 24.915 | 0.00 | 0.00 |
| ATOM | 6956 | HD21 | ASN | X | 460 | 69.202 | 43.686 | 24.158 | 0.00 | 0.00 |
| ATOM | 6957 | HD22 | ASN | X | 460 | 68.852 | 44.168 | 25.868 | 0.00 | 0.00 |
| ATOM | 6958 | C    | ASN | X | 460 | 64.026 | 44.770 | 24.973 | 0.00 | 0.00 |
| ATOM | 6959 | O    | ASN | X | 460 | 63.657 | 43.994 | 25.894 | 0.00 | 0.00 |
| ATOM | 6960 | N    | TYR | X | 461 | 63.550 | 44.527 | 23.783 | 0.00 | 0.00 |
| ATOM | 6961 | H    | TYR | X | 461 | 63.920 | 45.099 | 23.037 | 0.00 | 0.00 |
| ATOM | 6962 | CA   | TYR | X | 461 | 62.720 | 43.367 | 23.382 | 0.00 | 0.00 |
| ATOM | 6963 | HA   | TYR | X | 461 | 63.032 | 42.557 | 24.041 | 0.00 | 0.00 |
| ATOM | 6964 | CB   | TYR | X | 461 | 61.214 | 43.582 | 23.629 | 0.00 | 0.00 |
| ATOM | 6965 | HB2  | TYR | X | 461 | 60.907 | 44.288 | 22.857 | 0.00 | 0.00 |
| ATOM | 6966 | HB3  | TYR | X | 461 | 60.733 | 42.618 | 23.461 | 0.00 | 0.00 |
| ATOM | 6967 | CG   | TYR | X | 461 | 60.719 | 44.017 | 25.003 | 0.00 | 0.00 |
| ATOM | 6968 | CD1  | TYR | X | 461 | 60.909 | 45.279 | 25.454 | 0.00 | 0.00 |
| ATOM | 6969 | HD1  | TYR | X | 461 | 61.513 | 45.995 | 24.917 | 0.00 | 0.00 |
| ATOM | 6970 | CE1  | TYR | X | 461 | 60.483 | 45.812 | 26.688 | 0.00 | 0.00 |
| ATOM | 6971 | HE1  | TYR | X | 461 | 60.548 | 46.881 | 26.830 | 0.00 | 0.00 |
| ATOM | 6972 | CZ   | TYR | X | 461 | 59.772 | 44.997 | 27.601 | 0.00 | 0.00 |
| ATOM | 6973 | OH   | TYR | X | 461 | 59.147 | 45.448 | 28.711 | 0.00 | 0.00 |
| ATOM | 6974 | HH   | TYR | X | 461 | 58.606 | 44.721 | 29.028 | 0.00 | 0.00 |
| ATOM | 6975 | CE2  | TYR | X | 461 | 59.536 | 43.650 | 27.193 | 0.00 | 0.00 |
| ATOM | 6976 | HE2  | TYR | X | 461 | 58.839 | 43.073 | 27.783 | 0.00 | 0.00 |
| ATOM | 6977 | CD2  | TYR | X | 461 | 60.050 | 43.130 | 25.964 | 0.00 | 0.00 |
| ATOM | 6978 | HD2  | TYR | X | 461 | 59.961 | 42.081 | 25.724 | 0.00 | 0.00 |
| ATOM | 6979 | C    | TYR | X | 461 | 63.039 | 43.015 | 21.915 | 0.00 | 0.00 |
| ATOM | 6980 | O    | TYR | X | 461 | 63.677 | 43.831 | 21.264 | 0.00 | 0.00 |
| ATOM | 6981 | N    | THR | X | 462 | 62.574 | 41.840 | 21.417 | 0.00 | 0.00 |
| ATOM | 6982 | H    | THR | X | 462 | 62.010 | 41.265 | 22.026 | 0.00 | 0.00 |
| ATOM | 6983 | CA   | THR | X | 462 | 62.493 | 41.561 | 19.999 | 0.00 | 0.00 |
| ATOM | 6984 | HA   | THR | X | 462 | 63.491 | 41.774 | 19.617 | 0.00 | 0.00 |
| ATOM | 6985 | CB   | THR | X | 462 | 62.277 | 40.070 | 19.791 | 0.00 | 0.00 |
| ATOM | 6986 | HB   | THR | X | 462 | 62.238 | 39.973 | 18.706 | 0.00 | 0.00 |
| ATOM | 6987 | CG2  | THR | X | 462 | 63.482 | 39.276 | 20.268 | 0.00 | 0.00 |
| ATOM | 6988 | HG21 | THR | X | 462 | 64.378 | 39.553 | 19.712 | 0.00 | 0.00 |
| ATOM | 6989 | HG22 | THR | X | 462 | 63.669 | 39.505 | 21.317 | 0.00 | 0.00 |
| ATOM | 6990 | HG23 | THR | X | 462 | 63.346 | 38.198 | 20.188 | 0.00 | 0.00 |
| ATOM | 6991 | OG1  | THR | X | 462 | 61.151 | 39.491 | 20.350 | 0.00 | 0.00 |
| ATOM | 6992 | HG1  | THR | X | 462 | 61.173 | 39.594 | 21.304 | 0.00 | 0.00 |
| ATOM | 6993 | C    | THR | X | 462 | 61.713 | 42.440 | 19.066 | 0.00 | 0.00 |
| ATOM | 6994 | O    | THR | X | 462 | 60.735 | 42.993 | 19.557 | 0.00 | 0.00 |
| ATOM | 6995 | N    | ALA | X | 463 | 62.059 | 42.560 | 17.831 | 0.00 | 0.00 |
| ATOM | 6996 | H    | ALA | X | 463 | 62.973 | 42.274 | 17.510 | 0.00 | 0.00 |
| ATOM | 6997 | CA   | ALA | X | 463 | 61.112 | 43.047 | 16.811 | 0.00 | 0.00 |
| ATOM | 6998 | HA   | ALA | X | 463 | 60.857 | 44.078 | 17.056 | 0.00 | 0.00 |

|      |      |      |     |   |     |        |        |        |      |      |
|------|------|------|-----|---|-----|--------|--------|--------|------|------|
| ATOM | 6999 | CB   | ALA | X | 463 | 61.752 | 42.952 | 15.421 | 0.00 | 0.00 |
| ATOM | 7000 | HB1  | ALA | X | 463 | 61.085 | 43.339 | 14.650 | 0.00 | 0.00 |
| ATOM | 7001 | HB2  | ALA | X | 463 | 62.654 | 43.563 | 15.459 | 0.00 | 0.00 |
| ATOM | 7002 | HB3  | ALA | X | 463 | 62.129 | 41.969 | 15.139 | 0.00 | 0.00 |
| ATOM | 7003 | C    | ALA | X | 463 | 59.818 | 42.209 | 16.815 | 0.00 | 0.00 |
| ATOM | 7004 | O    | ALA | X | 463 | 58.717 | 42.726 | 16.712 | 0.00 | 0.00 |
| ATOM | 7005 | N    | GLU | X | 464 | 59.940 | 40.901 | 17.012 | 0.00 | 0.00 |
| ATOM | 7006 | H    | GLU | X | 464 | 60.831 | 40.430 | 16.947 | 0.00 | 0.00 |
| ATOM | 7007 | CA   | GLU | X | 464 | 58.853 | 39.947 | 17.068 | 0.00 | 0.00 |
| ATOM | 7008 | HA   | GLU | X | 464 | 58.247 | 40.195 | 16.198 | 0.00 | 0.00 |
| ATOM | 7009 | CB   | GLU | X | 464 | 59.300 | 38.539 | 17.055 | 0.00 | 0.00 |
| ATOM | 7010 | HB2  | GLU | X | 464 | 60.053 | 38.320 | 17.813 | 0.00 | 0.00 |
| ATOM | 7011 | HB3  | GLU | X | 464 | 58.411 | 37.940 | 17.255 | 0.00 | 0.00 |
| ATOM | 7012 | CG   | GLU | X | 464 | 59.709 | 37.922 | 15.691 | 0.00 | 0.00 |
| ATOM | 7013 | HG2  | GLU | X | 464 | 60.456 | 38.611 | 15.298 | 0.00 | 0.00 |
| ATOM | 7014 | HG3  | GLU | X | 464 | 60.099 | 36.925 | 15.896 | 0.00 | 0.00 |
| ATOM | 7015 | CD   | GLU | X | 464 | 58.553 | 37.824 | 14.627 | 0.00 | 0.00 |
| ATOM | 7016 | OE1  | GLU | X | 464 | 57.773 | 38.799 | 14.479 | 0.00 | 0.00 |
| ATOM | 7017 | OE2  | GLU | X | 464 | 58.513 | 36.888 | 13.817 | 0.00 | 0.00 |
| ATOM | 7018 | C    | GLU | X | 464 | 58.067 | 40.183 | 18.285 | 0.00 | 0.00 |
| ATOM | 7019 | O    | GLU | X | 464 | 56.854 | 40.240 | 18.131 | 0.00 | 0.00 |
| ATOM | 7020 | N    | GLU | X | 465 | 58.476 | 40.482 | 19.502 | 0.00 | 0.00 |
| ATOM | 7021 | H    | GLU | X | 465 | 59.455 | 40.305 | 19.674 | 0.00 | 0.00 |
| ATOM | 7022 | CA   | GLU | X | 465 | 57.711 | 40.976 | 20.619 | 0.00 | 0.00 |
| ATOM | 7023 | HA   | GLU | X | 465 | 56.935 | 40.238 | 20.819 | 0.00 | 0.00 |
| ATOM | 7024 | CB   | GLU | X | 465 | 58.589 | 41.048 | 21.875 | 0.00 | 0.00 |
| ATOM | 7025 | HB2  | GLU | X | 465 | 59.597 | 41.375 | 21.622 | 0.00 | 0.00 |
| ATOM | 7026 | HB3  | GLU | X | 465 | 58.151 | 41.819 | 22.509 | 0.00 | 0.00 |
| ATOM | 7027 | CG   | GLU | X | 465 | 58.664 | 39.764 | 22.655 | 0.00 | 0.00 |
| ATOM | 7028 | HG2  | GLU | X | 465 | 57.927 | 39.886 | 23.448 | 0.00 | 0.00 |
| ATOM | 7029 | HG3  | GLU | X | 465 | 58.451 | 38.964 | 21.946 | 0.00 | 0.00 |
| ATOM | 7030 | CD   | GLU | X | 465 | 60.027 | 39.395 | 23.196 | 0.00 | 0.00 |
| ATOM | 7031 | OE1  | GLU | X | 465 | 61.013 | 40.138 | 23.096 | 0.00 | 0.00 |
| ATOM | 7032 | OE2  | GLU | X | 465 | 60.131 | 38.296 | 23.706 | 0.00 | 0.00 |
| ATOM | 7033 | C    | GLU | X | 465 | 57.065 | 42.323 | 20.357 | 0.00 | 0.00 |
| ATOM | 7034 | O    | GLU | X | 465 | 55.911 | 42.543 | 20.804 | 0.00 | 0.00 |
| ATOM | 7035 | N    | LYS | X | 466 | 57.740 | 43.303 | 19.759 | 0.00 | 0.00 |
| ATOM | 7036 | H    | LYS | X | 466 | 58.473 | 43.031 | 19.119 | 0.00 | 0.00 |
| ATOM | 7037 | CA   | LYS | X | 466 | 57.072 | 44.588 | 19.563 | 0.00 | 0.00 |
| ATOM | 7038 | HA   | LYS | X | 466 | 56.550 | 44.744 | 20.507 | 0.00 | 0.00 |
| ATOM | 7039 | CB   | LYS | X | 466 | 58.143 | 45.752 | 19.536 | 0.00 | 0.00 |
| ATOM | 7040 | HB2  | LYS | X | 466 | 57.626 | 46.696 | 19.706 | 0.00 | 0.00 |
| ATOM | 7041 | HB3  | LYS | X | 466 | 58.898 | 45.662 | 20.317 | 0.00 | 0.00 |
| ATOM | 7042 | CG   | LYS | X | 466 | 58.911 | 45.895 | 18.267 | 0.00 | 0.00 |
| ATOM | 7043 | HG2  | LYS | X | 466 | 59.714 | 45.158 | 18.258 | 0.00 | 0.00 |
| ATOM | 7044 | HG3  | LYS | X | 466 | 58.239 | 45.733 | 17.424 | 0.00 | 0.00 |
| ATOM | 7045 | CD   | LYS | X | 466 | 59.582 | 47.205 | 18.122 | 0.00 | 0.00 |
| ATOM | 7046 | HD2  | LYS | X | 466 | 60.181 | 47.032 | 17.229 | 0.00 | 0.00 |
| ATOM | 7047 | HD3  | LYS | X | 466 | 58.928 | 48.048 | 17.897 | 0.00 | 0.00 |
| ATOM | 7048 | CE   | LYS | X | 466 | 60.602 | 47.548 | 19.196 | 0.00 | 0.00 |
| ATOM | 7049 | HE2  | LYS | X | 466 | 60.099 | 48.135 | 19.964 | 0.00 | 0.00 |
| ATOM | 7050 | HE3  | LYS | X | 466 | 60.955 | 46.714 | 19.803 | 0.00 | 0.00 |
| ATOM | 7051 | NZ   | LYS | X | 466 | 61.731 | 48.334 | 18.635 | 0.00 | 0.00 |
| ATOM | 7052 | HZ1  | LYS | X | 466 | 61.407 | 49.211 | 18.253 | 0.00 | 0.00 |
| ATOM | 7053 | HZ2  | LYS | X | 466 | 62.405 | 48.654 | 19.316 | 0.00 | 0.00 |
| ATOM | 7054 | HZ3  | LYS | X | 466 | 62.182 | 47.745 | 17.950 | 0.00 | 0.00 |
| ATOM | 7055 | C    | LYS | X | 466 | 56.021 | 44.611 | 18.430 | 0.00 | 0.00 |
| ATOM | 7056 | O    | LYS | X | 466 | 54.946 | 45.171 | 18.617 | 0.00 | 0.00 |
| ATOM | 7057 | N    | ILE | X | 467 | 56.189 | 43.841 | 17.360 | 0.00 | 0.00 |
| ATOM | 7058 | H    | ILE | X | 467 | 57.126 | 43.518 | 17.168 | 0.00 | 0.00 |
| ATOM | 7059 | CA   | ILE | X | 467 | 55.042 | 43.456 | 16.507 | 0.00 | 0.00 |
| ATOM | 7060 | HA   | ILE | X | 467 | 54.614 | 44.369 | 16.092 | 0.00 | 0.00 |
| ATOM | 7061 | CB   | ILE | X | 467 | 55.642 | 42.676 | 15.311 | 0.00 | 0.00 |
| ATOM | 7062 | HB   | ILE | X | 467 | 56.393 | 41.944 | 15.608 | 0.00 | 0.00 |
| ATOM | 7063 | CG2  | ILE | X | 467 | 54.526 | 42.039 | 14.497 | 0.00 | 0.00 |
| ATOM | 7064 | HG21 | ILE | X | 467 | 54.985 | 41.551 | 13.636 | 0.00 | 0.00 |
| ATOM | 7065 | HG22 | ILE | X | 467 | 53.935 | 41.262 | 14.982 | 0.00 | 0.00 |
| ATOM | 7066 | HG23 | ILE | X | 467 | 53.917 | 42.806 | 14.019 | 0.00 | 0.00 |
| ATOM | 7067 | CG1  | ILE | X | 467 | 56.380 | 43.729 | 14.428 | 0.00 | 0.00 |
| ATOM | 7068 | HG12 | ILE | X | 467 | 55.782 | 44.602 | 14.168 | 0.00 | 0.00 |

|      |      |      |     |   |     |        |        |        |      |      |
|------|------|------|-----|---|-----|--------|--------|--------|------|------|
| ATOM | 7069 | HG13 | ILE | X | 467 | 57.149 | 44.154 | 15.073 | 0.00 | 0.00 |
| ATOM | 7070 | CD1  | ILE | X | 467 | 57.124 | 43.160 | 13.225 | 0.00 | 0.00 |
| ATOM | 7071 | HD11 | ILE | X | 467 | 57.768 | 43.999 | 12.959 | 0.00 | 0.00 |
| ATOM | 7072 | HD12 | ILE | X | 467 | 57.627 | 42.232 | 13.497 | 0.00 | 0.00 |
| ATOM | 7073 | HD13 | ILE | X | 467 | 56.314 | 42.955 | 12.526 | 0.00 | 0.00 |
| ATOM | 7074 | C    | ILE | X | 467 | 53.906 | 42.661 | 17.189 | 0.00 | 0.00 |
| ATOM | 7075 | O    | ILE | X | 467 | 52.692 | 42.834 | 16.962 | 0.00 | 0.00 |
| ATOM | 7076 | N    | PHE | X | 468 | 54.281 | 41.768 | 18.121 | 0.00 | 0.00 |
| ATOM | 7077 | H    | PHE | X | 468 | 55.244 | 41.712 | 18.421 | 0.00 | 0.00 |
| ATOM | 7078 | CA   | PHE | X | 468 | 53.293 | 40.974 | 18.849 | 0.00 | 0.00 |
| ATOM | 7079 | HA   | PHE | X | 468 | 52.628 | 40.596 | 18.072 | 0.00 | 0.00 |
| ATOM | 7080 | CB   | PHE | X | 468 | 53.985 | 39.800 | 19.494 | 0.00 | 0.00 |
| ATOM | 7081 | HB2  | PHE | X | 468 | 54.476 | 39.167 | 18.755 | 0.00 | 0.00 |
| ATOM | 7082 | HB3  | PHE | X | 468 | 54.726 | 40.258 | 20.149 | 0.00 | 0.00 |
| ATOM | 7083 | CG   | PHE | X | 468 | 53.081 | 38.889 | 20.353 | 0.00 | 0.00 |
| ATOM | 7084 | CD1  | PHE | X | 468 | 51.818 | 38.443 | 19.956 | 0.00 | 0.00 |
| ATOM | 7085 | HD1  | PHE | X | 468 | 51.426 | 38.795 | 19.014 | 0.00 | 0.00 |
| ATOM | 7086 | CE1  | PHE | X | 468 | 50.997 | 37.702 | 20.804 | 0.00 | 0.00 |
| ATOM | 7087 | HE1  | PHE | X | 468 | 49.978 | 37.578 | 20.470 | 0.00 | 0.00 |
| ATOM | 7088 | CZ   | PHE | X | 468 | 51.543 | 37.041 | 21.927 | 0.00 | 0.00 |
| ATOM | 7089 | HZ   | PHE | X | 468 | 50.872 | 36.429 | 22.511 | 0.00 | 0.00 |
| ATOM | 7090 | CE2  | PHE | X | 468 | 52.931 | 37.280 | 22.286 | 0.00 | 0.00 |
| ATOM | 7091 | HE2  | PHE | X | 468 | 53.452 | 36.823 | 23.114 | 0.00 | 0.00 |
| ATOM | 7092 | CD2  | PHE | X | 468 | 53.616 | 38.286 | 21.522 | 0.00 | 0.00 |
| ATOM | 7093 | HD2  | PHE | X | 468 | 54.648 | 38.500 | 21.757 | 0.00 | 0.00 |
| ATOM | 7094 | C    | PHE | X | 468 | 52.436 | 41.791 | 19.818 | 0.00 | 0.00 |
| ATOM | 7095 | O    | PHE | X | 468 | 51.239 | 41.624 | 19.765 | 0.00 | 0.00 |
| ATOM | 7096 | N    | ALA | X | 469 | 53.050 | 42.691 | 20.582 | 0.00 | 0.00 |
| ATOM | 7097 | H    | ALA | X | 469 | 54.020 | 42.904 | 20.398 | 0.00 | 0.00 |
| ATOM | 7098 | CA   | ALA | X | 469 | 52.294 | 43.569 | 21.433 | 0.00 | 0.00 |
| ATOM | 7099 | HA   | ALA | X | 469 | 51.924 | 43.055 | 22.320 | 0.00 | 0.00 |
| ATOM | 7100 | CB   | ALA | X | 469 | 53.271 | 44.568 | 22.002 | 0.00 | 0.00 |
| ATOM | 7101 | HB1  | ALA | X | 469 | 53.967 | 44.957 | 21.259 | 0.00 | 0.00 |
| ATOM | 7102 | HB2  | ALA | X | 469 | 52.819 | 45.387 | 22.561 | 0.00 | 0.00 |
| ATOM | 7103 | HB3  | ALA | X | 469 | 53.752 | 44.073 | 22.846 | 0.00 | 0.00 |
| ATOM | 7104 | C    | ALA | X | 469 | 51.112 | 44.312 | 20.714 | 0.00 | 0.00 |
| ATOM | 7105 | O    | ALA | X | 469 | 49.997 | 44.375 | 21.226 | 0.00 | 0.00 |
| ATOM | 7106 | N    | GLN | X | 470 | 51.407 | 44.769 | 19.501 | 0.00 | 0.00 |
| ATOM | 7107 | H    | GLN | X | 470 | 52.298 | 44.596 | 19.059 | 0.00 | 0.00 |
| ATOM | 7108 | CA   | GLN | X | 470 | 50.410 | 45.551 | 18.758 | 0.00 | 0.00 |
| ATOM | 7109 | HA   | GLN | X | 470 | 50.005 | 46.200 | 19.534 | 0.00 | 0.00 |
| ATOM | 7110 | CB   | GLN | X | 470 | 51.115 | 46.313 | 17.597 | 0.00 | 0.00 |
| ATOM | 7111 | HB2  | GLN | X | 470 | 51.804 | 45.697 | 17.021 | 0.00 | 0.00 |
| ATOM | 7112 | HB3  | GLN | X | 470 | 50.337 | 46.813 | 17.020 | 0.00 | 0.00 |
| ATOM | 7113 | CG   | GLN | X | 470 | 51.975 | 47.406 | 18.120 | 0.00 | 0.00 |
| ATOM | 7114 | HG2  | GLN | X | 470 | 51.387 | 48.239 | 18.506 | 0.00 | 0.00 |
| ATOM | 7115 | HG3  | GLN | X | 470 | 52.569 | 47.084 | 18.975 | 0.00 | 0.00 |
| ATOM | 7116 | CD   | GLN | X | 470 | 52.973 | 47.841 | 17.023 | 0.00 | 0.00 |
| ATOM | 7117 | OE1  | GLN | X | 470 | 52.558 | 48.627 | 16.169 | 0.00 | 0.00 |
| ATOM | 7118 | NE2  | GLN | X | 470 | 54.294 | 47.585 | 17.110 | 0.00 | 0.00 |
| ATOM | 7119 | HE21 | GLN | X | 470 | 54.900 | 47.818 | 16.336 | 0.00 | 0.00 |
| ATOM | 7120 | HE22 | GLN | X | 470 | 54.625 | 46.886 | 17.760 | 0.00 | 0.00 |
| ATOM | 7121 | C    | GLN | X | 470 | 49.147 | 44.725 | 18.374 | 0.00 | 0.00 |
| ATOM | 7122 | O    | GLN | X | 470 | 48.009 | 45.270 | 18.508 | 0.00 | 0.00 |
| ATOM | 7123 | N    | ARG | X | 471 | 49.241 | 43.415 | 18.134 | 0.00 | 0.00 |
| ATOM | 7124 | H    | ARG | X | 471 | 50.177 | 43.046 | 18.211 | 0.00 | 0.00 |
| ATOM | 7125 | CA   | ARG | X | 471 | 48.053 | 42.581 | 17.983 | 0.00 | 0.00 |
| ATOM | 7126 | HA   | ARG | X | 471 | 47.384 | 43.006 | 17.235 | 0.00 | 0.00 |
| ATOM | 7127 | CB   | ARG | X | 471 | 48.474 | 41.196 | 17.559 | 0.00 | 0.00 |
| ATOM | 7128 | HB2  | ARG | X | 471 | 49.134 | 40.752 | 18.304 | 0.00 | 0.00 |
| ATOM | 7129 | HB3  | ARG | X | 471 | 47.597 | 40.575 | 17.379 | 0.00 | 0.00 |
| ATOM | 7130 | CG   | ARG | X | 471 | 49.216 | 41.093 | 16.224 | 0.00 | 0.00 |
| ATOM | 7131 | HG2  | ARG | X | 471 | 48.462 | 41.414 | 15.505 | 0.00 | 0.00 |
| ATOM | 7132 | HG3  | ARG | X | 471 | 50.107 | 41.714 | 16.126 | 0.00 | 0.00 |
| ATOM | 7133 | CD   | ARG | X | 471 | 49.751 | 39.623 | 16.059 | 0.00 | 0.00 |
| ATOM | 7134 | HD2  | ARG | X | 471 | 50.308 | 39.454 | 15.138 | 0.00 | 0.00 |
| ATOM | 7135 | HD3  | ARG | X | 471 | 50.472 | 39.539 | 16.872 | 0.00 | 0.00 |
| ATOM | 7136 | NE   | ARG | X | 471 | 48.700 | 38.641 | 16.232 | 0.00 | 0.00 |
| ATOM | 7137 | HE   | ARG | X | 471 | 47.775 | 38.903 | 15.921 | 0.00 | 0.00 |
| ATOM | 7138 | CZ   | ARG | X | 471 | 48.784 | 37.533 | 16.860 | 0.00 | 0.00 |

|      |      |      |     |   |     |        |        |        |      |      |
|------|------|------|-----|---|-----|--------|--------|--------|------|------|
| ATOM | 7139 | NH1  | ARG | X | 471 | 49.896 | 37.025 | 17.366 | 0.00 | 0.00 |
| ATOM | 7140 | HH11 | ARG | X | 471 | 50.723 | 37.557 | 17.135 | 0.00 | 0.00 |
| ATOM | 7141 | HH12 | ARG | X | 471 | 49.983 | 36.096 | 17.752 | 0.00 | 0.00 |
| ATOM | 7142 | NH2  | ARG | X | 471 | 47.757 | 36.784 | 17.094 | 0.00 | 0.00 |
| ATOM | 7143 | HH21 | ARG | X | 471 | 46.817 | 37.068 | 16.855 | 0.00 | 0.00 |
| ATOM | 7144 | HH22 | ARG | X | 471 | 47.937 | 35.893 | 17.535 | 0.00 | 0.00 |
| ATOM | 7145 | C    | ARG | X | 471 | 47.184 | 42.547 | 19.284 | 0.00 | 0.00 |
| ATOM | 7146 | O    | ARG | X | 471 | 45.986 | 42.669 | 19.273 | 0.00 | 0.00 |
| ATOM | 7147 | N    | LEU | X | 472 | 47.895 | 42.359 | 20.448 | 0.00 | 0.00 |
| ATOM | 7148 | H    | LEU | X | 472 | 48.876 | 42.149 | 20.335 | 0.00 | 0.00 |
| ATOM | 7149 | CA   | LEU | X | 472 | 47.302 | 42.253 | 21.813 | 0.00 | 0.00 |
| ATOM | 7150 | HA   | LEU | X | 472 | 46.549 | 41.468 | 21.737 | 0.00 | 0.00 |
| ATOM | 7151 | CB   | LEU | X | 472 | 48.427 | 41.668 | 22.751 | 0.00 | 0.00 |
| ATOM | 7152 | HB2  | LEU | X | 472 | 49.278 | 42.347 | 22.699 | 0.00 | 0.00 |
| ATOM | 7153 | HB3  | LEU | X | 472 | 48.024 | 41.651 | 23.764 | 0.00 | 0.00 |
| ATOM | 7154 | CG   | LEU | X | 472 | 48.968 | 40.244 | 22.340 | 0.00 | 0.00 |
| ATOM | 7155 | HG   | LEU | X | 472 | 49.229 | 40.146 | 21.287 | 0.00 | 0.00 |
| ATOM | 7156 | CD1  | LEU | X | 472 | 50.239 | 39.909 | 23.225 | 0.00 | 0.00 |
| ATOM | 7157 | HD11 | LEU | X | 472 | 51.083 | 40.419 | 22.761 | 0.00 | 0.00 |
| ATOM | 7158 | HD12 | LEU | X | 472 | 50.050 | 40.153 | 24.271 | 0.00 | 0.00 |
| ATOM | 7159 | HD13 | LEU | X | 472 | 50.552 | 38.867 | 23.295 | 0.00 | 0.00 |
| ATOM | 7160 | CD2  | LEU | X | 472 | 47.813 | 39.250 | 22.388 | 0.00 | 0.00 |
| ATOM | 7161 | HD21 | LEU | X | 472 | 47.411 | 39.320 | 23.399 | 0.00 | 0.00 |
| ATOM | 7162 | HD22 | LEU | X | 472 | 47.035 | 39.444 | 21.650 | 0.00 | 0.00 |
| ATOM | 7163 | HD23 | LEU | X | 472 | 48.108 | 38.224 | 22.168 | 0.00 | 0.00 |
| ATOM | 7164 | C    | LEU | X | 472 | 46.678 | 43.556 | 22.282 | 0.00 | 0.00 |
| ATOM | 7165 | O    | LEU | X | 472 | 45.540 | 43.569 | 22.561 | 0.00 | 0.00 |
| ATOM | 7166 | N    | MET | X | 473 | 47.400 | 44.691 | 22.244 | 0.00 | 0.00 |
| ATOM | 7167 | H    | MET | X | 473 | 48.372 | 44.658 | 21.970 | 0.00 | 0.00 |
| ATOM | 7168 | CA   | MET | X | 473 | 46.887 | 46.056 | 22.462 | 0.00 | 0.00 |
| ATOM | 7169 | HA   | MET | X | 473 | 46.734 | 46.194 | 23.532 | 0.00 | 0.00 |
| ATOM | 7170 | CB   | MET | X | 473 | 47.822 | 47.159 | 21.968 | 0.00 | 0.00 |
| ATOM | 7171 | HB2  | MET | X | 473 | 47.917 | 47.043 | 20.889 | 0.00 | 0.00 |
| ATOM | 7172 | HB3  | MET | X | 473 | 47.363 | 48.136 | 22.123 | 0.00 | 0.00 |
| ATOM | 7173 | CG   | MET | X | 473 | 49.120 | 47.124 | 22.622 | 0.00 | 0.00 |
| ATOM | 7174 | HG2  | MET | X | 473 | 49.089 | 47.428 | 23.668 | 0.00 | 0.00 |
| ATOM | 7175 | HG3  | MET | X | 473 | 49.455 | 46.091 | 22.711 | 0.00 | 0.00 |
| ATOM | 7176 | SD   | MET | X | 473 | 50.528 | 48.030 | 21.774 | 0.00 | 0.00 |
| ATOM | 7177 | CE   | MET | X | 473 | 50.122 | 49.766 | 22.108 | 0.00 | 0.00 |
| ATOM | 7178 | HE1  | MET | X | 473 | 50.551 | 49.995 | 23.083 | 0.00 | 0.00 |
| ATOM | 7179 | HE2  | MET | X | 473 | 50.662 | 50.191 | 21.262 | 0.00 | 0.00 |
| ATOM | 7180 | HE3  | MET | X | 473 | 49.072 | 50.040 | 22.010 | 0.00 | 0.00 |
| ATOM | 7181 | C    | MET | X | 473 | 45.608 | 46.216 | 21.631 | 0.00 | 0.00 |
| ATOM | 7182 | O    | MET | X | 473 | 44.573 | 46.709 | 22.114 | 0.00 | 0.00 |
| ATOM | 7183 | N    | ARG | X | 474 | 45.564 | 45.737 | 20.422 | 0.00 | 0.00 |
| ATOM | 7184 | H    | ARG | X | 474 | 46.363 | 45.212 | 20.095 | 0.00 | 0.00 |
| ATOM | 7185 | CA   | ARG | X | 474 | 44.451 | 45.945 | 19.573 | 0.00 | 0.00 |
| ATOM | 7186 | HA   | ARG | X | 474 | 44.181 | 46.991 | 19.724 | 0.00 | 0.00 |
| ATOM | 7187 | CB   | ARG | X | 474 | 44.724 | 45.768 | 18.007 | 0.00 | 0.00 |
| ATOM | 7188 | HB2  | ARG | X | 474 | 45.593 | 46.387 | 17.785 | 0.00 | 0.00 |
| ATOM | 7189 | HB3  | ARG | X | 474 | 45.028 | 44.726 | 17.904 | 0.00 | 0.00 |
| ATOM | 7190 | CG   | ARG | X | 474 | 43.589 | 46.055 | 17.010 | 0.00 | 0.00 |
| ATOM | 7191 | HG2  | ARG | X | 474 | 43.927 | 45.840 | 15.997 | 0.00 | 0.00 |
| ATOM | 7192 | HG3  | ARG | X | 474 | 42.749 | 45.429 | 17.312 | 0.00 | 0.00 |
| ATOM | 7193 | CD   | ARG | X | 474 | 43.038 | 47.487 | 17.021 | 0.00 | 0.00 |
| ATOM | 7194 | HD2  | ARG | X | 474 | 42.698 | 47.795 | 18.010 | 0.00 | 0.00 |
| ATOM | 7195 | HD3  | ARG | X | 474 | 43.880 | 48.149 | 16.818 | 0.00 | 0.00 |
| ATOM | 7196 | NE   | ARG | X | 474 | 41.953 | 47.675 | 16.047 | 0.00 | 0.00 |
| ATOM | 7197 | HE   | ARG | X | 474 | 41.601 | 46.856 | 15.571 | 0.00 | 0.00 |
| ATOM | 7198 | CZ   | ARG | X | 474 | 41.354 | 48.761 | 15.738 | 0.00 | 0.00 |
| ATOM | 7199 | NH1  | ARG | X | 474 | 41.703 | 49.997 | 16.098 | 0.00 | 0.00 |
| ATOM | 7200 | HH11 | ARG | X | 474 | 42.589 | 50.145 | 16.559 | 0.00 | 0.00 |
| ATOM | 7201 | HH12 | ARG | X | 474 | 41.086 | 50.792 | 16.010 | 0.00 | 0.00 |
| ATOM | 7202 | NH2  | ARG | X | 474 | 40.347 | 48.635 | 14.961 | 0.00 | 0.00 |
| ATOM | 7203 | HH21 | ARG | X | 474 | 40.194 | 47.746 | 14.507 | 0.00 | 0.00 |
| ATOM | 7204 | HH22 | ARG | X | 474 | 39.717 | 49.425 | 14.983 | 0.00 | 0.00 |
| ATOM | 7205 | C    | ARG | X | 474 | 43.295 | 45.105 | 19.978 | 0.00 | 0.00 |
| ATOM | 7206 | O    | ARG | X | 474 | 42.132 | 45.514 | 20.037 | 0.00 | 0.00 |
| ATOM | 7207 | N    | TYR | X | 475 | 43.496 | 43.884 | 20.240 | 0.00 | 0.00 |
| ATOM | 7208 | H    | TYR | X | 475 | 44.458 | 43.575 | 20.243 | 0.00 | 0.00 |

|      |      |      |     |   |     |        |        |        |      |      |
|------|------|------|-----|---|-----|--------|--------|--------|------|------|
| ATOM | 7209 | CA   | TYR | X | 475 | 42.467 | 42.988 | 20.790 | 0.00 | 0.00 |
| ATOM | 7210 | HA   | TYR | X | 475 | 41.625 | 42.990 | 20.098 | 0.00 | 0.00 |
| ATOM | 7211 | CB   | TYR | X | 475 | 43.072 | 41.553 | 20.914 | 0.00 | 0.00 |
| ATOM | 7212 | HB2  | TYR | X | 475 | 43.918 | 41.607 | 21.601 | 0.00 | 0.00 |
| ATOM | 7213 | HB3  | TYR | X | 475 | 42.343 | 40.856 | 21.328 | 0.00 | 0.00 |
| ATOM | 7214 | CG   | TYR | X | 475 | 43.679 | 40.795 | 19.717 | 0.00 | 0.00 |
| ATOM | 7215 | CD1  | TYR | X | 475 | 43.229 | 40.918 | 18.389 | 0.00 | 0.00 |
| ATOM | 7216 | HD1  | TYR | X | 475 | 42.532 | 41.649 | 18.007 | 0.00 | 0.00 |
| ATOM | 7217 | CE1  | TYR | X | 475 | 43.708 | 40.050 | 17.427 | 0.00 | 0.00 |
| ATOM | 7218 | HE1  | TYR | X | 475 | 43.647 | 40.158 | 16.354 | 0.00 | 0.00 |
| ATOM | 7219 | CZ   | TYR | X | 475 | 44.684 | 39.115 | 17.795 | 0.00 | 0.00 |
| ATOM | 7220 | OH   | TYR | X | 475 | 45.289 | 38.395 | 16.858 | 0.00 | 0.00 |
| ATOM | 7221 | HH   | TYR | X | 475 | 44.852 | 38.412 | 16.003 | 0.00 | 0.00 |
| ATOM | 7222 | CE2  | TYR | X | 475 | 45.132 | 38.936 | 19.115 | 0.00 | 0.00 |
| ATOM | 7223 | HE2  | TYR | X | 475 | 45.748 | 38.084 | 19.361 | 0.00 | 0.00 |
| ATOM | 7224 | CD2  | TYR | X | 475 | 44.647 | 39.827 | 20.085 | 0.00 | 0.00 |
| ATOM | 7225 | HD2  | TYR | X | 475 | 44.908 | 39.661 | 21.120 | 0.00 | 0.00 |
| ATOM | 7226 | C    | TYR | X | 475 | 41.896 | 43.387 | 22.197 | 0.00 | 0.00 |
| ATOM | 7227 | O    | TYR | X | 475 | 40.718 | 43.257 | 22.368 | 0.00 | 0.00 |
| ATOM | 7228 | N    | TRP | X | 476 | 42.690 | 43.923 | 23.159 | 0.00 | 0.00 |
| ATOM | 7229 | H    | TRP | X | 476 | 43.641 | 44.195 | 22.957 | 0.00 | 0.00 |
| ATOM | 7230 | CA   | TRP | X | 476 | 42.121 | 44.460 | 24.408 | 0.00 | 0.00 |
| ATOM | 7231 | HA   | TRP | X | 476 | 41.433 | 43.754 | 24.873 | 0.00 | 0.00 |
| ATOM | 7232 | CB   | TRP | X | 476 | 43.236 | 44.644 | 25.454 | 0.00 | 0.00 |
| ATOM | 7233 | HB2  | TRP | X | 476 | 44.190 | 44.815 | 24.954 | 0.00 | 0.00 |
| ATOM | 7234 | HB3  | TRP | X | 476 | 42.983 | 45.539 | 26.021 | 0.00 | 0.00 |
| ATOM | 7235 | CG   | TRP | X | 476 | 43.432 | 43.515 | 26.475 | 0.00 | 0.00 |
| ATOM | 7236 | CD1  | TRP | X | 476 | 43.297 | 43.594 | 27.816 | 0.00 | 0.00 |
| ATOM | 7237 | HD1  | TRP | X | 476 | 42.961 | 44.463 | 28.363 | 0.00 | 0.00 |
| ATOM | 7238 | NE1  | TRP | X | 476 | 43.914 | 42.445 | 28.348 | 0.00 | 0.00 |
| ATOM | 7239 | HE1  | TRP | X | 476 | 44.051 | 42.302 | 29.339 | 0.00 | 0.00 |
| ATOM | 7240 | CE2  | TRP | X | 476 | 44.195 | 41.489 | 27.429 | 0.00 | 0.00 |
| ATOM | 7241 | CZ2  | TRP | X | 476 | 44.616 | 40.173 | 27.566 | 0.00 | 0.00 |
| ATOM | 7242 | HZ2  | TRP | X | 476 | 44.825 | 39.758 | 28.541 | 0.00 | 0.00 |
| ATOM | 7243 | CH2  | TRP | X | 476 | 44.872 | 39.398 | 26.386 | 0.00 | 0.00 |
| ATOM | 7244 | HH2  | TRP | X | 476 | 45.167 | 38.361 | 26.441 | 0.00 | 0.00 |
| ATOM | 7245 | CZ3  | TRP | X | 476 | 44.757 | 40.055 | 25.072 | 0.00 | 0.00 |
| ATOM | 7246 | HZ3  | TRP | X | 476 | 45.023 | 39.459 | 24.211 | 0.00 | 0.00 |
| ATOM | 7247 | CE3  | TRP | X | 476 | 44.270 | 41.412 | 24.958 | 0.00 | 0.00 |
| ATOM | 7248 | HE3  | TRP | X | 476 | 43.994 | 41.872 | 24.021 | 0.00 | 0.00 |
| ATOM | 7249 | CD2  | TRP | X | 476 | 43.995 | 42.166 | 26.180 | 0.00 | 0.00 |
| ATOM | 7250 | C    | TRP | X | 476 | 41.357 | 45.724 | 24.027 | 0.00 | 0.00 |
| ATOM | 7251 | O    | TRP | X | 476 | 40.299 | 45.970 | 24.637 | 0.00 | 0.00 |
| ATOM | 7252 | N    | ALA | X | 477 | 41.868 | 46.609 | 23.103 | 0.00 | 0.00 |
| ATOM | 7253 | H    | ALA | X | 477 | 42.732 | 46.319 | 22.669 | 0.00 | 0.00 |
| ATOM | 7254 | CA   | ALA | X | 477 | 41.093 | 47.823 | 22.774 | 0.00 | 0.00 |
| ATOM | 7255 | HA   | ALA | X | 477 | 40.712 | 48.341 | 23.654 | 0.00 | 0.00 |
| ATOM | 7256 | CB   | ALA | X | 477 | 42.013 | 48.879 | 22.195 | 0.00 | 0.00 |
| ATOM | 7257 | HB1  | ALA | X | 477 | 42.306 | 48.583 | 21.187 | 0.00 | 0.00 |
| ATOM | 7258 | HB2  | ALA | X | 477 | 41.446 | 49.799 | 22.051 | 0.00 | 0.00 |
| ATOM | 7259 | HB3  | ALA | X | 477 | 42.775 | 49.287 | 22.858 | 0.00 | 0.00 |
| ATOM | 7260 | C    | ALA | X | 477 | 39.808 | 47.563 | 21.985 | 0.00 | 0.00 |
| ATOM | 7261 | O    | ALA | X | 477 | 38.778 | 48.207 | 22.279 | 0.00 | 0.00 |
| ATOM | 7262 | N    | ASN | X | 478 | 39.719 | 46.481 | 21.205 | 0.00 | 0.00 |
| ATOM | 7263 | H    | ASN | X | 478 | 40.592 | 46.056 | 20.927 | 0.00 | 0.00 |
| ATOM | 7264 | CA   | ASN | X | 478 | 38.466 | 46.062 | 20.624 | 0.00 | 0.00 |
| ATOM | 7265 | HA   | ASN | X | 478 | 37.957 | 46.939 | 20.224 | 0.00 | 0.00 |
| ATOM | 7266 | CB   | ASN | X | 478 | 38.745 | 44.981 | 19.517 | 0.00 | 0.00 |
| ATOM | 7267 | HB2  | ASN | X | 478 | 39.434 | 44.267 | 19.968 | 0.00 | 0.00 |
| ATOM | 7268 | HB3  | ASN | X | 478 | 37.880 | 44.397 | 19.203 | 0.00 | 0.00 |
| ATOM | 7269 | CG   | ASN | X | 478 | 39.369 | 45.643 | 18.296 | 0.00 | 0.00 |
| ATOM | 7270 | OD1  | ASN | X | 478 | 39.048 | 46.773 | 17.969 | 0.00 | 0.00 |
| ATOM | 7271 | ND2  | ASN | X | 478 | 40.145 | 44.822 | 17.591 | 0.00 | 0.00 |
| ATOM | 7272 | HD21 | ASN | X | 478 | 40.294 | 45.223 | 16.677 | 0.00 | 0.00 |
| ATOM | 7273 | HD22 | ASN | X | 478 | 40.327 | 43.864 | 17.855 | 0.00 | 0.00 |
| ATOM | 7274 | C    | ASN | X | 478 | 37.506 | 45.438 | 21.599 | 0.00 | 0.00 |
| ATOM | 7275 | O    | ASN | X | 478 | 36.316 | 45.788 | 21.546 | 0.00 | 0.00 |
| ATOM | 7276 | N    | PHE | X | 479 | 38.000 | 44.725 | 22.620 | 0.00 | 0.00 |
| ATOM | 7277 | H    | PHE | X | 479 | 38.982 | 44.498 | 22.563 | 0.00 | 0.00 |
| ATOM | 7278 | CA   | PHE | X | 479 | 37.091 | 44.368 | 23.695 | 0.00 | 0.00 |

|      |      |      |     |   |     |        |        |        |      |      |
|------|------|------|-----|---|-----|--------|--------|--------|------|------|
| ATOM | 7279 | HA   | PHE | X | 479 | 36.199 | 43.881 | 23.301 | 0.00 | 0.00 |
| ATOM | 7280 | CB   | PHE | X | 479 | 37.826 | 43.338 | 24.547 | 0.00 | 0.00 |
| ATOM | 7281 | HB2  | PHE | X | 479 | 38.188 | 42.486 | 23.973 | 0.00 | 0.00 |
| ATOM | 7282 | HB3  | PHE | X | 479 | 38.728 | 43.828 | 24.914 | 0.00 | 0.00 |
| ATOM | 7283 | CG   | PHE | X | 479 | 37.056 | 42.785 | 25.753 | 0.00 | 0.00 |
| ATOM | 7284 | CD1  | PHE | X | 479 | 36.139 | 41.750 | 25.560 | 0.00 | 0.00 |
| ATOM | 7285 | HD1  | PHE | X | 479 | 35.953 | 41.274 | 24.609 | 0.00 | 0.00 |
| ATOM | 7286 | CE1  | PHE | X | 479 | 35.282 | 41.383 | 26.657 | 0.00 | 0.00 |
| ATOM | 7287 | HE1  | PHE | X | 479 | 34.530 | 40.630 | 26.479 | 0.00 | 0.00 |
| ATOM | 7288 | CZ   | PHE | X | 479 | 35.411 | 41.960 | 27.910 | 0.00 | 0.00 |
| ATOM | 7289 | HZ   | PHE | X | 479 | 34.737 | 41.928 | 28.753 | 0.00 | 0.00 |
| ATOM | 7290 | CE2  | PHE | X | 479 | 36.559 | 42.816 | 28.073 | 0.00 | 0.00 |
| ATOM | 7291 | HE2  | PHE | X | 479 | 36.711 | 43.233 | 29.058 | 0.00 | 0.00 |
| ATOM | 7292 | CD2  | PHE | X | 479 | 37.315 | 43.306 | 27.042 | 0.00 | 0.00 |
| ATOM | 7293 | HD2  | PHE | X | 479 | 37.981 | 44.118 | 27.293 | 0.00 | 0.00 |
| ATOM | 7294 | C    | PHE | X | 479 | 36.611 | 45.566 | 24.587 | 0.00 | 0.00 |
| ATOM | 7295 | O    | PHE | X | 479 | 35.513 | 45.611 | 25.112 | 0.00 | 0.00 |
| ATOM | 7296 | N    | ALA | X | 480 | 37.385 | 46.658 | 24.679 | 0.00 | 0.00 |
| ATOM | 7297 | H    | ALA | X | 480 | 38.317 | 46.569 | 24.299 | 0.00 | 0.00 |
| ATOM | 7298 | CA   | ALA | X | 480 | 36.975 | 47.938 | 25.265 | 0.00 | 0.00 |
| ATOM | 7299 | HA   | ALA | X | 480 | 36.464 | 47.636 | 26.179 | 0.00 | 0.00 |
| ATOM | 7300 | CB   | ALA | X | 480 | 38.220 | 48.841 | 25.528 | 0.00 | 0.00 |
| ATOM | 7301 | HB1  | ALA | X | 480 | 38.606 | 49.037 | 24.528 | 0.00 | 0.00 |
| ATOM | 7302 | HB2  | ALA | X | 480 | 37.944 | 49.775 | 26.017 | 0.00 | 0.00 |
| ATOM | 7303 | HB3  | ALA | X | 480 | 38.935 | 48.292 | 26.141 | 0.00 | 0.00 |
| ATOM | 7304 | C    | ALA | X | 480 | 35.830 | 48.680 | 24.415 | 0.00 | 0.00 |
| ATOM | 7305 | O    | ALA | X | 480 | 34.809 | 49.110 | 25.022 | 0.00 | 0.00 |
| ATOM | 7306 | N    | ARG | X | 481 | 35.808 | 48.530 | 23.087 | 0.00 | 0.00 |
| ATOM | 7307 | H    | ARG | X | 481 | 36.480 | 47.874 | 22.715 | 0.00 | 0.00 |
| ATOM | 7308 | CA   | ARG | X | 481 | 34.819 | 49.189 | 22.199 | 0.00 | 0.00 |
| ATOM | 7309 | HA   | ARG | X | 481 | 34.734 | 50.189 | 22.624 | 0.00 | 0.00 |
| ATOM | 7310 | CB   | ARG | X | 481 | 35.434 | 49.342 | 20.842 | 0.00 | 0.00 |
| ATOM | 7311 | HB2  | ARG | X | 481 | 35.773 | 48.323 | 20.654 | 0.00 | 0.00 |
| ATOM | 7312 | HB3  | ARG | X | 481 | 34.662 | 49.636 | 20.131 | 0.00 | 0.00 |
| ATOM | 7313 | CG   | ARG | X | 481 | 36.557 | 50.333 | 20.613 | 0.00 | 0.00 |
| ATOM | 7314 | HG2  | ARG | X | 481 | 36.027 | 51.155 | 20.132 | 0.00 | 0.00 |
| ATOM | 7315 | HG3  | ARG | X | 481 | 37.024 | 50.686 | 21.533 | 0.00 | 0.00 |
| ATOM | 7316 | CD   | ARG | X | 481 | 37.648 | 49.978 | 19.665 | 0.00 | 0.00 |
| ATOM | 7317 | HD2  | ARG | X | 481 | 37.950 | 48.958 | 19.905 | 0.00 | 0.00 |
| ATOM | 7318 | HD3  | ARG | X | 481 | 37.232 | 50.021 | 18.659 | 0.00 | 0.00 |
| ATOM | 7319 | NE   | ARG | X | 481 | 38.818 | 50.830 | 19.679 | 0.00 | 0.00 |
| ATOM | 7320 | HE   | ARG | X | 481 | 38.583 | 51.810 | 19.612 | 0.00 | 0.00 |
| ATOM | 7321 | CZ   | ARG | X | 481 | 40.075 | 50.455 | 19.400 | 0.00 | 0.00 |
| ATOM | 7322 | NH1  | ARG | X | 481 | 40.442 | 49.270 | 19.076 | 0.00 | 0.00 |
| ATOM | 7323 | HH11 | ARG | X | 481 | 39.784 | 48.504 | 19.045 | 0.00 | 0.00 |
| ATOM | 7324 | HH12 | ARG | X | 481 | 41.367 | 49.267 | 18.670 | 0.00 | 0.00 |
| ATOM | 7325 | NH2  | ARG | X | 481 | 40.980 | 51.358 | 19.358 | 0.00 | 0.00 |
| ATOM | 7326 | HH21 | ARG | X | 481 | 40.966 | 52.240 | 19.850 | 0.00 | 0.00 |
| ATOM | 7327 | HH22 | ARG | X | 481 | 41.823 | 51.028 | 18.910 | 0.00 | 0.00 |
| ATOM | 7328 | C    | ARG | X | 481 | 33.428 | 48.540 | 22.244 | 0.00 | 0.00 |
| ATOM | 7329 | O    | ARG | X | 481 | 32.428 | 49.247 | 22.151 | 0.00 | 0.00 |
| ATOM | 7330 | N    | THR | X | 482 | 33.311 | 47.195 | 22.147 | 0.00 | 0.00 |
| ATOM | 7331 | H    | THR | X | 482 | 34.116 | 46.638 | 21.900 | 0.00 | 0.00 |
| ATOM | 7332 | CA   | THR | X | 482 | 32.028 | 46.487 | 22.078 | 0.00 | 0.00 |
| ATOM | 7333 | HA   | THR | X | 482 | 31.190 | 47.139 | 22.324 | 0.00 | 0.00 |
| ATOM | 7334 | CB   | THR | X | 482 | 31.710 | 45.999 | 20.651 | 0.00 | 0.00 |
| ATOM | 7335 | HB   | THR | X | 482 | 30.670 | 45.672 | 20.640 | 0.00 | 0.00 |
| ATOM | 7336 | CG2  | THR | X | 482 | 31.811 | 47.073 | 19.579 | 0.00 | 0.00 |
| ATOM | 7337 | HG21 | THR | X | 482 | 31.280 | 47.960 | 19.923 | 0.00 | 0.00 |
| ATOM | 7338 | HG22 | THR | X | 482 | 32.843 | 47.301 | 19.313 | 0.00 | 0.00 |
| ATOM | 7339 | HG23 | THR | X | 482 | 31.165 | 46.676 | 18.796 | 0.00 | 0.00 |
| ATOM | 7340 | OG1  | THR | X | 482 | 32.473 | 44.959 | 20.302 | 0.00 | 0.00 |
| ATOM | 7341 | HG1  | THR | X | 482 | 31.933 | 44.168 | 20.242 | 0.00 | 0.00 |
| ATOM | 7342 | C    | THR | X | 482 | 31.906 | 45.396 | 23.120 | 0.00 | 0.00 |
| ATOM | 7343 | O    | THR | X | 482 | 30.792 | 44.925 | 23.443 | 0.00 | 0.00 |
| ATOM | 7344 | N    | GLY | X | 483 | 33.037 | 44.872 | 23.589 | 0.00 | 0.00 |
| ATOM | 7345 | H    | GLY | X | 483 | 33.897 | 45.359 | 23.378 | 0.00 | 0.00 |
| ATOM | 7346 | CA   | GLY | X | 483 | 33.114 | 43.603 | 24.416 | 0.00 | 0.00 |
| ATOM | 7347 | HA2  | GLY | X | 483 | 33.918 | 43.747 | 25.176 | 0.00 | 0.00 |
| ATOM | 7348 | HA3  | GLY | X | 483 | 32.093 | 43.311 | 24.845 | 0.00 | 0.00 |



|      |      |      |     |   |     |        |        |        |      |      |
|------|------|------|-----|---|-----|--------|--------|--------|------|------|
| ATOM | 7349 | C    | GLY | X | 483 | 33.547 | 42.444 | 23.496 | 0.00 | 0.00 |
| ATOM | 7350 | O    | GLY | X | 483 | 33.379 | 41.323 | 23.952 | 0.00 | 0.00 |
| ATOM | 7351 | N    | ASP | X | 484 | 33.903 | 42.721 | 22.249 | 0.00 | 0.00 |
| ATOM | 7352 | H    | ASP | X | 484 | 33.688 | 43.676 | 22.001 | 0.00 | 0.00 |
| ATOM | 7353 | CA   | ASP | X | 484 | 34.262 | 41.749 | 21.245 | 0.00 | 0.00 |
| ATOM | 7354 | HA   | ASP | X | 484 | 34.200 | 40.714 | 21.581 | 0.00 | 0.00 |
| ATOM | 7355 | CB   | ASP | X | 484 | 33.320 | 41.801 | 20.026 | 0.00 | 0.00 |
| ATOM | 7356 | HB2  | ASP | X | 484 | 33.489 | 42.661 | 19.378 | 0.00 | 0.00 |
| ATOM | 7357 | HB3  | ASP | X | 484 | 33.620 | 40.903 | 19.485 | 0.00 | 0.00 |
| ATOM | 7358 | CG   | ASP | X | 484 | 31.770 | 41.716 | 20.282 | 0.00 | 0.00 |
| ATOM | 7359 | OD1  | ASP | X | 484 | 31.015 | 42.759 | 20.320 | 0.00 | 0.00 |
| ATOM | 7360 | OD2  | ASP | X | 484 | 31.271 | 40.573 | 20.467 | 0.00 | 0.00 |
| ATOM | 7361 | C    | ASP | X | 484 | 35.771 | 41.998 | 20.869 | 0.00 | 0.00 |
| ATOM | 7362 | O    | ASP | X | 484 | 36.066 | 43.063 | 20.293 | 0.00 | 0.00 |
| ATOM | 7363 | N    | PRO | X | 485 | 36.729 | 41.077 | 21.143 | 0.00 | 0.00 |
| ATOM | 7364 | CD   | PRO | X | 485 | 36.506 | 39.888 | 21.984 | 0.00 | 0.00 |
| ATOM | 7365 | HD2  | PRO | X | 485 | 36.148 | 39.090 | 21.334 | 0.00 | 0.00 |
| ATOM | 7366 | HD3  | PRO | X | 485 | 35.831 | 40.236 | 22.765 | 0.00 | 0.00 |
| ATOM | 7367 | CG   | PRO | X | 485 | 37.814 | 39.499 | 22.505 | 0.00 | 0.00 |
| ATOM | 7368 | HG2  | PRO | X | 485 | 37.952 | 38.438 | 22.715 | 0.00 | 0.00 |
| ATOM | 7369 | HG3  | PRO | X | 485 | 38.128 | 39.992 | 23.425 | 0.00 | 0.00 |
| ATOM | 7370 | CB   | PRO | X | 485 | 38.733 | 39.892 | 21.392 | 0.00 | 0.00 |
| ATOM | 7371 | HB2  | PRO | X | 485 | 38.759 | 39.204 | 20.547 | 0.00 | 0.00 |
| ATOM | 7372 | HB3  | PRO | X | 485 | 39.736 | 40.113 | 21.757 | 0.00 | 0.00 |
| ATOM | 7373 | CA   | PRO | X | 485 | 38.150 | 41.201 | 20.822 | 0.00 | 0.00 |
| ATOM | 7374 | HA   | PRO | X | 485 | 38.510 | 42.011 | 21.457 | 0.00 | 0.00 |
| ATOM | 7375 | C    | PRO | X | 485 | 38.558 | 41.456 | 19.340 | 0.00 | 0.00 |
| ATOM | 7376 | O    | PRO | X | 485 | 39.763 | 41.256 | 19.039 | 0.00 | 0.00 |
| ATOM | 7377 | N    | ASN | X | 486 | 37.568 | 41.733 | 18.478 | 0.00 | 0.00 |
| ATOM | 7378 | H    | ASN | X | 486 | 36.612 | 41.795 | 18.797 | 0.00 | 0.00 |
| ATOM | 7379 | CA   | ASN | X | 486 | 37.719 | 41.637 | 17.020 | 0.00 | 0.00 |
| ATOM | 7380 | HA   | ASN | X | 486 | 38.710 | 41.256 | 16.773 | 0.00 | 0.00 |
| ATOM | 7381 | CB   | ASN | X | 486 | 36.781 | 40.499 | 16.476 | 0.00 | 0.00 |
| ATOM | 7382 | HB2  | ASN | X | 486 | 36.865 | 40.649 | 15.400 | 0.00 | 0.00 |
| ATOM | 7383 | HB3  | ASN | X | 486 | 37.297 | 39.587 | 16.775 | 0.00 | 0.00 |
| ATOM | 7384 | CG   | ASN | X | 486 | 35.312 | 40.675 | 16.833 | 0.00 | 0.00 |
| ATOM | 7385 | OD1  | ASN | X | 486 | 34.703 | 39.911 | 17.582 | 0.00 | 0.00 |
| ATOM | 7386 | ND2  | ASN | X | 486 | 34.662 | 41.579 | 16.187 | 0.00 | 0.00 |
| ATOM | 7387 | HD21 | ASN | X | 486 | 33.722 | 41.661 | 16.547 | 0.00 | 0.00 |
| ATOM | 7388 | HD22 | ASN | X | 486 | 35.116 | 42.186 | 15.520 | 0.00 | 0.00 |
| ATOM | 7389 | C    | ASN | X | 486 | 37.396 | 42.985 | 16.292 | 0.00 | 0.00 |
| ATOM | 7390 | O    | ASN | X | 486 | 36.877 | 43.906 | 16.922 | 0.00 | 0.00 |
| ATOM | 7391 | N    | GLU | X | 487 | 37.829 | 43.067 | 15.016 | 0.00 | 0.00 |
| ATOM | 7392 | H    | GLU | X | 487 | 38.379 | 42.313 | 14.630 | 0.00 | 0.00 |
| ATOM | 7393 | CA   | GLU | X | 487 | 37.778 | 44.296 | 14.193 | 0.00 | 0.00 |
| ATOM | 7394 | HA   | GLU | X | 487 | 38.282 | 45.147 | 14.652 | 0.00 | 0.00 |
| ATOM | 7395 | CB   | GLU | X | 487 | 38.552 | 43.990 | 12.933 | 0.00 | 0.00 |
| ATOM | 7396 | HB2  | GLU | X | 487 | 38.208 | 43.029 | 12.551 | 0.00 | 0.00 |
| ATOM | 7397 | HB3  | GLU | X | 487 | 38.370 | 44.735 | 12.158 | 0.00 | 0.00 |
| ATOM | 7398 | CG   | GLU | X | 487 | 40.058 | 43.959 | 13.085 | 0.00 | 0.00 |
| ATOM | 7399 | HG2  | GLU | X | 487 | 40.217 | 43.168 | 13.818 | 0.00 | 0.00 |
| ATOM | 7400 | HG3  | GLU | X | 487 | 40.522 | 43.657 | 12.146 | 0.00 | 0.00 |
| ATOM | 7401 | CD   | GLU | X | 487 | 40.612 | 45.298 | 13.704 | 0.00 | 0.00 |
| ATOM | 7402 | OE1  | GLU | X | 487 | 41.014 | 45.321 | 14.856 | 0.00 | 0.00 |
| ATOM | 7403 | OE2  | GLU | X | 487 | 40.498 | 46.390 | 13.049 | 0.00 | 0.00 |
| ATOM | 7404 | C    | GLU | X | 487 | 36.297 | 44.666 | 13.896 | 0.00 | 0.00 |
| ATOM | 7405 | O    | GLU | X | 487 | 35.427 | 43.815 | 14.042 | 0.00 | 0.00 |
| ATOM | 7406 | N    | PRO | X | 488 | 35.948 | 45.941 | 13.588 | 0.00 | 0.00 |
| ATOM | 7407 | CD   | PRO | X | 488 | 36.839 | 47.098 | 13.732 | 0.00 | 0.00 |
| ATOM | 7408 | HD2  | PRO | X | 488 | 37.488 | 47.229 | 12.866 | 0.00 | 0.00 |
| ATOM | 7409 | HD3  | PRO | X | 488 | 37.481 | 47.025 | 14.610 | 0.00 | 0.00 |
| ATOM | 7410 | CG   | PRO | X | 488 | 35.985 | 48.389 | 13.597 | 0.00 | 0.00 |
| ATOM | 7411 | HG2  | PRO | X | 488 | 36.459 | 49.157 | 12.985 | 0.00 | 0.00 |
| ATOM | 7412 | HG3  | PRO | X | 488 | 35.721 | 48.899 | 14.523 | 0.00 | 0.00 |
| ATOM | 7413 | CB   | PRO | X | 488 | 34.736 | 47.849 | 13.011 | 0.00 | 0.00 |
| ATOM | 7414 | HB2  | PRO | X | 488 | 34.720 | 48.154 | 11.964 | 0.00 | 0.00 |
| ATOM | 7415 | HB3  | PRO | X | 488 | 33.849 | 48.243 | 13.506 | 0.00 | 0.00 |
| ATOM | 7416 | CA   | PRO | X | 488 | 34.644 | 46.325 | 13.099 | 0.00 | 0.00 |
| ATOM | 7417 | HA   | PRO | X | 488 | 33.863 | 46.151 | 13.839 | 0.00 | 0.00 |
| ATOM | 7418 | C    | PRO | X | 488 | 34.424 | 45.781 | 11.764 | 0.00 | 0.00 |

|      |      |      |     |   |     |        |        |        |      |      |
|------|------|------|-----|---|-----|--------|--------|--------|------|------|
| ATOM | 7419 | O    | PRO | X | 488 | 33.251 | 45.706 | 11.361 | 0.00 | 0.00 |
| ATOM | 7420 | N    | ARG | X | 489 | 35.431 | 45.413 | 11.037 | 0.00 | 0.00 |
| ATOM | 7421 | H    | ARG | X | 489 | 36.291 | 45.307 | 11.558 | 0.00 | 0.00 |
| ATOM | 7422 | CA   | ARG | X | 489 | 35.339 | 44.669 | 9.765  | 0.00 | 0.00 |
| ATOM | 7423 | HA   | ARG | X | 489 | 34.323 | 44.278 | 9.704  | 0.00 | 0.00 |
| ATOM | 7424 | CB   | ARG | X | 489 | 35.375 | 45.589 | 8.559  | 0.00 | 0.00 |
| ATOM | 7425 | HB2  | ARG | X | 489 | 35.079 | 45.082 | 7.642  | 0.00 | 0.00 |
| ATOM | 7426 | HB3  | ARG | X | 489 | 34.632 | 46.329 | 8.858  | 0.00 | 0.00 |
| ATOM | 7427 | CG   | ARG | X | 489 | 36.733 | 46.210 | 8.335  | 0.00 | 0.00 |
| ATOM | 7428 | HG2  | ARG | X | 489 | 37.015 | 46.775 | 9.224  | 0.00 | 0.00 |
| ATOM | 7429 | HG3  | ARG | X | 489 | 37.419 | 45.377 | 8.183  | 0.00 | 0.00 |
| ATOM | 7430 | CD   | ARG | X | 489 | 36.741 | 47.131 | 7.145  | 0.00 | 0.00 |
| ATOM | 7431 | HD2  | ARG | X | 489 | 36.309 | 46.723 | 6.231  | 0.00 | 0.00 |
| ATOM | 7432 | HD3  | ARG | X | 489 | 36.186 | 48.023 | 7.436  | 0.00 | 0.00 |
| ATOM | 7433 | NE   | ARG | X | 489 | 38.051 | 47.506 | 6.784  | 0.00 | 0.00 |
| ATOM | 7434 | HE   | ARG | X | 489 | 38.481 | 46.882 | 6.116  | 0.00 | 0.00 |
| ATOM | 7435 | CZ   | ARG | X | 489 | 38.867 | 48.489 | 7.195  | 0.00 | 0.00 |
| ATOM | 7436 | NH1  | ARG | X | 489 | 40.142 | 48.553 | 6.765  | 0.00 | 0.00 |
| ATOM | 7437 | HH11 | ARG | X | 489 | 40.504 | 47.745 | 6.280  | 0.00 | 0.00 |
| ATOM | 7438 | HH12 | ARG | X | 489 | 40.709 | 49.378 | 6.904  | 0.00 | 0.00 |
| ATOM | 7439 | NH2  | ARG | X | 489 | 38.479 | 49.436 | 7.938  | 0.00 | 0.00 |
| ATOM | 7440 | HH21 | ARG | X | 489 | 37.482 | 49.449 | 8.097  | 0.00 | 0.00 |
| ATOM | 7441 | HH22 | ARG | X | 489 | 38.932 | 50.336 | 7.864  | 0.00 | 0.00 |
| ATOM | 7442 | C    | ARG | X | 489 | 36.343 | 43.473 | 9.703  | 0.00 | 0.00 |
| ATOM | 7443 | O    | ARG | X | 489 | 37.511 | 43.686 | 10.112 | 0.00 | 0.00 |
| ATOM | 7444 | N    | ASP | X | 490 | 35.919 | 42.266 | 9.494  | 0.00 | 0.00 |
| ATOM | 7445 | H    | ASP | X | 490 | 34.917 | 42.153 | 9.439  | 0.00 | 0.00 |
| ATOM | 7446 | CA   | ASP | X | 490 | 36.784 | 41.051 | 9.534  | 0.00 | 0.00 |
| ATOM | 7447 | HA   | ASP | X | 490 | 37.154 | 40.887 | 10.546 | 0.00 | 0.00 |
| ATOM | 7448 | CB   | ASP | X | 490 | 35.933 | 39.830 | 9.327  | 0.00 | 0.00 |
| ATOM | 7449 | HB2  | ASP | X | 490 | 36.581 | 38.962 | 9.445  | 0.00 | 0.00 |
| ATOM | 7450 | HB3  | ASP | X | 490 | 35.271 | 39.667 | 10.177 | 0.00 | 0.00 |
| ATOM | 7451 | CG   | ASP | X | 490 | 35.203 | 39.739 | 8.010  | 0.00 | 0.00 |
| ATOM | 7452 | OD1  | ASP | X | 490 | 34.116 | 40.358 | 7.863  | 0.00 | 0.00 |
| ATOM | 7453 | OD2  | ASP | X | 490 | 35.658 | 38.957 | 7.125  | 0.00 | 0.00 |
| ATOM | 7454 | C    | ASP | X | 490 | 37.912 | 41.172 | 8.505  | 0.00 | 0.00 |
| ATOM | 7455 | O    | ASP | X | 490 | 37.668 | 41.450 | 7.328  | 0.00 | 0.00 |
| ATOM | 7456 | N    | PRO | X | 491 | 39.153 | 40.809 | 8.907  | 0.00 | 0.00 |
| ATOM | 7457 | CD   | PRO | X | 491 | 39.695 | 40.692 | 10.204 | 0.00 | 0.00 |
| ATOM | 7458 | HD2  | PRO | X | 491 | 39.607 | 39.642 | 10.485 | 0.00 | 0.00 |
| ATOM | 7459 | HD3  | PRO | X | 491 | 39.287 | 41.317 | 10.998 | 0.00 | 0.00 |
| ATOM | 7460 | CG   | PRO | X | 491 | 41.207 | 41.084 | 10.044 | 0.00 | 0.00 |
| ATOM | 7461 | HG2  | PRO | X | 491 | 41.865 | 40.886 | 10.890 | 0.00 | 0.00 |
| ATOM | 7462 | HG3  | PRO | X | 491 | 41.347 | 42.161 | 9.949  | 0.00 | 0.00 |
| ATOM | 7463 | CB   | PRO | X | 491 | 41.521 | 40.339 | 8.804  | 0.00 | 0.00 |
| ATOM | 7464 | HB2  | PRO | X | 491 | 41.771 | 39.326 | 9.118  | 0.00 | 0.00 |
| ATOM | 7465 | HB3  | PRO | X | 491 | 42.408 | 40.796 | 8.366  | 0.00 | 0.00 |
| ATOM | 7466 | CA   | PRO | X | 491 | 40.260 | 40.541 | 7.957  | 0.00 | 0.00 |
| ATOM | 7467 | HA   | PRO | X | 491 | 40.317 | 41.424 | 7.322  | 0.00 | 0.00 |
| ATOM | 7468 | C    | PRO | X | 491 | 39.993 | 39.345 | 7.020  | 0.00 | 0.00 |
| ATOM | 7469 | O    | PRO | X | 491 | 38.921 | 38.710 | 7.068  | 0.00 | 0.00 |
| ATOM | 7470 | N    | LYS | X | 492 | 40.971 | 38.988 | 6.176  | 0.00 | 0.00 |
| ATOM | 7471 | H    | LYS | X | 492 | 41.811 | 39.548 | 6.216  | 0.00 | 0.00 |
| ATOM | 7472 | CA   | LYS | X | 492 | 40.981 | 37.805 | 5.285  | 0.00 | 0.00 |
| ATOM | 7473 | HA   | LYS | X | 492 | 40.026 | 37.721 | 4.765  | 0.00 | 0.00 |
| ATOM | 7474 | CB   | LYS | X | 492 | 42.148 | 38.021 | 4.269  | 0.00 | 0.00 |
| ATOM | 7475 | HB2  | LYS | X | 492 | 42.115 | 37.123 | 3.651  | 0.00 | 0.00 |
| ATOM | 7476 | HB3  | LYS | X | 492 | 42.149 | 38.929 | 3.667  | 0.00 | 0.00 |
| ATOM | 7477 | CG   | LYS | X | 492 | 43.510 | 37.968 | 4.973  | 0.00 | 0.00 |
| ATOM | 7478 | HG2  | LYS | X | 492 | 43.662 | 38.926 | 5.471  | 0.00 | 0.00 |
| ATOM | 7479 | HG3  | LYS | X | 492 | 43.665 | 37.217 | 5.747  | 0.00 | 0.00 |
| ATOM | 7480 | CD   | LYS | X | 492 | 44.592 | 37.733 | 3.904  | 0.00 | 0.00 |
| ATOM | 7481 | HD2  | LYS | X | 492 | 44.416 | 36.750 | 3.468  | 0.00 | 0.00 |
| ATOM | 7482 | HD3  | LYS | X | 492 | 44.534 | 38.555 | 3.190  | 0.00 | 0.00 |
| ATOM | 7483 | CE   | LYS | X | 492 | 46.025 | 37.719 | 4.553  | 0.00 | 0.00 |
| ATOM | 7484 | HE2  | LYS | X | 492 | 46.112 | 36.938 | 5.307  | 0.00 | 0.00 |
| ATOM | 7485 | HE3  | LYS | X | 492 | 46.736 | 37.390 | 3.795  | 0.00 | 0.00 |
| ATOM | 7486 | NZ   | LYS | X | 492 | 46.469 | 39.083 | 4.998  | 0.00 | 0.00 |
| ATOM | 7487 | HZ1  | LYS | X | 492 | 47.467 | 39.106 | 5.146  | 0.00 | 0.00 |
| ATOM | 7488 | HZ2  | LYS | X | 492 | 46.351 | 39.826 | 4.324  | 0.00 | 0.00 |

|      |      |      |     |   |     |        |        |        |      |      |
|------|------|------|-----|---|-----|--------|--------|--------|------|------|
| ATOM | 7489 | HZ3  | LYS | X | 492 | 46.004 | 39.480 | 5.802  | 0.00 | 0.00 |
| ATOM | 7490 | C    | LYS | X | 492 | 41.068 | 36.409 | 5.926  | 0.00 | 0.00 |
| ATOM | 7491 | O    | LYS | X | 492 | 41.445 | 35.413 | 5.266  | 0.00 | 0.00 |
| ATOM | 7492 | N    | ALA | X | 493 | 40.855 | 36.422 | 7.226  | 0.00 | 0.00 |
| ATOM | 7493 | H    | ALA | X | 493 | 40.286 | 37.168 | 7.599  | 0.00 | 0.00 |
| ATOM | 7494 | CA   | ALA | X | 493 | 41.345 | 35.359 | 8.110  | 0.00 | 0.00 |
| ATOM | 7495 | HA   | ALA | X | 493 | 41.330 | 34.448 | 7.511  | 0.00 | 0.00 |
| ATOM | 7496 | CB   | ALA | X | 493 | 42.757 | 35.602 | 8.681  | 0.00 | 0.00 |
| ATOM | 7497 | HB1  | ALA | X | 493 | 43.495 | 35.728 | 7.889  | 0.00 | 0.00 |
| ATOM | 7498 | HB2  | ALA | X | 493 | 42.861 | 36.512 | 9.273  | 0.00 | 0.00 |
| ATOM | 7499 | HB3  | ALA | X | 493 | 43.102 | 34.748 | 9.265  | 0.00 | 0.00 |
| ATOM | 7500 | C    | ALA | X | 493 | 40.383 | 35.218 | 9.254  | 0.00 | 0.00 |
| ATOM | 7501 | O    | ALA | X | 493 | 39.846 | 36.224 | 9.620  | 0.00 | 0.00 |
| ATOM | 7502 | N    | PRO | X | 494 | 40.327 | 34.028 | 10.015 | 0.00 | 0.00 |
| ATOM | 7503 | CD   | PRO | X | 494 | 40.773 | 32.708 | 9.625  | 0.00 | 0.00 |
| ATOM | 7504 | HD2  | PRO | X | 494 | 41.803 | 32.612 | 9.970  | 0.00 | 0.00 |
| ATOM | 7505 | HD3  | PRO | X | 494 | 40.669 | 32.550 | 8.552  | 0.00 | 0.00 |
| ATOM | 7506 | CG   | PRO | X | 494 | 40.031 | 31.676 | 10.468 | 0.00 | 0.00 |
| ATOM | 7507 | HG2  | PRO | X | 494 | 40.671 | 30.810 | 10.633 | 0.00 | 0.00 |
| ATOM | 7508 | HG3  | PRO | X | 494 | 39.072 | 31.371 | 10.049 | 0.00 | 0.00 |
| ATOM | 7509 | CB   | PRO | X | 494 | 39.807 | 32.428 | 11.765 | 0.00 | 0.00 |
| ATOM | 7510 | HB2  | PRO | X | 494 | 40.726 | 32.376 | 12.349 | 0.00 | 0.00 |
| ATOM | 7511 | HB3  | PRO | X | 494 | 38.952 | 32.004 | 12.290 | 0.00 | 0.00 |
| ATOM | 7512 | CA   | PRO | X | 494 | 39.593 | 33.897 | 11.311 | 0.00 | 0.00 |
| ATOM | 7513 | HA   | PRO | X | 494 | 38.514 | 34.016 | 11.214 | 0.00 | 0.00 |
| ATOM | 7514 | C    | PRO | X | 494 | 40.008 | 34.887 | 12.436 | 0.00 | 0.00 |
| ATOM | 7515 | O    | PRO | X | 494 | 41.041 | 35.508 | 12.251 | 0.00 | 0.00 |
| ATOM | 7516 | N    | GLN | X | 495 | 39.277 | 34.956 | 13.546 | 0.00 | 0.00 |
| ATOM | 7517 | H    | GLN | X | 495 | 38.382 | 34.492 | 13.478 | 0.00 | 0.00 |
| ATOM | 7518 | CA   | GLN | X | 495 | 39.578 | 35.814 | 14.708 | 0.00 | 0.00 |
| ATOM | 7519 | HA   | GLN | X | 495 | 40.653 | 35.956 | 14.818 | 0.00 | 0.00 |
| ATOM | 7520 | CB   | GLN | X | 495 | 38.800 | 37.123 | 14.641 | 0.00 | 0.00 |
| ATOM | 7521 | HB2  | GLN | X | 495 | 37.738 | 36.931 | 14.484 | 0.00 | 0.00 |
| ATOM | 7522 | HB3  | GLN | X | 495 | 38.852 | 37.686 | 15.572 | 0.00 | 0.00 |
| ATOM | 7523 | CG   | GLN | X | 495 | 39.345 | 37.994 | 13.542 | 0.00 | 0.00 |
| ATOM | 7524 | HG2  | GLN | X | 495 | 40.403 | 38.198 | 13.707 | 0.00 | 0.00 |
| ATOM | 7525 | HG3  | GLN | X | 495 | 39.343 | 37.491 | 12.575 | 0.00 | 0.00 |
| ATOM | 7526 | CD   | GLN | X | 495 | 38.549 | 39.328 | 13.357 | 0.00 | 0.00 |
| ATOM | 7527 | OE1  | GLN | X | 495 | 39.062 | 40.373 | 13.782 | 0.00 | 0.00 |
| ATOM | 7528 | NE2  | GLN | X | 495 | 37.308 | 39.246 | 12.815 | 0.00 | 0.00 |
| ATOM | 7529 | HE21 | GLN | X | 495 | 36.775 | 40.104 | 12.829 | 0.00 | 0.00 |
| ATOM | 7530 | HE22 | GLN | X | 495 | 36.912 | 38.387 | 12.463 | 0.00 | 0.00 |
| ATOM | 7531 | C    | GLN | X | 495 | 39.244 | 35.001 | 15.982 | 0.00 | 0.00 |
| ATOM | 7532 | O    | GLN | X | 495 | 38.767 | 33.916 | 15.987 | 0.00 | 0.00 |
| ATOM | 7533 | N    | TRP | X | 496 | 39.444 | 35.607 | 17.152 | 0.00 | 0.00 |
| ATOM | 7534 | H    | TRP | X | 496 | 39.642 | 36.598 | 17.139 | 0.00 | 0.00 |
| ATOM | 7535 | CA   | TRP | X | 496 | 39.187 | 35.083 | 18.491 | 0.00 | 0.00 |
| ATOM | 7536 | HA   | TRP | X | 496 | 39.628 | 34.087 | 18.535 | 0.00 | 0.00 |
| ATOM | 7537 | CB   | TRP | X | 496 | 39.993 | 35.928 | 19.548 | 0.00 | 0.00 |
| ATOM | 7538 | HB2  | TRP | X | 496 | 41.057 | 35.878 | 19.319 | 0.00 | 0.00 |
| ATOM | 7539 | HB3  | TRP | X | 496 | 39.701 | 36.963 | 19.369 | 0.00 | 0.00 |
| ATOM | 7540 | CG   | TRP | X | 496 | 39.929 | 35.673 | 20.991 | 0.00 | 0.00 |
| ATOM | 7541 | CD1  | TRP | X | 496 | 39.236 | 34.772 | 21.704 | 0.00 | 0.00 |
| ATOM | 7542 | HD1  | TRP | X | 496 | 38.550 | 34.004 | 21.379 | 0.00 | 0.00 |
| ATOM | 7543 | NE1  | TRP | X | 496 | 39.613 | 34.762 | 23.012 | 0.00 | 0.00 |
| ATOM | 7544 | HE1  | TRP | X | 496 | 39.362 | 34.056 | 23.690 | 0.00 | 0.00 |
| ATOM | 7545 | CE2  | TRP | X | 496 | 40.427 | 35.854 | 23.301 | 0.00 | 0.00 |
| ATOM | 7546 | CZ2  | TRP | X | 496 | 40.946 | 36.449 | 24.460 | 0.00 | 0.00 |
| ATOM | 7547 | HZ2  | TRP | X | 496 | 40.705 | 35.968 | 25.397 | 0.00 | 0.00 |
| ATOM | 7548 | CH2  | TRP | X | 496 | 41.833 | 37.482 | 24.396 | 0.00 | 0.00 |
| ATOM | 7549 | HH2  | TRP | X | 496 | 42.258 | 37.845 | 25.321 | 0.00 | 0.00 |
| ATOM | 7550 | CZ3  | TRP | X | 496 | 42.162 | 38.058 | 23.143 | 0.00 | 0.00 |
| ATOM | 7551 | HZ3  | TRP | X | 496 | 42.830 | 38.907 | 23.118 | 0.00 | 0.00 |
| ATOM | 7552 | CE3  | TRP | X | 496 | 41.588 | 37.574 | 21.945 | 0.00 | 0.00 |
| ATOM | 7553 | HE3  | TRP | X | 496 | 41.819 | 38.143 | 21.056 | 0.00 | 0.00 |
| ATOM | 7554 | CD2  | TRP | X | 496 | 40.735 | 36.436 | 22.025 | 0.00 | 0.00 |
| ATOM | 7555 | C    | TRP | X | 496 | 37.659 | 34.932 | 18.746 | 0.00 | 0.00 |
| ATOM | 7556 | O    | TRP | X | 496 | 36.985 | 35.911 | 18.957 | 0.00 | 0.00 |
| ATOM | 7557 | N    | PRO | X | 497 | 37.129 | 33.712 | 18.736 | 0.00 | 0.00 |
| ATOM | 7558 | CD   | PRO | X | 497 | 37.812 | 32.441 | 18.473 | 0.00 | 0.00 |

|      |      |      |     |   |     |        |        |        |      |      |
|------|------|------|-----|---|-----|--------|--------|--------|------|------|
| ATOM | 7559 | HD2  | PRO | X | 497 | 38.607 | 32.253 | 19.194 | 0.00 | 0.00 |
| ATOM | 7560 | HD3  | PRO | X | 497 | 38.209 | 32.173 | 17.494 | 0.00 | 0.00 |
| ATOM | 7561 | CG   | PRO | X | 497 | 36.797 | 31.276 | 18.630 | 0.00 | 0.00 |
| ATOM | 7562 | HG2  | PRO | X | 497 | 36.683 | 30.888 | 19.642 | 0.00 | 0.00 |
| ATOM | 7563 | HG3  | PRO | X | 497 | 37.019 | 30.412 | 18.005 | 0.00 | 0.00 |
| ATOM | 7564 | CB   | PRO | X | 497 | 35.458 | 32.033 | 18.376 | 0.00 | 0.00 |
| ATOM | 7565 | HB2  | PRO | X | 497 | 34.683 | 31.399 | 18.805 | 0.00 | 0.00 |
| ATOM | 7566 | HB3  | PRO | X | 497 | 35.309 | 32.184 | 17.306 | 0.00 | 0.00 |
| ATOM | 7567 | CA   | PRO | X | 497 | 35.677 | 33.422 | 18.924 | 0.00 | 0.00 |
| ATOM | 7568 | HA   | PRO | X | 497 | 35.093 | 34.263 | 18.552 | 0.00 | 0.00 |
| ATOM | 7569 | C    | PRO | X | 497 | 35.413 | 33.476 | 20.428 | 0.00 | 0.00 |
| ATOM | 7570 | O    | PRO | X | 497 | 36.355 | 33.504 | 21.268 | 0.00 | 0.00 |
| ATOM | 7571 | N    | PRO | X | 498 | 34.130 | 33.423 | 20.810 | 0.00 | 0.00 |
| ATOM | 7572 | CD   | PRO | X | 498 | 32.972 | 33.630 | 19.941 | 0.00 | 0.00 |
| ATOM | 7573 | HD2  | PRO | X | 498 | 32.790 | 32.715 | 19.378 | 0.00 | 0.00 |
| ATOM | 7574 | HD3  | PRO | X | 498 | 33.127 | 34.553 | 19.383 | 0.00 | 0.00 |
| ATOM | 7575 | CG   | PRO | X | 498 | 31.823 | 33.758 | 20.940 | 0.00 | 0.00 |
| ATOM | 7576 | HG2  | PRO | X | 498 | 31.358 | 32.774 | 21.006 | 0.00 | 0.00 |
| ATOM | 7577 | HG3  | PRO | X | 498 | 31.076 | 34.477 | 20.602 | 0.00 | 0.00 |
| ATOM | 7578 | CB   | PRO | X | 498 | 32.441 | 34.154 | 22.317 | 0.00 | 0.00 |
| ATOM | 7579 | HB2  | PRO | X | 498 | 31.840 | 33.812 | 23.160 | 0.00 | 0.00 |
| ATOM | 7580 | HB3  | PRO | X | 498 | 32.764 | 35.192 | 22.387 | 0.00 | 0.00 |
| ATOM | 7581 | CA   | PRO | X | 498 | 33.648 | 33.268 | 22.220 | 0.00 | 0.00 |
| ATOM | 7582 | HA   | PRO | X | 498 | 34.436 | 33.608 | 22.891 | 0.00 | 0.00 |
| ATOM | 7583 | C    | PRO | X | 498 | 33.468 | 31.808 | 22.656 | 0.00 | 0.00 |
| ATOM | 7584 | O    | PRO | X | 498 | 33.408 | 30.843 | 21.824 | 0.00 | 0.00 |
| ATOM | 7585 | N    | TYR | X | 499 | 33.385 | 31.692 | 24.009 | 0.00 | 0.00 |
| ATOM | 7586 | H    | TYR | X | 499 | 33.330 | 32.576 | 24.493 | 0.00 | 0.00 |
| ATOM | 7587 | CA   | TYR | X | 499 | 33.204 | 30.458 | 24.748 | 0.00 | 0.00 |
| ATOM | 7588 | HA   | TYR | X | 499 | 33.601 | 29.659 | 24.122 | 0.00 | 0.00 |
| ATOM | 7589 | CB   | TYR | X | 499 | 34.072 | 30.654 | 26.049 | 0.00 | 0.00 |
| ATOM | 7590 | HB2  | TYR | X | 499 | 34.991 | 31.123 | 25.698 | 0.00 | 0.00 |
| ATOM | 7591 | HB3  | TYR | X | 499 | 33.699 | 31.438 | 26.709 | 0.00 | 0.00 |
| ATOM | 7592 | CG   | TYR | X | 499 | 34.376 | 29.451 | 26.881 | 0.00 | 0.00 |
| ATOM | 7593 | CD1  | TYR | X | 499 | 33.432 | 28.861 | 27.756 | 0.00 | 0.00 |
| ATOM | 7594 | HD1  | TYR | X | 499 | 32.406 | 29.185 | 27.664 | 0.00 | 0.00 |
| ATOM | 7595 | CE1  | TYR | X | 499 | 33.767 | 27.869 | 28.721 | 0.00 | 0.00 |
| ATOM | 7596 | HE1  | TYR | X | 499 | 33.094 | 27.340 | 29.379 | 0.00 | 0.00 |
| ATOM | 7597 | CZ   | TYR | X | 499 | 35.155 | 27.608 | 28.825 | 0.00 | 0.00 |
| ATOM | 7598 | OH   | TYR | X | 499 | 35.589 | 26.846 | 29.858 | 0.00 | 0.00 |
| ATOM | 7599 | HH   | TYR | X | 499 | 34.864 | 26.469 | 30.361 | 0.00 | 0.00 |
| ATOM | 7600 | CE2  | TYR | X | 499 | 36.132 | 28.164 | 27.927 | 0.00 | 0.00 |
| ATOM | 7601 | HE2  | TYR | X | 499 | 37.152 | 27.820 | 28.019 | 0.00 | 0.00 |
| ATOM | 7602 | CD2  | TYR | X | 499 | 35.720 | 29.152 | 27.057 | 0.00 | 0.00 |
| ATOM | 7603 | HD2  | TYR | X | 499 | 36.466 | 29.613 | 26.427 | 0.00 | 0.00 |
| ATOM | 7604 | C    | TYR | X | 499 | 31.731 | 30.215 | 25.151 | 0.00 | 0.00 |
| ATOM | 7605 | O    | TYR | X | 499 | 31.026 | 31.112 | 25.580 | 0.00 | 0.00 |
| ATOM | 7606 | N    | THR | X | 500 | 31.285 | 28.954 | 25.101 | 0.00 | 0.00 |
| ATOM | 7607 | H    | THR | X | 500 | 31.904 | 28.283 | 24.669 | 0.00 | 0.00 |
| ATOM | 7608 | CA   | THR | X | 500 | 30.086 | 28.376 | 25.646 | 0.00 | 0.00 |
| ATOM | 7609 | HA   | THR | X | 500 | 29.660 | 29.129 | 26.309 | 0.00 | 0.00 |
| ATOM | 7610 | CB   | THR | X | 500 | 29.118 | 27.923 | 24.540 | 0.00 | 0.00 |
| ATOM | 7611 | HB   | THR | X | 500 | 28.155 | 27.512 | 24.842 | 0.00 | 0.00 |
| ATOM | 7612 | CG2  | THR | X | 500 | 28.728 | 29.149 | 23.731 | 0.00 | 0.00 |
| ATOM | 7613 | HG21 | THR | X | 500 | 29.517 | 29.604 | 23.132 | 0.00 | 0.00 |
| ATOM | 7614 | HG22 | THR | X | 500 | 27.870 | 28.941 | 23.091 | 0.00 | 0.00 |
| ATOM | 7615 | HG23 | THR | X | 500 | 28.343 | 29.873 | 24.449 | 0.00 | 0.00 |
| ATOM | 7616 | OG1  | THR | X | 500 | 29.753 | 27.026 | 23.717 | 0.00 | 0.00 |
| ATOM | 7617 | HG1  | THR | X | 500 | 29.375 | 26.159 | 23.882 | 0.00 | 0.00 |
| ATOM | 7618 | C    | THR | X | 500 | 30.437 | 27.165 | 26.611 | 0.00 | 0.00 |
| ATOM | 7619 | O    | THR | X | 500 | 31.437 | 26.519 | 26.360 | 0.00 | 0.00 |
| ATOM | 7620 | N    | ALA | X | 501 | 29.587 | 26.987 | 27.588 | 0.00 | 0.00 |
| ATOM | 7621 | H    | ALA | X | 501 | 28.683 | 27.437 | 27.556 | 0.00 | 0.00 |
| ATOM | 7622 | CA   | ALA | X | 501 | 29.957 | 26.179 | 28.743 | 0.00 | 0.00 |
| ATOM | 7623 | HA   | ALA | X | 501 | 30.865 | 26.582 | 29.191 | 0.00 | 0.00 |
| ATOM | 7624 | CB   | ALA | X | 501 | 28.907 | 26.382 | 29.839 | 0.00 | 0.00 |
| ATOM | 7625 | HB1  | ALA | X | 501 | 28.687 | 27.432 | 30.034 | 0.00 | 0.00 |
| ATOM | 7626 | HB2  | ALA | X | 501 | 27.944 | 25.902 | 29.664 | 0.00 | 0.00 |
| ATOM | 7627 | HB3  | ALA | X | 501 | 29.415 | 26.004 | 30.726 | 0.00 | 0.00 |
| ATOM | 7628 | C    | ALA | X | 501 | 30.251 | 24.690 | 28.414 | 0.00 | 0.00 |

|      |      |      |     |   |     |        |        |        |      |      |
|------|------|------|-----|---|-----|--------|--------|--------|------|------|
| ATOM | 7629 | O    | ALA | X | 501 | 31.001 | 24.131 | 29.159 | 0.00 | 0.00 |
| ATOM | 7630 | N    | GLY | X | 502 | 29.690 | 24.044 | 27.387 | 0.00 | 0.00 |
| ATOM | 7631 | H    | GLY | X | 502 | 28.994 | 24.512 | 26.823 | 0.00 | 0.00 |
| ATOM | 7632 | CA   | GLY | X | 502 | 29.968 | 22.675 | 26.944 | 0.00 | 0.00 |
| ATOM | 7633 | HA2  | GLY | X | 502 | 30.078 | 22.080 | 27.890 | 0.00 | 0.00 |
| ATOM | 7634 | HA3  | GLY | X | 502 | 29.126 | 22.193 | 26.390 | 0.00 | 0.00 |
| ATOM | 7635 | C    | GLY | X | 502 | 31.161 | 22.500 | 26.134 | 0.00 | 0.00 |
| ATOM | 7636 | O    | GLY | X | 502 | 32.129 | 21.857 | 26.509 | 0.00 | 0.00 |
| ATOM | 7637 | N    | ALA | X | 503 | 31.169 | 23.256 | 25.055 | 0.00 | 0.00 |
| ATOM | 7638 | H    | ALA | X | 503 | 30.368 | 23.828 | 24.828 | 0.00 | 0.00 |
| ATOM | 7639 | CA   | ALA | X | 503 | 32.295 | 23.227 | 24.050 | 0.00 | 0.00 |
| ATOM | 7640 | HA   | ALA | X | 503 | 32.450 | 22.272 | 23.548 | 0.00 | 0.00 |
| ATOM | 7641 | CB   | ALA | X | 503 | 31.851 | 24.206 | 22.946 | 0.00 | 0.00 |
| ATOM | 7642 | HB1  | ALA | X | 503 | 30.799 | 24.167 | 22.662 | 0.00 | 0.00 |
| ATOM | 7643 | HB2  | ALA | X | 503 | 31.957 | 25.229 | 23.309 | 0.00 | 0.00 |
| ATOM | 7644 | HB3  | ALA | X | 503 | 32.311 | 23.896 | 22.008 | 0.00 | 0.00 |
| ATOM | 7645 | C    | ALA | X | 503 | 33.642 | 23.753 | 24.590 | 0.00 | 0.00 |
| ATOM | 7646 | O    | ALA | X | 503 | 34.566 | 23.046 | 24.347 | 0.00 | 0.00 |
| ATOM | 7647 | N    | GLN | X | 504 | 33.636 | 24.768 | 25.463 | 0.00 | 0.00 |
| ATOM | 7648 | H    | GLN | X | 504 | 32.736 | 25.214 | 25.571 | 0.00 | 0.00 |
| ATOM | 7649 | CA   | GLN | X | 504 | 34.823 | 25.225 | 26.183 | 0.00 | 0.00 |
| ATOM | 7650 | HA   | GLN | X | 504 | 34.527 | 26.088 | 26.781 | 0.00 | 0.00 |
| ATOM | 7651 | CB   | GLN | X | 504 | 35.270 | 24.147 | 27.240 | 0.00 | 0.00 |
| ATOM | 7652 | HB2  | GLN | X | 504 | 35.571 | 23.245 | 26.706 | 0.00 | 0.00 |
| ATOM | 7653 | HB3  | GLN | X | 504 | 36.141 | 24.558 | 27.751 | 0.00 | 0.00 |
| ATOM | 7654 | CG   | GLN | X | 504 | 34.114 | 23.907 | 28.310 | 0.00 | 0.00 |
| ATOM | 7655 | HG2  | GLN | X | 504 | 33.760 | 24.793 | 28.838 | 0.00 | 0.00 |
| ATOM | 7656 | HG3  | GLN | X | 504 | 33.208 | 23.591 | 27.794 | 0.00 | 0.00 |
| ATOM | 7657 | CD   | GLN | X | 504 | 34.372 | 22.938 | 29.387 | 0.00 | 0.00 |
| ATOM | 7658 | OE1  | GLN | X | 504 | 35.486 | 22.493 | 29.628 | 0.00 | 0.00 |
| ATOM | 7659 | NE2  | GLN | X | 504 | 33.324 | 22.658 | 30.163 | 0.00 | 0.00 |
| ATOM | 7660 | HE21 | GLN | X | 504 | 33.481 | 21.989 | 30.903 | 0.00 | 0.00 |
| ATOM | 7661 | HE22 | GLN | X | 504 | 32.425 | 23.090 | 30.001 | 0.00 | 0.00 |
| ATOM | 7662 | C    | GLN | X | 504 | 35.929 | 25.771 | 25.258 | 0.00 | 0.00 |
| ATOM | 7663 | O    | GLN | X | 504 | 37.025 | 25.272 | 25.311 | 0.00 | 0.00 |
| ATOM | 7664 | N    | GLN | X | 505 | 35.676 | 26.711 | 24.307 | 0.00 | 0.00 |
| ATOM | 7665 | H    | GLN | X | 505 | 34.715 | 27.020 | 24.303 | 0.00 | 0.00 |
| ATOM | 7666 | CA   | GLN | X | 505 | 36.583 | 27.172 | 23.269 | 0.00 | 0.00 |
| ATOM | 7667 | HA   | GLN | X | 505 | 37.206 | 26.367 | 22.879 | 0.00 | 0.00 |
| ATOM | 7668 | CB   | GLN | X | 505 | 35.646 | 27.583 | 22.177 | 0.00 | 0.00 |
| ATOM | 7669 | HB2  | GLN | X | 505 | 34.913 | 26.864 | 21.811 | 0.00 | 0.00 |
| ATOM | 7670 | HB3  | GLN | X | 505 | 35.126 | 28.431 | 22.623 | 0.00 | 0.00 |
| ATOM | 7671 | CG   | GLN | X | 505 | 36.469 | 27.888 | 20.889 | 0.00 | 0.00 |
| ATOM | 7672 | HG2  | GLN | X | 505 | 36.881 | 28.895 | 20.960 | 0.00 | 0.00 |
| ATOM | 7673 | HG3  | GLN | X | 505 | 37.282 | 27.189 | 20.693 | 0.00 | 0.00 |
| ATOM | 7674 | CD   | GLN | X | 505 | 35.557 | 27.985 | 19.677 | 0.00 | 0.00 |
| ATOM | 7675 | OE1  | GLN | X | 505 | 35.648 | 27.236 | 18.756 | 0.00 | 0.00 |
| ATOM | 7676 | NE2  | GLN | X | 505 | 34.651 | 28.963 | 19.657 | 0.00 | 0.00 |
| ATOM | 7677 | HE21 | GLN | X | 505 | 34.038 | 28.994 | 18.856 | 0.00 | 0.00 |
| ATOM | 7678 | HE22 | GLN | X | 505 | 34.660 | 29.535 | 20.490 | 0.00 | 0.00 |
| ATOM | 7679 | C    | GLN | X | 505 | 37.579 | 28.233 | 23.823 | 0.00 | 0.00 |
| ATOM | 7680 | O    | GLN | X | 505 | 37.096 | 29.359 | 24.076 | 0.00 | 0.00 |
| ATOM | 7681 | N    | TYR | X | 506 | 38.881 | 28.042 | 23.991 | 0.00 | 0.00 |
| ATOM | 7682 | H    | TYR | X | 506 | 39.269 | 27.183 | 23.628 | 0.00 | 0.00 |
| ATOM | 7683 | CA   | TYR | X | 506 | 39.904 | 29.080 | 24.398 | 0.00 | 0.00 |
| ATOM | 7684 | HA   | TYR | X | 506 | 39.385 | 30.038 | 24.439 | 0.00 | 0.00 |
| ATOM | 7685 | CB   | TYR | X | 506 | 40.389 | 28.666 | 25.793 | 0.00 | 0.00 |
| ATOM | 7686 | HB2  | TYR | X | 506 | 40.963 | 29.515 | 26.163 | 0.00 | 0.00 |
| ATOM | 7687 | HB3  | TYR | X | 506 | 39.609 | 28.513 | 26.539 | 0.00 | 0.00 |
| ATOM | 7688 | CG   | TYR | X | 506 | 41.364 | 27.536 | 25.839 | 0.00 | 0.00 |
| ATOM | 7689 | CD1  | TYR | X | 506 | 40.749 | 26.286 | 25.806 | 0.00 | 0.00 |
| ATOM | 7690 | HD1  | TYR | X | 506 | 39.680 | 26.137 | 25.813 | 0.00 | 0.00 |
| ATOM | 7691 | CE1  | TYR | X | 506 | 41.578 | 25.170 | 25.738 | 0.00 | 0.00 |
| ATOM | 7692 | HE1  | TYR | X | 506 | 41.238 | 24.145 | 25.707 | 0.00 | 0.00 |
| ATOM | 7693 | CZ   | TYR | X | 506 | 43.058 | 25.284 | 25.733 | 0.00 | 0.00 |
| ATOM | 7694 | OH   | TYR | X | 506 | 43.920 | 24.244 | 25.734 | 0.00 | 0.00 |
| ATOM | 7695 | HH   | TYR | X | 506 | 43.500 | 23.386 | 25.638 | 0.00 | 0.00 |
| ATOM | 7696 | CE2  | TYR | X | 506 | 43.645 | 26.590 | 25.682 | 0.00 | 0.00 |
| ATOM | 7697 | HE2  | TYR | X | 506 | 44.717 | 26.701 | 25.750 | 0.00 | 0.00 |
| ATOM | 7698 | CD2  | TYR | X | 506 | 42.746 | 27.732 | 25.712 | 0.00 | 0.00 |

|      |      |      |     |   |     |        |        |        |      |      |
|------|------|------|-----|---|-----|--------|--------|--------|------|------|
| ATOM | 7699 | HD2  | TYR | X | 506 | 43.023 | 28.773 | 25.632 | 0.00 | 0.00 |
| ATOM | 7700 | C    | TYR | X | 506 | 41.048 | 29.195 | 23.405 | 0.00 | 0.00 |
| ATOM | 7701 | O    | TYR | X | 506 | 41.324 | 28.232 | 22.731 | 0.00 | 0.00 |
| ATOM | 7702 | N    | VAL | X | 507 | 41.661 | 30.389 | 23.129 | 0.00 | 0.00 |
| ATOM | 7703 | H    | VAL | X | 507 | 41.439 | 31.172 | 23.728 | 0.00 | 0.00 |
| ATOM | 7704 | CA   | VAL | X | 507 | 42.877 | 30.541 | 22.233 | 0.00 | 0.00 |
| ATOM | 7705 | HA   | VAL | X | 507 | 42.821 | 29.843 | 21.399 | 0.00 | 0.00 |
| ATOM | 7706 | CB   | VAL | X | 507 | 42.823 | 31.955 | 21.473 | 0.00 | 0.00 |
| ATOM | 7707 | HB   | VAL | X | 507 | 43.697 | 32.011 | 20.825 | 0.00 | 0.00 |
| ATOM | 7708 | CG1  | VAL | X | 507 | 41.489 | 32.164 | 20.673 | 0.00 | 0.00 |
| ATOM | 7709 | HG11 | VAL | X | 507 | 41.422 | 33.196 | 20.329 | 0.00 | 0.00 |
| ATOM | 7710 | HG12 | VAL | X | 507 | 41.466 | 31.431 | 19.867 | 0.00 | 0.00 |
| ATOM | 7711 | HG13 | VAL | X | 507 | 40.561 | 31.956 | 21.206 | 0.00 | 0.00 |
| ATOM | 7712 | CG2  | VAL | X | 507 | 42.816 | 33.139 | 22.413 | 0.00 | 0.00 |
| ATOM | 7713 | HG21 | VAL | X | 507 | 41.981 | 33.106 | 23.113 | 0.00 | 0.00 |
| ATOM | 7714 | HG22 | VAL | X | 507 | 43.717 | 33.317 | 22.999 | 0.00 | 0.00 |
| ATOM | 7715 | HG23 | VAL | X | 507 | 42.753 | 34.070 | 21.848 | 0.00 | 0.00 |
| ATOM | 7716 | C    | VAL | X | 507 | 44.273 | 30.359 | 22.922 | 0.00 | 0.00 |
| ATOM | 7717 | O    | VAL | X | 507 | 44.447 | 30.510 | 24.101 | 0.00 | 0.00 |
| ATOM | 7718 | N    | SER | X | 508 | 45.303 | 30.108 | 22.101 | 0.00 | 0.00 |
| ATOM | 7719 | H    | SER | X | 508 | 45.019 | 29.882 | 21.159 | 0.00 | 0.00 |
| ATOM | 7720 | CA   | SER | X | 508 | 46.747 | 30.344 | 22.356 | 0.00 | 0.00 |
| ATOM | 7721 | HA   | SER | X | 508 | 46.924 | 30.452 | 23.426 | 0.00 | 0.00 |
| ATOM | 7722 | CB   | SER | X | 508 | 47.605 | 29.074 | 21.908 | 0.00 | 0.00 |
| ATOM | 7723 | HB2  | SER | X | 508 | 47.368 | 28.224 | 22.549 | 0.00 | 0.00 |
| ATOM | 7724 | HB3  | SER | X | 508 | 47.329 | 28.819 | 20.885 | 0.00 | 0.00 |
| ATOM | 7725 | OG   | SER | X | 508 | 48.986 | 29.419 | 21.996 | 0.00 | 0.00 |
| ATOM | 7726 | HG   | SER | X | 508 | 49.350 | 28.634 | 22.410 | 0.00 | 0.00 |
| ATOM | 7727 | C    | SER | X | 508 | 47.171 | 31.676 | 21.822 | 0.00 | 0.00 |
| ATOM | 7728 | O    | SER | X | 508 | 46.603 | 32.143 | 20.873 | 0.00 | 0.00 |
| ATOM | 7729 | N    | LEU | X | 509 | 48.165 | 32.317 | 22.481 | 0.00 | 0.00 |
| ATOM | 7730 | H    | LEU | X | 509 | 48.343 | 32.051 | 23.439 | 0.00 | 0.00 |
| ATOM | 7731 | CA   | LEU | X | 509 | 48.596 | 33.601 | 22.055 | 0.00 | 0.00 |
| ATOM | 7732 | HA   | LEU | X | 509 | 48.308 | 33.732 | 21.012 | 0.00 | 0.00 |
| ATOM | 7733 | CB   | LEU | X | 509 | 48.022 | 34.778 | 22.952 | 0.00 | 0.00 |
| ATOM | 7734 | HB2  | LEU | X | 509 | 48.286 | 34.616 | 23.997 | 0.00 | 0.00 |
| ATOM | 7735 | HB3  | LEU | X | 509 | 48.535 | 35.715 | 22.735 | 0.00 | 0.00 |
| ATOM | 7736 | CG   | LEU | X | 509 | 46.502 | 34.965 | 22.747 | 0.00 | 0.00 |
| ATOM | 7737 | HG   | LEU | X | 509 | 45.855 | 34.101 | 22.899 | 0.00 | 0.00 |
| ATOM | 7738 | CD1  | LEU | X | 509 | 46.208 | 36.128 | 23.702 | 0.00 | 0.00 |
| ATOM | 7739 | HD11 | LEU | X | 509 | 46.374 | 35.767 | 24.717 | 0.00 | 0.00 |
| ATOM | 7740 | HD12 | LEU | X | 509 | 46.830 | 36.963 | 23.381 | 0.00 | 0.00 |
| ATOM | 7741 | HD13 | LEU | X | 509 | 45.139 | 36.342 | 23.709 | 0.00 | 0.00 |
| ATOM | 7742 | CD2  | LEU | X | 509 | 46.249 | 35.372 | 21.278 | 0.00 | 0.00 |
| ATOM | 7743 | HD21 | LEU | X | 509 | 46.805 | 36.272 | 21.015 | 0.00 | 0.00 |
| ATOM | 7744 | HD22 | LEU | X | 509 | 46.406 | 34.559 | 20.569 | 0.00 | 0.00 |
| ATOM | 7745 | HD23 | LEU | X | 509 | 45.247 | 35.791 | 21.178 | 0.00 | 0.00 |
| ATOM | 7746 | C    | LEU | X | 509 | 50.137 | 33.678 | 22.075 | 0.00 | 0.00 |
| ATOM | 7747 | O    | LEU | X | 509 | 50.794 | 33.313 | 23.038 | 0.00 | 0.00 |
| ATOM | 7748 | N    | ASP | X | 510 | 50.762 | 34.154 | 20.988 | 0.00 | 0.00 |
| ATOM | 7749 | H    | ASP | X | 510 | 50.125 | 34.353 | 20.230 | 0.00 | 0.00 |
| ATOM | 7750 | CA   | ASP | X | 510 | 52.170 | 34.032 | 20.505 | 0.00 | 0.00 |
| ATOM | 7751 | HA   | ASP | X | 510 | 52.845 | 34.252 | 21.332 | 0.00 | 0.00 |
| ATOM | 7752 | CB   | ASP | X | 510 | 52.278 | 32.472 | 20.237 | 0.00 | 0.00 |
| ATOM | 7753 | HB2  | ASP | X | 510 | 51.825 | 31.873 | 21.027 | 0.00 | 0.00 |
| ATOM | 7754 | HB3  | ASP | X | 510 | 51.941 | 32.264 | 19.221 | 0.00 | 0.00 |
| ATOM | 7755 | CG   | ASP | X | 510 | 53.721 | 32.042 | 20.048 | 0.00 | 0.00 |
| ATOM | 7756 | OD1  | ASP | X | 510 | 54.393 | 31.597 | 20.978 | 0.00 | 0.00 |
| ATOM | 7757 | OD2  | ASP | X | 510 | 54.268 | 32.232 | 18.943 | 0.00 | 0.00 |
| ATOM | 7758 | C    | ASP | X | 510 | 52.598 | 34.973 | 19.435 | 0.00 | 0.00 |
| ATOM | 7759 | O    | ASP | X | 510 | 51.734 | 35.577 | 18.799 | 0.00 | 0.00 |
| ATOM | 7760 | N    | LEU | X | 511 | 53.884 | 34.976 | 19.033 | 0.00 | 0.00 |
| ATOM | 7761 | H    | LEU | X | 511 | 54.432 | 34.240 | 19.454 | 0.00 | 0.00 |
| ATOM | 7762 | CA   | LEU | X | 511 | 54.387 | 35.783 | 17.913 | 0.00 | 0.00 |
| ATOM | 7763 | HA   | LEU | X | 511 | 54.072 | 36.823 | 18.005 | 0.00 | 0.00 |
| ATOM | 7764 | CB   | LEU | X | 511 | 55.913 | 35.738 | 17.806 | 0.00 | 0.00 |
| ATOM | 7765 | HB2  | LEU | X | 511 | 56.215 | 34.851 | 17.250 | 0.00 | 0.00 |
| ATOM | 7766 | HB3  | LEU | X | 511 | 56.298 | 36.545 | 17.184 | 0.00 | 0.00 |
| ATOM | 7767 | CG   | LEU | X | 511 | 56.771 | 35.706 | 19.131 | 0.00 | 0.00 |
| ATOM | 7768 | HG   | LEU | X | 511 | 56.356 | 34.953 | 19.800 | 0.00 | 0.00 |

|      |      |      |     |   |     |        |        |        |      |      |
|------|------|------|-----|---|-----|--------|--------|--------|------|------|
| ATOM | 7769 | CD1  | LEU | X | 511 | 58.255 | 35.410 | 18.868 | 0.00 | 0.00 |
| ATOM | 7770 | HD11 | LEU | X | 511 | 58.730 | 36.344 | 18.567 | 0.00 | 0.00 |
| ATOM | 7771 | HD12 | LEU | X | 511 | 58.754 | 35.178 | 19.808 | 0.00 | 0.00 |
| ATOM | 7772 | HD13 | LEU | X | 511 | 58.302 | 34.653 | 18.085 | 0.00 | 0.00 |
| ATOM | 7773 | CD2  | LEU | X | 511 | 56.596 | 37.095 | 19.789 | 0.00 | 0.00 |
| ATOM | 7774 | HD21 | LEU | X | 511 | 56.557 | 37.890 | 19.045 | 0.00 | 0.00 |
| ATOM | 7775 | HD22 | LEU | X | 511 | 55.730 | 37.096 | 20.450 | 0.00 | 0.00 |
| ATOM | 7776 | HD23 | LEU | X | 511 | 57.418 | 37.326 | 20.467 | 0.00 | 0.00 |
| ATOM | 7777 | C    | LEU | X | 511 | 53.790 | 35.244 | 16.569 | 0.00 | 0.00 |
| ATOM | 7778 | O    | LEU | X | 511 | 53.588 | 36.113 | 15.663 | 0.00 | 0.00 |
| ATOM | 7779 | N    | ARG | X | 512 | 53.511 | 33.894 | 16.517 | 0.00 | 0.00 |
| ATOM | 7780 | H    | ARG | X | 512 | 53.578 | 33.341 | 17.360 | 0.00 | 0.00 |
| ATOM | 7781 | CA   | ARG | X | 512 | 52.953 | 33.261 | 15.400 | 0.00 | 0.00 |
| ATOM | 7782 | HA   | ARG | X | 512 | 53.253 | 33.877 | 14.552 | 0.00 | 0.00 |
| ATOM | 7783 | CB   | ARG | X | 512 | 53.556 | 31.821 | 15.388 | 0.00 | 0.00 |
| ATOM | 7784 | HB2  | ARG | X | 512 | 53.293 | 31.311 | 16.315 | 0.00 | 0.00 |
| ATOM | 7785 | HB3  | ARG | X | 512 | 53.148 | 31.280 | 14.535 | 0.00 | 0.00 |
| ATOM | 7786 | CG   | ARG | X | 512 | 55.132 | 31.676 | 15.406 | 0.00 | 0.00 |
| ATOM | 7787 | HG2  | ARG | X | 512 | 55.486 | 32.376 | 16.162 | 0.00 | 0.00 |
| ATOM | 7788 | HG3  | ARG | X | 512 | 55.438 | 30.689 | 15.752 | 0.00 | 0.00 |
| ATOM | 7789 | CD   | ARG | X | 512 | 55.823 | 31.891 | 14.014 | 0.00 | 0.00 |
| ATOM | 7790 | HD2  | ARG | X | 512 | 56.852 | 31.548 | 14.128 | 0.00 | 0.00 |
| ATOM | 7791 | HD3  | ARG | X | 512 | 55.269 | 31.266 | 13.314 | 0.00 | 0.00 |
| ATOM | 7792 | NE   | ARG | X | 512 | 55.661 | 33.244 | 13.591 | 0.00 | 0.00 |
| ATOM | 7793 | HE   | ARG | X | 512 | 54.874 | 33.489 | 13.007 | 0.00 | 0.00 |
| ATOM | 7794 | CZ   | ARG | X | 512 | 56.458 | 34.293 | 13.804 | 0.00 | 0.00 |
| ATOM | 7795 | NH1  | ARG | X | 512 | 57.646 | 34.245 | 14.290 | 0.00 | 0.00 |
| ATOM | 7796 | HH11 | ARG | X | 512 | 58.083 | 33.422 | 14.680 | 0.00 | 0.00 |
| ATOM | 7797 | HH12 | ARG | X | 512 | 58.197 | 35.089 | 14.351 | 0.00 | 0.00 |
| ATOM | 7798 | NH2  | ARG | X | 512 | 56.052 | 35.532 | 13.522 | 0.00 | 0.00 |
| ATOM | 7799 | HH21 | ARG | X | 512 | 55.088 | 35.723 | 13.290 | 0.00 | 0.00 |
| ATOM | 7800 | HH22 | ARG | X | 512 | 56.687 | 36.312 | 13.611 | 0.00 | 0.00 |
| ATOM | 7801 | C    | ARG | X | 512 | 51.428 | 33.252 | 15.306 | 0.00 | 0.00 |
| ATOM | 7802 | O    | ARG | X | 512 | 50.846 | 33.583 | 16.323 | 0.00 | 0.00 |
| ATOM | 7803 | N    | PRO | X | 513 | 50.803 | 32.961 | 14.151 | 0.00 | 0.00 |
| ATOM | 7804 | CD   | PRO | X | 513 | 51.421 | 32.547 | 12.865 | 0.00 | 0.00 |
| ATOM | 7805 | HD2  | PRO | X | 513 | 51.355 | 31.462 | 12.794 | 0.00 | 0.00 |
| ATOM | 7806 | HD3  | PRO | X | 513 | 52.463 | 32.836 | 12.721 | 0.00 | 0.00 |
| ATOM | 7807 | CG   | PRO | X | 513 | 50.490 | 33.058 | 11.762 | 0.00 | 0.00 |
| ATOM | 7808 | HG2  | PRO | X | 513 | 50.476 | 32.469 | 10.845 | 0.00 | 0.00 |
| ATOM | 7809 | HG3  | PRO | X | 513 | 50.612 | 34.113 | 11.518 | 0.00 | 0.00 |
| ATOM | 7810 | CB   | PRO | X | 513 | 49.112 | 32.835 | 12.335 | 0.00 | 0.00 |
| ATOM | 7811 | HB2  | PRO | X | 513 | 48.847 | 31.787 | 12.192 | 0.00 | 0.00 |
| ATOM | 7812 | HB3  | PRO | X | 513 | 48.420 | 33.560 | 11.908 | 0.00 | 0.00 |
| ATOM | 7813 | CA   | PRO | X | 513 | 49.358 | 33.135 | 13.845 | 0.00 | 0.00 |
| ATOM | 7814 | HA   | PRO | X | 513 | 49.330 | 34.216 | 13.988 | 0.00 | 0.00 |
| ATOM | 7815 | C    | PRO | X | 513 | 48.393 | 32.360 | 14.767 | 0.00 | 0.00 |
| ATOM | 7816 | O    | PRO | X | 513 | 48.890 | 31.434 | 15.423 | 0.00 | 0.00 |
| ATOM | 7817 | N    | LEU | X | 514 | 47.146 | 32.709 | 14.774 | 0.00 | 0.00 |
| ATOM | 7818 | H    | LEU | X | 514 | 46.974 | 33.592 | 14.315 | 0.00 | 0.00 |
| ATOM | 7819 | CA   | LEU | X | 514 | 46.210 | 32.257 | 15.840 | 0.00 | 0.00 |
| ATOM | 7820 | HA   | LEU | X | 514 | 46.680 | 32.469 | 16.800 | 0.00 | 0.00 |
| ATOM | 7821 | CB   | LEU | X | 514 | 44.927 | 33.082 | 15.789 | 0.00 | 0.00 |
| ATOM | 7822 | HB2  | LEU | X | 514 | 45.117 | 34.156 | 15.791 | 0.00 | 0.00 |
| ATOM | 7823 | HB3  | LEU | X | 514 | 44.433 | 32.862 | 14.843 | 0.00 | 0.00 |
| ATOM | 7824 | CG   | LEU | X | 514 | 43.933 | 32.833 | 16.927 | 0.00 | 0.00 |
| ATOM | 7825 | HG   | LEU | X | 514 | 43.846 | 31.753 | 17.041 | 0.00 | 0.00 |
| ATOM | 7826 | CD1  | LEU | X | 514 | 44.454 | 33.405 | 18.244 | 0.00 | 0.00 |
| ATOM | 7827 | HD11 | LEU | X | 514 | 44.757 | 34.436 | 18.060 | 0.00 | 0.00 |
| ATOM | 7828 | HD12 | LEU | X | 514 | 43.633 | 33.394 | 18.961 | 0.00 | 0.00 |
| ATOM | 7829 | HD13 | LEU | X | 514 | 45.322 | 32.896 | 18.664 | 0.00 | 0.00 |
| ATOM | 7830 | CD2  | LEU | X | 514 | 42.642 | 33.552 | 16.568 | 0.00 | 0.00 |
| ATOM | 7831 | HD21 | LEU | X | 514 | 42.664 | 34.625 | 16.381 | 0.00 | 0.00 |
| ATOM | 7832 | HD22 | LEU | X | 514 | 42.179 | 33.067 | 15.709 | 0.00 | 0.00 |
| ATOM | 7833 | HD23 | LEU | X | 514 | 42.015 | 33.556 | 17.460 | 0.00 | 0.00 |
| ATOM | 7834 | C    | LEU | X | 514 | 45.994 | 30.721 | 15.907 | 0.00 | 0.00 |
| ATOM | 7835 | O    | LEU | X | 514 | 45.765 | 30.129 | 14.830 | 0.00 | 0.00 |
| ATOM | 7836 | N    | GLU | X | 515 | 46.005 | 30.105 | 17.051 | 0.00 | 0.00 |
| ATOM | 7837 | H    | GLU | X | 515 | 45.996 | 30.667 | 17.890 | 0.00 | 0.00 |
| ATOM | 7838 | CA   | GLU | X | 515 | 45.526 | 28.788 | 17.175 | 0.00 | 0.00 |

|      |      |      |     |   |     |        |        |        |      |      |
|------|------|------|-----|---|-----|--------|--------|--------|------|------|
| ATOM | 7839 | HA   | GLU | X | 515 | 45.106 | 28.421 | 16.238 | 0.00 | 0.00 |
| ATOM | 7840 | CB   | GLU | X | 515 | 46.695 | 27.859 | 17.619 | 0.00 | 0.00 |
| ATOM | 7841 | HB2  | GLU | X | 515 | 47.564 | 28.001 | 16.977 | 0.00 | 0.00 |
| ATOM | 7842 | HB3  | GLU | X | 515 | 47.084 | 28.001 | 18.627 | 0.00 | 0.00 |
| ATOM | 7843 | CG   | GLU | X | 515 | 46.360 | 26.404 | 17.419 | 0.00 | 0.00 |
| ATOM | 7844 | HG2  | GLU | X | 515 | 45.518 | 26.093 | 18.038 | 0.00 | 0.00 |
| ATOM | 7845 | HG3  | GLU | X | 515 | 46.230 | 26.205 | 16.356 | 0.00 | 0.00 |
| ATOM | 7846 | CD   | GLU | X | 515 | 47.464 | 25.517 | 18.013 | 0.00 | 0.00 |
| ATOM | 7847 | OE1  | GLU | X | 515 | 47.255 | 24.982 | 19.079 | 0.00 | 0.00 |
| ATOM | 7848 | OE2  | GLU | X | 515 | 48.518 | 25.403 | 17.311 | 0.00 | 0.00 |
| ATOM | 7849 | C    | GLU | X | 515 | 44.384 | 28.825 | 18.195 | 0.00 | 0.00 |
| ATOM | 7850 | O    | GLU | X | 515 | 44.645 | 29.145 | 19.378 | 0.00 | 0.00 |
| ATOM | 7851 | N    | VAL | X | 516 | 43.172 | 28.387 | 17.765 | 0.00 | 0.00 |
| ATOM | 7852 | H    | VAL | X | 516 | 43.103 | 28.022 | 16.826 | 0.00 | 0.00 |
| ATOM | 7853 | CA   | VAL | X | 516 | 42.058 | 28.063 | 18.746 | 0.00 | 0.00 |
| ATOM | 7854 | HA   | VAL | X | 516 | 42.185 | 28.661 | 19.649 | 0.00 | 0.00 |
| ATOM | 7855 | CB   | VAL | X | 516 | 40.629 | 28.376 | 18.124 | 0.00 | 0.00 |
| ATOM | 7856 | HB   | VAL | X | 516 | 40.347 | 27.556 | 17.463 | 0.00 | 0.00 |
| ATOM | 7857 | CG1  | VAL | X | 516 | 39.599 | 28.518 | 19.229 | 0.00 | 0.00 |
| ATOM | 7858 | HG11 | VAL | X | 516 | 39.963 | 29.275 | 19.923 | 0.00 | 0.00 |
| ATOM | 7859 | HG12 | VAL | X | 516 | 38.679 | 28.903 | 18.790 | 0.00 | 0.00 |
| ATOM | 7860 | HG13 | VAL | X | 516 | 39.475 | 27.476 | 19.523 | 0.00 | 0.00 |
| ATOM | 7861 | CG2  | VAL | X | 516 | 40.645 | 29.609 | 17.221 | 0.00 | 0.00 |
| ATOM | 7862 | HG21 | VAL | X | 516 | 41.332 | 29.470 | 16.387 | 0.00 | 0.00 |
| ATOM | 7863 | HG22 | VAL | X | 516 | 39.640 | 29.722 | 16.815 | 0.00 | 0.00 |
| ATOM | 7864 | HG23 | VAL | X | 516 | 41.020 | 30.475 | 17.767 | 0.00 | 0.00 |
| ATOM | 7865 | C    | VAL | X | 516 | 42.018 | 26.621 | 19.254 | 0.00 | 0.00 |
| ATOM | 7866 | O    | VAL | X | 516 | 42.478 | 25.750 | 18.561 | 0.00 | 0.00 |
| ATOM | 7867 | N    | ARG | X | 517 | 41.621 | 26.350 | 20.514 | 0.00 | 0.00 |
| ATOM | 7868 | H    | ARG | X | 517 | 41.396 | 27.077 | 21.178 | 0.00 | 0.00 |
| ATOM | 7869 | CA   | ARG | X | 517 | 41.490 | 24.951 | 20.986 | 0.00 | 0.00 |
| ATOM | 7870 | HA   | ARG | X | 517 | 41.576 | 24.258 | 20.148 | 0.00 | 0.00 |
| ATOM | 7871 | CB   | ARG | X | 517 | 42.642 | 24.564 | 21.951 | 0.00 | 0.00 |
| ATOM | 7872 | HB2  | ARG | X | 517 | 42.473 | 24.992 | 22.939 | 0.00 | 0.00 |
| ATOM | 7873 | HB3  | ARG | X | 517 | 42.614 | 23.499 | 22.181 | 0.00 | 0.00 |
| ATOM | 7874 | CG   | ARG | X | 517 | 44.015 | 24.915 | 21.425 | 0.00 | 0.00 |
| ATOM | 7875 | HG2  | ARG | X | 517 | 44.084 | 24.660 | 20.368 | 0.00 | 0.00 |
| ATOM | 7876 | HG3  | ARG | X | 517 | 44.065 | 26.002 | 21.490 | 0.00 | 0.00 |
| ATOM | 7877 | CD   | ARG | X | 517 | 45.197 | 24.220 | 22.156 | 0.00 | 0.00 |
| ATOM | 7878 | HD2  | ARG | X | 517 | 45.250 | 24.459 | 23.218 | 0.00 | 0.00 |
| ATOM | 7879 | HD3  | ARG | X | 517 | 45.220 | 23.133 | 22.093 | 0.00 | 0.00 |
| ATOM | 7880 | NE   | ARG | X | 517 | 46.521 | 24.689 | 21.630 | 0.00 | 0.00 |
| ATOM | 7881 | HE   | ARG | X | 517 | 46.562 | 24.781 | 20.624 | 0.00 | 0.00 |
| ATOM | 7882 | CZ   | ARG | X | 517 | 47.485 | 25.309 | 22.227 | 0.00 | 0.00 |
| ATOM | 7883 | NH1  | ARG | X | 517 | 47.688 | 25.350 | 23.537 | 0.00 | 0.00 |
| ATOM | 7884 | HH11 | ARG | X | 517 | 47.098 | 25.043 | 24.298 | 0.00 | 0.00 |
| ATOM | 7885 | HH12 | ARG | X | 517 | 48.562 | 25.778 | 23.806 | 0.00 | 0.00 |
| ATOM | 7886 | NH2  | ARG | X | 517 | 48.448 | 25.823 | 21.532 | 0.00 | 0.00 |
| ATOM | 7887 | HH21 | ARG | X | 517 | 48.463 | 25.627 | 20.541 | 0.00 | 0.00 |
| ATOM | 7888 | HH22 | ARG | X | 517 | 49.233 | 26.141 | 22.082 | 0.00 | 0.00 |
| ATOM | 7889 | C    | ARG | X | 517 | 40.131 | 24.822 | 21.755 | 0.00 | 0.00 |
| ATOM | 7890 | O    | ARG | X | 517 | 39.482 | 25.840 | 22.065 | 0.00 | 0.00 |
| ATOM | 7891 | N    | ARG | X | 518 | 39.613 | 23.600 | 22.146 | 0.00 | 0.00 |
| ATOM | 7892 | H    | ARG | X | 518 | 40.132 | 22.827 | 21.756 | 0.00 | 0.00 |
| ATOM | 7893 | CA   | ARG | X | 518 | 38.474 | 23.317 | 23.121 | 0.00 | 0.00 |
| ATOM | 7894 | HA   | ARG | X | 518 | 38.147 | 24.286 | 23.501 | 0.00 | 0.00 |
| ATOM | 7895 | CB   | ARG | X | 518 | 37.285 | 22.743 | 22.460 | 0.00 | 0.00 |
| ATOM | 7896 | HB2  | ARG | X | 518 | 37.716 | 21.837 | 22.036 | 0.00 | 0.00 |
| ATOM | 7897 | HB3  | ARG | X | 518 | 36.480 | 22.510 | 23.158 | 0.00 | 0.00 |
| ATOM | 7898 | CG   | ARG | X | 518 | 36.830 | 23.577 | 21.326 | 0.00 | 0.00 |
| ATOM | 7899 | HG2  | ARG | X | 518 | 36.645 | 24.596 | 21.665 | 0.00 | 0.00 |
| ATOM | 7900 | HG3  | ARG | X | 518 | 37.549 | 23.461 | 20.516 | 0.00 | 0.00 |
| ATOM | 7901 | CD   | ARG | X | 518 | 35.494 | 22.984 | 20.746 | 0.00 | 0.00 |
| ATOM | 7902 | HD2  | ARG | X | 518 | 35.718 | 22.041 | 20.248 | 0.00 | 0.00 |
| ATOM | 7903 | HD3  | ARG | X | 518 | 34.775 | 22.810 | 21.547 | 0.00 | 0.00 |
| ATOM | 7904 | NE   | ARG | X | 518 | 34.843 | 23.786 | 19.777 | 0.00 | 0.00 |
| ATOM | 7905 | HE   | ARG | X | 518 | 35.401 | 24.588 | 19.524 | 0.00 | 0.00 |
| ATOM | 7906 | CZ   | ARG | X | 518 | 33.579 | 23.779 | 19.401 | 0.00 | 0.00 |
| ATOM | 7907 | NH1  | ARG | X | 518 | 32.779 | 22.791 | 19.685 | 0.00 | 0.00 |
| ATOM | 7908 | HH11 | ARG | X | 518 | 33.143 | 22.110 | 20.336 | 0.00 | 0.00 |



|      |      |      |     |   |     |        |        |        |      |      |
|------|------|------|-----|---|-----|--------|--------|--------|------|------|
| ATOM | 7909 | HH12 | ARG | X | 518 | 31.873 | 22.868 | 19.245 | 0.00 | 0.00 |
| ATOM | 7910 | NH2  | ARG | X | 518 | 33.082 | 24.812 | 18.724 | 0.00 | 0.00 |
| ATOM | 7911 | HH21 | ARG | X | 518 | 33.699 | 25.506 | 18.327 | 0.00 | 0.00 |
| ATOM | 7912 | HH22 | ARG | X | 518 | 32.159 | 24.550 | 18.408 | 0.00 | 0.00 |
| ATOM | 7913 | C    | ARG | X | 518 | 38.818 | 22.443 | 24.339 | 0.00 | 0.00 |
| ATOM | 7914 | O    | ARG | X | 518 | 39.853 | 21.843 | 24.419 | 0.00 | 0.00 |
| ATOM | 7915 | N    | GLY | X | 519 | 37.901 | 22.415 | 25.295 | 0.00 | 0.00 |
| ATOM | 7916 | H    | GLY | X | 519 | 37.132 | 23.067 | 25.228 | 0.00 | 0.00 |
| ATOM | 7917 | CA   | GLY | X | 519 | 37.769 | 21.510 | 26.475 | 0.00 | 0.00 |
| ATOM | 7918 | HA2  | GLY | X | 519 | 36.737 | 21.586 | 26.804 | 0.00 | 0.00 |
| ATOM | 7919 | HA3  | GLY | X | 519 | 38.064 | 20.513 | 26.153 | 0.00 | 0.00 |
| ATOM | 7920 | C    | GLY | X | 519 | 38.624 | 21.881 | 27.702 | 0.00 | 0.00 |
| ATOM | 7921 | O    | GLY | X | 519 | 39.044 | 21.030 | 28.488 | 0.00 | 0.00 |
| ATOM | 7922 | N    | LEU | X | 520 | 39.137 | 23.136 | 27.757 | 0.00 | 0.00 |
| ATOM | 7923 | H    | LEU | X | 520 | 38.773 | 23.695 | 26.998 | 0.00 | 0.00 |
| ATOM | 7924 | CA   | LEU | X | 520 | 40.086 | 23.679 | 28.796 | 0.00 | 0.00 |
| ATOM | 7925 | HA   | LEU | X | 520 | 41.071 | 23.544 | 28.349 | 0.00 | 0.00 |
| ATOM | 7926 | CB   | LEU | X | 520 | 39.711 | 25.230 | 28.911 | 0.00 | 0.00 |
| ATOM | 7927 | HB2  | LEU | X | 520 | 39.709 | 25.657 | 27.908 | 0.00 | 0.00 |
| ATOM | 7928 | HB3  | LEU | X | 520 | 38.678 | 25.163 | 29.251 | 0.00 | 0.00 |
| ATOM | 7929 | CG   | LEU | X | 520 | 40.487 | 26.108 | 29.923 | 0.00 | 0.00 |
| ATOM | 7930 | HG   | LEU | X | 520 | 40.511 | 25.748 | 30.951 | 0.00 | 0.00 |
| ATOM | 7931 | CD1  | LEU | X | 520 | 41.956 | 26.282 | 29.454 | 0.00 | 0.00 |
| ATOM | 7932 | HD11 | LEU | X | 520 | 42.100 | 26.252 | 28.374 | 0.00 | 0.00 |
| ATOM | 7933 | HD12 | LEU | X | 520 | 42.354 | 27.221 | 29.839 | 0.00 | 0.00 |
| ATOM | 7934 | HD13 | LEU | X | 520 | 42.590 | 25.517 | 29.901 | 0.00 | 0.00 |
| ATOM | 7935 | CD2  | LEU | X | 520 | 39.812 | 27.487 | 30.002 | 0.00 | 0.00 |
| ATOM | 7936 | HD21 | LEU | X | 520 | 40.364 | 28.199 | 30.615 | 0.00 | 0.00 |
| ATOM | 7937 | HD22 | LEU | X | 520 | 39.689 | 27.898 | 29.000 | 0.00 | 0.00 |
| ATOM | 7938 | HD23 | LEU | X | 520 | 38.857 | 27.305 | 30.496 | 0.00 | 0.00 |
| ATOM | 7939 | C    | LEU | X | 520 | 40.101 | 23.107 | 30.236 | 0.00 | 0.00 |
| ATOM | 7940 | O    | LEU | X | 520 | 39.332 | 23.485 | 31.113 | 0.00 | 0.00 |
| ATOM | 7941 | N    | ARG | X | 521 | 40.878 | 22.039 | 30.419 | 0.00 | 0.00 |
| ATOM | 7942 | H    | ARG | X | 521 | 41.409 | 21.792 | 29.596 | 0.00 | 0.00 |
| ATOM | 7943 | CA   | ARG | X | 521 | 41.235 | 21.299 | 31.673 | 0.00 | 0.00 |
| ATOM | 7944 | HA   | ARG | X | 521 | 42.059 | 20.612 | 31.479 | 0.00 | 0.00 |
| ATOM | 7945 | CB   | ARG | X | 521 | 41.741 | 22.236 | 32.772 | 0.00 | 0.00 |
| ATOM | 7946 | HB2  | ARG | X | 521 | 42.152 | 23.039 | 32.161 | 0.00 | 0.00 |
| ATOM | 7947 | HB3  | ARG | X | 521 | 40.824 | 22.634 | 33.207 | 0.00 | 0.00 |
| ATOM | 7948 | CG   | ARG | X | 521 | 42.743 | 21.690 | 33.822 | 0.00 | 0.00 |
| ATOM | 7949 | HG2  | ARG | X | 521 | 42.895 | 22.473 | 34.564 | 0.00 | 0.00 |
| ATOM | 7950 | HG3  | ARG | X | 521 | 42.292 | 20.843 | 34.340 | 0.00 | 0.00 |
| ATOM | 7951 | CD   | ARG | X | 521 | 44.058 | 21.322 | 33.189 | 0.00 | 0.00 |
| ATOM | 7952 | HD2  | ARG | X | 521 | 44.058 | 20.526 | 32.444 | 0.00 | 0.00 |
| ATOM | 7953 | HD3  | ARG | X | 521 | 44.526 | 22.220 | 32.786 | 0.00 | 0.00 |
| ATOM | 7954 | NE   | ARG | X | 521 | 44.978 | 20.840 | 34.303 | 0.00 | 0.00 |
| ATOM | 7955 | HE   | ARG | X | 521 | 44.793 | 21.197 | 35.229 | 0.00 | 0.00 |
| ATOM | 7956 | CZ   | ARG | X | 521 | 46.156 | 20.270 | 34.140 | 0.00 | 0.00 |
| ATOM | 7957 | NH1  | ARG | X | 521 | 46.552 | 19.734 | 33.022 | 0.00 | 0.00 |
| ATOM | 7958 | HH11 | ARG | X | 521 | 46.074 | 19.736 | 32.132 | 0.00 | 0.00 |
| ATOM | 7959 | HH12 | ARG | X | 521 | 47.527 | 19.471 | 33.055 | 0.00 | 0.00 |
| ATOM | 7960 | NH2  | ARG | X | 521 | 47.004 | 20.211 | 35.122 | 0.00 | 0.00 |
| ATOM | 7961 | HH21 | ARG | X | 521 | 46.828 | 20.547 | 36.058 | 0.00 | 0.00 |
| ATOM | 7962 | HH22 | ARG | X | 521 | 47.943 | 19.925 | 34.886 | 0.00 | 0.00 |
| ATOM | 7963 | C    | ARG | X | 521 | 40.167 | 20.358 | 32.238 | 0.00 | 0.00 |
| ATOM | 7964 | O    | ARG | X | 521 | 40.250 | 19.861 | 33.390 | 0.00 | 0.00 |
| ATOM | 7965 | N    | ALA | X | 522 | 39.279 | 19.868 | 31.404 | 0.00 | 0.00 |
| ATOM | 7966 | H    | ALA | X | 522 | 39.250 | 20.183 | 30.445 | 0.00 | 0.00 |
| ATOM | 7967 | CA   | ALA | X | 522 | 38.123 | 19.076 | 31.798 | 0.00 | 0.00 |
| ATOM | 7968 | HA   | ALA | X | 522 | 37.711 | 19.527 | 32.701 | 0.00 | 0.00 |
| ATOM | 7969 | CB   | ALA | X | 522 | 37.135 | 19.232 | 30.591 | 0.00 | 0.00 |
| ATOM | 7970 | HB1  | ALA | X | 522 | 37.653 | 18.765 | 29.753 | 0.00 | 0.00 |
| ATOM | 7971 | HB2  | ALA | X | 522 | 36.113 | 18.875 | 30.714 | 0.00 | 0.00 |
| ATOM | 7972 | HB3  | ALA | X | 522 | 37.011 | 20.290 | 30.359 | 0.00 | 0.00 |
| ATOM | 7973 | C    | ALA | X | 522 | 38.474 | 17.658 | 32.133 | 0.00 | 0.00 |
| ATOM | 7974 | O    | ALA | X | 522 | 37.609 | 16.741 | 32.068 | 0.00 | 0.00 |
| ATOM | 7975 | N    | GLN | X | 523 | 39.761 | 17.289 | 32.428 | 0.00 | 0.00 |
| ATOM | 7976 | H    | GLN | X | 523 | 40.492 | 17.987 | 32.424 | 0.00 | 0.00 |
| ATOM | 7977 | CA   | GLN | X | 523 | 40.120 | 16.055 | 33.122 | 0.00 | 0.00 |
| ATOM | 7978 | HA   | GLN | X | 523 | 39.233 | 15.466 | 33.356 | 0.00 | 0.00 |

|      |      |      |     |   |     |        |        |        |      |      |
|------|------|------|-----|---|-----|--------|--------|--------|------|------|
| ATOM | 7979 | CB   | GLN | X | 523 | 40.988 | 15.055 | 32.274 | 0.00 | 0.00 |
| ATOM | 7980 | HB2  | GLN | X | 523 | 41.995 | 15.444 | 32.129 | 0.00 | 0.00 |
| ATOM | 7981 | HB3  | GLN | X | 523 | 41.008 | 14.137 | 32.862 | 0.00 | 0.00 |
| ATOM | 7982 | CG   | GLN | X | 523 | 40.406 | 14.688 | 30.831 | 0.00 | 0.00 |
| ATOM | 7983 | HG2  | GLN | X | 523 | 40.332 | 15.579 | 30.208 | 0.00 | 0.00 |
| ATOM | 7984 | HG3  | GLN | X | 523 | 41.111 | 14.041 | 30.308 | 0.00 | 0.00 |
| ATOM | 7985 | CD   | GLN | X | 523 | 39.132 | 13.813 | 30.818 | 0.00 | 0.00 |
| ATOM | 7986 | OE1  | GLN | X | 523 | 38.812 | 13.069 | 31.736 | 0.00 | 0.00 |
| ATOM | 7987 | NE2  | GLN | X | 523 | 38.411 | 13.884 | 29.743 | 0.00 | 0.00 |
| ATOM | 7988 | HE21 | GLN | X | 523 | 37.550 | 13.372 | 29.871 | 0.00 | 0.00 |
| ATOM | 7989 | HE22 | GLN | X | 523 | 38.626 | 14.464 | 28.944 | 0.00 | 0.00 |
| ATOM | 7990 | C    | GLN | X | 523 | 40.657 | 16.305 | 34.523 | 0.00 | 0.00 |
| ATOM | 7991 | O    | GLN | X | 523 | 40.118 | 15.823 | 35.507 | 0.00 | 0.00 |
| ATOM | 7992 | N    | ALA | X | 524 | 41.727 | 17.154 | 34.716 | 0.00 | 0.00 |
| ATOM | 7993 | H    | ALA | X | 524 | 42.159 | 17.531 | 33.884 | 0.00 | 0.00 |
| ATOM | 7994 | CA   | ALA | X | 524 | 42.146 | 17.551 | 36.042 | 0.00 | 0.00 |
| ATOM | 7995 | HA   | ALA | X | 524 | 42.414 | 16.677 | 36.636 | 0.00 | 0.00 |
| ATOM | 7996 | CB   | ALA | X | 524 | 43.406 | 18.479 | 35.883 | 0.00 | 0.00 |
| ATOM | 7997 | HB1  | ALA | X | 524 | 43.243 | 19.182 | 36.700 | 0.00 | 0.00 |
| ATOM | 7998 | HB2  | ALA | X | 524 | 44.369 | 17.970 | 35.861 | 0.00 | 0.00 |
| ATOM | 7999 | HB3  | ALA | X | 524 | 43.367 | 18.937 | 34.894 | 0.00 | 0.00 |
| ATOM | 8000 | C    | ALA | X | 524 | 41.009 | 18.237 | 36.814 | 0.00 | 0.00 |
| ATOM | 8001 | O    | ALA | X | 524 | 40.824 | 17.833 | 37.981 | 0.00 | 0.00 |
| ATOM | 8002 | N    | CYX | X | 525 | 40.205 | 19.186 | 36.254 | 0.00 | 0.00 |
| ATOM | 8003 | H    | CYX | X | 525 | 40.387 | 19.513 | 35.316 | 0.00 | 0.00 |
| ATOM | 8004 | CA   | CYX | X | 525 | 39.228 | 19.948 | 37.090 | 0.00 | 0.00 |
| ATOM | 8005 | HA   | CYX | X | 525 | 39.761 | 20.166 | 38.015 | 0.00 | 0.00 |
| ATOM | 8006 | CB   | CYX | X | 525 | 38.756 | 21.259 | 36.466 | 0.00 | 0.00 |
| ATOM | 8007 | HB2  | CYX | X | 525 | 38.139 | 21.077 | 35.586 | 0.00 | 0.00 |
| ATOM | 8008 | HB3  | CYX | X | 525 | 38.138 | 21.759 | 37.211 | 0.00 | 0.00 |
| ATOM | 8009 | SG   | CYX | X | 525 | 40.120 | 22.393 | 35.999 | 0.00 | 0.00 |
| ATOM | 8010 | C    | CYX | X | 525 | 38.090 | 18.935 | 37.407 | 0.00 | 0.00 |
| ATOM | 8011 | O    | CYX | X | 525 | 37.388 | 19.143 | 38.334 | 0.00 | 0.00 |
| ATOM | 8012 | N    | ALA | X | 526 | 37.920 | 17.845 | 36.715 | 0.00 | 0.00 |
| ATOM | 8013 | H    | ALA | X | 526 | 38.583 | 17.564 | 36.007 | 0.00 | 0.00 |
| ATOM | 8014 | CA   | ALA | X | 526 | 37.012 | 16.757 | 37.036 | 0.00 | 0.00 |
| ATOM | 8015 | HA   | ALA | X | 526 | 36.017 | 17.079 | 37.343 | 0.00 | 0.00 |
| ATOM | 8016 | CB   | ALA | X | 526 | 36.807 | 15.911 | 35.749 | 0.00 | 0.00 |
| ATOM | 8017 | HB1  | ALA | X | 526 | 36.409 | 16.575 | 34.981 | 0.00 | 0.00 |
| ATOM | 8018 | HB2  | ALA | X | 526 | 37.712 | 15.404 | 35.417 | 0.00 | 0.00 |
| ATOM | 8019 | HB3  | ALA | X | 526 | 36.110 | 15.101 | 35.967 | 0.00 | 0.00 |
| ATOM | 8020 | C    | ALA | X | 526 | 37.535 | 15.873 | 38.149 | 0.00 | 0.00 |
| ATOM | 8021 | O    | ALA | X | 526 | 36.695 | 15.412 | 38.931 | 0.00 | 0.00 |
| ATOM | 8022 | N    | PHE | X | 527 | 38.857 | 15.694 | 38.278 | 0.00 | 0.00 |
| ATOM | 8023 | H    | PHE | X | 527 | 39.490 | 16.061 | 37.581 | 0.00 | 0.00 |
| ATOM | 8024 | CA   | PHE | X | 527 | 39.535 | 15.154 | 39.467 | 0.00 | 0.00 |
| ATOM | 8025 | HA   | PHE | X | 527 | 39.035 | 14.231 | 39.759 | 0.00 | 0.00 |
| ATOM | 8026 | CB   | PHE | X | 527 | 40.993 | 14.864 | 39.152 | 0.00 | 0.00 |
| ATOM | 8027 | HB2  | PHE | X | 527 | 41.067 | 13.989 | 38.506 | 0.00 | 0.00 |
| ATOM | 8028 | HB3  | PHE | X | 527 | 41.424 | 15.672 | 38.562 | 0.00 | 0.00 |
| ATOM | 8029 | CG   | PHE | X | 527 | 41.913 | 14.625 | 40.292 | 0.00 | 0.00 |
| ATOM | 8030 | CD1  | PHE | X | 527 | 42.183 | 13.347 | 40.760 | 0.00 | 0.00 |
| ATOM | 8031 | HD1  | PHE | X | 527 | 41.616 | 12.461 | 40.517 | 0.00 | 0.00 |
| ATOM | 8032 | CE1  | PHE | X | 527 | 43.046 | 13.136 | 41.842 | 0.00 | 0.00 |
| ATOM | 8033 | HE1  | PHE | X | 527 | 43.395 | 12.136 | 42.054 | 0.00 | 0.00 |
| ATOM | 8034 | CZ   | PHE | X | 527 | 43.546 | 14.225 | 42.536 | 0.00 | 0.00 |
| ATOM | 8035 | HZ   | PHE | X | 527 | 44.135 | 14.008 | 43.414 | 0.00 | 0.00 |
| ATOM | 8036 | CE2  | PHE | X | 527 | 43.275 | 15.532 | 42.083 | 0.00 | 0.00 |
| ATOM | 8037 | HE2  | PHE | X | 527 | 43.824 | 16.341 | 42.541 | 0.00 | 0.00 |
| ATOM | 8038 | CD2  | PHE | X | 527 | 42.523 | 15.774 | 40.884 | 0.00 | 0.00 |
| ATOM | 8039 | HD2  | PHE | X | 527 | 42.478 | 16.695 | 40.323 | 0.00 | 0.00 |
| ATOM | 8040 | C    | PHE | X | 527 | 39.267 | 16.044 | 40.635 | 0.00 | 0.00 |
| ATOM | 8041 | O    | PHE | X | 527 | 38.713 | 15.648 | 41.648 | 0.00 | 0.00 |
| ATOM | 8042 | N    | TRP | X | 528 | 39.354 | 17.368 | 40.527 | 0.00 | 0.00 |
| ATOM | 8043 | H    | TRP | X | 528 | 39.889 | 17.670 | 39.726 | 0.00 | 0.00 |
| ATOM | 8044 | CA   | TRP | X | 528 | 39.096 | 18.278 | 41.677 | 0.00 | 0.00 |
| ATOM | 8045 | HA   | TRP | X | 528 | 39.538 | 17.814 | 42.558 | 0.00 | 0.00 |
| ATOM | 8046 | CB   | TRP | X | 528 | 39.626 | 19.674 | 41.392 | 0.00 | 0.00 |
| ATOM | 8047 | HB2  | TRP | X | 528 | 39.110 | 20.015 | 40.494 | 0.00 | 0.00 |
| ATOM | 8048 | HB3  | TRP | X | 528 | 39.366 | 20.471 | 42.088 | 0.00 | 0.00 |

|      |      |      |     |   |     |        |        |        |      |      |
|------|------|------|-----|---|-----|--------|--------|--------|------|------|
| ATOM | 8049 | CG   | TRP | X | 528 | 41.087 | 19.830 | 41.020 | 0.00 | 0.00 |
| ATOM | 8050 | CD1  | TRP | X | 528 | 41.760 | 19.961 | 39.875 | 0.00 | 0.00 |
| ATOM | 8051 | HD1  | TRP | X | 528 | 41.340 | 20.126 | 38.895 | 0.00 | 0.00 |
| ATOM | 8052 | NE1  | TRP | X | 528 | 43.097 | 19.947 | 40.054 | 0.00 | 0.00 |
| ATOM | 8053 | HE1  | TRP | X | 528 | 43.703 | 19.921 | 39.247 | 0.00 | 0.00 |
| ATOM | 8054 | CE2  | TRP | X | 528 | 43.377 | 19.939 | 41.302 | 0.00 | 0.00 |
| ATOM | 8055 | CZ2  | TRP | X | 528 | 44.600 | 19.901 | 42.043 | 0.00 | 0.00 |
| ATOM | 8056 | HZ2  | TRP | X | 528 | 45.549 | 19.864 | 41.529 | 0.00 | 0.00 |
| ATOM | 8057 | CH2  | TRP | X | 528 | 44.670 | 19.819 | 43.459 | 0.00 | 0.00 |
| ATOM | 8058 | HH2  | TRP | X | 528 | 45.593 | 19.618 | 43.982 | 0.00 | 0.00 |
| ATOM | 8059 | CZ3  | TRP | X | 528 | 43.426 | 19.898 | 44.082 | 0.00 | 0.00 |
| ATOM | 8060 | HZ3  | TRP | X | 528 | 43.295 | 19.906 | 45.154 | 0.00 | 0.00 |
| ATOM | 8061 | CE3  | TRP | X | 528 | 42.224 | 19.864 | 43.409 | 0.00 | 0.00 |
| ATOM | 8062 | HE3  | TRP | X | 528 | 41.337 | 19.768 | 44.018 | 0.00 | 0.00 |
| ATOM | 8063 | CD2  | TRP | X | 528 | 42.162 | 19.839 | 42.008 | 0.00 | 0.00 |
| ATOM | 8064 | C    | TRP | X | 528 | 37.565 | 18.453 | 41.946 | 0.00 | 0.00 |
| ATOM | 8065 | O    | TRP | X | 528 | 37.310 | 18.715 | 43.100 | 0.00 | 0.00 |
| ATOM | 8066 | N    | ASN | X | 529 | 36.580 | 18.168 | 41.063 | 0.00 | 0.00 |
| ATOM | 8067 | H    | ASN | X | 529 | 36.780 | 17.836 | 40.130 | 0.00 | 0.00 |
| ATOM | 8068 | CA   | ASN | X | 529 | 35.149 | 18.053 | 41.435 | 0.00 | 0.00 |
| ATOM | 8069 | HA   | ASN | X | 529 | 34.863 | 18.711 | 42.256 | 0.00 | 0.00 |
| ATOM | 8070 | CB   | ASN | X | 529 | 34.323 | 18.471 | 40.207 | 0.00 | 0.00 |
| ATOM | 8071 | HB2  | ASN | X | 529 | 34.708 | 19.432 | 39.866 | 0.00 | 0.00 |
| ATOM | 8072 | HB3  | ASN | X | 529 | 34.513 | 17.759 | 39.404 | 0.00 | 0.00 |
| ATOM | 8073 | CG   | ASN | X | 529 | 32.852 | 18.586 | 40.527 | 0.00 | 0.00 |
| ATOM | 8074 | OD1  | ASN | X | 529 | 32.110 | 17.586 | 40.706 | 0.00 | 0.00 |
| ATOM | 8075 | ND2  | ASN | X | 529 | 32.381 | 19.839 | 40.576 | 0.00 | 0.00 |
| ATOM | 8076 | HD21 | ASN | X | 529 | 31.389 | 19.912 | 40.746 | 0.00 | 0.00 |
| ATOM | 8077 | HD22 | ASN | X | 529 | 32.951 | 20.655 | 40.403 | 0.00 | 0.00 |
| ATOM | 8078 | C    | ASN | X | 529 | 34.766 | 16.679 | 41.936 | 0.00 | 0.00 |
| ATOM | 8079 | O    | ASN | X | 529 | 34.355 | 16.484 | 43.096 | 0.00 | 0.00 |
| ATOM | 8080 | N    | ARG | X | 530 | 34.940 | 15.609 | 41.135 | 0.00 | 0.00 |
| ATOM | 8081 | H    | ARG | X | 530 | 35.387 | 15.736 | 40.238 | 0.00 | 0.00 |
| ATOM | 8082 | CA   | ARG | X | 530 | 34.350 | 14.280 | 41.467 | 0.00 | 0.00 |
| ATOM | 8083 | HA   | ARG | X | 530 | 33.425 | 14.332 | 42.041 | 0.00 | 0.00 |
| ATOM | 8084 | CB   | ARG | X | 530 | 33.959 | 13.665 | 40.145 | 0.00 | 0.00 |
| ATOM | 8085 | HB2  | ARG | X | 530 | 34.888 | 13.590 | 39.580 | 0.00 | 0.00 |
| ATOM | 8086 | HB3  | ARG | X | 530 | 33.554 | 12.683 | 40.391 | 0.00 | 0.00 |
| ATOM | 8087 | CG   | ARG | X | 530 | 32.881 | 14.474 | 39.358 | 0.00 | 0.00 |
| ATOM | 8088 | HG2  | ARG | X | 530 | 32.043 | 14.317 | 40.037 | 0.00 | 0.00 |
| ATOM | 8089 | HG3  | ARG | X | 530 | 33.079 | 15.533 | 39.192 | 0.00 | 0.00 |
| ATOM | 8090 | CD   | ARG | X | 530 | 32.670 | 13.839 | 37.939 | 0.00 | 0.00 |
| ATOM | 8091 | HD2  | ARG | X | 530 | 32.259 | 14.568 | 37.241 | 0.00 | 0.00 |
| ATOM | 8092 | HD3  | ARG | X | 530 | 33.649 | 13.716 | 37.476 | 0.00 | 0.00 |
| ATOM | 8093 | NE   | ARG | X | 530 | 31.989 | 12.532 | 37.972 | 0.00 | 0.00 |
| ATOM | 8094 | HE   | ARG | X | 530 | 31.165 | 12.471 | 38.553 | 0.00 | 0.00 |
| ATOM | 8095 | CZ   | ARG | X | 530 | 32.364 | 11.358 | 37.483 | 0.00 | 0.00 |
| ATOM | 8096 | NH1  | ARG | X | 530 | 33.325 | 11.296 | 36.575 | 0.00 | 0.00 |
| ATOM | 8097 | HH11 | ARG | X | 530 | 33.864 | 12.111 | 36.321 | 0.00 | 0.00 |
| ATOM | 8098 | HH12 | ARG | X | 530 | 33.830 | 10.437 | 36.410 | 0.00 | 0.00 |
| ATOM | 8099 | NH2  | ARG | X | 530 | 31.789 | 10.274 | 37.805 | 0.00 | 0.00 |
| ATOM | 8100 | HH21 | ARG | X | 530 | 30.880 | 10.271 | 38.244 | 0.00 | 0.00 |
| ATOM | 8101 | HH22 | ARG | X | 530 | 32.195 | 9.379  | 37.575 | 0.00 | 0.00 |
| ATOM | 8102 | C    | ARG | X | 530 | 35.265 | 13.273 | 42.265 | 0.00 | 0.00 |
| ATOM | 8103 | O    | ARG | X | 530 | 34.771 | 12.214 | 42.664 | 0.00 | 0.00 |
| ATOM | 8104 | N    | PHE | X | 531 | 36.534 | 13.531 | 42.519 | 0.00 | 0.00 |
| ATOM | 8105 | H    | PHE | X | 531 | 36.927 | 14.397 | 42.181 | 0.00 | 0.00 |
| ATOM | 8106 | CA   | PHE | X | 531 | 37.396 | 12.599 | 43.322 | 0.00 | 0.00 |
| ATOM | 8107 | HA   | PHE | X | 531 | 36.771 | 11.785 | 43.687 | 0.00 | 0.00 |
| ATOM | 8108 | CB   | PHE | X | 531 | 38.515 | 12.015 | 42.480 | 0.00 | 0.00 |
| ATOM | 8109 | HB2  | PHE | X | 531 | 38.110 | 11.890 | 41.475 | 0.00 | 0.00 |
| ATOM | 8110 | HB3  | PHE | X | 531 | 39.373 | 12.682 | 42.402 | 0.00 | 0.00 |
| ATOM | 8111 | CG   | PHE | X | 531 | 39.000 | 10.697 | 42.902 | 0.00 | 0.00 |
| ATOM | 8112 | CD1  | PHE | X | 531 | 38.257 | 9.604  | 42.451 | 0.00 | 0.00 |
| ATOM | 8113 | HD1  | PHE | X | 531 | 37.390 | 9.828  | 41.848 | 0.00 | 0.00 |
| ATOM | 8114 | CE1  | PHE | X | 531 | 38.519 | 8.298  | 42.845 | 0.00 | 0.00 |
| ATOM | 8115 | HE1  | PHE | X | 531 | 37.850 | 7.503  | 42.551 | 0.00 | 0.00 |
| ATOM | 8116 | CZ   | PHE | X | 531 | 39.636 | 8.149  | 43.708 | 0.00 | 0.00 |
| ATOM | 8117 | HZ   | PHE | X | 531 | 39.919 | 7.152  | 44.014 | 0.00 | 0.00 |
| ATOM | 8118 | CE2  | PHE | X | 531 | 40.457 | 9.240  | 44.204 | 0.00 | 0.00 |

|      |      |      |     |   |     |        |        |        |      |      |
|------|------|------|-----|---|-----|--------|--------|--------|------|------|
| ATOM | 8119 | HE2  | PHE | X | 531 | 41.318 | 9.058  | 44.829 | 0.00 | 0.00 |
| ATOM | 8120 | CD2  | PHE | X | 531 | 40.184 | 10.517 | 43.669 | 0.00 | 0.00 |
| ATOM | 8121 | HD2  | PHE | X | 531 | 40.818 | 11.337 | 43.972 | 0.00 | 0.00 |
| ATOM | 8122 | C    | PHE | X | 531 | 37.835 | 13.324 | 44.591 | 0.00 | 0.00 |
| ATOM | 8123 | O    | PHE | X | 531 | 37.491 | 12.923 | 45.749 | 0.00 | 0.00 |
| ATOM | 8124 | N    | LEU | X | 532 | 38.749 | 14.241 | 44.446 | 0.00 | 0.00 |
| ATOM | 8125 | H    | LEU | X | 532 | 39.020 | 14.429 | 43.491 | 0.00 | 0.00 |
| ATOM | 8126 | CA   | LEU | X | 532 | 39.554 | 14.805 | 45.510 | 0.00 | 0.00 |
| ATOM | 8127 | HA   | LEU | X | 532 | 40.388 | 14.170 | 45.808 | 0.00 | 0.00 |
| ATOM | 8128 | CB   | LEU | X | 532 | 40.450 | 15.901 | 44.787 | 0.00 | 0.00 |
| ATOM | 8129 | HB2  | LEU | X | 532 | 40.831 | 15.464 | 43.864 | 0.00 | 0.00 |
| ATOM | 8130 | HB3  | LEU | X | 532 | 39.822 | 16.741 | 44.489 | 0.00 | 0.00 |
| ATOM | 8131 | CG   | LEU | X | 532 | 41.755 | 16.476 | 45.499 | 0.00 | 0.00 |
| ATOM | 8132 | HG   | LEU | X | 532 | 42.375 | 17.010 | 44.779 | 0.00 | 0.00 |
| ATOM | 8133 | CD1  | LEU | X | 532 | 41.417 | 17.377 | 46.662 | 0.00 | 0.00 |
| ATOM | 8134 | HD11 | LEU | X | 532 | 40.982 | 16.723 | 47.418 | 0.00 | 0.00 |
| ATOM | 8135 | HD12 | LEU | X | 532 | 42.285 | 17.941 | 47.002 | 0.00 | 0.00 |
| ATOM | 8136 | HD13 | LEU | X | 532 | 40.606 | 18.043 | 46.367 | 0.00 | 0.00 |
| ATOM | 8137 | CD2  | LEU | X | 532 | 42.583 | 15.342 | 46.142 | 0.00 | 0.00 |
| ATOM | 8138 | HD21 | LEU | X | 532 | 42.108 | 14.780 | 46.945 | 0.00 | 0.00 |
| ATOM | 8139 | HD22 | LEU | X | 532 | 42.865 | 14.567 | 45.429 | 0.00 | 0.00 |
| ATOM | 8140 | HD23 | LEU | X | 532 | 43.519 | 15.743 | 46.530 | 0.00 | 0.00 |
| ATOM | 8141 | C    | LEU | X | 532 | 38.851 | 15.358 | 46.792 | 0.00 | 0.00 |
| ATOM | 8142 | O    | LEU | X | 532 | 39.214 | 14.704 | 47.795 | 0.00 | 0.00 |
| ATOM | 8143 | N    | PRO | X | 533 | 37.908 | 16.284 | 46.863 | 0.00 | 0.00 |
| ATOM | 8144 | CD   | PRO | X | 533 | 37.386 | 16.955 | 45.678 | 0.00 | 0.00 |
| ATOM | 8145 | HD2  | PRO | X | 533 | 37.054 | 16.271 | 44.897 | 0.00 | 0.00 |
| ATOM | 8146 | HD3  | PRO | X | 533 | 38.102 | 17.639 | 45.222 | 0.00 | 0.00 |
| ATOM | 8147 | CG   | PRO | X | 533 | 36.105 | 17.671 | 46.233 | 0.00 | 0.00 |
| ATOM | 8148 | HG2  | PRO | X | 533 | 35.227 | 17.030 | 46.152 | 0.00 | 0.00 |
| ATOM | 8149 | HG3  | PRO | X | 533 | 35.895 | 18.637 | 45.774 | 0.00 | 0.00 |
| ATOM | 8150 | CB   | PRO | X | 533 | 36.426 | 17.992 | 47.642 | 0.00 | 0.00 |
| ATOM | 8151 | HB2  | PRO | X | 533 | 35.602 | 18.010 | 48.356 | 0.00 | 0.00 |
| ATOM | 8152 | HB3  | PRO | X | 533 | 37.021 | 18.881 | 47.849 | 0.00 | 0.00 |
| ATOM | 8153 | CA   | PRO | X | 533 | 37.313 | 16.780 | 48.066 | 0.00 | 0.00 |
| ATOM | 8154 | HA   | PRO | X | 533 | 38.117 | 17.154 | 48.700 | 0.00 | 0.00 |
| ATOM | 8155 | C    | PRO | X | 533 | 36.514 | 15.701 | 48.816 | 0.00 | 0.00 |
| ATOM | 8156 | O    | PRO | X | 533 | 36.441 | 15.797 | 50.056 | 0.00 | 0.00 |
| ATOM | 8157 | N    | LYS | X | 534 | 35.999 | 14.743 | 48.045 | 0.00 | 0.00 |
| ATOM | 8158 | H    | LYS | X | 534 | 36.185 | 14.729 | 47.052 | 0.00 | 0.00 |
| ATOM | 8159 | CA   | LYS | X | 534 | 35.271 | 13.638 | 48.586 | 0.00 | 0.00 |
| ATOM | 8160 | HA   | LYS | X | 534 | 34.508 | 14.022 | 49.263 | 0.00 | 0.00 |
| ATOM | 8161 | CB   | LYS | X | 534 | 34.578 | 12.852 | 47.438 | 0.00 | 0.00 |
| ATOM | 8162 | HB2  | LYS | X | 534 | 34.011 | 13.593 | 46.875 | 0.00 | 0.00 |
| ATOM | 8163 | HB3  | LYS | X | 534 | 35.306 | 12.395 | 46.768 | 0.00 | 0.00 |
| ATOM | 8164 | CG   | LYS | X | 534 | 33.683 | 11.704 | 47.982 | 0.00 | 0.00 |
| ATOM | 8165 | HG2  | LYS | X | 534 | 34.055 | 10.919 | 48.640 | 0.00 | 0.00 |
| ATOM | 8166 | HG3  | LYS | X | 534 | 32.844 | 12.198 | 48.472 | 0.00 | 0.00 |
| ATOM | 8167 | CD   | LYS | X | 534 | 33.236 | 10.731 | 46.842 | 0.00 | 0.00 |
| ATOM | 8168 | HD2  | LYS | X | 534 | 32.721 | 9.947  | 47.398 | 0.00 | 0.00 |
| ATOM | 8169 | HD3  | LYS | X | 534 | 32.559 | 11.296 | 46.202 | 0.00 | 0.00 |
| ATOM | 8170 | CE   | LYS | X | 534 | 34.277 | 9.941  | 46.050 | 0.00 | 0.00 |
| ATOM | 8171 | HE2  | LYS | X | 534 | 34.484 | 10.610 | 45.215 | 0.00 | 0.00 |
| ATOM | 8172 | HE3  | LYS | X | 534 | 35.149 | 9.787  | 46.687 | 0.00 | 0.00 |
| ATOM | 8173 | NZ   | LYS | X | 534 | 33.740 | 8.715  | 45.449 | 0.00 | 0.00 |
| ATOM | 8174 | HZ1  | LYS | X | 534 | 34.436 | 8.263  | 44.874 | 0.00 | 0.00 |
| ATOM | 8175 | HZ2  | LYS | X | 534 | 33.566 | 8.114  | 46.242 | 0.00 | 0.00 |
| ATOM | 8176 | HZ3  | LYS | X | 534 | 32.915 | 8.896  | 44.895 | 0.00 | 0.00 |
| ATOM | 8177 | C    | LYS | X | 534 | 36.101 | 12.727 | 49.480 | 0.00 | 0.00 |
| ATOM | 8178 | O    | LYS | X | 534 | 35.554 | 12.062 | 50.362 | 0.00 | 0.00 |
| ATOM | 8179 | N    | LEU | X | 535 | 37.429 | 12.798 | 49.290 | 0.00 | 0.00 |
| ATOM | 8180 | H    | LEU | X | 535 | 37.696 | 13.288 | 48.449 | 0.00 | 0.00 |
| ATOM | 8181 | CA   | LEU | X | 535 | 38.455 | 12.160 | 50.092 | 0.00 | 0.00 |
| ATOM | 8182 | HA   | LEU | X | 535 | 37.932 | 11.292 | 50.494 | 0.00 | 0.00 |
| ATOM | 8183 | CB   | LEU | X | 535 | 39.694 | 11.707 | 49.357 | 0.00 | 0.00 |
| ATOM | 8184 | HB2  | LEU | X | 535 | 40.336 | 12.553 | 49.114 | 0.00 | 0.00 |
| ATOM | 8185 | HB3  | LEU | X | 535 | 40.329 | 11.235 | 50.106 | 0.00 | 0.00 |
| ATOM | 8186 | CG   | LEU | X | 535 | 39.543 | 10.928 | 47.993 | 0.00 | 0.00 |
| ATOM | 8187 | HG   | LEU | X | 535 | 39.135 | 11.504 | 47.162 | 0.00 | 0.00 |
| ATOM | 8188 | CD1  | LEU | X | 535 | 41.001 | 10.626 | 47.594 | 0.00 | 0.00 |

|      |      |      |     |   |     |        |        |        |      |      |
|------|------|------|-----|---|-----|--------|--------|--------|------|------|
| ATOM | 8189 | HD11 | LEU | X | 535 | 41.512 | 9.934  | 48.262 | 0.00 | 0.00 |
| ATOM | 8190 | HD12 | LEU | X | 535 | 40.985 | 10.296 | 46.555 | 0.00 | 0.00 |
| ATOM | 8191 | HD13 | LEU | X | 535 | 41.579 | 11.550 | 47.598 | 0.00 | 0.00 |
| ATOM | 8192 | CD2  | LEU | X | 535 | 38.745 | 9.578  | 47.953 | 0.00 | 0.00 |
| ATOM | 8193 | HD21 | LEU | X | 535 | 39.399 | 8.809  | 47.541 | 0.00 | 0.00 |
| ATOM | 8194 | HD22 | LEU | X | 535 | 38.517 | 9.321  | 48.987 | 0.00 | 0.00 |
| ATOM | 8195 | HD23 | LEU | X | 535 | 37.814 | 9.785  | 47.424 | 0.00 | 0.00 |
| ATOM | 8196 | C    | LEU | X | 535 | 38.843 | 12.985 | 51.282 | 0.00 | 0.00 |
| ATOM | 8197 | O    | LEU | X | 535 | 39.106 | 12.368 | 52.342 | 0.00 | 0.00 |
| ATOM | 8198 | N    | LEU | X | 536 | 38.854 | 14.321 | 51.121 | 0.00 | 0.00 |
| ATOM | 8199 | H    | LEU | X | 536 | 38.467 | 14.658 | 50.251 | 0.00 | 0.00 |
| ATOM | 8200 | CA   | LEU | X | 536 | 39.125 | 15.363 | 52.197 | 0.00 | 0.00 |
| ATOM | 8201 | HA   | LEU | X | 536 | 40.073 | 15.114 | 52.673 | 0.00 | 0.00 |
| ATOM | 8202 | CB   | LEU | X | 536 | 39.188 | 16.811 | 51.671 | 0.00 | 0.00 |
| ATOM | 8203 | HB2  | LEU | X | 536 | 38.233 | 17.087 | 51.223 | 0.00 | 0.00 |
| ATOM | 8204 | HB3  | LEU | X | 536 | 39.390 | 17.549 | 52.448 | 0.00 | 0.00 |
| ATOM | 8205 | CG   | LEU | X | 536 | 40.288 | 17.022 | 50.547 | 0.00 | 0.00 |
| ATOM | 8206 | HG   | LEU | X | 536 | 39.996 | 16.382 | 49.715 | 0.00 | 0.00 |
| ATOM | 8207 | CD1  | LEU | X | 536 | 40.349 | 18.472 | 50.088 | 0.00 | 0.00 |
| ATOM | 8208 | HD11 | LEU | X | 536 | 41.281 | 18.546 | 49.527 | 0.00 | 0.00 |
| ATOM | 8209 | HD12 | LEU | X | 536 | 39.446 | 18.881 | 49.635 | 0.00 | 0.00 |
| ATOM | 8210 | HD13 | LEU | X | 536 | 40.500 | 19.088 | 50.974 | 0.00 | 0.00 |
| ATOM | 8211 | CD2  | LEU | X | 536 | 41.660 | 16.554 | 51.106 | 0.00 | 0.00 |
| ATOM | 8212 | HD21 | LEU | X | 536 | 41.591 | 15.469 | 51.181 | 0.00 | 0.00 |
| ATOM | 8213 | HD22 | LEU | X | 536 | 42.496 | 16.909 | 50.503 | 0.00 | 0.00 |
| ATOM | 8214 | HD23 | LEU | X | 536 | 41.784 | 16.906 | 52.130 | 0.00 | 0.00 |
| ATOM | 8215 | C    | LEU | X | 536 | 37.977 | 15.254 | 53.236 | 0.00 | 0.00 |
| ATOM | 8216 | O    | LEU | X | 536 | 38.259 | 15.597 | 54.377 | 0.00 | 0.00 |
| ATOM | 8217 | N    | SER | X | 537 | 36.713 | 14.992 | 52.827 | 0.00 | 0.00 |
| ATOM | 8218 | H    | SER | X | 537 | 36.505 | 14.763 | 51.865 | 0.00 | 0.00 |
| ATOM | 8219 | CA   | SER | X | 537 | 35.657 | 14.970 | 53.748 | 0.00 | 0.00 |
| ATOM | 8220 | HA   | SER | X | 537 | 35.679 | 15.713 | 54.545 | 0.00 | 0.00 |
| ATOM | 8221 | CB   | SER | X | 537 | 34.316 | 15.183 | 52.984 | 0.00 | 0.00 |
| ATOM | 8222 | HB2  | SER | X | 537 | 33.458 | 15.097 | 53.651 | 0.00 | 0.00 |
| ATOM | 8223 | HB3  | SER | X | 537 | 34.226 | 16.139 | 52.468 | 0.00 | 0.00 |
| ATOM | 8224 | OG   | SER | X | 537 | 34.252 | 14.282 | 51.894 | 0.00 | 0.00 |
| ATOM | 8225 | HG   | SER | X | 537 | 33.533 | 14.458 | 51.283 | 0.00 | 0.00 |
| ATOM | 8226 | C    | SER | X | 537 | 35.453 | 13.651 | 54.552 | 0.00 | 0.00 |
| ATOM | 8227 | O    | SER | X | 537 | 34.581 | 13.621 | 55.410 | 0.00 | 0.00 |
| ATOM | 8228 | N    | ALA | X | 538 | 36.371 | 12.673 | 54.230 | 0.00 | 0.00 |
| ATOM | 8229 | H    | ALA | X | 538 | 37.080 | 12.813 | 53.524 | 0.00 | 0.00 |
| ATOM | 8230 | CA   | ALA | X | 538 | 36.453 | 11.421 | 55.074 | 0.00 | 0.00 |
| ATOM | 8231 | HA   | ALA | X | 538 | 35.754 | 11.484 | 55.908 | 0.00 | 0.00 |
| ATOM | 8232 | CB   | ALA | X | 538 | 35.979 | 10.252 | 54.208 | 0.00 | 0.00 |
| ATOM | 8233 | HB1  | ALA | X | 538 | 35.465 | 9.477  | 54.777 | 0.00 | 0.00 |
| ATOM | 8234 | HB2  | ALA | X | 538 | 35.317 | 10.663 | 53.446 | 0.00 | 0.00 |
| ATOM | 8235 | HB3  | ALA | X | 538 | 36.799 | 9.869  | 53.601 | 0.00 | 0.00 |
| ATOM | 8236 | C    | ALA | X | 538 | 37.814 | 11.260 | 55.840 | 0.00 | 0.00 |
| ATOM | 8237 | O    | ALA | X | 538 | 37.813 | 10.971 | 57.064 | 0.00 | 0.00 |
| ATOM | 8238 | N    | THR | X | 539 | 38.910 | 11.460 | 55.124 | 0.00 | 0.00 |
| ATOM | 8239 | H    | THR | X | 539 | 38.924 | 11.894 | 54.212 | 0.00 | 0.00 |
| ATOM | 8240 | CA   | THR | X | 539 | 40.235 | 10.957 | 55.587 | 0.00 | 0.00 |
| ATOM | 8241 | HA   | THR | X | 539 | 40.094 | 10.013 | 56.114 | 0.00 | 0.00 |
| ATOM | 8242 | CB   | THR | X | 539 | 41.290 | 10.696 | 54.489 | 0.00 | 0.00 |
| ATOM | 8243 | HB   | THR | X | 539 | 42.297 | 10.506 | 54.861 | 0.00 | 0.00 |
| ATOM | 8244 | CG2  | THR | X | 539 | 40.928 | 9.465  | 53.711 | 0.00 | 0.00 |
| ATOM | 8245 | HG21 | THR | X | 539 | 41.774 | 9.042  | 53.170 | 0.00 | 0.00 |
| ATOM | 8246 | HG22 | THR | X | 539 | 40.559 | 8.769  | 54.464 | 0.00 | 0.00 |
| ATOM | 8247 | HG23 | THR | X | 539 | 40.117 | 9.705  | 53.023 | 0.00 | 0.00 |
| ATOM | 8248 | OG1  | THR | X | 539 | 41.366 | 11.643 | 53.513 | 0.00 | 0.00 |
| ATOM | 8249 | HG1  | THR | X | 539 | 40.459 | 11.809 | 53.245 | 0.00 | 0.00 |
| ATOM | 8250 | C    | THR | X | 539 | 41.012 | 11.775 | 56.665 | 0.00 | 0.00 |
| ATOM | 8251 | O    | THR | X | 539 | 41.804 | 11.154 | 57.460 | 0.00 | 0.00 |
| ATOM | 8252 | OXT  | THR | X | 539 | 40.900 | 13.047 | 56.731 | 0.00 | 0.00 |
| ATOM | 8253 | C    | LIG | X | 540 | 55.508 | 33.569 | 51.459 | 0.00 | 0.00 |
| ATOM | 8254 | C1   | LIG | X | 540 | 54.417 | 32.972 | 50.730 | 0.00 | 0.00 |
| ATOM | 8255 | C2   | LIG | X | 540 | 53.764 | 33.641 | 49.634 | 0.00 | 0.00 |
| ATOM | 8256 | C3   | LIG | X | 540 | 54.239 | 34.963 | 49.413 | 0.00 | 0.00 |
| ATOM | 8257 | C4   | LIG | X | 540 | 55.311 | 35.507 | 50.106 | 0.00 | 0.00 |
| ATOM | 8258 | C5   | LIG | X | 540 | 55.959 | 34.824 | 51.131 | 0.00 | 0.00 |

|      |      |     |     |   |     |        |        |        |      |      |
|------|------|-----|-----|---|-----|--------|--------|--------|------|------|
| ATOM | 8259 | C6  | LIG | X | 540 | 57.187 | 35.422 | 51.822 | 0.00 | 0.00 |
| ATOM | 8260 | N   | LIG | X | 540 | 56.860 | 36.139 | 53.127 | 0.00 | 0.00 |
| ATOM | 8261 | C7  | LIG | X | 540 | 58.071 | 36.475 | 53.864 | 0.00 | 0.00 |
| ATOM | 8262 | C8  | LIG | X | 540 | 55.956 | 37.310 | 52.806 | 0.00 | 0.00 |
| ATOM | 8263 | O   | LIG | X | 540 | 53.645 | 35.708 | 48.429 | 0.00 | 0.00 |
| ATOM | 8264 | C9  | LIG | X | 540 | 54.374 | 36.000 | 47.172 | 0.00 | 0.00 |
| ATOM | 8265 | O1  | LIG | X | 540 | 52.801 | 33.023 | 48.912 | 0.00 | 0.00 |
| ATOM | 8266 | H   | LIG | X | 540 | 52.995 | 32.073 | 48.821 | 0.00 | 0.00 |
| ATOM | 8267 | H1  | LIG | X | 540 | 55.991 | 32.977 | 52.232 | 0.00 | 0.00 |
| ATOM | 8268 | H2  | LIG | X | 540 | 54.064 | 31.978 | 50.991 | 0.00 | 0.00 |
| ATOM | 8269 | H3  | LIG | X | 540 | 55.622 | 36.504 | 49.807 | 0.00 | 0.00 |
| ATOM | 8270 | H4  | LIG | X | 540 | 57.941 | 34.669 | 52.065 | 0.00 | 0.00 |
| ATOM | 8271 | H5  | LIG | X | 540 | 57.617 | 36.197 | 51.183 | 0.00 | 0.00 |
| ATOM | 8272 | H6  | LIG | X | 540 | 56.379 | 38.156 | 52.260 | 0.00 | 0.00 |
| ATOM | 8273 | H7  | LIG | X | 540 | 55.006 | 36.936 | 52.414 | 0.00 | 0.00 |
| ATOM | 8274 | H8  | LIG | X | 540 | 55.690 | 37.784 | 53.754 | 0.00 | 0.00 |
| ATOM | 8275 | H9  | LIG | X | 540 | 57.919 | 37.293 | 54.572 | 0.00 | 0.00 |
| ATOM | 8276 | H10 | LIG | X | 540 | 58.585 | 35.601 | 54.272 | 0.00 | 0.00 |
| ATOM | 8277 | H11 | LIG | X | 540 | 58.808 | 36.863 | 53.156 | 0.00 | 0.00 |
| ATOM | 8278 | H12 | LIG | X | 540 | 55.100 | 36.716 | 47.566 | 0.00 | 0.00 |
| ATOM | 8279 | H13 | LIG | X | 540 | 53.855 | 36.462 | 46.329 | 0.00 | 0.00 |
| ATOM | 8280 | H14 | LIG | X | 540 | 54.961 | 35.145 | 46.827 | 0.00 | 0.00 |
| ATOM | 8281 | Na+ | Na+ | X | 541 | 51.919 | 40.022 | 37.533 | 0.00 | 0.00 |
| ATOM | 8282 | Na+ | Na+ | X | 542 | 45.364 | 17.213 | 56.124 | 0.00 | 0.00 |
| ATOM | 8283 | Na+ | Na+ | X | 543 | 70.422 | 25.643 | 49.553 | 0.00 | 0.00 |
| ATOM | 8284 | Na+ | Na+ | X | 544 | 69.969 | 11.248 | 66.356 | 0.00 | 0.00 |
| ATOM | 8285 | Na+ | Na+ | X | 545 | 58.572 | 17.076 | 76.169 | 0.00 | 0.00 |
| ATOM | 8286 | Na+ | Na+ | X | 546 | 46.164 | 73.005 | 62.492 | 0.00 | 0.00 |
| ATOM | 8287 | Na+ | Na+ | X | 547 | 19.168 | 32.240 | 55.488 | 0.00 | 0.00 |

END

**2**

| CRYST1 | 84.300 | 84.300 | 84.300 | 90.00 | 90.00 | 90.00  | P 1    | 1      |      |      |
|--------|--------|--------|--------|-------|-------|--------|--------|--------|------|------|
| ATOM   | 1      | N      | ASP    | X     | 1     | 52.377 | 78.430 | 27.342 | 0.00 | 0.00 |
| ATOM   | 2      | H1     | ASP    | X     | 1     | 51.575 | 77.817 | 27.388 | 0.00 | 0.00 |
| ATOM   | 3      | H2     | ASP    | X     | 1     | 53.013 | 77.981 | 26.698 | 0.00 | 0.00 |
| ATOM   | 4      | H3     | ASP    | X     | 1     | 52.127 | 79.296 | 26.887 | 0.00 | 0.00 |
| ATOM   | 5      | CA     | ASP    | X     | 1     | 53.032 | 78.458 | 28.680 | 0.00 | 0.00 |
| ATOM   | 6      | HA     | ASP    | X     | 1     | 53.512 | 77.524 | 28.971 | 0.00 | 0.00 |
| ATOM   | 7      | CB     | ASP    | X     | 1     | 54.206 | 79.454 | 28.589 | 0.00 | 0.00 |
| ATOM   | 8      | HB2    | ASP    | X     | 1     | 54.853 | 79.143 | 27.769 | 0.00 | 0.00 |
| ATOM   | 9      | HB3    | ASP    | X     | 1     | 53.856 | 80.447 | 28.308 | 0.00 | 0.00 |
| ATOM   | 10     | CG     | ASP    | X     | 1     | 54.999 | 79.451 | 29.876 | 0.00 | 0.00 |
| ATOM   | 11     | OD1    | ASP    | X     | 1     | 54.832 | 80.456 | 30.616 | 0.00 | 0.00 |
| ATOM   | 12     | OD2    | ASP    | X     | 1     | 55.638 | 78.454 | 30.105 | 0.00 | 0.00 |
| ATOM   | 13     | C      | ASP    | X     | 1     | 52.005 | 78.916 | 29.733 | 0.00 | 0.00 |
| ATOM   | 14     | O      | ASP    | X     | 1     | 51.863 | 78.200 | 30.676 | 0.00 | 0.00 |
| ATOM   | 15     | N      | ALA    | X     | 2     | 51.219 | 79.975 | 29.573 | 0.00 | 0.00 |
| ATOM   | 16     | H      | ALA    | X     | 2     | 51.433 | 80.523 | 28.752 | 0.00 | 0.00 |
| ATOM   | 17     | CA     | ALA    | X     | 2     | 50.181 | 80.494 | 30.468 | 0.00 | 0.00 |
| ATOM   | 18     | HA     | ALA    | X     | 2     | 50.591 | 81.050 | 31.310 | 0.00 | 0.00 |
| ATOM   | 19     | CB     | ALA    | X     | 2     | 49.245 | 81.454 | 29.747 | 0.00 | 0.00 |
| ATOM   | 20     | HB1    | ALA    | X     | 2     | 49.803 | 82.324 | 29.403 | 0.00 | 0.00 |
| ATOM   | 21     | HB2    | ALA    | X     | 2     | 48.679 | 81.034 | 28.916 | 0.00 | 0.00 |
| ATOM   | 22     | HB3    | ALA    | X     | 2     | 48.641 | 81.933 | 30.519 | 0.00 | 0.00 |
| ATOM   | 23     | C      | ALA    | X     | 2     | 49.403 | 79.371 | 31.247 | 0.00 | 0.00 |
| ATOM   | 24     | O      | ALA    | X     | 2     | 49.181 | 79.580 | 32.442 | 0.00 | 0.00 |
| ATOM   | 25     | N      | GLU    | X     | 3     | 48.905 | 78.390 | 30.470 | 0.00 | 0.00 |
| ATOM   | 26     | H      | GLU    | X     | 3     | 49.228 | 78.383 | 29.513 | 0.00 | 0.00 |
| ATOM   | 27     | CA     | GLU    | X     | 3     | 48.098 | 77.211 | 30.932 | 0.00 | 0.00 |
| ATOM   | 28     | HA     | GLU    | X     | 3     | 47.372 | 77.684 | 31.593 | 0.00 | 0.00 |
| ATOM   | 29     | CB     | GLU    | X     | 3     | 47.224 | 76.775 | 29.721 | 0.00 | 0.00 |
| ATOM   | 30     | HB2    | GLU    | X     | 3     | 47.858 | 76.358 | 28.939 | 0.00 | 0.00 |
| ATOM   | 31     | HB3    | GLU    | X     | 3     | 46.652 | 75.964 | 30.172 | 0.00 | 0.00 |
| ATOM   | 32     | CG     | GLU    | X     | 3     | 46.362 | 77.871 | 29.178 | 0.00 | 0.00 |
| ATOM   | 33     | HG2    | GLU    | X     | 3     | 45.750 | 78.108 | 30.049 | 0.00 | 0.00 |
| ATOM   | 34     | HG3    | GLU    | X     | 3     | 46.916 | 78.768 | 28.905 | 0.00 | 0.00 |
| ATOM   | 35     | CD     | GLU    | X     | 3     | 45.620 | 77.350 | 28.010 | 0.00 | 0.00 |
| ATOM   | 36     | OE1    | GLU    | X     | 3     | 44.383 | 77.290 | 28.119 | 0.00 | 0.00 |
| ATOM   | 37     | OE2    | GLU    | X     | 3     | 46.182 | 77.056 | 26.935 | 0.00 | 0.00 |
| ATOM   | 38     | C      | GLU    | X     | 3     | 48.858 | 76.077 | 31.637 | 0.00 | 0.00 |

|      |     |      |     |   |   |        |        |        |      |      |
|------|-----|------|-----|---|---|--------|--------|--------|------|------|
| ATOM | 39  | O    | GLU | X | 3 | 48.217 | 75.160 | 32.153 | 0.00 | 0.00 |
| ATOM | 40  | N    | LEU | X | 4 | 50.141 | 76.251 | 31.798 | 0.00 | 0.00 |
| ATOM | 41  | H    | LEU | X | 4 | 50.563 | 76.962 | 31.218 | 0.00 | 0.00 |
| ATOM | 42  | CA   | LEU | X | 4 | 50.943 | 75.420 | 32.739 | 0.00 | 0.00 |
| ATOM | 43  | HA   | LEU | X | 4 | 50.550 | 74.410 | 32.623 | 0.00 | 0.00 |
| ATOM | 44  | CB   | LEU | X | 4 | 52.466 | 75.444 | 32.447 | 0.00 | 0.00 |
| ATOM | 45  | HB2  | LEU | X | 4 | 52.868 | 76.457 | 32.498 | 0.00 | 0.00 |
| ATOM | 46  | HB3  | LEU | X | 4 | 52.990 | 74.912 | 33.241 | 0.00 | 0.00 |
| ATOM | 47  | CG   | LEU | X | 4 | 52.820 | 74.999 | 31.074 | 0.00 | 0.00 |
| ATOM | 48  | HG   | LEU | X | 4 | 52.237 | 75.521 | 30.316 | 0.00 | 0.00 |
| ATOM | 49  | CD1  | LEU | X | 4 | 54.294 | 75.168 | 30.749 | 0.00 | 0.00 |
| ATOM | 50  | HD11 | LEU | X | 4 | 54.546 | 74.663 | 29.816 | 0.00 | 0.00 |
| ATOM | 51  | HD12 | LEU | X | 4 | 54.403 | 76.245 | 30.619 | 0.00 | 0.00 |
| ATOM | 52  | HD13 | LEU | X | 4 | 54.875 | 74.857 | 31.617 | 0.00 | 0.00 |
| ATOM | 53  | CD2  | LEU | X | 4 | 52.552 | 73.445 | 30.984 | 0.00 | 0.00 |
| ATOM | 54  | HD21 | LEU | X | 4 | 51.525 | 73.311 | 30.643 | 0.00 | 0.00 |
| ATOM | 55  | HD22 | LEU | X | 4 | 53.253 | 72.949 | 30.313 | 0.00 | 0.00 |
| ATOM | 56  | HD23 | LEU | X | 4 | 52.545 | 72.930 | 31.945 | 0.00 | 0.00 |
| ATOM | 57  | C    | LEU | X | 4 | 50.660 | 75.675 | 34.211 | 0.00 | 0.00 |
| ATOM | 58  | O    | LEU | X | 4 | 51.107 | 74.924 | 35.049 | 0.00 | 0.00 |
| ATOM | 59  | N    | LEU | X | 5 | 49.917 | 76.751 | 34.505 | 0.00 | 0.00 |
| ATOM | 60  | H    | LEU | X | 5 | 49.594 | 77.353 | 33.762 | 0.00 | 0.00 |
| ATOM | 61  | CA   | LEU | X | 5 | 49.309 | 77.136 | 35.773 | 0.00 | 0.00 |
| ATOM | 62  | HA   | LEU | X | 5 | 49.772 | 76.628 | 36.619 | 0.00 | 0.00 |
| ATOM | 63  | CB   | LEU | X | 5 | 49.464 | 78.706 | 35.976 | 0.00 | 0.00 |
| ATOM | 64  | HB2  | LEU | X | 5 | 50.517 | 78.950 | 35.835 | 0.00 | 0.00 |
| ATOM | 65  | HB3  | LEU | X | 5 | 48.883 | 79.213 | 35.205 | 0.00 | 0.00 |
| ATOM | 66  | CG   | LEU | X | 5 | 49.076 | 79.293 | 37.378 | 0.00 | 0.00 |
| ATOM | 67  | HG   | LEU | X | 5 | 49.308 | 80.339 | 37.180 | 0.00 | 0.00 |
| ATOM | 68  | CD1  | LEU | X | 5 | 47.568 | 79.126 | 37.788 | 0.00 | 0.00 |
| ATOM | 69  | HD11 | LEU | X | 5 | 47.426 | 79.775 | 38.652 | 0.00 | 0.00 |
| ATOM | 70  | HD12 | LEU | X | 5 | 46.987 | 79.454 | 36.926 | 0.00 | 0.00 |
| ATOM | 71  | HD13 | LEU | X | 5 | 47.278 | 78.186 | 38.257 | 0.00 | 0.00 |
| ATOM | 72  | CD2  | LEU | X | 5 | 49.937 | 79.007 | 38.564 | 0.00 | 0.00 |
| ATOM | 73  | HD21 | LEU | X | 5 | 50.118 | 77.947 | 38.746 | 0.00 | 0.00 |
| ATOM | 74  | HD22 | LEU | X | 5 | 50.971 | 79.288 | 38.364 | 0.00 | 0.00 |
| ATOM | 75  | HD23 | LEU | X | 5 | 49.596 | 79.646 | 39.378 | 0.00 | 0.00 |
| ATOM | 76  | C    | LEU | X | 5 | 47.845 | 76.623 | 35.827 | 0.00 | 0.00 |
| ATOM | 77  | O    | LEU | X | 5 | 47.089 | 76.955 | 34.916 | 0.00 | 0.00 |
| ATOM | 78  | N    | VAL | X | 6 | 47.391 | 75.794 | 36.774 | 0.00 | 0.00 |
| ATOM | 79  | H    | VAL | X | 6 | 48.040 | 75.616 | 37.527 | 0.00 | 0.00 |
| ATOM | 80  | CA   | VAL | X | 6 | 45.997 | 75.375 | 36.916 | 0.00 | 0.00 |
| ATOM | 81  | HA   | VAL | X | 6 | 45.485 | 75.865 | 36.088 | 0.00 | 0.00 |
| ATOM | 82  | CB   | VAL | X | 6 | 45.860 | 73.835 | 36.752 | 0.00 | 0.00 |
| ATOM | 83  | HB   | VAL | X | 6 | 46.433 | 73.696 | 35.835 | 0.00 | 0.00 |
| ATOM | 84  | CG1  | VAL | X | 6 | 46.554 | 73.004 | 37.811 | 0.00 | 0.00 |
| ATOM | 85  | HG11 | VAL | X | 6 | 47.506 | 73.494 | 38.018 | 0.00 | 0.00 |
| ATOM | 86  | HG12 | VAL | X | 6 | 46.072 | 72.948 | 38.787 | 0.00 | 0.00 |
| ATOM | 87  | HG13 | VAL | X | 6 | 46.727 | 72.099 | 37.228 | 0.00 | 0.00 |
| ATOM | 88  | CG2  | VAL | X | 6 | 44.355 | 73.467 | 36.636 | 0.00 | 0.00 |
| ATOM | 89  | HG21 | VAL | X | 6 | 44.433 | 72.633 | 35.939 | 0.00 | 0.00 |
| ATOM | 90  | HG22 | VAL | X | 6 | 43.893 | 73.123 | 37.562 | 0.00 | 0.00 |
| ATOM | 91  | HG23 | VAL | X | 6 | 43.727 | 74.246 | 36.204 | 0.00 | 0.00 |
| ATOM | 92  | C    | VAL | X | 6 | 45.329 | 75.760 | 38.201 | 0.00 | 0.00 |
| ATOM | 93  | O    | VAL | X | 6 | 46.017 | 76.009 | 39.173 | 0.00 | 0.00 |
| ATOM | 94  | N    | THR | X | 7 | 43.994 | 75.849 | 38.200 | 0.00 | 0.00 |
| ATOM | 95  | H    | THR | X | 7 | 43.574 | 75.832 | 37.282 | 0.00 | 0.00 |
| ATOM | 96  | CA   | THR | X | 7 | 43.159 | 76.034 | 39.430 | 0.00 | 0.00 |
| ATOM | 97  | HA   | THR | X | 7 | 43.775 | 76.315 | 40.284 | 0.00 | 0.00 |
| ATOM | 98  | CB   | THR | X | 7 | 42.273 | 77.192 | 39.214 | 0.00 | 0.00 |
| ATOM | 99  | HB   | THR | X | 7 | 41.396 | 76.952 | 38.613 | 0.00 | 0.00 |
| ATOM | 100 | CG2  | THR | X | 7 | 41.753 | 77.680 | 40.507 | 0.00 | 0.00 |
| ATOM | 101 | HG21 | THR | X | 7 | 41.504 | 78.737 | 40.415 | 0.00 | 0.00 |
| ATOM | 102 | HG22 | THR | X | 7 | 40.883 | 77.059 | 40.720 | 0.00 | 0.00 |
| ATOM | 103 | HG23 | THR | X | 7 | 42.454 | 77.640 | 41.341 | 0.00 | 0.00 |
| ATOM | 104 | OG1  | THR | X | 7 | 42.806 | 78.247 | 38.397 | 0.00 | 0.00 |
| ATOM | 105 | HG1  | THR | X | 7 | 43.084 | 77.901 | 37.545 | 0.00 | 0.00 |
| ATOM | 106 | C    | THR | X | 7 | 42.407 | 74.691 | 39.771 | 0.00 | 0.00 |
| ATOM | 107 | O    | THR | X | 7 | 41.873 | 74.074 | 38.827 | 0.00 | 0.00 |
| ATOM | 108 | N    | VAL | X | 8 | 42.414 | 74.257 | 41.025 | 0.00 | 0.00 |

|      |     |      |     |   |    |        |        |        |      |      |
|------|-----|------|-----|---|----|--------|--------|--------|------|------|
| ATOM | 109 | H    | VAL | X | 8  | 42.972 | 74.773 | 41.690 | 0.00 | 0.00 |
| ATOM | 110 | CA   | VAL | X | 8  | 41.817 | 73.040 | 41.763 | 0.00 | 0.00 |
| ATOM | 111 | HA   | VAL | X | 8  | 41.132 | 72.647 | 41.012 | 0.00 | 0.00 |
| ATOM | 112 | CB   | VAL | X | 8  | 42.976 | 71.995 | 41.982 | 0.00 | 0.00 |
| ATOM | 113 | HB   | VAL | X | 8  | 42.600 | 71.103 | 42.484 | 0.00 | 0.00 |
| ATOM | 114 | CG1  | VAL | X | 8  | 43.559 | 71.480 | 40.661 | 0.00 | 0.00 |
| ATOM | 115 | HG11 | VAL | X | 8  | 44.289 | 70.709 | 40.907 | 0.00 | 0.00 |
| ATOM | 116 | HG12 | VAL | X | 8  | 42.847 | 71.187 | 39.889 | 0.00 | 0.00 |
| ATOM | 117 | HG13 | VAL | X | 8  | 44.169 | 72.255 | 40.197 | 0.00 | 0.00 |
| ATOM | 118 | CG2  | VAL | X | 8  | 44.133 | 72.534 | 42.872 | 0.00 | 0.00 |
| ATOM | 119 | HG21 | VAL | X | 8  | 44.796 | 73.132 | 42.247 | 0.00 | 0.00 |
| ATOM | 120 | HG22 | VAL | X | 8  | 43.827 | 73.173 | 43.701 | 0.00 | 0.00 |
| ATOM | 121 | HG23 | VAL | X | 8  | 44.694 | 71.771 | 43.411 | 0.00 | 0.00 |
| ATOM | 122 | C    | VAL | X | 8  | 41.067 | 73.493 | 42.969 | 0.00 | 0.00 |
| ATOM | 123 | O    | VAL | X | 8  | 41.077 | 74.723 | 43.297 | 0.00 | 0.00 |
| ATOM | 124 | N    | ARG | X | 9  | 40.448 | 72.586 | 43.777 | 0.00 | 0.00 |
| ATOM | 125 | H    | ARG | X | 9  | 40.691 | 71.641 | 43.515 | 0.00 | 0.00 |
| ATOM | 126 | CA   | ARG | X | 9  | 39.603 | 72.965 | 44.955 | 0.00 | 0.00 |
| ATOM | 127 | HA   | ARG | X | 9  | 38.955 | 73.806 | 44.707 | 0.00 | 0.00 |
| ATOM | 128 | CB   | ARG | X | 9  | 38.801 | 71.840 | 45.456 | 0.00 | 0.00 |
| ATOM | 129 | HB2  | ARG | X | 9  | 38.104 | 71.476 | 44.701 | 0.00 | 0.00 |
| ATOM | 130 | HB3  | ARG | X | 9  | 39.430 | 70.957 | 45.568 | 0.00 | 0.00 |
| ATOM | 131 | CG   | ARG | X | 9  | 37.880 | 71.955 | 46.740 | 0.00 | 0.00 |
| ATOM | 132 | HG2  | ARG | X | 9  | 37.389 | 71.004 | 46.942 | 0.00 | 0.00 |
| ATOM | 133 | HG3  | ARG | X | 9  | 38.452 | 72.359 | 47.576 | 0.00 | 0.00 |
| ATOM | 134 | CD   | ARG | X | 9  | 36.726 | 72.949 | 46.531 | 0.00 | 0.00 |
| ATOM | 135 | HD2  | ARG | X | 9  | 36.459 | 73.305 | 47.526 | 0.00 | 0.00 |
| ATOM | 136 | HD3  | ARG | X | 9  | 36.941 | 73.903 | 46.049 | 0.00 | 0.00 |
| ATOM | 137 | NE   | ARG | X | 9  | 35.593 | 72.212 | 45.851 | 0.00 | 0.00 |
| ATOM | 138 | HE   | ARG | X | 9  | 35.808 | 71.236 | 45.704 | 0.00 | 0.00 |
| ATOM | 139 | CZ   | ARG | X | 9  | 34.607 | 72.745 | 45.123 | 0.00 | 0.00 |
| ATOM | 140 | NH1  | ARG | X | 9  | 34.282 | 74.026 | 45.201 | 0.00 | 0.00 |
| ATOM | 141 | HH11 | ARG | X | 9  | 34.840 | 74.701 | 45.705 | 0.00 | 0.00 |
| ATOM | 142 | HH12 | ARG | X | 9  | 33.468 | 74.266 | 44.653 | 0.00 | 0.00 |
| ATOM | 143 | NH2  | ARG | X | 9  | 33.923 | 71.983 | 44.357 | 0.00 | 0.00 |
| ATOM | 144 | HH21 | ARG | X | 9  | 34.258 | 71.036 | 44.259 | 0.00 | 0.00 |
| ATOM | 145 | HH22 | ARG | X | 9  | 33.156 | 72.359 | 43.817 | 0.00 | 0.00 |
| ATOM | 146 | C    | ARG | X | 9  | 40.375 | 73.505 | 46.115 | 0.00 | 0.00 |
| ATOM | 147 | O    | ARG | X | 9  | 39.840 | 74.448 | 46.788 | 0.00 | 0.00 |
| ATOM | 148 | N    | GLY | X | 10 | 41.668 | 73.179 | 46.189 | 0.00 | 0.00 |
| ATOM | 149 | H    | GLY | X | 10 | 42.016 | 72.408 | 45.637 | 0.00 | 0.00 |
| ATOM | 150 | CA   | GLY | X | 10 | 42.561 | 73.696 | 47.203 | 0.00 | 0.00 |
| ATOM | 151 | HA2  | GLY | X | 10 | 42.041 | 73.874 | 48.040 | 0.00 | 0.00 |
| ATOM | 152 | HA3  | GLY | X | 10 | 43.401 | 73.037 | 47.388 | 0.00 | 0.00 |
| ATOM | 153 | C    | GLY | X | 10 | 43.218 | 75.070 | 46.968 | 0.00 | 0.00 |
| ATOM | 154 | O    | GLY | X | 10 | 43.687 | 75.731 | 47.900 | 0.00 | 0.00 |
| ATOM | 155 | N    | GLY | X | 11 | 43.268 | 75.439 | 45.688 | 0.00 | 0.00 |
| ATOM | 156 | H    | GLY | X | 11 | 42.978 | 74.790 | 44.971 | 0.00 | 0.00 |
| ATOM | 157 | CA   | GLY | X | 11 | 43.880 | 76.699 | 45.227 | 0.00 | 0.00 |
| ATOM | 158 | HA2  | GLY | X | 11 | 43.058 | 77.357 | 45.118 | 0.00 | 0.00 |
| ATOM | 159 | HA3  | GLY | X | 11 | 44.588 | 77.082 | 45.926 | 0.00 | 0.00 |
| ATOM | 160 | C    | GLY | X | 11 | 44.510 | 76.499 | 43.825 | 0.00 | 0.00 |
| ATOM | 161 | O    | GLY | X | 11 | 43.926 | 75.885 | 42.955 | 0.00 | 0.00 |
| ATOM | 162 | N    | ARG | X | 12 | 45.666 | 77.165 | 43.587 | 0.00 | 0.00 |
| ATOM | 163 | H    | ARG | X | 12 | 45.967 | 77.812 | 44.302 | 0.00 | 0.00 |
| ATOM | 164 | CA   | ARG | X | 12 | 46.313 | 77.173 | 42.280 | 0.00 | 0.00 |
| ATOM | 165 | HA   | ARG | X | 12 | 45.679 | 76.747 | 41.502 | 0.00 | 0.00 |
| ATOM | 166 | CB   | ARG | X | 12 | 46.501 | 78.629 | 41.970 | 0.00 | 0.00 |
| ATOM | 167 | HB2  | ARG | X | 12 | 46.845 | 79.141 | 42.868 | 0.00 | 0.00 |
| ATOM | 168 | HB3  | ARG | X | 12 | 47.282 | 78.707 | 41.214 | 0.00 | 0.00 |
| ATOM | 169 | CG   | ARG | X | 12 | 45.189 | 79.290 | 41.409 | 0.00 | 0.00 |
| ATOM | 170 | HG2  | ARG | X | 12 | 44.907 | 78.743 | 40.509 | 0.00 | 0.00 |
| ATOM | 171 | HG3  | ARG | X | 12 | 44.492 | 79.094 | 42.224 | 0.00 | 0.00 |
| ATOM | 172 | CD   | ARG | X | 12 | 45.322 | 80.830 | 41.115 | 0.00 | 0.00 |
| ATOM | 173 | HD2  | ARG | X | 12 | 46.291 | 80.956 | 40.632 | 0.00 | 0.00 |
| ATOM | 174 | HD3  | ARG | X | 12 | 44.478 | 81.151 | 40.506 | 0.00 | 0.00 |
| ATOM | 175 | NE   | ARG | X | 12 | 45.072 | 81.634 | 42.385 | 0.00 | 0.00 |
| ATOM | 176 | HE   | ARG | X | 12 | 44.538 | 81.284 | 43.168 | 0.00 | 0.00 |
| ATOM | 177 | CZ   | ARG | X | 12 | 45.569 | 82.790 | 42.607 | 0.00 | 0.00 |
| ATOM | 178 | NH1  | ARG | X | 12 | 46.311 | 83.404 | 41.715 | 0.00 | 0.00 |



|      |     |      |     |   |    |        |        |        |      |      |
|------|-----|------|-----|---|----|--------|--------|--------|------|------|
| ATOM | 179 | HH11 | ARG | X | 12 | 46.547 | 82.948 | 40.845 | 0.00 | 0.00 |
| ATOM | 180 | HH12 | ARG | X | 12 | 46.614 | 84.340 | 41.942 | 0.00 | 0.00 |
| ATOM | 181 | NH2  | ARG | X | 12 | 45.504 | 83.485 | 43.725 | 0.00 | 0.00 |
| ATOM | 182 | HH21 | ARG | X | 12 | 44.925 | 83.130 | 44.473 | 0.00 | 0.00 |
| ATOM | 183 | HH22 | ARG | X | 12 | 46.058 | 84.316 | 43.874 | 0.00 | 0.00 |
| ATOM | 184 | C    | ARG | X | 12 | 47.648 | 76.428 | 42.280 | 0.00 | 0.00 |
| ATOM | 185 | O    | ARG | X | 12 | 48.264 | 76.522 | 43.343 | 0.00 | 0.00 |
| ATOM | 186 | N    | LEU | X | 13 | 48.065 | 75.764 | 41.199 | 0.00 | 0.00 |
| ATOM | 187 | H    | LEU | X | 13 | 47.453 | 75.915 | 40.410 | 0.00 | 0.00 |
| ATOM | 188 | CA   | LEU | X | 13 | 49.226 | 74.865 | 41.030 | 0.00 | 0.00 |
| ATOM | 189 | HA   | LEU | X | 13 | 49.936 | 75.096 | 41.824 | 0.00 | 0.00 |
| ATOM | 190 | CB   | LEU | X | 13 | 48.794 | 73.376 | 41.119 | 0.00 | 0.00 |
| ATOM | 191 | HB2  | LEU | X | 13 | 48.021 | 73.119 | 40.395 | 0.00 | 0.00 |
| ATOM | 192 | HB3  | LEU | X | 13 | 49.702 | 72.813 | 40.902 | 0.00 | 0.00 |
| ATOM | 193 | CG   | LEU | X | 13 | 48.174 | 72.885 | 42.441 | 0.00 | 0.00 |
| ATOM | 194 | HG   | LEU | X | 13 | 47.360 | 73.595 | 42.585 | 0.00 | 0.00 |
| ATOM | 195 | CD1  | LEU | X | 13 | 47.646 | 71.453 | 42.332 | 0.00 | 0.00 |
| ATOM | 196 | HD11 | LEU | X | 13 | 46.872 | 71.362 | 41.570 | 0.00 | 0.00 |
| ATOM | 197 | HD12 | LEU | X | 13 | 48.486 | 70.771 | 42.198 | 0.00 | 0.00 |
| ATOM | 198 | HD13 | LEU | X | 13 | 47.077 | 71.372 | 43.258 | 0.00 | 0.00 |
| ATOM | 199 | CD2  | LEU | X | 13 | 49.105 | 72.808 | 43.733 | 0.00 | 0.00 |
| ATOM | 200 | HD21 | LEU | X | 13 | 50.031 | 72.287 | 43.489 | 0.00 | 0.00 |
| ATOM | 201 | HD22 | LEU | X | 13 | 49.358 | 73.839 | 43.982 | 0.00 | 0.00 |
| ATOM | 202 | HD23 | LEU | X | 13 | 48.566 | 72.289 | 44.526 | 0.00 | 0.00 |
| ATOM | 203 | C    | LEU | X | 13 | 49.945 | 75.107 | 39.733 | 0.00 | 0.00 |
| ATOM | 204 | O    | LEU | X | 13 | 49.250 | 75.472 | 38.770 | 0.00 | 0.00 |
| ATOM | 205 | N    | ARG | X | 14 | 51.281 | 75.155 | 39.665 | 0.00 | 0.00 |
| ATOM | 206 | H    | ARG | X | 14 | 51.749 | 75.068 | 40.555 | 0.00 | 0.00 |
| ATOM | 207 | CA   | ARG | X | 14 | 52.152 | 75.226 | 38.474 | 0.00 | 0.00 |
| ATOM | 208 | HA   | ARG | X | 14 | 51.664 | 75.432 | 37.521 | 0.00 | 0.00 |
| ATOM | 209 | CB   | ARG | X | 14 | 53.036 | 76.390 | 38.769 | 0.00 | 0.00 |
| ATOM | 210 | HB2  | ARG | X | 14 | 52.471 | 77.321 | 38.726 | 0.00 | 0.00 |
| ATOM | 211 | HB3  | ARG | X | 14 | 53.343 | 76.239 | 39.804 | 0.00 | 0.00 |
| ATOM | 212 | CG   | ARG | X | 14 | 54.263 | 76.509 | 37.899 | 0.00 | 0.00 |
| ATOM | 213 | HG2  | ARG | X | 14 | 54.916 | 75.722 | 38.275 | 0.00 | 0.00 |
| ATOM | 214 | HG3  | ARG | X | 14 | 53.953 | 76.374 | 36.863 | 0.00 | 0.00 |
| ATOM | 215 | CD   | ARG | X | 14 | 55.015 | 77.854 | 37.976 | 0.00 | 0.00 |
| ATOM | 216 | HD2  | ARG | X | 14 | 55.124 | 78.082 | 39.036 | 0.00 | 0.00 |
| ATOM | 217 | HD3  | ARG | X | 14 | 55.980 | 77.772 | 37.476 | 0.00 | 0.00 |
| ATOM | 218 | NE   | ARG | X | 14 | 54.356 | 78.980 | 37.370 | 0.00 | 0.00 |
| ATOM | 219 | HE   | ARG | X | 14 | 53.860 | 79.629 | 37.964 | 0.00 | 0.00 |
| ATOM | 220 | CZ   | ARG | X | 14 | 54.189 | 79.253 | 36.099 | 0.00 | 0.00 |
| ATOM | 221 | NH1  | ARG | X | 14 | 54.715 | 78.498 | 35.094 | 0.00 | 0.00 |
| ATOM | 222 | HH11 | ARG | X | 14 | 55.342 | 77.719 | 35.240 | 0.00 | 0.00 |
| ATOM | 223 | HH12 | ARG | X | 14 | 54.375 | 78.679 | 34.160 | 0.00 | 0.00 |
| ATOM | 224 | NH2  | ARG | X | 14 | 53.257 | 80.128 | 35.763 | 0.00 | 0.00 |
| ATOM | 225 | HH21 | ARG | X | 14 | 52.730 | 80.604 | 36.482 | 0.00 | 0.00 |
| ATOM | 226 | HH22 | ARG | X | 14 | 53.321 | 80.663 | 34.908 | 0.00 | 0.00 |
| ATOM | 227 | C    | ARG | X | 14 | 52.912 | 73.944 | 38.166 | 0.00 | 0.00 |
| ATOM | 228 | O    | ARG | X | 14 | 53.646 | 73.368 | 38.998 | 0.00 | 0.00 |
| ATOM | 229 | N    | GLY | X | 15 | 52.713 | 73.470 | 36.929 | 0.00 | 0.00 |
| ATOM | 230 | H    | GLY | X | 15 | 52.245 | 74.020 | 36.223 | 0.00 | 0.00 |
| ATOM | 231 | CA   | GLY | X | 15 | 53.383 | 72.236 | 36.381 | 0.00 | 0.00 |
| ATOM | 232 | HA2  | GLY | X | 15 | 53.853 | 71.685 | 37.196 | 0.00 | 0.00 |
| ATOM | 233 | HA3  | GLY | X | 15 | 52.663 | 71.495 | 36.074 | 0.00 | 0.00 |
| ATOM | 234 | C    | GLY | X | 15 | 54.477 | 72.533 | 35.301 | 0.00 | 0.00 |
| ATOM | 235 | O    | GLY | X | 15 | 55.072 | 73.611 | 35.380 | 0.00 | 0.00 |
| ATOM | 236 | N    | ILE | X | 16 | 54.746 | 71.572 | 34.408 | 0.00 | 0.00 |
| ATOM | 237 | H    | ILE | X | 16 | 54.558 | 70.617 | 34.676 | 0.00 | 0.00 |
| ATOM | 238 | CA   | ILE | X | 16 | 55.810 | 71.687 | 33.434 | 0.00 | 0.00 |
| ATOM | 239 | HA   | ILE | X | 16 | 56.175 | 72.708 | 33.328 | 0.00 | 0.00 |
| ATOM | 240 | CB   | ILE | X | 16 | 57.115 | 71.061 | 33.911 | 0.00 | 0.00 |
| ATOM | 241 | HB   | ILE | X | 16 | 57.861 | 71.162 | 33.122 | 0.00 | 0.00 |
| ATOM | 242 | CG2  | ILE | X | 16 | 57.661 | 71.787 | 35.125 | 0.00 | 0.00 |
| ATOM | 243 | HG21 | ILE | X | 16 | 57.705 | 72.858 | 34.928 | 0.00 | 0.00 |
| ATOM | 244 | HG22 | ILE | X | 16 | 57.132 | 71.564 | 36.052 | 0.00 | 0.00 |
| ATOM | 245 | HG23 | ILE | X | 16 | 58.685 | 71.428 | 35.226 | 0.00 | 0.00 |
| ATOM | 246 | CG1  | ILE | X | 16 | 56.949 | 69.574 | 34.231 | 0.00 | 0.00 |
| ATOM | 247 | HG12 | ILE | X | 16 | 56.312 | 69.394 | 35.097 | 0.00 | 0.00 |
| ATOM | 248 | HG13 | ILE | X | 16 | 56.530 | 68.979 | 33.419 | 0.00 | 0.00 |

|      |     |      |     |   |    |        |        |        |      |      |
|------|-----|------|-----|---|----|--------|--------|--------|------|------|
| ATOM | 249 | CD1  | ILE | X | 16 | 58.169 | 68.759 | 34.718 | 0.00 | 0.00 |
| ATOM | 250 | HD11 | ILE | X | 16 | 58.543 | 69.238 | 35.623 | 0.00 | 0.00 |
| ATOM | 251 | HD12 | ILE | X | 16 | 57.783 | 67.778 | 34.995 | 0.00 | 0.00 |
| ATOM | 252 | HD13 | ILE | X | 16 | 58.920 | 68.825 | 33.931 | 0.00 | 0.00 |
| ATOM | 253 | C    | ILE | X | 16 | 55.465 | 71.220 | 32.008 | 0.00 | 0.00 |
| ATOM | 254 | O    | ILE | X | 16 | 54.824 | 70.215 | 31.784 | 0.00 | 0.00 |
| ATOM | 255 | N    | ARG | X | 17 | 56.036 | 71.923 | 31.017 | 0.00 | 0.00 |
| ATOM | 256 | H    | ARG | X | 17 | 56.632 | 72.689 | 31.298 | 0.00 | 0.00 |
| ATOM | 257 | CA   | ARG | X | 17 | 56.338 | 71.370 | 29.705 | 0.00 | 0.00 |
| ATOM | 258 | HA   | ARG | X | 17 | 55.453 | 70.971 | 29.210 | 0.00 | 0.00 |
| ATOM | 259 | CB   | ARG | X | 17 | 56.948 | 72.400 | 28.857 | 0.00 | 0.00 |
| ATOM | 260 | HB2  | ARG | X | 17 | 56.284 | 73.263 | 28.886 | 0.00 | 0.00 |
| ATOM | 261 | HB3  | ARG | X | 17 | 57.976 | 72.587 | 29.167 | 0.00 | 0.00 |
| ATOM | 262 | CG   | ARG | X | 17 | 57.071 | 71.975 | 27.321 | 0.00 | 0.00 |
| ATOM | 263 | HG2  | ARG | X | 17 | 57.794 | 71.165 | 27.226 | 0.00 | 0.00 |
| ATOM | 264 | HG3  | ARG | X | 17 | 56.120 | 71.625 | 26.920 | 0.00 | 0.00 |
| ATOM | 265 | CD   | ARG | X | 17 | 57.465 | 73.118 | 26.393 | 0.00 | 0.00 |
| ATOM | 266 | HD2  | ARG | X | 17 | 57.034 | 72.932 | 25.410 | 0.00 | 0.00 |
| ATOM | 267 | HD3  | ARG | X | 17 | 56.970 | 73.974 | 26.851 | 0.00 | 0.00 |
| ATOM | 268 | NE   | ARG | X | 17 | 58.979 | 73.243 | 26.443 | 0.00 | 0.00 |
| ATOM | 269 | HE   | ARG | X | 17 | 59.539 | 72.506 | 26.847 | 0.00 | 0.00 |
| ATOM | 270 | CZ   | ARG | X | 17 | 59.710 | 74.259 | 26.054 | 0.00 | 0.00 |
| ATOM | 271 | NH1  | ARG | X | 17 | 59.210 | 75.201 | 25.358 | 0.00 | 0.00 |
| ATOM | 272 | HH11 | ARG | X | 17 | 58.308 | 75.071 | 24.923 | 0.00 | 0.00 |
| ATOM | 273 | HH12 | ARG | X | 17 | 59.670 | 76.048 | 25.059 | 0.00 | 0.00 |
| ATOM | 274 | NH2  | ARG | X | 17 | 60.867 | 74.445 | 26.549 | 0.00 | 0.00 |
| ATOM | 275 | HH21 | ARG | X | 17 | 61.279 | 73.660 | 27.034 | 0.00 | 0.00 |
| ATOM | 276 | HH22 | ARG | X | 17 | 61.437 | 75.229 | 26.265 | 0.00 | 0.00 |
| ATOM | 277 | C    | ARG | X | 17 | 57.340 | 70.227 | 29.772 | 0.00 | 0.00 |
| ATOM | 278 | O    | ARG | X | 17 | 58.261 | 70.393 | 30.543 | 0.00 | 0.00 |
| ATOM | 279 | N    | LEU | X | 18 | 57.219 | 69.051 | 29.029 | 0.00 | 0.00 |
| ATOM | 280 | H    | LEU | X | 18 | 56.432 | 69.061 | 28.396 | 0.00 | 0.00 |
| ATOM | 281 | CA   | LEU | X | 18 | 58.223 | 67.997 | 28.757 | 0.00 | 0.00 |
| ATOM | 282 | HA   | LEU | X | 18 | 59.203 | 68.212 | 29.183 | 0.00 | 0.00 |
| ATOM | 283 | CB   | LEU | X | 18 | 57.696 | 66.751 | 29.357 | 0.00 | 0.00 |
| ATOM | 284 | HB2  | LEU | X | 18 | 56.739 | 66.430 | 28.946 | 0.00 | 0.00 |
| ATOM | 285 | HB3  | LEU | X | 18 | 58.475 | 66.015 | 29.156 | 0.00 | 0.00 |
| ATOM | 286 | CG   | LEU | X | 18 | 57.563 | 66.759 | 30.917 | 0.00 | 0.00 |
| ATOM | 287 | HG   | LEU | X | 18 | 56.768 | 67.451 | 31.196 | 0.00 | 0.00 |
| ATOM | 288 | CD1  | LEU | X | 18 | 57.188 | 65.325 | 31.318 | 0.00 | 0.00 |
| ATOM | 289 | HD11 | LEU | X | 18 | 57.065 | 65.101 | 32.377 | 0.00 | 0.00 |
| ATOM | 290 | HD12 | LEU | X | 18 | 56.229 | 65.120 | 30.842 | 0.00 | 0.00 |
| ATOM | 291 | HD13 | LEU | X | 18 | 57.923 | 64.652 | 30.875 | 0.00 | 0.00 |
| ATOM | 292 | CD2  | LEU | X | 18 | 58.811 | 67.265 | 31.624 | 0.00 | 0.00 |
| ATOM | 293 | HD21 | LEU | X | 18 | 58.722 | 66.991 | 32.675 | 0.00 | 0.00 |
| ATOM | 294 | HD22 | LEU | X | 18 | 59.658 | 66.775 | 31.143 | 0.00 | 0.00 |
| ATOM | 295 | HD23 | LEU | X | 18 | 58.789 | 68.352 | 31.540 | 0.00 | 0.00 |
| ATOM | 296 | C    | LEU | X | 18 | 58.397 | 67.627 | 27.250 | 0.00 | 0.00 |
| ATOM | 297 | O    | LEU | X | 18 | 57.482 | 67.705 | 26.436 | 0.00 | 0.00 |
| ATOM | 298 | N    | LYS | X | 19 | 59.632 | 67.233 | 26.968 | 0.00 | 0.00 |
| ATOM | 299 | H    | LYS | X | 19 | 60.313 | 67.095 | 27.700 | 0.00 | 0.00 |
| ATOM | 300 | CA   | LYS | X | 19 | 60.112 | 66.691 | 25.635 | 0.00 | 0.00 |
| ATOM | 301 | HA   | LYS | X | 19 | 59.381 | 67.022 | 24.897 | 0.00 | 0.00 |
| ATOM | 302 | CB   | LYS | X | 19 | 61.464 | 67.305 | 25.333 | 0.00 | 0.00 |
| ATOM | 303 | HB2  | LYS | X | 19 | 61.786 | 66.927 | 24.363 | 0.00 | 0.00 |
| ATOM | 304 | HB3  | LYS | X | 19 | 61.462 | 68.390 | 25.232 | 0.00 | 0.00 |
| ATOM | 305 | CG   | LYS | X | 19 | 62.611 | 66.830 | 26.264 | 0.00 | 0.00 |
| ATOM | 306 | HG2  | LYS | X | 19 | 62.558 | 67.344 | 27.224 | 0.00 | 0.00 |
| ATOM | 307 | HG3  | LYS | X | 19 | 62.500 | 65.757 | 26.417 | 0.00 | 0.00 |
| ATOM | 308 | CD   | LYS | X | 19 | 63.993 | 67.080 | 25.551 | 0.00 | 0.00 |
| ATOM | 309 | HD2  | LYS | X | 19 | 63.907 | 66.504 | 24.629 | 0.00 | 0.00 |
| ATOM | 310 | HD3  | LYS | X | 19 | 64.052 | 68.132 | 25.274 | 0.00 | 0.00 |
| ATOM | 311 | CE   | LYS | X | 19 | 65.184 | 66.565 | 26.408 | 0.00 | 0.00 |
| ATOM | 312 | HE2  | LYS | X | 19 | 65.249 | 67.144 | 27.329 | 0.00 | 0.00 |
| ATOM | 313 | HE3  | LYS | X | 19 | 65.131 | 65.512 | 26.684 | 0.00 | 0.00 |
| ATOM | 314 | NZ   | LYS | X | 19 | 66.432 | 66.720 | 25.592 | 0.00 | 0.00 |
| ATOM | 315 | HZ1  | LYS | X | 19 | 66.304 | 66.078 | 24.823 | 0.00 | 0.00 |
| ATOM | 316 | HZ2  | LYS | X | 19 | 66.572 | 67.688 | 25.337 | 0.00 | 0.00 |
| ATOM | 317 | HZ3  | LYS | X | 19 | 67.281 | 66.363 | 26.006 | 0.00 | 0.00 |
| ATOM | 318 | C    | LYS | X | 19 | 59.940 | 65.162 | 25.538 | 0.00 | 0.00 |

|      |     |      |     |   |    |        |        |        |      |      |
|------|-----|------|-----|---|----|--------|--------|--------|------|------|
| ATOM | 319 | O    | LYS | X | 19 | 59.845 | 64.500 | 26.577 | 0.00 | 0.00 |
| ATOM | 320 | N    | THR | X | 20 | 59.648 | 64.642 | 24.349 | 0.00 | 0.00 |
| ATOM | 321 | H    | THR | X | 20 | 59.409 | 65.202 | 23.543 | 0.00 | 0.00 |
| ATOM | 322 | CA   | THR | X | 20 | 59.767 | 63.185 | 23.951 | 0.00 | 0.00 |
| ATOM | 323 | HA   | THR | X | 20 | 60.462 | 62.761 | 24.676 | 0.00 | 0.00 |
| ATOM | 324 | CB   | THR | X | 20 | 58.461 | 62.349 | 24.071 | 0.00 | 0.00 |
| ATOM | 325 | HB   | THR | X | 20 | 58.733 | 61.294 | 24.114 | 0.00 | 0.00 |
| ATOM | 326 | CG2  | THR | X | 20 | 57.551 | 62.691 | 25.268 | 0.00 | 0.00 |
| ATOM | 327 | HG21 | THR | X | 20 | 56.713 | 61.994 | 25.269 | 0.00 | 0.00 |
| ATOM | 328 | HG22 | THR | X | 20 | 58.157 | 62.615 | 26.171 | 0.00 | 0.00 |
| ATOM | 329 | HG23 | THR | X | 20 | 57.215 | 63.727 | 25.225 | 0.00 | 0.00 |
| ATOM | 330 | OG1  | THR | X | 20 | 57.655 | 62.426 | 22.934 | 0.00 | 0.00 |
| ATOM | 331 | HG1  | THR | X | 20 | 57.298 | 63.299 | 22.754 | 0.00 | 0.00 |
| ATOM | 332 | C    | THR | X | 20 | 60.371 | 62.977 | 22.564 | 0.00 | 0.00 |
| ATOM | 333 | O    | THR | X | 20 | 60.612 | 64.007 | 21.936 | 0.00 | 0.00 |
| ATOM | 334 | N    | PRO | X | 21 | 60.612 | 61.779 | 22.032 | 0.00 | 0.00 |
| ATOM | 335 | CD   | PRO | X | 21 | 60.607 | 60.503 | 22.829 | 0.00 | 0.00 |
| ATOM | 336 | HD2  | PRO | X | 21 | 59.596 | 60.097 | 22.841 | 0.00 | 0.00 |
| ATOM | 337 | HD3  | PRO | X | 21 | 60.915 | 60.707 | 23.854 | 0.00 | 0.00 |
| ATOM | 338 | CG   | PRO | X | 21 | 61.639 | 59.649 | 22.085 | 0.00 | 0.00 |
| ATOM | 339 | HG2  | PRO | X | 21 | 61.247 | 58.637 | 22.185 | 0.00 | 0.00 |
| ATOM | 340 | HG3  | PRO | X | 21 | 62.606 | 59.790 | 22.567 | 0.00 | 0.00 |
| ATOM | 341 | CB   | PRO | X | 21 | 61.598 | 60.117 | 20.599 | 0.00 | 0.00 |
| ATOM | 342 | HB2  | PRO | X | 21 | 60.891 | 59.484 | 20.064 | 0.00 | 0.00 |
| ATOM | 343 | HB3  | PRO | X | 21 | 62.540 | 59.973 | 20.070 | 0.00 | 0.00 |
| ATOM | 344 | CA   | PRO | X | 21 | 61.121 | 61.622 | 20.656 | 0.00 | 0.00 |
| ATOM | 345 | HA   | PRO | X | 21 | 62.042 | 62.204 | 20.608 | 0.00 | 0.00 |
| ATOM | 346 | C    | PRO | X | 21 | 60.112 | 62.050 | 19.622 | 0.00 | 0.00 |
| ATOM | 347 | O    | PRO | X | 21 | 60.479 | 62.567 | 18.585 | 0.00 | 0.00 |
| ATOM | 348 | N    | GLY | X | 22 | 58.822 | 61.889 | 19.894 | 0.00 | 0.00 |
| ATOM | 349 | H    | GLY | X | 22 | 58.715 | 61.513 | 20.825 | 0.00 | 0.00 |
| ATOM | 350 | CA   | GLY | X | 22 | 57.627 | 62.275 | 19.194 | 0.00 | 0.00 |
| ATOM | 351 | HA2  | GLY | X | 22 | 57.551 | 62.024 | 18.148 | 0.00 | 0.00 |
| ATOM | 352 | HA3  | GLY | X | 22 | 56.748 | 61.772 | 19.658 | 0.00 | 0.00 |
| ATOM | 353 | C    | GLY | X | 22 | 57.309 | 63.760 | 19.244 | 0.00 | 0.00 |
| ATOM | 354 | O    | GLY | X | 22 | 56.304 | 64.169 | 18.627 | 0.00 | 0.00 |
| ATOM | 355 | N    | GLY | X | 23 | 58.134 | 64.535 | 19.943 | 0.00 | 0.00 |
| ATOM | 356 | H    | GLY | X | 23 | 58.859 | 64.063 | 20.462 | 0.00 | 0.00 |
| ATOM | 357 | CA   | GLY | X | 23 | 57.795 | 65.932 | 20.258 | 0.00 | 0.00 |
| ATOM | 358 | HA2  | GLY | X | 23 | 58.720 | 66.462 | 20.305 | 0.00 | 0.00 |
| ATOM | 359 | HA3  | GLY | X | 23 | 57.173 | 66.345 | 19.452 | 0.00 | 0.00 |
| ATOM | 360 | C    | GLY | X | 23 | 57.092 | 66.098 | 21.649 | 0.00 | 0.00 |
| ATOM | 361 | O    | GLY | X | 23 | 57.287 | 65.122 | 22.420 | 0.00 | 0.00 |
| ATOM | 362 | N    | PRO | X | 24 | 56.410 | 67.152 | 22.058 | 0.00 | 0.00 |
| ATOM | 363 | CD   | PRO | X | 24 | 56.207 | 68.301 | 21.158 | 0.00 | 0.00 |
| ATOM | 364 | HD2  | PRO | X | 24 | 55.441 | 67.912 | 20.487 | 0.00 | 0.00 |
| ATOM | 365 | HD3  | PRO | X | 24 | 57.183 | 68.535 | 20.732 | 0.00 | 0.00 |
| ATOM | 366 | CG   | PRO | X | 24 | 55.803 | 69.534 | 22.047 | 0.00 | 0.00 |
| ATOM | 367 | HG2  | PRO | X | 24 | 54.720 | 69.637 | 22.120 | 0.00 | 0.00 |
| ATOM | 368 | HG3  | PRO | X | 24 | 56.361 | 70.422 | 21.749 | 0.00 | 0.00 |
| ATOM | 369 | CB   | PRO | X | 24 | 56.419 | 69.105 | 23.426 | 0.00 | 0.00 |
| ATOM | 370 | HB2  | PRO | X | 24 | 55.823 | 69.617 | 24.180 | 0.00 | 0.00 |
| ATOM | 371 | HB3  | PRO | X | 24 | 57.490 | 69.304 | 23.444 | 0.00 | 0.00 |
| ATOM | 372 | CA   | PRO | X | 24 | 56.265 | 67.612 | 23.405 | 0.00 | 0.00 |
| ATOM | 373 | HA   | PRO | X | 24 | 57.165 | 67.242 | 23.895 | 0.00 | 0.00 |
| ATOM | 374 | C    | PRO | X | 24 | 54.954 | 67.095 | 24.114 | 0.00 | 0.00 |
| ATOM | 375 | O    | PRO | X | 24 | 54.105 | 66.447 | 23.499 | 0.00 | 0.00 |
| ATOM | 376 | N    | VAL | X | 25 | 54.852 | 67.410 | 25.387 | 0.00 | 0.00 |
| ATOM | 377 | H    | VAL | X | 25 | 55.688 | 67.778 | 25.817 | 0.00 | 0.00 |
| ATOM | 378 | CA   | VAL | X | 25 | 53.704 | 67.101 | 26.274 | 0.00 | 0.00 |
| ATOM | 379 | HA   | VAL | X | 25 | 52.734 | 67.386 | 25.866 | 0.00 | 0.00 |
| ATOM | 380 | CB   | VAL | X | 25 | 53.755 | 65.566 | 26.619 | 0.00 | 0.00 |
| ATOM | 381 | HB   | VAL | X | 25 | 53.503 | 65.505 | 27.678 | 0.00 | 0.00 |
| ATOM | 382 | CG1  | VAL | X | 25 | 52.769 | 64.769 | 25.809 | 0.00 | 0.00 |
| ATOM | 383 | HG11 | VAL | X | 25 | 53.155 | 64.413 | 24.854 | 0.00 | 0.00 |
| ATOM | 384 | HG12 | VAL | X | 25 | 52.613 | 63.901 | 26.451 | 0.00 | 0.00 |
| ATOM | 385 | HG13 | VAL | X | 25 | 51.769 | 65.186 | 25.687 | 0.00 | 0.00 |
| ATOM | 386 | CG2  | VAL | X | 25 | 55.178 | 64.922 | 26.588 | 0.00 | 0.00 |
| ATOM | 387 | HG21 | VAL | X | 25 | 55.938 | 65.607 | 26.964 | 0.00 | 0.00 |
| ATOM | 388 | HG22 | VAL | X | 25 | 55.197 | 63.984 | 27.143 | 0.00 | 0.00 |

|      |     |      |     |   |    |        |        |        |      |      |
|------|-----|------|-----|---|----|--------|--------|--------|------|------|
| ATOM | 389 | HG23 | VAL | X | 25 | 55.424 | 64.635 | 25.566 | 0.00 | 0.00 |
| ATOM | 390 | C    | VAL | X | 25 | 53.881 | 67.947 | 27.543 | 0.00 | 0.00 |
| ATOM | 391 | O    | VAL | X | 25 | 54.753 | 68.776 | 27.570 | 0.00 | 0.00 |
| ATOM | 392 | N    | SER | X | 26 | 53.043 | 67.747 | 28.533 | 0.00 | 0.00 |
| ATOM | 393 | H    | SER | X | 26 | 52.199 | 67.196 | 28.474 | 0.00 | 0.00 |
| ATOM | 394 | CA   | SER | X | 26 | 53.082 | 68.468 | 29.792 | 0.00 | 0.00 |
| ATOM | 395 | HA   | SER | X | 26 | 54.086 | 68.846 | 29.985 | 0.00 | 0.00 |
| ATOM | 396 | CB   | SER | X | 26 | 52.181 | 69.745 | 29.937 | 0.00 | 0.00 |
| ATOM | 397 | HB2  | SER | X | 26 | 51.996 | 69.958 | 30.990 | 0.00 | 0.00 |
| ATOM | 398 | HB3  | SER | X | 26 | 52.681 | 70.571 | 29.432 | 0.00 | 0.00 |
| ATOM | 399 | OG   | SER | X | 26 | 50.950 | 69.517 | 29.327 | 0.00 | 0.00 |
| ATOM | 400 | HG   | SER | X | 26 | 50.791 | 68.580 | 29.186 | 0.00 | 0.00 |
| ATOM | 401 | C    | SER | X | 26 | 52.915 | 67.532 | 31.008 | 0.00 | 0.00 |
| ATOM | 402 | O    | SER | X | 26 | 52.259 | 66.533 | 30.785 | 0.00 | 0.00 |
| ATOM | 403 | N    | ALA | X | 27 | 53.390 | 67.950 | 32.221 | 0.00 | 0.00 |
| ATOM | 404 | H    | ALA | X | 27 | 53.853 | 68.846 | 32.170 | 0.00 | 0.00 |
| ATOM | 405 | CA   | ALA | X | 27 | 53.123 | 67.285 | 33.502 | 0.00 | 0.00 |
| ATOM | 406 | HA   | ALA | X | 27 | 52.218 | 66.687 | 33.391 | 0.00 | 0.00 |
| ATOM | 407 | CB   | ALA | X | 27 | 54.206 | 66.239 | 33.742 | 0.00 | 0.00 |
| ATOM | 408 | HB1  | ALA | X | 27 | 54.584 | 65.791 | 32.823 | 0.00 | 0.00 |
| ATOM | 409 | HB2  | ALA | X | 27 | 55.063 | 66.764 | 34.164 | 0.00 | 0.00 |
| ATOM | 410 | HB3  | ALA | X | 27 | 53.789 | 65.421 | 34.328 | 0.00 | 0.00 |
| ATOM | 411 | C    | ALA | X | 27 | 52.971 | 68.184 | 34.752 | 0.00 | 0.00 |
| ATOM | 412 | O    | ALA | X | 27 | 53.514 | 69.251 | 34.865 | 0.00 | 0.00 |
| ATOM | 413 | N    | PHE | X | 28 | 52.182 | 67.730 | 35.705 | 0.00 | 0.00 |
| ATOM | 414 | H    | PHE | X | 28 | 51.717 | 66.880 | 35.420 | 0.00 | 0.00 |
| ATOM | 415 | CA   | PHE | X | 28 | 51.801 | 68.228 | 36.984 | 0.00 | 0.00 |
| ATOM | 416 | HA   | PHE | X | 28 | 52.429 | 69.112 | 37.090 | 0.00 | 0.00 |
| ATOM | 417 | CB   | PHE | X | 28 | 50.367 | 68.791 | 36.914 | 0.00 | 0.00 |
| ATOM | 418 | HB2  | PHE | X | 28 | 49.687 | 67.987 | 36.632 | 0.00 | 0.00 |
| ATOM | 419 | HB3  | PHE | X | 28 | 50.072 | 69.047 | 37.931 | 0.00 | 0.00 |
| ATOM | 420 | CG   | PHE | X | 28 | 50.051 | 70.005 | 36.005 | 0.00 | 0.00 |
| ATOM | 421 | CD1  | PHE | X | 28 | 49.768 | 69.743 | 34.669 | 0.00 | 0.00 |
| ATOM | 422 | HD1  | PHE | X | 28 | 49.785 | 68.731 | 34.292 | 0.00 | 0.00 |
| ATOM | 423 | CE1  | PHE | X | 28 | 49.346 | 70.787 | 33.839 | 0.00 | 0.00 |
| ATOM | 424 | HE1  | PHE | X | 28 | 49.101 | 70.631 | 32.799 | 0.00 | 0.00 |
| ATOM | 425 | CZ   | PHE | X | 28 | 49.262 | 72.105 | 34.336 | 0.00 | 0.00 |
| ATOM | 426 | HZ   | PHE | X | 28 | 48.825 | 72.869 | 33.711 | 0.00 | 0.00 |
| ATOM | 427 | CE2  | PHE | X | 28 | 49.527 | 72.365 | 35.682 | 0.00 | 0.00 |
| ATOM | 428 | HE2  | PHE | X | 28 | 49.222 | 73.276 | 36.176 | 0.00 | 0.00 |
| ATOM | 429 | CD2  | PHE | X | 28 | 50.018 | 71.311 | 36.521 | 0.00 | 0.00 |
| ATOM | 430 | HD2  | PHE | X | 28 | 50.236 | 71.392 | 37.576 | 0.00 | 0.00 |
| ATOM | 431 | C    | PHE | X | 28 | 52.082 | 67.081 | 37.984 | 0.00 | 0.00 |
| ATOM | 432 | O    | PHE | X | 28 | 51.335 | 66.121 | 37.912 | 0.00 | 0.00 |
| ATOM | 433 | N    | LEU | X | 29 | 53.113 | 67.192 | 38.790 | 0.00 | 0.00 |
| ATOM | 434 | H    | LEU | X | 29 | 53.516 | 68.101 | 38.972 | 0.00 | 0.00 |
| ATOM | 435 | CA   | LEU | X | 29 | 53.628 | 66.096 | 39.593 | 0.00 | 0.00 |
| ATOM | 436 | HA   | LEU | X | 29 | 53.134 | 65.142 | 39.412 | 0.00 | 0.00 |
| ATOM | 437 | CB   | LEU | X | 29 | 55.110 | 65.957 | 39.115 | 0.00 | 0.00 |
| ATOM | 438 | HB2  | LEU | X | 29 | 55.700 | 66.846 | 39.337 | 0.00 | 0.00 |
| ATOM | 439 | HB3  | LEU | X | 29 | 55.608 | 65.183 | 39.699 | 0.00 | 0.00 |
| ATOM | 440 | CG   | LEU | X | 29 | 55.223 | 65.591 | 37.582 | 0.00 | 0.00 |
| ATOM | 441 | HG   | LEU | X | 29 | 54.753 | 66.355 | 36.963 | 0.00 | 0.00 |
| ATOM | 442 | CD1  | LEU | X | 29 | 56.743 | 65.613 | 37.253 | 0.00 | 0.00 |
| ATOM | 443 | HD11 | LEU | X | 29 | 56.987 | 65.223 | 36.265 | 0.00 | 0.00 |
| ATOM | 444 | HD12 | LEU | X | 29 | 57.172 | 66.572 | 37.544 | 0.00 | 0.00 |
| ATOM | 445 | HD13 | LEU | X | 29 | 57.165 | 64.924 | 37.984 | 0.00 | 0.00 |
| ATOM | 446 | CD2  | LEU | X | 29 | 54.591 | 64.174 | 37.346 | 0.00 | 0.00 |
| ATOM | 447 | HD21 | LEU | X | 29 | 53.504 | 64.176 | 37.432 | 0.00 | 0.00 |
| ATOM | 448 | HD22 | LEU | X | 29 | 54.936 | 63.858 | 36.361 | 0.00 | 0.00 |
| ATOM | 449 | HD23 | LEU | X | 29 | 54.776 | 63.464 | 38.152 | 0.00 | 0.00 |
| ATOM | 450 | C    | LEU | X | 29 | 53.572 | 66.432 | 41.014 | 0.00 | 0.00 |
| ATOM | 451 | O    | LEU | X | 29 | 53.669 | 67.630 | 41.304 | 0.00 | 0.00 |
| ATOM | 452 | N    | GLY | X | 30 | 53.547 | 65.463 | 41.933 | 0.00 | 0.00 |
| ATOM | 453 | H    | GLY | X | 30 | 53.611 | 64.532 | 41.546 | 0.00 | 0.00 |
| ATOM | 454 | CA   | GLY | X | 30 | 53.593 | 65.765 | 43.371 | 0.00 | 0.00 |
| ATOM | 455 | HA2  | GLY | X | 30 | 53.789 | 64.883 | 44.006 | 0.00 | 0.00 |
| ATOM | 456 | HA3  | GLY | X | 30 | 54.501 | 66.321 | 43.614 | 0.00 | 0.00 |
| ATOM | 457 | C    | GLY | X | 30 | 52.371 | 66.548 | 43.938 | 0.00 | 0.00 |
| ATOM | 458 | O    | GLY | X | 30 | 52.455 | 67.028 | 45.078 | 0.00 | 0.00 |

|      |     |      |     |   |    |        |        |        |      |      |
|------|-----|------|-----|---|----|--------|--------|--------|------|------|
| ATOM | 459 | N    | ILE | X | 31 | 51.269 | 66.668 | 43.227 | 0.00 | 0.00 |
| ATOM | 460 | H    | ILE | X | 31 | 51.322 | 66.166 | 42.352 | 0.00 | 0.00 |
| ATOM | 461 | CA   | ILE | X | 31 | 50.088 | 67.357 | 43.693 | 0.00 | 0.00 |
| ATOM | 462 | HA   | ILE | X | 31 | 50.389 | 68.398 | 43.813 | 0.00 | 0.00 |
| ATOM | 463 | CB   | ILE | X | 31 | 49.002 | 67.308 | 42.561 | 0.00 | 0.00 |
| ATOM | 464 | HB   | ILE | X | 31 | 48.811 | 66.273 | 42.277 | 0.00 | 0.00 |
| ATOM | 465 | CG2  | ILE | X | 31 | 47.720 | 68.017 | 43.147 | 0.00 | 0.00 |
| ATOM | 466 | HG21 | ILE | X | 31 | 47.144 | 68.323 | 42.274 | 0.00 | 0.00 |
| ATOM | 467 | HG22 | ILE | X | 31 | 47.144 | 67.365 | 43.804 | 0.00 | 0.00 |
| ATOM | 468 | HG23 | ILE | X | 31 | 48.079 | 68.869 | 43.724 | 0.00 | 0.00 |
| ATOM | 469 | CG1  | ILE | X | 31 | 49.382 | 67.831 | 41.168 | 0.00 | 0.00 |
| ATOM | 470 | HG12 | ILE | X | 31 | 49.424 | 68.919 | 41.212 | 0.00 | 0.00 |
| ATOM | 471 | HG13 | ILE | X | 31 | 50.382 | 67.489 | 40.900 | 0.00 | 0.00 |
| ATOM | 472 | CD1  | ILE | X | 31 | 48.437 | 67.509 | 40.040 | 0.00 | 0.00 |
| ATOM | 473 | HD11 | ILE | X | 31 | 48.314 | 66.427 | 39.999 | 0.00 | 0.00 |
| ATOM | 474 | HD12 | ILE | X | 31 | 47.515 | 68.089 | 40.082 | 0.00 | 0.00 |
| ATOM | 475 | HD13 | ILE | X | 31 | 48.873 | 67.580 | 39.044 | 0.00 | 0.00 |
| ATOM | 476 | C    | ILE | X | 31 | 49.566 | 66.943 | 45.051 | 0.00 | 0.00 |
| ATOM | 477 | O    | ILE | X | 31 | 49.293 | 65.812 | 45.284 | 0.00 | 0.00 |
| ATOM | 478 | N    | PRO | X | 32 | 49.365 | 67.786 | 46.048 | 0.00 | 0.00 |
| ATOM | 479 | CD   | PRO | X | 32 | 49.740 | 69.227 | 46.019 | 0.00 | 0.00 |
| ATOM | 480 | HD2  | PRO | X | 32 | 49.079 | 69.806 | 45.374 | 0.00 | 0.00 |
| ATOM | 481 | HD3  | PRO | X | 32 | 50.779 | 69.314 | 45.700 | 0.00 | 0.00 |
| ATOM | 482 | CG   | PRO | X | 32 | 49.639 | 69.812 | 47.378 | 0.00 | 0.00 |
| ATOM | 483 | HG2  | PRO | X | 32 | 49.188 | 70.804 | 47.402 | 0.00 | 0.00 |
| ATOM | 484 | HG3  | PRO | X | 32 | 50.601 | 69.845 | 47.889 | 0.00 | 0.00 |
| ATOM | 485 | CB   | PRO | X | 32 | 48.953 | 68.715 | 48.186 | 0.00 | 0.00 |
| ATOM | 486 | HB2  | PRO | X | 32 | 48.078 | 69.136 | 48.681 | 0.00 | 0.00 |
| ATOM | 487 | HB3  | PRO | X | 32 | 49.604 | 68.305 | 48.958 | 0.00 | 0.00 |
| ATOM | 488 | CA   | PRO | X | 32 | 48.699 | 67.496 | 47.291 | 0.00 | 0.00 |
| ATOM | 489 | HA   | PRO | X | 32 | 49.062 | 66.534 | 47.652 | 0.00 | 0.00 |
| ATOM | 490 | C    | PRO | X | 32 | 47.186 | 67.281 | 47.127 | 0.00 | 0.00 |
| ATOM | 491 | O    | PRO | X | 32 | 46.531 | 68.104 | 46.551 | 0.00 | 0.00 |
| ATOM | 492 | N    | PHE | X | 33 | 46.681 | 66.216 | 47.803 | 0.00 | 0.00 |
| ATOM | 493 | H    | PHE | X | 33 | 47.407 | 65.668 | 48.242 | 0.00 | 0.00 |
| ATOM | 494 | CA   | PHE | X | 33 | 45.269 | 65.784 | 47.645 | 0.00 | 0.00 |
| ATOM | 495 | HA   | PHE | X | 33 | 44.812 | 66.726 | 47.344 | 0.00 | 0.00 |
| ATOM | 496 | CB   | PHE | X | 33 | 45.035 | 64.654 | 46.646 | 0.00 | 0.00 |
| ATOM | 497 | HB2  | PHE | X | 33 | 43.993 | 64.682 | 46.328 | 0.00 | 0.00 |
| ATOM | 498 | HB3  | PHE | X | 33 | 45.480 | 64.910 | 45.685 | 0.00 | 0.00 |
| ATOM | 499 | CG   | PHE | X | 33 | 45.542 | 63.346 | 47.081 | 0.00 | 0.00 |
| ATOM | 500 | CD1  | PHE | X | 33 | 44.632 | 62.432 | 47.650 | 0.00 | 0.00 |
| ATOM | 501 | HD1  | PHE | X | 33 | 43.599 | 62.738 | 47.732 | 0.00 | 0.00 |
| ATOM | 502 | CE1  | PHE | X | 33 | 45.010 | 61.158 | 47.964 | 0.00 | 0.00 |
| ATOM | 503 | HE1  | PHE | X | 33 | 44.311 | 60.437 | 48.361 | 0.00 | 0.00 |
| ATOM | 504 | CZ   | PHE | X | 33 | 46.272 | 60.664 | 47.618 | 0.00 | 0.00 |
| ATOM | 505 | HZ   | PHE | X | 33 | 46.561 | 59.627 | 47.706 | 0.00 | 0.00 |
| ATOM | 506 | CE2  | PHE | X | 33 | 47.134 | 61.513 | 46.992 | 0.00 | 0.00 |
| ATOM | 507 | HE2  | PHE | X | 33 | 48.116 | 61.166 | 46.705 | 0.00 | 0.00 |
| ATOM | 508 | CD2  | PHE | X | 33 | 46.800 | 62.861 | 46.769 | 0.00 | 0.00 |
| ATOM | 509 | HD2  | PHE | X | 33 | 47.482 | 63.563 | 46.311 | 0.00 | 0.00 |
| ATOM | 510 | C    | PHE | X | 33 | 44.543 | 65.544 | 49.002 | 0.00 | 0.00 |
| ATOM | 511 | O    | PHE | X | 33 | 43.309 | 65.704 | 49.049 | 0.00 | 0.00 |
| ATOM | 512 | N    | ALA | X | 34 | 45.338 | 65.170 | 49.988 | 0.00 | 0.00 |
| ATOM | 513 | H    | ALA | X | 34 | 46.336 | 65.148 | 49.836 | 0.00 | 0.00 |
| ATOM | 514 | CA   | ALA | X | 34 | 44.917 | 64.949 | 51.381 | 0.00 | 0.00 |
| ATOM | 515 | HA   | ALA | X | 34 | 43.949 | 65.418 | 51.556 | 0.00 | 0.00 |
| ATOM | 516 | CB   | ALA | X | 34 | 44.869 | 63.421 | 51.434 | 0.00 | 0.00 |
| ATOM | 517 | HB1  | ALA | X | 34 | 45.831 | 62.910 | 51.482 | 0.00 | 0.00 |
| ATOM | 518 | HB2  | ALA | X | 34 | 44.428 | 63.051 | 52.359 | 0.00 | 0.00 |
| ATOM | 519 | HB3  | ALA | X | 34 | 44.246 | 63.073 | 50.610 | 0.00 | 0.00 |
| ATOM | 520 | C    | ALA | X | 34 | 45.929 | 65.583 | 52.399 | 0.00 | 0.00 |
| ATOM | 521 | O    | ALA | X | 34 | 46.997 | 66.043 | 51.979 | 0.00 | 0.00 |
| ATOM | 522 | N    | GLU | X | 35 | 45.601 | 65.630 | 53.706 | 0.00 | 0.00 |
| ATOM | 523 | H    | GLU | X | 35 | 44.622 | 65.435 | 53.861 | 0.00 | 0.00 |
| ATOM | 524 | CA   | GLU | X | 35 | 46.461 | 65.982 | 54.857 | 0.00 | 0.00 |
| ATOM | 525 | HA   | GLU | X | 35 | 47.035 | 66.881 | 54.634 | 0.00 | 0.00 |
| ATOM | 526 | CB   | GLU | X | 35 | 45.628 | 66.329 | 56.086 | 0.00 | 0.00 |
| ATOM | 527 | HB2  | GLU | X | 35 | 44.921 | 65.535 | 56.325 | 0.00 | 0.00 |
| ATOM | 528 | HB3  | GLU | X | 35 | 46.253 | 66.399 | 56.977 | 0.00 | 0.00 |

|      |     |     |     |   |    |        |        |        |      |      |
|------|-----|-----|-----|---|----|--------|--------|--------|------|------|
| ATOM | 529 | CG  | GLU | X | 35 | 44.996 | 67.703 | 56.025 | 0.00 | 0.00 |
| ATOM | 530 | HG2 | GLU | X | 35 | 44.395 | 67.804 | 55.121 | 0.00 | 0.00 |
| ATOM | 531 | HG3 | GLU | X | 35 | 44.350 | 67.920 | 56.877 | 0.00 | 0.00 |
| ATOM | 532 | CD  | GLU | X | 35 | 46.057 | 68.795 | 56.041 | 0.00 | 0.00 |
| ATOM | 533 | OE1 | GLU | X | 35 | 46.599 | 68.972 | 57.148 | 0.00 | 0.00 |
| ATOM | 534 | OE2 | GLU | X | 35 | 46.136 | 69.567 | 55.042 | 0.00 | 0.00 |
| ATOM | 535 | C   | GLU | X | 35 | 47.455 | 64.800 | 55.156 | 0.00 | 0.00 |
| ATOM | 536 | O   | GLU | X | 35 | 47.126 | 63.664 | 54.901 | 0.00 | 0.00 |
| ATOM | 537 | N   | PRO | X | 36 | 48.536 | 65.182 | 55.807 | 0.00 | 0.00 |
| ATOM | 538 | CD  | PRO | X | 36 | 49.004 | 66.512 | 56.101 | 0.00 | 0.00 |
| ATOM | 539 | HD2 | PRO | X | 36 | 48.581 | 66.825 | 57.055 | 0.00 | 0.00 |
| ATOM | 540 | HD3 | PRO | X | 36 | 48.738 | 67.291 | 55.387 | 0.00 | 0.00 |
| ATOM | 541 | CG  | PRO | X | 36 | 50.522 | 66.383 | 56.258 | 0.00 | 0.00 |
| ATOM | 542 | HG2 | PRO | X | 36 | 50.918 | 67.257 | 56.775 | 0.00 | 0.00 |
| ATOM | 543 | HG3 | PRO | X | 36 | 50.961 | 66.168 | 55.284 | 0.00 | 0.00 |
| ATOM | 544 | CB  | PRO | X | 36 | 50.612 | 65.080 | 57.049 | 0.00 | 0.00 |
| ATOM | 545 | HB2 | PRO | X | 36 | 50.318 | 65.137 | 58.097 | 0.00 | 0.00 |
| ATOM | 546 | HB3 | PRO | X | 36 | 51.547 | 64.594 | 56.773 | 0.00 | 0.00 |
| ATOM | 547 | CA  | PRO | X | 36 | 49.547 | 64.275 | 56.286 | 0.00 | 0.00 |
| ATOM | 548 | HA  | PRO | X | 36 | 50.042 | 63.854 | 55.410 | 0.00 | 0.00 |
| ATOM | 549 | C   | PRO | X | 36 | 48.976 | 63.164 | 57.260 | 0.00 | 0.00 |
| ATOM | 550 | O   | PRO | X | 36 | 48.626 | 63.477 | 58.393 | 0.00 | 0.00 |
| ATOM | 551 | N   | PRO | X | 37 | 48.898 | 61.911 | 56.774 | 0.00 | 0.00 |
| ATOM | 552 | CD  | PRO | X | 37 | 49.378 | 61.363 | 55.477 | 0.00 | 0.00 |
| ATOM | 553 | HD2 | PRO | X | 37 | 50.437 | 61.454 | 55.238 | 0.00 | 0.00 |
| ATOM | 554 | HD3 | PRO | X | 37 | 48.744 | 61.843 | 54.731 | 0.00 | 0.00 |
| ATOM | 555 | CG  | PRO | X | 37 | 49.152 | 59.852 | 55.462 | 0.00 | 0.00 |
| ATOM | 556 | HG2 | PRO | X | 37 | 50.077 | 59.411 | 55.831 | 0.00 | 0.00 |
| ATOM | 557 | HG3 | PRO | X | 37 | 48.976 | 59.431 | 54.472 | 0.00 | 0.00 |
| ATOM | 558 | CB  | PRO | X | 37 | 47.986 | 59.717 | 56.341 | 0.00 | 0.00 |
| ATOM | 559 | HB2 | PRO | X | 37 | 47.919 | 58.704 | 56.738 | 0.00 | 0.00 |
| ATOM | 560 | HB3 | PRO | X | 37 | 47.029 | 59.928 | 55.865 | 0.00 | 0.00 |
| ATOM | 561 | CA  | PRO | X | 37 | 48.381 | 60.724 | 57.445 | 0.00 | 0.00 |
| ATOM | 562 | HA  | PRO | X | 37 | 47.481 | 61.035 | 57.976 | 0.00 | 0.00 |
| ATOM | 563 | C   | PRO | X | 37 | 49.375 | 60.067 | 58.460 | 0.00 | 0.00 |
| ATOM | 564 | O   | PRO | X | 37 | 49.073 | 59.104 | 59.161 | 0.00 | 0.00 |
| ATOM | 565 | N   | MET | X | 38 | 50.564 | 60.666 | 58.670 | 0.00 | 0.00 |
| ATOM | 566 | H   | MET | X | 38 | 50.910 | 61.271 | 57.938 | 0.00 | 0.00 |
| ATOM | 567 | CA  | MET | X | 38 | 51.528 | 60.330 | 59.749 | 0.00 | 0.00 |
| ATOM | 568 | HA  | MET | X | 38 | 51.994 | 59.368 | 59.533 | 0.00 | 0.00 |
| ATOM | 569 | CB  | MET | X | 38 | 52.658 | 61.320 | 59.783 | 0.00 | 0.00 |
| ATOM | 570 | HB2 | MET | X | 38 | 53.436 | 60.951 | 60.452 | 0.00 | 0.00 |
| ATOM | 571 | HB3 | MET | X | 38 | 53.068 | 61.487 | 58.787 | 0.00 | 0.00 |
| ATOM | 572 | CG  | MET | X | 38 | 52.272 | 62.732 | 60.217 | 0.00 | 0.00 |
| ATOM | 573 | HG2 | MET | X | 38 | 51.442 | 63.020 | 59.573 | 0.00 | 0.00 |
| ATOM | 574 | HG3 | MET | X | 38 | 52.038 | 62.626 | 61.276 | 0.00 | 0.00 |
| ATOM | 575 | SD  | MET | X | 38 | 53.541 | 64.018 | 60.051 | 0.00 | 0.00 |
| ATOM | 576 | CE  | MET | X | 38 | 52.660 | 65.586 | 60.457 | 0.00 | 0.00 |
| ATOM | 577 | HE1 | MET | X | 38 | 51.933 | 65.765 | 59.665 | 0.00 | 0.00 |
| ATOM | 578 | HE2 | MET | X | 38 | 52.267 | 65.592 | 61.474 | 0.00 | 0.00 |
| ATOM | 579 | HE3 | MET | X | 38 | 53.432 | 66.343 | 60.319 | 0.00 | 0.00 |
| ATOM | 580 | C   | MET | X | 38 | 50.946 | 60.233 | 61.125 | 0.00 | 0.00 |
| ATOM | 581 | O   | MET | X | 38 | 49.900 | 60.761 | 61.527 | 0.00 | 0.00 |
| ATOM | 582 | N   | GLY | X | 39 | 51.651 | 59.402 | 61.888 | 0.00 | 0.00 |
| ATOM | 583 | H   | GLY | X | 39 | 52.391 | 58.954 | 61.366 | 0.00 | 0.00 |
| ATOM | 584 | CA  | GLY | X | 39 | 51.528 | 59.348 | 63.332 | 0.00 | 0.00 |
| ATOM | 585 | HA2 | GLY | X | 39 | 52.148 | 58.567 | 63.805 | 0.00 | 0.00 |
| ATOM | 586 | HA3 | GLY | X | 39 | 51.852 | 60.287 | 63.743 | 0.00 | 0.00 |
| ATOM | 587 | C   | GLY | X | 39 | 50.130 | 59.041 | 63.844 | 0.00 | 0.00 |
| ATOM | 588 | O   | GLY | X | 39 | 49.685 | 57.848 | 63.828 | 0.00 | 0.00 |
| ATOM | 589 | N   | PRO | X | 40 | 49.381 | 60.002 | 64.428 | 0.00 | 0.00 |
| ATOM | 590 | CD  | PRO | X | 40 | 49.978 | 61.286 | 64.944 | 0.00 | 0.00 |
| ATOM | 591 | HD2 | PRO | X | 40 | 50.297 | 61.941 | 64.133 | 0.00 | 0.00 |
| ATOM | 592 | HD3 | PRO | X | 40 | 50.859 | 61.029 | 65.533 | 0.00 | 0.00 |
| ATOM | 593 | CG  | PRO | X | 40 | 48.854 | 61.865 | 65.821 | 0.00 | 0.00 |
| ATOM | 594 | HG2 | PRO | X | 40 | 48.961 | 62.949 | 65.797 | 0.00 | 0.00 |
| ATOM | 595 | HG3 | PRO | X | 40 | 48.965 | 61.437 | 66.817 | 0.00 | 0.00 |
| ATOM | 596 | CB  | PRO | X | 40 | 47.511 | 61.369 | 65.201 | 0.00 | 0.00 |
| ATOM | 597 | HB2 | PRO | X | 40 | 47.293 | 61.940 | 64.298 | 0.00 | 0.00 |
| ATOM | 598 | HB3 | PRO | X | 40 | 46.632 | 61.500 | 65.832 | 0.00 | 0.00 |

|      |     |      |     |   |    |        |        |        |      |      |
|------|-----|------|-----|---|----|--------|--------|--------|------|------|
| ATOM | 599 | CA   | PRO | X | 40 | 48.011 | 59.879 | 64.924 | 0.00 | 0.00 |
| ATOM | 600 | HA   | PRO | X | 40 | 47.959 | 59.265 | 65.823 | 0.00 | 0.00 |
| ATOM | 601 | C    | PRO | X | 40 | 47.049 | 59.244 | 63.887 | 0.00 | 0.00 |
| ATOM | 602 | O    | PRO | X | 40 | 46.132 | 58.549 | 64.350 | 0.00 | 0.00 |
| ATOM | 603 | N    | ARG | X | 41 | 47.277 | 59.545 | 62.664 | 0.00 | 0.00 |
| ATOM | 604 | H    | ARG | X | 41 | 47.961 | 60.211 | 62.333 | 0.00 | 0.00 |
| ATOM | 605 | CA   | ARG | X | 41 | 46.405 | 59.040 | 61.551 | 0.00 | 0.00 |
| ATOM | 606 | HA   | ARG | X | 41 | 45.408 | 58.888 | 61.966 | 0.00 | 0.00 |
| ATOM | 607 | CB   | ARG | X | 41 | 46.225 | 60.091 | 60.549 | 0.00 | 0.00 |
| ATOM | 608 | HB2  | ARG | X | 41 | 47.192 | 60.489 | 60.240 | 0.00 | 0.00 |
| ATOM | 609 | HB3  | ARG | X | 41 | 45.726 | 59.686 | 59.670 | 0.00 | 0.00 |
| ATOM | 610 | CG   | ARG | X | 41 | 45.406 | 61.249 | 61.031 | 0.00 | 0.00 |
| ATOM | 611 | HG2  | ARG | X | 41 | 44.460 | 60.829 | 61.371 | 0.00 | 0.00 |
| ATOM | 612 | HG3  | ARG | X | 41 | 45.926 | 61.604 | 61.921 | 0.00 | 0.00 |
| ATOM | 613 | CD   | ARG | X | 41 | 45.342 | 62.289 | 59.969 | 0.00 | 0.00 |
| ATOM | 614 | HD2  | ARG | X | 41 | 46.335 | 62.494 | 59.570 | 0.00 | 0.00 |
| ATOM | 615 | HD3  | ARG | X | 41 | 44.909 | 61.865 | 59.063 | 0.00 | 0.00 |
| ATOM | 616 | NE   | ARG | X | 41 | 44.598 | 63.515 | 60.285 | 0.00 | 0.00 |
| ATOM | 617 | HE   | ARG | X | 41 | 43.594 | 63.496 | 60.386 | 0.00 | 0.00 |
| ATOM | 618 | CZ   | ARG | X | 41 | 45.091 | 64.731 | 60.119 | 0.00 | 0.00 |
| ATOM | 619 | NH1  | ARG | X | 41 | 46.366 | 65.000 | 59.986 | 0.00 | 0.00 |
| ATOM | 620 | HH11 | ARG | X | 41 | 47.038 | 64.264 | 60.148 | 0.00 | 0.00 |
| ATOM | 621 | HH12 | ARG | X | 41 | 46.750 | 65.934 | 59.978 | 0.00 | 0.00 |
| ATOM | 622 | NH2  | ARG | X | 41 | 44.247 | 65.728 | 60.126 | 0.00 | 0.00 |
| ATOM | 623 | HH21 | ARG | X | 41 | 43.250 | 65.575 | 60.073 | 0.00 | 0.00 |
| ATOM | 624 | HH22 | ARG | X | 41 | 44.578 | 66.676 | 60.013 | 0.00 | 0.00 |
| ATOM | 625 | C    | ARG | X | 41 | 46.814 | 57.623 | 61.024 | 0.00 | 0.00 |
| ATOM | 626 | O    | ARG | X | 41 | 46.170 | 57.054 | 60.153 | 0.00 | 0.00 |
| ATOM | 627 | N    | ARG | X | 42 | 47.978 | 57.117 | 61.505 | 0.00 | 0.00 |
| ATOM | 628 | H    | ARG | X | 42 | 48.495 | 57.553 | 62.255 | 0.00 | 0.00 |
| ATOM | 629 | CA   | ARG | X | 42 | 48.389 | 55.807 | 61.123 | 0.00 | 0.00 |
| ATOM | 630 | HA   | ARG | X | 42 | 48.631 | 55.799 | 60.060 | 0.00 | 0.00 |
| ATOM | 631 | CB   | ARG | X | 42 | 49.739 | 55.507 | 61.878 | 0.00 | 0.00 |
| ATOM | 632 | HB2  | ARG | X | 42 | 50.467 | 56.298 | 61.697 | 0.00 | 0.00 |
| ATOM | 633 | HB3  | ARG | X | 42 | 49.499 | 55.425 | 62.939 | 0.00 | 0.00 |
| ATOM | 634 | CG   | ARG | X | 42 | 50.477 | 54.196 | 61.473 | 0.00 | 0.00 |
| ATOM | 635 | HG2  | ARG | X | 42 | 49.687 | 53.448 | 61.544 | 0.00 | 0.00 |
| ATOM | 636 | HG3  | ARG | X | 42 | 50.775 | 54.192 | 60.424 | 0.00 | 0.00 |
| ATOM | 637 | CD   | ARG | X | 42 | 51.604 | 53.767 | 62.363 | 0.00 | 0.00 |
| ATOM | 638 | HD2  | ARG | X | 42 | 51.255 | 53.758 | 63.395 | 0.00 | 0.00 |
| ATOM | 639 | HD3  | ARG | X | 42 | 51.909 | 52.779 | 62.020 | 0.00 | 0.00 |
| ATOM | 640 | NE   | ARG | X | 42 | 52.699 | 54.730 | 62.224 | 0.00 | 0.00 |
| ATOM | 641 | HE   | ARG | X | 42 | 52.729 | 55.323 | 61.407 | 0.00 | 0.00 |
| ATOM | 642 | CZ   | ARG | X | 42 | 53.663 | 54.917 | 63.126 | 0.00 | 0.00 |
| ATOM | 643 | NH1  | ARG | X | 42 | 53.823 | 54.096 | 64.147 | 0.00 | 0.00 |
| ATOM | 644 | HH11 | ARG | X | 42 | 53.097 | 53.415 | 64.317 | 0.00 | 0.00 |
| ATOM | 645 | HH12 | ARG | X | 42 | 54.513 | 54.243 | 64.869 | 0.00 | 0.00 |
| ATOM | 646 | NH2  | ARG | X | 42 | 54.410 | 55.968 | 62.991 | 0.00 | 0.00 |
| ATOM | 647 | HH21 | ARG | X | 42 | 54.209 | 56.503 | 62.158 | 0.00 | 0.00 |
| ATOM | 648 | HH22 | ARG | X | 42 | 55.022 | 56.211 | 63.757 | 0.00 | 0.00 |
| ATOM | 649 | C    | ARG | X | 42 | 47.304 | 54.837 | 61.534 | 0.00 | 0.00 |
| ATOM | 650 | O    | ARG | X | 42 | 46.725 | 54.994 | 62.645 | 0.00 | 0.00 |
| ATOM | 651 | N    | PHE | X | 43 | 46.876 | 53.918 | 60.662 | 0.00 | 0.00 |
| ATOM | 652 | H    | PHE | X | 43 | 47.404 | 53.853 | 59.804 | 0.00 | 0.00 |
| ATOM | 653 | CA   | PHE | X | 43 | 45.728 | 52.956 | 60.857 | 0.00 | 0.00 |
| ATOM | 654 | HA   | PHE | X | 43 | 45.794 | 52.238 | 60.040 | 0.00 | 0.00 |
| ATOM | 655 | CB   | PHE | X | 43 | 45.912 | 52.106 | 62.044 | 0.00 | 0.00 |
| ATOM | 656 | HB2  | PHE | X | 43 | 45.670 | 52.601 | 62.984 | 0.00 | 0.00 |
| ATOM | 657 | HB3  | PHE | X | 43 | 45.302 | 51.203 | 62.065 | 0.00 | 0.00 |
| ATOM | 658 | CG   | PHE | X | 43 | 47.342 | 51.629 | 62.264 | 0.00 | 0.00 |
| ATOM | 659 | CD1  | PHE | X | 43 | 48.118 | 51.191 | 61.175 | 0.00 | 0.00 |
| ATOM | 660 | HD1  | PHE | X | 43 | 47.826 | 51.255 | 60.137 | 0.00 | 0.00 |
| ATOM | 661 | CE1  | PHE | X | 43 | 49.449 | 50.804 | 61.478 | 0.00 | 0.00 |
| ATOM | 662 | HE1  | PHE | X | 43 | 50.114 | 50.482 | 60.690 | 0.00 | 0.00 |
| ATOM | 663 | CZ   | PHE | X | 43 | 50.015 | 50.814 | 62.755 | 0.00 | 0.00 |
| ATOM | 664 | HZ   | PHE | X | 43 | 51.013 | 50.506 | 63.032 | 0.00 | 0.00 |
| ATOM | 665 | CE2  | PHE | X | 43 | 49.117 | 51.235 | 63.786 | 0.00 | 0.00 |
| ATOM | 666 | HE2  | PHE | X | 43 | 49.448 | 51.233 | 64.814 | 0.00 | 0.00 |
| ATOM | 667 | CD2  | PHE | X | 43 | 47.820 | 51.652 | 63.575 | 0.00 | 0.00 |
| ATOM | 668 | HD2  | PHE | X | 43 | 47.243 | 51.957 | 64.436 | 0.00 | 0.00 |

|      |     |      |     |   |    |        |        |        |      |      |
|------|-----|------|-----|---|----|--------|--------|--------|------|------|
| ATOM | 669 | C    | PHE | X | 43 | 44.310 | 53.648 | 60.739 | 0.00 | 0.00 |
| ATOM | 670 | O    | PHE | X | 43 | 43.253 | 52.995 | 60.780 | 0.00 | 0.00 |
| ATOM | 671 | N    | LEU | X | 44 | 44.237 | 54.999 | 60.628 | 0.00 | 0.00 |
| ATOM | 672 | H    | LEU | X | 44 | 45.072 | 55.534 | 60.435 | 0.00 | 0.00 |
| ATOM | 673 | CA   | LEU | X | 44 | 42.988 | 55.686 | 60.434 | 0.00 | 0.00 |
| ATOM | 674 | HA   | LEU | X | 44 | 42.164 | 54.976 | 60.508 | 0.00 | 0.00 |
| ATOM | 675 | CB   | LEU | X | 44 | 42.843 | 56.894 | 61.330 | 0.00 | 0.00 |
| ATOM | 676 | HB2  | LEU | X | 44 | 43.804 | 57.409 | 61.338 | 0.00 | 0.00 |
| ATOM | 677 | HB3  | LEU | X | 44 | 42.136 | 57.559 | 60.834 | 0.00 | 0.00 |
| ATOM | 678 | CG   | LEU | X | 44 | 42.472 | 56.589 | 62.820 | 0.00 | 0.00 |
| ATOM | 679 | HG   | LEU | X | 44 | 43.196 | 55.972 | 63.352 | 0.00 | 0.00 |
| ATOM | 680 | CD1  | LEU | X | 44 | 42.374 | 57.982 | 63.467 | 0.00 | 0.00 |
| ATOM | 681 | HD11 | LEU | X | 44 | 43.205 | 58.586 | 63.102 | 0.00 | 0.00 |
| ATOM | 682 | HD12 | LEU | X | 44 | 41.495 | 58.509 | 63.096 | 0.00 | 0.00 |
| ATOM | 683 | HD13 | LEU | X | 44 | 42.257 | 57.807 | 64.537 | 0.00 | 0.00 |
| ATOM | 684 | CD2  | LEU | X | 44 | 41.218 | 55.749 | 62.852 | 0.00 | 0.00 |
| ATOM | 685 | HD21 | LEU | X | 44 | 41.397 | 54.686 | 62.691 | 0.00 | 0.00 |
| ATOM | 686 | HD22 | LEU | X | 44 | 40.835 | 55.817 | 63.870 | 0.00 | 0.00 |
| ATOM | 687 | HD23 | LEU | X | 44 | 40.426 | 56.043 | 62.164 | 0.00 | 0.00 |
| ATOM | 688 | C    | LEU | X | 44 | 42.936 | 56.164 | 58.962 | 0.00 | 0.00 |
| ATOM | 689 | O    | LEU | X | 44 | 43.948 | 56.407 | 58.358 | 0.00 | 0.00 |
| ATOM | 690 | N    | PRO | X | 45 | 41.696 | 56.206 | 58.395 | 0.00 | 0.00 |
| ATOM | 691 | CD   | PRO | X | 45 | 40.385 | 55.812 | 58.988 | 0.00 | 0.00 |
| ATOM | 692 | HD2  | PRO | X | 45 | 39.998 | 56.537 | 59.704 | 0.00 | 0.00 |
| ATOM | 693 | HD3  | PRO | X | 45 | 40.427 | 54.857 | 59.513 | 0.00 | 0.00 |
| ATOM | 694 | CG   | PRO | X | 45 | 39.460 | 55.711 | 57.832 | 0.00 | 0.00 |
| ATOM | 695 | HG2  | PRO | X | 45 | 38.439 | 55.832 | 58.195 | 0.00 | 0.00 |
| ATOM | 696 | HG3  | PRO | X | 45 | 39.663 | 54.743 | 57.375 | 0.00 | 0.00 |
| ATOM | 697 | CB   | PRO | X | 45 | 39.977 | 56.831 | 56.967 | 0.00 | 0.00 |
| ATOM | 698 | HB2  | PRO | X | 45 | 39.579 | 57.733 | 57.431 | 0.00 | 0.00 |
| ATOM | 699 | HB3  | PRO | X | 45 | 39.658 | 56.687 | 55.934 | 0.00 | 0.00 |
| ATOM | 700 | CA   | PRO | X | 45 | 41.496 | 56.833 | 57.098 | 0.00 | 0.00 |
| ATOM | 701 | HA   | PRO | X | 45 | 41.874 | 56.253 | 56.256 | 0.00 | 0.00 |
| ATOM | 702 | C    | PRO | X | 45 | 42.018 | 58.298 | 56.952 | 0.00 | 0.00 |
| ATOM | 703 | O    | PRO | X | 45 | 42.388 | 58.879 | 57.960 | 0.00 | 0.00 |
| ATOM | 704 | N    | PRO | X | 46 | 41.901 | 58.885 | 55.718 | 0.00 | 0.00 |
| ATOM | 705 | CD   | PRO | X | 46 | 41.585 | 58.207 | 54.437 | 0.00 | 0.00 |
| ATOM | 706 | HD2  | PRO | X | 46 | 40.550 | 57.868 | 54.483 | 0.00 | 0.00 |
| ATOM | 707 | HD3  | PRO | X | 46 | 42.299 | 57.394 | 54.308 | 0.00 | 0.00 |
| ATOM | 708 | CG   | PRO | X | 46 | 41.873 | 59.243 | 53.357 | 0.00 | 0.00 |
| ATOM | 709 | HG2  | PRO | X | 46 | 41.009 | 59.897 | 53.234 | 0.00 | 0.00 |
| ATOM | 710 | HG3  | PRO | X | 46 | 42.198 | 58.789 | 52.421 | 0.00 | 0.00 |
| ATOM | 711 | CB   | PRO | X | 46 | 42.996 | 60.036 | 54.052 | 0.00 | 0.00 |
| ATOM | 712 | HB2  | PRO | X | 46 | 43.052 | 60.994 | 53.535 | 0.00 | 0.00 |
| ATOM | 713 | HB3  | PRO | X | 46 | 43.992 | 59.611 | 53.925 | 0.00 | 0.00 |
| ATOM | 714 | CA   | PRO | X | 46 | 42.567 | 60.116 | 55.503 | 0.00 | 0.00 |
| ATOM | 715 | HA   | PRO | X | 46 | 43.400 | 60.255 | 56.192 | 0.00 | 0.00 |
| ATOM | 716 | C    | PRO | X | 46 | 41.594 | 61.323 | 55.689 | 0.00 | 0.00 |
| ATOM | 717 | O    | PRO | X | 46 | 40.521 | 61.195 | 56.291 | 0.00 | 0.00 |
| ATOM | 718 | N    | GLU | X | 47 | 42.000 | 62.518 | 55.141 | 0.00 | 0.00 |
| ATOM | 719 | H    | GLU | X | 47 | 42.911 | 62.637 | 54.720 | 0.00 | 0.00 |
| ATOM | 720 | CA   | GLU | X | 47 | 41.281 | 63.752 | 55.169 | 0.00 | 0.00 |
| ATOM | 721 | HA   | GLU | X | 47 | 40.193 | 63.720 | 55.110 | 0.00 | 0.00 |
| ATOM | 722 | CB   | GLU | X | 47 | 41.418 | 64.480 | 56.485 | 0.00 | 0.00 |
| ATOM | 723 | HB2  | GLU | X | 47 | 42.470 | 64.691 | 56.680 | 0.00 | 0.00 |
| ATOM | 724 | HB3  | GLU | X | 47 | 40.939 | 65.454 | 56.389 | 0.00 | 0.00 |
| ATOM | 725 | CG   | GLU | X | 47 | 40.721 | 63.828 | 57.721 | 0.00 | 0.00 |
| ATOM | 726 | HG2  | GLU | X | 47 | 39.707 | 63.634 | 57.373 | 0.00 | 0.00 |
| ATOM | 727 | HG3  | GLU | X | 47 | 41.282 | 62.920 | 57.942 | 0.00 | 0.00 |
| ATOM | 728 | CD   | GLU | X | 47 | 40.636 | 64.709 | 58.981 | 0.00 | 0.00 |
| ATOM | 729 | OE1  | GLU | X | 47 | 39.702 | 65.518 | 59.081 | 0.00 | 0.00 |
| ATOM | 730 | OE2  | GLU | X | 47 | 41.502 | 64.692 | 59.859 | 0.00 | 0.00 |
| ATOM | 731 | C    | GLU | X | 47 | 41.809 | 64.612 | 54.048 | 0.00 | 0.00 |
| ATOM | 732 | O    | GLU | X | 47 | 43.017 | 64.620 | 53.757 | 0.00 | 0.00 |
| ATOM | 733 | N    | PRO | X | 48 | 40.914 | 65.368 | 53.380 | 0.00 | 0.00 |
| ATOM | 734 | CD   | PRO | X | 48 | 39.556 | 65.583 | 53.744 | 0.00 | 0.00 |
| ATOM | 735 | HD2  | PRO | X | 48 | 39.475 | 65.842 | 54.800 | 0.00 | 0.00 |
| ATOM | 736 | HD3  | PRO | X | 48 | 38.970 | 64.714 | 53.445 | 0.00 | 0.00 |
| ATOM | 737 | CG   | PRO | X | 48 | 39.059 | 66.838 | 52.918 | 0.00 | 0.00 |
| ATOM | 738 | HG2  | PRO | X | 48 | 39.341 | 67.773 | 53.402 | 0.00 | 0.00 |



|      |     |      |     |   |    |        |        |        |      |      |
|------|-----|------|-----|---|----|--------|--------|--------|------|------|
| ATOM | 739 | HG3  | PRO | X | 48 | 38.027 | 66.911 | 52.575 | 0.00 | 0.00 |
| ATOM | 740 | CB   | PRO | X | 48 | 39.905 | 66.780 | 51.666 | 0.00 | 0.00 |
| ATOM | 741 | HB2  | PRO | X | 48 | 40.128 | 67.763 | 51.252 | 0.00 | 0.00 |
| ATOM | 742 | HB3  | PRO | X | 48 | 39.360 | 66.133 | 50.978 | 0.00 | 0.00 |
| ATOM | 743 | CA   | PRO | X | 48 | 41.211 | 66.153 | 52.200 | 0.00 | 0.00 |
| ATOM | 744 | HA   | PRO | X | 48 | 41.719 | 65.610 | 51.403 | 0.00 | 0.00 |
| ATOM | 745 | C    | PRO | X | 48 | 42.201 | 67.231 | 52.689 | 0.00 | 0.00 |
| ATOM | 746 | O    | PRO | X | 48 | 42.332 | 67.518 | 53.896 | 0.00 | 0.00 |
| ATOM | 747 | N    | LYS | X | 49 | 42.941 | 67.831 | 51.815 | 0.00 | 0.00 |
| ATOM | 748 | H    | LYS | X | 49 | 42.738 | 67.695 | 50.835 | 0.00 | 0.00 |
| ATOM | 749 | CA   | LYS | X | 49 | 44.025 | 68.814 | 52.064 | 0.00 | 0.00 |
| ATOM | 750 | HA   | LYS | X | 49 | 44.653 | 68.372 | 52.837 | 0.00 | 0.00 |
| ATOM | 751 | CB   | LYS | X | 49 | 44.887 | 68.843 | 50.771 | 0.00 | 0.00 |
| ATOM | 752 | HB2  | LYS | X | 49 | 45.384 | 67.903 | 50.531 | 0.00 | 0.00 |
| ATOM | 753 | HB3  | LYS | X | 49 | 44.218 | 69.080 | 49.943 | 0.00 | 0.00 |
| ATOM | 754 | CG   | LYS | X | 49 | 45.925 | 69.915 | 50.728 | 0.00 | 0.00 |
| ATOM | 755 | HG2  | LYS | X | 49 | 46.258 | 69.944 | 49.691 | 0.00 | 0.00 |
| ATOM | 756 | HG3  | LYS | X | 49 | 45.395 | 70.859 | 50.857 | 0.00 | 0.00 |
| ATOM | 757 | CD   | LYS | X | 49 | 47.247 | 69.888 | 51.564 | 0.00 | 0.00 |
| ATOM | 758 | HD2  | LYS | X | 49 | 46.942 | 69.990 | 52.606 | 0.00 | 0.00 |
| ATOM | 759 | HD3  | LYS | X | 49 | 47.928 | 69.053 | 51.402 | 0.00 | 0.00 |
| ATOM | 760 | CE   | LYS | X | 49 | 48.136 | 71.059 | 51.218 | 0.00 | 0.00 |
| ATOM | 761 | HE2  | LYS | X | 49 | 48.522 | 70.942 | 50.205 | 0.00 | 0.00 |
| ATOM | 762 | HE3  | LYS | X | 49 | 47.543 | 71.968 | 51.322 | 0.00 | 0.00 |
| ATOM | 763 | NZ   | LYS | X | 49 | 49.305 | 71.095 | 52.124 | 0.00 | 0.00 |
| ATOM | 764 | HZ1  | LYS | X | 49 | 49.847 | 71.931 | 51.955 | 0.00 | 0.00 |
| ATOM | 765 | HZ2  | LYS | X | 49 | 49.085 | 71.074 | 53.109 | 0.00 | 0.00 |
| ATOM | 766 | HZ3  | LYS | X | 49 | 49.901 | 70.285 | 52.034 | 0.00 | 0.00 |
| ATOM | 767 | C    | LYS | X | 49 | 43.523 | 70.195 | 52.498 | 0.00 | 0.00 |
| ATOM | 768 | O    | LYS | X | 49 | 42.598 | 70.756 | 51.974 | 0.00 | 0.00 |
| ATOM | 769 | N    | GLN | X | 50 | 44.195 | 70.816 | 53.466 | 0.00 | 0.00 |
| ATOM | 770 | H    | GLN | X | 50 | 44.915 | 70.335 | 53.985 | 0.00 | 0.00 |
| ATOM | 771 | CA   | GLN | X | 50 | 43.963 | 72.191 | 53.914 | 0.00 | 0.00 |
| ATOM | 772 | HA   | GLN | X | 50 | 42.902 | 72.333 | 54.118 | 0.00 | 0.00 |
| ATOM | 773 | CB   | GLN | X | 50 | 44.631 | 72.492 | 55.246 | 0.00 | 0.00 |
| ATOM | 774 | HB2  | GLN | X | 50 | 44.325 | 71.652 | 55.870 | 0.00 | 0.00 |
| ATOM | 775 | HB3  | GLN | X | 50 | 45.691 | 72.318 | 55.062 | 0.00 | 0.00 |
| ATOM | 776 | CG   | GLN | X | 50 | 44.218 | 73.809 | 55.946 | 0.00 | 0.00 |
| ATOM | 777 | HG2  | GLN | X | 50 | 44.252 | 74.689 | 55.303 | 0.00 | 0.00 |
| ATOM | 778 | HG3  | GLN | X | 50 | 43.166 | 73.878 | 56.223 | 0.00 | 0.00 |
| ATOM | 779 | CD   | GLN | X | 50 | 45.068 | 74.088 | 57.157 | 0.00 | 0.00 |
| ATOM | 780 | OE1  | GLN | X | 50 | 44.853 | 73.787 | 58.323 | 0.00 | 0.00 |
| ATOM | 781 | NE2  | GLN | X | 50 | 46.202 | 74.668 | 56.939 | 0.00 | 0.00 |
| ATOM | 782 | HE21 | GLN | X | 50 | 46.830 | 74.746 | 57.726 | 0.00 | 0.00 |
| ATOM | 783 | HE22 | GLN | X | 50 | 46.399 | 75.047 | 56.024 | 0.00 | 0.00 |
| ATOM | 784 | C    | GLN | X | 50 | 44.288 | 73.177 | 52.791 | 0.00 | 0.00 |
| ATOM | 785 | O    | GLN | X | 50 | 45.452 | 73.171 | 52.349 | 0.00 | 0.00 |
| ATOM | 786 | N    | PRO | X | 51 | 43.335 | 73.957 | 52.265 | 0.00 | 0.00 |
| ATOM | 787 | CD   | PRO | X | 51 | 41.962 | 74.190 | 52.800 | 0.00 | 0.00 |
| ATOM | 788 | HD2  | PRO | X | 51 | 41.924 | 74.536 | 53.833 | 0.00 | 0.00 |
| ATOM | 789 | HD3  | PRO | X | 51 | 41.398 | 73.325 | 52.453 | 0.00 | 0.00 |
| ATOM | 790 | CG   | PRO | X | 51 | 41.376 | 75.401 | 52.033 | 0.00 | 0.00 |
| ATOM | 791 | HG2  | PRO | X | 51 | 41.616 | 76.312 | 52.583 | 0.00 | 0.00 |
| ATOM | 792 | HG3  | PRO | X | 51 | 40.303 | 75.328 | 51.854 | 0.00 | 0.00 |
| ATOM | 793 | CB   | PRO | X | 51 | 42.122 | 75.329 | 50.705 | 0.00 | 0.00 |
| ATOM | 794 | HB2  | PRO | X | 51 | 42.197 | 76.262 | 50.146 | 0.00 | 0.00 |
| ATOM | 795 | HB3  | PRO | X | 51 | 41.565 | 74.641 | 50.070 | 0.00 | 0.00 |
| ATOM | 796 | CA   | PRO | X | 51 | 43.545 | 74.820 | 51.111 | 0.00 | 0.00 |
| ATOM | 797 | HA   | PRO | X | 51 | 43.980 | 74.210 | 50.320 | 0.00 | 0.00 |
| ATOM | 798 | C    | PRO | X | 51 | 44.359 | 76.064 | 51.409 | 0.00 | 0.00 |
| ATOM | 799 | O    | PRO | X | 51 | 44.624 | 76.520 | 52.508 | 0.00 | 0.00 |
| ATOM | 800 | N    | TRP | X | 52 | 44.968 | 76.593 | 50.317 | 0.00 | 0.00 |
| ATOM | 801 | H    | TRP | X | 52 | 44.702 | 76.139 | 49.455 | 0.00 | 0.00 |
| ATOM | 802 | CA   | TRP | X | 52 | 46.034 | 77.585 | 50.331 | 0.00 | 0.00 |
| ATOM | 803 | HA   | TRP | X | 52 | 46.188 | 77.965 | 51.341 | 0.00 | 0.00 |
| ATOM | 804 | CB   | TRP | X | 52 | 47.330 | 76.783 | 50.002 | 0.00 | 0.00 |
| ATOM | 805 | HB2  | TRP | X | 52 | 48.199 | 77.381 | 50.279 | 0.00 | 0.00 |
| ATOM | 806 | HB3  | TRP | X | 52 | 47.360 | 75.834 | 50.536 | 0.00 | 0.00 |
| ATOM | 807 | CG   | TRP | X | 52 | 47.363 | 76.323 | 48.549 | 0.00 | 0.00 |
| ATOM | 808 | CD1  | TRP | X | 52 | 47.927 | 77.033 | 47.538 | 0.00 | 0.00 |

|      |     |      |     |   |    |        |        |        |      |      |
|------|-----|------|-----|---|----|--------|--------|--------|------|------|
| ATOM | 809 | HD1  | TRP | X | 52 | 48.277 | 78.053 | 47.603 | 0.00 | 0.00 |
| ATOM | 810 | NE1  | TRP | X | 52 | 47.640 | 76.370 | 46.387 | 0.00 | 0.00 |
| ATOM | 811 | HE1  | TRP | X | 52 | 48.055 | 76.679 | 45.519 | 0.00 | 0.00 |
| ATOM | 812 | CE2  | TRP | X | 52 | 46.911 | 75.205 | 46.577 | 0.00 | 0.00 |
| ATOM | 813 | CZ2  | TRP | X | 52 | 46.503 | 74.166 | 45.746 | 0.00 | 0.00 |
| ATOM | 814 | HZ2  | TRP | X | 52 | 46.636 | 74.224 | 44.676 | 0.00 | 0.00 |
| ATOM | 815 | CH2  | TRP | X | 52 | 45.983 | 72.925 | 46.218 | 0.00 | 0.00 |
| ATOM | 816 | HH2  | TRP | X | 52 | 45.819 | 72.056 | 45.598 | 0.00 | 0.00 |
| ATOM | 817 | CZ3  | TRP | X | 52 | 46.085 | 72.708 | 47.590 | 0.00 | 0.00 |
| ATOM | 818 | HZ3  | TRP | X | 52 | 45.997 | 71.727 | 48.033 | 0.00 | 0.00 |
| ATOM | 819 | CE3  | TRP | X | 52 | 46.333 | 73.807 | 48.435 | 0.00 | 0.00 |
| ATOM | 820 | HE3  | TRP | X | 52 | 46.299 | 73.632 | 49.500 | 0.00 | 0.00 |
| ATOM | 821 | CD2  | TRP | X | 52 | 46.873 | 75.062 | 47.969 | 0.00 | 0.00 |
| ATOM | 822 | C    | TRP | X | 52 | 45.811 | 78.820 | 49.426 | 0.00 | 0.00 |
| ATOM | 823 | O    | TRP | X | 52 | 45.126 | 78.625 | 48.478 | 0.00 | 0.00 |
| ATOM | 824 | N    | SER | X | 53 | 46.472 | 79.959 | 49.643 | 0.00 | 0.00 |
| ATOM | 825 | H    | SER | X | 53 | 47.128 | 79.991 | 50.410 | 0.00 | 0.00 |
| ATOM | 826 | CA   | SER | X | 53 | 46.365 | 81.119 | 48.769 | 0.00 | 0.00 |
| ATOM | 827 | HA   | SER | X | 53 | 45.437 | 81.180 | 48.201 | 0.00 | 0.00 |
| ATOM | 828 | CB   | SER | X | 53 | 46.265 | 82.396 | 49.592 | 0.00 | 0.00 |
| ATOM | 829 | HB2  | SER | X | 53 | 47.236 | 82.626 | 50.031 | 0.00 | 0.00 |
| ATOM | 830 | HB3  | SER | X | 53 | 45.975 | 83.238 | 48.963 | 0.00 | 0.00 |
| ATOM | 831 | OG   | SER | X | 53 | 45.281 | 82.221 | 50.627 | 0.00 | 0.00 |
| ATOM | 832 | HG   | SER | X | 53 | 45.529 | 81.445 | 51.134 | 0.00 | 0.00 |
| ATOM | 833 | C    | SER | X | 53 | 47.515 | 81.166 | 47.726 | 0.00 | 0.00 |
| ATOM | 834 | O    | SER | X | 53 | 48.635 | 80.732 | 47.975 | 0.00 | 0.00 |
| ATOM | 835 | N    | GLY | X | 54 | 47.342 | 81.822 | 46.515 | 0.00 | 0.00 |
| ATOM | 836 | H    | GLY | X | 54 | 46.431 | 82.224 | 46.348 | 0.00 | 0.00 |
| ATOM | 837 | CA   | GLY | X | 54 | 48.415 | 81.949 | 45.553 | 0.00 | 0.00 |
| ATOM | 838 | HA2  | GLY | X | 54 | 48.081 | 82.699 | 44.852 | 0.00 | 0.00 |
| ATOM | 839 | HA3  | GLY | X | 54 | 49.270 | 82.380 | 46.005 | 0.00 | 0.00 |
| ATOM | 840 | C    | GLY | X | 54 | 48.815 | 80.686 | 44.827 | 0.00 | 0.00 |
| ATOM | 841 | O    | GLY | X | 54 | 48.151 | 79.672 | 44.906 | 0.00 | 0.00 |
| ATOM | 842 | N    | VAL | X | 55 | 49.939 | 80.679 | 44.136 | 0.00 | 0.00 |
| ATOM | 843 | H    | VAL | X | 55 | 50.573 | 81.449 | 44.295 | 0.00 | 0.00 |
| ATOM | 844 | CA   | VAL | X | 55 | 50.427 | 79.465 | 43.373 | 0.00 | 0.00 |
| ATOM | 845 | HA   | VAL | X | 55 | 49.565 | 78.938 | 42.964 | 0.00 | 0.00 |
| ATOM | 846 | CB   | VAL | X | 55 | 51.285 | 79.738 | 42.186 | 0.00 | 0.00 |
| ATOM | 847 | HB   | VAL | X | 55 | 50.629 | 80.264 | 41.493 | 0.00 | 0.00 |
| ATOM | 848 | CG1  | VAL | X | 55 | 52.539 | 80.644 | 42.361 | 0.00 | 0.00 |
| ATOM | 849 | HG11 | VAL | X | 55 | 53.067 | 80.698 | 41.408 | 0.00 | 0.00 |
| ATOM | 850 | HG12 | VAL | X | 55 | 52.173 | 81.639 | 42.616 | 0.00 | 0.00 |
| ATOM | 851 | HG13 | VAL | X | 55 | 53.343 | 80.203 | 42.950 | 0.00 | 0.00 |
| ATOM | 852 | CG2  | VAL | X | 55 | 51.804 | 78.514 | 41.475 | 0.00 | 0.00 |
| ATOM | 853 | HG21 | VAL | X | 55 | 52.457 | 77.905 | 42.100 | 0.00 | 0.00 |
| ATOM | 854 | HG22 | VAL | X | 55 | 50.977 | 77.855 | 41.210 | 0.00 | 0.00 |
| ATOM | 855 | HG23 | VAL | X | 55 | 52.333 | 78.887 | 40.598 | 0.00 | 0.00 |
| ATOM | 856 | C    | VAL | X | 55 | 51.158 | 78.533 | 44.360 | 0.00 | 0.00 |
| ATOM | 857 | O    | VAL | X | 55 | 52.070 | 79.039 | 45.046 | 0.00 | 0.00 |
| ATOM | 858 | N    | VAL | X | 56 | 50.886 | 77.223 | 44.453 | 0.00 | 0.00 |
| ATOM | 859 | H    | VAL | X | 56 | 50.097 | 76.878 | 43.926 | 0.00 | 0.00 |
| ATOM | 860 | CA   | VAL | X | 56 | 51.774 | 76.220 | 45.111 | 0.00 | 0.00 |
| ATOM | 861 | HA   | VAL | X | 56 | 52.616 | 76.700 | 45.610 | 0.00 | 0.00 |
| ATOM | 862 | CB   | VAL | X | 56 | 51.153 | 75.281 | 46.235 | 0.00 | 0.00 |
| ATOM | 863 | HB   | VAL | X | 56 | 50.125 | 75.042 | 45.966 | 0.00 | 0.00 |
| ATOM | 864 | CG1  | VAL | X | 56 | 51.737 | 73.904 | 46.447 | 0.00 | 0.00 |
| ATOM | 865 | HG11 | VAL | X | 56 | 52.811 | 73.965 | 46.624 | 0.00 | 0.00 |
| ATOM | 866 | HG12 | VAL | X | 56 | 51.258 | 73.404 | 47.289 | 0.00 | 0.00 |
| ATOM | 867 | HG13 | VAL | X | 56 | 51.609 | 73.235 | 45.596 | 0.00 | 0.00 |
| ATOM | 868 | CG2  | VAL | X | 56 | 51.198 | 76.127 | 47.549 | 0.00 | 0.00 |
| ATOM | 869 | HG21 | VAL | X | 56 | 50.702 | 77.092 | 47.448 | 0.00 | 0.00 |
| ATOM | 870 | HG22 | VAL | X | 56 | 50.680 | 75.621 | 48.363 | 0.00 | 0.00 |
| ATOM | 871 | HG23 | VAL | X | 56 | 52.238 | 76.338 | 47.801 | 0.00 | 0.00 |
| ATOM | 872 | C    | VAL | X | 56 | 52.463 | 75.422 | 44.027 | 0.00 | 0.00 |
| ATOM | 873 | O    | VAL | X | 56 | 51.951 | 75.137 | 42.962 | 0.00 | 0.00 |
| ATOM | 874 | N    | ASP | X | 57 | 53.735 | 75.005 | 44.341 | 0.00 | 0.00 |
| ATOM | 875 | H    | ASP | X | 57 | 54.074 | 75.104 | 45.288 | 0.00 | 0.00 |
| ATOM | 876 | CA   | ASP | X | 57 | 54.572 | 74.189 | 43.446 | 0.00 | 0.00 |
| ATOM | 877 | HA   | ASP | X | 57 | 54.470 | 74.736 | 42.508 | 0.00 | 0.00 |
| ATOM | 878 | CB   | ASP | X | 57 | 55.944 | 74.004 | 44.083 | 0.00 | 0.00 |

|      |     |      |     |   |    |        |        |        |      |      |
|------|-----|------|-----|---|----|--------|--------|--------|------|------|
| ATOM | 879 | HB2  | ASP | X | 57 | 56.155 | 74.919 | 44.637 | 0.00 | 0.00 |
| ATOM | 880 | HB3  | ASP | X | 57 | 55.965 | 73.167 | 44.781 | 0.00 | 0.00 |
| ATOM | 881 | CG   | ASP | X | 57 | 56.959 | 73.724 | 42.932 | 0.00 | 0.00 |
| ATOM | 882 | OD1  | ASP | X | 57 | 56.875 | 72.636 | 42.313 | 0.00 | 0.00 |
| ATOM | 883 | OD2  | ASP | X | 57 | 57.857 | 74.586 | 42.783 | 0.00 | 0.00 |
| ATOM | 884 | C    | ASP | X | 57 | 53.955 | 72.805 | 43.333 | 0.00 | 0.00 |
| ATOM | 885 | O    | ASP | X | 57 | 53.484 | 72.202 | 44.220 | 0.00 | 0.00 |
| ATOM | 886 | N    | ALA | X | 58 | 54.009 | 72.378 | 42.045 | 0.00 | 0.00 |
| ATOM | 887 | H    | ALA | X | 58 | 54.375 | 73.104 | 41.445 | 0.00 | 0.00 |
| ATOM | 888 | CA   | ALA | X | 58 | 53.546 | 71.089 | 41.599 | 0.00 | 0.00 |
| ATOM | 889 | HA   | ALA | X | 58 | 53.563 | 70.442 | 42.476 | 0.00 | 0.00 |
| ATOM | 890 | CB   | ALA | X | 58 | 52.082 | 71.144 | 41.180 | 0.00 | 0.00 |
| ATOM | 891 | HB1  | ALA | X | 58 | 51.840 | 70.085 | 41.085 | 0.00 | 0.00 |
| ATOM | 892 | HB2  | ALA | X | 58 | 51.572 | 71.518 | 42.068 | 0.00 | 0.00 |
| ATOM | 893 | HB3  | ALA | X | 58 | 52.072 | 71.609 | 40.194 | 0.00 | 0.00 |
| ATOM | 894 | C    | ALA | X | 58 | 54.518 | 70.513 | 40.504 | 0.00 | 0.00 |
| ATOM | 895 | O    | ALA | X | 58 | 54.153 | 69.604 | 39.697 | 0.00 | 0.00 |
| ATOM | 896 | N    | THR | X | 59 | 55.740 | 70.969 | 40.379 | 0.00 | 0.00 |
| ATOM | 897 | H    | THR | X | 59 | 56.085 | 71.400 | 41.225 | 0.00 | 0.00 |
| ATOM | 898 | CA   | THR | X | 59 | 56.858 | 70.604 | 39.457 | 0.00 | 0.00 |
| ATOM | 899 | HA   | THR | X | 59 | 56.443 | 70.415 | 38.467 | 0.00 | 0.00 |
| ATOM | 900 | CB   | THR | X | 59 | 57.896 | 71.693 | 39.368 | 0.00 | 0.00 |
| ATOM | 901 | HB   | THR | X | 59 | 58.647 | 71.397 | 38.635 | 0.00 | 0.00 |
| ATOM | 902 | CG2  | THR | X | 59 | 57.337 | 73.081 | 38.989 | 0.00 | 0.00 |
| ATOM | 903 | HG21 | THR | X | 59 | 56.337 | 73.021 | 38.559 | 0.00 | 0.00 |
| ATOM | 904 | HG22 | THR | X | 59 | 57.200 | 73.714 | 39.866 | 0.00 | 0.00 |
| ATOM | 905 | HG23 | THR | X | 59 | 58.000 | 73.498 | 38.231 | 0.00 | 0.00 |
| ATOM | 906 | OG1  | THR | X | 59 | 58.516 | 71.781 | 40.626 | 0.00 | 0.00 |
| ATOM | 907 | HG1  | THR | X | 59 | 57.870 | 72.258 | 41.152 | 0.00 | 0.00 |
| ATOM | 908 | C    | THR | X | 59 | 57.600 | 69.322 | 39.777 | 0.00 | 0.00 |
| ATOM | 909 | O    | THR | X | 59 | 58.129 | 68.752 | 38.847 | 0.00 | 0.00 |
| ATOM | 910 | N    | THR | X | 60 | 57.488 | 68.841 | 41.038 | 0.00 | 0.00 |
| ATOM | 911 | H    | THR | X | 60 | 56.983 | 69.282 | 41.793 | 0.00 | 0.00 |
| ATOM | 912 | CA   | THR | X | 60 | 58.179 | 67.535 | 41.477 | 0.00 | 0.00 |
| ATOM | 913 | HA   | THR | X | 60 | 58.244 | 66.866 | 40.619 | 0.00 | 0.00 |
| ATOM | 914 | CB   | THR | X | 60 | 59.622 | 67.894 | 41.699 | 0.00 | 0.00 |
| ATOM | 915 | HB   | THR | X | 60 | 59.978 | 68.463 | 40.840 | 0.00 | 0.00 |
| ATOM | 916 | CG2  | THR | X | 60 | 59.886 | 68.703 | 42.945 | 0.00 | 0.00 |
| ATOM | 917 | HG21 | THR | X | 60 | 60.920 | 68.606 | 43.275 | 0.00 | 0.00 |
| ATOM | 918 | HG22 | THR | X | 60 | 59.695 | 69.739 | 42.665 | 0.00 | 0.00 |
| ATOM | 919 | HG23 | THR | X | 60 | 59.245 | 68.279 | 43.717 | 0.00 | 0.00 |
| ATOM | 920 | OG1  | THR | X | 60 | 60.384 | 66.703 | 41.700 | 0.00 | 0.00 |
| ATOM | 921 | HG1  | THR | X | 60 | 61.287 | 66.819 | 42.005 | 0.00 | 0.00 |
| ATOM | 922 | C    | THR | X | 60 | 57.519 | 66.729 | 42.541 | 0.00 | 0.00 |
| ATOM | 923 | O    | THR | X | 60 | 56.636 | 67.301 | 43.213 | 0.00 | 0.00 |
| ATOM | 924 | N    | PHE | X | 61 | 57.937 | 65.471 | 42.710 | 0.00 | 0.00 |
| ATOM | 925 | H    | PHE | X | 61 | 58.783 | 65.215 | 42.221 | 0.00 | 0.00 |
| ATOM | 926 | CA   | PHE | X | 61 | 57.207 | 64.477 | 43.418 | 0.00 | 0.00 |
| ATOM | 927 | HA   | PHE | X | 61 | 56.130 | 64.646 | 43.411 | 0.00 | 0.00 |
| ATOM | 928 | CB   | PHE | X | 61 | 57.642 | 63.110 | 42.905 | 0.00 | 0.00 |
| ATOM | 929 | HB2  | PHE | X | 61 | 58.707 | 63.025 | 43.119 | 0.00 | 0.00 |
| ATOM | 930 | HB3  | PHE | X | 61 | 57.142 | 62.338 | 43.490 | 0.00 | 0.00 |
| ATOM | 931 | CG   | PHE | X | 61 | 57.469 | 62.802 | 41.543 | 0.00 | 0.00 |
| ATOM | 932 | CD1  | PHE | X | 61 | 56.303 | 62.124 | 41.172 | 0.00 | 0.00 |
| ATOM | 933 | HD1  | PHE | X | 61 | 55.536 | 61.916 | 41.903 | 0.00 | 0.00 |
| ATOM | 934 | CE1  | PHE | X | 61 | 56.126 | 61.732 | 39.821 | 0.00 | 0.00 |
| ATOM | 935 | HE1  | PHE | X | 61 | 55.243 | 61.207 | 39.487 | 0.00 | 0.00 |
| ATOM | 936 | CZ   | PHE | X | 61 | 57.046 | 62.161 | 38.797 | 0.00 | 0.00 |
| ATOM | 937 | HZ   | PHE | X | 61 | 56.950 | 61.986 | 37.736 | 0.00 | 0.00 |
| ATOM | 938 | CE2  | PHE | X | 61 | 58.202 | 62.822 | 39.255 | 0.00 | 0.00 |
| ATOM | 939 | HE2  | PHE | X | 61 | 58.933 | 63.059 | 38.497 | 0.00 | 0.00 |
| ATOM | 940 | CD2  | PHE | X | 61 | 58.441 | 63.171 | 40.581 | 0.00 | 0.00 |
| ATOM | 941 | HD2  | PHE | X | 61 | 59.360 | 63.656 | 40.874 | 0.00 | 0.00 |
| ATOM | 942 | C    | PHE | X | 61 | 57.623 | 64.728 | 44.893 | 0.00 | 0.00 |
| ATOM | 943 | O    | PHE | X | 61 | 58.814 | 64.949 | 45.242 | 0.00 | 0.00 |
| ATOM | 944 | N    | GLN | X | 62 | 56.566 | 64.583 | 45.731 | 0.00 | 0.00 |
| ATOM | 945 | H    | GLN | X | 62 | 55.676 | 64.240 | 45.400 | 0.00 | 0.00 |
| ATOM | 946 | CA   | GLN | X | 62 | 56.665 | 64.755 | 47.149 | 0.00 | 0.00 |
| ATOM | 947 | HA   | GLN | X | 62 | 57.509 | 65.343 | 47.511 | 0.00 | 0.00 |
| ATOM | 948 | CB   | GLN | X | 62 | 55.447 | 65.497 | 47.773 | 0.00 | 0.00 |

|      |      |      |     |   |    |        |        |        |      |      |
|------|------|------|-----|---|----|--------|--------|--------|------|------|
| ATOM | 949  | HB2  | GLN | X | 62 | 54.638 | 64.824 | 47.488 | 0.00 | 0.00 |
| ATOM | 950  | HB3  | GLN | X | 62 | 55.668 | 65.600 | 48.836 | 0.00 | 0.00 |
| ATOM | 951  | CG   | GLN | X | 62 | 55.298 | 66.865 | 47.172 | 0.00 | 0.00 |
| ATOM | 952  | HG2  | GLN | X | 62 | 55.037 | 66.777 | 46.117 | 0.00 | 0.00 |
| ATOM | 953  | HG3  | GLN | X | 62 | 54.522 | 67.425 | 47.695 | 0.00 | 0.00 |
| ATOM | 954  | CD   | GLN | X | 62 | 56.513 | 67.800 | 47.337 | 0.00 | 0.00 |
| ATOM | 955  | OE1  | GLN | X | 62 | 57.209 | 67.817 | 48.356 | 0.00 | 0.00 |
| ATOM | 956  | NE2  | GLN | X | 62 | 56.839 | 68.514 | 46.322 | 0.00 | 0.00 |
| ATOM | 957  | HE21 | GLN | X | 62 | 57.692 | 69.055 | 46.311 | 0.00 | 0.00 |
| ATOM | 958  | HE22 | GLN | X | 62 | 56.312 | 68.454 | 45.463 | 0.00 | 0.00 |
| ATOM | 959  | C    | GLN | X | 62 | 56.993 | 63.338 | 47.724 | 0.00 | 0.00 |
| ATOM | 960  | O    | GLN | X | 62 | 57.212 | 62.356 | 46.957 | 0.00 | 0.00 |
| ATOM | 961  | N    | SER | X | 63 | 57.149 | 63.260 | 49.019 | 0.00 | 0.00 |
| ATOM | 962  | H    | SER | X | 63 | 57.061 | 64.105 | 49.564 | 0.00 | 0.00 |
| ATOM | 963  | CA   | SER | X | 63 | 57.425 | 61.988 | 49.680 | 0.00 | 0.00 |
| ATOM | 964  | HA   | SER | X | 63 | 58.395 | 61.685 | 49.285 | 0.00 | 0.00 |
| ATOM | 965  | CB   | SER | X | 63 | 57.747 | 62.242 | 51.187 | 0.00 | 0.00 |
| ATOM | 966  | HB2  | SER | X | 63 | 57.637 | 61.337 | 51.785 | 0.00 | 0.00 |
| ATOM | 967  | HB3  | SER | X | 63 | 58.793 | 62.520 | 51.318 | 0.00 | 0.00 |
| ATOM | 968  | OG   | SER | X | 63 | 57.062 | 63.314 | 51.826 | 0.00 | 0.00 |
| ATOM | 969  | HG   | SER | X | 63 | 56.287 | 63.005 | 52.301 | 0.00 | 0.00 |
| ATOM | 970  | C    | SER | X | 63 | 56.438 | 60.810 | 49.447 | 0.00 | 0.00 |
| ATOM | 971  | O    | SER | X | 63 | 55.240 | 61.025 | 49.227 | 0.00 | 0.00 |
| ATOM | 972  | N    | VAL | X | 64 | 56.934 | 59.536 | 49.400 | 0.00 | 0.00 |
| ATOM | 973  | H    | VAL | X | 64 | 57.909 | 59.352 | 49.593 | 0.00 | 0.00 |
| ATOM | 974  | CA   | VAL | X | 64 | 56.117 | 58.374 | 49.360 | 0.00 | 0.00 |
| ATOM | 975  | HA   | VAL | X | 64 | 55.119 | 58.728 | 49.101 | 0.00 | 0.00 |
| ATOM | 976  | CB   | VAL | X | 64 | 56.571 | 57.449 | 48.258 | 0.00 | 0.00 |
| ATOM | 977  | HB   | VAL | X | 64 | 56.803 | 57.998 | 47.346 | 0.00 | 0.00 |
| ATOM | 978  | CG1  | VAL | X | 64 | 57.915 | 56.755 | 48.581 | 0.00 | 0.00 |
| ATOM | 979  | HG11 | VAL | X | 64 | 58.488 | 57.183 | 49.404 | 0.00 | 0.00 |
| ATOM | 980  | HG12 | VAL | X | 64 | 57.746 | 55.734 | 48.924 | 0.00 | 0.00 |
| ATOM | 981  | HG13 | VAL | X | 64 | 58.443 | 56.694 | 47.630 | 0.00 | 0.00 |
| ATOM | 982  | CG2  | VAL | X | 64 | 55.448 | 56.584 | 47.724 | 0.00 | 0.00 |
| ATOM | 983  | HG21 | VAL | X | 64 | 54.500 | 57.118 | 47.666 | 0.00 | 0.00 |
| ATOM | 984  | HG22 | VAL | X | 64 | 55.709 | 56.215 | 46.731 | 0.00 | 0.00 |
| ATOM | 985  | HG23 | VAL | X | 64 | 55.431 | 55.701 | 48.362 | 0.00 | 0.00 |
| ATOM | 986  | C    | VAL | X | 64 | 56.108 | 57.712 | 50.743 | 0.00 | 0.00 |
| ATOM | 987  | O    | VAL | X | 64 | 56.985 | 57.923 | 51.621 | 0.00 | 0.00 |
| ATOM | 988  | N    | CYX | X | 65 | 55.059 | 56.938 | 50.907 | 0.00 | 0.00 |
| ATOM | 989  | H    | CYX | X | 65 | 54.395 | 56.728 | 50.176 | 0.00 | 0.00 |
| ATOM | 990  | CA   | CYX | X | 65 | 54.821 | 56.374 | 52.279 | 0.00 | 0.00 |
| ATOM | 991  | HA   | CYX | X | 65 | 54.806 | 57.143 | 53.052 | 0.00 | 0.00 |
| ATOM | 992  | CB   | CYX | X | 65 | 53.426 | 55.676 | 52.293 | 0.00 | 0.00 |
| ATOM | 993  | HB2  | CYX | X | 65 | 53.434 | 54.825 | 51.612 | 0.00 | 0.00 |
| ATOM | 994  | HB3  | CYX | X | 65 | 53.113 | 55.395 | 53.299 | 0.00 | 0.00 |
| ATOM | 995  | SG   | CYX | X | 65 | 52.120 | 56.692 | 51.632 | 0.00 | 0.00 |
| ATOM | 996  | C    | CYX | X | 65 | 55.873 | 55.376 | 52.806 | 0.00 | 0.00 |
| ATOM | 997  | O    | CYX | X | 65 | 56.764 | 54.970 | 52.089 | 0.00 | 0.00 |
| ATOM | 998  | N    | TYR | X | 66 | 55.815 | 55.036 | 54.044 | 0.00 | 0.00 |
| ATOM | 999  | H    | TYR | X | 66 | 55.107 | 55.427 | 54.648 | 0.00 | 0.00 |
| ATOM | 1000 | CA   | TYR | X | 66 | 56.808 | 54.194 | 54.684 | 0.00 | 0.00 |
| ATOM | 1001 | HA   | TYR | X | 66 | 57.807 | 54.445 | 54.325 | 0.00 | 0.00 |
| ATOM | 1002 | CB   | TYR | X | 66 | 56.696 | 54.293 | 56.266 | 0.00 | 0.00 |
| ATOM | 1003 | HB2  | TYR | X | 66 | 55.936 | 55.024 | 56.540 | 0.00 | 0.00 |
| ATOM | 1004 | HB3  | TYR | X | 66 | 56.396 | 53.299 | 56.598 | 0.00 | 0.00 |
| ATOM | 1005 | CG   | TYR | X | 66 | 58.032 | 54.650 | 56.901 | 0.00 | 0.00 |
| ATOM | 1006 | CD1  | TYR | X | 66 | 58.320 | 55.989 | 57.122 | 0.00 | 0.00 |
| ATOM | 1007 | HD1  | TYR | X | 66 | 57.600 | 56.760 | 56.890 | 0.00 | 0.00 |
| ATOM | 1008 | CE1  | TYR | X | 66 | 59.608 | 56.334 | 57.572 | 0.00 | 0.00 |
| ATOM | 1009 | HE1  | TYR | X | 66 | 59.947 | 57.340 | 57.769 | 0.00 | 0.00 |
| ATOM | 1010 | CZ   | TYR | X | 66 | 60.497 | 55.302 | 57.923 | 0.00 | 0.00 |
| ATOM | 1011 | OH   | TYR | X | 66 | 61.761 | 55.616 | 58.398 | 0.00 | 0.00 |
| ATOM | 1012 | HH   | TYR | X | 66 | 61.972 | 56.550 | 58.331 | 0.00 | 0.00 |
| ATOM | 1013 | CE2  | TYR | X | 66 | 60.240 | 53.913 | 57.681 | 0.00 | 0.00 |
| ATOM | 1014 | HE2  | TYR | X | 66 | 60.972 | 53.138 | 57.856 | 0.00 | 0.00 |
| ATOM | 1015 | CD2  | TYR | X | 66 | 58.919 | 53.632 | 57.223 | 0.00 | 0.00 |
| ATOM | 1016 | HD2  | TYR | X | 66 | 58.665 | 52.594 | 57.068 | 0.00 | 0.00 |
| ATOM | 1017 | C    | TYR | X | 66 | 56.628 | 52.709 | 54.188 | 0.00 | 0.00 |
| ATOM | 1018 | O    | TYR | X | 66 | 55.476 | 52.283 | 54.058 | 0.00 | 0.00 |

|      |      |      |     |   |    |        |        |        |      |      |
|------|------|------|-----|---|----|--------|--------|--------|------|------|
| ATOM | 1019 | N    | GLN | X | 67 | 57.702 | 51.911 | 53.898 | 0.00 | 0.00 |
| ATOM | 1020 | H    | GLN | X | 67 | 58.642 | 52.177 | 54.155 | 0.00 | 0.00 |
| ATOM | 1021 | CA   | GLN | X | 67 | 57.574 | 50.553 | 53.293 | 0.00 | 0.00 |
| ATOM | 1022 | HA   | GLN | X | 67 | 56.669 | 50.040 | 53.618 | 0.00 | 0.00 |
| ATOM | 1023 | CB   | GLN | X | 67 | 57.405 | 50.780 | 51.742 | 0.00 | 0.00 |
| ATOM | 1024 | HB2  | GLN | X | 67 | 57.672 | 49.818 | 51.304 | 0.00 | 0.00 |
| ATOM | 1025 | HB3  | GLN | X | 67 | 56.353 | 51.062 | 51.701 | 0.00 | 0.00 |
| ATOM | 1026 | CG   | GLN | X | 67 | 58.220 | 51.788 | 50.983 | 0.00 | 0.00 |
| ATOM | 1027 | HG2  | GLN | X | 67 | 58.271 | 52.646 | 51.652 | 0.00 | 0.00 |
| ATOM | 1028 | HG3  | GLN | X | 67 | 59.215 | 51.368 | 50.838 | 0.00 | 0.00 |
| ATOM | 1029 | CD   | GLN | X | 67 | 57.578 | 52.169 | 49.664 | 0.00 | 0.00 |
| ATOM | 1030 | OE1  | GLN | X | 67 | 57.616 | 51.468 | 48.691 | 0.00 | 0.00 |
| ATOM | 1031 | NE2  | GLN | X | 67 | 57.018 | 53.349 | 49.612 | 0.00 | 0.00 |
| ATOM | 1032 | HE21 | GLN | X | 67 | 56.541 | 53.596 | 48.757 | 0.00 | 0.00 |
| ATOM | 1033 | HE22 | GLN | X | 67 | 56.873 | 53.816 | 50.496 | 0.00 | 0.00 |
| ATOM | 1034 | C    | GLN | X | 67 | 58.771 | 49.657 | 53.518 | 0.00 | 0.00 |
| ATOM | 1035 | O    | GLN | X | 67 | 59.772 | 50.204 | 54.009 | 0.00 | 0.00 |
| ATOM | 1036 | N    | TYR | X | 68 | 58.661 | 48.360 | 53.255 | 0.00 | 0.00 |
| ATOM | 1037 | H    | TYR | X | 68 | 57.826 | 47.877 | 52.956 | 0.00 | 0.00 |
| ATOM | 1038 | CA   | TYR | X | 68 | 59.811 | 47.464 | 53.367 | 0.00 | 0.00 |
| ATOM | 1039 | HA   | TYR | X | 68 | 60.423 | 47.633 | 54.254 | 0.00 | 0.00 |
| ATOM | 1040 | CB   | TYR | X | 68 | 59.222 | 46.052 | 53.486 | 0.00 | 0.00 |
| ATOM | 1041 | HB2  | TYR | X | 68 | 58.531 | 45.922 | 54.319 | 0.00 | 0.00 |
| ATOM | 1042 | HB3  | TYR | X | 68 | 58.673 | 45.886 | 52.559 | 0.00 | 0.00 |
| ATOM | 1043 | CG   | TYR | X | 68 | 60.297 | 45.045 | 53.722 | 0.00 | 0.00 |
| ATOM | 1044 | CD1  | TYR | X | 68 | 60.980 | 45.053 | 54.958 | 0.00 | 0.00 |
| ATOM | 1045 | HD1  | TYR | X | 68 | 60.815 | 45.867 | 55.649 | 0.00 | 0.00 |
| ATOM | 1046 | CE1  | TYR | X | 68 | 61.879 | 43.989 | 55.220 | 0.00 | 0.00 |
| ATOM | 1047 | HE1  | TYR | X | 68 | 62.308 | 43.984 | 56.211 | 0.00 | 0.00 |
| ATOM | 1048 | CZ   | TYR | X | 68 | 62.211 | 43.028 | 54.260 | 0.00 | 0.00 |
| ATOM | 1049 | OH   | TYR | X | 68 | 63.209 | 42.158 | 54.541 | 0.00 | 0.00 |
| ATOM | 1050 | HH   | TYR | X | 68 | 63.502 | 42.400 | 55.422 | 0.00 | 0.00 |
| ATOM | 1051 | CE2  | TYR | X | 68 | 61.643 | 43.144 | 52.972 | 0.00 | 0.00 |
| ATOM | 1052 | HE2  | TYR | X | 68 | 62.028 | 42.521 | 52.179 | 0.00 | 0.00 |
| ATOM | 1053 | CD2  | TYR | X | 68 | 60.617 | 44.075 | 52.731 | 0.00 | 0.00 |
| ATOM | 1054 | HD2  | TYR | X | 68 | 60.079 | 44.239 | 51.809 | 0.00 | 0.00 |
| ATOM | 1055 | C    | TYR | X | 68 | 60.737 | 47.619 | 52.117 | 0.00 | 0.00 |
| ATOM | 1056 | O    | TYR | X | 68 | 60.304 | 47.546 | 50.988 | 0.00 | 0.00 |
| ATOM | 1057 | N    | VAL | X | 69 | 62.067 | 47.792 | 52.261 | 0.00 | 0.00 |
| ATOM | 1058 | H    | VAL | X | 69 | 62.420 | 47.948 | 53.194 | 0.00 | 0.00 |
| ATOM | 1059 | CA   | VAL | X | 69 | 63.042 | 48.246 | 51.290 | 0.00 | 0.00 |
| ATOM | 1060 | HA   | VAL | X | 69 | 62.475 | 48.259 | 50.359 | 0.00 | 0.00 |
| ATOM | 1061 | CB   | VAL | X | 69 | 63.621 | 49.599 | 51.633 | 0.00 | 0.00 |
| ATOM | 1062 | HB   | VAL | X | 69 | 64.202 | 49.854 | 50.746 | 0.00 | 0.00 |
| ATOM | 1063 | CG1  | VAL | X | 69 | 62.466 | 50.630 | 51.498 | 0.00 | 0.00 |
| ATOM | 1064 | HG11 | VAL | X | 69 | 61.791 | 50.358 | 50.686 | 0.00 | 0.00 |
| ATOM | 1065 | HG12 | VAL | X | 69 | 61.836 | 50.710 | 52.383 | 0.00 | 0.00 |
| ATOM | 1066 | HG13 | VAL | X | 69 | 62.899 | 51.605 | 51.274 | 0.00 | 0.00 |
| ATOM | 1067 | CG2  | VAL | X | 69 | 64.371 | 49.613 | 53.007 | 0.00 | 0.00 |
| ATOM | 1068 | HG21 | VAL | X | 69 | 63.622 | 49.491 | 53.791 | 0.00 | 0.00 |
| ATOM | 1069 | HG22 | VAL | X | 69 | 64.986 | 48.735 | 53.204 | 0.00 | 0.00 |
| ATOM | 1070 | HG23 | VAL | X | 69 | 65.018 | 50.489 | 53.034 | 0.00 | 0.00 |
| ATOM | 1071 | C    | VAL | X | 69 | 64.227 | 47.199 | 51.132 | 0.00 | 0.00 |
| ATOM | 1072 | O    | VAL | X | 69 | 65.080 | 47.411 | 50.267 | 0.00 | 0.00 |
| ATOM | 1073 | N    | ASP | X | 70 | 64.301 | 46.145 | 51.941 | 0.00 | 0.00 |
| ATOM | 1074 | H    | ASP | X | 70 | 63.613 | 46.125 | 52.681 | 0.00 | 0.00 |
| ATOM | 1075 | CA   | ASP | X | 70 | 65.321 | 45.059 | 51.988 | 0.00 | 0.00 |
| ATOM | 1076 | HA   | ASP | X | 70 | 66.245 | 45.477 | 51.589 | 0.00 | 0.00 |
| ATOM | 1077 | CB   | ASP | X | 70 | 65.460 | 44.502 | 53.353 | 0.00 | 0.00 |
| ATOM | 1078 | HB2  | ASP | X | 70 | 64.491 | 44.364 | 53.832 | 0.00 | 0.00 |
| ATOM | 1079 | HB3  | ASP | X | 70 | 65.970 | 43.539 | 53.329 | 0.00 | 0.00 |
| ATOM | 1080 | CG   | ASP | X | 70 | 66.274 | 45.499 | 54.218 | 0.00 | 0.00 |
| ATOM | 1081 | OD1  | ASP | X | 70 | 65.701 | 46.227 | 55.044 | 0.00 | 0.00 |
| ATOM | 1082 | OD2  | ASP | X | 70 | 67.556 | 45.401 | 54.144 | 0.00 | 0.00 |
| ATOM | 1083 | C    | ASP | X | 70 | 64.968 | 43.987 | 51.049 | 0.00 | 0.00 |
| ATOM | 1084 | O    | ASP | X | 70 | 63.810 | 43.564 | 50.969 | 0.00 | 0.00 |
| ATOM | 1085 | N    | THR | X | 71 | 65.926 | 43.532 | 50.238 | 0.00 | 0.00 |
| ATOM | 1086 | H    | THR | X | 71 | 66.887 | 43.809 | 50.379 | 0.00 | 0.00 |
| ATOM | 1087 | CA   | THR | X | 71 | 65.708 | 42.616 | 49.064 | 0.00 | 0.00 |
| ATOM | 1088 | HA   | THR | X | 71 | 64.673 | 42.276 | 49.109 | 0.00 | 0.00 |

|      |      |      |     |   |    |        |        |        |      |      |
|------|------|------|-----|---|----|--------|--------|--------|------|------|
| ATOM | 1089 | CB   | THR | X | 71 | 66.005 | 43.373 | 47.759 | 0.00 | 0.00 |
| ATOM | 1090 | HB   | THR | X | 71 | 66.024 | 42.693 | 46.907 | 0.00 | 0.00 |
| ATOM | 1091 | CG2  | THR | X | 71 | 65.092 | 44.555 | 47.505 | 0.00 | 0.00 |
| ATOM | 1092 | HG21 | THR | X | 71 | 65.346 | 45.311 | 48.247 | 0.00 | 0.00 |
| ATOM | 1093 | HG22 | THR | X | 71 | 65.298 | 44.969 | 46.518 | 0.00 | 0.00 |
| ATOM | 1094 | HG23 | THR | X | 71 | 64.028 | 44.321 | 47.519 | 0.00 | 0.00 |
| ATOM | 1095 | OG1  | THR | X | 71 | 67.354 | 43.821 | 47.794 | 0.00 | 0.00 |
| ATOM | 1096 | HG1  | THR | X | 71 | 67.479 | 44.746 | 48.020 | 0.00 | 0.00 |
| ATOM | 1097 | C    | THR | X | 71 | 66.524 | 41.341 | 49.066 | 0.00 | 0.00 |
| ATOM | 1098 | O    | THR | X | 71 | 67.515 | 41.196 | 49.720 | 0.00 | 0.00 |
| ATOM | 1099 | N    | LEU | X | 72 | 66.095 | 40.401 | 48.218 | 0.00 | 0.00 |
| ATOM | 1100 | H    | LEU | X | 72 | 65.388 | 40.662 | 47.545 | 0.00 | 0.00 |
| ATOM | 1101 | CA   | LEU | X | 72 | 66.789 | 39.124 | 47.869 | 0.00 | 0.00 |
| ATOM | 1102 | HA   | LEU | X | 72 | 67.148 | 38.733 | 48.821 | 0.00 | 0.00 |
| ATOM | 1103 | CB   | LEU | X | 72 | 65.812 | 38.131 | 47.281 | 0.00 | 0.00 |
| ATOM | 1104 | HB2  | LEU | X | 72 | 65.026 | 38.011 | 48.026 | 0.00 | 0.00 |
| ATOM | 1105 | HB3  | LEU | X | 72 | 65.369 | 38.577 | 46.390 | 0.00 | 0.00 |
| ATOM | 1106 | CG   | LEU | X | 72 | 66.466 | 36.766 | 46.946 | 0.00 | 0.00 |
| ATOM | 1107 | HG   | LEU | X | 72 | 67.149 | 36.933 | 46.113 | 0.00 | 0.00 |
| ATOM | 1108 | CD1  | LEU | X | 72 | 67.278 | 36.149 | 48.077 | 0.00 | 0.00 |
| ATOM | 1109 | HD11 | LEU | X | 72 | 68.171 | 36.723 | 48.327 | 0.00 | 0.00 |
| ATOM | 1110 | HD12 | LEU | X | 72 | 66.670 | 36.067 | 48.978 | 0.00 | 0.00 |
| ATOM | 1111 | HD13 | LEU | X | 72 | 67.457 | 35.110 | 47.800 | 0.00 | 0.00 |
| ATOM | 1112 | CD2  | LEU | X | 72 | 65.429 | 35.747 | 46.476 | 0.00 | 0.00 |
| ATOM | 1113 | HD21 | LEU | X | 72 | 64.738 | 35.466 | 47.271 | 0.00 | 0.00 |
| ATOM | 1114 | HD22 | LEU | X | 72 | 64.898 | 36.223 | 45.651 | 0.00 | 0.00 |
| ATOM | 1115 | HD23 | LEU | X | 72 | 65.839 | 34.826 | 46.062 | 0.00 | 0.00 |
| ATOM | 1116 | C    | LEU | X | 72 | 67.977 | 39.375 | 46.910 | 0.00 | 0.00 |
| ATOM | 1117 | O    | LEU | X | 72 | 68.920 | 38.660 | 46.987 | 0.00 | 0.00 |
| ATOM | 1118 | N    | TYR | X | 73 | 67.701 | 40.272 | 45.929 | 0.00 | 0.00 |
| ATOM | 1119 | H    | TYR | X | 73 | 66.777 | 40.680 | 45.925 | 0.00 | 0.00 |
| ATOM | 1120 | CA   | TYR | X | 73 | 68.578 | 40.638 | 44.772 | 0.00 | 0.00 |
| ATOM | 1121 | HA   | TYR | X | 73 | 69.482 | 40.042 | 44.896 | 0.00 | 0.00 |
| ATOM | 1122 | CB   | TYR | X | 73 | 67.802 | 40.233 | 43.513 | 0.00 | 0.00 |
| ATOM | 1123 | HB2  | TYR | X | 73 | 66.882 | 40.816 | 43.535 | 0.00 | 0.00 |
| ATOM | 1124 | HB3  | TYR | X | 73 | 68.426 | 40.553 | 42.678 | 0.00 | 0.00 |
| ATOM | 1125 | CG   | TYR | X | 73 | 67.432 | 38.716 | 43.341 | 0.00 | 0.00 |
| ATOM | 1126 | CD1  | TYR | X | 73 | 68.541 | 37.811 | 43.161 | 0.00 | 0.00 |
| ATOM | 1127 | HD1  | TYR | X | 73 | 69.558 | 38.143 | 43.312 | 0.00 | 0.00 |
| ATOM | 1128 | CE1  | TYR | X | 73 | 68.240 | 36.438 | 42.951 | 0.00 | 0.00 |
| ATOM | 1129 | HE1  | TYR | X | 73 | 69.066 | 35.743 | 42.930 | 0.00 | 0.00 |
| ATOM | 1130 | CZ   | TYR | X | 73 | 66.896 | 36.034 | 42.841 | 0.00 | 0.00 |
| ATOM | 1131 | OH   | TYR | X | 73 | 66.564 | 34.798 | 42.501 | 0.00 | 0.00 |
| ATOM | 1132 | HH   | TYR | X | 73 | 65.617 | 34.658 | 42.563 | 0.00 | 0.00 |
| ATOM | 1133 | CE2  | TYR | X | 73 | 65.862 | 36.947 | 42.828 | 0.00 | 0.00 |
| ATOM | 1134 | HE2  | TYR | X | 73 | 64.887 | 36.486 | 42.779 | 0.00 | 0.00 |
| ATOM | 1135 | CD2  | TYR | X | 73 | 66.080 | 38.298 | 43.187 | 0.00 | 0.00 |
| ATOM | 1136 | HD2  | TYR | X | 73 | 65.294 | 39.026 | 43.321 | 0.00 | 0.00 |
| ATOM | 1137 | C    | TYR | X | 73 | 68.961 | 42.142 | 44.867 | 0.00 | 0.00 |
| ATOM | 1138 | O    | TYR | X | 73 | 68.608 | 42.940 | 43.969 | 0.00 | 0.00 |
| ATOM | 1139 | N    | PRO | X | 74 | 69.801 | 42.578 | 45.870 | 0.00 | 0.00 |
| ATOM | 1140 | CD   | PRO | X | 74 | 70.461 | 41.748 | 46.905 | 0.00 | 0.00 |
| ATOM | 1141 | HD2  | PRO | X | 74 | 70.931 | 40.789 | 46.687 | 0.00 | 0.00 |
| ATOM | 1142 | HD3  | PRO | X | 74 | 69.682 | 41.530 | 47.636 | 0.00 | 0.00 |
| ATOM | 1143 | CG   | PRO | X | 74 | 71.554 | 42.582 | 47.523 | 0.00 | 0.00 |
| ATOM | 1144 | HG2  | PRO | X | 74 | 72.558 | 42.466 | 47.115 | 0.00 | 0.00 |
| ATOM | 1145 | HG3  | PRO | X | 74 | 71.500 | 42.367 | 48.590 | 0.00 | 0.00 |
| ATOM | 1146 | CB   | PRO | X | 74 | 71.064 | 44.001 | 47.278 | 0.00 | 0.00 |
| ATOM | 1147 | HB2  | PRO | X | 74 | 71.916 | 44.680 | 47.302 | 0.00 | 0.00 |
| ATOM | 1148 | HB3  | PRO | X | 74 | 70.394 | 44.405 | 48.037 | 0.00 | 0.00 |
| ATOM | 1149 | CA   | PRO | X | 74 | 70.309 | 43.911 | 45.972 | 0.00 | 0.00 |
| ATOM | 1150 | HA   | PRO | X | 74 | 69.488 | 44.626 | 46.023 | 0.00 | 0.00 |
| ATOM | 1151 | C    | PRO | X | 74 | 71.129 | 44.318 | 44.785 | 0.00 | 0.00 |
| ATOM | 1152 | O    | PRO | X | 74 | 72.133 | 43.766 | 44.400 | 0.00 | 0.00 |
| ATOM | 1153 | N    | GLY | X | 75 | 70.747 | 45.466 | 44.231 | 0.00 | 0.00 |
| ATOM | 1154 | H    | GLY | X | 75 | 69.934 | 45.910 | 44.634 | 0.00 | 0.00 |
| ATOM | 1155 | CA   | GLY | X | 75 | 71.589 | 46.236 | 43.347 | 0.00 | 0.00 |
| ATOM | 1156 | HA2  | GLY | X | 75 | 71.258 | 47.257 | 43.434 | 0.00 | 0.00 |
| ATOM | 1157 | HA3  | GLY | X | 75 | 72.611 | 46.091 | 43.715 | 0.00 | 0.00 |
| ATOM | 1158 | C    | GLY | X | 75 | 71.533 | 45.797 | 41.852 | 0.00 | 0.00 |

|      |      |      |     |   |    |        |        |        |      |      |
|------|------|------|-----|---|----|--------|--------|--------|------|------|
| ATOM | 1159 | O    | GLY | X | 75 | 72.184 | 46.472 | 41.052 | 0.00 | 0.00 |
| ATOM | 1160 | N    | PHE | X | 76 | 70.900 | 44.638 | 41.543 | 0.00 | 0.00 |
| ATOM | 1161 | H    | PHE | X | 76 | 70.567 | 44.260 | 42.418 | 0.00 | 0.00 |
| ATOM | 1162 | CA   | PHE | X | 76 | 70.427 | 44.044 | 40.260 | 0.00 | 0.00 |
| ATOM | 1163 | HA   | PHE | X | 76 | 71.311 | 43.737 | 39.702 | 0.00 | 0.00 |
| ATOM | 1164 | CB   | PHE | X | 76 | 69.628 | 42.734 | 40.578 | 0.00 | 0.00 |
| ATOM | 1165 | HB2  | PHE | X | 76 | 70.331 | 42.072 | 41.084 | 0.00 | 0.00 |
| ATOM | 1166 | HB3  | PHE | X | 76 | 68.894 | 42.974 | 41.347 | 0.00 | 0.00 |
| ATOM | 1167 | CG   | PHE | X | 76 | 69.126 | 41.947 | 39.444 | 0.00 | 0.00 |
| ATOM | 1168 | CD1  | PHE | X | 76 | 70.071 | 41.561 | 38.480 | 0.00 | 0.00 |
| ATOM | 1169 | HD1  | PHE | X | 76 | 71.076 | 41.928 | 38.628 | 0.00 | 0.00 |
| ATOM | 1170 | CE1  | PHE | X | 76 | 69.631 | 40.886 | 37.326 | 0.00 | 0.00 |
| ATOM | 1171 | HE1  | PHE | X | 76 | 70.333 | 40.731 | 36.520 | 0.00 | 0.00 |
| ATOM | 1172 | CZ   | PHE | X | 76 | 68.296 | 40.572 | 37.144 | 0.00 | 0.00 |
| ATOM | 1173 | HZ   | PHE | X | 76 | 68.042 | 39.998 | 36.265 | 0.00 | 0.00 |
| ATOM | 1174 | CE2  | PHE | X | 76 | 67.329 | 41.065 | 38.095 | 0.00 | 0.00 |
| ATOM | 1175 | HE2  | PHE | X | 76 | 66.270 | 40.864 | 38.029 | 0.00 | 0.00 |
| ATOM | 1176 | CD2  | PHE | X | 76 | 67.770 | 41.731 | 39.283 | 0.00 | 0.00 |
| ATOM | 1177 | HD2  | PHE | X | 76 | 67.099 | 41.933 | 40.105 | 0.00 | 0.00 |
| ATOM | 1178 | C    | PHE | X | 76 | 69.540 | 45.066 | 39.516 | 0.00 | 0.00 |
| ATOM | 1179 | O    | PHE | X | 76 | 68.585 | 45.585 | 40.101 | 0.00 | 0.00 |
| ATOM | 1180 | N    | GLU | X | 77 | 69.820 | 45.297 | 38.212 | 0.00 | 0.00 |
| ATOM | 1181 | H    | GLU | X | 77 | 70.619 | 44.820 | 37.821 | 0.00 | 0.00 |
| ATOM | 1182 | CA   | GLU | X | 77 | 69.099 | 46.238 | 37.304 | 0.00 | 0.00 |
| ATOM | 1183 | HA   | GLU | X | 77 | 69.368 | 47.200 | 37.739 | 0.00 | 0.00 |
| ATOM | 1184 | CB   | GLU | X | 77 | 69.729 | 46.208 | 35.915 | 0.00 | 0.00 |
| ATOM | 1185 | HB2  | GLU | X | 77 | 70.807 | 46.049 | 35.952 | 0.00 | 0.00 |
| ATOM | 1186 | HB3  | GLU | X | 77 | 69.357 | 45.331 | 35.385 | 0.00 | 0.00 |
| ATOM | 1187 | CG   | GLU | X | 77 | 69.444 | 47.422 | 35.062 | 0.00 | 0.00 |
| ATOM | 1188 | HG2  | GLU | X | 77 | 68.375 | 47.519 | 34.874 | 0.00 | 0.00 |
| ATOM | 1189 | HG3  | GLU | X | 77 | 69.930 | 48.270 | 35.545 | 0.00 | 0.00 |
| ATOM | 1190 | CD   | GLU | X | 77 | 70.168 | 47.276 | 33.735 | 0.00 | 0.00 |
| ATOM | 1191 | OE1  | GLU | X | 77 | 69.382 | 47.179 | 32.746 | 0.00 | 0.00 |
| ATOM | 1192 | OE2  | GLU | X | 77 | 71.346 | 47.707 | 33.592 | 0.00 | 0.00 |
| ATOM | 1193 | C    | GLU | X | 77 | 67.557 | 45.982 | 37.185 | 0.00 | 0.00 |
| ATOM | 1194 | O    | GLU | X | 77 | 66.787 | 46.953 | 36.980 | 0.00 | 0.00 |
| ATOM | 1195 | N    | GLY | X | 78 | 67.150 | 44.707 | 37.339 | 0.00 | 0.00 |
| ATOM | 1196 | H    | GLY | X | 78 | 67.796 | 43.982 | 37.614 | 0.00 | 0.00 |
| ATOM | 1197 | CA   | GLY | X | 78 | 65.768 | 44.277 | 37.432 | 0.00 | 0.00 |
| ATOM | 1198 | HA2  | GLY | X | 78 | 64.935 | 44.841 | 36.844 | 0.00 | 0.00 |
| ATOM | 1199 | HA3  | GLY | X | 78 | 65.773 | 43.240 | 37.098 | 0.00 | 0.00 |
| ATOM | 1200 | C    | GLY | X | 78 | 65.164 | 44.413 | 38.802 | 0.00 | 0.00 |
| ATOM | 1201 | O    | GLY | X | 78 | 63.972 | 44.065 | 38.982 | 0.00 | 0.00 |
| ATOM | 1202 | N    | THR | X | 79 | 65.907 | 44.800 | 39.825 | 0.00 | 0.00 |
| ATOM | 1203 | H    | THR | X | 79 | 66.870 | 44.991 | 39.590 | 0.00 | 0.00 |
| ATOM | 1204 | CA   | THR | X | 79 | 65.399 | 45.103 | 41.165 | 0.00 | 0.00 |
| ATOM | 1205 | HA   | THR | X | 79 | 64.413 | 44.721 | 41.429 | 0.00 | 0.00 |
| ATOM | 1206 | CB   | THR | X | 79 | 66.407 | 44.565 | 42.231 | 0.00 | 0.00 |
| ATOM | 1207 | HB   | THR | X | 79 | 67.402 | 44.998 | 42.136 | 0.00 | 0.00 |
| ATOM | 1208 | CG2  | THR | X | 79 | 65.902 | 44.793 | 43.668 | 0.00 | 0.00 |
| ATOM | 1209 | HG21 | THR | X | 79 | 64.918 | 44.335 | 43.757 | 0.00 | 0.00 |
| ATOM | 1210 | HG22 | THR | X | 79 | 66.588 | 44.308 | 44.363 | 0.00 | 0.00 |
| ATOM | 1211 | HG23 | THR | X | 79 | 65.956 | 45.835 | 43.985 | 0.00 | 0.00 |
| ATOM | 1212 | OG1  | THR | X | 79 | 66.496 | 43.166 | 42.019 | 0.00 | 0.00 |
| ATOM | 1213 | HG1  | THR | X | 79 | 67.029 | 42.881 | 42.765 | 0.00 | 0.00 |
| ATOM | 1214 | C    | THR | X | 79 | 65.311 | 46.620 | 41.294 | 0.00 | 0.00 |
| ATOM | 1215 | O    | THR | X | 79 | 64.302 | 47.180 | 41.801 | 0.00 | 0.00 |
| ATOM | 1216 | N    | GLU | X | 80 | 66.465 | 47.259 | 41.006 | 0.00 | 0.00 |
| ATOM | 1217 | H    | GLU | X | 80 | 67.237 | 46.659 | 40.755 | 0.00 | 0.00 |
| ATOM | 1218 | CA   | GLU | X | 80 | 66.755 | 48.690 | 41.169 | 0.00 | 0.00 |
| ATOM | 1219 | HA   | GLU | X | 80 | 66.577 | 49.004 | 42.197 | 0.00 | 0.00 |
| ATOM | 1220 | CB   | GLU | X | 80 | 68.183 | 49.066 | 40.743 | 0.00 | 0.00 |
| ATOM | 1221 | HB2  | GLU | X | 80 | 68.371 | 48.567 | 39.792 | 0.00 | 0.00 |
| ATOM | 1222 | HB3  | GLU | X | 80 | 68.153 | 50.156 | 40.735 | 0.00 | 0.00 |
| ATOM | 1223 | CG   | GLU | X | 80 | 69.250 | 48.703 | 41.784 | 0.00 | 0.00 |
| ATOM | 1224 | HG2  | GLU | X | 80 | 69.170 | 47.627 | 41.939 | 0.00 | 0.00 |
| ATOM | 1225 | HG3  | GLU | X | 80 | 70.243 | 48.997 | 41.444 | 0.00 | 0.00 |
| ATOM | 1226 | CD   | GLU | X | 80 | 69.010 | 49.467 | 43.112 | 0.00 | 0.00 |
| ATOM | 1227 | OE1  | GLU | X | 80 | 68.321 | 48.843 | 43.946 | 0.00 | 0.00 |
| ATOM | 1228 | OE2  | GLU | X | 80 | 69.488 | 50.581 | 43.277 | 0.00 | 0.00 |

|      |      |      |     |   |    |        |        |        |      |      |
|------|------|------|-----|---|----|--------|--------|--------|------|------|
| ATOM | 1229 | C    | GLU | X | 80 | 65.723 | 49.475 | 40.372 | 0.00 | 0.00 |
| ATOM | 1230 | O    | GLU | X | 80 | 65.710 | 50.715 | 40.573 | 0.00 | 0.00 |
| ATOM | 1231 | N    | MET | X | 81 | 64.954 | 48.935 | 39.501 | 0.00 | 0.00 |
| ATOM | 1232 | H    | MET | X | 81 | 65.065 | 47.935 | 39.418 | 0.00 | 0.00 |
| ATOM | 1233 | CA   | MET | X | 81 | 64.011 | 49.659 | 38.573 | 0.00 | 0.00 |
| ATOM | 1234 | HA   | MET | X | 81 | 64.414 | 50.663 | 38.444 | 0.00 | 0.00 |
| ATOM | 1235 | CB   | MET | X | 81 | 64.028 | 48.916 | 37.155 | 0.00 | 0.00 |
| ATOM | 1236 | HB2  | MET | X | 81 | 63.853 | 49.663 | 36.381 | 0.00 | 0.00 |
| ATOM | 1237 | HB3  | MET | X | 81 | 65.069 | 48.681 | 36.934 | 0.00 | 0.00 |
| ATOM | 1238 | CG   | MET | X | 81 | 63.045 | 47.725 | 37.201 | 0.00 | 0.00 |
| ATOM | 1239 | HG2  | MET | X | 81 | 63.338 | 46.933 | 37.891 | 0.00 | 0.00 |
| ATOM | 1240 | HG3  | MET | X | 81 | 62.015 | 48.010 | 37.414 | 0.00 | 0.00 |
| ATOM | 1241 | SD   | MET | X | 81 | 63.033 | 46.913 | 35.639 | 0.00 | 0.00 |
| ATOM | 1242 | CE   | MET | X | 81 | 62.368 | 48.112 | 34.466 | 0.00 | 0.00 |
| ATOM | 1243 | HE1  | MET | X | 81 | 62.924 | 49.017 | 34.710 | 0.00 | 0.00 |
| ATOM | 1244 | HE2  | MET | X | 81 | 62.509 | 47.727 | 33.456 | 0.00 | 0.00 |
| ATOM | 1245 | HE3  | MET | X | 81 | 61.303 | 48.169 | 34.691 | 0.00 | 0.00 |
| ATOM | 1246 | C    | MET | X | 81 | 62.603 | 49.912 | 39.084 | 0.00 | 0.00 |
| ATOM | 1247 | O    | MET | X | 81 | 61.848 | 50.695 | 38.475 | 0.00 | 0.00 |
| ATOM | 1248 | N    | TRP | X | 82 | 62.282 | 49.281 | 40.185 | 0.00 | 0.00 |
| ATOM | 1249 | H    | TRP | X | 82 | 62.961 | 48.623 | 40.540 | 0.00 | 0.00 |
| ATOM | 1250 | CA   | TRP | X | 82 | 61.036 | 49.247 | 40.964 | 0.00 | 0.00 |
| ATOM | 1251 | HA   | TRP | X | 82 | 60.278 | 49.570 | 40.250 | 0.00 | 0.00 |
| ATOM | 1252 | CB   | TRP | X | 82 | 60.813 | 47.652 | 41.183 | 0.00 | 0.00 |
| ATOM | 1253 | HB2  | TRP | X | 82 | 61.610 | 47.358 | 41.866 | 0.00 | 0.00 |
| ATOM | 1254 | HB3  | TRP | X | 82 | 59.832 | 47.735 | 41.651 | 0.00 | 0.00 |
| ATOM | 1255 | CG   | TRP | X | 82 | 60.742 | 46.742 | 39.967 | 0.00 | 0.00 |
| ATOM | 1256 | CD1  | TRP | X | 82 | 61.321 | 45.514 | 39.795 | 0.00 | 0.00 |
| ATOM | 1257 | HD1  | TRP | X | 82 | 61.976 | 45.041 | 40.512 | 0.00 | 0.00 |
| ATOM | 1258 | NE1  | TRP | X | 82 | 61.151 | 45.099 | 38.494 | 0.00 | 0.00 |
| ATOM | 1259 | HE1  | TRP | X | 82 | 61.485 | 44.188 | 38.213 | 0.00 | 0.00 |
| ATOM | 1260 | CE2  | TRP | X | 82 | 60.338 | 45.901 | 37.735 | 0.00 | 0.00 |
| ATOM | 1261 | CZ2  | TRP | X | 82 | 60.021 | 45.995 | 36.388 | 0.00 | 0.00 |
| ATOM | 1262 | HZ2  | TRP | X | 82 | 60.127 | 45.145 | 35.730 | 0.00 | 0.00 |
| ATOM | 1263 | CH2  | TRP | X | 82 | 59.398 | 47.086 | 35.843 | 0.00 | 0.00 |
| ATOM | 1264 | HH2  | TRP | X | 82 | 59.193 | 47.085 | 34.783 | 0.00 | 0.00 |
| ATOM | 1265 | CZ3  | TRP | X | 82 | 58.944 | 48.113 | 36.762 | 0.00 | 0.00 |
| ATOM | 1266 | HZ3  | TRP | X | 82 | 58.263 | 48.824 | 36.317 | 0.00 | 0.00 |
| ATOM | 1267 | CE3  | TRP | X | 82 | 59.188 | 48.041 | 38.172 | 0.00 | 0.00 |
| ATOM | 1268 | HE3  | TRP | X | 82 | 58.782 | 48.830 | 38.787 | 0.00 | 0.00 |
| ATOM | 1269 | CD2  | TRP | X | 82 | 60.009 | 46.980 | 38.680 | 0.00 | 0.00 |
| ATOM | 1270 | C    | TRP | X | 82 | 61.184 | 49.973 | 42.392 | 0.00 | 0.00 |
| ATOM | 1271 | O    | TRP | X | 82 | 60.172 | 50.572 | 42.824 | 0.00 | 0.00 |
| ATOM | 1272 | N    | ASN | X | 83 | 62.394 | 49.994 | 42.961 | 0.00 | 0.00 |
| ATOM | 1273 | H    | ASN | X | 83 | 63.109 | 49.409 | 42.554 | 0.00 | 0.00 |
| ATOM | 1274 | CA   | ASN | X | 83 | 62.654 | 50.677 | 44.297 | 0.00 | 0.00 |
| ATOM | 1275 | HA   | ASN | X | 83 | 61.952 | 50.200 | 44.982 | 0.00 | 0.00 |
| ATOM | 1276 | CB   | ASN | X | 83 | 64.082 | 50.331 | 44.802 | 0.00 | 0.00 |
| ATOM | 1277 | HB2  | ASN | X | 83 | 64.213 | 49.249 | 44.792 | 0.00 | 0.00 |
| ATOM | 1278 | HB3  | ASN | X | 83 | 64.845 | 50.798 | 44.178 | 0.00 | 0.00 |
| ATOM | 1279 | CG   | ASN | X | 83 | 64.302 | 50.966 | 46.229 | 0.00 | 0.00 |
| ATOM | 1280 | OD1  | ASN | X | 83 | 64.618 | 52.137 | 46.326 | 0.00 | 0.00 |
| ATOM | 1281 | ND2  | ASN | X | 83 | 63.969 | 50.208 | 47.261 | 0.00 | 0.00 |
| ATOM | 1282 | HD21 | ASN | X | 83 | 64.093 | 50.640 | 48.165 | 0.00 | 0.00 |
| ATOM | 1283 | HD22 | ASN | X | 83 | 63.574 | 49.279 | 47.283 | 0.00 | 0.00 |
| ATOM | 1284 | C    | ASN | X | 83 | 62.389 | 52.215 | 44.138 | 0.00 | 0.00 |
| ATOM | 1285 | O    | ASN | X | 83 | 62.826 | 52.865 | 43.076 | 0.00 | 0.00 |
| ATOM | 1286 | N    | PRO | X | 84 | 61.823 | 52.896 | 45.153 | 0.00 | 0.00 |
| ATOM | 1287 | CD   | PRO | X | 84 | 61.123 | 52.229 | 46.181 | 0.00 | 0.00 |
| ATOM | 1288 | HD2  | PRO | X | 84 | 61.815 | 51.772 | 46.889 | 0.00 | 0.00 |
| ATOM | 1289 | HD3  | PRO | X | 84 | 60.474 | 51.494 | 45.705 | 0.00 | 0.00 |
| ATOM | 1290 | CG   | PRO | X | 84 | 60.247 | 53.281 | 46.866 | 0.00 | 0.00 |
| ATOM | 1291 | HG2  | PRO | X | 84 | 60.448 | 53.283 | 47.938 | 0.00 | 0.00 |
| ATOM | 1292 | HG3  | PRO | X | 84 | 59.176 | 53.190 | 46.686 | 0.00 | 0.00 |
| ATOM | 1293 | CB   | PRO | X | 84 | 60.690 | 54.624 | 46.324 | 0.00 | 0.00 |
| ATOM | 1294 | HB2  | PRO | X | 84 | 61.311 | 55.173 | 47.032 | 0.00 | 0.00 |
| ATOM | 1295 | HB3  | PRO | X | 84 | 59.880 | 55.350 | 46.251 | 0.00 | 0.00 |
| ATOM | 1296 | CA   | PRO | X | 84 | 61.470 | 54.271 | 45.022 | 0.00 | 0.00 |
| ATOM | 1297 | HA   | PRO | X | 84 | 60.718 | 54.398 | 44.242 | 0.00 | 0.00 |
| ATOM | 1298 | C    | PRO | X | 84 | 62.618 | 55.186 | 44.739 | 0.00 | 0.00 |



|      |      |      |     |   |    |        |        |        |      |      |
|------|------|------|-----|---|----|--------|--------|--------|------|------|
| ATOM | 1299 | O    | PRO | X | 84 | 63.511 | 55.261 | 45.612 | 0.00 | 0.00 |
| ATOM | 1300 | N    | ASN | X | 85 | 62.566 | 55.959 | 43.653 | 0.00 | 0.00 |
| ATOM | 1301 | H    | ASN | X | 85 | 61.853 | 55.760 | 42.965 | 0.00 | 0.00 |
| ATOM | 1302 | CA   | ASN | X | 85 | 63.437 | 57.083 | 43.318 | 0.00 | 0.00 |
| ATOM | 1303 | HA   | ASN | X | 85 | 64.429 | 56.845 | 43.701 | 0.00 | 0.00 |
| ATOM | 1304 | CB   | ASN | X | 85 | 63.476 | 57.233 | 41.827 | 0.00 | 0.00 |
| ATOM | 1305 | HB2  | ASN | X | 85 | 64.092 | 58.083 | 41.535 | 0.00 | 0.00 |
| ATOM | 1306 | HB3  | ASN | X | 85 | 63.943 | 56.368 | 41.355 | 0.00 | 0.00 |
| ATOM | 1307 | CG   | ASN | X | 85 | 62.148 | 57.649 | 41.128 | 0.00 | 0.00 |
| ATOM | 1308 | OD1  | ASN | X | 85 | 61.089 | 57.794 | 41.753 | 0.00 | 0.00 |
| ATOM | 1309 | ND2  | ASN | X | 85 | 62.255 | 58.021 | 39.887 | 0.00 | 0.00 |
| ATOM | 1310 | HD21 | ASN | X | 85 | 61.403 | 58.362 | 39.464 | 0.00 | 0.00 |
| ATOM | 1311 | HD22 | ASN | X | 85 | 63.118 | 57.954 | 39.367 | 0.00 | 0.00 |
| ATOM | 1312 | C    | ASN | X | 85 | 63.135 | 58.426 | 43.996 | 0.00 | 0.00 |
| ATOM | 1313 | O    | ASN | X | 85 | 63.443 | 59.483 | 43.482 | 0.00 | 0.00 |
| ATOM | 1314 | N    | ARG | X | 86 | 62.587 | 58.402 | 45.170 | 0.00 | 0.00 |
| ATOM | 1315 | H    | ARG | X | 86 | 62.483 | 57.496 | 45.604 | 0.00 | 0.00 |
| ATOM | 1316 | CA   | ARG | X | 86 | 61.965 | 59.472 | 45.966 | 0.00 | 0.00 |
| ATOM | 1317 | HA   | ARG | X | 86 | 62.615 | 60.342 | 45.877 | 0.00 | 0.00 |
| ATOM | 1318 | CB   | ARG | X | 86 | 60.698 | 59.948 | 45.338 | 0.00 | 0.00 |
| ATOM | 1319 | HB2  | ARG | X | 86 | 59.977 | 59.131 | 45.333 | 0.00 | 0.00 |
| ATOM | 1320 | HB3  | ARG | X | 86 | 60.390 | 60.751 | 46.008 | 0.00 | 0.00 |
| ATOM | 1321 | CG   | ARG | X | 86 | 60.764 | 60.605 | 43.960 | 0.00 | 0.00 |
| ATOM | 1322 | HG2  | ARG | X | 86 | 61.089 | 59.992 | 43.119 | 0.00 | 0.00 |
| ATOM | 1323 | HG3  | ARG | X | 86 | 59.740 | 60.914 | 43.749 | 0.00 | 0.00 |
| ATOM | 1324 | CD   | ARG | X | 86 | 61.735 | 61.865 | 43.917 | 0.00 | 0.00 |
| ATOM | 1325 | HD2  | ARG | X | 86 | 61.182 | 62.544 | 44.566 | 0.00 | 0.00 |
| ATOM | 1326 | HD3  | ARG | X | 86 | 62.739 | 61.697 | 44.307 | 0.00 | 0.00 |
| ATOM | 1327 | NE   | ARG | X | 86 | 62.003 | 62.312 | 42.552 | 0.00 | 0.00 |
| ATOM | 1328 | HE   | ARG | X | 86 | 61.773 | 61.711 | 41.773 | 0.00 | 0.00 |
| ATOM | 1329 | CZ   | ARG | X | 86 | 62.219 | 63.529 | 42.176 | 0.00 | 0.00 |
| ATOM | 1330 | NH1  | ARG | X | 86 | 62.278 | 64.490 | 43.071 | 0.00 | 0.00 |
| ATOM | 1331 | HH11 | ARG | X | 86 | 62.244 | 64.263 | 44.055 | 0.00 | 0.00 |
| ATOM | 1332 | HH12 | ARG | X | 86 | 62.670 | 65.375 | 42.781 | 0.00 | 0.00 |
| ATOM | 1333 | NH2  | ARG | X | 86 | 62.248 | 63.849 | 40.909 | 0.00 | 0.00 |
| ATOM | 1334 | HH21 | ARG | X | 86 | 62.123 | 63.232 | 40.119 | 0.00 | 0.00 |
| ATOM | 1335 | HH22 | ARG | X | 86 | 62.413 | 64.810 | 40.645 | 0.00 | 0.00 |
| ATOM | 1336 | C    | ARG | X | 86 | 61.847 | 59.080 | 47.406 | 0.00 | 0.00 |
| ATOM | 1337 | O    | ARG | X | 86 | 62.298 | 57.986 | 47.753 | 0.00 | 0.00 |
| ATOM | 1338 | N    | GLU | X | 87 | 61.419 | 59.957 | 48.301 | 0.00 | 0.00 |
| ATOM | 1339 | H    | GLU | X | 87 | 60.986 | 60.802 | 47.956 | 0.00 | 0.00 |
| ATOM | 1340 | CA   | GLU | X | 87 | 61.706 | 59.988 | 49.703 | 0.00 | 0.00 |
| ATOM | 1341 | HA   | GLU | X | 87 | 62.672 | 59.536 | 49.925 | 0.00 | 0.00 |
| ATOM | 1342 | CB   | GLU | X | 87 | 61.792 | 61.477 | 50.159 | 0.00 | 0.00 |
| ATOM | 1343 | HB2  | GLU | X | 87 | 62.415 | 62.122 | 49.541 | 0.00 | 0.00 |
| ATOM | 1344 | HB3  | GLU | X | 87 | 60.821 | 61.970 | 50.109 | 0.00 | 0.00 |
| ATOM | 1345 | CG   | GLU | X | 87 | 62.249 | 61.682 | 51.594 | 0.00 | 0.00 |
| ATOM | 1346 | HG2  | GLU | X | 87 | 61.591 | 61.076 | 52.218 | 0.00 | 0.00 |
| ATOM | 1347 | HG3  | GLU | X | 87 | 63.246 | 61.255 | 51.696 | 0.00 | 0.00 |
| ATOM | 1348 | CD   | GLU | X | 87 | 62.363 | 63.035 | 52.237 | 0.00 | 0.00 |
| ATOM | 1349 | OE1  | GLU | X | 87 | 63.540 | 63.531 | 52.273 | 0.00 | 0.00 |
| ATOM | 1350 | OE2  | GLU | X | 87 | 61.303 | 63.528 | 52.687 | 0.00 | 0.00 |
| ATOM | 1351 | C    | GLU | X | 87 | 60.636 | 59.260 | 50.502 | 0.00 | 0.00 |
| ATOM | 1352 | O    | GLU | X | 87 | 59.453 | 59.528 | 50.252 | 0.00 | 0.00 |
| ATOM | 1353 | N    | LEU | X | 88 | 61.009 | 58.395 | 51.440 | 0.00 | 0.00 |
| ATOM | 1354 | H    | LEU | X | 88 | 62.000 | 58.308 | 51.612 | 0.00 | 0.00 |
| ATOM | 1355 | CA   | LEU | X | 88 | 60.235 | 57.720 | 52.477 | 0.00 | 0.00 |
| ATOM | 1356 | HA   | LEU | X | 88 | 59.280 | 57.541 | 51.983 | 0.00 | 0.00 |
| ATOM | 1357 | CB   | LEU | X | 88 | 60.742 | 56.288 | 52.871 | 0.00 | 0.00 |
| ATOM | 1358 | HB2  | LEU | X | 88 | 61.780 | 56.311 | 53.204 | 0.00 | 0.00 |
| ATOM | 1359 | HB3  | LEU | X | 88 | 60.100 | 56.023 | 53.711 | 0.00 | 0.00 |
| ATOM | 1360 | CG   | LEU | X | 88 | 60.574 | 55.185 | 51.801 | 0.00 | 0.00 |
| ATOM | 1361 | HG   | LEU | X | 88 | 59.528 | 55.050 | 51.522 | 0.00 | 0.00 |
| ATOM | 1362 | CD1  | LEU | X | 88 | 61.497 | 55.391 | 50.549 | 0.00 | 0.00 |
| ATOM | 1363 | HD11 | LEU | X | 88 | 61.647 | 54.531 | 49.897 | 0.00 | 0.00 |
| ATOM | 1364 | HD12 | LEU | X | 88 | 61.247 | 56.284 | 49.976 | 0.00 | 0.00 |
| ATOM | 1365 | HD13 | LEU | X | 88 | 62.497 | 55.594 | 50.933 | 0.00 | 0.00 |
| ATOM | 1366 | CD2  | LEU | X | 88 | 60.925 | 53.840 | 52.473 | 0.00 | 0.00 |
| ATOM | 1367 | HD21 | LEU | X | 88 | 60.574 | 53.112 | 51.742 | 0.00 | 0.00 |
| ATOM | 1368 | HD22 | LEU | X | 88 | 61.953 | 53.808 | 52.835 | 0.00 | 0.00 |

|      |      |      |     |   |    |        |        |        |      |      |
|------|------|------|-----|---|----|--------|--------|--------|------|------|
| ATOM | 1369 | HD23 | LEU | X | 88 | 60.274 | 53.830 | 53.347 | 0.00 | 0.00 |
| ATOM | 1370 | C    | LEU | X | 88 | 60.076 | 58.639 | 53.707 | 0.00 | 0.00 |
| ATOM | 1371 | O    | LEU | X | 88 | 61.041 | 58.817 | 54.473 | 0.00 | 0.00 |
| ATOM | 1372 | N    | SER | X | 89 | 58.825 | 58.863 | 53.905 | 0.00 | 0.00 |
| ATOM | 1373 | H    | SER | X | 89 | 58.233 | 58.728 | 53.098 | 0.00 | 0.00 |
| ATOM | 1374 | CA   | SER | X | 89 | 58.210 | 59.463 | 55.106 | 0.00 | 0.00 |
| ATOM | 1375 | HA   | SER | X | 89 | 58.790 | 59.290 | 56.012 | 0.00 | 0.00 |
| ATOM | 1376 | CB   | SER | X | 89 | 58.136 | 61.015 | 54.875 | 0.00 | 0.00 |
| ATOM | 1377 | HB2  | SER | X | 89 | 59.168 | 61.305 | 54.682 | 0.00 | 0.00 |
| ATOM | 1378 | HB3  | SER | X | 89 | 57.524 | 61.240 | 54.001 | 0.00 | 0.00 |
| ATOM | 1379 | OG   | SER | X | 89 | 57.650 | 61.819 | 55.894 | 0.00 | 0.00 |
| ATOM | 1380 | HG   | SER | X | 89 | 57.822 | 62.728 | 55.637 | 0.00 | 0.00 |
| ATOM | 1381 | C    | SER | X | 89 | 56.759 | 58.914 | 55.280 | 0.00 | 0.00 |
| ATOM | 1382 | O    | SER | X | 89 | 56.263 | 58.172 | 54.466 | 0.00 | 0.00 |
| ATOM | 1383 | N    | GLU | X | 90 | 56.044 | 59.166 | 56.425 | 0.00 | 0.00 |
| ATOM | 1384 | H    | GLU | X | 90 | 56.518 | 59.816 | 57.035 | 0.00 | 0.00 |
| ATOM | 1385 | CA   | GLU | X | 90 | 54.585 | 59.037 | 56.554 | 0.00 | 0.00 |
| ATOM | 1386 | HA   | GLU | X | 90 | 54.341 | 58.261 | 55.830 | 0.00 | 0.00 |
| ATOM | 1387 | CB   | GLU | X | 90 | 54.076 | 58.536 | 57.923 | 0.00 | 0.00 |
| ATOM | 1388 | HB2  | GLU | X | 90 | 54.407 | 59.334 | 58.589 | 0.00 | 0.00 |
| ATOM | 1389 | HB3  | GLU | X | 90 | 52.994 | 58.466 | 57.814 | 0.00 | 0.00 |
| ATOM | 1390 | CG   | GLU | X | 90 | 54.523 | 57.234 | 58.524 | 0.00 | 0.00 |
| ATOM | 1391 | HG2  | GLU | X | 90 | 54.548 | 56.377 | 57.852 | 0.00 | 0.00 |
| ATOM | 1392 | HG3  | GLU | X | 90 | 55.586 | 57.424 | 58.671 | 0.00 | 0.00 |
| ATOM | 1393 | CD   | GLU | X | 90 | 53.787 | 57.000 | 59.866 | 0.00 | 0.00 |
| ATOM | 1394 | OE1  | GLU | X | 90 | 52.951 | 56.077 | 59.935 | 0.00 | 0.00 |
| ATOM | 1395 | OE2  | GLU | X | 90 | 54.272 | 57.650 | 60.776 | 0.00 | 0.00 |
| ATOM | 1396 | C    | GLU | X | 90 | 53.683 | 60.230 | 56.080 | 0.00 | 0.00 |
| ATOM | 1397 | O    | GLU | X | 90 | 52.463 | 60.152 | 55.864 | 0.00 | 0.00 |
| ATOM | 1398 | N    | ASP | X | 91 | 54.238 | 61.412 | 55.896 | 0.00 | 0.00 |
| ATOM | 1399 | H    | ASP | X | 91 | 55.188 | 61.480 | 56.233 | 0.00 | 0.00 |
| ATOM | 1400 | CA   | ASP | X | 91 | 53.680 | 62.471 | 55.061 | 0.00 | 0.00 |
| ATOM | 1401 | HA   | ASP | X | 91 | 52.599 | 62.517 | 55.194 | 0.00 | 0.00 |
| ATOM | 1402 | CB   | ASP | X | 91 | 54.366 | 63.819 | 55.436 | 0.00 | 0.00 |
| ATOM | 1403 | HB2  | ASP | X | 91 | 54.166 | 63.995 | 56.493 | 0.00 | 0.00 |
| ATOM | 1404 | HB3  | ASP | X | 91 | 55.456 | 63.827 | 55.432 | 0.00 | 0.00 |
| ATOM | 1405 | CG   | ASP | X | 91 | 53.825 | 64.967 | 54.668 | 0.00 | 0.00 |
| ATOM | 1406 | OD1  | ASP | X | 91 | 52.990 | 64.759 | 53.811 | 0.00 | 0.00 |
| ATOM | 1407 | OD2  | ASP | X | 91 | 54.178 | 66.134 | 54.982 | 0.00 | 0.00 |
| ATOM | 1408 | C    | ASP | X | 91 | 53.893 | 62.078 | 53.572 | 0.00 | 0.00 |
| ATOM | 1409 | O    | ASP | X | 91 | 54.943 | 62.338 | 53.021 | 0.00 | 0.00 |
| ATOM | 1410 | N    | CYX | X | 92 | 52.862 | 61.546 | 52.893 | 0.00 | 0.00 |
| ATOM | 1411 | H    | CYX | X | 92 | 51.969 | 61.396 | 53.339 | 0.00 | 0.00 |
| ATOM | 1412 | CA   | CYX | X | 92 | 52.971 | 61.047 | 51.532 | 0.00 | 0.00 |
| ATOM | 1413 | HA   | CYX | X | 92 | 53.712 | 61.609 | 50.965 | 0.00 | 0.00 |
| ATOM | 1414 | CB   | CYX | X | 92 | 53.476 | 59.640 | 51.698 | 0.00 | 0.00 |
| ATOM | 1415 | HB2  | CYX | X | 92 | 53.618 | 59.326 | 50.664 | 0.00 | 0.00 |
| ATOM | 1416 | HB3  | CYX | X | 92 | 54.377 | 59.569 | 52.308 | 0.00 | 0.00 |
| ATOM | 1417 | SG   | CYX | X | 92 | 52.253 | 58.554 | 52.532 | 0.00 | 0.00 |
| ATOM | 1418 | C    | CYX | X | 92 | 51.779 | 61.067 | 50.552 | 0.00 | 0.00 |
| ATOM | 1419 | O    | CYX | X | 92 | 52.015 | 60.636 | 49.450 | 0.00 | 0.00 |
| ATOM | 1420 | N    | LEU | X | 93 | 50.594 | 61.554 | 50.905 | 0.00 | 0.00 |
| ATOM | 1421 | H    | LEU | X | 93 | 50.511 | 62.110 | 51.744 | 0.00 | 0.00 |
| ATOM | 1422 | CA   | LEU | X | 93 | 49.440 | 61.398 | 50.021 | 0.00 | 0.00 |
| ATOM | 1423 | HA   | LEU | X | 93 | 49.654 | 60.478 | 49.477 | 0.00 | 0.00 |
| ATOM | 1424 | CB   | LEU | X | 93 | 48.101 | 61.264 | 50.822 | 0.00 | 0.00 |
| ATOM | 1425 | HB2  | LEU | X | 93 | 47.929 | 62.221 | 51.315 | 0.00 | 0.00 |
| ATOM | 1426 | HB3  | LEU | X | 93 | 47.275 | 61.040 | 50.146 | 0.00 | 0.00 |
| ATOM | 1427 | CG   | LEU | X | 93 | 48.083 | 60.099 | 51.850 | 0.00 | 0.00 |
| ATOM | 1428 | HG   | LEU | X | 93 | 48.776 | 60.442 | 52.619 | 0.00 | 0.00 |
| ATOM | 1429 | CD1  | LEU | X | 93 | 46.765 | 60.036 | 52.476 | 0.00 | 0.00 |
| ATOM | 1430 | HD11 | LEU | X | 93 | 45.983 | 59.711 | 51.791 | 0.00 | 0.00 |
| ATOM | 1431 | HD12 | LEU | X | 93 | 46.802 | 59.409 | 53.368 | 0.00 | 0.00 |
| ATOM | 1432 | HD13 | LEU | X | 93 | 46.502 | 61.008 | 52.892 | 0.00 | 0.00 |
| ATOM | 1433 | CD2  | LEU | X | 93 | 48.382 | 58.670 | 51.287 | 0.00 | 0.00 |
| ATOM | 1434 | HD21 | LEU | X | 93 | 48.316 | 57.978 | 52.126 | 0.00 | 0.00 |
| ATOM | 1435 | HD22 | LEU | X | 93 | 47.573 | 58.418 | 50.602 | 0.00 | 0.00 |
| ATOM | 1436 | HD23 | LEU | X | 93 | 49.340 | 58.706 | 50.767 | 0.00 | 0.00 |
| ATOM | 1437 | C    | LEU | X | 93 | 49.487 | 62.498 | 49.006 | 0.00 | 0.00 |
| ATOM | 1438 | O    | LEU | X | 93 | 48.923 | 63.535 | 49.254 | 0.00 | 0.00 |

|      |      |      |     |   |    |        |        |        |      |      |
|------|------|------|-----|---|----|--------|--------|--------|------|------|
| ATOM | 1439 | N    | TYR | X | 94 | 50.115 | 62.261 | 47.843 | 0.00 | 0.00 |
| ATOM | 1440 | H    | TYR | X | 94 | 50.601 | 61.377 | 47.797 | 0.00 | 0.00 |
| ATOM | 1441 | CA   | TYR | X | 94 | 50.363 | 63.198 | 46.686 | 0.00 | 0.00 |
| ATOM | 1442 | HA   | TYR | X | 94 | 49.624 | 64.000 | 46.698 | 0.00 | 0.00 |
| ATOM | 1443 | CB   | TYR | X | 94 | 51.760 | 63.809 | 46.860 | 0.00 | 0.00 |
| ATOM | 1444 | HB2  | TYR | X | 94 | 52.590 | 63.205 | 46.493 | 0.00 | 0.00 |
| ATOM | 1445 | HB3  | TYR | X | 94 | 51.897 | 64.597 | 46.120 | 0.00 | 0.00 |
| ATOM | 1446 | CG   | TYR | X | 94 | 52.109 | 64.580 | 48.172 | 0.00 | 0.00 |
| ATOM | 1447 | CD1  | TYR | X | 94 | 51.931 | 65.994 | 48.235 | 0.00 | 0.00 |
| ATOM | 1448 | HD1  | TYR | X | 94 | 51.578 | 66.518 | 47.359 | 0.00 | 0.00 |
| ATOM | 1449 | CE1  | TYR | X | 94 | 52.121 | 66.696 | 49.455 | 0.00 | 0.00 |
| ATOM | 1450 | HE1  | TYR | X | 94 | 51.870 | 67.734 | 49.617 | 0.00 | 0.00 |
| ATOM | 1451 | CZ   | TYR | X | 94 | 52.529 | 65.930 | 50.648 | 0.00 | 0.00 |
| ATOM | 1452 | OH   | TYR | X | 94 | 52.881 | 66.585 | 51.813 | 0.00 | 0.00 |
| ATOM | 1453 | HH   | TYR | X | 94 | 53.043 | 65.897 | 52.462 | 0.00 | 0.00 |
| ATOM | 1454 | CE2  | TYR | X | 94 | 53.000 | 64.574 | 50.491 | 0.00 | 0.00 |
| ATOM | 1455 | HE2  | TYR | X | 94 | 53.311 | 63.924 | 51.295 | 0.00 | 0.00 |
| ATOM | 1456 | CD2  | TYR | X | 94 | 52.799 | 63.928 | 49.251 | 0.00 | 0.00 |
| ATOM | 1457 | HD2  | TYR | X | 94 | 53.055 | 62.893 | 49.082 | 0.00 | 0.00 |
| ATOM | 1458 | C    | TYR | X | 94 | 50.216 | 62.480 | 45.344 | 0.00 | 0.00 |
| ATOM | 1459 | O    | TYR | X | 94 | 50.398 | 61.303 | 45.226 | 0.00 | 0.00 |
| ATOM | 1460 | N    | LEU | X | 95 | 49.880 | 63.232 | 44.356 | 0.00 | 0.00 |
| ATOM | 1461 | H    | LEU | X | 95 | 49.541 | 64.163 | 44.554 | 0.00 | 0.00 |
| ATOM | 1462 | CA   | LEU | X | 95 | 49.453 | 62.746 | 42.994 | 0.00 | 0.00 |
| ATOM | 1463 | HA   | LEU | X | 95 | 49.992 | 61.804 | 42.896 | 0.00 | 0.00 |
| ATOM | 1464 | CB   | LEU | X | 95 | 47.931 | 62.341 | 43.056 | 0.00 | 0.00 |
| ATOM | 1465 | HB2  | LEU | X | 95 | 47.765 | 61.768 | 42.143 | 0.00 | 0.00 |
| ATOM | 1466 | HB3  | LEU | X | 95 | 47.889 | 61.617 | 43.869 | 0.00 | 0.00 |
| ATOM | 1467 | CG   | LEU | X | 95 | 46.832 | 63.399 | 43.175 | 0.00 | 0.00 |
| ATOM | 1468 | HG   | LEU | X | 95 | 47.096 | 64.280 | 43.761 | 0.00 | 0.00 |
| ATOM | 1469 | CD1  | LEU | X | 95 | 46.586 | 63.971 | 41.762 | 0.00 | 0.00 |
| ATOM | 1470 | HD11 | LEU | X | 95 | 47.450 | 63.979 | 41.097 | 0.00 | 0.00 |
| ATOM | 1471 | HD12 | LEU | X | 95 | 45.822 | 63.384 | 41.253 | 0.00 | 0.00 |
| ATOM | 1472 | HD13 | LEU | X | 95 | 46.207 | 64.970 | 41.980 | 0.00 | 0.00 |
| ATOM | 1473 | CD2  | LEU | X | 95 | 45.485 | 62.739 | 43.626 | 0.00 | 0.00 |
| ATOM | 1474 | HD21 | LEU | X | 95 | 45.562 | 62.126 | 44.523 | 0.00 | 0.00 |
| ATOM | 1475 | HD22 | LEU | X | 95 | 44.728 | 63.523 | 43.665 | 0.00 | 0.00 |
| ATOM | 1476 | HD23 | LEU | X | 95 | 45.141 | 61.989 | 42.913 | 0.00 | 0.00 |
| ATOM | 1477 | C    | LEU | X | 95 | 49.920 | 63.554 | 41.789 | 0.00 | 0.00 |
| ATOM | 1478 | O    | LEU | X | 95 | 50.616 | 64.562 | 41.813 | 0.00 | 0.00 |
| ATOM | 1479 | N    | ASN | X | 96 | 49.827 | 62.821 | 40.619 | 0.00 | 0.00 |
| ATOM | 1480 | H    | ASN | X | 96 | 49.362 | 61.925 | 40.656 | 0.00 | 0.00 |
| ATOM | 1481 | CA   | ASN | X | 96 | 50.591 | 63.126 | 39.328 | 0.00 | 0.00 |
| ATOM | 1482 | HA   | ASN | X | 96 | 51.023 | 64.126 | 39.286 | 0.00 | 0.00 |
| ATOM | 1483 | CB   | ASN | X | 96 | 51.800 | 62.188 | 39.092 | 0.00 | 0.00 |
| ATOM | 1484 | HB2  | ASN | X | 96 | 51.427 | 61.212 | 38.783 | 0.00 | 0.00 |
| ATOM | 1485 | HB3  | ASN | X | 96 | 52.491 | 62.510 | 38.312 | 0.00 | 0.00 |
| ATOM | 1486 | CG   | ASN | X | 96 | 52.644 | 62.036 | 40.289 | 0.00 | 0.00 |
| ATOM | 1487 | OD1  | ASN | X | 96 | 53.507 | 62.896 | 40.601 | 0.00 | 0.00 |
| ATOM | 1488 | ND2  | ASN | X | 96 | 52.377 | 61.025 | 41.137 | 0.00 | 0.00 |
| ATOM | 1489 | HD21 | ASN | X | 96 | 53.143 | 60.830 | 41.766 | 0.00 | 0.00 |
| ATOM | 1490 | HD22 | ASN | X | 96 | 51.526 | 60.494 | 41.020 | 0.00 | 0.00 |
| ATOM | 1491 | C    | ASN | X | 96 | 49.602 | 63.038 | 38.138 | 0.00 | 0.00 |
| ATOM | 1492 | O    | ASN | X | 96 | 48.875 | 62.052 | 38.007 | 0.00 | 0.00 |
| ATOM | 1493 | N    | VAL | X | 97 | 49.661 | 64.039 | 37.257 | 0.00 | 0.00 |
| ATOM | 1494 | H    | VAL | X | 97 | 50.276 | 64.799 | 37.512 | 0.00 | 0.00 |
| ATOM | 1495 | CA   | VAL | X | 97 | 48.851 | 64.102 | 36.037 | 0.00 | 0.00 |
| ATOM | 1496 | HA   | VAL | X | 97 | 48.326 | 63.181 | 35.783 | 0.00 | 0.00 |
| ATOM | 1497 | CB   | VAL | X | 97 | 47.638 | 65.131 | 36.229 | 0.00 | 0.00 |
| ATOM | 1498 | HB   | VAL | X | 97 | 48.080 | 66.096 | 36.474 | 0.00 | 0.00 |
| ATOM | 1499 | CG1  | VAL | X | 97 | 46.910 | 65.345 | 34.903 | 0.00 | 0.00 |
| ATOM | 1500 | HG11 | VAL | X | 97 | 46.592 | 64.389 | 34.488 | 0.00 | 0.00 |
| ATOM | 1501 | HG12 | VAL | X | 97 | 46.019 | 65.958 | 35.044 | 0.00 | 0.00 |
| ATOM | 1502 | HG13 | VAL | X | 97 | 47.599 | 65.838 | 34.217 | 0.00 | 0.00 |
| ATOM | 1503 | CG2  | VAL | X | 97 | 46.684 | 64.775 | 37.394 | 0.00 | 0.00 |
| ATOM | 1504 | HG21 | VAL | X | 97 | 45.782 | 65.383 | 37.322 | 0.00 | 0.00 |
| ATOM | 1505 | HG22 | VAL | X | 97 | 46.433 | 63.717 | 37.464 | 0.00 | 0.00 |
| ATOM | 1506 | HG23 | VAL | X | 97 | 47.171 | 65.163 | 38.289 | 0.00 | 0.00 |
| ATOM | 1507 | C    | VAL | X | 97 | 49.757 | 64.624 | 34.908 | 0.00 | 0.00 |
| ATOM | 1508 | O    | VAL | X | 97 | 50.300 | 65.745 | 34.967 | 0.00 | 0.00 |

|      |      |      |     |   |     |        |        |        |      |      |
|------|------|------|-----|---|-----|--------|--------|--------|------|------|
| ATOM | 1509 | N    | TRP | X | 98  | 49.819 | 63.838 | 33.870 | 0.00 | 0.00 |
| ATOM | 1510 | H    | TRP | X | 98  | 49.249 | 63.007 | 33.941 | 0.00 | 0.00 |
| ATOM | 1511 | CA   | TRP | X | 98  | 50.459 | 64.202 | 32.594 | 0.00 | 0.00 |
| ATOM | 1512 | HA   | TRP | X | 98  | 50.968 | 65.165 | 32.640 | 0.00 | 0.00 |
| ATOM | 1513 | CB   | TRP | X | 98  | 51.441 | 63.132 | 32.020 | 0.00 | 0.00 |
| ATOM | 1514 | HB2  | TRP | X | 98  | 50.815 | 62.243 | 31.940 | 0.00 | 0.00 |
| ATOM | 1515 | HB3  | TRP | X | 98  | 51.806 | 63.504 | 31.062 | 0.00 | 0.00 |
| ATOM | 1516 | CG   | TRP | X | 98  | 52.681 | 62.814 | 32.755 | 0.00 | 0.00 |
| ATOM | 1517 | CD1  | TRP | X | 98  | 53.906 | 63.017 | 32.269 | 0.00 | 0.00 |
| ATOM | 1518 | HD1  | TRP | X | 98  | 54.009 | 63.311 | 31.235 | 0.00 | 0.00 |
| ATOM | 1519 | NE1  | TRP | X | 98  | 54.902 | 62.567 | 33.122 | 0.00 | 0.00 |
| ATOM | 1520 | HE1  | TRP | X | 98  | 55.901 | 62.551 | 32.971 | 0.00 | 0.00 |
| ATOM | 1521 | CE2  | TRP | X | 98  | 54.278 | 61.982 | 34.189 | 0.00 | 0.00 |
| ATOM | 1522 | CZ2  | TRP | X | 98  | 54.861 | 61.332 | 35.307 | 0.00 | 0.00 |
| ATOM | 1523 | HZ2  | TRP | X | 98  | 55.928 | 61.285 | 35.464 | 0.00 | 0.00 |
| ATOM | 1524 | CH2  | TRP | X | 98  | 54.042 | 60.752 | 36.270 | 0.00 | 0.00 |
| ATOM | 1525 | HH2  | TRP | X | 98  | 54.402 | 60.278 | 37.172 | 0.00 | 0.00 |
| ATOM | 1526 | CZ3  | TRP | X | 98  | 52.655 | 60.898 | 36.132 | 0.00 | 0.00 |
| ATOM | 1527 | HZ3  | TRP | X | 98  | 51.974 | 60.445 | 36.837 | 0.00 | 0.00 |
| ATOM | 1528 | CE3  | TRP | X | 98  | 52.096 | 61.524 | 35.018 | 0.00 | 0.00 |
| ATOM | 1529 | HE3  | TRP | X | 98  | 51.029 | 61.663 | 34.920 | 0.00 | 0.00 |
| ATOM | 1530 | CD2  | TRP | X | 98  | 52.876 | 62.117 | 34.032 | 0.00 | 0.00 |
| ATOM | 1531 | C    | TRP | X | 98  | 49.314 | 64.330 | 31.560 | 0.00 | 0.00 |
| ATOM | 1532 | O    | TRP | X | 98  | 48.444 | 63.519 | 31.422 | 0.00 | 0.00 |
| ATOM | 1533 | N    | THR | X | 99  | 49.355 | 65.412 | 30.783 | 0.00 | 0.00 |
| ATOM | 1534 | H    | THR | X | 99  | 50.244 | 65.870 | 30.642 | 0.00 | 0.00 |
| ATOM | 1535 | CA   | THR | X | 99  | 48.359 | 65.847 | 29.846 | 0.00 | 0.00 |
| ATOM | 1536 | HA   | THR | X | 99  | 47.690 | 65.048 | 29.527 | 0.00 | 0.00 |
| ATOM | 1537 | CB   | THR | X | 99  | 47.404 | 66.785 | 30.558 | 0.00 | 0.00 |
| ATOM | 1538 | HB   | THR | X | 99  | 46.997 | 66.109 | 31.310 | 0.00 | 0.00 |
| ATOM | 1539 | CG2  | THR | X | 99  | 48.058 | 67.996 | 31.180 | 0.00 | 0.00 |
| ATOM | 1540 | HG21 | THR | X | 99  | 48.852 | 67.759 | 31.887 | 0.00 | 0.00 |
| ATOM | 1541 | HG22 | THR | X | 99  | 48.467 | 68.602 | 30.371 | 0.00 | 0.00 |
| ATOM | 1542 | HG23 | THR | X | 99  | 47.286 | 68.620 | 31.630 | 0.00 | 0.00 |
| ATOM | 1543 | OG1  | THR | X | 99  | 46.376 | 67.168 | 29.728 | 0.00 | 0.00 |
| ATOM | 1544 | HG1  | THR | X | 99  | 45.620 | 67.525 | 30.200 | 0.00 | 0.00 |
| ATOM | 1545 | C    | THR | X | 99  | 49.052 | 66.398 | 28.532 | 0.00 | 0.00 |
| ATOM | 1546 | O    | THR | X | 99  | 50.199 | 66.820 | 28.671 | 0.00 | 0.00 |
| ATOM | 1547 | N    | PRO | X | 100 | 48.435 | 66.354 | 27.281 | 0.00 | 0.00 |
| ATOM | 1548 | CD   | PRO | X | 100 | 47.227 | 65.552 | 27.026 | 0.00 | 0.00 |
| ATOM | 1549 | HD2  | PRO | X | 100 | 46.389 | 66.220 | 27.219 | 0.00 | 0.00 |
| ATOM | 1550 | HD3  | PRO | X | 100 | 47.076 | 64.616 | 27.564 | 0.00 | 0.00 |
| ATOM | 1551 | CG   | PRO | X | 100 | 47.270 | 65.262 | 25.537 | 0.00 | 0.00 |
| ATOM | 1552 | HG2  | PRO | X | 100 | 46.237 | 65.183 | 25.198 | 0.00 | 0.00 |
| ATOM | 1553 | HG3  | PRO | X | 100 | 47.888 | 64.381 | 25.366 | 0.00 | 0.00 |
| ATOM | 1554 | CB   | PRO | X | 100 | 48.009 | 66.442 | 24.904 | 0.00 | 0.00 |
| ATOM | 1555 | HB2  | PRO | X | 100 | 47.274 | 67.239 | 24.795 | 0.00 | 0.00 |
| ATOM | 1556 | HB3  | PRO | X | 100 | 48.419 | 66.261 | 23.910 | 0.00 | 0.00 |
| ATOM | 1557 | CA   | PRO | X | 100 | 49.029 | 66.808 | 26.056 | 0.00 | 0.00 |
| ATOM | 1558 | HA   | PRO | X | 100 | 49.964 | 66.253 | 25.987 | 0.00 | 0.00 |
| ATOM | 1559 | C    | PRO | X | 100 | 49.483 | 68.301 | 26.077 | 0.00 | 0.00 |
| ATOM | 1560 | O    | PRO | X | 100 | 48.693 | 69.130 | 26.562 | 0.00 | 0.00 |
| ATOM | 1561 | N    | TYR | X | 101 | 50.661 | 68.724 | 25.496 | 0.00 | 0.00 |
| ATOM | 1562 | H    | TYR | X | 101 | 51.253 | 67.967 | 25.184 | 0.00 | 0.00 |
| ATOM | 1563 | CA   | TYR | X | 101 | 51.030 | 70.111 | 25.248 | 0.00 | 0.00 |
| ATOM | 1564 | HA   | TYR | X | 101 | 50.369 | 70.778 | 25.800 | 0.00 | 0.00 |
| ATOM | 1565 | CB   | TYR | X | 101 | 52.387 | 70.376 | 25.866 | 0.00 | 0.00 |
| ATOM | 1566 | HB2  | TYR | X | 101 | 52.298 | 69.978 | 26.877 | 0.00 | 0.00 |
| ATOM | 1567 | HB3  | TYR | X | 101 | 53.194 | 69.785 | 25.433 | 0.00 | 0.00 |
| ATOM | 1568 | CG   | TYR | X | 101 | 52.856 | 71.836 | 25.955 | 0.00 | 0.00 |
| ATOM | 1569 | CD1  | TYR | X | 101 | 53.381 | 72.446 | 24.769 | 0.00 | 0.00 |
| ATOM | 1570 | HD1  | TYR | X | 101 | 53.479 | 71.925 | 23.828 | 0.00 | 0.00 |
| ATOM | 1571 | CE1  | TYR | X | 101 | 53.649 | 73.840 | 24.776 | 0.00 | 0.00 |
| ATOM | 1572 | HE1  | TYR | X | 101 | 53.904 | 74.403 | 23.890 | 0.00 | 0.00 |
| ATOM | 1573 | CZ   | TYR | X | 101 | 53.468 | 74.632 | 25.912 | 0.00 | 0.00 |
| ATOM | 1574 | OH   | TYR | X | 101 | 53.922 | 75.937 | 25.931 | 0.00 | 0.00 |
| ATOM | 1575 | HH   | TYR | X | 101 | 54.019 | 76.260 | 25.032 | 0.00 | 0.00 |
| ATOM | 1576 | CE2  | TYR | X | 101 | 53.095 | 74.013 | 27.149 | 0.00 | 0.00 |
| ATOM | 1577 | HE2  | TYR | X | 101 | 53.124 | 74.572 | 28.073 | 0.00 | 0.00 |
| ATOM | 1578 | CD2  | TYR | X | 101 | 52.682 | 72.647 | 27.135 | 0.00 | 0.00 |

|      |      |      |     |   |     |        |        |        |      |      |
|------|------|------|-----|---|-----|--------|--------|--------|------|------|
| ATOM | 1579 | HD2  | TYR | X | 101 | 52.325 | 72.249 | 28.074 | 0.00 | 0.00 |
| ATOM | 1580 | C    | TYR | X | 101 | 51.089 | 70.360 | 23.723 | 0.00 | 0.00 |
| ATOM | 1581 | O    | TYR | X | 101 | 51.527 | 69.485 | 22.988 | 0.00 | 0.00 |
| ATOM | 1582 | N    | PRO | X | 102 | 50.507 | 71.496 | 23.259 | 0.00 | 0.00 |
| ATOM | 1583 | CD   | PRO | X | 102 | 50.516 | 71.887 | 21.865 | 0.00 | 0.00 |
| ATOM | 1584 | HD2  | PRO | X | 102 | 49.562 | 71.557 | 21.454 | 0.00 | 0.00 |
| ATOM | 1585 | HD3  | PRO | X | 102 | 51.310 | 71.431 | 21.273 | 0.00 | 0.00 |
| ATOM | 1586 | CG   | PRO | X | 102 | 50.628 | 73.382 | 21.896 | 0.00 | 0.00 |
| ATOM | 1587 | HG2  | PRO | X | 102 | 50.272 | 73.908 | 21.010 | 0.00 | 0.00 |
| ATOM | 1588 | HG3  | PRO | X | 102 | 51.586 | 73.723 | 22.287 | 0.00 | 0.00 |
| ATOM | 1589 | CB   | PRO | X | 102 | 49.662 | 73.773 | 23.035 | 0.00 | 0.00 |
| ATOM | 1590 | HB2  | PRO | X | 102 | 48.660 | 74.000 | 22.673 | 0.00 | 0.00 |
| ATOM | 1591 | HB3  | PRO | X | 102 | 49.998 | 74.630 | 23.618 | 0.00 | 0.00 |
| ATOM | 1592 | CA   | PRO | X | 102 | 49.771 | 72.544 | 23.988 | 0.00 | 0.00 |
| ATOM | 1593 | HA   | PRO | X | 102 | 50.399 | 72.814 | 24.836 | 0.00 | 0.00 |
| ATOM | 1594 | C    | PRO | X | 102 | 48.375 | 71.960 | 24.471 | 0.00 | 0.00 |
| ATOM | 1595 | O    | PRO | X | 102 | 47.908 | 70.986 | 23.935 | 0.00 | 0.00 |
| ATOM | 1596 | N    | ARG | X | 103 | 47.741 | 72.610 | 25.468 | 0.00 | 0.00 |
| ATOM | 1597 | H    | ARG | X | 103 | 48.250 | 73.426 | 25.777 | 0.00 | 0.00 |
| ATOM | 1598 | CA   | ARG | X | 103 | 46.605 | 71.969 | 26.165 | 0.00 | 0.00 |
| ATOM | 1599 | HA   | ARG | X | 103 | 47.008 | 71.046 | 26.583 | 0.00 | 0.00 |
| ATOM | 1600 | CB   | ARG | X | 103 | 46.212 | 72.941 | 27.299 | 0.00 | 0.00 |
| ATOM | 1601 | HB2  | ARG | X | 103 | 47.094 | 73.214 | 27.879 | 0.00 | 0.00 |
| ATOM | 1602 | HB3  | ARG | X | 103 | 45.922 | 73.945 | 26.989 | 0.00 | 0.00 |
| ATOM | 1603 | CG   | ARG | X | 103 | 45.143 | 72.436 | 28.200 | 0.00 | 0.00 |
| ATOM | 1604 | HG2  | ARG | X | 103 | 44.278 | 72.061 | 27.653 | 0.00 | 0.00 |
| ATOM | 1605 | HG3  | ARG | X | 103 | 45.656 | 71.677 | 28.790 | 0.00 | 0.00 |
| ATOM | 1606 | CD   | ARG | X | 103 | 44.662 | 73.525 | 29.178 | 0.00 | 0.00 |
| ATOM | 1607 | HD2  | ARG | X | 103 | 44.111 | 73.091 | 30.013 | 0.00 | 0.00 |
| ATOM | 1608 | HD3  | ARG | X | 103 | 45.497 | 74.127 | 29.538 | 0.00 | 0.00 |
| ATOM | 1609 | NE   | ARG | X | 103 | 43.808 | 74.618 | 28.546 | 0.00 | 0.00 |
| ATOM | 1610 | HE   | ARG | X | 103 | 44.239 | 75.511 | 28.354 | 0.00 | 0.00 |
| ATOM | 1611 | CZ   | ARG | X | 103 | 42.517 | 74.457 | 28.238 | 0.00 | 0.00 |
| ATOM | 1612 | NH1  | ARG | X | 103 | 41.806 | 73.397 | 28.608 | 0.00 | 0.00 |
| ATOM | 1613 | HH11 | ARG | X | 103 | 42.278 | 72.798 | 29.271 | 0.00 | 0.00 |
| ATOM | 1614 | HH12 | ARG | X | 103 | 40.837 | 73.258 | 28.360 | 0.00 | 0.00 |
| ATOM | 1615 | NH2  | ARG | X | 103 | 41.956 | 75.330 | 27.425 | 0.00 | 0.00 |
| ATOM | 1616 | HH21 | ARG | X | 103 | 42.489 | 76.166 | 27.234 | 0.00 | 0.00 |
| ATOM | 1617 | HH22 | ARG | X | 103 | 41.145 | 75.109 | 26.864 | 0.00 | 0.00 |
| ATOM | 1618 | C    | ARG | X | 103 | 45.390 | 71.662 | 25.235 | 0.00 | 0.00 |
| ATOM | 1619 | O    | ARG | X | 103 | 45.051 | 72.465 | 24.407 | 0.00 | 0.00 |
| ATOM | 1620 | N    | PRO | X | 104 | 44.783 | 70.492 | 25.427 | 0.00 | 0.00 |
| ATOM | 1621 | CD   | PRO | X | 104 | 45.121 | 69.409 | 26.368 | 0.00 | 0.00 |
| ATOM | 1622 | HD2  | PRO | X | 104 | 45.184 | 69.693 | 27.419 | 0.00 | 0.00 |
| ATOM | 1623 | HD3  | PRO | X | 104 | 46.099 | 69.094 | 26.004 | 0.00 | 0.00 |
| ATOM | 1624 | CG   | PRO | X | 104 | 44.107 | 68.251 | 26.102 | 0.00 | 0.00 |
| ATOM | 1625 | HG2  | PRO | X | 104 | 43.379 | 68.400 | 26.899 | 0.00 | 0.00 |
| ATOM | 1626 | HG3  | PRO | X | 104 | 44.577 | 67.267 | 26.121 | 0.00 | 0.00 |
| ATOM | 1627 | CB   | PRO | X | 104 | 43.542 | 68.541 | 24.654 | 0.00 | 0.00 |
| ATOM | 1628 | HB2  | PRO | X | 104 | 42.495 | 68.240 | 24.618 | 0.00 | 0.00 |
| ATOM | 1629 | HB3  | PRO | X | 104 | 44.087 | 68.100 | 23.819 | 0.00 | 0.00 |
| ATOM | 1630 | CA   | PRO | X | 104 | 43.660 | 70.090 | 24.563 | 0.00 | 0.00 |
| ATOM | 1631 | HA   | PRO | X | 104 | 43.682 | 70.385 | 23.515 | 0.00 | 0.00 |
| ATOM | 1632 | C    | PRO | X | 104 | 42.437 | 70.842 | 25.052 | 0.00 | 0.00 |
| ATOM | 1633 | O    | PRO | X | 104 | 42.182 | 70.843 | 26.228 | 0.00 | 0.00 |
| ATOM | 1634 | N    | THR | X | 105 | 41.672 | 71.460 | 24.127 | 0.00 | 0.00 |
| ATOM | 1635 | H    | THR | X | 105 | 41.960 | 71.282 | 23.175 | 0.00 | 0.00 |
| ATOM | 1636 | CA   | THR | X | 105 | 40.400 | 72.205 | 24.302 | 0.00 | 0.00 |
| ATOM | 1637 | HA   | THR | X | 105 | 40.417 | 72.552 | 25.335 | 0.00 | 0.00 |
| ATOM | 1638 | CB   | THR | X | 105 | 40.225 | 73.440 | 23.345 | 0.00 | 0.00 |
| ATOM | 1639 | HB   | THR | X | 105 | 39.262 | 73.945 | 23.428 | 0.00 | 0.00 |
| ATOM | 1640 | CG2  | THR | X | 105 | 41.230 | 74.520 | 23.714 | 0.00 | 0.00 |
| ATOM | 1641 | HG21 | THR | X | 105 | 40.775 | 75.163 | 24.467 | 0.00 | 0.00 |
| ATOM | 1642 | HG22 | THR | X | 105 | 42.094 | 74.101 | 24.231 | 0.00 | 0.00 |
| ATOM | 1643 | HG23 | THR | X | 105 | 41.523 | 75.113 | 22.848 | 0.00 | 0.00 |
| ATOM | 1644 | OG1  | THR | X | 105 | 40.545 | 73.042 | 21.994 | 0.00 | 0.00 |
| ATOM | 1645 | HG1  | THR | X | 105 | 39.754 | 72.634 | 21.634 | 0.00 | 0.00 |
| ATOM | 1646 | C    | THR | X | 105 | 39.219 | 71.300 | 24.347 | 0.00 | 0.00 |
| ATOM | 1647 | O    | THR | X | 105 | 38.324 | 71.664 | 25.094 | 0.00 | 0.00 |
| ATOM | 1648 | N    | SER | X | 106 | 39.119 | 70.217 | 23.594 | 0.00 | 0.00 |

|      |      |      |     |   |     |        |        |        |      |      |
|------|------|------|-----|---|-----|--------|--------|--------|------|------|
| ATOM | 1649 | H    | SER | X | 106 | 39.885 | 69.925 | 23.004 | 0.00 | 0.00 |
| ATOM | 1650 | CA   | SER | X | 106 | 38.002 | 69.241 | 23.709 | 0.00 | 0.00 |
| ATOM | 1651 | HA   | SER | X | 106 | 37.191 | 69.832 | 24.133 | 0.00 | 0.00 |
| ATOM | 1652 | CB   | SER | X | 106 | 37.532 | 68.721 | 22.354 | 0.00 | 0.00 |
| ATOM | 1653 | HB2  | SER | X | 106 | 36.528 | 68.418 | 22.653 | 0.00 | 0.00 |
| ATOM | 1654 | HB3  | SER | X | 106 | 37.599 | 69.542 | 21.641 | 0.00 | 0.00 |
| ATOM | 1655 | OG   | SER | X | 106 | 38.228 | 67.501 | 21.991 | 0.00 | 0.00 |
| ATOM | 1656 | HG   | SER | X | 106 | 38.259 | 67.442 | 21.033 | 0.00 | 0.00 |
| ATOM | 1657 | C    | SER | X | 106 | 38.372 | 68.114 | 24.697 | 0.00 | 0.00 |
| ATOM | 1658 | O    | SER | X | 106 | 39.557 | 67.941 | 24.986 | 0.00 | 0.00 |
| ATOM | 1659 | N    | PRO | X | 107 | 37.378 | 67.402 | 25.295 | 0.00 | 0.00 |
| ATOM | 1660 | CD   | PRO | X | 107 | 36.032 | 67.774 | 25.297 | 0.00 | 0.00 |
| ATOM | 1661 | HD2  | PRO | X | 107 | 35.519 | 67.261 | 24.484 | 0.00 | 0.00 |
| ATOM | 1662 | HD3  | PRO | X | 107 | 35.737 | 68.821 | 25.224 | 0.00 | 0.00 |
| ATOM | 1663 | CG   | PRO | X | 107 | 35.530 | 67.175 | 26.682 | 0.00 | 0.00 |
| ATOM | 1664 | HG2  | PRO | X | 107 | 34.469 | 66.976 | 26.833 | 0.00 | 0.00 |
| ATOM | 1665 | HG3  | PRO | X | 107 | 35.958 | 67.786 | 27.476 | 0.00 | 0.00 |
| ATOM | 1666 | CB   | PRO | X | 107 | 36.279 | 65.891 | 26.644 | 0.00 | 0.00 |
| ATOM | 1667 | HB2  | PRO | X | 107 | 35.820 | 65.166 | 25.972 | 0.00 | 0.00 |
| ATOM | 1668 | HB3  | PRO | X | 107 | 36.335 | 65.385 | 27.608 | 0.00 | 0.00 |
| ATOM | 1669 | CA   | PRO | X | 107 | 37.679 | 66.315 | 26.207 | 0.00 | 0.00 |
| ATOM | 1670 | HA   | PRO | X | 107 | 38.253 | 66.717 | 27.043 | 0.00 | 0.00 |
| ATOM | 1671 | C    | PRO | X | 107 | 38.409 | 65.166 | 25.637 | 0.00 | 0.00 |
| ATOM | 1672 | O    | PRO | X | 107 | 38.125 | 64.772 | 24.480 | 0.00 | 0.00 |
| ATOM | 1673 | N    | THR | X | 108 | 39.385 | 64.657 | 26.445 | 0.00 | 0.00 |
| ATOM | 1674 | H    | THR | X | 108 | 39.655 | 64.989 | 27.360 | 0.00 | 0.00 |
| ATOM | 1675 | CA   | THR | X | 108 | 40.056 | 63.356 | 26.191 | 0.00 | 0.00 |
| ATOM | 1676 | HA   | THR | X | 108 | 39.508 | 62.817 | 25.419 | 0.00 | 0.00 |
| ATOM | 1677 | CB   | THR | X | 108 | 41.411 | 63.621 | 25.549 | 0.00 | 0.00 |
| ATOM | 1678 | HB   | THR | X | 108 | 41.259 | 64.194 | 24.634 | 0.00 | 0.00 |
| ATOM | 1679 | CG2  | THR | X | 108 | 42.491 | 64.293 | 26.295 | 0.00 | 0.00 |
| ATOM | 1680 | HG21 | THR | X | 108 | 42.804 | 63.594 | 27.071 | 0.00 | 0.00 |
| ATOM | 1681 | HG22 | THR | X | 108 | 43.302 | 64.553 | 25.614 | 0.00 | 0.00 |
| ATOM | 1682 | HG23 | THR | X | 108 | 42.112 | 65.253 | 26.644 | 0.00 | 0.00 |
| ATOM | 1683 | OG1  | THR | X | 108 | 41.980 | 62.334 | 25.200 | 0.00 | 0.00 |
| ATOM | 1684 | HG1  | THR | X | 108 | 42.891 | 62.364 | 25.502 | 0.00 | 0.00 |
| ATOM | 1685 | C    | THR | X | 108 | 40.141 | 62.384 | 27.366 | 0.00 | 0.00 |
| ATOM | 1686 | O    | THR | X | 108 | 40.462 | 62.865 | 28.496 | 0.00 | 0.00 |
| ATOM | 1687 | N    | PRO | X | 109 | 39.895 | 61.090 | 27.169 | 0.00 | 0.00 |
| ATOM | 1688 | CD   | PRO | X | 109 | 39.844 | 60.413 | 25.903 | 0.00 | 0.00 |
| ATOM | 1689 | HD2  | PRO | X | 109 | 40.794 | 60.352 | 25.373 | 0.00 | 0.00 |
| ATOM | 1690 | HD3  | PRO | X | 109 | 39.173 | 60.888 | 25.187 | 0.00 | 0.00 |
| ATOM | 1691 | CG   | PRO | X | 109 | 39.195 | 59.072 | 26.169 | 0.00 | 0.00 |
| ATOM | 1692 | HG2  | PRO | X | 109 | 39.427 | 58.324 | 25.412 | 0.00 | 0.00 |
| ATOM | 1693 | HG3  | PRO | X | 109 | 38.111 | 59.141 | 26.261 | 0.00 | 0.00 |
| ATOM | 1694 | CB   | PRO | X | 109 | 39.601 | 58.665 | 27.607 | 0.00 | 0.00 |
| ATOM | 1695 | HB2  | PRO | X | 109 | 40.579 | 58.183 | 27.633 | 0.00 | 0.00 |
| ATOM | 1696 | HB3  | PRO | X | 109 | 38.783 | 58.109 | 28.065 | 0.00 | 0.00 |
| ATOM | 1697 | CA   | PRO | X | 109 | 39.790 | 60.091 | 28.243 | 0.00 | 0.00 |
| ATOM | 1698 | HA   | PRO | X | 109 | 38.939 | 60.278 | 28.897 | 0.00 | 0.00 |
| ATOM | 1699 | C    | PRO | X | 109 | 40.999 | 59.989 | 29.188 | 0.00 | 0.00 |
| ATOM | 1700 | O    | PRO | X | 109 | 42.054 | 60.521 | 28.840 | 0.00 | 0.00 |
| ATOM | 1701 | N    | VAL | X | 110 | 40.816 | 59.336 | 30.327 | 0.00 | 0.00 |
| ATOM | 1702 | H    | VAL | X | 110 | 39.868 | 59.035 | 30.502 | 0.00 | 0.00 |
| ATOM | 1703 | CA   | VAL | X | 110 | 41.810 | 59.406 | 31.413 | 0.00 | 0.00 |
| ATOM | 1704 | HA   | VAL | X | 110 | 42.715 | 59.907 | 31.069 | 0.00 | 0.00 |
| ATOM | 1705 | CB   | VAL | X | 110 | 41.229 | 60.195 | 32.629 | 0.00 | 0.00 |
| ATOM | 1706 | HB   | VAL | X | 110 | 40.413 | 59.697 | 33.153 | 0.00 | 0.00 |
| ATOM | 1707 | CG1  | VAL | X | 110 | 42.323 | 60.439 | 33.622 | 0.00 | 0.00 |
| ATOM | 1708 | HG11 | VAL | X | 110 | 42.997 | 59.582 | 33.645 | 0.00 | 0.00 |
| ATOM | 1709 | HG12 | VAL | X | 110 | 42.762 | 61.427 | 33.480 | 0.00 | 0.00 |
| ATOM | 1710 | HG13 | VAL | X | 110 | 41.851 | 60.424 | 34.605 | 0.00 | 0.00 |
| ATOM | 1711 | CG2  | VAL | X | 110 | 40.592 | 61.586 | 32.295 | 0.00 | 0.00 |
| ATOM | 1712 | HG21 | VAL | X | 110 | 39.751 | 61.403 | 31.626 | 0.00 | 0.00 |
| ATOM | 1713 | HG22 | VAL | X | 110 | 40.170 | 62.053 | 33.186 | 0.00 | 0.00 |
| ATOM | 1714 | HG23 | VAL | X | 110 | 41.250 | 62.235 | 31.718 | 0.00 | 0.00 |
| ATOM | 1715 | C    | VAL | X | 110 | 42.154 | 57.954 | 31.845 | 0.00 | 0.00 |
| ATOM | 1716 | O    | VAL | X | 110 | 41.332 | 57.113 | 32.265 | 0.00 | 0.00 |
| ATOM | 1717 | N    | LEU | X | 111 | 43.408 | 57.621 | 31.679 | 0.00 | 0.00 |
| ATOM | 1718 | H    | LEU | X | 111 | 44.130 | 58.273 | 31.409 | 0.00 | 0.00 |

|      |      |      |     |   |     |        |        |        |      |      |
|------|------|------|-----|---|-----|--------|--------|--------|------|------|
| ATOM | 1719 | CA   | LEU | X | 111 | 43.922 | 56.324 | 32.141 | 0.00 | 0.00 |
| ATOM | 1720 | HA   | LEU | X | 111 | 43.146 | 55.584 | 32.339 | 0.00 | 0.00 |
| ATOM | 1721 | CB   | LEU | X | 111 | 44.956 | 55.885 | 31.065 | 0.00 | 0.00 |
| ATOM | 1722 | HB2  | LEU | X | 111 | 45.407 | 56.775 | 30.627 | 0.00 | 0.00 |
| ATOM | 1723 | HB3  | LEU | X | 111 | 45.790 | 55.371 | 31.542 | 0.00 | 0.00 |
| ATOM | 1724 | CG   | LEU | X | 111 | 44.325 | 55.041 | 29.998 | 0.00 | 0.00 |
| ATOM | 1725 | HG   | LEU | X | 111 | 43.464 | 55.520 | 29.531 | 0.00 | 0.00 |
| ATOM | 1726 | CD1  | LEU | X | 111 | 45.416 | 54.704 | 28.949 | 0.00 | 0.00 |
| ATOM | 1727 | HD11 | LEU | X | 111 | 46.062 | 53.932 | 29.367 | 0.00 | 0.00 |
| ATOM | 1728 | HD12 | LEU | X | 111 | 44.920 | 54.322 | 28.056 | 0.00 | 0.00 |
| ATOM | 1729 | HD13 | LEU | X | 111 | 45.954 | 55.622 | 28.717 | 0.00 | 0.00 |
| ATOM | 1730 | CD2  | LEU | X | 111 | 43.764 | 53.686 | 30.649 | 0.00 | 0.00 |
| ATOM | 1731 | HD21 | LEU | X | 111 | 44.475 | 53.041 | 31.166 | 0.00 | 0.00 |
| ATOM | 1732 | HD22 | LEU | X | 111 | 42.907 | 53.982 | 31.253 | 0.00 | 0.00 |
| ATOM | 1733 | HD23 | LEU | X | 111 | 43.402 | 53.013 | 29.872 | 0.00 | 0.00 |
| ATOM | 1734 | C    | LEU | X | 111 | 44.635 | 56.552 | 33.557 | 0.00 | 0.00 |
| ATOM | 1735 | O    | LEU | X | 111 | 45.447 | 57.521 | 33.605 | 0.00 | 0.00 |
| ATOM | 1736 | N    | VAL | X | 112 | 44.254 | 55.814 | 34.593 | 0.00 | 0.00 |
| ATOM | 1737 | H    | VAL | X | 112 | 43.443 | 55.242 | 34.405 | 0.00 | 0.00 |
| ATOM | 1738 | CA   | VAL | X | 112 | 44.656 | 55.946 | 36.024 | 0.00 | 0.00 |
| ATOM | 1739 | HA   | VAL | X | 112 | 45.188 | 56.856 | 36.298 | 0.00 | 0.00 |
| ATOM | 1740 | CB   | VAL | X | 112 | 43.324 | 56.069 | 36.835 | 0.00 | 0.00 |
| ATOM | 1741 | HB   | VAL | X | 112 | 42.689 | 55.193 | 36.701 | 0.00 | 0.00 |
| ATOM | 1742 | CG1  | VAL | X | 112 | 43.575 | 56.173 | 38.389 | 0.00 | 0.00 |
| ATOM | 1743 | HG11 | VAL | X | 112 | 42.591 | 56.347 | 38.823 | 0.00 | 0.00 |
| ATOM | 1744 | HG12 | VAL | X | 112 | 44.192 | 55.363 | 38.777 | 0.00 | 0.00 |
| ATOM | 1745 | HG13 | VAL | X | 112 | 44.161 | 57.071 | 38.586 | 0.00 | 0.00 |
| ATOM | 1746 | CG2  | VAL | X | 112 | 42.541 | 57.385 | 36.407 | 0.00 | 0.00 |
| ATOM | 1747 | HG21 | VAL | X | 112 | 43.084 | 58.260 | 36.763 | 0.00 | 0.00 |
| ATOM | 1748 | HG22 | VAL | X | 112 | 42.515 | 57.557 | 35.331 | 0.00 | 0.00 |
| ATOM | 1749 | HG23 | VAL | X | 112 | 41.589 | 57.386 | 36.939 | 0.00 | 0.00 |
| ATOM | 1750 | C    | VAL | X | 112 | 45.521 | 54.747 | 36.394 | 0.00 | 0.00 |
| ATOM | 1751 | O    | VAL | X | 112 | 45.083 | 53.570 | 36.252 | 0.00 | 0.00 |
| ATOM | 1752 | N    | TRP | X | 113 | 46.758 | 54.972 | 36.804 | 0.00 | 0.00 |
| ATOM | 1753 | H    | TRP | X | 113 | 47.026 | 55.927 | 36.994 | 0.00 | 0.00 |
| ATOM | 1754 | CA   | TRP | X | 113 | 47.743 | 53.957 | 37.012 | 0.00 | 0.00 |
| ATOM | 1755 | HA   | TRP | X | 113 | 47.552 | 53.109 | 36.355 | 0.00 | 0.00 |
| ATOM | 1756 | CB   | TRP | X | 113 | 49.156 | 54.410 | 36.518 | 0.00 | 0.00 |
| ATOM | 1757 | HB2  | TRP | X | 113 | 49.102 | 54.639 | 35.454 | 0.00 | 0.00 |
| ATOM | 1758 | HB3  | TRP | X | 113 | 49.356 | 55.382 | 36.967 | 0.00 | 0.00 |
| ATOM | 1759 | CG   | TRP | X | 113 | 50.300 | 53.460 | 36.760 | 0.00 | 0.00 |
| ATOM | 1760 | CD1  | TRP | X | 113 | 51.510 | 53.737 | 37.392 | 0.00 | 0.00 |
| ATOM | 1761 | HD1  | TRP | X | 113 | 51.799 | 54.670 | 37.851 | 0.00 | 0.00 |
| ATOM | 1762 | NE1  | TRP | X | 113 | 52.278 | 52.591 | 37.502 | 0.00 | 0.00 |
| ATOM | 1763 | HE1  | TRP | X | 113 | 53.234 | 52.694 | 37.814 | 0.00 | 0.00 |
| ATOM | 1764 | CE2  | TRP | X | 113 | 51.632 | 51.500 | 37.076 | 0.00 | 0.00 |
| ATOM | 1765 | CZ2  | TRP | X | 113 | 52.021 | 50.160 | 36.930 | 0.00 | 0.00 |
| ATOM | 1766 | HZ2  | TRP | X | 113 | 52.968 | 49.773 | 37.276 | 0.00 | 0.00 |
| ATOM | 1767 | CH2  | TRP | X | 113 | 51.120 | 49.258 | 36.329 | 0.00 | 0.00 |
| ATOM | 1768 | HH2  | TRP | X | 113 | 51.360 | 48.209 | 36.423 | 0.00 | 0.00 |
| ATOM | 1769 | CZ3  | TRP | X | 113 | 49.880 | 49.686 | 35.844 | 0.00 | 0.00 |
| ATOM | 1770 | HZ3  | TRP | X | 113 | 49.136 | 48.982 | 35.502 | 0.00 | 0.00 |
| ATOM | 1771 | CE3  | TRP | X | 113 | 49.433 | 51.054 | 36.108 | 0.00 | 0.00 |
| ATOM | 1772 | HE3  | TRP | X | 113 | 48.436 | 51.299 | 35.775 | 0.00 | 0.00 |
| ATOM | 1773 | CD2  | TRP | X | 113 | 50.368 | 51.990 | 36.640 | 0.00 | 0.00 |
| ATOM | 1774 | C    | TRP | X | 113 | 47.788 | 53.577 | 38.455 | 0.00 | 0.00 |
| ATOM | 1775 | O    | TRP | X | 113 | 48.070 | 54.304 | 39.410 | 0.00 | 0.00 |
| ATOM | 1776 | N    | ILE | X | 114 | 47.491 | 52.301 | 38.697 | 0.00 | 0.00 |
| ATOM | 1777 | H    | ILE | X | 114 | 47.190 | 51.679 | 37.960 | 0.00 | 0.00 |
| ATOM | 1778 | CA   | ILE | X | 114 | 47.608 | 51.711 | 39.992 | 0.00 | 0.00 |
| ATOM | 1779 | HA   | ILE | X | 114 | 48.030 | 52.500 | 40.613 | 0.00 | 0.00 |
| ATOM | 1780 | CB   | ILE | X | 114 | 46.181 | 51.441 | 40.561 | 0.00 | 0.00 |
| ATOM | 1781 | HB   | ILE | X | 114 | 45.738 | 50.641 | 39.968 | 0.00 | 0.00 |
| ATOM | 1782 | CG2  | ILE | X | 114 | 46.251 | 50.848 | 41.983 | 0.00 | 0.00 |
| ATOM | 1783 | HG21 | ILE | X | 114 | 47.036 | 50.118 | 42.183 | 0.00 | 0.00 |
| ATOM | 1784 | HG22 | ILE | X | 114 | 46.566 | 51.632 | 42.672 | 0.00 | 0.00 |
| ATOM | 1785 | HG23 | ILE | X | 114 | 45.339 | 50.505 | 42.472 | 0.00 | 0.00 |
| ATOM | 1786 | CG1  | ILE | X | 114 | 45.261 | 52.641 | 40.439 | 0.00 | 0.00 |
| ATOM | 1787 | HG12 | ILE | X | 114 | 45.750 | 53.603 | 40.593 | 0.00 | 0.00 |
| ATOM | 1788 | HG13 | ILE | X | 114 | 44.933 | 52.631 | 39.399 | 0.00 | 0.00 |

|      |      |      |     |   |     |        |        |        |      |      |
|------|------|------|-----|---|-----|--------|--------|--------|------|------|
| ATOM | 1789 | CD1  | ILE | X | 114 | 44.029 | 52.676 | 41.349 | 0.00 | 0.00 |
| ATOM | 1790 | HD11 | ILE | X | 114 | 43.501 | 51.743 | 41.154 | 0.00 | 0.00 |
| ATOM | 1791 | HD12 | ILE | X | 114 | 44.330 | 52.712 | 42.396 | 0.00 | 0.00 |
| ATOM | 1792 | HD13 | ILE | X | 114 | 43.370 | 53.497 | 41.064 | 0.00 | 0.00 |
| ATOM | 1793 | C    | ILE | X | 114 | 48.706 | 50.555 | 40.111 | 0.00 | 0.00 |
| ATOM | 1794 | O    | ILE | X | 114 | 48.402 | 49.460 | 39.646 | 0.00 | 0.00 |
| ATOM | 1795 | N    | TYR | X | 115 | 49.920 | 50.876 | 40.605 | 0.00 | 0.00 |
| ATOM | 1796 | H    | TYR | X | 115 | 50.147 | 51.851 | 40.738 | 0.00 | 0.00 |
| ATOM | 1797 | CA   | TYR | X | 115 | 51.067 | 49.917 | 40.559 | 0.00 | 0.00 |
| ATOM | 1798 | HA   | TYR | X | 115 | 51.008 | 49.433 | 39.584 | 0.00 | 0.00 |
| ATOM | 1799 | CB   | TYR | X | 115 | 52.363 | 50.777 | 40.678 | 0.00 | 0.00 |
| ATOM | 1800 | HB2  | TYR | X | 115 | 53.223 | 50.113 | 40.763 | 0.00 | 0.00 |
| ATOM | 1801 | HB3  | TYR | X | 115 | 52.505 | 51.300 | 39.732 | 0.00 | 0.00 |
| ATOM | 1802 | CG   | TYR | X | 115 | 52.317 | 51.862 | 41.736 | 0.00 | 0.00 |
| ATOM | 1803 | CD1  | TYR | X | 115 | 52.581 | 51.556 | 43.036 | 0.00 | 0.00 |
| ATOM | 1804 | HD1  | TYR | X | 115 | 52.818 | 50.546 | 43.338 | 0.00 | 0.00 |
| ATOM | 1805 | CE1  | TYR | X | 115 | 52.379 | 52.408 | 44.112 | 0.00 | 0.00 |
| ATOM | 1806 | HE1  | TYR | X | 115 | 52.375 | 52.139 | 45.158 | 0.00 | 0.00 |
| ATOM | 1807 | CZ   | TYR | X | 115 | 51.963 | 53.738 | 43.764 | 0.00 | 0.00 |
| ATOM | 1808 | OH   | TYR | X | 115 | 51.860 | 54.594 | 44.814 | 0.00 | 0.00 |
| ATOM | 1809 | HH   | TYR | X | 115 | 51.314 | 55.349 | 44.584 | 0.00 | 0.00 |
| ATOM | 1810 | CE2  | TYR | X | 115 | 51.652 | 54.085 | 42.468 | 0.00 | 0.00 |
| ATOM | 1811 | HE2  | TYR | X | 115 | 51.247 | 55.053 | 42.213 | 0.00 | 0.00 |
| ATOM | 1812 | CD2  | TYR | X | 115 | 51.771 | 53.104 | 41.436 | 0.00 | 0.00 |
| ATOM | 1813 | HD2  | TYR | X | 115 | 51.475 | 53.439 | 40.452 | 0.00 | 0.00 |
| ATOM | 1814 | C    | TYR | X | 115 | 51.065 | 48.779 | 41.597 | 0.00 | 0.00 |
| ATOM | 1815 | O    | TYR | X | 115 | 50.396 | 48.870 | 42.681 | 0.00 | 0.00 |
| ATOM | 1816 | N    | GLY | X | 116 | 51.736 | 47.712 | 41.242 | 0.00 | 0.00 |
| ATOM | 1817 | H    | GLY | X | 116 | 52.253 | 47.673 | 40.376 | 0.00 | 0.00 |
| ATOM | 1818 | CA   | GLY | X | 116 | 52.076 | 46.549 | 42.150 | 0.00 | 0.00 |
| ATOM | 1819 | HA2  | GLY | X | 116 | 51.239 | 46.144 | 42.800 | 0.00 | 0.00 |
| ATOM | 1820 | HA3  | GLY | X | 116 | 52.384 | 45.698 | 41.535 | 0.00 | 0.00 |
| ATOM | 1821 | C    | GLY | X | 116 | 53.222 | 46.939 | 43.101 | 0.00 | 0.00 |
| ATOM | 1822 | O    | GLY | X | 116 | 53.839 | 47.998 | 42.965 | 0.00 | 0.00 |
| ATOM | 1823 | N    | GLY | X | 117 | 53.530 | 45.994 | 43.971 | 0.00 | 0.00 |
| ATOM | 1824 | H    | GLY | X | 117 | 53.033 | 45.124 | 43.844 | 0.00 | 0.00 |
| ATOM | 1825 | CA   | GLY | X | 117 | 54.567 | 45.979 | 45.057 | 0.00 | 0.00 |
| ATOM | 1826 | HA2  | GLY | X | 117 | 55.509 | 45.602 | 44.561 | 0.00 | 0.00 |
| ATOM | 1827 | HA3  | GLY | X | 117 | 54.861 | 46.987 | 45.374 | 0.00 | 0.00 |
| ATOM | 1828 | C    | GLY | X | 117 | 54.283 | 45.016 | 46.223 | 0.00 | 0.00 |
| ATOM | 1829 | O    | GLY | X | 117 | 54.877 | 45.333 | 47.259 | 0.00 | 0.00 |
| ATOM | 1830 | N    | GLY | X | 118 | 53.451 | 43.987 | 46.106 | 0.00 | 0.00 |
| ATOM | 1831 | H    | GLY | X | 118 | 52.994 | 44.001 | 45.206 | 0.00 | 0.00 |
| ATOM | 1832 | CA   | GLY | X | 118 | 52.933 | 42.979 | 47.091 | 0.00 | 0.00 |
| ATOM | 1833 | HA2  | GLY | X | 118 | 52.272 | 42.197 | 46.581 | 0.00 | 0.00 |
| ATOM | 1834 | HA3  | GLY | X | 118 | 53.765 | 42.436 | 47.552 | 0.00 | 0.00 |
| ATOM | 1835 | C    | GLY | X | 118 | 52.098 | 43.579 | 48.204 | 0.00 | 0.00 |
| ATOM | 1836 | O    | GLY | X | 118 | 52.083 | 43.015 | 49.287 | 0.00 | 0.00 |
| ATOM | 1837 | N    | PHE | X | 119 | 51.500 | 44.804 | 47.995 | 0.00 | 0.00 |
| ATOM | 1838 | H    | PHE | X | 119 | 51.511 | 45.117 | 47.035 | 0.00 | 0.00 |
| ATOM | 1839 | CA   | PHE | X | 119 | 50.778 | 45.647 | 48.959 | 0.00 | 0.00 |
| ATOM | 1840 | HA   | PHE | X | 119 | 50.425 | 46.501 | 48.380 | 0.00 | 0.00 |
| ATOM | 1841 | CB   | PHE | X | 119 | 49.584 | 44.987 | 49.612 | 0.00 | 0.00 |
| ATOM | 1842 | HB2  | PHE | X | 119 | 49.777 | 44.045 | 50.125 | 0.00 | 0.00 |
| ATOM | 1843 | HB3  | PHE | X | 119 | 49.213 | 45.707 | 50.342 | 0.00 | 0.00 |
| ATOM | 1844 | CG   | PHE | X | 119 | 48.367 | 44.686 | 48.662 | 0.00 | 0.00 |
| ATOM | 1845 | CD1  | PHE | X | 119 | 47.584 | 45.783 | 48.413 | 0.00 | 0.00 |
| ATOM | 1846 | HD1  | PHE | X | 119 | 47.844 | 46.744 | 48.833 | 0.00 | 0.00 |
| ATOM | 1847 | CE1  | PHE | X | 119 | 46.383 | 45.587 | 47.716 | 0.00 | 0.00 |
| ATOM | 1848 | HE1  | PHE | X | 119 | 45.825 | 46.491 | 47.522 | 0.00 | 0.00 |
| ATOM | 1849 | CZ   | PHE | X | 119 | 45.960 | 44.291 | 47.296 | 0.00 | 0.00 |
| ATOM | 1850 | HZ   | PHE | X | 119 | 45.003 | 44.217 | 46.801 | 0.00 | 0.00 |
| ATOM | 1851 | CE2  | PHE | X | 119 | 46.804 | 43.232 | 47.479 | 0.00 | 0.00 |
| ATOM | 1852 | HE2  | PHE | X | 119 | 46.503 | 42.247 | 47.153 | 0.00 | 0.00 |
| ATOM | 1853 | CD2  | PHE | X | 119 | 48.044 | 43.416 | 48.192 | 0.00 | 0.00 |
| ATOM | 1854 | HD2  | PHE | X | 119 | 48.651 | 42.554 | 48.426 | 0.00 | 0.00 |
| ATOM | 1855 | C    | PHE | X | 119 | 51.758 | 46.202 | 50.063 | 0.00 | 0.00 |
| ATOM | 1856 | O    | PHE | X | 119 | 51.291 | 46.960 | 50.915 | 0.00 | 0.00 |
| ATOM | 1857 | N    | TYR | X | 120 | 53.058 | 45.868 | 50.047 | 0.00 | 0.00 |
| ATOM | 1858 | H    | TYR | X | 120 | 53.285 | 45.162 | 49.362 | 0.00 | 0.00 |



|      |      |     |     |   |     |        |        |        |      |      |
|------|------|-----|-----|---|-----|--------|--------|--------|------|------|
| ATOM | 1859 | CA  | TYR | X | 120 | 54.064 | 46.221 | 51.072 | 0.00 | 0.00 |
| ATOM | 1860 | HA  | TYR | X | 120 | 53.591 | 46.732 | 51.911 | 0.00 | 0.00 |
| ATOM | 1861 | CB  | TYR | X | 120 | 54.609 | 44.949 | 51.718 | 0.00 | 0.00 |
| ATOM | 1862 | HB2 | TYR | X | 120 | 55.361 | 45.071 | 52.497 | 0.00 | 0.00 |
| ATOM | 1863 | HB3 | TYR | X | 120 | 53.740 | 44.404 | 52.086 | 0.00 | 0.00 |
| ATOM | 1864 | CG  | TYR | X | 120 | 55.306 | 43.907 | 50.820 | 0.00 | 0.00 |
| ATOM | 1865 | CD1 | TYR | X | 120 | 56.537 | 44.142 | 50.246 | 0.00 | 0.00 |
| ATOM | 1866 | HD1 | TYR | X | 120 | 57.039 | 45.090 | 50.366 | 0.00 | 0.00 |
| ATOM | 1867 | CE1 | TYR | X | 120 | 57.118 | 43.113 | 49.443 | 0.00 | 0.00 |
| ATOM | 1868 | HE1 | TYR | X | 120 | 58.022 | 43.230 | 48.863 | 0.00 | 0.00 |
| ATOM | 1869 | CZ  | TYR | X | 120 | 56.442 | 41.888 | 49.226 | 0.00 | 0.00 |
| ATOM | 1870 | OH  | TYR | X | 120 | 57.047 | 40.965 | 48.495 | 0.00 | 0.00 |
| ATOM | 1871 | HH  | TYR | X | 120 | 57.925 | 41.242 | 48.222 | 0.00 | 0.00 |
| ATOM | 1872 | CE2 | TYR | X | 120 | 55.205 | 41.636 | 49.845 | 0.00 | 0.00 |
| ATOM | 1873 | HE2 | TYR | X | 120 | 54.775 | 40.654 | 49.716 | 0.00 | 0.00 |
| ATOM | 1874 | CD2 | TYR | X | 120 | 54.709 | 42.643 | 50.646 | 0.00 | 0.00 |
| ATOM | 1875 | HD2 | TYR | X | 120 | 53.819 | 42.434 | 51.222 | 0.00 | 0.00 |
| ATOM | 1876 | C   | TYR | X | 120 | 55.273 | 47.083 | 50.634 | 0.00 | 0.00 |
| ATOM | 1877 | O   | TYR | X | 120 | 56.262 | 47.358 | 51.362 | 0.00 | 0.00 |
| ATOM | 1878 | N   | SER | X | 121 | 55.120 | 47.650 | 49.421 | 0.00 | 0.00 |
| ATOM | 1879 | H   | SER | X | 121 | 54.358 | 47.365 | 48.821 | 0.00 | 0.00 |
| ATOM | 1880 | CA  | SER | X | 121 | 56.060 | 48.512 | 48.716 | 0.00 | 0.00 |
| ATOM | 1881 | HA  | SER | X | 121 | 56.299 | 49.407 | 49.290 | 0.00 | 0.00 |
| ATOM | 1882 | CB  | SER | X | 121 | 57.410 | 47.823 | 48.402 | 0.00 | 0.00 |
| ATOM | 1883 | HB2 | SER | X | 121 | 57.956 | 48.321 | 47.600 | 0.00 | 0.00 |
| ATOM | 1884 | HB3 | SER | X | 121 | 58.109 | 47.773 | 49.237 | 0.00 | 0.00 |
| ATOM | 1885 | OG  | SER | X | 121 | 57.160 | 46.467 | 48.069 | 0.00 | 0.00 |
| ATOM | 1886 | HG  | SER | X | 121 | 56.224 | 46.261 | 48.013 | 0.00 | 0.00 |
| ATOM | 1887 | C   | SER | X | 121 | 55.384 | 49.156 | 47.475 | 0.00 | 0.00 |
| ATOM | 1888 | O   | SER | X | 121 | 54.401 | 48.602 | 46.994 | 0.00 | 0.00 |
| ATOM | 1889 | N   | GLY | X | 122 | 55.930 | 50.307 | 47.021 | 0.00 | 0.00 |
| ATOM | 1890 | H   | GLY | X | 122 | 56.777 | 50.686 | 47.418 | 0.00 | 0.00 |
| ATOM | 1891 | CA  | GLY | X | 122 | 55.314 | 50.986 | 45.817 | 0.00 | 0.00 |
| ATOM | 1892 | HA2 | GLY | X | 122 | 55.900 | 50.549 | 45.004 | 0.00 | 0.00 |
| ATOM | 1893 | HA3 | GLY | X | 122 | 54.287 | 50.753 | 45.745 | 0.00 | 0.00 |
| ATOM | 1894 | C   | GLY | X | 122 | 55.552 | 52.525 | 45.833 | 0.00 | 0.00 |
| ATOM | 1895 | O   | GLY | X | 122 | 55.528 | 53.202 | 46.853 | 0.00 | 0.00 |
| ATOM | 1896 | N   | ALA | X | 123 | 55.710 | 53.059 | 44.627 | 0.00 | 0.00 |
| ATOM | 1897 | H   | ALA | X | 123 | 55.478 | 52.474 | 43.837 | 0.00 | 0.00 |
| ATOM | 1898 | CA  | ALA | X | 123 | 56.088 | 54.447 | 44.460 | 0.00 | 0.00 |
| ATOM | 1899 | HA  | ALA | X | 123 | 55.542 | 55.119 | 45.122 | 0.00 | 0.00 |
| ATOM | 1900 | CB  | ALA | X | 123 | 57.534 | 54.661 | 44.602 | 0.00 | 0.00 |
| ATOM | 1901 | HB1 | ALA | X | 123 | 57.729 | 54.452 | 45.654 | 0.00 | 0.00 |
| ATOM | 1902 | HB2 | ALA | X | 123 | 58.101 | 53.970 | 43.978 | 0.00 | 0.00 |
| ATOM | 1903 | HB3 | ALA | X | 123 | 57.840 | 55.673 | 44.338 | 0.00 | 0.00 |
| ATOM | 1904 | C   | ALA | X | 123 | 55.491 | 54.839 | 43.100 | 0.00 | 0.00 |
| ATOM | 1905 | O   | ALA | X | 123 | 55.702 | 54.020 | 42.125 | 0.00 | 0.00 |
| ATOM | 1906 | N   | SER | X | 124 | 54.861 | 55.993 | 42.884 | 0.00 | 0.00 |
| ATOM | 1907 | H   | SER | X | 124 | 54.785 | 56.651 | 43.646 | 0.00 | 0.00 |
| ATOM | 1908 | CA  | SER | X | 124 | 54.448 | 56.568 | 41.629 | 0.00 | 0.00 |
| ATOM | 1909 | HA  | SER | X | 124 | 54.035 | 55.720 | 41.084 | 0.00 | 0.00 |
| ATOM | 1910 | CB  | SER | X | 124 | 53.437 | 57.690 | 41.817 | 0.00 | 0.00 |
| ATOM | 1911 | HB2 | SER | X | 124 | 53.184 | 58.111 | 40.844 | 0.00 | 0.00 |
| ATOM | 1912 | HB3 | SER | X | 124 | 52.535 | 57.320 | 42.304 | 0.00 | 0.00 |
| ATOM | 1913 | OG  | SER | X | 124 | 54.153 | 58.632 | 42.571 | 0.00 | 0.00 |
| ATOM | 1914 | HG  | SER | X | 124 | 54.042 | 58.486 | 43.513 | 0.00 | 0.00 |
| ATOM | 1915 | C   | SER | X | 124 | 55.598 | 57.058 | 40.760 | 0.00 | 0.00 |
| ATOM | 1916 | O   | SER | X | 124 | 55.489 | 57.084 | 39.544 | 0.00 | 0.00 |
| ATOM | 1917 | N   | SER | X | 125 | 56.685 | 57.536 | 41.299 | 0.00 | 0.00 |
| ATOM | 1918 | H   | SER | X | 125 | 56.763 | 57.476 | 42.304 | 0.00 | 0.00 |
| ATOM | 1919 | CA  | SER | X | 125 | 57.429 | 58.643 | 40.653 | 0.00 | 0.00 |
| ATOM | 1920 | HA  | SER | X | 125 | 56.873 | 59.278 | 39.963 | 0.00 | 0.00 |
| ATOM | 1921 | CB  | SER | X | 125 | 57.972 | 59.429 | 41.850 | 0.00 | 0.00 |
| ATOM | 1922 | HB2 | SER | X | 125 | 58.667 | 60.187 | 41.490 | 0.00 | 0.00 |
| ATOM | 1923 | HB3 | SER | X | 125 | 57.134 | 60.005 | 42.244 | 0.00 | 0.00 |
| ATOM | 1924 | OG  | SER | X | 125 | 58.610 | 58.591 | 42.877 | 0.00 | 0.00 |
| ATOM | 1925 | HG  | SER | X | 125 | 59.343 | 58.089 | 42.512 | 0.00 | 0.00 |
| ATOM | 1926 | C   | SER | X | 125 | 58.586 | 58.076 | 39.834 | 0.00 | 0.00 |
| ATOM | 1927 | O   | SER | X | 125 | 59.452 | 58.797 | 39.421 | 0.00 | 0.00 |
| ATOM | 1928 | N   | LEU | X | 126 | 58.658 | 56.717 | 39.624 | 0.00 | 0.00 |

|      |      |      |     |   |     |        |        |        |      |      |
|------|------|------|-----|---|-----|--------|--------|--------|------|------|
| ATOM | 1929 | H    | LEU | X | 126 | 57.785 | 56.231 | 39.765 | 0.00 | 0.00 |
| ATOM | 1930 | CA   | LEU | X | 126 | 59.627 | 55.857 | 38.889 | 0.00 | 0.00 |
| ATOM | 1931 | HA   | LEU | X | 126 | 60.643 | 56.063 | 39.228 | 0.00 | 0.00 |
| ATOM | 1932 | CB   | LEU | X | 126 | 59.382 | 54.308 | 38.922 | 0.00 | 0.00 |
| ATOM | 1933 | HB2  | LEU | X | 126 | 58.439 | 54.200 | 38.386 | 0.00 | 0.00 |
| ATOM | 1934 | HB3  | LEU | X | 126 | 60.189 | 53.816 | 38.378 | 0.00 | 0.00 |
| ATOM | 1935 | CG   | LEU | X | 126 | 59.336 | 53.729 | 40.309 | 0.00 | 0.00 |
| ATOM | 1936 | HG   | LEU | X | 126 | 58.535 | 54.142 | 40.922 | 0.00 | 0.00 |
| ATOM | 1937 | CD1  | LEU | X | 126 | 58.935 | 52.298 | 40.363 | 0.00 | 0.00 |
| ATOM | 1938 | HD11 | LEU | X | 126 | 57.997 | 52.139 | 39.830 | 0.00 | 0.00 |
| ATOM | 1939 | HD12 | LEU | X | 126 | 59.671 | 51.621 | 39.930 | 0.00 | 0.00 |
| ATOM | 1940 | HD13 | LEU | X | 126 | 58.654 | 52.003 | 41.374 | 0.00 | 0.00 |
| ATOM | 1941 | CD2  | LEU | X | 126 | 60.624 | 53.975 | 41.079 | 0.00 | 0.00 |
| ATOM | 1942 | HD21 | LEU | X | 126 | 61.484 | 53.586 | 40.534 | 0.00 | 0.00 |
| ATOM | 1943 | HD22 | LEU | X | 126 | 60.920 | 55.015 | 41.214 | 0.00 | 0.00 |
| ATOM | 1944 | HD23 | LEU | X | 126 | 60.527 | 53.455 | 42.032 | 0.00 | 0.00 |
| ATOM | 1945 | C    | LEU | X | 126 | 59.655 | 56.238 | 37.405 | 0.00 | 0.00 |
| ATOM | 1946 | O    | LEU | X | 126 | 58.627 | 56.660 | 36.846 | 0.00 | 0.00 |
| ATOM | 1947 | N    | ASP | X | 127 | 60.785 | 55.985 | 36.767 | 0.00 | 0.00 |
| ATOM | 1948 | H    | ASP | X | 127 | 61.622 | 55.761 | 37.286 | 0.00 | 0.00 |
| ATOM | 1949 | CA   | ASP | X | 127 | 60.988 | 56.282 | 35.292 | 0.00 | 0.00 |
| ATOM | 1950 | HA   | ASP | X | 127 | 60.711 | 57.321 | 35.117 | 0.00 | 0.00 |
| ATOM | 1951 | CB   | ASP | X | 127 | 62.487 | 56.079 | 35.049 | 0.00 | 0.00 |
| ATOM | 1952 | HB2  | ASP | X | 127 | 63.082 | 56.661 | 35.753 | 0.00 | 0.00 |
| ATOM | 1953 | HB3  | ASP | X | 127 | 62.621 | 55.004 | 35.173 | 0.00 | 0.00 |
| ATOM | 1954 | CG   | ASP | X | 127 | 62.792 | 56.542 | 33.588 | 0.00 | 0.00 |
| ATOM | 1955 | OD1  | ASP | X | 127 | 62.532 | 57.730 | 33.263 | 0.00 | 0.00 |
| ATOM | 1956 | OD2  | ASP | X | 127 | 63.225 | 55.718 | 32.798 | 0.00 | 0.00 |
| ATOM | 1957 | C    | ASP | X | 127 | 60.006 | 55.428 | 34.432 | 0.00 | 0.00 |
| ATOM | 1958 | O    | ASP | X | 127 | 59.424 | 55.906 | 33.496 | 0.00 | 0.00 |
| ATOM | 1959 | N    | VAL | X | 128 | 59.865 | 54.156 | 34.810 | 0.00 | 0.00 |
| ATOM | 1960 | H    | VAL | X | 128 | 60.453 | 53.877 | 35.582 | 0.00 | 0.00 |
| ATOM | 1961 | CA   | VAL | X | 128 | 59.108 | 53.157 | 34.025 | 0.00 | 0.00 |
| ATOM | 1962 | HA   | VAL | X | 128 | 59.493 | 53.281 | 33.012 | 0.00 | 0.00 |
| ATOM | 1963 | CB   | VAL | X | 128 | 59.546 | 51.781 | 34.571 | 0.00 | 0.00 |
| ATOM | 1964 | HB   | VAL | X | 128 | 60.636 | 51.747 | 34.569 | 0.00 | 0.00 |
| ATOM | 1965 | CG1  | VAL | X | 128 | 59.174 | 51.527 | 36.090 | 0.00 | 0.00 |
| ATOM | 1966 | HG11 | VAL | X | 128 | 59.401 | 52.385 | 36.723 | 0.00 | 0.00 |
| ATOM | 1967 | HG12 | VAL | X | 128 | 58.129 | 51.231 | 36.180 | 0.00 | 0.00 |
| ATOM | 1968 | HG13 | VAL | X | 128 | 59.836 | 50.696 | 36.333 | 0.00 | 0.00 |
| ATOM | 1969 | CG2  | VAL | X | 128 | 59.023 | 50.596 | 33.726 | 0.00 | 0.00 |
| ATOM | 1970 | HG21 | VAL | X | 128 | 57.947 | 50.591 | 33.902 | 0.00 | 0.00 |
| ATOM | 1971 | HG22 | VAL | X | 128 | 59.393 | 50.591 | 32.701 | 0.00 | 0.00 |
| ATOM | 1972 | HG23 | VAL | X | 128 | 59.430 | 49.650 | 34.082 | 0.00 | 0.00 |
| ATOM | 1973 | C    | VAL | X | 128 | 57.575 | 53.384 | 34.025 | 0.00 | 0.00 |
| ATOM | 1974 | O    | VAL | X | 128 | 56.805 | 53.095 | 33.085 | 0.00 | 0.00 |
| ATOM | 1975 | N    | TYR | X | 129 | 57.099 | 53.965 | 35.151 | 0.00 | 0.00 |
| ATOM | 1976 | H    | TYR | X | 129 | 57.697 | 54.094 | 35.955 | 0.00 | 0.00 |
| ATOM | 1977 | CA   | TYR | X | 129 | 55.699 | 54.363 | 35.325 | 0.00 | 0.00 |
| ATOM | 1978 | HA   | TYR | X | 129 | 54.940 | 53.661 | 34.982 | 0.00 | 0.00 |
| ATOM | 1979 | CB   | TYR | X | 129 | 55.373 | 54.342 | 36.877 | 0.00 | 0.00 |
| ATOM | 1980 | HB2  | TYR | X | 129 | 55.858 | 55.160 | 37.411 | 0.00 | 0.00 |
| ATOM | 1981 | HB3  | TYR | X | 129 | 54.348 | 54.595 | 37.148 | 0.00 | 0.00 |
| ATOM | 1982 | CG   | TYR | X | 129 | 55.565 | 53.026 | 37.648 | 0.00 | 0.00 |
| ATOM | 1983 | CD1  | TYR | X | 129 | 55.703 | 51.802 | 36.988 | 0.00 | 0.00 |
| ATOM | 1984 | HD1  | TYR | X | 129 | 55.798 | 51.799 | 35.912 | 0.00 | 0.00 |
| ATOM | 1985 | CE1  | TYR | X | 129 | 55.883 | 50.606 | 37.718 | 0.00 | 0.00 |
| ATOM | 1986 | HE1  | TYR | X | 129 | 56.110 | 49.693 | 37.187 | 0.00 | 0.00 |
| ATOM | 1987 | CZ   | TYR | X | 129 | 55.743 | 50.621 | 39.109 | 0.00 | 0.00 |
| ATOM | 1988 | OH   | TYR | X | 129 | 55.872 | 49.468 | 39.845 | 0.00 | 0.00 |
| ATOM | 1989 | HH   | TYR | X | 129 | 55.806 | 49.617 | 40.791 | 0.00 | 0.00 |
| ATOM | 1990 | CE2  | TYR | X | 129 | 55.474 | 51.839 | 39.783 | 0.00 | 0.00 |
| ATOM | 1991 | HE2  | TYR | X | 129 | 55.314 | 51.872 | 40.850 | 0.00 | 0.00 |
| ATOM | 1992 | CD2  | TYR | X | 129 | 55.362 | 52.994 | 39.056 | 0.00 | 0.00 |
| ATOM | 1993 | HD2  | TYR | X | 129 | 55.259 | 53.931 | 39.583 | 0.00 | 0.00 |
| ATOM | 1994 | C    | TYR | X | 129 | 55.226 | 55.748 | 34.729 | 0.00 | 0.00 |
| ATOM | 1995 | O    | TYR | X | 129 | 54.184 | 56.259 | 35.031 | 0.00 | 0.00 |
| ATOM | 1996 | N    | ASP | X | 130 | 56.068 | 56.436 | 33.998 | 0.00 | 0.00 |
| ATOM | 1997 | H    | ASP | X | 130 | 56.899 | 55.943 | 33.706 | 0.00 | 0.00 |
| ATOM | 1998 | CA   | ASP | X | 130 | 55.909 | 57.822 | 33.542 | 0.00 | 0.00 |

|      |      |      |     |   |     |        |        |        |      |      |
|------|------|------|-----|---|-----|--------|--------|--------|------|------|
| ATOM | 1999 | HA   | ASP | X | 130 | 55.316 | 58.311 | 34.315 | 0.00 | 0.00 |
| ATOM | 2000 | CB   | ASP | X | 130 | 57.316 | 58.446 | 33.483 | 0.00 | 0.00 |
| ATOM | 2001 | HB2  | ASP | X | 130 | 57.747 | 58.267 | 34.468 | 0.00 | 0.00 |
| ATOM | 2002 | HB3  | ASP | X | 130 | 57.903 | 57.913 | 32.735 | 0.00 | 0.00 |
| ATOM | 2003 | CG   | ASP | X | 130 | 57.396 | 59.950 | 33.166 | 0.00 | 0.00 |
| ATOM | 2004 | OD1  | ASP | X | 130 | 58.157 | 60.695 | 33.791 | 0.00 | 0.00 |
| ATOM | 2005 | OD2  | ASP | X | 130 | 56.957 | 60.398 | 32.093 | 0.00 | 0.00 |
| ATOM | 2006 | C    | ASP | X | 130 | 55.098 | 57.921 | 32.213 | 0.00 | 0.00 |
| ATOM | 2007 | O    | ASP | X | 130 | 55.335 | 57.210 | 31.255 | 0.00 | 0.00 |
| ATOM | 2008 | N    | GLY | X | 131 | 53.976 | 58.724 | 32.249 | 0.00 | 0.00 |
| ATOM | 2009 | H    | GLY | X | 131 | 53.791 | 59.378 | 32.996 | 0.00 | 0.00 |
| ATOM | 2010 | CA   | GLY | X | 131 | 52.915 | 58.764 | 31.124 | 0.00 | 0.00 |
| ATOM | 2011 | HA2  | GLY | X | 131 | 52.685 | 57.694 | 30.934 | 0.00 | 0.00 |
| ATOM | 2012 | HA3  | GLY | X | 131 | 51.986 | 59.268 | 31.447 | 0.00 | 0.00 |
| ATOM | 2013 | C    | GLY | X | 131 | 53.485 | 59.350 | 29.747 | 0.00 | 0.00 |
| ATOM | 2014 | O    | GLY | X | 131 | 52.780 | 59.254 | 28.751 | 0.00 | 0.00 |
| ATOM | 2015 | N    | ARG | X | 132 | 54.642 | 59.996 | 29.664 | 0.00 | 0.00 |
| ATOM | 2016 | H    | ARG | X | 132 | 55.123 | 60.122 | 30.543 | 0.00 | 0.00 |
| ATOM | 2017 | CA   | ARG | X | 132 | 54.939 | 60.972 | 28.584 | 0.00 | 0.00 |
| ATOM | 2018 | HA   | ARG | X | 132 | 54.240 | 61.774 | 28.825 | 0.00 | 0.00 |
| ATOM | 2019 | CB   | ARG | X | 132 | 56.353 | 61.615 | 28.858 | 0.00 | 0.00 |
| ATOM | 2020 | HB2  | ARG | X | 132 | 56.560 | 62.389 | 28.120 | 0.00 | 0.00 |
| ATOM | 2021 | HB3  | ARG | X | 132 | 56.252 | 62.060 | 29.848 | 0.00 | 0.00 |
| ATOM | 2022 | CG   | ARG | X | 132 | 57.565 | 60.662 | 28.851 | 0.00 | 0.00 |
| ATOM | 2023 | HG2  | ARG | X | 132 | 57.267 | 59.901 | 29.572 | 0.00 | 0.00 |
| ATOM | 2024 | HG3  | ARG | X | 132 | 57.711 | 60.142 | 27.905 | 0.00 | 0.00 |
| ATOM | 2025 | CD   | ARG | X | 132 | 58.983 | 61.229 | 29.160 | 0.00 | 0.00 |
| ATOM | 2026 | HD2  | ARG | X | 132 | 59.705 | 60.434 | 28.973 | 0.00 | 0.00 |
| ATOM | 2027 | HD3  | ARG | X | 132 | 59.107 | 62.161 | 28.608 | 0.00 | 0.00 |
| ATOM | 2028 | NE   | ARG | X | 132 | 59.045 | 61.685 | 30.475 | 0.00 | 0.00 |
| ATOM | 2029 | HE   | ARG | X | 132 | 58.432 | 61.162 | 31.084 | 0.00 | 0.00 |
| ATOM | 2030 | CZ   | ARG | X | 132 | 59.680 | 62.692 | 31.077 | 0.00 | 0.00 |
| ATOM | 2031 | NH1  | ARG | X | 132 | 60.433 | 63.579 | 30.431 | 0.00 | 0.00 |
| ATOM | 2032 | HH11 | ARG | X | 132 | 60.738 | 63.294 | 29.511 | 0.00 | 0.00 |
| ATOM | 2033 | HH12 | ARG | X | 132 | 60.847 | 64.395 | 30.859 | 0.00 | 0.00 |
| ATOM | 2034 | NH2  | ARG | X | 132 | 59.483 | 62.813 | 32.357 | 0.00 | 0.00 |
| ATOM | 2035 | HH21 | ARG | X | 132 | 59.066 | 62.034 | 32.848 | 0.00 | 0.00 |
| ATOM | 2036 | HH22 | ARG | X | 132 | 59.965 | 63.496 | 32.923 | 0.00 | 0.00 |
| ATOM | 2037 | C    | ARG | X | 132 | 54.842 | 60.389 | 27.223 | 0.00 | 0.00 |
| ATOM | 2038 | O    | ARG | X | 132 | 54.321 | 61.011 | 26.323 | 0.00 | 0.00 |
| ATOM | 2039 | N    | PHE | X | 133 | 55.373 | 59.184 | 26.962 | 0.00 | 0.00 |
| ATOM | 2040 | H    | PHE | X | 133 | 55.767 | 58.669 | 27.736 | 0.00 | 0.00 |
| ATOM | 2041 | CA   | PHE | X | 133 | 55.273 | 58.438 | 25.662 | 0.00 | 0.00 |
| ATOM | 2042 | HA   | PHE | X | 133 | 55.794 | 59.162 | 25.036 | 0.00 | 0.00 |
| ATOM | 2043 | CB   | PHE | X | 133 | 56.043 | 57.123 | 25.548 | 0.00 | 0.00 |
| ATOM | 2044 | HB2  | PHE | X | 133 | 55.597 | 56.404 | 26.235 | 0.00 | 0.00 |
| ATOM | 2045 | HB3  | PHE | X | 133 | 56.070 | 56.743 | 24.526 | 0.00 | 0.00 |
| ATOM | 2046 | CG   | PHE | X | 133 | 57.567 | 57.266 | 25.834 | 0.00 | 0.00 |
| ATOM | 2047 | CD1  | PHE | X | 133 | 58.079 | 56.827 | 27.095 | 0.00 | 0.00 |
| ATOM | 2048 | HD1  | PHE | X | 133 | 57.385 | 56.432 | 27.822 | 0.00 | 0.00 |
| ATOM | 2049 | CE1  | PHE | X | 133 | 59.486 | 56.943 | 27.355 | 0.00 | 0.00 |
| ATOM | 2050 | HE1  | PHE | X | 133 | 60.023 | 56.587 | 28.221 | 0.00 | 0.00 |
| ATOM | 2051 | CZ   | PHE | X | 133 | 60.323 | 57.501 | 26.396 | 0.00 | 0.00 |
| ATOM | 2052 | HZ   | PHE | X | 133 | 61.399 | 57.557 | 26.474 | 0.00 | 0.00 |
| ATOM | 2053 | CE2  | PHE | X | 133 | 59.803 | 57.934 | 25.213 | 0.00 | 0.00 |
| ATOM | 2054 | HE2  | PHE | X | 133 | 60.459 | 58.076 | 24.367 | 0.00 | 0.00 |
| ATOM | 2055 | CD2  | PHE | X | 133 | 58.440 | 57.727 | 24.894 | 0.00 | 0.00 |
| ATOM | 2056 | HD2  | PHE | X | 133 | 58.178 | 57.952 | 23.871 | 0.00 | 0.00 |
| ATOM | 2057 | C    | PHE | X | 133 | 53.859 | 58.135 | 25.178 | 0.00 | 0.00 |
| ATOM | 2058 | O    | PHE | X | 133 | 53.611 | 58.563 | 24.037 | 0.00 | 0.00 |
| ATOM | 2059 | N    | LEU | X | 134 | 52.954 | 57.579 | 26.042 | 0.00 | 0.00 |
| ATOM | 2060 | H    | LEU | X | 134 | 53.283 | 57.188 | 26.913 | 0.00 | 0.00 |
| ATOM | 2061 | CA   | LEU | X | 134 | 51.529 | 57.319 | 25.781 | 0.00 | 0.00 |
| ATOM | 2062 | HA   | LEU | X | 134 | 51.461 | 56.891 | 24.780 | 0.00 | 0.00 |
| ATOM | 2063 | CB   | LEU | X | 134 | 51.089 | 56.176 | 26.762 | 0.00 | 0.00 |
| ATOM | 2064 | HB2  | LEU | X | 134 | 51.599 | 55.251 | 26.493 | 0.00 | 0.00 |
| ATOM | 2065 | HB3  | LEU | X | 134 | 51.415 | 56.505 | 27.749 | 0.00 | 0.00 |
| ATOM | 2066 | CG   | LEU | X | 134 | 49.585 | 55.832 | 26.965 | 0.00 | 0.00 |
| ATOM | 2067 | HG   | LEU | X | 134 | 49.096 | 56.806 | 26.957 | 0.00 | 0.00 |
| ATOM | 2068 | CD1  | LEU | X | 134 | 49.121 | 54.954 | 25.748 | 0.00 | 0.00 |

|      |      |      |     |   |     |        |        |        |      |      |
|------|------|------|-----|---|-----|--------|--------|--------|------|------|
| ATOM | 2069 | HD11 | LEU | X | 134 | 48.047 | 54.792 | 25.836 | 0.00 | 0.00 |
| ATOM | 2070 | HD12 | LEU | X | 134 | 49.137 | 55.599 | 24.869 | 0.00 | 0.00 |
| ATOM | 2071 | HD13 | LEU | X | 134 | 49.663 | 54.015 | 25.629 | 0.00 | 0.00 |
| ATOM | 2072 | CD2  | LEU | X | 134 | 49.443 | 55.140 | 28.267 | 0.00 | 0.00 |
| ATOM | 2073 | HD21 | LEU | X | 134 | 49.714 | 55.762 | 29.121 | 0.00 | 0.00 |
| ATOM | 2074 | HD22 | LEU | X | 134 | 48.406 | 54.839 | 28.415 | 0.00 | 0.00 |
| ATOM | 2075 | HD23 | LEU | X | 134 | 49.956 | 54.183 | 28.172 | 0.00 | 0.00 |
| ATOM | 2076 | C    | LEU | X | 134 | 50.605 | 58.488 | 25.867 | 0.00 | 0.00 |
| ATOM | 2077 | O    | LEU | X | 134 | 49.694 | 58.446 | 25.070 | 0.00 | 0.00 |
| ATOM | 2078 | N    | VAL | X | 135 | 50.909 | 59.502 | 26.663 | 0.00 | 0.00 |
| ATOM | 2079 | H    | VAL | X | 135 | 51.688 | 59.313 | 27.277 | 0.00 | 0.00 |
| ATOM | 2080 | CA   | VAL | X | 135 | 50.330 | 60.885 | 26.577 | 0.00 | 0.00 |
| ATOM | 2081 | HA   | VAL | X | 135 | 49.249 | 60.754 | 26.627 | 0.00 | 0.00 |
| ATOM | 2082 | CB   | VAL | X | 135 | 50.770 | 61.731 | 27.728 | 0.00 | 0.00 |
| ATOM | 2083 | HB   | VAL | X | 135 | 51.855 | 61.813 | 27.657 | 0.00 | 0.00 |
| ATOM | 2084 | CG1  | VAL | X | 135 | 50.110 | 63.251 | 27.847 | 0.00 | 0.00 |
| ATOM | 2085 | HG11 | VAL | X | 135 | 49.026 | 63.144 | 27.888 | 0.00 | 0.00 |
| ATOM | 2086 | HG12 | VAL | X | 135 | 50.368 | 63.789 | 28.759 | 0.00 | 0.00 |
| ATOM | 2087 | HG13 | VAL | X | 135 | 50.352 | 63.968 | 27.063 | 0.00 | 0.00 |
| ATOM | 2088 | CG2  | VAL | X | 135 | 50.337 | 61.165 | 29.092 | 0.00 | 0.00 |
| ATOM | 2089 | HG21 | VAL | X | 135 | 50.683 | 61.858 | 29.859 | 0.00 | 0.00 |
| ATOM | 2090 | HG22 | VAL | X | 135 | 49.275 | 61.333 | 29.267 | 0.00 | 0.00 |
| ATOM | 2091 | HG23 | VAL | X | 135 | 50.619 | 60.142 | 29.343 | 0.00 | 0.00 |
| ATOM | 2092 | C    | VAL | X | 135 | 50.659 | 61.618 | 25.223 | 0.00 | 0.00 |
| ATOM | 2093 | O    | VAL | X | 135 | 50.015 | 62.549 | 24.883 | 0.00 | 0.00 |
| ATOM | 2094 | N    | GLN | X | 136 | 51.746 | 61.275 | 24.534 | 0.00 | 0.00 |
| ATOM | 2095 | H    | GLN | X | 136 | 52.440 | 60.635 | 24.893 | 0.00 | 0.00 |
| ATOM | 2096 | CA   | GLN | X | 136 | 52.140 | 61.867 | 23.199 | 0.00 | 0.00 |
| ATOM | 2097 | HA   | GLN | X | 136 | 51.820 | 62.902 | 23.080 | 0.00 | 0.00 |
| ATOM | 2098 | CB   | GLN | X | 136 | 53.678 | 61.820 | 23.058 | 0.00 | 0.00 |
| ATOM | 2099 | HB2  | GLN | X | 136 | 54.126 | 62.446 | 23.830 | 0.00 | 0.00 |
| ATOM | 2100 | HB3  | GLN | X | 136 | 54.164 | 60.847 | 23.118 | 0.00 | 0.00 |
| ATOM | 2101 | CG   | GLN | X | 136 | 54.138 | 62.348 | 21.668 | 0.00 | 0.00 |
| ATOM | 2102 | HG2  | GLN | X | 136 | 53.644 | 63.273 | 21.372 | 0.00 | 0.00 |
| ATOM | 2103 | HG3  | GLN | X | 136 | 55.147 | 62.674 | 21.924 | 0.00 | 0.00 |
| ATOM | 2104 | CD   | GLN | X | 136 | 54.181 | 61.355 | 20.520 | 0.00 | 0.00 |
| ATOM | 2105 | OE1  | GLN | X | 136 | 54.374 | 60.128 | 20.657 | 0.00 | 0.00 |
| ATOM | 2106 | NE2  | GLN | X | 136 | 54.024 | 61.864 | 19.263 | 0.00 | 0.00 |
| ATOM | 2107 | HE21 | GLN | X | 136 | 54.148 | 61.221 | 18.494 | 0.00 | 0.00 |
| ATOM | 2108 | HE22 | GLN | X | 136 | 53.771 | 62.830 | 19.114 | 0.00 | 0.00 |
| ATOM | 2109 | C    | GLN | X | 136 | 51.407 | 60.938 | 22.107 | 0.00 | 0.00 |
| ATOM | 2110 | O    | GLN | X | 136 | 50.759 | 61.517 | 21.211 | 0.00 | 0.00 |
| ATOM | 2111 | N    | ALA | X | 137 | 51.513 | 59.664 | 22.227 | 0.00 | 0.00 |
| ATOM | 2112 | H    | ALA | X | 137 | 52.128 | 59.370 | 22.972 | 0.00 | 0.00 |
| ATOM | 2113 | CA   | ALA | X | 137 | 51.150 | 58.622 | 21.287 | 0.00 | 0.00 |
| ATOM | 2114 | HA   | ALA | X | 137 | 51.587 | 58.808 | 20.306 | 0.00 | 0.00 |
| ATOM | 2115 | CB   | ALA | X | 137 | 51.599 | 57.190 | 21.736 | 0.00 | 0.00 |
| ATOM | 2116 | HB1  | ALA | X | 137 | 51.404 | 56.501 | 20.914 | 0.00 | 0.00 |
| ATOM | 2117 | HB2  | ALA | X | 137 | 52.679 | 57.135 | 21.876 | 0.00 | 0.00 |
| ATOM | 2118 | HB3  | ALA | X | 137 | 51.119 | 56.830 | 22.646 | 0.00 | 0.00 |
| ATOM | 2119 | C    | ALA | X | 137 | 49.590 | 58.539 | 21.091 | 0.00 | 0.00 |
| ATOM | 2120 | O    | ALA | X | 137 | 49.061 | 58.634 | 20.003 | 0.00 | 0.00 |
| ATOM | 2121 | N    | GLU | X | 138 | 48.857 | 58.359 | 22.243 | 0.00 | 0.00 |
| ATOM | 2122 | H    | GLU | X | 138 | 49.331 | 58.281 | 23.131 | 0.00 | 0.00 |
| ATOM | 2123 | CA   | GLU | X | 138 | 47.369 | 58.229 | 22.132 | 0.00 | 0.00 |
| ATOM | 2124 | HA   | GLU | X | 138 | 47.141 | 58.031 | 21.085 | 0.00 | 0.00 |
| ATOM | 2125 | CB   | GLU | X | 138 | 46.992 | 56.935 | 22.859 | 0.00 | 0.00 |
| ATOM | 2126 | HB2  | GLU | X | 138 | 47.426 | 57.079 | 23.848 | 0.00 | 0.00 |
| ATOM | 2127 | HB3  | GLU | X | 138 | 45.904 | 56.923 | 22.913 | 0.00 | 0.00 |
| ATOM | 2128 | CG   | GLU | X | 138 | 47.490 | 55.623 | 22.202 | 0.00 | 0.00 |
| ATOM | 2129 | HG2  | GLU | X | 138 | 48.565 | 55.632 | 22.026 | 0.00 | 0.00 |
| ATOM | 2130 | HG3  | GLU | X | 138 | 47.432 | 54.830 | 22.948 | 0.00 | 0.00 |
| ATOM | 2131 | CD   | GLU | X | 138 | 46.800 | 55.251 | 20.927 | 0.00 | 0.00 |
| ATOM | 2132 | OE1  | GLU | X | 138 | 45.568 | 55.300 | 20.914 | 0.00 | 0.00 |
| ATOM | 2133 | OE2  | GLU | X | 138 | 47.366 | 55.266 | 19.803 | 0.00 | 0.00 |
| ATOM | 2134 | C    | GLU | X | 138 | 46.493 | 59.356 | 22.758 | 0.00 | 0.00 |
| ATOM | 2135 | O    | GLU | X | 138 | 45.257 | 59.435 | 22.520 | 0.00 | 0.00 |
| ATOM | 2136 | N    | ARG | X | 139 | 47.162 | 60.166 | 23.658 | 0.00 | 0.00 |
| ATOM | 2137 | H    | ARG | X | 139 | 48.086 | 59.870 | 23.939 | 0.00 | 0.00 |
| ATOM | 2138 | CA   | ARG | X | 139 | 46.695 | 61.431 | 24.208 | 0.00 | 0.00 |

|      |      |      |     |   |     |        |        |        |      |      |
|------|------|------|-----|---|-----|--------|--------|--------|------|------|
| ATOM | 2139 | HA   | ARG | X | 139 | 47.534 | 61.996 | 24.615 | 0.00 | 0.00 |
| ATOM | 2140 | CB   | ARG | X | 139 | 46.107 | 62.293 | 23.018 | 0.00 | 0.00 |
| ATOM | 2141 | HB2  | ARG | X | 139 | 45.264 | 61.826 | 22.509 | 0.00 | 0.00 |
| ATOM | 2142 | HB3  | ARG | X | 139 | 45.713 | 63.234 | 23.401 | 0.00 | 0.00 |
| ATOM | 2143 | CG   | ARG | X | 139 | 47.280 | 62.538 | 21.987 | 0.00 | 0.00 |
| ATOM | 2144 | HG2  | ARG | X | 139 | 48.048 | 63.214 | 22.365 | 0.00 | 0.00 |
| ATOM | 2145 | HG3  | ARG | X | 139 | 47.735 | 61.611 | 21.640 | 0.00 | 0.00 |
| ATOM | 2146 | CD   | ARG | X | 139 | 46.786 | 63.363 | 20.782 | 0.00 | 0.00 |
| ATOM | 2147 | HD2  | ARG | X | 139 | 47.709 | 63.475 | 20.213 | 0.00 | 0.00 |
| ATOM | 2148 | HD3  | ARG | X | 139 | 45.969 | 62.810 | 20.319 | 0.00 | 0.00 |
| ATOM | 2149 | NE   | ARG | X | 139 | 46.219 | 64.706 | 21.106 | 0.00 | 0.00 |
| ATOM | 2150 | HE   | ARG | X | 139 | 45.223 | 64.837 | 21.207 | 0.00 | 0.00 |
| ATOM | 2151 | CZ   | ARG | X | 139 | 46.910 | 65.907 | 21.216 | 0.00 | 0.00 |
| ATOM | 2152 | NH1  | ARG | X | 139 | 48.227 | 65.911 | 21.026 | 0.00 | 0.00 |
| ATOM | 2153 | HH11 | ARG | X | 139 | 48.623 | 64.998 | 20.852 | 0.00 | 0.00 |
| ATOM | 2154 | HH12 | ARG | X | 139 | 48.756 | 66.771 | 21.037 | 0.00 | 0.00 |
| ATOM | 2155 | NH2  | ARG | X | 139 | 46.198 | 67.022 | 21.383 | 0.00 | 0.00 |
| ATOM | 2156 | HH21 | ARG | X | 139 | 45.201 | 66.891 | 21.469 | 0.00 | 0.00 |
| ATOM | 2157 | HH22 | ARG | X | 139 | 46.661 | 67.919 | 21.429 | 0.00 | 0.00 |
| ATOM | 2158 | C    | ARG | X | 139 | 45.662 | 61.283 | 25.361 | 0.00 | 0.00 |
| ATOM | 2159 | O    | ARG | X | 139 | 44.938 | 62.242 | 25.645 | 0.00 | 0.00 |
| ATOM | 2160 | N    | THR | X | 140 | 45.426 | 60.078 | 25.901 | 0.00 | 0.00 |
| ATOM | 2161 | H    | THR | X | 140 | 45.883 | 59.250 | 25.545 | 0.00 | 0.00 |
| ATOM | 2162 | CA   | THR | X | 140 | 44.706 | 59.734 | 27.173 | 0.00 | 0.00 |
| ATOM | 2163 | HA   | THR | X | 140 | 43.773 | 60.297 | 27.199 | 0.00 | 0.00 |
| ATOM | 2164 | CB   | THR | X | 140 | 44.503 | 58.145 | 27.156 | 0.00 | 0.00 |
| ATOM | 2165 | HB   | THR | X | 140 | 44.355 | 57.733 | 28.154 | 0.00 | 0.00 |
| ATOM | 2166 | CG2  | THR | X | 140 | 43.362 | 57.827 | 26.199 | 0.00 | 0.00 |
| ATOM | 2167 | HG21 | THR | X | 140 | 42.790 | 56.986 | 26.591 | 0.00 | 0.00 |
| ATOM | 2168 | HG22 | THR | X | 140 | 42.645 | 58.623 | 25.998 | 0.00 | 0.00 |
| ATOM | 2169 | HG23 | THR | X | 140 | 43.706 | 57.546 | 25.204 | 0.00 | 0.00 |
| ATOM | 2170 | OG1  | THR | X | 140 | 45.746 | 57.602 | 26.756 | 0.00 | 0.00 |
| ATOM | 2171 | HG1  | THR | X | 140 | 46.464 | 57.951 | 27.289 | 0.00 | 0.00 |
| ATOM | 2172 | C    | THR | X | 140 | 45.444 | 60.207 | 28.383 | 0.00 | 0.00 |
| ATOM | 2173 | O    | THR | X | 140 | 46.622 | 59.829 | 28.446 | 0.00 | 0.00 |
| ATOM | 2174 | N    | VAL | X | 141 | 44.802 | 60.954 | 29.258 | 0.00 | 0.00 |
| ATOM | 2175 | H    | VAL | X | 141 | 43.819 | 61.085 | 29.067 | 0.00 | 0.00 |
| ATOM | 2176 | CA   | VAL | X | 141 | 45.418 | 61.775 | 30.350 | 0.00 | 0.00 |
| ATOM | 2177 | HA   | VAL | X | 141 | 46.263 | 62.310 | 29.916 | 0.00 | 0.00 |
| ATOM | 2178 | CB   | VAL | X | 141 | 44.449 | 62.708 | 31.006 | 0.00 | 0.00 |
| ATOM | 2179 | HB   | VAL | X | 141 | 43.556 | 62.153 | 31.295 | 0.00 | 0.00 |
| ATOM | 2180 | CG1  | VAL | X | 141 | 45.025 | 63.404 | 32.288 | 0.00 | 0.00 |
| ATOM | 2181 | HG11 | VAL | X | 141 | 45.512 | 62.622 | 32.869 | 0.00 | 0.00 |
| ATOM | 2182 | HG12 | VAL | X | 141 | 45.651 | 64.271 | 32.078 | 0.00 | 0.00 |
| ATOM | 2183 | HG13 | VAL | X | 141 | 44.233 | 63.781 | 32.936 | 0.00 | 0.00 |
| ATOM | 2184 | CG2  | VAL | X | 141 | 44.072 | 63.836 | 30.019 | 0.00 | 0.00 |
| ATOM | 2185 | HG21 | VAL | X | 141 | 45.002 | 64.174 | 29.563 | 0.00 | 0.00 |
| ATOM | 2186 | HG22 | VAL | X | 141 | 43.345 | 63.406 | 29.330 | 0.00 | 0.00 |
| ATOM | 2187 | HG23 | VAL | X | 141 | 43.639 | 64.662 | 30.584 | 0.00 | 0.00 |
| ATOM | 2188 | C    | VAL | X | 141 | 45.905 | 60.683 | 31.358 | 0.00 | 0.00 |
| ATOM | 2189 | O    | VAL | X | 141 | 45.131 | 60.051 | 32.020 | 0.00 | 0.00 |
| ATOM | 2190 | N    | LEU | X | 142 | 47.255 | 60.629 | 31.561 | 0.00 | 0.00 |
| ATOM | 2191 | H    | LEU | X | 142 | 47.896 | 61.320 | 31.197 | 0.00 | 0.00 |
| ATOM | 2192 | CA   | LEU | X | 142 | 47.861 | 59.599 | 32.460 | 0.00 | 0.00 |
| ATOM | 2193 | HA   | LEU | X | 142 | 47.200 | 58.733 | 32.436 | 0.00 | 0.00 |
| ATOM | 2194 | CB   | LEU | X | 142 | 49.212 | 59.064 | 32.042 | 0.00 | 0.00 |
| ATOM | 2195 | HB2  | LEU | X | 142 | 49.050 | 58.739 | 31.014 | 0.00 | 0.00 |
| ATOM | 2196 | HB3  | LEU | X | 142 | 49.954 | 59.862 | 32.080 | 0.00 | 0.00 |
| ATOM | 2197 | CG   | LEU | X | 142 | 49.898 | 57.905 | 32.880 | 0.00 | 0.00 |
| ATOM | 2198 | HG   | LEU | X | 142 | 50.604 | 57.533 | 32.138 | 0.00 | 0.00 |
| ATOM | 2199 | CD1  | LEU | X | 142 | 50.705 | 58.415 | 34.108 | 0.00 | 0.00 |
| ATOM | 2200 | HD11 | LEU | X | 142 | 51.465 | 59.143 | 33.820 | 0.00 | 0.00 |
| ATOM | 2201 | HD12 | LEU | X | 142 | 50.010 | 58.914 | 34.784 | 0.00 | 0.00 |
| ATOM | 2202 | HD13 | LEU | X | 142 | 51.246 | 57.589 | 34.569 | 0.00 | 0.00 |
| ATOM | 2203 | CD2  | LEU | X | 142 | 48.968 | 56.725 | 33.296 | 0.00 | 0.00 |
| ATOM | 2204 | HD21 | LEU | X | 142 | 49.686 | 55.966 | 33.607 | 0.00 | 0.00 |
| ATOM | 2205 | HD22 | LEU | X | 142 | 48.358 | 57.090 | 34.122 | 0.00 | 0.00 |
| ATOM | 2206 | HD23 | LEU | X | 142 | 48.372 | 56.305 | 32.486 | 0.00 | 0.00 |
| ATOM | 2207 | C    | LEU | X | 142 | 47.911 | 60.174 | 33.931 | 0.00 | 0.00 |
| ATOM | 2208 | O    | LEU | X | 142 | 48.567 | 61.189 | 34.138 | 0.00 | 0.00 |

|      |      |      |     |   |     |        |        |        |      |      |
|------|------|------|-----|---|-----|--------|--------|--------|------|------|
| ATOM | 2209 | N    | VAL | X | 143 | 47.182 | 59.507 | 34.859 | 0.00 | 0.00 |
| ATOM | 2210 | H    | VAL | X | 143 | 46.557 | 58.813 | 34.475 | 0.00 | 0.00 |
| ATOM | 2211 | CA   | VAL | X | 143 | 47.219 | 59.870 | 36.275 | 0.00 | 0.00 |
| ATOM | 2212 | HA   | VAL | X | 143 | 47.727 | 60.825 | 36.411 | 0.00 | 0.00 |
| ATOM | 2213 | CB   | VAL | X | 143 | 45.807 | 60.154 | 36.691 | 0.00 | 0.00 |
| ATOM | 2214 | HB   | VAL | X | 143 | 45.233 | 59.237 | 36.556 | 0.00 | 0.00 |
| ATOM | 2215 | CG1  | VAL | X | 143 | 45.718 | 60.560 | 38.206 | 0.00 | 0.00 |
| ATOM | 2216 | HG11 | VAL | X | 143 | 44.707 | 60.795 | 38.537 | 0.00 | 0.00 |
| ATOM | 2217 | HG12 | VAL | X | 143 | 46.132 | 59.788 | 38.856 | 0.00 | 0.00 |
| ATOM | 2218 | HG13 | VAL | X | 143 | 46.268 | 61.479 | 38.408 | 0.00 | 0.00 |
| ATOM | 2219 | CG2  | VAL | X | 143 | 45.087 | 61.293 | 35.860 | 0.00 | 0.00 |
| ATOM | 2220 | HG21 | VAL | X | 143 | 44.158 | 61.645 | 36.308 | 0.00 | 0.00 |
| ATOM | 2221 | HG22 | VAL | X | 143 | 45.849 | 62.068 | 35.775 | 0.00 | 0.00 |
| ATOM | 2222 | HG23 | VAL | X | 143 | 44.903 | 60.858 | 34.878 | 0.00 | 0.00 |
| ATOM | 2223 | C    | VAL | X | 143 | 47.926 | 58.823 | 37.131 | 0.00 | 0.00 |
| ATOM | 2224 | O    | VAL | X | 143 | 47.810 | 57.567 | 36.858 | 0.00 | 0.00 |
| ATOM | 2225 | N    | SER | X | 144 | 48.560 | 59.204 | 38.244 | 0.00 | 0.00 |
| ATOM | 2226 | H    | SER | X | 144 | 48.472 | 60.178 | 38.500 | 0.00 | 0.00 |
| ATOM | 2227 | CA   | SER | X | 144 | 49.255 | 58.325 | 39.163 | 0.00 | 0.00 |
| ATOM | 2228 | HA   | SER | X | 144 | 48.733 | 57.369 | 39.207 | 0.00 | 0.00 |
| ATOM | 2229 | CB   | SER | X | 144 | 50.631 | 58.089 | 38.572 | 0.00 | 0.00 |
| ATOM | 2230 | HB2  | SER | X | 144 | 50.500 | 57.870 | 37.512 | 0.00 | 0.00 |
| ATOM | 2231 | HB3  | SER | X | 144 | 51.247 | 58.960 | 38.795 | 0.00 | 0.00 |
| ATOM | 2232 | OG   | SER | X | 144 | 51.297 | 56.886 | 39.077 | 0.00 | 0.00 |
| ATOM | 2233 | HG   | SER | X | 144 | 52.098 | 56.877 | 38.547 | 0.00 | 0.00 |
| ATOM | 2234 | C    | SER | X | 144 | 49.417 | 58.887 | 40.520 | 0.00 | 0.00 |
| ATOM | 2235 | O    | SER | X | 144 | 49.538 | 60.040 | 40.761 | 0.00 | 0.00 |
| ATOM | 2236 | N    | MET | X | 145 | 49.397 | 58.010 | 41.523 | 0.00 | 0.00 |
| ATOM | 2237 | H    | MET | X | 145 | 49.329 | 57.025 | 41.306 | 0.00 | 0.00 |
| ATOM | 2238 | CA   | MET | X | 145 | 49.086 | 58.459 | 42.934 | 0.00 | 0.00 |
| ATOM | 2239 | HA   | MET | X | 145 | 49.272 | 59.530 | 43.013 | 0.00 | 0.00 |
| ATOM | 2240 | CB   | MET | X | 145 | 47.562 | 58.295 | 43.159 | 0.00 | 0.00 |
| ATOM | 2241 | HB2  | MET | X | 145 | 47.255 | 58.357 | 44.203 | 0.00 | 0.00 |
| ATOM | 2242 | HB3  | MET | X | 145 | 47.044 | 59.134 | 42.694 | 0.00 | 0.00 |
| ATOM | 2243 | CG   | MET | X | 145 | 46.887 | 57.049 | 42.490 | 0.00 | 0.00 |
| ATOM | 2244 | HG2  | MET | X | 145 | 46.771 | 57.319 | 41.441 | 0.00 | 0.00 |
| ATOM | 2245 | HG3  | MET | X | 145 | 47.649 | 56.269 | 42.471 | 0.00 | 0.00 |
| ATOM | 2246 | SD   | MET | X | 145 | 45.397 | 56.271 | 43.066 | 0.00 | 0.00 |
| ATOM | 2247 | CE   | MET | X | 145 | 44.261 | 57.438 | 42.257 | 0.00 | 0.00 |
| ATOM | 2248 | HE1  | MET | X | 145 | 44.039 | 56.984 | 41.291 | 0.00 | 0.00 |
| ATOM | 2249 | HE2  | MET | X | 145 | 43.356 | 57.459 | 42.865 | 0.00 | 0.00 |
| ATOM | 2250 | HE3  | MET | X | 145 | 44.731 | 58.420 | 42.220 | 0.00 | 0.00 |
| ATOM | 2251 | C    | MET | X | 145 | 49.916 | 57.808 | 43.958 | 0.00 | 0.00 |
| ATOM | 2252 | O    | MET | X | 145 | 50.180 | 56.629 | 43.845 | 0.00 | 0.00 |
| ATOM | 2253 | N    | ASN | X | 146 | 50.225 | 58.447 | 45.079 | 0.00 | 0.00 |
| ATOM | 2254 | H    | ASN | X | 146 | 49.880 | 59.389 | 45.196 | 0.00 | 0.00 |
| ATOM | 2255 | CA   | ASN | X | 146 | 50.750 | 57.851 | 46.299 | 0.00 | 0.00 |
| ATOM | 2256 | HA   | ASN | X | 146 | 51.295 | 56.961 | 45.982 | 0.00 | 0.00 |
| ATOM | 2257 | CB   | ASN | X | 146 | 51.748 | 58.805 | 46.965 | 0.00 | 0.00 |
| ATOM | 2258 | HB2  | ASN | X | 146 | 51.232 | 59.705 | 47.297 | 0.00 | 0.00 |
| ATOM | 2259 | HB3  | ASN | X | 146 | 52.144 | 58.406 | 47.898 | 0.00 | 0.00 |
| ATOM | 2260 | CG   | ASN | X | 146 | 52.968 | 59.111 | 46.272 | 0.00 | 0.00 |
| ATOM | 2261 | OD1  | ASN | X | 146 | 53.338 | 58.657 | 45.244 | 0.00 | 0.00 |
| ATOM | 2262 | ND2  | ASN | X | 146 | 53.649 | 60.014 | 46.973 | 0.00 | 0.00 |
| ATOM | 2263 | HD21 | ASN | X | 146 | 54.493 | 60.454 | 46.632 | 0.00 | 0.00 |
| ATOM | 2264 | HD22 | ASN | X | 146 | 53.299 | 60.465 | 47.806 | 0.00 | 0.00 |
| ATOM | 2265 | C    | ASN | X | 146 | 49.793 | 57.518 | 47.425 | 0.00 | 0.00 |
| ATOM | 2266 | O    | ASN | X | 146 | 48.913 | 58.304 | 47.856 | 0.00 | 0.00 |
| ATOM | 2267 | N    | TYR | X | 147 | 49.939 | 56.315 | 47.929 | 0.00 | 0.00 |
| ATOM | 2268 | H    | TYR | X | 147 | 50.635 | 55.725 | 47.497 | 0.00 | 0.00 |
| ATOM | 2269 | CA   | TYR | X | 147 | 49.016 | 55.761 | 48.970 | 0.00 | 0.00 |
| ATOM | 2270 | HA   | TYR | X | 147 | 48.611 | 56.579 | 49.567 | 0.00 | 0.00 |
| ATOM | 2271 | CB   | TYR | X | 147 | 47.884 | 54.853 | 48.305 | 0.00 | 0.00 |
| ATOM | 2272 | HB2  | TYR | X | 147 | 47.479 | 54.141 | 49.024 | 0.00 | 0.00 |
| ATOM | 2273 | HB3  | TYR | X | 147 | 47.125 | 55.589 | 48.040 | 0.00 | 0.00 |
| ATOM | 2274 | CG   | TYR | X | 147 | 48.242 | 54.070 | 46.945 | 0.00 | 0.00 |
| ATOM | 2275 | CD1  | TYR | X | 147 | 47.961 | 54.566 | 45.691 | 0.00 | 0.00 |
| ATOM | 2276 | HD1  | TYR | X | 147 | 47.603 | 55.579 | 45.578 | 0.00 | 0.00 |
| ATOM | 2277 | CE1  | TYR | X | 147 | 48.227 | 53.787 | 44.523 | 0.00 | 0.00 |
| ATOM | 2278 | HE1  | TYR | X | 147 | 47.967 | 54.135 | 43.534 | 0.00 | 0.00 |

|      |      |      |     |   |     |        |        |        |      |      |
|------|------|------|-----|---|-----|--------|--------|--------|------|------|
| ATOM | 2279 | CZ   | TYR | X | 147 | 48.888 | 52.566 | 44.596 | 0.00 | 0.00 |
| ATOM | 2280 | OH   | TYR | X | 147 | 49.031 | 51.834 | 43.470 | 0.00 | 0.00 |
| ATOM | 2281 | HH   | TYR | X | 147 | 49.528 | 51.034 | 43.658 | 0.00 | 0.00 |
| ATOM | 2282 | CE2  | TYR | X | 147 | 49.098 | 51.998 | 45.893 | 0.00 | 0.00 |
| ATOM | 2283 | HE2  | TYR | X | 147 | 49.389 | 50.966 | 46.018 | 0.00 | 0.00 |
| ATOM | 2284 | CD2  | TYR | X | 147 | 48.781 | 52.724 | 47.039 | 0.00 | 0.00 |
| ATOM | 2285 | HD2  | TYR | X | 147 | 48.839 | 52.219 | 47.992 | 0.00 | 0.00 |
| ATOM | 2286 | C    | TYR | X | 147 | 49.780 | 54.767 | 49.889 | 0.00 | 0.00 |
| ATOM | 2287 | O    | TYR | X | 147 | 50.783 | 54.145 | 49.512 | 0.00 | 0.00 |
| ATOM | 2288 | N    | ARG | X | 148 | 49.278 | 54.612 | 51.080 | 0.00 | 0.00 |
| ATOM | 2289 | H    | ARG | X | 148 | 48.459 | 55.150 | 51.327 | 0.00 | 0.00 |
| ATOM | 2290 | CA   | ARG | X | 148 | 49.790 | 53.703 | 52.143 | 0.00 | 0.00 |
| ATOM | 2291 | HA   | ARG | X | 148 | 50.844 | 53.960 | 52.244 | 0.00 | 0.00 |
| ATOM | 2292 | CB   | ARG | X | 148 | 49.134 | 54.167 | 53.461 | 0.00 | 0.00 |
| ATOM | 2293 | HB2  | ARG | X | 148 | 48.053 | 54.277 | 53.371 | 0.00 | 0.00 |
| ATOM | 2294 | HB3  | ARG | X | 148 | 49.336 | 53.416 | 54.224 | 0.00 | 0.00 |
| ATOM | 2295 | CG   | ARG | X | 148 | 49.589 | 55.500 | 53.926 | 0.00 | 0.00 |
| ATOM | 2296 | HG2  | ARG | X | 148 | 50.654 | 55.514 | 54.160 | 0.00 | 0.00 |
| ATOM | 2297 | HG3  | ARG | X | 148 | 49.448 | 56.298 | 53.197 | 0.00 | 0.00 |
| ATOM | 2298 | CD   | ARG | X | 148 | 48.940 | 56.010 | 55.185 | 0.00 | 0.00 |
| ATOM | 2299 | HD2  | ARG | X | 148 | 49.054 | 55.224 | 55.932 | 0.00 | 0.00 |
| ATOM | 2300 | HD3  | ARG | X | 148 | 49.439 | 56.971 | 55.306 | 0.00 | 0.00 |
| ATOM | 2301 | NE   | ARG | X | 148 | 47.478 | 56.147 | 55.028 | 0.00 | 0.00 |
| ATOM | 2302 | HE   | ARG | X | 148 | 47.193 | 56.168 | 54.060 | 0.00 | 0.00 |
| ATOM | 2303 | CZ   | ARG | X | 148 | 46.510 | 56.187 | 55.910 | 0.00 | 0.00 |
| ATOM | 2304 | NH1  | ARG | X | 148 | 46.740 | 56.182 | 57.198 | 0.00 | 0.00 |
| ATOM | 2305 | HH11 | ARG | X | 148 | 47.698 | 56.274 | 57.504 | 0.00 | 0.00 |
| ATOM | 2306 | HH12 | ARG | X | 148 | 45.934 | 56.305 | 57.794 | 0.00 | 0.00 |
| ATOM | 2307 | NH2  | ARG | X | 148 | 45.198 | 56.199 | 55.514 | 0.00 | 0.00 |
| ATOM | 2308 | HH21 | ARG | X | 148 | 44.946 | 56.188 | 54.536 | 0.00 | 0.00 |
| ATOM | 2309 | HH22 | ARG | X | 148 | 44.466 | 56.300 | 56.202 | 0.00 | 0.00 |
| ATOM | 2310 | C    | ARG | X | 148 | 49.695 | 52.255 | 51.867 | 0.00 | 0.00 |
| ATOM | 2311 | O    | ARG | X | 148 | 48.786 | 51.758 | 51.185 | 0.00 | 0.00 |
| ATOM | 2312 | N    | VAL | X | 149 | 50.770 | 51.570 | 52.315 | 0.00 | 0.00 |
| ATOM | 2313 | H    | VAL | X | 149 | 51.464 | 52.087 | 52.835 | 0.00 | 0.00 |
| ATOM | 2314 | CA   | VAL | X | 149 | 51.187 | 50.178 | 52.142 | 0.00 | 0.00 |
| ATOM | 2315 | HA   | VAL | X | 149 | 50.324 | 49.565 | 51.882 | 0.00 | 0.00 |
| ATOM | 2316 | CB   | VAL | X | 149 | 52.194 | 50.053 | 50.946 | 0.00 | 0.00 |
| ATOM | 2317 | HB   | VAL | X | 149 | 52.612 | 49.051 | 50.848 | 0.00 | 0.00 |
| ATOM | 2318 | CG1  | VAL | X | 149 | 51.668 | 50.407 | 49.535 | 0.00 | 0.00 |
| ATOM | 2319 | HG11 | VAL | X | 149 | 52.062 | 49.672 | 48.834 | 0.00 | 0.00 |
| ATOM | 2320 | HG12 | VAL | X | 149 | 50.583 | 50.329 | 49.468 | 0.00 | 0.00 |
| ATOM | 2321 | HG13 | VAL | X | 149 | 52.072 | 51.353 | 49.173 | 0.00 | 0.00 |
| ATOM | 2322 | CG2  | VAL | X | 149 | 53.514 | 50.850 | 51.088 | 0.00 | 0.00 |
| ATOM | 2323 | HG21 | VAL | X | 149 | 54.084 | 50.338 | 51.863 | 0.00 | 0.00 |
| ATOM | 2324 | HG22 | VAL | X | 149 | 54.177 | 50.698 | 50.236 | 0.00 | 0.00 |
| ATOM | 2325 | HG23 | VAL | X | 149 | 53.397 | 51.879 | 51.431 | 0.00 | 0.00 |
| ATOM | 2326 | C    | VAL | X | 149 | 51.889 | 49.532 | 53.371 | 0.00 | 0.00 |
| ATOM | 2327 | O    | VAL | X | 149 | 52.450 | 50.295 | 54.200 | 0.00 | 0.00 |
| ATOM | 2328 | N    | GLY | X | 150 | 51.898 | 48.175 | 53.416 | 0.00 | 0.00 |
| ATOM | 2329 | H    | GLY | X | 150 | 51.566 | 47.676 | 52.603 | 0.00 | 0.00 |
| ATOM | 2330 | CA   | GLY | X | 150 | 52.275 | 47.427 | 54.631 | 0.00 | 0.00 |
| ATOM | 2331 | HA2  | GLY | X | 150 | 52.263 | 46.395 | 54.488 | 0.00 | 0.00 |
| ATOM | 2332 | HA3  | GLY | X | 150 | 53.272 | 47.782 | 55.046 | 0.00 | 0.00 |
| ATOM | 2333 | C    | GLY | X | 150 | 51.187 | 47.596 | 55.683 | 0.00 | 0.00 |
| ATOM | 2334 | O    | GLY | X | 150 | 50.078 | 47.960 | 55.426 | 0.00 | 0.00 |
| ATOM | 2335 | N    | ALA | X | 151 | 51.599 | 47.367 | 56.950 | 0.00 | 0.00 |
| ATOM | 2336 | H    | ALA | X | 151 | 52.545 | 47.068 | 57.135 | 0.00 | 0.00 |
| ATOM | 2337 | CA   | ALA | X | 151 | 50.775 | 47.778 | 58.106 | 0.00 | 0.00 |
| ATOM | 2338 | HA   | ALA | X | 151 | 49.875 | 47.180 | 57.966 | 0.00 | 0.00 |
| ATOM | 2339 | CB   | ALA | X | 151 | 51.547 | 47.445 | 59.405 | 0.00 | 0.00 |
| ATOM | 2340 | HB1  | ALA | X | 151 | 52.502 | 46.933 | 59.286 | 0.00 | 0.00 |
| ATOM | 2341 | HB2  | ALA | X | 151 | 51.723 | 48.330 | 60.017 | 0.00 | 0.00 |
| ATOM | 2342 | HB3  | ALA | X | 151 | 50.869 | 46.806 | 59.969 | 0.00 | 0.00 |
| ATOM | 2343 | C    | ALA | X | 151 | 50.343 | 49.257 | 58.048 | 0.00 | 0.00 |
| ATOM | 2344 | O    | ALA | X | 151 | 49.204 | 49.503 | 58.383 | 0.00 | 0.00 |
| ATOM | 2345 | N    | PHE | X | 152 | 51.160 | 50.212 | 57.652 | 0.00 | 0.00 |
| ATOM | 2346 | H    | PHE | X | 152 | 52.141 | 50.016 | 57.514 | 0.00 | 0.00 |
| ATOM | 2347 | CA   | PHE | X | 152 | 50.741 | 51.590 | 57.414 | 0.00 | 0.00 |
| ATOM | 2348 | HA   | PHE | X | 152 | 50.419 | 51.899 | 58.409 | 0.00 | 0.00 |

|      |      |      |     |   |     |        |        |        |      |      |
|------|------|------|-----|---|-----|--------|--------|--------|------|------|
| ATOM | 2349 | CB   | PHE | X | 152 | 51.894 | 52.371 | 56.710 | 0.00 | 0.00 |
| ATOM | 2350 | HB2  | PHE | X | 152 | 51.904 | 52.103 | 55.653 | 0.00 | 0.00 |
| ATOM | 2351 | HB3  | PHE | X | 152 | 51.640 | 53.426 | 56.613 | 0.00 | 0.00 |
| ATOM | 2352 | CG   | PHE | X | 152 | 53.253 | 52.174 | 57.345 | 0.00 | 0.00 |
| ATOM | 2353 | CD1  | PHE | X | 152 | 54.060 | 51.073 | 56.934 | 0.00 | 0.00 |
| ATOM | 2354 | HD1  | PHE | X | 152 | 53.737 | 50.304 | 56.248 | 0.00 | 0.00 |
| ATOM | 2355 | CE1  | PHE | X | 152 | 55.315 | 50.835 | 57.564 | 0.00 | 0.00 |
| ATOM | 2356 | HE1  | PHE | X | 152 | 55.898 | 49.993 | 57.223 | 0.00 | 0.00 |
| ATOM | 2357 | CZ   | PHE | X | 152 | 55.716 | 51.564 | 58.656 | 0.00 | 0.00 |
| ATOM | 2358 | HZ   | PHE | X | 152 | 56.674 | 51.349 | 59.106 | 0.00 | 0.00 |
| ATOM | 2359 | CE2  | PHE | X | 152 | 54.885 | 52.627 | 59.116 | 0.00 | 0.00 |
| ATOM | 2360 | HE2  | PHE | X | 152 | 55.106 | 53.304 | 59.928 | 0.00 | 0.00 |
| ATOM | 2361 | CD2  | PHE | X | 152 | 53.628 | 52.902 | 58.497 | 0.00 | 0.00 |
| ATOM | 2362 | HD2  | PHE | X | 152 | 52.997 | 53.597 | 59.030 | 0.00 | 0.00 |
| ATOM | 2363 | C    | PHE | X | 152 | 49.450 | 51.816 | 56.659 | 0.00 | 0.00 |
| ATOM | 2364 | O    | PHE | X | 152 | 48.587 | 52.753 | 56.913 | 0.00 | 0.00 |
| ATOM | 2365 | N    | GLY | X | 153 | 49.169 | 51.090 | 55.609 | 0.00 | 0.00 |
| ATOM | 2366 | H    | GLY | X | 153 | 49.797 | 50.381 | 55.259 | 0.00 | 0.00 |
| ATOM | 2367 | CA   | GLY | X | 153 | 47.829 | 51.127 | 54.870 | 0.00 | 0.00 |
| ATOM | 2368 | HA2  | GLY | X | 153 | 47.296 | 52.011 | 55.064 | 0.00 | 0.00 |
| ATOM | 2369 | HA3  | GLY | X | 153 | 48.096 | 51.173 | 53.852 | 0.00 | 0.00 |
| ATOM | 2370 | C    | GLY | X | 153 | 46.868 | 49.921 | 55.126 | 0.00 | 0.00 |
| ATOM | 2371 | O    | GLY | X | 153 | 45.719 | 50.099 | 54.852 | 0.00 | 0.00 |
| ATOM | 2372 | N    | PHE | X | 154 | 47.289 | 48.804 | 55.768 | 0.00 | 0.00 |
| ATOM | 2373 | H    | PHE | X | 154 | 48.258 | 48.871 | 56.045 | 0.00 | 0.00 |
| ATOM | 2374 | CA   | PHE | X | 154 | 46.591 | 47.566 | 55.615 | 0.00 | 0.00 |
| ATOM | 2375 | HA   | PHE | X | 154 | 45.584 | 47.765 | 55.249 | 0.00 | 0.00 |
| ATOM | 2376 | CB   | PHE | X | 154 | 47.237 | 46.760 | 54.451 | 0.00 | 0.00 |
| ATOM | 2377 | HB2  | PHE | X | 154 | 48.321 | 46.671 | 54.517 | 0.00 | 0.00 |
| ATOM | 2378 | HB3  | PHE | X | 154 | 46.790 | 45.766 | 54.456 | 0.00 | 0.00 |
| ATOM | 2379 | CG   | PHE | X | 154 | 46.908 | 47.372 | 53.044 | 0.00 | 0.00 |
| ATOM | 2380 | CD1  | PHE | X | 154 | 47.935 | 48.030 | 52.276 | 0.00 | 0.00 |
| ATOM | 2381 | HD1  | PHE | X | 154 | 48.974 | 47.994 | 52.568 | 0.00 | 0.00 |
| ATOM | 2382 | CE1  | PHE | X | 154 | 47.457 | 48.691 | 51.109 | 0.00 | 0.00 |
| ATOM | 2383 | HE1  | PHE | X | 154 | 48.140 | 49.363 | 50.610 | 0.00 | 0.00 |
| ATOM | 2384 | CZ   | PHE | X | 154 | 46.131 | 48.639 | 50.703 | 0.00 | 0.00 |
| ATOM | 2385 | HZ   | PHE | X | 154 | 45.700 | 49.099 | 49.827 | 0.00 | 0.00 |
| ATOM | 2386 | CE2  | PHE | X | 154 | 45.179 | 48.002 | 51.504 | 0.00 | 0.00 |
| ATOM | 2387 | HE2  | PHE | X | 154 | 44.137 | 47.969 | 51.223 | 0.00 | 0.00 |
| ATOM | 2388 | CD2  | PHE | X | 154 | 45.549 | 47.346 | 52.658 | 0.00 | 0.00 |
| ATOM | 2389 | HD2  | PHE | X | 154 | 44.774 | 46.903 | 53.265 | 0.00 | 0.00 |
| ATOM | 2390 | C    | PHE | X | 154 | 46.370 | 46.780 | 56.962 | 0.00 | 0.00 |
| ATOM | 2391 | O    | PHE | X | 154 | 45.789 | 45.634 | 56.936 | 0.00 | 0.00 |
| ATOM | 2392 | N    | LEU | X | 155 | 46.899 | 47.276 | 58.100 | 0.00 | 0.00 |
| ATOM | 2393 | H    | LEU | X | 155 | 47.287 | 48.208 | 58.117 | 0.00 | 0.00 |
| ATOM | 2394 | CA   | LEU | X | 155 | 46.399 | 46.877 | 59.380 | 0.00 | 0.00 |
| ATOM | 2395 | HA   | LEU | X | 155 | 46.441 | 45.791 | 59.455 | 0.00 | 0.00 |
| ATOM | 2396 | CB   | LEU | X | 155 | 47.373 | 47.490 | 60.466 | 0.00 | 0.00 |
| ATOM | 2397 | HB2  | LEU | X | 155 | 48.386 | 47.235 | 60.155 | 0.00 | 0.00 |
| ATOM | 2398 | HB3  | LEU | X | 155 | 47.324 | 48.577 | 60.528 | 0.00 | 0.00 |
| ATOM | 2399 | CG   | LEU | X | 155 | 47.152 | 46.918 | 61.918 | 0.00 | 0.00 |
| ATOM | 2400 | HG   | LEU | X | 155 | 46.520 | 46.035 | 61.828 | 0.00 | 0.00 |
| ATOM | 2401 | CD1  | LEU | X | 155 | 48.458 | 46.482 | 62.558 | 0.00 | 0.00 |
| ATOM | 2402 | HD11 | LEU | X | 155 | 49.069 | 47.308 | 62.922 | 0.00 | 0.00 |
| ATOM | 2403 | HD12 | LEU | X | 155 | 48.297 | 45.833 | 63.419 | 0.00 | 0.00 |
| ATOM | 2404 | HD13 | LEU | X | 155 | 49.089 | 45.947 | 61.848 | 0.00 | 0.00 |
| ATOM | 2405 | CD2  | LEU | X | 155 | 46.357 | 47.724 | 62.809 | 0.00 | 0.00 |
| ATOM | 2406 | HD21 | LEU | X | 155 | 46.923 | 48.629 | 63.028 | 0.00 | 0.00 |
| ATOM | 2407 | HD22 | LEU | X | 155 | 45.435 | 48.054 | 62.330 | 0.00 | 0.00 |
| ATOM | 2408 | HD23 | LEU | X | 155 | 46.053 | 47.152 | 63.686 | 0.00 | 0.00 |
| ATOM | 2409 | C    | LEU | X | 155 | 44.963 | 47.384 | 59.595 | 0.00 | 0.00 |
| ATOM | 2410 | O    | LEU | X | 155 | 44.656 | 48.518 | 59.152 | 0.00 | 0.00 |
| ATOM | 2411 | N    | ALA | X | 156 | 44.175 | 46.599 | 60.275 | 0.00 | 0.00 |
| ATOM | 2412 | H    | ALA | X | 156 | 44.668 | 45.809 | 60.667 | 0.00 | 0.00 |
| ATOM | 2413 | CA   | ALA | X | 156 | 42.839 | 46.798 | 60.743 | 0.00 | 0.00 |
| ATOM | 2414 | HA   | ALA | X | 156 | 42.455 | 47.785 | 60.486 | 0.00 | 0.00 |
| ATOM | 2415 | CB   | ALA | X | 156 | 41.962 | 45.757 | 60.061 | 0.00 | 0.00 |
| ATOM | 2416 | HB1  | ALA | X | 156 | 41.761 | 45.984 | 59.014 | 0.00 | 0.00 |
| ATOM | 2417 | HB2  | ALA | X | 156 | 42.442 | 44.792 | 60.229 | 0.00 | 0.00 |
| ATOM | 2418 | HB3  | ALA | X | 156 | 40.965 | 45.764 | 60.501 | 0.00 | 0.00 |



|      |      |      |     |   |     |        |        |        |      |      |
|------|------|------|-----|---|-----|--------|--------|--------|------|------|
| ATOM | 2419 | C    | ALA | X | 156 | 42.747 | 46.457 | 62.311 | 0.00 | 0.00 |
| ATOM | 2420 | O    | ALA | X | 156 | 43.478 | 45.693 | 62.845 | 0.00 | 0.00 |
| ATOM | 2421 | N    | LEU | X | 157 | 41.647 | 46.907 | 62.966 | 0.00 | 0.00 |
| ATOM | 2422 | H    | LEU | X | 157 | 41.091 | 47.499 | 62.366 | 0.00 | 0.00 |
| ATOM | 2423 | CA   | LEU | X | 157 | 41.032 | 46.424 | 64.199 | 0.00 | 0.00 |
| ATOM | 2424 | HA   | LEU | X | 157 | 41.388 | 45.398 | 64.289 | 0.00 | 0.00 |
| ATOM | 2425 | CB   | LEU | X | 157 | 41.595 | 47.208 | 65.388 | 0.00 | 0.00 |
| ATOM | 2426 | HB2  | LEU | X | 157 | 42.659 | 47.019 | 65.527 | 0.00 | 0.00 |
| ATOM | 2427 | HB3  | LEU | X | 157 | 41.499 | 48.294 | 65.369 | 0.00 | 0.00 |
| ATOM | 2428 | CG   | LEU | X | 157 | 40.972 | 46.755 | 66.726 | 0.00 | 0.00 |
| ATOM | 2429 | HG   | LEU | X | 157 | 39.882 | 46.745 | 66.714 | 0.00 | 0.00 |
| ATOM | 2430 | CD1  | LEU | X | 157 | 41.292 | 45.401 | 67.309 | 0.00 | 0.00 |
| ATOM | 2431 | HD11 | LEU | X | 157 | 42.316 | 45.314 | 67.673 | 0.00 | 0.00 |
| ATOM | 2432 | HD12 | LEU | X | 157 | 40.626 | 45.288 | 68.165 | 0.00 | 0.00 |
| ATOM | 2433 | HD13 | LEU | X | 157 | 41.052 | 44.510 | 66.728 | 0.00 | 0.00 |
| ATOM | 2434 | CD2  | LEU | X | 157 | 41.325 | 47.783 | 67.810 | 0.00 | 0.00 |
| ATOM | 2435 | HD21 | LEU | X | 157 | 42.362 | 47.578 | 68.075 | 0.00 | 0.00 |
| ATOM | 2436 | HD22 | LEU | X | 157 | 41.160 | 48.845 | 67.628 | 0.00 | 0.00 |
| ATOM | 2437 | HD23 | LEU | X | 157 | 40.754 | 47.482 | 68.689 | 0.00 | 0.00 |
| ATOM | 2438 | C    | LEU | X | 157 | 39.454 | 46.639 | 64.053 | 0.00 | 0.00 |
| ATOM | 2439 | O    | LEU | X | 157 | 38.951 | 47.668 | 64.551 | 0.00 | 0.00 |
| ATOM | 2440 | N    | PRO | X | 158 | 38.747 | 45.783 | 63.315 | 0.00 | 0.00 |
| ATOM | 2441 | CD   | PRO | X | 158 | 39.198 | 44.504 | 62.800 | 0.00 | 0.00 |
| ATOM | 2442 | HD2  | PRO | X | 158 | 39.552 | 43.829 | 63.580 | 0.00 | 0.00 |
| ATOM | 2443 | HD3  | PRO | X | 158 | 39.970 | 44.521 | 62.031 | 0.00 | 0.00 |
| ATOM | 2444 | CG   | PRO | X | 158 | 37.976 | 43.800 | 62.263 | 0.00 | 0.00 |
| ATOM | 2445 | HG2  | PRO | X | 158 | 37.541 | 43.183 | 63.050 | 0.00 | 0.00 |
| ATOM | 2446 | HG3  | PRO | X | 158 | 38.050 | 43.299 | 61.298 | 0.00 | 0.00 |
| ATOM | 2447 | CB   | PRO | X | 158 | 37.030 | 44.931 | 61.840 | 0.00 | 0.00 |
| ATOM | 2448 | HB2  | PRO | X | 158 | 35.990 | 44.665 | 62.027 | 0.00 | 0.00 |
| ATOM | 2449 | HB3  | PRO | X | 158 | 37.080 | 45.247 | 60.798 | 0.00 | 0.00 |
| ATOM | 2450 | CA   | PRO | X | 158 | 37.428 | 46.041 | 62.825 | 0.00 | 0.00 |
| ATOM | 2451 | HA   | PRO | X | 158 | 37.357 | 46.973 | 62.264 | 0.00 | 0.00 |
| ATOM | 2452 | C    | PRO | X | 158 | 36.401 | 46.071 | 63.973 | 0.00 | 0.00 |
| ATOM | 2453 | O    | PRO | X | 158 | 36.611 | 45.336 | 64.936 | 0.00 | 0.00 |
| ATOM | 2454 | N    | GLY | X | 159 | 35.356 | 46.828 | 63.791 | 0.00 | 0.00 |
| ATOM | 2455 | H    | GLY | X | 159 | 35.384 | 47.444 | 62.992 | 0.00 | 0.00 |
| ATOM | 2456 | CA   | GLY | X | 159 | 34.298 | 47.081 | 64.781 | 0.00 | 0.00 |
| ATOM | 2457 | HA2  | GLY | X | 159 | 33.387 | 47.382 | 64.297 | 0.00 | 0.00 |
| ATOM | 2458 | HA3  | GLY | X | 159 | 34.214 | 46.209 | 65.422 | 0.00 | 0.00 |
| ATOM | 2459 | C    | GLY | X | 159 | 34.606 | 48.350 | 65.655 | 0.00 | 0.00 |
| ATOM | 2460 | O    | GLY | X | 159 | 33.875 | 48.621 | 66.597 | 0.00 | 0.00 |
| ATOM | 2461 | N    | SER | X | 160 | 35.681 | 49.203 | 65.328 | 0.00 | 0.00 |
| ATOM | 2462 | H    | SER | X | 160 | 36.072 | 49.010 | 64.417 | 0.00 | 0.00 |
| ATOM | 2463 | CA   | SER | X | 160 | 36.267 | 50.264 | 66.042 | 0.00 | 0.00 |
| ATOM | 2464 | HA   | SER | X | 160 | 35.801 | 50.315 | 67.025 | 0.00 | 0.00 |
| ATOM | 2465 | CB   | SER | X | 160 | 37.787 | 49.900 | 66.303 | 0.00 | 0.00 |
| ATOM | 2466 | HB2  | SER | X | 160 | 38.137 | 50.359 | 67.227 | 0.00 | 0.00 |
| ATOM | 2467 | HB3  | SER | X | 160 | 37.811 | 48.819 | 66.442 | 0.00 | 0.00 |
| ATOM | 2468 | OG   | SER | X | 160 | 38.736 | 50.333 | 65.252 | 0.00 | 0.00 |
| ATOM | 2469 | HG   | SER | X | 160 | 39.063 | 49.549 | 64.804 | 0.00 | 0.00 |
| ATOM | 2470 | C    | SER | X | 160 | 36.041 | 51.645 | 65.416 | 0.00 | 0.00 |
| ATOM | 2471 | O    | SER | X | 160 | 35.848 | 51.705 | 64.203 | 0.00 | 0.00 |
| ATOM | 2472 | N    | ARG | X | 161 | 36.233 | 52.702 | 66.173 | 0.00 | 0.00 |
| ATOM | 2473 | H    | ARG | X | 161 | 36.449 | 52.564 | 67.150 | 0.00 | 0.00 |
| ATOM | 2474 | CA   | ARG | X | 161 | 36.483 | 54.056 | 65.582 | 0.00 | 0.00 |
| ATOM | 2475 | HA   | ARG | X | 161 | 36.122 | 54.003 | 64.555 | 0.00 | 0.00 |
| ATOM | 2476 | CB   | ARG | X | 161 | 35.785 | 55.146 | 66.392 | 0.00 | 0.00 |
| ATOM | 2477 | HB2  | ARG | X | 161 | 36.361 | 55.319 | 67.302 | 0.00 | 0.00 |
| ATOM | 2478 | HB3  | ARG | X | 161 | 35.858 | 56.102 | 65.873 | 0.00 | 0.00 |
| ATOM | 2479 | CG   | ARG | X | 161 | 34.349 | 54.836 | 66.776 | 0.00 | 0.00 |
| ATOM | 2480 | HG2  | ARG | X | 161 | 33.761 | 54.536 | 65.908 | 0.00 | 0.00 |
| ATOM | 2481 | HG3  | ARG | X | 161 | 34.364 | 54.022 | 67.502 | 0.00 | 0.00 |
| ATOM | 2482 | CD   | ARG | X | 161 | 33.631 | 56.038 | 67.391 | 0.00 | 0.00 |
| ATOM | 2483 | HD2  | ARG | X | 161 | 33.692 | 56.847 | 66.663 | 0.00 | 0.00 |
| ATOM | 2484 | HD3  | ARG | X | 161 | 32.562 | 55.847 | 67.488 | 0.00 | 0.00 |
| ATOM | 2485 | NE   | ARG | X | 161 | 34.269 | 56.449 | 68.706 | 0.00 | 0.00 |
| ATOM | 2486 | HE   | ARG | X | 161 | 33.965 | 55.924 | 69.514 | 0.00 | 0.00 |
| ATOM | 2487 | CZ   | ARG | X | 161 | 34.990 | 57.543 | 68.984 | 0.00 | 0.00 |
| ATOM | 2488 | NH1  | ARG | X | 161 | 35.203 | 58.372 | 67.983 | 0.00 | 0.00 |

|      |      |      |     |   |     |        |        |        |      |      |
|------|------|------|-----|---|-----|--------|--------|--------|------|------|
| ATOM | 2489 | HH11 | ARG | X | 161 | 34.853 | 58.278 | 67.040 | 0.00 | 0.00 |
| ATOM | 2490 | HH12 | ARG | X | 161 | 35.524 | 59.288 | 68.263 | 0.00 | 0.00 |
| ATOM | 2491 | NH2  | ARG | X | 161 | 35.318 | 57.824 | 70.168 | 0.00 | 0.00 |
| ATOM | 2492 | HH21 | ARG | X | 161 | 34.728 | 57.435 | 70.889 | 0.00 | 0.00 |
| ATOM | 2493 | HH22 | ARG | X | 161 | 35.804 | 58.692 | 70.340 | 0.00 | 0.00 |
| ATOM | 2494 | C    | ARG | X | 161 | 38.027 | 54.396 | 65.524 | 0.00 | 0.00 |
| ATOM | 2495 | O    | ARG | X | 161 | 38.416 | 55.325 | 64.787 | 0.00 | 0.00 |
| ATOM | 2496 | N    | GLU | X | 162 | 38.822 | 53.641 | 66.306 | 0.00 | 0.00 |
| ATOM | 2497 | H    | GLU | X | 162 | 38.272 | 53.074 | 66.935 | 0.00 | 0.00 |
| ATOM | 2498 | CA   | GLU | X | 162 | 40.164 | 53.729 | 66.561 | 0.00 | 0.00 |
| ATOM | 2499 | HA   | GLU | X | 162 | 40.316 | 54.803 | 66.668 | 0.00 | 0.00 |
| ATOM | 2500 | CB   | GLU | X | 162 | 40.438 | 52.963 | 67.908 | 0.00 | 0.00 |
| ATOM | 2501 | HB2  | GLU | X | 162 | 39.988 | 51.970 | 67.896 | 0.00 | 0.00 |
| ATOM | 2502 | HB3  | GLU | X | 162 | 41.517 | 53.001 | 68.059 | 0.00 | 0.00 |
| ATOM | 2503 | CG   | GLU | X | 162 | 39.842 | 53.815 | 69.098 | 0.00 | 0.00 |
| ATOM | 2504 | HG2  | GLU | X | 162 | 40.500 | 53.804 | 69.967 | 0.00 | 0.00 |
| ATOM | 2505 | HG3  | GLU | X | 162 | 39.658 | 54.820 | 68.718 | 0.00 | 0.00 |
| ATOM | 2506 | CD   | GLU | X | 162 | 38.477 | 53.395 | 69.420 | 0.00 | 0.00 |
| ATOM | 2507 | OE1  | GLU | X | 162 | 37.836 | 52.773 | 68.461 | 0.00 | 0.00 |
| ATOM | 2508 | OE2  | GLU | X | 162 | 38.012 | 53.634 | 70.563 | 0.00 | 0.00 |
| ATOM | 2509 | C    | GLU | X | 162 | 41.070 | 53.258 | 65.373 | 0.00 | 0.00 |
| ATOM | 2510 | O    | GLU | X | 162 | 42.130 | 53.821 | 65.165 | 0.00 | 0.00 |
| ATOM | 2511 | N    | ALA | X | 163 | 40.698 | 52.238 | 64.547 | 0.00 | 0.00 |
| ATOM | 2512 | H    | ALA | X | 163 | 39.771 | 51.872 | 64.710 | 0.00 | 0.00 |
| ATOM | 2513 | CA   | ALA | X | 163 | 41.415 | 51.522 | 63.498 | 0.00 | 0.00 |
| ATOM | 2514 | HA   | ALA | X | 163 | 41.801 | 52.361 | 62.920 | 0.00 | 0.00 |
| ATOM | 2515 | CB   | ALA | X | 163 | 42.677 | 50.855 | 64.067 | 0.00 | 0.00 |
| ATOM | 2516 | HB1  | ALA | X | 163 | 43.206 | 51.527 | 64.744 | 0.00 | 0.00 |
| ATOM | 2517 | HB2  | ALA | X | 163 | 42.390 | 50.002 | 64.681 | 0.00 | 0.00 |
| ATOM | 2518 | HB3  | ALA | X | 163 | 43.321 | 50.436 | 63.295 | 0.00 | 0.00 |
| ATOM | 2519 | C    | ALA | X | 163 | 40.461 | 50.644 | 62.633 | 0.00 | 0.00 |
| ATOM | 2520 | O    | ALA | X | 163 | 40.482 | 49.403 | 62.666 | 0.00 | 0.00 |
| ATOM | 2521 | N    | PRO | X | 164 | 39.638 | 51.265 | 61.746 | 0.00 | 0.00 |
| ATOM | 2522 | CD   | PRO | X | 164 | 39.652 | 52.693 | 61.395 | 0.00 | 0.00 |
| ATOM | 2523 | HD2  | PRO | X | 164 | 40.573 | 52.914 | 60.855 | 0.00 | 0.00 |
| ATOM | 2524 | HD3  | PRO | X | 164 | 39.707 | 53.313 | 62.290 | 0.00 | 0.00 |
| ATOM | 2525 | CG   | PRO | X | 164 | 38.374 | 52.944 | 60.499 | 0.00 | 0.00 |
| ATOM | 2526 | HG2  | PRO | X | 164 | 38.515 | 53.783 | 59.818 | 0.00 | 0.00 |
| ATOM | 2527 | HG3  | PRO | X | 164 | 37.505 | 53.189 | 61.109 | 0.00 | 0.00 |
| ATOM | 2528 | CB   | PRO | X | 164 | 38.075 | 51.631 | 59.752 | 0.00 | 0.00 |
| ATOM | 2529 | HB2  | PRO | X | 164 | 38.516 | 51.640 | 58.755 | 0.00 | 0.00 |
| ATOM | 2530 | HB3  | PRO | X | 164 | 36.999 | 51.522 | 59.617 | 0.00 | 0.00 |
| ATOM | 2531 | CA   | PRO | X | 164 | 38.778 | 50.556 | 60.779 | 0.00 | 0.00 |
| ATOM | 2532 | HA   | PRO | X | 164 | 37.981 | 50.024 | 61.299 | 0.00 | 0.00 |
| ATOM | 2533 | C    | PRO | X | 164 | 39.424 | 49.534 | 59.830 | 0.00 | 0.00 |
| ATOM | 2534 | O    | PRO | X | 164 | 38.978 | 48.407 | 59.805 | 0.00 | 0.00 |
| ATOM | 2535 | N    | GLY | X | 165 | 40.505 | 49.866 | 59.159 | 0.00 | 0.00 |
| ATOM | 2536 | H    | GLY | X | 165 | 40.761 | 50.843 | 59.163 | 0.00 | 0.00 |
| ATOM | 2537 | CA   | GLY | X | 165 | 41.298 | 48.912 | 58.296 | 0.00 | 0.00 |
| ATOM | 2538 | HA2  | GLY | X | 165 | 42.410 | 48.880 | 58.412 | 0.00 | 0.00 |
| ATOM | 2539 | HA3  | GLY | X | 165 | 40.891 | 47.926 | 58.565 | 0.00 | 0.00 |
| ATOM | 2540 | C    | GLY | X | 165 | 41.216 | 49.292 | 56.818 | 0.00 | 0.00 |
| ATOM | 2541 | O    | GLY | X | 165 | 40.406 | 50.134 | 56.523 | 0.00 | 0.00 |
| ATOM | 2542 | N    | ASN | X | 166 | 41.992 | 48.780 | 55.903 | 0.00 | 0.00 |
| ATOM | 2543 | H    | ASN | X | 166 | 42.454 | 47.916 | 56.149 | 0.00 | 0.00 |
| ATOM | 2544 | CA   | ASN | X | 166 | 41.931 | 49.094 | 54.511 | 0.00 | 0.00 |
| ATOM | 2545 | HA   | ASN | X | 166 | 42.828 | 48.610 | 54.124 | 0.00 | 0.00 |
| ATOM | 2546 | CB   | ASN | X | 166 | 40.652 | 48.537 | 53.748 | 0.00 | 0.00 |
| ATOM | 2547 | HB2  | ASN | X | 166 | 39.809 | 49.135 | 54.095 | 0.00 | 0.00 |
| ATOM | 2548 | HB3  | ASN | X | 166 | 40.799 | 48.731 | 52.686 | 0.00 | 0.00 |
| ATOM | 2549 | CG   | ASN | X | 166 | 40.535 | 47.039 | 54.065 | 0.00 | 0.00 |
| ATOM | 2550 | OD1  | ASN | X | 166 | 41.464 | 46.260 | 53.869 | 0.00 | 0.00 |
| ATOM | 2551 | ND2  | ASN | X | 166 | 39.434 | 46.679 | 54.745 | 0.00 | 0.00 |
| ATOM | 2552 | HD21 | ASN | X | 166 | 39.265 | 45.699 | 54.924 | 0.00 | 0.00 |
| ATOM | 2553 | HD22 | ASN | X | 166 | 38.774 | 47.341 | 55.127 | 0.00 | 0.00 |
| ATOM | 2554 | C    | ASN | X | 166 | 42.162 | 50.575 | 54.149 | 0.00 | 0.00 |
| ATOM | 2555 | O    | ASN | X | 166 | 41.830 | 51.064 | 53.065 | 0.00 | 0.00 |
| ATOM | 2556 | N    | VAL | X | 167 | 42.854 | 51.270 | 55.042 | 0.00 | 0.00 |
| ATOM | 2557 | H    | VAL | X | 167 | 43.099 | 50.768 | 55.883 | 0.00 | 0.00 |
| ATOM | 2558 | CA   | VAL | X | 167 | 43.080 | 52.712 | 54.981 | 0.00 | 0.00 |

|      |      |      |     |   |     |        |        |        |      |      |
|------|------|------|-----|---|-----|--------|--------|--------|------|------|
| ATOM | 2559 | HA   | VAL | X | 167 | 42.088 | 53.137 | 54.830 | 0.00 | 0.00 |
| ATOM | 2560 | CB   | VAL | X | 167 | 43.564 | 53.210 | 56.349 | 0.00 | 0.00 |
| ATOM | 2561 | HB   | VAL | X | 167 | 43.792 | 54.274 | 56.274 | 0.00 | 0.00 |
| ATOM | 2562 | CG1  | VAL | X | 167 | 42.417 | 53.085 | 57.408 | 0.00 | 0.00 |
| ATOM | 2563 | HG11 | VAL | X | 167 | 41.530 | 53.637 | 57.100 | 0.00 | 0.00 |
| ATOM | 2564 | HG12 | VAL | X | 167 | 42.357 | 52.003 | 57.523 | 0.00 | 0.00 |
| ATOM | 2565 | HG13 | VAL | X | 167 | 42.757 | 53.555 | 58.331 | 0.00 | 0.00 |
| ATOM | 2566 | CG2  | VAL | X | 167 | 44.852 | 52.486 | 56.847 | 0.00 | 0.00 |
| ATOM | 2567 | HG21 | VAL | X | 167 | 44.800 | 51.407 | 56.991 | 0.00 | 0.00 |
| ATOM | 2568 | HG22 | VAL | X | 167 | 45.615 | 52.603 | 56.077 | 0.00 | 0.00 |
| ATOM | 2569 | HG23 | VAL | X | 167 | 45.056 | 52.921 | 57.825 | 0.00 | 0.00 |
| ATOM | 2570 | C    | VAL | X | 167 | 43.908 | 53.095 | 53.767 | 0.00 | 0.00 |
| ATOM | 2571 | O    | VAL | X | 167 | 43.576 | 54.103 | 53.150 | 0.00 | 0.00 |
| ATOM | 2572 | N    | GLY | X | 168 | 44.865 | 52.271 | 53.329 | 0.00 | 0.00 |
| ATOM | 2573 | H    | GLY | X | 168 | 45.021 | 51.363 | 53.744 | 0.00 | 0.00 |
| ATOM | 2574 | CA   | GLY | X | 168 | 45.620 | 52.575 | 52.093 | 0.00 | 0.00 |
| ATOM | 2575 | HA2  | GLY | X | 168 | 46.067 | 53.572 | 52.137 | 0.00 | 0.00 |
| ATOM | 2576 | HA3  | GLY | X | 168 | 46.438 | 51.842 | 52.141 | 0.00 | 0.00 |
| ATOM | 2577 | C    | GLY | X | 168 | 44.877 | 52.400 | 50.747 | 0.00 | 0.00 |
| ATOM | 2578 | O    | GLY | X | 168 | 45.475 | 52.854 | 49.745 | 0.00 | 0.00 |
| ATOM | 2579 | N    | LEU | X | 169 | 43.573 | 51.936 | 50.728 | 0.00 | 0.00 |
| ATOM | 2580 | H    | LEU | X | 169 | 43.180 | 51.586 | 51.590 | 0.00 | 0.00 |
| ATOM | 2581 | CA   | LEU | X | 169 | 42.594 | 51.979 | 49.687 | 0.00 | 0.00 |
| ATOM | 2582 | HA   | LEU | X | 169 | 43.173 | 52.079 | 48.769 | 0.00 | 0.00 |
| ATOM | 2583 | CB   | LEU | X | 169 | 41.744 | 50.707 | 49.712 | 0.00 | 0.00 |
| ATOM | 2584 | HB2  | LEU | X | 169 | 41.445 | 50.445 | 50.727 | 0.00 | 0.00 |
| ATOM | 2585 | HB3  | LEU | X | 169 | 40.787 | 50.853 | 49.212 | 0.00 | 0.00 |
| ATOM | 2586 | CG   | LEU | X | 169 | 42.287 | 49.425 | 49.025 | 0.00 | 0.00 |
| ATOM | 2587 | HG   | LEU | X | 169 | 43.310 | 49.359 | 49.393 | 0.00 | 0.00 |
| ATOM | 2588 | CD1  | LEU | X | 169 | 41.526 | 48.147 | 49.533 | 0.00 | 0.00 |
| ATOM | 2589 | HD11 | LEU | X | 169 | 40.479 | 48.222 | 49.240 | 0.00 | 0.00 |
| ATOM | 2590 | HD12 | LEU | X | 169 | 42.065 | 47.289 | 49.131 | 0.00 | 0.00 |
| ATOM | 2591 | HD13 | LEU | X | 169 | 41.702 | 48.253 | 50.604 | 0.00 | 0.00 |
| ATOM | 2592 | CD2  | LEU | X | 169 | 42.489 | 49.536 | 47.501 | 0.00 | 0.00 |
| ATOM | 2593 | HD21 | LEU | X | 169 | 42.952 | 48.668 | 47.033 | 0.00 | 0.00 |
| ATOM | 2594 | HD22 | LEU | X | 169 | 41.546 | 49.700 | 46.980 | 0.00 | 0.00 |
| ATOM | 2595 | HD23 | LEU | X | 169 | 43.076 | 50.420 | 47.250 | 0.00 | 0.00 |
| ATOM | 2596 | C    | LEU | X | 169 | 41.703 | 53.236 | 49.778 | 0.00 | 0.00 |
| ATOM | 2597 | O    | LEU | X | 169 | 41.321 | 53.858 | 48.825 | 0.00 | 0.00 |
| ATOM | 2598 | N    | LEU | X | 170 | 41.371 | 53.621 | 50.999 | 0.00 | 0.00 |
| ATOM | 2599 | H    | LEU | X | 170 | 41.754 | 53.137 | 51.799 | 0.00 | 0.00 |
| ATOM | 2600 | CA   | LEU | X | 170 | 40.585 | 54.840 | 51.282 | 0.00 | 0.00 |
| ATOM | 2601 | HA   | LEU | X | 170 | 39.666 | 54.797 | 50.698 | 0.00 | 0.00 |
| ATOM | 2602 | CB   | LEU | X | 170 | 40.162 | 54.870 | 52.742 | 0.00 | 0.00 |
| ATOM | 2603 | HB2  | LEU | X | 170 | 41.063 | 54.832 | 53.355 | 0.00 | 0.00 |
| ATOM | 2604 | HB3  | LEU | X | 170 | 39.717 | 55.833 | 52.993 | 0.00 | 0.00 |
| ATOM | 2605 | CG   | LEU | X | 170 | 39.122 | 53.819 | 53.268 | 0.00 | 0.00 |
| ATOM | 2606 | HG   | LEU | X | 170 | 39.615 | 52.852 | 53.165 | 0.00 | 0.00 |
| ATOM | 2607 | CD1  | LEU | X | 170 | 38.883 | 53.891 | 54.779 | 0.00 | 0.00 |
| ATOM | 2608 | HD11 | LEU | X | 170 | 38.205 | 53.148 | 55.199 | 0.00 | 0.00 |
| ATOM | 2609 | HD12 | LEU | X | 170 | 39.891 | 53.877 | 55.194 | 0.00 | 0.00 |
| ATOM | 2610 | HD13 | LEU | X | 170 | 38.477 | 54.881 | 54.987 | 0.00 | 0.00 |
| ATOM | 2611 | CD2  | LEU | X | 170 | 37.757 | 53.763 | 52.595 | 0.00 | 0.00 |
| ATOM | 2612 | HD21 | LEU | X | 170 | 37.874 | 53.393 | 51.576 | 0.00 | 0.00 |
| ATOM | 2613 | HD22 | LEU | X | 170 | 37.077 | 53.129 | 53.164 | 0.00 | 0.00 |
| ATOM | 2614 | HD23 | LEU | X | 170 | 37.329 | 54.755 | 52.453 | 0.00 | 0.00 |
| ATOM | 2615 | C    | LEU | X | 170 | 41.362 | 56.118 | 50.862 | 0.00 | 0.00 |
| ATOM | 2616 | O    | LEU | X | 170 | 40.699 | 57.041 | 50.324 | 0.00 | 0.00 |
| ATOM | 2617 | N    | ASP | X | 171 | 42.698 | 56.201 | 51.052 | 0.00 | 0.00 |
| ATOM | 2618 | H    | ASP | X | 171 | 43.088 | 55.382 | 51.498 | 0.00 | 0.00 |
| ATOM | 2619 | CA   | ASP | X | 171 | 43.670 | 57.024 | 50.260 | 0.00 | 0.00 |
| ATOM | 2620 | HA   | ASP | X | 171 | 43.647 | 58.018 | 50.706 | 0.00 | 0.00 |
| ATOM | 2621 | CB   | ASP | X | 171 | 45.073 | 56.429 | 50.400 | 0.00 | 0.00 |
| ATOM | 2622 | HB2  | ASP | X | 171 | 45.081 | 55.405 | 50.027 | 0.00 | 0.00 |
| ATOM | 2623 | HB3  | ASP | X | 171 | 45.765 | 56.980 | 49.763 | 0.00 | 0.00 |
| ATOM | 2624 | CG   | ASP | X | 171 | 45.645 | 56.416 | 51.839 | 0.00 | 0.00 |
| ATOM | 2625 | OD1  | ASP | X | 171 | 44.951 | 56.778 | 52.765 | 0.00 | 0.00 |
| ATOM | 2626 | OD2  | ASP | X | 171 | 46.814 | 55.945 | 51.968 | 0.00 | 0.00 |
| ATOM | 2627 | C    | ASP | X | 171 | 43.253 | 57.172 | 48.782 | 0.00 | 0.00 |
| ATOM | 2628 | O    | ASP | X | 171 | 43.005 | 58.335 | 48.317 | 0.00 | 0.00 |

|      |      |      |     |   |     |        |        |        |      |      |
|------|------|------|-----|---|-----|--------|--------|--------|------|------|
| ATOM | 2629 | N    | GLN | X | 172 | 43.235 | 56.094 | 48.092 | 0.00 | 0.00 |
| ATOM | 2630 | H    | GLN | X | 172 | 43.170 | 55.257 | 48.653 | 0.00 | 0.00 |
| ATOM | 2631 | CA   | GLN | X | 172 | 42.935 | 56.067 | 46.610 | 0.00 | 0.00 |
| ATOM | 2632 | HA   | GLN | X | 172 | 43.618 | 56.742 | 46.093 | 0.00 | 0.00 |
| ATOM | 2633 | CB   | GLN | X | 172 | 43.194 | 54.632 | 46.069 | 0.00 | 0.00 |
| ATOM | 2634 | HB2  | GLN | X | 172 | 42.536 | 53.899 | 46.537 | 0.00 | 0.00 |
| ATOM | 2635 | HB3  | GLN | X | 172 | 42.928 | 54.648 | 45.013 | 0.00 | 0.00 |
| ATOM | 2636 | CG   | GLN | X | 172 | 44.611 | 54.054 | 46.321 | 0.00 | 0.00 |
| ATOM | 2637 | HG2  | GLN | X | 172 | 45.364 | 54.619 | 45.772 | 0.00 | 0.00 |
| ATOM | 2638 | HG3  | GLN | X | 172 | 44.757 | 54.039 | 47.401 | 0.00 | 0.00 |
| ATOM | 2639 | CD   | GLN | X | 172 | 44.681 | 52.566 | 45.911 | 0.00 | 0.00 |
| ATOM | 2640 | OE1  | GLN | X | 172 | 43.997 | 52.056 | 45.053 | 0.00 | 0.00 |
| ATOM | 2641 | NE2  | GLN | X | 172 | 45.416 | 51.722 | 46.625 | 0.00 | 0.00 |
| ATOM | 2642 | HE21 | GLN | X | 172 | 45.380 | 50.729 | 46.448 | 0.00 | 0.00 |
| ATOM | 2643 | HE22 | GLN | X | 172 | 46.238 | 52.004 | 47.141 | 0.00 | 0.00 |
| ATOM | 2644 | C    | GLN | X | 172 | 41.480 | 56.449 | 46.234 | 0.00 | 0.00 |
| ATOM | 2645 | O    | GLN | X | 172 | 41.255 | 57.147 | 45.209 | 0.00 | 0.00 |
| ATOM | 2646 | N    | ARG | X | 173 | 40.458 | 56.079 | 47.019 | 0.00 | 0.00 |
| ATOM | 2647 | H    | ARG | X | 173 | 40.721 | 55.549 | 47.837 | 0.00 | 0.00 |
| ATOM | 2648 | CA   | ARG | X | 173 | 39.108 | 56.585 | 46.930 | 0.00 | 0.00 |
| ATOM | 2649 | HA   | ARG | X | 173 | 38.729 | 56.426 | 45.920 | 0.00 | 0.00 |
| ATOM | 2650 | CB   | ARG | X | 173 | 38.239 | 55.780 | 47.890 | 0.00 | 0.00 |
| ATOM | 2651 | HB2  | ARG | X | 173 | 38.538 | 54.738 | 47.777 | 0.00 | 0.00 |
| ATOM | 2652 | HB3  | ARG | X | 173 | 38.520 | 56.118 | 48.888 | 0.00 | 0.00 |
| ATOM | 2653 | CG   | ARG | X | 173 | 36.808 | 55.998 | 47.522 | 0.00 | 0.00 |
| ATOM | 2654 | HG2  | ARG | X | 173 | 36.612 | 57.035 | 47.252 | 0.00 | 0.00 |
| ATOM | 2655 | HG3  | ARG | X | 173 | 36.614 | 55.422 | 46.617 | 0.00 | 0.00 |
| ATOM | 2656 | CD   | ARG | X | 173 | 35.856 | 55.549 | 48.599 | 0.00 | 0.00 |
| ATOM | 2657 | HD2  | ARG | X | 173 | 36.233 | 56.045 | 49.494 | 0.00 | 0.00 |
| ATOM | 2658 | HD3  | ARG | X | 173 | 34.859 | 55.876 | 48.304 | 0.00 | 0.00 |
| ATOM | 2659 | NE   | ARG | X | 173 | 35.908 | 54.115 | 48.738 | 0.00 | 0.00 |
| ATOM | 2660 | HE   | ARG | X | 173 | 36.282 | 53.596 | 47.956 | 0.00 | 0.00 |
| ATOM | 2661 | CZ   | ARG | X | 173 | 35.269 | 53.338 | 49.619 | 0.00 | 0.00 |
| ATOM | 2662 | NH1  | ARG | X | 173 | 34.718 | 53.876 | 50.701 | 0.00 | 0.00 |
| ATOM | 2663 | HH11 | ARG | X | 173 | 34.686 | 54.881 | 50.800 | 0.00 | 0.00 |
| ATOM | 2664 | HH12 | ARG | X | 173 | 34.122 | 53.266 | 51.241 | 0.00 | 0.00 |
| ATOM | 2665 | NH2  | ARG | X | 173 | 35.087 | 52.065 | 49.333 | 0.00 | 0.00 |
| ATOM | 2666 | HH21 | ARG | X | 173 | 35.383 | 51.630 | 48.471 | 0.00 | 0.00 |
| ATOM | 2667 | HH22 | ARG | X | 173 | 34.752 | 51.433 | 50.046 | 0.00 | 0.00 |
| ATOM | 2668 | C    | ARG | X | 173 | 39.084 | 58.121 | 47.069 | 0.00 | 0.00 |
| ATOM | 2669 | O    | ARG | X | 173 | 38.511 | 58.774 | 46.181 | 0.00 | 0.00 |
| ATOM | 2670 | N    | LEU | X | 174 | 39.796 | 58.743 | 48.009 | 0.00 | 0.00 |
| ATOM | 2671 | H    | LEU | X | 174 | 40.320 | 58.158 | 48.645 | 0.00 | 0.00 |
| ATOM | 2672 | CA   | LEU | X | 174 | 39.906 | 60.156 | 48.215 | 0.00 | 0.00 |
| ATOM | 2673 | HA   | LEU | X | 174 | 38.913 | 60.583 | 48.352 | 0.00 | 0.00 |
| ATOM | 2674 | CB   | LEU | X | 174 | 40.571 | 60.460 | 49.575 | 0.00 | 0.00 |
| ATOM | 2675 | HB2  | LEU | X | 174 | 40.114 | 59.901 | 50.392 | 0.00 | 0.00 |
| ATOM | 2676 | HB3  | LEU | X | 174 | 41.605 | 60.164 | 49.400 | 0.00 | 0.00 |
| ATOM | 2677 | CG   | LEU | X | 174 | 40.605 | 61.961 | 49.969 | 0.00 | 0.00 |
| ATOM | 2678 | HG   | LEU | X | 174 | 41.141 | 62.527 | 49.207 | 0.00 | 0.00 |
| ATOM | 2679 | CD1  | LEU | X | 174 | 39.197 | 62.557 | 50.175 | 0.00 | 0.00 |
| ATOM | 2680 | HD11 | LEU | X | 174 | 38.612 | 62.315 | 49.288 | 0.00 | 0.00 |
| ATOM | 2681 | HD12 | LEU | X | 174 | 38.915 | 62.106 | 51.127 | 0.00 | 0.00 |
| ATOM | 2682 | HD13 | LEU | X | 174 | 39.141 | 63.636 | 50.317 | 0.00 | 0.00 |
| ATOM | 2683 | CD2  | LEU | X | 174 | 41.615 | 62.225 | 51.098 | 0.00 | 0.00 |
| ATOM | 2684 | HD21 | LEU | X | 174 | 41.278 | 61.924 | 52.090 | 0.00 | 0.00 |
| ATOM | 2685 | HD22 | LEU | X | 174 | 42.473 | 61.675 | 50.711 | 0.00 | 0.00 |
| ATOM | 2686 | HD23 | LEU | X | 174 | 41.832 | 63.292 | 51.143 | 0.00 | 0.00 |
| ATOM | 2687 | C    | LEU | X | 174 | 40.700 | 60.757 | 47.012 | 0.00 | 0.00 |
| ATOM | 2688 | O    | LEU | X | 174 | 40.261 | 61.745 | 46.478 | 0.00 | 0.00 |
| ATOM | 2689 | N    | ALA | X | 175 | 41.729 | 60.112 | 46.479 | 0.00 | 0.00 |
| ATOM | 2690 | H    | ALA | X | 175 | 42.260 | 59.435 | 47.008 | 0.00 | 0.00 |
| ATOM | 2691 | CA   | ALA | X | 175 | 42.267 | 60.526 | 45.163 | 0.00 | 0.00 |
| ATOM | 2692 | HA   | ALA | X | 175 | 42.552 | 61.578 | 45.190 | 0.00 | 0.00 |
| ATOM | 2693 | CB   | ALA | X | 175 | 43.494 | 59.658 | 44.902 | 0.00 | 0.00 |
| ATOM | 2694 | HB1  | ALA | X | 175 | 43.200 | 58.611 | 44.826 | 0.00 | 0.00 |
| ATOM | 2695 | HB2  | ALA | X | 175 | 44.034 | 59.998 | 44.019 | 0.00 | 0.00 |
| ATOM | 2696 | HB3  | ALA | X | 175 | 44.111 | 59.692 | 45.800 | 0.00 | 0.00 |
| ATOM | 2697 | C    | ALA | X | 175 | 41.280 | 60.474 | 43.951 | 0.00 | 0.00 |
| ATOM | 2698 | O    | ALA | X | 175 | 41.320 | 61.335 | 43.076 | 0.00 | 0.00 |

|      |      |      |     |   |     |        |        |        |      |      |
|------|------|------|-----|---|-----|--------|--------|--------|------|------|
| ATOM | 2699 | N    | LEU | X | 176 | 40.374 | 59.503 | 43.853 | 0.00 | 0.00 |
| ATOM | 2700 | H    | LEU | X | 176 | 40.485 | 58.706 | 44.463 | 0.00 | 0.00 |
| ATOM | 2701 | CA   | LEU | X | 176 | 39.412 | 59.369 | 42.747 | 0.00 | 0.00 |
| ATOM | 2702 | HA   | LEU | X | 176 | 39.980 | 59.657 | 41.862 | 0.00 | 0.00 |
| ATOM | 2703 | CB   | LEU | X | 176 | 38.924 | 57.963 | 42.635 | 0.00 | 0.00 |
| ATOM | 2704 | HB2  | LEU | X | 176 | 38.863 | 57.512 | 43.626 | 0.00 | 0.00 |
| ATOM | 2705 | HB3  | LEU | X | 176 | 37.879 | 57.865 | 42.341 | 0.00 | 0.00 |
| ATOM | 2706 | CG   | LEU | X | 176 | 39.733 | 56.993 | 41.761 | 0.00 | 0.00 |
| ATOM | 2707 | HG   | LEU | X | 176 | 40.789 | 56.937 | 42.027 | 0.00 | 0.00 |
| ATOM | 2708 | CD1  | LEU | X | 176 | 39.111 | 55.629 | 42.042 | 0.00 | 0.00 |
| ATOM | 2709 | HD11 | LEU | X | 176 | 39.292 | 55.434 | 43.099 | 0.00 | 0.00 |
| ATOM | 2710 | HD12 | LEU | X | 176 | 38.053 | 55.545 | 41.793 | 0.00 | 0.00 |
| ATOM | 2711 | HD13 | LEU | X | 176 | 39.574 | 54.771 | 41.555 | 0.00 | 0.00 |
| ATOM | 2712 | CD2  | LEU | X | 176 | 39.486 | 57.335 | 40.222 | 0.00 | 0.00 |
| ATOM | 2713 | HD21 | LEU | X | 176 | 39.711 | 58.352 | 39.900 | 0.00 | 0.00 |
| ATOM | 2714 | HD22 | LEU | X | 176 | 40.156 | 56.680 | 39.666 | 0.00 | 0.00 |
| ATOM | 2715 | HD23 | LEU | X | 176 | 38.479 | 57.094 | 39.884 | 0.00 | 0.00 |
| ATOM | 2716 | C    | LEU | X | 176 | 38.251 | 60.372 | 42.911 | 0.00 | 0.00 |
| ATOM | 2717 | O    | LEU | X | 176 | 37.715 | 60.915 | 41.936 | 0.00 | 0.00 |
| ATOM | 2718 | N    | GLN | X | 177 | 37.849 | 60.687 | 44.138 | 0.00 | 0.00 |
| ATOM | 2719 | H    | GLN | X | 177 | 38.220 | 60.119 | 44.886 | 0.00 | 0.00 |
| ATOM | 2720 | CA   | GLN | X | 177 | 37.087 | 61.899 | 44.455 | 0.00 | 0.00 |
| ATOM | 2721 | HA   | GLN | X | 177 | 36.153 | 61.969 | 43.898 | 0.00 | 0.00 |
| ATOM | 2722 | CB   | GLN | X | 177 | 36.682 | 61.941 | 45.948 | 0.00 | 0.00 |
| ATOM | 2723 | HB2  | GLN | X | 177 | 37.559 | 61.655 | 46.529 | 0.00 | 0.00 |
| ATOM | 2724 | HB3  | GLN | X | 177 | 36.391 | 62.989 | 46.021 | 0.00 | 0.00 |
| ATOM | 2725 | CG   | GLN | X | 177 | 35.497 | 61.070 | 46.386 | 0.00 | 0.00 |
| ATOM | 2726 | HG2  | GLN | X | 177 | 34.614 | 61.571 | 45.990 | 0.00 | 0.00 |
| ATOM | 2727 | HG3  | GLN | X | 177 | 35.571 | 60.110 | 45.875 | 0.00 | 0.00 |
| ATOM | 2728 | CD   | GLN | X | 177 | 35.539 | 60.734 | 47.874 | 0.00 | 0.00 |
| ATOM | 2729 | OE1  | GLN | X | 177 | 35.470 | 59.620 | 48.256 | 0.00 | 0.00 |
| ATOM | 2730 | NE2  | GLN | X | 177 | 35.842 | 61.726 | 48.680 | 0.00 | 0.00 |
| ATOM | 2731 | HE21 | GLN | X | 177 | 36.072 | 61.619 | 49.658 | 0.00 | 0.00 |
| ATOM | 2732 | HE22 | GLN | X | 177 | 35.496 | 62.632 | 48.397 | 0.00 | 0.00 |
| ATOM | 2733 | C    | GLN | X | 177 | 37.884 | 63.193 | 44.052 | 0.00 | 0.00 |
| ATOM | 2734 | O    | GLN | X | 177 | 37.231 | 64.190 | 43.750 | 0.00 | 0.00 |
| ATOM | 2735 | N    | TRP | X | 178 | 39.192 | 63.178 | 44.217 | 0.00 | 0.00 |
| ATOM | 2736 | H    | TRP | X | 178 | 39.690 | 62.386 | 44.597 | 0.00 | 0.00 |
| ATOM | 2737 | CA   | TRP | X | 178 | 39.939 | 64.327 | 43.752 | 0.00 | 0.00 |
| ATOM | 2738 | HA   | TRP | X | 178 | 39.511 | 65.200 | 44.244 | 0.00 | 0.00 |
| ATOM | 2739 | CB   | TRP | X | 178 | 41.398 | 64.209 | 44.259 | 0.00 | 0.00 |
| ATOM | 2740 | HB2  | TRP | X | 178 | 41.666 | 63.912 | 45.273 | 0.00 | 0.00 |
| ATOM | 2741 | HB3  | TRP | X | 178 | 41.985 | 63.522 | 43.648 | 0.00 | 0.00 |
| ATOM | 2742 | CG   | TRP | X | 178 | 42.129 | 65.514 | 44.180 | 0.00 | 0.00 |
| ATOM | 2743 | CD1  | TRP | X | 178 | 42.296 | 66.361 | 45.238 | 0.00 | 0.00 |
| ATOM | 2744 | HD1  | TRP | X | 178 | 41.824 | 66.237 | 46.202 | 0.00 | 0.00 |
| ATOM | 2745 | NE1  | TRP | X | 178 | 43.079 | 67.401 | 44.842 | 0.00 | 0.00 |
| ATOM | 2746 | HE1  | TRP | X | 178 | 43.246 | 68.218 | 45.413 | 0.00 | 0.00 |
| ATOM | 2747 | CE2  | TRP | X | 178 | 43.454 | 67.352 | 43.549 | 0.00 | 0.00 |
| ATOM | 2748 | CZ2  | TRP | X | 178 | 44.248 | 68.264 | 42.739 | 0.00 | 0.00 |
| ATOM | 2749 | HZ2  | TRP | X | 178 | 44.779 | 69.103 | 43.163 | 0.00 | 0.00 |
| ATOM | 2750 | CH2  | TRP | X | 178 | 44.492 | 67.850 | 41.420 | 0.00 | 0.00 |
| ATOM | 2751 | HH2  | TRP | X | 178 | 45.159 | 68.386 | 40.762 | 0.00 | 0.00 |
| ATOM | 2752 | CZ3  | TRP | X | 178 | 44.036 | 66.560 | 41.002 | 0.00 | 0.00 |
| ATOM | 2753 | HZ3  | TRP | X | 178 | 44.340 | 66.203 | 40.029 | 0.00 | 0.00 |
| ATOM | 2754 | CE3  | TRP | X | 178 | 43.182 | 65.767 | 41.772 | 0.00 | 0.00 |
| ATOM | 2755 | HE3  | TRP | X | 178 | 42.798 | 64.846 | 41.359 | 0.00 | 0.00 |
| ATOM | 2756 | CD2  | TRP | X | 178 | 42.879 | 66.146 | 43.089 | 0.00 | 0.00 |
| ATOM | 2757 | C    | TRP | X | 178 | 39.913 | 64.559 | 42.237 | 0.00 | 0.00 |
| ATOM | 2758 | O    | TRP | X | 178 | 39.734 | 65.721 | 41.813 | 0.00 | 0.00 |
| ATOM | 2759 | N    | VAL | X | 179 | 40.147 | 63.461 | 41.553 | 0.00 | 0.00 |
| ATOM | 2760 | H    | VAL | X | 179 | 40.639 | 62.770 | 42.101 | 0.00 | 0.00 |
| ATOM | 2761 | CA   | VAL | X | 179 | 40.079 | 63.349 | 40.071 | 0.00 | 0.00 |
| ATOM | 2762 | HA   | VAL | X | 179 | 40.764 | 64.051 | 39.597 | 0.00 | 0.00 |
| ATOM | 2763 | CB   | VAL | X | 179 | 40.469 | 61.938 | 39.625 | 0.00 | 0.00 |
| ATOM | 2764 | HB   | VAL | X | 179 | 39.979 | 61.228 | 40.292 | 0.00 | 0.00 |
| ATOM | 2765 | CG1  | VAL | X | 179 | 39.866 | 61.614 | 38.236 | 0.00 | 0.00 |
| ATOM | 2766 | HG11 | VAL | X | 179 | 40.180 | 62.429 | 37.583 | 0.00 | 0.00 |
| ATOM | 2767 | HG12 | VAL | X | 179 | 40.247 | 60.659 | 37.874 | 0.00 | 0.00 |
| ATOM | 2768 | HG13 | VAL | X | 179 | 38.776 | 61.612 | 38.243 | 0.00 | 0.00 |

|      |      |      |     |   |     |        |        |        |      |      |
|------|------|------|-----|---|-----|--------|--------|--------|------|------|
| ATOM | 2769 | CG2  | VAL | X | 179 | 42.023 | 61.578 | 39.685 | 0.00 | 0.00 |
| ATOM | 2770 | HG21 | VAL | X | 179 | 42.682 | 62.128 | 39.013 | 0.00 | 0.00 |
| ATOM | 2771 | HG22 | VAL | X | 179 | 42.383 | 61.798 | 40.690 | 0.00 | 0.00 |
| ATOM | 2772 | HG23 | VAL | X | 179 | 42.123 | 60.495 | 39.613 | 0.00 | 0.00 |
| ATOM | 2773 | C    | VAL | X | 179 | 38.712 | 63.771 | 39.608 | 0.00 | 0.00 |
| ATOM | 2774 | O    | VAL | X | 179 | 38.570 | 64.594 | 38.687 | 0.00 | 0.00 |
| ATOM | 2775 | N    | GLN | X | 180 | 37.697 | 63.284 | 40.312 | 0.00 | 0.00 |
| ATOM | 2776 | H    | GLN | X | 180 | 37.840 | 62.604 | 41.045 | 0.00 | 0.00 |
| ATOM | 2777 | CA   | GLN | X | 180 | 36.317 | 63.688 | 39.882 | 0.00 | 0.00 |
| ATOM | 2778 | HA   | GLN | X | 180 | 36.314 | 63.551 | 38.801 | 0.00 | 0.00 |
| ATOM | 2779 | CB   | GLN | X | 180 | 35.302 | 62.761 | 40.588 | 0.00 | 0.00 |
| ATOM | 2780 | HB2  | GLN | X | 180 | 35.509 | 62.688 | 41.656 | 0.00 | 0.00 |
| ATOM | 2781 | HB3  | GLN | X | 180 | 34.295 | 63.174 | 40.643 | 0.00 | 0.00 |
| ATOM | 2782 | CG   | GLN | X | 180 | 35.126 | 61.425 | 39.936 | 0.00 | 0.00 |
| ATOM | 2783 | HG2  | GLN | X | 180 | 36.090 | 60.926 | 39.834 | 0.00 | 0.00 |
| ATOM | 2784 | HG3  | GLN | X | 180 | 34.576 | 60.764 | 40.605 | 0.00 | 0.00 |
| ATOM | 2785 | CD   | GLN | X | 180 | 34.432 | 61.634 | 38.557 | 0.00 | 0.00 |
| ATOM | 2786 | OE1  | GLN | X | 180 | 33.975 | 62.679 | 38.182 | 0.00 | 0.00 |
| ATOM | 2787 | NE2  | GLN | X | 180 | 34.485 | 60.618 | 37.764 | 0.00 | 0.00 |
| ATOM | 2788 | HE21 | GLN | X | 180 | 34.049 | 60.764 | 36.865 | 0.00 | 0.00 |
| ATOM | 2789 | HE22 | GLN | X | 180 | 34.895 | 59.724 | 37.996 | 0.00 | 0.00 |
| ATOM | 2790 | C    | GLN | X | 180 | 36.174 | 65.205 | 40.130 | 0.00 | 0.00 |
| ATOM | 2791 | O    | GLN | X | 180 | 35.579 | 65.912 | 39.283 | 0.00 | 0.00 |
| ATOM | 2792 | N    | GLU | X | 181 | 36.667 | 65.702 | 41.249 | 0.00 | 0.00 |
| ATOM | 2793 | H    | GLU | X | 181 | 37.266 | 65.130 | 41.827 | 0.00 | 0.00 |
| ATOM | 2794 | CA   | GLU | X | 181 | 36.607 | 67.150 | 41.524 | 0.00 | 0.00 |
| ATOM | 2795 | HA   | GLU | X | 181 | 35.579 | 67.466 | 41.348 | 0.00 | 0.00 |
| ATOM | 2796 | CB   | GLU | X | 181 | 37.083 | 67.357 | 43.007 | 0.00 | 0.00 |
| ATOM | 2797 | HB2  | GLU | X | 181 | 36.323 | 66.792 | 43.547 | 0.00 | 0.00 |
| ATOM | 2798 | HB3  | GLU | X | 181 | 38.112 | 67.022 | 43.140 | 0.00 | 0.00 |
| ATOM | 2799 | CG   | GLU | X | 181 | 36.939 | 68.795 | 43.540 | 0.00 | 0.00 |
| ATOM | 2800 | HG2  | GLU | X | 181 | 37.855 | 69.339 | 43.310 | 0.00 | 0.00 |
| ATOM | 2801 | HG3  | GLU | X | 181 | 36.100 | 69.248 | 43.012 | 0.00 | 0.00 |
| ATOM | 2802 | CD   | GLU | X | 181 | 36.703 | 68.799 | 45.022 | 0.00 | 0.00 |
| ATOM | 2803 | OE1  | GLU | X | 181 | 37.409 | 68.094 | 45.758 | 0.00 | 0.00 |
| ATOM | 2804 | OE2  | GLU | X | 181 | 35.698 | 69.450 | 45.415 | 0.00 | 0.00 |
| ATOM | 2805 | C    | GLU | X | 181 | 37.419 | 68.062 | 40.520 | 0.00 | 0.00 |
| ATOM | 2806 | O    | GLU | X | 181 | 37.108 | 69.251 | 40.380 | 0.00 | 0.00 |
| ATOM | 2807 | N    | ASN | X | 182 | 38.525 | 67.659 | 39.942 | 0.00 | 0.00 |
| ATOM | 2808 | H    | ASN | X | 182 | 38.651 | 66.659 | 40.004 | 0.00 | 0.00 |
| ATOM | 2809 | CA   | ASN | X | 182 | 39.550 | 68.520 | 39.348 | 0.00 | 0.00 |
| ATOM | 2810 | HA   | ASN | X | 182 | 39.190 | 69.548 | 39.383 | 0.00 | 0.00 |
| ATOM | 2811 | CB   | ASN | X | 182 | 40.827 | 68.606 | 40.226 | 0.00 | 0.00 |
| ATOM | 2812 | HB2  | ASN | X | 182 | 41.365 | 67.662 | 40.320 | 0.00 | 0.00 |
| ATOM | 2813 | HB3  | ASN | X | 182 | 41.521 | 69.337 | 39.811 | 0.00 | 0.00 |
| ATOM | 2814 | CG   | ASN | X | 182 | 40.517 | 69.079 | 41.633 | 0.00 | 0.00 |
| ATOM | 2815 | OD1  | ASN | X | 182 | 40.259 | 70.211 | 41.914 | 0.00 | 0.00 |
| ATOM | 2816 | ND2  | ASN | X | 182 | 40.637 | 68.166 | 42.573 | 0.00 | 0.00 |
| ATOM | 2817 | HD21 | ASN | X | 182 | 40.589 | 68.350 | 43.565 | 0.00 | 0.00 |
| ATOM | 2818 | HD22 | ASN | X | 182 | 40.698 | 67.198 | 42.291 | 0.00 | 0.00 |
| ATOM | 2819 | C    | ASN | X | 182 | 39.981 | 68.173 | 37.911 | 0.00 | 0.00 |
| ATOM | 2820 | O    | ASN | X | 182 | 40.443 | 69.077 | 37.246 | 0.00 | 0.00 |
| ATOM | 2821 | N    | VAL | X | 183 | 39.715 | 66.953 | 37.381 | 0.00 | 0.00 |
| ATOM | 2822 | H    | VAL | X | 183 | 39.274 | 66.201 | 37.891 | 0.00 | 0.00 |
| ATOM | 2823 | CA   | VAL | X | 183 | 40.450 | 66.600 | 36.162 | 0.00 | 0.00 |
| ATOM | 2824 | HA   | VAL | X | 183 | 41.480 | 66.955 | 36.213 | 0.00 | 0.00 |
| ATOM | 2825 | CB   | VAL | X | 183 | 40.502 | 65.098 | 35.945 | 0.00 | 0.00 |
| ATOM | 2826 | HB   | VAL | X | 183 | 40.630 | 64.671 | 36.940 | 0.00 | 0.00 |
| ATOM | 2827 | CG1  | VAL | X | 183 | 39.314 | 64.443 | 35.215 | 0.00 | 0.00 |
| ATOM | 2828 | HG11 | VAL | X | 183 | 39.399 | 63.361 | 35.324 | 0.00 | 0.00 |
| ATOM | 2829 | HG12 | VAL | X | 183 | 38.359 | 64.824 | 35.578 | 0.00 | 0.00 |
| ATOM | 2830 | HG13 | VAL | X | 183 | 39.441 | 64.620 | 34.147 | 0.00 | 0.00 |
| ATOM | 2831 | CG2  | VAL | X | 183 | 41.814 | 64.684 | 35.155 | 0.00 | 0.00 |
| ATOM | 2832 | HG21 | VAL | X | 183 | 41.980 | 63.608 | 35.206 | 0.00 | 0.00 |
| ATOM | 2833 | HG22 | VAL | X | 183 | 41.799 | 64.948 | 34.098 | 0.00 | 0.00 |
| ATOM | 2834 | HG23 | VAL | X | 183 | 42.708 | 65.079 | 35.639 | 0.00 | 0.00 |
| ATOM | 2835 | C    | VAL | X | 183 | 40.033 | 67.260 | 34.879 | 0.00 | 0.00 |
| ATOM | 2836 | O    | VAL | X | 183 | 40.856 | 67.213 | 33.959 | 0.00 | 0.00 |
| ATOM | 2837 | N    | ALA | X | 184 | 38.889 | 67.984 | 34.953 | 0.00 | 0.00 |
| ATOM | 2838 | H    | ALA | X | 184 | 38.359 | 68.025 | 35.812 | 0.00 | 0.00 |

|      |      |     |     |   |     |        |        |        |      |      |
|------|------|-----|-----|---|-----|--------|--------|--------|------|------|
| ATOM | 2839 | CA  | ALA | X | 184 | 38.403 | 68.683 | 33.804 | 0.00 | 0.00 |
| ATOM | 2840 | HA  | ALA | X | 184 | 38.283 | 67.928 | 33.027 | 0.00 | 0.00 |
| ATOM | 2841 | CB  | ALA | X | 184 | 36.981 | 69.255 | 34.068 | 0.00 | 0.00 |
| ATOM | 2842 | HB1 | ALA | X | 184 | 36.198 | 68.501 | 33.984 | 0.00 | 0.00 |
| ATOM | 2843 | HB2 | ALA | X | 184 | 36.991 | 69.485 | 35.134 | 0.00 | 0.00 |
| ATOM | 2844 | HB3 | ALA | X | 184 | 36.805 | 70.081 | 33.378 | 0.00 | 0.00 |
| ATOM | 2845 | C   | ALA | X | 184 | 39.340 | 69.753 | 33.296 | 0.00 | 0.00 |
| ATOM | 2846 | O   | ALA | X | 184 | 39.559 | 69.864 | 32.092 | 0.00 | 0.00 |
| ATOM | 2847 | N   | ALA | X | 185 | 39.771 | 70.729 | 34.167 | 0.00 | 0.00 |
| ATOM | 2848 | H   | ALA | X | 185 | 39.538 | 70.651 | 35.147 | 0.00 | 0.00 |
| ATOM | 2849 | CA  | ALA | X | 185 | 40.740 | 71.733 | 33.806 | 0.00 | 0.00 |
| ATOM | 2850 | HA  | ALA | X | 185 | 40.206 | 72.316 | 33.055 | 0.00 | 0.00 |
| ATOM | 2851 | CB  | ALA | X | 185 | 41.100 | 72.501 | 35.017 | 0.00 | 0.00 |
| ATOM | 2852 | HB1 | ALA | X | 185 | 41.536 | 71.895 | 35.811 | 0.00 | 0.00 |
| ATOM | 2853 | HB2 | ALA | X | 185 | 41.848 | 73.277 | 34.850 | 0.00 | 0.00 |
| ATOM | 2854 | HB3 | ALA | X | 185 | 40.197 | 72.980 | 35.395 | 0.00 | 0.00 |
| ATOM | 2855 | C   | ALA | X | 185 | 42.105 | 71.301 | 33.203 | 0.00 | 0.00 |
| ATOM | 2856 | O   | ALA | X | 185 | 42.694 | 71.989 | 32.373 | 0.00 | 0.00 |
| ATOM | 2857 | N   | PHE | X | 186 | 42.499 | 70.097 | 33.474 | 0.00 | 0.00 |
| ATOM | 2858 | H   | PHE | X | 186 | 42.108 | 69.527 | 34.210 | 0.00 | 0.00 |
| ATOM | 2859 | CA  | PHE | X | 186 | 43.706 | 69.489 | 32.885 | 0.00 | 0.00 |
| ATOM | 2860 | HA  | PHE | X | 186 | 44.483 | 70.226 | 32.682 | 0.00 | 0.00 |
| ATOM | 2861 | CB  | PHE | X | 186 | 44.349 | 68.389 | 33.879 | 0.00 | 0.00 |
| ATOM | 2862 | HB2 | PHE | X | 186 | 43.547 | 67.664 | 34.017 | 0.00 | 0.00 |
| ATOM | 2863 | HB3 | PHE | X | 186 | 45.132 | 67.787 | 33.420 | 0.00 | 0.00 |
| ATOM | 2864 | CG  | PHE | X | 186 | 44.870 | 68.872 | 35.173 | 0.00 | 0.00 |
| ATOM | 2865 | CD1 | PHE | X | 186 | 43.893 | 69.066 | 36.164 | 0.00 | 0.00 |
| ATOM | 2866 | HD1 | PHE | X | 186 | 42.858 | 68.898 | 35.903 | 0.00 | 0.00 |
| ATOM | 2867 | CE1 | PHE | X | 186 | 44.351 | 69.256 | 37.426 | 0.00 | 0.00 |
| ATOM | 2868 | HE1 | PHE | X | 186 | 43.738 | 69.451 | 38.294 | 0.00 | 0.00 |
| ATOM | 2869 | CZ  | PHE | X | 186 | 45.725 | 69.390 | 37.702 | 0.00 | 0.00 |
| ATOM | 2870 | HZ  | PHE | X | 186 | 46.082 | 69.658 | 38.686 | 0.00 | 0.00 |
| ATOM | 2871 | CE2 | PHE | X | 186 | 46.684 | 69.271 | 36.648 | 0.00 | 0.00 |
| ATOM | 2872 | HE2 | PHE | X | 186 | 47.762 | 69.249 | 36.692 | 0.00 | 0.00 |
| ATOM | 2873 | CD2 | PHE | X | 186 | 46.203 | 69.024 | 35.383 | 0.00 | 0.00 |
| ATOM | 2874 | HD2 | PHE | X | 186 | 46.891 | 68.895 | 34.561 | 0.00 | 0.00 |
| ATOM | 2875 | C   | PHE | X | 186 | 43.410 | 68.828 | 31.560 | 0.00 | 0.00 |
| ATOM | 2876 | O   | PHE | X | 186 | 44.315 | 68.481 | 30.794 | 0.00 | 0.00 |
| ATOM | 2877 | N   | GLY | X | 187 | 42.045 | 68.757 | 31.208 | 0.00 | 0.00 |
| ATOM | 2878 | H   | GLY | X | 187 | 41.343 | 69.162 | 31.810 | 0.00 | 0.00 |
| ATOM | 2879 | CA  | GLY | X | 187 | 41.496 | 68.330 | 29.946 | 0.00 | 0.00 |
| ATOM | 2880 | HA2 | GLY | X | 187 | 40.496 | 68.879 | 29.933 | 0.00 | 0.00 |
| ATOM | 2881 | HA3 | GLY | X | 187 | 42.147 | 68.523 | 29.152 | 0.00 | 0.00 |
| ATOM | 2882 | C   | GLY | X | 187 | 41.103 | 66.911 | 29.907 | 0.00 | 0.00 |
| ATOM | 2883 | O   | GLY | X | 187 | 40.616 | 66.531 | 28.856 | 0.00 | 0.00 |
| ATOM | 2884 | N   | GLY | X | 188 | 41.135 | 66.120 | 31.005 | 0.00 | 0.00 |
| ATOM | 2885 | H   | GLY | X | 188 | 41.451 | 66.589 | 31.842 | 0.00 | 0.00 |
| ATOM | 2886 | CA  | GLY | X | 188 | 40.567 | 64.836 | 31.223 | 0.00 | 0.00 |
| ATOM | 2887 | HA2 | GLY | X | 188 | 40.864 | 64.191 | 30.425 | 0.00 | 0.00 |
| ATOM | 2888 | HA3 | GLY | X | 188 | 41.055 | 64.348 | 32.070 | 0.00 | 0.00 |
| ATOM | 2889 | C   | GLY | X | 188 | 39.070 | 64.864 | 31.240 | 0.00 | 0.00 |
| ATOM | 2890 | O   | GLY | X | 188 | 38.430 | 65.763 | 31.773 | 0.00 | 0.00 |
| ATOM | 2891 | N   | ASP | X | 189 | 38.418 | 63.863 | 30.575 | 0.00 | 0.00 |
| ATOM | 2892 | H   | ASP | X | 189 | 38.994 | 63.188 | 30.092 | 0.00 | 0.00 |
| ATOM | 2893 | CA  | ASP | X | 189 | 36.939 | 63.550 | 30.612 | 0.00 | 0.00 |
| ATOM | 2894 | HA  | ASP | X | 189 | 36.374 | 64.467 | 30.442 | 0.00 | 0.00 |
| ATOM | 2895 | CB  | ASP | X | 189 | 36.660 | 62.639 | 29.412 | 0.00 | 0.00 |
| ATOM | 2896 | HB2 | ASP | X | 189 | 37.239 | 62.896 | 28.525 | 0.00 | 0.00 |
| ATOM | 2897 | HB3 | ASP | X | 189 | 37.092 | 61.714 | 29.793 | 0.00 | 0.00 |
| ATOM | 2898 | CG  | ASP | X | 189 | 35.197 | 62.528 | 29.159 | 0.00 | 0.00 |
| ATOM | 2899 | OD1 | ASP | X | 189 | 34.694 | 62.844 | 28.023 | 0.00 | 0.00 |
| ATOM | 2900 | OD2 | ASP | X | 189 | 34.473 | 62.013 | 30.022 | 0.00 | 0.00 |
| ATOM | 2901 | C   | ASP | X | 189 | 36.454 | 62.937 | 31.936 | 0.00 | 0.00 |
| ATOM | 2902 | O   | ASP | X | 189 | 36.638 | 61.751 | 32.286 | 0.00 | 0.00 |
| ATOM | 2903 | N   | PRO | X | 190 | 35.721 | 63.680 | 32.775 | 0.00 | 0.00 |
| ATOM | 2904 | CD  | PRO | X | 190 | 35.301 | 65.056 | 32.592 | 0.00 | 0.00 |
| ATOM | 2905 | HD2 | PRO | X | 190 | 34.583 | 65.181 | 31.782 | 0.00 | 0.00 |
| ATOM | 2906 | HD3 | PRO | X | 190 | 36.197 | 65.633 | 32.364 | 0.00 | 0.00 |
| ATOM | 2907 | CG  | PRO | X | 190 | 34.684 | 65.525 | 33.952 | 0.00 | 0.00 |
| ATOM | 2908 | HG2 | PRO | X | 190 | 33.606 | 65.612 | 33.810 | 0.00 | 0.00 |

|      |      |      |     |   |     |        |        |        |      |      |
|------|------|------|-----|---|-----|--------|--------|--------|------|------|
| ATOM | 2909 | HG3  | PRO | X | 190 | 35.264 | 66.337 | 34.390 | 0.00 | 0.00 |
| ATOM | 2910 | CB   | PRO | X | 190 | 34.889 | 64.357 | 34.886 | 0.00 | 0.00 |
| ATOM | 2911 | HB2  | PRO | X | 190 | 34.019 | 64.233 | 35.530 | 0.00 | 0.00 |
| ATOM | 2912 | HB3  | PRO | X | 190 | 35.705 | 64.639 | 35.551 | 0.00 | 0.00 |
| ATOM | 2913 | CA   | PRO | X | 190 | 35.232 | 63.135 | 34.026 | 0.00 | 0.00 |
| ATOM | 2914 | HA   | PRO | X | 190 | 36.058 | 62.576 | 34.467 | 0.00 | 0.00 |
| ATOM | 2915 | C    | PRO | X | 190 | 34.034 | 62.160 | 33.952 | 0.00 | 0.00 |
| ATOM | 2916 | O    | PRO | X | 190 | 33.701 | 61.556 | 34.987 | 0.00 | 0.00 |
| ATOM | 2917 | N    | THR | X | 191 | 33.630 | 61.774 | 32.782 | 0.00 | 0.00 |
| ATOM | 2918 | H    | THR | X | 191 | 33.935 | 62.323 | 31.992 | 0.00 | 0.00 |
| ATOM | 2919 | CA   | THR | X | 191 | 32.641 | 60.657 | 32.539 | 0.00 | 0.00 |
| ATOM | 2920 | HA   | THR | X | 191 | 32.394 | 60.127 | 33.459 | 0.00 | 0.00 |
| ATOM | 2921 | CB   | THR | X | 191 | 31.462 | 61.250 | 31.788 | 0.00 | 0.00 |
| ATOM | 2922 | HB   | THR | X | 191 | 30.890 | 60.438 | 31.339 | 0.00 | 0.00 |
| ATOM | 2923 | CG2  | THR | X | 191 | 30.411 | 61.764 | 32.692 | 0.00 | 0.00 |
| ATOM | 2924 | HG21 | THR | X | 191 | 30.814 | 62.441 | 33.445 | 0.00 | 0.00 |
| ATOM | 2925 | HG22 | THR | X | 191 | 29.684 | 62.276 | 32.062 | 0.00 | 0.00 |
| ATOM | 2926 | HG23 | THR | X | 191 | 29.968 | 60.892 | 33.172 | 0.00 | 0.00 |
| ATOM | 2927 | OG1  | THR | X | 191 | 31.944 | 62.192 | 30.821 | 0.00 | 0.00 |
| ATOM | 2928 | HG1  | THR | X | 191 | 32.819 | 62.041 | 30.456 | 0.00 | 0.00 |
| ATOM | 2929 | C    | THR | X | 191 | 33.317 | 59.513 | 31.751 | 0.00 | 0.00 |
| ATOM | 2930 | O    | THR | X | 191 | 32.659 | 58.675 | 31.169 | 0.00 | 0.00 |
| ATOM | 2931 | N    | SER | X | 192 | 34.729 | 59.497 | 31.669 | 0.00 | 0.00 |
| ATOM | 2932 | H    | SER | X | 192 | 35.311 | 60.242 | 32.024 | 0.00 | 0.00 |
| ATOM | 2933 | CA   | SER | X | 192 | 35.481 | 58.404 | 31.002 | 0.00 | 0.00 |
| ATOM | 2934 | HA   | SER | X | 192 | 34.891 | 57.489 | 31.047 | 0.00 | 0.00 |
| ATOM | 2935 | CB   | SER | X | 192 | 35.861 | 58.862 | 29.554 | 0.00 | 0.00 |
| ATOM | 2936 | HB2  | SER | X | 192 | 36.704 | 59.544 | 29.441 | 0.00 | 0.00 |
| ATOM | 2937 | HB3  | SER | X | 192 | 36.091 | 57.943 | 29.015 | 0.00 | 0.00 |
| ATOM | 2938 | OG   | SER | X | 192 | 34.704 | 59.441 | 28.953 | 0.00 | 0.00 |
| ATOM | 2939 | HG   | SER | X | 192 | 34.484 | 60.190 | 29.511 | 0.00 | 0.00 |
| ATOM | 2940 | C    | SER | X | 192 | 36.737 | 57.947 | 31.732 | 0.00 | 0.00 |
| ATOM | 2941 | O    | SER | X | 192 | 37.766 | 57.617 | 31.181 | 0.00 | 0.00 |
| ATOM | 2942 | N    | VAL | X | 193 | 36.693 | 58.067 | 33.086 | 0.00 | 0.00 |
| ATOM | 2943 | H    | VAL | X | 193 | 35.811 | 58.330 | 33.501 | 0.00 | 0.00 |
| ATOM | 2944 | CA   | VAL | X | 193 | 37.860 | 57.610 | 33.959 | 0.00 | 0.00 |
| ATOM | 2945 | HA   | VAL | X | 193 | 38.800 | 57.972 | 33.543 | 0.00 | 0.00 |
| ATOM | 2946 | CB   | VAL | X | 193 | 37.731 | 58.176 | 35.408 | 0.00 | 0.00 |
| ATOM | 2947 | HB   | VAL | X | 193 | 36.878 | 57.683 | 35.875 | 0.00 | 0.00 |
| ATOM | 2948 | CG1  | VAL | X | 193 | 38.975 | 57.829 | 36.085 | 0.00 | 0.00 |
| ATOM | 2949 | HG11 | VAL | X | 193 | 39.836 | 58.378 | 35.703 | 0.00 | 0.00 |
| ATOM | 2950 | HG12 | VAL | X | 193 | 38.979 | 58.025 | 37.158 | 0.00 | 0.00 |
| ATOM | 2951 | HG13 | VAL | X | 193 | 39.250 | 56.786 | 35.929 | 0.00 | 0.00 |
| ATOM | 2952 | CG2  | VAL | X | 193 | 37.530 | 59.709 | 35.380 | 0.00 | 0.00 |
| ATOM | 2953 | HG21 | VAL | X | 193 | 38.406 | 60.215 | 34.975 | 0.00 | 0.00 |
| ATOM | 2954 | HG22 | VAL | X | 193 | 36.784 | 59.951 | 34.622 | 0.00 | 0.00 |
| ATOM | 2955 | HG23 | VAL | X | 193 | 37.147 | 60.136 | 36.308 | 0.00 | 0.00 |
| ATOM | 2956 | C    | VAL | X | 193 | 38.015 | 56.117 | 33.847 | 0.00 | 0.00 |
| ATOM | 2957 | O    | VAL | X | 193 | 37.063 | 55.322 | 33.814 | 0.00 | 0.00 |
| ATOM | 2958 | N    | THR | X | 194 | 39.259 | 55.640 | 33.690 | 0.00 | 0.00 |
| ATOM | 2959 | H    | THR | X | 194 | 39.963 | 56.363 | 33.638 | 0.00 | 0.00 |
| ATOM | 2960 | CA   | THR | X | 194 | 39.634 | 54.246 | 33.351 | 0.00 | 0.00 |
| ATOM | 2961 | HA   | THR | X | 194 | 38.829 | 53.603 | 33.707 | 0.00 | 0.00 |
| ATOM | 2962 | CB   | THR | X | 194 | 39.829 | 53.971 | 31.858 | 0.00 | 0.00 |
| ATOM | 2963 | HB   | THR | X | 194 | 40.525 | 54.689 | 31.425 | 0.00 | 0.00 |
| ATOM | 2964 | CG2  | THR | X | 194 | 40.383 | 52.538 | 31.591 | 0.00 | 0.00 |
| ATOM | 2965 | HG21 | THR | X | 194 | 39.862 | 51.744 | 32.125 | 0.00 | 0.00 |
| ATOM | 2966 | HG22 | THR | X | 194 | 40.335 | 52.402 | 30.511 | 0.00 | 0.00 |
| ATOM | 2967 | HG23 | THR | X | 194 | 41.400 | 52.573 | 31.982 | 0.00 | 0.00 |
| ATOM | 2968 | OG1  | THR | X | 194 | 38.621 | 54.216 | 31.114 | 0.00 | 0.00 |
| ATOM | 2969 | HG1  | THR | X | 194 | 38.344 | 55.093 | 31.390 | 0.00 | 0.00 |
| ATOM | 2970 | C    | THR | X | 194 | 40.820 | 53.832 | 34.171 | 0.00 | 0.00 |
| ATOM | 2971 | O    | THR | X | 194 | 41.863 | 54.487 | 34.037 | 0.00 | 0.00 |
| ATOM | 2972 | N    | LEU | X | 195 | 40.674 | 52.738 | 34.952 | 0.00 | 0.00 |
| ATOM | 2973 | H    | LEU | X | 195 | 39.742 | 52.352 | 34.899 | 0.00 | 0.00 |
| ATOM | 2974 | CA   | LEU | X | 195 | 41.674 | 52.347 | 36.026 | 0.00 | 0.00 |
| ATOM | 2975 | HA   | LEU | X | 195 | 42.426 | 53.108 | 36.235 | 0.00 | 0.00 |
| ATOM | 2976 | CB   | LEU | X | 195 | 40.988 | 51.813 | 37.325 | 0.00 | 0.00 |
| ATOM | 2977 | HB2  | LEU | X | 195 | 40.486 | 50.895 | 37.022 | 0.00 | 0.00 |
| ATOM | 2978 | HB3  | LEU | X | 195 | 41.799 | 51.606 | 38.024 | 0.00 | 0.00 |



|      |      |      |     |   |     |        |        |        |      |      |
|------|------|------|-----|---|-----|--------|--------|--------|------|------|
| ATOM | 2979 | CG   | LEU | X | 195 | 39.867 | 52.655 | 37.909 | 0.00 | 0.00 |
| ATOM | 2980 | HG   | LEU | X | 195 | 39.005 | 52.596 | 37.245 | 0.00 | 0.00 |
| ATOM | 2981 | CD1  | LEU | X | 195 | 39.501 | 52.004 | 39.198 | 0.00 | 0.00 |
| ATOM | 2982 | HD11 | LEU | X | 195 | 40.315 | 51.602 | 39.801 | 0.00 | 0.00 |
| ATOM | 2983 | HD12 | LEU | X | 195 | 38.885 | 52.730 | 39.728 | 0.00 | 0.00 |
| ATOM | 2984 | HD13 | LEU | X | 195 | 38.819 | 51.186 | 38.963 | 0.00 | 0.00 |
| ATOM | 2985 | CD2  | LEU | X | 195 | 40.314 | 54.123 | 38.108 | 0.00 | 0.00 |
| ATOM | 2986 | HD21 | LEU | X | 195 | 39.333 | 54.581 | 38.229 | 0.00 | 0.00 |
| ATOM | 2987 | HD22 | LEU | X | 195 | 41.016 | 54.304 | 38.922 | 0.00 | 0.00 |
| ATOM | 2988 | HD23 | LEU | X | 195 | 40.851 | 54.595 | 37.285 | 0.00 | 0.00 |
| ATOM | 2989 | C    | LEU | X | 195 | 42.426 | 51.165 | 35.411 | 0.00 | 0.00 |
| ATOM | 2990 | O    | LEU | X | 195 | 41.813 | 50.314 | 34.775 | 0.00 | 0.00 |
| ATOM | 2991 | N    | PHE | X | 196 | 43.710 | 51.203 | 35.556 | 0.00 | 0.00 |
| ATOM | 2992 | H    | PHE | X | 196 | 44.067 | 52.113 | 35.812 | 0.00 | 0.00 |
| ATOM | 2993 | CA   | PHE | X | 196 | 44.671 | 50.140 | 35.195 | 0.00 | 0.00 |
| ATOM | 2994 | HA   | PHE | X | 196 | 44.093 | 49.223 | 35.075 | 0.00 | 0.00 |
| ATOM | 2995 | CB   | PHE | X | 196 | 45.332 | 50.317 | 33.802 | 0.00 | 0.00 |
| ATOM | 2996 | HB2  | PHE | X | 196 | 45.717 | 49.305 | 33.669 | 0.00 | 0.00 |
| ATOM | 2997 | HB3  | PHE | X | 196 | 44.577 | 50.513 | 33.041 | 0.00 | 0.00 |
| ATOM | 2998 | CG   | PHE | X | 196 | 46.490 | 51.324 | 33.592 | 0.00 | 0.00 |
| ATOM | 2999 | CD1  | PHE | X | 196 | 46.255 | 52.696 | 33.621 | 0.00 | 0.00 |
| ATOM | 3000 | HD1  | PHE | X | 196 | 45.269 | 53.120 | 33.740 | 0.00 | 0.00 |
| ATOM | 3001 | CE1  | PHE | X | 196 | 47.201 | 53.606 | 33.210 | 0.00 | 0.00 |
| ATOM | 3002 | HE1  | PHE | X | 196 | 46.978 | 54.660 | 33.293 | 0.00 | 0.00 |
| ATOM | 3003 | CZ   | PHE | X | 196 | 48.423 | 53.179 | 32.782 | 0.00 | 0.00 |
| ATOM | 3004 | HZ   | PHE | X | 196 | 49.164 | 53.920 | 32.522 | 0.00 | 0.00 |
| ATOM | 3005 | CE2  | PHE | X | 196 | 48.801 | 51.798 | 32.921 | 0.00 | 0.00 |
| ATOM | 3006 | HE2  | PHE | X | 196 | 49.804 | 51.455 | 32.716 | 0.00 | 0.00 |
| ATOM | 3007 | CD2  | PHE | X | 196 | 47.775 | 50.874 | 33.182 | 0.00 | 0.00 |
| ATOM | 3008 | HD2  | PHE | X | 196 | 48.023 | 49.823 | 33.157 | 0.00 | 0.00 |
| ATOM | 3009 | C    | PHE | X | 196 | 45.640 | 49.880 | 36.344 | 0.00 | 0.00 |
| ATOM | 3010 | O    | PHE | X | 196 | 45.928 | 50.802 | 37.084 | 0.00 | 0.00 |
| ATOM | 3011 | N    | GLY | X | 197 | 45.907 | 48.613 | 36.541 | 0.00 | 0.00 |
| ATOM | 3012 | H    | GLY | X | 197 | 45.746 | 47.913 | 35.831 | 0.00 | 0.00 |
| ATOM | 3013 | CA   | GLY | X | 197 | 46.954 | 48.346 | 37.531 | 0.00 | 0.00 |
| ATOM | 3014 | HA2  | GLY | X | 197 | 47.796 | 49.059 | 37.293 | 0.00 | 0.00 |
| ATOM | 3015 | HA3  | GLY | X | 197 | 46.616 | 48.270 | 38.533 | 0.00 | 0.00 |
| ATOM | 3016 | C    | GLY | X | 197 | 47.633 | 47.045 | 37.271 | 0.00 | 0.00 |
| ATOM | 3017 | O    | GLY | X | 197 | 47.071 | 46.246 | 36.522 | 0.00 | 0.00 |
| ATOM | 3018 | N    | GLU | X | 198 | 48.857 | 46.810 | 37.797 | 0.00 | 0.00 |
| ATOM | 3019 | H    | GLU | X | 198 | 49.295 | 47.441 | 38.452 | 0.00 | 0.00 |
| ATOM | 3020 | CA   | GLU | X | 198 | 49.447 | 45.513 | 37.730 | 0.00 | 0.00 |
| ATOM | 3021 | HA   | GLU | X | 198 | 48.854 | 44.875 | 37.075 | 0.00 | 0.00 |
| ATOM | 3022 | CB   | GLU | X | 198 | 50.940 | 45.591 | 37.202 | 0.00 | 0.00 |
| ATOM | 3023 | HB2  | GLU | X | 198 | 50.963 | 45.900 | 36.157 | 0.00 | 0.00 |
| ATOM | 3024 | HB3  | GLU | X | 198 | 51.544 | 46.318 | 37.745 | 0.00 | 0.00 |
| ATOM | 3025 | CG   | GLU | X | 198 | 51.688 | 44.265 | 37.270 | 0.00 | 0.00 |
| ATOM | 3026 | HG2  | GLU | X | 198 | 51.081 | 43.459 | 37.682 | 0.00 | 0.00 |
| ATOM | 3027 | HG3  | GLU | X | 198 | 51.825 | 43.988 | 36.224 | 0.00 | 0.00 |
| ATOM | 3028 | CD   | GLU | X | 198 | 53.156 | 44.349 | 37.800 | 0.00 | 0.00 |
| ATOM | 3029 | OE1  | GLU | X | 198 | 53.909 | 45.244 | 37.416 | 0.00 | 0.00 |
| ATOM | 3030 | OE2  | GLU | X | 198 | 53.477 | 43.503 | 38.648 | 0.00 | 0.00 |
| ATOM | 3031 | C    | GLU | X | 198 | 49.376 | 44.935 | 39.172 | 0.00 | 0.00 |
| ATOM | 3032 | O    | GLU | X | 198 | 49.715 | 45.638 | 40.109 | 0.00 | 0.00 |
| ATOM | 3033 | N    | XA1 | X | 199 | 49.022 | 43.664 | 39.338 | 0.00 | 0.00 |
| ATOM | 3034 | CA   | XA1 | X | 199 | 49.393 | 42.844 | 40.539 | 0.00 | 0.00 |
| ATOM | 3035 | C    | XA1 | X | 199 | 48.629 | 43.275 | 41.834 | 0.00 | 0.00 |
| ATOM | 3036 | O    | XA1 | X | 199 | 47.427 | 43.321 | 41.861 | 0.00 | 0.00 |
| ATOM | 3037 | CB   | XA1 | X | 199 | 50.888 | 42.808 | 40.743 | 0.00 | 0.00 |
| ATOM | 3038 | OG   | XA1 | X | 199 | 51.226 | 41.779 | 41.778 | 0.00 | 0.00 |
| ATOM | 3039 | P1   | XA1 | X | 199 | 52.469 | 42.169 | 42.691 | 0.00 | 0.00 |
| ATOM | 3040 | O1   | XA1 | X | 199 | 52.270 | 43.495 | 43.230 | 0.00 | 0.00 |
| ATOM | 3041 | O2   | XA1 | X | 199 | 53.806 | 42.066 | 42.077 | 0.00 | 0.00 |
| ATOM | 3042 | C1   | XA1 | X | 199 | 52.196 | 40.931 | 43.886 | 0.00 | 0.00 |
| ATOM | 3043 | H    | XA1 | X | 199 | 48.740 | 43.124 | 38.533 | 0.00 | 0.00 |
| ATOM | 3044 | HA   | XA1 | X | 199 | 49.105 | 41.811 | 40.339 | 0.00 | 0.00 |
| ATOM | 3045 | HB2  | XA1 | X | 199 | 51.411 | 42.576 | 39.811 | 0.00 | 0.00 |
| ATOM | 3046 | HB3  | XA1 | X | 199 | 51.286 | 43.802 | 40.965 | 0.00 | 0.00 |
| ATOM | 3047 | H11  | XA1 | X | 199 | 53.080 | 40.880 | 44.525 | 0.00 | 0.00 |
| ATOM | 3048 | H12  | XA1 | X | 199 | 51.263 | 40.936 | 44.454 | 0.00 | 0.00 |

|      |      |      |     |   |     |        |        |        |      |      |
|------|------|------|-----|---|-----|--------|--------|--------|------|------|
| ATOM | 3049 | H13  | XA1 | X | 199 | 52.168 | 39.999 | 43.317 | 0.00 | 0.00 |
| ATOM | 3050 | N    | ALA | X | 200 | 49.308 | 43.673 | 42.922 | 0.00 | 0.00 |
| ATOM | 3051 | H    | ALA | X | 200 | 50.310 | 43.614 | 43.032 | 0.00 | 0.00 |
| ATOM | 3052 | CA   | ALA | X | 200 | 48.606 | 44.227 | 44.091 | 0.00 | 0.00 |
| ATOM | 3053 | HA   | ALA | X | 200 | 47.899 | 43.547 | 44.567 | 0.00 | 0.00 |
| ATOM | 3054 | CB   | ALA | X | 200 | 49.668 | 44.584 | 45.123 | 0.00 | 0.00 |
| ATOM | 3055 | HB1  | ALA | X | 200 | 49.173 | 44.998 | 46.001 | 0.00 | 0.00 |
| ATOM | 3056 | HB2  | ALA | X | 200 | 50.165 | 43.651 | 45.390 | 0.00 | 0.00 |
| ATOM | 3057 | HB3  | ALA | X | 200 | 50.394 | 45.279 | 44.701 | 0.00 | 0.00 |
| ATOM | 3058 | C    | ALA | X | 200 | 47.790 | 45.489 | 43.769 | 0.00 | 0.00 |
| ATOM | 3059 | O    | ALA | X | 200 | 46.628 | 45.552 | 44.213 | 0.00 | 0.00 |
| ATOM | 3060 | N    | GLY | X | 201 | 48.258 | 46.297 | 42.809 | 0.00 | 0.00 |
| ATOM | 3061 | H    | GLY | X | 201 | 49.091 | 45.977 | 42.334 | 0.00 | 0.00 |
| ATOM | 3062 | CA   | GLY | X | 201 | 47.507 | 47.240 | 42.079 | 0.00 | 0.00 |
| ATOM | 3063 | HA2  | GLY | X | 201 | 46.985 | 47.972 | 42.750 | 0.00 | 0.00 |
| ATOM | 3064 | HA3  | GLY | X | 201 | 48.203 | 47.700 | 41.388 | 0.00 | 0.00 |
| ATOM | 3065 | C    | GLY | X | 201 | 46.346 | 46.782 | 41.149 | 0.00 | 0.00 |
| ATOM | 3066 | O    | GLY | X | 201 | 45.244 | 47.338 | 41.292 | 0.00 | 0.00 |
| ATOM | 3067 | N    | ALA | X | 202 | 46.516 | 45.674 | 40.405 | 0.00 | 0.00 |
| ATOM | 3068 | H    | ALA | X | 202 | 47.407 | 45.204 | 40.332 | 0.00 | 0.00 |
| ATOM | 3069 | CA   | ALA | X | 202 | 45.304 | 45.158 | 39.755 | 0.00 | 0.00 |
| ATOM | 3070 | HA   | ALA | X | 202 | 44.898 | 46.015 | 39.219 | 0.00 | 0.00 |
| ATOM | 3071 | CB   | ALA | X | 202 | 45.700 | 44.049 | 38.774 | 0.00 | 0.00 |
| ATOM | 3072 | HB1  | ALA | X | 202 | 46.086 | 43.202 | 39.341 | 0.00 | 0.00 |
| ATOM | 3073 | HB2  | ALA | X | 202 | 44.785 | 43.591 | 38.397 | 0.00 | 0.00 |
| ATOM | 3074 | HB3  | ALA | X | 202 | 46.416 | 44.449 | 38.056 | 0.00 | 0.00 |
| ATOM | 3075 | C    | ALA | X | 202 | 44.232 | 44.639 | 40.684 | 0.00 | 0.00 |
| ATOM | 3076 | O    | ALA | X | 202 | 43.014 | 44.853 | 40.519 | 0.00 | 0.00 |
| ATOM | 3077 | N    | ALA | X | 203 | 44.708 | 43.959 | 41.799 | 0.00 | 0.00 |
| ATOM | 3078 | H    | ALA | X | 203 | 45.704 | 43.910 | 41.958 | 0.00 | 0.00 |
| ATOM | 3079 | CA   | ALA | X | 203 | 43.819 | 43.406 | 42.816 | 0.00 | 0.00 |
| ATOM | 3080 | HA   | ALA | X | 203 | 43.000 | 42.938 | 42.271 | 0.00 | 0.00 |
| ATOM | 3081 | CB   | ALA | X | 203 | 44.597 | 42.418 | 43.651 | 0.00 | 0.00 |
| ATOM | 3082 | HB1  | ALA | X | 203 | 43.936 | 41.893 | 44.341 | 0.00 | 0.00 |
| ATOM | 3083 | HB2  | ALA | X | 203 | 45.093 | 41.767 | 42.931 | 0.00 | 0.00 |
| ATOM | 3084 | HB3  | ALA | X | 203 | 45.371 | 42.839 | 44.293 | 0.00 | 0.00 |
| ATOM | 3085 | C    | ALA | X | 203 | 43.217 | 44.612 | 43.637 | 0.00 | 0.00 |
| ATOM | 3086 | O    | ALA | X | 203 | 42.099 | 44.540 | 44.081 | 0.00 | 0.00 |
| ATOM | 3087 | N    | SER | X | 204 | 43.874 | 45.764 | 43.687 | 0.00 | 0.00 |
| ATOM | 3088 | H    | SER | X | 204 | 44.845 | 45.732 | 43.410 | 0.00 | 0.00 |
| ATOM | 3089 | CA   | SER | X | 204 | 43.271 | 47.011 | 44.207 | 0.00 | 0.00 |
| ATOM | 3090 | HA   | SER | X | 204 | 42.728 | 46.807 | 45.130 | 0.00 | 0.00 |
| ATOM | 3091 | CB   | SER | X | 204 | 44.293 | 48.124 | 44.486 | 0.00 | 0.00 |
| ATOM | 3092 | HB2  | SER | X | 204 | 44.716 | 48.463 | 43.541 | 0.00 | 0.00 |
| ATOM | 3093 | HB3  | SER | X | 204 | 43.768 | 49.028 | 44.795 | 0.00 | 0.00 |
| ATOM | 3094 | OG   | SER | X | 204 | 45.350 | 47.744 | 45.456 | 0.00 | 0.00 |
| ATOM | 3095 | HG   | SER | X | 204 | 45.912 | 47.044 | 45.118 | 0.00 | 0.00 |
| ATOM | 3096 | C    | SER | X | 204 | 42.227 | 47.527 | 43.263 | 0.00 | 0.00 |
| ATOM | 3097 | O    | SER | X | 204 | 41.172 | 47.964 | 43.672 | 0.00 | 0.00 |
| ATOM | 3098 | N    | VAL | X | 205 | 42.437 | 47.440 | 41.902 | 0.00 | 0.00 |
| ATOM | 3099 | H    | VAL | X | 205 | 43.321 | 47.105 | 41.546 | 0.00 | 0.00 |
| ATOM | 3100 | CA   | VAL | X | 205 | 41.424 | 47.863 | 40.939 | 0.00 | 0.00 |
| ATOM | 3101 | HA   | VAL | X | 205 | 41.024 | 48.856 | 41.141 | 0.00 | 0.00 |
| ATOM | 3102 | CB   | VAL | X | 205 | 41.950 | 48.056 | 39.525 | 0.00 | 0.00 |
| ATOM | 3103 | HB   | VAL | X | 205 | 42.590 | 47.217 | 39.250 | 0.00 | 0.00 |
| ATOM | 3104 | CG1  | VAL | X | 205 | 40.824 | 48.227 | 38.434 | 0.00 | 0.00 |
| ATOM | 3105 | HG11 | VAL | X | 205 | 40.298 | 47.273 | 38.443 | 0.00 | 0.00 |
| ATOM | 3106 | HG12 | VAL | X | 205 | 40.127 | 49.021 | 38.704 | 0.00 | 0.00 |
| ATOM | 3107 | HG13 | VAL | X | 205 | 41.128 | 48.372 | 37.397 | 0.00 | 0.00 |
| ATOM | 3108 | CG2  | VAL | X | 205 | 42.854 | 49.268 | 39.447 | 0.00 | 0.00 |
| ATOM | 3109 | HG21 | VAL | X | 205 | 43.709 | 49.148 | 40.111 | 0.00 | 0.00 |
| ATOM | 3110 | HG22 | VAL | X | 205 | 43.333 | 49.259 | 38.468 | 0.00 | 0.00 |
| ATOM | 3111 | HG23 | VAL | X | 205 | 42.359 | 50.226 | 39.608 | 0.00 | 0.00 |
| ATOM | 3112 | C    | VAL | X | 205 | 40.203 | 46.985 | 41.077 | 0.00 | 0.00 |
| ATOM | 3113 | O    | VAL | X | 205 | 39.129 | 47.521 | 41.044 | 0.00 | 0.00 |
| ATOM | 3114 | N    | GLY | X | 206 | 40.336 | 45.684 | 41.397 | 0.00 | 0.00 |
| ATOM | 3115 | H    | GLY | X | 206 | 41.221 | 45.256 | 41.165 | 0.00 | 0.00 |
| ATOM | 3116 | CA   | GLY | X | 206 | 39.226 | 44.851 | 41.802 | 0.00 | 0.00 |
| ATOM | 3117 | HA2  | GLY | X | 206 | 38.404 | 44.934 | 41.076 | 0.00 | 0.00 |
| ATOM | 3118 | HA3  | GLY | X | 206 | 39.536 | 43.869 | 41.621 | 0.00 | 0.00 |

|      |      |      |     |   |     |        |        |        |      |      |
|------|------|------|-----|---|-----|--------|--------|--------|------|------|
| ATOM | 3119 | C    | GLY | X | 206 | 38.639 | 45.030 | 43.220 | 0.00 | 0.00 |
| ATOM | 3120 | O    | GLY | X | 206 | 37.409 | 44.845 | 43.326 | 0.00 | 0.00 |
| ATOM | 3121 | N    | MET | X | 207 | 39.440 | 45.501 | 44.210 | 0.00 | 0.00 |
| ATOM | 3122 | H    | MET | X | 207 | 40.436 | 45.544 | 44.045 | 0.00 | 0.00 |
| ATOM | 3123 | CA   | MET | X | 207 | 38.804 | 46.010 | 45.415 | 0.00 | 0.00 |
| ATOM | 3124 | HA   | MET | X | 207 | 38.260 | 45.132 | 45.763 | 0.00 | 0.00 |
| ATOM | 3125 | CB   | MET | X | 207 | 39.838 | 46.363 | 46.562 | 0.00 | 0.00 |
| ATOM | 3126 | HB2  | MET | X | 207 | 40.565 | 47.138 | 46.317 | 0.00 | 0.00 |
| ATOM | 3127 | HB3  | MET | X | 207 | 39.288 | 46.741 | 47.424 | 0.00 | 0.00 |
| ATOM | 3128 | CG   | MET | X | 207 | 40.618 | 45.115 | 46.970 | 0.00 | 0.00 |
| ATOM | 3129 | HG2  | MET | X | 207 | 41.241 | 44.762 | 46.148 | 0.00 | 0.00 |
| ATOM | 3130 | HG3  | MET | X | 207 | 41.377 | 45.347 | 47.717 | 0.00 | 0.00 |
| ATOM | 3131 | SD   | MET | X | 207 | 39.645 | 43.795 | 47.813 | 0.00 | 0.00 |
| ATOM | 3132 | CE   | MET | X | 207 | 40.767 | 42.437 | 47.584 | 0.00 | 0.00 |
| ATOM | 3133 | HE1  | MET | X | 207 | 41.394 | 42.577 | 46.703 | 0.00 | 0.00 |
| ATOM | 3134 | HE2  | MET | X | 207 | 41.396 | 42.310 | 48.465 | 0.00 | 0.00 |
| ATOM | 3135 | HE3  | MET | X | 207 | 40.163 | 41.530 | 47.546 | 0.00 | 0.00 |
| ATOM | 3136 | C    | MET | X | 207 | 37.822 | 47.187 | 45.013 | 0.00 | 0.00 |
| ATOM | 3137 | O    | MET | X | 207 | 36.656 | 47.158 | 45.284 | 0.00 | 0.00 |
| ATOM | 3138 | N    | HIE | X | 208 | 38.381 | 48.226 | 44.303 | 0.00 | 0.00 |
| ATOM | 3139 | H    | HIE | X | 208 | 39.354 | 48.146 | 44.045 | 0.00 | 0.00 |
| ATOM | 3140 | CA   | HIE | X | 208 | 37.672 | 49.384 | 43.862 | 0.00 | 0.00 |
| ATOM | 3141 | HA   | HIE | X | 208 | 37.421 | 50.049 | 44.689 | 0.00 | 0.00 |
| ATOM | 3142 | CB   | HIE | X | 208 | 38.542 | 50.446 | 43.144 | 0.00 | 0.00 |
| ATOM | 3143 | HB2  | HIE | X | 208 | 39.182 | 49.879 | 42.468 | 0.00 | 0.00 |
| ATOM | 3144 | HB3  | HIE | X | 208 | 37.991 | 51.032 | 42.409 | 0.00 | 0.00 |
| ATOM | 3145 | CG   | HIE | X | 208 | 39.408 | 51.232 | 44.079 | 0.00 | 0.00 |
| ATOM | 3146 | ND1  | HIE | X | 208 | 39.038 | 51.787 | 45.327 | 0.00 | 0.00 |
| ATOM | 3147 | CE1  | HIE | X | 208 | 40.158 | 52.136 | 45.898 | 0.00 | 0.00 |
| ATOM | 3148 | HE1  | HIE | X | 208 | 40.208 | 52.614 | 46.865 | 0.00 | 0.00 |
| ATOM | 3149 | NE2  | HIE | X | 208 | 41.242 | 51.986 | 45.047 | 0.00 | 0.00 |
| ATOM | 3150 | HE2  | HIE | X | 208 | 42.218 | 51.911 | 45.297 | 0.00 | 0.00 |
| ATOM | 3151 | CD2  | HIE | X | 208 | 40.771 | 51.305 | 43.951 | 0.00 | 0.00 |
| ATOM | 3152 | HD2  | HIE | X | 208 | 41.397 | 50.817 | 43.219 | 0.00 | 0.00 |
| ATOM | 3153 | C    | HIE | X | 208 | 36.462 | 49.018 | 42.972 | 0.00 | 0.00 |
| ATOM | 3154 | O    | HIE | X | 208 | 35.410 | 49.639 | 43.064 | 0.00 | 0.00 |
| ATOM | 3155 | N    | LEU | X | 209 | 36.503 | 47.969 | 42.144 | 0.00 | 0.00 |
| ATOM | 3156 | H    | LEU | X | 209 | 37.424 | 47.573 | 42.020 | 0.00 | 0.00 |
| ATOM | 3157 | CA   | LEU | X | 209 | 35.367 | 47.347 | 41.422 | 0.00 | 0.00 |
| ATOM | 3158 | HA   | LEU | X | 209 | 34.873 | 48.150 | 40.876 | 0.00 | 0.00 |
| ATOM | 3159 | CB   | LEU | X | 209 | 35.895 | 46.286 | 40.479 | 0.00 | 0.00 |
| ATOM | 3160 | HB2  | LEU | X | 209 | 36.693 | 46.744 | 39.894 | 0.00 | 0.00 |
| ATOM | 3161 | HB3  | LEU | X | 209 | 36.302 | 45.450 | 41.046 | 0.00 | 0.00 |
| ATOM | 3162 | CG   | LEU | X | 209 | 34.923 | 45.781 | 39.466 | 0.00 | 0.00 |
| ATOM | 3163 | HG   | LEU | X | 209 | 34.150 | 45.272 | 40.042 | 0.00 | 0.00 |
| ATOM | 3164 | CD1  | LEU | X | 209 | 34.380 | 46.824 | 38.538 | 0.00 | 0.00 |
| ATOM | 3165 | HD11 | LEU | X | 209 | 33.753 | 47.495 | 39.125 | 0.00 | 0.00 |
| ATOM | 3166 | HD12 | LEU | X | 209 | 35.257 | 47.324 | 38.128 | 0.00 | 0.00 |
| ATOM | 3167 | HD13 | LEU | X | 209 | 33.795 | 46.313 | 37.773 | 0.00 | 0.00 |
| ATOM | 3168 | CD2  | LEU | X | 209 | 35.644 | 44.714 | 38.585 | 0.00 | 0.00 |
| ATOM | 3169 | HD21 | LEU | X | 209 | 36.390 | 45.050 | 37.864 | 0.00 | 0.00 |
| ATOM | 3170 | HD22 | LEU | X | 209 | 36.246 | 44.159 | 39.304 | 0.00 | 0.00 |
| ATOM | 3171 | HD23 | LEU | X | 209 | 35.019 | 43.968 | 38.095 | 0.00 | 0.00 |
| ATOM | 3172 | C    | LEU | X | 209 | 34.347 | 46.804 | 42.467 | 0.00 | 0.00 |
| ATOM | 3173 | O    | LEU | X | 209 | 33.225 | 47.227 | 42.388 | 0.00 | 0.00 |
| ATOM | 3174 | N    | LEU | X | 210 | 34.749 | 45.850 | 43.370 | 0.00 | 0.00 |
| ATOM | 3175 | H    | LEU | X | 210 | 35.723 | 45.582 | 43.374 | 0.00 | 0.00 |
| ATOM | 3176 | CA   | LEU | X | 210 | 33.828 | 45.194 | 44.371 | 0.00 | 0.00 |
| ATOM | 3177 | HA   | LEU | X | 210 | 32.978 | 44.712 | 43.888 | 0.00 | 0.00 |
| ATOM | 3178 | CB   | LEU | X | 210 | 34.650 | 44.264 | 45.179 | 0.00 | 0.00 |
| ATOM | 3179 | HB2  | LEU | X | 210 | 35.468 | 44.822 | 45.635 | 0.00 | 0.00 |
| ATOM | 3180 | HB3  | LEU | X | 210 | 33.887 | 44.071 | 45.933 | 0.00 | 0.00 |
| ATOM | 3181 | CG   | LEU | X | 210 | 34.999 | 42.855 | 44.570 | 0.00 | 0.00 |
| ATOM | 3182 | HG   | LEU | X | 210 | 35.670 | 42.950 | 43.716 | 0.00 | 0.00 |
| ATOM | 3183 | CD1  | LEU | X | 210 | 35.685 | 42.092 | 45.762 | 0.00 | 0.00 |
| ATOM | 3184 | HD11 | LEU | X | 210 | 34.994 | 41.919 | 46.588 | 0.00 | 0.00 |
| ATOM | 3185 | HD12 | LEU | X | 210 | 36.029 | 41.130 | 45.385 | 0.00 | 0.00 |
| ATOM | 3186 | HD13 | LEU | X | 210 | 36.591 | 42.486 | 46.222 | 0.00 | 0.00 |
| ATOM | 3187 | CD2  | LEU | X | 210 | 33.773 | 42.087 | 44.025 | 0.00 | 0.00 |
| ATOM | 3188 | HD21 | LEU | X | 210 | 33.463 | 42.426 | 43.037 | 0.00 | 0.00 |

|      |      |      |     |   |     |        |        |        |      |      |
|------|------|------|-----|---|-----|--------|--------|--------|------|------|
| ATOM | 3189 | HD22 | LEU | X | 210 | 34.121 | 41.066 | 43.872 | 0.00 | 0.00 |
| ATOM | 3190 | HD23 | LEU | X | 210 | 32.879 | 42.155 | 44.644 | 0.00 | 0.00 |
| ATOM | 3191 | C    | LEU | X | 210 | 33.150 | 46.144 | 45.307 | 0.00 | 0.00 |
| ATOM | 3192 | O    | LEU | X | 210 | 32.004 | 45.846 | 45.644 | 0.00 | 0.00 |
| ATOM | 3193 | N    | SER | X | 211 | 33.761 | 47.284 | 45.660 | 0.00 | 0.00 |
| ATOM | 3194 | H    | SER | X | 211 | 34.731 | 47.380 | 45.399 | 0.00 | 0.00 |
| ATOM | 3195 | CA   | SER | X | 211 | 33.220 | 48.130 | 46.636 | 0.00 | 0.00 |
| ATOM | 3196 | HA   | SER | X | 211 | 32.676 | 47.477 | 47.319 | 0.00 | 0.00 |
| ATOM | 3197 | CB   | SER | X | 211 | 34.476 | 48.676 | 47.355 | 0.00 | 0.00 |
| ATOM | 3198 | HB2  | SER | X | 211 | 35.005 | 47.760 | 47.619 | 0.00 | 0.00 |
| ATOM | 3199 | HB3  | SER | X | 211 | 35.220 | 49.183 | 46.741 | 0.00 | 0.00 |
| ATOM | 3200 | OG   | SER | X | 211 | 34.157 | 49.394 | 48.554 | 0.00 | 0.00 |
| ATOM | 3201 | HG   | SER | X | 211 | 33.567 | 48.965 | 49.177 | 0.00 | 0.00 |
| ATOM | 3202 | C    | SER | X | 211 | 32.379 | 49.272 | 46.029 | 0.00 | 0.00 |
| ATOM | 3203 | O    | SER | X | 211 | 32.930 | 50.232 | 45.427 | 0.00 | 0.00 |
| ATOM | 3204 | N    | PRO | X | 212 | 31.079 | 49.343 | 46.357 | 0.00 | 0.00 |
| ATOM | 3205 | CD   | PRO | X | 212 | 30.300 | 48.194 | 46.787 | 0.00 | 0.00 |
| ATOM | 3206 | HD2  | PRO | X | 212 | 30.752 | 47.686 | 47.639 | 0.00 | 0.00 |
| ATOM | 3207 | HD3  | PRO | X | 212 | 30.316 | 47.468 | 45.974 | 0.00 | 0.00 |
| ATOM | 3208 | CG   | PRO | X | 212 | 28.857 | 48.588 | 46.918 | 0.00 | 0.00 |
| ATOM | 3209 | HG2  | PRO | X | 212 | 28.459 | 48.650 | 47.931 | 0.00 | 0.00 |
| ATOM | 3210 | HG3  | PRO | X | 212 | 28.302 | 47.856 | 46.333 | 0.00 | 0.00 |
| ATOM | 3211 | CB   | PRO | X | 212 | 28.752 | 50.038 | 46.313 | 0.00 | 0.00 |
| ATOM | 3212 | HB2  | PRO | X | 212 | 28.353 | 50.743 | 47.042 | 0.00 | 0.00 |
| ATOM | 3213 | HB3  | PRO | X | 212 | 28.046 | 49.997 | 45.483 | 0.00 | 0.00 |
| ATOM | 3214 | CA   | PRO | X | 212 | 30.178 | 50.363 | 45.789 | 0.00 | 0.00 |
| ATOM | 3215 | HA   | PRO | X | 212 | 30.078 | 50.347 | 44.704 | 0.00 | 0.00 |
| ATOM | 3216 | C    | PRO | X | 212 | 30.666 | 51.807 | 46.059 | 0.00 | 0.00 |
| ATOM | 3217 | O    | PRO | X | 212 | 30.446 | 52.600 | 45.151 | 0.00 | 0.00 |
| ATOM | 3218 | N    | PRO | X | 213 | 31.161 | 52.278 | 47.173 | 0.00 | 0.00 |
| ATOM | 3219 | CD   | PRO | X | 213 | 31.254 | 51.566 | 48.470 | 0.00 | 0.00 |
| ATOM | 3220 | HD2  | PRO | X | 213 | 32.292 | 51.251 | 48.584 | 0.00 | 0.00 |
| ATOM | 3221 | HD3  | PRO | X | 213 | 30.492 | 50.807 | 48.645 | 0.00 | 0.00 |
| ATOM | 3222 | CG   | PRO | X | 213 | 31.032 | 52.691 | 49.501 | 0.00 | 0.00 |
| ATOM | 3223 | HG2  | PRO | X | 213 | 31.475 | 52.449 | 50.467 | 0.00 | 0.00 |
| ATOM | 3224 | HG3  | PRO | X | 213 | 29.970 | 52.933 | 49.464 | 0.00 | 0.00 |
| ATOM | 3225 | CB   | PRO | X | 213 | 31.663 | 53.885 | 48.861 | 0.00 | 0.00 |
| ATOM | 3226 | HB2  | PRO | X | 213 | 32.660 | 54.089 | 49.250 | 0.00 | 0.00 |
| ATOM | 3227 | HB3  | PRO | X | 213 | 30.970 | 54.690 | 49.104 | 0.00 | 0.00 |
| ATOM | 3228 | CA   | PRO | X | 213 | 31.556 | 53.682 | 47.344 | 0.00 | 0.00 |
| ATOM | 3229 | HA   | PRO | X | 213 | 30.816 | 54.371 | 46.936 | 0.00 | 0.00 |
| ATOM | 3230 | C    | PRO | X | 213 | 32.822 | 54.049 | 46.676 | 0.00 | 0.00 |
| ATOM | 3231 | O    | PRO | X | 213 | 33.162 | 55.200 | 46.556 | 0.00 | 0.00 |
| ATOM | 3232 | N    | SER | X | 214 | 33.577 | 53.079 | 46.161 | 0.00 | 0.00 |
| ATOM | 3233 | H    | SER | X | 214 | 33.373 | 52.103 | 46.325 | 0.00 | 0.00 |
| ATOM | 3234 | CA   | SER | X | 214 | 34.607 | 53.339 | 45.144 | 0.00 | 0.00 |
| ATOM | 3235 | HA   | SER | X | 214 | 35.143 | 54.278 | 45.279 | 0.00 | 0.00 |
| ATOM | 3236 | CB   | SER | X | 214 | 35.621 | 52.216 | 45.125 | 0.00 | 0.00 |
| ATOM | 3237 | HB2  | SER | X | 214 | 35.162 | 51.376 | 44.604 | 0.00 | 0.00 |
| ATOM | 3238 | HB3  | SER | X | 214 | 36.393 | 52.557 | 44.434 | 0.00 | 0.00 |
| ATOM | 3239 | OG   | SER | X | 214 | 36.018 | 51.959 | 46.509 | 0.00 | 0.00 |
| ATOM | 3240 | HG   | SER | X | 214 | 36.875 | 51.537 | 46.421 | 0.00 | 0.00 |
| ATOM | 3241 | C    | SER | X | 214 | 33.978 | 53.560 | 43.682 | 0.00 | 0.00 |
| ATOM | 3242 | O    | SER | X | 214 | 34.289 | 54.447 | 42.859 | 0.00 | 0.00 |
| ATOM | 3243 | N    | ARG | X | 215 | 33.003 | 52.685 | 43.385 | 0.00 | 0.00 |
| ATOM | 3244 | H    | ARG | X | 215 | 32.852 | 52.016 | 44.126 | 0.00 | 0.00 |
| ATOM | 3245 | CA   | ARG | X | 215 | 32.394 | 52.313 | 42.101 | 0.00 | 0.00 |
| ATOM | 3246 | HA   | ARG | X | 215 | 33.188 | 52.133 | 41.377 | 0.00 | 0.00 |
| ATOM | 3247 | CB   | ARG | X | 215 | 31.735 | 50.914 | 42.235 | 0.00 | 0.00 |
| ATOM | 3248 | HB2  | ARG | X | 215 | 32.502 | 50.149 | 42.355 | 0.00 | 0.00 |
| ATOM | 3249 | HB3  | ARG | X | 215 | 31.123 | 50.964 | 43.135 | 0.00 | 0.00 |
| ATOM | 3250 | CG   | ARG | X | 215 | 30.822 | 50.472 | 41.064 | 0.00 | 0.00 |
| ATOM | 3251 | HG2  | ARG | X | 215 | 30.069 | 51.257 | 40.988 | 0.00 | 0.00 |
| ATOM | 3252 | HG3  | ARG | X | 215 | 31.422 | 50.397 | 40.157 | 0.00 | 0.00 |
| ATOM | 3253 | CD   | ARG | X | 215 | 30.182 | 49.119 | 41.414 | 0.00 | 0.00 |
| ATOM | 3254 | HD2  | ARG | X | 215 | 31.013 | 48.416 | 41.470 | 0.00 | 0.00 |
| ATOM | 3255 | HD3  | ARG | X | 215 | 29.801 | 49.213 | 42.431 | 0.00 | 0.00 |
| ATOM | 3256 | NE   | ARG | X | 215 | 29.021 | 48.775 | 40.592 | 0.00 | 0.00 |
| ATOM | 3257 | HE   | ARG | X | 215 | 28.788 | 49.345 | 39.791 | 0.00 | 0.00 |
| ATOM | 3258 | CZ   | ARG | X | 215 | 28.205 | 47.778 | 40.784 | 0.00 | 0.00 |

|      |      |      |     |   |     |        |        |        |      |      |
|------|------|------|-----|---|-----|--------|--------|--------|------|------|
| ATOM | 3259 | NH1  | ARG | X | 215 | 28.317 | 46.795 | 41.670 | 0.00 | 0.00 |
| ATOM | 3260 | HH11 | ARG | X | 215 | 29.040 | 46.863 | 42.372 | 0.00 | 0.00 |
| ATOM | 3261 | HH12 | ARG | X | 215 | 27.756 | 45.956 | 41.667 | 0.00 | 0.00 |
| ATOM | 3262 | NH2  | ARG | X | 215 | 27.258 | 47.653 | 39.936 | 0.00 | 0.00 |
| ATOM | 3263 | HH21 | ARG | X | 215 | 27.050 | 48.352 | 39.237 | 0.00 | 0.00 |
| ATOM | 3264 | HH22 | ARG | X | 215 | 26.706 | 46.807 | 39.911 | 0.00 | 0.00 |
| ATOM | 3265 | C    | ARG | X | 215 | 31.525 | 53.488 | 41.481 | 0.00 | 0.00 |
| ATOM | 3266 | O    | ARG | X | 215 | 31.177 | 53.435 | 40.307 | 0.00 | 0.00 |
| ATOM | 3267 | N    | GLY | X | 216 | 31.292 | 54.593 | 42.271 | 0.00 | 0.00 |
| ATOM | 3268 | H    | GLY | X | 216 | 31.664 | 54.497 | 43.205 | 0.00 | 0.00 |
| ATOM | 3269 | CA   | GLY | X | 216 | 30.509 | 55.738 | 41.917 | 0.00 | 0.00 |
| ATOM | 3270 | HA2  | GLY | X | 216 | 29.826 | 55.429 | 41.118 | 0.00 | 0.00 |
| ATOM | 3271 | HA3  | GLY | X | 216 | 30.036 | 56.189 | 42.846 | 0.00 | 0.00 |
| ATOM | 3272 | C    | GLY | X | 216 | 31.406 | 56.871 | 41.368 | 0.00 | 0.00 |
| ATOM | 3273 | O    | GLY | X | 216 | 30.924 | 57.915 | 40.934 | 0.00 | 0.00 |
| ATOM | 3274 | N    | LEU | X | 217 | 32.740 | 56.638 | 41.266 | 0.00 | 0.00 |
| ATOM | 3275 | H    | LEU | X | 217 | 33.074 | 55.767 | 41.654 | 0.00 | 0.00 |
| ATOM | 3276 | CA   | LEU | X | 217 | 33.799 | 57.592 | 40.821 | 0.00 | 0.00 |
| ATOM | 3277 | HA   | LEU | X | 217 | 33.351 | 58.579 | 40.710 | 0.00 | 0.00 |
| ATOM | 3278 | CB   | LEU | X | 217 | 34.901 | 57.672 | 41.984 | 0.00 | 0.00 |
| ATOM | 3279 | HB2  | LEU | X | 217 | 35.503 | 56.765 | 41.930 | 0.00 | 0.00 |
| ATOM | 3280 | HB3  | LEU | X | 217 | 35.633 | 58.476 | 41.914 | 0.00 | 0.00 |
| ATOM | 3281 | CG   | LEU | X | 217 | 34.320 | 57.767 | 43.418 | 0.00 | 0.00 |
| ATOM | 3282 | HG   | LEU | X | 217 | 33.712 | 56.878 | 43.585 | 0.00 | 0.00 |
| ATOM | 3283 | CD1  | LEU | X | 217 | 35.402 | 57.669 | 44.466 | 0.00 | 0.00 |
| ATOM | 3284 | HD11 | LEU | X | 217 | 35.855 | 56.682 | 44.369 | 0.00 | 0.00 |
| ATOM | 3285 | HD12 | LEU | X | 217 | 36.210 | 58.359 | 44.223 | 0.00 | 0.00 |
| ATOM | 3286 | HD13 | LEU | X | 217 | 34.961 | 57.814 | 45.453 | 0.00 | 0.00 |
| ATOM | 3287 | CD2  | LEU | X | 217 | 33.575 | 59.142 | 43.614 | 0.00 | 0.00 |
| ATOM | 3288 | HD21 | LEU | X | 217 | 33.045 | 59.139 | 44.567 | 0.00 | 0.00 |
| ATOM | 3289 | HD22 | LEU | X | 217 | 34.176 | 60.028 | 43.408 | 0.00 | 0.00 |
| ATOM | 3290 | HD23 | LEU | X | 217 | 32.798 | 59.197 | 42.853 | 0.00 | 0.00 |
| ATOM | 3291 | C    | LEU | X | 217 | 34.495 | 57.269 | 39.505 | 0.00 | 0.00 |
| ATOM | 3292 | O    | LEU | X | 217 | 35.231 | 58.058 | 38.991 | 0.00 | 0.00 |
| ATOM | 3293 | N    | PHE | X | 218 | 34.174 | 56.082 | 38.937 | 0.00 | 0.00 |
| ATOM | 3294 | H    | PHE | X | 218 | 33.586 | 55.443 | 39.453 | 0.00 | 0.00 |
| ATOM | 3295 | CA   | PHE | X | 218 | 34.794 | 55.620 | 37.676 | 0.00 | 0.00 |
| ATOM | 3296 | HA   | PHE | X | 218 | 35.117 | 56.457 | 37.057 | 0.00 | 0.00 |
| ATOM | 3297 | CB   | PHE | X | 218 | 36.105 | 54.861 | 37.882 | 0.00 | 0.00 |
| ATOM | 3298 | HB2  | PHE | X | 218 | 36.548 | 54.786 | 36.888 | 0.00 | 0.00 |
| ATOM | 3299 | HB3  | PHE | X | 218 | 36.712 | 55.454 | 38.566 | 0.00 | 0.00 |
| ATOM | 3300 | CG   | PHE | X | 218 | 36.081 | 53.516 | 38.515 | 0.00 | 0.00 |
| ATOM | 3301 | CD1  | PHE | X | 218 | 35.969 | 53.331 | 39.947 | 0.00 | 0.00 |
| ATOM | 3302 | HD1  | PHE | X | 218 | 35.857 | 54.200 | 40.579 | 0.00 | 0.00 |
| ATOM | 3303 | CE1  | PHE | X | 218 | 35.849 | 52.006 | 40.492 | 0.00 | 0.00 |
| ATOM | 3304 | HE1  | PHE | X | 218 | 35.657 | 51.849 | 41.543 | 0.00 | 0.00 |
| ATOM | 3305 | CZ   | PHE | X | 218 | 35.783 | 50.919 | 39.627 | 0.00 | 0.00 |
| ATOM | 3306 | HZ   | PHE | X | 218 | 35.628 | 49.960 | 40.098 | 0.00 | 0.00 |
| ATOM | 3307 | CE2  | PHE | X | 218 | 36.025 | 51.056 | 38.267 | 0.00 | 0.00 |
| ATOM | 3308 | HE2  | PHE | X | 218 | 36.125 | 50.213 | 37.599 | 0.00 | 0.00 |
| ATOM | 3309 | CD2  | PHE | X | 218 | 36.156 | 52.338 | 37.658 | 0.00 | 0.00 |
| ATOM | 3310 | HD2  | PHE | X | 218 | 36.346 | 52.404 | 36.597 | 0.00 | 0.00 |
| ATOM | 3311 | C    | PHE | X | 218 | 33.901 | 54.580 | 36.941 | 0.00 | 0.00 |
| ATOM | 3312 | O    | PHE | X | 218 | 32.864 | 54.227 | 37.450 | 0.00 | 0.00 |
| ATOM | 3313 | N    | HIE | X | 219 | 34.351 | 54.205 | 35.765 | 0.00 | 0.00 |
| ATOM | 3314 | H    | HIE | X | 219 | 35.282 | 54.474 | 35.479 | 0.00 | 0.00 |
| ATOM | 3315 | CA   | HIE | X | 219 | 33.489 | 53.750 | 34.704 | 0.00 | 0.00 |
| ATOM | 3316 | HA   | HIE | X | 219 | 32.495 | 53.458 | 35.041 | 0.00 | 0.00 |
| ATOM | 3317 | CB   | HIE | X | 219 | 33.481 | 54.870 | 33.674 | 0.00 | 0.00 |
| ATOM | 3318 | HB2  | HIE | X | 219 | 34.471 | 54.976 | 33.231 | 0.00 | 0.00 |
| ATOM | 3319 | HB3  | HIE | X | 219 | 32.792 | 54.698 | 32.847 | 0.00 | 0.00 |
| ATOM | 3320 | CG   | HIE | X | 219 | 33.053 | 56.241 | 34.251 | 0.00 | 0.00 |
| ATOM | 3321 | ND1  | HIE | X | 219 | 33.959 | 57.349 | 34.113 | 0.00 | 0.00 |
| ATOM | 3322 | CE1  | HIE | X | 219 | 33.437 | 58.222 | 34.981 | 0.00 | 0.00 |
| ATOM | 3323 | HE1  | HIE | X | 219 | 33.993 | 59.080 | 35.329 | 0.00 | 0.00 |
| ATOM | 3324 | NE2  | HIE | X | 219 | 32.292 | 57.792 | 35.580 | 0.00 | 0.00 |
| ATOM | 3325 | HE2  | HIE | X | 219 | 31.882 | 58.166 | 36.424 | 0.00 | 0.00 |
| ATOM | 3326 | CD2  | HIE | X | 219 | 32.031 | 56.542 | 35.084 | 0.00 | 0.00 |
| ATOM | 3327 | HD2  | HIE | X | 219 | 31.329 | 55.779 | 35.387 | 0.00 | 0.00 |
| ATOM | 3328 | C    | HIE | X | 219 | 34.010 | 52.512 | 33.977 | 0.00 | 0.00 |

|      |      |      |     |   |     |        |        |        |      |      |
|------|------|------|-----|---|-----|--------|--------|--------|------|------|
| ATOM | 3329 | O    | HIE | X | 219 | 33.116 | 51.761 | 33.515 | 0.00 | 0.00 |
| ATOM | 3330 | N    | ARG | X | 220 | 35.358 | 52.269 | 33.966 | 0.00 | 0.00 |
| ATOM | 3331 | H    | ARG | X | 220 | 35.984 | 52.827 | 34.529 | 0.00 | 0.00 |
| ATOM | 3332 | CA   | ARG | X | 220 | 35.927 | 51.032 | 33.308 | 0.00 | 0.00 |
| ATOM | 3333 | HA   | ARG | X | 220 | 35.250 | 50.193 | 33.464 | 0.00 | 0.00 |
| ATOM | 3334 | CB   | ARG | X | 220 | 36.259 | 51.194 | 31.793 | 0.00 | 0.00 |
| ATOM | 3335 | HB2  | ARG | X | 220 | 37.260 | 51.613 | 31.694 | 0.00 | 0.00 |
| ATOM | 3336 | HB3  | ARG | X | 220 | 36.311 | 50.186 | 31.379 | 0.00 | 0.00 |
| ATOM | 3337 | CG   | ARG | X | 220 | 35.182 | 52.028 | 31.086 | 0.00 | 0.00 |
| ATOM | 3338 | HG2  | ARG | X | 220 | 34.235 | 51.524 | 31.276 | 0.00 | 0.00 |
| ATOM | 3339 | HG3  | ARG | X | 220 | 35.120 | 53.055 | 31.447 | 0.00 | 0.00 |
| ATOM | 3340 | CD   | ARG | X | 220 | 35.528 | 52.057 | 29.576 | 0.00 | 0.00 |
| ATOM | 3341 | HD2  | ARG | X | 220 | 36.468 | 52.598 | 29.476 | 0.00 | 0.00 |
| ATOM | 3342 | HD3  | ARG | X | 220 | 35.689 | 51.060 | 29.166 | 0.00 | 0.00 |
| ATOM | 3343 | NE   | ARG | X | 220 | 34.494 | 52.770 | 28.890 | 0.00 | 0.00 |
| ATOM | 3344 | HE   | ARG | X | 220 | 33.688 | 52.235 | 28.602 | 0.00 | 0.00 |
| ATOM | 3345 | CZ   | ARG | X | 220 | 34.240 | 54.052 | 28.786 | 0.00 | 0.00 |
| ATOM | 3346 | NH1  | ARG | X | 220 | 35.073 | 55.004 | 29.135 | 0.00 | 0.00 |
| ATOM | 3347 | HH11 | ARG | X | 220 | 36.040 | 54.746 | 29.268 | 0.00 | 0.00 |
| ATOM | 3348 | HH12 | ARG | X | 220 | 34.809 | 55.943 | 28.872 | 0.00 | 0.00 |
| ATOM | 3349 | NH2  | ARG | X | 220 | 33.119 | 54.472 | 28.222 | 0.00 | 0.00 |
| ATOM | 3350 | HH21 | ARG | X | 220 | 32.455 | 53.743 | 28.004 | 0.00 | 0.00 |
| ATOM | 3351 | HH22 | ARG | X | 220 | 32.902 | 55.451 | 28.099 | 0.00 | 0.00 |
| ATOM | 3352 | C    | ARG | X | 220 | 37.255 | 50.700 | 34.109 | 0.00 | 0.00 |
| ATOM | 3353 | O    | ARG | X | 220 | 37.769 | 51.584 | 34.829 | 0.00 | 0.00 |
| ATOM | 3354 | N    | ALA | X | 221 | 37.709 | 49.465 | 34.016 | 0.00 | 0.00 |
| ATOM | 3355 | H    | ALA | X | 221 | 37.276 | 48.816 | 33.375 | 0.00 | 0.00 |
| ATOM | 3356 | CA   | ALA | X | 221 | 38.709 | 48.886 | 34.871 | 0.00 | 0.00 |
| ATOM | 3357 | HA   | ALA | X | 221 | 39.402 | 49.659 | 35.204 | 0.00 | 0.00 |
| ATOM | 3358 | CB   | ALA | X | 221 | 38.000 | 48.134 | 36.009 | 0.00 | 0.00 |
| ATOM | 3359 | HB1  | ALA | X | 221 | 38.840 | 47.837 | 36.637 | 0.00 | 0.00 |
| ATOM | 3360 | HB2  | ALA | X | 221 | 37.318 | 48.774 | 36.568 | 0.00 | 0.00 |
| ATOM | 3361 | HB3  | ALA | X | 221 | 37.479 | 47.253 | 35.634 | 0.00 | 0.00 |
| ATOM | 3362 | C    | ALA | X | 221 | 39.571 | 47.774 | 34.105 | 0.00 | 0.00 |
| ATOM | 3363 | O    | ALA | X | 221 | 39.043 | 46.872 | 33.538 | 0.00 | 0.00 |
| ATOM | 3364 | N    | VAL | X | 222 | 40.857 | 47.980 | 34.014 | 0.00 | 0.00 |
| ATOM | 3365 | H    | VAL | X | 222 | 41.332 | 48.811 | 34.337 | 0.00 | 0.00 |
| ATOM | 3366 | CA   | VAL | X | 222 | 41.798 | 46.970 | 33.572 | 0.00 | 0.00 |
| ATOM | 3367 | HA   | VAL | X | 222 | 41.283 | 46.185 | 33.018 | 0.00 | 0.00 |
| ATOM | 3368 | CB   | VAL | X | 222 | 42.807 | 47.596 | 32.621 | 0.00 | 0.00 |
| ATOM | 3369 | HB   | VAL | X | 222 | 43.393 | 48.271 | 33.245 | 0.00 | 0.00 |
| ATOM | 3370 | CG1  | VAL | X | 222 | 43.916 | 46.572 | 32.099 | 0.00 | 0.00 |
| ATOM | 3371 | HG11 | VAL | X | 222 | 44.581 | 47.213 | 31.520 | 0.00 | 0.00 |
| ATOM | 3372 | HG12 | VAL | X | 222 | 44.569 | 46.274 | 32.919 | 0.00 | 0.00 |
| ATOM | 3373 | HG13 | VAL | X | 222 | 43.572 | 45.845 | 31.363 | 0.00 | 0.00 |
| ATOM | 3374 | CG2  | VAL | X | 222 | 42.156 | 48.310 | 31.506 | 0.00 | 0.00 |
| ATOM | 3375 | HG21 | VAL | X | 222 | 41.715 | 49.233 | 31.882 | 0.00 | 0.00 |
| ATOM | 3376 | HG22 | VAL | X | 222 | 42.954 | 48.508 | 30.791 | 0.00 | 0.00 |
| ATOM | 3377 | HG23 | VAL | X | 222 | 41.326 | 47.750 | 31.074 | 0.00 | 0.00 |
| ATOM | 3378 | C    | VAL | X | 222 | 42.579 | 46.326 | 34.765 | 0.00 | 0.00 |
| ATOM | 3379 | O    | VAL | X | 222 | 43.138 | 47.028 | 35.573 | 0.00 | 0.00 |
| ATOM | 3380 | N    | LEU | X | 223 | 42.612 | 45.007 | 34.826 | 0.00 | 0.00 |
| ATOM | 3381 | H    | LEU | X | 223 | 42.115 | 44.394 | 34.195 | 0.00 | 0.00 |
| ATOM | 3382 | CA   | LEU | X | 223 | 43.253 | 44.178 | 35.896 | 0.00 | 0.00 |
| ATOM | 3383 | HA   | LEU | X | 223 | 43.663 | 44.811 | 36.683 | 0.00 | 0.00 |
| ATOM | 3384 | CB   | LEU | X | 223 | 42.210 | 43.235 | 36.508 | 0.00 | 0.00 |
| ATOM | 3385 | HB2  | LEU | X | 223 | 41.743 | 42.608 | 35.749 | 0.00 | 0.00 |
| ATOM | 3386 | HB3  | LEU | X | 223 | 42.862 | 42.585 | 37.091 | 0.00 | 0.00 |
| ATOM | 3387 | CG   | LEU | X | 223 | 41.228 | 43.870 | 37.497 | 0.00 | 0.00 |
| ATOM | 3388 | HG   | LEU | X | 223 | 41.657 | 44.765 | 37.946 | 0.00 | 0.00 |
| ATOM | 3389 | CD1  | LEU | X | 223 | 40.021 | 44.210 | 36.749 | 0.00 | 0.00 |
| ATOM | 3390 | HD11 | LEU | X | 223 | 40.237 | 44.988 | 36.017 | 0.00 | 0.00 |
| ATOM | 3391 | HD12 | LEU | X | 223 | 39.582 | 43.266 | 36.428 | 0.00 | 0.00 |
| ATOM | 3392 | HD13 | LEU | X | 223 | 39.328 | 44.629 | 37.479 | 0.00 | 0.00 |
| ATOM | 3393 | CD2  | LEU | X | 223 | 40.884 | 43.050 | 38.721 | 0.00 | 0.00 |
| ATOM | 3394 | HD21 | LEU | X | 223 | 40.617 | 43.599 | 39.624 | 0.00 | 0.00 |
| ATOM | 3395 | HD22 | LEU | X | 223 | 40.016 | 42.424 | 38.512 | 0.00 | 0.00 |
| ATOM | 3396 | HD23 | LEU | X | 223 | 41.779 | 42.494 | 39.002 | 0.00 | 0.00 |
| ATOM | 3397 | C    | LEU | X | 223 | 44.335 | 43.280 | 35.208 | 0.00 | 0.00 |
| ATOM | 3398 | O    | LEU | X | 223 | 44.069 | 42.289 | 34.526 | 0.00 | 0.00 |

|      |      |      |     |   |     |        |        |        |      |      |
|------|------|------|-----|---|-----|--------|--------|--------|------|------|
| ATOM | 3399 | N    | GLN | X | 224 | 45.621 | 43.585 | 35.343 | 0.00 | 0.00 |
| ATOM | 3400 | H    | GLN | X | 224 | 45.797 | 44.405 | 35.907 | 0.00 | 0.00 |
| ATOM | 3401 | CA   | GLN | X | 224 | 46.811 | 42.910 | 34.898 | 0.00 | 0.00 |
| ATOM | 3402 | HA   | GLN | X | 224 | 46.519 | 42.144 | 34.181 | 0.00 | 0.00 |
| ATOM | 3403 | CB   | GLN | X | 224 | 47.709 | 43.831 | 34.101 | 0.00 | 0.00 |
| ATOM | 3404 | HB2  | GLN | X | 224 | 48.137 | 44.622 | 34.717 | 0.00 | 0.00 |
| ATOM | 3405 | HB3  | GLN | X | 224 | 48.481 | 43.135 | 33.773 | 0.00 | 0.00 |
| ATOM | 3406 | CG   | GLN | X | 224 | 47.007 | 44.747 | 33.062 | 0.00 | 0.00 |
| ATOM | 3407 | HG2  | GLN | X | 224 | 46.294 | 44.123 | 32.523 | 0.00 | 0.00 |
| ATOM | 3408 | HG3  | GLN | X | 224 | 46.333 | 45.431 | 33.578 | 0.00 | 0.00 |
| ATOM | 3409 | CD   | GLN | X | 224 | 47.921 | 45.580 | 32.166 | 0.00 | 0.00 |
| ATOM | 3410 | OE1  | GLN | X | 224 | 47.783 | 46.768 | 32.033 | 0.00 | 0.00 |
| ATOM | 3411 | NE2  | GLN | X | 224 | 49.036 | 45.081 | 31.713 | 0.00 | 0.00 |
| ATOM | 3412 | HE21 | GLN | X | 224 | 49.724 | 45.626 | 31.213 | 0.00 | 0.00 |
| ATOM | 3413 | HE22 | GLN | X | 224 | 49.360 | 44.157 | 31.965 | 0.00 | 0.00 |
| ATOM | 3414 | C    | GLN | X | 224 | 47.507 | 42.081 | 35.998 | 0.00 | 0.00 |
| ATOM | 3415 | O    | GLN | X | 224 | 48.009 | 42.628 | 36.944 | 0.00 | 0.00 |
| ATOM | 3416 | N    | SER | X | 225 | 47.619 | 40.734 | 35.867 | 0.00 | 0.00 |
| ATOM | 3417 | H    | SER | X | 225 | 47.450 | 40.246 | 35.000 | 0.00 | 0.00 |
| ATOM | 3418 | CA   | SER | X | 225 | 48.528 | 39.936 | 36.699 | 0.00 | 0.00 |
| ATOM | 3419 | HA   | SER | X | 225 | 48.332 | 38.883 | 36.493 | 0.00 | 0.00 |
| ATOM | 3420 | CB   | SER | X | 225 | 50.009 | 40.252 | 36.247 | 0.00 | 0.00 |
| ATOM | 3421 | HB2  | SER | X | 225 | 50.058 | 41.341 | 36.267 | 0.00 | 0.00 |
| ATOM | 3422 | HB3  | SER | X | 225 | 50.750 | 39.795 | 36.904 | 0.00 | 0.00 |
| ATOM | 3423 | OG   | SER | X | 225 | 50.284 | 39.828 | 34.877 | 0.00 | 0.00 |
| ATOM | 3424 | HG   | SER | X | 225 | 50.574 | 38.914 | 34.850 | 0.00 | 0.00 |
| ATOM | 3425 | C    | SER | X | 225 | 48.300 | 39.888 | 38.249 | 0.00 | 0.00 |
| ATOM | 3426 | O    | SER | X | 225 | 49.257 | 39.695 | 39.044 | 0.00 | 0.00 |
| ATOM | 3427 | N    | GLY | X | 226 | 47.012 | 39.842 | 38.644 | 0.00 | 0.00 |
| ATOM | 3428 | H    | GLY | X | 226 | 46.327 | 39.823 | 37.902 | 0.00 | 0.00 |
| ATOM | 3429 | CA   | GLY | X | 226 | 46.578 | 39.935 | 40.045 | 0.00 | 0.00 |
| ATOM | 3430 | HA2  | GLY | X | 226 | 46.946 | 39.102 | 40.635 | 0.00 | 0.00 |
| ATOM | 3431 | HA3  | GLY | X | 226 | 47.082 | 40.769 | 40.532 | 0.00 | 0.00 |
| ATOM | 3432 | C    | GLY | X | 226 | 45.099 | 40.141 | 40.127 | 0.00 | 0.00 |
| ATOM | 3433 | O    | GLY | X | 226 | 44.582 | 41.105 | 39.644 | 0.00 | 0.00 |
| ATOM | 3434 | N    | ALA | X | 227 | 44.445 | 39.100 | 40.708 | 0.00 | 0.00 |
| ATOM | 3435 | H    | ALA | X | 227 | 44.989 | 38.455 | 41.263 | 0.00 | 0.00 |
| ATOM | 3436 | CA   | ALA | X | 227 | 43.033 | 39.053 | 40.968 | 0.00 | 0.00 |
| ATOM | 3437 | HA   | ALA | X | 227 | 42.650 | 39.813 | 40.287 | 0.00 | 0.00 |
| ATOM | 3438 | CB   | ALA | X | 227 | 42.488 | 37.603 | 40.632 | 0.00 | 0.00 |
| ATOM | 3439 | HB1  | ALA | X | 227 | 43.079 | 36.918 | 41.240 | 0.00 | 0.00 |
| ATOM | 3440 | HB2  | ALA | X | 227 | 41.417 | 37.626 | 40.833 | 0.00 | 0.00 |
| ATOM | 3441 | HB3  | ALA | X | 227 | 42.681 | 37.414 | 39.576 | 0.00 | 0.00 |
| ATOM | 3442 | C    | ALA | X | 227 | 42.606 | 39.443 | 42.386 | 0.00 | 0.00 |
| ATOM | 3443 | O    | ALA | X | 227 | 43.116 | 38.846 | 43.296 | 0.00 | 0.00 |
| ATOM | 3444 | N    | PRO | X | 228 | 41.589 | 40.301 | 42.613 | 0.00 | 0.00 |
| ATOM | 3445 | CD   | PRO | X | 228 | 40.727 | 40.911 | 41.591 | 0.00 | 0.00 |
| ATOM | 3446 | HD2  | PRO | X | 228 | 40.511 | 40.329 | 40.695 | 0.00 | 0.00 |
| ATOM | 3447 | HD3  | PRO | X | 228 | 41.201 | 41.845 | 41.293 | 0.00 | 0.00 |
| ATOM | 3448 | CG   | PRO | X | 228 | 39.440 | 41.120 | 42.395 | 0.00 | 0.00 |
| ATOM | 3449 | HG2  | PRO | X | 228 | 38.862 | 40.196 | 42.410 | 0.00 | 0.00 |
| ATOM | 3450 | HG3  | PRO | X | 228 | 38.826 | 41.941 | 42.026 | 0.00 | 0.00 |
| ATOM | 3451 | CB   | PRO | X | 228 | 39.871 | 41.466 | 43.791 | 0.00 | 0.00 |
| ATOM | 3452 | HB2  | PRO | X | 228 | 39.102 | 41.258 | 44.535 | 0.00 | 0.00 |
| ATOM | 3453 | HB3  | PRO | X | 228 | 40.216 | 42.499 | 43.736 | 0.00 | 0.00 |
| ATOM | 3454 | CA   | PRO | X | 228 | 41.039 | 40.499 | 43.994 | 0.00 | 0.00 |
| ATOM | 3455 | HA   | PRO | X | 228 | 41.769 | 41.079 | 44.559 | 0.00 | 0.00 |
| ATOM | 3456 | C    | PRO | X | 228 | 40.689 | 39.210 | 44.668 | 0.00 | 0.00 |
| ATOM | 3457 | O    | PRO | X | 228 | 40.885 | 39.044 | 45.878 | 0.00 | 0.00 |
| ATOM | 3458 | N    | ASN | X | 229 | 40.080 | 38.264 | 43.921 | 0.00 | 0.00 |
| ATOM | 3459 | H    | ASN | X | 229 | 39.942 | 38.462 | 42.940 | 0.00 | 0.00 |
| ATOM | 3460 | CA   | ASN | X | 229 | 39.748 | 36.967 | 44.507 | 0.00 | 0.00 |
| ATOM | 3461 | HA   | ASN | X | 229 | 39.187 | 37.145 | 45.424 | 0.00 | 0.00 |
| ATOM | 3462 | CB   | ASN | X | 229 | 38.684 | 36.304 | 43.562 | 0.00 | 0.00 |
| ATOM | 3463 | HB2  | ASN | X | 229 | 38.545 | 35.269 | 43.872 | 0.00 | 0.00 |
| ATOM | 3464 | HB3  | ASN | X | 229 | 37.741 | 36.831 | 43.708 | 0.00 | 0.00 |
| ATOM | 3465 | CG   | ASN | X | 229 | 39.057 | 36.229 | 42.101 | 0.00 | 0.00 |
| ATOM | 3466 | OD1  | ASN | X | 229 | 39.107 | 37.267 | 41.444 | 0.00 | 0.00 |
| ATOM | 3467 | ND2  | ASN | X | 229 | 39.107 | 35.065 | 41.494 | 0.00 | 0.00 |
| ATOM | 3468 | HD21 | ASN | X | 229 | 39.478 | 35.039 | 40.554 | 0.00 | 0.00 |

|      |      |      |     |   |     |        |        |        |      |      |
|------|------|------|-----|---|-----|--------|--------|--------|------|------|
| ATOM | 3469 | HD22 | ASN | X | 229 | 38.993 | 34.186 | 41.978 | 0.00 | 0.00 |
| ATOM | 3470 | C    | ASN | X | 229 | 40.875 | 36.040 | 44.704 | 0.00 | 0.00 |
| ATOM | 3471 | O    | ASN | X | 229 | 40.724 | 34.910 | 45.193 | 0.00 | 0.00 |
| ATOM | 3472 | N    | GLY | X | 230 | 42.132 | 36.400 | 44.457 | 0.00 | 0.00 |
| ATOM | 3473 | H    | GLY | X | 230 | 42.392 | 37.329 | 44.159 | 0.00 | 0.00 |
| ATOM | 3474 | CA   | GLY | X | 230 | 43.305 | 35.503 | 44.611 | 0.00 | 0.00 |
| ATOM | 3475 | HA2  | GLY | X | 230 | 43.184 | 34.524 | 44.083 | 0.00 | 0.00 |
| ATOM | 3476 | HA3  | GLY | X | 230 | 44.153 | 35.982 | 44.249 | 0.00 | 0.00 |
| ATOM | 3477 | C    | GLY | X | 230 | 43.631 | 35.196 | 46.098 | 0.00 | 0.00 |
| ATOM | 3478 | O    | GLY | X | 230 | 43.378 | 36.103 | 46.878 | 0.00 | 0.00 |
| ATOM | 3479 | N    | PRO | X | 231 | 44.080 | 34.038 | 46.564 | 0.00 | 0.00 |
| ATOM | 3480 | CD   | PRO | X | 231 | 44.382 | 32.881 | 45.780 | 0.00 | 0.00 |
| ATOM | 3481 | HD2  | PRO | X | 231 | 45.035 | 33.144 | 44.948 | 0.00 | 0.00 |
| ATOM | 3482 | HD3  | PRO | X | 231 | 43.502 | 32.433 | 45.319 | 0.00 | 0.00 |
| ATOM | 3483 | CG   | PRO | X | 231 | 45.204 | 31.928 | 46.608 | 0.00 | 0.00 |
| ATOM | 3484 | HG2  | PRO | X | 231 | 46.265 | 32.174 | 46.556 | 0.00 | 0.00 |
| ATOM | 3485 | HG3  | PRO | X | 231 | 45.003 | 30.892 | 46.339 | 0.00 | 0.00 |
| ATOM | 3486 | CB   | PRO | X | 231 | 44.642 | 32.232 | 47.962 | 0.00 | 0.00 |
| ATOM | 3487 | HB2  | PRO | X | 231 | 45.401 | 32.059 | 48.725 | 0.00 | 0.00 |
| ATOM | 3488 | HB3  | PRO | X | 231 | 43.768 | 31.600 | 48.123 | 0.00 | 0.00 |
| ATOM | 3489 | CA   | PRO | X | 231 | 44.185 | 33.675 | 47.970 | 0.00 | 0.00 |
| ATOM | 3490 | HA   | PRO | X | 231 | 43.146 | 33.737 | 48.294 | 0.00 | 0.00 |
| ATOM | 3491 | C    | PRO | X | 231 | 45.128 | 34.583 | 48.812 | 0.00 | 0.00 |
| ATOM | 3492 | O    | PRO | X | 231 | 44.870 | 34.702 | 50.007 | 0.00 | 0.00 |
| ATOM | 3493 | N    | TRP | X | 232 | 46.072 | 35.297 | 48.231 | 0.00 | 0.00 |
| ATOM | 3494 | H    | TRP | X | 232 | 46.338 | 35.156 | 47.267 | 0.00 | 0.00 |
| ATOM | 3495 | CA   | TRP | X | 232 | 46.990 | 36.153 | 48.906 | 0.00 | 0.00 |
| ATOM | 3496 | HA   | TRP | X | 232 | 47.188 | 35.754 | 49.901 | 0.00 | 0.00 |
| ATOM | 3497 | CB   | TRP | X | 232 | 48.326 | 36.249 | 48.097 | 0.00 | 0.00 |
| ATOM | 3498 | HB2  | TRP | X | 232 | 48.965 | 36.996 | 48.566 | 0.00 | 0.00 |
| ATOM | 3499 | HB3  | TRP | X | 232 | 48.828 | 35.298 | 48.275 | 0.00 | 0.00 |
| ATOM | 3500 | CG   | TRP | X | 232 | 48.070 | 36.606 | 46.642 | 0.00 | 0.00 |
| ATOM | 3501 | CD1  | TRP | X | 232 | 47.812 | 35.765 | 45.627 | 0.00 | 0.00 |
| ATOM | 3502 | HD1  | TRP | X | 232 | 47.796 | 34.688 | 45.707 | 0.00 | 0.00 |
| ATOM | 3503 | NE1  | TRP | X | 232 | 47.588 | 36.490 | 44.466 | 0.00 | 0.00 |
| ATOM | 3504 | HE1  | TRP | X | 232 | 47.426 | 35.998 | 43.599 | 0.00 | 0.00 |
| ATOM | 3505 | CE2  | TRP | X | 232 | 47.784 | 37.856 | 44.686 | 0.00 | 0.00 |
| ATOM | 3506 | CZ2  | TRP | X | 232 | 47.801 | 39.010 | 43.818 | 0.00 | 0.00 |
| ATOM | 3507 | HZ2  | TRP | X | 232 | 47.571 | 38.832 | 42.778 | 0.00 | 0.00 |
| ATOM | 3508 | CH2  | TRP | X | 232 | 48.092 | 40.277 | 44.355 | 0.00 | 0.00 |
| ATOM | 3509 | HH2  | TRP | X | 232 | 48.015 | 41.070 | 43.626 | 0.00 | 0.00 |
| ATOM | 3510 | CZ3  | TRP | X | 232 | 48.443 | 40.379 | 45.712 | 0.00 | 0.00 |
| ATOM | 3511 | HZ3  | TRP | X | 232 | 48.424 | 41.372 | 46.136 | 0.00 | 0.00 |
| ATOM | 3512 | CE3  | TRP | X | 232 | 48.539 | 39.220 | 46.527 | 0.00 | 0.00 |
| ATOM | 3513 | HE3  | TRP | X | 232 | 48.712 | 39.394 | 47.579 | 0.00 | 0.00 |
| ATOM | 3514 | CD2  | TRP | X | 232 | 48.143 | 37.936 | 46.061 | 0.00 | 0.00 |
| ATOM | 3515 | C    | TRP | X | 232 | 46.480 | 37.582 | 48.961 | 0.00 | 0.00 |
| ATOM | 3516 | O    | TRP | X | 232 | 47.031 | 38.334 | 49.729 | 0.00 | 0.00 |
| ATOM | 3517 | N    | ALA | X | 233 | 45.463 | 37.911 | 48.163 | 0.00 | 0.00 |
| ATOM | 3518 | H    | ALA | X | 233 | 44.988 | 37.197 | 47.628 | 0.00 | 0.00 |
| ATOM | 3519 | CA   | ALA | X | 233 | 44.876 | 39.259 | 47.909 | 0.00 | 0.00 |
| ATOM | 3520 | HA   | ALA | X | 233 | 45.756 | 39.898 | 47.992 | 0.00 | 0.00 |
| ATOM | 3521 | CB   | ALA | X | 233 | 44.415 | 39.328 | 46.499 | 0.00 | 0.00 |
| ATOM | 3522 | HB1  | ALA | X | 233 | 45.197 | 39.184 | 45.753 | 0.00 | 0.00 |
| ATOM | 3523 | HB2  | ALA | X | 233 | 43.687 | 38.540 | 46.302 | 0.00 | 0.00 |
| ATOM | 3524 | HB3  | ALA | X | 233 | 43.997 | 40.327 | 46.381 | 0.00 | 0.00 |
| ATOM | 3525 | C    | ALA | X | 233 | 43.918 | 39.841 | 48.962 | 0.00 | 0.00 |
| ATOM | 3526 | O    | ALA | X | 233 | 43.545 | 40.993 | 49.037 | 0.00 | 0.00 |
| ATOM | 3527 | N    | THR | X | 234 | 43.635 | 38.982 | 49.943 | 0.00 | 0.00 |
| ATOM | 3528 | H    | THR | X | 234 | 44.228 | 38.166 | 50.003 | 0.00 | 0.00 |
| ATOM | 3529 | CA   | THR | X | 234 | 42.760 | 39.172 | 51.122 | 0.00 | 0.00 |
| ATOM | 3530 | HA   | THR | X | 234 | 42.786 | 40.257 | 51.222 | 0.00 | 0.00 |
| ATOM | 3531 | CB   | THR | X | 234 | 41.359 | 38.758 | 50.961 | 0.00 | 0.00 |
| ATOM | 3532 | HB   | THR | X | 234 | 41.008 | 39.109 | 49.990 | 0.00 | 0.00 |
| ATOM | 3533 | CG2  | THR | X | 234 | 41.000 | 37.316 | 51.181 | 0.00 | 0.00 |
| ATOM | 3534 | HG21 | THR | X | 234 | 41.139 | 37.096 | 52.239 | 0.00 | 0.00 |
| ATOM | 3535 | HG22 | THR | X | 234 | 39.934 | 37.124 | 51.064 | 0.00 | 0.00 |
| ATOM | 3536 | HG23 | THR | X | 234 | 41.625 | 36.727 | 50.510 | 0.00 | 0.00 |
| ATOM | 3537 | OG1  | THR | X | 234 | 40.633 | 39.586 | 51.808 | 0.00 | 0.00 |
| ATOM | 3538 | HG1  | THR | X | 234 | 40.975 | 40.478 | 51.896 | 0.00 | 0.00 |



|      |      |      |     |   |     |        |        |        |      |      |
|------|------|------|-----|---|-----|--------|--------|--------|------|------|
| ATOM | 3539 | C    | THR | X | 234 | 43.453 | 38.565 | 52.361 | 0.00 | 0.00 |
| ATOM | 3540 | O    | THR | X | 234 | 44.399 | 37.830 | 52.280 | 0.00 | 0.00 |
| ATOM | 3541 | N    | VAL | X | 235 | 42.917 | 38.919 | 53.543 | 0.00 | 0.00 |
| ATOM | 3542 | H    | VAL | X | 235 | 42.162 | 39.589 | 53.533 | 0.00 | 0.00 |
| ATOM | 3543 | CA   | VAL | X | 235 | 43.061 | 38.254 | 54.830 | 0.00 | 0.00 |
| ATOM | 3544 | HA   | VAL | X | 235 | 43.137 | 37.194 | 54.585 | 0.00 | 0.00 |
| ATOM | 3545 | CB   | VAL | X | 235 | 44.403 | 38.709 | 55.489 | 0.00 | 0.00 |
| ATOM | 3546 | HB   | VAL | X | 235 | 45.091 | 38.876 | 54.660 | 0.00 | 0.00 |
| ATOM | 3547 | CG1  | VAL | X | 235 | 44.391 | 40.155 | 56.039 | 0.00 | 0.00 |
| ATOM | 3548 | HG11 | VAL | X | 235 | 45.412 | 40.524 | 56.135 | 0.00 | 0.00 |
| ATOM | 3549 | HG12 | VAL | X | 235 | 44.001 | 40.911 | 55.358 | 0.00 | 0.00 |
| ATOM | 3550 | HG13 | VAL | X | 235 | 43.939 | 40.178 | 57.031 | 0.00 | 0.00 |
| ATOM | 3551 | CG2  | VAL | X | 235 | 44.873 | 37.755 | 56.549 | 0.00 | 0.00 |
| ATOM | 3552 | HG21 | VAL | X | 235 | 44.358 | 37.900 | 57.498 | 0.00 | 0.00 |
| ATOM | 3553 | HG22 | VAL | X | 235 | 44.899 | 36.709 | 56.246 | 0.00 | 0.00 |
| ATOM | 3554 | HG23 | VAL | X | 235 | 45.904 | 38.088 | 56.677 | 0.00 | 0.00 |
| ATOM | 3555 | C    | VAL | X | 235 | 41.775 | 38.506 | 55.644 | 0.00 | 0.00 |
| ATOM | 3556 | O    | VAL | X | 235 | 41.045 | 39.488 | 55.570 | 0.00 | 0.00 |
| ATOM | 3557 | N    | GLY | X | 236 | 41.441 | 37.532 | 56.435 | 0.00 | 0.00 |
| ATOM | 3558 | H    | GLY | X | 236 | 42.043 | 36.724 | 56.513 | 0.00 | 0.00 |
| ATOM | 3559 | CA   | GLY | X | 236 | 40.521 | 37.620 | 57.567 | 0.00 | 0.00 |
| ATOM | 3560 | HA2  | GLY | X | 236 | 39.507 | 38.048 | 57.221 | 0.00 | 0.00 |
| ATOM | 3561 | HA3  | GLY | X | 236 | 40.188 | 36.628 | 57.829 | 0.00 | 0.00 |
| ATOM | 3562 | C    | GLY | X | 236 | 40.852 | 38.434 | 58.771 | 0.00 | 0.00 |
| ATOM | 3563 | O    | GLY | X | 236 | 42.014 | 38.799 | 58.998 | 0.00 | 0.00 |
| ATOM | 3564 | N    | MET | X | 237 | 39.863 | 38.532 | 59.635 | 0.00 | 0.00 |
| ATOM | 3565 | H    | MET | X | 237 | 39.017 | 38.027 | 59.413 | 0.00 | 0.00 |
| ATOM | 3566 | CA   | MET | X | 237 | 39.958 | 39.252 | 60.958 | 0.00 | 0.00 |
| ATOM | 3567 | HA   | MET | X | 237 | 40.238 | 40.287 | 60.760 | 0.00 | 0.00 |
| ATOM | 3568 | CB   | MET | X | 237 | 38.491 | 39.142 | 61.648 | 0.00 | 0.00 |
| ATOM | 3569 | HB2  | MET | X | 237 | 38.312 | 38.072 | 61.753 | 0.00 | 0.00 |
| ATOM | 3570 | HB3  | MET | X | 237 | 38.574 | 39.415 | 62.700 | 0.00 | 0.00 |
| ATOM | 3571 | CG   | MET | X | 237 | 37.444 | 40.089 | 60.965 | 0.00 | 0.00 |
| ATOM | 3572 | HG2  | MET | X | 237 | 37.684 | 41.147 | 61.071 | 0.00 | 0.00 |
| ATOM | 3573 | HG3  | MET | X | 237 | 37.463 | 39.785 | 59.918 | 0.00 | 0.00 |
| ATOM | 3574 | SD   | MET | X | 237 | 35.649 | 39.931 | 61.406 | 0.00 | 0.00 |
| ATOM | 3575 | CE   | MET | X | 237 | 35.089 | 41.089 | 60.179 | 0.00 | 0.00 |
| ATOM | 3576 | HE1  | MET | X | 237 | 35.573 | 42.028 | 60.449 | 0.00 | 0.00 |
| ATOM | 3577 | HE2  | MET | X | 237 | 35.314 | 40.792 | 59.155 | 0.00 | 0.00 |
| ATOM | 3578 | HE3  | MET | X | 237 | 34.010 | 41.116 | 60.335 | 0.00 | 0.00 |
| ATOM | 3579 | C    | MET | X | 237 | 41.026 | 38.725 | 61.967 | 0.00 | 0.00 |
| ATOM | 3580 | O    | MET | X | 237 | 41.737 | 39.399 | 62.707 | 0.00 | 0.00 |
| ATOM | 3581 | N    | GLY | X | 238 | 41.191 | 37.401 | 61.855 | 0.00 | 0.00 |
| ATOM | 3582 | H    | GLY | X | 238 | 40.603 | 36.936 | 61.178 | 0.00 | 0.00 |
| ATOM | 3583 | CA   | GLY | X | 238 | 41.908 | 36.629 | 62.798 | 0.00 | 0.00 |
| ATOM | 3584 | HA2  | GLY | X | 238 | 41.701 | 37.060 | 63.753 | 0.00 | 0.00 |
| ATOM | 3585 | HA3  | GLY | X | 238 | 41.513 | 35.622 | 62.767 | 0.00 | 0.00 |
| ATOM | 3586 | C    | GLY | X | 238 | 43.378 | 36.583 | 62.614 | 0.00 | 0.00 |
| ATOM | 3587 | O    | GLY | X | 238 | 44.129 | 36.933 | 63.511 | 0.00 | 0.00 |
| ATOM | 3588 | N    | GLU | X | 239 | 43.740 | 36.336 | 61.333 | 0.00 | 0.00 |
| ATOM | 3589 | H    | GLU | X | 239 | 43.224 | 35.681 | 60.764 | 0.00 | 0.00 |
| ATOM | 3590 | CA   | GLU | X | 239 | 45.143 | 36.492 | 60.958 | 0.00 | 0.00 |
| ATOM | 3591 | HA   | GLU | X | 239 | 45.853 | 36.042 | 61.652 | 0.00 | 0.00 |
| ATOM | 3592 | CB   | GLU | X | 239 | 45.532 | 36.020 | 59.508 | 0.00 | 0.00 |
| ATOM | 3593 | HB2  | GLU | X | 239 | 44.565 | 35.883 | 59.022 | 0.00 | 0.00 |
| ATOM | 3594 | HB3  | GLU | X | 239 | 46.112 | 36.775 | 58.977 | 0.00 | 0.00 |
| ATOM | 3595 | CG   | GLU | X | 239 | 46.278 | 34.665 | 59.502 | 0.00 | 0.00 |
| ATOM | 3596 | HG2  | GLU | X | 239 | 45.461 | 34.000 | 59.783 | 0.00 | 0.00 |
| ATOM | 3597 | HG3  | GLU | X | 239 | 46.560 | 34.362 | 58.494 | 0.00 | 0.00 |
| ATOM | 3598 | CD   | GLU | X | 239 | 47.420 | 34.583 | 60.417 | 0.00 | 0.00 |
| ATOM | 3599 | OE1  | GLU | X | 239 | 47.335 | 34.145 | 61.609 | 0.00 | 0.00 |
| ATOM | 3600 | OE2  | GLU | X | 239 | 48.491 | 35.043 | 60.116 | 0.00 | 0.00 |
| ATOM | 3601 | C    | GLU | X | 239 | 45.578 | 37.987 | 61.090 | 0.00 | 0.00 |
| ATOM | 3602 | O    | GLU | X | 239 | 46.750 | 38.307 | 61.231 | 0.00 | 0.00 |
| ATOM | 3603 | N    | ALA | X | 240 | 44.652 | 38.933 | 60.935 | 0.00 | 0.00 |
| ATOM | 3604 | H    | ALA | X | 240 | 43.738 | 38.617 | 60.645 | 0.00 | 0.00 |
| ATOM | 3605 | CA   | ALA | X | 240 | 44.992 | 40.359 | 61.144 | 0.00 | 0.00 |
| ATOM | 3606 | HA   | ALA | X | 240 | 45.864 | 40.539 | 60.515 | 0.00 | 0.00 |
| ATOM | 3607 | CB   | ALA | X | 240 | 43.823 | 41.179 | 60.617 | 0.00 | 0.00 |
| ATOM | 3608 | HB1  | ALA | X | 240 | 44.078 | 42.238 | 60.648 | 0.00 | 0.00 |

|      |      |      |     |   |     |        |        |        |      |      |
|------|------|------|-----|---|-----|--------|--------|--------|------|------|
| ATOM | 3609 | HB2  | ALA | X | 240 | 43.621 | 40.960 | 59.569 | 0.00 | 0.00 |
| ATOM | 3610 | HB3  | ALA | X | 240 | 42.874 | 41.010 | 61.127 | 0.00 | 0.00 |
| ATOM | 3611 | C    | ALA | X | 240 | 45.273 | 40.752 | 62.579 | 0.00 | 0.00 |
| ATOM | 3612 | O    | ALA | X | 240 | 46.368 | 41.211 | 62.847 | 0.00 | 0.00 |
| ATOM | 3613 | N    | ARG | X | 241 | 44.391 | 40.345 | 63.521 | 0.00 | 0.00 |
| ATOM | 3614 | H    | ARG | X | 241 | 43.590 | 39.814 | 63.208 | 0.00 | 0.00 |
| ATOM | 3615 | CA   | ARG | X | 241 | 44.590 | 40.559 | 64.986 | 0.00 | 0.00 |
| ATOM | 3616 | HA   | ARG | X | 241 | 44.724 | 41.612 | 65.233 | 0.00 | 0.00 |
| ATOM | 3617 | CB   | ARG | X | 241 | 43.403 | 39.843 | 65.737 | 0.00 | 0.00 |
| ATOM | 3618 | HB2  | ARG | X | 241 | 42.503 | 39.992 | 65.139 | 0.00 | 0.00 |
| ATOM | 3619 | HB3  | ARG | X | 241 | 43.579 | 38.768 | 65.716 | 0.00 | 0.00 |
| ATOM | 3620 | CG   | ARG | X | 241 | 43.244 | 40.183 | 67.166 | 0.00 | 0.00 |
| ATOM | 3621 | HG2  | ARG | X | 241 | 42.529 | 39.513 | 67.644 | 0.00 | 0.00 |
| ATOM | 3622 | HG3  | ARG | X | 241 | 44.160 | 40.120 | 67.753 | 0.00 | 0.00 |
| ATOM | 3623 | CD   | ARG | X | 241 | 42.755 | 41.611 | 67.270 | 0.00 | 0.00 |
| ATOM | 3624 | HD2  | ARG | X | 241 | 43.638 | 42.237 | 67.142 | 0.00 | 0.00 |
| ATOM | 3625 | HD3  | ARG | X | 241 | 42.151 | 41.794 | 66.382 | 0.00 | 0.00 |
| ATOM | 3626 | NE   | ARG | X | 241 | 42.222 | 41.947 | 68.599 | 0.00 | 0.00 |
| ATOM | 3627 | HE   | ARG | X | 241 | 42.819 | 42.219 | 69.367 | 0.00 | 0.00 |
| ATOM | 3628 | CZ   | ARG | X | 241 | 40.930 | 41.932 | 68.905 | 0.00 | 0.00 |
| ATOM | 3629 | NH1  | ARG | X | 241 | 39.999 | 41.539 | 67.988 | 0.00 | 0.00 |
| ATOM | 3630 | HH11 | ARG | X | 241 | 40.223 | 41.297 | 67.034 | 0.00 | 0.00 |
| ATOM | 3631 | HH12 | ARG | X | 241 | 39.015 | 41.628 | 68.199 | 0.00 | 0.00 |
| ATOM | 3632 | NH2  | ARG | X | 241 | 40.518 | 42.184 | 70.108 | 0.00 | 0.00 |
| ATOM | 3633 | HH21 | ARG | X | 241 | 41.200 | 42.426 | 70.813 | 0.00 | 0.00 |
| ATOM | 3634 | HH22 | ARG | X | 241 | 39.532 | 42.095 | 70.308 | 0.00 | 0.00 |
| ATOM | 3635 | C    | ARG | X | 241 | 45.928 | 39.916 | 65.468 | 0.00 | 0.00 |
| ATOM | 3636 | O    | ARG | X | 241 | 46.656 | 40.550 | 66.250 | 0.00 | 0.00 |
| ATOM | 3637 | N    | ARG | X | 242 | 46.245 | 38.705 | 64.979 | 0.00 | 0.00 |
| ATOM | 3638 | H    | ARG | X | 242 | 45.511 | 38.186 | 64.519 | 0.00 | 0.00 |
| ATOM | 3639 | CA   | ARG | X | 242 | 47.401 | 38.029 | 65.478 | 0.00 | 0.00 |
| ATOM | 3640 | HA   | ARG | X | 242 | 47.408 | 38.008 | 66.568 | 0.00 | 0.00 |
| ATOM | 3641 | CB   | ARG | X | 242 | 47.350 | 36.612 | 65.008 | 0.00 | 0.00 |
| ATOM | 3642 | HB2  | ARG | X | 242 | 46.380 | 36.125 | 65.109 | 0.00 | 0.00 |
| ATOM | 3643 | HB3  | ARG | X | 242 | 47.735 | 36.608 | 63.989 | 0.00 | 0.00 |
| ATOM | 3644 | CG   | ARG | X | 242 | 48.206 | 35.729 | 65.866 | 0.00 | 0.00 |
| ATOM | 3645 | HG2  | ARG | X | 242 | 49.219 | 36.117 | 65.969 | 0.00 | 0.00 |
| ATOM | 3646 | HG3  | ARG | X | 242 | 47.806 | 35.545 | 66.864 | 0.00 | 0.00 |
| ATOM | 3647 | CD   | ARG | X | 242 | 48.295 | 34.368 | 65.231 | 0.00 | 0.00 |
| ATOM | 3648 | HD2  | ARG | X | 242 | 48.917 | 33.734 | 65.863 | 0.00 | 0.00 |
| ATOM | 3649 | HD3  | ARG | X | 242 | 47.305 | 33.927 | 65.118 | 0.00 | 0.00 |
| ATOM | 3650 | NE   | ARG | X | 242 | 48.874 | 34.517 | 63.881 | 0.00 | 0.00 |
| ATOM | 3651 | HE   | ARG | X | 242 | 48.257 | 34.176 | 63.158 | 0.00 | 0.00 |
| ATOM | 3652 | CZ   | ARG | X | 242 | 50.061 | 35.000 | 63.482 | 0.00 | 0.00 |
| ATOM | 3653 | NH1  | ARG | X | 242 | 51.005 | 35.204 | 64.374 | 0.00 | 0.00 |
| ATOM | 3654 | HH11 | ARG | X | 242 | 50.993 | 34.729 | 65.265 | 0.00 | 0.00 |
| ATOM | 3655 | HH12 | ARG | X | 242 | 51.920 | 35.479 | 64.048 | 0.00 | 0.00 |
| ATOM | 3656 | NH2  | ARG | X | 242 | 50.243 | 35.201 | 62.224 | 0.00 | 0.00 |
| ATOM | 3657 | HH21 | ARG | X | 242 | 49.547 | 34.914 | 61.551 | 0.00 | 0.00 |
| ATOM | 3658 | HH22 | ARG | X | 242 | 51.042 | 35.668 | 61.820 | 0.00 | 0.00 |
| ATOM | 3659 | C    | ARG | X | 242 | 48.694 | 38.748 | 64.996 | 0.00 | 0.00 |
| ATOM | 3660 | O    | ARG | X | 242 | 49.445 | 39.076 | 65.899 | 0.00 | 0.00 |
| ATOM | 3661 | N    | ARG | X | 243 | 48.827 | 38.987 | 63.702 | 0.00 | 0.00 |
| ATOM | 3662 | H    | ARG | X | 243 | 48.036 | 38.662 | 63.165 | 0.00 | 0.00 |
| ATOM | 3663 | CA   | ARG | X | 243 | 49.928 | 39.787 | 63.198 | 0.00 | 0.00 |
| ATOM | 3664 | HA   | ARG | X | 243 | 50.725 | 39.082 | 63.433 | 0.00 | 0.00 |
| ATOM | 3665 | CB   | ARG | X | 243 | 49.866 | 39.945 | 61.703 | 0.00 | 0.00 |
| ATOM | 3666 | HB2  | ARG | X | 243 | 48.920 | 40.469 | 61.567 | 0.00 | 0.00 |
| ATOM | 3667 | HB3  | ARG | X | 243 | 50.734 | 40.506 | 61.355 | 0.00 | 0.00 |
| ATOM | 3668 | CG   | ARG | X | 243 | 49.815 | 38.595 | 61.013 | 0.00 | 0.00 |
| ATOM | 3669 | HG2  | ARG | X | 243 | 50.790 | 38.117 | 61.099 | 0.00 | 0.00 |
| ATOM | 3670 | HG3  | ARG | X | 243 | 49.184 | 37.840 | 61.483 | 0.00 | 0.00 |
| ATOM | 3671 | CD   | ARG | X | 243 | 49.256 | 38.678 | 59.583 | 0.00 | 0.00 |
| ATOM | 3672 | HD2  | ARG | X | 243 | 48.194 | 38.893 | 59.698 | 0.00 | 0.00 |
| ATOM | 3673 | HD3  | ARG | X | 243 | 49.796 | 39.517 | 59.146 | 0.00 | 0.00 |
| ATOM | 3674 | NE   | ARG | X | 243 | 49.354 | 37.330 | 58.956 | 0.00 | 0.00 |
| ATOM | 3675 | HE   | ARG | X | 243 | 49.253 | 36.520 | 59.551 | 0.00 | 0.00 |
| ATOM | 3676 | CZ   | ARG | X | 243 | 49.333 | 37.048 | 57.687 | 0.00 | 0.00 |
| ATOM | 3677 | NH1  | ARG | X | 243 | 49.403 | 37.986 | 56.764 | 0.00 | 0.00 |
| ATOM | 3678 | HH11 | ARG | X | 243 | 49.656 | 38.934 | 57.002 | 0.00 | 0.00 |

|      |      |      |     |   |     |        |        |        |      |      |
|------|------|------|-----|---|-----|--------|--------|--------|------|------|
| ATOM | 3679 | HH12 | ARG | X | 243 | 49.477 | 37.686 | 55.803 | 0.00 | 0.00 |
| ATOM | 3680 | NH2  | ARG | X | 243 | 49.127 | 35.786 | 57.349 | 0.00 | 0.00 |
| ATOM | 3681 | HH21 | ARG | X | 243 | 48.867 | 35.261 | 58.172 | 0.00 | 0.00 |
| ATOM | 3682 | HH22 | ARG | X | 243 | 49.016 | 35.510 | 56.384 | 0.00 | 0.00 |
| ATOM | 3683 | C    | ARG | X | 243 | 50.160 | 41.052 | 63.961 | 0.00 | 0.00 |
| ATOM | 3684 | O    | ARG | X | 243 | 51.297 | 41.464 | 64.117 | 0.00 | 0.00 |
| ATOM | 3685 | N    | ALA | X | 244 | 49.070 | 41.777 | 64.337 | 0.00 | 0.00 |
| ATOM | 3686 | H    | ALA | X | 244 | 48.209 | 41.516 | 63.878 | 0.00 | 0.00 |
| ATOM | 3687 | CA   | ALA | X | 244 | 49.152 | 43.048 | 65.001 | 0.00 | 0.00 |
| ATOM | 3688 | HA   | ALA | X | 244 | 49.850 | 43.662 | 64.431 | 0.00 | 0.00 |
| ATOM | 3689 | CB   | ALA | X | 244 | 47.701 | 43.602 | 65.058 | 0.00 | 0.00 |
| ATOM | 3690 | HB1  | ALA | X | 244 | 47.797 | 44.627 | 65.414 | 0.00 | 0.00 |
| ATOM | 3691 | HB2  | ALA | X | 244 | 47.433 | 43.847 | 64.030 | 0.00 | 0.00 |
| ATOM | 3692 | HB3  | ALA | X | 244 | 46.939 | 43.136 | 65.683 | 0.00 | 0.00 |
| ATOM | 3693 | C    | ALA | X | 244 | 49.584 | 42.887 | 66.444 | 0.00 | 0.00 |
| ATOM | 3694 | O    | ALA | X | 244 | 50.488 | 43.631 | 66.852 | 0.00 | 0.00 |
| ATOM | 3695 | N    | THR | X | 245 | 49.095 | 41.896 | 67.202 | 0.00 | 0.00 |
| ATOM | 3696 | H    | THR | X | 245 | 48.410 | 41.274 | 66.797 | 0.00 | 0.00 |
| ATOM | 3697 | CA   | THR | X | 245 | 49.479 | 41.737 | 68.664 | 0.00 | 0.00 |
| ATOM | 3698 | HA   | THR | X | 245 | 49.428 | 42.689 | 69.192 | 0.00 | 0.00 |
| ATOM | 3699 | CB   | THR | X | 245 | 48.525 | 40.751 | 69.244 | 0.00 | 0.00 |
| ATOM | 3700 | HB   | THR | X | 245 | 48.821 | 39.840 | 68.724 | 0.00 | 0.00 |
| ATOM | 3701 | CG2  | THR | X | 245 | 48.640 | 40.589 | 70.739 | 0.00 | 0.00 |
| ATOM | 3702 | HG21 | THR | X | 245 | 47.982 | 39.788 | 71.075 | 0.00 | 0.00 |
| ATOM | 3703 | HG22 | THR | X | 245 | 49.682 | 40.330 | 70.931 | 0.00 | 0.00 |
| ATOM | 3704 | HG23 | THR | X | 245 | 48.517 | 41.511 | 71.307 | 0.00 | 0.00 |
| ATOM | 3705 | OG1  | THR | X | 245 | 47.204 | 41.092 | 68.966 | 0.00 | 0.00 |
| ATOM | 3706 | HG1  | THR | X | 245 | 46.910 | 40.607 | 68.192 | 0.00 | 0.00 |
| ATOM | 3707 | C    | THR | X | 245 | 50.945 | 41.189 | 68.712 | 0.00 | 0.00 |
| ATOM | 3708 | O    | THR | X | 245 | 51.711 | 41.318 | 69.654 | 0.00 | 0.00 |
| ATOM | 3709 | N    | GLN | X | 246 | 51.393 | 40.623 | 67.579 | 0.00 | 0.00 |
| ATOM | 3710 | H    | GLN | X | 246 | 50.764 | 40.511 | 66.797 | 0.00 | 0.00 |
| ATOM | 3711 | CA   | GLN | X | 246 | 52.793 | 40.140 | 67.459 | 0.00 | 0.00 |
| ATOM | 3712 | HA   | GLN | X | 246 | 53.201 | 39.778 | 68.403 | 0.00 | 0.00 |
| ATOM | 3713 | CB   | GLN | X | 246 | 52.776 | 38.976 | 66.459 | 0.00 | 0.00 |
| ATOM | 3714 | HB2  | GLN | X | 246 | 52.140 | 38.167 | 66.818 | 0.00 | 0.00 |
| ATOM | 3715 | HB3  | GLN | X | 246 | 52.259 | 39.338 | 65.571 | 0.00 | 0.00 |
| ATOM | 3716 | CG   | GLN | X | 246 | 54.122 | 38.357 | 66.191 | 0.00 | 0.00 |
| ATOM | 3717 | HG2  | GLN | X | 246 | 54.908 | 38.998 | 65.791 | 0.00 | 0.00 |
| ATOM | 3718 | HG3  | GLN | X | 246 | 54.439 | 38.233 | 67.226 | 0.00 | 0.00 |
| ATOM | 3719 | CD   | GLN | X | 246 | 54.043 | 36.933 | 65.649 | 0.00 | 0.00 |
| ATOM | 3720 | OE1  | GLN | X | 246 | 53.766 | 36.720 | 64.454 | 0.00 | 0.00 |
| ATOM | 3721 | NE2  | GLN | X | 246 | 54.273 | 35.861 | 66.336 | 0.00 | 0.00 |
| ATOM | 3722 | HE21 | GLN | X | 246 | 54.165 | 34.965 | 65.881 | 0.00 | 0.00 |
| ATOM | 3723 | HE22 | GLN | X | 246 | 54.682 | 35.871 | 67.259 | 0.00 | 0.00 |
| ATOM | 3724 | C    | GLN | X | 246 | 53.742 | 41.247 | 67.024 | 0.00 | 0.00 |
| ATOM | 3725 | O    | GLN | X | 246 | 54.851 | 41.377 | 67.589 | 0.00 | 0.00 |
| ATOM | 3726 | N    | LEU | X | 247 | 53.328 | 42.077 | 66.086 | 0.00 | 0.00 |
| ATOM | 3727 | H    | LEU | X | 247 | 52.416 | 41.996 | 65.659 | 0.00 | 0.00 |
| ATOM | 3728 | CA   | LEU | X | 247 | 54.123 | 43.251 | 65.800 | 0.00 | 0.00 |
| ATOM | 3729 | HA   | LEU | X | 247 | 55.127 | 42.886 | 65.581 | 0.00 | 0.00 |
| ATOM | 3730 | CB   | LEU | X | 247 | 53.449 | 43.866 | 64.554 | 0.00 | 0.00 |
| ATOM | 3731 | HB2  | LEU | X | 247 | 53.335 | 43.196 | 63.701 | 0.00 | 0.00 |
| ATOM | 3732 | HB3  | LEU | X | 247 | 52.490 | 44.295 | 64.842 | 0.00 | 0.00 |
| ATOM | 3733 | CG   | LEU | X | 247 | 54.291 | 45.067 | 64.045 | 0.00 | 0.00 |
| ATOM | 3734 | HG   | LEU | X | 247 | 54.341 | 45.772 | 64.875 | 0.00 | 0.00 |
| ATOM | 3735 | CD1  | LEU | X | 247 | 55.701 | 44.670 | 63.585 | 0.00 | 0.00 |
| ATOM | 3736 | HD11 | LEU | X | 247 | 55.552 | 43.927 | 62.802 | 0.00 | 0.00 |
| ATOM | 3737 | HD12 | LEU | X | 247 | 56.229 | 45.553 | 63.225 | 0.00 | 0.00 |
| ATOM | 3738 | HD13 | LEU | X | 247 | 56.285 | 44.262 | 64.411 | 0.00 | 0.00 |
| ATOM | 3739 | CD2  | LEU | X | 247 | 53.620 | 45.675 | 62.840 | 0.00 | 0.00 |
| ATOM | 3740 | HD21 | LEU | X | 247 | 53.997 | 46.691 | 62.726 | 0.00 | 0.00 |
| ATOM | 3741 | HD22 | LEU | X | 247 | 53.805 | 45.195 | 61.879 | 0.00 | 0.00 |
| ATOM | 3742 | HD23 | LEU | X | 247 | 52.563 | 45.832 | 63.053 | 0.00 | 0.00 |
| ATOM | 3743 | C    | LEU | X | 247 | 54.230 | 44.157 | 66.993 | 0.00 | 0.00 |
| ATOM | 3744 | O    | LEU | X | 247 | 55.288 | 44.663 | 67.236 | 0.00 | 0.00 |
| ATOM | 3745 | N    | ALA | X | 248 | 53.123 | 44.322 | 67.683 | 0.00 | 0.00 |
| ATOM | 3746 | H    | ALA | X | 248 | 52.295 | 43.843 | 67.359 | 0.00 | 0.00 |
| ATOM | 3747 | CA   | ALA | X | 248 | 53.174 | 45.167 | 68.879 | 0.00 | 0.00 |
| ATOM | 3748 | HA   | ALA | X | 248 | 53.564 | 46.126 | 68.538 | 0.00 | 0.00 |

|      |      |      |     |   |     |        |        |        |      |      |
|------|------|------|-----|---|-----|--------|--------|--------|------|------|
| ATOM | 3749 | CB   | ALA | X | 248 | 51.795 | 45.320 | 69.394 | 0.00 | 0.00 |
| ATOM | 3750 | HB1  | ALA | X | 248 | 51.877 | 45.928 | 70.296 | 0.00 | 0.00 |
| ATOM | 3751 | HB2  | ALA | X | 248 | 51.122 | 45.921 | 68.783 | 0.00 | 0.00 |
| ATOM | 3752 | HB3  | ALA | X | 248 | 51.332 | 44.368 | 69.651 | 0.00 | 0.00 |
| ATOM | 3753 | C    | ALA | X | 248 | 54.186 | 44.669 | 69.982 | 0.00 | 0.00 |
| ATOM | 3754 | O    | ALA | X | 248 | 55.010 | 45.416 | 70.399 | 0.00 | 0.00 |
| ATOM | 3755 | N    | HIE | X | 249 | 54.211 | 43.316 | 70.378 | 0.00 | 0.00 |
| ATOM | 3756 | H    | HIE | X | 249 | 53.471 | 42.790 | 69.936 | 0.00 | 0.00 |
| ATOM | 3757 | CA   | HIE | X | 249 | 55.279 | 42.764 | 71.251 | 0.00 | 0.00 |
| ATOM | 3758 | HA   | HIE | X | 249 | 55.133 | 43.253 | 72.214 | 0.00 | 0.00 |
| ATOM | 3759 | CB   | HIE | X | 249 | 55.048 | 41.285 | 71.596 | 0.00 | 0.00 |
| ATOM | 3760 | HB2  | HIE | X | 249 | 53.981 | 41.076 | 71.656 | 0.00 | 0.00 |
| ATOM | 3761 | HB3  | HIE | X | 249 | 55.492 | 40.658 | 70.823 | 0.00 | 0.00 |
| ATOM | 3762 | CG   | HIE | X | 249 | 55.712 | 40.768 | 72.932 | 0.00 | 0.00 |
| ATOM | 3763 | ND1  | HIE | X | 249 | 57.030 | 40.393 | 73.066 | 0.00 | 0.00 |
| ATOM | 3764 | CE1  | HIE | X | 249 | 57.250 | 40.056 | 74.356 | 0.00 | 0.00 |
| ATOM | 3765 | HE1  | HIE | X | 249 | 58.157 | 39.648 | 74.777 | 0.00 | 0.00 |
| ATOM | 3766 | NE2  | HIE | X | 249 | 56.057 | 40.247 | 75.067 | 0.00 | 0.00 |
| ATOM | 3767 | HE2  | HIE | X | 249 | 55.797 | 39.884 | 75.973 | 0.00 | 0.00 |
| ATOM | 3768 | CD2  | HIE | X | 249 | 55.115 | 40.720 | 74.194 | 0.00 | 0.00 |
| ATOM | 3769 | HD2  | HIE | X | 249 | 54.105 | 40.991 | 74.462 | 0.00 | 0.00 |
| ATOM | 3770 | C    | HIE | X | 249 | 56.675 | 43.060 | 70.684 | 0.00 | 0.00 |
| ATOM | 3771 | O    | HIE | X | 249 | 57.570 | 43.425 | 71.419 | 0.00 | 0.00 |
| ATOM | 3772 | N    | LEU | X | 250 | 56.861 | 42.880 | 69.364 | 0.00 | 0.00 |
| ATOM | 3773 | H    | LEU | X | 250 | 56.126 | 42.527 | 68.769 | 0.00 | 0.00 |
| ATOM | 3774 | CA   | LEU | X | 250 | 58.170 | 42.972 | 68.834 | 0.00 | 0.00 |
| ATOM | 3775 | HA   | LEU | X | 250 | 58.882 | 42.557 | 69.547 | 0.00 | 0.00 |
| ATOM | 3776 | CB   | LEU | X | 250 | 58.213 | 42.395 | 67.499 | 0.00 | 0.00 |
| ATOM | 3777 | HB2  | LEU | X | 250 | 57.383 | 42.804 | 66.923 | 0.00 | 0.00 |
| ATOM | 3778 | HB3  | LEU | X | 250 | 59.151 | 42.747 | 67.071 | 0.00 | 0.00 |
| ATOM | 3779 | CG   | LEU | X | 250 | 58.201 | 40.885 | 67.481 | 0.00 | 0.00 |
| ATOM | 3780 | HG   | LEU | X | 250 | 57.338 | 40.545 | 68.053 | 0.00 | 0.00 |
| ATOM | 3781 | CD1  | LEU | X | 250 | 57.964 | 40.406 | 66.110 | 0.00 | 0.00 |
| ATOM | 3782 | HD11 | LEU | X | 250 | 58.259 | 39.382 | 65.880 | 0.00 | 0.00 |
| ATOM | 3783 | HD12 | LEU | X | 250 | 56.938 | 40.581 | 65.788 | 0.00 | 0.00 |
| ATOM | 3784 | HD13 | LEU | X | 250 | 58.538 | 40.994 | 65.394 | 0.00 | 0.00 |
| ATOM | 3785 | CD2  | LEU | X | 250 | 59.464 | 40.306 | 68.219 | 0.00 | 0.00 |
| ATOM | 3786 | HD21 | LEU | X | 250 | 59.357 | 40.622 | 69.257 | 0.00 | 0.00 |
| ATOM | 3787 | HD22 | LEU | X | 250 | 59.492 | 39.243 | 67.978 | 0.00 | 0.00 |
| ATOM | 3788 | HD23 | LEU | X | 250 | 60.385 | 40.763 | 67.856 | 0.00 | 0.00 |
| ATOM | 3789 | C    | LEU | X | 250 | 58.641 | 44.456 | 68.923 | 0.00 | 0.00 |
| ATOM | 3790 | O    | LEU | X | 250 | 59.818 | 44.690 | 69.203 | 0.00 | 0.00 |
| ATOM | 3791 | N    | VAL | X | 251 | 57.777 | 45.435 | 68.679 | 0.00 | 0.00 |
| ATOM | 3792 | H    | VAL | X | 251 | 56.866 | 45.192 | 68.316 | 0.00 | 0.00 |
| ATOM | 3793 | CA   | VAL | X | 251 | 58.066 | 46.826 | 68.659 | 0.00 | 0.00 |
| ATOM | 3794 | HA   | VAL | X | 251 | 59.020 | 46.878 | 68.135 | 0.00 | 0.00 |
| ATOM | 3795 | CB   | VAL | X | 251 | 56.969 | 47.591 | 67.886 | 0.00 | 0.00 |
| ATOM | 3796 | HB   | VAL | X | 251 | 56.000 | 47.248 | 68.249 | 0.00 | 0.00 |
| ATOM | 3797 | CG1  | VAL | X | 251 | 56.831 | 49.092 | 67.980 | 0.00 | 0.00 |
| ATOM | 3798 | HG11 | VAL | X | 251 | 56.134 | 49.472 | 67.233 | 0.00 | 0.00 |
| ATOM | 3799 | HG12 | VAL | X | 251 | 56.357 | 49.320 | 68.934 | 0.00 | 0.00 |
| ATOM | 3800 | HG13 | VAL | X | 251 | 57.781 | 49.626 | 67.957 | 0.00 | 0.00 |
| ATOM | 3801 | CG2  | VAL | X | 251 | 57.175 | 47.145 | 66.384 | 0.00 | 0.00 |
| ATOM | 3802 | HG21 | VAL | X | 251 | 56.245 | 47.459 | 65.910 | 0.00 | 0.00 |
| ATOM | 3803 | HG22 | VAL | X | 251 | 57.976 | 47.648 | 65.842 | 0.00 | 0.00 |
| ATOM | 3804 | HG23 | VAL | X | 251 | 57.332 | 46.070 | 66.296 | 0.00 | 0.00 |
| ATOM | 3805 | C    | VAL | X | 251 | 58.238 | 47.376 | 70.086 | 0.00 | 0.00 |
| ATOM | 3806 | O    | VAL | X | 251 | 59.044 | 48.343 | 70.236 | 0.00 | 0.00 |
| ATOM | 3807 | N    | GLY | X | 252 | 57.465 | 46.915 | 71.087 | 0.00 | 0.00 |
| ATOM | 3808 | H    | GLY | X | 252 | 56.721 | 46.287 | 70.818 | 0.00 | 0.00 |
| ATOM | 3809 | CA   | GLY | X | 252 | 57.724 | 47.297 | 72.490 | 0.00 | 0.00 |
| ATOM | 3810 | HA2  | GLY | X | 252 | 58.110 | 46.404 | 73.022 | 0.00 | 0.00 |
| ATOM | 3811 | HA3  | GLY | X | 252 | 58.445 | 48.079 | 72.678 | 0.00 | 0.00 |
| ATOM | 3812 | C    | GLY | X | 252 | 56.452 | 47.820 | 73.189 | 0.00 | 0.00 |
| ATOM | 3813 | O    | GLY | X | 252 | 56.584 | 48.814 | 73.869 | 0.00 | 0.00 |
| ATOM | 3814 | N    | CYX | X | 253 | 55.302 | 47.178 | 72.926 | 0.00 | 0.00 |
| ATOM | 3815 | H    | CYX | X | 253 | 55.476 | 46.392 | 72.316 | 0.00 | 0.00 |
| ATOM | 3816 | CA   | CYX | X | 253 | 53.939 | 47.620 | 73.258 | 0.00 | 0.00 |
| ATOM | 3817 | HA   | CYX | X | 253 | 54.106 | 48.460 | 73.932 | 0.00 | 0.00 |
| ATOM | 3818 | CB   | CYX | X | 253 | 53.222 | 48.115 | 71.970 | 0.00 | 0.00 |

|      |      |      |     |   |     |        |        |        |      |      |
|------|------|------|-----|---|-----|--------|--------|--------|------|------|
| ATOM | 3819 | HB2  | CYX | X | 253 | 53.387 | 47.337 | 71.225 | 0.00 | 0.00 |
| ATOM | 3820 | HB3  | CYX | X | 253 | 52.153 | 48.193 | 72.169 | 0.00 | 0.00 |
| ATOM | 3821 | SG   | CYX | X | 253 | 53.921 | 49.594 | 71.196 | 0.00 | 0.00 |
| ATOM | 3822 | C    | CYX | X | 253 | 53.211 | 46.540 | 73.986 | 0.00 | 0.00 |
| ATOM | 3823 | O    | CYX | X | 253 | 52.888 | 45.501 | 73.394 | 0.00 | 0.00 |
| ATOM | 3824 | N    | PRO | X | 254 | 52.919 | 46.800 | 75.290 | 0.00 | 0.00 |
| ATOM | 3825 | CD   | PRO | X | 254 | 52.084 | 45.818 | 75.990 | 0.00 | 0.00 |
| ATOM | 3826 | HD2  | PRO | X | 254 | 52.467 | 44.811 | 75.820 | 0.00 | 0.00 |
| ATOM | 3827 | HD3  | PRO | X | 254 | 51.051 | 45.784 | 75.643 | 0.00 | 0.00 |
| ATOM | 3828 | CG   | PRO | X | 254 | 52.299 | 46.088 | 77.485 | 0.00 | 0.00 |
| ATOM | 3829 | HG2  | PRO | X | 254 | 53.123 | 45.424 | 77.746 | 0.00 | 0.00 |
| ATOM | 3830 | HG3  | PRO | X | 254 | 51.417 | 45.988 | 78.118 | 0.00 | 0.00 |
| ATOM | 3831 | CB   | PRO | X | 254 | 52.799 | 47.553 | 77.516 | 0.00 | 0.00 |
| ATOM | 3832 | HB2  | PRO | X | 254 | 53.487 | 47.794 | 78.327 | 0.00 | 0.00 |
| ATOM | 3833 | HB3  | PRO | X | 254 | 52.010 | 48.299 | 77.421 | 0.00 | 0.00 |
| ATOM | 3834 | CA   | PRO | X | 254 | 53.583 | 47.724 | 76.221 | 0.00 | 0.00 |
| ATOM | 3835 | HA   | PRO | X | 254 | 53.504 | 48.777 | 75.948 | 0.00 | 0.00 |
| ATOM | 3836 | C    | PRO | X | 254 | 55.009 | 47.375 | 76.539 | 0.00 | 0.00 |
| ATOM | 3837 | O    | PRO | X | 254 | 55.410 | 46.289 | 76.311 | 0.00 | 0.00 |
| ATOM | 3838 | N    | PRO | X | 255 | 55.811 | 48.187 | 77.180 | 0.00 | 0.00 |
| ATOM | 3839 | CD   | PRO | X | 255 | 55.558 | 49.656 | 77.403 | 0.00 | 0.00 |
| ATOM | 3840 | HD2  | PRO | X | 255 | 54.556 | 49.808 | 77.804 | 0.00 | 0.00 |
| ATOM | 3841 | HD3  | PRO | X | 255 | 55.695 | 50.137 | 76.434 | 0.00 | 0.00 |
| ATOM | 3842 | CG   | PRO | X | 255 | 56.623 | 50.171 | 78.427 | 0.00 | 0.00 |
| ATOM | 3843 | HG2  | PRO | X | 255 | 56.198 | 50.006 | 79.417 | 0.00 | 0.00 |
| ATOM | 3844 | HG3  | PRO | X | 255 | 56.908 | 51.214 | 78.286 | 0.00 | 0.00 |
| ATOM | 3845 | CB   | PRO | X | 255 | 57.791 | 49.229 | 78.027 | 0.00 | 0.00 |
| ATOM | 3846 | HB2  | PRO | X | 255 | 58.560 | 49.229 | 78.800 | 0.00 | 0.00 |
| ATOM | 3847 | HB3  | PRO | X | 255 | 58.168 | 49.656 | 77.098 | 0.00 | 0.00 |
| ATOM | 3848 | CA   | PRO | X | 255 | 57.098 | 47.863 | 77.841 | 0.00 | 0.00 |
| ATOM | 3849 | HA   | PRO | X | 255 | 57.747 | 47.310 | 77.162 | 0.00 | 0.00 |
| ATOM | 3850 | C    | PRO | X | 255 | 56.975 | 47.036 | 79.101 | 0.00 | 0.00 |
| ATOM | 3851 | O    | PRO | X | 255 | 57.842 | 47.045 | 79.949 | 0.00 | 0.00 |
| ATOM | 3852 | N    | GLY | X | 256 | 55.940 | 46.194 | 79.288 | 0.00 | 0.00 |
| ATOM | 3853 | H    | GLY | X | 256 | 55.196 | 46.253 | 78.607 | 0.00 | 0.00 |
| ATOM | 3854 | CA   | GLY | X | 256 | 55.369 | 45.528 | 80.463 | 0.00 | 0.00 |
| ATOM | 3855 | HA2  | GLY | X | 256 | 55.139 | 44.458 | 80.196 | 0.00 | 0.00 |
| ATOM | 3856 | HA3  | GLY | X | 256 | 56.138 | 45.505 | 81.236 | 0.00 | 0.00 |
| ATOM | 3857 | C    | GLY | X | 256 | 54.125 | 46.165 | 81.060 | 0.00 | 0.00 |
| ATOM | 3858 | O    | GLY | X | 256 | 53.823 | 47.327 | 80.939 | 0.00 | 0.00 |
| ATOM | 3859 | N    | GLY | X | 257 | 53.470 | 45.365 | 81.874 | 0.00 | 0.00 |
| ATOM | 3860 | H    | GLY | X | 257 | 53.695 | 44.386 | 81.771 | 0.00 | 0.00 |
| ATOM | 3861 | CA   | GLY | X | 257 | 52.267 | 45.831 | 82.653 | 0.00 | 0.00 |
| ATOM | 3862 | HA2  | GLY | X | 257 | 52.111 | 45.184 | 83.515 | 0.00 | 0.00 |
| ATOM | 3863 | HA3  | GLY | X | 257 | 52.419 | 46.790 | 83.013 | 0.00 | 0.00 |
| ATOM | 3864 | C    | GLY | X | 257 | 50.976 | 45.829 | 81.743 | 0.00 | 0.00 |
| ATOM | 3865 | O    | GLY | X | 257 | 50.874 | 45.096 | 80.762 | 0.00 | 0.00 |
| ATOM | 3866 | N    | THR | X | 258 | 50.114 | 46.675 | 82.215 | 0.00 | 0.00 |
| ATOM | 3867 | H    | THR | X | 258 | 50.381 | 47.314 | 82.950 | 0.00 | 0.00 |
| ATOM | 3868 | CA   | THR | X | 258 | 48.902 | 47.125 | 81.509 | 0.00 | 0.00 |
| ATOM | 3869 | HA   | THR | X | 258 | 48.308 | 46.242 | 81.274 | 0.00 | 0.00 |
| ATOM | 3870 | CB   | THR | X | 258 | 48.179 | 48.049 | 82.412 | 0.00 | 0.00 |
| ATOM | 3871 | HB   | THR | X | 258 | 47.372 | 48.487 | 81.824 | 0.00 | 0.00 |
| ATOM | 3872 | CG2  | THR | X | 258 | 47.597 | 47.451 | 83.708 | 0.00 | 0.00 |
| ATOM | 3873 | HG21 | THR | X | 258 | 46.899 | 46.670 | 83.407 | 0.00 | 0.00 |
| ATOM | 3874 | HG22 | THR | X | 258 | 48.423 | 47.031 | 84.283 | 0.00 | 0.00 |
| ATOM | 3875 | HG23 | THR | X | 258 | 47.004 | 48.233 | 84.183 | 0.00 | 0.00 |
| ATOM | 3876 | OG1  | THR | X | 258 | 49.181 | 49.006 | 82.949 | 0.00 | 0.00 |
| ATOM | 3877 | HG1  | THR | X | 258 | 48.707 | 49.802 | 83.199 | 0.00 | 0.00 |
| ATOM | 3878 | C    | THR | X | 258 | 49.285 | 47.777 | 80.178 | 0.00 | 0.00 |
| ATOM | 3879 | O    | THR | X | 258 | 50.394 | 48.280 | 79.948 | 0.00 | 0.00 |
| ATOM | 3880 | N    | GLY | X | 259 | 48.353 | 47.723 | 79.227 | 0.00 | 0.00 |
| ATOM | 3881 | H    | GLY | X | 259 | 47.402 | 47.471 | 79.456 | 0.00 | 0.00 |
| ATOM | 3882 | CA   | GLY | X | 259 | 48.543 | 48.155 | 77.791 | 0.00 | 0.00 |
| ATOM | 3883 | HA2  | GLY | X | 259 | 47.714 | 48.769 | 77.488 | 0.00 | 0.00 |
| ATOM | 3884 | HA3  | GLY | X | 259 | 49.400 | 48.772 | 77.739 | 0.00 | 0.00 |
| ATOM | 3885 | C    | GLY | X | 259 | 48.687 | 47.014 | 76.806 | 0.00 | 0.00 |
| ATOM | 3886 | O    | GLY | X | 259 | 49.025 | 47.199 | 75.630 | 0.00 | 0.00 |
| ATOM | 3887 | N    | GLY | X | 260 | 48.357 | 45.814 | 77.310 | 0.00 | 0.00 |
| ATOM | 3888 | H    | GLY | X | 260 | 47.983 | 45.765 | 78.247 | 0.00 | 0.00 |

|      |      |      |     |   |     |        |        |        |      |      |
|------|------|------|-----|---|-----|--------|--------|--------|------|------|
| ATOM | 3889 | CA   | GLY | X | 260 | 48.405 | 44.493 | 76.610 | 0.00 | 0.00 |
| ATOM | 3890 | HA2  | GLY | X | 260 | 49.062 | 44.524 | 75.874 | 0.00 | 0.00 |
| ATOM | 3891 | HA3  | GLY | X | 260 | 48.642 | 43.693 | 77.242 | 0.00 | 0.00 |
| ATOM | 3892 | C    | GLY | X | 260 | 47.129 | 44.138 | 75.802 | 0.00 | 0.00 |
| ATOM | 3893 | O    | GLY | X | 260 | 47.031 | 43.184 | 75.050 | 0.00 | 0.00 |
| ATOM | 3894 | N    | ASN | X | 261 | 46.123 | 44.925 | 76.134 | 0.00 | 0.00 |
| ATOM | 3895 | H    | ASN | X | 261 | 46.303 | 45.676 | 76.785 | 0.00 | 0.00 |
| ATOM | 3896 | CA   | ASN | X | 261 | 44.810 | 44.993 | 75.417 | 0.00 | 0.00 |
| ATOM | 3897 | HA   | ASN | X | 261 | 44.459 | 43.974 | 75.252 | 0.00 | 0.00 |
| ATOM | 3898 | CB   | ASN | X | 261 | 43.816 | 45.751 | 76.341 | 0.00 | 0.00 |
| ATOM | 3899 | HB2  | ASN | X | 261 | 43.742 | 45.071 | 77.190 | 0.00 | 0.00 |
| ATOM | 3900 | HB3  | ASN | X | 261 | 44.349 | 46.668 | 76.593 | 0.00 | 0.00 |
| ATOM | 3901 | CG   | ASN | X | 261 | 42.536 | 45.916 | 75.637 | 0.00 | 0.00 |
| ATOM | 3902 | OD1  | ASN | X | 261 | 42.280 | 46.940 | 75.171 | 0.00 | 0.00 |
| ATOM | 3903 | ND2  | ASN | X | 261 | 41.790 | 44.812 | 75.525 | 0.00 | 0.00 |
| ATOM | 3904 | HD21 | ASN | X | 261 | 40.848 | 44.855 | 75.163 | 0.00 | 0.00 |
| ATOM | 3905 | HD22 | ASN | X | 261 | 42.169 | 43.981 | 75.957 | 0.00 | 0.00 |
| ATOM | 3906 | C    | ASN | X | 261 | 44.836 | 45.757 | 74.135 | 0.00 | 0.00 |
| ATOM | 3907 | O    | ASN | X | 261 | 45.586 | 46.657 | 74.018 | 0.00 | 0.00 |
| ATOM | 3908 | N    | ASP | X | 262 | 44.071 | 45.267 | 73.131 | 0.00 | 0.00 |
| ATOM | 3909 | H    | ASP | X | 262 | 43.358 | 44.556 | 73.218 | 0.00 | 0.00 |
| ATOM | 3910 | CA   | ASP | X | 262 | 44.103 | 45.800 | 71.769 | 0.00 | 0.00 |
| ATOM | 3911 | HA   | ASP | X | 262 | 44.972 | 45.402 | 71.245 | 0.00 | 0.00 |
| ATOM | 3912 | CB   | ASP | X | 262 | 43.003 | 45.176 | 70.940 | 0.00 | 0.00 |
| ATOM | 3913 | HB2  | ASP | X | 262 | 42.049 | 45.656 | 71.157 | 0.00 | 0.00 |
| ATOM | 3914 | HB3  | ASP | X | 262 | 43.248 | 45.372 | 69.896 | 0.00 | 0.00 |
| ATOM | 3915 | CG   | ASP | X | 262 | 43.005 | 43.704 | 71.263 | 0.00 | 0.00 |
| ATOM | 3916 | OD1  | ASP | X | 262 | 43.747 | 43.039 | 70.532 | 0.00 | 0.00 |
| ATOM | 3917 | OD2  | ASP | X | 262 | 42.329 | 43.244 | 72.204 | 0.00 | 0.00 |
| ATOM | 3918 | C    | ASP | X | 262 | 44.150 | 47.283 | 71.599 | 0.00 | 0.00 |
| ATOM | 3919 | O    | ASP | X | 262 | 45.070 | 47.750 | 70.924 | 0.00 | 0.00 |
| ATOM | 3920 | N    | THR | X | 263 | 43.165 | 48.080 | 72.110 | 0.00 | 0.00 |
| ATOM | 3921 | H    | THR | X | 263 | 42.396 | 47.661 | 72.613 | 0.00 | 0.00 |
| ATOM | 3922 | CA   | THR | X | 263 | 43.180 | 49.519 | 71.862 | 0.00 | 0.00 |
| ATOM | 3923 | HA   | THR | X | 263 | 43.122 | 49.576 | 70.775 | 0.00 | 0.00 |
| ATOM | 3924 | CB   | THR | X | 263 | 41.889 | 50.087 | 72.471 | 0.00 | 0.00 |
| ATOM | 3925 | HB   | THR | X | 263 | 41.943 | 50.196 | 73.555 | 0.00 | 0.00 |
| ATOM | 3926 | CG2  | THR | X | 263 | 41.686 | 51.480 | 71.853 | 0.00 | 0.00 |
| ATOM | 3927 | HG21 | THR | X | 263 | 42.499 | 52.157 | 72.117 | 0.00 | 0.00 |
| ATOM | 3928 | HG22 | THR | X | 263 | 41.903 | 51.269 | 70.806 | 0.00 | 0.00 |
| ATOM | 3929 | HG23 | THR | X | 263 | 40.677 | 51.855 | 72.021 | 0.00 | 0.00 |
| ATOM | 3930 | OG1  | THR | X | 263 | 40.809 | 49.300 | 72.273 | 0.00 | 0.00 |
| ATOM | 3931 | HG1  | THR | X | 263 | 40.157 | 49.730 | 72.832 | 0.00 | 0.00 |
| ATOM | 3932 | C    | THR | X | 263 | 44.350 | 50.248 | 72.390 | 0.00 | 0.00 |
| ATOM | 3933 | O    | THR | X | 263 | 44.780 | 51.202 | 71.778 | 0.00 | 0.00 |
| ATOM | 3934 | N    | GLU | X | 264 | 44.977 | 49.684 | 73.453 | 0.00 | 0.00 |
| ATOM | 3935 | H    | GLU | X | 264 | 44.596 | 48.844 | 73.865 | 0.00 | 0.00 |
| ATOM | 3936 | CA   | GLU | X | 264 | 46.199 | 50.255 | 74.041 | 0.00 | 0.00 |
| ATOM | 3937 | HA   | GLU | X | 264 | 46.279 | 51.331 | 73.887 | 0.00 | 0.00 |
| ATOM | 3938 | CB   | GLU | X | 264 | 46.230 | 49.964 | 75.485 | 0.00 | 0.00 |
| ATOM | 3939 | HB2  | GLU | X | 264 | 46.215 | 48.876 | 75.543 | 0.00 | 0.00 |
| ATOM | 3940 | HB3  | GLU | X | 264 | 47.110 | 50.462 | 75.891 | 0.00 | 0.00 |
| ATOM | 3941 | CG   | GLU | X | 264 | 44.946 | 50.595 | 76.208 | 0.00 | 0.00 |
| ATOM | 3942 | HG2  | GLU | X | 264 | 44.687 | 51.490 | 75.642 | 0.00 | 0.00 |
| ATOM | 3943 | HG3  | GLU | X | 264 | 44.053 | 49.975 | 76.133 | 0.00 | 0.00 |
| ATOM | 3944 | CD   | GLU | X | 264 | 45.309 | 50.931 | 77.632 | 0.00 | 0.00 |
| ATOM | 3945 | OE1  | GLU | X | 264 | 45.256 | 50.051 | 78.492 | 0.00 | 0.00 |
| ATOM | 3946 | OE2  | GLU | X | 264 | 45.478 | 52.093 | 78.037 | 0.00 | 0.00 |
| ATOM | 3947 | C    | GLU | X | 264 | 47.461 | 49.745 | 73.317 | 0.00 | 0.00 |
| ATOM | 3948 | O    | GLU | X | 264 | 48.505 | 50.403 | 73.302 | 0.00 | 0.00 |
| ATOM | 3949 | N    | LEU | X | 265 | 47.411 | 48.576 | 72.591 | 0.00 | 0.00 |
| ATOM | 3950 | H    | LEU | X | 265 | 46.550 | 48.050 | 72.646 | 0.00 | 0.00 |
| ATOM | 3951 | CA   | LEU | X | 265 | 48.404 | 48.156 | 71.608 | 0.00 | 0.00 |
| ATOM | 3952 | HA   | LEU | X | 265 | 49.400 | 48.367 | 71.998 | 0.00 | 0.00 |
| ATOM | 3953 | CB   | LEU | X | 265 | 48.228 | 46.688 | 71.225 | 0.00 | 0.00 |
| ATOM | 3954 | HB2  | LEU | X | 265 | 47.209 | 46.708 | 70.840 | 0.00 | 0.00 |
| ATOM | 3955 | HB3  | LEU | X | 265 | 48.984 | 46.446 | 70.478 | 0.00 | 0.00 |
| ATOM | 3956 | CG   | LEU | X | 265 | 48.330 | 45.606 | 72.307 | 0.00 | 0.00 |
| ATOM | 3957 | HG   | LEU | X | 265 | 47.604 | 45.904 | 73.063 | 0.00 | 0.00 |
| ATOM | 3958 | CD1  | LEU | X | 265 | 47.809 | 44.242 | 71.858 | 0.00 | 0.00 |

|      |      |      |     |   |     |        |        |        |      |      |
|------|------|------|-----|---|-----|--------|--------|--------|------|------|
| ATOM | 3959 | HD11 | LEU | X | 265 | 46.735 | 44.178 | 71.682 | 0.00 | 0.00 |
| ATOM | 3960 | HD12 | LEU | X | 265 | 48.308 | 43.980 | 70.925 | 0.00 | 0.00 |
| ATOM | 3961 | HD13 | LEU | X | 265 | 47.940 | 43.551 | 72.690 | 0.00 | 0.00 |
| ATOM | 3962 | CD2  | LEU | X | 265 | 49.707 | 45.459 | 72.925 | 0.00 | 0.00 |
| ATOM | 3963 | HD21 | LEU | X | 265 | 50.286 | 44.971 | 72.141 | 0.00 | 0.00 |
| ATOM | 3964 | HD22 | LEU | X | 265 | 50.068 | 46.421 | 73.288 | 0.00 | 0.00 |
| ATOM | 3965 | HD23 | LEU | X | 265 | 49.687 | 44.741 | 73.746 | 0.00 | 0.00 |
| ATOM | 3966 | C    | LEU | X | 265 | 48.358 | 49.100 | 70.407 | 0.00 | 0.00 |
| ATOM | 3967 | O    | LEU | X | 265 | 49.388 | 49.658 | 69.987 | 0.00 | 0.00 |
| ATOM | 3968 | N    | VAL | X | 266 | 47.135 | 49.367 | 69.925 | 0.00 | 0.00 |
| ATOM | 3969 | H    | VAL | X | 266 | 46.372 | 48.728 | 70.095 | 0.00 | 0.00 |
| ATOM | 3970 | CA   | VAL | X | 266 | 46.981 | 50.240 | 68.793 | 0.00 | 0.00 |
| ATOM | 3971 | HA   | VAL | X | 266 | 47.718 | 49.895 | 68.068 | 0.00 | 0.00 |
| ATOM | 3972 | CB   | VAL | X | 266 | 45.559 | 50.044 | 68.165 | 0.00 | 0.00 |
| ATOM | 3973 | HB   | VAL | X | 266 | 44.972 | 49.955 | 69.079 | 0.00 | 0.00 |
| ATOM | 3974 | CG1  | VAL | X | 266 | 45.093 | 51.214 | 67.273 | 0.00 | 0.00 |
| ATOM | 3975 | HG11 | VAL | X | 266 | 44.067 | 51.012 | 66.965 | 0.00 | 0.00 |
| ATOM | 3976 | HG12 | VAL | X | 266 | 45.126 | 52.097 | 67.912 | 0.00 | 0.00 |
| ATOM | 3977 | HG13 | VAL | X | 266 | 45.755 | 51.325 | 66.413 | 0.00 | 0.00 |
| ATOM | 3978 | CG2  | VAL | X | 266 | 45.482 | 48.679 | 67.402 | 0.00 | 0.00 |
| ATOM | 3979 | HG21 | VAL | X | 266 | 45.492 | 47.825 | 68.080 | 0.00 | 0.00 |
| ATOM | 3980 | HG22 | VAL | X | 266 | 44.570 | 48.560 | 66.816 | 0.00 | 0.00 |
| ATOM | 3981 | HG23 | VAL | X | 266 | 46.271 | 48.603 | 66.654 | 0.00 | 0.00 |
| ATOM | 3982 | C    | VAL | X | 266 | 47.401 | 51.669 | 69.209 | 0.00 | 0.00 |
| ATOM | 3983 | O    | VAL | X | 266 | 47.885 | 52.421 | 68.355 | 0.00 | 0.00 |
| ATOM | 3984 | N    | ALA | X | 267 | 47.328 | 51.978 | 70.501 | 0.00 | 0.00 |
| ATOM | 3985 | H    | ALA | X | 267 | 46.867 | 51.413 | 71.199 | 0.00 | 0.00 |
| ATOM | 3986 | CA   | ALA | X | 267 | 47.767 | 53.245 | 70.996 | 0.00 | 0.00 |
| ATOM | 3987 | HA   | ALA | X | 267 | 47.320 | 54.043 | 70.404 | 0.00 | 0.00 |
| ATOM | 3988 | CB   | ALA | X | 267 | 47.371 | 53.573 | 72.508 | 0.00 | 0.00 |
| ATOM | 3989 | HB1  | ALA | X | 267 | 47.589 | 54.626 | 72.684 | 0.00 | 0.00 |
| ATOM | 3990 | HB2  | ALA | X | 267 | 46.301 | 53.382 | 72.592 | 0.00 | 0.00 |
| ATOM | 3991 | HB3  | ALA | X | 267 | 47.800 | 52.882 | 73.235 | 0.00 | 0.00 |
| ATOM | 3992 | C    | ALA | X | 267 | 49.287 | 53.304 | 70.942 | 0.00 | 0.00 |
| ATOM | 3993 | O    | ALA | X | 267 | 49.829 | 54.304 | 70.415 | 0.00 | 0.00 |
| ATOM | 3994 | N    | CYX | X | 268 | 50.018 | 52.277 | 71.461 | 0.00 | 0.00 |
| ATOM | 3995 | H    | CYX | X | 268 | 49.601 | 51.455 | 71.873 | 0.00 | 0.00 |
| ATOM | 3996 | CA   | CYX | X | 268 | 51.491 | 52.312 | 71.500 | 0.00 | 0.00 |
| ATOM | 3997 | HA   | CYX | X | 268 | 51.907 | 53.280 | 71.779 | 0.00 | 0.00 |
| ATOM | 3998 | CB   | CYX | X | 268 | 52.036 | 51.284 | 72.526 | 0.00 | 0.00 |
| ATOM | 3999 | HB2  | CYX | X | 268 | 51.629 | 51.602 | 73.486 | 0.00 | 0.00 |
| ATOM | 4000 | HB3  | CYX | X | 268 | 51.632 | 50.291 | 72.330 | 0.00 | 0.00 |
| ATOM | 4001 | SG   | CYX | X | 268 | 53.806 | 51.029 | 72.598 | 0.00 | 0.00 |
| ATOM | 4002 | C    | CYX | X | 268 | 52.044 | 52.071 | 70.078 | 0.00 | 0.00 |
| ATOM | 4003 | O    | CYX | X | 268 | 52.999 | 52.721 | 69.711 | 0.00 | 0.00 |
| ATOM | 4004 | N    | LEU | X | 269 | 51.392 | 51.324 | 69.185 | 0.00 | 0.00 |
| ATOM | 4005 | H    | LEU | X | 269 | 50.682 | 50.731 | 69.591 | 0.00 | 0.00 |
| ATOM | 4006 | CA   | LEU | X | 269 | 51.869 | 51.151 | 67.824 | 0.00 | 0.00 |
| ATOM | 4007 | HA   | LEU | X | 269 | 52.925 | 50.882 | 67.863 | 0.00 | 0.00 |
| ATOM | 4008 | CB   | LEU | X | 269 | 51.074 | 49.922 | 67.196 | 0.00 | 0.00 |
| ATOM | 4009 | HB2  | LEU | X | 269 | 51.042 | 49.102 | 67.913 | 0.00 | 0.00 |
| ATOM | 4010 | HB3  | LEU | X | 269 | 50.070 | 50.268 | 66.951 | 0.00 | 0.00 |
| ATOM | 4011 | CG   | LEU | X | 269 | 51.857 | 49.222 | 66.039 | 0.00 | 0.00 |
| ATOM | 4012 | HG   | LEU | X | 269 | 52.018 | 49.982 | 65.274 | 0.00 | 0.00 |
| ATOM | 4013 | CD1  | LEU | X | 269 | 53.242 | 48.604 | 66.426 | 0.00 | 0.00 |
| ATOM | 4014 | HD11 | LEU | X | 269 | 53.987 | 49.392 | 66.532 | 0.00 | 0.00 |
| ATOM | 4015 | HD12 | LEU | X | 269 | 53.254 | 48.134 | 67.410 | 0.00 | 0.00 |
| ATOM | 4016 | HD13 | LEU | X | 269 | 53.634 | 47.958 | 65.641 | 0.00 | 0.00 |
| ATOM | 4017 | CD2  | LEU | X | 269 | 50.940 | 48.134 | 65.454 | 0.00 | 0.00 |
| ATOM | 4018 | HD21 | LEU | X | 269 | 51.462 | 47.854 | 64.539 | 0.00 | 0.00 |
| ATOM | 4019 | HD22 | LEU | X | 269 | 50.965 | 47.289 | 66.142 | 0.00 | 0.00 |
| ATOM | 4020 | HD23 | LEU | X | 269 | 49.986 | 48.587 | 65.183 | 0.00 | 0.00 |
| ATOM | 4021 | C    | LEU | X | 269 | 51.824 | 52.477 | 66.986 | 0.00 | 0.00 |
| ATOM | 4022 | O    | LEU | X | 269 | 52.467 | 52.566 | 65.914 | 0.00 | 0.00 |
| ATOM | 4023 | N    | ARG | X | 270 | 51.041 | 53.416 | 67.481 | 0.00 | 0.00 |
| ATOM | 4024 | H    | ARG | X | 270 | 50.551 | 53.150 | 68.323 | 0.00 | 0.00 |
| ATOM | 4025 | CA   | ARG | X | 270 | 51.010 | 54.800 | 66.944 | 0.00 | 0.00 |
| ATOM | 4026 | HA   | ARG | X | 270 | 51.099 | 54.735 | 65.860 | 0.00 | 0.00 |
| ATOM | 4027 | CB   | ARG | X | 270 | 49.608 | 55.442 | 67.164 | 0.00 | 0.00 |
| ATOM | 4028 | HB2  | ARG | X | 270 | 49.177 | 55.230 | 68.142 | 0.00 | 0.00 |

|      |      |      |     |   |     |        |        |        |      |      |
|------|------|------|-----|---|-----|--------|--------|--------|------|------|
| ATOM | 4029 | HB3  | ARG | X | 270 | 49.628 | 56.523 | 67.025 | 0.00 | 0.00 |
| ATOM | 4030 | CG   | ARG | X | 270 | 48.628 | 54.893 | 66.011 | 0.00 | 0.00 |
| ATOM | 4031 | HG2  | ARG | X | 270 | 49.065 | 54.954 | 65.014 | 0.00 | 0.00 |
| ATOM | 4032 | HG3  | ARG | X | 270 | 48.404 | 53.841 | 66.186 | 0.00 | 0.00 |
| ATOM | 4033 | CD   | ARG | X | 270 | 47.328 | 55.754 | 65.927 | 0.00 | 0.00 |
| ATOM | 4034 | HD2  | ARG | X | 270 | 47.680 | 56.754 | 66.178 | 0.00 | 0.00 |
| ATOM | 4035 | HD3  | ARG | X | 270 | 47.046 | 55.658 | 64.878 | 0.00 | 0.00 |
| ATOM | 4036 | NE   | ARG | X | 270 | 46.283 | 55.254 | 66.824 | 0.00 | 0.00 |
| ATOM | 4037 | HE   | ARG | X | 270 | 46.400 | 55.502 | 67.796 | 0.00 | 0.00 |
| ATOM | 4038 | CZ   | ARG | X | 270 | 45.026 | 54.935 | 66.396 | 0.00 | 0.00 |
| ATOM | 4039 | NH1  | ARG | X | 270 | 44.742 | 54.750 | 65.162 | 0.00 | 0.00 |
| ATOM | 4040 | HH11 | ARG | X | 270 | 45.408 | 54.856 | 64.410 | 0.00 | 0.00 |
| ATOM | 4041 | HH12 | ARG | X | 270 | 43.827 | 54.462 | 64.846 | 0.00 | 0.00 |
| ATOM | 4042 | NH2  | ARG | X | 270 | 44.111 | 54.718 | 67.315 | 0.00 | 0.00 |
| ATOM | 4043 | HH21 | ARG | X | 270 | 44.316 | 54.771 | 68.303 | 0.00 | 0.00 |
| ATOM | 4044 | HH22 | ARG | X | 270 | 43.206 | 54.320 | 67.108 | 0.00 | 0.00 |
| ATOM | 4045 | C    | ARG | X | 270 | 52.219 | 55.606 | 67.427 | 0.00 | 0.00 |
| ATOM | 4046 | O    | ARG | X | 270 | 52.793 | 56.363 | 66.604 | 0.00 | 0.00 |
| ATOM | 4047 | N    | THR | X | 271 | 52.759 | 55.248 | 68.540 | 0.00 | 0.00 |
| ATOM | 4048 | H    | THR | X | 271 | 52.304 | 54.512 | 69.060 | 0.00 | 0.00 |
| ATOM | 4049 | CA   | THR | X | 271 | 53.817 | 55.998 | 69.239 | 0.00 | 0.00 |
| ATOM | 4050 | HA   | THR | X | 271 | 53.642 | 57.034 | 68.948 | 0.00 | 0.00 |
| ATOM | 4051 | CB   | THR | X | 271 | 53.749 | 55.947 | 70.768 | 0.00 | 0.00 |
| ATOM | 4052 | HB   | THR | X | 271 | 54.054 | 54.983 | 71.177 | 0.00 | 0.00 |
| ATOM | 4053 | CG2  | THR | X | 271 | 54.607 | 57.079 | 71.381 | 0.00 | 0.00 |
| ATOM | 4054 | HG21 | THR | X | 271 | 54.155 | 58.058 | 71.224 | 0.00 | 0.00 |
| ATOM | 4055 | HG22 | THR | X | 271 | 54.739 | 56.800 | 72.426 | 0.00 | 0.00 |
| ATOM | 4056 | HG23 | THR | X | 271 | 55.573 | 57.218 | 70.895 | 0.00 | 0.00 |
| ATOM | 4057 | OG1  | THR | X | 271 | 52.459 | 56.331 | 71.146 | 0.00 | 0.00 |
| ATOM | 4058 | HG1  | THR | X | 271 | 52.382 | 56.179 | 72.091 | 0.00 | 0.00 |
| ATOM | 4059 | C    | THR | X | 271 | 55.155 | 55.627 | 68.671 | 0.00 | 0.00 |
| ATOM | 4060 | O    | THR | X | 271 | 55.951 | 56.520 | 68.261 | 0.00 | 0.00 |
| ATOM | 4061 | N    | ARG | X | 272 | 55.537 | 54.364 | 68.684 | 0.00 | 0.00 |
| ATOM | 4062 | H    | ARG | X | 272 | 54.967 | 53.678 | 69.157 | 0.00 | 0.00 |
| ATOM | 4063 | CA   | ARG | X | 272 | 56.879 | 53.862 | 68.463 | 0.00 | 0.00 |
| ATOM | 4064 | HA   | ARG | X | 272 | 57.682 | 54.433 | 68.929 | 0.00 | 0.00 |
| ATOM | 4065 | CB   | ARG | X | 272 | 57.022 | 52.398 | 68.931 | 0.00 | 0.00 |
| ATOM | 4066 | HB2  | ARG | X | 272 | 56.084 | 51.910 | 68.667 | 0.00 | 0.00 |
| ATOM | 4067 | HB3  | ARG | X | 272 | 57.868 | 51.931 | 68.427 | 0.00 | 0.00 |
| ATOM | 4068 | CG   | ARG | X | 272 | 57.210 | 52.267 | 70.422 | 0.00 | 0.00 |
| ATOM | 4069 | HG2  | ARG | X | 272 | 58.085 | 52.858 | 70.694 | 0.00 | 0.00 |
| ATOM | 4070 | HG3  | ARG | X | 272 | 56.399 | 52.745 | 70.972 | 0.00 | 0.00 |
| ATOM | 4071 | CD   | ARG | X | 272 | 57.549 | 50.898 | 70.984 | 0.00 | 0.00 |
| ATOM | 4072 | HD2  | ARG | X | 272 | 56.724 | 50.213 | 70.786 | 0.00 | 0.00 |
| ATOM | 4073 | HD3  | ARG | X | 272 | 58.377 | 50.448 | 70.435 | 0.00 | 0.00 |
| ATOM | 4074 | NE   | ARG | X | 272 | 57.867 | 50.847 | 72.417 | 0.00 | 0.00 |
| ATOM | 4075 | HE   | ARG | X | 272 | 57.146 | 50.667 | 73.101 | 0.00 | 0.00 |
| ATOM | 4076 | CZ   | ARG | X | 272 | 59.059 | 50.590 | 72.864 | 0.00 | 0.00 |
| ATOM | 4077 | NH1  | ARG | X | 272 | 60.177 | 50.765 | 72.230 | 0.00 | 0.00 |
| ATOM | 4078 | HH11 | ARG | X | 272 | 60.222 | 51.252 | 71.346 | 0.00 | 0.00 |
| ATOM | 4079 | HH12 | ARG | X | 272 | 61.044 | 50.639 | 72.732 | 0.00 | 0.00 |
| ATOM | 4080 | NH2  | ARG | X | 272 | 59.173 | 50.128 | 74.077 | 0.00 | 0.00 |
| ATOM | 4081 | HH21 | ARG | X | 272 | 58.319 | 49.916 | 74.573 | 0.00 | 0.00 |
| ATOM | 4082 | HH22 | ARG | X | 272 | 60.023 | 49.896 | 74.570 | 0.00 | 0.00 |
| ATOM | 4083 | C    | ARG | X | 272 | 57.082 | 54.012 | 66.906 | 0.00 | 0.00 |
| ATOM | 4084 | O    | ARG | X | 272 | 56.102 | 53.776 | 66.169 | 0.00 | 0.00 |
| ATOM | 4085 | N    | PRO | X | 273 | 58.302 | 54.381 | 66.443 | 0.00 | 0.00 |
| ATOM | 4086 | CD   | PRO | X | 273 | 59.584 | 54.266 | 67.171 | 0.00 | 0.00 |
| ATOM | 4087 | HD2  | PRO | X | 273 | 59.796 | 53.250 | 67.505 | 0.00 | 0.00 |
| ATOM | 4088 | HD3  | PRO | X | 273 | 59.502 | 54.940 | 68.024 | 0.00 | 0.00 |
| ATOM | 4089 | CG   | PRO | X | 273 | 60.687 | 54.730 | 66.232 | 0.00 | 0.00 |
| ATOM | 4090 | HG2  | PRO | X | 273 | 61.117 | 53.889 | 65.687 | 0.00 | 0.00 |
| ATOM | 4091 | HG3  | PRO | X | 273 | 61.464 | 55.190 | 66.843 | 0.00 | 0.00 |
| ATOM | 4092 | CB   | PRO | X | 273 | 59.920 | 55.633 | 65.293 | 0.00 | 0.00 |
| ATOM | 4093 | HB2  | PRO | X | 273 | 60.361 | 55.679 | 64.297 | 0.00 | 0.00 |
| ATOM | 4094 | HB3  | PRO | X | 273 | 60.034 | 56.610 | 65.763 | 0.00 | 0.00 |
| ATOM | 4095 | CA   | PRO | X | 273 | 58.528 | 55.008 | 65.216 | 0.00 | 0.00 |
| ATOM | 4096 | HA   | PRO | X | 273 | 57.821 | 55.801 | 64.972 | 0.00 | 0.00 |
| ATOM | 4097 | C    | PRO | X | 273 | 58.564 | 53.967 | 64.043 | 0.00 | 0.00 |
| ATOM | 4098 | O    | PRO | X | 273 | 59.006 | 52.870 | 64.167 | 0.00 | 0.00 |



|      |      |      |     |   |     |        |        |        |      |      |
|------|------|------|-----|---|-----|--------|--------|--------|------|------|
| ATOM | 4099 | N    | ALA | X | 274 | 58.118 | 54.430 | 62.898 | 0.00 | 0.00 |
| ATOM | 4100 | H    | ALA | X | 274 | 57.837 | 55.398 | 62.826 | 0.00 | 0.00 |
| ATOM | 4101 | CA   | ALA | X | 274 | 57.837 | 53.630 | 61.618 | 0.00 | 0.00 |
| ATOM | 4102 | HA   | ALA | X | 274 | 56.906 | 53.064 | 61.659 | 0.00 | 0.00 |
| ATOM | 4103 | CB   | ALA | X | 274 | 57.645 | 54.630 | 60.419 | 0.00 | 0.00 |
| ATOM | 4104 | HB1  | ALA | X | 274 | 57.395 | 54.006 | 59.560 | 0.00 | 0.00 |
| ATOM | 4105 | HB2  | ALA | X | 274 | 56.809 | 55.322 | 60.517 | 0.00 | 0.00 |
| ATOM | 4106 | HB3  | ALA | X | 274 | 58.561 | 55.211 | 60.307 | 0.00 | 0.00 |
| ATOM | 4107 | C    | ALA | X | 274 | 59.025 | 52.638 | 61.274 | 0.00 | 0.00 |
| ATOM | 4108 | O    | ALA | X | 274 | 58.808 | 51.475 | 61.040 | 0.00 | 0.00 |
| ATOM | 4109 | N    | GLN | X | 275 | 60.255 | 53.120 | 61.291 | 0.00 | 0.00 |
| ATOM | 4110 | H    | GLN | X | 275 | 60.298 | 54.113 | 61.471 | 0.00 | 0.00 |
| ATOM | 4111 | CA   | GLN | X | 275 | 61.518 | 52.433 | 61.054 | 0.00 | 0.00 |
| ATOM | 4112 | HA   | GLN | X | 275 | 61.466 | 52.134 | 60.007 | 0.00 | 0.00 |
| ATOM | 4113 | CB   | GLN | X | 275 | 62.716 | 53.413 | 61.067 | 0.00 | 0.00 |
| ATOM | 4114 | HB2  | GLN | X | 275 | 62.525 | 54.305 | 60.471 | 0.00 | 0.00 |
| ATOM | 4115 | HB3  | GLN | X | 275 | 62.953 | 53.745 | 62.078 | 0.00 | 0.00 |
| ATOM | 4116 | CG   | GLN | X | 275 | 63.937 | 52.747 | 60.483 | 0.00 | 0.00 |
| ATOM | 4117 | HG2  | GLN | X | 275 | 64.362 | 51.936 | 61.074 | 0.00 | 0.00 |
| ATOM | 4118 | HG3  | GLN | X | 275 | 63.629 | 52.153 | 59.623 | 0.00 | 0.00 |
| ATOM | 4119 | CD   | GLN | X | 275 | 65.094 | 53.590 | 60.024 | 0.00 | 0.00 |
| ATOM | 4120 | OE1  | GLN | X | 275 | 65.110 | 54.785 | 59.937 | 0.00 | 0.00 |
| ATOM | 4121 | NE2  | GLN | X | 275 | 66.168 | 52.923 | 59.686 | 0.00 | 0.00 |
| ATOM | 4122 | HE21 | GLN | X | 275 | 67.044 | 53.310 | 59.366 | 0.00 | 0.00 |
| ATOM | 4123 | HE22 | GLN | X | 275 | 66.204 | 51.939 | 59.912 | 0.00 | 0.00 |
| ATOM | 4124 | C    | GLN | X | 275 | 61.831 | 51.227 | 62.028 | 0.00 | 0.00 |
| ATOM | 4125 | O    | GLN | X | 275 | 62.443 | 50.288 | 61.555 | 0.00 | 0.00 |
| ATOM | 4126 | N    | VAL | X | 276 | 61.322 | 51.291 | 63.230 | 0.00 | 0.00 |
| ATOM | 4127 | H    | VAL | X | 276 | 60.865 | 52.112 | 63.600 | 0.00 | 0.00 |
| ATOM | 4128 | CA   | VAL | X | 276 | 61.393 | 50.110 | 64.116 | 0.00 | 0.00 |
| ATOM | 4129 | HA   | VAL | X | 276 | 62.241 | 49.503 | 63.798 | 0.00 | 0.00 |
| ATOM | 4130 | CB   | VAL | X | 276 | 61.355 | 50.466 | 65.569 | 0.00 | 0.00 |
| ATOM | 4131 | HB   | VAL | X | 276 | 60.684 | 51.303 | 65.757 | 0.00 | 0.00 |
| ATOM | 4132 | CG1  | VAL | X | 276 | 60.977 | 49.284 | 66.586 | 0.00 | 0.00 |
| ATOM | 4133 | HG11 | VAL | X | 276 | 61.143 | 49.682 | 67.587 | 0.00 | 0.00 |
| ATOM | 4134 | HG12 | VAL | X | 276 | 59.966 | 48.974 | 66.324 | 0.00 | 0.00 |
| ATOM | 4135 | HG13 | VAL | X | 276 | 61.606 | 48.430 | 66.336 | 0.00 | 0.00 |
| ATOM | 4136 | CG2  | VAL | X | 276 | 62.793 | 50.903 | 65.933 | 0.00 | 0.00 |
| ATOM | 4137 | HG21 | VAL | X | 276 | 63.507 | 50.108 | 65.718 | 0.00 | 0.00 |
| ATOM | 4138 | HG22 | VAL | X | 276 | 63.167 | 51.709 | 65.302 | 0.00 | 0.00 |
| ATOM | 4139 | HG23 | VAL | X | 276 | 62.943 | 51.199 | 66.972 | 0.00 | 0.00 |
| ATOM | 4140 | C    | VAL | X | 276 | 60.148 | 49.245 | 63.874 | 0.00 | 0.00 |
| ATOM | 4141 | O    | VAL | X | 276 | 60.305 | 48.048 | 63.835 | 0.00 | 0.00 |
| ATOM | 4142 | N    | LEU | X | 277 | 58.935 | 49.783 | 63.615 | 0.00 | 0.00 |
| ATOM | 4143 | H    | LEU | X | 277 | 58.918 | 50.781 | 63.770 | 0.00 | 0.00 |
| ATOM | 4144 | CA   | LEU | X | 277 | 57.745 | 49.065 | 63.195 | 0.00 | 0.00 |
| ATOM | 4145 | HA   | LEU | X | 277 | 57.416 | 48.412 | 64.003 | 0.00 | 0.00 |
| ATOM | 4146 | CB   | LEU | X | 277 | 56.532 | 50.034 | 63.069 | 0.00 | 0.00 |
| ATOM | 4147 | HB2  | LEU | X | 277 | 56.542 | 50.612 | 63.993 | 0.00 | 0.00 |
| ATOM | 4148 | HB3  | LEU | X | 277 | 56.689 | 50.663 | 62.194 | 0.00 | 0.00 |
| ATOM | 4149 | CG   | LEU | X | 277 | 55.216 | 49.341 | 62.888 | 0.00 | 0.00 |
| ATOM | 4150 | HG   | LEU | X | 277 | 55.104 | 48.452 | 63.509 | 0.00 | 0.00 |
| ATOM | 4151 | CD1  | LEU | X | 277 | 54.115 | 50.268 | 63.254 | 0.00 | 0.00 |
| ATOM | 4152 | HD11 | LEU | X | 277 | 53.918 | 50.275 | 64.326 | 0.00 | 0.00 |
| ATOM | 4153 | HD12 | LEU | X | 277 | 54.251 | 51.280 | 62.873 | 0.00 | 0.00 |
| ATOM | 4154 | HD13 | LEU | X | 277 | 53.129 | 49.927 | 62.940 | 0.00 | 0.00 |
| ATOM | 4155 | CD2  | LEU | X | 277 | 54.914 | 49.048 | 61.397 | 0.00 | 0.00 |
| ATOM | 4156 | HD21 | LEU | X | 277 | 54.897 | 49.981 | 60.833 | 0.00 | 0.00 |
| ATOM | 4157 | HD22 | LEU | X | 277 | 55.708 | 48.390 | 61.044 | 0.00 | 0.00 |
| ATOM | 4158 | HD23 | LEU | X | 277 | 53.939 | 48.566 | 61.326 | 0.00 | 0.00 |
| ATOM | 4159 | C    | LEU | X | 277 | 57.984 | 48.212 | 61.938 | 0.00 | 0.00 |
| ATOM | 4160 | O    | LEU | X | 277 | 57.714 | 47.004 | 62.034 | 0.00 | 0.00 |
| ATOM | 4161 | N    | VAL | X | 278 | 58.446 | 48.805 | 60.838 | 0.00 | 0.00 |
| ATOM | 4162 | H    | VAL | X | 278 | 58.633 | 49.794 | 60.920 | 0.00 | 0.00 |
| ATOM | 4163 | CA   | VAL | X | 278 | 58.824 | 48.196 | 59.561 | 0.00 | 0.00 |
| ATOM | 4164 | HA   | VAL | X | 278 | 57.946 | 47.619 | 59.271 | 0.00 | 0.00 |
| ATOM | 4165 | CB   | VAL | X | 278 | 58.985 | 49.185 | 58.391 | 0.00 | 0.00 |
| ATOM | 4166 | HB   | VAL | X | 278 | 58.312 | 49.990 | 58.685 | 0.00 | 0.00 |
| ATOM | 4167 | CG1  | VAL | X | 278 | 60.404 | 49.748 | 58.215 | 0.00 | 0.00 |
| ATOM | 4168 | HG11 | VAL | X | 278 | 60.372 | 50.405 | 57.345 | 0.00 | 0.00 |

|      |      |      |     |   |     |        |        |        |      |      |
|------|------|------|-----|---|-----|--------|--------|--------|------|------|
| ATOM | 4169 | HG12 | VAL | X | 278 | 60.655 | 50.387 | 59.062 | 0.00 | 0.00 |
| ATOM | 4170 | HG13 | VAL | X | 278 | 61.098 | 48.917 | 58.090 | 0.00 | 0.00 |
| ATOM | 4171 | CG2  | VAL | X | 278 | 58.531 | 48.500 | 57.066 | 0.00 | 0.00 |
| ATOM | 4172 | HG21 | VAL | X | 278 | 57.528 | 48.102 | 57.224 | 0.00 | 0.00 |
| ATOM | 4173 | HG22 | VAL | X | 278 | 58.450 | 49.203 | 56.238 | 0.00 | 0.00 |
| ATOM | 4174 | HG23 | VAL | X | 278 | 59.252 | 47.775 | 56.689 | 0.00 | 0.00 |
| ATOM | 4175 | C    | VAL | X | 278 | 59.950 | 47.102 | 59.672 | 0.00 | 0.00 |
| ATOM | 4176 | O    | VAL | X | 278 | 59.976 | 46.149 | 58.983 | 0.00 | 0.00 |
| ATOM | 4177 | N    | ASN | X | 279 | 60.873 | 47.177 | 60.666 | 0.00 | 0.00 |
| ATOM | 4178 | H    | ASN | X | 279 | 60.952 | 48.007 | 61.237 | 0.00 | 0.00 |
| ATOM | 4179 | CA   | ASN | X | 279 | 61.815 | 46.073 | 60.909 | 0.00 | 0.00 |
| ATOM | 4180 | HA   | ASN | X | 279 | 62.449 | 45.856 | 60.049 | 0.00 | 0.00 |
| ATOM | 4181 | CB   | ASN | X | 279 | 62.720 | 46.484 | 62.106 | 0.00 | 0.00 |
| ATOM | 4182 | HB2  | ASN | X | 279 | 63.071 | 47.500 | 61.927 | 0.00 | 0.00 |
| ATOM | 4183 | HB3  | ASN | X | 279 | 62.138 | 46.428 | 63.026 | 0.00 | 0.00 |
| ATOM | 4184 | CG   | ASN | X | 279 | 63.818 | 45.420 | 62.313 | 0.00 | 0.00 |
| ATOM | 4185 | OD1  | ASN | X | 279 | 64.858 | 45.481 | 61.683 | 0.00 | 0.00 |
| ATOM | 4186 | ND2  | ASN | X | 279 | 63.512 | 44.467 | 63.219 | 0.00 | 0.00 |
| ATOM | 4187 | HD21 | ASN | X | 279 | 64.174 | 43.709 | 63.302 | 0.00 | 0.00 |
| ATOM | 4188 | HD22 | ASN | X | 279 | 62.665 | 44.482 | 63.769 | 0.00 | 0.00 |
| ATOM | 4189 | C    | ASN | X | 279 | 61.068 | 44.801 | 61.313 | 0.00 | 0.00 |
| ATOM | 4190 | O    | ASN | X | 279 | 61.403 | 43.721 | 60.905 | 0.00 | 0.00 |
| ATOM | 4191 | N    | HIE | X | 280 | 60.076 | 45.042 | 62.138 | 0.00 | 0.00 |
| ATOM | 4192 | H    | HIE | X | 280 | 59.889 | 45.969 | 62.492 | 0.00 | 0.00 |
| ATOM | 4193 | CA   | HIE | X | 280 | 59.302 | 44.007 | 62.696 | 0.00 | 0.00 |
| ATOM | 4194 | HA   | HIE | X | 280 | 59.978 | 43.156 | 62.784 | 0.00 | 0.00 |
| ATOM | 4195 | CB   | HIE | X | 280 | 59.035 | 44.306 | 64.218 | 0.00 | 0.00 |
| ATOM | 4196 | HB2  | HIE | X | 280 | 58.465 | 45.235 | 64.171 | 0.00 | 0.00 |
| ATOM | 4197 | HB3  | HIE | X | 280 | 58.524 | 43.459 | 64.676 | 0.00 | 0.00 |
| ATOM | 4198 | CG   | HIE | X | 280 | 60.258 | 44.511 | 65.144 | 0.00 | 0.00 |
| ATOM | 4199 | ND1  | HIE | X | 280 | 61.327 | 43.651 | 65.342 | 0.00 | 0.00 |
| ATOM | 4200 | CE1  | HIE | X | 280 | 62.091 | 44.278 | 66.227 | 0.00 | 0.00 |
| ATOM | 4201 | HE1  | HIE | X | 280 | 63.008 | 43.886 | 66.642 | 0.00 | 0.00 |
| ATOM | 4202 | NE2  | HIE | X | 280 | 61.537 | 45.462 | 66.671 | 0.00 | 0.00 |
| ATOM | 4203 | HE2  | HIE | X | 280 | 61.945 | 46.160 | 67.277 | 0.00 | 0.00 |
| ATOM | 4204 | CD2  | HIE | X | 280 | 60.442 | 45.672 | 65.839 | 0.00 | 0.00 |
| ATOM | 4205 | HD2  | HIE | X | 280 | 59.751 | 46.495 | 65.949 | 0.00 | 0.00 |
| ATOM | 4206 | C    | HIE | X | 280 | 58.047 | 43.524 | 61.889 | 0.00 | 0.00 |
| ATOM | 4207 | O    | HIE | X | 280 | 57.477 | 42.461 | 62.054 | 0.00 | 0.00 |
| ATOM | 4208 | N    | GLU | X | 281 | 57.733 | 44.227 | 60.803 | 0.00 | 0.00 |
| ATOM | 4209 | H    | GLU | X | 281 | 58.258 | 45.075 | 60.644 | 0.00 | 0.00 |
| ATOM | 4210 | CA   | GLU | X | 281 | 56.679 | 43.789 | 59.822 | 0.00 | 0.00 |
| ATOM | 4211 | HA   | GLU | X | 281 | 55.768 | 43.621 | 60.398 | 0.00 | 0.00 |
| ATOM | 4212 | CB   | GLU | X | 281 | 56.255 | 44.968 | 58.952 | 0.00 | 0.00 |
| ATOM | 4213 | HB2  | GLU | X | 281 | 55.825 | 45.736 | 59.595 | 0.00 | 0.00 |
| ATOM | 4214 | HB3  | GLU | X | 281 | 57.042 | 45.474 | 58.393 | 0.00 | 0.00 |
| ATOM | 4215 | CG   | GLU | X | 281 | 55.161 | 44.450 | 58.049 | 0.00 | 0.00 |
| ATOM | 4216 | HG2  | GLU | X | 281 | 55.578 | 43.614 | 57.487 | 0.00 | 0.00 |
| ATOM | 4217 | HG3  | GLU | X | 281 | 54.396 | 43.938 | 58.633 | 0.00 | 0.00 |
| ATOM | 4218 | CD   | GLU | X | 281 | 54.613 | 45.467 | 57.045 | 0.00 | 0.00 |
| ATOM | 4219 | OE1  | GLU | X | 281 | 54.205 | 46.631 | 57.329 | 0.00 | 0.00 |
| ATOM | 4220 | OE2  | GLU | X | 281 | 54.416 | 44.904 | 55.926 | 0.00 | 0.00 |
| ATOM | 4221 | C    | GLU | X | 281 | 57.059 | 42.483 | 59.077 | 0.00 | 0.00 |
| ATOM | 4222 | O    | GLU | X | 281 | 56.375 | 41.485 | 59.098 | 0.00 | 0.00 |
| ATOM | 4223 | N    | TRP | X | 282 | 58.277 | 42.467 | 58.470 | 0.00 | 0.00 |
| ATOM | 4224 | H    | TRP | X | 282 | 58.779 | 43.340 | 58.385 | 0.00 | 0.00 |
| ATOM | 4225 | CA   | TRP | X | 282 | 58.766 | 41.250 | 57.825 | 0.00 | 0.00 |
| ATOM | 4226 | HA   | TRP | X | 282 | 58.094 | 41.016 | 56.999 | 0.00 | 0.00 |
| ATOM | 4227 | CB   | TRP | X | 282 | 60.141 | 41.555 | 57.192 | 0.00 | 0.00 |
| ATOM | 4228 | HB2  | TRP | X | 282 | 60.286 | 42.625 | 57.047 | 0.00 | 0.00 |
| ATOM | 4229 | HB3  | TRP | X | 282 | 60.935 | 41.110 | 57.792 | 0.00 | 0.00 |
| ATOM | 4230 | CG   | TRP | X | 282 | 60.354 | 40.871 | 55.902 | 0.00 | 0.00 |
| ATOM | 4231 | CD1  | TRP | X | 282 | 61.170 | 39.885 | 55.809 | 0.00 | 0.00 |
| ATOM | 4232 | HD1  | TRP | X | 282 | 61.697 | 39.422 | 56.630 | 0.00 | 0.00 |
| ATOM | 4233 | NE1  | TRP | X | 282 | 61.216 | 39.432 | 54.532 | 0.00 | 0.00 |
| ATOM | 4234 | HE1  | TRP | X | 282 | 61.841 | 38.695 | 54.239 | 0.00 | 0.00 |
| ATOM | 4235 | CE2  | TRP | X | 282 | 60.329 | 40.090 | 53.742 | 0.00 | 0.00 |
| ATOM | 4236 | CZ2  | TRP | X | 282 | 60.001 | 40.020 | 52.405 | 0.00 | 0.00 |
| ATOM | 4237 | HZ2  | TRP | X | 282 | 60.560 | 39.329 | 51.792 | 0.00 | 0.00 |
| ATOM | 4238 | CH2  | TRP | X | 282 | 58.991 | 40.824 | 51.833 | 0.00 | 0.00 |

|      |      |      |     |   |     |        |        |        |      |      |
|------|------|------|-----|---|-----|--------|--------|--------|------|------|
| ATOM | 4239 | HH2  | TRP | X | 282 | 58.810 | 40.785 | 50.769 | 0.00 | 0.00 |
| ATOM | 4240 | CZ3  | TRP | X | 282 | 58.266 | 41.734 | 52.645 | 0.00 | 0.00 |
| ATOM | 4241 | HZ3  | TRP | X | 282 | 57.535 | 42.409 | 52.225 | 0.00 | 0.00 |
| ATOM | 4242 | CE3  | TRP | X | 282 | 58.598 | 41.787 | 53.983 | 0.00 | 0.00 |
| ATOM | 4243 | HE3  | TRP | X | 282 | 58.171 | 42.594 | 54.560 | 0.00 | 0.00 |
| ATOM | 4244 | CD2  | TRP | X | 282 | 59.699 | 41.076 | 54.597 | 0.00 | 0.00 |
| ATOM | 4245 | C    | TRP | X | 282 | 58.782 | 40.066 | 58.750 | 0.00 | 0.00 |
| ATOM | 4246 | O    | TRP | X | 282 | 58.626 | 38.876 | 58.353 | 0.00 | 0.00 |
| ATOM | 4247 | N    | HIE | X | 283 | 59.146 | 40.323 | 59.987 | 0.00 | 0.00 |
| ATOM | 4248 | H    | HIE | X | 283 | 59.346 | 41.280 | 60.240 | 0.00 | 0.00 |
| ATOM | 4249 | CA   | HIE | X | 283 | 59.150 | 39.293 | 61.060 | 0.00 | 0.00 |
| ATOM | 4250 | HA   | HIE | X | 283 | 59.761 | 38.423 | 60.818 | 0.00 | 0.00 |
| ATOM | 4251 | CB   | HIE | X | 283 | 59.735 | 39.964 | 62.332 | 0.00 | 0.00 |
| ATOM | 4252 | HB2  | HIE | X | 283 | 60.619 | 40.495 | 61.979 | 0.00 | 0.00 |
| ATOM | 4253 | HB3  | HIE | X | 283 | 58.884 | 40.473 | 62.785 | 0.00 | 0.00 |
| ATOM | 4254 | CG   | HIE | X | 283 | 60.280 | 38.975 | 63.375 | 0.00 | 0.00 |
| ATOM | 4255 | ND1  | HIE | X | 283 | 59.668 | 37.824 | 63.821 | 0.00 | 0.00 |
| ATOM | 4256 | CE1  | HIE | X | 283 | 60.389 | 37.319 | 64.800 | 0.00 | 0.00 |
| ATOM | 4257 | HE1  | HIE | X | 283 | 60.187 | 36.391 | 65.315 | 0.00 | 0.00 |
| ATOM | 4258 | NE2  | HIE | X | 283 | 61.461 | 38.116 | 65.021 | 0.00 | 0.00 |
| ATOM | 4259 | HE2  | HIE | X | 283 | 62.213 | 37.881 | 65.654 | 0.00 | 0.00 |
| ATOM | 4260 | CD2  | HIE | X | 283 | 61.385 | 39.147 | 64.170 | 0.00 | 0.00 |
| ATOM | 4261 | HD2  | HIE | X | 283 | 62.165 | 39.894 | 64.133 | 0.00 | 0.00 |
| ATOM | 4262 | C    | HIE | X | 283 | 57.724 | 38.675 | 61.312 | 0.00 | 0.00 |
| ATOM | 4263 | O    | HIE | X | 283 | 57.723 | 37.542 | 61.696 | 0.00 | 0.00 |
| ATOM | 4264 | N    | VAL | X | 284 | 56.608 | 39.325 | 61.017 | 0.00 | 0.00 |
| ATOM | 4265 | H    | VAL | X | 284 | 56.645 | 40.277 | 60.682 | 0.00 | 0.00 |
| ATOM | 4266 | CA   | VAL | X | 284 | 55.305 | 38.731 | 61.134 | 0.00 | 0.00 |
| ATOM | 4267 | HA   | VAL | X | 284 | 55.391 | 37.902 | 61.837 | 0.00 | 0.00 |
| ATOM | 4268 | CB   | VAL | X | 284 | 54.294 | 39.720 | 61.809 | 0.00 | 0.00 |
| ATOM | 4269 | HB   | VAL | X | 284 | 53.397 | 39.158 | 62.069 | 0.00 | 0.00 |
| ATOM | 4270 | CG1  | VAL | X | 284 | 54.853 | 40.159 | 63.105 | 0.00 | 0.00 |
| ATOM | 4271 | HG11 | VAL | X | 284 | 55.248 | 39.282 | 63.618 | 0.00 | 0.00 |
| ATOM | 4272 | HG12 | VAL | X | 284 | 55.683 | 40.832 | 62.889 | 0.00 | 0.00 |
| ATOM | 4273 | HG13 | VAL | X | 284 | 54.139 | 40.629 | 63.781 | 0.00 | 0.00 |
| ATOM | 4274 | CG2  | VAL | X | 284 | 53.812 | 40.995 | 61.032 | 0.00 | 0.00 |
| ATOM | 4275 | HG21 | VAL | X | 284 | 53.350 | 40.660 | 60.103 | 0.00 | 0.00 |
| ATOM | 4276 | HG22 | VAL | X | 284 | 53.005 | 41.348 | 61.674 | 0.00 | 0.00 |
| ATOM | 4277 | HG23 | VAL | X | 284 | 54.543 | 41.784 | 60.853 | 0.00 | 0.00 |
| ATOM | 4278 | C    | VAL | X | 284 | 54.754 | 38.182 | 59.843 | 0.00 | 0.00 |
| ATOM | 4279 | O    | VAL | X | 284 | 53.647 | 37.745 | 59.861 | 0.00 | 0.00 |
| ATOM | 4280 | N    | LEU | X | 285 | 55.538 | 38.182 | 58.741 | 0.00 | 0.00 |
| ATOM | 4281 | H    | LEU | X | 285 | 56.472 | 38.564 | 58.797 | 0.00 | 0.00 |
| ATOM | 4282 | CA   | LEU | X | 285 | 55.160 | 37.505 | 57.475 | 0.00 | 0.00 |
| ATOM | 4283 | HA   | LEU | X | 285 | 54.120 | 37.750 | 57.258 | 0.00 | 0.00 |
| ATOM | 4284 | CB   | LEU | X | 285 | 56.101 | 38.087 | 56.458 | 0.00 | 0.00 |
| ATOM | 4285 | HB2  | LEU | X | 285 | 55.960 | 39.158 | 56.606 | 0.00 | 0.00 |
| ATOM | 4286 | HB3  | LEU | X | 285 | 57.127 | 37.833 | 56.725 | 0.00 | 0.00 |
| ATOM | 4287 | CG   | LEU | X | 285 | 55.818 | 37.761 | 55.000 | 0.00 | 0.00 |
| ATOM | 4288 | HG   | LEU | X | 285 | 54.756 | 37.532 | 54.903 | 0.00 | 0.00 |
| ATOM | 4289 | CD1  | LEU | X | 285 | 56.160 | 38.928 | 54.019 | 0.00 | 0.00 |
| ATOM | 4290 | HD11 | LEU | X | 285 | 55.522 | 39.723 | 54.406 | 0.00 | 0.00 |
| ATOM | 4291 | HD12 | LEU | X | 285 | 57.221 | 39.152 | 54.130 | 0.00 | 0.00 |
| ATOM | 4292 | HD13 | LEU | X | 285 | 55.889 | 38.728 | 52.982 | 0.00 | 0.00 |
| ATOM | 4293 | CD2  | LEU | X | 285 | 56.608 | 36.509 | 54.555 | 0.00 | 0.00 |
| ATOM | 4294 | HD21 | LEU | X | 285 | 56.598 | 35.629 | 55.199 | 0.00 | 0.00 |
| ATOM | 4295 | HD22 | LEU | X | 285 | 56.219 | 36.183 | 53.591 | 0.00 | 0.00 |
| ATOM | 4296 | HD23 | LEU | X | 285 | 57.632 | 36.780 | 54.296 | 0.00 | 0.00 |
| ATOM | 4297 | C    | LEU | X | 285 | 55.276 | 36.002 | 57.691 | 0.00 | 0.00 |
| ATOM | 4298 | O    | LEU | X | 285 | 56.336 | 35.572 | 58.146 | 0.00 | 0.00 |
| ATOM | 4299 | N    | PRO | X | 286 | 54.255 | 35.159 | 57.408 | 0.00 | 0.00 |
| ATOM | 4300 | CD   | PRO | X | 286 | 52.917 | 35.528 | 56.988 | 0.00 | 0.00 |
| ATOM | 4301 | HD2  | PRO | X | 286 | 53.094 | 35.818 | 55.953 | 0.00 | 0.00 |
| ATOM | 4302 | HD3  | PRO | X | 286 | 52.509 | 36.358 | 57.565 | 0.00 | 0.00 |
| ATOM | 4303 | CG   | PRO | X | 286 | 52.033 | 34.269 | 57.133 | 0.00 | 0.00 |
| ATOM | 4304 | HG2  | PRO | X | 286 | 51.251 | 34.351 | 56.378 | 0.00 | 0.00 |
| ATOM | 4305 | HG3  | PRO | X | 286 | 51.438 | 34.359 | 58.042 | 0.00 | 0.00 |
| ATOM | 4306 | CB   | PRO | X | 286 | 53.086 | 33.131 | 57.020 | 0.00 | 0.00 |
| ATOM | 4307 | HB2  | PRO | X | 286 | 53.146 | 32.795 | 55.985 | 0.00 | 0.00 |
| ATOM | 4308 | HB3  | PRO | X | 286 | 52.844 | 32.213 | 57.555 | 0.00 | 0.00 |

|      |      |      |     |   |     |        |        |        |      |      |
|------|------|------|-----|---|-----|--------|--------|--------|------|------|
| ATOM | 4309 | CA   | PRO | X | 286 | 54.331 | 33.674 | 57.602 | 0.00 | 0.00 |
| ATOM | 4310 | HA   | PRO | X | 286 | 54.246 | 33.586 | 58.685 | 0.00 | 0.00 |
| ATOM | 4311 | C    | PRO | X | 286 | 55.594 | 32.912 | 57.096 | 0.00 | 0.00 |
| ATOM | 4312 | O    | PRO | X | 286 | 56.144 | 33.104 | 55.964 | 0.00 | 0.00 |
| ATOM | 4313 | N    | GLN | X | 287 | 56.045 | 32.040 | 57.996 | 0.00 | 0.00 |
| ATOM | 4314 | H    | GLN | X | 287 | 55.557 | 32.023 | 58.880 | 0.00 | 0.00 |
| ATOM | 4315 | CA   | GLN | X | 287 | 57.127 | 31.060 | 57.663 | 0.00 | 0.00 |
| ATOM | 4316 | HA   | GLN | X | 287 | 57.657 | 31.459 | 56.798 | 0.00 | 0.00 |
| ATOM | 4317 | CB   | GLN | X | 287 | 58.119 | 30.937 | 58.782 | 0.00 | 0.00 |
| ATOM | 4318 | HB2  | GLN | X | 287 | 57.575 | 30.834 | 59.720 | 0.00 | 0.00 |
| ATOM | 4319 | HB3  | GLN | X | 287 | 58.750 | 30.067 | 58.599 | 0.00 | 0.00 |
| ATOM | 4320 | CG   | GLN | X | 287 | 58.953 | 32.241 | 58.915 | 0.00 | 0.00 |
| ATOM | 4321 | HG2  | GLN | X | 287 | 58.454 | 33.055 | 59.441 | 0.00 | 0.00 |
| ATOM | 4322 | HG3  | GLN | X | 287 | 59.750 | 31.979 | 59.611 | 0.00 | 0.00 |
| ATOM | 4323 | CD   | GLN | X | 287 | 59.675 | 32.780 | 57.632 | 0.00 | 0.00 |
| ATOM | 4324 | OE1  | GLN | X | 287 | 60.726 | 32.357 | 57.156 | 0.00 | 0.00 |
| ATOM | 4325 | NE2  | GLN | X | 287 | 59.128 | 33.846 | 57.083 | 0.00 | 0.00 |
| ATOM | 4326 | HE21 | GLN | X | 287 | 59.529 | 34.011 | 56.171 | 0.00 | 0.00 |
| ATOM | 4327 | HE22 | GLN | X | 287 | 58.200 | 34.179 | 57.303 | 0.00 | 0.00 |
| ATOM | 4328 | C    | GLN | X | 287 | 56.562 | 29.659 | 57.245 | 0.00 | 0.00 |
| ATOM | 4329 | O    | GLN | X | 287 | 55.376 | 29.424 | 57.300 | 0.00 | 0.00 |
| ATOM | 4330 | N    | GLU | X | 288 | 57.406 | 28.698 | 56.854 | 0.00 | 0.00 |
| ATOM | 4331 | H    | GLU | X | 288 | 58.384 | 28.948 | 56.833 | 0.00 | 0.00 |
| ATOM | 4332 | CA   | GLU | X | 288 | 57.097 | 27.305 | 56.442 | 0.00 | 0.00 |
| ATOM | 4333 | HA   | GLU | X | 288 | 57.926 | 26.634 | 56.215 | 0.00 | 0.00 |
| ATOM | 4334 | CB   | GLU | X | 288 | 56.414 | 26.657 | 57.676 | 0.00 | 0.00 |
| ATOM | 4335 | HB2  | GLU | X | 288 | 55.480 | 27.163 | 57.924 | 0.00 | 0.00 |
| ATOM | 4336 | HB3  | GLU | X | 288 | 56.159 | 25.616 | 57.479 | 0.00 | 0.00 |
| ATOM | 4337 | CG   | GLU | X | 288 | 57.410 | 26.647 | 58.875 | 0.00 | 0.00 |
| ATOM | 4338 | HG2  | GLU | X | 288 | 58.373 | 26.159 | 58.724 | 0.00 | 0.00 |
| ATOM | 4339 | HG3  | GLU | X | 288 | 57.675 | 27.631 | 59.263 | 0.00 | 0.00 |
| ATOM | 4340 | CD   | GLU | X | 288 | 56.799 | 26.055 | 60.089 | 0.00 | 0.00 |
| ATOM | 4341 | OE1  | GLU | X | 288 | 56.865 | 24.804 | 60.244 | 0.00 | 0.00 |
| ATOM | 4342 | OE2  | GLU | X | 288 | 56.117 | 26.736 | 60.867 | 0.00 | 0.00 |
| ATOM | 4343 | C    | GLU | X | 288 | 56.179 | 27.347 | 55.213 | 0.00 | 0.00 |
| ATOM | 4344 | O    | GLU | X | 288 | 55.222 | 26.530 | 55.027 | 0.00 | 0.00 |
| ATOM | 4345 | N    | SER | X | 289 | 56.327 | 28.383 | 54.314 | 0.00 | 0.00 |
| ATOM | 4346 | H    | SER | X | 289 | 57.159 | 28.950 | 54.389 | 0.00 | 0.00 |
| ATOM | 4347 | CA   | SER | X | 289 | 55.325 | 28.864 | 53.399 | 0.00 | 0.00 |
| ATOM | 4348 | HA   | SER | X | 289 | 54.918 | 28.075 | 52.767 | 0.00 | 0.00 |
| ATOM | 4349 | CB   | SER | X | 289 | 54.098 | 29.368 | 54.195 | 0.00 | 0.00 |
| ATOM | 4350 | HB2  | SER | X | 289 | 53.433 | 29.749 | 53.420 | 0.00 | 0.00 |
| ATOM | 4351 | HB3  | SER | X | 289 | 53.622 | 28.504 | 54.659 | 0.00 | 0.00 |
| ATOM | 4352 | OG   | SER | X | 289 | 54.412 | 30.408 | 55.122 | 0.00 | 0.00 |
| ATOM | 4353 | HG   | SER | X | 289 | 54.992 | 30.081 | 55.813 | 0.00 | 0.00 |
| ATOM | 4354 | C    | SER | X | 289 | 55.949 | 29.917 | 52.491 | 0.00 | 0.00 |
| ATOM | 4355 | O    | SER | X | 289 | 56.975 | 30.520 | 52.736 | 0.00 | 0.00 |
| ATOM | 4356 | N    | VAL | X | 290 | 55.211 | 30.164 | 51.380 | 0.00 | 0.00 |
| ATOM | 4357 | H    | VAL | X | 290 | 54.398 | 29.576 | 51.267 | 0.00 | 0.00 |
| ATOM | 4358 | CA   | VAL | X | 290 | 55.540 | 30.934 | 50.136 | 0.00 | 0.00 |
| ATOM | 4359 | HA   | VAL | X | 290 | 56.225 | 31.704 | 50.490 | 0.00 | 0.00 |
| ATOM | 4360 | CB   | VAL | X | 290 | 56.245 | 30.048 | 49.069 | 0.00 | 0.00 |
| ATOM | 4361 | HB   | VAL | X | 290 | 55.511 | 29.363 | 48.644 | 0.00 | 0.00 |
| ATOM | 4362 | CG1  | VAL | X | 290 | 56.861 | 30.921 | 47.967 | 0.00 | 0.00 |
| ATOM | 4363 | HG11 | VAL | X | 290 | 57.456 | 31.676 | 48.481 | 0.00 | 0.00 |
| ATOM | 4364 | HG12 | VAL | X | 290 | 57.397 | 30.268 | 47.277 | 0.00 | 0.00 |
| ATOM | 4365 | HG13 | VAL | X | 290 | 56.058 | 31.426 | 47.431 | 0.00 | 0.00 |
| ATOM | 4366 | CG2  | VAL | X | 290 | 57.342 | 29.251 | 49.765 | 0.00 | 0.00 |
| ATOM | 4367 | HG21 | VAL | X | 290 | 57.878 | 28.671 | 49.014 | 0.00 | 0.00 |
| ATOM | 4368 | HG22 | VAL | X | 290 | 58.089 | 29.827 | 50.310 | 0.00 | 0.00 |
| ATOM | 4369 | HG23 | VAL | X | 290 | 56.815 | 28.591 | 50.455 | 0.00 | 0.00 |
| ATOM | 4370 | C    | VAL | X | 290 | 54.239 | 31.628 | 49.645 | 0.00 | 0.00 |
| ATOM | 4371 | O    | VAL | X | 290 | 53.203 | 31.057 | 49.813 | 0.00 | 0.00 |
| ATOM | 4372 | N    | PHE | X | 291 | 54.310 | 32.832 | 49.113 | 0.00 | 0.00 |
| ATOM | 4373 | H    | PHE | X | 291 | 55.198 | 33.308 | 49.190 | 0.00 | 0.00 |
| ATOM | 4374 | CA   | PHE | X | 291 | 53.181 | 33.586 | 48.537 | 0.00 | 0.00 |
| ATOM | 4375 | HA   | PHE | X | 291 | 53.649 | 34.494 | 48.158 | 0.00 | 0.00 |
| ATOM | 4376 | CB   | PHE | X | 291 | 52.718 | 32.999 | 47.202 | 0.00 | 0.00 |
| ATOM | 4377 | HB2  | PHE | X | 291 | 53.537 | 32.379 | 46.835 | 0.00 | 0.00 |
| ATOM | 4378 | HB3  | PHE | X | 291 | 51.830 | 32.402 | 47.411 | 0.00 | 0.00 |

|      |      |      |     |   |     |        |        |        |      |      |
|------|------|------|-----|---|-----|--------|--------|--------|------|------|
| ATOM | 4379 | CG   | PHE | X | 291 | 52.317 | 33.870 | 45.990 | 0.00 | 0.00 |
| ATOM | 4380 | CD1  | PHE | X | 291 | 51.788 | 35.131 | 46.111 | 0.00 | 0.00 |
| ATOM | 4381 | HD1  | PHE | X | 291 | 51.476 | 35.513 | 47.072 | 0.00 | 0.00 |
| ATOM | 4382 | CE1  | PHE | X | 291 | 51.288 | 35.885 | 45.072 | 0.00 | 0.00 |
| ATOM | 4383 | HE1  | PHE | X | 291 | 51.018 | 36.921 | 45.213 | 0.00 | 0.00 |
| ATOM | 4384 | CZ   | PHE | X | 291 | 51.472 | 35.463 | 43.723 | 0.00 | 0.00 |
| ATOM | 4385 | HZ   | PHE | X | 291 | 51.153 | 36.048 | 42.873 | 0.00 | 0.00 |
| ATOM | 4386 | CE2  | PHE | X | 291 | 52.054 | 34.119 | 43.631 | 0.00 | 0.00 |
| ATOM | 4387 | HE2  | PHE | X | 291 | 52.052 | 33.671 | 42.648 | 0.00 | 0.00 |
| ATOM | 4388 | CD2  | PHE | X | 291 | 52.504 | 33.389 | 44.701 | 0.00 | 0.00 |
| ATOM | 4389 | HD2  | PHE | X | 291 | 52.853 | 32.370 | 44.621 | 0.00 | 0.00 |
| ATOM | 4390 | C    | PHE | X | 291 | 52.116 | 34.018 | 49.468 | 0.00 | 0.00 |
| ATOM | 4391 | O    | PHE | X | 291 | 50.952 | 34.363 | 49.178 | 0.00 | 0.00 |
| ATOM | 4392 | N    | ARG | X | 292 | 52.438 | 34.032 | 50.750 | 0.00 | 0.00 |
| ATOM | 4393 | H    | ARG | X | 292 | 53.323 | 33.607 | 50.986 | 0.00 | 0.00 |
| ATOM | 4394 | CA   | ARG | X | 292 | 51.799 | 34.663 | 51.897 | 0.00 | 0.00 |
| ATOM | 4395 | HA   | ARG | X | 292 | 50.763 | 34.847 | 51.610 | 0.00 | 0.00 |
| ATOM | 4396 | CB   | ARG | X | 292 | 52.003 | 33.796 | 53.124 | 0.00 | 0.00 |
| ATOM | 4397 | HB2  | ARG | X | 292 | 53.074 | 33.620 | 53.225 | 0.00 | 0.00 |
| ATOM | 4398 | HB3  | ARG | X | 292 | 51.558 | 34.292 | 53.986 | 0.00 | 0.00 |
| ATOM | 4399 | CG   | ARG | X | 292 | 51.398 | 32.307 | 53.035 | 0.00 | 0.00 |
| ATOM | 4400 | HG2  | ARG | X | 292 | 51.708 | 31.726 | 52.166 | 0.00 | 0.00 |
| ATOM | 4401 | HG3  | ARG | X | 292 | 51.728 | 31.806 | 53.945 | 0.00 | 0.00 |
| ATOM | 4402 | CD   | ARG | X | 292 | 49.896 | 32.311 | 53.149 | 0.00 | 0.00 |
| ATOM | 4403 | HD2  | ARG | X | 292 | 49.610 | 31.306 | 53.458 | 0.00 | 0.00 |
| ATOM | 4404 | HD3  | ARG | X | 292 | 49.630 | 33.005 | 53.946 | 0.00 | 0.00 |
| ATOM | 4405 | NE   | ARG | X | 292 | 49.160 | 32.598 | 51.930 | 0.00 | 0.00 |
| ATOM | 4406 | HE   | ARG | X | 292 | 49.547 | 32.576 | 50.998 | 0.00 | 0.00 |
| ATOM | 4407 | CZ   | ARG | X | 292 | 47.858 | 32.845 | 51.905 | 0.00 | 0.00 |
| ATOM | 4408 | NH1  | ARG | X | 292 | 47.117 | 32.893 | 52.998 | 0.00 | 0.00 |
| ATOM | 4409 | HH11 | ARG | X | 292 | 47.421 | 32.971 | 53.958 | 0.00 | 0.00 |
| ATOM | 4410 | HH12 | ARG | X | 292 | 46.175 | 33.239 | 52.889 | 0.00 | 0.00 |
| ATOM | 4411 | NH2  | ARG | X | 292 | 47.290 | 33.067 | 50.719 | 0.00 | 0.00 |
| ATOM | 4412 | HH21 | ARG | X | 292 | 47.834 | 32.969 | 49.873 | 0.00 | 0.00 |
| ATOM | 4413 | HH22 | ARG | X | 292 | 46.308 | 33.300 | 50.700 | 0.00 | 0.00 |
| ATOM | 4414 | C    | ARG | X | 292 | 52.516 | 35.992 | 52.115 | 0.00 | 0.00 |
| ATOM | 4415 | O    | ARG | X | 292 | 53.742 | 36.051 | 52.150 | 0.00 | 0.00 |
| ATOM | 4416 | N    | PHE | X | 293 | 51.805 | 37.037 | 52.370 | 0.00 | 0.00 |
| ATOM | 4417 | H    | PHE | X | 293 | 50.830 | 36.907 | 52.602 | 0.00 | 0.00 |
| ATOM | 4418 | CA   | PHE | X | 293 | 52.334 | 38.405 | 52.700 | 0.00 | 0.00 |
| ATOM | 4419 | HA   | PHE | X | 293 | 53.417 | 38.322 | 52.602 | 0.00 | 0.00 |
| ATOM | 4420 | CB   | PHE | X | 293 | 51.844 | 39.440 | 51.605 | 0.00 | 0.00 |
| ATOM | 4421 | HB2  | PHE | X | 293 | 50.767 | 39.277 | 51.582 | 0.00 | 0.00 |
| ATOM | 4422 | HB3  | PHE | X | 293 | 52.186 | 40.464 | 51.756 | 0.00 | 0.00 |
| ATOM | 4423 | CG   | PHE | X | 293 | 52.215 | 39.150 | 50.136 | 0.00 | 0.00 |
| ATOM | 4424 | CD1  | PHE | X | 293 | 53.367 | 38.356 | 49.798 | 0.00 | 0.00 |
| ATOM | 4425 | HD1  | PHE | X | 293 | 54.047 | 37.983 | 50.549 | 0.00 | 0.00 |
| ATOM | 4426 | CE1  | PHE | X | 293 | 53.605 | 37.950 | 48.520 | 0.00 | 0.00 |
| ATOM | 4427 | HE1  | PHE | X | 293 | 54.477 | 37.330 | 48.372 | 0.00 | 0.00 |
| ATOM | 4428 | CZ   | PHE | X | 293 | 52.821 | 38.475 | 47.452 | 0.00 | 0.00 |
| ATOM | 4429 | HZ   | PHE | X | 293 | 53.067 | 38.136 | 46.457 | 0.00 | 0.00 |
| ATOM | 4430 | CE2  | PHE | X | 293 | 51.846 | 39.466 | 47.757 | 0.00 | 0.00 |
| ATOM | 4431 | HE2  | PHE | X | 293 | 51.343 | 40.034 | 46.988 | 0.00 | 0.00 |
| ATOM | 4432 | CD2  | PHE | X | 293 | 51.507 | 39.703 | 49.095 | 0.00 | 0.00 |
| ATOM | 4433 | HD2  | PHE | X | 293 | 50.667 | 40.328 | 49.363 | 0.00 | 0.00 |
| ATOM | 4434 | C    | PHE | X | 293 | 52.301 | 38.860 | 54.128 | 0.00 | 0.00 |
| ATOM | 4435 | O    | PHE | X | 293 | 52.062 | 38.113 | 55.053 | 0.00 | 0.00 |
| ATOM | 4436 | N    | SER | X | 294 | 52.796 | 40.052 | 54.414 | 0.00 | 0.00 |
| ATOM | 4437 | H    | SER | X | 294 | 53.042 | 40.671 | 53.655 | 0.00 | 0.00 |
| ATOM | 4438 | CA   | SER | X | 294 | 52.615 | 40.739 | 55.689 | 0.00 | 0.00 |
| ATOM | 4439 | HA   | SER | X | 294 | 52.752 | 39.977 | 56.457 | 0.00 | 0.00 |
| ATOM | 4440 | CB   | SER | X | 294 | 53.726 | 41.869 | 55.915 | 0.00 | 0.00 |
| ATOM | 4441 | HB2  | SER | X | 294 | 53.373 | 42.377 | 56.813 | 0.00 | 0.00 |
| ATOM | 4442 | HB3  | SER | X | 294 | 54.701 | 41.388 | 55.987 | 0.00 | 0.00 |
| ATOM | 4443 | OG   | SER | X | 294 | 53.664 | 42.726 | 54.730 | 0.00 | 0.00 |
| ATOM | 4444 | HG   | SER | X | 294 | 54.060 | 43.547 | 55.030 | 0.00 | 0.00 |
| ATOM | 4445 | C    | SER | X | 294 | 51.175 | 41.238 | 55.899 | 0.00 | 0.00 |
| ATOM | 4446 | O    | SER | X | 294 | 50.302 | 40.605 | 56.595 | 0.00 | 0.00 |
| ATOM | 4447 | N    | PHE | X | 295 | 50.881 | 42.375 | 55.295 | 0.00 | 0.00 |
| ATOM | 4448 | H    | PHE | X | 295 | 51.634 | 42.686 | 54.698 | 0.00 | 0.00 |

|      |      |      |     |   |     |        |        |        |      |      |
|------|------|------|-----|---|-----|--------|--------|--------|------|------|
| ATOM | 4449 | CA   | PHE | X | 295 | 49.636 | 43.149 | 55.295 | 0.00 | 0.00 |
| ATOM | 4450 | HA   | PHE | X | 295 | 48.966 | 42.474 | 55.827 | 0.00 | 0.00 |
| ATOM | 4451 | CB   | PHE | X | 295 | 49.649 | 44.396 | 56.209 | 0.00 | 0.00 |
| ATOM | 4452 | HB2  | PHE | X | 295 | 50.480 | 44.965 | 55.791 | 0.00 | 0.00 |
| ATOM | 4453 | HB3  | PHE | X | 295 | 48.717 | 44.933 | 56.034 | 0.00 | 0.00 |
| ATOM | 4454 | CG   | PHE | X | 295 | 49.880 | 44.063 | 57.691 | 0.00 | 0.00 |
| ATOM | 4455 | CD1  | PHE | X | 295 | 48.880 | 43.565 | 58.528 | 0.00 | 0.00 |
| ATOM | 4456 | HD1  | PHE | X | 295 | 47.999 | 43.172 | 58.043 | 0.00 | 0.00 |
| ATOM | 4457 | CE1  | PHE | X | 295 | 49.144 | 43.343 | 59.950 | 0.00 | 0.00 |
| ATOM | 4458 | HE1  | PHE | X | 295 | 48.387 | 42.922 | 60.595 | 0.00 | 0.00 |
| ATOM | 4459 | CZ   | PHE | X | 295 | 50.379 | 43.587 | 60.443 | 0.00 | 0.00 |
| ATOM | 4460 | HZ   | PHE | X | 295 | 50.496 | 43.586 | 61.517 | 0.00 | 0.00 |
| ATOM | 4461 | CE2  | PHE | X | 295 | 51.361 | 44.088 | 59.649 | 0.00 | 0.00 |
| ATOM | 4462 | HE2  | PHE | X | 295 | 52.293 | 44.286 | 60.157 | 0.00 | 0.00 |
| ATOM | 4463 | CD2  | PHE | X | 295 | 51.152 | 44.280 | 58.275 | 0.00 | 0.00 |
| ATOM | 4464 | HD2  | PHE | X | 295 | 51.975 | 44.608 | 57.657 | 0.00 | 0.00 |
| ATOM | 4465 | C    | PHE | X | 295 | 48.996 | 43.366 | 53.948 | 0.00 | 0.00 |
| ATOM | 4466 | O    | PHE | X | 295 | 49.710 | 43.608 | 53.032 | 0.00 | 0.00 |
| ATOM | 4467 | N    | VAL | X | 296 | 47.695 | 43.072 | 53.833 | 0.00 | 0.00 |
| ATOM | 4468 | H    | VAL | X | 296 | 47.265 | 43.120 | 54.745 | 0.00 | 0.00 |
| ATOM | 4469 | CA   | VAL | X | 296 | 46.956 | 42.948 | 52.564 | 0.00 | 0.00 |
| ATOM | 4470 | HA   | VAL | X | 296 | 47.347 | 43.642 | 51.821 | 0.00 | 0.00 |
| ATOM | 4471 | CB   | VAL | X | 296 | 47.072 | 41.556 | 51.892 | 0.00 | 0.00 |
| ATOM | 4472 | HB   | VAL | X | 296 | 46.543 | 41.517 | 50.940 | 0.00 | 0.00 |
| ATOM | 4473 | CG1  | VAL | X | 296 | 48.467 | 41.025 | 51.531 | 0.00 | 0.00 |
| ATOM | 4474 | HG11 | VAL | X | 296 | 49.074 | 41.851 | 51.161 | 0.00 | 0.00 |
| ATOM | 4475 | HG12 | VAL | X | 296 | 48.942 | 40.607 | 52.419 | 0.00 | 0.00 |
| ATOM | 4476 | HG13 | VAL | X | 296 | 48.459 | 40.185 | 50.836 | 0.00 | 0.00 |
| ATOM | 4477 | CG2  | VAL | X | 296 | 46.297 | 40.468 | 52.700 | 0.00 | 0.00 |
| ATOM | 4478 | HG21 | VAL | X | 296 | 45.329 | 40.883 | 52.981 | 0.00 | 0.00 |
| ATOM | 4479 | HG22 | VAL | X | 296 | 46.187 | 39.580 | 52.079 | 0.00 | 0.00 |
| ATOM | 4480 | HG23 | VAL | X | 296 | 46.821 | 40.213 | 53.622 | 0.00 | 0.00 |
| ATOM | 4481 | C    | VAL | X | 296 | 45.494 | 43.486 | 52.826 | 0.00 | 0.00 |
| ATOM | 4482 | O    | VAL | X | 296 | 45.314 | 43.873 | 53.969 | 0.00 | 0.00 |
| ATOM | 4483 | N    | PRO | X | 297 | 44.530 | 43.482 | 51.877 | 0.00 | 0.00 |
| ATOM | 4484 | CD   | PRO | X | 297 | 44.815 | 43.679 | 50.440 | 0.00 | 0.00 |
| ATOM | 4485 | HD2  | PRO | X | 297 | 45.113 | 42.722 | 50.011 | 0.00 | 0.00 |
| ATOM | 4486 | HD3  | PRO | X | 297 | 45.572 | 44.457 | 50.345 | 0.00 | 0.00 |
| ATOM | 4487 | CG   | PRO | X | 297 | 43.497 | 44.165 | 49.841 | 0.00 | 0.00 |
| ATOM | 4488 | HG2  | PRO | X | 297 | 43.366 | 43.722 | 48.854 | 0.00 | 0.00 |
| ATOM | 4489 | HG3  | PRO | X | 297 | 43.429 | 45.253 | 49.842 | 0.00 | 0.00 |
| ATOM | 4490 | CB   | PRO | X | 297 | 42.428 | 43.583 | 50.781 | 0.00 | 0.00 |
| ATOM | 4491 | HB2  | PRO | X | 297 | 42.201 | 42.519 | 50.722 | 0.00 | 0.00 |
| ATOM | 4492 | HB3  | PRO | X | 297 | 41.526 | 44.192 | 50.723 | 0.00 | 0.00 |
| ATOM | 4493 | CA   | PRO | X | 297 | 43.088 | 43.778 | 52.130 | 0.00 | 0.00 |
| ATOM | 4494 | HA   | PRO | X | 297 | 43.055 | 44.815 | 52.465 | 0.00 | 0.00 |
| ATOM | 4495 | C    | PRO | X | 297 | 42.404 | 42.885 | 53.110 | 0.00 | 0.00 |
| ATOM | 4496 | O    | PRO | X | 297 | 42.132 | 41.689 | 52.805 | 0.00 | 0.00 |
| ATOM | 4497 | N    | VAL | X | 298 | 42.135 | 43.454 | 54.257 | 0.00 | 0.00 |
| ATOM | 4498 | H    | VAL | X | 298 | 42.197 | 44.461 | 54.287 | 0.00 | 0.00 |
| ATOM | 4499 | CA   | VAL | X | 298 | 41.475 | 42.794 | 55.389 | 0.00 | 0.00 |
| ATOM | 4500 | HA   | VAL | X | 298 | 41.716 | 41.733 | 55.446 | 0.00 | 0.00 |
| ATOM | 4501 | CB   | VAL | X | 298 | 41.838 | 43.512 | 56.809 | 0.00 | 0.00 |
| ATOM | 4502 | HB   | VAL | X | 298 | 41.375 | 44.498 | 56.762 | 0.00 | 0.00 |
| ATOM | 4503 | CG1  | VAL | X | 298 | 41.145 | 42.761 | 57.947 | 0.00 | 0.00 |
| ATOM | 4504 | HG11 | VAL | X | 298 | 40.080 | 42.621 | 57.762 | 0.00 | 0.00 |
| ATOM | 4505 | HG12 | VAL | X | 298 | 41.640 | 41.790 | 57.938 | 0.00 | 0.00 |
| ATOM | 4506 | HG13 | VAL | X | 298 | 41.334 | 43.222 | 58.916 | 0.00 | 0.00 |
| ATOM | 4507 | CG2  | VAL | X | 298 | 43.363 | 43.513 | 57.117 | 0.00 | 0.00 |
| ATOM | 4508 | HG21 | VAL | X | 298 | 44.023 | 43.751 | 56.283 | 0.00 | 0.00 |
| ATOM | 4509 | HG22 | VAL | X | 298 | 43.561 | 44.160 | 57.971 | 0.00 | 0.00 |
| ATOM | 4510 | HG23 | VAL | X | 298 | 43.770 | 42.572 | 57.490 | 0.00 | 0.00 |
| ATOM | 4511 | C    | VAL | X | 298 | 39.934 | 42.764 | 55.143 | 0.00 | 0.00 |
| ATOM | 4512 | O    | VAL | X | 298 | 39.324 | 43.796 | 54.819 | 0.00 | 0.00 |
| ATOM | 4513 | N    | VAL | X | 299 | 39.271 | 41.643 | 55.351 | 0.00 | 0.00 |
| ATOM | 4514 | H    | VAL | X | 299 | 39.741 | 40.831 | 55.724 | 0.00 | 0.00 |
| ATOM | 4515 | CA   | VAL | X | 299 | 37.878 | 41.552 | 55.575 | 0.00 | 0.00 |
| ATOM | 4516 | HA   | VAL | X | 299 | 37.443 | 42.074 | 54.723 | 0.00 | 0.00 |
| ATOM | 4517 | CB   | VAL | X | 299 | 37.350 | 40.070 | 55.607 | 0.00 | 0.00 |
| ATOM | 4518 | HB   | VAL | X | 299 | 37.937 | 39.564 | 56.375 | 0.00 | 0.00 |

|      |      |      |     |   |     |        |        |        |      |      |
|------|------|------|-----|---|-----|--------|--------|--------|------|------|
| ATOM | 4519 | CG1  | VAL | X | 299 | 35.879 | 39.879 | 55.980 | 0.00 | 0.00 |
| ATOM | 4520 | HG11 | VAL | X | 299 | 35.238 | 40.582 | 55.447 | 0.00 | 0.00 |
| ATOM | 4521 | HG12 | VAL | X | 299 | 35.582 | 38.844 | 55.810 | 0.00 | 0.00 |
| ATOM | 4522 | HG13 | VAL | X | 299 | 35.668 | 40.057 | 57.034 | 0.00 | 0.00 |
| ATOM | 4523 | CG2  | VAL | X | 299 | 37.764 | 39.220 | 54.431 | 0.00 | 0.00 |
| ATOM | 4524 | HG21 | VAL | X | 299 | 37.648 | 39.684 | 53.451 | 0.00 | 0.00 |
| ATOM | 4525 | HG22 | VAL | X | 299 | 38.844 | 39.164 | 54.568 | 0.00 | 0.00 |
| ATOM | 4526 | HG23 | VAL | X | 299 | 37.417 | 38.190 | 54.356 | 0.00 | 0.00 |
| ATOM | 4527 | C    | VAL | X | 299 | 37.475 | 42.283 | 56.883 | 0.00 | 0.00 |
| ATOM | 4528 | O    | VAL | X | 299 | 37.548 | 41.582 | 57.942 | 0.00 | 0.00 |
| ATOM | 4529 | N    | ASP | X | 300 | 37.082 | 43.509 | 56.808 | 0.00 | 0.00 |
| ATOM | 4530 | H    | ASP | X | 300 | 37.013 | 43.916 | 55.886 | 0.00 | 0.00 |
| ATOM | 4531 | CA   | ASP | X | 300 | 36.690 | 44.374 | 57.890 | 0.00 | 0.00 |
| ATOM | 4532 | HA   | ASP | X | 300 | 37.174 | 44.000 | 58.792 | 0.00 | 0.00 |
| ATOM | 4533 | CB   | ASP | X | 300 | 37.136 | 45.730 | 57.597 | 0.00 | 0.00 |
| ATOM | 4534 | HB2  | ASP | X | 300 | 36.787 | 46.304 | 58.455 | 0.00 | 0.00 |
| ATOM | 4535 | HB3  | ASP | X | 300 | 38.225 | 45.687 | 57.566 | 0.00 | 0.00 |
| ATOM | 4536 | CG   | ASP | X | 300 | 36.660 | 46.395 | 56.288 | 0.00 | 0.00 |
| ATOM | 4537 | OD1  | ASP | X | 300 | 37.026 | 47.566 | 56.090 | 0.00 | 0.00 |
| ATOM | 4538 | OD2  | ASP | X | 300 | 35.990 | 45.768 | 55.452 | 0.00 | 0.00 |
| ATOM | 4539 | C    | ASP | X | 300 | 35.150 | 44.319 | 58.006 | 0.00 | 0.00 |
| ATOM | 4540 | O    | ASP | X | 300 | 34.655 | 44.825 | 59.027 | 0.00 | 0.00 |
| ATOM | 4541 | N    | GLY | X | 301 | 34.385 | 43.627 | 57.130 | 0.00 | 0.00 |
| ATOM | 4542 | H    | GLY | X | 301 | 34.840 | 43.203 | 56.334 | 0.00 | 0.00 |
| ATOM | 4543 | CA   | GLY | X | 301 | 32.885 | 43.683 | 57.116 | 0.00 | 0.00 |
| ATOM | 4544 | HA2  | GLY | X | 301 | 32.541 | 42.786 | 56.576 | 0.00 | 0.00 |
| ATOM | 4545 | HA3  | GLY | X | 301 | 32.538 | 43.592 | 58.185 | 0.00 | 0.00 |
| ATOM | 4546 | C    | GLY | X | 301 | 32.259 | 44.943 | 56.487 | 0.00 | 0.00 |
| ATOM | 4547 | O    | GLY | X | 301 | 31.040 | 45.151 | 56.600 | 0.00 | 0.00 |
| ATOM | 4548 | N    | ASP | X | 302 | 33.112 | 45.814 | 55.890 | 0.00 | 0.00 |
| ATOM | 4549 | H    | ASP | X | 302 | 34.065 | 45.514 | 55.741 | 0.00 | 0.00 |
| ATOM | 4550 | CA   | ASP | X | 302 | 32.735 | 47.128 | 55.463 | 0.00 | 0.00 |
| ATOM | 4551 | HA   | ASP | X | 302 | 31.663 | 47.160 | 55.269 | 0.00 | 0.00 |
| ATOM | 4552 | CB   | ASP | X | 302 | 32.993 | 48.126 | 56.580 | 0.00 | 0.00 |
| ATOM | 4553 | HB2  | ASP | X | 302 | 32.458 | 47.814 | 57.478 | 0.00 | 0.00 |
| ATOM | 4554 | HB3  | ASP | X | 302 | 34.074 | 48.041 | 56.691 | 0.00 | 0.00 |
| ATOM | 4555 | CG   | ASP | X | 302 | 32.615 | 49.544 | 56.115 | 0.00 | 0.00 |
| ATOM | 4556 | OD1  | ASP | X | 302 | 31.399 | 49.755 | 56.055 | 0.00 | 0.00 |
| ATOM | 4557 | OD2  | ASP | X | 302 | 33.509 | 50.453 | 55.917 | 0.00 | 0.00 |
| ATOM | 4558 | C    | ASP | X | 302 | 33.295 | 47.678 | 54.097 | 0.00 | 0.00 |
| ATOM | 4559 | O    | ASP | X | 302 | 32.501 | 48.000 | 53.227 | 0.00 | 0.00 |
| ATOM | 4560 | N    | PHE | X | 303 | 34.612 | 47.677 | 53.899 | 0.00 | 0.00 |
| ATOM | 4561 | H    | PHE | X | 303 | 35.293 | 47.500 | 54.624 | 0.00 | 0.00 |
| ATOM | 4562 | CA   | PHE | X | 303 | 35.202 | 47.816 | 52.525 | 0.00 | 0.00 |
| ATOM | 4563 | HA   | PHE | X | 303 | 34.585 | 48.505 | 51.949 | 0.00 | 0.00 |
| ATOM | 4564 | CB   | PHE | X | 303 | 36.647 | 48.245 | 52.602 | 0.00 | 0.00 |
| ATOM | 4565 | HB2  | PHE | X | 303 | 36.776 | 48.896 | 53.466 | 0.00 | 0.00 |
| ATOM | 4566 | HB3  | PHE | X | 303 | 37.262 | 47.371 | 52.816 | 0.00 | 0.00 |
| ATOM | 4567 | CG   | PHE | X | 303 | 37.202 | 48.953 | 51.350 | 0.00 | 0.00 |
| ATOM | 4568 | CD1  | PHE | X | 303 | 36.989 | 48.398 | 50.075 | 0.00 | 0.00 |
| ATOM | 4569 | HD1  | PHE | X | 303 | 36.473 | 47.461 | 49.924 | 0.00 | 0.00 |
| ATOM | 4570 | CE1  | PHE | X | 303 | 37.480 | 49.056 | 48.907 | 0.00 | 0.00 |
| ATOM | 4571 | HE1  | PHE | X | 303 | 37.427 | 48.520 | 47.970 | 0.00 | 0.00 |
| ATOM | 4572 | CZ   | PHE | X | 303 | 38.141 | 50.302 | 49.057 | 0.00 | 0.00 |
| ATOM | 4573 | HZ   | PHE | X | 303 | 38.592 | 50.670 | 48.147 | 0.00 | 0.00 |
| ATOM | 4574 | CE2  | PHE | X | 303 | 38.210 | 50.939 | 50.324 | 0.00 | 0.00 |
| ATOM | 4575 | HE2  | PHE | X | 303 | 38.709 | 51.897 | 50.319 | 0.00 | 0.00 |
| ATOM | 4576 | CD2  | PHE | X | 303 | 37.755 | 50.273 | 51.462 | 0.00 | 0.00 |
| ATOM | 4577 | HD2  | PHE | X | 303 | 37.654 | 50.677 | 52.458 | 0.00 | 0.00 |
| ATOM | 4578 | C    | PHE | X | 303 | 35.079 | 46.422 | 51.819 | 0.00 | 0.00 |
| ATOM | 4579 | O    | PHE | X | 303 | 34.539 | 46.256 | 50.701 | 0.00 | 0.00 |
| ATOM | 4580 | N    | LEU | X | 304 | 35.486 | 45.413 | 52.588 | 0.00 | 0.00 |
| ATOM | 4581 | H    | LEU | X | 304 | 35.788 | 45.629 | 53.527 | 0.00 | 0.00 |
| ATOM | 4582 | CA   | LEU | X | 304 | 35.270 | 44.012 | 52.354 | 0.00 | 0.00 |
| ATOM | 4583 | HA   | LEU | X | 304 | 35.082 | 43.905 | 51.286 | 0.00 | 0.00 |
| ATOM | 4584 | CB   | LEU | X | 304 | 36.608 | 43.309 | 52.613 | 0.00 | 0.00 |
| ATOM | 4585 | HB2  | LEU | X | 304 | 37.064 | 43.593 | 53.562 | 0.00 | 0.00 |
| ATOM | 4586 | HB3  | LEU | X | 304 | 36.473 | 42.227 | 52.624 | 0.00 | 0.00 |
| ATOM | 4587 | CG   | LEU | X | 304 | 37.646 | 43.614 | 51.471 | 0.00 | 0.00 |
| ATOM | 4588 | HG   | LEU | X | 304 | 37.100 | 43.731 | 50.535 | 0.00 | 0.00 |

|      |      |      |     |   |     |        |        |        |      |      |
|------|------|------|-----|---|-----|--------|--------|--------|------|------|
| ATOM | 4589 | CD1  | LEU | X | 304 | 38.411 | 45.010 | 51.673 | 0.00 | 0.00 |
| ATOM | 4590 | HD11 | LEU | X | 304 | 39.332 | 45.018 | 51.089 | 0.00 | 0.00 |
| ATOM | 4591 | HD12 | LEU | X | 304 | 37.899 | 45.886 | 51.274 | 0.00 | 0.00 |
| ATOM | 4592 | HD13 | LEU | X | 304 | 38.656 | 45.191 | 52.720 | 0.00 | 0.00 |
| ATOM | 4593 | CD2  | LEU | X | 304 | 38.698 | 42.474 | 51.344 | 0.00 | 0.00 |
| ATOM | 4594 | HD21 | LEU | X | 304 | 39.311 | 42.521 | 52.244 | 0.00 | 0.00 |
| ATOM | 4595 | HD22 | LEU | X | 304 | 38.209 | 41.509 | 51.210 | 0.00 | 0.00 |
| ATOM | 4596 | HD23 | LEU | X | 304 | 39.219 | 42.718 | 50.418 | 0.00 | 0.00 |
| ATOM | 4597 | C    | LEU | X | 304 | 34.100 | 43.521 | 53.203 | 0.00 | 0.00 |
| ATOM | 4598 | O    | LEU | X | 304 | 34.300 | 43.047 | 54.313 | 0.00 | 0.00 |
| ATOM | 4599 | N    | SER | X | 305 | 32.840 | 43.731 | 52.689 | 0.00 | 0.00 |
| ATOM | 4600 | H    | SER | X | 305 | 32.699 | 43.941 | 51.711 | 0.00 | 0.00 |
| ATOM | 4601 | CA   | SER | X | 305 | 31.642 | 43.311 | 53.353 | 0.00 | 0.00 |
| ATOM | 4602 | HA   | SER | X | 305 | 31.580 | 43.824 | 54.313 | 0.00 | 0.00 |
| ATOM | 4603 | CB   | SER | X | 305 | 30.390 | 43.779 | 52.558 | 0.00 | 0.00 |
| ATOM | 4604 | HB2  | SER | X | 305 | 30.348 | 43.309 | 51.575 | 0.00 | 0.00 |
| ATOM | 4605 | HB3  | SER | X | 305 | 29.438 | 43.557 | 53.039 | 0.00 | 0.00 |
| ATOM | 4606 | OG   | SER | X | 305 | 30.335 | 45.172 | 52.294 | 0.00 | 0.00 |
| ATOM | 4607 | HG   | SER | X | 305 | 30.831 | 45.312 | 51.484 | 0.00 | 0.00 |
| ATOM | 4608 | C    | SER | X | 305 | 31.500 | 41.838 | 53.717 | 0.00 | 0.00 |
| ATOM | 4609 | O    | SER | X | 305 | 30.542 | 41.406 | 54.349 | 0.00 | 0.00 |
| ATOM | 4610 | N    | ASP | X | 306 | 32.552 | 41.049 | 53.410 | 0.00 | 0.00 |
| ATOM | 4611 | H    | ASP | X | 306 | 33.305 | 41.524 | 52.934 | 0.00 | 0.00 |
| ATOM | 4612 | CA   | ASP | X | 306 | 32.858 | 39.689 | 53.579 | 0.00 | 0.00 |
| ATOM | 4613 | HA   | ASP | X | 306 | 33.206 | 39.522 | 54.598 | 0.00 | 0.00 |
| ATOM | 4614 | CB   | ASP | X | 306 | 31.696 | 38.782 | 53.212 | 0.00 | 0.00 |
| ATOM | 4615 | HB2  | ASP | X | 306 | 30.723 | 39.249 | 53.363 | 0.00 | 0.00 |
| ATOM | 4616 | HB3  | ASP | X | 306 | 31.830 | 38.333 | 52.227 | 0.00 | 0.00 |
| ATOM | 4617 | CG   | ASP | X | 306 | 31.764 | 37.510 | 54.164 | 0.00 | 0.00 |
| ATOM | 4618 | OD1  | ASP | X | 306 | 30.965 | 37.438 | 55.134 | 0.00 | 0.00 |
| ATOM | 4619 | OD2  | ASP | X | 306 | 32.567 | 36.602 | 53.873 | 0.00 | 0.00 |
| ATOM | 4620 | C    | ASP | X | 306 | 34.115 | 39.396 | 52.732 | 0.00 | 0.00 |
| ATOM | 4621 | O    | ASP | X | 306 | 34.766 | 40.343 | 52.321 | 0.00 | 0.00 |
| ATOM | 4622 | N    | THR | X | 307 | 34.488 | 38.171 | 52.598 | 0.00 | 0.00 |
| ATOM | 4623 | H    | THR | X | 307 | 33.989 | 37.432 | 53.073 | 0.00 | 0.00 |
| ATOM | 4624 | CA   | THR | X | 307 | 35.650 | 37.749 | 51.779 | 0.00 | 0.00 |
| ATOM | 4625 | HA   | THR | X | 307 | 36.373 | 38.543 | 51.969 | 0.00 | 0.00 |
| ATOM | 4626 | CB   | THR | X | 307 | 36.125 | 36.333 | 52.194 | 0.00 | 0.00 |
| ATOM | 4627 | HB   | THR | X | 307 | 36.180 | 36.438 | 53.277 | 0.00 | 0.00 |
| ATOM | 4628 | CG2  | THR | X | 307 | 35.157 | 35.186 | 51.822 | 0.00 | 0.00 |
| ATOM | 4629 | HG21 | THR | X | 307 | 34.883 | 35.018 | 50.780 | 0.00 | 0.00 |
| ATOM | 4630 | HG22 | THR | X | 307 | 35.637 | 34.305 | 52.248 | 0.00 | 0.00 |
| ATOM | 4631 | HG23 | THR | X | 307 | 34.263 | 35.281 | 52.440 | 0.00 | 0.00 |
| ATOM | 4632 | OG1  | THR | X | 307 | 37.309 | 36.107 | 51.526 | 0.00 | 0.00 |
| ATOM | 4633 | HG1  | THR | X | 307 | 37.821 | 35.382 | 51.893 | 0.00 | 0.00 |
| ATOM | 4634 | C    | THR | X | 307 | 35.399 | 37.957 | 50.247 | 0.00 | 0.00 |
| ATOM | 4635 | O    | THR | X | 307 | 34.323 | 37.592 | 49.770 | 0.00 | 0.00 |
| ATOM | 4636 | N    | PRO | X | 308 | 36.406 | 38.408 | 49.469 | 0.00 | 0.00 |
| ATOM | 4637 | CD   | PRO | X | 308 | 37.761 | 38.913 | 49.869 | 0.00 | 0.00 |
| ATOM | 4638 | HD2  | PRO | X | 308 | 38.442 | 38.077 | 50.029 | 0.00 | 0.00 |
| ATOM | 4639 | HD3  | PRO | X | 308 | 37.621 | 39.490 | 50.784 | 0.00 | 0.00 |
| ATOM | 4640 | CG   | PRO | X | 308 | 38.292 | 39.795 | 48.730 | 0.00 | 0.00 |
| ATOM | 4641 | HG2  | PRO | X | 308 | 39.380 | 39.757 | 48.683 | 0.00 | 0.00 |
| ATOM | 4642 | HG3  | PRO | X | 308 | 37.904 | 40.814 | 48.732 | 0.00 | 0.00 |
| ATOM | 4643 | CB   | PRO | X | 308 | 37.611 | 39.091 | 47.585 | 0.00 | 0.00 |
| ATOM | 4644 | HB2  | PRO | X | 308 | 38.088 | 38.126 | 47.411 | 0.00 | 0.00 |
| ATOM | 4645 | HB3  | PRO | X | 308 | 37.537 | 39.629 | 46.640 | 0.00 | 0.00 |
| ATOM | 4646 | CA   | PRO | X | 308 | 36.245 | 38.649 | 48.034 | 0.00 | 0.00 |
| ATOM | 4647 | HA   | PRO | X | 308 | 35.637 | 39.539 | 47.869 | 0.00 | 0.00 |
| ATOM | 4648 | C    | PRO | X | 308 | 35.711 | 37.437 | 47.245 | 0.00 | 0.00 |
| ATOM | 4649 | O    | PRO | X | 308 | 34.787 | 37.572 | 46.403 | 0.00 | 0.00 |
| ATOM | 4650 | N    | GLU | X | 309 | 36.182 | 36.232 | 47.508 | 0.00 | 0.00 |
| ATOM | 4651 | H    | GLU | X | 309 | 37.066 | 36.138 | 47.986 | 0.00 | 0.00 |
| ATOM | 4652 | CA   | GLU | X | 309 | 35.637 | 35.011 | 46.850 | 0.00 | 0.00 |
| ATOM | 4653 | HA   | GLU | X | 309 | 35.715 | 35.126 | 45.768 | 0.00 | 0.00 |
| ATOM | 4654 | CB   | GLU | X | 309 | 36.428 | 33.686 | 47.203 | 0.00 | 0.00 |
| ATOM | 4655 | HB2  | GLU | X | 309 | 36.099 | 32.942 | 46.476 | 0.00 | 0.00 |
| ATOM | 4656 | HB3  | GLU | X | 309 | 37.499 | 33.709 | 47.002 | 0.00 | 0.00 |
| ATOM | 4657 | CG   | GLU | X | 309 | 36.233 | 33.197 | 48.662 | 0.00 | 0.00 |
| ATOM | 4658 | HG2  | GLU | X | 309 | 36.722 | 33.922 | 49.312 | 0.00 | 0.00 |



|      |      |      |     |   |     |        |        |        |      |      |
|------|------|------|-----|---|-----|--------|--------|--------|------|------|
| ATOM | 4659 | HG3  | GLU | X | 309 | 35.208 | 33.208 | 49.032 | 0.00 | 0.00 |
| ATOM | 4660 | CD   | GLU | X | 309 | 36.786 | 31.742 | 48.727 | 0.00 | 0.00 |
| ATOM | 4661 | OE1  | GLU | X | 309 | 36.031 | 30.736 | 48.626 | 0.00 | 0.00 |
| ATOM | 4662 | OE2  | GLU | X | 309 | 38.020 | 31.690 | 48.944 | 0.00 | 0.00 |
| ATOM | 4663 | C    | GLU | X | 309 | 34.113 | 34.807 | 47.122 | 0.00 | 0.00 |
| ATOM | 4664 | O    | GLU | X | 309 | 33.533 | 33.966 | 46.501 | 0.00 | 0.00 |
| ATOM | 4665 | N    | ALA | X | 310 | 33.473 | 35.582 | 48.096 | 0.00 | 0.00 |
| ATOM | 4666 | H    | ALA | X | 310 | 34.055 | 36.139 | 48.705 | 0.00 | 0.00 |
| ATOM | 4667 | CA   | ALA | X | 310 | 32.045 | 35.548 | 48.326 | 0.00 | 0.00 |
| ATOM | 4668 | HA   | ALA | X | 310 | 31.517 | 34.792 | 47.745 | 0.00 | 0.00 |
| ATOM | 4669 | CB   | ALA | X | 310 | 31.856 | 35.213 | 49.786 | 0.00 | 0.00 |
| ATOM | 4670 | HB1  | ALA | X | 310 | 30.826 | 34.959 | 50.039 | 0.00 | 0.00 |
| ATOM | 4671 | HB2  | ALA | X | 310 | 32.362 | 34.272 | 50.004 | 0.00 | 0.00 |
| ATOM | 4672 | HB3  | ALA | X | 310 | 32.216 | 35.952 | 50.502 | 0.00 | 0.00 |
| ATOM | 4673 | C    | ALA | X | 310 | 31.290 | 36.799 | 47.856 | 0.00 | 0.00 |
| ATOM | 4674 | O    | ALA | X | 310 | 30.188 | 36.716 | 47.316 | 0.00 | 0.00 |
| ATOM | 4675 | N    | LEU | X | 311 | 32.036 | 37.908 | 47.957 | 0.00 | 0.00 |
| ATOM | 4676 | H    | LEU | X | 311 | 32.901 | 37.906 | 48.478 | 0.00 | 0.00 |
| ATOM | 4677 | CA   | LEU | X | 311 | 31.599 | 39.147 | 47.328 | 0.00 | 0.00 |
| ATOM | 4678 | HA   | LEU | X | 311 | 30.603 | 39.429 | 47.669 | 0.00 | 0.00 |
| ATOM | 4679 | CB   | LEU | X | 311 | 32.588 | 40.350 | 47.690 | 0.00 | 0.00 |
| ATOM | 4680 | HB2  | LEU | X | 311 | 33.572 | 40.080 | 47.306 | 0.00 | 0.00 |
| ATOM | 4681 | HB3  | LEU | X | 311 | 32.301 | 41.208 | 47.081 | 0.00 | 0.00 |
| ATOM | 4682 | CG   | LEU | X | 311 | 32.666 | 40.575 | 49.233 | 0.00 | 0.00 |
| ATOM | 4683 | HG   | LEU | X | 311 | 33.054 | 39.732 | 49.804 | 0.00 | 0.00 |
| ATOM | 4684 | CD1  | LEU | X | 311 | 33.580 | 41.820 | 49.462 | 0.00 | 0.00 |
| ATOM | 4685 | HD11 | LEU | X | 311 | 33.267 | 42.670 | 48.855 | 0.00 | 0.00 |
| ATOM | 4686 | HD12 | LEU | X | 311 | 33.562 | 42.021 | 50.533 | 0.00 | 0.00 |
| ATOM | 4687 | HD13 | LEU | X | 311 | 34.567 | 41.509 | 49.117 | 0.00 | 0.00 |
| ATOM | 4688 | CD2  | LEU | X | 311 | 31.261 | 40.925 | 49.673 | 0.00 | 0.00 |
| ATOM | 4689 | HD21 | LEU | X | 311 | 30.743 | 39.967 | 49.705 | 0.00 | 0.00 |
| ATOM | 4690 | HD22 | LEU | X | 311 | 31.331 | 41.362 | 50.669 | 0.00 | 0.00 |
| ATOM | 4691 | HD23 | LEU | X | 311 | 30.719 | 41.612 | 49.023 | 0.00 | 0.00 |
| ATOM | 4692 | C    | LEU | X | 311 | 31.393 | 39.072 | 45.848 | 0.00 | 0.00 |
| ATOM | 4693 | O    | LEU | X | 311 | 30.421 | 39.546 | 45.257 | 0.00 | 0.00 |
| ATOM | 4694 | N    | ILE | X | 312 | 32.422 | 38.556 | 45.236 | 0.00 | 0.00 |
| ATOM | 4695 | H    | ILE | X | 312 | 33.265 | 38.443 | 45.780 | 0.00 | 0.00 |
| ATOM | 4696 | CA   | ILE | X | 312 | 32.437 | 38.381 | 43.751 | 0.00 | 0.00 |
| ATOM | 4697 | HA   | ILE | X | 312 | 32.104 | 39.352 | 43.382 | 0.00 | 0.00 |
| ATOM | 4698 | CB   | ILE | X | 312 | 33.759 | 37.944 | 43.103 | 0.00 | 0.00 |
| ATOM | 4699 | HB   | ILE | X | 312 | 34.547 | 38.331 | 43.748 | 0.00 | 0.00 |
| ATOM | 4700 | CG2  | ILE | X | 312 | 33.935 | 36.360 | 43.178 | 0.00 | 0.00 |
| ATOM | 4701 | HG21 | ILE | X | 312 | 33.989 | 36.020 | 44.212 | 0.00 | 0.00 |
| ATOM | 4702 | HG22 | ILE | X | 312 | 33.194 | 35.757 | 42.652 | 0.00 | 0.00 |
| ATOM | 4703 | HG23 | ILE | X | 312 | 34.880 | 36.108 | 42.698 | 0.00 | 0.00 |
| ATOM | 4704 | CG1  | ILE | X | 312 | 33.844 | 38.583 | 41.711 | 0.00 | 0.00 |
| ATOM | 4705 | HG12 | ILE | X | 312 | 33.006 | 38.301 | 41.074 | 0.00 | 0.00 |
| ATOM | 4706 | HG13 | ILE | X | 312 | 33.788 | 39.656 | 41.898 | 0.00 | 0.00 |
| ATOM | 4707 | CD1  | ILE | X | 312 | 35.094 | 38.289 | 40.873 | 0.00 | 0.00 |
| ATOM | 4708 | HD11 | ILE | X | 312 | 35.895 | 38.183 | 41.605 | 0.00 | 0.00 |
| ATOM | 4709 | HD12 | ILE | X | 312 | 34.944 | 37.406 | 40.252 | 0.00 | 0.00 |
| ATOM | 4710 | HD13 | ILE | X | 312 | 35.228 | 39.228 | 40.335 | 0.00 | 0.00 |
| ATOM | 4711 | C    | ILE | X | 312 | 31.255 | 37.443 | 43.319 | 0.00 | 0.00 |
| ATOM | 4712 | O    | ILE | X | 312 | 30.803 | 37.594 | 42.206 | 0.00 | 0.00 |
| ATOM | 4713 | N    | ASN | X | 313 | 30.776 | 36.463 | 44.134 | 0.00 | 0.00 |
| ATOM | 4714 | H    | ASN | X | 313 | 31.190 | 36.299 | 45.041 | 0.00 | 0.00 |
| ATOM | 4715 | CA   | ASN | X | 313 | 29.604 | 35.648 | 43.837 | 0.00 | 0.00 |
| ATOM | 4716 | HA   | ASN | X | 313 | 29.655 | 35.310 | 42.802 | 0.00 | 0.00 |
| ATOM | 4717 | CB   | ASN | X | 313 | 29.612 | 34.448 | 44.727 | 0.00 | 0.00 |
| ATOM | 4718 | HB2  | ASN | X | 313 | 30.473 | 33.805 | 44.541 | 0.00 | 0.00 |
| ATOM | 4719 | HB3  | ASN | X | 313 | 29.678 | 34.768 | 45.767 | 0.00 | 0.00 |
| ATOM | 4720 | CG   | ASN | X | 313 | 28.319 | 33.641 | 44.535 | 0.00 | 0.00 |
| ATOM | 4721 | OD1  | ASN | X | 313 | 28.202 | 32.823 | 43.590 | 0.00 | 0.00 |
| ATOM | 4722 | ND2  | ASN | X | 313 | 27.318 | 33.783 | 45.463 | 0.00 | 0.00 |
| ATOM | 4723 | HD21 | ASN | X | 313 | 26.573 | 33.107 | 45.380 | 0.00 | 0.00 |
| ATOM | 4724 | HD22 | ASN | X | 313 | 27.461 | 34.303 | 46.317 | 0.00 | 0.00 |
| ATOM | 4725 | C    | ASN | X | 313 | 28.262 | 36.372 | 44.023 | 0.00 | 0.00 |
| ATOM | 4726 | O    | ASN | X | 313 | 27.245 | 36.062 | 43.338 | 0.00 | 0.00 |
| ATOM | 4727 | N    | ALA | X | 314 | 28.271 | 37.340 | 44.875 | 0.00 | 0.00 |
| ATOM | 4728 | H    | ALA | X | 314 | 29.069 | 37.470 | 45.480 | 0.00 | 0.00 |

|      |      |     |     |   |     |        |        |        |      |      |
|------|------|-----|-----|---|-----|--------|--------|--------|------|------|
| ATOM | 4729 | CA  | ALA | X | 314 | 27.062 | 37.975 | 45.293 | 0.00 | 0.00 |
| ATOM | 4730 | HA  | ALA | X | 314 | 26.197 | 37.351 | 45.065 | 0.00 | 0.00 |
| ATOM | 4731 | CB  | ALA | X | 314 | 27.223 | 38.237 | 46.872 | 0.00 | 0.00 |
| ATOM | 4732 | HB1 | ALA | X | 314 | 27.341 | 37.334 | 47.470 | 0.00 | 0.00 |
| ATOM | 4733 | HB2 | ALA | X | 314 | 28.024 | 38.958 | 47.041 | 0.00 | 0.00 |
| ATOM | 4734 | HB3 | ALA | X | 314 | 26.377 | 38.833 | 47.214 | 0.00 | 0.00 |
| ATOM | 4735 | C   | ALA | X | 314 | 26.804 | 39.346 | 44.542 | 0.00 | 0.00 |
| ATOM | 4736 | O   | ALA | X | 314 | 25.672 | 39.821 | 44.476 | 0.00 | 0.00 |
| ATOM | 4737 | N   | GLY | X | 315 | 27.828 | 39.936 | 43.978 | 0.00 | 0.00 |
| ATOM | 4738 | H   | GLY | X | 315 | 28.704 | 39.447 | 44.093 | 0.00 | 0.00 |
| ATOM | 4739 | CA  | GLY | X | 315 | 27.809 | 41.267 | 43.382 | 0.00 | 0.00 |
| ATOM | 4740 | HA2 | GLY | X | 315 | 27.238 | 41.836 | 44.038 | 0.00 | 0.00 |
| ATOM | 4741 | HA3 | GLY | X | 315 | 28.876 | 41.649 | 43.433 | 0.00 | 0.00 |
| ATOM | 4742 | C   | GLY | X | 315 | 27.118 | 41.441 | 41.940 | 0.00 | 0.00 |
| ATOM | 4743 | O   | GLY | X | 315 | 27.278 | 40.608 | 41.064 | 0.00 | 0.00 |
| ATOM | 4744 | N   | ASP | X | 316 | 26.319 | 42.533 | 41.789 | 0.00 | 0.00 |
| ATOM | 4745 | H   | ASP | X | 316 | 26.634 | 43.285 | 42.385 | 0.00 | 0.00 |
| ATOM | 4746 | CA  | ASP | X | 316 | 25.684 | 42.927 | 40.467 | 0.00 | 0.00 |
| ATOM | 4747 | HA  | ASP | X | 316 | 25.770 | 41.977 | 39.938 | 0.00 | 0.00 |
| ATOM | 4748 | CB  | ASP | X | 316 | 24.136 | 43.196 | 40.636 | 0.00 | 0.00 |
| ATOM | 4749 | HB2 | ASP | X | 316 | 23.785 | 42.445 | 41.344 | 0.00 | 0.00 |
| ATOM | 4750 | HB3 | ASP | X | 316 | 24.002 | 44.127 | 41.188 | 0.00 | 0.00 |
| ATOM | 4751 | CG  | ASP | X | 316 | 23.467 | 43.174 | 39.302 | 0.00 | 0.00 |
| ATOM | 4752 | OD1 | ASP | X | 316 | 22.761 | 42.156 | 39.113 | 0.00 | 0.00 |
| ATOM | 4753 | OD2 | ASP | X | 316 | 23.489 | 44.259 | 38.639 | 0.00 | 0.00 |
| ATOM | 4754 | C   | ASP | X | 316 | 26.433 | 43.941 | 39.607 | 0.00 | 0.00 |
| ATOM | 4755 | O   | ASP | X | 316 | 26.832 | 44.979 | 40.085 | 0.00 | 0.00 |
| ATOM | 4756 | N   | PHE | X | 317 | 26.827 | 43.598 | 38.374 | 0.00 | 0.00 |
| ATOM | 4757 | H   | PHE | X | 317 | 26.591 | 42.690 | 38.001 | 0.00 | 0.00 |
| ATOM | 4758 | CA  | PHE | X | 317 | 27.803 | 44.344 | 37.546 | 0.00 | 0.00 |
| ATOM | 4759 | HA  | PHE | X | 317 | 28.009 | 45.339 | 37.940 | 0.00 | 0.00 |
| ATOM | 4760 | CB  | PHE | X | 317 | 29.008 | 43.457 | 37.477 | 0.00 | 0.00 |
| ATOM | 4761 | HB2 | PHE | X | 317 | 28.815 | 42.553 | 36.900 | 0.00 | 0.00 |
| ATOM | 4762 | HB3 | PHE | X | 317 | 29.823 | 44.027 | 37.030 | 0.00 | 0.00 |
| ATOM | 4763 | CG  | PHE | X | 317 | 29.585 | 43.111 | 38.828 | 0.00 | 0.00 |
| ATOM | 4764 | CD1 | PHE | X | 317 | 29.923 | 44.049 | 39.811 | 0.00 | 0.00 |
| ATOM | 4765 | HD1 | PHE | X | 317 | 29.711 | 45.082 | 39.577 | 0.00 | 0.00 |
| ATOM | 4766 | CE1 | PHE | X | 317 | 30.500 | 43.634 | 41.008 | 0.00 | 0.00 |
| ATOM | 4767 | HE1 | PHE | X | 317 | 30.724 | 44.390 | 41.747 | 0.00 | 0.00 |
| ATOM | 4768 | CZ  | PHE | X | 317 | 30.699 | 42.259 | 41.280 | 0.00 | 0.00 |
| ATOM | 4769 | HZ  | PHE | X | 317 | 31.253 | 41.991 | 42.168 | 0.00 | 0.00 |
| ATOM | 4770 | CE2 | PHE | X | 317 | 30.326 | 41.301 | 40.324 | 0.00 | 0.00 |
| ATOM | 4771 | HE2 | PHE | X | 317 | 30.475 | 40.268 | 40.601 | 0.00 | 0.00 |
| ATOM | 4772 | CD2 | PHE | X | 317 | 29.856 | 41.698 | 39.069 | 0.00 | 0.00 |
| ATOM | 4773 | HD2 | PHE | X | 317 | 29.725 | 40.971 | 38.281 | 0.00 | 0.00 |
| ATOM | 4774 | C   | PHE | X | 317 | 27.249 | 44.798 | 36.177 | 0.00 | 0.00 |
| ATOM | 4775 | O   | PHE | X | 317 | 28.054 | 45.125 | 35.280 | 0.00 | 0.00 |
| ATOM | 4776 | N   | HIE | X | 318 | 25.925 | 44.878 | 36.036 | 0.00 | 0.00 |
| ATOM | 4777 | H   | HIE | X | 318 | 25.276 | 44.571 | 36.746 | 0.00 | 0.00 |
| ATOM | 4778 | CA  | HIE | X | 318 | 25.243 | 45.294 | 34.786 | 0.00 | 0.00 |
| ATOM | 4779 | HA  | HIE | X | 318 | 25.346 | 44.421 | 34.142 | 0.00 | 0.00 |
| ATOM | 4780 | CB  | HIE | X | 318 | 23.672 | 45.504 | 34.957 | 0.00 | 0.00 |
| ATOM | 4781 | HB2 | HIE | X | 318 | 23.316 | 44.781 | 35.690 | 0.00 | 0.00 |
| ATOM | 4782 | HB3 | HIE | X | 318 | 23.490 | 46.512 | 35.331 | 0.00 | 0.00 |
| ATOM | 4783 | CG  | HIE | X | 318 | 22.866 | 45.161 | 33.774 | 0.00 | 0.00 |
| ATOM | 4784 | ND1 | HIE | X | 318 | 22.920 | 45.837 | 32.587 | 0.00 | 0.00 |
| ATOM | 4785 | CE1 | HIE | X | 318 | 22.089 | 45.133 | 31.800 | 0.00 | 0.00 |
| ATOM | 4786 | HE1 | HIE | X | 318 | 21.908 | 45.313 | 30.750 | 0.00 | 0.00 |
| ATOM | 4787 | NE2 | HIE | X | 318 | 21.569 | 44.014 | 32.404 | 0.00 | 0.00 |
| ATOM | 4788 | HE2 | HIE | X | 318 | 21.030 | 43.321 | 31.905 | 0.00 | 0.00 |
| ATOM | 4789 | CD2 | HIE | X | 318 | 22.090 | 44.005 | 33.672 | 0.00 | 0.00 |
| ATOM | 4790 | HD2 | HIE | X | 318 | 21.819 | 43.278 | 34.424 | 0.00 | 0.00 |
| ATOM | 4791 | C   | HIE | X | 318 | 25.798 | 46.555 | 34.191 | 0.00 | 0.00 |
| ATOM | 4792 | O   | HIE | X | 318 | 26.031 | 47.568 | 34.862 | 0.00 | 0.00 |
| ATOM | 4793 | N   | GLY | X | 319 | 26.031 | 46.527 | 32.843 | 0.00 | 0.00 |
| ATOM | 4794 | H   | GLY | X | 319 | 25.707 | 45.716 | 32.336 | 0.00 | 0.00 |
| ATOM | 4795 | CA  | GLY | X | 319 | 26.438 | 47.688 | 31.980 | 0.00 | 0.00 |
| ATOM | 4796 | HA2 | GLY | X | 319 | 26.304 | 47.376 | 30.936 | 0.00 | 0.00 |
| ATOM | 4797 | HA3 | GLY | X | 319 | 25.784 | 48.509 | 32.226 | 0.00 | 0.00 |
| ATOM | 4798 | C   | GLY | X | 319 | 27.906 | 48.165 | 32.200 | 0.00 | 0.00 |

|      |      |      |     |   |     |        |        |        |      |      |
|------|------|------|-----|---|-----|--------|--------|--------|------|------|
| ATOM | 4799 | O    | GLY | X | 319 | 28.278 | 49.146 | 31.518 | 0.00 | 0.00 |
| ATOM | 4800 | N    | LEU | X | 320 | 28.761 | 47.520 | 33.044 | 0.00 | 0.00 |
| ATOM | 4801 | H    | LEU | X | 320 | 28.437 | 46.752 | 33.614 | 0.00 | 0.00 |
| ATOM | 4802 | CA   | LEU | X | 320 | 30.159 | 47.862 | 33.230 | 0.00 | 0.00 |
| ATOM | 4803 | HA   | LEU | X | 320 | 30.256 | 48.948 | 33.193 | 0.00 | 0.00 |
| ATOM | 4804 | CB   | LEU | X | 320 | 30.583 | 47.416 | 34.624 | 0.00 | 0.00 |
| ATOM | 4805 | HB2  | LEU | X | 320 | 30.306 | 46.364 | 34.687 | 0.00 | 0.00 |
| ATOM | 4806 | HB3  | LEU | X | 320 | 31.636 | 47.598 | 34.836 | 0.00 | 0.00 |
| ATOM | 4807 | CG   | LEU | X | 320 | 29.878 | 48.141 | 35.787 | 0.00 | 0.00 |
| ATOM | 4808 | HG   | LEU | X | 320 | 28.793 | 48.042 | 35.796 | 0.00 | 0.00 |
| ATOM | 4809 | CD1  | LEU | X | 320 | 30.187 | 47.527 | 37.160 | 0.00 | 0.00 |
| ATOM | 4810 | HD11 | LEU | X | 320 | 29.904 | 46.490 | 37.345 | 0.00 | 0.00 |
| ATOM | 4811 | HD12 | LEU | X | 320 | 31.241 | 47.603 | 37.430 | 0.00 | 0.00 |
| ATOM | 4812 | HD13 | LEU | X | 320 | 29.712 | 48.085 | 37.967 | 0.00 | 0.00 |
| ATOM | 4813 | CD2  | LEU | X | 320 | 30.173 | 49.721 | 35.793 | 0.00 | 0.00 |
| ATOM | 4814 | HD21 | LEU | X | 320 | 29.582 | 50.127 | 36.614 | 0.00 | 0.00 |
| ATOM | 4815 | HD22 | LEU | X | 320 | 31.210 | 49.928 | 36.058 | 0.00 | 0.00 |
| ATOM | 4816 | HD23 | LEU | X | 320 | 29.843 | 50.195 | 34.868 | 0.00 | 0.00 |
| ATOM | 4817 | C    | LEU | X | 320 | 31.030 | 47.311 | 32.176 | 0.00 | 0.00 |
| ATOM | 4818 | O    | LEU | X | 320 | 30.669 | 46.236 | 31.599 | 0.00 | 0.00 |
| ATOM | 4819 | N    | GLN | X | 321 | 32.186 | 47.957 | 31.843 | 0.00 | 0.00 |
| ATOM | 4820 | H    | GLN | X | 321 | 32.387 | 48.710 | 32.485 | 0.00 | 0.00 |
| ATOM | 4821 | CA   | GLN | X | 321 | 33.224 | 47.539 | 30.904 | 0.00 | 0.00 |
| ATOM | 4822 | HA   | GLN | X | 321 | 32.839 | 46.643 | 30.418 | 0.00 | 0.00 |
| ATOM | 4823 | CB   | GLN | X | 321 | 33.375 | 48.622 | 29.807 | 0.00 | 0.00 |
| ATOM | 4824 | HB2  | GLN | X | 321 | 33.746 | 49.564 | 30.211 | 0.00 | 0.00 |
| ATOM | 4825 | HB3  | GLN | X | 321 | 34.032 | 48.167 | 29.065 | 0.00 | 0.00 |
| ATOM | 4826 | CG   | GLN | X | 321 | 31.997 | 48.881 | 29.097 | 0.00 | 0.00 |
| ATOM | 4827 | HG2  | GLN | X | 321 | 31.767 | 47.916 | 28.646 | 0.00 | 0.00 |
| ATOM | 4828 | HG3  | GLN | X | 321 | 31.274 | 49.036 | 29.897 | 0.00 | 0.00 |
| ATOM | 4829 | CD   | GLN | X | 321 | 32.095 | 50.067 | 28.204 | 0.00 | 0.00 |
| ATOM | 4830 | OE1  | GLN | X | 321 | 32.386 | 51.196 | 28.598 | 0.00 | 0.00 |
| ATOM | 4831 | NE2  | GLN | X | 321 | 32.010 | 49.932 | 26.892 | 0.00 | 0.00 |
| ATOM | 4832 | HE21 | GLN | X | 321 | 32.088 | 50.763 | 26.323 | 0.00 | 0.00 |
| ATOM | 4833 | HE22 | GLN | X | 321 | 31.724 | 49.090 | 26.412 | 0.00 | 0.00 |
| ATOM | 4834 | C    | GLN | X | 321 | 34.522 | 47.215 | 31.641 | 0.00 | 0.00 |
| ATOM | 4835 | O    | GLN | X | 321 | 35.203 | 48.087 | 32.184 | 0.00 | 0.00 |
| ATOM | 4836 | N    | VAL | X | 322 | 35.001 | 45.954 | 31.495 | 0.00 | 0.00 |
| ATOM | 4837 | H    | VAL | X | 322 | 34.541 | 45.341 | 30.837 | 0.00 | 0.00 |
| ATOM | 4838 | CA   | VAL | X | 322 | 36.036 | 45.263 | 32.185 | 0.00 | 0.00 |
| ATOM | 4839 | HA   | VAL | X | 322 | 36.522 | 45.981 | 32.846 | 0.00 | 0.00 |
| ATOM | 4840 | CB   | VAL | X | 322 | 35.430 | 44.112 | 33.078 | 0.00 | 0.00 |
| ATOM | 4841 | HB   | VAL | X | 322 | 34.969 | 43.366 | 32.430 | 0.00 | 0.00 |
| ATOM | 4842 | CG1  | VAL | X | 322 | 36.559 | 43.387 | 33.821 | 0.00 | 0.00 |
| ATOM | 4843 | HG11 | VAL | X | 322 | 37.200 | 42.803 | 33.161 | 0.00 | 0.00 |
| ATOM | 4844 | HG12 | VAL | X | 322 | 37.157 | 44.115 | 34.371 | 0.00 | 0.00 |
| ATOM | 4845 | HG13 | VAL | X | 322 | 36.184 | 42.733 | 34.609 | 0.00 | 0.00 |
| ATOM | 4846 | CG2  | VAL | X | 322 | 34.345 | 44.560 | 33.998 | 0.00 | 0.00 |
| ATOM | 4847 | HG21 | VAL | X | 322 | 34.185 | 43.749 | 34.708 | 0.00 | 0.00 |
| ATOM | 4848 | HG22 | VAL | X | 322 | 34.615 | 45.455 | 34.558 | 0.00 | 0.00 |
| ATOM | 4849 | HG23 | VAL | X | 322 | 33.439 | 44.737 | 33.420 | 0.00 | 0.00 |
| ATOM | 4850 | C    | VAL | X | 322 | 37.180 | 44.826 | 31.218 | 0.00 | 0.00 |
| ATOM | 4851 | O    | VAL | X | 322 | 36.959 | 44.545 | 30.034 | 0.00 | 0.00 |
| ATOM | 4852 | N    | LEU | X | 323 | 38.461 | 44.824 | 31.654 | 0.00 | 0.00 |
| ATOM | 4853 | H    | LEU | X | 323 | 38.629 | 45.138 | 32.600 | 0.00 | 0.00 |
| ATOM | 4854 | CA   | LEU | X | 323 | 39.620 | 44.126 | 30.997 | 0.00 | 0.00 |
| ATOM | 4855 | HA   | LEU | X | 323 | 39.202 | 43.349 | 30.357 | 0.00 | 0.00 |
| ATOM | 4856 | CB   | LEU | X | 323 | 40.502 | 45.069 | 30.216 | 0.00 | 0.00 |
| ATOM | 4857 | HB2  | LEU | X | 323 | 39.827 | 45.727 | 29.669 | 0.00 | 0.00 |
| ATOM | 4858 | HB3  | LEU | X | 323 | 41.256 | 45.508 | 30.870 | 0.00 | 0.00 |
| ATOM | 4859 | CG   | LEU | X | 323 | 41.369 | 44.627 | 29.056 | 0.00 | 0.00 |
| ATOM | 4860 | HG   | LEU | X | 323 | 40.728 | 44.218 | 28.276 | 0.00 | 0.00 |
| ATOM | 4861 | CD1  | LEU | X | 323 | 42.054 | 45.832 | 28.449 | 0.00 | 0.00 |
| ATOM | 4862 | HD11 | LEU | X | 323 | 41.248 | 46.479 | 28.102 | 0.00 | 0.00 |
| ATOM | 4863 | HD12 | LEU | X | 323 | 42.817 | 46.249 | 29.105 | 0.00 | 0.00 |
| ATOM | 4864 | HD13 | LEU | X | 323 | 42.529 | 45.514 | 27.521 | 0.00 | 0.00 |
| ATOM | 4865 | CD2  | LEU | X | 323 | 42.592 | 43.686 | 29.384 | 0.00 | 0.00 |
| ATOM | 4866 | HD21 | LEU | X | 323 | 42.831 | 43.725 | 30.447 | 0.00 | 0.00 |
| ATOM | 4867 | HD22 | LEU | X | 323 | 42.220 | 42.687 | 29.156 | 0.00 | 0.00 |
| ATOM | 4868 | HD23 | LEU | X | 323 | 43.485 | 43.938 | 28.810 | 0.00 | 0.00 |

|      |      |      |     |   |     |        |        |        |      |      |
|------|------|------|-----|---|-----|--------|--------|--------|------|------|
| ATOM | 4869 | C    | LEU | X | 323 | 40.433 | 43.325 | 31.965 | 0.00 | 0.00 |
| ATOM | 4870 | O    | LEU | X | 323 | 40.670 | 43.803 | 33.103 | 0.00 | 0.00 |
| ATOM | 4871 | N    | VAL | X | 324 | 40.891 | 42.110 | 31.581 | 0.00 | 0.00 |
| ATOM | 4872 | H    | VAL | X | 324 | 40.742 | 41.809 | 30.628 | 0.00 | 0.00 |
| ATOM | 4873 | CA   | VAL | X | 324 | 41.630 | 41.194 | 32.379 | 0.00 | 0.00 |
| ATOM | 4874 | HA   | VAL | X | 324 | 42.065 | 41.738 | 33.217 | 0.00 | 0.00 |
| ATOM | 4875 | CB   | VAL | X | 324 | 40.854 | 40.075 | 33.046 | 0.00 | 0.00 |
| ATOM | 4876 | HB   | VAL | X | 324 | 41.558 | 39.722 | 33.800 | 0.00 | 0.00 |
| ATOM | 4877 | CG1  | VAL | X | 324 | 39.491 | 40.576 | 33.698 | 0.00 | 0.00 |
| ATOM | 4878 | HG11 | VAL | X | 324 | 38.790 | 41.055 | 33.015 | 0.00 | 0.00 |
| ATOM | 4879 | HG12 | VAL | X | 324 | 39.020 | 39.785 | 34.281 | 0.00 | 0.00 |
| ATOM | 4880 | HG13 | VAL | X | 324 | 39.709 | 41.374 | 34.407 | 0.00 | 0.00 |
| ATOM | 4881 | CG2  | VAL | X | 324 | 40.391 | 38.963 | 32.027 | 0.00 | 0.00 |
| ATOM | 4882 | HG21 | VAL | X | 324 | 39.760 | 39.366 | 31.234 | 0.00 | 0.00 |
| ATOM | 4883 | HG22 | VAL | X | 324 | 41.257 | 38.439 | 31.622 | 0.00 | 0.00 |
| ATOM | 4884 | HG23 | VAL | X | 324 | 39.805 | 38.278 | 32.639 | 0.00 | 0.00 |
| ATOM | 4885 | C    | VAL | X | 324 | 42.826 | 40.604 | 31.625 | 0.00 | 0.00 |
| ATOM | 4886 | O    | VAL | X | 324 | 42.830 | 40.315 | 30.446 | 0.00 | 0.00 |
| ATOM | 4887 | N    | GLY | X | 325 | 43.916 | 40.427 | 32.379 | 0.00 | 0.00 |
| ATOM | 4888 | H    | GLY | X | 325 | 43.847 | 40.856 | 33.291 | 0.00 | 0.00 |
| ATOM | 4889 | CA   | GLY | X | 325 | 45.202 | 40.047 | 31.820 | 0.00 | 0.00 |
| ATOM | 4890 | HA2  | GLY | X | 325 | 45.065 | 39.592 | 30.837 | 0.00 | 0.00 |
| ATOM | 4891 | HA3  | GLY | X | 325 | 45.784 | 40.892 | 31.779 | 0.00 | 0.00 |
| ATOM | 4892 | C    | GLY | X | 325 | 46.094 | 39.171 | 32.700 | 0.00 | 0.00 |
| ATOM | 4893 | O    | GLY | X | 325 | 46.037 | 39.265 | 33.929 | 0.00 | 0.00 |
| ATOM | 4894 | N    | VAL | X | 326 | 46.971 | 38.381 | 32.073 | 0.00 | 0.00 |
| ATOM | 4895 | H    | VAL | X | 326 | 46.877 | 38.380 | 31.068 | 0.00 | 0.00 |
| ATOM | 4896 | CA   | VAL | X | 326 | 48.093 | 37.693 | 32.717 | 0.00 | 0.00 |
| ATOM | 4897 | HA   | VAL | X | 326 | 48.392 | 38.280 | 33.586 | 0.00 | 0.00 |
| ATOM | 4898 | CB   | VAL | X | 326 | 47.788 | 36.286 | 33.236 | 0.00 | 0.00 |
| ATOM | 4899 | HB   | VAL | X | 326 | 48.718 | 35.756 | 33.445 | 0.00 | 0.00 |
| ATOM | 4900 | CG1  | VAL | X | 326 | 47.053 | 36.354 | 34.532 | 0.00 | 0.00 |
| ATOM | 4901 | HG11 | VAL | X | 326 | 47.541 | 37.066 | 35.198 | 0.00 | 0.00 |
| ATOM | 4902 | HG12 | VAL | X | 326 | 46.015 | 36.608 | 34.322 | 0.00 | 0.00 |
| ATOM | 4903 | HG13 | VAL | X | 326 | 47.036 | 35.354 | 34.967 | 0.00 | 0.00 |
| ATOM | 4904 | CG2  | VAL | X | 326 | 47.167 | 35.401 | 32.187 | 0.00 | 0.00 |
| ATOM | 4905 | HG21 | VAL | X | 326 | 47.194 | 34.415 | 32.651 | 0.00 | 0.00 |
| ATOM | 4906 | HG22 | VAL | X | 326 | 46.137 | 35.698 | 31.993 | 0.00 | 0.00 |
| ATOM | 4907 | HG23 | VAL | X | 326 | 47.767 | 35.479 | 31.280 | 0.00 | 0.00 |
| ATOM | 4908 | C    | VAL | X | 326 | 49.175 | 37.560 | 31.633 | 0.00 | 0.00 |
| ATOM | 4909 | O    | VAL | X | 326 | 48.822 | 37.707 | 30.472 | 0.00 | 0.00 |
| ATOM | 4910 | N    | VAL | X | 327 | 50.421 | 37.318 | 32.155 | 0.00 | 0.00 |
| ATOM | 4911 | H    | VAL | X | 327 | 50.406 | 37.155 | 33.152 | 0.00 | 0.00 |
| ATOM | 4912 | CA   | VAL | X | 327 | 51.508 | 37.006 | 31.249 | 0.00 | 0.00 |
| ATOM | 4913 | HA   | VAL | X | 327 | 51.106 | 37.054 | 30.236 | 0.00 | 0.00 |
| ATOM | 4914 | CB   | VAL | X | 327 | 52.776 | 37.980 | 31.426 | 0.00 | 0.00 |
| ATOM | 4915 | HB   | VAL | X | 327 | 53.276 | 37.654 | 32.338 | 0.00 | 0.00 |
| ATOM | 4916 | CG1  | VAL | X | 327 | 53.687 | 37.918 | 30.259 | 0.00 | 0.00 |
| ATOM | 4917 | HG11 | VAL | X | 327 | 54.340 | 38.791 | 30.249 | 0.00 | 0.00 |
| ATOM | 4918 | HG12 | VAL | X | 327 | 54.140 | 36.929 | 30.330 | 0.00 | 0.00 |
| ATOM | 4919 | HG13 | VAL | X | 327 | 53.169 | 37.771 | 29.311 | 0.00 | 0.00 |
| ATOM | 4920 | CG2  | VAL | X | 327 | 52.336 | 39.422 | 31.616 | 0.00 | 0.00 |
| ATOM | 4921 | HG21 | VAL | X | 327 | 53.012 | 39.893 | 32.330 | 0.00 | 0.00 |
| ATOM | 4922 | HG22 | VAL | X | 327 | 52.385 | 40.071 | 30.742 | 0.00 | 0.00 |
| ATOM | 4923 | HG23 | VAL | X | 327 | 51.329 | 39.517 | 32.024 | 0.00 | 0.00 |
| ATOM | 4924 | C    | VAL | X | 327 | 51.945 | 35.566 | 31.426 | 0.00 | 0.00 |
| ATOM | 4925 | O    | VAL | X | 327 | 51.986 | 35.115 | 32.529 | 0.00 | 0.00 |
| ATOM | 4926 | N    | LYS | X | 328 | 51.955 | 34.873 | 30.305 | 0.00 | 0.00 |
| ATOM | 4927 | H    | LYS | X | 328 | 52.104 | 35.369 | 29.437 | 0.00 | 0.00 |
| ATOM | 4928 | CA   | LYS | X | 328 | 51.773 | 33.348 | 30.284 | 0.00 | 0.00 |
| ATOM | 4929 | HA   | LYS | X | 328 | 50.702 | 33.166 | 30.380 | 0.00 | 0.00 |
| ATOM | 4930 | CB   | LYS | X | 328 | 52.106 | 32.904 | 28.850 | 0.00 | 0.00 |
| ATOM | 4931 | HB2  | LYS | X | 328 | 51.458 | 33.449 | 28.163 | 0.00 | 0.00 |
| ATOM | 4932 | HB3  | LYS | X | 328 | 53.110 | 33.287 | 28.670 | 0.00 | 0.00 |
| ATOM | 4933 | CG   | LYS | X | 328 | 52.013 | 31.359 | 28.655 | 0.00 | 0.00 |
| ATOM | 4934 | HG2  | LYS | X | 328 | 52.793 | 30.818 | 29.192 | 0.00 | 0.00 |
| ATOM | 4935 | HG3  | LYS | X | 328 | 51.024 | 30.977 | 28.910 | 0.00 | 0.00 |
| ATOM | 4936 | CD   | LYS | X | 328 | 52.348 | 30.963 | 27.282 | 0.00 | 0.00 |
| ATOM | 4937 | HD2  | LYS | X | 328 | 53.323 | 31.343 | 26.978 | 0.00 | 0.00 |
| ATOM | 4938 | HD3  | LYS | X | 328 | 52.366 | 29.873 | 27.274 | 0.00 | 0.00 |

|      |      |     |     |   |     |        |        |        |      |      |
|------|------|-----|-----|---|-----|--------|--------|--------|------|------|
| ATOM | 4939 | CE  | LYS | X | 328 | 51.298 | 31.406 | 26.215 | 0.00 | 0.00 |
| ATOM | 4940 | HE2 | LYS | X | 328 | 50.263 | 31.136 | 26.424 | 0.00 | 0.00 |
| ATOM | 4941 | HE3 | LYS | X | 328 | 51.460 | 32.481 | 26.136 | 0.00 | 0.00 |
| ATOM | 4942 | NZ  | LYS | X | 328 | 51.714 | 30.744 | 24.950 | 0.00 | 0.00 |
| ATOM | 4943 | HZ1 | LYS | X | 328 | 52.658 | 30.937 | 24.646 | 0.00 | 0.00 |
| ATOM | 4944 | HZ2 | LYS | X | 328 | 51.568 | 29.745 | 24.951 | 0.00 | 0.00 |
| ATOM | 4945 | HZ3 | LYS | X | 328 | 51.107 | 31.170 | 24.264 | 0.00 | 0.00 |
| ATOM | 4946 | C   | LYS | X | 328 | 52.392 | 32.481 | 31.406 | 0.00 | 0.00 |
| ATOM | 4947 | O   | LYS | X | 328 | 51.755 | 31.486 | 31.770 | 0.00 | 0.00 |
| ATOM | 4948 | N   | ASP | X | 329 | 53.487 | 32.924 | 31.993 | 0.00 | 0.00 |
| ATOM | 4949 | H   | ASP | X | 329 | 53.795 | 33.815 | 31.629 | 0.00 | 0.00 |
| ATOM | 4950 | CA  | ASP | X | 329 | 54.318 | 32.258 | 33.071 | 0.00 | 0.00 |
| ATOM | 4951 | HA  | ASP | X | 329 | 53.748 | 31.363 | 33.318 | 0.00 | 0.00 |
| ATOM | 4952 | CB  | ASP | X | 329 | 55.698 | 31.791 | 32.522 | 0.00 | 0.00 |
| ATOM | 4953 | HB2 | ASP | X | 329 | 56.403 | 32.619 | 32.582 | 0.00 | 0.00 |
| ATOM | 4954 | HB3 | ASP | X | 329 | 56.091 | 31.023 | 33.188 | 0.00 | 0.00 |
| ATOM | 4955 | CG  | ASP | X | 329 | 55.503 | 31.232 | 31.079 | 0.00 | 0.00 |
| ATOM | 4956 | OD1 | ASP | X | 329 | 55.211 | 30.022 | 30.857 | 0.00 | 0.00 |
| ATOM | 4957 | OD2 | ASP | X | 329 | 55.889 | 31.913 | 30.115 | 0.00 | 0.00 |
| ATOM | 4958 | C   | ASP | X | 329 | 54.387 | 32.978 | 34.534 | 0.00 | 0.00 |
| ATOM | 4959 | O   | ASP | X | 329 | 55.315 | 32.702 | 35.247 | 0.00 | 0.00 |
| ATOM | 4960 | N   | GLU | X | 330 | 53.490 | 33.912 | 34.816 | 0.00 | 0.00 |
| ATOM | 4961 | H   | GLU | X | 330 | 52.728 | 34.102 | 34.181 | 0.00 | 0.00 |
| ATOM | 4962 | CA  | GLU | X | 330 | 53.242 | 34.471 | 36.221 | 0.00 | 0.00 |
| ATOM | 4963 | HA  | GLU | X | 330 | 53.537 | 35.513 | 36.098 | 0.00 | 0.00 |
| ATOM | 4964 | CB  | GLU | X | 330 | 51.805 | 34.391 | 36.654 | 0.00 | 0.00 |
| ATOM | 4965 | HB2 | GLU | X | 330 | 51.455 | 33.359 | 36.653 | 0.00 | 0.00 |
| ATOM | 4966 | HB3 | GLU | X | 330 | 51.642 | 34.777 | 37.660 | 0.00 | 0.00 |
| ATOM | 4967 | CG  | GLU | X | 330 | 50.773 | 35.249 | 35.836 | 0.00 | 0.00 |
| ATOM | 4968 | HG2 | GLU | X | 330 | 50.696 | 34.916 | 34.801 | 0.00 | 0.00 |
| ATOM | 4969 | HG3 | GLU | X | 330 | 49.814 | 35.148 | 36.344 | 0.00 | 0.00 |
| ATOM | 4970 | CD  | GLU | X | 330 | 51.161 | 36.725 | 35.796 | 0.00 | 0.00 |
| ATOM | 4971 | OE1 | GLU | X | 330 | 51.681 | 37.296 | 36.810 | 0.00 | 0.00 |
| ATOM | 4972 | OE2 | GLU | X | 330 | 50.956 | 37.434 | 34.783 | 0.00 | 0.00 |
| ATOM | 4973 | C   | GLU | X | 330 | 54.139 | 33.920 | 37.377 | 0.00 | 0.00 |
| ATOM | 4974 | O   | GLU | X | 330 | 54.978 | 34.526 | 37.975 | 0.00 | 0.00 |
| ATOM | 4975 | N   | GLY | X | 331 | 53.955 | 32.622 | 37.666 | 0.00 | 0.00 |
| ATOM | 4976 | H   | GLY | X | 331 | 53.338 | 32.093 | 37.067 | 0.00 | 0.00 |
| ATOM | 4977 | CA  | GLY | X | 331 | 54.504 | 31.887 | 38.891 | 0.00 | 0.00 |
| ATOM | 4978 | HA2 | GLY | X | 331 | 54.398 | 32.539 | 39.843 | 0.00 | 0.00 |
| ATOM | 4979 | HA3 | GLY | X | 331 | 54.029 | 30.905 | 39.108 | 0.00 | 0.00 |
| ATOM | 4980 | C   | GLY | X | 331 | 55.936 | 31.629 | 38.905 | 0.00 | 0.00 |
| ATOM | 4981 | O   | GLY | X | 331 | 56.512 | 31.332 | 39.989 | 0.00 | 0.00 |
| ATOM | 4982 | N   | SER | X | 332 | 56.529 | 31.703 | 37.725 | 0.00 | 0.00 |
| ATOM | 4983 | H   | SER | X | 332 | 55.953 | 31.922 | 36.925 | 0.00 | 0.00 |
| ATOM | 4984 | CA  | SER | X | 332 | 57.899 | 31.398 | 37.669 | 0.00 | 0.00 |
| ATOM | 4985 | HA  | SER | X | 332 | 58.058 | 30.406 | 38.093 | 0.00 | 0.00 |
| ATOM | 4986 | CB  | SER | X | 332 | 58.169 | 31.300 | 36.109 | 0.00 | 0.00 |
| ATOM | 4987 | HB2 | SER | X | 332 | 58.106 | 32.292 | 35.660 | 0.00 | 0.00 |
| ATOM | 4988 | HB3 | SER | X | 332 | 59.169 | 30.890 | 35.969 | 0.00 | 0.00 |
| ATOM | 4989 | OG  | SER | X | 332 | 57.314 | 30.500 | 35.362 | 0.00 | 0.00 |
| ATOM | 4990 | HG  | SER | X | 332 | 56.478 | 30.963 | 35.273 | 0.00 | 0.00 |
| ATOM | 4991 | C   | SER | X | 332 | 58.706 | 32.534 | 38.293 | 0.00 | 0.00 |
| ATOM | 4992 | O   | SER | X | 332 | 59.738 | 32.236 | 38.944 | 0.00 | 0.00 |
| ATOM | 4993 | N   | TYR | X | 333 | 58.270 | 33.775 | 38.279 | 0.00 | 0.00 |
| ATOM | 4994 | H   | TYR | X | 333 | 57.413 | 33.944 | 37.773 | 0.00 | 0.00 |
| ATOM | 4995 | CA  | TYR | X | 333 | 58.812 | 34.938 | 39.000 | 0.00 | 0.00 |
| ATOM | 4996 | HA  | TYR | X | 333 | 59.901 | 34.985 | 38.976 | 0.00 | 0.00 |
| ATOM | 4997 | CB  | TYR | X | 333 | 58.145 | 36.233 | 38.516 | 0.00 | 0.00 |
| ATOM | 4998 | HB2 | TYR | X | 333 | 58.473 | 36.394 | 37.489 | 0.00 | 0.00 |
| ATOM | 4999 | HB3 | TYR | X | 333 | 57.058 | 36.160 | 38.557 | 0.00 | 0.00 |
| ATOM | 5000 | CG  | TYR | X | 333 | 58.608 | 37.452 | 39.289 | 0.00 | 0.00 |
| ATOM | 5001 | CD1 | TYR | X | 333 | 57.940 | 37.742 | 40.460 | 0.00 | 0.00 |
| ATOM | 5002 | HD1 | TYR | X | 333 | 57.028 | 37.199 | 40.660 | 0.00 | 0.00 |
| ATOM | 5003 | CE1 | TYR | X | 333 | 58.356 | 38.909 | 41.225 | 0.00 | 0.00 |
| ATOM | 5004 | HE1 | TYR | X | 333 | 57.779 | 39.257 | 42.069 | 0.00 | 0.00 |
| ATOM | 5005 | CZ  | TYR | X | 333 | 59.430 | 39.733 | 40.769 | 0.00 | 0.00 |
| ATOM | 5006 | OH  | TYR | X | 333 | 59.801 | 40.872 | 41.427 | 0.00 | 0.00 |
| ATOM | 5007 | HH  | TYR | X | 333 | 59.084 | 41.118 | 42.016 | 0.00 | 0.00 |
| ATOM | 5008 | CE2 | TYR | X | 333 | 60.148 | 39.360 | 39.615 | 0.00 | 0.00 |

|      |      |      |     |   |     |        |        |        |      |      |
|------|------|------|-----|---|-----|--------|--------|--------|------|------|
| ATOM | 5009 | HE2  | TYR | X | 333 | 61.080 | 39.818 | 39.319 | 0.00 | 0.00 |
| ATOM | 5010 | CD2  | TYR | X | 333 | 59.789 | 38.154 | 38.938 | 0.00 | 0.00 |
| ATOM | 5011 | HD2  | TYR | X | 333 | 60.328 | 37.763 | 38.088 | 0.00 | 0.00 |
| ATOM | 5012 | C    | TYR | X | 333 | 58.662 | 34.719 | 40.467 | 0.00 | 0.00 |
| ATOM | 5013 | O    | TYR | X | 333 | 59.618 | 34.875 | 41.177 | 0.00 | 0.00 |
| ATOM | 5014 | N    | PHE | X | 334 | 57.438 | 34.508 | 41.005 | 0.00 | 0.00 |
| ATOM | 5015 | H    | PHE | X | 334 | 56.698 | 34.383 | 40.329 | 0.00 | 0.00 |
| ATOM | 5016 | CA   | PHE | X | 334 | 57.143 | 34.185 | 42.395 | 0.00 | 0.00 |
| ATOM | 5017 | HA   | PHE | X | 334 | 57.420 | 35.008 | 43.054 | 0.00 | 0.00 |
| ATOM | 5018 | CB   | PHE | X | 334 | 55.665 | 34.081 | 42.618 | 0.00 | 0.00 |
| ATOM | 5019 | HB2  | PHE | X | 334 | 55.148 | 33.428 | 41.914 | 0.00 | 0.00 |
| ATOM | 5020 | HB3  | PHE | X | 334 | 55.470 | 33.670 | 43.608 | 0.00 | 0.00 |
| ATOM | 5021 | CG   | PHE | X | 334 | 54.942 | 35.363 | 42.435 | 0.00 | 0.00 |
| ATOM | 5022 | CD1  | PHE | X | 334 | 54.333 | 35.597 | 41.225 | 0.00 | 0.00 |
| ATOM | 5023 | HD1  | PHE | X | 334 | 54.409 | 34.967 | 40.351 | 0.00 | 0.00 |
| ATOM | 5024 | CE1  | PHE | X | 334 | 53.664 | 36.804 | 41.057 | 0.00 | 0.00 |
| ATOM | 5025 | HE1  | PHE | X | 334 | 53.114 | 37.019 | 40.153 | 0.00 | 0.00 |
| ATOM | 5026 | CZ   | PHE | X | 334 | 53.564 | 37.697 | 42.126 | 0.00 | 0.00 |
| ATOM | 5027 | HZ   | PHE | X | 334 | 52.905 | 38.527 | 41.919 | 0.00 | 0.00 |
| ATOM | 5028 | CE2  | PHE | X | 334 | 54.026 | 37.402 | 43.404 | 0.00 | 0.00 |
| ATOM | 5029 | HE2  | PHE | X | 334 | 53.765 | 38.029 | 44.244 | 0.00 | 0.00 |
| ATOM | 5030 | CD2  | PHE | X | 334 | 54.766 | 36.217 | 43.627 | 0.00 | 0.00 |
| ATOM | 5031 | HD2  | PHE | X | 334 | 55.139 | 35.911 | 44.593 | 0.00 | 0.00 |
| ATOM | 5032 | C    | PHE | X | 334 | 57.972 | 32.998 | 43.026 | 0.00 | 0.00 |
| ATOM | 5033 | O    | PHE | X | 334 | 58.188 | 32.997 | 44.229 | 0.00 | 0.00 |
| ATOM | 5034 | N    | LEU | X | 335 | 58.422 | 32.026 | 42.209 | 0.00 | 0.00 |
| ATOM | 5035 | H    | LEU | X | 335 | 57.986 | 32.012 | 41.298 | 0.00 | 0.00 |
| ATOM | 5036 | CA   | LEU | X | 335 | 59.254 | 30.934 | 42.681 | 0.00 | 0.00 |
| ATOM | 5037 | HA   | LEU | X | 335 | 58.775 | 30.535 | 43.575 | 0.00 | 0.00 |
| ATOM | 5038 | CB   | LEU | X | 335 | 59.270 | 29.800 | 41.599 | 0.00 | 0.00 |
| ATOM | 5039 | HB2  | LEU | X | 335 | 58.257 | 29.588 | 41.257 | 0.00 | 0.00 |
| ATOM | 5040 | HB3  | LEU | X | 335 | 59.787 | 30.046 | 40.672 | 0.00 | 0.00 |
| ATOM | 5041 | CG   | LEU | X | 335 | 59.871 | 28.484 | 42.141 | 0.00 | 0.00 |
| ATOM | 5042 | HG   | LEU | X | 335 | 60.863 | 28.687 | 42.543 | 0.00 | 0.00 |
| ATOM | 5043 | CD1  | LEU | X | 335 | 59.066 | 27.897 | 43.306 | 0.00 | 0.00 |
| ATOM | 5044 | HD11 | LEU | X | 335 | 59.180 | 26.846 | 43.574 | 0.00 | 0.00 |
| ATOM | 5045 | HD12 | LEU | X | 335 | 59.387 | 28.493 | 44.160 | 0.00 | 0.00 |
| ATOM | 5046 | HD13 | LEU | X | 335 | 58.034 | 28.064 | 42.996 | 0.00 | 0.00 |
| ATOM | 5047 | CD2  | LEU | X | 335 | 59.987 | 27.385 | 41.062 | 0.00 | 0.00 |
| ATOM | 5048 | HD21 | LEU | X | 335 | 58.975 | 27.160 | 40.724 | 0.00 | 0.00 |
| ATOM | 5049 | HD22 | LEU | X | 335 | 60.707 | 27.559 | 40.262 | 0.00 | 0.00 |
| ATOM | 5050 | HD23 | LEU | X | 335 | 60.263 | 26.456 | 41.562 | 0.00 | 0.00 |
| ATOM | 5051 | C    | LEU | X | 335 | 60.625 | 31.434 | 43.075 | 0.00 | 0.00 |
| ATOM | 5052 | O    | LEU | X | 335 | 60.921 | 31.357 | 44.271 | 0.00 | 0.00 |
| ATOM | 5053 | N    | VAL | X | 336 | 61.338 | 32.122 | 42.162 | 0.00 | 0.00 |
| ATOM | 5054 | H    | VAL | X | 336 | 60.918 | 32.267 | 41.255 | 0.00 | 0.00 |
| ATOM | 5055 | CA   | VAL | X | 336 | 62.760 | 32.524 | 42.363 | 0.00 | 0.00 |
| ATOM | 5056 | HA   | VAL | X | 336 | 63.180 | 31.618 | 42.799 | 0.00 | 0.00 |
| ATOM | 5057 | CB   | VAL | X | 336 | 63.674 | 32.569 | 41.065 | 0.00 | 0.00 |
| ATOM | 5058 | HB   | VAL | X | 336 | 64.721 | 32.757 | 41.307 | 0.00 | 0.00 |
| ATOM | 5059 | CG1  | VAL | X | 336 | 63.686 | 31.192 | 40.322 | 0.00 | 0.00 |
| ATOM | 5060 | HG11 | VAL | X | 336 | 64.032 | 30.521 | 41.109 | 0.00 | 0.00 |
| ATOM | 5061 | HG12 | VAL | X | 336 | 62.699 | 30.832 | 40.032 | 0.00 | 0.00 |
| ATOM | 5062 | HG13 | VAL | X | 336 | 64.360 | 31.288 | 39.471 | 0.00 | 0.00 |
| ATOM | 5063 | CG2  | VAL | X | 336 | 63.252 | 33.689 | 40.190 | 0.00 | 0.00 |
| ATOM | 5064 | HG21 | VAL | X | 336 | 63.992 | 33.931 | 39.427 | 0.00 | 0.00 |
| ATOM | 5065 | HG22 | VAL | X | 336 | 62.261 | 33.471 | 39.792 | 0.00 | 0.00 |
| ATOM | 5066 | HG23 | VAL | X | 336 | 63.212 | 34.584 | 40.811 | 0.00 | 0.00 |
| ATOM | 5067 | C    | VAL | X | 336 | 63.088 | 33.699 | 43.310 | 0.00 | 0.00 |
| ATOM | 5068 | O    | VAL | X | 336 | 64.161 | 33.747 | 43.807 | 0.00 | 0.00 |
| ATOM | 5069 | N    | TYR | X | 337 | 62.144 | 34.624 | 43.480 | 0.00 | 0.00 |
| ATOM | 5070 | H    | TYR | X | 337 | 61.408 | 34.625 | 42.788 | 0.00 | 0.00 |
| ATOM | 5071 | CA   | TYR | X | 337 | 62.089 | 35.684 | 44.429 | 0.00 | 0.00 |
| ATOM | 5072 | HA   | TYR | X | 337 | 63.046 | 36.155 | 44.656 | 0.00 | 0.00 |
| ATOM | 5073 | CB   | TYR | X | 337 | 61.278 | 36.742 | 43.692 | 0.00 | 0.00 |
| ATOM | 5074 | HB2  | TYR | X | 337 | 60.524 | 36.369 | 42.998 | 0.00 | 0.00 |
| ATOM | 5075 | HB3  | TYR | X | 337 | 60.761 | 37.416 | 44.374 | 0.00 | 0.00 |
| ATOM | 5076 | CG   | TYR | X | 337 | 62.106 | 37.725 | 42.903 | 0.00 | 0.00 |
| ATOM | 5077 | CD1  | TYR | X | 337 | 62.493 | 38.980 | 43.600 | 0.00 | 0.00 |
| ATOM | 5078 | HD1  | TYR | X | 337 | 62.347 | 39.005 | 44.670 | 0.00 | 0.00 |

|      |      |     |     |   |     |        |        |        |      |      |
|------|------|-----|-----|---|-----|--------|--------|--------|------|------|
| ATOM | 5079 | CE1 | TYR | X | 337 | 63.090 | 40.001 | 42.831 | 0.00 | 0.00 |
| ATOM | 5080 | HE1 | TYR | X | 337 | 63.419 | 40.928 | 43.277 | 0.00 | 0.00 |
| ATOM | 5081 | CZ  | TYR | X | 337 | 63.418 | 39.750 | 41.491 | 0.00 | 0.00 |
| ATOM | 5082 | OH  | TYR | X | 337 | 63.992 | 40.778 | 40.783 | 0.00 | 0.00 |
| ATOM | 5083 | HH  | TYR | X | 337 | 64.444 | 41.445 | 41.304 | 0.00 | 0.00 |
| ATOM | 5084 | CE2 | TYR | X | 337 | 63.080 | 38.540 | 40.798 | 0.00 | 0.00 |
| ATOM | 5085 | HE2 | TYR | X | 337 | 63.298 | 38.460 | 39.743 | 0.00 | 0.00 |
| ATOM | 5086 | CD2 | TYR | X | 337 | 62.397 | 37.535 | 41.532 | 0.00 | 0.00 |
| ATOM | 5087 | HD2 | TYR | X | 337 | 61.913 | 36.756 | 40.962 | 0.00 | 0.00 |
| ATOM | 5088 | C   | TYR | X | 337 | 61.516 | 35.324 | 45.802 | 0.00 | 0.00 |
| ATOM | 5089 | O   | TYR | X | 337 | 61.776 | 36.056 | 46.739 | 0.00 | 0.00 |
| ATOM | 5090 | N   | GLY | X | 338 | 60.765 | 34.252 | 46.021 | 0.00 | 0.00 |
| ATOM | 5091 | H   | GLY | X | 338 | 60.633 | 33.609 | 45.254 | 0.00 | 0.00 |
| ATOM | 5092 | CA  | GLY | X | 338 | 59.850 | 33.899 | 47.138 | 0.00 | 0.00 |
| ATOM | 5093 | HA2 | GLY | X | 338 | 59.891 | 34.741 | 47.834 | 0.00 | 0.00 |
| ATOM | 5094 | HA3 | GLY | X | 338 | 58.897 | 33.616 | 46.675 | 0.00 | 0.00 |
| ATOM | 5095 | C   | GLY | X | 338 | 60.200 | 32.576 | 47.941 | 0.00 | 0.00 |
| ATOM | 5096 | O   | GLY | X | 338 | 60.252 | 32.556 | 49.180 | 0.00 | 0.00 |
| ATOM | 5097 | N   | ALA | X | 339 | 60.534 | 31.466 | 47.261 | 0.00 | 0.00 |
| ATOM | 5098 | H   | ALA | X | 339 | 60.584 | 31.527 | 46.254 | 0.00 | 0.00 |
| ATOM | 5099 | CA  | ALA | X | 339 | 60.781 | 30.110 | 47.828 | 0.00 | 0.00 |
| ATOM | 5100 | HA  | ALA | X | 339 | 60.289 | 30.051 | 48.799 | 0.00 | 0.00 |
| ATOM | 5101 | CB  | ALA | X | 339 | 60.313 | 28.912 | 46.840 | 0.00 | 0.00 |
| ATOM | 5102 | HB1 | ALA | X | 339 | 60.362 | 29.322 | 45.831 | 0.00 | 0.00 |
| ATOM | 5103 | HB2 | ALA | X | 339 | 61.056 | 28.142 | 47.048 | 0.00 | 0.00 |
| ATOM | 5104 | HB3 | ALA | X | 339 | 59.306 | 28.536 | 47.023 | 0.00 | 0.00 |
| ATOM | 5105 | C   | ALA | X | 339 | 62.350 | 29.957 | 48.024 | 0.00 | 0.00 |
| ATOM | 5106 | O   | ALA | X | 339 | 63.175 | 30.268 | 47.150 | 0.00 | 0.00 |
| ATOM | 5107 | N   | PRO | X | 340 | 62.755 | 29.400 | 49.232 | 0.00 | 0.00 |
| ATOM | 5108 | CD  | PRO | X | 340 | 61.809 | 28.992 | 50.341 | 0.00 | 0.00 |
| ATOM | 5109 | HD2 | PRO | X | 340 | 61.106 | 28.186 | 50.130 | 0.00 | 0.00 |
| ATOM | 5110 | HD3 | PRO | X | 340 | 61.206 | 29.851 | 50.634 | 0.00 | 0.00 |
| ATOM | 5111 | CG  | PRO | X | 340 | 62.756 | 28.699 | 51.512 | 0.00 | 0.00 |
| ATOM | 5112 | HG2 | PRO | X | 340 | 62.520 | 27.730 | 51.952 | 0.00 | 0.00 |
| ATOM | 5113 | HG3 | PRO | X | 340 | 62.502 | 29.518 | 52.186 | 0.00 | 0.00 |
| ATOM | 5114 | CB  | PRO | X | 340 | 64.130 | 28.618 | 51.008 | 0.00 | 0.00 |
| ATOM | 5115 | HB2 | PRO | X | 340 | 64.476 | 27.585 | 51.034 | 0.00 | 0.00 |
| ATOM | 5116 | HB3 | PRO | X | 340 | 64.842 | 29.263 | 51.524 | 0.00 | 0.00 |
| ATOM | 5117 | CA  | PRO | X | 340 | 64.102 | 29.067 | 49.493 | 0.00 | 0.00 |
| ATOM | 5118 | HA  | PRO | X | 340 | 64.681 | 29.986 | 49.406 | 0.00 | 0.00 |
| ATOM | 5119 | C   | PRO | X | 340 | 64.655 | 28.031 | 48.545 | 0.00 | 0.00 |
| ATOM | 5120 | O   | PRO | X | 340 | 64.083 | 26.975 | 48.313 | 0.00 | 0.00 |
| ATOM | 5121 | N   | GLY | X | 341 | 65.835 | 28.328 | 47.957 | 0.00 | 0.00 |
| ATOM | 5122 | H   | GLY | X | 341 | 66.216 | 29.259 | 48.052 | 0.00 | 0.00 |
| ATOM | 5123 | CA  | GLY | X | 341 | 66.753 | 27.357 | 47.257 | 0.00 | 0.00 |
| ATOM | 5124 | HA2 | GLY | X | 341 | 67.761 | 27.730 | 47.552 | 0.00 | 0.00 |
| ATOM | 5125 | HA3 | GLY | X | 341 | 66.627 | 26.319 | 47.543 | 0.00 | 0.00 |
| ATOM | 5126 | C   | GLY | X | 341 | 66.768 | 27.403 | 45.695 | 0.00 | 0.00 |
| ATOM | 5127 | O   | GLY | X | 341 | 67.682 | 26.886 | 45.108 | 0.00 | 0.00 |
| ATOM | 5128 | N   | PHE | X | 342 | 65.783 | 28.082 | 45.142 | 0.00 | 0.00 |
| ATOM | 5129 | H   | PHE | X | 342 | 65.183 | 28.562 | 45.797 | 0.00 | 0.00 |
| ATOM | 5130 | CA  | PHE | X | 342 | 65.702 | 28.522 | 43.731 | 0.00 | 0.00 |
| ATOM | 5131 | HA  | PHE | X | 342 | 66.273 | 27.779 | 43.175 | 0.00 | 0.00 |
| ATOM | 5132 | CB  | PHE | X | 342 | 64.252 | 28.419 | 43.240 | 0.00 | 0.00 |
| ATOM | 5133 | HB2 | PHE | X | 342 | 63.678 | 29.294 | 43.545 | 0.00 | 0.00 |
| ATOM | 5134 | HB3 | PHE | X | 342 | 64.222 | 28.467 | 42.151 | 0.00 | 0.00 |
| ATOM | 5135 | CG  | PHE | X | 342 | 63.522 | 27.185 | 43.751 | 0.00 | 0.00 |
| ATOM | 5136 | CD1 | PHE | X | 342 | 63.288 | 26.042 | 42.917 | 0.00 | 0.00 |
| ATOM | 5137 | HD1 | PHE | X | 342 | 63.807 | 25.934 | 41.976 | 0.00 | 0.00 |
| ATOM | 5138 | CE1 | PHE | X | 342 | 62.477 | 24.999 | 43.271 | 0.00 | 0.00 |
| ATOM | 5139 | HE1 | PHE | X | 342 | 62.433 | 24.189 | 42.558 | 0.00 | 0.00 |
| ATOM | 5140 | CZ  | PHE | X | 342 | 61.868 | 24.954 | 44.509 | 0.00 | 0.00 |
| ATOM | 5141 | HZ  | PHE | X | 342 | 61.184 | 24.180 | 44.824 | 0.00 | 0.00 |
| ATOM | 5142 | CE2 | PHE | X | 342 | 61.888 | 26.150 | 45.287 | 0.00 | 0.00 |
| ATOM | 5143 | HE2 | PHE | X | 342 | 61.234 | 26.365 | 46.118 | 0.00 | 0.00 |
| ATOM | 5144 | CD2 | PHE | X | 342 | 62.719 | 27.216 | 44.913 | 0.00 | 0.00 |
| ATOM | 5145 | HD2 | PHE | X | 342 | 62.765 | 28.138 | 45.475 | 0.00 | 0.00 |
| ATOM | 5146 | C   | PHE | X | 342 | 66.082 | 29.961 | 43.488 | 0.00 | 0.00 |
| ATOM | 5147 | O   | PHE | X | 342 | 65.900 | 30.860 | 44.278 | 0.00 | 0.00 |
| ATOM | 5148 | N   | SER | X | 343 | 66.587 | 30.181 | 42.247 | 0.00 | 0.00 |

|      |      |      |     |   |     |        |        |        |      |      |
|------|------|------|-----|---|-----|--------|--------|--------|------|------|
| ATOM | 5149 | H    | SER | X | 343 | 66.796 | 29.415 | 41.621 | 0.00 | 0.00 |
| ATOM | 5150 | CA   | SER | X | 343 | 67.280 | 31.462 | 41.960 | 0.00 | 0.00 |
| ATOM | 5151 | HA   | SER | X | 343 | 66.802 | 32.318 | 42.435 | 0.00 | 0.00 |
| ATOM | 5152 | CB   | SER | X | 343 | 68.660 | 31.376 | 42.545 | 0.00 | 0.00 |
| ATOM | 5153 | HB2  | SER | X | 343 | 68.461 | 31.469 | 43.613 | 0.00 | 0.00 |
| ATOM | 5154 | HB3  | SER | X | 343 | 69.054 | 30.378 | 42.351 | 0.00 | 0.00 |
| ATOM | 5155 | OG   | SER | X | 343 | 69.483 | 32.402 | 42.111 | 0.00 | 0.00 |
| ATOM | 5156 | HG   | SER | X | 343 | 70.279 | 32.294 | 42.636 | 0.00 | 0.00 |
| ATOM | 5157 | C    | SER | X | 343 | 67.330 | 31.584 | 40.416 | 0.00 | 0.00 |
| ATOM | 5158 | O    | SER | X | 343 | 67.415 | 30.607 | 39.650 | 0.00 | 0.00 |
| ATOM | 5159 | N    | LYS | X | 344 | 67.389 | 32.805 | 39.932 | 0.00 | 0.00 |
| ATOM | 5160 | H    | LYS | X | 344 | 67.482 | 33.557 | 40.599 | 0.00 | 0.00 |
| ATOM | 5161 | CA   | LYS | X | 344 | 67.594 | 33.124 | 38.514 | 0.00 | 0.00 |
| ATOM | 5162 | HA   | LYS | X | 344 | 66.854 | 32.688 | 37.842 | 0.00 | 0.00 |
| ATOM | 5163 | CB   | LYS | X | 344 | 67.358 | 34.640 | 38.339 | 0.00 | 0.00 |
| ATOM | 5164 | HB2  | LYS | X | 344 | 67.241 | 34.835 | 37.273 | 0.00 | 0.00 |
| ATOM | 5165 | HB3  | LYS | X | 344 | 66.330 | 34.914 | 38.575 | 0.00 | 0.00 |
| ATOM | 5166 | CG   | LYS | X | 344 | 68.280 | 35.606 | 38.889 | 0.00 | 0.00 |
| ATOM | 5167 | HG2  | LYS | X | 344 | 68.352 | 35.432 | 39.962 | 0.00 | 0.00 |
| ATOM | 5168 | HG3  | LYS | X | 344 | 69.263 | 35.567 | 38.419 | 0.00 | 0.00 |
| ATOM | 5169 | CD   | LYS | X | 344 | 67.768 | 37.003 | 38.740 | 0.00 | 0.00 |
| ATOM | 5170 | HD2  | LYS | X | 344 | 67.715 | 37.216 | 37.672 | 0.00 | 0.00 |
| ATOM | 5171 | HD3  | LYS | X | 344 | 66.848 | 37.061 | 39.321 | 0.00 | 0.00 |
| ATOM | 5172 | CE   | LYS | X | 344 | 68.762 | 38.005 | 39.382 | 0.00 | 0.00 |
| ATOM | 5173 | HE2  | LYS | X | 344 | 68.524 | 39.038 | 39.129 | 0.00 | 0.00 |
| ATOM | 5174 | HE3  | LYS | X | 344 | 68.663 | 37.974 | 40.467 | 0.00 | 0.00 |
| ATOM | 5175 | NZ   | LYS | X | 344 | 70.172 | 37.774 | 39.017 | 0.00 | 0.00 |
| ATOM | 5176 | HZ1  | LYS | X | 344 | 70.165 | 38.044 | 38.044 | 0.00 | 0.00 |
| ATOM | 5177 | HZ2  | LYS | X | 344 | 70.790 | 38.399 | 39.513 | 0.00 | 0.00 |
| ATOM | 5178 | HZ3  | LYS | X | 344 | 70.398 | 36.792 | 39.093 | 0.00 | 0.00 |
| ATOM | 5179 | C    | LYS | X | 344 | 68.974 | 32.712 | 37.939 | 0.00 | 0.00 |
| ATOM | 5180 | O    | LYS | X | 344 | 69.175 | 32.571 | 36.778 | 0.00 | 0.00 |
| ATOM | 5181 | N    | ASP | X | 345 | 69.895 | 32.573 | 38.858 | 0.00 | 0.00 |
| ATOM | 5182 | H    | ASP | X | 345 | 69.474 | 32.473 | 39.771 | 0.00 | 0.00 |
| ATOM | 5183 | CA   | ASP | X | 345 | 71.340 | 32.420 | 38.796 | 0.00 | 0.00 |
| ATOM | 5184 | HA   | ASP | X | 345 | 71.557 | 32.613 | 37.745 | 0.00 | 0.00 |
| ATOM | 5185 | CB   | ASP | X | 345 | 72.004 | 33.445 | 39.778 | 0.00 | 0.00 |
| ATOM | 5186 | HB2  | ASP | X | 345 | 71.702 | 33.165 | 40.787 | 0.00 | 0.00 |
| ATOM | 5187 | HB3  | ASP | X | 345 | 73.090 | 33.349 | 39.776 | 0.00 | 0.00 |
| ATOM | 5188 | CG   | ASP | X | 345 | 71.800 | 34.939 | 39.407 | 0.00 | 0.00 |
| ATOM | 5189 | OD1  | ASP | X | 345 | 71.691 | 35.307 | 38.244 | 0.00 | 0.00 |
| ATOM | 5190 | OD2  | ASP | X | 345 | 71.604 | 35.734 | 40.316 | 0.00 | 0.00 |
| ATOM | 5191 | C    | ASP | X | 345 | 71.876 | 30.978 | 39.033 | 0.00 | 0.00 |
| ATOM | 5192 | O    | ASP | X | 345 | 73.022 | 30.763 | 39.386 | 0.00 | 0.00 |
| ATOM | 5193 | N    | ASN | X | 346 | 71.013 | 29.984 | 38.892 | 0.00 | 0.00 |
| ATOM | 5194 | H    | ASN | X | 346 | 70.169 | 30.253 | 38.408 | 0.00 | 0.00 |
| ATOM | 5195 | CA   | ASN | X | 346 | 71.140 | 28.592 | 39.419 | 0.00 | 0.00 |
| ATOM | 5196 | HA   | ASN | X | 346 | 72.119 | 28.137 | 39.272 | 0.00 | 0.00 |
| ATOM | 5197 | CB   | ASN | X | 346 | 70.891 | 28.591 | 40.899 | 0.00 | 0.00 |
| ATOM | 5198 | HB2  | ASN | X | 346 | 71.492 | 29.425 | 41.263 | 0.00 | 0.00 |
| ATOM | 5199 | HB3  | ASN | X | 346 | 69.842 | 28.867 | 41.012 | 0.00 | 0.00 |
| ATOM | 5200 | CG   | ASN | X | 346 | 71.083 | 27.258 | 41.660 | 0.00 | 0.00 |
| ATOM | 5201 | OD1  | ASN | X | 346 | 70.200 | 26.436 | 41.594 | 0.00 | 0.00 |
| ATOM | 5202 | ND2  | ASN | X | 346 | 72.170 | 27.063 | 42.399 | 0.00 | 0.00 |
| ATOM | 5203 | HD21 | ASN | X | 346 | 72.399 | 26.163 | 42.795 | 0.00 | 0.00 |
| ATOM | 5204 | HD22 | ASN | X | 346 | 72.935 | 27.723 | 42.394 | 0.00 | 0.00 |
| ATOM | 5205 | C    | ASN | X | 346 | 70.072 | 27.644 | 38.793 | 0.00 | 0.00 |
| ATOM | 5206 | O    | ASN | X | 346 | 68.938 | 28.051 | 38.524 | 0.00 | 0.00 |
| ATOM | 5207 | N    | GLU | X | 347 | 70.460 | 26.396 | 38.536 | 0.00 | 0.00 |
| ATOM | 5208 | H    | GLU | X | 347 | 71.417 | 26.130 | 38.718 | 0.00 | 0.00 |
| ATOM | 5209 | CA   | GLU | X | 347 | 69.515 | 25.500 | 37.742 | 0.00 | 0.00 |
| ATOM | 5210 | HA   | GLU | X | 347 | 69.111 | 26.038 | 36.884 | 0.00 | 0.00 |
| ATOM | 5211 | CB   | GLU | X | 347 | 70.099 | 24.228 | 37.145 | 0.00 | 0.00 |
| ATOM | 5212 | HB2  | GLU | X | 347 | 70.714 | 23.734 | 37.896 | 0.00 | 0.00 |
| ATOM | 5213 | HB3  | GLU | X | 347 | 69.219 | 23.704 | 36.770 | 0.00 | 0.00 |
| ATOM | 5214 | CG   | GLU | X | 347 | 70.987 | 24.663 | 35.981 | 0.00 | 0.00 |
| ATOM | 5215 | HG2  | GLU | X | 347 | 70.430 | 25.245 | 35.247 | 0.00 | 0.00 |
| ATOM | 5216 | HG3  | GLU | X | 347 | 71.756 | 25.318 | 36.391 | 0.00 | 0.00 |
| ATOM | 5217 | CD   | GLU | X | 347 | 71.577 | 23.466 | 35.317 | 0.00 | 0.00 |
| ATOM | 5218 | OE1  | GLU | X | 347 | 71.210 | 23.329 | 34.140 | 0.00 | 0.00 |



|      |      |      |     |   |     |        |        |        |      |      |
|------|------|------|-----|---|-----|--------|--------|--------|------|------|
| ATOM | 5219 | OE2  | GLU | X | 347 | 72.391 | 22.697 | 35.824 | 0.00 | 0.00 |
| ATOM | 5220 | C    | GLU | X | 347 | 68.204 | 25.223 | 38.481 | 0.00 | 0.00 |
| ATOM | 5221 | O    | GLU | X | 347 | 67.159 | 25.022 | 37.843 | 0.00 | 0.00 |
| ATOM | 5222 | N    | SER | X | 348 | 68.221 | 25.345 | 39.832 | 0.00 | 0.00 |
| ATOM | 5223 | H    | SER | X | 348 | 69.093 | 25.574 | 40.288 | 0.00 | 0.00 |
| ATOM | 5224 | CA   | SER | X | 348 | 67.043 | 25.430 | 40.681 | 0.00 | 0.00 |
| ATOM | 5225 | HA   | SER | X | 348 | 67.383 | 25.424 | 41.717 | 0.00 | 0.00 |
| ATOM | 5226 | CB   | SER | X | 348 | 66.163 | 26.725 | 40.406 | 0.00 | 0.00 |
| ATOM | 5227 | HB2  | SER | X | 348 | 65.679 | 26.520 | 39.451 | 0.00 | 0.00 |
| ATOM | 5228 | HB3  | SER | X | 348 | 65.400 | 26.965 | 41.146 | 0.00 | 0.00 |
| ATOM | 5229 | OG   | SER | X | 348 | 66.934 | 27.798 | 40.371 | 0.00 | 0.00 |
| ATOM | 5230 | HG   | SER | X | 348 | 67.346 | 27.869 | 39.507 | 0.00 | 0.00 |
| ATOM | 5231 | C    | SER | X | 348 | 66.144 | 24.185 | 40.576 | 0.00 | 0.00 |
| ATOM | 5232 | O    | SER | X | 348 | 64.891 | 24.296 | 40.558 | 0.00 | 0.00 |
| ATOM | 5233 | N    | LEU | X | 349 | 66.864 | 23.041 | 40.539 | 0.00 | 0.00 |
| ATOM | 5234 | H    | LEU | X | 349 | 67.849 | 23.124 | 40.748 | 0.00 | 0.00 |
| ATOM | 5235 | CA   | LEU | X | 349 | 66.464 | 21.645 | 40.313 | 0.00 | 0.00 |
| ATOM | 5236 | HA   | LEU | X | 349 | 65.679 | 21.662 | 39.557 | 0.00 | 0.00 |
| ATOM | 5237 | CB   | LEU | X | 349 | 67.665 | 20.813 | 39.774 | 0.00 | 0.00 |
| ATOM | 5238 | HB2  | LEU | X | 349 | 68.465 | 20.744 | 40.510 | 0.00 | 0.00 |
| ATOM | 5239 | HB3  | LEU | X | 349 | 67.425 | 19.763 | 39.605 | 0.00 | 0.00 |
| ATOM | 5240 | CG   | LEU | X | 349 | 68.310 | 21.299 | 38.429 | 0.00 | 0.00 |
| ATOM | 5241 | HG   | LEU | X | 349 | 68.660 | 22.327 | 38.519 | 0.00 | 0.00 |
| ATOM | 5242 | CD1  | LEU | X | 349 | 69.376 | 20.285 | 37.944 | 0.00 | 0.00 |
| ATOM | 5243 | HD11 | LEU | X | 349 | 70.116 | 20.087 | 38.719 | 0.00 | 0.00 |
| ATOM | 5244 | HD12 | LEU | X | 349 | 68.840 | 19.368 | 37.697 | 0.00 | 0.00 |
| ATOM | 5245 | HD13 | LEU | X | 349 | 69.878 | 20.632 | 37.041 | 0.00 | 0.00 |
| ATOM | 5246 | CD2  | LEU | X | 349 | 67.167 | 21.302 | 37.356 | 0.00 | 0.00 |
| ATOM | 5247 | HD21 | LEU | X | 349 | 67.624 | 21.685 | 36.443 | 0.00 | 0.00 |
| ATOM | 5248 | HD22 | LEU | X | 349 | 66.937 | 20.269 | 37.095 | 0.00 | 0.00 |
| ATOM | 5249 | HD23 | LEU | X | 349 | 66.330 | 21.990 | 37.471 | 0.00 | 0.00 |
| ATOM | 5250 | C    | LEU | X | 349 | 65.861 | 20.972 | 41.582 | 0.00 | 0.00 |
| ATOM | 5251 | O    | LEU | X | 349 | 66.499 | 21.046 | 42.634 | 0.00 | 0.00 |
| ATOM | 5252 | N    | ILE | X | 350 | 64.780 | 20.240 | 41.496 | 0.00 | 0.00 |
| ATOM | 5253 | H    | ILE | X | 350 | 64.276 | 20.271 | 40.622 | 0.00 | 0.00 |
| ATOM | 5254 | CA   | ILE | X | 350 | 64.192 | 19.443 | 42.584 | 0.00 | 0.00 |
| ATOM | 5255 | HA   | ILE | X | 350 | 64.975 | 19.202 | 43.304 | 0.00 | 0.00 |
| ATOM | 5256 | CB   | ILE | X | 350 | 62.925 | 20.230 | 43.223 | 0.00 | 0.00 |
| ATOM | 5257 | HB   | ILE | X | 350 | 62.622 | 19.536 | 44.007 | 0.00 | 0.00 |
| ATOM | 5258 | CG2  | ILE | X | 350 | 63.404 | 21.559 | 43.792 | 0.00 | 0.00 |
| ATOM | 5259 | HG21 | ILE | X | 350 | 64.281 | 21.373 | 44.412 | 0.00 | 0.00 |
| ATOM | 5260 | HG22 | ILE | X | 350 | 63.753 | 22.231 | 43.008 | 0.00 | 0.00 |
| ATOM | 5261 | HG23 | ILE | X | 350 | 62.642 | 21.959 | 44.461 | 0.00 | 0.00 |
| ATOM | 5262 | CG1  | ILE | X | 350 | 61.693 | 20.375 | 42.380 | 0.00 | 0.00 |
| ATOM | 5263 | HG12 | ILE | X | 350 | 62.066 | 20.515 | 41.365 | 0.00 | 0.00 |
| ATOM | 5264 | HG13 | ILE | X | 350 | 61.305 | 19.361 | 42.284 | 0.00 | 0.00 |
| ATOM | 5265 | CD1  | ILE | X | 350 | 60.545 | 21.350 | 42.673 | 0.00 | 0.00 |
| ATOM | 5266 | HD11 | ILE | X | 350 | 59.989 | 21.022 | 43.551 | 0.00 | 0.00 |
| ATOM | 5267 | HD12 | ILE | X | 350 | 61.018 | 22.304 | 42.904 | 0.00 | 0.00 |
| ATOM | 5268 | HD13 | ILE | X | 350 | 60.029 | 21.386 | 41.713 | 0.00 | 0.00 |
| ATOM | 5269 | C    | ILE | X | 350 | 63.756 | 18.045 | 42.179 | 0.00 | 0.00 |
| ATOM | 5270 | O    | ILE | X | 350 | 63.376 | 17.851 | 41.029 | 0.00 | 0.00 |
| ATOM | 5271 | N    | SER | X | 351 | 63.781 | 17.088 | 43.130 | 0.00 | 0.00 |
| ATOM | 5272 | H    | SER | X | 351 | 64.107 | 17.410 | 44.030 | 0.00 | 0.00 |
| ATOM | 5273 | CA   | SER | X | 351 | 63.133 | 15.784 | 43.129 | 0.00 | 0.00 |
| ATOM | 5274 | HA   | SER | X | 351 | 63.304 | 15.295 | 42.170 | 0.00 | 0.00 |
| ATOM | 5275 | CB   | SER | X | 351 | 63.687 | 14.844 | 44.253 | 0.00 | 0.00 |
| ATOM | 5276 | HB2  | SER | X | 351 | 63.633 | 13.801 | 43.942 | 0.00 | 0.00 |
| ATOM | 5277 | HB3  | SER | X | 351 | 64.762 | 14.999 | 44.348 | 0.00 | 0.00 |
| ATOM | 5278 | OG   | SER | X | 351 | 62.990 | 14.989 | 45.476 | 0.00 | 0.00 |
| ATOM | 5279 | HG   | SER | X | 351 | 63.447 | 14.459 | 46.132 | 0.00 | 0.00 |
| ATOM | 5280 | C    | SER | X | 351 | 61.570 | 15.903 | 43.265 | 0.00 | 0.00 |
| ATOM | 5281 | O    | SER | X | 351 | 61.085 | 17.018 | 43.458 | 0.00 | 0.00 |
| ATOM | 5282 | N    | ARG | X | 352 | 60.860 | 14.831 | 43.085 | 0.00 | 0.00 |
| ATOM | 5283 | H    | ARG | X | 352 | 61.432 | 14.045 | 42.811 | 0.00 | 0.00 |
| ATOM | 5284 | CA   | ARG | X | 352 | 59.388 | 14.777 | 43.202 | 0.00 | 0.00 |
| ATOM | 5285 | HA   | ARG | X | 352 | 59.023 | 15.702 | 42.755 | 0.00 | 0.00 |
| ATOM | 5286 | CB   | ARG | X | 352 | 58.846 | 13.604 | 42.388 | 0.00 | 0.00 |
| ATOM | 5287 | HB2  | ARG | X | 352 | 59.326 | 13.512 | 41.414 | 0.00 | 0.00 |
| ATOM | 5288 | HB3  | ARG | X | 352 | 58.875 | 12.664 | 42.939 | 0.00 | 0.00 |

|      |      |      |     |   |     |        |        |        |      |      |
|------|------|------|-----|---|-----|--------|--------|--------|------|------|
| ATOM | 5289 | CG   | ARG | X | 352 | 57.357 | 13.856 | 41.939 | 0.00 | 0.00 |
| ATOM | 5290 | HG2  | ARG | X | 352 | 56.746 | 13.767 | 42.837 | 0.00 | 0.00 |
| ATOM | 5291 | HG3  | ARG | X | 352 | 57.366 | 14.888 | 41.587 | 0.00 | 0.00 |
| ATOM | 5292 | CD   | ARG | X | 352 | 56.624 | 12.969 | 40.906 | 0.00 | 0.00 |
| ATOM | 5293 | HD2  | ARG | X | 352 | 55.611 | 13.296 | 40.669 | 0.00 | 0.00 |
| ATOM | 5294 | HD3  | ARG | X | 352 | 57.093 | 13.048 | 39.925 | 0.00 | 0.00 |
| ATOM | 5295 | NE   | ARG | X | 352 | 56.494 | 11.515 | 41.258 | 0.00 | 0.00 |
| ATOM | 5296 | HE   | ARG | X | 352 | 55.792 | 11.267 | 41.941 | 0.00 | 0.00 |
| ATOM | 5297 | CZ   | ARG | X | 352 | 57.211 | 10.507 | 40.744 | 0.00 | 0.00 |
| ATOM | 5298 | NH1  | ARG | X | 352 | 57.985 | 10.687 | 39.690 | 0.00 | 0.00 |
| ATOM | 5299 | HH11 | ARG | X | 352 | 58.111 | 11.561 | 39.199 | 0.00 | 0.00 |
| ATOM | 5300 | HH12 | ARG | X | 352 | 58.445 | 9.907  | 39.242 | 0.00 | 0.00 |
| ATOM | 5301 | NH2  | ARG | X | 352 | 57.043 | 9.271  | 41.157 | 0.00 | 0.00 |
| ATOM | 5302 | HH21 | ARG | X | 352 | 56.386 | 9.048  | 41.891 | 0.00 | 0.00 |
| ATOM | 5303 | HH22 | ARG | X | 352 | 57.446 | 8.529  | 40.604 | 0.00 | 0.00 |
| ATOM | 5304 | C    | ARG | X | 352 | 58.839 | 14.781 | 44.691 | 0.00 | 0.00 |
| ATOM | 5305 | O    | ARG | X | 352 | 57.781 | 15.431 | 44.885 | 0.00 | 0.00 |
| ATOM | 5306 | N    | ALA | X | 353 | 59.567 | 14.241 | 45.667 | 0.00 | 0.00 |
| ATOM | 5307 | H    | ALA | X | 353 | 60.402 | 13.745 | 45.390 | 0.00 | 0.00 |
| ATOM | 5308 | CA   | ALA | X | 353 | 59.388 | 14.444 | 47.098 | 0.00 | 0.00 |
| ATOM | 5309 | HA   | ALA | X | 353 | 58.361 | 14.213 | 47.379 | 0.00 | 0.00 |
| ATOM | 5310 | CB   | ALA | X | 353 | 60.405 | 13.586 | 47.820 | 0.00 | 0.00 |
| ATOM | 5311 | HB1  | ALA | X | 353 | 60.274 | 13.579 | 48.902 | 0.00 | 0.00 |
| ATOM | 5312 | HB2  | ALA | X | 353 | 60.394 | 12.542 | 47.506 | 0.00 | 0.00 |
| ATOM | 5313 | HB3  | ALA | X | 353 | 61.439 | 13.852 | 47.603 | 0.00 | 0.00 |
| ATOM | 5314 | C    | ALA | X | 353 | 59.601 | 15.974 | 47.476 | 0.00 | 0.00 |
| ATOM | 5315 | O    | ALA | X | 353 | 58.789 | 16.635 | 48.233 | 0.00 | 0.00 |
| ATOM | 5316 | N    | GLU | X | 354 | 60.701 | 16.613 | 46.964 | 0.00 | 0.00 |
| ATOM | 5317 | H    | GLU | X | 354 | 61.413 | 16.058 | 46.512 | 0.00 | 0.00 |
| ATOM | 5318 | CA   | GLU | X | 354 | 60.820 | 18.056 | 46.991 | 0.00 | 0.00 |
| ATOM | 5319 | HA   | GLU | X | 354 | 60.899 | 18.409 | 48.019 | 0.00 | 0.00 |
| ATOM | 5320 | CB   | GLU | X | 354 | 62.230 | 18.387 | 46.374 | 0.00 | 0.00 |
| ATOM | 5321 | HB2  | GLU | X | 354 | 62.418 | 18.037 | 45.359 | 0.00 | 0.00 |
| ATOM | 5322 | HB3  | GLU | X | 354 | 62.322 | 19.463 | 46.225 | 0.00 | 0.00 |
| ATOM | 5323 | CG   | GLU | X | 354 | 63.425 | 18.010 | 47.344 | 0.00 | 0.00 |
| ATOM | 5324 | HG2  | GLU | X | 354 | 63.336 | 18.609 | 48.251 | 0.00 | 0.00 |
| ATOM | 5325 | HG3  | GLU | X | 354 | 63.440 | 16.938 | 47.539 | 0.00 | 0.00 |
| ATOM | 5326 | CD   | GLU | X | 354 | 64.737 | 18.541 | 46.586 | 0.00 | 0.00 |
| ATOM | 5327 | OE1  | GLU | X | 354 | 65.242 | 19.621 | 47.047 | 0.00 | 0.00 |
| ATOM | 5328 | OE2  | GLU | X | 354 | 65.200 | 17.839 | 45.630 | 0.00 | 0.00 |
| ATOM | 5329 | C    | GLU | X | 354 | 59.628 | 18.798 | 46.367 | 0.00 | 0.00 |
| ATOM | 5330 | O    | GLU | X | 354 | 59.157 | 19.714 | 47.000 | 0.00 | 0.00 |
| ATOM | 5331 | N    | PHE | X | 355 | 59.183 | 18.396 | 45.177 | 0.00 | 0.00 |
| ATOM | 5332 | H    | PHE | X | 355 | 59.600 | 17.551 | 44.813 | 0.00 | 0.00 |
| ATOM | 5333 | CA   | PHE | X | 355 | 58.034 | 19.022 | 44.544 | 0.00 | 0.00 |
| ATOM | 5334 | HA   | PHE | X | 355 | 58.294 | 20.072 | 44.405 | 0.00 | 0.00 |
| ATOM | 5335 | CB   | PHE | X | 355 | 57.766 | 18.378 | 43.167 | 0.00 | 0.00 |
| ATOM | 5336 | HB2  | PHE | X | 355 | 58.588 | 18.632 | 42.497 | 0.00 | 0.00 |
| ATOM | 5337 | HB3  | PHE | X | 355 | 57.725 | 17.295 | 43.286 | 0.00 | 0.00 |
| ATOM | 5338 | CG   | PHE | X | 355 | 56.519 | 18.761 | 42.408 | 0.00 | 0.00 |
| ATOM | 5339 | CD1  | PHE | X | 355 | 56.047 | 20.086 | 42.355 | 0.00 | 0.00 |
| ATOM | 5340 | HD1  | PHE | X | 355 | 56.581 | 20.897 | 42.828 | 0.00 | 0.00 |
| ATOM | 5341 | CE1  | PHE | X | 355 | 54.799 | 20.344 | 41.799 | 0.00 | 0.00 |
| ATOM | 5342 | HE1  | PHE | X | 355 | 54.492 | 21.380 | 41.808 | 0.00 | 0.00 |
| ATOM | 5343 | CZ   | PHE | X | 355 | 54.147 | 19.391 | 41.052 | 0.00 | 0.00 |
| ATOM | 5344 | HZ   | PHE | X | 355 | 53.279 | 19.620 | 40.451 | 0.00 | 0.00 |
| ATOM | 5345 | CE2  | PHE | X | 355 | 54.733 | 18.094 | 40.926 | 0.00 | 0.00 |
| ATOM | 5346 | HE2  | PHE | X | 355 | 54.267 | 17.362 | 40.283 | 0.00 | 0.00 |
| ATOM | 5347 | CD2  | PHE | X | 355 | 55.906 | 17.748 | 41.677 | 0.00 | 0.00 |
| ATOM | 5348 | HD2  | PHE | X | 355 | 56.320 | 16.751 | 41.700 | 0.00 | 0.00 |
| ATOM | 5349 | C    | PHE | X | 355 | 56.757 | 18.882 | 45.406 | 0.00 | 0.00 |
| ATOM | 5350 | O    | PHE | X | 355 | 55.956 | 19.831 | 45.488 | 0.00 | 0.00 |
| ATOM | 5351 | N    | LEU | X | 356 | 56.545 | 17.761 | 46.131 | 0.00 | 0.00 |
| ATOM | 5352 | H    | LEU | X | 356 | 57.100 | 16.937 | 45.950 | 0.00 | 0.00 |
| ATOM | 5353 | CA   | LEU | X | 356 | 55.515 | 17.639 | 47.103 | 0.00 | 0.00 |
| ATOM | 5354 | HA   | LEU | X | 356 | 54.518 | 17.776 | 46.684 | 0.00 | 0.00 |
| ATOM | 5355 | CB   | LEU | X | 356 | 55.485 | 16.137 | 47.539 | 0.00 | 0.00 |
| ATOM | 5356 | HB2  | LEU | X | 356 | 55.437 | 15.638 | 46.572 | 0.00 | 0.00 |
| ATOM | 5357 | HB3  | LEU | X | 356 | 56.454 | 15.838 | 47.939 | 0.00 | 0.00 |
| ATOM | 5358 | CG   | LEU | X | 356 | 54.427 | 15.679 | 48.555 | 0.00 | 0.00 |

|      |      |      |     |   |     |        |        |        |      |      |
|------|------|------|-----|---|-----|--------|--------|--------|------|------|
| ATOM | 5359 | HG   | LEU | X | 356 | 54.473 | 14.595 | 48.459 | 0.00 | 0.00 |
| ATOM | 5360 | CD1  | LEU | X | 356 | 54.795 | 16.191 | 49.996 | 0.00 | 0.00 |
| ATOM | 5361 | HD11 | LEU | X | 356 | 55.828 | 16.238 | 50.341 | 0.00 | 0.00 |
| ATOM | 5362 | HD12 | LEU | X | 356 | 54.418 | 17.173 | 50.284 | 0.00 | 0.00 |
| ATOM | 5363 | HD13 | LEU | X | 356 | 54.208 | 15.508 | 50.610 | 0.00 | 0.00 |
| ATOM | 5364 | CD2  | LEU | X | 356 | 52.983 | 15.992 | 48.190 | 0.00 | 0.00 |
| ATOM | 5365 | HD21 | LEU | X | 356 | 52.711 | 16.988 | 48.541 | 0.00 | 0.00 |
| ATOM | 5366 | HD22 | LEU | X | 356 | 52.899 | 16.106 | 47.109 | 0.00 | 0.00 |
| ATOM | 5367 | HD23 | LEU | X | 356 | 52.227 | 15.320 | 48.596 | 0.00 | 0.00 |
| ATOM | 5368 | C    | LEU | X | 356 | 55.734 | 18.710 | 48.204 | 0.00 | 0.00 |
| ATOM | 5369 | O    | LEU | X | 356 | 54.736 | 19.334 | 48.661 | 0.00 | 0.00 |
| ATOM | 5370 | N    | ALA | X | 357 | 56.995 | 18.873 | 48.703 | 0.00 | 0.00 |
| ATOM | 5371 | H    | ALA | X | 357 | 57.698 | 18.237 | 48.354 | 0.00 | 0.00 |
| ATOM | 5372 | CA   | ALA | X | 357 | 57.255 | 19.855 | 49.799 | 0.00 | 0.00 |
| ATOM | 5373 | HA   | ALA | X | 357 | 56.562 | 19.593 | 50.599 | 0.00 | 0.00 |
| ATOM | 5374 | CB   | ALA | X | 357 | 58.692 | 19.730 | 50.259 | 0.00 | 0.00 |
| ATOM | 5375 | HB1  | ALA | X | 357 | 59.422 | 20.047 | 49.515 | 0.00 | 0.00 |
| ATOM | 5376 | HB2  | ALA | X | 357 | 58.769 | 20.316 | 51.174 | 0.00 | 0.00 |
| ATOM | 5377 | HB3  | ALA | X | 357 | 59.044 | 18.713 | 50.436 | 0.00 | 0.00 |
| ATOM | 5378 | C    | ALA | X | 357 | 56.918 | 21.248 | 49.238 | 0.00 | 0.00 |
| ATOM | 5379 | O    | ALA | X | 357 | 56.285 | 21.998 | 49.922 | 0.00 | 0.00 |
| ATOM | 5380 | N    | GLY | X | 358 | 57.369 | 21.528 | 48.022 | 0.00 | 0.00 |
| ATOM | 5381 | H    | GLY | X | 358 | 58.029 | 20.909 | 47.573 | 0.00 | 0.00 |
| ATOM | 5382 | CA   | GLY | X | 358 | 57.071 | 22.755 | 47.276 | 0.00 | 0.00 |
| ATOM | 5383 | HA2  | GLY | X | 358 | 57.641 | 23.643 | 47.614 | 0.00 | 0.00 |
| ATOM | 5384 | HA3  | GLY | X | 358 | 57.375 | 22.501 | 46.207 | 0.00 | 0.00 |
| ATOM | 5385 | C    | GLY | X | 358 | 55.604 | 23.084 | 47.239 | 0.00 | 0.00 |
| ATOM | 5386 | O    | GLY | X | 358 | 55.177 | 24.178 | 47.515 | 0.00 | 0.00 |
| ATOM | 5387 | N    | VAL | X | 359 | 54.801 | 22.054 | 46.896 | 0.00 | 0.00 |
| ATOM | 5388 | H    | VAL | X | 359 | 55.150 | 21.161 | 46.577 | 0.00 | 0.00 |
| ATOM | 5389 | CA   | VAL | X | 359 | 53.346 | 22.192 | 46.912 | 0.00 | 0.00 |
| ATOM | 5390 | HA   | VAL | X | 359 | 53.129 | 22.976 | 46.186 | 0.00 | 0.00 |
| ATOM | 5391 | CB   | VAL | X | 359 | 52.627 | 20.952 | 46.391 | 0.00 | 0.00 |
| ATOM | 5392 | HB   | VAL | X | 359 | 52.900 | 20.120 | 47.041 | 0.00 | 0.00 |
| ATOM | 5393 | CG1  | VAL | X | 359 | 51.106 | 21.051 | 46.595 | 0.00 | 0.00 |
| ATOM | 5394 | HG11 | VAL | X | 359 | 50.561 | 20.182 | 46.229 | 0.00 | 0.00 |
| ATOM | 5395 | HG12 | VAL | X | 359 | 50.799 | 21.096 | 47.640 | 0.00 | 0.00 |
| ATOM | 5396 | HG13 | VAL | X | 359 | 50.769 | 21.908 | 46.011 | 0.00 | 0.00 |
| ATOM | 5397 | CG2  | VAL | X | 359 | 52.825 | 20.682 | 44.841 | 0.00 | 0.00 |
| ATOM | 5398 | HG21 | VAL | X | 359 | 52.015 | 19.991 | 44.606 | 0.00 | 0.00 |
| ATOM | 5399 | HG22 | VAL | X | 359 | 52.731 | 21.552 | 44.191 | 0.00 | 0.00 |
| ATOM | 5400 | HG23 | VAL | X | 359 | 53.717 | 20.079 | 44.674 | 0.00 | 0.00 |
| ATOM | 5401 | C    | VAL | X | 359 | 52.841 | 22.625 | 48.323 | 0.00 | 0.00 |
| ATOM | 5402 | O    | VAL | X | 359 | 52.198 | 23.694 | 48.503 | 0.00 | 0.00 |
| ATOM | 5403 | N    | ARG | X | 360 | 53.210 | 21.871 | 49.361 | 0.00 | 0.00 |
| ATOM | 5404 | H    | ARG | X | 360 | 53.955 | 21.194 | 49.284 | 0.00 | 0.00 |
| ATOM | 5405 | CA   | ARG | X | 360 | 52.723 | 22.112 | 50.752 | 0.00 | 0.00 |
| ATOM | 5406 | HA   | ARG | X | 360 | 51.652 | 21.943 | 50.856 | 0.00 | 0.00 |
| ATOM | 5407 | CB   | ARG | X | 360 | 53.435 | 21.144 | 51.765 | 0.00 | 0.00 |
| ATOM | 5408 | HB2  | ARG | X | 360 | 54.522 | 21.166 | 51.692 | 0.00 | 0.00 |
| ATOM | 5409 | HB3  | ARG | X | 360 | 53.339 | 21.542 | 52.775 | 0.00 | 0.00 |
| ATOM | 5410 | CG   | ARG | X | 360 | 52.951 | 19.703 | 51.674 | 0.00 | 0.00 |
| ATOM | 5411 | HG2  | ARG | X | 360 | 53.371 | 19.260 | 50.771 | 0.00 | 0.00 |
| ATOM | 5412 | HG3  | ARG | X | 360 | 53.429 | 19.225 | 52.529 | 0.00 | 0.00 |
| ATOM | 5413 | CD   | ARG | X | 360 | 51.411 | 19.506 | 51.783 | 0.00 | 0.00 |
| ATOM | 5414 | HD2  | ARG | X | 360 | 50.960 | 19.798 | 50.834 | 0.00 | 0.00 |
| ATOM | 5415 | HD3  | ARG | X | 360 | 51.226 | 18.432 | 51.788 | 0.00 | 0.00 |
| ATOM | 5416 | NE   | ARG | X | 360 | 50.793 | 20.020 | 53.014 | 0.00 | 0.00 |
| ATOM | 5417 | HE   | ARG | X | 360 | 50.314 | 20.907 | 52.944 | 0.00 | 0.00 |
| ATOM | 5418 | CZ   | ARG | X | 360 | 50.602 | 19.405 | 54.168 | 0.00 | 0.00 |
| ATOM | 5419 | NH1  | ARG | X | 360 | 50.850 | 18.129 | 54.351 | 0.00 | 0.00 |
| ATOM | 5420 | HH11 | ARG | X | 360 | 51.378 | 17.557 | 53.707 | 0.00 | 0.00 |
| ATOM | 5421 | HH12 | ARG | X | 360 | 50.536 | 17.674 | 55.196 | 0.00 | 0.00 |
| ATOM | 5422 | NH2  | ARG | X | 360 | 50.169 | 20.036 | 55.173 | 0.00 | 0.00 |
| ATOM | 5423 | HH21 | ARG | X | 360 | 49.886 | 20.992 | 55.016 | 0.00 | 0.00 |
| ATOM | 5424 | HH22 | ARG | X | 360 | 49.851 | 19.692 | 56.067 | 0.00 | 0.00 |
| ATOM | 5425 | C    | ARG | X | 360 | 53.044 | 23.543 | 51.214 | 0.00 | 0.00 |
| ATOM | 5426 | O    | ARG | X | 360 | 52.220 | 24.067 | 52.010 | 0.00 | 0.00 |
| ATOM | 5427 | N    | VAL | X | 361 | 54.201 | 24.097 | 50.778 | 0.00 | 0.00 |
| ATOM | 5428 | H    | VAL | X | 361 | 54.773 | 23.506 | 50.192 | 0.00 | 0.00 |

|      |      |      |     |   |     |        |        |        |      |      |
|------|------|------|-----|---|-----|--------|--------|--------|------|------|
| ATOM | 5429 | CA   | VAL | X | 361 | 54.548 | 25.464 | 51.091 | 0.00 | 0.00 |
| ATOM | 5430 | HA   | VAL | X | 361 | 54.027 | 25.640 | 52.032 | 0.00 | 0.00 |
| ATOM | 5431 | CB   | VAL | X | 361 | 56.041 | 25.594 | 51.442 | 0.00 | 0.00 |
| ATOM | 5432 | HB   | VAL | X | 361 | 56.151 | 26.641 | 51.724 | 0.00 | 0.00 |
| ATOM | 5433 | CG1  | VAL | X | 361 | 56.491 | 24.642 | 52.583 | 0.00 | 0.00 |
| ATOM | 5434 | HG11 | VAL | X | 361 | 55.814 | 24.530 | 53.430 | 0.00 | 0.00 |
| ATOM | 5435 | HG12 | VAL | X | 361 | 56.472 | 23.612 | 52.227 | 0.00 | 0.00 |
| ATOM | 5436 | HG13 | VAL | X | 361 | 57.546 | 24.806 | 52.801 | 0.00 | 0.00 |
| ATOM | 5437 | CG2  | VAL | X | 361 | 56.970 | 25.444 | 50.258 | 0.00 | 0.00 |
| ATOM | 5438 | HG21 | VAL | X | 361 | 56.861 | 26.316 | 49.613 | 0.00 | 0.00 |
| ATOM | 5439 | HG22 | VAL | X | 361 | 58.017 | 25.332 | 50.539 | 0.00 | 0.00 |
| ATOM | 5440 | HG23 | VAL | X | 361 | 56.631 | 24.551 | 49.733 | 0.00 | 0.00 |
| ATOM | 5441 | C    | VAL | X | 361 | 54.110 | 26.574 | 50.126 | 0.00 | 0.00 |
| ATOM | 5442 | O    | VAL | X | 361 | 54.201 | 27.794 | 50.361 | 0.00 | 0.00 |
| ATOM | 5443 | N    | GLY | X | 362 | 53.634 | 26.192 | 48.903 | 0.00 | 0.00 |
| ATOM | 5444 | H    | GLY | X | 362 | 53.765 | 25.204 | 48.739 | 0.00 | 0.00 |
| ATOM | 5445 | CA   | GLY | X | 362 | 53.250 | 27.055 | 47.752 | 0.00 | 0.00 |
| ATOM | 5446 | HA2  | GLY | X | 362 | 53.762 | 28.040 | 47.750 | 0.00 | 0.00 |
| ATOM | 5447 | HA3  | GLY | X | 362 | 53.473 | 26.506 | 46.792 | 0.00 | 0.00 |
| ATOM | 5448 | C    | GLY | X | 362 | 51.714 | 27.266 | 47.682 | 0.00 | 0.00 |
| ATOM | 5449 | O    | GLY | X | 362 | 51.231 | 28.393 | 47.463 | 0.00 | 0.00 |
| ATOM | 5450 | N    | VAL | X | 363 | 50.995 | 26.144 | 48.039 | 0.00 | 0.00 |
| ATOM | 5451 | H    | VAL | X | 363 | 51.428 | 25.281 | 48.335 | 0.00 | 0.00 |
| ATOM | 5452 | CA   | VAL | X | 363 | 49.525 | 26.183 | 48.169 | 0.00 | 0.00 |
| ATOM | 5453 | HA   | VAL | X | 363 | 49.088 | 27.096 | 47.766 | 0.00 | 0.00 |
| ATOM | 5454 | CB   | VAL | X | 363 | 48.892 | 24.906 | 47.491 | 0.00 | 0.00 |
| ATOM | 5455 | HB   | VAL | X | 363 | 49.420 | 24.004 | 47.801 | 0.00 | 0.00 |
| ATOM | 5456 | CG1  | VAL | X | 363 | 47.398 | 24.732 | 47.848 | 0.00 | 0.00 |
| ATOM | 5457 | HG11 | VAL | X | 363 | 46.994 | 23.730 | 47.705 | 0.00 | 0.00 |
| ATOM | 5458 | HG12 | VAL | X | 363 | 47.233 | 24.782 | 48.924 | 0.00 | 0.00 |
| ATOM | 5459 | HG13 | VAL | X | 363 | 46.822 | 25.555 | 47.426 | 0.00 | 0.00 |
| ATOM | 5460 | CG2  | VAL | X | 363 | 49.088 | 25.082 | 45.944 | 0.00 | 0.00 |
| ATOM | 5461 | HG21 | VAL | X | 363 | 50.107 | 25.349 | 45.663 | 0.00 | 0.00 |
| ATOM | 5462 | HG22 | VAL | X | 363 | 48.928 | 24.136 | 45.425 | 0.00 | 0.00 |
| ATOM | 5463 | HG23 | VAL | X | 363 | 48.456 | 25.833 | 45.470 | 0.00 | 0.00 |
| ATOM | 5464 | C    | VAL | X | 363 | 49.163 | 26.190 | 49.662 | 0.00 | 0.00 |
| ATOM | 5465 | O    | VAL | X | 363 | 49.587 | 25.263 | 50.354 | 0.00 | 0.00 |
| ATOM | 5466 | N    | PRO | X | 364 | 48.407 | 27.154 | 50.147 | 0.00 | 0.00 |
| ATOM | 5467 | CD   | PRO | X | 364 | 47.878 | 28.335 | 49.518 | 0.00 | 0.00 |
| ATOM | 5468 | HD2  | PRO | X | 364 | 47.287 | 27.970 | 48.678 | 0.00 | 0.00 |
| ATOM | 5469 | HD3  | PRO | X | 364 | 48.660 | 29.052 | 49.266 | 0.00 | 0.00 |
| ATOM | 5470 | CG   | PRO | X | 364 | 46.933 | 28.906 | 50.570 | 0.00 | 0.00 |
| ATOM | 5471 | HG2  | PRO | X | 364 | 46.044 | 28.277 | 50.530 | 0.00 | 0.00 |
| ATOM | 5472 | HG3  | PRO | X | 364 | 46.753 | 29.975 | 50.456 | 0.00 | 0.00 |
| ATOM | 5473 | CB   | PRO | X | 364 | 47.636 | 28.620 | 51.870 | 0.00 | 0.00 |
| ATOM | 5474 | HB2  | PRO | X | 364 | 47.013 | 28.707 | 52.759 | 0.00 | 0.00 |
| ATOM | 5475 | HB3  | PRO | X | 364 | 48.581 | 29.163 | 51.852 | 0.00 | 0.00 |
| ATOM | 5476 | CA   | PRO | X | 364 | 48.089 | 27.157 | 51.559 | 0.00 | 0.00 |
| ATOM | 5477 | HA   | PRO | X | 364 | 49.009 | 26.937 | 52.099 | 0.00 | 0.00 |
| ATOM | 5478 | C    | PRO | X | 364 | 47.017 | 26.103 | 51.842 | 0.00 | 0.00 |
| ATOM | 5479 | O    | PRO | X | 364 | 46.297 | 25.764 | 50.945 | 0.00 | 0.00 |
| ATOM | 5480 | N    | GLN | X | 365 | 46.915 | 25.656 | 53.094 | 0.00 | 0.00 |
| ATOM | 5481 | H    | GLN | X | 365 | 47.662 | 25.860 | 53.743 | 0.00 | 0.00 |
| ATOM | 5482 | CA   | GLN | X | 365 | 45.801 | 24.809 | 53.692 | 0.00 | 0.00 |
| ATOM | 5483 | HA   | GLN | X | 365 | 45.920 | 24.783 | 54.776 | 0.00 | 0.00 |
| ATOM | 5484 | CB   | GLN | X | 365 | 44.412 | 25.347 | 53.386 | 0.00 | 0.00 |
| ATOM | 5485 | HB2  | GLN | X | 365 | 44.141 | 25.021 | 52.382 | 0.00 | 0.00 |
| ATOM | 5486 | HB3  | GLN | X | 365 | 43.784 | 24.879 | 54.144 | 0.00 | 0.00 |
| ATOM | 5487 | CG   | GLN | X | 365 | 44.264 | 26.891 | 53.566 | 0.00 | 0.00 |
| ATOM | 5488 | HG2  | GLN | X | 365 | 44.638 | 27.197 | 54.543 | 0.00 | 0.00 |
| ATOM | 5489 | HG3  | GLN | X | 365 | 44.841 | 27.358 | 52.769 | 0.00 | 0.00 |
| ATOM | 5490 | CD   | GLN | X | 365 | 42.832 | 27.364 | 53.471 | 0.00 | 0.00 |
| ATOM | 5491 | OE1  | GLN | X | 365 | 41.884 | 26.639 | 53.715 | 0.00 | 0.00 |
| ATOM | 5492 | NE2  | GLN | X | 365 | 42.565 | 28.582 | 53.155 | 0.00 | 0.00 |
| ATOM | 5493 | HE21 | GLN | X | 365 | 41.608 | 28.833 | 53.359 | 0.00 | 0.00 |
| ATOM | 5494 | HE22 | GLN | X | 365 | 43.315 | 29.256 | 53.219 | 0.00 | 0.00 |
| ATOM | 5495 | C    | GLN | X | 365 | 45.770 | 23.342 | 53.312 | 0.00 | 0.00 |
| ATOM | 5496 | O    | GLN | X | 365 | 45.108 | 22.527 | 53.956 | 0.00 | 0.00 |
| ATOM | 5497 | N    | VAL | X | 366 | 46.450 | 22.939 | 52.188 | 0.00 | 0.00 |
| ATOM | 5498 | H    | VAL | X | 366 | 46.869 | 23.713 | 51.693 | 0.00 | 0.00 |

|      |      |      |     |   |     |        |        |        |      |      |
|------|------|------|-----|---|-----|--------|--------|--------|------|------|
| ATOM | 5499 | CA   | VAL | X | 366 | 46.305 | 21.603 | 51.552 | 0.00 | 0.00 |
| ATOM | 5500 | HA   | VAL | X | 366 | 45.236 | 21.503 | 51.368 | 0.00 | 0.00 |
| ATOM | 5501 | CB   | VAL | X | 366 | 46.971 | 21.649 | 50.095 | 0.00 | 0.00 |
| ATOM | 5502 | HB   | VAL | X | 366 | 46.590 | 22.535 | 49.587 | 0.00 | 0.00 |
| ATOM | 5503 | CG1  | VAL | X | 366 | 48.461 | 21.681 | 50.172 | 0.00 | 0.00 |
| ATOM | 5504 | HG11 | VAL | X | 366 | 48.685 | 22.632 | 50.656 | 0.00 | 0.00 |
| ATOM | 5505 | HG12 | VAL | X | 366 | 48.883 | 20.840 | 50.722 | 0.00 | 0.00 |
| ATOM | 5506 | HG13 | VAL | X | 366 | 48.828 | 21.630 | 49.147 | 0.00 | 0.00 |
| ATOM | 5507 | CG2  | VAL | X | 366 | 46.581 | 20.349 | 49.289 | 0.00 | 0.00 |
| ATOM | 5508 | HG21 | VAL | X | 366 | 47.151 | 20.383 | 48.361 | 0.00 | 0.00 |
| ATOM | 5509 | HG22 | VAL | X | 366 | 46.794 | 19.425 | 49.828 | 0.00 | 0.00 |
| ATOM | 5510 | HG23 | VAL | X | 366 | 45.518 | 20.380 | 49.049 | 0.00 | 0.00 |
| ATOM | 5511 | C    | VAL | X | 366 | 46.875 | 20.370 | 52.469 | 0.00 | 0.00 |
| ATOM | 5512 | O    | VAL | X | 366 | 47.891 | 20.506 | 53.173 | 0.00 | 0.00 |
| ATOM | 5513 | N    | SER | X | 367 | 46.268 | 19.213 | 52.343 | 0.00 | 0.00 |
| ATOM | 5514 | H    | SER | X | 367 | 45.559 | 19.089 | 51.635 | 0.00 | 0.00 |
| ATOM | 5515 | CA   | SER | X | 367 | 46.629 | 17.941 | 53.063 | 0.00 | 0.00 |
| ATOM | 5516 | HA   | SER | X | 367 | 47.112 | 18.297 | 53.973 | 0.00 | 0.00 |
| ATOM | 5517 | CB   | SER | X | 367 | 45.305 | 17.203 | 53.441 | 0.00 | 0.00 |
| ATOM | 5518 | HB2  | SER | X | 367 | 45.379 | 16.475 | 54.250 | 0.00 | 0.00 |
| ATOM | 5519 | HB3  | SER | X | 367 | 44.676 | 18.044 | 53.729 | 0.00 | 0.00 |
| ATOM | 5520 | OG   | SER | X | 367 | 44.668 | 16.557 | 52.280 | 0.00 | 0.00 |
| ATOM | 5521 | HG   | SER | X | 367 | 43.797 | 16.192 | 52.453 | 0.00 | 0.00 |
| ATOM | 5522 | C    | SER | X | 367 | 47.628 | 17.030 | 52.330 | 0.00 | 0.00 |
| ATOM | 5523 | O    | SER | X | 367 | 47.964 | 17.260 | 51.150 | 0.00 | 0.00 |
| ATOM | 5524 | N    | ASP | X | 368 | 48.090 | 15.958 | 52.969 | 0.00 | 0.00 |
| ATOM | 5525 | H    | ASP | X | 368 | 47.781 | 15.723 | 53.901 | 0.00 | 0.00 |
| ATOM | 5526 | CA   | ASP | X | 368 | 49.243 | 15.093 | 52.389 | 0.00 | 0.00 |
| ATOM | 5527 | HA   | ASP | X | 368 | 50.073 | 15.717 | 52.058 | 0.00 | 0.00 |
| ATOM | 5528 | CB   | ASP | X | 368 | 49.837 | 14.319 | 53.501 | 0.00 | 0.00 |
| ATOM | 5529 | HB2  | ASP | X | 368 | 50.010 | 14.935 | 54.384 | 0.00 | 0.00 |
| ATOM | 5530 | HB3  | ASP | X | 368 | 49.028 | 13.682 | 53.856 | 0.00 | 0.00 |
| ATOM | 5531 | CG   | ASP | X | 368 | 51.043 | 13.408 | 53.111 | 0.00 | 0.00 |
| ATOM | 5532 | OD1  | ASP | X | 368 | 52.225 | 13.857 | 53.011 | 0.00 | 0.00 |
| ATOM | 5533 | OD2  | ASP | X | 368 | 50.741 | 12.263 | 52.746 | 0.00 | 0.00 |
| ATOM | 5534 | C    | ASP | X | 368 | 48.721 | 14.292 | 51.164 | 0.00 | 0.00 |
| ATOM | 5535 | O    | ASP | X | 368 | 49.430 | 14.197 | 50.187 | 0.00 | 0.00 |
| ATOM | 5536 | N    | LEU | X | 369 | 47.502 | 13.723 | 51.213 | 0.00 | 0.00 |
| ATOM | 5537 | H    | LEU | X | 369 | 47.026 | 13.608 | 52.096 | 0.00 | 0.00 |
| ATOM | 5538 | CA   | LEU | X | 369 | 46.938 | 13.020 | 50.041 | 0.00 | 0.00 |
| ATOM | 5539 | HA   | LEU | X | 369 | 47.612 | 12.261 | 49.642 | 0.00 | 0.00 |
| ATOM | 5540 | CB   | LEU | X | 369 | 45.721 | 12.177 | 50.532 | 0.00 | 0.00 |
| ATOM | 5541 | HB2  | LEU | X | 369 | 45.084 | 12.808 | 51.152 | 0.00 | 0.00 |
| ATOM | 5542 | HB3  | LEU | X | 369 | 45.166 | 11.826 | 49.662 | 0.00 | 0.00 |
| ATOM | 5543 | CG   | LEU | X | 369 | 45.977 | 10.937 | 51.492 | 0.00 | 0.00 |
| ATOM | 5544 | HG   | LEU | X | 369 | 46.654 | 11.252 | 52.286 | 0.00 | 0.00 |
| ATOM | 5545 | CD1  | LEU | X | 369 | 44.669 | 10.418 | 52.037 | 0.00 | 0.00 |
| ATOM | 5546 | HD11 | LEU | X | 369 | 44.855 | 9.535  | 52.648 | 0.00 | 0.00 |
| ATOM | 5547 | HD12 | LEU | X | 369 | 44.223 | 11.111 | 52.751 | 0.00 | 0.00 |
| ATOM | 5548 | HD13 | LEU | X | 369 | 43.925 | 10.255 | 51.257 | 0.00 | 0.00 |
| ATOM | 5549 | CD2  | LEU | X | 369 | 46.611 | 9.820  | 50.534 | 0.00 | 0.00 |
| ATOM | 5550 | HD21 | LEU | X | 369 | 45.975 | 9.680  | 49.660 | 0.00 | 0.00 |
| ATOM | 5551 | HD22 | LEU | X | 369 | 47.618 | 10.125 | 50.249 | 0.00 | 0.00 |
| ATOM | 5552 | HD23 | LEU | X | 369 | 46.764 | 8.842  | 50.989 | 0.00 | 0.00 |
| ATOM | 5553 | C    | LEU | X | 369 | 46.590 | 13.951 | 48.957 | 0.00 | 0.00 |
| ATOM | 5554 | O    | LEU | X | 369 | 46.455 | 13.550 | 47.797 | 0.00 | 0.00 |
| ATOM | 5555 | N    | ALA | X | 370 | 46.214 | 15.197 | 49.369 | 0.00 | 0.00 |
| ATOM | 5556 | H    | ALA | X | 370 | 46.154 | 15.428 | 50.350 | 0.00 | 0.00 |
| ATOM | 5557 | CA   | ALA | X | 370 | 45.684 | 16.185 | 48.410 | 0.00 | 0.00 |
| ATOM | 5558 | HA   | ALA | X | 370 | 45.019 | 15.757 | 47.661 | 0.00 | 0.00 |
| ATOM | 5559 | CB   | ALA | X | 370 | 44.991 | 17.209 | 49.246 | 0.00 | 0.00 |
| ATOM | 5560 | HB1  | ALA | X | 370 | 44.911 | 18.139 | 48.684 | 0.00 | 0.00 |
| ATOM | 5561 | HB2  | ALA | X | 370 | 43.978 | 16.990 | 49.582 | 0.00 | 0.00 |
| ATOM | 5562 | HB3  | ALA | X | 370 | 45.639 | 17.513 | 50.068 | 0.00 | 0.00 |
| ATOM | 5563 | C    | ALA | X | 370 | 46.821 | 16.771 | 47.618 | 0.00 | 0.00 |
| ATOM | 5564 | O    | ALA | X | 370 | 46.774 | 16.805 | 46.382 | 0.00 | 0.00 |
| ATOM | 5565 | N    | ALA | X | 371 | 47.889 | 17.220 | 48.303 | 0.00 | 0.00 |
| ATOM | 5566 | H    | ALA | X | 371 | 47.838 | 17.217 | 49.312 | 0.00 | 0.00 |
| ATOM | 5567 | CA   | ALA | X | 371 | 49.115 | 17.539 | 47.661 | 0.00 | 0.00 |
| ATOM | 5568 | HA   | ALA | X | 371 | 48.995 | 18.366 | 46.961 | 0.00 | 0.00 |

|      |      |      |     |   |     |        |        |        |      |      |
|------|------|------|-----|---|-----|--------|--------|--------|------|------|
| ATOM | 5569 | CB   | ALA | X | 371 | 50.066 | 17.945 | 48.880 | 0.00 | 0.00 |
| ATOM | 5570 | HB1  | ALA | X | 371 | 50.976 | 18.444 | 48.544 | 0.00 | 0.00 |
| ATOM | 5571 | HB2  | ALA | X | 371 | 49.530 | 18.596 | 49.571 | 0.00 | 0.00 |
| ATOM | 5572 | HB3  | ALA | X | 371 | 50.272 | 17.110 | 49.550 | 0.00 | 0.00 |
| ATOM | 5573 | C    | ALA | X | 371 | 49.751 | 16.366 | 46.900 | 0.00 | 0.00 |
| ATOM | 5574 | O    | ALA | X | 371 | 50.362 | 16.734 | 45.871 | 0.00 | 0.00 |
| ATOM | 5575 | N    | GLU | X | 372 | 49.508 | 15.095 | 47.305 | 0.00 | 0.00 |
| ATOM | 5576 | H    | GLU | X | 372 | 49.029 | 15.013 | 48.191 | 0.00 | 0.00 |
| ATOM | 5577 | CA   | GLU | X | 372 | 49.841 | 13.877 | 46.505 | 0.00 | 0.00 |
| ATOM | 5578 | HA   | GLU | X | 372 | 50.902 | 14.033 | 46.311 | 0.00 | 0.00 |
| ATOM | 5579 | CB   | GLU | X | 372 | 49.630 | 12.565 | 47.284 | 0.00 | 0.00 |
| ATOM | 5580 | HB2  | GLU | X | 372 | 50.168 | 12.490 | 48.229 | 0.00 | 0.00 |
| ATOM | 5581 | HB3  | GLU | X | 372 | 48.557 | 12.389 | 47.362 | 0.00 | 0.00 |
| ATOM | 5582 | CG   | GLU | X | 372 | 50.265 | 11.474 | 46.370 | 0.00 | 0.00 |
| ATOM | 5583 | HG2  | GLU | X | 372 | 49.525 | 11.326 | 45.584 | 0.00 | 0.00 |
| ATOM | 5584 | HG3  | GLU | X | 372 | 51.229 | 11.798 | 45.977 | 0.00 | 0.00 |
| ATOM | 5585 | CD   | GLU | X | 372 | 50.397 | 10.126 | 47.049 | 0.00 | 0.00 |
| ATOM | 5586 | OE1  | GLU | X | 372 | 51.471 | 9.968  | 47.672 | 0.00 | 0.00 |
| ATOM | 5587 | OE2  | GLU | X | 372 | 49.380 | 9.322  | 47.128 | 0.00 | 0.00 |
| ATOM | 5588 | C    | GLU | X | 372 | 49.063 | 13.896 | 45.194 | 0.00 | 0.00 |
| ATOM | 5589 | O    | GLU | X | 372 | 49.619 | 13.701 | 44.085 | 0.00 | 0.00 |
| ATOM | 5590 | N    | ALA | X | 373 | 47.725 | 14.082 | 45.254 | 0.00 | 0.00 |
| ATOM | 5591 | H    | ALA | X | 373 | 47.201 | 14.241 | 46.102 | 0.00 | 0.00 |
| ATOM | 5592 | CA   | ALA | X | 373 | 46.836 | 14.060 | 44.083 | 0.00 | 0.00 |
| ATOM | 5593 | HA   | ALA | X | 373 | 46.954 | 13.082 | 43.618 | 0.00 | 0.00 |
| ATOM | 5594 | CB   | ALA | X | 373 | 45.366 | 14.239 | 44.554 | 0.00 | 0.00 |
| ATOM | 5595 | HB1  | ALA | X | 373 | 45.065 | 15.217 | 44.928 | 0.00 | 0.00 |
| ATOM | 5596 | HB2  | ALA | X | 373 | 44.872 | 13.962 | 43.623 | 0.00 | 0.00 |
| ATOM | 5597 | HB3  | ALA | X | 373 | 45.190 | 13.565 | 45.392 | 0.00 | 0.00 |
| ATOM | 5598 | C    | ALA | X | 373 | 47.204 | 15.281 | 43.119 | 0.00 | 0.00 |
| ATOM | 5599 | O    | ALA | X | 373 | 47.042 | 15.252 | 41.887 | 0.00 | 0.00 |
| ATOM | 5600 | N    | VAL | X | 374 | 47.608 | 16.436 | 43.683 | 0.00 | 0.00 |
| ATOM | 5601 | H    | VAL | X | 374 | 47.557 | 16.474 | 44.691 | 0.00 | 0.00 |
| ATOM | 5602 | CA   | VAL | X | 374 | 48.113 | 17.561 | 42.859 | 0.00 | 0.00 |
| ATOM | 5603 | HA   | VAL | X | 374 | 47.370 | 17.757 | 42.087 | 0.00 | 0.00 |
| ATOM | 5604 | CB   | VAL | X | 374 | 48.436 | 18.878 | 43.661 | 0.00 | 0.00 |
| ATOM | 5605 | HB   | VAL | X | 374 | 49.165 | 18.644 | 44.437 | 0.00 | 0.00 |
| ATOM | 5606 | CG1  | VAL | X | 374 | 49.038 | 20.022 | 42.837 | 0.00 | 0.00 |
| ATOM | 5607 | HG11 | VAL | X | 374 | 48.239 | 20.462 | 42.241 | 0.00 | 0.00 |
| ATOM | 5608 | HG12 | VAL | X | 374 | 49.470 | 20.782 | 43.488 | 0.00 | 0.00 |
| ATOM | 5609 | HG13 | VAL | X | 374 | 49.884 | 19.587 | 42.305 | 0.00 | 0.00 |
| ATOM | 5610 | CG2  | VAL | X | 374 | 47.258 | 19.546 | 44.433 | 0.00 | 0.00 |
| ATOM | 5611 | HG21 | VAL | X | 374 | 46.455 | 19.908 | 43.791 | 0.00 | 0.00 |
| ATOM | 5612 | HG22 | VAL | X | 374 | 46.906 | 19.040 | 45.333 | 0.00 | 0.00 |
| ATOM | 5613 | HG23 | VAL | X | 374 | 47.668 | 20.408 | 44.960 | 0.00 | 0.00 |
| ATOM | 5614 | C    | VAL | X | 374 | 49.358 | 17.189 | 42.118 | 0.00 | 0.00 |
| ATOM | 5615 | O    | VAL | X | 374 | 49.319 | 17.443 | 40.950 | 0.00 | 0.00 |
| ATOM | 5616 | N    | VAL | X | 375 | 50.349 | 16.677 | 42.881 | 0.00 | 0.00 |
| ATOM | 5617 | H    | VAL | X | 375 | 50.288 | 16.626 | 43.887 | 0.00 | 0.00 |
| ATOM | 5618 | CA   | VAL | X | 375 | 51.609 | 16.197 | 42.254 | 0.00 | 0.00 |
| ATOM | 5619 | HA   | VAL | X | 375 | 51.992 | 17.021 | 41.652 | 0.00 | 0.00 |
| ATOM | 5620 | CB   | VAL | X | 375 | 52.659 | 15.792 | 43.325 | 0.00 | 0.00 |
| ATOM | 5621 | HB   | VAL | X | 375 | 52.143 | 15.107 | 43.998 | 0.00 | 0.00 |
| ATOM | 5622 | CG1  | VAL | X | 375 | 53.867 | 15.056 | 42.875 | 0.00 | 0.00 |
| ATOM | 5623 | HG11 | VAL | X | 375 | 53.574 | 14.075 | 42.500 | 0.00 | 0.00 |
| ATOM | 5624 | HG12 | VAL | X | 375 | 54.351 | 15.451 | 41.982 | 0.00 | 0.00 |
| ATOM | 5625 | HG13 | VAL | X | 375 | 54.649 | 14.940 | 43.625 | 0.00 | 0.00 |
| ATOM | 5626 | CG2  | VAL | X | 375 | 53.196 | 16.966 | 44.257 | 0.00 | 0.00 |
| ATOM | 5627 | HG21 | VAL | X | 375 | 54.039 | 16.564 | 44.818 | 0.00 | 0.00 |
| ATOM | 5628 | HG22 | VAL | X | 375 | 53.535 | 17.799 | 43.640 | 0.00 | 0.00 |
| ATOM | 5629 | HG23 | VAL | X | 375 | 52.482 | 17.232 | 45.037 | 0.00 | 0.00 |
| ATOM | 5630 | C    | VAL | X | 375 | 51.486 | 15.117 | 41.193 | 0.00 | 0.00 |
| ATOM | 5631 | O    | VAL | X | 375 | 52.395 | 14.920 | 40.365 | 0.00 | 0.00 |
| ATOM | 5632 | N    | LEU | X | 376 | 50.430 | 14.351 | 41.218 | 0.00 | 0.00 |
| ATOM | 5633 | H    | LEU | X | 376 | 49.870 | 14.402 | 42.057 | 0.00 | 0.00 |
| ATOM | 5634 | CA   | LEU | X | 376 | 50.146 | 13.236 | 40.254 | 0.00 | 0.00 |
| ATOM | 5635 | HA   | LEU | X | 376 | 51.054 | 12.759 | 39.885 | 0.00 | 0.00 |
| ATOM | 5636 | CB   | LEU | X | 376 | 49.270 | 12.109 | 40.894 | 0.00 | 0.00 |
| ATOM | 5637 | HB2  | LEU | X | 376 | 49.803 | 11.516 | 41.636 | 0.00 | 0.00 |
| ATOM | 5638 | HB3  | LEU | X | 376 | 48.433 | 12.572 | 41.417 | 0.00 | 0.00 |

|      |      |      |     |   |     |        |        |        |      |      |
|------|------|------|-----|---|-----|--------|--------|--------|------|------|
| ATOM | 5639 | CG   | LEU | X | 376 | 48.733 | 11.016 | 39.872 | 0.00 | 0.00 |
| ATOM | 5640 | HG   | LEU | X | 376 | 47.992 | 11.486 | 39.226 | 0.00 | 0.00 |
| ATOM | 5641 | CD1  | LEU | X | 376 | 49.799 | 10.401 | 39.004 | 0.00 | 0.00 |
| ATOM | 5642 | HD11 | LEU | X | 376 | 49.402 | 9.586  | 38.399 | 0.00 | 0.00 |
| ATOM | 5643 | HD12 | LEU | X | 376 | 50.158 | 11.117 | 38.264 | 0.00 | 0.00 |
| ATOM | 5644 | HD13 | LEU | X | 376 | 50.576 | 9.984  | 39.645 | 0.00 | 0.00 |
| ATOM | 5645 | CD2  | LEU | X | 376 | 47.976 | 9.872  | 40.548 | 0.00 | 0.00 |
| ATOM | 5646 | HD21 | LEU | X | 376 | 47.226 | 10.143 | 41.291 | 0.00 | 0.00 |
| ATOM | 5647 | HD22 | LEU | X | 376 | 47.326 | 9.338  | 39.855 | 0.00 | 0.00 |
| ATOM | 5648 | HD23 | LEU | X | 376 | 48.666 | 9.215  | 41.079 | 0.00 | 0.00 |
| ATOM | 5649 | C    | LEU | X | 376 | 49.553 | 13.982 | 39.027 | 0.00 | 0.00 |
| ATOM | 5650 | O    | LEU | X | 376 | 50.045 | 13.778 | 37.876 | 0.00 | 0.00 |
| ATOM | 5651 | N    | HIE | X | 377 | 48.452 | 14.786 | 39.237 | 0.00 | 0.00 |
| ATOM | 5652 | H    | HIE | X | 377 | 48.253 | 14.923 | 40.218 | 0.00 | 0.00 |
| ATOM | 5653 | CA   | HIE | X | 377 | 47.833 | 15.681 | 38.219 | 0.00 | 0.00 |
| ATOM | 5654 | HA   | HIE | X | 377 | 47.274 | 15.143 | 37.453 | 0.00 | 0.00 |
| ATOM | 5655 | CB   | HIE | X | 377 | 46.729 | 16.472 | 39.002 | 0.00 | 0.00 |
| ATOM | 5656 | HB2  | HIE | X | 377 | 46.069 | 15.788 | 39.536 | 0.00 | 0.00 |
| ATOM | 5657 | HB3  | HIE | X | 377 | 47.230 | 17.113 | 39.727 | 0.00 | 0.00 |
| ATOM | 5658 | CG   | HIE | X | 377 | 45.917 | 17.441 | 38.128 | 0.00 | 0.00 |
| ATOM | 5659 | ND1  | HIE | X | 377 | 45.229 | 17.007 | 37.070 | 0.00 | 0.00 |
| ATOM | 5660 | CE1  | HIE | X | 377 | 44.627 | 18.114 | 36.513 | 0.00 | 0.00 |
| ATOM | 5661 | HE1  | HIE | X | 377 | 43.993 | 18.202 | 35.643 | 0.00 | 0.00 |
| ATOM | 5662 | NE2  | HIE | X | 377 | 44.882 | 19.145 | 37.300 | 0.00 | 0.00 |
| ATOM | 5663 | HE2  | HIE | X | 377 | 44.464 | 20.059 | 37.196 | 0.00 | 0.00 |
| ATOM | 5664 | CD2  | HIE | X | 377 | 45.740 | 18.748 | 38.321 | 0.00 | 0.00 |
| ATOM | 5665 | HD2  | HIE | X | 377 | 46.139 | 19.406 | 39.080 | 0.00 | 0.00 |
| ATOM | 5666 | C    | HIE | X | 377 | 48.863 | 16.568 | 37.509 | 0.00 | 0.00 |
| ATOM | 5667 | O    | HIE | X | 377 | 48.806 | 16.665 | 36.299 | 0.00 | 0.00 |
| ATOM | 5668 | N    | TYR | X | 378 | 49.782 | 17.223 | 38.241 | 0.00 | 0.00 |
| ATOM | 5669 | H    | TYR | X | 378 | 49.817 | 17.072 | 39.239 | 0.00 | 0.00 |
| ATOM | 5670 | CA   | TYR | X | 378 | 50.624 | 18.184 | 37.659 | 0.00 | 0.00 |
| ATOM | 5671 | HA   | TYR | X | 378 | 50.038 | 18.728 | 36.918 | 0.00 | 0.00 |
| ATOM | 5672 | CB   | TYR | X | 378 | 50.956 | 19.231 | 38.702 | 0.00 | 0.00 |
| ATOM | 5673 | HB2  | TYR | X | 378 | 50.866 | 18.782 | 39.691 | 0.00 | 0.00 |
| ATOM | 5674 | HB3  | TYR | X | 378 | 51.978 | 19.565 | 38.524 | 0.00 | 0.00 |
| ATOM | 5675 | CG   | TYR | X | 378 | 50.039 | 20.466 | 38.653 | 0.00 | 0.00 |
| ATOM | 5676 | CD1  | TYR | X | 378 | 50.321 | 21.496 | 37.734 | 0.00 | 0.00 |
| ATOM | 5677 | HD1  | TYR | X | 378 | 51.123 | 21.444 | 37.014 | 0.00 | 0.00 |
| ATOM | 5678 | CE1  | TYR | X | 378 | 49.535 | 22.655 | 37.593 | 0.00 | 0.00 |
| ATOM | 5679 | HE1  | TYR | X | 378 | 49.891 | 23.443 | 36.946 | 0.00 | 0.00 |
| ATOM | 5680 | CZ   | TYR | X | 378 | 48.330 | 22.767 | 38.328 | 0.00 | 0.00 |
| ATOM | 5681 | OH   | TYR | X | 378 | 47.442 | 23.808 | 38.212 | 0.00 | 0.00 |
| ATOM | 5682 | HH   | TYR | X | 378 | 47.918 | 24.509 | 37.760 | 0.00 | 0.00 |
| ATOM | 5683 | CE2  | TYR | X | 378 | 47.995 | 21.647 | 39.116 | 0.00 | 0.00 |
| ATOM | 5684 | HE2  | TYR | X | 378 | 47.020 | 21.731 | 39.572 | 0.00 | 0.00 |
| ATOM | 5685 | CD2  | TYR | X | 378 | 48.774 | 20.514 | 39.247 | 0.00 | 0.00 |
| ATOM | 5686 | HD2  | TYR | X | 378 | 48.447 | 19.764 | 39.951 | 0.00 | 0.00 |
| ATOM | 5687 | C    | TYR | X | 378 | 51.966 | 17.636 | 37.024 | 0.00 | 0.00 |
| ATOM | 5688 | O    | TYR | X | 378 | 52.459 | 18.182 | 36.034 | 0.00 | 0.00 |
| ATOM | 5689 | N    | THR | X | 379 | 52.498 | 16.522 | 37.582 | 0.00 | 0.00 |
| ATOM | 5690 | H    | THR | X | 379 | 52.031 | 16.159 | 38.400 | 0.00 | 0.00 |
| ATOM | 5691 | CA   | THR | X | 379 | 53.657 | 15.828 | 36.899 | 0.00 | 0.00 |
| ATOM | 5692 | HA   | THR | X | 379 | 54.557 | 16.440 | 36.959 | 0.00 | 0.00 |
| ATOM | 5693 | CB   | THR | X | 379 | 54.054 | 14.487 | 37.600 | 0.00 | 0.00 |
| ATOM | 5694 | HB   | THR | X | 379 | 53.192 | 13.827 | 37.698 | 0.00 | 0.00 |
| ATOM | 5695 | CG2  | THR | X | 379 | 55.235 | 13.765 | 36.948 | 0.00 | 0.00 |
| ATOM | 5696 | HG21 | THR | X | 379 | 55.007 | 13.425 | 35.938 | 0.00 | 0.00 |
| ATOM | 5697 | HG22 | THR | X | 379 | 56.068 | 14.465 | 36.895 | 0.00 | 0.00 |
| ATOM | 5698 | HG23 | THR | X | 379 | 55.551 | 12.936 | 37.581 | 0.00 | 0.00 |
| ATOM | 5699 | OG1  | THR | X | 379 | 54.636 | 14.787 | 38.823 | 0.00 | 0.00 |
| ATOM | 5700 | HG1  | THR | X | 379 | 53.907 | 15.012 | 39.405 | 0.00 | 0.00 |
| ATOM | 5701 | C    | THR | X | 379 | 53.340 | 15.605 | 35.429 | 0.00 | 0.00 |
| ATOM | 5702 | O    | THR | X | 379 | 52.251 | 15.308 | 35.034 | 0.00 | 0.00 |
| ATOM | 5703 | N    | ASP | X | 380 | 54.418 | 15.772 | 34.626 | 0.00 | 0.00 |
| ATOM | 5704 | H    | ASP | X | 380 | 55.269 | 16.247 | 34.891 | 0.00 | 0.00 |
| ATOM | 5705 | CA   | ASP | X | 380 | 54.451 | 15.371 | 33.247 | 0.00 | 0.00 |
| ATOM | 5706 | HA   | ASP | X | 380 | 53.414 | 15.343 | 32.912 | 0.00 | 0.00 |
| ATOM | 5707 | CB   | ASP | X | 380 | 55.299 | 16.324 | 32.453 | 0.00 | 0.00 |
| ATOM | 5708 | HB2  | ASP | X | 380 | 55.123 | 17.337 | 32.812 | 0.00 | 0.00 |

|      |      |      |     |   |     |        |        |        |      |      |
|------|------|------|-----|---|-----|--------|--------|--------|------|------|
| ATOM | 5709 | HB3  | ASP | X | 380 | 56.344 | 16.094 | 32.660 | 0.00 | 0.00 |
| ATOM | 5710 | CG   | ASP | X | 380 | 55.135 | 16.289 | 30.926 | 0.00 | 0.00 |
| ATOM | 5711 | OD1  | ASP | X | 380 | 54.486 | 15.335 | 30.416 | 0.00 | 0.00 |
| ATOM | 5712 | OD2  | ASP | X | 380 | 55.652 | 17.200 | 30.215 | 0.00 | 0.00 |
| ATOM | 5713 | C    | ASP | X | 380 | 55.075 | 13.956 | 33.197 | 0.00 | 0.00 |
| ATOM | 5714 | O    | ASP | X | 380 | 56.256 | 13.723 | 33.440 | 0.00 | 0.00 |
| ATOM | 5715 | N    | TRP | X | 381 | 54.265 | 12.956 | 32.860 | 0.00 | 0.00 |
| ATOM | 5716 | H    | TRP | X | 381 | 53.310 | 13.213 | 32.654 | 0.00 | 0.00 |
| ATOM | 5717 | CA   | TRP | X | 381 | 54.673 | 11.570 | 32.624 | 0.00 | 0.00 |
| ATOM | 5718 | HA   | TRP | X | 381 | 55.461 | 11.387 | 33.355 | 0.00 | 0.00 |
| ATOM | 5719 | CB   | TRP | X | 381 | 53.484 | 10.677 | 32.977 | 0.00 | 0.00 |
| ATOM | 5720 | HB2  | TRP | X | 381 | 52.754 | 11.017 | 32.242 | 0.00 | 0.00 |
| ATOM | 5721 | HB3  | TRP | X | 381 | 53.679 | 9.611  | 32.859 | 0.00 | 0.00 |
| ATOM | 5722 | CG   | TRP | X | 381 | 52.940 | 10.908 | 34.372 | 0.00 | 0.00 |
| ATOM | 5723 | CD1  | TRP | X | 381 | 51.961 | 11.799 | 34.780 | 0.00 | 0.00 |
| ATOM | 5724 | HD1  | TRP | X | 381 | 51.470 | 12.538 | 34.163 | 0.00 | 0.00 |
| ATOM | 5725 | NE1  | TRP | X | 381 | 51.910 | 11.711 | 36.167 | 0.00 | 0.00 |
| ATOM | 5726 | HE1  | TRP | X | 381 | 51.264 | 12.278 | 36.698 | 0.00 | 0.00 |
| ATOM | 5727 | CE2  | TRP | X | 381 | 52.888 | 10.893 | 36.655 | 0.00 | 0.00 |
| ATOM | 5728 | CZ2  | TRP | X | 381 | 53.222 | 10.637 | 37.982 | 0.00 | 0.00 |
| ATOM | 5729 | HZ2  | TRP | X | 381 | 52.764 | 11.220 | 38.767 | 0.00 | 0.00 |
| ATOM | 5730 | CH2  | TRP | X | 381 | 54.162 | 9.716  | 38.255 | 0.00 | 0.00 |
| ATOM | 5731 | HH2  | TRP | X | 381 | 54.524 | 9.657  | 39.270 | 0.00 | 0.00 |
| ATOM | 5732 | CZ3  | TRP | X | 381 | 54.848 | 9.092  | 37.138 | 0.00 | 0.00 |
| ATOM | 5733 | HZ3  | TRP | X | 381 | 55.660 | 8.416  | 37.367 | 0.00 | 0.00 |
| ATOM | 5734 | CE3  | TRP | X | 381 | 54.573 | 9.417  | 35.814 | 0.00 | 0.00 |
| ATOM | 5735 | HE3  | TRP | X | 381 | 55.104 | 8.999  | 34.972 | 0.00 | 0.00 |
| ATOM | 5736 | CD2  | TRP | X | 381 | 53.498 | 10.317 | 35.560 | 0.00 | 0.00 |
| ATOM | 5737 | C    | TRP | X | 381 | 55.498 | 11.278 | 31.332 | 0.00 | 0.00 |
| ATOM | 5738 | O    | TRP | X | 381 | 55.995 | 10.145 | 31.179 | 0.00 | 0.00 |
| ATOM | 5739 | N    | LEU | X | 382 | 55.735 | 12.360 | 30.564 | 0.00 | 0.00 |
| ATOM | 5740 | H    | LEU | X | 382 | 55.323 | 13.275 | 30.676 | 0.00 | 0.00 |
| ATOM | 5741 | CA   | LEU | X | 382 | 56.752 | 12.330 | 29.549 | 0.00 | 0.00 |
| ATOM | 5742 | HA   | LEU | X | 382 | 56.619 | 11.380 | 29.030 | 0.00 | 0.00 |
| ATOM | 5743 | CB   | LEU | X | 382 | 56.456 | 13.363 | 28.412 | 0.00 | 0.00 |
| ATOM | 5744 | HB2  | LEU | X | 382 | 55.371 | 13.467 | 28.399 | 0.00 | 0.00 |
| ATOM | 5745 | HB3  | LEU | X | 382 | 56.713 | 14.375 | 28.725 | 0.00 | 0.00 |
| ATOM | 5746 | CG   | LEU | X | 382 | 56.968 | 12.942 | 27.034 | 0.00 | 0.00 |
| ATOM | 5747 | HG   | LEU | X | 382 | 58.037 | 12.734 | 27.091 | 0.00 | 0.00 |
| ATOM | 5748 | CD1  | LEU | X | 382 | 56.282 | 11.725 | 26.424 | 0.00 | 0.00 |
| ATOM | 5749 | HD11 | LEU | X | 382 | 56.493 | 11.704 | 25.354 | 0.00 | 0.00 |
| ATOM | 5750 | HD12 | LEU | X | 382 | 56.672 | 10.736 | 26.664 | 0.00 | 0.00 |
| ATOM | 5751 | HD13 | LEU | X | 382 | 55.201 | 11.698 | 26.564 | 0.00 | 0.00 |
| ATOM | 5752 | CD2  | LEU | X | 382 | 56.745 | 14.177 | 26.091 | 0.00 | 0.00 |
| ATOM | 5753 | HD21 | LEU | X | 382 | 57.057 | 15.134 | 26.510 | 0.00 | 0.00 |
| ATOM | 5754 | HD22 | LEU | X | 382 | 57.386 | 14.121 | 25.212 | 0.00 | 0.00 |
| ATOM | 5755 | HD23 | LEU | X | 382 | 55.717 | 14.188 | 25.728 | 0.00 | 0.00 |
| ATOM | 5756 | C    | LEU | X | 382 | 58.158 | 12.341 | 30.099 | 0.00 | 0.00 |
| ATOM | 5757 | O    | LEU | X | 382 | 59.121 | 11.815 | 29.546 | 0.00 | 0.00 |
| ATOM | 5758 | N    | HIE | X | 383 | 58.316 | 12.960 | 31.282 | 0.00 | 0.00 |
| ATOM | 5759 | H    | HIE | X | 383 | 57.462 | 13.386 | 31.612 | 0.00 | 0.00 |
| ATOM | 5760 | CA   | HIE | X | 383 | 59.632 | 13.117 | 32.031 | 0.00 | 0.00 |
| ATOM | 5761 | HA   | HIE | X | 383 | 60.330 | 12.310 | 31.805 | 0.00 | 0.00 |
| ATOM | 5762 | CB   | HIE | X | 383 | 60.269 | 14.497 | 31.641 | 0.00 | 0.00 |
| ATOM | 5763 | HB2  | HIE | X | 383 | 59.720 | 15.398 | 31.915 | 0.00 | 0.00 |
| ATOM | 5764 | HB3  | HIE | X | 383 | 61.237 | 14.547 | 32.139 | 0.00 | 0.00 |
| ATOM | 5765 | CG   | HIE | X | 383 | 60.670 | 14.582 | 30.205 | 0.00 | 0.00 |
| ATOM | 5766 | ND1  | HIE | X | 383 | 61.969 | 14.506 | 29.729 | 0.00 | 0.00 |
| ATOM | 5767 | CE1  | HIE | X | 383 | 61.867 | 14.407 | 28.366 | 0.00 | 0.00 |
| ATOM | 5768 | HE1  | HIE | X | 383 | 62.712 | 14.200 | 27.726 | 0.00 | 0.00 |
| ATOM | 5769 | NE2  | HIE | X | 383 | 60.594 | 14.565 | 28.016 | 0.00 | 0.00 |
| ATOM | 5770 | HE2  | HIE | X | 383 | 60.360 | 14.620 | 27.035 | 0.00 | 0.00 |
| ATOM | 5771 | CD2  | HIE | X | 383 | 59.825 | 14.660 | 29.099 | 0.00 | 0.00 |
| ATOM | 5772 | HD2  | HIE | X | 383 | 58.749 | 14.747 | 29.085 | 0.00 | 0.00 |
| ATOM | 5773 | C    | HIE | X | 383 | 59.449 | 13.094 | 33.597 | 0.00 | 0.00 |
| ATOM | 5774 | O    | HIE | X | 383 | 59.805 | 14.033 | 34.276 | 0.00 | 0.00 |
| ATOM | 5775 | N    | PRO | X | 384 | 58.924 | 12.065 | 34.209 | 0.00 | 0.00 |
| ATOM | 5776 | CD   | PRO | X | 384 | 58.583 | 10.797 | 33.609 | 0.00 | 0.00 |
| ATOM | 5777 | HD2  | PRO | X | 384 | 59.464 | 10.345 | 33.154 | 0.00 | 0.00 |
| ATOM | 5778 | HD3  | PRO | X | 384 | 57.778 | 10.863 | 32.876 | 0.00 | 0.00 |



|      |      |     |     |   |     |        |        |        |      |      |
|------|------|-----|-----|---|-----|--------|--------|--------|------|------|
| ATOM | 5779 | CG  | PRO | X | 384 | 58.106 | 9.942  | 34.751 | 0.00 | 0.00 |
| ATOM | 5780 | HG2 | PRO | X | 384 | 58.832 | 9.415  | 35.370 | 0.00 | 0.00 |
| ATOM | 5781 | HG3 | PRO | X | 384 | 57.426 | 9.208  | 34.317 | 0.00 | 0.00 |
| ATOM | 5782 | CB  | PRO | X | 384 | 57.403 | 10.982 | 35.627 | 0.00 | 0.00 |
| ATOM | 5783 | HB2 | PRO | X | 384 | 57.397 | 10.648 | 36.664 | 0.00 | 0.00 |
| ATOM | 5784 | HB3 | PRO | X | 384 | 56.469 | 11.156 | 35.093 | 0.00 | 0.00 |
| ATOM | 5785 | CA  | PRO | X | 384 | 58.265 | 12.231 | 35.495 | 0.00 | 0.00 |
| ATOM | 5786 | HA  | PRO | X | 384 | 57.626 | 13.094 | 35.310 | 0.00 | 0.00 |
| ATOM | 5787 | C   | PRO | X | 384 | 59.269 | 12.338 | 36.648 | 0.00 | 0.00 |
| ATOM | 5788 | O   | PRO | X | 384 | 58.832 | 12.577 | 37.783 | 0.00 | 0.00 |
| ATOM | 5789 | N   | GLU | X | 385 | 60.577 | 12.059 | 36.308 | 0.00 | 0.00 |
| ATOM | 5790 | H   | GLU | X | 385 | 60.868 | 11.973 | 35.345 | 0.00 | 0.00 |
| ATOM | 5791 | CA  | GLU | X | 385 | 61.699 | 12.137 | 37.179 | 0.00 | 0.00 |
| ATOM | 5792 | HA  | GLU | X | 385 | 61.415 | 12.531 | 38.155 | 0.00 | 0.00 |
| ATOM | 5793 | CB  | GLU | X | 385 | 62.237 | 10.693 | 37.381 | 0.00 | 0.00 |
| ATOM | 5794 | HB2 | GLU | X | 385 | 62.633 | 10.175 | 36.508 | 0.00 | 0.00 |
| ATOM | 5795 | HB3 | GLU | X | 385 | 63.085 | 10.842 | 38.050 | 0.00 | 0.00 |
| ATOM | 5796 | CG  | GLU | X | 385 | 61.349 | 9.779  | 38.133 | 0.00 | 0.00 |
| ATOM | 5797 | HG2 | GLU | X | 385 | 61.019 | 10.246 | 39.061 | 0.00 | 0.00 |
| ATOM | 5798 | HG3 | GLU | X | 385 | 60.417 | 9.669  | 37.578 | 0.00 | 0.00 |
| ATOM | 5799 | CD  | GLU | X | 385 | 61.998 | 8.419  | 38.417 | 0.00 | 0.00 |
| ATOM | 5800 | OE1 | GLU | X | 385 | 63.239 | 8.336  | 38.647 | 0.00 | 0.00 |
| ATOM | 5801 | OE2 | GLU | X | 385 | 61.275 | 7.418  | 38.346 | 0.00 | 0.00 |
| ATOM | 5802 | C   | GLU | X | 385 | 62.738 | 13.216 | 36.774 | 0.00 | 0.00 |
| ATOM | 5803 | O   | GLU | X | 385 | 63.688 | 13.294 | 37.551 | 0.00 | 0.00 |
| ATOM | 5804 | N   | ASP | X | 386 | 62.707 | 13.920 | 35.629 | 0.00 | 0.00 |
| ATOM | 5805 | H   | ASP | X | 386 | 61.937 | 13.781 | 34.991 | 0.00 | 0.00 |
| ATOM | 5806 | CA  | ASP | X | 386 | 63.629 | 15.034 | 35.400 | 0.00 | 0.00 |
| ATOM | 5807 | HA  | ASP | X | 386 | 64.629 | 14.599 | 35.412 | 0.00 | 0.00 |
| ATOM | 5808 | CB  | ASP | X | 386 | 63.375 | 15.465 | 33.950 | 0.00 | 0.00 |
| ATOM | 5809 | HB2 | ASP | X | 386 | 63.466 | 14.634 | 33.251 | 0.00 | 0.00 |
| ATOM | 5810 | HB3 | ASP | X | 386 | 62.313 | 15.689 | 33.854 | 0.00 | 0.00 |
| ATOM | 5811 | CG  | ASP | X | 386 | 64.267 | 16.681 | 33.521 | 0.00 | 0.00 |
| ATOM | 5812 | OD1 | ASP | X | 386 | 63.706 | 17.640 | 32.957 | 0.00 | 0.00 |
| ATOM | 5813 | OD2 | ASP | X | 386 | 65.424 | 16.826 | 33.913 | 0.00 | 0.00 |
| ATOM | 5814 | C   | ASP | X | 386 | 63.589 | 16.224 | 36.369 | 0.00 | 0.00 |
| ATOM | 5815 | O   | ASP | X | 386 | 62.576 | 16.995 | 36.284 | 0.00 | 0.00 |
| ATOM | 5816 | N   | PRO | X | 387 | 64.539 | 16.452 | 37.236 | 0.00 | 0.00 |
| ATOM | 5817 | CD  | PRO | X | 387 | 65.836 | 15.810 | 37.234 | 0.00 | 0.00 |
| ATOM | 5818 | HD2 | PRO | X | 387 | 66.344 | 16.263 | 36.382 | 0.00 | 0.00 |
| ATOM | 5819 | HD3 | PRO | X | 387 | 65.785 | 14.726 | 37.128 | 0.00 | 0.00 |
| ATOM | 5820 | CG  | PRO | X | 387 | 66.594 | 16.053 | 38.526 | 0.00 | 0.00 |
| ATOM | 5821 | HG2 | PRO | X | 387 | 67.671 | 15.992 | 38.375 | 0.00 | 0.00 |
| ATOM | 5822 | HG3 | PRO | X | 387 | 66.287 | 15.385 | 39.331 | 0.00 | 0.00 |
| ATOM | 5823 | CB  | PRO | X | 387 | 66.064 | 17.506 | 38.716 | 0.00 | 0.00 |
| ATOM | 5824 | HB2 | PRO | X | 387 | 66.756 | 18.153 | 38.177 | 0.00 | 0.00 |
| ATOM | 5825 | HB3 | PRO | X | 387 | 66.021 | 17.783 | 39.769 | 0.00 | 0.00 |
| ATOM | 5826 | CA  | PRO | X | 387 | 64.651 | 17.621 | 38.129 | 0.00 | 0.00 |
| ATOM | 5827 | HA  | PRO | X | 387 | 63.912 | 17.437 | 38.908 | 0.00 | 0.00 |
| ATOM | 5828 | C   | PRO | X | 387 | 64.332 | 18.983 | 37.530 | 0.00 | 0.00 |
| ATOM | 5829 | O   | PRO | X | 387 | 64.023 | 19.808 | 38.344 | 0.00 | 0.00 |
| ATOM | 5830 | N   | ALA | X | 388 | 64.502 | 19.206 | 36.242 | 0.00 | 0.00 |
| ATOM | 5831 | H   | ALA | X | 388 | 64.937 | 18.472 | 35.702 | 0.00 | 0.00 |
| ATOM | 5832 | CA  | ALA | X | 388 | 64.289 | 20.518 | 35.588 | 0.00 | 0.00 |
| ATOM | 5833 | HA  | ALA | X | 388 | 64.446 | 21.356 | 36.267 | 0.00 | 0.00 |
| ATOM | 5834 | CB  | ALA | X | 388 | 65.241 | 20.613 | 34.395 | 0.00 | 0.00 |
| ATOM | 5835 | HB1 | ALA | X | 388 | 65.219 | 21.586 | 33.903 | 0.00 | 0.00 |
| ATOM | 5836 | HB2 | ALA | X | 388 | 66.285 | 20.467 | 34.671 | 0.00 | 0.00 |
| ATOM | 5837 | HB3 | ALA | X | 388 | 64.987 | 19.865 | 33.644 | 0.00 | 0.00 |
| ATOM | 5838 | C   | ALA | X | 388 | 62.820 | 20.603 | 35.143 | 0.00 | 0.00 |
| ATOM | 5839 | O   | ALA | X | 388 | 62.176 | 21.599 | 35.507 | 0.00 | 0.00 |
| ATOM | 5840 | N   | ARG | X | 389 | 62.243 | 19.541 | 34.671 | 0.00 | 0.00 |
| ATOM | 5841 | H   | ARG | X | 389 | 62.737 | 18.703 | 34.398 | 0.00 | 0.00 |
| ATOM | 5842 | CA  | ARG | X | 389 | 60.762 | 19.523 | 34.589 | 0.00 | 0.00 |
| ATOM | 5843 | HA  | ARG | X | 389 | 60.503 | 20.365 | 33.947 | 0.00 | 0.00 |
| ATOM | 5844 | CB  | ARG | X | 389 | 60.373 | 18.225 | 33.853 | 0.00 | 0.00 |
| ATOM | 5845 | HB2 | ARG | X | 389 | 61.085 | 18.083 | 33.040 | 0.00 | 0.00 |
| ATOM | 5846 | HB3 | ARG | X | 389 | 60.437 | 17.435 | 34.600 | 0.00 | 0.00 |
| ATOM | 5847 | CG  | ARG | X | 389 | 59.048 | 18.201 | 33.149 | 0.00 | 0.00 |
| ATOM | 5848 | HG2 | ARG | X | 389 | 58.745 | 17.208 | 32.816 | 0.00 | 0.00 |

|      |      |      |     |   |     |        |        |        |      |      |
|------|------|------|-----|---|-----|--------|--------|--------|------|------|
| ATOM | 5849 | HG3  | ARG | X | 389 | 58.289 | 18.440 | 33.894 | 0.00 | 0.00 |
| ATOM | 5850 | CD   | ARG | X | 389 | 58.933 | 19.252 | 31.984 | 0.00 | 0.00 |
| ATOM | 5851 | HD2  | ARG | X | 389 | 58.469 | 20.179 | 32.323 | 0.00 | 0.00 |
| ATOM | 5852 | HD3  | ARG | X | 389 | 59.943 | 19.506 | 31.662 | 0.00 | 0.00 |
| ATOM | 5853 | NE   | ARG | X | 389 | 58.226 | 18.720 | 30.831 | 0.00 | 0.00 |
| ATOM | 5854 | HE   | ARG | X | 389 | 57.232 | 18.566 | 30.920 | 0.00 | 0.00 |
| ATOM | 5855 | CZ   | ARG | X | 389 | 58.759 | 18.482 | 29.649 | 0.00 | 0.00 |
| ATOM | 5856 | NH1  | ARG | X | 389 | 60.013 | 18.705 | 29.282 | 0.00 | 0.00 |
| ATOM | 5857 | HH11 | ARG | X | 389 | 60.499 | 19.420 | 29.804 | 0.00 | 0.00 |
| ATOM | 5858 | HH12 | ARG | X | 389 | 60.452 | 18.388 | 28.430 | 0.00 | 0.00 |
| ATOM | 5859 | NH2  | ARG | X | 389 | 57.974 | 17.715 | 28.859 | 0.00 | 0.00 |
| ATOM | 5860 | HH21 | ARG | X | 389 | 57.067 | 17.473 | 29.233 | 0.00 | 0.00 |
| ATOM | 5861 | HH22 | ARG | X | 389 | 58.254 | 17.378 | 27.949 | 0.00 | 0.00 |
| ATOM | 5862 | C    | ARG | X | 389 | 60.015 | 19.676 | 35.938 | 0.00 | 0.00 |
| ATOM | 5863 | O    | ARG | X | 389 | 58.963 | 20.314 | 35.923 | 0.00 | 0.00 |
| ATOM | 5864 | N    | LEU | X | 390 | 60.539 | 19.194 | 37.058 | 0.00 | 0.00 |
| ATOM | 5865 | H    | LEU | X | 390 | 61.418 | 18.706 | 36.959 | 0.00 | 0.00 |
| ATOM | 5866 | CA   | LEU | X | 390 | 59.778 | 19.147 | 38.323 | 0.00 | 0.00 |
| ATOM | 5867 | HA   | LEU | X | 390 | 58.705 | 19.022 | 38.181 | 0.00 | 0.00 |
| ATOM | 5868 | CB   | LEU | X | 390 | 60.467 | 18.088 | 39.218 | 0.00 | 0.00 |
| ATOM | 5869 | HB2  | LEU | X | 390 | 61.535 | 18.203 | 39.402 | 0.00 | 0.00 |
| ATOM | 5870 | HB3  | LEU | X | 390 | 60.071 | 18.147 | 40.232 | 0.00 | 0.00 |
| ATOM | 5871 | CG   | LEU | X | 390 | 60.301 | 16.619 | 38.685 | 0.00 | 0.00 |
| ATOM | 5872 | HG   | LEU | X | 390 | 60.642 | 16.553 | 37.652 | 0.00 | 0.00 |
| ATOM | 5873 | CD1  | LEU | X | 390 | 61.150 | 15.638 | 39.515 | 0.00 | 0.00 |
| ATOM | 5874 | HD11 | LEU | X | 390 | 60.878 | 15.636 | 40.570 | 0.00 | 0.00 |
| ATOM | 5875 | HD12 | LEU | X | 390 | 61.172 | 14.650 | 39.055 | 0.00 | 0.00 |
| ATOM | 5876 | HD13 | LEU | X | 390 | 62.184 | 15.981 | 39.564 | 0.00 | 0.00 |
| ATOM | 5877 | CD2  | LEU | X | 390 | 58.787 | 16.279 | 38.708 | 0.00 | 0.00 |
| ATOM | 5878 | HD21 | LEU | X | 390 | 58.481 | 16.170 | 39.748 | 0.00 | 0.00 |
| ATOM | 5879 | HD22 | LEU | X | 390 | 58.246 | 16.982 | 38.075 | 0.00 | 0.00 |
| ATOM | 5880 | HD23 | LEU | X | 390 | 58.713 | 15.334 | 38.169 | 0.00 | 0.00 |
| ATOM | 5881 | C    | LEU | X | 390 | 59.854 | 20.495 | 38.996 | 0.00 | 0.00 |
| ATOM | 5882 | O    | LEU | X | 390 | 58.742 | 20.958 | 39.327 | 0.00 | 0.00 |
| ATOM | 5883 | N    | ARG | X | 391 | 60.899 | 21.270 | 38.876 | 0.00 | 0.00 |
| ATOM | 5884 | H    | ARG | X | 391 | 61.723 | 20.825 | 38.498 | 0.00 | 0.00 |
| ATOM | 5885 | CA   | ARG | X | 391 | 60.807 | 22.721 | 39.213 | 0.00 | 0.00 |
| ATOM | 5886 | HA   | ARG | X | 391 | 60.316 | 22.758 | 40.185 | 0.00 | 0.00 |
| ATOM | 5887 | CB   | ARG | X | 391 | 62.107 | 23.504 | 39.373 | 0.00 | 0.00 |
| ATOM | 5888 | HB2  | ARG | X | 391 | 61.739 | 24.502 | 39.609 | 0.00 | 0.00 |
| ATOM | 5889 | HB3  | ARG | X | 391 | 62.700 | 23.122 | 40.205 | 0.00 | 0.00 |
| ATOM | 5890 | CG   | ARG | X | 391 | 63.116 | 23.257 | 38.210 | 0.00 | 0.00 |
| ATOM | 5891 | HG2  | ARG | X | 391 | 64.080 | 22.903 | 38.574 | 0.00 | 0.00 |
| ATOM | 5892 | HG3  | ARG | X | 391 | 62.754 | 22.441 | 37.585 | 0.00 | 0.00 |
| ATOM | 5893 | CD   | ARG | X | 391 | 63.172 | 24.564 | 37.407 | 0.00 | 0.00 |
| ATOM | 5894 | HD2  | ARG | X | 391 | 62.341 | 24.651 | 36.707 | 0.00 | 0.00 |
| ATOM | 5895 | HD3  | ARG | X | 391 | 63.216 | 25.406 | 38.099 | 0.00 | 0.00 |
| ATOM | 5896 | NE   | ARG | X | 391 | 64.473 | 24.793 | 36.822 | 0.00 | 0.00 |
| ATOM | 5897 | HE   | ARG | X | 391 | 65.193 | 25.199 | 37.403 | 0.00 | 0.00 |
| ATOM | 5898 | CZ   | ARG | X | 391 | 64.788 | 24.613 | 35.568 | 0.00 | 0.00 |
| ATOM | 5899 | NH1  | ARG | X | 391 | 63.983 | 24.139 | 34.724 | 0.00 | 0.00 |
| ATOM | 5900 | HH11 | ARG | X | 391 | 63.111 | 23.654 | 34.878 | 0.00 | 0.00 |
| ATOM | 5901 | HH12 | ARG | X | 391 | 64.438 | 24.019 | 33.831 | 0.00 | 0.00 |
| ATOM | 5902 | NH2  | ARG | X | 391 | 66.054 | 24.882 | 35.182 | 0.00 | 0.00 |
| ATOM | 5903 | HH21 | ARG | X | 391 | 66.770 | 25.138 | 35.846 | 0.00 | 0.00 |
| ATOM | 5904 | HH22 | ARG | X | 391 | 66.402 | 24.418 | 34.354 | 0.00 | 0.00 |
| ATOM | 5905 | C    | ARG | X | 391 | 59.815 | 23.523 | 38.279 | 0.00 | 0.00 |
| ATOM | 5906 | O    | ARG | X | 391 | 59.177 | 24.453 | 38.774 | 0.00 | 0.00 |
| ATOM | 5907 | N    | GLU | X | 392 | 59.751 | 23.181 | 36.964 | 0.00 | 0.00 |
| ATOM | 5908 | H    | GLU | X | 392 | 60.415 | 22.499 | 36.625 | 0.00 | 0.00 |
| ATOM | 5909 | CA   | GLU | X | 392 | 58.783 | 23.795 | 36.058 | 0.00 | 0.00 |
| ATOM | 5910 | HA   | GLU | X | 392 | 58.860 | 24.871 | 36.217 | 0.00 | 0.00 |
| ATOM | 5911 | CB   | GLU | X | 392 | 59.041 | 23.473 | 34.572 | 0.00 | 0.00 |
| ATOM | 5912 | HB2  | GLU | X | 392 | 59.143 | 22.391 | 34.495 | 0.00 | 0.00 |
| ATOM | 5913 | HB3  | GLU | X | 392 | 58.233 | 23.806 | 33.920 | 0.00 | 0.00 |
| ATOM | 5914 | CG   | GLU | X | 392 | 60.321 | 24.122 | 34.022 | 0.00 | 0.00 |
| ATOM | 5915 | HG2  | GLU | X | 392 | 60.316 | 25.209 | 34.100 | 0.00 | 0.00 |
| ATOM | 5916 | HG3  | GLU | X | 392 | 61.158 | 23.783 | 34.632 | 0.00 | 0.00 |
| ATOM | 5917 | CD   | GLU | X | 392 | 60.479 | 23.635 | 32.577 | 0.00 | 0.00 |
| ATOM | 5918 | OE1  | GLU | X | 392 | 61.482 | 23.001 | 32.238 | 0.00 | 0.00 |

|      |      |      |     |   |     |        |        |        |      |      |
|------|------|------|-----|---|-----|--------|--------|--------|------|------|
| ATOM | 5919 | OE2  | GLU | X | 392 | 59.594 | 23.993 | 31.703 | 0.00 | 0.00 |
| ATOM | 5920 | C    | GLU | X | 392 | 57.314 | 23.465 | 36.378 | 0.00 | 0.00 |
| ATOM | 5921 | O    | GLU | X | 392 | 56.518 | 24.326 | 36.097 | 0.00 | 0.00 |
| ATOM | 5922 | N    | ALA | X | 393 | 57.056 | 22.320 | 37.021 | 0.00 | 0.00 |
| ATOM | 5923 | H    | ALA | X | 393 | 57.815 | 21.682 | 37.211 | 0.00 | 0.00 |
| ATOM | 5924 | CA   | ALA | X | 393 | 55.712 | 21.921 | 37.511 | 0.00 | 0.00 |
| ATOM | 5925 | HA   | ALA | X | 393 | 55.034 | 22.101 | 36.677 | 0.00 | 0.00 |
| ATOM | 5926 | CB   | ALA | X | 393 | 55.740 | 20.444 | 37.730 | 0.00 | 0.00 |
| ATOM | 5927 | HB1  | ALA | X | 393 | 56.344 | 20.204 | 38.605 | 0.00 | 0.00 |
| ATOM | 5928 | HB2  | ALA | X | 393 | 54.720 | 20.167 | 37.996 | 0.00 | 0.00 |
| ATOM | 5929 | HB3  | ALA | X | 393 | 55.990 | 19.858 | 36.845 | 0.00 | 0.00 |
| ATOM | 5930 | C    | ALA | X | 393 | 55.464 | 22.727 | 38.804 | 0.00 | 0.00 |
| ATOM | 5931 | O    | ALA | X | 393 | 54.341 | 23.117 | 39.096 | 0.00 | 0.00 |
| ATOM | 5932 | N    | LEU | X | 394 | 56.462 | 22.946 | 39.636 | 0.00 | 0.00 |
| ATOM | 5933 | H    | LEU | X | 394 | 57.344 | 22.556 | 39.338 | 0.00 | 0.00 |
| ATOM | 5934 | CA   | LEU | X | 394 | 56.375 | 24.008 | 40.689 | 0.00 | 0.00 |
| ATOM | 5935 | HA   | LEU | X | 394 | 55.439 | 23.733 | 41.174 | 0.00 | 0.00 |
| ATOM | 5936 | CB   | LEU | X | 394 | 57.435 | 23.772 | 41.763 | 0.00 | 0.00 |
| ATOM | 5937 | HB2  | LEU | X | 394 | 57.530 | 22.710 | 41.988 | 0.00 | 0.00 |
| ATOM | 5938 | HB3  | LEU | X | 394 | 58.403 | 24.121 | 41.403 | 0.00 | 0.00 |
| ATOM | 5939 | CG   | LEU | X | 394 | 57.164 | 24.397 | 43.139 | 0.00 | 0.00 |
| ATOM | 5940 | HG   | LEU | X | 394 | 56.895 | 25.440 | 42.969 | 0.00 | 0.00 |
| ATOM | 5941 | CD1  | LEU | X | 394 | 55.888 | 23.828 | 43.868 | 0.00 | 0.00 |
| ATOM | 5942 | HD11 | LEU | X | 394 | 55.728 | 24.382 | 44.794 | 0.00 | 0.00 |
| ATOM | 5943 | HD12 | LEU | X | 394 | 55.028 | 23.903 | 43.203 | 0.00 | 0.00 |
| ATOM | 5944 | HD13 | LEU | X | 394 | 56.054 | 22.767 | 44.051 | 0.00 | 0.00 |
| ATOM | 5945 | CD2  | LEU | X | 394 | 58.366 | 24.246 | 44.145 | 0.00 | 0.00 |
| ATOM | 5946 | HD21 | LEU | X | 394 | 58.605 | 23.215 | 44.407 | 0.00 | 0.00 |
| ATOM | 5947 | HD22 | LEU | X | 394 | 59.204 | 24.721 | 43.634 | 0.00 | 0.00 |
| ATOM | 5948 | HD23 | LEU | X | 394 | 58.098 | 24.721 | 45.088 | 0.00 | 0.00 |
| ATOM | 5949 | C    | LEU | X | 394 | 56.154 | 25.472 | 40.276 | 0.00 | 0.00 |
| ATOM | 5950 | O    | LEU | X | 394 | 55.312 | 26.118 | 40.852 | 0.00 | 0.00 |
| ATOM | 5951 | N    | SER | X | 395 | 56.705 | 25.903 | 39.159 | 0.00 | 0.00 |
| ATOM | 5952 | H    | SER | X | 395 | 57.552 | 25.415 | 38.905 | 0.00 | 0.00 |
| ATOM | 5953 | CA   | SER | X | 395 | 56.317 | 27.274 | 38.630 | 0.00 | 0.00 |
| ATOM | 5954 | HA   | SER | X | 395 | 56.279 | 28.087 | 39.354 | 0.00 | 0.00 |
| ATOM | 5955 | CB   | SER | X | 395 | 57.232 | 27.632 | 37.484 | 0.00 | 0.00 |
| ATOM | 5956 | HB2  | SER | X | 395 | 56.913 | 26.999 | 36.656 | 0.00 | 0.00 |
| ATOM | 5957 | HB3  | SER | X | 395 | 57.125 | 28.684 | 37.219 | 0.00 | 0.00 |
| ATOM | 5958 | OG   | SER | X | 395 | 58.586 | 27.396 | 37.754 | 0.00 | 0.00 |
| ATOM | 5959 | HG   | SER | X | 395 | 58.958 | 27.627 | 36.900 | 0.00 | 0.00 |
| ATOM | 5960 | C    | SER | X | 395 | 54.886 | 27.240 | 38.169 | 0.00 | 0.00 |
| ATOM | 5961 | O    | SER | X | 395 | 54.138 | 28.157 | 38.279 | 0.00 | 0.00 |
| ATOM | 5962 | N    | ASP | X | 396 | 54.421 | 26.146 | 37.586 | 0.00 | 0.00 |
| ATOM | 5963 | H    | ASP | X | 396 | 55.090 | 25.412 | 37.403 | 0.00 | 0.00 |
| ATOM | 5964 | CA   | ASP | X | 396 | 53.078 | 25.973 | 37.179 | 0.00 | 0.00 |
| ATOM | 5965 | HA   | ASP | X | 396 | 52.755 | 26.746 | 36.482 | 0.00 | 0.00 |
| ATOM | 5966 | CB   | ASP | X | 396 | 52.870 | 24.673 | 36.377 | 0.00 | 0.00 |
| ATOM | 5967 | HB2  | ASP | X | 396 | 53.809 | 24.265 | 36.004 | 0.00 | 0.00 |
| ATOM | 5968 | HB3  | ASP | X | 396 | 52.533 | 23.948 | 37.117 | 0.00 | 0.00 |
| ATOM | 5969 | CG   | ASP | X | 396 | 51.892 | 24.784 | 35.158 | 0.00 | 0.00 |
| ATOM | 5970 | OD1  | ASP | X | 396 | 51.707 | 25.817 | 34.515 | 0.00 | 0.00 |
| ATOM | 5971 | OD2  | ASP | X | 396 | 51.343 | 23.709 | 34.826 | 0.00 | 0.00 |
| ATOM | 5972 | C    | ASP | X | 396 | 52.129 | 26.030 | 38.338 | 0.00 | 0.00 |
| ATOM | 5973 | O    | ASP | X | 396 | 51.185 | 26.825 | 38.387 | 0.00 | 0.00 |
| ATOM | 5974 | N    | VAL | X | 397 | 52.397 | 25.301 | 39.432 | 0.00 | 0.00 |
| ATOM | 5975 | H    | VAL | X | 397 | 53.177 | 24.660 | 39.378 | 0.00 | 0.00 |
| ATOM | 5976 | CA   | VAL | X | 397 | 51.490 | 25.326 | 40.606 | 0.00 | 0.00 |
| ATOM | 5977 | HA   | VAL | X | 397 | 50.457 | 25.276 | 40.261 | 0.00 | 0.00 |
| ATOM | 5978 | CB   | VAL | X | 397 | 51.765 | 24.163 | 41.671 | 0.00 | 0.00 |
| ATOM | 5979 | HB   | VAL | X | 397 | 52.825 | 24.123 | 41.924 | 0.00 | 0.00 |
| ATOM | 5980 | CG1  | VAL | X | 397 | 50.859 | 24.265 | 42.871 | 0.00 | 0.00 |
| ATOM | 5981 | HG11 | VAL | X | 397 | 49.801 | 24.209 | 42.615 | 0.00 | 0.00 |
| ATOM | 5982 | HG12 | VAL | X | 397 | 51.179 | 23.470 | 43.545 | 0.00 | 0.00 |
| ATOM | 5983 | HG13 | VAL | X | 397 | 50.947 | 25.104 | 43.561 | 0.00 | 0.00 |
| ATOM | 5984 | CG2  | VAL | X | 397 | 51.576 | 22.793 | 41.119 | 0.00 | 0.00 |
| ATOM | 5985 | HG21 | VAL | X | 397 | 52.248 | 22.631 | 40.277 | 0.00 | 0.00 |
| ATOM | 5986 | HG22 | VAL | X | 397 | 51.786 | 22.055 | 41.893 | 0.00 | 0.00 |
| ATOM | 5987 | HG23 | VAL | X | 397 | 50.605 | 22.629 | 40.651 | 0.00 | 0.00 |
| ATOM | 5988 | C    | VAL | X | 397 | 51.565 | 26.687 | 41.336 | 0.00 | 0.00 |

|      |      |      |     |   |     |        |        |        |      |      |
|------|------|------|-----|---|-----|--------|--------|--------|------|------|
| ATOM | 5989 | O    | VAL | X | 397 | 50.542 | 27.178 | 41.769 | 0.00 | 0.00 |
| ATOM | 5990 | N    | VAL | X | 398 | 52.669 | 27.414 | 41.395 | 0.00 | 0.00 |
| ATOM | 5991 | H    | VAL | X | 398 | 53.538 | 27.000 | 41.090 | 0.00 | 0.00 |
| ATOM | 5992 | CA   | VAL | X | 398 | 52.767 | 28.772 | 42.006 | 0.00 | 0.00 |
| ATOM | 5993 | HA   | VAL | X | 398 | 52.226 | 28.783 | 42.952 | 0.00 | 0.00 |
| ATOM | 5994 | CB   | VAL | X | 398 | 54.257 | 29.188 | 42.243 | 0.00 | 0.00 |
| ATOM | 5995 | HB   | VAL | X | 398 | 54.772 | 28.995 | 41.303 | 0.00 | 0.00 |
| ATOM | 5996 | CG1  | VAL | X | 398 | 54.504 | 30.535 | 42.920 | 0.00 | 0.00 |
| ATOM | 5997 | HG11 | VAL | X | 398 | 55.551 | 30.837 | 42.901 | 0.00 | 0.00 |
| ATOM | 5998 | HG12 | VAL | X | 398 | 54.006 | 31.273 | 42.291 | 0.00 | 0.00 |
| ATOM | 5999 | HG13 | VAL | X | 398 | 54.066 | 30.543 | 43.919 | 0.00 | 0.00 |
| ATOM | 6000 | CG2  | VAL | X | 398 | 54.956 | 28.205 | 43.187 | 0.00 | 0.00 |
| ATOM | 6001 | HG21 | VAL | X | 398 | 54.661 | 28.231 | 44.236 | 0.00 | 0.00 |
| ATOM | 6002 | HG22 | VAL | X | 398 | 54.829 | 27.153 | 42.929 | 0.00 | 0.00 |
| ATOM | 6003 | HG23 | VAL | X | 398 | 55.991 | 28.522 | 43.060 | 0.00 | 0.00 |
| ATOM | 6004 | C    | VAL | X | 398 | 52.075 | 29.778 | 41.044 | 0.00 | 0.00 |
| ATOM | 6005 | O    | VAL | X | 398 | 51.605 | 30.760 | 41.540 | 0.00 | 0.00 |
| ATOM | 6006 | N    | GLY | X | 399 | 52.001 | 29.569 | 39.765 | 0.00 | 0.00 |
| ATOM | 6007 | H    | GLY | X | 399 | 52.262 | 28.661 | 39.407 | 0.00 | 0.00 |
| ATOM | 6008 | CA   | GLY | X | 399 | 51.288 | 30.565 | 38.929 | 0.00 | 0.00 |
| ATOM | 6009 | HA2  | GLY | X | 399 | 51.464 | 31.549 | 39.254 | 0.00 | 0.00 |
| ATOM | 6010 | HA3  | GLY | X | 399 | 51.683 | 30.461 | 37.913 | 0.00 | 0.00 |
| ATOM | 6011 | C    | GLY | X | 399 | 49.779 | 30.378 | 38.696 | 0.00 | 0.00 |
| ATOM | 6012 | O    | GLY | X | 399 | 48.992 | 31.333 | 38.754 | 0.00 | 0.00 |
| ATOM | 6013 | N    | ASP | X | 400 | 49.422 | 29.149 | 38.492 | 0.00 | 0.00 |
| ATOM | 6014 | H    | ASP | X | 400 | 50.110 | 28.410 | 38.495 | 0.00 | 0.00 |
| ATOM | 6015 | CA   | ASP | X | 400 | 47.978 | 28.818 | 38.367 | 0.00 | 0.00 |
| ATOM | 6016 | HA   | ASP | X | 400 | 47.523 | 29.535 | 37.683 | 0.00 | 0.00 |
| ATOM | 6017 | CB   | ASP | X | 400 | 47.802 | 27.307 | 37.964 | 0.00 | 0.00 |
| ATOM | 6018 | HB2  | ASP | X | 400 | 48.291 | 26.650 | 38.684 | 0.00 | 0.00 |
| ATOM | 6019 | HB3  | ASP | X | 400 | 46.742 | 27.125 | 38.145 | 0.00 | 0.00 |
| ATOM | 6020 | CG   | ASP | X | 400 | 48.255 | 26.927 | 36.542 | 0.00 | 0.00 |
| ATOM | 6021 | OD1  | ASP | X | 400 | 48.461 | 27.841 | 35.734 | 0.00 | 0.00 |
| ATOM | 6022 | OD2  | ASP | X | 400 | 48.310 | 25.698 | 36.172 | 0.00 | 0.00 |
| ATOM | 6023 | C    | ASP | X | 400 | 47.225 | 29.009 | 39.731 | 0.00 | 0.00 |
| ATOM | 6024 | O    | ASP | X | 400 | 46.236 | 29.777 | 39.753 | 0.00 | 0.00 |
| ATOM | 6025 | N    | HIE | X | 401 | 47.757 | 28.418 | 40.843 | 0.00 | 0.00 |
| ATOM | 6026 | H    | HIE | X | 401 | 48.452 | 27.708 | 40.663 | 0.00 | 0.00 |
| ATOM | 6027 | CA   | HIE | X | 401 | 47.022 | 28.499 | 42.130 | 0.00 | 0.00 |
| ATOM | 6028 | HA   | HIE | X | 401 | 45.997 | 28.201 | 41.912 | 0.00 | 0.00 |
| ATOM | 6029 | CB   | HIE | X | 401 | 47.618 | 27.578 | 43.152 | 0.00 | 0.00 |
| ATOM | 6030 | HB2  | HIE | X | 401 | 47.662 | 26.540 | 42.822 | 0.00 | 0.00 |
| ATOM | 6031 | HB3  | HIE | X | 401 | 48.609 | 27.945 | 43.420 | 0.00 | 0.00 |
| ATOM | 6032 | CG   | HIE | X | 401 | 46.878 | 27.641 | 44.513 | 0.00 | 0.00 |
| ATOM | 6033 | ND1  | HIE | X | 401 | 47.164 | 28.587 | 45.606 | 0.00 | 0.00 |
| ATOM | 6034 | CE1  | HIE | X | 401 | 46.127 | 28.459 | 46.423 | 0.00 | 0.00 |
| ATOM | 6035 | HE1  | HIE | X | 401 | 45.989 | 29.131 | 47.256 | 0.00 | 0.00 |
| ATOM | 6036 | NE2  | HIE | X | 401 | 45.353 | 27.412 | 46.049 | 0.00 | 0.00 |
| ATOM | 6037 | HE2  | HIE | X | 401 | 44.640 | 27.029 | 46.654 | 0.00 | 0.00 |
| ATOM | 6038 | CD2  | HIE | X | 401 | 45.849 | 26.840 | 44.897 | 0.00 | 0.00 |
| ATOM | 6039 | HD2  | HIE | X | 401 | 45.443 | 25.962 | 44.417 | 0.00 | 0.00 |
| ATOM | 6040 | C    | HIE | X | 401 | 46.852 | 29.953 | 42.633 | 0.00 | 0.00 |
| ATOM | 6041 | O    | HIE | X | 401 | 45.870 | 30.347 | 43.116 | 0.00 | 0.00 |
| ATOM | 6042 | N    | ASN | X | 402 | 47.870 | 30.767 | 42.326 | 0.00 | 0.00 |
| ATOM | 6043 | H    | ASN | X | 402 | 48.686 | 30.400 | 41.858 | 0.00 | 0.00 |
| ATOM | 6044 | CA   | ASN | X | 402 | 47.966 | 32.097 | 42.992 | 0.00 | 0.00 |
| ATOM | 6045 | HA   | ASN | X | 402 | 47.384 | 32.070 | 43.913 | 0.00 | 0.00 |
| ATOM | 6046 | CB   | ASN | X | 402 | 49.395 | 32.514 | 43.407 | 0.00 | 0.00 |
| ATOM | 6047 | HB2  | ASN | X | 402 | 50.161 | 32.227 | 42.686 | 0.00 | 0.00 |
| ATOM | 6048 | HB3  | ASN | X | 402 | 49.383 | 33.592 | 43.563 | 0.00 | 0.00 |
| ATOM | 6049 | CG   | ASN | X | 402 | 49.520 | 31.873 | 44.755 | 0.00 | 0.00 |
| ATOM | 6050 | OD1  | ASN | X | 402 | 49.411 | 32.494 | 45.773 | 0.00 | 0.00 |
| ATOM | 6051 | ND2  | ASN | X | 402 | 49.899 | 30.667 | 44.806 | 0.00 | 0.00 |
| ATOM | 6052 | HD21 | ASN | X | 402 | 49.997 | 30.319 | 45.749 | 0.00 | 0.00 |
| ATOM | 6053 | HD22 | ASN | X | 402 | 50.389 | 30.261 | 44.022 | 0.00 | 0.00 |
| ATOM | 6054 | C    | ASN | X | 402 | 47.479 | 33.232 | 42.088 | 0.00 | 0.00 |
| ATOM | 6055 | O    | ASN | X | 402 | 46.958 | 34.223 | 42.605 | 0.00 | 0.00 |
| ATOM | 6056 | N    | VAL | X | 403 | 47.620 | 33.089 | 40.751 | 0.00 | 0.00 |
| ATOM | 6057 | H    | VAL | X | 403 | 48.071 | 32.291 | 40.326 | 0.00 | 0.00 |
| ATOM | 6058 | CA   | VAL | X | 403 | 47.346 | 34.218 | 39.825 | 0.00 | 0.00 |

|      |      |      |     |   |     |        |        |        |      |      |
|------|------|------|-----|---|-----|--------|--------|--------|------|------|
| ATOM | 6059 | HA   | VAL | X | 403 | 46.743 | 34.951 | 40.362 | 0.00 | 0.00 |
| ATOM | 6060 | CB   | VAL | X | 403 | 48.635 | 34.963 | 39.282 | 0.00 | 0.00 |
| ATOM | 6061 | HB   | VAL | X | 403 | 49.047 | 34.509 | 38.380 | 0.00 | 0.00 |
| ATOM | 6062 | CG1  | VAL | X | 403 | 48.289 | 36.351 | 38.789 | 0.00 | 0.00 |
| ATOM | 6063 | HG11 | VAL | X | 403 | 47.948 | 37.021 | 39.578 | 0.00 | 0.00 |
| ATOM | 6064 | HG12 | VAL | X | 403 | 49.091 | 36.825 | 38.221 | 0.00 | 0.00 |
| ATOM | 6065 | HG13 | VAL | X | 403 | 47.528 | 36.231 | 38.018 | 0.00 | 0.00 |
| ATOM | 6066 | CG2  | VAL | X | 403 | 49.719 | 35.176 | 40.360 | 0.00 | 0.00 |
| ATOM | 6067 | HG21 | VAL | X | 403 | 50.087 | 34.176 | 40.591 | 0.00 | 0.00 |
| ATOM | 6068 | HG22 | VAL | X | 403 | 50.521 | 35.846 | 40.049 | 0.00 | 0.00 |
| ATOM | 6069 | HG23 | VAL | X | 403 | 49.226 | 35.631 | 41.218 | 0.00 | 0.00 |
| ATOM | 6070 | C    | VAL | X | 403 | 46.479 | 33.774 | 38.663 | 0.00 | 0.00 |
| ATOM | 6071 | O    | VAL | X | 403 | 45.311 | 34.184 | 38.642 | 0.00 | 0.00 |
| ATOM | 6072 | N    | VAL | X | 404 | 46.960 | 32.903 | 37.749 | 0.00 | 0.00 |
| ATOM | 6073 | H    | VAL | X | 404 | 47.758 | 32.331 | 37.986 | 0.00 | 0.00 |
| ATOM | 6074 | CA   | VAL | X | 404 | 46.259 | 32.462 | 36.537 | 0.00 | 0.00 |
| ATOM | 6075 | HA   | VAL | X | 404 | 46.251 | 33.361 | 35.921 | 0.00 | 0.00 |
| ATOM | 6076 | CB   | VAL | X | 404 | 46.943 | 31.387 | 35.677 | 0.00 | 0.00 |
| ATOM | 6077 | HB   | VAL | X | 404 | 46.760 | 30.401 | 36.104 | 0.00 | 0.00 |
| ATOM | 6078 | CG1  | VAL | X | 404 | 46.203 | 31.173 | 34.367 | 0.00 | 0.00 |
| ATOM | 6079 | HG11 | VAL | X | 404 | 45.969 | 32.148 | 33.941 | 0.00 | 0.00 |
| ATOM | 6080 | HG12 | VAL | X | 404 | 46.808 | 30.614 | 33.652 | 0.00 | 0.00 |
| ATOM | 6081 | HG13 | VAL | X | 404 | 45.253 | 30.650 | 34.477 | 0.00 | 0.00 |
| ATOM | 6082 | CG2  | VAL | X | 404 | 48.330 | 31.726 | 35.328 | 0.00 | 0.00 |
| ATOM | 6083 | HG21 | VAL | X | 404 | 48.823 | 30.849 | 34.909 | 0.00 | 0.00 |
| ATOM | 6084 | HG22 | VAL | X | 404 | 48.440 | 32.525 | 34.596 | 0.00 | 0.00 |
| ATOM | 6085 | HG23 | VAL | X | 404 | 48.863 | 31.939 | 36.255 | 0.00 | 0.00 |
| ATOM | 6086 | C    | VAL | X | 404 | 44.817 | 31.978 | 36.768 | 0.00 | 0.00 |
| ATOM | 6087 | O    | VAL | X | 404 | 43.869 | 32.549 | 36.214 | 0.00 | 0.00 |
| ATOM | 6088 | N    | CYX | X | 405 | 44.589 | 31.063 | 37.681 | 0.00 | 0.00 |
| ATOM | 6089 | H    | CYX | X | 405 | 45.417 | 30.689 | 38.121 | 0.00 | 0.00 |
| ATOM | 6090 | CA   | CYX | X | 405 | 43.235 | 30.615 | 38.043 | 0.00 | 0.00 |
| ATOM | 6091 | HA   | CYX | X | 405 | 42.728 | 30.431 | 37.095 | 0.00 | 0.00 |
| ATOM | 6092 | CB   | CYX | X | 405 | 43.165 | 29.219 | 38.789 | 0.00 | 0.00 |
| ATOM | 6093 | HB2  | CYX | X | 405 | 43.785 | 29.242 | 39.685 | 0.00 | 0.00 |
| ATOM | 6094 | HB3  | CYX | X | 405 | 42.154 | 29.129 | 39.186 | 0.00 | 0.00 |
| ATOM | 6095 | SG   | CYX | X | 405 | 43.610 | 27.718 | 37.849 | 0.00 | 0.00 |
| ATOM | 6096 | C    | CYX | X | 405 | 42.356 | 31.700 | 38.658 | 0.00 | 0.00 |
| ATOM | 6097 | O    | CYX | X | 405 | 41.250 | 31.855 | 38.129 | 0.00 | 0.00 |
| ATOM | 6098 | N    | PRO | X | 406 | 42.790 | 32.388 | 39.703 | 0.00 | 0.00 |
| ATOM | 6099 | CD   | PRO | X | 406 | 43.833 | 32.031 | 40.672 | 0.00 | 0.00 |
| ATOM | 6100 | HD2  | PRO | X | 406 | 44.840 | 32.104 | 40.260 | 0.00 | 0.00 |
| ATOM | 6101 | HD3  | PRO | X | 406 | 43.655 | 31.057 | 41.127 | 0.00 | 0.00 |
| ATOM | 6102 | CG   | PRO | X | 406 | 43.774 | 33.039 | 41.811 | 0.00 | 0.00 |
| ATOM | 6103 | HG2  | PRO | X | 406 | 44.775 | 33.341 | 42.119 | 0.00 | 0.00 |
| ATOM | 6104 | HG3  | PRO | X | 406 | 43.346 | 32.558 | 42.690 | 0.00 | 0.00 |
| ATOM | 6105 | CB   | PRO | X | 406 | 42.985 | 34.225 | 41.183 | 0.00 | 0.00 |
| ATOM | 6106 | HB2  | PRO | X | 406 | 43.679 | 34.980 | 40.815 | 0.00 | 0.00 |
| ATOM | 6107 | HB3  | PRO | X | 406 | 42.431 | 34.620 | 42.035 | 0.00 | 0.00 |
| ATOM | 6108 | CA   | PRO | X | 406 | 42.095 | 33.636 | 40.148 | 0.00 | 0.00 |
| ATOM | 6109 | HA   | PRO | X | 406 | 41.223 | 33.315 | 40.717 | 0.00 | 0.00 |
| ATOM | 6110 | C    | PRO | X | 406 | 41.694 | 34.615 | 39.014 | 0.00 | 0.00 |
| ATOM | 6111 | O    | PRO | X | 406 | 40.523 | 35.033 | 39.059 | 0.00 | 0.00 |
| ATOM | 6112 | N    | VAL | X | 407 | 42.555 | 34.945 | 38.027 | 0.00 | 0.00 |
| ATOM | 6113 | H    | VAL | X | 407 | 43.526 | 34.668 | 38.025 | 0.00 | 0.00 |
| ATOM | 6114 | CA   | VAL | X | 407 | 42.075 | 35.927 | 36.994 | 0.00 | 0.00 |
| ATOM | 6115 | HA   | VAL | X | 407 | 41.599 | 36.793 | 37.454 | 0.00 | 0.00 |
| ATOM | 6116 | CB   | VAL | X | 407 | 43.280 | 36.436 | 36.120 | 0.00 | 0.00 |
| ATOM | 6117 | HB   | VAL | X | 407 | 43.957 | 35.615 | 35.883 | 0.00 | 0.00 |
| ATOM | 6118 | CG1  | VAL | X | 407 | 42.790 | 37.248 | 34.906 | 0.00 | 0.00 |
| ATOM | 6119 | HG11 | VAL | X | 407 | 43.646 | 37.707 | 34.412 | 0.00 | 0.00 |
| ATOM | 6120 | HG12 | VAL | X | 407 | 42.412 | 36.528 | 34.180 | 0.00 | 0.00 |
| ATOM | 6121 | HG13 | VAL | X | 407 | 42.008 | 37.953 | 35.190 | 0.00 | 0.00 |
| ATOM | 6122 | CG2  | VAL | X | 407 | 44.173 | 37.355 | 37.011 | 0.00 | 0.00 |
| ATOM | 6123 | HG21 | VAL | X | 407 | 44.928 | 37.854 | 36.403 | 0.00 | 0.00 |
| ATOM | 6124 | HG22 | VAL | X | 407 | 43.573 | 38.197 | 37.357 | 0.00 | 0.00 |
| ATOM | 6125 | HG23 | VAL | X | 407 | 44.516 | 36.759 | 37.856 | 0.00 | 0.00 |
| ATOM | 6126 | C    | VAL | X | 407 | 40.994 | 35.161 | 36.075 | 0.00 | 0.00 |
| ATOM | 6127 | O    | VAL | X | 407 | 39.962 | 35.796 | 35.738 | 0.00 | 0.00 |
| ATOM | 6128 | N    | ALA | X | 408 | 41.185 | 33.905 | 35.684 | 0.00 | 0.00 |

|      |      |      |     |   |     |        |        |        |      |      |
|------|------|------|-----|---|-----|--------|--------|--------|------|------|
| ATOM | 6129 | H    | ALA | X | 408 | 42.083 | 33.481 | 35.869 | 0.00 | 0.00 |
| ATOM | 6130 | CA   | ALA | X | 408 | 40.163 | 33.102 | 34.947 | 0.00 | 0.00 |
| ATOM | 6131 | HA   | ALA | X | 408 | 40.063 | 33.573 | 33.969 | 0.00 | 0.00 |
| ATOM | 6132 | CB   | ALA | X | 408 | 40.711 | 31.621 | 34.871 | 0.00 | 0.00 |
| ATOM | 6133 | HB1  | ALA | X | 408 | 39.962 | 30.999 | 34.381 | 0.00 | 0.00 |
| ATOM | 6134 | HB2  | ALA | X | 408 | 41.662 | 31.551 | 34.343 | 0.00 | 0.00 |
| ATOM | 6135 | HB3  | ALA | X | 408 | 40.835 | 31.361 | 35.922 | 0.00 | 0.00 |
| ATOM | 6136 | C    | ALA | X | 408 | 38.782 | 33.086 | 35.632 | 0.00 | 0.00 |
| ATOM | 6137 | O    | ALA | X | 408 | 37.720 | 33.223 | 34.934 | 0.00 | 0.00 |
| ATOM | 6138 | N    | GLN | X | 409 | 38.719 | 32.998 | 36.981 | 0.00 | 0.00 |
| ATOM | 6139 | H    | GLN | X | 409 | 39.629 | 32.868 | 37.400 | 0.00 | 0.00 |
| ATOM | 6140 | CA   | GLN | X | 409 | 37.481 | 33.081 | 37.739 | 0.00 | 0.00 |
| ATOM | 6141 | HA   | GLN | X | 409 | 36.690 | 32.635 | 37.136 | 0.00 | 0.00 |
| ATOM | 6142 | CB   | GLN | X | 409 | 37.681 | 32.371 | 39.029 | 0.00 | 0.00 |
| ATOM | 6143 | HB2  | GLN | X | 409 | 38.169 | 31.416 | 38.837 | 0.00 | 0.00 |
| ATOM | 6144 | HB3  | GLN | X | 409 | 38.320 | 33.001 | 39.648 | 0.00 | 0.00 |
| ATOM | 6145 | CG   | GLN | X | 409 | 36.465 | 32.012 | 39.875 | 0.00 | 0.00 |
| ATOM | 6146 | HG2  | GLN | X | 409 | 36.725 | 31.384 | 40.727 | 0.00 | 0.00 |
| ATOM | 6147 | HG3  | GLN | X | 409 | 36.000 | 32.908 | 40.285 | 0.00 | 0.00 |
| ATOM | 6148 | CD   | GLN | X | 409 | 35.401 | 31.305 | 39.004 | 0.00 | 0.00 |
| ATOM | 6149 | OE1  | GLN | X | 409 | 35.294 | 30.083 | 38.996 | 0.00 | 0.00 |
| ATOM | 6150 | NE2  | GLN | X | 409 | 34.496 | 32.086 | 38.305 | 0.00 | 0.00 |
| ATOM | 6151 | HE21 | GLN | X | 409 | 33.676 | 31.658 | 37.900 | 0.00 | 0.00 |
| ATOM | 6152 | HE22 | GLN | X | 409 | 34.541 | 33.082 | 38.146 | 0.00 | 0.00 |
| ATOM | 6153 | C    | GLN | X | 409 | 36.957 | 34.552 | 38.031 | 0.00 | 0.00 |
| ATOM | 6154 | O    | GLN | X | 409 | 35.743 | 34.718 | 37.943 | 0.00 | 0.00 |
| ATOM | 6155 | N    | LEU | X | 410 | 37.797 | 35.576 | 38.205 | 0.00 | 0.00 |
| ATOM | 6156 | H    | LEU | X | 410 | 38.791 | 35.401 | 38.231 | 0.00 | 0.00 |
| ATOM | 6157 | CA   | LEU | X | 410 | 37.396 | 36.989 | 38.116 | 0.00 | 0.00 |
| ATOM | 6158 | HA   | LEU | X | 410 | 36.808 | 37.226 | 39.003 | 0.00 | 0.00 |
| ATOM | 6159 | CB   | LEU | X | 410 | 38.699 | 37.851 | 38.179 | 0.00 | 0.00 |
| ATOM | 6160 | HB2  | LEU | X | 410 | 39.212 | 37.884 | 39.140 | 0.00 | 0.00 |
| ATOM | 6161 | HB3  | LEU | X | 410 | 39.438 | 37.418 | 37.505 | 0.00 | 0.00 |
| ATOM | 6162 | CG   | LEU | X | 410 | 38.548 | 39.306 | 37.747 | 0.00 | 0.00 |
| ATOM | 6163 | HG   | LEU | X | 410 | 37.889 | 39.412 | 36.885 | 0.00 | 0.00 |
| ATOM | 6164 | CD1  | LEU | X | 410 | 38.046 | 40.289 | 38.834 | 0.00 | 0.00 |
| ATOM | 6165 | HD11 | LEU | X | 410 | 36.959 | 40.251 | 38.907 | 0.00 | 0.00 |
| ATOM | 6166 | HD12 | LEU | X | 410 | 38.342 | 40.046 | 39.854 | 0.00 | 0.00 |
| ATOM | 6167 | HD13 | LEU | X | 410 | 38.253 | 41.335 | 38.605 | 0.00 | 0.00 |
| ATOM | 6168 | CD2  | LEU | X | 410 | 40.043 | 39.741 | 37.387 | 0.00 | 0.00 |
| ATOM | 6169 | HD21 | LEU | X | 410 | 40.413 | 39.077 | 36.606 | 0.00 | 0.00 |
| ATOM | 6170 | HD22 | LEU | X | 410 | 40.097 | 40.746 | 36.967 | 0.00 | 0.00 |
| ATOM | 6171 | HD23 | LEU | X | 410 | 40.691 | 39.736 | 38.264 | 0.00 | 0.00 |
| ATOM | 6172 | C    | LEU | X | 410 | 36.525 | 37.186 | 36.901 | 0.00 | 0.00 |
| ATOM | 6173 | O    | LEU | X | 410 | 35.443 | 37.741 | 37.070 | 0.00 | 0.00 |
| ATOM | 6174 | N    | ALA | X | 411 | 37.072 | 36.795 | 35.751 | 0.00 | 0.00 |
| ATOM | 6175 | H    | ALA | X | 411 | 37.985 | 36.363 | 35.750 | 0.00 | 0.00 |
| ATOM | 6176 | CA   | ALA | X | 411 | 36.434 | 37.109 | 34.462 | 0.00 | 0.00 |
| ATOM | 6177 | HA   | ALA | X | 411 | 36.216 | 38.171 | 34.567 | 0.00 | 0.00 |
| ATOM | 6178 | CB   | ALA | X | 411 | 37.355 | 36.654 | 33.386 | 0.00 | 0.00 |
| ATOM | 6179 | HB1  | ALA | X | 411 | 38.221 | 37.303 | 33.250 | 0.00 | 0.00 |
| ATOM | 6180 | HB2  | ALA | X | 411 | 37.645 | 35.623 | 33.586 | 0.00 | 0.00 |
| ATOM | 6181 | HB3  | ALA | X | 411 | 36.781 | 36.708 | 32.461 | 0.00 | 0.00 |
| ATOM | 6182 | C    | ALA | X | 411 | 35.068 | 36.421 | 34.286 | 0.00 | 0.00 |
| ATOM | 6183 | O    | ALA | X | 411 | 34.027 | 37.038 | 34.005 | 0.00 | 0.00 |
| ATOM | 6184 | N    | GLY | X | 412 | 34.959 | 35.067 | 34.628 | 0.00 | 0.00 |
| ATOM | 6185 | H    | GLY | X | 412 | 35.727 | 34.504 | 34.964 | 0.00 | 0.00 |
| ATOM | 6186 | CA   | GLY | X | 412 | 33.675 | 34.316 | 34.465 | 0.00 | 0.00 |
| ATOM | 6187 | HA2  | GLY | X | 412 | 33.250 | 34.451 | 33.452 | 0.00 | 0.00 |
| ATOM | 6188 | HA3  | GLY | X | 412 | 33.646 | 33.321 | 34.597 | 0.00 | 0.00 |
| ATOM | 6189 | C    | GLY | X | 412 | 32.548 | 34.878 | 35.358 | 0.00 | 0.00 |
| ATOM | 6190 | O    | GLY | X | 412 | 31.385 | 35.027 | 34.932 | 0.00 | 0.00 |
| ATOM | 6191 | N    | ARG | X | 413 | 33.000 | 35.306 | 36.561 | 0.00 | 0.00 |
| ATOM | 6192 | H    | ARG | X | 413 | 33.942 | 35.126 | 36.877 | 0.00 | 0.00 |
| ATOM | 6193 | CA   | ARG | X | 413 | 32.072 | 35.952 | 37.488 | 0.00 | 0.00 |
| ATOM | 6194 | HA   | ARG | X | 413 | 31.311 | 35.182 | 37.618 | 0.00 | 0.00 |
| ATOM | 6195 | CB   | ARG | X | 413 | 32.675 | 36.205 | 38.896 | 0.00 | 0.00 |
| ATOM | 6196 | HB2  | ARG | X | 413 | 33.634 | 36.701 | 38.750 | 0.00 | 0.00 |
| ATOM | 6197 | HB3  | ARG | X | 413 | 32.034 | 36.930 | 39.397 | 0.00 | 0.00 |
| ATOM | 6198 | CG   | ARG | X | 413 | 32.850 | 34.973 | 39.781 | 0.00 | 0.00 |

|      |      |      |     |   |     |        |        |        |      |      |
|------|------|------|-----|---|-----|--------|--------|--------|------|------|
| ATOM | 6199 | HG2  | ARG | X | 413 | 33.427 | 34.202 | 39.269 | 0.00 | 0.00 |
| ATOM | 6200 | HG3  | ARG | X | 413 | 33.500 | 35.276 | 40.602 | 0.00 | 0.00 |
| ATOM | 6201 | CD   | ARG | X | 413 | 31.514 | 34.499 | 40.425 | 0.00 | 0.00 |
| ATOM | 6202 | HD2  | ARG | X | 413 | 31.265 | 35.348 | 41.063 | 0.00 | 0.00 |
| ATOM | 6203 | HD3  | ARG | X | 413 | 30.715 | 34.364 | 39.696 | 0.00 | 0.00 |
| ATOM | 6204 | NE   | ARG | X | 413 | 31.688 | 33.360 | 41.328 | 0.00 | 0.00 |
| ATOM | 6205 | HE   | ARG | X | 413 | 31.856 | 33.624 | 42.288 | 0.00 | 0.00 |
| ATOM | 6206 | CZ   | ARG | X | 413 | 31.720 | 32.067 | 40.997 | 0.00 | 0.00 |
| ATOM | 6207 | NH1  | ARG | X | 413 | 31.280 | 31.667 | 39.838 | 0.00 | 0.00 |
| ATOM | 6208 | HH11 | ARG | X | 413 | 30.957 | 32.336 | 39.153 | 0.00 | 0.00 |
| ATOM | 6209 | HH12 | ARG | X | 413 | 31.525 | 30.716 | 39.603 | 0.00 | 0.00 |
| ATOM | 6210 | NH2  | ARG | X | 413 | 32.211 | 31.155 | 41.826 | 0.00 | 0.00 |
| ATOM | 6211 | HH21 | ARG | X | 413 | 32.561 | 31.405 | 42.739 | 0.00 | 0.00 |
| ATOM | 6212 | HH22 | ARG | X | 413 | 32.238 | 30.215 | 41.456 | 0.00 | 0.00 |
| ATOM | 6213 | C    | ARG | X | 413 | 31.503 | 37.311 | 36.948 | 0.00 | 0.00 |
| ATOM | 6214 | O    | ARG | X | 413 | 30.287 | 37.618 | 37.061 | 0.00 | 0.00 |
| ATOM | 6215 | N    | LEU | X | 414 | 32.418 | 38.112 | 36.427 | 0.00 | 0.00 |
| ATOM | 6216 | H    | LEU | X | 414 | 33.371 | 37.848 | 36.632 | 0.00 | 0.00 |
| ATOM | 6217 | CA   | LEU | X | 414 | 32.079 | 39.413 | 35.860 | 0.00 | 0.00 |
| ATOM | 6218 | HA   | LEU | X | 414 | 31.406 | 39.953 | 36.527 | 0.00 | 0.00 |
| ATOM | 6219 | CB   | LEU | X | 414 | 33.342 | 40.251 | 35.719 | 0.00 | 0.00 |
| ATOM | 6220 | HB2  | LEU | X | 414 | 34.210 | 39.645 | 35.458 | 0.00 | 0.00 |
| ATOM | 6221 | HB3  | LEU | X | 414 | 33.163 | 40.999 | 34.947 | 0.00 | 0.00 |
| ATOM | 6222 | CG   | LEU | X | 414 | 33.545 | 41.143 | 36.873 | 0.00 | 0.00 |
| ATOM | 6223 | HG   | LEU | X | 414 | 34.534 | 41.571 | 36.708 | 0.00 | 0.00 |
| ATOM | 6224 | CD1  | LEU | X | 414 | 32.552 | 42.278 | 36.885 | 0.00 | 0.00 |
| ATOM | 6225 | HD11 | LEU | X | 414 | 31.583 | 41.921 | 36.535 | 0.00 | 0.00 |
| ATOM | 6226 | HD12 | LEU | X | 414 | 32.441 | 42.633 | 37.909 | 0.00 | 0.00 |
| ATOM | 6227 | HD13 | LEU | X | 414 | 32.971 | 43.056 | 36.248 | 0.00 | 0.00 |
| ATOM | 6228 | CD2  | LEU | X | 414 | 33.549 | 40.547 | 38.310 | 0.00 | 0.00 |
| ATOM | 6229 | HD21 | LEU | X | 414 | 33.686 | 41.339 | 39.046 | 0.00 | 0.00 |
| ATOM | 6230 | HD22 | LEU | X | 414 | 32.621 | 40.003 | 38.486 | 0.00 | 0.00 |
| ATOM | 6231 | HD23 | LEU | X | 414 | 34.366 | 39.828 | 38.377 | 0.00 | 0.00 |
| ATOM | 6232 | C    | LEU | X | 414 | 31.126 | 39.349 | 34.701 | 0.00 | 0.00 |
| ATOM | 6233 | O    | LEU | X | 414 | 30.194 | 40.145 | 34.708 | 0.00 | 0.00 |
| ATOM | 6234 | N    | ALA | X | 415 | 31.409 | 38.455 | 33.764 | 0.00 | 0.00 |
| ATOM | 6235 | H    | ALA | X | 415 | 32.319 | 38.017 | 33.739 | 0.00 | 0.00 |
| ATOM | 6236 | CA   | ALA | X | 415 | 30.467 | 38.217 | 32.627 | 0.00 | 0.00 |
| ATOM | 6237 | HA   | ALA | X | 415 | 30.324 | 39.147 | 32.078 | 0.00 | 0.00 |
| ATOM | 6238 | CB   | ALA | X | 415 | 31.253 | 37.237 | 31.665 | 0.00 | 0.00 |
| ATOM | 6239 | HB1  | ALA | X | 415 | 32.096 | 37.778 | 31.234 | 0.00 | 0.00 |
| ATOM | 6240 | HB2  | ALA | X | 415 | 31.714 | 36.394 | 32.179 | 0.00 | 0.00 |
| ATOM | 6241 | HB3  | ALA | X | 415 | 30.613 | 36.947 | 30.831 | 0.00 | 0.00 |
| ATOM | 6242 | C    | ALA | X | 415 | 29.117 | 37.674 | 33.042 | 0.00 | 0.00 |
| ATOM | 6243 | O    | ALA | X | 415 | 28.140 | 38.066 | 32.402 | 0.00 | 0.00 |
| ATOM | 6244 | N    | ALA | X | 416 | 29.022 | 36.731 | 33.978 | 0.00 | 0.00 |
| ATOM | 6245 | H    | ALA | X | 416 | 29.853 | 36.448 | 34.476 | 0.00 | 0.00 |
| ATOM | 6246 | CA   | ALA | X | 416 | 27.744 | 36.139 | 34.424 | 0.00 | 0.00 |
| ATOM | 6247 | HA   | ALA | X | 416 | 27.239 | 35.675 | 33.576 | 0.00 | 0.00 |
| ATOM | 6248 | CB   | ALA | X | 416 | 28.097 | 35.020 | 35.449 | 0.00 | 0.00 |
| ATOM | 6249 | HB1  | ALA | X | 416 | 28.675 | 35.571 | 36.191 | 0.00 | 0.00 |
| ATOM | 6250 | HB2  | ALA | X | 416 | 27.229 | 34.527 | 35.886 | 0.00 | 0.00 |
| ATOM | 6251 | HB3  | ALA | X | 416 | 28.833 | 34.316 | 35.059 | 0.00 | 0.00 |
| ATOM | 6252 | C    | ALA | X | 416 | 26.780 | 37.192 | 35.027 | 0.00 | 0.00 |
| ATOM | 6253 | O    | ALA | X | 416 | 25.569 | 37.153 | 34.764 | 0.00 | 0.00 |
| ATOM | 6254 | N    | GLN | X | 417 | 27.360 | 38.039 | 35.814 | 0.00 | 0.00 |
| ATOM | 6255 | H    | GLN | X | 417 | 28.352 | 38.013 | 36.000 | 0.00 | 0.00 |
| ATOM | 6256 | CA   | GLN | X | 417 | 26.605 | 38.997 | 36.636 | 0.00 | 0.00 |
| ATOM | 6257 | HA   | GLN | X | 417 | 25.607 | 38.642 | 36.893 | 0.00 | 0.00 |
| ATOM | 6258 | CB   | GLN | X | 417 | 27.442 | 39.140 | 37.898 | 0.00 | 0.00 |
| ATOM | 6259 | HB2  | GLN | X | 417 | 28.490 | 39.359 | 37.695 | 0.00 | 0.00 |
| ATOM | 6260 | HB3  | GLN | X | 417 | 27.128 | 40.001 | 38.488 | 0.00 | 0.00 |
| ATOM | 6261 | CG   | GLN | X | 417 | 27.317 | 37.819 | 38.697 | 0.00 | 0.00 |
| ATOM | 6262 | HG2  | GLN | X | 417 | 26.298 | 37.901 | 39.075 | 0.00 | 0.00 |
| ATOM | 6263 | HG3  | GLN | X | 417 | 27.398 | 37.000 | 37.983 | 0.00 | 0.00 |
| ATOM | 6264 | CD   | GLN | X | 417 | 28.285 | 37.390 | 39.840 | 0.00 | 0.00 |
| ATOM | 6265 | OE1  | GLN | X | 417 | 28.703 | 36.247 | 39.788 | 0.00 | 0.00 |
| ATOM | 6266 | NE2  | GLN | X | 417 | 28.571 | 38.216 | 40.784 | 0.00 | 0.00 |
| ATOM | 6267 | HE21 | GLN | X | 417 | 29.056 | 37.879 | 41.604 | 0.00 | 0.00 |
| ATOM | 6268 | HE22 | GLN | X | 417 | 28.247 | 39.164 | 40.656 | 0.00 | 0.00 |

|      |      |      |     |   |     |        |        |        |      |      |
|------|------|------|-----|---|-----|--------|--------|--------|------|------|
| ATOM | 6269 | C    | GLN | X | 417 | 26.404 | 40.358 | 35.923 | 0.00 | 0.00 |
| ATOM | 6270 | O    | GLN | X | 417 | 25.985 | 41.353 | 36.596 | 0.00 | 0.00 |
| ATOM | 6271 | N    | GLY | X | 418 | 26.571 | 40.451 | 34.630 | 0.00 | 0.00 |
| ATOM | 6272 | H    | GLY | X | 418 | 26.989 | 39.636 | 34.203 | 0.00 | 0.00 |
| ATOM | 6273 | CA   | GLY | X | 418 | 26.153 | 41.564 | 33.763 | 0.00 | 0.00 |
| ATOM | 6274 | HA2  | GLY | X | 418 | 25.726 | 41.197 | 32.890 | 0.00 | 0.00 |
| ATOM | 6275 | HA3  | GLY | X | 418 | 25.541 | 42.252 | 34.326 | 0.00 | 0.00 |
| ATOM | 6276 | C    | GLY | X | 418 | 27.289 | 42.489 | 33.192 | 0.00 | 0.00 |
| ATOM | 6277 | O    | GLY | X | 418 | 26.910 | 43.448 | 32.555 | 0.00 | 0.00 |
| ATOM | 6278 | N    | ALA | X | 419 | 28.563 | 42.235 | 33.364 | 0.00 | 0.00 |
| ATOM | 6279 | H    | ALA | X | 419 | 28.788 | 41.388 | 33.865 | 0.00 | 0.00 |
| ATOM | 6280 | CA   | ALA | X | 419 | 29.698 | 43.099 | 32.908 | 0.00 | 0.00 |
| ATOM | 6281 | HA   | ALA | X | 419 | 29.317 | 44.091 | 32.666 | 0.00 | 0.00 |
| ATOM | 6282 | CB   | ALA | X | 419 | 30.726 | 43.202 | 34.006 | 0.00 | 0.00 |
| ATOM | 6283 | HB1  | ALA | X | 419 | 31.408 | 44.005 | 33.725 | 0.00 | 0.00 |
| ATOM | 6284 | HB2  | ALA | X | 419 | 30.213 | 43.368 | 34.953 | 0.00 | 0.00 |
| ATOM | 6285 | HB3  | ALA | X | 419 | 31.291 | 42.281 | 34.152 | 0.00 | 0.00 |
| ATOM | 6286 | C    | ALA | X | 419 | 30.291 | 42.562 | 31.561 | 0.00 | 0.00 |
| ATOM | 6287 | O    | ALA | X | 419 | 30.354 | 41.345 | 31.347 | 0.00 | 0.00 |
| ATOM | 6288 | N    | ARG | X | 420 | 30.706 | 43.492 | 30.662 | 0.00 | 0.00 |
| ATOM | 6289 | H    | ARG | X | 420 | 30.668 | 44.427 | 31.042 | 0.00 | 0.00 |
| ATOM | 6290 | CA   | ARG | X | 420 | 31.417 | 43.327 | 29.413 | 0.00 | 0.00 |
| ATOM | 6291 | HA   | ARG | X | 420 | 30.953 | 42.456 | 28.949 | 0.00 | 0.00 |
| ATOM | 6292 | CB   | ARG | X | 420 | 31.051 | 44.464 | 28.506 | 0.00 | 0.00 |
| ATOM | 6293 | HB2  | ARG | X | 420 | 29.962 | 44.433 | 28.465 | 0.00 | 0.00 |
| ATOM | 6294 | HB3  | ARG | X | 420 | 31.338 | 45.415 | 28.954 | 0.00 | 0.00 |
| ATOM | 6295 | CG   | ARG | X | 420 | 31.622 | 44.302 | 27.091 | 0.00 | 0.00 |
| ATOM | 6296 | HG2  | ARG | X | 420 | 32.711 | 44.268 | 27.048 | 0.00 | 0.00 |
| ATOM | 6297 | HG3  | ARG | X | 420 | 31.358 | 43.301 | 26.749 | 0.00 | 0.00 |
| ATOM | 6298 | CD   | ARG | X | 420 | 30.974 | 45.189 | 26.060 | 0.00 | 0.00 |
| ATOM | 6299 | HD2  | ARG | X | 420 | 29.923 | 44.929 | 25.941 | 0.00 | 0.00 |
| ATOM | 6300 | HD3  | ARG | X | 420 | 31.016 | 46.235 | 26.367 | 0.00 | 0.00 |
| ATOM | 6301 | NE   | ARG | X | 420 | 31.578 | 45.154 | 24.768 | 0.00 | 0.00 |
| ATOM | 6302 | HE   | ARG | X | 420 | 32.369 | 45.729 | 24.515 | 0.00 | 0.00 |
| ATOM | 6303 | CZ   | ARG | X | 420 | 31.147 | 44.487 | 23.743 | 0.00 | 0.00 |
| ATOM | 6304 | NH1  | ARG | X | 420 | 30.156 | 43.577 | 23.896 | 0.00 | 0.00 |
| ATOM | 6305 | HH11 | ARG | X | 420 | 29.843 | 43.367 | 24.833 | 0.00 | 0.00 |
| ATOM | 6306 | HH12 | ARG | X | 420 | 29.694 | 43.225 | 23.070 | 0.00 | 0.00 |
| ATOM | 6307 | NH2  | ARG | X | 420 | 31.649 | 44.687 | 22.571 | 0.00 | 0.00 |
| ATOM | 6308 | HH21 | ARG | X | 420 | 32.351 | 45.413 | 22.553 | 0.00 | 0.00 |
| ATOM | 6309 | HH22 | ARG | X | 420 | 31.345 | 44.026 | 21.871 | 0.00 | 0.00 |
| ATOM | 6310 | C    | ARG | X | 420 | 32.934 | 43.169 | 29.791 | 0.00 | 0.00 |
| ATOM | 6311 | O    | ARG | X | 420 | 33.504 | 44.103 | 30.376 | 0.00 | 0.00 |
| ATOM | 6312 | N    | VAL | X | 421 | 33.514 | 41.953 | 29.506 | 0.00 | 0.00 |
| ATOM | 6313 | H    | VAL | X | 421 | 32.952 | 41.240 | 29.063 | 0.00 | 0.00 |
| ATOM | 6314 | CA   | VAL | X | 421 | 34.946 | 41.558 | 29.947 | 0.00 | 0.00 |
| ATOM | 6315 | HA   | VAL | X | 421 | 35.390 | 42.347 | 30.554 | 0.00 | 0.00 |
| ATOM | 6316 | CB   | VAL | X | 421 | 34.845 | 40.279 | 30.865 | 0.00 | 0.00 |
| ATOM | 6317 | HB   | VAL | X | 421 | 34.260 | 39.495 | 30.384 | 0.00 | 0.00 |
| ATOM | 6318 | CG1  | VAL | X | 421 | 36.211 | 39.777 | 31.166 | 0.00 | 0.00 |
| ATOM | 6319 | HG11 | VAL | X | 421 | 36.903 | 40.464 | 31.654 | 0.00 | 0.00 |
| ATOM | 6320 | HG12 | VAL | X | 421 | 36.035 | 38.933 | 31.833 | 0.00 | 0.00 |
| ATOM | 6321 | HG13 | VAL | X | 421 | 36.747 | 39.466 | 30.269 | 0.00 | 0.00 |
| ATOM | 6322 | CG2  | VAL | X | 421 | 34.045 | 40.562 | 32.175 | 0.00 | 0.00 |
| ATOM | 6323 | HG21 | VAL | X | 421 | 33.228 | 41.231 | 31.906 | 0.00 | 0.00 |
| ATOM | 6324 | HG22 | VAL | X | 421 | 33.569 | 39.653 | 32.546 | 0.00 | 0.00 |
| ATOM | 6325 | HG23 | VAL | X | 421 | 34.662 | 40.981 | 32.971 | 0.00 | 0.00 |
| ATOM | 6326 | C    | VAL | X | 421 | 35.777 | 41.355 | 28.684 | 0.00 | 0.00 |
| ATOM | 6327 | O    | VAL | X | 421 | 35.298 | 40.800 | 27.663 | 0.00 | 0.00 |
| ATOM | 6328 | N    | TYR | X | 422 | 37.067 | 41.692 | 28.703 | 0.00 | 0.00 |
| ATOM | 6329 | H    | TYR | X | 422 | 37.335 | 42.084 | 29.594 | 0.00 | 0.00 |
| ATOM | 6330 | CA   | TYR | X | 422 | 38.079 | 41.551 | 27.602 | 0.00 | 0.00 |
| ATOM | 6331 | HA   | TYR | X | 422 | 37.725 | 40.851 | 26.846 | 0.00 | 0.00 |
| ATOM | 6332 | CB   | TYR | X | 422 | 38.474 | 42.898 | 26.975 | 0.00 | 0.00 |
| ATOM | 6333 | HB2  | TYR | X | 422 | 38.603 | 43.562 | 27.829 | 0.00 | 0.00 |
| ATOM | 6334 | HB3  | TYR | X | 422 | 39.443 | 42.923 | 26.477 | 0.00 | 0.00 |
| ATOM | 6335 | CG   | TYR | X | 422 | 37.413 | 43.367 | 26.009 | 0.00 | 0.00 |
| ATOM | 6336 | CD1  | TYR | X | 422 | 37.567 | 42.892 | 24.656 | 0.00 | 0.00 |
| ATOM | 6337 | HD1  | TYR | X | 422 | 38.348 | 42.184 | 24.419 | 0.00 | 0.00 |
| ATOM | 6338 | CE1  | TYR | X | 422 | 36.543 | 43.167 | 23.717 | 0.00 | 0.00 |



|      |      |      |     |   |     |        |        |        |      |      |
|------|------|------|-----|---|-----|--------|--------|--------|------|------|
| ATOM | 6339 | HE1  | TYR | X | 422 | 36.687 | 42.875 | 22.687 | 0.00 | 0.00 |
| ATOM | 6340 | CZ   | TYR | X | 422 | 35.521 | 44.009 | 24.053 | 0.00 | 0.00 |
| ATOM | 6341 | OH   | TYR | X | 422 | 34.573 | 44.152 | 23.097 | 0.00 | 0.00 |
| ATOM | 6342 | HH   | TYR | X | 422 | 34.735 | 43.790 | 22.223 | 0.00 | 0.00 |
| ATOM | 6343 | CE2  | TYR | X | 422 | 35.379 | 44.500 | 25.403 | 0.00 | 0.00 |
| ATOM | 6344 | HE2  | TYR | X | 422 | 34.573 | 45.200 | 25.564 | 0.00 | 0.00 |
| ATOM | 6345 | CD2  | TYR | X | 422 | 36.276 | 44.088 | 26.378 | 0.00 | 0.00 |
| ATOM | 6346 | HD2  | TYR | X | 422 | 36.236 | 44.354 | 27.424 | 0.00 | 0.00 |
| ATOM | 6347 | C    | TYR | X | 422 | 39.329 | 40.882 | 28.249 | 0.00 | 0.00 |
| ATOM | 6348 | O    | TYR | X | 422 | 39.910 | 41.458 | 29.117 | 0.00 | 0.00 |
| ATOM | 6349 | N    | ALA | X | 423 | 39.742 | 39.702 | 27.825 | 0.00 | 0.00 |
| ATOM | 6350 | H    | ALA | X | 423 | 39.235 | 39.295 | 27.052 | 0.00 | 0.00 |
| ATOM | 6351 | CA   | ALA | X | 423 | 40.778 | 38.807 | 28.312 | 0.00 | 0.00 |
| ATOM | 6352 | HA   | ALA | X | 423 | 41.150 | 39.299 | 29.211 | 0.00 | 0.00 |
| ATOM | 6353 | CB   | ALA | X | 423 | 40.236 | 37.461 | 28.834 | 0.00 | 0.00 |
| ATOM | 6354 | HB1  | ALA | X | 423 | 39.969 | 36.876 | 27.953 | 0.00 | 0.00 |
| ATOM | 6355 | HB2  | ALA | X | 423 | 40.961 | 36.871 | 29.394 | 0.00 | 0.00 |
| ATOM | 6356 | HB3  | ALA | X | 423 | 39.337 | 37.581 | 29.439 | 0.00 | 0.00 |
| ATOM | 6357 | C    | ALA | X | 423 | 41.888 | 38.600 | 27.296 | 0.00 | 0.00 |
| ATOM | 6358 | O    | ALA | X | 423 | 41.740 | 38.463 | 26.130 | 0.00 | 0.00 |
| ATOM | 6359 | N    | TYR | X | 424 | 43.093 | 38.451 | 27.816 | 0.00 | 0.00 |
| ATOM | 6360 | H    | TYR | X | 424 | 43.099 | 38.465 | 28.826 | 0.00 | 0.00 |
| ATOM | 6361 | CA   | TYR | X | 424 | 44.388 | 38.195 | 27.166 | 0.00 | 0.00 |
| ATOM | 6362 | HA   | TYR | X | 424 | 44.148 | 37.614 | 26.275 | 0.00 | 0.00 |
| ATOM | 6363 | CB   | TYR | X | 424 | 45.086 | 39.420 | 26.689 | 0.00 | 0.00 |
| ATOM | 6364 | HB2  | TYR | X | 424 | 45.854 | 39.185 | 25.952 | 0.00 | 0.00 |
| ATOM | 6365 | HB3  | TYR | X | 424 | 44.393 | 40.061 | 26.145 | 0.00 | 0.00 |
| ATOM | 6366 | CG   | TYR | X | 424 | 45.810 | 40.238 | 27.736 | 0.00 | 0.00 |
| ATOM | 6367 | CD1  | TYR | X | 424 | 47.134 | 39.893 | 28.071 | 0.00 | 0.00 |
| ATOM | 6368 | HD1  | TYR | X | 424 | 47.549 | 39.065 | 27.517 | 0.00 | 0.00 |
| ATOM | 6369 | CE1  | TYR | X | 424 | 47.822 | 40.623 | 29.081 | 0.00 | 0.00 |
| ATOM | 6370 | HE1  | TYR | X | 424 | 48.854 | 40.372 | 29.280 | 0.00 | 0.00 |
| ATOM | 6371 | CZ   | TYR | X | 424 | 47.213 | 41.673 | 29.696 | 0.00 | 0.00 |
| ATOM | 6372 | OH   | TYR | X | 424 | 47.813 | 42.551 | 30.542 | 0.00 | 0.00 |
| ATOM | 6373 | HH   | TYR | X | 424 | 48.764 | 42.452 | 30.621 | 0.00 | 0.00 |
| ATOM | 6374 | CE2  | TYR | X | 424 | 45.910 | 41.992 | 29.346 | 0.00 | 0.00 |
| ATOM | 6375 | HE2  | TYR | X | 424 | 45.474 | 42.850 | 29.835 | 0.00 | 0.00 |
| ATOM | 6376 | CD2  | TYR | X | 424 | 45.156 | 41.297 | 28.372 | 0.00 | 0.00 |
| ATOM | 6377 | HD2  | TYR | X | 424 | 44.121 | 41.523 | 28.160 | 0.00 | 0.00 |
| ATOM | 6378 | C    | TYR | X | 424 | 45.417 | 37.352 | 27.990 | 0.00 | 0.00 |
| ATOM | 6379 | O    | TYR | X | 424 | 45.535 | 37.492 | 29.193 | 0.00 | 0.00 |
| ATOM | 6380 | N    | VAL | X | 425 | 46.236 | 36.598 | 27.268 | 0.00 | 0.00 |
| ATOM | 6381 | H    | VAL | X | 425 | 46.055 | 36.540 | 26.276 | 0.00 | 0.00 |
| ATOM | 6382 | CA   | VAL | X | 425 | 47.546 | 36.103 | 27.764 | 0.00 | 0.00 |
| ATOM | 6383 | HA   | VAL | X | 425 | 47.833 | 36.508 | 28.734 | 0.00 | 0.00 |
| ATOM | 6384 | CB   | VAL | X | 425 | 47.638 | 34.548 | 27.725 | 0.00 | 0.00 |
| ATOM | 6385 | HB   | VAL | X | 425 | 47.323 | 34.071 | 26.797 | 0.00 | 0.00 |
| ATOM | 6386 | CG1  | VAL | X | 425 | 49.078 | 34.014 | 28.050 | 0.00 | 0.00 |
| ATOM | 6387 | HG11 | VAL | X | 425 | 48.905 | 32.957 | 28.252 | 0.00 | 0.00 |
| ATOM | 6388 | HG12 | VAL | X | 425 | 49.739 | 34.236 | 27.212 | 0.00 | 0.00 |
| ATOM | 6389 | HG13 | VAL | X | 425 | 49.514 | 34.450 | 28.949 | 0.00 | 0.00 |
| ATOM | 6390 | CG2  | VAL | X | 425 | 46.585 | 33.969 | 28.706 | 0.00 | 0.00 |
| ATOM | 6391 | HG21 | VAL | X | 425 | 47.066 | 34.035 | 29.682 | 0.00 | 0.00 |
| ATOM | 6392 | HG22 | VAL | X | 425 | 45.621 | 34.478 | 28.730 | 0.00 | 0.00 |
| ATOM | 6393 | HG23 | VAL | X | 425 | 46.541 | 32.896 | 28.522 | 0.00 | 0.00 |
| ATOM | 6394 | C    | VAL | X | 425 | 48.616 | 36.745 | 26.852 | 0.00 | 0.00 |
| ATOM | 6395 | O    | VAL | X | 425 | 48.615 | 36.581 | 25.637 | 0.00 | 0.00 |
| ATOM | 6396 | N    | PHE | X | 426 | 49.644 | 37.398 | 27.371 | 0.00 | 0.00 |
| ATOM | 6397 | H    | PHE | X | 426 | 49.670 | 37.455 | 28.379 | 0.00 | 0.00 |
| ATOM | 6398 | CA   | PHE | X | 426 | 50.764 | 37.961 | 26.627 | 0.00 | 0.00 |
| ATOM | 6399 | HA   | PHE | X | 426 | 50.258 | 38.121 | 25.675 | 0.00 | 0.00 |
| ATOM | 6400 | CB   | PHE | X | 426 | 51.170 | 39.289 | 27.355 | 0.00 | 0.00 |
| ATOM | 6401 | HB2  | PHE | X | 426 | 50.262 | 39.861 | 27.545 | 0.00 | 0.00 |
| ATOM | 6402 | HB3  | PHE | X | 426 | 51.611 | 39.057 | 28.324 | 0.00 | 0.00 |
| ATOM | 6403 | CG   | PHE | X | 426 | 52.331 | 39.918 | 26.595 | 0.00 | 0.00 |
| ATOM | 6404 | CD1  | PHE | X | 426 | 52.084 | 40.996 | 25.722 | 0.00 | 0.00 |
| ATOM | 6405 | HD1  | PHE | X | 426 | 51.084 | 41.398 | 25.662 | 0.00 | 0.00 |
| ATOM | 6406 | CE1  | PHE | X | 426 | 53.121 | 41.676 | 25.020 | 0.00 | 0.00 |
| ATOM | 6407 | HE1  | PHE | X | 426 | 52.861 | 42.484 | 24.351 | 0.00 | 0.00 |
| ATOM | 6408 | CZ   | PHE | X | 426 | 54.482 | 41.300 | 25.324 | 0.00 | 0.00 |

|      |      |      |     |   |     |        |        |        |      |      |
|------|------|------|-----|---|-----|--------|--------|--------|------|------|
| ATOM | 6409 | HZ   | PHE | X | 426 | 55.301 | 41.758 | 24.791 | 0.00 | 0.00 |
| ATOM | 6410 | CE2  | PHE | X | 426 | 54.724 | 40.162 | 26.099 | 0.00 | 0.00 |
| ATOM | 6411 | HE2  | PHE | X | 426 | 55.740 | 39.952 | 26.399 | 0.00 | 0.00 |
| ATOM | 6412 | CD2  | PHE | X | 426 | 53.654 | 39.501 | 26.707 | 0.00 | 0.00 |
| ATOM | 6413 | HD2  | PHE | X | 426 | 53.906 | 38.744 | 27.435 | 0.00 | 0.00 |
| ATOM | 6414 | C    | PHE | X | 426 | 51.898 | 36.957 | 26.438 | 0.00 | 0.00 |
| ATOM | 6415 | O    | PHE | X | 426 | 52.382 | 36.299 | 27.385 | 0.00 | 0.00 |
| ATOM | 6416 | N    | GLU | X | 427 | 52.371 | 36.780 | 25.199 | 0.00 | 0.00 |
| ATOM | 6417 | H    | GLU | X | 427 | 51.905 | 37.286 | 24.459 | 0.00 | 0.00 |
| ATOM | 6418 | CA   | GLU | X | 427 | 53.248 | 35.652 | 24.925 | 0.00 | 0.00 |
| ATOM | 6419 | HA   | GLU | X | 427 | 53.654 | 35.306 | 25.876 | 0.00 | 0.00 |
| ATOM | 6420 | CB   | GLU | X | 427 | 52.587 | 34.386 | 24.422 | 0.00 | 0.00 |
| ATOM | 6421 | HB2  | GLU | X | 427 | 53.354 | 33.700 | 24.063 | 0.00 | 0.00 |
| ATOM | 6422 | HB3  | GLU | X | 427 | 51.961 | 33.979 | 25.216 | 0.00 | 0.00 |
| ATOM | 6423 | CG   | GLU | X | 427 | 51.604 | 34.591 | 23.298 | 0.00 | 0.00 |
| ATOM | 6424 | HG2  | GLU | X | 427 | 50.737 | 35.169 | 23.618 | 0.00 | 0.00 |
| ATOM | 6425 | HG3  | GLU | X | 427 | 52.145 | 34.982 | 22.437 | 0.00 | 0.00 |
| ATOM | 6426 | CD   | GLU | X | 427 | 50.980 | 33.246 | 22.902 | 0.00 | 0.00 |
| ATOM | 6427 | OE1  | GLU | X | 427 | 50.307 | 32.659 | 23.747 | 0.00 | 0.00 |
| ATOM | 6428 | OE2  | GLU | X | 427 | 51.186 | 32.797 | 21.780 | 0.00 | 0.00 |
| ATOM | 6429 | C    | GLU | X | 427 | 54.467 | 36.066 | 24.059 | 0.00 | 0.00 |
| ATOM | 6430 | O    | GLU | X | 427 | 55.226 | 35.151 | 23.793 | 0.00 | 0.00 |
| ATOM | 6431 | N    | HIE | X | 428 | 54.746 | 37.270 | 23.664 | 0.00 | 0.00 |
| ATOM | 6432 | H    | HIE | X | 428 | 54.010 | 37.961 | 23.656 | 0.00 | 0.00 |
| ATOM | 6433 | CA   | HIE | X | 428 | 56.002 | 37.543 | 22.935 | 0.00 | 0.00 |
| ATOM | 6434 | HA   | HIE | X | 428 | 56.330 | 36.702 | 22.324 | 0.00 | 0.00 |
| ATOM | 6435 | CB   | HIE | X | 428 | 55.847 | 38.794 | 22.045 | 0.00 | 0.00 |
| ATOM | 6436 | HB2  | HIE | X | 428 | 55.017 | 38.529 | 21.390 | 0.00 | 0.00 |
| ATOM | 6437 | HB3  | HIE | X | 428 | 55.507 | 39.597 | 22.699 | 0.00 | 0.00 |
| ATOM | 6438 | CG   | HIE | X | 428 | 57.136 | 39.144 | 21.315 | 0.00 | 0.00 |
| ATOM | 6439 | ND1  | HIE | X | 428 | 57.781 | 38.340 | 20.478 | 0.00 | 0.00 |
| ATOM | 6440 | CE1  | HIE | X | 428 | 58.797 | 39.047 | 20.017 | 0.00 | 0.00 |
| ATOM | 6441 | HE1  | HIE | X | 428 | 59.631 | 38.734 | 19.407 | 0.00 | 0.00 |
| ATOM | 6442 | NE2  | HIE | X | 428 | 58.792 | 40.324 | 20.534 | 0.00 | 0.00 |
| ATOM | 6443 | HE2  | HIE | X | 428 | 59.513 | 41.002 | 20.333 | 0.00 | 0.00 |
| ATOM | 6444 | CD2  | HIE | X | 428 | 57.717 | 40.391 | 21.396 | 0.00 | 0.00 |
| ATOM | 6445 | HD2  | HIE | X | 428 | 57.364 | 41.238 | 21.965 | 0.00 | 0.00 |
| ATOM | 6446 | C    | HIE | X | 428 | 57.161 | 37.741 | 23.907 | 0.00 | 0.00 |
| ATOM | 6447 | O    | HIE | X | 428 | 57.107 | 38.464 | 24.883 | 0.00 | 0.00 |
| ATOM | 6448 | N    | ARG | X | 429 | 58.256 | 37.044 | 23.572 | 0.00 | 0.00 |
| ATOM | 6449 | H    | ARG | X | 429 | 58.191 | 36.578 | 22.679 | 0.00 | 0.00 |
| ATOM | 6450 | CA   | ARG | X | 429 | 59.514 | 36.952 | 24.368 | 0.00 | 0.00 |
| ATOM | 6451 | HA   | ARG | X | 429 | 59.213 | 37.283 | 25.362 | 0.00 | 0.00 |
| ATOM | 6452 | CB   | ARG | X | 429 | 60.038 | 35.508 | 24.441 | 0.00 | 0.00 |
| ATOM | 6453 | HB2  | ARG | X | 429 | 59.256 | 34.857 | 24.833 | 0.00 | 0.00 |
| ATOM | 6454 | HB3  | ARG | X | 429 | 60.268 | 35.057 | 23.476 | 0.00 | 0.00 |
| ATOM | 6455 | CG   | ARG | X | 429 | 61.167 | 35.270 | 25.503 | 0.00 | 0.00 |
| ATOM | 6456 | HG2  | ARG | X | 429 | 62.104 | 35.760 | 25.238 | 0.00 | 0.00 |
| ATOM | 6457 | HG3  | ARG | X | 429 | 60.880 | 35.791 | 26.417 | 0.00 | 0.00 |
| ATOM | 6458 | CD   | ARG | X | 429 | 61.493 | 33.788 | 25.849 | 0.00 | 0.00 |
| ATOM | 6459 | HD2  | ARG | X | 429 | 60.609 | 33.186 | 25.641 | 0.00 | 0.00 |
| ATOM | 6460 | HD3  | ARG | X | 429 | 62.283 | 33.306 | 25.274 | 0.00 | 0.00 |
| ATOM | 6461 | NE   | ARG | X | 429 | 61.838 | 33.701 | 27.249 | 0.00 | 0.00 |
| ATOM | 6462 | HE   | ARG | X | 429 | 61.182 | 34.099 | 27.906 | 0.00 | 0.00 |
| ATOM | 6463 | CZ   | ARG | X | 429 | 62.892 | 33.103 | 27.812 | 0.00 | 0.00 |
| ATOM | 6464 | NH1  | ARG | X | 429 | 63.994 | 32.907 | 27.110 | 0.00 | 0.00 |
| ATOM | 6465 | HH11 | ARG | X | 429 | 63.930 | 33.060 | 26.114 | 0.00 | 0.00 |
| ATOM | 6466 | HH12 | ARG | X | 429 | 64.881 | 32.750 | 27.566 | 0.00 | 0.00 |
| ATOM | 6467 | NH2  | ARG | X | 429 | 62.865 | 32.963 | 29.132 | 0.00 | 0.00 |
| ATOM | 6468 | HH21 | ARG | X | 429 | 61.987 | 33.043 | 29.624 | 0.00 | 0.00 |
| ATOM | 6469 | HH22 | ARG | X | 429 | 63.682 | 32.631 | 29.625 | 0.00 | 0.00 |
| ATOM | 6470 | C    | ARG | X | 429 | 60.559 | 37.850 | 23.698 | 0.00 | 0.00 |
| ATOM | 6471 | O    | ARG | X | 429 | 61.347 | 37.410 | 22.866 | 0.00 | 0.00 |
| ATOM | 6472 | N    | ALA | X | 430 | 60.588 | 39.099 | 24.156 | 0.00 | 0.00 |
| ATOM | 6473 | H    | ALA | X | 430 | 60.045 | 39.312 | 24.980 | 0.00 | 0.00 |
| ATOM | 6474 | CA   | ALA | X | 430 | 61.199 | 40.234 | 23.533 | 0.00 | 0.00 |
| ATOM | 6475 | HA   | ALA | X | 430 | 60.887 | 40.239 | 22.489 | 0.00 | 0.00 |
| ATOM | 6476 | CB   | ALA | X | 430 | 60.579 | 41.472 | 24.063 | 0.00 | 0.00 |
| ATOM | 6477 | HB1  | ALA | X | 430 | 60.842 | 41.870 | 25.042 | 0.00 | 0.00 |
| ATOM | 6478 | HB2  | ALA | X | 430 | 60.849 | 42.222 | 23.320 | 0.00 | 0.00 |

|      |      |      |     |   |     |        |        |        |      |      |
|------|------|------|-----|---|-----|--------|--------|--------|------|------|
| ATOM | 6479 | HB3  | ALA | X | 430 | 59.491 | 41.397 | 24.080 | 0.00 | 0.00 |
| ATOM | 6480 | C    | ALA | X | 430 | 62.749 | 40.166 | 23.610 | 0.00 | 0.00 |
| ATOM | 6481 | O    | ALA | X | 430 | 63.451 | 39.519 | 24.374 | 0.00 | 0.00 |
| ATOM | 6482 | N    | SER | X | 431 | 63.346 | 40.965 | 22.739 | 0.00 | 0.00 |
| ATOM | 6483 | H    | SER | X | 431 | 62.766 | 41.453 | 22.072 | 0.00 | 0.00 |
| ATOM | 6484 | CA   | SER | X | 431 | 64.812 | 41.196 | 22.716 | 0.00 | 0.00 |
| ATOM | 6485 | HA   | SER | X | 431 | 65.288 | 40.224 | 22.591 | 0.00 | 0.00 |
| ATOM | 6486 | CB   | SER | X | 431 | 65.125 | 42.149 | 21.600 | 0.00 | 0.00 |
| ATOM | 6487 | HB2  | SER | X | 431 | 66.192 | 42.324 | 21.465 | 0.00 | 0.00 |
| ATOM | 6488 | HB3  | SER | X | 431 | 64.755 | 41.639 | 20.711 | 0.00 | 0.00 |
| ATOM | 6489 | OG   | SER | X | 431 | 64.280 | 43.359 | 21.793 | 0.00 | 0.00 |
| ATOM | 6490 | HG   | SER | X | 431 | 63.550 | 43.269 | 21.175 | 0.00 | 0.00 |
| ATOM | 6491 | C    | SER | X | 431 | 65.456 | 41.765 | 23.946 | 0.00 | 0.00 |
| ATOM | 6492 | O    | SER | X | 431 | 66.633 | 41.561 | 24.209 | 0.00 | 0.00 |
| ATOM | 6493 | N    | THR | X | 432 | 64.575 | 42.401 | 24.786 | 0.00 | 0.00 |
| ATOM | 6494 | H    | THR | X | 432 | 63.666 | 42.534 | 24.367 | 0.00 | 0.00 |
| ATOM | 6495 | CA   | THR | X | 432 | 64.874 | 42.850 | 26.165 | 0.00 | 0.00 |
| ATOM | 6496 | HA   | THR | X | 432 | 65.955 | 42.877 | 26.302 | 0.00 | 0.00 |
| ATOM | 6497 | CB   | THR | X | 432 | 64.305 | 44.256 | 26.548 | 0.00 | 0.00 |
| ATOM | 6498 | HB   | THR | X | 432 | 63.231 | 44.263 | 26.729 | 0.00 | 0.00 |
| ATOM | 6499 | CG2  | THR | X | 432 | 64.882 | 44.876 | 27.751 | 0.00 | 0.00 |
| ATOM | 6500 | HG21 | THR | X | 432 | 64.738 | 44.145 | 28.547 | 0.00 | 0.00 |
| ATOM | 6501 | HG22 | THR | X | 432 | 65.947 | 45.075 | 27.635 | 0.00 | 0.00 |
| ATOM | 6502 | HG23 | THR | X | 432 | 64.418 | 45.827 | 28.010 | 0.00 | 0.00 |
| ATOM | 6503 | OG1  | THR | X | 432 | 64.535 | 45.037 | 25.435 | 0.00 | 0.00 |
| ATOM | 6504 | HG1  | THR | X | 432 | 63.830 | 45.642 | 25.191 | 0.00 | 0.00 |
| ATOM | 6505 | C    | THR | X | 432 | 64.377 | 41.818 | 27.199 | 0.00 | 0.00 |
| ATOM | 6506 | O    | THR | X | 432 | 63.106 | 41.761 | 27.268 | 0.00 | 0.00 |
| ATOM | 6507 | N    | LEU | X | 433 | 65.190 | 41.053 | 27.873 | 0.00 | 0.00 |
| ATOM | 6508 | H    | LEU | X | 433 | 66.192 | 41.070 | 27.753 | 0.00 | 0.00 |
| ATOM | 6509 | CA   | LEU | X | 433 | 64.798 | 39.988 | 28.835 | 0.00 | 0.00 |
| ATOM | 6510 | HA   | LEU | X | 433 | 63.967 | 40.381 | 29.422 | 0.00 | 0.00 |
| ATOM | 6511 | CB   | LEU | X | 433 | 64.407 | 38.798 | 28.072 | 0.00 | 0.00 |
| ATOM | 6512 | HB2  | LEU | X | 433 | 63.600 | 39.126 | 27.416 | 0.00 | 0.00 |
| ATOM | 6513 | HB3  | LEU | X | 433 | 65.252 | 38.519 | 27.443 | 0.00 | 0.00 |
| ATOM | 6514 | CG   | LEU | X | 433 | 63.950 | 37.585 | 28.846 | 0.00 | 0.00 |
| ATOM | 6515 | HG   | LEU | X | 433 | 64.704 | 37.308 | 29.583 | 0.00 | 0.00 |
| ATOM | 6516 | CD1  | LEU | X | 433 | 62.648 | 37.862 | 29.708 | 0.00 | 0.00 |
| ATOM | 6517 | HD11 | LEU | X | 433 | 62.334 | 36.959 | 30.232 | 0.00 | 0.00 |
| ATOM | 6518 | HD12 | LEU | X | 433 | 62.912 | 38.604 | 30.462 | 0.00 | 0.00 |
| ATOM | 6519 | HD13 | LEU | X | 433 | 61.824 | 38.240 | 29.103 | 0.00 | 0.00 |
| ATOM | 6520 | CD2  | LEU | X | 433 | 63.703 | 36.509 | 27.814 | 0.00 | 0.00 |
| ATOM | 6521 | HD21 | LEU | X | 433 | 63.099 | 36.809 | 26.958 | 0.00 | 0.00 |
| ATOM | 6522 | HD22 | LEU | X | 433 | 64.616 | 36.024 | 27.470 | 0.00 | 0.00 |
| ATOM | 6523 | HD23 | LEU | X | 433 | 63.178 | 35.651 | 28.235 | 0.00 | 0.00 |
| ATOM | 6524 | C    | LEU | X | 433 | 65.935 | 39.754 | 29.852 | 0.00 | 0.00 |
| ATOM | 6525 | O    | LEU | X | 433 | 67.088 | 39.518 | 29.505 | 0.00 | 0.00 |
| ATOM | 6526 | N    | SER | X | 434 | 65.557 | 39.595 | 31.106 | 0.00 | 0.00 |
| ATOM | 6527 | H    | SER | X | 434 | 64.606 | 39.820 | 31.362 | 0.00 | 0.00 |
| ATOM | 6528 | CA   | SER | X | 434 | 66.472 | 39.071 | 32.169 | 0.00 | 0.00 |
| ATOM | 6529 | HA   | SER | X | 434 | 67.490 | 39.365 | 31.915 | 0.00 | 0.00 |
| ATOM | 6530 | CB   | SER | X | 434 | 66.288 | 39.879 | 33.485 | 0.00 | 0.00 |
| ATOM | 6531 | HB2  | SER | X | 434 | 65.225 | 39.844 | 33.726 | 0.00 | 0.00 |
| ATOM | 6532 | HB3  | SER | X | 434 | 66.882 | 39.432 | 34.283 | 0.00 | 0.00 |
| ATOM | 6533 | OG   | SER | X | 434 | 66.747 | 41.230 | 33.224 | 0.00 | 0.00 |
| ATOM | 6534 | HG   | SER | X | 434 | 66.176 | 41.932 | 33.544 | 0.00 | 0.00 |
| ATOM | 6535 | C    | SER | X | 434 | 66.373 | 37.567 | 32.443 | 0.00 | 0.00 |
| ATOM | 6536 | O    | SER | X | 434 | 67.361 | 36.947 | 32.965 | 0.00 | 0.00 |
| ATOM | 6537 | N    | TRP | X | 435 | 65.186 | 36.951 | 32.214 | 0.00 | 0.00 |
| ATOM | 6538 | H    | TRP | X | 435 | 64.390 | 37.389 | 31.773 | 0.00 | 0.00 |
| ATOM | 6539 | CA   | TRP | X | 435 | 64.817 | 35.713 | 32.763 | 0.00 | 0.00 |
| ATOM | 6540 | HA   | TRP | X | 435 | 65.127 | 35.701 | 33.808 | 0.00 | 0.00 |
| ATOM | 6541 | CB   | TRP | X | 435 | 63.323 | 35.533 | 32.893 | 0.00 | 0.00 |
| ATOM | 6542 | HB2  | TRP | X | 435 | 62.914 | 35.370 | 31.896 | 0.00 | 0.00 |
| ATOM | 6543 | HB3  | TRP | X | 435 | 63.172 | 34.619 | 33.466 | 0.00 | 0.00 |
| ATOM | 6544 | CG   | TRP | X | 435 | 62.685 | 36.651 | 33.574 | 0.00 | 0.00 |
| ATOM | 6545 | CD1  | TRP | X | 435 | 61.689 | 37.345 | 33.005 | 0.00 | 0.00 |
| ATOM | 6546 | HD1  | TRP | X | 435 | 61.183 | 37.198 | 32.062 | 0.00 | 0.00 |
| ATOM | 6547 | NE1  | TRP | X | 435 | 61.226 | 38.252 | 33.924 | 0.00 | 0.00 |
| ATOM | 6548 | HE1  | TRP | X | 435 | 60.487 | 38.882 | 33.645 | 0.00 | 0.00 |

|      |      |      |     |   |     |        |        |        |      |      |
|------|------|------|-----|---|-----|--------|--------|--------|------|------|
| ATOM | 6549 | CE2  | TRP | X | 435 | 62.083 | 38.449 | 35.000 | 0.00 | 0.00 |
| ATOM | 6550 | CZ2  | TRP | X | 435 | 62.094 | 39.344 | 36.111 | 0.00 | 0.00 |
| ATOM | 6551 | HZ2  | TRP | X | 435 | 61.439 | 40.196 | 36.217 | 0.00 | 0.00 |
| ATOM | 6552 | CH2  | TRP | X | 435 | 63.124 | 39.231 | 37.051 | 0.00 | 0.00 |
| ATOM | 6553 | HH2  | TRP | X | 435 | 63.164 | 39.855 | 37.932 | 0.00 | 0.00 |
| ATOM | 6554 | CZ3  | TRP | X | 435 | 64.079 | 38.215 | 36.853 | 0.00 | 0.00 |
| ATOM | 6555 | HZ3  | TRP | X | 435 | 64.763 | 37.958 | 37.648 | 0.00 | 0.00 |
| ATOM | 6556 | CE3  | TRP | X | 435 | 64.081 | 37.389 | 35.771 | 0.00 | 0.00 |
| ATOM | 6557 | HE3  | TRP | X | 435 | 64.883 | 36.674 | 35.662 | 0.00 | 0.00 |
| ATOM | 6558 | CD2  | TRP | X | 435 | 63.078 | 37.425 | 34.826 | 0.00 | 0.00 |
| ATOM | 6559 | C    | TRP | X | 435 | 65.423 | 34.458 | 31.984 | 0.00 | 0.00 |
| ATOM | 6560 | O    | TRP | X | 435 | 65.526 | 34.561 | 30.757 | 0.00 | 0.00 |
| ATOM | 6561 | N    | PRO | X | 436 | 65.910 | 33.399 | 32.610 | 0.00 | 0.00 |
| ATOM | 6562 | CD   | PRO | X | 436 | 66.093 | 33.240 | 34.083 | 0.00 | 0.00 |
| ATOM | 6563 | HD2  | PRO | X | 436 | 65.282 | 33.709 | 34.640 | 0.00 | 0.00 |
| ATOM | 6564 | HD3  | PRO | X | 436 | 67.030 | 33.758 | 34.288 | 0.00 | 0.00 |
| ATOM | 6565 | CG   | PRO | X | 436 | 66.403 | 31.782 | 34.387 | 0.00 | 0.00 |
| ATOM | 6566 | HG2  | PRO | X | 436 | 65.486 | 31.205 | 34.513 | 0.00 | 0.00 |
| ATOM | 6567 | HG3  | PRO | X | 436 | 67.265 | 31.668 | 35.044 | 0.00 | 0.00 |
| ATOM | 6568 | CB   | PRO | X | 436 | 67.006 | 31.376 | 33.045 | 0.00 | 0.00 |
| ATOM | 6569 | HB2  | PRO | X | 436 | 66.868 | 30.312 | 32.854 | 0.00 | 0.00 |
| ATOM | 6570 | HB3  | PRO | X | 436 | 68.062 | 31.645 | 33.029 | 0.00 | 0.00 |
| ATOM | 6571 | CA   | PRO | X | 436 | 66.308 | 32.228 | 32.000 | 0.00 | 0.00 |
| ATOM | 6572 | HA   | PRO | X | 436 | 67.087 | 32.444 | 31.268 | 0.00 | 0.00 |
| ATOM | 6573 | C    | PRO | X | 436 | 65.129 | 31.381 | 31.302 | 0.00 | 0.00 |
| ATOM | 6574 | O    | PRO | X | 436 | 63.928 | 31.692 | 31.491 | 0.00 | 0.00 |
| ATOM | 6575 | N    | LEU | X | 437 | 65.457 | 30.454 | 30.404 | 0.00 | 0.00 |
| ATOM | 6576 | H    | LEU | X | 437 | 66.408 | 30.382 | 30.072 | 0.00 | 0.00 |
| ATOM | 6577 | CA   | LEU | X | 437 | 64.648 | 29.804 | 29.395 | 0.00 | 0.00 |
| ATOM | 6578 | HA   | LEU | X | 437 | 64.341 | 30.567 | 28.679 | 0.00 | 0.00 |
| ATOM | 6579 | CB   | LEU | X | 437 | 65.483 | 28.691 | 28.682 | 0.00 | 0.00 |
| ATOM | 6580 | HB2  | LEU | X | 437 | 66.289 | 29.235 | 28.190 | 0.00 | 0.00 |
| ATOM | 6581 | HB3  | LEU | X | 437 | 65.907 | 28.138 | 29.520 | 0.00 | 0.00 |
| ATOM | 6582 | CG   | LEU | X | 437 | 64.648 | 27.752 | 27.814 | 0.00 | 0.00 |
| ATOM | 6583 | HG   | LEU | X | 437 | 63.864 | 27.147 | 28.268 | 0.00 | 0.00 |
| ATOM | 6584 | CD1  | LEU | X | 437 | 64.078 | 28.466 | 26.628 | 0.00 | 0.00 |
| ATOM | 6585 | HD11 | LEU | X | 437 | 64.859 | 29.096 | 26.204 | 0.00 | 0.00 |
| ATOM | 6586 | HD12 | LEU | X | 437 | 63.649 | 27.720 | 25.959 | 0.00 | 0.00 |
| ATOM | 6587 | HD13 | LEU | X | 437 | 63.326 | 29.161 | 27.001 | 0.00 | 0.00 |
| ATOM | 6588 | CD2  | LEU | X | 437 | 65.560 | 26.685 | 27.174 | 0.00 | 0.00 |
| ATOM | 6589 | HD21 | LEU | X | 437 | 65.617 | 25.969 | 27.994 | 0.00 | 0.00 |
| ATOM | 6590 | HD22 | LEU | X | 437 | 65.172 | 26.159 | 26.302 | 0.00 | 0.00 |
| ATOM | 6591 | HD23 | LEU | X | 437 | 66.491 | 27.169 | 26.880 | 0.00 | 0.00 |
| ATOM | 6592 | C    | LEU | X | 437 | 63.317 | 29.232 | 30.048 | 0.00 | 0.00 |
| ATOM | 6593 | O    | LEU | X | 437 | 62.205 | 29.538 | 29.596 | 0.00 | 0.00 |
| ATOM | 6594 | N    | TRP | X | 438 | 63.530 | 28.521 | 31.182 | 0.00 | 0.00 |
| ATOM | 6595 | H    | TRP | X | 438 | 64.496 | 28.360 | 31.432 | 0.00 | 0.00 |
| ATOM | 6596 | CA   | TRP | X | 438 | 62.514 | 27.693 | 31.894 | 0.00 | 0.00 |
| ATOM | 6597 | HA   | TRP | X | 438 | 61.955 | 27.100 | 31.170 | 0.00 | 0.00 |
| ATOM | 6598 | CB   | TRP | X | 438 | 63.198 | 26.841 | 32.953 | 0.00 | 0.00 |
| ATOM | 6599 | HB2  | TRP | X | 438 | 62.435 | 26.167 | 33.343 | 0.00 | 0.00 |
| ATOM | 6600 | HB3  | TRP | X | 438 | 63.987 | 26.325 | 32.406 | 0.00 | 0.00 |
| ATOM | 6601 | CG   | TRP | X | 438 | 63.852 | 27.445 | 34.132 | 0.00 | 0.00 |
| ATOM | 6602 | CD1  | TRP | X | 438 | 65.115 | 27.933 | 34.075 | 0.00 | 0.00 |
| ATOM | 6603 | HD1  | TRP | X | 438 | 65.805 | 27.855 | 33.248 | 0.00 | 0.00 |
| ATOM | 6604 | NE1  | TRP | X | 438 | 65.422 | 28.400 | 35.294 | 0.00 | 0.00 |
| ATOM | 6605 | HE1  | TRP | X | 438 | 66.281 | 28.854 | 35.571 | 0.00 | 0.00 |
| ATOM | 6606 | CE2  | TRP | X | 438 | 64.372 | 28.369 | 36.162 | 0.00 | 0.00 |
| ATOM | 6607 | CZ2  | TRP | X | 438 | 64.175 | 28.743 | 37.557 | 0.00 | 0.00 |
| ATOM | 6608 | HZ2  | TRP | X | 438 | 65.001 | 29.202 | 38.079 | 0.00 | 0.00 |
| ATOM | 6609 | CH2  | TRP | X | 438 | 62.923 | 28.431 | 38.225 | 0.00 | 0.00 |
| ATOM | 6610 | HH2  | TRP | X | 438 | 62.788 | 28.771 | 39.241 | 0.00 | 0.00 |
| ATOM | 6611 | CZ3  | TRP | X | 438 | 61.933 | 27.820 | 37.488 | 0.00 | 0.00 |
| ATOM | 6612 | HZ3  | TRP | X | 438 | 60.972 | 27.656 | 37.951 | 0.00 | 0.00 |
| ATOM | 6613 | CE3  | TRP | X | 438 | 62.114 | 27.470 | 36.111 | 0.00 | 0.00 |
| ATOM | 6614 | HE3  | TRP | X | 438 | 61.275 | 26.991 | 35.629 | 0.00 | 0.00 |
| ATOM | 6615 | CD2  | TRP | X | 438 | 63.342 | 27.752 | 35.480 | 0.00 | 0.00 |
| ATOM | 6616 | C    | TRP | X | 438 | 61.440 | 28.549 | 32.641 | 0.00 | 0.00 |
| ATOM | 6617 | O    | TRP | X | 438 | 60.411 | 27.978 | 32.938 | 0.00 | 0.00 |
| ATOM | 6618 | N    | MET | X | 439 | 61.672 | 29.872 | 32.809 | 0.00 | 0.00 |

|      |      |      |     |   |     |        |        |        |      |      |
|------|------|------|-----|---|-----|--------|--------|--------|------|------|
| ATOM | 6619 | H    | MET | X | 439 | 62.484 | 30.187 | 32.297 | 0.00 | 0.00 |
| ATOM | 6620 | CA   | MET | X | 439 | 60.756 | 30.835 | 33.329 | 0.00 | 0.00 |
| ATOM | 6621 | HA   | MET | X | 439 | 60.075 | 30.372 | 34.043 | 0.00 | 0.00 |
| ATOM | 6622 | CB   | MET | X | 439 | 61.491 | 31.852 | 34.234 | 0.00 | 0.00 |
| ATOM | 6623 | HB2  | MET | X | 439 | 62.180 | 32.421 | 33.609 | 0.00 | 0.00 |
| ATOM | 6624 | HB3  | MET | X | 439 | 60.705 | 32.556 | 34.509 | 0.00 | 0.00 |
| ATOM | 6625 | CG   | MET | X | 439 | 62.300 | 31.408 | 35.398 | 0.00 | 0.00 |
| ATOM | 6626 | HG2  | MET | X | 439 | 61.607 | 31.012 | 36.141 | 0.00 | 0.00 |
| ATOM | 6627 | HG3  | MET | X | 439 | 62.951 | 30.559 | 35.190 | 0.00 | 0.00 |
| ATOM | 6628 | SD   | MET | X | 439 | 63.269 | 32.744 | 36.187 | 0.00 | 0.00 |
| ATOM | 6629 | CE   | MET | X | 439 | 61.865 | 33.772 | 36.853 | 0.00 | 0.00 |
| ATOM | 6630 | HE1  | MET | X | 439 | 61.353 | 34.323 | 36.064 | 0.00 | 0.00 |
| ATOM | 6631 | HE2  | MET | X | 439 | 61.046 | 33.113 | 37.140 | 0.00 | 0.00 |
| ATOM | 6632 | HE3  | MET | X | 439 | 62.194 | 34.336 | 37.725 | 0.00 | 0.00 |
| ATOM | 6633 | C    | MET | X | 439 | 59.811 | 31.418 | 32.257 | 0.00 | 0.00 |
| ATOM | 6634 | O    | MET | X | 439 | 59.053 | 32.293 | 32.597 | 0.00 | 0.00 |
| ATOM | 6635 | N    | GLY | X | 440 | 59.967 | 31.115 | 30.968 | 0.00 | 0.00 |
| ATOM | 6636 | H    | GLY | X | 440 | 60.653 | 30.387 | 30.823 | 0.00 | 0.00 |
| ATOM | 6637 | CA   | GLY | X | 440 | 59.108 | 31.630 | 29.939 | 0.00 | 0.00 |
| ATOM | 6638 | HA2  | GLY | X | 440 | 59.544 | 31.205 | 29.025 | 0.00 | 0.00 |
| ATOM | 6639 | HA3  | GLY | X | 440 | 58.083 | 31.338 | 30.119 | 0.00 | 0.00 |
| ATOM | 6640 | C    | GLY | X | 440 | 59.153 | 33.156 | 29.859 | 0.00 | 0.00 |
| ATOM | 6641 | O    | GLY | X | 440 | 60.240 | 33.745 | 29.727 | 0.00 | 0.00 |
| ATOM | 6642 | N    | VAL | X | 441 | 57.927 | 33.722 | 29.833 | 0.00 | 0.00 |
| ATOM | 6643 | H    | VAL | X | 441 | 57.146 | 33.085 | 29.892 | 0.00 | 0.00 |
| ATOM | 6644 | CA   | VAL | X | 441 | 57.713 | 35.141 | 29.942 | 0.00 | 0.00 |
| ATOM | 6645 | HA   | VAL | X | 441 | 58.624 | 35.725 | 30.075 | 0.00 | 0.00 |
| ATOM | 6646 | CB   | VAL | X | 441 | 56.995 | 35.776 | 28.660 | 0.00 | 0.00 |
| ATOM | 6647 | HB   | VAL | X | 441 | 56.796 | 36.818 | 28.909 | 0.00 | 0.00 |
| ATOM | 6648 | CG1  | VAL | X | 441 | 58.104 | 35.985 | 27.567 | 0.00 | 0.00 |
| ATOM | 6649 | HG11 | VAL | X | 441 | 58.506 | 35.034 | 27.219 | 0.00 | 0.00 |
| ATOM | 6650 | HG12 | VAL | X | 441 | 57.696 | 36.423 | 26.656 | 0.00 | 0.00 |
| ATOM | 6651 | HG13 | VAL | X | 441 | 58.890 | 36.686 | 27.848 | 0.00 | 0.00 |
| ATOM | 6652 | CG2  | VAL | X | 441 | 55.822 | 35.121 | 28.045 | 0.00 | 0.00 |
| ATOM | 6653 | HG21 | VAL | X | 441 | 55.181 | 35.877 | 27.590 | 0.00 | 0.00 |
| ATOM | 6654 | HG22 | VAL | X | 441 | 56.123 | 34.537 | 27.175 | 0.00 | 0.00 |
| ATOM | 6655 | HG23 | VAL | X | 441 | 55.396 | 34.439 | 28.781 | 0.00 | 0.00 |
| ATOM | 6656 | C    | VAL | X | 441 | 56.780 | 35.296 | 31.201 | 0.00 | 0.00 |
| ATOM | 6657 | O    | VAL | X | 441 | 55.641 | 35.016 | 31.129 | 0.00 | 0.00 |
| ATOM | 6658 | N    | PRO | X | 442 | 57.384 | 35.568 | 32.406 | 0.00 | 0.00 |
| ATOM | 6659 | CD   | PRO | X | 442 | 58.751 | 35.745 | 32.649 | 0.00 | 0.00 |
| ATOM | 6660 | HD2  | PRO | X | 442 | 59.096 | 36.717 | 32.295 | 0.00 | 0.00 |
| ATOM | 6661 | HD3  | PRO | X | 442 | 59.348 | 35.011 | 32.107 | 0.00 | 0.00 |
| ATOM | 6662 | CG   | PRO | X | 442 | 58.999 | 35.587 | 34.062 | 0.00 | 0.00 |
| ATOM | 6663 | HG2  | PRO | X | 442 | 59.048 | 36.519 | 34.625 | 0.00 | 0.00 |
| ATOM | 6664 | HG3  | PRO | X | 442 | 59.825 | 34.908 | 34.274 | 0.00 | 0.00 |
| ATOM | 6665 | CB   | PRO | X | 442 | 57.709 | 34.926 | 34.696 | 0.00 | 0.00 |
| ATOM | 6666 | HB2  | PRO | X | 442 | 57.528 | 35.178 | 35.741 | 0.00 | 0.00 |
| ATOM | 6667 | HB3  | PRO | X | 442 | 57.810 | 33.885 | 34.388 | 0.00 | 0.00 |
| ATOM | 6668 | CA   | PRO | X | 442 | 56.697 | 35.506 | 33.751 | 0.00 | 0.00 |
| ATOM | 6669 | HA   | PRO | X | 442 | 55.871 | 34.800 | 33.664 | 0.00 | 0.00 |
| ATOM | 6670 | C    | PRO | X | 442 | 56.117 | 36.832 | 34.245 | 0.00 | 0.00 |
| ATOM | 6671 | O    | PRO | X | 442 | 56.210 | 37.765 | 33.487 | 0.00 | 0.00 |
| ATOM | 6672 | N    | HIP | X | 443 | 55.616 | 36.938 | 35.459 | 0.00 | 0.00 |
| ATOM | 6673 | H    | HIP | X | 443 | 55.705 | 36.158 | 36.095 | 0.00 | 0.00 |
| ATOM | 6674 | CA   | HIP | X | 443 | 54.929 | 38.081 | 36.041 | 0.00 | 0.00 |
| ATOM | 6675 | HA   | HIP | X | 443 | 53.842 | 38.014 | 35.985 | 0.00 | 0.00 |
| ATOM | 6676 | CB   | HIP | X | 443 | 55.075 | 38.113 | 37.603 | 0.00 | 0.00 |
| ATOM | 6677 | HB2  | HIP | X | 443 | 54.787 | 37.144 | 38.010 | 0.00 | 0.00 |
| ATOM | 6678 | HB3  | HIP | X | 443 | 56.122 | 38.229 | 37.879 | 0.00 | 0.00 |
| ATOM | 6679 | CG   | HIP | X | 443 | 54.187 | 39.068 | 38.372 | 0.00 | 0.00 |
| ATOM | 6680 | ND1  | HIP | X | 443 | 52.735 | 39.044 | 38.505 | 0.00 | 0.00 |
| ATOM | 6681 | HD1  | HIP | X | 443 | 52.140 | 38.346 | 38.082 | 0.00 | 0.00 |
| ATOM | 6682 | CE1  | HIP | X | 443 | 52.420 | 40.000 | 39.415 | 0.00 | 0.00 |
| ATOM | 6683 | HE1  | HIP | X | 443 | 51.424 | 40.362 | 39.626 | 0.00 | 0.00 |
| ATOM | 6684 | NE2  | HIP | X | 443 | 53.561 | 40.543 | 39.892 | 0.00 | 0.00 |
| ATOM | 6685 | HE2  | HIP | X | 443 | 53.499 | 41.208 | 40.650 | 0.00 | 0.00 |
| ATOM | 6686 | CD2  | HIP | X | 443 | 54.694 | 40.026 | 39.234 | 0.00 | 0.00 |
| ATOM | 6687 | HD2  | HIP | X | 443 | 55.736 | 40.161 | 39.483 | 0.00 | 0.00 |
| ATOM | 6688 | C    | HIP | X | 443 | 55.171 | 39.478 | 35.488 | 0.00 | 0.00 |

|      |      |      |     |   |     |        |        |        |      |      |
|------|------|------|-----|---|-----|--------|--------|--------|------|------|
| ATOM | 6689 | O    | HIP | X | 443 | 56.211 | 40.110 | 35.764 | 0.00 | 0.00 |
| ATOM | 6690 | N    | GLY | X | 444 | 54.118 | 40.138 | 34.952 | 0.00 | 0.00 |
| ATOM | 6691 | H    | GLY | X | 444 | 53.247 | 39.627 | 34.957 | 0.00 | 0.00 |
| ATOM | 6692 | CA   | GLY | X | 444 | 53.985 | 41.585 | 34.729 | 0.00 | 0.00 |
| ATOM | 6693 | HA2  | GLY | X | 444 | 52.934 | 41.822 | 34.496 | 0.00 | 0.00 |
| ATOM | 6694 | HA3  | GLY | X | 444 | 54.283 | 42.062 | 35.677 | 0.00 | 0.00 |
| ATOM | 6695 | C    | GLY | X | 444 | 54.964 | 42.108 | 33.675 | 0.00 | 0.00 |
| ATOM | 6696 | O    | GLY | X | 444 | 55.365 | 43.270 | 33.795 | 0.00 | 0.00 |
| ATOM | 6697 | N    | TYR | X | 445 | 55.397 | 41.288 | 32.707 | 0.00 | 0.00 |
| ATOM | 6698 | H    | TYR | X | 445 | 55.031 | 40.347 | 32.712 | 0.00 | 0.00 |
| ATOM | 6699 | CA   | TYR | X | 445 | 56.537 | 41.665 | 31.869 | 0.00 | 0.00 |
| ATOM | 6700 | HA   | TYR | X | 445 | 57.378 | 41.926 | 32.511 | 0.00 | 0.00 |
| ATOM | 6701 | CB   | TYR | X | 445 | 56.859 | 40.321 | 31.110 | 0.00 | 0.00 |
| ATOM | 6702 | HB2  | TYR | X | 445 | 56.995 | 39.504 | 31.819 | 0.00 | 0.00 |
| ATOM | 6703 | HB3  | TYR | X | 445 | 56.022 | 39.995 | 30.492 | 0.00 | 0.00 |
| ATOM | 6704 | CG   | TYR | X | 445 | 57.950 | 40.195 | 30.017 | 0.00 | 0.00 |
| ATOM | 6705 | CD1  | TYR | X | 445 | 59.267 | 40.454 | 30.361 | 0.00 | 0.00 |
| ATOM | 6706 | HD1  | TYR | X | 445 | 59.477 | 40.689 | 31.394 | 0.00 | 0.00 |
| ATOM | 6707 | CE1  | TYR | X | 445 | 60.285 | 40.367 | 29.427 | 0.00 | 0.00 |
| ATOM | 6708 | HE1  | TYR | X | 445 | 61.303 | 40.496 | 29.762 | 0.00 | 0.00 |
| ATOM | 6709 | CZ   | TYR | X | 445 | 59.876 | 40.043 | 28.073 | 0.00 | 0.00 |
| ATOM | 6710 | OH   | TYR | X | 445 | 60.815 | 39.934 | 27.114 | 0.00 | 0.00 |
| ATOM | 6711 | HH   | TYR | X | 445 | 61.577 | 40.485 | 27.304 | 0.00 | 0.00 |
| ATOM | 6712 | CE2  | TYR | X | 445 | 58.549 | 40.043 | 27.637 | 0.00 | 0.00 |
| ATOM | 6713 | HE2  | TYR | X | 445 | 58.219 | 39.864 | 26.625 | 0.00 | 0.00 |
| ATOM | 6714 | CD2  | TYR | X | 445 | 57.555 | 40.189 | 28.652 | 0.00 | 0.00 |
| ATOM | 6715 | HD2  | TYR | X | 445 | 56.537 | 40.322 | 28.314 | 0.00 | 0.00 |
| ATOM | 6716 | C    | TYR | X | 445 | 56.194 | 42.803 | 30.913 | 0.00 | 0.00 |
| ATOM | 6717 | O    | TYR | X | 445 | 57.038 | 43.557 | 30.497 | 0.00 | 0.00 |
| ATOM | 6718 | N    | GLU | X | 446 | 54.961 | 42.939 | 30.502 | 0.00 | 0.00 |
| ATOM | 6719 | H    | GLU | X | 446 | 54.144 | 42.592 | 30.983 | 0.00 | 0.00 |
| ATOM | 6720 | CA   | GLU | X | 446 | 54.618 | 43.703 | 29.322 | 0.00 | 0.00 |
| ATOM | 6721 | HA   | GLU | X | 446 | 55.382 | 43.531 | 28.564 | 0.00 | 0.00 |
| ATOM | 6722 | CB   | GLU | X | 446 | 53.337 | 43.119 | 28.733 | 0.00 | 0.00 |
| ATOM | 6723 | HB2  | GLU | X | 446 | 53.334 | 43.375 | 27.673 | 0.00 | 0.00 |
| ATOM | 6724 | HB3  | GLU | X | 446 | 53.390 | 42.050 | 28.939 | 0.00 | 0.00 |
| ATOM | 6725 | CG   | GLU | X | 446 | 51.923 | 43.614 | 29.123 | 0.00 | 0.00 |
| ATOM | 6726 | HG2  | GLU | X | 446 | 51.758 | 44.682 | 28.983 | 0.00 | 0.00 |
| ATOM | 6727 | HG3  | GLU | X | 446 | 51.308 | 43.053 | 28.420 | 0.00 | 0.00 |
| ATOM | 6728 | CD   | GLU | X | 446 | 51.447 | 43.235 | 30.515 | 0.00 | 0.00 |
| ATOM | 6729 | OE1  | GLU | X | 446 | 50.361 | 42.638 | 30.679 | 0.00 | 0.00 |
| ATOM | 6730 | OE2  | GLU | X | 446 | 52.175 | 43.593 | 31.409 | 0.00 | 0.00 |
| ATOM | 6731 | C    | GLU | X | 446 | 54.477 | 45.203 | 29.597 | 0.00 | 0.00 |
| ATOM | 6732 | O    | GLU | X | 446 | 54.270 | 45.956 | 28.686 | 0.00 | 0.00 |
| ATOM | 6733 | N    | ILE | X | 447 | 54.198 | 45.660 | 30.876 | 0.00 | 0.00 |
| ATOM | 6734 | H    | ILE | X | 447 | 54.167 | 44.992 | 31.633 | 0.00 | 0.00 |
| ATOM | 6735 | CA   | ILE | X | 447 | 53.903 | 47.142 | 31.091 | 0.00 | 0.00 |
| ATOM | 6736 | HA   | ILE | X | 447 | 52.942 | 47.274 | 30.596 | 0.00 | 0.00 |
| ATOM | 6737 | CB   | ILE | X | 447 | 53.774 | 47.529 | 32.552 | 0.00 | 0.00 |
| ATOM | 6738 | HB   | ILE | X | 447 | 53.288 | 48.504 | 32.599 | 0.00 | 0.00 |
| ATOM | 6739 | CG2  | ILE | X | 447 | 52.948 | 46.546 | 33.350 | 0.00 | 0.00 |
| ATOM | 6740 | HG21 | ILE | X | 447 | 53.554 | 45.667 | 33.566 | 0.00 | 0.00 |
| ATOM | 6741 | HG22 | ILE | X | 447 | 52.652 | 47.027 | 34.283 | 0.00 | 0.00 |
| ATOM | 6742 | HG23 | ILE | X | 447 | 52.056 | 46.226 | 32.812 | 0.00 | 0.00 |
| ATOM | 6743 | CG1  | ILE | X | 447 | 55.178 | 47.747 | 33.252 | 0.00 | 0.00 |
| ATOM | 6744 | HG12 | ILE | X | 447 | 55.674 | 46.776 | 33.228 | 0.00 | 0.00 |
| ATOM | 6745 | HG13 | ILE | X | 447 | 55.891 | 48.354 | 32.694 | 0.00 | 0.00 |
| ATOM | 6746 | CD1  | ILE | X | 447 | 55.116 | 48.306 | 34.625 | 0.00 | 0.00 |
| ATOM | 6747 | HD11 | ILE | X | 447 | 54.514 | 47.709 | 35.310 | 0.00 | 0.00 |
| ATOM | 6748 | HD12 | ILE | X | 447 | 56.090 | 48.326 | 35.115 | 0.00 | 0.00 |
| ATOM | 6749 | HD13 | ILE | X | 447 | 54.834 | 49.358 | 34.589 | 0.00 | 0.00 |
| ATOM | 6750 | C    | ILE | X | 447 | 54.841 | 48.123 | 30.340 | 0.00 | 0.00 |
| ATOM | 6751 | O    | ILE | X | 447 | 54.397 | 49.203 | 29.895 | 0.00 | 0.00 |
| ATOM | 6752 | N    | GLU | X | 448 | 56.022 | 47.596 | 29.991 | 0.00 | 0.00 |
| ATOM | 6753 | H    | GLU | X | 448 | 56.414 | 46.739 | 30.354 | 0.00 | 0.00 |
| ATOM | 6754 | CA   | GLU | X | 448 | 56.991 | 48.400 | 29.192 | 0.00 | 0.00 |
| ATOM | 6755 | HA   | GLU | X | 448 | 56.960 | 49.370 | 29.688 | 0.00 | 0.00 |
| ATOM | 6756 | CB   | GLU | X | 448 | 58.311 | 47.803 | 29.072 | 0.00 | 0.00 |
| ATOM | 6757 | HB2  | GLU | X | 448 | 58.205 | 46.765 | 28.757 | 0.00 | 0.00 |
| ATOM | 6758 | HB3  | GLU | X | 448 | 58.894 | 48.382 | 28.354 | 0.00 | 0.00 |

|      |      |      |     |   |     |        |        |        |      |      |
|------|------|------|-----|---|-----|--------|--------|--------|------|------|
| ATOM | 6759 | CG   | GLU | X | 448 | 58.950 | 47.750 | 30.506 | 0.00 | 0.00 |
| ATOM | 6760 | HG2  | GLU | X | 448 | 59.180 | 48.775 | 30.794 | 0.00 | 0.00 |
| ATOM | 6761 | HG3  | GLU | X | 448 | 58.256 | 47.433 | 31.284 | 0.00 | 0.00 |
| ATOM | 6762 | CD   | GLU | X | 448 | 60.141 | 46.812 | 30.489 | 0.00 | 0.00 |
| ATOM | 6763 | OE1  | GLU | X | 448 | 61.351 | 47.191 | 30.524 | 0.00 | 0.00 |
| ATOM | 6764 | OE2  | GLU | X | 448 | 59.975 | 45.554 | 30.409 | 0.00 | 0.00 |
| ATOM | 6765 | C    | GLU | X | 448 | 56.511 | 48.721 | 27.763 | 0.00 | 0.00 |
| ATOM | 6766 | O    | GLU | X | 448 | 56.630 | 49.885 | 27.209 | 0.00 | 0.00 |
| ATOM | 6767 | N    | PHE | X | 449 | 55.691 | 47.770 | 27.271 | 0.00 | 0.00 |
| ATOM | 6768 | H    | PHE | X | 449 | 55.427 | 46.993 | 27.859 | 0.00 | 0.00 |
| ATOM | 6769 | CA   | PHE | X | 449 | 55.054 | 47.874 | 26.067 | 0.00 | 0.00 |
| ATOM | 6770 | HA   | PHE | X | 449 | 55.723 | 48.340 | 25.344 | 0.00 | 0.00 |
| ATOM | 6771 | CB   | PHE | X | 449 | 54.734 | 46.485 | 25.453 | 0.00 | 0.00 |
| ATOM | 6772 | HB2  | PHE | X | 449 | 54.121 | 45.823 | 26.064 | 0.00 | 0.00 |
| ATOM | 6773 | HB3  | PHE | X | 449 | 54.198 | 46.778 | 24.550 | 0.00 | 0.00 |
| ATOM | 6774 | CG   | PHE | X | 449 | 55.963 | 45.707 | 24.965 | 0.00 | 0.00 |
| ATOM | 6775 | CD1  | PHE | X | 449 | 56.929 | 45.183 | 25.790 | 0.00 | 0.00 |
| ATOM | 6776 | HD1  | PHE | X | 449 | 56.855 | 45.223 | 26.867 | 0.00 | 0.00 |
| ATOM | 6777 | CE1  | PHE | X | 449 | 57.979 | 44.414 | 25.283 | 0.00 | 0.00 |
| ATOM | 6778 | HE1  | PHE | X | 449 | 58.782 | 43.982 | 25.862 | 0.00 | 0.00 |
| ATOM | 6779 | CZ   | PHE | X | 449 | 58.002 | 44.194 | 23.916 | 0.00 | 0.00 |
| ATOM | 6780 | HZ   | PHE | X | 449 | 58.785 | 43.549 | 23.545 | 0.00 | 0.00 |
| ATOM | 6781 | CE2  | PHE | X | 449 | 57.159 | 44.841 | 23.047 | 0.00 | 0.00 |
| ATOM | 6782 | HE2  | PHE | X | 449 | 57.318 | 44.664 | 21.993 | 0.00 | 0.00 |
| ATOM | 6783 | CD2  | PHE | X | 449 | 56.045 | 45.527 | 23.564 | 0.00 | 0.00 |
| ATOM | 6784 | HD2  | PHE | X | 449 | 55.355 | 45.947 | 22.847 | 0.00 | 0.00 |
| ATOM | 6785 | C    | PHE | X | 449 | 53.796 | 48.712 | 26.147 | 0.00 | 0.00 |
| ATOM | 6786 | O    | PHE | X | 449 | 53.295 | 49.121 | 25.105 | 0.00 | 0.00 |
| ATOM | 6787 | N    | ILE | X | 450 | 53.293 | 48.985 | 27.345 | 0.00 | 0.00 |
| ATOM | 6788 | H    | ILE | X | 450 | 53.848 | 48.674 | 28.129 | 0.00 | 0.00 |
| ATOM | 6789 | CA   | ILE | X | 450 | 52.078 | 49.787 | 27.595 | 0.00 | 0.00 |
| ATOM | 6790 | HA   | ILE | X | 450 | 51.544 | 49.932 | 26.656 | 0.00 | 0.00 |
| ATOM | 6791 | CB   | ILE | X | 450 | 51.216 | 49.183 | 28.784 | 0.00 | 0.00 |
| ATOM | 6792 | HB   | ILE | X | 450 | 51.678 | 49.350 | 29.757 | 0.00 | 0.00 |
| ATOM | 6793 | CG2  | ILE | X | 450 | 49.881 | 49.977 | 28.877 | 0.00 | 0.00 |
| ATOM | 6794 | HG21 | ILE | X | 450 | 49.934 | 51.065 | 28.838 | 0.00 | 0.00 |
| ATOM | 6795 | HG22 | ILE | X | 450 | 49.281 | 49.660 | 28.024 | 0.00 | 0.00 |
| ATOM | 6796 | HG23 | ILE | X | 450 | 49.259 | 49.593 | 29.685 | 0.00 | 0.00 |
| ATOM | 6797 | CG1  | ILE | X | 450 | 50.958 | 47.637 | 28.599 | 0.00 | 0.00 |
| ATOM | 6798 | HG12 | ILE | X | 450 | 51.909 | 47.139 | 28.787 | 0.00 | 0.00 |
| ATOM | 6799 | HG13 | ILE | X | 450 | 50.266 | 47.346 | 29.389 | 0.00 | 0.00 |
| ATOM | 6800 | CD1  | ILE | X | 450 | 50.396 | 47.287 | 27.241 | 0.00 | 0.00 |
| ATOM | 6801 | HD11 | ILE | X | 450 | 50.325 | 46.199 | 27.262 | 0.00 | 0.00 |
| ATOM | 6802 | HD12 | ILE | X | 450 | 49.398 | 47.687 | 27.059 | 0.00 | 0.00 |
| ATOM | 6803 | HD13 | ILE | X | 450 | 51.118 | 47.466 | 26.444 | 0.00 | 0.00 |
| ATOM | 6804 | C    | ILE | X | 450 | 52.468 | 51.249 | 27.849 | 0.00 | 0.00 |
| ATOM | 6805 | O    | ILE | X | 450 | 52.056 | 52.149 | 27.143 | 0.00 | 0.00 |
| ATOM | 6806 | N    | PHE | X | 451 | 53.337 | 51.504 | 28.832 | 0.00 | 0.00 |
| ATOM | 6807 | H    | PHE | X | 451 | 53.668 | 50.730 | 29.390 | 0.00 | 0.00 |
| ATOM | 6808 | CA   | PHE | X | 451 | 53.937 | 52.778 | 29.019 | 0.00 | 0.00 |
| ATOM | 6809 | HA   | PHE | X | 451 | 53.217 | 53.581 | 29.174 | 0.00 | 0.00 |
| ATOM | 6810 | CB   | PHE | X | 451 | 54.723 | 52.751 | 30.371 | 0.00 | 0.00 |
| ATOM | 6811 | HB2  | PHE | X | 451 | 55.367 | 51.872 | 30.408 | 0.00 | 0.00 |
| ATOM | 6812 | HB3  | PHE | X | 451 | 55.386 | 53.612 | 30.281 | 0.00 | 0.00 |
| ATOM | 6813 | CG   | PHE | X | 451 | 53.895 | 53.036 | 31.618 | 0.00 | 0.00 |
| ATOM | 6814 | CD1  | PHE | X | 451 | 53.762 | 52.037 | 32.599 | 0.00 | 0.00 |
| ATOM | 6815 | HD1  | PHE | X | 451 | 54.218 | 51.077 | 32.409 | 0.00 | 0.00 |
| ATOM | 6816 | CE1  | PHE | X | 451 | 52.897 | 52.342 | 33.673 | 0.00 | 0.00 |
| ATOM | 6817 | HE1  | PHE | X | 451 | 52.855 | 51.587 | 34.445 | 0.00 | 0.00 |
| ATOM | 6818 | CZ   | PHE | X | 451 | 52.293 | 53.622 | 33.879 | 0.00 | 0.00 |
| ATOM | 6819 | HZ   | PHE | X | 451 | 51.733 | 53.872 | 34.768 | 0.00 | 0.00 |
| ATOM | 6820 | CE2  | PHE | X | 451 | 52.561 | 54.634 | 32.877 | 0.00 | 0.00 |
| ATOM | 6821 | HE2  | PHE | X | 451 | 52.246 | 55.655 | 33.036 | 0.00 | 0.00 |
| ATOM | 6822 | CD2  | PHE | X | 451 | 53.362 | 54.281 | 31.815 | 0.00 | 0.00 |
| ATOM | 6823 | HD2  | PHE | X | 451 | 53.489 | 55.035 | 31.053 | 0.00 | 0.00 |
| ATOM | 6824 | C    | PHE | X | 451 | 54.763 | 53.259 | 27.812 | 0.00 | 0.00 |
| ATOM | 6825 | O    | PHE | X | 451 | 55.107 | 54.474 | 27.759 | 0.00 | 0.00 |
| ATOM | 6826 | N    | GLY | X | 452 | 55.123 | 52.427 | 26.791 | 0.00 | 0.00 |
| ATOM | 6827 | H    | GLY | X | 452 | 54.897 | 51.444 | 26.848 | 0.00 | 0.00 |
| ATOM | 6828 | CA   | GLY | X | 452 | 55.716 | 52.914 | 25.545 | 0.00 | 0.00 |

|      |      |      |     |   |     |        |        |        |      |      |
|------|------|------|-----|---|-----|--------|--------|--------|------|------|
| ATOM | 6829 | HA2  | GLY | X | 452 | 55.629 | 52.076 | 24.757 | 0.00 | 0.00 |
| ATOM | 6830 | HA3  | GLY | X | 452 | 55.307 | 53.869 | 25.308 | 0.00 | 0.00 |
| ATOM | 6831 | C    | GLY | X | 452 | 57.217 | 53.044 | 25.633 | 0.00 | 0.00 |
| ATOM | 6832 | O    | GLY | X | 452 | 57.891 | 53.612 | 24.779 | 0.00 | 0.00 |
| ATOM | 6833 | N    | ILE | X | 453 | 57.801 | 52.462 | 26.693 | 0.00 | 0.00 |
| ATOM | 6834 | H    | ILE | X | 453 | 57.253 | 51.865 | 27.297 | 0.00 | 0.00 |
| ATOM | 6835 | CA   | ILE | X | 453 | 59.244 | 52.455 | 26.906 | 0.00 | 0.00 |
| ATOM | 6836 | HA   | ILE | X | 453 | 59.553 | 53.396 | 27.361 | 0.00 | 0.00 |
| ATOM | 6837 | CB   | ILE | X | 453 | 59.537 | 51.376 | 27.999 | 0.00 | 0.00 |
| ATOM | 6838 | HB   | ILE | X | 453 | 59.175 | 50.428 | 27.600 | 0.00 | 0.00 |
| ATOM | 6839 | CG2  | ILE | X | 453 | 61.011 | 51.247 | 28.464 | 0.00 | 0.00 |
| ATOM | 6840 | HG21 | ILE | X | 453 | 61.211 | 50.441 | 29.170 | 0.00 | 0.00 |
| ATOM | 6841 | HG22 | ILE | X | 453 | 61.564 | 50.922 | 27.583 | 0.00 | 0.00 |
| ATOM | 6842 | HG23 | ILE | X | 453 | 61.413 | 52.189 | 28.837 | 0.00 | 0.00 |
| ATOM | 6843 | CG1  | ILE | X | 453 | 58.791 | 51.680 | 29.321 | 0.00 | 0.00 |
| ATOM | 6844 | HG12 | ILE | X | 453 | 57.705 | 51.650 | 29.223 | 0.00 | 0.00 |
| ATOM | 6845 | HG13 | ILE | X | 453 | 59.027 | 50.847 | 29.983 | 0.00 | 0.00 |
| ATOM | 6846 | CD1  | ILE | X | 453 | 59.087 | 52.944 | 30.066 | 0.00 | 0.00 |
| ATOM | 6847 | HD11 | ILE | X | 453 | 58.365 | 53.181 | 30.847 | 0.00 | 0.00 |
| ATOM | 6848 | HD12 | ILE | X | 453 | 60.082 | 52.844 | 30.501 | 0.00 | 0.00 |
| ATOM | 6849 | HD13 | ILE | X | 453 | 59.065 | 53.801 | 29.392 | 0.00 | 0.00 |
| ATOM | 6850 | C    | ILE | X | 453 | 60.127 | 52.318 | 25.654 | 0.00 | 0.00 |
| ATOM | 6851 | O    | ILE | X | 453 | 61.141 | 53.005 | 25.518 | 0.00 | 0.00 |
| ATOM | 6852 | N    | PRO | X | 454 | 59.862 | 51.411 | 24.735 | 0.00 | 0.00 |
| ATOM | 6853 | CD   | PRO | X | 454 | 58.769 | 50.392 | 24.683 | 0.00 | 0.00 |
| ATOM | 6854 | HD2  | PRO | X | 454 | 57.886 | 50.978 | 24.427 | 0.00 | 0.00 |
| ATOM | 6855 | HD3  | PRO | X | 454 | 58.680 | 49.890 | 25.646 | 0.00 | 0.00 |
| ATOM | 6856 | CG   | PRO | X | 454 | 59.210 | 49.290 | 23.715 | 0.00 | 0.00 |
| ATOM | 6857 | HG2  | PRO | X | 454 | 58.392 | 48.747 | 23.241 | 0.00 | 0.00 |
| ATOM | 6858 | HG3  | PRO | X | 454 | 59.820 | 48.530 | 24.204 | 0.00 | 0.00 |
| ATOM | 6859 | CB   | PRO | X | 454 | 60.018 | 50.071 | 22.683 | 0.00 | 0.00 |
| ATOM | 6860 | HB2  | PRO | X | 454 | 59.252 | 50.617 | 22.132 | 0.00 | 0.00 |
| ATOM | 6861 | HB3  | PRO | X | 454 | 60.722 | 49.511 | 22.067 | 0.00 | 0.00 |
| ATOM | 6862 | CA   | PRO | X | 454 | 60.745 | 51.159 | 23.545 | 0.00 | 0.00 |
| ATOM | 6863 | HA   | PRO | X | 454 | 61.731 | 50.841 | 23.882 | 0.00 | 0.00 |
| ATOM | 6864 | C    | PRO | X | 454 | 60.962 | 52.401 | 22.543 | 0.00 | 0.00 |
| ATOM | 6865 | O    | PRO | X | 454 | 61.822 | 52.317 | 21.657 | 0.00 | 0.00 |
| ATOM | 6866 | N    | LEU | X | 455 | 60.248 | 53.547 | 22.666 | 0.00 | 0.00 |
| ATOM | 6867 | H    | LEU | X | 455 | 59.733 | 53.768 | 23.507 | 0.00 | 0.00 |
| ATOM | 6868 | CA   | LEU | X | 455 | 60.138 | 54.459 | 21.521 | 0.00 | 0.00 |
| ATOM | 6869 | HA   | LEU | X | 455 | 60.205 | 53.819 | 20.641 | 0.00 | 0.00 |
| ATOM | 6870 | CB   | LEU | X | 455 | 58.745 | 55.203 | 21.573 | 0.00 | 0.00 |
| ATOM | 6871 | HB2  | LEU | X | 455 | 58.388 | 55.298 | 22.598 | 0.00 | 0.00 |
| ATOM | 6872 | HB3  | LEU | X | 455 | 58.833 | 56.278 | 21.414 | 0.00 | 0.00 |
| ATOM | 6873 | CG   | LEU | X | 455 | 57.586 | 54.631 | 20.730 | 0.00 | 0.00 |
| ATOM | 6874 | HG   | LEU | X | 455 | 57.681 | 54.706 | 19.647 | 0.00 | 0.00 |
| ATOM | 6875 | CD1  | LEU | X | 455 | 57.372 | 53.145 | 21.129 | 0.00 | 0.00 |
| ATOM | 6876 | HD11 | LEU | X | 455 | 57.439 | 52.824 | 22.169 | 0.00 | 0.00 |
| ATOM | 6877 | HD12 | LEU | X | 455 | 56.458 | 52.699 | 20.737 | 0.00 | 0.00 |
| ATOM | 6878 | HD13 | LEU | X | 455 | 58.185 | 52.599 | 20.650 | 0.00 | 0.00 |
| ATOM | 6879 | CD2  | LEU | X | 455 | 56.253 | 55.272 | 21.250 | 0.00 | 0.00 |
| ATOM | 6880 | HD21 | LEU | X | 455 | 56.119 | 55.041 | 22.307 | 0.00 | 0.00 |
| ATOM | 6881 | HD22 | LEU | X | 455 | 56.226 | 56.361 | 21.204 | 0.00 | 0.00 |
| ATOM | 6882 | HD23 | LEU | X | 455 | 55.427 | 54.863 | 20.669 | 0.00 | 0.00 |
| ATOM | 6883 | C    | LEU | X | 455 | 61.340 | 55.446 | 21.327 | 0.00 | 0.00 |
| ATOM | 6884 | O    | LEU | X | 455 | 61.420 | 56.200 | 20.354 | 0.00 | 0.00 |
| ATOM | 6885 | N    | ASP | X | 456 | 62.236 | 55.487 | 22.329 | 0.00 | 0.00 |
| ATOM | 6886 | H    | ASP | X | 456 | 62.106 | 54.912 | 23.149 | 0.00 | 0.00 |
| ATOM | 6887 | CA   | ASP | X | 456 | 63.482 | 56.180 | 22.116 | 0.00 | 0.00 |
| ATOM | 6888 | HA   | ASP | X | 456 | 63.207 | 57.178 | 21.776 | 0.00 | 0.00 |
| ATOM | 6889 | CB   | ASP | X | 456 | 64.298 | 56.457 | 23.405 | 0.00 | 0.00 |
| ATOM | 6890 | HB2  | ASP | X | 456 | 63.844 | 56.954 | 24.262 | 0.00 | 0.00 |
| ATOM | 6891 | HB3  | ASP | X | 456 | 64.692 | 55.533 | 23.827 | 0.00 | 0.00 |
| ATOM | 6892 | CG   | ASP | X | 456 | 65.577 | 57.225 | 23.050 | 0.00 | 0.00 |
| ATOM | 6893 | OD1  | ASP | X | 456 | 65.556 | 58.467 | 22.760 | 0.00 | 0.00 |
| ATOM | 6894 | OD2  | ASP | X | 456 | 66.587 | 56.596 | 22.659 | 0.00 | 0.00 |
| ATOM | 6895 | C    | ASP | X | 456 | 64.294 | 55.461 | 20.938 | 0.00 | 0.00 |
| ATOM | 6896 | O    | ASP | X | 456 | 64.378 | 54.239 | 20.973 | 0.00 | 0.00 |
| ATOM | 6897 | N    | PRO | X | 457 | 64.876 | 56.189 | 19.996 | 0.00 | 0.00 |
| ATOM | 6898 | CD   | PRO | X | 457 | 64.624 | 57.553 | 19.607 | 0.00 | 0.00 |



|      |      |      |     |   |     |        |        |        |      |      |
|------|------|------|-----|---|-----|--------|--------|--------|------|------|
| ATOM | 6899 | HD2  | PRO | X | 457 | 65.285 | 58.213 | 20.169 | 0.00 | 0.00 |
| ATOM | 6900 | HD3  | PRO | X | 457 | 63.587 | 57.860 | 19.742 | 0.00 | 0.00 |
| ATOM | 6901 | CG   | PRO | X | 457 | 65.060 | 57.736 | 18.172 | 0.00 | 0.00 |
| ATOM | 6902 | HG2  | PRO | X | 457 | 65.373 | 58.751 | 17.927 | 0.00 | 0.00 |
| ATOM | 6903 | HG3  | PRO | X | 457 | 64.234 | 57.436 | 17.527 | 0.00 | 0.00 |
| ATOM | 6904 | CB   | PRO | X | 457 | 66.150 | 56.721 | 17.987 | 0.00 | 0.00 |
| ATOM | 6905 | HB2  | PRO | X | 457 | 67.122 | 57.027 | 18.373 | 0.00 | 0.00 |
| ATOM | 6906 | HB3  | PRO | X | 457 | 66.110 | 56.339 | 16.967 | 0.00 | 0.00 |
| ATOM | 6907 | CA   | PRO | X | 457 | 65.680 | 55.594 | 18.911 | 0.00 | 0.00 |
| ATOM | 6908 | HA   | PRO | X | 457 | 65.007 | 54.974 | 18.319 | 0.00 | 0.00 |
| ATOM | 6909 | C    | PRO | X | 457 | 66.770 | 54.665 | 19.181 | 0.00 | 0.00 |
| ATOM | 6910 | O    | PRO | X | 457 | 67.229 | 53.854 | 18.434 | 0.00 | 0.00 |
| ATOM | 6911 | N    | SER | X | 458 | 67.322 | 54.831 | 20.406 | 0.00 | 0.00 |
| ATOM | 6912 | H    | SER | X | 458 | 66.934 | 55.541 | 21.011 | 0.00 | 0.00 |
| ATOM | 6913 | CA   | SER | X | 458 | 68.472 | 54.125 | 20.858 | 0.00 | 0.00 |
| ATOM | 6914 | HA   | SER | X | 458 | 69.134 | 53.807 | 20.053 | 0.00 | 0.00 |
| ATOM | 6915 | CB   | SER | X | 458 | 69.287 | 55.016 | 21.750 | 0.00 | 0.00 |
| ATOM | 6916 | HB2  | SER | X | 458 | 70.355 | 54.799 | 21.748 | 0.00 | 0.00 |
| ATOM | 6917 | HB3  | SER | X | 458 | 69.146 | 56.047 | 21.425 | 0.00 | 0.00 |
| ATOM | 6918 | OG   | SER | X | 458 | 68.832 | 55.070 | 23.076 | 0.00 | 0.00 |
| ATOM | 6919 | HG   | SER | X | 458 | 68.077 | 55.662 | 23.119 | 0.00 | 0.00 |
| ATOM | 6920 | C    | SER | X | 458 | 68.061 | 52.828 | 21.561 | 0.00 | 0.00 |
| ATOM | 6921 | O    | SER | X | 458 | 68.936 | 51.938 | 21.733 | 0.00 | 0.00 |
| ATOM | 6922 | N    | ARG | X | 459 | 66.802 | 52.727 | 22.065 | 0.00 | 0.00 |
| ATOM | 6923 | H    | ARG | X | 459 | 66.108 | 53.394 | 21.759 | 0.00 | 0.00 |
| ATOM | 6924 | CA   | ARG | X | 459 | 66.455 | 51.622 | 22.897 | 0.00 | 0.00 |
| ATOM | 6925 | HA   | ARG | X | 459 | 67.290 | 51.523 | 23.591 | 0.00 | 0.00 |
| ATOM | 6926 | CB   | ARG | X | 459 | 65.098 | 51.919 | 23.644 | 0.00 | 0.00 |
| ATOM | 6927 | HB2  | ARG | X | 459 | 64.378 | 52.207 | 22.878 | 0.00 | 0.00 |
| ATOM | 6928 | HB3  | ARG | X | 459 | 64.759 | 50.954 | 24.020 | 0.00 | 0.00 |
| ATOM | 6929 | CG   | ARG | X | 459 | 65.332 | 52.932 | 24.752 | 0.00 | 0.00 |
| ATOM | 6930 | HG2  | ARG | X | 459 | 66.104 | 52.481 | 25.376 | 0.00 | 0.00 |
| ATOM | 6931 | HG3  | ARG | X | 459 | 65.871 | 53.768 | 24.305 | 0.00 | 0.00 |
| ATOM | 6932 | CD   | ARG | X | 459 | 64.109 | 53.338 | 25.618 | 0.00 | 0.00 |
| ATOM | 6933 | HD2  | ARG | X | 459 | 63.422 | 53.789 | 24.902 | 0.00 | 0.00 |
| ATOM | 6934 | HD3  | ARG | X | 459 | 63.588 | 52.460 | 25.998 | 0.00 | 0.00 |
| ATOM | 6935 | NE   | ARG | X | 459 | 64.450 | 54.313 | 26.691 | 0.00 | 0.00 |
| ATOM | 6936 | HE   | ARG | X | 459 | 65.410 | 54.624 | 26.692 | 0.00 | 0.00 |
| ATOM | 6937 | CZ   | ARG | X | 459 | 63.656 | 54.633 | 27.644 | 0.00 | 0.00 |
| ATOM | 6938 | NH1  | ARG | X | 459 | 62.346 | 54.334 | 27.614 | 0.00 | 0.00 |
| ATOM | 6939 | HH11 | ARG | X | 459 | 61.917 | 54.088 | 26.734 | 0.00 | 0.00 |
| ATOM | 6940 | HH12 | ARG | X | 459 | 61.781 | 54.549 | 28.424 | 0.00 | 0.00 |
| ATOM | 6941 | NH2  | ARG | X | 459 | 64.125 | 55.426 | 28.552 | 0.00 | 0.00 |
| ATOM | 6942 | HH21 | ARG | X | 459 | 65.129 | 55.360 | 28.644 | 0.00 | 0.00 |
| ATOM | 6943 | HH22 | ARG | X | 459 | 63.508 | 55.657 | 29.318 | 0.00 | 0.00 |
| ATOM | 6944 | C    | ARG | X | 459 | 66.420 | 50.375 | 21.977 | 0.00 | 0.00 |
| ATOM | 6945 | O    | ARG | X | 459 | 65.962 | 50.308 | 20.833 | 0.00 | 0.00 |
| ATOM | 6946 | N    | ASN | X | 460 | 66.966 | 49.309 | 22.568 | 0.00 | 0.00 |
| ATOM | 6947 | H    | ASN | X | 460 | 67.279 | 49.431 | 23.521 | 0.00 | 0.00 |
| ATOM | 6948 | CA   | ASN | X | 460 | 67.456 | 48.082 | 21.879 | 0.00 | 0.00 |
| ATOM | 6949 | HA   | ASN | X | 460 | 68.044 | 48.411 | 21.022 | 0.00 | 0.00 |
| ATOM | 6950 | CB   | ASN | X | 460 | 68.358 | 47.326 | 22.914 | 0.00 | 0.00 |
| ATOM | 6951 | HB2  | ASN | X | 460 | 69.096 | 46.777 | 22.329 | 0.00 | 0.00 |
| ATOM | 6952 | HB3  | ASN | X | 460 | 68.953 | 48.027 | 23.499 | 0.00 | 0.00 |
| ATOM | 6953 | CG   | ASN | X | 460 | 67.700 | 46.474 | 23.911 | 0.00 | 0.00 |
| ATOM | 6954 | OD1  | ASN | X | 460 | 67.759 | 46.771 | 25.137 | 0.00 | 0.00 |
| ATOM | 6955 | ND2  | ASN | X | 460 | 67.281 | 45.290 | 23.514 | 0.00 | 0.00 |
| ATOM | 6956 | HD21 | ASN | X | 460 | 66.782 | 44.740 | 24.199 | 0.00 | 0.00 |
| ATOM | 6957 | HD22 | ASN | X | 460 | 67.237 | 44.974 | 22.556 | 0.00 | 0.00 |
| ATOM | 6958 | C    | ASN | X | 460 | 66.355 | 47.152 | 21.346 | 0.00 | 0.00 |
| ATOM | 6959 | O    | ASN | X | 460 | 66.727 | 46.149 | 20.726 | 0.00 | 0.00 |
| ATOM | 6960 | N    | TYR | X | 461 | 65.094 | 47.486 | 21.558 | 0.00 | 0.00 |
| ATOM | 6961 | H    | TYR | X | 461 | 64.924 | 48.413 | 21.921 | 0.00 | 0.00 |
| ATOM | 6962 | CA   | TYR | X | 461 | 63.975 | 46.805 | 20.914 | 0.00 | 0.00 |
| ATOM | 6963 | HA   | TYR | X | 461 | 63.920 | 45.731 | 21.094 | 0.00 | 0.00 |
| ATOM | 6964 | CB   | TYR | X | 461 | 62.613 | 47.409 | 21.381 | 0.00 | 0.00 |
| ATOM | 6965 | HB2  | TYR | X | 461 | 62.693 | 48.495 | 21.325 | 0.00 | 0.00 |
| ATOM | 6966 | HB3  | TYR | X | 461 | 61.753 | 47.038 | 20.824 | 0.00 | 0.00 |
| ATOM | 6967 | CG   | TYR | X | 461 | 62.279 | 47.106 | 22.814 | 0.00 | 0.00 |
| ATOM | 6968 | CD1  | TYR | X | 461 | 62.707 | 47.999 | 23.778 | 0.00 | 0.00 |

|      |      |      |     |   |     |        |        |        |      |      |
|------|------|------|-----|---|-----|--------|--------|--------|------|------|
| ATOM | 6969 | HD1  | TYR | X | 461 | 63.262 | 48.876 | 23.479 | 0.00 | 0.00 |
| ATOM | 6970 | CE1  | TYR | X | 461 | 62.555 | 47.698 | 25.184 | 0.00 | 0.00 |
| ATOM | 6971 | HE1  | TYR | X | 461 | 62.954 | 48.450 | 25.850 | 0.00 | 0.00 |
| ATOM | 6972 | CZ   | TYR | X | 461 | 61.830 | 46.534 | 25.565 | 0.00 | 0.00 |
| ATOM | 6973 | OH   | TYR | X | 461 | 61.580 | 46.172 | 26.835 | 0.00 | 0.00 |
| ATOM | 6974 | HH   | TYR | X | 461 | 60.933 | 45.467 | 26.908 | 0.00 | 0.00 |
| ATOM | 6975 | CE2  | TYR | X | 461 | 61.336 | 45.676 | 24.515 | 0.00 | 0.00 |
| ATOM | 6976 | HE2  | TYR | X | 461 | 60.853 | 44.751 | 24.792 | 0.00 | 0.00 |
| ATOM | 6977 | CD2  | TYR | X | 461 | 61.535 | 45.982 | 23.188 | 0.00 | 0.00 |
| ATOM | 6978 | HD2  | TYR | X | 461 | 61.378 | 45.243 | 22.416 | 0.00 | 0.00 |
| ATOM | 6979 | C    | TYR | X | 461 | 64.130 | 46.967 | 19.372 | 0.00 | 0.00 |
| ATOM | 6980 | O    | TYR | X | 461 | 64.664 | 47.940 | 18.928 | 0.00 | 0.00 |
| ATOM | 6981 | N    | THR | X | 462 | 63.741 | 45.879 | 18.635 | 0.00 | 0.00 |
| ATOM | 6982 | H    | THR | X | 462 | 63.248 | 45.135 | 19.108 | 0.00 | 0.00 |
| ATOM | 6983 | CA   | THR | X | 462 | 63.701 | 45.895 | 17.195 | 0.00 | 0.00 |
| ATOM | 6984 | HA   | THR | X | 462 | 64.539 | 46.459 | 16.786 | 0.00 | 0.00 |
| ATOM | 6985 | CB   | THR | X | 462 | 63.509 | 44.443 | 16.619 | 0.00 | 0.00 |
| ATOM | 6986 | HB   | THR | X | 462 | 63.343 | 44.457 | 15.542 | 0.00 | 0.00 |
| ATOM | 6987 | CG2  | THR | X | 462 | 64.745 | 43.525 | 16.916 | 0.00 | 0.00 |
| ATOM | 6988 | HG21 | THR | X | 462 | 64.897 | 43.411 | 17.989 | 0.00 | 0.00 |
| ATOM | 6989 | HG22 | THR | X | 462 | 64.512 | 42.522 | 16.560 | 0.00 | 0.00 |
| ATOM | 6990 | HG23 | THR | X | 462 | 65.648 | 43.871 | 16.412 | 0.00 | 0.00 |
| ATOM | 6991 | OG1  | THR | X | 462 | 62.352 | 43.905 | 17.108 | 0.00 | 0.00 |
| ATOM | 6992 | HG1  | THR | X | 462 | 62.502 | 43.733 | 18.041 | 0.00 | 0.00 |
| ATOM | 6993 | C    | THR | X | 462 | 62.420 | 46.657 | 16.679 | 0.00 | 0.00 |
| ATOM | 6994 | O    | THR | X | 462 | 61.426 | 46.774 | 17.378 | 0.00 | 0.00 |
| ATOM | 6995 | N    | ALA | X | 463 | 62.565 | 47.026 | 15.391 | 0.00 | 0.00 |
| ATOM | 6996 | H    | ALA | X | 463 | 63.481 | 46.882 | 14.992 | 0.00 | 0.00 |
| ATOM | 6997 | CA   | ALA | X | 463 | 61.491 | 47.634 | 14.547 | 0.00 | 0.00 |
| ATOM | 6998 | HA   | ALA | X | 463 | 61.435 | 48.712 | 14.703 | 0.00 | 0.00 |
| ATOM | 6999 | CB   | ALA | X | 463 | 61.947 | 47.357 | 13.057 | 0.00 | 0.00 |
| ATOM | 7000 | HB1  | ALA | X | 463 | 61.022 | 47.617 | 12.542 | 0.00 | 0.00 |
| ATOM | 7001 | HB2  | ALA | X | 463 | 62.854 | 47.902 | 12.799 | 0.00 | 0.00 |
| ATOM | 7002 | HB3  | ALA | X | 463 | 62.124 | 46.296 | 12.877 | 0.00 | 0.00 |
| ATOM | 7003 | C    | ALA | X | 463 | 60.073 | 47.077 | 14.830 | 0.00 | 0.00 |
| ATOM | 7004 | O    | ALA | X | 463 | 59.126 | 47.841 | 15.195 | 0.00 | 0.00 |
| ATOM | 7005 | N    | GLU | X | 464 | 59.906 | 45.740 | 14.700 | 0.00 | 0.00 |
| ATOM | 7006 | H    | GLU | X | 464 | 60.727 | 45.158 | 14.612 | 0.00 | 0.00 |
| ATOM | 7007 | CA   | GLU | X | 464 | 58.676 | 44.919 | 14.915 | 0.00 | 0.00 |
| ATOM | 7008 | HA   | GLU | X | 464 | 57.827 | 45.339 | 14.374 | 0.00 | 0.00 |
| ATOM | 7009 | CB   | GLU | X | 464 | 58.904 | 43.579 | 14.248 | 0.00 | 0.00 |
| ATOM | 7010 | HB2  | GLU | X | 464 | 57.898 | 43.208 | 14.047 | 0.00 | 0.00 |
| ATOM | 7011 | HB3  | GLU | X | 464 | 59.399 | 43.684 | 13.282 | 0.00 | 0.00 |
| ATOM | 7012 | CG   | GLU | X | 464 | 59.772 | 42.535 | 15.181 | 0.00 | 0.00 |
| ATOM | 7013 | HG2  | GLU | X | 464 | 60.691 | 42.973 | 15.571 | 0.00 | 0.00 |
| ATOM | 7014 | HG3  | GLU | X | 464 | 59.018 | 42.377 | 15.953 | 0.00 | 0.00 |
| ATOM | 7015 | CD   | GLU | X | 464 | 59.998 | 41.193 | 14.536 | 0.00 | 0.00 |
| ATOM | 7016 | OE1  | GLU | X | 464 | 61.055 | 40.636 | 14.902 | 0.00 | 0.00 |
| ATOM | 7017 | OE2  | GLU | X | 464 | 59.296 | 40.709 | 13.593 | 0.00 | 0.00 |
| ATOM | 7018 | C    | GLU | X | 464 | 58.193 | 44.795 | 16.340 | 0.00 | 0.00 |
| ATOM | 7019 | O    | GLU | X | 464 | 57.030 | 44.689 | 16.598 | 0.00 | 0.00 |
| ATOM | 7020 | N    | GLU | X | 465 | 59.100 | 45.035 | 17.270 | 0.00 | 0.00 |
| ATOM | 7021 | H    | GLU | X | 465 | 60.005 | 45.387 | 16.992 | 0.00 | 0.00 |
| ATOM | 7022 | CA   | GLU | X | 465 | 58.722 | 45.150 | 18.681 | 0.00 | 0.00 |
| ATOM | 7023 | HA   | GLU | X | 465 | 57.923 | 44.461 | 18.957 | 0.00 | 0.00 |
| ATOM | 7024 | CB   | GLU | X | 465 | 59.904 | 44.715 | 19.613 | 0.00 | 0.00 |
| ATOM | 7025 | HB2  | GLU | X | 465 | 60.767 | 45.249 | 19.216 | 0.00 | 0.00 |
| ATOM | 7026 | HB3  | GLU | X | 465 | 59.657 | 44.951 | 20.648 | 0.00 | 0.00 |
| ATOM | 7027 | CG   | GLU | X | 465 | 60.054 | 43.210 | 19.461 | 0.00 | 0.00 |
| ATOM | 7028 | HG2  | GLU | X | 465 | 59.289 | 42.800 | 20.121 | 0.00 | 0.00 |
| ATOM | 7029 | HG3  | GLU | X | 465 | 59.945 | 42.884 | 18.427 | 0.00 | 0.00 |
| ATOM | 7030 | CD   | GLU | X | 465 | 61.443 | 42.808 | 20.011 | 0.00 | 0.00 |
| ATOM | 7031 | OE1  | GLU | X | 465 | 62.466 | 43.451 | 19.735 | 0.00 | 0.00 |
| ATOM | 7032 | OE2  | GLU | X | 465 | 61.419 | 41.789 | 20.712 | 0.00 | 0.00 |
| ATOM | 7033 | C    | GLU | X | 465 | 58.338 | 46.588 | 19.028 | 0.00 | 0.00 |
| ATOM | 7034 | O    | GLU | X | 465 | 57.369 | 46.822 | 19.806 | 0.00 | 0.00 |
| ATOM | 7035 | N    | LYS | X | 466 | 58.956 | 47.596 | 18.365 | 0.00 | 0.00 |
| ATOM | 7036 | H    | LYS | X | 466 | 59.586 | 47.433 | 17.592 | 0.00 | 0.00 |
| ATOM | 7037 | CA   | LYS | X | 466 | 58.578 | 49.009 | 18.602 | 0.00 | 0.00 |
| ATOM | 7038 | HA   | LYS | X | 466 | 58.433 | 49.127 | 19.676 | 0.00 | 0.00 |

|      |      |      |     |   |     |        |        |        |      |      |
|------|------|------|-----|---|-----|--------|--------|--------|------|------|
| ATOM | 7039 | CB   | LYS | X | 466 | 59.647 | 50.074 | 18.020 | 0.00 | 0.00 |
| ATOM | 7040 | HB2  | LYS | X | 466 | 59.809 | 50.009 | 16.944 | 0.00 | 0.00 |
| ATOM | 7041 | HB3  | LYS | X | 466 | 59.230 | 51.067 | 18.182 | 0.00 | 0.00 |
| ATOM | 7042 | CG   | LYS | X | 466 | 60.854 | 50.066 | 18.920 | 0.00 | 0.00 |
| ATOM | 7043 | HG2  | LYS | X | 466 | 60.550 | 50.275 | 19.945 | 0.00 | 0.00 |
| ATOM | 7044 | HG3  | LYS | X | 466 | 61.235 | 49.045 | 18.906 | 0.00 | 0.00 |
| ATOM | 7045 | CD   | LYS | X | 466 | 61.960 | 51.023 | 18.478 | 0.00 | 0.00 |
| ATOM | 7046 | HD2  | LYS | X | 466 | 62.272 | 50.745 | 17.471 | 0.00 | 0.00 |
| ATOM | 7047 | HD3  | LYS | X | 466 | 61.491 | 52.004 | 18.553 | 0.00 | 0.00 |
| ATOM | 7048 | CE   | LYS | X | 466 | 63.189 | 50.920 | 19.473 | 0.00 | 0.00 |
| ATOM | 7049 | HE2  | LYS | X | 466 | 62.784 | 50.850 | 20.482 | 0.00 | 0.00 |
| ATOM | 7050 | HE3  | LYS | X | 466 | 63.719 | 50.007 | 19.204 | 0.00 | 0.00 |
| ATOM | 7051 | NZ   | LYS | X | 466 | 64.041 | 52.136 | 19.175 | 0.00 | 0.00 |
| ATOM | 7052 | HZ1  | LYS | X | 466 | 64.290 | 52.048 | 18.201 | 0.00 | 0.00 |
| ATOM | 7053 | HZ2  | LYS | X | 466 | 63.520 | 52.997 | 19.268 | 0.00 | 0.00 |
| ATOM | 7054 | HZ3  | LYS | X | 466 | 64.889 | 52.265 | 19.708 | 0.00 | 0.00 |
| ATOM | 7055 | C    | LYS | X | 466 | 57.240 | 49.395 | 17.901 | 0.00 | 0.00 |
| ATOM | 7056 | O    | LYS | X | 466 | 56.448 | 50.071 | 18.537 | 0.00 | 0.00 |
| ATOM | 7057 | N    | ILE | X | 467 | 56.788 | 48.792 | 16.797 | 0.00 | 0.00 |
| ATOM | 7058 | H    | ILE | X | 467 | 57.337 | 48.122 | 16.278 | 0.00 | 0.00 |
| ATOM | 7059 | CA   | ILE | X | 467 | 55.475 | 49.071 | 16.274 | 0.00 | 0.00 |
| ATOM | 7060 | HA   | ILE | X | 467 | 55.292 | 50.128 | 16.466 | 0.00 | 0.00 |
| ATOM | 7061 | CB   | ILE | X | 467 | 55.337 | 48.675 | 14.761 | 0.00 | 0.00 |
| ATOM | 7062 | HB   | ILE | X | 467 | 56.113 | 49.283 | 14.297 | 0.00 | 0.00 |
| ATOM | 7063 | CG2  | ILE | X | 467 | 55.690 | 47.229 | 14.383 | 0.00 | 0.00 |
| ATOM | 7064 | HG21 | ILE | X | 467 | 55.077 | 46.523 | 14.942 | 0.00 | 0.00 |
| ATOM | 7065 | HG22 | ILE | X | 467 | 55.518 | 47.027 | 13.326 | 0.00 | 0.00 |
| ATOM | 7066 | HG23 | ILE | X | 467 | 56.761 | 47.040 | 14.462 | 0.00 | 0.00 |
| ATOM | 7067 | CG1  | ILE | X | 467 | 53.977 | 49.059 | 14.090 | 0.00 | 0.00 |
| ATOM | 7068 | HG12 | ILE | X | 467 | 53.899 | 48.529 | 13.141 | 0.00 | 0.00 |
| ATOM | 7069 | HG13 | ILE | X | 467 | 53.167 | 48.671 | 14.707 | 0.00 | 0.00 |
| ATOM | 7070 | CD1  | ILE | X | 467 | 53.787 | 50.565 | 13.885 | 0.00 | 0.00 |
| ATOM | 7071 | HD11 | ILE | X | 467 | 52.786 | 50.641 | 13.460 | 0.00 | 0.00 |
| ATOM | 7072 | HD12 | ILE | X | 467 | 53.884 | 50.970 | 14.892 | 0.00 | 0.00 |
| ATOM | 7073 | HD13 | ILE | X | 467 | 54.567 | 50.918 | 13.211 | 0.00 | 0.00 |
| ATOM | 7074 | C    | ILE | X | 467 | 54.522 | 48.204 | 17.101 | 0.00 | 0.00 |
| ATOM | 7075 | O    | ILE | X | 467 | 53.461 | 48.688 | 17.545 | 0.00 | 0.00 |
| ATOM | 7076 | N    | PHE | X | 468 | 54.828 | 46.964 | 17.603 | 0.00 | 0.00 |
| ATOM | 7077 | H    | PHE | X | 468 | 55.649 | 46.439 | 17.339 | 0.00 | 0.00 |
| ATOM | 7078 | CA   | PHE | X | 468 | 53.958 | 46.142 | 18.437 | 0.00 | 0.00 |
| ATOM | 7079 | HA   | PHE | X | 468 | 53.028 | 45.832 | 17.960 | 0.00 | 0.00 |
| ATOM | 7080 | CB   | PHE | X | 468 | 54.620 | 44.750 | 18.667 | 0.00 | 0.00 |
| ATOM | 7081 | HB2  | PHE | X | 468 | 54.511 | 44.210 | 17.727 | 0.00 | 0.00 |
| ATOM | 7082 | HB3  | PHE | X | 468 | 55.682 | 44.939 | 18.827 | 0.00 | 0.00 |
| ATOM | 7083 | CG   | PHE | X | 468 | 54.056 | 43.898 | 19.842 | 0.00 | 0.00 |
| ATOM | 7084 | CD1  | PHE | X | 468 | 52.672 | 43.521 | 19.765 | 0.00 | 0.00 |
| ATOM | 7085 | HD1  | PHE | X | 468 | 52.102 | 43.971 | 18.967 | 0.00 | 0.00 |
| ATOM | 7086 | CE1  | PHE | X | 468 | 52.260 | 42.437 | 20.607 | 0.00 | 0.00 |
| ATOM | 7087 | HE1  | PHE | X | 468 | 51.227 | 42.124 | 20.569 | 0.00 | 0.00 |
| ATOM | 7088 | CZ   | PHE | X | 468 | 53.056 | 41.919 | 21.567 | 0.00 | 0.00 |
| ATOM | 7089 | HZ   | PHE | X | 468 | 52.721 | 41.183 | 22.282 | 0.00 | 0.00 |
| ATOM | 7090 | CE2  | PHE | X | 468 | 54.373 | 42.364 | 21.572 | 0.00 | 0.00 |
| ATOM | 7091 | HE2  | PHE | X | 468 | 55.060 | 41.895 | 22.261 | 0.00 | 0.00 |
| ATOM | 7092 | CD2  | PHE | X | 468 | 54.927 | 43.258 | 20.660 | 0.00 | 0.00 |
| ATOM | 7093 | HD2  | PHE | X | 468 | 55.968 | 43.546 | 20.638 | 0.00 | 0.00 |
| ATOM | 7094 | C    | PHE | X | 468 | 53.646 | 46.705 | 19.791 | 0.00 | 0.00 |
| ATOM | 7095 | O    | PHE | X | 468 | 52.499 | 46.513 | 20.274 | 0.00 | 0.00 |
| ATOM | 7096 | N    | ALA | X | 469 | 54.546 | 47.501 | 20.451 | 0.00 | 0.00 |
| ATOM | 7097 | H    | ALA | X | 469 | 55.506 | 47.477 | 20.139 | 0.00 | 0.00 |
| ATOM | 7098 | CA   | ALA | X | 469 | 54.224 | 48.339 | 21.616 | 0.00 | 0.00 |
| ATOM | 7099 | HA   | ALA | X | 469 | 53.673 | 47.648 | 22.254 | 0.00 | 0.00 |
| ATOM | 7100 | CB   | ALA | X | 469 | 55.550 | 48.927 | 22.322 | 0.00 | 0.00 |
| ATOM | 7101 | HB1  | ALA | X | 469 | 55.919 | 49.663 | 21.609 | 0.00 | 0.00 |
| ATOM | 7102 | HB2  | ALA | X | 469 | 55.310 | 49.426 | 23.261 | 0.00 | 0.00 |
| ATOM | 7103 | HB3  | ALA | X | 469 | 56.274 | 48.128 | 22.484 | 0.00 | 0.00 |
| ATOM | 7104 | C    | ALA | X | 469 | 53.153 | 49.397 | 21.364 | 0.00 | 0.00 |
| ATOM | 7105 | O    | ALA | X | 469 | 52.217 | 49.449 | 22.162 | 0.00 | 0.00 |
| ATOM | 7106 | N    | GLN | X | 470 | 53.180 | 50.039 | 20.255 | 0.00 | 0.00 |
| ATOM | 7107 | H    | GLN | X | 470 | 53.902 | 49.821 | 19.583 | 0.00 | 0.00 |
| ATOM | 7108 | CA   | GLN | X | 470 | 52.290 | 51.070 | 19.882 | 0.00 | 0.00 |

|      |      |      |     |   |     |        |        |        |      |      |
|------|------|------|-----|---|-----|--------|--------|--------|------|------|
| ATOM | 7109 | HA   | GLN | X | 470 | 52.132 | 51.756 | 20.715 | 0.00 | 0.00 |
| ATOM | 7110 | CB   | GLN | X | 470 | 52.882 | 51.847 | 18.707 | 0.00 | 0.00 |
| ATOM | 7111 | HB2  | GLN | X | 470 | 53.026 | 51.235 | 17.816 | 0.00 | 0.00 |
| ATOM | 7112 | HB3  | GLN | X | 470 | 52.195 | 52.667 | 18.496 | 0.00 | 0.00 |
| ATOM | 7113 | CG   | GLN | X | 470 | 54.179 | 52.601 | 18.907 | 0.00 | 0.00 |
| ATOM | 7114 | HG2  | GLN | X | 470 | 54.149 | 53.381 | 19.667 | 0.00 | 0.00 |
| ATOM | 7115 | HG3  | GLN | X | 470 | 54.898 | 51.874 | 19.284 | 0.00 | 0.00 |
| ATOM | 7116 | CD   | GLN | X | 470 | 54.761 | 53.184 | 17.632 | 0.00 | 0.00 |
| ATOM | 7117 | OE1  | GLN | X | 470 | 54.284 | 54.186 | 17.084 | 0.00 | 0.00 |
| ATOM | 7118 | NE2  | GLN | X | 470 | 55.764 | 52.609 | 17.097 | 0.00 | 0.00 |
| ATOM | 7119 | HE21 | GLN | X | 470 | 56.007 | 53.002 | 16.199 | 0.00 | 0.00 |
| ATOM | 7120 | HE22 | GLN | X | 470 | 56.241 | 51.796 | 17.461 | 0.00 | 0.00 |
| ATOM | 7121 | C    | GLN | X | 470 | 50.913 | 50.531 | 19.563 | 0.00 | 0.00 |
| ATOM | 7122 | O    | GLN | X | 470 | 49.942 | 51.180 | 19.826 | 0.00 | 0.00 |
| ATOM | 7123 | N    | ARG | X | 471 | 50.764 | 49.318 | 19.173 | 0.00 | 0.00 |
| ATOM | 7124 | H    | ARG | X | 471 | 51.611 | 48.780 | 19.065 | 0.00 | 0.00 |
| ATOM | 7125 | CA   | ARG | X | 471 | 49.532 | 48.634 | 19.040 | 0.00 | 0.00 |
| ATOM | 7126 | HA   | ARG | X | 471 | 48.891 | 49.308 | 18.472 | 0.00 | 0.00 |
| ATOM | 7127 | CB   | ARG | X | 471 | 49.856 | 47.472 | 18.063 | 0.00 | 0.00 |
| ATOM | 7128 | HB2  | ARG | X | 471 | 49.932 | 47.963 | 17.093 | 0.00 | 0.00 |
| ATOM | 7129 | HB3  | ARG | X | 471 | 50.710 | 46.863 | 18.360 | 0.00 | 0.00 |
| ATOM | 7130 | CG   | ARG | X | 471 | 48.779 | 46.361 | 17.742 | 0.00 | 0.00 |
| ATOM | 7131 | HG2  | ARG | X | 471 | 48.571 | 45.818 | 18.664 | 0.00 | 0.00 |
| ATOM | 7132 | HG3  | ARG | X | 471 | 47.871 | 46.823 | 17.353 | 0.00 | 0.00 |
| ATOM | 7133 | CD   | ARG | X | 471 | 49.303 | 45.383 | 16.676 | 0.00 | 0.00 |
| ATOM | 7134 | HD2  | ARG | X | 471 | 49.371 | 45.877 | 15.707 | 0.00 | 0.00 |
| ATOM | 7135 | HD3  | ARG | X | 471 | 50.282 | 45.062 | 17.030 | 0.00 | 0.00 |
| ATOM | 7136 | NE   | ARG | X | 471 | 48.527 | 44.182 | 16.689 | 0.00 | 0.00 |
| ATOM | 7137 | HE   | ARG | X | 471 | 47.535 | 44.304 | 16.543 | 0.00 | 0.00 |
| ATOM | 7138 | CZ   | ARG | X | 471 | 48.884 | 42.939 | 17.169 | 0.00 | 0.00 |
| ATOM | 7139 | NH1  | ARG | X | 471 | 50.119 | 42.536 | 17.294 | 0.00 | 0.00 |
| ATOM | 7140 | HH11 | ARG | X | 471 | 50.871 | 43.032 | 16.837 | 0.00 | 0.00 |
| ATOM | 7141 | HH12 | ARG | X | 471 | 50.377 | 41.664 | 17.735 | 0.00 | 0.00 |
| ATOM | 7142 | NH2  | ARG | X | 471 | 47.932 | 42.112 | 17.577 | 0.00 | 0.00 |
| ATOM | 7143 | HH21 | ARG | X | 471 | 46.987 | 42.458 | 17.658 | 0.00 | 0.00 |
| ATOM | 7144 | HH22 | ARG | X | 471 | 48.108 | 41.210 | 17.997 | 0.00 | 0.00 |
| ATOM | 7145 | C    | ARG | X | 471 | 48.785 | 48.205 | 20.285 | 0.00 | 0.00 |
| ATOM | 7146 | O    | ARG | X | 471 | 47.574 | 48.217 | 20.463 | 0.00 | 0.00 |
| ATOM | 7147 | N    | LEU | X | 472 | 49.545 | 47.792 | 21.323 | 0.00 | 0.00 |
| ATOM | 7148 | H    | LEU | X | 472 | 50.518 | 47.617 | 21.115 | 0.00 | 0.00 |
| ATOM | 7149 | CA   | LEU | X | 472 | 49.128 | 47.645 | 22.693 | 0.00 | 0.00 |
| ATOM | 7150 | HA   | LEU | X | 472 | 48.213 | 47.062 | 22.802 | 0.00 | 0.00 |
| ATOM | 7151 | CB   | LEU | X | 472 | 50.179 | 46.868 | 23.501 | 0.00 | 0.00 |
| ATOM | 7152 | HB2  | LEU | X | 472 | 51.085 | 47.473 | 23.523 | 0.00 | 0.00 |
| ATOM | 7153 | HB3  | LEU | X | 472 | 49.771 | 46.757 | 24.505 | 0.00 | 0.00 |
| ATOM | 7154 | CG   | LEU | X | 472 | 50.599 | 45.494 | 22.922 | 0.00 | 0.00 |
| ATOM | 7155 | HG   | LEU | X | 472 | 51.043 | 45.652 | 21.939 | 0.00 | 0.00 |
| ATOM | 7156 | CD1  | LEU | X | 472 | 51.706 | 45.080 | 23.902 | 0.00 | 0.00 |
| ATOM | 7157 | HD11 | LEU | X | 472 | 52.672 | 45.038 | 23.398 | 0.00 | 0.00 |
| ATOM | 7158 | HD12 | LEU | X | 472 | 51.664 | 45.545 | 24.886 | 0.00 | 0.00 |
| ATOM | 7159 | HD13 | LEU | X | 472 | 51.512 | 44.059 | 24.231 | 0.00 | 0.00 |
| ATOM | 7160 | CD2  | LEU | X | 472 | 49.408 | 44.520 | 22.823 | 0.00 | 0.00 |
| ATOM | 7161 | HD21 | LEU | X | 472 | 49.746 | 43.545 | 22.473 | 0.00 | 0.00 |
| ATOM | 7162 | HD22 | LEU | X | 472 | 48.795 | 44.362 | 23.711 | 0.00 | 0.00 |
| ATOM | 7163 | HD23 | LEU | X | 472 | 48.835 | 44.862 | 21.961 | 0.00 | 0.00 |
| ATOM | 7164 | C    | LEU | X | 472 | 48.835 | 48.904 | 23.531 | 0.00 | 0.00 |
| ATOM | 7165 | O    | LEU | X | 472 | 47.947 | 49.022 | 24.393 | 0.00 | 0.00 |
| ATOM | 7166 | N    | MET | X | 473 | 49.556 | 50.019 | 23.265 | 0.00 | 0.00 |
| ATOM | 7167 | H    | MET | X | 473 | 50.470 | 49.900 | 22.852 | 0.00 | 0.00 |
| ATOM | 7168 | CA   | MET | X | 473 | 49.148 | 51.416 | 23.729 | 0.00 | 0.00 |
| ATOM | 7169 | HA   | MET | X | 473 | 49.102 | 51.549 | 24.810 | 0.00 | 0.00 |
| ATOM | 7170 | CB   | MET | X | 473 | 50.285 | 52.308 | 23.129 | 0.00 | 0.00 |
| ATOM | 7171 | HB2  | MET | X | 473 | 50.422 | 52.216 | 22.051 | 0.00 | 0.00 |
| ATOM | 7172 | HB3  | MET | X | 473 | 50.004 | 53.348 | 23.295 | 0.00 | 0.00 |
| ATOM | 7173 | CG   | MET | X | 473 | 51.591 | 51.976 | 23.945 | 0.00 | 0.00 |
| ATOM | 7174 | HG2  | MET | X | 473 | 51.452 | 52.190 | 25.005 | 0.00 | 0.00 |
| ATOM | 7175 | HG3  | MET | X | 473 | 51.881 | 50.926 | 23.966 | 0.00 | 0.00 |
| ATOM | 7176 | SD   | MET | X | 473 | 53.000 | 52.731 | 23.217 | 0.00 | 0.00 |
| ATOM | 7177 | CE   | MET | X | 473 | 52.843 | 54.398 | 23.777 | 0.00 | 0.00 |
| ATOM | 7178 | HE1  | MET | X | 473 | 53.698 | 54.963 | 23.405 | 0.00 | 0.00 |

|      |      |      |     |   |     |        |        |        |      |      |
|------|------|------|-----|---|-----|--------|--------|--------|------|------|
| ATOM | 7179 | HE2  | MET | X | 473 | 51.969 | 54.799 | 23.265 | 0.00 | 0.00 |
| ATOM | 7180 | HE3  | MET | X | 473 | 52.792 | 54.364 | 24.865 | 0.00 | 0.00 |
| ATOM | 7181 | C    | MET | X | 473 | 47.748 | 51.786 | 23.195 | 0.00 | 0.00 |
| ATOM | 7182 | O    | MET | X | 473 | 46.950 | 52.298 | 23.953 | 0.00 | 0.00 |
| ATOM | 7183 | N    | ARG | X | 474 | 47.597 | 51.489 | 21.900 | 0.00 | 0.00 |
| ATOM | 7184 | H    | ARG | X | 474 | 48.380 | 51.050 | 21.438 | 0.00 | 0.00 |
| ATOM | 7185 | CA   | ARG | X | 474 | 46.319 | 51.603 | 21.276 | 0.00 | 0.00 |
| ATOM | 7186 | HA   | ARG | X | 474 | 45.983 | 52.639 | 21.320 | 0.00 | 0.00 |
| ATOM | 7187 | CB   | ARG | X | 474 | 46.425 | 51.430 | 19.736 | 0.00 | 0.00 |
| ATOM | 7188 | HB2  | ARG | X | 474 | 47.304 | 52.016 | 19.466 | 0.00 | 0.00 |
| ATOM | 7189 | HB3  | ARG | X | 474 | 46.836 | 50.444 | 19.519 | 0.00 | 0.00 |
| ATOM | 7190 | CG   | ARG | X | 474 | 45.184 | 51.697 | 18.878 | 0.00 | 0.00 |
| ATOM | 7191 | HG2  | ARG | X | 474 | 45.406 | 51.407 | 17.851 | 0.00 | 0.00 |
| ATOM | 7192 | HG3  | ARG | X | 474 | 44.304 | 51.175 | 19.254 | 0.00 | 0.00 |
| ATOM | 7193 | CD   | ARG | X | 474 | 44.934 | 53.167 | 18.845 | 0.00 | 0.00 |
| ATOM | 7194 | HD2  | ARG | X | 474 | 44.599 | 53.509 | 19.824 | 0.00 | 0.00 |
| ATOM | 7195 | HD3  | ARG | X | 474 | 45.808 | 53.743 | 18.542 | 0.00 | 0.00 |
| ATOM | 7196 | NE   | ARG | X | 474 | 43.889 | 53.533 | 17.903 | 0.00 | 0.00 |
| ATOM | 7197 | HE   | ARG | X | 474 | 43.546 | 52.814 | 17.282 | 0.00 | 0.00 |
| ATOM | 7198 | CZ   | ARG | X | 474 | 43.509 | 54.809 | 17.631 | 0.00 | 0.00 |
| ATOM | 7199 | NH1  | ARG | X | 474 | 44.178 | 55.823 | 18.175 | 0.00 | 0.00 |
| ATOM | 7200 | HH11 | ARG | X | 474 | 44.963 | 55.679 | 18.794 | 0.00 | 0.00 |
| ATOM | 7201 | HH12 | ARG | X | 474 | 43.936 | 56.734 | 17.813 | 0.00 | 0.00 |
| ATOM | 7202 | NH2  | ARG | X | 474 | 42.638 | 55.061 | 16.711 | 0.00 | 0.00 |
| ATOM | 7203 | HH21 | ARG | X | 474 | 42.211 | 54.294 | 16.212 | 0.00 | 0.00 |
| ATOM | 7204 | HH22 | ARG | X | 474 | 42.177 | 55.959 | 16.738 | 0.00 | 0.00 |
| ATOM | 7205 | C    | ARG | X | 474 | 45.198 | 50.723 | 21.873 | 0.00 | 0.00 |
| ATOM | 7206 | O    | ARG | X | 474 | 44.183 | 51.202 | 22.183 | 0.00 | 0.00 |
| ATOM | 7207 | N    | TYR | X | 475 | 45.488 | 49.442 | 22.123 | 0.00 | 0.00 |
| ATOM | 7208 | H    | TYR | X | 475 | 46.282 | 48.973 | 21.711 | 0.00 | 0.00 |
| ATOM | 7209 | CA   | TYR | X | 475 | 44.492 | 48.594 | 22.797 | 0.00 | 0.00 |
| ATOM | 7210 | HA   | TYR | X | 475 | 43.595 | 48.559 | 22.179 | 0.00 | 0.00 |
| ATOM | 7211 | CB   | TYR | X | 475 | 45.057 | 47.150 | 22.854 | 0.00 | 0.00 |
| ATOM | 7212 | HB2  | TYR | X | 475 | 46.091 | 47.266 | 23.180 | 0.00 | 0.00 |
| ATOM | 7213 | HB3  | TYR | X | 475 | 44.382 | 46.647 | 23.545 | 0.00 | 0.00 |
| ATOM | 7214 | CG   | TYR | X | 475 | 45.244 | 46.287 | 21.588 | 0.00 | 0.00 |
| ATOM | 7215 | CD1  | TYR | X | 475 | 44.700 | 46.721 | 20.355 | 0.00 | 0.00 |
| ATOM | 7216 | HD1  | TYR | X | 475 | 44.186 | 47.664 | 20.245 | 0.00 | 0.00 |
| ATOM | 7217 | CE1  | TYR | X | 475 | 44.787 | 45.886 | 19.245 | 0.00 | 0.00 |
| ATOM | 7218 | HE1  | TYR | X | 475 | 44.348 | 46.154 | 18.295 | 0.00 | 0.00 |
| ATOM | 7219 | CZ   | TYR | X | 475 | 45.632 | 44.744 | 19.237 | 0.00 | 0.00 |
| ATOM | 7220 | OH   | TYR | X | 475 | 45.743 | 43.962 | 18.123 | 0.00 | 0.00 |
| ATOM | 7221 | HH   | TYR | X | 475 | 45.008 | 44.095 | 17.519 | 0.00 | 0.00 |
| ATOM | 7222 | CE2  | TYR | X | 475 | 46.214 | 44.317 | 20.458 | 0.00 | 0.00 |
| ATOM | 7223 | HE2  | TYR | X | 475 | 46.746 | 43.384 | 20.570 | 0.00 | 0.00 |
| ATOM | 7224 | CD2  | TYR | X | 475 | 45.988 | 45.056 | 21.649 | 0.00 | 0.00 |
| ATOM | 7225 | HD2  | TYR | X | 475 | 46.420 | 44.618 | 22.536 | 0.00 | 0.00 |
| ATOM | 7226 | C    | TYR | X | 475 | 44.030 | 49.196 | 24.160 | 0.00 | 0.00 |
| ATOM | 7227 | O    | TYR | X | 475 | 42.836 | 49.170 | 24.452 | 0.00 | 0.00 |
| ATOM | 7228 | N    | TRP | X | 476 | 44.925 | 49.685 | 24.990 | 0.00 | 0.00 |
| ATOM | 7229 | H    | TRP | X | 476 | 45.905 | 49.793 | 24.770 | 0.00 | 0.00 |
| ATOM | 7230 | CA   | TRP | X | 476 | 44.607 | 50.247 | 26.383 | 0.00 | 0.00 |
| ATOM | 7231 | HA   | TRP | X | 476 | 43.901 | 49.635 | 26.944 | 0.00 | 0.00 |
| ATOM | 7232 | CB   | TRP | X | 476 | 45.838 | 50.295 | 27.241 | 0.00 | 0.00 |
| ATOM | 7233 | HB2  | TRP | X | 476 | 46.720 | 50.559 | 26.657 | 0.00 | 0.00 |
| ATOM | 7234 | HB3  | TRP | X | 476 | 45.566 | 51.054 | 27.975 | 0.00 | 0.00 |
| ATOM | 7235 | CG   | TRP | X | 476 | 46.193 | 49.021 | 27.991 | 0.00 | 0.00 |
| ATOM | 7236 | CD1  | TRP | X | 476 | 46.594 | 48.998 | 29.316 | 0.00 | 0.00 |
| ATOM | 7237 | HD1  | TRP | X | 476 | 46.565 | 49.883 | 29.934 | 0.00 | 0.00 |
| ATOM | 7238 | NE1  | TRP | X | 476 | 46.868 | 47.714 | 29.687 | 0.00 | 0.00 |
| ATOM | 7239 | HE1  | TRP | X | 476 | 47.193 | 47.525 | 30.624 | 0.00 | 0.00 |
| ATOM | 7240 | CE2  | TRP | X | 476 | 46.685 | 46.826 | 28.688 | 0.00 | 0.00 |
| ATOM | 7241 | CZ2  | TRP | X | 476 | 46.792 | 45.394 | 28.650 | 0.00 | 0.00 |
| ATOM | 7242 | HZ2  | TRP | X | 476 | 46.929 | 44.841 | 29.568 | 0.00 | 0.00 |
| ATOM | 7243 | CH2  | TRP | X | 476 | 46.797 | 44.819 | 27.374 | 0.00 | 0.00 |
| ATOM | 7244 | HH2  | TRP | X | 476 | 46.947 | 43.758 | 27.237 | 0.00 | 0.00 |
| ATOM | 7245 | CZ3  | TRP | X | 476 | 46.513 | 45.641 | 26.258 | 0.00 | 0.00 |
| ATOM | 7246 | HZ3  | TRP | X | 476 | 46.461 | 45.134 | 25.306 | 0.00 | 0.00 |
| ATOM | 7247 | CE3  | TRP | X | 476 | 46.138 | 46.964 | 26.335 | 0.00 | 0.00 |
| ATOM | 7248 | HE3  | TRP | X | 476 | 45.952 | 47.541 | 25.441 | 0.00 | 0.00 |

|      |      |      |     |   |     |        |        |        |      |      |
|------|------|------|-----|---|-----|--------|--------|--------|------|------|
| ATOM | 7249 | CD2  | TRP | X | 476 | 46.279 | 47.603 | 27.570 | 0.00 | 0.00 |
| ATOM | 7250 | C    | TRP | X | 476 | 43.885 | 51.606 | 26.312 | 0.00 | 0.00 |
| ATOM | 7251 | O    | TRP | X | 476 | 42.955 | 51.809 | 27.053 | 0.00 | 0.00 |
| ATOM | 7252 | N    | ALA | X | 477 | 44.348 | 52.469 | 25.379 | 0.00 | 0.00 |
| ATOM | 7253 | H    | ALA | X | 477 | 45.159 | 52.119 | 24.888 | 0.00 | 0.00 |
| ATOM | 7254 | CA   | ALA | X | 477 | 43.691 | 53.769 | 25.050 | 0.00 | 0.00 |
| ATOM | 7255 | HA   | ALA | X | 477 | 43.591 | 54.356 | 25.963 | 0.00 | 0.00 |
| ATOM | 7256 | CB   | ALA | X | 477 | 44.594 | 54.602 | 24.192 | 0.00 | 0.00 |
| ATOM | 7257 | HB1  | ALA | X | 477 | 44.736 | 54.150 | 23.211 | 0.00 | 0.00 |
| ATOM | 7258 | HB2  | ALA | X | 477 | 44.112 | 55.558 | 23.986 | 0.00 | 0.00 |
| ATOM | 7259 | HB3  | ALA | X | 477 | 45.607 | 54.759 | 24.563 | 0.00 | 0.00 |
| ATOM | 7260 | C    | ALA | X | 477 | 42.316 | 53.509 | 24.484 | 0.00 | 0.00 |
| ATOM | 7261 | O    | ALA | X | 477 | 41.360 | 54.216 | 24.846 | 0.00 | 0.00 |
| ATOM | 7262 | N    | ASN | X | 478 | 42.138 | 52.377 | 23.744 | 0.00 | 0.00 |
| ATOM | 7263 | H    | ASN | X | 478 | 42.957 | 51.845 | 23.486 | 0.00 | 0.00 |
| ATOM | 7264 | CA   | ASN | X | 478 | 40.873 | 52.083 | 23.082 | 0.00 | 0.00 |
| ATOM | 7265 | HA   | ASN | X | 478 | 40.568 | 53.028 | 22.633 | 0.00 | 0.00 |
| ATOM | 7266 | CB   | ASN | X | 478 | 41.027 | 50.989 | 21.977 | 0.00 | 0.00 |
| ATOM | 7267 | HB2  | ASN | X | 478 | 41.812 | 50.276 | 22.229 | 0.00 | 0.00 |
| ATOM | 7268 | HB3  | ASN | X | 478 | 40.031 | 50.549 | 22.033 | 0.00 | 0.00 |
| ATOM | 7269 | CG   | ASN | X | 478 | 41.251 | 51.572 | 20.606 | 0.00 | 0.00 |
| ATOM | 7270 | OD1  | ASN | X | 478 | 41.319 | 52.776 | 20.336 | 0.00 | 0.00 |
| ATOM | 7271 | ND2  | ASN | X | 478 | 41.286 | 50.761 | 19.595 | 0.00 | 0.00 |
| ATOM | 7272 | HD21 | ASN | X | 478 | 41.388 | 51.095 | 18.648 | 0.00 | 0.00 |
| ATOM | 7273 | HD22 | ASN | X | 478 | 41.433 | 49.764 | 19.667 | 0.00 | 0.00 |
| ATOM | 7274 | C    | ASN | X | 478 | 39.794 | 51.513 | 24.029 | 0.00 | 0.00 |
| ATOM | 7275 | O    | ASN | X | 478 | 38.623 | 51.947 | 24.063 | 0.00 | 0.00 |
| ATOM | 7276 | N    | PHE | X | 479 | 40.231 | 50.679 | 25.025 | 0.00 | 0.00 |
| ATOM | 7277 | H    | PHE | X | 479 | 41.101 | 50.212 | 24.813 | 0.00 | 0.00 |
| ATOM | 7278 | CA   | PHE | X | 479 | 39.519 | 50.487 | 26.283 | 0.00 | 0.00 |
| ATOM | 7279 | HA   | PHE | X | 479 | 38.594 | 49.992 | 25.988 | 0.00 | 0.00 |
| ATOM | 7280 | CB   | PHE | X | 479 | 40.219 | 49.452 | 27.111 | 0.00 | 0.00 |
| ATOM | 7281 | HB2  | PHE | X | 479 | 40.508 | 48.680 | 26.398 | 0.00 | 0.00 |
| ATOM | 7282 | HB3  | PHE | X | 479 | 41.183 | 49.814 | 27.467 | 0.00 | 0.00 |
| ATOM | 7283 | CG   | PHE | X | 479 | 39.378 | 48.954 | 28.265 | 0.00 | 0.00 |
| ATOM | 7284 | CD1  | PHE | X | 479 | 38.345 | 47.997 | 28.051 | 0.00 | 0.00 |
| ATOM | 7285 | HD1  | PHE | X | 479 | 38.024 | 47.713 | 27.060 | 0.00 | 0.00 |
| ATOM | 7286 | CE1  | PHE | X | 479 | 37.592 | 47.612 | 29.142 | 0.00 | 0.00 |
| ATOM | 7287 | HE1  | PHE | X | 479 | 36.783 | 46.906 | 29.026 | 0.00 | 0.00 |
| ATOM | 7288 | CZ   | PHE | X | 479 | 37.954 | 48.099 | 30.397 | 0.00 | 0.00 |
| ATOM | 7289 | HZ   | PHE | X | 479 | 37.485 | 47.754 | 31.307 | 0.00 | 0.00 |
| ATOM | 7290 | CE2  | PHE | X | 479 | 38.999 | 48.977 | 30.582 | 0.00 | 0.00 |
| ATOM | 7291 | HE2  | PHE | X | 479 | 39.285 | 49.371 | 31.546 | 0.00 | 0.00 |
| ATOM | 7292 | CD2  | PHE | X | 479 | 39.745 | 49.391 | 29.524 | 0.00 | 0.00 |
| ATOM | 7293 | HD2  | PHE | X | 479 | 40.555 | 50.103 | 29.568 | 0.00 | 0.00 |
| ATOM | 7294 | C    | PHE | X | 479 | 39.120 | 51.764 | 27.052 | 0.00 | 0.00 |
| ATOM | 7295 | O    | PHE | X | 479 | 37.950 | 51.860 | 27.385 | 0.00 | 0.00 |
| ATOM | 7296 | N    | ALA | X | 480 | 39.998 | 52.729 | 27.276 | 0.00 | 0.00 |
| ATOM | 7297 | H    | ALA | X | 480 | 40.952 | 52.460 | 27.081 | 0.00 | 0.00 |
| ATOM | 7298 | CA   | ALA | X | 480 | 39.641 | 54.005 | 27.873 | 0.00 | 0.00 |
| ATOM | 7299 | HA   | ALA | X | 480 | 39.239 | 53.865 | 28.877 | 0.00 | 0.00 |
| ATOM | 7300 | CB   | ALA | X | 480 | 40.964 | 54.780 | 28.099 | 0.00 | 0.00 |
| ATOM | 7301 | HB1  | ALA | X | 480 | 41.761 | 54.205 | 28.570 | 0.00 | 0.00 |
| ATOM | 7302 | HB2  | ALA | X | 480 | 41.413 | 55.132 | 27.170 | 0.00 | 0.00 |
| ATOM | 7303 | HB3  | ALA | X | 480 | 40.916 | 55.665 | 28.734 | 0.00 | 0.00 |
| ATOM | 7304 | C    | ALA | X | 480 | 38.643 | 54.921 | 27.083 | 0.00 | 0.00 |
| ATOM | 7305 | O    | ALA | X | 480 | 37.887 | 55.619 | 27.784 | 0.00 | 0.00 |
| ATOM | 7306 | N    | ARG | X | 481 | 38.706 | 54.940 | 25.743 | 0.00 | 0.00 |
| ATOM | 7307 | H    | ARG | X | 481 | 39.491 | 54.440 | 25.351 | 0.00 | 0.00 |
| ATOM | 7308 | CA   | ARG | X | 481 | 37.893 | 55.701 | 24.779 | 0.00 | 0.00 |
| ATOM | 7309 | HA   | ARG | X | 481 | 37.857 | 56.753 | 25.063 | 0.00 | 0.00 |
| ATOM | 7310 | CB   | ARG | X | 481 | 38.426 | 55.639 | 23.363 | 0.00 | 0.00 |
| ATOM | 7311 | HB2  | ARG | X | 481 | 38.721 | 54.611 | 23.148 | 0.00 | 0.00 |
| ATOM | 7312 | HB3  | ARG | X | 481 | 37.572 | 56.029 | 22.810 | 0.00 | 0.00 |
| ATOM | 7313 | CG   | ARG | X | 481 | 39.584 | 56.578 | 23.020 | 0.00 | 0.00 |
| ATOM | 7314 | HG2  | ARG | X | 481 | 39.196 | 57.569 | 23.255 | 0.00 | 0.00 |
| ATOM | 7315 | HG3  | ARG | X | 481 | 40.383 | 56.391 | 23.737 | 0.00 | 0.00 |
| ATOM | 7316 | CD   | ARG | X | 481 | 40.114 | 56.506 | 21.593 | 0.00 | 0.00 |
| ATOM | 7317 | HD2  | ARG | X | 481 | 39.968 | 55.460 | 21.324 | 0.00 | 0.00 |
| ATOM | 7318 | HD3  | ARG | X | 481 | 39.438 | 57.091 | 20.969 | 0.00 | 0.00 |

|      |      |      |     |   |     |        |        |        |      |      |
|------|------|------|-----|---|-----|--------|--------|--------|------|------|
| ATOM | 7319 | NE   | ARG | X | 481 | 41.435 | 57.088 | 21.527 | 0.00 | 0.00 |
| ATOM | 7320 | HE   | ARG | X | 481 | 41.449 | 58.070 | 21.766 | 0.00 | 0.00 |
| ATOM | 7321 | CZ   | ARG | X | 481 | 42.578 | 56.466 | 21.285 | 0.00 | 0.00 |
| ATOM | 7322 | NH1  | ARG | X | 481 | 42.750 | 55.177 | 21.213 | 0.00 | 0.00 |
| ATOM | 7323 | HH11 | ARG | X | 481 | 41.995 | 54.507 | 21.212 | 0.00 | 0.00 |
| ATOM | 7324 | HH12 | ARG | X | 481 | 43.675 | 54.773 | 21.242 | 0.00 | 0.00 |
| ATOM | 7325 | NH2  | ARG | X | 481 | 43.715 | 57.090 | 21.174 | 0.00 | 0.00 |
| ATOM | 7326 | HH21 | ARG | X | 481 | 43.751 | 58.020 | 21.565 | 0.00 | 0.00 |
| ATOM | 7327 | HH22 | ARG | X | 481 | 44.506 | 56.555 | 20.844 | 0.00 | 0.00 |
| ATOM | 7328 | C    | ARG | X | 481 | 36.390 | 55.209 | 24.867 | 0.00 | 0.00 |
| ATOM | 7329 | O    | ARG | X | 481 | 35.548 | 56.023 | 25.263 | 0.00 | 0.00 |
| ATOM | 7330 | N    | THR | X | 482 | 36.166 | 53.991 | 24.387 | 0.00 | 0.00 |
| ATOM | 7331 | H    | THR | X | 482 | 36.955 | 53.554 | 23.932 | 0.00 | 0.00 |
| ATOM | 7332 | CA   | THR | X | 482 | 34.843 | 53.326 | 24.137 | 0.00 | 0.00 |
| ATOM | 7333 | HA   | THR | X | 482 | 34.084 | 54.105 | 24.209 | 0.00 | 0.00 |
| ATOM | 7334 | CB   | THR | X | 482 | 34.651 | 52.762 | 22.737 | 0.00 | 0.00 |
| ATOM | 7335 | HB   | THR | X | 482 | 33.783 | 52.115 | 22.858 | 0.00 | 0.00 |
| ATOM | 7336 | CG2  | THR | X | 482 | 34.488 | 53.833 | 21.724 | 0.00 | 0.00 |
| ATOM | 7337 | HG21 | THR | X | 482 | 35.377 | 54.459 | 21.794 | 0.00 | 0.00 |
| ATOM | 7338 | HG22 | THR | X | 482 | 34.245 | 53.346 | 20.779 | 0.00 | 0.00 |
| ATOM | 7339 | HG23 | THR | X | 482 | 33.699 | 54.550 | 21.952 | 0.00 | 0.00 |
| ATOM | 7340 | OG1  | THR | X | 482 | 35.697 | 51.857 | 22.447 | 0.00 | 0.00 |
| ATOM | 7341 | HG1  | THR | X | 482 | 35.601 | 51.624 | 21.520 | 0.00 | 0.00 |
| ATOM | 7342 | C    | THR | X | 482 | 34.498 | 52.177 | 25.121 | 0.00 | 0.00 |
| ATOM | 7343 | O    | THR | X | 482 | 33.391 | 52.110 | 25.556 | 0.00 | 0.00 |
| ATOM | 7344 | N    | GLY | X | 483 | 35.457 | 51.454 | 25.615 | 0.00 | 0.00 |
| ATOM | 7345 | H    | GLY | X | 483 | 36.394 | 51.714 | 25.344 | 0.00 | 0.00 |
| ATOM | 7346 | CA   | GLY | X | 483 | 35.330 | 50.164 | 26.447 | 0.00 | 0.00 |
| ATOM | 7347 | HA2  | GLY | X | 483 | 36.069 | 50.206 | 27.256 | 0.00 | 0.00 |
| ATOM | 7348 | HA3  | GLY | X | 483 | 34.254 | 50.019 | 26.822 | 0.00 | 0.00 |
| ATOM | 7349 | C    | GLY | X | 483 | 35.450 | 48.893 | 25.637 | 0.00 | 0.00 |
| ATOM | 7350 | O    | GLY | X | 483 | 35.635 | 47.811 | 26.252 | 0.00 | 0.00 |
| ATOM | 7351 | N    | ASP | X | 484 | 35.516 | 49.025 | 24.287 | 0.00 | 0.00 |
| ATOM | 7352 | H    | ASP | X | 484 | 35.530 | 49.965 | 23.916 | 0.00 | 0.00 |
| ATOM | 7353 | CA   | ASP | X | 484 | 36.107 | 48.006 | 23.413 | 0.00 | 0.00 |
| ATOM | 7354 | HA   | ASP | X | 484 | 35.958 | 47.061 | 23.936 | 0.00 | 0.00 |
| ATOM | 7355 | CB   | ASP | X | 484 | 35.192 | 48.015 | 22.207 | 0.00 | 0.00 |
| ATOM | 7356 | HB2  | ASP | X | 484 | 34.993 | 49.026 | 21.853 | 0.00 | 0.00 |
| ATOM | 7357 | HB3  | ASP | X | 484 | 35.624 | 47.536 | 21.328 | 0.00 | 0.00 |
| ATOM | 7358 | CG   | ASP | X | 484 | 33.750 | 47.570 | 22.249 | 0.00 | 0.00 |
| ATOM | 7359 | OD1  | ASP | X | 484 | 33.062 | 47.522 | 21.212 | 0.00 | 0.00 |
| ATOM | 7360 | OD2  | ASP | X | 484 | 33.239 | 47.155 | 23.369 | 0.00 | 0.00 |
| ATOM | 7361 | C    | ASP | X | 484 | 37.533 | 48.346 | 22.965 | 0.00 | 0.00 |
| ATOM | 7362 | O    | ASP | X | 484 | 37.795 | 49.486 | 22.569 | 0.00 | 0.00 |
| ATOM | 7363 | N    | PRO | X | 485 | 38.394 | 47.339 | 23.032 | 0.00 | 0.00 |
| ATOM | 7364 | CD   | PRO | X | 485 | 38.336 | 46.029 | 23.709 | 0.00 | 0.00 |
| ATOM | 7365 | HD2  | PRO | X | 485 | 37.900 | 45.297 | 23.030 | 0.00 | 0.00 |
| ATOM | 7366 | HD3  | PRO | X | 485 | 37.729 | 46.164 | 24.603 | 0.00 | 0.00 |
| ATOM | 7367 | CG   | PRO | X | 485 | 39.765 | 45.644 | 24.204 | 0.00 | 0.00 |
| ATOM | 7368 | HG2  | PRO | X | 485 | 39.867 | 44.559 | 24.201 | 0.00 | 0.00 |
| ATOM | 7369 | HG3  | PRO | X | 485 | 39.959 | 46.104 | 25.173 | 0.00 | 0.00 |
| ATOM | 7370 | CB   | PRO | X | 485 | 40.601 | 46.241 | 23.093 | 0.00 | 0.00 |
| ATOM | 7371 | HB2  | PRO | X | 485 | 40.677 | 45.504 | 22.293 | 0.00 | 0.00 |
| ATOM | 7372 | HB3  | PRO | X | 485 | 41.584 | 46.420 | 23.528 | 0.00 | 0.00 |
| ATOM | 7373 | CA   | PRO | X | 485 | 39.817 | 47.461 | 22.576 | 0.00 | 0.00 |
| ATOM | 7374 | HA   | PRO | X | 485 | 40.161 | 48.360 | 23.087 | 0.00 | 0.00 |
| ATOM | 7375 | C    | PRO | X | 485 | 40.046 | 47.642 | 21.069 | 0.00 | 0.00 |
| ATOM | 7376 | O    | PRO | X | 485 | 41.183 | 48.020 | 20.747 | 0.00 | 0.00 |
| ATOM | 7377 | N    | ASN | X | 486 | 38.992 | 47.405 | 20.273 | 0.00 | 0.00 |
| ATOM | 7378 | H    | ASN | X | 486 | 38.116 | 46.985 | 20.551 | 0.00 | 0.00 |
| ATOM | 7379 | CA   | ASN | X | 486 | 39.120 | 47.670 | 18.836 | 0.00 | 0.00 |
| ATOM | 7380 | HA   | ASN | X | 486 | 40.187 | 47.753 | 18.629 | 0.00 | 0.00 |
| ATOM | 7381 | CB   | ASN | X | 486 | 38.409 | 46.516 | 18.055 | 0.00 | 0.00 |
| ATOM | 7382 | HB2  | ASN | X | 486 | 38.544 | 46.745 | 16.998 | 0.00 | 0.00 |
| ATOM | 7383 | HB3  | ASN | X | 486 | 38.890 | 45.555 | 18.238 | 0.00 | 0.00 |
| ATOM | 7384 | CG   | ASN | X | 486 | 36.953 | 46.483 | 18.427 | 0.00 | 0.00 |
| ATOM | 7385 | OD1  | ASN | X | 486 | 36.614 | 45.794 | 19.361 | 0.00 | 0.00 |
| ATOM | 7386 | ND2  | ASN | X | 486 | 36.150 | 47.325 | 17.786 | 0.00 | 0.00 |
| ATOM | 7387 | HD21 | ASN | X | 486 | 35.160 | 47.370 | 17.977 | 0.00 | 0.00 |
| ATOM | 7388 | HD22 | ASN | X | 486 | 36.495 | 48.029 | 17.149 | 0.00 | 0.00 |

|      |      |      |     |   |     |        |        |        |      |      |
|------|------|------|-----|---|-----|--------|--------|--------|------|------|
| ATOM | 7389 | C    | ASN | X | 486 | 38.578 | 49.018 | 18.470 | 0.00 | 0.00 |
| ATOM | 7390 | O    | ASN | X | 486 | 37.870 | 49.692 | 19.240 | 0.00 | 0.00 |
| ATOM | 7391 | N    | GLU | X | 487 | 38.935 | 49.528 | 17.273 | 0.00 | 0.00 |
| ATOM | 7392 | H    | GLU | X | 487 | 39.518 | 49.008 | 16.633 | 0.00 | 0.00 |
| ATOM | 7393 | CA   | GLU | X | 487 | 38.415 | 50.844 | 16.718 | 0.00 | 0.00 |
| ATOM | 7394 | HA   | GLU | X | 487 | 38.842 | 51.686 | 17.264 | 0.00 | 0.00 |
| ATOM | 7395 | CB   | GLU | X | 487 | 38.910 | 51.093 | 15.272 | 0.00 | 0.00 |
| ATOM | 7396 | HB2  | GLU | X | 487 | 38.551 | 50.305 | 14.610 | 0.00 | 0.00 |
| ATOM | 7397 | HB3  | GLU | X | 487 | 38.491 | 52.045 | 14.946 | 0.00 | 0.00 |
| ATOM | 7398 | CG   | GLU | X | 487 | 40.444 | 51.160 | 15.155 | 0.00 | 0.00 |
| ATOM | 7399 | HG2  | GLU | X | 487 | 40.928 | 50.228 | 15.447 | 0.00 | 0.00 |
| ATOM | 7400 | HG3  | GLU | X | 487 | 40.608 | 51.255 | 14.082 | 0.00 | 0.00 |
| ATOM | 7401 | CD   | GLU | X | 487 | 41.101 | 52.385 | 15.744 | 0.00 | 0.00 |
| ATOM | 7402 | OE1  | GLU | X | 487 | 40.531 | 53.378 | 16.215 | 0.00 | 0.00 |
| ATOM | 7403 | OE2  | GLU | X | 487 | 42.355 | 52.336 | 15.802 | 0.00 | 0.00 |
| ATOM | 7404 | C    | GLU | X | 487 | 36.877 | 50.928 | 16.662 | 0.00 | 0.00 |
| ATOM | 7405 | O    | GLU | X | 487 | 36.301 | 49.880 | 16.378 | 0.00 | 0.00 |
| ATOM | 7406 | N    | PRO | X | 488 | 36.284 | 52.099 | 16.670 | 0.00 | 0.00 |
| ATOM | 7407 | CD   | PRO | X | 488 | 36.852 | 53.311 | 17.345 | 0.00 | 0.00 |
| ATOM | 7408 | HD2  | PRO | X | 488 | 37.767 | 53.609 | 16.833 | 0.00 | 0.00 |
| ATOM | 7409 | HD3  | PRO | X | 488 | 37.055 | 53.105 | 18.396 | 0.00 | 0.00 |
| ATOM | 7410 | CG   | PRO | X | 488 | 35.739 | 54.293 | 17.193 | 0.00 | 0.00 |
| ATOM | 7411 | HG2  | PRO | X | 488 | 35.902 | 54.869 | 16.282 | 0.00 | 0.00 |
| ATOM | 7412 | HG3  | PRO | X | 488 | 35.799 | 54.987 | 18.032 | 0.00 | 0.00 |
| ATOM | 7413 | CB   | PRO | X | 488 | 34.396 | 53.603 | 17.142 | 0.00 | 0.00 |
| ATOM | 7414 | HB2  | PRO | X | 488 | 33.636 | 54.196 | 16.632 | 0.00 | 0.00 |
| ATOM | 7415 | HB3  | PRO | X | 488 | 34.159 | 53.400 | 18.186 | 0.00 | 0.00 |
| ATOM | 7416 | CA   | PRO | X | 488 | 34.865 | 52.321 | 16.383 | 0.00 | 0.00 |
| ATOM | 7417 | HA   | PRO | X | 488 | 34.268 | 51.562 | 16.888 | 0.00 | 0.00 |
| ATOM | 7418 | C    | PRO | X | 488 | 34.670 | 52.406 | 14.822 | 0.00 | 0.00 |
| ATOM | 7419 | O    | PRO | X | 488 | 33.902 | 53.165 | 14.366 | 0.00 | 0.00 |
| ATOM | 7420 | N    | ARG | X | 489 | 35.408 | 51.610 | 14.098 | 0.00 | 0.00 |
| ATOM | 7421 | H    | ARG | X | 489 | 36.003 | 50.979 | 14.617 | 0.00 | 0.00 |
| ATOM | 7422 | CA   | ARG | X | 489 | 35.826 | 51.751 | 12.650 | 0.00 | 0.00 |
| ATOM | 7423 | HA   | ARG | X | 489 | 35.000 | 51.494 | 11.987 | 0.00 | 0.00 |
| ATOM | 7424 | CB   | ARG | X | 489 | 35.993 | 53.180 | 12.157 | 0.00 | 0.00 |
| ATOM | 7425 | HB2  | ARG | X | 489 | 36.297 | 53.075 | 11.116 | 0.00 | 0.00 |
| ATOM | 7426 | HB3  | ARG | X | 489 | 35.093 | 53.771 | 12.331 | 0.00 | 0.00 |
| ATOM | 7427 | CG   | ARG | X | 489 | 37.150 | 53.974 | 12.874 | 0.00 | 0.00 |
| ATOM | 7428 | HG2  | ARG | X | 489 | 37.004 | 53.981 | 13.954 | 0.00 | 0.00 |
| ATOM | 7429 | HG3  | ARG | X | 489 | 38.088 | 53.468 | 12.647 | 0.00 | 0.00 |
| ATOM | 7430 | CD   | ARG | X | 489 | 37.165 | 55.453 | 12.417 | 0.00 | 0.00 |
| ATOM | 7431 | HD2  | ARG | X | 489 | 38.085 | 55.940 | 12.741 | 0.00 | 0.00 |
| ATOM | 7432 | HD3  | ARG | X | 489 | 37.090 | 55.308 | 11.339 | 0.00 | 0.00 |
| ATOM | 7433 | NE   | ARG | X | 489 | 36.065 | 56.210 | 12.965 | 0.00 | 0.00 |
| ATOM | 7434 | HE   | ARG | X | 489 | 35.250 | 56.150 | 12.372 | 0.00 | 0.00 |
| ATOM | 7435 | CZ   | ARG | X | 489 | 35.939 | 56.964 | 14.015 | 0.00 | 0.00 |
| ATOM | 7436 | NH1  | ARG | X | 489 | 34.729 | 57.396 | 14.395 | 0.00 | 0.00 |
| ATOM | 7437 | HH11 | ARG | X | 489 | 33.954 | 57.009 | 13.876 | 0.00 | 0.00 |
| ATOM | 7438 | HH12 | ARG | X | 489 | 34.500 | 57.723 | 15.323 | 0.00 | 0.00 |
| ATOM | 7439 | NH2  | ARG | X | 489 | 36.963 | 57.186 | 14.805 | 0.00 | 0.00 |
| ATOM | 7440 | HH21 | ARG | X | 489 | 37.812 | 56.742 | 14.483 | 0.00 | 0.00 |
| ATOM | 7441 | HH22 | ARG | X | 489 | 36.943 | 57.559 | 15.743 | 0.00 | 0.00 |
| ATOM | 7442 | C    | ARG | X | 489 | 36.901 | 50.761 | 12.299 | 0.00 | 0.00 |
| ATOM | 7443 | O    | ARG | X | 489 | 38.048 | 51.057 | 12.014 | 0.00 | 0.00 |
| ATOM | 7444 | N    | ASP | X | 490 | 36.540 | 49.508 | 12.661 | 0.00 | 0.00 |
| ATOM | 7445 | H    | ASP | X | 490 | 35.601 | 49.370 | 13.006 | 0.00 | 0.00 |
| ATOM | 7446 | CA   | ASP | X | 490 | 37.458 | 48.374 | 12.714 | 0.00 | 0.00 |
| ATOM | 7447 | HA   | ASP | X | 490 | 38.382 | 48.856 | 13.034 | 0.00 | 0.00 |
| ATOM | 7448 | CB   | ASP | X | 490 | 36.895 | 47.348 | 13.714 | 0.00 | 0.00 |
| ATOM | 7449 | HB2  | ASP | X | 490 | 37.582 | 46.512 | 13.844 | 0.00 | 0.00 |
| ATOM | 7450 | HB3  | ASP | X | 490 | 36.815 | 47.765 | 14.718 | 0.00 | 0.00 |
| ATOM | 7451 | CG   | ASP | X | 490 | 35.403 | 46.832 | 13.508 | 0.00 | 0.00 |
| ATOM | 7452 | OD1  | ASP | X | 490 | 34.505 | 47.625 | 13.904 | 0.00 | 0.00 |
| ATOM | 7453 | OD2  | ASP | X | 490 | 35.139 | 45.697 | 13.089 | 0.00 | 0.00 |
| ATOM | 7454 | C    | ASP | X | 490 | 37.514 | 47.605 | 11.373 | 0.00 | 0.00 |
| ATOM | 7455 | O    | ASP | X | 490 | 36.487 | 47.255 | 10.812 | 0.00 | 0.00 |
| ATOM | 7456 | N    | PRO | X | 491 | 38.743 | 47.365 | 10.875 | 0.00 | 0.00 |
| ATOM | 7457 | CD   | PRO | X | 491 | 40.087 | 47.542 | 11.416 | 0.00 | 0.00 |
| ATOM | 7458 | HD2  | PRO | X | 491 | 40.154 | 46.905 | 12.297 | 0.00 | 0.00 |



|      |      |     |     |   |     |        |        |        |      |      |
|------|------|-----|-----|---|-----|--------|--------|--------|------|------|
| ATOM | 7459 | HD3 | PRO | X | 491 | 40.348 | 48.578 | 11.636 | 0.00 | 0.00 |
| ATOM | 7460 | CG  | PRO | X | 491 | 41.145 | 47.105 | 10.424 | 0.00 | 0.00 |
| ATOM | 7461 | HG2 | PRO | X | 491 | 41.408 | 46.063 | 10.602 | 0.00 | 0.00 |
| ATOM | 7462 | HG3 | PRO | X | 491 | 42.080 | 47.661 | 10.486 | 0.00 | 0.00 |
| ATOM | 7463 | CB  | PRO | X | 491 | 40.423 | 47.225 | 9.117  | 0.00 | 0.00 |
| ATOM | 7464 | HB2 | PRO | X | 491 | 40.877 | 46.617 | 8.334  | 0.00 | 0.00 |
| ATOM | 7465 | HB3 | PRO | X | 491 | 40.459 | 48.299 | 8.935  | 0.00 | 0.00 |
| ATOM | 7466 | CA  | PRO | X | 491 | 38.936 | 46.776 | 9.474  | 0.00 | 0.00 |
| ATOM | 7467 | HA  | PRO | X | 491 | 38.168 | 47.190 | 8.821  | 0.00 | 0.00 |
| ATOM | 7468 | C   | PRO | X | 491 | 38.838 | 45.307 | 9.465  | 0.00 | 0.00 |
| ATOM | 7469 | O   | PRO | X | 491 | 38.739 | 44.718 | 10.508 | 0.00 | 0.00 |
| ATOM | 7470 | N   | LYS | X | 492 | 38.760 | 44.703 | 8.246  | 0.00 | 0.00 |
| ATOM | 7471 | H   | LYS | X | 492 | 38.842 | 45.313 | 7.445  | 0.00 | 0.00 |
| ATOM | 7472 | CA  | LYS | X | 492 | 38.420 | 43.286 | 7.991  | 0.00 | 0.00 |
| ATOM | 7473 | HA  | LYS | X | 492 | 37.558 | 43.150 | 8.644  | 0.00 | 0.00 |
| ATOM | 7474 | CB  | LYS | X | 492 | 38.017 | 43.060 | 6.495  | 0.00 | 0.00 |
| ATOM | 7475 | HB2 | LYS | X | 492 | 37.529 | 42.093 | 6.367  | 0.00 | 0.00 |
| ATOM | 7476 | HB3 | LYS | X | 492 | 37.352 | 43.875 | 6.209  | 0.00 | 0.00 |
| ATOM | 7477 | CG  | LYS | X | 492 | 39.211 | 43.023 | 5.541  | 0.00 | 0.00 |
| ATOM | 7478 | HG2 | LYS | X | 492 | 40.041 | 43.615 | 5.927  | 0.00 | 0.00 |
| ATOM | 7479 | HG3 | LYS | X | 492 | 39.602 | 42.006 | 5.549  | 0.00 | 0.00 |
| ATOM | 7480 | CD  | LYS | X | 492 | 38.812 | 43.430 | 4.125  | 0.00 | 0.00 |
| ATOM | 7481 | HD2 | LYS | X | 492 | 38.091 | 42.717 | 3.724  | 0.00 | 0.00 |
| ATOM | 7482 | HD3 | LYS | X | 492 | 38.306 | 44.392 | 4.047  | 0.00 | 0.00 |
| ATOM | 7483 | CE  | LYS | X | 492 | 40.074 | 43.439 | 3.279  | 0.00 | 0.00 |
| ATOM | 7484 | HE2 | LYS | X | 492 | 40.847 | 42.746 | 3.610  | 0.00 | 0.00 |
| ATOM | 7485 | HE3 | LYS | X | 492 | 39.758 | 43.121 | 2.286  | 0.00 | 0.00 |
| ATOM | 7486 | NZ  | LYS | X | 492 | 40.623 | 44.783 | 3.185  | 0.00 | 0.00 |
| ATOM | 7487 | HZ1 | LYS | X | 492 | 39.892 | 45.419 | 2.900  | 0.00 | 0.00 |
| ATOM | 7488 | HZ2 | LYS | X | 492 | 41.070 | 45.204 | 3.987  | 0.00 | 0.00 |
| ATOM | 7489 | HZ3 | LYS | X | 492 | 41.396 | 44.739 | 2.537  | 0.00 | 0.00 |
| ATOM | 7490 | C   | LYS | X | 492 | 39.389 | 42.202 | 8.422  | 0.00 | 0.00 |
| ATOM | 7491 | O   | LYS | X | 492 | 39.296 | 41.028 | 8.190  | 0.00 | 0.00 |
| ATOM | 7492 | N   | ALA | X | 493 | 40.397 | 42.736 | 9.239  | 0.00 | 0.00 |
| ATOM | 7493 | H   | ALA | X | 493 | 40.367 | 43.735 | 9.390  | 0.00 | 0.00 |
| ATOM | 7494 | CA  | ALA | X | 493 | 41.489 | 41.958 | 9.815  | 0.00 | 0.00 |
| ATOM | 7495 | HA  | ALA | X | 493 | 41.767 | 41.061 | 9.260  | 0.00 | 0.00 |
| ATOM | 7496 | CB  | ALA | X | 493 | 42.757 | 42.798 | 10.011 | 0.00 | 0.00 |
| ATOM | 7497 | HB1 | ALA | X | 493 | 43.372 | 42.434 | 10.833 | 0.00 | 0.00 |
| ATOM | 7498 | HB2 | ALA | X | 493 | 43.229 | 42.942 | 9.039  | 0.00 | 0.00 |
| ATOM | 7499 | HB3 | ALA | X | 493 | 42.442 | 43.793 | 10.326 | 0.00 | 0.00 |
| ATOM | 7500 | C   | ALA | X | 493 | 41.084 | 41.512 | 11.284 | 0.00 | 0.00 |
| ATOM | 7501 | O   | ALA | X | 493 | 40.234 | 42.156 | 11.841 | 0.00 | 0.00 |
| ATOM | 7502 | N   | PRO | X | 494 | 41.663 | 40.443 | 11.885 | 0.00 | 0.00 |
| ATOM | 7503 | CD  | PRO | X | 494 | 42.778 | 39.663 | 11.384 | 0.00 | 0.00 |
| ATOM | 7504 | HD2 | PRO | X | 494 | 43.664 | 40.298 | 11.365 | 0.00 | 0.00 |
| ATOM | 7505 | HD3 | PRO | X | 494 | 42.624 | 39.070 | 10.482 | 0.00 | 0.00 |
| ATOM | 7506 | CG  | PRO | X | 494 | 43.020 | 38.568 | 12.422 | 0.00 | 0.00 |
| ATOM | 7507 | HG2 | PRO | X | 494 | 43.765 | 38.882 | 13.153 | 0.00 | 0.00 |
| ATOM | 7508 | HG3 | PRO | X | 494 | 43.440 | 37.730 | 11.865 | 0.00 | 0.00 |
| ATOM | 7509 | CB  | PRO | X | 494 | 41.643 | 38.334 | 12.999 | 0.00 | 0.00 |
| ATOM | 7510 | HB2 | PRO | X | 494 | 41.660 | 37.922 | 14.009 | 0.00 | 0.00 |
| ATOM | 7511 | HB3 | PRO | X | 494 | 41.155 | 37.600 | 12.358 | 0.00 | 0.00 |
| ATOM | 7512 | CA  | PRO | X | 494 | 41.048 | 39.740 | 12.977 | 0.00 | 0.00 |
| ATOM | 7513 | HA  | PRO | X | 494 | 39.997 | 39.685 | 12.693 | 0.00 | 0.00 |
| ATOM | 7514 | C   | PRO | X | 494 | 41.215 | 40.531 | 14.282 | 0.00 | 0.00 |
| ATOM | 7515 | O   | PRO | X | 494 | 42.253 | 41.012 | 14.535 | 0.00 | 0.00 |
| ATOM | 7516 | N   | GLN | X | 495 | 40.132 | 40.541 | 15.076 | 0.00 | 0.00 |
| ATOM | 7517 | H   | GLN | X | 495 | 39.342 | 40.038 | 14.696 | 0.00 | 0.00 |
| ATOM | 7518 | CA  | GLN | X | 495 | 39.885 | 41.440 | 16.120 | 0.00 | 0.00 |
| ATOM | 7519 | HA  | GLN | X | 495 | 40.818 | 41.993 | 16.231 | 0.00 | 0.00 |
| ATOM | 7520 | CB  | GLN | X | 495 | 38.780 | 42.525 | 15.836 | 0.00 | 0.00 |
| ATOM | 7521 | HB2 | GLN | X | 495 | 37.835 | 41.989 | 15.757 | 0.00 | 0.00 |
| ATOM | 7522 | HB3 | GLN | X | 495 | 38.773 | 43.256 | 16.645 | 0.00 | 0.00 |
| ATOM | 7523 | CG  | GLN | X | 495 | 39.094 | 43.348 | 14.558 | 0.00 | 0.00 |
| ATOM | 7524 | HG2 | GLN | X | 495 | 39.205 | 42.647 | 13.731 | 0.00 | 0.00 |
| ATOM | 7525 | HG3 | GLN | X | 495 | 38.110 | 43.795 | 14.415 | 0.00 | 0.00 |
| ATOM | 7526 | CD  | GLN | X | 495 | 40.257 | 44.328 | 14.538 | 0.00 | 0.00 |
| ATOM | 7527 | OE1 | GLN | X | 495 | 40.631 | 44.943 | 15.535 | 0.00 | 0.00 |
| ATOM | 7528 | NE2 | GLN | X | 495 | 40.937 | 44.520 | 13.432 | 0.00 | 0.00 |

|      |      |      |     |   |     |        |        |        |      |      |
|------|------|------|-----|---|-----|--------|--------|--------|------|------|
| ATOM | 7529 | HE21 | GLN | X | 495 | 41.667 | 45.218 | 13.441 | 0.00 | 0.00 |
| ATOM | 7530 | HE22 | GLN | X | 495 | 40.644 | 44.174 | 12.529 | 0.00 | 0.00 |
| ATOM | 7531 | C    | GLN | X | 495 | 39.660 | 40.722 | 17.416 | 0.00 | 0.00 |
| ATOM | 7532 | O    | GLN | X | 495 | 39.375 | 39.534 | 17.484 | 0.00 | 0.00 |
| ATOM | 7533 | N    | TRP | X | 496 | 39.773 | 41.428 | 18.510 | 0.00 | 0.00 |
| ATOM | 7534 | H    | TRP | X | 496 | 39.758 | 42.431 | 18.392 | 0.00 | 0.00 |
| ATOM | 7535 | CA   | TRP | X | 496 | 39.708 | 40.920 | 19.865 | 0.00 | 0.00 |
| ATOM | 7536 | HA   | TRP | X | 496 | 40.080 | 39.895 | 19.858 | 0.00 | 0.00 |
| ATOM | 7537 | CB   | TRP | X | 496 | 40.547 | 41.940 | 20.636 | 0.00 | 0.00 |
| ATOM | 7538 | HB2  | TRP | X | 496 | 41.568 | 42.012 | 20.261 | 0.00 | 0.00 |
| ATOM | 7539 | HB3  | TRP | X | 496 | 40.143 | 42.948 | 20.539 | 0.00 | 0.00 |
| ATOM | 7540 | CG   | TRP | X | 496 | 40.744 | 41.724 | 22.125 | 0.00 | 0.00 |
| ATOM | 7541 | CD1  | TRP | X | 496 | 40.115 | 40.857 | 22.946 | 0.00 | 0.00 |
| ATOM | 7542 | HD1  | TRP | X | 496 | 39.322 | 40.172 | 22.683 | 0.00 | 0.00 |
| ATOM | 7543 | NE1  | TRP | X | 496 | 40.604 | 40.910 | 24.189 | 0.00 | 0.00 |
| ATOM | 7544 | HE1  | TRP | X | 496 | 40.137 | 40.292 | 24.837 | 0.00 | 0.00 |
| ATOM | 7545 | CE2  | TRP | X | 496 | 41.632 | 41.799 | 24.360 | 0.00 | 0.00 |
| ATOM | 7546 | CZ2  | TRP | X | 496 | 42.473 | 42.154 | 25.371 | 0.00 | 0.00 |
| ATOM | 7547 | HZ2  | TRP | X | 496 | 42.416 | 41.643 | 26.321 | 0.00 | 0.00 |
| ATOM | 7548 | CH2  | TRP | X | 496 | 43.436 | 43.169 | 25.224 | 0.00 | 0.00 |
| ATOM | 7549 | HH2  | TRP | X | 496 | 44.034 | 43.342 | 26.107 | 0.00 | 0.00 |
| ATOM | 7550 | CZ3  | TRP | X | 496 | 43.614 | 43.759 | 24.003 | 0.00 | 0.00 |
| ATOM | 7551 | HZ3  | TRP | X | 496 | 44.360 | 44.510 | 23.789 | 0.00 | 0.00 |
| ATOM | 7552 | CE3  | TRP | X | 496 | 42.842 | 43.261 | 22.893 | 0.00 | 0.00 |
| ATOM | 7553 | HE3  | TRP | X | 496 | 42.972 | 43.645 | 21.892 | 0.00 | 0.00 |
| ATOM | 7554 | CD2  | TRP | X | 496 | 41.749 | 42.337 | 23.064 | 0.00 | 0.00 |
| ATOM | 7555 | C    | TRP | X | 496 | 38.234 | 40.847 | 20.342 | 0.00 | 0.00 |
| ATOM | 7556 | O    | TRP | X | 496 | 37.603 | 41.880 | 20.394 | 0.00 | 0.00 |
| ATOM | 7557 | N    | PRO | X | 497 | 37.677 | 39.677 | 20.650 | 0.00 | 0.00 |
| ATOM | 7558 | CD   | PRO | X | 497 | 38.178 | 38.268 | 20.352 | 0.00 | 0.00 |
| ATOM | 7559 | HD2  | PRO | X | 497 | 39.138 | 38.004 | 20.797 | 0.00 | 0.00 |
| ATOM | 7560 | HD3  | PRO | X | 497 | 38.333 | 38.295 | 19.273 | 0.00 | 0.00 |
| ATOM | 7561 | CG   | PRO | X | 497 | 37.036 | 37.310 | 20.682 | 0.00 | 0.00 |
| ATOM | 7562 | HG2  | PRO | X | 497 | 37.140 | 37.035 | 21.731 | 0.00 | 0.00 |
| ATOM | 7563 | HG3  | PRO | X | 497 | 36.932 | 36.471 | 19.994 | 0.00 | 0.00 |
| ATOM | 7564 | CB   | PRO | X | 497 | 35.825 | 38.170 | 20.509 | 0.00 | 0.00 |
| ATOM | 7565 | HB2  | PRO | X | 497 | 35.027 | 37.888 | 21.195 | 0.00 | 0.00 |
| ATOM | 7566 | HB3  | PRO | X | 497 | 35.594 | 38.187 | 19.444 | 0.00 | 0.00 |
| ATOM | 7567 | CA   | PRO | X | 497 | 36.232 | 39.598 | 20.977 | 0.00 | 0.00 |
| ATOM | 7568 | HA   | PRO | X | 497 | 35.643 | 40.341 | 20.439 | 0.00 | 0.00 |
| ATOM | 7569 | C    | PRO | X | 497 | 35.995 | 39.785 | 22.483 | 0.00 | 0.00 |
| ATOM | 7570 | O    | PRO | X | 497 | 36.837 | 39.284 | 23.242 | 0.00 | 0.00 |
| ATOM | 7571 | N    | PRO | X | 498 | 34.778 | 40.267 | 22.915 | 0.00 | 0.00 |
| ATOM | 7572 | CD   | PRO | X | 498 | 33.627 | 40.533 | 22.098 | 0.00 | 0.00 |
| ATOM | 7573 | HD2  | PRO | X | 498 | 33.327 | 39.684 | 21.483 | 0.00 | 0.00 |
| ATOM | 7574 | HD3  | PRO | X | 498 | 33.867 | 41.336 | 21.401 | 0.00 | 0.00 |
| ATOM | 7575 | CG   | PRO | X | 498 | 32.501 | 40.801 | 23.038 | 0.00 | 0.00 |
| ATOM | 7576 | HG2  | PRO | X | 498 | 31.785 | 39.979 | 23.042 | 0.00 | 0.00 |
| ATOM | 7577 | HG3  | PRO | X | 498 | 31.935 | 41.682 | 22.734 | 0.00 | 0.00 |
| ATOM | 7578 | CB   | PRO | X | 498 | 33.103 | 40.943 | 24.365 | 0.00 | 0.00 |
| ATOM | 7579 | HB2  | PRO | X | 498 | 32.414 | 40.554 | 25.115 | 0.00 | 0.00 |
| ATOM | 7580 | HB3  | PRO | X | 498 | 33.212 | 42.012 | 24.551 | 0.00 | 0.00 |
| ATOM | 7581 | CA   | PRO | X | 498 | 34.384 | 40.145 | 24.250 | 0.00 | 0.00 |
| ATOM | 7582 | HA   | PRO | X | 498 | 35.090 | 40.673 | 24.890 | 0.00 | 0.00 |
| ATOM | 7583 | C    | PRO | X | 498 | 34.271 | 38.701 | 24.722 | 0.00 | 0.00 |
| ATOM | 7584 | O    | PRO | X | 498 | 33.908 | 37.799 | 23.955 | 0.00 | 0.00 |
| ATOM | 7585 | N    | TYR | X | 499 | 34.605 | 38.526 | 26.010 | 0.00 | 0.00 |
| ATOM | 7586 | H    | TYR | X | 499 | 34.921 | 39.337 | 26.521 | 0.00 | 0.00 |
| ATOM | 7587 | CA   | TYR | X | 499 | 34.519 | 37.252 | 26.757 | 0.00 | 0.00 |
| ATOM | 7588 | HA   | TYR | X | 499 | 34.828 | 36.471 | 26.062 | 0.00 | 0.00 |
| ATOM | 7589 | CB   | TYR | X | 499 | 35.722 | 37.429 | 27.782 | 0.00 | 0.00 |
| ATOM | 7590 | HB2  | TYR | X | 499 | 36.578 | 37.517 | 27.112 | 0.00 | 0.00 |
| ATOM | 7591 | HB3  | TYR | X | 499 | 35.545 | 38.363 | 28.313 | 0.00 | 0.00 |
| ATOM | 7592 | CG   | TYR | X | 499 | 36.086 | 36.256 | 28.757 | 0.00 | 0.00 |
| ATOM | 7593 | CD1  | TYR | X | 499 | 35.284 | 35.833 | 29.831 | 0.00 | 0.00 |
| ATOM | 7594 | HD1  | TYR | X | 499 | 34.345 | 36.331 | 30.023 | 0.00 | 0.00 |
| ATOM | 7595 | CE1  | TYR | X | 499 | 35.655 | 34.836 | 30.773 | 0.00 | 0.00 |
| ATOM | 7596 | HE1  | TYR | X | 499 | 34.956 | 34.504 | 31.526 | 0.00 | 0.00 |
| ATOM | 7597 | CZ   | TYR | X | 499 | 36.986 | 34.276 | 30.698 | 0.00 | 0.00 |
| ATOM | 7598 | OH   | TYR | X | 499 | 37.441 | 33.170 | 31.388 | 0.00 | 0.00 |

|      |      |      |     |   |     |        |        |        |      |      |
|------|------|------|-----|---|-----|--------|--------|--------|------|------|
| ATOM | 7599 | HH   | TYR | X | 499 | 36.777 | 32.773 | 31.956 | 0.00 | 0.00 |
| ATOM | 7600 | CE2  | TYR | X | 499 | 37.791 | 34.605 | 29.576 | 0.00 | 0.00 |
| ATOM | 7601 | HE2  | TYR | X | 499 | 38.770 | 34.150 | 29.538 | 0.00 | 0.00 |
| ATOM | 7602 | CD2  | TYR | X | 499 | 37.292 | 35.606 | 28.621 | 0.00 | 0.00 |
| ATOM | 7603 | HD2  | TYR | X | 499 | 37.984 | 35.925 | 27.856 | 0.00 | 0.00 |
| ATOM | 7604 | C    | TYR | X | 499 | 33.157 | 36.960 | 27.353 | 0.00 | 0.00 |
| ATOM | 7605 | O    | TYR | X | 499 | 32.560 | 37.871 | 27.971 | 0.00 | 0.00 |
| ATOM | 7606 | N    | THR | X | 500 | 32.672 | 35.722 | 27.238 | 0.00 | 0.00 |
| ATOM | 7607 | H    | THR | X | 500 | 33.284 | 35.085 | 26.747 | 0.00 | 0.00 |
| ATOM | 7608 | CA   | THR | X | 500 | 31.442 | 35.273 | 27.861 | 0.00 | 0.00 |
| ATOM | 7609 | HA   | THR | X | 500 | 30.982 | 36.085 | 28.425 | 0.00 | 0.00 |
| ATOM | 7610 | CB   | THR | X | 500 | 30.563 | 34.769 | 26.725 | 0.00 | 0.00 |
| ATOM | 7611 | HB   | THR | X | 500 | 29.661 | 34.401 | 27.213 | 0.00 | 0.00 |
| ATOM | 7612 | CG2  | THR | X | 500 | 30.275 | 35.778 | 25.597 | 0.00 | 0.00 |
| ATOM | 7613 | HG21 | THR | X | 500 | 31.092 | 35.826 | 24.876 | 0.00 | 0.00 |
| ATOM | 7614 | HG22 | THR | X | 500 | 29.329 | 35.445 | 25.172 | 0.00 | 0.00 |
| ATOM | 7615 | HG23 | THR | X | 500 | 30.041 | 36.796 | 25.908 | 0.00 | 0.00 |
| ATOM | 7616 | OG1  | THR | X | 500 | 31.099 | 33.549 | 26.253 | 0.00 | 0.00 |
| ATOM | 7617 | HG1  | THR | X | 500 | 30.330 | 33.095 | 25.902 | 0.00 | 0.00 |
| ATOM | 7618 | C    | THR | X | 500 | 31.773 | 34.248 | 28.867 | 0.00 | 0.00 |
| ATOM | 7619 | O    | THR | X | 500 | 32.665 | 33.413 | 28.733 | 0.00 | 0.00 |
| ATOM | 7620 | N    | ALA | X | 501 | 30.985 | 34.192 | 29.884 | 0.00 | 0.00 |
| ATOM | 7621 | H    | ALA | X | 501 | 30.159 | 34.764 | 29.775 | 0.00 | 0.00 |
| ATOM | 7622 | CA   | ALA | X | 501 | 31.063 | 33.171 | 30.897 | 0.00 | 0.00 |
| ATOM | 7623 | HA   | ALA | X | 501 | 31.989 | 33.378 | 31.434 | 0.00 | 0.00 |
| ATOM | 7624 | CB   | ALA | X | 501 | 30.020 | 33.492 | 32.005 | 0.00 | 0.00 |
| ATOM | 7625 | HB1  | ALA | X | 501 | 30.236 | 34.473 | 32.428 | 0.00 | 0.00 |
| ATOM | 7626 | HB2  | ALA | X | 501 | 28.972 | 33.522 | 31.707 | 0.00 | 0.00 |
| ATOM | 7627 | HB3  | ALA | X | 501 | 30.100 | 32.769 | 32.817 | 0.00 | 0.00 |
| ATOM | 7628 | C    | ALA | X | 501 | 31.085 | 31.675 | 30.467 | 0.00 | 0.00 |
| ATOM | 7629 | O    | ALA | X | 501 | 31.837 | 30.822 | 30.993 | 0.00 | 0.00 |
| ATOM | 7630 | N    | GLY | X | 502 | 30.378 | 31.428 | 29.363 | 0.00 | 0.00 |
| ATOM | 7631 | H    | GLY | X | 502 | 29.642 | 32.089 | 29.158 | 0.00 | 0.00 |
| ATOM | 7632 | CA   | GLY | X | 502 | 30.272 | 30.035 | 28.926 | 0.00 | 0.00 |
| ATOM | 7633 | HA2  | GLY | X | 502 | 30.216 | 29.385 | 29.740 | 0.00 | 0.00 |
| ATOM | 7634 | HA3  | GLY | X | 502 | 29.476 | 29.902 | 28.189 | 0.00 | 0.00 |
| ATOM | 7635 | C    | GLY | X | 502 | 31.535 | 29.641 | 28.123 | 0.00 | 0.00 |
| ATOM | 7636 | O    | GLY | X | 502 | 32.157 | 28.625 | 28.427 | 0.00 | 0.00 |
| ATOM | 7637 | N    | ALA | X | 503 | 31.903 | 30.418 | 27.108 | 0.00 | 0.00 |
| ATOM | 7638 | H    | ALA | X | 503 | 31.329 | 31.239 | 26.986 | 0.00 | 0.00 |
| ATOM | 7639 | CA   | ALA | X | 503 | 32.990 | 30.190 | 26.161 | 0.00 | 0.00 |
| ATOM | 7640 | HA   | ALA | X | 503 | 33.268 | 29.142 | 26.047 | 0.00 | 0.00 |
| ATOM | 7641 | CB   | ALA | X | 503 | 32.449 | 30.680 | 24.881 | 0.00 | 0.00 |
| ATOM | 7642 | HB1  | ALA | X | 503 | 32.477 | 31.768 | 24.828 | 0.00 | 0.00 |
| ATOM | 7643 | HB2  | ALA | X | 503 | 33.135 | 30.316 | 24.116 | 0.00 | 0.00 |
| ATOM | 7644 | HB3  | ALA | X | 503 | 31.510 | 30.160 | 24.694 | 0.00 | 0.00 |
| ATOM | 7645 | C    | ALA | X | 503 | 34.388 | 30.761 | 26.492 | 0.00 | 0.00 |
| ATOM | 7646 | O    | ALA | X | 503 | 35.402 | 30.103 | 26.110 | 0.00 | 0.00 |
| ATOM | 7647 | N    | GLN | X | 504 | 34.438 | 31.787 | 27.335 | 0.00 | 0.00 |
| ATOM | 7648 | H    | GLN | X | 504 | 33.600 | 32.197 | 27.722 | 0.00 | 0.00 |
| ATOM | 7649 | CA   | GLN | X | 504 | 35.660 | 32.199 | 28.082 | 0.00 | 0.00 |
| ATOM | 7650 | HA   | GLN | X | 504 | 35.469 | 33.208 | 28.447 | 0.00 | 0.00 |
| ATOM | 7651 | CB   | GLN | X | 504 | 35.957 | 31.125 | 29.164 | 0.00 | 0.00 |
| ATOM | 7652 | HB2  | GLN | X | 504 | 36.358 | 30.266 | 28.626 | 0.00 | 0.00 |
| ATOM | 7653 | HB3  | GLN | X | 504 | 36.749 | 31.480 | 29.824 | 0.00 | 0.00 |
| ATOM | 7654 | CG   | GLN | X | 504 | 34.803 | 30.646 | 30.050 | 0.00 | 0.00 |
| ATOM | 7655 | HG2  | GLN | X | 504 | 34.637 | 31.414 | 30.806 | 0.00 | 0.00 |
| ATOM | 7656 | HG3  | GLN | X | 504 | 33.928 | 30.503 | 29.418 | 0.00 | 0.00 |
| ATOM | 7657 | CD   | GLN | X | 504 | 35.069 | 29.373 | 30.807 | 0.00 | 0.00 |
| ATOM | 7658 | OE1  | GLN | X | 504 | 34.813 | 28.266 | 30.364 | 0.00 | 0.00 |
| ATOM | 7659 | NE2  | GLN | X | 504 | 35.619 | 29.430 | 32.022 | 0.00 | 0.00 |
| ATOM | 7660 | HE21 | GLN | X | 504 | 35.947 | 28.532 | 32.345 | 0.00 | 0.00 |
| ATOM | 7661 | HE22 | GLN | X | 504 | 35.850 | 30.313 | 32.455 | 0.00 | 0.00 |
| ATOM | 7662 | C    | GLN | X | 504 | 36.876 | 32.447 | 27.199 | 0.00 | 0.00 |
| ATOM | 7663 | O    | GLN | X | 504 | 38.012 | 32.077 | 27.463 | 0.00 | 0.00 |
| ATOM | 7664 | N    | GLN | X | 505 | 36.680 | 33.217 | 26.139 | 0.00 | 0.00 |
| ATOM | 7665 | H    | GLN | X | 505 | 35.746 | 33.560 | 25.969 | 0.00 | 0.00 |
| ATOM | 7666 | CA   | GLN | X | 505 | 37.606 | 33.551 | 25.096 | 0.00 | 0.00 |
| ATOM | 7667 | HA   | GLN | X | 505 | 38.198 | 32.636 | 25.105 | 0.00 | 0.00 |
| ATOM | 7668 | CB   | GLN | X | 505 | 36.905 | 33.620 | 23.672 | 0.00 | 0.00 |

|      |      |      |     |   |     |        |        |        |      |      |
|------|------|------|-----|---|-----|--------|--------|--------|------|------|
| ATOM | 7669 | HB2  | GLN | X | 505 | 36.228 | 34.474 | 23.718 | 0.00 | 0.00 |
| ATOM | 7670 | HB3  | GLN | X | 505 | 37.635 | 33.737 | 22.871 | 0.00 | 0.00 |
| ATOM | 7671 | CG   | GLN | X | 505 | 36.040 | 32.408 | 23.370 | 0.00 | 0.00 |
| ATOM | 7672 | HG2  | GLN | X | 505 | 36.775 | 31.607 | 23.449 | 0.00 | 0.00 |
| ATOM | 7673 | HG3  | GLN | X | 505 | 35.227 | 32.368 | 24.095 | 0.00 | 0.00 |
| ATOM | 7674 | CD   | GLN | X | 505 | 35.548 | 32.484 | 21.908 | 0.00 | 0.00 |
| ATOM | 7675 | OE1  | GLN | X | 505 | 36.292 | 32.070 | 20.958 | 0.00 | 0.00 |
| ATOM | 7676 | NE2  | GLN | X | 505 | 34.326 | 32.885 | 21.628 | 0.00 | 0.00 |
| ATOM | 7677 | HE21 | GLN | X | 505 | 34.117 | 32.997 | 20.646 | 0.00 | 0.00 |
| ATOM | 7678 | HE22 | GLN | X | 505 | 33.770 | 33.098 | 22.444 | 0.00 | 0.00 |
| ATOM | 7679 | C    | GLN | X | 505 | 38.519 | 34.757 | 25.282 | 0.00 | 0.00 |
| ATOM | 7680 | O    | GLN | X | 505 | 38.101 | 35.892 | 25.378 | 0.00 | 0.00 |
| ATOM | 7681 | N    | TYR | X | 506 | 39.830 | 34.453 | 25.376 | 0.00 | 0.00 |
| ATOM | 7682 | H    | TYR | X | 506 | 39.961 | 33.452 | 25.345 | 0.00 | 0.00 |
| ATOM | 7683 | CA   | TYR | X | 506 | 41.031 | 35.266 | 25.698 | 0.00 | 0.00 |
| ATOM | 7684 | HA   | TYR | X | 506 | 40.719 | 36.290 | 25.900 | 0.00 | 0.00 |
| ATOM | 7685 | CB   | TYR | X | 506 | 41.723 | 34.635 | 26.901 | 0.00 | 0.00 |
| ATOM | 7686 | HB2  | TYR | X | 506 | 42.421 | 35.415 | 27.205 | 0.00 | 0.00 |
| ATOM | 7687 | HB3  | TYR | X | 506 | 41.160 | 34.605 | 27.833 | 0.00 | 0.00 |
| ATOM | 7688 | CG   | TYR | X | 506 | 42.450 | 33.319 | 26.667 | 0.00 | 0.00 |
| ATOM | 7689 | CD1  | TYR | X | 506 | 41.747 | 32.079 | 26.693 | 0.00 | 0.00 |
| ATOM | 7690 | HD1  | TYR | X | 506 | 40.672 | 32.017 | 26.774 | 0.00 | 0.00 |
| ATOM | 7691 | CE1  | TYR | X | 506 | 42.431 | 30.870 | 26.620 | 0.00 | 0.00 |
| ATOM | 7692 | HE1  | TYR | X | 506 | 42.031 | 29.871 | 26.529 | 0.00 | 0.00 |
| ATOM | 7693 | CZ   | TYR | X | 506 | 43.784 | 30.926 | 26.325 | 0.00 | 0.00 |
| ATOM | 7694 | OH   | TYR | X | 506 | 44.535 | 29.733 | 26.167 | 0.00 | 0.00 |
| ATOM | 7695 | HH   | TYR | X | 506 | 43.955 | 29.018 | 26.440 | 0.00 | 0.00 |
| ATOM | 7696 | CE2  | TYR | X | 506 | 44.542 | 32.164 | 26.314 | 0.00 | 0.00 |
| ATOM | 7697 | HE2  | TYR | X | 506 | 45.616 | 32.251 | 26.251 | 0.00 | 0.00 |
| ATOM | 7698 | CD2  | TYR | X | 506 | 43.846 | 33.378 | 26.426 | 0.00 | 0.00 |
| ATOM | 7699 | HD2  | TYR | X | 506 | 44.408 | 34.296 | 26.519 | 0.00 | 0.00 |
| ATOM | 7700 | C    | TYR | X | 506 | 42.016 | 35.395 | 24.489 | 0.00 | 0.00 |
| ATOM | 7701 | O    | TYR | X | 506 | 42.109 | 34.374 | 23.782 | 0.00 | 0.00 |
| ATOM | 7702 | N    | VAL | X | 507 | 42.636 | 36.551 | 24.197 | 0.00 | 0.00 |
| ATOM | 7703 | H    | VAL | X | 507 | 42.406 | 37.340 | 24.785 | 0.00 | 0.00 |
| ATOM | 7704 | CA   | VAL | X | 507 | 43.551 | 36.679 | 23.074 | 0.00 | 0.00 |
| ATOM | 7705 | HA   | VAL | X | 507 | 43.116 | 36.071 | 22.280 | 0.00 | 0.00 |
| ATOM | 7706 | CB   | VAL | X | 507 | 43.617 | 38.099 | 22.402 | 0.00 | 0.00 |
| ATOM | 7707 | HB   | VAL | X | 507 | 44.111 | 38.087 | 21.431 | 0.00 | 0.00 |
| ATOM | 7708 | CG1  | VAL | X | 507 | 42.209 | 38.512 | 21.933 | 0.00 | 0.00 |
| ATOM | 7709 | HG11 | VAL | X | 507 | 41.828 | 37.723 | 21.285 | 0.00 | 0.00 |
| ATOM | 7710 | HG12 | VAL | X | 507 | 41.635 | 38.706 | 22.839 | 0.00 | 0.00 |
| ATOM | 7711 | HG13 | VAL | X | 507 | 42.178 | 39.442 | 21.364 | 0.00 | 0.00 |
| ATOM | 7712 | CG2  | VAL | X | 507 | 44.272 | 39.276 | 23.133 | 0.00 | 0.00 |
| ATOM | 7713 | HG21 | VAL | X | 507 | 45.296 | 39.008 | 23.392 | 0.00 | 0.00 |
| ATOM | 7714 | HG22 | VAL | X | 507 | 44.334 | 40.116 | 22.442 | 0.00 | 0.00 |
| ATOM | 7715 | HG23 | VAL | X | 507 | 43.667 | 39.404 | 24.031 | 0.00 | 0.00 |
| ATOM | 7716 | C    | VAL | X | 507 | 44.951 | 36.183 | 23.386 | 0.00 | 0.00 |
| ATOM | 7717 | O    | VAL | X | 507 | 45.361 | 36.144 | 24.587 | 0.00 | 0.00 |
| ATOM | 7718 | N    | SER | X | 508 | 45.746 | 35.955 | 22.347 | 0.00 | 0.00 |
| ATOM | 7719 | H    | SER | X | 508 | 45.289 | 35.928 | 21.447 | 0.00 | 0.00 |
| ATOM | 7720 | CA   | SER | X | 508 | 47.226 | 35.906 | 22.375 | 0.00 | 0.00 |
| ATOM | 7721 | HA   | SER | X | 508 | 47.677 | 35.786 | 23.360 | 0.00 | 0.00 |
| ATOM | 7722 | CB   | SER | X | 508 | 47.787 | 34.768 | 21.547 | 0.00 | 0.00 |
| ATOM | 7723 | HB2  | SER | X | 508 | 47.166 | 34.684 | 20.655 | 0.00 | 0.00 |
| ATOM | 7724 | HB3  | SER | X | 508 | 48.776 | 35.048 | 21.184 | 0.00 | 0.00 |
| ATOM | 7725 | OG   | SER | X | 508 | 47.726 | 33.557 | 22.247 | 0.00 | 0.00 |
| ATOM | 7726 | HG   | SER | X | 508 | 48.652 | 33.305 | 22.278 | 0.00 | 0.00 |
| ATOM | 7727 | C    | SER | X | 508 | 47.763 | 37.295 | 21.935 | 0.00 | 0.00 |
| ATOM | 7728 | O    | SER | X | 508 | 47.661 | 37.636 | 20.810 | 0.00 | 0.00 |
| ATOM | 7729 | N    | LEU | X | 509 | 48.340 | 38.092 | 22.857 | 0.00 | 0.00 |
| ATOM | 7730 | H    | LEU | X | 509 | 48.533 | 37.736 | 23.782 | 0.00 | 0.00 |
| ATOM | 7731 | CA   | LEU | X | 509 | 49.056 | 39.310 | 22.472 | 0.00 | 0.00 |
| ATOM | 7732 | HA   | LEU | X | 509 | 48.610 | 39.791 | 21.602 | 0.00 | 0.00 |
| ATOM | 7733 | CB   | LEU | X | 509 | 49.085 | 40.309 | 23.696 | 0.00 | 0.00 |
| ATOM | 7734 | HB2  | LEU | X | 509 | 49.604 | 39.911 | 24.568 | 0.00 | 0.00 |
| ATOM | 7735 | HB3  | LEU | X | 509 | 49.750 | 41.132 | 23.438 | 0.00 | 0.00 |
| ATOM | 7736 | CG   | LEU | X | 509 | 47.709 | 40.731 | 24.066 | 0.00 | 0.00 |
| ATOM | 7737 | HG   | LEU | X | 509 | 47.201 | 39.929 | 24.601 | 0.00 | 0.00 |
| ATOM | 7738 | CD1  | LEU | X | 509 | 47.911 | 41.648 | 25.263 | 0.00 | 0.00 |

|      |      |      |     |   |     |        |        |        |      |      |
|------|------|------|-----|---|-----|--------|--------|--------|------|------|
| ATOM | 7739 | HD11 | LEU | X | 509 | 48.430 | 42.557 | 24.958 | 0.00 | 0.00 |
| ATOM | 7740 | HD12 | LEU | X | 509 | 46.940 | 41.939 | 25.662 | 0.00 | 0.00 |
| ATOM | 7741 | HD13 | LEU | X | 509 | 48.568 | 41.273 | 26.048 | 0.00 | 0.00 |
| ATOM | 7742 | CD2  | LEU | X | 509 | 46.785 | 41.466 | 23.066 | 0.00 | 0.00 |
| ATOM | 7743 | HD21 | LEU | X | 509 | 45.880 | 41.778 | 23.587 | 0.00 | 0.00 |
| ATOM | 7744 | HD22 | LEU | X | 509 | 47.345 | 42.284 | 22.611 | 0.00 | 0.00 |
| ATOM | 7745 | HD23 | LEU | X | 509 | 46.356 | 40.815 | 22.305 | 0.00 | 0.00 |
| ATOM | 7746 | C    | LEU | X | 509 | 50.497 | 38.919 | 22.103 | 0.00 | 0.00 |
| ATOM | 7747 | O    | LEU | X | 509 | 51.125 | 38.190 | 22.857 | 0.00 | 0.00 |
| ATOM | 7748 | N    | ASP | X | 510 | 50.947 | 39.293 | 20.888 | 0.00 | 0.00 |
| ATOM | 7749 | H    | ASP | X | 510 | 50.270 | 39.822 | 20.358 | 0.00 | 0.00 |
| ATOM | 7750 | CA   | ASP | X | 510 | 52.029 | 38.740 | 20.132 | 0.00 | 0.00 |
| ATOM | 7751 | HA   | ASP | X | 510 | 52.845 | 38.686 | 20.852 | 0.00 | 0.00 |
| ATOM | 7752 | CB   | ASP | X | 510 | 51.593 | 37.330 | 19.724 | 0.00 | 0.00 |
| ATOM | 7753 | HB2  | ASP | X | 510 | 51.177 | 36.725 | 20.530 | 0.00 | 0.00 |
| ATOM | 7754 | HB3  | ASP | X | 510 | 50.850 | 37.416 | 18.932 | 0.00 | 0.00 |
| ATOM | 7755 | CG   | ASP | X | 510 | 52.767 | 36.585 | 19.191 | 0.00 | 0.00 |
| ATOM | 7756 | OD1  | ASP | X | 510 | 53.790 | 36.455 | 19.869 | 0.00 | 0.00 |
| ATOM | 7757 | OD2  | ASP | X | 510 | 52.706 | 36.228 | 18.026 | 0.00 | 0.00 |
| ATOM | 7758 | C    | ASP | X | 510 | 52.441 | 39.619 | 18.959 | 0.00 | 0.00 |
| ATOM | 7759 | O    | ASP | X | 510 | 51.678 | 40.545 | 18.582 | 0.00 | 0.00 |
| ATOM | 7760 | N    | LEU | X | 511 | 53.441 | 39.168 | 18.199 | 0.00 | 0.00 |
| ATOM | 7761 | H    | LEU | X | 511 | 53.877 | 38.296 | 18.461 | 0.00 | 0.00 |
| ATOM | 7762 | CA   | LEU | X | 511 | 53.761 | 39.780 | 16.915 | 0.00 | 0.00 |
| ATOM | 7763 | HA   | LEU | X | 511 | 53.794 | 40.853 | 17.101 | 0.00 | 0.00 |
| ATOM | 7764 | CB   | LEU | X | 511 | 55.228 | 39.445 | 16.577 | 0.00 | 0.00 |
| ATOM | 7765 | HB2  | LEU | X | 511 | 55.439 | 38.387 | 16.422 | 0.00 | 0.00 |
| ATOM | 7766 | HB3  | LEU | X | 511 | 55.379 | 39.844 | 15.574 | 0.00 | 0.00 |
| ATOM | 7767 | CG   | LEU | X | 511 | 56.286 | 39.907 | 17.585 | 0.00 | 0.00 |
| ATOM | 7768 | HG   | LEU | X | 511 | 56.219 | 39.189 | 18.403 | 0.00 | 0.00 |
| ATOM | 7769 | CD1  | LEU | X | 511 | 57.659 | 40.013 | 17.046 | 0.00 | 0.00 |
| ATOM | 7770 | HD11 | LEU | X | 511 | 58.454 | 40.447 | 17.653 | 0.00 | 0.00 |
| ATOM | 7771 | HD12 | LEU | X | 511 | 57.892 | 38.967 | 16.850 | 0.00 | 0.00 |
| ATOM | 7772 | HD13 | LEU | X | 511 | 57.658 | 40.685 | 16.188 | 0.00 | 0.00 |
| ATOM | 7773 | CD2  | LEU | X | 511 | 56.124 | 41.334 | 18.117 | 0.00 | 0.00 |
| ATOM | 7774 | HD21 | LEU | X | 511 | 55.208 | 41.302 | 18.707 | 0.00 | 0.00 |
| ATOM | 7775 | HD22 | LEU | X | 511 | 56.908 | 41.667 | 18.797 | 0.00 | 0.00 |
| ATOM | 7776 | HD23 | LEU | X | 511 | 56.048 | 42.077 | 17.323 | 0.00 | 0.00 |
| ATOM | 7777 | C    | LEU | X | 511 | 52.802 | 39.395 | 15.775 | 0.00 | 0.00 |
| ATOM | 7778 | O    | LEU | X | 511 | 52.502 | 40.265 | 14.904 | 0.00 | 0.00 |
| ATOM | 7779 | N    | ARG | X | 512 | 52.224 | 38.148 | 15.671 | 0.00 | 0.00 |
| ATOM | 7780 | H    | ARG | X | 512 | 52.569 | 37.456 | 16.321 | 0.00 | 0.00 |
| ATOM | 7781 | CA   | ARG | X | 512 | 51.153 | 37.691 | 14.751 | 0.00 | 0.00 |
| ATOM | 7782 | HA   | ARG | X | 512 | 51.507 | 37.993 | 13.765 | 0.00 | 0.00 |
| ATOM | 7783 | CB   | ARG | X | 512 | 51.083 | 36.143 | 14.789 | 0.00 | 0.00 |
| ATOM | 7784 | HB2  | ARG | X | 512 | 50.459 | 35.754 | 13.984 | 0.00 | 0.00 |
| ATOM | 7785 | HB3  | ARG | X | 512 | 52.024 | 35.711 | 14.449 | 0.00 | 0.00 |
| ATOM | 7786 | CG   | ARG | X | 512 | 50.569 | 35.472 | 16.014 | 0.00 | 0.00 |
| ATOM | 7787 | HG2  | ARG | X | 512 | 50.723 | 36.063 | 16.916 | 0.00 | 0.00 |
| ATOM | 7788 | HG3  | ARG | X | 512 | 49.482 | 35.408 | 16.065 | 0.00 | 0.00 |
| ATOM | 7789 | CD   | ARG | X | 512 | 51.103 | 34.026 | 16.229 | 0.00 | 0.00 |
| ATOM | 7790 | HD2  | ARG | X | 512 | 50.899 | 33.573 | 15.260 | 0.00 | 0.00 |
| ATOM | 7791 | HD3  | ARG | X | 512 | 52.170 | 34.023 | 16.456 | 0.00 | 0.00 |
| ATOM | 7792 | NE   | ARG | X | 512 | 50.323 | 33.260 | 17.254 | 0.00 | 0.00 |
| ATOM | 7793 | HE   | ARG | X | 512 | 49.480 | 32.823 | 16.910 | 0.00 | 0.00 |
| ATOM | 7794 | CZ   | ARG | X | 512 | 50.686 | 33.184 | 18.565 | 0.00 | 0.00 |
| ATOM | 7795 | NH1  | ARG | X | 512 | 51.743 | 33.772 | 19.098 | 0.00 | 0.00 |
| ATOM | 7796 | HH11 | ARG | X | 512 | 52.239 | 34.404 | 18.487 | 0.00 | 0.00 |
| ATOM | 7797 | HH12 | ARG | X | 512 | 51.896 | 33.589 | 20.079 | 0.00 | 0.00 |
| ATOM | 7798 | NH2  | ARG | X | 512 | 49.946 | 32.397 | 19.345 | 0.00 | 0.00 |
| ATOM | 7799 | HH21 | ARG | X | 512 | 49.207 | 31.867 | 18.906 | 0.00 | 0.00 |
| ATOM | 7800 | HH22 | ARG | X | 512 | 50.160 | 32.357 | 20.331 | 0.00 | 0.00 |
| ATOM | 7801 | C    | ARG | X | 512 | 49.781 | 38.307 | 14.921 | 0.00 | 0.00 |
| ATOM | 7802 | O    | ARG | X | 512 | 49.424 | 38.679 | 15.987 | 0.00 | 0.00 |
| ATOM | 7803 | N    | PRO | X | 513 | 48.901 | 38.384 | 13.921 | 0.00 | 0.00 |
| ATOM | 7804 | CD   | PRO | X | 513 | 49.204 | 38.097 | 12.557 | 0.00 | 0.00 |
| ATOM | 7805 | HD2  | PRO | X | 513 | 49.774 | 37.172 | 12.640 | 0.00 | 0.00 |
| ATOM | 7806 | HD3  | PRO | X | 513 | 49.770 | 38.926 | 12.132 | 0.00 | 0.00 |
| ATOM | 7807 | CG   | PRO | X | 513 | 47.917 | 37.943 | 11.783 | 0.00 | 0.00 |
| ATOM | 7808 | HG2  | PRO | X | 513 | 47.717 | 36.872 | 11.774 | 0.00 | 0.00 |

|      |      |      |     |   |     |        |        |        |      |      |
|------|------|------|-----|---|-----|--------|--------|--------|------|------|
| ATOM | 7809 | HG3  | PRO | X | 513 | 48.023 | 38.360 | 10.781 | 0.00 | 0.00 |
| ATOM | 7810 | CB   | PRO | X | 513 | 46.975 | 38.827 | 12.583 | 0.00 | 0.00 |
| ATOM | 7811 | HB2  | PRO | X | 513 | 45.966 | 38.442 | 12.435 | 0.00 | 0.00 |
| ATOM | 7812 | HB3  | PRO | X | 513 | 47.053 | 39.845 | 12.200 | 0.00 | 0.00 |
| ATOM | 7813 | CA   | PRO | X | 513 | 47.514 | 38.756 | 14.034 | 0.00 | 0.00 |
| ATOM | 7814 | HA   | PRO | X | 513 | 47.582 | 39.765 | 14.441 | 0.00 | 0.00 |
| ATOM | 7815 | C    | PRO | X | 513 | 46.711 | 37.869 | 14.929 | 0.00 | 0.00 |
| ATOM | 7816 | O    | PRO | X | 513 | 46.865 | 36.679 | 15.048 | 0.00 | 0.00 |
| ATOM | 7817 | N    | LEU | X | 514 | 45.828 | 38.574 | 15.602 | 0.00 | 0.00 |
| ATOM | 7818 | H    | LEU | X | 514 | 45.668 | 39.516 | 15.275 | 0.00 | 0.00 |
| ATOM | 7819 | CA   | LEU | X | 514 | 45.101 | 38.183 | 16.790 | 0.00 | 0.00 |
| ATOM | 7820 | HA   | LEU | X | 514 | 45.804 | 38.134 | 17.622 | 0.00 | 0.00 |
| ATOM | 7821 | CB   | LEU | X | 514 | 44.070 | 39.295 | 17.204 | 0.00 | 0.00 |
| ATOM | 7822 | HB2  | LEU | X | 514 | 43.624 | 39.689 | 16.291 | 0.00 | 0.00 |
| ATOM | 7823 | HB3  | LEU | X | 514 | 43.289 | 38.949 | 17.881 | 0.00 | 0.00 |
| ATOM | 7824 | CG   | LEU | X | 514 | 44.682 | 40.484 | 17.952 | 0.00 | 0.00 |
| ATOM | 7825 | HG   | LEU | X | 514 | 45.538 | 40.791 | 17.352 | 0.00 | 0.00 |
| ATOM | 7826 | CD1  | LEU | X | 514 | 43.628 | 41.571 | 18.112 | 0.00 | 0.00 |
| ATOM | 7827 | HD11 | LEU | X | 514 | 43.288 | 42.010 | 17.174 | 0.00 | 0.00 |
| ATOM | 7828 | HD12 | LEU | X | 514 | 42.737 | 41.179 | 18.604 | 0.00 | 0.00 |
| ATOM | 7829 | HD13 | LEU | X | 514 | 43.992 | 42.316 | 18.819 | 0.00 | 0.00 |
| ATOM | 7830 | CD2  | LEU | X | 514 | 45.120 | 40.101 | 19.366 | 0.00 | 0.00 |
| ATOM | 7831 | HD21 | LEU | X | 514 | 44.280 | 39.770 | 19.978 | 0.00 | 0.00 |
| ATOM | 7832 | HD22 | LEU | X | 514 | 45.867 | 39.310 | 19.311 | 0.00 | 0.00 |
| ATOM | 7833 | HD23 | LEU | X | 514 | 45.647 | 40.900 | 19.889 | 0.00 | 0.00 |
| ATOM | 7834 | C    | LEU | X | 514 | 44.507 | 36.758 | 16.697 | 0.00 | 0.00 |
| ATOM | 7835 | O    | LEU | X | 514 | 43.336 | 36.544 | 16.390 | 0.00 | 0.00 |
| ATOM | 7836 | N    | GLU | X | 515 | 45.222 | 35.793 | 17.264 | 0.00 | 0.00 |
| ATOM | 7837 | H    | GLU | X | 515 | 46.123 | 36.108 | 17.594 | 0.00 | 0.00 |
| ATOM | 7838 | CA   | GLU | X | 515 | 44.758 | 34.446 | 17.598 | 0.00 | 0.00 |
| ATOM | 7839 | HA   | GLU | X | 515 | 44.098 | 34.091 | 16.806 | 0.00 | 0.00 |
| ATOM | 7840 | CB   | GLU | X | 515 | 45.953 | 33.546 | 17.546 | 0.00 | 0.00 |
| ATOM | 7841 | HB2  | GLU | X | 515 | 46.588 | 33.838 | 16.711 | 0.00 | 0.00 |
| ATOM | 7842 | HB3  | GLU | X | 515 | 46.585 | 33.825 | 18.389 | 0.00 | 0.00 |
| ATOM | 7843 | CG   | GLU | X | 515 | 45.672 | 32.034 | 17.578 | 0.00 | 0.00 |
| ATOM | 7844 | HG2  | GLU | X | 515 | 45.589 | 31.692 | 18.609 | 0.00 | 0.00 |
| ATOM | 7845 | HG3  | GLU | X | 515 | 44.830 | 31.833 | 16.915 | 0.00 | 0.00 |
| ATOM | 7846 | CD   | GLU | X | 515 | 46.868 | 31.414 | 17.017 | 0.00 | 0.00 |
| ATOM | 7847 | OE1  | GLU | X | 515 | 47.659 | 30.943 | 17.872 | 0.00 | 0.00 |
| ATOM | 7848 | OE2  | GLU | X | 515 | 47.060 | 31.221 | 15.764 | 0.00 | 0.00 |
| ATOM | 7849 | C    | GLU | X | 515 | 43.909 | 34.416 | 18.914 | 0.00 | 0.00 |
| ATOM | 7850 | O    | GLU | X | 515 | 44.400 | 34.799 | 19.982 | 0.00 | 0.00 |
| ATOM | 7851 | N    | VAL | X | 516 | 42.617 | 33.990 | 18.827 | 0.00 | 0.00 |
| ATOM | 7852 | H    | VAL | X | 516 | 42.252 | 33.634 | 17.955 | 0.00 | 0.00 |
| ATOM | 7853 | CA   | VAL | X | 516 | 41.629 | 33.992 | 19.879 | 0.00 | 0.00 |
| ATOM | 7854 | HA   | VAL | X | 516 | 42.060 | 34.579 | 20.689 | 0.00 | 0.00 |
| ATOM | 7855 | CB   | VAL | X | 516 | 40.245 | 34.441 | 19.396 | 0.00 | 0.00 |
| ATOM | 7856 | HB   | VAL | X | 516 | 39.969 | 33.762 | 18.589 | 0.00 | 0.00 |
| ATOM | 7857 | CG1  | VAL | X | 516 | 39.112 | 34.245 | 20.415 | 0.00 | 0.00 |
| ATOM | 7858 | HG11 | VAL | X | 516 | 38.150 | 34.487 | 19.962 | 0.00 | 0.00 |
| ATOM | 7859 | HG12 | VAL | X | 516 | 39.069 | 33.234 | 20.820 | 0.00 | 0.00 |
| ATOM | 7860 | HG13 | VAL | X | 516 | 39.288 | 34.903 | 21.266 | 0.00 | 0.00 |
| ATOM | 7861 | CG2  | VAL | X | 516 | 40.274 | 35.861 | 18.851 | 0.00 | 0.00 |
| ATOM | 7862 | HG21 | VAL | X | 516 | 39.315 | 36.369 | 18.746 | 0.00 | 0.00 |
| ATOM | 7863 | HG22 | VAL | X | 516 | 40.748 | 36.473 | 19.618 | 0.00 | 0.00 |
| ATOM | 7864 | HG23 | VAL | X | 516 | 40.819 | 35.897 | 17.908 | 0.00 | 0.00 |
| ATOM | 7865 | C    | VAL | X | 516 | 41.386 | 32.609 | 20.364 | 0.00 | 0.00 |
| ATOM | 7866 | O    | VAL | X | 516 | 41.043 | 31.690 | 19.603 | 0.00 | 0.00 |
| ATOM | 7867 | N    | ARG | X | 517 | 41.628 | 32.376 | 21.708 | 0.00 | 0.00 |
| ATOM | 7868 | H    | ARG | X | 517 | 41.826 | 33.163 | 22.309 | 0.00 | 0.00 |
| ATOM | 7869 | CA   | ARG | X | 517 | 41.662 | 30.975 | 22.257 | 0.00 | 0.00 |
| ATOM | 7870 | HA   | ARG | X | 517 | 41.596 | 30.190 | 21.504 | 0.00 | 0.00 |
| ATOM | 7871 | CB   | ARG | X | 517 | 42.961 | 30.723 | 23.044 | 0.00 | 0.00 |
| ATOM | 7872 | HB2  | ARG | X | 517 | 43.472 | 31.674 | 23.191 | 0.00 | 0.00 |
| ATOM | 7873 | HB3  | ARG | X | 517 | 42.741 | 30.113 | 23.921 | 0.00 | 0.00 |
| ATOM | 7874 | CG   | ARG | X | 517 | 43.941 | 29.812 | 22.251 | 0.00 | 0.00 |
| ATOM | 7875 | HG2  | ARG | X | 517 | 43.574 | 28.791 | 22.353 | 0.00 | 0.00 |
| ATOM | 7876 | HG3  | ARG | X | 517 | 43.954 | 30.024 | 21.181 | 0.00 | 0.00 |
| ATOM | 7877 | CD   | ARG | X | 517 | 45.355 | 29.790 | 22.780 | 0.00 | 0.00 |
| ATOM | 7878 | HD2  | ARG | X | 517 | 45.842 | 30.765 | 22.759 | 0.00 | 0.00 |

|      |      |      |     |   |     |        |        |        |      |      |
|------|------|------|-----|---|-----|--------|--------|--------|------|------|
| ATOM | 7879 | HD3  | ARG | X | 517 | 45.313 | 29.326 | 23.765 | 0.00 | 0.00 |
| ATOM | 7880 | NE   | ARG | X | 517 | 46.222 | 28.894 | 21.977 | 0.00 | 0.00 |
| ATOM | 7881 | HE   | ARG | X | 517 | 46.495 | 28.045 | 22.451 | 0.00 | 0.00 |
| ATOM | 7882 | CZ   | ARG | X | 517 | 46.947 | 29.236 | 20.924 | 0.00 | 0.00 |
| ATOM | 7883 | NH1  | ARG | X | 517 | 46.866 | 30.457 | 20.449 | 0.00 | 0.00 |
| ATOM | 7884 | HH11 | ARG | X | 517 | 46.415 | 31.192 | 20.975 | 0.00 | 0.00 |
| ATOM | 7885 | HH12 | ARG | X | 517 | 47.381 | 30.747 | 19.630 | 0.00 | 0.00 |
| ATOM | 7886 | NH2  | ARG | X | 517 | 47.616 | 28.284 | 20.294 | 0.00 | 0.00 |
| ATOM | 7887 | HH21 | ARG | X | 517 | 47.538 | 27.354 | 20.680 | 0.00 | 0.00 |
| ATOM | 7888 | HH22 | ARG | X | 517 | 48.379 | 28.582 | 19.703 | 0.00 | 0.00 |
| ATOM | 7889 | C    | ARG | X | 517 | 40.539 | 30.778 | 23.230 | 0.00 | 0.00 |
| ATOM | 7890 | O    | ARG | X | 517 | 40.153 | 31.619 | 24.020 | 0.00 | 0.00 |
| ATOM | 7891 | N    | ARG | X | 518 | 39.875 | 29.655 | 23.088 | 0.00 | 0.00 |
| ATOM | 7892 | H    | ARG | X | 518 | 40.114 | 29.006 | 22.352 | 0.00 | 0.00 |
| ATOM | 7893 | CA   | ARG | X | 518 | 38.810 | 29.308 | 24.035 | 0.00 | 0.00 |
| ATOM | 7894 | HA   | ARG | X | 518 | 38.184 | 30.199 | 24.083 | 0.00 | 0.00 |
| ATOM | 7895 | CB   | ARG | X | 518 | 38.014 | 28.252 | 23.425 | 0.00 | 0.00 |
| ATOM | 7896 | HB2  | ARG | X | 518 | 37.924 | 28.489 | 22.365 | 0.00 | 0.00 |
| ATOM | 7897 | HB3  | ARG | X | 518 | 38.578 | 27.325 | 23.523 | 0.00 | 0.00 |
| ATOM | 7898 | CG   | ARG | X | 518 | 36.597 | 28.173 | 23.947 | 0.00 | 0.00 |
| ATOM | 7899 | HG2  | ARG | X | 518 | 36.514 | 27.977 | 25.016 | 0.00 | 0.00 |
| ATOM | 7900 | HG3  | ARG | X | 518 | 36.271 | 29.199 | 23.773 | 0.00 | 0.00 |
| ATOM | 7901 | CD   | ARG | X | 518 | 35.703 | 27.226 | 23.138 | 0.00 | 0.00 |
| ATOM | 7902 | HD2  | ARG | X | 518 | 35.997 | 27.272 | 22.090 | 0.00 | 0.00 |
| ATOM | 7903 | HD3  | ARG | X | 518 | 35.897 | 26.212 | 23.488 | 0.00 | 0.00 |
| ATOM | 7904 | NE   | ARG | X | 518 | 34.254 | 27.602 | 23.301 | 0.00 | 0.00 |
| ATOM | 7905 | HE   | ARG | X | 518 | 33.826 | 27.023 | 24.008 | 0.00 | 0.00 |
| ATOM | 7906 | CZ   | ARG | X | 518 | 33.416 | 28.330 | 22.545 | 0.00 | 0.00 |
| ATOM | 7907 | NH1  | ARG | X | 518 | 33.852 | 29.076 | 21.576 | 0.00 | 0.00 |
| ATOM | 7908 | HH11 | ARG | X | 518 | 34.851 | 29.166 | 21.454 | 0.00 | 0.00 |
| ATOM | 7909 | HH12 | ARG | X | 518 | 33.213 | 29.573 | 20.972 | 0.00 | 0.00 |
| ATOM | 7910 | NH2  | ARG | X | 518 | 32.079 | 28.239 | 22.718 | 0.00 | 0.00 |
| ATOM | 7911 | HH21 | ARG | X | 518 | 31.745 | 27.641 | 23.460 | 0.00 | 0.00 |
| ATOM | 7912 | HH22 | ARG | X | 518 | 31.380 | 28.785 | 22.234 | 0.00 | 0.00 |
| ATOM | 7913 | C    | ARG | X | 518 | 39.462 | 28.858 | 25.444 | 0.00 | 0.00 |
| ATOM | 7914 | O    | ARG | X | 518 | 40.528 | 28.269 | 25.512 | 0.00 | 0.00 |
| ATOM | 7915 | N    | GLY | X | 519 | 38.751 | 29.116 | 26.568 | 0.00 | 0.00 |
| ATOM | 7916 | H    | GLY | X | 519 | 37.865 | 29.567 | 26.391 | 0.00 | 0.00 |
| ATOM | 7917 | CA   | GLY | X | 519 | 38.774 | 28.369 | 27.774 | 0.00 | 0.00 |
| ATOM | 7918 | HA2  | GLY | X | 519 | 37.830 | 28.393 | 28.363 | 0.00 | 0.00 |
| ATOM | 7919 | HA3  | GLY | X | 519 | 38.840 | 27.302 | 27.517 | 0.00 | 0.00 |
| ATOM | 7920 | C    | GLY | X | 519 | 39.874 | 28.775 | 28.725 | 0.00 | 0.00 |
| ATOM | 7921 | O    | GLY | X | 519 | 40.818 | 27.994 | 28.848 | 0.00 | 0.00 |
| ATOM | 7922 | N    | LEU | X | 520 | 39.813 | 30.014 | 29.237 | 0.00 | 0.00 |
| ATOM | 7923 | H    | LEU | X | 520 | 39.065 | 30.633 | 28.959 | 0.00 | 0.00 |
| ATOM | 7924 | CA   | LEU | X | 520 | 41.042 | 30.555 | 29.890 | 0.00 | 0.00 |
| ATOM | 7925 | HA   | LEU | X | 520 | 41.912 | 30.487 | 29.237 | 0.00 | 0.00 |
| ATOM | 7926 | CB   | LEU | X | 520 | 40.690 | 32.078 | 30.260 | 0.00 | 0.00 |
| ATOM | 7927 | HB2  | LEU | X | 520 | 40.403 | 32.624 | 29.361 | 0.00 | 0.00 |
| ATOM | 7928 | HB3  | LEU | X | 520 | 39.818 | 32.062 | 30.914 | 0.00 | 0.00 |
| ATOM | 7929 | CG   | LEU | X | 520 | 41.828 | 32.803 | 31.081 | 0.00 | 0.00 |
| ATOM | 7930 | HG   | LEU | X | 520 | 41.950 | 32.112 | 31.916 | 0.00 | 0.00 |
| ATOM | 7931 | CD1  | LEU | X | 520 | 43.126 | 32.938 | 30.194 | 0.00 | 0.00 |
| ATOM | 7932 | HD11 | LEU | X | 520 | 43.313 | 31.912 | 29.877 | 0.00 | 0.00 |
| ATOM | 7933 | HD12 | LEU | X | 520 | 42.980 | 33.650 | 29.382 | 0.00 | 0.00 |
| ATOM | 7934 | HD13 | LEU | X | 520 | 43.975 | 33.191 | 30.829 | 0.00 | 0.00 |
| ATOM | 7935 | CD2  | LEU | X | 520 | 41.387 | 34.191 | 31.392 | 0.00 | 0.00 |
| ATOM | 7936 | HD21 | LEU | X | 520 | 41.356 | 34.892 | 30.558 | 0.00 | 0.00 |
| ATOM | 7937 | HD22 | LEU | X | 520 | 40.387 | 34.124 | 31.821 | 0.00 | 0.00 |
| ATOM | 7938 | HD23 | LEU | X | 520 | 42.036 | 34.542 | 32.194 | 0.00 | 0.00 |
| ATOM | 7939 | C    | LEU | X | 520 | 41.442 | 29.603 | 31.099 | 0.00 | 0.00 |
| ATOM | 7940 | O    | LEU | X | 520 | 40.834 | 29.591 | 32.150 | 0.00 | 0.00 |
| ATOM | 7941 | N    | ARG | X | 521 | 42.577 | 28.865 | 30.903 | 0.00 | 0.00 |
| ATOM | 7942 | H    | ARG | X | 521 | 43.131 | 29.094 | 30.090 | 0.00 | 0.00 |
| ATOM | 7943 | CA   | ARG | X | 521 | 43.174 | 27.780 | 31.676 | 0.00 | 0.00 |
| ATOM | 7944 | HA   | ARG | X | 521 | 43.943 | 27.248 | 31.116 | 0.00 | 0.00 |
| ATOM | 7945 | CB   | ARG | X | 521 | 43.856 | 28.530 | 32.837 | 0.00 | 0.00 |
| ATOM | 7946 | HB2  | ARG | X | 521 | 44.334 | 29.455 | 32.516 | 0.00 | 0.00 |
| ATOM | 7947 | HB3  | ARG | X | 521 | 43.095 | 28.832 | 33.556 | 0.00 | 0.00 |
| ATOM | 7948 | CG   | ARG | X | 521 | 45.046 | 27.726 | 33.490 | 0.00 | 0.00 |

|      |      |      |     |   |     |        |        |        |      |      |
|------|------|------|-----|---|-----|--------|--------|--------|------|------|
| ATOM | 7949 | HG2  | ARG | X | 521 | 45.311 | 28.145 | 34.461 | 0.00 | 0.00 |
| ATOM | 7950 | HG3  | ARG | X | 521 | 44.718 | 26.717 | 33.740 | 0.00 | 0.00 |
| ATOM | 7951 | CD   | ARG | X | 521 | 46.246 | 27.754 | 32.523 | 0.00 | 0.00 |
| ATOM | 7952 | HD2  | ARG | X | 521 | 46.002 | 27.266 | 31.579 | 0.00 | 0.00 |
| ATOM | 7953 | HD3  | ARG | X | 521 | 46.541 | 28.768 | 32.255 | 0.00 | 0.00 |
| ATOM | 7954 | NE   | ARG | X | 521 | 47.399 | 27.175 | 33.065 | 0.00 | 0.00 |
| ATOM | 7955 | HE   | ARG | X | 521 | 47.646 | 27.369 | 34.024 | 0.00 | 0.00 |
| ATOM | 7956 | CZ   | ARG | X | 521 | 48.320 | 26.561 | 32.394 | 0.00 | 0.00 |
| ATOM | 7957 | NH1  | ARG | X | 521 | 48.493 | 26.591 | 31.081 | 0.00 | 0.00 |
| ATOM | 7958 | HH11 | ARG | X | 521 | 48.010 | 27.302 | 30.551 | 0.00 | 0.00 |
| ATOM | 7959 | HH12 | ARG | X | 521 | 49.313 | 26.142 | 30.698 | 0.00 | 0.00 |
| ATOM | 7960 | NH2  | ARG | X | 521 | 49.110 | 25.818 | 33.135 | 0.00 | 0.00 |
| ATOM | 7961 | HH21 | ARG | X | 521 | 49.102 | 25.986 | 34.131 | 0.00 | 0.00 |
| ATOM | 7962 | HH22 | ARG | X | 521 | 49.897 | 25.426 | 32.638 | 0.00 | 0.00 |
| ATOM | 7963 | C    | ARG | X | 521 | 42.136 | 26.765 | 32.146 | 0.00 | 0.00 |
| ATOM | 7964 | O    | ARG | X | 521 | 42.264 | 26.237 | 33.253 | 0.00 | 0.00 |
| ATOM | 7965 | N    | ALA | X | 522 | 41.063 | 26.570 | 31.447 | 0.00 | 0.00 |
| ATOM | 7966 | H    | ALA | X | 522 | 41.069 | 26.861 | 30.480 | 0.00 | 0.00 |
| ATOM | 7967 | CA   | ALA | X | 522 | 39.753 | 26.006 | 31.925 | 0.00 | 0.00 |
| ATOM | 7968 | HA   | ALA | X | 522 | 39.526 | 26.612 | 32.803 | 0.00 | 0.00 |
| ATOM | 7969 | CB   | ALA | X | 522 | 38.572 | 26.088 | 30.933 | 0.00 | 0.00 |
| ATOM | 7970 | HB1  | ALA | X | 522 | 37.792 | 25.525 | 31.446 | 0.00 | 0.00 |
| ATOM | 7971 | HB2  | ALA | X | 522 | 38.241 | 27.101 | 30.709 | 0.00 | 0.00 |
| ATOM | 7972 | HB3  | ALA | X | 522 | 38.745 | 25.602 | 29.972 | 0.00 | 0.00 |
| ATOM | 7973 | C    | ALA | X | 522 | 39.833 | 24.562 | 32.494 | 0.00 | 0.00 |
| ATOM | 7974 | O    | ALA | X | 522 | 39.374 | 24.275 | 33.634 | 0.00 | 0.00 |
| ATOM | 7975 | N    | GLN | X | 523 | 40.484 | 23.754 | 31.754 | 0.00 | 0.00 |
| ATOM | 7976 | H    | GLN | X | 523 | 40.897 | 24.159 | 30.926 | 0.00 | 0.00 |
| ATOM | 7977 | CA   | GLN | X | 523 | 40.584 | 22.286 | 32.011 | 0.00 | 0.00 |
| ATOM | 7978 | HA   | GLN | X | 523 | 39.627 | 21.904 | 32.366 | 0.00 | 0.00 |
| ATOM | 7979 | CB   | GLN | X | 523 | 40.936 | 21.633 | 30.691 | 0.00 | 0.00 |
| ATOM | 7980 | HB2  | GLN | X | 523 | 41.895 | 22.066 | 30.406 | 0.00 | 0.00 |
| ATOM | 7981 | HB3  | GLN | X | 523 | 41.016 | 20.552 | 30.799 | 0.00 | 0.00 |
| ATOM | 7982 | CG   | GLN | X | 523 | 39.889 | 21.633 | 29.511 | 0.00 | 0.00 |
| ATOM | 7983 | HG2  | GLN | X | 523 | 40.298 | 21.006 | 28.719 | 0.00 | 0.00 |
| ATOM | 7984 | HG3  | GLN | X | 523 | 38.933 | 21.262 | 29.881 | 0.00 | 0.00 |
| ATOM | 7985 | CD   | GLN | X | 523 | 39.656 | 22.948 | 28.899 | 0.00 | 0.00 |
| ATOM | 7986 | OE1  | GLN | X | 523 | 40.562 | 23.755 | 28.863 | 0.00 | 0.00 |
| ATOM | 7987 | NE2  | GLN | X | 523 | 38.447 | 23.143 | 28.422 | 0.00 | 0.00 |
| ATOM | 7988 | HE21 | GLN | X | 523 | 38.263 | 23.976 | 27.881 | 0.00 | 0.00 |
| ATOM | 7989 | HE22 | GLN | X | 523 | 37.731 | 22.442 | 28.551 | 0.00 | 0.00 |
| ATOM | 7990 | C    | GLN | X | 523 | 41.744 | 21.951 | 33.105 | 0.00 | 0.00 |
| ATOM | 7991 | O    | GLN | X | 523 | 41.857 | 20.800 | 33.526 | 0.00 | 0.00 |
| ATOM | 7992 | N    | ALA | X | 524 | 42.495 | 22.967 | 33.430 | 0.00 | 0.00 |
| ATOM | 7993 | H    | ALA | X | 524 | 42.491 | 23.837 | 32.917 | 0.00 | 0.00 |
| ATOM | 7994 | CA   | ALA | X | 524 | 43.386 | 22.858 | 34.563 | 0.00 | 0.00 |
| ATOM | 7995 | HA   | ALA | X | 524 | 43.536 | 21.830 | 34.894 | 0.00 | 0.00 |
| ATOM | 7996 | CB   | ALA | X | 524 | 44.665 | 23.595 | 34.339 | 0.00 | 0.00 |
| ATOM | 7997 | HB1  | ALA | X | 524 | 45.458 | 23.348 | 35.045 | 0.00 | 0.00 |
| ATOM | 7998 | HB2  | ALA | X | 524 | 45.013 | 23.295 | 33.350 | 0.00 | 0.00 |
| ATOM | 7999 | HB3  | ALA | X | 524 | 44.542 | 24.676 | 34.406 | 0.00 | 0.00 |
| ATOM | 8000 | C    | ALA | X | 524 | 42.786 | 23.435 | 35.759 | 0.00 | 0.00 |
| ATOM | 8001 | O    | ALA | X | 524 | 42.739 | 22.806 | 36.813 | 0.00 | 0.00 |
| ATOM | 8002 | N    | CYX | X | 525 | 42.193 | 24.634 | 35.744 | 0.00 | 0.00 |
| ATOM | 8003 | H    | CYX | X | 525 | 42.218 | 25.134 | 34.867 | 0.00 | 0.00 |
| ATOM | 8004 | CA   | CYX | X | 525 | 41.440 | 25.297 | 36.809 | 0.00 | 0.00 |
| ATOM | 8005 | HA   | CYX | X | 525 | 42.131 | 25.433 | 37.641 | 0.00 | 0.00 |
| ATOM | 8006 | CB   | CYX | X | 525 | 41.020 | 26.753 | 36.571 | 0.00 | 0.00 |
| ATOM | 8007 | HB2  | CYX | X | 525 | 40.387 | 26.836 | 35.687 | 0.00 | 0.00 |
| ATOM | 8008 | HB3  | CYX | X | 525 | 40.473 | 27.223 | 37.389 | 0.00 | 0.00 |
| ATOM | 8009 | SG   | CYX | X | 525 | 42.440 | 27.748 | 36.201 | 0.00 | 0.00 |
| ATOM | 8010 | C    | CYX | X | 525 | 40.221 | 24.545 | 37.392 | 0.00 | 0.00 |
| ATOM | 8011 | O    | CYX | X | 525 | 39.937 | 24.683 | 38.584 | 0.00 | 0.00 |
| ATOM | 8012 | N    | ALA | X | 526 | 39.488 | 23.757 | 36.647 | 0.00 | 0.00 |
| ATOM | 8013 | H    | ALA | X | 526 | 39.729 | 23.624 | 35.675 | 0.00 | 0.00 |
| ATOM | 8014 | CA   | ALA | X | 526 | 38.418 | 22.912 | 37.172 | 0.00 | 0.00 |
| ATOM | 8015 | HA   | ALA | X | 526 | 37.701 | 23.527 | 37.715 | 0.00 | 0.00 |
| ATOM | 8016 | CB   | ALA | X | 526 | 37.784 | 22.150 | 35.963 | 0.00 | 0.00 |
| ATOM | 8017 | HB1  | ALA | X | 526 | 37.234 | 22.761 | 35.247 | 0.00 | 0.00 |
| ATOM | 8018 | HB2  | ALA | X | 526 | 38.529 | 21.615 | 35.375 | 0.00 | 0.00 |



|      |      |      |     |   |     |        |        |        |      |      |
|------|------|------|-----|---|-----|--------|--------|--------|------|------|
| ATOM | 8019 | HB3  | ALA | X | 526 | 37.044 | 21.391 | 36.219 | 0.00 | 0.00 |
| ATOM | 8020 | C    | ALA | X | 526 | 38.889 | 21.867 | 38.238 | 0.00 | 0.00 |
| ATOM | 8021 | O    | ALA | X | 526 | 38.093 | 21.599 | 39.138 | 0.00 | 0.00 |
| ATOM | 8022 | N    | PHE | X | 527 | 40.174 | 21.420 | 38.174 | 0.00 | 0.00 |
| ATOM | 8023 | H    | PHE | X | 527 | 40.865 | 21.632 | 37.468 | 0.00 | 0.00 |
| ATOM | 8024 | CA   | PHE | X | 527 | 40.624 | 20.534 | 39.282 | 0.00 | 0.00 |
| ATOM | 8025 | HA   | PHE | X | 527 | 39.954 | 19.711 | 39.532 | 0.00 | 0.00 |
| ATOM | 8026 | CB   | PHE | X | 527 | 42.064 | 20.158 | 38.849 | 0.00 | 0.00 |
| ATOM | 8027 | HB2  | PHE | X | 527 | 42.075 | 19.398 | 38.067 | 0.00 | 0.00 |
| ATOM | 8028 | HB3  | PHE | X | 527 | 42.542 | 21.038 | 38.418 | 0.00 | 0.00 |
| ATOM | 8029 | CG   | PHE | X | 527 | 43.022 | 19.719 | 40.009 | 0.00 | 0.00 |
| ATOM | 8030 | CD1  | PHE | X | 527 | 42.997 | 18.392 | 40.434 | 0.00 | 0.00 |
| ATOM | 8031 | HD1  | PHE | X | 527 | 42.227 | 17.767 | 40.006 | 0.00 | 0.00 |
| ATOM | 8032 | CE1  | PHE | X | 527 | 43.807 | 17.954 | 41.439 | 0.00 | 0.00 |
| ATOM | 8033 | HE1  | PHE | X | 527 | 43.646 | 16.944 | 41.786 | 0.00 | 0.00 |
| ATOM | 8034 | CZ   | PHE | X | 527 | 44.820 | 18.821 | 41.909 | 0.00 | 0.00 |
| ATOM | 8035 | HZ   | PHE | X | 527 | 45.457 | 18.466 | 42.706 | 0.00 | 0.00 |
| ATOM | 8036 | CE2  | PHE | X | 527 | 44.799 | 20.131 | 41.518 | 0.00 | 0.00 |
| ATOM | 8037 | HE2  | PHE | X | 527 | 45.460 | 20.813 | 42.032 | 0.00 | 0.00 |
| ATOM | 8038 | CD2  | PHE | X | 527 | 43.882 | 20.641 | 40.579 | 0.00 | 0.00 |
| ATOM | 8039 | HD2  | PHE | X | 527 | 43.778 | 21.700 | 40.393 | 0.00 | 0.00 |
| ATOM | 8040 | C    | PHE | X | 527 | 40.678 | 21.293 | 40.654 | 0.00 | 0.00 |
| ATOM | 8041 | O    | PHE | X | 527 | 40.363 | 20.745 | 41.717 | 0.00 | 0.00 |
| ATOM | 8042 | N    | TRP | X | 528 | 40.783 | 22.628 | 40.607 | 0.00 | 0.00 |
| ATOM | 8043 | H    | TRP | X | 528 | 40.915 | 23.084 | 39.716 | 0.00 | 0.00 |
| ATOM | 8044 | CA   | TRP | X | 528 | 40.906 | 23.464 | 41.866 | 0.00 | 0.00 |
| ATOM | 8045 | HA   | TRP | X | 528 | 41.385 | 22.851 | 42.629 | 0.00 | 0.00 |
| ATOM | 8046 | CB   | TRP | X | 528 | 41.864 | 24.639 | 41.607 | 0.00 | 0.00 |
| ATOM | 8047 | HB2  | TRP | X | 528 | 41.449 | 25.321 | 40.865 | 0.00 | 0.00 |
| ATOM | 8048 | HB3  | TRP | X | 528 | 41.950 | 25.278 | 42.486 | 0.00 | 0.00 |
| ATOM | 8049 | CG   | TRP | X | 528 | 43.276 | 24.379 | 41.299 | 0.00 | 0.00 |
| ATOM | 8050 | CD1  | TRP | X | 528 | 43.792 | 24.679 | 40.078 | 0.00 | 0.00 |
| ATOM | 8051 | HD1  | TRP | X | 528 | 43.253 | 25.177 | 39.286 | 0.00 | 0.00 |
| ATOM | 8052 | NE1  | TRP | X | 528 | 45.163 | 24.362 | 40.058 | 0.00 | 0.00 |
| ATOM | 8053 | HE1  | TRP | X | 528 | 45.799 | 24.555 | 39.297 | 0.00 | 0.00 |
| ATOM | 8054 | CE2  | TRP | X | 528 | 45.538 | 23.874 | 41.337 | 0.00 | 0.00 |
| ATOM | 8055 | CZ2  | TRP | X | 528 | 46.795 | 23.464 | 41.794 | 0.00 | 0.00 |
| ATOM | 8056 | HZ2  | TRP | X | 528 | 47.670 | 23.538 | 41.164 | 0.00 | 0.00 |
| ATOM | 8057 | CH2  | TRP | X | 528 | 46.928 | 23.279 | 43.172 | 0.00 | 0.00 |
| ATOM | 8058 | HH2  | TRP | X | 528 | 47.883 | 22.951 | 43.556 | 0.00 | 0.00 |
| ATOM | 8059 | CZ3  | TRP | X | 528 | 45.788 | 23.228 | 44.003 | 0.00 | 0.00 |
| ATOM | 8060 | HZ3  | TRP | X | 528 | 45.936 | 22.940 | 45.033 | 0.00 | 0.00 |
| ATOM | 8061 | CE3  | TRP | X | 528 | 44.498 | 23.429 | 43.445 | 0.00 | 0.00 |
| ATOM | 8062 | HE3  | TRP | X | 528 | 43.615 | 23.266 | 44.045 | 0.00 | 0.00 |
| ATOM | 8063 | CD2  | TRP | X | 528 | 44.399 | 23.898 | 42.117 | 0.00 | 0.00 |
| ATOM | 8064 | C    | TRP | X | 528 | 39.569 | 23.894 | 42.380 | 0.00 | 0.00 |
| ATOM | 8065 | O    | TRP | X | 528 | 39.396 | 24.174 | 43.574 | 0.00 | 0.00 |
| ATOM | 8066 | N    | ASN | X | 529 | 38.546 | 24.041 | 41.555 | 0.00 | 0.00 |
| ATOM | 8067 | H    | ASN | X | 529 | 38.759 | 23.840 | 40.589 | 0.00 | 0.00 |
| ATOM | 8068 | CA   | ASN | X | 529 | 37.130 | 24.303 | 41.933 | 0.00 | 0.00 |
| ATOM | 8069 | HA   | ASN | X | 529 | 37.093 | 25.010 | 42.763 | 0.00 | 0.00 |
| ATOM | 8070 | CB   | ASN | X | 529 | 36.419 | 24.972 | 40.719 | 0.00 | 0.00 |
| ATOM | 8071 | HB2  | ASN | X | 529 | 36.637 | 24.373 | 39.835 | 0.00 | 0.00 |
| ATOM | 8072 | HB3  | ASN | X | 529 | 35.338 | 25.070 | 40.817 | 0.00 | 0.00 |
| ATOM | 8073 | CG   | ASN | X | 529 | 36.951 | 26.361 | 40.376 | 0.00 | 0.00 |
| ATOM | 8074 | OD1  | ASN | X | 529 | 37.539 | 27.066 | 41.169 | 0.00 | 0.00 |
| ATOM | 8075 | ND2  | ASN | X | 529 | 36.675 | 26.770 | 39.171 | 0.00 | 0.00 |
| ATOM | 8076 | HD21 | ASN | X | 529 | 36.684 | 27.771 | 39.037 | 0.00 | 0.00 |
| ATOM | 8077 | HD22 | ASN | X | 529 | 36.273 | 26.173 | 38.462 | 0.00 | 0.00 |
| ATOM | 8078 | C    | ASN | X | 529 | 36.236 | 23.112 | 42.189 | 0.00 | 0.00 |
| ATOM | 8079 | O    | ASN | X | 529 | 35.373 | 23.233 | 43.030 | 0.00 | 0.00 |
| ATOM | 8080 | N    | ARG | X | 530 | 36.508 | 21.923 | 41.516 | 0.00 | 0.00 |
| ATOM | 8081 | H    | ARG | X | 530 | 37.221 | 21.913 | 40.801 | 0.00 | 0.00 |
| ATOM | 8082 | CA   | ARG | X | 530 | 35.608 | 20.791 | 41.624 | 0.00 | 0.00 |
| ATOM | 8083 | HA   | ARG | X | 530 | 34.826 | 21.117 | 42.311 | 0.00 | 0.00 |
| ATOM | 8084 | CB   | ARG | X | 530 | 35.028 | 20.368 | 40.232 | 0.00 | 0.00 |
| ATOM | 8085 | HB2  | ARG | X | 530 | 34.406 | 21.215 | 39.943 | 0.00 | 0.00 |
| ATOM | 8086 | HB3  | ARG | X | 530 | 35.824 | 20.287 | 39.493 | 0.00 | 0.00 |
| ATOM | 8087 | CG   | ARG | X | 530 | 34.086 | 19.202 | 40.296 | 0.00 | 0.00 |
| ATOM | 8088 | HG2  | ARG | X | 530 | 34.614 | 18.342 | 40.708 | 0.00 | 0.00 |

|      |      |      |     |   |     |        |        |        |      |      |
|------|------|------|-----|---|-----|--------|--------|--------|------|------|
| ATOM | 8089 | HG3  | ARG | X | 530 | 33.289 | 19.466 | 40.993 | 0.00 | 0.00 |
| ATOM | 8090 | CD   | ARG | X | 530 | 33.413 | 18.791 | 38.981 | 0.00 | 0.00 |
| ATOM | 8091 | HD2  | ARG | X | 530 | 32.862 | 19.585 | 38.477 | 0.00 | 0.00 |
| ATOM | 8092 | HD3  | ARG | X | 530 | 34.226 | 18.475 | 38.328 | 0.00 | 0.00 |
| ATOM | 8093 | NE   | ARG | X | 530 | 32.528 | 17.599 | 39.150 | 0.00 | 0.00 |
| ATOM | 8094 | HE   | ARG | X | 530 | 32.964 | 16.701 | 39.000 | 0.00 | 0.00 |
| ATOM | 8095 | CZ   | ARG | X | 530 | 31.344 | 17.639 | 39.779 | 0.00 | 0.00 |
| ATOM | 8096 | NH1  | ARG | X | 530 | 30.895 | 18.576 | 40.560 | 0.00 | 0.00 |
| ATOM | 8097 | HH11 | ARG | X | 530 | 31.295 | 19.503 | 40.566 | 0.00 | 0.00 |
| ATOM | 8098 | HH12 | ARG | X | 530 | 29.937 | 18.526 | 40.876 | 0.00 | 0.00 |
| ATOM | 8099 | NH2  | ARG | X | 530 | 30.513 | 16.615 | 39.601 | 0.00 | 0.00 |
| ATOM | 8100 | HH21 | ARG | X | 530 | 30.700 | 15.824 | 39.001 | 0.00 | 0.00 |
| ATOM | 8101 | HH22 | ARG | X | 530 | 29.759 | 16.540 | 40.268 | 0.00 | 0.00 |
| ATOM | 8102 | C    | ARG | X | 530 | 36.230 | 19.630 | 42.292 | 0.00 | 0.00 |
| ATOM | 8103 | O    | ARG | X | 530 | 35.639 | 19.066 | 43.214 | 0.00 | 0.00 |
| ATOM | 8104 | N    | PHE | X | 531 | 37.414 | 19.190 | 41.875 | 0.00 | 0.00 |
| ATOM | 8105 | H    | PHE | X | 531 | 37.835 | 19.798 | 41.188 | 0.00 | 0.00 |
| ATOM | 8106 | CA   | PHE | X | 531 | 38.093 | 17.995 | 42.369 | 0.00 | 0.00 |
| ATOM | 8107 | HA   | PHE | X | 531 | 37.287 | 17.314 | 42.644 | 0.00 | 0.00 |
| ATOM | 8108 | CB   | PHE | X | 531 | 39.055 | 17.494 | 41.329 | 0.00 | 0.00 |
| ATOM | 8109 | HB2  | PHE | X | 531 | 38.526 | 17.316 | 40.393 | 0.00 | 0.00 |
| ATOM | 8110 | HB3  | PHE | X | 531 | 39.790 | 18.275 | 41.139 | 0.00 | 0.00 |
| ATOM | 8111 | CG   | PHE | X | 531 | 39.749 | 16.150 | 41.671 | 0.00 | 0.00 |
| ATOM | 8112 | CD1  | PHE | X | 531 | 39.171 | 14.950 | 41.273 | 0.00 | 0.00 |
| ATOM | 8113 | HD1  | PHE | X | 531 | 38.305 | 15.021 | 40.631 | 0.00 | 0.00 |
| ATOM | 8114 | CE1  | PHE | X | 531 | 39.710 | 13.680 | 41.635 | 0.00 | 0.00 |
| ATOM | 8115 | HE1  | PHE | X | 531 | 39.396 | 12.764 | 41.157 | 0.00 | 0.00 |
| ATOM | 8116 | CZ   | PHE | X | 531 | 40.838 | 13.592 | 42.505 | 0.00 | 0.00 |
| ATOM | 8117 | HZ   | PHE | X | 531 | 41.225 | 12.597 | 42.670 | 0.00 | 0.00 |
| ATOM | 8118 | CE2  | PHE | X | 531 | 41.430 | 14.830 | 42.881 | 0.00 | 0.00 |
| ATOM | 8119 | HE2  | PHE | X | 531 | 42.252 | 14.743 | 43.577 | 0.00 | 0.00 |
| ATOM | 8120 | CD2  | PHE | X | 531 | 40.799 | 16.041 | 42.581 | 0.00 | 0.00 |
| ATOM | 8121 | HD2  | PHE | X | 531 | 41.210 | 16.936 | 43.023 | 0.00 | 0.00 |
| ATOM | 8122 | C    | PHE | X | 531 | 38.821 | 18.163 | 43.732 | 0.00 | 0.00 |
| ATOM | 8123 | O    | PHE | X | 531 | 38.509 | 17.423 | 44.689 | 0.00 | 0.00 |
| ATOM | 8124 | N    | LEU | X | 532 | 39.770 | 19.114 | 43.853 | 0.00 | 0.00 |
| ATOM | 8125 | H    | LEU | X | 532 | 39.894 | 19.576 | 42.963 | 0.00 | 0.00 |
| ATOM | 8126 | CA   | LEU | X | 532 | 40.735 | 19.345 | 44.994 | 0.00 | 0.00 |
| ATOM | 8127 | HA   | LEU | X | 532 | 41.015 | 18.355 | 45.354 | 0.00 | 0.00 |
| ATOM | 8128 | CB   | LEU | X | 532 | 41.981 | 20.131 | 44.506 | 0.00 | 0.00 |
| ATOM | 8129 | HB2  | LEU | X | 532 | 42.316 | 19.879 | 43.499 | 0.00 | 0.00 |
| ATOM | 8130 | HB3  | LEU | X | 532 | 41.859 | 21.214 | 44.511 | 0.00 | 0.00 |
| ATOM | 8131 | CG   | LEU | X | 532 | 43.280 | 19.740 | 45.290 | 0.00 | 0.00 |
| ATOM | 8132 | HG   | LEU | X | 532 | 44.068 | 20.095 | 44.626 | 0.00 | 0.00 |
| ATOM | 8133 | CD1  | LEU | X | 532 | 43.286 | 20.607 | 46.585 | 0.00 | 0.00 |
| ATOM | 8134 | HD11 | LEU | X | 532 | 42.608 | 20.203 | 47.337 | 0.00 | 0.00 |
| ATOM | 8135 | HD12 | LEU | X | 532 | 44.245 | 20.719 | 47.091 | 0.00 | 0.00 |
| ATOM | 8136 | HD13 | LEU | X | 532 | 42.918 | 21.618 | 46.415 | 0.00 | 0.00 |
| ATOM | 8137 | CD2  | LEU | X | 532 | 43.358 | 18.247 | 45.527 | 0.00 | 0.00 |
| ATOM | 8138 | HD21 | LEU | X | 532 | 44.375 | 18.162 | 45.910 | 0.00 | 0.00 |
| ATOM | 8139 | HD22 | LEU | X | 532 | 42.692 | 17.942 | 46.334 | 0.00 | 0.00 |
| ATOM | 8140 | HD23 | LEU | X | 532 | 43.225 | 17.713 | 44.586 | 0.00 | 0.00 |
| ATOM | 8141 | C    | LEU | X | 532 | 40.025 | 19.873 | 46.282 | 0.00 | 0.00 |
| ATOM | 8142 | O    | LEU | X | 532 | 40.302 | 19.355 | 47.356 | 0.00 | 0.00 |
| ATOM | 8143 | N    | PRO | X | 533 | 38.970 | 20.681 | 46.219 | 0.00 | 0.00 |
| ATOM | 8144 | CD   | PRO | X | 533 | 38.614 | 21.594 | 45.182 | 0.00 | 0.00 |
| ATOM | 8145 | HD2  | PRO | X | 533 | 38.395 | 21.073 | 44.250 | 0.00 | 0.00 |
| ATOM | 8146 | HD3  | PRO | X | 533 | 39.443 | 22.301 | 45.138 | 0.00 | 0.00 |
| ATOM | 8147 | CG   | PRO | X | 533 | 37.314 | 22.227 | 45.622 | 0.00 | 0.00 |
| ATOM | 8148 | HG2  | PRO | X | 533 | 36.555 | 21.503 | 45.325 | 0.00 | 0.00 |
| ATOM | 8149 | HG3  | PRO | X | 533 | 37.159 | 23.158 | 45.077 | 0.00 | 0.00 |
| ATOM | 8150 | CB   | PRO | X | 533 | 37.487 | 22.301 | 47.093 | 0.00 | 0.00 |
| ATOM | 8151 | HB2  | PRO | X | 533 | 36.532 | 22.417 | 47.606 | 0.00 | 0.00 |
| ATOM | 8152 | HB3  | PRO | X | 533 | 38.088 | 23.183 | 47.315 | 0.00 | 0.00 |
| ATOM | 8153 | CA   | PRO | X | 533 | 38.293 | 21.045 | 47.407 | 0.00 | 0.00 |
| ATOM | 8154 | HA   | PRO | X | 533 | 39.015 | 21.331 | 48.172 | 0.00 | 0.00 |
| ATOM | 8155 | C    | PRO | X | 533 | 37.328 | 19.907 | 47.891 | 0.00 | 0.00 |
| ATOM | 8156 | O    | PRO | X | 533 | 37.287 | 19.795 | 49.145 | 0.00 | 0.00 |
| ATOM | 8157 | N    | LYS | X | 534 | 36.680 | 19.037 | 47.088 | 0.00 | 0.00 |
| ATOM | 8158 | H    | LYS | X | 534 | 36.823 | 19.092 | 46.089 | 0.00 | 0.00 |

|      |      |      |     |   |     |        |        |        |      |      |
|------|------|------|-----|---|-----|--------|--------|--------|------|------|
| ATOM | 8159 | CA   | LYS | X | 534 | 35.971 | 17.859 | 47.637 | 0.00 | 0.00 |
| ATOM | 8160 | HA   | LYS | X | 534 | 35.434 | 18.197 | 48.523 | 0.00 | 0.00 |
| ATOM | 8161 | CB   | LYS | X | 534 | 35.125 | 17.257 | 46.451 | 0.00 | 0.00 |
| ATOM | 8162 | HB2  | LYS | X | 534 | 35.791 | 17.360 | 45.594 | 0.00 | 0.00 |
| ATOM | 8163 | HB3  | LYS | X | 534 | 34.876 | 16.206 | 46.596 | 0.00 | 0.00 |
| ATOM | 8164 | CG   | LYS | X | 534 | 33.800 | 17.947 | 46.372 | 0.00 | 0.00 |
| ATOM | 8165 | HG2  | LYS | X | 534 | 33.196 | 17.628 | 47.221 | 0.00 | 0.00 |
| ATOM | 8166 | HG3  | LYS | X | 534 | 34.052 | 19.008 | 46.374 | 0.00 | 0.00 |
| ATOM | 8167 | CD   | LYS | X | 534 | 32.976 | 17.717 | 45.094 | 0.00 | 0.00 |
| ATOM | 8168 | HD2  | LYS | X | 534 | 33.614 | 17.933 | 44.237 | 0.00 | 0.00 |
| ATOM | 8169 | HD3  | LYS | X | 534 | 32.545 | 16.717 | 45.053 | 0.00 | 0.00 |
| ATOM | 8170 | CE   | LYS | X | 534 | 31.885 | 18.759 | 45.192 | 0.00 | 0.00 |
| ATOM | 8171 | HE2  | LYS | X | 534 | 31.054 | 18.154 | 45.555 | 0.00 | 0.00 |
| ATOM | 8172 | HE3  | LYS | X | 534 | 32.131 | 19.667 | 45.743 | 0.00 | 0.00 |
| ATOM | 8173 | NZ   | LYS | X | 534 | 31.534 | 19.191 | 43.884 | 0.00 | 0.00 |
| ATOM | 8174 | HZ1  | LYS | X | 534 | 32.169 | 19.930 | 43.618 | 0.00 | 0.00 |
| ATOM | 8175 | HZ2  | LYS | X | 534 | 31.622 | 18.359 | 43.318 | 0.00 | 0.00 |
| ATOM | 8176 | HZ3  | LYS | X | 534 | 30.587 | 19.537 | 43.816 | 0.00 | 0.00 |
| ATOM | 8177 | C    | LYS | X | 534 | 36.973 | 16.877 | 48.256 | 0.00 | 0.00 |
| ATOM | 8178 | O    | LYS | X | 534 | 36.516 | 16.067 | 49.156 | 0.00 | 0.00 |
| ATOM | 8179 | N    | LEU | X | 535 | 38.219 | 16.897 | 47.827 | 0.00 | 0.00 |
| ATOM | 8180 | H    | LEU | X | 535 | 38.527 | 17.406 | 47.011 | 0.00 | 0.00 |
| ATOM | 8181 | CA   | LEU | X | 535 | 39.223 | 16.045 | 48.442 | 0.00 | 0.00 |
| ATOM | 8182 | HA   | LEU | X | 535 | 38.820 | 15.075 | 48.734 | 0.00 | 0.00 |
| ATOM | 8183 | CB   | LEU | X | 535 | 40.324 | 15.810 | 47.453 | 0.00 | 0.00 |
| ATOM | 8184 | HB2  | LEU | X | 535 | 39.884 | 15.396 | 46.546 | 0.00 | 0.00 |
| ATOM | 8185 | HB3  | LEU | X | 535 | 40.721 | 16.786 | 47.173 | 0.00 | 0.00 |
| ATOM | 8186 | CG   | LEU | X | 535 | 41.521 | 14.802 | 47.786 | 0.00 | 0.00 |
| ATOM | 8187 | HG   | LEU | X | 535 | 42.269 | 15.155 | 48.495 | 0.00 | 0.00 |
| ATOM | 8188 | CD1  | LEU | X | 535 | 40.868 | 13.529 | 48.196 | 0.00 | 0.00 |
| ATOM | 8189 | HD11 | LEU | X | 535 | 41.528 | 12.723 | 47.874 | 0.00 | 0.00 |
| ATOM | 8190 | HD12 | LEU | X | 535 | 40.910 | 13.403 | 49.278 | 0.00 | 0.00 |
| ATOM | 8191 | HD13 | LEU | X | 535 | 39.942 | 13.259 | 47.688 | 0.00 | 0.00 |
| ATOM | 8192 | CD2  | LEU | X | 535 | 42.417 | 14.506 | 46.546 | 0.00 | 0.00 |
| ATOM | 8193 | HD21 | LEU | X | 535 | 42.977 | 15.425 | 46.373 | 0.00 | 0.00 |
| ATOM | 8194 | HD22 | LEU | X | 535 | 43.141 | 13.704 | 46.690 | 0.00 | 0.00 |
| ATOM | 8195 | HD23 | LEU | X | 535 | 41.791 | 14.352 | 45.668 | 0.00 | 0.00 |
| ATOM | 8196 | C    | LEU | X | 535 | 39.745 | 16.652 | 49.784 | 0.00 | 0.00 |
| ATOM | 8197 | O    | LEU | X | 535 | 40.002 | 15.887 | 50.664 | 0.00 | 0.00 |
| ATOM | 8198 | N    | LEU | X | 536 | 39.813 | 17.982 | 49.991 | 0.00 | 0.00 |
| ATOM | 8199 | H    | LEU | X | 536 | 39.758 | 18.651 | 49.236 | 0.00 | 0.00 |
| ATOM | 8200 | CA   | LEU | X | 536 | 40.062 | 18.510 | 51.320 | 0.00 | 0.00 |
| ATOM | 8201 | HA   | LEU | X | 536 | 40.889 | 18.004 | 51.817 | 0.00 | 0.00 |
| ATOM | 8202 | CB   | LEU | X | 536 | 40.532 | 19.974 | 51.206 | 0.00 | 0.00 |
| ATOM | 8203 | HB2  | LEU | X | 536 | 39.772 | 20.522 | 50.650 | 0.00 | 0.00 |
| ATOM | 8204 | HB3  | LEU | X | 536 | 40.504 | 20.297 | 52.247 | 0.00 | 0.00 |
| ATOM | 8205 | CG   | LEU | X | 536 | 41.872 | 20.345 | 50.575 | 0.00 | 0.00 |
| ATOM | 8206 | HG   | LEU | X | 536 | 41.878 | 20.019 | 49.535 | 0.00 | 0.00 |
| ATOM | 8207 | CD1  | LEU | X | 536 | 42.257 | 21.818 | 50.737 | 0.00 | 0.00 |
| ATOM | 8208 | HD11 | LEU | X | 536 | 43.076 | 21.991 | 50.039 | 0.00 | 0.00 |
| ATOM | 8209 | HD12 | LEU | X | 536 | 41.488 | 22.522 | 50.418 | 0.00 | 0.00 |
| ATOM | 8210 | HD13 | LEU | X | 536 | 42.516 | 21.933 | 51.789 | 0.00 | 0.00 |
| ATOM | 8211 | CD2  | LEU | X | 536 | 42.998 | 19.474 | 51.193 | 0.00 | 0.00 |
| ATOM | 8212 | HD21 | LEU | X | 536 | 42.877 | 18.405 | 51.014 | 0.00 | 0.00 |
| ATOM | 8213 | HD22 | LEU | X | 536 | 43.952 | 19.707 | 50.721 | 0.00 | 0.00 |
| ATOM | 8214 | HD23 | LEU | X | 536 | 43.178 | 19.636 | 52.255 | 0.00 | 0.00 |
| ATOM | 8215 | C    | LEU | X | 536 | 38.886 | 18.349 | 52.210 | 0.00 | 0.00 |
| ATOM | 8216 | O    | LEU | X | 536 | 39.029 | 18.056 | 53.380 | 0.00 | 0.00 |
| ATOM | 8217 | N    | SER | X | 537 | 37.722 | 18.418 | 51.620 | 0.00 | 0.00 |
| ATOM | 8218 | H    | SER | X | 537 | 37.632 | 18.769 | 50.677 | 0.00 | 0.00 |
| ATOM | 8219 | CA   | SER | X | 537 | 36.472 | 17.988 | 52.360 | 0.00 | 0.00 |
| ATOM | 8220 | HA   | SER | X | 537 | 36.427 | 18.479 | 53.332 | 0.00 | 0.00 |
| ATOM | 8221 | CB   | SER | X | 537 | 35.213 | 18.301 | 51.546 | 0.00 | 0.00 |
| ATOM | 8222 | HB2  | SER | X | 537 | 35.309 | 17.620 | 50.701 | 0.00 | 0.00 |
| ATOM | 8223 | HB3  | SER | X | 537 | 34.334 | 18.021 | 52.127 | 0.00 | 0.00 |
| ATOM | 8224 | OG   | SER | X | 537 | 35.074 | 19.587 | 51.109 | 0.00 | 0.00 |
| ATOM | 8225 | HG   | SER | X | 537 | 34.267 | 19.686 | 50.598 | 0.00 | 0.00 |
| ATOM | 8226 | C    | SER | X | 537 | 36.306 | 16.508 | 52.559 | 0.00 | 0.00 |
| ATOM | 8227 | O    | SER | X | 537 | 35.330 | 15.980 | 53.103 | 0.00 | 0.00 |
| ATOM | 8228 | N    | ALA | X | 538 | 37.295 | 15.762 | 52.131 | 0.00 | 0.00 |

|      |      |      |     |   |     |        |        |        |      |      |
|------|------|------|-----|---|-----|--------|--------|--------|------|------|
| ATOM | 8229 | H    | ALA | X | 538 | 37.981 | 16.068 | 51.456 | 0.00 | 0.00 |
| ATOM | 8230 | CA   | ALA | X | 538 | 37.340 | 14.302 | 52.414 | 0.00 | 0.00 |
| ATOM | 8231 | HA   | ALA | X | 538 | 36.491 | 14.093 | 53.066 | 0.00 | 0.00 |
| ATOM | 8232 | CB   | ALA | X | 538 | 37.192 | 13.536 | 51.038 | 0.00 | 0.00 |
| ATOM | 8233 | HB1  | ALA | X | 538 | 37.977 | 13.808 | 50.332 | 0.00 | 0.00 |
| ATOM | 8234 | HB2  | ALA | X | 538 | 37.281 | 12.455 | 51.143 | 0.00 | 0.00 |
| ATOM | 8235 | HB3  | ALA | X | 538 | 36.216 | 13.745 | 50.598 | 0.00 | 0.00 |
| ATOM | 8236 | C    | ALA | X | 538 | 38.537 | 13.796 | 53.240 | 0.00 | 0.00 |
| ATOM | 8237 | O    | ALA | X | 538 | 38.359 | 12.659 | 53.782 | 0.00 | 0.00 |
| ATOM | 8238 | N    | THR | X | 539 | 39.644 | 14.502 | 53.457 | 0.00 | 0.00 |
| ATOM | 8239 | H    | THR | X | 539 | 39.828 | 15.389 | 53.011 | 0.00 | 0.00 |
| ATOM | 8240 | CA   | THR | X | 539 | 40.816 | 13.914 | 54.122 | 0.00 | 0.00 |
| ATOM | 8241 | HA   | THR | X | 539 | 40.625 | 12.872 | 54.379 | 0.00 | 0.00 |
| ATOM | 8242 | CB   | THR | X | 539 | 42.067 | 14.094 | 53.231 | 0.00 | 0.00 |
| ATOM | 8243 | HB   | THR | X | 539 | 42.995 | 13.979 | 53.790 | 0.00 | 0.00 |
| ATOM | 8244 | CG2  | THR | X | 539 | 42.183 | 13.142 | 52.040 | 0.00 | 0.00 |
| ATOM | 8245 | HG21 | THR | X | 539 | 42.244 | 12.106 | 52.375 | 0.00 | 0.00 |
| ATOM | 8246 | HG22 | THR | X | 539 | 41.276 | 13.249 | 51.445 | 0.00 | 0.00 |
| ATOM | 8247 | HG23 | THR | X | 539 | 43.069 | 13.387 | 51.455 | 0.00 | 0.00 |
| ATOM | 8248 | OG1  | THR | X | 539 | 42.098 | 15.420 | 52.719 | 0.00 | 0.00 |
| ATOM | 8249 | HG1  | THR | X | 539 | 41.512 | 15.490 | 51.962 | 0.00 | 0.00 |
| ATOM | 8250 | C    | THR | X | 539 | 41.113 | 14.587 | 55.441 | 0.00 | 0.00 |
| ATOM | 8251 | O    | THR | X | 539 | 40.405 | 15.477 | 55.946 | 0.00 | 0.00 |
| ATOM | 8252 | OXT  | THR | X | 539 | 42.182 | 14.164 | 55.996 | 0.00 | 0.00 |
| ATOM | 8253 | C    | LIG | X | 540 | 57.877 | 36.673 | 45.338 | 0.00 | 0.00 |
| ATOM | 8254 | C1   | LIG | X | 540 | 57.293 | 35.650 | 46.031 | 0.00 | 0.00 |
| ATOM | 8255 | C2   | LIG | X | 540 | 57.145 | 35.678 | 47.427 | 0.00 | 0.00 |
| ATOM | 8256 | C3   | LIG | X | 540 | 57.516 | 36.844 | 48.134 | 0.00 | 0.00 |
| ATOM | 8257 | C4   | LIG | X | 540 | 58.034 | 37.877 | 47.403 | 0.00 | 0.00 |
| ATOM | 8258 | C5   | LIG | X | 540 | 58.286 | 37.800 | 46.027 | 0.00 | 0.00 |
| ATOM | 8259 | C6   | LIG | X | 540 | 58.821 | 38.933 | 45.250 | 0.00 | 0.00 |
| ATOM | 8260 | N    | LIG | X | 540 | 57.937 | 40.066 | 45.454 | 0.00 | 0.00 |
| ATOM | 8261 | C7   | LIG | X | 540 | 58.289 | 41.302 | 44.763 | 0.00 | 0.00 |
| ATOM | 8262 | C8   | LIG | X | 540 | 57.070 | 42.229 | 45.034 | 0.00 | 0.00 |
| ATOM | 8263 | C9   | LIG | X | 540 | 55.809 | 41.318 | 45.052 | 0.00 | 0.00 |
| ATOM | 8264 | C10  | LIG | X | 540 | 56.454 | 39.847 | 45.176 | 0.00 | 0.00 |
| ATOM | 8265 | O    | LIG | X | 540 | 57.395 | 36.907 | 49.487 | 0.00 | 0.00 |
| ATOM | 8266 | C11  | LIG | X | 540 | 57.272 | 38.137 | 50.285 | 0.00 | 0.00 |
| ATOM | 8267 | O1   | LIG | X | 540 | 56.476 | 34.697 | 48.076 | 0.00 | 0.00 |
| ATOM | 8268 | H    | LIG | X | 540 | 56.350 | 34.902 | 49.020 | 0.00 | 0.00 |
| ATOM | 8269 | H1   | LIG | X | 540 | 58.010 | 36.559 | 44.265 | 0.00 | 0.00 |
| ATOM | 8270 | H2   | LIG | X | 540 | 57.049 | 34.791 | 45.411 | 0.00 | 0.00 |
| ATOM | 8271 | H3   | LIG | X | 540 | 58.284 | 38.733 | 48.024 | 0.00 | 0.00 |
| ATOM | 8272 | H4   | LIG | X | 540 | 58.914 | 38.705 | 44.185 | 0.00 | 0.00 |
| ATOM | 8273 | H5   | LIG | X | 540 | 59.817 | 39.198 | 45.613 | 0.00 | 0.00 |
| ATOM | 8274 | H6   | LIG | X | 540 | 58.348 | 41.135 | 43.684 | 0.00 | 0.00 |
| ATOM | 8275 | H7   | LIG | X | 540 | 59.236 | 41.677 | 45.160 | 0.00 | 0.00 |
| ATOM | 8276 | H8   | LIG | X | 540 | 57.203 | 42.736 | 45.991 | 0.00 | 0.00 |
| ATOM | 8277 | H9   | LIG | X | 540 | 56.992 | 43.045 | 44.313 | 0.00 | 0.00 |
| ATOM | 8278 | H10  | LIG | X | 540 | 55.257 | 41.457 | 44.120 | 0.00 | 0.00 |
| ATOM | 8279 | H11  | LIG | X | 540 | 55.115 | 41.543 | 45.865 | 0.00 | 0.00 |
| ATOM | 8280 | H12  | LIG | X | 540 | 56.046 | 39.426 | 46.099 | 0.00 | 0.00 |
| ATOM | 8281 | H13  | LIG | X | 540 | 56.266 | 39.189 | 44.324 | 0.00 | 0.00 |
| ATOM | 8282 | H14  | LIG | X | 540 | 58.172 | 38.737 | 50.129 | 0.00 | 0.00 |
| ATOM | 8283 | H15  | LIG | X | 540 | 57.141 | 37.914 | 51.347 | 0.00 | 0.00 |
| ATOM | 8284 | H16  | LIG | X | 540 | 56.417 | 38.733 | 49.956 | 0.00 | 0.00 |
| ATOM | 8285 | Na+  | Na+ | X | 541 | 75.236 | 57.693 | 20.800 | 0.00 | 0.00 |
| ATOM | 8286 | Na+  | Na+ | X | 542 | 25.132 | 16.925 | 75.831 | 0.00 | 0.00 |
| ATOM | 8287 | Na+  | Na+ | X | 543 | 62.104 | 44.897 | 31.421 | 0.00 | 0.00 |
| ATOM | 8288 | Na+  | Na+ | X | 544 | 74.660 | 34.629 | 70.409 | 0.00 | 0.00 |
| ATOM | 8289 | Na+  | Na+ | X | 545 | 69.908 | 23.065 | 44.678 | 0.00 | 0.00 |
| ATOM | 8290 | Na+  | Na+ | X | 546 | 76.061 | 55.656 | 69.098 | 0.00 | 0.00 |
| ATOM | 8291 | Na+  | Na+ | X | 547 | 13.341 | 35.271 | 35.151 | 0.00 | 0.00 |

END

3

|        |        |        |        |       |       |        |        |        |      |      |
|--------|--------|--------|--------|-------|-------|--------|--------|--------|------|------|
| CRYST1 | 84.249 | 84.249 | 84.249 | 90.00 | 90.00 | 90.00  | P 1    | 1      |      |      |
| ATOM   | 1      | N      | ASP    | X     | 1     | 59.175 | 78.039 | 35.449 | 0.00 | 0.00 |
| ATOM   | 2      | H1     | ASP    | X     | 1     | 59.982 | 78.550 | 35.776 | 0.00 | 0.00 |
| ATOM   | 3      | H2     | ASP    | X     | 1     | 58.654 | 78.711 | 34.905 | 0.00 | 0.00 |
| ATOM   | 4      | H3     | ASP    | X     | 1     | 59.345 | 77.268 | 34.819 | 0.00 | 0.00 |

|      |    |      |     |   |   |        |        |        |      |      |
|------|----|------|-----|---|---|--------|--------|--------|------|------|
| ATOM | 5  | CA   | ASP | X | 1 | 58.490 | 77.591 | 36.679 | 0.00 | 0.00 |
| ATOM | 6  | HA   | ASP | X | 1 | 59.093 | 76.876 | 37.240 | 0.00 | 0.00 |
| ATOM | 7  | CB   | ASP | X | 1 | 58.149 | 78.824 | 37.550 | 0.00 | 0.00 |
| ATOM | 8  | HB2  | ASP | X | 1 | 58.953 | 79.500 | 37.842 | 0.00 | 0.00 |
| ATOM | 9  | HB3  | ASP | X | 1 | 57.342 | 79.402 | 37.098 | 0.00 | 0.00 |
| ATOM | 10 | CG   | ASP | X | 1 | 57.576 | 78.332 | 38.889 | 0.00 | 0.00 |
| ATOM | 11 | OD1  | ASP | X | 1 | 58.272 | 77.728 | 39.710 | 0.00 | 0.00 |
| ATOM | 12 | OD2  | ASP | X | 1 | 56.379 | 78.628 | 39.137 | 0.00 | 0.00 |
| ATOM | 13 | C    | ASP | X | 1 | 57.307 | 76.705 | 36.418 | 0.00 | 0.00 |
| ATOM | 14 | O    | ASP | X | 1 | 57.047 | 75.648 | 37.031 | 0.00 | 0.00 |
| ATOM | 15 | N    | ALA | X | 2 | 56.425 | 77.192 | 35.488 | 0.00 | 0.00 |
| ATOM | 16 | H    | ALA | X | 2 | 56.614 | 77.942 | 34.838 | 0.00 | 0.00 |
| ATOM | 17 | CA   | ALA | X | 2 | 55.108 | 76.539 | 35.241 | 0.00 | 0.00 |
| ATOM | 18 | HA   | ALA | X | 2 | 54.566 | 76.439 | 36.181 | 0.00 | 0.00 |
| ATOM | 19 | CB   | ALA | X | 2 | 54.376 | 77.584 | 34.400 | 0.00 | 0.00 |
| ATOM | 20 | HB1  | ALA | X | 2 | 54.374 | 78.496 | 34.997 | 0.00 | 0.00 |
| ATOM | 21 | HB2  | ALA | X | 2 | 54.886 | 77.839 | 33.471 | 0.00 | 0.00 |
| ATOM | 22 | HB3  | ALA | X | 2 | 53.391 | 77.214 | 34.114 | 0.00 | 0.00 |
| ATOM | 23 | C    | ALA | X | 2 | 55.065 | 75.121 | 34.545 | 0.00 | 0.00 |
| ATOM | 24 | O    | ALA | X | 2 | 54.017 | 74.479 | 34.512 | 0.00 | 0.00 |
| ATOM | 25 | N    | GLU | X | 3 | 56.201 | 74.580 | 34.077 | 0.00 | 0.00 |
| ATOM | 26 | H    | GLU | X | 3 | 57.129 | 74.970 | 34.151 | 0.00 | 0.00 |
| ATOM | 27 | CA   | GLU | X | 3 | 56.167 | 73.169 | 33.622 | 0.00 | 0.00 |
| ATOM | 28 | HA   | GLU | X | 3 | 55.197 | 72.822 | 33.264 | 0.00 | 0.00 |
| ATOM | 29 | CB   | GLU | X | 3 | 57.123 | 73.112 | 32.447 | 0.00 | 0.00 |
| ATOM | 30 | HB2  | GLU | X | 3 | 58.102 | 73.503 | 32.724 | 0.00 | 0.00 |
| ATOM | 31 | HB3  | GLU | X | 3 | 57.276 | 72.087 | 32.107 | 0.00 | 0.00 |
| ATOM | 32 | CG   | GLU | X | 3 | 56.753 | 73.965 | 31.267 | 0.00 | 0.00 |
| ATOM | 33 | HG2  | GLU | X | 3 | 56.995 | 74.992 | 31.542 | 0.00 | 0.00 |
| ATOM | 34 | HG3  | GLU | X | 3 | 57.372 | 73.762 | 30.394 | 0.00 | 0.00 |
| ATOM | 35 | CD   | GLU | X | 3 | 55.209 | 73.774 | 30.994 | 0.00 | 0.00 |
| ATOM | 36 | OE1  | GLU | X | 3 | 54.436 | 74.702 | 30.899 | 0.00 | 0.00 |
| ATOM | 37 | OE2  | GLU | X | 3 | 54.801 | 72.567 | 30.825 | 0.00 | 0.00 |
| ATOM | 38 | C    | GLU | X | 3 | 56.495 | 72.258 | 34.773 | 0.00 | 0.00 |
| ATOM | 39 | O    | GLU | X | 3 | 56.317 | 71.097 | 34.592 | 0.00 | 0.00 |
| ATOM | 40 | N    | LEU | X | 4 | 56.932 | 72.736 | 35.942 | 0.00 | 0.00 |
| ATOM | 41 | H    | LEU | X | 4 | 57.141 | 73.715 | 36.075 | 0.00 | 0.00 |
| ATOM | 42 | CA   | LEU | X | 4 | 57.305 | 71.856 | 37.049 | 0.00 | 0.00 |
| ATOM | 43 | HA   | LEU | X | 4 | 56.985 | 70.845 | 36.795 | 0.00 | 0.00 |
| ATOM | 44 | CB   | LEU | X | 4 | 58.826 | 71.884 | 37.371 | 0.00 | 0.00 |
| ATOM | 45 | HB2  | LEU | X | 4 | 59.145 | 72.865 | 37.721 | 0.00 | 0.00 |
| ATOM | 46 | HB3  | LEU | X | 4 | 58.952 | 71.111 | 38.130 | 0.00 | 0.00 |
| ATOM | 47 | CG   | LEU | X | 4 | 59.887 | 71.553 | 36.230 | 0.00 | 0.00 |
| ATOM | 48 | HG   | LEU | X | 4 | 59.730 | 72.194 | 35.363 | 0.00 | 0.00 |
| ATOM | 49 | CD1  | LEU | X | 4 | 61.308 | 71.640 | 36.790 | 0.00 | 0.00 |
| ATOM | 50 | HD11 | LEU | X | 4 | 61.945 | 71.485 | 35.920 | 0.00 | 0.00 |
| ATOM | 51 | HD12 | LEU | X | 4 | 61.556 | 72.608 | 37.225 | 0.00 | 0.00 |
| ATOM | 52 | HD13 | LEU | X | 4 | 61.428 | 70.765 | 37.429 | 0.00 | 0.00 |
| ATOM | 53 | CD2  | LEU | X | 4 | 59.638 | 70.132 | 35.725 | 0.00 | 0.00 |
| ATOM | 54 | HD21 | LEU | X | 4 | 58.726 | 70.129 | 35.128 | 0.00 | 0.00 |
| ATOM | 55 | HD22 | LEU | X | 4 | 60.414 | 69.977 | 34.976 | 0.00 | 0.00 |
| ATOM | 56 | HD23 | LEU | X | 4 | 59.649 | 69.307 | 36.438 | 0.00 | 0.00 |
| ATOM | 57 | C    | LEU | X | 4 | 56.495 | 72.193 | 38.296 | 0.00 | 0.00 |
| ATOM | 58 | O    | LEU | X | 4 | 56.554 | 71.389 | 39.235 | 0.00 | 0.00 |
| ATOM | 59 | N    | LEU | X | 5 | 55.779 | 73.338 | 38.403 | 0.00 | 0.00 |
| ATOM | 60 | H    | LEU | X | 5 | 55.795 | 74.022 | 37.660 | 0.00 | 0.00 |
| ATOM | 61 | CA   | LEU | X | 5 | 54.906 | 73.759 | 39.496 | 0.00 | 0.00 |
| ATOM | 62 | HA   | LEU | X | 5 | 55.110 | 73.132 | 40.364 | 0.00 | 0.00 |
| ATOM | 63 | CB   | LEU | X | 5 | 55.108 | 75.280 | 39.714 | 0.00 | 0.00 |
| ATOM | 64 | HB2  | LEU | X | 5 | 56.174 | 75.506 | 39.745 | 0.00 | 0.00 |
| ATOM | 65 | HB3  | LEU | X | 5 | 54.725 | 75.675 | 38.773 | 0.00 | 0.00 |
| ATOM | 66 | CG   | LEU | X | 5 | 54.538 | 76.052 | 40.932 | 0.00 | 0.00 |
| ATOM | 67 | HG   | LEU | X | 5 | 54.664 | 77.089 | 40.618 | 0.00 | 0.00 |
| ATOM | 68 | CD1  | LEU | X | 5 | 53.049 | 75.833 | 41.196 | 0.00 | 0.00 |
| ATOM | 69 | HD11 | LEU | X | 5 | 52.483 | 75.603 | 40.294 | 0.00 | 0.00 |
| ATOM | 70 | HD12 | LEU | X | 5 | 52.992 | 74.925 | 41.796 | 0.00 | 0.00 |
| ATOM | 71 | HD13 | LEU | X | 5 | 52.548 | 76.553 | 41.843 | 0.00 | 0.00 |
| ATOM | 72 | CD2  | LEU | X | 5 | 55.320 | 75.836 | 42.251 | 0.00 | 0.00 |
| ATOM | 73 | HD21 | LEU | X | 5 | 55.524 | 74.785 | 42.457 | 0.00 | 0.00 |
| ATOM | 74 | HD22 | LEU | X | 5 | 56.266 | 76.366 | 42.146 | 0.00 | 0.00 |

|      |     |      |     |   |   |        |        |        |      |      |
|------|-----|------|-----|---|---|--------|--------|--------|------|------|
| ATOM | 75  | HD23 | LEU | X | 5 | 54.688 | 76.359 | 42.969 | 0.00 | 0.00 |
| ATOM | 76  | C    | LEU | X | 5 | 53.430 | 73.430 | 39.117 | 0.00 | 0.00 |
| ATOM | 77  | O    | LEU | X | 5 | 52.991 | 73.775 | 38.014 | 0.00 | 0.00 |
| ATOM | 78  | N    | VAL | X | 6 | 52.480 | 72.978 | 39.914 | 0.00 | 0.00 |
| ATOM | 79  | H    | VAL | X | 6 | 52.823 | 72.817 | 40.850 | 0.00 | 0.00 |
| ATOM | 80  | CA   | VAL | X | 6 | 51.015 | 72.814 | 39.709 | 0.00 | 0.00 |
| ATOM | 81  | HA   | VAL | X | 6 | 50.576 | 73.470 | 38.957 | 0.00 | 0.00 |
| ATOM | 82  | CB   | VAL | X | 6 | 50.642 | 71.308 | 39.328 | 0.00 | 0.00 |
| ATOM | 83  | HB   | VAL | X | 6 | 51.012 | 70.672 | 40.131 | 0.00 | 0.00 |
| ATOM | 84  | CG1  | VAL | X | 6 | 49.158 | 70.957 | 39.217 | 0.00 | 0.00 |
| ATOM | 85  | HG11 | VAL | X | 6 | 48.744 | 71.495 | 38.364 | 0.00 | 0.00 |
| ATOM | 86  | HG12 | VAL | X | 6 | 49.046 | 69.873 | 39.179 | 0.00 | 0.00 |
| ATOM | 87  | HG13 | VAL | X | 6 | 48.483 | 71.397 | 39.951 | 0.00 | 0.00 |
| ATOM | 88  | CG2  | VAL | X | 6 | 51.282 | 70.935 | 38.000 | 0.00 | 0.00 |
| ATOM | 89  | HG21 | VAL | X | 6 | 50.937 | 71.573 | 37.186 | 0.00 | 0.00 |
| ATOM | 90  | HG22 | VAL | X | 6 | 52.371 | 70.958 | 38.006 | 0.00 | 0.00 |
| ATOM | 91  | HG23 | VAL | X | 6 | 51.005 | 69.920 | 37.714 | 0.00 | 0.00 |
| ATOM | 92  | C    | VAL | X | 6 | 50.253 | 73.273 | 40.977 | 0.00 | 0.00 |
| ATOM | 93  | O    | VAL | X | 6 | 50.612 | 72.941 | 42.094 | 0.00 | 0.00 |
| ATOM | 94  | N    | THR | X | 7 | 49.121 | 73.987 | 40.873 | 0.00 | 0.00 |
| ATOM | 95  | H    | THR | X | 7 | 48.903 | 74.376 | 39.966 | 0.00 | 0.00 |
| ATOM | 96  | CA   | THR | X | 7 | 48.109 | 74.261 | 41.879 | 0.00 | 0.00 |
| ATOM | 97  | HA   | THR | X | 7 | 48.669 | 74.246 | 42.814 | 0.00 | 0.00 |
| ATOM | 98  | CB   | THR | X | 7 | 47.497 | 75.615 | 41.615 | 0.00 | 0.00 |
| ATOM | 99  | HB   | THR | X | 7 | 46.955 | 75.685 | 40.672 | 0.00 | 0.00 |
| ATOM | 100 | CG2  | THR | X | 7 | 46.510 | 75.899 | 42.681 | 0.00 | 0.00 |
| ATOM | 101 | HG21 | THR | X | 7 | 45.571 | 75.363 | 42.541 | 0.00 | 0.00 |
| ATOM | 102 | HG22 | THR | X | 7 | 47.078 | 75.721 | 43.594 | 0.00 | 0.00 |
| ATOM | 103 | HG23 | THR | X | 7 | 46.342 | 76.972 | 42.591 | 0.00 | 0.00 |
| ATOM | 104 | OG1  | THR | X | 7 | 48.521 | 76.607 | 41.518 | 0.00 | 0.00 |
| ATOM | 105 | HG1  | THR | X | 7 | 48.478 | 76.967 | 40.629 | 0.00 | 0.00 |
| ATOM | 106 | C    | THR | X | 7 | 47.062 | 73.185 | 41.938 | 0.00 | 0.00 |
| ATOM | 107 | O    | THR | X | 7 | 46.332 | 72.931 | 40.959 | 0.00 | 0.00 |
| ATOM | 108 | N    | VAL | X | 8 | 46.937 | 72.422 | 43.059 | 0.00 | 0.00 |
| ATOM | 109 | H    | VAL | X | 8 | 47.591 | 72.630 | 43.800 | 0.00 | 0.00 |
| ATOM | 110 | CA   | VAL | X | 8 | 45.769 | 71.544 | 43.422 | 0.00 | 0.00 |
| ATOM | 111 | HA   | VAL | X | 8 | 45.154 | 71.346 | 42.545 | 0.00 | 0.00 |
| ATOM | 112 | CB   | VAL | X | 8 | 46.349 | 70.148 | 43.816 | 0.00 | 0.00 |
| ATOM | 113 | HB   | VAL | X | 8 | 45.587 | 69.483 | 44.223 | 0.00 | 0.00 |
| ATOM | 114 | CG1  | VAL | X | 8 | 46.892 | 69.441 | 42.606 | 0.00 | 0.00 |
| ATOM | 115 | HG11 | VAL | X | 8 | 46.293 | 69.529 | 41.700 | 0.00 | 0.00 |
| ATOM | 116 | HG12 | VAL | X | 8 | 47.845 | 69.890 | 42.327 | 0.00 | 0.00 |
| ATOM | 117 | HG13 | VAL | X | 8 | 47.003 | 68.380 | 42.831 | 0.00 | 0.00 |
| ATOM | 118 | CG2  | VAL | X | 8 | 47.264 | 70.330 | 45.016 | 0.00 | 0.00 |
| ATOM | 119 | HG21 | VAL | X | 8 | 47.533 | 69.305 | 45.273 | 0.00 | 0.00 |
| ATOM | 120 | HG22 | VAL | X | 8 | 48.163 | 70.871 | 44.722 | 0.00 | 0.00 |
| ATOM | 121 | HG23 | VAL | X | 8 | 46.740 | 70.840 | 45.825 | 0.00 | 0.00 |
| ATOM | 122 | C    | VAL | X | 8 | 44.905 | 72.161 | 44.528 | 0.00 | 0.00 |
| ATOM | 123 | O    | VAL | X | 8 | 45.130 | 73.292 | 44.997 | 0.00 | 0.00 |
| ATOM | 124 | N    | ARG | X | 9 | 43.870 | 71.515 | 45.014 | 0.00 | 0.00 |
| ATOM | 125 | H    | ARG | X | 9 | 43.672 | 70.629 | 44.572 | 0.00 | 0.00 |
| ATOM | 126 | CA   | ARG | X | 9 | 42.753 | 72.093 | 45.875 | 0.00 | 0.00 |
| ATOM | 127 | HA   | ARG | X | 9 | 42.356 | 72.963 | 45.351 | 0.00 | 0.00 |
| ATOM | 128 | CB   | ARG | X | 9 | 41.650 | 71.162 | 46.113 | 0.00 | 0.00 |
| ATOM | 129 | HB2  | ARG | X | 9 | 41.532 | 70.518 | 45.241 | 0.00 | 0.00 |
| ATOM | 130 | HB3  | ARG | X | 9 | 41.866 | 70.409 | 46.870 | 0.00 | 0.00 |
| ATOM | 131 | CG   | ARG | X | 9 | 40.328 | 71.839 | 46.555 | 0.00 | 0.00 |
| ATOM | 132 | HG2  | ARG | X | 9 | 40.546 | 72.323 | 47.506 | 0.00 | 0.00 |
| ATOM | 133 | HG3  | ARG | X | 9 | 39.991 | 72.550 | 45.801 | 0.00 | 0.00 |
| ATOM | 134 | CD   | ARG | X | 9 | 39.285 | 70.680 | 46.785 | 0.00 | 0.00 |
| ATOM | 135 | HD2  | ARG | X | 9 | 39.223 | 70.030 | 45.912 | 0.00 | 0.00 |
| ATOM | 136 | HD3  | ARG | X | 9 | 39.570 | 70.152 | 47.695 | 0.00 | 0.00 |
| ATOM | 137 | NE   | ARG | X | 9 | 37.940 | 71.241 | 46.937 | 0.00 | 0.00 |
| ATOM | 138 | HE   | ARG | X | 9 | 37.721 | 71.598 | 47.856 | 0.00 | 0.00 |
| ATOM | 139 | CZ   | ARG | X | 9 | 37.107 | 71.632 | 46.006 | 0.00 | 0.00 |
| ATOM | 140 | NH1  | ARG | X | 9 | 37.431 | 71.607 | 44.717 | 0.00 | 0.00 |
| ATOM | 141 | HH11 | ARG | X | 9 | 38.350 | 71.377 | 44.367 | 0.00 | 0.00 |
| ATOM | 142 | HH12 | ARG | X | 9 | 36.792 | 72.008 | 44.046 | 0.00 | 0.00 |
| ATOM | 143 | NH2  | ARG | X | 9 | 35.958 | 72.131 | 46.296 | 0.00 | 0.00 |
| ATOM | 144 | HH21 | ARG | X | 9 | 35.607 | 72.087 | 47.242 | 0.00 | 0.00 |

|      |     |      |     |   |    |        |        |        |      |      |
|------|-----|------|-----|---|----|--------|--------|--------|------|------|
| ATOM | 145 | HH22 | ARG | X | 9  | 35.346 | 72.502 | 45.584 | 0.00 | 0.00 |
| ATOM | 146 | C    | ARG | X | 9  | 43.392 | 72.521 | 47.217 | 0.00 | 0.00 |
| ATOM | 147 | O    | ARG | X | 9  | 42.925 | 73.419 | 47.931 | 0.00 | 0.00 |
| ATOM | 148 | N    | GLY | X | 10 | 44.286 | 71.616 | 47.659 | 0.00 | 0.00 |
| ATOM | 149 | H    | GLY | X | 10 | 44.387 | 70.728 | 47.189 | 0.00 | 0.00 |
| ATOM | 150 | CA   | GLY | X | 10 | 45.080 | 71.782 | 48.876 | 0.00 | 0.00 |
| ATOM | 151 | HA2  | GLY | X | 10 | 44.374 | 72.069 | 49.648 | 0.00 | 0.00 |
| ATOM | 152 | HA3  | GLY | X | 10 | 45.607 | 70.936 | 49.079 | 0.00 | 0.00 |
| ATOM | 153 | C    | GLY | X | 10 | 46.124 | 72.920 | 48.793 | 0.00 | 0.00 |
| ATOM | 154 | O    | GLY | X | 10 | 46.403 | 73.489 | 49.868 | 0.00 | 0.00 |
| ATOM | 155 | N    | GLY | X | 11 | 46.615 | 73.320 | 47.589 | 0.00 | 0.00 |
| ATOM | 156 | H    | GLY | X | 11 | 46.293 | 72.885 | 46.737 | 0.00 | 0.00 |
| ATOM | 157 | CA   | GLY | X | 11 | 47.674 | 74.337 | 47.435 | 0.00 | 0.00 |
| ATOM | 158 | HA2  | GLY | X | 11 | 47.278 | 75.293 | 47.230 | 0.00 | 0.00 |
| ATOM | 159 | HA3  | GLY | X | 11 | 48.295 | 74.338 | 48.409 | 0.00 | 0.00 |
| ATOM | 160 | C    | GLY | X | 11 | 48.660 | 73.979 | 46.260 | 0.00 | 0.00 |
| ATOM | 161 | O    | GLY | X | 11 | 48.382 | 73.257 | 45.350 | 0.00 | 0.00 |
| ATOM | 162 | N    | ARG | X | 12 | 49.889 | 74.609 | 46.276 | 0.00 | 0.00 |
| ATOM | 163 | H    | ARG | X | 12 | 50.061 | 75.099 | 47.142 | 0.00 | 0.00 |
| ATOM | 164 | CA   | ARG | X | 12 | 50.897 | 74.431 | 45.189 | 0.00 | 0.00 |
| ATOM | 165 | HA   | ARG | X | 12 | 50.345 | 74.318 | 44.256 | 0.00 | 0.00 |
| ATOM | 166 | CB   | ARG | X | 12 | 51.717 | 75.707 | 44.897 | 0.00 | 0.00 |
| ATOM | 167 | HB2  | ARG | X | 12 | 52.193 | 76.091 | 45.799 | 0.00 | 0.00 |
| ATOM | 168 | HB3  | ARG | X | 12 | 52.579 | 75.515 | 44.259 | 0.00 | 0.00 |
| ATOM | 169 | CG   | ARG | X | 12 | 50.866 | 76.901 | 44.319 | 0.00 | 0.00 |
| ATOM | 170 | HG2  | ARG | X | 12 | 50.483 | 76.593 | 43.346 | 0.00 | 0.00 |
| ATOM | 171 | HG3  | ARG | X | 12 | 50.066 | 77.121 | 45.026 | 0.00 | 0.00 |
| ATOM | 172 | CD   | ARG | X | 12 | 51.761 | 78.155 | 44.167 | 0.00 | 0.00 |
| ATOM | 173 | HD2  | ARG | X | 12 | 52.226 | 78.408 | 45.120 | 0.00 | 0.00 |
| ATOM | 174 | HD3  | ARG | X | 12 | 52.488 | 77.949 | 43.381 | 0.00 | 0.00 |
| ATOM | 175 | NE   | ARG | X | 12 | 51.002 | 79.318 | 43.757 | 0.00 | 0.00 |
| ATOM | 176 | HE   | ARG | X | 12 | 50.006 | 79.222 | 43.896 | 0.00 | 0.00 |
| ATOM | 177 | CZ   | ARG | X | 12 | 51.456 | 80.392 | 43.235 | 0.00 | 0.00 |
| ATOM | 178 | NH1  | ARG | X | 12 | 52.679 | 80.815 | 43.253 | 0.00 | 0.00 |
| ATOM | 179 | HH11 | ARG | X | 12 | 53.363 | 80.221 | 43.700 | 0.00 | 0.00 |
| ATOM | 180 | HH12 | ARG | X | 12 | 53.061 | 81.696 | 42.941 | 0.00 | 0.00 |
| ATOM | 181 | NH2  | ARG | X | 12 | 50.576 | 81.256 | 42.647 | 0.00 | 0.00 |
| ATOM | 182 | HH21 | ARG | X | 12 | 49.589 | 81.173 | 42.843 | 0.00 | 0.00 |
| ATOM | 183 | HH22 | ARG | X | 12 | 51.056 | 82.049 | 42.245 | 0.00 | 0.00 |
| ATOM | 184 | C    | ARG | X | 12 | 51.768 | 73.163 | 45.477 | 0.00 | 0.00 |
| ATOM | 185 | O    | ARG | X | 12 | 52.041 | 72.815 | 46.630 | 0.00 | 0.00 |
| ATOM | 186 | N    | LEU | X | 13 | 52.303 | 72.615 | 44.358 | 0.00 | 0.00 |
| ATOM | 187 | H    | LEU | X | 13 | 52.041 | 73.122 | 43.525 | 0.00 | 0.00 |
| ATOM | 188 | CA   | LEU | X | 13 | 53.059 | 71.366 | 44.228 | 0.00 | 0.00 |
| ATOM | 189 | HA   | LEU | X | 13 | 53.461 | 71.166 | 45.221 | 0.00 | 0.00 |
| ATOM | 190 | CB   | LEU | X | 13 | 52.085 | 70.303 | 43.705 | 0.00 | 0.00 |
| ATOM | 191 | HB2  | LEU | X | 13 | 51.643 | 70.613 | 42.758 | 0.00 | 0.00 |
| ATOM | 192 | HB3  | LEU | X | 13 | 52.738 | 69.468 | 43.453 | 0.00 | 0.00 |
| ATOM | 193 | CG   | LEU | X | 13 | 50.990 | 69.631 | 44.580 | 0.00 | 0.00 |
| ATOM | 194 | HG   | LEU | X | 13 | 50.252 | 70.408 | 44.773 | 0.00 | 0.00 |
| ATOM | 195 | CD1  | LEU | X | 13 | 50.339 | 68.602 | 43.653 | 0.00 | 0.00 |
| ATOM | 196 | HD11 | LEU | X | 13 | 49.979 | 68.955 | 42.686 | 0.00 | 0.00 |
| ATOM | 197 | HD12 | LEU | X | 13 | 50.941 | 67.712 | 43.469 | 0.00 | 0.00 |
| ATOM | 198 | HD13 | LEU | X | 13 | 49.422 | 68.384 | 44.201 | 0.00 | 0.00 |
| ATOM | 199 | CD2  | LEU | X | 13 | 51.563 | 68.931 | 45.768 | 0.00 | 0.00 |
| ATOM | 200 | HD21 | LEU | X | 13 | 52.135 | 69.595 | 46.416 | 0.00 | 0.00 |
| ATOM | 201 | HD22 | LEU | X | 13 | 50.793 | 68.520 | 46.420 | 0.00 | 0.00 |
| ATOM | 202 | HD23 | LEU | X | 13 | 52.255 | 68.131 | 45.503 | 0.00 | 0.00 |
| ATOM | 203 | C    | LEU | X | 13 | 54.190 | 71.510 | 43.251 | 0.00 | 0.00 |
| ATOM | 204 | O    | LEU | X | 13 | 54.027 | 72.179 | 42.221 | 0.00 | 0.00 |
| ATOM | 205 | N    | ARG | X | 14 | 55.349 | 70.901 | 43.490 | 0.00 | 0.00 |
| ATOM | 206 | H    | ARG | X | 14 | 55.381 | 70.309 | 44.308 | 0.00 | 0.00 |
| ATOM | 207 | CA   | ARG | X | 14 | 56.573 | 71.196 | 42.675 | 0.00 | 0.00 |
| ATOM | 208 | HA   | ARG | X | 14 | 56.227 | 71.570 | 41.712 | 0.00 | 0.00 |
| ATOM | 209 | CB   | ARG | X | 14 | 57.556 | 72.057 | 43.580 | 0.00 | 0.00 |
| ATOM | 210 | HB2  | ARG | X | 14 | 56.899 | 72.910 | 43.750 | 0.00 | 0.00 |
| ATOM | 211 | HB3  | ARG | X | 14 | 57.810 | 71.539 | 44.505 | 0.00 | 0.00 |
| ATOM | 212 | CG   | ARG | X | 14 | 58.836 | 72.392 | 42.876 | 0.00 | 0.00 |
| ATOM | 213 | HG2  | ARG | X | 14 | 59.314 | 71.434 | 42.671 | 0.00 | 0.00 |
| ATOM | 214 | HG3  | ARG | X | 14 | 58.638 | 72.812 | 41.890 | 0.00 | 0.00 |

|      |     |      |     |   |    |        |        |        |      |      |
|------|-----|------|-----|---|----|--------|--------|--------|------|------|
| ATOM | 215 | CD   | ARG | X | 14 | 59.735 | 73.371 | 43.658 | 0.00 | 0.00 |
| ATOM | 216 | HD2  | ARG | X | 14 | 60.673 | 73.387 | 43.102 | 0.00 | 0.00 |
| ATOM | 217 | HD3  | ARG | X | 14 | 59.309 | 74.373 | 43.610 | 0.00 | 0.00 |
| ATOM | 218 | NE   | ARG | X | 14 | 60.022 | 72.825 | 45.035 | 0.00 | 0.00 |
| ATOM | 219 | HE   | ARG | X | 14 | 60.471 | 71.929 | 45.158 | 0.00 | 0.00 |
| ATOM | 220 | CZ   | ARG | X | 14 | 59.666 | 73.442 | 46.154 | 0.00 | 0.00 |
| ATOM | 221 | NH1  | ARG | X | 14 | 59.158 | 74.620 | 46.072 | 0.00 | 0.00 |
| ATOM | 222 | HH11 | ARG | X | 14 | 59.250 | 75.066 | 45.170 | 0.00 | 0.00 |
| ATOM | 223 | HH12 | ARG | X | 14 | 58.846 | 75.177 | 46.854 | 0.00 | 0.00 |
| ATOM | 224 | NH2  | ARG | X | 14 | 59.783 | 72.831 | 47.303 | 0.00 | 0.00 |
| ATOM | 225 | HH21 | ARG | X | 14 | 60.356 | 72.000 | 47.307 | 0.00 | 0.00 |
| ATOM | 226 | HH22 | ARG | X | 14 | 59.286 | 73.153 | 48.121 | 0.00 | 0.00 |
| ATOM | 227 | C    | ARG | X | 14 | 57.326 | 69.909 | 42.319 | 0.00 | 0.00 |
| ATOM | 228 | O    | ARG | X | 14 | 58.012 | 69.345 | 43.138 | 0.00 | 0.00 |
| ATOM | 229 | N    | GLY | X | 15 | 57.024 | 69.391 | 41.135 | 0.00 | 0.00 |
| ATOM | 230 | H    | GLY | X | 15 | 56.518 | 70.000 | 40.508 | 0.00 | 0.00 |
| ATOM | 231 | CA   | GLY | X | 15 | 57.527 | 68.111 | 40.525 | 0.00 | 0.00 |
| ATOM | 232 | HA2  | GLY | X | 15 | 57.596 | 67.403 | 41.401 | 0.00 | 0.00 |
| ATOM | 233 | HA3  | GLY | X | 15 | 56.860 | 67.679 | 39.836 | 0.00 | 0.00 |
| ATOM | 234 | C    | GLY | X | 15 | 58.885 | 68.237 | 39.894 | 0.00 | 0.00 |
| ATOM | 235 | O    | GLY | X | 15 | 59.606 | 69.158 | 40.277 | 0.00 | 0.00 |
| ATOM | 236 | N    | ILE | X | 16 | 59.289 | 67.288 | 39.071 | 0.00 | 0.00 |
| ATOM | 237 | H    | ILE | X | 16 | 58.692 | 66.477 | 38.990 | 0.00 | 0.00 |
| ATOM | 238 | CA   | ILE | X | 16 | 60.620 | 67.244 | 38.442 | 0.00 | 0.00 |
| ATOM | 239 | HA   | ILE | X | 16 | 61.169 | 68.180 | 38.546 | 0.00 | 0.00 |
| ATOM | 240 | CB   | ILE | X | 16 | 61.627 | 66.360 | 39.217 | 0.00 | 0.00 |
| ATOM | 241 | HB   | ILE | X | 16 | 62.602 | 66.300 | 38.733 | 0.00 | 0.00 |
| ATOM | 242 | CG2  | ILE | X | 16 | 61.803 | 66.913 | 40.592 | 0.00 | 0.00 |
| ATOM | 243 | HG21 | ILE | X | 16 | 60.873 | 67.137 | 41.116 | 0.00 | 0.00 |
| ATOM | 244 | HG22 | ILE | X | 16 | 62.405 | 66.301 | 41.263 | 0.00 | 0.00 |
| ATOM | 245 | HG23 | ILE | X | 16 | 62.258 | 67.899 | 40.502 | 0.00 | 0.00 |
| ATOM | 246 | CG1  | ILE | X | 16 | 61.027 | 64.971 | 39.344 | 0.00 | 0.00 |
| ATOM | 247 | HG12 | ILE | X | 16 | 60.088 | 64.837 | 39.881 | 0.00 | 0.00 |
| ATOM | 248 | HG13 | ILE | X | 16 | 60.848 | 64.711 | 38.300 | 0.00 | 0.00 |
| ATOM | 249 | CD1  | ILE | X | 16 | 61.978 | 63.843 | 39.935 | 0.00 | 0.00 |
| ATOM | 250 | HD11 | ILE | X | 16 | 61.805 | 63.845 | 41.011 | 0.00 | 0.00 |
| ATOM | 251 | HD12 | ILE | X | 16 | 61.548 | 62.865 | 39.720 | 0.00 | 0.00 |
| ATOM | 252 | HD13 | ILE | X | 16 | 63.003 | 63.949 | 39.581 | 0.00 | 0.00 |
| ATOM | 253 | C    | ILE | X | 16 | 60.634 | 66.803 | 36.980 | 0.00 | 0.00 |
| ATOM | 254 | O    | ILE | X | 16 | 59.676 | 66.183 | 36.499 | 0.00 | 0.00 |
| ATOM | 255 | N    | ARG | X | 17 | 61.615 | 67.345 | 36.225 | 0.00 | 0.00 |
| ATOM | 256 | H    | ARG | X | 17 | 62.240 | 67.994 | 36.681 | 0.00 | 0.00 |
| ATOM | 257 | CA   | ARG | X | 17 | 61.927 | 66.822 | 34.853 | 0.00 | 0.00 |
| ATOM | 258 | HA   | ARG | X | 17 | 61.050 | 66.854 | 34.207 | 0.00 | 0.00 |
| ATOM | 259 | CB   | ARG | X | 17 | 62.928 | 67.811 | 34.171 | 0.00 | 0.00 |
| ATOM | 260 | HB2  | ARG | X | 17 | 62.462 | 68.794 | 34.099 | 0.00 | 0.00 |
| ATOM | 261 | HB3  | ARG | X | 17 | 63.802 | 67.886 | 34.818 | 0.00 | 0.00 |
| ATOM | 262 | CG   | ARG | X | 17 | 63.341 | 67.467 | 32.747 | 0.00 | 0.00 |
| ATOM | 263 | HG2  | ARG | X | 17 | 63.856 | 66.507 | 32.745 | 0.00 | 0.00 |
| ATOM | 264 | HG3  | ARG | X | 17 | 62.504 | 67.475 | 32.049 | 0.00 | 0.00 |
| ATOM | 265 | CD   | ARG | X | 17 | 64.297 | 68.556 | 32.186 | 0.00 | 0.00 |
| ATOM | 266 | HD2  | ARG | X | 17 | 64.290 | 68.536 | 31.096 | 0.00 | 0.00 |
| ATOM | 267 | HD3  | ARG | X | 17 | 64.000 | 69.586 | 32.379 | 0.00 | 0.00 |
| ATOM | 268 | NE   | ARG | X | 17 | 65.724 | 68.425 | 32.640 | 0.00 | 0.00 |
| ATOM | 269 | HE   | ARG | X | 17 | 66.174 | 67.558 | 32.383 | 0.00 | 0.00 |
| ATOM | 270 | CZ   | ARG | X | 17 | 66.484 | 69.272 | 33.364 | 0.00 | 0.00 |
| ATOM | 271 | NH1  | ARG | X | 17 | 66.139 | 70.427 | 33.719 | 0.00 | 0.00 |
| ATOM | 272 | HH11 | ARG | X | 17 | 65.376 | 70.966 | 33.335 | 0.00 | 0.00 |
| ATOM | 273 | HH12 | ARG | X | 17 | 66.796 | 70.996 | 34.234 | 0.00 | 0.00 |
| ATOM | 274 | NH2  | ARG | X | 17 | 67.685 | 68.857 | 33.729 | 0.00 | 0.00 |
| ATOM | 275 | HH21 | ARG | X | 17 | 67.986 | 67.915 | 33.522 | 0.00 | 0.00 |
| ATOM | 276 | HH22 | ARG | X | 17 | 68.241 | 69.480 | 34.296 | 0.00 | 0.00 |
| ATOM | 277 | C    | ARG | X | 17 | 62.597 | 65.437 | 34.865 | 0.00 | 0.00 |
| ATOM | 278 | O    | ARG | X | 17 | 63.600 | 65.265 | 35.534 | 0.00 | 0.00 |
| ATOM | 279 | N    | LEU | X | 18 | 62.038 | 64.395 | 34.203 | 0.00 | 0.00 |
| ATOM | 280 | H    | LEU | X | 18 | 61.137 | 64.561 | 33.777 | 0.00 | 0.00 |
| ATOM | 281 | CA   | LEU | X | 18 | 62.538 | 62.990 | 34.102 | 0.00 | 0.00 |
| ATOM | 282 | HA   | LEU | X | 18 | 63.370 | 62.781 | 34.774 | 0.00 | 0.00 |
| ATOM | 283 | CB   | LEU | X | 18 | 61.396 | 61.945 | 34.505 | 0.00 | 0.00 |
| ATOM | 284 | HB2  | LEU | X | 18 | 60.591 | 62.147 | 33.798 | 0.00 | 0.00 |



|      |     |      |     |   |    |        |        |        |      |      |
|------|-----|------|-----|---|----|--------|--------|--------|------|------|
| ATOM | 285 | HB3  | LEU | X | 18 | 61.720 | 60.929 | 34.279 | 0.00 | 0.00 |
| ATOM | 286 | CG   | LEU | X | 18 | 60.768 | 61.869 | 35.988 | 0.00 | 0.00 |
| ATOM | 287 | HG   | LEU | X | 18 | 60.137 | 62.731 | 36.204 | 0.00 | 0.00 |
| ATOM | 288 | CD1  | LEU | X | 18 | 59.849 | 60.607 | 36.123 | 0.00 | 0.00 |
| ATOM | 289 | HD11 | LEU | X | 18 | 60.388 | 59.704 | 36.410 | 0.00 | 0.00 |
| ATOM | 290 | HD12 | LEU | X | 18 | 59.139 | 60.740 | 36.940 | 0.00 | 0.00 |
| ATOM | 291 | HD13 | LEU | X | 18 | 59.245 | 60.518 | 35.220 | 0.00 | 0.00 |
| ATOM | 292 | CD2  | LEU | X | 18 | 61.883 | 61.916 | 37.048 | 0.00 | 0.00 |
| ATOM | 293 | HD21 | LEU | X | 18 | 62.295 | 62.924 | 37.009 | 0.00 | 0.00 |
| ATOM | 294 | HD22 | LEU | X | 18 | 61.543 | 61.732 | 38.067 | 0.00 | 0.00 |
| ATOM | 295 | HD23 | LEU | X | 18 | 62.629 | 61.159 | 36.810 | 0.00 | 0.00 |
| ATOM | 296 | C    | LEU | X | 18 | 62.939 | 62.616 | 32.692 | 0.00 | 0.00 |
| ATOM | 297 | O    | LEU | X | 18 | 62.246 | 62.914 | 31.680 | 0.00 | 0.00 |
| ATOM | 298 | N    | LYS | X | 19 | 64.126 | 62.010 | 32.594 | 0.00 | 0.00 |
| ATOM | 299 | H    | LYS | X | 19 | 64.664 | 61.950 | 33.447 | 0.00 | 0.00 |
| ATOM | 300 | CA   | LYS | X | 19 | 64.821 | 61.616 | 31.308 | 0.00 | 0.00 |
| ATOM | 301 | HA   | LYS | X | 19 | 64.603 | 62.300 | 30.488 | 0.00 | 0.00 |
| ATOM | 302 | CB   | LYS | X | 19 | 66.334 | 61.597 | 31.585 | 0.00 | 0.00 |
| ATOM | 303 | HB2  | LYS | X | 19 | 66.832 | 61.581 | 30.615 | 0.00 | 0.00 |
| ATOM | 304 | HB3  | LYS | X | 19 | 66.400 | 62.588 | 32.034 | 0.00 | 0.00 |
| ATOM | 305 | CG   | LYS | X | 19 | 66.766 | 60.513 | 32.593 | 0.00 | 0.00 |
| ATOM | 306 | HG2  | LYS | X | 19 | 66.269 | 60.672 | 33.550 | 0.00 | 0.00 |
| ATOM | 307 | HG3  | LYS | X | 19 | 66.589 | 59.508 | 32.211 | 0.00 | 0.00 |
| ATOM | 308 | CD   | LYS | X | 19 | 68.233 | 60.715 | 32.872 | 0.00 | 0.00 |
| ATOM | 309 | HD2  | LYS | X | 19 | 68.845 | 60.638 | 31.974 | 0.00 | 0.00 |
| ATOM | 310 | HD3  | LYS | X | 19 | 68.462 | 61.706 | 33.265 | 0.00 | 0.00 |
| ATOM | 311 | CE   | LYS | X | 19 | 68.727 | 59.793 | 33.953 | 0.00 | 0.00 |
| ATOM | 312 | HE2  | LYS | X | 19 | 68.100 | 60.041 | 34.809 | 0.00 | 0.00 |
| ATOM | 313 | HE3  | LYS | X | 19 | 68.553 | 58.750 | 33.691 | 0.00 | 0.00 |
| ATOM | 314 | NZ   | LYS | X | 19 | 70.142 | 59.887 | 34.330 | 0.00 | 0.00 |
| ATOM | 315 | HZ1  | LYS | X | 19 | 70.419 | 59.200 | 35.017 | 0.00 | 0.00 |
| ATOM | 316 | HZ2  | LYS | X | 19 | 70.635 | 59.633 | 33.486 | 0.00 | 0.00 |
| ATOM | 317 | HZ3  | LYS | X | 19 | 70.531 | 60.795 | 34.536 | 0.00 | 0.00 |
| ATOM | 318 | C    | LYS | X | 19 | 64.257 | 60.291 | 30.756 | 0.00 | 0.00 |
| ATOM | 319 | O    | LYS | X | 19 | 63.603 | 59.490 | 31.434 | 0.00 | 0.00 |
| ATOM | 320 | N    | THR | X | 20 | 64.501 | 60.047 | 29.488 | 0.00 | 0.00 |
| ATOM | 321 | H    | THR | X | 20 | 64.998 | 60.727 | 28.930 | 0.00 | 0.00 |
| ATOM | 322 | CA   | THR | X | 20 | 63.780 | 59.088 | 28.569 | 0.00 | 0.00 |
| ATOM | 323 | HA   | THR | X | 20 | 63.577 | 58.146 | 29.079 | 0.00 | 0.00 |
| ATOM | 324 | CB   | THR | X | 20 | 62.458 | 59.569 | 28.017 | 0.00 | 0.00 |
| ATOM | 325 | HB   | THR | X | 20 | 62.299 | 59.159 | 27.020 | 0.00 | 0.00 |
| ATOM | 326 | CG2  | THR | X | 20 | 61.167 | 59.210 | 28.911 | 0.00 | 0.00 |
| ATOM | 327 | HG21 | THR | X | 20 | 60.473 | 58.728 | 28.221 | 0.00 | 0.00 |
| ATOM | 328 | HG22 | THR | X | 20 | 61.437 | 58.511 | 29.701 | 0.00 | 0.00 |
| ATOM | 329 | HG23 | THR | X | 20 | 60.642 | 60.091 | 29.281 | 0.00 | 0.00 |
| ATOM | 330 | OG1  | THR | X | 20 | 62.572 | 60.922 | 27.892 | 0.00 | 0.00 |
| ATOM | 331 | HG1  | THR | X | 20 | 61.694 | 61.156 | 27.584 | 0.00 | 0.00 |
| ATOM | 332 | C    | THR | X | 20 | 64.745 | 58.712 | 27.371 | 0.00 | 0.00 |
| ATOM | 333 | O    | THR | X | 20 | 65.746 | 59.379 | 27.071 | 0.00 | 0.00 |
| ATOM | 334 | N    | PRO | X | 21 | 64.442 | 57.564 | 26.671 | 0.00 | 0.00 |
| ATOM | 335 | CD   | PRO | X | 21 | 63.619 | 56.451 | 27.085 | 0.00 | 0.00 |
| ATOM | 336 | HD2  | PRO | X | 21 | 62.559 | 56.667 | 27.221 | 0.00 | 0.00 |
| ATOM | 337 | HD3  | PRO | X | 21 | 63.966 | 55.985 | 28.007 | 0.00 | 0.00 |
| ATOM | 338 | CG   | PRO | X | 21 | 63.610 | 55.539 | 25.901 | 0.00 | 0.00 |
| ATOM | 339 | HG2  | PRO | X | 21 | 62.766 | 55.876 | 25.298 | 0.00 | 0.00 |
| ATOM | 340 | HG3  | PRO | X | 21 | 63.509 | 54.477 | 26.125 | 0.00 | 0.00 |
| ATOM | 341 | CB   | PRO | X | 21 | 64.900 | 55.736 | 25.127 | 0.00 | 0.00 |
| ATOM | 342 | HB2  | PRO | X | 21 | 64.861 | 55.424 | 24.084 | 0.00 | 0.00 |
| ATOM | 343 | HB3  | PRO | X | 21 | 65.671 | 55.157 | 25.635 | 0.00 | 0.00 |
| ATOM | 344 | CA   | PRO | X | 21 | 65.114 | 57.273 | 25.432 | 0.00 | 0.00 |
| ATOM | 345 | HA   | PRO | X | 21 | 66.164 | 57.505 | 25.612 | 0.00 | 0.00 |
| ATOM | 346 | C    | PRO | X | 21 | 64.598 | 58.171 | 24.259 | 0.00 | 0.00 |
| ATOM | 347 | O    | PRO | X | 21 | 65.356 | 58.393 | 23.330 | 0.00 | 0.00 |
| ATOM | 348 | N    | GLY | X | 22 | 63.477 | 58.792 | 24.399 | 0.00 | 0.00 |
| ATOM | 349 | H    | GLY | X | 22 | 62.782 | 58.450 | 25.048 | 0.00 | 0.00 |
| ATOM | 350 | CA   | GLY | X | 22 | 63.042 | 59.942 | 23.668 | 0.00 | 0.00 |
| ATOM | 351 | HA2  | GLY | X | 22 | 63.517 | 60.059 | 22.689 | 0.00 | 0.00 |
| ATOM | 352 | HA3  | GLY | X | 22 | 62.012 | 59.759 | 23.574 | 0.00 | 0.00 |
| ATOM | 353 | C    | GLY | X | 22 | 63.297 | 61.229 | 24.430 | 0.00 | 0.00 |
| ATOM | 354 | O    | GLY | X | 22 | 64.346 | 61.418 | 25.043 | 0.00 | 0.00 |

|      |     |      |     |   |    |        |        |        |      |      |
|------|-----|------|-----|---|----|--------|--------|--------|------|------|
| ATOM | 355 | N    | GLY | X | 23 | 62.378 | 62.192 | 24.370 | 0.00 | 0.00 |
| ATOM | 356 | H    | GLY | X | 23 | 61.677 | 61.996 | 23.670 | 0.00 | 0.00 |
| ATOM | 357 | CA   | GLY | X | 23 | 62.407 | 63.507 | 25.046 | 0.00 | 0.00 |
| ATOM | 358 | HA2  | GLY | X | 23 | 63.451 | 63.826 | 25.047 | 0.00 | 0.00 |
| ATOM | 359 | HA3  | GLY | X | 23 | 61.823 | 64.176 | 24.455 | 0.00 | 0.00 |
| ATOM | 360 | C    | GLY | X | 23 | 61.767 | 63.525 | 26.377 | 0.00 | 0.00 |
| ATOM | 361 | O    | GLY | X | 23 | 60.828 | 62.718 | 26.584 | 0.00 | 0.00 |
| ATOM | 362 | N    | PRO | X | 24 | 62.336 | 64.298 | 27.332 | 0.00 | 0.00 |
| ATOM | 363 | CD   | PRO | X | 24 | 63.191 | 65.445 | 27.131 | 0.00 | 0.00 |
| ATOM | 364 | HD2  | PRO | X | 24 | 62.720 | 66.075 | 26.376 | 0.00 | 0.00 |
| ATOM | 365 | HD3  | PRO | X | 24 | 64.170 | 65.052 | 26.856 | 0.00 | 0.00 |
| ATOM | 366 | CG   | PRO | X | 24 | 63.305 | 66.168 | 28.518 | 0.00 | 0.00 |
| ATOM | 367 | HG2  | PRO | X | 24 | 62.609 | 66.994 | 28.664 | 0.00 | 0.00 |
| ATOM | 368 | HG3  | PRO | X | 24 | 64.328 | 66.482 | 28.725 | 0.00 | 0.00 |
| ATOM | 369 | CB   | PRO | X | 24 | 62.922 | 65.097 | 29.496 | 0.00 | 0.00 |
| ATOM | 370 | HB2  | PRO | X | 24 | 62.300 | 65.518 | 30.287 | 0.00 | 0.00 |
| ATOM | 371 | HB3  | PRO | X | 24 | 63.851 | 64.608 | 29.787 | 0.00 | 0.00 |
| ATOM | 372 | CA   | PRO | X | 24 | 62.072 | 64.081 | 28.768 | 0.00 | 0.00 |
| ATOM | 373 | HA   | PRO | X | 24 | 62.441 | 63.092 | 29.040 | 0.00 | 0.00 |
| ATOM | 374 | C    | PRO | X | 24 | 60.585 | 64.312 | 28.985 | 0.00 | 0.00 |
| ATOM | 375 | O    | PRO | X | 24 | 59.944 | 65.008 | 28.224 | 0.00 | 0.00 |
| ATOM | 376 | N    | VAL | X | 25 | 59.965 | 63.597 | 29.929 | 0.00 | 0.00 |
| ATOM | 377 | H    | VAL | X | 25 | 60.570 | 63.062 | 30.535 | 0.00 | 0.00 |
| ATOM | 378 | CA   | VAL | X | 25 | 58.664 | 63.818 | 30.558 | 0.00 | 0.00 |
| ATOM | 379 | HA   | VAL | X | 25 | 58.096 | 64.527 | 29.955 | 0.00 | 0.00 |
| ATOM | 380 | CB   | VAL | X | 25 | 57.906 | 62.433 | 30.649 | 0.00 | 0.00 |
| ATOM | 381 | HB   | VAL | X | 25 | 56.912 | 62.685 | 31.021 | 0.00 | 0.00 |
| ATOM | 382 | CG1  | VAL | X | 25 | 57.682 | 61.710 | 29.279 | 0.00 | 0.00 |
| ATOM | 383 | HG11 | VAL | X | 25 | 57.118 | 60.794 | 29.455 | 0.00 | 0.00 |
| ATOM | 384 | HG12 | VAL | X | 25 | 57.202 | 62.383 | 28.569 | 0.00 | 0.00 |
| ATOM | 385 | HG13 | VAL | X | 25 | 58.633 | 61.436 | 28.822 | 0.00 | 0.00 |
| ATOM | 386 | CG2  | VAL | X | 25 | 58.496 | 61.413 | 31.660 | 0.00 | 0.00 |
| ATOM | 387 | HG21 | VAL | X | 25 | 59.477 | 61.189 | 31.242 | 0.00 | 0.00 |
| ATOM | 388 | HG22 | VAL | X | 25 | 58.563 | 61.866 | 32.650 | 0.00 | 0.00 |
| ATOM | 389 | HG23 | VAL | X | 25 | 57.950 | 60.476 | 31.774 | 0.00 | 0.00 |
| ATOM | 390 | C    | VAL | X | 25 | 58.797 | 64.439 | 31.933 | 0.00 | 0.00 |
| ATOM | 391 | O    | VAL | X | 25 | 59.944 | 64.787 | 32.284 | 0.00 | 0.00 |
| ATOM | 392 | N    | SER | X | 26 | 57.740 | 64.619 | 32.736 | 0.00 | 0.00 |
| ATOM | 393 | H    | SER | X | 26 | 56.861 | 64.280 | 32.371 | 0.00 | 0.00 |
| ATOM | 394 | CA   | SER | X | 26 | 57.848 | 65.171 | 34.128 | 0.00 | 0.00 |
| ATOM | 395 | HA   | SER | X | 26 | 58.841 | 65.049 | 34.561 | 0.00 | 0.00 |
| ATOM | 396 | CB   | SER | X | 26 | 57.560 | 66.679 | 34.156 | 0.00 | 0.00 |
| ATOM | 397 | HB2  | SER | X | 26 | 57.581 | 67.129 | 35.149 | 0.00 | 0.00 |
| ATOM | 398 | HB3  | SER | X | 26 | 58.310 | 67.187 | 33.550 | 0.00 | 0.00 |
| ATOM | 399 | OG   | SER | X | 26 | 56.302 | 66.865 | 33.540 | 0.00 | 0.00 |
| ATOM | 400 | HG   | SER | X | 26 | 56.256 | 66.268 | 32.790 | 0.00 | 0.00 |
| ATOM | 401 | C    | SER | X | 26 | 57.002 | 64.437 | 35.203 | 0.00 | 0.00 |
| ATOM | 402 | O    | SER | X | 26 | 56.116 | 63.644 | 34.828 | 0.00 | 0.00 |
| ATOM | 403 | N    | ALA | X | 27 | 57.189 | 64.715 | 36.519 | 0.00 | 0.00 |
| ATOM | 404 | H    | ALA | X | 27 | 57.848 | 65.408 | 36.844 | 0.00 | 0.00 |
| ATOM | 405 | CA   | ALA | X | 27 | 56.504 | 63.994 | 37.569 | 0.00 | 0.00 |
| ATOM | 406 | HA   | ALA | X | 27 | 55.486 | 63.978 | 37.180 | 0.00 | 0.00 |
| ATOM | 407 | CB   | ALA | X | 27 | 57.126 | 62.572 | 37.512 | 0.00 | 0.00 |
| ATOM | 408 | HB1  | ALA | X | 27 | 56.483 | 61.976 | 38.160 | 0.00 | 0.00 |
| ATOM | 409 | HB2  | ALA | X | 27 | 57.068 | 62.083 | 36.540 | 0.00 | 0.00 |
| ATOM | 410 | HB3  | ALA | X | 27 | 58.143 | 62.528 | 37.901 | 0.00 | 0.00 |
| ATOM | 411 | C    | ALA | X | 27 | 56.411 | 64.502 | 39.038 | 0.00 | 0.00 |
| ATOM | 412 | O    | ALA | X | 27 | 57.323 | 65.170 | 39.550 | 0.00 | 0.00 |
| ATOM | 413 | N    | PHE | X | 28 | 55.272 | 64.221 | 39.667 | 0.00 | 0.00 |
| ATOM | 414 | H    | PHE | X | 28 | 54.619 | 63.734 | 39.070 | 0.00 | 0.00 |
| ATOM | 415 | CA   | PHE | X | 28 | 54.851 | 64.778 | 40.947 | 0.00 | 0.00 |
| ATOM | 416 | HA   | PHE | X | 28 | 55.634 | 65.435 | 41.326 | 0.00 | 0.00 |
| ATOM | 417 | CB   | PHE | X | 28 | 53.567 | 65.566 | 40.769 | 0.00 | 0.00 |
| ATOM | 418 | HB2  | PHE | X | 28 | 52.790 | 64.891 | 40.409 | 0.00 | 0.00 |
| ATOM | 419 | HB3  | PHE | X | 28 | 53.347 | 66.007 | 41.741 | 0.00 | 0.00 |
| ATOM | 420 | CG   | PHE | X | 28 | 53.746 | 66.670 | 39.800 | 0.00 | 0.00 |
| ATOM | 421 | CD1  | PHE | X | 28 | 53.599 | 66.503 | 38.414 | 0.00 | 0.00 |
| ATOM | 422 | HD1  | PHE | X | 28 | 53.397 | 65.549 | 37.949 | 0.00 | 0.00 |
| ATOM | 423 | CE1  | PHE | X | 28 | 53.800 | 67.579 | 37.520 | 0.00 | 0.00 |
| ATOM | 424 | HE1  | PHE | X | 28 | 53.591 | 67.364 | 36.483 | 0.00 | 0.00 |

|      |     |      |     |   |    |        |        |        |      |      |
|------|-----|------|-----|---|----|--------|--------|--------|------|------|
| ATOM | 425 | CZ   | PHE | X | 28 | 54.150 | 68.884 | 38.011 | 0.00 | 0.00 |
| ATOM | 426 | HZ   | PHE | X | 28 | 54.260 | 69.788 | 37.431 | 0.00 | 0.00 |
| ATOM | 427 | CE2  | PHE | X | 28 | 54.205 | 69.095 | 39.410 | 0.00 | 0.00 |
| ATOM | 428 | HE2  | PHE | X | 28 | 54.304 | 70.094 | 39.807 | 0.00 | 0.00 |
| ATOM | 429 | CD2  | PHE | X | 28 | 53.977 | 68.023 | 40.223 | 0.00 | 0.00 |
| ATOM | 430 | HD2  | PHE | X | 28 | 54.004 | 68.254 | 41.277 | 0.00 | 0.00 |
| ATOM | 431 | C    | PHE | X | 28 | 54.807 | 63.559 | 41.871 | 0.00 | 0.00 |
| ATOM | 432 | O    | PHE | X | 28 | 53.849 | 62.799 | 41.856 | 0.00 | 0.00 |
| ATOM | 433 | N    | LEU | X | 29 | 55.883 | 63.352 | 42.677 | 0.00 | 0.00 |
| ATOM | 434 | H    | LEU | X | 29 | 56.617 | 64.043 | 42.618 | 0.00 | 0.00 |
| ATOM | 435 | CA   | LEU | X | 29 | 56.038 | 62.145 | 43.411 | 0.00 | 0.00 |
| ATOM | 436 | HA   | LEU | X | 29 | 55.422 | 61.384 | 42.933 | 0.00 | 0.00 |
| ATOM | 437 | CB   | LEU | X | 29 | 57.466 | 61.630 | 43.408 | 0.00 | 0.00 |
| ATOM | 438 | HB2  | LEU | X | 29 | 58.054 | 62.400 | 43.908 | 0.00 | 0.00 |
| ATOM | 439 | HB3  | LEU | X | 29 | 57.473 | 60.774 | 44.082 | 0.00 | 0.00 |
| ATOM | 440 | CG   | LEU | X | 29 | 58.026 | 61.254 | 41.983 | 0.00 | 0.00 |
| ATOM | 441 | HG   | LEU | X | 29 | 58.177 | 62.119 | 41.337 | 0.00 | 0.00 |
| ATOM | 442 | CD1  | LEU | X | 29 | 59.370 | 60.585 | 42.189 | 0.00 | 0.00 |
| ATOM | 443 | HD11 | LEU | X | 29 | 59.862 | 60.486 | 41.221 | 0.00 | 0.00 |
| ATOM | 444 | HD12 | LEU | X | 29 | 59.903 | 61.289 | 42.828 | 0.00 | 0.00 |
| ATOM | 445 | HD13 | LEU | X | 29 | 59.402 | 59.618 | 42.692 | 0.00 | 0.00 |
| ATOM | 446 | CD2  | LEU | X | 29 | 57.188 | 60.343 | 41.120 | 0.00 | 0.00 |
| ATOM | 447 | HD21 | LEU | X | 29 | 57.697 | 60.213 | 40.164 | 0.00 | 0.00 |
| ATOM | 448 | HD22 | LEU | X | 29 | 57.043 | 59.377 | 41.603 | 0.00 | 0.00 |
| ATOM | 449 | HD23 | LEU | X | 29 | 56.218 | 60.673 | 40.746 | 0.00 | 0.00 |
| ATOM | 450 | C    | LEU | X | 29 | 55.694 | 62.207 | 44.961 | 0.00 | 0.00 |
| ATOM | 451 | O    | LEU | X | 29 | 56.071 | 63.266 | 45.508 | 0.00 | 0.00 |
| ATOM | 452 | N    | GLY | X | 30 | 54.962 | 61.260 | 45.560 | 0.00 | 0.00 |
| ATOM | 453 | H    | GLY | X | 30 | 54.973 | 60.377 | 45.069 | 0.00 | 0.00 |
| ATOM | 454 | CA   | GLY | X | 30 | 54.555 | 61.318 | 47.012 | 0.00 | 0.00 |
| ATOM | 455 | HA2  | GLY | X | 30 | 53.915 | 60.501 | 47.180 | 0.00 | 0.00 |
| ATOM | 456 | HA3  | GLY | X | 30 | 55.420 | 61.350 | 47.584 | 0.00 | 0.00 |
| ATOM | 457 | C    | GLY | X | 30 | 53.818 | 62.706 | 47.317 | 0.00 | 0.00 |
| ATOM | 458 | O    | GLY | X | 30 | 54.187 | 63.392 | 48.215 | 0.00 | 0.00 |
| ATOM | 459 | N    | ILE | X | 31 | 52.783 | 62.954 | 46.603 | 0.00 | 0.00 |
| ATOM | 460 | H    | ILE | X | 31 | 52.510 | 62.266 | 45.916 | 0.00 | 0.00 |
| ATOM | 461 | CA   | ILE | X | 31 | 51.750 | 64.019 | 46.961 | 0.00 | 0.00 |
| ATOM | 462 | HA   | ILE | X | 31 | 52.225 | 64.922 | 47.343 | 0.00 | 0.00 |
| ATOM | 463 | CB   | ILE | X | 31 | 50.850 | 64.285 | 45.779 | 0.00 | 0.00 |
| ATOM | 464 | HB   | ILE | X | 31 | 50.236 | 63.410 | 45.568 | 0.00 | 0.00 |
| ATOM | 465 | CG2  | ILE | X | 31 | 49.862 | 65.411 | 46.141 | 0.00 | 0.00 |
| ATOM | 466 | HG21 | ILE | X | 31 | 49.387 | 65.766 | 45.226 | 0.00 | 0.00 |
| ATOM | 467 | HG22 | ILE | X | 31 | 49.097 | 65.042 | 46.824 | 0.00 | 0.00 |
| ATOM | 468 | HG23 | ILE | X | 31 | 50.270 | 66.326 | 46.571 | 0.00 | 0.00 |
| ATOM | 469 | CG1  | ILE | X | 31 | 51.634 | 64.604 | 44.495 | 0.00 | 0.00 |
| ATOM | 470 | HG12 | ILE | X | 31 | 52.391 | 65.386 | 44.550 | 0.00 | 0.00 |
| ATOM | 471 | HG13 | ILE | X | 31 | 52.137 | 63.687 | 44.187 | 0.00 | 0.00 |
| ATOM | 472 | CD1  | ILE | X | 31 | 50.777 | 64.667 | 43.250 | 0.00 | 0.00 |
| ATOM | 473 | HD11 | ILE | X | 31 | 51.395 | 64.734 | 42.355 | 0.00 | 0.00 |
| ATOM | 474 | HD12 | ILE | X | 31 | 50.093 | 63.845 | 43.038 | 0.00 | 0.00 |
| ATOM | 475 | HD13 | ILE | X | 31 | 50.059 | 65.485 | 43.310 | 0.00 | 0.00 |
| ATOM | 476 | C    | ILE | X | 31 | 50.818 | 63.396 | 48.064 | 0.00 | 0.00 |
| ATOM | 477 | O    | ILE | X | 31 | 50.310 | 62.311 | 47.818 | 0.00 | 0.00 |
| ATOM | 478 | N    | PRO | X | 32 | 50.608 | 64.068 | 49.196 | 0.00 | 0.00 |
| ATOM | 479 | CD   | PRO | X | 32 | 51.264 | 65.325 | 49.593 | 0.00 | 0.00 |
| ATOM | 480 | HD2  | PRO | X | 32 | 50.859 | 66.146 | 49.002 | 0.00 | 0.00 |
| ATOM | 481 | HD3  | PRO | X | 32 | 52.340 | 65.255 | 49.434 | 0.00 | 0.00 |
| ATOM | 482 | CG   | PRO | X | 32 | 50.828 | 65.620 | 51.102 | 0.00 | 0.00 |
| ATOM | 483 | HG2  | PRO | X | 32 | 50.186 | 66.502 | 51.100 | 0.00 | 0.00 |
| ATOM | 484 | HG3  | PRO | X | 32 | 51.683 | 65.842 | 51.740 | 0.00 | 0.00 |
| ATOM | 485 | CB   | PRO | X | 32 | 50.053 | 64.337 | 51.534 | 0.00 | 0.00 |
| ATOM | 486 | HB2  | PRO | X | 32 | 49.142 | 64.573 | 52.084 | 0.00 | 0.00 |
| ATOM | 487 | HB3  | PRO | X | 32 | 50.757 | 63.780 | 52.152 | 0.00 | 0.00 |
| ATOM | 488 | CA   | PRO | X | 32 | 49.711 | 63.547 | 50.197 | 0.00 | 0.00 |
| ATOM | 489 | HA   | PRO | X | 32 | 49.921 | 62.480 | 50.262 | 0.00 | 0.00 |
| ATOM | 490 | C    | PRO | X | 32 | 48.259 | 63.758 | 49.748 | 0.00 | 0.00 |
| ATOM | 491 | O    | PRO | X | 32 | 47.800 | 64.863 | 49.431 | 0.00 | 0.00 |
| ATOM | 492 | N    | PHE | X | 33 | 47.573 | 62.589 | 49.566 | 0.00 | 0.00 |
| ATOM | 493 | H    | PHE | X | 33 | 48.137 | 61.754 | 49.631 | 0.00 | 0.00 |
| ATOM | 494 | CA   | PHE | X | 33 | 46.097 | 62.493 | 49.422 | 0.00 | 0.00 |

|      |     |     |     |   |    |        |        |        |      |      |
|------|-----|-----|-----|---|----|--------|--------|--------|------|------|
| ATOM | 495 | HA  | PHE | X | 33 | 45.686 | 63.437 | 49.065 | 0.00 | 0.00 |
| ATOM | 496 | CB  | PHE | X | 33 | 45.825 | 61.457 | 48.338 | 0.00 | 0.00 |
| ATOM | 497 | HB2 | PHE | X | 33 | 44.766 | 61.615 | 48.137 | 0.00 | 0.00 |
| ATOM | 498 | HB3 | PHE | X | 33 | 46.353 | 61.749 | 47.430 | 0.00 | 0.00 |
| ATOM | 499 | CG  | PHE | X | 33 | 46.002 | 59.959 | 48.780 | 0.00 | 0.00 |
| ATOM | 500 | CD1 | PHE | X | 33 | 45.101 | 59.398 | 49.680 | 0.00 | 0.00 |
| ATOM | 501 | HD1 | PHE | X | 33 | 44.258 | 59.962 | 50.052 | 0.00 | 0.00 |
| ATOM | 502 | CE1 | PHE | X | 33 | 45.343 | 58.037 | 50.046 | 0.00 | 0.00 |
| ATOM | 503 | HE1 | PHE | X | 33 | 44.712 | 57.629 | 50.823 | 0.00 | 0.00 |
| ATOM | 504 | CZ  | PHE | X | 33 | 46.452 | 57.294 | 49.622 | 0.00 | 0.00 |
| ATOM | 505 | HZ  | PHE | X | 33 | 46.589 | 56.268 | 49.931 | 0.00 | 0.00 |
| ATOM | 506 | CE2 | PHE | X | 33 | 47.412 | 57.967 | 48.783 | 0.00 | 0.00 |
| ATOM | 507 | HE2 | PHE | X | 33 | 48.225 | 57.378 | 48.386 | 0.00 | 0.00 |
| ATOM | 508 | CD2 | PHE | X | 33 | 47.093 | 59.276 | 48.343 | 0.00 | 0.00 |
| ATOM | 509 | HD2 | PHE | X | 33 | 47.851 | 59.796 | 47.775 | 0.00 | 0.00 |
| ATOM | 510 | C   | PHE | X | 33 | 45.382 | 62.316 | 50.760 | 0.00 | 0.00 |
| ATOM | 511 | O   | PHE | X | 33 | 44.167 | 62.511 | 50.878 | 0.00 | 0.00 |
| ATOM | 512 | N   | ALA | X | 34 | 46.133 | 61.842 | 51.770 | 0.00 | 0.00 |
| ATOM | 513 | H   | ALA | X | 34 | 47.133 | 61.953 | 51.681 | 0.00 | 0.00 |
| ATOM | 514 | CA  | ALA | X | 34 | 45.571 | 61.566 | 53.078 | 0.00 | 0.00 |
| ATOM | 515 | HA  | ALA | X | 34 | 44.615 | 62.080 | 53.178 | 0.00 | 0.00 |
| ATOM | 516 | CB  | ALA | X | 34 | 45.408 | 60.060 | 53.304 | 0.00 | 0.00 |
| ATOM | 517 | HB1 | ALA | X | 34 | 46.334 | 59.486 | 53.288 | 0.00 | 0.00 |
| ATOM | 518 | HB2 | ALA | X | 34 | 44.917 | 59.936 | 54.269 | 0.00 | 0.00 |
| ATOM | 519 | HB3 | ALA | X | 34 | 44.676 | 59.702 | 52.580 | 0.00 | 0.00 |
| ATOM | 520 | C   | ALA | X | 34 | 46.381 | 62.231 | 54.254 | 0.00 | 0.00 |
| ATOM | 521 | O   | ALA | X | 34 | 47.532 | 62.760 | 54.125 | 0.00 | 0.00 |
| ATOM | 522 | N   | GLU | X | 35 | 45.804 | 62.238 | 55.440 | 0.00 | 0.00 |
| ATOM | 523 | H   | GLU | X | 35 | 44.867 | 61.863 | 55.424 | 0.00 | 0.00 |
| ATOM | 524 | CA  | GLU | X | 35 | 46.372 | 62.449 | 56.753 | 0.00 | 0.00 |
| ATOM | 525 | HA  | GLU | X | 35 | 47.159 | 63.195 | 56.643 | 0.00 | 0.00 |
| ATOM | 526 | CB  | GLU | X | 35 | 45.348 | 62.951 | 57.801 | 0.00 | 0.00 |
| ATOM | 527 | HB2 | GLU | X | 35 | 44.592 | 62.177 | 57.933 | 0.00 | 0.00 |
| ATOM | 528 | HB3 | GLU | X | 35 | 45.933 | 63.120 | 58.705 | 0.00 | 0.00 |
| ATOM | 529 | CG  | GLU | X | 35 | 44.638 | 64.289 | 57.480 | 0.00 | 0.00 |
| ATOM | 530 | HG2 | GLU | X | 35 | 44.113 | 64.208 | 56.528 | 0.00 | 0.00 |
| ATOM | 531 | HG3 | GLU | X | 35 | 43.966 | 64.470 | 58.319 | 0.00 | 0.00 |
| ATOM | 532 | CD  | GLU | X | 35 | 45.634 | 65.523 | 57.429 | 0.00 | 0.00 |
| ATOM | 533 | OE1 | GLU | X | 35 | 46.846 | 65.352 | 57.582 | 0.00 | 0.00 |
| ATOM | 534 | OE2 | GLU | X | 35 | 45.156 | 66.684 | 57.264 | 0.00 | 0.00 |
| ATOM | 535 | C   | GLU | X | 35 | 47.017 | 61.103 | 57.185 | 0.00 | 0.00 |
| ATOM | 536 | O   | GLU | X | 35 | 46.533 | 60.006 | 56.811 | 0.00 | 0.00 |
| ATOM | 537 | N   | PRO | X | 36 | 48.170 | 61.146 | 57.983 | 0.00 | 0.00 |
| ATOM | 538 | CD  | PRO | X | 36 | 48.616 | 62.294 | 58.711 | 0.00 | 0.00 |
| ATOM | 539 | HD2 | PRO | X | 36 | 47.892 | 62.731 | 59.398 | 0.00 | 0.00 |
| ATOM | 540 | HD3 | PRO | X | 36 | 49.022 | 63.030 | 58.017 | 0.00 | 0.00 |
| ATOM | 541 | CG  | PRO | X | 36 | 49.753 | 61.839 | 59.607 | 0.00 | 0.00 |
| ATOM | 542 | HG2 | PRO | X | 36 | 49.309 | 61.579 | 60.568 | 0.00 | 0.00 |
| ATOM | 543 | HG3 | PRO | X | 36 | 50.525 | 62.603 | 59.699 | 0.00 | 0.00 |
| ATOM | 544 | CB  | PRO | X | 36 | 50.279 | 60.508 | 58.943 | 0.00 | 0.00 |
| ATOM | 545 | HB2 | PRO | X | 36 | 50.697 | 59.761 | 59.618 | 0.00 | 0.00 |
| ATOM | 546 | HB3 | PRO | X | 36 | 51.025 | 60.710 | 58.174 | 0.00 | 0.00 |
| ATOM | 547 | CA  | PRO | X | 36 | 49.039 | 59.964 | 58.236 | 0.00 | 0.00 |
| ATOM | 548 | HA  | PRO | X | 36 | 49.256 | 59.525 | 57.263 | 0.00 | 0.00 |
| ATOM | 549 | C   | PRO | X | 36 | 48.402 | 58.906 | 59.092 | 0.00 | 0.00 |
| ATOM | 550 | O   | PRO | X | 36 | 47.516 | 59.203 | 59.897 | 0.00 | 0.00 |
| ATOM | 551 | N   | PRO | X | 37 | 48.802 | 57.538 | 58.987 | 0.00 | 0.00 |
| ATOM | 552 | CD  | PRO | X | 37 | 49.742 | 57.063 | 58.006 | 0.00 | 0.00 |
| ATOM | 553 | HD2 | PRO | X | 37 | 50.742 | 57.471 | 58.148 | 0.00 | 0.00 |
| ATOM | 554 | HD3 | PRO | X | 37 | 49.376 | 57.360 | 57.023 | 0.00 | 0.00 |
| ATOM | 555 | CG  | PRO | X | 37 | 49.763 | 55.577 | 57.986 | 0.00 | 0.00 |
| ATOM | 556 | HG2 | PRO | X | 37 | 50.542 | 55.141 | 58.612 | 0.00 | 0.00 |
| ATOM | 557 | HG3 | PRO | X | 37 | 49.805 | 55.095 | 57.009 | 0.00 | 0.00 |
| ATOM | 558 | CB  | PRO | X | 37 | 48.424 | 55.207 | 58.611 | 0.00 | 0.00 |
| ATOM | 559 | HB2 | PRO | X | 37 | 48.361 | 54.188 | 58.992 | 0.00 | 0.00 |
| ATOM | 560 | HB3 | PRO | X | 37 | 47.626 | 55.195 | 57.869 | 0.00 | 0.00 |
| ATOM | 561 | CA  | PRO | X | 37 | 48.157 | 56.412 | 59.635 | 0.00 | 0.00 |
| ATOM | 562 | HA  | PRO | X | 37 | 47.085 | 56.609 | 59.605 | 0.00 | 0.00 |
| ATOM | 563 | C   | PRO | X | 37 | 48.686 | 56.086 | 60.992 | 0.00 | 0.00 |
| ATOM | 564 | O   | PRO | X | 37 | 48.102 | 55.216 | 61.637 | 0.00 | 0.00 |

|      |     |      |     |   |    |        |        |        |      |      |
|------|-----|------|-----|---|----|--------|--------|--------|------|------|
| ATOM | 565 | N    | MET | X | 38 | 49.721 | 56.720 | 61.500 | 0.00 | 0.00 |
| ATOM | 566 | H    | MET | X | 38 | 50.132 | 57.484 | 60.984 | 0.00 | 0.00 |
| ATOM | 567 | CA   | MET | X | 38 | 50.396 | 56.385 | 62.745 | 0.00 | 0.00 |
| ATOM | 568 | HA   | MET | X | 38 | 50.956 | 55.450 | 62.714 | 0.00 | 0.00 |
| ATOM | 569 | CB   | MET | X | 38 | 51.498 | 57.412 | 63.116 | 0.00 | 0.00 |
| ATOM | 570 | HB2  | MET | X | 38 | 51.858 | 57.233 | 64.129 | 0.00 | 0.00 |
| ATOM | 571 | HB3  | MET | X | 38 | 52.265 | 57.486 | 62.345 | 0.00 | 0.00 |
| ATOM | 572 | CG   | MET | X | 38 | 50.969 | 58.857 | 63.312 | 0.00 | 0.00 |
| ATOM | 573 | HG2  | MET | X | 38 | 49.923 | 58.940 | 63.018 | 0.00 | 0.00 |
| ATOM | 574 | HG3  | MET | X | 38 | 50.996 | 59.034 | 64.387 | 0.00 | 0.00 |
| ATOM | 575 | SD   | MET | X | 38 | 52.056 | 60.106 | 62.706 | 0.00 | 0.00 |
| ATOM | 576 | CE   | MET | X | 38 | 51.133 | 61.538 | 63.159 | 0.00 | 0.00 |
| ATOM | 577 | HE1  | MET | X | 38 | 51.526 | 62.390 | 62.605 | 0.00 | 0.00 |
| ATOM | 578 | HE2  | MET | X | 38 | 50.090 | 61.350 | 62.904 | 0.00 | 0.00 |
| ATOM | 579 | HE3  | MET | X | 38 | 51.126 | 61.691 | 64.238 | 0.00 | 0.00 |
| ATOM | 580 | C    | MET | X | 38 | 49.415 | 56.244 | 63.999 | 0.00 | 0.00 |
| ATOM | 581 | O    | MET | X | 38 | 48.377 | 56.982 | 64.017 | 0.00 | 0.00 |
| ATOM | 582 | N    | GLY | X | 39 | 49.851 | 55.283 | 64.872 | 0.00 | 0.00 |
| ATOM | 583 | H    | GLY | X | 39 | 50.706 | 54.766 | 64.722 | 0.00 | 0.00 |
| ATOM | 584 | CA   | GLY | X | 39 | 49.403 | 55.259 | 66.254 | 0.00 | 0.00 |
| ATOM | 585 | HA2  | GLY | X | 39 | 50.068 | 54.643 | 66.913 | 0.00 | 0.00 |
| ATOM | 586 | HA3  | GLY | X | 39 | 49.528 | 56.311 | 66.650 | 0.00 | 0.00 |
| ATOM | 587 | C    | GLY | X | 39 | 47.938 | 54.800 | 66.348 | 0.00 | 0.00 |
| ATOM | 588 | O    | GLY | X | 39 | 47.701 | 53.657 | 66.011 | 0.00 | 0.00 |
| ATOM | 589 | N    | PRO | X | 40 | 46.919 | 55.572 | 66.856 | 0.00 | 0.00 |
| ATOM | 590 | CD   | PRO | X | 40 | 47.107 | 56.788 | 67.545 | 0.00 | 0.00 |
| ATOM | 591 | HD2  | PRO | X | 40 | 47.667 | 57.561 | 67.019 | 0.00 | 0.00 |
| ATOM | 592 | HD3  | PRO | X | 40 | 47.651 | 56.517 | 68.451 | 0.00 | 0.00 |
| ATOM | 593 | CG   | PRO | X | 40 | 45.627 | 57.285 | 67.743 | 0.00 | 0.00 |
| ATOM | 594 | HG2  | PRO | X | 40 | 45.466 | 57.891 | 66.852 | 0.00 | 0.00 |
| ATOM | 595 | HG3  | PRO | X | 40 | 45.501 | 57.882 | 68.646 | 0.00 | 0.00 |
| ATOM | 596 | CB   | PRO | X | 40 | 44.719 | 56.023 | 67.695 | 0.00 | 0.00 |
| ATOM | 597 | HB2  | PRO | X | 40 | 43.739 | 56.294 | 67.301 | 0.00 | 0.00 |
| ATOM | 598 | HB3  | PRO | X | 40 | 44.596 | 55.637 | 68.707 | 0.00 | 0.00 |
| ATOM | 599 | CA   | PRO | X | 40 | 45.589 | 55.075 | 66.872 | 0.00 | 0.00 |
| ATOM | 600 | HA   | PRO | X | 40 | 45.604 | 54.113 | 67.386 | 0.00 | 0.00 |
| ATOM | 601 | C    | PRO | X | 40 | 44.915 | 54.874 | 65.484 | 0.00 | 0.00 |
| ATOM | 602 | O    | PRO | X | 40 | 43.940 | 54.134 | 65.505 | 0.00 | 0.00 |
| ATOM | 603 | N    | ARG | X | 41 | 45.384 | 55.525 | 64.398 | 0.00 | 0.00 |
| ATOM | 604 | H    | ARG | X | 41 | 46.129 | 56.194 | 64.527 | 0.00 | 0.00 |
| ATOM | 605 | CA   | ARG | X | 41 | 44.756 | 55.356 | 63.096 | 0.00 | 0.00 |
| ATOM | 606 | HA   | ARG | X | 41 | 43.684 | 55.276 | 63.279 | 0.00 | 0.00 |
| ATOM | 607 | CB   | ARG | X | 41 | 44.988 | 56.698 | 62.285 | 0.00 | 0.00 |
| ATOM | 608 | HB2  | ARG | X | 41 | 44.690 | 57.540 | 62.910 | 0.00 | 0.00 |
| ATOM | 609 | HB3  | ARG | X | 41 | 46.055 | 56.816 | 62.095 | 0.00 | 0.00 |
| ATOM | 610 | CG   | ARG | X | 41 | 44.163 | 56.655 | 61.022 | 0.00 | 0.00 |
| ATOM | 611 | HG2  | ARG | X | 41 | 44.479 | 55.786 | 60.444 | 0.00 | 0.00 |
| ATOM | 612 | HG3  | ARG | X | 41 | 43.128 | 56.594 | 61.358 | 0.00 | 0.00 |
| ATOM | 613 | CD   | ARG | X | 41 | 44.327 | 57.939 | 60.235 | 0.00 | 0.00 |
| ATOM | 614 | HD2  | ARG | X | 41 | 45.385 | 58.086 | 60.017 | 0.00 | 0.00 |
| ATOM | 615 | HD3  | ARG | X | 41 | 43.786 | 57.735 | 59.311 | 0.00 | 0.00 |
| ATOM | 616 | NE   | ARG | X | 41 | 43.690 | 59.171 | 60.902 | 0.00 | 0.00 |
| ATOM | 617 | HE   | ARG | X | 41 | 42.771 | 59.059 | 61.305 | 0.00 | 0.00 |
| ATOM | 618 | CZ   | ARG | X | 41 | 44.058 | 60.393 | 61.167 | 0.00 | 0.00 |
| ATOM | 619 | NH1  | ARG | X | 41 | 45.272 | 60.810 | 60.969 | 0.00 | 0.00 |
| ATOM | 620 | HH11 | ARG | X | 41 | 45.957 | 60.127 | 60.677 | 0.00 | 0.00 |
| ATOM | 621 | HH12 | ARG | X | 41 | 45.587 | 61.740 | 61.204 | 0.00 | 0.00 |
| ATOM | 622 | NH2  | ARG | X | 41 | 43.175 | 61.233 | 61.641 | 0.00 | 0.00 |
| ATOM | 623 | HH21 | ARG | X | 41 | 42.198 | 60.978 | 61.601 | 0.00 | 0.00 |
| ATOM | 624 | HH22 | ARG | X | 41 | 43.392 | 62.178 | 61.924 | 0.00 | 0.00 |
| ATOM | 625 | C    | ARG | X | 41 | 45.189 | 54.020 | 62.406 | 0.00 | 0.00 |
| ATOM | 626 | O    | ARG | X | 41 | 44.550 | 53.552 | 61.428 | 0.00 | 0.00 |
| ATOM | 627 | N    | ARG | X | 42 | 46.285 | 53.352 | 62.947 | 0.00 | 0.00 |
| ATOM | 628 | H    | ARG | X | 42 | 46.803 | 53.759 | 63.713 | 0.00 | 0.00 |
| ATOM | 629 | CA   | ARG | X | 42 | 46.655 | 51.950 | 62.627 | 0.00 | 0.00 |
| ATOM | 630 | HA   | ARG | X | 42 | 47.069 | 51.941 | 61.619 | 0.00 | 0.00 |
| ATOM | 631 | CB   | ARG | X | 42 | 47.749 | 51.587 | 63.636 | 0.00 | 0.00 |
| ATOM | 632 | HB2  | ARG | X | 42 | 48.486 | 52.389 | 63.586 | 0.00 | 0.00 |
| ATOM | 633 | HB3  | ARG | X | 42 | 47.328 | 51.652 | 64.639 | 0.00 | 0.00 |
| ATOM | 634 | CG   | ARG | X | 42 | 48.386 | 50.262 | 63.315 | 0.00 | 0.00 |

|      |     |      |     |   |    |        |        |        |      |      |
|------|-----|------|-----|---|----|--------|--------|--------|------|------|
| ATOM | 635 | HG2  | ARG | X | 42 | 47.659 | 49.509 | 63.009 | 0.00 | 0.00 |
| ATOM | 636 | HG3  | ARG | X | 42 | 49.048 | 50.475 | 62.476 | 0.00 | 0.00 |
| ATOM | 637 | CD   | ARG | X | 42 | 49.231 | 49.568 | 64.338 | 0.00 | 0.00 |
| ATOM | 638 | HD2  | ARG | X | 42 | 48.686 | 49.438 | 65.273 | 0.00 | 0.00 |
| ATOM | 639 | HD3  | ARG | X | 42 | 49.481 | 48.535 | 64.096 | 0.00 | 0.00 |
| ATOM | 640 | NE   | ARG | X | 42 | 50.415 | 50.322 | 64.754 | 0.00 | 0.00 |
| ATOM | 641 | HE   | ARG | X | 42 | 50.715 | 51.061 | 64.136 | 0.00 | 0.00 |
| ATOM | 642 | CZ   | ARG | X | 42 | 51.234 | 49.821 | 65.654 | 0.00 | 0.00 |
| ATOM | 643 | NH1  | ARG | X | 42 | 51.067 | 48.886 | 66.531 | 0.00 | 0.00 |
| ATOM | 644 | HH11 | ARG | X | 42 | 50.150 | 48.470 | 66.605 | 0.00 | 0.00 |
| ATOM | 645 | HH12 | ARG | X | 42 | 51.786 | 48.753 | 67.228 | 0.00 | 0.00 |
| ATOM | 646 | NH2  | ARG | X | 42 | 52.401 | 50.402 | 65.713 | 0.00 | 0.00 |
| ATOM | 647 | HH21 | ARG | X | 42 | 52.702 | 51.127 | 65.076 | 0.00 | 0.00 |
| ATOM | 648 | HH22 | ARG | X | 42 | 53.090 | 50.245 | 66.434 | 0.00 | 0.00 |
| ATOM | 649 | C    | ARG | X | 42 | 45.449 | 50.928 | 62.698 | 0.00 | 0.00 |
| ATOM | 650 | O    | ARG | X | 42 | 44.635 | 51.033 | 63.569 | 0.00 | 0.00 |
| ATOM | 651 | N    | PHE | X | 43 | 45.254 | 50.146 | 61.574 | 0.00 | 0.00 |
| ATOM | 652 | H    | PHE | X | 43 | 46.010 | 49.901 | 60.950 | 0.00 | 0.00 |
| ATOM | 653 | CA   | PHE | X | 43 | 44.034 | 49.233 | 61.322 | 0.00 | 0.00 |
| ATOM | 654 | HA   | PHE | X | 43 | 44.295 | 48.667 | 60.428 | 0.00 | 0.00 |
| ATOM | 655 | CB   | PHE | X | 43 | 43.849 | 48.214 | 62.537 | 0.00 | 0.00 |
| ATOM | 656 | HB2  | PHE | X | 43 | 43.392 | 48.864 | 63.283 | 0.00 | 0.00 |
| ATOM | 657 | HB3  | PHE | X | 43 | 43.217 | 47.366 | 62.275 | 0.00 | 0.00 |
| ATOM | 658 | CG   | PHE | X | 43 | 45.091 | 47.570 | 63.170 | 0.00 | 0.00 |
| ATOM | 659 | CD1  | PHE | X | 43 | 46.188 | 47.161 | 62.408 | 0.00 | 0.00 |
| ATOM | 660 | HD1  | PHE | X | 43 | 46.169 | 47.364 | 61.347 | 0.00 | 0.00 |
| ATOM | 661 | CE1  | PHE | X | 43 | 47.379 | 46.702 | 63.032 | 0.00 | 0.00 |
| ATOM | 662 | HE1  | PHE | X | 43 | 48.180 | 46.364 | 62.392 | 0.00 | 0.00 |
| ATOM | 663 | CZ   | PHE | X | 43 | 47.251 | 46.448 | 64.403 | 0.00 | 0.00 |
| ATOM | 664 | HZ   | PHE | X | 43 | 48.102 | 46.025 | 64.916 | 0.00 | 0.00 |
| ATOM | 665 | CE2  | PHE | X | 43 | 46.154 | 46.785 | 65.139 | 0.00 | 0.00 |
| ATOM | 666 | HE2  | PHE | X | 43 | 46.258 | 46.718 | 66.212 | 0.00 | 0.00 |
| ATOM | 667 | CD2  | PHE | X | 43 | 45.105 | 47.441 | 64.555 | 0.00 | 0.00 |
| ATOM | 668 | HD2  | PHE | X | 43 | 44.257 | 47.801 | 65.119 | 0.00 | 0.00 |
| ATOM | 669 | C    | PHE | X | 43 | 42.690 | 49.935 | 60.991 | 0.00 | 0.00 |
| ATOM | 670 | O    | PHE | X | 43 | 41.729 | 49.277 | 60.664 | 0.00 | 0.00 |
| ATOM | 671 | N    | LEU | X | 44 | 42.605 | 51.236 | 61.183 | 0.00 | 0.00 |
| ATOM | 672 | H    | LEU | X | 44 | 43.408 | 51.682 | 61.603 | 0.00 | 0.00 |
| ATOM | 673 | CA   | LEU | X | 44 | 41.492 | 52.256 | 61.049 | 0.00 | 0.00 |
| ATOM | 674 | HA   | LEU | X | 44 | 40.681 | 51.528 | 61.027 | 0.00 | 0.00 |
| ATOM | 675 | CB   | LEU | X | 44 | 41.438 | 53.170 | 62.304 | 0.00 | 0.00 |
| ATOM | 676 | HB2  | LEU | X | 44 | 42.456 | 53.250 | 62.687 | 0.00 | 0.00 |
| ATOM | 677 | HB3  | LEU | X | 44 | 41.086 | 54.173 | 62.063 | 0.00 | 0.00 |
| ATOM | 678 | CG   | LEU | X | 44 | 40.741 | 52.682 | 63.503 | 0.00 | 0.00 |
| ATOM | 679 | HG   | LEU | X | 44 | 40.886 | 53.483 | 64.227 | 0.00 | 0.00 |
| ATOM | 680 | CD1  | LEU | X | 44 | 39.178 | 52.648 | 63.377 | 0.00 | 0.00 |
| ATOM | 681 | HD11 | LEU | X | 44 | 38.826 | 52.491 | 64.396 | 0.00 | 0.00 |
| ATOM | 682 | HD12 | LEU | X | 44 | 38.738 | 53.578 | 63.018 | 0.00 | 0.00 |
| ATOM | 683 | HD13 | LEU | X | 44 | 38.883 | 51.800 | 62.759 | 0.00 | 0.00 |
| ATOM | 684 | CD2  | LEU | X | 44 | 41.240 | 51.363 | 64.195 | 0.00 | 0.00 |
| ATOM | 685 | HD21 | LEU | X | 44 | 40.530 | 51.096 | 64.978 | 0.00 | 0.00 |
| ATOM | 686 | HD22 | LEU | X | 44 | 41.317 | 50.550 | 63.474 | 0.00 | 0.00 |
| ATOM | 687 | HD23 | LEU | X | 44 | 42.171 | 51.525 | 64.740 | 0.00 | 0.00 |
| ATOM | 688 | C    | LEU | X | 44 | 41.541 | 53.083 | 59.754 | 0.00 | 0.00 |
| ATOM | 689 | O    | LEU | X | 44 | 42.603 | 53.247 | 59.160 | 0.00 | 0.00 |
| ATOM | 690 | N    | PRO | X | 45 | 40.339 | 53.649 | 59.373 | 0.00 | 0.00 |
| ATOM | 691 | CD   | PRO | X | 45 | 39.012 | 53.236 | 59.769 | 0.00 | 0.00 |
| ATOM | 692 | HD2  | PRO | X | 45 | 38.780 | 53.860 | 60.632 | 0.00 | 0.00 |
| ATOM | 693 | HD3  | PRO | X | 45 | 39.016 | 52.149 | 59.849 | 0.00 | 0.00 |
| ATOM | 694 | CG   | PRO | X | 45 | 38.131 | 53.487 | 58.632 | 0.00 | 0.00 |
| ATOM | 695 | HG2  | PRO | X | 45 | 37.133 | 53.686 | 59.024 | 0.00 | 0.00 |
| ATOM | 696 | HG3  | PRO | X | 45 | 38.155 | 52.600 | 57.998 | 0.00 | 0.00 |
| ATOM | 697 | CB   | PRO | X | 45 | 38.743 | 54.672 | 57.851 | 0.00 | 0.00 |
| ATOM | 698 | HB2  | PRO | X | 45 | 38.398 | 55.576 | 58.353 | 0.00 | 0.00 |
| ATOM | 699 | HB3  | PRO | X | 45 | 38.513 | 54.772 | 56.790 | 0.00 | 0.00 |
| ATOM | 700 | CA   | PRO | X | 45 | 40.239 | 54.398 | 58.130 | 0.00 | 0.00 |
| ATOM | 701 | HA   | PRO | X | 45 | 40.666 | 53.787 | 57.334 | 0.00 | 0.00 |
| ATOM | 702 | C    | PRO | X | 45 | 41.039 | 55.699 | 58.138 | 0.00 | 0.00 |
| ATOM | 703 | O    | PRO | X | 45 | 41.233 | 56.335 | 59.186 | 0.00 | 0.00 |
| ATOM | 704 | N    | PRO | X | 46 | 41.501 | 56.184 | 56.950 | 0.00 | 0.00 |

|      |     |     |     |   |    |        |        |        |      |      |
|------|-----|-----|-----|---|----|--------|--------|--------|------|------|
| ATOM | 705 | CD  | PRO | X | 46 | 41.541 | 55.497 | 55.708 | 0.00 | 0.00 |
| ATOM | 706 | HD2 | PRO | X | 46 | 40.563 | 55.033 | 55.590 | 0.00 | 0.00 |
| ATOM | 707 | HD3 | PRO | X | 46 | 42.404 | 54.832 | 55.693 | 0.00 | 0.00 |
| ATOM | 708 | CG  | PRO | X | 46 | 41.835 | 56.508 | 54.657 | 0.00 | 0.00 |
| ATOM | 709 | HG2 | PRO | X | 46 | 40.894 | 57.029 | 54.478 | 0.00 | 0.00 |
| ATOM | 710 | HG3 | PRO | X | 46 | 42.264 | 56.110 | 53.737 | 0.00 | 0.00 |
| ATOM | 711 | CB  | PRO | X | 46 | 42.741 | 57.472 | 55.374 | 0.00 | 0.00 |
| ATOM | 712 | HB2 | PRO | X | 46 | 42.783 | 58.446 | 54.887 | 0.00 | 0.00 |
| ATOM | 713 | HB3 | PRO | X | 46 | 43.759 | 57.099 | 55.494 | 0.00 | 0.00 |
| ATOM | 714 | CA  | PRO | X | 46 | 42.106 | 57.442 | 56.718 | 0.00 | 0.00 |
| ATOM | 715 | HA  | PRO | X | 46 | 42.908 | 57.638 | 57.430 | 0.00 | 0.00 |
| ATOM | 716 | C   | PRO | X | 46 | 41.124 | 58.644 | 56.761 | 0.00 | 0.00 |
| ATOM | 717 | O   | PRO | X | 46 | 39.873 | 58.462 | 56.607 | 0.00 | 0.00 |
| ATOM | 718 | N   | GLU | X | 47 | 41.653 | 59.865 | 56.945 | 0.00 | 0.00 |
| ATOM | 719 | H   | GLU | X | 47 | 42.663 | 59.865 | 56.950 | 0.00 | 0.00 |
| ATOM | 720 | CA  | GLU | X | 47 | 40.972 | 61.131 | 56.586 | 0.00 | 0.00 |
| ATOM | 721 | HA  | GLU | X | 47 | 39.972 | 60.830 | 56.275 | 0.00 | 0.00 |
| ATOM | 722 | CB  | GLU | X | 47 | 40.921 | 62.025 | 57.860 | 0.00 | 0.00 |
| ATOM | 723 | HB2 | GLU | X | 47 | 41.974 | 62.125 | 58.122 | 0.00 | 0.00 |
| ATOM | 724 | HB3 | GLU | X | 47 | 40.539 | 63.019 | 57.628 | 0.00 | 0.00 |
| ATOM | 725 | CG  | GLU | X | 47 | 40.198 | 61.420 | 58.993 | 0.00 | 0.00 |
| ATOM | 726 | HG2 | GLU | X | 47 | 39.207 | 61.395 | 58.539 | 0.00 | 0.00 |
| ATOM | 727 | HG3 | GLU | X | 47 | 40.625 | 60.439 | 59.204 | 0.00 | 0.00 |
| ATOM | 728 | CD  | GLU | X | 47 | 40.130 | 62.323 | 60.284 | 0.00 | 0.00 |
| ATOM | 729 | OE1 | GLU | X | 47 | 39.619 | 63.457 | 60.170 | 0.00 | 0.00 |
| ATOM | 730 | OE2 | GLU | X | 47 | 40.428 | 61.838 | 61.403 | 0.00 | 0.00 |
| ATOM | 731 | C   | GLU | X | 47 | 41.768 | 62.016 | 55.527 | 0.00 | 0.00 |
| ATOM | 732 | O   | GLU | X | 47 | 42.975 | 61.831 | 55.395 | 0.00 | 0.00 |
| ATOM | 733 | N   | PRO | X | 48 | 41.095 | 62.855 | 54.747 | 0.00 | 0.00 |
| ATOM | 734 | CD  | PRO | X | 48 | 39.652 | 63.051 | 54.805 | 0.00 | 0.00 |
| ATOM | 735 | HD2 | PRO | X | 48 | 39.520 | 63.879 | 55.502 | 0.00 | 0.00 |
| ATOM | 736 | HD3 | PRO | X | 48 | 39.069 | 62.165 | 55.058 | 0.00 | 0.00 |
| ATOM | 737 | CG  | PRO | X | 48 | 39.213 | 63.577 | 53.455 | 0.00 | 0.00 |
| ATOM | 738 | HG2 | PRO | X | 48 | 38.404 | 64.307 | 53.490 | 0.00 | 0.00 |
| ATOM | 739 | HG3 | PRO | X | 48 | 38.897 | 62.698 | 52.892 | 0.00 | 0.00 |
| ATOM | 740 | CB  | PRO | X | 48 | 40.430 | 64.181 | 52.808 | 0.00 | 0.00 |
| ATOM | 741 | HB2 | PRO | X | 48 | 40.407 | 65.271 | 52.798 | 0.00 | 0.00 |
| ATOM | 742 | HB3 | PRO | X | 48 | 40.482 | 63.769 | 51.801 | 0.00 | 0.00 |
| ATOM | 743 | CA  | PRO | X | 48 | 41.594 | 63.614 | 53.612 | 0.00 | 0.00 |
| ATOM | 744 | HA  | PRO | X | 48 | 42.232 | 62.993 | 52.984 | 0.00 | 0.00 |
| ATOM | 745 | C   | PRO | X | 48 | 42.529 | 64.768 | 54.087 | 0.00 | 0.00 |
| ATOM | 746 | O   | PRO | X | 48 | 42.268 | 65.509 | 55.012 | 0.00 | 0.00 |
| ATOM | 747 | N   | LYS | X | 49 | 43.746 | 64.900 | 53.450 | 0.00 | 0.00 |
| ATOM | 748 | H   | LYS | X | 49 | 44.066 | 64.233 | 52.763 | 0.00 | 0.00 |
| ATOM | 749 | CA  | LYS | X | 49 | 44.708 | 65.883 | 53.691 | 0.00 | 0.00 |
| ATOM | 750 | HA  | LYS | X | 49 | 45.090 | 65.773 | 54.706 | 0.00 | 0.00 |
| ATOM | 751 | CB  | LYS | X | 49 | 45.927 | 65.637 | 52.779 | 0.00 | 0.00 |
| ATOM | 752 | HB2 | LYS | X | 49 | 46.296 | 64.612 | 52.821 | 0.00 | 0.00 |
| ATOM | 753 | HB3 | LYS | X | 49 | 45.594 | 65.821 | 51.758 | 0.00 | 0.00 |
| ATOM | 754 | CG  | LYS | X | 49 | 47.022 | 66.629 | 52.965 | 0.00 | 0.00 |
| ATOM | 755 | HG2 | LYS | X | 49 | 47.660 | 66.412 | 52.108 | 0.00 | 0.00 |
| ATOM | 756 | HG3 | LYS | X | 49 | 46.661 | 67.639 | 52.770 | 0.00 | 0.00 |
| ATOM | 757 | CD  | LYS | X | 49 | 47.985 | 66.653 | 54.197 | 0.00 | 0.00 |
| ATOM | 758 | HD2 | LYS | X | 49 | 47.288 | 66.817 | 55.018 | 0.00 | 0.00 |
| ATOM | 759 | HD3 | LYS | X | 49 | 48.528 | 65.726 | 54.381 | 0.00 | 0.00 |
| ATOM | 760 | CE  | LYS | X | 49 | 48.983 | 67.769 | 53.972 | 0.00 | 0.00 |
| ATOM | 761 | HE2 | LYS | X | 49 | 49.760 | 67.517 | 53.251 | 0.00 | 0.00 |
| ATOM | 762 | HE3 | LYS | X | 49 | 48.579 | 68.689 | 53.548 | 0.00 | 0.00 |
| ATOM | 763 | NZ  | LYS | X | 49 | 49.734 | 68.167 | 55.211 | 0.00 | 0.00 |
| ATOM | 764 | HZ1 | LYS | X | 49 | 50.288 | 68.988 | 55.012 | 0.00 | 0.00 |
| ATOM | 765 | HZ2 | LYS | X | 49 | 49.132 | 68.383 | 55.993 | 0.00 | 0.00 |
| ATOM | 766 | HZ3 | LYS | X | 49 | 50.262 | 67.371 | 55.538 | 0.00 | 0.00 |
| ATOM | 767 | C   | LYS | X | 49 | 44.176 | 67.338 | 53.759 | 0.00 | 0.00 |
| ATOM | 768 | O   | LYS | X | 49 | 43.671 | 67.821 | 52.757 | 0.00 | 0.00 |
| ATOM | 769 | N   | GLN | X | 50 | 44.529 | 68.094 | 54.808 | 0.00 | 0.00 |
| ATOM | 770 | H   | GLN | X | 50 | 44.820 | 67.651 | 55.668 | 0.00 | 0.00 |
| ATOM | 771 | CA  | GLN | X | 50 | 44.150 | 69.439 | 54.919 | 0.00 | 0.00 |
| ATOM | 772 | HA  | GLN | X | 50 | 43.114 | 69.558 | 54.605 | 0.00 | 0.00 |
| ATOM | 773 | CB  | GLN | X | 50 | 44.299 | 69.865 | 56.345 | 0.00 | 0.00 |
| ATOM | 774 | HB2 | GLN | X | 50 | 45.180 | 69.415 | 56.801 | 0.00 | 0.00 |

|      |     |      |     |   |    |        |        |        |      |      |
|------|-----|------|-----|---|----|--------|--------|--------|------|------|
| ATOM | 775 | HB3  | GLN | X | 50 | 44.314 | 70.944 | 56.495 | 0.00 | 0.00 |
| ATOM | 776 | CG   | GLN | X | 50 | 43.049 | 69.382 | 56.985 | 0.00 | 0.00 |
| ATOM | 777 | HG2  | GLN | X | 50 | 42.148 | 69.773 | 56.512 | 0.00 | 0.00 |
| ATOM | 778 | HG3  | GLN | X | 50 | 42.954 | 68.299 | 56.903 | 0.00 | 0.00 |
| ATOM | 779 | CD   | GLN | X | 50 | 42.954 | 69.846 | 58.452 | 0.00 | 0.00 |
| ATOM | 780 | OE1  | GLN | X | 50 | 42.227 | 70.780 | 58.793 | 0.00 | 0.00 |
| ATOM | 781 | NE2  | GLN | X | 50 | 43.624 | 69.155 | 59.317 | 0.00 | 0.00 |
| ATOM | 782 | HE21 | GLN | X | 50 | 43.524 | 69.406 | 60.290 | 0.00 | 0.00 |
| ATOM | 783 | HE22 | GLN | X | 50 | 44.195 | 68.346 | 59.121 | 0.00 | 0.00 |
| ATOM | 784 | C    | GLN | X | 50 | 45.004 | 70.332 | 53.976 | 0.00 | 0.00 |
| ATOM | 785 | O    | GLN | X | 50 | 46.020 | 69.844 | 53.496 | 0.00 | 0.00 |
| ATOM | 786 | N    | PRO | X | 51 | 44.610 | 71.598 | 53.777 | 0.00 | 0.00 |
| ATOM | 787 | CD   | PRO | X | 51 | 43.280 | 72.168 | 54.072 | 0.00 | 0.00 |
| ATOM | 788 | HD2  | PRO | X | 51 | 43.087 | 72.218 | 55.143 | 0.00 | 0.00 |
| ATOM | 789 | HD3  | PRO | X | 51 | 42.420 | 71.618 | 53.690 | 0.00 | 0.00 |
| ATOM | 790 | CG   | PRO | X | 51 | 43.263 | 73.575 | 53.550 | 0.00 | 0.00 |
| ATOM | 791 | HG2  | PRO | X | 51 | 43.565 | 74.343 | 54.262 | 0.00 | 0.00 |
| ATOM | 792 | HG3  | PRO | X | 51 | 42.267 | 73.792 | 53.166 | 0.00 | 0.00 |
| ATOM | 793 | CB   | PRO | X | 51 | 44.228 | 73.481 | 52.446 | 0.00 | 0.00 |
| ATOM | 794 | HB2  | PRO | X | 51 | 44.698 | 74.420 | 52.151 | 0.00 | 0.00 |
| ATOM | 795 | HB3  | PRO | X | 51 | 43.697 | 73.061 | 51.593 | 0.00 | 0.00 |
| ATOM | 796 | CA   | PRO | X | 51 | 45.251 | 72.441 | 52.816 | 0.00 | 0.00 |
| ATOM | 797 | HA   | PRO | X | 51 | 45.395 | 71.966 | 51.846 | 0.00 | 0.00 |
| ATOM | 798 | C    | PRO | X | 51 | 46.540 | 73.082 | 53.448 | 0.00 | 0.00 |
| ATOM | 799 | O    | PRO | X | 51 | 46.681 | 73.055 | 54.690 | 0.00 | 0.00 |
| ATOM | 800 | N    | TRP | X | 52 | 47.436 | 73.550 | 52.615 | 0.00 | 0.00 |
| ATOM | 801 | H    | TRP | X | 52 | 47.113 | 73.559 | 51.658 | 0.00 | 0.00 |
| ATOM | 802 | CA   | TRP | X | 52 | 48.732 | 74.107 | 52.943 | 0.00 | 0.00 |
| ATOM | 803 | HA   | TRP | X | 52 | 48.795 | 74.197 | 54.028 | 0.00 | 0.00 |
| ATOM | 804 | CB   | TRP | X | 52 | 49.841 | 73.076 | 52.491 | 0.00 | 0.00 |
| ATOM | 805 | HB2  | TRP | X | 52 | 50.840 | 73.420 | 52.759 | 0.00 | 0.00 |
| ATOM | 806 | HB3  | TRP | X | 52 | 49.739 | 72.128 | 53.018 | 0.00 | 0.00 |
| ATOM | 807 | CG   | TRP | X | 52 | 49.842 | 72.599 | 51.084 | 0.00 | 0.00 |
| ATOM | 808 | CD1  | TRP | X | 52 | 50.590 | 73.163 | 50.160 | 0.00 | 0.00 |
| ATOM | 809 | HD1  | TRP | X | 52 | 51.193 | 74.049 | 50.296 | 0.00 | 0.00 |
| ATOM | 810 | NE1  | TRP | X | 52 | 50.384 | 72.537 | 48.877 | 0.00 | 0.00 |
| ATOM | 811 | HE1  | TRP | X | 52 | 50.783 | 72.923 | 48.033 | 0.00 | 0.00 |
| ATOM | 812 | CE2  | TRP | X | 52 | 49.511 | 71.477 | 49.038 | 0.00 | 0.00 |
| ATOM | 813 | CZ2  | TRP | X | 52 | 49.015 | 70.508 | 48.140 | 0.00 | 0.00 |
| ATOM | 814 | HZ2  | TRP | X | 52 | 49.417 | 70.462 | 47.139 | 0.00 | 0.00 |
| ATOM | 815 | CH2  | TRP | X | 52 | 48.184 | 69.510 | 48.644 | 0.00 | 0.00 |
| ATOM | 816 | HH2  | TRP | X | 52 | 47.763 | 68.743 | 48.010 | 0.00 | 0.00 |
| ATOM | 817 | CZ3  | TRP | X | 52 | 47.824 | 69.521 | 49.983 | 0.00 | 0.00 |
| ATOM | 818 | HZ3  | TRP | X | 52 | 47.080 | 68.794 | 50.274 | 0.00 | 0.00 |
| ATOM | 819 | CE3  | TRP | X | 52 | 48.280 | 70.443 | 50.876 | 0.00 | 0.00 |
| ATOM | 820 | HE3  | TRP | X | 52 | 47.771 | 70.410 | 51.828 | 0.00 | 0.00 |
| ATOM | 821 | CD2  | TRP | X | 52 | 49.165 | 71.443 | 50.452 | 0.00 | 0.00 |
| ATOM | 822 | C    | TRP | X | 52 | 48.918 | 75.519 | 52.162 | 0.00 | 0.00 |
| ATOM | 823 | O    | TRP | X | 52 | 48.369 | 75.803 | 51.071 | 0.00 | 0.00 |
| ATOM | 824 | N    | SER | X | 53 | 49.641 | 76.381 | 52.794 | 0.00 | 0.00 |
| ATOM | 825 | H    | SER | X | 53 | 50.088 | 76.055 | 53.638 | 0.00 | 0.00 |
| ATOM | 826 | CA   | SER | X | 53 | 49.597 | 77.822 | 52.576 | 0.00 | 0.00 |
| ATOM | 827 | HA   | SER | X | 53 | 48.570 | 78.185 | 52.536 | 0.00 | 0.00 |
| ATOM | 828 | CB   | SER | X | 53 | 50.165 | 78.524 | 53.837 | 0.00 | 0.00 |
| ATOM | 829 | HB2  | SER | X | 53 | 51.113 | 78.072 | 54.126 | 0.00 | 0.00 |
| ATOM | 830 | HB3  | SER | X | 53 | 50.196 | 79.586 | 53.594 | 0.00 | 0.00 |
| ATOM | 831 | OG   | SER | X | 53 | 49.279 | 78.465 | 54.943 | 0.00 | 0.00 |
| ATOM | 832 | HG   | SER | X | 53 | 48.393 | 78.812 | 54.816 | 0.00 | 0.00 |
| ATOM | 833 | C    | SER | X | 53 | 50.411 | 78.286 | 51.383 | 0.00 | 0.00 |
| ATOM | 834 | O    | SER | X | 53 | 50.253 | 79.345 | 50.831 | 0.00 | 0.00 |
| ATOM | 835 | N    | GLY | X | 54 | 51.435 | 77.475 | 50.949 | 0.00 | 0.00 |
| ATOM | 836 | H    | GLY | X | 54 | 51.707 | 76.721 | 51.563 | 0.00 | 0.00 |
| ATOM | 837 | CA   | GLY | X | 54 | 52.332 | 77.790 | 49.798 | 0.00 | 0.00 |
| ATOM | 838 | HA2  | GLY | X | 54 | 51.949 | 78.550 | 49.148 | 0.00 | 0.00 |
| ATOM | 839 | HA3  | GLY | X | 54 | 53.325 | 78.174 | 50.050 | 0.00 | 0.00 |
| ATOM | 840 | C    | GLY | X | 54 | 52.662 | 76.477 | 49.080 | 0.00 | 0.00 |
| ATOM | 841 | O    | GLY | X | 54 | 51.737 | 76.073 | 48.425 | 0.00 | 0.00 |
| ATOM | 842 | N    | VAL | X | 55 | 53.829 | 75.906 | 49.124 | 0.00 | 0.00 |
| ATOM | 843 | H    | VAL | X | 55 | 54.535 | 76.388 | 49.662 | 0.00 | 0.00 |
| ATOM | 844 | CA   | VAL | X | 55 | 54.199 | 74.736 | 48.284 | 0.00 | 0.00 |



|      |     |      |     |   |    |        |        |        |      |      |
|------|-----|------|-----|---|----|--------|--------|--------|------|------|
| ATOM | 845 | HA   | VAL | X | 55 | 53.380 | 74.531 | 47.594 | 0.00 | 0.00 |
| ATOM | 846 | CB   | VAL | X | 55 | 55.455 | 75.086 | 47.453 | 0.00 | 0.00 |
| ATOM | 847 | HB   | VAL | X | 55 | 56.212 | 75.405 | 48.169 | 0.00 | 0.00 |
| ATOM | 848 | CG1  | VAL | X | 55 | 55.851 | 73.873 | 46.611 | 0.00 | 0.00 |
| ATOM | 849 | HG11 | VAL | X | 55 | 56.675 | 74.072 | 45.925 | 0.00 | 0.00 |
| ATOM | 850 | HG12 | VAL | X | 55 | 56.150 | 73.001 | 47.192 | 0.00 | 0.00 |
| ATOM | 851 | HG13 | VAL | X | 55 | 54.939 | 73.648 | 46.058 | 0.00 | 0.00 |
| ATOM | 852 | CG2  | VAL | X | 55 | 55.294 | 76.172 | 46.421 | 0.00 | 0.00 |
| ATOM | 853 | HG21 | VAL | X | 55 | 56.208 | 76.239 | 45.831 | 0.00 | 0.00 |
| ATOM | 854 | HG22 | VAL | X | 55 | 54.483 | 75.941 | 45.730 | 0.00 | 0.00 |
| ATOM | 855 | HG23 | VAL | X | 55 | 55.082 | 77.098 | 46.956 | 0.00 | 0.00 |
| ATOM | 856 | C    | VAL | X | 55 | 54.394 | 73.401 | 49.040 | 0.00 | 0.00 |
| ATOM | 857 | O    | VAL | X | 55 | 55.290 | 73.378 | 49.825 | 0.00 | 0.00 |
| ATOM | 858 | N    | VAL | X | 56 | 53.868 | 72.299 | 48.623 | 0.00 | 0.00 |
| ATOM | 859 | H    | VAL | X | 56 | 53.190 | 72.291 | 47.874 | 0.00 | 0.00 |
| ATOM | 860 | CA   | VAL | X | 56 | 54.325 | 71.006 | 49.070 | 0.00 | 0.00 |
| ATOM | 861 | HA   | VAL | X | 56 | 54.864 | 71.066 | 50.015 | 0.00 | 0.00 |
| ATOM | 862 | CB   | VAL | X | 56 | 53.117 | 70.022 | 49.215 | 0.00 | 0.00 |
| ATOM | 863 | HB   | VAL | X | 56 | 52.347 | 70.184 | 48.460 | 0.00 | 0.00 |
| ATOM | 864 | CG1  | VAL | X | 56 | 53.459 | 68.531 | 49.134 | 0.00 | 0.00 |
| ATOM | 865 | HG11 | VAL | X | 56 | 53.923 | 68.154 | 48.222 | 0.00 | 0.00 |
| ATOM | 866 | HG12 | VAL | X | 56 | 54.154 | 68.414 | 49.965 | 0.00 | 0.00 |
| ATOM | 867 | HG13 | VAL | X | 56 | 52.586 | 67.963 | 49.455 | 0.00 | 0.00 |
| ATOM | 868 | CG2  | VAL | X | 56 | 52.425 | 70.103 | 50.601 | 0.00 | 0.00 |
| ATOM | 869 | HG21 | VAL | X | 56 | 51.529 | 69.487 | 50.683 | 0.00 | 0.00 |
| ATOM | 870 | HG22 | VAL | X | 56 | 53.154 | 69.983 | 51.402 | 0.00 | 0.00 |
| ATOM | 871 | HG23 | VAL | X | 56 | 52.028 | 71.113 | 50.701 | 0.00 | 0.00 |
| ATOM | 872 | C    | VAL | X | 56 | 55.366 | 70.539 | 47.999 | 0.00 | 0.00 |
| ATOM | 873 | O    | VAL | X | 56 | 55.006 | 70.266 | 46.851 | 0.00 | 0.00 |
| ATOM | 874 | N    | ASP | X | 57 | 56.643 | 70.401 | 48.409 | 0.00 | 0.00 |
| ATOM | 875 | H    | ASP | X | 57 | 56.806 | 70.503 | 49.401 | 0.00 | 0.00 |
| ATOM | 876 | CA   | ASP | X | 57 | 57.591 | 69.577 | 47.649 | 0.00 | 0.00 |
| ATOM | 877 | HA   | ASP | X | 57 | 57.819 | 70.036 | 46.687 | 0.00 | 0.00 |
| ATOM | 878 | CB   | ASP | X | 57 | 58.863 | 69.437 | 48.433 | 0.00 | 0.00 |
| ATOM | 879 | HB2  | ASP | X | 57 | 59.100 | 70.438 | 48.794 | 0.00 | 0.00 |
| ATOM | 880 | HB3  | ASP | X | 57 | 58.789 | 68.874 | 49.362 | 0.00 | 0.00 |
| ATOM | 881 | CG   | ASP | X | 57 | 60.049 | 69.060 | 47.531 | 0.00 | 0.00 |
| ATOM | 882 | OD1  | ASP | X | 57 | 60.964 | 69.924 | 47.498 | 0.00 | 0.00 |
| ATOM | 883 | OD2  | ASP | X | 57 | 60.108 | 67.915 | 46.999 | 0.00 | 0.00 |
| ATOM | 884 | C    | ASP | X | 57 | 57.046 | 68.236 | 47.217 | 0.00 | 0.00 |
| ATOM | 885 | O    | ASP | X | 57 | 56.423 | 67.539 | 47.998 | 0.00 | 0.00 |
| ATOM | 886 | N    | ALA | X | 58 | 57.231 | 67.866 | 45.925 | 0.00 | 0.00 |
| ATOM | 887 | H    | ALA | X | 58 | 57.706 | 68.524 | 45.324 | 0.00 | 0.00 |
| ATOM | 888 | CA   | ALA | X | 58 | 56.727 | 66.729 | 45.247 | 0.00 | 0.00 |
| ATOM | 889 | HA   | ALA | X | 58 | 56.272 | 66.113 | 46.023 | 0.00 | 0.00 |
| ATOM | 890 | CB   | ALA | X | 58 | 55.551 | 67.107 | 44.221 | 0.00 | 0.00 |
| ATOM | 891 | HB1  | ALA | X | 58 | 54.931 | 66.212 | 44.179 | 0.00 | 0.00 |
| ATOM | 892 | HB2  | ALA | X | 58 | 54.962 | 67.898 | 44.687 | 0.00 | 0.00 |
| ATOM | 893 | HB3  | ALA | X | 58 | 55.924 | 67.390 | 43.237 | 0.00 | 0.00 |
| ATOM | 894 | C    | ALA | X | 58 | 57.865 | 66.044 | 44.515 | 0.00 | 0.00 |
| ATOM | 895 | O    | ALA | X | 58 | 57.637 | 65.438 | 43.464 | 0.00 | 0.00 |
| ATOM | 896 | N    | THR | X | 59 | 59.127 | 66.222 | 44.940 | 0.00 | 0.00 |
| ATOM | 897 | H    | THR | X | 59 | 59.271 | 66.718 | 45.808 | 0.00 | 0.00 |
| ATOM | 898 | CA   | THR | X | 59 | 60.346 | 65.874 | 44.249 | 0.00 | 0.00 |
| ATOM | 899 | HA   | THR | X | 59 | 60.047 | 65.964 | 43.205 | 0.00 | 0.00 |
| ATOM | 900 | CB   | THR | X | 59 | 61.566 | 66.826 | 44.423 | 0.00 | 0.00 |
| ATOM | 901 | HB   | THR | X | 59 | 62.420 | 66.458 | 43.854 | 0.00 | 0.00 |
| ATOM | 902 | CG2  | THR | X | 59 | 61.222 | 68.268 | 43.998 | 0.00 | 0.00 |
| ATOM | 903 | HG21 | THR | X | 59 | 60.231 | 68.316 | 43.546 | 0.00 | 0.00 |
| ATOM | 904 | HG22 | THR | X | 59 | 61.268 | 68.863 | 44.911 | 0.00 | 0.00 |
| ATOM | 905 | HG23 | THR | X | 59 | 61.968 | 68.513 | 43.243 | 0.00 | 0.00 |
| ATOM | 906 | OG1  | THR | X | 59 | 62.104 | 66.738 | 45.723 | 0.00 | 0.00 |
| ATOM | 907 | HG1  | THR | X | 59 | 61.537 | 67.314 | 46.240 | 0.00 | 0.00 |
| ATOM | 908 | C    | THR | X | 59 | 60.798 | 64.408 | 44.478 | 0.00 | 0.00 |
| ATOM | 909 | O    | THR | X | 59 | 61.646 | 63.937 | 43.772 | 0.00 | 0.00 |
| ATOM | 910 | N    | THR | X | 60 | 60.237 | 63.688 | 45.485 | 0.00 | 0.00 |
| ATOM | 911 | H    | THR | X | 60 | 59.533 | 64.187 | 46.010 | 0.00 | 0.00 |
| ATOM | 912 | CA   | THR | X | 60 | 60.707 | 62.413 | 46.056 | 0.00 | 0.00 |
| ATOM | 913 | HA   | THR | X | 60 | 60.881 | 61.885 | 45.118 | 0.00 | 0.00 |
| ATOM | 914 | CB   | THR | X | 60 | 61.980 | 62.584 | 46.827 | 0.00 | 0.00 |

|      |     |      |     |   |    |        |        |        |      |      |
|------|-----|------|-----|---|----|--------|--------|--------|------|------|
| ATOM | 915 | HB   | THR | X | 60 | 62.744 | 63.003 | 46.172 | 0.00 | 0.00 |
| ATOM | 916 | CG2  | THR | X | 60 | 61.918 | 63.473 | 48.061 | 0.00 | 0.00 |
| ATOM | 917 | HG21 | THR | X | 60 | 61.575 | 64.482 | 47.831 | 0.00 | 0.00 |
| ATOM | 918 | HG22 | THR | X | 60 | 61.213 | 62.973 | 48.724 | 0.00 | 0.00 |
| ATOM | 919 | HG23 | THR | X | 60 | 62.934 | 63.583 | 48.440 | 0.00 | 0.00 |
| ATOM | 920 | OG1  | THR | X | 60 | 62.535 | 61.288 | 47.020 | 0.00 | 0.00 |
| ATOM | 921 | HG1  | THR | X | 60 | 63.018 | 61.157 | 46.200 | 0.00 | 0.00 |
| ATOM | 922 | C    | THR | X | 60 | 59.591 | 61.622 | 46.716 | 0.00 | 0.00 |
| ATOM | 923 | O    | THR | X | 60 | 58.806 | 62.243 | 47.435 | 0.00 | 0.00 |
| ATOM | 924 | N    | PHE | X | 61 | 59.576 | 60.350 | 46.519 | 0.00 | 0.00 |
| ATOM | 925 | H    | PHE | X | 61 | 60.392 | 59.981 | 46.053 | 0.00 | 0.00 |
| ATOM | 926 | CA   | PHE | X | 61 | 58.816 | 59.367 | 47.364 | 0.00 | 0.00 |
| ATOM | 927 | HA   | PHE | X | 61 | 58.295 | 59.873 | 48.176 | 0.00 | 0.00 |
| ATOM | 928 | CB   | PHE | X | 61 | 57.945 | 58.540 | 46.364 | 0.00 | 0.00 |
| ATOM | 929 | HB2  | PHE | X | 61 | 57.198 | 59.268 | 46.048 | 0.00 | 0.00 |
| ATOM | 930 | HB3  | PHE | X | 61 | 58.585 | 58.303 | 45.515 | 0.00 | 0.00 |
| ATOM | 931 | CG   | PHE | X | 61 | 57.264 | 57.289 | 46.898 | 0.00 | 0.00 |
| ATOM | 932 | CD1  | PHE | X | 61 | 57.885 | 56.073 | 46.920 | 0.00 | 0.00 |
| ATOM | 933 | HD1  | PHE | X | 61 | 58.799 | 55.826 | 46.401 | 0.00 | 0.00 |
| ATOM | 934 | CE1  | PHE | X | 61 | 57.192 | 55.025 | 47.526 | 0.00 | 0.00 |
| ATOM | 935 | HE1  | PHE | X | 61 | 57.725 | 54.089 | 47.609 | 0.00 | 0.00 |
| ATOM | 936 | CZ   | PHE | X | 61 | 55.898 | 55.067 | 48.029 | 0.00 | 0.00 |
| ATOM | 937 | HZ   | PHE | X | 61 | 55.429 | 54.200 | 48.469 | 0.00 | 0.00 |
| ATOM | 938 | CE2  | PHE | X | 61 | 55.214 | 56.290 | 47.885 | 0.00 | 0.00 |
| ATOM | 939 | HE2  | PHE | X | 61 | 54.190 | 56.413 | 48.204 | 0.00 | 0.00 |
| ATOM | 940 | CD2  | PHE | X | 61 | 55.890 | 57.399 | 47.352 | 0.00 | 0.00 |
| ATOM | 941 | HD2  | PHE | X | 61 | 55.349 | 58.317 | 47.174 | 0.00 | 0.00 |
| ATOM | 942 | C    | PHE | X | 61 | 59.796 | 58.492 | 48.135 | 0.00 | 0.00 |
| ATOM | 943 | O    | PHE | X | 61 | 60.755 | 58.005 | 47.567 | 0.00 | 0.00 |
| ATOM | 944 | N    | GLN | X | 62 | 59.600 | 58.289 | 49.468 | 0.00 | 0.00 |
| ATOM | 945 | H    | GLN | X | 62 | 58.807 | 58.736 | 49.905 | 0.00 | 0.00 |
| ATOM | 946 | CA   | GLN | X | 62 | 60.724 | 57.942 | 50.363 | 0.00 | 0.00 |
| ATOM | 947 | HA   | GLN | X | 62 | 61.525 | 57.387 | 49.873 | 0.00 | 0.00 |
| ATOM | 948 | CB   | GLN | X | 62 | 61.250 | 59.237 | 50.959 | 0.00 | 0.00 |
| ATOM | 949 | HB2  | GLN | X | 62 | 60.401 | 59.846 | 51.272 | 0.00 | 0.00 |
| ATOM | 950 | HB3  | GLN | X | 62 | 61.813 | 59.136 | 51.887 | 0.00 | 0.00 |
| ATOM | 951 | CG   | GLN | X | 62 | 62.169 | 60.019 | 50.029 | 0.00 | 0.00 |
| ATOM | 952 | HG2  | GLN | X | 62 | 61.604 | 60.191 | 49.112 | 0.00 | 0.00 |
| ATOM | 953 | HG3  | GLN | X | 62 | 62.462 | 60.959 | 50.497 | 0.00 | 0.00 |
| ATOM | 954 | CD   | GLN | X | 62 | 63.535 | 59.267 | 49.711 | 0.00 | 0.00 |
| ATOM | 955 | OE1  | GLN | X | 62 | 64.019 | 58.456 | 50.492 | 0.00 | 0.00 |
| ATOM | 956 | NE2  | GLN | X | 62 | 63.964 | 59.269 | 48.442 | 0.00 | 0.00 |
| ATOM | 957 | HE21 | GLN | X | 62 | 64.758 | 58.701 | 48.183 | 0.00 | 0.00 |
| ATOM | 958 | HE22 | GLN | X | 62 | 63.357 | 59.611 | 47.711 | 0.00 | 0.00 |
| ATOM | 959 | C    | GLN | X | 62 | 60.322 | 57.068 | 51.550 | 0.00 | 0.00 |
| ATOM | 960 | O    | GLN | X | 62 | 61.257 | 56.703 | 52.291 | 0.00 | 0.00 |
| ATOM | 961 | N    | SER | X | 63 | 59.013 | 56.788 | 51.818 | 0.00 | 0.00 |
| ATOM | 962 | H    | SER | X | 63 | 58.280 | 57.090 | 51.192 | 0.00 | 0.00 |
| ATOM | 963 | CA   | SER | X | 63 | 58.680 | 55.903 | 52.923 | 0.00 | 0.00 |
| ATOM | 964 | HA   | SER | X | 63 | 59.476 | 55.185 | 53.120 | 0.00 | 0.00 |
| ATOM | 965 | CB   | SER | X | 63 | 58.271 | 56.666 | 54.282 | 0.00 | 0.00 |
| ATOM | 966 | HB2  | SER | X | 63 | 58.035 | 56.055 | 55.153 | 0.00 | 0.00 |
| ATOM | 967 | HB3  | SER | X | 63 | 59.108 | 57.325 | 54.514 | 0.00 | 0.00 |
| ATOM | 968 | OG   | SER | X | 63 | 57.038 | 57.451 | 54.206 | 0.00 | 0.00 |
| ATOM | 969 | HG   | SER | X | 63 | 56.321 | 57.031 | 54.685 | 0.00 | 0.00 |
| ATOM | 970 | C    | SER | X | 63 | 57.484 | 55.004 | 52.560 | 0.00 | 0.00 |
| ATOM | 971 | O    | SER | X | 63 | 56.571 | 55.410 | 51.837 | 0.00 | 0.00 |
| ATOM | 972 | N    | VAL | X | 64 | 57.390 | 53.748 | 53.146 | 0.00 | 0.00 |
| ATOM | 973 | H    | VAL | X | 64 | 58.108 | 53.622 | 53.845 | 0.00 | 0.00 |
| ATOM | 974 | CA   | VAL | X | 64 | 56.242 | 52.817 | 53.039 | 0.00 | 0.00 |
| ATOM | 975 | HA   | VAL | X | 64 | 55.365 | 53.403 | 52.767 | 0.00 | 0.00 |
| ATOM | 976 | CB   | VAL | X | 64 | 56.452 | 51.722 | 51.955 | 0.00 | 0.00 |
| ATOM | 977 | HB   | VAL | X | 64 | 55.602 | 51.054 | 52.094 | 0.00 | 0.00 |
| ATOM | 978 | CG1  | VAL | X | 64 | 56.342 | 52.347 | 50.548 | 0.00 | 0.00 |
| ATOM | 979 | HG11 | VAL | X | 64 | 57.090 | 53.124 | 50.389 | 0.00 | 0.00 |
| ATOM | 980 | HG12 | VAL | X | 64 | 56.592 | 51.613 | 49.782 | 0.00 | 0.00 |
| ATOM | 981 | HG13 | VAL | X | 64 | 55.345 | 52.709 | 50.300 | 0.00 | 0.00 |
| ATOM | 982 | CG2  | VAL | X | 64 | 57.897 | 51.084 | 52.151 | 0.00 | 0.00 |
| ATOM | 983 | HG21 | VAL | X | 64 | 58.012 | 50.305 | 51.396 | 0.00 | 0.00 |
| ATOM | 984 | HG22 | VAL | X | 64 | 58.709 | 51.808 | 52.086 | 0.00 | 0.00 |

|      |      |      |     |   |    |        |        |        |      |      |
|------|------|------|-----|---|----|--------|--------|--------|------|------|
| ATOM | 985  | HG23 | VAL | X | 64 | 58.046 | 50.686 | 53.154 | 0.00 | 0.00 |
| ATOM | 986  | C    | VAL | X | 64 | 55.920 | 52.083 | 54.319 | 0.00 | 0.00 |
| ATOM | 987  | O    | VAL | X | 64 | 56.780 | 51.931 | 55.203 | 0.00 | 0.00 |
| ATOM | 988  | N    | CYX | X | 65 | 54.716 | 51.594 | 54.411 | 0.00 | 0.00 |
| ATOM | 989  | H    | CYX | X | 65 | 54.052 | 51.840 | 53.691 | 0.00 | 0.00 |
| ATOM | 990  | CA   | CYX | X | 65 | 54.177 | 50.972 | 55.619 | 0.00 | 0.00 |
| ATOM | 991  | HA   | CYX | X | 65 | 54.299 | 51.702 | 56.418 | 0.00 | 0.00 |
| ATOM | 992  | CB   | CYX | X | 65 | 52.650 | 50.751 | 55.610 | 0.00 | 0.00 |
| ATOM | 993  | HB2  | CYX | X | 65 | 52.404 | 49.690 | 55.600 | 0.00 | 0.00 |
| ATOM | 994  | HB3  | CYX | X | 65 | 52.259 | 51.102 | 56.565 | 0.00 | 0.00 |
| ATOM | 995  | SG   | CYX | X | 65 | 51.744 | 51.571 | 54.346 | 0.00 | 0.00 |
| ATOM | 996  | C    | CYX | X | 65 | 55.025 | 49.710 | 55.999 | 0.00 | 0.00 |
| ATOM | 997  | O    | CYX | X | 65 | 55.439 | 48.920 | 55.107 | 0.00 | 0.00 |
| ATOM | 998  | N    | TYR | X | 66 | 55.224 | 49.477 | 57.301 | 0.00 | 0.00 |
| ATOM | 999  | H    | TYR | X | 66 | 54.725 | 50.158 | 57.855 | 0.00 | 0.00 |
| ATOM | 1000 | CA   | TYR | X | 66 | 55.732 | 48.196 | 57.805 | 0.00 | 0.00 |
| ATOM | 1001 | HA   | TYR | X | 66 | 56.814 | 48.105 | 57.709 | 0.00 | 0.00 |
| ATOM | 1002 | CB   | TYR | X | 66 | 55.489 | 48.161 | 59.275 | 0.00 | 0.00 |
| ATOM | 1003 | HB2  | TYR | X | 66 | 54.473 | 48.511 | 59.456 | 0.00 | 0.00 |
| ATOM | 1004 | HB3  | TYR | X | 66 | 55.516 | 47.103 | 59.535 | 0.00 | 0.00 |
| ATOM | 1005 | CG   | TYR | X | 66 | 56.546 | 48.995 | 60.011 | 0.00 | 0.00 |
| ATOM | 1006 | CD1  | TYR | X | 66 | 56.132 | 50.310 | 60.318 | 0.00 | 0.00 |
| ATOM | 1007 | HD1  | TYR | X | 66 | 55.162 | 50.622 | 59.961 | 0.00 | 0.00 |
| ATOM | 1008 | CE1  | TYR | X | 66 | 56.969 | 51.164 | 61.037 | 0.00 | 0.00 |
| ATOM | 1009 | HE1  | TYR | X | 66 | 56.583 | 52.090 | 61.437 | 0.00 | 0.00 |
| ATOM | 1010 | CZ   | TYR | X | 66 | 58.203 | 50.705 | 61.397 | 0.00 | 0.00 |
| ATOM | 1011 | OH   | TYR | X | 66 | 58.857 | 51.482 | 62.289 | 0.00 | 0.00 |
| ATOM | 1012 | HH   | TYR | X | 66 | 58.377 | 52.279 | 62.526 | 0.00 | 0.00 |
| ATOM | 1013 | CE2  | TYR | X | 66 | 58.719 | 49.432 | 61.034 | 0.00 | 0.00 |
| ATOM | 1014 | HE2  | TYR | X | 66 | 59.732 | 49.160 | 61.292 | 0.00 | 0.00 |
| ATOM | 1015 | CD2  | TYR | X | 66 | 57.783 | 48.516 | 60.395 | 0.00 | 0.00 |
| ATOM | 1016 | HD2  | TYR | X | 66 | 58.054 | 47.512 | 60.104 | 0.00 | 0.00 |
| ATOM | 1017 | C    | TYR | X | 66 | 55.174 | 46.916 | 57.162 | 0.00 | 0.00 |
| ATOM | 1018 | O    | TYR | X | 66 | 53.902 | 46.715 | 57.120 | 0.00 | 0.00 |
| ATOM | 1019 | N    | GLN | X | 67 | 55.982 | 46.021 | 56.558 | 0.00 | 0.00 |
| ATOM | 1020 | H    | GLN | X | 67 | 56.973 | 46.188 | 56.657 | 0.00 | 0.00 |
| ATOM | 1021 | CA   | GLN | X | 67 | 55.440 | 44.827 | 55.855 | 0.00 | 0.00 |
| ATOM | 1022 | HA   | GLN | X | 67 | 54.448 | 44.492 | 56.159 | 0.00 | 0.00 |
| ATOM | 1023 | CB   | GLN | X | 67 | 55.257 | 45.309 | 54.427 | 0.00 | 0.00 |
| ATOM | 1024 | HB2  | GLN | X | 67 | 54.794 | 44.530 | 53.820 | 0.00 | 0.00 |
| ATOM | 1025 | HB3  | GLN | X | 67 | 54.525 | 46.113 | 54.501 | 0.00 | 0.00 |
| ATOM | 1026 | CG   | GLN | X | 67 | 56.433 | 45.926 | 53.715 | 0.00 | 0.00 |
| ATOM | 1027 | HG2  | GLN | X | 67 | 56.963 | 46.660 | 54.322 | 0.00 | 0.00 |
| ATOM | 1028 | HG3  | GLN | X | 67 | 57.108 | 45.077 | 53.606 | 0.00 | 0.00 |
| ATOM | 1029 | CD   | GLN | X | 67 | 56.052 | 46.531 | 52.349 | 0.00 | 0.00 |
| ATOM | 1030 | OE1  | GLN | X | 67 | 56.309 | 45.952 | 51.251 | 0.00 | 0.00 |
| ATOM | 1031 | NE2  | GLN | X | 67 | 55.493 | 47.742 | 52.402 | 0.00 | 0.00 |
| ATOM | 1032 | HE21 | GLN | X | 67 | 55.257 | 48.069 | 51.476 | 0.00 | 0.00 |
| ATOM | 1033 | HE22 | GLN | X | 67 | 55.326 | 48.230 | 53.271 | 0.00 | 0.00 |
| ATOM | 1034 | C    | GLN | X | 67 | 56.497 | 43.701 | 55.945 | 0.00 | 0.00 |
| ATOM | 1035 | O    | GLN | X | 67 | 57.584 | 43.888 | 56.479 | 0.00 | 0.00 |
| ATOM | 1036 | N    | TYR | X | 68 | 56.379 | 42.780 | 55.039 | 0.00 | 0.00 |
| ATOM | 1037 | H    | TYR | X | 68 | 55.584 | 42.798 | 54.417 | 0.00 | 0.00 |
| ATOM | 1038 | CA   | TYR | X | 68 | 57.495 | 41.879 | 54.713 | 0.00 | 0.00 |
| ATOM | 1039 | HA   | TYR | X | 68 | 57.858 | 41.303 | 55.565 | 0.00 | 0.00 |
| ATOM | 1040 | CB   | TYR | X | 68 | 56.974 | 40.817 | 53.666 | 0.00 | 0.00 |
| ATOM | 1041 | HB2  | TYR | X | 68 | 56.021 | 40.399 | 53.990 | 0.00 | 0.00 |
| ATOM | 1042 | HB3  | TYR | X | 68 | 56.871 | 41.348 | 52.720 | 0.00 | 0.00 |
| ATOM | 1043 | CG   | TYR | X | 68 | 58.003 | 39.758 | 53.466 | 0.00 | 0.00 |
| ATOM | 1044 | CD1  | TYR | X | 68 | 58.373 | 38.939 | 54.616 | 0.00 | 0.00 |
| ATOM | 1045 | HD1  | TYR | X | 68 | 57.974 | 39.016 | 55.617 | 0.00 | 0.00 |
| ATOM | 1046 | CE1  | TYR | X | 68 | 59.266 | 37.896 | 54.424 | 0.00 | 0.00 |
| ATOM | 1047 | HE1  | TYR | X | 68 | 59.582 | 37.251 | 55.231 | 0.00 | 0.00 |
| ATOM | 1048 | CZ   | TYR | X | 68 | 59.835 | 37.644 | 53.151 | 0.00 | 0.00 |
| ATOM | 1049 | OH   | TYR | X | 68 | 60.750 | 36.575 | 53.010 | 0.00 | 0.00 |
| ATOM | 1050 | HH   | TYR | X | 68 | 61.007 | 36.187 | 53.850 | 0.00 | 0.00 |
| ATOM | 1051 | CE2  | TYR | X | 68 | 59.563 | 38.519 | 52.109 | 0.00 | 0.00 |
| ATOM | 1052 | HE2  | TYR | X | 68 | 59.958 | 38.364 | 51.115 | 0.00 | 0.00 |
| ATOM | 1053 | CD2  | TYR | X | 68 | 58.611 | 39.581 | 52.204 | 0.00 | 0.00 |
| ATOM | 1054 | HD2  | TYR | X | 68 | 58.384 | 40.320 | 51.450 | 0.00 | 0.00 |

|      |      |      |     |   |    |        |        |        |      |      |
|------|------|------|-----|---|----|--------|--------|--------|------|------|
| ATOM | 1055 | C    | TYR | X | 68 | 58.816 | 42.453 | 54.152 | 0.00 | 0.00 |
| ATOM | 1056 | O    | TYR | X | 68 | 58.870 | 42.990 | 53.072 | 0.00 | 0.00 |
| ATOM | 1057 | N    | VAL | X | 69 | 59.894 | 42.131 | 54.930 | 0.00 | 0.00 |
| ATOM | 1058 | H    | VAL | X | 69 | 59.761 | 41.823 | 55.883 | 0.00 | 0.00 |
| ATOM | 1059 | CA   | VAL | X | 69 | 61.269 | 42.283 | 54.358 | 0.00 | 0.00 |
| ATOM | 1060 | HA   | VAL | X | 69 | 61.300 | 42.794 | 53.396 | 0.00 | 0.00 |
| ATOM | 1061 | CB   | VAL | X | 69 | 62.192 | 43.143 | 55.304 | 0.00 | 0.00 |
| ATOM | 1062 | HB   | VAL | X | 69 | 62.216 | 42.583 | 56.239 | 0.00 | 0.00 |
| ATOM | 1063 | CG1  | VAL | X | 69 | 63.620 | 43.397 | 54.748 | 0.00 | 0.00 |
| ATOM | 1064 | HG11 | VAL | X | 69 | 63.674 | 43.205 | 53.677 | 0.00 | 0.00 |
| ATOM | 1065 | HG12 | VAL | X | 69 | 63.857 | 44.448 | 54.912 | 0.00 | 0.00 |
| ATOM | 1066 | HG13 | VAL | X | 69 | 64.412 | 42.744 | 55.114 | 0.00 | 0.00 |
| ATOM | 1067 | CG2  | VAL | X | 69 | 61.537 | 44.524 | 55.523 | 0.00 | 0.00 |
| ATOM | 1068 | HG21 | VAL | X | 69 | 60.640 | 44.464 | 56.140 | 0.00 | 0.00 |
| ATOM | 1069 | HG22 | VAL | X | 69 | 62.193 | 45.265 | 55.980 | 0.00 | 0.00 |
| ATOM | 1070 | HG23 | VAL | X | 69 | 61.385 | 44.982 | 54.545 | 0.00 | 0.00 |
| ATOM | 1071 | C    | VAL | X | 69 | 61.980 | 40.917 | 54.169 | 0.00 | 0.00 |
| ATOM | 1072 | O    | VAL | X | 69 | 61.880 | 40.013 | 54.951 | 0.00 | 0.00 |
| ATOM | 1073 | N    | ASP | X | 70 | 62.833 | 40.771 | 53.174 | 0.00 | 0.00 |
| ATOM | 1074 | H    | ASP | X | 70 | 62.905 | 41.561 | 52.548 | 0.00 | 0.00 |
| ATOM | 1075 | CA   | ASP | X | 70 | 63.241 | 39.486 | 52.607 | 0.00 | 0.00 |
| ATOM | 1076 | HA   | ASP | X | 70 | 62.251 | 39.088 | 52.384 | 0.00 | 0.00 |
| ATOM | 1077 | CB   | ASP | X | 70 | 64.049 | 39.655 | 51.277 | 0.00 | 0.00 |
| ATOM | 1078 | HB2  | ASP | X | 70 | 63.312 | 39.994 | 50.548 | 0.00 | 0.00 |
| ATOM | 1079 | HB3  | ASP | X | 70 | 64.748 | 40.491 | 51.295 | 0.00 | 0.00 |
| ATOM | 1080 | CG   | ASP | X | 70 | 64.736 | 38.353 | 50.905 | 0.00 | 0.00 |
| ATOM | 1081 | OD1  | ASP | X | 70 | 65.942 | 38.224 | 51.149 | 0.00 | 0.00 |
| ATOM | 1082 | OD2  | ASP | X | 70 | 64.022 | 37.387 | 50.480 | 0.00 | 0.00 |
| ATOM | 1083 | C    | ASP | X | 70 | 64.029 | 38.714 | 53.685 | 0.00 | 0.00 |
| ATOM | 1084 | O    | ASP | X | 70 | 65.123 | 39.195 | 54.058 | 0.00 | 0.00 |
| ATOM | 1085 | N    | THR | X | 71 | 63.575 | 37.497 | 54.068 | 0.00 | 0.00 |
| ATOM | 1086 | H    | THR | X | 71 | 62.671 | 37.229 | 53.706 | 0.00 | 0.00 |
| ATOM | 1087 | CA   | THR | X | 71 | 64.346 | 36.428 | 54.767 | 0.00 | 0.00 |
| ATOM | 1088 | HA   | THR | X | 71 | 65.261 | 36.878 | 55.151 | 0.00 | 0.00 |
| ATOM | 1089 | CB   | THR | X | 71 | 63.541 | 35.926 | 55.998 | 0.00 | 0.00 |
| ATOM | 1090 | HB   | THR | X | 71 | 64.219 | 35.196 | 56.439 | 0.00 | 0.00 |
| ATOM | 1091 | CG2  | THR | X | 71 | 63.434 | 37.008 | 57.029 | 0.00 | 0.00 |
| ATOM | 1092 | HG21 | THR | X | 71 | 62.955 | 37.887 | 56.597 | 0.00 | 0.00 |
| ATOM | 1093 | HG22 | THR | X | 71 | 62.688 | 36.754 | 57.782 | 0.00 | 0.00 |
| ATOM | 1094 | HG23 | THR | X | 71 | 64.426 | 37.147 | 57.458 | 0.00 | 0.00 |
| ATOM | 1095 | OG1  | THR | X | 71 | 62.341 | 35.361 | 55.629 | 0.00 | 0.00 |
| ATOM | 1096 | HG1  | THR | X | 71 | 61.957 | 35.008 | 56.435 | 0.00 | 0.00 |
| ATOM | 1097 | C    | THR | X | 71 | 64.681 | 35.213 | 53.897 | 0.00 | 0.00 |
| ATOM | 1098 | O    | THR | X | 71 | 65.239 | 34.226 | 54.358 | 0.00 | 0.00 |
| ATOM | 1099 | N    | LEU | X | 72 | 64.274 | 35.169 | 52.648 | 0.00 | 0.00 |
| ATOM | 1100 | H    | LEU | X | 72 | 63.838 | 35.982 | 52.235 | 0.00 | 0.00 |
| ATOM | 1101 | CA   | LEU | X | 72 | 64.170 | 33.934 | 51.876 | 0.00 | 0.00 |
| ATOM | 1102 | HA   | LEU | X | 72 | 64.336 | 33.009 | 52.428 | 0.00 | 0.00 |
| ATOM | 1103 | CB   | LEU | X | 72 | 62.737 | 33.855 | 51.313 | 0.00 | 0.00 |
| ATOM | 1104 | HB2  | LEU | X | 72 | 61.968 | 33.907 | 52.084 | 0.00 | 0.00 |
| ATOM | 1105 | HB3  | LEU | X | 72 | 62.645 | 34.658 | 50.582 | 0.00 | 0.00 |
| ATOM | 1106 | CG   | LEU | X | 72 | 62.459 | 32.567 | 50.502 | 0.00 | 0.00 |
| ATOM | 1107 | HG   | LEU | X | 72 | 63.055 | 32.613 | 49.590 | 0.00 | 0.00 |
| ATOM | 1108 | CD1  | LEU | X | 72 | 62.674 | 31.291 | 51.282 | 0.00 | 0.00 |
| ATOM | 1109 | HD11 | LEU | X | 72 | 62.159 | 30.468 | 50.788 | 0.00 | 0.00 |
| ATOM | 1110 | HD12 | LEU | X | 72 | 63.707 | 30.946 | 51.235 | 0.00 | 0.00 |
| ATOM | 1111 | HD13 | LEU | X | 72 | 62.308 | 31.406 | 52.303 | 0.00 | 0.00 |
| ATOM | 1112 | CD2  | LEU | X | 72 | 61.049 | 32.817 | 49.928 | 0.00 | 0.00 |
| ATOM | 1113 | HD21 | LEU | X | 72 | 60.968 | 33.721 | 49.324 | 0.00 | 0.00 |
| ATOM | 1114 | HD22 | LEU | X | 72 | 60.846 | 31.955 | 49.293 | 0.00 | 0.00 |
| ATOM | 1115 | HD23 | LEU | X | 72 | 60.330 | 32.902 | 50.743 | 0.00 | 0.00 |
| ATOM | 1116 | C    | LEU | X | 72 | 65.211 | 33.742 | 50.766 | 0.00 | 0.00 |
| ATOM | 1117 | O    | LEU | X | 72 | 65.872 | 32.722 | 50.707 | 0.00 | 0.00 |
| ATOM | 1118 | N    | TYR | X | 73 | 65.445 | 34.742 | 49.876 | 0.00 | 0.00 |
| ATOM | 1119 | H    | TYR | X | 73 | 64.920 | 35.598 | 49.986 | 0.00 | 0.00 |
| ATOM | 1120 | CA   | TYR | X | 73 | 66.344 | 34.642 | 48.735 | 0.00 | 0.00 |
| ATOM | 1121 | HA   | TYR | X | 73 | 67.006 | 33.851 | 49.086 | 0.00 | 0.00 |
| ATOM | 1122 | CB   | TYR | X | 73 | 65.628 | 34.193 | 47.424 | 0.00 | 0.00 |
| ATOM | 1123 | HB2  | TYR | X | 73 | 64.820 | 34.891 | 47.203 | 0.00 | 0.00 |
| ATOM | 1124 | HB3  | TYR | X | 73 | 66.388 | 34.319 | 46.653 | 0.00 | 0.00 |

|      |      |     |     |   |    |        |        |        |      |      |
|------|------|-----|-----|---|----|--------|--------|--------|------|------|
| ATOM | 1125 | CG  | TYR | X | 73 | 65.044 | 32.822 | 47.280 | 0.00 | 0.00 |
| ATOM | 1126 | CD1 | TYR | X | 73 | 65.887 | 31.695 | 47.330 | 0.00 | 0.00 |
| ATOM | 1127 | HD1 | TYR | X | 73 | 66.963 | 31.747 | 47.256 | 0.00 | 0.00 |
| ATOM | 1128 | CE1 | TYR | X | 73 | 65.390 | 30.383 | 47.424 | 0.00 | 0.00 |
| ATOM | 1129 | HE1 | TYR | X | 73 | 66.130 | 29.610 | 47.565 | 0.00 | 0.00 |
| ATOM | 1130 | CZ  | TYR | X | 73 | 63.989 | 30.221 | 47.312 | 0.00 | 0.00 |
| ATOM | 1131 | OH  | TYR | X | 73 | 63.451 | 28.937 | 47.123 | 0.00 | 0.00 |
| ATOM | 1132 | HH  | TYR | X | 73 | 62.508 | 29.117 | 47.110 | 0.00 | 0.00 |
| ATOM | 1133 | CE2 | TYR | X | 73 | 63.160 | 31.325 | 47.101 | 0.00 | 0.00 |
| ATOM | 1134 | HE2 | TYR | X | 73 | 62.085 | 31.302 | 47.001 | 0.00 | 0.00 |
| ATOM | 1135 | CD2 | TYR | X | 73 | 63.690 | 32.601 | 47.056 | 0.00 | 0.00 |
| ATOM | 1136 | HD2 | TYR | X | 73 | 63.085 | 33.484 | 46.915 | 0.00 | 0.00 |
| ATOM | 1137 | C   | TYR | X | 73 | 67.068 | 35.971 | 48.590 | 0.00 | 0.00 |
| ATOM | 1138 | O   | TYR | X | 73 | 66.596 | 36.878 | 47.924 | 0.00 | 0.00 |
| ATOM | 1139 | N   | PRO | X | 74 | 68.247 | 36.154 | 49.264 | 0.00 | 0.00 |
| ATOM | 1140 | CD  | PRO | X | 74 | 68.913 | 35.184 | 50.259 | 0.00 | 0.00 |
| ATOM | 1141 | HD2 | PRO | X | 74 | 68.967 | 34.152 | 49.912 | 0.00 | 0.00 |
| ATOM | 1142 | HD3 | PRO | X | 74 | 68.272 | 35.211 | 51.139 | 0.00 | 0.00 |
| ATOM | 1143 | CG  | PRO | X | 74 | 70.276 | 35.800 | 50.496 | 0.00 | 0.00 |
| ATOM | 1144 | HG2 | PRO | X | 74 | 71.029 | 35.400 | 49.816 | 0.00 | 0.00 |
| ATOM | 1145 | HG3 | PRO | X | 74 | 70.575 | 35.699 | 51.539 | 0.00 | 0.00 |
| ATOM | 1146 | CB  | PRO | X | 74 | 70.104 | 37.299 | 50.260 | 0.00 | 0.00 |
| ATOM | 1147 | HB2 | PRO | X | 74 | 70.966 | 37.945 | 50.094 | 0.00 | 0.00 |
| ATOM | 1148 | HB3 | PRO | X | 74 | 69.628 | 37.776 | 51.117 | 0.00 | 0.00 |
| ATOM | 1149 | CA  | PRO | X | 74 | 68.981 | 37.372 | 49.238 | 0.00 | 0.00 |
| ATOM | 1150 | HA  | PRO | X | 74 | 68.348 | 38.195 | 49.568 | 0.00 | 0.00 |
| ATOM | 1151 | C   | PRO | X | 74 | 69.492 | 37.707 | 47.829 | 0.00 | 0.00 |
| ATOM | 1152 | O   | PRO | X | 74 | 69.722 | 36.763 | 47.016 | 0.00 | 0.00 |
| ATOM | 1153 | N   | GLY | X | 75 | 69.719 | 38.978 | 47.564 | 0.00 | 0.00 |
| ATOM | 1154 | H   | GLY | X | 75 | 69.580 | 39.659 | 48.296 | 0.00 | 0.00 |
| ATOM | 1155 | CA  | GLY | X | 75 | 70.168 | 39.486 | 46.256 | 0.00 | 0.00 |
| ATOM | 1156 | HA2 | GLY | X | 75 | 70.297 | 40.521 | 46.615 | 0.00 | 0.00 |
| ATOM | 1157 | HA3 | GLY | X | 75 | 71.185 | 39.035 | 45.961 | 0.00 | 0.00 |
| ATOM | 1158 | C   | GLY | X | 75 | 69.057 | 39.484 | 45.190 | 0.00 | 0.00 |
| ATOM | 1159 | O   | GLY | X | 75 | 68.953 | 40.445 | 44.480 | 0.00 | 0.00 |
| ATOM | 1160 | N   | PHE | X | 76 | 68.293 | 38.406 | 45.108 | 0.00 | 0.00 |
| ATOM | 1161 | H   | PHE | X | 76 | 68.376 | 37.821 | 45.928 | 0.00 | 0.00 |
| ATOM | 1162 | CA  | PHE | X | 76 | 67.465 | 38.007 | 44.000 | 0.00 | 0.00 |
| ATOM | 1163 | HA  | PHE | X | 76 | 68.049 | 38.236 | 43.109 | 0.00 | 0.00 |
| ATOM | 1164 | CB  | PHE | X | 76 | 67.303 | 36.569 | 44.214 | 0.00 | 0.00 |
| ATOM | 1165 | HB2 | PHE | X | 76 | 68.224 | 36.009 | 44.374 | 0.00 | 0.00 |
| ATOM | 1166 | HB3 | PHE | X | 76 | 66.802 | 36.411 | 45.169 | 0.00 | 0.00 |
| ATOM | 1167 | CG  | PHE | X | 76 | 66.519 | 35.807 | 43.174 | 0.00 | 0.00 |
| ATOM | 1168 | CD1 | PHE | X | 76 | 67.066 | 35.734 | 41.851 | 0.00 | 0.00 |
| ATOM | 1169 | HD1 | PHE | X | 76 | 68.026 | 36.197 | 41.676 | 0.00 | 0.00 |
| ATOM | 1170 | CE1 | PHE | X | 76 | 66.341 | 35.102 | 40.844 | 0.00 | 0.00 |
| ATOM | 1171 | HE1 | PHE | X | 76 | 66.767 | 35.012 | 39.855 | 0.00 | 0.00 |
| ATOM | 1172 | CZ  | PHE | X | 76 | 65.046 | 34.558 | 41.147 | 0.00 | 0.00 |
| ATOM | 1173 | HZ  | PHE | X | 76 | 64.437 | 34.094 | 40.385 | 0.00 | 0.00 |
| ATOM | 1174 | CE2 | PHE | X | 76 | 64.497 | 34.693 | 42.419 | 0.00 | 0.00 |
| ATOM | 1175 | HE2 | PHE | X | 76 | 63.528 | 34.256 | 42.612 | 0.00 | 0.00 |
| ATOM | 1176 | CD2 | PHE | X | 76 | 65.255 | 35.218 | 43.440 | 0.00 | 0.00 |
| ATOM | 1177 | HD2 | PHE | X | 76 | 64.854 | 35.265 | 44.441 | 0.00 | 0.00 |
| ATOM | 1178 | C   | PHE | X | 76 | 66.184 | 38.784 | 43.905 | 0.00 | 0.00 |
| ATOM | 1179 | O   | PHE | X | 76 | 65.504 | 39.200 | 44.881 | 0.00 | 0.00 |
| ATOM | 1180 | N   | GLU | X | 77 | 65.817 | 38.837 | 42.638 | 0.00 | 0.00 |
| ATOM | 1181 | H   | GLU | X | 77 | 66.492 | 38.509 | 41.962 | 0.00 | 0.00 |
| ATOM | 1182 | CA  | GLU | X | 77 | 64.527 | 39.394 | 42.201 | 0.00 | 0.00 |
| ATOM | 1183 | HA  | GLU | X | 77 | 64.511 | 40.460 | 42.426 | 0.00 | 0.00 |
| ATOM | 1184 | CB  | GLU | X | 77 | 64.563 | 39.246 | 40.712 | 0.00 | 0.00 |
| ATOM | 1185 | HB2 | GLU | X | 77 | 65.408 | 39.819 | 40.329 | 0.00 | 0.00 |
| ATOM | 1186 | HB3 | GLU | X | 77 | 64.699 | 38.191 | 40.475 | 0.00 | 0.00 |
| ATOM | 1187 | CG  | GLU | X | 77 | 63.227 | 39.601 | 40.097 | 0.00 | 0.00 |
| ATOM | 1188 | HG2 | GLU | X | 77 | 62.552 | 38.746 | 40.127 | 0.00 | 0.00 |
| ATOM | 1189 | HG3 | GLU | X | 77 | 62.816 | 40.460 | 40.627 | 0.00 | 0.00 |
| ATOM | 1190 | CD  | GLU | X | 77 | 63.493 | 39.892 | 38.638 | 0.00 | 0.00 |
| ATOM | 1191 | OE1 | GLU | X | 77 | 63.637 | 38.902 | 37.839 | 0.00 | 0.00 |
| ATOM | 1192 | OE2 | GLU | X | 77 | 63.237 | 41.014 | 38.177 | 0.00 | 0.00 |
| ATOM | 1193 | C   | GLU | X | 77 | 63.310 | 38.795 | 42.886 | 0.00 | 0.00 |
| ATOM | 1194 | O   | GLU | X | 77 | 62.275 | 39.482 | 43.099 | 0.00 | 0.00 |

|      |      |      |     |   |    |        |        |        |      |      |
|------|------|------|-----|---|----|--------|--------|--------|------|------|
| ATOM | 1195 | N    | GLY | X | 78 | 63.309 | 37.543 | 43.241 | 0.00 | 0.00 |
| ATOM | 1196 | H    | GLY | X | 78 | 64.065 | 36.960 | 42.911 | 0.00 | 0.00 |
| ATOM | 1197 | CA   | GLY | X | 78 | 62.092 | 36.696 | 43.519 | 0.00 | 0.00 |
| ATOM | 1198 | HA2  | GLY | X | 78 | 61.448 | 36.693 | 42.612 | 0.00 | 0.00 |
| ATOM | 1199 | HA3  | GLY | X | 78 | 62.393 | 35.681 | 43.730 | 0.00 | 0.00 |
| ATOM | 1200 | C    | GLY | X | 78 | 61.258 | 37.217 | 44.719 | 0.00 | 0.00 |
| ATOM | 1201 | O    | GLY | X | 78 | 60.050 | 37.095 | 44.777 | 0.00 | 0.00 |
| ATOM | 1202 | N    | THR | X | 79 | 61.943 | 37.816 | 45.648 | 0.00 | 0.00 |
| ATOM | 1203 | H    | THR | X | 79 | 62.949 | 37.730 | 45.672 | 0.00 | 0.00 |
| ATOM | 1204 | CA   | THR | X | 79 | 61.369 | 38.582 | 46.765 | 0.00 | 0.00 |
| ATOM | 1205 | HA   | THR | X | 79 | 60.286 | 38.497 | 46.852 | 0.00 | 0.00 |
| ATOM | 1206 | CB   | THR | X | 79 | 61.931 | 38.069 | 48.090 | 0.00 | 0.00 |
| ATOM | 1207 | HB   | THR | X | 79 | 61.701 | 38.761 | 48.901 | 0.00 | 0.00 |
| ATOM | 1208 | CG2  | THR | X | 79 | 61.362 | 36.714 | 48.543 | 0.00 | 0.00 |
| ATOM | 1209 | HG21 | THR | X | 79 | 61.671 | 36.497 | 49.566 | 0.00 | 0.00 |
| ATOM | 1210 | HG22 | THR | X | 79 | 60.274 | 36.770 | 48.512 | 0.00 | 0.00 |
| ATOM | 1211 | HG23 | THR | X | 79 | 61.725 | 35.884 | 47.936 | 0.00 | 0.00 |
| ATOM | 1212 | OG1  | THR | X | 79 | 63.325 | 37.941 | 47.852 | 0.00 | 0.00 |
| ATOM | 1213 | HG1  | THR | X | 79 | 63.683 | 37.699 | 48.709 | 0.00 | 0.00 |
| ATOM | 1214 | C    | THR | X | 79 | 61.681 | 40.069 | 46.652 | 0.00 | 0.00 |
| ATOM | 1215 | O    | THR | X | 79 | 60.940 | 40.897 | 47.289 | 0.00 | 0.00 |
| ATOM | 1216 | N    | GLU | X | 80 | 62.640 | 40.552 | 45.882 | 0.00 | 0.00 |
| ATOM | 1217 | H    | GLU | X | 80 | 63.234 | 39.918 | 45.366 | 0.00 | 0.00 |
| ATOM | 1218 | CA   | GLU | X | 80 | 62.698 | 41.959 | 45.573 | 0.00 | 0.00 |
| ATOM | 1219 | HA   | GLU | X | 80 | 62.604 | 42.464 | 46.535 | 0.00 | 0.00 |
| ATOM | 1220 | CB   | GLU | X | 80 | 64.126 | 42.265 | 45.120 | 0.00 | 0.00 |
| ATOM | 1221 | HB2  | GLU | X | 80 | 64.898 | 41.797 | 45.730 | 0.00 | 0.00 |
| ATOM | 1222 | HB3  | GLU | X | 80 | 64.270 | 42.077 | 44.056 | 0.00 | 0.00 |
| ATOM | 1223 | CG   | GLU | X | 80 | 64.651 | 43.767 | 45.166 | 0.00 | 0.00 |
| ATOM | 1224 | HG2  | GLU | X | 80 | 64.035 | 44.482 | 44.621 | 0.00 | 0.00 |
| ATOM | 1225 | HG3  | GLU | X | 80 | 64.644 | 44.115 | 46.199 | 0.00 | 0.00 |
| ATOM | 1226 | CD   | GLU | X | 80 | 66.006 | 43.955 | 44.624 | 0.00 | 0.00 |
| ATOM | 1227 | OE1  | GLU | X | 80 | 66.121 | 43.807 | 43.343 | 0.00 | 0.00 |
| ATOM | 1228 | OE2  | GLU | X | 80 | 66.987 | 44.347 | 45.332 | 0.00 | 0.00 |
| ATOM | 1229 | C    | GLU | X | 80 | 61.550 | 42.505 | 44.708 | 0.00 | 0.00 |
| ATOM | 1230 | O    | GLU | X | 80 | 61.404 | 43.673 | 44.509 | 0.00 | 0.00 |
| ATOM | 1231 | N    | MET | X | 81 | 60.643 | 41.666 | 44.225 | 0.00 | 0.00 |
| ATOM | 1232 | H    | MET | X | 81 | 60.917 | 40.717 | 44.435 | 0.00 | 0.00 |
| ATOM | 1233 | CA   | MET | X | 81 | 59.388 | 41.739 | 43.567 | 0.00 | 0.00 |
| ATOM | 1234 | HA   | MET | X | 81 | 59.536 | 42.331 | 42.664 | 0.00 | 0.00 |
| ATOM | 1235 | CB   | MET | X | 81 | 59.012 | 40.328 | 43.085 | 0.00 | 0.00 |
| ATOM | 1236 | HB2  | MET | X | 81 | 59.834 | 39.641 | 42.883 | 0.00 | 0.00 |
| ATOM | 1237 | HB3  | MET | X | 81 | 58.415 | 39.872 | 43.875 | 0.00 | 0.00 |
| ATOM | 1238 | CG   | MET | X | 81 | 58.095 | 40.311 | 41.888 | 0.00 | 0.00 |
| ATOM | 1239 | HG2  | MET | X | 81 | 57.051 | 40.555 | 42.088 | 0.00 | 0.00 |
| ATOM | 1240 | HG3  | MET | X | 81 | 58.365 | 41.034 | 41.119 | 0.00 | 0.00 |
| ATOM | 1241 | SD   | MET | X | 81 | 57.957 | 38.708 | 40.983 | 0.00 | 0.00 |
| ATOM | 1242 | CE   | MET | X | 81 | 56.289 | 38.850 | 40.174 | 0.00 | 0.00 |
| ATOM | 1243 | HE1  | MET | X | 81 | 56.455 | 38.965 | 39.103 | 0.00 | 0.00 |
| ATOM | 1244 | HE2  | MET | X | 81 | 55.822 | 37.898 | 40.429 | 0.00 | 0.00 |
| ATOM | 1245 | HE3  | MET | X | 81 | 55.732 | 39.681 | 40.606 | 0.00 | 0.00 |
| ATOM | 1246 | C    | MET | X | 81 | 58.203 | 42.387 | 44.264 | 0.00 | 0.00 |
| ATOM | 1247 | O    | MET | X | 81 | 57.411 | 43.109 | 43.656 | 0.00 | 0.00 |
| ATOM | 1248 | N    | TRP | X | 82 | 58.233 | 42.196 | 45.580 | 0.00 | 0.00 |
| ATOM | 1249 | H    | TRP | X | 82 | 58.981 | 41.632 | 45.958 | 0.00 | 0.00 |
| ATOM | 1250 | CA   | TRP | X | 82 | 57.220 | 42.702 | 46.466 | 0.00 | 0.00 |
| ATOM | 1251 | HA   | TRP | X | 82 | 56.639 | 43.422 | 45.889 | 0.00 | 0.00 |
| ATOM | 1252 | CB   | TRP | X | 82 | 56.255 | 41.574 | 46.734 | 0.00 | 0.00 |
| ATOM | 1253 | HB2  | TRP | X | 82 | 56.579 | 40.945 | 47.563 | 0.00 | 0.00 |
| ATOM | 1254 | HB3  | TRP | X | 82 | 55.361 | 41.961 | 47.224 | 0.00 | 0.00 |
| ATOM | 1255 | CG   | TRP | X | 82 | 55.817 | 40.669 | 45.695 | 0.00 | 0.00 |
| ATOM | 1256 | CD1  | TRP | X | 82 | 56.065 | 39.327 | 45.784 | 0.00 | 0.00 |
| ATOM | 1257 | HD1  | TRP | X | 82 | 56.668 | 38.862 | 46.549 | 0.00 | 0.00 |
| ATOM | 1258 | NE1  | TRP | X | 82 | 55.455 | 38.662 | 44.793 | 0.00 | 0.00 |
| ATOM | 1259 | HE1  | TRP | X | 82 | 55.507 | 37.655 | 44.721 | 0.00 | 0.00 |
| ATOM | 1260 | CE2  | TRP | X | 82 | 54.703 | 39.539 | 43.998 | 0.00 | 0.00 |
| ATOM | 1261 | CZ2  | TRP | X | 82 | 53.813 | 39.391 | 42.883 | 0.00 | 0.00 |
| ATOM | 1262 | HZ2  | TRP | X | 82 | 53.572 | 38.357 | 42.683 | 0.00 | 0.00 |
| ATOM | 1263 | CH2  | TRP | X | 82 | 53.288 | 40.481 | 42.268 | 0.00 | 0.00 |
| ATOM | 1264 | HH2  | TRP | X | 82 | 52.526 | 40.288 | 41.528 | 0.00 | 0.00 |

|      |      |      |     |   |    |        |        |        |      |      |
|------|------|------|-----|---|----|--------|--------|--------|------|------|
| ATOM | 1265 | CZ3  | TRP | X | 82 | 53.515 | 41.752 | 42.785 | 0.00 | 0.00 |
| ATOM | 1266 | HZ3  | TRP | X | 82 | 53.148 | 42.668 | 42.347 | 0.00 | 0.00 |
| ATOM | 1267 | CE3  | TRP | X | 82 | 54.389 | 41.957 | 43.875 | 0.00 | 0.00 |
| ATOM | 1268 | HE3  | TRP | X | 82 | 54.411 | 42.924 | 44.355 | 0.00 | 0.00 |
| ATOM | 1269 | CD2  | TRP | X | 82 | 55.038 | 40.874 | 44.517 | 0.00 | 0.00 |
| ATOM | 1270 | C    | TRP | X | 82 | 57.767 | 43.326 | 47.797 | 0.00 | 0.00 |
| ATOM | 1271 | O    | TRP | X | 82 | 57.048 | 44.164 | 48.388 | 0.00 | 0.00 |
| ATOM | 1272 | N    | ASN | X | 83 | 58.923 | 42.824 | 48.277 | 0.00 | 0.00 |
| ATOM | 1273 | H    | ASN | X | 83 | 59.529 | 42.153 | 47.828 | 0.00 | 0.00 |
| ATOM | 1274 | CA   | ASN | X | 83 | 59.424 | 43.377 | 49.550 | 0.00 | 0.00 |
| ATOM | 1275 | HA   | ASN | X | 83 | 58.495 | 43.450 | 50.117 | 0.00 | 0.00 |
| ATOM | 1276 | CB   | ASN | X | 83 | 60.408 | 42.391 | 50.208 | 0.00 | 0.00 |
| ATOM | 1277 | HB2  | ASN | X | 83 | 60.107 | 42.221 | 51.241 | 0.00 | 0.00 |
| ATOM | 1278 | HB3  | ASN | X | 83 | 60.385 | 41.469 | 49.627 | 0.00 | 0.00 |
| ATOM | 1279 | CG   | ASN | X | 83 | 61.855 | 42.768 | 50.265 | 0.00 | 0.00 |
| ATOM | 1280 | OD1  | ASN | X | 83 | 62.255 | 43.449 | 51.190 | 0.00 | 0.00 |
| ATOM | 1281 | ND2  | ASN | X | 83 | 62.719 | 42.518 | 49.253 | 0.00 | 0.00 |
| ATOM | 1282 | HD21 | ASN | X | 83 | 63.605 | 42.971 | 49.425 | 0.00 | 0.00 |
| ATOM | 1283 | HD22 | ASN | X | 83 | 62.359 | 41.935 | 48.511 | 0.00 | 0.00 |
| ATOM | 1284 | C    | ASN | X | 83 | 59.992 | 44.772 | 49.340 | 0.00 | 0.00 |
| ATOM | 1285 | O    | ASN | X | 83 | 60.501 | 45.054 | 48.176 | 0.00 | 0.00 |
| ATOM | 1286 | N    | PRO | X | 84 | 60.060 | 45.668 | 50.378 | 0.00 | 0.00 |
| ATOM | 1287 | CD   | PRO | X | 84 | 59.645 | 45.424 | 51.751 | 0.00 | 0.00 |
| ATOM | 1288 | HD2  | PRO | X | 84 | 60.346 | 44.764 | 52.260 | 0.00 | 0.00 |
| ATOM | 1289 | HD3  | PRO | X | 84 | 58.627 | 45.038 | 51.693 | 0.00 | 0.00 |
| ATOM | 1290 | CG   | PRO | X | 84 | 59.692 | 46.768 | 52.462 | 0.00 | 0.00 |
| ATOM | 1291 | HG2  | PRO | X | 84 | 60.604 | 46.743 | 53.059 | 0.00 | 0.00 |
| ATOM | 1292 | HG3  | PRO | X | 84 | 58.921 | 46.928 | 53.215 | 0.00 | 0.00 |
| ATOM | 1293 | CB   | PRO | X | 84 | 59.699 | 47.866 | 51.421 | 0.00 | 0.00 |
| ATOM | 1294 | HB2  | PRO | X | 84 | 60.222 | 48.771 | 51.732 | 0.00 | 0.00 |
| ATOM | 1295 | HB3  | PRO | X | 84 | 58.653 | 48.151 | 51.309 | 0.00 | 0.00 |
| ATOM | 1296 | CA   | PRO | X | 84 | 60.251 | 47.128 | 50.212 | 0.00 | 0.00 |
| ATOM | 1297 | HA   | PRO | X | 84 | 59.748 | 47.464 | 49.305 | 0.00 | 0.00 |
| ATOM | 1298 | C    | PRO | X | 84 | 61.687 | 47.497 | 49.991 | 0.00 | 0.00 |
| ATOM | 1299 | O    | PRO | X | 84 | 62.587 | 47.050 | 50.668 | 0.00 | 0.00 |
| ATOM | 1300 | N    | ASN | X | 85 | 61.884 | 48.386 | 49.020 | 0.00 | 0.00 |
| ATOM | 1301 | H    | ASN | X | 85 | 61.063 | 48.771 | 48.574 | 0.00 | 0.00 |
| ATOM | 1302 | CA   | ASN | X | 85 | 63.194 | 49.069 | 48.761 | 0.00 | 0.00 |
| ATOM | 1303 | HA   | ASN | X | 85 | 63.992 | 48.497 | 49.233 | 0.00 | 0.00 |
| ATOM | 1304 | CB   | ASN | X | 85 | 63.539 | 49.198 | 47.229 | 0.00 | 0.00 |
| ATOM | 1305 | HB2  | ASN | X | 85 | 64.531 | 49.643 | 47.164 | 0.00 | 0.00 |
| ATOM | 1306 | HB3  | ASN | X | 85 | 63.572 | 48.150 | 46.935 | 0.00 | 0.00 |
| ATOM | 1307 | CG   | ASN | X | 85 | 62.482 | 50.006 | 46.396 | 0.00 | 0.00 |
| ATOM | 1308 | OD1  | ASN | X | 85 | 61.361 | 50.071 | 46.881 | 0.00 | 0.00 |
| ATOM | 1309 | ND2  | ASN | X | 85 | 62.802 | 50.679 | 45.240 | 0.00 | 0.00 |
| ATOM | 1310 | HD21 | ASN | X | 85 | 62.167 | 51.171 | 44.627 | 0.00 | 0.00 |
| ATOM | 1311 | HD22 | ASN | X | 85 | 63.757 | 50.669 | 44.912 | 0.00 | 0.00 |
| ATOM | 1312 | C    | ASN | X | 85 | 63.340 | 50.408 | 49.513 | 0.00 | 0.00 |
| ATOM | 1313 | O    | ASN | X | 85 | 64.428 | 50.969 | 49.603 | 0.00 | 0.00 |
| ATOM | 1314 | N    | ARG | X | 86 | 62.203 | 50.931 | 50.081 | 0.00 | 0.00 |
| ATOM | 1315 | H    | ARG | X | 86 | 61.340 | 50.433 | 49.915 | 0.00 | 0.00 |
| ATOM | 1316 | CA   | ARG | X | 86 | 62.133 | 52.194 | 50.772 | 0.00 | 0.00 |
| ATOM | 1317 | HA   | ARG | X | 86 | 63.047 | 52.769 | 50.623 | 0.00 | 0.00 |
| ATOM | 1318 | CB   | ARG | X | 86 | 60.961 | 53.063 | 50.161 | 0.00 | 0.00 |
| ATOM | 1319 | HB2  | ARG | X | 86 | 60.018 | 52.556 | 50.363 | 0.00 | 0.00 |
| ATOM | 1320 | HB3  | ARG | X | 86 | 60.931 | 54.032 | 50.659 | 0.00 | 0.00 |
| ATOM | 1321 | CG   | ARG | X | 86 | 61.113 | 53.406 | 48.655 | 0.00 | 0.00 |
| ATOM | 1322 | HG2  | ARG | X | 86 | 61.140 | 52.509 | 48.037 | 0.00 | 0.00 |
| ATOM | 1323 | HG3  | ARG | X | 86 | 60.138 | 53.891 | 48.605 | 0.00 | 0.00 |
| ATOM | 1324 | CD   | ARG | X | 86 | 62.211 | 54.434 | 48.308 | 0.00 | 0.00 |
| ATOM | 1325 | HD2  | ARG | X | 86 | 61.871 | 54.878 | 47.373 | 0.00 | 0.00 |
| ATOM | 1326 | HD3  | ARG | X | 86 | 62.176 | 55.236 | 49.046 | 0.00 | 0.00 |
| ATOM | 1327 | NE   | ARG | X | 86 | 63.576 | 53.944 | 48.321 | 0.00 | 0.00 |
| ATOM | 1328 | HE   | ARG | X | 86 | 63.997 | 53.931 | 49.239 | 0.00 | 0.00 |
| ATOM | 1329 | CZ   | ARG | X | 86 | 64.327 | 53.494 | 47.323 | 0.00 | 0.00 |
| ATOM | 1330 | NH1  | ARG | X | 86 | 64.040 | 53.489 | 46.073 | 0.00 | 0.00 |
| ATOM | 1331 | HH11 | ARG | X | 86 | 63.182 | 53.892 | 45.724 | 0.00 | 0.00 |
| ATOM | 1332 | HH12 | ARG | X | 86 | 64.594 | 52.936 | 45.435 | 0.00 | 0.00 |
| ATOM | 1333 | NH2  | ARG | X | 86 | 65.434 | 52.980 | 47.767 | 0.00 | 0.00 |
| ATOM | 1334 | HH21 | ARG | X | 86 | 65.574 | 52.770 | 48.745 | 0.00 | 0.00 |

|      |      |      |     |   |    |        |        |        |      |      |
|------|------|------|-----|---|----|--------|--------|--------|------|------|
| ATOM | 1335 | HH22 | ARG | X | 86 | 66.113 | 52.691 | 47.078 | 0.00 | 0.00 |
| ATOM | 1336 | C    | ARG | X | 86 | 61.837 | 51.975 | 52.285 | 0.00 | 0.00 |
| ATOM | 1337 | O    | ARG | X | 86 | 61.558 | 50.909 | 52.772 | 0.00 | 0.00 |
| ATOM | 1338 | N    | GLU | X | 87 | 62.071 | 53.047 | 53.055 | 0.00 | 0.00 |
| ATOM | 1339 | H    | GLU | X | 87 | 62.189 | 53.956 | 52.632 | 0.00 | 0.00 |
| ATOM | 1340 | CA   | GLU | X | 87 | 62.208 | 53.067 | 54.499 | 0.00 | 0.00 |
| ATOM | 1341 | HA   | GLU | X | 87 | 62.844 | 52.301 | 54.943 | 0.00 | 0.00 |
| ATOM | 1342 | CB   | GLU | X | 87 | 62.833 | 54.407 | 54.995 | 0.00 | 0.00 |
| ATOM | 1343 | HB2  | GLU | X | 87 | 63.873 | 54.378 | 54.670 | 0.00 | 0.00 |
| ATOM | 1344 | HB3  | GLU | X | 87 | 62.253 | 55.223 | 54.563 | 0.00 | 0.00 |
| ATOM | 1345 | CG   | GLU | X | 87 | 62.719 | 54.735 | 56.472 | 0.00 | 0.00 |
| ATOM | 1346 | HG2  | GLU | X | 87 | 61.708 | 54.867 | 56.859 | 0.00 | 0.00 |
| ATOM | 1347 | HG3  | GLU | X | 87 | 63.139 | 53.885 | 57.009 | 0.00 | 0.00 |
| ATOM | 1348 | CD   | GLU | X | 87 | 63.374 | 56.090 | 56.817 | 0.00 | 0.00 |
| ATOM | 1349 | OE1  | GLU | X | 87 | 62.969 | 57.072 | 56.206 | 0.00 | 0.00 |
| ATOM | 1350 | OE2  | GLU | X | 87 | 64.014 | 56.137 | 57.865 | 0.00 | 0.00 |
| ATOM | 1351 | C    | GLU | X | 87 | 60.804 | 52.825 | 55.153 | 0.00 | 0.00 |
| ATOM | 1352 | O    | GLU | X | 87 | 59.790 | 53.376 | 54.730 | 0.00 | 0.00 |
| ATOM | 1353 | N    | LEU | X | 88 | 60.826 | 51.896 | 56.160 | 0.00 | 0.00 |
| ATOM | 1354 | H    | LEU | X | 88 | 61.681 | 51.505 | 56.529 | 0.00 | 0.00 |
| ATOM | 1355 | CA   | LEU | X | 88 | 59.616 | 51.618 | 56.969 | 0.00 | 0.00 |
| ATOM | 1356 | HA   | LEU | X | 88 | 58.789 | 51.471 | 56.276 | 0.00 | 0.00 |
| ATOM | 1357 | CB   | LEU | X | 88 | 59.800 | 50.259 | 57.686 | 0.00 | 0.00 |
| ATOM | 1358 | HB2  | LEU | X | 88 | 60.172 | 50.522 | 58.676 | 0.00 | 0.00 |
| ATOM | 1359 | HB3  | LEU | X | 88 | 58.804 | 49.884 | 57.923 | 0.00 | 0.00 |
| ATOM | 1360 | CG   | LEU | X | 88 | 60.657 | 49.097 | 57.115 | 0.00 | 0.00 |
| ATOM | 1361 | HG   | LEU | X | 88 | 61.662 | 49.510 | 57.020 | 0.00 | 0.00 |
| ATOM | 1362 | CD1  | LEU | X | 88 | 60.589 | 47.883 | 58.150 | 0.00 | 0.00 |
| ATOM | 1363 | HD11 | LEU | X | 88 | 59.645 | 47.344 | 58.232 | 0.00 | 0.00 |
| ATOM | 1364 | HD12 | LEU | X | 88 | 61.340 | 47.176 | 57.797 | 0.00 | 0.00 |
| ATOM | 1365 | HD13 | LEU | X | 88 | 60.910 | 48.200 | 59.142 | 0.00 | 0.00 |
| ATOM | 1366 | CD2  | LEU | X | 88 | 60.121 | 48.633 | 55.764 | 0.00 | 0.00 |
| ATOM | 1367 | HD21 | LEU | X | 88 | 59.040 | 48.769 | 55.714 | 0.00 | 0.00 |
| ATOM | 1368 | HD22 | LEU | X | 88 | 60.543 | 49.184 | 54.924 | 0.00 | 0.00 |
| ATOM | 1369 | HD23 | LEU | X | 88 | 60.338 | 47.575 | 55.616 | 0.00 | 0.00 |
| ATOM | 1370 | C    | LEU | X | 88 | 59.214 | 52.769 | 57.833 | 0.00 | 0.00 |
| ATOM | 1371 | O    | LEU | X | 88 | 60.069 | 53.444 | 58.384 | 0.00 | 0.00 |
| ATOM | 1372 | N    | SER | X | 89 | 57.850 | 53.005 | 58.007 | 0.00 | 0.00 |
| ATOM | 1373 | H    | SER | X | 89 | 57.276 | 52.448 | 57.390 | 0.00 | 0.00 |
| ATOM | 1374 | CA   | SER | X | 89 | 57.190 | 54.048 | 58.808 | 0.00 | 0.00 |
| ATOM | 1375 | HA   | SER | X | 89 | 57.617 | 54.091 | 59.810 | 0.00 | 0.00 |
| ATOM | 1376 | CB   | SER | X | 89 | 57.220 | 55.333 | 58.045 | 0.00 | 0.00 |
| ATOM | 1377 | HB2  | SER | X | 89 | 58.149 | 55.473 | 57.491 | 0.00 | 0.00 |
| ATOM | 1378 | HB3  | SER | X | 89 | 56.402 | 55.524 | 57.352 | 0.00 | 0.00 |
| ATOM | 1379 | OG   | SER | X | 89 | 57.014 | 56.382 | 59.092 | 0.00 | 0.00 |
| ATOM | 1380 | HG   | SER | X | 89 | 57.135 | 57.243 | 58.684 | 0.00 | 0.00 |
| ATOM | 1381 | C    | SER | X | 89 | 55.668 | 53.691 | 58.946 | 0.00 | 0.00 |
| ATOM | 1382 | O    | SER | X | 89 | 55.144 | 52.894 | 58.150 | 0.00 | 0.00 |
| ATOM | 1383 | N    | GLU | X | 90 | 55.021 | 54.210 | 59.976 | 0.00 | 0.00 |
| ATOM | 1384 | H    | GLU | X | 90 | 55.407 | 54.783 | 60.713 | 0.00 | 0.00 |
| ATOM | 1385 | CA   | GLU | X | 90 | 53.555 | 54.389 | 59.940 | 0.00 | 0.00 |
| ATOM | 1386 | HA   | GLU | X | 90 | 53.050 | 53.673 | 59.292 | 0.00 | 0.00 |
| ATOM | 1387 | CB   | GLU | X | 90 | 53.062 | 54.247 | 61.406 | 0.00 | 0.00 |
| ATOM | 1388 | HB2  | GLU | X | 90 | 53.653 | 54.904 | 62.045 | 0.00 | 0.00 |
| ATOM | 1389 | HB3  | GLU | X | 90 | 51.989 | 54.439 | 61.396 | 0.00 | 0.00 |
| ATOM | 1390 | CG   | GLU | X | 90 | 53.269 | 52.781 | 61.925 | 0.00 | 0.00 |
| ATOM | 1391 | HG2  | GLU | X | 90 | 53.101 | 52.069 | 61.117 | 0.00 | 0.00 |
| ATOM | 1392 | HG3  | GLU | X | 90 | 54.321 | 52.646 | 62.175 | 0.00 | 0.00 |
| ATOM | 1393 | CD   | GLU | X | 90 | 52.361 | 52.504 | 63.132 | 0.00 | 0.00 |
| ATOM | 1394 | OE1  | GLU | X | 90 | 51.083 | 52.331 | 62.938 | 0.00 | 0.00 |
| ATOM | 1395 | OE2  | GLU | X | 90 | 52.887 | 52.518 | 64.234 | 0.00 | 0.00 |
| ATOM | 1396 | C    | GLU | X | 90 | 53.204 | 55.856 | 59.391 | 0.00 | 0.00 |
| ATOM | 1397 | O    | GLU | X | 90 | 52.667 | 56.713 | 60.027 | 0.00 | 0.00 |
| ATOM | 1398 | N    | ASP | X | 91 | 53.508 | 55.994 | 58.119 | 0.00 | 0.00 |
| ATOM | 1399 | H    | ASP | X | 91 | 54.104 | 55.249 | 57.788 | 0.00 | 0.00 |
| ATOM | 1400 | CA   | ASP | X | 91 | 53.473 | 57.102 | 57.199 | 0.00 | 0.00 |
| ATOM | 1401 | HA   | ASP | X | 91 | 52.425 | 57.395 | 57.143 | 0.00 | 0.00 |
| ATOM | 1402 | CB   | ASP | X | 91 | 54.251 | 58.350 | 57.728 | 0.00 | 0.00 |
| ATOM | 1403 | HB2  | ASP | X | 91 | 53.789 | 58.656 | 58.667 | 0.00 | 0.00 |
| ATOM | 1404 | HB3  | ASP | X | 91 | 55.282 | 58.092 | 57.974 | 0.00 | 0.00 |



|      |      |      |     |   |    |        |        |        |      |      |
|------|------|------|-----|---|----|--------|--------|--------|------|------|
| ATOM | 1405 | CG   | ASP | X | 91 | 54.169 | 59.571 | 56.704 | 0.00 | 0.00 |
| ATOM | 1406 | OD1  | ASP | X | 91 | 55.144 | 59.748 | 56.000 | 0.00 | 0.00 |
| ATOM | 1407 | OD2  | ASP | X | 91 | 53.091 | 60.153 | 56.547 | 0.00 | 0.00 |
| ATOM | 1408 | C    | ASP | X | 91 | 53.877 | 56.749 | 55.751 | 0.00 | 0.00 |
| ATOM | 1409 | O    | ASP | X | 91 | 55.011 | 56.543 | 55.365 | 0.00 | 0.00 |
| ATOM | 1410 | N    | CYX | X | 92 | 52.837 | 56.645 | 54.929 | 0.00 | 0.00 |
| ATOM | 1411 | H    | CYX | X | 92 | 51.961 | 57.058 | 55.218 | 0.00 | 0.00 |
| ATOM | 1412 | CA   | CYX | X | 92 | 52.970 | 55.841 | 53.684 | 0.00 | 0.00 |
| ATOM | 1413 | HA   | CYX | X | 92 | 53.877 | 56.215 | 53.210 | 0.00 | 0.00 |
| ATOM | 1414 | CB   | CYX | X | 92 | 53.028 | 54.310 | 53.947 | 0.00 | 0.00 |
| ATOM | 1415 | HB2  | CYX | X | 92 | 53.345 | 53.809 | 53.033 | 0.00 | 0.00 |
| ATOM | 1416 | HB3  | CYX | X | 92 | 53.832 | 54.156 | 54.667 | 0.00 | 0.00 |
| ATOM | 1417 | SG   | CYX | X | 92 | 51.662 | 53.557 | 54.722 | 0.00 | 0.00 |
| ATOM | 1418 | C    | CYX | X | 92 | 51.849 | 56.179 | 52.691 | 0.00 | 0.00 |
| ATOM | 1419 | O    | CYX | X | 92 | 51.776 | 55.564 | 51.570 | 0.00 | 0.00 |
| ATOM | 1420 | N    | LEU | X | 93 | 50.862 | 57.071 | 53.099 | 0.00 | 0.00 |
| ATOM | 1421 | H    | LEU | X | 93 | 50.903 | 57.509 | 54.008 | 0.00 | 0.00 |
| ATOM | 1422 | CA   | LEU | X | 93 | 49.762 | 57.442 | 52.310 | 0.00 | 0.00 |
| ATOM | 1423 | HA   | LEU | X | 93 | 49.552 | 56.599 | 51.651 | 0.00 | 0.00 |
| ATOM | 1424 | CB   | LEU | X | 93 | 48.427 | 57.485 | 53.161 | 0.00 | 0.00 |
| ATOM | 1425 | HB2  | LEU | X | 93 | 48.301 | 58.414 | 53.718 | 0.00 | 0.00 |
| ATOM | 1426 | HB3  | LEU | X | 93 | 47.652 | 57.548 | 52.397 | 0.00 | 0.00 |
| ATOM | 1427 | CG   | LEU | X | 93 | 48.133 | 56.273 | 54.212 | 0.00 | 0.00 |
| ATOM | 1428 | HG   | LEU | X | 93 | 49.016 | 56.122 | 54.833 | 0.00 | 0.00 |
| ATOM | 1429 | CD1  | LEU | X | 93 | 46.908 | 56.453 | 55.107 | 0.00 | 0.00 |
| ATOM | 1430 | HD11 | LEU | X | 93 | 46.037 | 56.691 | 54.497 | 0.00 | 0.00 |
| ATOM | 1431 | HD12 | LEU | X | 93 | 46.641 | 55.499 | 55.562 | 0.00 | 0.00 |
| ATOM | 1432 | HD13 | LEU | X | 93 | 46.993 | 57.136 | 55.953 | 0.00 | 0.00 |
| ATOM | 1433 | CD2  | LEU | X | 93 | 48.103 | 54.914 | 53.599 | 0.00 | 0.00 |
| ATOM | 1434 | HD21 | LEU | X | 93 | 47.318 | 54.740 | 52.862 | 0.00 | 0.00 |
| ATOM | 1435 | HD22 | LEU | X | 93 | 49.107 | 54.629 | 53.286 | 0.00 | 0.00 |
| ATOM | 1436 | HD23 | LEU | X | 93 | 48.039 | 54.189 | 54.410 | 0.00 | 0.00 |
| ATOM | 1437 | C    | LEU | X | 93 | 49.971 | 58.658 | 51.369 | 0.00 | 0.00 |
| ATOM | 1438 | O    | LEU | X | 93 | 49.498 | 59.725 | 51.668 | 0.00 | 0.00 |
| ATOM | 1439 | N    | TYR | X | 94 | 50.624 | 58.371 | 50.224 | 0.00 | 0.00 |
| ATOM | 1440 | H    | TYR | X | 94 | 51.039 | 57.463 | 50.070 | 0.00 | 0.00 |
| ATOM | 1441 | CA   | TYR | X | 94 | 50.967 | 59.346 | 49.282 | 0.00 | 0.00 |
| ATOM | 1442 | HA   | TYR | X | 94 | 50.179 | 60.097 | 49.242 | 0.00 | 0.00 |
| ATOM | 1443 | CB   | TYR | X | 94 | 52.306 | 60.059 | 49.575 | 0.00 | 0.00 |
| ATOM | 1444 | HB2  | TYR | X | 94 | 53.090 | 59.343 | 49.328 | 0.00 | 0.00 |
| ATOM | 1445 | HB3  | TYR | X | 94 | 52.483 | 60.912 | 48.919 | 0.00 | 0.00 |
| ATOM | 1446 | CG   | TYR | X | 94 | 52.731 | 60.558 | 50.954 | 0.00 | 0.00 |
| ATOM | 1447 | CD1  | TYR | X | 94 | 52.645 | 61.921 | 51.250 | 0.00 | 0.00 |
| ATOM | 1448 | HD1  | TYR | X | 94 | 52.478 | 62.626 | 50.450 | 0.00 | 0.00 |
| ATOM | 1449 | CE1  | TYR | X | 94 | 52.923 | 62.415 | 52.557 | 0.00 | 0.00 |
| ATOM | 1450 | HE1  | TYR | X | 94 | 52.770 | 63.472 | 52.718 | 0.00 | 0.00 |
| ATOM | 1451 | CZ   | TYR | X | 94 | 53.353 | 61.484 | 53.541 | 0.00 | 0.00 |
| ATOM | 1452 | OH   | TYR | X | 94 | 53.775 | 61.937 | 54.713 | 0.00 | 0.00 |
| ATOM | 1453 | HH   | TYR | X | 94 | 54.093 | 61.256 | 55.310 | 0.00 | 0.00 |
| ATOM | 1454 | CE2  | TYR | X | 94 | 53.435 | 60.141 | 53.229 | 0.00 | 0.00 |
| ATOM | 1455 | HE2  | TYR | X | 94 | 53.853 | 59.437 | 53.933 | 0.00 | 0.00 |
| ATOM | 1456 | CD2  | TYR | X | 94 | 53.094 | 59.650 | 51.967 | 0.00 | 0.00 |
| ATOM | 1457 | HD2  | TYR | X | 94 | 53.072 | 58.586 | 51.779 | 0.00 | 0.00 |
| ATOM | 1458 | C    | TYR | X | 94 | 50.982 | 58.722 | 47.865 | 0.00 | 0.00 |
| ATOM | 1459 | O    | TYR | X | 94 | 51.254 | 57.508 | 47.686 | 0.00 | 0.00 |
| ATOM | 1460 | N    | LEU | X | 95 | 50.621 | 59.520 | 46.861 | 0.00 | 0.00 |
| ATOM | 1461 | H    | LEU | X | 95 | 50.449 | 60.511 | 46.954 | 0.00 | 0.00 |
| ATOM | 1462 | CA   | LEU | X | 95 | 50.534 | 58.981 | 45.502 | 0.00 | 0.00 |
| ATOM | 1463 | HA   | LEU | X | 95 | 50.839 | 57.935 | 45.484 | 0.00 | 0.00 |
| ATOM | 1464 | CB   | LEU | X | 95 | 49.102 | 58.991 | 44.987 | 0.00 | 0.00 |
| ATOM | 1465 | HB2  | LEU | X | 95 | 49.066 | 58.436 | 44.050 | 0.00 | 0.00 |
| ATOM | 1466 | HB3  | LEU | X | 95 | 48.617 | 58.485 | 45.821 | 0.00 | 0.00 |
| ATOM | 1467 | CG   | LEU | X | 95 | 48.345 | 60.328 | 44.762 | 0.00 | 0.00 |
| ATOM | 1468 | HG   | LEU | X | 95 | 48.378 | 61.020 | 45.604 | 0.00 | 0.00 |
| ATOM | 1469 | CD1  | LEU | X | 95 | 48.668 | 61.060 | 43.419 | 0.00 | 0.00 |
| ATOM | 1470 | HD11 | LEU | X | 95 | 49.445 | 61.815 | 43.537 | 0.00 | 0.00 |
| ATOM | 1471 | HD12 | LEU | X | 95 | 48.895 | 60.360 | 42.616 | 0.00 | 0.00 |
| ATOM | 1472 | HD13 | LEU | X | 95 | 47.813 | 61.673 | 43.130 | 0.00 | 0.00 |
| ATOM | 1473 | CD2  | LEU | X | 95 | 46.878 | 59.942 | 44.708 | 0.00 | 0.00 |
| ATOM | 1474 | HD21 | LEU | X | 95 | 46.239 | 60.805 | 44.522 | 0.00 | 0.00 |

|      |      |      |     |   |    |        |        |        |      |      |
|------|------|------|-----|---|----|--------|--------|--------|------|------|
| ATOM | 1475 | HD22 | LEU | X | 95 | 46.705 | 59.246 | 43.886 | 0.00 | 0.00 |
| ATOM | 1476 | HD23 | LEU | X | 95 | 46.542 | 59.356 | 45.563 | 0.00 | 0.00 |
| ATOM | 1477 | C    | LEU | X | 95 | 51.424 | 59.756 | 44.564 | 0.00 | 0.00 |
| ATOM | 1478 | O    | LEU | X | 95 | 51.774 | 60.915 | 44.786 | 0.00 | 0.00 |
| ATOM | 1479 | N    | ASN | X | 96 | 51.808 | 59.135 | 43.432 | 0.00 | 0.00 |
| ATOM | 1480 | H    | ASN | X | 96 | 51.371 | 58.252 | 43.210 | 0.00 | 0.00 |
| ATOM | 1481 | CA   | ASN | X | 96 | 52.811 | 59.596 | 42.458 | 0.00 | 0.00 |
| ATOM | 1482 | HA   | ASN | X | 96 | 53.283 | 60.443 | 42.956 | 0.00 | 0.00 |
| ATOM | 1483 | CB   | ASN | X | 96 | 53.857 | 58.507 | 42.262 | 0.00 | 0.00 |
| ATOM | 1484 | HB2  | ASN | X | 96 | 53.356 | 57.657 | 41.798 | 0.00 | 0.00 |
| ATOM | 1485 | HB3  | ASN | X | 96 | 54.623 | 58.867 | 41.575 | 0.00 | 0.00 |
| ATOM | 1486 | CG   | ASN | X | 96 | 54.550 | 58.070 | 43.587 | 0.00 | 0.00 |
| ATOM | 1487 | OD1  | ASN | X | 96 | 55.161 | 58.860 | 44.200 | 0.00 | 0.00 |
| ATOM | 1488 | ND2  | ASN | X | 96 | 54.375 | 56.909 | 44.107 | 0.00 | 0.00 |
| ATOM | 1489 | HD21 | ASN | X | 96 | 54.777 | 56.673 | 45.003 | 0.00 | 0.00 |
| ATOM | 1490 | HD22 | ASN | X | 96 | 53.778 | 56.275 | 43.595 | 0.00 | 0.00 |
| ATOM | 1491 | C    | ASN | X | 96 | 52.119 | 59.810 | 41.136 | 0.00 | 0.00 |
| ATOM | 1492 | O    | ASN | X | 96 | 51.279 | 58.962 | 40.758 | 0.00 | 0.00 |
| ATOM | 1493 | N    | VAL | X | 97 | 52.467 | 60.824 | 40.308 | 0.00 | 0.00 |
| ATOM | 1494 | H    | VAL | X | 97 | 52.935 | 61.623 | 40.711 | 0.00 | 0.00 |
| ATOM | 1495 | CA   | VAL | X | 97 | 51.911 | 61.075 | 38.966 | 0.00 | 0.00 |
| ATOM | 1496 | HA   | VAL | X | 97 | 51.406 | 60.134 | 38.745 | 0.00 | 0.00 |
| ATOM | 1497 | CB   | VAL | X | 97 | 50.839 | 62.187 | 38.975 | 0.00 | 0.00 |
| ATOM | 1498 | HB   | VAL | X | 97 | 51.388 | 63.126 | 39.048 | 0.00 | 0.00 |
| ATOM | 1499 | CG1  | VAL | X | 97 | 49.989 | 62.130 | 37.668 | 0.00 | 0.00 |
| ATOM | 1500 | HG11 | VAL | X | 97 | 49.223 | 62.890 | 37.821 | 0.00 | 0.00 |
| ATOM | 1501 | HG12 | VAL | X | 97 | 50.676 | 62.456 | 36.886 | 0.00 | 0.00 |
| ATOM | 1502 | HG13 | VAL | X | 97 | 49.603 | 61.147 | 37.396 | 0.00 | 0.00 |
| ATOM | 1503 | CG2  | VAL | X | 97 | 49.935 | 61.999 | 40.199 | 0.00 | 0.00 |
| ATOM | 1504 | HG21 | VAL | X | 97 | 49.182 | 62.785 | 40.152 | 0.00 | 0.00 |
| ATOM | 1505 | HG22 | VAL | X | 97 | 49.438 | 61.033 | 40.116 | 0.00 | 0.00 |
| ATOM | 1506 | HG23 | VAL | X | 97 | 50.461 | 62.072 | 41.151 | 0.00 | 0.00 |
| ATOM | 1507 | C    | VAL | X | 97 | 53.020 | 61.401 | 38.018 | 0.00 | 0.00 |
| ATOM | 1508 | O    | VAL | X | 97 | 53.885 | 62.265 | 38.286 | 0.00 | 0.00 |
| ATOM | 1509 | N    | TRP | X | 98 | 52.794 | 60.954 | 36.787 | 0.00 | 0.00 |
| ATOM | 1510 | H    | TRP | X | 98 | 52.001 | 60.332 | 36.713 | 0.00 | 0.00 |
| ATOM | 1511 | CA   | TRP | X | 98 | 53.609 | 61.182 | 35.540 | 0.00 | 0.00 |
| ATOM | 1512 | HA   | TRP | X | 98 | 54.441 | 61.832 | 35.809 | 0.00 | 0.00 |
| ATOM | 1513 | CB   | TRP | X | 98 | 54.232 | 59.845 | 35.024 | 0.00 | 0.00 |
| ATOM | 1514 | HB2  | TRP | X | 98 | 53.492 | 59.064 | 34.851 | 0.00 | 0.00 |
| ATOM | 1515 | HB3  | TRP | X | 98 | 54.749 | 60.074 | 34.092 | 0.00 | 0.00 |
| ATOM | 1516 | CG   | TRP | X | 98 | 55.366 | 59.330 | 35.840 | 0.00 | 0.00 |
| ATOM | 1517 | CD1  | TRP | X | 98 | 56.638 | 59.205 | 35.355 | 0.00 | 0.00 |
| ATOM | 1518 | HD1  | TRP | X | 98 | 56.990 | 59.688 | 34.455 | 0.00 | 0.00 |
| ATOM | 1519 | NE1  | TRP | X | 98 | 57.480 | 58.702 | 36.338 | 0.00 | 0.00 |
| ATOM | 1520 | HE1  | TRP | X | 98 | 58.487 | 58.710 | 36.258 | 0.00 | 0.00 |
| ATOM | 1521 | CE2  | TRP | X | 98 | 56.816 | 58.160 | 37.358 | 0.00 | 0.00 |
| ATOM | 1522 | CZ2  | TRP | X | 98 | 57.153 | 57.446 | 38.523 | 0.00 | 0.00 |
| ATOM | 1523 | HZ2  | TRP | X | 98 | 58.158 | 57.306 | 38.894 | 0.00 | 0.00 |
| ATOM | 1524 | CH2  | TRP | X | 98 | 56.132 | 57.015 | 39.440 | 0.00 | 0.00 |
| ATOM | 1525 | HH2  | TRP | X | 98 | 56.376 | 56.413 | 40.303 | 0.00 | 0.00 |
| ATOM | 1526 | CZ3  | TRP | X | 98 | 54.796 | 57.215 | 39.102 | 0.00 | 0.00 |
| ATOM | 1527 | HZ3  | TRP | X | 98 | 54.015 | 56.878 | 39.766 | 0.00 | 0.00 |
| ATOM | 1528 | CE3  | TRP | X | 98 | 54.424 | 58.017 | 37.992 | 0.00 | 0.00 |
| ATOM | 1529 | HE3  | TRP | X | 98 | 53.411 | 58.339 | 37.805 | 0.00 | 0.00 |
| ATOM | 1530 | CD2  | TRP | X | 98 | 55.430 | 58.495 | 37.050 | 0.00 | 0.00 |
| ATOM | 1531 | C    | TRP | X | 98 | 52.818 | 61.904 | 34.395 | 0.00 | 0.00 |
| ATOM | 1532 | O    | TRP | X | 98 | 51.618 | 61.556 | 34.218 | 0.00 | 0.00 |
| ATOM | 1533 | N    | THR | X | 99 | 53.377 | 62.867 | 33.644 | 0.00 | 0.00 |
| ATOM | 1534 | H    | THR | X | 99 | 54.256 | 63.188 | 34.024 | 0.00 | 0.00 |
| ATOM | 1535 | CA   | THR | X | 99 | 52.878 | 63.650 | 32.531 | 0.00 | 0.00 |
| ATOM | 1536 | HA   | THR | X | 99 | 52.234 | 62.962 | 31.983 | 0.00 | 0.00 |
| ATOM | 1537 | CB   | THR | X | 99 | 51.896 | 64.733 | 33.096 | 0.00 | 0.00 |
| ATOM | 1538 | HB   | THR | X | 99 | 51.090 | 64.176 | 33.573 | 0.00 | 0.00 |
| ATOM | 1539 | CG2  | THR | X | 99 | 52.580 | 65.589 | 34.204 | 0.00 | 0.00 |
| ATOM | 1540 | HG21 | THR | X | 99 | 53.621 | 65.901 | 34.129 | 0.00 | 0.00 |
| ATOM | 1541 | HG22 | THR | X | 99 | 52.199 | 66.610 | 34.242 | 0.00 | 0.00 |
| ATOM | 1542 | HG23 | THR | X | 99 | 52.444 | 65.009 | 35.116 | 0.00 | 0.00 |
| ATOM | 1543 | OG1  | THR | X | 99 | 51.341 | 65.523 | 32.026 | 0.00 | 0.00 |
| ATOM | 1544 | HG1  | THR | X | 99 | 50.777 | 66.087 | 32.560 | 0.00 | 0.00 |

|      |      |      |     |   |     |        |        |        |      |      |
|------|------|------|-----|---|-----|--------|--------|--------|------|------|
| ATOM | 1545 | C    | THR | X | 99  | 53.933 | 64.231 | 31.628 | 0.00 | 0.00 |
| ATOM | 1546 | O    | THR | X | 99  | 55.010 | 64.550 | 32.135 | 0.00 | 0.00 |
| ATOM | 1547 | N    | PRO | X | 100 | 53.783 | 64.334 | 30.260 | 0.00 | 0.00 |
| ATOM | 1548 | CD   | PRO | X | 100 | 52.527 | 64.154 | 29.585 | 0.00 | 0.00 |
| ATOM | 1549 | HD2  | PRO | X | 100 | 52.008 | 65.085 | 29.812 | 0.00 | 0.00 |
| ATOM | 1550 | HD3  | PRO | X | 100 | 52.004 | 63.304 | 30.026 | 0.00 | 0.00 |
| ATOM | 1551 | CG   | PRO | X | 100 | 52.915 | 63.895 | 28.122 | 0.00 | 0.00 |
| ATOM | 1552 | HG2  | PRO | X | 100 | 52.073 | 64.189 | 27.496 | 0.00 | 0.00 |
| ATOM | 1553 | HG3  | PRO | X | 100 | 53.152 | 62.844 | 27.954 | 0.00 | 0.00 |
| ATOM | 1554 | CB   | PRO | X | 100 | 54.209 | 64.702 | 27.997 | 0.00 | 0.00 |
| ATOM | 1555 | HB2  | PRO | X | 100 | 54.109 | 65.710 | 27.594 | 0.00 | 0.00 |
| ATOM | 1556 | HB3  | PRO | X | 100 | 55.051 | 64.270 | 27.457 | 0.00 | 0.00 |
| ATOM | 1557 | CA   | PRO | X | 100 | 54.798 | 64.761 | 29.336 | 0.00 | 0.00 |
| ATOM | 1558 | HA   | PRO | X | 100 | 55.692 | 64.139 | 29.380 | 0.00 | 0.00 |
| ATOM | 1559 | C    | PRO | X | 100 | 55.233 | 66.219 | 29.665 | 0.00 | 0.00 |
| ATOM | 1560 | O    | PRO | X | 100 | 54.359 | 67.091 | 29.770 | 0.00 | 0.00 |
| ATOM | 1561 | N    | TYR | X | 101 | 56.580 | 66.452 | 29.617 | 0.00 | 0.00 |
| ATOM | 1562 | H    | TYR | X | 101 | 57.113 | 65.715 | 29.176 | 0.00 | 0.00 |
| ATOM | 1563 | CA   | TYR | X | 101 | 57.261 | 67.749 | 29.619 | 0.00 | 0.00 |
| ATOM | 1564 | HA   | TYR | X | 101 | 56.510 | 68.431 | 30.018 | 0.00 | 0.00 |
| ATOM | 1565 | CB   | TYR | X | 101 | 58.453 | 67.637 | 30.582 | 0.00 | 0.00 |
| ATOM | 1566 | HB2  | TYR | X | 101 | 58.034 | 67.438 | 31.569 | 0.00 | 0.00 |
| ATOM | 1567 | HB3  | TYR | X | 101 | 59.078 | 66.853 | 30.155 | 0.00 | 0.00 |
| ATOM | 1568 | CG   | TYR | X | 101 | 59.358 | 68.877 | 30.598 | 0.00 | 0.00 |
| ATOM | 1569 | CD1  | TYR | X | 101 | 60.528 | 68.959 | 29.800 | 0.00 | 0.00 |
| ATOM | 1570 | HD1  | TYR | X | 101 | 60.647 | 68.172 | 29.070 | 0.00 | 0.00 |
| ATOM | 1571 | CE1  | TYR | X | 101 | 61.472 | 70.028 | 29.995 | 0.00 | 0.00 |
| ATOM | 1572 | HE1  | TYR | X | 101 | 62.336 | 70.090 | 29.350 | 0.00 | 0.00 |
| ATOM | 1573 | CZ   | TYR | X | 101 | 61.310 | 70.968 | 31.078 | 0.00 | 0.00 |
| ATOM | 1574 | OH   | TYR | X | 101 | 62.304 | 71.907 | 31.347 | 0.00 | 0.00 |
| ATOM | 1575 | HH   | TYR | X | 101 | 62.975 | 71.823 | 30.665 | 0.00 | 0.00 |
| ATOM | 1576 | CE2  | TYR | X | 101 | 60.163 | 70.839 | 31.923 | 0.00 | 0.00 |
| ATOM | 1577 | HE2  | TYR | X | 101 | 59.971 | 71.505 | 32.751 | 0.00 | 0.00 |
| ATOM | 1578 | CD2  | TYR | X | 101 | 59.203 | 69.797 | 31.679 | 0.00 | 0.00 |
| ATOM | 1579 | HD2  | TYR | X | 101 | 58.385 | 69.661 | 32.372 | 0.00 | 0.00 |
| ATOM | 1580 | C    | TYR | X | 101 | 57.638 | 68.228 | 28.230 | 0.00 | 0.00 |
| ATOM | 1581 | O    | TYR | X | 101 | 58.277 | 67.443 | 27.527 | 0.00 | 0.00 |
| ATOM | 1582 | N    | PRO | X | 102 | 57.375 | 69.471 | 27.795 | 0.00 | 0.00 |
| ATOM | 1583 | CD   | PRO | X | 102 | 57.867 | 70.107 | 26.654 | 0.00 | 0.00 |
| ATOM | 1584 | HD2  | PRO | X | 102 | 57.958 | 69.385 | 25.842 | 0.00 | 0.00 |
| ATOM | 1585 | HD3  | PRO | X | 102 | 58.882 | 70.468 | 26.823 | 0.00 | 0.00 |
| ATOM | 1586 | CG   | PRO | X | 102 | 56.956 | 71.300 | 26.219 | 0.00 | 0.00 |
| ATOM | 1587 | HG2  | PRO | X | 102 | 56.069 | 70.835 | 25.790 | 0.00 | 0.00 |
| ATOM | 1588 | HG3  | PRO | X | 102 | 57.480 | 72.071 | 25.654 | 0.00 | 0.00 |
| ATOM | 1589 | CB   | PRO | X | 102 | 56.545 | 71.751 | 27.598 | 0.00 | 0.00 |
| ATOM | 1590 | HB2  | PRO | X | 102 | 55.543 | 72.176 | 27.539 | 0.00 | 0.00 |
| ATOM | 1591 | HB3  | PRO | X | 102 | 57.277 | 72.423 | 28.045 | 0.00 | 0.00 |
| ATOM | 1592 | CA   | PRO | X | 102 | 56.411 | 70.404 | 28.336 | 0.00 | 0.00 |
| ATOM | 1593 | HA   | PRO | X | 102 | 56.715 | 70.637 | 29.356 | 0.00 | 0.00 |
| ATOM | 1594 | C    | PRO | X | 102 | 55.044 | 69.793 | 28.142 | 0.00 | 0.00 |
| ATOM | 1595 | O    | PRO | X | 102 | 54.842 | 68.929 | 27.308 | 0.00 | 0.00 |
| ATOM | 1596 | N    | ARG | X | 103 | 54.092 | 70.342 | 28.904 | 0.00 | 0.00 |
| ATOM | 1597 | H    | ARG | X | 103 | 54.479 | 71.040 | 29.522 | 0.00 | 0.00 |
| ATOM | 1598 | CA   | ARG | X | 103 | 52.710 | 70.015 | 28.872 | 0.00 | 0.00 |
| ATOM | 1599 | HA   | ARG | X | 103 | 52.602 | 68.958 | 29.113 | 0.00 | 0.00 |
| ATOM | 1600 | CB   | ARG | X | 103 | 51.987 | 70.687 | 30.062 | 0.00 | 0.00 |
| ATOM | 1601 | HB2  | ARG | X | 103 | 52.687 | 70.744 | 30.895 | 0.00 | 0.00 |
| ATOM | 1602 | HB3  | ARG | X | 103 | 51.804 | 71.733 | 29.815 | 0.00 | 0.00 |
| ATOM | 1603 | CG   | ARG | X | 103 | 50.749 | 69.975 | 30.634 | 0.00 | 0.00 |
| ATOM | 1604 | HG2  | ARG | X | 103 | 50.279 | 70.636 | 31.362 | 0.00 | 0.00 |
| ATOM | 1605 | HG3  | ARG | X | 103 | 50.122 | 69.766 | 29.768 | 0.00 | 0.00 |
| ATOM | 1606 | CD   | ARG | X | 103 | 51.066 | 68.616 | 31.256 | 0.00 | 0.00 |
| ATOM | 1607 | HD2  | ARG | X | 103 | 50.079 | 68.182 | 31.416 | 0.00 | 0.00 |
| ATOM | 1608 | HD3  | ARG | X | 103 | 51.637 | 67.937 | 30.622 | 0.00 | 0.00 |
| ATOM | 1609 | NE   | ARG | X | 103 | 51.711 | 68.928 | 32.558 | 0.00 | 0.00 |
| ATOM | 1610 | HE   | ARG | X | 103 | 51.130 | 69.411 | 33.228 | 0.00 | 0.00 |
| ATOM | 1611 | CZ   | ARG | X | 103 | 52.949 | 68.734 | 32.971 | 0.00 | 0.00 |
| ATOM | 1612 | NH1  | ARG | X | 103 | 53.834 | 68.036 | 32.301 | 0.00 | 0.00 |
| ATOM | 1613 | HH11 | ARG | X | 103 | 53.503 | 67.644 | 31.430 | 0.00 | 0.00 |
| ATOM | 1614 | HH12 | ARG | X | 103 | 54.835 | 68.133 | 32.392 | 0.00 | 0.00 |

|      |      |      |     |   |     |        |        |        |      |      |
|------|------|------|-----|---|-----|--------|--------|--------|------|------|
| ATOM | 1615 | NH2  | ARG | X | 103 | 53.334 | 69.323 | 34.076 | 0.00 | 0.00 |
| ATOM | 1616 | HH21 | ARG | X | 103 | 52.697 | 69.968 | 34.520 | 0.00 | 0.00 |
| ATOM | 1617 | HH22 | ARG | X | 103 | 54.298 | 69.323 | 34.381 | 0.00 | 0.00 |
| ATOM | 1618 | C    | ARG | X | 103 | 52.028 | 70.298 | 27.490 | 0.00 | 0.00 |
| ATOM | 1619 | O    | ARG | X | 103 | 51.905 | 71.508 | 27.203 | 0.00 | 0.00 |
| ATOM | 1620 | N    | PRO | X | 104 | 51.402 | 69.295 | 26.837 | 0.00 | 0.00 |
| ATOM | 1621 | CD   | PRO | X | 104 | 51.491 | 67.848 | 27.092 | 0.00 | 0.00 |
| ATOM | 1622 | HD2  | PRO | X | 104 | 51.523 | 67.626 | 28.159 | 0.00 | 0.00 |
| ATOM | 1623 | HD3  | PRO | X | 104 | 52.339 | 67.500 | 26.502 | 0.00 | 0.00 |
| ATOM | 1624 | CG   | PRO | X | 104 | 50.221 | 67.257 | 26.538 | 0.00 | 0.00 |
| ATOM | 1625 | HG2  | PRO | X | 104 | 49.411 | 67.280 | 27.268 | 0.00 | 0.00 |
| ATOM | 1626 | HG3  | PRO | X | 104 | 50.346 | 66.184 | 26.390 | 0.00 | 0.00 |
| ATOM | 1627 | CB   | PRO | X | 104 | 49.845 | 68.067 | 25.360 | 0.00 | 0.00 |
| ATOM | 1628 | HB2  | PRO | X | 104 | 48.759 | 68.162 | 25.335 | 0.00 | 0.00 |
| ATOM | 1629 | HB3  | PRO | X | 104 | 50.253 | 67.747 | 24.401 | 0.00 | 0.00 |
| ATOM | 1630 | CA   | PRO | X | 104 | 50.419 | 69.474 | 25.796 | 0.00 | 0.00 |
| ATOM | 1631 | HA   | PRO | X | 104 | 50.862 | 69.918 | 24.904 | 0.00 | 0.00 |
| ATOM | 1632 | C    | PRO | X | 104 | 49.306 | 70.519 | 26.116 | 0.00 | 0.00 |
| ATOM | 1633 | O    | PRO | X | 104 | 49.157 | 70.863 | 27.271 | 0.00 | 0.00 |
| ATOM | 1634 | N    | THR | X | 105 | 48.659 | 71.077 | 25.085 | 0.00 | 0.00 |
| ATOM | 1635 | H    | THR | X | 105 | 48.996 | 70.739 | 24.195 | 0.00 | 0.00 |
| ATOM | 1636 | CA   | THR | X | 105 | 47.421 | 71.864 | 25.139 | 0.00 | 0.00 |
| ATOM | 1637 | HA   | THR | X | 105 | 47.444 | 72.649 | 25.894 | 0.00 | 0.00 |
| ATOM | 1638 | CB   | THR | X | 105 | 47.340 | 72.718 | 23.806 | 0.00 | 0.00 |
| ATOM | 1639 | HB   | THR | X | 105 | 46.464 | 73.357 | 23.694 | 0.00 | 0.00 |
| ATOM | 1640 | CG2  | THR | X | 105 | 48.588 | 73.634 | 23.717 | 0.00 | 0.00 |
| ATOM | 1641 | HG21 | THR | X | 105 | 48.689 | 74.152 | 24.671 | 0.00 | 0.00 |
| ATOM | 1642 | HG22 | THR | X | 105 | 49.480 | 73.034 | 23.541 | 0.00 | 0.00 |
| ATOM | 1643 | HG23 | THR | X | 105 | 48.475 | 74.221 | 22.806 | 0.00 | 0.00 |
| ATOM | 1644 | OG1  | THR | X | 105 | 47.369 | 71.939 | 22.693 | 0.00 | 0.00 |
| ATOM | 1645 | HG1  | THR | X | 105 | 47.242 | 72.507 | 21.929 | 0.00 | 0.00 |
| ATOM | 1646 | C    | THR | X | 105 | 46.130 | 71.045 | 25.335 | 0.00 | 0.00 |
| ATOM | 1647 | O    | THR | X | 105 | 45.042 | 71.620 | 25.662 | 0.00 | 0.00 |
| ATOM | 1648 | N    | SER | X | 106 | 46.100 | 69.710 | 25.071 | 0.00 | 0.00 |
| ATOM | 1649 | H    | SER | X | 106 | 46.975 | 69.317 | 24.756 | 0.00 | 0.00 |
| ATOM | 1650 | CA   | SER | X | 106 | 44.914 | 68.863 | 25.189 | 0.00 | 0.00 |
| ATOM | 1651 | HA   | SER | X | 106 | 44.052 | 69.510 | 25.353 | 0.00 | 0.00 |
| ATOM | 1652 | CB   | SER | X | 106 | 44.797 | 68.108 | 23.875 | 0.00 | 0.00 |
| ATOM | 1653 | HB2  | SER | X | 106 | 44.055 | 67.315 | 23.966 | 0.00 | 0.00 |
| ATOM | 1654 | HB3  | SER | X | 106 | 44.539 | 68.846 | 23.116 | 0.00 | 0.00 |
| ATOM | 1655 | OG   | SER | X | 106 | 46.041 | 67.531 | 23.504 | 0.00 | 0.00 |
| ATOM | 1656 | HG   | SER | X | 106 | 46.099 | 67.622 | 22.550 | 0.00 | 0.00 |
| ATOM | 1657 | C    | SER | X | 106 | 44.948 | 67.856 | 26.403 | 0.00 | 0.00 |
| ATOM | 1658 | O    | SER | X | 106 | 46.014 | 67.333 | 26.712 | 0.00 | 0.00 |
| ATOM | 1659 | N    | PRO | X | 107 | 43.774 | 67.584 | 27.001 | 0.00 | 0.00 |
| ATOM | 1660 | CD   | PRO | X | 107 | 42.472 | 68.201 | 26.721 | 0.00 | 0.00 |
| ATOM | 1661 | HD2  | PRO | X | 107 | 42.237 | 68.163 | 25.657 | 0.00 | 0.00 |
| ATOM | 1662 | HD3  | PRO | X | 107 | 42.469 | 69.233 | 27.074 | 0.00 | 0.00 |
| ATOM | 1663 | CG   | PRO | X | 107 | 41.447 | 67.476 | 27.599 | 0.00 | 0.00 |
| ATOM | 1664 | HG2  | PRO | X | 107 | 40.903 | 66.745 | 27.001 | 0.00 | 0.00 |
| ATOM | 1665 | HG3  | PRO | X | 107 | 40.818 | 68.147 | 28.184 | 0.00 | 0.00 |
| ATOM | 1666 | CB   | PRO | X | 107 | 42.351 | 66.719 | 28.666 | 0.00 | 0.00 |
| ATOM | 1667 | HB2  | PRO | X | 107 | 41.916 | 65.811 | 29.085 | 0.00 | 0.00 |
| ATOM | 1668 | HB3  | PRO | X | 107 | 42.416 | 67.316 | 29.576 | 0.00 | 0.00 |
| ATOM | 1669 | CA   | PRO | X | 107 | 43.695 | 66.494 | 27.974 | 0.00 | 0.00 |
| ATOM | 1670 | HA   | PRO | X | 107 | 44.583 | 66.531 | 28.605 | 0.00 | 0.00 |
| ATOM | 1671 | C    | PRO | X | 107 | 43.645 | 65.111 | 27.304 | 0.00 | 0.00 |
| ATOM | 1672 | O    | PRO | X | 107 | 43.683 | 65.058 | 26.066 | 0.00 | 0.00 |
| ATOM | 1673 | N    | THR | X | 108 | 43.541 | 64.046 | 28.056 | 0.00 | 0.00 |
| ATOM | 1674 | H    | THR | X | 108 | 43.604 | 64.128 | 29.061 | 0.00 | 0.00 |
| ATOM | 1675 | CA   | THR | X | 108 | 43.575 | 62.646 | 27.523 | 0.00 | 0.00 |
| ATOM | 1676 | HA   | THR | X | 108 | 42.819 | 62.493 | 26.753 | 0.00 | 0.00 |
| ATOM | 1677 | CB   | THR | X | 108 | 44.956 | 62.295 | 26.883 | 0.00 | 0.00 |
| ATOM | 1678 | HB   | THR | X | 108 | 45.237 | 63.127 | 26.237 | 0.00 | 0.00 |
| ATOM | 1679 | CG2  | THR | X | 108 | 46.199 | 62.012 | 27.852 | 0.00 | 0.00 |
| ATOM | 1680 | HG21 | THR | X | 108 | 46.270 | 62.758 | 28.643 | 0.00 | 0.00 |
| ATOM | 1681 | HG22 | THR | X | 108 | 46.070 | 61.041 | 28.330 | 0.00 | 0.00 |
| ATOM | 1682 | HG23 | THR | X | 108 | 47.076 | 61.896 | 27.215 | 0.00 | 0.00 |
| ATOM | 1683 | OG1  | THR | X | 108 | 44.799 | 61.140 | 26.042 | 0.00 | 0.00 |
| ATOM | 1684 | HG1  | THR | X | 108 | 45.534 | 61.010 | 25.438 | 0.00 | 0.00 |

|      |      |      |     |   |     |        |        |        |      |      |
|------|------|------|-----|---|-----|--------|--------|--------|------|------|
| ATOM | 1685 | C    | THR | X | 108 | 43.267 | 61.705 | 28.687 | 0.00 | 0.00 |
| ATOM | 1686 | O    | THR | X | 108 | 43.473 | 62.040 | 29.886 | 0.00 | 0.00 |
| ATOM | 1687 | N    | PRO | X | 109 | 42.584 | 60.556 | 28.376 | 0.00 | 0.00 |
| ATOM | 1688 | CD   | PRO | X | 109 | 42.049 | 60.204 | 27.087 | 0.00 | 0.00 |
| ATOM | 1689 | HD2  | PRO | X | 109 | 42.835 | 59.918 | 26.388 | 0.00 | 0.00 |
| ATOM | 1690 | HD3  | PRO | X | 109 | 41.303 | 60.932 | 26.766 | 0.00 | 0.00 |
| ATOM | 1691 | CG   | PRO | X | 109 | 41.353 | 58.866 | 27.354 | 0.00 | 0.00 |
| ATOM | 1692 | HG2  | PRO | X | 109 | 41.445 | 58.123 | 26.562 | 0.00 | 0.00 |
| ATOM | 1693 | HG3  | PRO | X | 109 | 40.300 | 59.083 | 27.535 | 0.00 | 0.00 |
| ATOM | 1694 | CB   | PRO | X | 109 | 41.967 | 58.341 | 28.612 | 0.00 | 0.00 |
| ATOM | 1695 | HB2  | PRO | X | 109 | 42.786 | 57.705 | 28.276 | 0.00 | 0.00 |
| ATOM | 1696 | HB3  | PRO | X | 109 | 41.254 | 57.764 | 29.201 | 0.00 | 0.00 |
| ATOM | 1697 | CA   | PRO | X | 109 | 42.320 | 59.582 | 29.408 | 0.00 | 0.00 |
| ATOM | 1698 | HA   | PRO | X | 109 | 41.463 | 59.933 | 29.982 | 0.00 | 0.00 |
| ATOM | 1699 | C    | PRO | X | 109 | 43.460 | 59.239 | 30.405 | 0.00 | 0.00 |
| ATOM | 1700 | O    | PRO | X | 109 | 44.652 | 59.335 | 30.111 | 0.00 | 0.00 |
| ATOM | 1701 | N    | VAL | X | 110 | 43.125 | 58.745 | 31.581 | 0.00 | 0.00 |
| ATOM | 1702 | H    | VAL | X | 110 | 42.166 | 58.579 | 31.850 | 0.00 | 0.00 |
| ATOM | 1703 | CA   | VAL | X | 110 | 44.101 | 58.388 | 32.674 | 0.00 | 0.00 |
| ATOM | 1704 | HA   | VAL | X | 110 | 45.056 | 58.851 | 32.425 | 0.00 | 0.00 |
| ATOM | 1705 | CB   | VAL | X | 110 | 43.611 | 59.059 | 33.991 | 0.00 | 0.00 |
| ATOM | 1706 | HB   | VAL | X | 110 | 42.668 | 58.631 | 34.333 | 0.00 | 0.00 |
| ATOM | 1707 | CG1  | VAL | X | 110 | 44.605 | 58.792 | 35.121 | 0.00 | 0.00 |
| ATOM | 1708 | HG11 | VAL | X | 110 | 45.563 | 59.225 | 34.832 | 0.00 | 0.00 |
| ATOM | 1709 | HG12 | VAL | X | 110 | 44.182 | 59.264 | 36.008 | 0.00 | 0.00 |
| ATOM | 1710 | HG13 | VAL | X | 110 | 44.593 | 57.726 | 35.347 | 0.00 | 0.00 |
| ATOM | 1711 | CG2  | VAL | X | 110 | 43.214 | 60.507 | 33.761 | 0.00 | 0.00 |
| ATOM | 1712 | HG21 | VAL | X | 110 | 44.051 | 60.976 | 33.242 | 0.00 | 0.00 |
| ATOM | 1713 | HG22 | VAL | X | 110 | 42.268 | 60.584 | 33.226 | 0.00 | 0.00 |
| ATOM | 1714 | HG23 | VAL | X | 110 | 43.066 | 61.015 | 34.714 | 0.00 | 0.00 |
| ATOM | 1715 | C    | VAL | X | 110 | 44.193 | 56.825 | 32.874 | 0.00 | 0.00 |
| ATOM | 1716 | O    | VAL | X | 110 | 43.117 | 56.219 | 32.594 | 0.00 | 0.00 |
| ATOM | 1717 | N    | LEU | X | 111 | 45.268 | 56.330 | 33.449 | 0.00 | 0.00 |
| ATOM | 1718 | H    | LEU | X | 111 | 46.065 | 56.937 | 33.576 | 0.00 | 0.00 |
| ATOM | 1719 | CA   | LEU | X | 111 | 45.353 | 55.041 | 34.031 | 0.00 | 0.00 |
| ATOM | 1720 | HA   | LEU | X | 111 | 44.375 | 54.559 | 34.039 | 0.00 | 0.00 |
| ATOM | 1721 | CB   | LEU | X | 111 | 46.394 | 54.098 | 33.241 | 0.00 | 0.00 |
| ATOM | 1722 | HB2  | LEU | X | 111 | 47.329 | 54.658 | 33.246 | 0.00 | 0.00 |
| ATOM | 1723 | HB3  | LEU | X | 111 | 46.566 | 53.225 | 33.870 | 0.00 | 0.00 |
| ATOM | 1724 | CG   | LEU | X | 111 | 46.036 | 53.606 | 31.814 | 0.00 | 0.00 |
| ATOM | 1725 | HG   | LEU | X | 111 | 45.022 | 53.215 | 31.903 | 0.00 | 0.00 |
| ATOM | 1726 | CD1  | LEU | X | 111 | 45.979 | 54.709 | 30.795 | 0.00 | 0.00 |
| ATOM | 1727 | HD11 | LEU | X | 111 | 44.995 | 55.180 | 30.788 | 0.00 | 0.00 |
| ATOM | 1728 | HD12 | LEU | X | 111 | 46.669 | 55.496 | 31.101 | 0.00 | 0.00 |
| ATOM | 1729 | HD13 | LEU | X | 111 | 46.167 | 54.231 | 29.834 | 0.00 | 0.00 |
| ATOM | 1730 | CD2  | LEU | X | 111 | 46.962 | 52.414 | 31.583 | 0.00 | 0.00 |
| ATOM | 1731 | HD21 | LEU | X | 111 | 47.974 | 52.746 | 31.818 | 0.00 | 0.00 |
| ATOM | 1732 | HD22 | LEU | X | 111 | 46.760 | 51.628 | 32.311 | 0.00 | 0.00 |
| ATOM | 1733 | HD23 | LEU | X | 111 | 46.830 | 52.075 | 30.556 | 0.00 | 0.00 |
| ATOM | 1734 | C    | LEU | X | 111 | 45.810 | 55.247 | 35.491 | 0.00 | 0.00 |
| ATOM | 1735 | O    | LEU | X | 111 | 46.721 | 56.012 | 35.681 | 0.00 | 0.00 |
| ATOM | 1736 | N    | VAL | X | 112 | 45.215 | 54.459 | 36.368 | 0.00 | 0.00 |
| ATOM | 1737 | H    | VAL | X | 112 | 44.420 | 53.920 | 36.054 | 0.00 | 0.00 |
| ATOM | 1738 | CA   | VAL | X | 112 | 45.632 | 54.481 | 37.815 | 0.00 | 0.00 |
| ATOM | 1739 | HA   | VAL | X | 112 | 46.368 | 55.277 | 37.925 | 0.00 | 0.00 |
| ATOM | 1740 | CB   | VAL | X | 112 | 44.440 | 54.913 | 38.758 | 0.00 | 0.00 |
| ATOM | 1741 | HB   | VAL | X | 112 | 43.751 | 54.074 | 38.856 | 0.00 | 0.00 |
| ATOM | 1742 | CG1  | VAL | X | 112 | 45.033 | 55.334 | 40.142 | 0.00 | 0.00 |
| ATOM | 1743 | HG11 | VAL | X | 112 | 45.521 | 54.411 | 40.454 | 0.00 | 0.00 |
| ATOM | 1744 | HG12 | VAL | X | 112 | 45.730 | 56.165 | 40.036 | 0.00 | 0.00 |
| ATOM | 1745 | HG13 | VAL | X | 112 | 44.195 | 55.643 | 40.766 | 0.00 | 0.00 |
| ATOM | 1746 | CG2  | VAL | X | 112 | 43.547 | 56.096 | 38.141 | 0.00 | 0.00 |
| ATOM | 1747 | HG21 | VAL | X | 112 | 43.027 | 55.681 | 37.278 | 0.00 | 0.00 |
| ATOM | 1748 | HG22 | VAL | X | 112 | 42.695 | 56.140 | 38.819 | 0.00 | 0.00 |
| ATOM | 1749 | HG23 | VAL | X | 112 | 43.969 | 57.100 | 38.204 | 0.00 | 0.00 |
| ATOM | 1750 | C    | VAL | X | 112 | 46.149 | 53.104 | 38.251 | 0.00 | 0.00 |
| ATOM | 1751 | O    | VAL | X | 112 | 45.384 | 52.174 | 38.371 | 0.00 | 0.00 |
| ATOM | 1752 | N    | TRP | X | 113 | 47.381 | 53.165 | 38.640 | 0.00 | 0.00 |
| ATOM | 1753 | H    | TRP | X | 113 | 47.916 | 54.015 | 38.536 | 0.00 | 0.00 |
| ATOM | 1754 | CA   | TRP | X | 113 | 48.067 | 51.858 | 38.973 | 0.00 | 0.00 |

|      |      |      |     |   |     |        |        |        |      |      |
|------|------|------|-----|---|-----|--------|--------|--------|------|------|
| ATOM | 1755 | HA   | TRP | X | 113 | 47.682 | 51.075 | 38.320 | 0.00 | 0.00 |
| ATOM | 1756 | CB   | TRP | X | 113 | 49.554 | 51.873 | 38.647 | 0.00 | 0.00 |
| ATOM | 1757 | HB2  | TRP | X | 113 | 49.631 | 52.123 | 37.589 | 0.00 | 0.00 |
| ATOM | 1758 | HB3  | TRP | X | 113 | 49.991 | 52.633 | 39.294 | 0.00 | 0.00 |
| ATOM | 1759 | CG   | TRP | X | 113 | 50.311 | 50.650 | 39.022 | 0.00 | 0.00 |
| ATOM | 1760 | CD1  | TRP | X | 113 | 51.160 | 50.622 | 40.071 | 0.00 | 0.00 |
| ATOM | 1761 | HD1  | TRP | X | 113 | 51.433 | 51.477 | 40.673 | 0.00 | 0.00 |
| ATOM | 1762 | NE1  | TRP | X | 113 | 51.538 | 49.368 | 40.261 | 0.00 | 0.00 |
| ATOM | 1763 | HE1  | TRP | X | 113 | 52.149 | 49.122 | 41.026 | 0.00 | 0.00 |
| ATOM | 1764 | CE2  | TRP | X | 113 | 51.029 | 48.509 | 39.317 | 0.00 | 0.00 |
| ATOM | 1765 | CZ2  | TRP | X | 113 | 51.092 | 47.121 | 39.084 | 0.00 | 0.00 |
| ATOM | 1766 | HZ2  | TRP | X | 113 | 51.690 | 46.450 | 39.684 | 0.00 | 0.00 |
| ATOM | 1767 | CH2  | TRP | X | 113 | 50.399 | 46.572 | 38.070 | 0.00 | 0.00 |
| ATOM | 1768 | HH2  | TRP | X | 113 | 50.281 | 45.509 | 37.918 | 0.00 | 0.00 |
| ATOM | 1769 | CZ3  | TRP | X | 113 | 49.541 | 47.357 | 37.284 | 0.00 | 0.00 |
| ATOM | 1770 | HZ3  | TRP | X | 113 | 49.038 | 46.897 | 36.446 | 0.00 | 0.00 |
| ATOM | 1771 | CE3  | TRP | X | 113 | 49.403 | 48.778 | 37.479 | 0.00 | 0.00 |
| ATOM | 1772 | HE3  | TRP | X | 113 | 48.686 | 49.300 | 36.863 | 0.00 | 0.00 |
| ATOM | 1773 | CD2  | TRP | X | 113 | 50.199 | 49.363 | 38.494 | 0.00 | 0.00 |
| ATOM | 1774 | C    | TRP | X | 113 | 47.879 | 51.413 | 40.459 | 0.00 | 0.00 |
| ATOM | 1775 | O    | TRP | X | 113 | 48.021 | 52.215 | 41.408 | 0.00 | 0.00 |
| ATOM | 1776 | N    | ILE | X | 114 | 47.548 | 50.142 | 40.713 | 0.00 | 0.00 |
| ATOM | 1777 | H    | ILE | X | 114 | 47.564 | 49.498 | 39.936 | 0.00 | 0.00 |
| ATOM | 1778 | CA   | ILE | X | 114 | 47.408 | 49.483 | 42.037 | 0.00 | 0.00 |
| ATOM | 1779 | HA   | ILE | X | 114 | 47.946 | 50.086 | 42.769 | 0.00 | 0.00 |
| ATOM | 1780 | CB   | ILE | X | 114 | 45.909 | 49.435 | 42.308 | 0.00 | 0.00 |
| ATOM | 1781 | HB   | ILE | X | 114 | 45.546 | 48.768 | 41.526 | 0.00 | 0.00 |
| ATOM | 1782 | CG2  | ILE | X | 114 | 45.640 | 48.806 | 43.681 | 0.00 | 0.00 |
| ATOM | 1783 | HG21 | ILE | X | 114 | 44.584 | 48.590 | 43.844 | 0.00 | 0.00 |
| ATOM | 1784 | HG22 | ILE | X | 114 | 46.020 | 47.786 | 43.736 | 0.00 | 0.00 |
| ATOM | 1785 | HG23 | ILE | X | 114 | 45.971 | 49.496 | 44.456 | 0.00 | 0.00 |
| ATOM | 1786 | CG1  | ILE | X | 114 | 45.127 | 50.727 | 42.228 | 0.00 | 0.00 |
| ATOM | 1787 | HG12 | ILE | X | 114 | 44.967 | 51.064 | 43.252 | 0.00 | 0.00 |
| ATOM | 1788 | HG13 | ILE | X | 114 | 45.746 | 51.435 | 41.677 | 0.00 | 0.00 |
| ATOM | 1789 | CD1  | ILE | X | 114 | 43.807 | 50.486 | 41.404 | 0.00 | 0.00 |
| ATOM | 1790 | HD11 | ILE | X | 114 | 43.898 | 50.260 | 40.342 | 0.00 | 0.00 |
| ATOM | 1791 | HD12 | ILE | X | 114 | 43.223 | 49.715 | 41.908 | 0.00 | 0.00 |
| ATOM | 1792 | HD13 | ILE | X | 114 | 43.089 | 51.306 | 41.442 | 0.00 | 0.00 |
| ATOM | 1793 | C    | ILE | X | 114 | 48.082 | 48.108 | 42.025 | 0.00 | 0.00 |
| ATOM | 1794 | O    | ILE | X | 114 | 47.685 | 47.258 | 41.275 | 0.00 | 0.00 |
| ATOM | 1795 | N    | TYR | X | 115 | 49.066 | 47.884 | 42.889 | 0.00 | 0.00 |
| ATOM | 1796 | H    | TYR | X | 115 | 49.216 | 48.542 | 43.640 | 0.00 | 0.00 |
| ATOM | 1797 | CA   | TYR | X | 115 | 50.015 | 46.828 | 42.882 | 0.00 | 0.00 |
| ATOM | 1798 | HA   | TYR | X | 115 | 50.052 | 46.424 | 41.870 | 0.00 | 0.00 |
| ATOM | 1799 | CB   | TYR | X | 115 | 51.457 | 47.373 | 43.305 | 0.00 | 0.00 |
| ATOM | 1800 | HB2  | TYR | X | 115 | 52.188 | 46.567 | 43.259 | 0.00 | 0.00 |
| ATOM | 1801 | HB3  | TYR | X | 115 | 51.835 | 47.943 | 42.456 | 0.00 | 0.00 |
| ATOM | 1802 | CG   | TYR | X | 115 | 51.439 | 48.128 | 44.646 | 0.00 | 0.00 |
| ATOM | 1803 | CD1  | TYR | X | 115 | 51.224 | 47.402 | 45.809 | 0.00 | 0.00 |
| ATOM | 1804 | HD1  | TYR | X | 115 | 51.236 | 46.324 | 45.739 | 0.00 | 0.00 |
| ATOM | 1805 | CE1  | TYR | X | 115 | 51.077 | 48.056 | 47.069 | 0.00 | 0.00 |
| ATOM | 1806 | HE1  | TYR | X | 115 | 50.805 | 47.554 | 47.986 | 0.00 | 0.00 |
| ATOM | 1807 | CZ   | TYR | X | 115 | 51.276 | 49.448 | 47.118 | 0.00 | 0.00 |
| ATOM | 1808 | OH   | TYR | X | 115 | 51.131 | 50.204 | 48.198 | 0.00 | 0.00 |
| ATOM | 1809 | HH   | TYR | X | 115 | 51.176 | 49.620 | 48.959 | 0.00 | 0.00 |
| ATOM | 1810 | CE2  | TYR | X | 115 | 51.532 | 50.162 | 45.926 | 0.00 | 0.00 |
| ATOM | 1811 | HE2  | TYR | X | 115 | 51.650 | 51.233 | 45.993 | 0.00 | 0.00 |
| ATOM | 1812 | CD2  | TYR | X | 115 | 51.588 | 49.507 | 44.684 | 0.00 | 0.00 |
| ATOM | 1813 | HD2  | TYR | X | 115 | 51.793 | 49.991 | 43.740 | 0.00 | 0.00 |
| ATOM | 1814 | C    | TYR | X | 115 | 49.578 | 45.596 | 43.763 | 0.00 | 0.00 |
| ATOM | 1815 | O    | TYR | X | 115 | 48.893 | 45.638 | 44.784 | 0.00 | 0.00 |
| ATOM | 1816 | N    | GLY | X | 116 | 50.135 | 44.451 | 43.409 | 0.00 | 0.00 |
| ATOM | 1817 | H    | GLY | X | 116 | 50.525 | 44.493 | 42.478 | 0.00 | 0.00 |
| ATOM | 1818 | CA   | GLY | X | 116 | 50.249 | 43.098 | 44.046 | 0.00 | 0.00 |
| ATOM | 1819 | HA2  | GLY | X | 116 | 49.354 | 42.614 | 44.411 | 0.00 | 0.00 |
| ATOM | 1820 | HA3  | GLY | X | 116 | 50.521 | 42.410 | 43.198 | 0.00 | 0.00 |
| ATOM | 1821 | C    | GLY | X | 116 | 51.184 | 42.989 | 45.177 | 0.00 | 0.00 |
| ATOM | 1822 | O    | GLY | X | 116 | 51.568 | 43.956 | 45.798 | 0.00 | 0.00 |
| ATOM | 1823 | N    | GLY | X | 117 | 51.540 | 41.748 | 45.474 | 0.00 | 0.00 |
| ATOM | 1824 | H    | GLY | X | 117 | 50.976 | 41.073 | 44.978 | 0.00 | 0.00 |

|      |      |     |     |   |     |        |        |        |      |      |
|------|------|-----|-----|---|-----|--------|--------|--------|------|------|
| ATOM | 1825 | CA  | GLY | X | 117 | 52.345 | 41.311 | 46.598 | 0.00 | 0.00 |
| ATOM | 1826 | HA2 | GLY | X | 117 | 53.075 | 40.534 | 46.415 | 0.00 | 0.00 |
| ATOM | 1827 | HA3 | GLY | X | 117 | 52.937 | 42.145 | 47.027 | 0.00 | 0.00 |
| ATOM | 1828 | C   | GLY | X | 117 | 51.557 | 40.768 | 47.777 | 0.00 | 0.00 |
| ATOM | 1829 | O   | GLY | X | 117 | 52.011 | 40.969 | 48.902 | 0.00 | 0.00 |
| ATOM | 1830 | N   | GLY | X | 118 | 50.442 | 40.081 | 47.552 | 0.00 | 0.00 |
| ATOM | 1831 | H   | GLY | X | 118 | 50.136 | 40.019 | 46.591 | 0.00 | 0.00 |
| ATOM | 1832 | CA  | GLY | X | 118 | 49.745 | 39.217 | 48.556 | 0.00 | 0.00 |
| ATOM | 1833 | HA2 | GLY | X | 118 | 49.225 | 38.544 | 47.952 | 0.00 | 0.00 |
| ATOM | 1834 | HA3 | GLY | X | 118 | 50.424 | 38.699 | 49.211 | 0.00 | 0.00 |
| ATOM | 1835 | C   | GLY | X | 118 | 48.694 | 39.916 | 49.389 | 0.00 | 0.00 |
| ATOM | 1836 | O   | GLY | X | 118 | 47.979 | 39.224 | 50.120 | 0.00 | 0.00 |
| ATOM | 1837 | N   | PHE | X | 119 | 48.598 | 41.282 | 49.327 | 0.00 | 0.00 |
| ATOM | 1838 | H   | PHE | X | 119 | 49.198 | 41.675 | 48.616 | 0.00 | 0.00 |
| ATOM | 1839 | CA  | PHE | X | 119 | 48.042 | 42.171 | 50.366 | 0.00 | 0.00 |
| ATOM | 1840 | HA  | PHE | X | 119 | 48.169 | 43.185 | 49.986 | 0.00 | 0.00 |
| ATOM | 1841 | CB  | PHE | X | 119 | 46.534 | 41.818 | 50.678 | 0.00 | 0.00 |
| ATOM | 1842 | HB2 | PHE | X | 119 | 46.503 | 40.894 | 51.257 | 0.00 | 0.00 |
| ATOM | 1843 | HB3 | PHE | X | 119 | 46.103 | 42.574 | 51.334 | 0.00 | 0.00 |
| ATOM | 1844 | CG  | PHE | X | 119 | 45.606 | 41.741 | 49.502 | 0.00 | 0.00 |
| ATOM | 1845 | CD1 | PHE | X | 119 | 45.102 | 42.865 | 48.931 | 0.00 | 0.00 |
| ATOM | 1846 | HD1 | PHE | X | 119 | 45.567 | 43.825 | 49.100 | 0.00 | 0.00 |
| ATOM | 1847 | CE1 | PHE | X | 119 | 44.044 | 42.789 | 47.961 | 0.00 | 0.00 |
| ATOM | 1848 | HE1 | PHE | X | 119 | 43.580 | 43.671 | 47.543 | 0.00 | 0.00 |
| ATOM | 1849 | CZ  | PHE | X | 119 | 43.460 | 41.540 | 47.745 | 0.00 | 0.00 |
| ATOM | 1850 | HZ  | PHE | X | 119 | 42.638 | 41.506 | 47.045 | 0.00 | 0.00 |
| ATOM | 1851 | CE2 | PHE | X | 119 | 43.984 | 40.370 | 48.357 | 0.00 | 0.00 |
| ATOM | 1852 | HE2 | PHE | X | 119 | 43.485 | 39.469 | 48.031 | 0.00 | 0.00 |
| ATOM | 1853 | CD2 | PHE | X | 119 | 45.063 | 40.480 | 49.211 | 0.00 | 0.00 |
| ATOM | 1854 | HD2 | PHE | X | 119 | 45.475 | 39.572 | 49.627 | 0.00 | 0.00 |
| ATOM | 1855 | C   | PHE | X | 119 | 48.924 | 42.148 | 51.631 | 0.00 | 0.00 |
| ATOM | 1856 | O   | PHE | X | 119 | 48.465 | 42.763 | 52.568 | 0.00 | 0.00 |
| ATOM | 1857 | N   | TYR | X | 120 | 50.106 | 41.546 | 51.639 | 0.00 | 0.00 |
| ATOM | 1858 | H   | TYR | X | 120 | 50.517 | 41.125 | 50.818 | 0.00 | 0.00 |
| ATOM | 1859 | CA  | TYR | X | 120 | 50.979 | 41.602 | 52.795 | 0.00 | 0.00 |
| ATOM | 1860 | HA  | TYR | X | 120 | 50.414 | 42.136 | 53.559 | 0.00 | 0.00 |
| ATOM | 1861 | CB  | TYR | X | 120 | 51.128 | 40.193 | 53.359 | 0.00 | 0.00 |
| ATOM | 1862 | HB2 | TYR | X | 120 | 51.272 | 40.261 | 54.437 | 0.00 | 0.00 |
| ATOM | 1863 | HB3 | TYR | X | 120 | 50.238 | 39.563 | 53.353 | 0.00 | 0.00 |
| ATOM | 1864 | CG  | TYR | X | 120 | 52.303 | 39.348 | 52.851 | 0.00 | 0.00 |
| ATOM | 1865 | CD1 | TYR | X | 120 | 53.251 | 38.873 | 53.789 | 0.00 | 0.00 |
| ATOM | 1866 | HD1 | TYR | X | 120 | 53.081 | 39.071 | 54.837 | 0.00 | 0.00 |
| ATOM | 1867 | CE1 | TYR | X | 120 | 54.426 | 38.280 | 53.284 | 0.00 | 0.00 |
| ATOM | 1868 | HE1 | TYR | X | 120 | 55.232 | 38.031 | 53.958 | 0.00 | 0.00 |
| ATOM | 1869 | CZ  | TYR | X | 120 | 54.538 | 38.050 | 51.862 | 0.00 | 0.00 |
| ATOM | 1870 | OH  | TYR | X | 120 | 55.714 | 37.385 | 51.520 | 0.00 | 0.00 |
| ATOM | 1871 | HH  | TYR | X | 120 | 56.224 | 37.136 | 52.295 | 0.00 | 0.00 |
| ATOM | 1872 | CE2 | TYR | X | 120 | 53.582 | 38.398 | 50.904 | 0.00 | 0.00 |
| ATOM | 1873 | HE2 | TYR | X | 120 | 53.693 | 38.264 | 49.838 | 0.00 | 0.00 |
| ATOM | 1874 | CD2 | TYR | X | 120 | 52.509 | 39.165 | 51.410 | 0.00 | 0.00 |
| ATOM | 1875 | HD2 | TYR | X | 120 | 51.780 | 39.474 | 50.675 | 0.00 | 0.00 |
| ATOM | 1876 | C   | TYR | X | 120 | 52.322 | 42.366 | 52.665 | 0.00 | 0.00 |
| ATOM | 1877 | O   | TYR | X | 120 | 53.240 | 42.288 | 53.485 | 0.00 | 0.00 |
| ATOM | 1878 | N   | SER | X | 121 | 52.589 | 42.958 | 51.469 | 0.00 | 0.00 |
| ATOM | 1879 | H   | SER | X | 121 | 51.923 | 42.914 | 50.711 | 0.00 | 0.00 |
| ATOM | 1880 | CA  | SER | X | 121 | 53.806 | 43.529 | 50.958 | 0.00 | 0.00 |
| ATOM | 1881 | HA  | SER | X | 121 | 54.173 | 44.218 | 51.719 | 0.00 | 0.00 |
| ATOM | 1882 | CB  | SER | X | 121 | 54.931 | 42.500 | 50.741 | 0.00 | 0.00 |
| ATOM | 1883 | HB2 | SER | X | 121 | 55.888 | 42.967 | 50.507 | 0.00 | 0.00 |
| ATOM | 1884 | HB3 | SER | X | 121 | 54.988 | 41.926 | 51.667 | 0.00 | 0.00 |
| ATOM | 1885 | OG  | SER | X | 121 | 54.593 | 41.362 | 49.910 | 0.00 | 0.00 |
| ATOM | 1886 | HG  | SER | X | 121 | 53.667 | 41.380 | 49.657 | 0.00 | 0.00 |
| ATOM | 1887 | C   | SER | X | 121 | 53.422 | 44.324 | 49.671 | 0.00 | 0.00 |
| ATOM | 1888 | O   | SER | X | 121 | 52.250 | 44.096 | 49.292 | 0.00 | 0.00 |
| ATOM | 1889 | N   | GLY | X | 122 | 54.315 | 45.021 | 48.988 | 0.00 | 0.00 |
| ATOM | 1890 | H   | GLY | X | 122 | 55.267 | 44.748 | 49.191 | 0.00 | 0.00 |
| ATOM | 1891 | CA  | GLY | X | 122 | 54.105 | 45.797 | 47.767 | 0.00 | 0.00 |
| ATOM | 1892 | HA2 | GLY | X | 122 | 54.840 | 45.553 | 47.009 | 0.00 | 0.00 |
| ATOM | 1893 | HA3 | GLY | X | 122 | 53.061 | 45.575 | 47.414 | 0.00 | 0.00 |
| ATOM | 1894 | C   | GLY | X | 122 | 54.309 | 47.327 | 48.070 | 0.00 | 0.00 |

|      |      |      |     |   |     |        |        |        |      |      |
|------|------|------|-----|---|-----|--------|--------|--------|------|------|
| ATOM | 1895 | O    | GLY | X | 122 | 54.100 | 47.808 | 49.185 | 0.00 | 0.00 |
| ATOM | 1896 | N    | ALA | X | 123 | 54.838 | 48.051 | 47.094 | 0.00 | 0.00 |
| ATOM | 1897 | H    | ALA | X | 123 | 54.881 | 47.687 | 46.153 | 0.00 | 0.00 |
| ATOM | 1898 | CA   | ALA | X | 123 | 55.261 | 49.436 | 47.210 | 0.00 | 0.00 |
| ATOM | 1899 | HA   | ALA | X | 123 | 54.614 | 50.006 | 47.876 | 0.00 | 0.00 |
| ATOM | 1900 | CB   | ALA | X | 123 | 56.672 | 49.426 | 47.860 | 0.00 | 0.00 |
| ATOM | 1901 | HB1  | ALA | X | 123 | 57.133 | 50.411 | 47.938 | 0.00 | 0.00 |
| ATOM | 1902 | HB2  | ALA | X | 123 | 56.527 | 49.103 | 48.891 | 0.00 | 0.00 |
| ATOM | 1903 | HB3  | ALA | X | 123 | 57.298 | 48.740 | 47.289 | 0.00 | 0.00 |
| ATOM | 1904 | C    | ALA | X | 123 | 55.288 | 50.102 | 45.799 | 0.00 | 0.00 |
| ATOM | 1905 | O    | ALA | X | 123 | 55.671 | 49.446 | 44.809 | 0.00 | 0.00 |
| ATOM | 1906 | N    | SER | X | 124 | 54.999 | 51.416 | 45.876 | 0.00 | 0.00 |
| ATOM | 1907 | H    | SER | X | 124 | 54.673 | 51.769 | 46.765 | 0.00 | 0.00 |
| ATOM | 1908 | CA   | SER | X | 124 | 54.884 | 52.208 | 44.689 | 0.00 | 0.00 |
| ATOM | 1909 | HA   | SER | X | 124 | 54.164 | 51.724 | 44.028 | 0.00 | 0.00 |
| ATOM | 1910 | CB   | SER | X | 124 | 54.227 | 53.567 | 45.015 | 0.00 | 0.00 |
| ATOM | 1911 | HB2  | SER | X | 124 | 53.459 | 53.459 | 45.782 | 0.00 | 0.00 |
| ATOM | 1912 | HB3  | SER | X | 124 | 55.003 | 54.222 | 45.412 | 0.00 | 0.00 |
| ATOM | 1913 | OG   | SER | X | 124 | 53.618 | 54.299 | 43.985 | 0.00 | 0.00 |
| ATOM | 1914 | HG   | SER | X | 124 | 52.701 | 54.020 | 43.948 | 0.00 | 0.00 |
| ATOM | 1915 | C    | SER | X | 124 | 56.221 | 52.486 | 43.937 | 0.00 | 0.00 |
| ATOM | 1916 | O    | SER | X | 124 | 56.279 | 52.986 | 42.790 | 0.00 | 0.00 |
| ATOM | 1917 | N    | SER | X | 125 | 57.268 | 52.268 | 44.665 | 0.00 | 0.00 |
| ATOM | 1918 | H    | SER | X | 125 | 57.066 | 51.991 | 45.615 | 0.00 | 0.00 |
| ATOM | 1919 | CA   | SER | X | 125 | 58.649 | 52.363 | 44.315 | 0.00 | 0.00 |
| ATOM | 1920 | HA   | SER | X | 125 | 58.742 | 53.238 | 43.673 | 0.00 | 0.00 |
| ATOM | 1921 | CB   | SER | X | 125 | 59.467 | 52.689 | 45.594 | 0.00 | 0.00 |
| ATOM | 1922 | HB2  | SER | X | 125 | 60.530 | 52.813 | 45.387 | 0.00 | 0.00 |
| ATOM | 1923 | HB3  | SER | X | 125 | 59.208 | 53.660 | 46.014 | 0.00 | 0.00 |
| ATOM | 1924 | OG   | SER | X | 125 | 59.077 | 51.727 | 46.602 | 0.00 | 0.00 |
| ATOM | 1925 | HG   | SER | X | 125 | 59.693 | 50.991 | 46.590 | 0.00 | 0.00 |
| ATOM | 1926 | C    | SER | X | 125 | 59.350 | 51.220 | 43.603 | 0.00 | 0.00 |
| ATOM | 1927 | O    | SER | X | 125 | 60.531 | 51.290 | 43.200 | 0.00 | 0.00 |
| ATOM | 1928 | N    | LEU | X | 126 | 58.698 | 50.033 | 43.418 | 0.00 | 0.00 |
| ATOM | 1929 | H    | LEU | X | 126 | 57.692 | 49.984 | 43.490 | 0.00 | 0.00 |
| ATOM | 1930 | CA   | LEU | X | 126 | 59.409 | 48.803 | 43.027 | 0.00 | 0.00 |
| ATOM | 1931 | HA   | LEU | X | 126 | 60.346 | 48.752 | 43.583 | 0.00 | 0.00 |
| ATOM | 1932 | CB   | LEU | X | 126 | 58.512 | 47.650 | 43.437 | 0.00 | 0.00 |
| ATOM | 1933 | HB2  | LEU | X | 126 | 57.506 | 47.745 | 43.029 | 0.00 | 0.00 |
| ATOM | 1934 | HB3  | LEU | X | 126 | 58.955 | 46.744 | 43.021 | 0.00 | 0.00 |
| ATOM | 1935 | CG   | LEU | X | 126 | 58.267 | 47.398 | 44.958 | 0.00 | 0.00 |
| ATOM | 1936 | HG   | LEU | X | 126 | 58.018 | 48.354 | 45.419 | 0.00 | 0.00 |
| ATOM | 1937 | CD1  | LEU | X | 126 | 57.263 | 46.237 | 45.286 | 0.00 | 0.00 |
| ATOM | 1938 | HD11 | LEU | X | 126 | 56.934 | 46.222 | 46.325 | 0.00 | 0.00 |
| ATOM | 1939 | HD12 | LEU | X | 126 | 56.328 | 46.458 | 44.771 | 0.00 | 0.00 |
| ATOM | 1940 | HD13 | LEU | X | 126 | 57.655 | 45.348 | 44.791 | 0.00 | 0.00 |
| ATOM | 1941 | CD2  | LEU | X | 126 | 59.648 | 46.962 | 45.525 | 0.00 | 0.00 |
| ATOM | 1942 | HD21 | LEU | X | 126 | 59.861 | 45.941 | 45.209 | 0.00 | 0.00 |
| ATOM | 1943 | HD22 | LEU | X | 126 | 60.552 | 47.509 | 45.258 | 0.00 | 0.00 |
| ATOM | 1944 | HD23 | LEU | X | 126 | 59.525 | 46.819 | 46.598 | 0.00 | 0.00 |
| ATOM | 1945 | C    | LEU | X | 126 | 59.673 | 48.726 | 41.521 | 0.00 | 0.00 |
| ATOM | 1946 | O    | LEU | X | 126 | 59.142 | 49.485 | 40.731 | 0.00 | 0.00 |
| ATOM | 1947 | N    | ASP | X | 127 | 60.664 | 47.936 | 41.103 | 0.00 | 0.00 |
| ATOM | 1948 | H    | ASP | X | 127 | 61.079 | 47.325 | 41.792 | 0.00 | 0.00 |
| ATOM | 1949 | CA   | ASP | X | 127 | 61.304 | 48.024 | 39.785 | 0.00 | 0.00 |
| ATOM | 1950 | HA   | ASP | X | 127 | 61.508 | 49.089 | 39.677 | 0.00 | 0.00 |
| ATOM | 1951 | CB   | ASP | X | 127 | 62.643 | 47.221 | 39.767 | 0.00 | 0.00 |
| ATOM | 1952 | HB2  | ASP | X | 127 | 63.311 | 47.540 | 40.567 | 0.00 | 0.00 |
| ATOM | 1953 | HB3  | ASP | X | 127 | 62.445 | 46.165 | 39.950 | 0.00 | 0.00 |
| ATOM | 1954 | CG   | ASP | X | 127 | 63.379 | 47.456 | 38.451 | 0.00 | 0.00 |
| ATOM | 1955 | OD1  | ASP | X | 127 | 63.398 | 48.622 | 38.047 | 0.00 | 0.00 |
| ATOM | 1956 | OD2  | ASP | X | 127 | 64.126 | 46.599 | 37.931 | 0.00 | 0.00 |
| ATOM | 1957 | C    | ASP | X | 127 | 60.440 | 47.613 | 38.605 | 0.00 | 0.00 |
| ATOM | 1958 | O    | ASP | X | 127 | 60.630 | 46.509 | 37.999 | 0.00 | 0.00 |
| ATOM | 1959 | N    | VAL | X | 128 | 59.491 | 48.521 | 38.172 | 0.00 | 0.00 |
| ATOM | 1960 | H    | VAL | X | 128 | 59.257 | 49.245 | 38.837 | 0.00 | 0.00 |
| ATOM | 1961 | CA   | VAL | X | 128 | 58.549 | 48.436 | 37.009 | 0.00 | 0.00 |
| ATOM | 1962 | HA   | VAL | X | 128 | 59.080 | 48.564 | 36.066 | 0.00 | 0.00 |
| ATOM | 1963 | CB   | VAL | X | 128 | 57.765 | 47.120 | 36.997 | 0.00 | 0.00 |
| ATOM | 1964 | HB   | VAL | X | 128 | 58.523 | 46.411 | 36.664 | 0.00 | 0.00 |



|      |      |      |     |   |     |        |        |        |      |      |
|------|------|------|-----|---|-----|--------|--------|--------|------|------|
| ATOM | 1965 | CG1  | VAL | X | 128 | 57.211 | 46.683 | 38.339 | 0.00 | 0.00 |
| ATOM | 1966 | HG11 | VAL | X | 128 | 56.323 | 46.078 | 38.156 | 0.00 | 0.00 |
| ATOM | 1967 | HG12 | VAL | X | 128 | 57.829 | 46.021 | 38.946 | 0.00 | 0.00 |
| ATOM | 1968 | HG13 | VAL | X | 128 | 56.965 | 47.520 | 38.992 | 0.00 | 0.00 |
| ATOM | 1969 | CG2  | VAL | X | 128 | 56.759 | 47.086 | 35.824 | 0.00 | 0.00 |
| ATOM | 1970 | HG21 | VAL | X | 128 | 55.904 | 47.728 | 36.040 | 0.00 | 0.00 |
| ATOM | 1971 | HG22 | VAL | X | 128 | 57.146 | 47.401 | 34.855 | 0.00 | 0.00 |
| ATOM | 1972 | HG23 | VAL | X | 128 | 56.396 | 46.062 | 35.734 | 0.00 | 0.00 |
| ATOM | 1973 | C    | VAL | X | 128 | 57.594 | 49.671 | 37.076 | 0.00 | 0.00 |
| ATOM | 1974 | O    | VAL | X | 128 | 57.262 | 50.269 | 36.098 | 0.00 | 0.00 |
| ATOM | 1975 | N    | TYR | X | 129 | 57.243 | 50.139 | 38.294 | 0.00 | 0.00 |
| ATOM | 1976 | H    | TYR | X | 129 | 57.554 | 49.606 | 39.094 | 0.00 | 0.00 |
| ATOM | 1977 | CA   | TYR | X | 129 | 56.130 | 51.111 | 38.531 | 0.00 | 0.00 |
| ATOM | 1978 | HA   | TYR | X | 129 | 55.311 | 50.856 | 37.858 | 0.00 | 0.00 |
| ATOM | 1979 | CB   | TYR | X | 129 | 55.525 | 50.897 | 39.917 | 0.00 | 0.00 |
| ATOM | 1980 | HB2  | TYR | X | 129 | 56.072 | 51.298 | 40.769 | 0.00 | 0.00 |
| ATOM | 1981 | HB3  | TYR | X | 129 | 54.573 | 51.420 | 39.829 | 0.00 | 0.00 |
| ATOM | 1982 | CG   | TYR | X | 129 | 55.031 | 49.491 | 40.292 | 0.00 | 0.00 |
| ATOM | 1983 | CD1  | TYR | X | 129 | 55.129 | 49.101 | 41.627 | 0.00 | 0.00 |
| ATOM | 1984 | HD1  | TYR | X | 129 | 55.425 | 49.822 | 42.374 | 0.00 | 0.00 |
| ATOM | 1985 | CE1  | TYR | X | 129 | 54.725 | 47.836 | 42.072 | 0.00 | 0.00 |
| ATOM | 1986 | HE1  | TYR | X | 129 | 54.924 | 47.577 | 43.101 | 0.00 | 0.00 |
| ATOM | 1987 | CZ   | TYR | X | 129 | 54.282 | 46.836 | 41.186 | 0.00 | 0.00 |
| ATOM | 1988 | OH   | TYR | X | 129 | 53.913 | 45.607 | 41.579 | 0.00 | 0.00 |
| ATOM | 1989 | HH   | TYR | X | 129 | 53.533 | 45.112 | 40.850 | 0.00 | 0.00 |
| ATOM | 1990 | CE2  | TYR | X | 129 | 54.164 | 47.276 | 39.837 | 0.00 | 0.00 |
| ATOM | 1991 | HE2  | TYR | X | 129 | 53.705 | 46.606 | 39.125 | 0.00 | 0.00 |
| ATOM | 1992 | CD2  | TYR | X | 129 | 54.526 | 48.525 | 39.382 | 0.00 | 0.00 |
| ATOM | 1993 | HD2  | TYR | X | 129 | 54.361 | 48.844 | 38.364 | 0.00 | 0.00 |
| ATOM | 1994 | C    | TYR | X | 129 | 56.445 | 52.605 | 38.236 | 0.00 | 0.00 |
| ATOM | 1995 | O    | TYR | X | 129 | 56.278 | 53.482 | 39.090 | 0.00 | 0.00 |
| ATOM | 1996 | N    | ASP | X | 130 | 56.852 | 52.922 | 37.046 | 0.00 | 0.00 |
| ATOM | 1997 | H    | ASP | X | 130 | 56.772 | 52.176 | 36.369 | 0.00 | 0.00 |
| ATOM | 1998 | CA   | ASP | X | 130 | 57.201 | 54.250 | 36.521 | 0.00 | 0.00 |
| ATOM | 1999 | HA   | ASP | X | 130 | 56.778 | 54.987 | 37.203 | 0.00 | 0.00 |
| ATOM | 2000 | CB   | ASP | X | 130 | 58.713 | 54.297 | 36.516 | 0.00 | 0.00 |
| ATOM | 2001 | HB2  | ASP | X | 130 | 59.097 | 54.066 | 37.510 | 0.00 | 0.00 |
| ATOM | 2002 | HB3  | ASP | X | 130 | 59.167 | 53.462 | 35.983 | 0.00 | 0.00 |
| ATOM | 2003 | CG   | ASP | X | 130 | 59.374 | 55.619 | 36.113 | 0.00 | 0.00 |
| ATOM | 2004 | OD1  | ASP | X | 130 | 59.055 | 56.231 | 35.070 | 0.00 | 0.00 |
| ATOM | 2005 | OD2  | ASP | X | 130 | 60.387 | 56.049 | 36.708 | 0.00 | 0.00 |
| ATOM | 2006 | C    | ASP | X | 130 | 56.542 | 54.501 | 35.151 | 0.00 | 0.00 |
| ATOM | 2007 | O    | ASP | X | 130 | 56.838 | 53.748 | 34.208 | 0.00 | 0.00 |
| ATOM | 2008 | N    | GLY | X | 131 | 55.806 | 55.620 | 35.085 | 0.00 | 0.00 |
| ATOM | 2009 | H    | GLY | X | 131 | 55.707 | 56.197 | 35.908 | 0.00 | 0.00 |
| ATOM | 2010 | CA   | GLY | X | 131 | 55.058 | 56.010 | 33.883 | 0.00 | 0.00 |
| ATOM | 2011 | HA2  | GLY | X | 131 | 54.582 | 55.058 | 33.621 | 0.00 | 0.00 |
| ATOM | 2012 | HA3  | GLY | X | 131 | 54.363 | 56.762 | 34.222 | 0.00 | 0.00 |
| ATOM | 2013 | C    | GLY | X | 131 | 55.800 | 56.556 | 32.677 | 0.00 | 0.00 |
| ATOM | 2014 | O    | GLY | X | 131 | 55.057 | 56.899 | 31.765 | 0.00 | 0.00 |
| ATOM | 2015 | N    | ARG | X | 132 | 57.124 | 56.675 | 32.685 | 0.00 | 0.00 |
| ATOM | 2016 | H    | ARG | X | 132 | 57.637 | 56.405 | 33.513 | 0.00 | 0.00 |
| ATOM | 2017 | CA   | ARG | X | 132 | 57.786 | 57.503 | 31.607 | 0.00 | 0.00 |
| ATOM | 2018 | HA   | ARG | X | 132 | 57.255 | 58.455 | 31.600 | 0.00 | 0.00 |
| ATOM | 2019 | CB   | ARG | X | 132 | 59.267 | 57.720 | 31.881 | 0.00 | 0.00 |
| ATOM | 2020 | HB2  | ARG | X | 132 | 59.702 | 58.274 | 31.049 | 0.00 | 0.00 |
| ATOM | 2021 | HB3  | ARG | X | 132 | 59.307 | 58.347 | 32.772 | 0.00 | 0.00 |
| ATOM | 2022 | CG   | ARG | X | 132 | 60.112 | 56.469 | 32.008 | 0.00 | 0.00 |
| ATOM | 2023 | HG2  | ARG | X | 132 | 59.640 | 55.682 | 32.596 | 0.00 | 0.00 |
| ATOM | 2024 | HG3  | ARG | X | 132 | 60.241 | 56.088 | 30.994 | 0.00 | 0.00 |
| ATOM | 2025 | CD   | ARG | X | 132 | 61.486 | 56.920 | 32.602 | 0.00 | 0.00 |
| ATOM | 2026 | HD2  | ARG | X | 132 | 62.093 | 56.039 | 32.397 | 0.00 | 0.00 |
| ATOM | 2027 | HD3  | ARG | X | 132 | 61.820 | 57.772 | 32.009 | 0.00 | 0.00 |
| ATOM | 2028 | NE   | ARG | X | 132 | 61.458 | 57.212 | 34.042 | 0.00 | 0.00 |
| ATOM | 2029 | HE   | ARG | X | 132 | 60.748 | 56.634 | 34.468 | 0.00 | 0.00 |
| ATOM | 2030 | CZ   | ARG | X | 132 | 62.355 | 57.848 | 34.749 | 0.00 | 0.00 |
| ATOM | 2031 | NH1  | ARG | X | 132 | 63.218 | 58.748 | 34.285 | 0.00 | 0.00 |
| ATOM | 2032 | HH11 | ARG | X | 132 | 63.336 | 58.789 | 33.283 | 0.00 | 0.00 |
| ATOM | 2033 | HH12 | ARG | X | 132 | 63.830 | 59.270 | 34.896 | 0.00 | 0.00 |
| ATOM | 2034 | NH2  | ARG | X | 132 | 62.300 | 57.807 | 36.034 | 0.00 | 0.00 |

|      |      |      |     |   |     |        |        |        |      |      |
|------|------|------|-----|---|-----|--------|--------|--------|------|------|
| ATOM | 2035 | HH21 | ARG | X | 132 | 61.514 | 57.328 | 36.451 | 0.00 | 0.00 |
| ATOM | 2036 | HH22 | ARG | X | 132 | 62.938 | 58.363 | 36.584 | 0.00 | 0.00 |
| ATOM | 2037 | C    | ARG | X | 132 | 57.624 | 56.851 | 30.194 | 0.00 | 0.00 |
| ATOM | 2038 | O    | ARG | X | 132 | 57.746 | 57.511 | 29.207 | 0.00 | 0.00 |
| ATOM | 2039 | N    | PHE | X | 133 | 57.413 | 55.548 | 30.093 | 0.00 | 0.00 |
| ATOM | 2040 | H    | PHE | X | 133 | 57.363 | 54.925 | 30.887 | 0.00 | 0.00 |
| ATOM | 2041 | CA   | PHE | X | 133 | 57.316 | 54.864 | 28.768 | 0.00 | 0.00 |
| ATOM | 2042 | HA   | PHE | X | 133 | 58.044 | 55.365 | 28.129 | 0.00 | 0.00 |
| ATOM | 2043 | CB   | PHE | X | 133 | 57.839 | 53.467 | 28.906 | 0.00 | 0.00 |
| ATOM | 2044 | HB2  | PHE | X | 133 | 57.085 | 52.948 | 29.498 | 0.00 | 0.00 |
| ATOM | 2045 | HB3  | PHE | X | 133 | 58.041 | 52.924 | 27.982 | 0.00 | 0.00 |
| ATOM | 2046 | CG   | PHE | X | 133 | 59.233 | 53.461 | 29.539 | 0.00 | 0.00 |
| ATOM | 2047 | CD1  | PHE | X | 133 | 59.423 | 53.031 | 30.840 | 0.00 | 0.00 |
| ATOM | 2048 | HD1  | PHE | X | 133 | 58.551 | 52.527 | 31.231 | 0.00 | 0.00 |
| ATOM | 2049 | CE1  | PHE | X | 133 | 60.693 | 53.105 | 31.453 | 0.00 | 0.00 |
| ATOM | 2050 | HE1  | PHE | X | 133 | 60.867 | 52.715 | 32.445 | 0.00 | 0.00 |
| ATOM | 2051 | CZ   | PHE | X | 133 | 61.836 | 53.571 | 30.745 | 0.00 | 0.00 |
| ATOM | 2052 | HZ   | PHE | X | 133 | 62.852 | 53.471 | 31.096 | 0.00 | 0.00 |
| ATOM | 2053 | CE2  | PHE | X | 133 | 61.628 | 53.971 | 29.388 | 0.00 | 0.00 |
| ATOM | 2054 | HE2  | PHE | X | 133 | 62.424 | 54.346 | 28.761 | 0.00 | 0.00 |
| ATOM | 2055 | CD2  | PHE | X | 133 | 60.361 | 53.928 | 28.766 | 0.00 | 0.00 |
| ATOM | 2056 | HD2  | PHE | X | 133 | 60.307 | 54.244 | 27.734 | 0.00 | 0.00 |
| ATOM | 2057 | C    | PHE | X | 133 | 55.899 | 55.005 | 28.163 | 0.00 | 0.00 |
| ATOM | 2058 | O    | PHE | X | 133 | 55.775 | 55.372 | 26.984 | 0.00 | 0.00 |
| ATOM | 2059 | N    | LEU | X | 134 | 54.824 | 54.696 | 28.953 | 0.00 | 0.00 |
| ATOM | 2060 | H    | LEU | X | 134 | 55.065 | 54.251 | 29.826 | 0.00 | 0.00 |
| ATOM | 2061 | CA   | LEU | X | 134 | 53.367 | 54.977 | 28.609 | 0.00 | 0.00 |
| ATOM | 2062 | HA   | LEU | X | 134 | 53.067 | 54.499 | 27.677 | 0.00 | 0.00 |
| ATOM | 2063 | CB   | LEU | X | 134 | 52.515 | 54.505 | 29.810 | 0.00 | 0.00 |
| ATOM | 2064 | HB2  | LEU | X | 134 | 52.899 | 53.538 | 30.134 | 0.00 | 0.00 |
| ATOM | 2065 | HB3  | LEU | X | 134 | 52.453 | 55.130 | 30.700 | 0.00 | 0.00 |
| ATOM | 2066 | CG   | LEU | X | 134 | 51.034 | 54.361 | 29.487 | 0.00 | 0.00 |
| ATOM | 2067 | HG   | LEU | X | 134 | 50.782 | 55.244 | 28.900 | 0.00 | 0.00 |
| ATOM | 2068 | CD1  | LEU | X | 134 | 50.839 | 53.095 | 28.707 | 0.00 | 0.00 |
| ATOM | 2069 | HD11 | LEU | X | 134 | 51.173 | 53.146 | 27.671 | 0.00 | 0.00 |
| ATOM | 2070 | HD12 | LEU | X | 134 | 51.308 | 52.242 | 29.197 | 0.00 | 0.00 |
| ATOM | 2071 | HD13 | LEU | X | 134 | 49.752 | 53.022 | 28.658 | 0.00 | 0.00 |
| ATOM | 2072 | CD2  | LEU | X | 134 | 50.083 | 54.414 | 30.670 | 0.00 | 0.00 |
| ATOM | 2073 | HD21 | LEU | X | 134 | 49.083 | 54.583 | 30.269 | 0.00 | 0.00 |
| ATOM | 2074 | HD22 | LEU | X | 134 | 50.373 | 53.506 | 31.199 | 0.00 | 0.00 |
| ATOM | 2075 | HD23 | LEU | X | 134 | 50.243 | 55.247 | 31.354 | 0.00 | 0.00 |
| ATOM | 2076 | C    | LEU | X | 134 | 52.957 | 56.461 | 28.410 | 0.00 | 0.00 |
| ATOM | 2077 | O    | LEU | X | 134 | 52.253 | 56.754 | 27.474 | 0.00 | 0.00 |
| ATOM | 2078 | N    | VAL | X | 135 | 53.521 | 57.339 | 29.233 | 0.00 | 0.00 |
| ATOM | 2079 | H    | VAL | X | 135 | 54.114 | 57.012 | 29.983 | 0.00 | 0.00 |
| ATOM | 2080 | CA   | VAL | X | 135 | 53.486 | 58.804 | 28.992 | 0.00 | 0.00 |
| ATOM | 2081 | HA   | VAL | X | 135 | 52.478 | 59.189 | 28.832 | 0.00 | 0.00 |
| ATOM | 2082 | CB   | VAL | X | 135 | 53.920 | 59.482 | 30.325 | 0.00 | 0.00 |
| ATOM | 2083 | HB   | VAL | X | 135 | 54.874 | 59.070 | 30.653 | 0.00 | 0.00 |
| ATOM | 2084 | CG1  | VAL | X | 135 | 54.161 | 61.001 | 30.356 | 0.00 | 0.00 |
| ATOM | 2085 | HG11 | VAL | X | 135 | 53.241 | 61.506 | 30.061 | 0.00 | 0.00 |
| ATOM | 2086 | HG12 | VAL | X | 135 | 54.398 | 61.473 | 31.309 | 0.00 | 0.00 |
| ATOM | 2087 | HG13 | VAL | X | 135 | 54.979 | 61.370 | 29.737 | 0.00 | 0.00 |
| ATOM | 2088 | CG2  | VAL | X | 135 | 52.829 | 59.139 | 31.341 | 0.00 | 0.00 |
| ATOM | 2089 | HG21 | VAL | X | 135 | 53.049 | 59.661 | 32.272 | 0.00 | 0.00 |
| ATOM | 2090 | HG22 | VAL | X | 135 | 51.849 | 59.531 | 31.069 | 0.00 | 0.00 |
| ATOM | 2091 | HG23 | VAL | X | 135 | 52.837 | 58.078 | 31.593 | 0.00 | 0.00 |
| ATOM | 2092 | C    | VAL | X | 135 | 54.318 | 59.246 | 27.743 | 0.00 | 0.00 |
| ATOM | 2093 | O    | VAL | X | 135 | 54.120 | 60.334 | 27.244 | 0.00 | 0.00 |
| ATOM | 2094 | N    | GLN | X | 136 | 55.304 | 58.471 | 27.284 | 0.00 | 0.00 |
| ATOM | 2095 | H    | GLN | X | 136 | 55.373 | 57.542 | 27.673 | 0.00 | 0.00 |
| ATOM | 2096 | CA   | GLN | X | 136 | 56.199 | 58.816 | 26.141 | 0.00 | 0.00 |
| ATOM | 2097 | HA   | GLN | X | 136 | 56.370 | 59.892 | 26.188 | 0.00 | 0.00 |
| ATOM | 2098 | CB   | GLN | X | 136 | 57.585 | 58.069 | 26.192 | 0.00 | 0.00 |
| ATOM | 2099 | HB2  | GLN | X | 136 | 58.069 | 58.520 | 27.058 | 0.00 | 0.00 |
| ATOM | 2100 | HB3  | GLN | X | 136 | 57.481 | 56.986 | 26.260 | 0.00 | 0.00 |
| ATOM | 2101 | CG   | GLN | X | 136 | 58.548 | 58.350 | 25.037 | 0.00 | 0.00 |
| ATOM | 2102 | HG2  | GLN | X | 136 | 58.108 | 58.122 | 24.066 | 0.00 | 0.00 |
| ATOM | 2103 | HG3  | GLN | X | 136 | 58.799 | 59.411 | 25.041 | 0.00 | 0.00 |
| ATOM | 2104 | CD   | GLN | X | 136 | 59.836 | 57.589 | 25.089 | 0.00 | 0.00 |

|      |      |      |     |   |     |        |        |        |      |      |
|------|------|------|-----|---|-----|--------|--------|--------|------|------|
| ATOM | 2105 | OE1  | GLN | X | 136 | 60.857 | 58.106 | 25.462 | 0.00 | 0.00 |
| ATOM | 2106 | NE2  | GLN | X | 136 | 59.800 | 56.310 | 24.700 | 0.00 | 0.00 |
| ATOM | 2107 | HE21 | GLN | X | 136 | 60.675 | 55.806 | 24.734 | 0.00 | 0.00 |
| ATOM | 2108 | HE22 | GLN | X | 136 | 59.087 | 55.831 | 24.167 | 0.00 | 0.00 |
| ATOM | 2109 | C    | GLN | X | 136 | 55.495 | 58.338 | 24.794 | 0.00 | 0.00 |
| ATOM | 2110 | O    | GLN | X | 136 | 55.460 | 59.126 | 23.861 | 0.00 | 0.00 |
| ATOM | 2111 | N    | ALA | X | 137 | 54.948 | 57.091 | 24.659 | 0.00 | 0.00 |
| ATOM | 2112 | H    | ALA | X | 137 | 55.034 | 56.485 | 25.463 | 0.00 | 0.00 |
| ATOM | 2113 | CA   | ALA | X | 137 | 54.401 | 56.339 | 23.461 | 0.00 | 0.00 |
| ATOM | 2114 | HA   | ALA | X | 137 | 55.061 | 56.617 | 22.639 | 0.00 | 0.00 |
| ATOM | 2115 | CB   | ALA | X | 137 | 54.553 | 54.832 | 23.801 | 0.00 | 0.00 |
| ATOM | 2116 | HB1  | ALA | X | 137 | 53.816 | 54.529 | 24.545 | 0.00 | 0.00 |
| ATOM | 2117 | HB2  | ALA | X | 137 | 54.313 | 54.174 | 22.966 | 0.00 | 0.00 |
| ATOM | 2118 | HB3  | ALA | X | 137 | 55.553 | 54.577 | 24.152 | 0.00 | 0.00 |
| ATOM | 2119 | C    | ALA | X | 137 | 52.985 | 56.552 | 23.029 | 0.00 | 0.00 |
| ATOM | 2120 | O    | ALA | X | 137 | 52.587 | 56.710 | 21.824 | 0.00 | 0.00 |
| ATOM | 2121 | N    | GLU | X | 138 | 52.123 | 56.629 | 24.031 | 0.00 | 0.00 |
| ATOM | 2122 | H    | GLU | X | 138 | 52.530 | 56.626 | 24.955 | 0.00 | 0.00 |
| ATOM | 2123 | CA   | GLU | X | 138 | 50.668 | 56.815 | 23.900 | 0.00 | 0.00 |
| ATOM | 2124 | HA   | GLU | X | 138 | 50.321 | 56.910 | 22.872 | 0.00 | 0.00 |
| ATOM | 2125 | CB   | GLU | X | 138 | 50.077 | 55.597 | 24.607 | 0.00 | 0.00 |
| ATOM | 2126 | HB2  | GLU | X | 138 | 50.618 | 55.517 | 25.549 | 0.00 | 0.00 |
| ATOM | 2127 | HB3  | GLU | X | 138 | 49.007 | 55.694 | 24.794 | 0.00 | 0.00 |
| ATOM | 2128 | CG   | GLU | X | 138 | 50.355 | 54.283 | 23.778 | 0.00 | 0.00 |
| ATOM | 2129 | HG2  | GLU | X | 138 | 51.440 | 54.194 | 23.711 | 0.00 | 0.00 |
| ATOM | 2130 | HG3  | GLU | X | 138 | 49.940 | 53.476 | 24.382 | 0.00 | 0.00 |
| ATOM | 2131 | CD   | GLU | X | 138 | 49.854 | 54.270 | 22.390 | 0.00 | 0.00 |
| ATOM | 2132 | OE1  | GLU | X | 138 | 48.985 | 55.098 | 22.007 | 0.00 | 0.00 |
| ATOM | 2133 | OE2  | GLU | X | 138 | 50.440 | 53.534 | 21.570 | 0.00 | 0.00 |
| ATOM | 2134 | C    | GLU | X | 138 | 50.194 | 58.033 | 24.655 | 0.00 | 0.00 |
| ATOM | 2135 | O    | GLU | X | 138 | 49.037 | 58.452 | 24.481 | 0.00 | 0.00 |
| ATOM | 2136 | N    | ARG | X | 139 | 51.026 | 58.677 | 25.491 | 0.00 | 0.00 |
| ATOM | 2137 | H    | ARG | X | 139 | 51.912 | 58.233 | 25.690 | 0.00 | 0.00 |
| ATOM | 2138 | CA   | ARG | X | 139 | 50.791 | 59.970 | 26.129 | 0.00 | 0.00 |
| ATOM | 2139 | HA   | ARG | X | 139 | 51.762 | 60.131 | 26.598 | 0.00 | 0.00 |
| ATOM | 2140 | CB   | ARG | X | 139 | 50.539 | 61.047 | 25.103 | 0.00 | 0.00 |
| ATOM | 2141 | HB2  | ARG | X | 139 | 49.674 | 60.801 | 24.488 | 0.00 | 0.00 |
| ATOM | 2142 | HB3  | ARG | X | 139 | 50.301 | 61.938 | 25.686 | 0.00 | 0.00 |
| ATOM | 2143 | CG   | ARG | X | 139 | 51.742 | 61.389 | 24.259 | 0.00 | 0.00 |
| ATOM | 2144 | HG2  | ARG | X | 139 | 52.678 | 61.328 | 24.815 | 0.00 | 0.00 |
| ATOM | 2145 | HG3  | ARG | X | 139 | 51.716 | 60.758 | 23.371 | 0.00 | 0.00 |
| ATOM | 2146 | CD   | ARG | X | 139 | 51.519 | 62.792 | 23.697 | 0.00 | 0.00 |
| ATOM | 2147 | HD2  | ARG | X | 139 | 50.554 | 62.846 | 23.193 | 0.00 | 0.00 |
| ATOM | 2148 | HD3  | ARG | X | 139 | 51.509 | 63.408 | 24.596 | 0.00 | 0.00 |
| ATOM | 2149 | NE   | ARG | X | 139 | 52.701 | 63.173 | 22.914 | 0.00 | 0.00 |
| ATOM | 2150 | HE   | ARG | X | 139 | 53.345 | 62.433 | 22.671 | 0.00 | 0.00 |
| ATOM | 2151 | CZ   | ARG | X | 139 | 52.941 | 64.328 | 22.287 | 0.00 | 0.00 |
| ATOM | 2152 | NH1  | ARG | X | 139 | 52.137 | 65.301 | 22.231 | 0.00 | 0.00 |
| ATOM | 2153 | HH11 | ARG | X | 139 | 51.243 | 65.118 | 22.663 | 0.00 | 0.00 |
| ATOM | 2154 | HH12 | ARG | X | 139 | 52.204 | 65.984 | 21.490 | 0.00 | 0.00 |
| ATOM | 2155 | NH2  | ARG | X | 139 | 54.046 | 64.390 | 21.592 | 0.00 | 0.00 |
| ATOM | 2156 | HH21 | ARG | X | 139 | 54.683 | 63.606 | 21.565 | 0.00 | 0.00 |
| ATOM | 2157 | HH22 | ARG | X | 139 | 54.401 | 65.237 | 21.171 | 0.00 | 0.00 |
| ATOM | 2158 | C    | ARG | X | 139 | 49.748 | 59.817 | 27.315 | 0.00 | 0.00 |
| ATOM | 2159 | O    | ARG | X | 139 | 49.603 | 60.893 | 27.907 | 0.00 | 0.00 |
| ATOM | 2160 | N    | THR | X | 140 | 49.035 | 58.736 | 27.583 | 0.00 | 0.00 |
| ATOM | 2161 | H    | THR | X | 140 | 49.295 | 57.958 | 26.993 | 0.00 | 0.00 |
| ATOM | 2162 | CA   | THR | X | 140 | 47.884 | 58.626 | 28.546 | 0.00 | 0.00 |
| ATOM | 2163 | HA   | THR | X | 140 | 47.167 | 59.422 | 28.348 | 0.00 | 0.00 |
| ATOM | 2164 | CB   | THR | X | 140 | 47.101 | 57.313 | 28.310 | 0.00 | 0.00 |
| ATOM | 2165 | HB   | THR | X | 140 | 46.378 | 57.148 | 29.109 | 0.00 | 0.00 |
| ATOM | 2166 | CG2  | THR | X | 140 | 46.254 | 57.391 | 27.082 | 0.00 | 0.00 |
| ATOM | 2167 | HG21 | THR | X | 140 | 46.655 | 57.034 | 26.133 | 0.00 | 0.00 |
| ATOM | 2168 | HG22 | THR | X | 140 | 45.376 | 56.755 | 27.196 | 0.00 | 0.00 |
| ATOM | 2169 | HG23 | THR | X | 140 | 45.793 | 58.368 | 26.938 | 0.00 | 0.00 |
| ATOM | 2170 | OG1  | THR | X | 140 | 47.966 | 56.238 | 28.091 | 0.00 | 0.00 |
| ATOM | 2171 | HG1  | THR | X | 140 | 48.660 | 56.203 | 28.753 | 0.00 | 0.00 |
| ATOM | 2172 | C    | THR | X | 140 | 48.414 | 58.724 | 30.022 | 0.00 | 0.00 |
| ATOM | 2173 | O    | THR | X | 140 | 49.490 | 58.259 | 30.307 | 0.00 | 0.00 |
| ATOM | 2174 | N    | VAL | X | 141 | 47.676 | 59.484 | 30.934 | 0.00 | 0.00 |

|      |      |      |     |   |     |        |        |        |      |      |
|------|------|------|-----|---|-----|--------|--------|--------|------|------|
| ATOM | 2175 | H    | VAL | X | 141 | 46.699 | 59.704 | 30.805 | 0.00 | 0.00 |
| ATOM | 2176 | CA   | VAL | X | 141 | 48.362 | 59.999 | 32.108 | 0.00 | 0.00 |
| ATOM | 2177 | HA   | VAL | X | 141 | 49.305 | 60.315 | 31.662 | 0.00 | 0.00 |
| ATOM | 2178 | CB   | VAL | X | 141 | 47.624 | 61.225 | 32.697 | 0.00 | 0.00 |
| ATOM | 2179 | HB   | VAL | X | 141 | 46.580 | 60.935 | 32.814 | 0.00 | 0.00 |
| ATOM | 2180 | CG1  | VAL | X | 141 | 48.200 | 61.711 | 34.014 | 0.00 | 0.00 |
| ATOM | 2181 | HG11 | VAL | X | 141 | 47.569 | 62.545 | 34.321 | 0.00 | 0.00 |
| ATOM | 2182 | HG12 | VAL | X | 141 | 48.171 | 60.919 | 34.762 | 0.00 | 0.00 |
| ATOM | 2183 | HG13 | VAL | X | 141 | 49.241 | 62.027 | 33.941 | 0.00 | 0.00 |
| ATOM | 2184 | CG2  | VAL | X | 141 | 47.634 | 62.369 | 31.626 | 0.00 | 0.00 |
| ATOM | 2185 | HG21 | VAL | X | 141 | 47.191 | 61.992 | 30.704 | 0.00 | 0.00 |
| ATOM | 2186 | HG22 | VAL | X | 141 | 46.983 | 63.201 | 31.896 | 0.00 | 0.00 |
| ATOM | 2187 | HG23 | VAL | X | 141 | 48.598 | 62.790 | 31.340 | 0.00 | 0.00 |
| ATOM | 2188 | C    | VAL | X | 141 | 48.549 | 58.864 | 33.132 | 0.00 | 0.00 |
| ATOM | 2189 | O    | VAL | X | 141 | 47.612 | 58.131 | 33.374 | 0.00 | 0.00 |
| ATOM | 2190 | N    | LEU | X | 142 | 49.736 | 58.682 | 33.748 | 0.00 | 0.00 |
| ATOM | 2191 | H    | LEU | X | 142 | 50.567 | 59.211 | 33.521 | 0.00 | 0.00 |
| ATOM | 2192 | CA   | LEU | X | 142 | 49.978 | 57.557 | 34.621 | 0.00 | 0.00 |
| ATOM | 2193 | HA   | LEU | X | 142 | 49.107 | 56.934 | 34.419 | 0.00 | 0.00 |
| ATOM | 2194 | CB   | LEU | X | 142 | 51.242 | 56.843 | 34.305 | 0.00 | 0.00 |
| ATOM | 2195 | HB2  | LEU | X | 142 | 51.104 | 56.395 | 33.321 | 0.00 | 0.00 |
| ATOM | 2196 | HB3  | LEU | X | 142 | 52.069 | 57.544 | 34.185 | 0.00 | 0.00 |
| ATOM | 2197 | CG   | LEU | X | 142 | 51.646 | 55.568 | 35.037 | 0.00 | 0.00 |
| ATOM | 2198 | HG   | LEU | X | 142 | 52.448 | 55.020 | 34.543 | 0.00 | 0.00 |
| ATOM | 2199 | CD1  | LEU | X | 142 | 52.177 | 55.732 | 36.478 | 0.00 | 0.00 |
| ATOM | 2200 | HD11 | LEU | X | 142 | 52.878 | 54.944 | 36.752 | 0.00 | 0.00 |
| ATOM | 2201 | HD12 | LEU | X | 142 | 52.773 | 56.644 | 36.435 | 0.00 | 0.00 |
| ATOM | 2202 | HD13 | LEU | X | 142 | 51.328 | 55.910 | 37.138 | 0.00 | 0.00 |
| ATOM | 2203 | CD2  | LEU | X | 142 | 50.511 | 54.581 | 34.963 | 0.00 | 0.00 |
| ATOM | 2204 | HD21 | LEU | X | 142 | 50.805 | 53.713 | 35.553 | 0.00 | 0.00 |
| ATOM | 2205 | HD22 | LEU | X | 142 | 49.569 | 54.916 | 35.398 | 0.00 | 0.00 |
| ATOM | 2206 | HD23 | LEU | X | 142 | 50.228 | 54.158 | 33.999 | 0.00 | 0.00 |
| ATOM | 2207 | C    | LEU | X | 142 | 49.966 | 57.988 | 36.117 | 0.00 | 0.00 |
| ATOM | 2208 | O    | LEU | X | 142 | 50.952 | 58.598 | 36.599 | 0.00 | 0.00 |
| ATOM | 2209 | N    | VAL | X | 143 | 48.927 | 57.492 | 36.804 | 0.00 | 0.00 |
| ATOM | 2210 | H    | VAL | X | 143 | 48.196 | 56.972 | 36.340 | 0.00 | 0.00 |
| ATOM | 2211 | CA   | VAL | X | 143 | 48.668 | 57.817 | 38.248 | 0.00 | 0.00 |
| ATOM | 2212 | HA   | VAL | X | 143 | 49.335 | 58.628 | 38.541 | 0.00 | 0.00 |
| ATOM | 2213 | CB   | VAL | X | 143 | 47.264 | 58.245 | 38.647 | 0.00 | 0.00 |
| ATOM | 2214 | HB   | VAL | X | 143 | 46.654 | 57.410 | 38.303 | 0.00 | 0.00 |
| ATOM | 2215 | CG1  | VAL | X | 143 | 47.026 | 58.566 | 40.157 | 0.00 | 0.00 |
| ATOM | 2216 | HG11 | VAL | X | 143 | 45.965 | 58.502 | 40.399 | 0.00 | 0.00 |
| ATOM | 2217 | HG12 | VAL | X | 143 | 47.503 | 57.840 | 40.815 | 0.00 | 0.00 |
| ATOM | 2218 | HG13 | VAL | X | 143 | 47.444 | 59.533 | 40.436 | 0.00 | 0.00 |
| ATOM | 2219 | CG2  | VAL | X | 143 | 46.790 | 59.480 | 37.770 | 0.00 | 0.00 |
| ATOM | 2220 | HG21 | VAL | X | 143 | 46.967 | 59.295 | 36.711 | 0.00 | 0.00 |
| ATOM | 2221 | HG22 | VAL | X | 143 | 45.784 | 59.807 | 38.031 | 0.00 | 0.00 |
| ATOM | 2222 | HG23 | VAL | X | 143 | 47.329 | 60.372 | 38.089 | 0.00 | 0.00 |
| ATOM | 2223 | C    | VAL | X | 143 | 48.999 | 56.561 | 39.021 | 0.00 | 0.00 |
| ATOM | 2224 | O    | VAL | X | 143 | 48.840 | 55.442 | 38.516 | 0.00 | 0.00 |
| ATOM | 2225 | N    | SER | X | 144 | 49.625 | 56.681 | 40.209 | 0.00 | 0.00 |
| ATOM | 2226 | H    | SER | X | 144 | 50.053 | 57.563 | 40.451 | 0.00 | 0.00 |
| ATOM | 2227 | CA   | SER | X | 144 | 50.094 | 55.530 | 40.997 | 0.00 | 0.00 |
| ATOM | 2228 | HA   | SER | X | 144 | 49.488 | 54.645 | 40.806 | 0.00 | 0.00 |
| ATOM | 2229 | CB   | SER | X | 144 | 51.501 | 55.048 | 40.666 | 0.00 | 0.00 |
| ATOM | 2230 | HB2  | SER | X | 144 | 51.337 | 54.829 | 39.610 | 0.00 | 0.00 |
| ATOM | 2231 | HB3  | SER | X | 144 | 52.137 | 55.909 | 40.870 | 0.00 | 0.00 |
| ATOM | 2232 | OG   | SER | X | 144 | 51.879 | 53.914 | 41.420 | 0.00 | 0.00 |
| ATOM | 2233 | HG   | SER | X | 144 | 52.838 | 53.958 | 41.440 | 0.00 | 0.00 |
| ATOM | 2234 | C    | SER | X | 144 | 50.062 | 55.824 | 42.491 | 0.00 | 0.00 |
| ATOM | 2235 | O    | SER | X | 144 | 50.577 | 56.780 | 42.948 | 0.00 | 0.00 |
| ATOM | 2236 | N    | MET | X | 145 | 49.328 | 54.971 | 43.260 | 0.00 | 0.00 |
| ATOM | 2237 | H    | MET | X | 145 | 48.838 | 54.231 | 42.778 | 0.00 | 0.00 |
| ATOM | 2238 | CA   | MET | X | 145 | 49.058 | 55.152 | 44.702 | 0.00 | 0.00 |
| ATOM | 2239 | HA   | MET | X | 145 | 48.967 | 56.203 | 44.976 | 0.00 | 0.00 |
| ATOM | 2240 | CB   | MET | X | 145 | 47.732 | 54.526 | 45.057 | 0.00 | 0.00 |
| ATOM | 2241 | HB2  | MET | X | 145 | 47.702 | 53.484 | 44.739 | 0.00 | 0.00 |
| ATOM | 2242 | HB3  | MET | X | 145 | 47.582 | 54.556 | 46.136 | 0.00 | 0.00 |
| ATOM | 2243 | CG   | MET | X | 145 | 46.485 | 55.290 | 44.473 | 0.00 | 0.00 |
| ATOM | 2244 | HG2  | MET | X | 145 | 46.452 | 56.355 | 44.703 | 0.00 | 0.00 |

|      |      |      |     |   |     |        |        |        |      |      |
|------|------|------|-----|---|-----|--------|--------|--------|------|------|
| ATOM | 2245 | HG3  | MET | X | 145 | 46.572 | 55.146 | 43.396 | 0.00 | 0.00 |
| ATOM | 2246 | SD   | MET | X | 145 | 44.834 | 54.551 | 45.029 | 0.00 | 0.00 |
| ATOM | 2247 | CE   | MET | X | 145 | 43.921 | 54.984 | 43.531 | 0.00 | 0.00 |
| ATOM | 2248 | HE1  | MET | X | 145 | 44.048 | 56.056 | 43.376 | 0.00 | 0.00 |
| ATOM | 2249 | HE2  | MET | X | 145 | 44.224 | 54.307 | 42.732 | 0.00 | 0.00 |
| ATOM | 2250 | HE3  | MET | X | 145 | 42.904 | 54.689 | 43.786 | 0.00 | 0.00 |
| ATOM | 2251 | C    | MET | X | 145 | 50.140 | 54.506 | 45.512 | 0.00 | 0.00 |
| ATOM | 2252 | O    | MET | X | 145 | 50.975 | 53.740 | 45.058 | 0.00 | 0.00 |
| ATOM | 2253 | N    | ASN | X | 146 | 50.044 | 54.640 | 46.822 | 0.00 | 0.00 |
| ATOM | 2254 | H    | ASN | X | 146 | 49.319 | 55.251 | 47.170 | 0.00 | 0.00 |
| ATOM | 2255 | CA   | ASN | X | 146 | 50.626 | 53.815 | 47.794 | 0.00 | 0.00 |
| ATOM | 2256 | HA   | ASN | X | 146 | 50.753 | 52.792 | 47.441 | 0.00 | 0.00 |
| ATOM | 2257 | CB   | ASN | X | 146 | 51.974 | 54.412 | 48.195 | 0.00 | 0.00 |
| ATOM | 2258 | HB2  | ASN | X | 146 | 52.412 | 54.849 | 47.297 | 0.00 | 0.00 |
| ATOM | 2259 | HB3  | ASN | X | 146 | 51.780 | 55.224 | 48.896 | 0.00 | 0.00 |
| ATOM | 2260 | CG   | ASN | X | 146 | 52.801 | 53.293 | 48.799 | 0.00 | 0.00 |
| ATOM | 2261 | OD1  | ASN | X | 146 | 53.471 | 52.588 | 48.147 | 0.00 | 0.00 |
| ATOM | 2262 | ND2  | ASN | X | 146 | 52.902 | 53.099 | 50.137 | 0.00 | 0.00 |
| ATOM | 2263 | HD21 | ASN | X | 146 | 53.363 | 52.261 | 50.462 | 0.00 | 0.00 |
| ATOM | 2264 | HD22 | ASN | X | 146 | 52.397 | 53.643 | 50.823 | 0.00 | 0.00 |
| ATOM | 2265 | C    | ASN | X | 146 | 49.592 | 53.726 | 48.975 | 0.00 | 0.00 |
| ATOM | 2266 | O    | ASN | X | 146 | 48.974 | 54.704 | 49.423 | 0.00 | 0.00 |
| ATOM | 2267 | N    | TYR | X | 147 | 49.448 | 52.571 | 49.587 | 0.00 | 0.00 |
| ATOM | 2268 | H    | TYR | X | 147 | 50.010 | 51.817 | 49.217 | 0.00 | 0.00 |
| ATOM | 2269 | CA   | TYR | X | 147 | 48.344 | 52.263 | 50.604 | 0.00 | 0.00 |
| ATOM | 2270 | HA   | TYR | X | 147 | 48.253 | 53.128 | 51.261 | 0.00 | 0.00 |
| ATOM | 2271 | CB   | TYR | X | 147 | 47.040 | 51.924 | 49.870 | 0.00 | 0.00 |
| ATOM | 2272 | HB2  | TYR | X | 147 | 46.249 | 51.605 | 50.548 | 0.00 | 0.00 |
| ATOM | 2273 | HB3  | TYR | X | 147 | 46.691 | 52.859 | 49.433 | 0.00 | 0.00 |
| ATOM | 2274 | CG   | TYR | X | 147 | 47.162 | 50.834 | 48.767 | 0.00 | 0.00 |
| ATOM | 2275 | CD1  | TYR | X | 147 | 47.543 | 51.184 | 47.532 | 0.00 | 0.00 |
| ATOM | 2276 | HD1  | TYR | X | 147 | 47.582 | 52.235 | 47.286 | 0.00 | 0.00 |
| ATOM | 2277 | CE1  | TYR | X | 147 | 47.793 | 50.304 | 46.480 | 0.00 | 0.00 |
| ATOM | 2278 | HE1  | TYR | X | 147 | 48.164 | 50.609 | 45.513 | 0.00 | 0.00 |
| ATOM | 2279 | CZ   | TYR | X | 147 | 47.696 | 48.938 | 46.770 | 0.00 | 0.00 |
| ATOM | 2280 | OH   | TYR | X | 147 | 47.866 | 48.154 | 45.702 | 0.00 | 0.00 |
| ATOM | 2281 | HH   | TYR | X | 147 | 47.675 | 47.215 | 45.747 | 0.00 | 0.00 |
| ATOM | 2282 | CE2  | TYR | X | 147 | 47.423 | 48.428 | 48.097 | 0.00 | 0.00 |
| ATOM | 2283 | HE2  | TYR | X | 147 | 47.543 | 47.377 | 48.314 | 0.00 | 0.00 |
| ATOM | 2284 | CD2  | TYR | X | 147 | 47.129 | 49.432 | 49.128 | 0.00 | 0.00 |
| ATOM | 2285 | HD2  | TYR | X | 147 | 46.754 | 49.245 | 50.123 | 0.00 | 0.00 |
| ATOM | 2286 | C    | TYR | X | 147 | 48.767 | 51.136 | 51.481 | 0.00 | 0.00 |
| ATOM | 2287 | O    | TYR | X | 147 | 49.510 | 50.231 | 51.129 | 0.00 | 0.00 |
| ATOM | 2288 | N    | ARG | X | 148 | 48.105 | 51.044 | 52.658 | 0.00 | 0.00 |
| ATOM | 2289 | H    | ARG | X | 148 | 47.369 | 51.687 | 52.912 | 0.00 | 0.00 |
| ATOM | 2290 | CA   | ARG | X | 148 | 48.469 | 50.048 | 53.742 | 0.00 | 0.00 |
| ATOM | 2291 | HA   | ARG | X | 148 | 49.512 | 50.178 | 54.034 | 0.00 | 0.00 |
| ATOM | 2292 | CB   | ARG | X | 148 | 47.766 | 50.374 | 55.049 | 0.00 | 0.00 |
| ATOM | 2293 | HB2  | ARG | X | 148 | 46.720 | 50.527 | 54.785 | 0.00 | 0.00 |
| ATOM | 2294 | HB3  | ARG | X | 148 | 47.863 | 49.458 | 55.632 | 0.00 | 0.00 |
| ATOM | 2295 | CG   | ARG | X | 148 | 48.392 | 51.486 | 55.920 | 0.00 | 0.00 |
| ATOM | 2296 | HG2  | ARG | X | 148 | 49.383 | 51.275 | 56.324 | 0.00 | 0.00 |
| ATOM | 2297 | HG3  | ARG | X | 148 | 48.445 | 52.422 | 55.363 | 0.00 | 0.00 |
| ATOM | 2298 | CD   | ARG | X | 148 | 47.576 | 51.938 | 57.169 | 0.00 | 0.00 |
| ATOM | 2299 | HD2  | ARG | X | 148 | 47.478 | 51.135 | 57.899 | 0.00 | 0.00 |
| ATOM | 2300 | HD3  | ARG | X | 148 | 48.131 | 52.705 | 57.710 | 0.00 | 0.00 |
| ATOM | 2301 | NE   | ARG | X | 148 | 46.283 | 52.502 | 56.749 | 0.00 | 0.00 |
| ATOM | 2302 | HE   | ARG | X | 148 | 46.218 | 52.607 | 55.747 | 0.00 | 0.00 |
| ATOM | 2303 | CZ   | ARG | X | 148 | 45.257 | 52.836 | 57.478 | 0.00 | 0.00 |
| ATOM | 2304 | NH1  | ARG | X | 148 | 45.311 | 52.851 | 58.817 | 0.00 | 0.00 |
| ATOM | 2305 | HH11 | ARG | X | 148 | 46.194 | 52.787 | 59.302 | 0.00 | 0.00 |
| ATOM | 2306 | HH12 | ARG | X | 148 | 44.443 | 52.992 | 59.314 | 0.00 | 0.00 |
| ATOM | 2307 | NH2  | ARG | X | 148 | 44.185 | 53.318 | 56.875 | 0.00 | 0.00 |
| ATOM | 2308 | HH21 | ARG | X | 148 | 44.183 | 53.518 | 55.885 | 0.00 | 0.00 |
| ATOM | 2309 | HH22 | ARG | X | 148 | 43.505 | 53.514 | 57.595 | 0.00 | 0.00 |
| ATOM | 2310 | C    | ARG | X | 148 | 48.341 | 48.590 | 53.320 | 0.00 | 0.00 |
| ATOM | 2311 | O    | ARG | X | 148 | 47.189 | 48.139 | 53.026 | 0.00 | 0.00 |
| ATOM | 2312 | N    | VAL | X | 149 | 49.451 | 47.883 | 53.351 | 0.00 | 0.00 |
| ATOM | 2313 | H    | VAL | X | 149 | 50.333 | 48.371 | 53.425 | 0.00 | 0.00 |
| ATOM | 2314 | CA   | VAL | X | 149 | 49.466 | 46.401 | 53.200 | 0.00 | 0.00 |

|      |      |      |     |   |     |        |        |        |      |      |
|------|------|------|-----|---|-----|--------|--------|--------|------|------|
| ATOM | 2315 | HA   | VAL | X | 149 | 48.439 | 46.161 | 52.925 | 0.00 | 0.00 |
| ATOM | 2316 | CB   | VAL | X | 149 | 50.411 | 46.076 | 52.081 | 0.00 | 0.00 |
| ATOM | 2317 | HB   | VAL | X | 149 | 50.617 | 45.023 | 52.272 | 0.00 | 0.00 |
| ATOM | 2318 | CG1  | VAL | X | 149 | 49.590 | 46.237 | 50.737 | 0.00 | 0.00 |
| ATOM | 2319 | HG11 | VAL | X | 149 | 49.321 | 47.292 | 50.780 | 0.00 | 0.00 |
| ATOM | 2320 | HG12 | VAL | X | 149 | 50.276 | 45.915 | 49.953 | 0.00 | 0.00 |
| ATOM | 2321 | HG13 | VAL | X | 149 | 48.711 | 45.597 | 50.813 | 0.00 | 0.00 |
| ATOM | 2322 | CG2  | VAL | X | 149 | 51.716 | 46.843 | 52.216 | 0.00 | 0.00 |
| ATOM | 2323 | HG21 | VAL | X | 149 | 51.545 | 47.919 | 52.178 | 0.00 | 0.00 |
| ATOM | 2324 | HG22 | VAL | X | 149 | 52.161 | 46.659 | 53.193 | 0.00 | 0.00 |
| ATOM | 2325 | HG23 | VAL | X | 149 | 52.312 | 46.533 | 51.358 | 0.00 | 0.00 |
| ATOM | 2326 | C    | VAL | X | 149 | 49.978 | 45.715 | 54.507 | 0.00 | 0.00 |
| ATOM | 2327 | O    | VAL | X | 149 | 50.542 | 46.355 | 55.393 | 0.00 | 0.00 |
| ATOM | 2328 | N    | GLY | X | 150 | 49.622 | 44.417 | 54.653 | 0.00 | 0.00 |
| ATOM | 2329 | H    | GLY | X | 150 | 49.023 | 43.984 | 53.964 | 0.00 | 0.00 |
| ATOM | 2330 | CA   | GLY | X | 150 | 49.922 | 43.603 | 55.809 | 0.00 | 0.00 |
| ATOM | 2331 | HA2  | GLY | X | 150 | 49.937 | 42.551 | 55.458 | 0.00 | 0.00 |
| ATOM | 2332 | HA3  | GLY | X | 150 | 50.910 | 43.956 | 56.185 | 0.00 | 0.00 |
| ATOM | 2333 | C    | GLY | X | 150 | 48.916 | 43.780 | 56.920 | 0.00 | 0.00 |
| ATOM | 2334 | O    | GLY | X | 150 | 47.835 | 44.294 | 56.640 | 0.00 | 0.00 |
| ATOM | 2335 | N    | ALA | X | 151 | 49.297 | 43.508 | 58.191 | 0.00 | 0.00 |
| ATOM | 2336 | H    | ALA | X | 151 | 50.262 | 43.267 | 58.366 | 0.00 | 0.00 |
| ATOM | 2337 | CA   | ALA | X | 151 | 48.463 | 43.673 | 59.309 | 0.00 | 0.00 |
| ATOM | 2338 | HA   | ALA | X | 151 | 47.594 | 43.039 | 59.131 | 0.00 | 0.00 |
| ATOM | 2339 | CB   | ALA | X | 151 | 49.283 | 43.285 | 60.618 | 0.00 | 0.00 |
| ATOM | 2340 | HB1  | ALA | X | 151 | 50.097 | 44.006 | 60.691 | 0.00 | 0.00 |
| ATOM | 2341 | HB2  | ALA | X | 151 | 48.507 | 43.310 | 61.383 | 0.00 | 0.00 |
| ATOM | 2342 | HB3  | ALA | X | 151 | 49.649 | 42.260 | 60.557 | 0.00 | 0.00 |
| ATOM | 2343 | C    | ALA | X | 151 | 47.882 | 45.077 | 59.389 | 0.00 | 0.00 |
| ATOM | 2344 | O    | ALA | X | 151 | 46.637 | 45.220 | 59.625 | 0.00 | 0.00 |
| ATOM | 2345 | N    | PHE | X | 152 | 48.654 | 46.152 | 59.176 | 0.00 | 0.00 |
| ATOM | 2346 | H    | PHE | X | 152 | 49.544 | 45.949 | 58.743 | 0.00 | 0.00 |
| ATOM | 2347 | CA   | PHE | X | 152 | 48.345 | 47.557 | 59.287 | 0.00 | 0.00 |
| ATOM | 2348 | HA   | PHE | X | 152 | 48.012 | 47.690 | 60.317 | 0.00 | 0.00 |
| ATOM | 2349 | CB   | PHE | X | 152 | 49.515 | 48.457 | 59.027 | 0.00 | 0.00 |
| ATOM | 2350 | HB2  | PHE | X | 152 | 49.948 | 48.297 | 58.040 | 0.00 | 0.00 |
| ATOM | 2351 | HB3  | PHE | X | 152 | 49.213 | 49.505 | 59.013 | 0.00 | 0.00 |
| ATOM | 2352 | CG   | PHE | X | 152 | 50.757 | 48.151 | 59.863 | 0.00 | 0.00 |
| ATOM | 2353 | CD1  | PHE | X | 152 | 51.594 | 47.100 | 59.477 | 0.00 | 0.00 |
| ATOM | 2354 | HD1  | PHE | X | 152 | 51.453 | 46.507 | 58.585 | 0.00 | 0.00 |
| ATOM | 2355 | CE1  | PHE | X | 152 | 52.746 | 46.793 | 60.322 | 0.00 | 0.00 |
| ATOM | 2356 | HE1  | PHE | X | 152 | 53.369 | 46.018 | 59.901 | 0.00 | 0.00 |
| ATOM | 2357 | CZ   | PHE | X | 152 | 52.932 | 47.370 | 61.582 | 0.00 | 0.00 |
| ATOM | 2358 | HZ   | PHE | X | 152 | 53.755 | 47.149 | 62.246 | 0.00 | 0.00 |
| ATOM | 2359 | CE2  | PHE | X | 152 | 51.984 | 48.334 | 61.959 | 0.00 | 0.00 |
| ATOM | 2360 | HE2  | PHE | X | 152 | 52.080 | 48.848 | 62.905 | 0.00 | 0.00 |
| ATOM | 2361 | CD2  | PHE | X | 152 | 50.916 | 48.744 | 61.138 | 0.00 | 0.00 |
| ATOM | 2362 | HD2  | PHE | X | 152 | 50.114 | 49.434 | 61.353 | 0.00 | 0.00 |
| ATOM | 2363 | C    | PHE | X | 152 | 47.136 | 48.051 | 58.489 | 0.00 | 0.00 |
| ATOM | 2364 | O    | PHE | X | 152 | 46.487 | 48.979 | 58.974 | 0.00 | 0.00 |
| ATOM | 2365 | N    | GLY | X | 153 | 46.935 | 47.418 | 57.354 | 0.00 | 0.00 |
| ATOM | 2366 | H    | GLY | X | 153 | 47.683 | 46.770 | 57.155 | 0.00 | 0.00 |
| ATOM | 2367 | CA   | GLY | X | 153 | 45.791 | 47.607 | 56.479 | 0.00 | 0.00 |
| ATOM | 2368 | HA2  | GLY | X | 153 | 45.304 | 48.573 | 56.603 | 0.00 | 0.00 |
| ATOM | 2369 | HA3  | GLY | X | 153 | 46.165 | 47.762 | 55.446 | 0.00 | 0.00 |
| ATOM | 2370 | C    | GLY | X | 153 | 44.661 | 46.575 | 56.537 | 0.00 | 0.00 |
| ATOM | 2371 | O    | GLY | X | 153 | 43.604 | 46.905 | 56.137 | 0.00 | 0.00 |
| ATOM | 2372 | N    | PHE | X | 154 | 44.902 | 45.308 | 57.004 | 0.00 | 0.00 |
| ATOM | 2373 | H    | PHE | X | 154 | 45.858 | 45.058 | 57.210 | 0.00 | 0.00 |
| ATOM | 2374 | CA   | PHE | X | 154 | 43.971 | 44.211 | 56.933 | 0.00 | 0.00 |
| ATOM | 2375 | HA   | PHE | X | 154 | 43.009 | 44.661 | 56.686 | 0.00 | 0.00 |
| ATOM | 2376 | CB   | PHE | X | 154 | 44.465 | 43.281 | 55.819 | 0.00 | 0.00 |
| ATOM | 2377 | HB2  | PHE | X | 154 | 45.499 | 42.986 | 55.998 | 0.00 | 0.00 |
| ATOM | 2378 | HB3  | PHE | X | 154 | 43.890 | 42.355 | 55.812 | 0.00 | 0.00 |
| ATOM | 2379 | CG   | PHE | X | 154 | 44.347 | 43.917 | 54.468 | 0.00 | 0.00 |
| ATOM | 2380 | CD1  | PHE | X | 154 | 45.519 | 44.378 | 53.831 | 0.00 | 0.00 |
| ATOM | 2381 | HD1  | PHE | X | 154 | 46.522 | 44.324 | 54.228 | 0.00 | 0.00 |
| ATOM | 2382 | CE1  | PHE | X | 154 | 45.384 | 45.133 | 52.651 | 0.00 | 0.00 |
| ATOM | 2383 | HE1  | PHE | X | 154 | 46.253 | 45.505 | 52.128 | 0.00 | 0.00 |
| ATOM | 2384 | CZ   | PHE | X | 154 | 44.083 | 45.480 | 52.173 | 0.00 | 0.00 |

|      |      |      |     |   |     |        |        |        |      |      |
|------|------|------|-----|---|-----|--------|--------|--------|------|------|
| ATOM | 2385 | HZ   | PHE | X | 154 | 43.989 | 46.074 | 51.277 | 0.00 | 0.00 |
| ATOM | 2386 | CE2  | PHE | X | 154 | 42.937 | 44.960 | 52.856 | 0.00 | 0.00 |
| ATOM | 2387 | HE2  | PHE | X | 154 | 41.980 | 45.221 | 52.430 | 0.00 | 0.00 |
| ATOM | 2388 | CD2  | PHE | X | 154 | 43.076 | 44.193 | 53.978 | 0.00 | 0.00 |
| ATOM | 2389 | HD2  | PHE | X | 154 | 42.218 | 44.010 | 54.607 | 0.00 | 0.00 |
| ATOM | 2390 | C    | PHE | X | 154 | 43.730 | 43.395 | 58.217 | 0.00 | 0.00 |
| ATOM | 2391 | O    | PHE | X | 154 | 42.947 | 42.465 | 58.129 | 0.00 | 0.00 |
| ATOM | 2392 | N    | LEU | X | 155 | 44.285 | 43.777 | 59.393 | 0.00 | 0.00 |
| ATOM | 2393 | H    | LEU | X | 155 | 44.845 | 44.617 | 59.423 | 0.00 | 0.00 |
| ATOM | 2394 | CA   | LEU | X | 155 | 43.787 | 43.331 | 60.679 | 0.00 | 0.00 |
| ATOM | 2395 | HA   | LEU | X | 155 | 43.719 | 42.244 | 60.725 | 0.00 | 0.00 |
| ATOM | 2396 | CB   | LEU | X | 155 | 44.880 | 43.648 | 61.718 | 0.00 | 0.00 |
| ATOM | 2397 | HB2  | LEU | X | 155 | 45.877 | 43.342 | 61.402 | 0.00 | 0.00 |
| ATOM | 2398 | HB3  | LEU | X | 155 | 44.954 | 44.728 | 61.849 | 0.00 | 0.00 |
| ATOM | 2399 | CG   | LEU | X | 155 | 44.805 | 42.984 | 63.120 | 0.00 | 0.00 |
| ATOM | 2400 | HG   | LEU | X | 155 | 44.626 | 41.915 | 63.002 | 0.00 | 0.00 |
| ATOM | 2401 | CD1  | LEU | X | 155 | 46.136 | 43.041 | 63.905 | 0.00 | 0.00 |
| ATOM | 2402 | HD11 | LEU | X | 155 | 46.198 | 44.083 | 64.217 | 0.00 | 0.00 |
| ATOM | 2403 | HD12 | LEU | X | 155 | 46.072 | 42.452 | 64.820 | 0.00 | 0.00 |
| ATOM | 2404 | HD13 | LEU | X | 155 | 46.986 | 42.723 | 63.300 | 0.00 | 0.00 |
| ATOM | 2405 | CD2  | LEU | X | 155 | 43.743 | 43.609 | 64.070 | 0.00 | 0.00 |
| ATOM | 2406 | HD21 | LEU | X | 155 | 42.706 | 43.496 | 63.752 | 0.00 | 0.00 |
| ATOM | 2407 | HD22 | LEU | X | 155 | 43.701 | 43.168 | 65.066 | 0.00 | 0.00 |
| ATOM | 2408 | HD23 | LEU | X | 155 | 43.876 | 44.676 | 64.245 | 0.00 | 0.00 |
| ATOM | 2409 | C    | LEU | X | 155 | 42.446 | 43.859 | 61.087 | 0.00 | 0.00 |
| ATOM | 2410 | O    | LEU | X | 155 | 42.162 | 45.042 | 61.074 | 0.00 | 0.00 |
| ATOM | 2411 | N    | ALA | X | 156 | 41.627 | 42.909 | 61.608 | 0.00 | 0.00 |
| ATOM | 2412 | H    | ALA | X | 156 | 41.867 | 41.929 | 61.577 | 0.00 | 0.00 |
| ATOM | 2413 | CA   | ALA | X | 156 | 40.217 | 43.139 | 62.057 | 0.00 | 0.00 |
| ATOM | 2414 | HA   | ALA | X | 156 | 40.007 | 44.188 | 62.265 | 0.00 | 0.00 |
| ATOM | 2415 | CB   | ALA | X | 156 | 39.247 | 42.608 | 60.972 | 0.00 | 0.00 |
| ATOM | 2416 | HB1  | ALA | X | 156 | 39.173 | 43.238 | 60.086 | 0.00 | 0.00 |
| ATOM | 2417 | HB2  | ALA | X | 156 | 39.555 | 41.596 | 60.710 | 0.00 | 0.00 |
| ATOM | 2418 | HB3  | ALA | X | 156 | 38.283 | 42.565 | 61.479 | 0.00 | 0.00 |
| ATOM | 2419 | C    | ALA | X | 156 | 39.950 | 42.374 | 63.272 | 0.00 | 0.00 |
| ATOM | 2420 | O    | ALA | X | 156 | 40.471 | 41.320 | 63.422 | 0.00 | 0.00 |
| ATOM | 2421 | N    | LEU | X | 157 | 39.018 | 42.887 | 64.045 | 0.00 | 0.00 |
| ATOM | 2422 | H    | LEU | X | 157 | 38.711 | 43.825 | 63.830 | 0.00 | 0.00 |
| ATOM | 2423 | CA   | LEU | X | 157 | 38.620 | 42.241 | 65.276 | 0.00 | 0.00 |
| ATOM | 2424 | HA   | LEU | X | 157 | 38.800 | 41.167 | 65.226 | 0.00 | 0.00 |
| ATOM | 2425 | CB   | LEU | X | 157 | 39.418 | 42.828 | 66.492 | 0.00 | 0.00 |
| ATOM | 2426 | HB2  | LEU | X | 157 | 40.427 | 43.107 | 66.188 | 0.00 | 0.00 |
| ATOM | 2427 | HB3  | LEU | X | 157 | 38.871 | 43.679 | 66.897 | 0.00 | 0.00 |
| ATOM | 2428 | CG   | LEU | X | 157 | 39.445 | 41.745 | 67.547 | 0.00 | 0.00 |
| ATOM | 2429 | HG   | LEU | X | 157 | 38.538 | 41.144 | 67.607 | 0.00 | 0.00 |
| ATOM | 2430 | CD1  | LEU | X | 157 | 40.589 | 40.782 | 67.177 | 0.00 | 0.00 |
| ATOM | 2431 | HD11 | LEU | X | 157 | 40.935 | 40.155 | 67.999 | 0.00 | 0.00 |
| ATOM | 2432 | HD12 | LEU | X | 157 | 40.247 | 40.139 | 66.366 | 0.00 | 0.00 |
| ATOM | 2433 | HD13 | LEU | X | 157 | 41.482 | 41.335 | 66.888 | 0.00 | 0.00 |
| ATOM | 2434 | CD2  | LEU | X | 157 | 39.543 | 42.343 | 68.963 | 0.00 | 0.00 |
| ATOM | 2435 | HD21 | LEU | X | 157 | 38.776 | 43.102 | 69.116 | 0.00 | 0.00 |
| ATOM | 2436 | HD22 | LEU | X | 157 | 39.307 | 41.451 | 69.543 | 0.00 | 0.00 |
| ATOM | 2437 | HD23 | LEU | X | 157 | 40.541 | 42.711 | 69.201 | 0.00 | 0.00 |
| ATOM | 2438 | C    | LEU | X | 157 | 37.088 | 42.334 | 65.489 | 0.00 | 0.00 |
| ATOM | 2439 | O    | LEU | X | 157 | 36.602 | 43.083 | 66.312 | 0.00 | 0.00 |
| ATOM | 2440 | N    | PRO | X | 158 | 36.340 | 41.561 | 64.743 | 0.00 | 0.00 |
| ATOM | 2441 | CD   | PRO | X | 158 | 36.827 | 40.745 | 63.612 | 0.00 | 0.00 |
| ATOM | 2442 | HD2  | PRO | X | 158 | 37.395 | 39.870 | 63.926 | 0.00 | 0.00 |
| ATOM | 2443 | HD3  | PRO | X | 158 | 37.315 | 41.326 | 62.829 | 0.00 | 0.00 |
| ATOM | 2444 | CG   | PRO | X | 158 | 35.563 | 40.059 | 63.117 | 0.00 | 0.00 |
| ATOM | 2445 | HG2  | PRO | X | 158 | 35.348 | 39.108 | 63.604 | 0.00 | 0.00 |
| ATOM | 2446 | HG3  | PRO | X | 158 | 35.655 | 39.861 | 62.049 | 0.00 | 0.00 |
| ATOM | 2447 | CB   | PRO | X | 158 | 34.438 | 41.022 | 63.329 | 0.00 | 0.00 |
| ATOM | 2448 | HB2  | PRO | X | 158 | 33.498 | 40.503 | 63.516 | 0.00 | 0.00 |
| ATOM | 2449 | HB3  | PRO | X | 158 | 34.278 | 41.658 | 62.458 | 0.00 | 0.00 |
| ATOM | 2450 | CA   | PRO | X | 158 | 34.852 | 41.677 | 64.630 | 0.00 | 0.00 |
| ATOM | 2451 | HA   | PRO | X | 158 | 34.530 | 42.717 | 64.691 | 0.00 | 0.00 |
| ATOM | 2452 | C    | PRO | X | 158 | 34.201 | 40.971 | 65.798 | 0.00 | 0.00 |
| ATOM | 2453 | O    | PRO | X | 158 | 34.808 | 40.006 | 66.344 | 0.00 | 0.00 |
| ATOM | 2454 | N    | GLY | X | 159 | 33.079 | 41.521 | 66.241 | 0.00 | 0.00 |

|      |      |      |     |   |     |        |        |        |      |      |
|------|------|------|-----|---|-----|--------|--------|--------|------|------|
| ATOM | 2455 | H    | GLY | X | 159 | 32.655 | 42.237 | 65.670 | 0.00 | 0.00 |
| ATOM | 2456 | CA   | GLY | X | 159 | 32.409 | 41.325 | 67.558 | 0.00 | 0.00 |
| ATOM | 2457 | HA2  | GLY | X | 159 | 31.312 | 41.101 | 67.384 | 0.00 | 0.00 |
| ATOM | 2458 | HA3  | GLY | X | 159 | 32.963 | 40.634 | 68.132 | 0.00 | 0.00 |
| ATOM | 2459 | C    | GLY | X | 159 | 32.389 | 42.673 | 68.337 | 0.00 | 0.00 |
| ATOM | 2460 | O    | GLY | X | 159 | 32.081 | 42.658 | 69.528 | 0.00 | 0.00 |
| ATOM | 2461 | N    | SER | X | 160 | 32.920 | 43.774 | 67.841 | 0.00 | 0.00 |
| ATOM | 2462 | H    | SER | X | 160 | 33.008 | 43.939 | 66.849 | 0.00 | 0.00 |
| ATOM | 2463 | CA   | SER | X | 160 | 33.137 | 45.025 | 68.608 | 0.00 | 0.00 |
| ATOM | 2464 | HA   | SER | X | 160 | 32.259 | 45.264 | 69.208 | 0.00 | 0.00 |
| ATOM | 2465 | CB   | SER | X | 160 | 34.292 | 44.912 | 69.606 | 0.00 | 0.00 |
| ATOM | 2466 | HB2  | SER | X | 160 | 34.523 | 45.773 | 70.234 | 0.00 | 0.00 |
| ATOM | 2467 | HB3  | SER | X | 160 | 34.115 | 44.069 | 70.274 | 0.00 | 0.00 |
| ATOM | 2468 | OG   | SER | X | 160 | 35.506 | 44.706 | 68.949 | 0.00 | 0.00 |
| ATOM | 2469 | HG   | SER | X | 160 | 35.802 | 43.827 | 69.197 | 0.00 | 0.00 |
| ATOM | 2470 | C    | SER | X | 160 | 33.310 | 46.219 | 67.640 | 0.00 | 0.00 |
| ATOM | 2471 | O    | SER | X | 160 | 33.151 | 45.954 | 66.442 | 0.00 | 0.00 |
| ATOM | 2472 | N    | ARG | X | 161 | 33.568 | 47.430 | 68.027 | 0.00 | 0.00 |
| ATOM | 2473 | H    | ARG | X | 161 | 33.676 | 47.585 | 69.019 | 0.00 | 0.00 |
| ATOM | 2474 | CA   | ARG | X | 161 | 33.612 | 48.691 | 67.168 | 0.00 | 0.00 |
| ATOM | 2475 | HA   | ARG | X | 161 | 33.568 | 48.436 | 66.109 | 0.00 | 0.00 |
| ATOM | 2476 | CB   | ARG | X | 161 | 32.401 | 49.564 | 67.488 | 0.00 | 0.00 |
| ATOM | 2477 | HB2  | ARG | X | 161 | 31.498 | 48.993 | 67.272 | 0.00 | 0.00 |
| ATOM | 2478 | HB3  | ARG | X | 161 | 32.344 | 49.872 | 68.532 | 0.00 | 0.00 |
| ATOM | 2479 | CG   | ARG | X | 161 | 32.413 | 50.769 | 66.519 | 0.00 | 0.00 |
| ATOM | 2480 | HG2  | ARG | X | 161 | 33.384 | 51.260 | 66.454 | 0.00 | 0.00 |
| ATOM | 2481 | HG3  | ARG | X | 161 | 32.220 | 50.398 | 65.513 | 0.00 | 0.00 |
| ATOM | 2482 | CD   | ARG | X | 161 | 31.392 | 51.862 | 66.900 | 0.00 | 0.00 |
| ATOM | 2483 | HD2  | ARG | X | 161 | 31.410 | 52.639 | 66.136 | 0.00 | 0.00 |
| ATOM | 2484 | HD3  | ARG | X | 161 | 30.445 | 51.366 | 66.688 | 0.00 | 0.00 |
| ATOM | 2485 | NE   | ARG | X | 161 | 31.564 | 52.301 | 68.248 | 0.00 | 0.00 |
| ATOM | 2486 | HE   | ARG | X | 161 | 31.034 | 51.904 | 69.010 | 0.00 | 0.00 |
| ATOM | 2487 | CZ   | ARG | X | 161 | 32.572 | 53.102 | 68.601 | 0.00 | 0.00 |
| ATOM | 2488 | NH1  | ARG | X | 161 | 33.519 | 53.646 | 67.925 | 0.00 | 0.00 |
| ATOM | 2489 | HH11 | ARG | X | 161 | 33.809 | 53.434 | 66.981 | 0.00 | 0.00 |
| ATOM | 2490 | HH12 | ARG | X | 161 | 34.192 | 54.111 | 68.518 | 0.00 | 0.00 |
| ATOM | 2491 | NH2  | ARG | X | 161 | 32.744 | 53.207 | 69.891 | 0.00 | 0.00 |
| ATOM | 2492 | HH21 | ARG | X | 161 | 32.074 | 52.936 | 70.597 | 0.00 | 0.00 |
| ATOM | 2493 | HH22 | ARG | X | 161 | 33.475 | 53.826 | 70.210 | 0.00 | 0.00 |
| ATOM | 2494 | C    | ARG | X | 161 | 35.035 | 49.307 | 67.343 | 0.00 | 0.00 |
| ATOM | 2495 | O    | ARG | X | 161 | 35.166 | 50.454 | 67.795 | 0.00 | 0.00 |
| ATOM | 2496 | N    | GLU | X | 162 | 36.085 | 48.483 | 67.034 | 0.00 | 0.00 |
| ATOM | 2497 | H    | GLU | X | 162 | 35.843 | 47.576 | 66.660 | 0.00 | 0.00 |
| ATOM | 2498 | CA   | GLU | X | 162 | 37.492 | 48.828 | 67.308 | 0.00 | 0.00 |
| ATOM | 2499 | HA   | GLU | X | 162 | 37.537 | 49.806 | 67.786 | 0.00 | 0.00 |
| ATOM | 2500 | CB   | GLU | X | 162 | 38.136 | 47.912 | 68.403 | 0.00 | 0.00 |
| ATOM | 2501 | HB2  | GLU | X | 162 | 38.296 | 46.898 | 68.037 | 0.00 | 0.00 |
| ATOM | 2502 | HB3  | GLU | X | 162 | 39.096 | 48.393 | 68.589 | 0.00 | 0.00 |
| ATOM | 2503 | CG   | GLU | X | 162 | 37.330 | 47.856 | 69.705 | 0.00 | 0.00 |
| ATOM | 2504 | HG2  | GLU | X | 162 | 36.359 | 47.464 | 69.401 | 0.00 | 0.00 |
| ATOM | 2505 | HG3  | GLU | X | 162 | 37.752 | 47.111 | 70.380 | 0.00 | 0.00 |
| ATOM | 2506 | CD   | GLU | X | 162 | 37.189 | 49.139 | 70.462 | 0.00 | 0.00 |
| ATOM | 2507 | OE1  | GLU | X | 162 | 36.177 | 49.301 | 71.188 | 0.00 | 0.00 |
| ATOM | 2508 | OE2  | GLU | X | 162 | 38.107 | 49.970 | 70.460 | 0.00 | 0.00 |
| ATOM | 2509 | C    | GLU | X | 162 | 38.253 | 48.837 | 65.967 | 0.00 | 0.00 |
| ATOM | 2510 | O    | GLU | X | 162 | 38.413 | 49.901 | 65.341 | 0.00 | 0.00 |
| ATOM | 2511 | N    | ALA | X | 163 | 38.670 | 47.644 | 65.592 | 0.00 | 0.00 |
| ATOM | 2512 | H    | ALA | X | 163 | 38.511 | 46.809 | 66.137 | 0.00 | 0.00 |
| ATOM | 2513 | CA   | ALA | X | 163 | 39.553 | 47.466 | 64.434 | 0.00 | 0.00 |
| ATOM | 2514 | HA   | ALA | X | 163 | 40.141 | 48.306 | 64.064 | 0.00 | 0.00 |
| ATOM | 2515 | CB   | ALA | X | 163 | 40.625 | 46.421 | 64.887 | 0.00 | 0.00 |
| ATOM | 2516 | HB1  | ALA | X | 163 | 41.319 | 46.913 | 65.569 | 0.00 | 0.00 |
| ATOM | 2517 | HB2  | ALA | X | 163 | 40.225 | 45.582 | 65.455 | 0.00 | 0.00 |
| ATOM | 2518 | HB3  | ALA | X | 163 | 41.264 | 46.044 | 64.088 | 0.00 | 0.00 |
| ATOM | 2519 | C    | ALA | X | 163 | 38.624 | 46.772 | 63.318 | 0.00 | 0.00 |
| ATOM | 2520 | O    | ALA | X | 163 | 38.148 | 45.651 | 63.635 | 0.00 | 0.00 |
| ATOM | 2521 | N    | PRO | X | 164 | 38.406 | 47.399 | 62.131 | 0.00 | 0.00 |
| ATOM | 2522 | CD   | PRO | X | 164 | 38.578 | 48.807 | 61.919 | 0.00 | 0.00 |
| ATOM | 2523 | HD2  | PRO | X | 164 | 39.637 | 49.066 | 61.928 | 0.00 | 0.00 |
| ATOM | 2524 | HD3  | PRO | X | 164 | 38.090 | 49.327 | 62.743 | 0.00 | 0.00 |



|      |      |      |     |   |     |        |        |        |      |      |
|------|------|------|-----|---|-----|--------|--------|--------|------|------|
| ATOM | 2525 | CG   | PRO | X | 164 | 37.875 | 49.142 | 60.612 | 0.00 | 0.00 |
| ATOM | 2526 | HG2  | PRO | X | 164 | 38.594 | 49.071 | 59.796 | 0.00 | 0.00 |
| ATOM | 2527 | HG3  | PRO | X | 164 | 37.527 | 50.162 | 60.780 | 0.00 | 0.00 |
| ATOM | 2528 | CB   | PRO | X | 164 | 36.768 | 48.174 | 60.606 | 0.00 | 0.00 |
| ATOM | 2529 | HB2  | PRO | X | 164 | 36.395 | 48.011 | 59.595 | 0.00 | 0.00 |
| ATOM | 2530 | HB3  | PRO | X | 164 | 35.982 | 48.461 | 61.305 | 0.00 | 0.00 |
| ATOM | 2531 | CA   | PRO | X | 164 | 37.395 | 46.904 | 61.225 | 0.00 | 0.00 |
| ATOM | 2532 | HA   | PRO | X | 164 | 36.620 | 46.454 | 61.846 | 0.00 | 0.00 |
| ATOM | 2533 | C    | PRO | X | 164 | 37.906 | 45.980 | 60.106 | 0.00 | 0.00 |
| ATOM | 2534 | O    | PRO | X | 164 | 37.062 | 45.086 | 59.746 | 0.00 | 0.00 |
| ATOM | 2535 | N    | GLY | X | 165 | 39.209 | 46.161 | 59.576 | 0.00 | 0.00 |
| ATOM | 2536 | H    | GLY | X | 165 | 39.705 | 46.933 | 59.999 | 0.00 | 0.00 |
| ATOM | 2537 | CA   | GLY | X | 165 | 39.642 | 45.589 | 58.362 | 0.00 | 0.00 |
| ATOM | 2538 | HA2  | GLY | X | 165 | 40.756 | 45.370 | 58.382 | 0.00 | 0.00 |
| ATOM | 2539 | HA3  | GLY | X | 165 | 39.149 | 44.671 | 58.032 | 0.00 | 0.00 |
| ATOM | 2540 | C    | GLY | X | 165 | 39.419 | 46.497 | 57.237 | 0.00 | 0.00 |
| ATOM | 2541 | O    | GLY | X | 165 | 38.758 | 47.515 | 57.279 | 0.00 | 0.00 |
| ATOM | 2542 | N    | ASN | X | 166 | 39.972 | 46.100 | 56.073 | 0.00 | 0.00 |
| ATOM | 2543 | H    | ASN | X | 166 | 40.327 | 45.156 | 56.131 | 0.00 | 0.00 |
| ATOM | 2544 | CA   | ASN | X | 166 | 39.772 | 46.586 | 54.753 | 0.00 | 0.00 |
| ATOM | 2545 | HA   | ASN | X | 166 | 40.368 | 45.918 | 54.130 | 0.00 | 0.00 |
| ATOM | 2546 | CB   | ASN | X | 166 | 38.298 | 46.540 | 54.247 | 0.00 | 0.00 |
| ATOM | 2547 | HB2  | ASN | X | 166 | 37.635 | 47.157 | 54.854 | 0.00 | 0.00 |
| ATOM | 2548 | HB3  | ASN | X | 166 | 38.229 | 46.974 | 53.249 | 0.00 | 0.00 |
| ATOM | 2549 | CG   | ASN | X | 166 | 37.697 | 45.093 | 54.276 | 0.00 | 0.00 |
| ATOM | 2550 | OD1  | ASN | X | 166 | 38.387 | 44.152 | 53.830 | 0.00 | 0.00 |
| ATOM | 2551 | ND2  | ASN | X | 166 | 36.566 | 44.917 | 54.859 | 0.00 | 0.00 |
| ATOM | 2552 | HD21 | ASN | X | 166 | 36.140 | 44.013 | 54.709 | 0.00 | 0.00 |
| ATOM | 2553 | HD22 | ASN | X | 166 | 36.085 | 45.631 | 55.387 | 0.00 | 0.00 |
| ATOM | 2554 | C    | ASN | X | 166 | 40.392 | 48.022 | 54.513 | 0.00 | 0.00 |
| ATOM | 2555 | O    | ASN | X | 166 | 40.140 | 48.629 | 53.425 | 0.00 | 0.00 |
| ATOM | 2556 | N    | VAL | X | 167 | 41.043 | 48.676 | 55.474 | 0.00 | 0.00 |
| ATOM | 2557 | H    | VAL | X | 167 | 41.215 | 48.136 | 56.310 | 0.00 | 0.00 |
| ATOM | 2558 | CA   | VAL | X | 167 | 41.310 | 50.090 | 55.392 | 0.00 | 0.00 |
| ATOM | 2559 | HA   | VAL | X | 167 | 40.385 | 50.584 | 55.093 | 0.00 | 0.00 |
| ATOM | 2560 | CB   | VAL | X | 167 | 41.716 | 50.628 | 56.823 | 0.00 | 0.00 |
| ATOM | 2561 | HB   | VAL | X | 167 | 41.815 | 51.714 | 56.825 | 0.00 | 0.00 |
| ATOM | 2562 | CG1  | VAL | X | 167 | 40.606 | 50.248 | 57.744 | 0.00 | 0.00 |
| ATOM | 2563 | HG11 | VAL | X | 167 | 40.633 | 50.711 | 58.731 | 0.00 | 0.00 |
| ATOM | 2564 | HG12 | VAL | X | 167 | 39.669 | 50.443 | 57.221 | 0.00 | 0.00 |
| ATOM | 2565 | HG13 | VAL | X | 167 | 40.560 | 49.203 | 58.051 | 0.00 | 0.00 |
| ATOM | 2566 | CG2  | VAL | X | 167 | 43.196 | 50.183 | 57.345 | 0.00 | 0.00 |
| ATOM | 2567 | HG21 | VAL | X | 167 | 43.437 | 50.608 | 58.320 | 0.00 | 0.00 |
| ATOM | 2568 | HG22 | VAL | X | 167 | 43.203 | 49.094 | 57.392 | 0.00 | 0.00 |
| ATOM | 2569 | HG23 | VAL | X | 167 | 43.950 | 50.435 | 56.599 | 0.00 | 0.00 |
| ATOM | 2570 | C    | VAL | X | 167 | 42.422 | 50.444 | 54.422 | 0.00 | 0.00 |
| ATOM | 2571 | O    | VAL | X | 167 | 42.369 | 51.562 | 53.947 | 0.00 | 0.00 |
| ATOM | 2572 | N    | GLY | X | 168 | 43.177 | 49.438 | 53.988 | 0.00 | 0.00 |
| ATOM | 2573 | H    | GLY | X | 168 | 43.167 | 48.607 | 54.562 | 0.00 | 0.00 |
| ATOM | 2574 | CA   | GLY | X | 168 | 44.061 | 49.511 | 52.905 | 0.00 | 0.00 |
| ATOM | 2575 | HA2  | GLY | X | 168 | 44.681 | 50.335 | 52.916 | 0.00 | 0.00 |
| ATOM | 2576 | HA3  | GLY | X | 168 | 44.788 | 48.734 | 52.903 | 0.00 | 0.00 |
| ATOM | 2577 | C    | GLY | X | 168 | 43.471 | 49.621 | 51.511 | 0.00 | 0.00 |
| ATOM | 2578 | O    | GLY | X | 168 | 44.190 | 50.057 | 50.601 | 0.00 | 0.00 |
| ATOM | 2579 | N    | LEU | X | 169 | 42.206 | 49.274 | 51.351 | 0.00 | 0.00 |
| ATOM | 2580 | H    | LEU | X | 169 | 41.629 | 48.808 | 52.037 | 0.00 | 0.00 |
| ATOM | 2581 | CA   | LEU | X | 169 | 41.464 | 49.729 | 50.223 | 0.00 | 0.00 |
| ATOM | 2582 | HA   | LEU | X | 169 | 42.147 | 49.818 | 49.377 | 0.00 | 0.00 |
| ATOM | 2583 | CB   | LEU | X | 169 | 40.403 | 48.676 | 49.886 | 0.00 | 0.00 |
| ATOM | 2584 | HB2  | LEU | X | 169 | 39.687 | 48.604 | 50.704 | 0.00 | 0.00 |
| ATOM | 2585 | HB3  | LEU | X | 169 | 39.848 | 49.005 | 49.008 | 0.00 | 0.00 |
| ATOM | 2586 | CG   | LEU | X | 169 | 40.906 | 47.217 | 49.626 | 0.00 | 0.00 |
| ATOM | 2587 | HG   | LEU | X | 169 | 41.367 | 46.885 | 50.557 | 0.00 | 0.00 |
| ATOM | 2588 | CD1  | LEU | X | 169 | 39.717 | 46.324 | 49.165 | 0.00 | 0.00 |
| ATOM | 2589 | HD11 | LEU | X | 169 | 40.100 | 45.357 | 48.839 | 0.00 | 0.00 |
| ATOM | 2590 | HD12 | LEU | X | 169 | 38.925 | 46.259 | 49.911 | 0.00 | 0.00 |
| ATOM | 2591 | HD13 | LEU | X | 169 | 39.391 | 46.651 | 48.177 | 0.00 | 0.00 |
| ATOM | 2592 | CD2  | LEU | X | 169 | 42.147 | 47.038 | 48.659 | 0.00 | 0.00 |
| ATOM | 2593 | HD21 | LEU | X | 169 | 41.926 | 47.514 | 47.703 | 0.00 | 0.00 |
| ATOM | 2594 | HD22 | LEU | X | 169 | 42.982 | 47.577 | 49.106 | 0.00 | 0.00 |

|      |      |      |     |   |     |        |        |        |      |      |
|------|------|------|-----|---|-----|--------|--------|--------|------|------|
| ATOM | 2595 | HD23 | LEU | X | 169 | 42.272 | 45.956 | 48.693 | 0.00 | 0.00 |
| ATOM | 2596 | C    | LEU | X | 169 | 40.764 | 50.977 | 50.490 | 0.00 | 0.00 |
| ATOM | 2597 | O    | LEU | X | 169 | 40.333 | 51.675 | 49.547 | 0.00 | 0.00 |
| ATOM | 2598 | N    | LEU | X | 170 | 40.483 | 51.411 | 51.761 | 0.00 | 0.00 |
| ATOM | 2599 | H    | LEU | X | 170 | 40.899 | 50.952 | 52.559 | 0.00 | 0.00 |
| ATOM | 2600 | CA   | LEU | X | 170 | 39.990 | 52.802 | 52.037 | 0.00 | 0.00 |
| ATOM | 2601 | HA   | LEU | X | 170 | 39.206 | 53.014 | 51.310 | 0.00 | 0.00 |
| ATOM | 2602 | CB   | LEU | X | 170 | 39.305 | 52.962 | 53.392 | 0.00 | 0.00 |
| ATOM | 2603 | HB2  | LEU | X | 170 | 39.992 | 52.858 | 54.232 | 0.00 | 0.00 |
| ATOM | 2604 | HB3  | LEU | X | 170 | 38.852 | 53.943 | 53.534 | 0.00 | 0.00 |
| ATOM | 2605 | CG   | LEU | X | 170 | 38.207 | 51.904 | 53.544 | 0.00 | 0.00 |
| ATOM | 2606 | HG   | LEU | X | 170 | 38.659 | 50.935 | 53.335 | 0.00 | 0.00 |
| ATOM | 2607 | CD1  | LEU | X | 170 | 37.611 | 51.904 | 54.976 | 0.00 | 0.00 |
| ATOM | 2608 | HD11 | LEU | X | 170 | 38.366 | 51.465 | 55.629 | 0.00 | 0.00 |
| ATOM | 2609 | HD12 | LEU | X | 170 | 37.201 | 52.860 | 55.301 | 0.00 | 0.00 |
| ATOM | 2610 | HD13 | LEU | X | 170 | 36.745 | 51.242 | 54.966 | 0.00 | 0.00 |
| ATOM | 2611 | CD2  | LEU | X | 170 | 37.076 | 52.158 | 52.535 | 0.00 | 0.00 |
| ATOM | 2612 | HD21 | LEU | X | 170 | 36.153 | 51.681 | 52.865 | 0.00 | 0.00 |
| ATOM | 2613 | HD22 | LEU | X | 170 | 36.843 | 53.211 | 52.373 | 0.00 | 0.00 |
| ATOM | 2614 | HD23 | LEU | X | 170 | 37.259 | 51.684 | 51.571 | 0.00 | 0.00 |
| ATOM | 2615 | C    | LEU | X | 170 | 40.888 | 53.993 | 51.630 | 0.00 | 0.00 |
| ATOM | 2616 | O    | LEU | X | 170 | 40.542 | 55.018 | 51.058 | 0.00 | 0.00 |
| ATOM | 2617 | N    | ASP | X | 171 | 42.189 | 53.772 | 51.873 | 0.00 | 0.00 |
| ATOM | 2618 | H    | ASP | X | 171 | 42.411 | 52.917 | 52.364 | 0.00 | 0.00 |
| ATOM | 2619 | CA   | ASP | X | 171 | 43.331 | 54.543 | 51.380 | 0.00 | 0.00 |
| ATOM | 2620 | HA   | ASP | X | 171 | 43.332 | 55.544 | 51.811 | 0.00 | 0.00 |
| ATOM | 2621 | CB   | ASP | X | 171 | 44.613 | 53.831 | 51.810 | 0.00 | 0.00 |
| ATOM | 2622 | HB2  | ASP | X | 171 | 44.620 | 52.858 | 51.319 | 0.00 | 0.00 |
| ATOM | 2623 | HB3  | ASP | X | 171 | 45.505 | 54.231 | 51.328 | 0.00 | 0.00 |
| ATOM | 2624 | CG   | ASP | X | 171 | 44.875 | 53.566 | 53.335 | 0.00 | 0.00 |
| ATOM | 2625 | OD1  | ASP | X | 171 | 44.502 | 54.392 | 54.126 | 0.00 | 0.00 |
| ATOM | 2626 | OD2  | ASP | X | 171 | 45.594 | 52.605 | 53.726 | 0.00 | 0.00 |
| ATOM | 2627 | C    | ASP | X | 171 | 43.267 | 54.749 | 49.878 | 0.00 | 0.00 |
| ATOM | 2628 | O    | ASP | X | 171 | 43.279 | 55.867 | 49.427 | 0.00 | 0.00 |
| ATOM | 2629 | N    | GLN | X | 172 | 42.953 | 53.685 | 49.111 | 0.00 | 0.00 |
| ATOM | 2630 | H    | GLN | X | 172 | 42.757 | 52.818 | 49.590 | 0.00 | 0.00 |
| ATOM | 2631 | CA   | GLN | X | 172 | 42.798 | 53.722 | 47.708 | 0.00 | 0.00 |
| ATOM | 2632 | HA   | GLN | X | 172 | 43.636 | 54.264 | 47.270 | 0.00 | 0.00 |
| ATOM | 2633 | CB   | GLN | X | 172 | 42.738 | 52.307 | 47.171 | 0.00 | 0.00 |
| ATOM | 2634 | HB2  | GLN | X | 172 | 41.878 | 51.798 | 47.607 | 0.00 | 0.00 |
| ATOM | 2635 | HB3  | GLN | X | 172 | 42.676 | 52.319 | 46.083 | 0.00 | 0.00 |
| ATOM | 2636 | CG   | GLN | X | 172 | 43.889 | 51.419 | 47.510 | 0.00 | 0.00 |
| ATOM | 2637 | HG2  | GLN | X | 172 | 44.743 | 51.755 | 46.922 | 0.00 | 0.00 |
| ATOM | 2638 | HG3  | GLN | X | 172 | 44.091 | 51.289 | 48.574 | 0.00 | 0.00 |
| ATOM | 2639 | CD   | GLN | X | 172 | 43.728 | 50.075 | 46.820 | 0.00 | 0.00 |
| ATOM | 2640 | OE1  | GLN | X | 172 | 43.041 | 49.984 | 45.775 | 0.00 | 0.00 |
| ATOM | 2641 | NE2  | GLN | X | 172 | 44.235 | 49.051 | 47.382 | 0.00 | 0.00 |
| ATOM | 2642 | HE21 | GLN | X | 172 | 44.123 | 48.164 | 46.912 | 0.00 | 0.00 |
| ATOM | 2643 | HE22 | GLN | X | 172 | 44.823 | 49.139 | 48.198 | 0.00 | 0.00 |
| ATOM | 2644 | C    | GLN | X | 172 | 41.516 | 54.404 | 47.308 | 0.00 | 0.00 |
| ATOM | 2645 | O    | GLN | X | 172 | 41.608 | 55.246 | 46.406 | 0.00 | 0.00 |
| ATOM | 2646 | N    | ARG | X | 173 | 40.379 | 54.224 | 48.004 | 0.00 | 0.00 |
| ATOM | 2647 | H    | ARG | X | 173 | 40.396 | 53.476 | 48.682 | 0.00 | 0.00 |
| ATOM | 2648 | CA   | ARG | X | 173 | 39.116 | 55.018 | 47.742 | 0.00 | 0.00 |
| ATOM | 2649 | HA   | ARG | X | 173 | 38.747 | 54.847 | 46.731 | 0.00 | 0.00 |
| ATOM | 2650 | CB   | ARG | X | 173 | 38.021 | 54.553 | 48.798 | 0.00 | 0.00 |
| ATOM | 2651 | HB2  | ARG | X | 173 | 37.894 | 53.471 | 48.827 | 0.00 | 0.00 |
| ATOM | 2652 | HB3  | ARG | X | 173 | 38.371 | 54.937 | 49.756 | 0.00 | 0.00 |
| ATOM | 2653 | CG   | ARG | X | 173 | 36.617 | 55.137 | 48.474 | 0.00 | 0.00 |
| ATOM | 2654 | HG2  | ARG | X | 173 | 36.738 | 56.210 | 48.327 | 0.00 | 0.00 |
| ATOM | 2655 | HG3  | ARG | X | 173 | 36.446 | 54.820 | 47.445 | 0.00 | 0.00 |
| ATOM | 2656 | CD   | ARG | X | 173 | 35.425 | 54.811 | 49.361 | 0.00 | 0.00 |
| ATOM | 2657 | HD2  | ARG | X | 173 | 35.715 | 55.081 | 50.376 | 0.00 | 0.00 |
| ATOM | 2658 | HD3  | ARG | X | 173 | 34.531 | 55.338 | 49.029 | 0.00 | 0.00 |
| ATOM | 2659 | NE   | ARG | X | 173 | 35.088 | 53.361 | 49.238 | 0.00 | 0.00 |
| ATOM | 2660 | HE   | ARG | X | 173 | 35.441 | 52.927 | 48.397 | 0.00 | 0.00 |
| ATOM | 2661 | CZ   | ARG | X | 173 | 34.487 | 52.611 | 50.116 | 0.00 | 0.00 |
| ATOM | 2662 | NH1  | ARG | X | 173 | 34.123 | 53.065 | 51.316 | 0.00 | 0.00 |
| ATOM | 2663 | HH11 | ARG | X | 173 | 34.338 | 54.017 | 51.577 | 0.00 | 0.00 |
| ATOM | 2664 | HH12 | ARG | X | 173 | 33.894 | 52.334 | 51.973 | 0.00 | 0.00 |

|      |      |      |     |   |     |        |        |        |      |      |
|------|------|------|-----|---|-----|--------|--------|--------|------|------|
| ATOM | 2665 | NH2  | ARG | X | 173 | 34.224 | 51.374 | 49.794 | 0.00 | 0.00 |
| ATOM | 2666 | HH21 | ARG | X | 173 | 34.531 | 51.166 | 48.855 | 0.00 | 0.00 |
| ATOM | 2667 | HH22 | ARG | X | 173 | 33.814 | 50.731 | 50.456 | 0.00 | 0.00 |
| ATOM | 2668 | C    | ARG | X | 173 | 39.424 | 56.463 | 47.846 | 0.00 | 0.00 |
| ATOM | 2669 | O    | ARG | X | 173 | 38.786 | 57.270 | 47.216 | 0.00 | 0.00 |
| ATOM | 2670 | N    | LEU | X | 174 | 40.250 | 56.876 | 48.809 | 0.00 | 0.00 |
| ATOM | 2671 | H    | LEU | X | 174 | 40.690 | 56.263 | 49.481 | 0.00 | 0.00 |
| ATOM | 2672 | CA   | LEU | X | 174 | 40.423 | 58.286 | 49.136 | 0.00 | 0.00 |
| ATOM | 2673 | HA   | LEU | X | 174 | 39.485 | 58.842 | 49.114 | 0.00 | 0.00 |
| ATOM | 2674 | CB   | LEU | X | 174 | 40.954 | 58.359 | 50.569 | 0.00 | 0.00 |
| ATOM | 2675 | HB2  | LEU | X | 174 | 40.245 | 57.813 | 51.191 | 0.00 | 0.00 |
| ATOM | 2676 | HB3  | LEU | X | 174 | 41.825 | 57.705 | 50.613 | 0.00 | 0.00 |
| ATOM | 2677 | CG   | LEU | X | 174 | 41.316 | 59.697 | 51.259 | 0.00 | 0.00 |
| ATOM | 2678 | HG   | LEU | X | 174 | 42.048 | 60.288 | 50.708 | 0.00 | 0.00 |
| ATOM | 2679 | CD1  | LEU | X | 174 | 39.991 | 60.545 | 51.248 | 0.00 | 0.00 |
| ATOM | 2680 | HD11 | LEU | X | 174 | 39.630 | 60.715 | 50.233 | 0.00 | 0.00 |
| ATOM | 2681 | HD12 | LEU | X | 174 | 39.238 | 60.237 | 51.973 | 0.00 | 0.00 |
| ATOM | 2682 | HD13 | LEU | X | 174 | 40.338 | 61.557 | 51.456 | 0.00 | 0.00 |
| ATOM | 2683 | CD2  | LEU | X | 174 | 41.751 | 59.424 | 52.689 | 0.00 | 0.00 |
| ATOM | 2684 | HD21 | LEU | X | 174 | 40.905 | 59.121 | 53.305 | 0.00 | 0.00 |
| ATOM | 2685 | HD22 | LEU | X | 174 | 42.567 | 58.702 | 52.647 | 0.00 | 0.00 |
| ATOM | 2686 | HD23 | LEU | X | 174 | 42.104 | 60.391 | 53.046 | 0.00 | 0.00 |
| ATOM | 2687 | C    | LEU | X | 174 | 41.322 | 58.937 | 48.070 | 0.00 | 0.00 |
| ATOM | 2688 | O    | LEU | X | 174 | 41.190 | 60.105 | 47.820 | 0.00 | 0.00 |
| ATOM | 2689 | N    | ALA | X | 175 | 42.200 | 58.220 | 47.381 | 0.00 | 0.00 |
| ATOM | 2690 | H    | ALA | X | 175 | 42.179 | 57.224 | 47.546 | 0.00 | 0.00 |
| ATOM | 2691 | CA   | ALA | X | 175 | 43.036 | 58.615 | 46.187 | 0.00 | 0.00 |
| ATOM | 2692 | HA   | ALA | X | 175 | 43.374 | 59.649 | 46.252 | 0.00 | 0.00 |
| ATOM | 2693 | CB   | ALA | X | 175 | 44.294 | 57.756 | 46.301 | 0.00 | 0.00 |
| ATOM | 2694 | HB1  | ALA | X | 175 | 44.029 | 56.740 | 46.591 | 0.00 | 0.00 |
| ATOM | 2695 | HB2  | ALA | X | 175 | 44.840 | 57.768 | 45.358 | 0.00 | 0.00 |
| ATOM | 2696 | HB3  | ALA | X | 175 | 44.886 | 58.263 | 47.064 | 0.00 | 0.00 |
| ATOM | 2697 | C    | ALA | X | 175 | 42.303 | 58.409 | 44.786 | 0.00 | 0.00 |
| ATOM | 2698 | O    | ALA | X | 175 | 42.671 | 59.118 | 43.833 | 0.00 | 0.00 |
| ATOM | 2699 | N    | LEU | X | 176 | 41.226 | 57.613 | 44.739 | 0.00 | 0.00 |
| ATOM | 2700 | H    | LEU | X | 176 | 41.111 | 57.086 | 45.592 | 0.00 | 0.00 |
| ATOM | 2701 | CA   | LEU | X | 176 | 40.190 | 57.566 | 43.630 | 0.00 | 0.00 |
| ATOM | 2702 | HA   | LEU | X | 176 | 40.785 | 57.469 | 42.721 | 0.00 | 0.00 |
| ATOM | 2703 | CB   | LEU | X | 176 | 39.325 | 56.359 | 43.791 | 0.00 | 0.00 |
| ATOM | 2704 | HB2  | LEU | X | 176 | 38.860 | 56.346 | 44.777 | 0.00 | 0.00 |
| ATOM | 2705 | HB3  | LEU | X | 176 | 38.494 | 56.624 | 43.138 | 0.00 | 0.00 |
| ATOM | 2706 | CG   | LEU | X | 176 | 40.001 | 54.959 | 43.333 | 0.00 | 0.00 |
| ATOM | 2707 | HG   | LEU | X | 176 | 40.792 | 54.925 | 44.082 | 0.00 | 0.00 |
| ATOM | 2708 | CD1  | LEU | X | 176 | 39.167 | 53.770 | 43.551 | 0.00 | 0.00 |
| ATOM | 2709 | HD11 | LEU | X | 176 | 38.769 | 53.759 | 44.565 | 0.00 | 0.00 |
| ATOM | 2710 | HD12 | LEU | X | 176 | 38.302 | 53.743 | 42.889 | 0.00 | 0.00 |
| ATOM | 2711 | HD13 | LEU | X | 176 | 39.790 | 52.876 | 43.525 | 0.00 | 0.00 |
| ATOM | 2712 | CD2  | LEU | X | 176 | 40.679 | 55.011 | 41.971 | 0.00 | 0.00 |
| ATOM | 2713 | HD21 | LEU | X | 176 | 41.525 | 55.699 | 41.961 | 0.00 | 0.00 |
| ATOM | 2714 | HD22 | LEU | X | 176 | 41.147 | 54.039 | 41.821 | 0.00 | 0.00 |
| ATOM | 2715 | HD23 | LEU | X | 176 | 40.033 | 55.368 | 41.169 | 0.00 | 0.00 |
| ATOM | 2716 | C    | LEU | X | 176 | 39.474 | 58.883 | 43.566 | 0.00 | 0.00 |
| ATOM | 2717 | O    | LEU | X | 176 | 39.495 | 59.592 | 42.558 | 0.00 | 0.00 |
| ATOM | 2718 | N    | GLN | X | 177 | 38.916 | 59.352 | 44.698 | 0.00 | 0.00 |
| ATOM | 2719 | H    | GLN | X | 177 | 39.007 | 58.725 | 45.485 | 0.00 | 0.00 |
| ATOM | 2720 | CA   | GLN | X | 177 | 38.358 | 60.681 | 44.874 | 0.00 | 0.00 |
| ATOM | 2721 | HA   | GLN | X | 177 | 37.546 | 60.776 | 44.153 | 0.00 | 0.00 |
| ATOM | 2722 | CB   | GLN | X | 177 | 37.750 | 60.848 | 46.335 | 0.00 | 0.00 |
| ATOM | 2723 | HB2  | GLN | X | 177 | 38.484 | 60.637 | 47.112 | 0.00 | 0.00 |
| ATOM | 2724 | HB3  | GLN | X | 177 | 37.470 | 61.891 | 46.487 | 0.00 | 0.00 |
| ATOM | 2725 | CG   | GLN | X | 177 | 36.532 | 59.967 | 46.679 | 0.00 | 0.00 |
| ATOM | 2726 | HG2  | GLN | X | 177 | 35.728 | 60.265 | 46.006 | 0.00 | 0.00 |
| ATOM | 2727 | HG3  | GLN | X | 177 | 36.640 | 58.905 | 46.459 | 0.00 | 0.00 |
| ATOM | 2728 | CD   | GLN | X | 177 | 36.228 | 60.307 | 48.165 | 0.00 | 0.00 |
| ATOM | 2729 | OE1  | GLN | X | 177 | 37.069 | 60.143 | 49.038 | 0.00 | 0.00 |
| ATOM | 2730 | NE2  | GLN | X | 177 | 35.061 | 60.867 | 48.441 | 0.00 | 0.00 |
| ATOM | 2731 | HE21 | GLN | X | 177 | 34.862 | 61.138 | 49.394 | 0.00 | 0.00 |
| ATOM | 2732 | HE22 | GLN | X | 177 | 34.679 | 61.364 | 47.649 | 0.00 | 0.00 |
| ATOM | 2733 | C    | GLN | X | 177 | 39.369 | 61.800 | 44.487 | 0.00 | 0.00 |
| ATOM | 2734 | O    | GLN | X | 177 | 39.057 | 62.788 | 43.808 | 0.00 | 0.00 |

|      |      |      |     |   |     |        |        |        |      |      |
|------|------|------|-----|---|-----|--------|--------|--------|------|------|
| ATOM | 2735 | N    | TRP | X | 178 | 40.621 | 61.637 | 44.916 | 0.00 | 0.00 |
| ATOM | 2736 | H    | TRP | X | 178 | 40.715 | 61.066 | 45.745 | 0.00 | 0.00 |
| ATOM | 2737 | CA   | TRP | X | 178 | 41.615 | 62.676 | 44.672 | 0.00 | 0.00 |
| ATOM | 2738 | HA   | TRP | X | 178 | 41.162 | 63.603 | 45.023 | 0.00 | 0.00 |
| ATOM | 2739 | CB   | TRP | X | 178 | 42.867 | 62.413 | 45.471 | 0.00 | 0.00 |
| ATOM | 2740 | HB2  | TRP | X | 178 | 42.624 | 62.062 | 46.473 | 0.00 | 0.00 |
| ATOM | 2741 | HB3  | TRP | X | 178 | 43.473 | 61.606 | 45.060 | 0.00 | 0.00 |
| ATOM | 2742 | CG   | TRP | X | 178 | 43.775 | 63.589 | 45.690 | 0.00 | 0.00 |
| ATOM | 2743 | CD1  | TRP | X | 178 | 43.689 | 64.313 | 46.793 | 0.00 | 0.00 |
| ATOM | 2744 | HD1  | TRP | X | 178 | 42.901 | 64.249 | 47.528 | 0.00 | 0.00 |
| ATOM | 2745 | NE1  | TRP | X | 178 | 44.562 | 65.375 | 46.677 | 0.00 | 0.00 |
| ATOM | 2746 | HE1  | TRP | X | 178 | 44.618 | 66.012 | 47.459 | 0.00 | 0.00 |
| ATOM | 2747 | CE2  | TRP | X | 178 | 45.325 | 65.278 | 45.564 | 0.00 | 0.00 |
| ATOM | 2748 | CZ2  | TRP | X | 178 | 46.443 | 66.058 | 45.088 | 0.00 | 0.00 |
| ATOM | 2749 | HZ2  | TRP | X | 178 | 46.813 | 66.869 | 45.698 | 0.00 | 0.00 |
| ATOM | 2750 | CH2  | TRP | X | 178 | 46.994 | 65.712 | 43.848 | 0.00 | 0.00 |
| ATOM | 2751 | HH2  | TRP | X | 178 | 47.778 | 66.343 | 43.457 | 0.00 | 0.00 |
| ATOM | 2752 | CZ3  | TRP | X | 178 | 46.506 | 64.606 | 43.136 | 0.00 | 0.00 |
| ATOM | 2753 | HZ3  | TRP | X | 178 | 46.907 | 64.370 | 42.162 | 0.00 | 0.00 |
| ATOM | 2754 | CE3  | TRP | X | 178 | 45.333 | 63.855 | 43.542 | 0.00 | 0.00 |
| ATOM | 2755 | HE3  | TRP | X | 178 | 44.930 | 63.032 | 42.969 | 0.00 | 0.00 |
| ATOM | 2756 | CD2  | TRP | X | 178 | 44.761 | 64.169 | 44.797 | 0.00 | 0.00 |
| ATOM | 2757 | C    | TRP | X | 178 | 42.040 | 62.791 | 43.226 | 0.00 | 0.00 |
| ATOM | 2758 | O    | TRP | X | 178 | 42.085 | 63.870 | 42.756 | 0.00 | 0.00 |
| ATOM | 2759 | N    | VAL | X | 179 | 42.042 | 61.630 | 42.429 | 0.00 | 0.00 |
| ATOM | 2760 | H    | VAL | X | 179 | 41.879 | 60.716 | 42.829 | 0.00 | 0.00 |
| ATOM | 2761 | CA   | VAL | X | 179 | 42.132 | 61.689 | 40.975 | 0.00 | 0.00 |
| ATOM | 2762 | HA   | VAL | X | 179 | 42.999 | 62.336 | 40.846 | 0.00 | 0.00 |
| ATOM | 2763 | CB   | VAL | X | 179 | 42.211 | 60.256 | 40.371 | 0.00 | 0.00 |
| ATOM | 2764 | HB   | VAL | X | 179 | 41.807 | 59.516 | 41.063 | 0.00 | 0.00 |
| ATOM | 2765 | CG1  | VAL | X | 179 | 41.607 | 60.145 | 38.988 | 0.00 | 0.00 |
| ATOM | 2766 | HG11 | VAL | X | 179 | 41.924 | 60.762 | 38.147 | 0.00 | 0.00 |
| ATOM | 2767 | HG12 | VAL | X | 179 | 41.542 | 59.070 | 38.823 | 0.00 | 0.00 |
| ATOM | 2768 | HG13 | VAL | X | 179 | 40.552 | 60.415 | 39.030 | 0.00 | 0.00 |
| ATOM | 2769 | CG2  | VAL | X | 179 | 43.707 | 59.812 | 40.277 | 0.00 | 0.00 |
| ATOM | 2770 | HG21 | VAL | X | 179 | 44.100 | 59.667 | 41.283 | 0.00 | 0.00 |
| ATOM | 2771 | HG22 | VAL | X | 179 | 43.698 | 58.831 | 39.801 | 0.00 | 0.00 |
| ATOM | 2772 | HG23 | VAL | X | 179 | 44.347 | 60.550 | 39.793 | 0.00 | 0.00 |
| ATOM | 2773 | C    | VAL | X | 179 | 40.979 | 62.559 | 40.447 | 0.00 | 0.00 |
| ATOM | 2774 | O    | VAL | X | 179 | 41.144 | 63.442 | 39.653 | 0.00 | 0.00 |
| ATOM | 2775 | N    | GLN | X | 180 | 39.761 | 62.330 | 40.889 | 0.00 | 0.00 |
| ATOM | 2776 | H    | GLN | X | 180 | 39.645 | 61.500 | 41.452 | 0.00 | 0.00 |
| ATOM | 2777 | CA   | GLN | X | 180 | 38.536 | 63.083 | 40.469 | 0.00 | 0.00 |
| ATOM | 2778 | HA   | GLN | X | 180 | 38.522 | 63.024 | 39.381 | 0.00 | 0.00 |
| ATOM | 2779 | CB   | GLN | X | 180 | 37.236 | 62.427 | 41.038 | 0.00 | 0.00 |
| ATOM | 2780 | HB2  | GLN | X | 180 | 37.364 | 62.154 | 42.085 | 0.00 | 0.00 |
| ATOM | 2781 | HB3  | GLN | X | 180 | 36.440 | 63.168 | 40.963 | 0.00 | 0.00 |
| ATOM | 2782 | CG   | GLN | X | 180 | 36.784 | 61.136 | 40.372 | 0.00 | 0.00 |
| ATOM | 2783 | HG2  | GLN | X | 180 | 37.758 | 60.676 | 40.208 | 0.00 | 0.00 |
| ATOM | 2784 | HG3  | GLN | X | 180 | 36.065 | 60.493 | 40.879 | 0.00 | 0.00 |
| ATOM | 2785 | CD   | GLN | X | 180 | 36.265 | 61.314 | 38.901 | 0.00 | 0.00 |
| ATOM | 2786 | OE1  | GLN | X | 180 | 36.054 | 62.431 | 38.471 | 0.00 | 0.00 |
| ATOM | 2787 | NE2  | GLN | X | 180 | 36.226 | 60.221 | 38.152 | 0.00 | 0.00 |
| ATOM | 2788 | HE21 | GLN | X | 180 | 36.053 | 60.429 | 37.179 | 0.00 | 0.00 |
| ATOM | 2789 | HE22 | GLN | X | 180 | 36.549 | 59.335 | 38.514 | 0.00 | 0.00 |
| ATOM | 2790 | C    | GLN | X | 180 | 38.789 | 64.529 | 40.852 | 0.00 | 0.00 |
| ATOM | 2791 | O    | GLN | X | 180 | 38.540 | 65.375 | 40.008 | 0.00 | 0.00 |
| ATOM | 2792 | N    | GLU | X | 181 | 39.224 | 64.804 | 42.060 | 0.00 | 0.00 |
| ATOM | 2793 | H    | GLU | X | 181 | 39.498 | 64.020 | 42.635 | 0.00 | 0.00 |
| ATOM | 2794 | CA   | GLU | X | 181 | 39.469 | 66.117 | 42.546 | 0.00 | 0.00 |
| ATOM | 2795 | HA   | GLU | X | 181 | 38.528 | 66.603 | 42.287 | 0.00 | 0.00 |
| ATOM | 2796 | CB   | GLU | X | 181 | 39.807 | 65.997 | 44.042 | 0.00 | 0.00 |
| ATOM | 2797 | HB2  | GLU | X | 181 | 39.129 | 65.283 | 44.509 | 0.00 | 0.00 |
| ATOM | 2798 | HB3  | GLU | X | 181 | 40.843 | 65.659 | 44.073 | 0.00 | 0.00 |
| ATOM | 2799 | CG   | GLU | X | 181 | 39.449 | 67.317 | 44.661 | 0.00 | 0.00 |
| ATOM | 2800 | HG2  | GLU | X | 181 | 39.795 | 68.108 | 43.996 | 0.00 | 0.00 |
| ATOM | 2801 | HG3  | GLU | X | 181 | 38.364 | 67.364 | 44.742 | 0.00 | 0.00 |
| ATOM | 2802 | CD   | GLU | X | 181 | 40.114 | 67.462 | 46.007 | 0.00 | 0.00 |
| ATOM | 2803 | OE1  | GLU | X | 181 | 39.291 | 67.353 | 46.968 | 0.00 | 0.00 |
| ATOM | 2804 | OE2  | GLU | X | 181 | 41.224 | 67.962 | 46.233 | 0.00 | 0.00 |

|      |      |      |     |   |     |        |        |        |      |      |
|------|------|------|-----|---|-----|--------|--------|--------|------|------|
| ATOM | 2805 | C    | GLU | X | 181 | 40.545 | 66.897 | 41.689 | 0.00 | 0.00 |
| ATOM | 2806 | O    | GLU | X | 181 | 40.253 | 67.991 | 41.254 | 0.00 | 0.00 |
| ATOM | 2807 | N    | ASN | X | 182 | 41.683 | 66.284 | 41.353 | 0.00 | 0.00 |
| ATOM | 2808 | H    | ASN | X | 182 | 41.753 | 65.320 | 41.646 | 0.00 | 0.00 |
| ATOM | 2809 | CA   | ASN | X | 182 | 42.955 | 66.937 | 40.822 | 0.00 | 0.00 |
| ATOM | 2810 | HA   | ASN | X | 182 | 42.546 | 67.926 | 40.618 | 0.00 | 0.00 |
| ATOM | 2811 | CB   | ASN | X | 182 | 43.866 | 67.246 | 41.951 | 0.00 | 0.00 |
| ATOM | 2812 | HB2  | ASN | X | 182 | 44.246 | 66.304 | 42.347 | 0.00 | 0.00 |
| ATOM | 2813 | HB3  | ASN | X | 182 | 44.661 | 67.863 | 41.533 | 0.00 | 0.00 |
| ATOM | 2814 | CG   | ASN | X | 182 | 43.285 | 68.116 | 43.071 | 0.00 | 0.00 |
| ATOM | 2815 | OD1  | ASN | X | 182 | 43.089 | 69.333 | 43.000 | 0.00 | 0.00 |
| ATOM | 2816 | ND2  | ASN | X | 182 | 43.094 | 67.449 | 44.203 | 0.00 | 0.00 |
| ATOM | 2817 | HD21 | ASN | X | 182 | 42.555 | 67.904 | 44.926 | 0.00 | 0.00 |
| ATOM | 2818 | HD22 | ASN | X | 182 | 43.331 | 66.477 | 44.343 | 0.00 | 0.00 |
| ATOM | 2819 | C    | ASN | X | 182 | 43.710 | 66.430 | 39.590 | 0.00 | 0.00 |
| ATOM | 2820 | O    | ASN | X | 182 | 44.592 | 67.224 | 39.094 | 0.00 | 0.00 |
| ATOM | 2821 | N    | VAL | X | 183 | 43.407 | 65.244 | 38.991 | 0.00 | 0.00 |
| ATOM | 2822 | H    | VAL | X | 183 | 42.661 | 64.642 | 39.306 | 0.00 | 0.00 |
| ATOM | 2823 | CA   | VAL | X | 183 | 44.192 | 64.788 | 37.815 | 0.00 | 0.00 |
| ATOM | 2824 | HA   | VAL | X | 183 | 45.175 | 64.705 | 38.280 | 0.00 | 0.00 |
| ATOM | 2825 | CB   | VAL | X | 183 | 43.791 | 63.375 | 37.448 | 0.00 | 0.00 |
| ATOM | 2826 | HB   | VAL | X | 183 | 43.543 | 62.904 | 38.400 | 0.00 | 0.00 |
| ATOM | 2827 | CG1  | VAL | X | 183 | 42.564 | 63.321 | 36.614 | 0.00 | 0.00 |
| ATOM | 2828 | HG11 | VAL | X | 183 | 42.338 | 62.262 | 36.491 | 0.00 | 0.00 |
| ATOM | 2829 | HG12 | VAL | X | 183 | 41.684 | 63.758 | 37.086 | 0.00 | 0.00 |
| ATOM | 2830 | HG13 | VAL | X | 183 | 42.718 | 63.652 | 35.587 | 0.00 | 0.00 |
| ATOM | 2831 | CG2  | VAL | X | 183 | 44.973 | 62.626 | 36.848 | 0.00 | 0.00 |
| ATOM | 2832 | HG21 | VAL | X | 183 | 44.672 | 61.584 | 36.741 | 0.00 | 0.00 |
| ATOM | 2833 | HG22 | VAL | X | 183 | 45.184 | 63.024 | 35.855 | 0.00 | 0.00 |
| ATOM | 2834 | HG23 | VAL | X | 183 | 45.789 | 62.694 | 37.568 | 0.00 | 0.00 |
| ATOM | 2835 | C    | VAL | X | 183 | 44.264 | 65.805 | 36.703 | 0.00 | 0.00 |
| ATOM | 2836 | O    | VAL | X | 183 | 45.204 | 65.757 | 35.934 | 0.00 | 0.00 |
| ATOM | 2837 | N    | ALA | X | 184 | 43.178 | 66.635 | 36.484 | 0.00 | 0.00 |
| ATOM | 2838 | H    | ALA | X | 184 | 42.457 | 66.572 | 37.189 | 0.00 | 0.00 |
| ATOM | 2839 | CA   | ALA | X | 184 | 43.147 | 67.601 | 35.359 | 0.00 | 0.00 |
| ATOM | 2840 | HA   | ALA | X | 184 | 43.263 | 67.078 | 34.410 | 0.00 | 0.00 |
| ATOM | 2841 | CB   | ALA | X | 184 | 41.668 | 68.052 | 35.425 | 0.00 | 0.00 |
| ATOM | 2842 | HB1  | ALA | X | 184 | 41.012 | 67.184 | 35.363 | 0.00 | 0.00 |
| ATOM | 2843 | HB2  | ALA | X | 184 | 41.462 | 68.481 | 36.406 | 0.00 | 0.00 |
| ATOM | 2844 | HB3  | ALA | X | 184 | 41.465 | 68.737 | 34.602 | 0.00 | 0.00 |
| ATOM | 2845 | C    | ALA | X | 184 | 44.199 | 68.753 | 35.530 | 0.00 | 0.00 |
| ATOM | 2846 | O    | ALA | X | 184 | 44.555 | 69.352 | 34.529 | 0.00 | 0.00 |
| ATOM | 2847 | N    | ALA | X | 185 | 44.734 | 68.946 | 36.754 | 0.00 | 0.00 |
| ATOM | 2848 | H    | ALA | X | 185 | 44.218 | 68.542 | 37.522 | 0.00 | 0.00 |
| ATOM | 2849 | CA   | ALA | X | 185 | 45.818 | 69.922 | 36.904 | 0.00 | 0.00 |
| ATOM | 2850 | HA   | ALA | X | 185 | 45.647 | 70.842 | 36.345 | 0.00 | 0.00 |
| ATOM | 2851 | CB   | ALA | X | 185 | 45.793 | 70.311 | 38.369 | 0.00 | 0.00 |
| ATOM | 2852 | HB1  | ALA | X | 185 | 46.211 | 69.609 | 39.091 | 0.00 | 0.00 |
| ATOM | 2853 | HB2  | ALA | X | 185 | 46.313 | 71.261 | 38.485 | 0.00 | 0.00 |
| ATOM | 2854 | HB3  | ALA | X | 185 | 44.751 | 70.424 | 38.668 | 0.00 | 0.00 |
| ATOM | 2855 | C    | ALA | X | 185 | 47.149 | 69.434 | 36.360 | 0.00 | 0.00 |
| ATOM | 2856 | O    | ALA | X | 185 | 47.978 | 70.281 | 35.992 | 0.00 | 0.00 |
| ATOM | 2857 | N    | PHE | X | 186 | 47.308 | 68.124 | 36.280 | 0.00 | 0.00 |
| ATOM | 2858 | H    | PHE | X | 186 | 46.553 | 67.599 | 36.699 | 0.00 | 0.00 |
| ATOM | 2859 | CA   | PHE | X | 186 | 48.519 | 67.472 | 35.698 | 0.00 | 0.00 |
| ATOM | 2860 | HA   | PHE | X | 186 | 49.445 | 68.037 | 35.806 | 0.00 | 0.00 |
| ATOM | 2861 | CB   | PHE | X | 186 | 48.872 | 66.225 | 36.437 | 0.00 | 0.00 |
| ATOM | 2862 | HB2  | PHE | X | 186 | 48.141 | 65.424 | 36.324 | 0.00 | 0.00 |
| ATOM | 2863 | HB3  | PHE | X | 186 | 49.869 | 65.880 | 36.163 | 0.00 | 0.00 |
| ATOM | 2864 | CG   | PHE | X | 186 | 49.061 | 66.429 | 37.885 | 0.00 | 0.00 |
| ATOM | 2865 | CD1  | PHE | X | 186 | 48.102 | 65.992 | 38.811 | 0.00 | 0.00 |
| ATOM | 2866 | HD1  | PHE | X | 186 | 47.269 | 65.405 | 38.452 | 0.00 | 0.00 |
| ATOM | 2867 | CE1  | PHE | X | 186 | 48.222 | 66.280 | 40.178 | 0.00 | 0.00 |
| ATOM | 2868 | HE1  | PHE | X | 186 | 47.453 | 65.967 | 40.869 | 0.00 | 0.00 |
| ATOM | 2869 | CZ   | PHE | X | 186 | 49.379 | 66.894 | 40.692 | 0.00 | 0.00 |
| ATOM | 2870 | HZ   | PHE | X | 186 | 49.519 | 67.069 | 41.749 | 0.00 | 0.00 |
| ATOM | 2871 | CE2  | PHE | X | 186 | 50.408 | 67.240 | 39.828 | 0.00 | 0.00 |
| ATOM | 2872 | HE2  | PHE | X | 186 | 51.243 | 67.764 | 40.269 | 0.00 | 0.00 |
| ATOM | 2873 | CD2  | PHE | X | 186 | 50.217 | 67.043 | 38.440 | 0.00 | 0.00 |
| ATOM | 2874 | HD2  | PHE | X | 186 | 50.898 | 67.344 | 37.658 | 0.00 | 0.00 |

|      |      |      |     |   |     |        |        |        |      |      |
|------|------|------|-----|---|-----|--------|--------|--------|------|------|
| ATOM | 2875 | C    | PHE | X | 186 | 48.308 | 67.151 | 34.230 | 0.00 | 0.00 |
| ATOM | 2876 | O    | PHE | X | 186 | 49.271 | 67.068 | 33.432 | 0.00 | 0.00 |
| ATOM | 2877 | N    | GLY | X | 187 | 47.046 | 67.049 | 33.706 | 0.00 | 0.00 |
| ATOM | 2878 | H    | GLY | X | 187 | 46.302 | 67.382 | 34.302 | 0.00 | 0.00 |
| ATOM | 2879 | CA   | GLY | X | 187 | 46.662 | 66.835 | 32.320 | 0.00 | 0.00 |
| ATOM | 2880 | HA2  | GLY | X | 187 | 46.222 | 67.775 | 31.972 | 0.00 | 0.00 |
| ATOM | 2881 | HA3  | GLY | X | 187 | 47.636 | 66.684 | 31.715 | 0.00 | 0.00 |
| ATOM | 2882 | C    | GLY | X | 187 | 45.614 | 65.768 | 32.027 | 0.00 | 0.00 |
| ATOM | 2883 | O    | GLY | X | 187 | 45.208 | 65.584 | 30.860 | 0.00 | 0.00 |
| ATOM | 2884 | N    | GLY | X | 188 | 45.157 | 64.970 | 33.055 | 0.00 | 0.00 |
| ATOM | 2885 | H    | GLY | X | 188 | 45.649 | 65.066 | 33.932 | 0.00 | 0.00 |
| ATOM | 2886 | CA   | GLY | X | 188 | 44.224 | 63.910 | 32.773 | 0.00 | 0.00 |
| ATOM | 2887 | HA2  | GLY | X | 188 | 44.615 | 63.294 | 31.943 | 0.00 | 0.00 |
| ATOM | 2888 | HA3  | GLY | X | 188 | 44.179 | 63.358 | 33.667 | 0.00 | 0.00 |
| ATOM | 2889 | C    | GLY | X | 188 | 42.827 | 64.362 | 32.429 | 0.00 | 0.00 |
| ATOM | 2890 | O    | GLY | X | 188 | 42.438 | 65.456 | 32.774 | 0.00 | 0.00 |
| ATOM | 2891 | N    | ASP | X | 189 | 41.960 | 63.542 | 31.831 | 0.00 | 0.00 |
| ATOM | 2892 | H    | ASP | X | 189 | 42.326 | 62.656 | 31.512 | 0.00 | 0.00 |
| ATOM | 2893 | CA   | ASP | X | 189 | 40.545 | 63.745 | 31.706 | 0.00 | 0.00 |
| ATOM | 2894 | HA   | ASP | X | 189 | 40.293 | 64.786 | 31.908 | 0.00 | 0.00 |
| ATOM | 2895 | CB   | ASP | X | 189 | 40.083 | 63.312 | 30.308 | 0.00 | 0.00 |
| ATOM | 2896 | HB2  | ASP | X | 189 | 40.809 | 63.850 | 29.699 | 0.00 | 0.00 |
| ATOM | 2897 | HB3  | ASP | X | 189 | 40.091 | 62.225 | 30.222 | 0.00 | 0.00 |
| ATOM | 2898 | CG   | ASP | X | 189 | 38.637 | 63.639 | 29.953 | 0.00 | 0.00 |
| ATOM | 2899 | OD1  | ASP | X | 189 | 38.355 | 63.447 | 28.744 | 0.00 | 0.00 |
| ATOM | 2900 | OD2  | ASP | X | 189 | 37.901 | 64.098 | 30.836 | 0.00 | 0.00 |
| ATOM | 2901 | C    | ASP | X | 189 | 39.883 | 62.917 | 32.816 | 0.00 | 0.00 |
| ATOM | 2902 | O    | ASP | X | 189 | 39.830 | 61.699 | 32.767 | 0.00 | 0.00 |
| ATOM | 2903 | N    | PRO | X | 190 | 39.371 | 63.517 | 33.948 | 0.00 | 0.00 |
| ATOM | 2904 | CD   | PRO | X | 190 | 39.217 | 64.960 | 34.104 | 0.00 | 0.00 |
| ATOM | 2905 | HD2  | PRO | X | 190 | 38.799 | 65.505 | 33.258 | 0.00 | 0.00 |
| ATOM | 2906 | HD3  | PRO | X | 190 | 40.217 | 65.357 | 34.279 | 0.00 | 0.00 |
| ATOM | 2907 | CG   | PRO | X | 190 | 38.318 | 65.073 | 35.260 | 0.00 | 0.00 |
| ATOM | 2908 | HG2  | PRO | X | 190 | 37.295 | 65.105 | 34.884 | 0.00 | 0.00 |
| ATOM | 2909 | HG3  | PRO | X | 190 | 38.404 | 65.980 | 35.858 | 0.00 | 0.00 |
| ATOM | 2910 | CB   | PRO | X | 190 | 38.476 | 63.835 | 36.143 | 0.00 | 0.00 |
| ATOM | 2911 | HB2  | PRO | X | 190 | 37.536 | 63.565 | 36.624 | 0.00 | 0.00 |
| ATOM | 2912 | HB3  | PRO | X | 190 | 39.360 | 63.836 | 36.781 | 0.00 | 0.00 |
| ATOM | 2913 | CA   | PRO | X | 190 | 38.676 | 62.805 | 35.067 | 0.00 | 0.00 |
| ATOM | 2914 | HA   | PRO | X | 190 | 39.347 | 62.020 | 35.416 | 0.00 | 0.00 |
| ATOM | 2915 | C    | PRO | X | 190 | 37.431 | 62.162 | 34.550 | 0.00 | 0.00 |
| ATOM | 2916 | O    | PRO | X | 190 | 36.807 | 61.388 | 35.295 | 0.00 | 0.00 |
| ATOM | 2917 | N    | THR | X | 191 | 36.990 | 62.491 | 33.311 | 0.00 | 0.00 |
| ATOM | 2918 | H    | THR | X | 191 | 37.489 | 63.137 | 32.716 | 0.00 | 0.00 |
| ATOM | 2919 | CA   | THR | X | 191 | 35.824 | 61.756 | 32.719 | 0.00 | 0.00 |
| ATOM | 2920 | HA   | THR | X | 191 | 35.071 | 61.495 | 33.463 | 0.00 | 0.00 |
| ATOM | 2921 | CB   | THR | X | 191 | 34.980 | 62.588 | 31.704 | 0.00 | 0.00 |
| ATOM | 2922 | HB   | THR | X | 191 | 34.079 | 62.006 | 31.511 | 0.00 | 0.00 |
| ATOM | 2923 | CG2  | THR | X | 191 | 34.569 | 63.898 | 32.308 | 0.00 | 0.00 |
| ATOM | 2924 | HG21 | THR | X | 191 | 33.942 | 63.773 | 33.190 | 0.00 | 0.00 |
| ATOM | 2925 | HG22 | THR | X | 191 | 35.467 | 64.453 | 32.581 | 0.00 | 0.00 |
| ATOM | 2926 | HG23 | THR | X | 191 | 34.018 | 64.399 | 31.512 | 0.00 | 0.00 |
| ATOM | 2927 | OG1  | THR | X | 191 | 35.642 | 62.820 | 30.441 | 0.00 | 0.00 |
| ATOM | 2928 | HG1  | THR | X | 191 | 36.419 | 63.333 | 30.676 | 0.00 | 0.00 |
| ATOM | 2929 | C    | THR | X | 191 | 36.151 | 60.430 | 31.959 | 0.00 | 0.00 |
| ATOM | 2930 | O    | THR | X | 191 | 35.264 | 59.873 | 31.349 | 0.00 | 0.00 |
| ATOM | 2931 | N    | SER | X | 192 | 37.432 | 59.950 | 32.022 | 0.00 | 0.00 |
| ATOM | 2932 | H    | SER | X | 192 | 38.088 | 60.511 | 32.546 | 0.00 | 0.00 |
| ATOM | 2933 | CA   | SER | X | 192 | 37.910 | 58.674 | 31.538 | 0.00 | 0.00 |
| ATOM | 2934 | HA   | SER | X | 192 | 37.039 | 58.030 | 31.660 | 0.00 | 0.00 |
| ATOM | 2935 | CB   | SER | X | 192 | 38.298 | 58.778 | 30.048 | 0.00 | 0.00 |
| ATOM | 2936 | HB2  | SER | X | 192 | 37.520 | 59.271 | 29.465 | 0.00 | 0.00 |
| ATOM | 2937 | HB3  | SER | X | 192 | 39.145 | 59.447 | 29.897 | 0.00 | 0.00 |
| ATOM | 2938 | OG   | SER | X | 192 | 38.501 | 57.520 | 29.508 | 0.00 | 0.00 |
| ATOM | 2939 | HG   | SER | X | 192 | 38.387 | 57.617 | 28.560 | 0.00 | 0.00 |
| ATOM | 2940 | C    | SER | X | 192 | 39.064 | 57.925 | 32.285 | 0.00 | 0.00 |
| ATOM | 2941 | O    | SER | X | 192 | 40.206 | 58.143 | 31.906 | 0.00 | 0.00 |
| ATOM | 2942 | N    | VAL | X | 193 | 38.744 | 57.192 | 33.314 | 0.00 | 0.00 |
| ATOM | 2943 | H    | VAL | X | 193 | 37.789 | 57.054 | 33.613 | 0.00 | 0.00 |
| ATOM | 2944 | CA   | VAL | X | 193 | 39.689 | 56.747 | 34.309 | 0.00 | 0.00 |

|      |      |      |     |   |     |        |        |        |      |      |
|------|------|------|-----|---|-----|--------|--------|--------|------|------|
| ATOM | 2945 | HA   | VAL | X | 193 | 40.714 | 57.036 | 34.078 | 0.00 | 0.00 |
| ATOM | 2946 | CB   | VAL | X | 193 | 39.392 | 57.303 | 35.744 | 0.00 | 0.00 |
| ATOM | 2947 | HB   | VAL | X | 193 | 38.457 | 56.918 | 36.151 | 0.00 | 0.00 |
| ATOM | 2948 | CG1  | VAL | X | 193 | 40.446 | 56.899 | 36.848 | 0.00 | 0.00 |
| ATOM | 2949 | HG11 | VAL | X | 193 | 40.604 | 55.825 | 36.944 | 0.00 | 0.00 |
| ATOM | 2950 | HG12 | VAL | X | 193 | 41.388 | 57.424 | 36.689 | 0.00 | 0.00 |
| ATOM | 2951 | HG13 | VAL | X | 193 | 40.171 | 57.206 | 37.857 | 0.00 | 0.00 |
| ATOM | 2952 | CG2  | VAL | X | 193 | 39.096 | 58.861 | 35.800 | 0.00 | 0.00 |
| ATOM | 2953 | HG21 | VAL | X | 193 | 40.051 | 59.372 | 35.683 | 0.00 | 0.00 |
| ATOM | 2954 | HG22 | VAL | X | 193 | 38.394 | 59.246 | 35.060 | 0.00 | 0.00 |
| ATOM | 2955 | HG23 | VAL | X | 193 | 38.704 | 59.128 | 36.781 | 0.00 | 0.00 |
| ATOM | 2956 | C    | VAL | X | 193 | 39.643 | 55.193 | 34.382 | 0.00 | 0.00 |
| ATOM | 2957 | O    | VAL | X | 193 | 38.707 | 54.533 | 34.851 | 0.00 | 0.00 |
| ATOM | 2958 | N    | THR | X | 194 | 40.820 | 54.616 | 34.072 | 0.00 | 0.00 |
| ATOM | 2959 | H    | THR | X | 194 | 41.531 | 55.155 | 33.600 | 0.00 | 0.00 |
| ATOM | 2960 | CA   | THR | X | 194 | 41.087 | 53.196 | 34.007 | 0.00 | 0.00 |
| ATOM | 2961 | HA   | THR | X | 194 | 40.137 | 52.686 | 34.166 | 0.00 | 0.00 |
| ATOM | 2962 | CB   | THR | X | 194 | 41.593 | 52.806 | 32.619 | 0.00 | 0.00 |
| ATOM | 2963 | HB   | THR | X | 194 | 42.519 | 53.359 | 32.460 | 0.00 | 0.00 |
| ATOM | 2964 | CG2  | THR | X | 194 | 41.892 | 51.355 | 32.419 | 0.00 | 0.00 |
| ATOM | 2965 | HG21 | THR | X | 194 | 40.939 | 50.832 | 32.501 | 0.00 | 0.00 |
| ATOM | 2966 | HG22 | THR | X | 194 | 42.368 | 51.171 | 31.456 | 0.00 | 0.00 |
| ATOM | 2967 | HG23 | THR | X | 194 | 42.616 | 51.091 | 33.190 | 0.00 | 0.00 |
| ATOM | 2968 | OG1  | THR | X | 194 | 40.724 | 53.149 | 31.585 | 0.00 | 0.00 |
| ATOM | 2969 | HG1  | THR | X | 194 | 41.090 | 53.972 | 31.255 | 0.00 | 0.00 |
| ATOM | 2970 | C    | THR | X | 194 | 41.930 | 52.714 | 35.143 | 0.00 | 0.00 |
| ATOM | 2971 | O    | THR | X | 194 | 43.078 | 53.209 | 35.309 | 0.00 | 0.00 |
| ATOM | 2972 | N    | LEU | X | 195 | 41.351 | 51.856 | 35.964 | 0.00 | 0.00 |
| ATOM | 2973 | H    | LEU | X | 195 | 40.410 | 51.511 | 35.837 | 0.00 | 0.00 |
| ATOM | 2974 | CA   | LEU | X | 195 | 42.242 | 51.242 | 36.913 | 0.00 | 0.00 |
| ATOM | 2975 | HA   | LEU | X | 195 | 42.958 | 51.940 | 37.349 | 0.00 | 0.00 |
| ATOM | 2976 | CB   | LEU | X | 195 | 41.362 | 50.923 | 38.123 | 0.00 | 0.00 |
| ATOM | 2977 | HB2  | LEU | X | 195 | 40.807 | 50.016 | 37.881 | 0.00 | 0.00 |
| ATOM | 2978 | HB3  | LEU | X | 195 | 42.097 | 50.625 | 38.870 | 0.00 | 0.00 |
| ATOM | 2979 | CG   | LEU | X | 195 | 40.337 | 52.001 | 38.637 | 0.00 | 0.00 |
| ATOM | 2980 | HG   | LEU | X | 195 | 39.575 | 52.065 | 37.860 | 0.00 | 0.00 |
| ATOM | 2981 | CD1  | LEU | X | 195 | 39.905 | 51.413 | 39.970 | 0.00 | 0.00 |
| ATOM | 2982 | HD11 | LEU | X | 195 | 39.421 | 52.122 | 40.641 | 0.00 | 0.00 |
| ATOM | 2983 | HD12 | LEU | X | 195 | 39.339 | 50.509 | 39.742 | 0.00 | 0.00 |
| ATOM | 2984 | HD13 | LEU | X | 195 | 40.792 | 51.101 | 40.522 | 0.00 | 0.00 |
| ATOM | 2985 | CD2  | LEU | X | 195 | 41.020 | 53.282 | 38.812 | 0.00 | 0.00 |
| ATOM | 2986 | HD21 | LEU | X | 195 | 41.829 | 53.178 | 39.536 | 0.00 | 0.00 |
| ATOM | 2987 | HD22 | LEU | X | 195 | 41.322 | 53.621 | 37.821 | 0.00 | 0.00 |
| ATOM | 2988 | HD23 | LEU | X | 195 | 40.259 | 53.935 | 39.240 | 0.00 | 0.00 |
| ATOM | 2989 | C    | LEU | X | 195 | 42.901 | 49.994 | 36.523 | 0.00 | 0.00 |
| ATOM | 2990 | O    | LEU | X | 195 | 42.236 | 49.145 | 35.879 | 0.00 | 0.00 |
| ATOM | 2991 | N    | PHE | X | 196 | 44.200 | 49.810 | 36.763 | 0.00 | 0.00 |
| ATOM | 2992 | H    | PHE | X | 196 | 44.796 | 50.506 | 37.188 | 0.00 | 0.00 |
| ATOM | 2993 | CA   | PHE | X | 196 | 45.006 | 48.613 | 36.393 | 0.00 | 0.00 |
| ATOM | 2994 | HA   | PHE | X | 196 | 44.282 | 47.803 | 36.308 | 0.00 | 0.00 |
| ATOM | 2995 | CB   | PHE | X | 196 | 45.640 | 48.794 | 35.033 | 0.00 | 0.00 |
| ATOM | 2996 | HB2  | PHE | X | 196 | 45.872 | 47.799 | 34.652 | 0.00 | 0.00 |
| ATOM | 2997 | HB3  | PHE | X | 196 | 44.919 | 49.301 | 34.393 | 0.00 | 0.00 |
| ATOM | 2998 | CG   | PHE | X | 196 | 46.869 | 49.582 | 35.035 | 0.00 | 0.00 |
| ATOM | 2999 | CD1  | PHE | X | 196 | 46.876 | 50.949 | 35.505 | 0.00 | 0.00 |
| ATOM | 3000 | HD1  | PHE | X | 196 | 45.988 | 51.388 | 35.935 | 0.00 | 0.00 |
| ATOM | 3001 | CE1  | PHE | X | 196 | 48.027 | 51.779 | 35.373 | 0.00 | 0.00 |
| ATOM | 3002 | HE1  | PHE | X | 196 | 48.026 | 52.797 | 35.734 | 0.00 | 0.00 |
| ATOM | 3003 | CZ   | PHE | X | 196 | 49.167 | 51.209 | 34.747 | 0.00 | 0.00 |
| ATOM | 3004 | HZ   | PHE | X | 196 | 50.071 | 51.773 | 34.569 | 0.00 | 0.00 |
| ATOM | 3005 | CE2  | PHE | X | 196 | 49.134 | 49.945 | 34.159 | 0.00 | 0.00 |
| ATOM | 3006 | HE2  | PHE | X | 196 | 50.031 | 49.726 | 33.599 | 0.00 | 0.00 |
| ATOM | 3007 | CD2  | PHE | X | 196 | 47.990 | 49.100 | 34.345 | 0.00 | 0.00 |
| ATOM | 3008 | HD2  | PHE | X | 196 | 47.927 | 48.091 | 33.966 | 0.00 | 0.00 |
| ATOM | 3009 | C    | PHE | X | 196 | 45.928 | 48.157 | 37.518 | 0.00 | 0.00 |
| ATOM | 3010 | O    | PHE | X | 196 | 46.322 | 48.944 | 38.356 | 0.00 | 0.00 |
| ATOM | 3011 | N    | GLY | X | 197 | 46.296 | 46.869 | 37.599 | 0.00 | 0.00 |
| ATOM | 3012 | H    | GLY | X | 197 | 45.813 | 46.241 | 36.973 | 0.00 | 0.00 |
| ATOM | 3013 | CA   | GLY | X | 197 | 46.977 | 46.229 | 38.755 | 0.00 | 0.00 |
| ATOM | 3014 | HA2  | GLY | X | 197 | 47.834 | 46.801 | 39.054 | 0.00 | 0.00 |

|      |      |     |     |   |     |        |        |        |      |      |
|------|------|-----|-----|---|-----|--------|--------|--------|------|------|
| ATOM | 3015 | HA3 | GLY | X | 197 | 46.284 | 46.269 | 39.560 | 0.00 | 0.00 |
| ATOM | 3016 | C   | GLY | X | 197 | 47.254 | 44.743 | 38.554 | 0.00 | 0.00 |
| ATOM | 3017 | O   | GLY | X | 197 | 46.463 | 44.128 | 37.794 | 0.00 | 0.00 |
| ATOM | 3018 | N   | GLU | X | 198 | 48.229 | 44.127 | 39.226 | 0.00 | 0.00 |
| ATOM | 3019 | H   | GLU | X | 198 | 48.838 | 44.634 | 39.852 | 0.00 | 0.00 |
| ATOM | 3020 | CA  | GLU | X | 198 | 48.454 | 42.713 | 39.154 | 0.00 | 0.00 |
| ATOM | 3021 | HA  | GLU | X | 198 | 47.700 | 42.315 | 38.476 | 0.00 | 0.00 |
| ATOM | 3022 | CB  | GLU | X | 198 | 49.763 | 42.322 | 38.522 | 0.00 | 0.00 |
| ATOM | 3023 | HB2 | GLU | X | 198 | 49.676 | 41.310 | 38.127 | 0.00 | 0.00 |
| ATOM | 3024 | HB3 | GLU | X | 198 | 50.012 | 42.935 | 37.655 | 0.00 | 0.00 |
| ATOM | 3025 | CG  | GLU | X | 198 | 50.988 | 42.298 | 39.446 | 0.00 | 0.00 |
| ATOM | 3026 | HG2 | GLU | X | 198 | 50.814 | 41.605 | 40.269 | 0.00 | 0.00 |
| ATOM | 3027 | HG3 | GLU | X | 198 | 51.782 | 41.892 | 38.820 | 0.00 | 0.00 |
| ATOM | 3028 | CD  | GLU | X | 198 | 51.432 | 43.660 | 40.050 | 0.00 | 0.00 |
| ATOM | 3029 | OE1 | GLU | X | 198 | 50.679 | 44.399 | 40.722 | 0.00 | 0.00 |
| ATOM | 3030 | OE2 | GLU | X | 198 | 52.666 | 44.049 | 39.757 | 0.00 | 0.00 |
| ATOM | 3031 | C   | GLU | X | 198 | 48.150 | 41.921 | 40.486 | 0.00 | 0.00 |
| ATOM | 3032 | O   | GLU | X | 198 | 48.337 | 42.435 | 41.574 | 0.00 | 0.00 |
| ATOM | 3033 | N   | XA1 | X | 199 | 47.662 | 40.696 | 40.391 | 0.00 | 0.00 |
| ATOM | 3034 | CA  | XA1 | X | 199 | 47.485 | 39.772 | 41.522 | 0.00 | 0.00 |
| ATOM | 3035 | C   | XA1 | X | 199 | 46.565 | 40.445 | 42.654 | 0.00 | 0.00 |
| ATOM | 3036 | O   | XA1 | X | 199 | 45.344 | 40.514 | 42.493 | 0.00 | 0.00 |
| ATOM | 3037 | CB  | XA1 | X | 199 | 48.795 | 39.465 | 42.158 | 0.00 | 0.00 |
| ATOM | 3038 | OG  | XA1 | X | 199 | 48.598 | 38.433 | 43.152 | 0.00 | 0.00 |
| ATOM | 3039 | P1  | XA1 | X | 199 | 49.620 | 38.376 | 44.351 | 0.00 | 0.00 |
| ATOM | 3040 | O1  | XA1 | X | 199 | 49.837 | 39.723 | 44.860 | 0.00 | 0.00 |
| ATOM | 3041 | O2  | XA1 | X | 199 | 50.837 | 37.766 | 43.869 | 0.00 | 0.00 |
| ATOM | 3042 | C1  | XA1 | X | 199 | 48.756 | 37.239 | 45.348 | 0.00 | 0.00 |
| ATOM | 3043 | H   | XA1 | X | 199 | 47.665 | 40.269 | 39.475 | 0.00 | 0.00 |
| ATOM | 3044 | HA  | XA1 | X | 199 | 47.022 | 38.826 | 41.241 | 0.00 | 0.00 |
| ATOM | 3045 | HB2 | XA1 | X | 199 | 49.473 | 39.201 | 41.343 | 0.00 | 0.00 |
| ATOM | 3046 | HB3 | XA1 | X | 199 | 49.260 | 40.368 | 42.561 | 0.00 | 0.00 |
| ATOM | 3047 | H11 | XA1 | X | 199 | 49.237 | 37.078 | 46.315 | 0.00 | 0.00 |
| ATOM | 3048 | H12 | XA1 | X | 199 | 47.823 | 37.750 | 45.596 | 0.00 | 0.00 |
| ATOM | 3049 | H13 | XA1 | X | 199 | 48.645 | 36.258 | 44.882 | 0.00 | 0.00 |
| ATOM | 3050 | N   | ALA | X | 200 | 47.106 | 40.873 | 43.813 | 0.00 | 0.00 |
| ATOM | 3051 | H   | ALA | X | 200 | 48.102 | 40.791 | 43.961 | 0.00 | 0.00 |
| ATOM | 3052 | CA  | ALA | X | 200 | 46.353 | 41.515 | 44.888 | 0.00 | 0.00 |
| ATOM | 3053 | HA  | ALA | X | 200 | 45.395 | 40.995 | 44.887 | 0.00 | 0.00 |
| ATOM | 3054 | CB  | ALA | X | 200 | 47.044 | 41.360 | 46.201 | 0.00 | 0.00 |
| ATOM | 3055 | HB1 | ALA | X | 200 | 47.986 | 41.902 | 46.279 | 0.00 | 0.00 |
| ATOM | 3056 | HB2 | ALA | X | 200 | 46.355 | 41.558 | 47.022 | 0.00 | 0.00 |
| ATOM | 3057 | HB3 | ALA | X | 200 | 47.335 | 40.322 | 46.364 | 0.00 | 0.00 |
| ATOM | 3058 | C   | ALA | X | 200 | 45.928 | 42.929 | 44.483 | 0.00 | 0.00 |
| ATOM | 3059 | O   | ALA | X | 200 | 44.935 | 43.455 | 45.050 | 0.00 | 0.00 |
| ATOM | 3060 | N   | GLY | X | 201 | 46.612 | 43.530 | 43.481 | 0.00 | 0.00 |
| ATOM | 3061 | H   | GLY | X | 201 | 47.523 | 43.166 | 43.243 | 0.00 | 0.00 |
| ATOM | 3062 | CA  | GLY | X | 201 | 46.225 | 44.726 | 42.767 | 0.00 | 0.00 |
| ATOM | 3063 | HA2 | GLY | X | 201 | 45.952 | 45.486 | 43.452 | 0.00 | 0.00 |
| ATOM | 3064 | HA3 | GLY | X | 201 | 47.078 | 45.147 | 42.202 | 0.00 | 0.00 |
| ATOM | 3065 | C   | GLY | X | 201 | 45.065 | 44.431 | 41.816 | 0.00 | 0.00 |
| ATOM | 3066 | O   | GLY | X | 201 | 44.019 | 45.127 | 41.796 | 0.00 | 0.00 |
| ATOM | 3067 | N   | ALA | X | 202 | 45.189 | 43.326 | 41.017 | 0.00 | 0.00 |
| ATOM | 3068 | H   | ALA | X | 202 | 46.043 | 42.792 | 41.087 | 0.00 | 0.00 |
| ATOM | 3069 | CA  | ALA | X | 202 | 44.063 | 42.847 | 40.163 | 0.00 | 0.00 |
| ATOM | 3070 | HA  | ALA | X | 202 | 43.700 | 43.594 | 39.457 | 0.00 | 0.00 |
| ATOM | 3071 | CB  | ALA | X | 202 | 44.561 | 41.697 | 39.267 | 0.00 | 0.00 |
| ATOM | 3072 | HB1 | ALA | X | 202 | 44.828 | 40.846 | 39.893 | 0.00 | 0.00 |
| ATOM | 3073 | HB2 | ALA | X | 202 | 43.733 | 41.429 | 38.611 | 0.00 | 0.00 |
| ATOM | 3074 | HB3 | ALA | X | 202 | 45.451 | 42.045 | 38.742 | 0.00 | 0.00 |
| ATOM | 3075 | C   | ALA | X | 202 | 42.785 | 42.532 | 40.929 | 0.00 | 0.00 |
| ATOM | 3076 | O   | ALA | X | 202 | 41.649 | 42.935 | 40.574 | 0.00 | 0.00 |
| ATOM | 3077 | N   | ALA | X | 203 | 42.942 | 41.884 | 42.034 | 0.00 | 0.00 |
| ATOM | 3078 | H   | ALA | X | 203 | 43.872 | 41.496 | 42.100 | 0.00 | 0.00 |
| ATOM | 3079 | CA  | ALA | X | 203 | 41.977 | 41.660 | 43.035 | 0.00 | 0.00 |
| ATOM | 3080 | HA  | ALA | X | 203 | 41.137 | 41.169 | 42.544 | 0.00 | 0.00 |
| ATOM | 3081 | CB  | ALA | X | 203 | 42.534 | 40.735 | 44.131 | 0.00 | 0.00 |
| ATOM | 3082 | HB1 | ALA | X | 203 | 41.778 | 40.555 | 44.896 | 0.00 | 0.00 |
| ATOM | 3083 | HB2 | ALA | X | 203 | 42.857 | 39.849 | 43.584 | 0.00 | 0.00 |
| ATOM | 3084 | HB3 | ALA | X | 203 | 43.402 | 41.164 | 44.631 | 0.00 | 0.00 |



|      |      |      |     |   |     |        |        |        |      |      |
|------|------|------|-----|---|-----|--------|--------|--------|------|------|
| ATOM | 3085 | C    | ALA | X | 203 | 41.478 | 42.955 | 43.672 | 0.00 | 0.00 |
| ATOM | 3086 | O    | ALA | X | 203 | 40.267 | 43.101 | 43.715 | 0.00 | 0.00 |
| ATOM | 3087 | N    | SER | X | 204 | 42.294 | 43.975 | 44.086 | 0.00 | 0.00 |
| ATOM | 3088 | H    | SER | X | 204 | 43.264 | 43.724 | 43.963 | 0.00 | 0.00 |
| ATOM | 3089 | CA   | SER | X | 204 | 41.939 | 45.352 | 44.426 | 0.00 | 0.00 |
| ATOM | 3090 | HA   | SER | X | 204 | 41.351 | 45.192 | 45.330 | 0.00 | 0.00 |
| ATOM | 3091 | CB   | SER | X | 204 | 43.076 | 46.245 | 44.782 | 0.00 | 0.00 |
| ATOM | 3092 | HB2  | SER | X | 204 | 43.689 | 46.254 | 43.881 | 0.00 | 0.00 |
| ATOM | 3093 | HB3  | SER | X | 204 | 42.742 | 47.247 | 45.052 | 0.00 | 0.00 |
| ATOM | 3094 | OG   | SER | X | 204 | 43.904 | 45.766 | 45.892 | 0.00 | 0.00 |
| ATOM | 3095 | HG   | SER | X | 204 | 44.356 | 44.978 | 45.581 | 0.00 | 0.00 |
| ATOM | 3096 | C    | SER | X | 204 | 41.137 | 46.058 | 43.341 | 0.00 | 0.00 |
| ATOM | 3097 | O    | SER | X | 204 | 40.122 | 46.532 | 43.765 | 0.00 | 0.00 |
| ATOM | 3098 | N    | VAL | X | 205 | 41.470 | 46.003 | 42.009 | 0.00 | 0.00 |
| ATOM | 3099 | H    | VAL | X | 205 | 42.251 | 45.390 | 41.825 | 0.00 | 0.00 |
| ATOM | 3100 | CA   | VAL | X | 205 | 40.688 | 46.671 | 40.956 | 0.00 | 0.00 |
| ATOM | 3101 | HA   | VAL | X | 205 | 40.527 | 47.701 | 41.274 | 0.00 | 0.00 |
| ATOM | 3102 | CB   | VAL | X | 205 | 41.468 | 46.562 | 39.606 | 0.00 | 0.00 |
| ATOM | 3103 | HB   | VAL | X | 205 | 41.861 | 45.566 | 39.401 | 0.00 | 0.00 |
| ATOM | 3104 | CG1  | VAL | X | 205 | 40.587 | 46.967 | 38.379 | 0.00 | 0.00 |
| ATOM | 3105 | HG11 | VAL | X | 205 | 41.126 | 47.454 | 37.566 | 0.00 | 0.00 |
| ATOM | 3106 | HG12 | VAL | X | 205 | 40.245 | 45.997 | 38.018 | 0.00 | 0.00 |
| ATOM | 3107 | HG13 | VAL | X | 205 | 39.720 | 47.544 | 38.701 | 0.00 | 0.00 |
| ATOM | 3108 | CG2  | VAL | X | 205 | 42.588 | 47.659 | 39.616 | 0.00 | 0.00 |
| ATOM | 3109 | HG21 | VAL | X | 205 | 43.107 | 47.770 | 38.663 | 0.00 | 0.00 |
| ATOM | 3110 | HG22 | VAL | X | 205 | 42.346 | 48.671 | 39.938 | 0.00 | 0.00 |
| ATOM | 3111 | HG23 | VAL | X | 205 | 43.324 | 47.356 | 40.361 | 0.00 | 0.00 |
| ATOM | 3112 | C    | VAL | X | 205 | 39.419 | 45.821 | 40.970 | 0.00 | 0.00 |
| ATOM | 3113 | O    | VAL | X | 205 | 38.385 | 46.483 | 41.040 | 0.00 | 0.00 |
| ATOM | 3114 | N    | GLY | X | 206 | 39.409 | 44.530 | 41.060 | 0.00 | 0.00 |
| ATOM | 3115 | H    | GLY | X | 206 | 40.350 | 44.163 | 41.035 | 0.00 | 0.00 |
| ATOM | 3116 | CA   | GLY | X | 206 | 38.248 | 43.618 | 41.076 | 0.00 | 0.00 |
| ATOM | 3117 | HA2  | GLY | X | 206 | 37.629 | 43.690 | 40.142 | 0.00 | 0.00 |
| ATOM | 3118 | HA3  | GLY | X | 206 | 38.669 | 42.612 | 41.192 | 0.00 | 0.00 |
| ATOM | 3119 | C    | GLY | X | 206 | 37.322 | 43.941 | 42.304 | 0.00 | 0.00 |
| ATOM | 3120 | O    | GLY | X | 206 | 36.146 | 43.662 | 42.230 | 0.00 | 0.00 |
| ATOM | 3121 | N    | MET | X | 207 | 37.799 | 44.486 | 43.471 | 0.00 | 0.00 |
| ATOM | 3122 | H    | MET | X | 207 | 38.800 | 44.561 | 43.583 | 0.00 | 0.00 |
| ATOM | 3123 | CA   | MET | X | 207 | 36.959 | 44.838 | 44.548 | 0.00 | 0.00 |
| ATOM | 3124 | HA   | MET | X | 207 | 36.283 | 44.019 | 44.793 | 0.00 | 0.00 |
| ATOM | 3125 | CB   | MET | X | 207 | 37.641 | 45.097 | 45.839 | 0.00 | 0.00 |
| ATOM | 3126 | HB2  | MET | X | 207 | 38.453 | 45.818 | 45.747 | 0.00 | 0.00 |
| ATOM | 3127 | HB3  | MET | X | 207 | 36.955 | 45.574 | 46.539 | 0.00 | 0.00 |
| ATOM | 3128 | CG   | MET | X | 207 | 38.247 | 43.807 | 46.463 | 0.00 | 0.00 |
| ATOM | 3129 | HG2  | MET | X | 207 | 38.915 | 43.367 | 45.722 | 0.00 | 0.00 |
| ATOM | 3130 | HG3  | MET | X | 207 | 38.844 | 44.164 | 47.302 | 0.00 | 0.00 |
| ATOM | 3131 | SD   | MET | X | 207 | 37.214 | 42.474 | 47.178 | 0.00 | 0.00 |
| ATOM | 3132 | CE   | MET | X | 207 | 38.573 | 41.304 | 47.428 | 0.00 | 0.00 |
| ATOM | 3133 | HE1  | MET | X | 207 | 38.333 | 40.423 | 48.023 | 0.00 | 0.00 |
| ATOM | 3134 | HE2  | MET | X | 207 | 38.848 | 41.050 | 46.405 | 0.00 | 0.00 |
| ATOM | 3135 | HE3  | MET | X | 207 | 39.388 | 41.774 | 47.979 | 0.00 | 0.00 |
| ATOM | 3136 | C    | MET | X | 207 | 36.159 | 46.074 | 44.280 | 0.00 | 0.00 |
| ATOM | 3137 | O    | MET | X | 207 | 35.040 | 46.164 | 44.654 | 0.00 | 0.00 |
| ATOM | 3138 | N    | HIE | X | 208 | 36.790 | 47.132 | 43.706 | 0.00 | 0.00 |
| ATOM | 3139 | H    | HIE | X | 208 | 37.735 | 47.021 | 43.367 | 0.00 | 0.00 |
| ATOM | 3140 | CA   | HIE | X | 208 | 36.205 | 48.444 | 43.478 | 0.00 | 0.00 |
| ATOM | 3141 | HA   | HIE | X | 208 | 35.757 | 48.731 | 44.429 | 0.00 | 0.00 |
| ATOM | 3142 | CB   | HIE | X | 208 | 37.327 | 49.417 | 43.029 | 0.00 | 0.00 |
| ATOM | 3143 | HB2  | HIE | X | 208 | 37.779 | 48.967 | 42.145 | 0.00 | 0.00 |
| ATOM | 3144 | HB3  | HIE | X | 208 | 36.940 | 50.408 | 42.790 | 0.00 | 0.00 |
| ATOM | 3145 | CG   | HIE | X | 208 | 38.405 | 49.801 | 44.094 | 0.00 | 0.00 |
| ATOM | 3146 | ND1  | HIE | X | 208 | 38.129 | 49.963 | 45.411 | 0.00 | 0.00 |
| ATOM | 3147 | CE1  | HIE | X | 208 | 39.290 | 50.063 | 46.062 | 0.00 | 0.00 |
| ATOM | 3148 | HE1  | HIE | X | 208 | 39.445 | 50.214 | 47.120 | 0.00 | 0.00 |
| ATOM | 3149 | NE2  | HIE | X | 208 | 40.273 | 49.769 | 45.215 | 0.00 | 0.00 |
| ATOM | 3150 | HE2  | HIE | X | 208 | 41.204 | 49.440 | 45.429 | 0.00 | 0.00 |
| ATOM | 3151 | CD2  | HIE | X | 208 | 39.733 | 49.728 | 43.966 | 0.00 | 0.00 |
| ATOM | 3152 | HD2  | HIE | X | 208 | 40.303 | 49.526 | 43.071 | 0.00 | 0.00 |
| ATOM | 3153 | C    | HIE | X | 208 | 35.100 | 48.339 | 42.406 | 0.00 | 0.00 |
| ATOM | 3154 | O    | HIE | X | 208 | 34.235 | 49.190 | 42.417 | 0.00 | 0.00 |

|      |      |      |     |   |     |        |        |        |      |      |
|------|------|------|-----|---|-----|--------|--------|--------|------|------|
| ATOM | 3155 | N    | LEU | X | 209 | 35.226 | 47.319 | 41.514 | 0.00 | 0.00 |
| ATOM | 3156 | H    | LEU | X | 209 | 36.092 | 46.801 | 41.499 | 0.00 | 0.00 |
| ATOM | 3157 | CA   | LEU | X | 209 | 34.113 | 46.836 | 40.706 | 0.00 | 0.00 |
| ATOM | 3158 | HA   | LEU | X | 209 | 33.834 | 47.641 | 40.026 | 0.00 | 0.00 |
| ATOM | 3159 | CB   | LEU | X | 209 | 34.933 | 45.880 | 39.812 | 0.00 | 0.00 |
| ATOM | 3160 | HB2  | LEU | X | 209 | 35.806 | 46.289 | 39.304 | 0.00 | 0.00 |
| ATOM | 3161 | HB3  | LEU | X | 209 | 35.181 | 45.054 | 40.479 | 0.00 | 0.00 |
| ATOM | 3162 | CG   | LEU | X | 209 | 34.038 | 45.243 | 38.625 | 0.00 | 0.00 |
| ATOM | 3163 | HG   | LEU | X | 209 | 33.253 | 44.616 | 39.047 | 0.00 | 0.00 |
| ATOM | 3164 | CD1  | LEU | X | 209 | 33.542 | 46.288 | 37.714 | 0.00 | 0.00 |
| ATOM | 3165 | HD11 | LEU | X | 209 | 34.360 | 46.797 | 37.206 | 0.00 | 0.00 |
| ATOM | 3166 | HD12 | LEU | X | 209 | 32.874 | 45.825 | 36.988 | 0.00 | 0.00 |
| ATOM | 3167 | HD13 | LEU | X | 209 | 32.839 | 46.935 | 38.238 | 0.00 | 0.00 |
| ATOM | 3168 | CD2  | LEU | X | 209 | 35.019 | 44.258 | 37.955 | 0.00 | 0.00 |
| ATOM | 3169 | HD21 | LEU | X | 209 | 35.431 | 43.516 | 38.638 | 0.00 | 0.00 |
| ATOM | 3170 | HD22 | LEU | X | 209 | 34.413 | 43.847 | 37.147 | 0.00 | 0.00 |
| ATOM | 3171 | HD23 | LEU | X | 209 | 35.845 | 44.855 | 37.569 | 0.00 | 0.00 |
| ATOM | 3172 | C    | LEU | X | 209 | 32.910 | 46.163 | 41.412 | 0.00 | 0.00 |
| ATOM | 3173 | O    | LEU | X | 209 | 31.870 | 45.972 | 40.769 | 0.00 | 0.00 |
| ATOM | 3174 | N    | LEU | X | 210 | 33.034 | 45.800 | 42.692 | 0.00 | 0.00 |
| ATOM | 3175 | H    | LEU | X | 210 | 33.953 | 45.787 | 43.112 | 0.00 | 0.00 |
| ATOM | 3176 | CA   | LEU | X | 210 | 32.018 | 45.238 | 43.564 | 0.00 | 0.00 |
| ATOM | 3177 | HA   | LEU | X | 210 | 31.158 | 44.839 | 43.026 | 0.00 | 0.00 |
| ATOM | 3178 | CB   | LEU | X | 210 | 32.590 | 44.044 | 44.358 | 0.00 | 0.00 |
| ATOM | 3179 | HB2  | LEU | X | 210 | 33.476 | 44.367 | 44.904 | 0.00 | 0.00 |
| ATOM | 3180 | HB3  | LEU | X | 210 | 31.807 | 43.767 | 45.064 | 0.00 | 0.00 |
| ATOM | 3181 | CG   | LEU | X | 210 | 32.859 | 42.703 | 43.579 | 0.00 | 0.00 |
| ATOM | 3182 | HG   | LEU | X | 210 | 33.661 | 42.941 | 42.880 | 0.00 | 0.00 |
| ATOM | 3183 | CD1  | LEU | X | 210 | 33.184 | 41.514 | 44.527 | 0.00 | 0.00 |
| ATOM | 3184 | HD11 | LEU | X | 210 | 32.415 | 41.419 | 45.293 | 0.00 | 0.00 |
| ATOM | 3185 | HD12 | LEU | X | 210 | 33.229 | 40.620 | 43.905 | 0.00 | 0.00 |
| ATOM | 3186 | HD13 | LEU | X | 210 | 34.163 | 41.762 | 44.936 | 0.00 | 0.00 |
| ATOM | 3187 | CD2  | LEU | X | 210 | 31.674 | 42.361 | 42.600 | 0.00 | 0.00 |
| ATOM | 3188 | HD21 | LEU | X | 210 | 30.688 | 42.253 | 43.054 | 0.00 | 0.00 |
| ATOM | 3189 | HD22 | LEU | X | 210 | 31.612 | 43.137 | 41.838 | 0.00 | 0.00 |
| ATOM | 3190 | HD23 | LEU | X | 210 | 31.835 | 41.375 | 42.164 | 0.00 | 0.00 |
| ATOM | 3191 | C    | LEU | X | 210 | 31.506 | 46.327 | 44.572 | 0.00 | 0.00 |
| ATOM | 3192 | O    | LEU | X | 210 | 30.339 | 46.351 | 44.888 | 0.00 | 0.00 |
| ATOM | 3193 | N    | SER | X | 211 | 32.353 | 47.133 | 45.121 | 0.00 | 0.00 |
| ATOM | 3194 | H    | SER | X | 211 | 33.306 | 47.114 | 44.787 | 0.00 | 0.00 |
| ATOM | 3195 | CA   | SER | X | 211 | 31.986 | 48.020 | 46.224 | 0.00 | 0.00 |
| ATOM | 3196 | HA   | SER | X | 211 | 31.411 | 47.495 | 46.987 | 0.00 | 0.00 |
| ATOM | 3197 | CB   | SER | X | 211 | 33.213 | 48.284 | 47.151 | 0.00 | 0.00 |
| ATOM | 3198 | HB2  | SER | X | 211 | 33.598 | 47.378 | 47.618 | 0.00 | 0.00 |
| ATOM | 3199 | HB3  | SER | X | 211 | 33.990 | 48.797 | 46.585 | 0.00 | 0.00 |
| ATOM | 3200 | OG   | SER | X | 211 | 32.890 | 49.130 | 48.156 | 0.00 | 0.00 |
| ATOM | 3201 | HG   | SER | X | 211 | 32.417 | 48.639 | 48.832 | 0.00 | 0.00 |
| ATOM | 3202 | C    | SER | X | 211 | 31.355 | 49.319 | 45.792 | 0.00 | 0.00 |
| ATOM | 3203 | O    | SER | X | 211 | 32.051 | 50.202 | 45.328 | 0.00 | 0.00 |
| ATOM | 3204 | N    | PRO | X | 212 | 30.017 | 49.631 | 45.969 | 0.00 | 0.00 |
| ATOM | 3205 | CD   | PRO | X | 212 | 29.054 | 48.832 | 46.631 | 0.00 | 0.00 |
| ATOM | 3206 | HD2  | PRO | X | 212 | 29.061 | 49.099 | 47.688 | 0.00 | 0.00 |
| ATOM | 3207 | HD3  | PRO | X | 212 | 29.304 | 47.784 | 46.462 | 0.00 | 0.00 |
| ATOM | 3208 | CG   | PRO | X | 212 | 27.762 | 49.230 | 46.004 | 0.00 | 0.00 |
| ATOM | 3209 | HG2  | PRO | X | 212 | 26.949 | 49.185 | 46.728 | 0.00 | 0.00 |
| ATOM | 3210 | HG3  | PRO | X | 212 | 27.491 | 48.591 | 45.164 | 0.00 | 0.00 |
| ATOM | 3211 | CB   | PRO | X | 212 | 27.903 | 50.709 | 45.538 | 0.00 | 0.00 |
| ATOM | 3212 | HB2  | PRO | X | 212 | 27.610 | 51.311 | 46.398 | 0.00 | 0.00 |
| ATOM | 3213 | HB3  | PRO | X | 212 | 27.315 | 50.876 | 44.636 | 0.00 | 0.00 |
| ATOM | 3214 | CA   | PRO | X | 212 | 29.418 | 50.775 | 45.270 | 0.00 | 0.00 |
| ATOM | 3215 | HA   | PRO | X | 212 | 29.536 | 50.553 | 44.210 | 0.00 | 0.00 |
| ATOM | 3216 | C    | PRO | X | 212 | 29.909 | 52.155 | 45.703 | 0.00 | 0.00 |
| ATOM | 3217 | O    | PRO | X | 212 | 29.892 | 53.045 | 44.870 | 0.00 | 0.00 |
| ATOM | 3218 | N    | PRO | X | 213 | 30.360 | 52.490 | 46.960 | 0.00 | 0.00 |
| ATOM | 3219 | CD   | PRO | X | 213 | 30.169 | 51.739 | 48.146 | 0.00 | 0.00 |
| ATOM | 3220 | HD2  | PRO | X | 213 | 30.927 | 50.975 | 48.324 | 0.00 | 0.00 |
| ATOM | 3221 | HD3  | PRO | X | 213 | 29.190 | 51.268 | 48.226 | 0.00 | 0.00 |
| ATOM | 3222 | CG   | PRO | X | 213 | 30.198 | 52.745 | 49.299 | 0.00 | 0.00 |
| ATOM | 3223 | HG2  | PRO | X | 213 | 30.649 | 52.318 | 50.194 | 0.00 | 0.00 |
| ATOM | 3224 | HG3  | PRO | X | 213 | 29.186 | 53.118 | 49.459 | 0.00 | 0.00 |

|      |      |      |     |   |     |        |        |        |      |      |
|------|------|------|-----|---|-----|--------|--------|--------|------|------|
| ATOM | 3225 | CB   | PRO | X | 213 | 31.186 | 53.801 | 48.756 | 0.00 | 0.00 |
| ATOM | 3226 | HB2  | PRO | X | 213 | 32.180 | 53.669 | 49.186 | 0.00 | 0.00 |
| ATOM | 3227 | HB3  | PRO | X | 213 | 30.947 | 54.810 | 49.094 | 0.00 | 0.00 |
| ATOM | 3228 | CA   | PRO | X | 213 | 31.058 | 53.715 | 47.273 | 0.00 | 0.00 |
| ATOM | 3229 | HA   | PRO | X | 213 | 30.605 | 54.628 | 46.887 | 0.00 | 0.00 |
| ATOM | 3230 | C    | PRO | X | 213 | 32.382 | 53.795 | 46.637 | 0.00 | 0.00 |
| ATOM | 3231 | O    | PRO | X | 213 | 32.914 | 54.895 | 46.463 | 0.00 | 0.00 |
| ATOM | 3232 | N    | SER | X | 214 | 33.013 | 52.677 | 46.234 | 0.00 | 0.00 |
| ATOM | 3233 | H    | SER | X | 214 | 32.625 | 51.764 | 46.424 | 0.00 | 0.00 |
| ATOM | 3234 | CA   | SER | X | 214 | 34.160 | 52.781 | 45.264 | 0.00 | 0.00 |
| ATOM | 3235 | HA   | SER | X | 214 | 34.765 | 53.640 | 45.553 | 0.00 | 0.00 |
| ATOM | 3236 | CB   | SER | X | 214 | 35.122 | 51.562 | 45.447 | 0.00 | 0.00 |
| ATOM | 3237 | HB2  | SER | X | 214 | 34.637 | 50.648 | 45.105 | 0.00 | 0.00 |
| ATOM | 3238 | HB3  | SER | X | 214 | 35.917 | 51.634 | 44.704 | 0.00 | 0.00 |
| ATOM | 3239 | OG   | SER | X | 214 | 35.628 | 51.587 | 46.804 | 0.00 | 0.00 |
| ATOM | 3240 | HG   | SER | X | 214 | 36.361 | 50.967 | 46.827 | 0.00 | 0.00 |
| ATOM | 3241 | C    | SER | X | 214 | 33.723 | 52.991 | 43.818 | 0.00 | 0.00 |
| ATOM | 3242 | O    | SER | X | 214 | 34.402 | 53.686 | 43.100 | 0.00 | 0.00 |
| ATOM | 3243 | N    | ARG | X | 215 | 32.590 | 52.381 | 43.383 | 0.00 | 0.00 |
| ATOM | 3244 | H    | ARG | X | 215 | 32.164 | 51.790 | 44.083 | 0.00 | 0.00 |
| ATOM | 3245 | CA   | ARG | X | 215 | 32.279 | 52.218 | 41.936 | 0.00 | 0.00 |
| ATOM | 3246 | HA   | ARG | X | 215 | 33.187 | 51.914 | 41.414 | 0.00 | 0.00 |
| ATOM | 3247 | CB   | ARG | X | 215 | 31.396 | 50.991 | 41.609 | 0.00 | 0.00 |
| ATOM | 3248 | HB2  | ARG | X | 215 | 31.836 | 50.089 | 42.035 | 0.00 | 0.00 |
| ATOM | 3249 | HB3  | ARG | X | 215 | 30.513 | 51.123 | 42.234 | 0.00 | 0.00 |
| ATOM | 3250 | CG   | ARG | X | 215 | 31.098 | 50.612 | 40.162 | 0.00 | 0.00 |
| ATOM | 3251 | HG2  | ARG | X | 215 | 30.614 | 51.413 | 39.604 | 0.00 | 0.00 |
| ATOM | 3252 | HG3  | ARG | X | 215 | 32.043 | 50.319 | 39.705 | 0.00 | 0.00 |
| ATOM | 3253 | CD   | ARG | X | 215 | 30.204 | 49.320 | 40.229 | 0.00 | 0.00 |
| ATOM | 3254 | HD2  | ARG | X | 215 | 30.931 | 48.510 | 40.176 | 0.00 | 0.00 |
| ATOM | 3255 | HD3  | ARG | X | 215 | 29.514 | 49.319 | 41.073 | 0.00 | 0.00 |
| ATOM | 3256 | NE   | ARG | X | 215 | 29.427 | 49.184 | 38.975 | 0.00 | 0.00 |
| ATOM | 3257 | HE   | ARG | X | 215 | 29.152 | 50.032 | 38.499 | 0.00 | 0.00 |
| ATOM | 3258 | CZ   | ARG | X | 215 | 28.814 | 48.101 | 38.473 | 0.00 | 0.00 |
| ATOM | 3259 | NH1  | ARG | X | 215 | 29.102 | 46.909 | 38.897 | 0.00 | 0.00 |
| ATOM | 3260 | HH11 | ARG | X | 215 | 29.363 | 46.777 | 39.863 | 0.00 | 0.00 |
| ATOM | 3261 | HH12 | ARG | X | 215 | 28.729 | 46.087 | 38.445 | 0.00 | 0.00 |
| ATOM | 3262 | NH2  | ARG | X | 215 | 27.912 | 48.170 | 37.543 | 0.00 | 0.00 |
| ATOM | 3263 | HH21 | ARG | X | 215 | 27.522 | 49.055 | 37.252 | 0.00 | 0.00 |
| ATOM | 3264 | HH22 | ARG | X | 215 | 27.481 | 47.311 | 37.234 | 0.00 | 0.00 |
| ATOM | 3265 | C    | ARG | X | 215 | 31.788 | 53.480 | 41.191 | 0.00 | 0.00 |
| ATOM | 3266 | O    | ARG | X | 215 | 31.899 | 53.526 | 39.946 | 0.00 | 0.00 |
| ATOM | 3267 | N    | GLY | X | 216 | 31.369 | 54.554 | 41.843 | 0.00 | 0.00 |
| ATOM | 3268 | H    | GLY | X | 216 | 31.192 | 54.492 | 42.835 | 0.00 | 0.00 |
| ATOM | 3269 | CA   | GLY | X | 216 | 31.002 | 55.793 | 41.161 | 0.00 | 0.00 |
| ATOM | 3270 | HA2  | GLY | X | 216 | 30.516 | 55.408 | 40.223 | 0.00 | 0.00 |
| ATOM | 3271 | HA3  | GLY | X | 216 | 30.270 | 56.471 | 41.687 | 0.00 | 0.00 |
| ATOM | 3272 | C    | GLY | X | 216 | 32.154 | 56.657 | 40.645 | 0.00 | 0.00 |
| ATOM | 3273 | O    | GLY | X | 216 | 32.039 | 57.727 | 40.152 | 0.00 | 0.00 |
| ATOM | 3274 | N    | LEU | X | 217 | 33.452 | 56.311 | 41.007 | 0.00 | 0.00 |
| ATOM | 3275 | H    | LEU | X | 217 | 33.664 | 55.444 | 41.480 | 0.00 | 0.00 |
| ATOM | 3276 | CA   | LEU | X | 217 | 34.687 | 57.228 | 40.880 | 0.00 | 0.00 |
| ATOM | 3277 | HA   | LEU | X | 217 | 34.408 | 58.280 | 40.940 | 0.00 | 0.00 |
| ATOM | 3278 | CB   | LEU | X | 217 | 35.546 | 56.976 | 42.228 | 0.00 | 0.00 |
| ATOM | 3279 | HB2  | LEU | X | 217 | 36.095 | 56.050 | 42.056 | 0.00 | 0.00 |
| ATOM | 3280 | HB3  | LEU | X | 217 | 36.262 | 57.798 | 42.229 | 0.00 | 0.00 |
| ATOM | 3281 | CG   | LEU | X | 217 | 34.838 | 56.984 | 43.620 | 0.00 | 0.00 |
| ATOM | 3282 | HG   | LEU | X | 217 | 33.884 | 56.459 | 43.660 | 0.00 | 0.00 |
| ATOM | 3283 | CD1  | LEU | X | 217 | 35.758 | 56.440 | 44.790 | 0.00 | 0.00 |
| ATOM | 3284 | HD11 | LEU | X | 217 | 36.669 | 57.032 | 44.863 | 0.00 | 0.00 |
| ATOM | 3285 | HD12 | LEU | X | 217 | 35.195 | 56.491 | 45.722 | 0.00 | 0.00 |
| ATOM | 3286 | HD13 | LEU | X | 217 | 35.976 | 55.396 | 44.566 | 0.00 | 0.00 |
| ATOM | 3287 | CD2  | LEU | X | 217 | 34.680 | 58.490 | 44.128 | 0.00 | 0.00 |
| ATOM | 3288 | HD21 | LEU | X | 217 | 34.266 | 58.585 | 45.132 | 0.00 | 0.00 |
| ATOM | 3289 | HD22 | LEU | X | 217 | 35.633 | 59.016 | 44.069 | 0.00 | 0.00 |
| ATOM | 3290 | HD23 | LEU | X | 217 | 34.099 | 59.019 | 43.372 | 0.00 | 0.00 |
| ATOM | 3291 | C    | LEU | X | 217 | 35.582 | 57.065 | 39.669 | 0.00 | 0.00 |
| ATOM | 3292 | O    | LEU | X | 217 | 36.488 | 57.804 | 39.499 | 0.00 | 0.00 |
| ATOM | 3293 | N    | PHE | X | 218 | 35.248 | 56.091 | 38.886 | 0.00 | 0.00 |
| ATOM | 3294 | H    | PHE | X | 218 | 34.506 | 55.509 | 39.246 | 0.00 | 0.00 |

|      |      |      |     |   |     |        |        |        |      |      |
|------|------|------|-----|---|-----|--------|--------|--------|------|------|
| ATOM | 3295 | CA   | PHE | X | 218 | 36.046 | 55.675 | 37.685 | 0.00 | 0.00 |
| ATOM | 3296 | HA   | PHE | X | 218 | 36.450 | 56.548 | 37.173 | 0.00 | 0.00 |
| ATOM | 3297 | CB   | PHE | X | 218 | 37.312 | 54.853 | 38.090 | 0.00 | 0.00 |
| ATOM | 3298 | HB2  | PHE | X | 218 | 37.831 | 54.673 | 37.149 | 0.00 | 0.00 |
| ATOM | 3299 | HB3  | PHE | X | 218 | 38.007 | 55.334 | 38.778 | 0.00 | 0.00 |
| ATOM | 3300 | CG   | PHE | X | 218 | 36.981 | 53.491 | 38.839 | 0.00 | 0.00 |
| ATOM | 3301 | CD1  | PHE | X | 218 | 36.562 | 53.411 | 40.196 | 0.00 | 0.00 |
| ATOM | 3302 | HD1  | PHE | X | 218 | 36.497 | 54.339 | 40.744 | 0.00 | 0.00 |
| ATOM | 3303 | CE1  | PHE | X | 218 | 36.183 | 52.198 | 40.728 | 0.00 | 0.00 |
| ATOM | 3304 | HE1  | PHE | X | 218 | 35.663 | 52.175 | 41.674 | 0.00 | 0.00 |
| ATOM | 3305 | CZ   | PHE | X | 218 | 36.287 | 51.021 | 39.939 | 0.00 | 0.00 |
| ATOM | 3306 | HZ   | PHE | X | 218 | 36.001 | 50.070 | 40.363 | 0.00 | 0.00 |
| ATOM | 3307 | CE2  | PHE | X | 218 | 36.659 | 51.060 | 38.579 | 0.00 | 0.00 |
| ATOM | 3308 | HE2  | PHE | X | 218 | 36.648 | 50.229 | 37.889 | 0.00 | 0.00 |
| ATOM | 3309 | CD2  | PHE | X | 218 | 36.947 | 52.324 | 38.022 | 0.00 | 0.00 |
| ATOM | 3310 | HD2  | PHE | X | 218 | 37.165 | 52.317 | 36.964 | 0.00 | 0.00 |
| ATOM | 3311 | C    | PHE | X | 218 | 35.155 | 54.914 | 36.739 | 0.00 | 0.00 |
| ATOM | 3312 | O    | PHE | X | 218 | 33.970 | 54.697 | 37.099 | 0.00 | 0.00 |
| ATOM | 3313 | N    | HIE | X | 219 | 35.581 | 54.494 | 35.593 | 0.00 | 0.00 |
| ATOM | 3314 | H    | HIE | X | 219 | 36.416 | 55.026 | 35.399 | 0.00 | 0.00 |
| ATOM | 3315 | CA   | HIE | X | 219 | 34.844 | 53.929 | 34.539 | 0.00 | 0.00 |
| ATOM | 3316 | HA   | HIE | X | 219 | 33.758 | 53.947 | 34.633 | 0.00 | 0.00 |
| ATOM | 3317 | CB   | HIE | X | 219 | 35.117 | 54.762 | 33.299 | 0.00 | 0.00 |
| ATOM | 3318 | HB2  | HIE | X | 219 | 36.184 | 54.683 | 33.089 | 0.00 | 0.00 |
| ATOM | 3319 | HB3  | HIE | X | 219 | 34.477 | 54.463 | 32.468 | 0.00 | 0.00 |
| ATOM | 3320 | CG   | HIE | X | 219 | 34.940 | 56.254 | 33.585 | 0.00 | 0.00 |
| ATOM | 3321 | ND1  | HIE | X | 219 | 35.927 | 57.026 | 34.113 | 0.00 | 0.00 |
| ATOM | 3322 | CE1  | HIE | X | 219 | 35.352 | 58.229 | 34.138 | 0.00 | 0.00 |
| ATOM | 3323 | HE1  | HIE | X | 219 | 35.818 | 59.152 | 34.451 | 0.00 | 0.00 |
| ATOM | 3324 | NE2  | HIE | X | 219 | 34.068 | 58.176 | 33.883 | 0.00 | 0.00 |
| ATOM | 3325 | HE2  | HIE | X | 219 | 33.448 | 58.967 | 33.975 | 0.00 | 0.00 |
| ATOM | 3326 | CD2  | HIE | X | 219 | 33.806 | 56.911 | 33.395 | 0.00 | 0.00 |
| ATOM | 3327 | HD2  | HIE | X | 219 | 32.866 | 56.539 | 33.014 | 0.00 | 0.00 |
| ATOM | 3328 | C    | HIE | X | 219 | 35.267 | 52.513 | 34.283 | 0.00 | 0.00 |
| ATOM | 3329 | O    | HIE | X | 219 | 34.455 | 51.569 | 34.294 | 0.00 | 0.00 |
| ATOM | 3330 | N    | ARG | X | 220 | 36.547 | 52.272 | 34.080 | 0.00 | 0.00 |
| ATOM | 3331 | H    | ARG | X | 220 | 37.172 | 53.036 | 34.297 | 0.00 | 0.00 |
| ATOM | 3332 | CA   | ARG | X | 220 | 37.100 | 51.042 | 33.562 | 0.00 | 0.00 |
| ATOM | 3333 | HA   | ARG | X | 220 | 36.256 | 50.403 | 33.302 | 0.00 | 0.00 |
| ATOM | 3334 | CB   | ARG | X | 220 | 37.877 | 51.408 | 32.232 | 0.00 | 0.00 |
| ATOM | 3335 | HB2  | ARG | X | 220 | 38.615 | 52.155 | 32.524 | 0.00 | 0.00 |
| ATOM | 3336 | HB3  | ARG | X | 220 | 38.427 | 50.561 | 31.822 | 0.00 | 0.00 |
| ATOM | 3337 | CG   | ARG | X | 220 | 36.992 | 51.993 | 31.122 | 0.00 | 0.00 |
| ATOM | 3338 | HG2  | ARG | X | 220 | 36.270 | 51.221 | 30.855 | 0.00 | 0.00 |
| ATOM | 3339 | HG3  | ARG | X | 220 | 36.469 | 52.875 | 31.490 | 0.00 | 0.00 |
| ATOM | 3340 | CD   | ARG | X | 220 | 37.684 | 52.328 | 29.798 | 0.00 | 0.00 |
| ATOM | 3341 | HD2  | ARG | X | 220 | 38.351 | 53.186 | 29.875 | 0.00 | 0.00 |
| ATOM | 3342 | HD3  | ARG | X | 220 | 38.313 | 51.539 | 29.387 | 0.00 | 0.00 |
| ATOM | 3343 | NE   | ARG | X | 220 | 36.630 | 52.556 | 28.748 | 0.00 | 0.00 |
| ATOM | 3344 | HE   | ARG | X | 220 | 35.876 | 51.885 | 28.738 | 0.00 | 0.00 |
| ATOM | 3345 | CZ   | ARG | X | 220 | 36.324 | 53.729 | 28.177 | 0.00 | 0.00 |
| ATOM | 3346 | NH1  | ARG | X | 220 | 37.011 | 54.855 | 28.183 | 0.00 | 0.00 |
| ATOM | 3347 | HH11 | ARG | X | 220 | 37.928 | 54.824 | 28.605 | 0.00 | 0.00 |
| ATOM | 3348 | HH12 | ARG | X | 220 | 36.726 | 55.698 | 27.704 | 0.00 | 0.00 |
| ATOM | 3349 | NH2  | ARG | X | 220 | 35.208 | 53.783 | 27.529 | 0.00 | 0.00 |
| ATOM | 3350 | HH21 | ARG | X | 220 | 34.615 | 52.971 | 27.614 | 0.00 | 0.00 |
| ATOM | 3351 | HH22 | ARG | X | 220 | 35.025 | 54.582 | 26.939 | 0.00 | 0.00 |
| ATOM | 3352 | C    | ARG | X | 220 | 37.962 | 50.284 | 34.578 | 0.00 | 0.00 |
| ATOM | 3353 | O    | ARG | X | 220 | 38.646 | 50.968 | 35.370 | 0.00 | 0.00 |
| ATOM | 3354 | N    | ALA | X | 221 | 38.089 | 48.991 | 34.448 | 0.00 | 0.00 |
| ATOM | 3355 | H    | ALA | X | 221 | 37.689 | 48.563 | 33.625 | 0.00 | 0.00 |
| ATOM | 3356 | CA   | ALA | X | 221 | 38.912 | 48.113 | 35.272 | 0.00 | 0.00 |
| ATOM | 3357 | HA   | ALA | X | 221 | 39.588 | 48.620 | 35.960 | 0.00 | 0.00 |
| ATOM | 3358 | CB   | ALA | X | 221 | 38.014 | 47.235 | 36.179 | 0.00 | 0.00 |
| ATOM | 3359 | HB1  | ALA | X | 221 | 38.422 | 46.340 | 36.648 | 0.00 | 0.00 |
| ATOM | 3360 | HB2  | ALA | X | 221 | 37.544 | 47.824 | 36.967 | 0.00 | 0.00 |
| ATOM | 3361 | HB3  | ALA | X | 221 | 37.168 | 46.890 | 35.585 | 0.00 | 0.00 |
| ATOM | 3362 | C    | ALA | X | 221 | 39.729 | 47.224 | 34.338 | 0.00 | 0.00 |
| ATOM | 3363 | O    | ALA | X | 221 | 39.227 | 46.704 | 33.369 | 0.00 | 0.00 |
| ATOM | 3364 | N    | VAL | X | 222 | 41.041 | 47.025 | 34.657 | 0.00 | 0.00 |

|      |      |      |     |   |     |        |        |        |      |      |
|------|------|------|-----|---|-----|--------|--------|--------|------|------|
| ATOM | 3365 | H    | VAL | X | 222 | 41.401 | 47.448 | 35.501 | 0.00 | 0.00 |
| ATOM | 3366 | CA   | VAL | X | 222 | 41.903 | 46.001 | 34.044 | 0.00 | 0.00 |
| ATOM | 3367 | HA   | VAL | X | 222 | 41.436 | 45.349 | 33.306 | 0.00 | 0.00 |
| ATOM | 3368 | CB   | VAL | X | 222 | 43.090 | 46.773 | 33.442 | 0.00 | 0.00 |
| ATOM | 3369 | HB   | VAL | X | 222 | 43.699 | 47.271 | 34.196 | 0.00 | 0.00 |
| ATOM | 3370 | CG1  | VAL | X | 222 | 44.099 | 45.774 | 32.864 | 0.00 | 0.00 |
| ATOM | 3371 | HG11 | VAL | X | 222 | 43.759 | 45.107 | 32.071 | 0.00 | 0.00 |
| ATOM | 3372 | HG12 | VAL | X | 222 | 44.799 | 46.421 | 32.336 | 0.00 | 0.00 |
| ATOM | 3373 | HG13 | VAL | X | 222 | 44.577 | 45.262 | 33.699 | 0.00 | 0.00 |
| ATOM | 3374 | CG2  | VAL | X | 222 | 42.584 | 47.773 | 32.460 | 0.00 | 0.00 |
| ATOM | 3375 | HG21 | VAL | X | 222 | 43.307 | 48.082 | 31.705 | 0.00 | 0.00 |
| ATOM | 3376 | HG22 | VAL | X | 222 | 41.827 | 47.267 | 31.861 | 0.00 | 0.00 |
| ATOM | 3377 | HG23 | VAL | X | 222 | 42.220 | 48.666 | 32.968 | 0.00 | 0.00 |
| ATOM | 3378 | C    | VAL | X | 222 | 42.396 | 45.052 | 35.154 | 0.00 | 0.00 |
| ATOM | 3379 | O    | VAL | X | 222 | 42.767 | 45.537 | 36.222 | 0.00 | 0.00 |
| ATOM | 3380 | N    | LEU | X | 223 | 42.467 | 43.739 | 34.847 | 0.00 | 0.00 |
| ATOM | 3381 | H    | LEU | X | 223 | 42.056 | 43.332 | 34.019 | 0.00 | 0.00 |
| ATOM | 3382 | CA   | LEU | X | 223 | 42.950 | 42.705 | 35.849 | 0.00 | 0.00 |
| ATOM | 3383 | HA   | LEU | X | 223 | 43.533 | 43.143 | 36.659 | 0.00 | 0.00 |
| ATOM | 3384 | CB   | LEU | X | 223 | 41.793 | 41.778 | 36.429 | 0.00 | 0.00 |
| ATOM | 3385 | HB2  | LEU | X | 223 | 41.243 | 41.266 | 35.640 | 0.00 | 0.00 |
| ATOM | 3386 | HB3  | LEU | X | 223 | 42.212 | 41.056 | 37.129 | 0.00 | 0.00 |
| ATOM | 3387 | CG   | LEU | X | 223 | 40.731 | 42.612 | 37.274 | 0.00 | 0.00 |
| ATOM | 3388 | HG   | LEU | X | 223 | 41.219 | 43.393 | 37.856 | 0.00 | 0.00 |
| ATOM | 3389 | CD1  | LEU | X | 223 | 39.641 | 43.207 | 36.403 | 0.00 | 0.00 |
| ATOM | 3390 | HD11 | LEU | X | 223 | 40.088 | 43.934 | 35.725 | 0.00 | 0.00 |
| ATOM | 3391 | HD12 | LEU | X | 223 | 39.279 | 42.402 | 35.764 | 0.00 | 0.00 |
| ATOM | 3392 | HD13 | LEU | X | 223 | 38.837 | 43.589 | 37.033 | 0.00 | 0.00 |
| ATOM | 3393 | CD2  | LEU | X | 223 | 40.000 | 41.662 | 38.251 | 0.00 | 0.00 |
| ATOM | 3394 | HD21 | LEU | X | 223 | 40.761 | 41.225 | 38.897 | 0.00 | 0.00 |
| ATOM | 3395 | HD22 | LEU | X | 223 | 39.277 | 42.172 | 38.888 | 0.00 | 0.00 |
| ATOM | 3396 | HD23 | LEU | X | 223 | 39.563 | 40.819 | 37.716 | 0.00 | 0.00 |
| ATOM | 3397 | C    | LEU | X | 223 | 43.953 | 41.793 | 35.146 | 0.00 | 0.00 |
| ATOM | 3398 | O    | LEU | X | 223 | 43.801 | 41.459 | 33.980 | 0.00 | 0.00 |
| ATOM | 3399 | N    | GLN | X | 224 | 45.093 | 41.550 | 35.778 | 0.00 | 0.00 |
| ATOM | 3400 | H    | GLN | X | 224 | 45.249 | 42.045 | 36.645 | 0.00 | 0.00 |
| ATOM | 3401 | CA   | GLN | X | 224 | 46.263 | 40.905 | 35.318 | 0.00 | 0.00 |
| ATOM | 3402 | HA   | GLN | X | 224 | 45.883 | 40.261 | 34.524 | 0.00 | 0.00 |
| ATOM | 3403 | CB   | GLN | X | 224 | 47.369 | 41.924 | 35.071 | 0.00 | 0.00 |
| ATOM | 3404 | HB2  | GLN | X | 224 | 47.617 | 42.380 | 36.030 | 0.00 | 0.00 |
| ATOM | 3405 | HB3  | GLN | X | 224 | 48.228 | 41.426 | 34.621 | 0.00 | 0.00 |
| ATOM | 3406 | CG   | GLN | X | 224 | 46.861 | 43.041 | 34.121 | 0.00 | 0.00 |
| ATOM | 3407 | HG2  | GLN | X | 224 | 46.456 | 42.601 | 33.211 | 0.00 | 0.00 |
| ATOM | 3408 | HG3  | GLN | X | 224 | 46.027 | 43.498 | 34.654 | 0.00 | 0.00 |
| ATOM | 3409 | CD   | GLN | X | 224 | 47.846 | 44.146 | 33.789 | 0.00 | 0.00 |
| ATOM | 3410 | OE1  | GLN | X | 224 | 47.485 | 45.248 | 33.558 | 0.00 | 0.00 |
| ATOM | 3411 | NE2  | GLN | X | 224 | 49.158 | 43.890 | 33.758 | 0.00 | 0.00 |
| ATOM | 3412 | HE21 | GLN | X | 224 | 49.664 | 44.763 | 33.804 | 0.00 | 0.00 |
| ATOM | 3413 | HE22 | GLN | X | 224 | 49.493 | 43.020 | 34.146 | 0.00 | 0.00 |
| ATOM | 3414 | C    | GLN | X | 224 | 46.829 | 39.890 | 36.336 | 0.00 | 0.00 |
| ATOM | 3415 | O    | GLN | X | 224 | 46.944 | 40.173 | 37.492 | 0.00 | 0.00 |
| ATOM | 3416 | N    | SER | X | 225 | 47.215 | 38.707 | 35.962 | 0.00 | 0.00 |
| ATOM | 3417 | H    | SER | X | 225 | 47.075 | 38.413 | 35.006 | 0.00 | 0.00 |
| ATOM | 3418 | CA   | SER | X | 225 | 47.945 | 37.721 | 36.802 | 0.00 | 0.00 |
| ATOM | 3419 | HA   | SER | X | 225 | 47.779 | 36.744 | 36.349 | 0.00 | 0.00 |
| ATOM | 3420 | CB   | SER | X | 225 | 49.451 | 37.999 | 37.011 | 0.00 | 0.00 |
| ATOM | 3421 | HB2  | SER | X | 225 | 49.608 | 39.039 | 37.296 | 0.00 | 0.00 |
| ATOM | 3422 | HB3  | SER | X | 225 | 49.805 | 37.359 | 37.820 | 0.00 | 0.00 |
| ATOM | 3423 | OG   | SER | X | 225 | 50.135 | 37.812 | 35.793 | 0.00 | 0.00 |
| ATOM | 3424 | HG   | SER | X | 225 | 49.813 | 38.479 | 35.182 | 0.00 | 0.00 |
| ATOM | 3425 | C    | SER | X | 225 | 47.232 | 37.494 | 38.120 | 0.00 | 0.00 |
| ATOM | 3426 | O    | SER | X | 225 | 47.857 | 37.440 | 39.217 | 0.00 | 0.00 |
| ATOM | 3427 | N    | GLY | X | 226 | 45.924 | 37.350 | 38.149 | 0.00 | 0.00 |
| ATOM | 3428 | H    | GLY | X | 226 | 45.431 | 37.485 | 37.278 | 0.00 | 0.00 |
| ATOM | 3429 | CA   | GLY | X | 226 | 45.086 | 37.409 | 39.393 | 0.00 | 0.00 |
| ATOM | 3430 | HA2  | GLY | X | 226 | 45.052 | 36.371 | 39.763 | 0.00 | 0.00 |
| ATOM | 3431 | HA3  | GLY | X | 226 | 45.632 | 37.904 | 40.144 | 0.00 | 0.00 |
| ATOM | 3432 | C    | GLY | X | 226 | 43.613 | 38.016 | 39.271 | 0.00 | 0.00 |
| ATOM | 3433 | O    | GLY | X | 226 | 43.370 | 38.864 | 38.385 | 0.00 | 0.00 |
| ATOM | 3434 | N    | ALA | X | 227 | 42.739 | 37.604 | 40.144 | 0.00 | 0.00 |

|      |      |      |     |   |     |        |        |        |      |      |
|------|------|------|-----|---|-----|--------|--------|--------|------|------|
| ATOM | 3435 | H    | ALA | X | 227 | 43.062 | 37.167 | 40.995 | 0.00 | 0.00 |
| ATOM | 3436 | CA   | ALA | X | 227 | 41.358 | 38.022 | 40.125 | 0.00 | 0.00 |
| ATOM | 3437 | HA   | ALA | X | 227 | 41.297 | 38.993 | 39.633 | 0.00 | 0.00 |
| ATOM | 3438 | CB   | ALA | X | 227 | 40.533 | 37.089 | 39.225 | 0.00 | 0.00 |
| ATOM | 3439 | HB1  | ALA | X | 227 | 39.473 | 37.023 | 39.469 | 0.00 | 0.00 |
| ATOM | 3440 | HB2  | ALA | X | 227 | 40.746 | 37.464 | 38.224 | 0.00 | 0.00 |
| ATOM | 3441 | HB3  | ALA | X | 227 | 40.933 | 36.083 | 39.354 | 0.00 | 0.00 |
| ATOM | 3442 | C    | ALA | X | 227 | 40.812 | 38.156 | 41.552 | 0.00 | 0.00 |
| ATOM | 3443 | O    | ALA | X | 227 | 41.381 | 37.576 | 42.542 | 0.00 | 0.00 |
| ATOM | 3444 | N    | PRO | X | 228 | 39.635 | 38.873 | 41.802 | 0.00 | 0.00 |
| ATOM | 3445 | CD   | PRO | X | 228 | 38.894 | 39.662 | 40.814 | 0.00 | 0.00 |
| ATOM | 3446 | HD2  | PRO | X | 228 | 38.663 | 39.027 | 39.959 | 0.00 | 0.00 |
| ATOM | 3447 | HD3  | PRO | X | 228 | 39.617 | 40.438 | 40.561 | 0.00 | 0.00 |
| ATOM | 3448 | CG   | PRO | X | 228 | 37.611 | 39.979 | 41.482 | 0.00 | 0.00 |
| ATOM | 3449 | HG2  | PRO | X | 228 | 36.864 | 39.186 | 41.513 | 0.00 | 0.00 |
| ATOM | 3450 | HG3  | PRO | X | 228 | 37.183 | 40.855 | 40.994 | 0.00 | 0.00 |
| ATOM | 3451 | CB   | PRO | X | 228 | 38.015 | 40.178 | 42.933 | 0.00 | 0.00 |
| ATOM | 3452 | HB2  | PRO | X | 228 | 37.163 | 40.042 | 43.600 | 0.00 | 0.00 |
| ATOM | 3453 | HB3  | PRO | X | 228 | 38.488 | 41.153 | 43.047 | 0.00 | 0.00 |
| ATOM | 3454 | CA   | PRO | X | 228 | 39.128 | 39.071 | 43.153 | 0.00 | 0.00 |
| ATOM | 3455 | HA   | PRO | X | 228 | 39.863 | 39.491 | 43.839 | 0.00 | 0.00 |
| ATOM | 3456 | C    | PRO | X | 228 | 38.623 | 37.806 | 43.762 | 0.00 | 0.00 |
| ATOM | 3457 | O    | PRO | X | 228 | 38.692 | 37.674 | 44.967 | 0.00 | 0.00 |
| ATOM | 3458 | N    | ASN | X | 229 | 37.896 | 37.030 | 42.981 | 0.00 | 0.00 |
| ATOM | 3459 | H    | ASN | X | 229 | 37.812 | 37.409 | 42.049 | 0.00 | 0.00 |
| ATOM | 3460 | CA   | ASN | X | 229 | 37.270 | 35.675 | 43.166 | 0.00 | 0.00 |
| ATOM | 3461 | HA   | ASN | X | 229 | 36.924 | 35.613 | 44.198 | 0.00 | 0.00 |
| ATOM | 3462 | CB   | ASN | X | 229 | 36.050 | 35.603 | 42.267 | 0.00 | 0.00 |
| ATOM | 3463 | HB2  | ASN | X | 229 | 35.622 | 34.632 | 42.516 | 0.00 | 0.00 |
| ATOM | 3464 | HB3  | ASN | X | 229 | 35.377 | 36.426 | 42.504 | 0.00 | 0.00 |
| ATOM | 3465 | CG   | ASN | X | 229 | 36.316 | 35.645 | 40.756 | 0.00 | 0.00 |
| ATOM | 3466 | OD1  | ASN | X | 229 | 37.049 | 36.541 | 40.287 | 0.00 | 0.00 |
| ATOM | 3467 | ND2  | ASN | X | 229 | 35.793 | 34.709 | 39.923 | 0.00 | 0.00 |
| ATOM | 3468 | HD21 | ASN | X | 229 | 35.964 | 34.754 | 38.928 | 0.00 | 0.00 |
| ATOM | 3469 | HD22 | ASN | X | 229 | 35.232 | 34.002 | 40.376 | 0.00 | 0.00 |
| ATOM | 3470 | C    | ASN | X | 229 | 38.244 | 34.470 | 43.120 | 0.00 | 0.00 |
| ATOM | 3471 | O    | ASN | X | 229 | 37.894 | 33.323 | 42.898 | 0.00 | 0.00 |
| ATOM | 3472 | N    | GLY | X | 230 | 39.559 | 34.724 | 43.165 | 0.00 | 0.00 |
| ATOM | 3473 | H    | GLY | X | 230 | 39.888 | 35.650 | 43.397 | 0.00 | 0.00 |
| ATOM | 3474 | CA   | GLY | X | 230 | 40.549 | 33.645 | 43.441 | 0.00 | 0.00 |
| ATOM | 3475 | HA2  | GLY | X | 230 | 40.427 | 32.747 | 42.765 | 0.00 | 0.00 |
| ATOM | 3476 | HA3  | GLY | X | 230 | 41.509 | 33.933 | 43.013 | 0.00 | 0.00 |
| ATOM | 3477 | C    | GLY | X | 230 | 40.583 | 33.328 | 44.952 | 0.00 | 0.00 |
| ATOM | 3478 | O    | GLY | X | 230 | 40.600 | 34.236 | 45.727 | 0.00 | 0.00 |
| ATOM | 3479 | N    | PRO | X | 231 | 40.438 | 32.000 | 45.347 | 0.00 | 0.00 |
| ATOM | 3480 | CD   | PRO | X | 231 | 40.370 | 30.833 | 44.456 | 0.00 | 0.00 |
| ATOM | 3481 | HD2  | PRO | X | 231 | 41.357 | 30.487 | 44.148 | 0.00 | 0.00 |
| ATOM | 3482 | HD3  | PRO | X | 231 | 39.703 | 30.943 | 43.600 | 0.00 | 0.00 |
| ATOM | 3483 | CG   | PRO | X | 231 | 39.818 | 29.671 | 45.319 | 0.00 | 0.00 |
| ATOM | 3484 | HG2  | PRO | X | 231 | 40.193 | 28.672 | 45.100 | 0.00 | 0.00 |
| ATOM | 3485 | HG3  | PRO | X | 231 | 38.733 | 29.623 | 45.233 | 0.00 | 0.00 |
| ATOM | 3486 | CB   | PRO | X | 231 | 40.342 | 30.145 | 46.724 | 0.00 | 0.00 |
| ATOM | 3487 | HB2  | PRO | X | 231 | 41.381 | 29.816 | 46.728 | 0.00 | 0.00 |
| ATOM | 3488 | HB3  | PRO | X | 231 | 39.758 | 29.682 | 47.519 | 0.00 | 0.00 |
| ATOM | 3489 | CA   | PRO | X | 231 | 40.188 | 31.626 | 46.709 | 0.00 | 0.00 |
| ATOM | 3490 | HA   | PRO | X | 231 | 39.136 | 31.871 | 46.857 | 0.00 | 0.00 |
| ATOM | 3491 | C    | PRO | X | 231 | 41.006 | 32.273 | 47.887 | 0.00 | 0.00 |
| ATOM | 3492 | O    | PRO | X | 231 | 40.447 | 32.651 | 48.906 | 0.00 | 0.00 |
| ATOM | 3493 | N    | TRP | X | 232 | 42.268 | 32.609 | 47.579 | 0.00 | 0.00 |
| ATOM | 3494 | H    | TRP | X | 232 | 42.515 | 32.382 | 46.626 | 0.00 | 0.00 |
| ATOM | 3495 | CA   | TRP | X | 232 | 43.217 | 33.310 | 48.442 | 0.00 | 0.00 |
| ATOM | 3496 | HA   | TRP | X | 232 | 43.352 | 32.828 | 49.410 | 0.00 | 0.00 |
| ATOM | 3497 | CB   | TRP | X | 232 | 44.639 | 33.260 | 47.884 | 0.00 | 0.00 |
| ATOM | 3498 | HB2  | TRP | X | 232 | 45.340 | 33.767 | 48.546 | 0.00 | 0.00 |
| ATOM | 3499 | HB3  | TRP | X | 232 | 44.947 | 32.215 | 47.867 | 0.00 | 0.00 |
| ATOM | 3500 | CG   | TRP | X | 232 | 44.713 | 33.817 | 46.491 | 0.00 | 0.00 |
| ATOM | 3501 | CD1  | TRP | X | 232 | 44.679 | 32.957 | 45.460 | 0.00 | 0.00 |
| ATOM | 3502 | HD1  | TRP | X | 232 | 44.486 | 31.895 | 45.441 | 0.00 | 0.00 |
| ATOM | 3503 | NE1  | TRP | X | 232 | 44.714 | 33.602 | 44.294 | 0.00 | 0.00 |
| ATOM | 3504 | HE1  | TRP | X | 232 | 44.564 | 33.159 | 43.399 | 0.00 | 0.00 |

|      |      |      |     |   |     |        |        |        |      |      |
|------|------|------|-----|---|-----|--------|--------|--------|------|------|
| ATOM | 3505 | CE2  | TRP | X | 232 | 44.879 | 34.981 | 44.474 | 0.00 | 0.00 |
| ATOM | 3506 | CZ2  | TRP | X | 232 | 44.880 | 36.042 | 43.605 | 0.00 | 0.00 |
| ATOM | 3507 | HZ2  | TRP | X | 232 | 44.694 | 35.905 | 42.550 | 0.00 | 0.00 |
| ATOM | 3508 | CH2  | TRP | X | 232 | 45.010 | 37.360 | 44.121 | 0.00 | 0.00 |
| ATOM | 3509 | HH2  | TRP | X | 232 | 44.973 | 38.204 | 43.448 | 0.00 | 0.00 |
| ATOM | 3510 | CZ3  | TRP | X | 232 | 45.237 | 37.497 | 45.534 | 0.00 | 0.00 |
| ATOM | 3511 | HZ3  | TRP | X | 232 | 45.392 | 38.498 | 45.907 | 0.00 | 0.00 |
| ATOM | 3512 | CE3  | TRP | X | 232 | 45.168 | 36.401 | 46.390 | 0.00 | 0.00 |
| ATOM | 3513 | HE3  | TRP | X | 232 | 45.267 | 36.634 | 47.440 | 0.00 | 0.00 |
| ATOM | 3514 | CD2  | TRP | X | 232 | 44.893 | 35.119 | 45.868 | 0.00 | 0.00 |
| ATOM | 3515 | C    | TRP | X | 232 | 42.777 | 34.720 | 48.753 | 0.00 | 0.00 |
| ATOM | 3516 | O    | TRP | X | 232 | 43.103 | 35.166 | 49.868 | 0.00 | 0.00 |
| ATOM | 3517 | N    | ALA | X | 233 | 42.013 | 35.481 | 47.951 | 0.00 | 0.00 |
| ATOM | 3518 | H    | ALA | X | 233 | 41.811 | 35.136 | 47.023 | 0.00 | 0.00 |
| ATOM | 3519 | CA   | ALA | X | 233 | 41.935 | 36.912 | 47.915 | 0.00 | 0.00 |
| ATOM | 3520 | HA   | ALA | X | 233 | 42.943 | 37.266 | 48.132 | 0.00 | 0.00 |
| ATOM | 3521 | CB   | ALA | X | 233 | 41.574 | 37.324 | 46.548 | 0.00 | 0.00 |
| ATOM | 3522 | HB1  | ALA | X | 233 | 41.500 | 38.409 | 46.487 | 0.00 | 0.00 |
| ATOM | 3523 | HB2  | ALA | X | 233 | 42.423 | 37.083 | 45.908 | 0.00 | 0.00 |
| ATOM | 3524 | HB3  | ALA | X | 233 | 40.669 | 36.909 | 46.106 | 0.00 | 0.00 |
| ATOM | 3525 | C    | ALA | X | 233 | 41.022 | 37.488 | 49.026 | 0.00 | 0.00 |
| ATOM | 3526 | O    | ALA | X | 233 | 41.026 | 38.695 | 49.143 | 0.00 | 0.00 |
| ATOM | 3527 | N    | THR | X | 234 | 40.323 | 36.658 | 49.796 | 0.00 | 0.00 |
| ATOM | 3528 | H    | THR | X | 234 | 40.740 | 35.748 | 49.934 | 0.00 | 0.00 |
| ATOM | 3529 | CA   | THR | X | 234 | 39.501 | 37.119 | 51.017 | 0.00 | 0.00 |
| ATOM | 3530 | HA   | THR | X | 234 | 39.832 | 38.143 | 51.189 | 0.00 | 0.00 |
| ATOM | 3531 | CB   | THR | X | 234 | 37.987 | 37.167 | 50.706 | 0.00 | 0.00 |
| ATOM | 3532 | HB   | THR | X | 234 | 37.573 | 37.320 | 51.703 | 0.00 | 0.00 |
| ATOM | 3533 | CG2  | THR | X | 234 | 37.707 | 38.448 | 49.896 | 0.00 | 0.00 |
| ATOM | 3534 | HG21 | THR | X | 234 | 38.007 | 39.342 | 50.443 | 0.00 | 0.00 |
| ATOM | 3535 | HG22 | THR | X | 234 | 38.342 | 38.370 | 49.013 | 0.00 | 0.00 |
| ATOM | 3536 | HG23 | THR | X | 234 | 36.638 | 38.492 | 49.685 | 0.00 | 0.00 |
| ATOM | 3537 | OG1  | THR | X | 234 | 37.671 | 35.946 | 50.069 | 0.00 | 0.00 |
| ATOM | 3538 | HG1  | THR | X | 234 | 37.053 | 35.507 | 50.657 | 0.00 | 0.00 |
| ATOM | 3539 | C    | THR | X | 234 | 39.854 | 36.288 | 52.283 | 0.00 | 0.00 |
| ATOM | 3540 | O    | THR | X | 234 | 40.282 | 35.132 | 52.156 | 0.00 | 0.00 |
| ATOM | 3541 | N    | VAL | X | 235 | 39.602 | 36.833 | 53.452 | 0.00 | 0.00 |
| ATOM | 3542 | H    | VAL | X | 235 | 39.131 | 37.721 | 53.546 | 0.00 | 0.00 |
| ATOM | 3543 | CA   | VAL | X | 235 | 39.390 | 35.972 | 54.591 | 0.00 | 0.00 |
| ATOM | 3544 | HA   | VAL | X | 235 | 39.392 | 34.950 | 54.213 | 0.00 | 0.00 |
| ATOM | 3545 | CB   | VAL | X | 235 | 40.561 | 36.185 | 55.624 | 0.00 | 0.00 |
| ATOM | 3546 | HB   | VAL | X | 235 | 41.561 | 35.980 | 55.240 | 0.00 | 0.00 |
| ATOM | 3547 | CG1  | VAL | X | 235 | 40.682 | 37.672 | 56.188 | 0.00 | 0.00 |
| ATOM | 3548 | HG11 | VAL | X | 235 | 41.737 | 37.823 | 56.415 | 0.00 | 0.00 |
| ATOM | 3549 | HG12 | VAL | X | 235 | 40.290 | 38.381 | 55.459 | 0.00 | 0.00 |
| ATOM | 3550 | HG13 | VAL | X | 235 | 40.076 | 37.920 | 57.060 | 0.00 | 0.00 |
| ATOM | 3551 | CG2  | VAL | X | 235 | 40.454 | 35.300 | 56.871 | 0.00 | 0.00 |
| ATOM | 3552 | HG21 | VAL | X | 235 | 41.384 | 35.218 | 57.433 | 0.00 | 0.00 |
| ATOM | 3553 | HG22 | VAL | X | 235 | 39.663 | 35.766 | 57.458 | 0.00 | 0.00 |
| ATOM | 3554 | HG23 | VAL | X | 235 | 40.282 | 34.267 | 56.566 | 0.00 | 0.00 |
| ATOM | 3555 | C    | VAL | X | 235 | 38.028 | 36.151 | 55.270 | 0.00 | 0.00 |
| ATOM | 3556 | O    | VAL | X | 235 | 37.475 | 37.273 | 55.213 | 0.00 | 0.00 |
| ATOM | 3557 | N    | GLY | X | 236 | 37.525 | 35.093 | 55.885 | 0.00 | 0.00 |
| ATOM | 3558 | H    | GLY | X | 236 | 37.999 | 34.207 | 55.984 | 0.00 | 0.00 |
| ATOM | 3559 | CA   | GLY | X | 236 | 36.290 | 35.295 | 56.678 | 0.00 | 0.00 |
| ATOM | 3560 | HA2  | GLY | X | 236 | 35.670 | 35.994 | 56.032 | 0.00 | 0.00 |
| ATOM | 3561 | HA3  | GLY | X | 236 | 35.826 | 34.288 | 56.794 | 0.00 | 0.00 |
| ATOM | 3562 | C    | GLY | X | 236 | 36.467 | 35.922 | 58.057 | 0.00 | 0.00 |
| ATOM | 3563 | O    | GLY | X | 236 | 37.584 | 35.843 | 58.602 | 0.00 | 0.00 |
| ATOM | 3564 | N    | MET | X | 237 | 35.383 | 36.509 | 58.536 | 0.00 | 0.00 |
| ATOM | 3565 | H    | MET | X | 237 | 34.538 | 36.365 | 58.001 | 0.00 | 0.00 |
| ATOM | 3566 | CA   | MET | X | 237 | 35.135 | 37.175 | 59.838 | 0.00 | 0.00 |
| ATOM | 3567 | HA   | MET | X | 237 | 35.609 | 38.152 | 59.735 | 0.00 | 0.00 |
| ATOM | 3568 | CB   | MET | X | 237 | 33.640 | 37.452 | 60.060 | 0.00 | 0.00 |
| ATOM | 3569 | HB2  | MET | X | 237 | 33.316 | 37.857 | 59.101 | 0.00 | 0.00 |
| ATOM | 3570 | HB3  | MET | X | 237 | 33.040 | 36.613 | 60.412 | 0.00 | 0.00 |
| ATOM | 3571 | CG   | MET | X | 237 | 33.359 | 38.653 | 61.012 | 0.00 | 0.00 |
| ATOM | 3572 | HG2  | MET | X | 237 | 33.535 | 38.325 | 62.036 | 0.00 | 0.00 |
| ATOM | 3573 | HG3  | MET | X | 237 | 34.022 | 39.489 | 60.789 | 0.00 | 0.00 |
| ATOM | 3574 | SD   | MET | X | 237 | 31.698 | 39.257 | 60.717 | 0.00 | 0.00 |

|      |      |      |     |   |     |        |        |        |      |      |
|------|------|------|-----|---|-----|--------|--------|--------|------|------|
| ATOM | 3575 | CE   | MET | X | 237 | 30.755 | 38.087 | 61.847 | 0.00 | 0.00 |
| ATOM | 3576 | HE1  | MET | X | 237 | 30.771 | 38.470 | 62.868 | 0.00 | 0.00 |
| ATOM | 3577 | HE2  | MET | X | 237 | 29.760 | 37.885 | 61.450 | 0.00 | 0.00 |
| ATOM | 3578 | HE3  | MET | X | 237 | 31.335 | 37.165 | 61.798 | 0.00 | 0.00 |
| ATOM | 3579 | C    | MET | X | 237 | 35.605 | 36.467 | 61.082 | 0.00 | 0.00 |
| ATOM | 3580 | O    | MET | X | 237 | 36.313 | 37.082 | 61.913 | 0.00 | 0.00 |
| ATOM | 3581 | N    | GLY | X | 238 | 35.337 | 35.145 | 61.204 | 0.00 | 0.00 |
| ATOM | 3582 | H    | GLY | X | 238 | 34.838 | 34.555 | 60.553 | 0.00 | 0.00 |
| ATOM | 3583 | CA   | GLY | X | 238 | 35.805 | 34.364 | 62.364 | 0.00 | 0.00 |
| ATOM | 3584 | HA2  | GLY | X | 238 | 35.569 | 34.984 | 63.237 | 0.00 | 0.00 |
| ATOM | 3585 | HA3  | GLY | X | 238 | 35.220 | 33.513 | 62.443 | 0.00 | 0.00 |
| ATOM | 3586 | C    | GLY | X | 238 | 37.300 | 34.020 | 62.296 | 0.00 | 0.00 |
| ATOM | 3587 | O    | GLY | X | 238 | 37.903 | 34.199 | 63.321 | 0.00 | 0.00 |
| ATOM | 3588 | N    | GLU | X | 239 | 37.791 | 33.709 | 61.102 | 0.00 | 0.00 |
| ATOM | 3589 | H    | GLU | X | 239 | 37.128 | 33.590 | 60.349 | 0.00 | 0.00 |
| ATOM | 3590 | CA   | GLU | X | 239 | 39.223 | 33.498 | 60.832 | 0.00 | 0.00 |
| ATOM | 3591 | HA   | GLU | X | 239 | 39.727 | 32.819 | 61.520 | 0.00 | 0.00 |
| ATOM | 3592 | CB   | GLU | X | 239 | 39.359 | 32.897 | 59.471 | 0.00 | 0.00 |
| ATOM | 3593 | HB2  | GLU | X | 239 | 38.717 | 33.534 | 58.864 | 0.00 | 0.00 |
| ATOM | 3594 | HB3  | GLU | X | 239 | 40.402 | 33.083 | 59.214 | 0.00 | 0.00 |
| ATOM | 3595 | CG   | GLU | X | 239 | 39.070 | 31.436 | 59.314 | 0.00 | 0.00 |
| ATOM | 3596 | HG2  | GLU | X | 239 | 38.032 | 31.344 | 59.632 | 0.00 | 0.00 |
| ATOM | 3597 | HG3  | GLU | X | 239 | 39.312 | 31.101 | 58.305 | 0.00 | 0.00 |
| ATOM | 3598 | CD   | GLU | X | 239 | 39.940 | 30.593 | 60.193 | 0.00 | 0.00 |
| ATOM | 3599 | OE1  | GLU | X | 239 | 39.434 | 30.052 | 61.167 | 0.00 | 0.00 |
| ATOM | 3600 | OE2  | GLU | X | 239 | 41.167 | 30.439 | 59.943 | 0.00 | 0.00 |
| ATOM | 3601 | C    | GLU | X | 239 | 40.066 | 34.804 | 60.986 | 0.00 | 0.00 |
| ATOM | 3602 | O    | GLU | X | 239 | 41.041 | 34.779 | 61.761 | 0.00 | 0.00 |
| ATOM | 3603 | N    | ALA | X | 240 | 39.551 | 35.908 | 60.573 | 0.00 | 0.00 |
| ATOM | 3604 | H    | ALA | X | 240 | 38.768 | 35.926 | 59.936 | 0.00 | 0.00 |
| ATOM | 3605 | CA   | ALA | X | 240 | 40.135 | 37.256 | 60.825 | 0.00 | 0.00 |
| ATOM | 3606 | HA   | ALA | X | 240 | 41.124 | 37.306 | 60.369 | 0.00 | 0.00 |
| ATOM | 3607 | CB   | ALA | X | 240 | 39.262 | 38.320 | 60.148 | 0.00 | 0.00 |
| ATOM | 3608 | HB1  | ALA | X | 240 | 38.308 | 38.483 | 60.650 | 0.00 | 0.00 |
| ATOM | 3609 | HB2  | ALA | X | 240 | 39.734 | 39.301 | 60.187 | 0.00 | 0.00 |
| ATOM | 3610 | HB3  | ALA | X | 240 | 39.030 | 38.092 | 59.107 | 0.00 | 0.00 |
| ATOM | 3611 | C    | ALA | X | 240 | 40.307 | 37.484 | 62.297 | 0.00 | 0.00 |
| ATOM | 3612 | O    | ALA | X | 240 | 41.430 | 37.708 | 62.756 | 0.00 | 0.00 |
| ATOM | 3613 | N    | ARG | X | 241 | 39.185 | 37.421 | 63.067 | 0.00 | 0.00 |
| ATOM | 3614 | H    | ARG | X | 241 | 38.295 | 37.134 | 62.684 | 0.00 | 0.00 |
| ATOM | 3615 | CA   | ARG | X | 241 | 39.238 | 37.539 | 64.536 | 0.00 | 0.00 |
| ATOM | 3616 | HA   | ARG | X | 241 | 39.612 | 38.557 | 64.646 | 0.00 | 0.00 |
| ATOM | 3617 | CB   | ARG | X | 241 | 37.763 | 37.463 | 65.216 | 0.00 | 0.00 |
| ATOM | 3618 | HB2  | ARG | X | 241 | 36.991 | 37.849 | 64.551 | 0.00 | 0.00 |
| ATOM | 3619 | HB3  | ARG | X | 241 | 37.509 | 36.403 | 65.241 | 0.00 | 0.00 |
| ATOM | 3620 | CG   | ARG | X | 241 | 37.682 | 38.247 | 66.566 | 0.00 | 0.00 |
| ATOM | 3621 | HG2  | ARG | X | 241 | 38.507 | 38.103 | 67.264 | 0.00 | 0.00 |
| ATOM | 3622 | HG3  | ARG | X | 241 | 37.457 | 39.305 | 66.435 | 0.00 | 0.00 |
| ATOM | 3623 | CD   | ARG | X | 241 | 36.615 | 37.538 | 67.349 | 0.00 | 0.00 |
| ATOM | 3624 | HD2  | ARG | X | 241 | 35.790 | 37.927 | 66.752 | 0.00 | 0.00 |
| ATOM | 3625 | HD3  | ARG | X | 241 | 36.615 | 36.456 | 67.215 | 0.00 | 0.00 |
| ATOM | 3626 | NE   | ARG | X | 241 | 36.637 | 37.779 | 68.815 | 0.00 | 0.00 |
| ATOM | 3627 | HE   | ARG | X | 241 | 36.877 | 36.973 | 69.374 | 0.00 | 0.00 |
| ATOM | 3628 | CZ   | ARG | X | 241 | 36.482 | 38.920 | 69.456 | 0.00 | 0.00 |
| ATOM | 3629 | NH1  | ARG | X | 241 | 36.119 | 40.002 | 68.906 | 0.00 | 0.00 |
| ATOM | 3630 | HH11 | ARG | X | 241 | 35.613 | 39.920 | 68.036 | 0.00 | 0.00 |
| ATOM | 3631 | HH12 | ARG | X | 241 | 36.227 | 40.864 | 69.420 | 0.00 | 0.00 |
| ATOM | 3632 | NH2  | ARG | X | 241 | 36.842 | 38.994 | 70.746 | 0.00 | 0.00 |
| ATOM | 3633 | HH21 | ARG | X | 241 | 37.213 | 38.160 | 71.178 | 0.00 | 0.00 |
| ATOM | 3634 | HH22 | ARG | X | 241 | 36.833 | 39.915 | 71.160 | 0.00 | 0.00 |
| ATOM | 3635 | C    | ARG | X | 241 | 40.269 | 36.561 | 65.101 | 0.00 | 0.00 |
| ATOM | 3636 | O    | ARG | X | 241 | 41.096 | 37.003 | 65.892 | 0.00 | 0.00 |
| ATOM | 3637 | N    | ARG | X | 242 | 40.248 | 35.228 | 64.741 | 0.00 | 0.00 |
| ATOM | 3638 | H    | ARG | X | 242 | 39.488 | 35.091 | 64.091 | 0.00 | 0.00 |
| ATOM | 3639 | CA   | ARG | X | 242 | 41.235 | 34.169 | 65.111 | 0.00 | 0.00 |
| ATOM | 3640 | HA   | ARG | X | 242 | 41.175 | 34.042 | 66.192 | 0.00 | 0.00 |
| ATOM | 3641 | CB   | ARG | X | 242 | 41.062 | 32.796 | 64.421 | 0.00 | 0.00 |
| ATOM | 3642 | HB2  | ARG | X | 242 | 40.027 | 32.465 | 64.503 | 0.00 | 0.00 |
| ATOM | 3643 | HB3  | ARG | X | 242 | 41.463 | 32.851 | 63.409 | 0.00 | 0.00 |
| ATOM | 3644 | CG   | ARG | X | 242 | 41.875 | 31.651 | 64.973 | 0.00 | 0.00 |



|      |      |      |     |   |     |        |        |        |      |      |
|------|------|------|-----|---|-----|--------|--------|--------|------|------|
| ATOM | 3645 | HG2  | ARG | X | 242 | 42.905 | 31.968 | 65.140 | 0.00 | 0.00 |
| ATOM | 3646 | HG3  | ARG | X | 242 | 41.513 | 31.426 | 65.976 | 0.00 | 0.00 |
| ATOM | 3647 | CD   | ARG | X | 242 | 41.813 | 30.381 | 64.036 | 0.00 | 0.00 |
| ATOM | 3648 | HD2  | ARG | X | 242 | 42.520 | 29.651 | 64.431 | 0.00 | 0.00 |
| ATOM | 3649 | HD3  | ARG | X | 242 | 40.804 | 29.970 | 63.986 | 0.00 | 0.00 |
| ATOM | 3650 | NE   | ARG | X | 242 | 42.334 | 30.709 | 62.724 | 0.00 | 0.00 |
| ATOM | 3651 | HE   | ARG | X | 242 | 41.604 | 30.823 | 62.036 | 0.00 | 0.00 |
| ATOM | 3652 | CZ   | ARG | X | 242 | 43.567 | 30.903 | 62.291 | 0.00 | 0.00 |
| ATOM | 3653 | NH1  | ARG | X | 242 | 44.668 | 30.843 | 63.012 | 0.00 | 0.00 |
| ATOM | 3654 | HH11 | ARG | X | 242 | 44.670 | 30.568 | 63.984 | 0.00 | 0.00 |
| ATOM | 3655 | HH12 | ARG | X | 242 | 45.549 | 30.822 | 62.519 | 0.00 | 0.00 |
| ATOM | 3656 | NH2  | ARG | X | 242 | 43.773 | 31.015 | 60.996 | 0.00 | 0.00 |
| ATOM | 3657 | HH21 | ARG | X | 242 | 43.007 | 30.931 | 60.343 | 0.00 | 0.00 |
| ATOM | 3658 | HH22 | ARG | X | 242 | 44.684 | 31.172 | 60.591 | 0.00 | 0.00 |
| ATOM | 3659 | C    | ARG | X | 242 | 42.666 | 34.696 | 65.040 | 0.00 | 0.00 |
| ATOM | 3660 | O    | ARG | X | 242 | 43.411 | 34.815 | 66.005 | 0.00 | 0.00 |
| ATOM | 3661 | N    | ARG | X | 243 | 43.022 | 35.056 | 63.856 | 0.00 | 0.00 |
| ATOM | 3662 | H    | ARG | X | 243 | 42.337 | 34.969 | 63.119 | 0.00 | 0.00 |
| ATOM | 3663 | CA   | ARG | X | 243 | 44.350 | 35.488 | 63.503 | 0.00 | 0.00 |
| ATOM | 3664 | HA   | ARG | X | 243 | 45.085 | 34.697 | 63.655 | 0.00 | 0.00 |
| ATOM | 3665 | CB   | ARG | X | 243 | 44.499 | 35.797 | 62.002 | 0.00 | 0.00 |
| ATOM | 3666 | HB2  | ARG | X | 243 | 43.757 | 36.566 | 61.788 | 0.00 | 0.00 |
| ATOM | 3667 | HB3  | ARG | X | 243 | 45.515 | 36.193 | 61.991 | 0.00 | 0.00 |
| ATOM | 3668 | CG   | ARG | X | 243 | 44.324 | 34.645 | 61.015 | 0.00 | 0.00 |
| ATOM | 3669 | HG2  | ARG | X | 243 | 45.037 | 33.856 | 61.255 | 0.00 | 0.00 |
| ATOM | 3670 | HG3  | ARG | X | 243 | 43.330 | 34.206 | 61.103 | 0.00 | 0.00 |
| ATOM | 3671 | CD   | ARG | X | 243 | 44.553 | 35.212 | 59.617 | 0.00 | 0.00 |
| ATOM | 3672 | HD2  | ARG | X | 243 | 43.896 | 36.072 | 59.491 | 0.00 | 0.00 |
| ATOM | 3673 | HD3  | ARG | X | 243 | 45.505 | 35.717 | 59.457 | 0.00 | 0.00 |
| ATOM | 3674 | NE   | ARG | X | 243 | 44.262 | 34.228 | 58.580 | 0.00 | 0.00 |
| ATOM | 3675 | HE   | ARG | X | 243 | 43.812 | 33.340 | 58.754 | 0.00 | 0.00 |
| ATOM | 3676 | CZ   | ARG | X | 243 | 44.423 | 34.267 | 57.281 | 0.00 | 0.00 |
| ATOM | 3677 | NH1  | ARG | X | 243 | 45.090 | 35.222 | 56.714 | 0.00 | 0.00 |
| ATOM | 3678 | HH11 | ARG | X | 243 | 45.643 | 35.839 | 57.291 | 0.00 | 0.00 |
| ATOM | 3679 | HH12 | ARG | X | 243 | 45.379 | 35.045 | 55.763 | 0.00 | 0.00 |
| ATOM | 3680 | NH2  | ARG | X | 243 | 44.041 | 33.306 | 56.481 | 0.00 | 0.00 |
| ATOM | 3681 | HH21 | ARG | X | 243 | 43.863 | 32.407 | 56.907 | 0.00 | 0.00 |
| ATOM | 3682 | HH22 | ARG | X | 243 | 43.923 | 33.459 | 55.490 | 0.00 | 0.00 |
| ATOM | 3683 | C    | ARG | X | 243 | 44.865 | 36.686 | 64.360 | 0.00 | 0.00 |
| ATOM | 3684 | O    | ARG | X | 243 | 45.917 | 36.593 | 65.053 | 0.00 | 0.00 |
| ATOM | 3685 | N    | ALA | X | 244 | 43.984 | 37.709 | 64.382 | 0.00 | 0.00 |
| ATOM | 3686 | H    | ALA | X | 244 | 43.140 | 37.665 | 63.830 | 0.00 | 0.00 |
| ATOM | 3687 | CA   | ALA | X | 244 | 44.189 | 38.862 | 65.179 | 0.00 | 0.00 |
| ATOM | 3688 | HA   | ALA | X | 244 | 45.117 | 39.332 | 64.854 | 0.00 | 0.00 |
| ATOM | 3689 | CB   | ALA | X | 244 | 43.003 | 39.770 | 64.784 | 0.00 | 0.00 |
| ATOM | 3690 | HB1  | ALA | X | 244 | 42.920 | 39.940 | 63.710 | 0.00 | 0.00 |
| ATOM | 3691 | HB2  | ALA | X | 244 | 42.107 | 39.301 | 65.191 | 0.00 | 0.00 |
| ATOM | 3692 | HB3  | ALA | X | 244 | 43.051 | 40.744 | 65.271 | 0.00 | 0.00 |
| ATOM | 3693 | C    | ALA | X | 244 | 44.393 | 38.569 | 66.726 | 0.00 | 0.00 |
| ATOM | 3694 | O    | ALA | X | 244 | 45.365 | 39.028 | 67.353 | 0.00 | 0.00 |
| ATOM | 3695 | N    | THR | X | 245 | 43.528 | 37.724 | 67.327 | 0.00 | 0.00 |
| ATOM | 3696 | H    | THR | X | 245 | 42.763 | 37.420 | 66.742 | 0.00 | 0.00 |
| ATOM | 3697 | CA   | THR | X | 245 | 43.636 | 37.057 | 68.646 | 0.00 | 0.00 |
| ATOM | 3698 | HA   | THR | X | 245 | 43.697 | 37.802 | 69.439 | 0.00 | 0.00 |
| ATOM | 3699 | CB   | THR | X | 245 | 42.484 | 35.981 | 68.887 | 0.00 | 0.00 |
| ATOM | 3700 | HB   | THR | X | 245 | 42.515 | 35.140 | 68.194 | 0.00 | 0.00 |
| ATOM | 3701 | CG2  | THR | X | 245 | 42.458 | 35.291 | 70.274 | 0.00 | 0.00 |
| ATOM | 3702 | HG21 | THR | X | 245 | 43.357 | 34.676 | 70.310 | 0.00 | 0.00 |
| ATOM | 3703 | HG22 | THR | X | 245 | 42.419 | 35.975 | 71.123 | 0.00 | 0.00 |
| ATOM | 3704 | HG23 | THR | X | 245 | 41.597 | 34.626 | 70.199 | 0.00 | 0.00 |
| ATOM | 3705 | OG1  | THR | X | 245 | 41.301 | 36.722 | 68.820 | 0.00 | 0.00 |
| ATOM | 3706 | HG1  | THR | X | 245 | 41.002 | 36.632 | 67.912 | 0.00 | 0.00 |
| ATOM | 3707 | C    | THR | X | 245 | 45.029 | 36.393 | 68.889 | 0.00 | 0.00 |
| ATOM | 3708 | O    | THR | X | 245 | 45.717 | 36.617 | 69.876 | 0.00 | 0.00 |
| ATOM | 3709 | N    | GLN | X | 246 | 45.385 | 35.510 | 67.995 | 0.00 | 0.00 |
| ATOM | 3710 | H    | GLN | X | 246 | 44.803 | 35.475 | 67.171 | 0.00 | 0.00 |
| ATOM | 3711 | CA   | GLN | X | 246 | 46.529 | 34.605 | 68.177 | 0.00 | 0.00 |
| ATOM | 3712 | HA   | GLN | X | 246 | 46.667 | 34.203 | 69.181 | 0.00 | 0.00 |
| ATOM | 3713 | CB   | GLN | X | 246 | 46.597 | 33.362 | 67.202 | 0.00 | 0.00 |
| ATOM | 3714 | HB2  | GLN | X | 246 | 46.432 | 33.742 | 66.194 | 0.00 | 0.00 |

|      |      |      |     |   |     |        |        |        |      |      |
|------|------|------|-----|---|-----|--------|--------|--------|------|------|
| ATOM | 3715 | HB3  | GLN | X | 246 | 47.630 | 33.016 | 67.245 | 0.00 | 0.00 |
| ATOM | 3716 | CG   | GLN | X | 246 | 45.741 | 32.082 | 67.442 | 0.00 | 0.00 |
| ATOM | 3717 | HG2  | GLN | X | 246 | 46.112 | 31.793 | 68.426 | 0.00 | 0.00 |
| ATOM | 3718 | HG3  | GLN | X | 246 | 44.692 | 32.357 | 67.333 | 0.00 | 0.00 |
| ATOM | 3719 | CD   | GLN | X | 246 | 45.979 | 31.058 | 66.326 | 0.00 | 0.00 |
| ATOM | 3720 | OE1  | GLN | X | 246 | 45.101 | 30.476 | 65.767 | 0.00 | 0.00 |
| ATOM | 3721 | NE2  | GLN | X | 246 | 47.180 | 30.575 | 66.122 | 0.00 | 0.00 |
| ATOM | 3722 | HE21 | GLN | X | 246 | 47.276 | 29.749 | 65.548 | 0.00 | 0.00 |
| ATOM | 3723 | HE22 | GLN | X | 246 | 47.908 | 30.821 | 66.778 | 0.00 | 0.00 |
| ATOM | 3724 | C    | GLN | X | 246 | 47.856 | 35.432 | 68.055 | 0.00 | 0.00 |
| ATOM | 3725 | O    | GLN | X | 246 | 48.849 | 35.161 | 68.650 | 0.00 | 0.00 |
| ATOM | 3726 | N    | LEU | X | 247 | 47.782 | 36.531 | 67.275 | 0.00 | 0.00 |
| ATOM | 3727 | H    | LEU | X | 247 | 46.952 | 36.636 | 66.708 | 0.00 | 0.00 |
| ATOM | 3728 | CA   | LEU | X | 247 | 48.891 | 37.509 | 67.106 | 0.00 | 0.00 |
| ATOM | 3729 | HA   | LEU | X | 247 | 49.772 | 36.878 | 67.224 | 0.00 | 0.00 |
| ATOM | 3730 | CB   | LEU | X | 247 | 48.772 | 38.257 | 65.790 | 0.00 | 0.00 |
| ATOM | 3731 | HB2  | LEU | X | 247 | 48.693 | 37.535 | 64.978 | 0.00 | 0.00 |
| ATOM | 3732 | HB3  | LEU | X | 247 | 47.807 | 38.750 | 65.908 | 0.00 | 0.00 |
| ATOM | 3733 | CG   | LEU | X | 247 | 49.835 | 39.309 | 65.383 | 0.00 | 0.00 |
| ATOM | 3734 | HG   | LEU | X | 247 | 49.650 | 40.165 | 66.031 | 0.00 | 0.00 |
| ATOM | 3735 | CD1  | LEU | X | 247 | 51.344 | 38.942 | 65.589 | 0.00 | 0.00 |
| ATOM | 3736 | HD11 | LEU | X | 247 | 51.551 | 38.893 | 66.658 | 0.00 | 0.00 |
| ATOM | 3737 | HD12 | LEU | X | 247 | 51.607 | 38.025 | 65.062 | 0.00 | 0.00 |
| ATOM | 3738 | HD13 | LEU | X | 247 | 51.968 | 39.733 | 65.174 | 0.00 | 0.00 |
| ATOM | 3739 | CD2  | LEU | X | 247 | 49.456 | 39.723 | 63.929 | 0.00 | 0.00 |
| ATOM | 3740 | HD21 | LEU | X | 247 | 49.999 | 40.619 | 63.629 | 0.00 | 0.00 |
| ATOM | 3741 | HD22 | LEU | X | 247 | 49.778 | 38.868 | 63.335 | 0.00 | 0.00 |
| ATOM | 3742 | HD23 | LEU | X | 247 | 48.398 | 39.926 | 63.763 | 0.00 | 0.00 |
| ATOM | 3743 | C    | LEU | X | 247 | 48.919 | 38.473 | 68.341 | 0.00 | 0.00 |
| ATOM | 3744 | O    | LEU | X | 247 | 50.025 | 38.796 | 68.822 | 0.00 | 0.00 |
| ATOM | 3745 | N    | ALA | X | 248 | 47.739 | 38.983 | 68.756 | 0.00 | 0.00 |
| ATOM | 3746 | H    | ALA | X | 248 | 46.839 | 38.895 | 68.307 | 0.00 | 0.00 |
| ATOM | 3747 | CA   | ALA | X | 248 | 47.617 | 39.703 | 69.971 | 0.00 | 0.00 |
| ATOM | 3748 | HA   | ALA | X | 248 | 48.306 | 40.543 | 69.888 | 0.00 | 0.00 |
| ATOM | 3749 | CB   | ALA | X | 248 | 46.137 | 40.119 | 70.206 | 0.00 | 0.00 |
| ATOM | 3750 | HB1  | ALA | X | 248 | 46.003 | 40.841 | 69.401 | 0.00 | 0.00 |
| ATOM | 3751 | HB2  | ALA | X | 248 | 45.474 | 39.257 | 70.134 | 0.00 | 0.00 |
| ATOM | 3752 | HB3  | ALA | X | 248 | 46.023 | 40.516 | 71.215 | 0.00 | 0.00 |
| ATOM | 3753 | C    | ALA | X | 248 | 48.170 | 39.041 | 71.192 | 0.00 | 0.00 |
| ATOM | 3754 | O    | ALA | X | 248 | 48.982 | 39.636 | 71.881 | 0.00 | 0.00 |
| ATOM | 3755 | N    | HIE | X | 249 | 47.935 | 37.747 | 71.301 | 0.00 | 0.00 |
| ATOM | 3756 | H    | HIE | X | 249 | 47.235 | 37.385 | 70.669 | 0.00 | 0.00 |
| ATOM | 3757 | CA   | HIE | X | 249 | 48.539 | 36.832 | 72.262 | 0.00 | 0.00 |
| ATOM | 3758 | HA   | HIE | X | 249 | 48.287 | 37.219 | 73.249 | 0.00 | 0.00 |
| ATOM | 3759 | CB   | HIE | X | 249 | 48.009 | 35.396 | 72.099 | 0.00 | 0.00 |
| ATOM | 3760 | HB2  | HIE | X | 249 | 46.937 | 35.548 | 71.972 | 0.00 | 0.00 |
| ATOM | 3761 | HB3  | HIE | X | 249 | 48.257 | 34.849 | 71.190 | 0.00 | 0.00 |
| ATOM | 3762 | CG   | HIE | X | 249 | 48.366 | 34.530 | 73.275 | 0.00 | 0.00 |
| ATOM | 3763 | ND1  | HIE | X | 249 | 47.718 | 34.671 | 74.577 | 0.00 | 0.00 |
| ATOM | 3764 | CE1  | HIE | X | 249 | 48.259 | 33.713 | 75.321 | 0.00 | 0.00 |
| ATOM | 3765 | HE1  | HIE | X | 249 | 47.940 | 33.399 | 76.303 | 0.00 | 0.00 |
| ATOM | 3766 | NE2  | HIE | X | 249 | 49.172 | 32.953 | 74.656 | 0.00 | 0.00 |
| ATOM | 3767 | HE2  | HIE | X | 249 | 49.598 | 32.078 | 74.927 | 0.00 | 0.00 |
| ATOM | 3768 | CD2  | HIE | X | 249 | 49.209 | 33.462 | 73.352 | 0.00 | 0.00 |
| ATOM | 3769 | HD2  | HIE | X | 249 | 49.826 | 33.064 | 72.560 | 0.00 | 0.00 |
| ATOM | 3770 | C    | HIE | X | 249 | 50.079 | 36.808 | 72.234 | 0.00 | 0.00 |
| ATOM | 3771 | O    | HIE | X | 249 | 50.774 | 36.672 | 73.251 | 0.00 | 0.00 |
| ATOM | 3772 | N    | LEU | X | 250 | 50.774 | 36.940 | 71.069 | 0.00 | 0.00 |
| ATOM | 3773 | H    | LEU | X | 250 | 50.246 | 37.119 | 70.227 | 0.00 | 0.00 |
| ATOM | 3774 | CA   | LEU | X | 250 | 52.245 | 36.999 | 70.885 | 0.00 | 0.00 |
| ATOM | 3775 | HA   | LEU | X | 250 | 52.797 | 36.285 | 71.495 | 0.00 | 0.00 |
| ATOM | 3776 | CB   | LEU | X | 250 | 52.563 | 36.526 | 69.420 | 0.00 | 0.00 |
| ATOM | 3777 | HB2  | LEU | X | 250 | 51.906 | 36.937 | 68.653 | 0.00 | 0.00 |
| ATOM | 3778 | HB3  | LEU | X | 250 | 53.533 | 36.924 | 69.123 | 0.00 | 0.00 |
| ATOM | 3779 | CG   | LEU | X | 250 | 52.687 | 34.948 | 69.303 | 0.00 | 0.00 |
| ATOM | 3780 | HG   | LEU | X | 250 | 51.994 | 34.497 | 70.013 | 0.00 | 0.00 |
| ATOM | 3781 | CD1  | LEU | X | 250 | 52.092 | 34.534 | 67.924 | 0.00 | 0.00 |
| ATOM | 3782 | HD11 | LEU | X | 250 | 52.159 | 33.469 | 67.705 | 0.00 | 0.00 |
| ATOM | 3783 | HD12 | LEU | X | 250 | 51.069 | 34.851 | 67.720 | 0.00 | 0.00 |
| ATOM | 3784 | HD13 | LEU | X | 250 | 52.820 | 34.880 | 67.190 | 0.00 | 0.00 |

|      |      |      |     |   |     |        |        |        |      |      |
|------|------|------|-----|---|-----|--------|--------|--------|------|------|
| ATOM | 3785 | CD2  | LEU | X | 250 | 54.062 | 34.396 | 69.392 | 0.00 | 0.00 |
| ATOM | 3786 | HD21 | LEU | X | 250 | 54.556 | 34.654 | 70.329 | 0.00 | 0.00 |
| ATOM | 3787 | HD22 | LEU | X | 250 | 54.073 | 33.318 | 69.233 | 0.00 | 0.00 |
| ATOM | 3788 | HD23 | LEU | X | 250 | 54.718 | 34.830 | 68.638 | 0.00 | 0.00 |
| ATOM | 3789 | C    | LEU | X | 250 | 52.791 | 38.456 | 71.211 | 0.00 | 0.00 |
| ATOM | 3790 | O    | LEU | X | 250 | 53.738 | 38.675 | 72.004 | 0.00 | 0.00 |
| ATOM | 3791 | N    | VAL | X | 251 | 52.157 | 39.493 | 70.704 | 0.00 | 0.00 |
| ATOM | 3792 | H    | VAL | X | 251 | 51.398 | 39.325 | 70.059 | 0.00 | 0.00 |
| ATOM | 3793 | CA   | VAL | X | 251 | 52.480 | 40.953 | 71.014 | 0.00 | 0.00 |
| ATOM | 3794 | HA   | VAL | X | 251 | 53.488 | 41.166 | 70.657 | 0.00 | 0.00 |
| ATOM | 3795 | CB   | VAL | X | 251 | 51.539 | 41.859 | 70.211 | 0.00 | 0.00 |
| ATOM | 3796 | HB   | VAL | X | 251 | 50.531 | 41.518 | 70.444 | 0.00 | 0.00 |
| ATOM | 3797 | CG1  | VAL | X | 251 | 51.479 | 43.390 | 70.600 | 0.00 | 0.00 |
| ATOM | 3798 | HG11 | VAL | X | 251 | 51.187 | 44.019 | 69.759 | 0.00 | 0.00 |
| ATOM | 3799 | HG12 | VAL | X | 251 | 50.752 | 43.510 | 71.403 | 0.00 | 0.00 |
| ATOM | 3800 | HG13 | VAL | X | 251 | 52.463 | 43.760 | 70.888 | 0.00 | 0.00 |
| ATOM | 3801 | CG2  | VAL | X | 251 | 51.820 | 41.802 | 68.716 | 0.00 | 0.00 |
| ATOM | 3802 | HG21 | VAL | X | 251 | 50.877 | 41.883 | 68.176 | 0.00 | 0.00 |
| ATOM | 3803 | HG22 | VAL | X | 251 | 52.427 | 42.647 | 68.392 | 0.00 | 0.00 |
| ATOM | 3804 | HG23 | VAL | X | 251 | 52.054 | 40.752 | 68.540 | 0.00 | 0.00 |
| ATOM | 3805 | C    | VAL | X | 251 | 52.411 | 41.308 | 72.514 | 0.00 | 0.00 |
| ATOM | 3806 | O    | VAL | X | 251 | 53.142 | 42.203 | 72.985 | 0.00 | 0.00 |
| ATOM | 3807 | N    | GLY | X | 252 | 51.518 | 40.602 | 73.258 | 0.00 | 0.00 |
| ATOM | 3808 | H    | GLY | X | 252 | 51.198 | 39.737 | 72.847 | 0.00 | 0.00 |
| ATOM | 3809 | CA   | GLY | X | 252 | 51.228 | 40.889 | 74.670 | 0.00 | 0.00 |
| ATOM | 3810 | HA2  | GLY | X | 252 | 51.243 | 39.926 | 75.134 | 0.00 | 0.00 |
| ATOM | 3811 | HA3  | GLY | X | 252 | 52.090 | 41.496 | 75.045 | 0.00 | 0.00 |
| ATOM | 3812 | C    | GLY | X | 252 | 49.879 | 41.586 | 74.967 | 0.00 | 0.00 |
| ATOM | 3813 | O    | GLY | X | 252 | 49.665 | 42.109 | 76.087 | 0.00 | 0.00 |
| ATOM | 3814 | N    | CYX | X | 253 | 48.899 | 41.520 | 74.099 | 0.00 | 0.00 |
| ATOM | 3815 | H    | CYX | X | 253 | 49.116 | 41.030 | 73.244 | 0.00 | 0.00 |
| ATOM | 3816 | CA   | CYX | X | 253 | 47.596 | 42.141 | 74.317 | 0.00 | 0.00 |
| ATOM | 3817 | HA   | CYX | X | 253 | 47.624 | 42.859 | 75.137 | 0.00 | 0.00 |
| ATOM | 3818 | CB   | CYX | X | 253 | 47.331 | 43.063 | 73.106 | 0.00 | 0.00 |
| ATOM | 3819 | HB2  | CYX | X | 253 | 47.131 | 42.443 | 72.232 | 0.00 | 0.00 |
| ATOM | 3820 | HB3  | CYX | X | 253 | 46.426 | 43.607 | 73.377 | 0.00 | 0.00 |
| ATOM | 3821 | SG   | CYX | X | 253 | 48.659 | 44.292 | 72.783 | 0.00 | 0.00 |
| ATOM | 3822 | C    | CYX | X | 253 | 46.336 | 41.293 | 74.623 | 0.00 | 0.00 |
| ATOM | 3823 | O    | CYX | X | 253 | 46.225 | 40.282 | 74.048 | 0.00 | 0.00 |
| ATOM | 3824 | N    | PRO | X | 254 | 45.432 | 41.642 | 75.510 | 0.00 | 0.00 |
| ATOM | 3825 | CD   | PRO | X | 254 | 44.257 | 40.833 | 75.773 | 0.00 | 0.00 |
| ATOM | 3826 | HD2  | PRO | X | 254 | 44.609 | 39.875 | 76.156 | 0.00 | 0.00 |
| ATOM | 3827 | HD3  | PRO | X | 254 | 43.572 | 40.797 | 74.925 | 0.00 | 0.00 |
| ATOM | 3828 | CG   | PRO | X | 254 | 43.419 | 41.562 | 76.868 | 0.00 | 0.00 |
| ATOM | 3829 | HG2  | PRO | X | 254 | 43.219 | 41.031 | 77.798 | 0.00 | 0.00 |
| ATOM | 3830 | HG3  | PRO | X | 254 | 42.400 | 41.678 | 76.499 | 0.00 | 0.00 |
| ATOM | 3831 | CB   | PRO | X | 254 | 44.100 | 42.945 | 76.966 | 0.00 | 0.00 |
| ATOM | 3832 | HB2  | PRO | X | 254 | 44.079 | 43.302 | 77.996 | 0.00 | 0.00 |
| ATOM | 3833 | HB3  | PRO | X | 254 | 43.544 | 43.621 | 76.316 | 0.00 | 0.00 |
| ATOM | 3834 | CA   | PRO | X | 254 | 45.465 | 42.798 | 76.486 | 0.00 | 0.00 |
| ATOM | 3835 | HA   | PRO | X | 254 | 45.775 | 43.694 | 75.949 | 0.00 | 0.00 |
| ATOM | 3836 | C    | PRO | X | 254 | 46.402 | 42.391 | 77.690 | 0.00 | 0.00 |
| ATOM | 3837 | O    | PRO | X | 254 | 46.535 | 41.185 | 77.943 | 0.00 | 0.00 |
| ATOM | 3838 | N    | PRO | X | 255 | 47.085 | 43.342 | 78.352 | 0.00 | 0.00 |
| ATOM | 3839 | CD   | PRO | X | 255 | 47.002 | 44.780 | 78.094 | 0.00 | 0.00 |
| ATOM | 3840 | HD2  | PRO | X | 255 | 45.956 | 45.063 | 77.972 | 0.00 | 0.00 |
| ATOM | 3841 | HD3  | PRO | X | 255 | 47.476 | 44.918 | 77.122 | 0.00 | 0.00 |
| ATOM | 3842 | CG   | PRO | X | 255 | 47.760 | 45.497 | 79.153 | 0.00 | 0.00 |
| ATOM | 3843 | HG2  | PRO | X | 255 | 47.114 | 45.737 | 79.997 | 0.00 | 0.00 |
| ATOM | 3844 | HG3  | PRO | X | 255 | 48.283 | 46.338 | 78.699 | 0.00 | 0.00 |
| ATOM | 3845 | CB   | PRO | X | 255 | 48.764 | 44.402 | 79.623 | 0.00 | 0.00 |
| ATOM | 3846 | HB2  | PRO | X | 255 | 48.986 | 44.556 | 80.679 | 0.00 | 0.00 |
| ATOM | 3847 | HB3  | PRO | X | 255 | 49.569 | 44.278 | 78.899 | 0.00 | 0.00 |
| ATOM | 3848 | CA   | PRO | X | 255 | 47.962 | 43.080 | 79.434 | 0.00 | 0.00 |
| ATOM | 3849 | HA   | PRO | X | 255 | 48.626 | 42.329 | 79.005 | 0.00 | 0.00 |
| ATOM | 3850 | C    | PRO | X | 255 | 47.218 | 42.604 | 80.662 | 0.00 | 0.00 |
| ATOM | 3851 | O    | PRO | X | 255 | 46.107 | 42.932 | 80.954 | 0.00 | 0.00 |
| ATOM | 3852 | N    | GLY | X | 256 | 47.988 | 41.787 | 81.380 | 0.00 | 0.00 |
| ATOM | 3853 | H    | GLY | X | 256 | 48.947 | 41.759 | 81.066 | 0.00 | 0.00 |
| ATOM | 3854 | CA   | GLY | X | 256 | 47.372 | 40.986 | 82.470 | 0.00 | 0.00 |

|      |      |      |     |   |     |        |        |        |      |      |
|------|------|------|-----|---|-----|--------|--------|--------|------|------|
| ATOM | 3855 | HA2  | GLY | X | 256 | 46.343 | 40.663 | 82.189 | 0.00 | 0.00 |
| ATOM | 3856 | HA3  | GLY | X | 256 | 48.112 | 40.222 | 82.734 | 0.00 | 0.00 |
| ATOM | 3857 | C    | GLY | X | 256 | 47.107 | 41.734 | 83.806 | 0.00 | 0.00 |
| ATOM | 3858 | O    | GLY | X | 256 | 47.549 | 42.883 | 83.981 | 0.00 | 0.00 |
| ATOM | 3859 | N    | GLY | X | 257 | 46.499 | 41.066 | 84.788 | 0.00 | 0.00 |
| ATOM | 3860 | H    | GLY | X | 257 | 46.133 | 40.138 | 84.634 | 0.00 | 0.00 |
| ATOM | 3861 | CA   | GLY | X | 257 | 46.073 | 41.779 | 86.082 | 0.00 | 0.00 |
| ATOM | 3862 | HA2  | GLY | X | 257 | 46.113 | 41.119 | 86.937 | 0.00 | 0.00 |
| ATOM | 3863 | HA3  | GLY | X | 257 | 46.636 | 42.696 | 86.335 | 0.00 | 0.00 |
| ATOM | 3864 | C    | GLY | X | 257 | 44.672 | 42.377 | 85.992 | 0.00 | 0.00 |
| ATOM | 3865 | O    | GLY | X | 257 | 43.837 | 42.189 | 86.880 | 0.00 | 0.00 |
| ATOM | 3866 | N    | THR | X | 258 | 44.378 | 43.105 | 84.901 | 0.00 | 0.00 |
| ATOM | 3867 | H    | THR | X | 258 | 45.220 | 43.266 | 84.367 | 0.00 | 0.00 |
| ATOM | 3868 | CA   | THR | X | 258 | 43.074 | 43.763 | 84.543 | 0.00 | 0.00 |
| ATOM | 3869 | HA   | THR | X | 258 | 42.459 | 43.962 | 85.421 | 0.00 | 0.00 |
| ATOM | 3870 | CB   | THR | X | 258 | 43.367 | 45.096 | 83.855 | 0.00 | 0.00 |
| ATOM | 3871 | HB   | THR | X | 258 | 42.520 | 45.396 | 83.238 | 0.00 | 0.00 |
| ATOM | 3872 | CG2  | THR | X | 258 | 43.796 | 46.158 | 84.932 | 0.00 | 0.00 |
| ATOM | 3873 | HG21 | THR | X | 258 | 43.043 | 46.505 | 85.640 | 0.00 | 0.00 |
| ATOM | 3874 | HG22 | THR | X | 258 | 44.626 | 45.789 | 85.534 | 0.00 | 0.00 |
| ATOM | 3875 | HG23 | THR | X | 258 | 44.376 | 46.951 | 84.461 | 0.00 | 0.00 |
| ATOM | 3876 | OG1  | THR | X | 258 | 44.377 | 45.058 | 82.924 | 0.00 | 0.00 |
| ATOM | 3877 | HG1  | THR | X | 258 | 44.177 | 45.766 | 82.307 | 0.00 | 0.00 |
| ATOM | 3878 | C    | THR | X | 258 | 42.272 | 42.790 | 83.708 | 0.00 | 0.00 |
| ATOM | 3879 | O    | THR | X | 258 | 42.837 | 41.814 | 83.153 | 0.00 | 0.00 |
| ATOM | 3880 | N    | GLY | X | 259 | 41.017 | 43.040 | 83.543 | 0.00 | 0.00 |
| ATOM | 3881 | H    | GLY | X | 259 | 40.549 | 43.892 | 83.817 | 0.00 | 0.00 |
| ATOM | 3882 | CA   | GLY | X | 259 | 40.230 | 42.169 | 82.696 | 0.00 | 0.00 |
| ATOM | 3883 | HA2  | GLY | X | 259 | 40.385 | 41.164 | 82.982 | 0.00 | 0.00 |
| ATOM | 3884 | HA3  | GLY | X | 259 | 39.147 | 42.335 | 82.768 | 0.00 | 0.00 |
| ATOM | 3885 | C    | GLY | X | 259 | 40.469 | 42.378 | 81.144 | 0.00 | 0.00 |
| ATOM | 3886 | O    | GLY | X | 259 | 40.909 | 43.473 | 80.769 | 0.00 | 0.00 |
| ATOM | 3887 | N    | GLY | X | 260 | 40.065 | 41.350 | 80.418 | 0.00 | 0.00 |
| ATOM | 3888 | H    | GLY | X | 260 | 39.761 | 40.518 | 80.903 | 0.00 | 0.00 |
| ATOM | 3889 | CA   | GLY | X | 260 | 40.084 | 41.378 | 79.008 | 0.00 | 0.00 |
| ATOM | 3890 | HA2  | GLY | X | 260 | 40.852 | 42.101 | 78.696 | 0.00 | 0.00 |
| ATOM | 3891 | HA3  | GLY | X | 260 | 40.364 | 40.416 | 78.672 | 0.00 | 0.00 |
| ATOM | 3892 | C    | GLY | X | 260 | 38.745 | 41.759 | 78.350 | 0.00 | 0.00 |
| ATOM | 3893 | O    | GLY | X | 260 | 37.697 | 41.324 | 78.842 | 0.00 | 0.00 |
| ATOM | 3894 | N    | ASN | X | 261 | 38.877 | 42.412 | 77.219 | 0.00 | 0.00 |
| ATOM | 3895 | H    | ASN | X | 261 | 39.785 | 42.635 | 76.838 | 0.00 | 0.00 |
| ATOM | 3896 | CA   | ASN | X | 261 | 37.886 | 42.990 | 76.377 | 0.00 | 0.00 |
| ATOM | 3897 | HA   | ASN | X | 261 | 37.275 | 42.123 | 76.125 | 0.00 | 0.00 |
| ATOM | 3898 | CB   | ASN | X | 261 | 37.002 | 44.011 | 77.134 | 0.00 | 0.00 |
| ATOM | 3899 | HB2  | ASN | X | 261 | 36.130 | 44.176 | 76.501 | 0.00 | 0.00 |
| ATOM | 3900 | HB3  | ASN | X | 261 | 36.703 | 43.694 | 78.134 | 0.00 | 0.00 |
| ATOM | 3901 | CG   | ASN | X | 261 | 37.803 | 45.272 | 77.328 | 0.00 | 0.00 |
| ATOM | 3902 | OD1  | ASN | X | 261 | 37.943 | 46.069 | 76.431 | 0.00 | 0.00 |
| ATOM | 3903 | ND2  | ASN | X | 261 | 38.345 | 45.578 | 78.522 | 0.00 | 0.00 |
| ATOM | 3904 | HD21 | ASN | X | 261 | 38.796 | 46.473 | 78.647 | 0.00 | 0.00 |
| ATOM | 3905 | HD22 | ASN | X | 261 | 38.182 | 44.999 | 79.334 | 0.00 | 0.00 |
| ATOM | 3906 | C    | ASN | X | 261 | 38.581 | 43.517 | 75.134 | 0.00 | 0.00 |
| ATOM | 3907 | O    | ASN | X | 261 | 39.814 | 43.798 | 75.116 | 0.00 | 0.00 |
| ATOM | 3908 | N    | ASP | X | 262 | 37.879 | 43.767 | 74.061 | 0.00 | 0.00 |
| ATOM | 3909 | H    | ASP | X | 262 | 36.901 | 43.603 | 74.250 | 0.00 | 0.00 |
| ATOM | 3910 | CA   | ASP | X | 262 | 38.427 | 44.154 | 72.722 | 0.00 | 0.00 |
| ATOM | 3911 | HA   | ASP | X | 262 | 39.260 | 43.541 | 72.378 | 0.00 | 0.00 |
| ATOM | 3912 | CB   | ASP | X | 262 | 37.355 | 44.032 | 71.617 | 0.00 | 0.00 |
| ATOM | 3913 | HB2  | ASP | X | 262 | 36.414 | 44.491 | 71.919 | 0.00 | 0.00 |
| ATOM | 3914 | HB3  | ASP | X | 262 | 37.666 | 44.633 | 70.762 | 0.00 | 0.00 |
| ATOM | 3915 | CG   | ASP | X | 262 | 37.027 | 42.562 | 71.164 | 0.00 | 0.00 |
| ATOM | 3916 | OD1  | ASP | X | 262 | 37.598 | 41.563 | 71.720 | 0.00 | 0.00 |
| ATOM | 3917 | OD2  | ASP | X | 262 | 36.058 | 42.390 | 70.358 | 0.00 | 0.00 |
| ATOM | 3918 | C    | ASP | X | 262 | 38.974 | 45.561 | 72.605 | 0.00 | 0.00 |
| ATOM | 3919 | O    | ASP | X | 262 | 40.040 | 45.739 | 71.985 | 0.00 | 0.00 |
| ATOM | 3920 | N    | THR | X | 263 | 38.342 | 46.524 | 73.210 | 0.00 | 0.00 |
| ATOM | 3921 | H    | THR | X | 263 | 37.449 | 46.267 | 73.606 | 0.00 | 0.00 |
| ATOM | 3922 | CA   | THR | X | 263 | 38.719 | 47.908 | 73.369 | 0.00 | 0.00 |
| ATOM | 3923 | HA   | THR | X | 263 | 38.938 | 48.245 | 72.356 | 0.00 | 0.00 |
| ATOM | 3924 | CB   | THR | X | 263 | 37.603 | 48.665 | 74.071 | 0.00 | 0.00 |

|      |      |      |     |   |     |        |        |        |      |      |
|------|------|------|-----|---|-----|--------|--------|--------|------|------|
| ATOM | 3925 | HB   | THR | X | 263 | 37.685 | 48.345 | 75.109 | 0.00 | 0.00 |
| ATOM | 3926 | CG2  | THR | X | 263 | 37.809 | 50.211 | 74.164 | 0.00 | 0.00 |
| ATOM | 3927 | HG21 | THR | X | 263 | 37.523 | 50.700 | 73.233 | 0.00 | 0.00 |
| ATOM | 3928 | HG22 | THR | X | 263 | 37.367 | 50.506 | 75.116 | 0.00 | 0.00 |
| ATOM | 3929 | HG23 | THR | X | 263 | 38.877 | 50.425 | 74.144 | 0.00 | 0.00 |
| ATOM | 3930 | OG1  | THR | X | 263 | 36.322 | 48.322 | 73.655 | 0.00 | 0.00 |
| ATOM | 3931 | HG1  | THR | X | 263 | 36.272 | 48.821 | 72.837 | 0.00 | 0.00 |
| ATOM | 3932 | C    | THR | X | 263 | 40.097 | 48.044 | 74.066 | 0.00 | 0.00 |
| ATOM | 3933 | O    | THR | X | 263 | 41.007 | 48.781 | 73.743 | 0.00 | 0.00 |
| ATOM | 3934 | N    | GLU | X | 264 | 40.402 | 47.198 | 75.100 | 0.00 | 0.00 |
| ATOM | 3935 | H    | GLU | X | 264 | 39.696 | 46.552 | 75.424 | 0.00 | 0.00 |
| ATOM | 3936 | CA   | GLU | X | 264 | 41.679 | 47.143 | 75.831 | 0.00 | 0.00 |
| ATOM | 3937 | HA   | GLU | X | 264 | 42.178 | 48.102 | 75.690 | 0.00 | 0.00 |
| ATOM | 3938 | CB   | GLU | X | 264 | 41.469 | 47.027 | 77.362 | 0.00 | 0.00 |
| ATOM | 3939 | HB2  | GLU | X | 264 | 40.580 | 46.427 | 77.557 | 0.00 | 0.00 |
| ATOM | 3940 | HB3  | GLU | X | 264 | 42.370 | 46.497 | 77.671 | 0.00 | 0.00 |
| ATOM | 3941 | CG   | GLU | X | 264 | 41.239 | 48.276 | 78.137 | 0.00 | 0.00 |
| ATOM | 3942 | HG2  | GLU | X | 264 | 42.161 | 48.857 | 78.109 | 0.00 | 0.00 |
| ATOM | 3943 | HG3  | GLU | X | 264 | 40.423 | 48.847 | 77.693 | 0.00 | 0.00 |
| ATOM | 3944 | CD   | GLU | X | 264 | 40.784 | 47.950 | 79.558 | 0.00 | 0.00 |
| ATOM | 3945 | OE1  | GLU | X | 264 | 39.551 | 48.126 | 79.899 | 0.00 | 0.00 |
| ATOM | 3946 | OE2  | GLU | X | 264 | 41.652 | 47.455 | 80.257 | 0.00 | 0.00 |
| ATOM | 3947 | C    | GLU | X | 264 | 42.717 | 46.188 | 75.260 | 0.00 | 0.00 |
| ATOM | 3948 | O    | GLU | X | 264 | 43.901 | 46.317 | 75.536 | 0.00 | 0.00 |
| ATOM | 3949 | N    | LEU | X | 265 | 42.320 | 45.334 | 74.304 | 0.00 | 0.00 |
| ATOM | 3950 | H    | LEU | X | 265 | 41.347 | 45.085 | 74.203 | 0.00 | 0.00 |
| ATOM | 3951 | CA   | LEU | X | 265 | 43.227 | 44.553 | 73.411 | 0.00 | 0.00 |
| ATOM | 3952 | HA   | LEU | X | 265 | 44.082 | 44.151 | 73.955 | 0.00 | 0.00 |
| ATOM | 3953 | CB   | LEU | X | 265 | 42.455 | 43.330 | 72.897 | 0.00 | 0.00 |
| ATOM | 3954 | HB2  | LEU | X | 265 | 41.898 | 42.813 | 73.678 | 0.00 | 0.00 |
| ATOM | 3955 | HB3  | LEU | X | 265 | 41.700 | 43.721 | 72.215 | 0.00 | 0.00 |
| ATOM | 3956 | CG   | LEU | X | 265 | 43.369 | 42.330 | 72.139 | 0.00 | 0.00 |
| ATOM | 3957 | HG   | LEU | X | 265 | 44.283 | 42.024 | 72.647 | 0.00 | 0.00 |
| ATOM | 3958 | CD1  | LEU | X | 265 | 42.420 | 41.087 | 71.902 | 0.00 | 0.00 |
| ATOM | 3959 | HD11 | LEU | X | 265 | 42.350 | 40.481 | 72.805 | 0.00 | 0.00 |
| ATOM | 3960 | HD12 | LEU | X | 265 | 41.477 | 41.502 | 71.546 | 0.00 | 0.00 |
| ATOM | 3961 | HD13 | LEU | X | 265 | 43.034 | 40.506 | 71.215 | 0.00 | 0.00 |
| ATOM | 3962 | CD2  | LEU | X | 265 | 43.794 | 42.960 | 70.772 | 0.00 | 0.00 |
| ATOM | 3963 | HD21 | LEU | X | 265 | 43.958 | 42.081 | 70.149 | 0.00 | 0.00 |
| ATOM | 3964 | HD22 | LEU | X | 265 | 43.036 | 43.582 | 70.295 | 0.00 | 0.00 |
| ATOM | 3965 | HD23 | LEU | X | 265 | 44.776 | 43.426 | 70.855 | 0.00 | 0.00 |
| ATOM | 3966 | C    | LEU | X | 265 | 43.731 | 45.609 | 72.300 | 0.00 | 0.00 |
| ATOM | 3967 | O    | LEU | X | 265 | 44.931 | 45.856 | 72.292 | 0.00 | 0.00 |
| ATOM | 3968 | N    | VAL | X | 266 | 42.847 | 46.090 | 71.417 | 0.00 | 0.00 |
| ATOM | 3969 | H    | VAL | X | 266 | 41.881 | 45.881 | 71.621 | 0.00 | 0.00 |
| ATOM | 3970 | CA   | VAL | X | 266 | 43.090 | 46.886 | 70.189 | 0.00 | 0.00 |
| ATOM | 3971 | HA   | VAL | X | 266 | 43.778 | 46.304 | 69.576 | 0.00 | 0.00 |
| ATOM | 3972 | CB   | VAL | X | 266 | 41.741 | 47.111 | 69.521 | 0.00 | 0.00 |
| ATOM | 3973 | HB   | VAL | X | 266 | 41.126 | 47.568 | 70.296 | 0.00 | 0.00 |
| ATOM | 3974 | CG1  | VAL | X | 266 | 41.999 | 47.960 | 68.255 | 0.00 | 0.00 |
| ATOM | 3975 | HG11 | VAL | X | 266 | 42.311 | 48.976 | 68.498 | 0.00 | 0.00 |
| ATOM | 3976 | HG12 | VAL | X | 266 | 42.755 | 47.453 | 67.655 | 0.00 | 0.00 |
| ATOM | 3977 | HG13 | VAL | X | 266 | 41.086 | 48.027 | 67.663 | 0.00 | 0.00 |
| ATOM | 3978 | CG2  | VAL | X | 266 | 41.140 | 45.831 | 69.037 | 0.00 | 0.00 |
| ATOM | 3979 | HG21 | VAL | X | 266 | 41.898 | 45.347 | 68.421 | 0.00 | 0.00 |
| ATOM | 3980 | HG22 | VAL | X | 266 | 40.951 | 45.107 | 69.829 | 0.00 | 0.00 |
| ATOM | 3981 | HG23 | VAL | X | 266 | 40.208 | 46.010 | 68.501 | 0.00 | 0.00 |
| ATOM | 3982 | C    | VAL | X | 266 | 43.767 | 48.173 | 70.702 | 0.00 | 0.00 |
| ATOM | 3983 | O    | VAL | X | 266 | 44.664 | 48.649 | 69.938 | 0.00 | 0.00 |
| ATOM | 3984 | N    | ALA | X | 267 | 43.454 | 48.735 | 71.819 | 0.00 | 0.00 |
| ATOM | 3985 | H    | ALA | X | 267 | 42.581 | 48.455 | 72.243 | 0.00 | 0.00 |
| ATOM | 3986 | CA   | ALA | X | 267 | 44.316 | 49.812 | 72.265 | 0.00 | 0.00 |
| ATOM | 3987 | HA   | ALA | X | 267 | 44.259 | 50.676 | 71.604 | 0.00 | 0.00 |
| ATOM | 3988 | CB   | ALA | X | 267 | 43.779 | 50.465 | 73.547 | 0.00 | 0.00 |
| ATOM | 3989 | HB1  | ALA | X | 267 | 44.359 | 51.350 | 73.810 | 0.00 | 0.00 |
| ATOM | 3990 | HB2  | ALA | X | 267 | 42.743 | 50.734 | 73.344 | 0.00 | 0.00 |
| ATOM | 3991 | HB3  | ALA | X | 267 | 43.754 | 49.775 | 74.391 | 0.00 | 0.00 |
| ATOM | 3992 | C    | ALA | X | 267 | 45.740 | 49.442 | 72.432 | 0.00 | 0.00 |
| ATOM | 3993 | O    | ALA | X | 267 | 46.642 | 49.973 | 71.757 | 0.00 | 0.00 |
| ATOM | 3994 | N    | CYX | X | 268 | 46.059 | 48.403 | 73.227 | 0.00 | 0.00 |

|      |      |      |     |   |     |        |        |        |      |      |
|------|------|------|-----|---|-----|--------|--------|--------|------|------|
| ATOM | 3995 | H    | CYX | X | 268 | 45.263 | 48.065 | 73.749 | 0.00 | 0.00 |
| ATOM | 3996 | CA   | CYX | X | 268 | 47.332 | 47.772 | 73.401 | 0.00 | 0.00 |
| ATOM | 3997 | HA   | CYX | X | 268 | 47.921 | 48.553 | 73.882 | 0.00 | 0.00 |
| ATOM | 3998 | CB   | CYX | X | 268 | 47.228 | 46.588 | 74.380 | 0.00 | 0.00 |
| ATOM | 3999 | HB2  | CYX | X | 268 | 47.042 | 47.035 | 75.357 | 0.00 | 0.00 |
| ATOM | 4000 | HB3  | CYX | X | 268 | 46.349 | 45.984 | 74.156 | 0.00 | 0.00 |
| ATOM | 4001 | SG   | CYX | X | 268 | 48.719 | 45.475 | 74.284 | 0.00 | 0.00 |
| ATOM | 4002 | C    | CYX | X | 268 | 47.997 | 47.456 | 72.009 | 0.00 | 0.00 |
| ATOM | 4003 | O    | CYX | X | 268 | 49.180 | 47.545 | 71.844 | 0.00 | 0.00 |
| ATOM | 4004 | N    | LEU | X | 269 | 47.224 | 47.074 | 71.003 | 0.00 | 0.00 |
| ATOM | 4005 | H    | LEU | X | 269 | 46.244 | 46.890 | 71.161 | 0.00 | 0.00 |
| ATOM | 4006 | CA   | LEU | X | 269 | 47.782 | 46.626 | 69.732 | 0.00 | 0.00 |
| ATOM | 4007 | HA   | LEU | X | 269 | 48.711 | 46.150 | 70.046 | 0.00 | 0.00 |
| ATOM | 4008 | CB   | LEU | X | 269 | 46.828 | 45.584 | 69.230 | 0.00 | 0.00 |
| ATOM | 4009 | HB2  | LEU | X | 269 | 46.525 | 45.019 | 70.111 | 0.00 | 0.00 |
| ATOM | 4010 | HB3  | LEU | X | 269 | 46.080 | 46.237 | 68.781 | 0.00 | 0.00 |
| ATOM | 4011 | CG   | LEU | X | 269 | 47.380 | 44.539 | 68.198 | 0.00 | 0.00 |
| ATOM | 4012 | HG   | LEU | X | 269 | 48.018 | 45.061 | 67.486 | 0.00 | 0.00 |
| ATOM | 4013 | CD1  | LEU | X | 269 | 48.260 | 43.566 | 68.975 | 0.00 | 0.00 |
| ATOM | 4014 | HD11 | LEU | X | 269 | 48.817 | 42.857 | 68.363 | 0.00 | 0.00 |
| ATOM | 4015 | HD12 | LEU | X | 269 | 49.069 | 44.126 | 69.446 | 0.00 | 0.00 |
| ATOM | 4016 | HD13 | LEU | X | 269 | 47.864 | 43.024 | 69.834 | 0.00 | 0.00 |
| ATOM | 4017 | CD2  | LEU | X | 269 | 46.417 | 43.749 | 67.281 | 0.00 | 0.00 |
| ATOM | 4018 | HD21 | LEU | X | 269 | 45.858 | 44.419 | 66.628 | 0.00 | 0.00 |
| ATOM | 4019 | HD22 | LEU | X | 269 | 47.054 | 43.159 | 66.622 | 0.00 | 0.00 |
| ATOM | 4020 | HD23 | LEU | X | 269 | 45.699 | 43.115 | 67.802 | 0.00 | 0.00 |
| ATOM | 4021 | C    | LEU | X | 269 | 47.990 | 47.799 | 68.715 | 0.00 | 0.00 |
| ATOM | 4022 | O    | LEU | X | 269 | 48.451 | 47.572 | 67.593 | 0.00 | 0.00 |
| ATOM | 4023 | N    | ARG | X | 270 | 47.647 | 49.016 | 69.145 | 0.00 | 0.00 |
| ATOM | 4024 | H    | ARG | X | 270 | 47.221 | 49.041 | 70.060 | 0.00 | 0.00 |
| ATOM | 4025 | CA   | ARG | X | 270 | 47.850 | 50.219 | 68.410 | 0.00 | 0.00 |
| ATOM | 4026 | HA   | ARG | X | 270 | 48.287 | 49.992 | 67.438 | 0.00 | 0.00 |
| ATOM | 4027 | CB   | ARG | X | 270 | 46.508 | 50.958 | 68.237 | 0.00 | 0.00 |
| ATOM | 4028 | HB2  | ARG | X | 270 | 46.046 | 50.944 | 69.224 | 0.00 | 0.00 |
| ATOM | 4029 | HB3  | ARG | X | 270 | 46.657 | 51.986 | 67.909 | 0.00 | 0.00 |
| ATOM | 4030 | CG   | ARG | X | 270 | 45.517 | 50.385 | 67.222 | 0.00 | 0.00 |
| ATOM | 4031 | HG2  | ARG | X | 270 | 46.006 | 50.247 | 66.258 | 0.00 | 0.00 |
| ATOM | 4032 | HG3  | ARG | X | 270 | 45.291 | 49.381 | 67.582 | 0.00 | 0.00 |
| ATOM | 4033 | CD   | ARG | X | 270 | 44.372 | 51.273 | 66.953 | 0.00 | 0.00 |
| ATOM | 4034 | HD2  | ARG | X | 270 | 44.920 | 52.181 | 66.701 | 0.00 | 0.00 |
| ATOM | 4035 | HD3  | ARG | X | 270 | 43.854 | 50.901 | 66.069 | 0.00 | 0.00 |
| ATOM | 4036 | NE   | ARG | X | 270 | 43.502 | 51.280 | 68.069 | 0.00 | 0.00 |
| ATOM | 4037 | HE   | ARG | X | 270 | 43.771 | 50.565 | 68.729 | 0.00 | 0.00 |
| ATOM | 4038 | CZ   | ARG | X | 270 | 42.390 | 51.913 | 68.162 | 0.00 | 0.00 |
| ATOM | 4039 | NH1  | ARG | X | 270 | 41.876 | 52.677 | 67.203 | 0.00 | 0.00 |
| ATOM | 4040 | HH11 | ARG | X | 270 | 42.258 | 52.761 | 66.271 | 0.00 | 0.00 |
| ATOM | 4041 | HH12 | ARG | X | 270 | 41.093 | 53.264 | 67.454 | 0.00 | 0.00 |
| ATOM | 4042 | NH2  | ARG | X | 270 | 41.643 | 51.767 | 69.197 | 0.00 | 0.00 |
| ATOM | 4043 | HH21 | ARG | X | 270 | 41.855 | 51.095 | 69.921 | 0.00 | 0.00 |
| ATOM | 4044 | HH22 | ARG | X | 270 | 40.844 | 52.357 | 69.379 | 0.00 | 0.00 |
| ATOM | 4045 | C    | ARG | X | 270 | 48.946 | 51.076 | 69.113 | 0.00 | 0.00 |
| ATOM | 4046 | O    | ARG | X | 270 | 49.678 | 51.771 | 68.433 | 0.00 | 0.00 |
| ATOM | 4047 | N    | THR | X | 271 | 48.979 | 51.021 | 70.479 | 0.00 | 0.00 |
| ATOM | 4048 | H    | THR | X | 271 | 48.184 | 50.616 | 70.953 | 0.00 | 0.00 |
| ATOM | 4049 | CA   | THR | X | 271 | 50.075 | 51.629 | 71.238 | 0.00 | 0.00 |
| ATOM | 4050 | HA   | THR | X | 271 | 50.395 | 52.529 | 70.713 | 0.00 | 0.00 |
| ATOM | 4051 | CB   | THR | X | 271 | 49.601 | 51.964 | 72.662 | 0.00 | 0.00 |
| ATOM | 4052 | HB   | THR | X | 271 | 50.399 | 52.478 | 73.197 | 0.00 | 0.00 |
| ATOM | 4053 | CG2  | THR | X | 271 | 48.349 | 52.838 | 72.838 | 0.00 | 0.00 |
| ATOM | 4054 | HG21 | THR | X | 271 | 48.041 | 52.925 | 73.880 | 0.00 | 0.00 |
| ATOM | 4055 | HG22 | THR | X | 271 | 48.517 | 53.882 | 72.576 | 0.00 | 0.00 |
| ATOM | 4056 | HG23 | THR | X | 271 | 47.541 | 52.392 | 72.256 | 0.00 | 0.00 |
| ATOM | 4057 | OG1  | THR | X | 271 | 49.448 | 50.864 | 73.341 | 0.00 | 0.00 |
| ATOM | 4058 | HG1  | THR | X | 271 | 50.350 | 50.745 | 73.646 | 0.00 | 0.00 |
| ATOM | 4059 | C    | THR | X | 271 | 51.389 | 50.857 | 71.176 | 0.00 | 0.00 |
| ATOM | 4060 | O    | THR | X | 271 | 52.465 | 51.507 | 71.178 | 0.00 | 0.00 |
| ATOM | 4061 | N    | ARG | X | 272 | 51.432 | 49.504 | 71.168 | 0.00 | 0.00 |
| ATOM | 4062 | H    | ARG | X | 272 | 50.551 | 49.019 | 71.074 | 0.00 | 0.00 |
| ATOM | 4063 | CA   | ARG | X | 272 | 52.703 | 48.796 | 71.151 | 0.00 | 0.00 |
| ATOM | 4064 | HA   | ARG | X | 272 | 53.333 | 49.246 | 71.918 | 0.00 | 0.00 |

|      |      |      |     |   |     |        |        |        |      |      |
|------|------|------|-----|---|-----|--------|--------|--------|------|------|
| ATOM | 4065 | CB   | ARG | X | 272 | 52.400 | 47.316 | 71.553 | 0.00 | 0.00 |
| ATOM | 4066 | HB2  | ARG | X | 272 | 51.567 | 46.886 | 70.997 | 0.00 | 0.00 |
| ATOM | 4067 | HB3  | ARG | X | 272 | 53.246 | 46.683 | 71.283 | 0.00 | 0.00 |
| ATOM | 4068 | CG   | ARG | X | 272 | 52.234 | 47.175 | 73.139 | 0.00 | 0.00 |
| ATOM | 4069 | HG2  | ARG | X | 272 | 52.971 | 47.734 | 73.716 | 0.00 | 0.00 |
| ATOM | 4070 | HG3  | ARG | X | 272 | 51.229 | 47.376 | 73.511 | 0.00 | 0.00 |
| ATOM | 4071 | CD   | ARG | X | 272 | 52.377 | 45.727 | 73.591 | 0.00 | 0.00 |
| ATOM | 4072 | HD2  | ARG | X | 272 | 51.559 | 45.182 | 73.122 | 0.00 | 0.00 |
| ATOM | 4073 | HD3  | ARG | X | 272 | 53.380 | 45.392 | 73.326 | 0.00 | 0.00 |
| ATOM | 4074 | NE   | ARG | X | 272 | 52.242 | 45.632 | 75.034 | 0.00 | 0.00 |
| ATOM | 4075 | HE   | ARG | X | 272 | 51.783 | 46.385 | 75.528 | 0.00 | 0.00 |
| ATOM | 4076 | CZ   | ARG | X | 272 | 52.763 | 44.770 | 75.875 | 0.00 | 0.00 |
| ATOM | 4077 | NH1  | ARG | X | 272 | 53.475 | 43.742 | 75.414 | 0.00 | 0.00 |
| ATOM | 4078 | HH11 | ARG | X | 272 | 53.583 | 43.615 | 74.418 | 0.00 | 0.00 |
| ATOM | 4079 | HH12 | ARG | X | 272 | 54.101 | 43.235 | 76.024 | 0.00 | 0.00 |
| ATOM | 4080 | NH2  | ARG | X | 272 | 52.511 | 44.797 | 77.142 | 0.00 | 0.00 |
| ATOM | 4081 | HH21 | ARG | X | 272 | 51.920 | 45.544 | 77.477 | 0.00 | 0.00 |
| ATOM | 4082 | HH22 | ARG | X | 272 | 52.777 | 44.034 | 77.749 | 0.00 | 0.00 |
| ATOM | 4083 | C    | ARG | X | 272 | 53.282 | 49.057 | 69.765 | 0.00 | 0.00 |
| ATOM | 4084 | O    | ARG | X | 272 | 52.608 | 49.353 | 68.757 | 0.00 | 0.00 |
| ATOM | 4085 | N    | PRO | X | 273 | 54.626 | 48.973 | 69.609 | 0.00 | 0.00 |
| ATOM | 4086 | CD   | PRO | X | 273 | 55.611 | 48.613 | 70.666 | 0.00 | 0.00 |
| ATOM | 4087 | HD2  | PRO | X | 273 | 55.799 | 47.546 | 70.783 | 0.00 | 0.00 |
| ATOM | 4088 | HD3  | PRO | X | 273 | 55.232 | 49.088 | 71.572 | 0.00 | 0.00 |
| ATOM | 4089 | CG   | PRO | X | 273 | 56.907 | 49.306 | 70.211 | 0.00 | 0.00 |
| ATOM | 4090 | HG2  | PRO | X | 273 | 57.812 | 48.813 | 70.566 | 0.00 | 0.00 |
| ATOM | 4091 | HG3  | PRO | X | 273 | 56.943 | 50.337 | 70.562 | 0.00 | 0.00 |
| ATOM | 4092 | CB   | PRO | X | 273 | 56.875 | 49.233 | 68.708 | 0.00 | 0.00 |
| ATOM | 4093 | HB2  | PRO | X | 273 | 57.231 | 48.250 | 68.399 | 0.00 | 0.00 |
| ATOM | 4094 | HB3  | PRO | X | 273 | 57.551 | 49.986 | 68.304 | 0.00 | 0.00 |
| ATOM | 4095 | CA   | PRO | X | 273 | 55.381 | 49.360 | 68.395 | 0.00 | 0.00 |
| ATOM | 4096 | HA   | PRO | X | 273 | 54.983 | 50.302 | 68.020 | 0.00 | 0.00 |
| ATOM | 4097 | C    | PRO | X | 273 | 55.118 | 48.450 | 67.192 | 0.00 | 0.00 |
| ATOM | 4098 | O    | PRO | X | 273 | 54.372 | 47.515 | 67.221 | 0.00 | 0.00 |
| ATOM | 4099 | N    | ALA | X | 274 | 55.751 | 48.745 | 66.052 | 0.00 | 0.00 |
| ATOM | 4100 | H    | ALA | X | 274 | 56.325 | 49.576 | 66.062 | 0.00 | 0.00 |
| ATOM | 4101 | CA   | ALA | X | 274 | 55.371 | 48.114 | 64.749 | 0.00 | 0.00 |
| ATOM | 4102 | HA   | ALA | X | 274 | 54.316 | 47.850 | 64.816 | 0.00 | 0.00 |
| ATOM | 4103 | CB   | ALA | X | 274 | 55.531 | 49.149 | 63.659 | 0.00 | 0.00 |
| ATOM | 4104 | HB1  | ALA | X | 274 | 54.750 | 49.879 | 63.871 | 0.00 | 0.00 |
| ATOM | 4105 | HB2  | ALA | X | 274 | 56.421 | 49.778 | 63.659 | 0.00 | 0.00 |
| ATOM | 4106 | HB3  | ALA | X | 274 | 55.320 | 48.832 | 62.638 | 0.00 | 0.00 |
| ATOM | 4107 | C    | ALA | X | 274 | 56.283 | 46.902 | 64.517 | 0.00 | 0.00 |
| ATOM | 4108 | O    | ALA | X | 274 | 55.850 | 45.930 | 63.782 | 0.00 | 0.00 |
| ATOM | 4109 | N    | GLN | X | 275 | 57.544 | 46.916 | 64.992 | 0.00 | 0.00 |
| ATOM | 4110 | H    | GLN | X | 275 | 57.851 | 47.780 | 65.415 | 0.00 | 0.00 |
| ATOM | 4111 | CA   | GLN | X | 275 | 58.512 | 45.827 | 64.859 | 0.00 | 0.00 |
| ATOM | 4112 | HA   | GLN | X | 275 | 58.549 | 45.616 | 63.790 | 0.00 | 0.00 |
| ATOM | 4113 | CB   | GLN | X | 275 | 59.959 | 46.219 | 65.157 | 0.00 | 0.00 |
| ATOM | 4114 | HB2  | GLN | X | 275 | 60.074 | 46.537 | 66.193 | 0.00 | 0.00 |
| ATOM | 4115 | HB3  | GLN | X | 275 | 60.666 | 45.393 | 65.078 | 0.00 | 0.00 |
| ATOM | 4116 | CG   | GLN | X | 275 | 60.586 | 47.321 | 64.298 | 0.00 | 0.00 |
| ATOM | 4117 | HG2  | GLN | X | 275 | 59.946 | 48.185 | 64.123 | 0.00 | 0.00 |
| ATOM | 4118 | HG3  | GLN | X | 275 | 61.410 | 47.790 | 64.836 | 0.00 | 0.00 |
| ATOM | 4119 | CD   | GLN | X | 275 | 61.057 | 46.904 | 62.973 | 0.00 | 0.00 |
| ATOM | 4120 | OE1  | GLN | X | 275 | 60.447 | 46.077 | 62.341 | 0.00 | 0.00 |
| ATOM | 4121 | NE2  | GLN | X | 275 | 62.098 | 47.568 | 62.441 | 0.00 | 0.00 |
| ATOM | 4122 | HE21 | GLN | X | 275 | 62.520 | 47.380 | 61.543 | 0.00 | 0.00 |
| ATOM | 4123 | HE22 | GLN | X | 275 | 62.540 | 48.167 | 63.123 | 0.00 | 0.00 |
| ATOM | 4124 | C    | GLN | X | 275 | 58.110 | 44.489 | 65.481 | 0.00 | 0.00 |
| ATOM | 4125 | O    | GLN | X | 275 | 58.020 | 43.454 | 64.817 | 0.00 | 0.00 |
| ATOM | 4126 | N    | VAL | X | 276 | 57.724 | 44.648 | 66.813 | 0.00 | 0.00 |
| ATOM | 4127 | H    | VAL | X | 276 | 57.913 | 45.431 | 67.422 | 0.00 | 0.00 |
| ATOM | 4128 | CA   | VAL | X | 276 | 57.166 | 43.498 | 67.521 | 0.00 | 0.00 |
| ATOM | 4129 | HA   | VAL | X | 276 | 57.940 | 42.740 | 67.643 | 0.00 | 0.00 |
| ATOM | 4130 | CB   | VAL | X | 276 | 56.603 | 43.892 | 69.005 | 0.00 | 0.00 |
| ATOM | 4131 | HB   | VAL | X | 276 | 57.421 | 44.110 | 69.692 | 0.00 | 0.00 |
| ATOM | 4132 | CG1  | VAL | X | 276 | 55.766 | 45.186 | 69.092 | 0.00 | 0.00 |
| ATOM | 4133 | HG11 | VAL | X | 276 | 56.285 | 46.088 | 68.767 | 0.00 | 0.00 |
| ATOM | 4134 | HG12 | VAL | X | 276 | 54.938 | 45.070 | 68.393 | 0.00 | 0.00 |

|      |      |      |     |   |     |        |        |        |      |      |
|------|------|------|-----|---|-----|--------|--------|--------|------|------|
| ATOM | 4135 | HG13 | VAL | X | 276 | 55.485 | 45.294 | 70.140 | 0.00 | 0.00 |
| ATOM | 4136 | CG2  | VAL | X | 276 | 55.719 | 42.740 | 69.518 | 0.00 | 0.00 |
| ATOM | 4137 | HG21 | VAL | X | 276 | 56.253 | 41.790 | 69.528 | 0.00 | 0.00 |
| ATOM | 4138 | HG22 | VAL | X | 276 | 55.633 | 42.941 | 70.586 | 0.00 | 0.00 |
| ATOM | 4139 | HG23 | VAL | X | 276 | 54.761 | 42.639 | 69.008 | 0.00 | 0.00 |
| ATOM | 4140 | C    | VAL | X | 276 | 55.959 | 42.853 | 66.747 | 0.00 | 0.00 |
| ATOM | 4141 | O    | VAL | X | 276 | 55.896 | 41.654 | 66.560 | 0.00 | 0.00 |
| ATOM | 4142 | N    | LEU | X | 277 | 55.127 | 43.704 | 66.128 | 0.00 | 0.00 |
| ATOM | 4143 | H    | LEU | X | 277 | 55.400 | 44.675 | 66.075 | 0.00 | 0.00 |
| ATOM | 4144 | CA   | LEU | X | 277 | 53.813 | 43.335 | 65.461 | 0.00 | 0.00 |
| ATOM | 4145 | HA   | LEU | X | 277 | 53.289 | 42.594 | 66.064 | 0.00 | 0.00 |
| ATOM | 4146 | CB   | LEU | X | 277 | 52.925 | 44.611 | 65.360 | 0.00 | 0.00 |
| ATOM | 4147 | HB2  | LEU | X | 277 | 52.662 | 44.908 | 66.375 | 0.00 | 0.00 |
| ATOM | 4148 | HB3  | LEU | X | 277 | 53.475 | 45.472 | 64.982 | 0.00 | 0.00 |
| ATOM | 4149 | CG   | LEU | X | 277 | 51.501 | 44.533 | 64.578 | 0.00 | 0.00 |
| ATOM | 4150 | HG   | LEU | X | 277 | 51.775 | 44.245 | 63.563 | 0.00 | 0.00 |
| ATOM | 4151 | CD1  | LEU | X | 277 | 50.516 | 43.405 | 65.103 | 0.00 | 0.00 |
| ATOM | 4152 | HD11 | LEU | X | 277 | 50.373 | 43.701 | 66.143 | 0.00 | 0.00 |
| ATOM | 4153 | HD12 | LEU | X | 277 | 49.599 | 43.365 | 64.516 | 0.00 | 0.00 |
| ATOM | 4154 | HD13 | LEU | X | 277 | 50.998 | 42.428 | 65.059 | 0.00 | 0.00 |
| ATOM | 4155 | CD2  | LEU | X | 277 | 50.817 | 45.937 | 64.569 | 0.00 | 0.00 |
| ATOM | 4156 | HD21 | LEU | X | 277 | 51.563 | 46.727 | 64.477 | 0.00 | 0.00 |
| ATOM | 4157 | HD22 | LEU | X | 277 | 50.186 | 45.967 | 63.681 | 0.00 | 0.00 |
| ATOM | 4158 | HD23 | LEU | X | 277 | 50.336 | 45.993 | 65.545 | 0.00 | 0.00 |
| ATOM | 4159 | C    | LEU | X | 277 | 54.131 | 42.594 | 64.083 | 0.00 | 0.00 |
| ATOM | 4160 | O    | LEU | X | 277 | 53.542 | 41.586 | 63.859 | 0.00 | 0.00 |
| ATOM | 4161 | N    | VAL | X | 278 | 54.967 | 43.235 | 63.224 | 0.00 | 0.00 |
| ATOM | 4162 | H    | VAL | X | 278 | 55.468 | 44.052 | 63.543 | 0.00 | 0.00 |
| ATOM | 4163 | CA   | VAL | X | 278 | 55.216 | 42.774 | 61.886 | 0.00 | 0.00 |
| ATOM | 4164 | HA   | VAL | X | 278 | 54.311 | 42.279 | 61.532 | 0.00 | 0.00 |
| ATOM | 4165 | CB   | VAL | X | 278 | 55.518 | 43.941 | 60.939 | 0.00 | 0.00 |
| ATOM | 4166 | HB   | VAL | X | 278 | 54.859 | 44.800 | 61.057 | 0.00 | 0.00 |
| ATOM | 4167 | CG1  | VAL | X | 278 | 57.002 | 44.473 | 61.189 | 0.00 | 0.00 |
| ATOM | 4168 | HG11 | VAL | X | 278 | 57.124 | 45.550 | 61.075 | 0.00 | 0.00 |
| ATOM | 4169 | HG12 | VAL | X | 278 | 57.489 | 44.136 | 62.103 | 0.00 | 0.00 |
| ATOM | 4170 | HG13 | VAL | X | 278 | 57.703 | 44.144 | 60.421 | 0.00 | 0.00 |
| ATOM | 4171 | CG2  | VAL | X | 278 | 55.401 | 43.392 | 59.489 | 0.00 | 0.00 |
| ATOM | 4172 | HG21 | VAL | X | 278 | 54.511 | 42.786 | 59.322 | 0.00 | 0.00 |
| ATOM | 4173 | HG22 | VAL | X | 278 | 55.274 | 44.262 | 58.844 | 0.00 | 0.00 |
| ATOM | 4174 | HG23 | VAL | X | 278 | 56.304 | 42.821 | 59.272 | 0.00 | 0.00 |
| ATOM | 4175 | C    | VAL | X | 278 | 56.208 | 41.609 | 61.840 | 0.00 | 0.00 |
| ATOM | 4176 | O    | VAL | X | 278 | 55.974 | 40.690 | 61.065 | 0.00 | 0.00 |
| ATOM | 4177 | N    | ASN | X | 279 | 57.136 | 41.513 | 62.769 | 0.00 | 0.00 |
| ATOM | 4178 | H    | ASN | X | 279 | 57.334 | 42.313 | 63.353 | 0.00 | 0.00 |
| ATOM | 4179 | CA   | ASN | X | 279 | 57.985 | 40.310 | 62.963 | 0.00 | 0.00 |
| ATOM | 4180 | HA   | ASN | X | 279 | 58.148 | 40.095 | 61.907 | 0.00 | 0.00 |
| ATOM | 4181 | CB   | ASN | X | 279 | 59.249 | 40.691 | 63.663 | 0.00 | 0.00 |
| ATOM | 4182 | HB2  | ASN | X | 279 | 59.033 | 41.179 | 64.614 | 0.00 | 0.00 |
| ATOM | 4183 | HB3  | ASN | X | 279 | 59.815 | 39.778 | 63.849 | 0.00 | 0.00 |
| ATOM | 4184 | CG   | ASN | X | 279 | 60.134 | 41.518 | 62.755 | 0.00 | 0.00 |
| ATOM | 4185 | OD1  | ASN | X | 279 | 60.909 | 40.934 | 61.969 | 0.00 | 0.00 |
| ATOM | 4186 | ND2  | ASN | X | 279 | 60.169 | 42.827 | 62.965 | 0.00 | 0.00 |
| ATOM | 4187 | HD21 | ASN | X | 279 | 60.588 | 43.445 | 62.284 | 0.00 | 0.00 |
| ATOM | 4188 | HD22 | ASN | X | 279 | 59.605 | 43.167 | 63.731 | 0.00 | 0.00 |
| ATOM | 4189 | C    | ASN | X | 279 | 57.201 | 39.130 | 63.550 | 0.00 | 0.00 |
| ATOM | 4190 | O    | ASN | X | 279 | 57.548 | 37.985 | 63.321 | 0.00 | 0.00 |
| ATOM | 4191 | N    | HIE | X | 280 | 56.096 | 39.300 | 64.309 | 0.00 | 0.00 |
| ATOM | 4192 | H    | HIE | X | 280 | 55.714 | 40.231 | 64.401 | 0.00 | 0.00 |
| ATOM | 4193 | CA   | HIE | X | 280 | 55.253 | 38.188 | 64.718 | 0.00 | 0.00 |
| ATOM | 4194 | HA   | HIE | X | 280 | 55.821 | 37.298 | 64.991 | 0.00 | 0.00 |
| ATOM | 4195 | CB   | HIE | X | 280 | 54.621 | 38.582 | 66.050 | 0.00 | 0.00 |
| ATOM | 4196 | HB2  | HIE | X | 280 | 54.188 | 39.582 | 66.026 | 0.00 | 0.00 |
| ATOM | 4197 | HB3  | HIE | X | 280 | 53.817 | 37.911 | 66.353 | 0.00 | 0.00 |
| ATOM | 4198 | CG   | HIE | X | 280 | 55.590 | 38.525 | 67.181 | 0.00 | 0.00 |
| ATOM | 4199 | ND1  | HIE | X | 280 | 56.698 | 37.680 | 67.423 | 0.00 | 0.00 |
| ATOM | 4200 | CE1  | HIE | X | 280 | 57.063 | 37.712 | 68.697 | 0.00 | 0.00 |
| ATOM | 4201 | HE1  | HIE | X | 280 | 57.941 | 37.245 | 69.119 | 0.00 | 0.00 |
| ATOM | 4202 | NE2  | HIE | X | 280 | 56.386 | 38.635 | 69.311 | 0.00 | 0.00 |
| ATOM | 4203 | HE2  | HIE | X | 280 | 56.637 | 38.902 | 70.252 | 0.00 | 0.00 |
| ATOM | 4204 | CD2  | HIE | X | 280 | 55.407 | 39.068 | 68.393 | 0.00 | 0.00 |



|      |      |      |     |   |     |        |        |        |      |      |
|------|------|------|-----|---|-----|--------|--------|--------|------|------|
| ATOM | 4205 | HD2  | HIE | X | 280 | 54.561 | 39.686 | 68.655 | 0.00 | 0.00 |
| ATOM | 4206 | C    | HIE | X | 280 | 54.150 | 37.893 | 63.668 | 0.00 | 0.00 |
| ATOM | 4207 | O    | HIE | X | 280 | 53.540 | 36.809 | 63.784 | 0.00 | 0.00 |
| ATOM | 4208 | N    | GLU | X | 281 | 53.893 | 38.713 | 62.660 | 0.00 | 0.00 |
| ATOM | 4209 | H    | GLU | X | 281 | 54.159 | 39.687 | 62.696 | 0.00 | 0.00 |
| ATOM | 4210 | CA   | GLU | X | 281 | 53.068 | 38.303 | 61.563 | 0.00 | 0.00 |
| ATOM | 4211 | HA   | GLU | X | 281 | 52.051 | 38.355 | 61.951 | 0.00 | 0.00 |
| ATOM | 4212 | CB   | GLU | X | 281 | 53.204 | 39.357 | 60.472 | 0.00 | 0.00 |
| ATOM | 4213 | HB2  | GLU | X | 281 | 53.391 | 40.389 | 60.766 | 0.00 | 0.00 |
| ATOM | 4214 | HB3  | GLU | X | 281 | 54.040 | 39.063 | 59.836 | 0.00 | 0.00 |
| ATOM | 4215 | CG   | GLU | X | 281 | 51.966 | 39.351 | 59.597 | 0.00 | 0.00 |
| ATOM | 4216 | HG2  | GLU | X | 281 | 51.606 | 38.338 | 59.420 | 0.00 | 0.00 |
| ATOM | 4217 | HG3  | GLU | X | 281 | 51.262 | 39.900 | 60.222 | 0.00 | 0.00 |
| ATOM | 4218 | CD   | GLU | X | 281 | 52.151 | 40.104 | 58.326 | 0.00 | 0.00 |
| ATOM | 4219 | OE1  | GLU | X | 281 | 51.859 | 41.317 | 58.305 | 0.00 | 0.00 |
| ATOM | 4220 | OE2  | GLU | X | 281 | 52.857 | 39.599 | 57.397 | 0.00 | 0.00 |
| ATOM | 4221 | C    | GLU | X | 281 | 53.434 | 36.953 | 60.946 | 0.00 | 0.00 |
| ATOM | 4222 | O    | GLU | X | 281 | 52.475 | 36.227 | 60.646 | 0.00 | 0.00 |
| ATOM | 4223 | N    | TRP | X | 282 | 54.659 | 36.516 | 60.852 | 0.00 | 0.00 |
| ATOM | 4224 | H    | TRP | X | 282 | 55.335 | 37.148 | 61.259 | 0.00 | 0.00 |
| ATOM | 4225 | CA   | TRP | X | 282 | 55.210 | 35.208 | 60.483 | 0.00 | 0.00 |
| ATOM | 4226 | HA   | TRP | X | 282 | 55.259 | 35.002 | 59.414 | 0.00 | 0.00 |
| ATOM | 4227 | CB   | TRP | X | 282 | 56.610 | 35.099 | 60.998 | 0.00 | 0.00 |
| ATOM | 4228 | HB2  | TRP | X | 282 | 57.098 | 35.983 | 60.588 | 0.00 | 0.00 |
| ATOM | 4229 | HB3  | TRP | X | 282 | 56.594 | 35.153 | 62.087 | 0.00 | 0.00 |
| ATOM | 4230 | CG   | TRP | X | 282 | 57.543 | 33.991 | 60.741 | 0.00 | 0.00 |
| ATOM | 4231 | CD1  | TRP | X | 282 | 57.897 | 33.410 | 59.573 | 0.00 | 0.00 |
| ATOM | 4232 | HD1  | TRP | X | 282 | 57.727 | 33.794 | 58.578 | 0.00 | 0.00 |
| ATOM | 4233 | NE1  | TRP | X | 282 | 58.663 | 32.305 | 59.820 | 0.00 | 0.00 |
| ATOM | 4234 | HE1  | TRP | X | 282 | 59.201 | 31.770 | 59.154 | 0.00 | 0.00 |
| ATOM | 4235 | CE2  | TRP | X | 282 | 58.743 | 32.116 | 61.218 | 0.00 | 0.00 |
| ATOM | 4236 | CZ2  | TRP | X | 282 | 59.433 | 31.155 | 61.977 | 0.00 | 0.00 |
| ATOM | 4237 | HZ2  | TRP | X | 282 | 59.942 | 30.373 | 61.432 | 0.00 | 0.00 |
| ATOM | 4238 | CH2  | TRP | X | 282 | 59.286 | 31.055 | 63.371 | 0.00 | 0.00 |
| ATOM | 4239 | HH2  | TRP | X | 282 | 59.738 | 30.203 | 63.856 | 0.00 | 0.00 |
| ATOM | 4240 | CZ3  | TRP | X | 282 | 58.661 | 32.111 | 64.032 | 0.00 | 0.00 |
| ATOM | 4241 | HZ3  | TRP | X | 282 | 58.574 | 32.191 | 65.105 | 0.00 | 0.00 |
| ATOM | 4242 | CE3  | TRP | X | 282 | 58.073 | 33.191 | 63.244 | 0.00 | 0.00 |
| ATOM | 4243 | HE3  | TRP | X | 282 | 57.562 | 34.010 | 63.728 | 0.00 | 0.00 |
| ATOM | 4244 | CD2  | TRP | X | 282 | 58.053 | 33.187 | 61.818 | 0.00 | 0.00 |
| ATOM | 4245 | C    | TRP | X | 282 | 54.380 | 34.030 | 60.972 | 0.00 | 0.00 |
| ATOM | 4246 | O    | TRP | X | 282 | 54.100 | 33.136 | 60.198 | 0.00 | 0.00 |
| ATOM | 4247 | N    | HIE | X | 283 | 53.957 | 34.083 | 62.233 | 0.00 | 0.00 |
| ATOM | 4248 | H    | HIE | X | 283 | 54.180 | 34.804 | 62.905 | 0.00 | 0.00 |
| ATOM | 4249 | CA   | HIE | X | 283 | 53.153 | 33.036 | 62.856 | 0.00 | 0.00 |
| ATOM | 4250 | HA   | HIE | X | 283 | 53.634 | 32.058 | 62.869 | 0.00 | 0.00 |
| ATOM | 4251 | CB   | HIE | X | 283 | 53.116 | 33.306 | 64.278 | 0.00 | 0.00 |
| ATOM | 4252 | HB2  | HIE | X | 283 | 52.749 | 34.326 | 64.390 | 0.00 | 0.00 |
| ATOM | 4253 | HB3  | HIE | X | 283 | 52.420 | 32.628 | 64.770 | 0.00 | 0.00 |
| ATOM | 4254 | CG   | HIE | X | 283 | 54.424 | 33.100 | 65.050 | 0.00 | 0.00 |
| ATOM | 4255 | ND1  | HIE | X | 283 | 54.976 | 31.853 | 65.243 | 0.00 | 0.00 |
| ATOM | 4256 | CE1  | HIE | X | 283 | 56.097 | 32.028 | 65.975 | 0.00 | 0.00 |
| ATOM | 4257 | HE1  | HIE | X | 283 | 56.708 | 31.239 | 66.388 | 0.00 | 0.00 |
| ATOM | 4258 | NE2  | HIE | X | 283 | 56.355 | 33.324 | 66.084 | 0.00 | 0.00 |
| ATOM | 4259 | HE2  | HIE | X | 283 | 57.112 | 33.732 | 66.614 | 0.00 | 0.00 |
| ATOM | 4260 | CD2  | HIE | X | 283 | 55.303 | 34.043 | 65.513 | 0.00 | 0.00 |
| ATOM | 4261 | HD2  | HIE | X | 283 | 55.188 | 35.101 | 65.328 | 0.00 | 0.00 |
| ATOM | 4262 | C    | HIE | X | 283 | 51.761 | 32.843 | 62.269 | 0.00 | 0.00 |
| ATOM | 4263 | O    | HIE | X | 283 | 51.237 | 31.687 | 62.293 | 0.00 | 0.00 |
| ATOM | 4264 | N    | VAL | X | 284 | 51.152 | 33.925 | 61.747 | 0.00 | 0.00 |
| ATOM | 4265 | H    | VAL | X | 284 | 51.769 | 34.713 | 61.610 | 0.00 | 0.00 |
| ATOM | 4266 | CA   | VAL | X | 284 | 49.868 | 33.753 | 60.982 | 0.00 | 0.00 |
| ATOM | 4267 | HA   | VAL | X | 284 | 49.428 | 32.779 | 61.195 | 0.00 | 0.00 |
| ATOM | 4268 | CB   | VAL | X | 284 | 48.803 | 34.750 | 61.412 | 0.00 | 0.00 |
| ATOM | 4269 | HB   | VAL | X | 284 | 47.876 | 34.478 | 60.907 | 0.00 | 0.00 |
| ATOM | 4270 | CG1  | VAL | X | 284 | 48.545 | 34.737 | 62.934 | 0.00 | 0.00 |
| ATOM | 4271 | HG11 | VAL | X | 284 | 49.497 | 34.818 | 63.458 | 0.00 | 0.00 |
| ATOM | 4272 | HG12 | VAL | X | 284 | 47.804 | 35.503 | 63.159 | 0.00 | 0.00 |
| ATOM | 4273 | HG13 | VAL | X | 284 | 48.160 | 33.776 | 63.274 | 0.00 | 0.00 |
| ATOM | 4274 | CG2  | VAL | X | 284 | 49.106 | 36.197 | 60.915 | 0.00 | 0.00 |

|      |      |      |     |   |     |        |        |        |      |      |
|------|------|------|-----|---|-----|--------|--------|--------|------|------|
| ATOM | 4275 | HG21 | VAL | X | 284 | 48.270 | 36.869 | 61.106 | 0.00 | 0.00 |
| ATOM | 4276 | HG22 | VAL | X | 284 | 49.996 | 36.586 | 61.410 | 0.00 | 0.00 |
| ATOM | 4277 | HG23 | VAL | X | 284 | 49.244 | 36.174 | 59.834 | 0.00 | 0.00 |
| ATOM | 4278 | C    | VAL | X | 284 | 50.157 | 33.781 | 59.462 | 0.00 | 0.00 |
| ATOM | 4279 | O    | VAL | X | 284 | 49.222 | 33.495 | 58.690 | 0.00 | 0.00 |
| ATOM | 4280 | N    | LEU | X | 285 | 51.351 | 34.140 | 58.997 | 0.00 | 0.00 |
| ATOM | 4281 | H    | LEU | X | 285 | 52.122 | 34.439 | 59.577 | 0.00 | 0.00 |
| ATOM | 4282 | CA   | LEU | X | 285 | 51.813 | 33.845 | 57.592 | 0.00 | 0.00 |
| ATOM | 4283 | HA   | LEU | X | 285 | 51.198 | 34.448 | 56.925 | 0.00 | 0.00 |
| ATOM | 4284 | CB   | LEU | X | 285 | 53.239 | 34.407 | 57.414 | 0.00 | 0.00 |
| ATOM | 4285 | HB2  | LEU | X | 285 | 53.424 | 35.256 | 58.071 | 0.00 | 0.00 |
| ATOM | 4286 | HB3  | LEU | X | 285 | 53.867 | 33.637 | 57.864 | 0.00 | 0.00 |
| ATOM | 4287 | CG   | LEU | X | 285 | 53.706 | 34.867 | 55.933 | 0.00 | 0.00 |
| ATOM | 4288 | HG   | LEU | X | 285 | 52.966 | 35.587 | 55.584 | 0.00 | 0.00 |
| ATOM | 4289 | CD1  | LEU | X | 285 | 54.991 | 35.598 | 56.255 | 0.00 | 0.00 |
| ATOM | 4290 | HD11 | LEU | X | 285 | 55.605 | 34.910 | 56.836 | 0.00 | 0.00 |
| ATOM | 4291 | HD12 | LEU | X | 285 | 55.447 | 36.018 | 55.358 | 0.00 | 0.00 |
| ATOM | 4292 | HD13 | LEU | X | 285 | 54.803 | 36.449 | 56.910 | 0.00 | 0.00 |
| ATOM | 4293 | CD2  | LEU | X | 285 | 53.795 | 33.640 | 54.976 | 0.00 | 0.00 |
| ATOM | 4294 | HD21 | LEU | X | 285 | 54.609 | 33.691 | 54.254 | 0.00 | 0.00 |
| ATOM | 4295 | HD22 | LEU | X | 285 | 53.898 | 32.675 | 55.474 | 0.00 | 0.00 |
| ATOM | 4296 | HD23 | LEU | X | 285 | 52.817 | 33.506 | 54.514 | 0.00 | 0.00 |
| ATOM | 4297 | C    | LEU | X | 285 | 51.768 | 32.365 | 57.226 | 0.00 | 0.00 |
| ATOM | 4298 | O    | LEU | X | 285 | 52.517 | 31.578 | 57.883 | 0.00 | 0.00 |
| ATOM | 4299 | N    | PRO | X | 286 | 50.937 | 31.899 | 56.240 | 0.00 | 0.00 |
| ATOM | 4300 | CD   | PRO | X | 286 | 49.973 | 32.680 | 55.475 | 0.00 | 0.00 |
| ATOM | 4301 | HD2  | PRO | X | 286 | 50.403 | 33.231 | 54.639 | 0.00 | 0.00 |
| ATOM | 4302 | HD3  | PRO | X | 286 | 49.513 | 33.415 | 56.136 | 0.00 | 0.00 |
| ATOM | 4303 | CG   | PRO | X | 286 | 48.833 | 31.715 | 55.108 | 0.00 | 0.00 |
| ATOM | 4304 | HG2  | PRO | X | 286 | 48.541 | 32.015 | 54.101 | 0.00 | 0.00 |
| ATOM | 4305 | HG3  | PRO | X | 286 | 48.073 | 31.827 | 55.880 | 0.00 | 0.00 |
| ATOM | 4306 | CB   | PRO | X | 286 | 49.513 | 30.352 | 55.107 | 0.00 | 0.00 |
| ATOM | 4307 | HB2  | PRO | X | 286 | 49.945 | 30.091 | 54.141 | 0.00 | 0.00 |
| ATOM | 4308 | HB3  | PRO | X | 286 | 48.832 | 29.557 | 55.413 | 0.00 | 0.00 |
| ATOM | 4309 | CA   | PRO | X | 286 | 50.629 | 30.483 | 56.177 | 0.00 | 0.00 |
| ATOM | 4310 | HA   | PRO | X | 286 | 50.271 | 30.306 | 57.191 | 0.00 | 0.00 |
| ATOM | 4311 | C    | PRO | X | 286 | 51.919 | 29.765 | 55.700 | 0.00 | 0.00 |
| ATOM | 4312 | O    | PRO | X | 286 | 52.555 | 30.086 | 54.737 | 0.00 | 0.00 |
| ATOM | 4313 | N    | GLN | X | 287 | 52.217 | 28.758 | 56.532 | 0.00 | 0.00 |
| ATOM | 4314 | H    | GLN | X | 287 | 51.518 | 28.486 | 57.208 | 0.00 | 0.00 |
| ATOM | 4315 | CA   | GLN | X | 287 | 53.288 | 27.748 | 56.388 | 0.00 | 0.00 |
| ATOM | 4316 | HA   | GLN | X | 287 | 53.721 | 27.913 | 55.402 | 0.00 | 0.00 |
| ATOM | 4317 | CB   | GLN | X | 287 | 54.325 | 27.859 | 57.506 | 0.00 | 0.00 |
| ATOM | 4318 | HB2  | GLN | X | 287 | 53.863 | 27.873 | 58.494 | 0.00 | 0.00 |
| ATOM | 4319 | HB3  | GLN | X | 287 | 54.927 | 26.954 | 57.418 | 0.00 | 0.00 |
| ATOM | 4320 | CG   | GLN | X | 287 | 55.217 | 29.071 | 57.086 | 0.00 | 0.00 |
| ATOM | 4321 | HG2  | GLN | X | 287 | 55.713 | 28.807 | 56.152 | 0.00 | 0.00 |
| ATOM | 4322 | HG3  | GLN | X | 287 | 54.579 | 29.897 | 56.773 | 0.00 | 0.00 |
| ATOM | 4323 | CD   | GLN | X | 287 | 56.098 | 29.572 | 58.200 | 0.00 | 0.00 |
| ATOM | 4324 | OE1  | GLN | X | 287 | 57.158 | 29.092 | 58.574 | 0.00 | 0.00 |
| ATOM | 4325 | NE2  | GLN | X | 287 | 55.873 | 30.724 | 58.800 | 0.00 | 0.00 |
| ATOM | 4326 | HE21 | GLN | X | 287 | 56.470 | 31.068 | 59.538 | 0.00 | 0.00 |
| ATOM | 4327 | HE22 | GLN | X | 287 | 54.973 | 31.166 | 58.675 | 0.00 | 0.00 |
| ATOM | 4328 | C    | GLN | X | 287 | 52.553 | 26.439 | 56.437 | 0.00 | 0.00 |
| ATOM | 4329 | O    | GLN | X | 287 | 51.418 | 26.305 | 56.934 | 0.00 | 0.00 |
| ATOM | 4330 | N    | GLU | X | 288 | 53.135 | 25.365 | 55.853 | 0.00 | 0.00 |
| ATOM | 4331 | H    | GLU | X | 288 | 54.011 | 25.459 | 55.359 | 0.00 | 0.00 |
| ATOM | 4332 | CA   | GLU | X | 288 | 52.444 | 24.108 | 55.543 | 0.00 | 0.00 |
| ATOM | 4333 | HA   | GLU | X | 288 | 53.229 | 23.521 | 55.065 | 0.00 | 0.00 |
| ATOM | 4334 | CB   | GLU | X | 288 | 52.081 | 23.387 | 56.904 | 0.00 | 0.00 |
| ATOM | 4335 | HB2  | GLU | X | 288 | 51.185 | 23.809 | 57.360 | 0.00 | 0.00 |
| ATOM | 4336 | HB3  | GLU | X | 288 | 51.804 | 22.364 | 56.648 | 0.00 | 0.00 |
| ATOM | 4337 | CG   | GLU | X | 288 | 53.191 | 23.374 | 57.983 | 0.00 | 0.00 |
| ATOM | 4338 | HG2  | GLU | X | 288 | 53.997 | 22.745 | 57.605 | 0.00 | 0.00 |
| ATOM | 4339 | HG3  | GLU | X | 288 | 53.612 | 24.357 | 58.190 | 0.00 | 0.00 |
| ATOM | 4340 | CD   | GLU | X | 288 | 52.790 | 22.695 | 59.273 | 0.00 | 0.00 |
| ATOM | 4341 | OE1  | GLU | X | 288 | 53.129 | 21.466 | 59.448 | 0.00 | 0.00 |
| ATOM | 4342 | OE2  | GLU | X | 288 | 52.314 | 23.417 | 60.171 | 0.00 | 0.00 |
| ATOM | 4343 | C    | GLU | X | 288 | 51.269 | 24.247 | 54.480 | 0.00 | 0.00 |
| ATOM | 4344 | O    | GLU | X | 288 | 50.293 | 23.486 | 54.396 | 0.00 | 0.00 |

|      |      |      |     |   |     |        |        |        |      |      |
|------|------|------|-----|---|-----|--------|--------|--------|------|------|
| ATOM | 4345 | N    | SER | X | 289 | 51.382 | 25.355 | 53.677 | 0.00 | 0.00 |
| ATOM | 4346 | H    | SER | X | 289 | 52.264 | 25.836 | 53.788 | 0.00 | 0.00 |
| ATOM | 4347 | CA   | SER | X | 289 | 50.485 | 25.820 | 52.633 | 0.00 | 0.00 |
| ATOM | 4348 | HA   | SER | X | 289 | 50.012 | 24.956 | 52.167 | 0.00 | 0.00 |
| ATOM | 4349 | CB   | SER | X | 289 | 49.339 | 26.670 | 53.197 | 0.00 | 0.00 |
| ATOM | 4350 | HB2  | SER | X | 289 | 48.890 | 26.109 | 54.017 | 0.00 | 0.00 |
| ATOM | 4351 | HB3  | SER | X | 289 | 49.732 | 27.553 | 53.701 | 0.00 | 0.00 |
| ATOM | 4352 | OG   | SER | X | 289 | 48.269 | 27.042 | 52.387 | 0.00 | 0.00 |
| ATOM | 4353 | HG   | SER | X | 289 | 47.554 | 27.417 | 52.906 | 0.00 | 0.00 |
| ATOM | 4354 | C    | SER | X | 289 | 51.190 | 26.716 | 51.650 | 0.00 | 0.00 |
| ATOM | 4355 | O    | SER | X | 289 | 52.393 | 26.991 | 51.905 | 0.00 | 0.00 |
| ATOM | 4356 | N    | VAL | X | 290 | 50.619 | 27.117 | 50.538 | 0.00 | 0.00 |
| ATOM | 4357 | H    | VAL | X | 290 | 49.662 | 26.950 | 50.263 | 0.00 | 0.00 |
| ATOM | 4358 | CA   | VAL | X | 290 | 51.298 | 28.096 | 49.652 | 0.00 | 0.00 |
| ATOM | 4359 | HA   | VAL | X | 290 | 51.787 | 28.917 | 50.176 | 0.00 | 0.00 |
| ATOM | 4360 | CB   | VAL | X | 290 | 52.269 | 27.549 | 48.580 | 0.00 | 0.00 |
| ATOM | 4361 | HB   | VAL | X | 290 | 52.575 | 28.418 | 47.998 | 0.00 | 0.00 |
| ATOM | 4362 | CG1  | VAL | X | 290 | 53.502 | 26.817 | 49.157 | 0.00 | 0.00 |
| ATOM | 4363 | HG11 | VAL | X | 290 | 54.127 | 26.575 | 48.297 | 0.00 | 0.00 |
| ATOM | 4364 | HG12 | VAL | X | 290 | 54.056 | 27.450 | 49.850 | 0.00 | 0.00 |
| ATOM | 4365 | HG13 | VAL | X | 290 | 53.341 | 25.810 | 49.540 | 0.00 | 0.00 |
| ATOM | 4366 | CG2  | VAL | X | 290 | 51.667 | 26.640 | 47.477 | 0.00 | 0.00 |
| ATOM | 4367 | HG21 | VAL | X | 290 | 52.342 | 26.731 | 46.626 | 0.00 | 0.00 |
| ATOM | 4368 | HG22 | VAL | X | 290 | 51.481 | 25.635 | 47.856 | 0.00 | 0.00 |
| ATOM | 4369 | HG23 | VAL | X | 290 | 50.688 | 26.973 | 47.134 | 0.00 | 0.00 |
| ATOM | 4370 | C    | VAL | X | 290 | 50.197 | 28.809 | 48.873 | 0.00 | 0.00 |
| ATOM | 4371 | O    | VAL | X | 290 | 49.053 | 28.329 | 48.850 | 0.00 | 0.00 |
| ATOM | 4372 | N    | PHE | X | 291 | 50.445 | 29.936 | 48.237 | 0.00 | 0.00 |
| ATOM | 4373 | H    | PHE | X | 291 | 51.352 | 30.369 | 48.333 | 0.00 | 0.00 |
| ATOM | 4374 | CA   | PHE | X | 291 | 49.469 | 30.790 | 47.568 | 0.00 | 0.00 |
| ATOM | 4375 | HA   | PHE | X | 291 | 50.032 | 31.683 | 47.295 | 0.00 | 0.00 |
| ATOM | 4376 | CB   | PHE | X | 291 | 48.938 | 30.088 | 46.270 | 0.00 | 0.00 |
| ATOM | 4377 | HB2  | PHE | X | 291 | 49.525 | 29.232 | 45.936 | 0.00 | 0.00 |
| ATOM | 4378 | HB3  | PHE | X | 291 | 47.986 | 29.584 | 46.435 | 0.00 | 0.00 |
| ATOM | 4379 | CG   | PHE | X | 291 | 48.657 | 30.889 | 45.009 | 0.00 | 0.00 |
| ATOM | 4380 | CD1  | PHE | X | 291 | 48.083 | 32.238 | 45.099 | 0.00 | 0.00 |
| ATOM | 4381 | HD1  | PHE | X | 291 | 47.790 | 32.725 | 46.018 | 0.00 | 0.00 |
| ATOM | 4382 | CE1  | PHE | X | 291 | 47.959 | 33.032 | 43.954 | 0.00 | 0.00 |
| ATOM | 4383 | HE1  | PHE | X | 291 | 47.636 | 34.057 | 44.062 | 0.00 | 0.00 |
| ATOM | 4384 | CZ   | PHE | X | 291 | 48.355 | 32.481 | 42.730 | 0.00 | 0.00 |
| ATOM | 4385 | HZ   | PHE | X | 291 | 48.413 | 33.218 | 41.943 | 0.00 | 0.00 |
| ATOM | 4386 | CE2  | PHE | X | 291 | 48.831 | 31.154 | 42.639 | 0.00 | 0.00 |
| ATOM | 4387 | HE2  | PHE | X | 291 | 49.131 | 30.755 | 41.681 | 0.00 | 0.00 |
| ATOM | 4388 | CD2  | PHE | X | 291 | 49.014 | 30.353 | 43.776 | 0.00 | 0.00 |
| ATOM | 4389 | HD2  | PHE | X | 291 | 49.395 | 29.352 | 43.644 | 0.00 | 0.00 |
| ATOM | 4390 | C    | PHE | X | 291 | 48.363 | 31.294 | 48.504 | 0.00 | 0.00 |
| ATOM | 4391 | O    | PHE | X | 291 | 47.218 | 31.495 | 48.143 | 0.00 | 0.00 |
| ATOM | 4392 | N    | ARG | X | 292 | 48.764 | 31.496 | 49.731 | 0.00 | 0.00 |
| ATOM | 4393 | H    | ARG | X | 292 | 49.709 | 31.240 | 49.981 | 0.00 | 0.00 |
| ATOM | 4394 | CA   | ARG | X | 292 | 47.957 | 32.039 | 50.851 | 0.00 | 0.00 |
| ATOM | 4395 | HA   | ARG | X | 292 | 47.137 | 32.545 | 50.342 | 0.00 | 0.00 |
| ATOM | 4396 | CB   | ARG | X | 292 | 47.313 | 30.897 | 51.682 | 0.00 | 0.00 |
| ATOM | 4397 | HB2  | ARG | X | 292 | 48.066 | 30.389 | 52.285 | 0.00 | 0.00 |
| ATOM | 4398 | HB3  | ARG | X | 292 | 46.698 | 31.322 | 52.476 | 0.00 | 0.00 |
| ATOM | 4399 | CG   | ARG | X | 292 | 46.426 | 29.907 | 50.901 | 0.00 | 0.00 |
| ATOM | 4400 | HG2  | ARG | X | 292 | 47.090 | 29.365 | 50.227 | 0.00 | 0.00 |
| ATOM | 4401 | HG3  | ARG | X | 292 | 46.007 | 29.199 | 51.617 | 0.00 | 0.00 |
| ATOM | 4402 | CD   | ARG | X | 292 | 45.173 | 30.642 | 50.281 | 0.00 | 0.00 |
| ATOM | 4403 | HD2  | ARG | X | 292 | 44.343 | 30.484 | 50.971 | 0.00 | 0.00 |
| ATOM | 4404 | HD3  | ARG | X | 292 | 45.307 | 31.711 | 50.119 | 0.00 | 0.00 |
| ATOM | 4405 | NE   | ARG | X | 292 | 44.862 | 29.971 | 48.993 | 0.00 | 0.00 |
| ATOM | 4406 | HE   | ARG | X | 292 | 45.518 | 30.208 | 48.262 | 0.00 | 0.00 |
| ATOM | 4407 | CZ   | ARG | X | 292 | 43.925 | 29.062 | 48.708 | 0.00 | 0.00 |
| ATOM | 4408 | NH1  | ARG | X | 292 | 43.007 | 28.679 | 49.575 | 0.00 | 0.00 |
| ATOM | 4409 | HH11 | ARG | X | 292 | 42.968 | 28.994 | 50.533 | 0.00 | 0.00 |
| ATOM | 4410 | HH12 | ARG | X | 292 | 42.295 | 28.088 | 49.167 | 0.00 | 0.00 |
| ATOM | 4411 | NH2  | ARG | X | 292 | 43.882 | 28.563 | 47.511 | 0.00 | 0.00 |
| ATOM | 4412 | HH21 | ARG | X | 292 | 44.642 | 28.737 | 46.869 | 0.00 | 0.00 |
| ATOM | 4413 | HH22 | ARG | X | 292 | 43.155 | 27.879 | 47.357 | 0.00 | 0.00 |
| ATOM | 4414 | C    | ARG | X | 292 | 48.705 | 33.055 | 51.688 | 0.00 | 0.00 |

|      |      |      |     |   |     |        |        |        |      |      |
|------|------|------|-----|---|-----|--------|--------|--------|------|------|
| ATOM | 4415 | O    | ARG | X | 292 | 49.919 | 32.909 | 51.799 | 0.00 | 0.00 |
| ATOM | 4416 | N    | PHE | X | 293 | 48.059 | 34.053 | 52.335 | 0.00 | 0.00 |
| ATOM | 4417 | H    | PHE | X | 293 | 47.050 | 34.071 | 52.390 | 0.00 | 0.00 |
| ATOM | 4418 | CA   | PHE | X | 293 | 48.715 | 35.216 | 52.865 | 0.00 | 0.00 |
| ATOM | 4419 | HA   | PHE | X | 293 | 49.786 | 35.020 | 52.916 | 0.00 | 0.00 |
| ATOM | 4420 | CB   | PHE | X | 293 | 48.325 | 36.387 | 51.909 | 0.00 | 0.00 |
| ATOM | 4421 | HB2  | PHE | X | 293 | 47.245 | 36.530 | 51.882 | 0.00 | 0.00 |
| ATOM | 4422 | HB3  | PHE | X | 293 | 48.676 | 37.378 | 52.199 | 0.00 | 0.00 |
| ATOM | 4423 | CG   | PHE | X | 293 | 48.737 | 36.043 | 50.460 | 0.00 | 0.00 |
| ATOM | 4424 | CD1  | PHE | X | 293 | 50.101 | 36.123 | 50.081 | 0.00 | 0.00 |
| ATOM | 4425 | HD1  | PHE | X | 293 | 50.860 | 36.454 | 50.774 | 0.00 | 0.00 |
| ATOM | 4426 | CE1  | PHE | X | 293 | 50.475 | 35.665 | 48.787 | 0.00 | 0.00 |
| ATOM | 4427 | HE1  | PHE | X | 293 | 51.479 | 35.589 | 48.398 | 0.00 | 0.00 |
| ATOM | 4428 | CZ   | PHE | X | 293 | 49.553 | 34.922 | 48.038 | 0.00 | 0.00 |
| ATOM | 4429 | HZ   | PHE | X | 293 | 49.911 | 34.517 | 47.102 | 0.00 | 0.00 |
| ATOM | 4430 | CE2  | PHE | X | 293 | 48.160 | 34.796 | 48.486 | 0.00 | 0.00 |
| ATOM | 4431 | HE2  | PHE | X | 293 | 47.453 | 34.213 | 47.915 | 0.00 | 0.00 |
| ATOM | 4432 | CD2  | PHE | X | 293 | 47.787 | 35.450 | 49.658 | 0.00 | 0.00 |
| ATOM | 4433 | HD2  | PHE | X | 293 | 46.813 | 35.305 | 50.102 | 0.00 | 0.00 |
| ATOM | 4434 | C    | PHE | X | 293 | 48.272 | 35.502 | 54.381 | 0.00 | 0.00 |
| ATOM | 4435 | O    | PHE | X | 293 | 47.135 | 35.267 | 54.731 | 0.00 | 0.00 |
| ATOM | 4436 | N    | SER | X | 294 | 49.116 | 36.175 | 55.200 | 0.00 | 0.00 |
| ATOM | 4437 | H    | SER | X | 294 | 49.963 | 36.518 | 54.769 | 0.00 | 0.00 |
| ATOM | 4438 | CA   | SER | X | 294 | 48.958 | 36.564 | 56.665 | 0.00 | 0.00 |
| ATOM | 4439 | HA   | SER | X | 294 | 48.791 | 35.565 | 57.067 | 0.00 | 0.00 |
| ATOM | 4440 | CB   | SER | X | 294 | 50.165 | 37.362 | 57.217 | 0.00 | 0.00 |
| ATOM | 4441 | HB2  | SER | X | 294 | 49.877 | 38.053 | 58.009 | 0.00 | 0.00 |
| ATOM | 4442 | HB3  | SER | X | 294 | 50.826 | 36.694 | 57.770 | 0.00 | 0.00 |
| ATOM | 4443 | OG   | SER | X | 294 | 50.903 | 38.023 | 56.139 | 0.00 | 0.00 |
| ATOM | 4444 | HG   | SER | X | 294 | 51.560 | 38.603 | 56.531 | 0.00 | 0.00 |
| ATOM | 4445 | C    | SER | X | 294 | 47.751 | 37.470 | 56.982 | 0.00 | 0.00 |
| ATOM | 4446 | O    | SER | X | 294 | 46.894 | 37.189 | 57.868 | 0.00 | 0.00 |
| ATOM | 4447 | N    | PHE | X | 295 | 47.601 | 38.628 | 56.259 | 0.00 | 0.00 |
| ATOM | 4448 | H    | PHE | X | 295 | 48.168 | 38.733 | 55.430 | 0.00 | 0.00 |
| ATOM | 4449 | CA   | PHE | X | 295 | 46.369 | 39.364 | 56.290 | 0.00 | 0.00 |
| ATOM | 4450 | HA   | PHE | X | 295 | 45.597 | 38.758 | 56.765 | 0.00 | 0.00 |
| ATOM | 4451 | CB   | PHE | X | 295 | 46.482 | 40.668 | 57.184 | 0.00 | 0.00 |
| ATOM | 4452 | HB2  | PHE | X | 295 | 47.280 | 41.265 | 56.744 | 0.00 | 0.00 |
| ATOM | 4453 | HB3  | PHE | X | 295 | 45.606 | 41.277 | 56.959 | 0.00 | 0.00 |
| ATOM | 4454 | CG   | PHE | X | 295 | 46.531 | 40.374 | 58.694 | 0.00 | 0.00 |
| ATOM | 4455 | CD1  | PHE | X | 295 | 45.473 | 40.517 | 59.641 | 0.00 | 0.00 |
| ATOM | 4456 | HD1  | PHE | X | 295 | 44.497 | 40.666 | 59.204 | 0.00 | 0.00 |
| ATOM | 4457 | CE1  | PHE | X | 295 | 45.614 | 40.076 | 61.006 | 0.00 | 0.00 |
| ATOM | 4458 | HE1  | PHE | X | 295 | 44.744 | 39.871 | 61.614 | 0.00 | 0.00 |
| ATOM | 4459 | CZ   | PHE | X | 295 | 46.841 | 39.716 | 61.481 | 0.00 | 0.00 |
| ATOM | 4460 | HZ   | PHE | X | 295 | 46.821 | 39.298 | 62.476 | 0.00 | 0.00 |
| ATOM | 4461 | CE2  | PHE | X | 295 | 47.972 | 39.738 | 60.619 | 0.00 | 0.00 |
| ATOM | 4462 | HE2  | PHE | X | 295 | 48.888 | 39.257 | 60.928 | 0.00 | 0.00 |
| ATOM | 4463 | CD2  | PHE | X | 295 | 47.784 | 40.024 | 59.240 | 0.00 | 0.00 |
| ATOM | 4464 | HD2  | PHE | X | 295 | 48.590 | 39.889 | 58.534 | 0.00 | 0.00 |
| ATOM | 4465 | C    | PHE | X | 295 | 45.944 | 39.818 | 54.834 | 0.00 | 0.00 |
| ATOM | 4466 | O    | PHE | X | 295 | 46.770 | 39.978 | 53.924 | 0.00 | 0.00 |
| ATOM | 4467 | N    | VAL | X | 296 | 44.663 | 39.931 | 54.633 | 0.00 | 0.00 |
| ATOM | 4468 | H    | VAL | X | 296 | 44.040 | 39.782 | 55.414 | 0.00 | 0.00 |
| ATOM | 4469 | CA   | VAL | X | 296 | 44.014 | 40.169 | 53.306 | 0.00 | 0.00 |
| ATOM | 4470 | HA   | VAL | X | 296 | 44.644 | 40.824 | 52.703 | 0.00 | 0.00 |
| ATOM | 4471 | CB   | VAL | X | 296 | 43.819 | 38.783 | 52.526 | 0.00 | 0.00 |
| ATOM | 4472 | HB   | VAL | X | 296 | 43.409 | 39.046 | 51.551 | 0.00 | 0.00 |
| ATOM | 4473 | CG1  | VAL | X | 296 | 45.097 | 38.117 | 52.114 | 0.00 | 0.00 |
| ATOM | 4474 | HG11 | VAL | X | 296 | 45.765 | 38.750 | 51.529 | 0.00 | 0.00 |
| ATOM | 4475 | HG12 | VAL | X | 296 | 45.584 | 37.757 | 53.020 | 0.00 | 0.00 |
| ATOM | 4476 | HG13 | VAL | X | 296 | 44.765 | 37.286 | 51.493 | 0.00 | 0.00 |
| ATOM | 4477 | CG2  | VAL | X | 296 | 42.905 | 37.762 | 53.230 | 0.00 | 0.00 |
| ATOM | 4478 | HG21 | VAL | X | 296 | 41.961 | 38.276 | 53.409 | 0.00 | 0.00 |
| ATOM | 4479 | HG22 | VAL | X | 296 | 42.859 | 36.780 | 52.758 | 0.00 | 0.00 |
| ATOM | 4480 | HG23 | VAL | X | 296 | 43.276 | 37.501 | 54.221 | 0.00 | 0.00 |
| ATOM | 4481 | C    | VAL | X | 296 | 42.655 | 40.891 | 53.527 | 0.00 | 0.00 |
| ATOM | 4482 | O    | VAL | X | 296 | 42.191 | 40.936 | 54.675 | 0.00 | 0.00 |
| ATOM | 4483 | N    | PRO | X | 297 | 41.944 | 41.388 | 52.480 | 0.00 | 0.00 |
| ATOM | 4484 | CD   | PRO | X | 297 | 42.429 | 41.738 | 51.172 | 0.00 | 0.00 |

|      |      |      |     |   |     |        |        |        |      |      |
|------|------|------|-----|---|-----|--------|--------|--------|------|------|
| ATOM | 4485 | HD2  | PRO | X | 297 | 42.869 | 40.865 | 50.689 | 0.00 | 0.00 |
| ATOM | 4486 | HD3  | PRO | X | 297 | 43.120 | 42.577 | 51.251 | 0.00 | 0.00 |
| ATOM | 4487 | CG   | PRO | X | 297 | 41.205 | 42.267 | 50.413 | 0.00 | 0.00 |
| ATOM | 4488 | HG2  | PRO | X | 297 | 41.084 | 41.686 | 49.499 | 0.00 | 0.00 |
| ATOM | 4489 | HG3  | PRO | X | 297 | 41.222 | 43.334 | 50.190 | 0.00 | 0.00 |
| ATOM | 4490 | CB   | PRO | X | 297 | 39.935 | 41.989 | 51.262 | 0.00 | 0.00 |
| ATOM | 4491 | HB2  | PRO | X | 297 | 39.532 | 41.024 | 50.954 | 0.00 | 0.00 |
| ATOM | 4492 | HB3  | PRO | X | 297 | 39.263 | 42.829 | 51.084 | 0.00 | 0.00 |
| ATOM | 4493 | CA   | PRO | X | 297 | 40.508 | 41.878 | 52.655 | 0.00 | 0.00 |
| ATOM | 4494 | HA   | PRO | X | 297 | 40.549 | 42.787 | 53.255 | 0.00 | 0.00 |
| ATOM | 4495 | C    | PRO | X | 297 | 39.612 | 40.902 | 53.408 | 0.00 | 0.00 |
| ATOM | 4496 | O    | PRO | X | 297 | 39.734 | 39.679 | 53.279 | 0.00 | 0.00 |
| ATOM | 4497 | N    | VAL | X | 298 | 38.627 | 41.416 | 54.094 | 0.00 | 0.00 |
| ATOM | 4498 | H    | VAL | X | 298 | 38.478 | 42.415 | 54.118 | 0.00 | 0.00 |
| ATOM | 4499 | CA   | VAL | X | 298 | 37.713 | 40.658 | 54.958 | 0.00 | 0.00 |
| ATOM | 4500 | HA   | VAL | X | 298 | 37.778 | 39.590 | 54.754 | 0.00 | 0.00 |
| ATOM | 4501 | CB   | VAL | X | 298 | 38.136 | 40.902 | 56.455 | 0.00 | 0.00 |
| ATOM | 4502 | HB   | VAL | X | 298 | 39.188 | 40.635 | 56.555 | 0.00 | 0.00 |
| ATOM | 4503 | CG1  | VAL | X | 298 | 37.988 | 42.360 | 56.999 | 0.00 | 0.00 |
| ATOM | 4504 | HG11 | VAL | X | 298 | 38.470 | 42.446 | 57.973 | 0.00 | 0.00 |
| ATOM | 4505 | HG12 | VAL | X | 298 | 38.435 | 43.126 | 56.365 | 0.00 | 0.00 |
| ATOM | 4506 | HG13 | VAL | X | 298 | 36.947 | 42.674 | 57.072 | 0.00 | 0.00 |
| ATOM | 4507 | CG2  | VAL | X | 298 | 37.254 | 39.960 | 57.312 | 0.00 | 0.00 |
| ATOM | 4508 | HG21 | VAL | X | 298 | 37.533 | 39.971 | 58.366 | 0.00 | 0.00 |
| ATOM | 4509 | HG22 | VAL | X | 298 | 36.192 | 40.204 | 57.314 | 0.00 | 0.00 |
| ATOM | 4510 | HG23 | VAL | X | 298 | 37.301 | 38.925 | 56.972 | 0.00 | 0.00 |
| ATOM | 4511 | C    | VAL | X | 298 | 36.244 | 40.953 | 54.743 | 0.00 | 0.00 |
| ATOM | 4512 | O    | VAL | X | 298 | 35.873 | 42.130 | 54.374 | 0.00 | 0.00 |
| ATOM | 4513 | N    | VAL | X | 299 | 35.506 | 39.866 | 54.657 | 0.00 | 0.00 |
| ATOM | 4514 | H    | VAL | X | 299 | 36.000 | 39.022 | 54.906 | 0.00 | 0.00 |
| ATOM | 4515 | CA   | VAL | X | 299 | 34.082 | 39.892 | 54.633 | 0.00 | 0.00 |
| ATOM | 4516 | HA   | VAL | X | 299 | 33.808 | 40.742 | 54.008 | 0.00 | 0.00 |
| ATOM | 4517 | CB   | VAL | X | 299 | 33.528 | 38.623 | 53.956 | 0.00 | 0.00 |
| ATOM | 4518 | HB   | VAL | X | 299 | 33.929 | 37.740 | 54.454 | 0.00 | 0.00 |
| ATOM | 4519 | CG1  | VAL | X | 299 | 32.006 | 38.516 | 53.900 | 0.00 | 0.00 |
| ATOM | 4520 | HG11 | VAL | X | 299 | 31.387 | 38.376 | 54.787 | 0.00 | 0.00 |
| ATOM | 4521 | HG12 | VAL | X | 299 | 31.733 | 39.504 | 53.529 | 0.00 | 0.00 |
| ATOM | 4522 | HG13 | VAL | X | 299 | 31.667 | 37.778 | 53.174 | 0.00 | 0.00 |
| ATOM | 4523 | CG2  | VAL | X | 299 | 33.960 | 38.423 | 52.551 | 0.00 | 0.00 |
| ATOM | 4524 | HG21 | VAL | X | 299 | 33.730 | 37.420 | 52.193 | 0.00 | 0.00 |
| ATOM | 4525 | HG22 | VAL | X | 299 | 33.605 | 39.212 | 51.887 | 0.00 | 0.00 |
| ATOM | 4526 | HG23 | VAL | X | 299 | 35.050 | 38.412 | 52.522 | 0.00 | 0.00 |
| ATOM | 4527 | C    | VAL | X | 299 | 33.487 | 39.924 | 56.071 | 0.00 | 0.00 |
| ATOM | 4528 | O    | VAL | X | 299 | 33.368 | 38.846 | 56.691 | 0.00 | 0.00 |
| ATOM | 4529 | N    | ASP | X | 300 | 33.078 | 41.118 | 56.527 | 0.00 | 0.00 |
| ATOM | 4530 | H    | ASP | X | 300 | 33.111 | 41.868 | 55.852 | 0.00 | 0.00 |
| ATOM | 4531 | CA   | ASP | X | 300 | 32.464 | 41.302 | 57.804 | 0.00 | 0.00 |
| ATOM | 4532 | HA   | ASP | X | 300 | 32.412 | 40.335 | 58.303 | 0.00 | 0.00 |
| ATOM | 4533 | CB   | ASP | X | 300 | 33.355 | 42.175 | 58.704 | 0.00 | 0.00 |
| ATOM | 4534 | HB2  | ASP | X | 300 | 33.043 | 41.969 | 59.728 | 0.00 | 0.00 |
| ATOM | 4535 | HB3  | ASP | X | 300 | 34.395 | 41.853 | 58.658 | 0.00 | 0.00 |
| ATOM | 4536 | CG   | ASP | X | 300 | 33.260 | 43.663 | 58.357 | 0.00 | 0.00 |
| ATOM | 4537 | OD1  | ASP | X | 300 | 32.630 | 44.387 | 59.169 | 0.00 | 0.00 |
| ATOM | 4538 | OD2  | ASP | X | 300 | 33.802 | 44.095 | 57.320 | 0.00 | 0.00 |
| ATOM | 4539 | C    | ASP | X | 300 | 30.927 | 41.890 | 57.749 | 0.00 | 0.00 |
| ATOM | 4540 | O    | ASP | X | 300 | 30.283 | 42.034 | 58.778 | 0.00 | 0.00 |
| ATOM | 4541 | N    | GLY | X | 301 | 30.512 | 42.273 | 56.558 | 0.00 | 0.00 |
| ATOM | 4542 | H    | GLY | X | 301 | 31.124 | 42.087 | 55.776 | 0.00 | 0.00 |
| ATOM | 4543 | CA   | GLY | X | 301 | 29.183 | 42.779 | 56.302 | 0.00 | 0.00 |
| ATOM | 4544 | HA2  | GLY | X | 301 | 28.880 | 42.291 | 55.316 | 0.00 | 0.00 |
| ATOM | 4545 | HA3  | GLY | X | 301 | 28.543 | 42.586 | 57.153 | 0.00 | 0.00 |
| ATOM | 4546 | C    | GLY | X | 301 | 28.981 | 44.341 | 56.067 | 0.00 | 0.00 |
| ATOM | 4547 | O    | GLY | X | 301 | 27.891 | 44.875 | 55.996 | 0.00 | 0.00 |
| ATOM | 4548 | N    | ASP | X | 302 | 30.090 | 45.006 | 55.785 | 0.00 | 0.00 |
| ATOM | 4549 | H    | ASP | X | 302 | 30.939 | 44.460 | 55.772 | 0.00 | 0.00 |
| ATOM | 4550 | CA   | ASP | X | 302 | 30.253 | 46.418 | 55.687 | 0.00 | 0.00 |
| ATOM | 4551 | HA   | ASP | X | 302 | 29.296 | 46.928 | 55.800 | 0.00 | 0.00 |
| ATOM | 4552 | CB   | ASP | X | 302 | 31.117 | 46.890 | 56.812 | 0.00 | 0.00 |
| ATOM | 4553 | HB2  | ASP | X | 302 | 30.571 | 46.681 | 57.732 | 0.00 | 0.00 |
| ATOM | 4554 | HB3  | ASP | X | 302 | 31.996 | 46.247 | 56.846 | 0.00 | 0.00 |

|      |      |      |     |   |     |        |        |        |      |      |
|------|------|------|-----|---|-----|--------|--------|--------|------|------|
| ATOM | 4555 | CG   | ASP | X | 302 | 31.469 | 48.315 | 56.756 | 0.00 | 0.00 |
| ATOM | 4556 | OD1  | ASP | X | 302 | 30.761 | 49.220 | 57.265 | 0.00 | 0.00 |
| ATOM | 4557 | OD2  | ASP | X | 302 | 32.538 | 48.563 | 56.170 | 0.00 | 0.00 |
| ATOM | 4558 | C    | ASP | X | 302 | 30.815 | 46.730 | 54.305 | 0.00 | 0.00 |
| ATOM | 4559 | O    | ASP | X | 302 | 30.072 | 46.730 | 53.333 | 0.00 | 0.00 |
| ATOM | 4560 | N    | PHE | X | 303 | 32.127 | 46.763 | 54.098 | 0.00 | 0.00 |
| ATOM | 4561 | H    | PHE | X | 303 | 32.826 | 46.574 | 54.802 | 0.00 | 0.00 |
| ATOM | 4562 | CA   | PHE | X | 303 | 32.773 | 47.023 | 52.795 | 0.00 | 0.00 |
| ATOM | 4563 | HA   | PHE | X | 303 | 32.487 | 47.946 | 52.290 | 0.00 | 0.00 |
| ATOM | 4564 | CB   | PHE | X | 303 | 34.297 | 47.122 | 53.027 | 0.00 | 0.00 |
| ATOM | 4565 | HB2  | PHE | X | 303 | 34.471 | 47.883 | 53.789 | 0.00 | 0.00 |
| ATOM | 4566 | HB3  | PHE | X | 303 | 34.697 | 46.180 | 53.402 | 0.00 | 0.00 |
| ATOM | 4567 | CG   | PHE | X | 303 | 35.104 | 47.536 | 51.793 | 0.00 | 0.00 |
| ATOM | 4568 | CD1  | PHE | X | 303 | 35.453 | 46.509 | 50.841 | 0.00 | 0.00 |
| ATOM | 4569 | HD1  | PHE | X | 303 | 34.874 | 45.602 | 50.924 | 0.00 | 0.00 |
| ATOM | 4570 | CE1  | PHE | X | 303 | 36.119 | 46.841 | 49.636 | 0.00 | 0.00 |
| ATOM | 4571 | HE1  | PHE | X | 303 | 36.279 | 46.096 | 48.870 | 0.00 | 0.00 |
| ATOM | 4572 | CZ   | PHE | X | 303 | 36.484 | 48.203 | 49.398 | 0.00 | 0.00 |
| ATOM | 4573 | HZ   | PHE | X | 303 | 36.946 | 48.393 | 48.440 | 0.00 | 0.00 |
| ATOM | 4574 | CE2  | PHE | X | 303 | 36.207 | 49.226 | 50.362 | 0.00 | 0.00 |
| ATOM | 4575 | HE2  | PHE | X | 303 | 36.674 | 50.190 | 50.231 | 0.00 | 0.00 |
| ATOM | 4576 | CD2  | PHE | X | 303 | 35.603 | 48.893 | 51.632 | 0.00 | 0.00 |
| ATOM | 4577 | HD2  | PHE | X | 303 | 35.457 | 49.653 | 52.386 | 0.00 | 0.00 |
| ATOM | 4578 | C    | PHE | X | 303 | 32.384 | 45.942 | 51.753 | 0.00 | 0.00 |
| ATOM | 4579 | O    | PHE | X | 303 | 31.993 | 46.271 | 50.668 | 0.00 | 0.00 |
| ATOM | 4580 | N    | LEU | X | 304 | 32.524 | 44.670 | 52.066 | 0.00 | 0.00 |
| ATOM | 4581 | H    | LEU | X | 304 | 32.947 | 44.528 | 52.971 | 0.00 | 0.00 |
| ATOM | 4582 | CA   | LEU | X | 304 | 31.949 | 43.537 | 51.323 | 0.00 | 0.00 |
| ATOM | 4583 | HA   | LEU | X | 304 | 31.535 | 43.865 | 50.369 | 0.00 | 0.00 |
| ATOM | 4584 | CB   | LEU | X | 304 | 32.957 | 42.405 | 51.062 | 0.00 | 0.00 |
| ATOM | 4585 | HB2  | LEU | X | 304 | 33.017 | 41.908 | 52.030 | 0.00 | 0.00 |
| ATOM | 4586 | HB3  | LEU | X | 304 | 32.387 | 41.767 | 50.387 | 0.00 | 0.00 |
| ATOM | 4587 | CG   | LEU | X | 304 | 34.351 | 42.651 | 50.441 | 0.00 | 0.00 |
| ATOM | 4588 | HG   | LEU | X | 304 | 34.892 | 43.151 | 51.244 | 0.00 | 0.00 |
| ATOM | 4589 | CD1  | LEU | X | 304 | 34.981 | 41.313 | 50.088 | 0.00 | 0.00 |
| ATOM | 4590 | HD11 | LEU | X | 304 | 36.007 | 41.599 | 49.856 | 0.00 | 0.00 |
| ATOM | 4591 | HD12 | LEU | X | 304 | 34.981 | 40.602 | 50.914 | 0.00 | 0.00 |
| ATOM | 4592 | HD13 | LEU | X | 304 | 34.557 | 40.803 | 49.223 | 0.00 | 0.00 |
| ATOM | 4593 | CD2  | LEU | X | 304 | 34.263 | 43.585 | 49.247 | 0.00 | 0.00 |
| ATOM | 4594 | HD21 | LEU | X | 304 | 33.753 | 43.139 | 48.392 | 0.00 | 0.00 |
| ATOM | 4595 | HD22 | LEU | X | 304 | 33.695 | 44.474 | 49.519 | 0.00 | 0.00 |
| ATOM | 4596 | HD23 | LEU | X | 304 | 35.240 | 43.931 | 48.908 | 0.00 | 0.00 |
| ATOM | 4597 | C    | LEU | X | 304 | 30.719 | 43.035 | 52.171 | 0.00 | 0.00 |
| ATOM | 4598 | O    | LEU | X | 304 | 30.866 | 42.756 | 53.336 | 0.00 | 0.00 |
| ATOM | 4599 | N    | SER | X | 305 | 29.529 | 43.005 | 51.569 | 0.00 | 0.00 |
| ATOM | 4600 | H    | SER | X | 305 | 29.493 | 43.532 | 50.708 | 0.00 | 0.00 |
| ATOM | 4601 | CA   | SER | X | 305 | 28.424 | 42.194 | 52.093 | 0.00 | 0.00 |
| ATOM | 4602 | HA   | SER | X | 305 | 28.352 | 42.493 | 53.138 | 0.00 | 0.00 |
| ATOM | 4603 | CB   | SER | X | 305 | 27.112 | 42.659 | 51.416 | 0.00 | 0.00 |
| ATOM | 4604 | HB2  | SER | X | 305 | 27.100 | 42.253 | 50.405 | 0.00 | 0.00 |
| ATOM | 4605 | HB3  | SER | X | 305 | 26.301 | 42.129 | 51.916 | 0.00 | 0.00 |
| ATOM | 4606 | OG   | SER | X | 305 | 26.952 | 44.008 | 51.345 | 0.00 | 0.00 |
| ATOM | 4607 | HG   | SER | X | 305 | 26.198 | 44.237 | 50.797 | 0.00 | 0.00 |
| ATOM | 4608 | C    | SER | X | 305 | 28.464 | 40.619 | 51.900 | 0.00 | 0.00 |
| ATOM | 4609 | O    | SER | X | 305 | 27.697 | 39.930 | 52.601 | 0.00 | 0.00 |
| ATOM | 4610 | N    | ASP | X | 306 | 29.424 | 40.017 | 51.118 | 0.00 | 0.00 |
| ATOM | 4611 | H    | ASP | X | 306 | 30.141 | 40.519 | 50.615 | 0.00 | 0.00 |
| ATOM | 4612 | CA   | ASP | X | 306 | 29.511 | 38.586 | 50.945 | 0.00 | 0.00 |
| ATOM | 4613 | HA   | ASP | X | 306 | 29.520 | 38.144 | 51.941 | 0.00 | 0.00 |
| ATOM | 4614 | CB   | ASP | X | 306 | 28.323 | 37.984 | 50.180 | 0.00 | 0.00 |
| ATOM | 4615 | HB2  | ASP | X | 306 | 27.376 | 38.453 | 50.446 | 0.00 | 0.00 |
| ATOM | 4616 | HB3  | ASP | X | 306 | 28.345 | 38.258 | 49.125 | 0.00 | 0.00 |
| ATOM | 4617 | CG   | ASP | X | 306 | 28.025 | 36.460 | 50.302 | 0.00 | 0.00 |
| ATOM | 4618 | OD1  | ASP | X | 306 | 26.839 | 35.936 | 50.191 | 0.00 | 0.00 |
| ATOM | 4619 | OD2  | ASP | X | 306 | 29.018 | 35.698 | 50.398 | 0.00 | 0.00 |
| ATOM | 4620 | C    | ASP | X | 306 | 30.890 | 38.282 | 50.331 | 0.00 | 0.00 |
| ATOM | 4621 | O    | ASP | X | 306 | 31.747 | 39.193 | 50.246 | 0.00 | 0.00 |
| ATOM | 4622 | N    | THR | X | 307 | 31.221 | 37.061 | 49.937 | 0.00 | 0.00 |
| ATOM | 4623 | H    | THR | X | 307 | 30.607 | 36.272 | 50.082 | 0.00 | 0.00 |
| ATOM | 4624 | CA   | THR | X | 307 | 32.372 | 36.562 | 49.154 | 0.00 | 0.00 |

|      |      |      |     |   |     |        |        |        |      |      |
|------|------|------|-----|---|-----|--------|--------|--------|------|------|
| ATOM | 4625 | HA   | THR | X | 307 | 33.209 | 37.054 | 49.650 | 0.00 | 0.00 |
| ATOM | 4626 | CB   | THR | X | 307 | 32.425 | 35.024 | 49.126 | 0.00 | 0.00 |
| ATOM | 4627 | HB   | THR | X | 307 | 33.221 | 34.657 | 48.479 | 0.00 | 0.00 |
| ATOM | 4628 | CG2  | THR | X | 307 | 32.413 | 34.398 | 50.488 | 0.00 | 0.00 |
| ATOM | 4629 | HG21 | THR | X | 307 | 33.231 | 33.677 | 50.497 | 0.00 | 0.00 |
| ATOM | 4630 | HG22 | THR | X | 307 | 32.776 | 35.104 | 51.236 | 0.00 | 0.00 |
| ATOM | 4631 | HG23 | THR | X | 307 | 31.430 | 34.021 | 50.769 | 0.00 | 0.00 |
| ATOM | 4632 | OG1  | THR | X | 307 | 31.301 | 34.438 | 48.472 | 0.00 | 0.00 |
| ATOM | 4633 | HG1  | THR | X | 307 | 30.543 | 34.621 | 49.033 | 0.00 | 0.00 |
| ATOM | 4634 | C    | THR | X | 307 | 32.332 | 37.040 | 47.689 | 0.00 | 0.00 |
| ATOM | 4635 | O    | THR | X | 307 | 31.274 | 37.347 | 47.196 | 0.00 | 0.00 |
| ATOM | 4636 | N    | PRO | X | 308 | 33.533 | 37.223 | 47.031 | 0.00 | 0.00 |
| ATOM | 4637 | CD   | PRO | X | 308 | 34.846 | 37.336 | 47.544 | 0.00 | 0.00 |
| ATOM | 4638 | HD2  | PRO | X | 308 | 35.237 | 36.395 | 47.932 | 0.00 | 0.00 |
| ATOM | 4639 | HD3  | PRO | X | 308 | 34.918 | 38.135 | 48.281 | 0.00 | 0.00 |
| ATOM | 4640 | CG   | PRO | X | 308 | 35.734 | 37.681 | 46.335 | 0.00 | 0.00 |
| ATOM | 4641 | HG2  | PRO | X | 308 | 36.036 | 36.787 | 45.789 | 0.00 | 0.00 |
| ATOM | 4642 | HG3  | PRO | X | 308 | 36.619 | 38.170 | 46.743 | 0.00 | 0.00 |
| ATOM | 4643 | CB   | PRO | X | 308 | 34.876 | 38.461 | 45.475 | 0.00 | 0.00 |
| ATOM | 4644 | HB2  | PRO | X | 308 | 35.152 | 38.364 | 44.425 | 0.00 | 0.00 |
| ATOM | 4645 | HB3  | PRO | X | 308 | 34.958 | 39.460 | 45.903 | 0.00 | 0.00 |
| ATOM | 4646 | CA   | PRO | X | 308 | 33.495 | 38.021 | 45.743 | 0.00 | 0.00 |
| ATOM | 4647 | HA   | PRO | X | 308 | 32.873 | 38.891 | 45.956 | 0.00 | 0.00 |
| ATOM | 4648 | C    | PRO | X | 308 | 32.758 | 37.193 | 44.685 | 0.00 | 0.00 |
| ATOM | 4649 | O    | PRO | X | 308 | 32.007 | 37.798 | 43.940 | 0.00 | 0.00 |
| ATOM | 4650 | N    | GLU | X | 309 | 32.775 | 35.862 | 44.775 | 0.00 | 0.00 |
| ATOM | 4651 | H    | GLU | X | 309 | 33.359 | 35.397 | 45.455 | 0.00 | 0.00 |
| ATOM | 4652 | CA   | GLU | X | 309 | 32.015 | 35.060 | 43.821 | 0.00 | 0.00 |
| ATOM | 4653 | HA   | GLU | X | 309 | 32.178 | 35.243 | 42.759 | 0.00 | 0.00 |
| ATOM | 4654 | CB   | GLU | X | 309 | 32.420 | 33.605 | 43.896 | 0.00 | 0.00 |
| ATOM | 4655 | HB2  | GLU | X | 309 | 31.788 | 32.966 | 43.280 | 0.00 | 0.00 |
| ATOM | 4656 | HB3  | GLU | X | 309 | 33.434 | 33.559 | 43.499 | 0.00 | 0.00 |
| ATOM | 4657 | CG   | GLU | X | 309 | 32.392 | 33.007 | 45.318 | 0.00 | 0.00 |
| ATOM | 4658 | HG2  | GLU | X | 309 | 33.177 | 33.451 | 45.930 | 0.00 | 0.00 |
| ATOM | 4659 | HG3  | GLU | X | 309 | 31.440 | 33.292 | 45.767 | 0.00 | 0.00 |
| ATOM | 4660 | CD   | GLU | X | 309 | 32.543 | 31.450 | 45.389 | 0.00 | 0.00 |
| ATOM | 4661 | OE1  | GLU | X | 309 | 33.604 | 30.926 | 45.659 | 0.00 | 0.00 |
| ATOM | 4662 | OE2  | GLU | X | 309 | 31.526 | 30.734 | 45.092 | 0.00 | 0.00 |
| ATOM | 4663 | C    | GLU | X | 309 | 30.463 | 35.109 | 43.964 | 0.00 | 0.00 |
| ATOM | 4664 | O    | GLU | X | 309 | 29.737 | 35.105 | 42.940 | 0.00 | 0.00 |
| ATOM | 4665 | N    | ALA | X | 310 | 30.051 | 35.276 | 45.253 | 0.00 | 0.00 |
| ATOM | 4666 | H    | ALA | X | 310 | 30.739 | 35.333 | 45.989 | 0.00 | 0.00 |
| ATOM | 4667 | CA   | ALA | X | 310 | 28.587 | 35.570 | 45.583 | 0.00 | 0.00 |
| ATOM | 4668 | HA   | ALA | X | 310 | 28.054 | 34.784 | 45.047 | 0.00 | 0.00 |
| ATOM | 4669 | CB   | ALA | X | 310 | 28.277 | 35.526 | 47.066 | 0.00 | 0.00 |
| ATOM | 4670 | HB1  | ALA | X | 310 | 27.232 | 35.601 | 47.368 | 0.00 | 0.00 |
| ATOM | 4671 | HB2  | ALA | X | 310 | 28.538 | 34.524 | 47.405 | 0.00 | 0.00 |
| ATOM | 4672 | HB3  | ALA | X | 310 | 28.804 | 36.286 | 47.642 | 0.00 | 0.00 |
| ATOM | 4673 | C    | ALA | X | 310 | 28.242 | 36.934 | 44.981 | 0.00 | 0.00 |
| ATOM | 4674 | O    | ALA | X | 310 | 27.254 | 36.998 | 44.197 | 0.00 | 0.00 |
| ATOM | 4675 | N    | LEU | X | 311 | 29.144 | 37.890 | 45.218 | 0.00 | 0.00 |
| ATOM | 4676 | H    | LEU | X | 311 | 29.882 | 37.528 | 45.805 | 0.00 | 0.00 |
| ATOM | 4677 | CA   | LEU | X | 311 | 29.017 | 39.282 | 44.779 | 0.00 | 0.00 |
| ATOM | 4678 | HA   | LEU | X | 311 | 28.044 | 39.696 | 45.045 | 0.00 | 0.00 |
| ATOM | 4679 | CB   | LEU | X | 311 | 30.033 | 40.082 | 45.540 | 0.00 | 0.00 |
| ATOM | 4680 | HB2  | LEU | X | 311 | 30.987 | 39.556 | 45.586 | 0.00 | 0.00 |
| ATOM | 4681 | HB3  | LEU | X | 311 | 30.068 | 41.106 | 45.169 | 0.00 | 0.00 |
| ATOM | 4682 | CG   | LEU | X | 311 | 29.690 | 40.244 | 47.020 | 0.00 | 0.00 |
| ATOM | 4683 | HG   | LEU | X | 311 | 29.643 | 39.251 | 47.467 | 0.00 | 0.00 |
| ATOM | 4684 | CD1  | LEU | X | 311 | 30.745 | 41.125 | 47.813 | 0.00 | 0.00 |
| ATOM | 4685 | HD11 | LEU | X | 311 | 30.551 | 40.986 | 48.877 | 0.00 | 0.00 |
| ATOM | 4686 | HD12 | LEU | X | 311 | 31.711 | 40.692 | 47.551 | 0.00 | 0.00 |
| ATOM | 4687 | HD13 | LEU | X | 311 | 30.812 | 42.162 | 47.485 | 0.00 | 0.00 |
| ATOM | 4688 | CD2  | LEU | X | 311 | 28.301 | 40.884 | 47.319 | 0.00 | 0.00 |
| ATOM | 4689 | HD21 | LEU | X | 311 | 27.564 | 40.404 | 46.676 | 0.00 | 0.00 |
| ATOM | 4690 | HD22 | LEU | X | 311 | 28.093 | 40.794 | 48.385 | 0.00 | 0.00 |
| ATOM | 4691 | HD23 | LEU | X | 311 | 28.254 | 41.909 | 46.949 | 0.00 | 0.00 |
| ATOM | 4692 | C    | LEU | X | 311 | 28.998 | 39.510 | 43.276 | 0.00 | 0.00 |
| ATOM | 4693 | O    | LEU | X | 311 | 28.211 | 40.385 | 42.895 | 0.00 | 0.00 |
| ATOM | 4694 | N    | ILE | X | 312 | 29.777 | 38.841 | 42.472 | 0.00 | 0.00 |

|      |      |      |     |   |     |        |        |        |      |      |
|------|------|------|-----|---|-----|--------|--------|--------|------|------|
| ATOM | 4695 | H    | ILE | X | 312 | 30.490 | 38.272 | 42.906 | 0.00 | 0.00 |
| ATOM | 4696 | CA   | ILE | X | 312 | 29.711 | 38.685 | 41.001 | 0.00 | 0.00 |
| ATOM | 4697 | HA   | ILE | X | 312 | 29.830 | 39.685 | 40.584 | 0.00 | 0.00 |
| ATOM | 4698 | CB   | ILE | X | 312 | 30.906 | 37.845 | 40.521 | 0.00 | 0.00 |
| ATOM | 4699 | HB   | ILE | X | 312 | 30.876 | 36.899 | 41.060 | 0.00 | 0.00 |
| ATOM | 4700 | CG2  | ILE | X | 312 | 30.681 | 37.495 | 39.101 | 0.00 | 0.00 |
| ATOM | 4701 | HG21 | ILE | X | 312 | 29.747 | 36.969 | 38.906 | 0.00 | 0.00 |
| ATOM | 4702 | HG22 | ILE | X | 312 | 30.778 | 38.381 | 38.472 | 0.00 | 0.00 |
| ATOM | 4703 | HG23 | ILE | X | 312 | 31.512 | 36.844 | 38.828 | 0.00 | 0.00 |
| ATOM | 4704 | CG1  | ILE | X | 312 | 32.342 | 38.511 | 40.669 | 0.00 | 0.00 |
| ATOM | 4705 | HG12 | ILE | X | 312 | 32.447 | 39.241 | 39.866 | 0.00 | 0.00 |
| ATOM | 4706 | HG13 | ILE | X | 312 | 32.370 | 38.996 | 41.644 | 0.00 | 0.00 |
| ATOM | 4707 | CD1  | ILE | X | 312 | 33.535 | 37.542 | 40.496 | 0.00 | 0.00 |
| ATOM | 4708 | HD11 | ILE | X | 312 | 33.540 | 37.068 | 39.514 | 0.00 | 0.00 |
| ATOM | 4709 | HD12 | ILE | X | 312 | 34.426 | 38.132 | 40.709 | 0.00 | 0.00 |
| ATOM | 4710 | HD13 | ILE | X | 312 | 33.497 | 36.823 | 41.314 | 0.00 | 0.00 |
| ATOM | 4711 | C    | ILE | X | 312 | 28.365 | 38.201 | 40.513 | 0.00 | 0.00 |
| ATOM | 4712 | O    | ILE | X | 312 | 27.657 | 38.857 | 39.760 | 0.00 | 0.00 |
| ATOM | 4713 | N    | ASN | X | 313 | 27.998 | 37.031 | 40.998 | 0.00 | 0.00 |
| ATOM | 4714 | H    | ASN | X | 313 | 28.624 | 36.527 | 41.611 | 0.00 | 0.00 |
| ATOM | 4715 | CA   | ASN | X | 313 | 26.879 | 36.336 | 40.359 | 0.00 | 0.00 |
| ATOM | 4716 | HA   | ASN | X | 313 | 27.183 | 36.304 | 39.313 | 0.00 | 0.00 |
| ATOM | 4717 | CB   | ASN | X | 313 | 26.752 | 34.843 | 40.821 | 0.00 | 0.00 |
| ATOM | 4718 | HB2  | ASN | X | 313 | 27.684 | 34.300 | 40.978 | 0.00 | 0.00 |
| ATOM | 4719 | HB3  | ASN | X | 313 | 26.338 | 34.774 | 41.827 | 0.00 | 0.00 |
| ATOM | 4720 | CG   | ASN | X | 313 | 25.774 | 34.023 | 39.924 | 0.00 | 0.00 |
| ATOM | 4721 | OD1  | ASN | X | 313 | 25.855 | 34.110 | 38.731 | 0.00 | 0.00 |
| ATOM | 4722 | ND2  | ASN | X | 313 | 24.828 | 33.298 | 40.478 | 0.00 | 0.00 |
| ATOM | 4723 | HD21 | ASN | X | 313 | 24.234 | 32.745 | 39.878 | 0.00 | 0.00 |
| ATOM | 4724 | HD22 | ASN | X | 313 | 24.936 | 33.018 | 41.443 | 0.00 | 0.00 |
| ATOM | 4725 | C    | ASN | X | 313 | 25.487 | 36.942 | 40.522 | 0.00 | 0.00 |
| ATOM | 4726 | O    | ASN | X | 313 | 24.594 | 36.778 | 39.671 | 0.00 | 0.00 |
| ATOM | 4727 | N    | ALA | X | 314 | 25.305 | 37.731 | 41.578 | 0.00 | 0.00 |
| ATOM | 4728 | H    | ALA | X | 314 | 26.098 | 37.746 | 42.204 | 0.00 | 0.00 |
| ATOM | 4729 | CA   | ALA | X | 314 | 24.055 | 38.546 | 41.846 | 0.00 | 0.00 |
| ATOM | 4730 | HA   | ALA | X | 314 | 23.155 | 38.066 | 41.462 | 0.00 | 0.00 |
| ATOM | 4731 | CB   | ALA | X | 314 | 23.894 | 38.477 | 43.411 | 0.00 | 0.00 |
| ATOM | 4732 | HB1  | ALA | X | 314 | 23.916 | 37.476 | 43.842 | 0.00 | 0.00 |
| ATOM | 4733 | HB2  | ALA | X | 314 | 24.671 | 39.056 | 43.910 | 0.00 | 0.00 |
| ATOM | 4734 | HB3  | ALA | X | 314 | 22.907 | 38.899 | 43.597 | 0.00 | 0.00 |
| ATOM | 4735 | C    | ALA | X | 314 | 24.233 | 39.957 | 41.348 | 0.00 | 0.00 |
| ATOM | 4736 | O    | ALA | X | 314 | 23.245 | 40.685 | 41.312 | 0.00 | 0.00 |
| ATOM | 4737 | N    | GLY | X | 315 | 25.330 | 40.464 | 40.800 | 0.00 | 0.00 |
| ATOM | 4738 | H    | GLY | X | 315 | 26.131 | 39.850 | 40.743 | 0.00 | 0.00 |
| ATOM | 4739 | CA   | GLY | X | 315 | 25.462 | 41.904 | 40.488 | 0.00 | 0.00 |
| ATOM | 4740 | HA2  | GLY | X | 315 | 24.918 | 42.501 | 41.147 | 0.00 | 0.00 |
| ATOM | 4741 | HA3  | GLY | X | 315 | 26.528 | 42.095 | 40.614 | 0.00 | 0.00 |
| ATOM | 4742 | C    | GLY | X | 315 | 25.078 | 42.328 | 39.075 | 0.00 | 0.00 |
| ATOM | 4743 | O    | GLY | X | 315 | 24.829 | 41.571 | 38.148 | 0.00 | 0.00 |
| ATOM | 4744 | N    | ASP | X | 316 | 25.102 | 43.571 | 38.926 | 0.00 | 0.00 |
| ATOM | 4745 | H    | ASP | X | 316 | 25.319 | 44.143 | 39.729 | 0.00 | 0.00 |
| ATOM | 4746 | CA   | ASP | X | 316 | 24.748 | 44.415 | 37.761 | 0.00 | 0.00 |
| ATOM | 4747 | HA   | ASP | X | 316 | 24.266 | 43.740 | 37.052 | 0.00 | 0.00 |
| ATOM | 4748 | CB   | ASP | X | 316 | 23.652 | 45.518 | 37.917 | 0.00 | 0.00 |
| ATOM | 4749 | HB2  | ASP | X | 316 | 23.900 | 46.079 | 38.818 | 0.00 | 0.00 |
| ATOM | 4750 | HB3  | ASP | X | 316 | 23.707 | 46.249 | 37.111 | 0.00 | 0.00 |
| ATOM | 4751 | CG   | ASP | X | 316 | 22.287 | 44.946 | 38.008 | 0.00 | 0.00 |
| ATOM | 4752 | OD1  | ASP | X | 316 | 21.991 | 44.642 | 39.177 | 0.00 | 0.00 |
| ATOM | 4753 | OD2  | ASP | X | 316 | 21.492 | 44.816 | 37.044 | 0.00 | 0.00 |
| ATOM | 4754 | C    | ASP | X | 316 | 25.985 | 44.944 | 37.032 | 0.00 | 0.00 |
| ATOM | 4755 | O    | ASP | X | 316 | 26.893 | 45.535 | 37.683 | 0.00 | 0.00 |
| ATOM | 4756 | N    | PHE | X | 317 | 26.135 | 44.730 | 35.731 | 0.00 | 0.00 |
| ATOM | 4757 | H    | PHE | X | 317 | 25.313 | 44.368 | 35.270 | 0.00 | 0.00 |
| ATOM | 4758 | CA   | PHE | X | 317 | 27.369 | 44.963 | 35.021 | 0.00 | 0.00 |
| ATOM | 4759 | HA   | PHE | X | 317 | 27.843 | 45.832 | 35.479 | 0.00 | 0.00 |
| ATOM | 4760 | CB   | PHE | X | 317 | 28.335 | 43.765 | 35.113 | 0.00 | 0.00 |
| ATOM | 4761 | HB2  | PHE | X | 317 | 27.852 | 43.016 | 34.486 | 0.00 | 0.00 |
| ATOM | 4762 | HB3  | PHE | X | 317 | 29.273 | 43.962 | 34.592 | 0.00 | 0.00 |
| ATOM | 4763 | CG   | PHE | X | 317 | 28.721 | 43.238 | 36.514 | 0.00 | 0.00 |
| ATOM | 4764 | CD1  | PHE | X | 317 | 29.860 | 43.725 | 37.080 | 0.00 | 0.00 |



|      |      |      |     |   |     |        |        |        |      |      |
|------|------|------|-----|---|-----|--------|--------|--------|------|------|
| ATOM | 4765 | HD1  | PHE | X | 317 | 30.365 | 44.506 | 36.531 | 0.00 | 0.00 |
| ATOM | 4766 | CE1  | PHE | X | 317 | 30.280 | 43.279 | 38.314 | 0.00 | 0.00 |
| ATOM | 4767 | HE1  | PHE | X | 317 | 31.160 | 43.725 | 38.754 | 0.00 | 0.00 |
| ATOM | 4768 | CZ   | PHE | X | 317 | 29.539 | 42.311 | 39.005 | 0.00 | 0.00 |
| ATOM | 4769 | HZ   | PHE | X | 317 | 29.891 | 42.145 | 40.013 | 0.00 | 0.00 |
| ATOM | 4770 | CE2  | PHE | X | 317 | 28.384 | 41.825 | 38.427 | 0.00 | 0.00 |
| ATOM | 4771 | HE2  | PHE | X | 317 | 27.800 | 41.064 | 38.924 | 0.00 | 0.00 |
| ATOM | 4772 | CD2  | PHE | X | 317 | 28.027 | 42.184 | 37.118 | 0.00 | 0.00 |
| ATOM | 4773 | HD2  | PHE | X | 317 | 27.163 | 41.716 | 36.671 | 0.00 | 0.00 |
| ATOM | 4774 | C    | PHE | X | 317 | 27.084 | 45.437 | 33.601 | 0.00 | 0.00 |
| ATOM | 4775 | O    | PHE | X | 317 | 27.968 | 45.688 | 32.781 | 0.00 | 0.00 |
| ATOM | 4776 | N    | HIE | X | 318 | 25.839 | 45.708 | 33.314 | 0.00 | 0.00 |
| ATOM | 4777 | H    | HIE | X | 318 | 25.130 | 45.599 | 34.025 | 0.00 | 0.00 |
| ATOM | 4778 | CA   | HIE | X | 318 | 25.439 | 46.238 | 31.986 | 0.00 | 0.00 |
| ATOM | 4779 | HA   | HIE | X | 318 | 25.581 | 45.434 | 31.264 | 0.00 | 0.00 |
| ATOM | 4780 | CB   | HIE | X | 318 | 23.877 | 46.506 | 32.091 | 0.00 | 0.00 |
| ATOM | 4781 | HB2  | HIE | X | 318 | 23.323 | 45.603 | 32.348 | 0.00 | 0.00 |
| ATOM | 4782 | HB3  | HIE | X | 318 | 23.795 | 47.280 | 32.854 | 0.00 | 0.00 |
| ATOM | 4783 | CG   | HIE | X | 318 | 23.246 | 47.035 | 30.831 | 0.00 | 0.00 |
| ATOM | 4784 | ND1  | HIE | X | 318 | 23.304 | 48.341 | 30.380 | 0.00 | 0.00 |
| ATOM | 4785 | CE1  | HIE | X | 318 | 22.466 | 48.433 | 29.315 | 0.00 | 0.00 |
| ATOM | 4786 | HE1  | HIE | X | 318 | 22.325 | 49.364 | 28.786 | 0.00 | 0.00 |
| ATOM | 4787 | NE2  | HIE | X | 318 | 22.073 | 47.138 | 28.951 | 0.00 | 0.00 |
| ATOM | 4788 | HE2  | HIE | X | 318 | 21.756 | 46.965 | 28.008 | 0.00 | 0.00 |
| ATOM | 4789 | CD2  | HIE | X | 318 | 22.580 | 46.312 | 29.910 | 0.00 | 0.00 |
| ATOM | 4790 | HD2  | HIE | X | 318 | 22.294 | 45.276 | 29.804 | 0.00 | 0.00 |
| ATOM | 4791 | C    | HIE | X | 318 | 26.118 | 47.558 | 31.552 | 0.00 | 0.00 |
| ATOM | 4792 | O    | HIE | X | 318 | 26.062 | 48.551 | 32.256 | 0.00 | 0.00 |
| ATOM | 4793 | N    | GLY | X | 319 | 26.763 | 47.636 | 30.367 | 0.00 | 0.00 |
| ATOM | 4794 | H    | GLY | X | 319 | 26.853 | 46.749 | 29.893 | 0.00 | 0.00 |
| ATOM | 4795 | CA   | GLY | X | 319 | 27.451 | 48.847 | 29.900 | 0.00 | 0.00 |
| ATOM | 4796 | HA2  | GLY | X | 319 | 27.315 | 49.063 | 28.898 | 0.00 | 0.00 |
| ATOM | 4797 | HA3  | GLY | X | 319 | 26.984 | 49.669 | 30.464 | 0.00 | 0.00 |
| ATOM | 4798 | C    | GLY | X | 319 | 28.942 | 48.749 | 30.145 | 0.00 | 0.00 |
| ATOM | 4799 | O    | GLY | X | 319 | 29.597 | 49.610 | 29.579 | 0.00 | 0.00 |
| ATOM | 4800 | N    | LEU | X | 320 | 29.486 | 47.934 | 30.994 | 0.00 | 0.00 |
| ATOM | 4801 | H    | LEU | X | 320 | 28.867 | 47.381 | 31.570 | 0.00 | 0.00 |
| ATOM | 4802 | CA   | LEU | X | 320 | 30.837 | 48.068 | 31.509 | 0.00 | 0.00 |
| ATOM | 4803 | HA   | LEU | X | 320 | 31.175 | 49.104 | 31.476 | 0.00 | 0.00 |
| ATOM | 4804 | CB   | LEU | X | 320 | 30.884 | 47.462 | 32.936 | 0.00 | 0.00 |
| ATOM | 4805 | HB2  | LEU | X | 320 | 30.234 | 46.587 | 32.902 | 0.00 | 0.00 |
| ATOM | 4806 | HB3  | LEU | X | 320 | 31.896 | 47.127 | 33.163 | 0.00 | 0.00 |
| ATOM | 4807 | CG   | LEU | X | 320 | 30.537 | 48.400 | 34.146 | 0.00 | 0.00 |
| ATOM | 4808 | HG   | LEU | X | 320 | 31.147 | 49.297 | 34.042 | 0.00 | 0.00 |
| ATOM | 4809 | CD1  | LEU | X | 320 | 29.080 | 48.800 | 34.244 | 0.00 | 0.00 |
| ATOM | 4810 | HD11 | LEU | X | 320 | 28.712 | 49.421 | 33.427 | 0.00 | 0.00 |
| ATOM | 4811 | HD12 | LEU | X | 320 | 28.374 | 47.969 | 34.228 | 0.00 | 0.00 |
| ATOM | 4812 | HD13 | LEU | X | 320 | 28.819 | 49.346 | 35.151 | 0.00 | 0.00 |
| ATOM | 4813 | CD2  | LEU | X | 320 | 30.900 | 47.756 | 35.571 | 0.00 | 0.00 |
| ATOM | 4814 | HD21 | LEU | X | 320 | 30.743 | 48.538 | 36.313 | 0.00 | 0.00 |
| ATOM | 4815 | HD22 | LEU | X | 320 | 30.083 | 47.054 | 35.738 | 0.00 | 0.00 |
| ATOM | 4816 | HD23 | LEU | X | 320 | 31.895 | 47.311 | 35.538 | 0.00 | 0.00 |
| ATOM | 4817 | C    | LEU | X | 320 | 31.830 | 47.299 | 30.591 | 0.00 | 0.00 |
| ATOM | 4818 | O    | LEU | X | 320 | 31.507 | 46.340 | 29.889 | 0.00 | 0.00 |
| ATOM | 4819 | N    | GLN | X | 321 | 33.043 | 47.793 | 30.495 | 0.00 | 0.00 |
| ATOM | 4820 | H    | GLN | X | 321 | 33.222 | 48.612 | 31.058 | 0.00 | 0.00 |
| ATOM | 4821 | CA   | GLN | X | 321 | 34.241 | 47.070 | 29.884 | 0.00 | 0.00 |
| ATOM | 4822 | HA   | GLN | X | 321 | 33.931 | 46.238 | 29.253 | 0.00 | 0.00 |
| ATOM | 4823 | CB   | GLN | X | 321 | 35.012 | 48.033 | 28.979 | 0.00 | 0.00 |
| ATOM | 4824 | HB2  | GLN | X | 321 | 35.467 | 48.779 | 29.630 | 0.00 | 0.00 |
| ATOM | 4825 | HB3  | GLN | X | 321 | 35.734 | 47.364 | 28.509 | 0.00 | 0.00 |
| ATOM | 4826 | CG   | GLN | X | 321 | 34.125 | 48.644 | 27.834 | 0.00 | 0.00 |
| ATOM | 4827 | HG2  | GLN | X | 321 | 34.630 | 48.565 | 26.871 | 0.00 | 0.00 |
| ATOM | 4828 | HG3  | GLN | X | 321 | 33.207 | 48.056 | 27.827 | 0.00 | 0.00 |
| ATOM | 4829 | CD   | GLN | X | 321 | 33.703 | 50.084 | 28.009 | 0.00 | 0.00 |
| ATOM | 4830 | OE1  | GLN | X | 321 | 34.456 | 50.983 | 28.439 | 0.00 | 0.00 |
| ATOM | 4831 | NE2  | GLN | X | 321 | 32.573 | 50.486 | 27.561 | 0.00 | 0.00 |
| ATOM | 4832 | HE21 | GLN | X | 321 | 32.438 | 51.487 | 27.536 | 0.00 | 0.00 |
| ATOM | 4833 | HE22 | GLN | X | 321 | 31.928 | 49.805 | 27.186 | 0.00 | 0.00 |
| ATOM | 4834 | C    | GLN | X | 321 | 35.191 | 46.493 | 30.947 | 0.00 | 0.00 |

|      |      |      |     |   |     |        |        |        |      |      |
|------|------|------|-----|---|-----|--------|--------|--------|------|------|
| ATOM | 4835 | O    | GLN | X | 321 | 35.574 | 47.199 | 31.895 | 0.00 | 0.00 |
| ATOM | 4836 | N    | VAL | X | 322 | 35.602 | 45.219 | 30.897 | 0.00 | 0.00 |
| ATOM | 4837 | H    | VAL | X | 322 | 35.142 | 44.619 | 30.228 | 0.00 | 0.00 |
| ATOM | 4838 | CA   | VAL | X | 322 | 36.590 | 44.653 | 31.757 | 0.00 | 0.00 |
| ATOM | 4839 | HA   | VAL | X | 322 | 37.235 | 45.478 | 32.061 | 0.00 | 0.00 |
| ATOM | 4840 | CB   | VAL | X | 322 | 36.054 | 43.775 | 32.942 | 0.00 | 0.00 |
| ATOM | 4841 | HB   | VAL | X | 322 | 35.573 | 42.839 | 32.660 | 0.00 | 0.00 |
| ATOM | 4842 | CG1  | VAL | X | 322 | 37.165 | 43.377 | 33.894 | 0.00 | 0.00 |
| ATOM | 4843 | HG11 | VAL | X | 322 | 37.548 | 44.288 | 34.352 | 0.00 | 0.00 |
| ATOM | 4844 | HG12 | VAL | X | 322 | 36.817 | 42.621 | 34.597 | 0.00 | 0.00 |
| ATOM | 4845 | HG13 | VAL | X | 322 | 37.972 | 42.834 | 33.400 | 0.00 | 0.00 |
| ATOM | 4846 | CG2  | VAL | X | 322 | 35.089 | 44.586 | 33.774 | 0.00 | 0.00 |
| ATOM | 4847 | HG21 | VAL | X | 322 | 34.605 | 43.943 | 34.509 | 0.00 | 0.00 |
| ATOM | 4848 | HG22 | VAL | X | 322 | 35.544 | 45.449 | 34.261 | 0.00 | 0.00 |
| ATOM | 4849 | HG23 | VAL | X | 322 | 34.213 | 44.835 | 33.176 | 0.00 | 0.00 |
| ATOM | 4850 | C    | VAL | X | 322 | 37.575 | 43.813 | 30.941 | 0.00 | 0.00 |
| ATOM | 4851 | O    | VAL | X | 322 | 37.230 | 42.962 | 30.108 | 0.00 | 0.00 |
| ATOM | 4852 | N    | LEU | X | 323 | 38.876 | 44.077 | 31.175 | 0.00 | 0.00 |
| ATOM | 4853 | H    | LEU | X | 323 | 39.142 | 44.861 | 31.752 | 0.00 | 0.00 |
| ATOM | 4854 | CA   | LEU | X | 323 | 39.988 | 43.237 | 30.616 | 0.00 | 0.00 |
| ATOM | 4855 | HA   | LEU | X | 323 | 39.662 | 42.581 | 29.809 | 0.00 | 0.00 |
| ATOM | 4856 | CB   | LEU | X | 323 | 41.088 | 44.161 | 30.106 | 0.00 | 0.00 |
| ATOM | 4857 | HB2  | LEU | X | 323 | 40.633 | 44.864 | 29.408 | 0.00 | 0.00 |
| ATOM | 4858 | HB3  | LEU | X | 323 | 41.514 | 44.709 | 30.946 | 0.00 | 0.00 |
| ATOM | 4859 | CG   | LEU | X | 323 | 42.250 | 43.803 | 29.203 | 0.00 | 0.00 |
| ATOM | 4860 | HG   | LEU | X | 323 | 41.754 | 43.423 | 28.311 | 0.00 | 0.00 |
| ATOM | 4861 | CD1  | LEU | X | 323 | 43.034 | 45.094 | 28.898 | 0.00 | 0.00 |
| ATOM | 4862 | HD11 | LEU | X | 323 | 43.869 | 44.849 | 28.242 | 0.00 | 0.00 |
| ATOM | 4863 | HD12 | LEU | X | 323 | 42.353 | 45.799 | 28.420 | 0.00 | 0.00 |
| ATOM | 4864 | HD13 | LEU | X | 323 | 43.483 | 45.503 | 29.803 | 0.00 | 0.00 |
| ATOM | 4865 | CD2  | LEU | X | 323 | 43.046 | 42.611 | 29.876 | 0.00 | 0.00 |
| ATOM | 4866 | HD21 | LEU | X | 323 | 43.216 | 42.789 | 30.938 | 0.00 | 0.00 |
| ATOM | 4867 | HD22 | LEU | X | 323 | 42.590 | 41.664 | 29.587 | 0.00 | 0.00 |
| ATOM | 4868 | HD23 | LEU | X | 323 | 44.026 | 42.561 | 29.401 | 0.00 | 0.00 |
| ATOM | 4869 | C    | LEU | X | 323 | 40.461 | 42.299 | 31.744 | 0.00 | 0.00 |
| ATOM | 4870 | O    | LEU | X | 323 | 40.501 | 42.742 | 32.884 | 0.00 | 0.00 |
| ATOM | 4871 | N    | VAL | X | 324 | 40.692 | 41.017 | 31.405 | 0.00 | 0.00 |
| ATOM | 4872 | H    | VAL | X | 324 | 40.559 | 40.720 | 30.449 | 0.00 | 0.00 |
| ATOM | 4873 | CA   | VAL | X | 324 | 41.063 | 39.952 | 32.393 | 0.00 | 0.00 |
| ATOM | 4874 | HA   | VAL | X | 324 | 41.479 | 40.431 | 33.279 | 0.00 | 0.00 |
| ATOM | 4875 | CB   | VAL | X | 324 | 39.905 | 39.044 | 32.910 | 0.00 | 0.00 |
| ATOM | 4876 | HB   | VAL | X | 324 | 40.351 | 38.452 | 33.709 | 0.00 | 0.00 |
| ATOM | 4877 | CG1  | VAL | X | 324 | 38.736 | 39.841 | 33.602 | 0.00 | 0.00 |
| ATOM | 4878 | HG11 | VAL | X | 324 | 39.001 | 40.235 | 34.583 | 0.00 | 0.00 |
| ATOM | 4879 | HG12 | VAL | X | 324 | 38.519 | 40.701 | 32.969 | 0.00 | 0.00 |
| ATOM | 4880 | HG13 | VAL | X | 324 | 37.854 | 39.263 | 33.878 | 0.00 | 0.00 |
| ATOM | 4881 | CG2  | VAL | X | 324 | 39.390 | 38.116 | 31.753 | 0.00 | 0.00 |
| ATOM | 4882 | HG21 | VAL | X | 324 | 40.144 | 37.335 | 31.656 | 0.00 | 0.00 |
| ATOM | 4883 | HG22 | VAL | X | 324 | 38.480 | 37.597 | 32.055 | 0.00 | 0.00 |
| ATOM | 4884 | HG23 | VAL | X | 324 | 39.280 | 38.626 | 30.797 | 0.00 | 0.00 |
| ATOM | 4885 | C    | VAL | X | 324 | 42.191 | 39.095 | 31.792 | 0.00 | 0.00 |
| ATOM | 4886 | O    | VAL | X | 324 | 42.362 | 39.001 | 30.635 | 0.00 | 0.00 |
| ATOM | 4887 | N    | GLY | X | 325 | 43.080 | 38.468 | 32.658 | 0.00 | 0.00 |
| ATOM | 4888 | H    | GLY | X | 325 | 43.061 | 38.779 | 33.619 | 0.00 | 0.00 |
| ATOM | 4889 | CA   | GLY | X | 325 | 44.043 | 37.537 | 32.133 | 0.00 | 0.00 |
| ATOM | 4890 | HA2  | GLY | X | 325 | 43.607 | 36.604 | 31.770 | 0.00 | 0.00 |
| ATOM | 4891 | HA3  | GLY | X | 325 | 44.479 | 37.890 | 31.209 | 0.00 | 0.00 |
| ATOM | 4892 | C    | GLY | X | 325 | 45.154 | 37.046 | 33.046 | 0.00 | 0.00 |
| ATOM | 4893 | O    | GLY | X | 325 | 45.193 | 37.374 | 34.264 | 0.00 | 0.00 |
| ATOM | 4894 | N    | VAL | X | 326 | 46.032 | 36.252 | 32.498 | 0.00 | 0.00 |
| ATOM | 4895 | H    | VAL | X | 326 | 45.939 | 36.201 | 31.493 | 0.00 | 0.00 |
| ATOM | 4896 | CA   | VAL | X | 326 | 47.043 | 35.443 | 33.181 | 0.00 | 0.00 |
| ATOM | 4897 | HA   | VAL | X | 326 | 47.338 | 35.963 | 34.092 | 0.00 | 0.00 |
| ATOM | 4898 | CB   | VAL | X | 326 | 46.502 | 34.006 | 33.558 | 0.00 | 0.00 |
| ATOM | 4899 | HB   | VAL | X | 326 | 47.307 | 33.476 | 34.069 | 0.00 | 0.00 |
| ATOM | 4900 | CG1  | VAL | X | 326 | 45.147 | 33.940 | 34.325 | 0.00 | 0.00 |
| ATOM | 4901 | HG11 | VAL | X | 326 | 45.130 | 34.642 | 35.158 | 0.00 | 0.00 |
| ATOM | 4902 | HG12 | VAL | X | 326 | 44.278 | 34.033 | 33.673 | 0.00 | 0.00 |
| ATOM | 4903 | HG13 | VAL | X | 326 | 45.073 | 32.934 | 34.739 | 0.00 | 0.00 |
| ATOM | 4904 | CG2  | VAL | X | 326 | 46.296 | 33.235 | 32.279 | 0.00 | 0.00 |

|      |      |      |     |   |     |        |        |        |      |      |
|------|------|------|-----|---|-----|--------|--------|--------|------|------|
| ATOM | 4905 | HG21 | VAL | X | 326 | 45.822 | 32.290 | 32.546 | 0.00 | 0.00 |
| ATOM | 4906 | HG22 | VAL | X | 326 | 45.674 | 33.789 | 31.576 | 0.00 | 0.00 |
| ATOM | 4907 | HG23 | VAL | X | 326 | 47.252 | 33.033 | 31.795 | 0.00 | 0.00 |
| ATOM | 4908 | C    | VAL | X | 326 | 48.343 | 35.377 | 32.351 | 0.00 | 0.00 |
| ATOM | 4909 | O    | VAL | X | 326 | 48.362 | 35.636 | 31.144 | 0.00 | 0.00 |
| ATOM | 4910 | N    | VAL | X | 327 | 49.390 | 34.830 | 32.987 | 0.00 | 0.00 |
| ATOM | 4911 | H    | VAL | X | 327 | 49.262 | 34.821 | 33.989 | 0.00 | 0.00 |
| ATOM | 4912 | CA   | VAL | X | 327 | 50.632 | 34.228 | 32.396 | 0.00 | 0.00 |
| ATOM | 4913 | HA   | VAL | X | 327 | 50.805 | 34.661 | 31.411 | 0.00 | 0.00 |
| ATOM | 4914 | CB   | VAL | X | 327 | 51.924 | 34.585 | 33.136 | 0.00 | 0.00 |
| ATOM | 4915 | HB   | VAL | X | 327 | 52.671 | 34.139 | 32.480 | 0.00 | 0.00 |
| ATOM | 4916 | CG1  | VAL | X | 327 | 52.287 | 36.092 | 33.233 | 0.00 | 0.00 |
| ATOM | 4917 | HG11 | VAL | X | 327 | 51.742 | 36.620 | 34.015 | 0.00 | 0.00 |
| ATOM | 4918 | HG12 | VAL | X | 327 | 53.363 | 36.209 | 33.357 | 0.00 | 0.00 |
| ATOM | 4919 | HG13 | VAL | X | 327 | 52.059 | 36.650 | 32.325 | 0.00 | 0.00 |
| ATOM | 4920 | CG2  | VAL | X | 327 | 51.977 | 34.012 | 34.567 | 0.00 | 0.00 |
| ATOM | 4921 | HG21 | VAL | X | 327 | 52.958 | 33.969 | 35.040 | 0.00 | 0.00 |
| ATOM | 4922 | HG22 | VAL | X | 327 | 51.322 | 34.624 | 35.187 | 0.00 | 0.00 |
| ATOM | 4923 | HG23 | VAL | X | 327 | 51.707 | 32.956 | 34.603 | 0.00 | 0.00 |
| ATOM | 4924 | C    | VAL | X | 327 | 50.442 | 32.749 | 32.106 | 0.00 | 0.00 |
| ATOM | 4925 | O    | VAL | X | 327 | 49.430 | 32.192 | 32.636 | 0.00 | 0.00 |
| ATOM | 4926 | N    | LYS | X | 328 | 51.315 | 32.111 | 31.313 | 0.00 | 0.00 |
| ATOM | 4927 | H    | LYS | X | 328 | 52.047 | 32.698 | 30.940 | 0.00 | 0.00 |
| ATOM | 4928 | CA   | LYS | X | 328 | 51.094 | 30.707 | 30.886 | 0.00 | 0.00 |
| ATOM | 4929 | HA   | LYS | X | 328 | 50.121 | 30.585 | 30.410 | 0.00 | 0.00 |
| ATOM | 4930 | CB   | LYS | X | 328 | 52.225 | 30.294 | 29.922 | 0.00 | 0.00 |
| ATOM | 4931 | HB2  | LYS | X | 328 | 52.205 | 31.102 | 29.191 | 0.00 | 0.00 |
| ATOM | 4932 | HB3  | LYS | X | 328 | 53.209 | 30.320 | 30.390 | 0.00 | 0.00 |
| ATOM | 4933 | CG   | LYS | X | 328 | 51.996 | 28.846 | 29.368 | 0.00 | 0.00 |
| ATOM | 4934 | HG2  | LYS | X | 328 | 51.983 | 28.114 | 30.176 | 0.00 | 0.00 |
| ATOM | 4935 | HG3  | LYS | X | 328 | 50.974 | 28.731 | 29.008 | 0.00 | 0.00 |
| ATOM | 4936 | CD   | LYS | X | 328 | 52.905 | 28.296 | 28.250 | 0.00 | 0.00 |
| ATOM | 4937 | HD2  | LYS | X | 328 | 52.382 | 27.382 | 27.970 | 0.00 | 0.00 |
| ATOM | 4938 | HD3  | LYS | X | 328 | 52.979 | 29.002 | 27.423 | 0.00 | 0.00 |
| ATOM | 4939 | CE   | LYS | X | 328 | 54.385 | 28.075 | 28.565 | 0.00 | 0.00 |
| ATOM | 4940 | HE2  | LYS | X | 328 | 54.855 | 27.509 | 27.761 | 0.00 | 0.00 |
| ATOM | 4941 | HE3  | LYS | X | 328 | 54.849 | 29.057 | 28.655 | 0.00 | 0.00 |
| ATOM | 4942 | NZ   | LYS | X | 328 | 54.618 | 27.309 | 29.808 | 0.00 | 0.00 |
| ATOM | 4943 | HZ1  | LYS | X | 328 | 54.308 | 27.759 | 30.657 | 0.00 | 0.00 |
| ATOM | 4944 | HZ2  | LYS | X | 328 | 54.187 | 26.397 | 29.774 | 0.00 | 0.00 |
| ATOM | 4945 | HZ3  | LYS | X | 328 | 55.605 | 27.096 | 29.784 | 0.00 | 0.00 |
| ATOM | 4946 | C    | LYS | X | 328 | 51.000 | 29.765 | 32.080 | 0.00 | 0.00 |
| ATOM | 4947 | O    | LYS | X | 328 | 50.032 | 28.986 | 32.197 | 0.00 | 0.00 |
| ATOM | 4948 | N    | ASP | X | 329 | 51.976 | 29.727 | 32.983 | 0.00 | 0.00 |
| ATOM | 4949 | H    | ASP | X | 329 | 52.789 | 30.326 | 32.985 | 0.00 | 0.00 |
| ATOM | 4950 | CA   | ASP | X | 329 | 51.979 | 28.702 | 34.045 | 0.00 | 0.00 |
| ATOM | 4951 | HA   | ASP | X | 329 | 51.457 | 27.790 | 33.757 | 0.00 | 0.00 |
| ATOM | 4952 | CB   | ASP | X | 329 | 53.400 | 28.251 | 34.293 | 0.00 | 0.00 |
| ATOM | 4953 | HB2  | ASP | X | 329 | 53.954 | 29.126 | 34.633 | 0.00 | 0.00 |
| ATOM | 4954 | HB3  | ASP | X | 329 | 53.403 | 27.459 | 35.042 | 0.00 | 0.00 |
| ATOM | 4955 | CG   | ASP | X | 329 | 54.061 | 27.756 | 32.981 | 0.00 | 0.00 |
| ATOM | 4956 | OD1  | ASP | X | 329 | 53.828 | 26.546 | 32.677 | 0.00 | 0.00 |
| ATOM | 4957 | OD2  | ASP | X | 329 | 54.554 | 28.575 | 32.193 | 0.00 | 0.00 |
| ATOM | 4958 | C    | ASP | X | 329 | 51.373 | 29.214 | 35.386 | 0.00 | 0.00 |
| ATOM | 4959 | O    | ASP | X | 329 | 50.716 | 28.461 | 36.100 | 0.00 | 0.00 |
| ATOM | 4960 | N    | GLU | X | 330 | 51.679 | 30.429 | 35.796 | 0.00 | 0.00 |
| ATOM | 4961 | H    | GLU | X | 330 | 52.278 | 30.928 | 35.154 | 0.00 | 0.00 |
| ATOM | 4962 | CA   | GLU | X | 330 | 51.151 | 31.058 | 37.060 | 0.00 | 0.00 |
| ATOM | 4963 | HA   | GLU | X | 330 | 51.482 | 32.095 | 36.993 | 0.00 | 0.00 |
| ATOM | 4964 | CB   | GLU | X | 330 | 49.594 | 31.065 | 37.126 | 0.00 | 0.00 |
| ATOM | 4965 | HB2  | GLU | X | 330 | 49.217 | 30.045 | 37.060 | 0.00 | 0.00 |
| ATOM | 4966 | HB3  | GLU | X | 330 | 49.291 | 31.375 | 38.126 | 0.00 | 0.00 |
| ATOM | 4967 | CG   | GLU | X | 330 | 48.976 | 32.033 | 36.105 | 0.00 | 0.00 |
| ATOM | 4968 | HG2  | GLU | X | 330 | 49.331 | 31.950 | 35.078 | 0.00 | 0.00 |
| ATOM | 4969 | HG3  | GLU | X | 330 | 47.949 | 31.690 | 35.982 | 0.00 | 0.00 |
| ATOM | 4970 | CD   | GLU | X | 330 | 49.114 | 33.562 | 36.577 | 0.00 | 0.00 |
| ATOM | 4971 | OE1  | GLU | X | 330 | 49.680 | 33.879 | 37.643 | 0.00 | 0.00 |
| ATOM | 4972 | OE2  | GLU | X | 330 | 48.506 | 34.366 | 35.887 | 0.00 | 0.00 |
| ATOM | 4973 | C    | GLU | X | 330 | 51.819 | 30.411 | 38.351 | 0.00 | 0.00 |
| ATOM | 4974 | O    | GLU | X | 330 | 52.985 | 30.596 | 38.741 | 0.00 | 0.00 |

|      |      |      |     |   |     |        |        |        |      |      |
|------|------|------|-----|---|-----|--------|--------|--------|------|------|
| ATOM | 4975 | N    | GLY | X | 331 | 50.948 | 29.563 | 39.017 | 0.00 | 0.00 |
| ATOM | 4976 | H    | GLY | X | 331 | 50.045 | 29.538 | 38.564 | 0.00 | 0.00 |
| ATOM | 4977 | CA   | GLY | X | 331 | 51.148 | 29.133 | 40.354 | 0.00 | 0.00 |
| ATOM | 4978 | HA2  | GLY | X | 331 | 51.039 | 29.995 | 40.904 | 0.00 | 0.00 |
| ATOM | 4979 | HA3  | GLY | X | 331 | 50.297 | 28.497 | 40.573 | 0.00 | 0.00 |
| ATOM | 4980 | C    | GLY | X | 331 | 52.414 | 28.318 | 40.685 | 0.00 | 0.00 |
| ATOM | 4981 | O    | GLY | X | 331 | 52.574 | 28.034 | 41.878 | 0.00 | 0.00 |
| ATOM | 4982 | N    | SER | X | 332 | 53.227 | 28.018 | 39.696 | 0.00 | 0.00 |
| ATOM | 4983 | H    | SER | X | 332 | 53.021 | 28.330 | 38.758 | 0.00 | 0.00 |
| ATOM | 4984 | CA   | SER | X | 332 | 54.562 | 27.476 | 39.905 | 0.00 | 0.00 |
| ATOM | 4985 | HA   | SER | X | 332 | 54.533 | 26.497 | 40.384 | 0.00 | 0.00 |
| ATOM | 4986 | CB   | SER | X | 332 | 55.317 | 27.255 | 38.563 | 0.00 | 0.00 |
| ATOM | 4987 | HB2  | SER | X | 332 | 55.050 | 28.033 | 37.847 | 0.00 | 0.00 |
| ATOM | 4988 | HB3  | SER | X | 332 | 56.374 | 27.427 | 38.764 | 0.00 | 0.00 |
| ATOM | 4989 | OG   | SER | X | 332 | 55.068 | 25.961 | 38.019 | 0.00 | 0.00 |
| ATOM | 4990 | HG   | SER | X | 332 | 54.254 | 25.992 | 37.512 | 0.00 | 0.00 |
| ATOM | 4991 | C    | SER | X | 332 | 55.475 | 28.457 | 40.719 | 0.00 | 0.00 |
| ATOM | 4992 | O    | SER | X | 332 | 56.387 | 28.072 | 41.410 | 0.00 | 0.00 |
| ATOM | 4993 | N    | TYR | X | 333 | 55.240 | 29.735 | 40.482 | 0.00 | 0.00 |
| ATOM | 4994 | H    | TYR | X | 333 | 54.512 | 29.980 | 39.828 | 0.00 | 0.00 |
| ATOM | 4995 | CA   | TYR | X | 333 | 55.757 | 30.837 | 41.307 | 0.00 | 0.00 |
| ATOM | 4996 | HA   | TYR | X | 333 | 56.794 | 30.997 | 41.012 | 0.00 | 0.00 |
| ATOM | 4997 | CB   | TYR | X | 333 | 54.929 | 32.100 | 41.062 | 0.00 | 0.00 |
| ATOM | 4998 | HB2  | TYR | X | 333 | 54.939 | 32.246 | 39.982 | 0.00 | 0.00 |
| ATOM | 4999 | HB3  | TYR | X | 333 | 53.896 | 32.081 | 41.410 | 0.00 | 0.00 |
| ATOM | 5000 | CG   | TYR | X | 333 | 55.569 | 33.290 | 41.700 | 0.00 | 0.00 |
| ATOM | 5001 | CD1  | TYR | X | 333 | 56.371 | 34.140 | 40.968 | 0.00 | 0.00 |
| ATOM | 5002 | HD1  | TYR | X | 333 | 56.684 | 33.933 | 39.955 | 0.00 | 0.00 |
| ATOM | 5003 | CE1  | TYR | X | 333 | 56.851 | 35.356 | 41.530 | 0.00 | 0.00 |
| ATOM | 5004 | HE1  | TYR | X | 333 | 57.539 | 35.962 | 40.959 | 0.00 | 0.00 |
| ATOM | 5005 | CZ   | TYR | X | 333 | 56.639 | 35.657 | 42.906 | 0.00 | 0.00 |
| ATOM | 5006 | OH   | TYR | X | 333 | 57.149 | 36.829 | 43.432 | 0.00 | 0.00 |
| ATOM | 5007 | HH   | TYR | X | 333 | 57.632 | 37.340 | 42.778 | 0.00 | 0.00 |
| ATOM | 5008 | CE2  | TYR | X | 333 | 55.794 | 34.816 | 43.646 | 0.00 | 0.00 |
| ATOM | 5009 | HE2  | TYR | X | 333 | 55.647 | 34.919 | 44.711 | 0.00 | 0.00 |
| ATOM | 5010 | CD2  | TYR | X | 333 | 55.254 | 33.656 | 43.036 | 0.00 | 0.00 |
| ATOM | 5011 | HD2  | TYR | X | 333 | 54.671 | 32.980 | 43.645 | 0.00 | 0.00 |
| ATOM | 5012 | C    | TYR | X | 333 | 55.734 | 30.437 | 42.808 | 0.00 | 0.00 |
| ATOM | 5013 | O    | TYR | X | 333 | 56.750 | 30.321 | 43.560 | 0.00 | 0.00 |
| ATOM | 5014 | N    | PHE | X | 334 | 54.562 | 30.328 | 43.459 | 0.00 | 0.00 |
| ATOM | 5015 | H    | PHE | X | 334 | 53.749 | 30.601 | 42.925 | 0.00 | 0.00 |
| ATOM | 5016 | CA   | PHE | X | 334 | 54.371 | 30.103 | 44.883 | 0.00 | 0.00 |
| ATOM | 5017 | HA   | PHE | X | 334 | 55.053 | 30.729 | 45.459 | 0.00 | 0.00 |
| ATOM | 5018 | CB   | PHE | X | 334 | 52.971 | 30.520 | 45.367 | 0.00 | 0.00 |
| ATOM | 5019 | HB2  | PHE | X | 334 | 52.273 | 30.051 | 44.674 | 0.00 | 0.00 |
| ATOM | 5020 | HB3  | PHE | X | 334 | 52.872 | 30.060 | 46.350 | 0.00 | 0.00 |
| ATOM | 5021 | CG   | PHE | X | 334 | 52.773 | 32.018 | 45.309 | 0.00 | 0.00 |
| ATOM | 5022 | CD1  | PHE | X | 334 | 51.944 | 32.616 | 44.387 | 0.00 | 0.00 |
| ATOM | 5023 | HD1  | PHE | X | 334 | 51.326 | 32.021 | 43.730 | 0.00 | 0.00 |
| ATOM | 5024 | CE1  | PHE | X | 334 | 51.765 | 34.040 | 44.316 | 0.00 | 0.00 |
| ATOM | 5025 | HE1  | PHE | X | 334 | 51.029 | 34.352 | 43.589 | 0.00 | 0.00 |
| ATOM | 5026 | CZ   | PHE | X | 334 | 52.507 | 34.862 | 45.161 | 0.00 | 0.00 |
| ATOM | 5027 | HZ   | PHE | X | 334 | 52.432 | 35.939 | 45.153 | 0.00 | 0.00 |
| ATOM | 5028 | CE2  | PHE | X | 334 | 53.389 | 34.268 | 46.019 | 0.00 | 0.00 |
| ATOM | 5029 | HE2  | PHE | X | 334 | 54.030 | 34.955 | 46.551 | 0.00 | 0.00 |
| ATOM | 5030 | CD2  | PHE | X | 334 | 53.521 | 32.878 | 46.157 | 0.00 | 0.00 |
| ATOM | 5031 | HD2  | PHE | X | 334 | 54.268 | 32.453 | 46.810 | 0.00 | 0.00 |
| ATOM | 5032 | C    | PHE | X | 334 | 54.812 | 28.684 | 45.337 | 0.00 | 0.00 |
| ATOM | 5033 | O    | PHE | X | 334 | 54.958 | 28.427 | 46.495 | 0.00 | 0.00 |
| ATOM | 5034 | N    | LEU | X | 335 | 55.266 | 27.853 | 44.394 | 0.00 | 0.00 |
| ATOM | 5035 | H    | LEU | X | 335 | 55.111 | 28.169 | 43.447 | 0.00 | 0.00 |
| ATOM | 5036 | CA   | LEU | X | 335 | 55.929 | 26.568 | 44.631 | 0.00 | 0.00 |
| ATOM | 5037 | HA   | LEU | X | 335 | 55.348 | 26.031 | 45.380 | 0.00 | 0.00 |
| ATOM | 5038 | CB   | LEU | X | 335 | 55.985 | 25.561 | 43.482 | 0.00 | 0.00 |
| ATOM | 5039 | HB2  | LEU | X | 335 | 56.447 | 25.987 | 42.591 | 0.00 | 0.00 |
| ATOM | 5040 | HB3  | LEU | X | 335 | 56.531 | 24.684 | 43.829 | 0.00 | 0.00 |
| ATOM | 5041 | CG   | LEU | X | 335 | 54.587 | 24.949 | 43.033 | 0.00 | 0.00 |
| ATOM | 5042 | HG   | LEU | X | 335 | 54.030 | 25.783 | 42.607 | 0.00 | 0.00 |
| ATOM | 5043 | CD1  | LEU | X | 335 | 54.780 | 23.993 | 41.848 | 0.00 | 0.00 |
| ATOM | 5044 | HD11 | LEU | X | 335 | 53.787 | 23.760 | 41.466 | 0.00 | 0.00 |

|      |      |      |     |   |     |        |        |        |      |      |
|------|------|------|-----|---|-----|--------|--------|--------|------|------|
| ATOM | 5045 | HD12 | LEU | X | 335 | 55.302 | 24.579 | 41.091 | 0.00 | 0.00 |
| ATOM | 5046 | HD13 | LEU | X | 335 | 55.335 | 23.097 | 42.128 | 0.00 | 0.00 |
| ATOM | 5047 | CD2  | LEU | X | 335 | 53.850 | 24.222 | 44.169 | 0.00 | 0.00 |
| ATOM | 5048 | HD21 | LEU | X | 335 | 52.872 | 23.901 | 43.809 | 0.00 | 0.00 |
| ATOM | 5049 | HD22 | LEU | X | 335 | 54.510 | 23.441 | 44.548 | 0.00 | 0.00 |
| ATOM | 5050 | HD23 | LEU | X | 335 | 53.597 | 24.861 | 45.015 | 0.00 | 0.00 |
| ATOM | 5051 | C    | LEU | X | 335 | 57.353 | 26.796 | 45.216 | 0.00 | 0.00 |
| ATOM | 5052 | O    | LEU | X | 335 | 57.644 | 26.447 | 46.350 | 0.00 | 0.00 |
| ATOM | 5053 | N    | VAL | X | 336 | 58.154 | 27.580 | 44.457 | 0.00 | 0.00 |
| ATOM | 5054 | H    | VAL | X | 336 | 57.701 | 27.990 | 43.653 | 0.00 | 0.00 |
| ATOM | 5055 | CA   | VAL | X | 336 | 59.599 | 27.936 | 44.779 | 0.00 | 0.00 |
| ATOM | 5056 | HA   | VAL | X | 336 | 60.089 | 27.016 | 45.098 | 0.00 | 0.00 |
| ATOM | 5057 | CB   | VAL | X | 336 | 60.345 | 28.534 | 43.588 | 0.00 | 0.00 |
| ATOM | 5058 | HB   | VAL | X | 336 | 61.325 | 28.876 | 43.922 | 0.00 | 0.00 |
| ATOM | 5059 | CG1  | VAL | X | 336 | 60.398 | 27.380 | 42.556 | 0.00 | 0.00 |
| ATOM | 5060 | HG11 | VAL | X | 336 | 61.127 | 27.514 | 41.757 | 0.00 | 0.00 |
| ATOM | 5061 | HG12 | VAL | X | 336 | 60.750 | 26.450 | 43.002 | 0.00 | 0.00 |
| ATOM | 5062 | HG13 | VAL | X | 336 | 59.408 | 27.163 | 42.156 | 0.00 | 0.00 |
| ATOM | 5063 | CG2  | VAL | X | 336 | 59.783 | 29.737 | 42.868 | 0.00 | 0.00 |
| ATOM | 5064 | HG21 | VAL | X | 336 | 59.797 | 30.460 | 43.684 | 0.00 | 0.00 |
| ATOM | 5065 | HG22 | VAL | X | 336 | 60.470 | 30.168 | 42.139 | 0.00 | 0.00 |
| ATOM | 5066 | HG23 | VAL | X | 336 | 58.784 | 29.520 | 42.489 | 0.00 | 0.00 |
| ATOM | 5067 | C    | VAL | X | 336 | 59.740 | 28.846 | 46.069 | 0.00 | 0.00 |
| ATOM | 5068 | O    | VAL | X | 336 | 60.833 | 28.980 | 46.573 | 0.00 | 0.00 |
| ATOM | 5069 | N    | TYR | X | 337 | 58.692 | 29.364 | 46.593 | 0.00 | 0.00 |
| ATOM | 5070 | H    | TYR | X | 337 | 57.867 | 29.235 | 46.025 | 0.00 | 0.00 |
| ATOM | 5071 | CA   | TYR | X | 337 | 58.553 | 30.222 | 47.809 | 0.00 | 0.00 |
| ATOM | 5072 | HA   | TYR | X | 337 | 59.339 | 30.975 | 47.875 | 0.00 | 0.00 |
| ATOM | 5073 | CB   | TYR | X | 337 | 57.113 | 30.960 | 47.725 | 0.00 | 0.00 |
| ATOM | 5074 | HB2  | TYR | X | 337 | 56.501 | 30.535 | 46.930 | 0.00 | 0.00 |
| ATOM | 5075 | HB3  | TYR | X | 337 | 56.503 | 30.940 | 48.629 | 0.00 | 0.00 |
| ATOM | 5076 | CG   | TYR | X | 337 | 57.300 | 32.436 | 47.319 | 0.00 | 0.00 |
| ATOM | 5077 | CD1  | TYR | X | 337 | 57.949 | 32.743 | 46.134 | 0.00 | 0.00 |
| ATOM | 5078 | HD1  | TYR | X | 337 | 58.297 | 31.970 | 45.464 | 0.00 | 0.00 |
| ATOM | 5079 | CE1  | TYR | X | 337 | 58.131 | 34.072 | 45.718 | 0.00 | 0.00 |
| ATOM | 5080 | HE1  | TYR | X | 337 | 58.579 | 34.270 | 44.755 | 0.00 | 0.00 |
| ATOM | 5081 | CZ   | TYR | X | 337 | 57.615 | 35.079 | 46.547 | 0.00 | 0.00 |
| ATOM | 5082 | OH   | TYR | X | 337 | 57.617 | 36.391 | 46.088 | 0.00 | 0.00 |
| ATOM | 5083 | HH   | TYR | X | 337 | 57.890 | 36.413 | 45.168 | 0.00 | 0.00 |
| ATOM | 5084 | CE2  | TYR | X | 337 | 56.949 | 34.829 | 47.748 | 0.00 | 0.00 |
| ATOM | 5085 | HE2  | TYR | X | 337 | 56.424 | 35.625 | 48.255 | 0.00 | 0.00 |
| ATOM | 5086 | CD2  | TYR | X | 337 | 56.803 | 33.464 | 48.187 | 0.00 | 0.00 |
| ATOM | 5087 | HD2  | TYR | X | 337 | 56.341 | 33.221 | 49.133 | 0.00 | 0.00 |
| ATOM | 5088 | C    | TYR | X | 337 | 58.614 | 29.345 | 49.051 | 0.00 | 0.00 |
| ATOM | 5089 | O    | TYR | X | 337 | 59.165 | 29.823 | 50.088 | 0.00 | 0.00 |
| ATOM | 5090 | N    | GLY | X | 338 | 58.069 | 28.107 | 48.931 | 0.00 | 0.00 |
| ATOM | 5091 | H    | GLY | X | 338 | 57.670 | 27.801 | 48.056 | 0.00 | 0.00 |
| ATOM | 5092 | CA   | GLY | X | 338 | 58.099 | 27.085 | 50.097 | 0.00 | 0.00 |
| ATOM | 5093 | HA2  | GLY | X | 338 | 59.074 | 26.724 | 50.041 | 0.00 | 0.00 |
| ATOM | 5094 | HA3  | GLY | X | 338 | 57.998 | 27.620 | 51.067 | 0.00 | 0.00 |
| ATOM | 5095 | C    | GLY | X | 338 | 57.239 | 25.819 | 50.018 | 0.00 | 0.00 |
| ATOM | 5096 | O    | GLY | X | 338 | 56.910 | 25.314 | 51.051 | 0.00 | 0.00 |
| ATOM | 5097 | N    | ALA | X | 339 | 57.109 | 25.182 | 48.807 | 0.00 | 0.00 |
| ATOM | 5098 | H    | ALA | X | 339 | 57.384 | 25.737 | 48.009 | 0.00 | 0.00 |
| ATOM | 5099 | CA   | ALA | X | 339 | 56.504 | 23.841 | 48.562 | 0.00 | 0.00 |
| ATOM | 5100 | HA   | ALA | X | 339 | 55.715 | 23.752 | 49.309 | 0.00 | 0.00 |
| ATOM | 5101 | CB   | ALA | X | 339 | 55.774 | 23.838 | 47.230 | 0.00 | 0.00 |
| ATOM | 5102 | HB1  | ALA | X | 339 | 55.107 | 22.977 | 47.175 | 0.00 | 0.00 |
| ATOM | 5103 | HB2  | ALA | X | 339 | 55.226 | 24.771 | 47.095 | 0.00 | 0.00 |
| ATOM | 5104 | HB3  | ALA | X | 339 | 56.575 | 23.781 | 46.494 | 0.00 | 0.00 |
| ATOM | 5105 | C    | ALA | X | 339 | 57.637 | 22.635 | 48.629 | 0.00 | 0.00 |
| ATOM | 5106 | O    | ALA | X | 339 | 58.862 | 22.925 | 48.552 | 0.00 | 0.00 |
| ATOM | 5107 | N    | PRO | X | 340 | 57.248 | 21.354 | 48.788 | 0.00 | 0.00 |
| ATOM | 5108 | CD   | PRO | X | 340 | 55.907 | 20.916 | 49.191 | 0.00 | 0.00 |
| ATOM | 5109 | HD2  | PRO | X | 340 | 55.345 | 20.761 | 48.270 | 0.00 | 0.00 |
| ATOM | 5110 | HD3  | PRO | X | 340 | 55.332 | 21.609 | 49.804 | 0.00 | 0.00 |
| ATOM | 5111 | CG   | PRO | X | 340 | 56.066 | 19.659 | 49.986 | 0.00 | 0.00 |
| ATOM | 5112 | HG2  | PRO | X | 340 | 55.130 | 19.101 | 50.017 | 0.00 | 0.00 |
| ATOM | 5113 | HG3  | PRO | X | 340 | 56.418 | 19.789 | 51.010 | 0.00 | 0.00 |
| ATOM | 5114 | CB   | PRO | X | 340 | 57.113 | 18.946 | 49.166 | 0.00 | 0.00 |

|      |      |     |     |   |     |        |        |        |      |      |
|------|------|-----|-----|---|-----|--------|--------|--------|------|------|
| ATOM | 5115 | HB2 | PRO | X | 340 | 56.719 | 18.566 | 48.224 | 0.00 | 0.00 |
| ATOM | 5116 | HB3 | PRO | X | 340 | 57.666 | 18.153 | 49.670 | 0.00 | 0.00 |
| ATOM | 5117 | CA  | PRO | X | 340 | 58.136 | 20.117 | 48.851 | 0.00 | 0.00 |
| ATOM | 5118 | HA  | PRO | X | 340 | 58.926 | 20.295 | 49.582 | 0.00 | 0.00 |
| ATOM | 5119 | C   | PRO | X | 340 | 58.905 | 19.977 | 47.562 | 0.00 | 0.00 |
| ATOM | 5120 | O   | PRO | X | 340 | 58.362 | 19.764 | 46.461 | 0.00 | 0.00 |
| ATOM | 5121 | N   | GLY | X | 341 | 60.178 | 20.128 | 47.700 | 0.00 | 0.00 |
| ATOM | 5122 | H   | GLY | X | 341 | 60.529 | 20.316 | 48.628 | 0.00 | 0.00 |
| ATOM | 5123 | CA  | GLY | X | 341 | 61.206 | 19.996 | 46.639 | 0.00 | 0.00 |
| ATOM | 5124 | HA2 | GLY | X | 341 | 62.245 | 19.775 | 47.097 | 0.00 | 0.00 |
| ATOM | 5125 | HA3 | GLY | X | 341 | 60.938 | 19.236 | 45.954 | 0.00 | 0.00 |
| ATOM | 5126 | C   | GLY | X | 341 | 61.555 | 21.241 | 45.863 | 0.00 | 0.00 |
| ATOM | 5127 | O   | GLY | X | 341 | 62.679 | 21.405 | 45.305 | 0.00 | 0.00 |
| ATOM | 5128 | N   | PHE | X | 342 | 60.660 | 22.220 | 45.873 | 0.00 | 0.00 |
| ATOM | 5129 | H   | PHE | X | 342 | 59.809 | 22.140 | 46.412 | 0.00 | 0.00 |
| ATOM | 5130 | CA  | PHE | X | 342 | 60.832 | 23.518 | 45.227 | 0.00 | 0.00 |
| ATOM | 5131 | HA  | PHE | X | 342 | 61.210 | 23.375 | 44.215 | 0.00 | 0.00 |
| ATOM | 5132 | CB  | PHE | X | 342 | 59.445 | 24.081 | 45.004 | 0.00 | 0.00 |
| ATOM | 5133 | HB2 | PHE | X | 342 | 58.946 | 24.134 | 45.971 | 0.00 | 0.00 |
| ATOM | 5134 | HB3 | PHE | X | 342 | 59.436 | 25.061 | 44.527 | 0.00 | 0.00 |
| ATOM | 5135 | CG  | PHE | X | 342 | 58.707 | 23.194 | 43.979 | 0.00 | 0.00 |
| ATOM | 5136 | CD1 | PHE | X | 342 | 58.827 | 23.401 | 42.600 | 0.00 | 0.00 |
| ATOM | 5137 | HD1 | PHE | X | 342 | 59.374 | 24.286 | 42.310 | 0.00 | 0.00 |
| ATOM | 5138 | CE1 | PHE | X | 342 | 58.359 | 22.387 | 41.700 | 0.00 | 0.00 |
| ATOM | 5139 | HE1 | PHE | X | 342 | 58.433 | 22.622 | 40.648 | 0.00 | 0.00 |
| ATOM | 5140 | CZ  | PHE | X | 342 | 57.592 | 21.322 | 42.143 | 0.00 | 0.00 |
| ATOM | 5141 | HZ  | PHE | X | 342 | 57.132 | 20.669 | 41.417 | 0.00 | 0.00 |
| ATOM | 5142 | CE2 | PHE | X | 342 | 57.391 | 21.200 | 43.521 | 0.00 | 0.00 |
| ATOM | 5143 | HE2 | PHE | X | 342 | 56.746 | 20.413 | 43.883 | 0.00 | 0.00 |
| ATOM | 5144 | CD2 | PHE | X | 342 | 58.017 | 22.103 | 44.439 | 0.00 | 0.00 |
| ATOM | 5145 | HD2 | PHE | X | 342 | 57.785 | 22.005 | 45.489 | 0.00 | 0.00 |
| ATOM | 5146 | C   | PHE | X | 342 | 61.734 | 24.475 | 45.951 | 0.00 | 0.00 |
| ATOM | 5147 | O   | PHE | X | 342 | 61.507 | 25.002 | 47.039 | 0.00 | 0.00 |
| ATOM | 5148 | N   | SER | X | 343 | 62.808 | 24.874 | 45.204 | 0.00 | 0.00 |
| ATOM | 5149 | H   | SER | X | 343 | 62.997 | 24.266 | 44.420 | 0.00 | 0.00 |
| ATOM | 5150 | CA  | SER | X | 343 | 63.561 | 26.187 | 45.369 | 0.00 | 0.00 |
| ATOM | 5151 | HA  | SER | X | 343 | 62.987 | 26.901 | 45.961 | 0.00 | 0.00 |
| ATOM | 5152 | CB  | SER | X | 343 | 64.835 | 25.926 | 46.243 | 0.00 | 0.00 |
| ATOM | 5153 | HB2 | SER | X | 343 | 64.458 | 25.646 | 47.227 | 0.00 | 0.00 |
| ATOM | 5154 | HB3 | SER | X | 343 | 65.361 | 25.145 | 45.695 | 0.00 | 0.00 |
| ATOM | 5155 | OG  | SER | X | 343 | 65.790 | 26.911 | 46.224 | 0.00 | 0.00 |
| ATOM | 5156 | HG  | SER | X | 343 | 65.898 | 27.316 | 47.088 | 0.00 | 0.00 |
| ATOM | 5157 | C   | SER | X | 343 | 63.804 | 26.865 | 44.004 | 0.00 | 0.00 |
| ATOM | 5158 | O   | SER | X | 343 | 63.744 | 26.230 | 42.911 | 0.00 | 0.00 |
| ATOM | 5159 | N   | LYS | X | 344 | 64.246 | 28.144 | 43.946 | 0.00 | 0.00 |
| ATOM | 5160 | H   | LYS | X | 344 | 64.401 | 28.717 | 44.764 | 0.00 | 0.00 |
| ATOM | 5161 | CA  | LYS | X | 344 | 64.741 | 28.823 | 42.680 | 0.00 | 0.00 |
| ATOM | 5162 | HA  | LYS | X | 344 | 64.220 | 28.430 | 41.808 | 0.00 | 0.00 |
| ATOM | 5163 | CB  | LYS | X | 344 | 64.470 | 30.374 | 42.618 | 0.00 | 0.00 |
| ATOM | 5164 | HB2 | LYS | X | 344 | 64.876 | 30.676 | 41.653 | 0.00 | 0.00 |
| ATOM | 5165 | HB3 | LYS | X | 344 | 63.386 | 30.445 | 42.524 | 0.00 | 0.00 |
| ATOM | 5166 | CG  | LYS | X | 344 | 64.915 | 31.302 | 43.755 | 0.00 | 0.00 |
| ATOM | 5167 | HG2 | LYS | X | 344 | 64.296 | 32.199 | 43.713 | 0.00 | 0.00 |
| ATOM | 5168 | HG3 | LYS | X | 344 | 64.708 | 30.831 | 44.716 | 0.00 | 0.00 |
| ATOM | 5169 | CD  | LYS | X | 344 | 66.399 | 31.595 | 43.776 | 0.00 | 0.00 |
| ATOM | 5170 | HD2 | LYS | X | 344 | 66.556 | 32.293 | 44.598 | 0.00 | 0.00 |
| ATOM | 5171 | HD3 | LYS | X | 344 | 66.943 | 30.675 | 43.990 | 0.00 | 0.00 |
| ATOM | 5172 | CE  | LYS | X | 344 | 66.914 | 32.107 | 42.442 | 0.00 | 0.00 |
| ATOM | 5173 | HE2 | LYS | X | 344 | 66.872 | 31.280 | 41.733 | 0.00 | 0.00 |
| ATOM | 5174 | HE3 | LYS | X | 344 | 66.196 | 32.802 | 42.006 | 0.00 | 0.00 |
| ATOM | 5175 | NZ  | LYS | X | 344 | 68.281 | 32.645 | 42.515 | 0.00 | 0.00 |
| ATOM | 5176 | HZ1 | LYS | X | 344 | 68.892 | 31.999 | 42.993 | 0.00 | 0.00 |
| ATOM | 5177 | HZ2 | LYS | X | 344 | 68.728 | 32.990 | 41.677 | 0.00 | 0.00 |
| ATOM | 5178 | HZ3 | LYS | X | 344 | 68.286 | 33.462 | 43.108 | 0.00 | 0.00 |
| ATOM | 5179 | C   | LYS | X | 344 | 66.158 | 28.386 | 42.369 | 0.00 | 0.00 |
| ATOM | 5180 | O   | LYS | X | 344 | 66.573 | 28.569 | 41.223 | 0.00 | 0.00 |
| ATOM | 5181 | N   | ASP | X | 345 | 66.833 | 27.765 | 43.276 | 0.00 | 0.00 |
| ATOM | 5182 | H   | ASP | X | 345 | 66.359 | 27.616 | 44.155 | 0.00 | 0.00 |
| ATOM | 5183 | CA  | ASP | X | 345 | 68.252 | 27.530 | 43.202 | 0.00 | 0.00 |
| ATOM | 5184 | HA  | ASP | X | 345 | 68.708 | 28.233 | 42.505 | 0.00 | 0.00 |

|      |      |      |     |   |     |        |        |        |      |      |
|------|------|------|-----|---|-----|--------|--------|--------|------|------|
| ATOM | 5185 | CB   | ASP | X | 345 | 68.931 | 27.906 | 44.562 | 0.00 | 0.00 |
| ATOM | 5186 | HB2  | ASP | X | 345 | 68.468 | 28.822 | 44.928 | 0.00 | 0.00 |
| ATOM | 5187 | HB3  | ASP | X | 345 | 68.595 | 27.234 | 45.351 | 0.00 | 0.00 |
| ATOM | 5188 | CG   | ASP | X | 345 | 70.477 | 27.966 | 44.578 | 0.00 | 0.00 |
| ATOM | 5189 | OD1  | ASP | X | 345 | 71.031 | 28.675 | 43.731 | 0.00 | 0.00 |
| ATOM | 5190 | OD2  | ASP | X | 345 | 71.193 | 27.289 | 45.389 | 0.00 | 0.00 |
| ATOM | 5191 | C    | ASP | X | 345 | 68.604 | 26.011 | 42.818 | 0.00 | 0.00 |
| ATOM | 5192 | O    | ASP | X | 345 | 69.781 | 25.683 | 42.589 | 0.00 | 0.00 |
| ATOM | 5193 | N    | ASN | X | 346 | 67.618 | 25.148 | 42.812 | 0.00 | 0.00 |
| ATOM | 5194 | H    | ASN | X | 346 | 66.695 | 25.514 | 42.999 | 0.00 | 0.00 |
| ATOM | 5195 | CA   | ASN | X | 346 | 67.744 | 23.667 | 42.527 | 0.00 | 0.00 |
| ATOM | 5196 | HA   | ASN | X | 346 | 68.753 | 23.312 | 42.321 | 0.00 | 0.00 |
| ATOM | 5197 | CB   | ASN | X | 346 | 67.371 | 22.854 | 43.776 | 0.00 | 0.00 |
| ATOM | 5198 | HB2  | ASN | X | 346 | 67.785 | 21.846 | 43.815 | 0.00 | 0.00 |
| ATOM | 5199 | HB3  | ASN | X | 346 | 67.755 | 23.376 | 44.652 | 0.00 | 0.00 |
| ATOM | 5200 | CG   | ASN | X | 346 | 65.847 | 22.902 | 44.049 | 0.00 | 0.00 |
| ATOM | 5201 | OD1  | ASN | X | 346 | 65.029 | 23.456 | 43.374 | 0.00 | 0.00 |
| ATOM | 5202 | ND2  | ASN | X | 346 | 65.397 | 22.323 | 45.104 | 0.00 | 0.00 |
| ATOM | 5203 | HD21 | ASN | X | 346 | 64.394 | 22.210 | 45.143 | 0.00 | 0.00 |
| ATOM | 5204 | HD22 | ASN | X | 346 | 66.022 | 21.804 | 45.705 | 0.00 | 0.00 |
| ATOM | 5205 | C    | ASN | X | 346 | 66.961 | 23.200 | 41.246 | 0.00 | 0.00 |
| ATOM | 5206 | O    | ASN | X | 346 | 66.180 | 23.871 | 40.605 | 0.00 | 0.00 |
| ATOM | 5207 | N    | GLU | X | 347 | 66.979 | 21.923 | 40.930 | 0.00 | 0.00 |
| ATOM | 5208 | H    | GLU | X | 347 | 67.588 | 21.309 | 41.452 | 0.00 | 0.00 |
| ATOM | 5209 | CA   | GLU | X | 347 | 66.249 | 21.239 | 39.854 | 0.00 | 0.00 |
| ATOM | 5210 | HA   | GLU | X | 347 | 66.284 | 21.832 | 38.940 | 0.00 | 0.00 |
| ATOM | 5211 | CB   | GLU | X | 347 | 67.065 | 20.062 | 39.461 | 0.00 | 0.00 |
| ATOM | 5212 | HB2  | GLU | X | 347 | 68.126 | 20.291 | 39.568 | 0.00 | 0.00 |
| ATOM | 5213 | HB3  | GLU | X | 347 | 66.955 | 19.245 | 40.174 | 0.00 | 0.00 |
| ATOM | 5214 | CG   | GLU | X | 347 | 66.908 | 19.400 | 38.124 | 0.00 | 0.00 |
| ATOM | 5215 | HG2  | GLU | X | 347 | 67.526 | 18.502 | 38.162 | 0.00 | 0.00 |
| ATOM | 5216 | HG3  | GLU | X | 347 | 65.879 | 19.070 | 37.976 | 0.00 | 0.00 |
| ATOM | 5217 | CD   | GLU | X | 347 | 67.502 | 20.337 | 37.079 | 0.00 | 0.00 |
| ATOM | 5218 | OE1  | GLU | X | 347 | 66.746 | 21.176 | 36.555 | 0.00 | 0.00 |
| ATOM | 5219 | OE2  | GLU | X | 347 | 68.696 | 20.210 | 36.682 | 0.00 | 0.00 |
| ATOM | 5220 | C    | GLU | X | 347 | 64.798 | 20.809 | 40.094 | 0.00 | 0.00 |
| ATOM | 5221 | O    | GLU | X | 347 | 64.069 | 20.400 | 39.210 | 0.00 | 0.00 |
| ATOM | 5222 | N    | SER | X | 348 | 64.342 | 20.994 | 41.302 | 0.00 | 0.00 |
| ATOM | 5223 | H    | SER | X | 348 | 64.970 | 21.424 | 41.966 | 0.00 | 0.00 |
| ATOM | 5224 | CA   | SER | X | 348 | 63.039 | 20.632 | 41.896 | 0.00 | 0.00 |
| ATOM | 5225 | HA   | SER | X | 348 | 63.078 | 20.714 | 42.982 | 0.00 | 0.00 |
| ATOM | 5226 | CB   | SER | X | 348 | 61.904 | 21.548 | 41.502 | 0.00 | 0.00 |
| ATOM | 5227 | HB2  | SER | X | 348 | 61.879 | 21.411 | 40.421 | 0.00 | 0.00 |
| ATOM | 5228 | HB3  | SER | X | 348 | 60.971 | 21.223 | 41.962 | 0.00 | 0.00 |
| ATOM | 5229 | OG   | SER | X | 348 | 62.020 | 22.939 | 41.781 | 0.00 | 0.00 |
| ATOM | 5230 | HG   | SER | X | 348 | 62.690 | 23.387 | 41.259 | 0.00 | 0.00 |
| ATOM | 5231 | C    | SER | X | 348 | 62.753 | 19.191 | 41.577 | 0.00 | 0.00 |
| ATOM | 5232 | O    | SER | X | 348 | 61.925 | 18.904 | 40.686 | 0.00 | 0.00 |
| ATOM | 5233 | N    | LEU | X | 349 | 63.473 | 18.257 | 42.190 | 0.00 | 0.00 |
| ATOM | 5234 | H    | LEU | X | 349 | 64.227 | 18.493 | 42.820 | 0.00 | 0.00 |
| ATOM | 5235 | CA   | LEU | X | 349 | 63.235 | 16.819 | 42.081 | 0.00 | 0.00 |
| ATOM | 5236 | HA   | LEU | X | 349 | 62.659 | 16.650 | 41.172 | 0.00 | 0.00 |
| ATOM | 5237 | CB   | LEU | X | 349 | 64.604 | 16.072 | 42.028 | 0.00 | 0.00 |
| ATOM | 5238 | HB2  | LEU | X | 349 | 65.095 | 16.063 | 43.001 | 0.00 | 0.00 |
| ATOM | 5239 | HB3  | LEU | X | 349 | 64.556 | 14.990 | 41.898 | 0.00 | 0.00 |
| ATOM | 5240 | CG   | LEU | X | 349 | 65.498 | 16.681 | 40.952 | 0.00 | 0.00 |
| ATOM | 5241 | HG   | LEU | X | 349 | 65.626 | 17.759 | 41.053 | 0.00 | 0.00 |
| ATOM | 5242 | CD1  | LEU | X | 349 | 66.877 | 16.081 | 41.146 | 0.00 | 0.00 |
| ATOM | 5243 | HD11 | LEU | X | 349 | 67.327 | 16.460 | 42.063 | 0.00 | 0.00 |
| ATOM | 5244 | HD12 | LEU | X | 349 | 66.808 | 14.997 | 41.238 | 0.00 | 0.00 |
| ATOM | 5245 | HD13 | LEU | X | 349 | 67.464 | 16.519 | 40.339 | 0.00 | 0.00 |
| ATOM | 5246 | CD2  | LEU | X | 349 | 64.908 | 16.407 | 39.553 | 0.00 | 0.00 |
| ATOM | 5247 | HD21 | LEU | X | 349 | 63.900 | 16.752 | 39.323 | 0.00 | 0.00 |
| ATOM | 5248 | HD22 | LEU | X | 349 | 65.528 | 16.944 | 38.835 | 0.00 | 0.00 |
| ATOM | 5249 | HD23 | LEU | X | 349 | 64.854 | 15.337 | 39.355 | 0.00 | 0.00 |
| ATOM | 5250 | C    | LEU | X | 349 | 62.281 | 16.375 | 43.221 | 0.00 | 0.00 |
| ATOM | 5251 | O    | LEU | X | 349 | 62.571 | 16.802 | 44.380 | 0.00 | 0.00 |
| ATOM | 5252 | N    | ILE | X | 350 | 61.302 | 15.502 | 42.965 | 0.00 | 0.00 |
| ATOM | 5253 | H    | ILE | X | 350 | 61.154 | 15.170 | 42.023 | 0.00 | 0.00 |
| ATOM | 5254 | CA   | ILE | X | 350 | 60.411 | 14.998 | 44.002 | 0.00 | 0.00 |

|      |      |      |     |   |     |        |        |        |      |      |
|------|------|------|-----|---|-----|--------|--------|--------|------|------|
| ATOM | 5255 | HA   | ILE | X | 350 | 60.873 | 15.144 | 44.979 | 0.00 | 0.00 |
| ATOM | 5256 | CB   | ILE | X | 350 | 59.155 | 15.928 | 43.977 | 0.00 | 0.00 |
| ATOM | 5257 | HB   | ILE | X | 350 | 58.426 | 15.518 | 44.676 | 0.00 | 0.00 |
| ATOM | 5258 | CG2  | ILE | X | 350 | 59.493 | 17.332 | 44.541 | 0.00 | 0.00 |
| ATOM | 5259 | HG21 | ILE | X | 350 | 60.290 | 17.787 | 43.953 | 0.00 | 0.00 |
| ATOM | 5260 | HG22 | ILE | X | 350 | 58.642 | 17.996 | 44.391 | 0.00 | 0.00 |
| ATOM | 5261 | HG23 | ILE | X | 350 | 59.705 | 17.352 | 45.610 | 0.00 | 0.00 |
| ATOM | 5262 | CG1  | ILE | X | 350 | 58.432 | 16.164 | 42.631 | 0.00 | 0.00 |
| ATOM | 5263 | HG12 | ILE | X | 350 | 59.039 | 16.792 | 41.978 | 0.00 | 0.00 |
| ATOM | 5264 | HG13 | ILE | X | 350 | 58.266 | 15.161 | 42.239 | 0.00 | 0.00 |
| ATOM | 5265 | CD1  | ILE | X | 350 | 57.096 | 16.766 | 42.703 | 0.00 | 0.00 |
| ATOM | 5266 | HD11 | ILE | X | 350 | 56.609 | 16.225 | 43.515 | 0.00 | 0.00 |
| ATOM | 5267 | HD12 | ILE | X | 350 | 57.150 | 17.830 | 42.936 | 0.00 | 0.00 |
| ATOM | 5268 | HD13 | ILE | X | 350 | 56.525 | 16.670 | 41.780 | 0.00 | 0.00 |
| ATOM | 5269 | C    | ILE | X | 350 | 60.045 | 13.529 | 43.773 | 0.00 | 0.00 |
| ATOM | 5270 | O    | ILE | X | 350 | 60.008 | 13.025 | 42.653 | 0.00 | 0.00 |
| ATOM | 5271 | N    | SER | X | 351 | 59.740 | 12.832 | 44.876 | 0.00 | 0.00 |
| ATOM | 5272 | H    | SER | X | 351 | 59.894 | 13.260 | 45.778 | 0.00 | 0.00 |
| ATOM | 5273 | CA   | SER | X | 351 | 59.152 | 11.494 | 44.834 | 0.00 | 0.00 |
| ATOM | 5274 | HA   | SER | X | 351 | 59.563 | 10.995 | 43.957 | 0.00 | 0.00 |
| ATOM | 5275 | CB   | SER | X | 351 | 59.567 | 10.765 | 46.107 | 0.00 | 0.00 |
| ATOM | 5276 | HB2  | SER | X | 351 | 59.386 | 9.705  | 45.929 | 0.00 | 0.00 |
| ATOM | 5277 | HB3  | SER | X | 351 | 60.637 | 10.892 | 46.267 | 0.00 | 0.00 |
| ATOM | 5278 | OG   | SER | X | 351 | 58.788 | 11.241 | 47.237 | 0.00 | 0.00 |
| ATOM | 5279 | HG   | SER | X | 351 | 59.292 | 11.199 | 48.053 | 0.00 | 0.00 |
| ATOM | 5280 | C    | SER | X | 351 | 57.598 | 11.570 | 44.633 | 0.00 | 0.00 |
| ATOM | 5281 | O    | SER | X | 351 | 56.931 | 12.618 | 44.909 | 0.00 | 0.00 |
| ATOM | 5282 | N    | ARG | X | 352 | 57.007 | 10.484 | 44.311 | 0.00 | 0.00 |
| ATOM | 5283 | H    | ARG | X | 352 | 57.541 | 9.637  | 44.182 | 0.00 | 0.00 |
| ATOM | 5284 | CA   | ARG | X | 352 | 55.539 | 10.316 | 44.349 | 0.00 | 0.00 |
| ATOM | 5285 | HA   | ARG | X | 352 | 55.221 | 10.908 | 43.491 | 0.00 | 0.00 |
| ATOM | 5286 | CB   | ARG | X | 352 | 55.123 | 8.896  | 43.898 | 0.00 | 0.00 |
| ATOM | 5287 | HB2  | ARG | X | 352 | 55.808 | 8.597  | 43.105 | 0.00 | 0.00 |
| ATOM | 5288 | HB3  | ARG | X | 352 | 55.295 | 8.307  | 44.799 | 0.00 | 0.00 |
| ATOM | 5289 | CG   | ARG | X | 352 | 53.703 | 8.678  | 43.427 | 0.00 | 0.00 |
| ATOM | 5290 | HG2  | ARG | X | 352 | 53.529 | 7.649  | 43.743 | 0.00 | 0.00 |
| ATOM | 5291 | HG3  | ARG | X | 352 | 53.046 | 9.389  | 43.928 | 0.00 | 0.00 |
| ATOM | 5292 | CD   | ARG | X | 352 | 53.296 | 8.548  | 41.907 | 0.00 | 0.00 |
| ATOM | 5293 | HD2  | ARG | X | 352 | 53.275 | 9.513  | 41.400 | 0.00 | 0.00 |
| ATOM | 5294 | HD3  | ARG | X | 352 | 54.155 | 8.129  | 41.383 | 0.00 | 0.00 |
| ATOM | 5295 | NE   | ARG | X | 352 | 52.090 | 7.718  | 41.805 | 0.00 | 0.00 |
| ATOM | 5296 | HE   | ARG | X | 352 | 52.090 | 6.978  | 42.493 | 0.00 | 0.00 |
| ATOM | 5297 | CZ   | ARG | X | 352 | 50.927 | 8.040  | 41.284 | 0.00 | 0.00 |
| ATOM | 5298 | NH1  | ARG | X | 352 | 50.768 | 8.972  | 40.387 | 0.00 | 0.00 |
| ATOM | 5299 | HH11 | ARG | X | 352 | 51.496 | 9.567  | 40.019 | 0.00 | 0.00 |
| ATOM | 5300 | HH12 | ARG | X | 352 | 49.863 | 8.836  | 39.959 | 0.00 | 0.00 |
| ATOM | 5301 | NH2  | ARG | X | 352 | 49.791 | 7.474  | 41.690 | 0.00 | 0.00 |
| ATOM | 5302 | HH21 | ARG | X | 352 | 49.780 | 6.835  | 42.472 | 0.00 | 0.00 |
| ATOM | 5303 | HH22 | ARG | X | 352 | 48.901 | 7.850  | 41.393 | 0.00 | 0.00 |
| ATOM | 5304 | C    | ARG | X | 352 | 54.941 | 10.840 | 45.643 | 0.00 | 0.00 |
| ATOM | 5305 | O    | ARG | X | 352 | 53.974 | 11.535 | 45.592 | 0.00 | 0.00 |
| ATOM | 5306 | N    | ALA | X | 353 | 55.618 | 10.502 | 46.761 | 0.00 | 0.00 |
| ATOM | 5307 | H    | ALA | X | 353 | 56.414 | 9.882  | 46.727 | 0.00 | 0.00 |
| ATOM | 5308 | CA   | ALA | X | 353 | 55.305 | 10.967 | 48.078 | 0.00 | 0.00 |
| ATOM | 5309 | HA   | ALA | X | 353 | 54.249 | 10.807 | 48.296 | 0.00 | 0.00 |
| ATOM | 5310 | CB   | ALA | X | 353 | 56.132 | 10.188 | 49.068 | 0.00 | 0.00 |
| ATOM | 5311 | HB1  | ALA | X | 353 | 55.795 | 9.152  | 49.062 | 0.00 | 0.00 |
| ATOM | 5312 | HB2  | ALA | X | 353 | 57.205 | 10.194 | 48.877 | 0.00 | 0.00 |
| ATOM | 5313 | HB3  | ALA | X | 353 | 56.061 | 10.575 | 50.085 | 0.00 | 0.00 |
| ATOM | 5314 | C    | ALA | X | 353 | 55.507 | 12.469 | 48.264 | 0.00 | 0.00 |
| ATOM | 5315 | O    | ALA | X | 353 | 54.853 | 13.069 | 49.065 | 0.00 | 0.00 |
| ATOM | 5316 | N    | GLU | X | 354 | 56.447 | 13.102 | 47.537 | 0.00 | 0.00 |
| ATOM | 5317 | H    | GLU | X | 354 | 57.154 | 12.599 | 47.019 | 0.00 | 0.00 |
| ATOM | 5318 | CA   | GLU | X | 354 | 56.698 | 14.524 | 47.725 | 0.00 | 0.00 |
| ATOM | 5319 | HA   | GLU | X | 354 | 56.435 | 14.888 | 48.718 | 0.00 | 0.00 |
| ATOM | 5320 | CB   | GLU | X | 354 | 58.173 | 14.702 | 47.428 | 0.00 | 0.00 |
| ATOM | 5321 | HB2  | GLU | X | 354 | 58.400 | 14.084 | 46.558 | 0.00 | 0.00 |
| ATOM | 5322 | HB3  | GLU | X | 354 | 58.417 | 15.729 | 47.156 | 0.00 | 0.00 |
| ATOM | 5323 | CG   | GLU | X | 354 | 59.066 | 14.215 | 48.581 | 0.00 | 0.00 |
| ATOM | 5324 | HG2  | GLU | X | 354 | 58.771 | 14.827 | 49.433 | 0.00 | 0.00 |



|      |      |      |     |   |     |        |        |        |      |      |
|------|------|------|-----|---|-----|--------|--------|--------|------|------|
| ATOM | 5325 | HG3  | GLU | X | 354 | 58.775 | 13.182 | 48.769 | 0.00 | 0.00 |
| ATOM | 5326 | CD   | GLU | X | 354 | 60.574 | 14.124 | 48.326 | 0.00 | 0.00 |
| ATOM | 5327 | OE1  | GLU | X | 354 | 61.303 | 14.027 | 49.345 | 0.00 | 0.00 |
| ATOM | 5328 | OE2  | GLU | X | 354 | 61.039 | 14.249 | 47.146 | 0.00 | 0.00 |
| ATOM | 5329 | C    | GLU | X | 354 | 55.786 | 15.308 | 46.810 | 0.00 | 0.00 |
| ATOM | 5330 | O    | GLU | X | 354 | 55.386 | 16.419 | 47.167 | 0.00 | 0.00 |
| ATOM | 5331 | N    | PHE | X | 355 | 55.315 | 14.688 | 45.684 | 0.00 | 0.00 |
| ATOM | 5332 | H    | PHE | X | 355 | 55.692 | 13.805 | 45.371 | 0.00 | 0.00 |
| ATOM | 5333 | CA   | PHE | X | 355 | 54.127 | 15.162 | 44.997 | 0.00 | 0.00 |
| ATOM | 5334 | HA   | PHE | X | 355 | 54.296 | 16.210 | 44.747 | 0.00 | 0.00 |
| ATOM | 5335 | CB   | PHE | X | 355 | 54.008 | 14.384 | 43.672 | 0.00 | 0.00 |
| ATOM | 5336 | HB2  | PHE | X | 355 | 54.684 | 14.808 | 42.929 | 0.00 | 0.00 |
| ATOM | 5337 | HB3  | PHE | X | 355 | 54.158 | 13.334 | 43.924 | 0.00 | 0.00 |
| ATOM | 5338 | CG   | PHE | X | 355 | 52.718 | 14.426 | 42.890 | 0.00 | 0.00 |
| ATOM | 5339 | CD1  | PHE | X | 355 | 51.925 | 15.588 | 42.843 | 0.00 | 0.00 |
| ATOM | 5340 | HD1  | PHE | X | 355 | 52.180 | 16.475 | 43.402 | 0.00 | 0.00 |
| ATOM | 5341 | CE1  | PHE | X | 355 | 50.917 | 15.703 | 41.886 | 0.00 | 0.00 |
| ATOM | 5342 | HE1  | PHE | X | 355 | 50.312 | 16.586 | 41.744 | 0.00 | 0.00 |
| ATOM | 5343 | CZ   | PHE | X | 355 | 50.649 | 14.612 | 41.014 | 0.00 | 0.00 |
| ATOM | 5344 | HZ   | PHE | X | 355 | 49.788 | 14.598 | 40.362 | 0.00 | 0.00 |
| ATOM | 5345 | CE2  | PHE | X | 355 | 51.325 | 13.410 | 41.283 | 0.00 | 0.00 |
| ATOM | 5346 | HE2  | PHE | X | 355 | 51.075 | 12.561 | 40.665 | 0.00 | 0.00 |
| ATOM | 5347 | CD2  | PHE | X | 355 | 52.319 | 13.261 | 42.202 | 0.00 | 0.00 |
| ATOM | 5348 | HD2  | PHE | X | 355 | 52.769 | 12.292 | 42.360 | 0.00 | 0.00 |
| ATOM | 5349 | C    | PHE | X | 355 | 52.795 | 15.050 | 45.811 | 0.00 | 0.00 |
| ATOM | 5350 | O    | PHE | X | 355 | 51.950 | 15.973 | 45.787 | 0.00 | 0.00 |
| ATOM | 5351 | N    | LEU | X | 356 | 52.620 | 14.069 | 46.683 | 0.00 | 0.00 |
| ATOM | 5352 | H    | LEU | X | 356 | 53.278 | 13.308 | 46.592 | 0.00 | 0.00 |
| ATOM | 5353 | CA   | LEU | X | 356 | 51.446 | 13.946 | 47.460 | 0.00 | 0.00 |
| ATOM | 5354 | HA   | LEU | X | 356 | 50.635 | 14.131 | 46.755 | 0.00 | 0.00 |
| ATOM | 5355 | CB   | LEU | X | 356 | 51.381 | 12.509 | 48.059 | 0.00 | 0.00 |
| ATOM | 5356 | HB2  | LEU | X | 356 | 51.179 | 11.770 | 47.283 | 0.00 | 0.00 |
| ATOM | 5357 | HB3  | LEU | X | 356 | 52.377 | 12.356 | 48.473 | 0.00 | 0.00 |
| ATOM | 5358 | CG   | LEU | X | 356 | 50.358 | 12.202 | 49.152 | 0.00 | 0.00 |
| ATOM | 5359 | HG   | LEU | X | 356 | 50.377 | 12.925 | 49.967 | 0.00 | 0.00 |
| ATOM | 5360 | CD1  | LEU | X | 356 | 48.925 | 12.354 | 48.641 | 0.00 | 0.00 |
| ATOM | 5361 | HD11 | LEU | X | 356 | 48.285 | 12.066 | 49.475 | 0.00 | 0.00 |
| ATOM | 5362 | HD12 | LEU | X | 356 | 48.707 | 13.316 | 48.177 | 0.00 | 0.00 |
| ATOM | 5363 | HD13 | LEU | X | 356 | 48.685 | 11.651 | 47.843 | 0.00 | 0.00 |
| ATOM | 5364 | CD2  | LEU | X | 356 | 50.585 | 10.762 | 49.688 | 0.00 | 0.00 |
| ATOM | 5365 | HD21 | LEU | X | 356 | 50.487 | 10.116 | 48.815 | 0.00 | 0.00 |
| ATOM | 5366 | HD22 | LEU | X | 356 | 51.587 | 10.629 | 50.096 | 0.00 | 0.00 |
| ATOM | 5367 | HD23 | LEU | X | 356 | 49.840 | 10.510 | 50.443 | 0.00 | 0.00 |
| ATOM | 5368 | C    | LEU | X | 356 | 51.448 | 15.041 | 48.535 | 0.00 | 0.00 |
| ATOM | 5369 | O    | LEU | X | 356 | 50.432 | 15.708 | 48.648 | 0.00 | 0.00 |
| ATOM | 5370 | N    | ALA | X | 357 | 52.577 | 15.408 | 49.097 | 0.00 | 0.00 |
| ATOM | 5371 | H    | ALA | X | 357 | 53.357 | 14.767 | 49.052 | 0.00 | 0.00 |
| ATOM | 5372 | CA   | ALA | X | 357 | 52.663 | 16.550 | 50.026 | 0.00 | 0.00 |
| ATOM | 5373 | HA   | ALA | X | 357 | 51.819 | 16.470 | 50.711 | 0.00 | 0.00 |
| ATOM | 5374 | CB   | ALA | X | 357 | 54.028 | 16.624 | 50.673 | 0.00 | 0.00 |
| ATOM | 5375 | HB1  | ALA | X | 357 | 54.236 | 17.634 | 51.027 | 0.00 | 0.00 |
| ATOM | 5376 | HB2  | ALA | X | 357 | 54.411 | 15.859 | 51.348 | 0.00 | 0.00 |
| ATOM | 5377 | HB3  | ALA | X | 357 | 54.790 | 16.665 | 49.894 | 0.00 | 0.00 |
| ATOM | 5378 | C    | ALA | X | 357 | 52.377 | 17.933 | 49.351 | 0.00 | 0.00 |
| ATOM | 5379 | O    | ALA | X | 357 | 51.675 | 18.862 | 49.796 | 0.00 | 0.00 |
| ATOM | 5380 | N    | GLY | X | 358 | 52.797 | 18.003 | 48.087 | 0.00 | 0.00 |
| ATOM | 5381 | H    | GLY | X | 358 | 53.518 | 17.381 | 47.751 | 0.00 | 0.00 |
| ATOM | 5382 | CA   | GLY | X | 358 | 52.510 | 19.057 | 47.119 | 0.00 | 0.00 |
| ATOM | 5383 | HA2  | GLY | X | 358 | 52.914 | 20.046 | 47.369 | 0.00 | 0.00 |
| ATOM | 5384 | HA3  | GLY | X | 358 | 52.870 | 18.822 | 46.135 | 0.00 | 0.00 |
| ATOM | 5385 | C    | GLY | X | 358 | 51.064 | 19.399 | 46.942 | 0.00 | 0.00 |
| ATOM | 5386 | O    | GLY | X | 358 | 50.621 | 20.569 | 46.833 | 0.00 | 0.00 |
| ATOM | 5387 | N    | VAL | X | 359 | 50.216 | 18.396 | 46.829 | 0.00 | 0.00 |
| ATOM | 5388 | H    | VAL | X | 359 | 50.650 | 17.486 | 46.774 | 0.00 | 0.00 |
| ATOM | 5389 | CA   | VAL | X | 359 | 48.755 | 18.622 | 46.811 | 0.00 | 0.00 |
| ATOM | 5390 | HA   | VAL | X | 359 | 48.498 | 19.447 | 46.147 | 0.00 | 0.00 |
| ATOM | 5391 | CB   | VAL | X | 359 | 48.026 | 17.313 | 46.327 | 0.00 | 0.00 |
| ATOM | 5392 | HB   | VAL | X | 359 | 48.315 | 16.620 | 47.116 | 0.00 | 0.00 |
| ATOM | 5393 | CG1  | VAL | X | 359 | 46.560 | 17.531 | 46.289 | 0.00 | 0.00 |
| ATOM | 5394 | HG11 | VAL | X | 359 | 46.075 | 16.780 | 45.666 | 0.00 | 0.00 |

|      |      |      |     |   |     |        |        |        |      |      |
|------|------|------|-----|---|-----|--------|--------|--------|------|------|
| ATOM | 5395 | HG12 | VAL | X | 359 | 46.198 | 17.431 | 47.312 | 0.00 | 0.00 |
| ATOM | 5396 | HG13 | VAL | X | 359 | 46.300 | 18.504 | 45.873 | 0.00 | 0.00 |
| ATOM | 5397 | CG2  | VAL | X | 359 | 48.536 | 16.737 | 44.981 | 0.00 | 0.00 |
| ATOM | 5398 | HG21 | VAL | X | 359 | 49.607 | 16.542 | 45.048 | 0.00 | 0.00 |
| ATOM | 5399 | HG22 | VAL | X | 359 | 47.992 | 15.811 | 44.799 | 0.00 | 0.00 |
| ATOM | 5400 | HG23 | VAL | X | 359 | 48.228 | 17.464 | 44.229 | 0.00 | 0.00 |
| ATOM | 5401 | C    | VAL | X | 359 | 48.267 | 19.071 | 48.142 | 0.00 | 0.00 |
| ATOM | 5402 | O    | VAL | X | 359 | 47.557 | 20.088 | 48.186 | 0.00 | 0.00 |
| ATOM | 5403 | N    | ARG | X | 360 | 48.753 | 18.524 | 49.275 | 0.00 | 0.00 |
| ATOM | 5404 | H    | ARG | X | 360 | 49.366 | 17.722 | 49.239 | 0.00 | 0.00 |
| ATOM | 5405 | CA   | ARG | X | 360 | 48.347 | 19.008 | 50.553 | 0.00 | 0.00 |
| ATOM | 5406 | HA   | ARG | X | 360 | 47.275 | 18.858 | 50.678 | 0.00 | 0.00 |
| ATOM | 5407 | CB   | ARG | X | 360 | 48.936 | 18.173 | 51.704 | 0.00 | 0.00 |
| ATOM | 5408 | HB2  | ARG | X | 360 | 49.883 | 18.590 | 52.048 | 0.00 | 0.00 |
| ATOM | 5409 | HB3  | ARG | X | 360 | 48.233 | 18.356 | 52.517 | 0.00 | 0.00 |
| ATOM | 5410 | CG   | ARG | X | 360 | 48.893 | 16.607 | 51.365 | 0.00 | 0.00 |
| ATOM | 5411 | HG2  | ARG | X | 360 | 48.014 | 16.332 | 50.783 | 0.00 | 0.00 |
| ATOM | 5412 | HG3  | ARG | X | 360 | 49.778 | 16.333 | 50.789 | 0.00 | 0.00 |
| ATOM | 5413 | CD   | ARG | X | 360 | 48.936 | 15.890 | 52.668 | 0.00 | 0.00 |
| ATOM | 5414 | HD2  | ARG | X | 360 | 49.660 | 16.485 | 53.225 | 0.00 | 0.00 |
| ATOM | 5415 | HD3  | ARG | X | 360 | 47.990 | 16.004 | 53.196 | 0.00 | 0.00 |
| ATOM | 5416 | NE   | ARG | X | 360 | 49.317 | 14.514 | 52.622 | 0.00 | 0.00 |
| ATOM | 5417 | HE   | ARG | X | 360 | 50.309 | 14.391 | 52.771 | 0.00 | 0.00 |
| ATOM | 5418 | CZ   | ARG | X | 360 | 48.500 | 13.489 | 52.552 | 0.00 | 0.00 |
| ATOM | 5419 | NH1  | ARG | X | 360 | 47.215 | 13.555 | 52.471 | 0.00 | 0.00 |
| ATOM | 5420 | HH11 | ARG | X | 360 | 46.707 | 14.428 | 52.467 | 0.00 | 0.00 |
| ATOM | 5421 | HH12 | ARG | X | 360 | 46.668 | 12.706 | 52.483 | 0.00 | 0.00 |
| ATOM | 5422 | NH2  | ARG | X | 360 | 48.997 | 12.288 | 52.446 | 0.00 | 0.00 |
| ATOM | 5423 | HH21 | ARG | X | 360 | 49.994 | 12.135 | 52.483 | 0.00 | 0.00 |
| ATOM | 5424 | HH22 | ARG | X | 360 | 48.455 | 11.436 | 52.408 | 0.00 | 0.00 |
| ATOM | 5425 | C    | ARG | X | 360 | 48.718 | 20.490 | 50.803 | 0.00 | 0.00 |
| ATOM | 5426 | O    | ARG | X | 360 | 48.091 | 21.193 | 51.614 | 0.00 | 0.00 |
| ATOM | 5427 | N    | VAL | X | 361 | 49.820 | 20.954 | 50.294 | 0.00 | 0.00 |
| ATOM | 5428 | H    | VAL | X | 361 | 50.443 | 20.299 | 49.845 | 0.00 | 0.00 |
| ATOM | 5429 | CA   | VAL | X | 361 | 50.122 | 22.432 | 50.400 | 0.00 | 0.00 |
| ATOM | 5430 | HA   | VAL | X | 361 | 49.778 | 22.903 | 51.321 | 0.00 | 0.00 |
| ATOM | 5431 | CB   | VAL | X | 361 | 51.637 | 22.746 | 50.387 | 0.00 | 0.00 |
| ATOM | 5432 | HB   | VAL | X | 361 | 51.730 | 23.832 | 50.406 | 0.00 | 0.00 |
| ATOM | 5433 | CG1  | VAL | X | 361 | 52.413 | 22.245 | 51.619 | 0.00 | 0.00 |
| ATOM | 5434 | HG11 | VAL | X | 361 | 51.843 | 22.324 | 52.545 | 0.00 | 0.00 |
| ATOM | 5435 | HG12 | VAL | X | 361 | 52.539 | 21.169 | 51.494 | 0.00 | 0.00 |
| ATOM | 5436 | HG13 | VAL | X | 361 | 53.365 | 22.769 | 51.692 | 0.00 | 0.00 |
| ATOM | 5437 | CG2  | VAL | X | 361 | 52.505 | 22.249 | 49.215 | 0.00 | 0.00 |
| ATOM | 5438 | HG21 | VAL | X | 361 | 52.334 | 22.730 | 48.252 | 0.00 | 0.00 |
| ATOM | 5439 | HG22 | VAL | X | 361 | 53.562 | 22.407 | 49.431 | 0.00 | 0.00 |
| ATOM | 5440 | HG23 | VAL | X | 361 | 52.396 | 21.169 | 49.115 | 0.00 | 0.00 |
| ATOM | 5441 | C    | VAL | X | 361 | 49.478 | 23.278 | 49.380 | 0.00 | 0.00 |
| ATOM | 5442 | O    | VAL | X | 361 | 49.135 | 24.448 | 49.678 | 0.00 | 0.00 |
| ATOM | 5443 | N    | GLY | X | 362 | 49.411 | 22.732 | 48.154 | 0.00 | 0.00 |
| ATOM | 5444 | H    | GLY | X | 362 | 49.605 | 21.747 | 48.043 | 0.00 | 0.00 |
| ATOM | 5445 | CA   | GLY | X | 362 | 49.087 | 23.579 | 46.972 | 0.00 | 0.00 |
| ATOM | 5446 | HA2  | GLY | X | 362 | 49.385 | 24.555 | 47.269 | 0.00 | 0.00 |
| ATOM | 5447 | HA3  | GLY | X | 362 | 49.734 | 23.304 | 46.116 | 0.00 | 0.00 |
| ATOM | 5448 | C    | GLY | X | 362 | 47.598 | 23.511 | 46.632 | 0.00 | 0.00 |
| ATOM | 5449 | O    | GLY | X | 362 | 47.155 | 24.439 | 46.000 | 0.00 | 0.00 |
| ATOM | 5450 | N    | VAL | X | 363 | 46.904 | 22.507 | 47.125 | 0.00 | 0.00 |
| ATOM | 5451 | H    | VAL | X | 363 | 47.462 | 21.890 | 47.698 | 0.00 | 0.00 |
| ATOM | 5452 | CA   | VAL | X | 363 | 45.465 | 22.475 | 47.321 | 0.00 | 0.00 |
| ATOM | 5453 | HA   | VAL | X | 363 | 45.104 | 23.348 | 46.776 | 0.00 | 0.00 |
| ATOM | 5454 | CB   | VAL | X | 363 | 44.748 | 21.184 | 46.746 | 0.00 | 0.00 |
| ATOM | 5455 | HB   | VAL | X | 363 | 45.017 | 20.265 | 47.266 | 0.00 | 0.00 |
| ATOM | 5456 | CG1  | VAL | X | 363 | 43.179 | 21.494 | 46.826 | 0.00 | 0.00 |
| ATOM | 5457 | HG11 | VAL | X | 363 | 43.087 | 22.308 | 46.108 | 0.00 | 0.00 |
| ATOM | 5458 | HG12 | VAL | X | 363 | 42.568 | 20.700 | 46.396 | 0.00 | 0.00 |
| ATOM | 5459 | HG13 | VAL | X | 363 | 42.893 | 21.761 | 47.844 | 0.00 | 0.00 |
| ATOM | 5460 | CG2  | VAL | X | 363 | 45.087 | 20.978 | 45.271 | 0.00 | 0.00 |
| ATOM | 5461 | HG21 | VAL | X | 363 | 46.168 | 20.849 | 45.223 | 0.00 | 0.00 |
| ATOM | 5462 | HG22 | VAL | X | 363 | 44.572 | 20.057 | 44.998 | 0.00 | 0.00 |
| ATOM | 5463 | HG23 | VAL | X | 363 | 44.917 | 21.834 | 44.618 | 0.00 | 0.00 |
| ATOM | 5464 | C    | VAL | X | 363 | 45.159 | 22.666 | 48.843 | 0.00 | 0.00 |

|      |      |      |     |   |     |        |        |        |      |      |
|------|------|------|-----|---|-----|--------|--------|--------|------|------|
| ATOM | 5465 | O    | VAL | X | 363 | 45.243 | 21.640 | 49.502 | 0.00 | 0.00 |
| ATOM | 5466 | N    | PRO | X | 364 | 45.047 | 23.903 | 49.353 | 0.00 | 0.00 |
| ATOM | 5467 | CD   | PRO | X | 364 | 45.118 | 25.198 | 48.709 | 0.00 | 0.00 |
| ATOM | 5468 | HD2  | PRO | X | 364 | 44.091 | 25.498 | 48.500 | 0.00 | 0.00 |
| ATOM | 5469 | HD3  | PRO | X | 364 | 45.738 | 25.070 | 47.822 | 0.00 | 0.00 |
| ATOM | 5470 | CG   | PRO | X | 364 | 45.771 | 26.184 | 49.693 | 0.00 | 0.00 |
| ATOM | 5471 | HG2  | PRO | X | 364 | 45.512 | 27.240 | 49.616 | 0.00 | 0.00 |
| ATOM | 5472 | HG3  | PRO | X | 364 | 46.819 | 25.889 | 49.655 | 0.00 | 0.00 |
| ATOM | 5473 | CB   | PRO | X | 364 | 45.112 | 25.658 | 51.003 | 0.00 | 0.00 |
| ATOM | 5474 | HB2  | PRO | X | 364 | 44.132 | 26.116 | 51.139 | 0.00 | 0.00 |
| ATOM | 5475 | HB3  | PRO | X | 364 | 45.656 | 25.773 | 51.940 | 0.00 | 0.00 |
| ATOM | 5476 | CA   | PRO | X | 364 | 45.042 | 24.159 | 50.746 | 0.00 | 0.00 |
| ATOM | 5477 | HA   | PRO | X | 364 | 45.895 | 23.662 | 51.207 | 0.00 | 0.00 |
| ATOM | 5478 | C    | PRO | X | 364 | 43.729 | 23.583 | 51.366 | 0.00 | 0.00 |
| ATOM | 5479 | O    | PRO | X | 364 | 42.667 | 23.523 | 50.692 | 0.00 | 0.00 |
| ATOM | 5480 | N    | GLN | X | 365 | 43.852 | 23.152 | 52.586 | 0.00 | 0.00 |
| ATOM | 5481 | H    | GLN | X | 365 | 44.781 | 23.217 | 52.976 | 0.00 | 0.00 |
| ATOM | 5482 | CA   | GLN | X | 365 | 42.869 | 22.342 | 53.348 | 0.00 | 0.00 |
| ATOM | 5483 | HA   | GLN | X | 365 | 43.391 | 21.766 | 54.112 | 0.00 | 0.00 |
| ATOM | 5484 | CB   | GLN | X | 365 | 41.869 | 23.261 | 53.986 | 0.00 | 0.00 |
| ATOM | 5485 | HB2  | GLN | X | 365 | 41.266 | 22.676 | 54.681 | 0.00 | 0.00 |
| ATOM | 5486 | HB3  | GLN | X | 365 | 42.462 | 23.917 | 54.623 | 0.00 | 0.00 |
| ATOM | 5487 | CG   | GLN | X | 365 | 40.997 | 24.191 | 53.058 | 0.00 | 0.00 |
| ATOM | 5488 | HG2  | GLN | X | 365 | 41.675 | 24.920 | 52.614 | 0.00 | 0.00 |
| ATOM | 5489 | HG3  | GLN | X | 365 | 40.534 | 23.585 | 52.280 | 0.00 | 0.00 |
| ATOM | 5490 | CD   | GLN | X | 365 | 39.882 | 24.831 | 53.861 | 0.00 | 0.00 |
| ATOM | 5491 | OE1  | GLN | X | 365 | 40.135 | 25.945 | 54.315 | 0.00 | 0.00 |
| ATOM | 5492 | NE2  | GLN | X | 365 | 38.777 | 24.148 | 54.157 | 0.00 | 0.00 |
| ATOM | 5493 | HE21 | GLN | X | 365 | 38.106 | 24.606 | 54.758 | 0.00 | 0.00 |
| ATOM | 5494 | HE22 | GLN | X | 365 | 38.593 | 23.235 | 53.768 | 0.00 | 0.00 |
| ATOM | 5495 | C    | GLN | X | 365 | 42.196 | 21.214 | 52.584 | 0.00 | 0.00 |
| ATOM | 5496 | O    | GLN | X | 365 | 41.080 | 20.785 | 52.921 | 0.00 | 0.00 |
| ATOM | 5497 | N    | VAL | X | 366 | 42.927 | 20.559 | 51.621 | 0.00 | 0.00 |
| ATOM | 5498 | H    | VAL | X | 366 | 43.917 | 20.757 | 51.577 | 0.00 | 0.00 |
| ATOM | 5499 | CA   | VAL | X | 366 | 42.473 | 19.430 | 50.847 | 0.00 | 0.00 |
| ATOM | 5500 | HA   | VAL | X | 366 | 41.431 | 19.575 | 50.563 | 0.00 | 0.00 |
| ATOM | 5501 | CB   | VAL | X | 366 | 43.212 | 19.055 | 49.542 | 0.00 | 0.00 |
| ATOM | 5502 | HB   | VAL | X | 366 | 43.450 | 20.043 | 49.148 | 0.00 | 0.00 |
| ATOM | 5503 | CG1  | VAL | X | 366 | 44.486 | 18.320 | 49.781 | 0.00 | 0.00 |
| ATOM | 5504 | HG11 | VAL | X | 366 | 45.057 | 18.406 | 48.857 | 0.00 | 0.00 |
| ATOM | 5505 | HG12 | VAL | X | 366 | 45.129 | 18.636 | 50.603 | 0.00 | 0.00 |
| ATOM | 5506 | HG13 | VAL | X | 366 | 44.337 | 17.264 | 50.008 | 0.00 | 0.00 |
| ATOM | 5507 | CG2  | VAL | X | 366 | 42.256 | 18.350 | 48.537 | 0.00 | 0.00 |
| ATOM | 5508 | HG21 | VAL | X | 366 | 41.356 | 18.953 | 48.419 | 0.00 | 0.00 |
| ATOM | 5509 | HG22 | VAL | X | 366 | 42.814 | 18.230 | 47.609 | 0.00 | 0.00 |
| ATOM | 5510 | HG23 | VAL | X | 366 | 41.941 | 17.374 | 48.908 | 0.00 | 0.00 |
| ATOM | 5511 | C    | VAL | X | 366 | 42.383 | 18.170 | 51.871 | 0.00 | 0.00 |
| ATOM | 5512 | O    | VAL | X | 366 | 43.328 | 18.050 | 52.591 | 0.00 | 0.00 |
| ATOM | 5513 | N    | SER | X | 367 | 41.360 | 17.295 | 51.796 | 0.00 | 0.00 |
| ATOM | 5514 | H    | SER | X | 367 | 40.606 | 17.433 | 51.138 | 0.00 | 0.00 |
| ATOM | 5515 | CA   | SER | X | 367 | 41.345 | 16.079 | 52.532 | 0.00 | 0.00 |
| ATOM | 5516 | HA   | SER | X | 367 | 41.663 | 16.474 | 53.497 | 0.00 | 0.00 |
| ATOM | 5517 | CB   | SER | X | 367 | 39.912 | 15.499 | 52.733 | 0.00 | 0.00 |
| ATOM | 5518 | HB2  | SER | X | 367 | 39.875 | 14.585 | 53.326 | 0.00 | 0.00 |
| ATOM | 5519 | HB3  | SER | X | 367 | 39.337 | 16.283 | 53.226 | 0.00 | 0.00 |
| ATOM | 5520 | OG   | SER | X | 367 | 39.242 | 15.260 | 51.511 | 0.00 | 0.00 |
| ATOM | 5521 | HG   | SER | X | 367 | 38.405 | 14.850 | 51.741 | 0.00 | 0.00 |
| ATOM | 5522 | C    | SER | X | 367 | 42.357 | 15.103 | 52.014 | 0.00 | 0.00 |
| ATOM | 5523 | O    | SER | X | 367 | 42.785 | 15.130 | 50.854 | 0.00 | 0.00 |
| ATOM | 5524 | N    | ASP | X | 368 | 42.786 | 14.167 | 52.880 | 0.00 | 0.00 |
| ATOM | 5525 | H    | ASP | X | 368 | 42.321 | 14.226 | 53.774 | 0.00 | 0.00 |
| ATOM | 5526 | CA   | ASP | X | 368 | 43.633 | 12.958 | 52.603 | 0.00 | 0.00 |
| ATOM | 5527 | HA   | ASP | X | 368 | 44.599 | 13.384 | 52.329 | 0.00 | 0.00 |
| ATOM | 5528 | CB   | ASP | X | 368 | 43.878 | 12.159 | 53.892 | 0.00 | 0.00 |
| ATOM | 5529 | HB2  | ASP | X | 368 | 44.261 | 12.860 | 54.633 | 0.00 | 0.00 |
| ATOM | 5530 | HB3  | ASP | X | 368 | 42.930 | 11.797 | 54.289 | 0.00 | 0.00 |
| ATOM | 5531 | CG   | ASP | X | 368 | 44.873 | 11.017 | 53.685 | 0.00 | 0.00 |
| ATOM | 5532 | OD1  | ASP | X | 368 | 46.044 | 11.321 | 53.443 | 0.00 | 0.00 |
| ATOM | 5533 | OD2  | ASP | X | 368 | 44.491 | 9.847  | 53.657 | 0.00 | 0.00 |
| ATOM | 5534 | C    | ASP | X | 368 | 43.151 | 12.160 | 51.403 | 0.00 | 0.00 |

|      |      |      |     |   |     |        |        |        |      |      |
|------|------|------|-----|---|-----|--------|--------|--------|------|------|
| ATOM | 5535 | O    | ASP | X | 368 | 43.814 | 12.025 | 50.364 | 0.00 | 0.00 |
| ATOM | 5536 | N    | LEU | X | 369 | 41.934 | 11.628 | 51.530 | 0.00 | 0.00 |
| ATOM | 5537 | H    | LEU | X | 369 | 41.422 | 11.806 | 52.382 | 0.00 | 0.00 |
| ATOM | 5538 | CA   | LEU | X | 369 | 41.272 | 10.872 | 50.458 | 0.00 | 0.00 |
| ATOM | 5539 | HA   | LEU | X | 369 | 41.955 | 10.050 | 50.246 | 0.00 | 0.00 |
| ATOM | 5540 | CB   | LEU | X | 369 | 39.897 | 10.397 | 50.971 | 0.00 | 0.00 |
| ATOM | 5541 | HB2  | LEU | X | 369 | 39.359 | 9.794  | 50.241 | 0.00 | 0.00 |
| ATOM | 5542 | HB3  | LEU | X | 369 | 40.079 | 9.519  | 51.591 | 0.00 | 0.00 |
| ATOM | 5543 | CG   | LEU | X | 369 | 38.911 | 11.389 | 51.626 | 0.00 | 0.00 |
| ATOM | 5544 | HG   | LEU | X | 369 | 39.517 | 12.190 | 52.049 | 0.00 | 0.00 |
| ATOM | 5545 | CD1  | LEU | X | 369 | 37.775 | 11.991 | 50.675 | 0.00 | 0.00 |
| ATOM | 5546 | HD11 | LEU | X | 369 | 36.943 | 12.413 | 51.238 | 0.00 | 0.00 |
| ATOM | 5547 | HD12 | LEU | X | 369 | 38.298 | 12.862 | 50.281 | 0.00 | 0.00 |
| ATOM | 5548 | HD13 | LEU | X | 369 | 37.490 | 11.378 | 49.819 | 0.00 | 0.00 |
| ATOM | 5549 | CD2  | LEU | X | 369 | 38.069 | 10.622 | 52.697 | 0.00 | 0.00 |
| ATOM | 5550 | HD21 | LEU | X | 369 | 37.296 | 11.292 | 53.074 | 0.00 | 0.00 |
| ATOM | 5551 | HD22 | LEU | X | 369 | 37.540 | 9.794  | 52.227 | 0.00 | 0.00 |
| ATOM | 5552 | HD23 | LEU | X | 369 | 38.683 | 10.214 | 53.501 | 0.00 | 0.00 |
| ATOM | 5553 | C    | LEU | X | 369 | 41.121 | 11.526 | 49.115 | 0.00 | 0.00 |
| ATOM | 5554 | O    | LEU | X | 369 | 41.074 | 10.889 | 48.033 | 0.00 | 0.00 |
| ATOM | 5555 | N    | ALA | X | 370 | 41.020 | 12.903 | 49.160 | 0.00 | 0.00 |
| ATOM | 5556 | H    | ALA | X | 370 | 41.025 | 13.267 | 50.102 | 0.00 | 0.00 |
| ATOM | 5557 | CA   | ALA | X | 370 | 40.984 | 13.801 | 48.004 | 0.00 | 0.00 |
| ATOM | 5558 | HA   | ALA | X | 370 | 40.413 | 13.364 | 47.185 | 0.00 | 0.00 |
| ATOM | 5559 | CB   | ALA | X | 370 | 40.296 | 15.110 | 48.456 | 0.00 | 0.00 |
| ATOM | 5560 | HB1  | ALA | X | 370 | 39.258 | 14.912 | 48.723 | 0.00 | 0.00 |
| ATOM | 5561 | HB2  | ALA | X | 370 | 40.826 | 15.571 | 49.290 | 0.00 | 0.00 |
| ATOM | 5562 | HB3  | ALA | X | 370 | 40.362 | 15.796 | 47.612 | 0.00 | 0.00 |
| ATOM | 5563 | C    | ALA | X | 370 | 42.416 | 13.932 | 47.389 | 0.00 | 0.00 |
| ATOM | 5564 | O    | ALA | X | 370 | 42.638 | 13.595 | 46.233 | 0.00 | 0.00 |
| ATOM | 5565 | N    | ALA | X | 371 | 43.431 | 14.353 | 48.191 | 0.00 | 0.00 |
| ATOM | 5566 | H    | ALA | X | 371 | 43.227 | 14.676 | 49.126 | 0.00 | 0.00 |
| ATOM | 5567 | CA   | ALA | X | 371 | 44.847 | 14.303 | 47.720 | 0.00 | 0.00 |
| ATOM | 5568 | HA   | ALA | X | 371 | 44.994 | 15.113 | 47.006 | 0.00 | 0.00 |
| ATOM | 5569 | CB   | ALA | X | 371 | 45.900 | 14.519 | 48.756 | 0.00 | 0.00 |
| ATOM | 5570 | HB1  | ALA | X | 371 | 46.914 | 14.667 | 48.384 | 0.00 | 0.00 |
| ATOM | 5571 | HB2  | ALA | X | 371 | 45.629 | 15.457 | 49.242 | 0.00 | 0.00 |
| ATOM | 5572 | HB3  | ALA | X | 371 | 45.797 | 13.869 | 49.625 | 0.00 | 0.00 |
| ATOM | 5573 | C    | ALA | X | 371 | 45.235 | 13.036 | 46.962 | 0.00 | 0.00 |
| ATOM | 5574 | O    | ALA | X | 371 | 45.920 | 12.950 | 45.914 | 0.00 | 0.00 |
| ATOM | 5575 | N    | GLU | X | 372 | 44.860 | 11.933 | 47.551 | 0.00 | 0.00 |
| ATOM | 5576 | H    | GLU | X | 372 | 44.323 | 11.962 | 48.406 | 0.00 | 0.00 |
| ATOM | 5577 | CA   | GLU | X | 372 | 45.052 | 10.648 | 46.892 | 0.00 | 0.00 |
| ATOM | 5578 | HA   | GLU | X | 372 | 46.086 | 10.670 | 46.548 | 0.00 | 0.00 |
| ATOM | 5579 | CB   | GLU | X | 372 | 44.817 | 9.448  | 47.856 | 0.00 | 0.00 |
| ATOM | 5580 | HB2  | GLU | X | 372 | 43.802 | 9.483  | 48.252 | 0.00 | 0.00 |
| ATOM | 5581 | HB3  | GLU | X | 372 | 44.988 | 8.499  | 47.348 | 0.00 | 0.00 |
| ATOM | 5582 | CG   | GLU | X | 372 | 45.783 | 9.489  | 49.103 | 0.00 | 0.00 |
| ATOM | 5583 | HG2  | GLU | X | 372 | 46.804 | 9.498  | 48.721 | 0.00 | 0.00 |
| ATOM | 5584 | HG3  | GLU | X | 372 | 45.765 | 10.451 | 49.614 | 0.00 | 0.00 |
| ATOM | 5585 | CD   | GLU | X | 372 | 45.684 | 8.349  | 50.087 | 0.00 | 0.00 |
| ATOM | 5586 | OE1  | GLU | X | 372 | 44.615 | 7.792  | 50.225 | 0.00 | 0.00 |
| ATOM | 5587 | OE2  | GLU | X | 372 | 46.681 | 7.933  | 50.623 | 0.00 | 0.00 |
| ATOM | 5588 | C    | GLU | X | 372 | 44.244 | 10.446 | 45.658 | 0.00 | 0.00 |
| ATOM | 5589 | O    | GLU | X | 372 | 44.794 | 9.870  | 44.755 | 0.00 | 0.00 |
| ATOM | 5590 | N    | ALA | X | 373 | 42.997 | 10.916 | 45.627 | 0.00 | 0.00 |
| ATOM | 5591 | H    | ALA | X | 373 | 42.581 | 11.370 | 46.428 | 0.00 | 0.00 |
| ATOM | 5592 | CA   | ALA | X | 373 | 42.207 | 10.829 | 44.367 | 0.00 | 0.00 |
| ATOM | 5593 | HA   | ALA | X | 373 | 42.356 | 9.814  | 44.000 | 0.00 | 0.00 |
| ATOM | 5594 | CB   | ALA | X | 373 | 40.739 | 11.122 | 44.502 | 0.00 | 0.00 |
| ATOM | 5595 | HB1  | ALA | X | 373 | 40.326 | 10.945 | 43.509 | 0.00 | 0.00 |
| ATOM | 5596 | HB2  | ALA | X | 373 | 40.353 | 10.330 | 45.143 | 0.00 | 0.00 |
| ATOM | 5597 | HB3  | ALA | X | 373 | 40.640 | 12.137 | 44.888 | 0.00 | 0.00 |
| ATOM | 5598 | C    | ALA | X | 373 | 42.792 | 11.720 | 43.247 | 0.00 | 0.00 |
| ATOM | 5599 | O    | ALA | X | 373 | 42.532 | 11.405 | 42.064 | 0.00 | 0.00 |
| ATOM | 5600 | N    | VAL | X | 374 | 43.449 | 12.846 | 43.636 | 0.00 | 0.00 |
| ATOM | 5601 | H    | VAL | X | 374 | 43.354 | 13.016 | 44.627 | 0.00 | 0.00 |
| ATOM | 5602 | CA   | VAL | X | 374 | 44.075 | 13.757 | 42.741 | 0.00 | 0.00 |
| ATOM | 5603 | HA   | VAL | X | 374 | 43.438 | 13.955 | 41.879 | 0.00 | 0.00 |
| ATOM | 5604 | CB   | VAL | X | 374 | 44.437 | 15.092 | 43.323 | 0.00 | 0.00 |

|      |      |      |     |   |     |        |        |        |      |      |
|------|------|------|-----|---|-----|--------|--------|--------|------|------|
| ATOM | 5605 | HB   | VAL | X | 374 | 44.996 | 14.940 | 44.247 | 0.00 | 0.00 |
| ATOM | 5606 | CG1  | VAL | X | 374 | 45.122 | 16.077 | 42.385 | 0.00 | 0.00 |
| ATOM | 5607 | HG11 | VAL | X | 374 | 45.253 | 17.049 | 42.861 | 0.00 | 0.00 |
| ATOM | 5608 | HG12 | VAL | X | 374 | 46.163 | 15.856 | 42.151 | 0.00 | 0.00 |
| ATOM | 5609 | HG13 | VAL | X | 374 | 44.535 | 16.254 | 41.483 | 0.00 | 0.00 |
| ATOM | 5610 | CG2  | VAL | X | 374 | 43.263 | 15.937 | 43.891 | 0.00 | 0.00 |
| ATOM | 5611 | HG21 | VAL | X | 374 | 42.549 | 15.441 | 44.548 | 0.00 | 0.00 |
| ATOM | 5612 | HG22 | VAL | X | 374 | 43.663 | 16.749 | 44.498 | 0.00 | 0.00 |
| ATOM | 5613 | HG23 | VAL | X | 374 | 42.766 | 16.351 | 43.014 | 0.00 | 0.00 |
| ATOM | 5614 | C    | VAL | X | 374 | 45.347 | 13.119 | 42.134 | 0.00 | 0.00 |
| ATOM | 5615 | O    | VAL | X | 374 | 45.490 | 12.992 | 40.922 | 0.00 | 0.00 |
| ATOM | 5616 | N    | VAL | X | 375 | 46.276 | 12.515 | 42.900 | 0.00 | 0.00 |
| ATOM | 5617 | H    | VAL | X | 375 | 46.003 | 12.579 | 43.870 | 0.00 | 0.00 |
| ATOM | 5618 | CA   | VAL | X | 375 | 47.463 | 11.658 | 42.655 | 0.00 | 0.00 |
| ATOM | 5619 | HA   | VAL | X | 375 | 48.176 | 12.153 | 41.995 | 0.00 | 0.00 |
| ATOM | 5620 | CB   | VAL | X | 375 | 48.086 | 11.219 | 43.990 | 0.00 | 0.00 |
| ATOM | 5621 | HB   | VAL | X | 375 | 47.197 | 11.158 | 44.617 | 0.00 | 0.00 |
| ATOM | 5622 | CG1  | VAL | X | 375 | 49.013 | 9.944  | 44.016 | 0.00 | 0.00 |
| ATOM | 5623 | HG11 | VAL | X | 375 | 48.459 | 9.046  | 43.743 | 0.00 | 0.00 |
| ATOM | 5624 | HG12 | VAL | X | 375 | 49.831 | 9.976  | 43.297 | 0.00 | 0.00 |
| ATOM | 5625 | HG13 | VAL | X | 375 | 49.297 | 9.725  | 45.046 | 0.00 | 0.00 |
| ATOM | 5626 | CG2  | VAL | X | 375 | 48.894 | 12.257 | 44.672 | 0.00 | 0.00 |
| ATOM | 5627 | HG21 | VAL | X | 375 | 49.883 | 12.111 | 44.238 | 0.00 | 0.00 |
| ATOM | 5628 | HG22 | VAL | X | 375 | 48.333 | 13.146 | 44.385 | 0.00 | 0.00 |
| ATOM | 5629 | HG23 | VAL | X | 375 | 48.971 | 12.100 | 45.748 | 0.00 | 0.00 |
| ATOM | 5630 | C    | VAL | X | 375 | 47.033 | 10.432 | 41.794 | 0.00 | 0.00 |
| ATOM | 5631 | O    | VAL | X | 375 | 47.808 | 10.035 | 40.897 | 0.00 | 0.00 |
| ATOM | 5632 | N    | LEU | X | 376 | 45.762 | 9.876  | 41.836 | 0.00 | 0.00 |
| ATOM | 5633 | H    | LEU | X | 376 | 45.293 | 9.987  | 42.723 | 0.00 | 0.00 |
| ATOM | 5634 | CA   | LEU | X | 376 | 45.125 | 9.001  | 40.807 | 0.00 | 0.00 |
| ATOM | 5635 | HA   | LEU | X | 376 | 45.862 | 8.228  | 40.591 | 0.00 | 0.00 |
| ATOM | 5636 | CB   | LEU | X | 376 | 43.867 | 8.379  | 41.428 | 0.00 | 0.00 |
| ATOM | 5637 | HB2  | LEU | X | 376 | 44.158 | 7.767  | 42.282 | 0.00 | 0.00 |
| ATOM | 5638 | HB3  | LEU | X | 376 | 43.156 | 9.109  | 41.815 | 0.00 | 0.00 |
| ATOM | 5639 | CG   | LEU | X | 376 | 43.147 | 7.439  | 40.478 | 0.00 | 0.00 |
| ATOM | 5640 | HG   | LEU | X | 376 | 42.891 | 7.860  | 39.506 | 0.00 | 0.00 |
| ATOM | 5641 | CD1  | LEU | X | 376 | 43.820 | 6.108  | 40.037 | 0.00 | 0.00 |
| ATOM | 5642 | HD11 | LEU | X | 376 | 43.744 | 5.249  | 40.704 | 0.00 | 0.00 |
| ATOM | 5643 | HD12 | LEU | X | 376 | 43.459 | 5.871  | 39.037 | 0.00 | 0.00 |
| ATOM | 5644 | HD13 | LEU | X | 376 | 44.870 | 6.298  | 39.813 | 0.00 | 0.00 |
| ATOM | 5645 | CD2  | LEU | X | 376 | 41.873 | 6.925  | 41.208 | 0.00 | 0.00 |
| ATOM | 5646 | HD21 | LEU | X | 376 | 41.332 | 6.336  | 40.467 | 0.00 | 0.00 |
| ATOM | 5647 | HD22 | LEU | X | 376 | 42.053 | 6.267  | 42.058 | 0.00 | 0.00 |
| ATOM | 5648 | HD23 | LEU | X | 376 | 41.235 | 7.783  | 41.418 | 0.00 | 0.00 |
| ATOM | 5649 | C    | LEU | X | 376 | 44.870 | 9.644  | 39.495 | 0.00 | 0.00 |
| ATOM | 5650 | O    | LEU | X | 376 | 45.348 | 9.265  | 38.443 | 0.00 | 0.00 |
| ATOM | 5651 | N    | HIE | X | 377 | 44.042 | 10.717 | 39.520 | 0.00 | 0.00 |
| ATOM | 5652 | H    | HIE | X | 377 | 43.877 | 11.111 | 40.436 | 0.00 | 0.00 |
| ATOM | 5653 | CA   | HIE | X | 377 | 43.668 | 11.507 | 38.368 | 0.00 | 0.00 |
| ATOM | 5654 | HA   | HIE | X | 377 | 43.249 | 10.761 | 37.693 | 0.00 | 0.00 |
| ATOM | 5655 | CB   | HIE | X | 377 | 42.635 | 12.522 | 38.954 | 0.00 | 0.00 |
| ATOM | 5656 | HB2  | HIE | X | 377 | 42.038 | 11.993 | 39.698 | 0.00 | 0.00 |
| ATOM | 5657 | HB3  | HIE | X | 377 | 43.259 | 13.369 | 39.239 | 0.00 | 0.00 |
| ATOM | 5658 | CG   | HIE | X | 377 | 41.648 | 12.950 | 37.929 | 0.00 | 0.00 |
| ATOM | 5659 | ND1  | HIE | X | 377 | 40.531 | 12.130 | 37.579 | 0.00 | 0.00 |
| ATOM | 5660 | CE1  | HIE | X | 377 | 39.929 | 12.849 | 36.603 | 0.00 | 0.00 |
| ATOM | 5661 | HE1  | HIE | X | 377 | 39.105 | 12.433 | 36.041 | 0.00 | 0.00 |
| ATOM | 5662 | NE2  | HIE | X | 377 | 40.638 | 13.941 | 36.277 | 0.00 | 0.00 |
| ATOM | 5663 | HE2  | HIE | X | 377 | 40.573 | 14.528 | 35.458 | 0.00 | 0.00 |
| ATOM | 5664 | CD2  | HIE | X | 377 | 41.715 | 14.031 | 37.079 | 0.00 | 0.00 |
| ATOM | 5665 | HD2  | HIE | X | 377 | 42.497 | 14.772 | 37.148 | 0.00 | 0.00 |
| ATOM | 5666 | C    | HIE | X | 377 | 44.917 | 12.184 | 37.607 | 0.00 | 0.00 |
| ATOM | 5667 | O    | HIE | X | 377 | 44.794 | 12.413 | 36.405 | 0.00 | 0.00 |
| ATOM | 5668 | N    | TYR | X | 378 | 46.029 | 12.500 | 38.242 | 0.00 | 0.00 |
| ATOM | 5669 | H    | TYR | X | 378 | 45.942 | 12.504 | 39.249 | 0.00 | 0.00 |
| ATOM | 5670 | CA   | TYR | X | 378 | 47.235 | 13.163 | 37.661 | 0.00 | 0.00 |
| ATOM | 5671 | HA   | TYR | X | 378 | 47.134 | 13.477 | 36.623 | 0.00 | 0.00 |
| ATOM | 5672 | CB   | TYR | X | 378 | 47.568 | 14.405 | 38.520 | 0.00 | 0.00 |
| ATOM | 5673 | HB2  | TYR | X | 378 | 47.564 | 14.131 | 39.575 | 0.00 | 0.00 |
| ATOM | 5674 | HB3  | TYR | X | 378 | 48.579 | 14.716 | 38.254 | 0.00 | 0.00 |

|      |      |      |     |   |     |        |        |        |      |      |
|------|------|------|-----|---|-----|--------|--------|--------|------|------|
| ATOM | 5675 | CG   | TYR | X | 378 | 46.590 | 15.557 | 38.151 | 0.00 | 0.00 |
| ATOM | 5676 | CD1  | TYR | X | 378 | 46.910 | 16.564 | 37.134 | 0.00 | 0.00 |
| ATOM | 5677 | HD1  | TYR | X | 378 | 47.892 | 16.406 | 36.712 | 0.00 | 0.00 |
| ATOM | 5678 | CE1  | TYR | X | 378 | 45.921 | 17.516 | 36.699 | 0.00 | 0.00 |
| ATOM | 5679 | HE1  | TYR | X | 378 | 46.173 | 18.243 | 35.941 | 0.00 | 0.00 |
| ATOM | 5680 | CZ   | TYR | X | 378 | 44.674 | 17.546 | 37.363 | 0.00 | 0.00 |
| ATOM | 5681 | OH   | TYR | X | 378 | 43.706 | 18.389 | 37.020 | 0.00 | 0.00 |
| ATOM | 5682 | HH   | TYR | X | 378 | 44.098 | 19.108 | 36.519 | 0.00 | 0.00 |
| ATOM | 5683 | CE2  | TYR | X | 378 | 44.340 | 16.573 | 38.323 | 0.00 | 0.00 |
| ATOM | 5684 | HE2  | TYR | X | 378 | 43.366 | 16.660 | 38.782 | 0.00 | 0.00 |
| ATOM | 5685 | CD2  | TYR | X | 378 | 45.304 | 15.664 | 38.747 | 0.00 | 0.00 |
| ATOM | 5686 | HD2  | TYR | X | 378 | 45.109 | 14.966 | 39.548 | 0.00 | 0.00 |
| ATOM | 5687 | C    | TYR | X | 378 | 48.480 | 12.148 | 37.669 | 0.00 | 0.00 |
| ATOM | 5688 | O    | TYR | X | 378 | 49.630 | 12.551 | 37.721 | 0.00 | 0.00 |
| ATOM | 5689 | N    | THR | X | 379 | 48.286 | 10.824 | 37.556 | 0.00 | 0.00 |
| ATOM | 5690 | H    | THR | X | 379 | 47.325 | 10.524 | 37.636 | 0.00 | 0.00 |
| ATOM | 5691 | CA   | THR | X | 379 | 49.243 | 9.778  | 37.268 | 0.00 | 0.00 |
| ATOM | 5692 | HA   | THR | X | 379 | 50.065 | 9.776  | 37.984 | 0.00 | 0.00 |
| ATOM | 5693 | CB   | THR | X | 379 | 48.558 | 8.404  | 37.434 | 0.00 | 0.00 |
| ATOM | 5694 | HB   | THR | X | 379 | 47.664 | 8.291  | 36.821 | 0.00 | 0.00 |
| ATOM | 5695 | CG2  | THR | X | 379 | 49.528 | 7.207  | 37.273 | 0.00 | 0.00 |
| ATOM | 5696 | HG21 | THR | X | 379 | 49.086 | 6.300  | 37.686 | 0.00 | 0.00 |
| ATOM | 5697 | HG22 | THR | X | 379 | 49.740 | 6.919  | 36.243 | 0.00 | 0.00 |
| ATOM | 5698 | HG23 | THR | X | 379 | 50.496 | 7.407  | 37.732 | 0.00 | 0.00 |
| ATOM | 5699 | OG1  | THR | X | 379 | 48.243 | 8.278  | 38.764 | 0.00 | 0.00 |
| ATOM | 5700 | HG1  | THR | X | 379 | 47.679 | 8.939  | 39.172 | 0.00 | 0.00 |
| ATOM | 5701 | C    | THR | X | 379 | 49.845 | 9.994  | 35.842 | 0.00 | 0.00 |
| ATOM | 5702 | O    | THR | X | 379 | 49.080 | 10.393 | 34.960 | 0.00 | 0.00 |
| ATOM | 5703 | N    | ASP | X | 380 | 51.088 | 9.662  | 35.600 | 0.00 | 0.00 |
| ATOM | 5704 | H    | ASP | X | 380 | 51.588 | 9.351  | 36.420 | 0.00 | 0.00 |
| ATOM | 5705 | CA   | ASP | X | 380 | 51.592 | 9.373  | 34.237 | 0.00 | 0.00 |
| ATOM | 5706 | HA   | ASP | X | 380 | 50.799 | 9.746  | 33.587 | 0.00 | 0.00 |
| ATOM | 5707 | CB   | ASP | X | 380 | 52.933 | 10.099 | 34.015 | 0.00 | 0.00 |
| ATOM | 5708 | HB2  | ASP | X | 380 | 52.723 | 11.167 | 34.074 | 0.00 | 0.00 |
| ATOM | 5709 | HB3  | ASP | X | 380 | 53.619 | 9.784  | 34.802 | 0.00 | 0.00 |
| ATOM | 5710 | CG   | ASP | X | 380 | 53.625 | 9.610  | 32.714 | 0.00 | 0.00 |
| ATOM | 5711 | OD1  | ASP | X | 380 | 53.121 | 9.602  | 31.620 | 0.00 | 0.00 |
| ATOM | 5712 | OD2  | ASP | X | 380 | 54.818 | 9.276  | 32.850 | 0.00 | 0.00 |
| ATOM | 5713 | C    | ASP | X | 380 | 51.627 | 7.837  | 34.035 | 0.00 | 0.00 |
| ATOM | 5714 | O    | ASP | X | 380 | 51.869 | 7.037  | 34.942 | 0.00 | 0.00 |
| ATOM | 5715 | N    | TRP | X | 381 | 51.323 | 7.389  | 32.833 | 0.00 | 0.00 |
| ATOM | 5716 | H    | TRP | X | 381 | 51.159 | 8.011  | 32.054 | 0.00 | 0.00 |
| ATOM | 5717 | CA   | TRP | X | 381 | 51.427 | 5.922  | 32.507 | 0.00 | 0.00 |
| ATOM | 5718 | HA   | TRP | X | 381 | 51.362 | 5.327  | 33.419 | 0.00 | 0.00 |
| ATOM | 5719 | CB   | TRP | X | 381 | 50.258 | 5.489  | 31.592 | 0.00 | 0.00 |
| ATOM | 5720 | HB2  | TRP | X | 381 | 50.146 | 6.127  | 30.716 | 0.00 | 0.00 |
| ATOM | 5721 | HB3  | TRP | X | 381 | 50.319 | 4.474  | 31.201 | 0.00 | 0.00 |
| ATOM | 5722 | CG   | TRP | X | 381 | 48.974 | 5.683  | 32.344 | 0.00 | 0.00 |
| ATOM | 5723 | CD1  | TRP | X | 381 | 48.307 | 6.817  | 32.428 | 0.00 | 0.00 |
| ATOM | 5724 | HD1  | TRP | X | 381 | 48.613 | 7.705  | 31.896 | 0.00 | 0.00 |
| ATOM | 5725 | NE1  | TRP | X | 381 | 47.324 | 6.723  | 33.396 | 0.00 | 0.00 |
| ATOM | 5726 | HE1  | TRP | X | 381 | 46.788 | 7.485  | 33.785 | 0.00 | 0.00 |
| ATOM | 5727 | CE2  | TRP | X | 381 | 47.396 | 5.540  | 34.030 | 0.00 | 0.00 |
| ATOM | 5728 | CZ2  | TRP | X | 381 | 46.654 | 5.029  | 35.107 | 0.00 | 0.00 |
| ATOM | 5729 | HZ2  | TRP | X | 381 | 45.931 | 5.652  | 35.614 | 0.00 | 0.00 |
| ATOM | 5730 | CH2  | TRP | X | 381 | 46.828 | 3.715  | 35.467 | 0.00 | 0.00 |
| ATOM | 5731 | HH2  | TRP | X | 381 | 46.290 | 3.331  | 36.321 | 0.00 | 0.00 |
| ATOM | 5732 | CZ3  | TRP | X | 381 | 47.792 | 2.915  | 34.766 | 0.00 | 0.00 |
| ATOM | 5733 | HZ3  | TRP | X | 381 | 47.943 | 1.882  | 35.041 | 0.00 | 0.00 |
| ATOM | 5734 | CE3  | TRP | X | 381 | 48.586 | 3.482  | 33.780 | 0.00 | 0.00 |
| ATOM | 5735 | HE3  | TRP | X | 381 | 49.204 | 2.899  | 33.113 | 0.00 | 0.00 |
| ATOM | 5736 | CD2  | TRP | X | 381 | 48.425 | 4.815  | 33.332 | 0.00 | 0.00 |
| ATOM | 5737 | C    | TRP | X | 381 | 52.750 | 5.512  | 31.882 | 0.00 | 0.00 |
| ATOM | 5738 | O    | TRP | X | 381 | 53.116 | 4.361  | 31.985 | 0.00 | 0.00 |
| ATOM | 5739 | N    | LEU | X | 382 | 53.528 | 6.464  | 31.309 | 0.00 | 0.00 |
| ATOM | 5740 | H    | LEU | X | 382 | 53.181 | 7.412  | 31.337 | 0.00 | 0.00 |
| ATOM | 5741 | CA   | LEU | X | 382 | 54.861 | 6.157  | 30.790 | 0.00 | 0.00 |
| ATOM | 5742 | HA   | LEU | X | 382 | 54.750 | 5.233  | 30.221 | 0.00 | 0.00 |
| ATOM | 5743 | CB   | LEU | X | 382 | 55.267 | 7.292  | 29.857 | 0.00 | 0.00 |
| ATOM | 5744 | HB2  | LEU | X | 382 | 54.500 | 7.376  | 29.087 | 0.00 | 0.00 |

|      |      |      |     |   |     |        |        |        |      |      |
|------|------|------|-----|---|-----|--------|--------|--------|------|------|
| ATOM | 5745 | HB3  | LEU | X | 382 | 55.243 | 8.228  | 30.415 | 0.00 | 0.00 |
| ATOM | 5746 | CG   | LEU | X | 382 | 56.573 | 7.135  | 29.069 | 0.00 | 0.00 |
| ATOM | 5747 | HG   | LEU | X | 382 | 56.770 | 8.085  | 28.571 | 0.00 | 0.00 |
| ATOM | 5748 | CD1  | LEU | X | 382 | 57.855 | 6.820  | 29.899 | 0.00 | 0.00 |
| ATOM | 5749 | HD11 | LEU | X | 382 | 57.841 | 7.421  | 30.808 | 0.00 | 0.00 |
| ATOM | 5750 | HD12 | LEU | X | 382 | 57.946 | 5.762  | 30.143 | 0.00 | 0.00 |
| ATOM | 5751 | HD13 | LEU | X | 382 | 58.754 | 7.068  | 29.336 | 0.00 | 0.00 |
| ATOM | 5752 | CD2  | LEU | X | 382 | 56.316 | 6.146  | 27.996 | 0.00 | 0.00 |
| ATOM | 5753 | HD21 | LEU | X | 382 | 55.732 | 6.669  | 27.239 | 0.00 | 0.00 |
| ATOM | 5754 | HD22 | LEU | X | 382 | 57.273 | 5.959  | 27.508 | 0.00 | 0.00 |
| ATOM | 5755 | HD23 | LEU | X | 382 | 55.885 | 5.207  | 28.344 | 0.00 | 0.00 |
| ATOM | 5756 | C    | LEU | X | 382 | 55.845 | 5.797  | 31.930 | 0.00 | 0.00 |
| ATOM | 5757 | O    | LEU | X | 382 | 56.373 | 4.710  | 31.971 | 0.00 | 0.00 |
| ATOM | 5758 | N    | HIE | X | 383 | 56.035 | 6.779  | 32.839 | 0.00 | 0.00 |
| ATOM | 5759 | H    | HIE | X | 383 | 55.622 | 7.699  | 32.774 | 0.00 | 0.00 |
| ATOM | 5760 | CA   | HIE | X | 383 | 56.810 | 6.420  | 34.024 | 0.00 | 0.00 |
| ATOM | 5761 | HA   | HIE | X | 383 | 56.735 | 5.352  | 34.229 | 0.00 | 0.00 |
| ATOM | 5762 | CB   | HIE | X | 383 | 58.303 | 6.625  | 33.896 | 0.00 | 0.00 |
| ATOM | 5763 | HB2  | HIE | X | 383 | 58.650 | 6.145  | 32.981 | 0.00 | 0.00 |
| ATOM | 5764 | HB3  | HIE | X | 383 | 58.615 | 7.625  | 33.592 | 0.00 | 0.00 |
| ATOM | 5765 | CG   | HIE | X | 383 | 59.142 | 6.223  | 35.116 | 0.00 | 0.00 |
| ATOM | 5766 | ND1  | HIE | X | 383 | 58.725 | 5.256  | 36.074 | 0.00 | 0.00 |
| ATOM | 5767 | CE1  | HIE | X | 383 | 59.717 | 5.157  | 36.938 | 0.00 | 0.00 |
| ATOM | 5768 | HE1  | HIE | X | 383 | 59.658 | 4.487  | 37.783 | 0.00 | 0.00 |
| ATOM | 5769 | NE2  | HIE | X | 383 | 60.725 | 6.021  | 36.629 | 0.00 | 0.00 |
| ATOM | 5770 | HE2  | HIE | X | 383 | 61.542 | 6.196  | 37.196 | 0.00 | 0.00 |
| ATOM | 5771 | CD2  | HIE | X | 383 | 60.409 | 6.629  | 35.485 | 0.00 | 0.00 |
| ATOM | 5772 | HD2  | HIE | X | 383 | 61.009 | 7.272  | 34.858 | 0.00 | 0.00 |
| ATOM | 5773 | C    | HIE | X | 383 | 56.241 | 7.200  | 35.246 | 0.00 | 0.00 |
| ATOM | 5774 | O    | HIE | X | 383 | 56.584 | 8.390  | 35.276 | 0.00 | 0.00 |
| ATOM | 5775 | N    | PRO | X | 384 | 55.413 | 6.717  | 36.157 | 0.00 | 0.00 |
| ATOM | 5776 | CD   | PRO | X | 384 | 54.974 | 5.324  | 36.253 | 0.00 | 0.00 |
| ATOM | 5777 | HD2  | PRO | X | 384 | 55.788 | 4.611  | 36.127 | 0.00 | 0.00 |
| ATOM | 5778 | HD3  | PRO | X | 384 | 54.268 | 5.052  | 35.468 | 0.00 | 0.00 |
| ATOM | 5779 | CG   | PRO | X | 384 | 54.345 | 5.160  | 37.644 | 0.00 | 0.00 |
| ATOM | 5780 | HG2  | PRO | X | 384 | 55.117 | 5.039  | 38.404 | 0.00 | 0.00 |
| ATOM | 5781 | HG3  | PRO | X | 384 | 53.519 | 4.449  | 37.653 | 0.00 | 0.00 |
| ATOM | 5782 | CB   | PRO | X | 384 | 53.741 | 6.591  | 37.774 | 0.00 | 0.00 |
| ATOM | 5783 | HB2  | PRO | X | 384 | 53.471 | 6.870  | 38.792 | 0.00 | 0.00 |
| ATOM | 5784 | HB3  | PRO | X | 384 | 52.826 | 6.579  | 37.182 | 0.00 | 0.00 |
| ATOM | 5785 | CA   | PRO | X | 384 | 54.754 | 7.562  | 37.170 | 0.00 | 0.00 |
| ATOM | 5786 | HA   | PRO | X | 384 | 54.253 | 8.372  | 36.640 | 0.00 | 0.00 |
| ATOM | 5787 | C    | PRO | X | 384 | 55.694 | 8.160  | 38.180 | 0.00 | 0.00 |
| ATOM | 5788 | O    | PRO | X | 384 | 55.377 | 9.185  | 38.755 | 0.00 | 0.00 |
| ATOM | 5789 | N    | GLU | X | 385 | 56.848 | 7.572  | 38.439 | 0.00 | 0.00 |
| ATOM | 5790 | H    | GLU | X | 385 | 57.157 | 6.732  | 37.970 | 0.00 | 0.00 |
| ATOM | 5791 | CA   | GLU | X | 385 | 57.707 | 7.906  | 39.572 | 0.00 | 0.00 |
| ATOM | 5792 | HA   | GLU | X | 385 | 57.184 | 8.491  | 40.328 | 0.00 | 0.00 |
| ATOM | 5793 | CB   | GLU | X | 385 | 58.154 | 6.599  | 40.198 | 0.00 | 0.00 |
| ATOM | 5794 | HB2  | GLU | X | 385 | 58.770 | 5.990  | 39.536 | 0.00 | 0.00 |
| ATOM | 5795 | HB3  | GLU | X | 385 | 58.895 | 6.785  | 40.975 | 0.00 | 0.00 |
| ATOM | 5796 | CG   | GLU | X | 385 | 56.917 | 5.916  | 40.893 | 0.00 | 0.00 |
| ATOM | 5797 | HG2  | GLU | X | 385 | 56.401 | 6.607  | 41.560 | 0.00 | 0.00 |
| ATOM | 5798 | HG3  | GLU | X | 385 | 56.165 | 5.556  | 40.190 | 0.00 | 0.00 |
| ATOM | 5799 | CD   | GLU | X | 385 | 57.348 | 4.731  | 41.768 | 0.00 | 0.00 |
| ATOM | 5800 | OE1  | GLU | X | 385 | 57.851 | 3.715  | 41.277 | 0.00 | 0.00 |
| ATOM | 5801 | OE2  | GLU | X | 385 | 57.105 | 4.731  | 42.985 | 0.00 | 0.00 |
| ATOM | 5802 | C    | GLU | X | 385 | 58.944 | 8.797  | 39.143 | 0.00 | 0.00 |
| ATOM | 5803 | O    | GLU | X | 385 | 59.867 | 9.024  | 39.965 | 0.00 | 0.00 |
| ATOM | 5804 | N    | ASP | X | 386 | 59.007 | 9.241  | 37.850 | 0.00 | 0.00 |
| ATOM | 5805 | H    | ASP | X | 386 | 58.244 | 8.953  | 37.254 | 0.00 | 0.00 |
| ATOM | 5806 | CA   | ASP | X | 386 | 59.956 | 10.148 | 37.314 | 0.00 | 0.00 |
| ATOM | 5807 | HA   | ASP | X | 386 | 60.946 | 9.717  | 37.464 | 0.00 | 0.00 |
| ATOM | 5808 | CB   | ASP | X | 386 | 59.845 | 10.142 | 35.781 | 0.00 | 0.00 |
| ATOM | 5809 | HB2  | ASP | X | 386 | 60.014 | 9.137  | 35.394 | 0.00 | 0.00 |
| ATOM | 5810 | HB3  | ASP | X | 386 | 58.825 | 10.458 | 35.564 | 0.00 | 0.00 |
| ATOM | 5811 | CG   | ASP | X | 386 | 60.766 | 11.157 | 35.127 | 0.00 | 0.00 |
| ATOM | 5812 | OD1  | ASP | X | 386 | 61.898 | 10.783 | 34.816 | 0.00 | 0.00 |
| ATOM | 5813 | OD2  | ASP | X | 386 | 60.356 | 12.297 | 34.870 | 0.00 | 0.00 |
| ATOM | 5814 | C    | ASP | X | 386 | 59.780 | 11.595 | 37.888 | 0.00 | 0.00 |

|      |      |      |     |   |     |        |        |        |      |      |
|------|------|------|-----|---|-----|--------|--------|--------|------|------|
| ATOM | 5815 | O    | ASP | X | 386 | 58.685 | 12.124 | 37.882 | 0.00 | 0.00 |
| ATOM | 5816 | N    | PRO | X | 387 | 60.842 | 12.185 | 38.511 | 0.00 | 0.00 |
| ATOM | 5817 | CD   | PRO | X | 387 | 62.160 | 11.631 | 38.558 | 0.00 | 0.00 |
| ATOM | 5818 | HD2  | PRO | X | 387 | 62.619 | 11.648 | 37.570 | 0.00 | 0.00 |
| ATOM | 5819 | HD3  | PRO | X | 387 | 62.163 | 10.601 | 38.916 | 0.00 | 0.00 |
| ATOM | 5820 | CG   | PRO | X | 387 | 62.956 | 12.479 | 39.629 | 0.00 | 0.00 |
| ATOM | 5821 | HG2  | PRO | X | 387 | 63.997 | 12.586 | 39.324 | 0.00 | 0.00 |
| ATOM | 5822 | HG3  | PRO | X | 387 | 62.956 | 11.942 | 40.578 | 0.00 | 0.00 |
| ATOM | 5823 | CB   | PRO | X | 387 | 62.204 | 13.800 | 39.688 | 0.00 | 0.00 |
| ATOM | 5824 | HB2  | PRO | X | 387 | 62.791 | 14.485 | 39.076 | 0.00 | 0.00 |
| ATOM | 5825 | HB3  | PRO | X | 387 | 62.225 | 14.156 | 40.718 | 0.00 | 0.00 |
| ATOM | 5826 | CA   | PRO | X | 387 | 60.784 | 13.495 | 39.211 | 0.00 | 0.00 |
| ATOM | 5827 | HA   | PRO | X | 387 | 60.151 | 13.413 | 40.094 | 0.00 | 0.00 |
| ATOM | 5828 | C    | PRO | X | 387 | 60.257 | 14.614 | 38.321 | 0.00 | 0.00 |
| ATOM | 5829 | O    | PRO | X | 387 | 59.313 | 15.255 | 38.845 | 0.00 | 0.00 |
| ATOM | 5830 | N    | ALA | X | 388 | 60.698 | 14.782 | 37.092 | 0.00 | 0.00 |
| ATOM | 5831 | H    | ALA | X | 388 | 61.252 | 14.055 | 36.662 | 0.00 | 0.00 |
| ATOM | 5832 | CA   | ALA | X | 388 | 60.228 | 15.940 | 36.300 | 0.00 | 0.00 |
| ATOM | 5833 | HA   | ALA | X | 388 | 60.017 | 16.847 | 36.867 | 0.00 | 0.00 |
| ATOM | 5834 | CB   | ALA | X | 388 | 61.231 | 16.248 | 35.169 | 0.00 | 0.00 |
| ATOM | 5835 | HB1  | ALA | X | 388 | 61.340 | 15.366 | 34.539 | 0.00 | 0.00 |
| ATOM | 5836 | HB2  | ALA | X | 388 | 60.778 | 17.001 | 34.523 | 0.00 | 0.00 |
| ATOM | 5837 | HB3  | ALA | X | 388 | 62.209 | 16.547 | 35.546 | 0.00 | 0.00 |
| ATOM | 5838 | C    | ALA | X | 388 | 58.855 | 15.728 | 35.718 | 0.00 | 0.00 |
| ATOM | 5839 | O    | ALA | X | 388 | 58.059 | 16.646 | 35.741 | 0.00 | 0.00 |
| ATOM | 5840 | N    | ARG | X | 389 | 58.466 | 14.443 | 35.451 | 0.00 | 0.00 |
| ATOM | 5841 | H    | ARG | X | 389 | 59.116 | 13.675 | 35.535 | 0.00 | 0.00 |
| ATOM | 5842 | CA   | ARG | X | 389 | 57.107 | 14.161 | 35.134 | 0.00 | 0.00 |
| ATOM | 5843 | HA   | ARG | X | 389 | 56.757 | 14.816 | 34.336 | 0.00 | 0.00 |
| ATOM | 5844 | CB   | ARG | X | 389 | 57.025 | 12.786 | 34.473 | 0.00 | 0.00 |
| ATOM | 5845 | HB2  | ARG | X | 389 | 57.529 | 12.078 | 35.131 | 0.00 | 0.00 |
| ATOM | 5846 | HB3  | ARG | X | 389 | 55.994 | 12.431 | 34.461 | 0.00 | 0.00 |
| ATOM | 5847 | CG   | ARG | X | 389 | 57.566 | 12.628 | 33.062 | 0.00 | 0.00 |
| ATOM | 5848 | HG2  | ARG | X | 389 | 56.917 | 13.016 | 32.277 | 0.00 | 0.00 |
| ATOM | 5849 | HG3  | ARG | X | 389 | 58.518 | 13.132 | 32.895 | 0.00 | 0.00 |
| ATOM | 5850 | CD   | ARG | X | 389 | 57.862 | 11.144 | 32.735 | 0.00 | 0.00 |
| ATOM | 5851 | HD2  | ARG | X | 389 | 58.673 | 10.862 | 33.407 | 0.00 | 0.00 |
| ATOM | 5852 | HD3  | ARG | X | 389 | 56.987 | 10.528 | 32.945 | 0.00 | 0.00 |
| ATOM | 5853 | NE   | ARG | X | 389 | 58.174 | 10.829 | 31.337 | 0.00 | 0.00 |
| ATOM | 5854 | HE   | ARG | X | 389 | 59.151 | 10.662 | 31.140 | 0.00 | 0.00 |
| ATOM | 5855 | CZ   | ARG | X | 389 | 57.357 | 10.779 | 30.323 | 0.00 | 0.00 |
| ATOM | 5856 | NH1  | ARG | X | 389 | 56.072 | 10.789 | 30.460 | 0.00 | 0.00 |
| ATOM | 5857 | HH11 | ARG | X | 389 | 55.637 | 10.769 | 31.371 | 0.00 | 0.00 |
| ATOM | 5858 | HH12 | ARG | X | 389 | 55.509 | 10.724 | 29.623 | 0.00 | 0.00 |
| ATOM | 5859 | NH2  | ARG | X | 389 | 57.893 | 10.719 | 29.149 | 0.00 | 0.00 |
| ATOM | 5860 | HH21 | ARG | X | 389 | 58.845 | 10.449 | 28.947 | 0.00 | 0.00 |
| ATOM | 5861 | HH22 | ARG | X | 389 | 57.251 | 10.891 | 28.389 | 0.00 | 0.00 |
| ATOM | 5862 | C    | ARG | X | 389 | 56.172 | 14.236 | 36.284 | 0.00 | 0.00 |
| ATOM | 5863 | O    | ARG | X | 389 | 54.967 | 14.596 | 36.113 | 0.00 | 0.00 |
| ATOM | 5864 | N    | LEU | X | 390 | 56.674 | 14.138 | 37.462 | 0.00 | 0.00 |
| ATOM | 5865 | H    | LEU | X | 390 | 57.652 | 13.891 | 37.435 | 0.00 | 0.00 |
| ATOM | 5866 | CA   | LEU | X | 390 | 55.880 | 14.311 | 38.738 | 0.00 | 0.00 |
| ATOM | 5867 | HA   | LEU | X | 390 | 54.861 | 13.998 | 38.511 | 0.00 | 0.00 |
| ATOM | 5868 | CB   | LEU | X | 390 | 56.536 | 13.696 | 39.980 | 0.00 | 0.00 |
| ATOM | 5869 | HB2  | LEU | X | 390 | 57.595 | 13.956 | 39.955 | 0.00 | 0.00 |
| ATOM | 5870 | HB3  | LEU | X | 390 | 56.053 | 14.176 | 40.831 | 0.00 | 0.00 |
| ATOM | 5871 | CG   | LEU | X | 390 | 56.401 | 12.183 | 40.135 | 0.00 | 0.00 |
| ATOM | 5872 | HG   | LEU | X | 390 | 56.555 | 11.550 | 39.261 | 0.00 | 0.00 |
| ATOM | 5873 | CD1  | LEU | X | 390 | 57.485 | 11.720 | 41.132 | 0.00 | 0.00 |
| ATOM | 5874 | HD11 | LEU | X | 390 | 57.388 | 10.634 | 41.132 | 0.00 | 0.00 |
| ATOM | 5875 | HD12 | LEU | X | 390 | 58.473 | 12.010 | 40.773 | 0.00 | 0.00 |
| ATOM | 5876 | HD13 | LEU | X | 390 | 57.201 | 12.045 | 42.132 | 0.00 | 0.00 |
| ATOM | 5877 | CD2  | LEU | X | 390 | 55.085 | 11.841 | 40.786 | 0.00 | 0.00 |
| ATOM | 5878 | HD21 | LEU | X | 390 | 55.064 | 12.310 | 41.769 | 0.00 | 0.00 |
| ATOM | 5879 | HD22 | LEU | X | 390 | 54.372 | 12.181 | 40.035 | 0.00 | 0.00 |
| ATOM | 5880 | HD23 | LEU | X | 390 | 54.853 | 10.777 | 40.731 | 0.00 | 0.00 |
| ATOM | 5881 | C    | LEU | X | 390 | 55.715 | 15.785 | 39.046 | 0.00 | 0.00 |
| ATOM | 5882 | O    | LEU | X | 390 | 54.598 | 16.251 | 39.232 | 0.00 | 0.00 |
| ATOM | 5883 | N    | ARG | X | 391 | 56.753 | 16.521 | 38.843 | 0.00 | 0.00 |
| ATOM | 5884 | H    | ARG | X | 391 | 57.659 | 16.121 | 38.647 | 0.00 | 0.00 |



|      |      |      |     |   |     |        |        |        |      |      |
|------|------|------|-----|---|-----|--------|--------|--------|------|------|
| ATOM | 5885 | CA   | ARG | X | 391 | 56.787 | 17.996 | 38.792 | 0.00 | 0.00 |
| ATOM | 5886 | HA   | ARG | X | 391 | 56.660 | 18.349 | 39.816 | 0.00 | 0.00 |
| ATOM | 5887 | CB   | ARG | X | 391 | 58.252 | 18.517 | 38.431 | 0.00 | 0.00 |
| ATOM | 5888 | HB2  | ARG | X | 391 | 58.992 | 17.937 | 38.984 | 0.00 | 0.00 |
| ATOM | 5889 | HB3  | ARG | X | 391 | 58.448 | 18.416 | 37.364 | 0.00 | 0.00 |
| ATOM | 5890 | CG   | ARG | X | 391 | 58.557 | 19.947 | 38.853 | 0.00 | 0.00 |
| ATOM | 5891 | HG2  | ARG | X | 391 | 57.747 | 20.627 | 38.586 | 0.00 | 0.00 |
| ATOM | 5892 | HG3  | ARG | X | 391 | 58.826 | 19.930 | 39.909 | 0.00 | 0.00 |
| ATOM | 5893 | CD   | ARG | X | 391 | 59.812 | 20.587 | 38.198 | 0.00 | 0.00 |
| ATOM | 5894 | HD2  | ARG | X | 391 | 59.595 | 20.931 | 37.187 | 0.00 | 0.00 |
| ATOM | 5895 | HD3  | ARG | X | 391 | 59.954 | 21.446 | 38.854 | 0.00 | 0.00 |
| ATOM | 5896 | NE   | ARG | X | 391 | 61.043 | 19.763 | 38.265 | 0.00 | 0.00 |
| ATOM | 5897 | HE   | ARG | X | 391 | 61.426 | 19.639 | 39.192 | 0.00 | 0.00 |
| ATOM | 5898 | CZ   | ARG | X | 391 | 61.811 | 19.297 | 37.222 | 0.00 | 0.00 |
| ATOM | 5899 | NH1  | ARG | X | 391 | 61.525 | 19.383 | 35.975 | 0.00 | 0.00 |
| ATOM | 5900 | HH11 | ARG | X | 391 | 60.639 | 19.743 | 35.649 | 0.00 | 0.00 |
| ATOM | 5901 | HH12 | ARG | X | 391 | 62.206 | 19.378 | 35.229 | 0.00 | 0.00 |
| ATOM | 5902 | NH2  | ARG | X | 391 | 62.943 | 18.621 | 37.458 | 0.00 | 0.00 |
| ATOM | 5903 | HH21 | ARG | X | 391 | 63.376 | 18.700 | 38.367 | 0.00 | 0.00 |
| ATOM | 5904 | HH22 | ARG | X | 391 | 63.421 | 18.294 | 36.631 | 0.00 | 0.00 |
| ATOM | 5905 | C    | ARG | X | 391 | 55.780 | 18.587 | 37.775 | 0.00 | 0.00 |
| ATOM | 5906 | O    | ARG | X | 391 | 54.980 | 19.349 | 38.210 | 0.00 | 0.00 |
| ATOM | 5907 | N    | GLU | X | 392 | 55.862 | 18.222 | 36.518 | 0.00 | 0.00 |
| ATOM | 5908 | H    | GLU | X | 392 | 56.606 | 17.587 | 36.266 | 0.00 | 0.00 |
| ATOM | 5909 | CA   | GLU | X | 392 | 54.904 | 18.600 | 35.461 | 0.00 | 0.00 |
| ATOM | 5910 | HA   | GLU | X | 392 | 55.005 | 19.672 | 35.297 | 0.00 | 0.00 |
| ATOM | 5911 | CB   | GLU | X | 392 | 55.171 | 17.956 | 34.118 | 0.00 | 0.00 |
| ATOM | 5912 | HB2  | GLU | X | 392 | 56.246 | 18.042 | 33.961 | 0.00 | 0.00 |
| ATOM | 5913 | HB3  | GLU | X | 392 | 54.985 | 16.883 | 34.172 | 0.00 | 0.00 |
| ATOM | 5914 | CG   | GLU | X | 392 | 54.409 | 18.563 | 32.967 | 0.00 | 0.00 |
| ATOM | 5915 | HG2  | GLU | X | 392 | 53.395 | 18.212 | 33.156 | 0.00 | 0.00 |
| ATOM | 5916 | HG3  | GLU | X | 392 | 54.419 | 19.647 | 33.083 | 0.00 | 0.00 |
| ATOM | 5917 | CD   | GLU | X | 392 | 54.853 | 18.104 | 31.630 | 0.00 | 0.00 |
| ATOM | 5918 | OE1  | GLU | X | 392 | 54.448 | 17.106 | 31.020 | 0.00 | 0.00 |
| ATOM | 5919 | OE2  | GLU | X | 392 | 55.765 | 18.874 | 31.208 | 0.00 | 0.00 |
| ATOM | 5920 | C    | GLU | X | 392 | 53.426 | 18.486 | 35.988 | 0.00 | 0.00 |
| ATOM | 5921 | O    | GLU | X | 392 | 52.589 | 19.305 | 35.650 | 0.00 | 0.00 |
| ATOM | 5922 | N    | ALA | X | 393 | 53.062 | 17.448 | 36.761 | 0.00 | 0.00 |
| ATOM | 5923 | H    | ALA | X | 393 | 53.714 | 16.741 | 37.071 | 0.00 | 0.00 |
| ATOM | 5924 | CA   | ALA | X | 393 | 51.691 | 17.183 | 37.111 | 0.00 | 0.00 |
| ATOM | 5925 | HA   | ALA | X | 393 | 51.002 | 17.264 | 36.271 | 0.00 | 0.00 |
| ATOM | 5926 | CB   | ALA | X | 393 | 51.615 | 15.791 | 37.613 | 0.00 | 0.00 |
| ATOM | 5927 | HB1  | ALA | X | 393 | 52.408 | 15.478 | 38.293 | 0.00 | 0.00 |
| ATOM | 5928 | HB2  | ALA | X | 393 | 50.720 | 15.761 | 38.234 | 0.00 | 0.00 |
| ATOM | 5929 | HB3  | ALA | X | 393 | 51.327 | 15.150 | 36.780 | 0.00 | 0.00 |
| ATOM | 5930 | C    | ALA | X | 393 | 51.267 | 18.246 | 38.157 | 0.00 | 0.00 |
| ATOM | 5931 | O    | ALA | X | 393 | 50.206 | 18.899 | 37.974 | 0.00 | 0.00 |
| ATOM | 5932 | N    | LEU | X | 394 | 52.056 | 18.479 | 39.209 | 0.00 | 0.00 |
| ATOM | 5933 | H    | LEU | X | 394 | 52.908 | 17.940 | 39.278 | 0.00 | 0.00 |
| ATOM | 5934 | CA   | LEU | X | 394 | 51.754 | 19.498 | 40.213 | 0.00 | 0.00 |
| ATOM | 5935 | HA   | LEU | X | 394 | 50.823 | 19.227 | 40.712 | 0.00 | 0.00 |
| ATOM | 5936 | CB   | LEU | X | 394 | 52.776 | 19.413 | 41.324 | 0.00 | 0.00 |
| ATOM | 5937 | HB2  | LEU | X | 394 | 52.880 | 18.396 | 41.703 | 0.00 | 0.00 |
| ATOM | 5938 | HB3  | LEU | X | 394 | 53.772 | 19.564 | 40.909 | 0.00 | 0.00 |
| ATOM | 5939 | CG   | LEU | X | 394 | 52.566 | 20.435 | 42.403 | 0.00 | 0.00 |
| ATOM | 5940 | HG   | LEU | X | 394 | 52.418 | 21.435 | 41.996 | 0.00 | 0.00 |
| ATOM | 5941 | CD1  | LEU | X | 394 | 51.315 | 20.138 | 43.281 | 0.00 | 0.00 |
| ATOM | 5942 | HD11 | LEU | X | 394 | 50.460 | 20.215 | 42.610 | 0.00 | 0.00 |
| ATOM | 5943 | HD12 | LEU | X | 394 | 51.381 | 19.161 | 43.761 | 0.00 | 0.00 |
| ATOM | 5944 | HD13 | LEU | X | 394 | 51.236 | 20.870 | 44.085 | 0.00 | 0.00 |
| ATOM | 5945 | CD2  | LEU | X | 394 | 53.878 | 20.408 | 43.270 | 0.00 | 0.00 |
| ATOM | 5946 | HD21 | LEU | X | 394 | 54.028 | 19.490 | 43.837 | 0.00 | 0.00 |
| ATOM | 5947 | HD22 | LEU | X | 394 | 54.779 | 20.675 | 42.717 | 0.00 | 0.00 |
| ATOM | 5948 | HD23 | LEU | X | 394 | 53.802 | 21.239 | 43.971 | 0.00 | 0.00 |
| ATOM | 5949 | C    | LEU | X | 394 | 51.679 | 20.951 | 39.657 | 0.00 | 0.00 |
| ATOM | 5950 | O    | LEU | X | 394 | 50.768 | 21.691 | 39.947 | 0.00 | 0.00 |
| ATOM | 5951 | N    | SER | X | 395 | 52.596 | 21.221 | 38.700 | 0.00 | 0.00 |
| ATOM | 5952 | H    | SER | X | 395 | 53.211 | 20.453 | 38.472 | 0.00 | 0.00 |
| ATOM | 5953 | CA   | SER | X | 395 | 52.673 | 22.388 | 37.800 | 0.00 | 0.00 |
| ATOM | 5954 | HA   | SER | X | 395 | 52.787 | 23.273 | 38.425 | 0.00 | 0.00 |

|      |      |      |     |   |     |        |        |        |      |      |
|------|------|------|-----|---|-----|--------|--------|--------|------|------|
| ATOM | 5955 | CB   | SER | X | 395 | 53.853 | 22.464 | 36.836 | 0.00 | 0.00 |
| ATOM | 5956 | HB2  | SER | X | 395 | 53.725 | 21.670 | 36.099 | 0.00 | 0.00 |
| ATOM | 5957 | HB3  | SER | X | 395 | 53.871 | 23.403 | 36.283 | 0.00 | 0.00 |
| ATOM | 5958 | OG   | SER | X | 395 | 55.042 | 22.224 | 37.604 | 0.00 | 0.00 |
| ATOM | 5959 | HG   | SER | X | 395 | 54.999 | 21.346 | 37.991 | 0.00 | 0.00 |
| ATOM | 5960 | C    | SER | X | 395 | 51.327 | 22.550 | 36.946 | 0.00 | 0.00 |
| ATOM | 5961 | O    | SER | X | 395 | 50.970 | 23.669 | 36.608 | 0.00 | 0.00 |
| ATOM | 5962 | N    | ASP | X | 396 | 50.615 | 21.522 | 36.568 | 0.00 | 0.00 |
| ATOM | 5963 | H    | ASP | X | 396 | 50.978 | 20.586 | 36.683 | 0.00 | 0.00 |
| ATOM | 5964 | CA   | ASP | X | 396 | 49.376 | 21.558 | 35.801 | 0.00 | 0.00 |
| ATOM | 5965 | HA   | ASP | X | 396 | 49.503 | 22.425 | 35.152 | 0.00 | 0.00 |
| ATOM | 5966 | CB   | ASP | X | 396 | 49.240 | 20.260 | 34.987 | 0.00 | 0.00 |
| ATOM | 5967 | HB2  | ASP | X | 396 | 50.074 | 20.221 | 34.286 | 0.00 | 0.00 |
| ATOM | 5968 | HB3  | ASP | X | 396 | 49.341 | 19.392 | 35.638 | 0.00 | 0.00 |
| ATOM | 5969 | CG   | ASP | X | 396 | 47.936 | 20.271 | 34.189 | 0.00 | 0.00 |
| ATOM | 5970 | OD1  | ASP | X | 396 | 47.455 | 21.410 | 33.876 | 0.00 | 0.00 |
| ATOM | 5971 | OD2  | ASP | X | 396 | 47.350 | 19.197 | 33.865 | 0.00 | 0.00 |
| ATOM | 5972 | C    | ASP | X | 396 | 48.185 | 21.802 | 36.758 | 0.00 | 0.00 |
| ATOM | 5973 | O    | ASP | X | 396 | 47.239 | 22.594 | 36.465 | 0.00 | 0.00 |
| ATOM | 5974 | N    | VAL | X | 397 | 48.315 | 21.270 | 37.997 | 0.00 | 0.00 |
| ATOM | 5975 | H    | VAL | X | 397 | 49.205 | 20.806 | 38.112 | 0.00 | 0.00 |
| ATOM | 5976 | CA   | VAL | X | 397 | 47.348 | 21.392 | 39.101 | 0.00 | 0.00 |
| ATOM | 5977 | HA   | VAL | X | 397 | 46.331 | 21.104 | 38.838 | 0.00 | 0.00 |
| ATOM | 5978 | CB   | VAL | X | 397 | 47.621 | 20.386 | 40.265 | 0.00 | 0.00 |
| ATOM | 5979 | HB   | VAL | X | 397 | 48.706 | 20.354 | 40.363 | 0.00 | 0.00 |
| ATOM | 5980 | CG1  | VAL | X | 397 | 47.146 | 20.837 | 41.665 | 0.00 | 0.00 |
| ATOM | 5981 | HG11 | VAL | X | 397 | 47.152 | 20.031 | 42.399 | 0.00 | 0.00 |
| ATOM | 5982 | HG12 | VAL | X | 397 | 47.770 | 21.667 | 41.995 | 0.00 | 0.00 |
| ATOM | 5983 | HG13 | VAL | X | 397 | 46.160 | 21.294 | 41.742 | 0.00 | 0.00 |
| ATOM | 5984 | CG2  | VAL | X | 397 | 47.159 | 18.977 | 39.893 | 0.00 | 0.00 |
| ATOM | 5985 | HG21 | VAL | X | 397 | 47.703 | 18.595 | 39.029 | 0.00 | 0.00 |
| ATOM | 5986 | HG22 | VAL | X | 397 | 47.341 | 18.287 | 40.718 | 0.00 | 0.00 |
| ATOM | 5987 | HG23 | VAL | X | 397 | 46.112 | 18.977 | 39.590 | 0.00 | 0.00 |
| ATOM | 5988 | C    | VAL | X | 397 | 47.368 | 22.775 | 39.710 | 0.00 | 0.00 |
| ATOM | 5989 | O    | VAL | X | 397 | 46.218 | 23.286 | 39.820 | 0.00 | 0.00 |
| ATOM | 5990 | N    | VAL | X | 398 | 48.475 | 23.338 | 40.069 | 0.00 | 0.00 |
| ATOM | 5991 | H    | VAL | X | 398 | 49.244 | 22.695 | 39.945 | 0.00 | 0.00 |
| ATOM | 5992 | CA   | VAL | X | 398 | 48.757 | 24.479 | 40.985 | 0.00 | 0.00 |
| ATOM | 5993 | HA   | VAL | X | 398 | 48.167 | 24.372 | 41.895 | 0.00 | 0.00 |
| ATOM | 5994 | CB   | VAL | X | 398 | 50.248 | 24.604 | 41.403 | 0.00 | 0.00 |
| ATOM | 5995 | HB   | VAL | X | 398 | 50.606 | 23.634 | 41.745 | 0.00 | 0.00 |
| ATOM | 5996 | CG1  | VAL | X | 398 | 51.125 | 24.897 | 40.151 | 0.00 | 0.00 |
| ATOM | 5997 | HG11 | VAL | X | 398 | 50.898 | 25.843 | 39.661 | 0.00 | 0.00 |
| ATOM | 5998 | HG12 | VAL | X | 398 | 52.192 | 24.931 | 40.372 | 0.00 | 0.00 |
| ATOM | 5999 | HG13 | VAL | X | 398 | 50.908 | 24.153 | 39.384 | 0.00 | 0.00 |
| ATOM | 6000 | CG2  | VAL | X | 398 | 50.518 | 25.680 | 42.466 | 0.00 | 0.00 |
| ATOM | 6001 | HG21 | VAL | X | 398 | 51.543 | 25.531 | 42.808 | 0.00 | 0.00 |
| ATOM | 6002 | HG22 | VAL | X | 398 | 50.325 | 26.695 | 42.119 | 0.00 | 0.00 |
| ATOM | 6003 | HG23 | VAL | X | 398 | 49.890 | 25.418 | 43.317 | 0.00 | 0.00 |
| ATOM | 6004 | C    | VAL | X | 398 | 48.149 | 25.838 | 40.614 | 0.00 | 0.00 |
| ATOM | 6005 | O    | VAL | X | 398 | 47.643 | 26.611 | 41.487 | 0.00 | 0.00 |
| ATOM | 6006 | N    | GLY | X | 399 | 48.088 | 26.210 | 39.372 | 0.00 | 0.00 |
| ATOM | 6007 | H    | GLY | X | 399 | 48.354 | 25.578 | 38.630 | 0.00 | 0.00 |
| ATOM | 6008 | CA   | GLY | X | 399 | 47.665 | 27.552 | 38.891 | 0.00 | 0.00 |
| ATOM | 6009 | HA2  | GLY | X | 399 | 47.861 | 28.311 | 39.677 | 0.00 | 0.00 |
| ATOM | 6010 | HA3  | GLY | X | 399 | 48.167 | 27.841 | 37.965 | 0.00 | 0.00 |
| ATOM | 6011 | C    | GLY | X | 399 | 46.233 | 27.537 | 38.548 | 0.00 | 0.00 |
| ATOM | 6012 | O    | GLY | X | 399 | 45.694 | 28.679 | 38.486 | 0.00 | 0.00 |
| ATOM | 6013 | N    | ASP | X | 400 | 45.516 | 26.433 | 38.427 | 0.00 | 0.00 |
| ATOM | 6014 | H    | ASP | X | 400 | 46.029 | 25.609 | 38.703 | 0.00 | 0.00 |
| ATOM | 6015 | CA   | ASP | X | 400 | 44.129 | 26.358 | 38.054 | 0.00 | 0.00 |
| ATOM | 6016 | HA   | ASP | X | 400 | 43.987 | 26.933 | 37.138 | 0.00 | 0.00 |
| ATOM | 6017 | CB   | ASP | X | 400 | 43.800 | 24.863 | 37.662 | 0.00 | 0.00 |
| ATOM | 6018 | HB2  | ASP | X | 400 | 44.159 | 24.197 | 38.447 | 0.00 | 0.00 |
| ATOM | 6019 | HB3  | ASP | X | 400 | 42.729 | 24.707 | 37.792 | 0.00 | 0.00 |
| ATOM | 6020 | CG   | ASP | X | 400 | 44.330 | 24.284 | 36.322 | 0.00 | 0.00 |
| ATOM | 6021 | OD1  | ASP | X | 400 | 45.186 | 24.964 | 35.660 | 0.00 | 0.00 |
| ATOM | 6022 | OD2  | ASP | X | 400 | 44.037 | 23.168 | 36.001 | 0.00 | 0.00 |
| ATOM | 6023 | C    | ASP | X | 400 | 43.225 | 26.923 | 39.104 | 0.00 | 0.00 |
| ATOM | 6024 | O    | ASP | X | 400 | 42.733 | 28.068 | 38.846 | 0.00 | 0.00 |

|      |      |      |     |   |     |        |        |        |      |      |
|------|------|------|-----|---|-----|--------|--------|--------|------|------|
| ATOM | 6025 | N    | HIE | X | 401 | 43.037 | 26.273 | 40.168 | 0.00 | 0.00 |
| ATOM | 6026 | H    | HIE | X | 401 | 43.383 | 25.324 | 40.147 | 0.00 | 0.00 |
| ATOM | 6027 | CA   | HIE | X | 401 | 42.049 | 26.583 | 41.181 | 0.00 | 0.00 |
| ATOM | 6028 | HA   | HIE | X | 401 | 41.096 | 26.712 | 40.668 | 0.00 | 0.00 |
| ATOM | 6029 | CB   | HIE | X | 401 | 41.936 | 25.274 | 42.052 | 0.00 | 0.00 |
| ATOM | 6030 | HB2  | HIE | X | 401 | 41.005 | 25.290 | 42.618 | 0.00 | 0.00 |
| ATOM | 6031 | HB3  | HIE | X | 401 | 41.834 | 24.292 | 41.589 | 0.00 | 0.00 |
| ATOM | 6032 | CG   | HIE | X | 401 | 43.031 | 25.152 | 43.049 | 0.00 | 0.00 |
| ATOM | 6033 | ND1  | HIE | X | 401 | 42.914 | 25.545 | 44.401 | 0.00 | 0.00 |
| ATOM | 6034 | CE1  | HIE | X | 401 | 44.181 | 25.445 | 44.844 | 0.00 | 0.00 |
| ATOM | 6035 | HE1  | HIE | X | 401 | 44.503 | 25.501 | 45.873 | 0.00 | 0.00 |
| ATOM | 6036 | NE2  | HIE | X | 401 | 45.004 | 24.965 | 43.935 | 0.00 | 0.00 |
| ATOM | 6037 | HE2  | HIE | X | 401 | 45.954 | 24.665 | 44.099 | 0.00 | 0.00 |
| ATOM | 6038 | CD2  | HIE | X | 401 | 44.276 | 24.759 | 42.786 | 0.00 | 0.00 |
| ATOM | 6039 | HD2  | HIE | X | 401 | 44.670 | 24.510 | 41.812 | 0.00 | 0.00 |
| ATOM | 6040 | C    | HIE | X | 401 | 42.421 | 27.923 | 41.949 | 0.00 | 0.00 |
| ATOM | 6041 | O    | HIE | X | 401 | 41.500 | 28.683 | 42.289 | 0.00 | 0.00 |
| ATOM | 6042 | N    | ASN | X | 402 | 43.728 | 28.173 | 42.117 | 0.00 | 0.00 |
| ATOM | 6043 | H    | ASN | X | 402 | 44.417 | 27.452 | 41.958 | 0.00 | 0.00 |
| ATOM | 6044 | CA   | ASN | X | 402 | 44.260 | 29.334 | 42.813 | 0.00 | 0.00 |
| ATOM | 6045 | HA   | ASN | X | 402 | 43.739 | 29.556 | 43.745 | 0.00 | 0.00 |
| ATOM | 6046 | CB   | ASN | X | 402 | 45.728 | 29.077 | 43.009 | 0.00 | 0.00 |
| ATOM | 6047 | HB2  | ASN | X | 402 | 46.166 | 28.515 | 42.184 | 0.00 | 0.00 |
| ATOM | 6048 | HB3  | ASN | X | 402 | 46.186 | 30.066 | 43.017 | 0.00 | 0.00 |
| ATOM | 6049 | CG   | ASN | X | 402 | 46.068 | 28.426 | 44.319 | 0.00 | 0.00 |
| ATOM | 6050 | OD1  | ASN | X | 402 | 45.527 | 28.820 | 45.386 | 0.00 | 0.00 |
| ATOM | 6051 | ND2  | ASN | X | 402 | 46.802 | 27.338 | 44.284 | 0.00 | 0.00 |
| ATOM | 6052 | HD21 | ASN | X | 402 | 46.892 | 26.756 | 45.104 | 0.00 | 0.00 |
| ATOM | 6053 | HD22 | ASN | X | 402 | 47.043 | 26.887 | 43.413 | 0.00 | 0.00 |
| ATOM | 6054 | C    | ASN | X | 402 | 44.007 | 30.620 | 41.847 | 0.00 | 0.00 |
| ATOM | 6055 | O    | ASN | X | 402 | 43.648 | 31.636 | 42.450 | 0.00 | 0.00 |
| ATOM | 6056 | N    | VAL | X | 403 | 44.130 | 30.594 | 40.494 | 0.00 | 0.00 |
| ATOM | 6057 | H    | VAL | X | 403 | 44.452 | 29.718 | 40.106 | 0.00 | 0.00 |
| ATOM | 6058 | CA   | VAL | X | 403 | 43.966 | 31.843 | 39.645 | 0.00 | 0.00 |
| ATOM | 6059 | HA   | VAL | X | 403 | 43.241 | 32.475 | 40.158 | 0.00 | 0.00 |
| ATOM | 6060 | CB   | VAL | X | 403 | 45.275 | 32.607 | 39.425 | 0.00 | 0.00 |
| ATOM | 6061 | HB   | VAL | X | 403 | 45.080 | 33.393 | 38.695 | 0.00 | 0.00 |
| ATOM | 6062 | CG1  | VAL | X | 403 | 45.537 | 33.346 | 40.780 | 0.00 | 0.00 |
| ATOM | 6063 | HG11 | VAL | X | 403 | 44.628 | 33.849 | 41.110 | 0.00 | 0.00 |
| ATOM | 6064 | HG12 | VAL | X | 403 | 45.846 | 32.621 | 41.533 | 0.00 | 0.00 |
| ATOM | 6065 | HG13 | VAL | X | 403 | 46.359 | 34.061 | 40.742 | 0.00 | 0.00 |
| ATOM | 6066 | CG2  | VAL | X | 403 | 46.516 | 31.718 | 39.104 | 0.00 | 0.00 |
| ATOM | 6067 | HG21 | VAL | X | 403 | 46.430 | 31.324 | 38.092 | 0.00 | 0.00 |
| ATOM | 6068 | HG22 | VAL | X | 403 | 47.369 | 32.380 | 39.250 | 0.00 | 0.00 |
| ATOM | 6069 | HG23 | VAL | X | 403 | 46.692 | 30.833 | 39.716 | 0.00 | 0.00 |
| ATOM | 6070 | C    | VAL | X | 403 | 43.309 | 31.653 | 38.266 | 0.00 | 0.00 |
| ATOM | 6071 | O    | VAL | X | 403 | 42.346 | 32.383 | 37.965 | 0.00 | 0.00 |
| ATOM | 6072 | N    | VAL | X | 404 | 43.788 | 30.661 | 37.409 | 0.00 | 0.00 |
| ATOM | 6073 | H    | VAL | X | 404 | 44.551 | 30.059 | 37.682 | 0.00 | 0.00 |
| ATOM | 6074 | CA   | VAL | X | 404 | 43.364 | 30.575 | 35.966 | 0.00 | 0.00 |
| ATOM | 6075 | HA   | VAL | X | 404 | 43.487 | 31.572 | 35.545 | 0.00 | 0.00 |
| ATOM | 6076 | CB   | VAL | X | 404 | 44.209 | 29.606 | 35.030 | 0.00 | 0.00 |
| ATOM | 6077 | HB   | VAL | X | 404 | 44.183 | 28.581 | 35.400 | 0.00 | 0.00 |
| ATOM | 6078 | CG1  | VAL | X | 404 | 43.720 | 29.649 | 33.602 | 0.00 | 0.00 |
| ATOM | 6079 | HG11 | VAL | X | 404 | 42.643 | 29.483 | 33.606 | 0.00 | 0.00 |
| ATOM | 6080 | HG12 | VAL | X | 404 | 43.966 | 30.600 | 33.130 | 0.00 | 0.00 |
| ATOM | 6081 | HG13 | VAL | X | 404 | 44.379 | 28.935 | 33.107 | 0.00 | 0.00 |
| ATOM | 6082 | CG2  | VAL | X | 404 | 45.679 | 29.979 | 35.044 | 0.00 | 0.00 |
| ATOM | 6083 | HG21 | VAL | X | 404 | 46.216 | 29.150 | 34.584 | 0.00 | 0.00 |
| ATOM | 6084 | HG22 | VAL | X | 404 | 45.969 | 30.778 | 34.362 | 0.00 | 0.00 |
| ATOM | 6085 | HG23 | VAL | X | 404 | 45.980 | 30.061 | 36.089 | 0.00 | 0.00 |
| ATOM | 6086 | C    | VAL | X | 404 | 41.792 | 30.268 | 35.951 | 0.00 | 0.00 |
| ATOM | 6087 | O    | VAL | X | 404 | 41.173 | 30.759 | 35.051 | 0.00 | 0.00 |
| ATOM | 6088 | N    | CYX | X | 405 | 41.260 | 29.408 | 36.823 | 0.00 | 0.00 |
| ATOM | 6089 | H    | CYX | X | 405 | 41.903 | 28.979 | 37.474 | 0.00 | 0.00 |
| ATOM | 6090 | CA   | CYX | X | 405 | 39.806 | 29.131 | 36.822 | 0.00 | 0.00 |
| ATOM | 6091 | HA   | CYX | X | 405 | 39.485 | 29.004 | 35.788 | 0.00 | 0.00 |
| ATOM | 6092 | CB   | CYX | X | 405 | 39.487 | 27.829 | 37.595 | 0.00 | 0.00 |
| ATOM | 6093 | HB2  | CYX | X | 405 | 40.001 | 27.813 | 38.556 | 0.00 | 0.00 |
| ATOM | 6094 | HB3  | CYX | X | 405 | 38.404 | 27.814 | 37.715 | 0.00 | 0.00 |

|      |      |      |     |   |     |        |        |        |      |      |
|------|------|------|-----|---|-----|--------|--------|--------|------|------|
| ATOM | 6095 | SG   | CYX | X | 405 | 40.081 | 26.414 | 36.691 | 0.00 | 0.00 |
| ATOM | 6096 | C    | CYX | X | 405 | 39.004 | 30.336 | 37.376 | 0.00 | 0.00 |
| ATOM | 6097 | O    | CYX | X | 405 | 38.062 | 30.771 | 36.752 | 0.00 | 0.00 |
| ATOM | 6098 | N    | PRO | X | 406 | 39.466 | 31.006 | 38.497 | 0.00 | 0.00 |
| ATOM | 6099 | CD   | PRO | X | 406 | 40.309 | 30.479 | 39.571 | 0.00 | 0.00 |
| ATOM | 6100 | HD2  | PRO | X | 406 | 41.363 | 30.489 | 39.292 | 0.00 | 0.00 |
| ATOM | 6101 | HD3  | PRO | X | 406 | 40.009 | 29.478 | 39.881 | 0.00 | 0.00 |
| ATOM | 6102 | CG   | PRO | X | 406 | 40.181 | 31.391 | 40.775 | 0.00 | 0.00 |
| ATOM | 6103 | HG2  | PRO | X | 406 | 41.159 | 31.398 | 41.257 | 0.00 | 0.00 |
| ATOM | 6104 | HG3  | PRO | X | 406 | 39.369 | 30.911 | 41.322 | 0.00 | 0.00 |
| ATOM | 6105 | CB   | PRO | X | 406 | 39.783 | 32.713 | 40.119 | 0.00 | 0.00 |
| ATOM | 6106 | HB2  | PRO | X | 406 | 40.691 | 33.187 | 39.745 | 0.00 | 0.00 |
| ATOM | 6107 | HB3  | PRO | X | 406 | 39.251 | 33.330 | 40.843 | 0.00 | 0.00 |
| ATOM | 6108 | CA   | PRO | X | 406 | 38.889 | 32.293 | 38.961 | 0.00 | 0.00 |
| ATOM | 6109 | HA   | PRO | X | 406 | 37.892 | 32.098 | 39.354 | 0.00 | 0.00 |
| ATOM | 6110 | C    | PRO | X | 406 | 38.779 | 33.454 | 37.900 | 0.00 | 0.00 |
| ATOM | 6111 | O    | PRO | X | 406 | 37.735 | 34.098 | 37.927 | 0.00 | 0.00 |
| ATOM | 6112 | N    | VAL | X | 407 | 39.726 | 33.563 | 36.980 | 0.00 | 0.00 |
| ATOM | 6113 | H    | VAL | X | 407 | 40.651 | 33.263 | 37.252 | 0.00 | 0.00 |
| ATOM | 6114 | CA   | VAL | X | 407 | 39.609 | 34.447 | 35.761 | 0.00 | 0.00 |
| ATOM | 6115 | HA   | VAL | X | 407 | 39.391 | 35.422 | 36.197 | 0.00 | 0.00 |
| ATOM | 6116 | CB   | VAL | X | 407 | 40.918 | 34.545 | 34.930 | 0.00 | 0.00 |
| ATOM | 6117 | HB   | VAL | X | 407 | 41.337 | 33.576 | 34.659 | 0.00 | 0.00 |
| ATOM | 6118 | CG1  | VAL | X | 407 | 40.747 | 35.101 | 33.568 | 0.00 | 0.00 |
| ATOM | 6119 | HG11 | VAL | X | 407 | 40.253 | 36.072 | 33.598 | 0.00 | 0.00 |
| ATOM | 6120 | HG12 | VAL | X | 407 | 41.700 | 35.180 | 33.046 | 0.00 | 0.00 |
| ATOM | 6121 | HG13 | VAL | X | 407 | 40.046 | 34.543 | 32.947 | 0.00 | 0.00 |
| ATOM | 6122 | CG2  | VAL | X | 407 | 41.850 | 35.493 | 35.770 | 0.00 | 0.00 |
| ATOM | 6123 | HG21 | VAL | X | 407 | 42.126 | 35.030 | 36.717 | 0.00 | 0.00 |
| ATOM | 6124 | HG22 | VAL | X | 407 | 42.808 | 35.733 | 35.308 | 0.00 | 0.00 |
| ATOM | 6125 | HG23 | VAL | X | 407 | 41.423 | 36.477 | 35.968 | 0.00 | 0.00 |
| ATOM | 6126 | C    | VAL | X | 407 | 38.451 | 34.051 | 34.948 | 0.00 | 0.00 |
| ATOM | 6127 | O    | VAL | X | 407 | 37.686 | 34.944 | 34.490 | 0.00 | 0.00 |
| ATOM | 6128 | N    | ALA | X | 408 | 38.318 | 32.793 | 34.553 | 0.00 | 0.00 |
| ATOM | 6129 | H    | ALA | X | 408 | 39.033 | 32.118 | 34.782 | 0.00 | 0.00 |
| ATOM | 6130 | CA   | ALA | X | 408 | 37.167 | 32.347 | 33.704 | 0.00 | 0.00 |
| ATOM | 6131 | HA   | ALA | X | 408 | 37.105 | 32.907 | 32.771 | 0.00 | 0.00 |
| ATOM | 6132 | CB   | ALA | X | 408 | 37.451 | 30.876 | 33.255 | 0.00 | 0.00 |
| ATOM | 6133 | HB1  | ALA | X | 408 | 38.251 | 30.823 | 32.517 | 0.00 | 0.00 |
| ATOM | 6134 | HB2  | ALA | X | 408 | 37.566 | 30.199 | 34.101 | 0.00 | 0.00 |
| ATOM | 6135 | HB3  | ALA | X | 408 | 36.524 | 30.526 | 32.802 | 0.00 | 0.00 |
| ATOM | 6136 | C    | ALA | X | 408 | 35.815 | 32.535 | 34.402 | 0.00 | 0.00 |
| ATOM | 6137 | O    | ALA | X | 408 | 34.785 | 32.859 | 33.804 | 0.00 | 0.00 |
| ATOM | 6138 | N    | GLN | X | 409 | 35.797 | 32.236 | 35.711 | 0.00 | 0.00 |
| ATOM | 6139 | H    | GLN | X | 409 | 36.724 | 32.066 | 36.074 | 0.00 | 0.00 |
| ATOM | 6140 | CA   | GLN | X | 409 | 34.638 | 32.349 | 36.607 | 0.00 | 0.00 |
| ATOM | 6141 | HA   | GLN | X | 409 | 33.735 | 32.022 | 36.091 | 0.00 | 0.00 |
| ATOM | 6142 | CB   | GLN | X | 409 | 34.875 | 31.497 | 37.846 | 0.00 | 0.00 |
| ATOM | 6143 | HB2  | GLN | X | 409 | 35.864 | 31.661 | 38.272 | 0.00 | 0.00 |
| ATOM | 6144 | HB3  | GLN | X | 409 | 34.099 | 31.737 | 38.573 | 0.00 | 0.00 |
| ATOM | 6145 | CG   | GLN | X | 409 | 34.759 | 29.968 | 37.685 | 0.00 | 0.00 |
| ATOM | 6146 | HG2  | GLN | X | 409 | 33.883 | 29.797 | 37.060 | 0.00 | 0.00 |
| ATOM | 6147 | HG3  | GLN | X | 409 | 35.640 | 29.574 | 37.179 | 0.00 | 0.00 |
| ATOM | 6148 | CD   | GLN | X | 409 | 34.644 | 29.257 | 39.058 | 0.00 | 0.00 |
| ATOM | 6149 | OE1  | GLN | X | 409 | 34.557 | 29.887 | 40.055 | 0.00 | 0.00 |
| ATOM | 6150 | NE2  | GLN | X | 409 | 34.683 | 27.970 | 39.166 | 0.00 | 0.00 |
| ATOM | 6151 | HE21 | GLN | X | 409 | 34.505 | 27.553 | 40.069 | 0.00 | 0.00 |
| ATOM | 6152 | HE22 | GLN | X | 409 | 34.581 | 27.366 | 38.364 | 0.00 | 0.00 |
| ATOM | 6153 | C    | GLN | X | 409 | 34.348 | 33.748 | 36.952 | 0.00 | 0.00 |
| ATOM | 6154 | O    | GLN | X | 409 | 33.230 | 34.025 | 37.465 | 0.00 | 0.00 |
| ATOM | 6155 | N    | LEU | X | 410 | 35.275 | 34.658 | 36.617 | 0.00 | 0.00 |
| ATOM | 6156 | H    | LEU | X | 410 | 36.132 | 34.369 | 36.167 | 0.00 | 0.00 |
| ATOM | 6157 | CA   | LEU | X | 410 | 34.973 | 36.054 | 36.585 | 0.00 | 0.00 |
| ATOM | 6158 | HA   | LEU | X | 410 | 34.282 | 36.370 | 37.367 | 0.00 | 0.00 |
| ATOM | 6159 | CB   | LEU | X | 410 | 36.324 | 36.824 | 36.877 | 0.00 | 0.00 |
| ATOM | 6160 | HB2  | LEU | X | 410 | 36.618 | 36.495 | 37.873 | 0.00 | 0.00 |
| ATOM | 6161 | HB3  | LEU | X | 410 | 37.060 | 36.611 | 36.101 | 0.00 | 0.00 |
| ATOM | 6162 | CG   | LEU | X | 410 | 36.334 | 38.341 | 36.852 | 0.00 | 0.00 |
| ATOM | 6163 | HG   | LEU | X | 410 | 35.924 | 38.541 | 35.862 | 0.00 | 0.00 |
| ATOM | 6164 | CD1  | LEU | X | 410 | 35.412 | 38.959 | 37.942 | 0.00 | 0.00 |

|      |      |      |     |   |     |        |        |        |      |      |
|------|------|------|-----|---|-----|--------|--------|--------|------|------|
| ATOM | 6165 | HD11 | LEU | X | 410 | 35.765 | 38.750 | 38.951 | 0.00 | 0.00 |
| ATOM | 6166 | HD12 | LEU | X | 410 | 35.295 | 40.039 | 37.849 | 0.00 | 0.00 |
| ATOM | 6167 | HD13 | LEU | X | 410 | 34.398 | 38.586 | 37.796 | 0.00 | 0.00 |
| ATOM | 6168 | CD2  | LEU | X | 410 | 37.727 | 38.966 | 37.046 | 0.00 | 0.00 |
| ATOM | 6169 | HD21 | LEU | X | 410 | 38.062 | 38.634 | 38.029 | 0.00 | 0.00 |
| ATOM | 6170 | HD22 | LEU | X | 410 | 38.422 | 38.550 | 36.317 | 0.00 | 0.00 |
| ATOM | 6171 | HD23 | LEU | X | 410 | 37.652 | 40.044 | 36.910 | 0.00 | 0.00 |
| ATOM | 6172 | C    | LEU | X | 410 | 34.379 | 36.453 | 35.233 | 0.00 | 0.00 |
| ATOM | 6173 | O    | LEU | X | 410 | 33.323 | 37.121 | 35.156 | 0.00 | 0.00 |
| ATOM | 6174 | N    | ALA | X | 411 | 35.132 | 36.167 | 34.113 | 0.00 | 0.00 |
| ATOM | 6175 | H    | ALA | X | 411 | 35.989 | 35.666 | 34.298 | 0.00 | 0.00 |
| ATOM | 6176 | CA   | ALA | X | 411 | 34.785 | 36.502 | 32.785 | 0.00 | 0.00 |
| ATOM | 6177 | HA   | ALA | X | 411 | 34.938 | 37.561 | 32.576 | 0.00 | 0.00 |
| ATOM | 6178 | CB   | ALA | X | 411 | 35.872 | 35.797 | 31.931 | 0.00 | 0.00 |
| ATOM | 6179 | HB1  | ALA | X | 411 | 35.711 | 34.719 | 31.901 | 0.00 | 0.00 |
| ATOM | 6180 | HB2  | ALA | X | 411 | 35.753 | 36.183 | 30.919 | 0.00 | 0.00 |
| ATOM | 6181 | HB3  | ALA | X | 411 | 36.885 | 35.895 | 32.323 | 0.00 | 0.00 |
| ATOM | 6182 | C    | ALA | X | 411 | 33.365 | 36.068 | 32.410 | 0.00 | 0.00 |
| ATOM | 6183 | O    | ALA | X | 411 | 32.527 | 36.865 | 32.073 | 0.00 | 0.00 |
| ATOM | 6184 | N    | GLY | X | 412 | 33.106 | 34.762 | 32.512 | 0.00 | 0.00 |
| ATOM | 6185 | H    | GLY | X | 412 | 33.808 | 34.111 | 32.832 | 0.00 | 0.00 |
| ATOM | 6186 | CA   | GLY | X | 412 | 31.865 | 34.083 | 32.104 | 0.00 | 0.00 |
| ATOM | 6187 | HA2  | GLY | X | 412 | 31.812 | 33.964 | 31.048 | 0.00 | 0.00 |
| ATOM | 6188 | HA3  | GLY | X | 412 | 31.805 | 33.066 | 32.560 | 0.00 | 0.00 |
| ATOM | 6189 | C    | GLY | X | 412 | 30.698 | 34.773 | 32.717 | 0.00 | 0.00 |
| ATOM | 6190 | O    | GLY | X | 412 | 29.711 | 35.055 | 32.007 | 0.00 | 0.00 |
| ATOM | 6191 | N    | ARG | X | 413 | 30.754 | 35.063 | 34.025 | 0.00 | 0.00 |
| ATOM | 6192 | H    | ARG | X | 413 | 31.619 | 34.870 | 34.510 | 0.00 | 0.00 |
| ATOM | 6193 | CA   | ARG | X | 413 | 29.782 | 35.795 | 34.913 | 0.00 | 0.00 |
| ATOM | 6194 | HA   | ARG | X | 413 | 28.884 | 35.205 | 34.729 | 0.00 | 0.00 |
| ATOM | 6195 | CB   | ARG | X | 413 | 30.106 | 35.616 | 36.389 | 0.00 | 0.00 |
| ATOM | 6196 | HB2  | ARG | X | 413 | 31.132 | 35.845 | 36.676 | 0.00 | 0.00 |
| ATOM | 6197 | HB3  | ARG | X | 413 | 29.444 | 36.322 | 36.889 | 0.00 | 0.00 |
| ATOM | 6198 | CG   | ARG | X | 413 | 29.806 | 34.211 | 36.894 | 0.00 | 0.00 |
| ATOM | 6199 | HG2  | ARG | X | 413 | 28.902 | 33.825 | 36.423 | 0.00 | 0.00 |
| ATOM | 6200 | HG3  | ARG | X | 413 | 30.612 | 33.519 | 36.650 | 0.00 | 0.00 |
| ATOM | 6201 | CD   | ARG | X | 413 | 29.615 | 34.183 | 38.418 | 0.00 | 0.00 |
| ATOM | 6202 | HD2  | ARG | X | 413 | 30.561 | 34.346 | 38.934 | 0.00 | 0.00 |
| ATOM | 6203 | HD3  | ARG | X | 413 | 28.989 | 35.041 | 38.666 | 0.00 | 0.00 |
| ATOM | 6204 | NE   | ARG | X | 413 | 28.982 | 32.907 | 38.913 | 0.00 | 0.00 |
| ATOM | 6205 | HE   | ARG | X | 413 | 28.268 | 32.465 | 38.351 | 0.00 | 0.00 |
| ATOM | 6206 | CZ   | ARG | X | 413 | 29.179 | 32.287 | 40.093 | 0.00 | 0.00 |
| ATOM | 6207 | NH1  | ARG | X | 413 | 30.226 | 32.571 | 40.805 | 0.00 | 0.00 |
| ATOM | 6208 | HH11 | ARG | X | 413 | 31.010 | 33.104 | 40.457 | 0.00 | 0.00 |
| ATOM | 6209 | HH12 | ARG | X | 413 | 30.365 | 32.107 | 41.692 | 0.00 | 0.00 |
| ATOM | 6210 | NH2  | ARG | X | 413 | 28.299 | 31.479 | 40.656 | 0.00 | 0.00 |
| ATOM | 6211 | HH21 | ARG | X | 413 | 27.414 | 31.227 | 40.239 | 0.00 | 0.00 |
| ATOM | 6212 | HH22 | ARG | X | 413 | 28.672 | 31.059 | 41.495 | 0.00 | 0.00 |
| ATOM | 6213 | C    | ARG | X | 413 | 29.525 | 37.189 | 34.417 | 0.00 | 0.00 |
| ATOM | 6214 | O    | ARG | X | 413 | 28.318 | 37.535 | 34.160 | 0.00 | 0.00 |
| ATOM | 6215 | N    | LEU | X | 414 | 30.594 | 37.960 | 34.266 | 0.00 | 0.00 |
| ATOM | 6216 | H    | LEU | X | 414 | 31.494 | 37.551 | 34.473 | 0.00 | 0.00 |
| ATOM | 6217 | CA   | LEU | X | 414 | 30.599 | 39.372 | 33.829 | 0.00 | 0.00 |
| ATOM | 6218 | HA   | LEU | X | 414 | 30.000 | 40.017 | 34.472 | 0.00 | 0.00 |
| ATOM | 6219 | CB   | LEU | X | 414 | 31.988 | 40.053 | 33.856 | 0.00 | 0.00 |
| ATOM | 6220 | HB2  | LEU | X | 414 | 32.630 | 39.596 | 33.102 | 0.00 | 0.00 |
| ATOM | 6221 | HB3  | LEU | X | 414 | 31.936 | 41.103 | 33.570 | 0.00 | 0.00 |
| ATOM | 6222 | CG   | LEU | X | 414 | 32.584 | 40.233 | 35.256 | 0.00 | 0.00 |
| ATOM | 6223 | HG   | LEU | X | 414 | 32.809 | 39.295 | 35.763 | 0.00 | 0.00 |
| ATOM | 6224 | CD1  | LEU | X | 414 | 33.937 | 40.976 | 35.073 | 0.00 | 0.00 |
| ATOM | 6225 | HD11 | LEU | X | 414 | 34.382 | 41.246 | 36.031 | 0.00 | 0.00 |
| ATOM | 6226 | HD12 | LEU | X | 414 | 34.633 | 40.448 | 34.422 | 0.00 | 0.00 |
| ATOM | 6227 | HD13 | LEU | X | 414 | 33.764 | 41.972 | 34.664 | 0.00 | 0.00 |
| ATOM | 6228 | CD2  | LEU | X | 414 | 31.723 | 41.004 | 36.173 | 0.00 | 0.00 |
| ATOM | 6229 | HD21 | LEU | X | 414 | 32.350 | 41.152 | 37.052 | 0.00 | 0.00 |
| ATOM | 6230 | HD22 | LEU | X | 414 | 31.451 | 41.973 | 35.757 | 0.00 | 0.00 |
| ATOM | 6231 | HD23 | LEU | X | 414 | 30.787 | 40.560 | 36.515 | 0.00 | 0.00 |
| ATOM | 6232 | C    | LEU | X | 414 | 29.962 | 39.404 | 32.421 | 0.00 | 0.00 |
| ATOM | 6233 | O    | LEU | X | 414 | 29.134 | 40.274 | 32.170 | 0.00 | 0.00 |
| ATOM | 6234 | N    | ALA | X | 415 | 30.298 | 38.445 | 31.524 | 0.00 | 0.00 |

|      |      |      |     |   |     |        |        |        |      |      |
|------|------|------|-----|---|-----|--------|--------|--------|------|------|
| ATOM | 6235 | H    | ALA | X | 415 | 30.956 | 37.827 | 31.978 | 0.00 | 0.00 |
| ATOM | 6236 | CA   | ALA | X | 415 | 30.002 | 38.398 | 30.080 | 0.00 | 0.00 |
| ATOM | 6237 | HA   | ALA | X | 415 | 30.171 | 39.413 | 29.721 | 0.00 | 0.00 |
| ATOM | 6238 | CB   | ALA | X | 415 | 30.946 | 37.363 | 29.458 | 0.00 | 0.00 |
| ATOM | 6239 | HB1  | ALA | X | 415 | 30.872 | 37.253 | 28.376 | 0.00 | 0.00 |
| ATOM | 6240 | HB2  | ALA | X | 415 | 31.956 | 37.761 | 29.553 | 0.00 | 0.00 |
| ATOM | 6241 | HB3  | ALA | X | 415 | 30.727 | 36.370 | 29.851 | 0.00 | 0.00 |
| ATOM | 6242 | C    | ALA | X | 415 | 28.496 | 38.160 | 29.938 | 0.00 | 0.00 |
| ATOM | 6243 | O    | ALA | X | 415 | 27.805 | 38.963 | 29.308 | 0.00 | 0.00 |
| ATOM | 6244 | N    | ALA | X | 416 | 28.018 | 37.080 | 30.606 | 0.00 | 0.00 |
| ATOM | 6245 | H    | ALA | X | 416 | 28.669 | 36.519 | 31.137 | 0.00 | 0.00 |
| ATOM | 6246 | CA   | ALA | X | 416 | 26.599 | 36.759 | 30.681 | 0.00 | 0.00 |
| ATOM | 6247 | HA   | ALA | X | 416 | 26.202 | 36.836 | 29.668 | 0.00 | 0.00 |
| ATOM | 6248 | CB   | ALA | X | 416 | 26.574 | 35.316 | 31.146 | 0.00 | 0.00 |
| ATOM | 6249 | HB1  | ALA | X | 416 | 27.013 | 34.621 | 30.430 | 0.00 | 0.00 |
| ATOM | 6250 | HB2  | ALA | X | 416 | 26.990 | 35.219 | 32.149 | 0.00 | 0.00 |
| ATOM | 6251 | HB3  | ALA | X | 416 | 25.567 | 34.960 | 31.366 | 0.00 | 0.00 |
| ATOM | 6252 | C    | ALA | X | 416 | 25.695 | 37.742 | 31.496 | 0.00 | 0.00 |
| ATOM | 6253 | O    | ALA | X | 416 | 24.492 | 37.669 | 31.395 | 0.00 | 0.00 |
| ATOM | 6254 | N    | GLN | X | 417 | 26.293 | 38.567 | 32.319 | 0.00 | 0.00 |
| ATOM | 6255 | H    | GLN | X | 417 | 27.297 | 38.586 | 32.425 | 0.00 | 0.00 |
| ATOM | 6256 | CA   | GLN | X | 417 | 25.521 | 39.630 | 33.006 | 0.00 | 0.00 |
| ATOM | 6257 | HA   | GLN | X | 417 | 24.471 | 39.352 | 32.915 | 0.00 | 0.00 |
| ATOM | 6258 | CB   | GLN | X | 417 | 25.835 | 39.660 | 34.498 | 0.00 | 0.00 |
| ATOM | 6259 | HB2  | GLN | X | 417 | 26.900 | 39.866 | 34.607 | 0.00 | 0.00 |
| ATOM | 6260 | HB3  | GLN | X | 417 | 25.184 | 40.455 | 34.862 | 0.00 | 0.00 |
| ATOM | 6261 | CG   | GLN | X | 417 | 25.499 | 38.464 | 35.309 | 0.00 | 0.00 |
| ATOM | 6262 | HG2  | GLN | X | 417 | 24.456 | 38.558 | 35.610 | 0.00 | 0.00 |
| ATOM | 6263 | HG3  | GLN | X | 417 | 25.619 | 37.563 | 34.707 | 0.00 | 0.00 |
| ATOM | 6264 | CD   | GLN | X | 417 | 26.262 | 38.249 | 36.571 | 0.00 | 0.00 |
| ATOM | 6265 | OE1  | GLN | X | 417 | 26.954 | 37.268 | 36.819 | 0.00 | 0.00 |
| ATOM | 6266 | NE2  | GLN | X | 417 | 26.287 | 39.204 | 37.496 | 0.00 | 0.00 |
| ATOM | 6267 | HE21 | GLN | X | 417 | 26.895 | 39.102 | 38.296 | 0.00 | 0.00 |
| ATOM | 6268 | HE22 | GLN | X | 417 | 25.673 | 40.005 | 37.460 | 0.00 | 0.00 |
| ATOM | 6269 | C    | GLN | X | 417 | 25.559 | 41.048 | 32.283 | 0.00 | 0.00 |
| ATOM | 6270 | O    | GLN | X | 417 | 25.022 | 41.987 | 32.819 | 0.00 | 0.00 |
| ATOM | 6271 | N    | GLY | X | 418 | 26.313 | 41.295 | 31.196 | 0.00 | 0.00 |
| ATOM | 6272 | H    | GLY | X | 418 | 26.858 | 40.515 | 30.858 | 0.00 | 0.00 |
| ATOM | 6273 | CA   | GLY | X | 418 | 26.311 | 42.559 | 30.397 | 0.00 | 0.00 |
| ATOM | 6274 | HA2  | GLY | X | 418 | 25.888 | 42.248 | 29.422 | 0.00 | 0.00 |
| ATOM | 6275 | HA3  | GLY | X | 418 | 25.625 | 43.330 | 30.844 | 0.00 | 0.00 |
| ATOM | 6276 | C    | GLY | X | 418 | 27.640 | 43.296 | 30.218 | 0.00 | 0.00 |
| ATOM | 6277 | O    | GLY | X | 418 | 27.657 | 44.291 | 29.526 | 0.00 | 0.00 |
| ATOM | 6278 | N    | ALA | X | 419 | 28.717 | 42.783 | 30.842 | 0.00 | 0.00 |
| ATOM | 6279 | H    | ALA | X | 419 | 28.681 | 41.887 | 31.306 | 0.00 | 0.00 |
| ATOM | 6280 | CA   | ALA | X | 419 | 30.088 | 43.348 | 30.643 | 0.00 | 0.00 |
| ATOM | 6281 | HA   | ALA | X | 419 | 29.983 | 44.424 | 30.504 | 0.00 | 0.00 |
| ATOM | 6282 | CB   | ALA | X | 419 | 30.985 | 42.957 | 31.881 | 0.00 | 0.00 |
| ATOM | 6283 | HB1  | ALA | X | 419 | 31.887 | 43.568 | 31.901 | 0.00 | 0.00 |
| ATOM | 6284 | HB2  | ALA | X | 419 | 30.383 | 43.099 | 32.779 | 0.00 | 0.00 |
| ATOM | 6285 | HB3  | ALA | X | 419 | 31.405 | 41.956 | 31.777 | 0.00 | 0.00 |
| ATOM | 6286 | C    | ALA | X | 419 | 30.658 | 42.879 | 29.246 | 0.00 | 0.00 |
| ATOM | 6287 | O    | ALA | X | 419 | 30.579 | 41.698 | 28.870 | 0.00 | 0.00 |
| ATOM | 6288 | N    | ARG | X | 420 | 31.330 | 43.813 | 28.602 | 0.00 | 0.00 |
| ATOM | 6289 | H    | ARG | X | 420 | 31.340 | 44.753 | 28.970 | 0.00 | 0.00 |
| ATOM | 6290 | CA   | ARG | X | 420 | 32.295 | 43.585 | 27.508 | 0.00 | 0.00 |
| ATOM | 6291 | HA   | ARG | X | 420 | 31.829 | 42.918 | 26.782 | 0.00 | 0.00 |
| ATOM | 6292 | CB   | ARG | X | 420 | 32.452 | 44.954 | 26.786 | 0.00 | 0.00 |
| ATOM | 6293 | HB2  | ARG | X | 420 | 31.451 | 45.353 | 26.616 | 0.00 | 0.00 |
| ATOM | 6294 | HB3  | ARG | X | 420 | 33.072 | 45.621 | 27.385 | 0.00 | 0.00 |
| ATOM | 6295 | CG   | ARG | X | 420 | 33.083 | 44.873 | 25.440 | 0.00 | 0.00 |
| ATOM | 6296 | HG2  | ARG | X | 420 | 33.980 | 44.259 | 25.511 | 0.00 | 0.00 |
| ATOM | 6297 | HG3  | ARG | X | 420 | 32.357 | 44.340 | 24.826 | 0.00 | 0.00 |
| ATOM | 6298 | CD   | ARG | X | 420 | 33.302 | 46.323 | 24.915 | 0.00 | 0.00 |
| ATOM | 6299 | HD2  | ARG | X | 420 | 32.387 | 46.886 | 25.098 | 0.00 | 0.00 |
| ATOM | 6300 | HD3  | ARG | X | 420 | 34.054 | 46.902 | 25.451 | 0.00 | 0.00 |
| ATOM | 6301 | NE   | ARG | X | 420 | 33.540 | 46.343 | 23.500 | 0.00 | 0.00 |
| ATOM | 6302 | HE   | ARG | X | 420 | 34.498 | 46.217 | 23.206 | 0.00 | 0.00 |
| ATOM | 6303 | CZ   | ARG | X | 420 | 32.692 | 46.712 | 22.554 | 0.00 | 0.00 |
| ATOM | 6304 | NH1  | ARG | X | 420 | 31.407 | 46.885 | 22.689 | 0.00 | 0.00 |

|      |      |      |     |   |     |        |        |        |      |      |
|------|------|------|-----|---|-----|--------|--------|--------|------|------|
| ATOM | 6305 | HH11 | ARG | X | 420 | 30.915 | 46.635 | 23.534 | 0.00 | 0.00 |
| ATOM | 6306 | HH12 | ARG | X | 420 | 30.808 | 47.061 | 21.895 | 0.00 | 0.00 |
| ATOM | 6307 | NH2  | ARG | X | 420 | 33.232 | 47.043 | 21.357 | 0.00 | 0.00 |
| ATOM | 6308 | HH21 | ARG | X | 420 | 34.194 | 47.350 | 21.317 | 0.00 | 0.00 |
| ATOM | 6309 | HH22 | ARG | X | 420 | 32.595 | 47.328 | 20.627 | 0.00 | 0.00 |
| ATOM | 6310 | C    | ARG | X | 420 | 33.590 | 43.086 | 28.064 | 0.00 | 0.00 |
| ATOM | 6311 | O    | ARG | X | 420 | 34.324 | 43.726 | 28.856 | 0.00 | 0.00 |
| ATOM | 6312 | N    | VAL | X | 421 | 33.920 | 41.887 | 27.722 | 0.00 | 0.00 |
| ATOM | 6313 | H    | VAL | X | 421 | 33.309 | 41.327 | 27.144 | 0.00 | 0.00 |
| ATOM | 6314 | CA   | VAL | X | 421 | 35.049 | 41.132 | 28.332 | 0.00 | 0.00 |
| ATOM | 6315 | HA   | VAL | X | 421 | 35.414 | 41.789 | 29.121 | 0.00 | 0.00 |
| ATOM | 6316 | CB   | VAL | X | 421 | 34.550 | 39.816 | 28.989 | 0.00 | 0.00 |
| ATOM | 6317 | HB   | VAL | X | 421 | 33.981 | 39.140 | 28.351 | 0.00 | 0.00 |
| ATOM | 6318 | CG1  | VAL | X | 421 | 35.710 | 39.217 | 29.795 | 0.00 | 0.00 |
| ATOM | 6319 | HG11 | VAL | X | 421 | 36.123 | 39.983 | 30.451 | 0.00 | 0.00 |
| ATOM | 6320 | HG12 | VAL | X | 421 | 35.491 | 38.297 | 30.338 | 0.00 | 0.00 |
| ATOM | 6321 | HG13 | VAL | X | 421 | 36.446 | 38.814 | 29.100 | 0.00 | 0.00 |
| ATOM | 6322 | CG2  | VAL | X | 421 | 33.444 | 40.171 | 30.071 | 0.00 | 0.00 |
| ATOM | 6323 | HG21 | VAL | X | 421 | 33.181 | 39.390 | 30.784 | 0.00 | 0.00 |
| ATOM | 6324 | HG22 | VAL | X | 421 | 33.834 | 41.011 | 30.646 | 0.00 | 0.00 |
| ATOM | 6325 | HG23 | VAL | X | 421 | 32.531 | 40.547 | 29.609 | 0.00 | 0.00 |
| ATOM | 6326 | C    | VAL | X | 421 | 36.155 | 41.011 | 27.252 | 0.00 | 0.00 |
| ATOM | 6327 | O    | VAL | X | 421 | 35.819 | 40.583 | 26.130 | 0.00 | 0.00 |
| ATOM | 6328 | N    | TYR | X | 422 | 37.452 | 41.109 | 27.577 | 0.00 | 0.00 |
| ATOM | 6329 | H    | TYR | X | 422 | 37.676 | 41.435 | 28.506 | 0.00 | 0.00 |
| ATOM | 6330 | CA   | TYR | X | 422 | 38.642 | 40.694 | 26.812 | 0.00 | 0.00 |
| ATOM | 6331 | HA   | TYR | X | 422 | 38.415 | 40.069 | 25.949 | 0.00 | 0.00 |
| ATOM | 6332 | CB   | TYR | X | 422 | 39.384 | 41.905 | 26.273 | 0.00 | 0.00 |
| ATOM | 6333 | HB2  | TYR | X | 422 | 39.715 | 42.475 | 27.142 | 0.00 | 0.00 |
| ATOM | 6334 | HB3  | TYR | X | 422 | 40.222 | 41.500 | 25.706 | 0.00 | 0.00 |
| ATOM | 6335 | CG   | TYR | X | 422 | 38.529 | 42.720 | 25.291 | 0.00 | 0.00 |
| ATOM | 6336 | CD1  | TYR | X | 422 | 38.465 | 42.328 | 23.944 | 0.00 | 0.00 |
| ATOM | 6337 | HD1  | TYR | X | 422 | 39.040 | 41.473 | 23.618 | 0.00 | 0.00 |
| ATOM | 6338 | CE1  | TYR | X | 422 | 37.584 | 42.969 | 23.073 | 0.00 | 0.00 |
| ATOM | 6339 | HE1  | TYR | X | 422 | 37.514 | 42.618 | 22.055 | 0.00 | 0.00 |
| ATOM | 6340 | CZ   | TYR | X | 422 | 36.797 | 44.067 | 23.484 | 0.00 | 0.00 |
| ATOM | 6341 | OH   | TYR | X | 422 | 36.023 | 44.697 | 22.532 | 0.00 | 0.00 |
| ATOM | 6342 | HH   | TYR | X | 422 | 35.922 | 44.169 | 21.736 | 0.00 | 0.00 |
| ATOM | 6343 | CE2  | TYR | X | 422 | 36.905 | 44.473 | 24.809 | 0.00 | 0.00 |
| ATOM | 6344 | HE2  | TYR | X | 422 | 36.380 | 45.356 | 25.143 | 0.00 | 0.00 |
| ATOM | 6345 | CD2  | TYR | X | 422 | 37.794 | 43.863 | 25.742 | 0.00 | 0.00 |
| ATOM | 6346 | HD2  | TYR | X | 422 | 37.854 | 44.178 | 26.773 | 0.00 | 0.00 |
| ATOM | 6347 | C    | TYR | X | 422 | 39.585 | 39.853 | 27.732 | 0.00 | 0.00 |
| ATOM | 6348 | O    | TYR | X | 422 | 40.028 | 40.306 | 28.785 | 0.00 | 0.00 |
| ATOM | 6349 | N    | ALA | X | 423 | 39.885 | 38.607 | 27.345 | 0.00 | 0.00 |
| ATOM | 6350 | H    | ALA | X | 423 | 39.461 | 38.207 | 26.521 | 0.00 | 0.00 |
| ATOM | 6351 | CA   | ALA | X | 423 | 40.755 | 37.717 | 28.168 | 0.00 | 0.00 |
| ATOM | 6352 | HA   | ALA | X | 423 | 41.055 | 38.139 | 29.127 | 0.00 | 0.00 |
| ATOM | 6353 | CB   | ALA | X | 423 | 39.856 | 36.599 | 28.468 | 0.00 | 0.00 |
| ATOM | 6354 | HB1  | ALA | X | 423 | 39.543 | 36.267 | 27.478 | 0.00 | 0.00 |
| ATOM | 6355 | HB2  | ALA | X | 423 | 40.378 | 35.888 | 29.108 | 0.00 | 0.00 |
| ATOM | 6356 | HB3  | ALA | X | 423 | 38.916 | 36.918 | 28.917 | 0.00 | 0.00 |
| ATOM | 6357 | C    | ALA | X | 423 | 42.103 | 37.315 | 27.492 | 0.00 | 0.00 |
| ATOM | 6358 | O    | ALA | X | 423 | 42.138 | 36.995 | 26.280 | 0.00 | 0.00 |
| ATOM | 6359 | N    | TYR | X | 424 | 43.265 | 37.312 | 28.223 | 0.00 | 0.00 |
| ATOM | 6360 | H    | TYR | X | 424 | 43.249 | 37.797 | 29.108 | 0.00 | 0.00 |
| ATOM | 6361 | CA   | TYR | X | 424 | 44.538 | 36.857 | 27.760 | 0.00 | 0.00 |
| ATOM | 6362 | HA   | TYR | X | 424 | 44.397 | 36.404 | 26.778 | 0.00 | 0.00 |
| ATOM | 6363 | CB   | TYR | X | 424 | 45.430 | 38.121 | 27.511 | 0.00 | 0.00 |
| ATOM | 6364 | HB2  | TYR | X | 424 | 46.296 | 37.849 | 26.908 | 0.00 | 0.00 |
| ATOM | 6365 | HB3  | TYR | X | 424 | 44.953 | 38.896 | 26.910 | 0.00 | 0.00 |
| ATOM | 6366 | CG   | TYR | X | 424 | 45.930 | 38.821 | 28.757 | 0.00 | 0.00 |
| ATOM | 6367 | CD1  | TYR | X | 424 | 47.163 | 38.390 | 29.332 | 0.00 | 0.00 |
| ATOM | 6368 | HD1  | TYR | X | 424 | 47.821 | 37.676 | 28.859 | 0.00 | 0.00 |
| ATOM | 6369 | CE1  | TYR | X | 424 | 47.682 | 38.912 | 30.537 | 0.00 | 0.00 |
| ATOM | 6370 | HE1  | TYR | X | 424 | 48.528 | 38.525 | 31.083 | 0.00 | 0.00 |
| ATOM | 6371 | CZ   | TYR | X | 424 | 46.842 | 39.820 | 31.134 | 0.00 | 0.00 |
| ATOM | 6372 | OH   | TYR | X | 424 | 47.237 | 40.267 | 32.385 | 0.00 | 0.00 |
| ATOM | 6373 | HH   | TYR | X | 424 | 48.066 | 39.919 | 32.724 | 0.00 | 0.00 |
| ATOM | 6374 | CE2  | TYR | X | 424 | 45.642 | 40.377 | 30.613 | 0.00 | 0.00 |

|      |      |      |     |   |     |        |        |        |      |      |
|------|------|------|-----|---|-----|--------|--------|--------|------|------|
| ATOM | 6375 | HE2  | TYR | X | 424 | 45.041 | 41.072 | 31.180 | 0.00 | 0.00 |
| ATOM | 6376 | CD2  | TYR | X | 424 | 45.193 | 39.821 | 29.418 | 0.00 | 0.00 |
| ATOM | 6377 | HD2  | TYR | X | 424 | 44.205 | 40.094 | 29.076 | 0.00 | 0.00 |
| ATOM | 6378 | C    | TYR | X | 424 | 45.315 | 35.863 | 28.637 | 0.00 | 0.00 |
| ATOM | 6379 | O    | TYR | X | 424 | 45.319 | 35.902 | 29.869 | 0.00 | 0.00 |
| ATOM | 6380 | N    | VAL | X | 425 | 46.035 | 34.993 | 27.932 | 0.00 | 0.00 |
| ATOM | 6381 | H    | VAL | X | 425 | 45.834 | 35.006 | 26.942 | 0.00 | 0.00 |
| ATOM | 6382 | CA   | VAL | X | 425 | 47.270 | 34.256 | 28.311 | 0.00 | 0.00 |
| ATOM | 6383 | HA   | VAL | X | 425 | 47.253 | 34.331 | 29.399 | 0.00 | 0.00 |
| ATOM | 6384 | CB   | VAL | X | 425 | 47.208 | 32.769 | 28.013 | 0.00 | 0.00 |
| ATOM | 6385 | HB   | VAL | X | 425 | 47.166 | 32.595 | 26.938 | 0.00 | 0.00 |
| ATOM | 6386 | CG1  | VAL | X | 425 | 48.483 | 32.120 | 28.529 | 0.00 | 0.00 |
| ATOM | 6387 | HG11 | VAL | X | 425 | 49.226 | 32.390 | 27.779 | 0.00 | 0.00 |
| ATOM | 6388 | HG12 | VAL | X | 425 | 48.749 | 32.602 | 29.470 | 0.00 | 0.00 |
| ATOM | 6389 | HG13 | VAL | X | 425 | 48.443 | 31.050 | 28.733 | 0.00 | 0.00 |
| ATOM | 6390 | CG2  | VAL | X | 425 | 46.042 | 32.058 | 28.675 | 0.00 | 0.00 |
| ATOM | 6391 | HG21 | VAL | X | 425 | 45.169 | 32.145 | 28.028 | 0.00 | 0.00 |
| ATOM | 6392 | HG22 | VAL | X | 425 | 46.225 | 31.000 | 28.864 | 0.00 | 0.00 |
| ATOM | 6393 | HG23 | VAL | X | 425 | 45.641 | 32.545 | 29.563 | 0.00 | 0.00 |
| ATOM | 6394 | C    | VAL | X | 425 | 48.511 | 35.029 | 27.818 | 0.00 | 0.00 |
| ATOM | 6395 | O    | VAL | X | 425 | 48.359 | 35.420 | 26.662 | 0.00 | 0.00 |
| ATOM | 6396 | N    | PHE | X | 426 | 49.629 | 35.126 | 28.568 | 0.00 | 0.00 |
| ATOM | 6397 | H    | PHE | X | 426 | 49.598 | 34.624 | 29.444 | 0.00 | 0.00 |
| ATOM | 6398 | CA   | PHE | X | 426 | 50.908 | 35.752 | 28.235 | 0.00 | 0.00 |
| ATOM | 6399 | HA   | PHE | X | 426 | 50.808 | 36.140 | 27.221 | 0.00 | 0.00 |
| ATOM | 6400 | CB   | PHE | X | 426 | 51.272 | 36.919 | 29.180 | 0.00 | 0.00 |
| ATOM | 6401 | HB2  | PHE | X | 426 | 50.485 | 37.662 | 29.054 | 0.00 | 0.00 |
| ATOM | 6402 | HB3  | PHE | X | 426 | 51.254 | 36.624 | 30.229 | 0.00 | 0.00 |
| ATOM | 6403 | CG   | PHE | X | 426 | 52.647 | 37.593 | 28.883 | 0.00 | 0.00 |
| ATOM | 6404 | CD1  | PHE | X | 426 | 52.575 | 38.743 | 28.098 | 0.00 | 0.00 |
| ATOM | 6405 | HD1  | PHE | X | 426 | 51.707 | 39.084 | 27.554 | 0.00 | 0.00 |
| ATOM | 6406 | CE1  | PHE | X | 426 | 53.791 | 39.453 | 27.950 | 0.00 | 0.00 |
| ATOM | 6407 | HE1  | PHE | X | 426 | 53.757 | 40.306 | 27.289 | 0.00 | 0.00 |
| ATOM | 6408 | CZ   | PHE | X | 426 | 55.024 | 39.036 | 28.439 | 0.00 | 0.00 |
| ATOM | 6409 | HZ   | PHE | X | 426 | 55.952 | 39.512 | 28.161 | 0.00 | 0.00 |
| ATOM | 6410 | CE2  | PHE | X | 426 | 55.082 | 37.811 | 29.160 | 0.00 | 0.00 |
| ATOM | 6411 | HE2  | PHE | X | 426 | 56.013 | 37.590 | 29.662 | 0.00 | 0.00 |
| ATOM | 6412 | CD2  | PHE | X | 426 | 53.900 | 37.089 | 29.444 | 0.00 | 0.00 |
| ATOM | 6413 | HD2  | PHE | X | 426 | 53.876 | 36.282 | 30.161 | 0.00 | 0.00 |
| ATOM | 6414 | C    | PHE | X | 426 | 52.010 | 34.596 | 28.227 | 0.00 | 0.00 |
| ATOM | 6415 | O    | PHE | X | 426 | 52.399 | 34.003 | 29.253 | 0.00 | 0.00 |
| ATOM | 6416 | N    | GLU | X | 427 | 52.523 | 34.275 | 27.033 | 0.00 | 0.00 |
| ATOM | 6417 | H    | GLU | X | 427 | 52.124 | 34.713 | 26.214 | 0.00 | 0.00 |
| ATOM | 6418 | CA   | GLU | X | 427 | 53.364 | 33.158 | 26.789 | 0.00 | 0.00 |
| ATOM | 6419 | HA   | GLU | X | 427 | 53.162 | 32.524 | 27.652 | 0.00 | 0.00 |
| ATOM | 6420 | CB   | GLU | X | 427 | 52.837 | 32.552 | 25.518 | 0.00 | 0.00 |
| ATOM | 6421 | HB2  | GLU | X | 427 | 52.694 | 33.201 | 24.654 | 0.00 | 0.00 |
| ATOM | 6422 | HB3  | GLU | X | 427 | 53.564 | 31.782 | 25.261 | 0.00 | 0.00 |
| ATOM | 6423 | CG   | GLU | X | 427 | 51.486 | 31.864 | 25.853 | 0.00 | 0.00 |
| ATOM | 6424 | HG2  | GLU | X | 427 | 51.607 | 31.402 | 26.833 | 0.00 | 0.00 |
| ATOM | 6425 | HG3  | GLU | X | 427 | 50.687 | 32.605 | 25.840 | 0.00 | 0.00 |
| ATOM | 6426 | CD   | GLU | X | 427 | 51.127 | 30.674 | 24.945 | 0.00 | 0.00 |
| ATOM | 6427 | OE1  | GLU | X | 427 | 51.201 | 30.725 | 23.705 | 0.00 | 0.00 |
| ATOM | 6428 | OE2  | GLU | X | 427 | 50.609 | 29.691 | 25.532 | 0.00 | 0.00 |
| ATOM | 6429 | C    | GLU | X | 427 | 54.875 | 33.488 | 26.615 | 0.00 | 0.00 |
| ATOM | 6430 | O    | GLU | X | 427 | 55.689 | 32.613 | 26.574 | 0.00 | 0.00 |
| ATOM | 6431 | N    | HIE | X | 428 | 55.138 | 34.787 | 26.487 | 0.00 | 0.00 |
| ATOM | 6432 | H    | HIE | X | 428 | 54.376 | 35.439 | 26.372 | 0.00 | 0.00 |
| ATOM | 6433 | CA   | HIE | X | 428 | 56.526 | 35.151 | 26.108 | 0.00 | 0.00 |
| ATOM | 6434 | HA   | HIE | X | 428 | 56.794 | 34.491 | 25.283 | 0.00 | 0.00 |
| ATOM | 6435 | CB   | HIE | X | 428 | 56.570 | 36.544 | 25.592 | 0.00 | 0.00 |
| ATOM | 6436 | HB2  | HIE | X | 428 | 55.902 | 36.520 | 24.732 | 0.00 | 0.00 |
| ATOM | 6437 | HB3  | HIE | X | 428 | 56.168 | 37.255 | 26.315 | 0.00 | 0.00 |
| ATOM | 6438 | CG   | HIE | X | 428 | 57.922 | 36.988 | 25.262 | 0.00 | 0.00 |
| ATOM | 6439 | ND1  | HIE | X | 428 | 58.865 | 36.194 | 24.645 | 0.00 | 0.00 |
| ATOM | 6440 | CE1  | HIE | X | 428 | 60.037 | 36.855 | 24.635 | 0.00 | 0.00 |
| ATOM | 6441 | HE1  | HIE | X | 428 | 60.955 | 36.456 | 24.229 | 0.00 | 0.00 |
| ATOM | 6442 | NE2  | HIE | X | 428 | 59.826 | 38.080 | 25.252 | 0.00 | 0.00 |
| ATOM | 6443 | HE2  | HIE | X | 428 | 60.500 | 38.773 | 25.544 | 0.00 | 0.00 |
| ATOM | 6444 | CD2  | HIE | X | 428 | 58.491 | 38.112 | 25.744 | 0.00 | 0.00 |



|      |      |      |     |   |     |        |        |        |      |      |
|------|------|------|-----|---|-----|--------|--------|--------|------|------|
| ATOM | 6445 | HD2  | HIE | X | 428 | 57.906 | 38.809 | 26.325 | 0.00 | 0.00 |
| ATOM | 6446 | C    | HIE | X | 428 | 57.479 | 34.876 | 27.285 | 0.00 | 0.00 |
| ATOM | 6447 | O    | HIE | X | 428 | 57.295 | 35.501 | 28.346 | 0.00 | 0.00 |
| ATOM | 6448 | N    | ARG | X | 429 | 58.504 | 34.057 | 27.093 | 0.00 | 0.00 |
| ATOM | 6449 | H    | ARG | X | 429 | 58.520 | 33.508 | 26.245 | 0.00 | 0.00 |
| ATOM | 6450 | CA   | ARG | X | 429 | 59.607 | 33.938 | 28.043 | 0.00 | 0.00 |
| ATOM | 6451 | HA   | ARG | X | 429 | 59.182 | 34.172 | 29.019 | 0.00 | 0.00 |
| ATOM | 6452 | CB   | ARG | X | 429 | 60.234 | 32.493 | 27.999 | 0.00 | 0.00 |
| ATOM | 6453 | HB2  | ARG | X | 429 | 59.514 | 31.943 | 28.605 | 0.00 | 0.00 |
| ATOM | 6454 | HB3  | ARG | X | 429 | 60.080 | 32.161 | 26.972 | 0.00 | 0.00 |
| ATOM | 6455 | CG   | ARG | X | 429 | 61.646 | 32.353 | 28.594 | 0.00 | 0.00 |
| ATOM | 6456 | HG2  | ARG | X | 429 | 62.227 | 32.910 | 27.860 | 0.00 | 0.00 |
| ATOM | 6457 | HG3  | ARG | X | 429 | 61.759 | 32.870 | 29.547 | 0.00 | 0.00 |
| ATOM | 6458 | CD   | ARG | X | 429 | 62.062 | 30.908 | 28.920 | 0.00 | 0.00 |
| ATOM | 6459 | HD2  | ARG | X | 429 | 61.960 | 30.217 | 28.084 | 0.00 | 0.00 |
| ATOM | 6460 | HD3  | ARG | X | 429 | 63.136 | 31.061 | 29.028 | 0.00 | 0.00 |
| ATOM | 6461 | NE   | ARG | X | 429 | 61.448 | 30.437 | 30.128 | 0.00 | 0.00 |
| ATOM | 6462 | HE   | ARG | X | 429 | 60.447 | 30.331 | 30.052 | 0.00 | 0.00 |
| ATOM | 6463 | CZ   | ARG | X | 429 | 62.018 | 30.253 | 31.320 | 0.00 | 0.00 |
| ATOM | 6464 | NH1  | ARG | X | 429 | 63.236 | 30.412 | 31.584 | 0.00 | 0.00 |
| ATOM | 6465 | HH11 | ARG | X | 429 | 63.864 | 30.852 | 30.926 | 0.00 | 0.00 |
| ATOM | 6466 | HH12 | ARG | X | 429 | 63.673 | 30.318 | 32.490 | 0.00 | 0.00 |
| ATOM | 6467 | NH2  | ARG | X | 429 | 61.307 | 29.866 | 32.320 | 0.00 | 0.00 |
| ATOM | 6468 | HH21 | ARG | X | 429 | 60.306 | 30.000 | 32.303 | 0.00 | 0.00 |
| ATOM | 6469 | HH22 | ARG | X | 429 | 61.724 | 29.779 | 33.236 | 0.00 | 0.00 |
| ATOM | 6470 | C    | ARG | X | 429 | 60.629 | 34.983 | 27.622 | 0.00 | 0.00 |
| ATOM | 6471 | O    | ARG | X | 429 | 61.329 | 34.828 | 26.594 | 0.00 | 0.00 |
| ATOM | 6472 | N    | ALA | X | 430 | 60.694 | 36.166 | 28.319 | 0.00 | 0.00 |
| ATOM | 6473 | H    | ALA | X | 430 | 60.067 | 36.262 | 29.105 | 0.00 | 0.00 |
| ATOM | 6474 | CA   | ALA | X | 430 | 61.476 | 37.348 | 27.992 | 0.00 | 0.00 |
| ATOM | 6475 | HA   | ALA | X | 430 | 61.355 | 37.569 | 26.932 | 0.00 | 0.00 |
| ATOM | 6476 | CB   | ALA | X | 430 | 61.093 | 38.533 | 28.879 | 0.00 | 0.00 |
| ATOM | 6477 | HB1  | ALA | X | 430 | 60.991 | 38.198 | 29.911 | 0.00 | 0.00 |
| ATOM | 6478 | HB2  | ALA | X | 430 | 61.785 | 39.372 | 28.807 | 0.00 | 0.00 |
| ATOM | 6479 | HB3  | ALA | X | 430 | 60.171 | 39.002 | 28.534 | 0.00 | 0.00 |
| ATOM | 6480 | C    | ALA | X | 430 | 62.948 | 37.168 | 28.184 | 0.00 | 0.00 |
| ATOM | 6481 | O    | ALA | X | 430 | 63.332 | 36.187 | 28.753 | 0.00 | 0.00 |
| ATOM | 6482 | N    | SER | X | 431 | 63.762 | 37.882 | 27.397 | 0.00 | 0.00 |
| ATOM | 6483 | H    | SER | X | 431 | 63.299 | 38.526 | 26.772 | 0.00 | 0.00 |
| ATOM | 6484 | CA   | SER | X | 431 | 65.202 | 37.609 | 27.198 | 0.00 | 0.00 |
| ATOM | 6485 | HA   | SER | X | 431 | 65.378 | 36.560 | 26.960 | 0.00 | 0.00 |
| ATOM | 6486 | CB   | SER | X | 431 | 65.638 | 38.462 | 26.023 | 0.00 | 0.00 |
| ATOM | 6487 | HB2  | SER | X | 431 | 66.692 | 38.281 | 25.812 | 0.00 | 0.00 |
| ATOM | 6488 | HB3  | SER | X | 431 | 65.212 | 38.189 | 25.057 | 0.00 | 0.00 |
| ATOM | 6489 | OG   | SER | X | 431 | 65.472 | 39.841 | 26.245 | 0.00 | 0.00 |
| ATOM | 6490 | HG   | SER | X | 431 | 64.791 | 40.217 | 25.683 | 0.00 | 0.00 |
| ATOM | 6491 | C    | SER | X | 431 | 66.075 | 37.906 | 28.421 | 0.00 | 0.00 |
| ATOM | 6492 | O    | SER | X | 431 | 67.139 | 37.313 | 28.520 | 0.00 | 0.00 |
| ATOM | 6493 | N    | THR | X | 432 | 65.531 | 38.745 | 29.351 | 0.00 | 0.00 |
| ATOM | 6494 | H    | THR | X | 432 | 64.795 | 39.374 | 29.063 | 0.00 | 0.00 |
| ATOM | 6495 | CA   | THR | X | 432 | 66.061 | 38.941 | 30.705 | 0.00 | 0.00 |
| ATOM | 6496 | HA   | THR | X | 432 | 67.144 | 38.996 | 30.815 | 0.00 | 0.00 |
| ATOM | 6497 | CB   | THR | X | 432 | 65.478 | 40.290 | 31.153 | 0.00 | 0.00 |
| ATOM | 6498 | HB   | THR | X | 432 | 65.853 | 40.483 | 32.158 | 0.00 | 0.00 |
| ATOM | 6499 | CG2  | THR | X | 432 | 65.863 | 41.493 | 30.325 | 0.00 | 0.00 |
| ATOM | 6500 | HG21 | THR | X | 432 | 65.297 | 41.433 | 29.395 | 0.00 | 0.00 |
| ATOM | 6501 | HG22 | THR | X | 432 | 65.514 | 42.414 | 30.791 | 0.00 | 0.00 |
| ATOM | 6502 | HG23 | THR | X | 432 | 66.941 | 41.602 | 30.205 | 0.00 | 0.00 |
| ATOM | 6503 | OG1  | THR | X | 432 | 64.076 | 40.245 | 31.135 | 0.00 | 0.00 |
| ATOM | 6504 | HG1  | THR | X | 432 | 63.756 | 41.137 | 30.982 | 0.00 | 0.00 |
| ATOM | 6505 | C    | THR | X | 432 | 65.661 | 37.866 | 31.774 | 0.00 | 0.00 |
| ATOM | 6506 | O    | THR | X | 432 | 66.287 | 37.841 | 32.826 | 0.00 | 0.00 |
| ATOM | 6507 | N    | LEU | X | 433 | 64.705 | 37.027 | 31.523 | 0.00 | 0.00 |
| ATOM | 6508 | H    | LEU | X | 433 | 64.332 | 37.036 | 30.584 | 0.00 | 0.00 |
| ATOM | 6509 | CA   | LEU | X | 433 | 64.170 | 36.024 | 32.502 | 0.00 | 0.00 |
| ATOM | 6510 | HA   | LEU | X | 433 | 63.751 | 36.654 | 33.287 | 0.00 | 0.00 |
| ATOM | 6511 | CB   | LEU | X | 433 | 62.997 | 35.306 | 31.831 | 0.00 | 0.00 |
| ATOM | 6512 | HB2  | LEU | X | 433 | 62.485 | 35.978 | 31.142 | 0.00 | 0.00 |
| ATOM | 6513 | HB3  | LEU | X | 433 | 63.378 | 34.604 | 31.089 | 0.00 | 0.00 |
| ATOM | 6514 | CG   | LEU | X | 433 | 62.079 | 34.715 | 32.852 | 0.00 | 0.00 |

|      |      |      |     |   |     |        |        |        |      |      |
|------|------|------|-----|---|-----|--------|--------|--------|------|------|
| ATOM | 6515 | HG   | LEU | X | 433 | 62.585 | 34.110 | 33.604 | 0.00 | 0.00 |
| ATOM | 6516 | CD1  | LEU | X | 433 | 61.216 | 35.922 | 33.440 | 0.00 | 0.00 |
| ATOM | 6517 | HD11 | LEU | X | 433 | 60.253 | 35.513 | 33.747 | 0.00 | 0.00 |
| ATOM | 6518 | HD12 | LEU | X | 433 | 61.735 | 36.335 | 34.304 | 0.00 | 0.00 |
| ATOM | 6519 | HD13 | LEU | X | 433 | 61.089 | 36.738 | 32.729 | 0.00 | 0.00 |
| ATOM | 6520 | CD2  | LEU | X | 433 | 61.095 | 33.773 | 32.208 | 0.00 | 0.00 |
| ATOM | 6521 | HD21 | LEU | X | 433 | 60.555 | 34.270 | 31.403 | 0.00 | 0.00 |
| ATOM | 6522 | HD22 | LEU | X | 433 | 61.564 | 32.890 | 31.775 | 0.00 | 0.00 |
| ATOM | 6523 | HD23 | LEU | X | 433 | 60.375 | 33.458 | 32.964 | 0.00 | 0.00 |
| ATOM | 6524 | C    | LEU | X | 433 | 65.176 | 35.077 | 33.179 | 0.00 | 0.00 |
| ATOM | 6525 | O    | LEU | X | 433 | 65.898 | 34.277 | 32.522 | 0.00 | 0.00 |
| ATOM | 6526 | N    | SER | X | 434 | 65.243 | 35.131 | 34.475 | 0.00 | 0.00 |
| ATOM | 6527 | H    | SER | X | 434 | 64.631 | 35.761 | 34.974 | 0.00 | 0.00 |
| ATOM | 6528 | CA   | SER | X | 434 | 66.136 | 34.322 | 35.304 | 0.00 | 0.00 |
| ATOM | 6529 | HA   | SER | X | 434 | 66.935 | 33.869 | 34.717 | 0.00 | 0.00 |
| ATOM | 6530 | CB   | SER | X | 434 | 66.712 | 35.041 | 36.535 | 0.00 | 0.00 |
| ATOM | 6531 | HB2  | SER | X | 434 | 67.356 | 34.285 | 36.984 | 0.00 | 0.00 |
| ATOM | 6532 | HB3  | SER | X | 434 | 67.289 | 35.939 | 36.317 | 0.00 | 0.00 |
| ATOM | 6533 | OG   | SER | X | 434 | 65.719 | 35.377 | 37.471 | 0.00 | 0.00 |
| ATOM | 6534 | HG   | SER | X | 434 | 65.886 | 36.233 | 37.871 | 0.00 | 0.00 |
| ATOM | 6535 | C    | SER | X | 434 | 65.444 | 33.079 | 35.829 | 0.00 | 0.00 |
| ATOM | 6536 | O    | SER | X | 434 | 66.115 | 32.119 | 36.166 | 0.00 | 0.00 |
| ATOM | 6537 | N    | TRP | X | 435 | 64.099 | 33.033 | 35.877 | 0.00 | 0.00 |
| ATOM | 6538 | H    | TRP | X | 435 | 63.659 | 33.866 | 35.512 | 0.00 | 0.00 |
| ATOM | 6539 | CA   | TRP | X | 435 | 63.277 | 31.897 | 36.422 | 0.00 | 0.00 |
| ATOM | 6540 | HA   | TRP | X | 435 | 63.826 | 31.743 | 37.351 | 0.00 | 0.00 |
| ATOM | 6541 | CB   | TRP | X | 435 | 61.827 | 32.116 | 36.624 | 0.00 | 0.00 |
| ATOM | 6542 | HB2  | TRP | X | 435 | 61.289 | 32.304 | 35.694 | 0.00 | 0.00 |
| ATOM | 6543 | HB3  | TRP | X | 435 | 61.503 | 31.205 | 37.126 | 0.00 | 0.00 |
| ATOM | 6544 | CG   | TRP | X | 435 | 61.446 | 33.195 | 37.552 | 0.00 | 0.00 |
| ATOM | 6545 | CD1  | TRP | X | 435 | 60.839 | 34.310 | 37.124 | 0.00 | 0.00 |
| ATOM | 6546 | HD1  | TRP | X | 435 | 60.415 | 34.515 | 36.152 | 0.00 | 0.00 |
| ATOM | 6547 | NE1  | TRP | X | 435 | 60.448 | 35.080 | 38.217 | 0.00 | 0.00 |
| ATOM | 6548 | HE1  | TRP | X | 435 | 59.963 | 35.966 | 38.225 | 0.00 | 0.00 |
| ATOM | 6549 | CE2  | TRP | X | 435 | 60.842 | 34.493 | 39.406 | 0.00 | 0.00 |
| ATOM | 6550 | CZ2  | TRP | X | 435 | 60.607 | 34.815 | 40.731 | 0.00 | 0.00 |
| ATOM | 6551 | HZ2  | TRP | X | 435 | 59.914 | 35.615 | 40.945 | 0.00 | 0.00 |
| ATOM | 6552 | CH2  | TRP | X | 435 | 60.983 | 33.924 | 41.739 | 0.00 | 0.00 |
| ATOM | 6553 | HH2  | TRP | X | 435 | 60.655 | 34.152 | 42.742 | 0.00 | 0.00 |
| ATOM | 6554 | CZ3  | TRP | X | 435 | 61.676 | 32.710 | 41.404 | 0.00 | 0.00 |
| ATOM | 6555 | HZ3  | TRP | X | 435 | 62.005 | 32.060 | 42.201 | 0.00 | 0.00 |
| ATOM | 6556 | CE3  | TRP | X | 435 | 61.889 | 32.421 | 40.018 | 0.00 | 0.00 |
| ATOM | 6557 | HE3  | TRP | X | 435 | 62.390 | 31.476 | 39.869 | 0.00 | 0.00 |
| ATOM | 6558 | CD2  | TRP | X | 435 | 61.510 | 33.294 | 38.984 | 0.00 | 0.00 |
| ATOM | 6559 | C    | TRP | X | 435 | 63.519 | 30.574 | 35.700 | 0.00 | 0.00 |
| ATOM | 6560 | O    | TRP | X | 435 | 63.597 | 30.648 | 34.463 | 0.00 | 0.00 |
| ATOM | 6561 | N    | PRO | X | 436 | 63.654 | 29.372 | 36.365 | 0.00 | 0.00 |
| ATOM | 6562 | CD   | PRO | X | 436 | 63.726 | 29.302 | 37.840 | 0.00 | 0.00 |
| ATOM | 6563 | HD2  | PRO | X | 436 | 62.852 | 29.782 | 38.280 | 0.00 | 0.00 |
| ATOM | 6564 | HD3  | PRO | X | 436 | 64.669 | 29.671 | 38.245 | 0.00 | 0.00 |
| ATOM | 6565 | CG   | PRO | X | 436 | 63.721 | 27.827 | 38.200 | 0.00 | 0.00 |
| ATOM | 6566 | HG2  | PRO | X | 436 | 62.741 | 27.465 | 38.513 | 0.00 | 0.00 |
| ATOM | 6567 | HG3  | PRO | X | 436 | 64.427 | 27.628 | 39.006 | 0.00 | 0.00 |
| ATOM | 6568 | CB   | PRO | X | 436 | 64.107 | 27.114 | 36.902 | 0.00 | 0.00 |
| ATOM | 6569 | HB2  | PRO | X | 436 | 63.590 | 26.159 | 36.807 | 0.00 | 0.00 |
| ATOM | 6570 | HB3  | PRO | X | 436 | 65.163 | 26.859 | 36.986 | 0.00 | 0.00 |
| ATOM | 6571 | CA   | PRO | X | 436 | 64.025 | 28.122 | 35.767 | 0.00 | 0.00 |
| ATOM | 6572 | HA   | PRO | X | 436 | 65.037 | 28.156 | 35.365 | 0.00 | 0.00 |
| ATOM | 6573 | C    | PRO | X | 436 | 63.025 | 27.742 | 34.654 | 0.00 | 0.00 |
| ATOM | 6574 | O    | PRO | X | 436 | 61.902 | 28.143 | 34.586 | 0.00 | 0.00 |
| ATOM | 6575 | N    | LEU | X | 437 | 63.512 | 26.946 | 33.652 | 0.00 | 0.00 |
| ATOM | 6576 | H    | LEU | X | 437 | 64.459 | 26.606 | 33.738 | 0.00 | 0.00 |
| ATOM | 6577 | CA   | LEU | X | 437 | 62.786 | 26.615 | 32.452 | 0.00 | 0.00 |
| ATOM | 6578 | HA   | LEU | X | 437 | 62.581 | 27.556 | 31.940 | 0.00 | 0.00 |
| ATOM | 6579 | CB   | LEU | X | 437 | 63.743 | 25.914 | 31.471 | 0.00 | 0.00 |
| ATOM | 6580 | HB2  | LEU | X | 437 | 64.597 | 26.556 | 31.255 | 0.00 | 0.00 |
| ATOM | 6581 | HB3  | LEU | X | 437 | 64.227 | 24.993 | 31.795 | 0.00 | 0.00 |
| ATOM | 6582 | CG   | LEU | X | 437 | 63.204 | 25.629 | 30.045 | 0.00 | 0.00 |
| ATOM | 6583 | HG   | LEU | X | 437 | 62.330 | 24.991 | 30.178 | 0.00 | 0.00 |
| ATOM | 6584 | CD1  | LEU | X | 437 | 62.729 | 26.934 | 29.360 | 0.00 | 0.00 |

|      |      |      |     |   |     |        |        |        |      |      |
|------|------|------|-----|---|-----|--------|--------|--------|------|------|
| ATOM | 6585 | HD11 | LEU | X | 437 | 62.051 | 27.417 | 30.064 | 0.00 | 0.00 |
| ATOM | 6586 | HD12 | LEU | X | 437 | 63.560 | 27.601 | 29.130 | 0.00 | 0.00 |
| ATOM | 6587 | HD13 | LEU | X | 437 | 62.116 | 26.725 | 28.484 | 0.00 | 0.00 |
| ATOM | 6588 | CD2  | LEU | X | 437 | 64.256 | 24.983 | 29.123 | 0.00 | 0.00 |
| ATOM | 6589 | HD21 | LEU | X | 437 | 64.676 | 24.051 | 29.502 | 0.00 | 0.00 |
| ATOM | 6590 | HD22 | LEU | X | 437 | 63.848 | 24.882 | 28.118 | 0.00 | 0.00 |
| ATOM | 6591 | HD23 | LEU | X | 437 | 65.027 | 25.747 | 29.024 | 0.00 | 0.00 |
| ATOM | 6592 | C    | LEU | X | 437 | 61.396 | 25.815 | 32.679 | 0.00 | 0.00 |
| ATOM | 6593 | O    | LEU | X | 437 | 60.454 | 26.178 | 31.919 | 0.00 | 0.00 |
| ATOM | 6594 | N    | TRP | X | 438 | 61.316 | 24.849 | 33.555 | 0.00 | 0.00 |
| ATOM | 6595 | H    | TRP | X | 438 | 62.145 | 24.398 | 33.915 | 0.00 | 0.00 |
| ATOM | 6596 | CA   | TRP | X | 438 | 60.022 | 24.177 | 33.918 | 0.00 | 0.00 |
| ATOM | 6597 | HA   | TRP | X | 438 | 59.640 | 23.781 | 32.977 | 0.00 | 0.00 |
| ATOM | 6598 | CB   | TRP | X | 438 | 60.238 | 23.092 | 34.905 | 0.00 | 0.00 |
| ATOM | 6599 | HB2  | TRP | X | 438 | 59.309 | 22.548 | 35.072 | 0.00 | 0.00 |
| ATOM | 6600 | HB3  | TRP | X | 438 | 61.038 | 22.418 | 34.599 | 0.00 | 0.00 |
| ATOM | 6601 | CG   | TRP | X | 438 | 60.519 | 23.584 | 36.285 | 0.00 | 0.00 |
| ATOM | 6602 | CD1  | TRP | X | 438 | 61.730 | 23.762 | 36.853 | 0.00 | 0.00 |
| ATOM | 6603 | HD1  | TRP | X | 438 | 62.646 | 23.625 | 36.297 | 0.00 | 0.00 |
| ATOM | 6604 | NE1  | TRP | X | 438 | 61.669 | 24.129 | 38.188 | 0.00 | 0.00 |
| ATOM | 6605 | HE1  | TRP | X | 438 | 62.442 | 24.103 | 38.839 | 0.00 | 0.00 |
| ATOM | 6606 | CE2  | TRP | X | 438 | 60.350 | 24.452 | 38.453 | 0.00 | 0.00 |
| ATOM | 6607 | CZ2  | TRP | X | 438 | 59.787 | 25.123 | 39.610 | 0.00 | 0.00 |
| ATOM | 6608 | HZ2  | TRP | X | 438 | 60.406 | 25.478 | 40.421 | 0.00 | 0.00 |
| ATOM | 6609 | CH2  | TRP | X | 438 | 58.448 | 25.074 | 39.802 | 0.00 | 0.00 |
| ATOM | 6610 | HH2  | TRP | X | 438 | 57.988 | 25.419 | 40.716 | 0.00 | 0.00 |
| ATOM | 6611 | CZ3  | TRP | X | 438 | 57.711 | 24.433 | 38.751 | 0.00 | 0.00 |
| ATOM | 6612 | HZ3  | TRP | X | 438 | 56.645 | 24.357 | 38.911 | 0.00 | 0.00 |
| ATOM | 6613 | CE3  | TRP | X | 438 | 58.241 | 23.973 | 37.529 | 0.00 | 0.00 |
| ATOM | 6614 | HE3  | TRP | X | 438 | 57.556 | 23.823 | 36.707 | 0.00 | 0.00 |
| ATOM | 6615 | CD2  | TRP | X | 438 | 59.605 | 24.022 | 37.330 | 0.00 | 0.00 |
| ATOM | 6616 | C    | TRP | X | 438 | 58.907 | 25.170 | 34.343 | 0.00 | 0.00 |
| ATOM | 6617 | O    | TRP | X | 438 | 57.745 | 24.831 | 34.111 | 0.00 | 0.00 |
| ATOM | 6618 | N    | MET | X | 439 | 59.287 | 26.326 | 34.911 | 0.00 | 0.00 |
| ATOM | 6619 | H    | MET | X | 439 | 60.268 | 26.530 | 35.036 | 0.00 | 0.00 |
| ATOM | 6620 | CA   | MET | X | 439 | 58.295 | 27.294 | 35.294 | 0.00 | 0.00 |
| ATOM | 6621 | HA   | MET | X | 439 | 57.540 | 26.629 | 35.713 | 0.00 | 0.00 |
| ATOM | 6622 | CB   | MET | X | 439 | 58.818 | 28.236 | 36.310 | 0.00 | 0.00 |
| ATOM | 6623 | HB2  | MET | X | 439 | 59.608 | 28.852 | 35.880 | 0.00 | 0.00 |
| ATOM | 6624 | HB3  | MET | X | 439 | 57.916 | 28.808 | 36.529 | 0.00 | 0.00 |
| ATOM | 6625 | CG   | MET | X | 439 | 59.374 | 27.625 | 37.597 | 0.00 | 0.00 |
| ATOM | 6626 | HG2  | MET | X | 439 | 58.503 | 27.284 | 38.156 | 0.00 | 0.00 |
| ATOM | 6627 | HG3  | MET | X | 439 | 60.147 | 26.867 | 37.469 | 0.00 | 0.00 |
| ATOM | 6628 | SD   | MET | X | 439 | 60.214 | 28.935 | 38.482 | 0.00 | 0.00 |
| ATOM | 6629 | CE   | MET | X | 439 | 58.734 | 29.594 | 39.329 | 0.00 | 0.00 |
| ATOM | 6630 | HE1  | MET | X | 439 | 57.898 | 29.893 | 38.697 | 0.00 | 0.00 |
| ATOM | 6631 | HE2  | MET | X | 439 | 58.245 | 28.816 | 39.914 | 0.00 | 0.00 |
| ATOM | 6632 | HE3  | MET | X | 439 | 59.059 | 30.413 | 39.972 | 0.00 | 0.00 |
| ATOM | 6633 | C    | MET | X | 439 | 57.686 | 28.018 | 34.109 | 0.00 | 0.00 |
| ATOM | 6634 | O    | MET | X | 439 | 56.574 | 28.613 | 34.253 | 0.00 | 0.00 |
| ATOM | 6635 | N    | GLY | X | 440 | 58.330 | 27.802 | 32.955 | 0.00 | 0.00 |
| ATOM | 6636 | H    | GLY | X | 440 | 59.245 | 27.374 | 32.941 | 0.00 | 0.00 |
| ATOM | 6637 | CA   | GLY | X | 440 | 57.751 | 28.297 | 31.672 | 0.00 | 0.00 |
| ATOM | 6638 | HA2  | GLY | X | 440 | 58.581 | 28.213 | 30.936 | 0.00 | 0.00 |
| ATOM | 6639 | HA3  | GLY | X | 440 | 56.756 | 27.810 | 31.409 | 0.00 | 0.00 |
| ATOM | 6640 | C    | GLY | X | 440 | 57.642 | 29.849 | 31.660 | 0.00 | 0.00 |
| ATOM | 6641 | O    | GLY | X | 440 | 58.692 | 30.479 | 31.568 | 0.00 | 0.00 |
| ATOM | 6642 | N    | VAL | X | 441 | 56.514 | 30.486 | 31.879 | 0.00 | 0.00 |
| ATOM | 6643 | H    | VAL | X | 441 | 55.757 | 29.873 | 32.146 | 0.00 | 0.00 |
| ATOM | 6644 | CA   | VAL | X | 441 | 56.395 | 31.878 | 32.301 | 0.00 | 0.00 |
| ATOM | 6645 | HA   | VAL | X | 441 | 57.347 | 32.360 | 32.526 | 0.00 | 0.00 |
| ATOM | 6646 | CB   | VAL | X | 441 | 55.624 | 32.763 | 31.246 | 0.00 | 0.00 |
| ATOM | 6647 | HB   | VAL | X | 441 | 54.559 | 32.546 | 31.159 | 0.00 | 0.00 |
| ATOM | 6648 | CG1  | VAL | X | 441 | 55.778 | 34.258 | 31.613 | 0.00 | 0.00 |
| ATOM | 6649 | HG11 | VAL | X | 441 | 55.128 | 34.474 | 32.461 | 0.00 | 0.00 |
| ATOM | 6650 | HG12 | VAL | X | 441 | 56.771 | 34.469 | 32.012 | 0.00 | 0.00 |
| ATOM | 6651 | HG13 | VAL | X | 441 | 55.461 | 34.906 | 30.796 | 0.00 | 0.00 |
| ATOM | 6652 | CG2  | VAL | X | 441 | 56.138 | 32.668 | 29.780 | 0.00 | 0.00 |
| ATOM | 6653 | HG21 | VAL | X | 441 | 57.176 | 33.003 | 29.784 | 0.00 | 0.00 |
| ATOM | 6654 | HG22 | VAL | X | 441 | 55.919 | 31.689 | 29.355 | 0.00 | 0.00 |

|      |      |      |     |   |     |        |        |        |      |      |
|------|------|------|-----|---|-----|--------|--------|--------|------|------|
| ATOM | 6655 | HG23 | VAL | X | 441 | 55.499 | 33.364 | 29.238 | 0.00 | 0.00 |
| ATOM | 6656 | C    | VAL | X | 441 | 55.608 | 31.773 | 33.659 | 0.00 | 0.00 |
| ATOM | 6657 | O    | VAL | X | 441 | 54.398 | 31.755 | 33.642 | 0.00 | 0.00 |
| ATOM | 6658 | N    | PRO | X | 442 | 56.230 | 31.924 | 34.840 | 0.00 | 0.00 |
| ATOM | 6659 | CD   | PRO | X | 442 | 57.662 | 32.005 | 35.071 | 0.00 | 0.00 |
| ATOM | 6660 | HD2  | PRO | X | 442 | 58.210 | 32.780 | 34.536 | 0.00 | 0.00 |
| ATOM | 6661 | HD3  | PRO | X | 442 | 58.135 | 31.110 | 34.665 | 0.00 | 0.00 |
| ATOM | 6662 | CG   | PRO | X | 442 | 57.860 | 32.145 | 36.620 | 0.00 | 0.00 |
| ATOM | 6663 | HG2  | PRO | X | 442 | 58.021 | 33.190 | 36.884 | 0.00 | 0.00 |
| ATOM | 6664 | HG3  | PRO | X | 442 | 58.664 | 31.622 | 37.138 | 0.00 | 0.00 |
| ATOM | 6665 | CB   | PRO | X | 442 | 56.550 | 31.629 | 37.168 | 0.00 | 0.00 |
| ATOM | 6666 | HB2  | PRO | X | 442 | 56.405 | 31.957 | 38.197 | 0.00 | 0.00 |
| ATOM | 6667 | HB3  | PRO | X | 442 | 56.606 | 30.544 | 37.073 | 0.00 | 0.00 |
| ATOM | 6668 | CA   | PRO | X | 442 | 55.539 | 32.018 | 36.166 | 0.00 | 0.00 |
| ATOM | 6669 | HA   | PRO | X | 442 | 54.804 | 31.238 | 36.364 | 0.00 | 0.00 |
| ATOM | 6670 | C    | PRO | X | 442 | 54.849 | 33.347 | 36.505 | 0.00 | 0.00 |
| ATOM | 6671 | O    | PRO | X | 442 | 55.090 | 34.322 | 35.840 | 0.00 | 0.00 |
| ATOM | 6672 | N    | HIP | X | 443 | 54.056 | 33.467 | 37.603 | 0.00 | 0.00 |
| ATOM | 6673 | H    | HIP | X | 443 | 53.885 | 32.649 | 38.171 | 0.00 | 0.00 |
| ATOM | 6674 | CA   | HIP | X | 443 | 53.132 | 34.489 | 37.886 | 0.00 | 0.00 |
| ATOM | 6675 | HA   | HIP | X | 443 | 52.279 | 34.482 | 37.207 | 0.00 | 0.00 |
| ATOM | 6676 | CB   | HIP | X | 443 | 52.704 | 34.183 | 39.324 | 0.00 | 0.00 |
| ATOM | 6677 | HB2  | HIP | X | 443 | 52.141 | 33.250 | 39.322 | 0.00 | 0.00 |
| ATOM | 6678 | HB3  | HIP | X | 443 | 53.570 | 34.099 | 39.980 | 0.00 | 0.00 |
| ATOM | 6679 | CG   | HIP | X | 443 | 51.867 | 35.279 | 39.920 | 0.00 | 0.00 |
| ATOM | 6680 | ND1  | HIP | X | 443 | 50.567 | 35.531 | 39.610 | 0.00 | 0.00 |
| ATOM | 6681 | HD1  | HIP | X | 443 | 50.065 | 35.051 | 38.877 | 0.00 | 0.00 |
| ATOM | 6682 | CE1  | HIP | X | 443 | 50.058 | 36.191 | 40.668 | 0.00 | 0.00 |
| ATOM | 6683 | HE1  | HIP | X | 443 | 49.036 | 36.478 | 40.862 | 0.00 | 0.00 |
| ATOM | 6684 | NE2  | HIP | X | 443 | 50.990 | 36.529 | 41.521 | 0.00 | 0.00 |
| ATOM | 6685 | HE2  | HIP | X | 443 | 50.856 | 37.079 | 42.357 | 0.00 | 0.00 |
| ATOM | 6686 | CD2  | HIP | X | 443 | 52.200 | 35.969 | 41.035 | 0.00 | 0.00 |
| ATOM | 6687 | HD2  | HIP | X | 443 | 53.114 | 35.959 | 41.611 | 0.00 | 0.00 |
| ATOM | 6688 | C    | HIP | X | 443 | 53.694 | 35.937 | 37.895 | 0.00 | 0.00 |
| ATOM | 6689 | O    | HIP | X | 443 | 54.765 | 36.198 | 38.483 | 0.00 | 0.00 |
| ATOM | 6690 | N    | GLY | X | 444 | 52.900 | 36.888 | 37.313 | 0.00 | 0.00 |
| ATOM | 6691 | H    | GLY | X | 444 | 51.995 | 36.534 | 37.039 | 0.00 | 0.00 |
| ATOM | 6692 | CA   | GLY | X | 444 | 53.243 | 38.314 | 37.379 | 0.00 | 0.00 |
| ATOM | 6693 | HA2  | GLY | X | 444 | 52.347 | 38.858 | 37.022 | 0.00 | 0.00 |
| ATOM | 6694 | HA3  | GLY | X | 444 | 53.552 | 38.685 | 38.362 | 0.00 | 0.00 |
| ATOM | 6695 | C    | GLY | X | 444 | 54.257 | 38.849 | 36.364 | 0.00 | 0.00 |
| ATOM | 6696 | O    | GLY | X | 444 | 55.095 | 39.695 | 36.779 | 0.00 | 0.00 |
| ATOM | 6697 | N    | TYR | X | 445 | 54.317 | 38.291 | 35.146 | 0.00 | 0.00 |
| ATOM | 6698 | H    | TYR | X | 445 | 53.676 | 37.576 | 34.833 | 0.00 | 0.00 |
| ATOM | 6699 | CA   | TYR | X | 445 | 55.433 | 38.546 | 34.212 | 0.00 | 0.00 |
| ATOM | 6700 | HA   | TYR | X | 445 | 56.035 | 39.346 | 34.643 | 0.00 | 0.00 |
| ATOM | 6701 | CB   | TYR | X | 445 | 56.343 | 37.287 | 34.179 | 0.00 | 0.00 |
| ATOM | 6702 | HB2  | TYR | X | 445 | 55.713 | 36.424 | 34.397 | 0.00 | 0.00 |
| ATOM | 6703 | HB3  | TYR | X | 445 | 56.717 | 37.134 | 33.167 | 0.00 | 0.00 |
| ATOM | 6704 | CG   | TYR | X | 445 | 57.587 | 37.425 | 35.060 | 0.00 | 0.00 |
| ATOM | 6705 | CD1  | TYR | X | 445 | 58.694 | 38.162 | 34.623 | 0.00 | 0.00 |
| ATOM | 6706 | HD1  | TYR | X | 445 | 58.703 | 38.543 | 33.612 | 0.00 | 0.00 |
| ATOM | 6707 | CE1  | TYR | X | 445 | 59.766 | 38.379 | 35.552 | 0.00 | 0.00 |
| ATOM | 6708 | HE1  | TYR | X | 445 | 60.615 | 38.957 | 35.216 | 0.00 | 0.00 |
| ATOM | 6709 | CZ   | TYR | X | 445 | 59.655 | 37.962 | 36.922 | 0.00 | 0.00 |
| ATOM | 6710 | OH   | TYR | X | 445 | 60.635 | 38.092 | 37.806 | 0.00 | 0.00 |
| ATOM | 6711 | HH   | TYR | X | 445 | 61.493 | 38.428 | 37.535 | 0.00 | 0.00 |
| ATOM | 6712 | CE2  | TYR | X | 445 | 58.489 | 37.319 | 37.276 | 0.00 | 0.00 |
| ATOM | 6713 | HE2  | TYR | X | 445 | 58.304 | 37.165 | 38.329 | 0.00 | 0.00 |
| ATOM | 6714 | CD2  | TYR | X | 445 | 57.471 | 36.959 | 36.376 | 0.00 | 0.00 |
| ATOM | 6715 | HD2  | TYR | X | 445 | 56.639 | 36.375 | 36.742 | 0.00 | 0.00 |
| ATOM | 6716 | C    | TYR | X | 445 | 55.056 | 39.156 | 32.873 | 0.00 | 0.00 |
| ATOM | 6717 | O    | TYR | X | 445 | 55.949 | 39.442 | 32.072 | 0.00 | 0.00 |
| ATOM | 6718 | N    | GLU | X | 446 | 53.789 | 39.447 | 32.607 | 0.00 | 0.00 |
| ATOM | 6719 | H    | GLU | X | 446 | 53.103 | 39.347 | 33.341 | 0.00 | 0.00 |
| ATOM | 6720 | CA   | GLU | X | 446 | 53.314 | 40.289 | 31.534 | 0.00 | 0.00 |
| ATOM | 6721 | HA   | GLU | X | 446 | 53.927 | 40.007 | 30.678 | 0.00 | 0.00 |
| ATOM | 6722 | CB   | GLU | X | 446 | 51.826 | 40.112 | 31.185 | 0.00 | 0.00 |
| ATOM | 6723 | HB2  | GLU | X | 446 | 51.600 | 40.536 | 30.207 | 0.00 | 0.00 |
| ATOM | 6724 | HB3  | GLU | X | 446 | 51.683 | 39.035 | 31.099 | 0.00 | 0.00 |

|      |      |      |     |   |     |        |        |        |      |      |
|------|------|------|-----|---|-----|--------|--------|--------|------|------|
| ATOM | 6725 | CG   | GLU | X | 446 | 50.665 | 40.678 | 32.079 | 0.00 | 0.00 |
| ATOM | 6726 | HG2  | GLU | X | 446 | 50.790 | 41.746 | 32.258 | 0.00 | 0.00 |
| ATOM | 6727 | HG3  | GLU | X | 446 | 49.727 | 40.516 | 31.548 | 0.00 | 0.00 |
| ATOM | 6728 | CD   | GLU | X | 446 | 50.572 | 40.039 | 33.451 | 0.00 | 0.00 |
| ATOM | 6729 | OE1  | GLU | X | 446 | 51.581 | 40.172 | 34.191 | 0.00 | 0.00 |
| ATOM | 6730 | OE2  | GLU | X | 446 | 49.488 | 39.465 | 33.811 | 0.00 | 0.00 |
| ATOM | 6731 | C    | GLU | X | 446 | 53.636 | 41.713 | 31.851 | 0.00 | 0.00 |
| ATOM | 6732 | O    | GLU | X | 446 | 54.042 | 42.382 | 30.917 | 0.00 | 0.00 |
| ATOM | 6733 | N    | ILE | X | 447 | 53.494 | 42.111 | 33.090 | 0.00 | 0.00 |
| ATOM | 6734 | H    | ILE | X | 447 | 53.104 | 41.409 | 33.703 | 0.00 | 0.00 |
| ATOM | 6735 | CA   | ILE | X | 447 | 53.515 | 43.473 | 33.624 | 0.00 | 0.00 |
| ATOM | 6736 | HA   | ILE | X | 447 | 52.527 | 43.882 | 33.409 | 0.00 | 0.00 |
| ATOM | 6737 | CB   | ILE | X | 447 | 53.651 | 43.363 | 35.165 | 0.00 | 0.00 |
| ATOM | 6738 | HB   | ILE | X | 447 | 52.889 | 42.637 | 35.447 | 0.00 | 0.00 |
| ATOM | 6739 | CG2  | ILE | X | 447 | 54.985 | 42.786 | 35.568 | 0.00 | 0.00 |
| ATOM | 6740 | HG21 | ILE | X | 447 | 55.263 | 41.887 | 35.018 | 0.00 | 0.00 |
| ATOM | 6741 | HG22 | ILE | X | 447 | 55.862 | 43.414 | 35.408 | 0.00 | 0.00 |
| ATOM | 6742 | HG23 | ILE | X | 447 | 55.088 | 42.565 | 36.630 | 0.00 | 0.00 |
| ATOM | 6743 | CG1  | ILE | X | 447 | 53.435 | 44.760 | 35.861 | 0.00 | 0.00 |
| ATOM | 6744 | HG12 | ILE | X | 447 | 53.455 | 44.600 | 36.939 | 0.00 | 0.00 |
| ATOM | 6745 | HG13 | ILE | X | 447 | 54.278 | 45.409 | 35.626 | 0.00 | 0.00 |
| ATOM | 6746 | CD1  | ILE | X | 447 | 52.135 | 45.513 | 35.422 | 0.00 | 0.00 |
| ATOM | 6747 | HD11 | ILE | X | 447 | 52.121 | 46.421 | 36.025 | 0.00 | 0.00 |
| ATOM | 6748 | HD12 | ILE | X | 447 | 52.067 | 45.866 | 34.392 | 0.00 | 0.00 |
| ATOM | 6749 | HD13 | ILE | X | 447 | 51.234 | 44.917 | 35.570 | 0.00 | 0.00 |
| ATOM | 6750 | C    | ILE | X | 447 | 54.444 | 44.496 | 33.102 | 0.00 | 0.00 |
| ATOM | 6751 | O    | ILE | X | 447 | 54.033 | 45.571 | 32.796 | 0.00 | 0.00 |
| ATOM | 6752 | N    | GLU | X | 448 | 55.695 | 44.066 | 32.884 | 0.00 | 0.00 |
| ATOM | 6753 | H    | GLU | X | 448 | 55.789 | 43.087 | 33.114 | 0.00 | 0.00 |
| ATOM | 6754 | CA   | GLU | X | 448 | 56.787 | 44.841 | 32.368 | 0.00 | 0.00 |
| ATOM | 6755 | HA   | GLU | X | 448 | 56.722 | 45.766 | 32.941 | 0.00 | 0.00 |
| ATOM | 6756 | CB   | GLU | X | 448 | 58.121 | 44.118 | 32.625 | 0.00 | 0.00 |
| ATOM | 6757 | HB2  | GLU | X | 448 | 58.030 | 43.052 | 32.418 | 0.00 | 0.00 |
| ATOM | 6758 | HB3  | GLU | X | 448 | 58.944 | 44.469 | 32.002 | 0.00 | 0.00 |
| ATOM | 6759 | CG   | GLU | X | 448 | 58.672 | 44.284 | 33.979 | 0.00 | 0.00 |
| ATOM | 6760 | HG2  | GLU | X | 448 | 58.549 | 45.333 | 34.245 | 0.00 | 0.00 |
| ATOM | 6761 | HG3  | GLU | X | 448 | 58.065 | 43.750 | 34.710 | 0.00 | 0.00 |
| ATOM | 6762 | CD   | GLU | X | 448 | 60.096 | 43.844 | 34.164 | 0.00 | 0.00 |
| ATOM | 6763 | OE1  | GLU | X | 448 | 60.380 | 42.647 | 33.983 | 0.00 | 0.00 |
| ATOM | 6764 | OE2  | GLU | X | 448 | 60.977 | 44.658 | 34.537 | 0.00 | 0.00 |
| ATOM | 6765 | C    | GLU | X | 448 | 56.753 | 45.258 | 30.833 | 0.00 | 0.00 |
| ATOM | 6766 | O    | GLU | X | 448 | 57.249 | 46.318 | 30.512 | 0.00 | 0.00 |
| ATOM | 6767 | N    | PHE | X | 449 | 56.042 | 44.420 | 29.968 | 0.00 | 0.00 |
| ATOM | 6768 | H    | PHE | X | 449 | 55.629 | 43.540 | 30.244 | 0.00 | 0.00 |
| ATOM | 6769 | CA   | PHE | X | 449 | 55.721 | 44.805 | 28.557 | 0.00 | 0.00 |
| ATOM | 6770 | HA   | PHE | X | 449 | 56.565 | 45.324 | 28.103 | 0.00 | 0.00 |
| ATOM | 6771 | CB   | PHE | X | 449 | 55.386 | 43.515 | 27.796 | 0.00 | 0.00 |
| ATOM | 6772 | HB2  | PHE | X | 449 | 54.719 | 43.020 | 28.502 | 0.00 | 0.00 |
| ATOM | 6773 | HB3  | PHE | X | 449 | 54.829 | 43.737 | 26.887 | 0.00 | 0.00 |
| ATOM | 6774 | CG   | PHE | X | 449 | 56.531 | 42.684 | 27.459 | 0.00 | 0.00 |
| ATOM | 6775 | CD1  | PHE | X | 449 | 57.264 | 42.000 | 28.476 | 0.00 | 0.00 |
| ATOM | 6776 | HD1  | PHE | X | 449 | 56.962 | 41.965 | 29.512 | 0.00 | 0.00 |
| ATOM | 6777 | CE1  | PHE | X | 449 | 58.471 | 41.312 | 28.174 | 0.00 | 0.00 |
| ATOM | 6778 | HE1  | PHE | X | 449 | 59.029 | 40.787 | 28.935 | 0.00 | 0.00 |
| ATOM | 6779 | CZ   | PHE | X | 449 | 58.981 | 41.420 | 26.885 | 0.00 | 0.00 |
| ATOM | 6780 | HZ   | PHE | X | 449 | 59.894 | 40.890 | 26.655 | 0.00 | 0.00 |
| ATOM | 6781 | CE2  | PHE | X | 449 | 58.328 | 42.180 | 25.838 | 0.00 | 0.00 |
| ATOM | 6782 | HE2  | PHE | X | 449 | 58.802 | 42.445 | 24.904 | 0.00 | 0.00 |
| ATOM | 6783 | CD2  | PHE | X | 449 | 57.089 | 42.767 | 26.159 | 0.00 | 0.00 |
| ATOM | 6784 | HD2  | PHE | X | 449 | 56.541 | 43.297 | 25.393 | 0.00 | 0.00 |
| ATOM | 6785 | C    | PHE | X | 449 | 54.601 | 45.837 | 28.554 | 0.00 | 0.00 |
| ATOM | 6786 | O    | PHE | X | 449 | 54.572 | 46.725 | 27.735 | 0.00 | 0.00 |
| ATOM | 6787 | N    | ILE | X | 450 | 53.696 | 45.801 | 29.542 | 0.00 | 0.00 |
| ATOM | 6788 | H    | ILE | X | 450 | 53.938 | 45.148 | 30.274 | 0.00 | 0.00 |
| ATOM | 6789 | CA   | ILE | X | 450 | 52.478 | 46.741 | 29.744 | 0.00 | 0.00 |
| ATOM | 6790 | HA   | ILE | X | 450 | 51.984 | 47.008 | 28.810 | 0.00 | 0.00 |
| ATOM | 6791 | CB   | ILE | X | 450 | 51.411 | 46.103 | 30.705 | 0.00 | 0.00 |
| ATOM | 6792 | HB   | ILE | X | 450 | 51.950 | 45.957 | 31.642 | 0.00 | 0.00 |
| ATOM | 6793 | CG2  | ILE | X | 450 | 50.318 | 47.105 | 31.032 | 0.00 | 0.00 |
| ATOM | 6794 | HG21 | ILE | X | 450 | 49.582 | 46.689 | 31.719 | 0.00 | 0.00 |

|      |      |      |     |   |     |        |        |        |      |      |
|------|------|------|-----|---|-----|--------|--------|--------|------|------|
| ATOM | 6795 | HG22 | ILE | X | 450 | 50.632 | 47.990 | 31.585 | 0.00 | 0.00 |
| ATOM | 6796 | HG23 | ILE | X | 450 | 49.686 | 47.414 | 30.200 | 0.00 | 0.00 |
| ATOM | 6797 | CG1  | ILE | X | 450 | 50.874 | 44.698 | 30.364 | 0.00 | 0.00 |
| ATOM | 6798 | HG12 | ILE | X | 450 | 51.696 | 43.983 | 30.402 | 0.00 | 0.00 |
| ATOM | 6799 | HG13 | ILE | X | 450 | 50.046 | 44.490 | 31.042 | 0.00 | 0.00 |
| ATOM | 6800 | CD1  | ILE | X | 450 | 50.329 | 44.544 | 28.941 | 0.00 | 0.00 |
| ATOM | 6801 | HD11 | ILE | X | 450 | 50.124 | 43.484 | 28.789 | 0.00 | 0.00 |
| ATOM | 6802 | HD12 | ILE | X | 450 | 49.387 | 45.089 | 28.886 | 0.00 | 0.00 |
| ATOM | 6803 | HD13 | ILE | X | 450 | 51.066 | 44.972 | 28.262 | 0.00 | 0.00 |
| ATOM | 6804 | C    | ILE | X | 450 | 52.946 | 48.142 | 30.232 | 0.00 | 0.00 |
| ATOM | 6805 | O    | ILE | X | 450 | 52.408 | 49.184 | 29.877 | 0.00 | 0.00 |
| ATOM | 6806 | N    | PHE | X | 451 | 54.000 | 48.070 | 31.107 | 0.00 | 0.00 |
| ATOM | 6807 | H    | PHE | X | 451 | 54.264 | 47.171 | 31.483 | 0.00 | 0.00 |
| ATOM | 6808 | CA   | PHE | X | 451 | 54.561 | 49.315 | 31.604 | 0.00 | 0.00 |
| ATOM | 6809 | HA   | PHE | X | 451 | 53.742 | 50.001 | 31.818 | 0.00 | 0.00 |
| ATOM | 6810 | CB   | PHE | X | 451 | 55.188 | 49.177 | 33.008 | 0.00 | 0.00 |
| ATOM | 6811 | HB2  | PHE | X | 451 | 55.380 | 48.119 | 33.187 | 0.00 | 0.00 |
| ATOM | 6812 | HB3  | PHE | X | 451 | 56.201 | 49.577 | 32.992 | 0.00 | 0.00 |
| ATOM | 6813 | CG   | PHE | X | 451 | 54.366 | 49.757 | 34.111 | 0.00 | 0.00 |
| ATOM | 6814 | CD1  | PHE | X | 451 | 53.285 | 49.069 | 34.631 | 0.00 | 0.00 |
| ATOM | 6815 | HD1  | PHE | X | 451 | 53.065 | 48.093 | 34.223 | 0.00 | 0.00 |
| ATOM | 6816 | CE1  | PHE | X | 451 | 52.505 | 49.615 | 35.668 | 0.00 | 0.00 |
| ATOM | 6817 | HE1  | PHE | X | 451 | 51.685 | 49.074 | 36.117 | 0.00 | 0.00 |
| ATOM | 6818 | CZ   | PHE | X | 451 | 52.890 | 50.864 | 36.234 | 0.00 | 0.00 |
| ATOM | 6819 | HZ   | PHE | X | 451 | 52.334 | 51.294 | 37.054 | 0.00 | 0.00 |
| ATOM | 6820 | CE2  | PHE | X | 451 | 53.906 | 51.601 | 35.699 | 0.00 | 0.00 |
| ATOM | 6821 | HE2  | PHE | X | 451 | 54.277 | 52.497 | 36.175 | 0.00 | 0.00 |
| ATOM | 6822 | CD2  | PHE | X | 451 | 54.642 | 51.046 | 34.590 | 0.00 | 0.00 |
| ATOM | 6823 | HD2  | PHE | X | 451 | 55.431 | 51.716 | 34.280 | 0.00 | 0.00 |
| ATOM | 6824 | C    | PHE | X | 451 | 55.526 | 49.915 | 30.607 | 0.00 | 0.00 |
| ATOM | 6825 | O    | PHE | X | 451 | 55.867 | 51.108 | 30.665 | 0.00 | 0.00 |
| ATOM | 6826 | N    | GLY | X | 452 | 56.020 | 49.076 | 29.739 | 0.00 | 0.00 |
| ATOM | 6827 | H    | GLY | X | 452 | 55.654 | 48.136 | 29.690 | 0.00 | 0.00 |
| ATOM | 6828 | CA   | GLY | X | 452 | 56.916 | 49.498 | 28.643 | 0.00 | 0.00 |
| ATOM | 6829 | HA2  | GLY | X | 452 | 56.733 | 48.828 | 27.745 | 0.00 | 0.00 |
| ATOM | 6830 | HA3  | GLY | X | 452 | 56.817 | 50.584 | 28.454 | 0.00 | 0.00 |
| ATOM | 6831 | C    | GLY | X | 452 | 58.367 | 49.271 | 28.835 | 0.00 | 0.00 |
| ATOM | 6832 | O    | GLY | X | 452 | 59.211 | 49.966 | 28.259 | 0.00 | 0.00 |
| ATOM | 6833 | N    | ILE | X | 453 | 58.779 | 48.430 | 29.801 | 0.00 | 0.00 |
| ATOM | 6834 | H    | ILE | X | 453 | 58.019 | 47.943 | 30.254 | 0.00 | 0.00 |
| ATOM | 6835 | CA   | ILE | X | 453 | 60.184 | 48.295 | 30.177 | 0.00 | 0.00 |
| ATOM | 6836 | HA   | ILE | X | 453 | 60.454 | 49.263 | 30.600 | 0.00 | 0.00 |
| ATOM | 6837 | CB   | ILE | X | 453 | 60.274 | 47.421 | 31.437 | 0.00 | 0.00 |
| ATOM | 6838 | HB   | ILE | X | 453 | 60.117 | 46.426 | 31.023 | 0.00 | 0.00 |
| ATOM | 6839 | CG2  | ILE | X | 453 | 61.702 | 47.213 | 31.931 | 0.00 | 0.00 |
| ATOM | 6840 | HG21 | ILE | X | 453 | 62.020 | 48.116 | 32.452 | 0.00 | 0.00 |
| ATOM | 6841 | HG22 | ILE | X | 453 | 61.634 | 46.472 | 32.728 | 0.00 | 0.00 |
| ATOM | 6842 | HG23 | ILE | X | 453 | 62.420 | 46.958 | 31.153 | 0.00 | 0.00 |
| ATOM | 6843 | CG1  | ILE | X | 453 | 59.351 | 47.870 | 32.640 | 0.00 | 0.00 |
| ATOM | 6844 | HG12 | ILE | X | 453 | 58.322 | 47.787 | 32.291 | 0.00 | 0.00 |
| ATOM | 6845 | HG13 | ILE | X | 453 | 59.534 | 47.061 | 33.347 | 0.00 | 0.00 |
| ATOM | 6846 | CD1  | ILE | X | 453 | 59.596 | 49.246 | 33.212 | 0.00 | 0.00 |
| ATOM | 6847 | HD11 | ILE | X | 453 | 60.647 | 49.450 | 33.415 | 0.00 | 0.00 |
| ATOM | 6848 | HD12 | ILE | X | 453 | 59.115 | 49.994 | 32.581 | 0.00 | 0.00 |
| ATOM | 6849 | HD13 | ILE | X | 453 | 59.171 | 49.362 | 34.209 | 0.00 | 0.00 |
| ATOM | 6850 | C    | ILE | X | 453 | 61.172 | 47.945 | 29.010 | 0.00 | 0.00 |
| ATOM | 6851 | O    | ILE | X | 453 | 62.322 | 48.430 | 29.135 | 0.00 | 0.00 |
| ATOM | 6852 | N    | PRO | X | 454 | 60.763 | 47.089 | 28.050 | 0.00 | 0.00 |
| ATOM | 6853 | CD   | PRO | X | 454 | 59.551 | 46.285 | 28.003 | 0.00 | 0.00 |
| ATOM | 6854 | HD2  | PRO | X | 454 | 58.815 | 46.735 | 27.335 | 0.00 | 0.00 |
| ATOM | 6855 | HD3  | PRO | X | 454 | 59.233 | 46.004 | 29.007 | 0.00 | 0.00 |
| ATOM | 6856 | CG   | PRO | X | 454 | 59.983 | 45.104 | 27.230 | 0.00 | 0.00 |
| ATOM | 6857 | HG2  | PRO | X | 454 | 59.079 | 44.619 | 26.863 | 0.00 | 0.00 |
| ATOM | 6858 | HG3  | PRO | X | 454 | 60.593 | 44.417 | 27.818 | 0.00 | 0.00 |
| ATOM | 6859 | CB   | PRO | X | 454 | 60.876 | 45.794 | 26.148 | 0.00 | 0.00 |
| ATOM | 6860 | HB2  | PRO | X | 454 | 60.292 | 46.306 | 25.383 | 0.00 | 0.00 |
| ATOM | 6861 | HB3  | PRO | X | 454 | 61.520 | 45.026 | 25.719 | 0.00 | 0.00 |
| ATOM | 6862 | CA   | PRO | X | 454 | 61.682 | 46.799 | 26.953 | 0.00 | 0.00 |
| ATOM | 6863 | HA   | PRO | X | 454 | 62.559 | 46.229 | 27.260 | 0.00 | 0.00 |
| ATOM | 6864 | C    | PRO | X | 454 | 62.244 | 47.967 | 26.200 | 0.00 | 0.00 |

|      |      |      |     |   |     |        |        |        |      |      |
|------|------|------|-----|---|-----|--------|--------|--------|------|------|
| ATOM | 6865 | O    | PRO | X | 454 | 63.350 | 47.886 | 25.729 | 0.00 | 0.00 |
| ATOM | 6866 | N    | LEU | X | 455 | 61.570 | 49.130 | 26.202 | 0.00 | 0.00 |
| ATOM | 6867 | H    | LEU | X | 455 | 60.735 | 49.186 | 26.767 | 0.00 | 0.00 |
| ATOM | 6868 | CA   | LEU | X | 455 | 62.027 | 50.318 | 25.545 | 0.00 | 0.00 |
| ATOM | 6869 | HA   | LEU | X | 455 | 62.421 | 50.126 | 24.547 | 0.00 | 0.00 |
| ATOM | 6870 | CB   | LEU | X | 455 | 60.890 | 51.389 | 25.419 | 0.00 | 0.00 |
| ATOM | 6871 | HB2  | LEU | X | 455 | 60.655 | 51.812 | 26.396 | 0.00 | 0.00 |
| ATOM | 6872 | HB3  | LEU | X | 455 | 61.307 | 52.254 | 24.901 | 0.00 | 0.00 |
| ATOM | 6873 | CG   | LEU | X | 455 | 59.542 | 50.846 | 24.864 | 0.00 | 0.00 |
| ATOM | 6874 | HG   | LEU | X | 455 | 59.114 | 50.203 | 25.633 | 0.00 | 0.00 |
| ATOM | 6875 | CD1  | LEU | X | 455 | 58.520 | 52.064 | 24.628 | 0.00 | 0.00 |
| ATOM | 6876 | HD11 | LEU | X | 455 | 58.892 | 52.604 | 23.757 | 0.00 | 0.00 |
| ATOM | 6877 | HD12 | LEU | X | 455 | 57.493 | 51.712 | 24.528 | 0.00 | 0.00 |
| ATOM | 6878 | HD13 | LEU | X | 455 | 58.534 | 52.706 | 25.509 | 0.00 | 0.00 |
| ATOM | 6879 | CD2  | LEU | X | 455 | 59.685 | 50.124 | 23.597 | 0.00 | 0.00 |
| ATOM | 6880 | HD21 | LEU | X | 455 | 58.709 | 49.878 | 23.180 | 0.00 | 0.00 |
| ATOM | 6881 | HD22 | LEU | X | 455 | 60.241 | 50.756 | 22.904 | 0.00 | 0.00 |
| ATOM | 6882 | HD23 | LEU | X | 455 | 60.251 | 49.197 | 23.695 | 0.00 | 0.00 |
| ATOM | 6883 | C    | LEU | X | 455 | 63.311 | 50.828 | 26.221 | 0.00 | 0.00 |
| ATOM | 6884 | O    | LEU | X | 455 | 64.102 | 51.485 | 25.584 | 0.00 | 0.00 |
| ATOM | 6885 | N    | ASP | X | 456 | 63.604 | 50.519 | 27.526 | 0.00 | 0.00 |
| ATOM | 6886 | H    | ASP | X | 456 | 63.146 | 49.801 | 28.069 | 0.00 | 0.00 |
| ATOM | 6887 | CA   | ASP | X | 456 | 64.539 | 51.180 | 28.452 | 0.00 | 0.00 |
| ATOM | 6888 | HA   | ASP | X | 456 | 64.195 | 52.197 | 28.643 | 0.00 | 0.00 |
| ATOM | 6889 | CB   | ASP | X | 456 | 64.527 | 50.417 | 29.812 | 0.00 | 0.00 |
| ATOM | 6890 | HB2  | ASP | X | 456 | 63.519 | 50.332 | 30.218 | 0.00 | 0.00 |
| ATOM | 6891 | HB3  | ASP | X | 456 | 64.931 | 49.451 | 29.507 | 0.00 | 0.00 |
| ATOM | 6892 | CG   | ASP | X | 456 | 65.401 | 51.048 | 31.011 | 0.00 | 0.00 |
| ATOM | 6893 | OD1  | ASP | X | 456 | 66.122 | 52.042 | 30.670 | 0.00 | 0.00 |
| ATOM | 6894 | OD2  | ASP | X | 456 | 65.289 | 50.585 | 32.203 | 0.00 | 0.00 |
| ATOM | 6895 | C    | ASP | X | 456 | 65.982 | 51.106 | 27.838 | 0.00 | 0.00 |
| ATOM | 6896 | O    | ASP | X | 456 | 66.453 | 49.979 | 27.634 | 0.00 | 0.00 |
| ATOM | 6897 | N    | PRO | X | 457 | 66.724 | 52.222 | 27.621 | 0.00 | 0.00 |
| ATOM | 6898 | CD   | PRO | X | 457 | 66.284 | 53.565 | 27.871 | 0.00 | 0.00 |
| ATOM | 6899 | HD2  | PRO | X | 457 | 65.728 | 53.690 | 28.801 | 0.00 | 0.00 |
| ATOM | 6900 | HD3  | PRO | X | 457 | 65.568 | 53.932 | 27.135 | 0.00 | 0.00 |
| ATOM | 6901 | CG   | PRO | X | 457 | 67.530 | 54.389 | 27.768 | 0.00 | 0.00 |
| ATOM | 6902 | HG2  | PRO | X | 457 | 67.930 | 54.459 | 28.780 | 0.00 | 0.00 |
| ATOM | 6903 | HG3  | PRO | X | 457 | 67.310 | 55.409 | 27.455 | 0.00 | 0.00 |
| ATOM | 6904 | CB   | PRO | X | 457 | 68.423 | 53.585 | 26.799 | 0.00 | 0.00 |
| ATOM | 6905 | HB2  | PRO | X | 457 | 69.487 | 53.820 | 26.837 | 0.00 | 0.00 |
| ATOM | 6906 | HB3  | PRO | X | 457 | 68.095 | 53.626 | 25.760 | 0.00 | 0.00 |
| ATOM | 6907 | CA   | PRO | X | 457 | 68.161 | 52.161 | 27.271 | 0.00 | 0.00 |
| ATOM | 6908 | HA   | PRO | X | 457 | 68.355 | 51.527 | 26.406 | 0.00 | 0.00 |
| ATOM | 6909 | C    | PRO | X | 457 | 69.126 | 51.692 | 28.381 | 0.00 | 0.00 |
| ATOM | 6910 | O    | PRO | X | 457 | 70.257 | 51.387 | 28.133 | 0.00 | 0.00 |
| ATOM | 6911 | N    | SER | X | 458 | 68.683 | 51.639 | 29.639 | 0.00 | 0.00 |
| ATOM | 6912 | H    | SER | X | 458 | 67.738 | 51.850 | 29.927 | 0.00 | 0.00 |
| ATOM | 6913 | CA   | SER | X | 458 | 69.609 | 51.238 | 30.780 | 0.00 | 0.00 |
| ATOM | 6914 | HA   | SER | X | 458 | 70.617 | 51.627 | 30.635 | 0.00 | 0.00 |
| ATOM | 6915 | CB   | SER | X | 458 | 69.199 | 51.793 | 32.139 | 0.00 | 0.00 |
| ATOM | 6916 | HB2  | SER | X | 458 | 69.891 | 51.493 | 32.926 | 0.00 | 0.00 |
| ATOM | 6917 | HB3  | SER | X | 458 | 69.253 | 52.882 | 32.139 | 0.00 | 0.00 |
| ATOM | 6918 | OG   | SER | X | 458 | 67.873 | 51.346 | 32.552 | 0.00 | 0.00 |
| ATOM | 6919 | HG   | SER | X | 458 | 67.253 | 51.603 | 31.865 | 0.00 | 0.00 |
| ATOM | 6920 | C    | SER | X | 458 | 69.839 | 49.728 | 31.060 | 0.00 | 0.00 |
| ATOM | 6921 | O    | SER | X | 458 | 70.788 | 49.297 | 31.742 | 0.00 | 0.00 |
| ATOM | 6922 | N    | ARG | X | 459 | 68.930 | 48.960 | 30.499 | 0.00 | 0.00 |
| ATOM | 6923 | H    | ARG | X | 459 | 68.233 | 49.440 | 29.948 | 0.00 | 0.00 |
| ATOM | 6924 | CA   | ARG | X | 459 | 68.983 | 47.504 | 30.389 | 0.00 | 0.00 |
| ATOM | 6925 | HA   | ARG | X | 459 | 69.995 | 47.206 | 30.665 | 0.00 | 0.00 |
| ATOM | 6926 | CB   | ARG | X | 459 | 68.021 | 46.757 | 31.273 | 0.00 | 0.00 |
| ATOM | 6927 | HB2  | ARG | X | 459 | 68.062 | 45.678 | 31.121 | 0.00 | 0.00 |
| ATOM | 6928 | HB3  | ARG | X | 459 | 68.411 | 46.946 | 32.274 | 0.00 | 0.00 |
| ATOM | 6929 | CG   | ARG | X | 459 | 66.509 | 47.165 | 31.336 | 0.00 | 0.00 |
| ATOM | 6930 | HG2  | ARG | X | 459 | 66.344 | 48.215 | 31.098 | 0.00 | 0.00 |
| ATOM | 6931 | HG3  | ARG | X | 459 | 66.136 | 46.669 | 30.439 | 0.00 | 0.00 |
| ATOM | 6932 | CD   | ARG | X | 459 | 65.571 | 46.812 | 32.513 | 0.00 | 0.00 |
| ATOM | 6933 | HD2  | ARG | X | 459 | 64.542 | 46.792 | 32.154 | 0.00 | 0.00 |
| ATOM | 6934 | HD3  | ARG | X | 459 | 65.719 | 45.795 | 32.877 | 0.00 | 0.00 |

|      |      |      |     |   |     |        |        |        |      |      |
|------|------|------|-----|---|-----|--------|--------|--------|------|------|
| ATOM | 6935 | NE   | ARG | X | 459 | 65.832 | 47.676 | 33.636 | 0.00 | 0.00 |
| ATOM | 6936 | HE   | ARG | X | 459 | 66.465 | 48.463 | 33.628 | 0.00 | 0.00 |
| ATOM | 6937 | CZ   | ARG | X | 459 | 65.218 | 47.649 | 34.816 | 0.00 | 0.00 |
| ATOM | 6938 | NH1  | ARG | X | 459 | 64.450 | 46.641 | 35.181 | 0.00 | 0.00 |
| ATOM | 6939 | HH11 | ARG | X | 459 | 64.269 | 45.916 | 34.502 | 0.00 | 0.00 |
| ATOM | 6940 | HH12 | ARG | X | 459 | 64.086 | 46.549 | 36.119 | 0.00 | 0.00 |
| ATOM | 6941 | NH2  | ARG | X | 459 | 65.372 | 48.593 | 35.690 | 0.00 | 0.00 |
| ATOM | 6942 | HH21 | ARG | X | 459 | 66.055 | 49.317 | 35.519 | 0.00 | 0.00 |
| ATOM | 6943 | HH22 | ARG | X | 459 | 64.967 | 48.438 | 36.602 | 0.00 | 0.00 |
| ATOM | 6944 | C    | ARG | X | 459 | 68.800 | 46.960 | 28.938 | 0.00 | 0.00 |
| ATOM | 6945 | O    | ARG | X | 459 | 68.564 | 47.808 | 28.010 | 0.00 | 0.00 |
| ATOM | 6946 | N    | ASN | X | 460 | 68.868 | 45.694 | 28.699 | 0.00 | 0.00 |
| ATOM | 6947 | H    | ASN | X | 460 | 69.172 | 45.072 | 29.435 | 0.00 | 0.00 |
| ATOM | 6948 | CA   | ASN | X | 460 | 68.797 | 45.111 | 27.395 | 0.00 | 0.00 |
| ATOM | 6949 | HA   | ASN | X | 460 | 68.690 | 45.993 | 26.763 | 0.00 | 0.00 |
| ATOM | 6950 | CB   | ASN | X | 460 | 70.181 | 44.579 | 26.929 | 0.00 | 0.00 |
| ATOM | 6951 | HB2  | ASN | X | 460 | 70.833 | 45.352 | 27.335 | 0.00 | 0.00 |
| ATOM | 6952 | HB3  | ASN | X | 460 | 70.395 | 43.600 | 27.357 | 0.00 | 0.00 |
| ATOM | 6953 | CG   | ASN | X | 460 | 70.397 | 44.728 | 25.470 | 0.00 | 0.00 |
| ATOM | 6954 | OD1  | ASN | X | 460 | 69.483 | 45.085 | 24.740 | 0.00 | 0.00 |
| ATOM | 6955 | ND2  | ASN | X | 460 | 71.611 | 44.484 | 24.908 | 0.00 | 0.00 |
| ATOM | 6956 | HD21 | ASN | X | 460 | 71.605 | 44.575 | 23.902 | 0.00 | 0.00 |
| ATOM | 6957 | HD22 | ASN | X | 460 | 72.439 | 44.203 | 25.413 | 0.00 | 0.00 |
| ATOM | 6958 | C    | ASN | X | 460 | 67.560 | 44.200 | 27.094 | 0.00 | 0.00 |
| ATOM | 6959 | O    | ASN | X | 460 | 67.207 | 43.308 | 27.883 | 0.00 | 0.00 |
| ATOM | 6960 | N    | TYR | X | 461 | 66.965 | 44.459 | 25.923 | 0.00 | 0.00 |
| ATOM | 6961 | H    | TYR | X | 461 | 67.329 | 45.245 | 25.404 | 0.00 | 0.00 |
| ATOM | 6962 | CA   | TYR | X | 461 | 65.760 | 43.867 | 25.347 | 0.00 | 0.00 |
| ATOM | 6963 | HA   | TYR | X | 461 | 65.772 | 42.820 | 25.650 | 0.00 | 0.00 |
| ATOM | 6964 | CB   | TYR | X | 461 | 64.488 | 44.628 | 25.843 | 0.00 | 0.00 |
| ATOM | 6965 | HB2  | TYR | X | 461 | 64.572 | 45.715 | 25.826 | 0.00 | 0.00 |
| ATOM | 6966 | HB3  | TYR | X | 461 | 63.696 | 44.424 | 25.123 | 0.00 | 0.00 |
| ATOM | 6967 | CG   | TYR | X | 461 | 64.053 | 44.144 | 27.231 | 0.00 | 0.00 |
| ATOM | 6968 | CD1  | TYR | X | 461 | 64.537 | 44.755 | 28.436 | 0.00 | 0.00 |
| ATOM | 6969 | HD1  | TYR | X | 461 | 65.009 | 45.721 | 28.341 | 0.00 | 0.00 |
| ATOM | 6970 | CE1  | TYR | X | 461 | 64.073 | 44.304 | 29.672 | 0.00 | 0.00 |
| ATOM | 6971 | HE1  | TYR | X | 461 | 64.427 | 44.762 | 30.584 | 0.00 | 0.00 |
| ATOM | 6972 | CZ   | TYR | X | 461 | 63.192 | 43.232 | 29.753 | 0.00 | 0.00 |
| ATOM | 6973 | OH   | TYR | X | 461 | 62.725 | 42.826 | 30.935 | 0.00 | 0.00 |
| ATOM | 6974 | HH   | TYR | X | 461 | 61.982 | 42.223 | 30.859 | 0.00 | 0.00 |
| ATOM | 6975 | CE2  | TYR | X | 461 | 62.794 | 42.558 | 28.580 | 0.00 | 0.00 |
| ATOM | 6976 | HE2  | TYR | X | 461 | 62.091 | 41.739 | 28.525 | 0.00 | 0.00 |
| ATOM | 6977 | CD2  | TYR | X | 461 | 63.241 | 42.955 | 27.323 | 0.00 | 0.00 |
| ATOM | 6978 | HD2  | TYR | X | 461 | 63.136 | 42.353 | 26.432 | 0.00 | 0.00 |
| ATOM | 6979 | C    | TYR | X | 461 | 65.908 | 43.951 | 23.815 | 0.00 | 0.00 |
| ATOM | 6980 | O    | TYR | X | 461 | 66.362 | 44.935 | 23.225 | 0.00 | 0.00 |
| ATOM | 6981 | N    | THR | X | 462 | 65.523 | 42.894 | 23.143 | 0.00 | 0.00 |
| ATOM | 6982 | H    | THR | X | 462 | 65.372 | 42.049 | 23.675 | 0.00 | 0.00 |
| ATOM | 6983 | CA   | THR | X | 462 | 65.708 | 42.623 | 21.698 | 0.00 | 0.00 |
| ATOM | 6984 | HA   | THR | X | 462 | 66.629 | 43.006 | 21.258 | 0.00 | 0.00 |
| ATOM | 6985 | CB   | THR | X | 462 | 65.605 | 41.203 | 21.363 | 0.00 | 0.00 |
| ATOM | 6986 | HB   | THR | X | 462 | 65.616 | 41.078 | 20.280 | 0.00 | 0.00 |
| ATOM | 6987 | CG2  | THR | X | 462 | 66.747 | 40.394 | 22.069 | 0.00 | 0.00 |
| ATOM | 6988 | HG21 | THR | X | 462 | 66.539 | 40.104 | 23.100 | 0.00 | 0.00 |
| ATOM | 6989 | HG22 | THR | X | 462 | 66.895 | 39.477 | 21.499 | 0.00 | 0.00 |
| ATOM | 6990 | HG23 | THR | X | 462 | 67.660 | 40.982 | 22.162 | 0.00 | 0.00 |
| ATOM | 6991 | OG1  | THR | X | 462 | 64.425 | 40.611 | 21.855 | 0.00 | 0.00 |
| ATOM | 6992 | HG1  | THR | X | 462 | 64.320 | 40.869 | 22.773 | 0.00 | 0.00 |
| ATOM | 6993 | C    | THR | X | 462 | 64.656 | 43.417 | 20.910 | 0.00 | 0.00 |
| ATOM | 6994 | O    | THR | X | 462 | 63.609 | 43.753 | 21.501 | 0.00 | 0.00 |
| ATOM | 6995 | N    | ALA | X | 463 | 64.885 | 43.629 | 19.608 | 0.00 | 0.00 |
| ATOM | 6996 | H    | ALA | X | 463 | 65.749 | 43.248 | 19.248 | 0.00 | 0.00 |
| ATOM | 6997 | CA   | ALA | X | 463 | 63.999 | 44.449 | 18.798 | 0.00 | 0.00 |
| ATOM | 6998 | HA   | ALA | X | 463 | 63.983 | 45.433 | 19.267 | 0.00 | 0.00 |
| ATOM | 6999 | CB   | ALA | X | 463 | 64.666 | 44.621 | 17.501 | 0.00 | 0.00 |
| ATOM | 7000 | HB1  | ALA | X | 463 | 65.665 | 45.058 | 17.507 | 0.00 | 0.00 |
| ATOM | 7001 | HB2  | ALA | X | 463 | 64.804 | 43.661 | 17.002 | 0.00 | 0.00 |
| ATOM | 7002 | HB3  | ALA | X | 463 | 64.006 | 45.304 | 16.967 | 0.00 | 0.00 |
| ATOM | 7003 | C    | ALA | X | 463 | 62.618 | 43.889 | 18.757 | 0.00 | 0.00 |
| ATOM | 7004 | O    | ALA | X | 463 | 61.652 | 44.662 | 18.829 | 0.00 | 0.00 |



|      |      |      |     |   |     |        |        |        |      |      |
|------|------|------|-----|---|-----|--------|--------|--------|------|------|
| ATOM | 7005 | N    | GLU | X | 464 | 62.565 | 42.546 | 18.810 | 0.00 | 0.00 |
| ATOM | 7006 | H    | GLU | X | 464 | 63.387 | 41.967 | 18.908 | 0.00 | 0.00 |
| ATOM | 7007 | CA   | GLU | X | 464 | 61.243 | 41.877 | 18.791 | 0.00 | 0.00 |
| ATOM | 7008 | HA   | GLU | X | 464 | 60.720 | 42.321 | 17.944 | 0.00 | 0.00 |
| ATOM | 7009 | CB   | GLU | X | 464 | 61.401 | 40.409 | 18.347 | 0.00 | 0.00 |
| ATOM | 7010 | HB2  | GLU | X | 464 | 60.472 | 39.846 | 18.431 | 0.00 | 0.00 |
| ATOM | 7011 | HB3  | GLU | X | 464 | 61.654 | 40.412 | 17.286 | 0.00 | 0.00 |
| ATOM | 7012 | CG   | GLU | X | 464 | 62.476 | 39.411 | 18.907 | 0.00 | 0.00 |
| ATOM | 7013 | HG2  | GLU | X | 464 | 62.514 | 39.339 | 19.994 | 0.00 | 0.00 |
| ATOM | 7014 | HG3  | GLU | X | 464 | 62.132 | 38.404 | 18.671 | 0.00 | 0.00 |
| ATOM | 7015 | CD   | GLU | X | 464 | 63.891 | 39.667 | 18.412 | 0.00 | 0.00 |
| ATOM | 7016 | OE1  | GLU | X | 464 | 64.114 | 40.575 | 17.576 | 0.00 | 0.00 |
| ATOM | 7017 | OE2  | GLU | X | 464 | 64.763 | 38.911 | 18.922 | 0.00 | 0.00 |
| ATOM | 7018 | C    | GLU | X | 464 | 60.467 | 42.087 | 20.151 | 0.00 | 0.00 |
| ATOM | 7019 | O    | GLU | X | 464 | 59.220 | 42.062 | 20.132 | 0.00 | 0.00 |
| ATOM | 7020 | N    | GLU | X | 465 | 61.096 | 42.267 | 21.309 | 0.00 | 0.00 |
| ATOM | 7021 | H    | GLU | X | 465 | 62.100 | 42.380 | 21.316 | 0.00 | 0.00 |
| ATOM | 7022 | CA   | GLU | X | 465 | 60.366 | 42.529 | 22.551 | 0.00 | 0.00 |
| ATOM | 7023 | HA   | GLU | X | 465 | 59.435 | 41.962 | 22.564 | 0.00 | 0.00 |
| ATOM | 7024 | CB   | GLU | X | 465 | 61.316 | 42.297 | 23.750 | 0.00 | 0.00 |
| ATOM | 7025 | HB2  | GLU | X | 465 | 62.258 | 42.846 | 23.753 | 0.00 | 0.00 |
| ATOM | 7026 | HB3  | GLU | X | 465 | 60.877 | 42.493 | 24.728 | 0.00 | 0.00 |
| ATOM | 7027 | CG   | GLU | X | 465 | 61.606 | 40.811 | 23.695 | 0.00 | 0.00 |
| ATOM | 7028 | HG2  | GLU | X | 465 | 60.655 | 40.319 | 23.897 | 0.00 | 0.00 |
| ATOM | 7029 | HG3  | GLU | X | 465 | 62.076 | 40.539 | 22.750 | 0.00 | 0.00 |
| ATOM | 7030 | CD   | GLU | X | 465 | 62.617 | 40.409 | 24.729 | 0.00 | 0.00 |
| ATOM | 7031 | OE1  | GLU | X | 465 | 63.792 | 40.719 | 24.503 | 0.00 | 0.00 |
| ATOM | 7032 | OE2  | GLU | X | 465 | 62.260 | 39.860 | 25.800 | 0.00 | 0.00 |
| ATOM | 7033 | C    | GLU | X | 465 | 59.958 | 44.018 | 22.610 | 0.00 | 0.00 |
| ATOM | 7034 | O    | GLU | X | 465 | 58.905 | 44.264 | 23.165 | 0.00 | 0.00 |
| ATOM | 7035 | N    | LYS | X | 466 | 60.792 | 44.898 | 22.012 | 0.00 | 0.00 |
| ATOM | 7036 | H    | LYS | X | 466 | 61.648 | 44.539 | 21.611 | 0.00 | 0.00 |
| ATOM | 7037 | CA   | LYS | X | 466 | 60.430 | 46.331 | 21.848 | 0.00 | 0.00 |
| ATOM | 7038 | HA   | LYS | X | 466 | 60.127 | 46.736 | 22.813 | 0.00 | 0.00 |
| ATOM | 7039 | CB   | LYS | X | 466 | 61.582 | 47.208 | 21.369 | 0.00 | 0.00 |
| ATOM | 7040 | HB2  | LYS | X | 466 | 61.987 | 46.823 | 20.434 | 0.00 | 0.00 |
| ATOM | 7041 | HB3  | LYS | X | 466 | 61.283 | 48.241 | 21.191 | 0.00 | 0.00 |
| ATOM | 7042 | CG   | LYS | X | 466 | 62.730 | 47.267 | 22.395 | 0.00 | 0.00 |
| ATOM | 7043 | HG2  | LYS | X | 466 | 62.442 | 47.849 | 23.270 | 0.00 | 0.00 |
| ATOM | 7044 | HG3  | LYS | X | 466 | 62.829 | 46.215 | 22.663 | 0.00 | 0.00 |
| ATOM | 7045 | CD   | LYS | X | 466 | 64.053 | 47.677 | 21.832 | 0.00 | 0.00 |
| ATOM | 7046 | HD2  | LYS | X | 466 | 64.548 | 46.915 | 21.230 | 0.00 | 0.00 |
| ATOM | 7047 | HD3  | LYS | X | 466 | 63.935 | 48.536 | 21.172 | 0.00 | 0.00 |
| ATOM | 7048 | CE   | LYS | X | 466 | 64.912 | 47.878 | 23.152 | 0.00 | 0.00 |
| ATOM | 7049 | HE2  | LYS | X | 466 | 64.417 | 48.661 | 23.726 | 0.00 | 0.00 |
| ATOM | 7050 | HE3  | LYS | X | 466 | 64.756 | 46.988 | 23.760 | 0.00 | 0.00 |
| ATOM | 7051 | NZ   | LYS | X | 466 | 66.361 | 48.087 | 22.843 | 0.00 | 0.00 |
| ATOM | 7052 | HZ1  | LYS | X | 466 | 66.890 | 48.439 | 23.628 | 0.00 | 0.00 |
| ATOM | 7053 | HZ2  | LYS | X | 466 | 66.860 | 47.295 | 22.463 | 0.00 | 0.00 |
| ATOM | 7054 | HZ3  | LYS | X | 466 | 66.512 | 48.834 | 22.180 | 0.00 | 0.00 |
| ATOM | 7055 | C    | LYS | X | 466 | 59.208 | 46.565 | 20.980 | 0.00 | 0.00 |
| ATOM | 7056 | O    | LYS | X | 466 | 58.251 | 47.225 | 21.479 | 0.00 | 0.00 |
| ATOM | 7057 | N    | ILE | X | 467 | 59.064 | 45.966 | 19.813 | 0.00 | 0.00 |
| ATOM | 7058 | H    | ILE | X | 467 | 59.846 | 45.423 | 19.474 | 0.00 | 0.00 |
| ATOM | 7059 | CA   | ILE | X | 467 | 57.787 | 46.067 | 19.077 | 0.00 | 0.00 |
| ATOM | 7060 | HA   | ILE | X | 467 | 57.405 | 47.088 | 19.092 | 0.00 | 0.00 |
| ATOM | 7061 | CB   | ILE | X | 467 | 57.856 | 45.694 | 17.583 | 0.00 | 0.00 |
| ATOM | 7062 | HB   | ILE | X | 467 | 56.800 | 45.688 | 17.312 | 0.00 | 0.00 |
| ATOM | 7063 | CG2  | ILE | X | 467 | 58.554 | 46.793 | 16.869 | 0.00 | 0.00 |
| ATOM | 7064 | HG21 | ILE | X | 467 | 58.281 | 47.787 | 17.224 | 0.00 | 0.00 |
| ATOM | 7065 | HG22 | ILE | X | 467 | 59.639 | 46.730 | 16.951 | 0.00 | 0.00 |
| ATOM | 7066 | HG23 | ILE | X | 467 | 58.318 | 46.669 | 15.811 | 0.00 | 0.00 |
| ATOM | 7067 | CG1  | ILE | X | 467 | 58.452 | 44.306 | 17.326 | 0.00 | 0.00 |
| ATOM | 7068 | HG12 | ILE | X | 467 | 59.485 | 44.146 | 17.636 | 0.00 | 0.00 |
| ATOM | 7069 | HG13 | ILE | X | 467 | 57.943 | 43.571 | 17.950 | 0.00 | 0.00 |
| ATOM | 7070 | CD1  | ILE | X | 467 | 58.429 | 43.844 | 15.806 | 0.00 | 0.00 |
| ATOM | 7071 | HD11 | ILE | X | 467 | 58.699 | 42.789 | 15.761 | 0.00 | 0.00 |
| ATOM | 7072 | HD12 | ILE | X | 467 | 57.449 | 44.020 | 15.363 | 0.00 | 0.00 |
| ATOM | 7073 | HD13 | ILE | X | 467 | 59.223 | 44.380 | 15.287 | 0.00 | 0.00 |
| ATOM | 7074 | C    | ILE | X | 467 | 56.585 | 45.286 | 19.714 | 0.00 | 0.00 |

|      |      |      |     |   |     |        |        |        |      |      |
|------|------|------|-----|---|-----|--------|--------|--------|------|------|
| ATOM | 7075 | O    | ILE | X | 467 | 55.482 | 45.823 | 19.704 | 0.00 | 0.00 |
| ATOM | 7076 | N    | PHE | X | 468 | 56.763 | 44.066 | 20.291 | 0.00 | 0.00 |
| ATOM | 7077 | H    | PHE | X | 468 | 57.595 | 43.516 | 20.129 | 0.00 | 0.00 |
| ATOM | 7078 | CA   | PHE | X | 468 | 55.829 | 43.451 | 21.268 | 0.00 | 0.00 |
| ATOM | 7079 | HA   | PHE | X | 468 | 54.857 | 43.349 | 20.786 | 0.00 | 0.00 |
| ATOM | 7080 | CB   | PHE | X | 468 | 56.391 | 42.146 | 21.722 | 0.00 | 0.00 |
| ATOM | 7081 | HB2  | PHE | X | 468 | 56.610 | 41.467 | 20.898 | 0.00 | 0.00 |
| ATOM | 7082 | HB3  | PHE | X | 468 | 57.288 | 42.273 | 22.328 | 0.00 | 0.00 |
| ATOM | 7083 | CG   | PHE | X | 468 | 55.534 | 41.334 | 22.632 | 0.00 | 0.00 |
| ATOM | 7084 | CD1  | PHE | X | 468 | 54.215 | 41.003 | 22.238 | 0.00 | 0.00 |
| ATOM | 7085 | HD1  | PHE | X | 468 | 53.797 | 41.461 | 21.354 | 0.00 | 0.00 |
| ATOM | 7086 | CE1  | PHE | X | 468 | 53.436 | 40.128 | 23.035 | 0.00 | 0.00 |
| ATOM | 7087 | HE1  | PHE | X | 468 | 52.398 | 39.940 | 22.802 | 0.00 | 0.00 |
| ATOM | 7088 | CZ   | PHE | X | 468 | 54.003 | 39.552 | 24.184 | 0.00 | 0.00 |
| ATOM | 7089 | HZ   | PHE | X | 468 | 53.409 | 38.826 | 24.719 | 0.00 | 0.00 |
| ATOM | 7090 | CE2  | PHE | X | 468 | 55.275 | 39.855 | 24.623 | 0.00 | 0.00 |
| ATOM | 7091 | HE2  | PHE | X | 468 | 55.667 | 39.258 | 25.433 | 0.00 | 0.00 |
| ATOM | 7092 | CD2  | PHE | X | 468 | 56.070 | 40.713 | 23.819 | 0.00 | 0.00 |
| ATOM | 7093 | HD2  | PHE | X | 468 | 57.102 | 40.746 | 24.135 | 0.00 | 0.00 |
| ATOM | 7094 | C    | PHE | X | 468 | 55.521 | 44.349 | 22.492 | 0.00 | 0.00 |
| ATOM | 7095 | O    | PHE | X | 468 | 54.400 | 44.377 | 22.939 | 0.00 | 0.00 |
| ATOM | 7096 | N    | ALA | X | 469 | 56.376 | 45.190 | 23.058 | 0.00 | 0.00 |
| ATOM | 7097 | H    | ALA | X | 469 | 57.365 | 45.070 | 22.889 | 0.00 | 0.00 |
| ATOM | 7098 | CA   | ALA | X | 469 | 56.065 | 46.147 | 24.131 | 0.00 | 0.00 |
| ATOM | 7099 | HA   | ALA | X | 469 | 55.612 | 45.606 | 24.962 | 0.00 | 0.00 |
| ATOM | 7100 | CB   | ALA | X | 469 | 57.367 | 46.803 | 24.732 | 0.00 | 0.00 |
| ATOM | 7101 | HB1  | ALA | X | 469 | 57.024 | 47.489 | 25.507 | 0.00 | 0.00 |
| ATOM | 7102 | HB2  | ALA | X | 469 | 57.899 | 45.957 | 25.167 | 0.00 | 0.00 |
| ATOM | 7103 | HB3  | ALA | X | 469 | 57.882 | 47.309 | 23.914 | 0.00 | 0.00 |
| ATOM | 7104 | C    | ALA | X | 469 | 55.070 | 47.179 | 23.651 | 0.00 | 0.00 |
| ATOM | 7105 | O    | ALA | X | 469 | 54.016 | 47.293 | 24.222 | 0.00 | 0.00 |
| ATOM | 7106 | N    | GLN | X | 470 | 55.451 | 47.832 | 22.530 | 0.00 | 0.00 |
| ATOM | 7107 | H    | GLN | X | 470 | 56.408 | 47.770 | 22.212 | 0.00 | 0.00 |
| ATOM | 7108 | CA   | GLN | X | 470 | 54.663 | 48.907 | 21.901 | 0.00 | 0.00 |
| ATOM | 7109 | HA   | GLN | X | 470 | 54.561 | 49.786 | 22.538 | 0.00 | 0.00 |
| ATOM | 7110 | CB   | GLN | X | 470 | 55.250 | 49.425 | 20.590 | 0.00 | 0.00 |
| ATOM | 7111 | HB2  | GLN | X | 470 | 55.445 | 48.562 | 19.954 | 0.00 | 0.00 |
| ATOM | 7112 | HB3  | GLN | X | 470 | 54.568 | 50.066 | 20.031 | 0.00 | 0.00 |
| ATOM | 7113 | CG   | GLN | X | 470 | 56.501 | 50.307 | 20.942 | 0.00 | 0.00 |
| ATOM | 7114 | HG2  | GLN | X | 470 | 56.182 | 51.245 | 21.396 | 0.00 | 0.00 |
| ATOM | 7115 | HG3  | GLN | X | 470 | 57.173 | 49.881 | 21.687 | 0.00 | 0.00 |
| ATOM | 7116 | CD   | GLN | X | 470 | 57.314 | 50.546 | 19.630 | 0.00 | 0.00 |
| ATOM | 7117 | OE1  | GLN | X | 470 | 58.306 | 49.907 | 19.421 | 0.00 | 0.00 |
| ATOM | 7118 | NE2  | GLN | X | 470 | 56.977 | 51.621 | 18.905 | 0.00 | 0.00 |
| ATOM | 7119 | HE21 | GLN | X | 470 | 57.435 | 51.865 | 18.038 | 0.00 | 0.00 |
| ATOM | 7120 | HE22 | GLN | X | 470 | 56.191 | 52.208 | 19.145 | 0.00 | 0.00 |
| ATOM | 7121 | C    | GLN | X | 470 | 53.281 | 48.462 | 21.587 | 0.00 | 0.00 |
| ATOM | 7122 | O    | GLN | X | 470 | 52.249 | 49.159 | 21.582 | 0.00 | 0.00 |
| ATOM | 7123 | N    | ARG | X | 471 | 53.163 | 47.159 | 21.239 | 0.00 | 0.00 |
| ATOM | 7124 | H    | ARG | X | 471 | 54.087 | 46.752 | 21.265 | 0.00 | 0.00 |
| ATOM | 7125 | CA   | ARG | X | 471 | 51.954 | 46.487 | 20.798 | 0.00 | 0.00 |
| ATOM | 7126 | HA   | ARG | X | 471 | 51.447 | 46.989 | 19.974 | 0.00 | 0.00 |
| ATOM | 7127 | CB   | ARG | X | 471 | 52.450 | 45.249 | 20.102 | 0.00 | 0.00 |
| ATOM | 7128 | HB2  | ARG | X | 471 | 53.118 | 45.549 | 19.295 | 0.00 | 0.00 |
| ATOM | 7129 | HB3  | ARG | X | 471 | 53.061 | 44.731 | 20.842 | 0.00 | 0.00 |
| ATOM | 7130 | CG   | ARG | X | 471 | 51.339 | 44.285 | 19.524 | 0.00 | 0.00 |
| ATOM | 7131 | HG2  | ARG | X | 471 | 50.587 | 44.255 | 20.313 | 0.00 | 0.00 |
| ATOM | 7132 | HG3  | ARG | X | 471 | 50.859 | 44.775 | 18.676 | 0.00 | 0.00 |
| ATOM | 7133 | CD   | ARG | X | 471 | 51.985 | 42.936 | 19.137 | 0.00 | 0.00 |
| ATOM | 7134 | HD2  | ARG | X | 471 | 52.574 | 42.993 | 18.221 | 0.00 | 0.00 |
| ATOM | 7135 | HD3  | ARG | X | 471 | 52.528 | 42.608 | 20.024 | 0.00 | 0.00 |
| ATOM | 7136 | NE   | ARG | X | 471 | 50.946 | 41.975 | 18.910 | 0.00 | 0.00 |
| ATOM | 7137 | HE   | ARG | X | 471 | 50.006 | 42.333 | 18.999 | 0.00 | 0.00 |
| ATOM | 7138 | CZ   | ARG | X | 471 | 51.077 | 40.629 | 19.036 | 0.00 | 0.00 |
| ATOM | 7139 | NH1  | ARG | X | 471 | 52.250 | 40.119 | 19.048 | 0.00 | 0.00 |
| ATOM | 7140 | HH11 | ARG | X | 471 | 53.082 | 40.651 | 18.837 | 0.00 | 0.00 |
| ATOM | 7141 | HH12 | ARG | X | 471 | 52.447 | 39.140 | 19.200 | 0.00 | 0.00 |
| ATOM | 7142 | NH2  | ARG | X | 471 | 50.022 | 39.926 | 19.170 | 0.00 | 0.00 |
| ATOM | 7143 | HH21 | ARG | X | 471 | 49.076 | 40.279 | 19.205 | 0.00 | 0.00 |
| ATOM | 7144 | HH22 | ARG | X | 471 | 50.173 | 38.943 | 19.342 | 0.00 | 0.00 |

|      |      |      |     |   |     |        |        |        |      |      |
|------|------|------|-----|---|-----|--------|--------|--------|------|------|
| ATOM | 7145 | C    | ARG | X | 471 | 50.978 | 46.225 | 21.951 | 0.00 | 0.00 |
| ATOM | 7146 | O    | ARG | X | 471 | 49.775 | 46.413 | 21.817 | 0.00 | 0.00 |
| ATOM | 7147 | N    | LEU | X | 472 | 51.436 | 45.996 | 23.127 | 0.00 | 0.00 |
| ATOM | 7148 | H    | LEU | X | 472 | 52.437 | 45.891 | 23.208 | 0.00 | 0.00 |
| ATOM | 7149 | CA   | LEU | X | 472 | 50.690 | 45.736 | 24.397 | 0.00 | 0.00 |
| ATOM | 7150 | HA   | LEU | X | 472 | 49.678 | 45.398 | 24.177 | 0.00 | 0.00 |
| ATOM | 7151 | CB   | LEU | X | 472 | 51.387 | 44.669 | 25.253 | 0.00 | 0.00 |
| ATOM | 7152 | HB2  | LEU | X | 472 | 52.386 | 45.011 | 25.522 | 0.00 | 0.00 |
| ATOM | 7153 | HB3  | LEU | X | 472 | 50.699 | 44.435 | 26.066 | 0.00 | 0.00 |
| ATOM | 7154 | CG   | LEU | X | 472 | 51.589 | 43.349 | 24.585 | 0.00 | 0.00 |
| ATOM | 7155 | HG   | LEU | X | 472 | 52.347 | 43.407 | 23.803 | 0.00 | 0.00 |
| ATOM | 7156 | CD1  | LEU | X | 472 | 52.266 | 42.418 | 25.636 | 0.00 | 0.00 |
| ATOM | 7157 | HD11 | LEU | X | 472 | 53.064 | 42.997 | 26.099 | 0.00 | 0.00 |
| ATOM | 7158 | HD12 | LEU | X | 472 | 51.529 | 42.182 | 26.404 | 0.00 | 0.00 |
| ATOM | 7159 | HD13 | LEU | X | 472 | 52.628 | 41.551 | 25.084 | 0.00 | 0.00 |
| ATOM | 7160 | CD2  | LEU | X | 472 | 50.369 | 42.723 | 23.935 | 0.00 | 0.00 |
| ATOM | 7161 | HD21 | LEU | X | 472 | 49.465 | 42.834 | 24.533 | 0.00 | 0.00 |
| ATOM | 7162 | HD22 | LEU | X | 472 | 50.130 | 43.225 | 22.997 | 0.00 | 0.00 |
| ATOM | 7163 | HD23 | LEU | X | 472 | 50.421 | 41.641 | 23.813 | 0.00 | 0.00 |
| ATOM | 7164 | C    | LEU | X | 472 | 50.423 | 47.005 | 25.173 | 0.00 | 0.00 |
| ATOM | 7165 | O    | LEU | X | 472 | 49.355 | 47.255 | 25.707 | 0.00 | 0.00 |
| ATOM | 7166 | N    | MET | X | 473 | 51.388 | 47.942 | 25.265 | 0.00 | 0.00 |
| ATOM | 7167 | H    | MET | X | 473 | 52.357 | 47.720 | 25.089 | 0.00 | 0.00 |
| ATOM | 7168 | CA   | MET | X | 473 | 51.110 | 49.264 | 25.622 | 0.00 | 0.00 |
| ATOM | 7169 | HA   | MET | X | 473 | 50.772 | 49.208 | 26.657 | 0.00 | 0.00 |
| ATOM | 7170 | CB   | MET | X | 473 | 52.345 | 50.180 | 25.542 | 0.00 | 0.00 |
| ATOM | 7171 | HB2  | MET | X | 473 | 52.720 | 50.303 | 24.526 | 0.00 | 0.00 |
| ATOM | 7172 | HB3  | MET | X | 473 | 51.969 | 51.159 | 25.841 | 0.00 | 0.00 |
| ATOM | 7173 | CG   | MET | X | 473 | 53.409 | 49.743 | 26.559 | 0.00 | 0.00 |
| ATOM | 7174 | HG2  | MET | X | 473 | 53.137 | 49.929 | 27.598 | 0.00 | 0.00 |
| ATOM | 7175 | HG3  | MET | X | 473 | 53.572 | 48.679 | 26.389 | 0.00 | 0.00 |
| ATOM | 7176 | SD   | MET | X | 473 | 54.993 | 50.505 | 26.053 | 0.00 | 0.00 |
| ATOM | 7177 | CE   | MET | X | 473 | 54.966 | 52.088 | 26.877 | 0.00 | 0.00 |
| ATOM | 7178 | HE1  | MET | X | 473 | 54.715 | 51.949 | 27.928 | 0.00 | 0.00 |
| ATOM | 7179 | HE2  | MET | X | 473 | 55.974 | 52.483 | 26.745 | 0.00 | 0.00 |
| ATOM | 7180 | HE3  | MET | X | 473 | 54.142 | 52.683 | 26.485 | 0.00 | 0.00 |
| ATOM | 7181 | C    | MET | X | 473 | 49.912 | 49.933 | 24.829 | 0.00 | 0.00 |
| ATOM | 7182 | O    | MET | X | 473 | 48.846 | 50.283 | 25.410 | 0.00 | 0.00 |
| ATOM | 7183 | N    | ARG | X | 474 | 50.026 | 49.830 | 23.472 | 0.00 | 0.00 |
| ATOM | 7184 | H    | ARG | X | 474 | 50.840 | 49.432 | 23.025 | 0.00 | 0.00 |
| ATOM | 7185 | CA   | ARG | X | 474 | 48.941 | 50.204 | 22.548 | 0.00 | 0.00 |
| ATOM | 7186 | HA   | ARG | X | 474 | 48.804 | 51.274 | 22.710 | 0.00 | 0.00 |
| ATOM | 7187 | CB   | ARG | X | 474 | 49.251 | 50.010 | 21.032 | 0.00 | 0.00 |
| ATOM | 7188 | HB2  | ARG | X | 474 | 50.195 | 50.542 | 20.910 | 0.00 | 0.00 |
| ATOM | 7189 | HB3  | ARG | X | 474 | 49.400 | 48.951 | 20.825 | 0.00 | 0.00 |
| ATOM | 7190 | CG   | ARG | X | 474 | 48.195 | 50.536 | 20.066 | 0.00 | 0.00 |
| ATOM | 7191 | HG2  | ARG | X | 474 | 48.583 | 50.436 | 19.053 | 0.00 | 0.00 |
| ATOM | 7192 | HG3  | ARG | X | 474 | 47.313 | 49.902 | 20.152 | 0.00 | 0.00 |
| ATOM | 7193 | CD   | ARG | X | 474 | 47.873 | 52.008 | 20.334 | 0.00 | 0.00 |
| ATOM | 7194 | HD2  | ARG | X | 474 | 47.383 | 52.197 | 21.289 | 0.00 | 0.00 |
| ATOM | 7195 | HD3  | ARG | X | 474 | 48.850 | 52.492 | 20.356 | 0.00 | 0.00 |
| ATOM | 7196 | NE   | ARG | X | 474 | 47.101 | 52.526 | 19.157 | 0.00 | 0.00 |
| ATOM | 7197 | HE   | ARG | X | 474 | 46.776 | 51.858 | 18.472 | 0.00 | 0.00 |
| ATOM | 7198 | CZ   | ARG | X | 474 | 46.949 | 53.783 | 18.918 | 0.00 | 0.00 |
| ATOM | 7199 | NH1  | ARG | X | 474 | 47.544 | 54.752 | 19.531 | 0.00 | 0.00 |
| ATOM | 7200 | HH11 | ARG | X | 474 | 48.090 | 54.683 | 20.378 | 0.00 | 0.00 |
| ATOM | 7201 | HH12 | ARG | X | 474 | 47.455 | 55.633 | 19.045 | 0.00 | 0.00 |
| ATOM | 7202 | NH2  | ARG | X | 474 | 46.129 | 54.165 | 17.963 | 0.00 | 0.00 |
| ATOM | 7203 | HH21 | ARG | X | 474 | 45.452 | 53.440 | 17.777 | 0.00 | 0.00 |
| ATOM | 7204 | HH22 | ARG | X | 474 | 46.012 | 55.165 | 17.879 | 0.00 | 0.00 |
| ATOM | 7205 | C    | ARG | X | 474 | 47.577 | 49.519 | 22.813 | 0.00 | 0.00 |
| ATOM | 7206 | O    | ARG | X | 474 | 46.597 | 50.247 | 22.733 | 0.00 | 0.00 |
| ATOM | 7207 | N    | TYR | X | 475 | 47.541 | 48.270 | 23.170 | 0.00 | 0.00 |
| ATOM | 7208 | H    | TYR | X | 475 | 48.400 | 47.744 | 23.097 | 0.00 | 0.00 |
| ATOM | 7209 | CA   | TYR | X | 475 | 46.249 | 47.653 | 23.538 | 0.00 | 0.00 |
| ATOM | 7210 | HA   | TYR | X | 475 | 45.484 | 47.920 | 22.809 | 0.00 | 0.00 |
| ATOM | 7211 | CB   | TYR | X | 475 | 46.480 | 46.149 | 23.545 | 0.00 | 0.00 |
| ATOM | 7212 | HB2  | TYR | X | 475 | 47.293 | 46.099 | 24.268 | 0.00 | 0.00 |
| ATOM | 7213 | HB3  | TYR | X | 475 | 45.559 | 45.663 | 23.867 | 0.00 | 0.00 |
| ATOM | 7214 | CG   | TYR | X | 475 | 46.857 | 45.501 | 22.270 | 0.00 | 0.00 |

|      |      |      |     |   |     |        |        |        |      |      |
|------|------|------|-----|---|-----|--------|--------|--------|------|------|
| ATOM | 7215 | CD1  | TYR | X | 475 | 46.936 | 46.131 | 20.916 | 0.00 | 0.00 |
| ATOM | 7216 | HD1  | TYR | X | 475 | 46.538 | 47.126 | 20.780 | 0.00 | 0.00 |
| ATOM | 7217 | CE1  | TYR | X | 475 | 47.455 | 45.385 | 19.876 | 0.00 | 0.00 |
| ATOM | 7218 | HE1  | TYR | X | 475 | 47.561 | 45.891 | 18.927 | 0.00 | 0.00 |
| ATOM | 7219 | CZ   | TYR | X | 475 | 47.771 | 44.028 | 20.026 | 0.00 | 0.00 |
| ATOM | 7220 | OH   | TYR | X | 475 | 48.148 | 43.314 | 18.922 | 0.00 | 0.00 |
| ATOM | 7221 | HH   | TYR | X | 475 | 47.922 | 43.809 | 18.131 | 0.00 | 0.00 |
| ATOM | 7222 | CE2  | TYR | X | 475 | 47.543 | 43.405 | 21.249 | 0.00 | 0.00 |
| ATOM | 7223 | HE2  | TYR | X | 475 | 47.701 | 42.339 | 21.313 | 0.00 | 0.00 |
| ATOM | 7224 | CD2  | TYR | X | 475 | 47.097 | 44.123 | 22.365 | 0.00 | 0.00 |
| ATOM | 7225 | HD2  | TYR | X | 475 | 46.961 | 43.569 | 23.282 | 0.00 | 0.00 |
| ATOM | 7226 | C    | TYR | X | 475 | 45.674 | 48.167 | 24.862 | 0.00 | 0.00 |
| ATOM | 7227 | O    | TYR | X | 475 | 44.522 | 48.575 | 24.848 | 0.00 | 0.00 |
| ATOM | 7228 | N    | TRP | X | 476 | 46.485 | 48.265 | 25.955 | 0.00 | 0.00 |
| ATOM | 7229 | H    | TRP | X | 476 | 47.425 | 47.917 | 25.832 | 0.00 | 0.00 |
| ATOM | 7230 | CA   | TRP | X | 476 | 46.051 | 48.913 | 27.182 | 0.00 | 0.00 |
| ATOM | 7231 | HA   | TRP | X | 476 | 45.238 | 48.358 | 27.650 | 0.00 | 0.00 |
| ATOM | 7232 | CB   | TRP | X | 476 | 47.166 | 48.810 | 28.240 | 0.00 | 0.00 |
| ATOM | 7233 | HB2  | TRP | X | 476 | 48.126 | 48.747 | 27.727 | 0.00 | 0.00 |
| ATOM | 7234 | HB3  | TRP | X | 476 | 47.234 | 49.711 | 28.850 | 0.00 | 0.00 |
| ATOM | 7235 | CG   | TRP | X | 476 | 47.060 | 47.541 | 29.117 | 0.00 | 0.00 |
| ATOM | 7236 | CD1  | TRP | X | 476 | 47.108 | 47.542 | 30.492 | 0.00 | 0.00 |
| ATOM | 7237 | HD1  | TRP | X | 476 | 47.357 | 48.393 | 31.109 | 0.00 | 0.00 |
| ATOM | 7238 | NE1  | TRP | X | 476 | 46.950 | 46.230 | 30.967 | 0.00 | 0.00 |
| ATOM | 7239 | HE1  | TRP | X | 476 | 46.865 | 45.952 | 31.934 | 0.00 | 0.00 |
| ATOM | 7240 | CE2  | TRP | X | 476 | 46.866 | 45.306 | 29.882 | 0.00 | 0.00 |
| ATOM | 7241 | CZ2  | TRP | X | 476 | 46.725 | 43.918 | 29.851 | 0.00 | 0.00 |
| ATOM | 7242 | HZ2  | TRP | X | 476 | 46.643 | 43.318 | 30.745 | 0.00 | 0.00 |
| ATOM | 7243 | CH2  | TRP | X | 476 | 46.772 | 43.198 | 28.635 | 0.00 | 0.00 |
| ATOM | 7244 | HH2  | TRP | X | 476 | 46.866 | 42.123 | 28.669 | 0.00 | 0.00 |
| ATOM | 7245 | CZ3  | TRP | X | 476 | 46.855 | 43.957 | 27.494 | 0.00 | 0.00 |
| ATOM | 7246 | HZ3  | TRP | X | 476 | 46.914 | 43.508 | 26.514 | 0.00 | 0.00 |
| ATOM | 7247 | CE3  | TRP | X | 476 | 46.925 | 45.328 | 27.561 | 0.00 | 0.00 |
| ATOM | 7248 | HE3  | TRP | X | 476 | 46.997 | 45.910 | 26.655 | 0.00 | 0.00 |
| ATOM | 7249 | CD2  | TRP | X | 476 | 46.938 | 46.124 | 28.697 | 0.00 | 0.00 |
| ATOM | 7250 | C    | TRP | X | 476 | 45.641 | 50.395 | 26.976 | 0.00 | 0.00 |
| ATOM | 7251 | O    | TRP | X | 476 | 44.564 | 50.758 | 27.503 | 0.00 | 0.00 |
| ATOM | 7252 | N    | ALA | X | 477 | 46.310 | 51.200 | 26.161 | 0.00 | 0.00 |
| ATOM | 7253 | H    | ALA | X | 477 | 47.090 | 50.829 | 25.638 | 0.00 | 0.00 |
| ATOM | 7254 | CA   | ALA | X | 477 | 45.852 | 52.579 | 25.868 | 0.00 | 0.00 |
| ATOM | 7255 | HA   | ALA | X | 477 | 45.608 | 53.100 | 26.794 | 0.00 | 0.00 |
| ATOM | 7256 | CB   | ALA | X | 477 | 47.076 | 53.348 | 25.247 | 0.00 | 0.00 |
| ATOM | 7257 | HB1  | ALA | X | 477 | 47.020 | 54.436 | 25.220 | 0.00 | 0.00 |
| ATOM | 7258 | HB2  | ALA | X | 477 | 47.959 | 53.082 | 25.828 | 0.00 | 0.00 |
| ATOM | 7259 | HB3  | ALA | X | 477 | 47.228 | 52.887 | 24.271 | 0.00 | 0.00 |
| ATOM | 7260 | C    | ALA | X | 477 | 44.579 | 52.690 | 24.999 | 0.00 | 0.00 |
| ATOM | 7261 | O    | ALA | X | 477 | 43.660 | 53.498 | 25.297 | 0.00 | 0.00 |
| ATOM | 7262 | N    | ASN | X | 478 | 44.377 | 51.800 | 24.018 | 0.00 | 0.00 |
| ATOM | 7263 | H    | ASN | X | 478 | 45.173 | 51.306 | 23.641 | 0.00 | 0.00 |
| ATOM | 7264 | CA   | ASN | X | 478 | 43.102 | 51.783 | 23.253 | 0.00 | 0.00 |
| ATOM | 7265 | HA   | ASN | X | 478 | 42.959 | 52.779 | 22.834 | 0.00 | 0.00 |
| ATOM | 7266 | CB   | ASN | X | 478 | 43.312 | 50.778 | 22.110 | 0.00 | 0.00 |
| ATOM | 7267 | HB2  | ASN | X | 478 | 43.564 | 49.778 | 22.462 | 0.00 | 0.00 |
| ATOM | 7268 | HB3  | ASN | X | 478 | 42.410 | 50.617 | 21.519 | 0.00 | 0.00 |
| ATOM | 7269 | CG   | ASN | X | 478 | 44.323 | 51.312 | 21.085 | 0.00 | 0.00 |
| ATOM | 7270 | OD1  | ASN | X | 478 | 44.716 | 52.486 | 21.102 | 0.00 | 0.00 |
| ATOM | 7271 | ND2  | ASN | X | 478 | 44.720 | 50.451 | 20.178 | 0.00 | 0.00 |
| ATOM | 7272 | HD21 | ASN | X | 478 | 45.290 | 50.743 | 19.397 | 0.00 | 0.00 |
| ATOM | 7273 | HD22 | ASN | X | 478 | 44.274 | 49.545 | 20.151 | 0.00 | 0.00 |
| ATOM | 7274 | C    | ASN | X | 478 | 41.903 | 51.315 | 24.121 | 0.00 | 0.00 |
| ATOM | 7275 | O    | ASN | X | 478 | 40.906 | 51.969 | 24.260 | 0.00 | 0.00 |
| ATOM | 7276 | N    | PHE | X | 479 | 42.148 | 50.349 | 25.021 | 0.00 | 0.00 |
| ATOM | 7277 | H    | PHE | X | 479 | 43.011 | 49.825 | 25.005 | 0.00 | 0.00 |
| ATOM | 7278 | CA   | PHE | X | 479 | 41.184 | 50.014 | 26.135 | 0.00 | 0.00 |
| ATOM | 7279 | HA   | PHE | X | 479 | 40.307 | 49.681 | 25.580 | 0.00 | 0.00 |
| ATOM | 7280 | CB   | PHE | X | 479 | 41.705 | 48.771 | 26.835 | 0.00 | 0.00 |
| ATOM | 7281 | HB2  | PHE | X | 479 | 41.939 | 48.020 | 26.080 | 0.00 | 0.00 |
| ATOM | 7282 | HB3  | PHE | X | 479 | 42.588 | 48.973 | 27.442 | 0.00 | 0.00 |
| ATOM | 7283 | CG   | PHE | X | 479 | 40.739 | 48.136 | 27.833 | 0.00 | 0.00 |
| ATOM | 7284 | CD1  | PHE | X | 479 | 39.842 | 47.131 | 27.460 | 0.00 | 0.00 |

|      |      |      |     |   |     |        |        |        |      |      |
|------|------|------|-----|---|-----|--------|--------|--------|------|------|
| ATOM | 7285 | HD1  | PHE | X | 479 | 39.733 | 46.675 | 26.487 | 0.00 | 0.00 |
| ATOM | 7286 | CE1  | PHE | X | 479 | 38.875 | 46.651 | 28.339 | 0.00 | 0.00 |
| ATOM | 7287 | HE1  | PHE | X | 479 | 38.108 | 46.014 | 27.922 | 0.00 | 0.00 |
| ATOM | 7288 | CZ   | PHE | X | 479 | 38.758 | 47.262 | 29.564 | 0.00 | 0.00 |
| ATOM | 7289 | HZ   | PHE | X | 479 | 38.006 | 46.954 | 30.276 | 0.00 | 0.00 |
| ATOM | 7290 | CE2  | PHE | X | 479 | 39.648 | 48.290 | 29.995 | 0.00 | 0.00 |
| ATOM | 7291 | HE2  | PHE | X | 479 | 39.613 | 48.669 | 31.006 | 0.00 | 0.00 |
| ATOM | 7292 | CD2  | PHE | X | 479 | 40.660 | 48.654 | 29.131 | 0.00 | 0.00 |
| ATOM | 7293 | HD2  | PHE | X | 479 | 41.392 | 49.405 | 29.390 | 0.00 | 0.00 |
| ATOM | 7294 | C    | PHE | X | 479 | 40.999 | 51.160 | 27.183 | 0.00 | 0.00 |
| ATOM | 7295 | O    | PHE | X | 479 | 39.820 | 51.440 | 27.502 | 0.00 | 0.00 |
| ATOM | 7296 | N    | ALA | X | 480 | 42.014 | 51.927 | 27.557 | 0.00 | 0.00 |
| ATOM | 7297 | H    | ALA | X | 480 | 42.946 | 51.732 | 27.222 | 0.00 | 0.00 |
| ATOM | 7298 | CA   | ALA | X | 480 | 41.778 | 53.208 | 28.358 | 0.00 | 0.00 |
| ATOM | 7299 | HA   | ALA | X | 480 | 41.246 | 52.939 | 29.270 | 0.00 | 0.00 |
| ATOM | 7300 | CB   | ALA | X | 480 | 43.110 | 53.808 | 28.879 | 0.00 | 0.00 |
| ATOM | 7301 | HB1  | ALA | X | 480 | 43.649 | 52.910 | 29.183 | 0.00 | 0.00 |
| ATOM | 7302 | HB2  | ALA | X | 480 | 43.619 | 54.387 | 28.109 | 0.00 | 0.00 |
| ATOM | 7303 | HB3  | ALA | X | 480 | 42.829 | 54.423 | 29.733 | 0.00 | 0.00 |
| ATOM | 7304 | C    | ALA | X | 480 | 40.855 | 54.184 | 27.662 | 0.00 | 0.00 |
| ATOM | 7305 | O    | ALA | X | 480 | 40.000 | 54.776 | 28.329 | 0.00 | 0.00 |
| ATOM | 7306 | N    | ARG | X | 481 | 41.007 | 54.287 | 26.346 | 0.00 | 0.00 |
| ATOM | 7307 | H    | ARG | X | 481 | 41.822 | 53.855 | 25.935 | 0.00 | 0.00 |
| ATOM | 7308 | CA   | ARG | X | 481 | 40.410 | 55.207 | 25.436 | 0.00 | 0.00 |
| ATOM | 7309 | HA   | ARG | X | 481 | 40.357 | 56.190 | 25.903 | 0.00 | 0.00 |
| ATOM | 7310 | CB   | ARG | X | 481 | 41.146 | 55.465 | 24.114 | 0.00 | 0.00 |
| ATOM | 7311 | HB2  | ARG | X | 481 | 41.296 | 54.535 | 23.565 | 0.00 | 0.00 |
| ATOM | 7312 | HB3  | ARG | X | 481 | 40.539 | 56.151 | 23.524 | 0.00 | 0.00 |
| ATOM | 7313 | CG   | ARG | X | 481 | 42.506 | 56.166 | 24.234 | 0.00 | 0.00 |
| ATOM | 7314 | HG2  | ARG | X | 481 | 42.416 | 57.217 | 24.509 | 0.00 | 0.00 |
| ATOM | 7315 | HG3  | ARG | X | 481 | 43.092 | 55.825 | 25.087 | 0.00 | 0.00 |
| ATOM | 7316 | CD   | ARG | X | 481 | 43.320 | 56.039 | 22.896 | 0.00 | 0.00 |
| ATOM | 7317 | HD2  | ARG | X | 481 | 43.298 | 55.002 | 22.561 | 0.00 | 0.00 |
| ATOM | 7318 | HD3  | ARG | X | 481 | 42.740 | 56.461 | 22.074 | 0.00 | 0.00 |
| ATOM | 7319 | NE   | ARG | X | 481 | 44.640 | 56.671 | 22.927 | 0.00 | 0.00 |
| ATOM | 7320 | HE   | ARG | X | 481 | 44.658 | 57.659 | 23.139 | 0.00 | 0.00 |
| ATOM | 7321 | CZ   | ARG | X | 481 | 45.816 | 56.067 | 22.677 | 0.00 | 0.00 |
| ATOM | 7322 | NH1  | ARG | X | 481 | 46.045 | 54.789 | 22.417 | 0.00 | 0.00 |
| ATOM | 7323 | HH11 | ARG | X | 481 | 45.239 | 54.201 | 22.254 | 0.00 | 0.00 |
| ATOM | 7324 | HH12 | ARG | X | 481 | 46.987 | 54.465 | 22.248 | 0.00 | 0.00 |
| ATOM | 7325 | NH2  | ARG | X | 481 | 46.908 | 56.811 | 22.797 | 0.00 | 0.00 |
| ATOM | 7326 | HH21 | ARG | X | 481 | 46.840 | 57.812 | 22.682 | 0.00 | 0.00 |
| ATOM | 7327 | HH22 | ARG | X | 481 | 47.796 | 56.369 | 22.606 | 0.00 | 0.00 |
| ATOM | 7328 | C    | ARG | X | 481 | 38.949 | 54.877 | 25.040 | 0.00 | 0.00 |
| ATOM | 7329 | O    | ARG | X | 481 | 38.124 | 55.821 | 24.908 | 0.00 | 0.00 |
| ATOM | 7330 | N    | THR | X | 482 | 38.638 | 53.593 | 24.785 | 0.00 | 0.00 |
| ATOM | 7331 | H    | THR | X | 482 | 39.356 | 52.886 | 24.854 | 0.00 | 0.00 |
| ATOM | 7332 | CA   | THR | X | 482 | 37.345 | 53.139 | 24.183 | 0.00 | 0.00 |
| ATOM | 7333 | HA   | THR | X | 482 | 36.569 | 53.900 | 24.108 | 0.00 | 0.00 |
| ATOM | 7334 | CB   | THR | X | 482 | 37.542 | 52.687 | 22.735 | 0.00 | 0.00 |
| ATOM | 7335 | HB   | THR | X | 482 | 38.284 | 51.890 | 22.781 | 0.00 | 0.00 |
| ATOM | 7336 | CG2  | THR | X | 482 | 36.309 | 52.363 | 21.983 | 0.00 | 0.00 |
| ATOM | 7337 | HG21 | THR | X | 482 | 36.049 | 51.313 | 22.112 | 0.00 | 0.00 |
| ATOM | 7338 | HG22 | THR | X | 482 | 35.457 | 53.019 | 22.160 | 0.00 | 0.00 |
| ATOM | 7339 | HG23 | THR | X | 482 | 36.493 | 52.405 | 20.910 | 0.00 | 0.00 |
| ATOM | 7340 | OG1  | THR | X | 482 | 38.105 | 53.882 | 22.184 | 0.00 | 0.00 |
| ATOM | 7341 | HG1  | THR | X | 482 | 38.366 | 53.530 | 21.329 | 0.00 | 0.00 |
| ATOM | 7342 | C    | THR | X | 482 | 36.796 | 51.915 | 24.938 | 0.00 | 0.00 |
| ATOM | 7343 | O    | THR | X | 482 | 35.571 | 51.692 | 24.885 | 0.00 | 0.00 |
| ATOM | 7344 | N    | GLY | X | 483 | 37.670 | 51.210 | 25.631 | 0.00 | 0.00 |
| ATOM | 7345 | H    | GLY | X | 483 | 38.548 | 51.668 | 25.826 | 0.00 | 0.00 |
| ATOM | 7346 | CA   | GLY | X | 483 | 37.295 | 49.941 | 26.320 | 0.00 | 0.00 |
| ATOM | 7347 | HA2  | GLY | X | 483 | 37.745 | 49.778 | 27.282 | 0.00 | 0.00 |
| ATOM | 7348 | HA3  | GLY | X | 483 | 36.286 | 49.972 | 26.550 | 0.00 | 0.00 |
| ATOM | 7349 | C    | GLY | X | 483 | 37.537 | 48.738 | 25.453 | 0.00 | 0.00 |
| ATOM | 7350 | O    | GLY | X | 483 | 37.179 | 47.612 | 25.883 | 0.00 | 0.00 |
| ATOM | 7351 | N    | ASP | X | 484 | 38.267 | 48.915 | 24.355 | 0.00 | 0.00 |
| ATOM | 7352 | H    | ASP | X | 484 | 38.485 | 49.881 | 24.157 | 0.00 | 0.00 |
| ATOM | 7353 | CA   | ASP | X | 484 | 38.634 | 47.857 | 23.429 | 0.00 | 0.00 |
| ATOM | 7354 | HA   | ASP | X | 484 | 38.241 | 46.916 | 23.815 | 0.00 | 0.00 |

|      |      |      |     |   |     |        |        |        |      |      |
|------|------|------|-----|---|-----|--------|--------|--------|------|------|
| ATOM | 7355 | CB   | ASP | X | 484 | 38.000 | 48.153 | 22.062 | 0.00 | 0.00 |
| ATOM | 7356 | HB2  | ASP | X | 484 | 38.182 | 49.211 | 21.875 | 0.00 | 0.00 |
| ATOM | 7357 | HB3  | ASP | X | 484 | 38.507 | 47.560 | 21.301 | 0.00 | 0.00 |
| ATOM | 7358 | CG   | ASP | X | 484 | 36.491 | 48.038 | 21.928 | 0.00 | 0.00 |
| ATOM | 7359 | OD1  | ASP | X | 484 | 35.716 | 48.379 | 22.847 | 0.00 | 0.00 |
| ATOM | 7360 | OD2  | ASP | X | 484 | 36.052 | 47.626 | 20.885 | 0.00 | 0.00 |
| ATOM | 7361 | C    | ASP | X | 484 | 40.199 | 47.777 | 23.169 | 0.00 | 0.00 |
| ATOM | 7362 | O    | ASP | X | 484 | 40.782 | 48.863 | 22.973 | 0.00 | 0.00 |
| ATOM | 7363 | N    | PRO | X | 485 | 40.872 | 46.597 | 23.089 | 0.00 | 0.00 |
| ATOM | 7364 | CD   | PRO | X | 485 | 40.333 | 45.312 | 23.524 | 0.00 | 0.00 |
| ATOM | 7365 | HD2  | PRO | X | 485 | 39.365 | 45.164 | 23.046 | 0.00 | 0.00 |
| ATOM | 7366 | HD3  | PRO | X | 485 | 40.181 | 45.272 | 24.603 | 0.00 | 0.00 |
| ATOM | 7367 | CG   | PRO | X | 485 | 41.310 | 44.307 | 22.950 | 0.00 | 0.00 |
| ATOM | 7368 | HG2  | PRO | X | 485 | 41.034 | 44.180 | 21.904 | 0.00 | 0.00 |
| ATOM | 7369 | HG3  | PRO | X | 485 | 41.175 | 43.359 | 23.471 | 0.00 | 0.00 |
| ATOM | 7370 | CB   | PRO | X | 485 | 42.691 | 44.972 | 22.968 | 0.00 | 0.00 |
| ATOM | 7371 | HB2  | PRO | X | 485 | 43.425 | 44.473 | 22.336 | 0.00 | 0.00 |
| ATOM | 7372 | HB3  | PRO | X | 485 | 43.034 | 44.931 | 24.002 | 0.00 | 0.00 |
| ATOM | 7373 | CA   | PRO | X | 485 | 42.287 | 46.434 | 22.701 | 0.00 | 0.00 |
| ATOM | 7374 | HA   | PRO | X | 485 | 42.964 | 47.115 | 23.216 | 0.00 | 0.00 |
| ATOM | 7375 | C    | PRO | X | 485 | 42.409 | 46.773 | 21.179 | 0.00 | 0.00 |
| ATOM | 7376 | O    | PRO | X | 485 | 43.449 | 47.330 | 20.906 | 0.00 | 0.00 |
| ATOM | 7377 | N    | ASN | X | 486 | 41.377 | 46.472 | 20.346 | 0.00 | 0.00 |
| ATOM | 7378 | H    | ASN | X | 486 | 40.500 | 46.057 | 20.627 | 0.00 | 0.00 |
| ATOM | 7379 | CA   | ASN | X | 486 | 41.526 | 46.754 | 18.899 | 0.00 | 0.00 |
| ATOM | 7380 | HA   | ASN | X | 486 | 42.557 | 46.588 | 18.587 | 0.00 | 0.00 |
| ATOM | 7381 | CB   | ASN | X | 486 | 40.664 | 45.861 | 18.047 | 0.00 | 0.00 |
| ATOM | 7382 | HB2  | ASN | X | 486 | 40.945 | 45.977 | 17.000 | 0.00 | 0.00 |
| ATOM | 7383 | HB3  | ASN | X | 486 | 40.796 | 44.825 | 18.360 | 0.00 | 0.00 |
| ATOM | 7384 | CG   | ASN | X | 486 | 39.192 | 46.221 | 18.239 | 0.00 | 0.00 |
| ATOM | 7385 | OD1  | ASN | X | 486 | 38.543 | 45.700 | 19.122 | 0.00 | 0.00 |
| ATOM | 7386 | ND2  | ASN | X | 486 | 38.679 | 47.271 | 17.510 | 0.00 | 0.00 |
| ATOM | 7387 | HD21 | ASN | X | 486 | 37.674 | 47.315 | 17.592 | 0.00 | 0.00 |
| ATOM | 7388 | HD22 | ASN | X | 486 | 39.260 | 47.821 | 16.893 | 0.00 | 0.00 |
| ATOM | 7389 | C    | ASN | X | 486 | 41.327 | 48.223 | 18.641 | 0.00 | 0.00 |
| ATOM | 7390 | O    | ASN | X | 486 | 40.730 | 48.962 | 19.436 | 0.00 | 0.00 |
| ATOM | 7391 | N    | GLU | X | 487 | 41.632 | 48.667 | 17.442 | 0.00 | 0.00 |
| ATOM | 7392 | H    | GLU | X | 487 | 42.083 | 48.019 | 16.813 | 0.00 | 0.00 |
| ATOM | 7393 | CA   | GLU | X | 487 | 41.509 | 50.114 | 17.081 | 0.00 | 0.00 |
| ATOM | 7394 | HA   | GLU | X | 487 | 41.816 | 50.606 | 18.004 | 0.00 | 0.00 |
| ATOM | 7395 | CB   | GLU | X | 487 | 42.384 | 50.482 | 15.822 | 0.00 | 0.00 |
| ATOM | 7396 | HB2  | GLU | X | 487 | 41.997 | 49.900 | 14.984 | 0.00 | 0.00 |
| ATOM | 7397 | HB3  | GLU | X | 487 | 42.232 | 51.534 | 15.581 | 0.00 | 0.00 |
| ATOM | 7398 | CG   | GLU | X | 487 | 43.896 | 50.193 | 15.921 | 0.00 | 0.00 |
| ATOM | 7399 | HG2  | GLU | X | 487 | 44.096 | 49.141 | 16.120 | 0.00 | 0.00 |
| ATOM | 7400 | HG3  | GLU | X | 487 | 44.358 | 50.510 | 14.986 | 0.00 | 0.00 |
| ATOM | 7401 | CD   | GLU | X | 487 | 44.610 | 51.016 | 16.979 | 0.00 | 0.00 |
| ATOM | 7402 | OE1  | GLU | X | 487 | 45.552 | 50.458 | 17.529 | 0.00 | 0.00 |
| ATOM | 7403 | OE2  | GLU | X | 487 | 44.293 | 52.213 | 17.060 | 0.00 | 0.00 |
| ATOM | 7404 | C    | GLU | X | 487 | 40.055 | 50.553 | 16.669 | 0.00 | 0.00 |
| ATOM | 7405 | O    | GLU | X | 487 | 39.395 | 49.748 | 16.061 | 0.00 | 0.00 |
| ATOM | 7406 | N    | PRO | X | 488 | 39.646 | 51.825 | 16.718 | 0.00 | 0.00 |
| ATOM | 7407 | CD   | PRO | X | 488 | 40.326 | 52.886 | 17.399 | 0.00 | 0.00 |
| ATOM | 7408 | HD2  | PRO | X | 488 | 41.375 | 52.905 | 17.105 | 0.00 | 0.00 |
| ATOM | 7409 | HD3  | PRO | X | 488 | 40.326 | 52.726 | 18.478 | 0.00 | 0.00 |
| ATOM | 7410 | CG   | PRO | X | 488 | 39.651 | 54.178 | 17.060 | 0.00 | 0.00 |
| ATOM | 7411 | HG2  | PRO | X | 488 | 40.115 | 54.546 | 16.144 | 0.00 | 0.00 |
| ATOM | 7412 | HG3  | PRO | X | 488 | 39.777 | 54.969 | 17.799 | 0.00 | 0.00 |
| ATOM | 7413 | CB   | PRO | X | 488 | 38.189 | 53.739 | 16.785 | 0.00 | 0.00 |
| ATOM | 7414 | HB2  | PRO | X | 488 | 37.671 | 54.410 | 16.099 | 0.00 | 0.00 |
| ATOM | 7415 | HB3  | PRO | X | 488 | 37.682 | 53.712 | 17.750 | 0.00 | 0.00 |
| ATOM | 7416 | CA   | PRO | X | 488 | 38.317 | 52.322 | 16.253 | 0.00 | 0.00 |
| ATOM | 7417 | HA   | PRO | X | 488 | 37.516 | 51.681 | 16.623 | 0.00 | 0.00 |
| ATOM | 7418 | C    | PRO | X | 488 | 38.136 | 52.353 | 14.703 | 0.00 | 0.00 |
| ATOM | 7419 | O    | PRO | X | 488 | 37.098 | 52.758 | 14.159 | 0.00 | 0.00 |
| ATOM | 7420 | N    | ARG | X | 489 | 39.192 | 51.812 | 13.962 | 0.00 | 0.00 |
| ATOM | 7421 | H    | ARG | X | 489 | 40.024 | 51.644 | 14.510 | 0.00 | 0.00 |
| ATOM | 7422 | CA   | ARG | X | 489 | 39.371 | 51.834 | 12.468 | 0.00 | 0.00 |
| ATOM | 7423 | HA   | ARG | X | 489 | 38.440 | 51.764 | 11.906 | 0.00 | 0.00 |
| ATOM | 7424 | CB   | ARG | X | 489 | 40.145 | 53.160 | 12.016 | 0.00 | 0.00 |

|      |      |      |     |   |     |        |        |        |      |      |
|------|------|------|-----|---|-----|--------|--------|--------|------|------|
| ATOM | 7425 | HB2  | ARG | X | 489 | 40.235 | 53.210 | 10.930 | 0.00 | 0.00 |
| ATOM | 7426 | HB3  | ARG | X | 489 | 39.634 | 54.061 | 12.356 | 0.00 | 0.00 |
| ATOM | 7427 | CG   | ARG | X | 489 | 41.569 | 53.085 | 12.692 | 0.00 | 0.00 |
| ATOM | 7428 | HG2  | ARG | X | 489 | 41.441 | 53.680 | 13.597 | 0.00 | 0.00 |
| ATOM | 7429 | HG3  | ARG | X | 489 | 41.871 | 52.137 | 13.136 | 0.00 | 0.00 |
| ATOM | 7430 | CD   | ARG | X | 489 | 42.838 | 53.555 | 11.882 | 0.00 | 0.00 |
| ATOM | 7431 | HD2  | ARG | X | 489 | 42.387 | 54.212 | 11.138 | 0.00 | 0.00 |
| ATOM | 7432 | HD3  | ARG | X | 489 | 43.424 | 54.227 | 12.509 | 0.00 | 0.00 |
| ATOM | 7433 | NE   | ARG | X | 489 | 43.589 | 52.370 | 11.329 | 0.00 | 0.00 |
| ATOM | 7434 | HE   | ARG | X | 489 | 43.241 | 51.922 | 10.493 | 0.00 | 0.00 |
| ATOM | 7435 | CZ   | ARG | X | 489 | 44.785 | 52.022 | 11.683 | 0.00 | 0.00 |
| ATOM | 7436 | NH1  | ARG | X | 489 | 45.407 | 51.030 | 11.111 | 0.00 | 0.00 |
| ATOM | 7437 | HH11 | ARG | X | 489 | 45.060 | 50.655 | 10.240 | 0.00 | 0.00 |
| ATOM | 7438 | HH12 | ARG | X | 489 | 46.285 | 50.698 | 11.482 | 0.00 | 0.00 |
| ATOM | 7439 | NH2  | ARG | X | 489 | 45.350 | 52.480 | 12.809 | 0.00 | 0.00 |
| ATOM | 7440 | HH21 | ARG | X | 489 | 44.863 | 53.227 | 13.284 | 0.00 | 0.00 |
| ATOM | 7441 | HH22 | ARG | X | 489 | 46.302 | 52.225 | 13.028 | 0.00 | 0.00 |
| ATOM | 7442 | C    | ARG | X | 489 | 40.078 | 50.569 | 12.083 | 0.00 | 0.00 |
| ATOM | 7443 | O    | ARG | X | 489 | 41.045 | 50.533 | 11.278 | 0.00 | 0.00 |
| ATOM | 7444 | N    | ASP | X | 490 | 39.815 | 49.505 | 12.819 | 0.00 | 0.00 |
| ATOM | 7445 | H    | ASP | X | 490 | 39.017 | 49.504 | 13.438 | 0.00 | 0.00 |
| ATOM | 7446 | CA   | ASP | X | 490 | 40.562 | 48.232 | 12.674 | 0.00 | 0.00 |
| ATOM | 7447 | HA   | ASP | X | 490 | 41.524 | 48.466 | 13.130 | 0.00 | 0.00 |
| ATOM | 7448 | CB   | ASP | X | 490 | 40.079 | 47.154 | 13.596 | 0.00 | 0.00 |
| ATOM | 7449 | HB2  | ASP | X | 490 | 40.716 | 46.294 | 13.392 | 0.00 | 0.00 |
| ATOM | 7450 | HB3  | ASP | X | 490 | 40.239 | 47.445 | 14.635 | 0.00 | 0.00 |
| ATOM | 7451 | CG   | ASP | X | 490 | 38.617 | 46.835 | 13.448 | 0.00 | 0.00 |
| ATOM | 7452 | OD1  | ASP | X | 490 | 38.299 | 45.742 | 12.945 | 0.00 | 0.00 |
| ATOM | 7453 | OD2  | ASP | X | 490 | 37.739 | 47.748 | 13.657 | 0.00 | 0.00 |
| ATOM | 7454 | C    | ASP | X | 490 | 40.740 | 47.702 | 11.241 | 0.00 | 0.00 |
| ATOM | 7455 | O    | ASP | X | 490 | 39.676 | 47.610 | 10.584 | 0.00 | 0.00 |
| ATOM | 7456 | N    | PRO | X | 491 | 41.930 | 47.372 | 10.829 | 0.00 | 0.00 |
| ATOM | 7457 | CD   | PRO | X | 491 | 43.232 | 47.635 | 11.439 | 0.00 | 0.00 |
| ATOM | 7458 | HD2  | PRO | X | 491 | 43.219 | 47.368 | 12.496 | 0.00 | 0.00 |
| ATOM | 7459 | HD3  | PRO | X | 491 | 43.452 | 48.689 | 11.267 | 0.00 | 0.00 |
| ATOM | 7460 | CG   | PRO | X | 491 | 44.254 | 46.947 | 10.560 | 0.00 | 0.00 |
| ATOM | 7461 | HG2  | PRO | X | 491 | 44.322 | 45.906 | 10.876 | 0.00 | 0.00 |
| ATOM | 7462 | HG3  | PRO | X | 491 | 45.184 | 47.515 | 10.535 | 0.00 | 0.00 |
| ATOM | 7463 | CB   | PRO | X | 491 | 43.610 | 46.758 | 9.213  | 0.00 | 0.00 |
| ATOM | 7464 | HB2  | PRO | X | 491 | 43.958 | 45.944 | 8.578  | 0.00 | 0.00 |
| ATOM | 7465 | HB3  | PRO | X | 491 | 43.719 | 47.683 | 8.646  | 0.00 | 0.00 |
| ATOM | 7466 | CA   | PRO | X | 491 | 42.081 | 46.697 | 9.540  | 0.00 | 0.00 |
| ATOM | 7467 | HA   | PRO | X | 491 | 41.571 | 47.279 | 8.773  | 0.00 | 0.00 |
| ATOM | 7468 | C    | PRO | X | 491 | 41.729 | 45.129 | 9.594  | 0.00 | 0.00 |
| ATOM | 7469 | O    | PRO | X | 491 | 41.938 | 44.537 | 10.625 | 0.00 | 0.00 |
| ATOM | 7470 | N    | LYS | X | 492 | 41.450 | 44.522 | 8.432  | 0.00 | 0.00 |
| ATOM | 7471 | H    | LYS | X | 492 | 41.503 | 45.065 | 7.582  | 0.00 | 0.00 |
| ATOM | 7472 | CA   | LYS | X | 492 | 41.104 | 43.105 | 8.305  | 0.00 | 0.00 |
| ATOM | 7473 | HA   | LYS | X | 492 | 40.196 | 43.051 | 8.905  | 0.00 | 0.00 |
| ATOM | 7474 | CB   | LYS | X | 492 | 40.574 | 42.790 | 6.894  | 0.00 | 0.00 |
| ATOM | 7475 | HB2  | LYS | X | 492 | 40.321 | 41.742 | 6.729  | 0.00 | 0.00 |
| ATOM | 7476 | HB3  | LYS | X | 492 | 39.595 | 43.261 | 6.813  | 0.00 | 0.00 |
| ATOM | 7477 | CG   | LYS | X | 492 | 41.388 | 43.291 | 5.685  | 0.00 | 0.00 |
| ATOM | 7478 | HG2  | LYS | X | 492 | 40.770 | 43.085 | 4.811  | 0.00 | 0.00 |
| ATOM | 7479 | HG3  | LYS | X | 492 | 41.453 | 44.379 | 5.713  | 0.00 | 0.00 |
| ATOM | 7480 | CD   | LYS | X | 492 | 42.692 | 42.637 | 5.297  | 0.00 | 0.00 |
| ATOM | 7481 | HD2  | LYS | X | 492 | 43.448 | 42.743 | 6.075  | 0.00 | 0.00 |
| ATOM | 7482 | HD3  | LYS | X | 492 | 42.496 | 41.596 | 5.041  | 0.00 | 0.00 |
| ATOM | 7483 | CE   | LYS | X | 492 | 43.238 | 43.388 | 4.118  | 0.00 | 0.00 |
| ATOM | 7484 | HE2  | LYS | X | 492 | 42.533 | 43.329 | 3.288  | 0.00 | 0.00 |
| ATOM | 7485 | HE3  | LYS | X | 492 | 43.415 | 44.396 | 4.493  | 0.00 | 0.00 |
| ATOM | 7486 | NZ   | LYS | X | 492 | 44.574 | 42.811 | 3.713  | 0.00 | 0.00 |
| ATOM | 7487 | HZ1  | LYS | X | 492 | 45.091 | 43.433 | 3.108  | 0.00 | 0.00 |
| ATOM | 7488 | HZ2  | LYS | X | 492 | 45.076 | 42.605 | 4.564  | 0.00 | 0.00 |
| ATOM | 7489 | HZ3  | LYS | X | 492 | 44.437 | 42.105 | 3.003  | 0.00 | 0.00 |
| ATOM | 7490 | C    | LYS | X | 492 | 42.086 | 42.070 | 8.868  | 0.00 | 0.00 |
| ATOM | 7491 | O    | LYS | X | 492 | 41.816 | 40.889 | 8.882  | 0.00 | 0.00 |
| ATOM | 7492 | N    | ALA | X | 493 | 43.259 | 42.534 | 9.321  | 0.00 | 0.00 |
| ATOM | 7493 | H    | ALA | X | 493 | 43.412 | 43.532 | 9.319  | 0.00 | 0.00 |
| ATOM | 7494 | CA   | ALA | X | 493 | 44.261 | 41.756 | 10.088 | 0.00 | 0.00 |

|      |      |      |     |   |     |        |        |        |      |      |
|------|------|------|-----|---|-----|--------|--------|--------|------|------|
| ATOM | 7495 | HA   | ALA | X | 493 | 44.514 | 40.903 | 9.458  | 0.00 | 0.00 |
| ATOM | 7496 | CB   | ALA | X | 493 | 45.573 | 42.614 | 10.123 | 0.00 | 0.00 |
| ATOM | 7497 | HB1  | ALA | X | 493 | 46.293 | 42.102 | 10.761 | 0.00 | 0.00 |
| ATOM | 7498 | HB2  | ALA | X | 493 | 46.092 | 42.811 | 9.185  | 0.00 | 0.00 |
| ATOM | 7499 | HB3  | ALA | X | 493 | 45.445 | 43.540 | 10.684 | 0.00 | 0.00 |
| ATOM | 7500 | C    | ALA | X | 493 | 43.735 | 41.222 | 11.433 | 0.00 | 0.00 |
| ATOM | 7501 | O    | ALA | X | 493 | 42.766 | 41.832 | 11.829 | 0.00 | 0.00 |
| ATOM | 7502 | N    | PRO | X | 494 | 44.455 | 40.235 | 12.083 | 0.00 | 0.00 |
| ATOM | 7503 | CD   | PRO | X | 494 | 45.564 | 39.464 | 11.467 | 0.00 | 0.00 |
| ATOM | 7504 | HD2  | PRO | X | 494 | 46.461 | 40.029 | 11.720 | 0.00 | 0.00 |
| ATOM | 7505 | HD3  | PRO | X | 494 | 45.375 | 39.357 | 10.399 | 0.00 | 0.00 |
| ATOM | 7506 | CG   | PRO | X | 494 | 45.634 | 38.184 | 12.218 | 0.00 | 0.00 |
| ATOM | 7507 | HG2  | PRO | X | 494 | 46.670 | 37.855 | 12.301 | 0.00 | 0.00 |
| ATOM | 7508 | HG3  | PRO | X | 494 | 44.922 | 37.417 | 11.912 | 0.00 | 0.00 |
| ATOM | 7509 | CB   | PRO | X | 494 | 45.338 | 38.745 | 13.648 | 0.00 | 0.00 |
| ATOM | 7510 | HB2  | PRO | X | 494 | 46.224 | 39.143 | 14.143 | 0.00 | 0.00 |
| ATOM | 7511 | HB3  | PRO | X | 494 | 44.988 | 37.931 | 14.282 | 0.00 | 0.00 |
| ATOM | 7512 | CA   | PRO | X | 494 | 44.116 | 39.699 | 13.339 | 0.00 | 0.00 |
| ATOM | 7513 | HA   | PRO | X | 494 | 43.197 | 39.120 | 13.245 | 0.00 | 0.00 |
| ATOM | 7514 | C    | PRO | X | 494 | 43.920 | 40.726 | 14.490 | 0.00 | 0.00 |
| ATOM | 7515 | O    | PRO | X | 494 | 44.556 | 41.790 | 14.616 | 0.00 | 0.00 |
| ATOM | 7516 | N    | GLN | X | 495 | 43.186 | 40.343 | 15.466 | 0.00 | 0.00 |
| ATOM | 7517 | H    | GLN | X | 495 | 42.749 | 39.434 | 15.415 | 0.00 | 0.00 |
| ATOM | 7518 | CA   | GLN | X | 495 | 42.755 | 41.208 | 16.549 | 0.00 | 0.00 |
| ATOM | 7519 | HA   | GLN | X | 495 | 43.596 | 41.747 | 16.986 | 0.00 | 0.00 |
| ATOM | 7520 | CB   | GLN | X | 495 | 41.778 | 42.351 | 16.059 | 0.00 | 0.00 |
| ATOM | 7521 | HB2  | GLN | X | 495 | 41.553 | 43.017 | 16.892 | 0.00 | 0.00 |
| ATOM | 7522 | HB3  | GLN | X | 495 | 42.229 | 42.971 | 15.284 | 0.00 | 0.00 |
| ATOM | 7523 | CG   | GLN | X | 495 | 40.344 | 41.852 | 15.580 | 0.00 | 0.00 |
| ATOM | 7524 | HG2  | GLN | X | 495 | 40.542 | 41.236 | 14.702 | 0.00 | 0.00 |
| ATOM | 7525 | HG3  | GLN | X | 495 | 39.833 | 41.235 | 16.319 | 0.00 | 0.00 |
| ATOM | 7526 | CD   | GLN | X | 495 | 39.391 | 43.000 | 15.095 | 0.00 | 0.00 |
| ATOM | 7527 | OE1  | GLN | X | 495 | 38.407 | 43.430 | 15.621 | 0.00 | 0.00 |
| ATOM | 7528 | NE2  | GLN | X | 495 | 39.671 | 43.577 | 13.951 | 0.00 | 0.00 |
| ATOM | 7529 | HE21 | GLN | X | 495 | 39.036 | 44.222 | 13.503 | 0.00 | 0.00 |
| ATOM | 7530 | HE22 | GLN | X | 495 | 40.526 | 43.528 | 13.416 | 0.00 | 0.00 |
| ATOM | 7531 | C    | GLN | X | 495 | 42.155 | 40.321 | 17.621 | 0.00 | 0.00 |
| ATOM | 7532 | O    | GLN | X | 495 | 41.562 | 39.240 | 17.353 | 0.00 | 0.00 |
| ATOM | 7533 | N    | TRP | X | 496 | 42.120 | 40.882 | 18.791 | 0.00 | 0.00 |
| ATOM | 7534 | H    | TRP | X | 496 | 42.588 | 41.750 | 19.009 | 0.00 | 0.00 |
| ATOM | 7535 | CA   | TRP | X | 496 | 41.593 | 40.285 | 19.977 | 0.00 | 0.00 |
| ATOM | 7536 | HA   | TRP | X | 496 | 41.872 | 39.236 | 20.076 | 0.00 | 0.00 |
| ATOM | 7537 | CB   | TRP | X | 496 | 42.192 | 40.972 | 21.209 | 0.00 | 0.00 |
| ATOM | 7538 | HB2  | TRP | X | 496 | 43.266 | 41.078 | 21.056 | 0.00 | 0.00 |
| ATOM | 7539 | HB3  | TRP | X | 496 | 41.751 | 41.969 | 21.191 | 0.00 | 0.00 |
| ATOM | 7540 | CG   | TRP | X | 496 | 42.132 | 40.396 | 22.532 | 0.00 | 0.00 |
| ATOM | 7541 | CD1  | TRP | X | 496 | 41.317 | 39.373 | 22.916 | 0.00 | 0.00 |
| ATOM | 7542 | HD1  | TRP | X | 496 | 40.685 | 38.793 | 22.260 | 0.00 | 0.00 |
| ATOM | 7543 | NE1  | TRP | X | 496 | 41.481 | 39.175 | 24.310 | 0.00 | 0.00 |
| ATOM | 7544 | HE1  | TRP | X | 496 | 40.905 | 38.575 | 24.883 | 0.00 | 0.00 |
| ATOM | 7545 | CE2  | TRP | X | 496 | 42.399 | 40.097 | 24.808 | 0.00 | 0.00 |
| ATOM | 7546 | CZ2  | TRP | X | 496 | 42.721 | 40.481 | 26.097 | 0.00 | 0.00 |
| ATOM | 7547 | HZ2  | TRP | X | 496 | 42.382 | 39.877 | 26.925 | 0.00 | 0.00 |
| ATOM | 7548 | CH2  | TRP | X | 496 | 43.516 | 41.575 | 26.413 | 0.00 | 0.00 |
| ATOM | 7549 | HH2  | TRP | X | 496 | 43.881 | 41.628 | 27.428 | 0.00 | 0.00 |
| ATOM | 7550 | CZ3  | TRP | X | 496 | 44.035 | 42.330 | 25.309 | 0.00 | 0.00 |
| ATOM | 7551 | HZ3  | TRP | X | 496 | 44.714 | 43.137 | 25.541 | 0.00 | 0.00 |
| ATOM | 7552 | CE3  | TRP | X | 496 | 43.711 | 41.970 | 23.987 | 0.00 | 0.00 |
| ATOM | 7553 | HE3  | TRP | X | 496 | 44.138 | 42.574 | 23.200 | 0.00 | 0.00 |
| ATOM | 7554 | CD2  | TRP | X | 496 | 42.862 | 40.852 | 23.738 | 0.00 | 0.00 |
| ATOM | 7555 | C    | TRP | X | 496 | 40.039 | 40.324 | 19.936 | 0.00 | 0.00 |
| ATOM | 7556 | O    | TRP | X | 496 | 39.484 | 41.388 | 20.049 | 0.00 | 0.00 |
| ATOM | 7557 | N    | PRO | X | 497 | 39.333 | 39.197 | 19.846 | 0.00 | 0.00 |
| ATOM | 7558 | CD   | PRO | X | 497 | 39.915 | 37.824 | 19.560 | 0.00 | 0.00 |
| ATOM | 7559 | HD2  | PRO | X | 497 | 40.679 | 37.435 | 20.234 | 0.00 | 0.00 |
| ATOM | 7560 | HD3  | PRO | X | 497 | 40.212 | 37.818 | 18.511 | 0.00 | 0.00 |
| ATOM | 7561 | CG   | PRO | X | 497 | 38.776 | 36.918 | 19.484 | 0.00 | 0.00 |
| ATOM | 7562 | HG2  | PRO | X | 497 | 38.873 | 36.392 | 20.433 | 0.00 | 0.00 |
| ATOM | 7563 | HG3  | PRO | X | 497 | 38.874 | 36.108 | 18.761 | 0.00 | 0.00 |
| ATOM | 7564 | CB   | PRO | X | 497 | 37.495 | 37.792 | 19.426 | 0.00 | 0.00 |



|      |      |      |     |   |     |        |        |        |      |      |
|------|------|------|-----|---|-----|--------|--------|--------|------|------|
| ATOM | 7565 | HB2  | PRO | X | 497 | 36.680 | 37.263 | 19.921 | 0.00 | 0.00 |
| ATOM | 7566 | HB3  | PRO | X | 497 | 37.195 | 37.855 | 18.380 | 0.00 | 0.00 |
| ATOM | 7567 | CA   | PRO | X | 497 | 37.858 | 39.160 | 20.052 | 0.00 | 0.00 |
| ATOM | 7568 | HA   | PRO | X | 497 | 37.296 | 39.944 | 19.544 | 0.00 | 0.00 |
| ATOM | 7569 | C    | PRO | X | 497 | 37.485 | 39.164 | 21.479 | 0.00 | 0.00 |
| ATOM | 7570 | O    | PRO | X | 497 | 38.400 | 38.922 | 22.289 | 0.00 | 0.00 |
| ATOM | 7571 | N    | PRO | X | 498 | 36.213 | 39.470 | 21.915 | 0.00 | 0.00 |
| ATOM | 7572 | CD   | PRO | X | 498 | 35.109 | 39.838 | 21.062 | 0.00 | 0.00 |
| ATOM | 7573 | HD2  | PRO | X | 498 | 35.069 | 39.215 | 20.169 | 0.00 | 0.00 |
| ATOM | 7574 | HD3  | PRO | X | 498 | 35.151 | 40.856 | 20.676 | 0.00 | 0.00 |
| ATOM | 7575 | CG   | PRO | X | 498 | 33.909 | 39.791 | 21.940 | 0.00 | 0.00 |
| ATOM | 7576 | HG2  | PRO | X | 498 | 33.587 | 38.753 | 22.020 | 0.00 | 0.00 |
| ATOM | 7577 | HG3  | PRO | X | 498 | 33.079 | 40.414 | 21.608 | 0.00 | 0.00 |
| ATOM | 7578 | CB   | PRO | X | 498 | 34.429 | 40.106 | 23.345 | 0.00 | 0.00 |
| ATOM | 7579 | HB2  | PRO | X | 498 | 33.772 | 39.625 | 24.070 | 0.00 | 0.00 |
| ATOM | 7580 | HB3  | PRO | X | 498 | 34.555 | 41.174 | 23.528 | 0.00 | 0.00 |
| ATOM | 7581 | CA   | PRO | X | 498 | 35.779 | 39.337 | 23.273 | 0.00 | 0.00 |
| ATOM | 7582 | HA   | PRO | X | 498 | 36.547 | 39.737 | 23.936 | 0.00 | 0.00 |
| ATOM | 7583 | C    | PRO | X | 498 | 35.548 | 37.926 | 23.786 | 0.00 | 0.00 |
| ATOM | 7584 | O    | PRO | X | 498 | 35.578 | 36.967 | 23.053 | 0.00 | 0.00 |
| ATOM | 7585 | N    | TYR | X | 499 | 35.424 | 37.803 | 25.079 | 0.00 | 0.00 |
| ATOM | 7586 | H    | TYR | X | 499 | 35.434 | 38.638 | 25.646 | 0.00 | 0.00 |
| ATOM | 7587 | CA   | TYR | X | 499 | 34.958 | 36.587 | 25.746 | 0.00 | 0.00 |
| ATOM | 7588 | HA   | TYR | X | 499 | 35.379 | 35.688 | 25.296 | 0.00 | 0.00 |
| ATOM | 7589 | CB   | TYR | X | 499 | 35.501 | 36.535 | 27.225 | 0.00 | 0.00 |
| ATOM | 7590 | HB2  | TYR | X | 499 | 36.552 | 36.808 | 27.125 | 0.00 | 0.00 |
| ATOM | 7591 | HB3  | TYR | X | 499 | 35.000 | 37.306 | 27.811 | 0.00 | 0.00 |
| ATOM | 7592 | CG   | TYR | X | 499 | 35.457 | 35.252 | 27.953 | 0.00 | 0.00 |
| ATOM | 7593 | CD1  | TYR | X | 499 | 34.317 | 34.840 | 28.676 | 0.00 | 0.00 |
| ATOM | 7594 | HD1  | TYR | X | 499 | 33.434 | 35.458 | 28.740 | 0.00 | 0.00 |
| ATOM | 7595 | CE1  | TYR | X | 499 | 34.336 | 33.676 | 29.487 | 0.00 | 0.00 |
| ATOM | 7596 | HE1  | TYR | X | 499 | 33.493 | 33.296 | 30.046 | 0.00 | 0.00 |
| ATOM | 7597 | CZ   | TYR | X | 499 | 35.537 | 32.961 | 29.594 | 0.00 | 0.00 |
| ATOM | 7598 | OH   | TYR | X | 499 | 35.551 | 31.840 | 30.360 | 0.00 | 0.00 |
| ATOM | 7599 | HH   | TYR | X | 499 | 34.705 | 31.660 | 30.777 | 0.00 | 0.00 |
| ATOM | 7600 | CE2  | TYR | X | 499 | 36.739 | 33.338 | 28.828 | 0.00 | 0.00 |
| ATOM | 7601 | HE2  | TYR | X | 499 | 37.628 | 32.729 | 28.768 | 0.00 | 0.00 |
| ATOM | 7602 | CD2  | TYR | X | 499 | 36.617 | 34.493 | 28.102 | 0.00 | 0.00 |
| ATOM | 7603 | HD2  | TYR | X | 499 | 37.410 | 34.996 | 27.570 | 0.00 | 0.00 |
| ATOM | 7604 | C    | TYR | X | 499 | 33.426 | 36.414 | 25.735 | 0.00 | 0.00 |
| ATOM | 7605 | O    | TYR | X | 499 | 32.771 | 37.422 | 25.634 | 0.00 | 0.00 |
| ATOM | 7606 | N    | THR | X | 500 | 32.812 | 35.210 | 25.821 | 0.00 | 0.00 |
| ATOM | 7607 | H    | THR | X | 500 | 33.396 | 34.457 | 25.486 | 0.00 | 0.00 |
| ATOM | 7608 | CA   | THR | X | 500 | 31.397 | 34.876 | 25.998 | 0.00 | 0.00 |
| ATOM | 7609 | HA   | THR | X | 500 | 30.883 | 35.702 | 26.489 | 0.00 | 0.00 |
| ATOM | 7610 | CB   | THR | X | 500 | 30.666 | 34.551 | 24.657 | 0.00 | 0.00 |
| ATOM | 7611 | HB   | THR | X | 500 | 29.613 | 34.348 | 24.851 | 0.00 | 0.00 |
| ATOM | 7612 | CG2  | THR | X | 500 | 30.672 | 35.759 | 23.702 | 0.00 | 0.00 |
| ATOM | 7613 | HG21 | THR | X | 500 | 29.974 | 35.473 | 22.916 | 0.00 | 0.00 |
| ATOM | 7614 | HG22 | THR | X | 500 | 30.089 | 36.589 | 24.101 | 0.00 | 0.00 |
| ATOM | 7615 | HG23 | THR | X | 500 | 31.700 | 36.030 | 23.458 | 0.00 | 0.00 |
| ATOM | 7616 | OG1  | THR | X | 500 | 31.219 | 33.490 | 23.953 | 0.00 | 0.00 |
| ATOM | 7617 | HG1  | THR | X | 500 | 30.534 | 33.303 | 23.307 | 0.00 | 0.00 |
| ATOM | 7618 | C    | THR | X | 500 | 31.258 | 33.708 | 26.927 | 0.00 | 0.00 |
| ATOM | 7619 | O    | THR | X | 500 | 32.129 | 32.847 | 26.981 | 0.00 | 0.00 |
| ATOM | 7620 | N    | ALA | X | 501 | 30.195 | 33.646 | 27.745 | 0.00 | 0.00 |
| ATOM | 7621 | H    | ALA | X | 501 | 29.479 | 34.350 | 27.640 | 0.00 | 0.00 |
| ATOM | 7622 | CA   | ALA | X | 501 | 29.768 | 32.536 | 28.622 | 0.00 | 0.00 |
| ATOM | 7623 | HA   | ALA | X | 501 | 30.658 | 32.315 | 29.211 | 0.00 | 0.00 |
| ATOM | 7624 | CB   | ALA | X | 501 | 28.607 | 33.032 | 29.479 | 0.00 | 0.00 |
| ATOM | 7625 | HB1  | ALA | X | 501 | 28.819 | 34.087 | 29.655 | 0.00 | 0.00 |
| ATOM | 7626 | HB2  | ALA | X | 501 | 27.639 | 32.866 | 29.006 | 0.00 | 0.00 |
| ATOM | 7627 | HB3  | ALA | X | 501 | 28.578 | 32.414 | 30.376 | 0.00 | 0.00 |
| ATOM | 7628 | C    | ALA | X | 501 | 29.447 | 31.263 | 27.783 | 0.00 | 0.00 |
| ATOM | 7629 | O    | ALA | X | 501 | 29.603 | 30.117 | 28.280 | 0.00 | 0.00 |
| ATOM | 7630 | N    | GLY | X | 502 | 29.062 | 31.411 | 26.491 | 0.00 | 0.00 |
| ATOM | 7631 | H    | GLY | X | 502 | 28.676 | 32.315 | 26.257 | 0.00 | 0.00 |
| ATOM | 7632 | CA   | GLY | X | 502 | 29.089 | 30.349 | 25.546 | 0.00 | 0.00 |
| ATOM | 7633 | HA2  | GLY | X | 502 | 28.748 | 29.478 | 26.049 | 0.00 | 0.00 |
| ATOM | 7634 | HA3  | GLY | X | 502 | 28.539 | 30.618 | 24.679 | 0.00 | 0.00 |

|      |      |      |     |   |     |        |        |        |      |      |
|------|------|------|-----|---|-----|--------|--------|--------|------|------|
| ATOM | 7635 | C    | GLY | X | 502 | 30.457 | 29.880 | 25.165 | 0.00 | 0.00 |
| ATOM | 7636 | O    | GLY | X | 502 | 31.009 | 28.978 | 25.854 | 0.00 | 0.00 |
| ATOM | 7637 | N    | ALA | X | 503 | 30.996 | 30.452 | 24.128 | 0.00 | 0.00 |
| ATOM | 7638 | H    | ALA | X | 503 | 30.399 | 31.202 | 23.809 | 0.00 | 0.00 |
| ATOM | 7639 | CA   | ALA | X | 503 | 32.301 | 30.086 | 23.493 | 0.00 | 0.00 |
| ATOM | 7640 | HA   | ALA | X | 503 | 32.359 | 29.007 | 23.351 | 0.00 | 0.00 |
| ATOM | 7641 | CB   | ALA | X | 503 | 32.301 | 30.615 | 22.123 | 0.00 | 0.00 |
| ATOM | 7642 | HB1  | ALA | X | 503 | 32.057 | 31.677 | 22.162 | 0.00 | 0.00 |
| ATOM | 7643 | HB2  | ALA | X | 503 | 33.181 | 30.465 | 21.497 | 0.00 | 0.00 |
| ATOM | 7644 | HB3  | ALA | X | 503 | 31.538 | 30.198 | 21.466 | 0.00 | 0.00 |
| ATOM | 7645 | C    | ALA | X | 503 | 33.694 | 30.443 | 24.215 | 0.00 | 0.00 |
| ATOM | 7646 | O    | ALA | X | 503 | 34.700 | 29.829 | 23.983 | 0.00 | 0.00 |
| ATOM | 7647 | N    | GLN | X | 504 | 33.706 | 31.327 | 25.256 | 0.00 | 0.00 |
| ATOM | 7648 | H    | GLN | X | 504 | 32.879 | 31.843 | 25.521 | 0.00 | 0.00 |
| ATOM | 7649 | CA   | GLN | X | 504 | 34.831 | 31.502 | 26.205 | 0.00 | 0.00 |
| ATOM | 7650 | HA   | GLN | X | 504 | 34.735 | 32.441 | 26.751 | 0.00 | 0.00 |
| ATOM | 7651 | CB   | GLN | X | 504 | 34.734 | 30.349 | 27.241 | 0.00 | 0.00 |
| ATOM | 7652 | HB2  | GLN | X | 504 | 34.785 | 29.421 | 26.671 | 0.00 | 0.00 |
| ATOM | 7653 | HB3  | GLN | X | 504 | 35.649 | 30.299 | 27.831 | 0.00 | 0.00 |
| ATOM | 7654 | CG   | GLN | X | 504 | 33.483 | 30.360 | 28.131 | 0.00 | 0.00 |
| ATOM | 7655 | HG2  | GLN | X | 504 | 33.370 | 31.303 | 28.665 | 0.00 | 0.00 |
| ATOM | 7656 | HG3  | GLN | X | 504 | 32.624 | 30.232 | 27.473 | 0.00 | 0.00 |
| ATOM | 7657 | CD   | GLN | X | 504 | 33.463 | 29.271 | 29.140 | 0.00 | 0.00 |
| ATOM | 7658 | OE1  | GLN | X | 504 | 34.461 | 28.722 | 29.578 | 0.00 | 0.00 |
| ATOM | 7659 | NE2  | GLN | X | 504 | 32.293 | 28.848 | 29.463 | 0.00 | 0.00 |
| ATOM | 7660 | HE21 | GLN | X | 504 | 32.224 | 27.923 | 29.864 | 0.00 | 0.00 |
| ATOM | 7661 | HE22 | GLN | X | 504 | 31.422 | 29.358 | 29.416 | 0.00 | 0.00 |
| ATOM | 7662 | C    | GLN | X | 504 | 36.197 | 31.678 | 25.664 | 0.00 | 0.00 |
| ATOM | 7663 | O    | GLN | X | 504 | 37.146 | 31.063 | 26.052 | 0.00 | 0.00 |
| ATOM | 7664 | N    | GLN | X | 505 | 36.282 | 32.440 | 24.565 | 0.00 | 0.00 |
| ATOM | 7665 | H    | GLN | X | 505 | 35.449 | 32.827 | 24.145 | 0.00 | 0.00 |
| ATOM | 7666 | CA   | GLN | X | 505 | 37.427 | 32.695 | 23.796 | 0.00 | 0.00 |
| ATOM | 7667 | HA   | GLN | X | 505 | 38.008 | 31.774 | 23.743 | 0.00 | 0.00 |
| ATOM | 7668 | CB   | GLN | X | 505 | 36.993 | 33.071 | 22.375 | 0.00 | 0.00 |
| ATOM | 7669 | HB2  | GLN | X | 505 | 36.559 | 34.069 | 22.434 | 0.00 | 0.00 |
| ATOM | 7670 | HB3  | GLN | X | 505 | 37.902 | 33.090 | 21.775 | 0.00 | 0.00 |
| ATOM | 7671 | CG   | GLN | X | 505 | 36.012 | 32.068 | 21.725 | 0.00 | 0.00 |
| ATOM | 7672 | HG2  | GLN | X | 505 | 36.401 | 31.086 | 21.992 | 0.00 | 0.00 |
| ATOM | 7673 | HG3  | GLN | X | 505 | 35.013 | 32.192 | 22.143 | 0.00 | 0.00 |
| ATOM | 7674 | CD   | GLN | X | 505 | 35.916 | 32.177 | 20.226 | 0.00 | 0.00 |
| ATOM | 7675 | OE1  | GLN | X | 505 | 36.353 | 31.271 | 19.566 | 0.00 | 0.00 |
| ATOM | 7676 | NE2  | GLN | X | 505 | 35.437 | 33.221 | 19.651 | 0.00 | 0.00 |
| ATOM | 7677 | HE21 | GLN | X | 505 | 35.287 | 33.186 | 18.653 | 0.00 | 0.00 |
| ATOM | 7678 | HE22 | GLN | X | 505 | 35.180 | 34.029 | 20.201 | 0.00 | 0.00 |
| ATOM | 7679 | C    | GLN | X | 505 | 38.243 | 33.836 | 24.335 | 0.00 | 0.00 |
| ATOM | 7680 | O    | GLN | X | 505 | 37.764 | 34.796 | 24.886 | 0.00 | 0.00 |
| ATOM | 7681 | N    | TYR | X | 506 | 39.505 | 33.757 | 24.048 | 0.00 | 0.00 |
| ATOM | 7682 | H    | TYR | X | 506 | 39.776 | 32.987 | 23.454 | 0.00 | 0.00 |
| ATOM | 7683 | CA   | TYR | X | 506 | 40.627 | 34.342 | 24.836 | 0.00 | 0.00 |
| ATOM | 7684 | HA   | TYR | X | 506 | 40.429 | 35.394 | 25.043 | 0.00 | 0.00 |
| ATOM | 7685 | CB   | TYR | X | 506 | 40.746 | 33.586 | 26.188 | 0.00 | 0.00 |
| ATOM | 7686 | HB2  | TYR | X | 506 | 41.520 | 34.115 | 26.744 | 0.00 | 0.00 |
| ATOM | 7687 | HB3  | TYR | X | 506 | 39.789 | 33.561 | 26.709 | 0.00 | 0.00 |
| ATOM | 7688 | CG   | TYR | X | 506 | 41.345 | 32.149 | 26.130 | 0.00 | 0.00 |
| ATOM | 7689 | CD1  | TYR | X | 506 | 40.520 | 31.078 | 25.688 | 0.00 | 0.00 |
| ATOM | 7690 | HD1  | TYR | X | 506 | 39.490 | 31.292 | 25.445 | 0.00 | 0.00 |
| ATOM | 7691 | CE1  | TYR | X | 506 | 41.094 | 29.779 | 25.524 | 0.00 | 0.00 |
| ATOM | 7692 | HE1  | TYR | X | 506 | 40.422 | 29.007 | 25.180 | 0.00 | 0.00 |
| ATOM | 7693 | CZ   | TYR | X | 506 | 42.485 | 29.534 | 25.844 | 0.00 | 0.00 |
| ATOM | 7694 | OH   | TYR | X | 506 | 43.049 | 28.352 | 25.679 | 0.00 | 0.00 |
| ATOM | 7695 | HH   | TYR | X | 506 | 42.324 | 27.725 | 25.634 | 0.00 | 0.00 |
| ATOM | 7696 | CE2  | TYR | X | 506 | 43.279 | 30.640 | 26.309 | 0.00 | 0.00 |
| ATOM | 7697 | HE2  | TYR | X | 506 | 44.316 | 30.409 | 26.506 | 0.00 | 0.00 |
| ATOM | 7698 | CD2  | TYR | X | 506 | 42.715 | 31.946 | 26.380 | 0.00 | 0.00 |
| ATOM | 7699 | HD2  | TYR | X | 506 | 43.325 | 32.768 | 26.724 | 0.00 | 0.00 |
| ATOM | 7700 | C    | TYR | X | 506 | 41.986 | 34.143 | 24.051 | 0.00 | 0.00 |
| ATOM | 7701 | O    | TYR | X | 506 | 42.043 | 33.275 | 23.187 | 0.00 | 0.00 |
| ATOM | 7702 | N    | VAL | X | 507 | 43.002 | 34.946 | 24.299 | 0.00 | 0.00 |
| ATOM | 7703 | H    | VAL | X | 507 | 42.861 | 35.535 | 25.108 | 0.00 | 0.00 |
| ATOM | 7704 | CA   | VAL | X | 507 | 44.202 | 35.034 | 23.377 | 0.00 | 0.00 |

|      |      |      |     |   |     |        |        |        |      |      |
|------|------|------|-----|---|-----|--------|--------|--------|------|------|
| ATOM | 7705 | HA   | VAL | X | 507 | 44.083 | 34.361 | 22.528 | 0.00 | 0.00 |
| ATOM | 7706 | CB   | VAL | X | 507 | 44.388 | 36.444 | 22.768 | 0.00 | 0.00 |
| ATOM | 7707 | HB   | VAL | X | 507 | 45.230 | 36.546 | 22.084 | 0.00 | 0.00 |
| ATOM | 7708 | CG1  | VAL | X | 507 | 43.129 | 36.580 | 21.858 | 0.00 | 0.00 |
| ATOM | 7709 | HG11 | VAL | X | 507 | 42.922 | 35.766 | 21.163 | 0.00 | 0.00 |
| ATOM | 7710 | HG12 | VAL | X | 507 | 42.232 | 36.832 | 22.424 | 0.00 | 0.00 |
| ATOM | 7711 | HG13 | VAL | X | 507 | 43.347 | 37.414 | 21.190 | 0.00 | 0.00 |
| ATOM | 7712 | CG2  | VAL | X | 507 | 44.610 | 37.543 | 23.797 | 0.00 | 0.00 |
| ATOM | 7713 | HG21 | VAL | X | 507 | 45.597 | 37.471 | 24.253 | 0.00 | 0.00 |
| ATOM | 7714 | HG22 | VAL | X | 507 | 44.423 | 38.514 | 23.337 | 0.00 | 0.00 |
| ATOM | 7715 | HG23 | VAL | X | 507 | 43.859 | 37.344 | 24.561 | 0.00 | 0.00 |
| ATOM | 7716 | C    | VAL | X | 507 | 45.514 | 34.650 | 24.000 | 0.00 | 0.00 |
| ATOM | 7717 | O    | VAL | X | 507 | 45.767 | 34.951 | 25.147 | 0.00 | 0.00 |
| ATOM | 7718 | N    | SER | X | 508 | 46.458 | 34.034 | 23.217 | 0.00 | 0.00 |
| ATOM | 7719 | H    | SER | X | 508 | 46.278 | 33.941 | 22.227 | 0.00 | 0.00 |
| ATOM | 7720 | CA   | SER | X | 508 | 47.912 | 34.039 | 23.644 | 0.00 | 0.00 |
| ATOM | 7721 | HA   | SER | X | 508 | 47.935 | 34.067 | 24.733 | 0.00 | 0.00 |
| ATOM | 7722 | CB   | SER | X | 508 | 48.655 | 32.808 | 23.186 | 0.00 | 0.00 |
| ATOM | 7723 | HB2  | SER | X | 508 | 48.445 | 31.955 | 23.832 | 0.00 | 0.00 |
| ATOM | 7724 | HB3  | SER | X | 508 | 48.217 | 32.516 | 22.232 | 0.00 | 0.00 |
| ATOM | 7725 | OG   | SER | X | 508 | 50.037 | 33.010 | 23.139 | 0.00 | 0.00 |
| ATOM | 7726 | HG   | SER | X | 508 | 50.512 | 32.188 | 23.280 | 0.00 | 0.00 |
| ATOM | 7727 | C    | SER | X | 508 | 48.571 | 35.345 | 23.136 | 0.00 | 0.00 |
| ATOM | 7728 | O    | SER | X | 508 | 48.494 | 35.589 | 21.933 | 0.00 | 0.00 |
| ATOM | 7729 | N    | LEU | X | 509 | 49.245 | 36.143 | 24.022 | 0.00 | 0.00 |
| ATOM | 7730 | H    | LEU | X | 509 | 49.090 | 35.975 | 25.006 | 0.00 | 0.00 |
| ATOM | 7731 | CA   | LEU | X | 509 | 50.230 | 37.219 | 23.758 | 0.00 | 0.00 |
| ATOM | 7732 | HA   | LEU | X | 509 | 49.997 | 37.579 | 22.756 | 0.00 | 0.00 |
| ATOM | 7733 | CB   | LEU | X | 509 | 50.141 | 38.344 | 24.869 | 0.00 | 0.00 |
| ATOM | 7734 | HB2  | LEU | X | 509 | 50.498 | 37.998 | 25.839 | 0.00 | 0.00 |
| ATOM | 7735 | HB3  | LEU | X | 509 | 50.812 | 39.130 | 24.522 | 0.00 | 0.00 |
| ATOM | 7736 | CG   | LEU | X | 509 | 48.765 | 39.000 | 25.153 | 0.00 | 0.00 |
| ATOM | 7737 | HG   | LEU | X | 509 | 48.096 | 38.291 | 25.639 | 0.00 | 0.00 |
| ATOM | 7738 | CD1  | LEU | X | 509 | 48.937 | 40.033 | 26.267 | 0.00 | 0.00 |
| ATOM | 7739 | HD11 | LEU | X | 509 | 47.915 | 40.295 | 26.538 | 0.00 | 0.00 |
| ATOM | 7740 | HD12 | LEU | X | 509 | 49.533 | 39.666 | 27.103 | 0.00 | 0.00 |
| ATOM | 7741 | HD13 | LEU | X | 509 | 49.370 | 40.941 | 25.846 | 0.00 | 0.00 |
| ATOM | 7742 | CD2  | LEU | X | 509 | 48.099 | 39.654 | 23.938 | 0.00 | 0.00 |
| ATOM | 7743 | HD21 | LEU | X | 509 | 48.792 | 40.254 | 23.348 | 0.00 | 0.00 |
| ATOM | 7744 | HD22 | LEU | X | 509 | 47.478 | 39.058 | 23.269 | 0.00 | 0.00 |
| ATOM | 7745 | HD23 | LEU | X | 509 | 47.419 | 40.424 | 24.303 | 0.00 | 0.00 |
| ATOM | 7746 | C    | LEU | X | 509 | 51.656 | 36.763 | 23.821 | 0.00 | 0.00 |
| ATOM | 7747 | O    | LEU | X | 509 | 52.019 | 36.169 | 24.825 | 0.00 | 0.00 |
| ATOM | 7748 | N    | ASP | X | 510 | 52.372 | 36.989 | 22.731 | 0.00 | 0.00 |
| ATOM | 7749 | H    | ASP | X | 510 | 52.054 | 37.509 | 21.925 | 0.00 | 0.00 |
| ATOM | 7750 | CA   | ASP | X | 510 | 53.628 | 36.422 | 22.475 | 0.00 | 0.00 |
| ATOM | 7751 | HA   | ASP | X | 510 | 54.307 | 36.560 | 23.317 | 0.00 | 0.00 |
| ATOM | 7752 | CB   | ASP | X | 510 | 53.350 | 34.924 | 22.147 | 0.00 | 0.00 |
| ATOM | 7753 | HB2  | ASP | X | 510 | 52.660 | 34.595 | 22.924 | 0.00 | 0.00 |
| ATOM | 7754 | HB3  | ASP | X | 510 | 52.810 | 34.821 | 21.206 | 0.00 | 0.00 |
| ATOM | 7755 | CG   | ASP | X | 510 | 54.639 | 34.096 | 22.131 | 0.00 | 0.00 |
| ATOM | 7756 | OD1  | ASP | X | 510 | 54.764 | 33.125 | 22.911 | 0.00 | 0.00 |
| ATOM | 7757 | OD2  | ASP | X | 510 | 55.596 | 34.368 | 21.338 | 0.00 | 0.00 |
| ATOM | 7758 | C    | ASP | X | 510 | 54.116 | 37.221 | 21.255 | 0.00 | 0.00 |
| ATOM | 7759 | O    | ASP | X | 510 | 53.299 | 37.920 | 20.693 | 0.00 | 0.00 |
| ATOM | 7760 | N    | LEU | X | 511 | 55.360 | 37.073 | 20.839 | 0.00 | 0.00 |
| ATOM | 7761 | H    | LEU | X | 511 | 55.960 | 36.464 | 21.377 | 0.00 | 0.00 |
| ATOM | 7762 | CA   | LEU | X | 511 | 56.013 | 37.689 | 19.681 | 0.00 | 0.00 |
| ATOM | 7763 | HA   | LEU | X | 511 | 55.825 | 38.762 | 19.667 | 0.00 | 0.00 |
| ATOM | 7764 | CB   | LEU | X | 511 | 57.607 | 37.440 | 19.757 | 0.00 | 0.00 |
| ATOM | 7765 | HB2  | LEU | X | 511 | 57.740 | 36.392 | 20.027 | 0.00 | 0.00 |
| ATOM | 7766 | HB3  | LEU | X | 511 | 58.051 | 37.566 | 18.770 | 0.00 | 0.00 |
| ATOM | 7767 | CG   | LEU | X | 511 | 58.388 | 38.402 | 20.644 | 0.00 | 0.00 |
| ATOM | 7768 | HG   | LEU | X | 511 | 58.546 | 39.324 | 20.084 | 0.00 | 0.00 |
| ATOM | 7769 | CD1  | LEU | X | 511 | 57.750 | 38.621 | 22.073 | 0.00 | 0.00 |
| ATOM | 7770 | HD11 | LEU | X | 511 | 57.795 | 37.650 | 22.565 | 0.00 | 0.00 |
| ATOM | 7771 | HD12 | LEU | X | 511 | 58.347 | 39.366 | 22.600 | 0.00 | 0.00 |
| ATOM | 7772 | HD13 | LEU | X | 511 | 56.750 | 39.046 | 21.989 | 0.00 | 0.00 |
| ATOM | 7773 | CD2  | LEU | X | 511 | 59.856 | 37.848 | 20.671 | 0.00 | 0.00 |
| ATOM | 7774 | HD21 | LEU | X | 511 | 60.221 | 37.705 | 19.654 | 0.00 | 0.00 |

|      |      |      |     |   |     |        |        |        |      |      |
|------|------|------|-----|---|-----|--------|--------|--------|------|------|
| ATOM | 7775 | HD22 | LEU | X | 511 | 60.425 | 38.630 | 21.174 | 0.00 | 0.00 |
| ATOM | 7776 | HD23 | LEU | X | 511 | 60.007 | 36.987 | 21.322 | 0.00 | 0.00 |
| ATOM | 7777 | C    | LEU | X | 511 | 55.471 | 37.023 | 18.424 | 0.00 | 0.00 |
| ATOM | 7778 | O    | LEU | X | 511 | 55.486 | 37.632 | 17.372 | 0.00 | 0.00 |
| ATOM | 7779 | N    | ARG | X | 512 | 54.891 | 35.822 | 18.543 | 0.00 | 0.00 |
| ATOM | 7780 | H    | ARG | X | 512 | 54.862 | 35.267 | 19.386 | 0.00 | 0.00 |
| ATOM | 7781 | CA   | ARG | X | 512 | 54.204 | 35.151 | 17.477 | 0.00 | 0.00 |
| ATOM | 7782 | HA   | ARG | X | 512 | 54.844 | 35.039 | 16.602 | 0.00 | 0.00 |
| ATOM | 7783 | CB   | ARG | X | 512 | 53.747 | 33.805 | 17.934 | 0.00 | 0.00 |
| ATOM | 7784 | HB2  | ARG | X | 512 | 53.239 | 34.015 | 18.876 | 0.00 | 0.00 |
| ATOM | 7785 | HB3  | ARG | X | 512 | 53.115 | 33.344 | 17.176 | 0.00 | 0.00 |
| ATOM | 7786 | CG   | ARG | X | 512 | 54.886 | 32.834 | 18.107 | 0.00 | 0.00 |
| ATOM | 7787 | HG2  | ARG | X | 512 | 55.422 | 32.632 | 17.180 | 0.00 | 0.00 |
| ATOM | 7788 | HG3  | ARG | X | 512 | 55.578 | 33.142 | 18.891 | 0.00 | 0.00 |
| ATOM | 7789 | CD   | ARG | X | 512 | 54.418 | 31.528 | 18.730 | 0.00 | 0.00 |
| ATOM | 7790 | HD2  | ARG | X | 512 | 55.237 | 30.809 | 18.761 | 0.00 | 0.00 |
| ATOM | 7791 | HD3  | ARG | X | 512 | 54.165 | 31.724 | 19.772 | 0.00 | 0.00 |
| ATOM | 7792 | NE   | ARG | X | 512 | 53.227 | 31.029 | 17.998 | 0.00 | 0.00 |
| ATOM | 7793 | HE   | ARG | X | 512 | 53.446 | 30.569 | 17.126 | 0.00 | 0.00 |
| ATOM | 7794 | CZ   | ARG | X | 512 | 52.001 | 30.840 | 18.462 | 0.00 | 0.00 |
| ATOM | 7795 | NH1  | ARG | X | 512 | 51.569 | 31.235 | 19.577 | 0.00 | 0.00 |
| ATOM | 7796 | HH11 | ARG | X | 512 | 52.185 | 31.698 | 20.230 | 0.00 | 0.00 |
| ATOM | 7797 | HH12 | ARG | X | 512 | 50.692 | 30.842 | 19.889 | 0.00 | 0.00 |
| ATOM | 7798 | NH2  | ARG | X | 512 | 51.078 | 30.324 | 17.690 | 0.00 | 0.00 |
| ATOM | 7799 | HH21 | ARG | X | 512 | 51.197 | 29.857 | 16.802 | 0.00 | 0.00 |
| ATOM | 7800 | HH22 | ARG | X | 512 | 50.185 | 30.142 | 18.125 | 0.00 | 0.00 |
| ATOM | 7801 | C    | ARG | X | 512 | 52.922 | 35.953 | 17.123 | 0.00 | 0.00 |
| ATOM | 7802 | O    | ARG | X | 512 | 52.388 | 36.662 | 18.026 | 0.00 | 0.00 |
| ATOM | 7803 | N    | PRO | X | 513 | 52.416 | 36.042 | 15.836 | 0.00 | 0.00 |
| ATOM | 7804 | CD   | PRO | X | 513 | 53.012 | 35.443 | 14.644 | 0.00 | 0.00 |
| ATOM | 7805 | HD2  | PRO | X | 513 | 53.009 | 34.357 | 14.737 | 0.00 | 0.00 |
| ATOM | 7806 | HD3  | PRO | X | 513 | 53.914 | 35.944 | 14.294 | 0.00 | 0.00 |
| ATOM | 7807 | CG   | PRO | X | 513 | 52.015 | 35.779 | 13.572 | 0.00 | 0.00 |
| ATOM | 7808 | HG2  | PRO | X | 513 | 51.283 | 34.972 | 13.559 | 0.00 | 0.00 |
| ATOM | 7809 | HG3  | PRO | X | 513 | 52.434 | 35.820 | 12.566 | 0.00 | 0.00 |
| ATOM | 7810 | CB   | PRO | X | 513 | 51.413 | 37.122 | 13.961 | 0.00 | 0.00 |
| ATOM | 7811 | HB2  | PRO | X | 513 | 50.482 | 37.331 | 13.434 | 0.00 | 0.00 |
| ATOM | 7812 | HB3  | PRO | X | 513 | 52.215 | 37.835 | 13.775 | 0.00 | 0.00 |
| ATOM | 7813 | CA   | PRO | X | 513 | 51.227 | 36.790 | 15.520 | 0.00 | 0.00 |
| ATOM | 7814 | HA   | PRO | X | 513 | 51.363 | 37.731 | 16.053 | 0.00 | 0.00 |
| ATOM | 7815 | C    | PRO | X | 513 | 49.959 | 36.254 | 16.041 | 0.00 | 0.00 |
| ATOM | 7816 | O    | PRO | X | 513 | 49.830 | 35.021 | 16.209 | 0.00 | 0.00 |
| ATOM | 7817 | N    | LEU | X | 514 | 49.010 | 37.189 | 16.437 | 0.00 | 0.00 |
| ATOM | 7818 | H    | LEU | X | 514 | 49.150 | 38.157 | 16.186 | 0.00 | 0.00 |
| ATOM | 7819 | CA   | LEU | X | 514 | 48.020 | 36.895 | 17.495 | 0.00 | 0.00 |
| ATOM | 7820 | HA   | LEU | X | 514 | 48.573 | 36.725 | 18.418 | 0.00 | 0.00 |
| ATOM | 7821 | CB   | LEU | X | 514 | 47.148 | 38.131 | 17.598 | 0.00 | 0.00 |
| ATOM | 7822 | HB2  | LEU | X | 514 | 47.668 | 39.057 | 17.843 | 0.00 | 0.00 |
| ATOM | 7823 | HB3  | LEU | X | 514 | 46.734 | 38.182 | 16.591 | 0.00 | 0.00 |
| ATOM | 7824 | CG   | LEU | X | 514 | 45.994 | 38.015 | 18.604 | 0.00 | 0.00 |
| ATOM | 7825 | HG   | LEU | X | 514 | 45.283 | 37.206 | 18.434 | 0.00 | 0.00 |
| ATOM | 7826 | CD1  | LEU | X | 514 | 46.541 | 38.063 | 20.026 | 0.00 | 0.00 |
| ATOM | 7827 | HD11 | LEU | X | 514 | 47.058 | 37.155 | 20.337 | 0.00 | 0.00 |
| ATOM | 7828 | HD12 | LEU | X | 514 | 47.110 | 38.992 | 20.059 | 0.00 | 0.00 |
| ATOM | 7829 | HD13 | LEU | X | 514 | 45.661 | 38.171 | 20.659 | 0.00 | 0.00 |
| ATOM | 7830 | CD2  | LEU | X | 514 | 45.158 | 39.227 | 18.359 | 0.00 | 0.00 |
| ATOM | 7831 | HD21 | LEU | X | 514 | 45.740 | 40.123 | 18.141 | 0.00 | 0.00 |
| ATOM | 7832 | HD22 | LEU | X | 514 | 44.563 | 38.951 | 17.489 | 0.00 | 0.00 |
| ATOM | 7833 | HD23 | LEU | X | 514 | 44.421 | 39.335 | 19.155 | 0.00 | 0.00 |
| ATOM | 7834 | C    | LEU | X | 514 | 47.213 | 35.594 | 17.247 | 0.00 | 0.00 |
| ATOM | 7835 | O    | LEU | X | 514 | 46.567 | 35.524 | 16.216 | 0.00 | 0.00 |
| ATOM | 7836 | N    | GLU | X | 515 | 47.352 | 34.769 | 18.239 | 0.00 | 0.00 |
| ATOM | 7837 | H    | GLU | X | 515 | 47.974 | 35.019 | 18.995 | 0.00 | 0.00 |
| ATOM | 7838 | CA   | GLU | X | 515 | 46.775 | 33.526 | 18.387 | 0.00 | 0.00 |
| ATOM | 7839 | HA   | GLU | X | 515 | 46.446 | 33.171 | 17.411 | 0.00 | 0.00 |
| ATOM | 7840 | CB   | GLU | X | 515 | 47.795 | 32.451 | 18.901 | 0.00 | 0.00 |
| ATOM | 7841 | HB2  | GLU | X | 515 | 48.820 | 32.574 | 18.551 | 0.00 | 0.00 |
| ATOM | 7842 | HB3  | GLU | X | 515 | 47.776 | 32.442 | 19.990 | 0.00 | 0.00 |
| ATOM | 7843 | CG   | GLU | X | 515 | 47.309 | 31.078 | 18.412 | 0.00 | 0.00 |
| ATOM | 7844 | HG2  | GLU | X | 515 | 46.244 | 30.899 | 18.559 | 0.00 | 0.00 |

|      |      |      |     |   |     |        |        |        |      |      |
|------|------|------|-----|---|-----|--------|--------|--------|------|------|
| ATOM | 7845 | HG3  | GLU | X | 515 | 47.556 | 30.894 | 17.367 | 0.00 | 0.00 |
| ATOM | 7846 | CD   | GLU | X | 515 | 47.912 | 29.967 | 19.306 | 0.00 | 0.00 |
| ATOM | 7847 | OE1  | GLU | X | 515 | 49.067 | 30.074 | 19.747 | 0.00 | 0.00 |
| ATOM | 7848 | OE2  | GLU | X | 515 | 47.262 | 28.976 | 19.670 | 0.00 | 0.00 |
| ATOM | 7849 | C    | GLU | X | 515 | 45.511 | 33.638 | 19.233 | 0.00 | 0.00 |
| ATOM | 7850 | O    | GLU | X | 515 | 45.602 | 33.752 | 20.427 | 0.00 | 0.00 |
| ATOM | 7851 | N    | VAL | X | 516 | 44.342 | 33.560 | 18.580 | 0.00 | 0.00 |
| ATOM | 7852 | H    | VAL | X | 516 | 44.355 | 33.425 | 17.579 | 0.00 | 0.00 |
| ATOM | 7853 | CA   | VAL | X | 516 | 43.080 | 33.290 | 19.309 | 0.00 | 0.00 |
| ATOM | 7854 | HA   | VAL | X | 516 | 43.101 | 33.795 | 20.275 | 0.00 | 0.00 |
| ATOM | 7855 | CB   | VAL | X | 516 | 41.894 | 33.860 | 18.537 | 0.00 | 0.00 |
| ATOM | 7856 | HB   | VAL | X | 516 | 41.750 | 33.398 | 17.560 | 0.00 | 0.00 |
| ATOM | 7857 | CG1  | VAL | X | 516 | 40.603 | 33.693 | 19.414 | 0.00 | 0.00 |
| ATOM | 7858 | HG11 | VAL | X | 516 | 40.855 | 33.929 | 20.448 | 0.00 | 0.00 |
| ATOM | 7859 | HG12 | VAL | X | 516 | 39.761 | 34.293 | 19.068 | 0.00 | 0.00 |
| ATOM | 7860 | HG13 | VAL | X | 516 | 40.286 | 32.651 | 19.388 | 0.00 | 0.00 |
| ATOM | 7861 | CG2  | VAL | X | 516 | 42.136 | 35.321 | 18.293 | 0.00 | 0.00 |
| ATOM | 7862 | HG21 | VAL | X | 516 | 42.847 | 35.516 | 17.491 | 0.00 | 0.00 |
| ATOM | 7863 | HG22 | VAL | X | 516 | 41.201 | 35.808 | 18.015 | 0.00 | 0.00 |
| ATOM | 7864 | HG23 | VAL | X | 516 | 42.658 | 35.845 | 19.094 | 0.00 | 0.00 |
| ATOM | 7865 | C    | VAL | X | 516 | 42.870 | 31.766 | 19.531 | 0.00 | 0.00 |
| ATOM | 7866 | O    | VAL | X | 516 | 43.215 | 30.958 | 18.660 | 0.00 | 0.00 |
| ATOM | 7867 | N    | ARG | X | 517 | 42.320 | 31.518 | 20.740 | 0.00 | 0.00 |
| ATOM | 7868 | H    | ARG | X | 517 | 42.163 | 32.346 | 21.298 | 0.00 | 0.00 |
| ATOM | 7869 | CA   | ARG | X | 517 | 41.967 | 30.233 | 21.332 | 0.00 | 0.00 |
| ATOM | 7870 | HA   | ARG | X | 517 | 42.049 | 29.494 | 20.535 | 0.00 | 0.00 |
| ATOM | 7871 | CB   | ARG | X | 517 | 42.931 | 29.831 | 22.404 | 0.00 | 0.00 |
| ATOM | 7872 | HB2  | ARG | X | 517 | 43.026 | 30.630 | 23.139 | 0.00 | 0.00 |
| ATOM | 7873 | HB3  | ARG | X | 517 | 42.739 | 28.844 | 22.825 | 0.00 | 0.00 |
| ATOM | 7874 | CG   | ARG | X | 517 | 44.350 | 29.702 | 21.813 | 0.00 | 0.00 |
| ATOM | 7875 | HG2  | ARG | X | 517 | 44.450 | 28.810 | 21.194 | 0.00 | 0.00 |
| ATOM | 7876 | HG3  | ARG | X | 517 | 44.546 | 30.568 | 21.181 | 0.00 | 0.00 |
| ATOM | 7877 | CD   | ARG | X | 517 | 45.371 | 29.586 | 23.043 | 0.00 | 0.00 |
| ATOM | 7878 | HD2  | ARG | X | 517 | 45.172 | 30.538 | 23.536 | 0.00 | 0.00 |
| ATOM | 7879 | HD3  | ARG | X | 517 | 45.019 | 28.758 | 23.659 | 0.00 | 0.00 |
| ATOM | 7880 | NE   | ARG | X | 517 | 46.697 | 29.406 | 22.489 | 0.00 | 0.00 |
| ATOM | 7881 | HE   | ARG | X | 517 | 46.768 | 29.242 | 21.495 | 0.00 | 0.00 |
| ATOM | 7882 | CZ   | ARG | X | 517 | 47.871 | 29.443 | 23.125 | 0.00 | 0.00 |
| ATOM | 7883 | NH1  | ARG | X | 517 | 48.023 | 29.435 | 24.440 | 0.00 | 0.00 |
| ATOM | 7884 | HH11 | ARG | X | 517 | 47.278 | 29.094 | 25.031 | 0.00 | 0.00 |
| ATOM | 7885 | HH12 | ARG | X | 517 | 48.969 | 29.543 | 24.776 | 0.00 | 0.00 |
| ATOM | 7886 | NH2  | ARG | X | 517 | 48.974 | 29.429 | 22.442 | 0.00 | 0.00 |
| ATOM | 7887 | HH21 | ARG | X | 517 | 49.016 | 29.572 | 21.443 | 0.00 | 0.00 |
| ATOM | 7888 | HH22 | ARG | X | 517 | 49.780 | 29.441 | 23.050 | 0.00 | 0.00 |
| ATOM | 7889 | C    | ARG | X | 517 | 40.519 | 30.225 | 21.850 | 0.00 | 0.00 |
| ATOM | 7890 | O    | ARG | X | 517 | 39.902 | 31.276 | 22.034 | 0.00 | 0.00 |
| ATOM | 7891 | N    | ARG | X | 518 | 39.980 | 29.066 | 22.126 | 0.00 | 0.00 |
| ATOM | 7892 | H    | ARG | X | 518 | 40.523 | 28.215 | 22.150 | 0.00 | 0.00 |
| ATOM | 7893 | CA   | ARG | X | 518 | 38.525 | 28.881 | 22.515 | 0.00 | 0.00 |
| ATOM | 7894 | HA   | ARG | X | 518 | 38.128 | 29.858 | 22.791 | 0.00 | 0.00 |
| ATOM | 7895 | CB   | ARG | X | 518 | 37.856 | 28.360 | 21.223 | 0.00 | 0.00 |
| ATOM | 7896 | HB2  | ARG | X | 518 | 37.949 | 29.092 | 20.420 | 0.00 | 0.00 |
| ATOM | 7897 | HB3  | ARG | X | 518 | 38.306 | 27.398 | 20.979 | 0.00 | 0.00 |
| ATOM | 7898 | CG   | ARG | X | 518 | 36.309 | 28.182 | 21.433 | 0.00 | 0.00 |
| ATOM | 7899 | HG2  | ARG | X | 518 | 36.110 | 27.556 | 22.303 | 0.00 | 0.00 |
| ATOM | 7900 | HG3  | ARG | X | 518 | 35.757 | 29.070 | 21.742 | 0.00 | 0.00 |
| ATOM | 7901 | CD   | ARG | X | 518 | 35.471 | 27.579 | 20.292 | 0.00 | 0.00 |
| ATOM | 7902 | HD2  | ARG | X | 518 | 36.069 | 26.850 | 19.745 | 0.00 | 0.00 |
| ATOM | 7903 | HD3  | ARG | X | 518 | 34.536 | 27.123 | 20.615 | 0.00 | 0.00 |
| ATOM | 7904 | NE   | ARG | X | 518 | 35.015 | 28.560 | 19.236 | 0.00 | 0.00 |
| ATOM | 7905 | HE   | ARG | X | 518 | 35.367 | 29.503 | 19.326 | 0.00 | 0.00 |
| ATOM | 7906 | CZ   | ARG | X | 518 | 34.063 | 28.356 | 18.342 | 0.00 | 0.00 |
| ATOM | 7907 | NH1  | ARG | X | 518 | 33.413 | 27.303 | 18.146 | 0.00 | 0.00 |
| ATOM | 7908 | HH11 | ARG | X | 518 | 33.681 | 26.468 | 18.647 | 0.00 | 0.00 |
| ATOM | 7909 | HH12 | ARG | X | 518 | 32.679 | 27.238 | 17.455 | 0.00 | 0.00 |
| ATOM | 7910 | NH2  | ARG | X | 518 | 33.700 | 29.370 | 17.619 | 0.00 | 0.00 |
| ATOM | 7911 | HH21 | ARG | X | 518 | 34.180 | 30.250 | 17.746 | 0.00 | 0.00 |
| ATOM | 7912 | HH22 | ARG | X | 518 | 32.864 | 29.304 | 17.057 | 0.00 | 0.00 |
| ATOM | 7913 | C    | ARG | X | 518 | 38.356 | 27.966 | 23.708 | 0.00 | 0.00 |
| ATOM | 7914 | O    | ARG | X | 518 | 39.161 | 27.113 | 23.986 | 0.00 | 0.00 |

|      |      |      |     |   |     |        |        |        |      |      |
|------|------|------|-----|---|-----|--------|--------|--------|------|------|
| ATOM | 7915 | N    | GLY | X | 519 | 37.247 | 28.080 | 24.500 | 0.00 | 0.00 |
| ATOM | 7916 | H    | GLY | X | 519 | 36.661 | 28.890 | 24.357 | 0.00 | 0.00 |
| ATOM | 7917 | CA   | GLY | X | 519 | 36.844 | 27.130 | 25.557 | 0.00 | 0.00 |
| ATOM | 7918 | HA2  | GLY | X | 519 | 35.754 | 27.246 | 25.638 | 0.00 | 0.00 |
| ATOM | 7919 | HA3  | GLY | X | 519 | 37.087 | 26.131 | 25.184 | 0.00 | 0.00 |
| ATOM | 7920 | C    | GLY | X | 519 | 37.574 | 27.335 | 26.884 | 0.00 | 0.00 |
| ATOM | 7921 | O    | GLY | X | 519 | 37.587 | 26.369 | 27.661 | 0.00 | 0.00 |
| ATOM | 7922 | N    | LEU | X | 520 | 38.025 | 28.579 | 27.105 | 0.00 | 0.00 |
| ATOM | 7923 | H    | LEU | X | 520 | 37.815 | 29.299 | 26.429 | 0.00 | 0.00 |
| ATOM | 7924 | CA   | LEU | X | 520 | 39.012 | 28.898 | 28.199 | 0.00 | 0.00 |
| ATOM | 7925 | HA   | LEU | X | 520 | 40.032 | 28.805 | 27.828 | 0.00 | 0.00 |
| ATOM | 7926 | CB   | LEU | X | 520 | 38.960 | 30.459 | 28.633 | 0.00 | 0.00 |
| ATOM | 7927 | HB2  | LEU | X | 520 | 39.085 | 31.165 | 27.813 | 0.00 | 0.00 |
| ATOM | 7928 | HB3  | LEU | X | 520 | 37.936 | 30.683 | 28.932 | 0.00 | 0.00 |
| ATOM | 7929 | CG   | LEU | X | 520 | 39.881 | 30.789 | 29.817 | 0.00 | 0.00 |
| ATOM | 7930 | HG   | LEU | X | 520 | 39.824 | 30.044 | 30.610 | 0.00 | 0.00 |
| ATOM | 7931 | CD1  | LEU | X | 520 | 41.454 | 30.762 | 29.530 | 0.00 | 0.00 |
| ATOM | 7932 | HD11 | LEU | X | 520 | 41.885 | 31.533 | 28.891 | 0.00 | 0.00 |
| ATOM | 7933 | HD12 | LEU | X | 520 | 41.876 | 30.929 | 30.521 | 0.00 | 0.00 |
| ATOM | 7934 | HD13 | LEU | X | 520 | 41.711 | 29.760 | 29.189 | 0.00 | 0.00 |
| ATOM | 7935 | CD2  | LEU | X | 520 | 39.437 | 32.090 | 30.449 | 0.00 | 0.00 |
| ATOM | 7936 | HD21 | LEU | X | 520 | 39.551 | 32.959 | 29.801 | 0.00 | 0.00 |
| ATOM | 7937 | HD22 | LEU | X | 520 | 38.397 | 32.015 | 30.769 | 0.00 | 0.00 |
| ATOM | 7938 | HD23 | LEU | X | 520 | 40.070 | 32.197 | 31.329 | 0.00 | 0.00 |
| ATOM | 7939 | C    | LEU | X | 520 | 39.011 | 28.019 | 29.425 | 0.00 | 0.00 |
| ATOM | 7940 | O    | LEU | X | 520 | 38.122 | 28.128 | 30.244 | 0.00 | 0.00 |
| ATOM | 7941 | N    | ARG | X | 521 | 40.030 | 27.122 | 29.485 | 0.00 | 0.00 |
| ATOM | 7942 | H    | ARG | X | 521 | 40.796 | 27.215 | 28.834 | 0.00 | 0.00 |
| ATOM | 7943 | CA   | ARG | X | 521 | 40.309 | 26.211 | 30.554 | 0.00 | 0.00 |
| ATOM | 7944 | HA   | ARG | X | 521 | 41.180 | 25.623 | 30.264 | 0.00 | 0.00 |
| ATOM | 7945 | CB   | ARG | X | 521 | 40.881 | 27.040 | 31.667 | 0.00 | 0.00 |
| ATOM | 7946 | HB2  | ARG | X | 521 | 41.401 | 27.883 | 31.212 | 0.00 | 0.00 |
| ATOM | 7947 | HB3  | ARG | X | 521 | 40.098 | 27.407 | 32.330 | 0.00 | 0.00 |
| ATOM | 7948 | CG   | ARG | X | 521 | 41.883 | 26.341 | 32.632 | 0.00 | 0.00 |
| ATOM | 7949 | HG2  | ARG | X | 521 | 42.298 | 27.079 | 33.318 | 0.00 | 0.00 |
| ATOM | 7950 | HG3  | ARG | X | 521 | 41.304 | 25.708 | 33.304 | 0.00 | 0.00 |
| ATOM | 7951 | CD   | ARG | X | 521 | 43.006 | 25.614 | 31.930 | 0.00 | 0.00 |
| ATOM | 7952 | HD2  | ARG | X | 521 | 42.511 | 24.858 | 31.320 | 0.00 | 0.00 |
| ATOM | 7953 | HD3  | ARG | X | 521 | 43.602 | 26.316 | 31.348 | 0.00 | 0.00 |
| ATOM | 7954 | NE   | ARG | X | 521 | 43.960 | 24.957 | 32.805 | 0.00 | 0.00 |
| ATOM | 7955 | HE   | ARG | X | 521 | 43.915 | 25.247 | 33.771 | 0.00 | 0.00 |
| ATOM | 7956 | CZ   | ARG | X | 521 | 44.648 | 23.879 | 32.489 | 0.00 | 0.00 |
| ATOM | 7957 | NH1  | ARG | X | 521 | 44.925 | 23.489 | 31.261 | 0.00 | 0.00 |
| ATOM | 7958 | HH11 | ARG | X | 521 | 44.498 | 24.020 | 30.516 | 0.00 | 0.00 |
| ATOM | 7959 | HH12 | ARG | X | 521 | 45.523 | 22.705 | 31.043 | 0.00 | 0.00 |
| ATOM | 7960 | NH2  | ARG | X | 521 | 45.228 | 23.222 | 33.486 | 0.00 | 0.00 |
| ATOM | 7961 | HH21 | ARG | X | 521 | 45.052 | 23.502 | 34.441 | 0.00 | 0.00 |
| ATOM | 7962 | HH22 | ARG | X | 521 | 45.738 | 22.361 | 33.347 | 0.00 | 0.00 |
| ATOM | 7963 | C    | ARG | X | 521 | 39.234 | 25.197 | 31.111 | 0.00 | 0.00 |
| ATOM | 7964 | O    | ARG | X | 521 | 39.472 | 24.484 | 32.051 | 0.00 | 0.00 |
| ATOM | 7965 | N    | ALA | X | 522 | 37.983 | 25.256 | 30.540 | 0.00 | 0.00 |
| ATOM | 7966 | H    | ALA | X | 522 | 38.023 | 25.905 | 29.767 | 0.00 | 0.00 |
| ATOM | 7967 | CA   | ALA | X | 522 | 36.693 | 24.650 | 30.963 | 0.00 | 0.00 |
| ATOM | 7968 | HA   | ALA | X | 522 | 36.216 | 25.092 | 31.837 | 0.00 | 0.00 |
| ATOM | 7969 | CB   | ALA | X | 522 | 35.703 | 24.769 | 29.810 | 0.00 | 0.00 |
| ATOM | 7970 | HB1  | ALA | X | 522 | 35.666 | 25.807 | 29.480 | 0.00 | 0.00 |
| ATOM | 7971 | HB2  | ALA | X | 522 | 36.041 | 24.086 | 29.030 | 0.00 | 0.00 |
| ATOM | 7972 | HB3  | ALA | X | 522 | 34.662 | 24.594 | 30.083 | 0.00 | 0.00 |
| ATOM | 7973 | C    | ALA | X | 522 | 36.978 | 23.150 | 31.389 | 0.00 | 0.00 |
| ATOM | 7974 | O    | ALA | X | 522 | 36.604 | 22.809 | 32.530 | 0.00 | 0.00 |
| ATOM | 7975 | N    | GLN | X | 523 | 37.677 | 22.360 | 30.557 | 0.00 | 0.00 |
| ATOM | 7976 | H    | GLN | X | 523 | 38.009 | 22.782 | 29.701 | 0.00 | 0.00 |
| ATOM | 7977 | CA   | GLN | X | 523 | 37.877 | 20.882 | 30.787 | 0.00 | 0.00 |
| ATOM | 7978 | HA   | GLN | X | 523 | 36.926 | 20.442 | 31.089 | 0.00 | 0.00 |
| ATOM | 7979 | CB   | GLN | X | 523 | 38.383 | 20.267 | 29.427 | 0.00 | 0.00 |
| ATOM | 7980 | HB2  | GLN | X | 523 | 39.385 | 20.612 | 29.171 | 0.00 | 0.00 |
| ATOM | 7981 | HB3  | GLN | X | 523 | 38.256 | 19.185 | 29.432 | 0.00 | 0.00 |
| ATOM | 7982 | CG   | GLN | X | 523 | 37.601 | 20.694 | 28.199 | 0.00 | 0.00 |
| ATOM | 7983 | HG2  | GLN | X | 523 | 37.806 | 21.744 | 27.994 | 0.00 | 0.00 |
| ATOM | 7984 | HG3  | GLN | X | 523 | 37.975 | 20.013 | 27.434 | 0.00 | 0.00 |

|      |      |      |     |   |     |        |        |        |      |      |
|------|------|------|-----|---|-----|--------|--------|--------|------|------|
| ATOM | 7985 | CD   | GLN | X | 523 | 36.060 | 20.438 | 28.335 | 0.00 | 0.00 |
| ATOM | 7986 | OE1  | GLN | X | 523 | 35.308 | 21.379 | 28.482 | 0.00 | 0.00 |
| ATOM | 7987 | NE2  | GLN | X | 523 | 35.623 | 19.216 | 28.220 | 0.00 | 0.00 |
| ATOM | 7988 | HE21 | GLN | X | 523 | 34.621 | 19.092 | 28.227 | 0.00 | 0.00 |
| ATOM | 7989 | HE22 | GLN | X | 523 | 36.223 | 18.408 | 28.298 | 0.00 | 0.00 |
| ATOM | 7990 | C    | GLN | X | 523 | 38.871 | 20.611 | 31.927 | 0.00 | 0.00 |
| ATOM | 7991 | O    | GLN | X | 523 | 38.790 | 19.500 | 32.540 | 0.00 | 0.00 |
| ATOM | 7992 | N    | ALA | X | 524 | 39.817 | 21.443 | 32.207 | 0.00 | 0.00 |
| ATOM | 7993 | H    | ALA | X | 524 | 39.794 | 22.288 | 31.653 | 0.00 | 0.00 |
| ATOM | 7994 | CA   | ALA | X | 524 | 40.658 | 21.359 | 33.405 | 0.00 | 0.00 |
| ATOM | 7995 | HA   | ALA | X | 524 | 40.936 | 20.336 | 33.661 | 0.00 | 0.00 |
| ATOM | 7996 | CB   | ALA | X | 524 | 41.896 | 22.131 | 33.251 | 0.00 | 0.00 |
| ATOM | 7997 | HB1  | ALA | X | 524 | 42.454 | 22.126 | 34.187 | 0.00 | 0.00 |
| ATOM | 7998 | HB2  | ALA | X | 524 | 42.489 | 21.684 | 32.453 | 0.00 | 0.00 |
| ATOM | 7999 | HB3  | ALA | X | 524 | 41.656 | 23.148 | 32.943 | 0.00 | 0.00 |
| ATOM | 8000 | C    | ALA | X | 524 | 39.823 | 21.838 | 34.677 | 0.00 | 0.00 |
| ATOM | 8001 | O    | ALA | X | 524 | 39.610 | 20.983 | 35.588 | 0.00 | 0.00 |
| ATOM | 8002 | N    | CYX | X | 525 | 39.301 | 23.071 | 34.695 | 0.00 | 0.00 |
| ATOM | 8003 | H    | CYX | X | 525 | 39.323 | 23.565 | 33.814 | 0.00 | 0.00 |
| ATOM | 8004 | CA   | CYX | X | 525 | 38.338 | 23.641 | 35.711 | 0.00 | 0.00 |
| ATOM | 8005 | HA   | CYX | X | 525 | 38.829 | 23.854 | 36.660 | 0.00 | 0.00 |
| ATOM | 8006 | CB   | CYX | X | 525 | 37.859 | 25.000 | 35.170 | 0.00 | 0.00 |
| ATOM | 8007 | HB2  | CYX | X | 525 | 37.355 | 24.823 | 34.221 | 0.00 | 0.00 |
| ATOM | 8008 | HB3  | CYX | X | 525 | 37.099 | 25.286 | 35.896 | 0.00 | 0.00 |
| ATOM | 8009 | SG   | CYX | X | 525 | 39.119 | 26.190 | 34.828 | 0.00 | 0.00 |
| ATOM | 8010 | C    | CYX | X | 525 | 37.161 | 22.652 | 36.145 | 0.00 | 0.00 |
| ATOM | 8011 | O    | CYX | X | 525 | 36.720 | 22.671 | 37.306 | 0.00 | 0.00 |
| ATOM | 8012 | N    | ALA | X | 526 | 36.824 | 21.758 | 35.256 | 0.00 | 0.00 |
| ATOM | 8013 | H    | ALA | X | 526 | 37.171 | 21.911 | 34.320 | 0.00 | 0.00 |
| ATOM | 8014 | CA   | ALA | X | 526 | 35.621 | 20.884 | 35.375 | 0.00 | 0.00 |
| ATOM | 8015 | HA   | ALA | X | 526 | 34.719 | 21.466 | 35.564 | 0.00 | 0.00 |
| ATOM | 8016 | CB   | ALA | X | 526 | 35.475 | 19.955 | 34.199 | 0.00 | 0.00 |
| ATOM | 8017 | HB1  | ALA | X | 526 | 34.940 | 20.490 | 33.415 | 0.00 | 0.00 |
| ATOM | 8018 | HB2  | ALA | X | 526 | 36.458 | 19.766 | 33.767 | 0.00 | 0.00 |
| ATOM | 8019 | HB3  | ALA | X | 526 | 35.051 | 18.972 | 34.404 | 0.00 | 0.00 |
| ATOM | 8020 | C    | ALA | X | 526 | 35.726 | 19.922 | 36.573 | 0.00 | 0.00 |
| ATOM | 8021 | O    | ALA | X | 526 | 34.756 | 19.716 | 37.380 | 0.00 | 0.00 |
| ATOM | 8022 | N    | PHE | X | 527 | 36.912 | 19.287 | 36.719 | 0.00 | 0.00 |
| ATOM | 8023 | H    | PHE | X | 527 | 37.686 | 19.476 | 36.099 | 0.00 | 0.00 |
| ATOM | 8024 | CA   | PHE | X | 527 | 37.290 | 18.433 | 37.904 | 0.00 | 0.00 |
| ATOM | 8025 | HA   | PHE | X | 527 | 36.613 | 17.584 | 37.991 | 0.00 | 0.00 |
| ATOM | 8026 | CB   | PHE | X | 527 | 38.742 | 18.025 | 37.759 | 0.00 | 0.00 |
| ATOM | 8027 | HB2  | PHE | X | 527 | 38.785 | 17.483 | 36.814 | 0.00 | 0.00 |
| ATOM | 8028 | HB3  | PHE | X | 527 | 39.355 | 18.901 | 37.547 | 0.00 | 0.00 |
| ATOM | 8029 | CG   | PHE | X | 527 | 39.314 | 17.278 | 38.923 | 0.00 | 0.00 |
| ATOM | 8030 | CD1  | PHE | X | 527 | 39.161 | 15.865 | 39.023 | 0.00 | 0.00 |
| ATOM | 8031 | HD1  | PHE | X | 527 | 38.489 | 15.392 | 38.322 | 0.00 | 0.00 |
| ATOM | 8032 | CE1  | PHE | X | 527 | 39.794 | 15.150 | 40.090 | 0.00 | 0.00 |
| ATOM | 8033 | HE1  | PHE | X | 527 | 39.669 | 14.090 | 40.256 | 0.00 | 0.00 |
| ATOM | 8034 | CZ   | PHE | X | 527 | 40.525 | 15.892 | 41.063 | 0.00 | 0.00 |
| ATOM | 8035 | HZ   | PHE | X | 527 | 40.977 | 15.311 | 41.854 | 0.00 | 0.00 |
| ATOM | 8036 | CE2  | PHE | X | 527 | 40.697 | 17.284 | 40.887 | 0.00 | 0.00 |
| ATOM | 8037 | HE2  | PHE | X | 527 | 41.252 | 17.919 | 41.561 | 0.00 | 0.00 |
| ATOM | 8038 | CD2  | PHE | X | 527 | 40.170 | 17.964 | 39.800 | 0.00 | 0.00 |
| ATOM | 8039 | HD2  | PHE | X | 527 | 40.310 | 19.027 | 39.674 | 0.00 | 0.00 |
| ATOM | 8040 | C    | PHE | X | 527 | 37.097 | 19.240 | 39.275 | 0.00 | 0.00 |
| ATOM | 8041 | O    | PHE | X | 527 | 36.634 | 18.689 | 40.295 | 0.00 | 0.00 |
| ATOM | 8042 | N    | TRP | X | 528 | 37.574 | 20.464 | 39.312 | 0.00 | 0.00 |
| ATOM | 8043 | H    | TRP | X | 528 | 38.210 | 20.640 | 38.547 | 0.00 | 0.00 |
| ATOM | 8044 | CA   | TRP | X | 528 | 37.663 | 21.242 | 40.559 | 0.00 | 0.00 |
| ATOM | 8045 | HA   | TRP | X | 528 | 38.037 | 20.694 | 41.424 | 0.00 | 0.00 |
| ATOM | 8046 | CB   | TRP | X | 528 | 38.549 | 22.494 | 40.363 | 0.00 | 0.00 |
| ATOM | 8047 | HB2  | TRP | X | 528 | 38.089 | 23.001 | 39.514 | 0.00 | 0.00 |
| ATOM | 8048 | HB3  | TRP | X | 528 | 38.394 | 23.130 | 41.234 | 0.00 | 0.00 |
| ATOM | 8049 | CG   | TRP | X | 528 | 39.914 | 22.186 | 40.018 | 0.00 | 0.00 |
| ATOM | 8050 | CD1  | TRP | X | 528 | 40.444 | 22.239 | 38.833 | 0.00 | 0.00 |
| ATOM | 8051 | HD1  | TRP | X | 528 | 40.010 | 22.642 | 37.930 | 0.00 | 0.00 |
| ATOM | 8052 | NE1  | TRP | X | 528 | 41.791 | 21.872 | 38.851 | 0.00 | 0.00 |
| ATOM | 8053 | HE1  | TRP | X | 528 | 42.458 | 21.862 | 38.093 | 0.00 | 0.00 |
| ATOM | 8054 | CE2  | TRP | X | 528 | 42.113 | 21.412 | 40.090 | 0.00 | 0.00 |

|      |      |      |     |   |     |        |        |        |      |      |
|------|------|------|-----|---|-----|--------|--------|--------|------|------|
| ATOM | 8055 | CZ2  | TRP | X | 528 | 43.238 | 20.739 | 40.601 | 0.00 | 0.00 |
| ATOM | 8056 | HZ2  | TRP | X | 528 | 44.144 | 20.635 | 40.022 | 0.00 | 0.00 |
| ATOM | 8057 | CH2  | TRP | X | 528 | 43.182 | 20.284 | 41.920 | 0.00 | 0.00 |
| ATOM | 8058 | HH2  | TRP | X | 528 | 43.997 | 19.753 | 42.391 | 0.00 | 0.00 |
| ATOM | 8059 | CZ3  | TRP | X | 528 | 42.202 | 20.676 | 42.762 | 0.00 | 0.00 |
| ATOM | 8060 | HZ3  | TRP | X | 528 | 42.326 | 20.459 | 43.813 | 0.00 | 0.00 |
| ATOM | 8061 | CE3  | TRP | X | 528 | 41.038 | 21.375 | 42.300 | 0.00 | 0.00 |
| ATOM | 8062 | HE3  | TRP | X | 528 | 40.247 | 21.692 | 42.964 | 0.00 | 0.00 |
| ATOM | 8063 | CD2  | TRP | X | 528 | 40.917 | 21.665 | 40.890 | 0.00 | 0.00 |
| ATOM | 8064 | C    | TRP | X | 528 | 36.250 | 21.616 | 41.056 | 0.00 | 0.00 |
| ATOM | 8065 | O    | TRP | X | 528 | 36.175 | 22.020 | 42.230 | 0.00 | 0.00 |
| ATOM | 8066 | N    | ASN | X | 529 | 35.211 | 21.390 | 40.302 | 0.00 | 0.00 |
| ATOM | 8067 | H    | ASN | X | 529 | 35.374 | 20.926 | 39.420 | 0.00 | 0.00 |
| ATOM | 8068 | CA   | ASN | X | 529 | 33.851 | 21.922 | 40.656 | 0.00 | 0.00 |
| ATOM | 8069 | HA   | ASN | X | 529 | 33.713 | 22.284 | 41.675 | 0.00 | 0.00 |
| ATOM | 8070 | CB   | ASN | X | 529 | 33.517 | 23.084 | 39.782 | 0.00 | 0.00 |
| ATOM | 8071 | HB2  | ASN | X | 529 | 33.546 | 22.827 | 38.723 | 0.00 | 0.00 |
| ATOM | 8072 | HB3  | ASN | X | 529 | 32.504 | 23.405 | 40.027 | 0.00 | 0.00 |
| ATOM | 8073 | CG   | ASN | X | 529 | 34.361 | 24.348 | 39.976 | 0.00 | 0.00 |
| ATOM | 8074 | OD1  | ASN | X | 529 | 33.873 | 25.290 | 40.651 | 0.00 | 0.00 |
| ATOM | 8075 | ND2  | ASN | X | 529 | 35.589 | 24.350 | 39.492 | 0.00 | 0.00 |
| ATOM | 8076 | HD21 | ASN | X | 529 | 36.211 | 25.125 | 39.671 | 0.00 | 0.00 |
| ATOM | 8077 | HD22 | ASN | X | 529 | 35.921 | 23.524 | 39.016 | 0.00 | 0.00 |
| ATOM | 8078 | C    | ASN | X | 529 | 32.749 | 20.856 | 40.595 | 0.00 | 0.00 |
| ATOM | 8079 | O    | ASN | X | 529 | 31.931 | 20.769 | 41.488 | 0.00 | 0.00 |
| ATOM | 8080 | N    | ARG | X | 530 | 32.779 | 20.025 | 39.582 | 0.00 | 0.00 |
| ATOM | 8081 | H    | ARG | X | 530 | 33.568 | 20.141 | 38.963 | 0.00 | 0.00 |
| ATOM | 8082 | CA   | ARG | X | 530 | 31.812 | 18.899 | 39.311 | 0.00 | 0.00 |
| ATOM | 8083 | HA   | ARG | X | 530 | 30.832 | 19.289 | 39.588 | 0.00 | 0.00 |
| ATOM | 8084 | CB   | ARG | X | 530 | 31.881 | 18.526 | 37.862 | 0.00 | 0.00 |
| ATOM | 8085 | HB2  | ARG | X | 530 | 32.850 | 18.246 | 37.451 | 0.00 | 0.00 |
| ATOM | 8086 | HB3  | ARG | X | 530 | 31.068 | 17.806 | 37.758 | 0.00 | 0.00 |
| ATOM | 8087 | CG   | ARG | X | 530 | 31.347 | 19.640 | 36.921 | 0.00 | 0.00 |
| ATOM | 8088 | HG2  | ARG | X | 530 | 30.324 | 19.986 | 37.070 | 0.00 | 0.00 |
| ATOM | 8089 | HG3  | ARG | X | 530 | 32.003 | 20.492 | 37.098 | 0.00 | 0.00 |
| ATOM | 8090 | CD   | ARG | X | 530 | 31.517 | 19.322 | 35.483 | 0.00 | 0.00 |
| ATOM | 8091 | HD2  | ARG | X | 530 | 32.582 | 19.104 | 35.405 | 0.00 | 0.00 |
| ATOM | 8092 | HD3  | ARG | X | 530 | 30.846 | 18.533 | 35.142 | 0.00 | 0.00 |
| ATOM | 8093 | NE   | ARG | X | 530 | 31.107 | 20.548 | 34.785 | 0.00 | 0.00 |
| ATOM | 8094 | HE   | ARG | X | 530 | 30.714 | 21.304 | 35.328 | 0.00 | 0.00 |
| ATOM | 8095 | CZ   | ARG | X | 530 | 31.164 | 20.643 | 33.498 | 0.00 | 0.00 |
| ATOM | 8096 | NH1  | ARG | X | 530 | 31.720 | 19.764 | 32.660 | 0.00 | 0.00 |
| ATOM | 8097 | HH11 | ARG | X | 530 | 32.038 | 18.912 | 33.098 | 0.00 | 0.00 |
| ATOM | 8098 | HH12 | ARG | X | 530 | 31.916 | 20.024 | 31.704 | 0.00 | 0.00 |
| ATOM | 8099 | NH2  | ARG | X | 530 | 30.923 | 21.850 | 33.038 | 0.00 | 0.00 |
| ATOM | 8100 | HH21 | ARG | X | 530 | 30.701 | 22.577 | 33.704 | 0.00 | 0.00 |
| ATOM | 8101 | HH22 | ARG | X | 530 | 31.095 | 22.127 | 32.083 | 0.00 | 0.00 |
| ATOM | 8102 | C    | ARG | X | 530 | 32.153 | 17.735 | 40.248 | 0.00 | 0.00 |
| ATOM | 8103 | O    | ARG | X | 530 | 31.327 | 17.088 | 40.844 | 0.00 | 0.00 |
| ATOM | 8104 | N    | PHE | X | 531 | 33.488 | 17.451 | 40.408 | 0.00 | 0.00 |
| ATOM | 8105 | H    | PHE | X | 531 | 34.076 | 17.974 | 39.775 | 0.00 | 0.00 |
| ATOM | 8106 | CA   | PHE | X | 531 | 33.900 | 16.252 | 41.160 | 0.00 | 0.00 |
| ATOM | 8107 | HA   | PHE | X | 531 | 33.014 | 15.676 | 41.426 | 0.00 | 0.00 |
| ATOM | 8108 | CB   | PHE | X | 531 | 34.868 | 15.336 | 40.335 | 0.00 | 0.00 |
| ATOM | 8109 | HB2  | PHE | X | 531 | 34.383 | 15.016 | 39.412 | 0.00 | 0.00 |
| ATOM | 8110 | HB3  | PHE | X | 531 | 35.707 | 15.967 | 40.041 | 0.00 | 0.00 |
| ATOM | 8111 | CG   | PHE | X | 531 | 35.498 | 14.209 | 41.117 | 0.00 | 0.00 |
| ATOM | 8112 | CD1  | PHE | X | 531 | 34.918 | 12.932 | 41.150 | 0.00 | 0.00 |
| ATOM | 8113 | HD1  | PHE | X | 531 | 34.014 | 12.699 | 40.607 | 0.00 | 0.00 |
| ATOM | 8114 | CE1  | PHE | X | 531 | 35.512 | 11.839 | 41.832 | 0.00 | 0.00 |
| ATOM | 8115 | HE1  | PHE | X | 531 | 35.050 | 10.863 | 41.860 | 0.00 | 0.00 |
| ATOM | 8116 | CZ   | PHE | X | 531 | 36.754 | 12.120 | 42.411 | 0.00 | 0.00 |
| ATOM | 8117 | HZ   | PHE | X | 531 | 37.181 | 11.274 | 42.929 | 0.00 | 0.00 |
| ATOM | 8118 | CE2  | PHE | X | 531 | 37.472 | 13.327 | 42.363 | 0.00 | 0.00 |
| ATOM | 8119 | HE2  | PHE | X | 531 | 38.461 | 13.441 | 42.783 | 0.00 | 0.00 |
| ATOM | 8120 | CD2  | PHE | X | 531 | 36.817 | 14.395 | 41.736 | 0.00 | 0.00 |
| ATOM | 8121 | HD2  | PHE | X | 531 | 37.303 | 15.338 | 41.538 | 0.00 | 0.00 |
| ATOM | 8122 | C    | PHE | X | 531 | 34.551 | 16.567 | 42.468 | 0.00 | 0.00 |
| ATOM | 8123 | O    | PHE | X | 531 | 34.128 | 15.957 | 43.415 | 0.00 | 0.00 |
| ATOM | 8124 | N    | LEU | X | 532 | 35.553 | 17.395 | 42.560 | 0.00 | 0.00 |



|      |      |      |     |   |     |        |        |        |      |      |
|------|------|------|-----|---|-----|--------|--------|--------|------|------|
| ATOM | 8125 | H    | LEU | X | 532 | 35.884 | 17.892 | 41.745 | 0.00 | 0.00 |
| ATOM | 8126 | CA   | LEU | X | 532 | 36.443 | 17.505 | 43.793 | 0.00 | 0.00 |
| ATOM | 8127 | HA   | LEU | X | 532 | 36.944 | 16.583 | 44.086 | 0.00 | 0.00 |
| ATOM | 8128 | CB   | LEU | X | 532 | 37.557 | 18.558 | 43.518 | 0.00 | 0.00 |
| ATOM | 8129 | HB2  | LEU | X | 532 | 37.905 | 18.399 | 42.497 | 0.00 | 0.00 |
| ATOM | 8130 | HB3  | LEU | X | 532 | 37.273 | 19.609 | 43.558 | 0.00 | 0.00 |
| ATOM | 8131 | CG   | LEU | X | 532 | 38.816 | 18.461 | 44.446 | 0.00 | 0.00 |
| ATOM | 8132 | HG   | LEU | X | 532 | 39.633 | 18.924 | 43.894 | 0.00 | 0.00 |
| ATOM | 8133 | CD1  | LEU | X | 532 | 38.739 | 19.281 | 45.725 | 0.00 | 0.00 |
| ATOM | 8134 | HD11 | LEU | X | 532 | 37.793 | 19.213 | 46.263 | 0.00 | 0.00 |
| ATOM | 8135 | HD12 | LEU | X | 532 | 39.553 | 18.994 | 46.390 | 0.00 | 0.00 |
| ATOM | 8136 | HD13 | LEU | X | 532 | 38.944 | 20.337 | 45.553 | 0.00 | 0.00 |
| ATOM | 8137 | CD2  | LEU | X | 532 | 39.330 | 17.014 | 44.657 | 0.00 | 0.00 |
| ATOM | 8138 | HD21 | LEU | X | 532 | 39.080 | 16.429 | 43.772 | 0.00 | 0.00 |
| ATOM | 8139 | HD22 | LEU | X | 532 | 40.364 | 16.972 | 44.998 | 0.00 | 0.00 |
| ATOM | 8140 | HD23 | LEU | X | 532 | 38.734 | 16.617 | 45.479 | 0.00 | 0.00 |
| ATOM | 8141 | C    | LEU | X | 532 | 35.636 | 17.832 | 45.062 | 0.00 | 0.00 |
| ATOM | 8142 | O    | LEU | X | 532 | 35.929 | 17.220 | 46.087 | 0.00 | 0.00 |
| ATOM | 8143 | N    | PRO | X | 533 | 34.719 | 18.846 | 45.049 | 0.00 | 0.00 |
| ATOM | 8144 | CD   | PRO | X | 533 | 34.444 | 19.831 | 43.998 | 0.00 | 0.00 |
| ATOM | 8145 | HD2  | PRO | X | 533 | 33.646 | 19.500 | 43.334 | 0.00 | 0.00 |
| ATOM | 8146 | HD3  | PRO | X | 533 | 35.299 | 20.119 | 43.386 | 0.00 | 0.00 |
| ATOM | 8147 | CG   | PRO | X | 533 | 33.789 | 20.980 | 44.722 | 0.00 | 0.00 |
| ATOM | 8148 | HG2  | PRO | X | 533 | 33.140 | 21.489 | 44.009 | 0.00 | 0.00 |
| ATOM | 8149 | HG3  | PRO | X | 533 | 34.567 | 21.627 | 45.128 | 0.00 | 0.00 |
| ATOM | 8150 | CB   | PRO | X | 533 | 32.905 | 20.273 | 45.827 | 0.00 | 0.00 |
| ATOM | 8151 | HB2  | PRO | X | 533 | 31.949 | 19.924 | 45.438 | 0.00 | 0.00 |
| ATOM | 8152 | HB3  | PRO | X | 533 | 32.804 | 20.909 | 46.707 | 0.00 | 0.00 |
| ATOM | 8153 | CA   | PRO | X | 533 | 33.802 | 19.060 | 46.208 | 0.00 | 0.00 |
| ATOM | 8154 | HA   | PRO | X | 533 | 34.500 | 19.297 | 47.010 | 0.00 | 0.00 |
| ATOM | 8155 | C    | PRO | X | 533 | 32.960 | 17.846 | 46.630 | 0.00 | 0.00 |
| ATOM | 8156 | O    | PRO | X | 533 | 32.748 | 17.689 | 47.778 | 0.00 | 0.00 |
| ATOM | 8157 | N    | LYS | X | 534 | 32.638 | 16.828 | 45.775 | 0.00 | 0.00 |
| ATOM | 8158 | H    | LYS | X | 534 | 32.981 | 16.839 | 44.825 | 0.00 | 0.00 |
| ATOM | 8159 | CA   | LYS | X | 534 | 31.892 | 15.586 | 46.103 | 0.00 | 0.00 |
| ATOM | 8160 | HA   | LYS | X | 534 | 31.037 | 15.935 | 46.683 | 0.00 | 0.00 |
| ATOM | 8161 | CB   | LYS | X | 534 | 31.197 | 14.944 | 44.907 | 0.00 | 0.00 |
| ATOM | 8162 | HB2  | LYS | X | 534 | 31.884 | 14.773 | 44.078 | 0.00 | 0.00 |
| ATOM | 8163 | HB3  | LYS | X | 534 | 30.848 | 13.941 | 45.156 | 0.00 | 0.00 |
| ATOM | 8164 | CG   | LYS | X | 534 | 30.086 | 15.743 | 44.324 | 0.00 | 0.00 |
| ATOM | 8165 | HG2  | LYS | X | 534 | 29.308 | 15.822 | 45.084 | 0.00 | 0.00 |
| ATOM | 8166 | HG3  | LYS | X | 534 | 30.227 | 16.809 | 44.145 | 0.00 | 0.00 |
| ATOM | 8167 | CD   | LYS | X | 534 | 29.653 | 14.986 | 43.024 | 0.00 | 0.00 |
| ATOM | 8168 | HD2  | LYS | X | 534 | 30.473 | 15.215 | 42.344 | 0.00 | 0.00 |
| ATOM | 8169 | HD3  | LYS | X | 534 | 29.756 | 13.902 | 43.053 | 0.00 | 0.00 |
| ATOM | 8170 | CE   | LYS | X | 534 | 28.371 | 15.479 | 42.484 | 0.00 | 0.00 |
| ATOM | 8171 | HE2  | LYS | X | 534 | 28.059 | 14.930 | 41.595 | 0.00 | 0.00 |
| ATOM | 8172 | HE3  | LYS | X | 534 | 27.616 | 15.375 | 43.263 | 0.00 | 0.00 |
| ATOM | 8173 | NZ   | LYS | X | 534 | 28.516 | 16.944 | 42.306 | 0.00 | 0.00 |
| ATOM | 8174 | HZ1  | LYS | X | 534 | 28.314 | 17.474 | 43.142 | 0.00 | 0.00 |
| ATOM | 8175 | HZ2  | LYS | X | 534 | 29.395 | 17.217 | 41.889 | 0.00 | 0.00 |
| ATOM | 8176 | HZ3  | LYS | X | 534 | 27.835 | 17.329 | 41.668 | 0.00 | 0.00 |
| ATOM | 8177 | C    | LYS | X | 534 | 32.627 | 14.659 | 46.982 | 0.00 | 0.00 |
| ATOM | 8178 | O    | LYS | X | 534 | 31.980 | 13.843 | 47.659 | 0.00 | 0.00 |
| ATOM | 8179 | N    | LEU | X | 535 | 34.021 | 14.700 | 46.934 | 0.00 | 0.00 |
| ATOM | 8180 | H    | LEU | X | 535 | 34.362 | 15.211 | 46.132 | 0.00 | 0.00 |
| ATOM | 8181 | CA   | LEU | X | 535 | 34.925 | 14.142 | 47.912 | 0.00 | 0.00 |
| ATOM | 8182 | HA   | LEU | X | 535 | 34.504 | 13.187 | 48.222 | 0.00 | 0.00 |
| ATOM | 8183 | CB   | LEU | X | 535 | 36.290 | 14.046 | 47.294 | 0.00 | 0.00 |
| ATOM | 8184 | HB2  | LEU | X | 535 | 36.634 | 15.035 | 46.992 | 0.00 | 0.00 |
| ATOM | 8185 | HB3  | LEU | X | 535 | 36.962 | 13.738 | 48.095 | 0.00 | 0.00 |
| ATOM | 8186 | CG   | LEU | X | 535 | 36.317 | 13.006 | 46.207 | 0.00 | 0.00 |
| ATOM | 8187 | HG   | LEU | X | 535 | 35.744 | 13.316 | 45.333 | 0.00 | 0.00 |
| ATOM | 8188 | CD1  | LEU | X | 535 | 37.786 | 12.712 | 45.675 | 0.00 | 0.00 |
| ATOM | 8189 | HD11 | LEU | X | 535 | 38.130 | 13.531 | 45.043 | 0.00 | 0.00 |
| ATOM | 8190 | HD12 | LEU | X | 535 | 38.519 | 12.547 | 46.465 | 0.00 | 0.00 |
| ATOM | 8191 | HD13 | LEU | X | 535 | 37.798 | 11.861 | 44.994 | 0.00 | 0.00 |
| ATOM | 8192 | CD2  | LEU | X | 535 | 35.728 | 11.587 | 46.605 | 0.00 | 0.00 |
| ATOM | 8193 | HD21 | LEU | X | 535 | 36.058 | 11.207 | 47.572 | 0.00 | 0.00 |
| ATOM | 8194 | HD22 | LEU | X | 535 | 34.657 | 11.789 | 46.625 | 0.00 | 0.00 |

|      |      |      |     |   |     |        |        |        |      |      |
|------|------|------|-----|---|-----|--------|--------|--------|------|------|
| ATOM | 8195 | HD23 | LEU | X | 535 | 35.795 | 10.839 | 45.815 | 0.00 | 0.00 |
| ATOM | 8196 | C    | LEU | X | 535 | 34.910 | 14.963 | 49.221 | 0.00 | 0.00 |
| ATOM | 8197 | O    | LEU | X | 535 | 35.164 | 14.233 | 50.182 | 0.00 | 0.00 |
| ATOM | 8198 | N    | LEU | X | 536 | 34.801 | 16.279 | 49.252 | 0.00 | 0.00 |
| ATOM | 8199 | H    | LEU | X | 536 | 34.624 | 16.676 | 48.340 | 0.00 | 0.00 |
| ATOM | 8200 | CA   | LEU | X | 536 | 34.981 | 17.177 | 50.402 | 0.00 | 0.00 |
| ATOM | 8201 | HA   | LEU | X | 536 | 35.794 | 16.777 | 51.009 | 0.00 | 0.00 |
| ATOM | 8202 | CB   | LEU | X | 536 | 35.201 | 18.651 | 49.891 | 0.00 | 0.00 |
| ATOM | 8203 | HB2  | LEU | X | 536 | 34.329 | 19.011 | 49.344 | 0.00 | 0.00 |
| ATOM | 8204 | HB3  | LEU | X | 536 | 35.168 | 19.265 | 50.791 | 0.00 | 0.00 |
| ATOM | 8205 | CG   | LEU | X | 536 | 36.505 | 19.084 | 49.171 | 0.00 | 0.00 |
| ATOM | 8206 | HG   | LEU | X | 536 | 36.634 | 18.461 | 48.286 | 0.00 | 0.00 |
| ATOM | 8207 | CD1  | LEU | X | 536 | 36.487 | 20.570 | 48.790 | 0.00 | 0.00 |
| ATOM | 8208 | HD11 | LEU | X | 536 | 36.958 | 20.676 | 47.813 | 0.00 | 0.00 |
| ATOM | 8209 | HD12 | LEU | X | 536 | 35.475 | 20.837 | 48.484 | 0.00 | 0.00 |
| ATOM | 8210 | HD13 | LEU | X | 536 | 36.971 | 21.163 | 49.566 | 0.00 | 0.00 |
| ATOM | 8211 | CD2  | LEU | X | 536 | 37.758 | 18.694 | 50.035 | 0.00 | 0.00 |
| ATOM | 8212 | HD21 | LEU | X | 536 | 37.730 | 19.021 | 51.074 | 0.00 | 0.00 |
| ATOM | 8213 | HD22 | LEU | X | 536 | 37.782 | 17.609 | 50.139 | 0.00 | 0.00 |
| ATOM | 8214 | HD23 | LEU | X | 536 | 38.688 | 19.024 | 49.572 | 0.00 | 0.00 |
| ATOM | 8215 | C    | LEU | X | 536 | 33.720 | 17.122 | 51.281 | 0.00 | 0.00 |
| ATOM | 8216 | O    | LEU | X | 536 | 33.863 | 16.981 | 52.506 | 0.00 | 0.00 |
| ATOM | 8217 | N    | SER | X | 537 | 32.613 | 17.015 | 50.656 | 0.00 | 0.00 |
| ATOM | 8218 | H    | SER | X | 537 | 32.603 | 17.225 | 49.668 | 0.00 | 0.00 |
| ATOM | 8219 | CA   | SER | X | 537 | 31.403 | 16.562 | 51.315 | 0.00 | 0.00 |
| ATOM | 8220 | HA   | SER | X | 537 | 31.245 | 17.102 | 52.249 | 0.00 | 0.00 |
| ATOM | 8221 | CB   | SER | X | 537 | 30.193 | 16.943 | 50.424 | 0.00 | 0.00 |
| ATOM | 8222 | HB2  | SER | X | 537 | 29.327 | 16.504 | 50.920 | 0.00 | 0.00 |
| ATOM | 8223 | HB3  | SER | X | 537 | 30.222 | 18.012 | 50.216 | 0.00 | 0.00 |
| ATOM | 8224 | OG   | SER | X | 537 | 30.270 | 16.309 | 49.164 | 0.00 | 0.00 |
| ATOM | 8225 | HG   | SER | X | 537 | 29.733 | 16.882 | 48.611 | 0.00 | 0.00 |
| ATOM | 8226 | C    | SER | X | 537 | 31.484 | 15.131 | 51.789 | 0.00 | 0.00 |
| ATOM | 8227 | O    | SER | X | 537 | 31.126 | 14.810 | 52.957 | 0.00 | 0.00 |
| ATOM | 8228 | N    | ALA | X | 538 | 32.044 | 14.225 | 50.991 | 0.00 | 0.00 |
| ATOM | 8229 | H    | ALA | X | 538 | 32.229 | 14.467 | 50.028 | 0.00 | 0.00 |
| ATOM | 8230 | CA   | ALA | X | 538 | 32.186 | 12.832 | 51.397 | 0.00 | 0.00 |
| ATOM | 8231 | HA   | ALA | X | 538 | 31.352 | 12.578 | 52.051 | 0.00 | 0.00 |
| ATOM | 8232 | CB   | ALA | X | 538 | 32.027 | 11.861 | 50.193 | 0.00 | 0.00 |
| ATOM | 8233 | HB1  | ALA | X | 538 | 32.262 | 10.821 | 50.423 | 0.00 | 0.00 |
| ATOM | 8234 | HB2  | ALA | X | 538 | 31.015 | 11.898 | 49.791 | 0.00 | 0.00 |
| ATOM | 8235 | HB3  | ALA | X | 538 | 32.592 | 12.154 | 49.308 | 0.00 | 0.00 |
| ATOM | 8236 | C    | ALA | X | 538 | 33.425 | 12.574 | 52.302 | 0.00 | 0.00 |
| ATOM | 8237 | O    | ALA | X | 538 | 33.744 | 11.418 | 52.528 | 0.00 | 0.00 |
| ATOM | 8238 | N    | THR | X | 539 | 34.035 | 13.663 | 52.808 | 0.00 | 0.00 |
| ATOM | 8239 | H    | THR | X | 539 | 33.622 | 14.565 | 52.617 | 0.00 | 0.00 |
| ATOM | 8240 | CA   | THR | X | 539 | 35.130 | 13.582 | 53.852 | 0.00 | 0.00 |
| ATOM | 8241 | HA   | THR | X | 539 | 35.545 | 12.583 | 53.718 | 0.00 | 0.00 |
| ATOM | 8242 | CB   | THR | X | 539 | 36.211 | 14.708 | 53.617 | 0.00 | 0.00 |
| ATOM | 8243 | HB   | THR | X | 539 | 35.594 | 15.597 | 53.487 | 0.00 | 0.00 |
| ATOM | 8244 | CG2  | THR | X | 539 | 37.280 | 15.000 | 54.701 | 0.00 | 0.00 |
| ATOM | 8245 | HG21 | THR | X | 539 | 38.007 | 14.192 | 54.783 | 0.00 | 0.00 |
| ATOM | 8246 | HG22 | THR | X | 539 | 37.817 | 15.924 | 54.489 | 0.00 | 0.00 |
| ATOM | 8247 | HG23 | THR | X | 539 | 36.728 | 14.902 | 55.636 | 0.00 | 0.00 |
| ATOM | 8248 | OG1  | THR | X | 539 | 36.812 | 14.465 | 52.319 | 0.00 | 0.00 |
| ATOM | 8249 | HG1  | THR | X | 539 | 36.077 | 14.332 | 51.716 | 0.00 | 0.00 |
| ATOM | 8250 | C    | THR | X | 539 | 34.551 | 13.591 | 55.259 | 0.00 | 0.00 |
| ATOM | 8251 | O    | THR | X | 539 | 33.769 | 14.418 | 55.664 | 0.00 | 0.00 |
| ATOM | 8252 | OXT  | THR | X | 539 | 34.849 | 12.677 | 55.991 | 0.00 | 0.00 |
| ATOM | 8253 | C    | LIG | X | 540 | 55.545 | 30.795 | 51.100 | 0.00 | 0.00 |
| ATOM | 8254 | C1   | LIG | X | 540 | 54.199 | 30.627 | 50.772 | 0.00 | 0.00 |
| ATOM | 8255 | C2   | LIG | X | 540 | 53.303 | 31.675 | 51.000 | 0.00 | 0.00 |
| ATOM | 8256 | C3   | LIG | X | 540 | 53.813 | 32.944 | 51.403 | 0.00 | 0.00 |
| ATOM | 8257 | C4   | LIG | X | 540 | 55.168 | 33.076 | 51.632 | 0.00 | 0.00 |
| ATOM | 8258 | C5   | LIG | X | 540 | 56.029 | 32.008 | 51.535 | 0.00 | 0.00 |
| ATOM | 8259 | C6   | LIG | X | 540 | 57.462 | 32.218 | 52.074 | 0.00 | 0.00 |
| ATOM | 8260 | N    | LIG | X | 540 | 57.809 | 31.398 | 53.311 | 0.00 | 0.00 |
| ATOM | 8261 | C7   | LIG | X | 540 | 56.788 | 31.467 | 54.438 | 0.00 | 0.00 |
| ATOM | 8262 | C8   | LIG | X | 540 | 57.113 | 32.738 | 55.310 | 0.00 | 0.00 |
| ATOM | 8263 | C9   | LIG | X | 540 | 58.561 | 32.677 | 55.903 | 0.00 | 0.00 |
| ATOM | 8264 | C10  | LIG | X | 540 | 59.570 | 32.593 | 54.694 | 0.00 | 0.00 |

|      |      |     |     |   |     |        |        |        |      |      |
|------|------|-----|-----|---|-----|--------|--------|--------|------|------|
| ATOM | 8265 | C11 | LIG | X | 540 | 59.254 | 31.371 | 53.822 | 0.00 | 0.00 |
| ATOM | 8266 | O   | LIG | X | 540 | 52.865 | 33.914 | 51.635 | 0.00 | 0.00 |
| ATOM | 8267 | C12 | LIG | X | 540 | 53.212 | 35.304 | 51.786 | 0.00 | 0.00 |
| ATOM | 8268 | O1  | LIG | X | 540 | 51.969 | 31.515 | 50.722 | 0.00 | 0.00 |
| ATOM | 8269 | H   | LIG | X | 540 | 51.543 | 32.316 | 51.076 | 0.00 | 0.00 |
| ATOM | 8270 | H1  | LIG | X | 540 | 56.135 | 29.884 | 51.165 | 0.00 | 0.00 |
| ATOM | 8271 | H2  | LIG | X | 540 | 53.867 | 29.597 | 50.669 | 0.00 | 0.00 |
| ATOM | 8272 | H3  | LIG | X | 540 | 55.624 | 34.017 | 51.931 | 0.00 | 0.00 |
| ATOM | 8273 | H4  | LIG | X | 540 | 57.701 | 33.281 | 52.164 | 0.00 | 0.00 |
| ATOM | 8274 | H5  | LIG | X | 540 | 58.105 | 31.810 | 51.290 | 0.00 | 0.00 |
| ATOM | 8275 | H6  | LIG | X | 540 | 55.723 | 31.417 | 54.198 | 0.00 | 0.00 |
| ATOM | 8276 | H7  | LIG | X | 540 | 56.923 | 30.573 | 55.052 | 0.00 | 0.00 |
| ATOM | 8277 | H8  | LIG | X | 540 | 57.117 | 33.637 | 54.690 | 0.00 | 0.00 |
| ATOM | 8278 | H9  | LIG | X | 540 | 56.342 | 32.946 | 56.055 | 0.00 | 0.00 |
| ATOM | 8279 | H10 | LIG | X | 540 | 58.586 | 31.830 | 56.592 | 0.00 | 0.00 |
| ATOM | 8280 | H11 | LIG | X | 540 | 58.787 | 33.509 | 56.573 | 0.00 | 0.00 |
| ATOM | 8281 | H12 | LIG | X | 540 | 59.337 | 33.435 | 54.039 | 0.00 | 0.00 |
| ATOM | 8282 | H13 | LIG | X | 540 | 60.637 | 32.591 | 54.927 | 0.00 | 0.00 |
| ATOM | 8283 | H14 | LIG | X | 540 | 59.974 | 31.332 | 53.001 | 0.00 | 0.00 |
| ATOM | 8284 | H15 | LIG | X | 540 | 59.361 | 30.424 | 54.358 | 0.00 | 0.00 |
| ATOM | 8285 | H16 | LIG | X | 540 | 52.265 | 35.794 | 52.025 | 0.00 | 0.00 |
| ATOM | 8286 | H17 | LIG | X | 540 | 53.757 | 35.459 | 52.721 | 0.00 | 0.00 |
| ATOM | 8287 | H18 | LIG | X | 540 | 53.612 | 35.601 | 50.813 | 0.00 | 0.00 |
| ATOM | 8288 | Na+ | Na+ | X | 541 | 61.450 | 42.234 | 38.600 | 0.00 | 0.00 |
| ATOM | 8289 | Na+ | Na+ | X | 542 | 25.320 | 1.151  | 46.937 | 0.00 | 0.00 |
| ATOM | 8290 | Na+ | Na+ | X | 543 | 62.905 | 40.708 | 36.011 | 0.00 | 0.00 |
| ATOM | 8291 | Na+ | Na+ | X | 544 | 66.122 | 17.992 | 57.356 | 0.00 | 0.00 |
| ATOM | 8292 | Na+ | Na+ | X | 545 | 79.887 | 5.542  | 57.662 | 0.00 | 0.00 |
| ATOM | 8293 | Na+ | Na+ | X | 546 | 68.986 | 43.449 | 48.529 | 0.00 | 0.00 |
| ATOM | 8294 | Na+ | Na+ | X | 547 | 74.002 | 14.852 | 90.739 | 0.00 | 0.00 |

END

4

| CRYST1 | 84.265 | 84.265 | 84.265 | 90.00 | 90.00 | 90.00  | P 1    | 1      |      |      |
|--------|--------|--------|--------|-------|-------|--------|--------|--------|------|------|
| ATOM   | 1      | N      | ASP    | X     | 1     | 55.616 | 76.063 | 32.146 | 0.00 | 0.00 |
| ATOM   | 2      | H1     | ASP    | X     | 1     | 55.331 | 75.098 | 32.235 | 0.00 | 0.00 |
| ATOM   | 3      | H2     | ASP    | X     | 1     | 55.776 | 76.466 | 33.058 | 0.00 | 0.00 |
| ATOM   | 4      | H3     | ASP    | X     | 1     | 56.463 | 75.907 | 31.617 | 0.00 | 0.00 |
| ATOM   | 5      | CA     | ASP    | X     | 1     | 54.595 | 76.872 | 31.441 | 0.00 | 0.00 |
| ATOM   | 6      | HA     | ASP    | X     | 1     | 55.030 | 77.866 | 31.346 | 0.00 | 0.00 |
| ATOM   | 7      | CB     | ASP    | X     | 1     | 54.340 | 76.294 | 30.056 | 0.00 | 0.00 |
| ATOM   | 8      | HB2    | ASP    | X     | 1     | 55.345 | 76.124 | 29.667 | 0.00 | 0.00 |
| ATOM   | 9      | HB3    | ASP    | X     | 1     | 53.848 | 75.324 | 30.114 | 0.00 | 0.00 |
| ATOM   | 10     | CG     | ASP    | X     | 1     | 53.548 | 77.236 | 29.054 | 0.00 | 0.00 |
| ATOM   | 11     | OD1    | ASP    | X     | 1     | 54.274 | 77.815 | 28.203 | 0.00 | 0.00 |
| ATOM   | 12     | OD2    | ASP    | X     | 1     | 52.284 | 77.276 | 28.980 | 0.00 | 0.00 |
| ATOM   | 13     | C      | ASP    | X     | 1     | 53.236 | 76.998 | 32.161 | 0.00 | 0.00 |
| ATOM   | 14     | O      | ASP    | X     | 1     | 52.754 | 75.930 | 32.636 | 0.00 | 0.00 |
| ATOM   | 15     | N      | ALA    | X     | 2     | 52.568 | 78.118 | 32.210 | 0.00 | 0.00 |
| ATOM   | 16     | H      | ALA    | X     | 2     | 53.064 | 78.897 | 31.802 | 0.00 | 0.00 |
| ATOM   | 17     | CA     | ALA    | X     | 2     | 51.185 | 78.312 | 32.623 | 0.00 | 0.00 |
| ATOM   | 18     | HA     | ALA    | X     | 2     | 51.197 | 78.303 | 33.713 | 0.00 | 0.00 |
| ATOM   | 19     | CB     | ALA    | X     | 2     | 50.725 | 79.671 | 32.060 | 0.00 | 0.00 |
| ATOM   | 20     | HB1    | ALA    | X     | 2     | 50.863 | 79.702 | 30.979 | 0.00 | 0.00 |
| ATOM   | 21     | HB2    | ALA    | X     | 2     | 49.650 | 79.756 | 32.218 | 0.00 | 0.00 |
| ATOM   | 22     | HB3    | ALA    | X     | 2     | 51.247 | 80.537 | 32.467 | 0.00 | 0.00 |
| ATOM   | 23     | C      | ALA    | X     | 2     | 50.172 | 77.192 | 32.193 | 0.00 | 0.00 |
| ATOM   | 24     | O      | ALA    | X     | 2     | 49.280 | 76.787 | 33.029 | 0.00 | 0.00 |
| ATOM   | 25     | N      | GLU    | X     | 3     | 50.245 | 76.670 | 30.937 | 0.00 | 0.00 |
| ATOM   | 26     | H      | GLU    | X     | 3     | 50.873 | 77.007 | 30.221 | 0.00 | 0.00 |
| ATOM   | 27     | CA     | GLU    | X     | 3     | 49.424 | 75.443 | 30.591 | 0.00 | 0.00 |
| ATOM   | 28     | HA     | GLU    | X     | 3     | 48.385 | 75.744 | 30.460 | 0.00 | 0.00 |
| ATOM   | 29     | CB     | GLU    | X     | 3     | 49.969 | 74.919 | 29.200 | 0.00 | 0.00 |
| ATOM   | 30     | HB2    | GLU    | X     | 3     | 51.049 | 74.772 | 29.176 | 0.00 | 0.00 |
| ATOM   | 31     | HB3    | GLU    | X     | 3     | 49.650 | 73.889 | 29.038 | 0.00 | 0.00 |
| ATOM   | 32     | CG     | GLU    | X     | 3     | 49.548 | 75.721 | 28.018 | 0.00 | 0.00 |
| ATOM   | 33     | HG2    | GLU    | X     | 3     | 49.879 | 76.732 | 28.253 | 0.00 | 0.00 |
| ATOM   | 34     | HG3    | GLU    | X     | 3     | 50.195 | 75.405 | 27.200 | 0.00 | 0.00 |
| ATOM   | 35     | CD     | GLU    | X     | 3     | 48.124 | 75.733 | 27.611 | 0.00 | 0.00 |
| ATOM   | 36     | OE1    | GLU    | X     | 3     | 47.212 | 75.524 | 28.495 | 0.00 | 0.00 |
| ATOM   | 37     | OE2    | GLU    | X     | 3     | 47.785 | 75.833 | 26.434 | 0.00 | 0.00 |

|      |     |      |     |   |   |        |        |        |      |      |
|------|-----|------|-----|---|---|--------|--------|--------|------|------|
| ATOM | 38  | C    | GLU | X | 3 | 49.468 | 74.345 | 31.660 | 0.00 | 0.00 |
| ATOM | 39  | O    | GLU | X | 3 | 48.507 | 73.585 | 31.612 | 0.00 | 0.00 |
| ATOM | 40  | N    | LEU | X | 4 | 50.570 | 74.167 | 32.465 | 0.00 | 0.00 |
| ATOM | 41  | H    | LEU | X | 4 | 51.364 | 74.785 | 32.380 | 0.00 | 0.00 |
| ATOM | 42  | CA   | LEU | X | 4 | 50.654 | 73.068 | 33.432 | 0.00 | 0.00 |
| ATOM | 43  | HA   | LEU | X | 4 | 50.300 | 72.101 | 33.076 | 0.00 | 0.00 |
| ATOM | 44  | CB   | LEU | X | 4 | 52.138 | 72.787 | 33.842 | 0.00 | 0.00 |
| ATOM | 45  | HB2  | LEU | X | 4 | 52.482 | 73.676 | 34.371 | 0.00 | 0.00 |
| ATOM | 46  | HB3  | LEU | X | 4 | 52.182 | 71.937 | 34.522 | 0.00 | 0.00 |
| ATOM | 47  | CG   | LEU | X | 4 | 53.136 | 72.664 | 32.630 | 0.00 | 0.00 |
| ATOM | 48  | HG   | LEU | X | 4 | 52.962 | 73.509 | 31.964 | 0.00 | 0.00 |
| ATOM | 49  | CD1  | LEU | X | 4 | 54.544 | 72.461 | 33.033 | 0.00 | 0.00 |
| ATOM | 50  | HD11 | LEU | X | 4 | 54.704 | 71.565 | 33.633 | 0.00 | 0.00 |
| ATOM | 51  | HD12 | LEU | X | 4 | 55.243 | 72.287 | 32.216 | 0.00 | 0.00 |
| ATOM | 52  | HD13 | LEU | X | 4 | 54.938 | 73.347 | 33.531 | 0.00 | 0.00 |
| ATOM | 53  | CD2  | LEU | X | 4 | 52.703 | 71.443 | 31.864 | 0.00 | 0.00 |
| ATOM | 54  | HD21 | LEU | X | 4 | 51.730 | 71.705 | 31.448 | 0.00 | 0.00 |
| ATOM | 55  | HD22 | LEU | X | 4 | 53.371 | 71.257 | 31.023 | 0.00 | 0.00 |
| ATOM | 56  | HD23 | LEU | X | 4 | 52.599 | 70.488 | 32.379 | 0.00 | 0.00 |
| ATOM | 57  | C    | LEU | X | 4 | 49.770 | 73.274 | 34.690 | 0.00 | 0.00 |
| ATOM | 58  | O    | LEU | X | 4 | 49.716 | 72.370 | 35.566 | 0.00 | 0.00 |
| ATOM | 59  | N    | LEU | X | 5 | 49.001 | 74.410 | 34.804 | 0.00 | 0.00 |
| ATOM | 60  | H    | LEU | X | 5 | 49.082 | 75.111 | 34.082 | 0.00 | 0.00 |
| ATOM | 61  | CA   | LEU | X | 5 | 48.259 | 74.790 | 35.994 | 0.00 | 0.00 |
| ATOM | 62  | HA   | LEU | X | 5 | 48.618 | 74.196 | 36.835 | 0.00 | 0.00 |
| ATOM | 63  | CB   | LEU | X | 5 | 48.638 | 76.201 | 36.459 | 0.00 | 0.00 |
| ATOM | 64  | HB2  | LEU | X | 5 | 49.727 | 76.168 | 36.465 | 0.00 | 0.00 |
| ATOM | 65  | HB3  | LEU | X | 5 | 48.484 | 76.911 | 35.647 | 0.00 | 0.00 |
| ATOM | 66  | CG   | LEU | X | 5 | 48.096 | 76.682 | 37.828 | 0.00 | 0.00 |
| ATOM | 67  | HG   | LEU | X | 5 | 48.406 | 77.726 | 37.857 | 0.00 | 0.00 |
| ATOM | 68  | CD1  | LEU | X | 5 | 46.531 | 76.709 | 38.039 | 0.00 | 0.00 |
| ATOM | 69  | HD11 | LEU | X | 5 | 46.011 | 76.908 | 37.102 | 0.00 | 0.00 |
| ATOM | 70  | HD12 | LEU | X | 5 | 46.185 | 75.705 | 38.282 | 0.00 | 0.00 |
| ATOM | 71  | HD13 | LEU | X | 5 | 46.352 | 77.544 | 38.717 | 0.00 | 0.00 |
| ATOM | 72  | CD2  | LEU | X | 5 | 48.717 | 75.970 | 39.033 | 0.00 | 0.00 |
| ATOM | 73  | HD21 | LEU | X | 5 | 49.783 | 75.797 | 38.887 | 0.00 | 0.00 |
| ATOM | 74  | HD22 | LEU | X | 5 | 48.516 | 76.536 | 39.943 | 0.00 | 0.00 |
| ATOM | 75  | HD23 | LEU | X | 5 | 48.382 | 74.933 | 39.066 | 0.00 | 0.00 |
| ATOM | 76  | C    | LEU | X | 5 | 46.794 | 74.530 | 35.636 | 0.00 | 0.00 |
| ATOM | 77  | O    | LEU | X | 5 | 46.252 | 75.225 | 34.809 | 0.00 | 0.00 |
| ATOM | 78  | N    | VAL | X | 6 | 46.152 | 73.508 | 36.227 | 0.00 | 0.00 |
| ATOM | 79  | H    | VAL | X | 6 | 46.726 | 73.066 | 36.931 | 0.00 | 0.00 |
| ATOM | 80  | CA   | VAL | X | 6 | 44.806 | 73.005 | 35.935 | 0.00 | 0.00 |
| ATOM | 81  | HA   | VAL | X | 6 | 44.400 | 73.555 | 35.087 | 0.00 | 0.00 |
| ATOM | 82  | CB   | VAL | X | 6 | 44.803 | 71.518 | 35.512 | 0.00 | 0.00 |
| ATOM | 83  | HB   | VAL | X | 6 | 45.071 | 70.882 | 36.356 | 0.00 | 0.00 |
| ATOM | 84  | CG1  | VAL | X | 6 | 43.451 | 71.056 | 35.156 | 0.00 | 0.00 |
| ATOM | 85  | HG11 | VAL | X | 6 | 43.479 | 70.299 | 34.372 | 0.00 | 0.00 |
| ATOM | 86  | HG12 | VAL | X | 6 | 43.038 | 70.575 | 36.042 | 0.00 | 0.00 |
| ATOM | 87  | HG13 | VAL | X | 6 | 42.757 | 71.785 | 34.737 | 0.00 | 0.00 |
| ATOM | 88  | CG2  | VAL | X | 6 | 45.735 | 71.219 | 34.329 | 0.00 | 0.00 |
| ATOM | 89  | HG21 | VAL | X | 6 | 45.460 | 71.718 | 33.399 | 0.00 | 0.00 |
| ATOM | 90  | HG22 | VAL | X | 6 | 46.730 | 71.453 | 34.707 | 0.00 | 0.00 |
| ATOM | 91  | HG23 | VAL | X | 6 | 45.681 | 70.135 | 34.237 | 0.00 | 0.00 |
| ATOM | 92  | C    | VAL | X | 6 | 44.058 | 73.187 | 37.250 | 0.00 | 0.00 |
| ATOM | 93  | O    | VAL | X | 6 | 44.672 | 73.205 | 38.289 | 0.00 | 0.00 |
| ATOM | 94  | N    | THR | X | 7 | 42.739 | 73.380 | 37.177 | 0.00 | 0.00 |
| ATOM | 95  | H    | THR | X | 7 | 42.361 | 73.268 | 36.247 | 0.00 | 0.00 |
| ATOM | 96  | CA   | THR | X | 7 | 41.813 | 73.421 | 38.297 | 0.00 | 0.00 |
| ATOM | 97  | HA   | THR | X | 7 | 42.361 | 73.526 | 39.233 | 0.00 | 0.00 |
| ATOM | 98  | CB   | THR | X | 7 | 40.862 | 74.649 | 38.282 | 0.00 | 0.00 |
| ATOM | 99  | HB   | THR | X | 7 | 40.285 | 74.643 | 37.358 | 0.00 | 0.00 |
| ATOM | 100 | CG2  | THR | X | 7 | 40.001 | 74.915 | 39.520 | 0.00 | 0.00 |
| ATOM | 101 | HG21 | THR | X | 7 | 39.516 | 75.882 | 39.384 | 0.00 | 0.00 |
| ATOM | 102 | HG22 | THR | X | 7 | 39.205 | 74.178 | 39.622 | 0.00 | 0.00 |
| ATOM | 103 | HG23 | THR | X | 7 | 40.646 | 75.063 | 40.386 | 0.00 | 0.00 |
| ATOM | 104 | OG1  | THR | X | 7 | 41.792 | 75.779 | 38.321 | 0.00 | 0.00 |
| ATOM | 105 | HG1  | THR | X | 7 | 42.382 | 75.513 | 37.612 | 0.00 | 0.00 |
| ATOM | 106 | C    | THR | X | 7 | 40.963 | 72.146 | 38.417 | 0.00 | 0.00 |
| ATOM | 107 | O    | THR | X | 7 | 40.510 | 71.621 | 37.457 | 0.00 | 0.00 |

|      |     |      |     |   |    |        |        |        |      |      |
|------|-----|------|-----|---|----|--------|--------|--------|------|------|
| ATOM | 108 | N    | VAL | X | 8  | 40.713 | 71.750 | 39.638 | 0.00 | 0.00 |
| ATOM | 109 | H    | VAL | X | 8  | 41.075 | 72.230 | 40.450 | 0.00 | 0.00 |
| ATOM | 110 | CA   | VAL | X | 8  | 39.752 | 70.666 | 39.935 | 0.00 | 0.00 |
| ATOM | 111 | HA   | VAL | X | 8  | 39.108 | 70.441 | 39.085 | 0.00 | 0.00 |
| ATOM | 112 | CB   | VAL | X | 8  | 40.505 | 69.425 | 40.375 | 0.00 | 0.00 |
| ATOM | 113 | HB   | VAL | X | 8  | 39.780 | 68.713 | 40.769 | 0.00 | 0.00 |
| ATOM | 114 | CG1  | VAL | X | 8  | 41.234 | 68.757 | 39.236 | 0.00 | 0.00 |
| ATOM | 115 | HG11 | VAL | X | 8  | 41.777 | 67.877 | 39.581 | 0.00 | 0.00 |
| ATOM | 116 | HG12 | VAL | X | 8  | 40.447 | 68.535 | 38.515 | 0.00 | 0.00 |
| ATOM | 117 | HG13 | VAL | X | 8  | 41.862 | 69.510 | 38.761 | 0.00 | 0.00 |
| ATOM | 118 | CG2  | VAL | X | 8  | 41.513 | 69.782 | 41.539 | 0.00 | 0.00 |
| ATOM | 119 | HG21 | VAL | X | 8  | 42.266 | 70.426 | 41.086 | 0.00 | 0.00 |
| ATOM | 120 | HG22 | VAL | X | 8  | 41.025 | 70.331 | 42.344 | 0.00 | 0.00 |
| ATOM | 121 | HG23 | VAL | X | 8  | 41.978 | 68.855 | 41.872 | 0.00 | 0.00 |
| ATOM | 122 | C    | VAL | X | 8  | 38.707 | 71.229 | 40.960 | 0.00 | 0.00 |
| ATOM | 123 | O    | VAL | X | 8  | 38.741 | 72.333 | 41.484 | 0.00 | 0.00 |
| ATOM | 124 | N    | ARG | X | 9  | 37.719 | 70.317 | 41.318 | 0.00 | 0.00 |
| ATOM | 125 | H    | ARG | X | 9  | 37.825 | 69.493 | 40.743 | 0.00 | 0.00 |
| ATOM | 126 | CA   | ARG | X | 9  | 36.683 | 70.508 | 42.344 | 0.00 | 0.00 |
| ATOM | 127 | HA   | ARG | X | 9  | 36.024 | 71.287 | 41.960 | 0.00 | 0.00 |
| ATOM | 128 | CB   | ARG | X | 9  | 35.918 | 69.236 | 42.633 | 0.00 | 0.00 |
| ATOM | 129 | HB2  | ARG | X | 9  | 35.534 | 68.810 | 41.706 | 0.00 | 0.00 |
| ATOM | 130 | HB3  | ARG | X | 9  | 36.543 | 68.482 | 43.114 | 0.00 | 0.00 |
| ATOM | 131 | CG   | ARG | X | 9  | 34.611 | 69.458 | 43.449 | 0.00 | 0.00 |
| ATOM | 132 | HG2  | ARG | X | 9  | 34.162 | 68.477 | 43.605 | 0.00 | 0.00 |
| ATOM | 133 | HG3  | ARG | X | 9  | 34.812 | 69.717 | 44.488 | 0.00 | 0.00 |
| ATOM | 134 | CD   | ARG | X | 9  | 33.619 | 70.488 | 43.000 | 0.00 | 0.00 |
| ATOM | 135 | HD2  | ARG | X | 9  | 32.853 | 70.668 | 43.754 | 0.00 | 0.00 |
| ATOM | 136 | HD3  | ARG | X | 9  | 34.076 | 71.471 | 42.883 | 0.00 | 0.00 |
| ATOM | 137 | NE   | ARG | X | 9  | 32.961 | 70.029 | 41.754 | 0.00 | 0.00 |
| ATOM | 138 | HE   | ARG | X | 9  | 32.563 | 69.101 | 41.734 | 0.00 | 0.00 |
| ATOM | 139 | CZ   | ARG | X | 9  | 32.926 | 70.586 | 40.553 | 0.00 | 0.00 |
| ATOM | 140 | NH1  | ARG | X | 9  | 33.170 | 71.878 | 40.335 | 0.00 | 0.00 |
| ATOM | 141 | HH11 | ARG | X | 9  | 33.431 | 72.534 | 41.057 | 0.00 | 0.00 |
| ATOM | 142 | HH12 | ARG | X | 9  | 33.164 | 72.250 | 39.396 | 0.00 | 0.00 |
| ATOM | 143 | NH2  | ARG | X | 9  | 32.613 | 69.873 | 39.470 | 0.00 | 0.00 |
| ATOM | 144 | HH21 | ARG | X | 9  | 32.207 | 68.975 | 39.691 | 0.00 | 0.00 |
| ATOM | 145 | HH22 | ARG | X | 9  | 32.774 | 70.129 | 38.507 | 0.00 | 0.00 |
| ATOM | 146 | C    | ARG | X | 9  | 37.203 | 71.077 | 43.701 | 0.00 | 0.00 |
| ATOM | 147 | O    | ARG | X | 9  | 36.375 | 71.685 | 44.376 | 0.00 | 0.00 |
| ATOM | 148 | N    | GLY | X | 10 | 38.482 | 70.850 | 44.092 | 0.00 | 0.00 |
| ATOM | 149 | H    | GLY | X | 10 | 39.058 | 70.236 | 43.534 | 0.00 | 0.00 |
| ATOM | 150 | CA   | GLY | X | 10 | 39.135 | 71.404 | 45.321 | 0.00 | 0.00 |
| ATOM | 151 | HA2  | GLY | X | 10 | 38.383 | 71.564 | 46.040 | 0.00 | 0.00 |
| ATOM | 152 | HA3  | GLY | X | 10 | 39.732 | 70.603 | 45.655 | 0.00 | 0.00 |
| ATOM | 153 | C    | GLY | X | 10 | 39.791 | 72.750 | 45.172 | 0.00 | 0.00 |
| ATOM | 154 | O    | GLY | X | 10 | 39.519 | 73.597 | 46.002 | 0.00 | 0.00 |
| ATOM | 155 | N    | GLY | X | 11 | 40.543 | 72.974 | 44.078 | 0.00 | 0.00 |
| ATOM | 156 | H    | GLY | X | 11 | 40.517 | 72.229 | 43.396 | 0.00 | 0.00 |
| ATOM | 157 | CA   | GLY | X | 11 | 41.300 | 74.127 | 43.783 | 0.00 | 0.00 |
| ATOM | 158 | HA2  | GLY | X | 11 | 40.567 | 74.923 | 43.511 | 0.00 | 0.00 |
| ATOM | 159 | HA3  | GLY | X | 11 | 41.784 | 74.407 | 44.733 | 0.00 | 0.00 |
| ATOM | 160 | C    | GLY | X | 11 | 42.219 | 74.057 | 42.572 | 0.00 | 0.00 |
| ATOM | 161 | O    | GLY | X | 11 | 41.940 | 73.334 | 41.624 | 0.00 | 0.00 |
| ATOM | 162 | N    | ARG | X | 12 | 43.412 | 74.649 | 42.588 | 0.00 | 0.00 |
| ATOM | 163 | H    | ARG | X | 12 | 43.612 | 75.221 | 43.396 | 0.00 | 0.00 |
| ATOM | 164 | CA   | ARG | X | 12 | 44.410 | 74.684 | 41.608 | 0.00 | 0.00 |
| ATOM | 165 | HA   | ARG | X | 12 | 43.967 | 74.534 | 40.624 | 0.00 | 0.00 |
| ATOM | 166 | CB   | ARG | X | 12 | 45.061 | 76.050 | 41.603 | 0.00 | 0.00 |
| ATOM | 167 | HB2  | ARG | X | 12 | 45.529 | 76.216 | 42.573 | 0.00 | 0.00 |
| ATOM | 168 | HB3  | ARG | X | 12 | 45.978 | 76.058 | 41.015 | 0.00 | 0.00 |
| ATOM | 169 | CG   | ARG | X | 12 | 44.238 | 77.210 | 40.967 | 0.00 | 0.00 |
| ATOM | 170 | HG2  | ARG | X | 12 | 44.328 | 77.100 | 39.886 | 0.00 | 0.00 |
| ATOM | 171 | HG3  | ARG | X | 12 | 43.164 | 77.198 | 41.151 | 0.00 | 0.00 |
| ATOM | 172 | CD   | ARG | X | 12 | 44.847 | 78.608 | 41.129 | 0.00 | 0.00 |
| ATOM | 173 | HD2  | ARG | X | 12 | 45.919 | 78.612 | 40.932 | 0.00 | 0.00 |
| ATOM | 174 | HD3  | ARG | X | 12 | 44.401 | 79.293 | 40.408 | 0.00 | 0.00 |
| ATOM | 175 | NE   | ARG | X | 12 | 44.601 | 79.070 | 42.493 | 0.00 | 0.00 |
| ATOM | 176 | HE   | ARG | X | 12 | 43.656 | 78.873 | 42.792 | 0.00 | 0.00 |
| ATOM | 177 | CZ   | ARG | X | 12 | 45.356 | 79.883 | 43.281 | 0.00 | 0.00 |

|      |     |      |     |   |    |        |        |        |      |      |
|------|-----|------|-----|---|----|--------|--------|--------|------|------|
| ATOM | 178 | NH1  | ARG | X | 12 | 46.563 | 80.287 | 43.139 | 0.00 | 0.00 |
| ATOM | 179 | HH11 | ARG | X | 12 | 47.139 | 79.989 | 42.364 | 0.00 | 0.00 |
| ATOM | 180 | HH12 | ARG | X | 12 | 46.925 | 81.004 | 43.751 | 0.00 | 0.00 |
| ATOM | 181 | NH2  | ARG | X | 12 | 44.816 | 80.228 | 44.378 | 0.00 | 0.00 |
| ATOM | 182 | HH21 | ARG | X | 12 | 43.912 | 79.871 | 44.653 | 0.00 | 0.00 |
| ATOM | 183 | HH22 | ARG | X | 12 | 45.265 | 80.832 | 45.052 | 0.00 | 0.00 |
| ATOM | 184 | C    | ARG | X | 12 | 45.482 | 73.626 | 41.822 | 0.00 | 0.00 |
| ATOM | 185 | O    | ARG | X | 12 | 45.733 | 73.230 | 43.010 | 0.00 | 0.00 |
| ATOM | 186 | N    | LEU | X | 13 | 46.076 | 73.096 | 40.764 | 0.00 | 0.00 |
| ATOM | 187 | H    | LEU | X | 13 | 46.033 | 73.621 | 39.902 | 0.00 | 0.00 |
| ATOM | 188 | CA   | LEU | X | 13 | 46.798 | 71.871 | 40.710 | 0.00 | 0.00 |
| ATOM | 189 | HA   | LEU | X | 13 | 47.317 | 71.708 | 41.655 | 0.00 | 0.00 |
| ATOM | 190 | CB   | LEU | X | 13 | 45.671 | 70.796 | 40.503 | 0.00 | 0.00 |
| ATOM | 191 | HB2  | LEU | X | 13 | 44.928 | 71.033 | 41.264 | 0.00 | 0.00 |
| ATOM | 192 | HB3  | LEU | X | 13 | 45.235 | 70.866 | 39.507 | 0.00 | 0.00 |
| ATOM | 193 | CG   | LEU | X | 13 | 46.025 | 69.341 | 40.842 | 0.00 | 0.00 |
| ATOM | 194 | HG   | LEU | X | 13 | 46.515 | 69.266 | 41.813 | 0.00 | 0.00 |
| ATOM | 195 | CD1  | LEU | X | 13 | 44.710 | 68.563 | 40.936 | 0.00 | 0.00 |
| ATOM | 196 | HD11 | LEU | X | 13 | 44.233 | 68.859 | 41.869 | 0.00 | 0.00 |
| ATOM | 197 | HD12 | LEU | X | 13 | 44.074 | 68.760 | 40.073 | 0.00 | 0.00 |
| ATOM | 198 | HD13 | LEU | X | 13 | 44.913 | 67.495 | 40.859 | 0.00 | 0.00 |
| ATOM | 199 | CD2  | LEU | X | 13 | 46.980 | 68.831 | 39.749 | 0.00 | 0.00 |
| ATOM | 200 | HD21 | LEU | X | 13 | 47.127 | 67.760 | 39.887 | 0.00 | 0.00 |
| ATOM | 201 | HD22 | LEU | X | 13 | 46.496 | 69.076 | 38.804 | 0.00 | 0.00 |
| ATOM | 202 | HD23 | LEU | X | 13 | 47.988 | 69.246 | 39.779 | 0.00 | 0.00 |
| ATOM | 203 | C    | LEU | X | 13 | 47.831 | 71.882 | 39.573 | 0.00 | 0.00 |
| ATOM | 204 | O    | LEU | X | 13 | 47.479 | 72.090 | 38.392 | 0.00 | 0.00 |
| ATOM | 205 | N    | ARG | X | 14 | 49.115 | 71.681 | 39.934 | 0.00 | 0.00 |
| ATOM | 206 | H    | ARG | X | 14 | 49.350 | 71.544 | 40.907 | 0.00 | 0.00 |
| ATOM | 207 | CA   | ARG | X | 14 | 50.233 | 71.969 | 39.028 | 0.00 | 0.00 |
| ATOM | 208 | HA   | ARG | X | 14 | 49.904 | 72.484 | 38.125 | 0.00 | 0.00 |
| ATOM | 209 | CB   | ARG | X | 14 | 51.260 | 72.844 | 39.721 | 0.00 | 0.00 |
| ATOM | 210 | HB2  | ARG | X | 14 | 50.859 | 73.836 | 39.929 | 0.00 | 0.00 |
| ATOM | 211 | HB3  | ARG | X | 14 | 51.587 | 72.346 | 40.634 | 0.00 | 0.00 |
| ATOM | 212 | CG   | ARG | X | 14 | 52.448 | 73.121 | 38.754 | 0.00 | 0.00 |
| ATOM | 213 | HG2  | ARG | X | 14 | 53.152 | 73.611 | 39.427 | 0.00 | 0.00 |
| ATOM | 214 | HG3  | ARG | X | 14 | 52.853 | 72.169 | 38.413 | 0.00 | 0.00 |
| ATOM | 215 | CD   | ARG | X | 14 | 52.167 | 74.023 | 37.531 | 0.00 | 0.00 |
| ATOM | 216 | HD2  | ARG | X | 14 | 52.079 | 73.313 | 36.709 | 0.00 | 0.00 |
| ATOM | 217 | HD3  | ARG | X | 14 | 51.313 | 74.685 | 37.671 | 0.00 | 0.00 |
| ATOM | 218 | NE   | ARG | X | 14 | 53.371 | 74.878 | 37.255 | 0.00 | 0.00 |
| ATOM | 219 | HE   | ARG | X | 14 | 53.244 | 75.877 | 37.342 | 0.00 | 0.00 |
| ATOM | 220 | CZ   | ARG | X | 14 | 54.544 | 74.514 | 36.754 | 0.00 | 0.00 |
| ATOM | 221 | NH1  | ARG | X | 14 | 54.765 | 73.254 | 36.549 | 0.00 | 0.00 |
| ATOM | 222 | HH11 | ARG | X | 14 | 54.095 | 72.535 | 36.780 | 0.00 | 0.00 |
| ATOM | 223 | HH12 | ARG | X | 14 | 55.702 | 73.029 | 36.245 | 0.00 | 0.00 |
| ATOM | 224 | NH2  | ARG | X | 14 | 55.577 | 75.325 | 36.504 | 0.00 | 0.00 |
| ATOM | 225 | HH21 | ARG | X | 14 | 55.682 | 76.283 | 36.807 | 0.00 | 0.00 |
| ATOM | 226 | HH22 | ARG | X | 14 | 56.435 | 74.792 | 36.514 | 0.00 | 0.00 |
| ATOM | 227 | C    | ARG | X | 14 | 50.915 | 70.595 | 38.797 | 0.00 | 0.00 |
| ATOM | 228 | O    | ARG | X | 14 | 51.352 | 70.064 | 39.733 | 0.00 | 0.00 |
| ATOM | 229 | N    | GLY | X | 15 | 51.120 | 70.196 | 37.569 | 0.00 | 0.00 |
| ATOM | 230 | H    | GLY | X | 15 | 50.776 | 70.841 | 36.872 | 0.00 | 0.00 |
| ATOM | 231 | CA   | GLY | X | 15 | 52.019 | 69.065 | 37.126 | 0.00 | 0.00 |
| ATOM | 232 | HA2  | GLY | X | 15 | 52.397 | 68.580 | 37.937 | 0.00 | 0.00 |
| ATOM | 233 | HA3  | GLY | X | 15 | 51.410 | 68.269 | 36.622 | 0.00 | 0.00 |
| ATOM | 234 | C    | GLY | X | 15 | 53.108 | 69.553 | 36.137 | 0.00 | 0.00 |
| ATOM | 235 | O    | GLY | X | 15 | 53.486 | 70.711 | 36.191 | 0.00 | 0.00 |
| ATOM | 236 | N    | ILE | X | 16 | 53.491 | 68.627 | 35.231 | 0.00 | 0.00 |
| ATOM | 237 | H    | ILE | X | 16 | 53.061 | 67.715 | 35.287 | 0.00 | 0.00 |
| ATOM | 238 | CA   | ILE | X | 16 | 54.849 | 68.643 | 34.635 | 0.00 | 0.00 |
| ATOM | 239 | HA   | ILE | X | 16 | 55.182 | 69.681 | 34.666 | 0.00 | 0.00 |
| ATOM | 240 | CB   | ILE | X | 16 | 55.852 | 67.764 | 35.380 | 0.00 | 0.00 |
| ATOM | 241 | HB   | ILE | X | 16 | 56.843 | 67.973 | 34.977 | 0.00 | 0.00 |
| ATOM | 242 | CG2  | ILE | X | 16 | 56.011 | 68.211 | 36.891 | 0.00 | 0.00 |
| ATOM | 243 | HG21 | ILE | X | 16 | 55.954 | 69.296 | 36.970 | 0.00 | 0.00 |
| ATOM | 244 | HG22 | ILE | X | 16 | 55.259 | 67.782 | 37.552 | 0.00 | 0.00 |
| ATOM | 245 | HG23 | ILE | X | 16 | 56.986 | 67.996 | 37.327 | 0.00 | 0.00 |
| ATOM | 246 | CG1  | ILE | X | 16 | 55.616 | 66.190 | 35.306 | 0.00 | 0.00 |
| ATOM | 247 | HG12 | ILE | X | 16 | 54.668 | 66.084 | 35.833 | 0.00 | 0.00 |

|      |     |      |     |   |    |        |        |        |      |      |
|------|-----|------|-----|---|----|--------|--------|--------|------|------|
| ATOM | 248 | HG13 | ILE | X | 16 | 55.486 | 65.872 | 34.271 | 0.00 | 0.00 |
| ATOM | 249 | CD1  | ILE | X | 16 | 56.837 | 65.460 | 35.955 | 0.00 | 0.00 |
| ATOM | 250 | HD11 | ILE | X | 16 | 57.003 | 65.771 | 36.986 | 0.00 | 0.00 |
| ATOM | 251 | HD12 | ILE | X | 16 | 56.712 | 64.377 | 35.956 | 0.00 | 0.00 |
| ATOM | 252 | HD13 | ILE | X | 16 | 57.722 | 65.609 | 35.336 | 0.00 | 0.00 |
| ATOM | 253 | C    | ILE | X | 16 | 54.797 | 68.266 | 33.124 | 0.00 | 0.00 |
| ATOM | 254 | O    | ILE | X | 16 | 54.104 | 67.327 | 32.784 | 0.00 | 0.00 |
| ATOM | 255 | N    | ARG | X | 17 | 55.488 | 68.866 | 32.205 | 0.00 | 0.00 |
| ATOM | 256 | H    | ARG | X | 17 | 56.065 | 69.619 | 32.552 | 0.00 | 0.00 |
| ATOM | 257 | CA   | ARG | X | 17 | 55.559 | 68.413 | 30.815 | 0.00 | 0.00 |
| ATOM | 258 | HA   | ARG | X | 17 | 54.625 | 67.947 | 30.500 | 0.00 | 0.00 |
| ATOM | 259 | CB   | ARG | X | 17 | 55.873 | 69.508 | 29.794 | 0.00 | 0.00 |
| ATOM | 260 | HB2  | ARG | X | 17 | 55.849 | 69.166 | 28.759 | 0.00 | 0.00 |
| ATOM | 261 | HB3  | ARG | X | 17 | 55.074 | 70.245 | 29.876 | 0.00 | 0.00 |
| ATOM | 262 | CG   | ARG | X | 17 | 57.218 | 70.312 | 29.898 | 0.00 | 0.00 |
| ATOM | 263 | HG2  | ARG | X | 17 | 57.071 | 71.015 | 30.719 | 0.00 | 0.00 |
| ATOM | 264 | HG3  | ARG | X | 17 | 58.032 | 69.639 | 30.167 | 0.00 | 0.00 |
| ATOM | 265 | CD   | ARG | X | 17 | 57.556 | 71.177 | 28.724 | 0.00 | 0.00 |
| ATOM | 266 | HD2  | ARG | X | 17 | 56.819 | 71.968 | 28.589 | 0.00 | 0.00 |
| ATOM | 267 | HD3  | ARG | X | 17 | 58.517 | 71.602 | 29.015 | 0.00 | 0.00 |
| ATOM | 268 | NE   | ARG | X | 17 | 57.752 | 70.539 | 27.426 | 0.00 | 0.00 |
| ATOM | 269 | HE   | ARG | X | 17 | 58.114 | 69.600 | 27.513 | 0.00 | 0.00 |
| ATOM | 270 | CZ   | ARG | X | 17 | 57.705 | 71.048 | 26.203 | 0.00 | 0.00 |
| ATOM | 271 | NH1  | ARG | X | 17 | 57.504 | 72.290 | 25.939 | 0.00 | 0.00 |
| ATOM | 272 | HH11 | ARG | X | 17 | 57.237 | 72.865 | 26.725 | 0.00 | 0.00 |
| ATOM | 273 | HH12 | ARG | X | 17 | 57.527 | 72.500 | 24.952 | 0.00 | 0.00 |
| ATOM | 274 | NH2  | ARG | X | 17 | 57.981 | 70.279 | 25.177 | 0.00 | 0.00 |
| ATOM | 275 | HH21 | ARG | X | 17 | 58.446 | 69.401 | 25.357 | 0.00 | 0.00 |
| ATOM | 276 | HH22 | ARG | X | 17 | 58.206 | 70.612 | 24.250 | 0.00 | 0.00 |
| ATOM | 277 | C    | ARG | X | 17 | 56.653 | 67.280 | 30.678 | 0.00 | 0.00 |
| ATOM | 278 | O    | ARG | X | 17 | 57.793 | 67.384 | 31.180 | 0.00 | 0.00 |
| ATOM | 279 | N    | LEU | X | 18 | 56.344 | 66.242 | 29.876 | 0.00 | 0.00 |
| ATOM | 280 | H    | LEU | X | 18 | 55.416 | 66.226 | 29.477 | 0.00 | 0.00 |
| ATOM | 281 | CA   | LEU | X | 18 | 57.216 | 65.050 | 29.578 | 0.00 | 0.00 |
| ATOM | 282 | HA   | LEU | X | 18 | 58.113 | 65.338 | 30.127 | 0.00 | 0.00 |
| ATOM | 283 | CB   | LEU | X | 18 | 56.512 | 63.800 | 30.192 | 0.00 | 0.00 |
| ATOM | 284 | HB2  | LEU | X | 18 | 55.444 | 63.735 | 29.984 | 0.00 | 0.00 |
| ATOM | 285 | HB3  | LEU | X | 18 | 57.000 | 62.903 | 29.810 | 0.00 | 0.00 |
| ATOM | 286 | CG   | LEU | X | 18 | 56.578 | 63.797 | 31.781 | 0.00 | 0.00 |
| ATOM | 287 | HG   | LEU | X | 18 | 56.019 | 64.634 | 32.199 | 0.00 | 0.00 |
| ATOM | 288 | CD1  | LEU | X | 18 | 55.827 | 62.521 | 32.212 | 0.00 | 0.00 |
| ATOM | 289 | HD11 | LEU | X | 18 | 54.770 | 62.667 | 31.987 | 0.00 | 0.00 |
| ATOM | 290 | HD12 | LEU | X | 18 | 56.196 | 61.614 | 31.735 | 0.00 | 0.00 |
| ATOM | 291 | HD13 | LEU | X | 18 | 55.849 | 62.428 | 33.298 | 0.00 | 0.00 |
| ATOM | 292 | CD2  | LEU | X | 18 | 57.956 | 63.820 | 32.419 | 0.00 | 0.00 |
| ATOM | 293 | HD21 | LEU | X | 18 | 58.548 | 62.949 | 32.138 | 0.00 | 0.00 |
| ATOM | 294 | HD22 | LEU | X | 18 | 58.513 | 64.756 | 32.363 | 0.00 | 0.00 |
| ATOM | 295 | HD23 | LEU | X | 18 | 57.814 | 63.598 | 33.476 | 0.00 | 0.00 |
| ATOM | 296 | C    | LEU | X | 18 | 57.445 | 64.643 | 28.067 | 0.00 | 0.00 |
| ATOM | 297 | O    | LEU | X | 18 | 56.554 | 64.832 | 27.228 | 0.00 | 0.00 |
| ATOM | 298 | N    | LYS | X | 19 | 58.670 | 64.170 | 27.814 | 0.00 | 0.00 |
| ATOM | 299 | H    | LYS | X | 19 | 59.294 | 64.076 | 28.603 | 0.00 | 0.00 |
| ATOM | 300 | CA   | LYS | X | 19 | 59.160 | 63.594 | 26.536 | 0.00 | 0.00 |
| ATOM | 301 | HA   | LYS | X | 19 | 58.780 | 64.276 | 25.776 | 0.00 | 0.00 |
| ATOM | 302 | CB   | LYS | X | 19 | 60.696 | 63.625 | 26.651 | 0.00 | 0.00 |
| ATOM | 303 | HB2  | LYS | X | 19 | 60.942 | 62.969 | 27.486 | 0.00 | 0.00 |
| ATOM | 304 | HB3  | LYS | X | 19 | 61.132 | 63.192 | 25.751 | 0.00 | 0.00 |
| ATOM | 305 | CG   | LYS | X | 19 | 61.275 | 65.023 | 26.753 | 0.00 | 0.00 |
| ATOM | 306 | HG2  | LYS | X | 19 | 60.891 | 65.531 | 25.868 | 0.00 | 0.00 |
| ATOM | 307 | HG3  | LYS | X | 19 | 60.966 | 65.542 | 27.660 | 0.00 | 0.00 |
| ATOM | 308 | CD   | LYS | X | 19 | 62.804 | 64.939 | 26.759 | 0.00 | 0.00 |
| ATOM | 309 | HD2  | LYS | X | 19 | 63.156 | 64.408 | 25.874 | 0.00 | 0.00 |
| ATOM | 310 | HD3  | LYS | X | 19 | 63.227 | 65.937 | 26.870 | 0.00 | 0.00 |
| ATOM | 311 | CE   | LYS | X | 19 | 63.335 | 64.172 | 27.974 | 0.00 | 0.00 |
| ATOM | 312 | HE2  | LYS | X | 19 | 62.832 | 64.552 | 28.863 | 0.00 | 0.00 |
| ATOM | 313 | HE3  | LYS | X | 19 | 63.133 | 63.118 | 27.781 | 0.00 | 0.00 |
| ATOM | 314 | NZ   | LYS | X | 19 | 64.823 | 64.271 | 28.136 | 0.00 | 0.00 |
| ATOM | 315 | HZ1  | LYS | X | 19 | 65.255 | 63.957 | 27.278 | 0.00 | 0.00 |
| ATOM | 316 | HZ2  | LYS | X | 19 | 65.052 | 65.251 | 28.222 | 0.00 | 0.00 |
| ATOM | 317 | HZ3  | LYS | X | 19 | 65.173 | 63.633 | 28.836 | 0.00 | 0.00 |

|      |     |      |     |   |    |        |        |        |      |      |
|------|-----|------|-----|---|----|--------|--------|--------|------|------|
| ATOM | 318 | C    | LYS | X | 19 | 58.589 | 62.223 | 26.398 | 0.00 | 0.00 |
| ATOM | 319 | O    | LYS | X | 19 | 58.501 | 61.509 | 27.391 | 0.00 | 0.00 |
| ATOM | 320 | N    | THR | X | 20 | 58.197 | 61.918 | 25.161 | 0.00 | 0.00 |
| ATOM | 321 | H    | THR | X | 20 | 58.306 | 62.626 | 24.449 | 0.00 | 0.00 |
| ATOM | 322 | CA   | THR | X | 20 | 57.699 | 60.561 | 24.679 | 0.00 | 0.00 |
| ATOM | 323 | HA   | THR | X | 20 | 58.395 | 59.795 | 25.022 | 0.00 | 0.00 |
| ATOM | 324 | CB   | THR | X | 20 | 56.300 | 60.285 | 25.341 | 0.00 | 0.00 |
| ATOM | 325 | HB   | THR | X | 20 | 55.674 | 59.755 | 24.623 | 0.00 | 0.00 |
| ATOM | 326 | CG2  | THR | X | 20 | 56.302 | 59.268 | 26.534 | 0.00 | 0.00 |
| ATOM | 327 | HG21 | THR | X | 20 | 56.749 | 58.311 | 26.267 | 0.00 | 0.00 |
| ATOM | 328 | HG22 | THR | X | 20 | 56.694 | 59.749 | 27.430 | 0.00 | 0.00 |
| ATOM | 329 | HG23 | THR | X | 20 | 55.274 | 59.026 | 26.804 | 0.00 | 0.00 |
| ATOM | 330 | OG1  | THR | X | 20 | 55.696 | 61.491 | 25.680 | 0.00 | 0.00 |
| ATOM | 331 | HG1  | THR | X | 20 | 55.632 | 61.870 | 24.800 | 0.00 | 0.00 |
| ATOM | 332 | C    | THR | X | 20 | 57.761 | 60.569 | 23.084 | 0.00 | 0.00 |
| ATOM | 333 | O    | THR | X | 20 | 57.717 | 61.659 | 22.470 | 0.00 | 0.00 |
| ATOM | 334 | N    | PRO | X | 21 | 58.007 | 59.400 | 22.438 | 0.00 | 0.00 |
| ATOM | 335 | CD   | PRO | X | 21 | 58.022 | 58.067 | 23.095 | 0.00 | 0.00 |
| ATOM | 336 | HD2  | PRO | X | 21 | 57.105 | 57.930 | 23.668 | 0.00 | 0.00 |
| ATOM | 337 | HD3  | PRO | X | 21 | 58.886 | 58.051 | 23.760 | 0.00 | 0.00 |
| ATOM | 338 | CG   | PRO | X | 21 | 58.059 | 57.139 | 21.981 | 0.00 | 0.00 |
| ATOM | 339 | HG2  | PRO | X | 21 | 57.078 | 57.088 | 21.508 | 0.00 | 0.00 |
| ATOM | 340 | HG3  | PRO | X | 21 | 58.511 | 56.179 | 22.230 | 0.00 | 0.00 |
| ATOM | 341 | CB   | PRO | X | 21 | 58.984 | 57.891 | 20.948 | 0.00 | 0.00 |
| ATOM | 342 | HB2  | PRO | X | 21 | 58.927 | 57.545 | 19.916 | 0.00 | 0.00 |
| ATOM | 343 | HB3  | PRO | X | 21 | 60.059 | 57.800 | 21.098 | 0.00 | 0.00 |
| ATOM | 344 | CA   | PRO | X | 21 | 58.601 | 59.323 | 21.087 | 0.00 | 0.00 |
| ATOM | 345 | HA   | PRO | X | 21 | 59.537 | 59.877 | 21.026 | 0.00 | 0.00 |
| ATOM | 346 | C    | PRO | X | 21 | 57.736 | 59.865 | 19.898 | 0.00 | 0.00 |
| ATOM | 347 | O    | PRO | X | 21 | 58.225 | 60.460 | 18.956 | 0.00 | 0.00 |
| ATOM | 348 | N    | GLY | X | 22 | 56.434 | 59.582 | 19.860 | 0.00 | 0.00 |
| ATOM | 349 | H    | GLY | X | 22 | 56.045 | 59.053 | 20.627 | 0.00 | 0.00 |
| ATOM | 350 | CA   | GLY | X | 22 | 55.480 | 60.065 | 18.851 | 0.00 | 0.00 |
| ATOM | 351 | HA2  | GLY | X | 22 | 56.021 | 60.149 | 17.834 | 0.00 | 0.00 |
| ATOM | 352 | HA3  | GLY | X | 22 | 54.711 | 59.225 | 18.816 | 0.00 | 0.00 |
| ATOM | 353 | C    | GLY | X | 22 | 54.722 | 61.409 | 19.301 | 0.00 | 0.00 |
| ATOM | 354 | O    | GLY | X | 22 | 53.999 | 61.981 | 18.468 | 0.00 | 0.00 |
| ATOM | 355 | N    | GLY | X | 23 | 54.829 | 61.950 | 20.524 | 0.00 | 0.00 |
| ATOM | 356 | H    | GLY | X | 23 | 55.427 | 61.421 | 21.143 | 0.00 | 0.00 |
| ATOM | 357 | CA   | GLY | X | 23 | 54.210 | 63.170 | 21.060 | 0.00 | 0.00 |
| ATOM | 358 | HA2  | GLY | X | 23 | 54.431 | 64.067 | 20.547 | 0.00 | 0.00 |
| ATOM | 359 | HA3  | GLY | X | 23 | 53.160 | 62.889 | 20.949 | 0.00 | 0.00 |
| ATOM | 360 | C    | GLY | X | 23 | 54.551 | 63.401 | 22.516 | 0.00 | 0.00 |
| ATOM | 361 | O    | GLY | X | 23 | 54.709 | 62.429 | 23.303 | 0.00 | 0.00 |
| ATOM | 362 | N    | PRO | X | 24 | 54.733 | 64.683 | 22.869 | 0.00 | 0.00 |
| ATOM | 363 | CD   | PRO | X | 24 | 54.671 | 65.922 | 22.061 | 0.00 | 0.00 |
| ATOM | 364 | HD2  | PRO | X | 24 | 53.613 | 66.099 | 21.865 | 0.00 | 0.00 |
| ATOM | 365 | HD3  | PRO | X | 24 | 55.128 | 65.848 | 21.075 | 0.00 | 0.00 |
| ATOM | 366 | CG   | PRO | X | 24 | 55.226 | 67.054 | 22.883 | 0.00 | 0.00 |
| ATOM | 367 | HG2  | PRO | X | 24 | 54.624 | 67.950 | 22.735 | 0.00 | 0.00 |
| ATOM | 368 | HG3  | PRO | X | 24 | 56.288 | 67.113 | 22.643 | 0.00 | 0.00 |
| ATOM | 369 | CB   | PRO | X | 24 | 55.105 | 66.557 | 24.331 | 0.00 | 0.00 |
| ATOM | 370 | HB2  | PRO | X | 24 | 54.216 | 67.111 | 24.632 | 0.00 | 0.00 |
| ATOM | 371 | HB3  | PRO | X | 24 | 55.992 | 66.716 | 24.945 | 0.00 | 0.00 |
| ATOM | 372 | CA   | PRO | X | 24 | 54.980 | 65.006 | 24.295 | 0.00 | 0.00 |
| ATOM | 373 | HA   | PRO | X | 24 | 55.847 | 64.469 | 24.680 | 0.00 | 0.00 |
| ATOM | 374 | C    | PRO | X | 24 | 53.707 | 64.683 | 25.109 | 0.00 | 0.00 |
| ATOM | 375 | O    | PRO | X | 24 | 52.608 | 64.632 | 24.549 | 0.00 | 0.00 |
| ATOM | 376 | N    | VAL | X | 25 | 53.824 | 64.531 | 26.388 | 0.00 | 0.00 |
| ATOM | 377 | H    | VAL | X | 25 | 54.731 | 64.785 | 26.754 | 0.00 | 0.00 |
| ATOM | 378 | CA   | VAL | X | 25 | 52.698 | 64.418 | 27.419 | 0.00 | 0.00 |
| ATOM | 379 | HA   | VAL | X | 25 | 51.855 | 64.815 | 26.855 | 0.00 | 0.00 |
| ATOM | 380 | CB   | VAL | X | 25 | 52.434 | 62.892 | 27.701 | 0.00 | 0.00 |
| ATOM | 381 | HB   | VAL | X | 25 | 51.529 | 62.832 | 28.305 | 0.00 | 0.00 |
| ATOM | 382 | CG1  | VAL | X | 25 | 52.211 | 62.016 | 26.489 | 0.00 | 0.00 |
| ATOM | 383 | HG11 | VAL | X | 25 | 51.803 | 61.057 | 26.806 | 0.00 | 0.00 |
| ATOM | 384 | HG12 | VAL | X | 25 | 51.316 | 62.383 | 25.987 | 0.00 | 0.00 |
| ATOM | 385 | HG13 | VAL | X | 25 | 53.027 | 62.090 | 25.770 | 0.00 | 0.00 |
| ATOM | 386 | CG2  | VAL | X | 25 | 53.518 | 62.222 | 28.547 | 0.00 | 0.00 |
| ATOM | 387 | HG21 | VAL | X | 25 | 53.621 | 61.161 | 28.322 | 0.00 | 0.00 |



|      |     |      |     |   |    |        |        |        |      |      |
|------|-----|------|-----|---|----|--------|--------|--------|------|------|
| ATOM | 388 | HG22 | VAL | X | 25 | 54.466 | 62.694 | 28.291 | 0.00 | 0.00 |
| ATOM | 389 | HG23 | VAL | X | 25 | 53.297 | 62.306 | 29.611 | 0.00 | 0.00 |
| ATOM | 390 | C    | VAL | X | 25 | 52.948 | 65.252 | 28.625 | 0.00 | 0.00 |
| ATOM | 391 | O    | VAL | X | 25 | 53.814 | 66.132 | 28.568 | 0.00 | 0.00 |
| ATOM | 392 | N    | SER | X | 26 | 52.252 | 64.960 | 29.696 | 0.00 | 0.00 |
| ATOM | 393 | H    | SER | X | 26 | 51.695 | 64.122 | 29.604 | 0.00 | 0.00 |
| ATOM | 394 | CA   | SER | X | 26 | 52.342 | 65.574 | 31.078 | 0.00 | 0.00 |
| ATOM | 395 | HA   | SER | X | 26 | 53.395 | 65.663 | 31.348 | 0.00 | 0.00 |
| ATOM | 396 | CB   | SER | X | 26 | 51.621 | 66.965 | 31.081 | 0.00 | 0.00 |
| ATOM | 397 | HB2  | SER | X | 26 | 51.509 | 67.360 | 32.091 | 0.00 | 0.00 |
| ATOM | 398 | HB3  | SER | X | 26 | 52.206 | 67.707 | 30.537 | 0.00 | 0.00 |
| ATOM | 399 | OG   | SER | X | 26 | 50.300 | 66.833 | 30.682 | 0.00 | 0.00 |
| ATOM | 400 | HG   | SER | X | 26 | 50.308 | 66.082 | 30.084 | 0.00 | 0.00 |
| ATOM | 401 | C    | SER | X | 26 | 51.884 | 64.501 | 32.113 | 0.00 | 0.00 |
| ATOM | 402 | O    | SER | X | 26 | 51.231 | 63.519 | 31.852 | 0.00 | 0.00 |
| ATOM | 403 | N    | ALA | X | 27 | 52.302 | 64.895 | 33.310 | 0.00 | 0.00 |
| ATOM | 404 | H    | ALA | X | 27 | 52.908 | 65.702 | 33.341 | 0.00 | 0.00 |
| ATOM | 405 | CA   | ALA | X | 27 | 51.927 | 64.177 | 34.537 | 0.00 | 0.00 |
| ATOM | 406 | HA   | ALA | X | 27 | 51.055 | 63.533 | 34.421 | 0.00 | 0.00 |
| ATOM | 407 | CB   | ALA | X | 27 | 53.166 | 63.360 | 34.970 | 0.00 | 0.00 |
| ATOM | 408 | HB1  | ALA | X | 27 | 53.280 | 62.501 | 34.309 | 0.00 | 0.00 |
| ATOM | 409 | HB2  | ALA | X | 27 | 53.989 | 64.074 | 34.959 | 0.00 | 0.00 |
| ATOM | 410 | HB3  | ALA | X | 27 | 53.144 | 62.980 | 35.992 | 0.00 | 0.00 |
| ATOM | 411 | C    | ALA | X | 27 | 51.496 | 65.176 | 35.658 | 0.00 | 0.00 |
| ATOM | 412 | O    | ALA | X | 27 | 52.071 | 66.253 | 35.669 | 0.00 | 0.00 |
| ATOM | 413 | N    | PHE | X | 28 | 50.632 | 64.731 | 36.574 | 0.00 | 0.00 |
| ATOM | 414 | H    | PHE | X | 28 | 50.305 | 63.778 | 36.508 | 0.00 | 0.00 |
| ATOM | 415 | CA   | PHE | X | 28 | 50.134 | 65.383 | 37.782 | 0.00 | 0.00 |
| ATOM | 416 | HA   | PHE | X | 28 | 50.831 | 66.164 | 38.087 | 0.00 | 0.00 |
| ATOM | 417 | CB   | PHE | X | 28 | 48.769 | 66.113 | 37.512 | 0.00 | 0.00 |
| ATOM | 418 | HB2  | PHE | X | 28 | 48.087 | 65.310 | 37.232 | 0.00 | 0.00 |
| ATOM | 419 | HB3  | PHE | X | 28 | 48.424 | 66.585 | 38.432 | 0.00 | 0.00 |
| ATOM | 420 | CG   | PHE | X | 28 | 48.659 | 67.081 | 36.309 | 0.00 | 0.00 |
| ATOM | 421 | CD1  | PHE | X | 28 | 48.451 | 66.660 | 34.952 | 0.00 | 0.00 |
| ATOM | 422 | HD1  | PHE | X | 28 | 48.500 | 65.600 | 34.749 | 0.00 | 0.00 |
| ATOM | 423 | CE1  | PHE | X | 28 | 48.452 | 67.652 | 33.934 | 0.00 | 0.00 |
| ATOM | 424 | HE1  | PHE | X | 28 | 48.262 | 67.240 | 32.954 | 0.00 | 0.00 |
| ATOM | 425 | CZ   | PHE | X | 28 | 48.269 | 69.046 | 34.272 | 0.00 | 0.00 |
| ATOM | 426 | HZ   | PHE | X | 28 | 48.103 | 69.807 | 33.524 | 0.00 | 0.00 |
| ATOM | 427 | CE2  | PHE | X | 28 | 48.330 | 69.379 | 35.603 | 0.00 | 0.00 |
| ATOM | 428 | HE2  | PHE | X | 28 | 48.123 | 70.417 | 35.815 | 0.00 | 0.00 |
| ATOM | 429 | CD2  | PHE | X | 28 | 48.528 | 68.404 | 36.605 | 0.00 | 0.00 |
| ATOM | 430 | HD2  | PHE | X | 28 | 48.704 | 68.750 | 37.613 | 0.00 | 0.00 |
| ATOM | 431 | C    | PHE | X | 28 | 49.990 | 64.300 | 38.860 | 0.00 | 0.00 |
| ATOM | 432 | O    | PHE | X | 28 | 49.145 | 63.391 | 38.779 | 0.00 | 0.00 |
| ATOM | 433 | N    | LEU | X | 29 | 50.861 | 64.396 | 39.867 | 0.00 | 0.00 |
| ATOM | 434 | H    | LEU | X | 29 | 51.530 | 65.152 | 39.818 | 0.00 | 0.00 |
| ATOM | 435 | CA   | LEU | X | 29 | 51.304 | 63.378 | 40.776 | 0.00 | 0.00 |
| ATOM | 436 | HA   | LEU | X | 29 | 50.757 | 62.492 | 40.455 | 0.00 | 0.00 |
| ATOM | 437 | CB   | LEU | X | 29 | 52.779 | 63.082 | 40.625 | 0.00 | 0.00 |
| ATOM | 438 | HB2  | LEU | X | 29 | 53.248 | 64.052 | 40.791 | 0.00 | 0.00 |
| ATOM | 439 | HB3  | LEU | X | 29 | 53.099 | 62.346 | 41.362 | 0.00 | 0.00 |
| ATOM | 440 | CG   | LEU | X | 29 | 53.170 | 62.726 | 39.130 | 0.00 | 0.00 |
| ATOM | 441 | HG   | LEU | X | 29 | 52.937 | 63.564 | 38.473 | 0.00 | 0.00 |
| ATOM | 442 | CD1  | LEU | X | 29 | 54.721 | 62.631 | 39.058 | 0.00 | 0.00 |
| ATOM | 443 | HD11 | LEU | X | 29 | 54.903 | 62.707 | 37.986 | 0.00 | 0.00 |
| ATOM | 444 | HD12 | LEU | X | 29 | 55.202 | 63.468 | 39.564 | 0.00 | 0.00 |
| ATOM | 445 | HD13 | LEU | X | 29 | 55.083 | 61.742 | 39.575 | 0.00 | 0.00 |
| ATOM | 446 | CD2  | LEU | X | 29 | 52.601 | 61.474 | 38.515 | 0.00 | 0.00 |
| ATOM | 447 | HD21 | LEU | X | 29 | 51.552 | 61.705 | 38.331 | 0.00 | 0.00 |
| ATOM | 448 | HD22 | LEU | X | 29 | 53.077 | 61.310 | 37.548 | 0.00 | 0.00 |
| ATOM | 449 | HD23 | LEU | X | 29 | 52.636 | 60.618 | 39.189 | 0.00 | 0.00 |
| ATOM | 450 | C    | LEU | X | 29 | 50.764 | 63.609 | 42.218 | 0.00 | 0.00 |
| ATOM | 451 | O    | LEU | X | 29 | 50.719 | 64.763 | 42.665 | 0.00 | 0.00 |
| ATOM | 452 | N    | GLY | X | 30 | 50.367 | 62.540 | 42.912 | 0.00 | 0.00 |
| ATOM | 453 | H    | GLY | X | 30 | 50.487 | 61.650 | 42.451 | 0.00 | 0.00 |
| ATOM | 454 | CA   | GLY | X | 30 | 49.924 | 62.441 | 44.275 | 0.00 | 0.00 |
| ATOM | 455 | HA2  | GLY | X | 30 | 49.447 | 61.441 | 44.426 | 0.00 | 0.00 |
| ATOM | 456 | HA3  | GLY | X | 30 | 50.839 | 62.480 | 44.916 | 0.00 | 0.00 |
| ATOM | 457 | C    | GLY | X | 30 | 48.917 | 63.512 | 44.823 | 0.00 | 0.00 |

|      |     |      |     |   |    |        |        |        |      |      |
|------|-----|------|-----|---|----|--------|--------|--------|------|------|
| ATOM | 458 | O    | GLY | X | 30 | 49.325 | 63.962 | 45.851 | 0.00 | 0.00 |
| ATOM | 459 | N    | ILE | X | 31 | 47.798 | 63.881 | 44.252 | 0.00 | 0.00 |
| ATOM | 460 | H    | ILE | X | 31 | 47.495 | 63.231 | 43.540 | 0.00 | 0.00 |
| ATOM | 461 | CA   | ILE | X | 31 | 46.853 | 64.923 | 44.681 | 0.00 | 0.00 |
| ATOM | 462 | HA   | ILE | X | 31 | 47.421 | 65.809 | 44.964 | 0.00 | 0.00 |
| ATOM | 463 | CB   | ILE | X | 31 | 46.024 | 65.165 | 43.328 | 0.00 | 0.00 |
| ATOM | 464 | HB   | ILE | X | 31 | 45.723 | 64.160 | 43.032 | 0.00 | 0.00 |
| ATOM | 465 | CG2  | ILE | X | 31 | 44.856 | 66.118 | 43.621 | 0.00 | 0.00 |
| ATOM | 466 | HG21 | ILE | X | 31 | 44.387 | 66.661 | 42.801 | 0.00 | 0.00 |
| ATOM | 467 | HG22 | ILE | X | 31 | 44.077 | 65.430 | 43.948 | 0.00 | 0.00 |
| ATOM | 468 | HG23 | ILE | X | 31 | 45.200 | 66.814 | 44.386 | 0.00 | 0.00 |
| ATOM | 469 | CG1  | ILE | X | 31 | 46.939 | 65.718 | 42.181 | 0.00 | 0.00 |
| ATOM | 470 | HG12 | ILE | X | 31 | 46.814 | 66.800 | 42.160 | 0.00 | 0.00 |
| ATOM | 471 | HG13 | ILE | X | 31 | 48.009 | 65.541 | 42.295 | 0.00 | 0.00 |
| ATOM | 472 | CD1  | ILE | X | 31 | 46.638 | 65.110 | 40.795 | 0.00 | 0.00 |
| ATOM | 473 | HD11 | ILE | X | 31 | 47.318 | 65.546 | 40.063 | 0.00 | 0.00 |
| ATOM | 474 | HD12 | ILE | X | 31 | 46.900 | 64.055 | 40.866 | 0.00 | 0.00 |
| ATOM | 475 | HD13 | ILE | X | 31 | 45.581 | 65.225 | 40.552 | 0.00 | 0.00 |
| ATOM | 476 | C    | ILE | X | 31 | 45.869 | 64.486 | 45.795 | 0.00 | 0.00 |
| ATOM | 477 | O    | ILE | X | 31 | 45.316 | 63.424 | 45.667 | 0.00 | 0.00 |
| ATOM | 478 | N    | PRO | X | 32 | 45.575 | 65.230 | 46.826 | 0.00 | 0.00 |
| ATOM | 479 | CD   | PRO | X | 32 | 46.068 | 66.538 | 47.147 | 0.00 | 0.00 |
| ATOM | 480 | HD2  | PRO | X | 32 | 45.426 | 67.324 | 46.748 | 0.00 | 0.00 |
| ATOM | 481 | HD3  | PRO | X | 32 | 47.080 | 66.819 | 46.853 | 0.00 | 0.00 |
| ATOM | 482 | CG   | PRO | X | 32 | 46.111 | 66.518 | 48.685 | 0.00 | 0.00 |
| ATOM | 483 | HG2  | PRO | X | 32 | 46.063 | 67.479 | 49.196 | 0.00 | 0.00 |
| ATOM | 484 | HG3  | PRO | X | 32 | 46.952 | 65.932 | 49.058 | 0.00 | 0.00 |
| ATOM | 485 | CB   | PRO | X | 32 | 44.968 | 65.595 | 49.112 | 0.00 | 0.00 |
| ATOM | 486 | HB2  | PRO | X | 32 | 44.093 | 66.191 | 49.372 | 0.00 | 0.00 |
| ATOM | 487 | HB3  | PRO | X | 32 | 45.366 | 64.951 | 49.896 | 0.00 | 0.00 |
| ATOM | 488 | CA   | PRO | X | 32 | 44.714 | 64.647 | 47.921 | 0.00 | 0.00 |
| ATOM | 489 | HA   | PRO | X | 32 | 45.000 | 63.640 | 48.224 | 0.00 | 0.00 |
| ATOM | 490 | C    | PRO | X | 32 | 43.197 | 64.594 | 47.517 | 0.00 | 0.00 |
| ATOM | 491 | O    | PRO | X | 32 | 42.541 | 65.616 | 47.377 | 0.00 | 0.00 |
| ATOM | 492 | N    | PHE | X | 33 | 42.683 | 63.387 | 47.396 | 0.00 | 0.00 |
| ATOM | 493 | H    | PHE | X | 33 | 43.360 | 62.638 | 47.361 | 0.00 | 0.00 |
| ATOM | 494 | CA   | PHE | X | 33 | 41.257 | 63.213 | 47.047 | 0.00 | 0.00 |
| ATOM | 495 | HA   | PHE | X | 33 | 40.899 | 64.036 | 46.428 | 0.00 | 0.00 |
| ATOM | 496 | CB   | PHE | X | 33 | 41.002 | 61.915 | 46.251 | 0.00 | 0.00 |
| ATOM | 497 | HB2  | PHE | X | 33 | 39.920 | 61.902 | 46.120 | 0.00 | 0.00 |
| ATOM | 498 | HB3  | PHE | X | 33 | 41.524 | 61.954 | 45.295 | 0.00 | 0.00 |
| ATOM | 499 | CG   | PHE | X | 33 | 41.379 | 60.489 | 46.827 | 0.00 | 0.00 |
| ATOM | 500 | CD1  | PHE | X | 33 | 40.483 | 59.793 | 47.657 | 0.00 | 0.00 |
| ATOM | 501 | HD1  | PHE | X | 33 | 39.495 | 60.224 | 47.722 | 0.00 | 0.00 |
| ATOM | 502 | CE1  | PHE | X | 33 | 40.916 | 58.516 | 48.177 | 0.00 | 0.00 |
| ATOM | 503 | HE1  | PHE | X | 33 | 40.241 | 57.860 | 48.708 | 0.00 | 0.00 |
| ATOM | 504 | CZ   | PHE | X | 33 | 42.173 | 58.018 | 47.816 | 0.00 | 0.00 |
| ATOM | 505 | HZ   | PHE | X | 33 | 42.461 | 57.052 | 48.203 | 0.00 | 0.00 |
| ATOM | 506 | CE2  | PHE | X | 33 | 43.034 | 58.748 | 47.117 | 0.00 | 0.00 |
| ATOM | 507 | HE2  | PHE | X | 33 | 44.023 | 58.340 | 46.973 | 0.00 | 0.00 |
| ATOM | 508 | CD2  | PHE | X | 33 | 42.685 | 60.029 | 46.683 | 0.00 | 0.00 |
| ATOM | 509 | HD2  | PHE | X | 33 | 43.476 | 60.556 | 46.172 | 0.00 | 0.00 |
| ATOM | 510 | C    | PHE | X | 33 | 40.287 | 63.187 | 48.282 | 0.00 | 0.00 |
| ATOM | 511 | O    | PHE | X | 33 | 39.043 | 63.317 | 48.278 | 0.00 | 0.00 |
| ATOM | 512 | N    | ALA | X | 34 | 40.914 | 62.903 | 49.429 | 0.00 | 0.00 |
| ATOM | 513 | H    | ALA | X | 34 | 41.919 | 62.847 | 49.354 | 0.00 | 0.00 |
| ATOM | 514 | CA   | ALA | X | 34 | 40.395 | 62.474 | 50.701 | 0.00 | 0.00 |
| ATOM | 515 | HA   | ALA | X | 34 | 39.364 | 62.824 | 50.745 | 0.00 | 0.00 |
| ATOM | 516 | CB   | ALA | X | 34 | 40.513 | 60.947 | 50.940 | 0.00 | 0.00 |
| ATOM | 517 | HB1  | ALA | X | 34 | 40.142 | 60.759 | 51.948 | 0.00 | 0.00 |
| ATOM | 518 | HB2  | ALA | X | 34 | 39.852 | 60.489 | 50.203 | 0.00 | 0.00 |
| ATOM | 519 | HB3  | ALA | X | 34 | 41.510 | 60.551 | 50.751 | 0.00 | 0.00 |
| ATOM | 520 | C    | ALA | X | 34 | 41.018 | 63.285 | 51.837 | 0.00 | 0.00 |
| ATOM | 521 | O    | ALA | X | 34 | 42.251 | 63.508 | 51.725 | 0.00 | 0.00 |
| ATOM | 522 | N    | GLU | X | 35 | 40.298 | 63.452 | 52.931 | 0.00 | 0.00 |
| ATOM | 523 | H    | GLU | X | 35 | 39.412 | 62.977 | 53.026 | 0.00 | 0.00 |
| ATOM | 524 | CA   | GLU | X | 35 | 40.872 | 63.788 | 54.236 | 0.00 | 0.00 |
| ATOM | 525 | HA   | GLU | X | 35 | 41.542 | 64.646 | 54.290 | 0.00 | 0.00 |
| ATOM | 526 | CB   | GLU | X | 35 | 39.770 | 63.998 | 55.275 | 0.00 | 0.00 |
| ATOM | 527 | HB2  | GLU | X | 35 | 39.175 | 63.085 | 55.293 | 0.00 | 0.00 |

|      |     |     |     |   |    |        |        |        |      |      |
|------|-----|-----|-----|---|----|--------|--------|--------|------|------|
| ATOM | 528 | HB3 | GLU | X | 35 | 40.196 | 63.971 | 56.278 | 0.00 | 0.00 |
| ATOM | 529 | CG  | GLU | X | 35 | 38.898 | 65.208 | 55.006 | 0.00 | 0.00 |
| ATOM | 530 | HG2 | GLU | X | 35 | 38.301 | 65.069 | 54.104 | 0.00 | 0.00 |
| ATOM | 531 | HG3 | GLU | X | 35 | 38.075 | 65.294 | 55.716 | 0.00 | 0.00 |
| ATOM | 532 | CD  | GLU | X | 35 | 39.647 | 66.570 | 54.983 | 0.00 | 0.00 |
| ATOM | 533 | OE1 | GLU | X | 35 | 40.169 | 66.956 | 56.080 | 0.00 | 0.00 |
| ATOM | 534 | OE2 | GLU | X | 35 | 39.765 | 67.274 | 53.913 | 0.00 | 0.00 |
| ATOM | 535 | C   | GLU | X | 35 | 41.715 | 62.620 | 54.819 | 0.00 | 0.00 |
| ATOM | 536 | O   | GLU | X | 35 | 41.281 | 61.475 | 54.472 | 0.00 | 0.00 |
| ATOM | 537 | N   | PRO | X | 36 | 42.814 | 62.882 | 55.539 | 0.00 | 0.00 |
| ATOM | 538 | CD  | PRO | X | 36 | 43.169 | 64.125 | 56.285 | 0.00 | 0.00 |
| ATOM | 539 | HD2 | PRO | X | 36 | 42.268 | 64.477 | 56.787 | 0.00 | 0.00 |
| ATOM | 540 | HD3 | PRO | X | 36 | 43.445 | 64.815 | 55.488 | 0.00 | 0.00 |
| ATOM | 541 | CG  | PRO | X | 36 | 44.240 | 63.778 | 57.345 | 0.00 | 0.00 |
| ATOM | 542 | HG2 | PRO | X | 36 | 43.794 | 63.550 | 58.313 | 0.00 | 0.00 |
| ATOM | 543 | HG3 | PRO | X | 36 | 45.011 | 64.542 | 57.438 | 0.00 | 0.00 |
| ATOM | 544 | CB  | PRO | X | 36 | 44.847 | 62.524 | 56.757 | 0.00 | 0.00 |
| ATOM | 545 | HB2 | PRO | X | 36 | 45.300 | 61.898 | 57.526 | 0.00 | 0.00 |
| ATOM | 546 | HB3 | PRO | X | 36 | 45.668 | 62.800 | 56.096 | 0.00 | 0.00 |
| ATOM | 547 | CA  | PRO | X | 36 | 43.746 | 61.842 | 55.913 | 0.00 | 0.00 |
| ATOM | 548 | HA  | PRO | X | 36 | 44.205 | 61.470 | 54.998 | 0.00 | 0.00 |
| ATOM | 549 | C   | PRO | X | 36 | 42.957 | 60.792 | 56.740 | 0.00 | 0.00 |
| ATOM | 550 | O   | PRO | X | 36 | 42.050 | 61.095 | 57.475 | 0.00 | 0.00 |
| ATOM | 551 | N   | PRO | X | 37 | 43.311 | 59.503 | 56.620 | 0.00 | 0.00 |
| ATOM | 552 | CD  | PRO | X | 37 | 44.317 | 58.953 | 55.677 | 0.00 | 0.00 |
| ATOM | 553 | HD2 | PRO | X | 37 | 45.290 | 59.327 | 55.997 | 0.00 | 0.00 |
| ATOM | 554 | HD3 | PRO | X | 37 | 44.128 | 59.277 | 54.653 | 0.00 | 0.00 |
| ATOM | 555 | CG  | PRO | X | 37 | 44.253 | 57.427 | 55.917 | 0.00 | 0.00 |
| ATOM | 556 | HG2 | PRO | X | 37 | 44.838 | 57.148 | 56.793 | 0.00 | 0.00 |
| ATOM | 557 | HG3 | PRO | X | 37 | 44.554 | 56.806 | 55.073 | 0.00 | 0.00 |
| ATOM | 558 | CB  | PRO | X | 37 | 42.706 | 57.302 | 56.244 | 0.00 | 0.00 |
| ATOM | 559 | HB2 | PRO | X | 37 | 42.495 | 56.353 | 56.737 | 0.00 | 0.00 |
| ATOM | 560 | HB3 | PRO | X | 37 | 42.152 | 57.425 | 55.314 | 0.00 | 0.00 |
| ATOM | 561 | CA  | PRO | X | 37 | 42.598 | 58.416 | 57.240 | 0.00 | 0.00 |
| ATOM | 562 | HA  | PRO | X | 37 | 41.561 | 58.671 | 57.462 | 0.00 | 0.00 |
| ATOM | 563 | C   | PRO | X | 37 | 43.239 | 57.992 | 58.569 | 0.00 | 0.00 |
| ATOM | 564 | O   | PRO | X | 37 | 43.058 | 56.832 | 58.999 | 0.00 | 0.00 |
| ATOM | 565 | N   | MET | X | 38 | 44.052 | 58.906 | 59.170 | 0.00 | 0.00 |
| ATOM | 566 | H   | MET | X | 38 | 43.969 | 59.787 | 58.684 | 0.00 | 0.00 |
| ATOM | 567 | CA  | MET | X | 38 | 44.919 | 58.757 | 60.325 | 0.00 | 0.00 |
| ATOM | 568 | HA  | MET | X | 38 | 45.309 | 57.739 | 60.333 | 0.00 | 0.00 |
| ATOM | 569 | CB  | MET | X | 38 | 46.020 | 59.821 | 60.328 | 0.00 | 0.00 |
| ATOM | 570 | HB2 | MET | X | 38 | 46.663 | 59.520 | 61.155 | 0.00 | 0.00 |
| ATOM | 571 | HB3 | MET | X | 38 | 46.723 | 59.668 | 59.510 | 0.00 | 0.00 |
| ATOM | 572 | CG  | MET | X | 38 | 45.550 | 61.309 | 60.265 | 0.00 | 0.00 |
| ATOM | 573 | HG2 | MET | X | 38 | 44.844 | 61.418 | 59.442 | 0.00 | 0.00 |
| ATOM | 574 | HG3 | MET | X | 38 | 45.111 | 61.450 | 61.253 | 0.00 | 0.00 |
| ATOM | 575 | SD  | MET | X | 38 | 46.933 | 62.373 | 60.127 | 0.00 | 0.00 |
| ATOM | 576 | CE  | MET | X | 38 | 47.401 | 62.331 | 61.867 | 0.00 | 0.00 |
| ATOM | 577 | HE1 | MET | X | 38 | 48.405 | 62.701 | 62.075 | 0.00 | 0.00 |
| ATOM | 578 | HE2 | MET | X | 38 | 46.608 | 62.948 | 62.292 | 0.00 | 0.00 |
| ATOM | 579 | HE3 | MET | X | 38 | 47.315 | 61.283 | 62.153 | 0.00 | 0.00 |
| ATOM | 580 | C   | MET | X | 38 | 44.122 | 58.691 | 61.666 | 0.00 | 0.00 |
| ATOM | 581 | O   | MET | X | 38 | 42.986 | 59.137 | 61.737 | 0.00 | 0.00 |
| ATOM | 582 | N   | GLY | X | 39 | 44.686 | 58.126 | 62.760 | 0.00 | 0.00 |
| ATOM | 583 | H   | GLY | X | 39 | 45.644 | 57.814 | 62.695 | 0.00 | 0.00 |
| ATOM | 584 | CA  | GLY | X | 39 | 44.047 | 57.966 | 64.087 | 0.00 | 0.00 |
| ATOM | 585 | HA2 | GLY | X | 39 | 44.485 | 57.228 | 64.715 | 0.00 | 0.00 |
| ATOM | 586 | HA3 | GLY | X | 39 | 44.097 | 58.926 | 64.566 | 0.00 | 0.00 |
| ATOM | 587 | C   | GLY | X | 39 | 42.542 | 57.550 | 64.138 | 0.00 | 0.00 |
| ATOM | 588 | O   | GLY | X | 39 | 42.339 | 56.380 | 63.997 | 0.00 | 0.00 |
| ATOM | 589 | N   | PRO | X | 40 | 41.528 | 58.414 | 64.313 | 0.00 | 0.00 |
| ATOM | 590 | CD  | PRO | X | 40 | 41.725 | 59.805 | 64.739 | 0.00 | 0.00 |
| ATOM | 591 | HD2 | PRO | X | 40 | 41.969 | 60.406 | 63.863 | 0.00 | 0.00 |
| ATOM | 592 | HD3 | PRO | X | 40 | 42.503 | 59.843 | 65.501 | 0.00 | 0.00 |
| ATOM | 593 | CG  | PRO | X | 40 | 40.311 | 60.261 | 65.217 | 0.00 | 0.00 |
| ATOM | 594 | HG2 | PRO | X | 40 | 39.965 | 61.294 | 65.171 | 0.00 | 0.00 |
| ATOM | 595 | HG3 | PRO | X | 40 | 40.142 | 59.939 | 66.245 | 0.00 | 0.00 |
| ATOM | 596 | CB  | PRO | X | 40 | 39.288 | 59.377 | 64.459 | 0.00 | 0.00 |
| ATOM | 597 | HB2 | PRO | X | 40 | 39.025 | 59.683 | 63.446 | 0.00 | 0.00 |

|      |     |      |     |   |    |        |        |        |      |      |
|------|-----|------|-----|---|----|--------|--------|--------|------|------|
| ATOM | 598 | HB3  | PRO | X | 40 | 38.363 | 59.218 | 65.012 | 0.00 | 0.00 |
| ATOM | 599 | CA   | PRO | X | 40 | 40.139 | 58.045 | 64.330 | 0.00 | 0.00 |
| ATOM | 600 | HA   | PRO | X | 40 | 40.007 | 57.425 | 65.216 | 0.00 | 0.00 |
| ATOM | 601 | C    | PRO | X | 40 | 39.818 | 57.306 | 63.076 | 0.00 | 0.00 |
| ATOM | 602 | O    | PRO | X | 40 | 39.281 | 56.248 | 63.226 | 0.00 | 0.00 |
| ATOM | 603 | N    | ARG | X | 41 | 40.169 | 57.718 | 61.877 | 0.00 | 0.00 |
| ATOM | 604 | H    | ARG | X | 41 | 40.832 | 58.479 | 61.894 | 0.00 | 0.00 |
| ATOM | 605 | CA   | ARG | X | 41 | 39.682 | 57.083 | 60.671 | 0.00 | 0.00 |
| ATOM | 606 | HA   | ARG | X | 41 | 38.614 | 56.930 | 60.821 | 0.00 | 0.00 |
| ATOM | 607 | CB   | ARG | X | 41 | 39.857 | 58.059 | 59.423 | 0.00 | 0.00 |
| ATOM | 608 | HB2  | ARG | X | 41 | 40.738 | 58.690 | 59.537 | 0.00 | 0.00 |
| ATOM | 609 | HB3  | ARG | X | 41 | 39.815 | 57.506 | 58.485 | 0.00 | 0.00 |
| ATOM | 610 | CG   | ARG | X | 41 | 38.729 | 59.026 | 59.360 | 0.00 | 0.00 |
| ATOM | 611 | HG2  | ARG | X | 41 | 37.780 | 58.498 | 59.463 | 0.00 | 0.00 |
| ATOM | 612 | HG3  | ARG | X | 41 | 38.852 | 59.678 | 60.225 | 0.00 | 0.00 |
| ATOM | 613 | CD   | ARG | X | 41 | 38.660 | 59.879 | 58.077 | 0.00 | 0.00 |
| ATOM | 614 | HD2  | ARG | X | 41 | 39.676 | 60.191 | 57.835 | 0.00 | 0.00 |
| ATOM | 615 | HD3  | ARG | X | 41 | 38.201 | 59.230 | 57.332 | 0.00 | 0.00 |
| ATOM | 616 | NE   | ARG | X | 41 | 37.809 | 61.022 | 58.209 | 0.00 | 0.00 |
| ATOM | 617 | HE   | ARG | X | 41 | 36.827 | 60.832 | 58.353 | 0.00 | 0.00 |
| ATOM | 618 | CZ   | ARG | X | 41 | 38.246 | 62.185 | 58.546 | 0.00 | 0.00 |
| ATOM | 619 | NH1  | ARG | X | 41 | 39.506 | 62.386 | 58.784 | 0.00 | 0.00 |
| ATOM | 620 | HH11 | ARG | X | 41 | 40.210 | 61.662 | 58.786 | 0.00 | 0.00 |
| ATOM | 621 | HH12 | ARG | X | 41 | 39.662 | 63.214 | 59.341 | 0.00 | 0.00 |
| ATOM | 622 | NH2  | ARG | X | 41 | 37.538 | 63.226 | 58.572 | 0.00 | 0.00 |
| ATOM | 623 | HH21 | ARG | X | 41 | 36.565 | 63.131 | 58.320 | 0.00 | 0.00 |
| ATOM | 624 | HH22 | ARG | X | 41 | 38.011 | 64.118 | 58.534 | 0.00 | 0.00 |
| ATOM | 625 | C    | ARG | X | 41 | 40.344 | 55.780 | 60.325 | 0.00 | 0.00 |
| ATOM | 626 | O    | ARG | X | 41 | 39.899 | 55.108 | 59.350 | 0.00 | 0.00 |
| ATOM | 627 | N    | ARG | X | 42 | 41.414 | 55.357 | 61.061 | 0.00 | 0.00 |
| ATOM | 628 | H    | ARG | X | 42 | 41.565 | 55.890 | 61.906 | 0.00 | 0.00 |
| ATOM | 629 | CA   | ARG | X | 42 | 42.067 | 54.097 | 60.912 | 0.00 | 0.00 |
| ATOM | 630 | HA   | ARG | X | 42 | 42.538 | 54.012 | 59.932 | 0.00 | 0.00 |
| ATOM | 631 | CB   | ARG | X | 42 | 43.142 | 53.986 | 62.035 | 0.00 | 0.00 |
| ATOM | 632 | HB2  | ARG | X | 42 | 43.716 | 54.901 | 62.182 | 0.00 | 0.00 |
| ATOM | 633 | HB3  | ARG | X | 42 | 42.684 | 53.743 | 62.994 | 0.00 | 0.00 |
| ATOM | 634 | CG   | ARG | X | 42 | 44.083 | 52.717 | 61.877 | 0.00 | 0.00 |
| ATOM | 635 | HG2  | ARG | X | 42 | 43.467 | 51.866 | 61.588 | 0.00 | 0.00 |
| ATOM | 636 | HG3  | ARG | X | 42 | 44.812 | 52.886 | 61.083 | 0.00 | 0.00 |
| ATOM | 637 | CD   | ARG | X | 42 | 44.980 | 52.301 | 63.056 | 0.00 | 0.00 |
| ATOM | 638 | HD2  | ARG | X | 42 | 44.289 | 52.289 | 63.899 | 0.00 | 0.00 |
| ATOM | 639 | HD3  | ARG | X | 42 | 45.461 | 51.335 | 62.907 | 0.00 | 0.00 |
| ATOM | 640 | NE   | ARG | X | 42 | 45.954 | 53.375 | 63.365 | 0.00 | 0.00 |
| ATOM | 641 | HE   | ARG | X | 42 | 46.217 | 54.069 | 62.679 | 0.00 | 0.00 |
| ATOM | 642 | CZ   | ARG | X | 42 | 46.642 | 53.584 | 64.466 | 0.00 | 0.00 |
| ATOM | 643 | NH1  | ARG | X | 42 | 46.524 | 52.743 | 65.439 | 0.00 | 0.00 |
| ATOM | 644 | HH11 | ARG | X | 42 | 45.983 | 51.892 | 65.385 | 0.00 | 0.00 |
| ATOM | 645 | HH12 | ARG | X | 42 | 47.095 | 52.886 | 66.260 | 0.00 | 0.00 |
| ATOM | 646 | NH2  | ARG | X | 42 | 47.434 | 54.616 | 64.582 | 0.00 | 0.00 |
| ATOM | 647 | HH21 | ARG | X | 42 | 47.551 | 55.309 | 63.856 | 0.00 | 0.00 |
| ATOM | 648 | HH22 | ARG | X | 42 | 47.943 | 54.772 | 65.440 | 0.00 | 0.00 |
| ATOM | 649 | C    | ARG | X | 42 | 40.931 | 53.024 | 61.079 | 0.00 | 0.00 |
| ATOM | 650 | O    | ARG | X | 42 | 40.169 | 53.093 | 62.102 | 0.00 | 0.00 |
| ATOM | 651 | N    | PHE | X | 43 | 40.935 | 52.071 | 60.185 | 0.00 | 0.00 |
| ATOM | 652 | H    | PHE | X | 43 | 41.513 | 52.227 | 59.372 | 0.00 | 0.00 |
| ATOM | 653 | CA   | PHE | X | 43 | 39.949 | 50.978 | 60.143 | 0.00 | 0.00 |
| ATOM | 654 | HA   | PHE | X | 43 | 40.257 | 50.220 | 59.423 | 0.00 | 0.00 |
| ATOM | 655 | CB   | PHE | X | 43 | 39.903 | 50.163 | 61.546 | 0.00 | 0.00 |
| ATOM | 656 | HB2  | PHE | X | 43 | 39.333 | 50.752 | 62.264 | 0.00 | 0.00 |
| ATOM | 657 | HB3  | PHE | X | 43 | 39.470 | 49.186 | 61.333 | 0.00 | 0.00 |
| ATOM | 658 | CG   | PHE | X | 43 | 41.263 | 49.754 | 62.121 | 0.00 | 0.00 |
| ATOM | 659 | CD1  | PHE | X | 43 | 42.141 | 48.877 | 61.403 | 0.00 | 0.00 |
| ATOM | 660 | HD1  | PHE | X | 43 | 41.924 | 48.778 | 60.350 | 0.00 | 0.00 |
| ATOM | 661 | CE1  | PHE | X | 43 | 43.307 | 48.386 | 61.972 | 0.00 | 0.00 |
| ATOM | 662 | HE1  | PHE | X | 43 | 43.955 | 47.740 | 61.397 | 0.00 | 0.00 |
| ATOM | 663 | CZ   | PHE | X | 43 | 43.686 | 48.758 | 63.262 | 0.00 | 0.00 |
| ATOM | 664 | HZ   | PHE | X | 43 | 44.591 | 48.319 | 63.656 | 0.00 | 0.00 |
| ATOM | 665 | CE2  | PHE | X | 43 | 42.978 | 49.733 | 63.939 | 0.00 | 0.00 |
| ATOM | 666 | HE2  | PHE | X | 43 | 43.294 | 49.973 | 64.943 | 0.00 | 0.00 |
| ATOM | 667 | CD2  | PHE | X | 43 | 41.695 | 50.132 | 63.427 | 0.00 | 0.00 |

|      |     |      |     |   |    |        |        |        |      |      |
|------|-----|------|-----|---|----|--------|--------|--------|------|------|
| ATOM | 668 | HD2  | PHE | X | 43 | 41.049 | 50.753 | 64.030 | 0.00 | 0.00 |
| ATOM | 669 | C    | PHE | X | 43 | 38.534 | 51.435 | 59.727 | 0.00 | 0.00 |
| ATOM | 670 | O    | PHE | X | 43 | 37.606 | 50.640 | 59.704 | 0.00 | 0.00 |
| ATOM | 671 | N    | LEU | X | 44 | 38.351 | 52.756 | 59.499 | 0.00 | 0.00 |
| ATOM | 672 | H    | LEU | X | 44 | 39.092 | 53.428 | 59.641 | 0.00 | 0.00 |
| ATOM | 673 | CA   | LEU | X | 44 | 37.062 | 53.312 | 59.062 | 0.00 | 0.00 |
| ATOM | 674 | HA   | LEU | X | 44 | 36.341 | 52.551 | 59.359 | 0.00 | 0.00 |
| ATOM | 675 | CB   | LEU | X | 44 | 36.666 | 54.548 | 59.909 | 0.00 | 0.00 |
| ATOM | 676 | HB2  | LEU | X | 44 | 37.266 | 55.421 | 59.653 | 0.00 | 0.00 |
| ATOM | 677 | HB3  | LEU | X | 44 | 35.735 | 54.944 | 59.502 | 0.00 | 0.00 |
| ATOM | 678 | CG   | LEU | X | 44 | 36.648 | 54.401 | 61.481 | 0.00 | 0.00 |
| ATOM | 679 | HG   | LEU | X | 44 | 37.658 | 54.345 | 61.887 | 0.00 | 0.00 |
| ATOM | 680 | CD1  | LEU | X | 44 | 36.086 | 55.619 | 62.215 | 0.00 | 0.00 |
| ATOM | 681 | HD11 | LEU | X | 44 | 36.056 | 55.424 | 63.287 | 0.00 | 0.00 |
| ATOM | 682 | HD12 | LEU | X | 44 | 36.628 | 56.543 | 62.015 | 0.00 | 0.00 |
| ATOM | 683 | HD13 | LEU | X | 44 | 35.085 | 55.871 | 61.863 | 0.00 | 0.00 |
| ATOM | 684 | CD2  | LEU | X | 44 | 35.838 | 53.180 | 61.934 | 0.00 | 0.00 |
| ATOM | 685 | HD21 | LEU | X | 44 | 34.829 | 53.168 | 61.522 | 0.00 | 0.00 |
| ATOM | 686 | HD22 | LEU | X | 44 | 36.322 | 52.240 | 61.671 | 0.00 | 0.00 |
| ATOM | 687 | HD23 | LEU | X | 44 | 35.687 | 53.188 | 63.013 | 0.00 | 0.00 |
| ATOM | 688 | C    | LEU | X | 44 | 37.048 | 53.676 | 57.527 | 0.00 | 0.00 |
| ATOM | 689 | O    | LEU | X | 44 | 38.085 | 54.014 | 56.911 | 0.00 | 0.00 |
| ATOM | 690 | N    | PRO | X | 45 | 35.850 | 53.814 | 56.983 | 0.00 | 0.00 |
| ATOM | 691 | CD   | PRO | X | 45 | 34.538 | 53.337 | 57.421 | 0.00 | 0.00 |
| ATOM | 692 | HD2  | PRO | X | 45 | 34.084 | 54.263 | 57.776 | 0.00 | 0.00 |
| ATOM | 693 | HD3  | PRO | X | 45 | 34.450 | 52.633 | 58.248 | 0.00 | 0.00 |
| ATOM | 694 | CG   | PRO | X | 45 | 33.868 | 52.837 | 56.113 | 0.00 | 0.00 |
| ATOM | 695 | HG2  | PRO | X | 45 | 32.780 | 52.787 | 56.164 | 0.00 | 0.00 |
| ATOM | 696 | HG3  | PRO | X | 45 | 34.212 | 51.846 | 55.819 | 0.00 | 0.00 |
| ATOM | 697 | CB   | PRO | X | 45 | 34.385 | 53.860 | 55.150 | 0.00 | 0.00 |
| ATOM | 698 | HB2  | PRO | X | 45 | 33.815 | 54.786 | 55.226 | 0.00 | 0.00 |
| ATOM | 699 | HB3  | PRO | X | 45 | 34.428 | 53.335 | 54.196 | 0.00 | 0.00 |
| ATOM | 700 | CA   | PRO | X | 45 | 35.772 | 54.276 | 55.606 | 0.00 | 0.00 |
| ATOM | 701 | HA   | PRO | X | 45 | 36.429 | 53.527 | 55.164 | 0.00 | 0.00 |
| ATOM | 702 | C    | PRO | X | 45 | 36.072 | 55.826 | 55.475 | 0.00 | 0.00 |
| ATOM | 703 | O    | PRO | X | 45 | 35.906 | 56.532 | 56.432 | 0.00 | 0.00 |
| ATOM | 704 | N    | PRO | X | 46 | 36.523 | 56.275 | 54.259 | 0.00 | 0.00 |
| ATOM | 705 | CD   | PRO | X | 46 | 36.467 | 55.639 | 52.990 | 0.00 | 0.00 |
| ATOM | 706 | HD2  | PRO | X | 46 | 35.437 | 55.457 | 52.685 | 0.00 | 0.00 |
| ATOM | 707 | HD3  | PRO | X | 46 | 36.989 | 54.688 | 53.093 | 0.00 | 0.00 |
| ATOM | 708 | CG   | PRO | X | 46 | 37.164 | 56.453 | 51.874 | 0.00 | 0.00 |
| ATOM | 709 | HG2  | PRO | X | 46 | 36.453 | 56.832 | 51.140 | 0.00 | 0.00 |
| ATOM | 710 | HG3  | PRO | X | 46 | 37.825 | 55.815 | 51.289 | 0.00 | 0.00 |
| ATOM | 711 | CB   | PRO | X | 46 | 37.954 | 57.429 | 52.689 | 0.00 | 0.00 |
| ATOM | 712 | HB2  | PRO | X | 46 | 37.968 | 58.375 | 52.147 | 0.00 | 0.00 |
| ATOM | 713 | HB3  | PRO | X | 46 | 38.942 | 57.042 | 52.940 | 0.00 | 0.00 |
| ATOM | 714 | CA   | PRO | X | 46 | 37.145 | 57.599 | 54.005 | 0.00 | 0.00 |
| ATOM | 715 | HA   | PRO | X | 46 | 37.788 | 57.935 | 54.818 | 0.00 | 0.00 |
| ATOM | 716 | C    | PRO | X | 46 | 36.080 | 58.720 | 53.846 | 0.00 | 0.00 |
| ATOM | 717 | O    | PRO | X | 46 | 34.899 | 58.419 | 53.555 | 0.00 | 0.00 |
| ATOM | 718 | N    | GLU | X | 47 | 36.525 | 59.960 | 53.987 | 0.00 | 0.00 |
| ATOM | 719 | H    | GLU | X | 47 | 37.519 | 60.056 | 54.138 | 0.00 | 0.00 |
| ATOM | 720 | CA   | GLU | X | 47 | 35.809 | 61.225 | 53.891 | 0.00 | 0.00 |
| ATOM | 721 | HA   | GLU | X | 47 | 34.776 | 60.973 | 53.652 | 0.00 | 0.00 |
| ATOM | 722 | CB   | GLU | X | 47 | 35.704 | 62.023 | 55.188 | 0.00 | 0.00 |
| ATOM | 723 | HB2  | GLU | X | 47 | 36.621 | 62.192 | 55.752 | 0.00 | 0.00 |
| ATOM | 724 | HB3  | GLU | X | 47 | 35.355 | 63.028 | 54.950 | 0.00 | 0.00 |
| ATOM | 725 | CG   | GLU | X | 47 | 34.709 | 61.294 | 56.093 | 0.00 | 0.00 |
| ATOM | 726 | HG2  | GLU | X | 47 | 33.877 | 60.963 | 55.471 | 0.00 | 0.00 |
| ATOM | 727 | HG3  | GLU | X | 47 | 35.222 | 60.389 | 56.418 | 0.00 | 0.00 |
| ATOM | 728 | CD   | GLU | X | 47 | 34.253 | 62.189 | 57.263 | 0.00 | 0.00 |
| ATOM | 729 | OE1  | GLU | X | 47 | 33.194 | 61.909 | 57.804 | 0.00 | 0.00 |
| ATOM | 730 | OE2  | GLU | X | 47 | 34.958 | 63.138 | 57.616 | 0.00 | 0.00 |
| ATOM | 731 | C    | GLU | X | 47 | 36.407 | 62.051 | 52.770 | 0.00 | 0.00 |
| ATOM | 732 | O    | GLU | X | 47 | 37.663 | 62.074 | 52.670 | 0.00 | 0.00 |
| ATOM | 733 | N    | PRO | X | 48 | 35.599 | 62.919 | 52.099 | 0.00 | 0.00 |
| ATOM | 734 | CD   | PRO | X | 48 | 34.124 | 62.906 | 51.994 | 0.00 | 0.00 |
| ATOM | 735 | HD2  | PRO | X | 48 | 33.695 | 63.252 | 52.934 | 0.00 | 0.00 |
| ATOM | 736 | HD3  | PRO | X | 48 | 33.774 | 61.903 | 51.750 | 0.00 | 0.00 |
| ATOM | 737 | CG   | PRO | X | 48 | 33.754 | 63.789 | 50.836 | 0.00 | 0.00 |

|      |     |      |     |   |    |        |        |        |      |      |
|------|-----|------|-----|---|----|--------|--------|--------|------|------|
| ATOM | 738 | HG2  | PRO | X | 48 | 33.193 | 64.665 | 51.164 | 0.00 | 0.00 |
| ATOM | 739 | HG3  | PRO | X | 48 | 33.105 | 63.206 | 50.183 | 0.00 | 0.00 |
| ATOM | 740 | CB   | PRO | X | 48 | 35.004 | 64.128 | 50.022 | 0.00 | 0.00 |
| ATOM | 741 | HB2  | PRO | X | 48 | 34.944 | 65.203 | 49.851 | 0.00 | 0.00 |
| ATOM | 742 | HB3  | PRO | X | 48 | 35.101 | 63.486 | 49.146 | 0.00 | 0.00 |
| ATOM | 743 | CA   | PRO | X | 48 | 36.128 | 63.658 | 50.879 | 0.00 | 0.00 |
| ATOM | 744 | HA   | PRO | X | 48 | 36.743 | 62.994 | 50.272 | 0.00 | 0.00 |
| ATOM | 745 | C    | PRO | X | 48 | 36.946 | 64.822 | 51.293 | 0.00 | 0.00 |
| ATOM | 746 | O    | PRO | X | 48 | 36.732 | 65.284 | 52.430 | 0.00 | 0.00 |
| ATOM | 747 | N    | LYS | X | 49 | 37.858 | 65.288 | 50.425 | 0.00 | 0.00 |
| ATOM | 748 | H    | LYS | X | 49 | 38.070 | 64.873 | 49.529 | 0.00 | 0.00 |
| ATOM | 749 | CA   | LYS | X | 49 | 38.830 | 66.406 | 50.800 | 0.00 | 0.00 |
| ATOM | 750 | HA   | LYS | X | 49 | 39.083 | 66.197 | 51.839 | 0.00 | 0.00 |
| ATOM | 751 | CB   | LYS | X | 49 | 40.052 | 66.361 | 49.824 | 0.00 | 0.00 |
| ATOM | 752 | HB2  | LYS | X | 49 | 40.628 | 65.485 | 50.121 | 0.00 | 0.00 |
| ATOM | 753 | HB3  | LYS | X | 49 | 39.653 | 66.192 | 48.824 | 0.00 | 0.00 |
| ATOM | 754 | CG   | LYS | X | 49 | 40.972 | 67.587 | 50.016 | 0.00 | 0.00 |
| ATOM | 755 | HG2  | LYS | X | 49 | 41.844 | 67.277 | 49.440 | 0.00 | 0.00 |
| ATOM | 756 | HG3  | LYS | X | 49 | 40.512 | 68.494 | 49.622 | 0.00 | 0.00 |
| ATOM | 757 | CD   | LYS | X | 49 | 41.540 | 67.817 | 51.429 | 0.00 | 0.00 |
| ATOM | 758 | HD2  | LYS | X | 49 | 40.885 | 68.483 | 51.990 | 0.00 | 0.00 |
| ATOM | 759 | HD3  | LYS | X | 49 | 41.397 | 66.867 | 51.945 | 0.00 | 0.00 |
| ATOM | 760 | CE   | LYS | X | 49 | 43.012 | 68.170 | 51.543 | 0.00 | 0.00 |
| ATOM | 761 | HE2  | LYS | X | 49 | 43.568 | 67.449 | 50.943 | 0.00 | 0.00 |
| ATOM | 762 | HE3  | LYS | X | 49 | 43.111 | 69.103 | 50.989 | 0.00 | 0.00 |
| ATOM | 763 | NZ   | LYS | X | 49 | 43.444 | 68.268 | 52.915 | 0.00 | 0.00 |
| ATOM | 764 | HZ1  | LYS | X | 49 | 42.867 | 68.832 | 53.522 | 0.00 | 0.00 |
| ATOM | 765 | HZ2  | LYS | X | 49 | 43.488 | 67.326 | 53.278 | 0.00 | 0.00 |
| ATOM | 766 | HZ3  | LYS | X | 49 | 44.338 | 68.715 | 53.057 | 0.00 | 0.00 |
| ATOM | 767 | C    | LYS | X | 49 | 38.063 | 67.804 | 50.787 | 0.00 | 0.00 |
| ATOM | 768 | O    | LYS | X | 49 | 37.508 | 68.240 | 49.809 | 0.00 | 0.00 |
| ATOM | 769 | N    | GLN | X | 50 | 38.226 | 68.637 | 51.843 | 0.00 | 0.00 |
| ATOM | 770 | H    | GLN | X | 50 | 38.805 | 68.297 | 52.597 | 0.00 | 0.00 |
| ATOM | 771 | CA   | GLN | X | 50 | 37.617 | 69.965 | 51.903 | 0.00 | 0.00 |
| ATOM | 772 | HA   | GLN | X | 50 | 36.577 | 70.091 | 51.603 | 0.00 | 0.00 |
| ATOM | 773 | CB   | GLN | X | 50 | 37.763 | 70.605 | 53.305 | 0.00 | 0.00 |
| ATOM | 774 | HB2  | GLN | X | 50 | 38.774 | 70.410 | 53.663 | 0.00 | 0.00 |
| ATOM | 775 | HB3  | GLN | X | 50 | 37.544 | 71.657 | 53.117 | 0.00 | 0.00 |
| ATOM | 776 | CG   | GLN | X | 50 | 36.809 | 70.064 | 54.380 | 0.00 | 0.00 |
| ATOM | 777 | HG2  | GLN | X | 50 | 37.357 | 69.190 | 54.732 | 0.00 | 0.00 |
| ATOM | 778 | HG3  | GLN | X | 50 | 36.862 | 70.770 | 55.208 | 0.00 | 0.00 |
| ATOM | 779 | CD   | GLN | X | 50 | 35.320 | 69.934 | 53.916 | 0.00 | 0.00 |
| ATOM | 780 | OE1  | GLN | X | 50 | 34.911 | 69.030 | 53.214 | 0.00 | 0.00 |
| ATOM | 781 | NE2  | GLN | X | 50 | 34.510 | 70.914 | 54.146 | 0.00 | 0.00 |
| ATOM | 782 | HE21 | GLN | X | 50 | 33.651 | 70.987 | 53.620 | 0.00 | 0.00 |
| ATOM | 783 | HE22 | GLN | X | 50 | 34.876 | 71.772 | 54.534 | 0.00 | 0.00 |
| ATOM | 784 | C    | GLN | X | 50 | 38.315 | 70.924 | 50.870 | 0.00 | 0.00 |
| ATOM | 785 | O    | GLN | X | 50 | 39.524 | 70.854 | 50.762 | 0.00 | 0.00 |
| ATOM | 786 | N    | PRO | X | 51 | 37.627 | 71.762 | 50.123 | 0.00 | 0.00 |
| ATOM | 787 | CD   | PRO | X | 51 | 36.186 | 72.067 | 50.245 | 0.00 | 0.00 |
| ATOM | 788 | HD2  | PRO | X | 51 | 36.004 | 72.185 | 51.313 | 0.00 | 0.00 |
| ATOM | 789 | HD3  | PRO | X | 51 | 35.529 | 71.303 | 49.830 | 0.00 | 0.00 |
| ATOM | 790 | CG   | PRO | X | 51 | 35.903 | 73.409 | 49.572 | 0.00 | 0.00 |
| ATOM | 791 | HG2  | PRO | X | 51 | 36.160 | 74.204 | 50.273 | 0.00 | 0.00 |
| ATOM | 792 | HG3  | PRO | X | 51 | 34.847 | 73.519 | 49.325 | 0.00 | 0.00 |
| ATOM | 793 | CB   | PRO | X | 51 | 36.903 | 73.195 | 48.390 | 0.00 | 0.00 |
| ATOM | 794 | HB2  | PRO | X | 51 | 37.166 | 74.041 | 47.756 | 0.00 | 0.00 |
| ATOM | 795 | HB3  | PRO | X | 51 | 36.521 | 72.380 | 47.775 | 0.00 | 0.00 |
| ATOM | 796 | CA   | PRO | X | 51 | 38.139 | 72.628 | 49.024 | 0.00 | 0.00 |
| ATOM | 797 | HA   | PRO | X | 51 | 38.687 | 72.001 | 48.320 | 0.00 | 0.00 |
| ATOM | 798 | C    | PRO | X | 51 | 39.032 | 73.717 | 49.582 | 0.00 | 0.00 |
| ATOM | 799 | O    | PRO | X | 51 | 38.951 | 74.087 | 50.768 | 0.00 | 0.00 |
| ATOM | 800 | N    | TRP | X | 52 | 39.954 | 74.255 | 48.778 | 0.00 | 0.00 |
| ATOM | 801 | H    | TRP | X | 52 | 39.898 | 74.176 | 47.772 | 0.00 | 0.00 |
| ATOM | 802 | CA   | TRP | X | 52 | 41.102 | 74.978 | 49.197 | 0.00 | 0.00 |
| ATOM | 803 | HA   | TRP | X | 52 | 40.923 | 75.309 | 50.220 | 0.00 | 0.00 |
| ATOM | 804 | CB   | TRP | X | 52 | 42.297 | 74.007 | 49.333 | 0.00 | 0.00 |
| ATOM | 805 | HB2  | TRP | X | 52 | 42.967 | 74.623 | 49.932 | 0.00 | 0.00 |
| ATOM | 806 | HB3  | TRP | X | 52 | 41.914 | 73.175 | 49.925 | 0.00 | 0.00 |
| ATOM | 807 | CG   | TRP | X | 52 | 42.912 | 73.655 | 48.039 | 0.00 | 0.00 |

|      |     |      |     |   |    |        |        |        |      |      |
|------|-----|------|-----|---|----|--------|--------|--------|------|------|
| ATOM | 808 | CD1  | TRP | X | 52 | 43.688 | 74.430 | 47.260 | 0.00 | 0.00 |
| ATOM | 809 | HD1  | TRP | X | 52 | 44.008 | 75.428 | 47.519 | 0.00 | 0.00 |
| ATOM | 810 | NE1  | TRP | X | 52 | 44.067 | 73.721 | 46.144 | 0.00 | 0.00 |
| ATOM | 811 | HE1  | TRP | X | 52 | 44.602 | 74.240 | 45.463 | 0.00 | 0.00 |
| ATOM | 812 | CE2  | TRP | X | 52 | 43.435 | 72.533 | 46.029 | 0.00 | 0.00 |
| ATOM | 813 | CZ2  | TRP | X | 52 | 43.376 | 71.573 | 45.022 | 0.00 | 0.00 |
| ATOM | 814 | HZ2  | TRP | X | 52 | 43.805 | 71.696 | 44.038 | 0.00 | 0.00 |
| ATOM | 815 | CH2  | TRP | X | 52 | 42.782 | 70.329 | 45.297 | 0.00 | 0.00 |
| ATOM | 816 | HH2  | TRP | X | 52 | 42.689 | 69.601 | 44.504 | 0.00 | 0.00 |
| ATOM | 817 | CZ3  | TRP | X | 52 | 42.147 | 70.165 | 46.562 | 0.00 | 0.00 |
| ATOM | 818 | HZ3  | TRP | X | 52 | 41.499 | 69.314 | 46.708 | 0.00 | 0.00 |
| ATOM | 819 | CE3  | TRP | X | 52 | 41.995 | 71.234 | 47.464 | 0.00 | 0.00 |
| ATOM | 820 | HE3  | TRP | X | 52 | 41.425 | 71.105 | 48.373 | 0.00 | 0.00 |
| ATOM | 821 | CD2  | TRP | X | 52 | 42.782 | 72.401 | 47.276 | 0.00 | 0.00 |
| ATOM | 822 | C    | TRP | X | 52 | 41.433 | 76.150 | 48.322 | 0.00 | 0.00 |
| ATOM | 823 | O    | TRP | X | 52 | 41.314 | 76.080 | 47.097 | 0.00 | 0.00 |
| ATOM | 824 | N    | SER | X | 53 | 41.719 | 77.297 | 48.947 | 0.00 | 0.00 |
| ATOM | 825 | H    | SER | X | 53 | 41.529 | 77.312 | 49.938 | 0.00 | 0.00 |
| ATOM | 826 | CA   | SER | X | 53 | 41.849 | 78.587 | 48.280 | 0.00 | 0.00 |
| ATOM | 827 | HA   | SER | X | 53 | 40.982 | 78.709 | 47.631 | 0.00 | 0.00 |
| ATOM | 828 | CB   | SER | X | 53 | 41.698 | 79.552 | 49.382 | 0.00 | 0.00 |
| ATOM | 829 | HB2  | SER | X | 53 | 42.509 | 79.630 | 50.105 | 0.00 | 0.00 |
| ATOM | 830 | HB3  | SER | X | 53 | 41.624 | 80.506 | 48.859 | 0.00 | 0.00 |
| ATOM | 831 | OG   | SER | X | 53 | 40.405 | 79.601 | 49.917 | 0.00 | 0.00 |
| ATOM | 832 | HG   | SER | X | 53 | 40.174 | 80.532 | 49.958 | 0.00 | 0.00 |
| ATOM | 833 | C    | SER | X | 53 | 43.142 | 78.629 | 47.476 | 0.00 | 0.00 |
| ATOM | 834 | O    | SER | X | 53 | 43.054 | 79.391 | 46.490 | 0.00 | 0.00 |
| ATOM | 835 | N    | GLY | X | 54 | 44.191 | 77.857 | 47.879 | 0.00 | 0.00 |
| ATOM | 836 | H    | GLY | X | 54 | 44.085 | 77.468 | 48.805 | 0.00 | 0.00 |
| ATOM | 837 | CA   | GLY | X | 54 | 45.447 | 77.917 | 47.147 | 0.00 | 0.00 |
| ATOM | 838 | HA2  | GLY | X | 54 | 45.563 | 78.945 | 46.612 | 0.00 | 0.00 |
| ATOM | 839 | HA3  | GLY | X | 54 | 46.179 | 77.789 | 47.958 | 0.00 | 0.00 |
| ATOM | 840 | C    | GLY | X | 54 | 45.730 | 76.719 | 46.184 | 0.00 | 0.00 |
| ATOM | 841 | O    | GLY | X | 54 | 44.864 | 76.506 | 45.393 | 0.00 | 0.00 |
| ATOM | 842 | N    | VAL | X | 55 | 46.933 | 76.169 | 46.190 | 0.00 | 0.00 |
| ATOM | 843 | H    | VAL | X | 55 | 47.584 | 76.289 | 46.953 | 0.00 | 0.00 |
| ATOM | 844 | CA   | VAL | X | 55 | 47.489 | 75.371 | 45.126 | 0.00 | 0.00 |
| ATOM | 845 | HA   | VAL | X | 55 | 46.701 | 75.178 | 44.398 | 0.00 | 0.00 |
| ATOM | 846 | CB   | VAL | X | 55 | 48.590 | 76.220 | 44.386 | 0.00 | 0.00 |
| ATOM | 847 | HB   | VAL | X | 55 | 49.535 | 76.292 | 44.925 | 0.00 | 0.00 |
| ATOM | 848 | CG1  | VAL | X | 55 | 49.009 | 75.472 | 43.056 | 0.00 | 0.00 |
| ATOM | 849 | HG11 | VAL | X | 55 | 49.371 | 74.460 | 43.238 | 0.00 | 0.00 |
| ATOM | 850 | HG12 | VAL | X | 55 | 48.231 | 75.464 | 42.292 | 0.00 | 0.00 |
| ATOM | 851 | HG13 | VAL | X | 55 | 49.915 | 75.928 | 42.657 | 0.00 | 0.00 |
| ATOM | 852 | CG2  | VAL | X | 55 | 48.206 | 77.588 | 43.805 | 0.00 | 0.00 |
| ATOM | 853 | HG21 | VAL | X | 55 | 47.301 | 77.679 | 43.204 | 0.00 | 0.00 |
| ATOM | 854 | HG22 | VAL | X | 55 | 48.086 | 78.221 | 44.685 | 0.00 | 0.00 |
| ATOM | 855 | HG23 | VAL | X | 55 | 49.035 | 78.092 | 43.309 | 0.00 | 0.00 |
| ATOM | 856 | C    | VAL | X | 55 | 48.069 | 74.023 | 45.538 | 0.00 | 0.00 |
| ATOM | 857 | O    | VAL | X | 55 | 48.987 | 73.963 | 46.331 | 0.00 | 0.00 |
| ATOM | 858 | N    | VAL | X | 56 | 47.564 | 72.878 | 45.047 | 0.00 | 0.00 |
| ATOM | 859 | H    | VAL | X | 56 | 46.816 | 72.924 | 44.370 | 0.00 | 0.00 |
| ATOM | 860 | CA   | VAL | X | 56 | 48.215 | 71.638 | 45.125 | 0.00 | 0.00 |
| ATOM | 861 | HA   | VAL | X | 56 | 48.504 | 71.482 | 46.165 | 0.00 | 0.00 |
| ATOM | 862 | CB   | VAL | X | 56 | 47.253 | 70.427 | 44.687 | 0.00 | 0.00 |
| ATOM | 863 | HB   | VAL | X | 56 | 46.791 | 70.622 | 43.719 | 0.00 | 0.00 |
| ATOM | 864 | CG1  | VAL | X | 56 | 48.048 | 69.160 | 44.512 | 0.00 | 0.00 |
| ATOM | 865 | HG11 | VAL | X | 56 | 48.776 | 69.186 | 43.701 | 0.00 | 0.00 |
| ATOM | 866 | HG12 | VAL | X | 56 | 48.571 | 69.056 | 45.463 | 0.00 | 0.00 |
| ATOM | 867 | HG13 | VAL | X | 56 | 47.365 | 68.337 | 44.301 | 0.00 | 0.00 |
| ATOM | 868 | CG2  | VAL | X | 56 | 46.186 | 70.327 | 45.808 | 0.00 | 0.00 |
| ATOM | 869 | HG21 | VAL | X | 56 | 45.774 | 71.332 | 45.892 | 0.00 | 0.00 |
| ATOM | 870 | HG22 | VAL | X | 56 | 45.475 | 69.545 | 45.542 | 0.00 | 0.00 |
| ATOM | 871 | HG23 | VAL | X | 56 | 46.723 | 70.055 | 46.717 | 0.00 | 0.00 |
| ATOM | 872 | C    | VAL | X | 56 | 49.471 | 71.657 | 44.252 | 0.00 | 0.00 |
| ATOM | 873 | O    | VAL | X | 56 | 49.400 | 71.823 | 43.017 | 0.00 | 0.00 |
| ATOM | 874 | N    | ASP | X | 57 | 50.669 | 71.505 | 44.802 | 0.00 | 0.00 |
| ATOM | 875 | H    | ASP | X | 57 | 50.729 | 71.357 | 45.799 | 0.00 | 0.00 |
| ATOM | 876 | CA   | ASP | X | 57 | 51.815 | 71.034 | 44.046 | 0.00 | 0.00 |
| ATOM | 877 | HA   | ASP | X | 57 | 51.796 | 71.638 | 43.139 | 0.00 | 0.00 |

|      |     |      |     |   |    |        |        |        |      |      |
|------|-----|------|-----|---|----|--------|--------|--------|------|------|
| ATOM | 878 | CB   | ASP | X | 57 | 53.089 | 71.373 | 44.847 | 0.00 | 0.00 |
| ATOM | 879 | HB2  | ASP | X | 57 | 52.994 | 72.421 | 45.133 | 0.00 | 0.00 |
| ATOM | 880 | HB3  | ASP | X | 57 | 53.090 | 70.816 | 45.784 | 0.00 | 0.00 |
| ATOM | 881 | CG   | ASP | X | 57 | 54.438 | 71.072 | 44.101 | 0.00 | 0.00 |
| ATOM | 882 | OD1  | ASP | X | 57 | 55.490 | 71.491 | 44.553 | 0.00 | 0.00 |
| ATOM | 883 | OD2  | ASP | X | 57 | 54.308 | 70.549 | 42.961 | 0.00 | 0.00 |
| ATOM | 884 | C    | ASP | X | 57 | 51.753 | 69.586 | 43.814 | 0.00 | 0.00 |
| ATOM | 885 | O    | ASP | X | 57 | 51.960 | 68.733 | 44.678 | 0.00 | 0.00 |
| ATOM | 886 | N    | ALA | X | 58 | 51.453 | 69.245 | 42.524 | 0.00 | 0.00 |
| ATOM | 887 | H    | ALA | X | 58 | 51.307 | 69.984 | 41.852 | 0.00 | 0.00 |
| ATOM | 888 | CA   | ALA | X | 58 | 51.389 | 67.897 | 41.940 | 0.00 | 0.00 |
| ATOM | 889 | HA   | ALA | X | 58 | 51.464 | 67.254 | 42.817 | 0.00 | 0.00 |
| ATOM | 890 | CB   | ALA | X | 58 | 50.021 | 67.652 | 41.242 | 0.00 | 0.00 |
| ATOM | 891 | HB1  | ALA | X | 58 | 49.781 | 66.596 | 41.119 | 0.00 | 0.00 |
| ATOM | 892 | HB2  | ALA | X | 58 | 49.201 | 68.115 | 41.791 | 0.00 | 0.00 |
| ATOM | 893 | HB3  | ALA | X | 58 | 50.055 | 68.100 | 40.249 | 0.00 | 0.00 |
| ATOM | 894 | C    | ALA | X | 58 | 52.589 | 67.534 | 41.039 | 0.00 | 0.00 |
| ATOM | 895 | O    | ALA | X | 58 | 52.458 | 66.806 | 40.038 | 0.00 | 0.00 |
| ATOM | 896 | N    | THR | X | 59 | 53.816 | 68.002 | 41.298 | 0.00 | 0.00 |
| ATOM | 897 | H    | THR | X | 59 | 53.779 | 68.713 | 42.015 | 0.00 | 0.00 |
| ATOM | 898 | CA   | THR | X | 59 | 55.037 | 67.866 | 40.398 | 0.00 | 0.00 |
| ATOM | 899 | HA   | THR | X | 59 | 54.683 | 67.633 | 39.394 | 0.00 | 0.00 |
| ATOM | 900 | CB   | THR | X | 59 | 55.902 | 69.170 | 40.402 | 0.00 | 0.00 |
| ATOM | 901 | HB   | THR | X | 59 | 56.829 | 69.137 | 39.828 | 0.00 | 0.00 |
| ATOM | 902 | CG2  | THR | X | 59 | 55.080 | 70.382 | 39.873 | 0.00 | 0.00 |
| ATOM | 903 | HG21 | THR | X | 59 | 54.293 | 70.608 | 40.592 | 0.00 | 0.00 |
| ATOM | 904 | HG22 | THR | X | 59 | 55.722 | 71.254 | 39.747 | 0.00 | 0.00 |
| ATOM | 905 | HG23 | THR | X | 59 | 54.487 | 70.187 | 38.980 | 0.00 | 0.00 |
| ATOM | 906 | OG1  | THR | X | 59 | 56.376 | 69.390 | 41.667 | 0.00 | 0.00 |
| ATOM | 907 | HG1  | THR | X | 59 | 55.735 | 69.911 | 42.156 | 0.00 | 0.00 |
| ATOM | 908 | C    | THR | X | 59 | 55.918 | 66.640 | 40.769 | 0.00 | 0.00 |
| ATOM | 909 | O    | THR | X | 59 | 56.906 | 66.361 | 40.111 | 0.00 | 0.00 |
| ATOM | 910 | N    | THR | X | 60 | 55.543 | 65.861 | 41.814 | 0.00 | 0.00 |
| ATOM | 911 | H    | THR | X | 60 | 54.676 | 66.121 | 42.262 | 0.00 | 0.00 |
| ATOM | 912 | CA   | THR | X | 60 | 56.108 | 64.585 | 42.314 | 0.00 | 0.00 |
| ATOM | 913 | HA   | THR | X | 60 | 56.182 | 63.833 | 41.529 | 0.00 | 0.00 |
| ATOM | 914 | CB   | THR | X | 60 | 57.529 | 64.831 | 42.867 | 0.00 | 0.00 |
| ATOM | 915 | HB   | THR | X | 60 | 58.119 | 65.551 | 42.299 | 0.00 | 0.00 |
| ATOM | 916 | CG2  | THR | X | 60 | 57.507 | 65.416 | 44.239 | 0.00 | 0.00 |
| ATOM | 917 | HG21 | THR | X | 60 | 56.961 | 64.811 | 44.963 | 0.00 | 0.00 |
| ATOM | 918 | HG22 | THR | X | 60 | 58.459 | 65.376 | 44.769 | 0.00 | 0.00 |
| ATOM | 919 | HG23 | THR | X | 60 | 57.076 | 66.415 | 44.301 | 0.00 | 0.00 |
| ATOM | 920 | OG1  | THR | X | 60 | 58.278 | 63.616 | 42.969 | 0.00 | 0.00 |
| ATOM | 921 | HG1  | THR | X | 60 | 58.639 | 63.611 | 42.079 | 0.00 | 0.00 |
| ATOM | 922 | C    | THR | X | 60 | 55.196 | 63.968 | 43.281 | 0.00 | 0.00 |
| ATOM | 923 | O    | THR | X | 60 | 54.324 | 64.732 | 43.792 | 0.00 | 0.00 |
| ATOM | 924 | N    | PHE | X | 61 | 55.391 | 62.713 | 43.653 | 0.00 | 0.00 |
| ATOM | 925 | H    | PHE | X | 61 | 56.147 | 62.123 | 43.336 | 0.00 | 0.00 |
| ATOM | 926 | CA   | PHE | X | 61 | 54.517 | 61.939 | 44.590 | 0.00 | 0.00 |
| ATOM | 927 | HA   | PHE | X | 61 | 53.466 | 61.951 | 44.302 | 0.00 | 0.00 |
| ATOM | 928 | CB   | PHE | X | 61 | 54.955 | 60.472 | 44.565 | 0.00 | 0.00 |
| ATOM | 929 | HB2  | PHE | X | 61 | 55.949 | 60.368 | 44.999 | 0.00 | 0.00 |
| ATOM | 930 | HB3  | PHE | X | 61 | 54.356 | 59.807 | 45.187 | 0.00 | 0.00 |
| ATOM | 931 | CG   | PHE | X | 61 | 54.913 | 59.939 | 43.162 | 0.00 | 0.00 |
| ATOM | 932 | CD1  | PHE | X | 61 | 53.671 | 59.403 | 42.683 | 0.00 | 0.00 |
| ATOM | 933 | HD1  | PHE | X | 61 | 52.731 | 59.430 | 43.214 | 0.00 | 0.00 |
| ATOM | 934 | CE1  | PHE | X | 61 | 53.649 | 59.009 | 41.300 | 0.00 | 0.00 |
| ATOM | 935 | HE1  | PHE | X | 61 | 52.707 | 58.590 | 40.979 | 0.00 | 0.00 |
| ATOM | 936 | CZ   | PHE | X | 61 | 54.686 | 59.096 | 40.427 | 0.00 | 0.00 |
| ATOM | 937 | HZ   | PHE | X | 61 | 54.570 | 58.829 | 39.387 | 0.00 | 0.00 |
| ATOM | 938 | CE2  | PHE | X | 61 | 55.897 | 59.578 | 40.959 | 0.00 | 0.00 |
| ATOM | 939 | HE2  | PHE | X | 61 | 56.766 | 59.715 | 40.333 | 0.00 | 0.00 |
| ATOM | 940 | CD2  | PHE | X | 61 | 56.037 | 60.021 | 42.266 | 0.00 | 0.00 |
| ATOM | 941 | HD2  | PHE | X | 61 | 57.051 | 60.302 | 42.510 | 0.00 | 0.00 |
| ATOM | 942 | C    | PHE | X | 61 | 54.496 | 62.425 | 46.052 | 0.00 | 0.00 |
| ATOM | 943 | O    | PHE | X | 61 | 55.259 | 63.293 | 46.417 | 0.00 | 0.00 |
| ATOM | 944 | N    | GLN | X | 62 | 53.683 | 61.898 | 46.930 | 0.00 | 0.00 |
| ATOM | 945 | H    | GLN | X | 62 | 53.132 | 61.144 | 46.546 | 0.00 | 0.00 |
| ATOM | 946 | CA   | GLN | X | 62 | 53.574 | 62.130 | 48.406 | 0.00 | 0.00 |
| ATOM | 947 | HA   | GLN | X | 62 | 54.379 | 62.802 | 48.702 | 0.00 | 0.00 |



|      |      |      |     |   |    |        |        |        |      |      |
|------|------|------|-----|---|----|--------|--------|--------|------|------|
| ATOM | 948  | CB   | GLN | X | 62 | 52.137 | 62.690 | 48.700 | 0.00 | 0.00 |
| ATOM | 949  | HB2  | GLN | X | 62 | 51.366 | 61.946 | 48.500 | 0.00 | 0.00 |
| ATOM | 950  | HB3  | GLN | X | 62 | 52.036 | 62.846 | 49.774 | 0.00 | 0.00 |
| ATOM | 951  | CG   | GLN | X | 62 | 51.876 | 64.050 | 48.068 | 0.00 | 0.00 |
| ATOM | 952  | HG2  | GLN | X | 62 | 51.888 | 63.854 | 46.995 | 0.00 | 0.00 |
| ATOM | 953  | HG3  | GLN | X | 62 | 50.828 | 64.319 | 48.194 | 0.00 | 0.00 |
| ATOM | 954  | CD   | GLN | X | 62 | 52.714 | 65.258 | 48.509 | 0.00 | 0.00 |
| ATOM | 955  | OE1  | GLN | X | 62 | 53.713 | 65.098 | 49.204 | 0.00 | 0.00 |
| ATOM | 956  | NE2  | GLN | X | 62 | 52.478 | 66.464 | 48.010 | 0.00 | 0.00 |
| ATOM | 957  | HE21 | GLN | X | 62 | 53.206 | 67.148 | 48.160 | 0.00 | 0.00 |
| ATOM | 958  | HE22 | GLN | X | 62 | 51.612 | 66.600 | 47.508 | 0.00 | 0.00 |
| ATOM | 959  | C    | GLN | X | 62 | 53.906 | 60.773 | 49.148 | 0.00 | 0.00 |
| ATOM | 960  | O    | GLN | X | 62 | 54.697 | 59.983 | 48.573 | 0.00 | 0.00 |
| ATOM | 961  | N    | SER | X | 63 | 53.409 | 60.488 | 50.369 | 0.00 | 0.00 |
| ATOM | 962  | H    | SER | X | 63 | 52.884 | 61.261 | 50.751 | 0.00 | 0.00 |
| ATOM | 963  | CA   | SER | X | 63 | 53.739 | 59.384 | 51.228 | 0.00 | 0.00 |
| ATOM | 964  | HA   | SER | X | 63 | 54.760 | 59.144 | 50.930 | 0.00 | 0.00 |
| ATOM | 965  | CB   | SER | X | 63 | 53.799 | 59.802 | 52.781 | 0.00 | 0.00 |
| ATOM | 966  | HB2  | SER | X | 63 | 53.880 | 58.861 | 53.326 | 0.00 | 0.00 |
| ATOM | 967  | HB3  | SER | X | 63 | 54.715 | 60.362 | 52.969 | 0.00 | 0.00 |
| ATOM | 968  | OG   | SER | X | 63 | 52.696 | 60.677 | 53.089 | 0.00 | 0.00 |
| ATOM | 969  | HG   | SER | X | 63 | 52.020 | 60.140 | 53.509 | 0.00 | 0.00 |
| ATOM | 970  | C    | SER | X | 63 | 52.800 | 58.170 | 50.903 | 0.00 | 0.00 |
| ATOM | 971  | O    | SER | X | 63 | 51.827 | 58.280 | 50.257 | 0.00 | 0.00 |
| ATOM | 972  | N    | VAL | X | 64 | 53.204 | 56.942 | 51.376 | 0.00 | 0.00 |
| ATOM | 973  | H    | VAL | X | 64 | 54.082 | 56.849 | 51.866 | 0.00 | 0.00 |
| ATOM | 974  | CA   | VAL | X | 64 | 52.379 | 55.769 | 51.156 | 0.00 | 0.00 |
| ATOM | 975  | HA   | VAL | X | 64 | 51.371 | 56.034 | 50.835 | 0.00 | 0.00 |
| ATOM | 976  | CB   | VAL | X | 64 | 53.099 | 54.823 | 50.076 | 0.00 | 0.00 |
| ATOM | 977  | HB   | VAL | X | 64 | 53.362 | 55.457 | 49.230 | 0.00 | 0.00 |
| ATOM | 978  | CG1  | VAL | X | 64 | 54.343 | 54.063 | 50.557 | 0.00 | 0.00 |
| ATOM | 979  | HG11 | VAL | X | 64 | 55.186 | 54.647 | 50.927 | 0.00 | 0.00 |
| ATOM | 980  | HG12 | VAL | X | 64 | 54.167 | 53.232 | 51.239 | 0.00 | 0.00 |
| ATOM | 981  | HG13 | VAL | X | 64 | 54.664 | 53.641 | 49.605 | 0.00 | 0.00 |
| ATOM | 982  | CG2  | VAL | X | 64 | 52.134 | 53.737 | 49.508 | 0.00 | 0.00 |
| ATOM | 983  | HG21 | VAL | X | 64 | 51.233 | 54.243 | 49.160 | 0.00 | 0.00 |
| ATOM | 984  | HG22 | VAL | X | 64 | 52.713 | 53.357 | 48.666 | 0.00 | 0.00 |
| ATOM | 985  | HG23 | VAL | X | 64 | 51.919 | 53.019 | 50.300 | 0.00 | 0.00 |
| ATOM | 986  | C    | VAL | X | 64 | 52.071 | 55.013 | 52.431 | 0.00 | 0.00 |
| ATOM | 987  | O    | VAL | X | 64 | 52.833 | 55.088 | 53.381 | 0.00 | 0.00 |
| ATOM | 988  | N    | CYX | X | 65 | 51.022 | 54.138 | 52.481 | 0.00 | 0.00 |
| ATOM | 989  | H    | CYX | X | 65 | 50.323 | 54.086 | 51.753 | 0.00 | 0.00 |
| ATOM | 990  | CA   | CYX | X | 65 | 50.608 | 53.614 | 53.772 | 0.00 | 0.00 |
| ATOM | 991  | HA   | CYX | X | 65 | 50.408 | 54.407 | 54.492 | 0.00 | 0.00 |
| ATOM | 992  | CB   | CYX | X | 65 | 49.273 | 52.996 | 53.691 | 0.00 | 0.00 |
| ATOM | 993  | HB2  | CYX | X | 65 | 49.399 | 51.916 | 53.621 | 0.00 | 0.00 |
| ATOM | 994  | HB3  | CYX | X | 65 | 48.781 | 53.145 | 54.652 | 0.00 | 0.00 |
| ATOM | 995  | SG   | CYX | X | 65 | 48.150 | 53.589 | 52.413 | 0.00 | 0.00 |
| ATOM | 996  | C    | CYX | X | 65 | 51.622 | 52.718 | 54.467 | 0.00 | 0.00 |
| ATOM | 997  | O    | CYX | X | 65 | 52.362 | 51.929 | 53.845 | 0.00 | 0.00 |
| ATOM | 998  | N    | TYR | X | 66 | 51.597 | 52.627 | 55.833 | 0.00 | 0.00 |
| ATOM | 999  | H    | TYR | X | 66 | 51.047 | 53.314 | 56.328 | 0.00 | 0.00 |
| ATOM | 1000 | CA   | TYR | X | 66 | 52.309 | 51.581 | 56.629 | 0.00 | 0.00 |
| ATOM | 1001 | HA   | TYR | X | 66 | 53.352 | 51.863 | 56.486 | 0.00 | 0.00 |
| ATOM | 1002 | CB   | TYR | X | 66 | 52.055 | 51.652 | 58.141 | 0.00 | 0.00 |
| ATOM | 1003 | HB2  | TYR | X | 66 | 51.013 | 51.943 | 58.270 | 0.00 | 0.00 |
| ATOM | 1004 | HB3  | TYR | X | 66 | 52.290 | 50.668 | 58.546 | 0.00 | 0.00 |
| ATOM | 1005 | CG   | TYR | X | 66 | 52.921 | 52.792 | 58.773 | 0.00 | 0.00 |
| ATOM | 1006 | CD1  | TYR | X | 66 | 52.336 | 53.977 | 59.243 | 0.00 | 0.00 |
| ATOM | 1007 | HD1  | TYR | X | 66 | 51.261 | 54.067 | 59.189 | 0.00 | 0.00 |
| ATOM | 1008 | CE1  | TYR | X | 66 | 53.112 | 54.984 | 59.728 | 0.00 | 0.00 |
| ATOM | 1009 | HE1  | TYR | X | 66 | 52.672 | 55.907 | 60.074 | 0.00 | 0.00 |
| ATOM | 1010 | CZ   | TYR | X | 66 | 54.496 | 54.882 | 59.771 | 0.00 | 0.00 |
| ATOM | 1011 | OH   | TYR | X | 66 | 55.258 | 55.892 | 60.259 | 0.00 | 0.00 |
| ATOM | 1012 | HH   | TYR | X | 66 | 54.749 | 56.706 | 60.253 | 0.00 | 0.00 |
| ATOM | 1013 | CE2  | TYR | X | 66 | 55.133 | 53.638 | 59.345 | 0.00 | 0.00 |
| ATOM | 1014 | HE2  | TYR | X | 66 | 56.202 | 53.560 | 59.478 | 0.00 | 0.00 |
| ATOM | 1015 | CD2  | TYR | X | 66 | 54.320 | 52.638 | 58.793 | 0.00 | 0.00 |
| ATOM | 1016 | HD2  | TYR | X | 66 | 54.630 | 51.630 | 58.560 | 0.00 | 0.00 |
| ATOM | 1017 | C    | TYR | X | 66 | 51.989 | 50.156 | 56.074 | 0.00 | 0.00 |

|      |      |      |     |   |    |        |        |        |      |      |
|------|------|------|-----|---|----|--------|--------|--------|------|------|
| ATOM | 1018 | O    | TYR | X | 66 | 50.826 | 49.766 | 55.958 | 0.00 | 0.00 |
| ATOM | 1019 | N    | GLN | X | 67 | 53.039 | 49.360 | 55.765 | 0.00 | 0.00 |
| ATOM | 1020 | H    | GLN | X | 67 | 53.927 | 49.837 | 55.818 | 0.00 | 0.00 |
| ATOM | 1021 | CA   | GLN | X | 67 | 53.055 | 47.979 | 55.163 | 0.00 | 0.00 |
| ATOM | 1022 | HA   | GLN | X | 67 | 52.200 | 47.452 | 55.587 | 0.00 | 0.00 |
| ATOM | 1023 | CB   | GLN | X | 67 | 52.904 | 48.044 | 53.643 | 0.00 | 0.00 |
| ATOM | 1024 | HB2  | GLN | X | 67 | 52.920 | 47.006 | 53.313 | 0.00 | 0.00 |
| ATOM | 1025 | HB3  | GLN | X | 67 | 51.947 | 48.528 | 53.445 | 0.00 | 0.00 |
| ATOM | 1026 | CG   | GLN | X | 67 | 54.018 | 48.894 | 52.936 | 0.00 | 0.00 |
| ATOM | 1027 | HG2  | GLN | X | 67 | 54.470 | 49.657 | 53.571 | 0.00 | 0.00 |
| ATOM | 1028 | HG3  | GLN | X | 67 | 54.841 | 48.189 | 52.819 | 0.00 | 0.00 |
| ATOM | 1029 | CD   | GLN | X | 67 | 53.622 | 49.361 | 51.527 | 0.00 | 0.00 |
| ATOM | 1030 | OE1  | GLN | X | 67 | 53.873 | 48.692 | 50.539 | 0.00 | 0.00 |
| ATOM | 1031 | NE2  | GLN | X | 67 | 53.001 | 50.502 | 51.312 | 0.00 | 0.00 |
| ATOM | 1032 | HE21 | GLN | X | 67 | 52.581 | 50.650 | 50.406 | 0.00 | 0.00 |
| ATOM | 1033 | HE22 | GLN | X | 67 | 52.884 | 51.223 | 52.010 | 0.00 | 0.00 |
| ATOM | 1034 | C    | GLN | X | 67 | 54.452 | 47.283 | 55.488 | 0.00 | 0.00 |
| ATOM | 1035 | O    | GLN | X | 67 | 55.332 | 47.923 | 56.038 | 0.00 | 0.00 |
| ATOM | 1036 | N    | TYR | X | 68 | 54.611 | 45.995 | 55.259 | 0.00 | 0.00 |
| ATOM | 1037 | H    | TYR | X | 68 | 53.830 | 45.454 | 54.916 | 0.00 | 0.00 |
| ATOM | 1038 | CA   | TYR | X | 68 | 55.777 | 45.144 | 55.726 | 0.00 | 0.00 |
| ATOM | 1039 | HA   | TYR | X | 68 | 56.200 | 45.470 | 56.676 | 0.00 | 0.00 |
| ATOM | 1040 | CB   | TYR | X | 68 | 55.314 | 43.727 | 55.778 | 0.00 | 0.00 |
| ATOM | 1041 | HB2  | TYR | X | 68 | 54.407 | 43.643 | 56.378 | 0.00 | 0.00 |
| ATOM | 1042 | HB3  | TYR | X | 68 | 55.122 | 43.463 | 54.738 | 0.00 | 0.00 |
| ATOM | 1043 | CG   | TYR | X | 68 | 56.438 | 42.873 | 56.308 | 0.00 | 0.00 |
| ATOM | 1044 | CD1  | TYR | X | 68 | 56.447 | 42.528 | 57.666 | 0.00 | 0.00 |
| ATOM | 1045 | HD1  | TYR | X | 68 | 55.603 | 42.812 | 58.278 | 0.00 | 0.00 |
| ATOM | 1046 | CE1  | TYR | X | 68 | 57.495 | 41.824 | 58.200 | 0.00 | 0.00 |
| ATOM | 1047 | HE1  | TYR | X | 68 | 57.476 | 41.625 | 59.261 | 0.00 | 0.00 |
| ATOM | 1048 | CZ   | TYR | X | 68 | 58.603 | 41.454 | 57.413 | 0.00 | 0.00 |
| ATOM | 1049 | OH   | TYR | X | 68 | 59.656 | 40.796 | 58.000 | 0.00 | 0.00 |
| ATOM | 1050 | HH   | TYR | X | 68 | 59.435 | 40.577 | 58.908 | 0.00 | 0.00 |
| ATOM | 1051 | CE2  | TYR | X | 68 | 58.590 | 41.745 | 56.029 | 0.00 | 0.00 |
| ATOM | 1052 | HE2  | TYR | X | 68 | 59.367 | 41.350 | 55.390 | 0.00 | 0.00 |
| ATOM | 1053 | CD2  | TYR | X | 68 | 57.510 | 42.408 | 55.474 | 0.00 | 0.00 |
| ATOM | 1054 | HD2  | TYR | X | 68 | 57.571 | 42.569 | 54.408 | 0.00 | 0.00 |
| ATOM | 1055 | C    | TYR | X | 68 | 56.874 | 45.511 | 54.719 | 0.00 | 0.00 |
| ATOM | 1056 | O    | TYR | X | 68 | 56.653 | 45.250 | 53.532 | 0.00 | 0.00 |
| ATOM | 1057 | N    | VAL | X | 69 | 58.092 | 45.876 | 55.186 | 0.00 | 0.00 |
| ATOM | 1058 | H    | VAL | X | 69 | 58.158 | 46.304 | 56.098 | 0.00 | 0.00 |
| ATOM | 1059 | CA   | VAL | X | 69 | 59.217 | 46.058 | 54.263 | 0.00 | 0.00 |
| ATOM | 1060 | HA   | VAL | X | 69 | 58.784 | 46.441 | 53.339 | 0.00 | 0.00 |
| ATOM | 1061 | CB   | VAL | X | 69 | 60.296 | 47.110 | 54.735 | 0.00 | 0.00 |
| ATOM | 1062 | HB   | VAL | X | 69 | 60.715 | 46.829 | 55.702 | 0.00 | 0.00 |
| ATOM | 1063 | CG1  | VAL | X | 69 | 61.652 | 47.105 | 53.942 | 0.00 | 0.00 |
| ATOM | 1064 | HG11 | VAL | X | 69 | 62.356 | 47.868 | 54.277 | 0.00 | 0.00 |
| ATOM | 1065 | HG12 | VAL | X | 69 | 62.225 | 46.182 | 54.032 | 0.00 | 0.00 |
| ATOM | 1066 | HG13 | VAL | X | 69 | 61.385 | 47.185 | 52.888 | 0.00 | 0.00 |
| ATOM | 1067 | CG2  | VAL | X | 69 | 59.653 | 48.501 | 54.841 | 0.00 | 0.00 |
| ATOM | 1068 | HG21 | VAL | X | 69 | 59.156 | 48.733 | 53.899 | 0.00 | 0.00 |
| ATOM | 1069 | HG22 | VAL | X | 69 | 58.830 | 48.423 | 55.551 | 0.00 | 0.00 |
| ATOM | 1070 | HG23 | VAL | X | 69 | 60.391 | 49.231 | 55.174 | 0.00 | 0.00 |
| ATOM | 1071 | C    | VAL | X | 69 | 59.991 | 44.747 | 53.932 | 0.00 | 0.00 |
| ATOM | 1072 | O    | VAL | X | 69 | 60.425 | 44.062 | 54.880 | 0.00 | 0.00 |
| ATOM | 1073 | N    | ASP | X | 70 | 60.012 | 44.424 | 52.641 | 0.00 | 0.00 |
| ATOM | 1074 | H    | ASP | X | 70 | 59.578 | 45.133 | 52.068 | 0.00 | 0.00 |
| ATOM | 1075 | CA   | ASP | X | 70 | 60.690 | 43.208 | 52.131 | 0.00 | 0.00 |
| ATOM | 1076 | HA   | ASP | X | 70 | 60.091 | 42.413 | 52.575 | 0.00 | 0.00 |
| ATOM | 1077 | CB   | ASP | X | 70 | 60.726 | 43.170 | 50.595 | 0.00 | 0.00 |
| ATOM | 1078 | HB2  | ASP | X | 70 | 59.700 | 43.007 | 50.266 | 0.00 | 0.00 |
| ATOM | 1079 | HB3  | ASP | X | 70 | 61.092 | 44.142 | 50.266 | 0.00 | 0.00 |
| ATOM | 1080 | CG   | ASP | X | 70 | 61.745 | 42.115 | 50.155 | 0.00 | 0.00 |
| ATOM | 1081 | OD1  | ASP | X | 70 | 61.731 | 41.015 | 50.711 | 0.00 | 0.00 |
| ATOM | 1082 | OD2  | ASP | X | 70 | 62.482 | 42.403 | 49.207 | 0.00 | 0.00 |
| ATOM | 1083 | C    | ASP | X | 70 | 62.129 | 43.088 | 52.718 | 0.00 | 0.00 |
| ATOM | 1084 | O    | ASP | X | 70 | 63.004 | 43.937 | 52.548 | 0.00 | 0.00 |
| ATOM | 1085 | N    | THR | X | 71 | 62.234 | 42.100 | 53.619 | 0.00 | 0.00 |
| ATOM | 1086 | H    | THR | X | 71 | 61.487 | 41.425 | 53.696 | 0.00 | 0.00 |
| ATOM | 1087 | CA   | THR | X | 71 | 63.408 | 41.751 | 54.383 | 0.00 | 0.00 |

|      |      |      |     |   |    |        |        |        |      |      |
|------|------|------|-----|---|----|--------|--------|--------|------|------|
| ATOM | 1088 | HA   | THR | X | 71 | 64.152 | 42.546 | 54.332 | 0.00 | 0.00 |
| ATOM | 1089 | CB   | THR | X | 71 | 62.984 | 41.527 | 55.872 | 0.00 | 0.00 |
| ATOM | 1090 | HB   | THR | X | 71 | 62.423 | 40.592 | 55.872 | 0.00 | 0.00 |
| ATOM | 1091 | CG2  | THR | X | 71 | 64.190 | 41.322 | 56.777 | 0.00 | 0.00 |
| ATOM | 1092 | HG21 | THR | X | 71 | 63.868 | 41.386 | 57.816 | 0.00 | 0.00 |
| ATOM | 1093 | HG22 | THR | X | 71 | 64.502 | 40.289 | 56.621 | 0.00 | 0.00 |
| ATOM | 1094 | HG23 | THR | X | 71 | 64.970 | 42.072 | 56.646 | 0.00 | 0.00 |
| ATOM | 1095 | OG1  | THR | X | 71 | 62.337 | 42.682 | 56.314 | 0.00 | 0.00 |
| ATOM | 1096 | HG1  | THR | X | 71 | 61.701 | 43.013 | 55.676 | 0.00 | 0.00 |
| ATOM | 1097 | C    | THR | X | 71 | 64.175 | 40.502 | 53.756 | 0.00 | 0.00 |
| ATOM | 1098 | O    | THR | X | 71 | 65.264 | 40.095 | 54.210 | 0.00 | 0.00 |
| ATOM | 1099 | N    | LEU | X | 72 | 63.591 | 39.859 | 52.719 | 0.00 | 0.00 |
| ATOM | 1100 | H    | LEU | X | 72 | 62.703 | 40.115 | 52.312 | 0.00 | 0.00 |
| ATOM | 1101 | CA   | LEU | X | 72 | 64.343 | 38.716 | 52.106 | 0.00 | 0.00 |
| ATOM | 1102 | HA   | LEU | X | 72 | 65.009 | 38.129 | 52.738 | 0.00 | 0.00 |
| ATOM | 1103 | CB   | LEU | X | 72 | 63.222 | 37.722 | 51.608 | 0.00 | 0.00 |
| ATOM | 1104 | HB2  | LEU | X | 72 | 62.496 | 37.561 | 52.405 | 0.00 | 0.00 |
| ATOM | 1105 | HB3  | LEU | X | 72 | 62.550 | 38.189 | 50.889 | 0.00 | 0.00 |
| ATOM | 1106 | CG   | LEU | X | 72 | 63.693 | 36.343 | 51.110 | 0.00 | 0.00 |
| ATOM | 1107 | HG   | LEU | X | 72 | 64.032 | 36.429 | 50.077 | 0.00 | 0.00 |
| ATOM | 1108 | CD1  | LEU | X | 72 | 64.846 | 35.769 | 51.943 | 0.00 | 0.00 |
| ATOM | 1109 | HD11 | LEU | X | 72 | 65.825 | 36.242 | 51.876 | 0.00 | 0.00 |
| ATOM | 1110 | HD12 | LEU | X | 72 | 64.734 | 35.832 | 53.026 | 0.00 | 0.00 |
| ATOM | 1111 | HD13 | LEU | X | 72 | 64.982 | 34.711 | 51.718 | 0.00 | 0.00 |
| ATOM | 1112 | CD2  | LEU | X | 72 | 62.581 | 35.332 | 51.078 | 0.00 | 0.00 |
| ATOM | 1113 | HD21 | LEU | X | 72 | 62.188 | 35.203 | 52.087 | 0.00 | 0.00 |
| ATOM | 1114 | HD22 | LEU | X | 72 | 61.789 | 35.816 | 50.506 | 0.00 | 0.00 |
| ATOM | 1115 | HD23 | LEU | X | 72 | 62.851 | 34.380 | 50.622 | 0.00 | 0.00 |
| ATOM | 1116 | C    | LEU | X | 72 | 65.300 | 39.197 | 51.056 | 0.00 | 0.00 |
| ATOM | 1117 | O    | LEU | X | 72 | 66.505 | 39.072 | 51.268 | 0.00 | 0.00 |
| ATOM | 1118 | N    | TYR | X | 73 | 64.908 | 39.776 | 49.960 | 0.00 | 0.00 |
| ATOM | 1119 | H    | TYR | X | 73 | 63.958 | 40.107 | 50.044 | 0.00 | 0.00 |
| ATOM | 1120 | CA   | TYR | X | 73 | 65.676 | 40.155 | 48.744 | 0.00 | 0.00 |
| ATOM | 1121 | HA   | TYR | X | 73 | 66.714 | 39.855 | 48.884 | 0.00 | 0.00 |
| ATOM | 1122 | CB   | TYR | X | 73 | 65.047 | 39.356 | 47.595 | 0.00 | 0.00 |
| ATOM | 1123 | HB2  | TYR | X | 73 | 64.111 | 39.842 | 47.321 | 0.00 | 0.00 |
| ATOM | 1124 | HB3  | TYR | X | 73 | 65.553 | 39.663 | 46.680 | 0.00 | 0.00 |
| ATOM | 1125 | CG   | TYR | X | 73 | 64.977 | 37.816 | 47.624 | 0.00 | 0.00 |
| ATOM | 1126 | CD1  | TYR | X | 73 | 66.125 | 37.022 | 47.864 | 0.00 | 0.00 |
| ATOM | 1127 | HD1  | TYR | X | 73 | 67.112 | 37.399 | 48.089 | 0.00 | 0.00 |
| ATOM | 1128 | CE1  | TYR | X | 73 | 66.013 | 35.589 | 47.679 | 0.00 | 0.00 |
| ATOM | 1129 | HE1  | TYR | X | 73 | 66.781 | 34.912 | 48.023 | 0.00 | 0.00 |
| ATOM | 1130 | CZ   | TYR | X | 73 | 64.793 | 34.997 | 47.294 | 0.00 | 0.00 |
| ATOM | 1131 | OH   | TYR | X | 73 | 64.785 | 33.677 | 47.044 | 0.00 | 0.00 |
| ATOM | 1132 | HH   | TYR | X | 73 | 63.905 | 33.329 | 46.880 | 0.00 | 0.00 |
| ATOM | 1133 | CE2  | TYR | X | 73 | 63.660 | 35.821 | 47.136 | 0.00 | 0.00 |
| ATOM | 1134 | HE2  | TYR | X | 73 | 62.743 | 35.298 | 46.910 | 0.00 | 0.00 |
| ATOM | 1135 | CD2  | TYR | X | 73 | 63.718 | 37.196 | 47.232 | 0.00 | 0.00 |
| ATOM | 1136 | HD2  | TYR | X | 73 | 62.829 | 37.786 | 47.063 | 0.00 | 0.00 |
| ATOM | 1137 | C    | TYR | X | 73 | 65.650 | 41.682 | 48.585 | 0.00 | 0.00 |
| ATOM | 1138 | O    | TYR | X | 73 | 65.126 | 42.173 | 47.516 | 0.00 | 0.00 |
| ATOM | 1139 | N    | PRO | X | 74 | 66.222 | 42.452 | 49.516 | 0.00 | 0.00 |
| ATOM | 1140 | CD   | PRO | X | 74 | 66.883 | 42.054 | 50.760 | 0.00 | 0.00 |
| ATOM | 1141 | HD2  | PRO | X | 74 | 67.536 | 41.193 | 50.621 | 0.00 | 0.00 |
| ATOM | 1142 | HD3  | PRO | X | 74 | 66.156 | 41.848 | 51.546 | 0.00 | 0.00 |
| ATOM | 1143 | CG   | PRO | X | 74 | 67.705 | 43.287 | 51.239 | 0.00 | 0.00 |
| ATOM | 1144 | HG2  | PRO | X | 74 | 68.654 | 43.149 | 50.719 | 0.00 | 0.00 |
| ATOM | 1145 | HG3  | PRO | X | 74 | 67.728 | 43.203 | 52.325 | 0.00 | 0.00 |
| ATOM | 1146 | CB   | PRO | X | 74 | 66.975 | 44.471 | 50.688 | 0.00 | 0.00 |
| ATOM | 1147 | HB2  | PRO | X | 74 | 67.597 | 45.346 | 50.497 | 0.00 | 0.00 |
| ATOM | 1148 | HB3  | PRO | X | 74 | 66.248 | 44.757 | 51.449 | 0.00 | 0.00 |
| ATOM | 1149 | CA   | PRO | X | 74 | 66.237 | 43.947 | 49.452 | 0.00 | 0.00 |
| ATOM | 1150 | HA   | PRO | X | 74 | 65.226 | 44.352 | 49.423 | 0.00 | 0.00 |
| ATOM | 1151 | C    | PRO | X | 74 | 66.920 | 44.366 | 48.155 | 0.00 | 0.00 |
| ATOM | 1152 | O    | PRO | X | 74 | 68.039 | 44.035 | 47.803 | 0.00 | 0.00 |
| ATOM | 1153 | N    | GLY | X | 75 | 66.241 | 45.220 | 47.439 | 0.00 | 0.00 |
| ATOM | 1154 | H    | GLY | X | 75 | 65.297 | 45.389 | 47.757 | 0.00 | 0.00 |
| ATOM | 1155 | CA   | GLY | X | 75 | 66.622 | 45.978 | 46.238 | 0.00 | 0.00 |
| ATOM | 1156 | HA2  | GLY | X | 75 | 66.173 | 46.956 | 46.198 | 0.00 | 0.00 |
| ATOM | 1157 | HA3  | GLY | X | 75 | 67.661 | 46.146 | 46.440 | 0.00 | 0.00 |

|      |      |      |     |   |    |        |        |        |      |      |
|------|------|------|-----|---|----|--------|--------|--------|------|------|
| ATOM | 1158 | C    | GLY | X | 75 | 66.349 | 45.320 | 44.938 | 0.00 | 0.00 |
| ATOM | 1159 | O    | GLY | X | 75 | 66.760 | 45.867 | 43.936 | 0.00 | 0.00 |
| ATOM | 1160 | N    | PHE | X | 76 | 65.835 | 44.123 | 44.988 | 0.00 | 0.00 |
| ATOM | 1161 | H    | PHE | X | 76 | 65.790 | 43.737 | 45.920 | 0.00 | 0.00 |
| ATOM | 1162 | CA   | PHE | X | 76 | 65.670 | 43.260 | 43.804 | 0.00 | 0.00 |
| ATOM | 1163 | HA   | PHE | X | 76 | 66.489 | 43.413 | 43.101 | 0.00 | 0.00 |
| ATOM | 1164 | CB   | PHE | X | 76 | 65.488 | 41.777 | 44.242 | 0.00 | 0.00 |
| ATOM | 1165 | HB2  | PHE | X | 76 | 66.357 | 41.494 | 44.836 | 0.00 | 0.00 |
| ATOM | 1166 | HB3  | PHE | X | 76 | 64.673 | 41.745 | 44.965 | 0.00 | 0.00 |
| ATOM | 1167 | CG   | PHE | X | 76 | 65.214 | 40.677 | 43.213 | 0.00 | 0.00 |
| ATOM | 1168 | CD1  | PHE | X | 76 | 66.239 | 40.375 | 42.358 | 0.00 | 0.00 |
| ATOM | 1169 | HD1  | PHE | X | 76 | 67.137 | 40.972 | 42.429 | 0.00 | 0.00 |
| ATOM | 1170 | CE1  | PHE | X | 76 | 66.149 | 39.317 | 41.502 | 0.00 | 0.00 |
| ATOM | 1171 | HE1  | PHE | X | 76 | 66.926 | 39.059 | 40.797 | 0.00 | 0.00 |
| ATOM | 1172 | CZ   | PHE | X | 76 | 64.983 | 38.545 | 41.414 | 0.00 | 0.00 |
| ATOM | 1173 | HZ   | PHE | X | 76 | 64.943 | 37.701 | 40.740 | 0.00 | 0.00 |
| ATOM | 1174 | CE2  | PHE | X | 76 | 63.892 | 38.945 | 42.233 | 0.00 | 0.00 |
| ATOM | 1175 | HE2  | PHE | X | 76 | 63.067 | 38.249 | 42.279 | 0.00 | 0.00 |
| ATOM | 1176 | CD2  | PHE | X | 76 | 64.058 | 39.930 | 43.190 | 0.00 | 0.00 |
| ATOM | 1177 | HD2  | PHE | X | 76 | 63.352 | 39.984 | 44.005 | 0.00 | 0.00 |
| ATOM | 1178 | C    | PHE | X | 76 | 64.356 | 43.619 | 43.013 | 0.00 | 0.00 |
| ATOM | 1179 | O    | PHE | X | 76 | 63.379 | 43.973 | 43.616 | 0.00 | 0.00 |
| ATOM | 1180 | N    | GLU | X | 77 | 64.486 | 43.558 | 41.664 | 0.00 | 0.00 |
| ATOM | 1181 | H    | GLU | X | 77 | 65.423 | 43.379 | 41.333 | 0.00 | 0.00 |
| ATOM | 1182 | CA   | GLU | X | 77 | 63.383 | 44.042 | 40.761 | 0.00 | 0.00 |
| ATOM | 1183 | HA   | GLU | X | 77 | 63.161 | 45.095 | 40.938 | 0.00 | 0.00 |
| ATOM | 1184 | CB   | GLU | X | 77 | 64.041 | 44.010 | 39.346 | 0.00 | 0.00 |
| ATOM | 1185 | HB2  | GLU | X | 77 | 64.941 | 44.625 | 39.359 | 0.00 | 0.00 |
| ATOM | 1186 | HB3  | GLU | X | 77 | 64.332 | 42.978 | 39.154 | 0.00 | 0.00 |
| ATOM | 1187 | CG   | GLU | X | 77 | 63.219 | 44.455 | 38.165 | 0.00 | 0.00 |
| ATOM | 1188 | HG2  | GLU | X | 77 | 62.619 | 45.345 | 38.358 | 0.00 | 0.00 |
| ATOM | 1189 | HG3  | GLU | X | 77 | 64.004 | 44.732 | 37.461 | 0.00 | 0.00 |
| ATOM | 1190 | CD   | GLU | X | 77 | 62.363 | 43.419 | 37.465 | 0.00 | 0.00 |
| ATOM | 1191 | OE1  | GLU | X | 77 | 61.259 | 43.868 | 37.120 | 0.00 | 0.00 |
| ATOM | 1192 | OE2  | GLU | X | 77 | 62.794 | 42.292 | 37.240 | 0.00 | 0.00 |
| ATOM | 1193 | C    | GLU | X | 77 | 62.150 | 43.086 | 40.875 | 0.00 | 0.00 |
| ATOM | 1194 | O    | GLU | X | 77 | 61.009 | 43.472 | 40.573 | 0.00 | 0.00 |
| ATOM | 1195 | N    | GLY | X | 78 | 62.258 | 41.836 | 41.431 | 0.00 | 0.00 |
| ATOM | 1196 | H    | GLY | X | 78 | 63.170 | 41.404 | 41.451 | 0.00 | 0.00 |
| ATOM | 1197 | CA   | GLY | X | 78 | 61.169 | 40.909 | 41.822 | 0.00 | 0.00 |
| ATOM | 1198 | HA2  | GLY | X | 78 | 60.404 | 41.085 | 41.049 | 0.00 | 0.00 |
| ATOM | 1199 | HA3  | GLY | X | 78 | 61.544 | 39.915 | 41.748 | 0.00 | 0.00 |
| ATOM | 1200 | C    | GLY | X | 78 | 60.532 | 40.994 | 43.199 | 0.00 | 0.00 |
| ATOM | 1201 | O    | GLY | X | 78 | 59.734 | 40.142 | 43.505 | 0.00 | 0.00 |
| ATOM | 1202 | N    | THR | X | 79 | 60.884 | 42.024 | 43.948 | 0.00 | 0.00 |
| ATOM | 1203 | H    | THR | X | 79 | 61.677 | 42.557 | 43.619 | 0.00 | 0.00 |
| ATOM | 1204 | CA   | THR | X | 79 | 60.358 | 42.382 | 45.273 | 0.00 | 0.00 |
| ATOM | 1205 | HA   | THR | X | 79 | 59.401 | 41.881 | 45.417 | 0.00 | 0.00 |
| ATOM | 1206 | CB   | THR | X | 79 | 61.285 | 42.000 | 46.447 | 0.00 | 0.00 |
| ATOM | 1207 | HB   | THR | X | 79 | 60.702 | 42.378 | 47.287 | 0.00 | 0.00 |
| ATOM | 1208 | CG2  | THR | X | 79 | 61.402 | 40.464 | 46.610 | 0.00 | 0.00 |
| ATOM | 1209 | HG21 | THR | X | 79 | 61.808 | 40.167 | 47.577 | 0.00 | 0.00 |
| ATOM | 1210 | HG22 | THR | X | 79 | 60.407 | 40.033 | 46.489 | 0.00 | 0.00 |
| ATOM | 1211 | HG23 | THR | X | 79 | 61.986 | 40.098 | 45.766 | 0.00 | 0.00 |
| ATOM | 1212 | OG1  | THR | X | 79 | 62.533 | 42.627 | 46.314 | 0.00 | 0.00 |
| ATOM | 1213 | HG1  | THR | X | 79 | 63.065 | 42.282 | 47.034 | 0.00 | 0.00 |
| ATOM | 1214 | C    | THR | X | 79 | 59.962 | 43.830 | 45.373 | 0.00 | 0.00 |
| ATOM | 1215 | O    | THR | X | 79 | 58.807 | 44.131 | 45.714 | 0.00 | 0.00 |
| ATOM | 1216 | N    | GLU | X | 80 | 60.693 | 44.678 | 44.635 | 0.00 | 0.00 |
| ATOM | 1217 | H    | GLU | X | 80 | 61.544 | 44.262 | 44.284 | 0.00 | 0.00 |
| ATOM | 1218 | CA   | GLU | X | 80 | 60.326 | 45.941 | 44.111 | 0.00 | 0.00 |
| ATOM | 1219 | HA   | GLU | X | 80 | 59.933 | 46.682 | 44.807 | 0.00 | 0.00 |
| ATOM | 1220 | CB   | GLU | X | 80 | 61.515 | 46.639 | 43.592 | 0.00 | 0.00 |
| ATOM | 1221 | HB2  | GLU | X | 80 | 62.158 | 46.015 | 42.972 | 0.00 | 0.00 |
| ATOM | 1222 | HB3  | GLU | X | 80 | 61.211 | 47.407 | 42.881 | 0.00 | 0.00 |
| ATOM | 1223 | CG   | GLU | X | 80 | 62.356 | 47.237 | 44.686 | 0.00 | 0.00 |
| ATOM | 1224 | HG2  | GLU | X | 80 | 61.703 | 47.910 | 45.241 | 0.00 | 0.00 |
| ATOM | 1225 | HG3  | GLU | X | 80 | 62.795 | 46.495 | 45.353 | 0.00 | 0.00 |
| ATOM | 1226 | CD   | GLU | X | 80 | 63.551 | 48.095 | 44.134 | 0.00 | 0.00 |
| ATOM | 1227 | OE1  | GLU | X | 80 | 64.229 | 48.783 | 44.990 | 0.00 | 0.00 |

|      |      |      |     |   |    |        |        |        |      |      |
|------|------|------|-----|---|----|--------|--------|--------|------|------|
| ATOM | 1228 | OE2  | GLU | X | 80 | 63.735 | 48.351 | 42.982 | 0.00 | 0.00 |
| ATOM | 1229 | C    | GLU | X | 80 | 59.292 | 45.782 | 43.037 | 0.00 | 0.00 |
| ATOM | 1230 | O    | GLU | X | 80 | 58.849 | 46.824 | 42.581 | 0.00 | 0.00 |
| ATOM | 1231 | N    | MET | X | 81 | 58.709 | 44.587 | 42.708 | 0.00 | 0.00 |
| ATOM | 1232 | H    | MET | X | 81 | 59.031 | 43.755 | 43.181 | 0.00 | 0.00 |
| ATOM | 1233 | CA   | MET | X | 81 | 57.387 | 44.416 | 41.962 | 0.00 | 0.00 |
| ATOM | 1234 | HA   | MET | X | 81 | 57.504 | 44.717 | 40.921 | 0.00 | 0.00 |
| ATOM | 1235 | CB   | MET | X | 81 | 56.896 | 42.934 | 42.028 | 0.00 | 0.00 |
| ATOM | 1236 | HB2  | MET | X | 81 | 57.117 | 42.487 | 42.998 | 0.00 | 0.00 |
| ATOM | 1237 | HB3  | MET | X | 81 | 55.812 | 42.875 | 41.937 | 0.00 | 0.00 |
| ATOM | 1238 | CG   | MET | X | 81 | 57.650 | 42.114 | 40.916 | 0.00 | 0.00 |
| ATOM | 1239 | HG2  | MET | X | 81 | 57.249 | 42.493 | 39.977 | 0.00 | 0.00 |
| ATOM | 1240 | HG3  | MET | X | 81 | 58.709 | 42.373 | 40.918 | 0.00 | 0.00 |
| ATOM | 1241 | SD   | MET | X | 81 | 57.611 | 40.286 | 41.038 | 0.00 | 0.00 |
| ATOM | 1242 | CE   | MET | X | 81 | 55.976 | 39.878 | 40.492 | 0.00 | 0.00 |
| ATOM | 1243 | HE1  | MET | X | 81 | 55.339 | 40.254 | 41.292 | 0.00 | 0.00 |
| ATOM | 1244 | HE2  | MET | X | 81 | 55.787 | 40.489 | 39.609 | 0.00 | 0.00 |
| ATOM | 1245 | HE3  | MET | X | 81 | 55.764 | 38.839 | 40.241 | 0.00 | 0.00 |
| ATOM | 1246 | C    | MET | X | 81 | 56.400 | 45.285 | 42.678 | 0.00 | 0.00 |
| ATOM | 1247 | O    | MET | X | 81 | 55.608 | 45.917 | 41.947 | 0.00 | 0.00 |
| ATOM | 1248 | N    | TRP | X | 82 | 56.206 | 45.173 | 44.020 | 0.00 | 0.00 |
| ATOM | 1249 | H    | TRP | X | 82 | 56.835 | 44.618 | 44.582 | 0.00 | 0.00 |
| ATOM | 1250 | CA   | TRP | X | 82 | 55.193 | 46.020 | 44.735 | 0.00 | 0.00 |
| ATOM | 1251 | HA   | TRP | X | 82 | 54.816 | 46.729 | 43.998 | 0.00 | 0.00 |
| ATOM | 1252 | CB   | TRP | X | 82 | 54.042 | 45.255 | 45.114 | 0.00 | 0.00 |
| ATOM | 1253 | HB2  | TRP | X | 82 | 54.324 | 44.460 | 45.804 | 0.00 | 0.00 |
| ATOM | 1254 | HB3  | TRP | X | 82 | 53.403 | 45.898 | 45.719 | 0.00 | 0.00 |
| ATOM | 1255 | CG   | TRP | X | 82 | 53.347 | 44.416 | 44.041 | 0.00 | 0.00 |
| ATOM | 1256 | CD1  | TRP | X | 82 | 53.233 | 43.017 | 44.039 | 0.00 | 0.00 |
| ATOM | 1257 | HD1  | TRP | X | 82 | 53.635 | 42.373 | 44.808 | 0.00 | 0.00 |
| ATOM | 1258 | NE1  | TRP | X | 82 | 52.348 | 42.612 | 43.088 | 0.00 | 0.00 |
| ATOM | 1259 | HE1  | TRP | X | 82 | 51.916 | 41.702 | 43.011 | 0.00 | 0.00 |
| ATOM | 1260 | CE2  | TRP | X | 82 | 51.811 | 43.730 | 42.387 | 0.00 | 0.00 |
| ATOM | 1261 | CZ2  | TRP | X | 82 | 50.962 | 43.864 | 41.284 | 0.00 | 0.00 |
| ATOM | 1262 | HZ2  | TRP | X | 82 | 50.487 | 42.939 | 40.994 | 0.00 | 0.00 |
| ATOM | 1263 | CH2  | TRP | X | 82 | 50.758 | 45.177 | 40.703 | 0.00 | 0.00 |
| ATOM | 1264 | HH2  | TRP | X | 82 | 50.021 | 45.255 | 39.917 | 0.00 | 0.00 |
| ATOM | 1265 | CZ3  | TRP | X | 82 | 51.479 | 46.261 | 41.229 | 0.00 | 0.00 |
| ATOM | 1266 | HZ3  | TRP | X | 82 | 51.357 | 47.243 | 40.796 | 0.00 | 0.00 |
| ATOM | 1267 | CE3  | TRP | X | 82 | 52.371 | 46.041 | 42.270 | 0.00 | 0.00 |
| ATOM | 1268 | HE3  | TRP | X | 82 | 52.802 | 46.905 | 42.753 | 0.00 | 0.00 |
| ATOM | 1269 | CD2  | TRP | X | 82 | 52.579 | 44.810 | 42.825 | 0.00 | 0.00 |
| ATOM | 1270 | C    | TRP | X | 82 | 55.632 | 46.856 | 45.924 | 0.00 | 0.00 |
| ATOM | 1271 | O    | TRP | X | 82 | 54.991 | 47.876 | 46.278 | 0.00 | 0.00 |
| ATOM | 1272 | N    | ASN | X | 83 | 56.774 | 46.499 | 46.573 | 0.00 | 0.00 |
| ATOM | 1273 | H    | ASN | X | 83 | 57.244 | 45.669 | 46.240 | 0.00 | 0.00 |
| ATOM | 1274 | CA   | ASN | X | 83 | 57.251 | 47.016 | 47.893 | 0.00 | 0.00 |
| ATOM | 1275 | HA   | ASN | X | 83 | 56.308 | 47.096 | 48.434 | 0.00 | 0.00 |
| ATOM | 1276 | CB   | ASN | X | 83 | 58.183 | 45.982 | 48.537 | 0.00 | 0.00 |
| ATOM | 1277 | HB2  | ASN | X | 83 | 57.902 | 45.018 | 48.113 | 0.00 | 0.00 |
| ATOM | 1278 | HB3  | ASN | X | 83 | 59.173 | 46.303 | 48.214 | 0.00 | 0.00 |
| ATOM | 1279 | CG   | ASN | X | 83 | 58.102 | 45.910 | 50.078 | 0.00 | 0.00 |
| ATOM | 1280 | OD1  | ASN | X | 83 | 59.106 | 46.262 | 50.707 | 0.00 | 0.00 |
| ATOM | 1281 | ND2  | ASN | X | 83 | 56.969 | 45.637 | 50.696 | 0.00 | 0.00 |
| ATOM | 1282 | HD21 | ASN | X | 83 | 56.999 | 45.539 | 51.701 | 0.00 | 0.00 |
| ATOM | 1283 | HD22 | ASN | X | 83 | 56.117 | 45.510 | 50.168 | 0.00 | 0.00 |
| ATOM | 1284 | C    | ASN | X | 83 | 57.849 | 48.443 | 47.644 | 0.00 | 0.00 |
| ATOM | 1285 | O    | ASN | X | 83 | 58.473 | 48.749 | 46.575 | 0.00 | 0.00 |
| ATOM | 1286 | N    | PRO | X | 84 | 57.541 | 49.427 | 48.514 | 0.00 | 0.00 |
| ATOM | 1287 | CD   | PRO | X | 84 | 57.164 | 49.263 | 49.872 | 0.00 | 0.00 |
| ATOM | 1288 | HD2  | PRO | X | 84 | 57.954 | 48.737 | 50.407 | 0.00 | 0.00 |
| ATOM | 1289 | HD3  | PRO | X | 84 | 56.227 | 48.709 | 49.940 | 0.00 | 0.00 |
| ATOM | 1290 | CG   | PRO | X | 84 | 56.920 | 50.658 | 50.462 | 0.00 | 0.00 |
| ATOM | 1291 | HG2  | PRO | X | 84 | 57.737 | 50.984 | 51.105 | 0.00 | 0.00 |
| ATOM | 1292 | HG3  | PRO | X | 84 | 55.965 | 50.625 | 50.986 | 0.00 | 0.00 |
| ATOM | 1293 | CB   | PRO | X | 84 | 56.728 | 51.535 | 49.148 | 0.00 | 0.00 |
| ATOM | 1294 | HB2  | PRO | X | 84 | 56.974 | 52.591 | 49.263 | 0.00 | 0.00 |
| ATOM | 1295 | HB3  | PRO | X | 84 | 55.693 | 51.592 | 48.810 | 0.00 | 0.00 |
| ATOM | 1296 | CA   | PRO | X | 84 | 57.543 | 50.832 | 48.069 | 0.00 | 0.00 |
| ATOM | 1297 | HA   | PRO | X | 84 | 56.980 | 50.909 | 47.138 | 0.00 | 0.00 |

|      |      |      |     |   |    |        |        |        |      |      |
|------|------|------|-----|---|----|--------|--------|--------|------|------|
| ATOM | 1298 | C    | PRO | X | 84 | 58.919 | 51.478 | 47.877 | 0.00 | 0.00 |
| ATOM | 1299 | O    | PRO | X | 84 | 59.859 | 51.160 | 48.579 | 0.00 | 0.00 |
| ATOM | 1300 | N    | ASN | X | 85 | 59.047 | 52.435 | 46.934 | 0.00 | 0.00 |
| ATOM | 1301 | H    | ASN | X | 85 | 58.293 | 52.662 | 46.301 | 0.00 | 0.00 |
| ATOM | 1302 | CA   | ASN | X | 85 | 60.109 | 53.425 | 46.828 | 0.00 | 0.00 |
| ATOM | 1303 | HA   | ASN | X | 85 | 61.021 | 52.914 | 47.134 | 0.00 | 0.00 |
| ATOM | 1304 | CB   | ASN | X | 85 | 60.267 | 53.883 | 45.360 | 0.00 | 0.00 |
| ATOM | 1305 | HB2  | ASN | X | 85 | 61.242 | 54.350 | 45.221 | 0.00 | 0.00 |
| ATOM | 1306 | HB3  | ASN | X | 85 | 60.340 | 52.999 | 44.727 | 0.00 | 0.00 |
| ATOM | 1307 | CG   | ASN | X | 85 | 59.145 | 54.800 | 44.807 | 0.00 | 0.00 |
| ATOM | 1308 | OD1  | ASN | X | 85 | 58.061 | 54.969 | 45.369 | 0.00 | 0.00 |
| ATOM | 1309 | ND2  | ASN | X | 85 | 59.421 | 55.520 | 43.729 | 0.00 | 0.00 |
| ATOM | 1310 | HD21 | ASN | X | 85 | 58.632 | 56.017 | 43.341 | 0.00 | 0.00 |
| ATOM | 1311 | HD22 | ASN | X | 85 | 60.276 | 55.379 | 43.210 | 0.00 | 0.00 |
| ATOM | 1312 | C    | ASN | X | 85 | 59.869 | 54.691 | 47.675 | 0.00 | 0.00 |
| ATOM | 1313 | O    | ASN | X | 85 | 60.721 | 55.514 | 47.739 | 0.00 | 0.00 |
| ATOM | 1314 | N    | ARG | X | 86 | 58.758 | 54.819 | 48.401 | 0.00 | 0.00 |
| ATOM | 1315 | H    | ARG | X | 86 | 58.070 | 54.110 | 48.191 | 0.00 | 0.00 |
| ATOM | 1316 | CA   | ARG | X | 86 | 58.267 | 55.994 | 49.159 | 0.00 | 0.00 |
| ATOM | 1317 | HA   | ARG | X | 86 | 58.891 | 56.846 | 48.889 | 0.00 | 0.00 |
| ATOM | 1318 | CB   | ARG | X | 86 | 56.801 | 56.135 | 48.697 | 0.00 | 0.00 |
| ATOM | 1319 | HB2  | ARG | X | 86 | 56.582 | 55.630 | 47.756 | 0.00 | 0.00 |
| ATOM | 1320 | HB3  | ARG | X | 86 | 56.175 | 55.762 | 49.509 | 0.00 | 0.00 |
| ATOM | 1321 | CG   | ARG | X | 86 | 56.463 | 57.600 | 48.507 | 0.00 | 0.00 |
| ATOM | 1322 | HG2  | ARG | X | 86 | 55.388 | 57.763 | 48.594 | 0.00 | 0.00 |
| ATOM | 1323 | HG3  | ARG | X | 86 | 56.856 | 58.225 | 49.309 | 0.00 | 0.00 |
| ATOM | 1324 | CD   | ARG | X | 86 | 57.095 | 58.135 | 47.248 | 0.00 | 0.00 |
| ATOM | 1325 | HD2  | ARG | X | 86 | 58.063 | 57.667 | 47.072 | 0.00 | 0.00 |
| ATOM | 1326 | HD3  | ARG | X | 86 | 56.543 | 57.889 | 46.341 | 0.00 | 0.00 |
| ATOM | 1327 | NE   | ARG | X | 86 | 57.228 | 59.624 | 47.256 | 0.00 | 0.00 |
| ATOM | 1328 | HE   | ARG | X | 86 | 56.514 | 60.128 | 47.764 | 0.00 | 0.00 |
| ATOM | 1329 | CZ   | ARG | X | 86 | 58.174 | 60.469 | 46.854 | 0.00 | 0.00 |
| ATOM | 1330 | NH1  | ARG | X | 86 | 59.267 | 60.094 | 46.237 | 0.00 | 0.00 |
| ATOM | 1331 | HH11 | ARG | X | 86 | 59.495 | 59.118 | 46.112 | 0.00 | 0.00 |
| ATOM | 1332 | HH12 | ARG | X | 86 | 59.862 | 60.802 | 45.831 | 0.00 | 0.00 |
| ATOM | 1333 | NH2  | ARG | X | 86 | 57.923 | 61.710 | 46.928 | 0.00 | 0.00 |
| ATOM | 1334 | HH21 | ARG | X | 86 | 57.008 | 61.987 | 47.254 | 0.00 | 0.00 |
| ATOM | 1335 | HH22 | ARG | X | 86 | 58.646 | 62.362 | 46.660 | 0.00 | 0.00 |
| ATOM | 1336 | C    | ARG | X | 86 | 58.335 | 55.726 | 50.649 | 0.00 | 0.00 |
| ATOM | 1337 | O    | ARG | X | 86 | 58.672 | 54.650 | 51.173 | 0.00 | 0.00 |
| ATOM | 1338 | N    | GLU | X | 87 | 58.103 | 56.792 | 51.366 | 0.00 | 0.00 |
| ATOM | 1339 | H    | GLU | X | 87 | 57.967 | 57.648 | 50.846 | 0.00 | 0.00 |
| ATOM | 1340 | CA   | GLU | X | 87 | 58.021 | 56.864 | 52.801 | 0.00 | 0.00 |
| ATOM | 1341 | HA   | GLU | X | 87 | 58.729 | 56.174 | 53.261 | 0.00 | 0.00 |
| ATOM | 1342 | CB   | GLU | X | 87 | 58.383 | 58.279 | 53.372 | 0.00 | 0.00 |
| ATOM | 1343 | HB2  | GLU | X | 87 | 58.556 | 58.312 | 54.447 | 0.00 | 0.00 |
| ATOM | 1344 | HB3  | GLU | X | 87 | 59.261 | 58.649 | 52.843 | 0.00 | 0.00 |
| ATOM | 1345 | CG   | GLU | X | 87 | 57.240 | 59.316 | 53.243 | 0.00 | 0.00 |
| ATOM | 1346 | HG2  | GLU | X | 87 | 56.945 | 59.296 | 52.194 | 0.00 | 0.00 |
| ATOM | 1347 | HG3  | GLU | X | 87 | 56.431 | 59.163 | 53.957 | 0.00 | 0.00 |
| ATOM | 1348 | CD   | GLU | X | 87 | 57.844 | 60.679 | 53.384 | 0.00 | 0.00 |
| ATOM | 1349 | OE1  | GLU | X | 87 | 58.630 | 60.963 | 54.302 | 0.00 | 0.00 |
| ATOM | 1350 | OE2  | GLU | X | 87 | 57.758 | 61.504 | 52.462 | 0.00 | 0.00 |
| ATOM | 1351 | C    | GLU | X | 87 | 56.665 | 56.488 | 53.353 | 0.00 | 0.00 |
| ATOM | 1352 | O    | GLU | X | 87 | 55.588 | 56.698 | 52.683 | 0.00 | 0.00 |
| ATOM | 1353 | N    | LEU | X | 88 | 56.742 | 55.884 | 54.532 | 0.00 | 0.00 |
| ATOM | 1354 | H    | LEU | X | 88 | 57.629 | 55.782 | 55.005 | 0.00 | 0.00 |
| ATOM | 1355 | CA   | LEU | X | 88 | 55.602 | 55.381 | 55.268 | 0.00 | 0.00 |
| ATOM | 1356 | HA   | LEU | X | 88 | 54.837 | 55.197 | 54.514 | 0.00 | 0.00 |
| ATOM | 1357 | CB   | LEU | X | 88 | 55.922 | 54.071 | 56.018 | 0.00 | 0.00 |
| ATOM | 1358 | HB2  | LEU | X | 88 | 56.574 | 54.341 | 56.849 | 0.00 | 0.00 |
| ATOM | 1359 | HB3  | LEU | X | 88 | 54.970 | 53.688 | 56.385 | 0.00 | 0.00 |
| ATOM | 1360 | CG   | LEU | X | 88 | 56.698 | 53.012 | 55.152 | 0.00 | 0.00 |
| ATOM | 1361 | HG   | LEU | X | 88 | 57.676 | 53.412 | 54.886 | 0.00 | 0.00 |
| ATOM | 1362 | CD1  | LEU | X | 88 | 56.941 | 51.659 | 55.931 | 0.00 | 0.00 |
| ATOM | 1363 | HD11 | LEU | X | 88 | 57.742 | 51.083 | 55.469 | 0.00 | 0.00 |
| ATOM | 1364 | HD12 | LEU | X | 88 | 57.272 | 51.848 | 56.952 | 0.00 | 0.00 |
| ATOM | 1365 | HD13 | LEU | X | 88 | 56.052 | 51.027 | 55.936 | 0.00 | 0.00 |
| ATOM | 1366 | CD2  | LEU | X | 88 | 56.055 | 52.700 | 53.735 | 0.00 | 0.00 |
| ATOM | 1367 | HD21 | LEU | X | 88 | 56.356 | 51.707 | 53.403 | 0.00 | 0.00 |

|      |      |      |     |   |    |        |        |        |      |      |
|------|------|------|-----|---|----|--------|--------|--------|------|------|
| ATOM | 1368 | HD22 | LEU | X | 88 | 54.968 | 52.674 | 53.660 | 0.00 | 0.00 |
| ATOM | 1369 | HD23 | LEU | X | 88 | 56.390 | 53.444 | 53.012 | 0.00 | 0.00 |
| ATOM | 1370 | C    | LEU | X | 88 | 54.817 | 56.372 | 56.175 | 0.00 | 0.00 |
| ATOM | 1371 | O    | LEU | X | 88 | 55.348 | 57.264 | 56.840 | 0.00 | 0.00 |
| ATOM | 1372 | N    | SER | X | 89 | 53.438 | 56.173 | 56.251 | 0.00 | 0.00 |
| ATOM | 1373 | H    | SER | X | 89 | 53.026 | 55.441 | 55.690 | 0.00 | 0.00 |
| ATOM | 1374 | CA   | SER | X | 89 | 52.513 | 56.999 | 57.032 | 0.00 | 0.00 |
| ATOM | 1375 | HA   | SER | X | 89 | 52.874 | 57.125 | 58.052 | 0.00 | 0.00 |
| ATOM | 1376 | CB   | SER | X | 89 | 52.317 | 58.468 | 56.414 | 0.00 | 0.00 |
| ATOM | 1377 | HB2  | SER | X | 89 | 52.143 | 58.416 | 55.339 | 0.00 | 0.00 |
| ATOM | 1378 | HB3  | SER | X | 89 | 51.446 | 58.923 | 56.886 | 0.00 | 0.00 |
| ATOM | 1379 | OG   | SER | X | 89 | 53.485 | 59.263 | 56.517 | 0.00 | 0.00 |
| ATOM | 1380 | HG   | SER | X | 89 | 54.208 | 58.639 | 56.614 | 0.00 | 0.00 |
| ATOM | 1381 | C    | SER | X | 89 | 51.105 | 56.360 | 57.128 | 0.00 | 0.00 |
| ATOM | 1382 | O    | SER | X | 89 | 50.877 | 55.348 | 56.438 | 0.00 | 0.00 |
| ATOM | 1383 | N    | GLU | X | 90 | 50.138 | 56.927 | 57.812 | 0.00 | 0.00 |
| ATOM | 1384 | H    | GLU | X | 90 | 50.400 | 57.691 | 58.419 | 0.00 | 0.00 |
| ATOM | 1385 | CA   | GLU | X | 90 | 48.690 | 56.657 | 57.803 | 0.00 | 0.00 |
| ATOM | 1386 | HA   | GLU | X | 90 | 48.647 | 55.645 | 57.402 | 0.00 | 0.00 |
| ATOM | 1387 | CB   | GLU | X | 90 | 47.983 | 56.873 | 59.140 | 0.00 | 0.00 |
| ATOM | 1388 | HB2  | GLU | X | 90 | 48.236 | 57.828 | 59.600 | 0.00 | 0.00 |
| ATOM | 1389 | HB3  | GLU | X | 90 | 46.906 | 56.884 | 58.977 | 0.00 | 0.00 |
| ATOM | 1390 | CG   | GLU | X | 90 | 48.334 | 55.664 | 60.071 | 0.00 | 0.00 |
| ATOM | 1391 | HG2  | GLU | X | 90 | 47.838 | 54.796 | 59.638 | 0.00 | 0.00 |
| ATOM | 1392 | HG3  | GLU | X | 90 | 49.394 | 55.428 | 59.979 | 0.00 | 0.00 |
| ATOM | 1393 | CD   | GLU | X | 90 | 47.985 | 55.805 | 61.557 | 0.00 | 0.00 |
| ATOM | 1394 | OE1  | GLU | X | 90 | 46.871 | 55.397 | 61.939 | 0.00 | 0.00 |
| ATOM | 1395 | OE2  | GLU | X | 90 | 48.808 | 56.225 | 62.400 | 0.00 | 0.00 |
| ATOM | 1396 | C    | GLU | X | 90 | 48.205 | 57.616 | 56.731 | 0.00 | 0.00 |
| ATOM | 1397 | O    | GLU | X | 90 | 47.379 | 57.248 | 55.938 | 0.00 | 0.00 |
| ATOM | 1398 | N    | ASP | X | 91 | 48.637 | 58.910 | 56.755 | 0.00 | 0.00 |
| ATOM | 1399 | H    | ASP | X | 91 | 49.245 | 59.269 | 57.476 | 0.00 | 0.00 |
| ATOM | 1400 | CA   | ASP | X | 91 | 48.485 | 59.903 | 55.683 | 0.00 | 0.00 |
| ATOM | 1401 | HA   | ASP | X | 91 | 47.419 | 60.120 | 55.610 | 0.00 | 0.00 |
| ATOM | 1402 | CB   | ASP | X | 91 | 49.377 | 61.113 | 56.102 | 0.00 | 0.00 |
| ATOM | 1403 | HB2  | ASP | X | 91 | 48.922 | 61.479 | 57.023 | 0.00 | 0.00 |
| ATOM | 1404 | HB3  | ASP | X | 91 | 50.406 | 60.836 | 56.331 | 0.00 | 0.00 |
| ATOM | 1405 | CG   | ASP | X | 91 | 49.326 | 62.277 | 55.083 | 0.00 | 0.00 |
| ATOM | 1406 | OD1  | ASP | X | 91 | 50.404 | 62.834 | 54.823 | 0.00 | 0.00 |
| ATOM | 1407 | OD2  | ASP | X | 91 | 48.196 | 62.586 | 54.687 | 0.00 | 0.00 |
| ATOM | 1408 | C    | ASP | X | 91 | 49.009 | 59.284 | 54.310 | 0.00 | 0.00 |
| ATOM | 1409 | O    | ASP | X | 91 | 50.216 | 59.428 | 54.006 | 0.00 | 0.00 |
| ATOM | 1410 | N    | CYX | X | 92 | 48.193 | 58.718 | 53.480 | 0.00 | 0.00 |
| ATOM | 1411 | H    | CYX | X | 92 | 47.271 | 58.621 | 53.882 | 0.00 | 0.00 |
| ATOM | 1412 | CA   | CYX | X | 92 | 48.615 | 58.073 | 52.294 | 0.00 | 0.00 |
| ATOM | 1413 | HA   | CYX | X | 92 | 49.547 | 58.512 | 51.937 | 0.00 | 0.00 |
| ATOM | 1414 | CB   | CYX | X | 92 | 48.970 | 56.597 | 52.710 | 0.00 | 0.00 |
| ATOM | 1415 | HB2  | CYX | X | 92 | 49.526 | 56.166 | 51.878 | 0.00 | 0.00 |
| ATOM | 1416 | HB3  | CYX | X | 92 | 49.598 | 56.733 | 53.590 | 0.00 | 0.00 |
| ATOM | 1417 | SG   | CYX | X | 92 | 47.613 | 55.485 | 53.130 | 0.00 | 0.00 |
| ATOM | 1418 | C    | CYX | X | 92 | 47.589 | 58.104 | 51.126 | 0.00 | 0.00 |
| ATOM | 1419 | O    | CYX | X | 92 | 47.769 | 57.356 | 50.168 | 0.00 | 0.00 |
| ATOM | 1420 | N    | LEU | X | 93 | 46.464 | 58.865 | 51.351 | 0.00 | 0.00 |
| ATOM | 1421 | H    | LEU | X | 93 | 46.470 | 59.443 | 52.179 | 0.00 | 0.00 |
| ATOM | 1422 | CA   | LEU | X | 93 | 45.352 | 58.827 | 50.365 | 0.00 | 0.00 |
| ATOM | 1423 | HA   | LEU | X | 93 | 45.458 | 57.838 | 49.919 | 0.00 | 0.00 |
| ATOM | 1424 | CB   | LEU | X | 93 | 43.914 | 58.839 | 50.999 | 0.00 | 0.00 |
| ATOM | 1425 | HB2  | LEU | X | 93 | 43.816 | 59.854 | 51.384 | 0.00 | 0.00 |
| ATOM | 1426 | HB3  | LEU | X | 93 | 43.205 | 58.663 | 50.190 | 0.00 | 0.00 |
| ATOM | 1427 | CG   | LEU | X | 93 | 43.554 | 57.748 | 52.052 | 0.00 | 0.00 |
| ATOM | 1428 | HG   | LEU | X | 93 | 44.168 | 57.844 | 52.948 | 0.00 | 0.00 |
| ATOM | 1429 | CD1  | LEU | X | 93 | 42.065 | 57.812 | 52.419 | 0.00 | 0.00 |
| ATOM | 1430 | HD11 | LEU | X | 93 | 41.823 | 57.013 | 53.121 | 0.00 | 0.00 |
| ATOM | 1431 | HD12 | LEU | X | 93 | 41.913 | 58.801 | 52.850 | 0.00 | 0.00 |
| ATOM | 1432 | HD13 | LEU | X | 93 | 41.436 | 57.655 | 51.543 | 0.00 | 0.00 |
| ATOM | 1433 | CD2  | LEU | X | 93 | 43.848 | 56.399 | 51.506 | 0.00 | 0.00 |
| ATOM | 1434 | HD21 | LEU | X | 93 | 43.391 | 55.646 | 52.149 | 0.00 | 0.00 |
| ATOM | 1435 | HD22 | LEU | X | 93 | 43.454 | 56.307 | 50.493 | 0.00 | 0.00 |
| ATOM | 1436 | HD23 | LEU | X | 93 | 44.927 | 56.273 | 51.416 | 0.00 | 0.00 |
| ATOM | 1437 | C    | LEU | X | 93 | 45.541 | 59.945 | 49.336 | 0.00 | 0.00 |

|      |      |      |     |   |    |        |        |        |      |      |
|------|------|------|-----|---|----|--------|--------|--------|------|------|
| ATOM | 1438 | O    | LEU | X | 93 | 45.307 | 61.143 | 49.537 | 0.00 | 0.00 |
| ATOM | 1439 | N    | TYR | X | 94 | 45.901 | 59.521 | 48.101 | 0.00 | 0.00 |
| ATOM | 1440 | H    | TYR | X | 94 | 45.901 | 58.517 | 47.989 | 0.00 | 0.00 |
| ATOM | 1441 | CA   | TYR | X | 94 | 46.646 | 60.287 | 47.084 | 0.00 | 0.00 |
| ATOM | 1442 | HA   | TYR | X | 94 | 46.205 | 61.283 | 47.043 | 0.00 | 0.00 |
| ATOM | 1443 | CB   | TYR | X | 94 | 48.071 | 60.298 | 47.462 | 0.00 | 0.00 |
| ATOM | 1444 | HB2  | TYR | X | 94 | 48.481 | 59.289 | 47.489 | 0.00 | 0.00 |
| ATOM | 1445 | HB3  | TYR | X | 94 | 48.632 | 60.695 | 46.616 | 0.00 | 0.00 |
| ATOM | 1446 | CG   | TYR | X | 94 | 48.363 | 61.129 | 48.684 | 0.00 | 0.00 |
| ATOM | 1447 | CD1  | TYR | X | 94 | 48.070 | 62.495 | 48.750 | 0.00 | 0.00 |
| ATOM | 1448 | HD1  | TYR | X | 94 | 47.587 | 63.012 | 47.934 | 0.00 | 0.00 |
| ATOM | 1449 | CE1  | TYR | X | 94 | 48.369 | 63.316 | 49.836 | 0.00 | 0.00 |
| ATOM | 1450 | HE1  | TYR | X | 94 | 48.337 | 64.396 | 49.848 | 0.00 | 0.00 |
| ATOM | 1451 | CZ   | TYR | X | 94 | 48.964 | 62.689 | 50.955 | 0.00 | 0.00 |
| ATOM | 1452 | OH   | TYR | X | 94 | 49.393 | 63.395 | 52.052 | 0.00 | 0.00 |
| ATOM | 1453 | HH   | TYR | X | 94 | 49.488 | 62.914 | 52.877 | 0.00 | 0.00 |
| ATOM | 1454 | CE2  | TYR | X | 94 | 49.359 | 61.334 | 50.851 | 0.00 | 0.00 |
| ATOM | 1455 | HE2  | TYR | X | 94 | 49.831 | 60.868 | 51.703 | 0.00 | 0.00 |
| ATOM | 1456 | CD2  | TYR | X | 94 | 49.024 | 60.527 | 49.751 | 0.00 | 0.00 |
| ATOM | 1457 | HD2  | TYR | X | 94 | 49.341 | 59.498 | 49.663 | 0.00 | 0.00 |
| ATOM | 1458 | C    | TYR | X | 94 | 46.451 | 59.742 | 45.696 | 0.00 | 0.00 |
| ATOM | 1459 | O    | TYR | X | 94 | 46.812 | 58.554 | 45.541 | 0.00 | 0.00 |
| ATOM | 1460 | N    | LEU | X | 95 | 46.042 | 60.527 | 44.703 | 0.00 | 0.00 |
| ATOM | 1461 | H    | LEU | X | 95 | 45.716 | 61.458 | 44.917 | 0.00 | 0.00 |
| ATOM | 1462 | CA   | LEU | X | 95 | 45.953 | 60.010 | 43.328 | 0.00 | 0.00 |
| ATOM | 1463 | HA   | LEU | X | 95 | 46.380 | 59.017 | 43.183 | 0.00 | 0.00 |
| ATOM | 1464 | CB   | LEU | X | 95 | 44.450 | 59.821 | 42.915 | 0.00 | 0.00 |
| ATOM | 1465 | HB2  | LEU | X | 95 | 44.430 | 59.352 | 41.931 | 0.00 | 0.00 |
| ATOM | 1466 | HB3  | LEU | X | 95 | 44.077 | 59.173 | 43.708 | 0.00 | 0.00 |
| ATOM | 1467 | CG   | LEU | X | 95 | 43.632 | 61.148 | 42.885 | 0.00 | 0.00 |
| ATOM | 1468 | HG   | LEU | X | 95 | 43.846 | 61.792 | 43.738 | 0.00 | 0.00 |
| ATOM | 1469 | CD1  | LEU | X | 95 | 43.901 | 61.971 | 41.592 | 0.00 | 0.00 |
| ATOM | 1470 | HD11 | LEU | X | 95 | 44.818 | 62.542 | 41.736 | 0.00 | 0.00 |
| ATOM | 1471 | HD12 | LEU | X | 95 | 44.048 | 61.277 | 40.765 | 0.00 | 0.00 |
| ATOM | 1472 | HD13 | LEU | X | 95 | 43.069 | 62.641 | 41.378 | 0.00 | 0.00 |
| ATOM | 1473 | CD2  | LEU | X | 95 | 42.171 | 60.614 | 42.767 | 0.00 | 0.00 |
| ATOM | 1474 | HD21 | LEU | X | 95 | 41.895 | 60.261 | 41.773 | 0.00 | 0.00 |
| ATOM | 1475 | HD22 | LEU | X | 95 | 41.973 | 59.835 | 43.503 | 0.00 | 0.00 |
| ATOM | 1476 | HD23 | LEU | X | 95 | 41.434 | 61.411 | 42.869 | 0.00 | 0.00 |
| ATOM | 1477 | C    | LEU | X | 95 | 46.779 | 60.738 | 42.328 | 0.00 | 0.00 |
| ATOM | 1478 | O    | LEU | X | 95 | 47.391 | 61.774 | 42.568 | 0.00 | 0.00 |
| ATOM | 1479 | N    | ASN | X | 96 | 46.813 | 60.214 | 41.052 | 0.00 | 0.00 |
| ATOM | 1480 | H    | ASN | X | 96 | 46.308 | 59.346 | 40.947 | 0.00 | 0.00 |
| ATOM | 1481 | CA   | ASN | X | 96 | 47.771 | 60.725 | 40.062 | 0.00 | 0.00 |
| ATOM | 1482 | HA   | ASN | X | 96 | 48.053 | 61.766 | 40.224 | 0.00 | 0.00 |
| ATOM | 1483 | CB   | ASN | X | 96 | 49.027 | 59.862 | 39.923 | 0.00 | 0.00 |
| ATOM | 1484 | HB2  | ASN | X | 96 | 48.819 | 59.005 | 39.282 | 0.00 | 0.00 |
| ATOM | 1485 | HB3  | ASN | X | 96 | 49.775 | 60.487 | 39.436 | 0.00 | 0.00 |
| ATOM | 1486 | CG   | ASN | X | 96 | 49.659 | 59.382 | 41.195 | 0.00 | 0.00 |
| ATOM | 1487 | OD1  | ASN | X | 96 | 50.432 | 60.014 | 41.839 | 0.00 | 0.00 |
| ATOM | 1488 | ND2  | ASN | X | 96 | 49.273 | 58.161 | 41.655 | 0.00 | 0.00 |
| ATOM | 1489 | HD21 | ASN | X | 96 | 49.724 | 57.782 | 42.475 | 0.00 | 0.00 |
| ATOM | 1490 | HD22 | ASN | X | 96 | 48.675 | 57.597 | 41.068 | 0.00 | 0.00 |
| ATOM | 1491 | C    | ASN | X | 96 | 47.091 | 60.611 | 38.692 | 0.00 | 0.00 |
| ATOM | 1492 | O    | ASN | X | 96 | 46.393 | 59.589 | 38.366 | 0.00 | 0.00 |
| ATOM | 1493 | N    | VAL | X | 97 | 47.291 | 61.612 | 37.820 | 0.00 | 0.00 |
| ATOM | 1494 | H    | VAL | X | 97 | 47.990 | 62.298 | 38.065 | 0.00 | 0.00 |
| ATOM | 1495 | CA   | VAL | X | 97 | 46.924 | 61.698 | 36.378 | 0.00 | 0.00 |
| ATOM | 1496 | HA   | VAL | X | 97 | 46.504 | 60.724 | 36.124 | 0.00 | 0.00 |
| ATOM | 1497 | CB   | VAL | X | 97 | 45.817 | 62.871 | 36.151 | 0.00 | 0.00 |
| ATOM | 1498 | HB   | VAL | X | 97 | 46.231 | 63.833 | 36.454 | 0.00 | 0.00 |
| ATOM | 1499 | CG1  | VAL | X | 97 | 45.267 | 62.751 | 34.721 | 0.00 | 0.00 |
| ATOM | 1500 | HG11 | VAL | X | 97 | 46.108 | 62.836 | 34.032 | 0.00 | 0.00 |
| ATOM | 1501 | HG12 | VAL | X | 97 | 44.787 | 61.778 | 34.617 | 0.00 | 0.00 |
| ATOM | 1502 | HG13 | VAL | X | 97 | 44.516 | 63.519 | 34.532 | 0.00 | 0.00 |
| ATOM | 1503 | CG2  | VAL | X | 97 | 44.538 | 62.716 | 37.011 | 0.00 | 0.00 |
| ATOM | 1504 | HG21 | VAL | X | 97 | 44.687 | 62.433 | 38.053 | 0.00 | 0.00 |
| ATOM | 1505 | HG22 | VAL | X | 97 | 44.036 | 63.677 | 37.121 | 0.00 | 0.00 |
| ATOM | 1506 | HG23 | VAL | X | 97 | 43.842 | 62.050 | 36.501 | 0.00 | 0.00 |
| ATOM | 1507 | C    | VAL | X | 97 | 48.165 | 61.870 | 35.421 | 0.00 | 0.00 |



|      |      |      |     |   |     |        |        |        |      |      |
|------|------|------|-----|---|-----|--------|--------|--------|------|------|
| ATOM | 1508 | O    | VAL | X | 97  | 48.980 | 62.776 | 35.621 | 0.00 | 0.00 |
| ATOM | 1509 | N    | TRP | X | 98  | 48.154 | 61.144 | 34.271 | 0.00 | 0.00 |
| ATOM | 1510 | H    | TRP | X | 98  | 47.389 | 60.505 | 34.106 | 0.00 | 0.00 |
| ATOM | 1511 | CA   | TRP | X | 98  | 48.951 | 61.616 | 33.111 | 0.00 | 0.00 |
| ATOM | 1512 | HA   | TRP | X | 98  | 49.540 | 62.515 | 33.295 | 0.00 | 0.00 |
| ATOM | 1513 | CB   | TRP | X | 98  | 50.010 | 60.493 | 32.830 | 0.00 | 0.00 |
| ATOM | 1514 | HB2  | TRP | X | 98  | 49.531 | 59.545 | 32.585 | 0.00 | 0.00 |
| ATOM | 1515 | HB3  | TRP | X | 98  | 50.589 | 60.784 | 31.954 | 0.00 | 0.00 |
| ATOM | 1516 | CG   | TRP | X | 98  | 51.099 | 60.119 | 33.879 | 0.00 | 0.00 |
| ATOM | 1517 | CD1  | TRP | X | 98  | 52.422 | 60.171 | 33.741 | 0.00 | 0.00 |
| ATOM | 1518 | HD1  | TRP | X | 98  | 52.889 | 60.508 | 32.828 | 0.00 | 0.00 |
| ATOM | 1519 | NE1  | TRP | X | 98  | 53.101 | 59.691 | 34.855 | 0.00 | 0.00 |
| ATOM | 1520 | HE1  | TRP | X | 98  | 54.109 | 59.693 | 34.914 | 0.00 | 0.00 |
| ATOM | 1521 | CE2  | TRP | X | 98  | 52.254 | 59.113 | 35.731 | 0.00 | 0.00 |
| ATOM | 1522 | CZ2  | TRP | X | 98  | 52.521 | 58.385 | 36.898 | 0.00 | 0.00 |
| ATOM | 1523 | HZ2  | TRP | X | 98  | 53.489 | 58.346 | 37.376 | 0.00 | 0.00 |
| ATOM | 1524 | CH2  | TRP | X | 98  | 51.406 | 57.838 | 37.470 | 0.00 | 0.00 |
| ATOM | 1525 | HH2  | TRP | X | 98  | 51.509 | 57.285 | 38.392 | 0.00 | 0.00 |
| ATOM | 1526 | CZ3  | TRP | X | 98  | 50.105 | 57.955 | 36.930 | 0.00 | 0.00 |
| ATOM | 1527 | HZ3  | TRP | X | 98  | 49.305 | 57.434 | 37.434 | 0.00 | 0.00 |
| ATOM | 1528 | CE3  | TRP | X | 98  | 49.878 | 58.761 | 35.810 | 0.00 | 0.00 |
| ATOM | 1529 | HE3  | TRP | X | 98  | 48.907 | 58.904 | 35.358 | 0.00 | 0.00 |
| ATOM | 1530 | CD2  | TRP | X | 98  | 50.947 | 59.382 | 35.106 | 0.00 | 0.00 |
| ATOM | 1531 | C    | TRP | X | 98  | 48.011 | 61.780 | 31.864 | 0.00 | 0.00 |
| ATOM | 1532 | O    | TRP | X | 98  | 47.062 | 60.973 | 31.765 | 0.00 | 0.00 |
| ATOM | 1533 | N    | THR | X | 99  | 48.363 | 62.766 | 31.008 | 0.00 | 0.00 |
| ATOM | 1534 | H    | THR | X | 99  | 49.148 | 63.325 | 31.312 | 0.00 | 0.00 |
| ATOM | 1535 | CA   | THR | X | 99  | 47.515 | 63.243 | 29.922 | 0.00 | 0.00 |
| ATOM | 1536 | HA   | THR | X | 99  | 47.006 | 62.360 | 29.537 | 0.00 | 0.00 |
| ATOM | 1537 | CB   | THR | X | 99  | 46.401 | 64.141 | 30.556 | 0.00 | 0.00 |
| ATOM | 1538 | HB   | THR | X | 99  | 45.785 | 63.528 | 31.214 | 0.00 | 0.00 |
| ATOM | 1539 | CG2  | THR | X | 99  | 46.976 | 65.327 | 31.274 | 0.00 | 0.00 |
| ATOM | 1540 | HG21 | THR | X | 99  | 47.464 | 65.002 | 32.194 | 0.00 | 0.00 |
| ATOM | 1541 | HG22 | THR | X | 99  | 47.653 | 65.866 | 30.611 | 0.00 | 0.00 |
| ATOM | 1542 | HG23 | THR | X | 99  | 46.242 | 66.047 | 31.636 | 0.00 | 0.00 |
| ATOM | 1543 | OG1  | THR | X | 99  | 45.574 | 64.787 | 29.545 | 0.00 | 0.00 |
| ATOM | 1544 | HG1  | THR | X | 99  | 44.701 | 64.945 | 29.912 | 0.00 | 0.00 |
| ATOM | 1545 | C    | THR | X | 99  | 48.364 | 63.871 | 28.834 | 0.00 | 0.00 |
| ATOM | 1546 | O    | THR | X | 99  | 49.352 | 64.559 | 29.214 | 0.00 | 0.00 |
| ATOM | 1547 | N    | PRO | X | 100 | 47.986 | 63.905 | 27.551 | 0.00 | 0.00 |
| ATOM | 1548 | CD   | PRO | X | 100 | 46.920 | 63.028 | 26.999 | 0.00 | 0.00 |
| ATOM | 1549 | HD2  | PRO | X | 100 | 45.946 | 63.466 | 27.217 | 0.00 | 0.00 |
| ATOM | 1550 | HD3  | PRO | X | 100 | 46.957 | 62.002 | 27.364 | 0.00 | 0.00 |
| ATOM | 1551 | CG   | PRO | X | 100 | 47.094 | 62.972 | 25.460 | 0.00 | 0.00 |
| ATOM | 1552 | HG2  | PRO | X | 100 | 46.158 | 63.048 | 24.907 | 0.00 | 0.00 |
| ATOM | 1553 | HG3  | PRO | X | 100 | 47.711 | 62.107 | 25.217 | 0.00 | 0.00 |
| ATOM | 1554 | CB   | PRO | X | 100 | 47.862 | 64.253 | 25.197 | 0.00 | 0.00 |
| ATOM | 1555 | HB2  | PRO | X | 100 | 47.144 | 65.058 | 25.038 | 0.00 | 0.00 |
| ATOM | 1556 | HB3  | PRO | X | 100 | 48.452 | 64.120 | 24.290 | 0.00 | 0.00 |
| ATOM | 1557 | CA   | PRO | X | 100 | 48.644 | 64.580 | 26.416 | 0.00 | 0.00 |
| ATOM | 1558 | HA   | PRO | X | 100 | 49.652 | 64.187 | 26.281 | 0.00 | 0.00 |
| ATOM | 1559 | C    | PRO | X | 100 | 48.801 | 66.092 | 26.683 | 0.00 | 0.00 |
| ATOM | 1560 | O    | PRO | X | 100 | 48.086 | 66.642 | 27.544 | 0.00 | 0.00 |
| ATOM | 1561 | N    | TYR | X | 101 | 49.625 | 66.757 | 25.852 | 0.00 | 0.00 |
| ATOM | 1562 | H    | TYR | X | 101 | 49.797 | 66.296 | 24.970 | 0.00 | 0.00 |
| ATOM | 1563 | CA   | TYR | X | 101 | 50.080 | 68.080 | 26.165 | 0.00 | 0.00 |
| ATOM | 1564 | HA   | TYR | X | 101 | 49.369 | 68.525 | 26.861 | 0.00 | 0.00 |
| ATOM | 1565 | CB   | TYR | X | 101 | 51.402 | 67.993 | 26.846 | 0.00 | 0.00 |
| ATOM | 1566 | HB2  | TYR | X | 101 | 51.167 | 67.497 | 27.787 | 0.00 | 0.00 |
| ATOM | 1567 | HB3  | TYR | X | 101 | 52.125 | 67.396 | 26.290 | 0.00 | 0.00 |
| ATOM | 1568 | CG   | TYR | X | 101 | 52.086 | 69.339 | 27.104 | 0.00 | 0.00 |
| ATOM | 1569 | CD1  | TYR | X | 101 | 53.260 | 69.693 | 26.425 | 0.00 | 0.00 |
| ATOM | 1570 | HD1  | TYR | X | 101 | 53.715 | 69.036 | 25.698 | 0.00 | 0.00 |
| ATOM | 1571 | CE1  | TYR | X | 101 | 53.802 | 70.985 | 26.578 | 0.00 | 0.00 |
| ATOM | 1572 | HE1  | TYR | X | 101 | 54.730 | 71.259 | 26.099 | 0.00 | 0.00 |
| ATOM | 1573 | CZ   | TYR | X | 101 | 53.233 | 71.864 | 27.513 | 0.00 | 0.00 |
| ATOM | 1574 | OH   | TYR | X | 101 | 53.755 | 73.073 | 27.814 | 0.00 | 0.00 |
| ATOM | 1575 | HH   | TYR | X | 101 | 54.415 | 73.366 | 27.181 | 0.00 | 0.00 |
| ATOM | 1576 | CE2  | TYR | X | 101 | 52.074 | 71.477 | 28.177 | 0.00 | 0.00 |
| ATOM | 1577 | HE2  | TYR | X | 101 | 51.678 | 72.139 | 28.933 | 0.00 | 0.00 |

|      |      |      |     |   |     |        |        |        |      |      |
|------|------|------|-----|---|-----|--------|--------|--------|------|------|
| ATOM | 1578 | CD2  | TYR | X | 101 | 51.449 | 70.256 | 28.023 | 0.00 | 0.00 |
| ATOM | 1579 | HD2  | TYR | X | 101 | 50.518 | 70.021 | 28.518 | 0.00 | 0.00 |
| ATOM | 1580 | C    | TYR | X | 101 | 50.111 | 69.020 | 24.918 | 0.00 | 0.00 |
| ATOM | 1581 | O    | TYR | X | 101 | 50.883 | 68.690 | 24.005 | 0.00 | 0.00 |
| ATOM | 1582 | N    | PRO | X | 102 | 49.508 | 70.206 | 24.902 | 0.00 | 0.00 |
| ATOM | 1583 | CD   | PRO | X | 102 | 49.817 | 71.208 | 23.906 | 0.00 | 0.00 |
| ATOM | 1584 | HD2  | PRO | X | 102 | 49.557 | 70.821 | 22.921 | 0.00 | 0.00 |
| ATOM | 1585 | HD3  | PRO | X | 102 | 50.901 | 71.236 | 24.024 | 0.00 | 0.00 |
| ATOM | 1586 | CG   | PRO | X | 102 | 49.224 | 72.540 | 24.360 | 0.00 | 0.00 |
| ATOM | 1587 | HG2  | PRO | X | 102 | 48.867 | 73.094 | 23.491 | 0.00 | 0.00 |
| ATOM | 1588 | HG3  | PRO | X | 102 | 49.810 | 73.232 | 24.964 | 0.00 | 0.00 |
| ATOM | 1589 | CB   | PRO | X | 102 | 48.009 | 71.997 | 25.165 | 0.00 | 0.00 |
| ATOM | 1590 | HB2  | PRO | X | 102 | 47.135 | 71.928 | 24.518 | 0.00 | 0.00 |
| ATOM | 1591 | HB3  | PRO | X | 102 | 47.769 | 72.724 | 25.941 | 0.00 | 0.00 |
| ATOM | 1592 | CA   | PRO | X | 102 | 48.392 | 70.608 | 25.721 | 0.00 | 0.00 |
| ATOM | 1593 | HA   | PRO | X | 102 | 48.798 | 70.752 | 26.723 | 0.00 | 0.00 |
| ATOM | 1594 | C    | PRO | X | 102 | 47.202 | 69.637 | 25.665 | 0.00 | 0.00 |
| ATOM | 1595 | O    | PRO | X | 102 | 47.123 | 68.777 | 24.764 | 0.00 | 0.00 |
| ATOM | 1596 | N    | ARG | X | 103 | 46.314 | 69.709 | 26.638 | 0.00 | 0.00 |
| ATOM | 1597 | H    | ARG | X | 103 | 46.566 | 70.395 | 27.335 | 0.00 | 0.00 |
| ATOM | 1598 | CA   | ARG | X | 103 | 45.201 | 68.798 | 26.823 | 0.00 | 0.00 |
| ATOM | 1599 | HA   | ARG | X | 103 | 45.627 | 67.873 | 27.211 | 0.00 | 0.00 |
| ATOM | 1600 | CB   | ARG | X | 103 | 44.251 | 69.337 | 27.857 | 0.00 | 0.00 |
| ATOM | 1601 | HB2  | ARG | X | 103 | 44.039 | 70.392 | 27.684 | 0.00 | 0.00 |
| ATOM | 1602 | HB3  | ARG | X | 103 | 43.308 | 68.839 | 27.632 | 0.00 | 0.00 |
| ATOM | 1603 | CG   | ARG | X | 103 | 44.765 | 69.137 | 29.316 | 0.00 | 0.00 |
| ATOM | 1604 | HG2  | ARG | X | 103 | 44.869 | 68.089 | 29.596 | 0.00 | 0.00 |
| ATOM | 1605 | HG3  | ARG | X | 103 | 45.747 | 69.608 | 29.369 | 0.00 | 0.00 |
| ATOM | 1606 | CD   | ARG | X | 103 | 43.840 | 69.761 | 30.306 | 0.00 | 0.00 |
| ATOM | 1607 | HD2  | ARG | X | 103 | 42.846 | 69.415 | 30.022 | 0.00 | 0.00 |
| ATOM | 1608 | HD3  | ARG | X | 103 | 44.092 | 69.515 | 31.338 | 0.00 | 0.00 |
| ATOM | 1609 | NE   | ARG | X | 103 | 43.899 | 71.263 | 30.082 | 0.00 | 0.00 |
| ATOM | 1610 | HE   | ARG | X | 103 | 44.674 | 71.625 | 29.545 | 0.00 | 0.00 |
| ATOM | 1611 | CZ   | ARG | X | 103 | 42.993 | 72.061 | 30.403 | 0.00 | 0.00 |
| ATOM | 1612 | NH1  | ARG | X | 103 | 41.877 | 71.805 | 31.086 | 0.00 | 0.00 |
| ATOM | 1613 | HH11 | ARG | X | 103 | 41.591 | 70.838 | 31.143 | 0.00 | 0.00 |
| ATOM | 1614 | HH12 | ARG | X | 103 | 41.194 | 72.543 | 31.178 | 0.00 | 0.00 |
| ATOM | 1615 | NH2  | ARG | X | 103 | 43.181 | 73.309 | 30.056 | 0.00 | 0.00 |
| ATOM | 1616 | HH21 | ARG | X | 103 | 43.964 | 73.566 | 29.472 | 0.00 | 0.00 |
| ATOM | 1617 | HH22 | ARG | X | 103 | 42.628 | 74.025 | 30.506 | 0.00 | 0.00 |
| ATOM | 1618 | C    | ARG | X | 103 | 44.402 | 68.418 | 25.541 | 0.00 | 0.00 |
| ATOM | 1619 | O    | ARG | X | 103 | 44.349 | 69.216 | 24.597 | 0.00 | 0.00 |
| ATOM | 1620 | N    | PRO | X | 104 | 43.731 | 67.220 | 25.462 | 0.00 | 0.00 |
| ATOM | 1621 | CD   | PRO | X | 104 | 43.906 | 66.157 | 26.400 | 0.00 | 0.00 |
| ATOM | 1622 | HD2  | PRO | X | 104 | 43.429 | 66.434 | 27.340 | 0.00 | 0.00 |
| ATOM | 1623 | HD3  | PRO | X | 104 | 44.951 | 65.865 | 26.502 | 0.00 | 0.00 |
| ATOM | 1624 | CG   | PRO | X | 104 | 43.201 | 64.915 | 25.868 | 0.00 | 0.00 |
| ATOM | 1625 | HG2  | PRO | X | 104 | 42.727 | 64.326 | 26.654 | 0.00 | 0.00 |
| ATOM | 1626 | HG3  | PRO | X | 104 | 43.982 | 64.365 | 25.343 | 0.00 | 0.00 |
| ATOM | 1627 | CB   | PRO | X | 104 | 42.167 | 65.439 | 24.923 | 0.00 | 0.00 |
| ATOM | 1628 | HB2  | PRO | X | 104 | 41.251 | 65.564 | 25.501 | 0.00 | 0.00 |
| ATOM | 1629 | HB3  | PRO | X | 104 | 42.041 | 64.808 | 24.044 | 0.00 | 0.00 |
| ATOM | 1630 | CA   | PRO | X | 104 | 42.754 | 66.822 | 24.402 | 0.00 | 0.00 |
| ATOM | 1631 | HA   | PRO | X | 104 | 43.316 | 66.695 | 23.476 | 0.00 | 0.00 |
| ATOM | 1632 | C    | PRO | X | 104 | 41.607 | 67.761 | 24.120 | 0.00 | 0.00 |
| ATOM | 1633 | O    | PRO | X | 104 | 40.815 | 68.017 | 25.034 | 0.00 | 0.00 |
| ATOM | 1634 | N    | THR | X | 105 | 41.399 | 68.214 | 22.938 | 0.00 | 0.00 |
| ATOM | 1635 | H    | THR | X | 105 | 42.004 | 67.859 | 22.211 | 0.00 | 0.00 |
| ATOM | 1636 | CA   | THR | X | 105 | 40.307 | 69.153 | 22.619 | 0.00 | 0.00 |
| ATOM | 1637 | HA   | THR | X | 105 | 40.101 | 69.769 | 23.494 | 0.00 | 0.00 |
| ATOM | 1638 | CB   | THR | X | 105 | 40.724 | 70.213 | 21.514 | 0.00 | 0.00 |
| ATOM | 1639 | HB   | THR | X | 105 | 39.815 | 70.811 | 21.444 | 0.00 | 0.00 |
| ATOM | 1640 | CG2  | THR | X | 105 | 41.987 | 70.969 | 21.916 | 0.00 | 0.00 |
| ATOM | 1641 | HG21 | THR | X | 105 | 42.803 | 70.250 | 21.850 | 0.00 | 0.00 |
| ATOM | 1642 | HG22 | THR | X | 105 | 42.158 | 71.799 | 21.230 | 0.00 | 0.00 |
| ATOM | 1643 | HG23 | THR | X | 105 | 41.901 | 71.443 | 22.894 | 0.00 | 0.00 |
| ATOM | 1644 | OG1  | THR | X | 105 | 40.972 | 69.520 | 20.345 | 0.00 | 0.00 |
| ATOM | 1645 | HG1  | THR | X | 105 | 41.827 | 69.112 | 20.501 | 0.00 | 0.00 |
| ATOM | 1646 | C    | THR | X | 105 | 38.992 | 68.362 | 22.257 | 0.00 | 0.00 |
| ATOM | 1647 | O    | THR | X | 105 | 37.949 | 68.879 | 22.436 | 0.00 | 0.00 |

|      |      |      |     |   |     |        |        |        |      |      |
|------|------|------|-----|---|-----|--------|--------|--------|------|------|
| ATOM | 1648 | N    | SER | X | 106 | 39.129 | 67.113 | 21.867 | 0.00 | 0.00 |
| ATOM | 1649 | H    | SER | X | 106 | 40.045 | 66.723 | 21.696 | 0.00 | 0.00 |
| ATOM | 1650 | CA   | SER | X | 106 | 38.067 | 66.115 | 21.872 | 0.00 | 0.00 |
| ATOM | 1651 | HA   | SER | X | 106 | 37.161 | 66.544 | 22.299 | 0.00 | 0.00 |
| ATOM | 1652 | CB   | SER | X | 106 | 37.874 | 65.538 | 20.462 | 0.00 | 0.00 |
| ATOM | 1653 | HB2  | SER | X | 106 | 37.857 | 66.348 | 19.733 | 0.00 | 0.00 |
| ATOM | 1654 | HB3  | SER | X | 106 | 38.814 | 65.004 | 20.324 | 0.00 | 0.00 |
| ATOM | 1655 | OG   | SER | X | 106 | 36.788 | 64.576 | 20.415 | 0.00 | 0.00 |
| ATOM | 1656 | HG   | SER | X | 106 | 35.940 | 64.999 | 20.264 | 0.00 | 0.00 |
| ATOM | 1657 | C    | SER | X | 106 | 38.522 | 64.894 | 22.815 | 0.00 | 0.00 |
| ATOM | 1658 | O    | SER | X | 106 | 39.663 | 64.588 | 22.681 | 0.00 | 0.00 |
| ATOM | 1659 | N    | PRO | X | 107 | 37.658 | 64.362 | 23.689 | 0.00 | 0.00 |
| ATOM | 1660 | CD   | PRO | X | 107 | 36.232 | 64.532 | 23.693 | 0.00 | 0.00 |
| ATOM | 1661 | HD2  | PRO | X | 107 | 35.850 | 64.080 | 22.778 | 0.00 | 0.00 |
| ATOM | 1662 | HD3  | PRO | X | 107 | 35.918 | 65.569 | 23.814 | 0.00 | 0.00 |
| ATOM | 1663 | CG   | PRO | X | 107 | 35.705 | 63.705 | 24.905 | 0.00 | 0.00 |
| ATOM | 1664 | HG2  | PRO | X | 107 | 35.342 | 62.729 | 24.582 | 0.00 | 0.00 |
| ATOM | 1665 | HG3  | PRO | X | 107 | 34.890 | 64.258 | 25.372 | 0.00 | 0.00 |
| ATOM | 1666 | CB   | PRO | X | 107 | 36.976 | 63.578 | 25.815 | 0.00 | 0.00 |
| ATOM | 1667 | HB2  | PRO | X | 107 | 36.890 | 62.696 | 26.448 | 0.00 | 0.00 |
| ATOM | 1668 | HB3  | PRO | X | 107 | 37.021 | 64.567 | 26.271 | 0.00 | 0.00 |
| ATOM | 1669 | CA   | PRO | X | 107 | 38.137 | 63.563 | 24.845 | 0.00 | 0.00 |
| ATOM | 1670 | HA   | PRO | X | 107 | 39.039 | 64.029 | 25.243 | 0.00 | 0.00 |
| ATOM | 1671 | C    | PRO | X | 107 | 38.485 | 62.179 | 24.321 | 0.00 | 0.00 |
| ATOM | 1672 | O    | PRO | X | 107 | 38.163 | 61.713 | 23.256 | 0.00 | 0.00 |
| ATOM | 1673 | N    | THR | X | 108 | 39.124 | 61.458 | 25.275 | 0.00 | 0.00 |
| ATOM | 1674 | H    | THR | X | 108 | 39.208 | 61.937 | 26.161 | 0.00 | 0.00 |
| ATOM | 1675 | CA   | THR | X | 108 | 39.709 | 60.125 | 25.130 | 0.00 | 0.00 |
| ATOM | 1676 | HA   | THR | X | 108 | 39.220 | 59.720 | 24.244 | 0.00 | 0.00 |
| ATOM | 1677 | CB   | THR | X | 108 | 41.188 | 60.297 | 24.846 | 0.00 | 0.00 |
| ATOM | 1678 | HB   | THR | X | 108 | 41.336 | 60.891 | 23.945 | 0.00 | 0.00 |
| ATOM | 1679 | CG2  | THR | X | 108 | 41.950 | 60.969 | 25.983 | 0.00 | 0.00 |
| ATOM | 1680 | HG21 | THR | X | 108 | 41.550 | 61.970 | 26.148 | 0.00 | 0.00 |
| ATOM | 1681 | HG22 | THR | X | 108 | 41.857 | 60.384 | 26.898 | 0.00 | 0.00 |
| ATOM | 1682 | HG23 | THR | X | 108 | 43.016 | 61.131 | 25.825 | 0.00 | 0.00 |
| ATOM | 1683 | OG1  | THR | X | 108 | 41.825 | 59.114 | 24.541 | 0.00 | 0.00 |
| ATOM | 1684 | HG1  | THR | X | 108 | 42.749 | 59.333 | 24.685 | 0.00 | 0.00 |
| ATOM | 1685 | C    | THR | X | 108 | 39.381 | 59.236 | 26.350 | 0.00 | 0.00 |
| ATOM | 1686 | O    | THR | X | 108 | 39.334 | 59.697 | 27.506 | 0.00 | 0.00 |
| ATOM | 1687 | N    | PRO | X | 109 | 39.096 | 57.941 | 26.199 | 0.00 | 0.00 |
| ATOM | 1688 | CD   | PRO | X | 109 | 38.973 | 57.302 | 24.878 | 0.00 | 0.00 |
| ATOM | 1689 | HD2  | PRO | X | 109 | 39.970 | 57.103 | 24.486 | 0.00 | 0.00 |
| ATOM | 1690 | HD3  | PRO | X | 109 | 38.339 | 57.838 | 24.172 | 0.00 | 0.00 |
| ATOM | 1691 | CG   | PRO | X | 109 | 38.172 | 56.045 | 25.157 | 0.00 | 0.00 |
| ATOM | 1692 | HG2  | PRO | X | 109 | 38.404 | 55.273 | 24.424 | 0.00 | 0.00 |
| ATOM | 1693 | HG3  | PRO | X | 109 | 37.095 | 56.155 | 25.289 | 0.00 | 0.00 |
| ATOM | 1694 | CB   | PRO | X | 109 | 38.762 | 55.602 | 26.494 | 0.00 | 0.00 |
| ATOM | 1695 | HB2  | PRO | X | 109 | 39.659 | 55.035 | 26.245 | 0.00 | 0.00 |
| ATOM | 1696 | HB3  | PRO | X | 109 | 38.083 | 54.842 | 26.884 | 0.00 | 0.00 |
| ATOM | 1697 | CA   | PRO | X | 109 | 38.946 | 56.928 | 27.220 | 0.00 | 0.00 |
| ATOM | 1698 | HA   | PRO | X | 109 | 37.987 | 57.250 | 27.627 | 0.00 | 0.00 |
| ATOM | 1699 | C    | PRO | X | 109 | 40.020 | 57.007 | 28.272 | 0.00 | 0.00 |
| ATOM | 1700 | O    | PRO | X | 109 | 41.158 | 57.401 | 28.098 | 0.00 | 0.00 |
| ATOM | 1701 | N    | VAL | X | 110 | 39.644 | 56.408 | 29.375 | 0.00 | 0.00 |
| ATOM | 1702 | H    | VAL | X | 110 | 38.717 | 56.038 | 29.525 | 0.00 | 0.00 |
| ATOM | 1703 | CA   | VAL | X | 110 | 40.296 | 56.518 | 30.707 | 0.00 | 0.00 |
| ATOM | 1704 | HA   | VAL | X | 110 | 41.214 | 57.093 | 30.582 | 0.00 | 0.00 |
| ATOM | 1705 | CB   | VAL | X | 110 | 39.452 | 57.385 | 31.652 | 0.00 | 0.00 |
| ATOM | 1706 | HB   | VAL | X | 110 | 38.449 | 56.962 | 31.594 | 0.00 | 0.00 |
| ATOM | 1707 | CG1  | VAL | X | 110 | 39.913 | 57.326 | 33.114 | 0.00 | 0.00 |
| ATOM | 1708 | HG11 | VAL | X | 110 | 39.783 | 56.391 | 33.659 | 0.00 | 0.00 |
| ATOM | 1709 | HG12 | VAL | X | 110 | 40.958 | 57.572 | 33.307 | 0.00 | 0.00 |
| ATOM | 1710 | HG13 | VAL | X | 110 | 39.238 | 58.049 | 33.572 | 0.00 | 0.00 |
| ATOM | 1711 | CG2  | VAL | X | 110 | 39.386 | 58.826 | 31.118 | 0.00 | 0.00 |
| ATOM | 1712 | HG21 | VAL | X | 110 | 40.319 | 59.338 | 31.352 | 0.00 | 0.00 |
| ATOM | 1713 | HG22 | VAL | X | 110 | 39.103 | 58.807 | 30.066 | 0.00 | 0.00 |
| ATOM | 1714 | HG23 | VAL | X | 110 | 38.624 | 59.361 | 31.685 | 0.00 | 0.00 |
| ATOM | 1715 | C    | VAL | X | 110 | 40.606 | 55.128 | 31.288 | 0.00 | 0.00 |
| ATOM | 1716 | O    | VAL | X | 110 | 39.762 | 54.250 | 31.333 | 0.00 | 0.00 |
| ATOM | 1717 | N    | LEU | X | 111 | 41.823 | 54.860 | 31.673 | 0.00 | 0.00 |

|      |      |      |     |   |     |        |        |        |      |      |
|------|------|------|-----|---|-----|--------|--------|--------|------|------|
| ATOM | 1718 | H    | LEU | X | 111 | 42.589 | 55.511 | 31.578 | 0.00 | 0.00 |
| ATOM | 1719 | CA   | LEU | X | 111 | 42.264 | 53.575 | 32.134 | 0.00 | 0.00 |
| ATOM | 1720 | HA   | LEU | X | 111 | 41.492 | 52.815 | 32.258 | 0.00 | 0.00 |
| ATOM | 1721 | CB   | LEU | X | 111 | 43.379 | 53.016 | 31.210 | 0.00 | 0.00 |
| ATOM | 1722 | HB2  | LEU | X | 111 | 43.936 | 53.819 | 30.726 | 0.00 | 0.00 |
| ATOM | 1723 | HB3  | LEU | X | 111 | 44.094 | 52.524 | 31.868 | 0.00 | 0.00 |
| ATOM | 1724 | CG   | LEU | X | 111 | 42.803 | 52.048 | 30.195 | 0.00 | 0.00 |
| ATOM | 1725 | HG   | LEU | X | 111 | 41.831 | 52.425 | 29.879 | 0.00 | 0.00 |
| ATOM | 1726 | CD1  | LEU | X | 111 | 43.644 | 51.822 | 28.884 | 0.00 | 0.00 |
| ATOM | 1727 | HD11 | LEU | X | 111 | 43.034 | 51.324 | 28.131 | 0.00 | 0.00 |
| ATOM | 1728 | HD12 | LEU | X | 111 | 43.918 | 52.761 | 28.402 | 0.00 | 0.00 |
| ATOM | 1729 | HD13 | LEU | X | 111 | 44.556 | 51.328 | 29.220 | 0.00 | 0.00 |
| ATOM | 1730 | CD2  | LEU | X | 111 | 42.548 | 50.703 | 30.880 | 0.00 | 0.00 |
| ATOM | 1731 | HD21 | LEU | X | 111 | 42.014 | 50.699 | 31.830 | 0.00 | 0.00 |
| ATOM | 1732 | HD22 | LEU | X | 111 | 41.951 | 50.079 | 30.216 | 0.00 | 0.00 |
| ATOM | 1733 | HD23 | LEU | X | 111 | 43.520 | 50.243 | 31.062 | 0.00 | 0.00 |
| ATOM | 1734 | C    | LEU | X | 111 | 42.792 | 53.763 | 33.581 | 0.00 | 0.00 |
| ATOM | 1735 | O    | LEU | X | 111 | 43.804 | 54.522 | 33.798 | 0.00 | 0.00 |
| ATOM | 1736 | N    | VAL | X | 112 | 42.083 | 53.181 | 34.541 | 0.00 | 0.00 |
| ATOM | 1737 | H    | VAL | X | 112 | 41.188 | 52.753 | 34.352 | 0.00 | 0.00 |
| ATOM | 1738 | CA   | VAL | X | 112 | 42.325 | 53.380 | 35.949 | 0.00 | 0.00 |
| ATOM | 1739 | HA   | VAL | X | 112 | 42.945 | 54.262 | 36.112 | 0.00 | 0.00 |
| ATOM | 1740 | CB   | VAL | X | 112 | 41.055 | 53.439 | 36.924 | 0.00 | 0.00 |
| ATOM | 1741 | HB   | VAL | X | 112 | 40.431 | 52.552 | 36.812 | 0.00 | 0.00 |
| ATOM | 1742 | CG1  | VAL | X | 112 | 41.473 | 53.516 | 38.398 | 0.00 | 0.00 |
| ATOM | 1743 | HG11 | VAL | X | 112 | 42.296 | 52.850 | 38.657 | 0.00 | 0.00 |
| ATOM | 1744 | HG12 | VAL | X | 112 | 41.688 | 54.522 | 38.759 | 0.00 | 0.00 |
| ATOM | 1745 | HG13 | VAL | X | 112 | 40.620 | 53.217 | 39.008 | 0.00 | 0.00 |
| ATOM | 1746 | CG2  | VAL | X | 112 | 40.100 | 54.547 | 36.489 | 0.00 | 0.00 |
| ATOM | 1747 | HG21 | VAL | X | 112 | 39.846 | 54.351 | 35.447 | 0.00 | 0.00 |
| ATOM | 1748 | HG22 | VAL | X | 112 | 39.287 | 54.505 | 37.213 | 0.00 | 0.00 |
| ATOM | 1749 | HG23 | VAL | X | 112 | 40.758 | 55.414 | 36.435 | 0.00 | 0.00 |
| ATOM | 1750 | C    | VAL | X | 112 | 43.222 | 52.202 | 36.424 | 0.00 | 0.00 |
| ATOM | 1751 | O    | VAL | X | 112 | 42.743 | 51.124 | 36.570 | 0.00 | 0.00 |
| ATOM | 1752 | N    | TRP | X | 113 | 44.513 | 52.471 | 36.775 | 0.00 | 0.00 |
| ATOM | 1753 | H    | TRP | X | 113 | 44.841 | 53.417 | 36.639 | 0.00 | 0.00 |
| ATOM | 1754 | CA   | TRP | X | 113 | 45.478 | 51.391 | 37.309 | 0.00 | 0.00 |
| ATOM | 1755 | HA   | TRP | X | 113 | 45.300 | 50.413 | 36.863 | 0.00 | 0.00 |
| ATOM | 1756 | CB   | TRP | X | 113 | 46.917 | 51.668 | 36.884 | 0.00 | 0.00 |
| ATOM | 1757 | HB2  | TRP | X | 113 | 47.143 | 51.620 | 35.818 | 0.00 | 0.00 |
| ATOM | 1758 | HB3  | TRP | X | 113 | 47.125 | 52.650 | 37.309 | 0.00 | 0.00 |
| ATOM | 1759 | CG   | TRP | X | 113 | 47.867 | 50.679 | 37.462 | 0.00 | 0.00 |
| ATOM | 1760 | CD1  | TRP | X | 113 | 48.747 | 50.831 | 38.447 | 0.00 | 0.00 |
| ATOM | 1761 | HD1  | TRP | X | 113 | 48.877 | 51.735 | 39.022 | 0.00 | 0.00 |
| ATOM | 1762 | NE1  | TRP | X | 113 | 49.469 | 49.654 | 38.633 | 0.00 | 0.00 |
| ATOM | 1763 | HE1  | TRP | X | 113 | 50.299 | 49.667 | 39.209 | 0.00 | 0.00 |
| ATOM | 1764 | CE2  | TRP | X | 113 | 49.171 | 48.746 | 37.655 | 0.00 | 0.00 |
| ATOM | 1765 | CZ2  | TRP | X | 113 | 49.750 | 47.589 | 37.292 | 0.00 | 0.00 |
| ATOM | 1766 | HZ2  | TRP | X | 113 | 50.511 | 47.075 | 37.860 | 0.00 | 0.00 |
| ATOM | 1767 | CH2  | TRP | X | 113 | 49.189 | 46.870 | 36.227 | 0.00 | 0.00 |
| ATOM | 1768 | HH2  | TRP | X | 113 | 49.611 | 45.892 | 36.052 | 0.00 | 0.00 |
| ATOM | 1769 | CZ3  | TRP | X | 113 | 48.052 | 47.265 | 35.541 | 0.00 | 0.00 |
| ATOM | 1770 | HZ3  | TRP | X | 113 | 47.698 | 46.693 | 34.696 | 0.00 | 0.00 |
| ATOM | 1771 | CE3  | TRP | X | 113 | 47.487 | 48.535 | 35.940 | 0.00 | 0.00 |
| ATOM | 1772 | HE3  | TRP | X | 113 | 46.676 | 49.057 | 35.454 | 0.00 | 0.00 |
| ATOM | 1773 | CD2  | TRP | X | 113 | 48.099 | 49.273 | 36.963 | 0.00 | 0.00 |
| ATOM | 1774 | C    | TRP | X | 113 | 45.348 | 51.332 | 38.855 | 0.00 | 0.00 |
| ATOM | 1775 | O    | TRP | X | 113 | 45.686 | 52.291 | 39.526 | 0.00 | 0.00 |
| ATOM | 1776 | N    | ILE | X | 114 | 45.094 | 50.055 | 39.247 | 0.00 | 0.00 |
| ATOM | 1777 | H    | ILE | X | 114 | 44.785 | 49.383 | 38.559 | 0.00 | 0.00 |
| ATOM | 1778 | CA   | ILE | X | 114 | 45.054 | 49.559 | 40.572 | 0.00 | 0.00 |
| ATOM | 1779 | HA   | ILE | X | 114 | 45.164 | 50.342 | 41.321 | 0.00 | 0.00 |
| ATOM | 1780 | CB   | ILE | X | 114 | 43.721 | 48.824 | 40.913 | 0.00 | 0.00 |
| ATOM | 1781 | HB   | ILE | X | 114 | 43.826 | 47.888 | 40.366 | 0.00 | 0.00 |
| ATOM | 1782 | CG2  | ILE | X | 114 | 43.522 | 48.559 | 42.415 | 0.00 | 0.00 |
| ATOM | 1783 | HG21 | ILE | X | 114 | 44.127 | 47.687 | 42.664 | 0.00 | 0.00 |
| ATOM | 1784 | HG22 | ILE | X | 114 | 43.709 | 49.463 | 42.995 | 0.00 | 0.00 |
| ATOM | 1785 | HG23 | ILE | X | 114 | 42.502 | 48.242 | 42.630 | 0.00 | 0.00 |
| ATOM | 1786 | CG1  | ILE | X | 114 | 42.409 | 49.520 | 40.312 | 0.00 | 0.00 |
| ATOM | 1787 | HG12 | ILE | X | 114 | 42.560 | 49.655 | 39.241 | 0.00 | 0.00 |

|      |      |      |     |   |     |        |        |        |      |      |
|------|------|------|-----|---|-----|--------|--------|--------|------|------|
| ATOM | 1788 | HG13 | ILE | X | 114 | 41.513 | 48.911 | 40.432 | 0.00 | 0.00 |
| ATOM | 1789 | CD1  | ILE | X | 114 | 42.064 | 50.772 | 41.155 | 0.00 | 0.00 |
| ATOM | 1790 | HD11 | ILE | X | 114 | 41.790 | 50.420 | 42.149 | 0.00 | 0.00 |
| ATOM | 1791 | HD12 | ILE | X | 114 | 42.917 | 51.448 | 41.221 | 0.00 | 0.00 |
| ATOM | 1792 | HD13 | ILE | X | 114 | 41.244 | 51.291 | 40.659 | 0.00 | 0.00 |
| ATOM | 1793 | C    | ILE | X | 114 | 46.161 | 48.516 | 40.782 | 0.00 | 0.00 |
| ATOM | 1794 | O    | ILE | X | 114 | 46.226 | 47.463 | 40.151 | 0.00 | 0.00 |
| ATOM | 1795 | N    | TYR | X | 115 | 47.001 | 48.757 | 41.831 | 0.00 | 0.00 |
| ATOM | 1796 | H    | TYR | X | 115 | 46.731 | 49.523 | 42.432 | 0.00 | 0.00 |
| ATOM | 1797 | CA   | TYR | X | 115 | 48.159 | 47.959 | 42.205 | 0.00 | 0.00 |
| ATOM | 1798 | HA   | TYR | X | 115 | 48.537 | 47.632 | 41.235 | 0.00 | 0.00 |
| ATOM | 1799 | CB   | TYR | X | 115 | 49.255 | 48.794 | 42.883 | 0.00 | 0.00 |
| ATOM | 1800 | HB2  | TYR | X | 115 | 50.043 | 48.121 | 43.222 | 0.00 | 0.00 |
| ATOM | 1801 | HB3  | TYR | X | 115 | 49.673 | 49.455 | 42.124 | 0.00 | 0.00 |
| ATOM | 1802 | CG   | TYR | X | 115 | 48.968 | 49.528 | 44.138 | 0.00 | 0.00 |
| ATOM | 1803 | CD1  | TYR | X | 115 | 48.645 | 48.822 | 45.287 | 0.00 | 0.00 |
| ATOM | 1804 | HD1  | TYR | X | 115 | 48.460 | 47.758 | 45.296 | 0.00 | 0.00 |
| ATOM | 1805 | CE1  | TYR | X | 115 | 48.395 | 49.471 | 46.538 | 0.00 | 0.00 |
| ATOM | 1806 | HE1  | TYR | X | 115 | 48.267 | 48.906 | 47.450 | 0.00 | 0.00 |
| ATOM | 1807 | CZ   | TYR | X | 115 | 48.636 | 50.839 | 46.620 | 0.00 | 0.00 |
| ATOM | 1808 | OH   | TYR | X | 115 | 48.506 | 51.491 | 47.835 | 0.00 | 0.00 |
| ATOM | 1809 | HH   | TYR | X | 115 | 48.519 | 50.948 | 48.627 | 0.00 | 0.00 |
| ATOM | 1810 | CE2  | TYR | X | 115 | 48.939 | 51.551 | 45.436 | 0.00 | 0.00 |
| ATOM | 1811 | HE2  | TYR | X | 115 | 49.036 | 52.626 | 45.448 | 0.00 | 0.00 |
| ATOM | 1812 | CD2  | TYR | X | 115 | 49.144 | 50.943 | 44.144 | 0.00 | 0.00 |
| ATOM | 1813 | HD2  | TYR | X | 115 | 49.409 | 51.486 | 43.249 | 0.00 | 0.00 |
| ATOM | 1814 | C    | TYR | X | 115 | 47.823 | 46.745 | 42.975 | 0.00 | 0.00 |
| ATOM | 1815 | O    | TYR | X | 115 | 46.894 | 46.843 | 43.775 | 0.00 | 0.00 |
| ATOM | 1816 | N    | GLY | X | 116 | 48.586 | 45.693 | 42.852 | 0.00 | 0.00 |
| ATOM | 1817 | H    | GLY | X | 116 | 49.420 | 45.718 | 42.283 | 0.00 | 0.00 |
| ATOM | 1818 | CA   | GLY | X | 116 | 48.676 | 44.566 | 43.816 | 0.00 | 0.00 |
| ATOM | 1819 | HA2  | GLY | X | 116 | 47.634 | 44.667 | 44.268 | 0.00 | 0.00 |
| ATOM | 1820 | HA3  | GLY | X | 116 | 48.615 | 43.581 | 43.342 | 0.00 | 0.00 |
| ATOM | 1821 | C    | GLY | X | 116 | 49.860 | 44.707 | 44.821 | 0.00 | 0.00 |
| ATOM | 1822 | O    | GLY | X | 116 | 50.363 | 45.792 | 44.968 | 0.00 | 0.00 |
| ATOM | 1823 | N    | GLY | X | 117 | 50.338 | 43.632 | 45.393 | 0.00 | 0.00 |
| ATOM | 1824 | H    | GLY | X | 117 | 50.121 | 42.773 | 44.907 | 0.00 | 0.00 |
| ATOM | 1825 | CA   | GLY | X | 117 | 51.084 | 43.589 | 46.591 | 0.00 | 0.00 |
| ATOM | 1826 | HA2  | GLY | X | 117 | 52.043 | 43.137 | 46.395 | 0.00 | 0.00 |
| ATOM | 1827 | HA3  | GLY | X | 117 | 51.227 | 44.627 | 46.966 | 0.00 | 0.00 |
| ATOM | 1828 | C    | GLY | X | 117 | 50.240 | 42.768 | 47.593 | 0.00 | 0.00 |
| ATOM | 1829 | O    | GLY | X | 117 | 50.171 | 43.244 | 48.753 | 0.00 | 0.00 |
| ATOM | 1830 | N    | GLY | X | 118 | 49.542 | 41.674 | 47.221 | 0.00 | 0.00 |
| ATOM | 1831 | H    | GLY | X | 118 | 49.671 | 41.373 | 46.265 | 0.00 | 0.00 |
| ATOM | 1832 | CA   | GLY | X | 118 | 48.782 | 40.810 | 48.085 | 0.00 | 0.00 |
| ATOM | 1833 | HA2  | GLY | X | 118 | 48.279 | 40.049 | 47.433 | 0.00 | 0.00 |
| ATOM | 1834 | HA3  | GLY | X | 118 | 49.515 | 40.242 | 48.718 | 0.00 | 0.00 |
| ATOM | 1835 | C    | GLY | X | 118 | 47.770 | 41.452 | 49.050 | 0.00 | 0.00 |
| ATOM | 1836 | O    | GLY | X | 118 | 47.368 | 40.740 | 49.984 | 0.00 | 0.00 |
| ATOM | 1837 | N    | PHE | X | 119 | 47.458 | 42.706 | 48.855 | 0.00 | 0.00 |
| ATOM | 1838 | H    | PHE | X | 119 | 47.904 | 42.989 | 47.994 | 0.00 | 0.00 |
| ATOM | 1839 | CA   | PHE | X | 119 | 46.792 | 43.678 | 49.791 | 0.00 | 0.00 |
| ATOM | 1840 | HA   | PHE | X | 119 | 46.576 | 44.630 | 49.307 | 0.00 | 0.00 |
| ATOM | 1841 | CB   | PHE | X | 119 | 45.316 | 43.172 | 50.267 | 0.00 | 0.00 |
| ATOM | 1842 | HB2  | PHE | X | 119 | 45.348 | 42.220 | 50.797 | 0.00 | 0.00 |
| ATOM | 1843 | HB3  | PHE | X | 119 | 44.920 | 43.917 | 50.958 | 0.00 | 0.00 |
| ATOM | 1844 | CG   | PHE | X | 119 | 44.240 | 42.883 | 49.227 | 0.00 | 0.00 |
| ATOM | 1845 | CD1  | PHE | X | 119 | 43.423 | 43.869 | 48.695 | 0.00 | 0.00 |
| ATOM | 1846 | HD1  | PHE | X | 119 | 43.477 | 44.898 | 49.019 | 0.00 | 0.00 |
| ATOM | 1847 | CE1  | PHE | X | 119 | 42.484 | 43.550 | 47.649 | 0.00 | 0.00 |
| ATOM | 1848 | HE1  | PHE | X | 119 | 41.925 | 44.381 | 47.244 | 0.00 | 0.00 |
| ATOM | 1849 | CZ   | PHE | X | 119 | 42.275 | 42.248 | 47.292 | 0.00 | 0.00 |
| ATOM | 1850 | HZ   | PHE | X | 119 | 41.563 | 42.005 | 46.518 | 0.00 | 0.00 |
| ATOM | 1851 | CE2  | PHE | X | 119 | 43.159 | 41.240 | 47.732 | 0.00 | 0.00 |
| ATOM | 1852 | HE2  | PHE | X | 119 | 43.072 | 40.213 | 47.410 | 0.00 | 0.00 |
| ATOM | 1853 | CD2  | PHE | X | 119 | 44.128 | 41.597 | 48.689 | 0.00 | 0.00 |
| ATOM | 1854 | HD2  | PHE | X | 119 | 44.728 | 40.819 | 49.138 | 0.00 | 0.00 |
| ATOM | 1855 | C    | PHE | X | 119 | 47.651 | 44.085 | 51.010 | 0.00 | 0.00 |
| ATOM | 1856 | O    | PHE | X | 119 | 47.337 | 45.104 | 51.558 | 0.00 | 0.00 |
| ATOM | 1857 | N    | TYR | X | 120 | 48.652 | 43.295 | 51.455 | 0.00 | 0.00 |

|      |      |     |     |   |     |        |        |        |      |      |
|------|------|-----|-----|---|-----|--------|--------|--------|------|------|
| ATOM | 1858 | H   | TYR | X | 120 | 48.745 | 42.378 | 51.043 | 0.00 | 0.00 |
| ATOM | 1859 | CA  | TYR | X | 120 | 49.512 | 43.777 | 52.589 | 0.00 | 0.00 |
| ATOM | 1860 | HA  | TYR | X | 120 | 48.936 | 44.020 | 53.481 | 0.00 | 0.00 |
| ATOM | 1861 | CB  | TYR | X | 120 | 50.408 | 42.614 | 53.046 | 0.00 | 0.00 |
| ATOM | 1862 | HB2 | TYR | X | 120 | 50.661 | 42.723 | 54.100 | 0.00 | 0.00 |
| ATOM | 1863 | HB3 | TYR | X | 120 | 49.755 | 41.756 | 52.885 | 0.00 | 0.00 |
| ATOM | 1864 | CG  | TYR | X | 120 | 51.709 | 42.298 | 52.350 | 0.00 | 0.00 |
| ATOM | 1865 | CD1 | TYR | X | 120 | 52.899 | 42.738 | 52.877 | 0.00 | 0.00 |
| ATOM | 1866 | HD1 | TYR | X | 120 | 52.884 | 43.243 | 53.832 | 0.00 | 0.00 |
| ATOM | 1867 | CE1 | TYR | X | 120 | 54.124 | 42.578 | 52.188 | 0.00 | 0.00 |
| ATOM | 1868 | HE1 | TYR | X | 120 | 55.057 | 43.016 | 52.510 | 0.00 | 0.00 |
| ATOM | 1869 | CZ  | TYR | X | 120 | 54.220 | 41.879 | 50.971 | 0.00 | 0.00 |
| ATOM | 1870 | OH  | TYR | X | 120 | 55.395 | 41.731 | 50.374 | 0.00 | 0.00 |
| ATOM | 1871 | HH  | TYR | X | 120 | 56.208 | 41.837 | 50.873 | 0.00 | 0.00 |
| ATOM | 1872 | CE2 | TYR | X | 120 | 52.983 | 41.430 | 50.369 | 0.00 | 0.00 |
| ATOM | 1873 | HE2 | TYR | X | 120 | 52.868 | 40.991 | 49.389 | 0.00 | 0.00 |
| ATOM | 1874 | CD2 | TYR | X | 120 | 51.782 | 41.702 | 51.085 | 0.00 | 0.00 |
| ATOM | 1875 | HD2 | TYR | X | 120 | 50.853 | 41.337 | 50.673 | 0.00 | 0.00 |
| ATOM | 1876 | C   | TYR | X | 120 | 50.325 | 44.967 | 52.185 | 0.00 | 0.00 |
| ATOM | 1877 | O   | TYR | X | 120 | 50.820 | 45.626 | 53.047 | 0.00 | 0.00 |
| ATOM | 1878 | N   | SER | X | 121 | 50.502 | 45.222 | 50.951 | 0.00 | 0.00 |
| ATOM | 1879 | H   | SER | X | 121 | 49.917 | 44.817 | 50.235 | 0.00 | 0.00 |
| ATOM | 1880 | CA  | SER | X | 121 | 51.495 | 46.182 | 50.419 | 0.00 | 0.00 |
| ATOM | 1881 | HA  | SER | X | 121 | 51.726 | 46.832 | 51.263 | 0.00 | 0.00 |
| ATOM | 1882 | CB  | SER | X | 121 | 52.868 | 45.492 | 50.282 | 0.00 | 0.00 |
| ATOM | 1883 | HB2 | SER | X | 121 | 53.579 | 46.152 | 49.787 | 0.00 | 0.00 |
| ATOM | 1884 | HB3 | SER | X | 121 | 53.270 | 45.231 | 51.261 | 0.00 | 0.00 |
| ATOM | 1885 | OG  | SER | X | 121 | 52.802 | 44.365 | 49.444 | 0.00 | 0.00 |
| ATOM | 1886 | HG  | SER | X | 121 | 52.052 | 43.804 | 49.653 | 0.00 | 0.00 |
| ATOM | 1887 | C   | SER | X | 121 | 51.085 | 46.885 | 49.097 | 0.00 | 0.00 |
| ATOM | 1888 | O   | SER | X | 121 | 50.161 | 46.425 | 48.391 | 0.00 | 0.00 |
| ATOM | 1889 | N   | GLY | X | 122 | 51.764 | 47.977 | 48.710 | 0.00 | 0.00 |
| ATOM | 1890 | H   | GLY | X | 122 | 52.426 | 48.346 | 49.378 | 0.00 | 0.00 |
| ATOM | 1891 | CA  | GLY | X | 122 | 51.773 | 48.496 | 47.338 | 0.00 | 0.00 |
| ATOM | 1892 | HA2 | GLY | X | 122 | 52.649 | 48.038 | 46.826 | 0.00 | 0.00 |
| ATOM | 1893 | HA3 | GLY | X | 122 | 50.965 | 48.329 | 46.728 | 0.00 | 0.00 |
| ATOM | 1894 | C   | GLY | X | 122 | 52.116 | 49.953 | 47.367 | 0.00 | 0.00 |
| ATOM | 1895 | O   | GLY | X | 122 | 52.127 | 50.577 | 48.440 | 0.00 | 0.00 |
| ATOM | 1896 | N   | ALA | X | 123 | 52.236 | 50.517 | 46.145 | 0.00 | 0.00 |
| ATOM | 1897 | H   | ALA | X | 123 | 52.112 | 49.970 | 45.304 | 0.00 | 0.00 |
| ATOM | 1898 | CA  | ALA | X | 123 | 52.396 | 51.887 | 45.921 | 0.00 | 0.00 |
| ATOM | 1899 | HA  | ALA | X | 123 | 51.704 | 52.439 | 46.557 | 0.00 | 0.00 |
| ATOM | 1900 | CB  | ALA | X | 123 | 53.895 | 52.365 | 46.240 | 0.00 | 0.00 |
| ATOM | 1901 | HB1 | ALA | X | 123 | 53.822 | 53.446 | 46.129 | 0.00 | 0.00 |
| ATOM | 1902 | HB2 | ALA | X | 123 | 54.150 | 52.124 | 47.272 | 0.00 | 0.00 |
| ATOM | 1903 | HB3 | ALA | X | 123 | 54.592 | 52.000 | 45.485 | 0.00 | 0.00 |
| ATOM | 1904 | C   | ALA | X | 123 | 52.130 | 52.362 | 44.458 | 0.00 | 0.00 |
| ATOM | 1905 | O   | ALA | X | 123 | 52.343 | 51.595 | 43.553 | 0.00 | 0.00 |
| ATOM | 1906 | N   | SER | X | 124 | 51.612 | 53.578 | 44.349 | 0.00 | 0.00 |
| ATOM | 1907 | H   | SER | X | 124 | 51.204 | 53.975 | 45.183 | 0.00 | 0.00 |
| ATOM | 1908 | CA  | SER | X | 124 | 51.280 | 54.150 | 43.031 | 0.00 | 0.00 |
| ATOM | 1909 | HA  | SER | X | 124 | 51.070 | 53.270 | 42.423 | 0.00 | 0.00 |
| ATOM | 1910 | CB  | SER | X | 124 | 50.031 | 55.150 | 43.079 | 0.00 | 0.00 |
| ATOM | 1911 | HB2 | SER | X | 124 | 49.805 | 55.292 | 42.022 | 0.00 | 0.00 |
| ATOM | 1912 | HB3 | SER | X | 124 | 49.171 | 54.634 | 43.506 | 0.00 | 0.00 |
| ATOM | 1913 | OG  | SER | X | 124 | 50.261 | 56.380 | 43.719 | 0.00 | 0.00 |
| ATOM | 1914 | HG  | SER | X | 124 | 50.066 | 56.224 | 44.645 | 0.00 | 0.00 |
| ATOM | 1915 | C   | SER | X | 124 | 52.545 | 54.738 | 42.352 | 0.00 | 0.00 |
| ATOM | 1916 | O   | SER | X | 124 | 52.515 | 55.034 | 41.147 | 0.00 | 0.00 |
| ATOM | 1917 | N   | SER | X | 125 | 53.675 | 55.075 | 43.016 | 0.00 | 0.00 |
| ATOM | 1918 | H   | SER | X | 125 | 53.730 | 54.849 | 43.999 | 0.00 | 0.00 |
| ATOM | 1919 | CA  | SER | X | 125 | 54.845 | 55.772 | 42.579 | 0.00 | 0.00 |
| ATOM | 1920 | HA  | SER | X | 125 | 54.498 | 56.603 | 41.964 | 0.00 | 0.00 |
| ATOM | 1921 | CB  | SER | X | 125 | 55.493 | 56.392 | 43.777 | 0.00 | 0.00 |
| ATOM | 1922 | HB2 | SER | X | 125 | 56.539 | 56.560 | 43.522 | 0.00 | 0.00 |
| ATOM | 1923 | HB3 | SER | X | 125 | 55.047 | 57.349 | 44.048 | 0.00 | 0.00 |
| ATOM | 1924 | OG  | SER | X | 125 | 55.518 | 55.549 | 44.917 | 0.00 | 0.00 |
| ATOM | 1925 | HG  | SER | X | 125 | 56.363 | 55.116 | 45.061 | 0.00 | 0.00 |
| ATOM | 1926 | C   | SER | X | 125 | 55.941 | 54.860 | 41.958 | 0.00 | 0.00 |
| ATOM | 1927 | O   | SER | X | 125 | 57.087 | 55.297 | 41.717 | 0.00 | 0.00 |

|      |      |      |     |   |     |        |        |        |      |      |
|------|------|------|-----|---|-----|--------|--------|--------|------|------|
| ATOM | 1928 | N    | LEU | X | 126 | 55.661 | 53.562 | 41.662 | 0.00 | 0.00 |
| ATOM | 1929 | H    | LEU | X | 126 | 54.776 | 53.150 | 41.920 | 0.00 | 0.00 |
| ATOM | 1930 | CA   | LEU | X | 126 | 56.634 | 52.721 | 40.967 | 0.00 | 0.00 |
| ATOM | 1931 | HA   | LEU | X | 126 | 57.605 | 53.056 | 41.332 | 0.00 | 0.00 |
| ATOM | 1932 | CB   | LEU | X | 126 | 56.412 | 51.225 | 41.312 | 0.00 | 0.00 |
| ATOM | 1933 | HB2  | LEU | X | 126 | 55.514 | 50.950 | 40.760 | 0.00 | 0.00 |
| ATOM | 1934 | HB3  | LEU | X | 126 | 57.311 | 50.713 | 40.968 | 0.00 | 0.00 |
| ATOM | 1935 | CG   | LEU | X | 126 | 56.177 | 51.011 | 42.764 | 0.00 | 0.00 |
| ATOM | 1936 | HG   | LEU | X | 126 | 55.201 | 51.407 | 43.046 | 0.00 | 0.00 |
| ATOM | 1937 | CD1  | LEU | X | 126 | 56.234 | 49.546 | 43.139 | 0.00 | 0.00 |
| ATOM | 1938 | HD11 | LEU | X | 126 | 57.220 | 49.082 | 43.136 | 0.00 | 0.00 |
| ATOM | 1939 | HD12 | LEU | X | 126 | 55.780 | 49.438 | 44.124 | 0.00 | 0.00 |
| ATOM | 1940 | HD13 | LEU | X | 126 | 55.545 | 49.016 | 42.482 | 0.00 | 0.00 |
| ATOM | 1941 | CD2  | LEU | X | 126 | 57.306 | 51.588 | 43.706 | 0.00 | 0.00 |
| ATOM | 1942 | HD21 | LEU | X | 126 | 57.243 | 52.669 | 43.827 | 0.00 | 0.00 |
| ATOM | 1943 | HD22 | LEU | X | 126 | 57.191 | 51.151 | 44.698 | 0.00 | 0.00 |
| ATOM | 1944 | HD23 | LEU | X | 126 | 58.327 | 51.265 | 43.500 | 0.00 | 0.00 |
| ATOM | 1945 | C    | LEU | X | 126 | 56.449 | 52.980 | 39.487 | 0.00 | 0.00 |
| ATOM | 1946 | O    | LEU | X | 126 | 55.350 | 53.036 | 38.960 | 0.00 | 0.00 |
| ATOM | 1947 | N    | ASP | X | 127 | 57.587 | 52.956 | 38.796 | 0.00 | 0.00 |
| ATOM | 1948 | H    | ASP | X | 127 | 58.443 | 52.808 | 39.311 | 0.00 | 0.00 |
| ATOM | 1949 | CA   | ASP | X | 127 | 57.745 | 53.441 | 37.433 | 0.00 | 0.00 |
| ATOM | 1950 | HA   | ASP | X | 127 | 56.954 | 54.181 | 37.310 | 0.00 | 0.00 |
| ATOM | 1951 | CB   | ASP | X | 127 | 59.089 | 54.095 | 37.383 | 0.00 | 0.00 |
| ATOM | 1952 | HB2  | ASP | X | 127 | 59.202 | 54.635 | 36.443 | 0.00 | 0.00 |
| ATOM | 1953 | HB3  | ASP | X | 127 | 59.218 | 54.816 | 38.190 | 0.00 | 0.00 |
| ATOM | 1954 | CG   | ASP | X | 127 | 60.213 | 53.012 | 37.442 | 0.00 | 0.00 |
| ATOM | 1955 | OD1  | ASP | X | 127 | 60.493 | 52.349 | 36.462 | 0.00 | 0.00 |
| ATOM | 1956 | OD2  | ASP | X | 127 | 60.950 | 53.096 | 38.465 | 0.00 | 0.00 |
| ATOM | 1957 | C    | ASP | X | 127 | 57.483 | 52.418 | 36.340 | 0.00 | 0.00 |
| ATOM | 1958 | O    | ASP | X | 127 | 57.180 | 52.946 | 35.266 | 0.00 | 0.00 |
| ATOM | 1959 | N    | VAL | X | 128 | 57.420 | 51.020 | 36.500 | 0.00 | 0.00 |
| ATOM | 1960 | H    | VAL | X | 128 | 57.564 | 50.665 | 37.434 | 0.00 | 0.00 |
| ATOM | 1961 | CA   | VAL | X | 128 | 56.823 | 50.026 | 35.554 | 0.00 | 0.00 |
| ATOM | 1962 | HA   | VAL | X | 128 | 57.332 | 50.297 | 34.629 | 0.00 | 0.00 |
| ATOM | 1963 | CB   | VAL | X | 128 | 57.056 | 48.529 | 35.932 | 0.00 | 0.00 |
| ATOM | 1964 | HB   | VAL | X | 128 | 58.097 | 48.474 | 36.251 | 0.00 | 0.00 |
| ATOM | 1965 | CG1  | VAL | X | 128 | 56.265 | 47.869 | 37.058 | 0.00 | 0.00 |
| ATOM | 1966 | HG11 | VAL | X | 128 | 55.291 | 47.729 | 36.588 | 0.00 | 0.00 |
| ATOM | 1967 | HG12 | VAL | X | 128 | 56.674 | 46.908 | 37.370 | 0.00 | 0.00 |
| ATOM | 1968 | HG13 | VAL | X | 128 | 56.039 | 48.653 | 37.781 | 0.00 | 0.00 |
| ATOM | 1969 | CG2  | VAL | X | 128 | 57.089 | 47.635 | 34.704 | 0.00 | 0.00 |
| ATOM | 1970 | HG21 | VAL | X | 128 | 57.599 | 46.688 | 34.881 | 0.00 | 0.00 |
| ATOM | 1971 | HG22 | VAL | X | 128 | 56.113 | 47.392 | 34.285 | 0.00 | 0.00 |
| ATOM | 1972 | HG23 | VAL | X | 128 | 57.744 | 48.132 | 33.988 | 0.00 | 0.00 |
| ATOM | 1973 | C    | VAL | X | 128 | 55.318 | 50.249 | 35.183 | 0.00 | 0.00 |
| ATOM | 1974 | O    | VAL | X | 128 | 54.998 | 49.962 | 34.011 | 0.00 | 0.00 |
| ATOM | 1975 | N    | TYR | X | 129 | 54.449 | 50.926 | 35.919 | 0.00 | 0.00 |
| ATOM | 1976 | H    | TYR | X | 129 | 54.824 | 51.124 | 36.836 | 0.00 | 0.00 |
| ATOM | 1977 | CA   | TYR | X | 129 | 53.110 | 51.325 | 35.493 | 0.00 | 0.00 |
| ATOM | 1978 | HA   | TYR | X | 129 | 52.947 | 51.064 | 34.448 | 0.00 | 0.00 |
| ATOM | 1979 | CB   | TYR | X | 129 | 52.084 | 50.577 | 36.339 | 0.00 | 0.00 |
| ATOM | 1980 | HB2  | TYR | X | 129 | 51.098 | 51.032 | 36.239 | 0.00 | 0.00 |
| ATOM | 1981 | HB3  | TYR | X | 129 | 51.952 | 49.568 | 35.948 | 0.00 | 0.00 |
| ATOM | 1982 | CG   | TYR | X | 129 | 52.394 | 50.386 | 37.813 | 0.00 | 0.00 |
| ATOM | 1983 | CD1  | TYR | X | 129 | 52.920 | 49.168 | 38.279 | 0.00 | 0.00 |
| ATOM | 1984 | HD1  | TYR | X | 129 | 53.160 | 48.347 | 37.620 | 0.00 | 0.00 |
| ATOM | 1985 | CE1  | TYR | X | 129 | 53.240 | 48.890 | 39.624 | 0.00 | 0.00 |
| ATOM | 1986 | HE1  | TYR | X | 129 | 53.754 | 47.964 | 39.834 | 0.00 | 0.00 |
| ATOM | 1987 | CZ   | TYR | X | 129 | 52.899 | 49.838 | 40.579 | 0.00 | 0.00 |
| ATOM | 1988 | OH   | TYR | X | 129 | 53.068 | 49.522 | 41.851 | 0.00 | 0.00 |
| ATOM | 1989 | HH   | TYR | X | 129 | 52.798 | 50.202 | 42.472 | 0.00 | 0.00 |
| ATOM | 1990 | CE2  | TYR | X | 129 | 52.257 | 51.033 | 40.199 | 0.00 | 0.00 |
| ATOM | 1991 | HE2  | TYR | X | 129 | 51.794 | 51.673 | 40.935 | 0.00 | 0.00 |
| ATOM | 1992 | CD2  | TYR | X | 129 | 52.059 | 51.351 | 38.825 | 0.00 | 0.00 |
| ATOM | 1993 | HD2  | TYR | X | 129 | 51.480 | 52.203 | 38.500 | 0.00 | 0.00 |
| ATOM | 1994 | C    | TYR | X | 129 | 52.985 | 52.880 | 35.527 | 0.00 | 0.00 |
| ATOM | 1995 | O    | TYR | X | 129 | 51.826 | 53.328 | 35.616 | 0.00 | 0.00 |
| ATOM | 1996 | N    | ASP | X | 130 | 54.100 | 53.685 | 35.411 | 0.00 | 0.00 |
| ATOM | 1997 | H    | ASP | X | 130 | 55.021 | 53.280 | 35.496 | 0.00 | 0.00 |

|      |      |      |     |   |     |        |        |        |      |      |
|------|------|------|-----|---|-----|--------|--------|--------|------|------|
| ATOM | 1998 | CA   | ASP | X | 130 | 54.011 | 55.092 | 34.908 | 0.00 | 0.00 |
| ATOM | 1999 | HA   | ASP | X | 130 | 53.348 | 55.642 | 35.575 | 0.00 | 0.00 |
| ATOM | 2000 | CB   | ASP | X | 130 | 55.370 | 55.763 | 34.936 | 0.00 | 0.00 |
| ATOM | 2001 | HB2  | ASP | X | 130 | 55.669 | 55.775 | 35.985 | 0.00 | 0.00 |
| ATOM | 2002 | HB3  | ASP | X | 130 | 56.071 | 55.200 | 34.319 | 0.00 | 0.00 |
| ATOM | 2003 | CG   | ASP | X | 130 | 55.379 | 57.137 | 34.378 | 0.00 | 0.00 |
| ATOM | 2004 | OD1  | ASP | X | 130 | 55.203 | 57.390 | 33.170 | 0.00 | 0.00 |
| ATOM | 2005 | OD2  | ASP | X | 130 | 55.752 | 58.088 | 35.129 | 0.00 | 0.00 |
| ATOM | 2006 | C    | ASP | X | 130 | 53.407 | 55.076 | 33.487 | 0.00 | 0.00 |
| ATOM | 2007 | O    | ASP | X | 130 | 53.846 | 54.307 | 32.613 | 0.00 | 0.00 |
| ATOM | 2008 | N    | GLY | X | 131 | 52.428 | 55.956 | 33.234 | 0.00 | 0.00 |
| ATOM | 2009 | H    | GLY | X | 131 | 52.182 | 56.623 | 33.952 | 0.00 | 0.00 |
| ATOM | 2010 | CA   | GLY | X | 131 | 51.568 | 55.825 | 32.044 | 0.00 | 0.00 |
| ATOM | 2011 | HA2  | GLY | X | 131 | 51.279 | 54.816 | 31.863 | 0.00 | 0.00 |
| ATOM | 2012 | HA3  | GLY | X | 131 | 50.618 | 56.249 | 32.292 | 0.00 | 0.00 |
| ATOM | 2013 | C    | GLY | X | 131 | 51.999 | 56.505 | 30.766 | 0.00 | 0.00 |
| ATOM | 2014 | O    | GLY | X | 131 | 51.333 | 56.391 | 29.735 | 0.00 | 0.00 |
| ATOM | 2015 | N    | ARG | X | 132 | 53.137 | 57.206 | 30.754 | 0.00 | 0.00 |
| ATOM | 2016 | H    | ARG | X | 132 | 53.683 | 57.198 | 31.604 | 0.00 | 0.00 |
| ATOM | 2017 | CA   | ARG | X | 132 | 53.611 | 58.051 | 29.667 | 0.00 | 0.00 |
| ATOM | 2018 | HA   | ARG | X | 132 | 52.853 | 58.797 | 29.429 | 0.00 | 0.00 |
| ATOM | 2019 | CB   | ARG | X | 132 | 54.855 | 58.857 | 30.066 | 0.00 | 0.00 |
| ATOM | 2020 | HB2  | ARG | X | 132 | 54.921 | 59.739 | 29.429 | 0.00 | 0.00 |
| ATOM | 2021 | HB3  | ARG | X | 132 | 54.806 | 59.327 | 31.048 | 0.00 | 0.00 |
| ATOM | 2022 | CG   | ARG | X | 132 | 56.192 | 58.042 | 30.070 | 0.00 | 0.00 |
| ATOM | 2023 | HG2  | ARG | X | 132 | 55.977 | 57.147 | 30.654 | 0.00 | 0.00 |
| ATOM | 2024 | HG3  | ARG | X | 132 | 56.365 | 57.663 | 29.063 | 0.00 | 0.00 |
| ATOM | 2025 | CD   | ARG | X | 132 | 57.348 | 58.821 | 30.696 | 0.00 | 0.00 |
| ATOM | 2026 | HD2  | ARG | X | 132 | 58.261 | 58.278 | 30.452 | 0.00 | 0.00 |
| ATOM | 2027 | HD3  | ARG | X | 132 | 57.549 | 59.783 | 30.225 | 0.00 | 0.00 |
| ATOM | 2028 | NE   | ARG | X | 132 | 57.215 | 58.994 | 32.135 | 0.00 | 0.00 |
| ATOM | 2029 | HE   | ARG | X | 132 | 56.310 | 58.732 | 32.499 | 0.00 | 0.00 |
| ATOM | 2030 | CZ   | ARG | X | 132 | 57.924 | 59.731 | 32.913 | 0.00 | 0.00 |
| ATOM | 2031 | NH1  | ARG | X | 132 | 59.057 | 60.242 | 32.495 | 0.00 | 0.00 |
| ATOM | 2032 | HH11 | ARG | X | 132 | 59.318 | 60.161 | 31.522 | 0.00 | 0.00 |
| ATOM | 2033 | HH12 | ARG | X | 132 | 59.481 | 60.883 | 33.150 | 0.00 | 0.00 |
| ATOM | 2034 | NH2  | ARG | X | 132 | 57.546 | 59.844 | 34.192 | 0.00 | 0.00 |
| ATOM | 2035 | HH21 | ARG | X | 132 | 56.853 | 59.196 | 34.538 | 0.00 | 0.00 |
| ATOM | 2036 | HH22 | ARG | X | 132 | 57.971 | 60.471 | 34.860 | 0.00 | 0.00 |
| ATOM | 2037 | C    | ARG | X | 132 | 53.623 | 57.303 | 28.302 | 0.00 | 0.00 |
| ATOM | 2038 | O    | ARG | X | 132 | 53.081 | 57.879 | 27.387 | 0.00 | 0.00 |
| ATOM | 2039 | N    | PHE | X | 133 | 54.206 | 56.163 | 28.116 | 0.00 | 0.00 |
| ATOM | 2040 | H    | PHE | X | 133 | 54.493 | 55.700 | 28.967 | 0.00 | 0.00 |
| ATOM | 2041 | CA   | PHE | X | 133 | 54.287 | 55.476 | 26.794 | 0.00 | 0.00 |
| ATOM | 2042 | HA   | PHE | X | 133 | 54.731 | 56.132 | 26.045 | 0.00 | 0.00 |
| ATOM | 2043 | CB   | PHE | X | 133 | 55.231 | 54.286 | 27.046 | 0.00 | 0.00 |
| ATOM | 2044 | HB2  | PHE | X | 133 | 54.865 | 53.648 | 27.851 | 0.00 | 0.00 |
| ATOM | 2045 | HB3  | PHE | X | 133 | 55.311 | 53.729 | 26.114 | 0.00 | 0.00 |
| ATOM | 2046 | CG   | PHE | X | 133 | 56.595 | 54.865 | 27.324 | 0.00 | 0.00 |
| ATOM | 2047 | CD1  | PHE | X | 133 | 57.132 | 54.907 | 28.587 | 0.00 | 0.00 |
| ATOM | 2048 | HD1  | PHE | X | 133 | 56.532 | 54.362 | 29.300 | 0.00 | 0.00 |
| ATOM | 2049 | CE1  | PHE | X | 133 | 58.461 | 55.355 | 28.776 | 0.00 | 0.00 |
| ATOM | 2050 | HE1  | PHE | X | 133 | 58.869 | 55.335 | 29.776 | 0.00 | 0.00 |
| ATOM | 2051 | CZ   | PHE | X | 133 | 59.068 | 55.909 | 27.652 | 0.00 | 0.00 |
| ATOM | 2052 | HZ   | PHE | X | 133 | 60.096 | 56.238 | 27.644 | 0.00 | 0.00 |
| ATOM | 2053 | CE2  | PHE | X | 133 | 58.547 | 55.858 | 26.390 | 0.00 | 0.00 |
| ATOM | 2054 | HE2  | PHE | X | 133 | 59.033 | 56.354 | 25.563 | 0.00 | 0.00 |
| ATOM | 2055 | CD2  | PHE | X | 133 | 57.240 | 55.388 | 26.221 | 0.00 | 0.00 |
| ATOM | 2056 | HD2  | PHE | X | 133 | 56.872 | 55.304 | 25.210 | 0.00 | 0.00 |
| ATOM | 2057 | C    | PHE | X | 133 | 52.979 | 54.954 | 26.230 | 0.00 | 0.00 |
| ATOM | 2058 | O    | PHE | X | 133 | 52.652 | 55.338 | 25.098 | 0.00 | 0.00 |
| ATOM | 2059 | N    | LEU | X | 134 | 52.089 | 54.346 | 27.027 | 0.00 | 0.00 |
| ATOM | 2060 | H    | LEU | X | 134 | 52.346 | 54.071 | 27.964 | 0.00 | 0.00 |
| ATOM | 2061 | CA   | LEU | X | 134 | 50.715 | 54.065 | 26.573 | 0.00 | 0.00 |
| ATOM | 2062 | HA   | LEU | X | 134 | 50.784 | 53.440 | 25.683 | 0.00 | 0.00 |
| ATOM | 2063 | CB   | LEU | X | 134 | 49.862 | 53.384 | 27.739 | 0.00 | 0.00 |
| ATOM | 2064 | HB2  | LEU | X | 134 | 50.360 | 52.475 | 28.077 | 0.00 | 0.00 |
| ATOM | 2065 | HB3  | LEU | X | 134 | 49.778 | 54.106 | 28.552 | 0.00 | 0.00 |
| ATOM | 2066 | CG   | LEU | X | 134 | 48.484 | 52.885 | 27.326 | 0.00 | 0.00 |
| ATOM | 2067 | HG   | LEU | X | 134 | 47.966 | 53.726 | 26.864 | 0.00 | 0.00 |



|      |      |      |     |   |     |        |        |        |      |      |
|------|------|------|-----|---|-----|--------|--------|--------|------|------|
| ATOM | 2068 | CD1  | LEU | X | 134 | 48.486 | 51.630 | 26.398 | 0.00 | 0.00 |
| ATOM | 2069 | HD11 | LEU | X | 134 | 49.194 | 51.777 | 25.582 | 0.00 | 0.00 |
| ATOM | 2070 | HD12 | LEU | X | 134 | 48.928 | 50.976 | 27.150 | 0.00 | 0.00 |
| ATOM | 2071 | HD13 | LEU | X | 134 | 47.492 | 51.420 | 26.002 | 0.00 | 0.00 |
| ATOM | 2072 | CD2  | LEU | X | 134 | 47.585 | 52.600 | 28.532 | 0.00 | 0.00 |
| ATOM | 2073 | HD21 | LEU | X | 134 | 47.687 | 53.382 | 29.284 | 0.00 | 0.00 |
| ATOM | 2074 | HD22 | LEU | X | 134 | 46.550 | 52.605 | 28.188 | 0.00 | 0.00 |
| ATOM | 2075 | HD23 | LEU | X | 134 | 47.744 | 51.592 | 28.916 | 0.00 | 0.00 |
| ATOM | 2076 | C    | LEU | X | 134 | 50.014 | 55.362 | 26.199 | 0.00 | 0.00 |
| ATOM | 2077 | O    | LEU | X | 134 | 49.301 | 55.395 | 25.194 | 0.00 | 0.00 |
| ATOM | 2078 | N    | VAL | X | 135 | 50.208 | 56.380 | 27.028 | 0.00 | 0.00 |
| ATOM | 2079 | H    | VAL | X | 135 | 50.859 | 56.325 | 27.798 | 0.00 | 0.00 |
| ATOM | 2080 | CA   | VAL | X | 135 | 49.316 | 57.632 | 26.920 | 0.00 | 0.00 |
| ATOM | 2081 | HA   | VAL | X | 135 | 48.306 | 57.281 | 26.710 | 0.00 | 0.00 |
| ATOM | 2082 | CB   | VAL | X | 135 | 49.347 | 58.360 | 28.274 | 0.00 | 0.00 |
| ATOM | 2083 | HB   | VAL | X | 135 | 50.391 | 58.410 | 28.581 | 0.00 | 0.00 |
| ATOM | 2084 | CG1  | VAL | X | 135 | 48.922 | 59.898 | 28.323 | 0.00 | 0.00 |
| ATOM | 2085 | HG11 | VAL | X | 135 | 47.852 | 60.025 | 28.157 | 0.00 | 0.00 |
| ATOM | 2086 | HG12 | VAL | X | 135 | 49.077 | 60.222 | 29.352 | 0.00 | 0.00 |
| ATOM | 2087 | HG13 | VAL | X | 135 | 49.564 | 60.402 | 27.600 | 0.00 | 0.00 |
| ATOM | 2088 | CG2  | VAL | X | 135 | 48.575 | 57.681 | 29.485 | 0.00 | 0.00 |
| ATOM | 2089 | HG21 | VAL | X | 135 | 48.842 | 57.993 | 30.495 | 0.00 | 0.00 |
| ATOM | 2090 | HG22 | VAL | X | 135 | 47.498 | 57.852 | 29.489 | 0.00 | 0.00 |
| ATOM | 2091 | HG23 | VAL | X | 135 | 48.711 | 56.600 | 29.455 | 0.00 | 0.00 |
| ATOM | 2092 | C    | VAL | X | 135 | 49.725 | 58.505 | 25.759 | 0.00 | 0.00 |
| ATOM | 2093 | O    | VAL | X | 135 | 48.904 | 59.236 | 25.260 | 0.00 | 0.00 |
| ATOM | 2094 | N    | GLN | X | 136 | 51.019 | 58.410 | 25.291 | 0.00 | 0.00 |
| ATOM | 2095 | H    | GLN | X | 136 | 51.613 | 57.716 | 25.720 | 0.00 | 0.00 |
| ATOM | 2096 | CA   | GLN | X | 136 | 51.400 | 59.023 | 23.985 | 0.00 | 0.00 |
| ATOM | 2097 | HA   | GLN | X | 136 | 51.037 | 60.043 | 23.863 | 0.00 | 0.00 |
| ATOM | 2098 | CB   | GLN | X | 136 | 52.916 | 59.116 | 23.932 | 0.00 | 0.00 |
| ATOM | 2099 | HB2  | GLN | X | 136 | 53.219 | 59.738 | 24.775 | 0.00 | 0.00 |
| ATOM | 2100 | HB3  | GLN | X | 136 | 53.286 | 58.098 | 24.054 | 0.00 | 0.00 |
| ATOM | 2101 | CG   | GLN | X | 136 | 53.365 | 59.666 | 22.608 | 0.00 | 0.00 |
| ATOM | 2102 | HG2  | GLN | X | 136 | 52.896 | 60.543 | 22.163 | 0.00 | 0.00 |
| ATOM | 2103 | HG3  | GLN | X | 136 | 54.397 | 60.002 | 22.715 | 0.00 | 0.00 |
| ATOM | 2104 | CD   | GLN | X | 136 | 53.501 | 58.629 | 21.485 | 0.00 | 0.00 |
| ATOM | 2105 | OE1  | GLN | X | 136 | 54.428 | 57.824 | 21.492 | 0.00 | 0.00 |
| ATOM | 2106 | NE2  | GLN | X | 136 | 52.789 | 58.800 | 20.372 | 0.00 | 0.00 |
| ATOM | 2107 | HE21 | GLN | X | 136 | 52.939 | 58.134 | 19.628 | 0.00 | 0.00 |
| ATOM | 2108 | HE22 | GLN | X | 136 | 52.284 | 59.668 | 20.260 | 0.00 | 0.00 |
| ATOM | 2109 | C    | GLN | X | 136 | 50.781 | 58.142 | 22.874 | 0.00 | 0.00 |
| ATOM | 2110 | O    | GLN | X | 136 | 50.096 | 58.705 | 22.063 | 0.00 | 0.00 |
| ATOM | 2111 | N    | ALA | X | 137 | 51.038 | 56.870 | 22.969 | 0.00 | 0.00 |
| ATOM | 2112 | H    | ALA | X | 137 | 51.468 | 56.478 | 23.795 | 0.00 | 0.00 |
| ATOM | 2113 | CA   | ALA | X | 137 | 50.849 | 55.965 | 21.848 | 0.00 | 0.00 |
| ATOM | 2114 | HA   | ALA | X | 137 | 51.392 | 56.433 | 21.027 | 0.00 | 0.00 |
| ATOM | 2115 | CB   | ALA | X | 137 | 51.643 | 54.659 | 22.156 | 0.00 | 0.00 |
| ATOM | 2116 | HB1  | ALA | X | 137 | 52.713 | 54.750 | 22.339 | 0.00 | 0.00 |
| ATOM | 2117 | HB2  | ALA | X | 137 | 51.161 | 54.130 | 22.979 | 0.00 | 0.00 |
| ATOM | 2118 | HB3  | ALA | X | 137 | 51.565 | 54.116 | 21.214 | 0.00 | 0.00 |
| ATOM | 2119 | C    | ALA | X | 137 | 49.367 | 55.788 | 21.503 | 0.00 | 0.00 |
| ATOM | 2120 | O    | ALA | X | 137 | 49.041 | 56.116 | 20.338 | 0.00 | 0.00 |
| ATOM | 2121 | N    | GLU | X | 138 | 48.587 | 55.283 | 22.388 | 0.00 | 0.00 |
| ATOM | 2122 | H    | GLU | X | 138 | 49.071 | 55.148 | 23.264 | 0.00 | 0.00 |
| ATOM | 2123 | CA   | GLU | X | 138 | 47.192 | 54.928 | 22.314 | 0.00 | 0.00 |
| ATOM | 2124 | HA   | GLU | X | 138 | 46.873 | 54.814 | 21.278 | 0.00 | 0.00 |
| ATOM | 2125 | CB   | GLU | X | 138 | 46.963 | 53.616 | 23.096 | 0.00 | 0.00 |
| ATOM | 2126 | HB2  | GLU | X | 138 | 47.082 | 53.719 | 24.174 | 0.00 | 0.00 |
| ATOM | 2127 | HB3  | GLU | X | 138 | 45.881 | 53.492 | 23.038 | 0.00 | 0.00 |
| ATOM | 2128 | CG   | GLU | X | 138 | 47.604 | 52.367 | 22.466 | 0.00 | 0.00 |
| ATOM | 2129 | HG2  | GLU | X | 138 | 48.682 | 52.514 | 22.528 | 0.00 | 0.00 |
| ATOM | 2130 | HG3  | GLU | X | 138 | 47.430 | 51.512 | 23.120 | 0.00 | 0.00 |
| ATOM | 2131 | CD   | GLU | X | 138 | 47.153 | 52.031 | 21.059 | 0.00 | 0.00 |
| ATOM | 2132 | OE1  | GLU | X | 138 | 45.936 | 52.100 | 20.758 | 0.00 | 0.00 |
| ATOM | 2133 | OE2  | GLU | X | 138 | 48.034 | 51.509 | 20.310 | 0.00 | 0.00 |
| ATOM | 2134 | C    | GLU | X | 138 | 46.239 | 56.007 | 22.799 | 0.00 | 0.00 |
| ATOM | 2135 | O    | GLU | X | 138 | 45.025 | 55.884 | 22.784 | 0.00 | 0.00 |
| ATOM | 2136 | N    | ARG | X | 139 | 46.697 | 57.236 | 23.234 | 0.00 | 0.00 |
| ATOM | 2137 | H    | ARG | X | 139 | 47.691 | 57.352 | 23.372 | 0.00 | 0.00 |

|      |      |      |     |   |     |        |        |        |      |      |
|------|------|------|-----|---|-----|--------|--------|--------|------|------|
| ATOM | 2138 | CA   | ARG | X | 139 | 45.870 | 58.382 | 23.624 | 0.00 | 0.00 |
| ATOM | 2139 | HA   | ARG | X | 139 | 46.560 | 59.103 | 24.062 | 0.00 | 0.00 |
| ATOM | 2140 | CB   | ARG | X | 139 | 45.258 | 59.084 | 22.351 | 0.00 | 0.00 |
| ATOM | 2141 | HB2  | ARG | X | 139 | 46.125 | 59.233 | 21.708 | 0.00 | 0.00 |
| ATOM | 2142 | HB3  | ARG | X | 139 | 44.496 | 58.485 | 21.853 | 0.00 | 0.00 |
| ATOM | 2143 | CG   | ARG | X | 139 | 44.735 | 60.481 | 22.642 | 0.00 | 0.00 |
| ATOM | 2144 | HG2  | ARG | X | 139 | 43.738 | 60.367 | 23.066 | 0.00 | 0.00 |
| ATOM | 2145 | HG3  | ARG | X | 139 | 45.459 | 60.997 | 23.272 | 0.00 | 0.00 |
| ATOM | 2146 | CD   | ARG | X | 139 | 44.490 | 61.314 | 21.365 | 0.00 | 0.00 |
| ATOM | 2147 | HD2  | ARG | X | 139 | 45.472 | 61.150 | 20.921 | 0.00 | 0.00 |
| ATOM | 2148 | HD3  | ARG | X | 139 | 43.635 | 60.932 | 20.807 | 0.00 | 0.00 |
| ATOM | 2149 | NE   | ARG | X | 139 | 44.360 | 62.744 | 21.644 | 0.00 | 0.00 |
| ATOM | 2150 | HE   | ARG | X | 139 | 43.415 | 63.075 | 21.512 | 0.00 | 0.00 |
| ATOM | 2151 | CZ   | ARG | X | 139 | 45.286 | 63.632 | 21.959 | 0.00 | 0.00 |
| ATOM | 2152 | NH1  | ARG | X | 139 | 46.558 | 63.349 | 21.946 | 0.00 | 0.00 |
| ATOM | 2153 | HH11 | ARG | X | 139 | 46.785 | 62.429 | 21.598 | 0.00 | 0.00 |
| ATOM | 2154 | HH12 | ARG | X | 139 | 47.362 | 63.940 | 22.104 | 0.00 | 0.00 |
| ATOM | 2155 | NH2  | ARG | X | 139 | 44.830 | 64.828 | 22.243 | 0.00 | 0.00 |
| ATOM | 2156 | HH21 | ARG | X | 139 | 43.868 | 65.037 | 22.019 | 0.00 | 0.00 |
| ATOM | 2157 | HH22 | ARG | X | 139 | 45.476 | 65.599 | 22.333 | 0.00 | 0.00 |
| ATOM | 2158 | C    | ARG | X | 139 | 44.921 | 58.094 | 24.806 | 0.00 | 0.00 |
| ATOM | 2159 | O    | ARG | X | 139 | 44.481 | 59.101 | 25.314 | 0.00 | 0.00 |
| ATOM | 2160 | N    | THR | X | 140 | 44.568 | 56.898 | 25.342 | 0.00 | 0.00 |
| ATOM | 2161 | H    | THR | X | 140 | 44.891 | 56.051 | 24.897 | 0.00 | 0.00 |
| ATOM | 2162 | CA   | THR | X | 140 | 43.862 | 56.864 | 26.659 | 0.00 | 0.00 |
| ATOM | 2163 | HA   | THR | X | 140 | 42.890 | 57.352 | 26.592 | 0.00 | 0.00 |
| ATOM | 2164 | CB   | THR | X | 140 | 43.611 | 55.423 | 26.927 | 0.00 | 0.00 |
| ATOM | 2165 | HB   | THR | X | 140 | 43.117 | 55.384 | 27.898 | 0.00 | 0.00 |
| ATOM | 2166 | CG2  | THR | X | 140 | 42.596 | 54.874 | 25.857 | 0.00 | 0.00 |
| ATOM | 2167 | HG21 | THR | X | 140 | 41.595 | 55.263 | 26.045 | 0.00 | 0.00 |
| ATOM | 2168 | HG22 | THR | X | 140 | 42.876 | 55.071 | 24.822 | 0.00 | 0.00 |
| ATOM | 2169 | HG23 | THR | X | 140 | 42.562 | 53.799 | 26.033 | 0.00 | 0.00 |
| ATOM | 2170 | OG1  | THR | X | 140 | 44.796 | 54.666 | 26.950 | 0.00 | 0.00 |
| ATOM | 2171 | HG1  | THR | X | 140 | 45.399 | 55.222 | 27.448 | 0.00 | 0.00 |
| ATOM | 2172 | C    | THR | X | 140 | 44.701 | 57.532 | 27.790 | 0.00 | 0.00 |
| ATOM | 2173 | O    | THR | X | 140 | 45.873 | 57.293 | 27.872 | 0.00 | 0.00 |
| ATOM | 2174 | N    | VAL | X | 141 | 43.958 | 58.189 | 28.713 | 0.00 | 0.00 |
| ATOM | 2175 | H    | VAL | X | 141 | 42.963 | 58.183 | 28.536 | 0.00 | 0.00 |
| ATOM | 2176 | CA   | VAL | X | 141 | 44.501 | 58.912 | 29.907 | 0.00 | 0.00 |
| ATOM | 2177 | HA   | VAL | X | 141 | 45.417 | 59.380 | 29.546 | 0.00 | 0.00 |
| ATOM | 2178 | CB   | VAL | X | 141 | 43.541 | 60.106 | 30.225 | 0.00 | 0.00 |
| ATOM | 2179 | HB   | VAL | X | 141 | 42.514 | 59.756 | 30.328 | 0.00 | 0.00 |
| ATOM | 2180 | CG1  | VAL | X | 141 | 43.848 | 60.774 | 31.477 | 0.00 | 0.00 |
| ATOM | 2181 | HG11 | VAL | X | 141 | 44.912 | 60.991 | 31.576 | 0.00 | 0.00 |
| ATOM | 2182 | HG12 | VAL | X | 141 | 43.287 | 61.706 | 31.534 | 0.00 | 0.00 |
| ATOM | 2183 | HG13 | VAL | X | 141 | 43.589 | 60.129 | 32.317 | 0.00 | 0.00 |
| ATOM | 2184 | CG2  | VAL | X | 141 | 43.612 | 61.057 | 29.047 | 0.00 | 0.00 |
| ATOM | 2185 | HG21 | VAL | X | 141 | 43.838 | 60.551 | 28.108 | 0.00 | 0.00 |
| ATOM | 2186 | HG22 | VAL | X | 141 | 42.715 | 61.647 | 28.861 | 0.00 | 0.00 |
| ATOM | 2187 | HG23 | VAL | X | 141 | 44.428 | 61.750 | 29.253 | 0.00 | 0.00 |
| ATOM | 2188 | C    | VAL | X | 141 | 44.769 | 57.959 | 31.063 | 0.00 | 0.00 |
| ATOM | 2189 | O    | VAL | X | 141 | 43.843 | 57.247 | 31.365 | 0.00 | 0.00 |
| ATOM | 2190 | N    | LEU | X | 142 | 45.994 | 58.039 | 31.651 | 0.00 | 0.00 |
| ATOM | 2191 | H    | LEU | X | 142 | 46.530 | 58.882 | 31.498 | 0.00 | 0.00 |
| ATOM | 2192 | CA   | LEU | X | 142 | 46.402 | 57.072 | 32.696 | 0.00 | 0.00 |
| ATOM | 2193 | HA   | LEU | X | 142 | 45.762 | 56.193 | 32.620 | 0.00 | 0.00 |
| ATOM | 2194 | CB   | LEU | X | 142 | 47.803 | 56.515 | 32.420 | 0.00 | 0.00 |
| ATOM | 2195 | HB2  | LEU | X | 142 | 47.754 | 56.163 | 31.390 | 0.00 | 0.00 |
| ATOM | 2196 | HB3  | LEU | X | 142 | 48.550 | 57.293 | 32.577 | 0.00 | 0.00 |
| ATOM | 2197 | CG   | LEU | X | 142 | 48.219 | 55.209 | 33.168 | 0.00 | 0.00 |
| ATOM | 2198 | HG   | LEU | X | 142 | 49.040 | 54.719 | 32.646 | 0.00 | 0.00 |
| ATOM | 2199 | CD1  | LEU | X | 142 | 48.540 | 55.589 | 34.669 | 0.00 | 0.00 |
| ATOM | 2200 | HD11 | LEU | X | 142 | 49.255 | 56.407 | 34.763 | 0.00 | 0.00 |
| ATOM | 2201 | HD12 | LEU | X | 142 | 47.682 | 55.754 | 35.322 | 0.00 | 0.00 |
| ATOM | 2202 | HD13 | LEU | X | 142 | 49.026 | 54.725 | 35.122 | 0.00 | 0.00 |
| ATOM | 2203 | CD2  | LEU | X | 142 | 47.079 | 54.208 | 33.219 | 0.00 | 0.00 |
| ATOM | 2204 | HD21 | LEU | X | 142 | 46.652 | 54.044 | 32.229 | 0.00 | 0.00 |
| ATOM | 2205 | HD22 | LEU | X | 142 | 47.431 | 53.280 | 33.670 | 0.00 | 0.00 |
| ATOM | 2206 | HD23 | LEU | X | 142 | 46.362 | 54.625 | 33.926 | 0.00 | 0.00 |
| ATOM | 2207 | C    | LEU | X | 142 | 46.022 | 57.733 | 34.039 | 0.00 | 0.00 |

|      |      |      |     |   |     |        |        |        |      |      |
|------|------|------|-----|---|-----|--------|--------|--------|------|------|
| ATOM | 2208 | O    | LEU | X | 142 | 46.568 | 58.786 | 34.347 | 0.00 | 0.00 |
| ATOM | 2209 | N    | VAL | X | 143 | 45.230 | 57.083 | 34.894 | 0.00 | 0.00 |
| ATOM | 2210 | H    | VAL | X | 143 | 45.006 | 56.134 | 34.631 | 0.00 | 0.00 |
| ATOM | 2211 | CA   | VAL | X | 143 | 44.954 | 57.436 | 36.260 | 0.00 | 0.00 |
| ATOM | 2212 | HA   | VAL | X | 143 | 45.467 | 58.383 | 36.428 | 0.00 | 0.00 |
| ATOM | 2213 | CB   | VAL | X | 143 | 43.375 | 57.561 | 36.574 | 0.00 | 0.00 |
| ATOM | 2214 | HB   | VAL | X | 143 | 42.949 | 56.592 | 36.315 | 0.00 | 0.00 |
| ATOM | 2215 | CG1  | VAL | X | 143 | 43.065 | 57.907 | 38.057 | 0.00 | 0.00 |
| ATOM | 2216 | HG11 | VAL | X | 143 | 42.028 | 58.213 | 38.199 | 0.00 | 0.00 |
| ATOM | 2217 | HG12 | VAL | X | 143 | 43.246 | 57.107 | 38.774 | 0.00 | 0.00 |
| ATOM | 2218 | HG13 | VAL | X | 143 | 43.712 | 58.738 | 38.338 | 0.00 | 0.00 |
| ATOM | 2219 | CG2  | VAL | X | 143 | 42.673 | 58.632 | 35.700 | 0.00 | 0.00 |
| ATOM | 2220 | HG21 | VAL | X | 143 | 41.608 | 58.627 | 35.936 | 0.00 | 0.00 |
| ATOM | 2221 | HG22 | VAL | X | 143 | 43.121 | 59.583 | 35.989 | 0.00 | 0.00 |
| ATOM | 2222 | HG23 | VAL | X | 143 | 42.839 | 58.377 | 34.653 | 0.00 | 0.00 |
| ATOM | 2223 | C    | VAL | X | 143 | 45.541 | 56.393 | 37.188 | 0.00 | 0.00 |
| ATOM | 2224 | O    | VAL | X | 143 | 45.308 | 55.215 | 36.816 | 0.00 | 0.00 |
| ATOM | 2225 | N    | SER | X | 144 | 46.079 | 56.612 | 38.383 | 0.00 | 0.00 |
| ATOM | 2226 | H    | SER | X | 144 | 45.959 | 57.566 | 38.693 | 0.00 | 0.00 |
| ATOM | 2227 | CA   | SER | X | 144 | 46.221 | 55.641 | 39.445 | 0.00 | 0.00 |
| ATOM | 2228 | HA   | SER | X | 144 | 45.574 | 54.771 | 39.337 | 0.00 | 0.00 |
| ATOM | 2229 | CB   | SER | X | 144 | 47.652 | 55.006 | 39.359 | 0.00 | 0.00 |
| ATOM | 2230 | HB2  | SER | X | 144 | 47.681 | 54.094 | 39.954 | 0.00 | 0.00 |
| ATOM | 2231 | HB3  | SER | X | 144 | 47.742 | 54.754 | 38.303 | 0.00 | 0.00 |
| ATOM | 2232 | OG   | SER | X | 144 | 48.765 | 55.853 | 39.540 | 0.00 | 0.00 |
| ATOM | 2233 | HG   | SER | X | 144 | 49.473 | 55.360 | 39.119 | 0.00 | 0.00 |
| ATOM | 2234 | C    | SER | X | 144 | 46.102 | 56.236 | 40.849 | 0.00 | 0.00 |
| ATOM | 2235 | O    | SER | X | 144 | 46.173 | 57.461 | 41.052 | 0.00 | 0.00 |
| ATOM | 2236 | N    | MET | X | 145 | 46.087 | 55.455 | 41.950 | 0.00 | 0.00 |
| ATOM | 2237 | H    | MET | X | 145 | 46.189 | 54.456 | 41.843 | 0.00 | 0.00 |
| ATOM | 2238 | CA   | MET | X | 145 | 46.015 | 56.006 | 43.331 | 0.00 | 0.00 |
| ATOM | 2239 | HA   | MET | X | 145 | 46.677 | 56.860 | 43.473 | 0.00 | 0.00 |
| ATOM | 2240 | CB   | MET | X | 145 | 44.570 | 56.475 | 43.733 | 0.00 | 0.00 |
| ATOM | 2241 | HB2  | MET | X | 145 | 44.631 | 57.147 | 44.588 | 0.00 | 0.00 |
| ATOM | 2242 | HB3  | MET | X | 145 | 44.119 | 56.974 | 42.876 | 0.00 | 0.00 |
| ATOM | 2243 | CG   | MET | X | 145 | 43.709 | 55.335 | 44.149 | 0.00 | 0.00 |
| ATOM | 2244 | HG2  | MET | X | 145 | 44.020 | 54.842 | 45.070 | 0.00 | 0.00 |
| ATOM | 2245 | HG3  | MET | X | 145 | 42.732 | 55.783 | 44.336 | 0.00 | 0.00 |
| ATOM | 2246 | SD   | MET | X | 145 | 43.347 | 53.970 | 42.985 | 0.00 | 0.00 |
| ATOM | 2247 | CE   | MET | X | 145 | 42.639 | 54.875 | 41.536 | 0.00 | 0.00 |
| ATOM | 2248 | HE1  | MET | X | 145 | 43.402 | 55.144 | 40.805 | 0.00 | 0.00 |
| ATOM | 2249 | HE2  | MET | X | 145 | 42.029 | 54.079 | 41.110 | 0.00 | 0.00 |
| ATOM | 2250 | HE3  | MET | X | 145 | 41.891 | 55.564 | 41.929 | 0.00 | 0.00 |
| ATOM | 2251 | C    | MET | X | 145 | 46.669 | 55.051 | 44.403 | 0.00 | 0.00 |
| ATOM | 2252 | O    | MET | X | 145 | 46.652 | 53.808 | 44.268 | 0.00 | 0.00 |
| ATOM | 2253 | N    | ASN | X | 146 | 47.162 | 55.695 | 45.492 | 0.00 | 0.00 |
| ATOM | 2254 | H    | ASN | X | 146 | 46.859 | 56.646 | 45.642 | 0.00 | 0.00 |
| ATOM | 2255 | CA   | ASN | X | 146 | 47.371 | 54.915 | 46.731 | 0.00 | 0.00 |
| ATOM | 2256 | HA   | ASN | X | 146 | 47.816 | 53.945 | 46.509 | 0.00 | 0.00 |
| ATOM | 2257 | CB   | ASN | X | 146 | 48.287 | 55.748 | 47.689 | 0.00 | 0.00 |
| ATOM | 2258 | HB2  | ASN | X | 146 | 47.862 | 56.729 | 47.901 | 0.00 | 0.00 |
| ATOM | 2259 | HB3  | ASN | X | 146 | 48.381 | 55.139 | 48.588 | 0.00 | 0.00 |
| ATOM | 2260 | CG   | ASN | X | 146 | 49.748 | 56.041 | 47.208 | 0.00 | 0.00 |
| ATOM | 2261 | OD1  | ASN | X | 146 | 50.214 | 55.485 | 46.265 | 0.00 | 0.00 |
| ATOM | 2262 | ND2  | ASN | X | 146 | 50.395 | 56.958 | 47.869 | 0.00 | 0.00 |
| ATOM | 2263 | HD21 | ASN | X | 146 | 51.361 | 57.140 | 47.635 | 0.00 | 0.00 |
| ATOM | 2264 | HD22 | ASN | X | 146 | 49.981 | 57.431 | 48.660 | 0.00 | 0.00 |
| ATOM | 2265 | C    | ASN | X | 146 | 46.078 | 54.670 | 47.565 | 0.00 | 0.00 |
| ATOM | 2266 | O    | ASN | X | 146 | 45.064 | 55.417 | 47.472 | 0.00 | 0.00 |
| ATOM | 2267 | N    | TYR | X | 147 | 46.095 | 53.556 | 48.304 | 0.00 | 0.00 |
| ATOM | 2268 | H    | TYR | X | 147 | 46.887 | 52.930 | 48.268 | 0.00 | 0.00 |
| ATOM | 2269 | CA   | TYR | X | 147 | 45.044 | 53.091 | 49.159 | 0.00 | 0.00 |
| ATOM | 2270 | HA   | TYR | X | 147 | 44.473 | 53.912 | 49.592 | 0.00 | 0.00 |
| ATOM | 2271 | CB   | TYR | X | 147 | 44.127 | 52.343 | 48.206 | 0.00 | 0.00 |
| ATOM | 2272 | HB2  | TYR | X | 147 | 43.181 | 52.234 | 48.737 | 0.00 | 0.00 |
| ATOM | 2273 | HB3  | TYR | X | 147 | 43.846 | 52.931 | 47.331 | 0.00 | 0.00 |
| ATOM | 2274 | CG   | TYR | X | 147 | 44.535 | 50.923 | 47.723 | 0.00 | 0.00 |
| ATOM | 2275 | CD1  | TYR | X | 147 | 45.006 | 50.798 | 46.383 | 0.00 | 0.00 |
| ATOM | 2276 | HD1  | TYR | X | 147 | 45.212 | 51.696 | 45.819 | 0.00 | 0.00 |
| ATOM | 2277 | CE1  | TYR | X | 147 | 45.247 | 49.530 | 45.805 | 0.00 | 0.00 |

|      |      |      |     |   |     |        |        |        |      |      |
|------|------|------|-----|---|-----|--------|--------|--------|------|------|
| ATOM | 2278 | HE1  | TYR | X | 147 | 45.419 | 49.344 | 44.755 | 0.00 | 0.00 |
| ATOM | 2279 | CZ   | TYR | X | 147 | 44.847 | 48.398 | 46.541 | 0.00 | 0.00 |
| ATOM | 2280 | OH   | TYR | X | 147 | 44.958 | 47.140 | 46.048 | 0.00 | 0.00 |
| ATOM | 2281 | HH   | TYR | X | 147 | 45.420 | 47.015 | 45.216 | 0.00 | 0.00 |
| ATOM | 2282 | CE2  | TYR | X | 147 | 44.377 | 48.507 | 47.871 | 0.00 | 0.00 |
| ATOM | 2283 | HE2  | TYR | X | 147 | 44.031 | 47.631 | 48.400 | 0.00 | 0.00 |
| ATOM | 2284 | CD2  | TYR | X | 147 | 44.309 | 49.799 | 48.486 | 0.00 | 0.00 |
| ATOM | 2285 | HD2  | TYR | X | 147 | 43.857 | 49.772 | 49.467 | 0.00 | 0.00 |
| ATOM | 2286 | C    | TYR | X | 147 | 45.434 | 52.277 | 50.402 | 0.00 | 0.00 |
| ATOM | 2287 | O    | TYR | X | 147 | 46.518 | 51.700 | 50.471 | 0.00 | 0.00 |
| ATOM | 2288 | N    | ARG | X | 148 | 44.682 | 52.298 | 51.520 | 0.00 | 0.00 |
| ATOM | 2289 | H    | ARG | X | 148 | 43.771 | 52.730 | 51.457 | 0.00 | 0.00 |
| ATOM | 2290 | CA   | ARG | X | 148 | 44.995 | 51.513 | 52.695 | 0.00 | 0.00 |
| ATOM | 2291 | HA   | ARG | X | 148 | 45.984 | 51.893 | 52.953 | 0.00 | 0.00 |
| ATOM | 2292 | CB   | ARG | X | 148 | 44.137 | 51.895 | 53.881 | 0.00 | 0.00 |
| ATOM | 2293 | HB2  | ARG | X | 148 | 43.104 | 51.802 | 53.546 | 0.00 | 0.00 |
| ATOM | 2294 | HB3  | ARG | X | 148 | 44.311 | 51.176 | 54.682 | 0.00 | 0.00 |
| ATOM | 2295 | CG   | ARG | X | 148 | 44.388 | 53.338 | 54.317 | 0.00 | 0.00 |
| ATOM | 2296 | HG2  | ARG | X | 148 | 45.362 | 53.481 | 54.783 | 0.00 | 0.00 |
| ATOM | 2297 | HG3  | ARG | X | 148 | 44.294 | 54.077 | 53.521 | 0.00 | 0.00 |
| ATOM | 2298 | CD   | ARG | X | 148 | 43.319 | 53.650 | 55.332 | 0.00 | 0.00 |
| ATOM | 2299 | HD2  | ARG | X | 148 | 43.225 | 52.783 | 55.986 | 0.00 | 0.00 |
| ATOM | 2300 | HD3  | ARG | X | 148 | 43.709 | 54.581 | 55.744 | 0.00 | 0.00 |
| ATOM | 2301 | NE   | ARG | X | 148 | 42.024 | 53.968 | 54.727 | 0.00 | 0.00 |
| ATOM | 2302 | HE   | ARG | X | 148 | 41.912 | 53.984 | 53.724 | 0.00 | 0.00 |
| ATOM | 2303 | CZ   | ARG | X | 148 | 40.930 | 54.108 | 55.457 | 0.00 | 0.00 |
| ATOM | 2304 | NH1  | ARG | X | 148 | 40.864 | 54.132 | 56.788 | 0.00 | 0.00 |
| ATOM | 2305 | HH11 | ARG | X | 148 | 41.705 | 54.210 | 57.341 | 0.00 | 0.00 |
| ATOM | 2306 | HH12 | ARG | X | 148 | 39.970 | 54.087 | 57.257 | 0.00 | 0.00 |
| ATOM | 2307 | NH2  | ARG | X | 148 | 39.816 | 54.283 | 54.782 | 0.00 | 0.00 |
| ATOM | 2308 | HH21 | ARG | X | 148 | 39.783 | 54.312 | 53.773 | 0.00 | 0.00 |
| ATOM | 2309 | HH22 | ARG | X | 148 | 38.968 | 54.513 | 55.279 | 0.00 | 0.00 |
| ATOM | 2310 | C    | ARG | X | 148 | 45.120 | 49.937 | 52.420 | 0.00 | 0.00 |
| ATOM | 2311 | O    | ARG | X | 148 | 44.156 | 49.216 | 52.239 | 0.00 | 0.00 |
| ATOM | 2312 | N    | VAL | X | 149 | 46.411 | 49.521 | 52.503 | 0.00 | 0.00 |
| ATOM | 2313 | H    | VAL | X | 149 | 47.085 | 50.269 | 52.584 | 0.00 | 0.00 |
| ATOM | 2314 | CA   | VAL | X | 149 | 46.930 | 48.168 | 52.558 | 0.00 | 0.00 |
| ATOM | 2315 | HA   | VAL | X | 149 | 46.289 | 47.617 | 51.870 | 0.00 | 0.00 |
| ATOM | 2316 | CB   | VAL | X | 149 | 48.333 | 48.156 | 51.936 | 0.00 | 0.00 |
| ATOM | 2317 | HB   | VAL | X | 149 | 48.719 | 47.154 | 52.125 | 0.00 | 0.00 |
| ATOM | 2318 | CG1  | VAL | X | 149 | 48.359 | 48.280 | 50.393 | 0.00 | 0.00 |
| ATOM | 2319 | HG11 | VAL | X | 149 | 47.900 | 47.441 | 49.871 | 0.00 | 0.00 |
| ATOM | 2320 | HG12 | VAL | X | 149 | 47.718 | 49.130 | 50.157 | 0.00 | 0.00 |
| ATOM | 2321 | HG13 | VAL | X | 149 | 49.364 | 48.457 | 50.011 | 0.00 | 0.00 |
| ATOM | 2322 | CG2  | VAL | X | 149 | 49.201 | 49.344 | 52.473 | 0.00 | 0.00 |
| ATOM | 2323 | HG21 | VAL | X | 149 | 48.755 | 50.208 | 51.981 | 0.00 | 0.00 |
| ATOM | 2324 | HG22 | VAL | X | 149 | 49.050 | 49.386 | 53.552 | 0.00 | 0.00 |
| ATOM | 2325 | HG23 | VAL | X | 149 | 50.232 | 49.200 | 52.149 | 0.00 | 0.00 |
| ATOM | 2326 | C    | VAL | X | 149 | 46.905 | 47.632 | 53.972 | 0.00 | 0.00 |
| ATOM | 2327 | O    | VAL | X | 149 | 46.583 | 48.410 | 54.906 | 0.00 | 0.00 |
| ATOM | 2328 | N    | GLY | X | 150 | 47.164 | 46.366 | 54.092 | 0.00 | 0.00 |
| ATOM | 2329 | H    | GLY | X | 150 | 47.353 | 45.917 | 53.208 | 0.00 | 0.00 |
| ATOM | 2330 | CA   | GLY | X | 150 | 47.426 | 45.624 | 55.412 | 0.00 | 0.00 |
| ATOM | 2331 | HA2  | GLY | X | 150 | 47.805 | 44.625 | 55.226 | 0.00 | 0.00 |
| ATOM | 2332 | HA3  | GLY | X | 150 | 48.176 | 46.267 | 55.918 | 0.00 | 0.00 |
| ATOM | 2333 | C    | GLY | X | 150 | 46.292 | 45.582 | 56.441 | 0.00 | 0.00 |
| ATOM | 2334 | O    | GLY | X | 150 | 45.113 | 45.678 | 56.030 | 0.00 | 0.00 |
| ATOM | 2335 | N    | ALA | X | 151 | 46.569 | 45.687 | 57.778 | 0.00 | 0.00 |
| ATOM | 2336 | H    | ALA | X | 151 | 47.562 | 45.761 | 57.946 | 0.00 | 0.00 |
| ATOM | 2337 | CA   | ALA | X | 151 | 45.554 | 45.819 | 58.866 | 0.00 | 0.00 |
| ATOM | 2338 | HA   | ALA | X | 151 | 44.897 | 44.949 | 58.867 | 0.00 | 0.00 |
| ATOM | 2339 | CB   | ALA | X | 151 | 46.217 | 45.700 | 60.234 | 0.00 | 0.00 |
| ATOM | 2340 | HB1  | ALA | X | 151 | 46.950 | 46.500 | 60.340 | 0.00 | 0.00 |
| ATOM | 2341 | HB2  | ALA | X | 151 | 45.499 | 45.781 | 61.050 | 0.00 | 0.00 |
| ATOM | 2342 | HB3  | ALA | X | 151 | 46.854 | 44.824 | 60.358 | 0.00 | 0.00 |
| ATOM | 2343 | C    | ALA | X | 151 | 44.722 | 47.140 | 58.663 | 0.00 | 0.00 |
| ATOM | 2344 | O    | ALA | X | 151 | 43.502 | 47.120 | 58.769 | 0.00 | 0.00 |
| ATOM | 2345 | N    | PHE | X | 152 | 45.368 | 48.238 | 58.307 | 0.00 | 0.00 |
| ATOM | 2346 | H    | PHE | X | 152 | 46.344 | 48.205 | 58.046 | 0.00 | 0.00 |
| ATOM | 2347 | CA   | PHE | X | 152 | 44.700 | 49.556 | 58.009 | 0.00 | 0.00 |

|      |      |      |     |   |     |        |        |        |      |      |
|------|------|------|-----|---|-----|--------|--------|--------|------|------|
| ATOM | 2348 | HA   | PHE | X | 152 | 44.256 | 50.006 | 58.897 | 0.00 | 0.00 |
| ATOM | 2349 | CB   | PHE | X | 152 | 45.842 | 50.589 | 57.684 | 0.00 | 0.00 |
| ATOM | 2350 | HB2  | PHE | X | 152 | 46.178 | 50.336 | 56.679 | 0.00 | 0.00 |
| ATOM | 2351 | HB3  | PHE | X | 152 | 45.410 | 51.590 | 57.706 | 0.00 | 0.00 |
| ATOM | 2352 | CG   | PHE | X | 152 | 47.000 | 50.512 | 58.696 | 0.00 | 0.00 |
| ATOM | 2353 | CD1  | PHE | X | 152 | 48.280 | 50.097 | 58.317 | 0.00 | 0.00 |
| ATOM | 2354 | HD1  | PHE | X | 152 | 48.420 | 49.768 | 57.298 | 0.00 | 0.00 |
| ATOM | 2355 | CE1  | PHE | X | 152 | 49.213 | 49.862 | 59.273 | 0.00 | 0.00 |
| ATOM | 2356 | HE1  | PHE | X | 152 | 50.152 | 49.444 | 58.941 | 0.00 | 0.00 |
| ATOM | 2357 | CZ   | PHE | X | 152 | 48.997 | 50.247 | 60.606 | 0.00 | 0.00 |
| ATOM | 2358 | HZ   | PHE | X | 152 | 49.697 | 50.054 | 61.405 | 0.00 | 0.00 |
| ATOM | 2359 | CE2  | PHE | X | 152 | 47.722 | 50.757 | 60.960 | 0.00 | 0.00 |
| ATOM | 2360 | HE2  | PHE | X | 152 | 47.516 | 51.043 | 61.981 | 0.00 | 0.00 |
| ATOM | 2361 | CD2  | PHE | X | 152 | 46.752 | 50.862 | 60.001 | 0.00 | 0.00 |
| ATOM | 2362 | HD2  | PHE | X | 152 | 45.749 | 51.106 | 60.319 | 0.00 | 0.00 |
| ATOM | 2363 | C    | PHE | X | 152 | 43.638 | 49.559 | 56.964 | 0.00 | 0.00 |
| ATOM | 2364 | O    | PHE | X | 152 | 42.714 | 50.367 | 56.990 | 0.00 | 0.00 |
| ATOM | 2365 | N    | GLY | X | 153 | 43.844 | 48.642 | 55.939 | 0.00 | 0.00 |
| ATOM | 2366 | H    | GLY | X | 153 | 44.647 | 48.034 | 56.022 | 0.00 | 0.00 |
| ATOM | 2367 | CA   | GLY | X | 153 | 42.773 | 48.336 | 54.990 | 0.00 | 0.00 |
| ATOM | 2368 | HA2  | GLY | X | 153 | 42.160 | 49.303 | 54.774 | 0.00 | 0.00 |
| ATOM | 2369 | HA3  | GLY | X | 153 | 43.172 | 47.989 | 54.079 | 0.00 | 0.00 |
| ATOM | 2370 | C    | GLY | X | 153 | 41.712 | 47.292 | 55.421 | 0.00 | 0.00 |
| ATOM | 2371 | O    | GLY | X | 153 | 40.539 | 47.368 | 54.991 | 0.00 | 0.00 |
| ATOM | 2372 | N    | PHE | X | 154 | 42.183 | 46.146 | 56.014 | 0.00 | 0.00 |
| ATOM | 2373 | H    | PHE | X | 154 | 43.176 | 46.102 | 56.197 | 0.00 | 0.00 |
| ATOM | 2374 | CA   | PHE | X | 154 | 41.509 | 44.832 | 56.010 | 0.00 | 0.00 |
| ATOM | 2375 | HA   | PHE | X | 154 | 40.480 | 44.924 | 55.663 | 0.00 | 0.00 |
| ATOM | 2376 | CB   | PHE | X | 154 | 42.410 | 43.943 | 55.089 | 0.00 | 0.00 |
| ATOM | 2377 | HB2  | PHE | X | 154 | 43.460 | 44.010 | 55.373 | 0.00 | 0.00 |
| ATOM | 2378 | HB3  | PHE | X | 154 | 41.961 | 42.951 | 55.129 | 0.00 | 0.00 |
| ATOM | 2379 | CG   | PHE | X | 154 | 42.333 | 44.433 | 53.651 | 0.00 | 0.00 |
| ATOM | 2380 | CD1  | PHE | X | 154 | 43.415 | 45.157 | 53.108 | 0.00 | 0.00 |
| ATOM | 2381 | HD1  | PHE | X | 154 | 44.359 | 45.255 | 53.623 | 0.00 | 0.00 |
| ATOM | 2382 | CE1  | PHE | X | 154 | 43.222 | 45.796 | 51.880 | 0.00 | 0.00 |
| ATOM | 2383 | HE1  | PHE | X | 154 | 43.993 | 46.465 | 51.528 | 0.00 | 0.00 |
| ATOM | 2384 | CZ   | PHE | X | 154 | 42.047 | 45.718 | 51.168 | 0.00 | 0.00 |
| ATOM | 2385 | HZ   | PHE | X | 154 | 41.990 | 46.228 | 50.217 | 0.00 | 0.00 |
| ATOM | 2386 | CE2  | PHE | X | 154 | 41.034 | 44.859 | 51.632 | 0.00 | 0.00 |
| ATOM | 2387 | HE2  | PHE | X | 154 | 40.111 | 44.765 | 51.079 | 0.00 | 0.00 |
| ATOM | 2388 | CD2  | PHE | X | 154 | 41.135 | 44.305 | 52.934 | 0.00 | 0.00 |
| ATOM | 2389 | HD2  | PHE | X | 154 | 40.327 | 43.687 | 53.299 | 0.00 | 0.00 |
| ATOM | 2390 | C    | PHE | X | 154 | 41.217 | 44.163 | 57.333 | 0.00 | 0.00 |
| ATOM | 2391 | O    | PHE | X | 154 | 40.797 | 43.015 | 57.351 | 0.00 | 0.00 |
| ATOM | 2392 | N    | LEU | X | 155 | 41.548 | 44.773 | 58.494 | 0.00 | 0.00 |
| ATOM | 2393 | H    | LEU | X | 155 | 41.900 | 45.715 | 58.403 | 0.00 | 0.00 |
| ATOM | 2394 | CA   | LEU | X | 155 | 41.119 | 44.380 | 59.858 | 0.00 | 0.00 |
| ATOM | 2395 | HA   | LEU | X | 155 | 41.302 | 43.319 | 60.027 | 0.00 | 0.00 |
| ATOM | 2396 | CB   | LEU | X | 155 | 42.050 | 45.160 | 60.839 | 0.00 | 0.00 |
| ATOM | 2397 | HB2  | LEU | X | 155 | 43.103 | 45.055 | 60.576 | 0.00 | 0.00 |
| ATOM | 2398 | HB3  | LEU | X | 155 | 41.673 | 46.181 | 60.787 | 0.00 | 0.00 |
| ATOM | 2399 | CG   | LEU | X | 155 | 42.000 | 44.610 | 62.246 | 0.00 | 0.00 |
| ATOM | 2400 | HG   | LEU | X | 155 | 41.943 | 43.524 | 62.184 | 0.00 | 0.00 |
| ATOM | 2401 | CD1  | LEU | X | 155 | 43.293 | 44.871 | 63.025 | 0.00 | 0.00 |
| ATOM | 2402 | HD11 | LEU | X | 155 | 44.187 | 44.452 | 62.562 | 0.00 | 0.00 |
| ATOM | 2403 | HD12 | LEU | X | 155 | 43.471 | 45.899 | 63.339 | 0.00 | 0.00 |
| ATOM | 2404 | HD13 | LEU | X | 155 | 43.252 | 44.258 | 63.925 | 0.00 | 0.00 |
| ATOM | 2405 | CD2  | LEU | X | 155 | 40.826 | 45.195 | 63.026 | 0.00 | 0.00 |
| ATOM | 2406 | HD21 | LEU | X | 155 | 41.150 | 46.225 | 63.177 | 0.00 | 0.00 |
| ATOM | 2407 | HD22 | LEU | X | 155 | 39.966 | 45.129 | 62.359 | 0.00 | 0.00 |
| ATOM | 2408 | HD23 | LEU | X | 155 | 40.694 | 44.814 | 64.039 | 0.00 | 0.00 |
| ATOM | 2409 | C    | LEU | X | 155 | 39.605 | 44.644 | 59.954 | 0.00 | 0.00 |
| ATOM | 2410 | O    | LEU | X | 155 | 39.292 | 45.841 | 60.163 | 0.00 | 0.00 |
| ATOM | 2411 | N    | ALA | X | 156 | 38.745 | 43.647 | 59.705 | 0.00 | 0.00 |
| ATOM | 2412 | H    | ALA | X | 156 | 39.038 | 42.796 | 59.246 | 0.00 | 0.00 |
| ATOM | 2413 | CA   | ALA | X | 156 | 37.418 | 43.620 | 60.241 | 0.00 | 0.00 |
| ATOM | 2414 | HA   | ALA | X | 156 | 37.068 | 44.634 | 60.436 | 0.00 | 0.00 |
| ATOM | 2415 | CB   | ALA | X | 156 | 36.429 | 42.862 | 59.284 | 0.00 | 0.00 |
| ATOM | 2416 | HB1  | ALA | X | 156 | 36.637 | 41.827 | 59.012 | 0.00 | 0.00 |
| ATOM | 2417 | HB2  | ALA | X | 156 | 35.427 | 42.893 | 59.712 | 0.00 | 0.00 |

|      |      |      |     |   |     |        |        |        |      |      |
|------|------|------|-----|---|-----|--------|--------|--------|------|------|
| ATOM | 2418 | HB3  | ALA | X | 156 | 36.366 | 43.359 | 58.316 | 0.00 | 0.00 |
| ATOM | 2419 | C    | ALA | X | 156 | 37.416 | 43.003 | 61.626 | 0.00 | 0.00 |
| ATOM | 2420 | O    | ALA | X | 156 | 37.863 | 41.908 | 61.759 | 0.00 | 0.00 |
| ATOM | 2421 | N    | LEU | X | 157 | 36.657 | 43.507 | 62.523 | 0.00 | 0.00 |
| ATOM | 2422 | H    | LEU | X | 157 | 36.183 | 44.366 | 62.284 | 0.00 | 0.00 |
| ATOM | 2423 | CA   | LEU | X | 157 | 36.261 | 42.808 | 63.738 | 0.00 | 0.00 |
| ATOM | 2424 | HA   | LEU | X | 157 | 36.638 | 41.789 | 63.829 | 0.00 | 0.00 |
| ATOM | 2425 | CB   | LEU | X | 157 | 36.921 | 43.730 | 64.829 | 0.00 | 0.00 |
| ATOM | 2426 | HB2  | LEU | X | 157 | 37.964 | 43.847 | 64.537 | 0.00 | 0.00 |
| ATOM | 2427 | HB3  | LEU | X | 157 | 36.486 | 44.722 | 64.712 | 0.00 | 0.00 |
| ATOM | 2428 | CG   | LEU | X | 157 | 36.741 | 43.360 | 66.274 | 0.00 | 0.00 |
| ATOM | 2429 | HG   | LEU | X | 157 | 35.703 | 43.302 | 66.601 | 0.00 | 0.00 |
| ATOM | 2430 | CD1  | LEU | X | 157 | 37.416 | 42.038 | 66.647 | 0.00 | 0.00 |
| ATOM | 2431 | HD11 | LEU | X | 157 | 36.952 | 41.213 | 66.106 | 0.00 | 0.00 |
| ATOM | 2432 | HD12 | LEU | X | 157 | 38.462 | 42.219 | 66.400 | 0.00 | 0.00 |
| ATOM | 2433 | HD13 | LEU | X | 157 | 37.142 | 41.988 | 67.701 | 0.00 | 0.00 |
| ATOM | 2434 | CD2  | LEU | X | 157 | 37.349 | 44.345 | 67.218 | 0.00 | 0.00 |
| ATOM | 2435 | HD21 | LEU | X | 157 | 36.806 | 45.270 | 67.025 | 0.00 | 0.00 |
| ATOM | 2436 | HD22 | LEU | X | 157 | 37.148 | 44.079 | 68.256 | 0.00 | 0.00 |
| ATOM | 2437 | HD23 | LEU | X | 157 | 38.398 | 44.500 | 66.965 | 0.00 | 0.00 |
| ATOM | 2438 | C    | LEU | X | 157 | 34.743 | 42.785 | 63.828 | 0.00 | 0.00 |
| ATOM | 2439 | O    | LEU | X | 157 | 34.156 | 43.782 | 64.154 | 0.00 | 0.00 |
| ATOM | 2440 | N    | PRO | X | 158 | 34.121 | 41.583 | 63.500 | 0.00 | 0.00 |
| ATOM | 2441 | CD   | PRO | X | 158 | 34.716 | 40.489 | 62.765 | 0.00 | 0.00 |
| ATOM | 2442 | HD2  | PRO | X | 158 | 35.658 | 40.105 | 63.155 | 0.00 | 0.00 |
| ATOM | 2443 | HD3  | PRO | X | 158 | 35.014 | 40.822 | 61.771 | 0.00 | 0.00 |
| ATOM | 2444 | CG   | PRO | X | 158 | 33.661 | 39.383 | 62.836 | 0.00 | 0.00 |
| ATOM | 2445 | HG2  | PRO | X | 158 | 33.645 | 38.911 | 63.818 | 0.00 | 0.00 |
| ATOM | 2446 | HG3  | PRO | X | 158 | 33.785 | 38.637 | 62.050 | 0.00 | 0.00 |
| ATOM | 2447 | CB   | PRO | X | 158 | 32.369 | 40.251 | 62.699 | 0.00 | 0.00 |
| ATOM | 2448 | HB2  | PRO | X | 158 | 31.502 | 39.689 | 63.046 | 0.00 | 0.00 |
| ATOM | 2449 | HB3  | PRO | X | 158 | 32.269 | 40.550 | 61.656 | 0.00 | 0.00 |
| ATOM | 2450 | CA   | PRO | X | 158 | 32.712 | 41.408 | 63.637 | 0.00 | 0.00 |
| ATOM | 2451 | HA   | PRO | X | 158 | 32.097 | 42.230 | 63.269 | 0.00 | 0.00 |
| ATOM | 2452 | C    | PRO | X | 158 | 32.371 | 41.159 | 65.068 | 0.00 | 0.00 |
| ATOM | 2453 | O    | PRO | X | 158 | 33.244 | 40.866 | 65.920 | 0.00 | 0.00 |
| ATOM | 2454 | N    | GLY | X | 159 | 31.062 | 41.028 | 65.427 | 0.00 | 0.00 |
| ATOM | 2455 | H    | GLY | X | 159 | 30.329 | 40.844 | 64.757 | 0.00 | 0.00 |
| ATOM | 2456 | CA   | GLY | X | 159 | 30.517 | 40.988 | 66.781 | 0.00 | 0.00 |
| ATOM | 2457 | HA2  | GLY | X | 159 | 29.542 | 40.603 | 66.665 | 0.00 | 0.00 |
| ATOM | 2458 | HA3  | GLY | X | 159 | 31.131 | 40.305 | 67.448 | 0.00 | 0.00 |
| ATOM | 2459 | C    | GLY | X | 159 | 30.334 | 42.448 | 67.372 | 0.00 | 0.00 |
| ATOM | 2460 | O    | GLY | X | 159 | 29.939 | 42.527 | 68.553 | 0.00 | 0.00 |
| ATOM | 2461 | N    | SER | X | 160 | 30.748 | 43.472 | 66.619 | 0.00 | 0.00 |
| ATOM | 2462 | H    | SER | X | 160 | 31.206 | 43.234 | 65.750 | 0.00 | 0.00 |
| ATOM | 2463 | CA   | SER | X | 160 | 30.745 | 44.878 | 66.912 | 0.00 | 0.00 |
| ATOM | 2464 | HA   | SER | X | 160 | 29.723 | 45.145 | 67.180 | 0.00 | 0.00 |
| ATOM | 2465 | CB   | SER | X | 160 | 31.676 | 45.224 | 68.066 | 0.00 | 0.00 |
| ATOM | 2466 | HB2  | SER | X | 160 | 31.570 | 46.278 | 68.325 | 0.00 | 0.00 |
| ATOM | 2467 | HB3  | SER | X | 160 | 31.310 | 44.542 | 68.834 | 0.00 | 0.00 |
| ATOM | 2468 | OG   | SER | X | 160 | 33.084 | 44.873 | 67.792 | 0.00 | 0.00 |
| ATOM | 2469 | HG   | SER | X | 160 | 33.453 | 44.296 | 68.465 | 0.00 | 0.00 |
| ATOM | 2470 | C    | SER | X | 160 | 31.133 | 45.707 | 65.665 | 0.00 | 0.00 |
| ATOM | 2471 | O    | SER | X | 160 | 31.409 | 45.092 | 64.640 | 0.00 | 0.00 |
| ATOM | 2472 | N    | ARG | X | 161 | 31.134 | 47.095 | 65.703 | 0.00 | 0.00 |
| ATOM | 2473 | H    | ARG | X | 161 | 31.145 | 47.519 | 66.620 | 0.00 | 0.00 |
| ATOM | 2474 | CA   | ARG | X | 161 | 31.318 | 47.976 | 64.528 | 0.00 | 0.00 |
| ATOM | 2475 | HA   | ARG | X | 161 | 31.654 | 47.354 | 63.698 | 0.00 | 0.00 |
| ATOM | 2476 | CB   | ARG | X | 161 | 29.990 | 48.615 | 64.248 | 0.00 | 0.00 |
| ATOM | 2477 | HB2  | ARG | X | 161 | 29.655 | 49.128 | 65.150 | 0.00 | 0.00 |
| ATOM | 2478 | HB3  | ARG | X | 161 | 30.087 | 49.386 | 63.483 | 0.00 | 0.00 |
| ATOM | 2479 | CG   | ARG | X | 161 | 28.897 | 47.581 | 63.842 | 0.00 | 0.00 |
| ATOM | 2480 | HG2  | ARG | X | 161 | 28.932 | 46.843 | 64.643 | 0.00 | 0.00 |
| ATOM | 2481 | HG3  | ARG | X | 161 | 27.873 | 47.952 | 63.788 | 0.00 | 0.00 |
| ATOM | 2482 | CD   | ARG | X | 161 | 29.138 | 46.907 | 62.513 | 0.00 | 0.00 |
| ATOM | 2483 | HD2  | ARG | X | 161 | 29.062 | 47.673 | 61.740 | 0.00 | 0.00 |
| ATOM | 2484 | HD3  | ARG | X | 161 | 30.118 | 46.433 | 62.569 | 0.00 | 0.00 |
| ATOM | 2485 | NE   | ARG | X | 161 | 28.164 | 45.818 | 62.267 | 0.00 | 0.00 |
| ATOM | 2486 | HE   | ARG | X | 161 | 27.512 | 46.036 | 61.527 | 0.00 | 0.00 |
| ATOM | 2487 | CZ   | ARG | X | 161 | 28.087 | 44.599 | 62.808 | 0.00 | 0.00 |

|      |      |      |     |   |     |        |        |        |      |      |
|------|------|------|-----|---|-----|--------|--------|--------|------|------|
| ATOM | 2488 | NH1  | ARG | X | 161 | 28.850 | 44.034 | 63.625 | 0.00 | 0.00 |
| ATOM | 2489 | HH11 | ARG | X | 161 | 29.740 | 44.486 | 63.779 | 0.00 | 0.00 |
| ATOM | 2490 | HH12 | ARG | X | 161 | 28.598 | 43.178 | 64.099 | 0.00 | 0.00 |
| ATOM | 2491 | NH2  | ARG | X | 161 | 26.958 | 43.947 | 62.560 | 0.00 | 0.00 |
| ATOM | 2492 | HH21 | ARG | X | 161 | 26.157 | 44.274 | 62.038 | 0.00 | 0.00 |
| ATOM | 2493 | HH22 | ARG | X | 161 | 26.916 | 42.949 | 62.712 | 0.00 | 0.00 |
| ATOM | 2494 | C    | ARG | X | 161 | 32.453 | 48.943 | 64.670 | 0.00 | 0.00 |
| ATOM | 2495 | O    | ARG | X | 161 | 32.610 | 49.783 | 63.782 | 0.00 | 0.00 |
| ATOM | 2496 | N    | GLU | X | 162 | 33.264 | 48.812 | 65.755 | 0.00 | 0.00 |
| ATOM | 2497 | H    | GLU | X | 162 | 33.066 | 48.141 | 66.484 | 0.00 | 0.00 |
| ATOM | 2498 | CA   | GLU | X | 162 | 34.545 | 49.501 | 65.838 | 0.00 | 0.00 |
| ATOM | 2499 | HA   | GLU | X | 162 | 34.276 | 50.553 | 65.742 | 0.00 | 0.00 |
| ATOM | 2500 | CB   | GLU | X | 162 | 35.141 | 49.164 | 67.179 | 0.00 | 0.00 |
| ATOM | 2501 | HB2  | GLU | X | 162 | 35.580 | 48.172 | 67.067 | 0.00 | 0.00 |
| ATOM | 2502 | HB3  | GLU | X | 162 | 35.933 | 49.896 | 67.333 | 0.00 | 0.00 |
| ATOM | 2503 | CG   | GLU | X | 162 | 34.286 | 49.186 | 68.442 | 0.00 | 0.00 |
| ATOM | 2504 | HG2  | GLU | X | 162 | 33.481 | 48.452 | 68.395 | 0.00 | 0.00 |
| ATOM | 2505 | HG3  | GLU | X | 162 | 34.877 | 48.934 | 69.323 | 0.00 | 0.00 |
| ATOM | 2506 | CD   | GLU | X | 162 | 33.624 | 50.583 | 68.817 | 0.00 | 0.00 |
| ATOM | 2507 | OE1  | GLU | X | 162 | 34.335 | 51.390 | 69.434 | 0.00 | 0.00 |
| ATOM | 2508 | OE2  | GLU | X | 162 | 32.493 | 50.865 | 68.434 | 0.00 | 0.00 |
| ATOM | 2509 | C    | GLU | X | 162 | 35.566 | 49.258 | 64.757 | 0.00 | 0.00 |
| ATOM | 2510 | O    | GLU | X | 162 | 36.249 | 50.258 | 64.446 | 0.00 | 0.00 |
| ATOM | 2511 | N    | ALA | X | 163 | 35.664 | 48.142 | 64.049 | 0.00 | 0.00 |
| ATOM | 2512 | H    | ALA | X | 163 | 35.126 | 47.373 | 64.421 | 0.00 | 0.00 |
| ATOM | 2513 | CA   | ALA | X | 163 | 36.432 | 47.942 | 62.821 | 0.00 | 0.00 |
| ATOM | 2514 | HA   | ALA | X | 163 | 36.772 | 48.906 | 62.443 | 0.00 | 0.00 |
| ATOM | 2515 | CB   | ALA | X | 163 | 37.750 | 47.160 | 63.117 | 0.00 | 0.00 |
| ATOM | 2516 | HB1  | ALA | X | 163 | 37.504 | 46.272 | 63.700 | 0.00 | 0.00 |
| ATOM | 2517 | HB2  | ALA | X | 163 | 38.288 | 46.909 | 62.203 | 0.00 | 0.00 |
| ATOM | 2518 | HB3  | ALA | X | 163 | 38.399 | 47.851 | 63.655 | 0.00 | 0.00 |
| ATOM | 2519 | C    | ALA | X | 163 | 35.467 | 47.302 | 61.810 | 0.00 | 0.00 |
| ATOM | 2520 | O    | ALA | X | 163 | 35.280 | 46.117 | 61.845 | 0.00 | 0.00 |
| ATOM | 2521 | N    | PRO | X | 164 | 34.917 | 48.136 | 60.933 | 0.00 | 0.00 |
| ATOM | 2522 | CD   | PRO | X | 164 | 34.595 | 49.505 | 61.071 | 0.00 | 0.00 |
| ATOM | 2523 | HD2  | PRO | X | 164 | 35.539 | 50.027 | 60.915 | 0.00 | 0.00 |
| ATOM | 2524 | HD3  | PRO | X | 164 | 34.198 | 49.786 | 62.047 | 0.00 | 0.00 |
| ATOM | 2525 | CG   | PRO | X | 164 | 33.476 | 49.829 | 60.084 | 0.00 | 0.00 |
| ATOM | 2526 | HG2  | PRO | X | 164 | 33.516 | 50.838 | 59.674 | 0.00 | 0.00 |
| ATOM | 2527 | HG3  | PRO | X | 164 | 32.492 | 49.563 | 60.469 | 0.00 | 0.00 |
| ATOM | 2528 | CB   | PRO | X | 164 | 33.873 | 48.915 | 58.885 | 0.00 | 0.00 |
| ATOM | 2529 | HB2  | PRO | X | 164 | 34.720 | 49.365 | 58.367 | 0.00 | 0.00 |
| ATOM | 2530 | HB3  | PRO | X | 164 | 33.011 | 48.756 | 58.238 | 0.00 | 0.00 |
| ATOM | 2531 | CA   | PRO | X | 164 | 34.286 | 47.657 | 59.648 | 0.00 | 0.00 |
| ATOM | 2532 | HA   | PRO | X | 164 | 33.365 | 47.164 | 59.958 | 0.00 | 0.00 |
| ATOM | 2533 | C    | PRO | X | 164 | 35.228 | 46.745 | 58.912 | 0.00 | 0.00 |
| ATOM | 2534 | O    | PRO | X | 164 | 34.794 | 45.753 | 58.417 | 0.00 | 0.00 |
| ATOM | 2535 | N    | GLY | X | 165 | 36.482 | 47.134 | 58.723 | 0.00 | 0.00 |
| ATOM | 2536 | H    | GLY | X | 165 | 36.712 | 48.006 | 59.178 | 0.00 | 0.00 |
| ATOM | 2537 | CA   | GLY | X | 165 | 37.337 | 46.507 | 57.705 | 0.00 | 0.00 |
| ATOM | 2538 | HA2  | GLY | X | 165 | 38.294 | 46.970 | 57.962 | 0.00 | 0.00 |
| ATOM | 2539 | HA3  | GLY | X | 165 | 37.441 | 45.448 | 57.835 | 0.00 | 0.00 |
| ATOM | 2540 | C    | GLY | X | 165 | 36.963 | 46.827 | 56.307 | 0.00 | 0.00 |
| ATOM | 2541 | O    | GLY | X | 165 | 36.201 | 47.734 | 56.087 | 0.00 | 0.00 |
| ATOM | 2542 | N    | ASN | X | 166 | 37.676 | 46.215 | 55.384 | 0.00 | 0.00 |
| ATOM | 2543 | H    | ASN | X | 166 | 38.467 | 45.692 | 55.731 | 0.00 | 0.00 |
| ATOM | 2544 | CA   | ASN | X | 166 | 37.431 | 46.240 | 53.858 | 0.00 | 0.00 |
| ATOM | 2545 | HA   | ASN | X | 166 | 38.245 | 45.692 | 53.384 | 0.00 | 0.00 |
| ATOM | 2546 | CB   | ASN | X | 166 | 36.160 | 45.526 | 53.448 | 0.00 | 0.00 |
| ATOM | 2547 | HB2  | ASN | X | 166 | 35.321 | 46.134 | 53.788 | 0.00 | 0.00 |
| ATOM | 2548 | HB3  | ASN | X | 166 | 36.142 | 45.543 | 52.358 | 0.00 | 0.00 |
| ATOM | 2549 | CG   | ASN | X | 166 | 36.174 | 44.095 | 54.069 | 0.00 | 0.00 |
| ATOM | 2550 | OD1  | ASN | X | 166 | 37.227 | 43.460 | 54.351 | 0.00 | 0.00 |
| ATOM | 2551 | ND2  | ASN | X | 166 | 35.054 | 43.406 | 54.020 | 0.00 | 0.00 |
| ATOM | 2552 | HD21 | ASN | X | 166 | 35.162 | 42.417 | 54.195 | 0.00 | 0.00 |
| ATOM | 2553 | HD22 | ASN | X | 166 | 34.138 | 43.783 | 53.818 | 0.00 | 0.00 |
| ATOM | 2554 | C    | ASN | X | 166 | 37.588 | 47.578 | 53.164 | 0.00 | 0.00 |
| ATOM | 2555 | O    | ASN | X | 166 | 37.512 | 47.734 | 51.914 | 0.00 | 0.00 |
| ATOM | 2556 | N    | VAL | X | 167 | 38.094 | 48.581 | 53.933 | 0.00 | 0.00 |
| ATOM | 2557 | H    | VAL | X | 167 | 38.448 | 48.377 | 54.857 | 0.00 | 0.00 |

|      |      |      |     |   |     |        |        |        |      |      |
|------|------|------|-----|---|-----|--------|--------|--------|------|------|
| ATOM | 2558 | CA   | VAL | X | 167 | 38.313 | 49.984 | 53.427 | 0.00 | 0.00 |
| ATOM | 2559 | HA   | VAL | X | 167 | 37.326 | 50.322 | 53.112 | 0.00 | 0.00 |
| ATOM | 2560 | CB   | VAL | X | 167 | 38.688 | 50.970 | 54.590 | 0.00 | 0.00 |
| ATOM | 2561 | HB   | VAL | X | 167 | 38.559 | 51.998 | 54.252 | 0.00 | 0.00 |
| ATOM | 2562 | CG1  | VAL | X | 167 | 37.706 | 50.754 | 55.786 | 0.00 | 0.00 |
| ATOM | 2563 | HG11 | VAL | X | 167 | 37.778 | 51.517 | 56.561 | 0.00 | 0.00 |
| ATOM | 2564 | HG12 | VAL | X | 167 | 36.673 | 50.721 | 55.441 | 0.00 | 0.00 |
| ATOM | 2565 | HG13 | VAL | X | 167 | 37.859 | 49.776 | 56.242 | 0.00 | 0.00 |
| ATOM | 2566 | CG2  | VAL | X | 167 | 40.045 | 50.742 | 55.194 | 0.00 | 0.00 |
| ATOM | 2567 | HG21 | VAL | X | 167 | 40.171 | 51.414 | 56.042 | 0.00 | 0.00 |
| ATOM | 2568 | HG22 | VAL | X | 167 | 40.130 | 49.708 | 55.527 | 0.00 | 0.00 |
| ATOM | 2569 | HG23 | VAL | X | 167 | 40.762 | 50.738 | 54.373 | 0.00 | 0.00 |
| ATOM | 2570 | C    | VAL | X | 167 | 39.318 | 50.282 | 52.380 | 0.00 | 0.00 |
| ATOM | 2571 | O    | VAL | X | 167 | 39.295 | 51.358 | 51.777 | 0.00 | 0.00 |
| ATOM | 2572 | N    | GLY | X | 168 | 40.292 | 49.443 | 52.122 | 0.00 | 0.00 |
| ATOM | 2573 | H    | GLY | X | 168 | 40.422 | 48.697 | 52.790 | 0.00 | 0.00 |
| ATOM | 2574 | CA   | GLY | X | 168 | 41.200 | 49.604 | 50.922 | 0.00 | 0.00 |
| ATOM | 2575 | HA2  | GLY | X | 168 | 41.725 | 50.610 | 50.959 | 0.00 | 0.00 |
| ATOM | 2576 | HA3  | GLY | X | 168 | 41.911 | 48.777 | 50.889 | 0.00 | 0.00 |
| ATOM | 2577 | C    | GLY | X | 168 | 40.405 | 49.488 | 49.619 | 0.00 | 0.00 |
| ATOM | 2578 | O    | GLY | X | 168 | 40.790 | 50.143 | 48.660 | 0.00 | 0.00 |
| ATOM | 2579 | N    | LEU | X | 169 | 39.323 | 48.744 | 49.532 | 0.00 | 0.00 |
| ATOM | 2580 | H    | LEU | X | 169 | 39.116 | 48.135 | 50.310 | 0.00 | 0.00 |
| ATOM | 2581 | CA   | LEU | X | 169 | 38.430 | 48.711 | 48.399 | 0.00 | 0.00 |
| ATOM | 2582 | HA   | LEU | X | 169 | 38.967 | 48.757 | 47.452 | 0.00 | 0.00 |
| ATOM | 2583 | CB   | LEU | X | 169 | 37.561 | 47.411 | 48.410 | 0.00 | 0.00 |
| ATOM | 2584 | HB2  | LEU | X | 169 | 37.184 | 47.477 | 49.430 | 0.00 | 0.00 |
| ATOM | 2585 | HB3  | LEU | X | 169 | 36.815 | 47.442 | 47.615 | 0.00 | 0.00 |
| ATOM | 2586 | CG   | LEU | X | 169 | 38.290 | 46.103 | 48.293 | 0.00 | 0.00 |
| ATOM | 2587 | HG   | LEU | X | 169 | 39.231 | 46.182 | 48.838 | 0.00 | 0.00 |
| ATOM | 2588 | CD1  | LEU | X | 169 | 37.533 | 44.954 | 48.947 | 0.00 | 0.00 |
| ATOM | 2589 | HD11 | LEU | X | 169 | 37.608 | 45.030 | 50.032 | 0.00 | 0.00 |
| ATOM | 2590 | HD12 | LEU | X | 169 | 36.466 | 44.953 | 48.726 | 0.00 | 0.00 |
| ATOM | 2591 | HD13 | LEU | X | 169 | 37.907 | 43.968 | 48.673 | 0.00 | 0.00 |
| ATOM | 2592 | CD2  | LEU | X | 169 | 38.478 | 45.784 | 46.810 | 0.00 | 0.00 |
| ATOM | 2593 | HD21 | LEU | X | 169 | 39.127 | 46.536 | 46.361 | 0.00 | 0.00 |
| ATOM | 2594 | HD22 | LEU | X | 169 | 39.026 | 44.843 | 46.785 | 0.00 | 0.00 |
| ATOM | 2595 | HD23 | LEU | X | 169 | 37.515 | 45.708 | 46.304 | 0.00 | 0.00 |
| ATOM | 2596 | C    | LEU | X | 169 | 37.472 | 49.983 | 48.421 | 0.00 | 0.00 |
| ATOM | 2597 | O    | LEU | X | 169 | 37.056 | 50.402 | 47.369 | 0.00 | 0.00 |
| ATOM | 2598 | N    | LEU | X | 170 | 37.286 | 50.665 | 49.586 | 0.00 | 0.00 |
| ATOM | 2599 | H    | LEU | X | 170 | 37.761 | 50.335 | 50.414 | 0.00 | 0.00 |
| ATOM | 2600 | CA   | LEU | X | 170 | 36.393 | 51.843 | 49.697 | 0.00 | 0.00 |
| ATOM | 2601 | HA   | LEU | X | 170 | 35.513 | 51.692 | 49.072 | 0.00 | 0.00 |
| ATOM | 2602 | CB   | LEU | X | 170 | 35.851 | 51.788 | 51.139 | 0.00 | 0.00 |
| ATOM | 2603 | HB2  | LEU | X | 170 | 36.613 | 52.106 | 51.850 | 0.00 | 0.00 |
| ATOM | 2604 | HB3  | LEU | X | 170 | 35.233 | 52.678 | 51.262 | 0.00 | 0.00 |
| ATOM | 2605 | CG   | LEU | X | 170 | 35.003 | 50.514 | 51.407 | 0.00 | 0.00 |
| ATOM | 2606 | HG   | LEU | X | 170 | 35.622 | 49.617 | 51.377 | 0.00 | 0.00 |
| ATOM | 2607 | CD1  | LEU | X | 170 | 34.343 | 50.712 | 52.845 | 0.00 | 0.00 |
| ATOM | 2608 | HD11 | LEU | X | 170 | 33.645 | 51.548 | 52.892 | 0.00 | 0.00 |
| ATOM | 2609 | HD12 | LEU | X | 170 | 33.858 | 49.800 | 53.189 | 0.00 | 0.00 |
| ATOM | 2610 | HD13 | LEU | X | 170 | 35.139 | 50.871 | 53.573 | 0.00 | 0.00 |
| ATOM | 2611 | CD2  | LEU | X | 170 | 33.848 | 50.374 | 50.443 | 0.00 | 0.00 |
| ATOM | 2612 | HD21 | LEU | X | 170 | 34.143 | 50.120 | 49.425 | 0.00 | 0.00 |
| ATOM | 2613 | HD22 | LEU | X | 170 | 33.174 | 49.564 | 50.720 | 0.00 | 0.00 |
| ATOM | 2614 | HD23 | LEU | X | 170 | 33.372 | 51.348 | 50.329 | 0.00 | 0.00 |
| ATOM | 2615 | C    | LEU | X | 170 | 37.146 | 53.169 | 49.403 | 0.00 | 0.00 |
| ATOM | 2616 | O    | LEU | X | 170 | 36.564 | 54.161 | 48.926 | 0.00 | 0.00 |
| ATOM | 2617 | N    | ASP | X | 171 | 38.462 | 53.229 | 49.676 | 0.00 | 0.00 |
| ATOM | 2618 | H    | ASP | X | 171 | 38.856 | 52.460 | 50.199 | 0.00 | 0.00 |
| ATOM | 2619 | CA   | ASP | X | 171 | 39.312 | 54.302 | 49.214 | 0.00 | 0.00 |
| ATOM | 2620 | HA   | ASP | X | 171 | 39.096 | 55.266 | 49.674 | 0.00 | 0.00 |
| ATOM | 2621 | CB   | ASP | X | 171 | 40.730 | 53.882 | 49.869 | 0.00 | 0.00 |
| ATOM | 2622 | HB2  | ASP | X | 171 | 40.923 | 52.849 | 49.582 | 0.00 | 0.00 |
| ATOM | 2623 | HB3  | ASP | X | 171 | 41.404 | 54.614 | 49.423 | 0.00 | 0.00 |
| ATOM | 2624 | CG   | ASP | X | 171 | 40.911 | 53.981 | 51.375 | 0.00 | 0.00 |
| ATOM | 2625 | OD1  | ASP | X | 171 | 40.141 | 54.682 | 52.028 | 0.00 | 0.00 |
| ATOM | 2626 | OD2  | ASP | X | 171 | 41.911 | 53.462 | 51.862 | 0.00 | 0.00 |
| ATOM | 2627 | C    | ASP | X | 171 | 39.334 | 54.412 | 47.703 | 0.00 | 0.00 |



|      |      |      |     |   |     |        |        |        |      |      |
|------|------|------|-----|---|-----|--------|--------|--------|------|------|
| ATOM | 2628 | O    | ASP | X | 171 | 39.148 | 55.464 | 47.152 | 0.00 | 0.00 |
| ATOM | 2629 | N    | GLN | X | 172 | 39.603 | 53.312 | 47.047 | 0.00 | 0.00 |
| ATOM | 2630 | H    | GLN | X | 172 | 39.861 | 52.496 | 47.583 | 0.00 | 0.00 |
| ATOM | 2631 | CA   | GLN | X | 172 | 39.426 | 53.218 | 45.568 | 0.00 | 0.00 |
| ATOM | 2632 | HA   | GLN | X | 172 | 40.102 | 53.904 | 45.058 | 0.00 | 0.00 |
| ATOM | 2633 | CB   | GLN | X | 172 | 39.603 | 51.756 | 45.194 | 0.00 | 0.00 |
| ATOM | 2634 | HB2  | GLN | X | 172 | 39.051 | 51.107 | 45.874 | 0.00 | 0.00 |
| ATOM | 2635 | HB3  | GLN | X | 172 | 39.257 | 51.657 | 44.164 | 0.00 | 0.00 |
| ATOM | 2636 | CG   | GLN | X | 172 | 41.022 | 51.263 | 45.214 | 0.00 | 0.00 |
| ATOM | 2637 | HG2  | GLN | X | 172 | 41.596 | 51.701 | 44.398 | 0.00 | 0.00 |
| ATOM | 2638 | HG3  | GLN | X | 172 | 41.508 | 51.587 | 46.134 | 0.00 | 0.00 |
| ATOM | 2639 | CD   | GLN | X | 172 | 40.956 | 49.696 | 45.036 | 0.00 | 0.00 |
| ATOM | 2640 | OE1  | GLN | X | 172 | 40.298 | 49.169 | 44.187 | 0.00 | 0.00 |
| ATOM | 2641 | NE2  | GLN | X | 172 | 41.641 | 48.904 | 45.916 | 0.00 | 0.00 |
| ATOM | 2642 | HE21 | GLN | X | 172 | 41.744 | 47.947 | 45.609 | 0.00 | 0.00 |
| ATOM | 2643 | HE22 | GLN | X | 172 | 42.319 | 49.305 | 46.547 | 0.00 | 0.00 |
| ATOM | 2644 | C    | GLN | X | 172 | 38.052 | 53.626 | 45.085 | 0.00 | 0.00 |
| ATOM | 2645 | O    | GLN | X | 172 | 37.961 | 54.312 | 44.067 | 0.00 | 0.00 |
| ATOM | 2646 | N    | ARG | X | 173 | 36.947 | 53.236 | 45.753 | 0.00 | 0.00 |
| ATOM | 2647 | H    | ARG | X | 173 | 37.064 | 52.532 | 46.468 | 0.00 | 0.00 |
| ATOM | 2648 | CA   | ARG | X | 173 | 35.598 | 53.712 | 45.295 | 0.00 | 0.00 |
| ATOM | 2649 | HA   | ARG | X | 173 | 35.425 | 53.503 | 44.239 | 0.00 | 0.00 |
| ATOM | 2650 | CB   | ARG | X | 173 | 34.527 | 52.907 | 46.041 | 0.00 | 0.00 |
| ATOM | 2651 | HB2  | ARG | X | 173 | 34.803 | 51.862 | 46.176 | 0.00 | 0.00 |
| ATOM | 2652 | HB3  | ARG | X | 173 | 34.491 | 53.222 | 47.084 | 0.00 | 0.00 |
| ATOM | 2653 | CG   | ARG | X | 173 | 33.133 | 53.054 | 45.324 | 0.00 | 0.00 |
| ATOM | 2654 | HG2  | ARG | X | 173 | 32.742 | 54.051 | 45.125 | 0.00 | 0.00 |
| ATOM | 2655 | HG3  | ARG | X | 173 | 33.198 | 52.571 | 44.349 | 0.00 | 0.00 |
| ATOM | 2656 | CD   | ARG | X | 173 | 31.873 | 52.501 | 46.172 | 0.00 | 0.00 |
| ATOM | 2657 | HD2  | ARG | X | 173 | 31.662 | 53.115 | 47.048 | 0.00 | 0.00 |
| ATOM | 2658 | HD3  | ARG | X | 173 | 31.018 | 52.767 | 45.550 | 0.00 | 0.00 |
| ATOM | 2659 | NE   | ARG | X | 173 | 31.942 | 51.108 | 46.561 | 0.00 | 0.00 |
| ATOM | 2660 | HE   | ARG | X | 173 | 32.230 | 50.490 | 45.816 | 0.00 | 0.00 |
| ATOM | 2661 | CZ   | ARG | X | 173 | 31.405 | 50.577 | 47.648 | 0.00 | 0.00 |
| ATOM | 2662 | NH1  | ARG | X | 173 | 30.858 | 51.267 | 48.648 | 0.00 | 0.00 |
| ATOM | 2663 | HH11 | ARG | X | 173 | 30.758 | 52.270 | 48.712 | 0.00 | 0.00 |
| ATOM | 2664 | HH12 | ARG | X | 173 | 30.462 | 50.775 | 49.436 | 0.00 | 0.00 |
| ATOM | 2665 | NH2  | ARG | X | 173 | 31.353 | 49.301 | 47.756 | 0.00 | 0.00 |
| ATOM | 2666 | HH21 | ARG | X | 173 | 31.712 | 48.668 | 47.056 | 0.00 | 0.00 |
| ATOM | 2667 | HH22 | ARG | X | 173 | 30.822 | 48.910 | 48.521 | 0.00 | 0.00 |
| ATOM | 2668 | C    | ARG | X | 173 | 35.497 | 55.204 | 45.333 | 0.00 | 0.00 |
| ATOM | 2669 | O    | ARG | X | 173 | 34.972 | 55.837 | 44.398 | 0.00 | 0.00 |
| ATOM | 2670 | N    | LEU | X | 174 | 35.944 | 55.768 | 46.498 | 0.00 | 0.00 |
| ATOM | 2671 | H    | LEU | X | 174 | 36.410 | 55.250 | 47.229 | 0.00 | 0.00 |
| ATOM | 2672 | CA   | LEU | X | 174 | 35.926 | 57.233 | 46.601 | 0.00 | 0.00 |
| ATOM | 2673 | HA   | LEU | X | 174 | 34.881 | 57.526 | 46.496 | 0.00 | 0.00 |
| ATOM | 2674 | CB   | LEU | X | 174 | 36.427 | 57.684 | 47.990 | 0.00 | 0.00 |
| ATOM | 2675 | HB2  | LEU | X | 174 | 35.828 | 57.250 | 48.792 | 0.00 | 0.00 |
| ATOM | 2676 | HB3  | LEU | X | 174 | 37.476 | 57.393 | 48.054 | 0.00 | 0.00 |
| ATOM | 2677 | CG   | LEU | X | 174 | 36.406 | 59.189 | 48.278 | 0.00 | 0.00 |
| ATOM | 2678 | HG   | LEU | X | 174 | 37.064 | 59.671 | 47.555 | 0.00 | 0.00 |
| ATOM | 2679 | CD1  | LEU | X | 174 | 34.982 | 59.828 | 48.069 | 0.00 | 0.00 |
| ATOM | 2680 | HD11 | LEU | X | 174 | 35.167 | 60.898 | 48.169 | 0.00 | 0.00 |
| ATOM | 2681 | HD12 | LEU | X | 174 | 34.532 | 59.621 | 47.098 | 0.00 | 0.00 |
| ATOM | 2682 | HD13 | LEU | X | 174 | 34.210 | 59.585 | 48.799 | 0.00 | 0.00 |
| ATOM | 2683 | CD2  | LEU | X | 174 | 36.832 | 59.511 | 49.748 | 0.00 | 0.00 |
| ATOM | 2684 | HD21 | LEU | X | 174 | 36.014 | 59.219 | 50.406 | 0.00 | 0.00 |
| ATOM | 2685 | HD22 | LEU | X | 174 | 37.789 | 59.006 | 49.878 | 0.00 | 0.00 |
| ATOM | 2686 | HD23 | LEU | X | 174 | 36.992 | 60.589 | 49.792 | 0.00 | 0.00 |
| ATOM | 2687 | C    | LEU | X | 174 | 36.681 | 57.972 | 45.519 | 0.00 | 0.00 |
| ATOM | 2688 | O    | LEU | X | 174 | 36.205 | 58.986 | 45.046 | 0.00 | 0.00 |
| ATOM | 2689 | N    | ALA | X | 175 | 37.817 | 57.376 | 45.081 | 0.00 | 0.00 |
| ATOM | 2690 | H    | ALA | X | 175 | 38.155 | 56.588 | 45.615 | 0.00 | 0.00 |
| ATOM | 2691 | CA   | ALA | X | 175 | 38.688 | 57.999 | 44.081 | 0.00 | 0.00 |
| ATOM | 2692 | HA   | ALA | X | 175 | 38.865 | 59.053 | 44.294 | 0.00 | 0.00 |
| ATOM | 2693 | CB   | ALA | X | 175 | 40.111 | 57.427 | 44.059 | 0.00 | 0.00 |
| ATOM | 2694 | HB1  | ALA | X | 175 | 40.260 | 56.482 | 43.536 | 0.00 | 0.00 |
| ATOM | 2695 | HB2  | ALA | X | 175 | 40.656 | 58.055 | 43.356 | 0.00 | 0.00 |
| ATOM | 2696 | HB3  | ALA | X | 175 | 40.530 | 57.355 | 45.063 | 0.00 | 0.00 |
| ATOM | 2697 | C    | ALA | X | 175 | 38.087 | 57.796 | 42.690 | 0.00 | 0.00 |

|      |      |      |     |   |     |        |        |        |      |      |
|------|------|------|-----|---|-----|--------|--------|--------|------|------|
| ATOM | 2698 | O    | ALA | X | 175 | 38.102 | 58.756 | 41.893 | 0.00 | 0.00 |
| ATOM | 2699 | N    | LEU | X | 176 | 37.316 | 56.719 | 42.440 | 0.00 | 0.00 |
| ATOM | 2700 | H    | LEU | X | 176 | 37.375 | 55.937 | 43.076 | 0.00 | 0.00 |
| ATOM | 2701 | CA   | LEU | X | 176 | 36.473 | 56.667 | 41.196 | 0.00 | 0.00 |
| ATOM | 2702 | HA   | LEU | X | 176 | 37.124 | 56.723 | 40.324 | 0.00 | 0.00 |
| ATOM | 2703 | CB   | LEU | X | 176 | 35.935 | 55.226 | 41.114 | 0.00 | 0.00 |
| ATOM | 2704 | HB2  | LEU | X | 176 | 35.348 | 55.034 | 42.012 | 0.00 | 0.00 |
| ATOM | 2705 | HB3  | LEU | X | 176 | 35.263 | 55.225 | 40.255 | 0.00 | 0.00 |
| ATOM | 2706 | CG   | LEU | X | 176 | 36.914 | 54.141 | 40.787 | 0.00 | 0.00 |
| ATOM | 2707 | HG   | LEU | X | 176 | 37.840 | 54.276 | 41.346 | 0.00 | 0.00 |
| ATOM | 2708 | CD1  | LEU | X | 176 | 36.154 | 52.820 | 41.198 | 0.00 | 0.00 |
| ATOM | 2709 | HD11 | LEU | X | 176 | 35.122 | 52.726 | 40.860 | 0.00 | 0.00 |
| ATOM | 2710 | HD12 | LEU | X | 176 | 36.759 | 51.957 | 40.920 | 0.00 | 0.00 |
| ATOM | 2711 | HD13 | LEU | X | 176 | 36.176 | 52.718 | 42.283 | 0.00 | 0.00 |
| ATOM | 2712 | CD2  | LEU | X | 176 | 37.142 | 54.104 | 39.254 | 0.00 | 0.00 |
| ATOM | 2713 | HD21 | LEU | X | 176 | 38.042 | 53.508 | 39.099 | 0.00 | 0.00 |
| ATOM | 2714 | HD22 | LEU | X | 176 | 36.375 | 53.530 | 38.733 | 0.00 | 0.00 |
| ATOM | 2715 | HD23 | LEU | X | 176 | 37.253 | 55.088 | 38.799 | 0.00 | 0.00 |
| ATOM | 2716 | C    | LEU | X | 176 | 35.396 | 57.764 | 41.082 | 0.00 | 0.00 |
| ATOM | 2717 | O    | LEU | X | 176 | 35.260 | 58.336 | 39.983 | 0.00 | 0.00 |
| ATOM | 2718 | N    | GLN | X | 177 | 34.797 | 58.244 | 42.179 | 0.00 | 0.00 |
| ATOM | 2719 | H    | GLN | X | 177 | 34.829 | 57.672 | 43.011 | 0.00 | 0.00 |
| ATOM | 2720 | CA   | GLN | X | 177 | 33.914 | 59.366 | 42.293 | 0.00 | 0.00 |
| ATOM | 2721 | HA   | GLN | X | 177 | 33.162 | 59.308 | 41.506 | 0.00 | 0.00 |
| ATOM | 2722 | CB   | GLN | X | 177 | 33.123 | 59.524 | 43.643 | 0.00 | 0.00 |
| ATOM | 2723 | HB2  | GLN | X | 177 | 33.719 | 59.842 | 44.499 | 0.00 | 0.00 |
| ATOM | 2724 | HB3  | GLN | X | 177 | 32.421 | 60.324 | 43.409 | 0.00 | 0.00 |
| ATOM | 2725 | CG   | GLN | X | 177 | 32.269 | 58.305 | 43.864 | 0.00 | 0.00 |
| ATOM | 2726 | HG2  | GLN | X | 177 | 31.606 | 58.143 | 43.014 | 0.00 | 0.00 |
| ATOM | 2727 | HG3  | GLN | X | 177 | 32.874 | 57.426 | 44.089 | 0.00 | 0.00 |
| ATOM | 2728 | CD   | GLN | X | 177 | 31.273 | 58.550 | 45.064 | 0.00 | 0.00 |
| ATOM | 2729 | OE1  | GLN | X | 177 | 31.695 | 58.364 | 46.195 | 0.00 | 0.00 |
| ATOM | 2730 | NE2  | GLN | X | 177 | 30.211 | 59.310 | 44.756 | 0.00 | 0.00 |
| ATOM | 2731 | HE21 | GLN | X | 177 | 29.643 | 59.626 | 45.529 | 0.00 | 0.00 |
| ATOM | 2732 | HE22 | GLN | X | 177 | 30.055 | 59.673 | 43.826 | 0.00 | 0.00 |
| ATOM | 2733 | C    | GLN | X | 177 | 34.710 | 60.733 | 42.081 | 0.00 | 0.00 |
| ATOM | 2734 | O    | GLN | X | 177 | 34.207 | 61.612 | 41.321 | 0.00 | 0.00 |
| ATOM | 2735 | N    | TRP | X | 178 | 36.047 | 60.848 | 42.331 | 0.00 | 0.00 |
| ATOM | 2736 | H    | TRP | X | 178 | 36.337 | 60.037 | 42.859 | 0.00 | 0.00 |
| ATOM | 2737 | CA   | TRP | X | 178 | 36.916 | 61.996 | 42.070 | 0.00 | 0.00 |
| ATOM | 2738 | HA   | TRP | X | 178 | 36.392 | 62.931 | 42.269 | 0.00 | 0.00 |
| ATOM | 2739 | CB   | TRP | X | 178 | 38.145 | 61.866 | 42.943 | 0.00 | 0.00 |
| ATOM | 2740 | HB2  | TRP | X | 178 | 37.819 | 61.547 | 43.933 | 0.00 | 0.00 |
| ATOM | 2741 | HB3  | TRP | X | 178 | 38.744 | 61.013 | 42.623 | 0.00 | 0.00 |
| ATOM | 2742 | CG   | TRP | X | 178 | 39.005 | 63.125 | 43.061 | 0.00 | 0.00 |
| ATOM | 2743 | CD1  | TRP | X | 178 | 39.103 | 63.972 | 44.077 | 0.00 | 0.00 |
| ATOM | 2744 | HD1  | TRP | X | 178 | 38.615 | 63.859 | 45.033 | 0.00 | 0.00 |
| ATOM | 2745 | NE1  | TRP | X | 178 | 40.038 | 64.927 | 43.804 | 0.00 | 0.00 |
| ATOM | 2746 | HE1  | TRP | X | 178 | 40.324 | 65.616 | 44.486 | 0.00 | 0.00 |
| ATOM | 2747 | CE2  | TRP | X | 178 | 40.681 | 64.735 | 42.578 | 0.00 | 0.00 |
| ATOM | 2748 | CZ2  | TRP | X | 178 | 41.625 | 65.437 | 41.771 | 0.00 | 0.00 |
| ATOM | 2749 | HZ2  | TRP | X | 178 | 42.120 | 66.293 | 42.204 | 0.00 | 0.00 |
| ATOM | 2750 | CH2  | TRP | X | 178 | 41.965 | 64.964 | 40.498 | 0.00 | 0.00 |
| ATOM | 2751 | HH2  | TRP | X | 178 | 42.786 | 65.402 | 39.950 | 0.00 | 0.00 |
| ATOM | 2752 | CZ3  | TRP | X | 178 | 41.263 | 63.847 | 39.972 | 0.00 | 0.00 |
| ATOM | 2753 | HZ3  | TRP | X | 178 | 41.468 | 63.535 | 38.959 | 0.00 | 0.00 |
| ATOM | 2754 | CE3  | TRP | X | 178 | 40.318 | 63.180 | 40.763 | 0.00 | 0.00 |
| ATOM | 2755 | HE3  | TRP | X | 178 | 39.857 | 62.259 | 40.438 | 0.00 | 0.00 |
| ATOM | 2756 | CD2  | TRP | X | 178 | 39.918 | 63.634 | 42.038 | 0.00 | 0.00 |
| ATOM | 2757 | C    | TRP | X | 178 | 37.315 | 62.084 | 40.576 | 0.00 | 0.00 |
| ATOM | 2758 | O    | TRP | X | 178 | 37.304 | 63.125 | 39.927 | 0.00 | 0.00 |
| ATOM | 2759 | N    | VAL | X | 179 | 37.437 | 60.868 | 39.985 | 0.00 | 0.00 |
| ATOM | 2760 | H    | VAL | X | 179 | 37.481 | 60.087 | 40.624 | 0.00 | 0.00 |
| ATOM | 2761 | CA   | VAL | X | 179 | 37.611 | 60.716 | 38.574 | 0.00 | 0.00 |
| ATOM | 2762 | HA   | VAL | X | 179 | 38.361 | 61.459 | 38.304 | 0.00 | 0.00 |
| ATOM | 2763 | CB   | VAL | X | 179 | 38.181 | 59.309 | 38.270 | 0.00 | 0.00 |
| ATOM | 2764 | HB   | VAL | X | 179 | 37.779 | 58.559 | 38.951 | 0.00 | 0.00 |
| ATOM | 2765 | CG1  | VAL | X | 179 | 37.997 | 58.691 | 36.830 | 0.00 | 0.00 |
| ATOM | 2766 | HG11 | VAL | X | 179 | 37.060 | 58.147 | 36.713 | 0.00 | 0.00 |
| ATOM | 2767 | HG12 | VAL | X | 179 | 38.016 | 59.517 | 36.118 | 0.00 | 0.00 |

|      |      |      |     |   |     |        |        |        |      |      |
|------|------|------|-----|---|-----|--------|--------|--------|------|------|
| ATOM | 2768 | HG13 | VAL | X | 179 | 38.825 | 58.050 | 36.527 | 0.00 | 0.00 |
| ATOM | 2769 | CG2  | VAL | X | 179 | 39.716 | 59.455 | 38.543 | 0.00 | 0.00 |
| ATOM | 2770 | HG21 | VAL | X | 179 | 40.145 | 58.477 | 38.328 | 0.00 | 0.00 |
| ATOM | 2771 | HG22 | VAL | X | 179 | 40.068 | 60.291 | 37.938 | 0.00 | 0.00 |
| ATOM | 2772 | HG23 | VAL | X | 179 | 39.780 | 59.784 | 39.580 | 0.00 | 0.00 |
| ATOM | 2773 | C    | VAL | X | 179 | 36.355 | 61.084 | 37.739 | 0.00 | 0.00 |
| ATOM | 2774 | O    | VAL | X | 179 | 36.418 | 61.874 | 36.840 | 0.00 | 0.00 |
| ATOM | 2775 | N    | GLN | X | 180 | 35.184 | 60.697 | 38.155 | 0.00 | 0.00 |
| ATOM | 2776 | H    | GLN | X | 180 | 35.161 | 60.134 | 38.993 | 0.00 | 0.00 |
| ATOM | 2777 | CA   | GLN | X | 180 | 33.932 | 61.079 | 37.559 | 0.00 | 0.00 |
| ATOM | 2778 | HA   | GLN | X | 180 | 33.927 | 60.818 | 36.501 | 0.00 | 0.00 |
| ATOM | 2779 | CB   | GLN | X | 180 | 32.891 | 60.292 | 38.284 | 0.00 | 0.00 |
| ATOM | 2780 | HB2  | GLN | X | 180 | 33.081 | 60.361 | 39.355 | 0.00 | 0.00 |
| ATOM | 2781 | HB3  | GLN | X | 180 | 31.931 | 60.782 | 38.120 | 0.00 | 0.00 |
| ATOM | 2782 | CG   | GLN | X | 180 | 32.734 | 58.906 | 37.744 | 0.00 | 0.00 |
| ATOM | 2783 | HG2  | GLN | X | 180 | 33.719 | 58.442 | 37.682 | 0.00 | 0.00 |
| ATOM | 2784 | HG3  | GLN | X | 180 | 32.136 | 58.342 | 38.460 | 0.00 | 0.00 |
| ATOM | 2785 | CD   | GLN | X | 180 | 32.020 | 58.804 | 36.392 | 0.00 | 0.00 |
| ATOM | 2786 | OE1  | GLN | X | 180 | 31.358 | 59.669 | 35.903 | 0.00 | 0.00 |
| ATOM | 2787 | NE2  | GLN | X | 180 | 32.190 | 57.695 | 35.652 | 0.00 | 0.00 |
| ATOM | 2788 | HE21 | GLN | X | 180 | 31.763 | 57.806 | 34.743 | 0.00 | 0.00 |
| ATOM | 2789 | HE22 | GLN | X | 180 | 32.709 | 56.904 | 36.006 | 0.00 | 0.00 |
| ATOM | 2790 | C    | GLN | X | 180 | 33.750 | 62.632 | 37.640 | 0.00 | 0.00 |
| ATOM | 2791 | O    | GLN | X | 180 | 33.140 | 63.190 | 36.679 | 0.00 | 0.00 |
| ATOM | 2792 | N    | GLU | X | 181 | 34.175 | 63.192 | 38.805 | 0.00 | 0.00 |
| ATOM | 2793 | H    | GLU | X | 181 | 34.721 | 62.722 | 39.513 | 0.00 | 0.00 |
| ATOM | 2794 | CA   | GLU | X | 181 | 33.977 | 64.656 | 39.010 | 0.00 | 0.00 |
| ATOM | 2795 | HA   | GLU | X | 181 | 32.944 | 64.844 | 38.718 | 0.00 | 0.00 |
| ATOM | 2796 | CB   | GLU | X | 181 | 34.289 | 64.903 | 40.526 | 0.00 | 0.00 |
| ATOM | 2797 | HB2  | GLU | X | 181 | 33.783 | 64.150 | 41.129 | 0.00 | 0.00 |
| ATOM | 2798 | HB3  | GLU | X | 181 | 35.339 | 64.908 | 40.821 | 0.00 | 0.00 |
| ATOM | 2799 | CG   | GLU | X | 181 | 33.813 | 66.295 | 40.975 | 0.00 | 0.00 |
| ATOM | 2800 | HG2  | GLU | X | 181 | 34.395 | 66.528 | 41.867 | 0.00 | 0.00 |
| ATOM | 2801 | HG3  | GLU | X | 181 | 33.997 | 67.077 | 40.239 | 0.00 | 0.00 |
| ATOM | 2802 | CD   | GLU | X | 181 | 32.275 | 66.273 | 41.419 | 0.00 | 0.00 |
| ATOM | 2803 | OE1  | GLU | X | 181 | 31.761 | 65.232 | 41.955 | 0.00 | 0.00 |
| ATOM | 2804 | OE2  | GLU | X | 181 | 31.660 | 67.355 | 41.344 | 0.00 | 0.00 |
| ATOM | 2805 | C    | GLU | X | 181 | 34.951 | 65.509 | 38.119 | 0.00 | 0.00 |
| ATOM | 2806 | O    | GLU | X | 181 | 34.475 | 66.496 | 37.600 | 0.00 | 0.00 |
| ATOM | 2807 | N    | ASN | X | 182 | 36.254 | 65.024 | 38.054 | 0.00 | 0.00 |
| ATOM | 2808 | H    | ASN | X | 182 | 36.635 | 64.208 | 38.511 | 0.00 | 0.00 |
| ATOM | 2809 | CA   | ASN | X | 182 | 37.316 | 65.766 | 37.401 | 0.00 | 0.00 |
| ATOM | 2810 | HA   | ASN | X | 182 | 36.893 | 66.714 | 37.069 | 0.00 | 0.00 |
| ATOM | 2811 | CB   | ASN | X | 182 | 38.351 | 66.149 | 38.539 | 0.00 | 0.00 |
| ATOM | 2812 | HB2  | ASN | X | 182 | 38.690 | 65.206 | 38.968 | 0.00 | 0.00 |
| ATOM | 2813 | HB3  | ASN | X | 182 | 39.206 | 66.760 | 38.252 | 0.00 | 0.00 |
| ATOM | 2814 | CG   | ASN | X | 182 | 37.779 | 66.996 | 39.691 | 0.00 | 0.00 |
| ATOM | 2815 | OD1  | ASN | X | 182 | 37.250 | 68.095 | 39.482 | 0.00 | 0.00 |
| ATOM | 2816 | ND2  | ASN | X | 182 | 37.919 | 66.567 | 40.900 | 0.00 | 0.00 |
| ATOM | 2817 | HD21 | ASN | X | 182 | 37.640 | 67.206 | 41.630 | 0.00 | 0.00 |
| ATOM | 2818 | HD22 | ASN | X | 182 | 38.298 | 65.659 | 41.130 | 0.00 | 0.00 |
| ATOM | 2819 | C    | ASN | X | 182 | 38.109 | 65.262 | 36.263 | 0.00 | 0.00 |
| ATOM | 2820 | O    | ASN | X | 182 | 38.903 | 66.057 | 35.811 | 0.00 | 0.00 |
| ATOM | 2821 | N    | VAL | X | 183 | 37.968 | 64.005 | 35.792 | 0.00 | 0.00 |
| ATOM | 2822 | H    | VAL | X | 183 | 37.378 | 63.419 | 36.364 | 0.00 | 0.00 |
| ATOM | 2823 | CA   | VAL | X | 183 | 38.801 | 63.575 | 34.650 | 0.00 | 0.00 |
| ATOM | 2824 | HA   | VAL | X | 183 | 39.817 | 63.894 | 34.881 | 0.00 | 0.00 |
| ATOM | 2825 | CB   | VAL | X | 183 | 38.804 | 62.052 | 34.408 | 0.00 | 0.00 |
| ATOM | 2826 | HB   | VAL | X | 183 | 38.856 | 61.445 | 35.313 | 0.00 | 0.00 |
| ATOM | 2827 | CG1  | VAL | X | 183 | 37.439 | 61.628 | 33.773 | 0.00 | 0.00 |
| ATOM | 2828 | HG11 | VAL | X | 183 | 37.218 | 60.561 | 33.801 | 0.00 | 0.00 |
| ATOM | 2829 | HG12 | VAL | X | 183 | 36.657 | 62.261 | 34.193 | 0.00 | 0.00 |
| ATOM | 2830 | HG13 | VAL | X | 183 | 37.580 | 61.851 | 32.716 | 0.00 | 0.00 |
| ATOM | 2831 | CG2  | VAL | X | 183 | 40.028 | 61.676 | 33.497 | 0.00 | 0.00 |
| ATOM | 2832 | HG21 | VAL | X | 183 | 39.985 | 60.606 | 33.295 | 0.00 | 0.00 |
| ATOM | 2833 | HG22 | VAL | X | 183 | 40.064 | 62.138 | 32.511 | 0.00 | 0.00 |
| ATOM | 2834 | HG23 | VAL | X | 183 | 40.943 | 62.084 | 33.926 | 0.00 | 0.00 |
| ATOM | 2835 | C    | VAL | X | 183 | 38.551 | 64.409 | 33.414 | 0.00 | 0.00 |
| ATOM | 2836 | O    | VAL | X | 183 | 39.535 | 64.700 | 32.742 | 0.00 | 0.00 |
| ATOM | 2837 | N    | ALA | X | 184 | 37.413 | 65.001 | 33.236 | 0.00 | 0.00 |

|      |      |     |     |   |     |        |        |        |      |      |
|------|------|-----|-----|---|-----|--------|--------|--------|------|------|
| ATOM | 2838 | H   | ALA | X | 184 | 36.652 | 64.748 | 33.850 | 0.00 | 0.00 |
| ATOM | 2839 | CA  | ALA | X | 184 | 37.065 | 65.949 | 32.147 | 0.00 | 0.00 |
| ATOM | 2840 | HA  | ALA | X | 184 | 37.538 | 65.499 | 31.274 | 0.00 | 0.00 |
| ATOM | 2841 | CB  | ALA | X | 184 | 35.578 | 65.953 | 31.919 | 0.00 | 0.00 |
| ATOM | 2842 | HB1 | ALA | X | 184 | 35.451 | 66.473 | 30.969 | 0.00 | 0.00 |
| ATOM | 2843 | HB2 | ALA | X | 184 | 35.267 | 64.930 | 31.708 | 0.00 | 0.00 |
| ATOM | 2844 | HB3 | ALA | X | 184 | 35.061 | 66.269 | 32.825 | 0.00 | 0.00 |
| ATOM | 2845 | C   | ALA | X | 184 | 37.725 | 67.330 | 32.305 | 0.00 | 0.00 |
| ATOM | 2846 | O   | ALA | X | 184 | 37.707 | 67.998 | 31.233 | 0.00 | 0.00 |
| ATOM | 2847 | N   | ALA | X | 185 | 38.352 | 67.728 | 33.427 | 0.00 | 0.00 |
| ATOM | 2848 | H   | ALA | X | 185 | 38.381 | 67.144 | 34.251 | 0.00 | 0.00 |
| ATOM | 2849 | CA  | ALA | X | 185 | 39.277 | 68.793 | 33.472 | 0.00 | 0.00 |
| ATOM | 2850 | HA  | ALA | X | 185 | 38.726 | 69.640 | 33.063 | 0.00 | 0.00 |
| ATOM | 2851 | CB  | ALA | X | 185 | 39.539 | 69.111 | 34.930 | 0.00 | 0.00 |
| ATOM | 2852 | HB1 | ALA | X | 185 | 38.532 | 69.141 | 35.344 | 0.00 | 0.00 |
| ATOM | 2853 | HB2 | ALA | X | 185 | 40.106 | 68.335 | 35.445 | 0.00 | 0.00 |
| ATOM | 2854 | HB3 | ALA | X | 185 | 39.937 | 70.115 | 35.074 | 0.00 | 0.00 |
| ATOM | 2855 | C   | ALA | X | 185 | 40.546 | 68.468 | 32.738 | 0.00 | 0.00 |
| ATOM | 2856 | O   | ALA | X | 185 | 41.075 | 69.242 | 31.943 | 0.00 | 0.00 |
| ATOM | 2857 | N   | PHE | X | 186 | 40.966 | 67.203 | 32.951 | 0.00 | 0.00 |
| ATOM | 2858 | H   | PHE | X | 186 | 40.452 | 66.559 | 33.536 | 0.00 | 0.00 |
| ATOM | 2859 | CA  | PHE | X | 186 | 42.206 | 66.684 | 32.334 | 0.00 | 0.00 |
| ATOM | 2860 | HA  | PHE | X | 186 | 42.860 | 67.556 | 32.346 | 0.00 | 0.00 |
| ATOM | 2861 | CB  | PHE | X | 186 | 42.815 | 65.599 | 33.320 | 0.00 | 0.00 |
| ATOM | 2862 | HB2 | PHE | X | 186 | 42.202 | 64.699 | 33.284 | 0.00 | 0.00 |
| ATOM | 2863 | HB3 | PHE | X | 186 | 43.799 | 65.261 | 32.996 | 0.00 | 0.00 |
| ATOM | 2864 | CG  | PHE | X | 186 | 42.981 | 66.128 | 34.725 | 0.00 | 0.00 |
| ATOM | 2865 | CD1 | PHE | X | 186 | 42.077 | 65.702 | 35.746 | 0.00 | 0.00 |
| ATOM | 2866 | HD1 | PHE | X | 186 | 41.263 | 64.998 | 35.655 | 0.00 | 0.00 |
| ATOM | 2867 | CE1 | PHE | X | 186 | 42.401 | 66.201 | 36.994 | 0.00 | 0.00 |
| ATOM | 2868 | HE1 | PHE | X | 186 | 41.820 | 65.891 | 37.850 | 0.00 | 0.00 |
| ATOM | 2869 | CZ  | PHE | X | 186 | 43.340 | 67.288 | 37.221 | 0.00 | 0.00 |
| ATOM | 2870 | HZ  | PHE | X | 186 | 43.411 | 67.692 | 38.220 | 0.00 | 0.00 |
| ATOM | 2871 | CE2 | PHE | X | 186 | 44.278 | 67.628 | 36.256 | 0.00 | 0.00 |
| ATOM | 2872 | HE2 | PHE | X | 186 | 45.039 | 68.389 | 36.348 | 0.00 | 0.00 |
| ATOM | 2873 | CD2 | PHE | X | 186 | 44.052 | 67.000 | 34.997 | 0.00 | 0.00 |
| ATOM | 2874 | HD2 | PHE | X | 186 | 44.660 | 67.266 | 34.145 | 0.00 | 0.00 |
| ATOM | 2875 | C   | PHE | X | 186 | 42.040 | 66.237 | 30.924 | 0.00 | 0.00 |
| ATOM | 2876 | O   | PHE | X | 186 | 43.008 | 65.786 | 30.339 | 0.00 | 0.00 |
| ATOM | 2877 | N   | GLY | X | 187 | 40.819 | 66.315 | 30.357 | 0.00 | 0.00 |
| ATOM | 2878 | H   | GLY | X | 187 | 40.081 | 66.755 | 30.888 | 0.00 | 0.00 |
| ATOM | 2879 | CA  | GLY | X | 187 | 40.513 | 65.949 | 28.944 | 0.00 | 0.00 |
| ATOM | 2880 | HA2 | GLY | X | 187 | 39.685 | 66.617 | 28.644 | 0.00 | 0.00 |
| ATOM | 2881 | HA3 | GLY | X | 187 | 41.380 | 66.264 | 28.415 | 0.00 | 0.00 |
| ATOM | 2882 | C   | GLY | X | 187 | 40.156 | 64.539 | 28.573 | 0.00 | 0.00 |
| ATOM | 2883 | O   | GLY | X | 187 | 40.007 | 64.191 | 27.364 | 0.00 | 0.00 |
| ATOM | 2884 | N   | GLY | X | 188 | 39.953 | 63.669 | 29.565 | 0.00 | 0.00 |
| ATOM | 2885 | H   | GLY | X | 188 | 40.014 | 64.103 | 30.475 | 0.00 | 0.00 |
| ATOM | 2886 | CA  | GLY | X | 188 | 39.435 | 62.341 | 29.518 | 0.00 | 0.00 |
| ATOM | 2887 | HA2 | GLY | X | 188 | 39.755 | 61.848 | 28.573 | 0.00 | 0.00 |
| ATOM | 2888 | HA3 | GLY | X | 188 | 39.863 | 61.759 | 30.331 | 0.00 | 0.00 |
| ATOM | 2889 | C   | GLY | X | 188 | 37.917 | 62.343 | 29.443 | 0.00 | 0.00 |
| ATOM | 2890 | O   | GLY | X | 188 | 37.266 | 63.396 | 29.188 | 0.00 | 0.00 |
| ATOM | 2891 | N   | ASP | X | 189 | 37.348 | 61.122 | 29.384 | 0.00 | 0.00 |
| ATOM | 2892 | H   | ASP | X | 189 | 38.003 | 60.356 | 29.444 | 0.00 | 0.00 |
| ATOM | 2893 | CA  | ASP | X | 189 | 35.917 | 60.876 | 29.076 | 0.00 | 0.00 |
| ATOM | 2894 | HA  | ASP | X | 189 | 35.349 | 61.789 | 28.902 | 0.00 | 0.00 |
| ATOM | 2895 | CB  | ASP | X | 189 | 35.763 | 60.179 | 27.764 | 0.00 | 0.00 |
| ATOM | 2896 | HB2 | ASP | X | 189 | 36.018 | 60.904 | 26.991 | 0.00 | 0.00 |
| ATOM | 2897 | HB3 | ASP | X | 189 | 36.468 | 59.354 | 27.668 | 0.00 | 0.00 |
| ATOM | 2898 | CG  | ASP | X | 189 | 34.315 | 59.666 | 27.258 | 0.00 | 0.00 |
| ATOM | 2899 | OD1 | ASP | X | 189 | 34.232 | 59.052 | 26.203 | 0.00 | 0.00 |
| ATOM | 2900 | OD2 | ASP | X | 189 | 33.245 | 59.971 | 27.867 | 0.00 | 0.00 |
| ATOM | 2901 | C   | ASP | X | 189 | 35.174 | 60.029 | 30.259 | 0.00 | 0.00 |
| ATOM | 2902 | O   | ASP | X | 189 | 35.302 | 58.827 | 30.407 | 0.00 | 0.00 |
| ATOM | 2903 | N   | PRO | X | 190 | 34.165 | 60.658 | 30.948 | 0.00 | 0.00 |
| ATOM | 2904 | CD  | PRO | X | 190 | 33.823 | 62.070 | 30.816 | 0.00 | 0.00 |
| ATOM | 2905 | HD2 | PRO | X | 190 | 33.352 | 62.289 | 29.858 | 0.00 | 0.00 |
| ATOM | 2906 | HD3 | PRO | X | 190 | 34.696 | 62.702 | 30.981 | 0.00 | 0.00 |
| ATOM | 2907 | CG  | PRO | X | 190 | 32.744 | 62.322 | 31.883 | 0.00 | 0.00 |

|      |      |      |     |   |     |        |        |        |      |      |
|------|------|------|-----|---|-----|--------|--------|--------|------|------|
| ATOM | 2908 | HG2  | PRO | X | 190 | 31.777 | 62.324 | 31.380 | 0.00 | 0.00 |
| ATOM | 2909 | HG3  | PRO | X | 190 | 32.999 | 63.276 | 32.345 | 0.00 | 0.00 |
| ATOM | 2910 | CB   | PRO | X | 190 | 32.771 | 61.111 | 32.875 | 0.00 | 0.00 |
| ATOM | 2911 | HB2  | PRO | X | 190 | 31.761 | 60.816 | 33.158 | 0.00 | 0.00 |
| ATOM | 2912 | HB3  | PRO | X | 190 | 33.404 | 61.363 | 33.725 | 0.00 | 0.00 |
| ATOM | 2913 | CA   | PRO | X | 190 | 33.427 | 59.991 | 31.998 | 0.00 | 0.00 |
| ATOM | 2914 | HA   | PRO | X | 190 | 34.165 | 59.473 | 32.611 | 0.00 | 0.00 |
| ATOM | 2915 | C    | PRO | X | 190 | 32.461 | 58.900 | 31.694 | 0.00 | 0.00 |
| ATOM | 2916 | O    | PRO | X | 190 | 31.926 | 58.296 | 32.651 | 0.00 | 0.00 |
| ATOM | 2917 | N    | THR | X | 191 | 32.114 | 58.645 | 30.381 | 0.00 | 0.00 |
| ATOM | 2918 | H    | THR | X | 191 | 32.511 | 59.240 | 29.668 | 0.00 | 0.00 |
| ATOM | 2919 | CA   | THR | X | 191 | 31.375 | 57.514 | 29.920 | 0.00 | 0.00 |
| ATOM | 2920 | HA   | THR | X | 191 | 30.759 | 57.156 | 30.744 | 0.00 | 0.00 |
| ATOM | 2921 | CB   | THR | X | 191 | 30.495 | 57.912 | 28.765 | 0.00 | 0.00 |
| ATOM | 2922 | HB   | THR | X | 191 | 29.926 | 57.019 | 28.506 | 0.00 | 0.00 |
| ATOM | 2923 | CG2  | THR | X | 191 | 29.675 | 59.130 | 28.955 | 0.00 | 0.00 |
| ATOM | 2924 | HG21 | THR | X | 191 | 29.090 | 59.304 | 28.052 | 0.00 | 0.00 |
| ATOM | 2925 | HG22 | THR | X | 191 | 28.952 | 59.103 | 29.770 | 0.00 | 0.00 |
| ATOM | 2926 | HG23 | THR | X | 191 | 30.214 | 60.073 | 29.051 | 0.00 | 0.00 |
| ATOM | 2927 | OG1  | THR | X | 191 | 31.342 | 57.974 | 27.598 | 0.00 | 0.00 |
| ATOM | 2928 | HG1  | THR | X | 191 | 32.035 | 58.620 | 27.754 | 0.00 | 0.00 |
| ATOM | 2929 | C    | THR | X | 191 | 32.289 | 56.274 | 29.531 | 0.00 | 0.00 |
| ATOM | 2930 | O    | THR | X | 191 | 31.888 | 55.230 | 28.987 | 0.00 | 0.00 |
| ATOM | 2931 | N    | SER | X | 192 | 33.610 | 56.496 | 29.710 | 0.00 | 0.00 |
| ATOM | 2932 | H    | SER | X | 192 | 33.828 | 57.425 | 30.042 | 0.00 | 0.00 |
| ATOM | 2933 | CA   | SER | X | 192 | 34.621 | 55.580 | 29.265 | 0.00 | 0.00 |
| ATOM | 2934 | HA   | SER | X | 192 | 34.206 | 54.579 | 29.151 | 0.00 | 0.00 |
| ATOM | 2935 | CB   | SER | X | 192 | 35.258 | 56.074 | 27.942 | 0.00 | 0.00 |
| ATOM | 2936 | HB2  | SER | X | 192 | 35.680 | 57.048 | 28.185 | 0.00 | 0.00 |
| ATOM | 2937 | HB3  | SER | X | 192 | 36.106 | 55.394 | 27.866 | 0.00 | 0.00 |
| ATOM | 2938 | OG   | SER | X | 192 | 34.453 | 55.984 | 26.807 | 0.00 | 0.00 |
| ATOM | 2939 | HG   | SER | X | 192 | 34.786 | 56.613 | 26.163 | 0.00 | 0.00 |
| ATOM | 2940 | C    | SER | X | 192 | 35.749 | 55.452 | 30.351 | 0.00 | 0.00 |
| ATOM | 2941 | O    | SER | X | 192 | 36.945 | 55.526 | 30.086 | 0.00 | 0.00 |
| ATOM | 2942 | N    | VAL | X | 193 | 35.390 | 55.327 | 31.618 | 0.00 | 0.00 |
| ATOM | 2943 | H    | VAL | X | 193 | 34.401 | 55.359 | 31.820 | 0.00 | 0.00 |
| ATOM | 2944 | CA   | VAL | X | 193 | 36.274 | 54.920 | 32.719 | 0.00 | 0.00 |
| ATOM | 2945 | HA   | VAL | X | 193 | 37.184 | 55.457 | 32.454 | 0.00 | 0.00 |
| ATOM | 2946 | CB   | VAL | X | 193 | 35.748 | 55.349 | 34.098 | 0.00 | 0.00 |
| ATOM | 2947 | HB   | VAL | X | 193 | 34.947 | 54.618 | 34.208 | 0.00 | 0.00 |
| ATOM | 2948 | CG1  | VAL | X | 193 | 36.936 | 55.243 | 35.149 | 0.00 | 0.00 |
| ATOM | 2949 | HG11 | VAL | X | 193 | 36.671 | 55.391 | 36.196 | 0.00 | 0.00 |
| ATOM | 2950 | HG12 | VAL | X | 193 | 37.429 | 54.284 | 34.993 | 0.00 | 0.00 |
| ATOM | 2951 | HG13 | VAL | X | 193 | 37.705 | 55.924 | 34.784 | 0.00 | 0.00 |
| ATOM | 2952 | CG2  | VAL | X | 193 | 35.258 | 56.823 | 34.138 | 0.00 | 0.00 |
| ATOM | 2953 | HG21 | VAL | X | 193 | 34.488 | 56.984 | 33.384 | 0.00 | 0.00 |
| ATOM | 2954 | HG22 | VAL | X | 193 | 35.062 | 57.014 | 35.193 | 0.00 | 0.00 |
| ATOM | 2955 | HG23 | VAL | X | 193 | 36.007 | 57.552 | 33.827 | 0.00 | 0.00 |
| ATOM | 2956 | C    | VAL | X | 193 | 36.459 | 53.370 | 32.527 | 0.00 | 0.00 |
| ATOM | 2957 | O    | VAL | X | 193 | 35.466 | 52.668 | 32.469 | 0.00 | 0.00 |
| ATOM | 2958 | N    | THR | X | 194 | 37.710 | 52.939 | 32.615 | 0.00 | 0.00 |
| ATOM | 2959 | H    | THR | X | 194 | 38.454 | 53.612 | 32.727 | 0.00 | 0.00 |
| ATOM | 2960 | CA   | THR | X | 194 | 38.151 | 51.508 | 32.575 | 0.00 | 0.00 |
| ATOM | 2961 | HA   | THR | X | 194 | 37.204 | 50.974 | 32.504 | 0.00 | 0.00 |
| ATOM | 2962 | CB   | THR | X | 194 | 38.984 | 51.056 | 31.379 | 0.00 | 0.00 |
| ATOM | 2963 | HB   | THR | X | 194 | 39.964 | 51.528 | 31.443 | 0.00 | 0.00 |
| ATOM | 2964 | CG2  | THR | X | 194 | 39.190 | 49.507 | 31.324 | 0.00 | 0.00 |
| ATOM | 2965 | HG21 | THR | X | 194 | 39.753 | 49.327 | 30.408 | 0.00 | 0.00 |
| ATOM | 2966 | HG22 | THR | X | 194 | 39.697 | 48.975 | 32.129 | 0.00 | 0.00 |
| ATOM | 2967 | HG23 | THR | X | 194 | 38.231 | 48.990 | 31.284 | 0.00 | 0.00 |
| ATOM | 2968 | OG1  | THR | X | 194 | 38.244 | 51.445 | 30.235 | 0.00 | 0.00 |
| ATOM | 2969 | HG1  | THR | X | 194 | 38.078 | 52.386 | 30.322 | 0.00 | 0.00 |
| ATOM | 2970 | C    | THR | X | 194 | 38.872 | 51.074 | 33.851 | 0.00 | 0.00 |
| ATOM | 2971 | O    | THR | X | 194 | 39.885 | 51.655 | 34.089 | 0.00 | 0.00 |
| ATOM | 2972 | N    | LEU | X | 195 | 38.468 | 50.048 | 34.595 | 0.00 | 0.00 |
| ATOM | 2973 | H    | LEU | X | 195 | 37.720 | 49.448 | 34.279 | 0.00 | 0.00 |
| ATOM | 2974 | CA   | LEU | X | 195 | 39.343 | 49.562 | 35.688 | 0.00 | 0.00 |
| ATOM | 2975 | HA   | LEU | X | 195 | 39.887 | 50.377 | 36.164 | 0.00 | 0.00 |
| ATOM | 2976 | CB   | LEU | X | 195 | 38.516 | 48.812 | 36.674 | 0.00 | 0.00 |
| ATOM | 2977 | HB2  | LEU | X | 195 | 38.148 | 47.905 | 36.196 | 0.00 | 0.00 |

|      |      |      |     |   |     |        |        |        |      |      |
|------|------|------|-----|---|-----|--------|--------|--------|------|------|
| ATOM | 2978 | HB3  | LEU | X | 195 | 39.203 | 48.460 | 37.443 | 0.00 | 0.00 |
| ATOM | 2979 | CG   | LEU | X | 195 | 37.303 | 49.496 | 37.267 | 0.00 | 0.00 |
| ATOM | 2980 | HG   | LEU | X | 195 | 36.576 | 49.712 | 36.485 | 0.00 | 0.00 |
| ATOM | 2981 | CD1  | LEU | X | 195 | 36.660 | 48.464 | 38.220 | 0.00 | 0.00 |
| ATOM | 2982 | HD11 | LEU | X | 195 | 37.377 | 48.076 | 38.944 | 0.00 | 0.00 |
| ATOM | 2983 | HD12 | LEU | X | 195 | 35.740 | 48.845 | 38.663 | 0.00 | 0.00 |
| ATOM | 2984 | HD13 | LEU | X | 195 | 36.465 | 47.559 | 37.645 | 0.00 | 0.00 |
| ATOM | 2985 | CD2  | LEU | X | 195 | 37.612 | 50.826 | 38.055 | 0.00 | 0.00 |
| ATOM | 2986 | HD21 | LEU | X | 195 | 37.984 | 51.554 | 37.334 | 0.00 | 0.00 |
| ATOM | 2987 | HD22 | LEU | X | 195 | 36.730 | 51.183 | 38.587 | 0.00 | 0.00 |
| ATOM | 2988 | HD23 | LEU | X | 195 | 38.338 | 50.609 | 38.837 | 0.00 | 0.00 |
| ATOM | 2989 | C    | LEU | X | 195 | 40.440 | 48.556 | 35.105 | 0.00 | 0.00 |
| ATOM | 2990 | O    | LEU | X | 195 | 40.058 | 47.660 | 34.314 | 0.00 | 0.00 |
| ATOM | 2991 | N    | PHE | X | 196 | 41.761 | 48.713 | 35.270 | 0.00 | 0.00 |
| ATOM | 2992 | H    | PHE | X | 196 | 42.060 | 49.484 | 35.850 | 0.00 | 0.00 |
| ATOM | 2993 | CA   | PHE | X | 196 | 42.709 | 47.601 | 35.123 | 0.00 | 0.00 |
| ATOM | 2994 | HA   | PHE | X | 196 | 42.140 | 46.672 | 35.094 | 0.00 | 0.00 |
| ATOM | 2995 | CB   | PHE | X | 196 | 43.470 | 47.542 | 33.747 | 0.00 | 0.00 |
| ATOM | 2996 | HB2  | PHE | X | 196 | 43.981 | 46.581 | 33.807 | 0.00 | 0.00 |
| ATOM | 2997 | HB3  | PHE | X | 196 | 42.775 | 47.421 | 32.916 | 0.00 | 0.00 |
| ATOM | 2998 | CG   | PHE | X | 196 | 44.583 | 48.580 | 33.430 | 0.00 | 0.00 |
| ATOM | 2999 | CD1  | PHE | X | 196 | 44.491 | 49.912 | 33.835 | 0.00 | 0.00 |
| ATOM | 3000 | HD1  | PHE | X | 196 | 43.686 | 50.322 | 34.428 | 0.00 | 0.00 |
| ATOM | 3001 | CE1  | PHE | X | 196 | 45.525 | 50.844 | 33.499 | 0.00 | 0.00 |
| ATOM | 3002 | HE1  | PHE | X | 196 | 45.343 | 51.879 | 33.751 | 0.00 | 0.00 |
| ATOM | 3003 | CZ   | PHE | X | 196 | 46.677 | 50.450 | 32.849 | 0.00 | 0.00 |
| ATOM | 3004 | HZ   | PHE | X | 196 | 47.426 | 51.139 | 32.487 | 0.00 | 0.00 |
| ATOM | 3005 | CE2  | PHE | X | 196 | 46.803 | 49.076 | 32.430 | 0.00 | 0.00 |
| ATOM | 3006 | HE2  | PHE | X | 196 | 47.635 | 48.664 | 31.879 | 0.00 | 0.00 |
| ATOM | 3007 | CD2  | PHE | X | 196 | 45.746 | 48.157 | 32.762 | 0.00 | 0.00 |
| ATOM | 3008 | HD2  | PHE | X | 196 | 45.836 | 47.152 | 32.376 | 0.00 | 0.00 |
| ATOM | 3009 | C    | PHE | X | 196 | 43.621 | 47.561 | 36.305 | 0.00 | 0.00 |
| ATOM | 3010 | O    | PHE | X | 196 | 43.499 | 48.408 | 37.210 | 0.00 | 0.00 |
| ATOM | 3011 | N    | GLY | X | 197 | 44.396 | 46.559 | 36.434 | 0.00 | 0.00 |
| ATOM | 3012 | H    | GLY | X | 197 | 44.383 | 45.800 | 35.768 | 0.00 | 0.00 |
| ATOM | 3013 | CA   | GLY | X | 197 | 45.219 | 46.257 | 37.562 | 0.00 | 0.00 |
| ATOM | 3014 | HA2  | GLY | X | 197 | 46.052 | 46.997 | 37.614 | 0.00 | 0.00 |
| ATOM | 3015 | HA3  | GLY | X | 197 | 44.614 | 46.312 | 38.439 | 0.00 | 0.00 |
| ATOM | 3016 | C    | GLY | X | 197 | 45.810 | 44.871 | 37.527 | 0.00 | 0.00 |
| ATOM | 3017 | O    | GLY | X | 197 | 45.305 | 44.134 | 36.661 | 0.00 | 0.00 |
| ATOM | 3018 | N    | GLU | X | 198 | 46.763 | 44.496 | 38.424 | 0.00 | 0.00 |
| ATOM | 3019 | H    | GLU | X | 198 | 47.114 | 45.239 | 39.011 | 0.00 | 0.00 |
| ATOM | 3020 | CA   | GLU | X | 198 | 47.395 | 43.199 | 38.428 | 0.00 | 0.00 |
| ATOM | 3021 | HA   | GLU | X | 198 | 46.838 | 42.506 | 37.798 | 0.00 | 0.00 |
| ATOM | 3022 | CB   | GLU | X | 198 | 48.769 | 43.345 | 37.842 | 0.00 | 0.00 |
| ATOM | 3023 | HB2  | GLU | X | 198 | 48.658 | 43.870 | 36.893 | 0.00 | 0.00 |
| ATOM | 3024 | HB3  | GLU | X | 198 | 49.405 | 44.031 | 38.400 | 0.00 | 0.00 |
| ATOM | 3025 | CG   | GLU | X | 198 | 49.531 | 41.960 | 37.626 | 0.00 | 0.00 |
| ATOM | 3026 | HG2  | GLU | X | 198 | 48.975 | 41.159 | 38.113 | 0.00 | 0.00 |
| ATOM | 3027 | HG3  | GLU | X | 198 | 49.749 | 41.890 | 36.560 | 0.00 | 0.00 |
| ATOM | 3028 | CD   | GLU | X | 198 | 50.859 | 41.976 | 38.386 | 0.00 | 0.00 |
| ATOM | 3029 | OE1  | GLU | X | 198 | 51.721 | 42.803 | 37.986 | 0.00 | 0.00 |
| ATOM | 3030 | OE2  | GLU | X | 198 | 50.969 | 41.146 | 39.291 | 0.00 | 0.00 |
| ATOM | 3031 | C    | GLU | X | 198 | 47.505 | 42.622 | 39.873 | 0.00 | 0.00 |
| ATOM | 3032 | O    | GLU | X | 198 | 47.697 | 43.233 | 40.868 | 0.00 | 0.00 |
| ATOM | 3033 | N    | XA1 | X | 199 | 47.276 | 41.292 | 39.935 | 0.00 | 0.00 |
| ATOM | 3034 | CA   | XA1 | X | 199 | 47.376 | 40.520 | 41.241 | 0.00 | 0.00 |
| ATOM | 3035 | C    | XA1 | X | 199 | 46.319 | 40.982 | 42.276 | 0.00 | 0.00 |
| ATOM | 3036 | O    | XA1 | X | 199 | 45.075 | 40.797 | 42.061 | 0.00 | 0.00 |
| ATOM | 3037 | CB   | XA1 | X | 199 | 48.837 | 40.375 | 41.705 | 0.00 | 0.00 |
| ATOM | 3038 | OG   | XA1 | X | 199 | 48.941 | 39.407 | 42.771 | 0.00 | 0.00 |
| ATOM | 3039 | P1   | XA1 | X | 199 | 49.898 | 39.868 | 43.884 | 0.00 | 0.00 |
| ATOM | 3040 | O1   | XA1 | X | 199 | 49.360 | 41.102 | 44.548 | 0.00 | 0.00 |
| ATOM | 3041 | O2   | XA1 | X | 199 | 51.215 | 40.070 | 43.301 | 0.00 | 0.00 |
| ATOM | 3042 | C1   | XA1 | X | 199 | 49.916 | 38.408 | 44.901 | 0.00 | 0.00 |
| ATOM | 3043 | H    | XA1 | X | 199 | 46.930 | 40.775 | 39.139 | 0.00 | 0.00 |
| ATOM | 3044 | HA   | XA1 | X | 199 | 47.035 | 39.509 | 41.020 | 0.00 | 0.00 |
| ATOM | 3045 | HB2  | XA1 | X | 199 | 49.531 | 40.179 | 40.883 | 0.00 | 0.00 |
| ATOM | 3046 | HB3  | XA1 | X | 199 | 49.044 | 41.368 | 42.110 | 0.00 | 0.00 |
| ATOM | 3047 | H11  | XA1 | X | 199 | 48.894 | 38.064 | 45.071 | 0.00 | 0.00 |

|      |      |      |     |   |     |        |        |        |      |      |
|------|------|------|-----|---|-----|--------|--------|--------|------|------|
| ATOM | 3048 | H12  | XA1 | X | 199 | 50.447 | 37.586 | 44.417 | 0.00 | 0.00 |
| ATOM | 3049 | H13  | XA1 | X | 199 | 50.509 | 38.572 | 45.803 | 0.00 | 0.00 |
| ATOM | 3050 | N    | ALA | X | 200 | 46.676 | 41.504 | 43.479 | 0.00 | 0.00 |
| ATOM | 3051 | H    | ALA | X | 200 | 47.676 | 41.620 | 43.551 | 0.00 | 0.00 |
| ATOM | 3052 | CA   | ALA | X | 200 | 45.707 | 42.057 | 44.392 | 0.00 | 0.00 |
| ATOM | 3053 | HA   | ALA | X | 200 | 44.946 | 41.331 | 44.677 | 0.00 | 0.00 |
| ATOM | 3054 | CB   | ALA | X | 200 | 46.363 | 42.331 | 45.774 | 0.00 | 0.00 |
| ATOM | 3055 | HB1  | ALA | X | 200 | 46.960 | 41.482 | 46.105 | 0.00 | 0.00 |
| ATOM | 3056 | HB2  | ALA | X | 200 | 47.089 | 43.143 | 45.776 | 0.00 | 0.00 |
| ATOM | 3057 | HB3  | ALA | X | 200 | 45.630 | 42.589 | 46.539 | 0.00 | 0.00 |
| ATOM | 3058 | C    | ALA | X | 200 | 44.944 | 43.300 | 43.746 | 0.00 | 0.00 |
| ATOM | 3059 | O    | ALA | X | 200 | 43.777 | 43.659 | 44.141 | 0.00 | 0.00 |
| ATOM | 3060 | N    | GLY | X | 201 | 45.502 | 43.916 | 42.693 | 0.00 | 0.00 |
| ATOM | 3061 | H    | GLY | X | 201 | 46.453 | 43.631 | 42.510 | 0.00 | 0.00 |
| ATOM | 3062 | CA   | GLY | X | 201 | 44.834 | 44.836 | 41.872 | 0.00 | 0.00 |
| ATOM | 3063 | HA2  | GLY | X | 201 | 44.281 | 45.505 | 42.492 | 0.00 | 0.00 |
| ATOM | 3064 | HA3  | GLY | X | 201 | 45.546 | 45.470 | 41.290 | 0.00 | 0.00 |
| ATOM | 3065 | C    | GLY | X | 201 | 43.893 | 44.124 | 40.906 | 0.00 | 0.00 |
| ATOM | 3066 | O    | GLY | X | 201 | 42.715 | 44.494 | 40.880 | 0.00 | 0.00 |
| ATOM | 3067 | N    | ALA | X | 202 | 44.251 | 43.037 | 40.236 | 0.00 | 0.00 |
| ATOM | 3068 | H    | ALA | X | 202 | 45.215 | 42.778 | 40.078 | 0.00 | 0.00 |
| ATOM | 3069 | CA   | ALA | X | 202 | 43.229 | 42.350 | 39.412 | 0.00 | 0.00 |
| ATOM | 3070 | HA   | ALA | X | 202 | 42.810 | 42.992 | 38.637 | 0.00 | 0.00 |
| ATOM | 3071 | CB   | ALA | X | 202 | 43.999 | 41.265 | 38.694 | 0.00 | 0.00 |
| ATOM | 3072 | HB1  | ALA | X | 202 | 44.380 | 40.649 | 39.508 | 0.00 | 0.00 |
| ATOM | 3073 | HB2  | ALA | X | 202 | 43.299 | 40.671 | 38.107 | 0.00 | 0.00 |
| ATOM | 3074 | HB3  | ALA | X | 202 | 44.663 | 41.754 | 37.981 | 0.00 | 0.00 |
| ATOM | 3075 | C    | ALA | X | 202 | 42.081 | 41.909 | 40.314 | 0.00 | 0.00 |
| ATOM | 3076 | O    | ALA | X | 202 | 40.932 | 42.088 | 39.986 | 0.00 | 0.00 |
| ATOM | 3077 | N    | ALA | X | 203 | 42.398 | 41.413 | 41.515 | 0.00 | 0.00 |
| ATOM | 3078 | H    | ALA | X | 203 | 43.332 | 41.056 | 41.652 | 0.00 | 0.00 |
| ATOM | 3079 | CA   | ALA | X | 203 | 41.444 | 40.904 | 42.552 | 0.00 | 0.00 |
| ATOM | 3080 | HA   | ALA | X | 203 | 40.877 | 40.085 | 42.110 | 0.00 | 0.00 |
| ATOM | 3081 | CB   | ALA | X | 203 | 42.244 | 40.422 | 43.767 | 0.00 | 0.00 |
| ATOM | 3082 | HB1  | ALA | X | 203 | 42.705 | 41.174 | 44.407 | 0.00 | 0.00 |
| ATOM | 3083 | HB2  | ALA | X | 203 | 41.512 | 39.883 | 44.369 | 0.00 | 0.00 |
| ATOM | 3084 | HB3  | ALA | X | 203 | 42.986 | 39.666 | 43.510 | 0.00 | 0.00 |
| ATOM | 3085 | C    | ALA | X | 203 | 40.491 | 42.010 | 42.967 | 0.00 | 0.00 |
| ATOM | 3086 | O    | ALA | X | 203 | 39.295 | 41.826 | 42.995 | 0.00 | 0.00 |
| ATOM | 3087 | N    | SER | X | 204 | 41.053 | 43.255 | 43.162 | 0.00 | 0.00 |
| ATOM | 3088 | H    | SER | X | 204 | 42.051 | 43.331 | 43.030 | 0.00 | 0.00 |
| ATOM | 3089 | CA   | SER | X | 204 | 40.259 | 44.495 | 43.400 | 0.00 | 0.00 |
| ATOM | 3090 | HA   | SER | X | 204 | 39.583 | 44.349 | 44.243 | 0.00 | 0.00 |
| ATOM | 3091 | CB   | SER | X | 204 | 41.132 | 45.678 | 43.920 | 0.00 | 0.00 |
| ATOM | 3092 | HB2  | SER | X | 204 | 41.783 | 45.922 | 43.081 | 0.00 | 0.00 |
| ATOM | 3093 | HB3  | SER | X | 204 | 40.411 | 46.490 | 44.016 | 0.00 | 0.00 |
| ATOM | 3094 | OG   | SER | X | 204 | 42.001 | 45.443 | 45.058 | 0.00 | 0.00 |
| ATOM | 3095 | HG   | SER | X | 204 | 42.582 | 44.710 | 44.840 | 0.00 | 0.00 |
| ATOM | 3096 | C    | SER | X | 204 | 39.376 | 44.911 | 42.257 | 0.00 | 0.00 |
| ATOM | 3097 | O    | SER | X | 204 | 38.129 | 44.937 | 42.478 | 0.00 | 0.00 |
| ATOM | 3098 | N    | VAL | X | 205 | 39.888 | 44.920 | 41.000 | 0.00 | 0.00 |
| ATOM | 3099 | H    | VAL | X | 205 | 40.725 | 44.370 | 40.873 | 0.00 | 0.00 |
| ATOM | 3100 | CA   | VAL | X | 205 | 38.915 | 45.113 | 39.894 | 0.00 | 0.00 |
| ATOM | 3101 | HA   | VAL | X | 205 | 38.536 | 46.135 | 39.870 | 0.00 | 0.00 |
| ATOM | 3102 | CB   | VAL | X | 205 | 39.662 | 45.174 | 38.587 | 0.00 | 0.00 |
| ATOM | 3103 | HB   | VAL | X | 205 | 40.229 | 44.263 | 38.396 | 0.00 | 0.00 |
| ATOM | 3104 | CG1  | VAL | X | 205 | 38.711 | 45.294 | 37.370 | 0.00 | 0.00 |
| ATOM | 3105 | HG11 | VAL | X | 205 | 38.055 | 44.424 | 37.331 | 0.00 | 0.00 |
| ATOM | 3106 | HG12 | VAL | X | 205 | 38.083 | 46.161 | 37.572 | 0.00 | 0.00 |
| ATOM | 3107 | HG13 | VAL | X | 205 | 39.320 | 45.406 | 36.473 | 0.00 | 0.00 |
| ATOM | 3108 | CG2  | VAL | X | 205 | 40.619 | 46.384 | 38.503 | 0.00 | 0.00 |
| ATOM | 3109 | HG21 | VAL | X | 205 | 40.903 | 46.494 | 37.456 | 0.00 | 0.00 |
| ATOM | 3110 | HG22 | VAL | X | 205 | 40.179 | 47.257 | 38.986 | 0.00 | 0.00 |
| ATOM | 3111 | HG23 | VAL | X | 205 | 41.481 | 46.057 | 39.086 | 0.00 | 0.00 |
| ATOM | 3112 | C    | VAL | X | 205 | 37.723 | 44.191 | 39.933 | 0.00 | 0.00 |
| ATOM | 3113 | O    | VAL | X | 205 | 36.571 | 44.587 | 39.684 | 0.00 | 0.00 |
| ATOM | 3114 | N    | GLY | X | 206 | 37.959 | 42.933 | 40.258 | 0.00 | 0.00 |
| ATOM | 3115 | H    | GLY | X | 206 | 38.877 | 42.747 | 40.637 | 0.00 | 0.00 |
| ATOM | 3116 | CA   | GLY | X | 206 | 36.982 | 41.861 | 40.301 | 0.00 | 0.00 |
| ATOM | 3117 | HA2  | GLY | X | 206 | 36.491 | 41.701 | 39.344 | 0.00 | 0.00 |

|      |      |      |     |   |     |        |        |        |      |      |
|------|------|------|-----|---|-----|--------|--------|--------|------|------|
| ATOM | 3118 | HA3  | GLY | X | 206 | 37.596 | 41.006 | 40.548 | 0.00 | 0.00 |
| ATOM | 3119 | C    | GLY | X | 206 | 35.972 | 41.951 | 41.438 | 0.00 | 0.00 |
| ATOM | 3120 | O    | GLY | X | 206 | 34.839 | 41.423 | 41.343 | 0.00 | 0.00 |
| ATOM | 3121 | N    | MET | X | 207 | 36.328 | 42.663 | 42.530 | 0.00 | 0.00 |
| ATOM | 3122 | H    | MET | X | 207 | 37.202 | 43.156 | 42.414 | 0.00 | 0.00 |
| ATOM | 3123 | CA   | MET | X | 207 | 35.477 | 42.875 | 43.677 | 0.00 | 0.00 |
| ATOM | 3124 | HA   | MET | X | 207 | 34.898 | 41.952 | 43.648 | 0.00 | 0.00 |
| ATOM | 3125 | CB   | MET | X | 207 | 36.221 | 43.101 | 44.971 | 0.00 | 0.00 |
| ATOM | 3126 | HB2  | MET | X | 207 | 36.779 | 44.038 | 44.992 | 0.00 | 0.00 |
| ATOM | 3127 | HB3  | MET | X | 207 | 35.524 | 43.156 | 45.807 | 0.00 | 0.00 |
| ATOM | 3128 | CG   | MET | X | 207 | 37.111 | 41.958 | 45.244 | 0.00 | 0.00 |
| ATOM | 3129 | HG2  | MET | X | 207 | 36.787 | 41.067 | 44.707 | 0.00 | 0.00 |
| ATOM | 3130 | HG3  | MET | X | 207 | 38.120 | 42.212 | 44.919 | 0.00 | 0.00 |
| ATOM | 3131 | SD   | MET | X | 207 | 37.246 | 41.639 | 46.953 | 0.00 | 0.00 |
| ATOM | 3132 | CE   | MET | X | 207 | 38.357 | 40.203 | 47.004 | 0.00 | 0.00 |
| ATOM | 3133 | HE1  | MET | X | 207 | 38.081 | 39.481 | 46.236 | 0.00 | 0.00 |
| ATOM | 3134 | HE2  | MET | X | 207 | 39.359 | 40.608 | 46.862 | 0.00 | 0.00 |
| ATOM | 3135 | HE3  | MET | X | 207 | 38.367 | 39.710 | 47.976 | 0.00 | 0.00 |
| ATOM | 3136 | C    | MET | X | 207 | 34.511 | 43.978 | 43.333 | 0.00 | 0.00 |
| ATOM | 3137 | O    | MET | X | 207 | 33.340 | 43.943 | 43.806 | 0.00 | 0.00 |
| ATOM | 3138 | N    | HIE | X | 208 | 34.978 | 44.940 | 42.548 | 0.00 | 0.00 |
| ATOM | 3139 | H    | HIE | X | 208 | 35.970 | 45.120 | 42.482 | 0.00 | 0.00 |
| ATOM | 3140 | CA   | HIE | X | 208 | 34.160 | 46.071 | 42.146 | 0.00 | 0.00 |
| ATOM | 3141 | HA   | HIE | X | 208 | 33.731 | 46.531 | 43.036 | 0.00 | 0.00 |
| ATOM | 3142 | CB   | HIE | X | 208 | 35.121 | 47.161 | 41.453 | 0.00 | 0.00 |
| ATOM | 3143 | HB2  | HIE | X | 208 | 35.718 | 46.692 | 40.670 | 0.00 | 0.00 |
| ATOM | 3144 | HB3  | HIE | X | 208 | 34.458 | 47.947 | 41.091 | 0.00 | 0.00 |
| ATOM | 3145 | CG   | HIE | X | 208 | 35.966 | 47.927 | 42.418 | 0.00 | 0.00 |
| ATOM | 3146 | ND1  | HIE | X | 208 | 35.496 | 48.512 | 43.635 | 0.00 | 0.00 |
| ATOM | 3147 | CE1  | HIE | X | 208 | 36.582 | 49.083 | 44.097 | 0.00 | 0.00 |
| ATOM | 3148 | HE1  | HIE | X | 208 | 36.687 | 49.644 | 45.014 | 0.00 | 0.00 |
| ATOM | 3149 | NE2  | HIE | X | 208 | 37.625 | 49.017 | 43.222 | 0.00 | 0.00 |
| ATOM | 3150 | HE2  | HIE | X | 208 | 38.585 | 49.275 | 43.402 | 0.00 | 0.00 |
| ATOM | 3151 | CD2  | HIE | X | 208 | 37.308 | 48.228 | 42.238 | 0.00 | 0.00 |
| ATOM | 3152 | HD2  | HIE | X | 208 | 37.951 | 47.787 | 41.491 | 0.00 | 0.00 |
| ATOM | 3153 | C    | HIE | X | 208 | 33.024 | 45.675 | 41.146 | 0.00 | 0.00 |
| ATOM | 3154 | O    | HIE | X | 208 | 31.934 | 46.297 | 41.171 | 0.00 | 0.00 |
| ATOM | 3155 | N    | LEU | X | 209 | 33.189 | 44.593 | 40.387 | 0.00 | 0.00 |
| ATOM | 3156 | H    | LEU | X | 209 | 34.090 | 44.158 | 40.256 | 0.00 | 0.00 |
| ATOM | 3157 | CA   | LEU | X | 209 | 32.053 | 43.891 | 39.711 | 0.00 | 0.00 |
| ATOM | 3158 | HA   | LEU | X | 209 | 31.653 | 44.578 | 38.965 | 0.00 | 0.00 |
| ATOM | 3159 | CB   | LEU | X | 209 | 32.629 | 42.702 | 39.014 | 0.00 | 0.00 |
| ATOM | 3160 | HB2  | LEU | X | 209 | 32.837 | 41.898 | 39.719 | 0.00 | 0.00 |
| ATOM | 3161 | HB3  | LEU | X | 209 | 31.842 | 42.289 | 38.383 | 0.00 | 0.00 |
| ATOM | 3162 | CG   | LEU | X | 209 | 33.894 | 42.959 | 38.123 | 0.00 | 0.00 |
| ATOM | 3163 | HG   | LEU | X | 209 | 34.719 | 43.176 | 38.802 | 0.00 | 0.00 |
| ATOM | 3164 | CD1  | LEU | X | 209 | 34.233 | 41.684 | 37.349 | 0.00 | 0.00 |
| ATOM | 3165 | HD11 | LEU | X | 209 | 34.951 | 41.832 | 36.542 | 0.00 | 0.00 |
| ATOM | 3166 | HD12 | LEU | X | 209 | 34.519 | 40.893 | 38.042 | 0.00 | 0.00 |
| ATOM | 3167 | HD13 | LEU | X | 209 | 33.355 | 41.249 | 36.869 | 0.00 | 0.00 |
| ATOM | 3168 | CD2  | LEU | X | 209 | 33.669 | 44.230 | 37.191 | 0.00 | 0.00 |
| ATOM | 3169 | HD21 | LEU | X | 209 | 32.814 | 44.092 | 36.529 | 0.00 | 0.00 |
| ATOM | 3170 | HD22 | LEU | X | 209 | 33.541 | 45.169 | 37.728 | 0.00 | 0.00 |
| ATOM | 3171 | HD23 | LEU | X | 209 | 34.560 | 44.308 | 36.569 | 0.00 | 0.00 |
| ATOM | 3172 | C    | LEU | X | 209 | 30.876 | 43.463 | 40.565 | 0.00 | 0.00 |
| ATOM | 3173 | O    | LEU | X | 209 | 29.721 | 43.459 | 40.220 | 0.00 | 0.00 |
| ATOM | 3174 | N    | LEU | X | 210 | 31.212 | 43.110 | 41.778 | 0.00 | 0.00 |
| ATOM | 3175 | H    | LEU | X | 210 | 32.210 | 43.033 | 41.914 | 0.00 | 0.00 |
| ATOM | 3176 | CA   | LEU | X | 210 | 30.325 | 42.465 | 42.808 | 0.00 | 0.00 |
| ATOM | 3177 | HA   | LEU | X | 210 | 29.446 | 42.064 | 42.304 | 0.00 | 0.00 |
| ATOM | 3178 | CB   | LEU | X | 210 | 31.152 | 41.367 | 43.641 | 0.00 | 0.00 |
| ATOM | 3179 | HB2  | LEU | X | 210 | 32.049 | 41.886 | 43.979 | 0.00 | 0.00 |
| ATOM | 3180 | HB3  | LEU | X | 210 | 30.489 | 41.123 | 44.471 | 0.00 | 0.00 |
| ATOM | 3181 | CG   | LEU | X | 210 | 31.650 | 40.143 | 42.830 | 0.00 | 0.00 |
| ATOM | 3182 | HG   | LEU | X | 210 | 32.395 | 40.452 | 42.097 | 0.00 | 0.00 |
| ATOM | 3183 | CD1  | LEU | X | 210 | 32.379 | 39.161 | 43.759 | 0.00 | 0.00 |
| ATOM | 3184 | HD11 | LEU | X | 210 | 31.843 | 39.004 | 44.696 | 0.00 | 0.00 |
| ATOM | 3185 | HD12 | LEU | X | 210 | 32.549 | 38.228 | 43.223 | 0.00 | 0.00 |
| ATOM | 3186 | HD13 | LEU | X | 210 | 33.310 | 39.697 | 43.938 | 0.00 | 0.00 |
| ATOM | 3187 | CD2  | LEU | X | 210 | 30.468 | 39.403 | 42.109 | 0.00 | 0.00 |



|      |      |      |     |   |     |        |        |        |      |      |
|------|------|------|-----|---|-----|--------|--------|--------|------|------|
| ATOM | 3188 | HD21 | LEU | X | 210 | 29.931 | 38.820 | 42.857 | 0.00 | 0.00 |
| ATOM | 3189 | HD22 | LEU | X | 210 | 29.766 | 40.120 | 41.682 | 0.00 | 0.00 |
| ATOM | 3190 | HD23 | LEU | X | 210 | 30.777 | 38.743 | 41.298 | 0.00 | 0.00 |
| ATOM | 3191 | C    | LEU | X | 210 | 29.625 | 43.555 | 43.728 | 0.00 | 0.00 |
| ATOM | 3192 | O    | LEU | X | 210 | 28.777 | 43.174 | 44.538 | 0.00 | 0.00 |
| ATOM | 3193 | N    | SER | X | 211 | 30.012 | 44.794 | 43.537 | 0.00 | 0.00 |
| ATOM | 3194 | H    | SER | X | 211 | 30.711 | 44.872 | 42.813 | 0.00 | 0.00 |
| ATOM | 3195 | CA   | SER | X | 211 | 29.674 | 45.856 | 44.410 | 0.00 | 0.00 |
| ATOM | 3196 | HA   | SER | X | 211 | 28.885 | 45.563 | 45.102 | 0.00 | 0.00 |
| ATOM | 3197 | CB   | SER | X | 211 | 30.951 | 46.264 | 45.033 | 0.00 | 0.00 |
| ATOM | 3198 | HB2  | SER | X | 211 | 31.336 | 45.299 | 45.363 | 0.00 | 0.00 |
| ATOM | 3199 | HB3  | SER | X | 211 | 31.622 | 46.757 | 44.329 | 0.00 | 0.00 |
| ATOM | 3200 | OG   | SER | X | 211 | 30.692 | 47.035 | 46.223 | 0.00 | 0.00 |
| ATOM | 3201 | HG   | SER | X | 211 | 30.259 | 46.444 | 46.843 | 0.00 | 0.00 |
| ATOM | 3202 | C    | SER | X | 211 | 28.998 | 47.010 | 43.631 | 0.00 | 0.00 |
| ATOM | 3203 | O    | SER | X | 211 | 29.678 | 47.883 | 43.111 | 0.00 | 0.00 |
| ATOM | 3204 | N    | PRO | X | 212 | 27.663 | 47.093 | 43.568 | 0.00 | 0.00 |
| ATOM | 3205 | CD   | PRO | X | 212 | 26.701 | 46.077 | 44.036 | 0.00 | 0.00 |
| ATOM | 3206 | HD2  | PRO | X | 212 | 26.599 | 46.091 | 45.121 | 0.00 | 0.00 |
| ATOM | 3207 | HD3  | PRO | X | 212 | 27.033 | 45.088 | 43.722 | 0.00 | 0.00 |
| ATOM | 3208 | CG   | PRO | X | 212 | 25.331 | 46.387 | 43.439 | 0.00 | 0.00 |
| ATOM | 3209 | HG2  | PRO | X | 212 | 24.498 | 46.421 | 44.141 | 0.00 | 0.00 |
| ATOM | 3210 | HG3  | PRO | X | 212 | 25.130 | 45.683 | 42.631 | 0.00 | 0.00 |
| ATOM | 3211 | CB   | PRO | X | 212 | 25.489 | 47.802 | 42.847 | 0.00 | 0.00 |
| ATOM | 3212 | HB2  | PRO | X | 212 | 25.015 | 48.608 | 43.407 | 0.00 | 0.00 |
| ATOM | 3213 | HB3  | PRO | X | 212 | 25.000 | 47.651 | 41.886 | 0.00 | 0.00 |
| ATOM | 3214 | CA   | PRO | X | 212 | 26.962 | 48.033 | 42.724 | 0.00 | 0.00 |
| ATOM | 3215 | HA   | PRO | X | 212 | 27.133 | 47.793 | 41.675 | 0.00 | 0.00 |
| ATOM | 3216 | C    | PRO | X | 212 | 27.277 | 49.501 | 42.933 | 0.00 | 0.00 |
| ATOM | 3217 | O    | PRO | X | 212 | 27.204 | 50.301 | 41.988 | 0.00 | 0.00 |
| ATOM | 3218 | N    | PRO | X | 213 | 27.513 | 49.999 | 44.173 | 0.00 | 0.00 |
| ATOM | 3219 | CD   | PRO | X | 213 | 27.226 | 49.309 | 45.432 | 0.00 | 0.00 |
| ATOM | 3220 | HD2  | PRO | X | 213 | 28.183 | 48.828 | 45.630 | 0.00 | 0.00 |
| ATOM | 3221 | HD3  | PRO | X | 213 | 26.425 | 48.570 | 45.416 | 0.00 | 0.00 |
| ATOM | 3222 | CG   | PRO | X | 213 | 27.027 | 50.521 | 46.348 | 0.00 | 0.00 |
| ATOM | 3223 | HG2  | PRO | X | 213 | 27.246 | 50.318 | 47.397 | 0.00 | 0.00 |
| ATOM | 3224 | HG3  | PRO | X | 213 | 26.008 | 50.853 | 46.149 | 0.00 | 0.00 |
| ATOM | 3225 | CB   | PRO | X | 213 | 28.082 | 51.506 | 45.929 | 0.00 | 0.00 |
| ATOM | 3226 | HB2  | PRO | X | 213 | 29.078 | 51.273 | 46.306 | 0.00 | 0.00 |
| ATOM | 3227 | HB3  | PRO | X | 213 | 27.723 | 52.452 | 46.334 | 0.00 | 0.00 |
| ATOM | 3228 | CA   | PRO | X | 213 | 27.992 | 51.308 | 44.436 | 0.00 | 0.00 |
| ATOM | 3229 | HA   | PRO | X | 213 | 27.324 | 52.121 | 44.151 | 0.00 | 0.00 |
| ATOM | 3230 | C    | PRO | X | 213 | 29.306 | 51.550 | 43.648 | 0.00 | 0.00 |
| ATOM | 3231 | O    | PRO | X | 213 | 29.560 | 52.691 | 43.278 | 0.00 | 0.00 |
| ATOM | 3232 | N    | SER | X | 214 | 30.161 | 50.536 | 43.426 | 0.00 | 0.00 |
| ATOM | 3233 | H    | SER | X | 214 | 29.950 | 49.591 | 43.713 | 0.00 | 0.00 |
| ATOM | 3234 | CA   | SER | X | 214 | 31.279 | 50.682 | 42.412 | 0.00 | 0.00 |
| ATOM | 3235 | HA   | SER | X | 214 | 31.743 | 51.661 | 42.526 | 0.00 | 0.00 |
| ATOM | 3236 | CB   | SER | X | 214 | 32.446 | 49.721 | 42.822 | 0.00 | 0.00 |
| ATOM | 3237 | HB2  | SER | X | 214 | 32.020 | 48.718 | 42.786 | 0.00 | 0.00 |
| ATOM | 3238 | HB3  | SER | X | 214 | 33.262 | 49.747 | 42.099 | 0.00 | 0.00 |
| ATOM | 3239 | OG   | SER | X | 214 | 33.007 | 49.889 | 44.085 | 0.00 | 0.00 |
| ATOM | 3240 | HG   | SER | X | 214 | 33.867 | 49.464 | 44.115 | 0.00 | 0.00 |
| ATOM | 3241 | C    | SER | X | 214 | 30.810 | 50.531 | 40.997 | 0.00 | 0.00 |
| ATOM | 3242 | O    | SER | X | 214 | 31.215 | 51.331 | 40.127 | 0.00 | 0.00 |
| ATOM | 3243 | N    | ARG | X | 215 | 29.903 | 49.544 | 40.804 | 0.00 | 0.00 |
| ATOM | 3244 | H    | ARG | X | 215 | 29.528 | 49.024 | 41.584 | 0.00 | 0.00 |
| ATOM | 3245 | CA   | ARG | X | 215 | 29.579 | 49.180 | 39.367 | 0.00 | 0.00 |
| ATOM | 3246 | HA   | ARG | X | 215 | 30.500 | 48.827 | 38.903 | 0.00 | 0.00 |
| ATOM | 3247 | CB   | ARG | X | 215 | 28.535 | 48.041 | 39.332 | 0.00 | 0.00 |
| ATOM | 3248 | HB2  | ARG | X | 215 | 28.854 | 47.359 | 40.120 | 0.00 | 0.00 |
| ATOM | 3249 | HB3  | ARG | X | 215 | 27.534 | 48.424 | 39.528 | 0.00 | 0.00 |
| ATOM | 3250 | CG   | ARG | X | 215 | 28.734 | 47.368 | 37.929 | 0.00 | 0.00 |
| ATOM | 3251 | HG2  | ARG | X | 215 | 28.345 | 48.055 | 37.178 | 0.00 | 0.00 |
| ATOM | 3252 | HG3  | ARG | X | 215 | 29.783 | 47.198 | 37.688 | 0.00 | 0.00 |
| ATOM | 3253 | CD   | ARG | X | 215 | 27.982 | 45.944 | 38.009 | 0.00 | 0.00 |
| ATOM | 3254 | HD2  | ARG | X | 215 | 28.087 | 45.375 | 37.086 | 0.00 | 0.00 |
| ATOM | 3255 | HD3  | ARG | X | 215 | 28.604 | 45.325 | 38.656 | 0.00 | 0.00 |
| ATOM | 3256 | NE   | ARG | X | 215 | 26.616 | 45.930 | 38.576 | 0.00 | 0.00 |
| ATOM | 3257 | HE   | ARG | X | 215 | 25.993 | 46.512 | 38.035 | 0.00 | 0.00 |

|      |      |      |     |   |     |        |        |        |      |      |
|------|------|------|-----|---|-----|--------|--------|--------|------|------|
| ATOM | 3258 | CZ   | ARG | X | 215 | 26.152 | 45.233 | 39.566 | 0.00 | 0.00 |
| ATOM | 3259 | NH1  | ARG | X | 215 | 26.794 | 44.276 | 40.245 | 0.00 | 0.00 |
| ATOM | 3260 | HH11 | ARG | X | 215 | 27.718 | 43.962 | 39.986 | 0.00 | 0.00 |
| ATOM | 3261 | HH12 | ARG | X | 215 | 26.246 | 43.785 | 40.938 | 0.00 | 0.00 |
| ATOM | 3262 | NH2  | ARG | X | 215 | 24.890 | 45.569 | 39.921 | 0.00 | 0.00 |
| ATOM | 3263 | HH21 | ARG | X | 215 | 24.500 | 46.373 | 39.451 | 0.00 | 0.00 |
| ATOM | 3264 | HH22 | ARG | X | 215 | 24.415 | 44.961 | 40.573 | 0.00 | 0.00 |
| ATOM | 3265 | C    | ARG | X | 215 | 29.104 | 50.375 | 38.545 | 0.00 | 0.00 |
| ATOM | 3266 | O    | ARG | X | 215 | 29.375 | 50.447 | 37.367 | 0.00 | 0.00 |
| ATOM | 3267 | N    | GLY | X | 216 | 28.377 | 51.303 | 39.138 | 0.00 | 0.00 |
| ATOM | 3268 | H    | GLY | X | 216 | 28.353 | 51.249 | 40.146 | 0.00 | 0.00 |
| ATOM | 3269 | CA   | GLY | X | 216 | 27.805 | 52.385 | 38.379 | 0.00 | 0.00 |
| ATOM | 3270 | HA2  | GLY | X | 216 | 27.303 | 52.174 | 37.472 | 0.00 | 0.00 |
| ATOM | 3271 | HA3  | GLY | X | 216 | 27.083 | 52.954 | 38.945 | 0.00 | 0.00 |
| ATOM | 3272 | C    | GLY | X | 216 | 28.910 | 53.389 | 37.980 | 0.00 | 0.00 |
| ATOM | 3273 | O    | GLY | X | 216 | 28.657 | 54.309 | 37.197 | 0.00 | 0.00 |
| ATOM | 3274 | N    | LEU | X | 217 | 30.142 | 53.327 | 38.429 | 0.00 | 0.00 |
| ATOM | 3275 | H    | LEU | X | 217 | 30.384 | 52.520 | 38.987 | 0.00 | 0.00 |
| ATOM | 3276 | CA   | LEU | X | 217 | 31.219 | 54.352 | 38.171 | 0.00 | 0.00 |
| ATOM | 3277 | HA   | LEU | X | 217 | 30.700 | 55.289 | 37.968 | 0.00 | 0.00 |
| ATOM | 3278 | CB   | LEU | X | 217 | 32.123 | 54.443 | 39.425 | 0.00 | 0.00 |
| ATOM | 3279 | HB2  | LEU | X | 217 | 32.375 | 53.417 | 39.694 | 0.00 | 0.00 |
| ATOM | 3280 | HB3  | LEU | X | 217 | 33.040 | 54.962 | 39.148 | 0.00 | 0.00 |
| ATOM | 3281 | CG   | LEU | X | 217 | 31.497 | 55.053 | 40.706 | 0.00 | 0.00 |
| ATOM | 3282 | HG   | LEU | X | 217 | 30.803 | 54.324 | 41.124 | 0.00 | 0.00 |
| ATOM | 3283 | CD1  | LEU | X | 217 | 32.653 | 55.222 | 41.738 | 0.00 | 0.00 |
| ATOM | 3284 | HD11 | LEU | X | 217 | 32.203 | 55.421 | 42.711 | 0.00 | 0.00 |
| ATOM | 3285 | HD12 | LEU | X | 217 | 33.225 | 54.294 | 41.728 | 0.00 | 0.00 |
| ATOM | 3286 | HD13 | LEU | X | 217 | 33.202 | 56.129 | 41.487 | 0.00 | 0.00 |
| ATOM | 3287 | CD2  | LEU | X | 217 | 30.848 | 56.445 | 40.506 | 0.00 | 0.00 |
| ATOM | 3288 | HD21 | LEU | X | 217 | 30.059 | 56.434 | 39.754 | 0.00 | 0.00 |
| ATOM | 3289 | HD22 | LEU | X | 217 | 30.274 | 56.807 | 41.359 | 0.00 | 0.00 |
| ATOM | 3290 | HD23 | LEU | X | 217 | 31.677 | 57.064 | 40.164 | 0.00 | 0.00 |
| ATOM | 3291 | C    | LEU | X | 217 | 32.066 | 54.078 | 36.915 | 0.00 | 0.00 |
| ATOM | 3292 | O    | LEU | X | 217 | 32.662 | 54.985 | 36.379 | 0.00 | 0.00 |
| ATOM | 3293 | N    | PHE | X | 218 | 32.195 | 52.832 | 36.545 | 0.00 | 0.00 |
| ATOM | 3294 | H    | PHE | X | 218 | 31.600 | 52.135 | 36.969 | 0.00 | 0.00 |
| ATOM | 3295 | CA   | PHE | X | 218 | 33.037 | 52.362 | 35.441 | 0.00 | 0.00 |
| ATOM | 3296 | HA   | PHE | X | 218 | 33.518 | 53.244 | 35.017 | 0.00 | 0.00 |
| ATOM | 3297 | CB   | PHE | X | 218 | 34.289 | 51.593 | 35.998 | 0.00 | 0.00 |
| ATOM | 3298 | HB2  | PHE | X | 218 | 34.919 | 51.327 | 35.149 | 0.00 | 0.00 |
| ATOM | 3299 | HB3  | PHE | X | 218 | 34.949 | 52.219 | 36.599 | 0.00 | 0.00 |
| ATOM | 3300 | CG   | PHE | X | 218 | 33.862 | 50.277 | 36.644 | 0.00 | 0.00 |
| ATOM | 3301 | CD1  | PHE | X | 218 | 33.346 | 50.356 | 37.946 | 0.00 | 0.00 |
| ATOM | 3302 | HD1  | PHE | X | 218 | 33.440 | 51.318 | 38.428 | 0.00 | 0.00 |
| ATOM | 3303 | CE1  | PHE | X | 218 | 32.870 | 49.207 | 38.619 | 0.00 | 0.00 |
| ATOM | 3304 | HE1  | PHE | X | 218 | 32.619 | 49.268 | 39.667 | 0.00 | 0.00 |
| ATOM | 3305 | CZ   | PHE | X | 218 | 32.780 | 47.986 | 37.906 | 0.00 | 0.00 |
| ATOM | 3306 | HZ   | PHE | X | 218 | 32.333 | 47.103 | 38.337 | 0.00 | 0.00 |
| ATOM | 3307 | CE2  | PHE | X | 218 | 33.327 | 47.920 | 36.551 | 0.00 | 0.00 |
| ATOM | 3308 | HE2  | PHE | X | 218 | 33.372 | 46.967 | 36.045 | 0.00 | 0.00 |
| ATOM | 3309 | CD2  | PHE | X | 218 | 33.829 | 49.064 | 35.927 | 0.00 | 0.00 |
| ATOM | 3310 | HD2  | PHE | X | 218 | 34.142 | 49.005 | 34.895 | 0.00 | 0.00 |
| ATOM | 3311 | C    | PHE | X | 218 | 32.228 | 51.697 | 34.359 | 0.00 | 0.00 |
| ATOM | 3312 | O    | PHE | X | 218 | 31.079 | 51.324 | 34.528 | 0.00 | 0.00 |
| ATOM | 3313 | N    | HIE | X | 219 | 32.818 | 51.523 | 33.154 | 0.00 | 0.00 |
| ATOM | 3314 | H    | HIE | X | 219 | 33.696 | 52.016 | 33.237 | 0.00 | 0.00 |
| ATOM | 3315 | CA   | HIE | X | 219 | 32.155 | 51.110 | 31.919 | 0.00 | 0.00 |
| ATOM | 3316 | HA   | HIE | X | 219 | 31.105 | 50.999 | 32.190 | 0.00 | 0.00 |
| ATOM | 3317 | CB   | HIE | X | 219 | 32.317 | 52.238 | 30.929 | 0.00 | 0.00 |
| ATOM | 3318 | HB2  | HIE | X | 219 | 33.374 | 52.305 | 30.673 | 0.00 | 0.00 |
| ATOM | 3319 | HB3  | HIE | X | 219 | 31.666 | 52.054 | 30.075 | 0.00 | 0.00 |
| ATOM | 3320 | CG   | HIE | X | 219 | 31.831 | 53.566 | 31.546 | 0.00 | 0.00 |
| ATOM | 3321 | ND1  | HIE | X | 219 | 32.649 | 54.445 | 32.259 | 0.00 | 0.00 |
| ATOM | 3322 | CE1  | HIE | X | 219 | 31.689 | 55.158 | 32.859 | 0.00 | 0.00 |
| ATOM | 3323 | HE1  | HIE | X | 219 | 31.965 | 55.965 | 33.523 | 0.00 | 0.00 |
| ATOM | 3324 | NE2  | HIE | X | 219 | 30.415 | 54.937 | 32.588 | 0.00 | 0.00 |
| ATOM | 3325 | HE2  | HIE | X | 219 | 29.614 | 55.190 | 33.148 | 0.00 | 0.00 |
| ATOM | 3326 | CD2  | HIE | X | 219 | 30.491 | 53.846 | 31.759 | 0.00 | 0.00 |
| ATOM | 3327 | HD2  | HIE | X | 219 | 29.647 | 53.215 | 31.518 | 0.00 | 0.00 |

|      |      |      |     |   |     |        |        |        |      |      |
|------|------|------|-----|---|-----|--------|--------|--------|------|------|
| ATOM | 3328 | C    | HIE | X | 219 | 32.579 | 49.749 | 31.440 | 0.00 | 0.00 |
| ATOM | 3329 | O    | HIE | X | 219 | 32.002 | 49.175 | 30.521 | 0.00 | 0.00 |
| ATOM | 3330 | N    | ARG | X | 220 | 33.653 | 49.176 | 31.978 | 0.00 | 0.00 |
| ATOM | 3331 | H    | ARG | X | 220 | 34.031 | 49.555 | 32.834 | 0.00 | 0.00 |
| ATOM | 3332 | CA   | ARG | X | 220 | 34.436 | 47.991 | 31.429 | 0.00 | 0.00 |
| ATOM | 3333 | HA   | ARG | X | 220 | 33.681 | 47.209 | 31.512 | 0.00 | 0.00 |
| ATOM | 3334 | CB   | ARG | X | 220 | 34.778 | 48.246 | 29.957 | 0.00 | 0.00 |
| ATOM | 3335 | HB2  | ARG | X | 220 | 35.400 | 47.487 | 29.483 | 0.00 | 0.00 |
| ATOM | 3336 | HB3  | ARG | X | 220 | 33.833 | 48.272 | 29.415 | 0.00 | 0.00 |
| ATOM | 3337 | CG   | ARG | X | 220 | 35.568 | 49.515 | 29.725 | 0.00 | 0.00 |
| ATOM | 3338 | HG2  | ARG | X | 220 | 35.206 | 50.379 | 30.281 | 0.00 | 0.00 |
| ATOM | 3339 | HG3  | ARG | X | 220 | 36.617 | 49.321 | 29.947 | 0.00 | 0.00 |
| ATOM | 3340 | CD   | ARG | X | 220 | 35.437 | 49.955 | 28.235 | 0.00 | 0.00 |
| ATOM | 3341 | HD2  | ARG | X | 220 | 36.264 | 50.562 | 27.865 | 0.00 | 0.00 |
| ATOM | 3342 | HD3  | ARG | X | 220 | 35.578 | 49.029 | 27.678 | 0.00 | 0.00 |
| ATOM | 3343 | NE   | ARG | X | 220 | 34.092 | 50.443 | 27.862 | 0.00 | 0.00 |
| ATOM | 3344 | HE   | ARG | X | 220 | 33.422 | 49.687 | 27.838 | 0.00 | 0.00 |
| ATOM | 3345 | CZ   | ARG | X | 220 | 33.672 | 51.645 | 27.440 | 0.00 | 0.00 |
| ATOM | 3346 | NH1  | ARG | X | 220 | 34.556 | 52.579 | 27.232 | 0.00 | 0.00 |
| ATOM | 3347 | HH11 | ARG | X | 220 | 35.556 | 52.446 | 27.193 | 0.00 | 0.00 |
| ATOM | 3348 | HH12 | ARG | X | 220 | 34.140 | 53.447 | 26.925 | 0.00 | 0.00 |
| ATOM | 3349 | NH2  | ARG | X | 220 | 32.414 | 51.770 | 27.148 | 0.00 | 0.00 |
| ATOM | 3350 | HH21 | ARG | X | 220 | 31.833 | 50.958 | 27.298 | 0.00 | 0.00 |
| ATOM | 3351 | HH22 | ARG | X | 220 | 32.047 | 52.608 | 26.720 | 0.00 | 0.00 |
| ATOM | 3352 | C    | ARG | X | 220 | 35.571 | 47.650 | 32.309 | 0.00 | 0.00 |
| ATOM | 3353 | O    | ARG | X | 220 | 36.138 | 48.545 | 32.940 | 0.00 | 0.00 |
| ATOM | 3354 | N    | ALA | X | 221 | 35.986 | 46.406 | 32.510 | 0.00 | 0.00 |
| ATOM | 3355 | H    | ALA | X | 221 | 35.609 | 45.631 | 31.983 | 0.00 | 0.00 |
| ATOM | 3356 | CA   | ALA | X | 221 | 36.949 | 46.072 | 33.623 | 0.00 | 0.00 |
| ATOM | 3357 | HA   | ALA | X | 221 | 37.485 | 46.920 | 34.049 | 0.00 | 0.00 |
| ATOM | 3358 | CB   | ALA | X | 221 | 36.234 | 45.365 | 34.761 | 0.00 | 0.00 |
| ATOM | 3359 | HB1  | ALA | X | 221 | 35.624 | 45.927 | 35.469 | 0.00 | 0.00 |
| ATOM | 3360 | HB2  | ALA | X | 221 | 35.595 | 44.576 | 34.365 | 0.00 | 0.00 |
| ATOM | 3361 | HB3  | ALA | X | 221 | 36.957 | 44.901 | 35.430 | 0.00 | 0.00 |
| ATOM | 3362 | C    | ALA | X | 221 | 37.943 | 44.964 | 33.155 | 0.00 | 0.00 |
| ATOM | 3363 | O    | ALA | X | 221 | 37.607 | 44.130 | 32.304 | 0.00 | 0.00 |
| ATOM | 3364 | N    | VAL | X | 222 | 39.173 | 44.921 | 33.701 | 0.00 | 0.00 |
| ATOM | 3365 | H    | VAL | X | 222 | 39.484 | 45.720 | 34.236 | 0.00 | 0.00 |
| ATOM | 3366 | CA   | VAL | X | 222 | 40.314 | 44.054 | 33.276 | 0.00 | 0.00 |
| ATOM | 3367 | HA   | VAL | X | 222 | 40.045 | 43.332 | 32.504 | 0.00 | 0.00 |
| ATOM | 3368 | CB   | VAL | X | 222 | 41.461 | 44.968 | 32.703 | 0.00 | 0.00 |
| ATOM | 3369 | HB   | VAL | X | 222 | 41.674 | 45.677 | 33.502 | 0.00 | 0.00 |
| ATOM | 3370 | CG1  | VAL | X | 222 | 42.675 | 44.083 | 32.214 | 0.00 | 0.00 |
| ATOM | 3371 | HG11 | VAL | X | 222 | 42.475 | 43.418 | 31.374 | 0.00 | 0.00 |
| ATOM | 3372 | HG12 | VAL | X | 222 | 43.445 | 44.696 | 31.747 | 0.00 | 0.00 |
| ATOM | 3373 | HG13 | VAL | X | 222 | 43.080 | 43.402 | 32.963 | 0.00 | 0.00 |
| ATOM | 3374 | CG2  | VAL | X | 222 | 40.888 | 45.725 | 31.565 | 0.00 | 0.00 |
| ATOM | 3375 | HG21 | VAL | X | 222 | 40.302 | 45.143 | 30.853 | 0.00 | 0.00 |
| ATOM | 3376 | HG22 | VAL | X | 222 | 40.241 | 46.548 | 31.869 | 0.00 | 0.00 |
| ATOM | 3377 | HG23 | VAL | X | 222 | 41.735 | 46.168 | 31.041 | 0.00 | 0.00 |
| ATOM | 3378 | C    | VAL | X | 222 | 40.906 | 43.255 | 34.462 | 0.00 | 0.00 |
| ATOM | 3379 | O    | VAL | X | 222 | 41.083 | 43.718 | 35.581 | 0.00 | 0.00 |
| ATOM | 3380 | N    | LEU | X | 223 | 41.229 | 41.999 | 34.203 | 0.00 | 0.00 |
| ATOM | 3381 | H    | LEU | X | 223 | 40.784 | 41.544 | 33.419 | 0.00 | 0.00 |
| ATOM | 3382 | CA   | LEU | X | 223 | 41.957 | 41.187 | 35.201 | 0.00 | 0.00 |
| ATOM | 3383 | HA   | LEU | X | 223 | 42.310 | 41.846 | 35.994 | 0.00 | 0.00 |
| ATOM | 3384 | CB   | LEU | X | 223 | 41.024 | 40.105 | 35.885 | 0.00 | 0.00 |
| ATOM | 3385 | HB2  | LEU | X | 223 | 40.512 | 39.475 | 35.158 | 0.00 | 0.00 |
| ATOM | 3386 | HB3  | LEU | X | 223 | 41.706 | 39.463 | 36.443 | 0.00 | 0.00 |
| ATOM | 3387 | CG   | LEU | X | 223 | 39.966 | 40.668 | 36.889 | 0.00 | 0.00 |
| ATOM | 3388 | HG   | LEU | X | 223 | 40.473 | 41.499 | 37.379 | 0.00 | 0.00 |
| ATOM | 3389 | CD1  | LEU | X | 223 | 38.618 | 41.119 | 36.305 | 0.00 | 0.00 |
| ATOM | 3390 | HD11 | LEU | X | 223 | 38.429 | 42.170 | 36.523 | 0.00 | 0.00 |
| ATOM | 3391 | HD12 | LEU | X | 223 | 38.610 | 41.139 | 35.215 | 0.00 | 0.00 |
| ATOM | 3392 | HD13 | LEU | X | 223 | 37.778 | 40.529 | 36.673 | 0.00 | 0.00 |
| ATOM | 3393 | CD2  | LEU | X | 223 | 39.699 | 39.712 | 38.046 | 0.00 | 0.00 |
| ATOM | 3394 | HD21 | LEU | X | 223 | 40.653 | 39.704 | 38.574 | 0.00 | 0.00 |
| ATOM | 3395 | HD22 | LEU | X | 223 | 38.856 | 39.931 | 38.701 | 0.00 | 0.00 |
| ATOM | 3396 | HD23 | LEU | X | 223 | 39.588 | 38.721 | 37.605 | 0.00 | 0.00 |
| ATOM | 3397 | C    | LEU | X | 223 | 43.207 | 40.504 | 34.599 | 0.00 | 0.00 |

|      |      |      |     |   |     |        |        |        |      |      |
|------|------|------|-----|---|-----|--------|--------|--------|------|------|
| ATOM | 3398 | O    | LEU | X | 223 | 43.223 | 40.081 | 33.483 | 0.00 | 0.00 |
| ATOM | 3399 | N    | GLN | X | 224 | 44.225 | 40.366 | 35.458 | 0.00 | 0.00 |
| ATOM | 3400 | H    | GLN | X | 224 | 44.087 | 40.693 | 36.403 | 0.00 | 0.00 |
| ATOM | 3401 | CA   | GLN | X | 224 | 45.616 | 40.111 | 35.093 | 0.00 | 0.00 |
| ATOM | 3402 | HA   | GLN | X | 224 | 45.702 | 39.406 | 34.267 | 0.00 | 0.00 |
| ATOM | 3403 | CB   | GLN | X | 224 | 46.355 | 41.393 | 34.704 | 0.00 | 0.00 |
| ATOM | 3404 | HB2  | GLN | X | 224 | 46.601 | 41.961 | 35.602 | 0.00 | 0.00 |
| ATOM | 3405 | HB3  | GLN | X | 224 | 47.322 | 41.063 | 34.324 | 0.00 | 0.00 |
| ATOM | 3406 | CG   | GLN | X | 224 | 45.595 | 42.199 | 33.690 | 0.00 | 0.00 |
| ATOM | 3407 | HG2  | GLN | X | 224 | 45.269 | 41.582 | 32.853 | 0.00 | 0.00 |
| ATOM | 3408 | HG3  | GLN | X | 224 | 44.649 | 42.559 | 34.095 | 0.00 | 0.00 |
| ATOM | 3409 | CD   | GLN | X | 224 | 46.254 | 43.406 | 33.150 | 0.00 | 0.00 |
| ATOM | 3410 | OE1  | GLN | X | 224 | 45.743 | 44.505 | 33.026 | 0.00 | 0.00 |
| ATOM | 3411 | NE2  | GLN | X | 224 | 47.459 | 43.331 | 32.667 | 0.00 | 0.00 |
| ATOM | 3412 | HE21 | GLN | X | 224 | 47.922 | 44.065 | 32.150 | 0.00 | 0.00 |
| ATOM | 3413 | HE22 | GLN | X | 224 | 47.797 | 42.381 | 32.606 | 0.00 | 0.00 |
| ATOM | 3414 | C    | GLN | X | 224 | 46.426 | 39.436 | 36.295 | 0.00 | 0.00 |
| ATOM | 3415 | O    | GLN | X | 224 | 46.461 | 40.092 | 37.337 | 0.00 | 0.00 |
| ATOM | 3416 | N    | SER | X | 225 | 46.922 | 38.186 | 36.131 | 0.00 | 0.00 |
| ATOM | 3417 | H    | SER | X | 225 | 46.810 | 37.752 | 35.226 | 0.00 | 0.00 |
| ATOM | 3418 | CA   | SER | X | 225 | 47.713 | 37.445 | 37.141 | 0.00 | 0.00 |
| ATOM | 3419 | HA   | SER | X | 225 | 47.846 | 36.423 | 36.787 | 0.00 | 0.00 |
| ATOM | 3420 | CB   | SER | X | 225 | 49.069 | 38.053 | 37.224 | 0.00 | 0.00 |
| ATOM | 3421 | HB2  | SER | X | 225 | 48.967 | 39.136 | 37.280 | 0.00 | 0.00 |
| ATOM | 3422 | HB3  | SER | X | 225 | 49.550 | 37.598 | 38.090 | 0.00 | 0.00 |
| ATOM | 3423 | OG   | SER | X | 225 | 49.918 | 37.810 | 36.135 | 0.00 | 0.00 |
| ATOM | 3424 | HG   | SER | X | 225 | 49.899 | 36.879 | 35.901 | 0.00 | 0.00 |
| ATOM | 3425 | C    | SER | X | 225 | 46.976 | 37.261 | 38.512 | 0.00 | 0.00 |
| ATOM | 3426 | O    | SER | X | 225 | 47.625 | 36.872 | 39.517 | 0.00 | 0.00 |
| ATOM | 3427 | N    | GLY | X | 226 | 45.637 | 37.618 | 38.581 | 0.00 | 0.00 |
| ATOM | 3428 | H    | GLY | X | 226 | 45.096 | 37.876 | 37.768 | 0.00 | 0.00 |
| ATOM | 3429 | CA   | GLY | X | 226 | 44.913 | 37.599 | 39.812 | 0.00 | 0.00 |
| ATOM | 3430 | HA2  | GLY | X | 226 | 45.206 | 36.780 | 40.428 | 0.00 | 0.00 |
| ATOM | 3431 | HA3  | GLY | X | 226 | 45.157 | 38.548 | 40.368 | 0.00 | 0.00 |
| ATOM | 3432 | C    | GLY | X | 226 | 43.374 | 37.411 | 39.585 | 0.00 | 0.00 |
| ATOM | 3433 | O    | GLY | X | 226 | 42.938 | 37.772 | 38.470 | 0.00 | 0.00 |
| ATOM | 3434 | N    | ALA | X | 227 | 42.717 | 36.996 | 40.644 | 0.00 | 0.00 |
| ATOM | 3435 | H    | ALA | X | 227 | 43.208 | 36.664 | 41.462 | 0.00 | 0.00 |
| ATOM | 3436 | CA   | ALA | X | 227 | 41.311 | 36.852 | 40.588 | 0.00 | 0.00 |
| ATOM | 3437 | HA   | ALA | X | 227 | 40.889 | 37.563 | 39.877 | 0.00 | 0.00 |
| ATOM | 3438 | CB   | ALA | X | 227 | 40.884 | 35.460 | 40.024 | 0.00 | 0.00 |
| ATOM | 3439 | HB1  | ALA | X | 227 | 41.223 | 34.667 | 40.691 | 0.00 | 0.00 |
| ATOM | 3440 | HB2  | ALA | X | 227 | 39.812 | 35.353 | 39.859 | 0.00 | 0.00 |
| ATOM | 3441 | HB3  | ALA | X | 227 | 41.489 | 35.215 | 39.151 | 0.00 | 0.00 |
| ATOM | 3442 | C    | ALA | X | 227 | 40.664 | 37.023 | 41.970 | 0.00 | 0.00 |
| ATOM | 3443 | O    | ALA | X | 227 | 41.361 | 36.627 | 42.945 | 0.00 | 0.00 |
| ATOM | 3444 | N    | PRO | X | 228 | 39.374 | 37.430 | 42.029 | 0.00 | 0.00 |
| ATOM | 3445 | CD   | PRO | X | 228 | 38.569 | 37.905 | 40.977 | 0.00 | 0.00 |
| ATOM | 3446 | HD2  | PRO | X | 228 | 38.465 | 37.174 | 40.175 | 0.00 | 0.00 |
| ATOM | 3447 | HD3  | PRO | X | 228 | 39.052 | 38.804 | 40.595 | 0.00 | 0.00 |
| ATOM | 3448 | CG   | PRO | X | 228 | 37.156 | 38.162 | 41.567 | 0.00 | 0.00 |
| ATOM | 3449 | HG2  | PRO | X | 228 | 36.621 | 37.213 | 41.524 | 0.00 | 0.00 |
| ATOM | 3450 | HG3  | PRO | X | 228 | 36.573 | 38.961 | 41.109 | 0.00 | 0.00 |
| ATOM | 3451 | CB   | PRO | X | 228 | 37.466 | 38.555 | 43.002 | 0.00 | 0.00 |
| ATOM | 3452 | HB2  | PRO | X | 228 | 36.607 | 38.410 | 43.656 | 0.00 | 0.00 |
| ATOM | 3453 | HB3  | PRO | X | 228 | 37.884 | 39.558 | 43.084 | 0.00 | 0.00 |
| ATOM | 3454 | CA   | PRO | X | 228 | 38.663 | 37.597 | 43.292 | 0.00 | 0.00 |
| ATOM | 3455 | HA   | PRO | X | 228 | 39.307 | 38.153 | 43.972 | 0.00 | 0.00 |
| ATOM | 3456 | C    | PRO | X | 228 | 38.314 | 36.309 | 43.988 | 0.00 | 0.00 |
| ATOM | 3457 | O    | PRO | X | 228 | 38.306 | 36.147 | 45.253 | 0.00 | 0.00 |
| ATOM | 3458 | N    | ASN | X | 229 | 37.890 | 35.293 | 43.226 | 0.00 | 0.00 |
| ATOM | 3459 | H    | ASN | X | 229 | 37.700 | 35.451 | 42.246 | 0.00 | 0.00 |
| ATOM | 3460 | CA   | ASN | X | 229 | 37.485 | 33.947 | 43.687 | 0.00 | 0.00 |
| ATOM | 3461 | HA   | ASN | X | 229 | 37.159 | 34.032 | 44.724 | 0.00 | 0.00 |
| ATOM | 3462 | CB   | ASN | X | 229 | 36.403 | 33.280 | 42.756 | 0.00 | 0.00 |
| ATOM | 3463 | HB2  | ASN | X | 229 | 36.160 | 32.322 | 43.215 | 0.00 | 0.00 |
| ATOM | 3464 | HB3  | ASN | X | 229 | 35.469 | 33.825 | 42.895 | 0.00 | 0.00 |
| ATOM | 3465 | CG   | ASN | X | 229 | 36.877 | 33.245 | 41.289 | 0.00 | 0.00 |
| ATOM | 3466 | OD1  | ASN | X | 229 | 36.978 | 34.281 | 40.594 | 0.00 | 0.00 |
| ATOM | 3467 | ND2  | ASN | X | 229 | 37.276 | 32.127 | 40.717 | 0.00 | 0.00 |

|      |      |      |     |   |     |        |        |        |      |      |
|------|------|------|-----|---|-----|--------|--------|--------|------|------|
| ATOM | 3468 | HD21 | ASN | X | 229 | 37.552 | 32.051 | 39.748 | 0.00 | 0.00 |
| ATOM | 3469 | HD22 | ASN | X | 229 | 37.222 | 31.245 | 41.207 | 0.00 | 0.00 |
| ATOM | 3470 | C    | ASN | X | 229 | 38.807 | 33.058 | 43.877 | 0.00 | 0.00 |
| ATOM | 3471 | O    | ASN | X | 229 | 38.651 | 31.840 | 44.227 | 0.00 | 0.00 |
| ATOM | 3472 | N    | GLY | X | 230 | 39.993 | 33.680 | 43.708 | 0.00 | 0.00 |
| ATOM | 3473 | H    | GLY | X | 230 | 39.879 | 34.648 | 43.444 | 0.00 | 0.00 |
| ATOM | 3474 | CA   | GLY | X | 230 | 41.285 | 33.166 | 44.194 | 0.00 | 0.00 |
| ATOM | 3475 | HA2  | GLY | X | 230 | 41.449 | 32.186 | 43.738 | 0.00 | 0.00 |
| ATOM | 3476 | HA3  | GLY | X | 230 | 42.107 | 33.837 | 43.872 | 0.00 | 0.00 |
| ATOM | 3477 | C    | GLY | X | 230 | 41.303 | 33.051 | 45.694 | 0.00 | 0.00 |
| ATOM | 3478 | O    | GLY | X | 230 | 40.925 | 34.052 | 46.261 | 0.00 | 0.00 |
| ATOM | 3479 | N    | PRO | X | 231 | 41.711 | 31.918 | 46.330 | 0.00 | 0.00 |
| ATOM | 3480 | CD   | PRO | X | 231 | 42.490 | 30.830 | 45.668 | 0.00 | 0.00 |
| ATOM | 3481 | HD2  | PRO | X | 231 | 43.311 | 31.168 | 45.036 | 0.00 | 0.00 |
| ATOM | 3482 | HD3  | PRO | X | 231 | 41.768 | 30.300 | 45.047 | 0.00 | 0.00 |
| ATOM | 3483 | CG   | PRO | X | 231 | 43.043 | 29.957 | 46.792 | 0.00 | 0.00 |
| ATOM | 3484 | HG2  | PRO | X | 231 | 43.933 | 30.461 | 47.170 | 0.00 | 0.00 |
| ATOM | 3485 | HG3  | PRO | X | 231 | 43.127 | 28.933 | 46.428 | 0.00 | 0.00 |
| ATOM | 3486 | CB   | PRO | X | 231 | 41.930 | 30.079 | 47.850 | 0.00 | 0.00 |
| ATOM | 3487 | HB2  | PRO | X | 231 | 42.258 | 29.898 | 48.874 | 0.00 | 0.00 |
| ATOM | 3488 | HB3  | PRO | X | 231 | 41.060 | 29.480 | 47.584 | 0.00 | 0.00 |
| ATOM | 3489 | CA   | PRO | X | 231 | 41.456 | 31.484 | 47.716 | 0.00 | 0.00 |
| ATOM | 3490 | HA   | PRO | X | 231 | 40.379 | 31.466 | 47.886 | 0.00 | 0.00 |
| ATOM | 3491 | C    | PRO | X | 231 | 42.170 | 32.469 | 48.699 | 0.00 | 0.00 |
| ATOM | 3492 | O    | PRO | X | 231 | 41.623 | 32.772 | 49.767 | 0.00 | 0.00 |
| ATOM | 3493 | N    | TRP | X | 232 | 43.358 | 32.983 | 48.257 | 0.00 | 0.00 |
| ATOM | 3494 | H    | TRP | X | 232 | 43.693 | 32.713 | 47.343 | 0.00 | 0.00 |
| ATOM | 3495 | CA   | TRP | X | 232 | 44.291 | 33.911 | 48.945 | 0.00 | 0.00 |
| ATOM | 3496 | HA   | TRP | X | 232 | 44.209 | 33.824 | 50.028 | 0.00 | 0.00 |
| ATOM | 3497 | CB   | TRP | X | 232 | 45.711 | 33.656 | 48.407 | 0.00 | 0.00 |
| ATOM | 3498 | HB2  | TRP | X | 232 | 46.378 | 34.253 | 49.029 | 0.00 | 0.00 |
| ATOM | 3499 | HB3  | TRP | X | 232 | 45.908 | 32.618 | 48.673 | 0.00 | 0.00 |
| ATOM | 3500 | CG   | TRP | X | 232 | 45.944 | 33.956 | 46.968 | 0.00 | 0.00 |
| ATOM | 3501 | CD1  | TRP | X | 232 | 45.765 | 33.085 | 45.949 | 0.00 | 0.00 |
| ATOM | 3502 | HD1  | TRP | X | 232 | 45.464 | 32.054 | 46.062 | 0.00 | 0.00 |
| ATOM | 3503 | NE1  | TRP | X | 232 | 45.867 | 33.821 | 44.754 | 0.00 | 0.00 |
| ATOM | 3504 | HE1  | TRP | X | 232 | 45.721 | 33.388 | 43.853 | 0.00 | 0.00 |
| ATOM | 3505 | CE2  | TRP | X | 232 | 46.145 | 35.149 | 45.015 | 0.00 | 0.00 |
| ATOM | 3506 | CZ2  | TRP | X | 232 | 46.195 | 36.269 | 44.189 | 0.00 | 0.00 |
| ATOM | 3507 | HZ2  | TRP | X | 232 | 46.071 | 36.113 | 43.128 | 0.00 | 0.00 |
| ATOM | 3508 | CH2  | TRP | X | 232 | 46.363 | 37.589 | 44.780 | 0.00 | 0.00 |
| ATOM | 3509 | HH2  | TRP | X | 232 | 46.491 | 38.446 | 44.135 | 0.00 | 0.00 |
| ATOM | 3510 | CZ3  | TRP | X | 232 | 46.382 | 37.720 | 46.143 | 0.00 | 0.00 |
| ATOM | 3511 | HZ3  | TRP | X | 232 | 46.534 | 38.733 | 46.487 | 0.00 | 0.00 |
| ATOM | 3512 | CE3  | TRP | X | 232 | 46.256 | 36.594 | 46.980 | 0.00 | 0.00 |
| ATOM | 3513 | HE3  | TRP | X | 232 | 46.175 | 36.774 | 48.042 | 0.00 | 0.00 |
| ATOM | 3514 | CD2  | TRP | X | 232 | 46.174 | 35.294 | 46.458 | 0.00 | 0.00 |
| ATOM | 3515 | C    | TRP | X | 232 | 43.836 | 35.401 | 48.791 | 0.00 | 0.00 |
| ATOM | 3516 | O    | TRP | X | 232 | 44.350 | 36.176 | 49.510 | 0.00 | 0.00 |
| ATOM | 3517 | N    | ALA | X | 233 | 42.869 | 35.667 | 47.896 | 0.00 | 0.00 |
| ATOM | 3518 | H    | ALA | X | 233 | 42.343 | 34.923 | 47.460 | 0.00 | 0.00 |
| ATOM | 3519 | CA   | ALA | X | 233 | 42.286 | 37.013 | 47.901 | 0.00 | 0.00 |
| ATOM | 3520 | HA   | ALA | X | 233 | 42.975 | 37.769 | 48.277 | 0.00 | 0.00 |
| ATOM | 3521 | CB   | ALA | X | 233 | 41.819 | 37.252 | 46.457 | 0.00 | 0.00 |
| ATOM | 3522 | HB1  | ALA | X | 233 | 42.671 | 37.027 | 45.815 | 0.00 | 0.00 |
| ATOM | 3523 | HB2  | ALA | X | 233 | 41.003 | 36.584 | 46.180 | 0.00 | 0.00 |
| ATOM | 3524 | HB3  | ALA | X | 233 | 41.561 | 38.275 | 46.185 | 0.00 | 0.00 |
| ATOM | 3525 | C    | ALA | X | 233 | 41.040 | 37.142 | 48.856 | 0.00 | 0.00 |
| ATOM | 3526 | O    | ALA | X | 233 | 40.322 | 38.132 | 48.746 | 0.00 | 0.00 |
| ATOM | 3527 | N    | THR | X | 234 | 40.699 | 36.123 | 49.711 | 0.00 | 0.00 |
| ATOM | 3528 | H    | THR | X | 234 | 41.262 | 35.298 | 49.861 | 0.00 | 0.00 |
| ATOM | 3529 | CA   | THR | X | 234 | 39.624 | 36.335 | 50.736 | 0.00 | 0.00 |
| ATOM | 3530 | HA   | THR | X | 234 | 39.506 | 37.377 | 51.034 | 0.00 | 0.00 |
| ATOM | 3531 | CB   | THR | X | 234 | 38.280 | 35.803 | 50.183 | 0.00 | 0.00 |
| ATOM | 3532 | HB   | THR | X | 234 | 38.357 | 34.723 | 50.059 | 0.00 | 0.00 |
| ATOM | 3533 | CG2  | THR | X | 234 | 37.049 | 36.244 | 50.930 | 0.00 | 0.00 |
| ATOM | 3534 | HG21 | THR | X | 234 | 37.052 | 37.327 | 51.056 | 0.00 | 0.00 |
| ATOM | 3535 | HG22 | THR | X | 234 | 36.203 | 35.907 | 50.331 | 0.00 | 0.00 |
| ATOM | 3536 | HG23 | THR | X | 234 | 36.979 | 35.813 | 51.928 | 0.00 | 0.00 |
| ATOM | 3537 | OG1  | THR | X | 234 | 38.162 | 36.428 | 48.981 | 0.00 | 0.00 |

|      |      |      |     |   |     |        |        |        |      |      |
|------|------|------|-----|---|-----|--------|--------|--------|------|------|
| ATOM | 3538 | HG1  | THR | X | 234 | 38.808 | 37.138 | 48.992 | 0.00 | 0.00 |
| ATOM | 3539 | C    | THR | X | 234 | 39.999 | 35.595 | 52.031 | 0.00 | 0.00 |
| ATOM | 3540 | O    | THR | X | 234 | 40.917 | 34.837 | 52.110 | 0.00 | 0.00 |
| ATOM | 3541 | N    | VAL | X | 235 | 39.178 | 35.904 | 53.050 | 0.00 | 0.00 |
| ATOM | 3542 | H    | VAL | X | 235 | 38.562 | 36.698 | 52.952 | 0.00 | 0.00 |
| ATOM | 3543 | CA   | VAL | X | 235 | 39.207 | 35.295 | 54.445 | 0.00 | 0.00 |
| ATOM | 3544 | HA   | VAL | X | 235 | 39.141 | 34.246 | 54.158 | 0.00 | 0.00 |
| ATOM | 3545 | CB   | VAL | X | 235 | 40.527 | 35.618 | 55.195 | 0.00 | 0.00 |
| ATOM | 3546 | HB   | VAL | X | 235 | 41.384 | 35.415 | 54.552 | 0.00 | 0.00 |
| ATOM | 3547 | CG1  | VAL | X | 235 | 40.705 | 37.129 | 55.526 | 0.00 | 0.00 |
| ATOM | 3548 | HG11 | VAL | X | 235 | 40.853 | 37.821 | 54.696 | 0.00 | 0.00 |
| ATOM | 3549 | HG12 | VAL | X | 235 | 39.766 | 37.440 | 55.985 | 0.00 | 0.00 |
| ATOM | 3550 | HG13 | VAL | X | 235 | 41.485 | 37.198 | 56.284 | 0.00 | 0.00 |
| ATOM | 3551 | CG2  | VAL | X | 235 | 40.756 | 34.671 | 56.490 | 0.00 | 0.00 |
| ATOM | 3552 | HG21 | VAL | X | 235 | 39.940 | 34.682 | 57.213 | 0.00 | 0.00 |
| ATOM | 3553 | HG22 | VAL | X | 235 | 40.917 | 33.637 | 56.186 | 0.00 | 0.00 |
| ATOM | 3554 | HG23 | VAL | X | 235 | 41.668 | 34.895 | 57.042 | 0.00 | 0.00 |
| ATOM | 3555 | C    | VAL | X | 235 | 37.910 | 35.629 | 55.156 | 0.00 | 0.00 |
| ATOM | 3556 | O    | VAL | X | 235 | 37.078 | 36.409 | 54.694 | 0.00 | 0.00 |
| ATOM | 3557 | N    | GLY | X | 236 | 37.672 | 34.715 | 56.127 | 0.00 | 0.00 |
| ATOM | 3558 | H    | GLY | X | 236 | 38.415 | 34.055 | 56.307 | 0.00 | 0.00 |
| ATOM | 3559 | CA   | GLY | X | 236 | 36.391 | 34.705 | 56.879 | 0.00 | 0.00 |
| ATOM | 3560 | HA2  | GLY | X | 236 | 35.549 | 34.872 | 56.250 | 0.00 | 0.00 |
| ATOM | 3561 | HA3  | GLY | X | 236 | 36.290 | 33.669 | 57.322 | 0.00 | 0.00 |
| ATOM | 3562 | C    | GLY | X | 236 | 36.403 | 35.575 | 58.162 | 0.00 | 0.00 |
| ATOM | 3563 | O    | GLY | X | 236 | 37.398 | 36.085 | 58.728 | 0.00 | 0.00 |
| ATOM | 3564 | N    | MET | X | 237 | 35.141 | 35.867 | 58.597 | 0.00 | 0.00 |
| ATOM | 3565 | H    | MET | X | 237 | 34.393 | 35.514 | 58.017 | 0.00 | 0.00 |
| ATOM | 3566 | CA   | MET | X | 237 | 34.801 | 36.661 | 59.878 | 0.00 | 0.00 |
| ATOM | 3567 | HA   | MET | X | 237 | 35.004 | 37.721 | 59.729 | 0.00 | 0.00 |
| ATOM | 3568 | CB   | MET | X | 237 | 33.318 | 36.481 | 60.263 | 0.00 | 0.00 |
| ATOM | 3569 | HB2  | MET | X | 237 | 33.070 | 35.438 | 60.068 | 0.00 | 0.00 |
| ATOM | 3570 | HB3  | MET | X | 237 | 33.101 | 36.675 | 61.313 | 0.00 | 0.00 |
| ATOM | 3571 | CG   | MET | X | 237 | 32.428 | 37.414 | 59.514 | 0.00 | 0.00 |
| ATOM | 3572 | HG2  | MET | X | 237 | 32.809 | 38.429 | 59.623 | 0.00 | 0.00 |
| ATOM | 3573 | HG3  | MET | X | 237 | 32.530 | 36.972 | 58.522 | 0.00 | 0.00 |
| ATOM | 3574 | SD   | MET | X | 237 | 30.741 | 37.433 | 60.246 | 0.00 | 0.00 |
| ATOM | 3575 | CE   | MET | X | 237 | 30.137 | 38.142 | 58.643 | 0.00 | 0.00 |
| ATOM | 3576 | HE1  | MET | X | 237 | 29.978 | 37.289 | 57.983 | 0.00 | 0.00 |
| ATOM | 3577 | HE2  | MET | X | 237 | 29.132 | 38.562 | 58.687 | 0.00 | 0.00 |
| ATOM | 3578 | HE3  | MET | X | 237 | 30.870 | 38.755 | 58.118 | 0.00 | 0.00 |
| ATOM | 3579 | C    | MET | X | 237 | 35.523 | 36.151 | 61.118 | 0.00 | 0.00 |
| ATOM | 3580 | O    | MET | X | 237 | 36.105 | 36.970 | 61.873 | 0.00 | 0.00 |
| ATOM | 3581 | N    | GLY | X | 238 | 35.614 | 34.869 | 61.370 | 0.00 | 0.00 |
| ATOM | 3582 | H    | GLY | X | 238 | 35.075 | 34.266 | 60.766 | 0.00 | 0.00 |
| ATOM | 3583 | CA   | GLY | X | 238 | 36.217 | 34.316 | 62.608 | 0.00 | 0.00 |
| ATOM | 3584 | HA2  | GLY | X | 238 | 35.791 | 34.836 | 63.418 | 0.00 | 0.00 |
| ATOM | 3585 | HA3  | GLY | X | 238 | 35.960 | 33.223 | 62.776 | 0.00 | 0.00 |
| ATOM | 3586 | C    | GLY | X | 238 | 37.763 | 34.345 | 62.744 | 0.00 | 0.00 |
| ATOM | 3587 | O    | GLY | X | 238 | 38.265 | 34.828 | 63.742 | 0.00 | 0.00 |
| ATOM | 3588 | N    | GLU | X | 239 | 38.441 | 34.053 | 61.648 | 0.00 | 0.00 |
| ATOM | 3589 | H    | GLU | X | 239 | 37.994 | 33.489 | 60.939 | 0.00 | 0.00 |
| ATOM | 3590 | CA   | GLU | X | 239 | 39.786 | 34.392 | 61.461 | 0.00 | 0.00 |
| ATOM | 3591 | HA   | GLU | X | 239 | 40.383 | 33.926 | 62.245 | 0.00 | 0.00 |
| ATOM | 3592 | CB   | GLU | X | 239 | 40.340 | 33.712 | 60.199 | 0.00 | 0.00 |
| ATOM | 3593 | HB2  | GLU | X | 239 | 39.606 | 33.726 | 59.393 | 0.00 | 0.00 |
| ATOM | 3594 | HB3  | GLU | X | 239 | 41.261 | 34.191 | 59.866 | 0.00 | 0.00 |
| ATOM | 3595 | CG   | GLU | X | 239 | 40.779 | 32.268 | 60.385 | 0.00 | 0.00 |
| ATOM | 3596 | HG2  | GLU | X | 239 | 40.048 | 31.786 | 61.034 | 0.00 | 0.00 |
| ATOM | 3597 | HG3  | GLU | X | 239 | 40.921 | 31.796 | 59.413 | 0.00 | 0.00 |
| ATOM | 3598 | CD   | GLU | X | 239 | 42.083 | 32.283 | 61.106 | 0.00 | 0.00 |
| ATOM | 3599 | OE1  | GLU | X | 239 | 42.125 | 31.791 | 62.200 | 0.00 | 0.00 |
| ATOM | 3600 | OE2  | GLU | X | 239 | 43.144 | 32.832 | 60.610 | 0.00 | 0.00 |
| ATOM | 3601 | C    | GLU | X | 239 | 40.048 | 35.903 | 61.531 | 0.00 | 0.00 |
| ATOM | 3602 | O    | GLU | X | 239 | 40.790 | 36.256 | 62.375 | 0.00 | 0.00 |
| ATOM | 3603 | N    | ALA | X | 240 | 39.289 | 36.801 | 60.824 | 0.00 | 0.00 |
| ATOM | 3604 | H    | ALA | X | 240 | 38.546 | 36.391 | 60.277 | 0.00 | 0.00 |
| ATOM | 3605 | CA   | ALA | X | 240 | 39.440 | 38.238 | 61.064 | 0.00 | 0.00 |
| ATOM | 3606 | HA   | ALA | X | 240 | 40.421 | 38.541 | 60.698 | 0.00 | 0.00 |
| ATOM | 3607 | CB   | ALA | X | 240 | 38.312 | 38.989 | 60.311 | 0.00 | 0.00 |

|      |      |      |     |   |     |        |        |        |      |      |
|------|------|------|-----|---|-----|--------|--------|--------|------|------|
| ATOM | 3608 | HB1  | ALA | X | 240 | 38.251 | 38.861 | 59.230 | 0.00 | 0.00 |
| ATOM | 3609 | HB2  | ALA | X | 240 | 37.332 | 38.670 | 60.667 | 0.00 | 0.00 |
| ATOM | 3610 | HB3  | ALA | X | 240 | 38.460 | 40.051 | 60.507 | 0.00 | 0.00 |
| ATOM | 3611 | C    | ALA | X | 240 | 39.401 | 38.670 | 62.526 | 0.00 | 0.00 |
| ATOM | 3612 | O    | ALA | X | 240 | 40.422 | 39.173 | 63.002 | 0.00 | 0.00 |
| ATOM | 3613 | N    | ARG | X | 241 | 38.308 | 38.387 | 63.226 | 0.00 | 0.00 |
| ATOM | 3614 | H    | ARG | X | 241 | 37.508 | 38.077 | 62.694 | 0.00 | 0.00 |
| ATOM | 3615 | CA   | ARG | X | 241 | 38.160 | 38.548 | 64.748 | 0.00 | 0.00 |
| ATOM | 3616 | HA   | ARG | X | 241 | 38.021 | 39.602 | 64.989 | 0.00 | 0.00 |
| ATOM | 3617 | CB   | ARG | X | 241 | 36.871 | 37.797 | 65.225 | 0.00 | 0.00 |
| ATOM | 3618 | HB2  | ARG | X | 241 | 36.004 | 38.312 | 64.810 | 0.00 | 0.00 |
| ATOM | 3619 | HB3  | ARG | X | 241 | 36.791 | 36.720 | 65.082 | 0.00 | 0.00 |
| ATOM | 3620 | CG   | ARG | X | 241 | 36.611 | 38.088 | 66.732 | 0.00 | 0.00 |
| ATOM | 3621 | HG2  | ARG | X | 241 | 36.880 | 37.204 | 67.309 | 0.00 | 0.00 |
| ATOM | 3622 | HG3  | ARG | X | 241 | 37.254 | 38.907 | 67.055 | 0.00 | 0.00 |
| ATOM | 3623 | CD   | ARG | X | 241 | 35.207 | 38.523 | 67.042 | 0.00 | 0.00 |
| ATOM | 3624 | HD2  | ARG | X | 241 | 34.914 | 39.346 | 66.391 | 0.00 | 0.00 |
| ATOM | 3625 | HD3  | ARG | X | 241 | 34.565 | 37.699 | 66.730 | 0.00 | 0.00 |
| ATOM | 3626 | NE   | ARG | X | 241 | 34.957 | 38.874 | 68.487 | 0.00 | 0.00 |
| ATOM | 3627 | HE   | ARG | X | 241 | 35.304 | 38.135 | 69.082 | 0.00 | 0.00 |
| ATOM | 3628 | CZ   | ARG | X | 241 | 34.705 | 40.047 | 69.075 | 0.00 | 0.00 |
| ATOM | 3629 | NH1  | ARG | X | 241 | 34.359 | 41.125 | 68.415 | 0.00 | 0.00 |
| ATOM | 3630 | HH11 | ARG | X | 241 | 34.376 | 41.078 | 67.406 | 0.00 | 0.00 |
| ATOM | 3631 | HH12 | ARG | X | 241 | 34.420 | 41.976 | 68.956 | 0.00 | 0.00 |
| ATOM | 3632 | NH2  | ARG | X | 241 | 34.455 | 40.148 | 70.389 | 0.00 | 0.00 |
| ATOM | 3633 | HH21 | ARG | X | 241 | 34.435 | 39.348 | 71.006 | 0.00 | 0.00 |
| ATOM | 3634 | HH22 | ARG | X | 241 | 34.472 | 41.016 | 70.906 | 0.00 | 0.00 |
| ATOM | 3635 | C    | ARG | X | 241 | 39.433 | 38.080 | 65.490 | 0.00 | 0.00 |
| ATOM | 3636 | O    | ARG | X | 241 | 39.986 | 38.812 | 66.380 | 0.00 | 0.00 |
| ATOM | 3637 | N    | ARG | X | 242 | 39.946 | 36.867 | 65.180 | 0.00 | 0.00 |
| ATOM | 3638 | H    | ARG | X | 242 | 39.559 | 36.318 | 64.427 | 0.00 | 0.00 |
| ATOM | 3639 | CA   | ARG | X | 242 | 41.082 | 36.234 | 65.870 | 0.00 | 0.00 |
| ATOM | 3640 | HA   | ARG | X | 242 | 40.861 | 36.404 | 66.924 | 0.00 | 0.00 |
| ATOM | 3641 | CB   | ARG | X | 242 | 41.243 | 34.798 | 65.420 | 0.00 | 0.00 |
| ATOM | 3642 | HB2  | ARG | X | 242 | 40.427 | 34.127 | 65.688 | 0.00 | 0.00 |
| ATOM | 3643 | HB3  | ARG | X | 242 | 41.376 | 34.718 | 64.341 | 0.00 | 0.00 |
| ATOM | 3644 | CG   | ARG | X | 242 | 42.401 | 34.158 | 66.286 | 0.00 | 0.00 |
| ATOM | 3645 | HG2  | ARG | X | 242 | 43.262 | 34.800 | 66.097 | 0.00 | 0.00 |
| ATOM | 3646 | HG3  | ARG | X | 242 | 42.127 | 34.276 | 67.335 | 0.00 | 0.00 |
| ATOM | 3647 | CD   | ARG | X | 242 | 42.920 | 32.735 | 65.907 | 0.00 | 0.00 |
| ATOM | 3648 | HD2  | ARG | X | 242 | 43.743 | 32.515 | 66.587 | 0.00 | 0.00 |
| ATOM | 3649 | HD3  | ARG | X | 242 | 42.128 | 32.019 | 66.127 | 0.00 | 0.00 |
| ATOM | 3650 | NE   | ARG | X | 242 | 43.456 | 32.728 | 64.534 | 0.00 | 0.00 |
| ATOM | 3651 | HE   | ARG | X | 242 | 42.879 | 32.280 | 63.837 | 0.00 | 0.00 |
| ATOM | 3652 | CZ   | ARG | X | 242 | 44.606 | 33.193 | 64.029 | 0.00 | 0.00 |
| ATOM | 3653 | NH1  | ARG | X | 242 | 45.584 | 33.830 | 64.749 | 0.00 | 0.00 |
| ATOM | 3654 | HH11 | ARG | X | 242 | 45.589 | 33.937 | 65.753 | 0.00 | 0.00 |
| ATOM | 3655 | HH12 | ARG | X | 242 | 46.345 | 34.315 | 64.294 | 0.00 | 0.00 |
| ATOM | 3656 | NH2  | ARG | X | 242 | 44.829 | 32.998 | 62.776 | 0.00 | 0.00 |
| ATOM | 3657 | HH21 | ARG | X | 242 | 44.086 | 32.773 | 62.130 | 0.00 | 0.00 |
| ATOM | 3658 | HH22 | ARG | X | 242 | 45.748 | 33.281 | 62.465 | 0.00 | 0.00 |
| ATOM | 3659 | C    | ARG | X | 242 | 42.274 | 37.063 | 65.621 | 0.00 | 0.00 |
| ATOM | 3660 | O    | ARG | X | 242 | 42.869 | 37.651 | 66.605 | 0.00 | 0.00 |
| ATOM | 3661 | N    | ARG | X | 243 | 42.694 | 37.329 | 64.342 | 0.00 | 0.00 |
| ATOM | 3662 | H    | ARG | X | 243 | 42.107 | 37.289 | 63.521 | 0.00 | 0.00 |
| ATOM | 3663 | CA   | ARG | X | 243 | 43.982 | 37.897 | 64.100 | 0.00 | 0.00 |
| ATOM | 3664 | HA   | ARG | X | 243 | 44.754 | 37.343 | 64.633 | 0.00 | 0.00 |
| ATOM | 3665 | CB   | ARG | X | 243 | 44.295 | 37.913 | 62.596 | 0.00 | 0.00 |
| ATOM | 3666 | HB2  | ARG | X | 243 | 43.579 | 38.451 | 61.974 | 0.00 | 0.00 |
| ATOM | 3667 | HB3  | ARG | X | 243 | 45.253 | 38.319 | 62.270 | 0.00 | 0.00 |
| ATOM | 3668 | CG   | ARG | X | 243 | 44.343 | 36.554 | 61.903 | 0.00 | 0.00 |
| ATOM | 3669 | HG2  | ARG | X | 243 | 45.049 | 35.922 | 62.442 | 0.00 | 0.00 |
| ATOM | 3670 | HG3  | ARG | X | 243 | 43.397 | 36.018 | 61.976 | 0.00 | 0.00 |
| ATOM | 3671 | CD   | ARG | X | 243 | 44.723 | 36.644 | 60.410 | 0.00 | 0.00 |
| ATOM | 3672 | HD2  | ARG | X | 243 | 44.329 | 37.572 | 59.995 | 0.00 | 0.00 |
| ATOM | 3673 | HD3  | ARG | X | 243 | 45.808 | 36.726 | 60.342 | 0.00 | 0.00 |
| ATOM | 3674 | NE   | ARG | X | 243 | 44.161 | 35.376 | 59.801 | 0.00 | 0.00 |
| ATOM | 3675 | HE   | ARG | X | 243 | 43.600 | 34.813 | 60.425 | 0.00 | 0.00 |
| ATOM | 3676 | CZ   | ARG | X | 243 | 44.346 | 34.985 | 58.579 | 0.00 | 0.00 |
| ATOM | 3677 | NH1  | ARG | X | 243 | 44.946 | 35.727 | 57.614 | 0.00 | 0.00 |

|      |      |      |     |   |     |        |        |        |      |      |
|------|------|------|-----|---|-----|--------|--------|--------|------|------|
| ATOM | 3678 | HH11 | ARG | X | 243 | 45.449 | 36.596 | 57.725 | 0.00 | 0.00 |
| ATOM | 3679 | HH12 | ARG | X | 243 | 44.995 | 35.442 | 56.646 | 0.00 | 0.00 |
| ATOM | 3680 | NH2  | ARG | X | 243 | 43.948 | 33.841 | 58.104 | 0.00 | 0.00 |
| ATOM | 3681 | HH21 | ARG | X | 243 | 43.699 | 33.170 | 58.817 | 0.00 | 0.00 |
| ATOM | 3682 | HH22 | ARG | X | 243 | 44.193 | 33.613 | 57.151 | 0.00 | 0.00 |
| ATOM | 3683 | C    | ARG | X | 243 | 44.039 | 39.319 | 64.559 | 0.00 | 0.00 |
| ATOM | 3684 | O    | ARG | X | 243 | 45.033 | 39.829 | 65.026 | 0.00 | 0.00 |
| ATOM | 3685 | N    | ALA | X | 244 | 42.880 | 40.032 | 64.540 | 0.00 | 0.00 |
| ATOM | 3686 | H    | ALA | X | 244 | 42.066 | 39.613 | 64.113 | 0.00 | 0.00 |
| ATOM | 3687 | CA   | ALA | X | 244 | 42.622 | 41.381 | 65.094 | 0.00 | 0.00 |
| ATOM | 3688 | HA   | ALA | X | 244 | 43.398 | 41.974 | 64.610 | 0.00 | 0.00 |
| ATOM | 3689 | CB   | ALA | X | 244 | 41.198 | 41.845 | 64.660 | 0.00 | 0.00 |
| ATOM | 3690 | HB1  | ALA | X | 244 | 41.080 | 42.868 | 65.017 | 0.00 | 0.00 |
| ATOM | 3691 | HB2  | ALA | X | 244 | 41.117 | 41.713 | 63.581 | 0.00 | 0.00 |
| ATOM | 3692 | HB3  | ALA | X | 244 | 40.448 | 41.248 | 65.178 | 0.00 | 0.00 |
| ATOM | 3693 | C    | ALA | X | 244 | 42.808 | 41.371 | 66.649 | 0.00 | 0.00 |
| ATOM | 3694 | O    | ALA | X | 244 | 43.397 | 42.311 | 67.190 | 0.00 | 0.00 |
| ATOM | 3695 | N    | THR | X | 245 | 42.350 | 40.361 | 67.348 | 0.00 | 0.00 |
| ATOM | 3696 | H    | THR | X | 245 | 42.050 | 39.508 | 66.899 | 0.00 | 0.00 |
| ATOM | 3697 | CA   | THR | X | 245 | 42.277 | 40.398 | 68.827 | 0.00 | 0.00 |
| ATOM | 3698 | HA   | THR | X | 245 | 42.155 | 41.422 | 69.181 | 0.00 | 0.00 |
| ATOM | 3699 | CB   | THR | X | 245 | 41.224 | 39.414 | 69.275 | 0.00 | 0.00 |
| ATOM | 3700 | HB   | THR | X | 245 | 41.381 | 38.506 | 68.694 | 0.00 | 0.00 |
| ATOM | 3701 | CG2  | THR | X | 245 | 41.183 | 39.364 | 70.787 | 0.00 | 0.00 |
| ATOM | 3702 | HG21 | THR | X | 245 | 42.058 | 38.828 | 71.154 | 0.00 | 0.00 |
| ATOM | 3703 | HG22 | THR | X | 245 | 41.101 | 40.370 | 71.197 | 0.00 | 0.00 |
| ATOM | 3704 | HG23 | THR | X | 245 | 40.300 | 38.758 | 70.995 | 0.00 | 0.00 |
| ATOM | 3705 | OG1  | THR | X | 245 | 39.986 | 40.005 | 68.830 | 0.00 | 0.00 |
| ATOM | 3706 | HG1  | THR | X | 245 | 39.785 | 39.681 | 67.949 | 0.00 | 0.00 |
| ATOM | 3707 | C    | THR | X | 245 | 43.585 | 40.026 | 69.411 | 0.00 | 0.00 |
| ATOM | 3708 | O    | THR | X | 245 | 44.046 | 40.707 | 70.301 | 0.00 | 0.00 |
| ATOM | 3709 | N    | GLN | X | 246 | 44.298 | 39.084 | 68.732 | 0.00 | 0.00 |
| ATOM | 3710 | H    | GLN | X | 246 | 43.904 | 38.648 | 67.911 | 0.00 | 0.00 |
| ATOM | 3711 | CA   | GLN | X | 246 | 45.654 | 38.743 | 69.079 | 0.00 | 0.00 |
| ATOM | 3712 | HA   | GLN | X | 246 | 45.709 | 38.430 | 70.122 | 0.00 | 0.00 |
| ATOM | 3713 | CB   | GLN | X | 246 | 46.001 | 37.524 | 68.212 | 0.00 | 0.00 |
| ATOM | 3714 | HB2  | GLN | X | 246 | 45.200 | 36.807 | 68.392 | 0.00 | 0.00 |
| ATOM | 3715 | HB3  | GLN | X | 246 | 46.066 | 37.821 | 67.165 | 0.00 | 0.00 |
| ATOM | 3716 | CG   | GLN | X | 246 | 47.312 | 36.837 | 68.639 | 0.00 | 0.00 |
| ATOM | 3717 | HG2  | GLN | X | 246 | 48.189 | 37.479 | 68.558 | 0.00 | 0.00 |
| ATOM | 3718 | HG3  | GLN | X | 246 | 47.254 | 36.464 | 69.661 | 0.00 | 0.00 |
| ATOM | 3719 | CD   | GLN | X | 246 | 47.513 | 35.461 | 67.919 | 0.00 | 0.00 |
| ATOM | 3720 | OE1  | GLN | X | 246 | 46.677 | 35.011 | 67.123 | 0.00 | 0.00 |
| ATOM | 3721 | NE2  | GLN | X | 246 | 48.587 | 34.841 | 68.042 | 0.00 | 0.00 |
| ATOM | 3722 | HE21 | GLN | X | 246 | 48.692 | 33.935 | 67.609 | 0.00 | 0.00 |
| ATOM | 3723 | HE22 | GLN | X | 246 | 49.247 | 35.141 | 68.746 | 0.00 | 0.00 |
| ATOM | 3724 | C    | GLN | X | 246 | 46.695 | 39.762 | 68.780 | 0.00 | 0.00 |
| ATOM | 3725 | O    | GLN | X | 246 | 47.723 | 39.844 | 69.462 | 0.00 | 0.00 |
| ATOM | 3726 | N    | LEU | X | 247 | 46.625 | 40.527 | 67.705 | 0.00 | 0.00 |
| ATOM | 3727 | H    | LEU | X | 247 | 46.089 | 40.232 | 66.901 | 0.00 | 0.00 |
| ATOM | 3728 | CA   | LEU | X | 247 | 47.286 | 41.791 | 67.505 | 0.00 | 0.00 |
| ATOM | 3729 | HA   | LEU | X | 247 | 48.358 | 41.596 | 67.452 | 0.00 | 0.00 |
| ATOM | 3730 | CB   | LEU | X | 247 | 46.890 | 42.157 | 66.093 | 0.00 | 0.00 |
| ATOM | 3731 | HB2  | LEU | X | 247 | 47.232 | 41.372 | 65.419 | 0.00 | 0.00 |
| ATOM | 3732 | HB3  | LEU | X | 247 | 45.803 | 42.175 | 66.010 | 0.00 | 0.00 |
| ATOM | 3733 | CG   | LEU | X | 247 | 47.358 | 43.415 | 65.446 | 0.00 | 0.00 |
| ATOM | 3734 | HG   | LEU | X | 247 | 46.938 | 44.299 | 65.925 | 0.00 | 0.00 |
| ATOM | 3735 | CD1  | LEU | X | 247 | 48.885 | 43.548 | 65.509 | 0.00 | 0.00 |
| ATOM | 3736 | HD11 | LEU | X | 247 | 49.361 | 42.753 | 64.936 | 0.00 | 0.00 |
| ATOM | 3737 | HD12 | LEU | X | 247 | 49.224 | 44.509 | 65.123 | 0.00 | 0.00 |
| ATOM | 3738 | HD13 | LEU | X | 247 | 49.267 | 43.600 | 66.529 | 0.00 | 0.00 |
| ATOM | 3739 | CD2  | LEU | X | 247 | 46.759 | 43.489 | 64.021 | 0.00 | 0.00 |
| ATOM | 3740 | HD21 | LEU | X | 247 | 45.695 | 43.284 | 64.139 | 0.00 | 0.00 |
| ATOM | 3741 | HD22 | LEU | X | 247 | 46.787 | 44.496 | 63.604 | 0.00 | 0.00 |
| ATOM | 3742 | HD23 | LEU | X | 247 | 47.265 | 42.783 | 63.362 | 0.00 | 0.00 |
| ATOM | 3743 | C    | LEU | X | 247 | 47.029 | 42.919 | 68.516 | 0.00 | 0.00 |
| ATOM | 3744 | O    | LEU | X | 247 | 47.965 | 43.629 | 68.948 | 0.00 | 0.00 |
| ATOM | 3745 | N    | ALA | X | 248 | 45.825 | 42.975 | 69.032 | 0.00 | 0.00 |
| ATOM | 3746 | H    | ALA | X | 248 | 45.031 | 42.503 | 68.623 | 0.00 | 0.00 |
| ATOM | 3747 | CA   | ALA | X | 248 | 45.602 | 43.833 | 70.207 | 0.00 | 0.00 |



|      |      |      |     |   |     |        |        |        |      |      |
|------|------|------|-----|---|-----|--------|--------|--------|------|------|
| ATOM | 3748 | HA   | ALA | X | 248 | 46.044 | 44.799 | 69.967 | 0.00 | 0.00 |
| ATOM | 3749 | CB   | ALA | X | 248 | 44.087 | 43.966 | 70.519 | 0.00 | 0.00 |
| ATOM | 3750 | HB1  | ALA | X | 248 | 43.941 | 44.695 | 71.316 | 0.00 | 0.00 |
| ATOM | 3751 | HB2  | ALA | X | 248 | 43.494 | 44.260 | 69.653 | 0.00 | 0.00 |
| ATOM | 3752 | HB3  | ALA | X | 248 | 43.659 | 43.037 | 70.896 | 0.00 | 0.00 |
| ATOM | 3753 | C    | ALA | X | 248 | 46.473 | 43.346 | 71.407 | 0.00 | 0.00 |
| ATOM | 3754 | O    | ALA | X | 248 | 47.167 | 44.111 | 72.091 | 0.00 | 0.00 |
| ATOM | 3755 | N    | HIE | X | 249 | 46.323 | 42.052 | 71.656 | 0.00 | 0.00 |
| ATOM | 3756 | H    | HIE | X | 249 | 45.686 | 41.472 | 71.128 | 0.00 | 0.00 |
| ATOM | 3757 | CA   | HIE | X | 249 | 47.198 | 41.415 | 72.649 | 0.00 | 0.00 |
| ATOM | 3758 | HA   | HIE | X | 249 | 46.848 | 41.814 | 73.601 | 0.00 | 0.00 |
| ATOM | 3759 | CB   | HIE | X | 249 | 46.965 | 39.871 | 72.664 | 0.00 | 0.00 |
| ATOM | 3760 | HB2  | HIE | X | 249 | 47.236 | 39.371 | 71.734 | 0.00 | 0.00 |
| ATOM | 3761 | HB3  | HIE | X | 249 | 47.665 | 39.541 | 73.432 | 0.00 | 0.00 |
| ATOM | 3762 | CG   | HIE | X | 249 | 45.619 | 39.341 | 73.082 | 0.00 | 0.00 |
| ATOM | 3763 | ND1  | HIE | X | 249 | 45.138 | 38.065 | 72.787 | 0.00 | 0.00 |
| ATOM | 3764 | CE1  | HIE | X | 249 | 43.953 | 38.055 | 73.351 | 0.00 | 0.00 |
| ATOM | 3765 | HE1  | HIE | X | 249 | 43.377 | 37.157 | 73.522 | 0.00 | 0.00 |
| ATOM | 3766 | NE2  | HIE | X | 249 | 43.717 | 39.228 | 73.920 | 0.00 | 0.00 |
| ATOM | 3767 | HE2  | HIE | X | 249 | 42.896 | 39.498 | 74.443 | 0.00 | 0.00 |
| ATOM | 3768 | CD2  | HIE | X | 249 | 44.660 | 40.079 | 73.661 | 0.00 | 0.00 |
| ATOM | 3769 | HD2  | HIE | X | 249 | 44.806 | 41.127 | 73.874 | 0.00 | 0.00 |
| ATOM | 3770 | C    | HIE | X | 249 | 48.746 | 41.661 | 72.553 | 0.00 | 0.00 |
| ATOM | 3771 | O    | HIE | X | 249 | 49.311 | 42.068 | 73.586 | 0.00 | 0.00 |
| ATOM | 3772 | N    | LEU | X | 250 | 49.292 | 41.499 | 71.343 | 0.00 | 0.00 |
| ATOM | 3773 | H    | LEU | X | 250 | 48.665 | 41.045 | 70.695 | 0.00 | 0.00 |
| ATOM | 3774 | CA   | LEU | X | 250 | 50.690 | 41.809 | 70.913 | 0.00 | 0.00 |
| ATOM | 3775 | HA   | LEU | X | 250 | 51.367 | 41.220 | 71.531 | 0.00 | 0.00 |
| ATOM | 3776 | CB   | LEU | X | 250 | 51.082 | 41.371 | 69.398 | 0.00 | 0.00 |
| ATOM | 3777 | HB2  | LEU | X | 250 | 50.175 | 41.499 | 68.807 | 0.00 | 0.00 |
| ATOM | 3778 | HB3  | LEU | X | 250 | 52.005 | 41.832 | 69.046 | 0.00 | 0.00 |
| ATOM | 3779 | CG   | LEU | X | 250 | 51.261 | 39.851 | 69.379 | 0.00 | 0.00 |
| ATOM | 3780 | HG   | LEU | X | 250 | 50.587 | 39.428 | 70.124 | 0.00 | 0.00 |
| ATOM | 3781 | CD1  | LEU | X | 250 | 50.862 | 39.361 | 67.984 | 0.00 | 0.00 |
| ATOM | 3782 | HD11 | LEU | X | 250 | 49.778 | 39.348 | 67.873 | 0.00 | 0.00 |
| ATOM | 3783 | HD12 | LEU | X | 250 | 51.207 | 40.003 | 67.173 | 0.00 | 0.00 |
| ATOM | 3784 | HD13 | LEU | X | 250 | 51.255 | 38.355 | 67.838 | 0.00 | 0.00 |
| ATOM | 3785 | CD2  | LEU | X | 250 | 52.556 | 39.219 | 69.846 | 0.00 | 0.00 |
| ATOM | 3786 | HD21 | LEU | X | 250 | 53.358 | 39.412 | 69.133 | 0.00 | 0.00 |
| ATOM | 3787 | HD22 | LEU | X | 250 | 52.912 | 39.526 | 70.829 | 0.00 | 0.00 |
| ATOM | 3788 | HD23 | LEU | X | 250 | 52.425 | 38.137 | 69.816 | 0.00 | 0.00 |
| ATOM | 3789 | C    | LEU | X | 250 | 51.029 | 43.276 | 71.196 | 0.00 | 0.00 |
| ATOM | 3790 | O    | LEU | X | 250 | 52.100 | 43.544 | 71.786 | 0.00 | 0.00 |
| ATOM | 3791 | N    | VAL | X | 251 | 50.261 | 44.224 | 70.752 | 0.00 | 0.00 |
| ATOM | 3792 | H    | VAL | X | 251 | 49.450 | 43.976 | 70.204 | 0.00 | 0.00 |
| ATOM | 3793 | CA   | VAL | X | 251 | 50.614 | 45.648 | 70.918 | 0.00 | 0.00 |
| ATOM | 3794 | HA   | VAL | X | 251 | 51.640 | 45.695 | 70.555 | 0.00 | 0.00 |
| ATOM | 3795 | CB   | VAL | X | 251 | 49.804 | 46.358 | 69.861 | 0.00 | 0.00 |
| ATOM | 3796 | HB   | VAL | X | 251 | 49.801 | 45.679 | 69.008 | 0.00 | 0.00 |
| ATOM | 3797 | CG1  | VAL | X | 251 | 48.316 | 46.766 | 69.988 | 0.00 | 0.00 |
| ATOM | 3798 | HG11 | VAL | X | 251 | 47.727 | 45.859 | 69.852 | 0.00 | 0.00 |
| ATOM | 3799 | HG12 | VAL | X | 251 | 48.112 | 47.288 | 70.923 | 0.00 | 0.00 |
| ATOM | 3800 | HG13 | VAL | X | 251 | 48.025 | 47.451 | 69.192 | 0.00 | 0.00 |
| ATOM | 3801 | CG2  | VAL | X | 251 | 50.535 | 47.554 | 69.305 | 0.00 | 0.00 |
| ATOM | 3802 | HG21 | VAL | X | 251 | 50.013 | 47.901 | 68.413 | 0.00 | 0.00 |
| ATOM | 3803 | HG22 | VAL | X | 251 | 50.569 | 48.328 | 70.072 | 0.00 | 0.00 |
| ATOM | 3804 | HG23 | VAL | X | 251 | 51.542 | 47.325 | 68.957 | 0.00 | 0.00 |
| ATOM | 3805 | C    | VAL | X | 251 | 50.410 | 46.398 | 72.294 | 0.00 | 0.00 |
| ATOM | 3806 | O    | VAL | X | 251 | 50.807 | 47.546 | 72.482 | 0.00 | 0.00 |
| ATOM | 3807 | N    | GLY | X | 252 | 49.817 | 45.658 | 73.252 | 0.00 | 0.00 |
| ATOM | 3808 | H    | GLY | X | 252 | 49.476 | 44.752 | 72.965 | 0.00 | 0.00 |
| ATOM | 3809 | CA   | GLY | X | 252 | 49.664 | 46.000 | 74.671 | 0.00 | 0.00 |
| ATOM | 3810 | HA2  | GLY | X | 252 | 49.945 | 45.101 | 75.387 | 0.00 | 0.00 |
| ATOM | 3811 | HA3  | GLY | X | 252 | 50.228 | 46.919 | 74.893 | 0.00 | 0.00 |
| ATOM | 3812 | C    | GLY | X | 252 | 48.238 | 46.300 | 75.037 | 0.00 | 0.00 |
| ATOM | 3813 | O    | GLY | X | 252 | 48.064 | 46.700 | 76.188 | 0.00 | 0.00 |
| ATOM | 3814 | N    | CYX | X | 253 | 47.269 | 46.064 | 74.156 | 0.00 | 0.00 |
| ATOM | 3815 | H    | CYX | X | 253 | 47.420 | 45.549 | 73.300 | 0.00 | 0.00 |
| ATOM | 3816 | CA   | CYX | X | 253 | 45.894 | 46.377 | 74.509 | 0.00 | 0.00 |
| ATOM | 3817 | HA   | CYX | X | 253 | 45.943 | 47.253 | 75.155 | 0.00 | 0.00 |

|      |      |      |     |   |     |        |        |        |      |      |
|------|------|------|-----|---|-----|--------|--------|--------|------|------|
| ATOM | 3818 | CB   | CYX | X | 253 | 45.188 | 46.777 | 73.192 | 0.00 | 0.00 |
| ATOM | 3819 | HB2  | CYX | X | 253 | 45.228 | 45.907 | 72.536 | 0.00 | 0.00 |
| ATOM | 3820 | HB3  | CYX | X | 253 | 44.099 | 46.821 | 73.229 | 0.00 | 0.00 |
| ATOM | 3821 | SG   | CYX | X | 253 | 45.726 | 48.265 | 72.223 | 0.00 | 0.00 |
| ATOM | 3822 | C    | CYX | X | 253 | 45.066 | 45.192 | 75.062 | 0.00 | 0.00 |
| ATOM | 3823 | O    | CYX | X | 253 | 45.332 | 43.980 | 74.888 | 0.00 | 0.00 |
| ATOM | 3824 | N    | PRO | X | 254 | 43.995 | 45.569 | 75.823 | 0.00 | 0.00 |
| ATOM | 3825 | CD   | PRO | X | 254 | 43.072 | 44.524 | 76.249 | 0.00 | 0.00 |
| ATOM | 3826 | HD2  | PRO | X | 254 | 43.247 | 44.319 | 77.306 | 0.00 | 0.00 |
| ATOM | 3827 | HD3  | PRO | X | 254 | 42.976 | 43.612 | 75.660 | 0.00 | 0.00 |
| ATOM | 3828 | CG   | PRO | X | 254 | 41.785 | 45.307 | 76.242 | 0.00 | 0.00 |
| ATOM | 3829 | HG2  | PRO | X | 254 | 40.999 | 44.850 | 76.843 | 0.00 | 0.00 |
| ATOM | 3830 | HG3  | PRO | X | 254 | 41.320 | 45.235 | 75.258 | 0.00 | 0.00 |
| ATOM | 3831 | CB   | PRO | X | 254 | 42.180 | 46.691 | 76.671 | 0.00 | 0.00 |
| ATOM | 3832 | HB2  | PRO | X | 254 | 42.076 | 46.780 | 77.752 | 0.00 | 0.00 |
| ATOM | 3833 | HB3  | PRO | X | 254 | 41.510 | 47.415 | 76.206 | 0.00 | 0.00 |
| ATOM | 3834 | CA   | PRO | X | 254 | 43.607 | 46.864 | 76.309 | 0.00 | 0.00 |
| ATOM | 3835 | HA   | PRO | X | 254 | 43.708 | 47.684 | 75.598 | 0.00 | 0.00 |
| ATOM | 3836 | C    | PRO | X | 254 | 44.462 | 47.317 | 77.522 | 0.00 | 0.00 |
| ATOM | 3837 | O    | PRO | X | 254 | 45.074 | 46.460 | 78.112 | 0.00 | 0.00 |
| ATOM | 3838 | N    | PRO | X | 255 | 44.324 | 48.593 | 77.955 | 0.00 | 0.00 |
| ATOM | 3839 | CD   | PRO | X | 255 | 43.587 | 49.636 | 77.249 | 0.00 | 0.00 |
| ATOM | 3840 | HD2  | PRO | X | 255 | 42.521 | 49.440 | 77.133 | 0.00 | 0.00 |
| ATOM | 3841 | HD3  | PRO | X | 255 | 44.091 | 49.925 | 76.326 | 0.00 | 0.00 |
| ATOM | 3842 | CG   | PRO | X | 255 | 43.640 | 50.885 | 78.111 | 0.00 | 0.00 |
| ATOM | 3843 | HG2  | PRO | X | 255 | 42.803 | 50.986 | 78.802 | 0.00 | 0.00 |
| ATOM | 3844 | HG3  | PRO | X | 255 | 43.764 | 51.762 | 77.476 | 0.00 | 0.00 |
| ATOM | 3845 | CB   | PRO | X | 255 | 44.836 | 50.632 | 79.021 | 0.00 | 0.00 |
| ATOM | 3846 | HB2  | PRO | X | 255 | 44.811 | 51.046 | 80.029 | 0.00 | 0.00 |
| ATOM | 3847 | HB3  | PRO | X | 255 | 45.761 | 50.896 | 78.509 | 0.00 | 0.00 |
| ATOM | 3848 | CA   | PRO | X | 255 | 44.888 | 49.136 | 79.244 | 0.00 | 0.00 |
| ATOM | 3849 | HA   | PRO | X | 255 | 45.926 | 48.816 | 79.337 | 0.00 | 0.00 |
| ATOM | 3850 | C    | PRO | X | 255 | 44.089 | 48.623 | 80.468 | 0.00 | 0.00 |
| ATOM | 3851 | O    | PRO | X | 255 | 42.908 | 48.319 | 80.315 | 0.00 | 0.00 |
| ATOM | 3852 | N    | GLY | X | 256 | 44.720 | 48.596 | 81.664 | 0.00 | 0.00 |
| ATOM | 3853 | H    | GLY | X | 256 | 45.685 | 48.883 | 81.740 | 0.00 | 0.00 |
| ATOM | 3854 | CA   | GLY | X | 256 | 44.035 | 48.313 | 82.893 | 0.00 | 0.00 |
| ATOM | 3855 | HA2  | GLY | X | 256 | 44.687 | 48.554 | 83.682 | 0.00 | 0.00 |
| ATOM | 3856 | HA3  | GLY | X | 256 | 43.232 | 48.967 | 82.883 | 0.00 | 0.00 |
| ATOM | 3857 | C    | GLY | X | 256 | 43.600 | 46.836 | 82.967 | 0.00 | 0.00 |
| ATOM | 3858 | O    | GLY | X | 256 | 43.834 | 46.062 | 82.058 | 0.00 | 0.00 |
| ATOM | 3859 | N    | GLY | X | 257 | 42.897 | 46.494 | 84.027 | 0.00 | 0.00 |
| ATOM | 3860 | H    | GLY | X | 257 | 42.771 | 47.163 | 84.774 | 0.00 | 0.00 |
| ATOM | 3861 | CA   | GLY | X | 257 | 42.154 | 45.202 | 84.085 | 0.00 | 0.00 |
| ATOM | 3862 | HA2  | GLY | X | 257 | 42.690 | 44.494 | 83.456 | 0.00 | 0.00 |
| ATOM | 3863 | HA3  | GLY | X | 257 | 42.117 | 44.641 | 85.109 | 0.00 | 0.00 |
| ATOM | 3864 | C    | GLY | X | 257 | 40.701 | 45.373 | 83.548 | 0.00 | 0.00 |
| ATOM | 3865 | O    | GLY | X | 257 | 40.185 | 46.500 | 83.503 | 0.00 | 0.00 |
| ATOM | 3866 | N    | THR | X | 258 | 40.091 | 44.219 | 83.192 | 0.00 | 0.00 |
| ATOM | 3867 | H    | THR | X | 258 | 40.695 | 43.419 | 83.066 | 0.00 | 0.00 |
| ATOM | 3868 | CA   | THR | X | 258 | 38.666 | 44.036 | 82.833 | 0.00 | 0.00 |
| ATOM | 3869 | HA   | THR | X | 258 | 38.507 | 43.032 | 82.440 | 0.00 | 0.00 |
| ATOM | 3870 | CB   | THR | X | 258 | 37.721 | 43.962 | 84.085 | 0.00 | 0.00 |
| ATOM | 3871 | HB   | THR | X | 258 | 36.800 | 43.632 | 83.604 | 0.00 | 0.00 |
| ATOM | 3872 | CG2  | THR | X | 258 | 38.180 | 42.931 | 85.084 | 0.00 | 0.00 |
| ATOM | 3873 | HG21 | THR | X | 258 | 38.112 | 41.884 | 84.789 | 0.00 | 0.00 |
| ATOM | 3874 | HG22 | THR | X | 258 | 39.207 | 43.096 | 85.410 | 0.00 | 0.00 |
| ATOM | 3875 | HG23 | THR | X | 258 | 37.523 | 42.911 | 85.954 | 0.00 | 0.00 |
| ATOM | 3876 | OG1  | THR | X | 258 | 37.592 | 45.269 | 84.652 | 0.00 | 0.00 |
| ATOM | 3877 | HG1  | THR | X | 258 | 36.929 | 45.013 | 85.297 | 0.00 | 0.00 |
| ATOM | 3878 | C    | THR | X | 258 | 38.183 | 44.995 | 81.774 | 0.00 | 0.00 |
| ATOM | 3879 | O    | THR | X | 258 | 36.982 | 44.996 | 81.527 | 0.00 | 0.00 |
| ATOM | 3880 | N    | GLY | X | 259 | 39.048 | 45.694 | 81.022 | 0.00 | 0.00 |
| ATOM | 3881 | H    | GLY | X | 259 | 40.010 | 45.723 | 81.330 | 0.00 | 0.00 |
| ATOM | 3882 | CA   | GLY | X | 259 | 38.676 | 46.471 | 79.892 | 0.00 | 0.00 |
| ATOM | 3883 | HA2  | GLY | X | 259 | 37.706 | 46.891 | 79.981 | 0.00 | 0.00 |
| ATOM | 3884 | HA3  | GLY | X | 259 | 39.424 | 47.238 | 79.766 | 0.00 | 0.00 |
| ATOM | 3885 | C    | GLY | X | 259 | 38.620 | 45.749 | 78.577 | 0.00 | 0.00 |
| ATOM | 3886 | O    | GLY | X | 259 | 39.054 | 46.244 | 77.530 | 0.00 | 0.00 |
| ATOM | 3887 | N    | GLY | X | 260 | 38.106 | 44.550 | 78.570 | 0.00 | 0.00 |

|      |      |      |     |   |     |        |        |        |      |      |
|------|------|------|-----|---|-----|--------|--------|--------|------|------|
| ATOM | 3888 | H    | GLY | X | 260 | 37.885 | 44.180 | 79.483 | 0.00 | 0.00 |
| ATOM | 3889 | CA   | GLY | X | 260 | 38.012 | 43.592 | 77.481 | 0.00 | 0.00 |
| ATOM | 3890 | HA2  | GLY | X | 260 | 38.944 | 43.717 | 76.882 | 0.00 | 0.00 |
| ATOM | 3891 | HA3  | GLY | X | 260 | 38.051 | 42.606 | 77.974 | 0.00 | 0.00 |
| ATOM | 3892 | C    | GLY | X | 260 | 36.856 | 43.805 | 76.486 | 0.00 | 0.00 |
| ATOM | 3893 | O    | GLY | X | 260 | 36.846 | 42.998 | 75.530 | 0.00 | 0.00 |
| ATOM | 3894 | N    | ASN | X | 261 | 36.042 | 44.899 | 76.534 | 0.00 | 0.00 |
| ATOM | 3895 | H    | ASN | X | 261 | 36.081 | 45.489 | 77.352 | 0.00 | 0.00 |
| ATOM | 3896 | CA   | ASN | X | 261 | 35.083 | 45.178 | 75.478 | 0.00 | 0.00 |
| ATOM | 3897 | HA   | ASN | X | 261 | 34.584 | 44.243 | 75.223 | 0.00 | 0.00 |
| ATOM | 3898 | CB   | ASN | X | 261 | 33.956 | 46.075 | 75.978 | 0.00 | 0.00 |
| ATOM | 3899 | HB2  | ASN | X | 261 | 33.200 | 46.089 | 75.193 | 0.00 | 0.00 |
| ATOM | 3900 | HB3  | ASN | X | 261 | 33.402 | 45.608 | 76.792 | 0.00 | 0.00 |
| ATOM | 3901 | CG   | ASN | X | 261 | 34.422 | 47.448 | 76.404 | 0.00 | 0.00 |
| ATOM | 3902 | OD1  | ASN | X | 261 | 34.509 | 48.359 | 75.603 | 0.00 | 0.00 |
| ATOM | 3903 | ND2  | ASN | X | 261 | 34.718 | 47.748 | 77.642 | 0.00 | 0.00 |
| ATOM | 3904 | HD21 | ASN | X | 261 | 35.054 | 48.680 | 77.835 | 0.00 | 0.00 |
| ATOM | 3905 | HD22 | ASN | X | 261 | 34.598 | 47.060 | 78.372 | 0.00 | 0.00 |
| ATOM | 3906 | C    | ASN | X | 261 | 35.798 | 45.794 | 74.231 | 0.00 | 0.00 |
| ATOM | 3907 | O    | ASN | X | 261 | 36.856 | 46.325 | 74.363 | 0.00 | 0.00 |
| ATOM | 3908 | N    | ASP | X | 262 | 35.175 | 45.704 | 73.018 | 0.00 | 0.00 |
| ATOM | 3909 | H    | ASP | X | 262 | 34.283 | 45.230 | 73.013 | 0.00 | 0.00 |
| ATOM | 3910 | CA   | ASP | X | 262 | 35.713 | 46.235 | 71.776 | 0.00 | 0.00 |
| ATOM | 3911 | HA   | ASP | X | 262 | 36.675 | 45.744 | 71.631 | 0.00 | 0.00 |
| ATOM | 3912 | CB   | ASP | X | 262 | 34.981 | 45.749 | 70.562 | 0.00 | 0.00 |
| ATOM | 3913 | HB2  | ASP | X | 262 | 33.946 | 45.982 | 70.809 | 0.00 | 0.00 |
| ATOM | 3914 | HB3  | ASP | X | 262 | 35.392 | 46.204 | 69.661 | 0.00 | 0.00 |
| ATOM | 3915 | CG   | ASP | X | 262 | 35.165 | 44.223 | 70.346 | 0.00 | 0.00 |
| ATOM | 3916 | OD1  | ASP | X | 262 | 34.302 | 43.572 | 69.702 | 0.00 | 0.00 |
| ATOM | 3917 | OD2  | ASP | X | 262 | 36.252 | 43.772 | 70.766 | 0.00 | 0.00 |
| ATOM | 3918 | C    | ASP | X | 262 | 35.864 | 47.782 | 71.706 | 0.00 | 0.00 |
| ATOM | 3919 | O    | ASP | X | 262 | 36.797 | 48.248 | 71.089 | 0.00 | 0.00 |
| ATOM | 3920 | N    | THR | X | 263 | 34.999 | 48.531 | 72.470 | 0.00 | 0.00 |
| ATOM | 3921 | H    | THR | X | 263 | 34.356 | 48.026 | 73.062 | 0.00 | 0.00 |
| ATOM | 3922 | CA   | THR | X | 263 | 34.999 | 50.008 | 72.536 | 0.00 | 0.00 |
| ATOM | 3923 | HA   | THR | X | 263 | 34.935 | 50.391 | 71.518 | 0.00 | 0.00 |
| ATOM | 3924 | CB   | THR | X | 263 | 33.869 | 50.618 | 73.335 | 0.00 | 0.00 |
| ATOM | 3925 | HB   | THR | X | 263 | 33.970 | 50.391 | 74.396 | 0.00 | 0.00 |
| ATOM | 3926 | CG2  | THR | X | 263 | 33.864 | 52.150 | 73.049 | 0.00 | 0.00 |
| ATOM | 3927 | HG21 | THR | X | 263 | 34.743 | 52.739 | 73.311 | 0.00 | 0.00 |
| ATOM | 3928 | HG22 | THR | X | 263 | 33.608 | 52.411 | 72.022 | 0.00 | 0.00 |
| ATOM | 3929 | HG23 | THR | X | 263 | 33.025 | 52.505 | 73.648 | 0.00 | 0.00 |
| ATOM | 3930 | OG1  | THR | X | 263 | 32.538 | 50.136 | 72.900 | 0.00 | 0.00 |
| ATOM | 3931 | HG1  | THR | X | 263 | 32.586 | 49.185 | 73.019 | 0.00 | 0.00 |
| ATOM | 3932 | C    | THR | X | 263 | 36.401 | 50.531 | 73.044 | 0.00 | 0.00 |
| ATOM | 3933 | O    | THR | X | 263 | 36.949 | 51.435 | 72.465 | 0.00 | 0.00 |
| ATOM | 3934 | N    | GLU | X | 264 | 36.832 | 49.871 | 74.140 | 0.00 | 0.00 |
| ATOM | 3935 | H    | GLU | X | 264 | 36.271 | 49.104 | 74.480 | 0.00 | 0.00 |
| ATOM | 3936 | CA   | GLU | X | 264 | 38.179 | 50.122 | 74.771 | 0.00 | 0.00 |
| ATOM | 3937 | HA   | GLU | X | 264 | 38.588 | 51.132 | 74.749 | 0.00 | 0.00 |
| ATOM | 3938 | CB   | GLU | X | 264 | 38.245 | 49.528 | 76.244 | 0.00 | 0.00 |
| ATOM | 3939 | HB2  | GLU | X | 264 | 37.253 | 49.659 | 76.676 | 0.00 | 0.00 |
| ATOM | 3940 | HB3  | GLU | X | 264 | 38.449 | 48.457 | 76.238 | 0.00 | 0.00 |
| ATOM | 3941 | CG   | GLU | X | 264 | 39.264 | 50.256 | 77.180 | 0.00 | 0.00 |
| ATOM | 3942 | HG2  | GLU | X | 264 | 39.328 | 49.668 | 78.095 | 0.00 | 0.00 |
| ATOM | 3943 | HG3  | GLU | X | 264 | 40.282 | 50.220 | 76.792 | 0.00 | 0.00 |
| ATOM | 3944 | CD   | GLU | X | 264 | 38.875 | 51.662 | 77.566 | 0.00 | 0.00 |
| ATOM | 3945 | OE1  | GLU | X | 264 | 38.282 | 51.756 | 78.632 | 0.00 | 0.00 |
| ATOM | 3946 | OE2  | GLU | X | 264 | 39.490 | 52.598 | 76.978 | 0.00 | 0.00 |
| ATOM | 3947 | C    | GLU | X | 264 | 39.259 | 49.406 | 73.954 | 0.00 | 0.00 |
| ATOM | 3948 | O    | GLU | X | 264 | 40.304 | 49.962 | 73.799 | 0.00 | 0.00 |
| ATOM | 3949 | N    | LEU | X | 265 | 39.101 | 48.191 | 73.417 | 0.00 | 0.00 |
| ATOM | 3950 | H    | LEU | X | 265 | 38.271 | 47.664 | 73.646 | 0.00 | 0.00 |
| ATOM | 3951 | CA   | LEU | X | 265 | 40.199 | 47.471 | 72.725 | 0.00 | 0.00 |
| ATOM | 3952 | HA   | LEU | X | 265 | 41.096 | 47.477 | 73.344 | 0.00 | 0.00 |
| ATOM | 3953 | CB   | LEU | X | 265 | 39.739 | 45.954 | 72.572 | 0.00 | 0.00 |
| ATOM | 3954 | HB2  | LEU | X | 265 | 39.603 | 45.615 | 73.599 | 0.00 | 0.00 |
| ATOM | 3955 | HB3  | LEU | X | 265 | 38.717 | 45.774 | 72.241 | 0.00 | 0.00 |
| ATOM | 3956 | CG   | LEU | X | 265 | 40.737 | 44.995 | 71.914 | 0.00 | 0.00 |
| ATOM | 3957 | HG   | LEU | X | 265 | 41.716 | 45.470 | 71.980 | 0.00 | 0.00 |

|      |      |      |     |   |     |        |        |        |      |      |
|------|------|------|-----|---|-----|--------|--------|--------|------|------|
| ATOM | 3958 | CD1  | LEU | X | 265 | 40.747 | 43.624 | 72.570 | 0.00 | 0.00 |
| ATOM | 3959 | HD11 | LEU | X | 265 | 40.994 | 43.715 | 73.628 | 0.00 | 0.00 |
| ATOM | 3960 | HD12 | LEU | X | 265 | 39.735 | 43.219 | 72.568 | 0.00 | 0.00 |
| ATOM | 3961 | HD13 | LEU | X | 265 | 41.443 | 42.971 | 72.043 | 0.00 | 0.00 |
| ATOM | 3962 | CD2  | LEU | X | 265 | 40.341 | 44.824 | 70.465 | 0.00 | 0.00 |
| ATOM | 3963 | HD21 | LEU | X | 265 | 40.331 | 45.826 | 70.035 | 0.00 | 0.00 |
| ATOM | 3964 | HD22 | LEU | X | 265 | 41.170 | 44.321 | 69.967 | 0.00 | 0.00 |
| ATOM | 3965 | HD23 | LEU | X | 265 | 39.311 | 44.495 | 70.330 | 0.00 | 0.00 |
| ATOM | 3966 | C    | LEU | X | 265 | 40.481 | 48.161 | 71.467 | 0.00 | 0.00 |
| ATOM | 3967 | O    | LEU | X | 265 | 41.666 | 48.379 | 71.187 | 0.00 | 0.00 |
| ATOM | 3968 | N    | VAL | X | 266 | 39.489 | 48.444 | 70.582 | 0.00 | 0.00 |
| ATOM | 3969 | H    | VAL | X | 266 | 38.554 | 48.315 | 70.942 | 0.00 | 0.00 |
| ATOM | 3970 | CA   | VAL | X | 266 | 39.791 | 49.120 | 69.236 | 0.00 | 0.00 |
| ATOM | 3971 | HA   | VAL | X | 266 | 40.727 | 48.662 | 68.915 | 0.00 | 0.00 |
| ATOM | 3972 | CB   | VAL | X | 266 | 38.878 | 48.857 | 68.006 | 0.00 | 0.00 |
| ATOM | 3973 | HB   | VAL | X | 266 | 38.020 | 49.528 | 67.972 | 0.00 | 0.00 |
| ATOM | 3974 | CG1  | VAL | X | 266 | 39.598 | 48.907 | 66.622 | 0.00 | 0.00 |
| ATOM | 3975 | HG11 | VAL | X | 266 | 40.280 | 48.059 | 66.690 | 0.00 | 0.00 |
| ATOM | 3976 | HG12 | VAL | X | 266 | 38.892 | 48.759 | 65.805 | 0.00 | 0.00 |
| ATOM | 3977 | HG13 | VAL | X | 266 | 40.205 | 49.797 | 66.461 | 0.00 | 0.00 |
| ATOM | 3978 | CG2  | VAL | X | 266 | 38.322 | 47.419 | 68.040 | 0.00 | 0.00 |
| ATOM | 3979 | HG21 | VAL | X | 266 | 37.614 | 47.273 | 67.224 | 0.00 | 0.00 |
| ATOM | 3980 | HG22 | VAL | X | 266 | 39.185 | 46.758 | 67.967 | 0.00 | 0.00 |
| ATOM | 3981 | HG23 | VAL | X | 266 | 37.783 | 47.246 | 68.972 | 0.00 | 0.00 |
| ATOM | 3982 | C    | VAL | X | 266 | 40.094 | 50.641 | 69.361 | 0.00 | 0.00 |
| ATOM | 3983 | O    | VAL | X | 266 | 40.692 | 51.261 | 68.500 | 0.00 | 0.00 |
| ATOM | 3984 | N    | ALA | X | 267 | 39.681 | 51.282 | 70.466 | 0.00 | 0.00 |
| ATOM | 3985 | H    | ALA | X | 267 | 39.141 | 50.773 | 71.152 | 0.00 | 0.00 |
| ATOM | 3986 | CA   | ALA | X | 267 | 40.089 | 52.666 | 70.635 | 0.00 | 0.00 |
| ATOM | 3987 | HA   | ALA | X | 267 | 39.904 | 53.293 | 69.762 | 0.00 | 0.00 |
| ATOM | 3988 | CB   | ALA | X | 267 | 39.210 | 53.190 | 71.785 | 0.00 | 0.00 |
| ATOM | 3989 | HB1  | ALA | X | 267 | 39.395 | 52.634 | 72.705 | 0.00 | 0.00 |
| ATOM | 3990 | HB2  | ALA | X | 267 | 39.471 | 54.222 | 72.020 | 0.00 | 0.00 |
| ATOM | 3991 | HB3  | ALA | X | 267 | 38.167 | 53.057 | 71.497 | 0.00 | 0.00 |
| ATOM | 3992 | C    | ALA | X | 267 | 41.586 | 52.680 | 71.084 | 0.00 | 0.00 |
| ATOM | 3993 | O    | ALA | X | 267 | 42.451 | 53.431 | 70.590 | 0.00 | 0.00 |
| ATOM | 3994 | N    | CYX | X | 268 | 42.051 | 51.616 | 71.759 | 0.00 | 0.00 |
| ATOM | 3995 | H    | CYX | X | 268 | 41.439 | 51.037 | 72.317 | 0.00 | 0.00 |
| ATOM | 3996 | CA   | CYX | X | 268 | 43.511 | 51.332 | 72.016 | 0.00 | 0.00 |
| ATOM | 3997 | HA   | CYX | X | 268 | 43.979 | 52.263 | 72.336 | 0.00 | 0.00 |
| ATOM | 3998 | CB   | CYX | X | 268 | 43.601 | 50.272 | 73.150 | 0.00 | 0.00 |
| ATOM | 3999 | HB2  | CYX | X | 268 | 43.281 | 50.709 | 74.096 | 0.00 | 0.00 |
| ATOM | 4000 | HB3  | CYX | X | 268 | 42.890 | 49.457 | 73.014 | 0.00 | 0.00 |
| ATOM | 4001 | SG   | CYX | X | 268 | 45.300 | 49.774 | 73.473 | 0.00 | 0.00 |
| ATOM | 4002 | C    | CYX | X | 268 | 44.285 | 50.932 | 70.797 | 0.00 | 0.00 |
| ATOM | 4003 | O    | CYX | X | 268 | 45.358 | 51.419 | 70.512 | 0.00 | 0.00 |
| ATOM | 4004 | N    | LEU | X | 269 | 43.596 | 50.223 | 69.905 | 0.00 | 0.00 |
| ATOM | 4005 | H    | LEU | X | 269 | 42.832 | 49.668 | 70.263 | 0.00 | 0.00 |
| ATOM | 4006 | CA   | LEU | X | 269 | 44.194 | 49.773 | 68.688 | 0.00 | 0.00 |
| ATOM | 4007 | HA   | LEU | X | 269 | 45.227 | 49.601 | 68.992 | 0.00 | 0.00 |
| ATOM | 4008 | CB   | LEU | X | 269 | 43.438 | 48.573 | 68.101 | 0.00 | 0.00 |
| ATOM | 4009 | HB2  | LEU | X | 269 | 43.077 | 47.907 | 68.885 | 0.00 | 0.00 |
| ATOM | 4010 | HB3  | LEU | X | 269 | 42.581 | 48.943 | 67.539 | 0.00 | 0.00 |
| ATOM | 4011 | CG   | LEU | X | 269 | 44.280 | 47.608 | 67.181 | 0.00 | 0.00 |
| ATOM | 4012 | HG   | LEU | X | 269 | 44.839 | 48.223 | 66.477 | 0.00 | 0.00 |
| ATOM | 4013 | CD1  | LEU | X | 269 | 45.260 | 46.868 | 68.047 | 0.00 | 0.00 |
| ATOM | 4014 | HD11 | LEU | X | 269 | 45.946 | 46.345 | 67.380 | 0.00 | 0.00 |
| ATOM | 4015 | HD12 | LEU | X | 269 | 45.896 | 47.496 | 68.670 | 0.00 | 0.00 |
| ATOM | 4016 | HD13 | LEU | X | 269 | 44.778 | 46.102 | 68.655 | 0.00 | 0.00 |
| ATOM | 4017 | CD2  | LEU | X | 269 | 43.501 | 46.652 | 66.310 | 0.00 | 0.00 |
| ATOM | 4018 | HD21 | LEU | X | 269 | 42.749 | 47.152 | 65.699 | 0.00 | 0.00 |
| ATOM | 4019 | HD22 | LEU | X | 269 | 44.242 | 46.135 | 65.701 | 0.00 | 0.00 |
| ATOM | 4020 | HD23 | LEU | X | 269 | 43.058 | 45.799 | 66.824 | 0.00 | 0.00 |
| ATOM | 4021 | C    | LEU | X | 269 | 44.225 | 50.974 | 67.732 | 0.00 | 0.00 |
| ATOM | 4022 | O    | LEU | X | 269 | 44.868 | 50.836 | 66.649 | 0.00 | 0.00 |
| ATOM | 4023 | N    | ARG | X | 270 | 43.621 | 52.130 | 67.978 | 0.00 | 0.00 |
| ATOM | 4024 | H    | ARG | X | 270 | 42.957 | 52.211 | 68.735 | 0.00 | 0.00 |
| ATOM | 4025 | CA   | ARG | X | 270 | 43.819 | 53.386 | 67.247 | 0.00 | 0.00 |
| ATOM | 4026 | HA   | ARG | X | 270 | 44.183 | 53.179 | 66.240 | 0.00 | 0.00 |
| ATOM | 4027 | CB   | ARG | X | 270 | 42.503 | 54.002 | 67.078 | 0.00 | 0.00 |

|      |      |      |     |   |     |        |        |        |      |      |
|------|------|------|-----|---|-----|--------|--------|--------|------|------|
| ATOM | 4028 | HB2  | ARG | X | 270 | 41.863 | 53.898 | 67.954 | 0.00 | 0.00 |
| ATOM | 4029 | HB3  | ARG | X | 270 | 42.562 | 55.082 | 66.938 | 0.00 | 0.00 |
| ATOM | 4030 | CG   | ARG | X | 270 | 41.775 | 53.370 | 65.898 | 0.00 | 0.00 |
| ATOM | 4031 | HG2  | ARG | X | 270 | 42.469 | 53.588 | 65.086 | 0.00 | 0.00 |
| ATOM | 4032 | HG3  | ARG | X | 270 | 41.716 | 52.284 | 65.965 | 0.00 | 0.00 |
| ATOM | 4033 | CD   | ARG | X | 270 | 40.433 | 54.111 | 65.572 | 0.00 | 0.00 |
| ATOM | 4034 | HD2  | ARG | X | 270 | 40.526 | 55.189 | 65.704 | 0.00 | 0.00 |
| ATOM | 4035 | HD3  | ARG | X | 270 | 40.243 | 54.034 | 64.502 | 0.00 | 0.00 |
| ATOM | 4036 | NE   | ARG | X | 270 | 39.294 | 53.534 | 66.296 | 0.00 | 0.00 |
| ATOM | 4037 | HE   | ARG | X | 270 | 39.113 | 53.875 | 67.229 | 0.00 | 0.00 |
| ATOM | 4038 | CZ   | ARG | X | 270 | 38.463 | 52.548 | 65.805 | 0.00 | 0.00 |
| ATOM | 4039 | NH1  | ARG | X | 270 | 38.387 | 52.176 | 64.530 | 0.00 | 0.00 |
| ATOM | 4040 | HH11 | ARG | X | 270 | 38.900 | 52.668 | 63.812 | 0.00 | 0.00 |
| ATOM | 4041 | HH12 | ARG | X | 270 | 37.729 | 51.455 | 64.270 | 0.00 | 0.00 |
| ATOM | 4042 | NH2  | ARG | X | 270 | 37.564 | 51.983 | 66.632 | 0.00 | 0.00 |
| ATOM | 4043 | HH21 | ARG | X | 270 | 37.466 | 52.229 | 67.607 | 0.00 | 0.00 |
| ATOM | 4044 | HH22 | ARG | X | 270 | 36.960 | 51.290 | 66.214 | 0.00 | 0.00 |
| ATOM | 4045 | C    | ARG | X | 270 | 44.781 | 54.327 | 67.959 | 0.00 | 0.00 |
| ATOM | 4046 | O    | ARG | X | 270 | 45.626 | 54.933 | 67.313 | 0.00 | 0.00 |
| ATOM | 4047 | N    | THR | X | 271 | 44.817 | 54.400 | 69.291 | 0.00 | 0.00 |
| ATOM | 4048 | H    | THR | X | 271 | 44.022 | 54.013 | 69.779 | 0.00 | 0.00 |
| ATOM | 4049 | CA   | THR | X | 271 | 45.865 | 55.152 | 70.074 | 0.00 | 0.00 |
| ATOM | 4050 | HA   | THR | X | 271 | 45.989 | 56.043 | 69.459 | 0.00 | 0.00 |
| ATOM | 4051 | CB   | THR | X | 271 | 45.329 | 55.559 | 71.498 | 0.00 | 0.00 |
| ATOM | 4052 | HB   | THR | X | 271 | 46.030 | 56.311 | 71.862 | 0.00 | 0.00 |
| ATOM | 4053 | CG2  | THR | X | 271 | 44.065 | 56.444 | 71.465 | 0.00 | 0.00 |
| ATOM | 4054 | HG21 | THR | X | 271 | 44.325 | 57.399 | 71.008 | 0.00 | 0.00 |
| ATOM | 4055 | HG22 | THR | X | 271 | 43.236 | 55.982 | 70.929 | 0.00 | 0.00 |
| ATOM | 4056 | HG23 | THR | X | 271 | 43.795 | 56.659 | 72.499 | 0.00 | 0.00 |
| ATOM | 4057 | OG1  | THR | X | 271 | 45.256 | 54.456 | 72.358 | 0.00 | 0.00 |
| ATOM | 4058 | HG1  | THR | X | 271 | 45.554 | 54.816 | 73.197 | 0.00 | 0.00 |
| ATOM | 4059 | C    | THR | X | 271 | 47.218 | 54.571 | 70.207 | 0.00 | 0.00 |
| ATOM | 4060 | O    | THR | X | 271 | 48.153 | 55.399 | 70.148 | 0.00 | 0.00 |
| ATOM | 4061 | N    | ARG | X | 272 | 47.361 | 53.246 | 70.076 | 0.00 | 0.00 |
| ATOM | 4062 | H    | ARG | X | 272 | 46.512 | 52.701 | 70.114 | 0.00 | 0.00 |
| ATOM | 4063 | CA   | ARG | X | 272 | 48.634 | 52.710 | 69.998 | 0.00 | 0.00 |
| ATOM | 4064 | HA   | ARG | X | 272 | 49.335 | 53.134 | 70.717 | 0.00 | 0.00 |
| ATOM | 4065 | CB   | ARG | X | 272 | 48.592 | 51.150 | 70.326 | 0.00 | 0.00 |
| ATOM | 4066 | HB2  | ARG | X | 272 | 47.910 | 50.743 | 69.580 | 0.00 | 0.00 |
| ATOM | 4067 | HB3  | ARG | X | 272 | 49.491 | 50.683 | 69.924 | 0.00 | 0.00 |
| ATOM | 4068 | CG   | ARG | X | 272 | 48.279 | 50.795 | 71.805 | 0.00 | 0.00 |
| ATOM | 4069 | HG2  | ARG | X | 272 | 47.425 | 51.387 | 72.133 | 0.00 | 0.00 |
| ATOM | 4070 | HG3  | ARG | X | 272 | 48.139 | 49.721 | 71.924 | 0.00 | 0.00 |
| ATOM | 4071 | CD   | ARG | X | 272 | 49.367 | 51.151 | 72.759 | 0.00 | 0.00 |
| ATOM | 4072 | HD2  | ARG | X | 272 | 50.258 | 50.576 | 72.505 | 0.00 | 0.00 |
| ATOM | 4073 | HD3  | ARG | X | 272 | 49.598 | 52.190 | 72.526 | 0.00 | 0.00 |
| ATOM | 4074 | NE   | ARG | X | 272 | 48.958 | 51.046 | 74.168 | 0.00 | 0.00 |
| ATOM | 4075 | HE   | ARG | X | 272 | 48.073 | 51.455 | 74.432 | 0.00 | 0.00 |
| ATOM | 4076 | CZ   | ARG | X | 272 | 49.551 | 50.348 | 75.138 | 0.00 | 0.00 |
| ATOM | 4077 | NH1  | ARG | X | 272 | 50.684 | 49.612 | 74.997 | 0.00 | 0.00 |
| ATOM | 4078 | HH11 | ARG | X | 272 | 51.271 | 49.801 | 74.197 | 0.00 | 0.00 |
| ATOM | 4079 | HH12 | ARG | X | 272 | 50.916 | 49.095 | 75.833 | 0.00 | 0.00 |
| ATOM | 4080 | NH2  | ARG | X | 272 | 48.984 | 50.413 | 76.346 | 0.00 | 0.00 |
| ATOM | 4081 | HH21 | ARG | X | 272 | 48.184 | 51.022 | 76.439 | 0.00 | 0.00 |
| ATOM | 4082 | HH22 | ARG | X | 272 | 49.207 | 49.818 | 77.130 | 0.00 | 0.00 |
| ATOM | 4083 | C    | ARG | X | 272 | 49.148 | 52.984 | 68.560 | 0.00 | 0.00 |
| ATOM | 4084 | O    | ARG | X | 272 | 48.386 | 52.916 | 67.609 | 0.00 | 0.00 |
| ATOM | 4085 | N    | PRO | X | 273 | 50.395 | 53.526 | 68.386 | 0.00 | 0.00 |
| ATOM | 4086 | CD   | PRO | X | 273 | 51.236 | 54.066 | 69.436 | 0.00 | 0.00 |
| ATOM | 4087 | HD2  | PRO | X | 273 | 51.420 | 53.256 | 70.142 | 0.00 | 0.00 |
| ATOM | 4088 | HD3  | PRO | X | 273 | 50.661 | 54.813 | 69.983 | 0.00 | 0.00 |
| ATOM | 4089 | CG   | PRO | X | 273 | 52.559 | 54.559 | 68.903 | 0.00 | 0.00 |
| ATOM | 4090 | HG2  | PRO | X | 273 | 53.329 | 53.788 | 68.893 | 0.00 | 0.00 |
| ATOM | 4091 | HG3  | PRO | X | 273 | 52.962 | 55.454 | 69.377 | 0.00 | 0.00 |
| ATOM | 4092 | CB   | PRO | X | 273 | 52.169 | 54.900 | 67.468 | 0.00 | 0.00 |
| ATOM | 4093 | HB2  | PRO | X | 273 | 52.961 | 54.737 | 66.737 | 0.00 | 0.00 |
| ATOM | 4094 | HB3  | PRO | X | 273 | 51.815 | 55.926 | 67.362 | 0.00 | 0.00 |
| ATOM | 4095 | CA   | PRO | X | 273 | 50.891 | 54.102 | 67.109 | 0.00 | 0.00 |
| ATOM | 4096 | HA   | PRO | X | 273 | 50.195 | 54.854 | 66.736 | 0.00 | 0.00 |
| ATOM | 4097 | C    | PRO | X | 273 | 51.070 | 53.092 | 65.975 | 0.00 | 0.00 |

|      |      |      |     |   |     |        |        |        |      |      |
|------|------|------|-----|---|-----|--------|--------|--------|------|------|
| ATOM | 4098 | O    | PRO | X | 273 | 51.356 | 51.901 | 66.143 | 0.00 | 0.00 |
| ATOM | 4099 | N    | ALA | X | 274 | 50.910 | 53.544 | 64.745 | 0.00 | 0.00 |
| ATOM | 4100 | H    | ALA | X | 274 | 50.548 | 54.480 | 64.629 | 0.00 | 0.00 |
| ATOM | 4101 | CA   | ALA | X | 274 | 50.895 | 52.630 | 63.511 | 0.00 | 0.00 |
| ATOM | 4102 | HA   | ALA | X | 274 | 50.048 | 51.964 | 63.673 | 0.00 | 0.00 |
| ATOM | 4103 | CB   | ALA | X | 274 | 50.649 | 53.454 | 62.296 | 0.00 | 0.00 |
| ATOM | 4104 | HB1  | ALA | X | 274 | 49.610 | 53.706 | 62.507 | 0.00 | 0.00 |
| ATOM | 4105 | HB2  | ALA | X | 274 | 51.291 | 54.325 | 62.162 | 0.00 | 0.00 |
| ATOM | 4106 | HB3  | ALA | X | 274 | 50.778 | 52.833 | 61.409 | 0.00 | 0.00 |
| ATOM | 4107 | C    | ALA | X | 274 | 52.176 | 51.715 | 63.347 | 0.00 | 0.00 |
| ATOM | 4108 | O    | ALA | X | 274 | 52.104 | 50.541 | 62.924 | 0.00 | 0.00 |
| ATOM | 4109 | N    | GLN | X | 275 | 53.331 | 52.324 | 63.668 | 0.00 | 0.00 |
| ATOM | 4110 | H    | GLN | X | 275 | 53.255 | 53.273 | 64.006 | 0.00 | 0.00 |
| ATOM | 4111 | CA   | GLN | X | 275 | 54.640 | 51.692 | 63.662 | 0.00 | 0.00 |
| ATOM | 4112 | HA   | GLN | X | 275 | 54.879 | 51.356 | 62.653 | 0.00 | 0.00 |
| ATOM | 4113 | CB   | GLN | X | 275 | 55.771 | 52.736 | 64.058 | 0.00 | 0.00 |
| ATOM | 4114 | HB2  | GLN | X | 275 | 55.563 | 53.254 | 64.994 | 0.00 | 0.00 |
| ATOM | 4115 | HB3  | GLN | X | 275 | 56.592 | 52.031 | 64.196 | 0.00 | 0.00 |
| ATOM | 4116 | CG   | GLN | X | 275 | 56.174 | 53.696 | 62.923 | 0.00 | 0.00 |
| ATOM | 4117 | HG2  | GLN | X | 275 | 56.900 | 53.128 | 62.342 | 0.00 | 0.00 |
| ATOM | 4118 | HG3  | GLN | X | 275 | 55.333 | 54.075 | 62.343 | 0.00 | 0.00 |
| ATOM | 4119 | CD   | GLN | X | 275 | 57.017 | 54.865 | 63.514 | 0.00 | 0.00 |
| ATOM | 4120 | OE1  | GLN | X | 275 | 58.236 | 54.923 | 63.464 | 0.00 | 0.00 |
| ATOM | 4121 | NE2  | GLN | X | 275 | 56.385 | 55.894 | 64.066 | 0.00 | 0.00 |
| ATOM | 4122 | HE21 | GLN | X | 275 | 57.023 | 56.635 | 64.321 | 0.00 | 0.00 |
| ATOM | 4123 | HE22 | GLN | X | 275 | 55.380 | 55.962 | 64.141 | 0.00 | 0.00 |
| ATOM | 4124 | C    | GLN | X | 275 | 54.628 | 50.394 | 64.511 | 0.00 | 0.00 |
| ATOM | 4125 | O    | GLN | X | 275 | 54.741 | 49.305 | 64.004 | 0.00 | 0.00 |
| ATOM | 4126 | N    | VAL | X | 276 | 54.374 | 50.492 | 65.810 | 0.00 | 0.00 |
| ATOM | 4127 | H    | VAL | X | 276 | 54.417 | 51.419 | 66.208 | 0.00 | 0.00 |
| ATOM | 4128 | CA   | VAL | X | 276 | 54.287 | 49.319 | 66.651 | 0.00 | 0.00 |
| ATOM | 4129 | HA   | VAL | X | 276 | 55.227 | 48.770 | 66.585 | 0.00 | 0.00 |
| ATOM | 4130 | CB   | VAL | X | 276 | 54.241 | 49.757 | 68.146 | 0.00 | 0.00 |
| ATOM | 4131 | HB   | VAL | X | 276 | 54.990 | 50.514 | 68.374 | 0.00 | 0.00 |
| ATOM | 4132 | CG1  | VAL | X | 276 | 52.914 | 50.372 | 68.618 | 0.00 | 0.00 |
| ATOM | 4133 | HG11 | VAL | X | 276 | 52.123 | 49.622 | 68.605 | 0.00 | 0.00 |
| ATOM | 4134 | HG12 | VAL | X | 276 | 53.005 | 50.798 | 69.617 | 0.00 | 0.00 |
| ATOM | 4135 | HG13 | VAL | X | 276 | 52.627 | 51.206 | 67.977 | 0.00 | 0.00 |
| ATOM | 4136 | CG2  | VAL | X | 276 | 54.567 | 48.602 | 69.105 | 0.00 | 0.00 |
| ATOM | 4137 | HG21 | VAL | X | 276 | 55.523 | 48.142 | 68.852 | 0.00 | 0.00 |
| ATOM | 4138 | HG22 | VAL | X | 276 | 54.604 | 48.959 | 70.134 | 0.00 | 0.00 |
| ATOM | 4139 | HG23 | VAL | X | 276 | 53.771 | 47.875 | 68.942 | 0.00 | 0.00 |
| ATOM | 4140 | C    | VAL | X | 276 | 53.140 | 48.319 | 66.346 | 0.00 | 0.00 |
| ATOM | 4141 | O    | VAL | X | 276 | 53.228 | 47.098 | 66.515 | 0.00 | 0.00 |
| ATOM | 4142 | N    | LEU | X | 277 | 52.088 | 48.772 | 65.622 | 0.00 | 0.00 |
| ATOM | 4143 | H    | LEU | X | 277 | 52.234 | 49.735 | 65.356 | 0.00 | 0.00 |
| ATOM | 4144 | CA   | LEU | X | 277 | 50.988 | 47.922 | 65.125 | 0.00 | 0.00 |
| ATOM | 4145 | HA   | LEU | X | 277 | 50.631 | 47.127 | 65.779 | 0.00 | 0.00 |
| ATOM | 4146 | CB   | LEU | X | 277 | 49.722 | 48.758 | 64.868 | 0.00 | 0.00 |
| ATOM | 4147 | HB2  | LEU | X | 277 | 49.569 | 49.322 | 65.788 | 0.00 | 0.00 |
| ATOM | 4148 | HB3  | LEU | X | 277 | 49.972 | 49.520 | 64.130 | 0.00 | 0.00 |
| ATOM | 4149 | CG   | LEU | X | 277 | 48.425 | 48.137 | 64.400 | 0.00 | 0.00 |
| ATOM | 4150 | HG   | LEU | X | 277 | 47.793 | 48.982 | 64.126 | 0.00 | 0.00 |
| ATOM | 4151 | CD1  | LEU | X | 277 | 48.489 | 47.356 | 63.024 | 0.00 | 0.00 |
| ATOM | 4152 | HD11 | LEU | X | 277 | 49.064 | 46.431 | 63.059 | 0.00 | 0.00 |
| ATOM | 4153 | HD12 | LEU | X | 277 | 47.489 | 47.043 | 62.724 | 0.00 | 0.00 |
| ATOM | 4154 | HD13 | LEU | X | 277 | 48.931 | 48.107 | 62.369 | 0.00 | 0.00 |
| ATOM | 4155 | CD2  | LEU | X | 277 | 47.895 | 47.144 | 65.421 | 0.00 | 0.00 |
| ATOM | 4156 | HD21 | LEU | X | 277 | 46.924 | 46.841 | 65.029 | 0.00 | 0.00 |
| ATOM | 4157 | HD22 | LEU | X | 277 | 48.666 | 46.407 | 65.643 | 0.00 | 0.00 |
| ATOM | 4158 | HD23 | LEU | X | 277 | 47.731 | 47.764 | 66.303 | 0.00 | 0.00 |
| ATOM | 4159 | C    | LEU | X | 277 | 51.520 | 47.173 | 63.935 | 0.00 | 0.00 |
| ATOM | 4160 | O    | LEU | X | 277 | 51.525 | 45.995 | 64.045 | 0.00 | 0.00 |
| ATOM | 4161 | N    | VAL | X | 278 | 51.848 | 47.791 | 62.788 | 0.00 | 0.00 |
| ATOM | 4162 | H    | VAL | X | 278 | 51.859 | 48.801 | 62.822 | 0.00 | 0.00 |
| ATOM | 4163 | CA   | VAL | X | 278 | 52.424 | 47.084 | 61.539 | 0.00 | 0.00 |
| ATOM | 4164 | HA   | VAL | X | 278 | 51.605 | 46.458 | 61.183 | 0.00 | 0.00 |
| ATOM | 4165 | CB   | VAL | X | 278 | 52.605 | 48.108 | 60.439 | 0.00 | 0.00 |
| ATOM | 4166 | HB   | VAL | X | 278 | 51.791 | 48.833 | 60.460 | 0.00 | 0.00 |
| ATOM | 4167 | CG1  | VAL | X | 278 | 53.887 | 48.854 | 60.656 | 0.00 | 0.00 |

|      |      |      |     |   |     |        |        |        |      |      |
|------|------|------|-----|---|-----|--------|--------|--------|------|------|
| ATOM | 4168 | HG11 | VAL | X | 278 | 53.982 | 49.713 | 59.993 | 0.00 | 0.00 |
| ATOM | 4169 | HG12 | VAL | X | 278 | 53.967 | 49.118 | 61.711 | 0.00 | 0.00 |
| ATOM | 4170 | HG13 | VAL | X | 278 | 54.673 | 48.151 | 60.380 | 0.00 | 0.00 |
| ATOM | 4171 | CG2  | VAL | X | 278 | 52.497 | 47.498 | 59.027 | 0.00 | 0.00 |
| ATOM | 4172 | HG21 | VAL | X | 278 | 51.472 | 47.134 | 58.966 | 0.00 | 0.00 |
| ATOM | 4173 | HG22 | VAL | X | 278 | 52.705 | 48.264 | 58.279 | 0.00 | 0.00 |
| ATOM | 4174 | HG23 | VAL | X | 278 | 53.248 | 46.720 | 58.889 | 0.00 | 0.00 |
| ATOM | 4175 | C    | VAL | X | 278 | 53.647 | 46.145 | 61.795 | 0.00 | 0.00 |
| ATOM | 4176 | O    | VAL | X | 278 | 53.887 | 45.241 | 61.010 | 0.00 | 0.00 |
| ATOM | 4177 | N    | ASN | X | 279 | 54.364 | 46.405 | 62.846 | 0.00 | 0.00 |
| ATOM | 4178 | H    | ASN | X | 279 | 54.050 | 47.214 | 63.363 | 0.00 | 0.00 |
| ATOM | 4179 | CA   | ASN | X | 279 | 55.449 | 45.575 | 63.390 | 0.00 | 0.00 |
| ATOM | 4180 | HA   | ASN | X | 279 | 56.142 | 45.353 | 62.579 | 0.00 | 0.00 |
| ATOM | 4181 | CB   | ASN | X | 279 | 56.232 | 46.407 | 64.456 | 0.00 | 0.00 |
| ATOM | 4182 | HB2  | ASN | X | 279 | 56.869 | 47.054 | 63.852 | 0.00 | 0.00 |
| ATOM | 4183 | HB3  | ASN | X | 279 | 55.515 | 46.963 | 65.060 | 0.00 | 0.00 |
| ATOM | 4184 | CG   | ASN | X | 279 | 57.078 | 45.541 | 65.402 | 0.00 | 0.00 |
| ATOM | 4185 | OD1  | ASN | X | 279 | 58.053 | 44.923 | 65.051 | 0.00 | 0.00 |
| ATOM | 4186 | ND2  | ASN | X | 279 | 56.630 | 45.340 | 66.640 | 0.00 | 0.00 |
| ATOM | 4187 | HD21 | ASN | X | 279 | 57.055 | 44.550 | 67.105 | 0.00 | 0.00 |
| ATOM | 4188 | HD22 | ASN | X | 279 | 55.839 | 45.783 | 67.084 | 0.00 | 0.00 |
| ATOM | 4189 | C    | ASN | X | 279 | 54.845 | 44.195 | 63.837 | 0.00 | 0.00 |
| ATOM | 4190 | O    | ASN | X | 279 | 55.429 | 43.098 | 63.523 | 0.00 | 0.00 |
| ATOM | 4191 | N    | HIE | X | 280 | 53.708 | 44.207 | 64.621 | 0.00 | 0.00 |
| ATOM | 4192 | H    | HIE | X | 280 | 53.189 | 45.029 | 64.894 | 0.00 | 0.00 |
| ATOM | 4193 | CA   | HIE | X | 280 | 53.163 | 42.994 | 65.159 | 0.00 | 0.00 |
| ATOM | 4194 | HA   | HIE | X | 280 | 53.998 | 42.311 | 65.309 | 0.00 | 0.00 |
| ATOM | 4195 | CB   | HIE | X | 280 | 52.377 | 43.319 | 66.495 | 0.00 | 0.00 |
| ATOM | 4196 | HB2  | HIE | X | 280 | 51.727 | 44.165 | 66.274 | 0.00 | 0.00 |
| ATOM | 4197 | HB3  | HIE | X | 280 | 51.931 | 42.361 | 66.764 | 0.00 | 0.00 |
| ATOM | 4198 | CG   | HIE | X | 280 | 53.367 | 43.650 | 67.629 | 0.00 | 0.00 |
| ATOM | 4199 | ND1  | HIE | X | 280 | 54.474 | 42.781 | 67.943 | 0.00 | 0.00 |
| ATOM | 4200 | CE1  | HIE | X | 280 | 55.142 | 43.405 | 68.980 | 0.00 | 0.00 |
| ATOM | 4201 | HE1  | HIE | X | 280 | 55.827 | 42.929 | 69.666 | 0.00 | 0.00 |
| ATOM | 4202 | NE2  | HIE | X | 280 | 54.528 | 44.625 | 69.220 | 0.00 | 0.00 |
| ATOM | 4203 | HE2  | HIE | X | 280 | 54.611 | 45.149 | 70.080 | 0.00 | 0.00 |
| ATOM | 4204 | CD2  | HIE | X | 280 | 53.444 | 44.786 | 68.395 | 0.00 | 0.00 |
| ATOM | 4205 | HD2  | HIE | X | 280 | 52.870 | 45.700 | 68.350 | 0.00 | 0.00 |
| ATOM | 4206 | C    | HIE | X | 280 | 52.200 | 42.328 | 64.172 | 0.00 | 0.00 |
| ATOM | 4207 | O    | HIE | X | 280 | 51.671 | 41.241 | 64.446 | 0.00 | 0.00 |
| ATOM | 4208 | N    | GLU | X | 281 | 51.810 | 43.042 | 63.120 | 0.00 | 0.00 |
| ATOM | 4209 | H    | GLU | X | 281 | 52.176 | 43.980 | 63.036 | 0.00 | 0.00 |
| ATOM | 4210 | CA   | GLU | X | 281 | 50.793 | 42.592 | 62.137 | 0.00 | 0.00 |
| ATOM | 4211 | HA   | GLU | X | 281 | 49.879 | 42.465 | 62.718 | 0.00 | 0.00 |
| ATOM | 4212 | CB   | GLU | X | 281 | 50.722 | 43.584 | 60.958 | 0.00 | 0.00 |
| ATOM | 4213 | HB2  | GLU | X | 281 | 50.543 | 44.584 | 61.355 | 0.00 | 0.00 |
| ATOM | 4214 | HB3  | GLU | X | 281 | 51.644 | 43.620 | 60.378 | 0.00 | 0.00 |
| ATOM | 4215 | CG   | GLU | X | 281 | 49.435 | 43.411 | 60.110 | 0.00 | 0.00 |
| ATOM | 4216 | HG2  | GLU | X | 281 | 49.334 | 42.341 | 59.931 | 0.00 | 0.00 |
| ATOM | 4217 | HG3  | GLU | X | 281 | 48.552 | 43.731 | 60.664 | 0.00 | 0.00 |
| ATOM | 4218 | CD   | GLU | X | 281 | 49.569 | 44.099 | 58.742 | 0.00 | 0.00 |
| ATOM | 4219 | OE1  | GLU | X | 281 | 49.251 | 45.277 | 58.507 | 0.00 | 0.00 |
| ATOM | 4220 | OE2  | GLU | X | 281 | 49.926 | 43.294 | 57.853 | 0.00 | 0.00 |
| ATOM | 4221 | C    | GLU | X | 281 | 51.270 | 41.263 | 61.510 | 0.00 | 0.00 |
| ATOM | 4222 | O    | GLU | X | 281 | 50.588 | 40.273 | 61.438 | 0.00 | 0.00 |
| ATOM | 4223 | N    | TRP | X | 282 | 52.553 | 41.240 | 61.075 | 0.00 | 0.00 |
| ATOM | 4224 | H    | TRP | X | 282 | 53.080 | 42.095 | 60.968 | 0.00 | 0.00 |
| ATOM | 4225 | CA   | TRP | X | 282 | 53.170 | 40.080 | 60.441 | 0.00 | 0.00 |
| ATOM | 4226 | HA   | TRP | X | 282 | 52.409 | 39.635 | 59.799 | 0.00 | 0.00 |
| ATOM | 4227 | CB   | TRP | X | 282 | 54.231 | 40.521 | 59.537 | 0.00 | 0.00 |
| ATOM | 4228 | HB2  | TRP | X | 282 | 54.680 | 41.459 | 59.862 | 0.00 | 0.00 |
| ATOM | 4229 | HB3  | TRP | X | 282 | 54.949 | 39.703 | 59.468 | 0.00 | 0.00 |
| ATOM | 4230 | CG   | TRP | X | 282 | 53.592 | 40.837 | 58.172 | 0.00 | 0.00 |
| ATOM | 4231 | CD1  | TRP | X | 282 | 52.767 | 41.843 | 57.881 | 0.00 | 0.00 |
| ATOM | 4232 | HD1  | TRP | X | 282 | 52.445 | 42.639 | 58.536 | 0.00 | 0.00 |
| ATOM | 4233 | NE1  | TRP | X | 282 | 52.283 | 41.631 | 56.600 | 0.00 | 0.00 |
| ATOM | 4234 | HE1  | TRP | X | 282 | 51.650 | 42.217 | 56.074 | 0.00 | 0.00 |
| ATOM | 4235 | CE2  | TRP | X | 282 | 52.584 | 40.439 | 56.054 | 0.00 | 0.00 |
| ATOM | 4236 | CZ2  | TRP | X | 282 | 52.300 | 39.785 | 54.823 | 0.00 | 0.00 |
| ATOM | 4237 | HZ2  | TRP | X | 282 | 51.682 | 40.296 | 54.099 | 0.00 | 0.00 |

|      |      |      |     |   |     |        |        |        |      |      |
|------|------|------|-----|---|-----|--------|--------|--------|------|------|
| ATOM | 4238 | CH2  | TRP | X | 282 | 52.946 | 38.583 | 54.541 | 0.00 | 0.00 |
| ATOM | 4239 | HH2  | TRP | X | 282 | 52.830 | 38.101 | 53.581 | 0.00 | 0.00 |
| ATOM | 4240 | CZ3  | TRP | X | 282 | 53.824 | 38.056 | 55.471 | 0.00 | 0.00 |
| ATOM | 4241 | HZ3  | TRP | X | 282 | 54.206 | 37.059 | 55.307 | 0.00 | 0.00 |
| ATOM | 4242 | CE3  | TRP | X | 282 | 54.158 | 38.731 | 56.625 | 0.00 | 0.00 |
| ATOM | 4243 | HE3  | TRP | X | 282 | 54.728 | 38.229 | 57.393 | 0.00 | 0.00 |
| ATOM | 4244 | CD2  | TRP | X | 282 | 53.564 | 39.938 | 56.956 | 0.00 | 0.00 |
| ATOM | 4245 | C    | TRP | X | 282 | 53.566 | 39.002 | 61.446 | 0.00 | 0.00 |
| ATOM | 4246 | O    | TRP | X | 282 | 54.163 | 37.971 | 61.011 | 0.00 | 0.00 |
| ATOM | 4247 | N    | HIE | X | 283 | 53.217 | 39.114 | 62.782 | 0.00 | 0.00 |
| ATOM | 4248 | H    | HIE | X | 283 | 52.884 | 40.026 | 63.061 | 0.00 | 0.00 |
| ATOM | 4249 | CA   | HIE | X | 283 | 53.263 | 38.172 | 63.899 | 0.00 | 0.00 |
| ATOM | 4250 | HA   | HIE | X | 283 | 53.962 | 37.364 | 63.682 | 0.00 | 0.00 |
| ATOM | 4251 | CB   | HIE | X | 283 | 53.790 | 38.811 | 65.178 | 0.00 | 0.00 |
| ATOM | 4252 | HB2  | HIE | X | 283 | 53.310 | 39.785 | 65.274 | 0.00 | 0.00 |
| ATOM | 4253 | HB3  | HIE | X | 283 | 53.609 | 38.176 | 66.045 | 0.00 | 0.00 |
| ATOM | 4254 | CG   | HIE | X | 283 | 55.260 | 39.013 | 65.122 | 0.00 | 0.00 |
| ATOM | 4255 | ND1  | HIE | X | 283 | 56.273 | 38.277 | 64.473 | 0.00 | 0.00 |
| ATOM | 4256 | CE1  | HIE | X | 283 | 57.422 | 38.948 | 64.633 | 0.00 | 0.00 |
| ATOM | 4257 | HE1  | HIE | X | 283 | 58.402 | 38.509 | 64.515 | 0.00 | 0.00 |
| ATOM | 4258 | NE2  | HIE | X | 283 | 57.249 | 40.043 | 65.365 | 0.00 | 0.00 |
| ATOM | 4259 | HE2  | HIE | X | 283 | 58.066 | 40.508 | 65.735 | 0.00 | 0.00 |
| ATOM | 4260 | CD2  | HIE | X | 283 | 55.928 | 40.126 | 65.615 | 0.00 | 0.00 |
| ATOM | 4261 | HD2  | HIE | X | 283 | 55.409 | 40.917 | 66.136 | 0.00 | 0.00 |
| ATOM | 4262 | C    | HIE | X | 283 | 51.843 | 37.530 | 64.123 | 0.00 | 0.00 |
| ATOM | 4263 | O    | HIE | X | 283 | 51.698 | 36.407 | 64.811 | 0.00 | 0.00 |
| ATOM | 4264 | N    | VAL | X | 284 | 50.813 | 38.095 | 63.427 | 0.00 | 0.00 |
| ATOM | 4265 | H    | VAL | X | 284 | 51.033 | 38.901 | 62.861 | 0.00 | 0.00 |
| ATOM | 4266 | CA   | VAL | X | 284 | 49.528 | 37.520 | 63.142 | 0.00 | 0.00 |
| ATOM | 4267 | HA   | VAL | X | 284 | 49.494 | 36.535 | 63.608 | 0.00 | 0.00 |
| ATOM | 4268 | CB   | VAL | X | 284 | 48.296 | 38.278 | 63.627 | 0.00 | 0.00 |
| ATOM | 4269 | HB   | VAL | X | 284 | 47.384 | 37.743 | 63.364 | 0.00 | 0.00 |
| ATOM | 4270 | CG1  | VAL | X | 284 | 48.283 | 38.474 | 65.164 | 0.00 | 0.00 |
| ATOM | 4271 | HG11 | VAL | X | 284 | 48.936 | 39.245 | 65.573 | 0.00 | 0.00 |
| ATOM | 4272 | HG12 | VAL | X | 284 | 47.305 | 38.817 | 65.502 | 0.00 | 0.00 |
| ATOM | 4273 | HG13 | VAL | X | 284 | 48.567 | 37.533 | 65.635 | 0.00 | 0.00 |
| ATOM | 4274 | CG2  | VAL | X | 284 | 48.161 | 39.662 | 63.082 | 0.00 | 0.00 |
| ATOM | 4275 | HG21 | VAL | X | 284 | 47.307 | 40.164 | 63.537 | 0.00 | 0.00 |
| ATOM | 4276 | HG22 | VAL | X | 284 | 49.075 | 40.191 | 63.354 | 0.00 | 0.00 |
| ATOM | 4277 | HG23 | VAL | X | 284 | 47.885 | 39.774 | 62.033 | 0.00 | 0.00 |
| ATOM | 4278 | C    | VAL | X | 284 | 49.384 | 37.118 | 61.593 | 0.00 | 0.00 |
| ATOM | 4279 | O    | VAL | X | 284 | 48.353 | 37.139 | 60.993 | 0.00 | 0.00 |
| ATOM | 4280 | N    | LEU | X | 285 | 50.409 | 36.440 | 61.087 | 0.00 | 0.00 |
| ATOM | 4281 | H    | LEU | X | 285 | 51.175 | 36.359 | 61.741 | 0.00 | 0.00 |
| ATOM | 4282 | CA   | LEU | X | 285 | 50.468 | 35.616 | 59.837 | 0.00 | 0.00 |
| ATOM | 4283 | HA   | LEU | X | 285 | 49.857 | 36.120 | 59.088 | 0.00 | 0.00 |
| ATOM | 4284 | CB   | LEU | X | 285 | 51.936 | 35.561 | 59.339 | 0.00 | 0.00 |
| ATOM | 4285 | HB2  | LEU | X | 285 | 52.342 | 36.566 | 59.457 | 0.00 | 0.00 |
| ATOM | 4286 | HB3  | LEU | X | 285 | 52.534 | 34.948 | 60.012 | 0.00 | 0.00 |
| ATOM | 4287 | CG   | LEU | X | 285 | 52.116 | 35.119 | 57.874 | 0.00 | 0.00 |
| ATOM | 4288 | HG   | LEU | X | 285 | 51.619 | 34.157 | 57.752 | 0.00 | 0.00 |
| ATOM | 4289 | CD1  | LEU | X | 285 | 51.456 | 36.048 | 56.885 | 0.00 | 0.00 |
| ATOM | 4290 | HD11 | LEU | X | 285 | 51.763 | 37.071 | 57.100 | 0.00 | 0.00 |
| ATOM | 4291 | HD12 | LEU | X | 285 | 51.797 | 35.782 | 55.884 | 0.00 | 0.00 |
| ATOM | 4292 | HD13 | LEU | X | 285 | 50.370 | 35.971 | 56.942 | 0.00 | 0.00 |
| ATOM | 4293 | CD2  | LEU | X | 285 | 53.601 | 34.936 | 57.588 | 0.00 | 0.00 |
| ATOM | 4294 | HD21 | LEU | X | 285 | 53.948 | 35.963 | 57.697 | 0.00 | 0.00 |
| ATOM | 4295 | HD22 | LEU | X | 285 | 54.046 | 34.202 | 58.260 | 0.00 | 0.00 |
| ATOM | 4296 | HD23 | LEU | X | 285 | 53.761 | 34.480 | 56.610 | 0.00 | 0.00 |
| ATOM | 4297 | C    | LEU | X | 285 | 49.977 | 34.231 | 60.125 | 0.00 | 0.00 |
| ATOM | 4298 | O    | LEU | X | 285 | 50.496 | 33.683 | 61.145 | 0.00 | 0.00 |
| ATOM | 4299 | N    | PRO | X | 286 | 49.189 | 33.546 | 59.282 | 0.00 | 0.00 |
| ATOM | 4300 | CD   | PRO | X | 286 | 48.327 | 34.074 | 58.263 | 0.00 | 0.00 |
| ATOM | 4301 | HD2  | PRO | X | 286 | 48.912 | 34.088 | 57.343 | 0.00 | 0.00 |
| ATOM | 4302 | HD3  | PRO | X | 286 | 47.870 | 35.005 | 58.600 | 0.00 | 0.00 |
| ATOM | 4303 | CG   | PRO | X | 286 | 47.239 | 33.050 | 57.990 | 0.00 | 0.00 |
| ATOM | 4304 | HG2  | PRO | X | 286 | 46.923 | 33.157 | 56.953 | 0.00 | 0.00 |
| ATOM | 4305 | HG3  | PRO | X | 286 | 46.415 | 33.000 | 58.701 | 0.00 | 0.00 |
| ATOM | 4306 | CB   | PRO | X | 286 | 47.919 | 31.717 | 58.270 | 0.00 | 0.00 |
| ATOM | 4307 | HB2  | PRO | X | 286 | 48.394 | 31.441 | 57.328 | 0.00 | 0.00 |



|      |      |      |     |   |     |        |        |        |      |      |
|------|------|------|-----|---|-----|--------|--------|--------|------|------|
| ATOM | 4308 | HB3  | PRO | X | 286 | 47.211 | 30.955 | 58.595 | 0.00 | 0.00 |
| ATOM | 4309 | CA   | PRO | X | 286 | 48.963 | 32.108 | 59.313 | 0.00 | 0.00 |
| ATOM | 4310 | HA   | PRO | X | 286 | 48.531 | 31.939 | 60.300 | 0.00 | 0.00 |
| ATOM | 4311 | C    | PRO | X | 286 | 50.139 | 31.122 | 59.353 | 0.00 | 0.00 |
| ATOM | 4312 | O    | PRO | X | 286 | 51.328 | 31.483 | 59.218 | 0.00 | 0.00 |
| ATOM | 4313 | N    | GLN | X | 287 | 49.899 | 29.826 | 59.720 | 0.00 | 0.00 |
| ATOM | 4314 | H    | GLN | X | 287 | 48.968 | 29.445 | 59.808 | 0.00 | 0.00 |
| ATOM | 4315 | CA   | GLN | X | 287 | 50.945 | 28.814 | 60.050 | 0.00 | 0.00 |
| ATOM | 4316 | HA   | GLN | X | 287 | 51.947 | 29.008 | 59.668 | 0.00 | 0.00 |
| ATOM | 4317 | CB   | GLN | X | 287 | 51.031 | 28.647 | 61.573 | 0.00 | 0.00 |
| ATOM | 4318 | HB2  | GLN | X | 287 | 50.009 | 28.677 | 61.950 | 0.00 | 0.00 |
| ATOM | 4319 | HB3  | GLN | X | 287 | 51.521 | 27.692 | 61.763 | 0.00 | 0.00 |
| ATOM | 4320 | CG   | GLN | X | 287 | 51.700 | 29.820 | 62.298 | 0.00 | 0.00 |
| ATOM | 4321 | HG2  | GLN | X | 287 | 52.715 | 29.985 | 61.934 | 0.00 | 0.00 |
| ATOM | 4322 | HG3  | GLN | X | 287 | 51.120 | 30.714 | 62.068 | 0.00 | 0.00 |
| ATOM | 4323 | CD   | GLN | X | 287 | 51.665 | 29.740 | 63.804 | 0.00 | 0.00 |
| ATOM | 4324 | OE1  | GLN | X | 287 | 52.628 | 29.970 | 64.498 | 0.00 | 0.00 |
| ATOM | 4325 | NE2  | GLN | X | 287 | 50.541 | 29.565 | 64.443 | 0.00 | 0.00 |
| ATOM | 4326 | HE21 | GLN | X | 287 | 50.592 | 29.706 | 65.442 | 0.00 | 0.00 |
| ATOM | 4327 | HE22 | GLN | X | 287 | 49.673 | 29.415 | 63.949 | 0.00 | 0.00 |
| ATOM | 4328 | C    | GLN | X | 287 | 50.576 | 27.514 | 59.340 | 0.00 | 0.00 |
| ATOM | 4329 | O    | GLN | X | 287 | 49.548 | 27.335 | 58.674 | 0.00 | 0.00 |
| ATOM | 4330 | N    | GLU | X | 288 | 51.593 | 26.655 | 59.122 | 0.00 | 0.00 |
| ATOM | 4331 | H    | GLU | X | 288 | 52.512 | 26.976 | 59.393 | 0.00 | 0.00 |
| ATOM | 4332 | CA   | GLU | X | 288 | 51.559 | 25.347 | 58.408 | 0.00 | 0.00 |
| ATOM | 4333 | HA   | GLU | X | 288 | 52.565 | 24.933 | 58.472 | 0.00 | 0.00 |
| ATOM | 4334 | CB   | GLU | X | 288 | 50.664 | 24.400 | 59.188 | 0.00 | 0.00 |
| ATOM | 4335 | HB2  | GLU | X | 288 | 49.720 | 24.868 | 59.470 | 0.00 | 0.00 |
| ATOM | 4336 | HB3  | GLU | X | 288 | 50.625 | 23.540 | 58.519 | 0.00 | 0.00 |
| ATOM | 4337 | CG   | GLU | X | 288 | 51.256 | 23.834 | 60.460 | 0.00 | 0.00 |
| ATOM | 4338 | HG2  | GLU | X | 288 | 52.064 | 23.194 | 60.104 | 0.00 | 0.00 |
| ATOM | 4339 | HG3  | GLU | X | 288 | 51.759 | 24.635 | 61.000 | 0.00 | 0.00 |
| ATOM | 4340 | CD   | GLU | X | 288 | 50.308 | 23.283 | 61.433 | 0.00 | 0.00 |
| ATOM | 4341 | OE1  | GLU | X | 288 | 49.869 | 22.108 | 61.334 | 0.00 | 0.00 |
| ATOM | 4342 | OE2  | GLU | X | 288 | 49.800 | 23.983 | 62.348 | 0.00 | 0.00 |
| ATOM | 4343 | C    | GLU | X | 288 | 51.195 | 25.569 | 56.891 | 0.00 | 0.00 |
| ATOM | 4344 | O    | GLU | X | 288 | 50.600 | 24.661 | 56.310 | 0.00 | 0.00 |
| ATOM | 4345 | N    | SER | X | 289 | 51.682 | 26.651 | 56.380 | 0.00 | 0.00 |
| ATOM | 4346 | H    | SER | X | 289 | 52.252 | 27.298 | 56.906 | 0.00 | 0.00 |
| ATOM | 4347 | CA   | SER | X | 289 | 51.231 | 27.051 | 55.066 | 0.00 | 0.00 |
| ATOM | 4348 | HA   | SER | X | 289 | 51.100 | 26.178 | 54.427 | 0.00 | 0.00 |
| ATOM | 4349 | CB   | SER | X | 289 | 49.839 | 27.636 | 55.266 | 0.00 | 0.00 |
| ATOM | 4350 | HB2  | SER | X | 289 | 49.530 | 28.130 | 54.345 | 0.00 | 0.00 |
| ATOM | 4351 | HB3  | SER | X | 289 | 49.153 | 26.807 | 55.439 | 0.00 | 0.00 |
| ATOM | 4352 | OG   | SER | X | 289 | 49.782 | 28.740 | 56.139 | 0.00 | 0.00 |
| ATOM | 4353 | HG   | SER | X | 289 | 49.733 | 28.440 | 57.049 | 0.00 | 0.00 |
| ATOM | 4354 | C    | SER | X | 289 | 52.271 | 27.952 | 54.384 | 0.00 | 0.00 |
| ATOM | 4355 | O    | SER | X | 289 | 53.261 | 28.352 | 55.002 | 0.00 | 0.00 |
| ATOM | 4356 | N    | VAL | X | 290 | 52.026 | 28.293 | 53.087 | 0.00 | 0.00 |
| ATOM | 4357 | H    | VAL | X | 290 | 51.205 | 27.950 | 52.610 | 0.00 | 0.00 |
| ATOM | 4358 | CA   | VAL | X | 290 | 52.820 | 29.218 | 52.320 | 0.00 | 0.00 |
| ATOM | 4359 | HA   | VAL | X | 290 | 53.392 | 29.827 | 53.020 | 0.00 | 0.00 |
| ATOM | 4360 | CB   | VAL | X | 290 | 53.859 | 28.435 | 51.483 | 0.00 | 0.00 |
| ATOM | 4361 | HB   | VAL | X | 290 | 53.254 | 27.686 | 50.972 | 0.00 | 0.00 |
| ATOM | 4362 | CG1  | VAL | X | 290 | 54.489 | 29.165 | 50.300 | 0.00 | 0.00 |
| ATOM | 4363 | HG11 | VAL | X | 290 | 54.871 | 30.142 | 50.593 | 0.00 | 0.00 |
| ATOM | 4364 | HG12 | VAL | X | 290 | 55.228 | 28.567 | 49.767 | 0.00 | 0.00 |
| ATOM | 4365 | HG13 | VAL | X | 290 | 53.654 | 29.261 | 49.606 | 0.00 | 0.00 |
| ATOM | 4366 | CG2  | VAL | X | 290 | 54.920 | 27.646 | 52.317 | 0.00 | 0.00 |
| ATOM | 4367 | HG21 | VAL | X | 290 | 54.456 | 26.970 | 53.035 | 0.00 | 0.00 |
| ATOM | 4368 | HG22 | VAL | X | 290 | 55.609 | 27.019 | 51.752 | 0.00 | 0.00 |
| ATOM | 4369 | HG23 | VAL | X | 290 | 55.511 | 28.403 | 52.832 | 0.00 | 0.00 |
| ATOM | 4370 | C    | VAL | X | 290 | 51.906 | 30.094 | 51.484 | 0.00 | 0.00 |
| ATOM | 4371 | O    | VAL | X | 290 | 50.733 | 29.734 | 51.227 | 0.00 | 0.00 |
| ATOM | 4372 | N    | PHE | X | 291 | 52.361 | 31.324 | 51.346 | 0.00 | 0.00 |
| ATOM | 4373 | H    | PHE | X | 291 | 53.276 | 31.468 | 51.748 | 0.00 | 0.00 |
| ATOM | 4374 | CA   | PHE | X | 291 | 51.713 | 32.522 | 50.744 | 0.00 | 0.00 |
| ATOM | 4375 | HA   | PHE | X | 291 | 52.329 | 33.348 | 51.098 | 0.00 | 0.00 |
| ATOM | 4376 | CB   | PHE | X | 291 | 51.816 | 32.514 | 49.177 | 0.00 | 0.00 |
| ATOM | 4377 | HB2  | PHE | X | 291 | 52.572 | 31.757 | 48.968 | 0.00 | 0.00 |

|      |      |      |     |   |     |        |        |        |      |      |
|------|------|------|-----|---|-----|--------|--------|--------|------|------|
| ATOM | 4378 | HB3  | PHE | X | 291 | 50.898 | 32.169 | 48.701 | 0.00 | 0.00 |
| ATOM | 4379 | CG   | PHE | X | 291 | 52.310 | 33.807 | 48.512 | 0.00 | 0.00 |
| ATOM | 4380 | CD1  | PHE | X | 291 | 53.669 | 34.233 | 48.575 | 0.00 | 0.00 |
| ATOM | 4381 | HD1  | PHE | X | 291 | 54.368 | 33.564 | 49.056 | 0.00 | 0.00 |
| ATOM | 4382 | CE1  | PHE | X | 291 | 54.078 | 35.293 | 47.784 | 0.00 | 0.00 |
| ATOM | 4383 | HE1  | PHE | X | 291 | 55.097 | 35.649 | 47.814 | 0.00 | 0.00 |
| ATOM | 4384 | CZ   | PHE | X | 291 | 53.162 | 36.048 | 47.062 | 0.00 | 0.00 |
| ATOM | 4385 | HZ   | PHE | X | 291 | 53.571 | 36.894 | 46.530 | 0.00 | 0.00 |
| ATOM | 4386 | CE2  | PHE | X | 291 | 51.842 | 35.601 | 46.956 | 0.00 | 0.00 |
| ATOM | 4387 | HE2  | PHE | X | 291 | 51.243 | 36.124 | 46.226 | 0.00 | 0.00 |
| ATOM | 4388 | CD2  | PHE | X | 291 | 51.440 | 34.507 | 47.695 | 0.00 | 0.00 |
| ATOM | 4389 | HD2  | PHE | X | 291 | 50.396 | 34.238 | 47.638 | 0.00 | 0.00 |
| ATOM | 4390 | C    | PHE | X | 291 | 50.256 | 32.816 | 51.303 | 0.00 | 0.00 |
| ATOM | 4391 | O    | PHE | X | 291 | 49.361 | 33.070 | 50.584 | 0.00 | 0.00 |
| ATOM | 4392 | N    | ARG | X | 292 | 49.917 | 32.660 | 52.611 | 0.00 | 0.00 |
| ATOM | 4393 | H    | ARG | X | 292 | 50.651 | 32.390 | 53.250 | 0.00 | 0.00 |
| ATOM | 4394 | CA   | ARG | X | 292 | 48.673 | 33.146 | 53.310 | 0.00 | 0.00 |
| ATOM | 4395 | HA   | ARG | X | 292 | 48.007 | 33.336 | 52.469 | 0.00 | 0.00 |
| ATOM | 4396 | CB   | ARG | X | 292 | 48.014 | 32.132 | 54.191 | 0.00 | 0.00 |
| ATOM | 4397 | HB2  | ARG | X | 292 | 48.691 | 31.865 | 55.003 | 0.00 | 0.00 |
| ATOM | 4398 | HB3  | ARG | X | 292 | 47.088 | 32.608 | 54.513 | 0.00 | 0.00 |
| ATOM | 4399 | CG   | ARG | X | 292 | 47.669 | 30.848 | 53.418 | 0.00 | 0.00 |
| ATOM | 4400 | HG2  | ARG | X | 292 | 48.594 | 30.514 | 52.948 | 0.00 | 0.00 |
| ATOM | 4401 | HG3  | ARG | X | 292 | 47.165 | 30.042 | 53.950 | 0.00 | 0.00 |
| ATOM | 4402 | CD   | ARG | X | 292 | 46.620 | 31.150 | 52.366 | 0.00 | 0.00 |
| ATOM | 4403 | HD2  | ARG | X | 292 | 45.824 | 30.408 | 52.422 | 0.00 | 0.00 |
| ATOM | 4404 | HD3  | ARG | X | 292 | 46.220 | 32.132 | 52.619 | 0.00 | 0.00 |
| ATOM | 4405 | NE   | ARG | X | 292 | 47.198 | 31.130 | 51.038 | 0.00 | 0.00 |
| ATOM | 4406 | HE   | ARG | X | 292 | 48.078 | 31.601 | 50.878 | 0.00 | 0.00 |
| ATOM | 4407 | CZ   | ARG | X | 292 | 46.738 | 30.368 | 50.063 | 0.00 | 0.00 |
| ATOM | 4408 | NH1  | ARG | X | 292 | 45.545 | 29.822 | 49.971 | 0.00 | 0.00 |
| ATOM | 4409 | HH11 | ARG | X | 292 | 44.873 | 29.987 | 50.706 | 0.00 | 0.00 |
| ATOM | 4410 | HH12 | ARG | X | 292 | 45.367 | 29.124 | 49.264 | 0.00 | 0.00 |
| ATOM | 4411 | NH2  | ARG | X | 292 | 47.513 | 30.075 | 49.075 | 0.00 | 0.00 |
| ATOM | 4412 | HH21 | ARG | X | 292 | 48.411 | 30.536 | 49.099 | 0.00 | 0.00 |
| ATOM | 4413 | HH22 | ARG | X | 292 | 47.225 | 29.489 | 48.304 | 0.00 | 0.00 |
| ATOM | 4414 | C    | ARG | X | 292 | 49.064 | 34.402 | 54.178 | 0.00 | 0.00 |
| ATOM | 4415 | O    | ARG | X | 292 | 49.813 | 34.236 | 55.140 | 0.00 | 0.00 |
| ATOM | 4416 | N    | PHE | X | 293 | 48.490 | 35.589 | 53.830 | 0.00 | 0.00 |
| ATOM | 4417 | H    | PHE | X | 293 | 47.865 | 35.571 | 53.037 | 0.00 | 0.00 |
| ATOM | 4418 | CA   | PHE | X | 293 | 48.836 | 36.902 | 54.396 | 0.00 | 0.00 |
| ATOM | 4419 | HA   | PHE | X | 293 | 49.919 | 36.994 | 54.483 | 0.00 | 0.00 |
| ATOM | 4420 | CB   | PHE | X | 293 | 48.390 | 37.952 | 53.325 | 0.00 | 0.00 |
| ATOM | 4421 | HB2  | PHE | X | 293 | 47.314 | 37.864 | 53.174 | 0.00 | 0.00 |
| ATOM | 4422 | HB3  | PHE | X | 293 | 48.629 | 38.895 | 53.815 | 0.00 | 0.00 |
| ATOM | 4423 | CG   | PHE | X | 293 | 49.142 | 37.959 | 51.993 | 0.00 | 0.00 |
| ATOM | 4424 | CD1  | PHE | X | 293 | 50.457 | 38.531 | 51.915 | 0.00 | 0.00 |
| ATOM | 4425 | HD1  | PHE | X | 293 | 50.995 | 38.861 | 52.792 | 0.00 | 0.00 |
| ATOM | 4426 | CE1  | PHE | X | 293 | 51.140 | 38.525 | 50.666 | 0.00 | 0.00 |
| ATOM | 4427 | HE1  | PHE | X | 293 | 52.118 | 38.958 | 50.519 | 0.00 | 0.00 |
| ATOM | 4428 | CZ   | PHE | X | 293 | 50.530 | 37.986 | 49.527 | 0.00 | 0.00 |
| ATOM | 4429 | HZ   | PHE | X | 293 | 50.939 | 37.978 | 48.528 | 0.00 | 0.00 |
| ATOM | 4430 | CE2  | PHE | X | 293 | 49.217 | 37.403 | 49.626 | 0.00 | 0.00 |
| ATOM | 4431 | HE2  | PHE | X | 293 | 48.820 | 36.945 | 48.732 | 0.00 | 0.00 |
| ATOM | 4432 | CD2  | PHE | X | 293 | 48.600 | 37.354 | 50.861 | 0.00 | 0.00 |
| ATOM | 4433 | HD2  | PHE | X | 293 | 47.632 | 36.883 | 50.954 | 0.00 | 0.00 |
| ATOM | 4434 | C    | PHE | X | 293 | 48.321 | 37.105 | 55.837 | 0.00 | 0.00 |
| ATOM | 4435 | O    | PHE | X | 293 | 47.545 | 36.326 | 56.402 | 0.00 | 0.00 |
| ATOM | 4436 | N    | SER | X | 294 | 48.628 | 38.218 | 56.458 | 0.00 | 0.00 |
| ATOM | 4437 | H    | SER | X | 294 | 49.396 | 38.687 | 55.999 | 0.00 | 0.00 |
| ATOM | 4438 | CA   | SER | X | 294 | 48.078 | 38.760 | 57.675 | 0.00 | 0.00 |
| ATOM | 4439 | HA   | SER | X | 294 | 48.084 | 37.976 | 58.432 | 0.00 | 0.00 |
| ATOM | 4440 | CB   | SER | X | 294 | 49.061 | 39.820 | 58.058 | 0.00 | 0.00 |
| ATOM | 4441 | HB2  | SER | X | 294 | 48.769 | 40.252 | 59.015 | 0.00 | 0.00 |
| ATOM | 4442 | HB3  | SER | X | 294 | 50.043 | 39.358 | 58.159 | 0.00 | 0.00 |
| ATOM | 4443 | OG   | SER | X | 294 | 49.138 | 40.834 | 57.137 | 0.00 | 0.00 |
| ATOM | 4444 | HG   | SER | X | 294 | 49.566 | 41.627 | 57.467 | 0.00 | 0.00 |
| ATOM | 4445 | C    | SER | X | 294 | 46.594 | 39.167 | 57.557 | 0.00 | 0.00 |
| ATOM | 4446 | O    | SER | X | 294 | 45.793 | 38.495 | 58.201 | 0.00 | 0.00 |
| ATOM | 4447 | N    | PHE | X | 295 | 46.274 | 40.203 | 56.751 | 0.00 | 0.00 |

|      |      |      |     |   |     |        |        |        |      |      |
|------|------|------|-----|---|-----|--------|--------|--------|------|------|
| ATOM | 4448 | H    | PHE | X | 295 | 47.023 | 40.781 | 56.399 | 0.00 | 0.00 |
| ATOM | 4449 | CA   | PHE | X | 295 | 44.887 | 40.664 | 56.500 | 0.00 | 0.00 |
| ATOM | 4450 | HA   | PHE | X | 295 | 44.294 | 39.939 | 57.058 | 0.00 | 0.00 |
| ATOM | 4451 | CB   | PHE | X | 295 | 44.697 | 42.026 | 57.262 | 0.00 | 0.00 |
| ATOM | 4452 | HB2  | PHE | X | 295 | 45.453 | 42.707 | 56.872 | 0.00 | 0.00 |
| ATOM | 4453 | HB3  | PHE | X | 295 | 43.724 | 42.462 | 57.035 | 0.00 | 0.00 |
| ATOM | 4454 | CG   | PHE | X | 295 | 44.772 | 41.815 | 58.711 | 0.00 | 0.00 |
| ATOM | 4455 | CD1  | PHE | X | 295 | 43.676 | 41.178 | 59.415 | 0.00 | 0.00 |
| ATOM | 4456 | HD1  | PHE | X | 295 | 42.752 | 40.884 | 58.939 | 0.00 | 0.00 |
| ATOM | 4457 | CE1  | PHE | X | 295 | 43.783 | 40.956 | 60.772 | 0.00 | 0.00 |
| ATOM | 4458 | HE1  | PHE | X | 295 | 42.928 | 40.490 | 61.239 | 0.00 | 0.00 |
| ATOM | 4459 | CZ   | PHE | X | 295 | 44.977 | 41.254 | 61.423 | 0.00 | 0.00 |
| ATOM | 4460 | HZ   | PHE | X | 295 | 45.108 | 40.933 | 62.446 | 0.00 | 0.00 |
| ATOM | 4461 | CE2  | PHE | X | 295 | 46.079 | 41.924 | 60.695 | 0.00 | 0.00 |
| ATOM | 4462 | HE2  | PHE | X | 295 | 46.946 | 42.237 | 61.258 | 0.00 | 0.00 |
| ATOM | 4463 | CD2  | PHE | X | 295 | 45.987 | 42.158 | 59.335 | 0.00 | 0.00 |
| ATOM | 4464 | HD2  | PHE | X | 295 | 46.806 | 42.613 | 58.799 | 0.00 | 0.00 |
| ATOM | 4465 | C    | PHE | X | 295 | 44.639 | 40.809 | 54.963 | 0.00 | 0.00 |
| ATOM | 4466 | O    | PHE | X | 295 | 45.347 | 41.525 | 54.252 | 0.00 | 0.00 |
| ATOM | 4467 | N    | VAL | X | 296 | 43.508 | 40.286 | 54.504 | 0.00 | 0.00 |
| ATOM | 4468 | H    | VAL | X | 296 | 42.877 | 39.834 | 55.150 | 0.00 | 0.00 |
| ATOM | 4469 | CA   | VAL | X | 296 | 43.005 | 40.359 | 53.145 | 0.00 | 0.00 |
| ATOM | 4470 | HA   | VAL | X | 296 | 43.410 | 41.280 | 52.725 | 0.00 | 0.00 |
| ATOM | 4471 | CB   | VAL | X | 296 | 43.423 | 39.146 | 52.246 | 0.00 | 0.00 |
| ATOM | 4472 | HB   | VAL | X | 296 | 43.293 | 39.453 | 51.208 | 0.00 | 0.00 |
| ATOM | 4473 | CG1  | VAL | X | 296 | 44.908 | 38.791 | 52.158 | 0.00 | 0.00 |
| ATOM | 4474 | HG11 | VAL | X | 296 | 45.553 | 39.632 | 51.905 | 0.00 | 0.00 |
| ATOM | 4475 | HG12 | VAL | X | 296 | 45.177 | 38.437 | 53.153 | 0.00 | 0.00 |
| ATOM | 4476 | HG13 | VAL | X | 296 | 45.035 | 37.941 | 51.487 | 0.00 | 0.00 |
| ATOM | 4477 | CG2  | VAL | X | 296 | 42.710 | 37.852 | 52.614 | 0.00 | 0.00 |
| ATOM | 4478 | HG21 | VAL | X | 296 | 41.656 | 38.072 | 52.784 | 0.00 | 0.00 |
| ATOM | 4479 | HG22 | VAL | X | 296 | 42.683 | 37.120 | 51.808 | 0.00 | 0.00 |
| ATOM | 4480 | HG23 | VAL | X | 296 | 43.141 | 37.484 | 53.545 | 0.00 | 0.00 |
| ATOM | 4481 | C    | VAL | X | 296 | 41.506 | 40.551 | 53.252 | 0.00 | 0.00 |
| ATOM | 4482 | O    | VAL | X | 296 | 40.914 | 40.587 | 54.349 | 0.00 | 0.00 |
| ATOM | 4483 | N    | PRO | X | 297 | 40.793 | 40.874 | 52.129 | 0.00 | 0.00 |
| ATOM | 4484 | CD   | PRO | X | 297 | 41.307 | 41.141 | 50.769 | 0.00 | 0.00 |
| ATOM | 4485 | HD2  | PRO | X | 297 | 41.561 | 40.180 | 50.321 | 0.00 | 0.00 |
| ATOM | 4486 | HD3  | PRO | X | 297 | 42.096 | 41.886 | 50.666 | 0.00 | 0.00 |
| ATOM | 4487 | CG   | PRO | X | 297 | 40.088 | 41.751 | 50.015 | 0.00 | 0.00 |
| ATOM | 4488 | HG2  | PRO | X | 297 | 40.144 | 41.549 | 48.945 | 0.00 | 0.00 |
| ATOM | 4489 | HG3  | PRO | X | 297 | 40.021 | 42.837 | 50.085 | 0.00 | 0.00 |
| ATOM | 4490 | CB   | PRO | X | 297 | 38.972 | 40.980 | 50.669 | 0.00 | 0.00 |
| ATOM | 4491 | HB2  | PRO | X | 297 | 38.948 | 39.953 | 50.306 | 0.00 | 0.00 |
| ATOM | 4492 | HB3  | PRO | X | 297 | 38.087 | 41.574 | 50.437 | 0.00 | 0.00 |
| ATOM | 4493 | CA   | PRO | X | 297 | 39.327 | 41.105 | 52.084 | 0.00 | 0.00 |
| ATOM | 4494 | HA   | PRO | X | 297 | 39.101 | 42.118 | 52.418 | 0.00 | 0.00 |
| ATOM | 4495 | C    | PRO | X | 297 | 38.567 | 40.053 | 52.901 | 0.00 | 0.00 |
| ATOM | 4496 | O    | PRO | X | 297 | 38.876 | 38.850 | 52.792 | 0.00 | 0.00 |
| ATOM | 4497 | N    | VAL | X | 298 | 37.595 | 40.571 | 53.641 | 0.00 | 0.00 |
| ATOM | 4498 | H    | VAL | X | 298 | 37.662 | 41.565 | 53.809 | 0.00 | 0.00 |
| ATOM | 4499 | CA   | VAL | X | 298 | 36.788 | 39.635 | 54.527 | 0.00 | 0.00 |
| ATOM | 4500 | HA   | VAL | X | 298 | 37.258 | 38.653 | 54.480 | 0.00 | 0.00 |
| ATOM | 4501 | CB   | VAL | X | 298 | 36.851 | 40.217 | 55.957 | 0.00 | 0.00 |
| ATOM | 4502 | HB   | VAL | X | 298 | 36.254 | 41.126 | 56.045 | 0.00 | 0.00 |
| ATOM | 4503 | CG1  | VAL | X | 298 | 36.428 | 39.093 | 56.899 | 0.00 | 0.00 |
| ATOM | 4504 | HG11 | VAL | X | 298 | 35.540 | 38.546 | 56.581 | 0.00 | 0.00 |
| ATOM | 4505 | HG12 | VAL | X | 298 | 37.220 | 38.358 | 57.038 | 0.00 | 0.00 |
| ATOM | 4506 | HG13 | VAL | X | 298 | 36.195 | 39.606 | 57.832 | 0.00 | 0.00 |
| ATOM | 4507 | CG2  | VAL | X | 298 | 38.297 | 40.584 | 56.334 | 0.00 | 0.00 |
| ATOM | 4508 | HG21 | VAL | X | 298 | 38.681 | 41.427 | 55.760 | 0.00 | 0.00 |
| ATOM | 4509 | HG22 | VAL | X | 298 | 38.230 | 40.988 | 57.344 | 0.00 | 0.00 |
| ATOM | 4510 | HG23 | VAL | X | 298 | 38.962 | 39.726 | 56.233 | 0.00 | 0.00 |
| ATOM | 4511 | C    | VAL | X | 298 | 35.327 | 39.549 | 54.056 | 0.00 | 0.00 |
| ATOM | 4512 | O    | VAL | X | 298 | 34.747 | 40.620 | 53.794 | 0.00 | 0.00 |
| ATOM | 4513 | N    | VAL | X | 299 | 34.696 | 38.432 | 54.210 | 0.00 | 0.00 |
| ATOM | 4514 | H    | VAL | X | 299 | 35.262 | 37.623 | 54.423 | 0.00 | 0.00 |
| ATOM | 4515 | CA   | VAL | X | 299 | 33.320 | 38.342 | 54.376 | 0.00 | 0.00 |
| ATOM | 4516 | HA   | VAL | X | 299 | 32.871 | 38.797 | 53.493 | 0.00 | 0.00 |
| ATOM | 4517 | CB   | VAL | X | 299 | 32.823 | 36.926 | 54.263 | 0.00 | 0.00 |

|      |      |      |     |   |     |        |        |        |      |      |
|------|------|------|-----|---|-----|--------|--------|--------|------|------|
| ATOM | 4518 | HB   | VAL | X | 299 | 33.087 | 36.472 | 55.218 | 0.00 | 0.00 |
| ATOM | 4519 | CG1  | VAL | X | 299 | 31.296 | 36.783 | 54.190 | 0.00 | 0.00 |
| ATOM | 4520 | HG11 | VAL | X | 299 | 30.886 | 37.508 | 54.894 | 0.00 | 0.00 |
| ATOM | 4521 | HG12 | VAL | X | 299 | 31.197 | 37.137 | 53.164 | 0.00 | 0.00 |
| ATOM | 4522 | HG13 | VAL | X | 299 | 30.871 | 35.785 | 54.291 | 0.00 | 0.00 |
| ATOM | 4523 | CG2  | VAL | X | 299 | 33.534 | 36.098 | 53.120 | 0.00 | 0.00 |
| ATOM | 4524 | HG21 | VAL | X | 299 | 33.023 | 35.176 | 52.844 | 0.00 | 0.00 |
| ATOM | 4525 | HG22 | VAL | X | 299 | 33.614 | 36.701 | 52.215 | 0.00 | 0.00 |
| ATOM | 4526 | HG23 | VAL | X | 299 | 34.542 | 35.718 | 53.288 | 0.00 | 0.00 |
| ATOM | 4527 | C    | VAL | X | 299 | 32.855 | 39.058 | 55.654 | 0.00 | 0.00 |
| ATOM | 4528 | O    | VAL | X | 299 | 33.054 | 38.553 | 56.785 | 0.00 | 0.00 |
| ATOM | 4529 | N    | ASP | X | 300 | 32.252 | 40.246 | 55.482 | 0.00 | 0.00 |
| ATOM | 4530 | H    | ASP | X | 300 | 32.063 | 40.528 | 54.531 | 0.00 | 0.00 |
| ATOM | 4531 | CA   | ASP | X | 300 | 31.824 | 41.235 | 56.539 | 0.00 | 0.00 |
| ATOM | 4532 | HA   | ASP | X | 300 | 32.013 | 40.853 | 57.542 | 0.00 | 0.00 |
| ATOM | 4533 | CB   | ASP | X | 300 | 32.616 | 42.558 | 56.389 | 0.00 | 0.00 |
| ATOM | 4534 | HB2  | ASP | X | 300 | 32.393 | 43.094 | 57.312 | 0.00 | 0.00 |
| ATOM | 4535 | HB3  | ASP | X | 300 | 33.698 | 42.435 | 56.338 | 0.00 | 0.00 |
| ATOM | 4536 | CG   | ASP | X | 300 | 32.215 | 43.489 | 55.241 | 0.00 | 0.00 |
| ATOM | 4537 | OD1  | ASP | X | 300 | 31.695 | 42.934 | 54.272 | 0.00 | 0.00 |
| ATOM | 4538 | OD2  | ASP | X | 300 | 32.486 | 44.739 | 55.324 | 0.00 | 0.00 |
| ATOM | 4539 | C    | ASP | X | 300 | 30.339 | 41.528 | 56.544 | 0.00 | 0.00 |
| ATOM | 4540 | O    | ASP | X | 300 | 29.853 | 42.263 | 57.432 | 0.00 | 0.00 |
| ATOM | 4541 | N    | GLY | X | 301 | 29.518 | 41.160 | 55.562 | 0.00 | 0.00 |
| ATOM | 4542 | H    | GLY | X | 301 | 29.907 | 40.501 | 54.903 | 0.00 | 0.00 |
| ATOM | 4543 | CA   | GLY | X | 301 | 28.053 | 41.468 | 55.492 | 0.00 | 0.00 |
| ATOM | 4544 | HA2  | GLY | X | 301 | 27.550 | 40.761 | 54.854 | 0.00 | 0.00 |
| ATOM | 4545 | HA3  | GLY | X | 301 | 27.576 | 41.514 | 56.455 | 0.00 | 0.00 |
| ATOM | 4546 | C    | GLY | X | 301 | 27.727 | 42.814 | 54.831 | 0.00 | 0.00 |
| ATOM | 4547 | O    | GLY | X | 301 | 26.532 | 43.028 | 54.701 | 0.00 | 0.00 |
| ATOM | 4548 | N    | ASP | X | 302 | 28.762 | 43.578 | 54.478 | 0.00 | 0.00 |
| ATOM | 4549 | H    | ASP | X | 302 | 29.737 | 43.333 | 54.575 | 0.00 | 0.00 |
| ATOM | 4550 | CA   | ASP | X | 302 | 28.431 | 44.922 | 53.895 | 0.00 | 0.00 |
| ATOM | 4551 | HA   | ASP | X | 302 | 27.364 | 45.088 | 53.744 | 0.00 | 0.00 |
| ATOM | 4552 | CB   | ASP | X | 302 | 28.986 | 45.985 | 54.922 | 0.00 | 0.00 |
| ATOM | 4553 | HB2  | ASP | X | 302 | 28.533 | 45.919 | 55.911 | 0.00 | 0.00 |
| ATOM | 4554 | HB3  | ASP | X | 302 | 30.027 | 45.693 | 55.060 | 0.00 | 0.00 |
| ATOM | 4555 | CG   | ASP | X | 302 | 28.984 | 47.410 | 54.368 | 0.00 | 0.00 |
| ATOM | 4556 | OD1  | ASP | X | 302 | 28.036 | 48.163 | 54.732 | 0.00 | 0.00 |
| ATOM | 4557 | OD2  | ASP | X | 302 | 29.904 | 47.779 | 53.645 | 0.00 | 0.00 |
| ATOM | 4558 | C    | ASP | X | 302 | 29.024 | 44.986 | 52.511 | 0.00 | 0.00 |
| ATOM | 4559 | O    | ASP | X | 302 | 28.243 | 45.156 | 51.559 | 0.00 | 0.00 |
| ATOM | 4560 | N    | PHE | X | 303 | 30.329 | 44.738 | 52.355 | 0.00 | 0.00 |
| ATOM | 4561 | H    | PHE | X | 303 | 30.935 | 44.680 | 53.161 | 0.00 | 0.00 |
| ATOM | 4562 | CA   | PHE | X | 303 | 30.876 | 44.564 | 51.027 | 0.00 | 0.00 |
| ATOM | 4563 | HA   | PHE | X | 303 | 30.340 | 45.212 | 50.335 | 0.00 | 0.00 |
| ATOM | 4564 | CB   | PHE | X | 303 | 32.400 | 44.917 | 51.050 | 0.00 | 0.00 |
| ATOM | 4565 | HB2  | PHE | X | 303 | 32.543 | 45.630 | 51.862 | 0.00 | 0.00 |
| ATOM | 4566 | HB3  | PHE | X | 303 | 33.003 | 44.102 | 51.452 | 0.00 | 0.00 |
| ATOM | 4567 | CG   | PHE | X | 303 | 32.975 | 45.392 | 49.717 | 0.00 | 0.00 |
| ATOM | 4568 | CD1  | PHE | X | 303 | 33.241 | 44.333 | 48.817 | 0.00 | 0.00 |
| ATOM | 4569 | HD1  | PHE | X | 303 | 32.953 | 43.315 | 49.036 | 0.00 | 0.00 |
| ATOM | 4570 | CE1  | PHE | X | 303 | 33.784 | 44.711 | 47.567 | 0.00 | 0.00 |
| ATOM | 4571 | HE1  | PHE | X | 303 | 33.897 | 44.015 | 46.749 | 0.00 | 0.00 |
| ATOM | 4572 | CZ   | PHE | X | 303 | 34.042 | 46.042 | 47.224 | 0.00 | 0.00 |
| ATOM | 4573 | HZ   | PHE | X | 303 | 34.241 | 46.308 | 46.197 | 0.00 | 0.00 |
| ATOM | 4574 | CE2  | PHE | X | 303 | 33.756 | 47.099 | 48.153 | 0.00 | 0.00 |
| ATOM | 4575 | HE2  | PHE | X | 303 | 33.869 | 48.141 | 47.893 | 0.00 | 0.00 |
| ATOM | 4576 | CD2  | PHE | X | 303 | 33.286 | 46.716 | 49.408 | 0.00 | 0.00 |
| ATOM | 4577 | HD2  | PHE | X | 303 | 33.068 | 47.348 | 50.256 | 0.00 | 0.00 |
| ATOM | 4578 | C    | PHE | X | 303 | 30.731 | 43.161 | 50.516 | 0.00 | 0.00 |
| ATOM | 4579 | O    | PHE | X | 303 | 30.219 | 42.975 | 49.368 | 0.00 | 0.00 |
| ATOM | 4580 | N    | LEU | X | 304 | 31.175 | 42.135 | 51.282 | 0.00 | 0.00 |
| ATOM | 4581 | H    | LEU | X | 304 | 31.715 | 42.455 | 52.073 | 0.00 | 0.00 |
| ATOM | 4582 | CA   | LEU | X | 304 | 31.071 | 40.724 | 50.979 | 0.00 | 0.00 |
| ATOM | 4583 | HA   | LEU | X | 304 | 30.627 | 40.537 | 50.001 | 0.00 | 0.00 |
| ATOM | 4584 | CB   | LEU | X | 304 | 32.470 | 40.087 | 51.138 | 0.00 | 0.00 |
| ATOM | 4585 | HB2  | LEU | X | 304 | 32.856 | 40.372 | 52.116 | 0.00 | 0.00 |
| ATOM | 4586 | HB3  | LEU | X | 304 | 32.355 | 39.004 | 51.183 | 0.00 | 0.00 |
| ATOM | 4587 | CG   | LEU | X | 304 | 33.445 | 40.602 | 50.058 | 0.00 | 0.00 |

|      |      |      |     |   |     |        |        |        |      |      |
|------|------|------|-----|---|-----|--------|--------|--------|------|------|
| ATOM | 4588 | HG   | LEU | X | 304 | 33.584 | 41.665 | 50.254 | 0.00 | 0.00 |
| ATOM | 4589 | CD1  | LEU | X | 304 | 34.745 | 39.875 | 50.181 | 0.00 | 0.00 |
| ATOM | 4590 | HD11 | LEU | X | 304 | 34.582 | 38.822 | 49.948 | 0.00 | 0.00 |
| ATOM | 4591 | HD12 | LEU | X | 304 | 35.484 | 40.383 | 49.562 | 0.00 | 0.00 |
| ATOM | 4592 | HD13 | LEU | X | 304 | 35.154 | 39.864 | 51.192 | 0.00 | 0.00 |
| ATOM | 4593 | CD2  | LEU | X | 304 | 32.935 | 40.462 | 48.606 | 0.00 | 0.00 |
| ATOM | 4594 | HD21 | LEU | X | 304 | 32.203 | 41.250 | 48.432 | 0.00 | 0.00 |
| ATOM | 4595 | HD22 | LEU | X | 304 | 33.640 | 40.720 | 47.816 | 0.00 | 0.00 |
| ATOM | 4596 | HD23 | LEU | X | 304 | 32.593 | 39.438 | 48.458 | 0.00 | 0.00 |
| ATOM | 4597 | C    | LEU | X | 304 | 30.066 | 40.097 | 52.044 | 0.00 | 0.00 |
| ATOM | 4598 | O    | LEU | X | 304 | 30.381 | 39.728 | 53.148 | 0.00 | 0.00 |
| ATOM | 4599 | N    | SER | X | 305 | 28.805 | 39.956 | 51.620 | 0.00 | 0.00 |
| ATOM | 4600 | H    | SER | X | 305 | 28.476 | 40.365 | 50.757 | 0.00 | 0.00 |
| ATOM | 4601 | CA   | SER | X | 305 | 27.822 | 39.176 | 52.311 | 0.00 | 0.00 |
| ATOM | 4602 | HA   | SER | X | 305 | 27.837 | 39.461 | 53.363 | 0.00 | 0.00 |
| ATOM | 4603 | CB   | SER | X | 305 | 26.444 | 39.525 | 51.717 | 0.00 | 0.00 |
| ATOM | 4604 | HB2  | SER | X | 305 | 25.751 | 38.854 | 52.225 | 0.00 | 0.00 |
| ATOM | 4605 | HB3  | SER | X | 305 | 26.294 | 40.594 | 51.874 | 0.00 | 0.00 |
| ATOM | 4606 | OG   | SER | X | 305 | 26.276 | 39.367 | 50.292 | 0.00 | 0.00 |
| ATOM | 4607 | HG   | SER | X | 305 | 26.848 | 40.002 | 49.855 | 0.00 | 0.00 |
| ATOM | 4608 | C    | SER | X | 305 | 28.174 | 37.657 | 52.225 | 0.00 | 0.00 |
| ATOM | 4609 | O    | SER | X | 305 | 27.924 | 36.854 | 53.160 | 0.00 | 0.00 |
| ATOM | 4610 | N    | ASP | X | 306 | 28.864 | 37.163 | 51.185 | 0.00 | 0.00 |
| ATOM | 4611 | H    | ASP | X | 306 | 29.141 | 37.804 | 50.455 | 0.00 | 0.00 |
| ATOM | 4612 | CA   | ASP | X | 306 | 29.449 | 35.828 | 51.136 | 0.00 | 0.00 |
| ATOM | 4613 | HA   | ASP | X | 306 | 29.669 | 35.417 | 52.121 | 0.00 | 0.00 |
| ATOM | 4614 | CB   | ASP | X | 306 | 28.556 | 34.795 | 50.480 | 0.00 | 0.00 |
| ATOM | 4615 | HB2  | ASP | X | 306 | 27.509 | 35.098 | 50.516 | 0.00 | 0.00 |
| ATOM | 4616 | HB3  | ASP | X | 306 | 28.779 | 34.744 | 49.414 | 0.00 | 0.00 |
| ATOM | 4617 | CG   | ASP | X | 306 | 28.635 | 33.477 | 51.198 | 0.00 | 0.00 |
| ATOM | 4618 | OD1  | ASP | X | 306 | 27.823 | 33.301 | 52.126 | 0.00 | 0.00 |
| ATOM | 4619 | OD2  | ASP | X | 306 | 29.580 | 32.685 | 50.956 | 0.00 | 0.00 |
| ATOM | 4620 | C    | ASP | X | 306 | 30.844 | 35.950 | 50.487 | 0.00 | 0.00 |
| ATOM | 4621 | O    | ASP | X | 306 | 31.198 | 36.968 | 50.073 | 0.00 | 0.00 |
| ATOM | 4622 | N    | THR | X | 307 | 31.529 | 34.817 | 50.213 | 0.00 | 0.00 |
| ATOM | 4623 | H    | THR | X | 307 | 31.013 | 33.973 | 50.417 | 0.00 | 0.00 |
| ATOM | 4624 | CA   | THR | X | 307 | 32.696 | 34.746 | 49.333 | 0.00 | 0.00 |
| ATOM | 4625 | HA   | THR | X | 307 | 33.324 | 35.531 | 49.753 | 0.00 | 0.00 |
| ATOM | 4626 | CB   | THR | X | 307 | 33.580 | 33.487 | 49.359 | 0.00 | 0.00 |
| ATOM | 4627 | HB   | THR | X | 307 | 34.452 | 33.739 | 48.755 | 0.00 | 0.00 |
| ATOM | 4628 | CG2  | THR | X | 307 | 33.982 | 33.030 | 50.764 | 0.00 | 0.00 |
| ATOM | 4629 | HG21 | THR | X | 307 | 34.561 | 33.817 | 51.248 | 0.00 | 0.00 |
| ATOM | 4630 | HG22 | THR | X | 307 | 33.155 | 32.732 | 51.408 | 0.00 | 0.00 |
| ATOM | 4631 | HG23 | THR | X | 307 | 34.636 | 32.159 | 50.798 | 0.00 | 0.00 |
| ATOM | 4632 | OG1  | THR | X | 307 | 32.888 | 32.393 | 48.856 | 0.00 | 0.00 |
| ATOM | 4633 | HG1  | THR | X | 307 | 33.397 | 31.579 | 48.846 | 0.00 | 0.00 |
| ATOM | 4634 | C    | THR | X | 307 | 32.488 | 35.272 | 47.920 | 0.00 | 0.00 |
| ATOM | 4635 | O    | THR | X | 307 | 31.306 | 35.292 | 47.504 | 0.00 | 0.00 |
| ATOM | 4636 | N    | PRO | X | 308 | 33.505 | 35.839 | 47.234 | 0.00 | 0.00 |
| ATOM | 4637 | CD   | PRO | X | 308 | 34.788 | 36.211 | 47.809 | 0.00 | 0.00 |
| ATOM | 4638 | HD2  | PRO | X | 308 | 35.430 | 35.332 | 47.858 | 0.00 | 0.00 |
| ATOM | 4639 | HD3  | PRO | X | 308 | 34.719 | 36.727 | 48.766 | 0.00 | 0.00 |
| ATOM | 4640 | CG   | PRO | X | 308 | 35.473 | 37.056 | 46.699 | 0.00 | 0.00 |
| ATOM | 4641 | HG2  | PRO | X | 308 | 36.562 | 37.026 | 46.730 | 0.00 | 0.00 |
| ATOM | 4642 | HG3  | PRO | X | 308 | 35.077 | 38.067 | 46.800 | 0.00 | 0.00 |
| ATOM | 4643 | CB   | PRO | X | 308 | 34.826 | 36.498 | 45.373 | 0.00 | 0.00 |
| ATOM | 4644 | HB2  | PRO | X | 308 | 35.408 | 35.709 | 44.896 | 0.00 | 0.00 |
| ATOM | 4645 | HB3  | PRO | X | 308 | 34.691 | 37.219 | 44.567 | 0.00 | 0.00 |
| ATOM | 4646 | CA   | PRO | X | 308 | 33.437 | 36.136 | 45.788 | 0.00 | 0.00 |
| ATOM | 4647 | HA   | PRO | X | 308 | 32.843 | 37.031 | 45.599 | 0.00 | 0.00 |
| ATOM | 4648 | C    | PRO | X | 308 | 32.871 | 35.013 | 44.886 | 0.00 | 0.00 |
| ATOM | 4649 | O    | PRO | X | 308 | 31.970 | 35.263 | 44.056 | 0.00 | 0.00 |
| ATOM | 4650 | N    | GLU | X | 309 | 33.409 | 33.780 | 44.997 | 0.00 | 0.00 |
| ATOM | 4651 | H    | GLU | X | 309 | 34.255 | 33.683 | 45.540 | 0.00 | 0.00 |
| ATOM | 4652 | CA   | GLU | X | 309 | 32.908 | 32.644 | 44.307 | 0.00 | 0.00 |
| ATOM | 4653 | HA   | GLU | X | 309 | 33.072 | 32.702 | 43.231 | 0.00 | 0.00 |
| ATOM | 4654 | CB   | GLU | X | 309 | 33.592 | 31.376 | 44.908 | 0.00 | 0.00 |
| ATOM | 4655 | HB2  | GLU | X | 309 | 34.674 | 31.471 | 44.813 | 0.00 | 0.00 |
| ATOM | 4656 | HB3  | GLU | X | 309 | 33.383 | 31.224 | 45.967 | 0.00 | 0.00 |
| ATOM | 4657 | CG   | GLU | X | 309 | 33.249 | 30.092 | 44.171 | 0.00 | 0.00 |

|      |      |      |     |   |     |        |        |        |      |      |
|------|------|------|-----|---|-----|--------|--------|--------|------|------|
| ATOM | 4658 | HG2  | GLU | X | 309 | 32.192 | 29.910 | 44.367 | 0.00 | 0.00 |
| ATOM | 4659 | HG3  | GLU | X | 309 | 33.187 | 30.271 | 43.098 | 0.00 | 0.00 |
| ATOM | 4660 | CD   | GLU | X | 309 | 34.014 | 28.864 | 44.514 | 0.00 | 0.00 |
| ATOM | 4661 | OE1  | GLU | X | 309 | 33.398 | 27.819 | 44.845 | 0.00 | 0.00 |
| ATOM | 4662 | OE2  | GLU | X | 309 | 35.298 | 28.901 | 44.456 | 0.00 | 0.00 |
| ATOM | 4663 | C    | GLU | X | 309 | 31.348 | 32.535 | 44.588 | 0.00 | 0.00 |
| ATOM | 4664 | O    | GLU | X | 309 | 30.556 | 32.369 | 43.664 | 0.00 | 0.00 |
| ATOM | 4665 | N    | ALA | X | 310 | 30.875 | 32.640 | 45.812 | 0.00 | 0.00 |
| ATOM | 4666 | H    | ALA | X | 310 | 31.509 | 32.804 | 46.581 | 0.00 | 0.00 |
| ATOM | 4667 | CA   | ALA | X | 310 | 29.452 | 32.579 | 46.185 | 0.00 | 0.00 |
| ATOM | 4668 | HA   | ALA | X | 310 | 29.022 | 31.641 | 45.833 | 0.00 | 0.00 |
| ATOM | 4669 | CB   | ALA | X | 310 | 29.424 | 32.469 | 47.716 | 0.00 | 0.00 |
| ATOM | 4670 | HB1  | ALA | X | 310 | 29.853 | 33.368 | 48.157 | 0.00 | 0.00 |
| ATOM | 4671 | HB2  | ALA | X | 310 | 28.472 | 32.362 | 48.237 | 0.00 | 0.00 |
| ATOM | 4672 | HB3  | ALA | X | 310 | 30.055 | 31.617 | 47.969 | 0.00 | 0.00 |
| ATOM | 4673 | C    | ALA | X | 310 | 28.463 | 33.721 | 45.794 | 0.00 | 0.00 |
| ATOM | 4674 | O    | ALA | X | 310 | 27.260 | 33.573 | 45.577 | 0.00 | 0.00 |
| ATOM | 4675 | N    | LEU | X | 311 | 29.036 | 34.927 | 45.617 | 0.00 | 0.00 |
| ATOM | 4676 | H    | LEU | X | 311 | 30.018 | 34.950 | 45.852 | 0.00 | 0.00 |
| ATOM | 4677 | CA   | LEU | X | 311 | 28.352 | 36.024 | 44.968 | 0.00 | 0.00 |
| ATOM | 4678 | HA   | LEU | X | 311 | 27.297 | 36.008 | 45.241 | 0.00 | 0.00 |
| ATOM | 4679 | CB   | LEU | X | 311 | 29.111 | 37.328 | 45.460 | 0.00 | 0.00 |
| ATOM | 4680 | HB2  | LEU | X | 311 | 30.154 | 37.176 | 45.185 | 0.00 | 0.00 |
| ATOM | 4681 | HB3  | LEU | X | 311 | 28.740 | 38.180 | 44.890 | 0.00 | 0.00 |
| ATOM | 4682 | CG   | LEU | X | 311 | 28.921 | 37.561 | 46.979 | 0.00 | 0.00 |
| ATOM | 4683 | HG   | LEU | X | 311 | 29.045 | 36.622 | 47.520 | 0.00 | 0.00 |
| ATOM | 4684 | CD1  | LEU | X | 311 | 29.959 | 38.558 | 47.520 | 0.00 | 0.00 |
| ATOM | 4685 | HD11 | LEU | X | 311 | 29.743 | 38.543 | 48.589 | 0.00 | 0.00 |
| ATOM | 4686 | HD12 | LEU | X | 311 | 30.952 | 38.191 | 47.263 | 0.00 | 0.00 |
| ATOM | 4687 | HD13 | LEU | X | 311 | 29.941 | 39.584 | 47.152 | 0.00 | 0.00 |
| ATOM | 4688 | CD2  | LEU | X | 311 | 27.515 | 38.033 | 47.169 | 0.00 | 0.00 |
| ATOM | 4689 | HD21 | LEU | X | 311 | 27.414 | 38.172 | 48.245 | 0.00 | 0.00 |
| ATOM | 4690 | HD22 | LEU | X | 311 | 27.386 | 39.006 | 46.695 | 0.00 | 0.00 |
| ATOM | 4691 | HD23 | LEU | X | 311 | 26.774 | 37.396 | 46.685 | 0.00 | 0.00 |
| ATOM | 4692 | C    | LEU | X | 311 | 28.421 | 36.065 | 43.513 | 0.00 | 0.00 |
| ATOM | 4693 | O    | LEU | X | 311 | 27.502 | 36.587 | 42.898 | 0.00 | 0.00 |
| ATOM | 4694 | N    | ILE | X | 312 | 29.388 | 35.430 | 42.840 | 0.00 | 0.00 |
| ATOM | 4695 | H    | ILE | X | 312 | 30.187 | 35.116 | 43.372 | 0.00 | 0.00 |
| ATOM | 4696 | CA   | ILE | X | 312 | 29.278 | 35.137 | 41.424 | 0.00 | 0.00 |
| ATOM | 4697 | HA   | ILE | X | 312 | 28.849 | 35.981 | 40.885 | 0.00 | 0.00 |
| ATOM | 4698 | CB   | ILE | X | 312 | 30.721 | 34.944 | 40.860 | 0.00 | 0.00 |
| ATOM | 4699 | HB   | ILE | X | 312 | 31.061 | 34.019 | 41.326 | 0.00 | 0.00 |
| ATOM | 4700 | CG2  | ILE | X | 312 | 30.641 | 34.412 | 39.484 | 0.00 | 0.00 |
| ATOM | 4701 | HG21 | ILE | X | 312 | 30.204 | 33.418 | 39.580 | 0.00 | 0.00 |
| ATOM | 4702 | HG22 | ILE | X | 312 | 29.972 | 35.037 | 38.891 | 0.00 | 0.00 |
| ATOM | 4703 | HG23 | ILE | X | 312 | 31.666 | 34.369 | 39.115 | 0.00 | 0.00 |
| ATOM | 4704 | CG1  | ILE | X | 312 | 31.737 | 36.120 | 40.964 | 0.00 | 0.00 |
| ATOM | 4705 | HG12 | ILE | X | 312 | 31.652 | 36.571 | 39.976 | 0.00 | 0.00 |
| ATOM | 4706 | HG13 | ILE | X | 312 | 31.492 | 36.836 | 41.748 | 0.00 | 0.00 |
| ATOM | 4707 | CD1  | ILE | X | 312 | 33.149 | 35.604 | 41.195 | 0.00 | 0.00 |
| ATOM | 4708 | HD11 | ILE | X | 312 | 33.530 | 35.322 | 40.213 | 0.00 | 0.00 |
| ATOM | 4709 | HD12 | ILE | X | 312 | 33.790 | 36.339 | 41.681 | 0.00 | 0.00 |
| ATOM | 4710 | HD13 | ILE | X | 312 | 33.154 | 34.667 | 41.751 | 0.00 | 0.00 |
| ATOM | 4711 | C    | ILE | X | 312 | 28.262 | 34.049 | 41.194 | 0.00 | 0.00 |
| ATOM | 4712 | O    | ILE | X | 312 | 27.498 | 34.178 | 40.300 | 0.00 | 0.00 |
| ATOM | 4713 | N    | ASN | X | 313 | 28.066 | 33.075 | 42.111 | 0.00 | 0.00 |
| ATOM | 4714 | H    | ASN | X | 313 | 28.715 | 33.045 | 42.884 | 0.00 | 0.00 |
| ATOM | 4715 | CA   | ASN | X | 313 | 26.990 | 32.065 | 41.988 | 0.00 | 0.00 |
| ATOM | 4716 | HA   | ASN | X | 313 | 27.034 | 31.680 | 40.969 | 0.00 | 0.00 |
| ATOM | 4717 | CB   | ASN | X | 313 | 27.257 | 30.922 | 42.981 | 0.00 | 0.00 |
| ATOM | 4718 | HB2  | ASN | X | 313 | 27.723 | 31.382 | 43.852 | 0.00 | 0.00 |
| ATOM | 4719 | HB3  | ASN | X | 313 | 26.298 | 30.498 | 43.280 | 0.00 | 0.00 |
| ATOM | 4720 | CG   | ASN | X | 313 | 28.043 | 29.817 | 42.319 | 0.00 | 0.00 |
| ATOM | 4721 | OD1  | ASN | X | 313 | 28.036 | 29.656 | 41.101 | 0.00 | 0.00 |
| ATOM | 4722 | ND2  | ASN | X | 313 | 28.840 | 29.037 | 43.091 | 0.00 | 0.00 |
| ATOM | 4723 | HD21 | ASN | X | 313 | 29.386 | 28.341 | 42.604 | 0.00 | 0.00 |
| ATOM | 4724 | HD22 | ASN | X | 313 | 28.890 | 29.303 | 44.064 | 0.00 | 0.00 |
| ATOM | 4725 | C    | ASN | X | 313 | 25.627 | 32.615 | 42.142 | 0.00 | 0.00 |
| ATOM | 4726 | O    | ASN | X | 313 | 24.708 | 32.312 | 41.405 | 0.00 | 0.00 |
| ATOM | 4727 | N    | ALA | X | 314 | 25.389 | 33.490 | 43.128 | 0.00 | 0.00 |

|      |      |     |     |   |     |        |        |        |      |      |
|------|------|-----|-----|---|-----|--------|--------|--------|------|------|
| ATOM | 4728 | H   | ALA | X | 314 | 26.106 | 33.833 | 43.750 | 0.00 | 0.00 |
| ATOM | 4729 | CA  | ALA | X | 314 | 24.107 | 34.236 | 43.306 | 0.00 | 0.00 |
| ATOM | 4730 | HA  | ALA | X | 314 | 23.327 | 33.518 | 43.054 | 0.00 | 0.00 |
| ATOM | 4731 | CB  | ALA | X | 314 | 24.062 | 34.575 | 44.748 | 0.00 | 0.00 |
| ATOM | 4732 | HB1 | ALA | X | 314 | 24.444 | 33.768 | 45.373 | 0.00 | 0.00 |
| ATOM | 4733 | HB2 | ALA | X | 314 | 24.750 | 35.416 | 44.828 | 0.00 | 0.00 |
| ATOM | 4734 | HB3 | ALA | X | 314 | 23.060 | 34.921 | 45.002 | 0.00 | 0.00 |
| ATOM | 4735 | C   | ALA | X | 314 | 23.921 | 35.471 | 42.348 | 0.00 | 0.00 |
| ATOM | 4736 | O   | ALA | X | 314 | 23.519 | 36.547 | 42.788 | 0.00 | 0.00 |
| ATOM | 4737 | N   | GLY | X | 315 | 24.448 | 35.345 | 41.192 | 0.00 | 0.00 |
| ATOM | 4738 | H   | GLY | X | 315 | 24.639 | 34.395 | 40.908 | 0.00 | 0.00 |
| ATOM | 4739 | CA  | GLY | X | 315 | 24.880 | 36.343 | 40.203 | 0.00 | 0.00 |
| ATOM | 4740 | HA2 | GLY | X | 315 | 25.033 | 37.339 | 40.636 | 0.00 | 0.00 |
| ATOM | 4741 | HA3 | GLY | X | 315 | 25.802 | 35.949 | 39.844 | 0.00 | 0.00 |
| ATOM | 4742 | C   | GLY | X | 315 | 23.952 | 36.502 | 38.994 | 0.00 | 0.00 |
| ATOM | 4743 | O   | GLY | X | 315 | 23.048 | 35.698 | 38.743 | 0.00 | 0.00 |
| ATOM | 4744 | N   | ASP | X | 316 | 24.338 | 37.505 | 38.245 | 0.00 | 0.00 |
| ATOM | 4745 | H   | ASP | X | 316 | 25.145 | 38.037 | 38.539 | 0.00 | 0.00 |
| ATOM | 4746 | CA  | ASP | X | 316 | 23.651 | 38.088 | 37.064 | 0.00 | 0.00 |
| ATOM | 4747 | HA  | ASP | X | 316 | 23.396 | 37.365 | 36.289 | 0.00 | 0.00 |
| ATOM | 4748 | CB  | ASP | X | 316 | 22.319 | 38.794 | 37.566 | 0.00 | 0.00 |
| ATOM | 4749 | HB2 | ASP | X | 316 | 21.661 | 38.031 | 37.984 | 0.00 | 0.00 |
| ATOM | 4750 | HB3 | ASP | X | 316 | 22.563 | 39.544 | 38.319 | 0.00 | 0.00 |
| ATOM | 4751 | CG  | ASP | X | 316 | 21.653 | 39.377 | 36.322 | 0.00 | 0.00 |
| ATOM | 4752 | OD1 | ASP | X | 316 | 21.855 | 38.819 | 35.185 | 0.00 | 0.00 |
| ATOM | 4753 | OD2 | ASP | X | 316 | 20.770 | 40.240 | 36.407 | 0.00 | 0.00 |
| ATOM | 4754 | C   | ASP | X | 316 | 24.593 | 39.095 | 36.477 | 0.00 | 0.00 |
| ATOM | 4755 | O   | ASP | X | 316 | 24.897 | 40.050 | 37.176 | 0.00 | 0.00 |
| ATOM | 4756 | N   | PHE | X | 317 | 25.043 | 38.989 | 35.232 | 0.00 | 0.00 |
| ATOM | 4757 | H   | PHE | X | 317 | 24.917 | 38.097 | 34.776 | 0.00 | 0.00 |
| ATOM | 4758 | CA  | PHE | X | 317 | 26.191 | 39.720 | 34.761 | 0.00 | 0.00 |
| ATOM | 4759 | HA  | PHE | X | 317 | 26.275 | 40.611 | 35.382 | 0.00 | 0.00 |
| ATOM | 4760 | CB  | PHE | X | 317 | 27.388 | 38.825 | 34.987 | 0.00 | 0.00 |
| ATOM | 4761 | HB2 | PHE | X | 317 | 27.372 | 37.910 | 34.395 | 0.00 | 0.00 |
| ATOM | 4762 | HB3 | PHE | X | 317 | 28.212 | 39.361 | 34.515 | 0.00 | 0.00 |
| ATOM | 4763 | CG  | PHE | X | 317 | 27.703 | 38.585 | 36.487 | 0.00 | 0.00 |
| ATOM | 4764 | CD1 | PHE | X | 317 | 27.778 | 39.646 | 37.466 | 0.00 | 0.00 |
| ATOM | 4765 | HD1 | PHE | X | 317 | 27.619 | 40.687 | 37.224 | 0.00 | 0.00 |
| ATOM | 4766 | CE1 | PHE | X | 317 | 27.929 | 39.434 | 38.818 | 0.00 | 0.00 |
| ATOM | 4767 | HE1 | PHE | X | 317 | 27.887 | 40.301 | 39.461 | 0.00 | 0.00 |
| ATOM | 4768 | CZ  | PHE | X | 317 | 27.913 | 38.124 | 39.308 | 0.00 | 0.00 |
| ATOM | 4769 | HZ  | PHE | X | 317 | 27.975 | 37.996 | 40.379 | 0.00 | 0.00 |
| ATOM | 4770 | CE2 | PHE | X | 317 | 27.812 | 37.040 | 38.386 | 0.00 | 0.00 |
| ATOM | 4771 | HE2 | PHE | X | 317 | 27.739 | 36.026 | 38.753 | 0.00 | 0.00 |
| ATOM | 4772 | CD2 | PHE | X | 317 | 27.700 | 37.285 | 36.999 | 0.00 | 0.00 |
| ATOM | 4773 | HD2 | PHE | X | 317 | 27.474 | 36.489 | 36.304 | 0.00 | 0.00 |
| ATOM | 4774 | C   | PHE | X | 317 | 25.962 | 40.243 | 33.295 | 0.00 | 0.00 |
| ATOM | 4775 | O   | PHE | X | 317 | 26.910 | 40.885 | 32.784 | 0.00 | 0.00 |
| ATOM | 4776 | N   | HIE | X | 318 | 24.830 | 40.062 | 32.657 | 0.00 | 0.00 |
| ATOM | 4777 | H   | HIE | X | 318 | 24.164 | 39.421 | 33.063 | 0.00 | 0.00 |
| ATOM | 4778 | CA  | HIE | X | 318 | 24.450 | 40.818 | 31.462 | 0.00 | 0.00 |
| ATOM | 4779 | HA  | HIE | X | 318 | 25.070 | 40.490 | 30.629 | 0.00 | 0.00 |
| ATOM | 4780 | CB  | HIE | X | 318 | 22.985 | 40.496 | 31.029 | 0.00 | 0.00 |
| ATOM | 4781 | HB2 | HIE | X | 318 | 22.846 | 39.418 | 30.954 | 0.00 | 0.00 |
| ATOM | 4782 | HB3 | HIE | X | 318 | 22.260 | 40.896 | 31.739 | 0.00 | 0.00 |
| ATOM | 4783 | CG  | HIE | X | 318 | 22.698 | 41.117 | 29.687 | 0.00 | 0.00 |
| ATOM | 4784 | ND1 | HIE | X | 318 | 23.456 | 40.881 | 28.551 | 0.00 | 0.00 |
| ATOM | 4785 | CE1 | HIE | X | 318 | 22.998 | 41.661 | 27.581 | 0.00 | 0.00 |
| ATOM | 4786 | HE1 | HIE | X | 318 | 23.329 | 41.544 | 26.559 | 0.00 | 0.00 |
| ATOM | 4787 | NE2 | HIE | X | 318 | 22.035 | 42.485 | 28.127 | 0.00 | 0.00 |
| ATOM | 4788 | HE2 | HIE | X | 318 | 21.586 | 43.224 | 27.604 | 0.00 | 0.00 |
| ATOM | 4789 | CD2 | HIE | X | 318 | 21.912 | 42.186 | 29.451 | 0.00 | 0.00 |
| ATOM | 4790 | HD2 | HIE | X | 318 | 21.288 | 42.678 | 30.183 | 0.00 | 0.00 |
| ATOM | 4791 | C   | HIE | X | 318 | 24.651 | 42.355 | 31.587 | 0.00 | 0.00 |
| ATOM | 4792 | O   | HIE | X | 318 | 24.162 | 42.984 | 32.529 | 0.00 | 0.00 |
| ATOM | 4793 | N   | GLY | X | 319 | 25.313 | 42.903 | 30.549 | 0.00 | 0.00 |
| ATOM | 4794 | H   | GLY | X | 319 | 25.548 | 42.306 | 29.769 | 0.00 | 0.00 |
| ATOM | 4795 | CA  | GLY | X | 319 | 25.689 | 44.341 | 30.534 | 0.00 | 0.00 |
| ATOM | 4796 | HA2 | GLY | X | 319 | 25.596 | 44.527 | 29.468 | 0.00 | 0.00 |
| ATOM | 4797 | HA3 | GLY | X | 319 | 24.986 | 44.929 | 31.101 | 0.00 | 0.00 |

|      |      |      |     |   |     |        |        |        |      |      |
|------|------|------|-----|---|-----|--------|--------|--------|------|------|
| ATOM | 4798 | C    | GLY | X | 319 | 27.109 | 44.691 | 31.050 | 0.00 | 0.00 |
| ATOM | 4799 | O    | GLY | X | 319 | 27.434 | 45.864 | 31.018 | 0.00 | 0.00 |
| ATOM | 4800 | N    | LEU | X | 320 | 27.983 | 43.669 | 31.336 | 0.00 | 0.00 |
| ATOM | 4801 | H    | LEU | X | 320 | 27.579 | 42.747 | 31.248 | 0.00 | 0.00 |
| ATOM | 4802 | CA   | LEU | X | 320 | 29.387 | 43.856 | 31.726 | 0.00 | 0.00 |
| ATOM | 4803 | HA   | LEU | X | 320 | 29.694 | 44.887 | 31.905 | 0.00 | 0.00 |
| ATOM | 4804 | CB   | LEU | X | 320 | 29.726 | 43.034 | 32.977 | 0.00 | 0.00 |
| ATOM | 4805 | HB2  | LEU | X | 320 | 29.175 | 42.114 | 32.784 | 0.00 | 0.00 |
| ATOM | 4806 | HB3  | LEU | X | 320 | 30.789 | 42.794 | 33.000 | 0.00 | 0.00 |
| ATOM | 4807 | CG   | LEU | X | 320 | 29.430 | 43.618 | 34.356 | 0.00 | 0.00 |
| ATOM | 4808 | HG   | LEU | X | 320 | 28.356 | 43.736 | 34.500 | 0.00 | 0.00 |
| ATOM | 4809 | CD1  | LEU | X | 320 | 29.941 | 42.623 | 35.434 | 0.00 | 0.00 |
| ATOM | 4810 | HD11 | LEU | X | 320 | 29.643 | 42.912 | 36.442 | 0.00 | 0.00 |
| ATOM | 4811 | HD12 | LEU | X | 320 | 29.585 | 41.611 | 35.238 | 0.00 | 0.00 |
| ATOM | 4812 | HD13 | LEU | X | 320 | 31.005 | 42.478 | 35.250 | 0.00 | 0.00 |
| ATOM | 4813 | CD2  | LEU | X | 320 | 30.025 | 45.028 | 34.614 | 0.00 | 0.00 |
| ATOM | 4814 | HD21 | LEU | X | 320 | 31.107 | 45.018 | 34.483 | 0.00 | 0.00 |
| ATOM | 4815 | HD22 | LEU | X | 320 | 29.400 | 45.762 | 34.105 | 0.00 | 0.00 |
| ATOM | 4816 | HD23 | LEU | X | 320 | 29.728 | 45.237 | 35.642 | 0.00 | 0.00 |
| ATOM | 4817 | C    | LEU | X | 320 | 30.275 | 43.512 | 30.546 | 0.00 | 0.00 |
| ATOM | 4818 | O    | LEU | X | 320 | 29.912 | 42.660 | 29.730 | 0.00 | 0.00 |
| ATOM | 4819 | N    | GLN | X | 321 | 31.307 | 44.269 | 30.275 | 0.00 | 0.00 |
| ATOM | 4820 | H    | GLN | X | 321 | 31.395 | 45.075 | 30.877 | 0.00 | 0.00 |
| ATOM | 4821 | CA   | GLN | X | 321 | 32.315 | 44.117 | 29.333 | 0.00 | 0.00 |
| ATOM | 4822 | HA   | GLN | X | 321 | 32.148 | 43.351 | 28.576 | 0.00 | 0.00 |
| ATOM | 4823 | CB   | GLN | X | 321 | 32.527 | 45.464 | 28.679 | 0.00 | 0.00 |
| ATOM | 4824 | HB2  | GLN | X | 321 | 32.658 | 46.179 | 29.491 | 0.00 | 0.00 |
| ATOM | 4825 | HB3  | GLN | X | 321 | 33.448 | 45.422 | 28.097 | 0.00 | 0.00 |
| ATOM | 4826 | CG   | GLN | X | 321 | 31.449 | 45.951 | 27.778 | 0.00 | 0.00 |
| ATOM | 4827 | HG2  | GLN | X | 321 | 31.241 | 45.169 | 27.048 | 0.00 | 0.00 |
| ATOM | 4828 | HG3  | GLN | X | 321 | 30.521 | 46.041 | 28.344 | 0.00 | 0.00 |
| ATOM | 4829 | CD   | GLN | X | 321 | 31.666 | 47.258 | 27.036 | 0.00 | 0.00 |
| ATOM | 4830 | OE1  | GLN | X | 321 | 32.607 | 48.050 | 27.205 | 0.00 | 0.00 |
| ATOM | 4831 | NE2  | GLN | X | 321 | 30.794 | 47.692 | 26.130 | 0.00 | 0.00 |
| ATOM | 4832 | HE21 | GLN | X | 321 | 30.995 | 48.635 | 25.829 | 0.00 | 0.00 |
| ATOM | 4833 | HE22 | GLN | X | 321 | 29.887 | 47.254 | 26.061 | 0.00 | 0.00 |
| ATOM | 4834 | C    | GLN | X | 321 | 33.546 | 43.857 | 30.213 | 0.00 | 0.00 |
| ATOM | 4835 | O    | GLN | X | 321 | 33.918 | 44.693 | 30.999 | 0.00 | 0.00 |
| ATOM | 4836 | N    | VAL | X | 322 | 34.196 | 42.667 | 30.080 | 0.00 | 0.00 |
| ATOM | 4837 | H    | VAL | X | 322 | 33.807 | 41.973 | 29.458 | 0.00 | 0.00 |
| ATOM | 4838 | CA   | VAL | X | 322 | 35.224 | 42.182 | 31.004 | 0.00 | 0.00 |
| ATOM | 4839 | HA   | VAL | X | 322 | 35.497 | 43.047 | 31.608 | 0.00 | 0.00 |
| ATOM | 4840 | CB   | VAL | X | 322 | 34.742 | 41.009 | 31.912 | 0.00 | 0.00 |
| ATOM | 4841 | HB   | VAL | X | 322 | 34.477 | 40.209 | 31.222 | 0.00 | 0.00 |
| ATOM | 4842 | CG1  | VAL | X | 322 | 35.684 | 40.467 | 32.938 | 0.00 | 0.00 |
| ATOM | 4843 | HG11 | VAL | X | 322 | 35.248 | 40.577 | 33.931 | 0.00 | 0.00 |
| ATOM | 4844 | HG12 | VAL | X | 322 | 35.935 | 39.411 | 32.840 | 0.00 | 0.00 |
| ATOM | 4845 | HG13 | VAL | X | 322 | 36.597 | 41.046 | 33.074 | 0.00 | 0.00 |
| ATOM | 4846 | CG2  | VAL | X | 322 | 33.381 | 41.329 | 32.614 | 0.00 | 0.00 |
| ATOM | 4847 | HG21 | VAL | X | 322 | 32.642 | 41.771 | 31.945 | 0.00 | 0.00 |
| ATOM | 4848 | HG22 | VAL | X | 322 | 32.846 | 40.451 | 32.976 | 0.00 | 0.00 |
| ATOM | 4849 | HG23 | VAL | X | 322 | 33.408 | 41.964 | 33.500 | 0.00 | 0.00 |
| ATOM | 4850 | C    | VAL | X | 322 | 36.481 | 41.665 | 30.197 | 0.00 | 0.00 |
| ATOM | 4851 | O    | VAL | X | 322 | 36.317 | 40.972 | 29.170 | 0.00 | 0.00 |
| ATOM | 4852 | N    | LEU | X | 323 | 37.749 | 41.757 | 30.633 | 0.00 | 0.00 |
| ATOM | 4853 | H    | LEU | X | 323 | 37.882 | 42.324 | 31.459 | 0.00 | 0.00 |
| ATOM | 4854 | CA   | LEU | X | 323 | 38.864 | 41.018 | 30.062 | 0.00 | 0.00 |
| ATOM | 4855 | HA   | LEU | X | 323 | 38.508 | 40.313 | 29.311 | 0.00 | 0.00 |
| ATOM | 4856 | CB   | LEU | X | 323 | 39.814 | 42.048 | 29.431 | 0.00 | 0.00 |
| ATOM | 4857 | HB2  | LEU | X | 323 | 39.240 | 42.653 | 28.730 | 0.00 | 0.00 |
| ATOM | 4858 | HB3  | LEU | X | 323 | 40.256 | 42.587 | 30.269 | 0.00 | 0.00 |
| ATOM | 4859 | CG   | LEU | X | 323 | 40.964 | 41.486 | 28.555 | 0.00 | 0.00 |
| ATOM | 4860 | HG   | LEU | X | 323 | 40.659 | 40.732 | 27.829 | 0.00 | 0.00 |
| ATOM | 4861 | CD1  | LEU | X | 323 | 41.406 | 42.711 | 27.753 | 0.00 | 0.00 |
| ATOM | 4862 | HD11 | LEU | X | 323 | 41.635 | 43.494 | 28.476 | 0.00 | 0.00 |
| ATOM | 4863 | HD12 | LEU | X | 323 | 42.314 | 42.446 | 27.211 | 0.00 | 0.00 |
| ATOM | 4864 | HD13 | LEU | X | 323 | 40.607 | 43.084 | 27.113 | 0.00 | 0.00 |
| ATOM | 4865 | CD2  | LEU | X | 323 | 42.223 | 41.045 | 29.312 | 0.00 | 0.00 |
| ATOM | 4866 | HD21 | LEU | X | 323 | 42.116 | 39.968 | 29.440 | 0.00 | 0.00 |
| ATOM | 4867 | HD22 | LEU | X | 323 | 43.190 | 41.324 | 28.892 | 0.00 | 0.00 |



|      |      |      |     |   |     |        |        |        |      |      |
|------|------|------|-----|---|-----|--------|--------|--------|------|------|
| ATOM | 4868 | HD23 | LEU | X | 323 | 42.180 | 41.353 | 30.357 | 0.00 | 0.00 |
| ATOM | 4869 | C    | LEU | X | 323 | 39.572 | 40.267 | 31.220 | 0.00 | 0.00 |
| ATOM | 4870 | O    | LEU | X | 323 | 39.697 | 40.810 | 32.336 | 0.00 | 0.00 |
| ATOM | 4871 | N    | VAL | X | 324 | 39.911 | 38.978 | 31.048 | 0.00 | 0.00 |
| ATOM | 4872 | H    | VAL | X | 324 | 39.777 | 38.493 | 30.172 | 0.00 | 0.00 |
| ATOM | 4873 | CA   | VAL | X | 324 | 40.521 | 38.127 | 32.107 | 0.00 | 0.00 |
| ATOM | 4874 | HA   | VAL | X | 324 | 40.808 | 38.733 | 32.967 | 0.00 | 0.00 |
| ATOM | 4875 | CB   | VAL | X | 324 | 39.691 | 36.979 | 32.605 | 0.00 | 0.00 |
| ATOM | 4876 | HB   | VAL | X | 324 | 40.295 | 36.417 | 33.318 | 0.00 | 0.00 |
| ATOM | 4877 | CG1  | VAL | X | 324 | 38.415 | 37.529 | 33.218 | 0.00 | 0.00 |
| ATOM | 4878 | HG11 | VAL | X | 324 | 38.642 | 38.205 | 34.043 | 0.00 | 0.00 |
| ATOM | 4879 | HG12 | VAL | X | 324 | 37.683 | 37.905 | 32.503 | 0.00 | 0.00 |
| ATOM | 4880 | HG13 | VAL | X | 324 | 37.897 | 36.751 | 33.778 | 0.00 | 0.00 |
| ATOM | 4881 | CG2  | VAL | X | 324 | 39.096 | 35.937 | 31.588 | 0.00 | 0.00 |
| ATOM | 4882 | HG21 | VAL | X | 324 | 38.224 | 35.437 | 32.009 | 0.00 | 0.00 |
| ATOM | 4883 | HG22 | VAL | X | 324 | 38.830 | 36.446 | 30.661 | 0.00 | 0.00 |
| ATOM | 4884 | HG23 | VAL | X | 324 | 39.852 | 35.229 | 31.250 | 0.00 | 0.00 |
| ATOM | 4885 | C    | VAL | X | 324 | 41.786 | 37.410 | 31.607 | 0.00 | 0.00 |
| ATOM | 4886 | O    | VAL | X | 324 | 41.832 | 36.974 | 30.497 | 0.00 | 0.00 |
| ATOM | 4887 | N    | GLY | X | 325 | 42.897 | 37.242 | 32.370 | 0.00 | 0.00 |
| ATOM | 4888 | H    | GLY | X | 325 | 42.878 | 37.609 | 33.311 | 0.00 | 0.00 |
| ATOM | 4889 | CA   | GLY | X | 325 | 44.027 | 36.374 | 32.007 | 0.00 | 0.00 |
| ATOM | 4890 | HA2  | GLY | X | 325 | 43.660 | 35.393 | 32.059 | 0.00 | 0.00 |
| ATOM | 4891 | HA3  | GLY | X | 325 | 44.298 | 36.559 | 30.998 | 0.00 | 0.00 |
| ATOM | 4892 | C    | GLY | X | 325 | 45.140 | 36.470 | 33.005 | 0.00 | 0.00 |
| ATOM | 4893 | O    | GLY | X | 325 | 44.968 | 36.804 | 34.178 | 0.00 | 0.00 |
| ATOM | 4894 | N    | VAL | X | 326 | 46.282 | 35.923 | 32.620 | 0.00 | 0.00 |
| ATOM | 4895 | H    | VAL | X | 326 | 46.314 | 35.675 | 31.641 | 0.00 | 0.00 |
| ATOM | 4896 | CA   | VAL | X | 326 | 47.459 | 35.501 | 33.408 | 0.00 | 0.00 |
| ATOM | 4897 | HA   | VAL | X | 326 | 47.629 | 36.234 | 34.197 | 0.00 | 0.00 |
| ATOM | 4898 | CB   | VAL | X | 326 | 47.247 | 34.080 | 34.019 | 0.00 | 0.00 |
| ATOM | 4899 | HB   | VAL | X | 326 | 48.196 | 33.668 | 34.360 | 0.00 | 0.00 |
| ATOM | 4900 | CG1  | VAL | X | 326 | 46.268 | 34.027 | 35.242 | 0.00 | 0.00 |
| ATOM | 4901 | HG11 | VAL | X | 326 | 46.438 | 34.963 | 35.775 | 0.00 | 0.00 |
| ATOM | 4902 | HG12 | VAL | X | 326 | 45.223 | 34.012 | 34.932 | 0.00 | 0.00 |
| ATOM | 4903 | HG13 | VAL | X | 326 | 46.504 | 33.149 | 35.844 | 0.00 | 0.00 |
| ATOM | 4904 | CG2  | VAL | X | 326 | 46.833 | 33.039 | 32.912 | 0.00 | 0.00 |
| ATOM | 4905 | HG21 | VAL | X | 326 | 47.680 | 32.947 | 32.231 | 0.00 | 0.00 |
| ATOM | 4906 | HG22 | VAL | X | 326 | 46.485 | 32.163 | 33.458 | 0.00 | 0.00 |
| ATOM | 4907 | HG23 | VAL | X | 326 | 46.051 | 33.376 | 32.232 | 0.00 | 0.00 |
| ATOM | 4908 | C    | VAL | X | 326 | 48.678 | 35.464 | 32.468 | 0.00 | 0.00 |
| ATOM | 4909 | O    | VAL | X | 326 | 48.484 | 35.550 | 31.264 | 0.00 | 0.00 |
| ATOM | 4910 | N    | VAL | X | 327 | 49.815 | 35.113 | 33.040 | 0.00 | 0.00 |
| ATOM | 4911 | H    | VAL | X | 327 | 49.781 | 35.199 | 34.046 | 0.00 | 0.00 |
| ATOM | 4912 | CA   | VAL | X | 327 | 51.095 | 34.697 | 32.507 | 0.00 | 0.00 |
| ATOM | 4913 | HA   | VAL | X | 327 | 51.092 | 35.044 | 31.474 | 0.00 | 0.00 |
| ATOM | 4914 | CB   | VAL | X | 327 | 52.291 | 35.526 | 33.107 | 0.00 | 0.00 |
| ATOM | 4915 | HB   | VAL | X | 327 | 53.098 | 35.515 | 32.374 | 0.00 | 0.00 |
| ATOM | 4916 | CG1  | VAL | X | 327 | 51.855 | 36.981 | 33.223 | 0.00 | 0.00 |
| ATOM | 4917 | HG11 | VAL | X | 327 | 51.214 | 37.167 | 34.084 | 0.00 | 0.00 |
| ATOM | 4918 | HG12 | VAL | X | 327 | 52.752 | 37.585 | 33.360 | 0.00 | 0.00 |
| ATOM | 4919 | HG13 | VAL | X | 327 | 51.355 | 37.247 | 32.292 | 0.00 | 0.00 |
| ATOM | 4920 | CG2  | VAL | X | 327 | 52.768 | 34.959 | 34.397 | 0.00 | 0.00 |
| ATOM | 4921 | HG21 | VAL | X | 327 | 52.073 | 35.188 | 35.205 | 0.00 | 0.00 |
| ATOM | 4922 | HG22 | VAL | X | 327 | 52.719 | 33.874 | 34.315 | 0.00 | 0.00 |
| ATOM | 4923 | HG23 | VAL | X | 327 | 53.790 | 35.296 | 34.571 | 0.00 | 0.00 |
| ATOM | 4924 | C    | VAL | X | 327 | 51.279 | 33.186 | 32.463 | 0.00 | 0.00 |
| ATOM | 4925 | O    | VAL | X | 327 | 50.435 | 32.386 | 32.873 | 0.00 | 0.00 |
| ATOM | 4926 | N    | LYS | X | 328 | 52.344 | 32.697 | 31.856 | 0.00 | 0.00 |
| ATOM | 4927 | H    | LYS | X | 328 | 53.001 | 33.337 | 31.432 | 0.00 | 0.00 |
| ATOM | 4928 | CA   | LYS | X | 328 | 52.589 | 31.172 | 31.630 | 0.00 | 0.00 |
| ATOM | 4929 | HA   | LYS | X | 328 | 51.761 | 30.912 | 30.971 | 0.00 | 0.00 |
| ATOM | 4930 | CB   | LYS | X | 328 | 53.842 | 30.994 | 30.792 | 0.00 | 0.00 |
| ATOM | 4931 | HB2  | LYS | X | 328 | 53.940 | 31.789 | 30.054 | 0.00 | 0.00 |
| ATOM | 4932 | HB3  | LYS | X | 328 | 54.693 | 30.998 | 31.473 | 0.00 | 0.00 |
| ATOM | 4933 | CG   | LYS | X | 328 | 53.756 | 29.613 | 30.074 | 0.00 | 0.00 |
| ATOM | 4934 | HG2  | LYS | X | 328 | 53.503 | 28.855 | 30.815 | 0.00 | 0.00 |
| ATOM | 4935 | HG3  | LYS | X | 328 | 52.974 | 29.540 | 29.317 | 0.00 | 0.00 |
| ATOM | 4936 | CD   | LYS | X | 328 | 55.128 | 29.299 | 29.480 | 0.00 | 0.00 |
| ATOM | 4937 | HD2  | LYS | X | 328 | 55.182 | 29.738 | 28.483 | 0.00 | 0.00 |

|      |      |     |     |   |     |        |        |        |      |      |
|------|------|-----|-----|---|-----|--------|--------|--------|------|------|
| ATOM | 4938 | HD3 | LYS | X | 328 | 55.941 | 29.718 | 30.073 | 0.00 | 0.00 |
| ATOM | 4939 | CE  | LYS | X | 328 | 55.442 | 27.754 | 29.372 | 0.00 | 0.00 |
| ATOM | 4940 | HE2 | LYS | X | 328 | 54.758 | 27.190 | 28.738 | 0.00 | 0.00 |
| ATOM | 4941 | HE3 | LYS | X | 328 | 56.474 | 27.698 | 29.025 | 0.00 | 0.00 |
| ATOM | 4942 | NZ  | LYS | X | 328 | 55.450 | 27.054 | 30.708 | 0.00 | 0.00 |
| ATOM | 4943 | HZ1 | LYS | X | 328 | 56.115 | 27.518 | 31.310 | 0.00 | 0.00 |
| ATOM | 4944 | HZ2 | LYS | X | 328 | 54.546 | 27.023 | 31.157 | 0.00 | 0.00 |
| ATOM | 4945 | HZ3 | LYS | X | 328 | 55.776 | 26.101 | 30.629 | 0.00 | 0.00 |
| ATOM | 4946 | C   | LYS | X | 328 | 52.651 | 30.400 | 32.986 | 0.00 | 0.00 |
| ATOM | 4947 | O   | LYS | X | 328 | 52.208 | 29.265 | 33.037 | 0.00 | 0.00 |
| ATOM | 4948 | N   | ASP | X | 329 | 53.284 | 30.992 | 34.011 | 0.00 | 0.00 |
| ATOM | 4949 | H   | ASP | X | 329 | 53.518 | 31.967 | 33.890 | 0.00 | 0.00 |
| ATOM | 4950 | CA  | ASP | X | 329 | 53.738 | 30.415 | 35.214 | 0.00 | 0.00 |
| ATOM | 4951 | HA  | ASP | X | 329 | 53.117 | 29.563 | 35.491 | 0.00 | 0.00 |
| ATOM | 4952 | CB  | ASP | X | 329 | 55.164 | 29.830 | 35.137 | 0.00 | 0.00 |
| ATOM | 4953 | HB2 | ASP | X | 329 | 55.995 | 30.518 | 35.291 | 0.00 | 0.00 |
| ATOM | 4954 | HB3 | ASP | X | 329 | 55.235 | 29.104 | 35.947 | 0.00 | 0.00 |
| ATOM | 4955 | CG  | ASP | X | 329 | 55.509 | 29.115 | 33.804 | 0.00 | 0.00 |
| ATOM | 4956 | OD1 | ASP | X | 329 | 54.954 | 28.047 | 33.589 | 0.00 | 0.00 |
| ATOM | 4957 | OD2 | ASP | X | 329 | 56.206 | 29.697 | 32.957 | 0.00 | 0.00 |
| ATOM | 4958 | C   | ASP | X | 329 | 53.693 | 31.329 | 36.442 | 0.00 | 0.00 |
| ATOM | 4959 | O   | ASP | X | 329 | 54.703 | 31.765 | 37.043 | 0.00 | 0.00 |
| ATOM | 4960 | N   | GLU | X | 330 | 52.423 | 31.511 | 36.883 | 0.00 | 0.00 |
| ATOM | 4961 | H   | GLU | X | 330 | 51.705 | 31.243 | 36.225 | 0.00 | 0.00 |
| ATOM | 4962 | CA  | GLU | X | 330 | 52.038 | 32.301 | 38.052 | 0.00 | 0.00 |
| ATOM | 4963 | HA  | GLU | X | 330 | 52.360 | 33.312 | 37.803 | 0.00 | 0.00 |
| ATOM | 4964 | CB  | GLU | X | 330 | 50.542 | 32.237 | 38.220 | 0.00 | 0.00 |
| ATOM | 4965 | HB2 | GLU | X | 330 | 50.212 | 31.206 | 38.347 | 0.00 | 0.00 |
| ATOM | 4966 | HB3 | GLU | X | 330 | 50.315 | 32.785 | 39.135 | 0.00 | 0.00 |
| ATOM | 4967 | CG  | GLU | X | 330 | 49.780 | 32.901 | 37.041 | 0.00 | 0.00 |
| ATOM | 4968 | HG2 | GLU | X | 330 | 49.989 | 32.332 | 36.135 | 0.00 | 0.00 |
| ATOM | 4969 | HG3 | GLU | X | 330 | 48.772 | 32.841 | 37.453 | 0.00 | 0.00 |
| ATOM | 4970 | CD  | GLU | X | 330 | 49.991 | 34.399 | 36.935 | 0.00 | 0.00 |
| ATOM | 4971 | OE1 | GLU | X | 330 | 50.495 | 35.103 | 37.829 | 0.00 | 0.00 |
| ATOM | 4972 | OE2 | GLU | X | 330 | 49.549 | 34.970 | 35.881 | 0.00 | 0.00 |
| ATOM | 4973 | C   | GLU | X | 330 | 52.668 | 31.763 | 39.415 | 0.00 | 0.00 |
| ATOM | 4974 | O   | GLU | X | 330 | 53.231 | 32.518 | 40.252 | 0.00 | 0.00 |
| ATOM | 4975 | N   | GLY | X | 331 | 52.842 | 30.438 | 39.495 | 0.00 | 0.00 |
| ATOM | 4976 | H   | GLY | X | 331 | 52.515 | 29.907 | 38.700 | 0.00 | 0.00 |
| ATOM | 4977 | CA  | GLY | X | 331 | 53.075 | 29.731 | 40.777 | 0.00 | 0.00 |
| ATOM | 4978 | HA2 | GLY | X | 331 | 52.533 | 30.238 | 41.526 | 0.00 | 0.00 |
| ATOM | 4979 | HA3 | GLY | X | 331 | 52.699 | 28.751 | 40.737 | 0.00 | 0.00 |
| ATOM | 4980 | C   | GLY | X | 331 | 54.546 | 29.653 | 41.182 | 0.00 | 0.00 |
| ATOM | 4981 | O   | GLY | X | 331 | 54.763 | 29.392 | 42.386 | 0.00 | 0.00 |
| ATOM | 4982 | N   | SER | X | 332 | 55.498 | 29.990 | 40.334 | 0.00 | 0.00 |
| ATOM | 4983 | H   | SER | X | 332 | 55.263 | 30.051 | 39.354 | 0.00 | 0.00 |
| ATOM | 4984 | CA  | SER | X | 332 | 56.921 | 29.935 | 40.715 | 0.00 | 0.00 |
| ATOM | 4985 | HA  | SER | X | 332 | 57.262 | 29.045 | 41.244 | 0.00 | 0.00 |
| ATOM | 4986 | CB  | SER | X | 332 | 57.697 | 30.148 | 39.387 | 0.00 | 0.00 |
| ATOM | 4987 | HB2 | SER | X | 332 | 57.664 | 31.189 | 39.065 | 0.00 | 0.00 |
| ATOM | 4988 | HB3 | SER | X | 332 | 58.730 | 29.938 | 39.661 | 0.00 | 0.00 |
| ATOM | 4989 | OG  | SER | X | 332 | 57.263 | 29.330 | 38.244 | 0.00 | 0.00 |
| ATOM | 4990 | HG  | SER | X | 332 | 57.720 | 29.649 | 37.462 | 0.00 | 0.00 |
| ATOM | 4991 | C   | SER | X | 332 | 57.250 | 31.061 | 41.767 | 0.00 | 0.00 |
| ATOM | 4992 | O   | SER | X | 332 | 58.288 | 30.890 | 42.426 | 0.00 | 0.00 |
| ATOM | 4993 | N   | TYR | X | 333 | 56.497 | 32.188 | 41.837 | 0.00 | 0.00 |
| ATOM | 4994 | H   | TYR | X | 333 | 55.670 | 32.242 | 41.259 | 0.00 | 0.00 |
| ATOM | 4995 | CA  | TYR | X | 333 | 56.765 | 33.393 | 42.633 | 0.00 | 0.00 |
| ATOM | 4996 | HA  | TYR | X | 333 | 57.844 | 33.535 | 42.701 | 0.00 | 0.00 |
| ATOM | 4997 | CB  | TYR | X | 333 | 56.037 | 34.524 | 41.976 | 0.00 | 0.00 |
| ATOM | 4998 | HB2 | TYR | X | 333 | 56.575 | 34.648 | 41.036 | 0.00 | 0.00 |
| ATOM | 4999 | HB3 | TYR | X | 333 | 55.047 | 34.306 | 41.575 | 0.00 | 0.00 |
| ATOM | 5000 | CG  | TYR | X | 333 | 55.959 | 35.761 | 42.698 | 0.00 | 0.00 |
| ATOM | 5001 | CD1 | TYR | X | 333 | 54.676 | 36.370 | 42.975 | 0.00 | 0.00 |
| ATOM | 5002 | HD1 | TYR | X | 333 | 53.759 | 35.881 | 42.679 | 0.00 | 0.00 |
| ATOM | 5003 | CE1 | TYR | X | 333 | 54.545 | 37.702 | 43.525 | 0.00 | 0.00 |
| ATOM | 5004 | HE1 | TYR | X | 333 | 53.585 | 38.061 | 43.867 | 0.00 | 0.00 |
| ATOM | 5005 | CZ  | TYR | X | 333 | 55.723 | 38.274 | 43.940 | 0.00 | 0.00 |
| ATOM | 5006 | OH  | TYR | X | 333 | 55.596 | 39.524 | 44.404 | 0.00 | 0.00 |
| ATOM | 5007 | HH  | TYR | X | 333 | 54.690 | 39.789 | 44.579 | 0.00 | 0.00 |

|      |      |      |     |   |     |        |        |        |      |      |
|------|------|------|-----|---|-----|--------|--------|--------|------|------|
| ATOM | 5008 | CE2  | TYR | X | 333 | 56.985 | 37.774 | 43.586 | 0.00 | 0.00 |
| ATOM | 5009 | HE2  | TYR | X | 333 | 57.791 | 38.431 | 43.875 | 0.00 | 0.00 |
| ATOM | 5010 | CD2  | TYR | X | 333 | 57.114 | 36.533 | 42.909 | 0.00 | 0.00 |
| ATOM | 5011 | HD2  | TYR | X | 333 | 58.041 | 36.121 | 42.539 | 0.00 | 0.00 |
| ATOM | 5012 | C    | TYR | X | 333 | 56.196 | 33.229 | 44.091 | 0.00 | 0.00 |
| ATOM | 5013 | O    | TYR | X | 333 | 56.944 | 33.331 | 45.094 | 0.00 | 0.00 |
| ATOM | 5014 | N    | PHE | X | 334 | 54.988 | 32.709 | 44.175 | 0.00 | 0.00 |
| ATOM | 5015 | H    | PHE | X | 334 | 54.462 | 32.599 | 43.320 | 0.00 | 0.00 |
| ATOM | 5016 | CA   | PHE | X | 334 | 54.380 | 32.228 | 45.449 | 0.00 | 0.00 |
| ATOM | 5017 | HA   | PHE | X | 334 | 54.303 | 33.102 | 46.095 | 0.00 | 0.00 |
| ATOM | 5018 | CB   | PHE | X | 334 | 53.055 | 31.547 | 45.213 | 0.00 | 0.00 |
| ATOM | 5019 | HB2  | PHE | X | 334 | 53.246 | 30.765 | 44.479 | 0.00 | 0.00 |
| ATOM | 5020 | HB3  | PHE | X | 334 | 52.693 | 31.040 | 46.108 | 0.00 | 0.00 |
| ATOM | 5021 | CG   | PHE | X | 334 | 51.956 | 32.412 | 44.724 | 0.00 | 0.00 |
| ATOM | 5022 | CD1  | PHE | X | 334 | 50.712 | 32.376 | 45.416 | 0.00 | 0.00 |
| ATOM | 5023 | HD1  | PHE | X | 334 | 50.595 | 31.666 | 46.222 | 0.00 | 0.00 |
| ATOM | 5024 | CE1  | PHE | X | 334 | 49.707 | 33.268 | 45.173 | 0.00 | 0.00 |
| ATOM | 5025 | HE1  | PHE | X | 334 | 48.807 | 33.225 | 45.769 | 0.00 | 0.00 |
| ATOM | 5026 | CZ   | PHE | X | 334 | 49.865 | 34.154 | 44.043 | 0.00 | 0.00 |
| ATOM | 5027 | HZ   | PHE | X | 334 | 49.011 | 34.767 | 43.796 | 0.00 | 0.00 |
| ATOM | 5028 | CE2  | PHE | X | 334 | 51.069 | 34.137 | 43.244 | 0.00 | 0.00 |
| ATOM | 5029 | HE2  | PHE | X | 334 | 51.124 | 34.648 | 42.294 | 0.00 | 0.00 |
| ATOM | 5030 | CD2  | PHE | X | 334 | 52.084 | 33.245 | 43.578 | 0.00 | 0.00 |
| ATOM | 5031 | HD2  | PHE | X | 334 | 52.863 | 33.116 | 42.841 | 0.00 | 0.00 |
| ATOM | 5032 | C    | PHE | X | 334 | 55.165 | 31.053 | 46.172 | 0.00 | 0.00 |
| ATOM | 5033 | O    | PHE | X | 334 | 55.167 | 30.979 | 47.400 | 0.00 | 0.00 |
| ATOM | 5034 | N    | LEU | X | 335 | 55.959 | 30.302 | 45.402 | 0.00 | 0.00 |
| ATOM | 5035 | H    | LEU | X | 335 | 55.848 | 30.361 | 44.399 | 0.00 | 0.00 |
| ATOM | 5036 | CA   | LEU | X | 335 | 57.084 | 29.585 | 45.929 | 0.00 | 0.00 |
| ATOM | 5037 | HA   | LEU | X | 335 | 56.688 | 29.206 | 46.871 | 0.00 | 0.00 |
| ATOM | 5038 | CB   | LEU | X | 335 | 57.463 | 28.464 | 44.954 | 0.00 | 0.00 |
| ATOM | 5039 | HB2  | LEU | X | 335 | 57.724 | 28.885 | 43.983 | 0.00 | 0.00 |
| ATOM | 5040 | HB3  | LEU | X | 335 | 58.413 | 28.041 | 45.278 | 0.00 | 0.00 |
| ATOM | 5041 | CG   | LEU | X | 335 | 56.421 | 27.318 | 44.886 | 0.00 | 0.00 |
| ATOM | 5042 | HG   | LEU | X | 335 | 55.509 | 27.730 | 44.453 | 0.00 | 0.00 |
| ATOM | 5043 | CD1  | LEU | X | 335 | 56.948 | 26.313 | 43.847 | 0.00 | 0.00 |
| ATOM | 5044 | HD11 | LEU | X | 335 | 56.204 | 25.526 | 43.722 | 0.00 | 0.00 |
| ATOM | 5045 | HD12 | LEU | X | 335 | 57.191 | 26.829 | 42.918 | 0.00 | 0.00 |
| ATOM | 5046 | HD13 | LEU | X | 335 | 57.862 | 25.856 | 44.224 | 0.00 | 0.00 |
| ATOM | 5047 | CD2  | LEU | X | 335 | 55.995 | 26.758 | 46.255 | 0.00 | 0.00 |
| ATOM | 5048 | HD21 | LEU | X | 335 | 56.874 | 26.529 | 46.857 | 0.00 | 0.00 |
| ATOM | 5049 | HD22 | LEU | X | 335 | 55.305 | 27.400 | 46.804 | 0.00 | 0.00 |
| ATOM | 5050 | HD23 | LEU | X | 335 | 55.486 | 25.795 | 46.208 | 0.00 | 0.00 |
| ATOM | 5051 | C    | LEU | X | 335 | 58.261 | 30.523 | 46.309 | 0.00 | 0.00 |
| ATOM | 5052 | O    | LEU | X | 335 | 58.329 | 30.788 | 47.480 | 0.00 | 0.00 |
| ATOM | 5053 | N    | VAL | X | 336 | 59.166 | 30.897 | 45.421 | 0.00 | 0.00 |
| ATOM | 5054 | H    | VAL | X | 336 | 58.905 | 30.867 | 44.446 | 0.00 | 0.00 |
| ATOM | 5055 | CA   | VAL | X | 336 | 60.528 | 31.349 | 45.777 | 0.00 | 0.00 |
| ATOM | 5056 | HA   | VAL | X | 336 | 60.807 | 30.589 | 46.506 | 0.00 | 0.00 |
| ATOM | 5057 | CB   | VAL | X | 336 | 61.578 | 31.099 | 44.645 | 0.00 | 0.00 |
| ATOM | 5058 | HB   | VAL | X | 336 | 62.564 | 30.890 | 45.060 | 0.00 | 0.00 |
| ATOM | 5059 | CG1  | VAL | X | 336 | 61.157 | 29.814 | 43.830 | 0.00 | 0.00 |
| ATOM | 5060 | HG11 | VAL | X | 336 | 60.476 | 30.030 | 43.007 | 0.00 | 0.00 |
| ATOM | 5061 | HG12 | VAL | X | 336 | 62.081 | 29.359 | 43.472 | 0.00 | 0.00 |
| ATOM | 5062 | HG13 | VAL | X | 336 | 60.694 | 29.036 | 44.437 | 0.00 | 0.00 |
| ATOM | 5063 | CG2  | VAL | X | 336 | 61.502 | 32.345 | 43.698 | 0.00 | 0.00 |
| ATOM | 5064 | HG21 | VAL | X | 336 | 61.981 | 32.182 | 42.733 | 0.00 | 0.00 |
| ATOM | 5065 | HG22 | VAL | X | 336 | 60.484 | 32.596 | 43.399 | 0.00 | 0.00 |
| ATOM | 5066 | HG23 | VAL | X | 336 | 61.930 | 33.193 | 44.234 | 0.00 | 0.00 |
| ATOM | 5067 | C    | VAL | X | 336 | 60.541 | 32.638 | 46.588 | 0.00 | 0.00 |
| ATOM | 5068 | O    | VAL | X | 336 | 61.643 | 32.899 | 47.000 | 0.00 | 0.00 |
| ATOM | 5069 | N    | TYR | X | 337 | 59.464 | 33.389 | 46.776 | 0.00 | 0.00 |
| ATOM | 5070 | H    | TYR | X | 337 | 58.679 | 33.115 | 46.203 | 0.00 | 0.00 |
| ATOM | 5071 | CA   | TYR | X | 337 | 59.472 | 34.577 | 47.713 | 0.00 | 0.00 |
| ATOM | 5072 | HA   | TYR | X | 337 | 60.487 | 34.966 | 47.782 | 0.00 | 0.00 |
| ATOM | 5073 | CB   | TYR | X | 337 | 58.860 | 35.704 | 46.884 | 0.00 | 0.00 |
| ATOM | 5074 | HB2  | TYR | X | 337 | 59.386 | 35.709 | 45.929 | 0.00 | 0.00 |
| ATOM | 5075 | HB3  | TYR | X | 337 | 57.843 | 35.591 | 46.508 | 0.00 | 0.00 |
| ATOM | 5076 | CG   | TYR | X | 337 | 59.002 | 37.107 | 47.498 | 0.00 | 0.00 |
| ATOM | 5077 | CD1  | TYR | X | 337 | 59.958 | 37.384 | 48.515 | 0.00 | 0.00 |

|      |      |     |     |   |     |        |        |        |      |      |
|------|------|-----|-----|---|-----|--------|--------|--------|------|------|
| ATOM | 5078 | HD1 | TYR | X | 337 | 60.754 | 36.722 | 48.825 | 0.00 | 0.00 |
| ATOM | 5079 | CE1 | TYR | X | 337 | 59.968 | 38.576 | 49.228 | 0.00 | 0.00 |
| ATOM | 5080 | HE1 | TYR | X | 337 | 60.694 | 38.814 | 49.992 | 0.00 | 0.00 |
| ATOM | 5081 | CZ  | TYR | X | 337 | 58.922 | 39.487 | 48.948 | 0.00 | 0.00 |
| ATOM | 5082 | OH  | TYR | X | 337 | 58.943 | 40.704 | 49.572 | 0.00 | 0.00 |
| ATOM | 5083 | HH  | TYR | X | 337 | 59.762 | 40.725 | 50.072 | 0.00 | 0.00 |
| ATOM | 5084 | CE2 | TYR | X | 337 | 57.900 | 39.258 | 47.963 | 0.00 | 0.00 |
| ATOM | 5085 | HE2 | TYR | X | 337 | 57.251 | 40.088 | 47.727 | 0.00 | 0.00 |
| ATOM | 5086 | CD2 | TYR | X | 337 | 57.928 | 38.022 | 47.301 | 0.00 | 0.00 |
| ATOM | 5087 | HD2 | TYR | X | 337 | 57.040 | 37.843 | 46.713 | 0.00 | 0.00 |
| ATOM | 5088 | C   | TYR | X | 337 | 58.778 | 34.286 | 49.019 | 0.00 | 0.00 |
| ATOM | 5089 | O   | TYR | X | 337 | 58.663 | 35.027 | 49.994 | 0.00 | 0.00 |
| ATOM | 5090 | N   | GLY | X | 338 | 58.070 | 33.147 | 49.118 | 0.00 | 0.00 |
| ATOM | 5091 | H   | GLY | X | 338 | 58.199 | 32.494 | 48.358 | 0.00 | 0.00 |
| ATOM | 5092 | CA  | GLY | X | 338 | 57.248 | 32.731 | 50.224 | 0.00 | 0.00 |
| ATOM | 5093 | HA2 | GLY | X | 338 | 57.112 | 33.545 | 50.889 | 0.00 | 0.00 |
| ATOM | 5094 | HA3 | GLY | X | 338 | 56.318 | 32.484 | 49.744 | 0.00 | 0.00 |
| ATOM | 5095 | C   | GLY | X | 338 | 57.838 | 31.471 | 50.974 | 0.00 | 0.00 |
| ATOM | 5096 | O   | GLY | X | 338 | 57.779 | 31.374 | 52.228 | 0.00 | 0.00 |
| ATOM | 5097 | N   | ALA | X | 339 | 58.106 | 30.429 | 50.198 | 0.00 | 0.00 |
| ATOM | 5098 | H   | ALA | X | 339 | 57.974 | 30.714 | 49.238 | 0.00 | 0.00 |
| ATOM | 5099 | CA  | ALA | X | 339 | 58.480 | 29.077 | 50.585 | 0.00 | 0.00 |
| ATOM | 5100 | HA  | ALA | X | 339 | 57.865 | 28.843 | 51.455 | 0.00 | 0.00 |
| ATOM | 5101 | CB  | ALA | X | 339 | 58.118 | 28.043 | 49.443 | 0.00 | 0.00 |
| ATOM | 5102 | HB1 | ALA | X | 339 | 58.771 | 28.252 | 48.596 | 0.00 | 0.00 |
| ATOM | 5103 | HB2 | ALA | X | 339 | 58.220 | 27.039 | 49.854 | 0.00 | 0.00 |
| ATOM | 5104 | HB3 | ALA | X | 339 | 57.106 | 28.146 | 49.051 | 0.00 | 0.00 |
| ATOM | 5105 | C   | ALA | X | 339 | 59.962 | 28.867 | 51.056 | 0.00 | 0.00 |
| ATOM | 5106 | O   | ALA | X | 339 | 60.873 | 29.210 | 50.321 | 0.00 | 0.00 |
| ATOM | 5107 | N   | PRO | X | 340 | 60.183 | 28.305 | 52.273 | 0.00 | 0.00 |
| ATOM | 5108 | CD  | PRO | X | 340 | 59.154 | 27.745 | 53.217 | 0.00 | 0.00 |
| ATOM | 5109 | HD2 | PRO | X | 340 | 58.672 | 26.852 | 52.819 | 0.00 | 0.00 |
| ATOM | 5110 | HD3 | PRO | X | 340 | 58.476 | 28.569 | 53.444 | 0.00 | 0.00 |
| ATOM | 5111 | CG  | PRO | X | 340 | 59.844 | 27.287 | 54.430 | 0.00 | 0.00 |
| ATOM | 5112 | HG2 | PRO | X | 340 | 60.090 | 26.228 | 54.353 | 0.00 | 0.00 |
| ATOM | 5113 | HG3 | PRO | X | 340 | 59.226 | 27.454 | 55.313 | 0.00 | 0.00 |
| ATOM | 5114 | CB  | PRO | X | 340 | 61.158 | 28.080 | 54.406 | 0.00 | 0.00 |
| ATOM | 5115 | HB2 | PRO | X | 340 | 61.949 | 27.619 | 54.998 | 0.00 | 0.00 |
| ATOM | 5116 | HB3 | PRO | X | 340 | 60.910 | 29.056 | 54.825 | 0.00 | 0.00 |
| ATOM | 5117 | CA  | PRO | X | 340 | 61.467 | 28.242 | 52.931 | 0.00 | 0.00 |
| ATOM | 5118 | HA  | PRO | X | 340 | 61.943 | 29.220 | 52.862 | 0.00 | 0.00 |
| ATOM | 5119 | C   | PRO | X | 340 | 62.294 | 27.146 | 52.272 | 0.00 | 0.00 |
| ATOM | 5120 | O   | PRO | X | 340 | 61.738 | 26.107 | 51.959 | 0.00 | 0.00 |
| ATOM | 5121 | N   | GLY | X | 341 | 63.609 | 27.314 | 52.156 | 0.00 | 0.00 |
| ATOM | 5122 | H   | GLY | X | 341 | 64.091 | 28.101 | 52.565 | 0.00 | 0.00 |
| ATOM | 5123 | CA  | GLY | X | 341 | 64.401 | 26.260 | 51.464 | 0.00 | 0.00 |
| ATOM | 5124 | HA2 | GLY | X | 341 | 65.392 | 26.197 | 51.933 | 0.00 | 0.00 |
| ATOM | 5125 | HA3 | GLY | X | 341 | 63.838 | 25.339 | 51.534 | 0.00 | 0.00 |
| ATOM | 5126 | C   | GLY | X | 341 | 64.493 | 26.573 | 49.959 | 0.00 | 0.00 |
| ATOM | 5127 | O   | GLY | X | 341 | 65.495 | 26.193 | 49.377 | 0.00 | 0.00 |
| ATOM | 5128 | N   | PHE | X | 342 | 63.640 | 27.365 | 49.354 | 0.00 | 0.00 |
| ATOM | 5129 | H   | PHE | X | 342 | 62.837 | 27.705 | 49.865 | 0.00 | 0.00 |
| ATOM | 5130 | CA  | PHE | X | 342 | 63.672 | 27.729 | 47.898 | 0.00 | 0.00 |
| ATOM | 5131 | HA  | PHE | X | 342 | 64.233 | 26.986 | 47.331 | 0.00 | 0.00 |
| ATOM | 5132 | CB  | PHE | X | 342 | 62.282 | 27.679 | 47.287 | 0.00 | 0.00 |
| ATOM | 5133 | HB2 | PHE | X | 342 | 61.688 | 28.425 | 47.816 | 0.00 | 0.00 |
| ATOM | 5134 | HB3 | PHE | X | 342 | 62.330 | 27.929 | 46.227 | 0.00 | 0.00 |
| ATOM | 5135 | CG  | PHE | X | 342 | 61.542 | 26.334 | 47.292 | 0.00 | 0.00 |
| ATOM | 5136 | CD1 | PHE | X | 342 | 61.634 | 25.537 | 46.090 | 0.00 | 0.00 |
| ATOM | 5137 | HD1 | PHE | X | 342 | 62.300 | 25.758 | 45.269 | 0.00 | 0.00 |
| ATOM | 5138 | CE1 | PHE | X | 342 | 60.846 | 24.392 | 46.038 | 0.00 | 0.00 |
| ATOM | 5139 | HE1 | PHE | X | 342 | 60.924 | 23.745 | 45.177 | 0.00 | 0.00 |
| ATOM | 5140 | CZ  | PHE | X | 342 | 60.076 | 23.984 | 47.193 | 0.00 | 0.00 |
| ATOM | 5141 | HZ  | PHE | X | 342 | 59.607 | 23.017 | 47.087 | 0.00 | 0.00 |
| ATOM | 5142 | CE2 | PHE | X | 342 | 59.975 | 24.770 | 48.404 | 0.00 | 0.00 |
| ATOM | 5143 | HE2 | PHE | X | 342 | 59.326 | 24.402 | 49.186 | 0.00 | 0.00 |
| ATOM | 5144 | CD2 | PHE | X | 342 | 60.753 | 25.965 | 48.402 | 0.00 | 0.00 |
| ATOM | 5145 | HD2 | PHE | X | 342 | 60.608 | 26.620 | 49.249 | 0.00 | 0.00 |
| ATOM | 5146 | C   | PHE | X | 342 | 64.386 | 29.068 | 47.736 | 0.00 | 0.00 |
| ATOM | 5147 | O   | PHE | X | 342 | 64.296 | 29.972 | 48.605 | 0.00 | 0.00 |

|      |      |      |     |   |     |        |        |        |      |      |
|------|------|------|-----|---|-----|--------|--------|--------|------|------|
| ATOM | 5148 | N    | SER | X | 343 | 65.104 | 29.279 | 46.625 | 0.00 | 0.00 |
| ATOM | 5149 | H    | SER | X | 343 | 65.136 | 28.573 | 45.902 | 0.00 | 0.00 |
| ATOM | 5150 | CA   | SER | X | 343 | 65.959 | 30.440 | 46.389 | 0.00 | 0.00 |
| ATOM | 5151 | HA   | SER | X | 343 | 65.596 | 31.338 | 46.888 | 0.00 | 0.00 |
| ATOM | 5152 | CB   | SER | X | 343 | 67.257 | 29.964 | 46.970 | 0.00 | 0.00 |
| ATOM | 5153 | HB2  | SER | X | 343 | 66.969 | 29.991 | 48.021 | 0.00 | 0.00 |
| ATOM | 5154 | HB3  | SER | X | 343 | 67.441 | 28.946 | 46.627 | 0.00 | 0.00 |
| ATOM | 5155 | OG   | SER | X | 343 | 68.292 | 30.896 | 46.656 | 0.00 | 0.00 |
| ATOM | 5156 | HG   | SER | X | 343 | 68.997 | 30.693 | 47.275 | 0.00 | 0.00 |
| ATOM | 5157 | C    | SER | X | 343 | 66.068 | 30.694 | 44.944 | 0.00 | 0.00 |
| ATOM | 5158 | O    | SER | X | 343 | 66.035 | 29.842 | 44.044 | 0.00 | 0.00 |
| ATOM | 5159 | N    | LYS | X | 344 | 66.263 | 31.991 | 44.635 | 0.00 | 0.00 |
| ATOM | 5160 | H    | LYS | X | 344 | 66.220 | 32.668 | 45.384 | 0.00 | 0.00 |
| ATOM | 5161 | CA   | LYS | X | 344 | 66.640 | 32.434 | 43.278 | 0.00 | 0.00 |
| ATOM | 5162 | HA   | LYS | X | 344 | 66.164 | 31.750 | 42.576 | 0.00 | 0.00 |
| ATOM | 5163 | CB   | LYS | X | 344 | 66.095 | 33.814 | 43.047 | 0.00 | 0.00 |
| ATOM | 5164 | HB2  | LYS | X | 344 | 66.353 | 34.068 | 42.018 | 0.00 | 0.00 |
| ATOM | 5165 | HB3  | LYS | X | 344 | 65.009 | 33.871 | 43.128 | 0.00 | 0.00 |
| ATOM | 5166 | CG   | LYS | X | 344 | 66.666 | 34.925 | 43.850 | 0.00 | 0.00 |
| ATOM | 5167 | HG2  | LYS | X | 344 | 66.405 | 34.771 | 44.897 | 0.00 | 0.00 |
| ATOM | 5168 | HG3  | LYS | X | 344 | 67.746 | 34.783 | 43.887 | 0.00 | 0.00 |
| ATOM | 5169 | CD   | LYS | X | 344 | 66.257 | 36.400 | 43.593 | 0.00 | 0.00 |
| ATOM | 5170 | HD2  | LYS | X | 344 | 66.420 | 36.522 | 42.523 | 0.00 | 0.00 |
| ATOM | 5171 | HD3  | LYS | X | 344 | 65.208 | 36.558 | 43.842 | 0.00 | 0.00 |
| ATOM | 5172 | CE   | LYS | X | 344 | 66.987 | 37.487 | 44.419 | 0.00 | 0.00 |
| ATOM | 5173 | HE2  | LYS | X | 344 | 66.448 | 38.388 | 44.127 | 0.00 | 0.00 |
| ATOM | 5174 | HE3  | LYS | X | 344 | 66.639 | 37.210 | 45.414 | 0.00 | 0.00 |
| ATOM | 5175 | NZ   | LYS | X | 344 | 68.429 | 37.543 | 44.387 | 0.00 | 0.00 |
| ATOM | 5176 | HZ1  | LYS | X | 344 | 68.842 | 36.987 | 45.123 | 0.00 | 0.00 |
| ATOM | 5177 | HZ2  | LYS | X | 344 | 68.850 | 37.215 | 43.530 | 0.00 | 0.00 |
| ATOM | 5178 | HZ3  | LYS | X | 344 | 68.796 | 38.455 | 44.617 | 0.00 | 0.00 |
| ATOM | 5179 | C    | LYS | X | 344 | 68.200 | 32.346 | 42.983 | 0.00 | 0.00 |
| ATOM | 5180 | O    | LYS | X | 344 | 68.634 | 32.721 | 41.930 | 0.00 | 0.00 |
| ATOM | 5181 | N    | ASP | X | 345 | 68.983 | 31.772 | 43.894 | 0.00 | 0.00 |
| ATOM | 5182 | H    | ASP | X | 345 | 68.545 | 31.505 | 44.764 | 0.00 | 0.00 |
| ATOM | 5183 | CA   | ASP | X | 345 | 70.435 | 31.617 | 43.866 | 0.00 | 0.00 |
| ATOM | 5184 | HA   | ASP | X | 345 | 70.837 | 31.906 | 42.894 | 0.00 | 0.00 |
| ATOM | 5185 | CB   | ASP | X | 345 | 70.940 | 32.625 | 44.930 | 0.00 | 0.00 |
| ATOM | 5186 | HB2  | ASP | X | 345 | 70.712 | 33.676 | 44.756 | 0.00 | 0.00 |
| ATOM | 5187 | HB3  | ASP | X | 345 | 70.645 | 32.221 | 45.899 | 0.00 | 0.00 |
| ATOM | 5188 | CG   | ASP | X | 345 | 72.482 | 32.695 | 45.099 | 0.00 | 0.00 |
| ATOM | 5189 | OD1  | ASP | X | 345 | 73.032 | 32.102 | 46.069 | 0.00 | 0.00 |
| ATOM | 5190 | OD2  | ASP | X | 345 | 73.252 | 33.210 | 44.273 | 0.00 | 0.00 |
| ATOM | 5191 | C    | ASP | X | 345 | 70.758 | 30.100 | 44.120 | 0.00 | 0.00 |
| ATOM | 5192 | O    | ASP | X | 345 | 71.269 | 29.533 | 43.163 | 0.00 | 0.00 |
| ATOM | 5193 | N    | ASN | X | 346 | 70.539 | 29.441 | 45.265 | 0.00 | 0.00 |
| ATOM | 5194 | H    | ASN | X | 346 | 70.163 | 29.886 | 46.090 | 0.00 | 0.00 |
| ATOM | 5195 | CA   | ASN | X | 346 | 70.610 | 28.016 | 45.388 | 0.00 | 0.00 |
| ATOM | 5196 | HA   | ASN | X | 346 | 71.573 | 27.663 | 45.019 | 0.00 | 0.00 |
| ATOM | 5197 | CB   | ASN | X | 346 | 70.375 | 27.583 | 46.853 | 0.00 | 0.00 |
| ATOM | 5198 | HB2  | ASN | X | 346 | 71.141 | 28.020 | 47.494 | 0.00 | 0.00 |
| ATOM | 5199 | HB3  | ASN | X | 346 | 69.385 | 27.951 | 47.122 | 0.00 | 0.00 |
| ATOM | 5200 | CG   | ASN | X | 346 | 70.409 | 26.089 | 47.060 | 0.00 | 0.00 |
| ATOM | 5201 | OD1  | ASN | X | 346 | 69.411 | 25.469 | 47.344 | 0.00 | 0.00 |
| ATOM | 5202 | ND2  | ASN | X | 346 | 71.538 | 25.399 | 46.925 | 0.00 | 0.00 |
| ATOM | 5203 | HD21 | ASN | X | 346 | 71.650 | 24.436 | 47.207 | 0.00 | 0.00 |
| ATOM | 5204 | HD22 | ASN | X | 346 | 72.378 | 25.898 | 46.669 | 0.00 | 0.00 |
| ATOM | 5205 | C    | ASN | X | 346 | 69.650 | 27.273 | 44.471 | 0.00 | 0.00 |
| ATOM | 5206 | O    | ASN | X | 346 | 68.515 | 27.701 | 44.328 | 0.00 | 0.00 |
| ATOM | 5207 | N    | GLU | X | 347 | 70.092 | 26.095 | 43.980 | 0.00 | 0.00 |
| ATOM | 5208 | H    | GLU | X | 347 | 71.039 | 25.879 | 44.256 | 0.00 | 0.00 |
| ATOM | 5209 | CA   | GLU | X | 347 | 69.550 | 25.106 | 43.037 | 0.00 | 0.00 |
| ATOM | 5210 | HA   | GLU | X | 347 | 69.477 | 25.557 | 42.047 | 0.00 | 0.00 |
| ATOM | 5211 | CB   | GLU | X | 347 | 70.455 | 23.943 | 42.844 | 0.00 | 0.00 |
| ATOM | 5212 | HB2  | GLU | X | 347 | 70.466 | 23.310 | 43.731 | 0.00 | 0.00 |
| ATOM | 5213 | HB3  | GLU | X | 347 | 70.064 | 23.452 | 41.954 | 0.00 | 0.00 |
| ATOM | 5214 | CG   | GLU | X | 347 | 71.964 | 24.304 | 42.426 | 0.00 | 0.00 |
| ATOM | 5215 | HG2  | GLU | X | 347 | 72.353 | 23.433 | 41.898 | 0.00 | 0.00 |
| ATOM | 5216 | HG3  | GLU | X | 347 | 71.968 | 25.170 | 41.765 | 0.00 | 0.00 |
| ATOM | 5217 | CD   | GLU | X | 347 | 72.854 | 24.659 | 43.569 | 0.00 | 0.00 |

|      |      |      |     |   |     |        |        |        |      |      |
|------|------|------|-----|---|-----|--------|--------|--------|------|------|
| ATOM | 5218 | OE1  | GLU | X | 347 | 72.789 | 25.803 | 44.066 | 0.00 | 0.00 |
| ATOM | 5219 | OE2  | GLU | X | 347 | 73.715 | 23.820 | 44.023 | 0.00 | 0.00 |
| ATOM | 5220 | C    | GLU | X | 347 | 68.179 | 24.643 | 43.414 | 0.00 | 0.00 |
| ATOM | 5221 | O    | GLU | X | 347 | 67.320 | 24.341 | 42.556 | 0.00 | 0.00 |
| ATOM | 5222 | N    | SER | X | 348 | 67.944 | 24.561 | 44.744 | 0.00 | 0.00 |
| ATOM | 5223 | H    | SER | X | 348 | 68.671 | 24.820 | 45.395 | 0.00 | 0.00 |
| ATOM | 5224 | CA   | SER | X | 348 | 66.543 | 24.348 | 45.313 | 0.00 | 0.00 |
| ATOM | 5225 | HA   | SER | X | 348 | 66.624 | 24.361 | 46.400 | 0.00 | 0.00 |
| ATOM | 5226 | CB   | SER | X | 348 | 65.699 | 25.583 | 44.877 | 0.00 | 0.00 |
| ATOM | 5227 | HB2  | SER | X | 348 | 65.556 | 25.672 | 43.800 | 0.00 | 0.00 |
| ATOM | 5228 | HB3  | SER | X | 348 | 64.683 | 25.532 | 45.267 | 0.00 | 0.00 |
| ATOM | 5229 | OG   | SER | X | 348 | 66.105 | 26.853 | 45.361 | 0.00 | 0.00 |
| ATOM | 5230 | HG   | SER | X | 348 | 66.845 | 27.241 | 44.890 | 0.00 | 0.00 |
| ATOM | 5231 | C    | SER | X | 348 | 65.914 | 23.045 | 44.734 | 0.00 | 0.00 |
| ATOM | 5232 | O    | SER | X | 348 | 64.721 | 22.957 | 44.614 | 0.00 | 0.00 |
| ATOM | 5233 | N    | LEU | X | 349 | 66.742 | 22.025 | 44.514 | 0.00 | 0.00 |
| ATOM | 5234 | H    | LEU | X | 349 | 67.744 | 22.154 | 44.520 | 0.00 | 0.00 |
| ATOM | 5235 | CA   | LEU | X | 349 | 66.284 | 20.648 | 44.235 | 0.00 | 0.00 |
| ATOM | 5236 | HA   | LEU | X | 349 | 65.673 | 20.712 | 43.335 | 0.00 | 0.00 |
| ATOM | 5237 | CB   | LEU | X | 349 | 67.539 | 19.818 | 43.988 | 0.00 | 0.00 |
| ATOM | 5238 | HB2  | LEU | X | 349 | 68.050 | 19.859 | 44.950 | 0.00 | 0.00 |
| ATOM | 5239 | HB3  | LEU | X | 349 | 67.364 | 18.753 | 43.835 | 0.00 | 0.00 |
| ATOM | 5240 | CG   | LEU | X | 349 | 68.586 | 20.307 | 42.986 | 0.00 | 0.00 |
| ATOM | 5241 | HG   | LEU | X | 349 | 68.882 | 21.300 | 43.321 | 0.00 | 0.00 |
| ATOM | 5242 | CD1  | LEU | X | 349 | 69.854 | 19.476 | 42.797 | 0.00 | 0.00 |
| ATOM | 5243 | HD11 | LEU | X | 349 | 70.355 | 19.785 | 41.879 | 0.00 | 0.00 |
| ATOM | 5244 | HD12 | LEU | X | 349 | 70.484 | 19.699 | 43.658 | 0.00 | 0.00 |
| ATOM | 5245 | HD13 | LEU | X | 349 | 69.695 | 18.398 | 42.823 | 0.00 | 0.00 |
| ATOM | 5246 | CD2  | LEU | X | 349 | 67.984 | 20.414 | 41.598 | 0.00 | 0.00 |
| ATOM | 5247 | HD21 | LEU | X | 349 | 67.278 | 21.244 | 41.565 | 0.00 | 0.00 |
| ATOM | 5248 | HD22 | LEU | X | 349 | 68.665 | 20.823 | 40.853 | 0.00 | 0.00 |
| ATOM | 5249 | HD23 | LEU | X | 349 | 67.430 | 19.586 | 41.155 | 0.00 | 0.00 |
| ATOM | 5250 | C    | LEU | X | 349 | 65.502 | 20.033 | 45.473 | 0.00 | 0.00 |
| ATOM | 5251 | O    | LEU | X | 349 | 65.839 | 20.353 | 46.594 | 0.00 | 0.00 |
| ATOM | 5252 | N    | ILE | X | 350 | 64.444 | 19.245 | 45.191 | 0.00 | 0.00 |
| ATOM | 5253 | H    | ILE | X | 350 | 64.133 | 19.279 | 44.230 | 0.00 | 0.00 |
| ATOM | 5254 | CA   | ILE | X | 350 | 63.690 | 18.597 | 46.221 | 0.00 | 0.00 |
| ATOM | 5255 | HA   | ILE | X | 350 | 64.224 | 18.629 | 47.170 | 0.00 | 0.00 |
| ATOM | 5256 | CB   | ILE | X | 350 | 62.405 | 19.339 | 46.435 | 0.00 | 0.00 |
| ATOM | 5257 | HB   | ILE | X | 350 | 61.904 | 18.834 | 47.261 | 0.00 | 0.00 |
| ATOM | 5258 | CG2  | ILE | X | 350 | 62.619 | 20.720 | 47.057 | 0.00 | 0.00 |
| ATOM | 5259 | HG21 | ILE | X | 350 | 61.661 | 21.173 | 47.312 | 0.00 | 0.00 |
| ATOM | 5260 | HG22 | ILE | X | 350 | 63.268 | 20.574 | 47.921 | 0.00 | 0.00 |
| ATOM | 5261 | HG23 | ILE | X | 350 | 63.218 | 21.327 | 46.379 | 0.00 | 0.00 |
| ATOM | 5262 | CG1  | ILE | X | 350 | 61.450 | 19.310 | 45.269 | 0.00 | 0.00 |
| ATOM | 5263 | HG12 | ILE | X | 350 | 61.647 | 20.077 | 44.521 | 0.00 | 0.00 |
| ATOM | 5264 | HG13 | ILE | X | 350 | 61.508 | 18.414 | 44.651 | 0.00 | 0.00 |
| ATOM | 5265 | CD1  | ILE | X | 350 | 60.018 | 19.524 | 45.669 | 0.00 | 0.00 |
| ATOM | 5266 | HD11 | ILE | X | 350 | 59.326 | 19.209 | 44.887 | 0.00 | 0.00 |
| ATOM | 5267 | HD12 | ILE | X | 350 | 59.824 | 19.062 | 46.637 | 0.00 | 0.00 |
| ATOM | 5268 | HD13 | ILE | X | 350 | 59.762 | 20.567 | 45.852 | 0.00 | 0.00 |
| ATOM | 5269 | C    | ILE | X | 350 | 63.435 | 17.115 | 45.995 | 0.00 | 0.00 |
| ATOM | 5270 | O    | ILE | X | 350 | 63.771 | 16.558 | 44.893 | 0.00 | 0.00 |
| ATOM | 5271 | N    | SER | X | 351 | 62.812 | 16.435 | 46.983 | 0.00 | 0.00 |
| ATOM | 5272 | H    | SER | X | 351 | 62.403 | 16.934 | 47.761 | 0.00 | 0.00 |
| ATOM | 5273 | CA   | SER | X | 351 | 62.579 | 14.952 | 46.875 | 0.00 | 0.00 |
| ATOM | 5274 | HA   | SER | X | 351 | 63.051 | 14.600 | 45.958 | 0.00 | 0.00 |
| ATOM | 5275 | CB   | SER | X | 351 | 63.203 | 14.188 | 47.999 | 0.00 | 0.00 |
| ATOM | 5276 | HB2  | SER | X | 351 | 63.241 | 13.106 | 47.876 | 0.00 | 0.00 |
| ATOM | 5277 | HB3  | SER | X | 351 | 64.213 | 14.489 | 48.280 | 0.00 | 0.00 |
| ATOM | 5278 | OG   | SER | X | 351 | 62.428 | 14.480 | 49.122 | 0.00 | 0.00 |
| ATOM | 5279 | HG   | SER | X | 351 | 62.580 | 13.845 | 49.826 | 0.00 | 0.00 |
| ATOM | 5280 | C    | SER | X | 351 | 61.087 | 14.734 | 46.602 | 0.00 | 0.00 |
| ATOM | 5281 | O    | SER | X | 351 | 60.309 | 15.697 | 46.895 | 0.00 | 0.00 |
| ATOM | 5282 | N    | ARG | X | 352 | 60.576 | 13.557 | 46.238 | 0.00 | 0.00 |
| ATOM | 5283 | H    | ARG | X | 352 | 61.232 | 12.850 | 45.938 | 0.00 | 0.00 |
| ATOM | 5284 | CA   | ARG | X | 352 | 59.132 | 13.356 | 46.062 | 0.00 | 0.00 |
| ATOM | 5285 | HA   | ARG | X | 352 | 58.751 | 14.122 | 45.387 | 0.00 | 0.00 |
| ATOM | 5286 | CB   | ARG | X | 352 | 58.861 | 11.918 | 45.668 | 0.00 | 0.00 |
| ATOM | 5287 | HB2  | ARG | X | 352 | 59.499 | 11.221 | 46.212 | 0.00 | 0.00 |

|      |      |      |     |   |     |        |        |        |      |      |
|------|------|------|-----|---|-----|--------|--------|--------|------|------|
| ATOM | 5288 | HB3  | ARG | X | 352 | 57.802 | 11.734 | 45.845 | 0.00 | 0.00 |
| ATOM | 5289 | CG   | ARG | X | 352 | 59.107 | 11.835 | 44.157 | 0.00 | 0.00 |
| ATOM | 5290 | HG2  | ARG | X | 352 | 58.450 | 12.620 | 43.782 | 0.00 | 0.00 |
| ATOM | 5291 | HG3  | ARG | X | 352 | 60.104 | 12.168 | 43.871 | 0.00 | 0.00 |
| ATOM | 5292 | CD   | ARG | X | 352 | 58.707 | 10.448 | 43.624 | 0.00 | 0.00 |
| ATOM | 5293 | HD2  | ARG | X | 352 | 59.212 | 10.201 | 42.690 | 0.00 | 0.00 |
| ATOM | 5294 | HD3  | ARG | X | 352 | 59.035 | 9.681  | 44.325 | 0.00 | 0.00 |
| ATOM | 5295 | NE   | ARG | X | 352 | 57.317 | 10.327 | 43.369 | 0.00 | 0.00 |
| ATOM | 5296 | HE   | ARG | X | 352 | 56.811 | 9.630  | 43.897 | 0.00 | 0.00 |
| ATOM | 5297 | CZ   | ARG | X | 352 | 56.613 | 11.031 | 42.535 | 0.00 | 0.00 |
| ATOM | 5298 | NH1  | ARG | X | 352 | 57.163 | 11.859 | 41.640 | 0.00 | 0.00 |
| ATOM | 5299 | HH11 | ARG | X | 352 | 58.130 | 11.709 | 41.391 | 0.00 | 0.00 |
| ATOM | 5300 | HH12 | ARG | X | 352 | 56.494 | 12.271 | 41.006 | 0.00 | 0.00 |
| ATOM | 5301 | NH2  | ARG | X | 352 | 55.341 | 10.849 | 42.638 | 0.00 | 0.00 |
| ATOM | 5302 | HH21 | ARG | X | 352 | 54.994 | 10.124 | 43.249 | 0.00 | 0.00 |
| ATOM | 5303 | HH22 | ARG | X | 352 | 54.708 | 11.256 | 41.964 | 0.00 | 0.00 |
| ATOM | 5304 | C    | ARG | X | 352 | 58.434 | 13.710 | 47.398 | 0.00 | 0.00 |
| ATOM | 5305 | O    | ARG | X | 352 | 57.384 | 14.284 | 47.345 | 0.00 | 0.00 |
| ATOM | 5306 | N    | ALA | X | 353 | 58.985 | 13.353 | 48.586 | 0.00 | 0.00 |
| ATOM | 5307 | H    | ALA | X | 353 | 59.768 | 12.716 | 48.607 | 0.00 | 0.00 |
| ATOM | 5308 | CA   | ALA | X | 353 | 58.469 | 13.637 | 49.918 | 0.00 | 0.00 |
| ATOM | 5309 | HA   | ALA | X | 353 | 57.602 | 13.027 | 50.173 | 0.00 | 0.00 |
| ATOM | 5310 | CB   | ALA | X | 353 | 59.462 | 13.182 | 50.959 | 0.00 | 0.00 |
| ATOM | 5311 | HB1  | ALA | X | 353 | 60.372 | 13.764 | 50.809 | 0.00 | 0.00 |
| ATOM | 5312 | HB2  | ALA | X | 353 | 59.186 | 13.444 | 51.980 | 0.00 | 0.00 |
| ATOM | 5313 | HB3  | ALA | X | 353 | 59.583 | 12.105 | 50.848 | 0.00 | 0.00 |
| ATOM | 5314 | C    | ALA | X | 353 | 58.059 | 15.125 | 50.066 | 0.00 | 0.00 |
| ATOM | 5315 | O    | ALA | X | 353 | 56.872 | 15.464 | 50.320 | 0.00 | 0.00 |
| ATOM | 5316 | N    | GLU | X | 354 | 59.042 | 15.926 | 49.683 | 0.00 | 0.00 |
| ATOM | 5317 | H    | GLU | X | 354 | 59.916 | 15.507 | 49.399 | 0.00 | 0.00 |
| ATOM | 5318 | CA   | GLU | X | 354 | 58.929 | 17.425 | 49.755 | 0.00 | 0.00 |
| ATOM | 5319 | HA   | GLU | X | 354 | 58.621 | 17.720 | 50.758 | 0.00 | 0.00 |
| ATOM | 5320 | CB   | GLU | X | 354 | 60.309 | 18.089 | 49.507 | 0.00 | 0.00 |
| ATOM | 5321 | HB2  | GLU | X | 354 | 60.741 | 17.672 | 48.598 | 0.00 | 0.00 |
| ATOM | 5322 | HB3  | GLU | X | 354 | 60.134 | 19.165 | 49.516 | 0.00 | 0.00 |
| ATOM | 5323 | CG   | GLU | X | 354 | 61.410 | 17.542 | 50.467 | 0.00 | 0.00 |
| ATOM | 5324 | HG2  | GLU | X | 354 | 61.028 | 17.529 | 51.488 | 0.00 | 0.00 |
| ATOM | 5325 | HG3  | GLU | X | 354 | 61.740 | 16.522 | 50.271 | 0.00 | 0.00 |
| ATOM | 5326 | CD   | GLU | X | 354 | 62.599 | 18.526 | 50.445 | 0.00 | 0.00 |
| ATOM | 5327 | OE1  | GLU | X | 354 | 62.550 | 19.522 | 51.218 | 0.00 | 0.00 |
| ATOM | 5328 | OE2  | GLU | X | 354 | 63.540 | 18.272 | 49.750 | 0.00 | 0.00 |
| ATOM | 5329 | C    | GLU | X | 354 | 57.984 | 17.985 | 48.699 | 0.00 | 0.00 |
| ATOM | 5330 | O    | GLU | X | 354 | 57.443 | 19.076 | 48.929 | 0.00 | 0.00 |
| ATOM | 5331 | N    | PHE | X | 355 | 57.746 | 17.325 | 47.541 | 0.00 | 0.00 |
| ATOM | 5332 | H    | PHE | X | 355 | 58.299 | 16.519 | 47.289 | 0.00 | 0.00 |
| ATOM | 5333 | CA   | PHE | X | 355 | 56.678 | 17.758 | 46.691 | 0.00 | 0.00 |
| ATOM | 5334 | HA   | PHE | X | 355 | 56.854 | 18.753 | 46.282 | 0.00 | 0.00 |
| ATOM | 5335 | CB   | PHE | X | 355 | 56.818 | 16.828 | 45.495 | 0.00 | 0.00 |
| ATOM | 5336 | HB2  | PHE | X | 355 | 57.801 | 16.932 | 45.036 | 0.00 | 0.00 |
| ATOM | 5337 | HB3  | PHE | X | 355 | 56.689 | 15.787 | 45.791 | 0.00 | 0.00 |
| ATOM | 5338 | CG   | PHE | X | 355 | 55.816 | 17.111 | 44.368 | 0.00 | 0.00 |
| ATOM | 5339 | CD1  | PHE | X | 355 | 55.319 | 18.406 | 44.114 | 0.00 | 0.00 |
| ATOM | 5340 | HD1  | PHE | X | 355 | 55.602 | 19.275 | 44.690 | 0.00 | 0.00 |
| ATOM | 5341 | CE1  | PHE | X | 355 | 54.333 | 18.477 | 43.128 | 0.00 | 0.00 |
| ATOM | 5342 | HE1  | PHE | X | 355 | 53.845 | 19.414 | 42.903 | 0.00 | 0.00 |
| ATOM | 5343 | CZ   | PHE | X | 355 | 54.017 | 17.352 | 42.339 | 0.00 | 0.00 |
| ATOM | 5344 | HZ   | PHE | X | 355 | 53.350 | 17.453 | 41.495 | 0.00 | 0.00 |
| ATOM | 5345 | CE2  | PHE | X | 355 | 54.637 | 16.125 | 42.566 | 0.00 | 0.00 |
| ATOM | 5346 | HE2  | PHE | X | 355 | 54.560 | 15.236 | 41.956 | 0.00 | 0.00 |
| ATOM | 5347 | CD2  | PHE | X | 355 | 55.593 | 15.999 | 43.553 | 0.00 | 0.00 |
| ATOM | 5348 | HD2  | PHE | X | 355 | 56.040 | 15.047 | 43.800 | 0.00 | 0.00 |
| ATOM | 5349 | C    | PHE | X | 355 | 55.248 | 17.673 | 47.370 | 0.00 | 0.00 |
| ATOM | 5350 | O    | PHE | X | 355 | 54.515 | 18.635 | 47.468 | 0.00 | 0.00 |
| ATOM | 5351 | N    | LEU | X | 356 | 55.017 | 16.513 | 47.989 | 0.00 | 0.00 |
| ATOM | 5352 | H    | LEU | X | 356 | 55.733 | 15.810 | 47.872 | 0.00 | 0.00 |
| ATOM | 5353 | CA   | LEU | X | 356 | 53.854 | 16.179 | 48.874 | 0.00 | 0.00 |
| ATOM | 5354 | HA   | LEU | X | 356 | 52.970 | 16.197 | 48.237 | 0.00 | 0.00 |
| ATOM | 5355 | CB   | LEU | X | 356 | 54.078 | 14.695 | 49.279 | 0.00 | 0.00 |
| ATOM | 5356 | HB2  | LEU | X | 356 | 54.825 | 14.210 | 48.650 | 0.00 | 0.00 |
| ATOM | 5357 | HB3  | LEU | X | 356 | 54.546 | 14.722 | 50.262 | 0.00 | 0.00 |

|      |      |      |     |   |     |        |        |        |      |      |
|------|------|------|-----|---|-----|--------|--------|--------|------|------|
| ATOM | 5358 | CG   | LEU | X | 356 | 52.791 | 13.848 | 49.358 | 0.00 | 0.00 |
| ATOM | 5359 | HG   | LEU | X | 356 | 52.277 | 13.925 | 48.400 | 0.00 | 0.00 |
| ATOM | 5360 | CD1  | LEU | X | 356 | 53.108 | 12.354 | 49.592 | 0.00 | 0.00 |
| ATOM | 5361 | HD11 | LEU | X | 356 | 53.479 | 12.153 | 50.597 | 0.00 | 0.00 |
| ATOM | 5362 | HD12 | LEU | X | 356 | 52.215 | 11.745 | 49.454 | 0.00 | 0.00 |
| ATOM | 5363 | HD13 | LEU | X | 356 | 53.890 | 12.007 | 48.916 | 0.00 | 0.00 |
| ATOM | 5364 | CD2  | LEU | X | 356 | 51.802 | 14.419 | 50.410 | 0.00 | 0.00 |
| ATOM | 5365 | HD21 | LEU | X | 356 | 52.239 | 14.413 | 51.409 | 0.00 | 0.00 |
| ATOM | 5366 | HD22 | LEU | X | 356 | 51.522 | 15.402 | 50.033 | 0.00 | 0.00 |
| ATOM | 5367 | HD23 | LEU | X | 356 | 50.847 | 13.897 | 50.466 | 0.00 | 0.00 |
| ATOM | 5368 | C    | LEU | X | 356 | 53.715 | 17.117 | 50.137 | 0.00 | 0.00 |
| ATOM | 5369 | O    | LEU | X | 356 | 52.615 | 17.692 | 50.294 | 0.00 | 0.00 |
| ATOM | 5370 | N    | ALA | X | 357 | 54.764 | 17.477 | 50.822 | 0.00 | 0.00 |
| ATOM | 5371 | H    | ALA | X | 357 | 55.616 | 16.964 | 50.640 | 0.00 | 0.00 |
| ATOM | 5372 | CA   | ALA | X | 357 | 54.754 | 18.643 | 51.724 | 0.00 | 0.00 |
| ATOM | 5373 | HA   | ALA | X | 357 | 54.011 | 18.452 | 52.498 | 0.00 | 0.00 |
| ATOM | 5374 | CB   | ALA | X | 357 | 56.129 | 18.540 | 52.483 | 0.00 | 0.00 |
| ATOM | 5375 | HB1  | ALA | X | 357 | 56.325 | 17.509 | 52.777 | 0.00 | 0.00 |
| ATOM | 5376 | HB2  | ALA | X | 357 | 56.985 | 18.756 | 51.844 | 0.00 | 0.00 |
| ATOM | 5377 | HB3  | ALA | X | 357 | 56.124 | 19.233 | 53.324 | 0.00 | 0.00 |
| ATOM | 5378 | C    | ALA | X | 357 | 54.619 | 20.093 | 51.231 | 0.00 | 0.00 |
| ATOM | 5379 | O    | ALA | X | 357 | 53.939 | 20.875 | 51.869 | 0.00 | 0.00 |
| ATOM | 5380 | N    | GLY | X | 358 | 55.139 | 20.343 | 50.033 | 0.00 | 0.00 |
| ATOM | 5381 | H    | GLY | X | 358 | 55.678 | 19.613 | 49.589 | 0.00 | 0.00 |
| ATOM | 5382 | CA   | GLY | X | 358 | 54.881 | 21.549 | 49.304 | 0.00 | 0.00 |
| ATOM | 5383 | HA2  | GLY | X | 358 | 55.147 | 22.303 | 50.006 | 0.00 | 0.00 |
| ATOM | 5384 | HA3  | GLY | X | 358 | 55.481 | 21.643 | 48.432 | 0.00 | 0.00 |
| ATOM | 5385 | C    | GLY | X | 358 | 53.367 | 21.681 | 48.903 | 0.00 | 0.00 |
| ATOM | 5386 | O    | GLY | X | 358 | 52.776 | 22.678 | 49.333 | 0.00 | 0.00 |
| ATOM | 5387 | N    | VAL | X | 359 | 52.709 | 20.647 | 48.238 | 0.00 | 0.00 |
| ATOM | 5388 | H    | VAL | X | 359 | 53.183 | 19.769 | 48.083 | 0.00 | 0.00 |
| ATOM | 5389 | CA   | VAL | X | 359 | 51.267 | 20.751 | 47.866 | 0.00 | 0.00 |
| ATOM | 5390 | HA   | VAL | X | 359 | 51.135 | 21.631 | 47.237 | 0.00 | 0.00 |
| ATOM | 5391 | CB   | VAL | X | 359 | 50.751 | 19.515 | 47.055 | 0.00 | 0.00 |
| ATOM | 5392 | HB   | VAL | X | 359 | 50.723 | 18.591 | 47.633 | 0.00 | 0.00 |
| ATOM | 5393 | CG1  | VAL | X | 359 | 49.268 | 19.789 | 46.751 | 0.00 | 0.00 |
| ATOM | 5394 | HG11 | VAL | X | 359 | 49.154 | 20.716 | 46.189 | 0.00 | 0.00 |
| ATOM | 5395 | HG12 | VAL | X | 359 | 48.955 | 18.931 | 46.156 | 0.00 | 0.00 |
| ATOM | 5396 | HG13 | VAL | X | 359 | 48.629 | 19.970 | 47.616 | 0.00 | 0.00 |
| ATOM | 5397 | CG2  | VAL | X | 359 | 51.511 | 19.183 | 45.718 | 0.00 | 0.00 |
| ATOM | 5398 | HG21 | VAL | X | 359 | 51.988 | 20.111 | 45.400 | 0.00 | 0.00 |
| ATOM | 5399 | HG22 | VAL | X | 359 | 52.226 | 18.391 | 45.942 | 0.00 | 0.00 |
| ATOM | 5400 | HG23 | VAL | X | 359 | 50.788 | 18.779 | 45.009 | 0.00 | 0.00 |
| ATOM | 5401 | C    | VAL | X | 359 | 50.430 | 20.969 | 49.118 | 0.00 | 0.00 |
| ATOM | 5402 | O    | VAL | X | 359 | 49.655 | 21.951 | 49.131 | 0.00 | 0.00 |
| ATOM | 5403 | N    | ARG | X | 360 | 50.760 | 20.377 | 50.257 | 0.00 | 0.00 |
| ATOM | 5404 | H    | ARG | X | 360 | 51.459 | 19.648 | 50.256 | 0.00 | 0.00 |
| ATOM | 5405 | CA   | ARG | X | 360 | 50.065 | 20.707 | 51.464 | 0.00 | 0.00 |
| ATOM | 5406 | HA   | ARG | X | 360 | 49.002 | 20.746 | 51.228 | 0.00 | 0.00 |
| ATOM | 5407 | CB   | ARG | X | 360 | 50.437 | 19.746 | 52.619 | 0.00 | 0.00 |
| ATOM | 5408 | HB2  | ARG | X | 360 | 51.526 | 19.786 | 52.644 | 0.00 | 0.00 |
| ATOM | 5409 | HB3  | ARG | X | 360 | 50.032 | 20.188 | 53.529 | 0.00 | 0.00 |
| ATOM | 5410 | CG   | ARG | X | 360 | 50.019 | 18.277 | 52.470 | 0.00 | 0.00 |
| ATOM | 5411 | HG2  | ARG | X | 360 | 48.931 | 18.207 | 52.442 | 0.00 | 0.00 |
| ATOM | 5412 | HG3  | ARG | X | 360 | 50.493 | 17.995 | 51.530 | 0.00 | 0.00 |
| ATOM | 5413 | CD   | ARG | X | 360 | 50.539 | 17.482 | 53.665 | 0.00 | 0.00 |
| ATOM | 5414 | HD2  | ARG | X | 360 | 51.518 | 17.947 | 53.782 | 0.00 | 0.00 |
| ATOM | 5415 | HD3  | ARG | X | 360 | 49.868 | 17.674 | 54.502 | 0.00 | 0.00 |
| ATOM | 5416 | NE   | ARG | X | 360 | 50.722 | 16.045 | 53.458 | 0.00 | 0.00 |
| ATOM | 5417 | HE   | ARG | X | 360 | 51.686 | 15.780 | 53.315 | 0.00 | 0.00 |
| ATOM | 5418 | CZ   | ARG | X | 360 | 49.985 | 15.018 | 53.823 | 0.00 | 0.00 |
| ATOM | 5419 | NH1  | ARG | X | 360 | 48.787 | 14.994 | 54.262 | 0.00 | 0.00 |
| ATOM | 5420 | HH11 | ARG | X | 360 | 48.283 | 15.857 | 54.402 | 0.00 | 0.00 |
| ATOM | 5421 | HH12 | ARG | X | 360 | 48.541 | 14.183 | 54.811 | 0.00 | 0.00 |
| ATOM | 5422 | NH2  | ARG | X | 360 | 50.519 | 13.819 | 53.909 | 0.00 | 0.00 |
| ATOM | 5423 | HH21 | ARG | X | 360 | 51.485 | 13.662 | 53.657 | 0.00 | 0.00 |
| ATOM | 5424 | HH22 | ARG | X | 360 | 50.010 | 12.971 | 54.113 | 0.00 | 0.00 |
| ATOM | 5425 | C    | ARG | X | 360 | 50.202 | 22.120 | 52.010 | 0.00 | 0.00 |
| ATOM | 5426 | O    | ARG | X | 360 | 49.185 | 22.724 | 52.497 | 0.00 | 0.00 |
| ATOM | 5427 | N    | VAL | X | 361 | 51.373 | 22.740 | 51.980 | 0.00 | 0.00 |



|      |      |      |     |   |     |        |        |        |      |      |
|------|------|------|-----|---|-----|--------|--------|--------|------|------|
| ATOM | 5428 | H    | VAL | X | 361 | 52.240 | 22.286 | 51.731 | 0.00 | 0.00 |
| ATOM | 5429 | CA   | VAL | X | 361 | 51.538 | 24.109 | 52.502 | 0.00 | 0.00 |
| ATOM | 5430 | HA   | VAL | X | 361 | 50.750 | 24.337 | 53.220 | 0.00 | 0.00 |
| ATOM | 5431 | CB   | VAL | X | 361 | 52.962 | 24.414 | 53.026 | 0.00 | 0.00 |
| ATOM | 5432 | HB   | VAL | X | 361 | 52.980 | 25.451 | 53.363 | 0.00 | 0.00 |
| ATOM | 5433 | CG1  | VAL | X | 361 | 53.158 | 23.380 | 54.203 | 0.00 | 0.00 |
| ATOM | 5434 | HG11 | VAL | X | 361 | 52.270 | 23.397 | 54.834 | 0.00 | 0.00 |
| ATOM | 5435 | HG12 | VAL | X | 361 | 53.176 | 22.375 | 53.782 | 0.00 | 0.00 |
| ATOM | 5436 | HG13 | VAL | X | 361 | 54.038 | 23.549 | 54.823 | 0.00 | 0.00 |
| ATOM | 5437 | CG2  | VAL | X | 361 | 54.111 | 24.179 | 52.011 | 0.00 | 0.00 |
| ATOM | 5438 | HG21 | VAL | X | 361 | 54.025 | 24.846 | 51.154 | 0.00 | 0.00 |
| ATOM | 5439 | HG22 | VAL | X | 361 | 54.976 | 24.410 | 52.633 | 0.00 | 0.00 |
| ATOM | 5440 | HG23 | VAL | X | 361 | 54.309 | 23.169 | 51.650 | 0.00 | 0.00 |
| ATOM | 5441 | C    | VAL | X | 361 | 51.265 | 25.146 | 51.344 | 0.00 | 0.00 |
| ATOM | 5442 | O    | VAL | X | 361 | 50.646 | 26.127 | 51.650 | 0.00 | 0.00 |
| ATOM | 5443 | N    | GLY | X | 362 | 51.636 | 24.951 | 50.108 | 0.00 | 0.00 |
| ATOM | 5444 | H    | GLY | X | 362 | 51.996 | 24.029 | 49.910 | 0.00 | 0.00 |
| ATOM | 5445 | CA   | GLY | X | 362 | 51.339 | 25.914 | 48.974 | 0.00 | 0.00 |
| ATOM | 5446 | HA2  | GLY | X | 362 | 51.579 | 26.961 | 49.243 | 0.00 | 0.00 |
| ATOM | 5447 | HA3  | GLY | X | 362 | 52.053 | 25.654 | 48.154 | 0.00 | 0.00 |
| ATOM | 5448 | C    | GLY | X | 362 | 49.892 | 25.890 | 48.382 | 0.00 | 0.00 |
| ATOM | 5449 | O    | GLY | X | 362 | 49.534 | 26.843 | 47.686 | 0.00 | 0.00 |
| ATOM | 5450 | N    | VAL | X | 363 | 49.171 | 24.861 | 48.646 | 0.00 | 0.00 |
| ATOM | 5451 | H    | VAL | X | 363 | 49.471 | 23.995 | 49.070 | 0.00 | 0.00 |
| ATOM | 5452 | CA   | VAL | X | 363 | 47.679 | 24.930 | 48.447 | 0.00 | 0.00 |
| ATOM | 5453 | HA   | VAL | X | 363 | 47.295 | 25.928 | 48.236 | 0.00 | 0.00 |
| ATOM | 5454 | CB   | VAL | X | 363 | 47.150 | 24.028 | 47.232 | 0.00 | 0.00 |
| ATOM | 5455 | HB   | VAL | X | 363 | 47.337 | 22.966 | 47.389 | 0.00 | 0.00 |
| ATOM | 5456 | CG1  | VAL | X | 363 | 45.645 | 24.091 | 47.055 | 0.00 | 0.00 |
| ATOM | 5457 | HG11 | VAL | X | 363 | 45.207 | 23.401 | 47.777 | 0.00 | 0.00 |
| ATOM | 5458 | HG12 | VAL | X | 363 | 45.260 | 25.101 | 47.192 | 0.00 | 0.00 |
| ATOM | 5459 | HG13 | VAL | X | 363 | 45.210 | 23.761 | 46.112 | 0.00 | 0.00 |
| ATOM | 5460 | CG2  | VAL | X | 363 | 47.712 | 24.531 | 45.925 | 0.00 | 0.00 |
| ATOM | 5461 | HG21 | VAL | X | 363 | 47.305 | 25.475 | 45.564 | 0.00 | 0.00 |
| ATOM | 5462 | HG22 | VAL | X | 363 | 48.798 | 24.586 | 45.987 | 0.00 | 0.00 |
| ATOM | 5463 | HG23 | VAL | X | 363 | 47.594 | 23.740 | 45.184 | 0.00 | 0.00 |
| ATOM | 5464 | C    | VAL | X | 363 | 47.103 | 24.483 | 49.753 | 0.00 | 0.00 |
| ATOM | 5465 | O    | VAL | X | 363 | 46.613 | 23.376 | 49.791 | 0.00 | 0.00 |
| ATOM | 5466 | N    | PRO | X | 364 | 47.023 | 25.298 | 50.861 | 0.00 | 0.00 |
| ATOM | 5467 | CD   | PRO | X | 364 | 47.520 | 26.677 | 50.833 | 0.00 | 0.00 |
| ATOM | 5468 | HD2  | PRO | X | 364 | 46.926 | 27.236 | 50.110 | 0.00 | 0.00 |
| ATOM | 5469 | HD3  | PRO | X | 364 | 48.563 | 26.651 | 50.516 | 0.00 | 0.00 |
| ATOM | 5470 | CG   | PRO | X | 364 | 47.297 | 27.261 | 52.215 | 0.00 | 0.00 |
| ATOM | 5471 | HG2  | PRO | X | 364 | 46.315 | 27.720 | 52.331 | 0.00 | 0.00 |
| ATOM | 5472 | HG3  | PRO | X | 364 | 48.135 | 27.887 | 52.521 | 0.00 | 0.00 |
| ATOM | 5473 | CB   | PRO | X | 364 | 47.257 | 25.997 | 53.034 | 0.00 | 0.00 |
| ATOM | 5474 | HB2  | PRO | X | 364 | 46.739 | 26.144 | 53.982 | 0.00 | 0.00 |
| ATOM | 5475 | HB3  | PRO | X | 364 | 48.293 | 25.680 | 53.146 | 0.00 | 0.00 |
| ATOM | 5476 | CA   | PRO | X | 364 | 46.658 | 24.886 | 52.176 | 0.00 | 0.00 |
| ATOM | 5477 | HA   | PRO | X | 364 | 47.164 | 23.968 | 52.474 | 0.00 | 0.00 |
| ATOM | 5478 | C    | PRO | X | 364 | 45.161 | 24.761 | 52.287 | 0.00 | 0.00 |
| ATOM | 5479 | O    | PRO | X | 364 | 44.424 | 25.700 | 52.581 | 0.00 | 0.00 |
| ATOM | 5480 | N    | GLN | X | 365 | 44.659 | 23.554 | 51.974 | 0.00 | 0.00 |
| ATOM | 5481 | H    | GLN | X | 365 | 45.324 | 22.795 | 51.940 | 0.00 | 0.00 |
| ATOM | 5482 | CA   | GLN | X | 365 | 43.263 | 23.102 | 51.936 | 0.00 | 0.00 |
| ATOM | 5483 | HA   | GLN | X | 365 | 42.950 | 23.066 | 52.979 | 0.00 | 0.00 |
| ATOM | 5484 | CB   | GLN | X | 365 | 42.341 | 24.103 | 51.170 | 0.00 | 0.00 |
| ATOM | 5485 | HB2  | GLN | X | 365 | 41.385 | 23.647 | 50.913 | 0.00 | 0.00 |
| ATOM | 5486 | HB3  | GLN | X | 365 | 42.148 | 24.935 | 51.848 | 0.00 | 0.00 |
| ATOM | 5487 | CG   | GLN | X | 365 | 42.915 | 24.492 | 49.728 | 0.00 | 0.00 |
| ATOM | 5488 | HG2  | GLN | X | 365 | 43.804 | 25.107 | 49.870 | 0.00 | 0.00 |
| ATOM | 5489 | HG3  | GLN | X | 365 | 43.110 | 23.603 | 49.128 | 0.00 | 0.00 |
| ATOM | 5490 | CD   | GLN | X | 365 | 41.890 | 25.212 | 48.856 | 0.00 | 0.00 |
| ATOM | 5491 | OE1  | GLN | X | 365 | 42.169 | 26.337 | 48.400 | 0.00 | 0.00 |
| ATOM | 5492 | NE2  | GLN | X | 365 | 40.786 | 24.555 | 48.479 | 0.00 | 0.00 |
| ATOM | 5493 | HE21 | GLN | X | 365 | 40.355 | 24.878 | 47.625 | 0.00 | 0.00 |
| ATOM | 5494 | HE22 | GLN | X | 365 | 40.688 | 23.591 | 48.765 | 0.00 | 0.00 |
| ATOM | 5495 | C    | GLN | X | 365 | 43.169 | 21.725 | 51.382 | 0.00 | 0.00 |
| ATOM | 5496 | O    | GLN | X | 365 | 42.072 | 21.248 | 51.137 | 0.00 | 0.00 |
| ATOM | 5497 | N    | VAL | X | 366 | 44.275 | 20.905 | 51.092 | 0.00 | 0.00 |

|      |      |      |     |   |     |        |        |        |      |      |
|------|------|------|-----|---|-----|--------|--------|--------|------|------|
| ATOM | 5498 | H    | VAL | X | 366 | 45.115 | 21.186 | 51.577 | 0.00 | 0.00 |
| ATOM | 5499 | CA   | VAL | X | 366 | 44.239 | 19.538 | 50.492 | 0.00 | 0.00 |
| ATOM | 5500 | HA   | VAL | X | 366 | 43.375 | 19.371 | 49.848 | 0.00 | 0.00 |
| ATOM | 5501 | CB   | VAL | X | 366 | 45.401 | 19.342 | 49.454 | 0.00 | 0.00 |
| ATOM | 5502 | HB   | VAL | X | 366 | 46.396 | 19.416 | 49.893 | 0.00 | 0.00 |
| ATOM | 5503 | CG1  | VAL | X | 366 | 45.279 | 18.001 | 48.681 | 0.00 | 0.00 |
| ATOM | 5504 | HG11 | VAL | X | 366 | 45.345 | 17.138 | 49.344 | 0.00 | 0.00 |
| ATOM | 5505 | HG12 | VAL | X | 366 | 44.350 | 18.019 | 48.111 | 0.00 | 0.00 |
| ATOM | 5506 | HG13 | VAL | X | 366 | 46.101 | 18.035 | 47.966 | 0.00 | 0.00 |
| ATOM | 5507 | CG2  | VAL | X | 366 | 45.374 | 20.432 | 48.347 | 0.00 | 0.00 |
| ATOM | 5508 | HG21 | VAL | X | 366 | 46.206 | 20.284 | 47.660 | 0.00 | 0.00 |
| ATOM | 5509 | HG22 | VAL | X | 366 | 44.425 | 20.459 | 47.811 | 0.00 | 0.00 |
| ATOM | 5510 | HG23 | VAL | X | 366 | 45.533 | 21.408 | 48.805 | 0.00 | 0.00 |
| ATOM | 5511 | C    | VAL | X | 366 | 44.443 | 18.357 | 51.486 | 0.00 | 0.00 |
| ATOM | 5512 | O    | VAL | X | 366 | 45.379 | 18.332 | 52.315 | 0.00 | 0.00 |
| ATOM | 5513 | N    | SER | X | 367 | 43.579 | 17.335 | 51.443 | 0.00 | 0.00 |
| ATOM | 5514 | H    | SER | X | 367 | 42.927 | 17.330 | 50.672 | 0.00 | 0.00 |
| ATOM | 5515 | CA   | SER | X | 367 | 43.668 | 16.080 | 52.351 | 0.00 | 0.00 |
| ATOM | 5516 | HA   | SER | X | 367 | 43.785 | 16.497 | 53.351 | 0.00 | 0.00 |
| ATOM | 5517 | CB   | SER | X | 367 | 42.391 | 15.164 | 52.389 | 0.00 | 0.00 |
| ATOM | 5518 | HB2  | SER | X | 367 | 42.542 | 14.563 | 53.285 | 0.00 | 0.00 |
| ATOM | 5519 | HB3  | SER | X | 367 | 41.581 | 15.865 | 52.590 | 0.00 | 0.00 |
| ATOM | 5520 | OG   | SER | X | 367 | 42.141 | 14.396 | 51.223 | 0.00 | 0.00 |
| ATOM | 5521 | HG   | SER | X | 367 | 41.529 | 13.672 | 51.378 | 0.00 | 0.00 |
| ATOM | 5522 | C    | SER | X | 367 | 44.850 | 15.211 | 51.949 | 0.00 | 0.00 |
| ATOM | 5523 | O    | SER | X | 367 | 45.457 | 15.415 | 50.854 | 0.00 | 0.00 |
| ATOM | 5524 | N    | ASP | X | 368 | 45.166 | 14.188 | 52.745 | 0.00 | 0.00 |
| ATOM | 5525 | H    | ASP | X | 368 | 44.696 | 14.178 | 53.639 | 0.00 | 0.00 |
| ATOM | 5526 | CA   | ASP | X | 368 | 46.218 | 13.209 | 52.485 | 0.00 | 0.00 |
| ATOM | 5527 | HA   | ASP | X | 368 | 47.155 | 13.752 | 52.368 | 0.00 | 0.00 |
| ATOM | 5528 | CB   | ASP | X | 368 | 46.404 | 12.207 | 53.656 | 0.00 | 0.00 |
| ATOM | 5529 | HB2  | ASP | X | 368 | 46.385 | 12.816 | 54.559 | 0.00 | 0.00 |
| ATOM | 5530 | HB3  | ASP | X | 368 | 45.562 | 11.518 | 53.586 | 0.00 | 0.00 |
| ATOM | 5531 | CG   | ASP | X | 368 | 47.749 | 11.488 | 53.612 | 0.00 | 0.00 |
| ATOM | 5532 | OD1  | ASP | X | 368 | 48.634 | 12.001 | 54.298 | 0.00 | 0.00 |
| ATOM | 5533 | OD2  | ASP | X | 368 | 47.991 | 10.568 | 52.771 | 0.00 | 0.00 |
| ATOM | 5534 | C    | ASP | X | 368 | 45.979 | 12.489 | 51.174 | 0.00 | 0.00 |
| ATOM | 5535 | O    | ASP | X | 368 | 46.855 | 12.406 | 50.360 | 0.00 | 0.00 |
| ATOM | 5536 | N    | LEU | X | 369 | 44.847 | 11.819 | 51.059 | 0.00 | 0.00 |
| ATOM | 5537 | H    | LEU | X | 369 | 44.151 | 11.970 | 51.775 | 0.00 | 0.00 |
| ATOM | 5538 | CA   | LEU | X | 369 | 44.487 | 11.074 | 49.805 | 0.00 | 0.00 |
| ATOM | 5539 | HA   | LEU | X | 369 | 45.334 | 10.455 | 49.511 | 0.00 | 0.00 |
| ATOM | 5540 | CB   | LEU | X | 369 | 43.263 | 10.185 | 50.107 | 0.00 | 0.00 |
| ATOM | 5541 | HB2  | LEU | X | 369 | 43.585 | 9.362  | 50.745 | 0.00 | 0.00 |
| ATOM | 5542 | HB3  | LEU | X | 369 | 42.504 | 10.834 | 50.544 | 0.00 | 0.00 |
| ATOM | 5543 | CG   | LEU | X | 369 | 42.579 | 9.516  | 48.902 | 0.00 | 0.00 |
| ATOM | 5544 | HG   | LEU | X | 369 | 42.359 | 10.210 | 48.091 | 0.00 | 0.00 |
| ATOM | 5545 | CD1  | LEU | X | 369 | 43.323 | 8.335  | 48.374 | 0.00 | 0.00 |
| ATOM | 5546 | HD11 | LEU | X | 369 | 44.229 | 8.603  | 47.830 | 0.00 | 0.00 |
| ATOM | 5547 | HD12 | LEU | X | 369 | 43.602 | 7.629  | 49.156 | 0.00 | 0.00 |
| ATOM | 5548 | HD13 | LEU | X | 369 | 42.618 | 7.872  | 47.683 | 0.00 | 0.00 |
| ATOM | 5549 | CD2  | LEU | X | 369 | 41.207 | 9.033  | 49.363 | 0.00 | 0.00 |
| ATOM | 5550 | HD21 | LEU | X | 369 | 41.377 | 8.266  | 50.119 | 0.00 | 0.00 |
| ATOM | 5551 | HD22 | LEU | X | 369 | 40.623 | 9.852  | 49.782 | 0.00 | 0.00 |
| ATOM | 5552 | HD23 | LEU | X | 369 | 40.670 | 8.568  | 48.536 | 0.00 | 0.00 |
| ATOM | 5553 | C    | LEU | X | 369 | 44.319 | 11.992 | 48.585 | 0.00 | 0.00 |
| ATOM | 5554 | O    | LEU | X | 369 | 44.582 | 11.546 | 47.464 | 0.00 | 0.00 |
| ATOM | 5555 | N    | ALA | X | 370 | 44.014 | 13.268 | 48.801 | 0.00 | 0.00 |
| ATOM | 5556 | H    | ALA | X | 370 | 43.769 | 13.517 | 49.749 | 0.00 | 0.00 |
| ATOM | 5557 | CA   | ALA | X | 370 | 44.009 | 14.290 | 47.761 | 0.00 | 0.00 |
| ATOM | 5558 | HA   | ALA | X | 370 | 43.498 | 13.844 | 46.908 | 0.00 | 0.00 |
| ATOM | 5559 | CB   | ALA | X | 370 | 43.037 | 15.441 | 48.254 | 0.00 | 0.00 |
| ATOM | 5560 | HB1  | ALA | X | 370 | 43.420 | 15.909 | 49.161 | 0.00 | 0.00 |
| ATOM | 5561 | HB2  | ALA | X | 370 | 42.963 | 16.223 | 47.498 | 0.00 | 0.00 |
| ATOM | 5562 | HB3  | ALA | X | 370 | 42.052 | 14.976 | 48.250 | 0.00 | 0.00 |
| ATOM | 5563 | C    | ALA | X | 370 | 45.354 | 14.824 | 47.308 | 0.00 | 0.00 |
| ATOM | 5564 | O    | ALA | X | 370 | 45.643 | 14.991 | 46.150 | 0.00 | 0.00 |
| ATOM | 5565 | N    | ALA | X | 371 | 46.289 | 14.952 | 48.250 | 0.00 | 0.00 |
| ATOM | 5566 | H    | ALA | X | 371 | 46.109 | 14.742 | 49.222 | 0.00 | 0.00 |
| ATOM | 5567 | CA   | ALA | X | 371 | 47.671 | 15.384 | 48.151 | 0.00 | 0.00 |

|      |      |      |     |   |     |        |        |        |      |      |
|------|------|------|-----|---|-----|--------|--------|--------|------|------|
| ATOM | 5568 | HA   | ALA | X | 371 | 47.731 | 16.277 | 47.530 | 0.00 | 0.00 |
| ATOM | 5569 | CB   | ALA | X | 371 | 48.236 | 15.540 | 49.553 | 0.00 | 0.00 |
| ATOM | 5570 | HB1  | ALA | X | 371 | 47.891 | 14.773 | 50.246 | 0.00 | 0.00 |
| ATOM | 5571 | HB2  | ALA | X | 371 | 49.297 | 15.688 | 49.754 | 0.00 | 0.00 |
| ATOM | 5572 | HB3  | ALA | X | 371 | 47.859 | 16.516 | 49.859 | 0.00 | 0.00 |
| ATOM | 5573 | C    | ALA | X | 371 | 48.416 | 14.254 | 47.389 | 0.00 | 0.00 |
| ATOM | 5574 | O    | ALA | X | 371 | 49.010 | 14.488 | 46.350 | 0.00 | 0.00 |
| ATOM | 5575 | N    | GLU | X | 372 | 48.234 | 12.977 | 47.796 | 0.00 | 0.00 |
| ATOM | 5576 | H    | GLU | X | 372 | 47.852 | 12.798 | 48.714 | 0.00 | 0.00 |
| ATOM | 5577 | CA   | GLU | X | 372 | 48.684 | 11.826 | 47.065 | 0.00 | 0.00 |
| ATOM | 5578 | HA   | GLU | X | 372 | 49.771 | 11.882 | 47.136 | 0.00 | 0.00 |
| ATOM | 5579 | CB   | GLU | X | 372 | 48.251 | 10.500 | 47.675 | 0.00 | 0.00 |
| ATOM | 5580 | HB2  | GLU | X | 372 | 47.177 | 10.393 | 47.833 | 0.00 | 0.00 |
| ATOM | 5581 | HB3  | GLU | X | 372 | 48.435 | 9.725  | 46.932 | 0.00 | 0.00 |
| ATOM | 5582 | CG   | GLU | X | 372 | 49.081 | 10.175 | 48.943 | 0.00 | 0.00 |
| ATOM | 5583 | HG2  | GLU | X | 372 | 50.102 | 10.472 | 48.706 | 0.00 | 0.00 |
| ATOM | 5584 | HG3  | GLU | X | 372 | 48.775 | 10.819 | 49.768 | 0.00 | 0.00 |
| ATOM | 5585 | CD   | GLU | X | 372 | 49.023 | 8.638  | 49.127 | 0.00 | 0.00 |
| ATOM | 5586 | OE1  | GLU | X | 372 | 47.986 | 7.977  | 49.327 | 0.00 | 0.00 |
| ATOM | 5587 | OE2  | GLU | X | 372 | 50.134 | 8.072  | 49.018 | 0.00 | 0.00 |
| ATOM | 5588 | C    | GLU | X | 372 | 48.339 | 11.831 | 45.623 | 0.00 | 0.00 |
| ATOM | 5589 | O    | GLU | X | 372 | 49.169 | 11.603 | 44.698 | 0.00 | 0.00 |
| ATOM | 5590 | N    | ALA | X | 373 | 47.113 | 12.159 | 45.327 | 0.00 | 0.00 |
| ATOM | 5591 | H    | ALA | X | 373 | 46.507 | 12.460 | 46.077 | 0.00 | 0.00 |
| ATOM | 5592 | CA   | ALA | X | 373 | 46.588 | 12.282 | 43.950 | 0.00 | 0.00 |
| ATOM | 5593 | HA   | ALA | X | 373 | 46.663 | 11.336 | 43.413 | 0.00 | 0.00 |
| ATOM | 5594 | CB   | ALA | X | 373 | 45.075 | 12.417 | 44.058 | 0.00 | 0.00 |
| ATOM | 5595 | HB1  | ALA | X | 373 | 44.507 | 11.719 | 44.673 | 0.00 | 0.00 |
| ATOM | 5596 | HB2  | ALA | X | 373 | 44.832 | 13.357 | 44.553 | 0.00 | 0.00 |
| ATOM | 5597 | HB3  | ALA | X | 373 | 44.679 | 12.425 | 43.042 | 0.00 | 0.00 |
| ATOM | 5598 | C    | ALA | X | 373 | 47.103 | 13.508 | 43.141 | 0.00 | 0.00 |
| ATOM | 5599 | O    | ALA | X | 373 | 47.383 | 13.295 | 41.986 | 0.00 | 0.00 |
| ATOM | 5600 | N    | VAL | X | 374 | 47.246 | 14.718 | 43.680 | 0.00 | 0.00 |
| ATOM | 5601 | H    | VAL | X | 374 | 46.884 | 14.747 | 44.622 | 0.00 | 0.00 |
| ATOM | 5602 | CA   | VAL | X | 374 | 47.977 | 15.835 | 43.067 | 0.00 | 0.00 |
| ATOM | 5603 | HA   | VAL | X | 374 | 47.354 | 15.987 | 42.185 | 0.00 | 0.00 |
| ATOM | 5604 | CB   | VAL | X | 374 | 47.880 | 17.137 | 43.891 | 0.00 | 0.00 |
| ATOM | 5605 | HB   | VAL | X | 374 | 48.252 | 17.003 | 44.907 | 0.00 | 0.00 |
| ATOM | 5606 | CG1  | VAL | X | 374 | 48.531 | 18.330 | 43.182 | 0.00 | 0.00 |
| ATOM | 5607 | HG11 | VAL | X | 374 | 49.593 | 18.208 | 42.973 | 0.00 | 0.00 |
| ATOM | 5608 | HG12 | VAL | X | 374 | 48.022 | 18.462 | 42.227 | 0.00 | 0.00 |
| ATOM | 5609 | HG13 | VAL | X | 374 | 48.412 | 19.265 | 43.730 | 0.00 | 0.00 |
| ATOM | 5610 | CG2  | VAL | X | 374 | 46.459 | 17.596 | 44.001 | 0.00 | 0.00 |
| ATOM | 5611 | HG21 | VAL | X | 374 | 45.822 | 16.903 | 44.551 | 0.00 | 0.00 |
| ATOM | 5612 | HG22 | VAL | X | 374 | 46.475 | 18.557 | 44.516 | 0.00 | 0.00 |
| ATOM | 5613 | HG23 | VAL | X | 374 | 46.056 | 17.600 | 42.989 | 0.00 | 0.00 |
| ATOM | 5614 | C    | VAL | X | 374 | 49.425 | 15.458 | 42.686 | 0.00 | 0.00 |
| ATOM | 5615 | O    | VAL | X | 374 | 49.754 | 15.399 | 41.521 | 0.00 | 0.00 |
| ATOM | 5616 | N    | VAL | X | 375 | 50.088 | 14.705 | 43.606 | 0.00 | 0.00 |
| ATOM | 5617 | H    | VAL | X | 375 | 49.760 | 14.535 | 44.546 | 0.00 | 0.00 |
| ATOM | 5618 | CA   | VAL | X | 375 | 51.449 | 14.132 | 43.415 | 0.00 | 0.00 |
| ATOM | 5619 | HA   | VAL | X | 375 | 51.993 | 15.025 | 43.106 | 0.00 | 0.00 |
| ATOM | 5620 | CB   | VAL | X | 375 | 52.172 | 13.596 | 44.669 | 0.00 | 0.00 |
| ATOM | 5621 | HB   | VAL | X | 375 | 51.471 | 12.951 | 45.199 | 0.00 | 0.00 |
| ATOM | 5622 | CG1  | VAL | X | 375 | 53.455 | 12.772 | 44.459 | 0.00 | 0.00 |
| ATOM | 5623 | HG11 | VAL | X | 375 | 53.168 | 11.895 | 43.879 | 0.00 | 0.00 |
| ATOM | 5624 | HG12 | VAL | X | 375 | 54.163 | 13.447 | 43.978 | 0.00 | 0.00 |
| ATOM | 5625 | HG13 | VAL | X | 375 | 53.660 | 12.343 | 45.439 | 0.00 | 0.00 |
| ATOM | 5626 | CG2  | VAL | X | 375 | 52.435 | 14.866 | 45.534 | 0.00 | 0.00 |
| ATOM | 5627 | HG21 | VAL | X | 375 | 51.512 | 15.270 | 45.950 | 0.00 | 0.00 |
| ATOM | 5628 | HG22 | VAL | X | 375 | 53.052 | 14.510 | 46.358 | 0.00 | 0.00 |
| ATOM | 5629 | HG23 | VAL | X | 375 | 53.079 | 15.591 | 45.036 | 0.00 | 0.00 |
| ATOM | 5630 | C    | VAL | X | 375 | 51.434 | 13.085 | 42.255 | 0.00 | 0.00 |
| ATOM | 5631 | O    | VAL | X | 375 | 52.411 | 13.026 | 41.531 | 0.00 | 0.00 |
| ATOM | 5632 | N    | LEU | X | 376 | 50.397 | 12.203 | 42.158 | 0.00 | 0.00 |
| ATOM | 5633 | H    | LEU | X | 376 | 49.682 | 12.240 | 42.870 | 0.00 | 0.00 |
| ATOM | 5634 | CA   | LEU | X | 376 | 50.276 | 11.194 | 41.153 | 0.00 | 0.00 |
| ATOM | 5635 | HA   | LEU | X | 376 | 51.272 | 10.754 | 41.123 | 0.00 | 0.00 |
| ATOM | 5636 | CB   | LEU | X | 376 | 49.187 | 10.259 | 41.563 | 0.00 | 0.00 |
| ATOM | 5637 | HB2  | LEU | X | 376 | 49.403 | 9.854  | 42.552 | 0.00 | 0.00 |

|      |      |      |     |   |     |        |        |        |      |      |
|------|------|------|-----|---|-----|--------|--------|--------|------|------|
| ATOM | 5638 | HB3  | LEU | X | 376 | 48.242 | 10.803 | 41.562 | 0.00 | 0.00 |
| ATOM | 5639 | CG   | LEU | X | 376 | 48.941 | 8.982  | 40.663 | 0.00 | 0.00 |
| ATOM | 5640 | HG   | LEU | X | 376 | 48.663 | 9.412  | 39.701 | 0.00 | 0.00 |
| ATOM | 5641 | CD1  | LEU | X | 376 | 50.265 | 8.260  | 40.427 | 0.00 | 0.00 |
| ATOM | 5642 | HD11 | LEU | X | 376 | 50.120 | 7.361  | 39.828 | 0.00 | 0.00 |
| ATOM | 5643 | HD12 | LEU | X | 376 | 50.895 | 8.809  | 39.728 | 0.00 | 0.00 |
| ATOM | 5644 | HD13 | LEU | X | 376 | 50.672 | 7.961  | 41.393 | 0.00 | 0.00 |
| ATOM | 5645 | CD2  | LEU | X | 376 | 47.859 | 8.013  | 41.069 | 0.00 | 0.00 |
| ATOM | 5646 | HD21 | LEU | X | 376 | 46.952 | 8.552  | 41.340 | 0.00 | 0.00 |
| ATOM | 5647 | HD22 | LEU | X | 376 | 47.709 | 7.311  | 40.249 | 0.00 | 0.00 |
| ATOM | 5648 | HD23 | LEU | X | 376 | 48.040 | 7.514  | 42.022 | 0.00 | 0.00 |
| ATOM | 5649 | C    | LEU | X | 376 | 50.050 | 11.767 | 39.651 | 0.00 | 0.00 |
| ATOM | 5650 | O    | LEU | X | 376 | 50.470 | 11.110 | 38.711 | 0.00 | 0.00 |
| ATOM | 5651 | N    | HIE | X | 377 | 49.364 | 12.879 | 39.592 | 0.00 | 0.00 |
| ATOM | 5652 | H    | HIE | X | 377 | 49.076 | 13.416 | 40.398 | 0.00 | 0.00 |
| ATOM | 5653 | CA   | HIE | X | 377 | 48.902 | 13.403 | 38.368 | 0.00 | 0.00 |
| ATOM | 5654 | HA   | HIE | X | 377 | 48.896 | 12.566 | 37.670 | 0.00 | 0.00 |
| ATOM | 5655 | CB   | HIE | X | 377 | 47.553 | 14.033 | 38.621 | 0.00 | 0.00 |
| ATOM | 5656 | HB2  | HIE | X | 377 | 46.785 | 13.260 | 38.638 | 0.00 | 0.00 |
| ATOM | 5657 | HB3  | HIE | X | 377 | 47.450 | 14.642 | 39.520 | 0.00 | 0.00 |
| ATOM | 5658 | CG   | HIE | X | 377 | 47.106 | 14.889 | 37.460 | 0.00 | 0.00 |
| ATOM | 5659 | ND1  | HIE | X | 377 | 47.678 | 16.056 | 37.058 | 0.00 | 0.00 |
| ATOM | 5660 | CE1  | HIE | X | 377 | 46.827 | 16.588 | 36.182 | 0.00 | 0.00 |
| ATOM | 5661 | HE1  | HIE | X | 377 | 46.917 | 17.616 | 35.863 | 0.00 | 0.00 |
| ATOM | 5662 | NE2  | HIE | X | 377 | 45.773 | 15.794 | 36.024 | 0.00 | 0.00 |
| ATOM | 5663 | HE2  | HIE | X | 377 | 45.031 | 15.916 | 35.350 | 0.00 | 0.00 |
| ATOM | 5664 | CD2  | HIE | X | 377 | 45.889 | 14.715 | 36.891 | 0.00 | 0.00 |
| ATOM | 5665 | HD2  | HIE | X | 377 | 45.099 | 14.026 | 37.152 | 0.00 | 0.00 |
| ATOM | 5666 | C    | HIE | X | 377 | 50.000 | 14.427 | 37.898 | 0.00 | 0.00 |
| ATOM | 5667 | O    | HIE | X | 377 | 50.376 | 14.310 | 36.738 | 0.00 | 0.00 |
| ATOM | 5668 | N    | TYR | X | 378 | 50.600 | 15.323 | 38.731 | 0.00 | 0.00 |
| ATOM | 5669 | H    | TYR | X | 378 | 50.431 | 15.268 | 39.726 | 0.00 | 0.00 |
| ATOM | 5670 | CA   | TYR | X | 378 | 51.590 | 16.283 | 38.300 | 0.00 | 0.00 |
| ATOM | 5671 | HA   | TYR | X | 378 | 51.354 | 16.725 | 37.332 | 0.00 | 0.00 |
| ATOM | 5672 | CB   | TYR | X | 378 | 51.501 | 17.496 | 39.268 | 0.00 | 0.00 |
| ATOM | 5673 | HB2  | TYR | X | 378 | 51.499 | 17.122 | 40.292 | 0.00 | 0.00 |
| ATOM | 5674 | HB3  | TYR | X | 378 | 52.419 | 18.064 | 39.120 | 0.00 | 0.00 |
| ATOM | 5675 | CG   | TYR | X | 378 | 50.295 | 18.406 | 39.134 | 0.00 | 0.00 |
| ATOM | 5676 | CD1  | TYR | X | 378 | 50.495 | 19.576 | 38.418 | 0.00 | 0.00 |
| ATOM | 5677 | HD1  | TYR | X | 378 | 51.503 | 19.831 | 38.124 | 0.00 | 0.00 |
| ATOM | 5678 | CE1  | TYR | X | 378 | 49.507 | 20.489 | 38.090 | 0.00 | 0.00 |
| ATOM | 5679 | HE1  | TYR | X | 378 | 49.636 | 21.452 | 37.619 | 0.00 | 0.00 |
| ATOM | 5680 | CZ   | TYR | X | 378 | 48.202 | 20.228 | 38.551 | 0.00 | 0.00 |
| ATOM | 5681 | OH   | TYR | X | 378 | 47.214 | 21.139 | 38.350 | 0.00 | 0.00 |
| ATOM | 5682 | HH   | TYR | X | 378 | 47.370 | 21.992 | 37.938 | 0.00 | 0.00 |
| ATOM | 5683 | CE2  | TYR | X | 378 | 47.931 | 19.130 | 39.355 | 0.00 | 0.00 |
| ATOM | 5684 | HE2  | TYR | X | 378 | 46.932 | 18.994 | 39.743 | 0.00 | 0.00 |
| ATOM | 5685 | CD2  | TYR | X | 378 | 48.989 | 18.196 | 39.577 | 0.00 | 0.00 |
| ATOM | 5686 | HD2  | TYR | X | 378 | 48.791 | 17.390 | 40.268 | 0.00 | 0.00 |
| ATOM | 5687 | C    | TYR | X | 378 | 52.974 | 15.673 | 38.254 | 0.00 | 0.00 |
| ATOM | 5688 | O    | TYR | X | 378 | 53.916 | 16.362 | 37.882 | 0.00 | 0.00 |
| ATOM | 5689 | N    | THR | X | 379 | 53.244 | 14.416 | 38.549 | 0.00 | 0.00 |
| ATOM | 5690 | H    | THR | X | 379 | 52.471 | 13.829 | 38.829 | 0.00 | 0.00 |
| ATOM | 5691 | CA   | THR | X | 379 | 54.483 | 13.616 | 38.260 | 0.00 | 0.00 |
| ATOM | 5692 | HA   | THR | X | 379 | 55.312 | 14.259 | 38.556 | 0.00 | 0.00 |
| ATOM | 5693 | CB   | THR | X | 379 | 54.513 | 12.235 | 38.958 | 0.00 | 0.00 |
| ATOM | 5694 | HB   | THR | X | 379 | 53.537 | 11.757 | 38.869 | 0.00 | 0.00 |
| ATOM | 5695 | CG2  | THR | X | 379 | 55.685 | 11.343 | 38.451 | 0.00 | 0.00 |
| ATOM | 5696 | HG21 | THR | X | 379 | 55.714 | 10.405 | 39.006 | 0.00 | 0.00 |
| ATOM | 5697 | HG22 | THR | X | 379 | 55.407 | 11.018 | 37.449 | 0.00 | 0.00 |
| ATOM | 5698 | HG23 | THR | X | 379 | 56.643 | 11.854 | 38.549 | 0.00 | 0.00 |
| ATOM | 5699 | OG1  | THR | X | 379 | 54.823 | 12.523 | 40.297 | 0.00 | 0.00 |
| ATOM | 5700 | HG1  | THR | X | 379 | 54.021 | 12.917 | 40.649 | 0.00 | 0.00 |
| ATOM | 5701 | C    | THR | X | 379 | 54.611 | 13.472 | 36.744 | 0.00 | 0.00 |
| ATOM | 5702 | O    | THR | X | 379 | 53.701 | 13.147 | 35.987 | 0.00 | 0.00 |
| ATOM | 5703 | N    | ASP | X | 380 | 55.800 | 13.721 | 36.280 | 0.00 | 0.00 |
| ATOM | 5704 | H    | ASP | X | 380 | 56.539 | 13.828 | 36.961 | 0.00 | 0.00 |
| ATOM | 5705 | CA   | ASP | X | 380 | 56.296 | 13.123 | 34.996 | 0.00 | 0.00 |
| ATOM | 5706 | HA   | ASP | X | 380 | 55.454 | 12.945 | 34.328 | 0.00 | 0.00 |
| ATOM | 5707 | CB   | ASP | X | 380 | 57.252 | 14.174 | 34.351 | 0.00 | 0.00 |

|      |      |      |     |   |     |        |        |        |      |      |
|------|------|------|-----|---|-----|--------|--------|--------|------|------|
| ATOM | 5708 | HB2  | ASP | X | 380 | 56.585 | 15.016 | 34.166 | 0.00 | 0.00 |
| ATOM | 5709 | HB3  | ASP | X | 380 | 58.094 | 14.404 | 35.003 | 0.00 | 0.00 |
| ATOM | 5710 | CG   | ASP | X | 380 | 57.888 | 13.734 | 33.091 | 0.00 | 0.00 |
| ATOM | 5711 | OD1  | ASP | X | 380 | 58.822 | 14.456 | 32.720 | 0.00 | 0.00 |
| ATOM | 5712 | OD2  | ASP | X | 380 | 57.415 | 12.873 | 32.395 | 0.00 | 0.00 |
| ATOM | 5713 | C    | ASP | X | 380 | 56.943 | 11.702 | 35.284 | 0.00 | 0.00 |
| ATOM | 5714 | O    | ASP | X | 380 | 57.961 | 11.567 | 35.916 | 0.00 | 0.00 |
| ATOM | 5715 | N    | TRP | X | 381 | 56.302 | 10.639 | 34.684 | 0.00 | 0.00 |
| ATOM | 5716 | H    | TRP | X | 381 | 55.419 | 10.867 | 34.250 | 0.00 | 0.00 |
| ATOM | 5717 | CA   | TRP | X | 381 | 56.634 | 9.211  | 34.798 | 0.00 | 0.00 |
| ATOM | 5718 | HA   | TRP | X | 381 | 57.103 | 9.175  | 35.782 | 0.00 | 0.00 |
| ATOM | 5719 | CB   | TRP | X | 381 | 55.325 | 8.354  | 34.784 | 0.00 | 0.00 |
| ATOM | 5720 | HB2  | TRP | X | 381 | 54.759 | 8.666  | 33.906 | 0.00 | 0.00 |
| ATOM | 5721 | HB3  | TRP | X | 381 | 55.628 | 7.312  | 34.678 | 0.00 | 0.00 |
| ATOM | 5722 | CG   | TRP | X | 381 | 54.481 | 8.461  | 36.021 | 0.00 | 0.00 |
| ATOM | 5723 | CD1  | TRP | X | 381 | 53.257 | 8.985  | 36.071 | 0.00 | 0.00 |
| ATOM | 5724 | HD1  | TRP | X | 381 | 52.643 | 9.294  | 35.238 | 0.00 | 0.00 |
| ATOM | 5725 | NE1  | TRP | X | 381 | 52.833 | 9.055  | 37.355 | 0.00 | 0.00 |
| ATOM | 5726 | HE1  | TRP | X | 381 | 51.892 | 9.270  | 37.652 | 0.00 | 0.00 |
| ATOM | 5727 | CE2  | TRP | X | 381 | 53.743 | 8.477  | 38.260 | 0.00 | 0.00 |
| ATOM | 5728 | CZ2  | TRP | X | 381 | 53.817 | 8.248  | 39.682 | 0.00 | 0.00 |
| ATOM | 5729 | HZ2  | TRP | X | 381 | 53.002 | 8.454  | 40.361 | 0.00 | 0.00 |
| ATOM | 5730 | CH2  | TRP | X | 381 | 54.935 | 7.625  | 40.249 | 0.00 | 0.00 |
| ATOM | 5731 | HH2  | TRP | X | 381 | 54.951 | 7.473  | 41.319 | 0.00 | 0.00 |
| ATOM | 5732 | CZ3  | TRP | X | 381 | 56.011 | 7.257  | 39.387 | 0.00 | 0.00 |
| ATOM | 5733 | HZ3  | TRP | X | 381 | 56.960 | 6.957  | 39.806 | 0.00 | 0.00 |
| ATOM | 5734 | CE3  | TRP | X | 381 | 55.878 | 7.423  | 37.997 | 0.00 | 0.00 |
| ATOM | 5735 | HE3  | TRP | X | 381 | 56.715 | 7.066  | 37.416 | 0.00 | 0.00 |
| ATOM | 5736 | CD2  | TRP | X | 381 | 54.824 | 8.099  | 37.391 | 0.00 | 0.00 |
| ATOM | 5737 | C    | TRP | X | 381 | 57.697 | 8.729  | 33.742 | 0.00 | 0.00 |
| ATOM | 5738 | O    | TRP | X | 381 | 58.184 | 7.625  | 33.823 | 0.00 | 0.00 |
| ATOM | 5739 | N    | LEU | X | 382 | 58.177 | 9.690  | 32.946 | 0.00 | 0.00 |
| ATOM | 5740 | H    | LEU | X | 382 | 57.742 | 10.593 | 33.070 | 0.00 | 0.00 |
| ATOM | 5741 | CA   | LEU | X | 382 | 59.387 | 9.534  | 32.122 | 0.00 | 0.00 |
| ATOM | 5742 | HA   | LEU | X | 382 | 59.336 | 8.515  | 31.737 | 0.00 | 0.00 |
| ATOM | 5743 | CB   | LEU | X | 382 | 59.305 | 10.555 | 30.929 | 0.00 | 0.00 |
| ATOM | 5744 | HB2  | LEU | X | 382 | 58.266 | 10.540 | 30.601 | 0.00 | 0.00 |
| ATOM | 5745 | HB3  | LEU | X | 382 | 59.608 | 11.541 | 31.283 | 0.00 | 0.00 |
| ATOM | 5746 | CG   | LEU | X | 382 | 60.158 | 10.377 | 29.646 | 0.00 | 0.00 |
| ATOM | 5747 | HG   | LEU | X | 382 | 59.715 | 11.161 | 29.033 | 0.00 | 0.00 |
| ATOM | 5748 | CD1  | LEU | X | 382 | 61.611 | 10.729 | 29.842 | 0.00 | 0.00 |
| ATOM | 5749 | HD11 | LEU | X | 382 | 61.822 | 11.601 | 30.460 | 0.00 | 0.00 |
| ATOM | 5750 | HD12 | LEU | X | 382 | 62.176 | 9.865  | 30.192 | 0.00 | 0.00 |
| ATOM | 5751 | HD13 | LEU | X | 382 | 62.075 | 10.968 | 28.885 | 0.00 | 0.00 |
| ATOM | 5752 | CD2  | LEU | X | 382 | 60.132 | 8.949  | 29.026 | 0.00 | 0.00 |
| ATOM | 5753 | HD21 | LEU | X | 382 | 60.511 | 8.238  | 29.760 | 0.00 | 0.00 |
| ATOM | 5754 | HD22 | LEU | X | 382 | 59.182 | 8.612  | 28.609 | 0.00 | 0.00 |
| ATOM | 5755 | HD23 | LEU | X | 382 | 60.847 | 8.990  | 28.205 | 0.00 | 0.00 |
| ATOM | 5756 | C    | LEU | X | 382 | 60.675 | 9.682  | 32.953 | 0.00 | 0.00 |
| ATOM | 5757 | O    | LEU | X | 382 | 61.544 | 8.803  | 32.963 | 0.00 | 0.00 |
| ATOM | 5758 | N    | HIE | X | 383 | 60.692 | 10.637 | 33.804 | 0.00 | 0.00 |
| ATOM | 5759 | H    | HIE | X | 383 | 59.951 | 11.301 | 33.626 | 0.00 | 0.00 |
| ATOM | 5760 | CA   | HIE | X | 383 | 61.729 | 11.017 | 34.845 | 0.00 | 0.00 |
| ATOM | 5761 | HA   | HIE | X | 383 | 62.441 | 10.200 | 34.959 | 0.00 | 0.00 |
| ATOM | 5762 | CB   | HIE | X | 383 | 62.437 | 12.336 | 34.478 | 0.00 | 0.00 |
| ATOM | 5763 | HB2  | HIE | X | 383 | 61.639 | 13.077 | 34.433 | 0.00 | 0.00 |
| ATOM | 5764 | HB3  | HIE | X | 383 | 63.126 | 12.506 | 35.305 | 0.00 | 0.00 |
| ATOM | 5765 | CG   | HIE | X | 383 | 63.172 | 12.291 | 33.247 | 0.00 | 0.00 |
| ATOM | 5766 | ND1  | HIE | X | 383 | 63.317 | 13.375 | 32.364 | 0.00 | 0.00 |
| ATOM | 5767 | CE1  | HIE | X | 383 | 64.288 | 13.016 | 31.483 | 0.00 | 0.00 |
| ATOM | 5768 | HE1  | HIE | X | 383 | 64.621 | 13.656 | 30.680 | 0.00 | 0.00 |
| ATOM | 5769 | NE2  | HIE | X | 383 | 64.695 | 11.768 | 31.848 | 0.00 | 0.00 |
| ATOM | 5770 | HE2  | HIE | X | 383 | 65.442 | 11.292 | 31.363 | 0.00 | 0.00 |
| ATOM | 5771 | CD2  | HIE | X | 383 | 64.045 | 11.286 | 32.950 | 0.00 | 0.00 |
| ATOM | 5772 | HD2  | HIE | X | 383 | 64.182 | 10.315 | 33.405 | 0.00 | 0.00 |
| ATOM | 5773 | C    | HIE | X | 383 | 61.094 | 11.114 | 36.291 | 0.00 | 0.00 |
| ATOM | 5774 | O    | HIE | X | 383 | 61.114 | 12.223 | 36.831 | 0.00 | 0.00 |
| ATOM | 5775 | N    | PRO | X | 384 | 60.579 | 10.048 | 36.877 | 0.00 | 0.00 |
| ATOM | 5776 | CD   | PRO | X | 384 | 60.670 | 8.682  | 36.406 | 0.00 | 0.00 |
| ATOM | 5777 | HD2  | PRO | X | 384 | 61.661 | 8.349  | 36.101 | 0.00 | 0.00 |

|      |      |     |     |   |     |        |        |        |      |      |
|------|------|-----|-----|---|-----|--------|--------|--------|------|------|
| ATOM | 5778 | HD3 | PRO | X | 384 | 59.956 | 8.404  | 35.630 | 0.00 | 0.00 |
| ATOM | 5779 | CG  | PRO | X | 384 | 60.480 | 7.803  | 37.602 | 0.00 | 0.00 |
| ATOM | 5780 | HG2 | PRO | X | 384 | 61.316 | 7.792  | 38.301 | 0.00 | 0.00 |
| ATOM | 5781 | HG3 | PRO | X | 384 | 60.188 | 6.794  | 37.311 | 0.00 | 0.00 |
| ATOM | 5782 | CB  | PRO | X | 384 | 59.518 | 8.646  | 38.411 | 0.00 | 0.00 |
| ATOM | 5783 | HB2 | PRO | X | 384 | 59.685 | 8.334  | 39.442 | 0.00 | 0.00 |
| ATOM | 5784 | HB3 | PRO | X | 384 | 58.525 | 8.534  | 37.976 | 0.00 | 0.00 |
| ATOM | 5785 | CA  | PRO | X | 384 | 59.856 | 10.114 | 38.140 | 0.00 | 0.00 |
| ATOM | 5786 | HA  | PRO | X | 384 | 59.053 | 10.816 | 37.913 | 0.00 | 0.00 |
| ATOM | 5787 | C   | PRO | X | 384 | 60.625 | 10.723 | 39.350 | 0.00 | 0.00 |
| ATOM | 5788 | O   | PRO | X | 384 | 59.993 | 11.342 | 40.272 | 0.00 | 0.00 |
| ATOM | 5789 | N   | GLU | X | 385 | 61.947 | 10.605 | 39.356 | 0.00 | 0.00 |
| ATOM | 5790 | H   | GLU | X | 385 | 62.468 | 10.266 | 38.559 | 0.00 | 0.00 |
| ATOM | 5791 | CA  | GLU | X | 385 | 62.745 | 10.909 | 40.506 | 0.00 | 0.00 |
| ATOM | 5792 | HA  | GLU | X | 385 | 62.148 | 11.204 | 41.369 | 0.00 | 0.00 |
| ATOM | 5793 | CB  | GLU | X | 385 | 63.552 | 9.663  | 40.935 | 0.00 | 0.00 |
| ATOM | 5794 | HB2 | GLU | X | 385 | 64.203 | 9.462  | 40.083 | 0.00 | 0.00 |
| ATOM | 5795 | HB3 | GLU | X | 385 | 64.190 | 9.904  | 41.785 | 0.00 | 0.00 |
| ATOM | 5796 | CG  | GLU | X | 385 | 62.634 | 8.475  | 41.389 | 0.00 | 0.00 |
| ATOM | 5797 | HG2 | GLU | X | 385 | 61.912 | 8.198  | 40.620 | 0.00 | 0.00 |
| ATOM | 5798 | HG3 | GLU | X | 385 | 63.361 | 7.701  | 41.636 | 0.00 | 0.00 |
| ATOM | 5799 | CD  | GLU | X | 385 | 61.921 | 8.687  | 42.718 | 0.00 | 0.00 |
| ATOM | 5800 | OE1 | GLU | X | 385 | 62.082 | 9.684  | 43.465 | 0.00 | 0.00 |
| ATOM | 5801 | OE2 | GLU | X | 385 | 61.092 | 7.777  | 43.080 | 0.00 | 0.00 |
| ATOM | 5802 | C   | GLU | X | 385 | 63.799 | 11.963 | 40.182 | 0.00 | 0.00 |
| ATOM | 5803 | O   | GLU | X | 385 | 64.576 | 12.340 | 41.006 | 0.00 | 0.00 |
| ATOM | 5804 | N   | ASP | X | 386 | 63.892 | 12.522 | 38.958 | 0.00 | 0.00 |
| ATOM | 5805 | H   | ASP | X | 386 | 63.271 | 12.228 | 38.219 | 0.00 | 0.00 |
| ATOM | 5806 | CA  | ASP | X | 386 | 64.572 | 13.799 | 38.709 | 0.00 | 0.00 |
| ATOM | 5807 | HA  | ASP | X | 386 | 65.602 | 13.603 | 39.008 | 0.00 | 0.00 |
| ATOM | 5808 | CB  | ASP | X | 386 | 64.367 | 14.077 | 37.131 | 0.00 | 0.00 |
| ATOM | 5809 | HB2 | ASP | X | 386 | 64.850 | 13.297 | 36.542 | 0.00 | 0.00 |
| ATOM | 5810 | HB3 | ASP | X | 386 | 63.300 | 14.174 | 36.931 | 0.00 | 0.00 |
| ATOM | 5811 | CG  | ASP | X | 386 | 65.144 | 15.358 | 36.735 | 0.00 | 0.00 |
| ATOM | 5812 | OD1 | ASP | X | 386 | 64.481 | 16.415 | 36.424 | 0.00 | 0.00 |
| ATOM | 5813 | OD2 | ASP | X | 386 | 66.377 | 15.371 | 36.792 | 0.00 | 0.00 |
| ATOM | 5814 | C   | ASP | X | 386 | 64.087 | 15.052 | 39.618 | 0.00 | 0.00 |
| ATOM | 5815 | O   | ASP | X | 386 | 62.917 | 15.385 | 39.627 | 0.00 | 0.00 |
| ATOM | 5816 | N   | PRO | X | 387 | 64.990 | 15.716 | 40.316 | 0.00 | 0.00 |
| ATOM | 5817 | CD  | PRO | X | 387 | 66.383 | 15.375 | 40.525 | 0.00 | 0.00 |
| ATOM | 5818 | HD2 | PRO | X | 387 | 66.945 | 15.294 | 39.595 | 0.00 | 0.00 |
| ATOM | 5819 | HD3 | PRO | X | 387 | 66.450 | 14.425 | 41.056 | 0.00 | 0.00 |
| ATOM | 5820 | CG  | PRO | X | 387 | 67.080 | 16.454 | 41.371 | 0.00 | 0.00 |
| ATOM | 5821 | HG2 | PRO | X | 387 | 67.548 | 17.185 | 40.712 | 0.00 | 0.00 |
| ATOM | 5822 | HG3 | PRO | X | 387 | 67.848 | 16.065 | 42.040 | 0.00 | 0.00 |
| ATOM | 5823 | CB  | PRO | X | 387 | 65.875 | 17.145 | 42.044 | 0.00 | 0.00 |
| ATOM | 5824 | HB2 | PRO | X | 387 | 65.891 | 18.199 | 42.323 | 0.00 | 0.00 |
| ATOM | 5825 | HB3 | PRO | X | 387 | 65.647 | 16.720 | 43.022 | 0.00 | 0.00 |
| ATOM | 5826 | CA  | PRO | X | 387 | 64.601 | 16.853 | 41.147 | 0.00 | 0.00 |
| ATOM | 5827 | HA  | PRO | X | 387 | 63.795 | 16.493 | 41.787 | 0.00 | 0.00 |
| ATOM | 5828 | C   | PRO | X | 387 | 64.154 | 18.125 | 40.463 | 0.00 | 0.00 |
| ATOM | 5829 | O   | PRO | X | 387 | 63.309 | 18.848 | 40.975 | 0.00 | 0.00 |
| ATOM | 5830 | N   | ALA | X | 388 | 64.618 | 18.436 | 39.239 | 0.00 | 0.00 |
| ATOM | 5831 | H   | ALA | X | 388 | 65.285 | 17.823 | 38.793 | 0.00 | 0.00 |
| ATOM | 5832 | CA  | ALA | X | 388 | 64.142 | 19.631 | 38.547 | 0.00 | 0.00 |
| ATOM | 5833 | HA  | ALA | X | 388 | 64.404 | 20.496 | 39.158 | 0.00 | 0.00 |
| ATOM | 5834 | CB  | ALA | X | 388 | 64.881 | 19.781 | 37.183 | 0.00 | 0.00 |
| ATOM | 5835 | HB1 | ALA | X | 388 | 64.641 | 18.913 | 36.569 | 0.00 | 0.00 |
| ATOM | 5836 | HB2 | ALA | X | 388 | 64.589 | 20.716 | 36.705 | 0.00 | 0.00 |
| ATOM | 5837 | HB3 | ALA | X | 388 | 65.957 | 19.796 | 37.359 | 0.00 | 0.00 |
| ATOM | 5838 | C   | ALA | X | 388 | 62.631 | 19.530 | 38.344 | 0.00 | 0.00 |
| ATOM | 5839 | O   | ALA | X | 388 | 61.907 | 20.476 | 38.681 | 0.00 | 0.00 |
| ATOM | 5840 | N   | ARG | X | 389 | 62.156 | 18.398 | 37.768 | 0.00 | 0.00 |
| ATOM | 5841 | H   | ARG | X | 389 | 62.728 | 17.638 | 37.427 | 0.00 | 0.00 |
| ATOM | 5842 | CA  | ARG | X | 389 | 60.732 | 18.231 | 37.479 | 0.00 | 0.00 |
| ATOM | 5843 | HA  | ARG | X | 389 | 60.434 | 18.928 | 36.696 | 0.00 | 0.00 |
| ATOM | 5844 | CB  | ARG | X | 389 | 60.535 | 16.820 | 37.018 | 0.00 | 0.00 |
| ATOM | 5845 | HB2 | ARG | X | 389 | 61.148 | 16.168 | 37.640 | 0.00 | 0.00 |
| ATOM | 5846 | HB3 | ARG | X | 389 | 59.483 | 16.621 | 37.218 | 0.00 | 0.00 |
| ATOM | 5847 | CG  | ARG | X | 389 | 60.922 | 16.577 | 35.570 | 0.00 | 0.00 |

|      |      |      |     |   |     |        |        |        |      |      |
|------|------|------|-----|---|-----|--------|--------|--------|------|------|
| ATOM | 5848 | HG2  | ARG | X | 389 | 62.003 | 16.606 | 35.436 | 0.00 | 0.00 |
| ATOM | 5849 | HG3  | ARG | X | 389 | 60.650 | 15.537 | 35.392 | 0.00 | 0.00 |
| ATOM | 5850 | CD   | ARG | X | 389 | 60.321 | 17.575 | 34.590 | 0.00 | 0.00 |
| ATOM | 5851 | HD2  | ARG | X | 389 | 59.279 | 17.809 | 34.811 | 0.00 | 0.00 |
| ATOM | 5852 | HD3  | ARG | X | 389 | 60.898 | 18.489 | 34.732 | 0.00 | 0.00 |
| ATOM | 5853 | NE   | ARG | X | 389 | 60.394 | 17.068 | 33.262 | 0.00 | 0.00 |
| ATOM | 5854 | HE   | ARG | X | 389 | 60.464 | 16.070 | 33.120 | 0.00 | 0.00 |
| ATOM | 5855 | CZ   | ARG | X | 389 | 59.966 | 17.660 | 32.164 | 0.00 | 0.00 |
| ATOM | 5856 | NH1  | ARG | X | 389 | 59.508 | 18.923 | 32.148 | 0.00 | 0.00 |
| ATOM | 5857 | HH11 | ARG | X | 389 | 59.513 | 19.481 | 32.990 | 0.00 | 0.00 |
| ATOM | 5858 | HH12 | ARG | X | 389 | 59.092 | 19.242 | 31.285 | 0.00 | 0.00 |
| ATOM | 5859 | NH2  | ARG | X | 389 | 59.925 | 17.074 | 30.994 | 0.00 | 0.00 |
| ATOM | 5860 | HH21 | ARG | X | 389 | 60.252 | 16.134 | 30.817 | 0.00 | 0.00 |
| ATOM | 5861 | HH22 | ARG | X | 389 | 59.381 | 17.501 | 30.259 | 0.00 | 0.00 |
| ATOM | 5862 | C    | ARG | X | 389 | 59.832 | 18.389 | 38.677 | 0.00 | 0.00 |
| ATOM | 5863 | O    | ARG | X | 389 | 58.782 | 18.995 | 38.608 | 0.00 | 0.00 |
| ATOM | 5864 | N    | LEU | X | 390 | 60.384 | 18.080 | 39.875 | 0.00 | 0.00 |
| ATOM | 5865 | H    | LEU | X | 390 | 61.380 | 17.940 | 39.962 | 0.00 | 0.00 |
| ATOM | 5866 | CA   | LEU | X | 390 | 59.651 | 18.200 | 41.143 | 0.00 | 0.00 |
| ATOM | 5867 | HA   | LEU | X | 390 | 58.657 | 17.764 | 41.046 | 0.00 | 0.00 |
| ATOM | 5868 | CB   | LEU | X | 390 | 60.285 | 17.399 | 42.314 | 0.00 | 0.00 |
| ATOM | 5869 | HB2  | LEU | X | 390 | 61.306 | 17.774 | 42.395 | 0.00 | 0.00 |
| ATOM | 5870 | HB3  | LEU | X | 390 | 59.806 | 17.650 | 43.260 | 0.00 | 0.00 |
| ATOM | 5871 | CG   | LEU | X | 390 | 60.270 | 15.899 | 41.972 | 0.00 | 0.00 |
| ATOM | 5872 | HG   | LEU | X | 390 | 60.728 | 15.758 | 40.993 | 0.00 | 0.00 |
| ATOM | 5873 | CD1  | LEU | X | 390 | 61.145 | 15.153 | 42.959 | 0.00 | 0.00 |
| ATOM | 5874 | HD11 | LEU | X | 390 | 61.171 | 14.100 | 42.679 | 0.00 | 0.00 |
| ATOM | 5875 | HD12 | LEU | X | 390 | 62.138 | 15.589 | 43.065 | 0.00 | 0.00 |
| ATOM | 5876 | HD13 | LEU | X | 390 | 60.688 | 15.135 | 43.949 | 0.00 | 0.00 |
| ATOM | 5877 | CD2  | LEU | X | 390 | 58.870 | 15.280 | 41.883 | 0.00 | 0.00 |
| ATOM | 5878 | HD21 | LEU | X | 390 | 58.331 | 15.325 | 42.830 | 0.00 | 0.00 |
| ATOM | 5879 | HD22 | LEU | X | 390 | 58.345 | 15.832 | 41.103 | 0.00 | 0.00 |
| ATOM | 5880 | HD23 | LEU | X | 390 | 58.997 | 14.229 | 41.625 | 0.00 | 0.00 |
| ATOM | 5881 | C    | LEU | X | 390 | 59.371 | 19.619 | 41.497 | 0.00 | 0.00 |
| ATOM | 5882 | O    | LEU | X | 390 | 58.190 | 19.981 | 41.754 | 0.00 | 0.00 |
| ATOM | 5883 | N    | ARG | X | 391 | 60.346 | 20.559 | 41.448 | 0.00 | 0.00 |
| ATOM | 5884 | H    | ARG | X | 391 | 61.266 | 20.158 | 41.331 | 0.00 | 0.00 |
| ATOM | 5885 | CA   | ARG | X | 391 | 60.133 | 21.998 | 41.612 | 0.00 | 0.00 |
| ATOM | 5886 | HA   | ARG | X | 391 | 59.494 | 22.079 | 42.491 | 0.00 | 0.00 |
| ATOM | 5887 | CB   | ARG | X | 391 | 61.427 | 22.673 | 42.111 | 0.00 | 0.00 |
| ATOM | 5888 | HB2  | ARG | X | 391 | 61.251 | 23.728 | 42.322 | 0.00 | 0.00 |
| ATOM | 5889 | HB3  | ARG | X | 391 | 61.763 | 22.207 | 43.037 | 0.00 | 0.00 |
| ATOM | 5890 | CG   | ARG | X | 391 | 62.666 | 22.515 | 41.182 | 0.00 | 0.00 |
| ATOM | 5891 | HG2  | ARG | X | 391 | 63.109 | 21.539 | 41.377 | 0.00 | 0.00 |
| ATOM | 5892 | HG3  | ARG | X | 391 | 62.397 | 22.498 | 40.126 | 0.00 | 0.00 |
| ATOM | 5893 | CD   | ARG | X | 391 | 63.708 | 23.603 | 41.508 | 0.00 | 0.00 |
| ATOM | 5894 | HD2  | ARG | X | 391 | 63.395 | 24.532 | 41.033 | 0.00 | 0.00 |
| ATOM | 5895 | HD3  | ARG | X | 391 | 63.666 | 23.879 | 42.562 | 0.00 | 0.00 |
| ATOM | 5896 | NE   | ARG | X | 391 | 65.109 | 23.253 | 41.138 | 0.00 | 0.00 |
| ATOM | 5897 | HE   | ARG | X | 391 | 65.848 | 23.375 | 41.816 | 0.00 | 0.00 |
| ATOM | 5898 | CZ   | ARG | X | 391 | 65.627 | 23.454 | 39.968 | 0.00 | 0.00 |
| ATOM | 5899 | NH1  | ARG | X | 391 | 64.971 | 23.408 | 38.840 | 0.00 | 0.00 |
| ATOM | 5900 | HH11 | ARG | X | 391 | 63.991 | 23.173 | 38.772 | 0.00 | 0.00 |
| ATOM | 5901 | HH12 | ARG | X | 391 | 65.453 | 23.553 | 37.964 | 0.00 | 0.00 |
| ATOM | 5902 | NH2  | ARG | X | 391 | 66.915 | 23.754 | 39.874 | 0.00 | 0.00 |
| ATOM | 5903 | HH21 | ARG | X | 391 | 67.487 | 23.820 | 40.704 | 0.00 | 0.00 |
| ATOM | 5904 | HH22 | ARG | X | 391 | 67.341 | 24.017 | 38.997 | 0.00 | 0.00 |
| ATOM | 5905 | C    | ARG | X | 391 | 59.388 | 22.682 | 40.398 | 0.00 | 0.00 |
| ATOM | 5906 | O    | ARG | X | 391 | 58.758 | 23.692 | 40.625 | 0.00 | 0.00 |
| ATOM | 5907 | N    | GLU | X | 392 | 59.381 | 22.097 | 39.190 | 0.00 | 0.00 |
| ATOM | 5908 | H    | GLU | X | 392 | 59.852 | 21.218 | 39.031 | 0.00 | 0.00 |
| ATOM | 5909 | CA   | GLU | X | 392 | 58.614 | 22.715 | 38.106 | 0.00 | 0.00 |
| ATOM | 5910 | HA   | GLU | X | 392 | 58.716 | 23.800 | 38.115 | 0.00 | 0.00 |
| ATOM | 5911 | CB   | GLU | X | 392 | 59.168 | 21.983 | 36.807 | 0.00 | 0.00 |
| ATOM | 5912 | HB2  | GLU | X | 392 | 60.247 | 22.134 | 36.764 | 0.00 | 0.00 |
| ATOM | 5913 | HB3  | GLU | X | 392 | 58.953 | 20.921 | 36.928 | 0.00 | 0.00 |
| ATOM | 5914 | CG   | GLU | X | 392 | 58.605 | 22.572 | 35.505 | 0.00 | 0.00 |
| ATOM | 5915 | HG2  | GLU | X | 392 | 57.566 | 22.250 | 35.435 | 0.00 | 0.00 |
| ATOM | 5916 | HG3  | GLU | X | 392 | 58.888 | 23.624 | 35.487 | 0.00 | 0.00 |
| ATOM | 5917 | CD   | GLU | X | 392 | 59.303 | 22.062 | 34.307 | 0.00 | 0.00 |

|      |      |      |     |   |     |        |        |        |      |      |
|------|------|------|-----|---|-----|--------|--------|--------|------|------|
| ATOM | 5918 | OE1  | GLU | X | 392 | 59.151 | 20.830 | 34.070 | 0.00 | 0.00 |
| ATOM | 5919 | OE2  | GLU | X | 392 | 59.996 | 22.781 | 33.620 | 0.00 | 0.00 |
| ATOM | 5920 | C    | GLU | X | 392 | 57.143 | 22.341 | 38.356 | 0.00 | 0.00 |
| ATOM | 5921 | O    | GLU | X | 392 | 56.248 | 23.187 | 38.188 | 0.00 | 0.00 |
| ATOM | 5922 | N    | ALA | X | 393 | 56.906 | 21.100 | 38.888 | 0.00 | 0.00 |
| ATOM | 5923 | H    | ALA | X | 393 | 57.717 | 20.500 | 38.953 | 0.00 | 0.00 |
| ATOM | 5924 | CA   | ALA | X | 393 | 55.507 | 20.629 | 38.984 | 0.00 | 0.00 |
| ATOM | 5925 | HA   | ALA | X | 393 | 54.883 | 20.902 | 38.134 | 0.00 | 0.00 |
| ATOM | 5926 | CB   | ALA | X | 393 | 55.666 | 19.121 | 39.227 | 0.00 | 0.00 |
| ATOM | 5927 | HB1  | ALA | X | 393 | 56.476 | 18.931 | 39.932 | 0.00 | 0.00 |
| ATOM | 5928 | HB2  | ALA | X | 393 | 54.737 | 18.647 | 39.542 | 0.00 | 0.00 |
| ATOM | 5929 | HB3  | ALA | X | 393 | 55.988 | 18.652 | 38.298 | 0.00 | 0.00 |
| ATOM | 5930 | C    | ALA | X | 393 | 54.882 | 21.374 | 40.177 | 0.00 | 0.00 |
| ATOM | 5931 | O    | ALA | X | 393 | 53.727 | 21.749 | 40.078 | 0.00 | 0.00 |
| ATOM | 5932 | N    | LEU | X | 394 | 55.593 | 21.500 | 41.219 | 0.00 | 0.00 |
| ATOM | 5933 | H    | LEU | X | 394 | 56.518 | 21.098 | 41.266 | 0.00 | 0.00 |
| ATOM | 5934 | CA   | LEU | X | 394 | 55.104 | 22.250 | 42.435 | 0.00 | 0.00 |
| ATOM | 5935 | HA   | LEU | X | 394 | 54.116 | 21.877 | 42.707 | 0.00 | 0.00 |
| ATOM | 5936 | CB   | LEU | X | 394 | 56.234 | 22.002 | 43.451 | 0.00 | 0.00 |
| ATOM | 5937 | HB2  | LEU | X | 394 | 56.265 | 20.922 | 43.596 | 0.00 | 0.00 |
| ATOM | 5938 | HB3  | LEU | X | 394 | 57.156 | 22.461 | 43.096 | 0.00 | 0.00 |
| ATOM | 5939 | CG   | LEU | X | 394 | 55.786 | 22.756 | 44.797 | 0.00 | 0.00 |
| ATOM | 5940 | HG   | LEU | X | 394 | 55.634 | 23.800 | 44.524 | 0.00 | 0.00 |
| ATOM | 5941 | CD1  | LEU | X | 394 | 54.519 | 22.165 | 45.402 | 0.00 | 0.00 |
| ATOM | 5942 | HD11 | LEU | X | 394 | 54.268 | 22.568 | 46.384 | 0.00 | 0.00 |
| ATOM | 5943 | HD12 | LEU | X | 394 | 53.728 | 22.501 | 44.731 | 0.00 | 0.00 |
| ATOM | 5944 | HD13 | LEU | X | 394 | 54.636 | 21.084 | 45.473 | 0.00 | 0.00 |
| ATOM | 5945 | CD2  | LEU | X | 394 | 56.961 | 22.605 | 45.792 | 0.00 | 0.00 |
| ATOM | 5946 | HD21 | LEU | X | 394 | 57.910 | 22.926 | 45.363 | 0.00 | 0.00 |
| ATOM | 5947 | HD22 | LEU | X | 394 | 56.767 | 23.013 | 46.783 | 0.00 | 0.00 |
| ATOM | 5948 | HD23 | LEU | X | 394 | 57.140 | 21.555 | 46.025 | 0.00 | 0.00 |
| ATOM | 5949 | C    | LEU | X | 394 | 54.861 | 23.764 | 42.103 | 0.00 | 0.00 |
| ATOM | 5950 | O    | LEU | X | 394 | 53.952 | 24.347 | 42.623 | 0.00 | 0.00 |
| ATOM | 5951 | N    | SER | X | 395 | 55.558 | 24.374 | 41.135 | 0.00 | 0.00 |
| ATOM | 5952 | H    | SER | X | 395 | 56.398 | 23.900 | 40.835 | 0.00 | 0.00 |
| ATOM | 5953 | CA   | SER | X | 395 | 55.209 | 25.739 | 40.694 | 0.00 | 0.00 |
| ATOM | 5954 | HA   | SER | X | 395 | 54.967 | 26.322 | 41.582 | 0.00 | 0.00 |
| ATOM | 5955 | CB   | SER | X | 395 | 56.312 | 26.375 | 39.903 | 0.00 | 0.00 |
| ATOM | 5956 | HB2  | SER | X | 395 | 56.518 | 25.974 | 38.910 | 0.00 | 0.00 |
| ATOM | 5957 | HB3  | SER | X | 395 | 56.131 | 27.444 | 39.796 | 0.00 | 0.00 |
| ATOM | 5958 | OG   | SER | X | 395 | 57.529 | 26.239 | 40.625 | 0.00 | 0.00 |
| ATOM | 5959 | HG   | SER | X | 395 | 57.888 | 25.353 | 40.711 | 0.00 | 0.00 |
| ATOM | 5960 | C    | SER | X | 395 | 53.974 | 25.687 | 39.731 | 0.00 | 0.00 |
| ATOM | 5961 | O    | SER | X | 395 | 53.146 | 26.639 | 39.839 | 0.00 | 0.00 |
| ATOM | 5962 | N    | ASP | X | 396 | 53.798 | 24.681 | 38.897 | 0.00 | 0.00 |
| ATOM | 5963 | H    | ASP | X | 396 | 54.588 | 24.060 | 38.794 | 0.00 | 0.00 |
| ATOM | 5964 | CA   | ASP | X | 396 | 52.541 | 24.473 | 38.156 | 0.00 | 0.00 |
| ATOM | 5965 | HA   | ASP | X | 396 | 52.349 | 25.282 | 37.451 | 0.00 | 0.00 |
| ATOM | 5966 | CB   | ASP | X | 396 | 52.715 | 23.304 | 37.181 | 0.00 | 0.00 |
| ATOM | 5967 | HB2  | ASP | X | 396 | 53.769 | 23.191 | 36.926 | 0.00 | 0.00 |
| ATOM | 5968 | HB3  | ASP | X | 396 | 52.407 | 22.376 | 37.663 | 0.00 | 0.00 |
| ATOM | 5969 | CG   | ASP | X | 396 | 51.964 | 23.397 | 35.855 | 0.00 | 0.00 |
| ATOM | 5970 | OD1  | ASP | X | 396 | 51.898 | 24.436 | 35.160 | 0.00 | 0.00 |
| ATOM | 5971 | OD2  | ASP | X | 396 | 51.279 | 22.367 | 35.424 | 0.00 | 0.00 |
| ATOM | 5972 | C    | ASP | X | 396 | 51.292 | 24.176 | 39.085 | 0.00 | 0.00 |
| ATOM | 5973 | O    | ASP | X | 396 | 50.305 | 24.882 | 38.977 | 0.00 | 0.00 |
| ATOM | 5974 | N    | VAL | X | 397 | 51.410 | 23.294 | 40.030 | 0.00 | 0.00 |
| ATOM | 5975 | H    | VAL | X | 397 | 52.235 | 22.715 | 40.100 | 0.00 | 0.00 |
| ATOM | 5976 | CA   | VAL | X | 397 | 50.465 | 23.139 | 41.102 | 0.00 | 0.00 |
| ATOM | 5977 | HA   | VAL | X | 397 | 49.493 | 22.756 | 40.790 | 0.00 | 0.00 |
| ATOM | 5978 | CB   | VAL | X | 397 | 51.007 | 22.193 | 42.237 | 0.00 | 0.00 |
| ATOM | 5979 | HB   | VAL | X | 397 | 52.011 | 22.458 | 42.567 | 0.00 | 0.00 |
| ATOM | 5980 | CG1  | VAL | X | 397 | 50.230 | 22.135 | 43.558 | 0.00 | 0.00 |
| ATOM | 5981 | HG11 | VAL | X | 397 | 50.248 | 21.132 | 43.985 | 0.00 | 0.00 |
| ATOM | 5982 | HG12 | VAL | X | 397 | 50.455 | 22.863 | 44.337 | 0.00 | 0.00 |
| ATOM | 5983 | HG13 | VAL | X | 397 | 49.188 | 22.283 | 43.275 | 0.00 | 0.00 |
| ATOM | 5984 | CG2  | VAL | X | 397 | 51.228 | 20.781 | 41.701 | 0.00 | 0.00 |
| ATOM | 5985 | HG21 | VAL | X | 397 | 50.337 | 20.160 | 41.606 | 0.00 | 0.00 |
| ATOM | 5986 | HG22 | VAL | X | 397 | 51.663 | 20.814 | 40.702 | 0.00 | 0.00 |
| ATOM | 5987 | HG23 | VAL | X | 397 | 51.922 | 20.361 | 42.429 | 0.00 | 0.00 |



|      |      |      |     |   |     |        |        |        |      |      |
|------|------|------|-----|---|-----|--------|--------|--------|------|------|
| ATOM | 5988 | C    | VAL | X | 397 | 50.153 | 24.480 | 41.784 | 0.00 | 0.00 |
| ATOM | 5989 | O    | VAL | X | 397 | 48.998 | 24.909 | 41.933 | 0.00 | 0.00 |
| ATOM | 5990 | N    | VAL | X | 398 | 51.150 | 25.169 | 42.318 | 0.00 | 0.00 |
| ATOM | 5991 | H    | VAL | X | 398 | 52.079 | 24.776 | 42.354 | 0.00 | 0.00 |
| ATOM | 5992 | CA   | VAL | X | 398 | 50.956 | 26.357 | 43.144 | 0.00 | 0.00 |
| ATOM | 5993 | HA   | VAL | X | 398 | 50.168 | 26.197 | 43.880 | 0.00 | 0.00 |
| ATOM | 5994 | CB   | VAL | X | 398 | 52.191 | 26.614 | 43.984 | 0.00 | 0.00 |
| ATOM | 5995 | HB   | VAL | X | 398 | 53.021 | 26.619 | 43.277 | 0.00 | 0.00 |
| ATOM | 5996 | CG1  | VAL | X | 398 | 52.258 | 27.974 | 44.736 | 0.00 | 0.00 |
| ATOM | 5997 | HG11 | VAL | X | 398 | 51.402 | 28.135 | 45.392 | 0.00 | 0.00 |
| ATOM | 5998 | HG12 | VAL | X | 398 | 53.175 | 28.026 | 45.323 | 0.00 | 0.00 |
| ATOM | 5999 | HG13 | VAL | X | 398 | 52.349 | 28.699 | 43.927 | 0.00 | 0.00 |
| ATOM | 6000 | CG2  | VAL | X | 398 | 52.537 | 25.507 | 44.978 | 0.00 | 0.00 |
| ATOM | 6001 | HG21 | VAL | X | 398 | 51.902 | 25.595 | 45.860 | 0.00 | 0.00 |
| ATOM | 6002 | HG22 | VAL | X | 398 | 52.419 | 24.517 | 44.537 | 0.00 | 0.00 |
| ATOM | 6003 | HG23 | VAL | X | 398 | 53.545 | 25.733 | 45.327 | 0.00 | 0.00 |
| ATOM | 6004 | C    | VAL | X | 398 | 50.446 | 27.578 | 42.360 | 0.00 | 0.00 |
| ATOM | 6005 | O    | VAL | X | 398 | 50.083 | 28.549 | 43.000 | 0.00 | 0.00 |
| ATOM | 6006 | N    | GLY | X | 399 | 50.423 | 27.537 | 41.034 | 0.00 | 0.00 |
| ATOM | 6007 | H    | GLY | X | 399 | 50.621 | 26.649 | 40.595 | 0.00 | 0.00 |
| ATOM | 6008 | CA   | GLY | X | 399 | 49.801 | 28.486 | 40.096 | 0.00 | 0.00 |
| ATOM | 6009 | HA2  | GLY | X | 399 | 49.680 | 29.451 | 40.600 | 0.00 | 0.00 |
| ATOM | 6010 | HA3  | GLY | X | 399 | 50.494 | 28.600 | 39.239 | 0.00 | 0.00 |
| ATOM | 6011 | C    | GLY | X | 399 | 48.325 | 28.106 | 39.641 | 0.00 | 0.00 |
| ATOM | 6012 | O    | GLY | X | 399 | 47.512 | 29.018 | 39.374 | 0.00 | 0.00 |
| ATOM | 6013 | N    | ASP | X | 400 | 47.983 | 26.816 | 39.586 | 0.00 | 0.00 |
| ATOM | 6014 | H    | ASP | X | 400 | 48.704 | 26.115 | 39.676 | 0.00 | 0.00 |
| ATOM | 6015 | CA   | ASP | X | 400 | 46.662 | 26.348 | 39.247 | 0.00 | 0.00 |
| ATOM | 6016 | HA   | ASP | X | 400 | 46.448 | 26.908 | 38.337 | 0.00 | 0.00 |
| ATOM | 6017 | CB   | ASP | X | 400 | 46.677 | 24.833 | 38.925 | 0.00 | 0.00 |
| ATOM | 6018 | HB2  | ASP | X | 400 | 47.351 | 24.339 | 39.625 | 0.00 | 0.00 |
| ATOM | 6019 | HB3  | ASP | X | 400 | 45.704 | 24.365 | 39.067 | 0.00 | 0.00 |
| ATOM | 6020 | CG   | ASP | X | 400 | 47.234 | 24.620 | 37.497 | 0.00 | 0.00 |
| ATOM | 6021 | OD1  | ASP | X | 400 | 47.163 | 25.577 | 36.614 | 0.00 | 0.00 |
| ATOM | 6022 | OD2  | ASP | X | 400 | 47.777 | 23.573 | 37.202 | 0.00 | 0.00 |
| ATOM | 6023 | C    | ASP | X | 400 | 45.611 | 26.643 | 40.287 | 0.00 | 0.00 |
| ATOM | 6024 | O    | ASP | X | 400 | 44.913 | 27.613 | 40.083 | 0.00 | 0.00 |
| ATOM | 6025 | N    | HIE | X | 401 | 45.645 | 26.020 | 41.448 | 0.00 | 0.00 |
| ATOM | 6026 | H    | HIE | X | 401 | 46.353 | 25.302 | 41.506 | 0.00 | 0.00 |
| ATOM | 6027 | CA   | HIE | X | 401 | 44.584 | 26.100 | 42.405 | 0.00 | 0.00 |
| ATOM | 6028 | HA   | HIE | X | 401 | 43.581 | 26.274 | 42.017 | 0.00 | 0.00 |
| ATOM | 6029 | CB   | HIE | X | 401 | 44.330 | 24.757 | 43.067 | 0.00 | 0.00 |
| ATOM | 6030 | HB2  | HIE | X | 401 | 44.696 | 24.045 | 42.328 | 0.00 | 0.00 |
| ATOM | 6031 | HB3  | HIE | X | 401 | 44.864 | 24.665 | 44.013 | 0.00 | 0.00 |
| ATOM | 6032 | CG   | HIE | X | 401 | 42.890 | 24.379 | 43.466 | 0.00 | 0.00 |
| ATOM | 6033 | ND1  | HIE | X | 401 | 41.743 | 24.898 | 42.875 | 0.00 | 0.00 |
| ATOM | 6034 | CE1  | HIE | X | 401 | 40.725 | 24.527 | 43.726 | 0.00 | 0.00 |
| ATOM | 6035 | HE1  | HIE | X | 401 | 39.671 | 24.760 | 43.695 | 0.00 | 0.00 |
| ATOM | 6036 | NE2  | HIE | X | 401 | 41.178 | 23.932 | 44.819 | 0.00 | 0.00 |
| ATOM | 6037 | HE2  | HIE | X | 401 | 40.580 | 23.479 | 45.494 | 0.00 | 0.00 |
| ATOM | 6038 | CD2  | HIE | X | 401 | 42.557 | 23.858 | 44.675 | 0.00 | 0.00 |
| ATOM | 6039 | HD2  | HIE | X | 401 | 43.207 | 23.306 | 45.338 | 0.00 | 0.00 |
| ATOM | 6040 | C    | HIE | X | 401 | 44.659 | 27.276 | 43.403 | 0.00 | 0.00 |
| ATOM | 6041 | O    | HIE | X | 401 | 43.781 | 27.447 | 44.258 | 0.00 | 0.00 |
| ATOM | 6042 | N    | ASN | X | 402 | 45.670 | 28.162 | 43.195 | 0.00 | 0.00 |
| ATOM | 6043 | H    | ASN | X | 402 | 46.397 | 27.914 | 42.539 | 0.00 | 0.00 |
| ATOM | 6044 | CA   | ASN | X | 402 | 45.704 | 29.543 | 43.677 | 0.00 | 0.00 |
| ATOM | 6045 | HA   | ASN | X | 402 | 45.050 | 29.595 | 44.547 | 0.00 | 0.00 |
| ATOM | 6046 | CB   | ASN | X | 402 | 47.059 | 29.789 | 44.217 | 0.00 | 0.00 |
| ATOM | 6047 | HB2  | ASN | X | 402 | 47.854 | 29.563 | 43.506 | 0.00 | 0.00 |
| ATOM | 6048 | HB3  | ASN | X | 402 | 47.267 | 30.808 | 44.543 | 0.00 | 0.00 |
| ATOM | 6049 | CG   | ASN | X | 402 | 47.342 | 29.022 | 45.497 | 0.00 | 0.00 |
| ATOM | 6050 | OD1  | ASN | X | 402 | 46.646 | 29.034 | 46.524 | 0.00 | 0.00 |
| ATOM | 6051 | ND2  | ASN | X | 402 | 48.465 | 28.416 | 45.562 | 0.00 | 0.00 |
| ATOM | 6052 | HD21 | ASN | X | 402 | 48.760 | 27.794 | 46.300 | 0.00 | 0.00 |
| ATOM | 6053 | HD22 | ASN | X | 402 | 49.172 | 28.446 | 44.841 | 0.00 | 0.00 |
| ATOM | 6054 | C    | ASN | X | 402 | 45.323 | 30.645 | 42.683 | 0.00 | 0.00 |
| ATOM | 6055 | O    | ASN | X | 402 | 44.967 | 31.676 | 43.178 | 0.00 | 0.00 |
| ATOM | 6056 | N    | VAL | X | 403 | 45.476 | 30.506 | 41.336 | 0.00 | 0.00 |
| ATOM | 6057 | H    | VAL | X | 403 | 45.513 | 29.563 | 40.977 | 0.00 | 0.00 |

|      |      |      |     |   |     |        |        |        |      |      |
|------|------|------|-----|---|-----|--------|--------|--------|------|------|
| ATOM | 6058 | CA   | VAL | X | 403 | 45.405 | 31.599 | 40.342 | 0.00 | 0.00 |
| ATOM | 6059 | HA   | VAL | X | 403 | 44.696 | 32.336 | 40.720 | 0.00 | 0.00 |
| ATOM | 6060 | CB   | VAL | X | 403 | 46.741 | 32.326 | 40.061 | 0.00 | 0.00 |
| ATOM | 6061 | HB   | VAL | X | 403 | 47.428 | 31.664 | 39.534 | 0.00 | 0.00 |
| ATOM | 6062 | CG1  | VAL | X | 403 | 46.531 | 33.478 | 39.099 | 0.00 | 0.00 |
| ATOM | 6063 | HG11 | VAL | X | 403 | 45.864 | 34.156 | 39.632 | 0.00 | 0.00 |
| ATOM | 6064 | HG12 | VAL | X | 403 | 47.461 | 34.033 | 38.970 | 0.00 | 0.00 |
| ATOM | 6065 | HG13 | VAL | X | 403 | 46.182 | 33.160 | 38.117 | 0.00 | 0.00 |
| ATOM | 6066 | CG2  | VAL | X | 403 | 47.460 | 32.771 | 41.356 | 0.00 | 0.00 |
| ATOM | 6067 | HG21 | VAL | X | 403 | 46.815 | 33.518 | 41.819 | 0.00 | 0.00 |
| ATOM | 6068 | HG22 | VAL | X | 403 | 47.753 | 31.960 | 42.022 | 0.00 | 0.00 |
| ATOM | 6069 | HG23 | VAL | X | 403 | 48.383 | 33.299 | 41.118 | 0.00 | 0.00 |
| ATOM | 6070 | C    | VAL | X | 403 | 44.790 | 31.216 | 38.985 | 0.00 | 0.00 |
| ATOM | 6071 | O    | VAL | X | 403 | 43.632 | 31.618 | 38.704 | 0.00 | 0.00 |
| ATOM | 6072 | N    | VAL | X | 404 | 45.434 | 30.393 | 38.152 | 0.00 | 0.00 |
| ATOM | 6073 | H    | VAL | X | 404 | 46.306 | 29.948 | 38.399 | 0.00 | 0.00 |
| ATOM | 6074 | CA   | VAL | X | 404 | 45.037 | 30.073 | 36.805 | 0.00 | 0.00 |
| ATOM | 6075 | HA   | VAL | X | 404 | 44.823 | 31.014 | 36.299 | 0.00 | 0.00 |
| ATOM | 6076 | CB   | VAL | X | 404 | 46.079 | 29.225 | 36.044 | 0.00 | 0.00 |
| ATOM | 6077 | HB   | VAL | X | 404 | 46.282 | 28.315 | 36.609 | 0.00 | 0.00 |
| ATOM | 6078 | CG1  | VAL | X | 404 | 45.539 | 28.880 | 34.630 | 0.00 | 0.00 |
| ATOM | 6079 | HG11 | VAL | X | 404 | 46.305 | 28.404 | 34.018 | 0.00 | 0.00 |
| ATOM | 6080 | HG12 | VAL | X | 404 | 44.716 | 28.167 | 34.666 | 0.00 | 0.00 |
| ATOM | 6081 | HG13 | VAL | X | 404 | 45.332 | 29.832 | 34.141 | 0.00 | 0.00 |
| ATOM | 6082 | CG2  | VAL | X | 404 | 47.365 | 29.938 | 36.004 | 0.00 | 0.00 |
| ATOM | 6083 | HG21 | VAL | X | 404 | 48.172 | 29.288 | 35.669 | 0.00 | 0.00 |
| ATOM | 6084 | HG22 | VAL | X | 404 | 47.284 | 30.775 | 35.310 | 0.00 | 0.00 |
| ATOM | 6085 | HG23 | VAL | X | 404 | 47.678 | 30.304 | 36.982 | 0.00 | 0.00 |
| ATOM | 6086 | C    | VAL | X | 404 | 43.638 | 29.411 | 36.756 | 0.00 | 0.00 |
| ATOM | 6087 | O    | VAL | X | 404 | 42.704 | 29.793 | 36.019 | 0.00 | 0.00 |
| ATOM | 6088 | N    | CYX | X | 405 | 43.335 | 28.533 | 37.747 | 0.00 | 0.00 |
| ATOM | 6089 | H    | CYX | X | 405 | 44.031 | 28.175 | 38.386 | 0.00 | 0.00 |
| ATOM | 6090 | CA   | CYX | X | 405 | 42.004 | 27.907 | 37.863 | 0.00 | 0.00 |
| ATOM | 6091 | HA   | CYX | X | 405 | 41.709 | 27.673 | 36.840 | 0.00 | 0.00 |
| ATOM | 6092 | CB   | CYX | X | 405 | 42.095 | 26.583 | 38.638 | 0.00 | 0.00 |
| ATOM | 6093 | HB2  | CYX | X | 405 | 42.497 | 26.848 | 39.616 | 0.00 | 0.00 |
| ATOM | 6094 | HB3  | CYX | X | 405 | 41.143 | 26.164 | 38.963 | 0.00 | 0.00 |
| ATOM | 6095 | SG   | CYX | X | 405 | 43.251 | 25.357 | 37.971 | 0.00 | 0.00 |
| ATOM | 6096 | C    | CYX | X | 405 | 40.857 | 28.776 | 38.315 | 0.00 | 0.00 |
| ATOM | 6097 | O    | CYX | X | 405 | 39.783 | 28.757 | 37.767 | 0.00 | 0.00 |
| ATOM | 6098 | N    | PRO | X | 406 | 41.148 | 29.609 | 39.326 | 0.00 | 0.00 |
| ATOM | 6099 | CD   | PRO | X | 406 | 42.008 | 29.403 | 40.473 | 0.00 | 0.00 |
| ATOM | 6100 | HD2  | PRO | X | 406 | 43.067 | 29.496 | 40.230 | 0.00 | 0.00 |
| ATOM | 6101 | HD3  | PRO | X | 406 | 41.960 | 28.398 | 40.893 | 0.00 | 0.00 |
| ATOM | 6102 | CG   | PRO | X | 406 | 41.498 | 30.277 | 41.575 | 0.00 | 0.00 |
| ATOM | 6103 | HG2  | PRO | X | 406 | 42.361 | 30.614 | 42.148 | 0.00 | 0.00 |
| ATOM | 6104 | HG3  | PRO | X | 406 | 40.730 | 29.842 | 42.215 | 0.00 | 0.00 |
| ATOM | 6105 | CB   | PRO | X | 406 | 40.979 | 31.448 | 40.783 | 0.00 | 0.00 |
| ATOM | 6106 | HB2  | PRO | X | 406 | 41.795 | 31.921 | 40.235 | 0.00 | 0.00 |
| ATOM | 6107 | HB3  | PRO | X | 406 | 40.398 | 32.160 | 41.369 | 0.00 | 0.00 |
| ATOM | 6108 | CA   | PRO | X | 406 | 40.218 | 30.688 | 39.690 | 0.00 | 0.00 |
| ATOM | 6109 | HA   | PRO | X | 406 | 39.287 | 30.294 | 40.098 | 0.00 | 0.00 |
| ATOM | 6110 | C    | PRO | X | 406 | 39.803 | 31.578 | 38.501 | 0.00 | 0.00 |
| ATOM | 6111 | O    | PRO | X | 406 | 38.606 | 31.677 | 38.260 | 0.00 | 0.00 |
| ATOM | 6112 | N    | VAL | X | 407 | 40.787 | 32.089 | 37.753 | 0.00 | 0.00 |
| ATOM | 6113 | H    | VAL | X | 407 | 41.696 | 32.238 | 38.166 | 0.00 | 0.00 |
| ATOM | 6114 | CA   | VAL | X | 407 | 40.573 | 32.834 | 36.551 | 0.00 | 0.00 |
| ATOM | 6115 | HA   | VAL | X | 407 | 40.029 | 33.755 | 36.761 | 0.00 | 0.00 |
| ATOM | 6116 | CB   | VAL | X | 407 | 41.973 | 33.215 | 35.885 | 0.00 | 0.00 |
| ATOM | 6117 | HB   | VAL | X | 407 | 42.589 | 32.335 | 36.068 | 0.00 | 0.00 |
| ATOM | 6118 | CG1  | VAL | X | 407 | 41.858 | 33.654 | 34.407 | 0.00 | 0.00 |
| ATOM | 6119 | HG11 | VAL | X | 407 | 41.697 | 32.819 | 33.725 | 0.00 | 0.00 |
| ATOM | 6120 | HG12 | VAL | X | 407 | 41.166 | 34.467 | 34.188 | 0.00 | 0.00 |
| ATOM | 6121 | HG13 | VAL | X | 407 | 42.843 | 33.978 | 34.069 | 0.00 | 0.00 |
| ATOM | 6122 | CG2  | VAL | X | 407 | 42.575 | 34.465 | 36.578 | 0.00 | 0.00 |
| ATOM | 6123 | HG21 | VAL | X | 407 | 43.286 | 35.003 | 35.951 | 0.00 | 0.00 |
| ATOM | 6124 | HG22 | VAL | X | 407 | 41.838 | 35.266 | 36.637 | 0.00 | 0.00 |
| ATOM | 6125 | HG23 | VAL | X | 407 | 43.055 | 34.260 | 37.535 | 0.00 | 0.00 |
| ATOM | 6126 | C    | VAL | X | 407 | 39.730 | 31.978 | 35.521 | 0.00 | 0.00 |
| ATOM | 6127 | O    | VAL | X | 407 | 38.895 | 32.632 | 34.813 | 0.00 | 0.00 |

|      |      |      |     |   |     |        |        |        |      |      |
|------|------|------|-----|---|-----|--------|--------|--------|------|------|
| ATOM | 6128 | N    | ALA | X | 408 | 39.955 | 30.705 | 35.313 | 0.00 | 0.00 |
| ATOM | 6129 | H    | ALA | X | 408 | 40.661 | 30.256 | 35.879 | 0.00 | 0.00 |
| ATOM | 6130 | CA   | ALA | X | 408 | 39.232 | 29.893 | 34.323 | 0.00 | 0.00 |
| ATOM | 6131 | HA   | ALA | X | 408 | 39.311 | 30.330 | 33.327 | 0.00 | 0.00 |
| ATOM | 6132 | CB   | ALA | X | 408 | 39.816 | 28.516 | 34.220 | 0.00 | 0.00 |
| ATOM | 6133 | HB1  | ALA | X | 408 | 39.245 | 27.954 | 33.481 | 0.00 | 0.00 |
| ATOM | 6134 | HB2  | ALA | X | 408 | 40.844 | 28.464 | 33.861 | 0.00 | 0.00 |
| ATOM | 6135 | HB3  | ALA | X | 408 | 39.703 | 28.034 | 35.191 | 0.00 | 0.00 |
| ATOM | 6136 | C    | ALA | X | 408 | 37.784 | 29.708 | 34.835 | 0.00 | 0.00 |
| ATOM | 6137 | O    | ALA | X | 408 | 36.830 | 29.498 | 34.049 | 0.00 | 0.00 |
| ATOM | 6138 | N    | GLN | X | 409 | 37.508 | 29.645 | 36.163 | 0.00 | 0.00 |
| ATOM | 6139 | H    | GLN | X | 409 | 38.283 | 29.690 | 36.809 | 0.00 | 0.00 |
| ATOM | 6140 | CA   | GLN | X | 409 | 36.173 | 29.663 | 36.651 | 0.00 | 0.00 |
| ATOM | 6141 | HA   | GLN | X | 409 | 35.608 | 28.882 | 36.144 | 0.00 | 0.00 |
| ATOM | 6142 | CB   | GLN | X | 409 | 36.189 | 29.235 | 38.116 | 0.00 | 0.00 |
| ATOM | 6143 | HB2  | GLN | X | 409 | 37.100 | 28.669 | 38.308 | 0.00 | 0.00 |
| ATOM | 6144 | HB3  | GLN | X | 409 | 36.080 | 30.121 | 38.741 | 0.00 | 0.00 |
| ATOM | 6145 | CG   | GLN | X | 409 | 34.970 | 28.408 | 38.423 | 0.00 | 0.00 |
| ATOM | 6146 | HG2  | GLN | X | 409 | 34.047 | 28.872 | 38.077 | 0.00 | 0.00 |
| ATOM | 6147 | HG3  | GLN | X | 409 | 35.040 | 27.509 | 37.810 | 0.00 | 0.00 |
| ATOM | 6148 | CD   | GLN | X | 409 | 34.837 | 28.057 | 39.871 | 0.00 | 0.00 |
| ATOM | 6149 | OE1  | GLN | X | 409 | 34.487 | 28.875 | 40.702 | 0.00 | 0.00 |
| ATOM | 6150 | NE2  | GLN | X | 409 | 35.238 | 26.909 | 40.310 | 0.00 | 0.00 |
| ATOM | 6151 | HE21 | GLN | X | 409 | 35.108 | 26.680 | 41.285 | 0.00 | 0.00 |
| ATOM | 6152 | HE22 | GLN | X | 409 | 35.415 | 26.223 | 39.591 | 0.00 | 0.00 |
| ATOM | 6153 | C    | GLN | X | 409 | 35.385 | 31.012 | 36.481 | 0.00 | 0.00 |
| ATOM | 6154 | O    | GLN | X | 409 | 34.309 | 30.947 | 35.912 | 0.00 | 0.00 |
| ATOM | 6155 | N    | LEU | X | 410 | 35.904 | 32.182 | 36.878 | 0.00 | 0.00 |
| ATOM | 6156 | H    | LEU | X | 410 | 36.790 | 32.068 | 37.349 | 0.00 | 0.00 |
| ATOM | 6157 | CA   | LEU | X | 410 | 35.346 | 33.519 | 36.703 | 0.00 | 0.00 |
| ATOM | 6158 | HA   | LEU | X | 410 | 34.549 | 33.677 | 37.429 | 0.00 | 0.00 |
| ATOM | 6159 | CB   | LEU | X | 410 | 36.560 | 34.568 | 37.010 | 0.00 | 0.00 |
| ATOM | 6160 | HB2  | LEU | X | 410 | 37.082 | 34.252 | 37.913 | 0.00 | 0.00 |
| ATOM | 6161 | HB3  | LEU | X | 410 | 37.211 | 34.399 | 36.153 | 0.00 | 0.00 |
| ATOM | 6162 | CG   | LEU | X | 410 | 36.401 | 36.088 | 36.974 | 0.00 | 0.00 |
| ATOM | 6163 | HG   | LEU | X | 410 | 35.781 | 36.245 | 36.091 | 0.00 | 0.00 |
| ATOM | 6164 | CD1  | LEU | X | 410 | 35.472 | 36.568 | 38.099 | 0.00 | 0.00 |
| ATOM | 6165 | HD11 | LEU | X | 410 | 35.318 | 37.642 | 37.993 | 0.00 | 0.00 |
| ATOM | 6166 | HD12 | LEU | X | 410 | 34.478 | 36.137 | 37.971 | 0.00 | 0.00 |
| ATOM | 6167 | HD13 | LEU | X | 410 | 35.833 | 36.331 | 39.100 | 0.00 | 0.00 |
| ATOM | 6168 | CD2  | LEU | X | 410 | 37.736 | 36.804 | 36.979 | 0.00 | 0.00 |
| ATOM | 6169 | HD21 | LEU | X | 410 | 38.216 | 36.359 | 36.107 | 0.00 | 0.00 |
| ATOM | 6170 | HD22 | LEU | X | 410 | 37.560 | 37.875 | 36.878 | 0.00 | 0.00 |
| ATOM | 6171 | HD23 | LEU | X | 410 | 38.394 | 36.494 | 37.790 | 0.00 | 0.00 |
| ATOM | 6172 | C    | LEU | X | 410 | 34.798 | 33.730 | 35.318 | 0.00 | 0.00 |
| ATOM | 6173 | O    | LEU | X | 410 | 33.657 | 34.186 | 35.141 | 0.00 | 0.00 |
| ATOM | 6174 | N    | ALA | X | 411 | 35.599 | 33.496 | 34.301 | 0.00 | 0.00 |
| ATOM | 6175 | H    | ALA | X | 411 | 36.561 | 33.470 | 34.609 | 0.00 | 0.00 |
| ATOM | 6176 | CA   | ALA | X | 411 | 35.313 | 33.461 | 32.929 | 0.00 | 0.00 |
| ATOM | 6177 | HA   | ALA | X | 411 | 35.230 | 34.495 | 32.596 | 0.00 | 0.00 |
| ATOM | 6178 | CB   | ALA | X | 411 | 36.505 | 32.843 | 32.194 | 0.00 | 0.00 |
| ATOM | 6179 | HB1  | ALA | X | 411 | 36.535 | 31.791 | 32.476 | 0.00 | 0.00 |
| ATOM | 6180 | HB2  | ALA | X | 411 | 36.504 | 32.916 | 31.106 | 0.00 | 0.00 |
| ATOM | 6181 | HB3  | ALA | X | 411 | 37.393 | 33.340 | 32.584 | 0.00 | 0.00 |
| ATOM | 6182 | C    | ALA | X | 411 | 33.964 | 32.779 | 32.593 | 0.00 | 0.00 |
| ATOM | 6183 | O    | ALA | X | 411 | 33.112 | 33.531 | 32.175 | 0.00 | 0.00 |
| ATOM | 6184 | N    | GLY | X | 412 | 33.763 | 31.497 | 32.926 | 0.00 | 0.00 |
| ATOM | 6185 | H    | GLY | X | 412 | 34.565 | 31.017 | 33.309 | 0.00 | 0.00 |
| ATOM | 6186 | CA   | GLY | X | 412 | 32.560 | 30.663 | 32.789 | 0.00 | 0.00 |
| ATOM | 6187 | HA2  | GLY | X | 412 | 32.251 | 30.645 | 31.732 | 0.00 | 0.00 |
| ATOM | 6188 | HA3  | GLY | X | 412 | 32.564 | 29.654 | 33.179 | 0.00 | 0.00 |
| ATOM | 6189 | C    | GLY | X | 412 | 31.404 | 31.218 | 33.596 | 0.00 | 0.00 |
| ATOM | 6190 | O    | GLY | X | 412 | 30.430 | 31.548 | 33.001 | 0.00 | 0.00 |
| ATOM | 6191 | N    | ARG | X | 413 | 31.648 | 31.322 | 34.894 | 0.00 | 0.00 |
| ATOM | 6192 | H    | ARG | X | 413 | 32.582 | 31.120 | 35.220 | 0.00 | 0.00 |
| ATOM | 6193 | CA   | ARG | X | 413 | 30.597 | 31.882 | 35.802 | 0.00 | 0.00 |
| ATOM | 6194 | HA   | ARG | X | 413 | 29.777 | 31.173 | 35.688 | 0.00 | 0.00 |
| ATOM | 6195 | CB   | ARG | X | 413 | 30.998 | 31.705 | 37.308 | 0.00 | 0.00 |
| ATOM | 6196 | HB2  | ARG | X | 413 | 31.637 | 32.544 | 37.585 | 0.00 | 0.00 |
| ATOM | 6197 | HB3  | ARG | X | 413 | 30.137 | 31.959 | 37.927 | 0.00 | 0.00 |

|      |      |      |     |   |     |        |        |        |      |      |
|------|------|------|-----|---|-----|--------|--------|--------|------|------|
| ATOM | 6198 | CG   | ARG | X | 413 | 31.570 | 30.368 | 37.708 | 0.00 | 0.00 |
| ATOM | 6199 | HG2  | ARG | X | 413 | 32.340 | 29.923 | 37.079 | 0.00 | 0.00 |
| ATOM | 6200 | HG3  | ARG | X | 413 | 32.052 | 30.570 | 38.665 | 0.00 | 0.00 |
| ATOM | 6201 | CD   | ARG | X | 413 | 30.430 | 29.353 | 38.039 | 0.00 | 0.00 |
| ATOM | 6202 | HD2  | ARG | X | 413 | 29.831 | 29.699 | 38.882 | 0.00 | 0.00 |
| ATOM | 6203 | HD3  | ARG | X | 413 | 29.691 | 29.122 | 37.272 | 0.00 | 0.00 |
| ATOM | 6204 | NE   | ARG | X | 413 | 31.082 | 28.040 | 38.395 | 0.00 | 0.00 |
| ATOM | 6205 | HE   | ARG | X | 413 | 31.251 | 27.342 | 37.684 | 0.00 | 0.00 |
| ATOM | 6206 | CZ   | ARG | X | 413 | 31.367 | 27.652 | 39.613 | 0.00 | 0.00 |
| ATOM | 6207 | NH1  | ARG | X | 413 | 31.172 | 28.412 | 40.626 | 0.00 | 0.00 |
| ATOM | 6208 | HH11 | ARG | X | 413 | 30.779 | 29.340 | 40.553 | 0.00 | 0.00 |
| ATOM | 6209 | HH12 | ARG | X | 413 | 31.483 | 28.094 | 41.533 | 0.00 | 0.00 |
| ATOM | 6210 | NH2  | ARG | X | 413 | 31.860 | 26.436 | 39.881 | 0.00 | 0.00 |
| ATOM | 6211 | HH21 | ARG | X | 413 | 32.105 | 25.833 | 39.109 | 0.00 | 0.00 |
| ATOM | 6212 | HH22 | ARG | X | 413 | 31.791 | 26.122 | 40.839 | 0.00 | 0.00 |
| ATOM | 6213 | C    | ARG | X | 413 | 30.124 | 33.299 | 35.412 | 0.00 | 0.00 |
| ATOM | 6214 | O    | ARG | X | 413 | 28.971 | 33.715 | 35.678 | 0.00 | 0.00 |
| ATOM | 6215 | N    | LEU | X | 414 | 30.892 | 34.220 | 34.843 | 0.00 | 0.00 |
| ATOM | 6216 | H    | LEU | X | 414 | 31.854 | 33.945 | 34.709 | 0.00 | 0.00 |
| ATOM | 6217 | CA   | LEU | X | 414 | 30.511 | 35.481 | 34.335 | 0.00 | 0.00 |
| ATOM | 6218 | HA   | LEU | X | 414 | 29.767 | 35.936 | 34.990 | 0.00 | 0.00 |
| ATOM | 6219 | CB   | LEU | X | 414 | 31.673 | 36.530 | 34.244 | 0.00 | 0.00 |
| ATOM | 6220 | HB2  | LEU | X | 414 | 32.450 | 36.237 | 33.536 | 0.00 | 0.00 |
| ATOM | 6221 | HB3  | LEU | X | 414 | 31.209 | 37.390 | 33.760 | 0.00 | 0.00 |
| ATOM | 6222 | CG   | LEU | X | 414 | 32.367 | 36.962 | 35.577 | 0.00 | 0.00 |
| ATOM | 6223 | HG   | LEU | X | 414 | 32.895 | 36.130 | 36.043 | 0.00 | 0.00 |
| ATOM | 6224 | CD1  | LEU | X | 414 | 33.605 | 37.753 | 35.208 | 0.00 | 0.00 |
| ATOM | 6225 | HD11 | LEU | X | 414 | 34.080 | 38.121 | 36.118 | 0.00 | 0.00 |
| ATOM | 6226 | HD12 | LEU | X | 414 | 34.285 | 37.113 | 34.645 | 0.00 | 0.00 |
| ATOM | 6227 | HD13 | LEU | X | 414 | 33.369 | 38.586 | 34.547 | 0.00 | 0.00 |
| ATOM | 6228 | CD2  | LEU | X | 414 | 31.349 | 37.652 | 36.506 | 0.00 | 0.00 |
| ATOM | 6229 | HD21 | LEU | X | 414 | 30.685 | 38.408 | 36.085 | 0.00 | 0.00 |
| ATOM | 6230 | HD22 | LEU | X | 414 | 30.720 | 36.901 | 36.984 | 0.00 | 0.00 |
| ATOM | 6231 | HD23 | LEU | X | 414 | 31.903 | 38.173 | 37.287 | 0.00 | 0.00 |
| ATOM | 6232 | C    | LEU | X | 414 | 29.898 | 35.264 | 32.925 | 0.00 | 0.00 |
| ATOM | 6233 | O    | LEU | X | 414 | 28.738 | 35.650 | 32.812 | 0.00 | 0.00 |
| ATOM | 6234 | N    | ALA | X | 415 | 30.514 | 34.716 | 31.910 | 0.00 | 0.00 |
| ATOM | 6235 | H    | ALA | X | 415 | 31.373 | 34.195 | 32.014 | 0.00 | 0.00 |
| ATOM | 6236 | CA   | ALA | X | 415 | 29.965 | 34.574 | 30.512 | 0.00 | 0.00 |
| ATOM | 6237 | HA   | ALA | X | 415 | 29.722 | 35.520 | 30.027 | 0.00 | 0.00 |
| ATOM | 6238 | CB   | ALA | X | 415 | 31.123 | 34.045 | 29.686 | 0.00 | 0.00 |
| ATOM | 6239 | HB1  | ALA | X | 415 | 30.859 | 33.858 | 28.645 | 0.00 | 0.00 |
| ATOM | 6240 | HB2  | ALA | X | 415 | 31.944 | 34.751 | 29.813 | 0.00 | 0.00 |
| ATOM | 6241 | HB3  | ALA | X | 415 | 31.452 | 33.052 | 29.993 | 0.00 | 0.00 |
| ATOM | 6242 | C    | ALA | X | 415 | 28.739 | 33.697 | 30.376 | 0.00 | 0.00 |
| ATOM | 6243 | O    | ALA | X | 415 | 27.879 | 33.975 | 29.608 | 0.00 | 0.00 |
| ATOM | 6244 | N    | ALA | X | 416 | 28.594 | 32.715 | 31.231 | 0.00 | 0.00 |
| ATOM | 6245 | H    | ALA | X | 416 | 29.359 | 32.409 | 31.814 | 0.00 | 0.00 |
| ATOM | 6246 | CA   | ALA | X | 416 | 27.303 | 32.030 | 31.267 | 0.00 | 0.00 |
| ATOM | 6247 | HA   | ALA | X | 416 | 27.003 | 31.637 | 30.296 | 0.00 | 0.00 |
| ATOM | 6248 | CB   | ALA | X | 416 | 27.367 | 30.882 | 32.311 | 0.00 | 0.00 |
| ATOM | 6249 | HB1  | ALA | X | 416 | 26.638 | 30.121 | 32.035 | 0.00 | 0.00 |
| ATOM | 6250 | HB2  | ALA | X | 416 | 28.308 | 30.331 | 32.308 | 0.00 | 0.00 |
| ATOM | 6251 | HB3  | ALA | X | 416 | 27.178 | 31.223 | 33.329 | 0.00 | 0.00 |
| ATOM | 6252 | C    | ALA | X | 416 | 26.196 | 33.044 | 31.697 | 0.00 | 0.00 |
| ATOM | 6253 | O    | ALA | X | 416 | 25.078 | 32.999 | 31.124 | 0.00 | 0.00 |
| ATOM | 6254 | N    | GLN | X | 417 | 26.411 | 33.776 | 32.802 | 0.00 | 0.00 |
| ATOM | 6255 | H    | GLN | X | 417 | 27.270 | 33.594 | 33.301 | 0.00 | 0.00 |
| ATOM | 6256 | CA   | GLN | X | 417 | 25.398 | 34.600 | 33.495 | 0.00 | 0.00 |
| ATOM | 6257 | HA   | GLN | X | 417 | 24.401 | 34.165 | 33.429 | 0.00 | 0.00 |
| ATOM | 6258 | CB   | GLN | X | 417 | 25.768 | 34.623 | 35.022 | 0.00 | 0.00 |
| ATOM | 6259 | HB2  | GLN | X | 417 | 26.773 | 35.011 | 35.192 | 0.00 | 0.00 |
| ATOM | 6260 | HB3  | GLN | X | 417 | 25.055 | 35.248 | 35.557 | 0.00 | 0.00 |
| ATOM | 6261 | CG   | GLN | X | 417 | 25.566 | 33.283 | 35.686 | 0.00 | 0.00 |
| ATOM | 6262 | HG2  | GLN | X | 417 | 24.511 | 33.124 | 35.464 | 0.00 | 0.00 |
| ATOM | 6263 | HG3  | GLN | X | 417 | 26.193 | 32.594 | 35.119 | 0.00 | 0.00 |
| ATOM | 6264 | CD   | GLN | X | 417 | 25.781 | 33.188 | 37.210 | 0.00 | 0.00 |
| ATOM | 6265 | OE1  | GLN | X | 417 | 24.892 | 32.690 | 37.859 | 0.00 | 0.00 |
| ATOM | 6266 | NE2  | GLN | X | 417 | 26.957 | 33.439 | 37.730 | 0.00 | 0.00 |
| ATOM | 6267 | HE21 | GLN | X | 417 | 27.177 | 33.490 | 38.714 | 0.00 | 0.00 |

|      |      |      |     |   |     |        |        |        |      |      |
|------|------|------|-----|---|-----|--------|--------|--------|------|------|
| ATOM | 6268 | HE22 | GLN | X | 417 | 27.635 | 33.670 | 37.017 | 0.00 | 0.00 |
| ATOM | 6269 | C    | GLN | X | 417 | 25.382 | 36.008 | 32.823 | 0.00 | 0.00 |
| ATOM | 6270 | O    | GLN | X | 417 | 24.742 | 36.850 | 33.339 | 0.00 | 0.00 |
| ATOM | 6271 | N    | GLY | X | 418 | 25.972 | 36.157 | 31.645 | 0.00 | 0.00 |
| ATOM | 6272 | H    | GLY | X | 418 | 26.672 | 35.458 | 31.441 | 0.00 | 0.00 |
| ATOM | 6273 | CA   | GLY | X | 418 | 25.746 | 37.194 | 30.682 | 0.00 | 0.00 |
| ATOM | 6274 | HA2  | GLY | X | 418 | 25.617 | 36.657 | 29.707 | 0.00 | 0.00 |
| ATOM | 6275 | HA3  | GLY | X | 418 | 24.897 | 37.726 | 30.822 | 0.00 | 0.00 |
| ATOM | 6276 | C    | GLY | X | 418 | 26.929 | 38.151 | 30.388 | 0.00 | 0.00 |
| ATOM | 6277 | O    | GLY | X | 418 | 26.793 | 38.877 | 29.421 | 0.00 | 0.00 |
| ATOM | 6278 | N    | ALA | X | 419 | 28.018 | 38.126 | 31.120 | 0.00 | 0.00 |
| ATOM | 6279 | H    | ALA | X | 419 | 28.068 | 37.397 | 31.817 | 0.00 | 0.00 |
| ATOM | 6280 | CA   | ALA | X | 419 | 29.185 | 39.026 | 30.846 | 0.00 | 0.00 |
| ATOM | 6281 | HA   | ALA | X | 419 | 28.838 | 40.035 | 31.067 | 0.00 | 0.00 |
| ATOM | 6282 | CB   | ALA | X | 419 | 30.191 | 38.894 | 31.852 | 0.00 | 0.00 |
| ATOM | 6283 | HB1  | ALA | X | 419 | 30.955 | 39.615 | 31.559 | 0.00 | 0.00 |
| ATOM | 6284 | HB2  | ALA | X | 419 | 29.862 | 39.035 | 32.882 | 0.00 | 0.00 |
| ATOM | 6285 | HB3  | ALA | X | 419 | 30.707 | 37.947 | 31.695 | 0.00 | 0.00 |
| ATOM | 6286 | C    | ALA | X | 419 | 29.726 | 38.845 | 29.436 | 0.00 | 0.00 |
| ATOM | 6287 | O    | ALA | X | 419 | 29.727 | 37.654 | 28.926 | 0.00 | 0.00 |
| ATOM | 6288 | N    | ARG | X | 420 | 30.054 | 39.897 | 28.781 | 0.00 | 0.00 |
| ATOM | 6289 | H    | ARG | X | 420 | 29.969 | 40.803 | 29.219 | 0.00 | 0.00 |
| ATOM | 6290 | CA   | ARG | X | 420 | 30.856 | 39.839 | 27.528 | 0.00 | 0.00 |
| ATOM | 6291 | HA   | ARG | X | 420 | 30.650 | 38.900 | 27.014 | 0.00 | 0.00 |
| ATOM | 6292 | CB   | ARG | X | 420 | 30.564 | 41.100 | 26.668 | 0.00 | 0.00 |
| ATOM | 6293 | HB2  | ARG | X | 420 | 29.497 | 41.079 | 26.447 | 0.00 | 0.00 |
| ATOM | 6294 | HB3  | ARG | X | 420 | 30.706 | 41.978 | 27.298 | 0.00 | 0.00 |
| ATOM | 6295 | CG   | ARG | X | 420 | 31.305 | 41.035 | 25.251 | 0.00 | 0.00 |
| ATOM | 6296 | HG2  | ARG | X | 420 | 32.373 | 40.981 | 25.462 | 0.00 | 0.00 |
| ATOM | 6297 | HG3  | ARG | X | 420 | 30.882 | 40.221 | 24.662 | 0.00 | 0.00 |
| ATOM | 6298 | CD   | ARG | X | 420 | 31.010 | 42.278 | 24.472 | 0.00 | 0.00 |
| ATOM | 6299 | HD2  | ARG | X | 420 | 29.950 | 42.319 | 24.220 | 0.00 | 0.00 |
| ATOM | 6300 | HD3  | ARG | X | 420 | 31.343 | 43.171 | 25.001 | 0.00 | 0.00 |
| ATOM | 6301 | NE   | ARG | X | 420 | 31.706 | 42.336 | 23.190 | 0.00 | 0.00 |
| ATOM | 6302 | HE   | ARG | X | 420 | 32.554 | 42.882 | 23.133 | 0.00 | 0.00 |
| ATOM | 6303 | CZ   | ARG | X | 420 | 31.118 | 41.940 | 22.093 | 0.00 | 0.00 |
| ATOM | 6304 | NH1  | ARG | X | 420 | 30.176 | 40.955 | 22.153 | 0.00 | 0.00 |
| ATOM | 6305 | HH11 | ARG | X | 420 | 29.765 | 40.622 | 23.014 | 0.00 | 0.00 |
| ATOM | 6306 | HH12 | ARG | X | 420 | 29.720 | 40.644 | 21.307 | 0.00 | 0.00 |
| ATOM | 6307 | NH2  | ARG | X | 420 | 31.680 | 42.324 | 20.924 | 0.00 | 0.00 |
| ATOM | 6308 | HH21 | ARG | X | 420 | 32.302 | 43.119 | 20.895 | 0.00 | 0.00 |
| ATOM | 6309 | HH22 | ARG | X | 420 | 31.269 | 41.893 | 20.108 | 0.00 | 0.00 |
| ATOM | 6310 | C    | ARG | X | 420 | 32.279 | 39.829 | 28.103 | 0.00 | 0.00 |
| ATOM | 6311 | O    | ARG | X | 420 | 32.752 | 40.859 | 28.596 | 0.00 | 0.00 |
| ATOM | 6312 | N    | VAL | X | 421 | 32.916 | 38.697 | 28.081 | 0.00 | 0.00 |
| ATOM | 6313 | H    | VAL | X | 421 | 32.599 | 38.039 | 27.384 | 0.00 | 0.00 |
| ATOM | 6314 | CA   | VAL | X | 421 | 34.247 | 38.437 | 28.578 | 0.00 | 0.00 |
| ATOM | 6315 | HA   | VAL | X | 421 | 34.553 | 39.314 | 29.149 | 0.00 | 0.00 |
| ATOM | 6316 | CB   | VAL | X | 421 | 34.157 | 37.226 | 29.541 | 0.00 | 0.00 |
| ATOM | 6317 | HB   | VAL | X | 421 | 34.044 | 36.340 | 28.916 | 0.00 | 0.00 |
| ATOM | 6318 | CG1  | VAL | X | 421 | 35.493 | 37.131 | 30.269 | 0.00 | 0.00 |
| ATOM | 6319 | HG11 | VAL | X | 421 | 36.248 | 36.751 | 29.582 | 0.00 | 0.00 |
| ATOM | 6320 | HG12 | VAL | X | 421 | 35.823 | 38.124 | 30.575 | 0.00 | 0.00 |
| ATOM | 6321 | HG13 | VAL | X | 421 | 35.380 | 36.423 | 31.090 | 0.00 | 0.00 |
| ATOM | 6322 | CG2  | VAL | X | 421 | 32.969 | 37.339 | 30.471 | 0.00 | 0.00 |
| ATOM | 6323 | HG21 | VAL | X | 421 | 33.012 | 38.393 | 30.745 | 0.00 | 0.00 |
| ATOM | 6324 | HG22 | VAL | X | 421 | 32.064 | 37.128 | 29.901 | 0.00 | 0.00 |
| ATOM | 6325 | HG23 | VAL | X | 421 | 33.000 | 36.554 | 31.226 | 0.00 | 0.00 |
| ATOM | 6326 | C    | VAL | X | 421 | 35.291 | 38.193 | 27.459 | 0.00 | 0.00 |
| ATOM | 6327 | O    | VAL | X | 421 | 34.975 | 37.552 | 26.436 | 0.00 | 0.00 |
| ATOM | 6328 | N    | TYR | X | 422 | 36.617 | 38.363 | 27.613 | 0.00 | 0.00 |
| ATOM | 6329 | H    | TYR | X | 422 | 36.938 | 38.737 | 28.494 | 0.00 | 0.00 |
| ATOM | 6330 | CA   | TYR | X | 422 | 37.734 | 37.956 | 26.725 | 0.00 | 0.00 |
| ATOM | 6331 | HA   | TYR | X | 422 | 37.491 | 37.137 | 26.049 | 0.00 | 0.00 |
| ATOM | 6332 | CB   | TYR | X | 422 | 38.139 | 39.249 | 25.949 | 0.00 | 0.00 |
| ATOM | 6333 | HB2  | TYR | X | 422 | 38.412 | 40.059 | 26.625 | 0.00 | 0.00 |
| ATOM | 6334 | HB3  | TYR | X | 422 | 39.065 | 39.023 | 25.419 | 0.00 | 0.00 |
| ATOM | 6335 | CG   | TYR | X | 422 | 37.206 | 39.756 | 24.887 | 0.00 | 0.00 |
| ATOM | 6336 | CD1  | TYR | X | 422 | 37.199 | 39.258 | 23.556 | 0.00 | 0.00 |
| ATOM | 6337 | HD1  | TYR | X | 422 | 37.829 | 38.433 | 23.255 | 0.00 | 0.00 |

|      |      |      |     |   |     |        |        |        |      |      |
|------|------|------|-----|---|-----|--------|--------|--------|------|------|
| ATOM | 6338 | CE1  | TYR | X | 422 | 36.308 | 39.849 | 22.677 | 0.00 | 0.00 |
| ATOM | 6339 | HE1  | TYR | X | 422 | 36.299 | 39.618 | 21.622 | 0.00 | 0.00 |
| ATOM | 6340 | CZ   | TYR | X | 422 | 35.251 | 40.710 | 23.110 | 0.00 | 0.00 |
| ATOM | 6341 | OH   | TYR | X | 422 | 34.373 | 41.168 | 22.218 | 0.00 | 0.00 |
| ATOM | 6342 | HH   | TYR | X | 422 | 34.581 | 40.848 | 21.337 | 0.00 | 0.00 |
| ATOM | 6343 | CE2  | TYR | X | 422 | 35.231 | 41.146 | 24.459 | 0.00 | 0.00 |
| ATOM | 6344 | HE2  | TYR | X | 422 | 34.654 | 41.998 | 24.785 | 0.00 | 0.00 |
| ATOM | 6345 | CD2  | TYR | X | 422 | 36.246 | 40.646 | 25.358 | 0.00 | 0.00 |
| ATOM | 6346 | HD2  | TYR | X | 422 | 36.334 | 40.916 | 26.400 | 0.00 | 0.00 |
| ATOM | 6347 | C    | TYR | X | 422 | 38.871 | 37.407 | 27.561 | 0.00 | 0.00 |
| ATOM | 6348 | O    | TYR | X | 422 | 39.484 | 38.061 | 28.409 | 0.00 | 0.00 |
| ATOM | 6349 | N    | ALA | X | 423 | 39.355 | 36.173 | 27.209 | 0.00 | 0.00 |
| ATOM | 6350 | H    | ALA | X | 423 | 39.026 | 35.729 | 26.364 | 0.00 | 0.00 |
| ATOM | 6351 | CA   | ALA | X | 423 | 40.472 | 35.476 | 27.927 | 0.00 | 0.00 |
| ATOM | 6352 | HA   | ALA | X | 423 | 40.643 | 35.997 | 28.869 | 0.00 | 0.00 |
| ATOM | 6353 | CB   | ALA | X | 423 | 40.063 | 34.054 | 28.398 | 0.00 | 0.00 |
| ATOM | 6354 | HB1  | ALA | X | 423 | 39.918 | 33.465 | 27.492 | 0.00 | 0.00 |
| ATOM | 6355 | HB2  | ALA | X | 423 | 40.895 | 33.640 | 28.967 | 0.00 | 0.00 |
| ATOM | 6356 | HB3  | ALA | X | 423 | 39.213 | 34.129 | 29.076 | 0.00 | 0.00 |
| ATOM | 6357 | C    | ALA | X | 423 | 41.811 | 35.368 | 27.198 | 0.00 | 0.00 |
| ATOM | 6358 | O    | ALA | X | 423 | 41.874 | 35.368 | 25.988 | 0.00 | 0.00 |
| ATOM | 6359 | N    | TYR | X | 424 | 42.881 | 35.311 | 27.975 | 0.00 | 0.00 |
| ATOM | 6360 | H    | TYR | X | 424 | 42.774 | 35.539 | 28.953 | 0.00 | 0.00 |
| ATOM | 6361 | CA   | TYR | X | 424 | 44.241 | 35.296 | 27.400 | 0.00 | 0.00 |
| ATOM | 6362 | HA   | TYR | X | 424 | 44.228 | 34.769 | 26.445 | 0.00 | 0.00 |
| ATOM | 6363 | CB   | TYR | X | 424 | 44.738 | 36.707 | 27.124 | 0.00 | 0.00 |
| ATOM | 6364 | HB2  | TYR | X | 424 | 45.567 | 36.704 | 26.416 | 0.00 | 0.00 |
| ATOM | 6365 | HB3  | TYR | X | 424 | 44.071 | 37.237 | 26.444 | 0.00 | 0.00 |
| ATOM | 6366 | CG   | TYR | X | 424 | 45.245 | 37.443 | 28.342 | 0.00 | 0.00 |
| ATOM | 6367 | CD1  | TYR | X | 424 | 46.578 | 37.463 | 28.698 | 0.00 | 0.00 |
| ATOM | 6368 | HD1  | TYR | X | 424 | 47.303 | 36.867 | 28.163 | 0.00 | 0.00 |
| ATOM | 6369 | CE1  | TYR | X | 424 | 47.084 | 38.028 | 29.895 | 0.00 | 0.00 |
| ATOM | 6370 | HE1  | TYR | X | 424 | 48.136 | 38.068 | 30.135 | 0.00 | 0.00 |
| ATOM | 6371 | CZ   | TYR | X | 424 | 46.178 | 38.739 | 30.677 | 0.00 | 0.00 |
| ATOM | 6372 | OH   | TYR | X | 424 | 46.711 | 39.370 | 31.752 | 0.00 | 0.00 |
| ATOM | 6373 | HH   | TYR | X | 424 | 47.642 | 39.227 | 31.938 | 0.00 | 0.00 |
| ATOM | 6374 | CE2  | TYR | X | 424 | 44.871 | 38.877 | 30.290 | 0.00 | 0.00 |
| ATOM | 6375 | HE2  | TYR | X | 424 | 44.194 | 39.458 | 30.899 | 0.00 | 0.00 |
| ATOM | 6376 | CD2  | TYR | X | 424 | 44.382 | 38.168 | 29.159 | 0.00 | 0.00 |
| ATOM | 6377 | HD2  | TYR | X | 424 | 43.324 | 38.224 | 28.946 | 0.00 | 0.00 |
| ATOM | 6378 | C    | TYR | X | 424 | 45.215 | 34.566 | 28.358 | 0.00 | 0.00 |
| ATOM | 6379 | O    | TYR | X | 424 | 45.093 | 34.612 | 29.572 | 0.00 | 0.00 |
| ATOM | 6380 | N    | VAL | X | 425 | 46.221 | 33.899 | 27.817 | 0.00 | 0.00 |
| ATOM | 6381 | H    | VAL | X | 425 | 46.171 | 33.690 | 26.830 | 0.00 | 0.00 |
| ATOM | 6382 | CA   | VAL | X | 425 | 47.476 | 33.654 | 28.515 | 0.00 | 0.00 |
| ATOM | 6383 | HA   | VAL | X | 425 | 47.328 | 34.041 | 29.523 | 0.00 | 0.00 |
| ATOM | 6384 | CB   | VAL | X | 425 | 47.758 | 32.139 | 28.509 | 0.00 | 0.00 |
| ATOM | 6385 | HB   | VAL | X | 425 | 47.687 | 31.840 | 27.463 | 0.00 | 0.00 |
| ATOM | 6386 | CG1  | VAL | X | 425 | 49.107 | 31.664 | 29.072 | 0.00 | 0.00 |
| ATOM | 6387 | HG11 | VAL | X | 425 | 49.060 | 31.810 | 30.152 | 0.00 | 0.00 |
| ATOM | 6388 | HG12 | VAL | X | 425 | 49.072 | 30.599 | 28.843 | 0.00 | 0.00 |
| ATOM | 6389 | HG13 | VAL | X | 425 | 49.974 | 32.096 | 28.572 | 0.00 | 0.00 |
| ATOM | 6390 | CG2  | VAL | X | 425 | 46.657 | 31.365 | 29.235 | 0.00 | 0.00 |
| ATOM | 6391 | HG21 | VAL | X | 425 | 45.767 | 31.471 | 28.615 | 0.00 | 0.00 |
| ATOM | 6392 | HG22 | VAL | X | 425 | 46.843 | 30.298 | 29.110 | 0.00 | 0.00 |
| ATOM | 6393 | HG23 | VAL | X | 425 | 46.618 | 31.788 | 30.239 | 0.00 | 0.00 |
| ATOM | 6394 | C    | VAL | X | 425 | 48.660 | 34.450 | 27.872 | 0.00 | 0.00 |
| ATOM | 6395 | O    | VAL | X | 425 | 48.717 | 34.552 | 26.601 | 0.00 | 0.00 |
| ATOM | 6396 | N    | PHE | X | 426 | 49.627 | 34.995 | 28.672 | 0.00 | 0.00 |
| ATOM | 6397 | H    | PHE | X | 426 | 49.573 | 34.849 | 29.670 | 0.00 | 0.00 |
| ATOM | 6398 | CA   | PHE | X | 426 | 50.855 | 35.567 | 28.128 | 0.00 | 0.00 |
| ATOM | 6399 | HA   | PHE | X | 426 | 50.717 | 35.776 | 27.068 | 0.00 | 0.00 |
| ATOM | 6400 | CB   | PHE | X | 426 | 51.132 | 36.905 | 28.937 | 0.00 | 0.00 |
| ATOM | 6401 | HB2  | PHE | X | 426 | 50.318 | 37.616 | 28.792 | 0.00 | 0.00 |
| ATOM | 6402 | HB3  | PHE | X | 426 | 51.084 | 36.650 | 29.995 | 0.00 | 0.00 |
| ATOM | 6403 | CG   | PHE | X | 426 | 52.476 | 37.604 | 28.816 | 0.00 | 0.00 |
| ATOM | 6404 | CD1  | PHE | X | 426 | 52.639 | 38.696 | 27.942 | 0.00 | 0.00 |
| ATOM | 6405 | HD1  | PHE | X | 426 | 51.841 | 38.980 | 27.273 | 0.00 | 0.00 |
| ATOM | 6406 | CE1  | PHE | X | 426 | 53.876 | 39.353 | 27.829 | 0.00 | 0.00 |
| ATOM | 6407 | HE1  | PHE | X | 426 | 54.035 | 40.138 | 27.105 | 0.00 | 0.00 |

|      |      |      |     |   |     |        |        |        |      |      |
|------|------|------|-----|---|-----|--------|--------|--------|------|------|
| ATOM | 6408 | CZ   | PHE | X | 426 | 54.961 | 38.923 | 28.592 | 0.00 | 0.00 |
| ATOM | 6409 | HZ   | PHE | X | 426 | 55.885 | 39.452 | 28.414 | 0.00 | 0.00 |
| ATOM | 6410 | CE2  | PHE | X | 426 | 54.795 | 37.919 | 29.510 | 0.00 | 0.00 |
| ATOM | 6411 | HE2  | PHE | X | 426 | 55.626 | 37.734 | 30.175 | 0.00 | 0.00 |
| ATOM | 6412 | CD2  | PHE | X | 426 | 53.608 | 37.194 | 29.593 | 0.00 | 0.00 |
| ATOM | 6413 | HD2  | PHE | X | 426 | 53.502 | 36.444 | 30.363 | 0.00 | 0.00 |
| ATOM | 6414 | C    | PHE | X | 426 | 51.975 | 34.503 | 28.237 | 0.00 | 0.00 |
| ATOM | 6415 | O    | PHE | X | 426 | 52.126 | 33.903 | 29.326 | 0.00 | 0.00 |
| ATOM | 6416 | N    | GLU | X | 427 | 52.684 | 34.243 | 27.123 | 0.00 | 0.00 |
| ATOM | 6417 | H    | GLU | X | 427 | 52.498 | 34.766 | 26.279 | 0.00 | 0.00 |
| ATOM | 6418 | CA   | GLU | X | 427 | 53.834 | 33.224 | 27.093 | 0.00 | 0.00 |
| ATOM | 6419 | HA   | GLU | X | 427 | 54.027 | 32.840 | 28.094 | 0.00 | 0.00 |
| ATOM | 6420 | CB   | GLU | X | 427 | 53.399 | 31.995 | 26.205 | 0.00 | 0.00 |
| ATOM | 6421 | HB2  | GLU | X | 427 | 54.182 | 31.243 | 26.293 | 0.00 | 0.00 |
| ATOM | 6422 | HB3  | GLU | X | 427 | 52.483 | 31.567 | 26.613 | 0.00 | 0.00 |
| ATOM | 6423 | CG   | GLU | X | 427 | 53.190 | 32.252 | 24.679 | 0.00 | 0.00 |
| ATOM | 6424 | HG2  | GLU | X | 427 | 52.430 | 32.969 | 24.370 | 0.00 | 0.00 |
| ATOM | 6425 | HG3  | GLU | X | 427 | 54.135 | 32.590 | 24.253 | 0.00 | 0.00 |
| ATOM | 6426 | CD   | GLU | X | 427 | 52.982 | 30.928 | 24.111 | 0.00 | 0.00 |
| ATOM | 6427 | OE1  | GLU | X | 427 | 53.841 | 30.441 | 23.315 | 0.00 | 0.00 |
| ATOM | 6428 | OE2  | GLU | X | 427 | 51.898 | 30.331 | 24.420 | 0.00 | 0.00 |
| ATOM | 6429 | C    | GLU | X | 427 | 55.198 | 33.728 | 26.630 | 0.00 | 0.00 |
| ATOM | 6430 | O    | GLU | X | 427 | 55.981 | 32.843 | 26.206 | 0.00 | 0.00 |
| ATOM | 6431 | N    | HIE | X | 428 | 55.472 | 35.038 | 26.450 | 0.00 | 0.00 |
| ATOM | 6432 | H    | HIE | X | 428 | 54.778 | 35.756 | 26.601 | 0.00 | 0.00 |
| ATOM | 6433 | CA   | HIE | X | 428 | 56.828 | 35.462 | 26.085 | 0.00 | 0.00 |
| ATOM | 6434 | HA   | HIE | X | 428 | 57.244 | 34.786 | 25.337 | 0.00 | 0.00 |
| ATOM | 6435 | CB   | HIE | X | 428 | 56.658 | 36.801 | 25.437 | 0.00 | 0.00 |
| ATOM | 6436 | HB2  | HIE | X | 428 | 56.223 | 36.709 | 24.442 | 0.00 | 0.00 |
| ATOM | 6437 | HB3  | HIE | X | 428 | 56.036 | 37.322 | 26.165 | 0.00 | 0.00 |
| ATOM | 6438 | CG   | HIE | X | 428 | 57.869 | 37.605 | 25.274 | 0.00 | 0.00 |
| ATOM | 6439 | ND1  | HIE | X | 428 | 58.845 | 37.395 | 24.321 | 0.00 | 0.00 |
| ATOM | 6440 | CE1  | HIE | X | 428 | 59.836 | 38.280 | 24.582 | 0.00 | 0.00 |
| ATOM | 6441 | HE1  | HIE | X | 428 | 60.732 | 38.395 | 23.990 | 0.00 | 0.00 |
| ATOM | 6442 | NE2  | HIE | X | 428 | 59.492 | 39.006 | 25.641 | 0.00 | 0.00 |
| ATOM | 6443 | HE2  | HIE | X | 428 | 60.127 | 39.618 | 26.134 | 0.00 | 0.00 |
| ATOM | 6444 | CD2  | HIE | X | 428 | 58.196 | 38.663 | 26.050 | 0.00 | 0.00 |
| ATOM | 6445 | HD2  | HIE | X | 428 | 57.680 | 38.994 | 26.939 | 0.00 | 0.00 |
| ATOM | 6446 | C    | HIE | X | 428 | 57.628 | 35.720 | 27.365 | 0.00 | 0.00 |
| ATOM | 6447 | O    | HIE | X | 428 | 57.226 | 36.476 | 28.251 | 0.00 | 0.00 |
| ATOM | 6448 | N    | ARG | X | 429 | 58.881 | 35.199 | 27.392 | 0.00 | 0.00 |
| ATOM | 6449 | H    | ARG | X | 429 | 59.079 | 34.531 | 26.660 | 0.00 | 0.00 |
| ATOM | 6450 | CA   | ARG | X | 429 | 59.813 | 35.525 | 28.475 | 0.00 | 0.00 |
| ATOM | 6451 | HA   | ARG | X | 429 | 59.341 | 35.945 | 29.363 | 0.00 | 0.00 |
| ATOM | 6452 | CB   | ARG | X | 429 | 60.752 | 34.342 | 28.827 | 0.00 | 0.00 |
| ATOM | 6453 | HB2  | ARG | X | 429 | 60.148 | 33.443 | 28.959 | 0.00 | 0.00 |
| ATOM | 6454 | HB3  | ARG | X | 429 | 61.497 | 34.138 | 28.058 | 0.00 | 0.00 |
| ATOM | 6455 | CG   | ARG | X | 429 | 61.488 | 34.444 | 30.187 | 0.00 | 0.00 |
| ATOM | 6456 | HG2  | ARG | X | 429 | 62.195 | 35.264 | 30.310 | 0.00 | 0.00 |
| ATOM | 6457 | HG3  | ARG | X | 429 | 60.746 | 34.608 | 30.969 | 0.00 | 0.00 |
| ATOM | 6458 | CD   | ARG | X | 429 | 62.150 | 33.070 | 30.556 | 0.00 | 0.00 |
| ATOM | 6459 | HD2  | ARG | X | 429 | 61.500 | 32.279 | 30.183 | 0.00 | 0.00 |
| ATOM | 6460 | HD3  | ARG | X | 429 | 63.115 | 33.014 | 30.053 | 0.00 | 0.00 |
| ATOM | 6461 | NE   | ARG | X | 429 | 62.224 | 32.920 | 32.009 | 0.00 | 0.00 |
| ATOM | 6462 | HE   | ARG | X | 429 | 61.808 | 32.087 | 32.400 | 0.00 | 0.00 |
| ATOM | 6463 | CZ   | ARG | X | 429 | 62.961 | 33.556 | 32.920 | 0.00 | 0.00 |
| ATOM | 6464 | NH1  | ARG | X | 429 | 63.866 | 34.398 | 32.631 | 0.00 | 0.00 |
| ATOM | 6465 | HH11 | ARG | X | 429 | 64.219 | 34.511 | 31.691 | 0.00 | 0.00 |
| ATOM | 6466 | HH12 | ARG | X | 429 | 64.377 | 34.911 | 33.335 | 0.00 | 0.00 |
| ATOM | 6467 | NH2  | ARG | X | 429 | 62.651 | 33.487 | 34.190 | 0.00 | 0.00 |
| ATOM | 6468 | HH21 | ARG | X | 429 | 61.879 | 32.881 | 34.428 | 0.00 | 0.00 |
| ATOM | 6469 | HH22 | ARG | X | 429 | 63.081 | 34.013 | 34.937 | 0.00 | 0.00 |
| ATOM | 6470 | C    | ARG | X | 429 | 60.762 | 36.667 | 27.930 | 0.00 | 0.00 |
| ATOM | 6471 | O    | ARG | X | 429 | 61.219 | 36.602 | 26.807 | 0.00 | 0.00 |
| ATOM | 6472 | N    | ALA | X | 430 | 61.008 | 37.676 | 28.752 | 0.00 | 0.00 |
| ATOM | 6473 | H    | ALA | X | 430 | 60.334 | 37.789 | 29.496 | 0.00 | 0.00 |
| ATOM | 6474 | CA   | ALA | X | 430 | 61.856 | 38.763 | 28.283 | 0.00 | 0.00 |
| ATOM | 6475 | HA   | ALA | X | 430 | 61.576 | 39.196 | 27.323 | 0.00 | 0.00 |
| ATOM | 6476 | CB   | ALA | X | 430 | 61.696 | 39.970 | 29.243 | 0.00 | 0.00 |
| ATOM | 6477 | HB1  | ALA | X | 430 | 60.633 | 40.186 | 29.134 | 0.00 | 0.00 |

|      |      |      |     |   |     |        |        |        |      |      |
|------|------|------|-----|---|-----|--------|--------|--------|------|------|
| ATOM | 6478 | HB2  | ALA | X | 430 | 61.971 | 39.718 | 30.267 | 0.00 | 0.00 |
| ATOM | 6479 | HB3  | ALA | X | 430 | 62.257 | 40.848 | 28.922 | 0.00 | 0.00 |
| ATOM | 6480 | C    | ALA | X | 430 | 63.372 | 38.418 | 28.125 | 0.00 | 0.00 |
| ATOM | 6481 | O    | ALA | X | 430 | 63.839 | 37.474 | 28.688 | 0.00 | 0.00 |
| ATOM | 6482 | N    | SER | X | 431 | 64.084 | 39.232 | 27.285 | 0.00 | 0.00 |
| ATOM | 6483 | H    | SER | X | 431 | 63.597 | 39.877 | 26.679 | 0.00 | 0.00 |
| ATOM | 6484 | CA   | SER | X | 431 | 65.461 | 39.002 | 26.916 | 0.00 | 0.00 |
| ATOM | 6485 | HA   | SER | X | 431 | 65.566 | 37.977 | 26.561 | 0.00 | 0.00 |
| ATOM | 6486 | CB   | SER | X | 431 | 65.821 | 39.714 | 25.664 | 0.00 | 0.00 |
| ATOM | 6487 | HB2  | SER | X | 431 | 66.911 | 39.715 | 25.661 | 0.00 | 0.00 |
| ATOM | 6488 | HB3  | SER | X | 431 | 65.418 | 39.198 | 24.792 | 0.00 | 0.00 |
| ATOM | 6489 | OG   | SER | X | 431 | 65.380 | 41.044 | 25.674 | 0.00 | 0.00 |
| ATOM | 6490 | HG   | SER | X | 431 | 64.611 | 41.052 | 25.099 | 0.00 | 0.00 |
| ATOM | 6491 | C    | SER | X | 431 | 66.512 | 39.161 | 28.033 | 0.00 | 0.00 |
| ATOM | 6492 | O    | SER | X | 431 | 67.544 | 38.529 | 27.973 | 0.00 | 0.00 |
| ATOM | 6493 | N    | THR | X | 432 | 66.150 | 39.875 | 29.091 | 0.00 | 0.00 |
| ATOM | 6494 | H    | THR | X | 432 | 65.371 | 40.498 | 28.935 | 0.00 | 0.00 |
| ATOM | 6495 | CA   | THR | X | 432 | 66.725 | 39.687 | 30.423 | 0.00 | 0.00 |
| ATOM | 6496 | HA   | THR | X | 432 | 67.176 | 38.723 | 30.657 | 0.00 | 0.00 |
| ATOM | 6497 | CB   | THR | X | 432 | 67.812 | 40.707 | 30.611 | 0.00 | 0.00 |
| ATOM | 6498 | HB   | THR | X | 432 | 67.373 | 41.695 | 30.468 | 0.00 | 0.00 |
| ATOM | 6499 | CG2  | THR | X | 432 | 68.608 | 40.794 | 31.941 | 0.00 | 0.00 |
| ATOM | 6500 | HG21 | THR | X | 432 | 69.283 | 39.939 | 31.989 | 0.00 | 0.00 |
| ATOM | 6501 | HG22 | THR | X | 432 | 69.221 | 41.694 | 31.892 | 0.00 | 0.00 |
| ATOM | 6502 | HG23 | THR | X | 432 | 68.033 | 40.777 | 32.867 | 0.00 | 0.00 |
| ATOM | 6503 | OG1  | THR | X | 432 | 68.761 | 40.588 | 29.615 | 0.00 | 0.00 |
| ATOM | 6504 | HG1  | THR | X | 432 | 68.417 | 40.241 | 28.789 | 0.00 | 0.00 |
| ATOM | 6505 | C    | THR | X | 432 | 65.688 | 39.919 | 31.559 | 0.00 | 0.00 |
| ATOM | 6506 | O    | THR | X | 432 | 65.290 | 41.075 | 31.764 | 0.00 | 0.00 |
| ATOM | 6507 | N    | LEU | X | 433 | 65.482 | 38.917 | 32.394 | 0.00 | 0.00 |
| ATOM | 6508 | H    | LEU | X | 433 | 66.171 | 38.181 | 32.336 | 0.00 | 0.00 |
| ATOM | 6509 | CA   | LEU | X | 433 | 64.317 | 38.896 | 33.307 | 0.00 | 0.00 |
| ATOM | 6510 | HA   | LEU | X | 433 | 63.977 | 39.929 | 33.387 | 0.00 | 0.00 |
| ATOM | 6511 | CB   | LEU | X | 433 | 63.146 | 38.067 | 32.752 | 0.00 | 0.00 |
| ATOM | 6512 | HB2  | LEU | X | 433 | 62.937 | 38.273 | 31.702 | 0.00 | 0.00 |
| ATOM | 6513 | HB3  | LEU | X | 433 | 63.367 | 37.000 | 32.771 | 0.00 | 0.00 |
| ATOM | 6514 | CG   | LEU | X | 433 | 61.827 | 38.251 | 33.519 | 0.00 | 0.00 |
| ATOM | 6515 | HG   | LEU | X | 433 | 61.767 | 39.336 | 33.609 | 0.00 | 0.00 |
| ATOM | 6516 | CD1  | LEU | X | 433 | 60.678 | 37.627 | 32.746 | 0.00 | 0.00 |
| ATOM | 6517 | HD11 | LEU | X | 433 | 60.653 | 37.962 | 31.709 | 0.00 | 0.00 |
| ATOM | 6518 | HD12 | LEU | X | 433 | 60.812 | 36.546 | 32.715 | 0.00 | 0.00 |
| ATOM | 6519 | HD13 | LEU | X | 433 | 59.751 | 37.800 | 33.292 | 0.00 | 0.00 |
| ATOM | 6520 | CD2  | LEU | X | 433 | 61.794 | 37.540 | 34.910 | 0.00 | 0.00 |
| ATOM | 6521 | HD21 | LEU | X | 433 | 62.199 | 38.153 | 35.716 | 0.00 | 0.00 |
| ATOM | 6522 | HD22 | LEU | X | 433 | 60.798 | 37.230 | 35.227 | 0.00 | 0.00 |
| ATOM | 6523 | HD23 | LEU | X | 433 | 62.463 | 36.680 | 34.895 | 0.00 | 0.00 |
| ATOM | 6524 | C    | LEU | X | 433 | 64.909 | 38.351 | 34.647 | 0.00 | 0.00 |
| ATOM | 6525 | O    | LEU | X | 433 | 65.465 | 37.281 | 34.642 | 0.00 | 0.00 |
| ATOM | 6526 | N    | SER | X | 434 | 64.755 | 39.086 | 35.764 | 0.00 | 0.00 |
| ATOM | 6527 | H    | SER | X | 434 | 64.117 | 39.868 | 35.736 | 0.00 | 0.00 |
| ATOM | 6528 | CA   | SER | X | 434 | 65.658 | 38.957 | 36.943 | 0.00 | 0.00 |
| ATOM | 6529 | HA   | SER | X | 434 | 66.696 | 39.018 | 36.616 | 0.00 | 0.00 |
| ATOM | 6530 | CB   | SER | X | 434 | 65.326 | 40.190 | 37.885 | 0.00 | 0.00 |
| ATOM | 6531 | HB2  | SER | X | 434 | 65.959 | 40.229 | 38.771 | 0.00 | 0.00 |
| ATOM | 6532 | HB3  | SER | X | 434 | 65.627 | 41.044 | 37.279 | 0.00 | 0.00 |
| ATOM | 6533 | OG   | SER | X | 434 | 63.946 | 40.251 | 38.153 | 0.00 | 0.00 |
| ATOM | 6534 | HG   | SER | X | 434 | 63.510 | 41.037 | 37.816 | 0.00 | 0.00 |
| ATOM | 6535 | C    | SER | X | 434 | 65.567 | 37.577 | 37.749 | 0.00 | 0.00 |
| ATOM | 6536 | O    | SER | X | 434 | 66.457 | 37.072 | 38.423 | 0.00 | 0.00 |
| ATOM | 6537 | N    | TRP | X | 435 | 64.364 | 36.951 | 37.624 | 0.00 | 0.00 |
| ATOM | 6538 | H    | TRP | X | 435 | 63.611 | 37.440 | 37.160 | 0.00 | 0.00 |
| ATOM | 6539 | CA   | TRP | X | 435 | 64.123 | 35.634 | 38.073 | 0.00 | 0.00 |
| ATOM | 6540 | HA   | TRP | X | 435 | 64.519 | 35.637 | 39.089 | 0.00 | 0.00 |
| ATOM | 6541 | CB   | TRP | X | 435 | 62.598 | 35.456 | 38.026 | 0.00 | 0.00 |
| ATOM | 6542 | HB2  | TRP | X | 435 | 62.287 | 35.743 | 37.022 | 0.00 | 0.00 |
| ATOM | 6543 | HB3  | TRP | X | 435 | 62.316 | 34.408 | 38.127 | 0.00 | 0.00 |
| ATOM | 6544 | CG   | TRP | X | 435 | 61.811 | 36.295 | 38.973 | 0.00 | 0.00 |
| ATOM | 6545 | CD1  | TRP | X | 435 | 60.867 | 37.221 | 38.676 | 0.00 | 0.00 |
| ATOM | 6546 | HD1  | TRP | X | 435 | 60.644 | 37.507 | 37.659 | 0.00 | 0.00 |
| ATOM | 6547 | NE1  | TRP | X | 435 | 60.158 | 37.567 | 39.828 | 0.00 | 0.00 |



|      |      |      |     |   |     |        |        |        |      |      |
|------|------|------|-----|---|-----|--------|--------|--------|------|------|
| ATOM | 6548 | HE1  | TRP | X | 435 | 59.286 | 38.077 | 39.842 | 0.00 | 0.00 |
| ATOM | 6549 | CE2  | TRP | X | 435 | 60.763 | 37.043 | 40.943 | 0.00 | 0.00 |
| ATOM | 6550 | CZ2  | TRP | X | 435 | 60.489 | 37.124 | 42.324 | 0.00 | 0.00 |
| ATOM | 6551 | HZ2  | TRP | X | 435 | 59.675 | 37.757 | 42.645 | 0.00 | 0.00 |
| ATOM | 6552 | CH2  | TRP | X | 435 | 61.308 | 36.427 | 43.244 | 0.00 | 0.00 |
| ATOM | 6553 | HH2  | TRP | X | 435 | 61.196 | 36.353 | 44.316 | 0.00 | 0.00 |
| ATOM | 6554 | CZ3  | TRP | X | 435 | 62.318 | 35.620 | 42.763 | 0.00 | 0.00 |
| ATOM | 6555 | HZ3  | TRP | X | 435 | 62.894 | 35.072 | 43.494 | 0.00 | 0.00 |
| ATOM | 6556 | CE3  | TRP | X | 435 | 62.572 | 35.469 | 41.396 | 0.00 | 0.00 |
| ATOM | 6557 | HE3  | TRP | X | 435 | 63.216 | 34.696 | 41.004 | 0.00 | 0.00 |
| ATOM | 6558 | CD2  | TRP | X | 435 | 61.796 | 36.219 | 40.414 | 0.00 | 0.00 |
| ATOM | 6559 | C    | TRP | X | 435 | 64.726 | 34.594 | 37.120 | 0.00 | 0.00 |
| ATOM | 6560 | O    | TRP | X | 435 | 64.481 | 34.726 | 35.917 | 0.00 | 0.00 |
| ATOM | 6561 | N    | PRO | X | 436 | 65.288 | 33.405 | 37.631 | 0.00 | 0.00 |
| ATOM | 6562 | CD   | PRO | X | 436 | 65.601 | 33.207 | 39.000 | 0.00 | 0.00 |
| ATOM | 6563 | HD2  | PRO | X | 436 | 64.840 | 33.300 | 39.775 | 0.00 | 0.00 |
| ATOM | 6564 | HD3  | PRO | X | 436 | 66.446 | 33.862 | 39.211 | 0.00 | 0.00 |
| ATOM | 6565 | CG   | PRO | X | 436 | 66.078 | 31.752 | 39.076 | 0.00 | 0.00 |
| ATOM | 6566 | HG2  | PRO | X | 436 | 65.212 | 31.093 | 39.028 | 0.00 | 0.00 |
| ATOM | 6567 | HG3  | PRO | X | 436 | 66.750 | 31.458 | 39.882 | 0.00 | 0.00 |
| ATOM | 6568 | CB   | PRO | X | 436 | 66.782 | 31.505 | 37.793 | 0.00 | 0.00 |
| ATOM | 6569 | HB2  | PRO | X | 436 | 66.770 | 30.452 | 37.512 | 0.00 | 0.00 |
| ATOM | 6570 | HB3  | PRO | X | 436 | 67.742 | 31.943 | 38.067 | 0.00 | 0.00 |
| ATOM | 6571 | CA   | PRO | X | 436 | 66.090 | 32.456 | 36.784 | 0.00 | 0.00 |
| ATOM | 6572 | HA   | PRO | X | 436 | 66.806 | 33.079 | 36.248 | 0.00 | 0.00 |
| ATOM | 6573 | C    | PRO | X | 436 | 65.154 | 31.712 | 35.826 | 0.00 | 0.00 |
| ATOM | 6574 | O    | PRO | X | 436 | 63.991 | 31.460 | 36.225 | 0.00 | 0.00 |
| ATOM | 6575 | N    | LEU | X | 437 | 65.762 | 31.273 | 34.695 | 0.00 | 0.00 |
| ATOM | 6576 | H    | LEU | X | 437 | 66.764 | 31.392 | 34.660 | 0.00 | 0.00 |
| ATOM | 6577 | CA   | LEU | X | 437 | 65.011 | 30.672 | 33.602 | 0.00 | 0.00 |
| ATOM | 6578 | HA   | LEU | X | 437 | 64.394 | 31.484 | 33.216 | 0.00 | 0.00 |
| ATOM | 6579 | CB   | LEU | X | 437 | 65.988 | 30.327 | 32.489 | 0.00 | 0.00 |
| ATOM | 6580 | HB2  | LEU | X | 437 | 66.436 | 31.266 | 32.162 | 0.00 | 0.00 |
| ATOM | 6581 | HB3  | LEU | X | 437 | 66.757 | 29.730 | 32.979 | 0.00 | 0.00 |
| ATOM | 6582 | CG   | LEU | X | 437 | 65.375 | 29.634 | 31.264 | 0.00 | 0.00 |
| ATOM | 6583 | HG   | LEU | X | 437 | 64.808 | 28.760 | 31.584 | 0.00 | 0.00 |
| ATOM | 6584 | CD1  | LEU | X | 437 | 64.419 | 30.627 | 30.523 | 0.00 | 0.00 |
| ATOM | 6585 | HD11 | LEU | X | 437 | 64.969 | 31.553 | 30.358 | 0.00 | 0.00 |
| ATOM | 6586 | HD12 | LEU | X | 437 | 64.176 | 30.224 | 29.539 | 0.00 | 0.00 |
| ATOM | 6587 | HD13 | LEU | X | 437 | 63.500 | 30.845 | 31.067 | 0.00 | 0.00 |
| ATOM | 6588 | CD2  | LEU | X | 437 | 66.458 | 29.258 | 30.226 | 0.00 | 0.00 |
| ATOM | 6589 | HD21 | LEU | X | 437 | 65.979 | 28.801 | 29.360 | 0.00 | 0.00 |
| ATOM | 6590 | HD22 | LEU | X | 437 | 66.946 | 30.100 | 29.734 | 0.00 | 0.00 |
| ATOM | 6591 | HD23 | LEU | X | 437 | 67.220 | 28.601 | 30.644 | 0.00 | 0.00 |
| ATOM | 6592 | C    | LEU | X | 437 | 64.074 | 29.489 | 34.006 | 0.00 | 0.00 |
| ATOM | 6593 | O    | LEU | X | 437 | 62.859 | 29.509 | 33.639 | 0.00 | 0.00 |
| ATOM | 6594 | N    | TRP | X | 438 | 64.561 | 28.606 | 34.864 | 0.00 | 0.00 |
| ATOM | 6595 | H    | TRP | X | 438 | 65.530 | 28.619 | 35.147 | 0.00 | 0.00 |
| ATOM | 6596 | CA   | TRP | X | 438 | 63.815 | 27.413 | 35.256 | 0.00 | 0.00 |
| ATOM | 6597 | HA   | TRP | X | 438 | 63.608 | 26.913 | 34.310 | 0.00 | 0.00 |
| ATOM | 6598 | CB   | TRP | X | 438 | 64.644 | 26.591 | 36.225 | 0.00 | 0.00 |
| ATOM | 6599 | HB2  | TRP | X | 438 | 64.197 | 25.597 | 36.235 | 0.00 | 0.00 |
| ATOM | 6600 | HB3  | TRP | X | 438 | 65.606 | 26.380 | 35.757 | 0.00 | 0.00 |
| ATOM | 6601 | CG   | TRP | X | 438 | 64.838 | 27.055 | 37.674 | 0.00 | 0.00 |
| ATOM | 6602 | CD1  | TRP | X | 438 | 65.942 | 27.663 | 38.190 | 0.00 | 0.00 |
| ATOM | 6603 | HD1  | TRP | X | 438 | 66.811 | 27.857 | 37.578 | 0.00 | 0.00 |
| ATOM | 6604 | NE1  | TRP | X | 438 | 65.785 | 27.994 | 39.536 | 0.00 | 0.00 |
| ATOM | 6605 | HE1  | TRP | X | 438 | 66.547 | 28.357 | 40.089 | 0.00 | 0.00 |
| ATOM | 6606 | CE2  | TRP | X | 438 | 64.485 | 27.670 | 39.930 | 0.00 | 0.00 |
| ATOM | 6607 | CZ2  | TRP | X | 438 | 63.796 | 27.930 | 41.133 | 0.00 | 0.00 |
| ATOM | 6608 | HZ2  | TRP | X | 438 | 64.232 | 28.568 | 41.888 | 0.00 | 0.00 |
| ATOM | 6609 | CH2  | TRP | X | 438 | 62.542 | 27.277 | 41.342 | 0.00 | 0.00 |
| ATOM | 6610 | HH2  | TRP | X | 438 | 62.001 | 27.597 | 42.220 | 0.00 | 0.00 |
| ATOM | 6611 | CZ3  | TRP | X | 438 | 61.932 | 26.547 | 40.308 | 0.00 | 0.00 |
| ATOM | 6612 | HZ3  | TRP | X | 438 | 60.933 | 26.141 | 40.374 | 0.00 | 0.00 |
| ATOM | 6613 | CE3  | TRP | X | 438 | 62.623 | 26.453 | 39.036 | 0.00 | 0.00 |
| ATOM | 6614 | HE3  | TRP | X | 438 | 62.115 | 26.017 | 38.189 | 0.00 | 0.00 |
| ATOM | 6615 | CD2  | TRP | X | 438 | 63.900 | 26.977 | 38.827 | 0.00 | 0.00 |
| ATOM | 6616 | C    | TRP | X | 438 | 62.401 | 27.680 | 35.933 | 0.00 | 0.00 |
| ATOM | 6617 | O    | TRP | X | 438 | 61.555 | 26.767 | 35.760 | 0.00 | 0.00 |

|      |      |      |     |   |     |        |        |        |      |      |
|------|------|------|-----|---|-----|--------|--------|--------|------|------|
| ATOM | 6618 | N    | MET | X | 439 | 62.211 | 28.924 | 36.450 | 0.00 | 0.00 |
| ATOM | 6619 | H    | MET | X | 439 | 62.979 | 29.572 | 36.548 | 0.00 | 0.00 |
| ATOM | 6620 | CA   | MET | X | 439 | 60.849 | 29.293 | 37.020 | 0.00 | 0.00 |
| ATOM | 6621 | HA   | MET | X | 439 | 60.501 | 28.469 | 37.643 | 0.00 | 0.00 |
| ATOM | 6622 | CB   | MET | X | 439 | 61.077 | 30.554 | 37.881 | 0.00 | 0.00 |
| ATOM | 6623 | HB2  | MET | X | 439 | 61.706 | 31.274 | 37.358 | 0.00 | 0.00 |
| ATOM | 6624 | HB3  | MET | X | 439 | 60.137 | 31.023 | 38.172 | 0.00 | 0.00 |
| ATOM | 6625 | CG   | MET | X | 439 | 61.752 | 30.235 | 39.182 | 0.00 | 0.00 |
| ATOM | 6626 | HG2  | MET | X | 439 | 61.060 | 29.633 | 39.772 | 0.00 | 0.00 |
| ATOM | 6627 | HG3  | MET | X | 439 | 62.638 | 29.663 | 38.906 | 0.00 | 0.00 |
| ATOM | 6628 | SD   | MET | X | 439 | 62.213 | 31.515 | 40.259 | 0.00 | 0.00 |
| ATOM | 6629 | CE   | MET | X | 439 | 60.826 | 32.696 | 40.149 | 0.00 | 0.00 |
| ATOM | 6630 | HE1  | MET | X | 439 | 60.913 | 33.515 | 40.864 | 0.00 | 0.00 |
| ATOM | 6631 | HE2  | MET | X | 439 | 60.771 | 33.171 | 39.170 | 0.00 | 0.00 |
| ATOM | 6632 | HE3  | MET | X | 439 | 59.892 | 32.197 | 40.406 | 0.00 | 0.00 |
| ATOM | 6633 | C    | MET | X | 439 | 59.797 | 29.555 | 35.928 | 0.00 | 0.00 |
| ATOM | 6634 | O    | MET | X | 439 | 58.698 | 29.990 | 36.119 | 0.00 | 0.00 |
| ATOM | 6635 | N    | GLY | X | 440 | 60.246 | 29.622 | 34.695 | 0.00 | 0.00 |
| ATOM | 6636 | H    | GLY | X | 440 | 61.212 | 29.586 | 34.404 | 0.00 | 0.00 |
| ATOM | 6637 | CA   | GLY | X | 440 | 59.402 | 29.973 | 33.596 | 0.00 | 0.00 |
| ATOM | 6638 | HA2  | GLY | X | 440 | 59.782 | 29.535 | 32.679 | 0.00 | 0.00 |
| ATOM | 6639 | HA3  | GLY | X | 440 | 58.431 | 29.581 | 33.694 | 0.00 | 0.00 |
| ATOM | 6640 | C    | GLY | X | 440 | 59.199 | 31.445 | 33.417 | 0.00 | 0.00 |
| ATOM | 6641 | O    | GLY | X | 440 | 60.099 | 32.253 | 33.646 | 0.00 | 0.00 |
| ATOM | 6642 | N    | VAL | X | 441 | 58.010 | 31.888 | 32.980 | 0.00 | 0.00 |
| ATOM | 6643 | H    | VAL | X | 441 | 57.330 | 31.160 | 32.817 | 0.00 | 0.00 |
| ATOM | 6644 | CA   | VAL | X | 441 | 57.503 | 33.319 | 32.934 | 0.00 | 0.00 |
| ATOM | 6645 | HA   | VAL | X | 441 | 58.392 | 33.948 | 32.961 | 0.00 | 0.00 |
| ATOM | 6646 | CB   | VAL | X | 441 | 56.635 | 33.596 | 31.693 | 0.00 | 0.00 |
| ATOM | 6647 | HB   | VAL | X | 441 | 55.657 | 33.114 | 31.711 | 0.00 | 0.00 |
| ATOM | 6648 | CG1  | VAL | X | 441 | 56.487 | 35.160 | 31.614 | 0.00 | 0.00 |
| ATOM | 6649 | HG11 | VAL | X | 441 | 57.436 | 35.564 | 31.262 | 0.00 | 0.00 |
| ATOM | 6650 | HG12 | VAL | X | 441 | 55.736 | 35.537 | 30.920 | 0.00 | 0.00 |
| ATOM | 6651 | HG13 | VAL | X | 441 | 56.249 | 35.571 | 32.595 | 0.00 | 0.00 |
| ATOM | 6652 | CG2  | VAL | X | 441 | 57.282 | 33.167 | 30.406 | 0.00 | 0.00 |
| ATOM | 6653 | HG21 | VAL | X | 441 | 58.288 | 33.584 | 30.438 | 0.00 | 0.00 |
| ATOM | 6654 | HG22 | VAL | X | 441 | 57.404 | 32.092 | 30.275 | 0.00 | 0.00 |
| ATOM | 6655 | HG23 | VAL | X | 441 | 56.740 | 33.516 | 29.527 | 0.00 | 0.00 |
| ATOM | 6656 | C    | VAL | X | 441 | 56.730 | 33.587 | 34.236 | 0.00 | 0.00 |
| ATOM | 6657 | O    | VAL | X | 441 | 55.583 | 33.196 | 34.339 | 0.00 | 0.00 |
| ATOM | 6658 | N    | PRO | X | 442 | 57.342 | 34.335 | 35.210 | 0.00 | 0.00 |
| ATOM | 6659 | CD   | PRO | X | 442 | 58.562 | 34.979 | 35.233 | 0.00 | 0.00 |
| ATOM | 6660 | HD2  | PRO | X | 442 | 58.531 | 35.766 | 34.479 | 0.00 | 0.00 |
| ATOM | 6661 | HD3  | PRO | X | 442 | 59.323 | 34.211 | 35.099 | 0.00 | 0.00 |
| ATOM | 6662 | CG   | PRO | X | 442 | 58.750 | 35.704 | 36.581 | 0.00 | 0.00 |
| ATOM | 6663 | HG2  | PRO | X | 442 | 58.241 | 36.665 | 36.514 | 0.00 | 0.00 |
| ATOM | 6664 | HG3  | PRO | X | 442 | 59.799 | 35.810 | 36.859 | 0.00 | 0.00 |
| ATOM | 6665 | CB   | PRO | X | 442 | 57.871 | 34.755 | 37.459 | 0.00 | 0.00 |
| ATOM | 6666 | HB2  | PRO | X | 442 | 57.513 | 35.091 | 38.432 | 0.00 | 0.00 |
| ATOM | 6667 | HB3  | PRO | X | 442 | 58.365 | 33.784 | 37.482 | 0.00 | 0.00 |
| ATOM | 6668 | CA   | PRO | X | 442 | 56.713 | 34.438 | 36.493 | 0.00 | 0.00 |
| ATOM | 6669 | HA   | PRO | X | 442 | 56.370 | 33.432 | 36.737 | 0.00 | 0.00 |
| ATOM | 6670 | C    | PRO | X | 442 | 55.745 | 35.570 | 36.588 | 0.00 | 0.00 |
| ATOM | 6671 | O    | PRO | X | 442 | 55.809 | 36.455 | 35.748 | 0.00 | 0.00 |
| ATOM | 6672 | N    | HIP | X | 443 | 54.845 | 35.405 | 37.523 | 0.00 | 0.00 |
| ATOM | 6673 | H    | HIP | X | 443 | 54.816 | 34.516 | 38.002 | 0.00 | 0.00 |
| ATOM | 6674 | CA   | HIP | X | 443 | 53.628 | 36.165 | 37.777 | 0.00 | 0.00 |
| ATOM | 6675 | HA   | HIP | X | 443 | 52.791 | 35.742 | 37.220 | 0.00 | 0.00 |
| ATOM | 6676 | CB   | HIP | X | 443 | 53.425 | 35.801 | 39.290 | 0.00 | 0.00 |
| ATOM | 6677 | HB2  | HIP | X | 443 | 53.073 | 34.771 | 39.347 | 0.00 | 0.00 |
| ATOM | 6678 | HB3  | HIP | X | 443 | 54.364 | 35.969 | 39.817 | 0.00 | 0.00 |
| ATOM | 6679 | CG   | HIP | X | 443 | 52.398 | 36.651 | 40.001 | 0.00 | 0.00 |
| ATOM | 6680 | ND1  | HIP | X | 443 | 51.078 | 36.349 | 40.201 | 0.00 | 0.00 |
| ATOM | 6681 | HD1  | HIP | X | 443 | 50.573 | 35.654 | 39.670 | 0.00 | 0.00 |
| ATOM | 6682 | CE1  | HIP | X | 443 | 50.552 | 37.253 | 41.052 | 0.00 | 0.00 |
| ATOM | 6683 | HE1  | HIP | X | 443 | 49.533 | 37.237 | 41.407 | 0.00 | 0.00 |
| ATOM | 6684 | NE2  | HIP | X | 443 | 51.501 | 38.136 | 41.412 | 0.00 | 0.00 |
| ATOM | 6685 | HE2  | HIP | X | 443 | 51.414 | 38.980 | 41.960 | 0.00 | 0.00 |
| ATOM | 6686 | CD2  | HIP | X | 443 | 52.626 | 37.732 | 40.795 | 0.00 | 0.00 |
| ATOM | 6687 | HD2  | HIP | X | 443 | 53.564 | 38.218 | 41.023 | 0.00 | 0.00 |

|      |      |      |     |   |     |        |        |        |      |      |
|------|------|------|-----|---|-----|--------|--------|--------|------|------|
| ATOM | 6688 | C    | HIP | X | 443 | 53.820 | 37.752 | 37.564 | 0.00 | 0.00 |
| ATOM | 6689 | O    | HIP | X | 443 | 54.672 | 38.353 | 38.175 | 0.00 | 0.00 |
| ATOM | 6690 | N    | GLY | X | 444 | 53.005 | 38.226 | 36.605 | 0.00 | 0.00 |
| ATOM | 6691 | H    | GLY | X | 444 | 52.238 | 37.619 | 36.352 | 0.00 | 0.00 |
| ATOM | 6692 | CA   | GLY | X | 444 | 52.664 | 39.633 | 36.249 | 0.00 | 0.00 |
| ATOM | 6693 | HA2  | GLY | X | 444 | 51.687 | 39.826 | 35.755 | 0.00 | 0.00 |
| ATOM | 6694 | HA3  | GLY | X | 444 | 52.578 | 40.249 | 37.120 | 0.00 | 0.00 |
| ATOM | 6695 | C    | GLY | X | 444 | 53.762 | 40.318 | 35.340 | 0.00 | 0.00 |
| ATOM | 6696 | O    | GLY | X | 444 | 53.474 | 41.402 | 34.767 | 0.00 | 0.00 |
| ATOM | 6697 | N    | TYR | X | 445 | 54.818 | 39.571 | 34.886 | 0.00 | 0.00 |
| ATOM | 6698 | H    | TYR | X | 445 | 54.955 | 38.636 | 35.243 | 0.00 | 0.00 |
| ATOM | 6699 | CA   | TYR | X | 445 | 55.883 | 40.047 | 33.920 | 0.00 | 0.00 |
| ATOM | 6700 | HA   | TYR | X | 445 | 56.243 | 41.010 | 34.283 | 0.00 | 0.00 |
| ATOM | 6701 | CB   | TYR | X | 445 | 57.064 | 39.133 | 33.901 | 0.00 | 0.00 |
| ATOM | 6702 | HB2  | TYR | X | 445 | 56.776 | 38.102 | 34.105 | 0.00 | 0.00 |
| ATOM | 6703 | HB3  | TYR | X | 445 | 57.573 | 39.171 | 32.937 | 0.00 | 0.00 |
| ATOM | 6704 | CG   | TYR | X | 445 | 58.026 | 39.381 | 34.997 | 0.00 | 0.00 |
| ATOM | 6705 | CD1  | TYR | X | 445 | 59.262 | 39.988 | 34.653 | 0.00 | 0.00 |
| ATOM | 6706 | HD1  | TYR | X | 445 | 59.562 | 40.155 | 33.629 | 0.00 | 0.00 |
| ATOM | 6707 | CE1  | TYR | X | 445 | 60.076 | 40.532 | 35.602 | 0.00 | 0.00 |
| ATOM | 6708 | HE1  | TYR | X | 445 | 61.021 | 40.981 | 35.336 | 0.00 | 0.00 |
| ATOM | 6709 | CZ   | TYR | X | 445 | 59.704 | 40.412 | 37.004 | 0.00 | 0.00 |
| ATOM | 6710 | OH   | TYR | X | 445 | 60.523 | 40.925 | 37.984 | 0.00 | 0.00 |
| ATOM | 6711 | HH   | TYR | X | 445 | 61.234 | 41.389 | 37.536 | 0.00 | 0.00 |
| ATOM | 6712 | CE2  | TYR | X | 445 | 58.485 | 39.820 | 37.336 | 0.00 | 0.00 |
| ATOM | 6713 | HE2  | TYR | X | 445 | 58.147 | 39.801 | 38.362 | 0.00 | 0.00 |
| ATOM | 6714 | CD2  | TYR | X | 445 | 57.628 | 39.336 | 36.374 | 0.00 | 0.00 |
| ATOM | 6715 | HD2  | TYR | X | 445 | 56.696 | 38.929 | 36.739 | 0.00 | 0.00 |
| ATOM | 6716 | C    | TYR | X | 445 | 55.310 | 40.395 | 32.474 | 0.00 | 0.00 |
| ATOM | 6717 | O    | TYR | X | 445 | 56.051 | 40.914 | 31.673 | 0.00 | 0.00 |
| ATOM | 6718 | N    | GLU | X | 446 | 53.974 | 40.219 | 32.266 | 0.00 | 0.00 |
| ATOM | 6719 | H    | GLU | X | 446 | 53.436 | 39.900 | 33.059 | 0.00 | 0.00 |
| ATOM | 6720 | CA   | GLU | X | 446 | 53.206 | 40.802 | 31.155 | 0.00 | 0.00 |
| ATOM | 6721 | HA   | GLU | X | 446 | 53.773 | 40.449 | 30.293 | 0.00 | 0.00 |
| ATOM | 6722 | CB   | GLU | X | 446 | 51.799 | 40.184 | 31.145 | 0.00 | 0.00 |
| ATOM | 6723 | HB2  | GLU | X | 446 | 51.187 | 40.659 | 30.379 | 0.00 | 0.00 |
| ATOM | 6724 | HB3  | GLU | X | 446 | 51.845 | 39.151 | 30.799 | 0.00 | 0.00 |
| ATOM | 6725 | CG   | GLU | X | 446 | 51.016 | 40.390 | 32.455 | 0.00 | 0.00 |
| ATOM | 6726 | HG2  | GLU | X | 446 | 51.441 | 39.846 | 33.299 | 0.00 | 0.00 |
| ATOM | 6727 | HG3  | GLU | X | 446 | 51.023 | 41.463 | 32.644 | 0.00 | 0.00 |
| ATOM | 6728 | CD   | GLU | X | 446 | 49.564 | 40.085 | 32.339 | 0.00 | 0.00 |
| ATOM | 6729 | OE1  | GLU | X | 446 | 48.813 | 41.050 | 32.061 | 0.00 | 0.00 |
| ATOM | 6730 | OE2  | GLU | X | 446 | 49.268 | 38.877 | 32.372 | 0.00 | 0.00 |
| ATOM | 6731 | C    | GLU | X | 446 | 53.216 | 42.376 | 31.060 | 0.00 | 0.00 |
| ATOM | 6732 | O    | GLU | X | 446 | 53.439 | 42.963 | 29.971 | 0.00 | 0.00 |
| ATOM | 6733 | N    | ILE | X | 447 | 52.990 | 43.054 | 32.220 | 0.00 | 0.00 |
| ATOM | 6734 | H    | ILE | X | 447 | 53.074 | 42.471 | 33.040 | 0.00 | 0.00 |
| ATOM | 6735 | CA   | ILE | X | 447 | 52.572 | 44.472 | 32.351 | 0.00 | 0.00 |
| ATOM | 6736 | HA   | ILE | X | 447 | 51.654 | 44.554 | 31.770 | 0.00 | 0.00 |
| ATOM | 6737 | CB   | ILE | X | 447 | 52.125 | 44.851 | 33.844 | 0.00 | 0.00 |
| ATOM | 6738 | HB   | ILE | X | 447 | 51.729 | 45.857 | 33.985 | 0.00 | 0.00 |
| ATOM | 6739 | CG2  | ILE | X | 447 | 51.057 | 43.850 | 34.358 | 0.00 | 0.00 |
| ATOM | 6740 | HG21 | ILE | X | 447 | 50.180 | 43.887 | 33.712 | 0.00 | 0.00 |
| ATOM | 6741 | HG22 | ILE | X | 447 | 51.442 | 42.831 | 34.339 | 0.00 | 0.00 |
| ATOM | 6742 | HG23 | ILE | X | 447 | 50.704 | 44.023 | 35.375 | 0.00 | 0.00 |
| ATOM | 6743 | CG1  | ILE | X | 447 | 53.237 | 44.870 | 34.885 | 0.00 | 0.00 |
| ATOM | 6744 | HG12 | ILE | X | 447 | 53.452 | 43.824 | 35.107 | 0.00 | 0.00 |
| ATOM | 6745 | HG13 | ILE | X | 447 | 54.135 | 45.313 | 34.454 | 0.00 | 0.00 |
| ATOM | 6746 | CD1  | ILE | X | 447 | 52.966 | 45.506 | 36.284 | 0.00 | 0.00 |
| ATOM | 6747 | HD11 | ILE | X | 447 | 52.185 | 45.056 | 36.896 | 0.00 | 0.00 |
| ATOM | 6748 | HD12 | ILE | X | 447 | 53.862 | 45.463 | 36.904 | 0.00 | 0.00 |
| ATOM | 6749 | HD13 | ILE | X | 447 | 52.604 | 46.523 | 36.134 | 0.00 | 0.00 |
| ATOM | 6750 | C    | ILE | X | 447 | 53.566 | 45.420 | 31.821 | 0.00 | 0.00 |
| ATOM | 6751 | O    | ILE | X | 447 | 53.256 | 46.540 | 31.481 | 0.00 | 0.00 |
| ATOM | 6752 | N    | GLU | X | 448 | 54.809 | 45.032 | 31.750 | 0.00 | 0.00 |
| ATOM | 6753 | H    | GLU | X | 448 | 55.125 | 44.162 | 32.154 | 0.00 | 0.00 |
| ATOM | 6754 | CA   | GLU | X | 448 | 55.814 | 45.873 | 31.025 | 0.00 | 0.00 |
| ATOM | 6755 | HA   | GLU | X | 448 | 55.954 | 46.802 | 31.578 | 0.00 | 0.00 |
| ATOM | 6756 | CB   | GLU | X | 448 | 57.224 | 45.158 | 30.962 | 0.00 | 0.00 |
| ATOM | 6757 | HB2  | GLU | X | 448 | 57.103 | 44.199 | 30.458 | 0.00 | 0.00 |

|      |      |      |     |   |     |        |        |        |      |      |
|------|------|------|-----|---|-----|--------|--------|--------|------|------|
| ATOM | 6758 | HB3  | GLU | X | 448 | 57.904 | 45.839 | 30.449 | 0.00 | 0.00 |
| ATOM | 6759 | CG   | GLU | X | 448 | 57.680 | 44.980 | 32.397 | 0.00 | 0.00 |
| ATOM | 6760 | HG2  | GLU | X | 448 | 57.687 | 45.954 | 32.886 | 0.00 | 0.00 |
| ATOM | 6761 | HG3  | GLU | X | 448 | 56.972 | 44.276 | 32.835 | 0.00 | 0.00 |
| ATOM | 6762 | CD   | GLU | X | 448 | 59.122 | 44.452 | 32.512 | 0.00 | 0.00 |
| ATOM | 6763 | OE1  | GLU | X | 448 | 59.340 | 43.194 | 32.340 | 0.00 | 0.00 |
| ATOM | 6764 | OE2  | GLU | X | 448 | 60.057 | 45.252 | 32.852 | 0.00 | 0.00 |
| ATOM | 6765 | C    | GLU | X | 448 | 55.415 | 46.201 | 29.573 | 0.00 | 0.00 |
| ATOM | 6766 | O    | GLU | X | 448 | 55.486 | 47.374 | 29.114 | 0.00 | 0.00 |
| ATOM | 6767 | N    | PHE | X | 449 | 54.999 | 45.209 | 28.762 | 0.00 | 0.00 |
| ATOM | 6768 | H    | PHE | X | 449 | 54.984 | 44.269 | 29.131 | 0.00 | 0.00 |
| ATOM | 6769 | CA   | PHE | X | 449 | 54.571 | 45.289 | 27.379 | 0.00 | 0.00 |
| ATOM | 6770 | HA   | PHE | X | 449 | 55.345 | 45.866 | 26.872 | 0.00 | 0.00 |
| ATOM | 6771 | CB   | PHE | X | 449 | 54.514 | 43.869 | 26.787 | 0.00 | 0.00 |
| ATOM | 6772 | HB2  | PHE | X | 449 | 53.829 | 43.339 | 27.449 | 0.00 | 0.00 |
| ATOM | 6773 | HB3  | PHE | X | 449 | 54.146 | 43.969 | 25.766 | 0.00 | 0.00 |
| ATOM | 6774 | CG   | PHE | X | 449 | 55.868 | 43.238 | 26.664 | 0.00 | 0.00 |
| ATOM | 6775 | CD1  | PHE | X | 449 | 56.539 | 42.684 | 27.748 | 0.00 | 0.00 |
| ATOM | 6776 | HD1  | PHE | X | 449 | 56.235 | 42.730 | 28.783 | 0.00 | 0.00 |
| ATOM | 6777 | CE1  | PHE | X | 449 | 57.752 | 42.111 | 27.608 | 0.00 | 0.00 |
| ATOM | 6778 | HE1  | PHE | X | 449 | 58.134 | 41.694 | 28.527 | 0.00 | 0.00 |
| ATOM | 6779 | CZ   | PHE | X | 449 | 58.505 | 42.198 | 26.392 | 0.00 | 0.00 |
| ATOM | 6780 | HZ   | PHE | X | 449 | 59.529 | 41.861 | 26.338 | 0.00 | 0.00 |
| ATOM | 6781 | CE2  | PHE | X | 449 | 57.915 | 42.924 | 25.323 | 0.00 | 0.00 |
| ATOM | 6782 | HE2  | PHE | X | 449 | 58.449 | 43.156 | 24.413 | 0.00 | 0.00 |
| ATOM | 6783 | CD2  | PHE | X | 449 | 56.559 | 43.287 | 25.390 | 0.00 | 0.00 |
| ATOM | 6784 | HD2  | PHE | X | 449 | 56.105 | 43.818 | 24.566 | 0.00 | 0.00 |
| ATOM | 6785 | C    | PHE | X | 449 | 53.241 | 46.010 | 27.138 | 0.00 | 0.00 |
| ATOM | 6786 | O    | PHE | X | 449 | 52.920 | 46.482 | 26.020 | 0.00 | 0.00 |
| ATOM | 6787 | N    | ILE | X | 450 | 52.454 | 46.118 | 28.164 | 0.00 | 0.00 |
| ATOM | 6788 | H    | ILE | X | 450 | 52.932 | 45.830 | 29.006 | 0.00 | 0.00 |
| ATOM | 6789 | CA   | ILE | X | 450 | 51.118 | 46.796 | 28.181 | 0.00 | 0.00 |
| ATOM | 6790 | HA   | ILE | X | 450 | 50.731 | 46.754 | 27.163 | 0.00 | 0.00 |
| ATOM | 6791 | CB   | ILE | X | 450 | 50.166 | 46.079 | 29.197 | 0.00 | 0.00 |
| ATOM | 6792 | HB   | ILE | X | 450 | 50.592 | 46.156 | 30.198 | 0.00 | 0.00 |
| ATOM | 6793 | CG2  | ILE | X | 450 | 48.807 | 46.803 | 29.232 | 0.00 | 0.00 |
| ATOM | 6794 | HG21 | ILE | X | 450 | 48.373 | 46.551 | 28.264 | 0.00 | 0.00 |
| ATOM | 6795 | HG22 | ILE | X | 450 | 48.208 | 46.477 | 30.082 | 0.00 | 0.00 |
| ATOM | 6796 | HG23 | ILE | X | 450 | 48.871 | 47.885 | 29.350 | 0.00 | 0.00 |
| ATOM | 6797 | CG1  | ILE | X | 450 | 50.088 | 44.546 | 28.876 | 0.00 | 0.00 |
| ATOM | 6798 | HG12 | ILE | X | 450 | 49.535 | 44.441 | 27.942 | 0.00 | 0.00 |
| ATOM | 6799 | HG13 | ILE | X | 450 | 51.057 | 44.083 | 28.690 | 0.00 | 0.00 |
| ATOM | 6800 | CD1  | ILE | X | 450 | 49.449 | 43.559 | 29.900 | 0.00 | 0.00 |
| ATOM | 6801 | HD11 | ILE | X | 450 | 49.393 | 42.548 | 29.498 | 0.00 | 0.00 |
| ATOM | 6802 | HD12 | ILE | X | 450 | 49.985 | 43.667 | 30.843 | 0.00 | 0.00 |
| ATOM | 6803 | HD13 | ILE | X | 450 | 48.465 | 43.976 | 30.115 | 0.00 | 0.00 |
| ATOM | 6804 | C    | ILE | X | 450 | 51.146 | 48.231 | 28.564 | 0.00 | 0.00 |
| ATOM | 6805 | O    | ILE | X | 450 | 50.513 | 48.994 | 27.870 | 0.00 | 0.00 |
| ATOM | 6806 | N    | PHE | X | 451 | 51.894 | 48.587 | 29.571 | 0.00 | 0.00 |
| ATOM | 6807 | H    | PHE | X | 451 | 52.349 | 47.904 | 30.160 | 0.00 | 0.00 |
| ATOM | 6808 | CA   | PHE | X | 451 | 52.350 | 49.993 | 29.675 | 0.00 | 0.00 |
| ATOM | 6809 | HA   | PHE | X | 451 | 51.438 | 50.579 | 29.566 | 0.00 | 0.00 |
| ATOM | 6810 | CB   | PHE | X | 451 | 52.941 | 50.156 | 31.045 | 0.00 | 0.00 |
| ATOM | 6811 | HB2  | PHE | X | 451 | 53.537 | 49.276 | 31.286 | 0.00 | 0.00 |
| ATOM | 6812 | HB3  | PHE | X | 451 | 53.566 | 51.048 | 31.090 | 0.00 | 0.00 |
| ATOM | 6813 | CG   | PHE | X | 451 | 51.887 | 50.463 | 32.087 | 0.00 | 0.00 |
| ATOM | 6814 | CD1  | PHE | X | 451 | 51.122 | 49.378 | 32.599 | 0.00 | 0.00 |
| ATOM | 6815 | HD1  | PHE | X | 451 | 51.311 | 48.379 | 32.233 | 0.00 | 0.00 |
| ATOM | 6816 | CE1  | PHE | X | 451 | 50.075 | 49.662 | 33.483 | 0.00 | 0.00 |
| ATOM | 6817 | HE1  | PHE | X | 451 | 49.511 | 48.841 | 33.899 | 0.00 | 0.00 |
| ATOM | 6818 | CZ   | PHE | X | 451 | 49.736 | 50.974 | 33.854 | 0.00 | 0.00 |
| ATOM | 6819 | HZ   | PHE | X | 451 | 48.948 | 51.110 | 34.580 | 0.00 | 0.00 |
| ATOM | 6820 | CE2  | PHE | X | 451 | 50.514 | 52.006 | 33.299 | 0.00 | 0.00 |
| ATOM | 6821 | HE2  | PHE | X | 451 | 50.400 | 53.043 | 33.577 | 0.00 | 0.00 |
| ATOM | 6822 | CD2  | PHE | X | 451 | 51.546 | 51.793 | 32.427 | 0.00 | 0.00 |
| ATOM | 6823 | HD2  | PHE | X | 451 | 52.191 | 52.574 | 32.054 | 0.00 | 0.00 |
| ATOM | 6824 | C    | PHE | X | 451 | 53.372 | 50.493 | 28.623 | 0.00 | 0.00 |
| ATOM | 6825 | O    | PHE | X | 451 | 53.620 | 51.701 | 28.465 | 0.00 | 0.00 |
| ATOM | 6826 | N    | GLY | X | 452 | 54.017 | 49.550 | 27.899 | 0.00 | 0.00 |
| ATOM | 6827 | H    | GLY | X | 452 | 53.982 | 48.568 | 28.134 | 0.00 | 0.00 |

|      |      |      |     |   |     |        |        |        |      |      |
|------|------|------|-----|---|-----|--------|--------|--------|------|------|
| ATOM | 6828 | CA   | GLY | X | 452 | 54.707 | 49.871 | 26.677 | 0.00 | 0.00 |
| ATOM | 6829 | HA2  | GLY | X | 452 | 54.727 | 49.079 | 25.970 | 0.00 | 0.00 |
| ATOM | 6830 | HA3  | GLY | X | 452 | 54.230 | 50.751 | 26.244 | 0.00 | 0.00 |
| ATOM | 6831 | C    | GLY | X | 452 | 56.146 | 50.334 | 26.978 | 0.00 | 0.00 |
| ATOM | 6832 | O    | GLY | X | 452 | 56.836 | 50.761 | 26.033 | 0.00 | 0.00 |
| ATOM | 6833 | N    | ILE | X | 453 | 56.708 | 49.982 | 28.111 | 0.00 | 0.00 |
| ATOM | 6834 | H    | ILE | X | 453 | 56.039 | 49.519 | 28.709 | 0.00 | 0.00 |
| ATOM | 6835 | CA   | ILE | X | 453 | 58.009 | 50.142 | 28.679 | 0.00 | 0.00 |
| ATOM | 6836 | HA   | ILE | X | 453 | 57.971 | 51.219 | 28.848 | 0.00 | 0.00 |
| ATOM | 6837 | CB   | ILE | X | 453 | 58.069 | 49.456 | 30.055 | 0.00 | 0.00 |
| ATOM | 6838 | HB   | ILE | X | 453 | 58.037 | 48.368 | 29.985 | 0.00 | 0.00 |
| ATOM | 6839 | CG2  | ILE | X | 453 | 59.454 | 49.724 | 30.713 | 0.00 | 0.00 |
| ATOM | 6840 | HG21 | ILE | X | 453 | 59.272 | 49.255 | 31.680 | 0.00 | 0.00 |
| ATOM | 6841 | HG22 | ILE | X | 453 | 60.278 | 49.125 | 30.325 | 0.00 | 0.00 |
| ATOM | 6842 | HG23 | ILE | X | 453 | 59.604 | 50.804 | 30.709 | 0.00 | 0.00 |
| ATOM | 6843 | CG1  | ILE | X | 453 | 56.920 | 49.974 | 30.934 | 0.00 | 0.00 |
| ATOM | 6844 | HG12 | ILE | X | 453 | 55.945 | 49.849 | 30.462 | 0.00 | 0.00 |
| ATOM | 6845 | HG13 | ILE | X | 453 | 56.660 | 49.296 | 31.747 | 0.00 | 0.00 |
| ATOM | 6846 | CD1  | ILE | X | 453 | 56.844 | 51.436 | 31.433 | 0.00 | 0.00 |
| ATOM | 6847 | HD11 | ILE | X | 453 | 57.601 | 51.669 | 32.182 | 0.00 | 0.00 |
| ATOM | 6848 | HD12 | ILE | X | 453 | 56.896 | 52.080 | 30.555 | 0.00 | 0.00 |
| ATOM | 6849 | HD13 | ILE | X | 453 | 55.893 | 51.459 | 31.965 | 0.00 | 0.00 |
| ATOM | 6850 | C    | ILE | X | 453 | 59.205 | 49.827 | 27.782 | 0.00 | 0.00 |
| ATOM | 6851 | O    | ILE | X | 453 | 60.127 | 50.660 | 27.870 | 0.00 | 0.00 |
| ATOM | 6852 | N    | PRO | X | 454 | 59.076 | 48.905 | 26.794 | 0.00 | 0.00 |
| ATOM | 6853 | CD   | PRO | X | 454 | 58.174 | 47.810 | 26.549 | 0.00 | 0.00 |
| ATOM | 6854 | HD2  | PRO | X | 454 | 57.357 | 48.154 | 25.915 | 0.00 | 0.00 |
| ATOM | 6855 | HD3  | PRO | X | 454 | 57.754 | 47.458 | 27.491 | 0.00 | 0.00 |
| ATOM | 6856 | CG   | PRO | X | 454 | 59.031 | 46.641 | 25.909 | 0.00 | 0.00 |
| ATOM | 6857 | HG2  | PRO | X | 454 | 58.409 | 45.966 | 25.320 | 0.00 | 0.00 |
| ATOM | 6858 | HG3  | PRO | X | 454 | 59.672 | 46.093 | 26.599 | 0.00 | 0.00 |
| ATOM | 6859 | CB   | PRO | X | 454 | 60.017 | 47.443 | 24.978 | 0.00 | 0.00 |
| ATOM | 6860 | HB2  | PRO | X | 454 | 59.553 | 47.784 | 24.052 | 0.00 | 0.00 |
| ATOM | 6861 | HB3  | PRO | X | 454 | 60.919 | 46.865 | 24.773 | 0.00 | 0.00 |
| ATOM | 6862 | CA   | PRO | X | 454 | 60.264 | 48.625 | 25.958 | 0.00 | 0.00 |
| ATOM | 6863 | HA   | PRO | X | 454 | 61.086 | 48.360 | 26.622 | 0.00 | 0.00 |
| ATOM | 6864 | C    | PRO | X | 454 | 60.733 | 49.782 | 25.112 | 0.00 | 0.00 |
| ATOM | 6865 | O    | PRO | X | 454 | 61.881 | 49.800 | 24.657 | 0.00 | 0.00 |
| ATOM | 6866 | N    | LEU | X | 455 | 59.943 | 50.834 | 24.966 | 0.00 | 0.00 |
| ATOM | 6867 | H    | LEU | X | 455 | 59.067 | 50.957 | 25.455 | 0.00 | 0.00 |
| ATOM | 6868 | CA   | LEU | X | 455 | 60.247 | 52.116 | 24.234 | 0.00 | 0.00 |
| ATOM | 6869 | HA   | LEU | X | 455 | 60.826 | 51.869 | 23.345 | 0.00 | 0.00 |
| ATOM | 6870 | CB   | LEU | X | 455 | 58.982 | 52.844 | 23.849 | 0.00 | 0.00 |
| ATOM | 6871 | HB2  | LEU | X | 455 | 58.600 | 53.259 | 24.782 | 0.00 | 0.00 |
| ATOM | 6872 | HB3  | LEU | X | 455 | 59.289 | 53.667 | 23.204 | 0.00 | 0.00 |
| ATOM | 6873 | CG   | LEU | X | 455 | 57.872 | 52.004 | 23.184 | 0.00 | 0.00 |
| ATOM | 6874 | HG   | LEU | X | 455 | 57.531 | 51.173 | 23.802 | 0.00 | 0.00 |
| ATOM | 6875 | CD1  | LEU | X | 455 | 56.670 | 52.861 | 22.794 | 0.00 | 0.00 |
| ATOM | 6876 | HD11 | LEU | X | 455 | 55.915 | 52.222 | 22.336 | 0.00 | 0.00 |
| ATOM | 6877 | HD12 | LEU | X | 455 | 56.319 | 53.410 | 23.668 | 0.00 | 0.00 |
| ATOM | 6878 | HD13 | LEU | X | 455 | 56.951 | 53.619 | 22.062 | 0.00 | 0.00 |
| ATOM | 6879 | CD2  | LEU | X | 455 | 58.412 | 51.332 | 21.918 | 0.00 | 0.00 |
| ATOM | 6880 | HD21 | LEU | X | 455 | 59.337 | 50.793 | 22.129 | 0.00 | 0.00 |
| ATOM | 6881 | HD22 | LEU | X | 455 | 57.658 | 50.596 | 21.640 | 0.00 | 0.00 |
| ATOM | 6882 | HD23 | LEU | X | 455 | 58.631 | 52.152 | 21.235 | 0.00 | 0.00 |
| ATOM | 6883 | C    | LEU | X | 455 | 61.178 | 53.040 | 24.968 | 0.00 | 0.00 |
| ATOM | 6884 | O    | LEU | X | 455 | 61.854 | 53.867 | 24.278 | 0.00 | 0.00 |
| ATOM | 6885 | N    | ASP | X | 456 | 61.279 | 52.974 | 26.288 | 0.00 | 0.00 |
| ATOM | 6886 | H    | ASP | X | 456 | 60.837 | 52.169 | 26.709 | 0.00 | 0.00 |
| ATOM | 6887 | CA   | ASP | X | 456 | 62.071 | 53.872 | 27.177 | 0.00 | 0.00 |
| ATOM | 6888 | HA   | ASP | X | 456 | 61.790 | 54.878 | 26.867 | 0.00 | 0.00 |
| ATOM | 6889 | CB   | ASP | X | 456 | 61.630 | 53.629 | 28.577 | 0.00 | 0.00 |
| ATOM | 6890 | HB2  | ASP | X | 456 | 60.556 | 53.816 | 28.576 | 0.00 | 0.00 |
| ATOM | 6891 | HB3  | ASP | X | 456 | 61.780 | 52.613 | 28.943 | 0.00 | 0.00 |
| ATOM | 6892 | CG   | ASP | X | 456 | 62.240 | 54.680 | 29.510 | 0.00 | 0.00 |
| ATOM | 6893 | OD1  | ASP | X | 456 | 61.604 | 55.690 | 29.920 | 0.00 | 0.00 |
| ATOM | 6894 | OD2  | ASP | X | 456 | 63.469 | 54.539 | 29.873 | 0.00 | 0.00 |
| ATOM | 6895 | C    | ASP | X | 456 | 63.639 | 53.653 | 26.932 | 0.00 | 0.00 |
| ATOM | 6896 | O    | ASP | X | 456 | 64.022 | 52.504 | 26.822 | 0.00 | 0.00 |
| ATOM | 6897 | N    | PRO | X | 457 | 64.544 | 54.671 | 26.977 | 0.00 | 0.00 |

|      |      |      |     |   |     |        |        |        |      |      |
|------|------|------|-----|---|-----|--------|--------|--------|------|------|
| ATOM | 6898 | CD   | PRO | X | 457 | 64.167 | 56.124 | 26.948 | 0.00 | 0.00 |
| ATOM | 6899 | HD2  | PRO | X | 457 | 64.252 | 56.490 | 27.971 | 0.00 | 0.00 |
| ATOM | 6900 | HD3  | PRO | X | 457 | 63.159 | 56.313 | 26.576 | 0.00 | 0.00 |
| ATOM | 6901 | CG   | PRO | X | 457 | 65.167 | 56.782 | 26.084 | 0.00 | 0.00 |
| ATOM | 6902 | HG2  | PRO | X | 457 | 65.279 | 57.836 | 26.339 | 0.00 | 0.00 |
| ATOM | 6903 | HG3  | PRO | X | 457 | 64.865 | 56.565 | 25.059 | 0.00 | 0.00 |
| ATOM | 6904 | CB   | PRO | X | 457 | 66.400 | 55.983 | 26.366 | 0.00 | 0.00 |
| ATOM | 6905 | HB2  | PRO | X | 457 | 66.948 | 56.367 | 27.227 | 0.00 | 0.00 |
| ATOM | 6906 | HB3  | PRO | X | 457 | 67.000 | 55.942 | 25.458 | 0.00 | 0.00 |
| ATOM | 6907 | CA   | PRO | X | 457 | 65.920 | 54.542 | 26.816 | 0.00 | 0.00 |
| ATOM | 6908 | HA   | PRO | X | 457 | 66.037 | 53.926 | 25.925 | 0.00 | 0.00 |
| ATOM | 6909 | C    | PRO | X | 457 | 66.641 | 54.011 | 28.049 | 0.00 | 0.00 |
| ATOM | 6910 | O    | PRO | X | 457 | 67.828 | 53.733 | 27.927 | 0.00 | 0.00 |
| ATOM | 6911 | N    | SER | X | 458 | 66.051 | 53.850 | 29.267 | 0.00 | 0.00 |
| ATOM | 6912 | H    | SER | X | 458 | 65.093 | 54.159 | 29.342 | 0.00 | 0.00 |
| ATOM | 6913 | CA   | SER | X | 458 | 66.600 | 53.088 | 30.441 | 0.00 | 0.00 |
| ATOM | 6914 | HA   | SER | X | 458 | 67.585 | 53.500 | 30.657 | 0.00 | 0.00 |
| ATOM | 6915 | CB   | SER | X | 458 | 65.729 | 53.444 | 31.628 | 0.00 | 0.00 |
| ATOM | 6916 | HB2  | SER | X | 458 | 66.260 | 52.989 | 32.465 | 0.00 | 0.00 |
| ATOM | 6917 | HB3  | SER | X | 458 | 65.658 | 54.532 | 31.653 | 0.00 | 0.00 |
| ATOM | 6918 | OG   | SER | X | 458 | 64.416 | 52.922 | 31.542 | 0.00 | 0.00 |
| ATOM | 6919 | HG   | SER | X | 458 | 64.055 | 53.224 | 30.706 | 0.00 | 0.00 |
| ATOM | 6920 | C    | SER | X | 458 | 66.719 | 51.574 | 30.184 | 0.00 | 0.00 |
| ATOM | 6921 | O    | SER | X | 458 | 67.633 | 50.961 | 30.791 | 0.00 | 0.00 |
| ATOM | 6922 | N    | ARG | X | 459 | 65.900 | 51.027 | 29.299 | 0.00 | 0.00 |
| ATOM | 6923 | H    | ARG | X | 459 | 65.402 | 51.653 | 28.683 | 0.00 | 0.00 |
| ATOM | 6924 | CA   | ARG | X | 459 | 65.701 | 49.571 | 29.111 | 0.00 | 0.00 |
| ATOM | 6925 | HA   | ARG | X | 459 | 66.023 | 49.124 | 30.052 | 0.00 | 0.00 |
| ATOM | 6926 | CB   | ARG | X | 459 | 64.225 | 49.196 | 28.807 | 0.00 | 0.00 |
| ATOM | 6927 | HB2  | ARG | X | 459 | 63.897 | 49.664 | 27.879 | 0.00 | 0.00 |
| ATOM | 6928 | HB3  | ARG | X | 459 | 64.166 | 48.110 | 28.731 | 0.00 | 0.00 |
| ATOM | 6929 | CG   | ARG | X | 459 | 63.217 | 49.576 | 29.891 | 0.00 | 0.00 |
| ATOM | 6930 | HG2  | ARG | X | 459 | 62.839 | 50.594 | 29.806 | 0.00 | 0.00 |
| ATOM | 6931 | HG3  | ARG | X | 459 | 62.312 | 49.014 | 29.661 | 0.00 | 0.00 |
| ATOM | 6932 | CD   | ARG | X | 459 | 63.843 | 49.166 | 31.258 | 0.00 | 0.00 |
| ATOM | 6933 | HD2  | ARG | X | 459 | 64.505 | 48.308 | 31.137 | 0.00 | 0.00 |
| ATOM | 6934 | HD3  | ARG | X | 459 | 64.538 | 49.968 | 31.507 | 0.00 | 0.00 |
| ATOM | 6935 | NE   | ARG | X | 459 | 62.811 | 49.064 | 32.270 | 0.00 | 0.00 |
| ATOM | 6936 | HE   | ARG | X | 459 | 62.669 | 49.856 | 32.881 | 0.00 | 0.00 |
| ATOM | 6937 | CZ   | ARG | X | 459 | 62.010 | 47.994 | 32.496 | 0.00 | 0.00 |
| ATOM | 6938 | NH1  | ARG | X | 459 | 62.123 | 46.897 | 31.822 | 0.00 | 0.00 |
| ATOM | 6939 | HH11 | ARG | X | 459 | 62.961 | 46.811 | 31.265 | 0.00 | 0.00 |
| ATOM | 6940 | HH12 | ARG | X | 459 | 61.578 | 46.117 | 32.162 | 0.00 | 0.00 |
| ATOM | 6941 | NH2  | ARG | X | 459 | 61.035 | 48.034 | 33.396 | 0.00 | 0.00 |
| ATOM | 6942 | HH21 | ARG | X | 459 | 60.672 | 48.907 | 33.750 | 0.00 | 0.00 |
| ATOM | 6943 | HH22 | ARG | X | 459 | 60.418 | 47.239 | 33.305 | 0.00 | 0.00 |
| ATOM | 6944 | C    | ARG | X | 459 | 66.504 | 48.997 | 27.936 | 0.00 | 0.00 |
| ATOM | 6945 | O    | ARG | X | 459 | 66.749 | 49.623 | 26.903 | 0.00 | 0.00 |
| ATOM | 6946 | N    | ASN | X | 460 | 67.001 | 47.785 | 28.094 | 0.00 | 0.00 |
| ATOM | 6947 | H    | ASN | X | 460 | 66.816 | 47.496 | 29.043 | 0.00 | 0.00 |
| ATOM | 6948 | CA   | ASN | X | 460 | 67.449 | 46.759 | 27.166 | 0.00 | 0.00 |
| ATOM | 6949 | HA   | ASN | X | 460 | 67.656 | 47.200 | 26.191 | 0.00 | 0.00 |
| ATOM | 6950 | CB   | ASN | X | 460 | 68.735 | 46.104 | 27.758 | 0.00 | 0.00 |
| ATOM | 6951 | HB2  | ASN | X | 460 | 69.465 | 46.817 | 28.140 | 0.00 | 0.00 |
| ATOM | 6952 | HB3  | ASN | X | 460 | 68.421 | 45.653 | 28.700 | 0.00 | 0.00 |
| ATOM | 6953 | CG   | ASN | X | 460 | 69.429 | 45.047 | 26.846 | 0.00 | 0.00 |
| ATOM | 6954 | OD1  | ASN | X | 460 | 68.978 | 44.505 | 25.825 | 0.00 | 0.00 |
| ATOM | 6955 | ND2  | ASN | X | 460 | 70.529 | 44.545 | 27.364 | 0.00 | 0.00 |
| ATOM | 6956 | HD21 | ASN | X | 460 | 70.876 | 43.712 | 26.909 | 0.00 | 0.00 |
| ATOM | 6957 | HD22 | ASN | X | 460 | 70.927 | 44.819 | 28.251 | 0.00 | 0.00 |
| ATOM | 6958 | C    | ASN | X | 460 | 66.277 | 45.714 | 26.861 | 0.00 | 0.00 |
| ATOM | 6959 | O    | ASN | X | 460 | 65.672 | 45.136 | 27.797 | 0.00 | 0.00 |
| ATOM | 6960 | N    | TYR | X | 461 | 66.079 | 45.440 | 25.589 | 0.00 | 0.00 |
| ATOM | 6961 | H    | TYR | X | 461 | 66.741 | 45.893 | 24.975 | 0.00 | 0.00 |
| ATOM | 6962 | CA   | TYR | X | 461 | 64.907 | 44.770 | 24.915 | 0.00 | 0.00 |
| ATOM | 6963 | HA   | TYR | X | 461 | 64.686 | 43.803 | 25.368 | 0.00 | 0.00 |
| ATOM | 6964 | CB   | TYR | X | 461 | 63.579 | 45.550 | 25.122 | 0.00 | 0.00 |
| ATOM | 6965 | HB2  | TYR | X | 461 | 63.689 | 46.625 | 24.975 | 0.00 | 0.00 |
| ATOM | 6966 | HB3  | TYR | X | 461 | 62.948 | 45.175 | 24.317 | 0.00 | 0.00 |
| ATOM | 6967 | CG   | TYR | X | 461 | 62.844 | 45.260 | 26.402 | 0.00 | 0.00 |

|      |      |      |     |   |     |        |        |        |      |      |
|------|------|------|-----|---|-----|--------|--------|--------|------|------|
| ATOM | 6968 | CD1  | TYR | X | 461 | 62.552 | 46.272 | 27.305 | 0.00 | 0.00 |
| ATOM | 6969 | HD1  | TYR | X | 461 | 62.926 | 47.245 | 27.022 | 0.00 | 0.00 |
| ATOM | 6970 | CE1  | TYR | X | 461 | 61.890 | 46.063 | 28.525 | 0.00 | 0.00 |
| ATOM | 6971 | HE1  | TYR | X | 461 | 61.668 | 46.914 | 29.153 | 0.00 | 0.00 |
| ATOM | 6972 | CZ   | TYR | X | 461 | 61.482 | 44.751 | 28.870 | 0.00 | 0.00 |
| ATOM | 6973 | OH   | TYR | X | 461 | 60.607 | 44.507 | 29.936 | 0.00 | 0.00 |
| ATOM | 6974 | HH   | TYR | X | 461 | 60.309 | 43.632 | 30.196 | 0.00 | 0.00 |
| ATOM | 6975 | CE2  | TYR | X | 461 | 61.625 | 43.741 | 27.903 | 0.00 | 0.00 |
| ATOM | 6976 | HE2  | TYR | X | 461 | 61.258 | 42.755 | 28.148 | 0.00 | 0.00 |
| ATOM | 6977 | CD2  | TYR | X | 461 | 62.282 | 43.961 | 26.694 | 0.00 | 0.00 |
| ATOM | 6978 | HD2  | TYR | X | 461 | 62.530 | 43.125 | 26.057 | 0.00 | 0.00 |
| ATOM | 6979 | C    | TYR | X | 461 | 65.164 | 44.631 | 23.347 | 0.00 | 0.00 |
| ATOM | 6980 | O    | TYR | X | 461 | 65.827 | 45.517 | 22.813 | 0.00 | 0.00 |
| ATOM | 6981 | N    | THR | X | 462 | 64.757 | 43.552 | 22.692 | 0.00 | 0.00 |
| ATOM | 6982 | H    | THR | X | 462 | 64.232 | 42.846 | 23.187 | 0.00 | 0.00 |
| ATOM | 6983 | CA   | THR | X | 462 | 64.984 | 43.346 | 21.229 | 0.00 | 0.00 |
| ATOM | 6984 | HA   | THR | X | 462 | 65.989 | 43.621 | 20.909 | 0.00 | 0.00 |
| ATOM | 6985 | CB   | THR | X | 462 | 64.785 | 41.881 | 20.861 | 0.00 | 0.00 |
| ATOM | 6986 | HB   | THR | X | 462 | 64.804 | 41.801 | 19.774 | 0.00 | 0.00 |
| ATOM | 6987 | CG2  | THR | X | 462 | 65.895 | 40.916 | 21.362 | 0.00 | 0.00 |
| ATOM | 6988 | HG21 | THR | X | 462 | 66.009 | 40.905 | 22.446 | 0.00 | 0.00 |
| ATOM | 6989 | HG22 | THR | X | 462 | 65.554 | 39.941 | 21.014 | 0.00 | 0.00 |
| ATOM | 6990 | HG23 | THR | X | 462 | 66.872 | 41.097 | 20.914 | 0.00 | 0.00 |
| ATOM | 6991 | OG1  | THR | X | 462 | 63.537 | 41.444 | 21.283 | 0.00 | 0.00 |
| ATOM | 6992 | HG1  | THR | X | 462 | 63.515 | 41.451 | 22.243 | 0.00 | 0.00 |
| ATOM | 6993 | C    | THR | X | 462 | 64.069 | 44.220 | 20.447 | 0.00 | 0.00 |
| ATOM | 6994 | O    | THR | X | 462 | 63.028 | 44.638 | 20.983 | 0.00 | 0.00 |
| ATOM | 6995 | N    | ALA | X | 463 | 64.400 | 44.426 | 19.229 | 0.00 | 0.00 |
| ATOM | 6996 | H    | ALA | X | 463 | 65.355 | 44.258 | 18.948 | 0.00 | 0.00 |
| ATOM | 6997 | CA   | ALA | X | 463 | 63.488 | 45.092 | 18.248 | 0.00 | 0.00 |
| ATOM | 6998 | HA   | ALA | X | 463 | 63.381 | 46.127 | 18.572 | 0.00 | 0.00 |
| ATOM | 6999 | CB   | ALA | X | 463 | 64.113 | 45.038 | 16.858 | 0.00 | 0.00 |
| ATOM | 7000 | HB1  | ALA | X | 463 | 65.124 | 45.444 | 16.836 | 0.00 | 0.00 |
| ATOM | 7001 | HB2  | ALA | X | 463 | 64.169 | 44.036 | 16.433 | 0.00 | 0.00 |
| ATOM | 7002 | HB3  | ALA | X | 463 | 63.702 | 45.716 | 16.110 | 0.00 | 0.00 |
| ATOM | 7003 | C    | ALA | X | 463 | 62.112 | 44.425 | 18.204 | 0.00 | 0.00 |
| ATOM | 7004 | O    | ALA | X | 463 | 61.066 | 45.112 | 18.001 | 0.00 | 0.00 |
| ATOM | 7005 | N    | GLU | X | 464 | 62.016 | 43.099 | 18.419 | 0.00 | 0.00 |
| ATOM | 7006 | H    | GLU | X | 464 | 62.896 | 42.635 | 18.246 | 0.00 | 0.00 |
| ATOM | 7007 | CA   | GLU | X | 464 | 60.693 | 42.425 | 18.367 | 0.00 | 0.00 |
| ATOM | 7008 | HA   | GLU | X | 464 | 60.015 | 42.921 | 17.671 | 0.00 | 0.00 |
| ATOM | 7009 | CB   | GLU | X | 464 | 60.683 | 40.976 | 17.877 | 0.00 | 0.00 |
| ATOM | 7010 | HB2  | GLU | X | 464 | 59.680 | 40.548 | 17.883 | 0.00 | 0.00 |
| ATOM | 7011 | HB3  | GLU | X | 464 | 60.841 | 41.155 | 16.814 | 0.00 | 0.00 |
| ATOM | 7012 | CG   | GLU | X | 464 | 61.772 | 40.082 | 18.515 | 0.00 | 0.00 |
| ATOM | 7013 | HG2  | GLU | X | 464 | 62.022 | 40.435 | 19.515 | 0.00 | 0.00 |
| ATOM | 7014 | HG3  | GLU | X | 464 | 61.369 | 39.072 | 18.596 | 0.00 | 0.00 |
| ATOM | 7015 | CD   | GLU | X | 464 | 63.015 | 39.935 | 17.564 | 0.00 | 0.00 |
| ATOM | 7016 | OE1  | GLU | X | 464 | 64.000 | 40.690 | 17.804 | 0.00 | 0.00 |
| ATOM | 7017 | OE2  | GLU | X | 464 | 62.956 | 39.189 | 16.564 | 0.00 | 0.00 |
| ATOM | 7018 | C    | GLU | X | 464 | 59.876 | 42.583 | 19.720 | 0.00 | 0.00 |
| ATOM | 7019 | O    | GLU | X | 464 | 58.619 | 42.743 | 19.685 | 0.00 | 0.00 |
| ATOM | 7020 | N    | GLU | X | 465 | 60.565 | 42.835 | 20.853 | 0.00 | 0.00 |
| ATOM | 7021 | H    | GLU | X | 465 | 61.566 | 42.714 | 20.900 | 0.00 | 0.00 |
| ATOM | 7022 | CA   | GLU | X | 465 | 59.902 | 43.038 | 22.135 | 0.00 | 0.00 |
| ATOM | 7023 | HA   | GLU | X | 465 | 59.169 | 42.245 | 22.276 | 0.00 | 0.00 |
| ATOM | 7024 | CB   | GLU | X | 465 | 60.970 | 42.886 | 23.186 | 0.00 | 0.00 |
| ATOM | 7025 | HB2  | GLU | X | 465 | 61.888 | 43.217 | 22.700 | 0.00 | 0.00 |
| ATOM | 7026 | HB3  | GLU | X | 465 | 60.776 | 43.497 | 24.068 | 0.00 | 0.00 |
| ATOM | 7027 | CG   | GLU | X | 465 | 61.057 | 41.421 | 23.683 | 0.00 | 0.00 |
| ATOM | 7028 | HG2  | GLU | X | 465 | 60.139 | 41.339 | 24.265 | 0.00 | 0.00 |
| ATOM | 7029 | HG3  | GLU | X | 465 | 61.010 | 40.668 | 22.896 | 0.00 | 0.00 |
| ATOM | 7030 | CD   | GLU | X | 465 | 62.377 | 41.136 | 24.469 | 0.00 | 0.00 |
| ATOM | 7031 | OE1  | GLU | X | 465 | 63.460 | 41.425 | 23.924 | 0.00 | 0.00 |
| ATOM | 7032 | OE2  | GLU | X | 465 | 62.285 | 40.748 | 25.645 | 0.00 | 0.00 |
| ATOM | 7033 | C    | GLU | X | 465 | 59.246 | 44.497 | 22.108 | 0.00 | 0.00 |
| ATOM | 7034 | O    | GLU | X | 465 | 58.232 | 44.735 | 22.775 | 0.00 | 0.00 |
| ATOM | 7035 | N    | LYS | X | 466 | 59.761 | 45.359 | 21.275 | 0.00 | 0.00 |
| ATOM | 7036 | H    | LYS | X | 466 | 60.709 | 45.083 | 21.064 | 0.00 | 0.00 |
| ATOM | 7037 | CA   | LYS | X | 466 | 59.187 | 46.727 | 20.951 | 0.00 | 0.00 |

|      |      |      |     |   |     |        |        |        |      |      |
|------|------|------|-----|---|-----|--------|--------|--------|------|------|
| ATOM | 7038 | HA   | LYS | X | 466 | 58.865 | 47.321 | 21.806 | 0.00 | 0.00 |
| ATOM | 7039 | CB   | LYS | X | 466 | 60.273 | 47.498 | 20.304 | 0.00 | 0.00 |
| ATOM | 7040 | HB2  | LYS | X | 466 | 60.756 | 46.822 | 19.598 | 0.00 | 0.00 |
| ATOM | 7041 | HB3  | LYS | X | 466 | 59.857 | 48.357 | 19.778 | 0.00 | 0.00 |
| ATOM | 7042 | CG   | LYS | X | 466 | 61.358 | 47.884 | 21.370 | 0.00 | 0.00 |
| ATOM | 7043 | HG2  | LYS | X | 466 | 60.923 | 48.651 | 22.010 | 0.00 | 0.00 |
| ATOM | 7044 | HG3  | LYS | X | 466 | 61.628 | 47.070 | 22.043 | 0.00 | 0.00 |
| ATOM | 7045 | CD   | LYS | X | 466 | 62.609 | 48.368 | 20.631 | 0.00 | 0.00 |
| ATOM | 7046 | HD2  | LYS | X | 466 | 63.233 | 47.575 | 20.220 | 0.00 | 0.00 |
| ATOM | 7047 | HD3  | LYS | X | 466 | 62.416 | 49.171 | 19.920 | 0.00 | 0.00 |
| ATOM | 7048 | CE   | LYS | X | 466 | 63.364 | 49.005 | 21.767 | 0.00 | 0.00 |
| ATOM | 7049 | HE2  | LYS | X | 466 | 62.749 | 49.825 | 22.139 | 0.00 | 0.00 |
| ATOM | 7050 | HE3  | LYS | X | 466 | 63.582 | 48.313 | 22.580 | 0.00 | 0.00 |
| ATOM | 7051 | NZ   | LYS | X | 466 | 64.708 | 49.470 | 21.370 | 0.00 | 0.00 |
| ATOM | 7052 | HZ1  | LYS | X | 466 | 64.758 | 50.232 | 20.709 | 0.00 | 0.00 |
| ATOM | 7053 | HZ2  | LYS | X | 466 | 65.086 | 49.730 | 22.270 | 0.00 | 0.00 |
| ATOM | 7054 | HZ3  | LYS | X | 466 | 65.375 | 48.794 | 21.027 | 0.00 | 0.00 |
| ATOM | 7055 | C    | LYS | X | 466 | 57.910 | 46.624 | 20.120 | 0.00 | 0.00 |
| ATOM | 7056 | O    | LYS | X | 466 | 56.833 | 47.238 | 20.404 | 0.00 | 0.00 |
| ATOM | 7057 | N    | ILE | X | 467 | 58.020 | 45.942 | 18.961 | 0.00 | 0.00 |
| ATOM | 7058 | H    | ILE | X | 467 | 58.930 | 45.590 | 18.698 | 0.00 | 0.00 |
| ATOM | 7059 | CA   | ILE | X | 467 | 56.848 | 45.556 | 18.092 | 0.00 | 0.00 |
| ATOM | 7060 | HA   | ILE | X | 467 | 56.513 | 46.491 | 17.644 | 0.00 | 0.00 |
| ATOM | 7061 | CB   | ILE | X | 467 | 57.260 | 44.725 | 16.884 | 0.00 | 0.00 |
| ATOM | 7062 | HB   | ILE | X | 467 | 57.833 | 43.869 | 17.240 | 0.00 | 0.00 |
| ATOM | 7063 | CG2  | ILE | X | 467 | 56.048 | 44.202 | 16.063 | 0.00 | 0.00 |
| ATOM | 7064 | HG21 | ILE | X | 467 | 55.474 | 45.097 | 15.822 | 0.00 | 0.00 |
| ATOM | 7065 | HG22 | ILE | X | 467 | 56.306 | 43.556 | 15.224 | 0.00 | 0.00 |
| ATOM | 7066 | HG23 | ILE | X | 467 | 55.513 | 43.603 | 16.800 | 0.00 | 0.00 |
| ATOM | 7067 | CG1  | ILE | X | 467 | 58.219 | 45.585 | 16.104 | 0.00 | 0.00 |
| ATOM | 7068 | HG12 | ILE | X | 467 | 57.654 | 46.362 | 15.590 | 0.00 | 0.00 |
| ATOM | 7069 | HG13 | ILE | X | 467 | 58.794 | 46.234 | 16.765 | 0.00 | 0.00 |
| ATOM | 7070 | CD1  | ILE | X | 467 | 59.104 | 44.818 | 15.187 | 0.00 | 0.00 |
| ATOM | 7071 | HD11 | ILE | X | 467 | 58.525 | 44.037 | 14.694 | 0.00 | 0.00 |
| ATOM | 7072 | HD12 | ILE | X | 467 | 59.560 | 45.532 | 14.502 | 0.00 | 0.00 |
| ATOM | 7073 | HD13 | ILE | X | 467 | 59.902 | 44.232 | 15.643 | 0.00 | 0.00 |
| ATOM | 7074 | C    | ILE | X | 467 | 55.678 | 44.959 | 18.979 | 0.00 | 0.00 |
| ATOM | 7075 | O    | ILE | X | 467 | 54.484 | 45.317 | 18.878 | 0.00 | 0.00 |
| ATOM | 7076 | N    | PHE | X | 468 | 56.001 | 43.972 | 19.847 | 0.00 | 0.00 |
| ATOM | 7077 | H    | PHE | X | 468 | 56.950 | 43.631 | 19.909 | 0.00 | 0.00 |
| ATOM | 7078 | CA   | PHE | X | 468 | 55.099 | 43.226 | 20.731 | 0.00 | 0.00 |
| ATOM | 7079 | HA   | PHE | X | 468 | 54.372 | 42.744 | 20.077 | 0.00 | 0.00 |
| ATOM | 7080 | CB   | PHE | X | 468 | 55.874 | 42.116 | 21.330 | 0.00 | 0.00 |
| ATOM | 7081 | HB2  | PHE | X | 468 | 56.117 | 41.365 | 20.579 | 0.00 | 0.00 |
| ATOM | 7082 | HB3  | PHE | X | 468 | 56.861 | 42.437 | 21.665 | 0.00 | 0.00 |
| ATOM | 7083 | CG   | PHE | X | 468 | 55.184 | 41.328 | 22.389 | 0.00 | 0.00 |
| ATOM | 7084 | CD1  | PHE | X | 468 | 53.860 | 40.891 | 22.193 | 0.00 | 0.00 |
| ATOM | 7085 | HD1  | PHE | X | 468 | 53.249 | 41.295 | 21.400 | 0.00 | 0.00 |
| ATOM | 7086 | CE1  | PHE | X | 468 | 53.223 | 40.073 | 23.181 | 0.00 | 0.00 |
| ATOM | 7087 | HE1  | PHE | X | 468 | 52.239 | 39.725 | 22.903 | 0.00 | 0.00 |
| ATOM | 7088 | CZ   | PHE | X | 468 | 53.956 | 39.500 | 24.237 | 0.00 | 0.00 |
| ATOM | 7089 | HZ   | PHE | X | 468 | 53.543 | 38.752 | 24.898 | 0.00 | 0.00 |
| ATOM | 7090 | CE2  | PHE | X | 468 | 55.301 | 39.903 | 24.442 | 0.00 | 0.00 |
| ATOM | 7091 | HE2  | PHE | X | 468 | 55.753 | 39.448 | 25.311 | 0.00 | 0.00 |
| ATOM | 7092 | CD2  | PHE | X | 468 | 55.854 | 40.808 | 23.518 | 0.00 | 0.00 |
| ATOM | 7093 | HD2  | PHE | X | 468 | 56.912 | 41.028 | 23.501 | 0.00 | 0.00 |
| ATOM | 7094 | C    | PHE | X | 468 | 54.448 | 44.138 | 21.824 | 0.00 | 0.00 |
| ATOM | 7095 | O    | PHE | X | 468 | 53.244 | 43.972 | 21.941 | 0.00 | 0.00 |
| ATOM | 7096 | N    | ALA | X | 469 | 55.302 | 45.054 | 22.337 | 0.00 | 0.00 |
| ATOM | 7097 | H    | ALA | X | 469 | 56.263 | 45.194 | 22.058 | 0.00 | 0.00 |
| ATOM | 7098 | CA   | ALA | X | 469 | 54.704 | 46.094 | 23.254 | 0.00 | 0.00 |
| ATOM | 7099 | HA   | ALA | X | 469 | 54.268 | 45.644 | 24.146 | 0.00 | 0.00 |
| ATOM | 7100 | CB   | ALA | X | 469 | 55.764 | 47.023 | 23.782 | 0.00 | 0.00 |
| ATOM | 7101 | HB1  | ALA | X | 469 | 56.568 | 46.492 | 24.292 | 0.00 | 0.00 |
| ATOM | 7102 | HB2  | ALA | X | 469 | 56.278 | 47.478 | 22.936 | 0.00 | 0.00 |
| ATOM | 7103 | HB3  | ALA | X | 469 | 55.412 | 47.732 | 24.531 | 0.00 | 0.00 |
| ATOM | 7104 | C    | ALA | X | 469 | 53.619 | 46.852 | 22.499 | 0.00 | 0.00 |
| ATOM | 7105 | O    | ALA | X | 469 | 52.509 | 47.014 | 23.031 | 0.00 | 0.00 |
| ATOM | 7106 | N    | GLN | X | 470 | 53.896 | 47.248 | 21.300 | 0.00 | 0.00 |
| ATOM | 7107 | H    | GLN | X | 470 | 54.768 | 46.941 | 20.892 | 0.00 | 0.00 |



|      |      |      |     |   |     |        |        |        |      |      |
|------|------|------|-----|---|-----|--------|--------|--------|------|------|
| ATOM | 7108 | CA   | GLN | X | 470 | 53.033 | 48.116 | 20.463 | 0.00 | 0.00 |
| ATOM | 7109 | HA   | GLN | X | 470 | 52.639 | 48.857 | 21.158 | 0.00 | 0.00 |
| ATOM | 7110 | CB   | GLN | X | 470 | 53.854 | 48.684 | 19.327 | 0.00 | 0.00 |
| ATOM | 7111 | HB2  | GLN | X | 470 | 54.345 | 47.892 | 18.763 | 0.00 | 0.00 |
| ATOM | 7112 | HB3  | GLN | X | 470 | 53.141 | 49.150 | 18.647 | 0.00 | 0.00 |
| ATOM | 7113 | CG   | GLN | X | 470 | 54.851 | 49.847 | 19.687 | 0.00 | 0.00 |
| ATOM | 7114 | HG2  | GLN | X | 470 | 54.351 | 50.708 | 20.131 | 0.00 | 0.00 |
| ATOM | 7115 | HG3  | GLN | X | 470 | 55.532 | 49.502 | 20.465 | 0.00 | 0.00 |
| ATOM | 7116 | CD   | GLN | X | 470 | 55.666 | 50.363 | 18.529 | 0.00 | 0.00 |
| ATOM | 7117 | OE1  | GLN | X | 470 | 56.863 | 50.722 | 18.584 | 0.00 | 0.00 |
| ATOM | 7118 | NE2  | GLN | X | 470 | 55.154 | 50.483 | 17.362 | 0.00 | 0.00 |
| ATOM | 7119 | HE21 | GLN | X | 470 | 55.695 | 51.114 | 16.788 | 0.00 | 0.00 |
| ATOM | 7120 | HE22 | GLN | X | 470 | 54.175 | 50.311 | 17.181 | 0.00 | 0.00 |
| ATOM | 7121 | C    | GLN | X | 470 | 51.811 | 47.264 | 20.014 | 0.00 | 0.00 |
| ATOM | 7122 | O    | GLN | X | 470 | 50.702 | 47.869 | 19.976 | 0.00 | 0.00 |
| ATOM | 7123 | N    | ARG | X | 471 | 51.875 | 45.945 | 20.048 | 0.00 | 0.00 |
| ATOM | 7124 | H    | ARG | X | 471 | 52.772 | 45.495 | 20.161 | 0.00 | 0.00 |
| ATOM | 7125 | CA   | ARG | X | 471 | 50.732 | 45.115 | 19.868 | 0.00 | 0.00 |
| ATOM | 7126 | HA   | ARG | X | 471 | 50.141 | 45.559 | 19.066 | 0.00 | 0.00 |
| ATOM | 7127 | CB   | ARG | X | 471 | 51.004 | 43.680 | 19.309 | 0.00 | 0.00 |
| ATOM | 7128 | HB2  | ARG | X | 471 | 51.864 | 43.307 | 19.865 | 0.00 | 0.00 |
| ATOM | 7129 | HB3  | ARG | X | 471 | 50.163 | 43.087 | 19.669 | 0.00 | 0.00 |
| ATOM | 7130 | CG   | ARG | X | 471 | 51.158 | 43.685 | 17.792 | 0.00 | 0.00 |
| ATOM | 7131 | HG2  | ARG | X | 471 | 50.226 | 43.901 | 17.269 | 0.00 | 0.00 |
| ATOM | 7132 | HG3  | ARG | X | 471 | 51.902 | 44.457 | 17.595 | 0.00 | 0.00 |
| ATOM | 7133 | CD   | ARG | X | 471 | 51.586 | 42.382 | 17.226 | 0.00 | 0.00 |
| ATOM | 7134 | HD2  | ARG | X | 471 | 51.547 | 42.436 | 16.138 | 0.00 | 0.00 |
| ATOM | 7135 | HD3  | ARG | X | 471 | 52.613 | 42.173 | 17.525 | 0.00 | 0.00 |
| ATOM | 7136 | NE   | ARG | X | 471 | 50.653 | 41.293 | 17.698 | 0.00 | 0.00 |
| ATOM | 7137 | HE   | ARG | X | 471 | 49.692 | 41.410 | 17.410 | 0.00 | 0.00 |
| ATOM | 7138 | CZ   | ARG | X | 471 | 50.965 | 40.235 | 18.415 | 0.00 | 0.00 |
| ATOM | 7139 | NH1  | ARG | X | 471 | 52.181 | 39.902 | 18.684 | 0.00 | 0.00 |
| ATOM | 7140 | HH11 | ARG | X | 471 | 52.998 | 40.243 | 18.199 | 0.00 | 0.00 |
| ATOM | 7141 | HH12 | ARG | X | 471 | 52.385 | 39.037 | 19.163 | 0.00 | 0.00 |
| ATOM | 7142 | NH2  | ARG | X | 471 | 49.853 | 39.589 | 18.862 | 0.00 | 0.00 |
| ATOM | 7143 | HH21 | ARG | X | 471 | 48.923 | 39.888 | 18.607 | 0.00 | 0.00 |
| ATOM | 7144 | HH22 | ARG | X | 471 | 49.878 | 38.811 | 19.506 | 0.00 | 0.00 |
| ATOM | 7145 | C    | ARG | X | 471 | 49.886 | 45.040 | 21.180 | 0.00 | 0.00 |
| ATOM | 7146 | O    | ARG | X | 471 | 48.673 | 45.038 | 21.231 | 0.00 | 0.00 |
| ATOM | 7147 | N    | LEU | X | 472 | 50.492 | 44.940 | 22.394 | 0.00 | 0.00 |
| ATOM | 7148 | H    | LEU | X | 472 | 51.495 | 45.059 | 22.420 | 0.00 | 0.00 |
| ATOM | 7149 | CA   | LEU | X | 472 | 49.863 | 44.755 | 23.691 | 0.00 | 0.00 |
| ATOM | 7150 | HA   | LEU | X | 472 | 49.094 | 44.010 | 23.487 | 0.00 | 0.00 |
| ATOM | 7151 | CB   | LEU | X | 472 | 50.777 | 44.159 | 24.710 | 0.00 | 0.00 |
| ATOM | 7152 | HB2  | LEU | X | 472 | 51.642 | 44.806 | 24.856 | 0.00 | 0.00 |
| ATOM | 7153 | HB3  | LEU | X | 472 | 50.195 | 44.046 | 25.625 | 0.00 | 0.00 |
| ATOM | 7154 | CG   | LEU | X | 472 | 51.261 | 42.697 | 24.390 | 0.00 | 0.00 |
| ATOM | 7155 | HG   | LEU | X | 472 | 51.898 | 42.578 | 23.514 | 0.00 | 0.00 |
| ATOM | 7156 | CD1  | LEU | X | 472 | 51.930 | 42.099 | 25.658 | 0.00 | 0.00 |
| ATOM | 7157 | HD11 | LEU | X | 472 | 52.987 | 41.911 | 25.473 | 0.00 | 0.00 |
| ATOM | 7158 | HD12 | LEU | X | 472 | 51.621 | 42.736 | 26.486 | 0.00 | 0.00 |
| ATOM | 7159 | HD13 | LEU | X | 472 | 51.538 | 41.089 | 25.784 | 0.00 | 0.00 |
| ATOM | 7160 | CD2  | LEU | X | 472 | 49.940 | 41.981 | 24.021 | 0.00 | 0.00 |
| ATOM | 7161 | HD21 | LEU | X | 472 | 49.117 | 42.074 | 24.730 | 0.00 | 0.00 |
| ATOM | 7162 | HD22 | LEU | X | 472 | 49.685 | 41.996 | 22.961 | 0.00 | 0.00 |
| ATOM | 7163 | HD23 | LEU | X | 472 | 50.230 | 40.931 | 24.068 | 0.00 | 0.00 |
| ATOM | 7164 | C    | LEU | X | 472 | 49.217 | 46.068 | 24.068 | 0.00 | 0.00 |
| ATOM | 7165 | O    | LEU | X | 472 | 48.105 | 45.982 | 24.528 | 0.00 | 0.00 |
| ATOM | 7166 | N    | MET | X | 473 | 49.937 | 47.181 | 23.929 | 0.00 | 0.00 |
| ATOM | 7167 | H    | MET | X | 473 | 50.911 | 46.939 | 23.818 | 0.00 | 0.00 |
| ATOM | 7168 | CA   | MET | X | 473 | 49.392 | 48.546 | 24.145 | 0.00 | 0.00 |
| ATOM | 7169 | HA   | MET | X | 473 | 49.192 | 48.590 | 25.216 | 0.00 | 0.00 |
| ATOM | 7170 | CB   | MET | X | 473 | 50.386 | 49.619 | 23.624 | 0.00 | 0.00 |
| ATOM | 7171 | HB2  | MET | X | 473 | 50.772 | 49.363 | 22.637 | 0.00 | 0.00 |
| ATOM | 7172 | HB3  | MET | X | 473 | 49.873 | 50.580 | 23.580 | 0.00 | 0.00 |
| ATOM | 7173 | CG   | MET | X | 473 | 51.497 | 49.877 | 24.584 | 0.00 | 0.00 |
| ATOM | 7174 | HG2  | MET | X | 473 | 51.128 | 49.797 | 25.606 | 0.00 | 0.00 |
| ATOM | 7175 | HG3  | MET | X | 473 | 52.270 | 49.112 | 24.518 | 0.00 | 0.00 |
| ATOM | 7176 | SD   | MET | X | 473 | 52.204 | 51.447 | 24.302 | 0.00 | 0.00 |
| ATOM | 7177 | CE   | MET | X | 473 | 53.157 | 51.281 | 22.832 | 0.00 | 0.00 |

|      |      |      |     |   |     |        |        |        |      |      |
|------|------|------|-----|---|-----|--------|--------|--------|------|------|
| ATOM | 7178 | HE1  | MET | X | 473 | 53.415 | 52.255 | 22.415 | 0.00 | 0.00 |
| ATOM | 7179 | HE2  | MET | X | 473 | 54.126 | 50.841 | 23.069 | 0.00 | 0.00 |
| ATOM | 7180 | HE3  | MET | X | 473 | 52.651 | 50.747 | 22.028 | 0.00 | 0.00 |
| ATOM | 7181 | C    | MET | X | 473 | 48.146 | 48.613 | 23.330 | 0.00 | 0.00 |
| ATOM | 7182 | O    | MET | X | 473 | 47.066 | 48.887 | 23.906 | 0.00 | 0.00 |
| ATOM | 7183 | N    | ARG | X | 474 | 48.175 | 48.329 | 21.998 | 0.00 | 0.00 |
| ATOM | 7184 | H    | ARG | X | 474 | 49.080 | 48.132 | 21.596 | 0.00 | 0.00 |
| ATOM | 7185 | CA   | ARG | X | 474 | 46.957 | 48.351 | 21.188 | 0.00 | 0.00 |
| ATOM | 7186 | HA   | ARG | X | 474 | 46.671 | 49.401 | 21.249 | 0.00 | 0.00 |
| ATOM | 7187 | CB   | ARG | X | 474 | 47.322 | 47.925 | 19.745 | 0.00 | 0.00 |
| ATOM | 7188 | HB2  | ARG | X | 474 | 48.195 | 48.478 | 19.399 | 0.00 | 0.00 |
| ATOM | 7189 | HB3  | ARG | X | 474 | 47.553 | 46.862 | 19.675 | 0.00 | 0.00 |
| ATOM | 7190 | CG   | ARG | X | 474 | 46.215 | 48.140 | 18.670 | 0.00 | 0.00 |
| ATOM | 7191 | HG2  | ARG | X | 474 | 46.669 | 47.904 | 17.708 | 0.00 | 0.00 |
| ATOM | 7192 | HG3  | ARG | X | 474 | 45.447 | 47.381 | 18.824 | 0.00 | 0.00 |
| ATOM | 7193 | CD   | ARG | X | 474 | 45.735 | 49.624 | 18.596 | 0.00 | 0.00 |
| ATOM | 7194 | HD2  | ARG | X | 474 | 45.369 | 49.775 | 19.612 | 0.00 | 0.00 |
| ATOM | 7195 | HD3  | ARG | X | 474 | 46.620 | 50.257 | 18.535 | 0.00 | 0.00 |
| ATOM | 7196 | NE   | ARG | X | 474 | 44.580 | 49.879 | 17.725 | 0.00 | 0.00 |
| ATOM | 7197 | HE   | ARG | X | 474 | 43.898 | 49.176 | 17.480 | 0.00 | 0.00 |
| ATOM | 7198 | CZ   | ARG | X | 474 | 44.137 | 51.026 | 17.297 | 0.00 | 0.00 |
| ATOM | 7199 | NH1  | ARG | X | 474 | 44.760 | 52.151 | 17.606 | 0.00 | 0.00 |
| ATOM | 7200 | HH11 | ARG | X | 474 | 45.539 | 52.012 | 18.233 | 0.00 | 0.00 |
| ATOM | 7201 | HH12 | ARG | X | 474 | 44.521 | 53.096 | 17.342 | 0.00 | 0.00 |
| ATOM | 7202 | NH2  | ARG | X | 474 | 43.096 | 51.080 | 16.462 | 0.00 | 0.00 |
| ATOM | 7203 | HH21 | ARG | X | 474 | 42.560 | 50.353 | 16.009 | 0.00 | 0.00 |
| ATOM | 7204 | HH22 | ARG | X | 474 | 42.748 | 51.931 | 16.044 | 0.00 | 0.00 |
| ATOM | 7205 | C    | ARG | X | 474 | 45.784 | 47.550 | 21.752 | 0.00 | 0.00 |
| ATOM | 7206 | O    | ARG | X | 474 | 44.669 | 48.128 | 21.708 | 0.00 | 0.00 |
| ATOM | 7207 | N    | TYR | X | 475 | 45.915 | 46.329 | 22.271 | 0.00 | 0.00 |
| ATOM | 7208 | H    | TYR | X | 475 | 46.856 | 45.976 | 22.365 | 0.00 | 0.00 |
| ATOM | 7209 | CA   | TYR | X | 475 | 44.858 | 45.504 | 22.828 | 0.00 | 0.00 |
| ATOM | 7210 | HA   | TYR | X | 475 | 44.086 | 45.504 | 22.059 | 0.00 | 0.00 |
| ATOM | 7211 | CB   | TYR | X | 475 | 45.264 | 44.078 | 22.964 | 0.00 | 0.00 |
| ATOM | 7212 | HB2  | TYR | X | 475 | 45.943 | 44.185 | 23.811 | 0.00 | 0.00 |
| ATOM | 7213 | HB3  | TYR | X | 475 | 44.418 | 43.439 | 23.219 | 0.00 | 0.00 |
| ATOM | 7214 | CG   | TYR | X | 475 | 45.965 | 43.408 | 21.785 | 0.00 | 0.00 |
| ATOM | 7215 | CD1  | TYR | X | 475 | 45.479 | 43.626 | 20.463 | 0.00 | 0.00 |
| ATOM | 7216 | HD1  | TYR | X | 475 | 44.578 | 44.165 | 20.210 | 0.00 | 0.00 |
| ATOM | 7217 | CE1  | TYR | X | 475 | 46.108 | 43.030 | 19.338 | 0.00 | 0.00 |
| ATOM | 7218 | HE1  | TYR | X | 475 | 45.714 | 43.242 | 18.355 | 0.00 | 0.00 |
| ATOM | 7219 | CZ   | TYR | X | 475 | 47.132 | 42.127 | 19.535 | 0.00 | 0.00 |
| ATOM | 7220 | OH   | TYR | X | 475 | 47.714 | 41.581 | 18.382 | 0.00 | 0.00 |
| ATOM | 7221 | HH   | TYR | X | 475 | 47.237 | 41.871 | 17.601 | 0.00 | 0.00 |
| ATOM | 7222 | CE2  | TYR | X | 475 | 47.673 | 41.930 | 20.820 | 0.00 | 0.00 |
| ATOM | 7223 | HE2  | TYR | X | 475 | 48.563 | 41.323 | 20.885 | 0.00 | 0.00 |
| ATOM | 7224 | CD2  | TYR | X | 475 | 47.106 | 42.568 | 21.891 | 0.00 | 0.00 |
| ATOM | 7225 | HD2  | TYR | X | 475 | 47.568 | 42.441 | 22.858 | 0.00 | 0.00 |
| ATOM | 7226 | C    | TYR | X | 475 | 44.230 | 46.052 | 24.087 | 0.00 | 0.00 |
| ATOM | 7227 | O    | TYR | X | 475 | 43.043 | 46.174 | 24.156 | 0.00 | 0.00 |
| ATOM | 7228 | N    | TRP | X | 476 | 44.975 | 46.547 | 25.107 | 0.00 | 0.00 |
| ATOM | 7229 | H    | TRP | X | 476 | 45.979 | 46.511 | 25.012 | 0.00 | 0.00 |
| ATOM | 7230 | CA   | TRP | X | 476 | 44.419 | 47.195 | 26.306 | 0.00 | 0.00 |
| ATOM | 7231 | HA   | TRP | X | 476 | 43.710 | 46.547 | 26.823 | 0.00 | 0.00 |
| ATOM | 7232 | CB   | TRP | X | 476 | 45.537 | 47.319 | 27.404 | 0.00 | 0.00 |
| ATOM | 7233 | HB2  | TRP | X | 476 | 46.495 | 47.414 | 26.893 | 0.00 | 0.00 |
| ATOM | 7234 | HB3  | TRP | X | 476 | 45.388 | 48.251 | 27.950 | 0.00 | 0.00 |
| ATOM | 7235 | CG   | TRP | X | 476 | 45.512 | 46.201 | 28.412 | 0.00 | 0.00 |
| ATOM | 7236 | CD1  | TRP | X | 476 | 45.289 | 46.399 | 29.773 | 0.00 | 0.00 |
| ATOM | 7237 | HD1  | TRP | X | 476 | 44.995 | 47.323 | 30.250 | 0.00 | 0.00 |
| ATOM | 7238 | NE1  | TRP | X | 476 | 45.483 | 45.157 | 30.380 | 0.00 | 0.00 |
| ATOM | 7239 | HE1  | TRP | X | 476 | 45.607 | 45.027 | 31.374 | 0.00 | 0.00 |
| ATOM | 7240 | CE2  | TRP | X | 476 | 45.609 | 44.152 | 29.479 | 0.00 | 0.00 |
| ATOM | 7241 | CZ2  | TRP | X | 476 | 45.749 | 42.775 | 29.590 | 0.00 | 0.00 |
| ATOM | 7242 | HZ2  | TRP | X | 476 | 45.657 | 42.261 | 30.535 | 0.00 | 0.00 |
| ATOM | 7243 | CH2  | TRP | X | 476 | 46.122 | 41.977 | 28.439 | 0.00 | 0.00 |
| ATOM | 7244 | HH2  | TRP | X | 476 | 46.292 | 40.922 | 28.590 | 0.00 | 0.00 |
| ATOM | 7245 | CZ3  | TRP | X | 476 | 46.408 | 42.639 | 27.242 | 0.00 | 0.00 |
| ATOM | 7246 | HZ3  | TRP | X | 476 | 46.686 | 42.094 | 26.352 | 0.00 | 0.00 |
| ATOM | 7247 | CE3  | TRP | X | 476 | 46.163 | 44.022 | 27.054 | 0.00 | 0.00 |

|      |      |      |     |   |     |        |        |        |      |      |
|------|------|------|-----|---|-----|--------|--------|--------|------|------|
| ATOM | 7248 | HE3  | TRP | X | 476 | 46.182 | 44.523 | 26.097 | 0.00 | 0.00 |
| ATOM | 7249 | CD2  | TRP | X | 476 | 45.829 | 44.782 | 28.179 | 0.00 | 0.00 |
| ATOM | 7250 | C    | TRP | X | 476 | 43.594 | 48.433 | 25.915 | 0.00 | 0.00 |
| ATOM | 7251 | O    | TRP | X | 476 | 42.434 | 48.657 | 26.289 | 0.00 | 0.00 |
| ATOM | 7252 | N    | ALA | X | 477 | 44.184 | 49.289 | 25.052 | 0.00 | 0.00 |
| ATOM | 7253 | H    | ALA | X | 477 | 45.189 | 49.335 | 24.969 | 0.00 | 0.00 |
| ATOM | 7254 | CA   | ALA | X | 477 | 43.510 | 50.522 | 24.565 | 0.00 | 0.00 |
| ATOM | 7255 | HA   | ALA | X | 477 | 43.211 | 51.127 | 25.421 | 0.00 | 0.00 |
| ATOM | 7256 | CB   | ALA | X | 477 | 44.529 | 51.311 | 23.688 | 0.00 | 0.00 |
| ATOM | 7257 | HB1  | ALA | X | 477 | 44.871 | 50.747 | 22.821 | 0.00 | 0.00 |
| ATOM | 7258 | HB2  | ALA | X | 477 | 44.033 | 52.222 | 23.353 | 0.00 | 0.00 |
| ATOM | 7259 | HB3  | ALA | X | 477 | 45.412 | 51.565 | 24.275 | 0.00 | 0.00 |
| ATOM | 7260 | C    | ALA | X | 477 | 42.266 | 50.278 | 23.752 | 0.00 | 0.00 |
| ATOM | 7261 | O    | ALA | X | 477 | 41.272 | 50.880 | 24.037 | 0.00 | 0.00 |
| ATOM | 7262 | N    | ASN | X | 478 | 42.283 | 49.381 | 22.737 | 0.00 | 0.00 |
| ATOM | 7263 | H    | ASN | X | 478 | 43.159 | 48.949 | 22.478 | 0.00 | 0.00 |
| ATOM | 7264 | CA   | ASN | X | 478 | 41.067 | 48.908 | 22.063 | 0.00 | 0.00 |
| ATOM | 7265 | HA   | ASN | X | 478 | 40.564 | 49.706 | 21.517 | 0.00 | 0.00 |
| ATOM | 7266 | CB   | ASN | X | 478 | 41.397 | 47.691 | 21.106 | 0.00 | 0.00 |
| ATOM | 7267 | HB2  | ASN | X | 478 | 42.197 | 47.042 | 21.463 | 0.00 | 0.00 |
| ATOM | 7268 | HB3  | ASN | X | 478 | 40.471 | 47.142 | 20.935 | 0.00 | 0.00 |
| ATOM | 7269 | CG   | ASN | X | 478 | 41.815 | 48.134 | 19.693 | 0.00 | 0.00 |
| ATOM | 7270 | OD1  | ASN | X | 478 | 41.863 | 49.338 | 19.369 | 0.00 | 0.00 |
| ATOM | 7271 | ND2  | ASN | X | 478 | 42.153 | 47.187 | 18.868 | 0.00 | 0.00 |
| ATOM | 7272 | HD21 | ASN | X | 478 | 42.578 | 47.425 | 17.984 | 0.00 | 0.00 |
| ATOM | 7273 | HD22 | ASN | X | 478 | 42.322 | 46.238 | 19.169 | 0.00 | 0.00 |
| ATOM | 7274 | C    | ASN | X | 478 | 39.950 | 48.426 | 23.029 | 0.00 | 0.00 |
| ATOM | 7275 | O    | ASN | X | 478 | 38.785 | 48.836 | 22.928 | 0.00 | 0.00 |
| ATOM | 7276 | N    | PHE | X | 479 | 40.367 | 47.664 | 24.088 | 0.00 | 0.00 |
| ATOM | 7277 | H    | PHE | X | 479 | 41.348 | 47.424 | 24.065 | 0.00 | 0.00 |
| ATOM | 7278 | CA   | PHE | X | 479 | 39.539 | 47.313 | 25.246 | 0.00 | 0.00 |
| ATOM | 7279 | HA   | PHE | X | 479 | 38.673 | 46.829 | 24.794 | 0.00 | 0.00 |
| ATOM | 7280 | CB   | PHE | X | 479 | 40.145 | 46.326 | 26.211 | 0.00 | 0.00 |
| ATOM | 7281 | HB2  | PHE | X | 479 | 40.680 | 45.553 | 25.660 | 0.00 | 0.00 |
| ATOM | 7282 | HB3  | PHE | X | 479 | 40.921 | 46.863 | 26.755 | 0.00 | 0.00 |
| ATOM | 7283 | CG   | PHE | X | 479 | 39.107 | 45.728 | 27.169 | 0.00 | 0.00 |
| ATOM | 7284 | CD1  | PHE | X | 479 | 38.202 | 44.677 | 26.838 | 0.00 | 0.00 |
| ATOM | 7285 | HD1  | PHE | X | 479 | 38.153 | 44.180 | 25.881 | 0.00 | 0.00 |
| ATOM | 7286 | CE1  | PHE | X | 479 | 37.343 | 44.282 | 27.799 | 0.00 | 0.00 |
| ATOM | 7287 | HE1  | PHE | X | 479 | 36.645 | 43.489 | 27.575 | 0.00 | 0.00 |
| ATOM | 7288 | CZ   | PHE | X | 479 | 37.207 | 44.954 | 29.002 | 0.00 | 0.00 |
| ATOM | 7289 | HZ   | PHE | X | 479 | 36.533 | 44.500 | 29.712 | 0.00 | 0.00 |
| ATOM | 7290 | CE2  | PHE | X | 479 | 37.934 | 46.066 | 29.252 | 0.00 | 0.00 |
| ATOM | 7291 | HE2  | PHE | X | 479 | 37.840 | 46.439 | 30.261 | 0.00 | 0.00 |
| ATOM | 7292 | CD2  | PHE | X | 479 | 38.919 | 46.528 | 28.379 | 0.00 | 0.00 |
| ATOM | 7293 | HD2  | PHE | X | 479 | 39.540 | 47.363 | 28.669 | 0.00 | 0.00 |
| ATOM | 7294 | C    | PHE | X | 479 | 38.831 | 48.533 | 25.876 | 0.00 | 0.00 |
| ATOM | 7295 | O    | PHE | X | 479 | 37.628 | 48.670 | 25.847 | 0.00 | 0.00 |
| ATOM | 7296 | N    | ALA | X | 480 | 39.601 | 49.460 | 26.392 | 0.00 | 0.00 |
| ATOM | 7297 | H    | ALA | X | 480 | 40.605 | 49.374 | 26.315 | 0.00 | 0.00 |
| ATOM | 7298 | CA   | ALA | X | 480 | 39.104 | 50.765 | 26.892 | 0.00 | 0.00 |
| ATOM | 7299 | HA   | ALA | X | 480 | 38.469 | 50.594 | 27.761 | 0.00 | 0.00 |
| ATOM | 7300 | CB   | ALA | X | 480 | 40.273 | 51.609 | 27.354 | 0.00 | 0.00 |
| ATOM | 7301 | HB1  | ALA | X | 480 | 40.686 | 51.148 | 28.251 | 0.00 | 0.00 |
| ATOM | 7302 | HB2  | ALA | X | 480 | 40.930 | 51.640 | 26.484 | 0.00 | 0.00 |
| ATOM | 7303 | HB3  | ALA | X | 480 | 39.903 | 52.609 | 27.580 | 0.00 | 0.00 |
| ATOM | 7304 | C    | ALA | X | 480 | 38.227 | 51.522 | 25.954 | 0.00 | 0.00 |
| ATOM | 7305 | O    | ALA | X | 480 | 37.158 | 52.007 | 26.386 | 0.00 | 0.00 |
| ATOM | 7306 | N    | ARG | X | 481 | 38.570 | 51.622 | 24.622 | 0.00 | 0.00 |
| ATOM | 7307 | H    | ARG | X | 481 | 39.348 | 51.084 | 24.266 | 0.00 | 0.00 |
| ATOM | 7308 | CA   | ARG | X | 481 | 37.776 | 52.311 | 23.581 | 0.00 | 0.00 |
| ATOM | 7309 | HA   | ARG | X | 481 | 37.725 | 53.383 | 23.773 | 0.00 | 0.00 |
| ATOM | 7310 | CB   | ARG | X | 481 | 38.372 | 52.114 | 22.179 | 0.00 | 0.00 |
| ATOM | 7311 | HB2  | ARG | X | 481 | 38.851 | 51.141 | 22.078 | 0.00 | 0.00 |
| ATOM | 7312 | HB3  | ARG | X | 481 | 37.795 | 52.432 | 21.310 | 0.00 | 0.00 |
| ATOM | 7313 | CG   | ARG | X | 481 | 39.608 | 53.041 | 22.182 | 0.00 | 0.00 |
| ATOM | 7314 | HG2  | ARG | X | 481 | 39.229 | 54.062 | 22.228 | 0.00 | 0.00 |
| ATOM | 7315 | HG3  | ARG | X | 481 | 40.344 | 52.829 | 22.958 | 0.00 | 0.00 |
| ATOM | 7316 | CD   | ARG | X | 481 | 40.372 | 53.003 | 20.849 | 0.00 | 0.00 |
| ATOM | 7317 | HD2  | ARG | X | 481 | 40.537 | 51.988 | 20.489 | 0.00 | 0.00 |

|      |      |      |     |   |     |        |        |        |      |      |
|------|------|------|-----|---|-----|--------|--------|--------|------|------|
| ATOM | 7318 | HD3  | ARG | X | 481 | 39.692 | 53.452 | 20.125 | 0.00 | 0.00 |
| ATOM | 7319 | NE   | ARG | X | 481 | 41.711 | 53.639 | 20.883 | 0.00 | 0.00 |
| ATOM | 7320 | HE   | ARG | X | 481 | 41.667 | 54.593 | 21.212 | 0.00 | 0.00 |
| ATOM | 7321 | CZ   | ARG | X | 481 | 42.888 | 53.117 | 20.867 | 0.00 | 0.00 |
| ATOM | 7322 | NH1  | ARG | X | 481 | 43.175 | 51.851 | 20.765 | 0.00 | 0.00 |
| ATOM | 7323 | HH11 | ARG | X | 481 | 42.468 | 51.173 | 20.520 | 0.00 | 0.00 |
| ATOM | 7324 | HH12 | ARG | X | 481 | 44.154 | 51.613 | 20.841 | 0.00 | 0.00 |
| ATOM | 7325 | NH2  | ARG | X | 481 | 43.935 | 53.884 | 20.986 | 0.00 | 0.00 |
| ATOM | 7326 | HH21 | ARG | X | 481 | 43.927 | 54.893 | 21.021 | 0.00 | 0.00 |
| ATOM | 7327 | HH22 | ARG | X | 481 | 44.813 | 53.404 | 20.846 | 0.00 | 0.00 |
| ATOM | 7328 | C    | ARG | X | 481 | 36.353 | 51.766 | 23.474 | 0.00 | 0.00 |
| ATOM | 7329 | O    | ARG | X | 481 | 35.457 | 52.602 | 23.341 | 0.00 | 0.00 |
| ATOM | 7330 | N    | THR | X | 482 | 36.127 | 50.477 | 23.440 | 0.00 | 0.00 |
| ATOM | 7331 | H    | THR | X | 482 | 36.880 | 49.826 | 23.607 | 0.00 | 0.00 |
| ATOM | 7332 | CA   | THR | X | 482 | 34.735 | 49.854 | 23.143 | 0.00 | 0.00 |
| ATOM | 7333 | HA   | THR | X | 482 | 33.987 | 50.646 | 23.177 | 0.00 | 0.00 |
| ATOM | 7334 | CB   | THR | X | 482 | 34.743 | 49.211 | 21.722 | 0.00 | 0.00 |
| ATOM | 7335 | HB   | THR | X | 482 | 33.795 | 48.706 | 21.535 | 0.00 | 0.00 |
| ATOM | 7336 | CG2  | THR | X | 482 | 34.957 | 50.276 | 20.595 | 0.00 | 0.00 |
| ATOM | 7337 | HG21 | THR | X | 482 | 35.906 | 50.810 | 20.648 | 0.00 | 0.00 |
| ATOM | 7338 | HG22 | THR | X | 482 | 35.044 | 49.636 | 19.717 | 0.00 | 0.00 |
| ATOM | 7339 | HG23 | THR | X | 482 | 34.098 | 50.939 | 20.495 | 0.00 | 0.00 |
| ATOM | 7340 | OG1  | THR | X | 482 | 35.904 | 48.307 | 21.626 | 0.00 | 0.00 |
| ATOM | 7341 | HG1  | THR | X | 482 | 36.431 | 48.499 | 20.847 | 0.00 | 0.00 |
| ATOM | 7342 | C    | THR | X | 482 | 34.287 | 48.729 | 24.012 | 0.00 | 0.00 |
| ATOM | 7343 | O    | THR | X | 482 | 33.130 | 48.506 | 24.005 | 0.00 | 0.00 |
| ATOM | 7344 | N    | GLY | X | 483 | 35.136 | 48.088 | 24.768 | 0.00 | 0.00 |
| ATOM | 7345 | H    | GLY | X | 483 | 36.057 | 48.495 | 24.848 | 0.00 | 0.00 |
| ATOM | 7346 | CA   | GLY | X | 483 | 34.889 | 46.829 | 25.452 | 0.00 | 0.00 |
| ATOM | 7347 | HA2  | GLY | X | 483 | 35.241 | 46.878 | 26.432 | 0.00 | 0.00 |
| ATOM | 7348 | HA3  | GLY | X | 483 | 33.756 | 46.619 | 25.566 | 0.00 | 0.00 |
| ATOM | 7349 | C    | GLY | X | 483 | 35.464 | 45.609 | 24.787 | 0.00 | 0.00 |
| ATOM | 7350 | O    | GLY | X | 483 | 35.219 | 44.565 | 25.296 | 0.00 | 0.00 |
| ATOM | 7351 | N    | ASP | X | 484 | 36.163 | 45.755 | 23.649 | 0.00 | 0.00 |
| ATOM | 7352 | H    | ASP | X | 484 | 36.242 | 46.684 | 23.261 | 0.00 | 0.00 |
| ATOM | 7353 | CA   | ASP | X | 484 | 36.609 | 44.671 | 22.845 | 0.00 | 0.00 |
| ATOM | 7354 | HA   | ASP | X | 484 | 36.497 | 43.734 | 23.390 | 0.00 | 0.00 |
| ATOM | 7355 | CB   | ASP | X | 484 | 35.846 | 44.744 | 21.531 | 0.00 | 0.00 |
| ATOM | 7356 | HB2  | ASP | X | 484 | 35.812 | 45.776 | 21.183 | 0.00 | 0.00 |
| ATOM | 7357 | HB3  | ASP | X | 484 | 36.443 | 44.236 | 20.774 | 0.00 | 0.00 |
| ATOM | 7358 | CG   | ASP | X | 484 | 34.393 | 44.288 | 21.486 | 0.00 | 0.00 |
| ATOM | 7359 | OD1  | ASP | X | 484 | 33.742 | 44.300 | 22.535 | 0.00 | 0.00 |
| ATOM | 7360 | OD2  | ASP | X | 484 | 33.799 | 43.956 | 20.408 | 0.00 | 0.00 |
| ATOM | 7361 | C    | ASP | X | 484 | 38.139 | 44.905 | 22.433 | 0.00 | 0.00 |
| ATOM | 7362 | O    | ASP | X | 484 | 38.401 | 46.020 | 21.942 | 0.00 | 0.00 |
| ATOM | 7363 | N    | PRO | X | 485 | 39.111 | 43.981 | 22.705 | 0.00 | 0.00 |
| ATOM | 7364 | CD   | PRO | X | 485 | 38.856 | 42.622 | 23.240 | 0.00 | 0.00 |
| ATOM | 7365 | HD2  | PRO | X | 485 | 38.490 | 42.013 | 22.414 | 0.00 | 0.00 |
| ATOM | 7366 | HD3  | PRO | X | 485 | 38.189 | 42.677 | 24.100 | 0.00 | 0.00 |
| ATOM | 7367 | CG   | PRO | X | 485 | 40.226 | 42.033 | 23.618 | 0.00 | 0.00 |
| ATOM | 7368 | HG2  | PRO | X | 485 | 40.378 | 41.165 | 22.976 | 0.00 | 0.00 |
| ATOM | 7369 | HG3  | PRO | X | 485 | 40.273 | 41.725 | 24.662 | 0.00 | 0.00 |
| ATOM | 7370 | CB   | PRO | X | 485 | 41.186 | 43.178 | 23.446 | 0.00 | 0.00 |
| ATOM | 7371 | HB2  | PRO | X | 485 | 42.122 | 42.840 | 23.001 | 0.00 | 0.00 |
| ATOM | 7372 | HB3  | PRO | X | 485 | 41.425 | 43.646 | 24.401 | 0.00 | 0.00 |
| ATOM | 7373 | CA   | PRO | X | 485 | 40.537 | 44.280 | 22.562 | 0.00 | 0.00 |
| ATOM | 7374 | HA   | PRO | X | 485 | 40.759 | 45.280 | 22.935 | 0.00 | 0.00 |
| ATOM | 7375 | C    | PRO | X | 485 | 40.956 | 44.181 | 21.051 | 0.00 | 0.00 |
| ATOM | 7376 | O    | PRO | X | 485 | 42.107 | 44.295 | 20.720 | 0.00 | 0.00 |
| ATOM | 7377 | N    | ASN | X | 486 | 40.006 | 44.070 | 20.123 | 0.00 | 0.00 |
| ATOM | 7378 | H    | ASN | X | 486 | 39.057 | 43.901 | 20.425 | 0.00 | 0.00 |
| ATOM | 7379 | CA   | ASN | X | 486 | 40.136 | 44.014 | 18.656 | 0.00 | 0.00 |
| ATOM | 7380 | HA   | ASN | X | 486 | 41.176 | 44.013 | 18.329 | 0.00 | 0.00 |
| ATOM | 7381 | CB   | ASN | X | 486 | 39.331 | 42.752 | 18.262 | 0.00 | 0.00 |
| ATOM | 7382 | HB2  | ASN | X | 486 | 39.378 | 42.504 | 17.202 | 0.00 | 0.00 |
| ATOM | 7383 | HB3  | ASN | X | 486 | 39.723 | 41.899 | 18.817 | 0.00 | 0.00 |
| ATOM | 7384 | CG   | ASN | X | 486 | 37.869 | 42.780 | 18.621 | 0.00 | 0.00 |
| ATOM | 7385 | OD1  | ASN | X | 486 | 37.072 | 43.621 | 18.300 | 0.00 | 0.00 |
| ATOM | 7386 | ND2  | ASN | X | 486 | 37.449 | 41.814 | 19.366 | 0.00 | 0.00 |
| ATOM | 7387 | HD21 | ASN | X | 486 | 36.534 | 41.939 | 19.775 | 0.00 | 0.00 |

|      |      |      |     |   |     |        |        |        |      |      |
|------|------|------|-----|---|-----|--------|--------|--------|------|------|
| ATOM | 7388 | HD22 | ASN | X | 486 | 38.036 | 41.024 | 19.591 | 0.00 | 0.00 |
| ATOM | 7389 | C    | ASN | X | 486 | 39.628 | 45.313 | 17.943 | 0.00 | 0.00 |
| ATOM | 7390 | O    | ASN | X | 486 | 38.651 | 45.939 | 18.415 | 0.00 | 0.00 |
| ATOM | 7391 | N    | GLU | X | 487 | 40.157 | 45.699 | 16.736 | 0.00 | 0.00 |
| ATOM | 7392 | H    | GLU | X | 487 | 40.801 | 45.024 | 16.350 | 0.00 | 0.00 |
| ATOM | 7393 | CA   | GLU | X | 487 | 39.490 | 46.546 | 15.851 | 0.00 | 0.00 |
| ATOM | 7394 | HA   | GLU | X | 487 | 39.513 | 47.588 | 16.170 | 0.00 | 0.00 |
| ATOM | 7395 | CB   | GLU | X | 487 | 40.245 | 46.549 | 14.505 | 0.00 | 0.00 |
| ATOM | 7396 | HB2  | GLU | X | 487 | 40.120 | 45.603 | 13.978 | 0.00 | 0.00 |
| ATOM | 7397 | HB3  | GLU | X | 487 | 39.815 | 47.404 | 13.985 | 0.00 | 0.00 |
| ATOM | 7398 | CG   | GLU | X | 487 | 41.809 | 46.742 | 14.548 | 0.00 | 0.00 |
| ATOM | 7399 | HG2  | GLU | X | 487 | 42.342 | 45.881 | 14.950 | 0.00 | 0.00 |
| ATOM | 7400 | HG3  | GLU | X | 487 | 42.233 | 46.817 | 13.547 | 0.00 | 0.00 |
| ATOM | 7401 | CD   | GLU | X | 487 | 42.092 | 48.074 | 15.307 | 0.00 | 0.00 |
| ATOM | 7402 | OE1  | GLU | X | 487 | 42.835 | 48.014 | 16.332 | 0.00 | 0.00 |
| ATOM | 7403 | OE2  | GLU | X | 487 | 41.771 | 49.161 | 14.856 | 0.00 | 0.00 |
| ATOM | 7404 | C    | GLU | X | 487 | 38.029 | 46.113 | 15.609 | 0.00 | 0.00 |
| ATOM | 7405 | O    | GLU | X | 487 | 37.746 | 44.942 | 15.287 | 0.00 | 0.00 |
| ATOM | 7406 | N    | PRO | X | 488 | 37.086 | 47.032 | 15.472 | 0.00 | 0.00 |
| ATOM | 7407 | CD   | PRO | X | 488 | 37.261 | 48.461 | 15.883 | 0.00 | 0.00 |
| ATOM | 7408 | HD2  | PRO | X | 488 | 37.677 | 49.126 | 15.126 | 0.00 | 0.00 |
| ATOM | 7409 | HD3  | PRO | X | 488 | 37.947 | 48.606 | 16.717 | 0.00 | 0.00 |
| ATOM | 7410 | CG   | PRO | X | 488 | 35.877 | 48.900 | 16.234 | 0.00 | 0.00 |
| ATOM | 7411 | HG2  | PRO | X | 488 | 35.798 | 49.950 | 15.950 | 0.00 | 0.00 |
| ATOM | 7412 | HG3  | PRO | X | 488 | 35.666 | 48.654 | 17.275 | 0.00 | 0.00 |
| ATOM | 7413 | CB   | PRO | X | 488 | 35.018 | 48.054 | 15.298 | 0.00 | 0.00 |
| ATOM | 7414 | HB2  | PRO | X | 488 | 35.091 | 48.548 | 14.329 | 0.00 | 0.00 |
| ATOM | 7415 | HB3  | PRO | X | 488 | 33.958 | 47.924 | 15.518 | 0.00 | 0.00 |
| ATOM | 7416 | CA   | PRO | X | 488 | 35.679 | 46.724 | 15.215 | 0.00 | 0.00 |
| ATOM | 7417 | HA   | PRO | X | 488 | 35.318 | 46.083 | 16.019 | 0.00 | 0.00 |
| ATOM | 7418 | C    | PRO | X | 488 | 35.458 | 46.108 | 13.823 | 0.00 | 0.00 |
| ATOM | 7419 | O    | PRO | X | 488 | 34.441 | 45.460 | 13.720 | 0.00 | 0.00 |
| ATOM | 7420 | N    | ARG | X | 489 | 36.342 | 46.223 | 12.841 | 0.00 | 0.00 |
| ATOM | 7421 | H    | ARG | X | 489 | 37.246 | 46.618 | 13.056 | 0.00 | 0.00 |
| ATOM | 7422 | CA   | ARG | X | 489 | 36.159 | 45.390 | 11.653 | 0.00 | 0.00 |
| ATOM | 7423 | HA   | ARG | X | 489 | 35.548 | 44.530 | 11.926 | 0.00 | 0.00 |
| ATOM | 7424 | CB   | ARG | X | 489 | 35.337 | 46.202 | 10.655 | 0.00 | 0.00 |
| ATOM | 7425 | HB2  | ARG | X | 489 | 35.161 | 45.612 | 9.756  | 0.00 | 0.00 |
| ATOM | 7426 | HB3  | ARG | X | 489 | 34.335 | 46.436 | 11.015 | 0.00 | 0.00 |
| ATOM | 7427 | CG   | ARG | X | 489 | 36.021 | 47.455 | 10.232 | 0.00 | 0.00 |
| ATOM | 7428 | HG2  | ARG | X | 489 | 36.562 | 48.019 | 10.992 | 0.00 | 0.00 |
| ATOM | 7429 | HG3  | ARG | X | 489 | 36.561 | 47.110 | 9.351  | 0.00 | 0.00 |
| ATOM | 7430 | CD   | ARG | X | 489 | 34.978 | 48.441 | 9.712  | 0.00 | 0.00 |
| ATOM | 7431 | HD2  | ARG | X | 489 | 34.289 | 47.976 | 9.008  | 0.00 | 0.00 |
| ATOM | 7432 | HD3  | ARG | X | 489 | 34.374 | 48.710 | 10.579 | 0.00 | 0.00 |
| ATOM | 7433 | NE   | ARG | X | 489 | 35.578 | 49.623 | 9.090  | 0.00 | 0.00 |
| ATOM | 7434 | HE   | ARG | X | 489 | 35.794 | 50.391 | 9.710  | 0.00 | 0.00 |
| ATOM | 7435 | CZ   | ARG | X | 489 | 35.779 | 49.838 | 7.797  | 0.00 | 0.00 |
| ATOM | 7436 | NH1  | ARG | X | 489 | 36.301 | 50.963 | 7.417  | 0.00 | 0.00 |
| ATOM | 7437 | HH11 | ARG | X | 489 | 36.479 | 51.663 | 8.123  | 0.00 | 0.00 |
| ATOM | 7438 | HH12 | ARG | X | 489 | 36.799 | 51.164 | 6.562  | 0.00 | 0.00 |
| ATOM | 7439 | NH2  | ARG | X | 489 | 35.579 | 49.009 | 6.857  | 0.00 | 0.00 |
| ATOM | 7440 | HH21 | ARG | X | 489 | 34.994 | 48.202 | 7.020  | 0.00 | 0.00 |
| ATOM | 7441 | HH22 | ARG | X | 489 | 35.866 | 49.305 | 5.936  | 0.00 | 0.00 |
| ATOM | 7442 | C    | ARG | X | 489 | 37.548 | 44.826 | 11.115 | 0.00 | 0.00 |
| ATOM | 7443 | O    | ARG | X | 489 | 38.593 | 45.406 | 11.475 | 0.00 | 0.00 |
| ATOM | 7444 | N    | ASP | X | 490 | 37.493 | 43.763 | 10.274 | 0.00 | 0.00 |
| ATOM | 7445 | H    | ASP | X | 490 | 36.605 | 43.285 | 10.216 | 0.00 | 0.00 |
| ATOM | 7446 | CA   | ASP | X | 490 | 38.597 | 42.834 | 9.881  | 0.00 | 0.00 |
| ATOM | 7447 | HA   | ASP | X | 490 | 38.869 | 42.503 | 10.883 | 0.00 | 0.00 |
| ATOM | 7448 | CB   | ASP | X | 490 | 37.955 | 41.642 | 9.212  | 0.00 | 0.00 |
| ATOM | 7449 | HB2  | ASP | X | 490 | 37.139 | 41.261 | 9.827  | 0.00 | 0.00 |
| ATOM | 7450 | HB3  | ASP | X | 490 | 37.572 | 41.923 | 8.231  | 0.00 | 0.00 |
| ATOM | 7451 | CG   | ASP | X | 490 | 39.024 | 40.566 | 9.022  | 0.00 | 0.00 |
| ATOM | 7452 | OD1  | ASP | X | 490 | 39.849 | 40.631 | 8.019  | 0.00 | 0.00 |
| ATOM | 7453 | OD2  | ASP | X | 490 | 39.011 | 39.610 | 9.823  | 0.00 | 0.00 |
| ATOM | 7454 | C    | ASP | X | 490 | 39.740 | 43.404 | 9.108  | 0.00 | 0.00 |
| ATOM | 7455 | O    | ASP | X | 490 | 39.456 | 43.906 | 7.977  | 0.00 | 0.00 |
| ATOM | 7456 | N    | PRO | X | 491 | 40.964 | 43.409 | 9.571  | 0.00 | 0.00 |
| ATOM | 7457 | CD   | PRO | X | 491 | 41.278 | 43.134 | 10.933 | 0.00 | 0.00 |

|      |      |     |     |   |     |        |        |        |      |      |
|------|------|-----|-----|---|-----|--------|--------|--------|------|------|
| ATOM | 7458 | HD2 | PRO | X | 491 | 41.222 | 42.055 | 11.080 | 0.00 | 0.00 |
| ATOM | 7459 | HD3 | PRO | X | 491 | 40.589 | 43.628 | 11.617 | 0.00 | 0.00 |
| ATOM | 7460 | CG  | PRO | X | 491 | 42.689 | 43.580 | 11.273 | 0.00 | 0.00 |
| ATOM | 7461 | HG2 | PRO | X | 491 | 43.345 | 42.716 | 11.383 | 0.00 | 0.00 |
| ATOM | 7462 | HG3 | PRO | X | 491 | 42.699 | 44.249 | 12.133 | 0.00 | 0.00 |
| ATOM | 7463 | CB  | PRO | X | 491 | 43.075 | 44.405 | 10.008 | 0.00 | 0.00 |
| ATOM | 7464 | HB2 | PRO | X | 491 | 44.132 | 44.435 | 9.742  | 0.00 | 0.00 |
| ATOM | 7465 | HB3 | PRO | X | 491 | 42.730 | 45.427 | 10.166 | 0.00 | 0.00 |
| ATOM | 7466 | CA  | PRO | X | 491 | 42.254 | 43.777 | 8.875  | 0.00 | 0.00 |
| ATOM | 7467 | HA  | PRO | X | 491 | 42.170 | 44.540 | 8.101  | 0.00 | 0.00 |
| ATOM | 7468 | C   | PRO | X | 491 | 42.990 | 42.531 | 8.350  | 0.00 | 0.00 |
| ATOM | 7469 | O   | PRO | X | 491 | 42.594 | 41.360 | 8.518  | 0.00 | 0.00 |
| ATOM | 7470 | N   | LYS | X | 492 | 44.139 | 42.720 | 7.701  | 0.00 | 0.00 |
| ATOM | 7471 | H   | LYS | X | 492 | 44.312 | 43.628 | 7.294  | 0.00 | 0.00 |
| ATOM | 7472 | CA  | LYS | X | 492 | 44.931 | 41.622 | 7.232  | 0.00 | 0.00 |
| ATOM | 7473 | HA  | LYS | X | 492 | 44.333 | 40.776 | 6.893  | 0.00 | 0.00 |
| ATOM | 7474 | CB  | LYS | X | 492 | 45.746 | 42.278 | 6.162  | 0.00 | 0.00 |
| ATOM | 7475 | HB2 | LYS | X | 492 | 46.263 | 41.537 | 5.551  | 0.00 | 0.00 |
| ATOM | 7476 | HB3 | LYS | X | 492 | 45.085 | 42.672 | 5.391  | 0.00 | 0.00 |
| ATOM | 7477 | CG  | LYS | X | 492 | 46.727 | 43.307 | 6.537  | 0.00 | 0.00 |
| ATOM | 7478 | HG2 | LYS | X | 492 | 46.180 | 44.214 | 6.794  | 0.00 | 0.00 |
| ATOM | 7479 | HG3 | LYS | X | 492 | 47.225 | 43.142 | 7.492  | 0.00 | 0.00 |
| ATOM | 7480 | CD  | LYS | X | 492 | 47.744 | 43.639 | 5.498  | 0.00 | 0.00 |
| ATOM | 7481 | HD2 | LYS | X | 492 | 48.441 | 44.424 | 5.792  | 0.00 | 0.00 |
| ATOM | 7482 | HD3 | LYS | X | 492 | 48.429 | 42.791 | 5.466  | 0.00 | 0.00 |
| ATOM | 7483 | CE  | LYS | X | 492 | 47.148 | 43.989 | 4.106  | 0.00 | 0.00 |
| ATOM | 7484 | HE2 | LYS | X | 492 | 46.569 | 43.111 | 3.818  | 0.00 | 0.00 |
| ATOM | 7485 | HE3 | LYS | X | 492 | 46.516 | 44.874 | 4.186  | 0.00 | 0.00 |
| ATOM | 7486 | NZ  | LYS | X | 492 | 48.180 | 44.282 | 3.033  | 0.00 | 0.00 |
| ATOM | 7487 | HZ1 | LYS | X | 492 | 48.537 | 45.208 | 3.221  | 0.00 | 0.00 |
| ATOM | 7488 | HZ2 | LYS | X | 492 | 48.887 | 43.563 | 2.977  | 0.00 | 0.00 |
| ATOM | 7489 | HZ3 | LYS | X | 492 | 47.753 | 44.302 | 2.118  | 0.00 | 0.00 |
| ATOM | 7490 | C   | LYS | X | 492 | 45.769 | 41.016 | 8.367  | 0.00 | 0.00 |
| ATOM | 7491 | O   | LYS | X | 492 | 46.904 | 40.603 | 8.081  | 0.00 | 0.00 |
| ATOM | 7492 | N   | ALA | X | 493 | 45.182 | 40.933 | 9.581  | 0.00 | 0.00 |
| ATOM | 7493 | H   | ALA | X | 493 | 44.244 | 41.303 | 9.643  | 0.00 | 0.00 |
| ATOM | 7494 | CA  | ALA | X | 493 | 45.833 | 40.427 | 10.826 | 0.00 | 0.00 |
| ATOM | 7495 | HA  | ALA | X | 493 | 46.728 | 39.856 | 10.580 | 0.00 | 0.00 |
| ATOM | 7496 | CB  | ALA | X | 493 | 46.338 | 41.657 | 11.711 | 0.00 | 0.00 |
| ATOM | 7497 | HB1 | ALA | X | 493 | 46.937 | 41.243 | 12.523 | 0.00 | 0.00 |
| ATOM | 7498 | HB2 | ALA | X | 493 | 47.080 | 42.245 | 11.172 | 0.00 | 0.00 |
| ATOM | 7499 | HB3 | ALA | X | 493 | 45.484 | 42.243 | 12.049 | 0.00 | 0.00 |
| ATOM | 7500 | C   | ALA | X | 493 | 44.832 | 39.591 | 11.704 | 0.00 | 0.00 |
| ATOM | 7501 | O   | ALA | X | 493 | 43.637 | 39.789 | 11.612 | 0.00 | 0.00 |
| ATOM | 7502 | N   | PRO | X | 494 | 45.326 | 38.720 | 12.561 | 0.00 | 0.00 |
| ATOM | 7503 | CD  | PRO | X | 494 | 46.709 | 38.350 | 12.559 | 0.00 | 0.00 |
| ATOM | 7504 | HD2 | PRO | X | 494 | 47.387 | 39.143 | 12.873 | 0.00 | 0.00 |
| ATOM | 7505 | HD3 | PRO | X | 494 | 47.141 | 37.955 | 11.639 | 0.00 | 0.00 |
| ATOM | 7506 | CG  | PRO | X | 494 | 46.877 | 37.308 | 13.558 | 0.00 | 0.00 |
| ATOM | 7507 | HG2 | PRO | X | 494 | 47.327 | 37.706 | 14.468 | 0.00 | 0.00 |
| ATOM | 7508 | HG3 | PRO | X | 494 | 47.510 | 36.502 | 13.188 | 0.00 | 0.00 |
| ATOM | 7509 | CB  | PRO | X | 494 | 45.484 | 36.650 | 13.579 | 0.00 | 0.00 |
| ATOM | 7510 | HB2 | PRO | X | 494 | 45.232 | 36.065 | 14.463 | 0.00 | 0.00 |
| ATOM | 7511 | HB3 | PRO | X | 494 | 45.376 | 35.998 | 12.713 | 0.00 | 0.00 |
| ATOM | 7512 | CA  | PRO | X | 494 | 44.504 | 37.799 | 13.447 | 0.00 | 0.00 |
| ATOM | 7513 | HA  | PRO | X | 494 | 43.640 | 37.428 | 12.896 | 0.00 | 0.00 |
| ATOM | 7514 | C   | PRO | X | 494 | 44.089 | 38.481 | 14.743 | 0.00 | 0.00 |
| ATOM | 7515 | O   | PRO | X | 494 | 44.889 | 38.945 | 15.516 | 0.00 | 0.00 |
| ATOM | 7516 | N   | GLN | X | 495 | 42.747 | 38.469 | 14.985 | 0.00 | 0.00 |
| ATOM | 7517 | H   | GLN | X | 495 | 42.185 | 38.023 | 14.274 | 0.00 | 0.00 |
| ATOM | 7518 | CA  | GLN | X | 495 | 42.165 | 39.196 | 16.128 | 0.00 | 0.00 |
| ATOM | 7519 | HA  | GLN | X | 495 | 43.003 | 39.722 | 16.585 | 0.00 | 0.00 |
| ATOM | 7520 | CB  | GLN | X | 495 | 41.134 | 40.198 | 15.515 | 0.00 | 0.00 |
| ATOM | 7521 | HB2 | GLN | X | 495 | 40.480 | 39.706 | 14.795 | 0.00 | 0.00 |
| ATOM | 7522 | HB3 | GLN | X | 495 | 40.512 | 40.637 | 16.294 | 0.00 | 0.00 |
| ATOM | 7523 | CG  | GLN | X | 495 | 41.735 | 41.302 | 14.696 | 0.00 | 0.00 |
| ATOM | 7524 | HG2 | GLN | X | 495 | 42.720 | 41.516 | 15.110 | 0.00 | 0.00 |
| ATOM | 7525 | HG3 | GLN | X | 495 | 41.902 | 40.980 | 13.667 | 0.00 | 0.00 |
| ATOM | 7526 | CD  | GLN | X | 495 | 40.920 | 42.569 | 14.720 | 0.00 | 0.00 |
| ATOM | 7527 | OE1 | GLN | X | 495 | 41.143 | 43.400 | 15.548 | 0.00 | 0.00 |

|      |      |      |     |   |     |        |        |        |      |      |
|------|------|------|-----|---|-----|--------|--------|--------|------|------|
| ATOM | 7528 | NE2  | GLN | X | 495 | 39.827 | 42.620 | 13.980 | 0.00 | 0.00 |
| ATOM | 7529 | HE21 | GLN | X | 495 | 39.324 | 43.491 | 14.073 | 0.00 | 0.00 |
| ATOM | 7530 | HE22 | GLN | X | 495 | 39.596 | 41.824 | 13.403 | 0.00 | 0.00 |
| ATOM | 7531 | C    | GLN | X | 495 | 41.432 | 38.315 | 17.217 | 0.00 | 0.00 |
| ATOM | 7532 | O    | GLN | X | 495 | 41.126 | 37.136 | 16.991 | 0.00 | 0.00 |
| ATOM | 7533 | N    | TRP | X | 496 | 41.289 | 38.949 | 18.398 | 0.00 | 0.00 |
| ATOM | 7534 | H    | TRP | X | 496 | 41.735 | 39.840 | 18.562 | 0.00 | 0.00 |
| ATOM | 7535 | CA   | TRP | X | 496 | 40.936 | 38.304 | 19.646 | 0.00 | 0.00 |
| ATOM | 7536 | HA   | TRP | X | 496 | 41.564 | 37.414 | 19.684 | 0.00 | 0.00 |
| ATOM | 7537 | CB   | TRP | X | 496 | 41.431 | 39.247 | 20.687 | 0.00 | 0.00 |
| ATOM | 7538 | HB2  | TRP | X | 496 | 42.471 | 39.472 | 20.451 | 0.00 | 0.00 |
| ATOM | 7539 | HB3  | TRP | X | 496 | 40.841 | 40.163 | 20.710 | 0.00 | 0.00 |
| ATOM | 7540 | CG   | TRP | X | 496 | 41.502 | 38.841 | 22.126 | 0.00 | 0.00 |
| ATOM | 7541 | CD1  | TRP | X | 496 | 40.832 | 37.818 | 22.711 | 0.00 | 0.00 |
| ATOM | 7542 | HD1  | TRP | X | 496 | 40.227 | 37.051 | 22.252 | 0.00 | 0.00 |
| ATOM | 7543 | NE1  | TRP | X | 496 | 41.077 | 37.753 | 24.070 | 0.00 | 0.00 |
| ATOM | 7544 | HE1  | TRP | X | 496 | 40.834 | 36.952 | 24.636 | 0.00 | 0.00 |
| ATOM | 7545 | CE2  | TRP | X | 496 | 41.942 | 38.758 | 24.468 | 0.00 | 0.00 |
| ATOM | 7546 | CZ2  | TRP | X | 496 | 42.418 | 39.158 | 25.672 | 0.00 | 0.00 |
| ATOM | 7547 | HZ2  | TRP | X | 496 | 42.170 | 38.701 | 26.619 | 0.00 | 0.00 |
| ATOM | 7548 | CH2  | TRP | X | 496 | 43.390 | 40.140 | 25.702 | 0.00 | 0.00 |
| ATOM | 7549 | HH2  | TRP | X | 496 | 43.904 | 40.362 | 26.626 | 0.00 | 0.00 |
| ATOM | 7550 | CZ3  | TRP | X | 496 | 43.952 | 40.674 | 24.543 | 0.00 | 0.00 |
| ATOM | 7551 | HZ3  | TRP | X | 496 | 44.854 | 41.267 | 24.519 | 0.00 | 0.00 |
| ATOM | 7552 | CE3  | TRP | X | 496 | 43.279 | 40.357 | 23.323 | 0.00 | 0.00 |
| ATOM | 7553 | HE3  | TRP | X | 496 | 43.566 | 40.905 | 22.437 | 0.00 | 0.00 |
| ATOM | 7554 | CD2  | TRP | X | 496 | 42.338 | 39.411 | 23.248 | 0.00 | 0.00 |
| ATOM | 7555 | C    | TRP | X | 496 | 39.414 | 38.023 | 19.791 | 0.00 | 0.00 |
| ATOM | 7556 | O    | TRP | X | 496 | 38.626 | 39.003 | 19.837 | 0.00 | 0.00 |
| ATOM | 7557 | N    | PRO | X | 497 | 39.008 | 36.688 | 19.922 | 0.00 | 0.00 |
| ATOM | 7558 | CD   | PRO | X | 497 | 39.872 | 35.542 | 19.862 | 0.00 | 0.00 |
| ATOM | 7559 | HD2  | PRO | X | 497 | 40.641 | 35.563 | 20.634 | 0.00 | 0.00 |
| ATOM | 7560 | HD3  | PRO | X | 497 | 40.498 | 35.465 | 18.972 | 0.00 | 0.00 |
| ATOM | 7561 | CG   | PRO | X | 497 | 39.005 | 34.334 | 19.935 | 0.00 | 0.00 |
| ATOM | 7562 | HG2  | PRO | X | 497 | 38.911 | 34.020 | 20.974 | 0.00 | 0.00 |
| ATOM | 7563 | HG3  | PRO | X | 497 | 39.400 | 33.584 | 19.249 | 0.00 | 0.00 |
| ATOM | 7564 | CB   | PRO | X | 497 | 37.634 | 34.845 | 19.555 | 0.00 | 0.00 |
| ATOM | 7565 | HB2  | PRO | X | 497 | 36.843 | 34.270 | 20.035 | 0.00 | 0.00 |
| ATOM | 7566 | HB3  | PRO | X | 497 | 37.456 | 34.873 | 18.480 | 0.00 | 0.00 |
| ATOM | 7567 | CA   | PRO | X | 497 | 37.617 | 36.276 | 20.073 | 0.00 | 0.00 |
| ATOM | 7568 | HA   | PRO | X | 497 | 36.876 | 36.826 | 19.492 | 0.00 | 0.00 |
| ATOM | 7569 | C    | PRO | X | 497 | 37.172 | 36.267 | 21.553 | 0.00 | 0.00 |
| ATOM | 7570 | O    | PRO | X | 497 | 38.052 | 36.204 | 22.402 | 0.00 | 0.00 |
| ATOM | 7571 | N    | PRO | X | 498 | 35.873 | 36.353 | 21.821 | 0.00 | 0.00 |
| ATOM | 7572 | CD   | PRO | X | 498 | 34.773 | 36.588 | 20.907 | 0.00 | 0.00 |
| ATOM | 7573 | HD2  | PRO | X | 498 | 34.752 | 35.768 | 20.189 | 0.00 | 0.00 |
| ATOM | 7574 | HD3  | PRO | X | 498 | 35.074 | 37.542 | 20.474 | 0.00 | 0.00 |
| ATOM | 7575 | CG   | PRO | X | 498 | 33.455 | 36.699 | 21.757 | 0.00 | 0.00 |
| ATOM | 7576 | HG2  | PRO | X | 498 | 32.814 | 35.831 | 21.604 | 0.00 | 0.00 |
| ATOM | 7577 | HG3  | PRO | X | 498 | 32.991 | 37.656 | 21.521 | 0.00 | 0.00 |
| ATOM | 7578 | CB   | PRO | X | 498 | 34.005 | 36.806 | 23.195 | 0.00 | 0.00 |
| ATOM | 7579 | HB2  | PRO | X | 498 | 33.327 | 36.220 | 23.814 | 0.00 | 0.00 |
| ATOM | 7580 | HB3  | PRO | X | 498 | 34.012 | 37.827 | 23.575 | 0.00 | 0.00 |
| ATOM | 7581 | CA   | PRO | X | 498 | 35.446 | 36.293 | 23.230 | 0.00 | 0.00 |
| ATOM | 7582 | HA   | PRO | X | 498 | 36.033 | 36.934 | 23.887 | 0.00 | 0.00 |
| ATOM | 7583 | C    | PRO | X | 498 | 35.442 | 34.864 | 23.916 | 0.00 | 0.00 |
| ATOM | 7584 | O    | PRO | X | 498 | 35.555 | 33.824 | 23.268 | 0.00 | 0.00 |
| ATOM | 7585 | N    | TYR | X | 499 | 35.412 | 34.826 | 25.226 | 0.00 | 0.00 |
| ATOM | 7586 | H    | TYR | X | 499 | 35.048 | 35.650 | 25.683 | 0.00 | 0.00 |
| ATOM | 7587 | CA   | TYR | X | 499 | 35.519 | 33.604 | 25.983 | 0.00 | 0.00 |
| ATOM | 7588 | HA   | TYR | X | 499 | 36.191 | 32.878 | 25.525 | 0.00 | 0.00 |
| ATOM | 7589 | CB   | TYR | X | 499 | 35.943 | 33.840 | 27.459 | 0.00 | 0.00 |
| ATOM | 7590 | HB2  | TYR | X | 499 | 36.980 | 34.107 | 27.256 | 0.00 | 0.00 |
| ATOM | 7591 | HB3  | TYR | X | 499 | 35.370 | 34.663 | 27.887 | 0.00 | 0.00 |
| ATOM | 7592 | CG   | TYR | X | 499 | 35.805 | 32.701 | 28.426 | 0.00 | 0.00 |
| ATOM | 7593 | CD1  | TYR | X | 499 | 34.557 | 32.423 | 28.973 | 0.00 | 0.00 |
| ATOM | 7594 | HD1  | TYR | X | 499 | 33.734 | 33.111 | 28.851 | 0.00 | 0.00 |
| ATOM | 7595 | CE1  | TYR | X | 499 | 34.297 | 31.176 | 29.643 | 0.00 | 0.00 |
| ATOM | 7596 | HE1  | TYR | X | 499 | 33.364 | 31.008 | 30.161 | 0.00 | 0.00 |
| ATOM | 7597 | CZ   | TYR | X | 499 | 35.288 | 30.226 | 29.774 | 0.00 | 0.00 |

|      |      |      |     |   |     |        |        |        |      |      |
|------|------|------|-----|---|-----|--------|--------|--------|------|------|
| ATOM | 7598 | OH   | TYR | X | 499 | 35.024 | 29.171 | 30.559 | 0.00 | 0.00 |
| ATOM | 7599 | HH   | TYR | X | 499 | 34.086 | 28.970 | 30.594 | 0.00 | 0.00 |
| ATOM | 7600 | CE2  | TYR | X | 499 | 36.598 | 30.535 | 29.271 | 0.00 | 0.00 |
| ATOM | 7601 | HE2  | TYR | X | 499 | 37.364 | 29.802 | 29.474 | 0.00 | 0.00 |
| ATOM | 7602 | CD2  | TYR | X | 499 | 36.845 | 31.710 | 28.522 | 0.00 | 0.00 |
| ATOM | 7603 | HD2  | TYR | X | 499 | 37.802 | 31.952 | 28.085 | 0.00 | 0.00 |
| ATOM | 7604 | C    | TYR | X | 499 | 34.086 | 33.053 | 25.927 | 0.00 | 0.00 |
| ATOM | 7605 | O    | TYR | X | 499 | 33.116 | 33.646 | 26.362 | 0.00 | 0.00 |
| ATOM | 7606 | N    | THR | X | 500 | 34.047 | 31.822 | 25.362 | 0.00 | 0.00 |
| ATOM | 7607 | H    | THR | X | 500 | 34.934 | 31.383 | 25.163 | 0.00 | 0.00 |
| ATOM | 7608 | CA   | THR | X | 500 | 32.852 | 31.108 | 25.179 | 0.00 | 0.00 |
| ATOM | 7609 | HA   | THR | X | 500 | 32.015 | 31.806 | 25.206 | 0.00 | 0.00 |
| ATOM | 7610 | CB   | THR | X | 500 | 32.751 | 30.413 | 23.808 | 0.00 | 0.00 |
| ATOM | 7611 | HB   | THR | X | 500 | 31.766 | 29.945 | 23.777 | 0.00 | 0.00 |
| ATOM | 7612 | CG2  | THR | X | 500 | 32.914 | 31.368 | 22.654 | 0.00 | 0.00 |
| ATOM | 7613 | HG21 | THR | X | 500 | 32.269 | 32.240 | 22.763 | 0.00 | 0.00 |
| ATOM | 7614 | HG22 | THR | X | 500 | 33.928 | 31.730 | 22.824 | 0.00 | 0.00 |
| ATOM | 7615 | HG23 | THR | X | 500 | 32.808 | 30.876 | 21.687 | 0.00 | 0.00 |
| ATOM | 7616 | OG1  | THR | X | 500 | 33.755 | 29.506 | 23.713 | 0.00 | 0.00 |
| ATOM | 7617 | HG1  | THR | X | 500 | 33.682 | 29.107 | 22.843 | 0.00 | 0.00 |
| ATOM | 7618 | C    | THR | X | 500 | 32.617 | 30.210 | 26.364 | 0.00 | 0.00 |
| ATOM | 7619 | O    | THR | X | 500 | 33.525 | 29.422 | 26.680 | 0.00 | 0.00 |
| ATOM | 7620 | N    | ALA | X | 501 | 31.421 | 30.134 | 26.957 | 0.00 | 0.00 |
| ATOM | 7621 | H    | ALA | X | 501 | 30.703 | 30.824 | 26.789 | 0.00 | 0.00 |
| ATOM | 7622 | CA   | ALA | X | 501 | 30.993 | 29.163 | 27.929 | 0.00 | 0.00 |
| ATOM | 7623 | HA   | ALA | X | 501 | 31.676 | 29.152 | 28.779 | 0.00 | 0.00 |
| ATOM | 7624 | CB   | ALA | X | 501 | 29.643 | 29.646 | 28.457 | 0.00 | 0.00 |
| ATOM | 7625 | HB1  | ALA | X | 501 | 29.572 | 30.710 | 28.681 | 0.00 | 0.00 |
| ATOM | 7626 | HB2  | ALA | X | 501 | 28.887 | 29.582 | 27.674 | 0.00 | 0.00 |
| ATOM | 7627 | HB3  | ALA | X | 501 | 29.245 | 28.961 | 29.207 | 0.00 | 0.00 |
| ATOM | 7628 | C    | ALA | X | 501 | 30.833 | 27.696 | 27.329 | 0.00 | 0.00 |
| ATOM | 7629 | O    | ALA | X | 501 | 31.078 | 26.716 | 28.060 | 0.00 | 0.00 |
| ATOM | 7630 | N    | GLY | X | 502 | 30.573 | 27.586 | 25.999 | 0.00 | 0.00 |
| ATOM | 7631 | H    | GLY | X | 502 | 30.215 | 28.363 | 25.463 | 0.00 | 0.00 |
| ATOM | 7632 | CA   | GLY | X | 502 | 30.850 | 26.319 | 25.321 | 0.00 | 0.00 |
| ATOM | 7633 | HA2  | GLY | X | 502 | 30.462 | 25.462 | 25.929 | 0.00 | 0.00 |
| ATOM | 7634 | HA3  | GLY | X | 502 | 30.411 | 26.306 | 24.405 | 0.00 | 0.00 |
| ATOM | 7635 | C    | GLY | X | 502 | 32.438 | 26.001 | 25.362 | 0.00 | 0.00 |
| ATOM | 7636 | O    | GLY | X | 502 | 32.953 | 25.369 | 26.306 | 0.00 | 0.00 |
| ATOM | 7637 | N    | ALA | X | 503 | 33.132 | 26.469 | 24.352 | 0.00 | 0.00 |
| ATOM | 7638 | H    | ALA | X | 503 | 32.792 | 27.188 | 23.729 | 0.00 | 0.00 |
| ATOM | 7639 | CA   | ALA | X | 503 | 34.516 | 25.942 | 24.006 | 0.00 | 0.00 |
| ATOM | 7640 | HA   | ALA | X | 503 | 34.581 | 24.857 | 24.086 | 0.00 | 0.00 |
| ATOM | 7641 | CB   | ALA | X | 503 | 34.792 | 26.224 | 22.535 | 0.00 | 0.00 |
| ATOM | 7642 | HB1  | ALA | X | 503 | 35.796 | 25.812 | 22.437 | 0.00 | 0.00 |
| ATOM | 7643 | HB2  | ALA | X | 503 | 34.146 | 25.588 | 21.930 | 0.00 | 0.00 |
| ATOM | 7644 | HB3  | ALA | X | 503 | 34.835 | 27.292 | 22.323 | 0.00 | 0.00 |
| ATOM | 7645 | C    | ALA | X | 503 | 35.622 | 26.494 | 24.969 | 0.00 | 0.00 |
| ATOM | 7646 | O    | ALA | X | 503 | 36.804 | 26.118 | 24.817 | 0.00 | 0.00 |
| ATOM | 7647 | N    | GLN | X | 504 | 35.278 | 27.306 | 25.955 | 0.00 | 0.00 |
| ATOM | 7648 | H    | GLN | X | 504 | 34.351 | 27.705 | 25.909 | 0.00 | 0.00 |
| ATOM | 7649 | CA   | GLN | X | 504 | 36.238 | 27.958 | 26.872 | 0.00 | 0.00 |
| ATOM | 7650 | HA   | GLN | X | 504 | 35.730 | 28.741 | 27.435 | 0.00 | 0.00 |
| ATOM | 7651 | CB   | GLN | X | 504 | 36.746 | 26.987 | 27.952 | 0.00 | 0.00 |
| ATOM | 7652 | HB2  | GLN | X | 504 | 37.459 | 26.291 | 27.511 | 0.00 | 0.00 |
| ATOM | 7653 | HB3  | GLN | X | 504 | 37.224 | 27.548 | 28.756 | 0.00 | 0.00 |
| ATOM | 7654 | CG   | GLN | X | 504 | 35.687 | 26.086 | 28.624 | 0.00 | 0.00 |
| ATOM | 7655 | HG2  | GLN | X | 504 | 34.922 | 26.738 | 29.045 | 0.00 | 0.00 |
| ATOM | 7656 | HG3  | GLN | X | 504 | 35.296 | 25.404 | 27.869 | 0.00 | 0.00 |
| ATOM | 7657 | CD   | GLN | X | 504 | 36.182 | 25.115 | 29.661 | 0.00 | 0.00 |
| ATOM | 7658 | OE1  | GLN | X | 504 | 36.181 | 25.309 | 30.873 | 0.00 | 0.00 |
| ATOM | 7659 | NE2  | GLN | X | 504 | 36.839 | 24.023 | 29.202 | 0.00 | 0.00 |
| ATOM | 7660 | HE21 | GLN | X | 504 | 37.189 | 23.446 | 29.954 | 0.00 | 0.00 |
| ATOM | 7661 | HE22 | GLN | X | 504 | 36.794 | 23.644 | 28.267 | 0.00 | 0.00 |
| ATOM | 7662 | C    | GLN | X | 504 | 37.424 | 28.669 | 26.167 | 0.00 | 0.00 |
| ATOM | 7663 | O    | GLN | X | 504 | 38.599 | 28.435 | 26.434 | 0.00 | 0.00 |
| ATOM | 7664 | N    | GLN | X | 505 | 37.025 | 29.344 | 25.086 | 0.00 | 0.00 |
| ATOM | 7665 | H    | GLN | X | 505 | 36.095 | 29.226 | 24.710 | 0.00 | 0.00 |
| ATOM | 7666 | CA   | GLN | X | 505 | 37.977 | 30.047 | 24.160 | 0.00 | 0.00 |
| ATOM | 7667 | HA   | GLN | X | 505 | 38.674 | 29.344 | 23.705 | 0.00 | 0.00 |



|      |      |      |     |   |     |        |        |        |      |      |
|------|------|------|-----|---|-----|--------|--------|--------|------|------|
| ATOM | 7668 | CB   | GLN | X | 505 | 37.068 | 30.626 | 23.025 | 0.00 | 0.00 |
| ATOM | 7669 | HB2  | GLN | X | 505 | 36.427 | 29.805 | 22.704 | 0.00 | 0.00 |
| ATOM | 7670 | HB3  | GLN | X | 505 | 36.335 | 31.309 | 23.454 | 0.00 | 0.00 |
| ATOM | 7671 | CG   | GLN | X | 505 | 37.783 | 31.126 | 21.736 | 0.00 | 0.00 |
| ATOM | 7672 | HG2  | GLN | X | 505 | 38.416 | 32.012 | 21.789 | 0.00 | 0.00 |
| ATOM | 7673 | HG3  | GLN | X | 505 | 38.459 | 30.372 | 21.333 | 0.00 | 0.00 |
| ATOM | 7674 | CD   | GLN | X | 505 | 36.756 | 31.376 | 20.650 | 0.00 | 0.00 |
| ATOM | 7675 | OE1  | GLN | X | 505 | 36.762 | 30.739 | 19.605 | 0.00 | 0.00 |
| ATOM | 7676 | NE2  | GLN | X | 505 | 35.779 | 32.222 | 20.931 | 0.00 | 0.00 |
| ATOM | 7677 | HE21 | GLN | X | 505 | 34.947 | 32.205 | 20.357 | 0.00 | 0.00 |
| ATOM | 7678 | HE22 | GLN | X | 505 | 35.735 | 32.797 | 21.759 | 0.00 | 0.00 |
| ATOM | 7679 | C    | GLN | X | 505 | 38.870 | 31.089 | 24.836 | 0.00 | 0.00 |
| ATOM | 7680 | O    | GLN | X | 505 | 38.447 | 31.912 | 25.662 | 0.00 | 0.00 |
| ATOM | 7681 | N    | TYR | X | 506 | 40.156 | 31.107 | 24.432 | 0.00 | 0.00 |
| ATOM | 7682 | H    | TYR | X | 506 | 40.454 | 30.493 | 23.688 | 0.00 | 0.00 |
| ATOM | 7683 | CA   | TYR | X | 506 | 41.111 | 32.123 | 24.947 | 0.00 | 0.00 |
| ATOM | 7684 | HA   | TYR | X | 506 | 40.512 | 33.028 | 25.047 | 0.00 | 0.00 |
| ATOM | 7685 | CB   | TYR | X | 506 | 41.739 | 31.679 | 26.277 | 0.00 | 0.00 |
| ATOM | 7686 | HB2  | TYR | X | 506 | 42.239 | 32.508 | 26.778 | 0.00 | 0.00 |
| ATOM | 7687 | HB3  | TYR | X | 506 | 40.904 | 31.381 | 26.911 | 0.00 | 0.00 |
| ATOM | 7688 | CG   | TYR | X | 506 | 42.694 | 30.573 | 26.133 | 0.00 | 0.00 |
| ATOM | 7689 | CD1  | TYR | X | 506 | 42.224 | 29.285 | 25.984 | 0.00 | 0.00 |
| ATOM | 7690 | HD1  | TYR | X | 506 | 41.172 | 29.042 | 25.947 | 0.00 | 0.00 |
| ATOM | 7691 | CE1  | TYR | X | 506 | 43.180 | 28.217 | 25.910 | 0.00 | 0.00 |
| ATOM | 7692 | HE1  | TYR | X | 506 | 43.026 | 27.157 | 25.769 | 0.00 | 0.00 |
| ATOM | 7693 | CZ   | TYR | X | 506 | 44.541 | 28.509 | 25.984 | 0.00 | 0.00 |
| ATOM | 7694 | OH   | TYR | X | 506 | 45.501 | 27.533 | 25.792 | 0.00 | 0.00 |
| ATOM | 7695 | HH   | TYR | X | 506 | 45.013 | 26.707 | 25.837 | 0.00 | 0.00 |
| ATOM | 7696 | CE2  | TYR | X | 506 | 44.959 | 29.852 | 26.197 | 0.00 | 0.00 |
| ATOM | 7697 | HE2  | TYR | X | 506 | 46.014 | 30.073 | 26.134 | 0.00 | 0.00 |
| ATOM | 7698 | CD2  | TYR | X | 506 | 44.055 | 30.900 | 26.233 | 0.00 | 0.00 |
| ATOM | 7699 | HD2  | TYR | X | 506 | 44.324 | 31.943 | 26.307 | 0.00 | 0.00 |
| ATOM | 7700 | C    | TYR | X | 506 | 42.257 | 32.444 | 23.934 | 0.00 | 0.00 |
| ATOM | 7701 | O    | TYR | X | 506 | 42.518 | 31.608 | 23.076 | 0.00 | 0.00 |
| ATOM | 7702 | N    | VAL | X | 507 | 43.015 | 33.546 | 24.031 | 0.00 | 0.00 |
| ATOM | 7703 | H    | VAL | X | 507 | 42.610 | 34.288 | 24.584 | 0.00 | 0.00 |
| ATOM | 7704 | CA   | VAL | X | 507 | 44.252 | 33.757 | 23.147 | 0.00 | 0.00 |
| ATOM | 7705 | HA   | VAL | X | 507 | 44.117 | 32.981 | 22.393 | 0.00 | 0.00 |
| ATOM | 7706 | CB   | VAL | X | 507 | 44.173 | 35.108 | 22.451 | 0.00 | 0.00 |
| ATOM | 7707 | HB   | VAL | X | 507 | 44.935 | 35.082 | 21.672 | 0.00 | 0.00 |
| ATOM | 7708 | CG1  | VAL | X | 507 | 42.856 | 35.325 | 21.671 | 0.00 | 0.00 |
| ATOM | 7709 | HG11 | VAL | X | 507 | 42.681 | 34.637 | 20.843 | 0.00 | 0.00 |
| ATOM | 7710 | HG12 | VAL | X | 507 | 41.953 | 35.301 | 22.281 | 0.00 | 0.00 |
| ATOM | 7711 | HG13 | VAL | X | 507 | 42.692 | 36.359 | 21.368 | 0.00 | 0.00 |
| ATOM | 7712 | CG2  | VAL | X | 507 | 44.552 | 36.337 | 23.370 | 0.00 | 0.00 |
| ATOM | 7713 | HG21 | VAL | X | 507 | 43.886 | 36.380 | 24.232 | 0.00 | 0.00 |
| ATOM | 7714 | HG22 | VAL | X | 507 | 45.545 | 36.252 | 23.810 | 0.00 | 0.00 |
| ATOM | 7715 | HG23 | VAL | X | 507 | 44.470 | 37.258 | 22.792 | 0.00 | 0.00 |
| ATOM | 7716 | C    | VAL | X | 507 | 45.630 | 33.564 | 23.818 | 0.00 | 0.00 |
| ATOM | 7717 | O    | VAL | X | 507 | 45.785 | 33.586 | 25.028 | 0.00 | 0.00 |
| ATOM | 7718 | N    | SER | X | 508 | 46.705 | 33.341 | 22.978 | 0.00 | 0.00 |
| ATOM | 7719 | H    | SER | X | 508 | 46.500 | 33.143 | 22.009 | 0.00 | 0.00 |
| ATOM | 7720 | CA   | SER | X | 508 | 48.125 | 33.553 | 23.376 | 0.00 | 0.00 |
| ATOM | 7721 | HA   | SER | X | 508 | 48.214 | 33.361 | 24.445 | 0.00 | 0.00 |
| ATOM | 7722 | CB   | SER | X | 508 | 48.914 | 32.482 | 22.627 | 0.00 | 0.00 |
| ATOM | 7723 | HB2  | SER | X | 508 | 48.485 | 31.481 | 22.678 | 0.00 | 0.00 |
| ATOM | 7724 | HB3  | SER | X | 508 | 49.066 | 32.875 | 21.622 | 0.00 | 0.00 |
| ATOM | 7725 | OG   | SER | X | 508 | 50.190 | 32.538 | 23.199 | 0.00 | 0.00 |
| ATOM | 7726 | HG   | SER | X | 508 | 50.259 | 31.911 | 23.923 | 0.00 | 0.00 |
| ATOM | 7727 | C    | SER | X | 508 | 48.609 | 34.956 | 23.067 | 0.00 | 0.00 |
| ATOM | 7728 | O    | SER | X | 508 | 48.384 | 35.495 | 21.962 | 0.00 | 0.00 |
| ATOM | 7729 | N    | LEU | X | 509 | 49.426 | 35.541 | 23.955 | 0.00 | 0.00 |
| ATOM | 7730 | H    | LEU | X | 509 | 49.651 | 34.961 | 24.750 | 0.00 | 0.00 |
| ATOM | 7731 | CA   | LEU | X | 509 | 50.128 | 36.894 | 23.853 | 0.00 | 0.00 |
| ATOM | 7732 | HA   | LEU | X | 509 | 49.949 | 37.339 | 22.874 | 0.00 | 0.00 |
| ATOM | 7733 | CB   | LEU | X | 509 | 49.686 | 37.869 | 24.936 | 0.00 | 0.00 |
| ATOM | 7734 | HB2  | LEU | X | 509 | 49.922 | 37.387 | 25.885 | 0.00 | 0.00 |
| ATOM | 7735 | HB3  | LEU | X | 509 | 50.258 | 38.786 | 24.798 | 0.00 | 0.00 |
| ATOM | 7736 | CG   | LEU | X | 509 | 48.193 | 38.145 | 25.037 | 0.00 | 0.00 |
| ATOM | 7737 | HG   | LEU | X | 509 | 47.689 | 37.222 | 25.325 | 0.00 | 0.00 |

|      |      |      |     |   |     |        |        |        |      |      |
|------|------|------|-----|---|-----|--------|--------|--------|------|------|
| ATOM | 7738 | CD1  | LEU | X | 509 | 47.959 | 39.252 | 26.104 | 0.00 | 0.00 |
| ATOM | 7739 | HD11 | LEU | X | 509 | 48.375 | 39.038 | 27.089 | 0.00 | 0.00 |
| ATOM | 7740 | HD12 | LEU | X | 509 | 48.434 | 40.090 | 25.595 | 0.00 | 0.00 |
| ATOM | 7741 | HD13 | LEU | X | 509 | 46.879 | 39.393 | 26.140 | 0.00 | 0.00 |
| ATOM | 7742 | CD2  | LEU | X | 509 | 47.477 | 38.577 | 23.826 | 0.00 | 0.00 |
| ATOM | 7743 | HD21 | LEU | X | 509 | 47.660 | 37.857 | 23.028 | 0.00 | 0.00 |
| ATOM | 7744 | HD22 | LEU | X | 509 | 46.406 | 38.538 | 24.026 | 0.00 | 0.00 |
| ATOM | 7745 | HD23 | LEU | X | 509 | 47.809 | 39.548 | 23.459 | 0.00 | 0.00 |
| ATOM | 7746 | C    | LEU | X | 509 | 51.632 | 36.547 | 23.872 | 0.00 | 0.00 |
| ATOM | 7747 | O    | LEU | X | 509 | 52.234 | 36.168 | 24.888 | 0.00 | 0.00 |
| ATOM | 7748 | N    | ASP | X | 510 | 52.233 | 36.821 | 22.715 | 0.00 | 0.00 |
| ATOM | 7749 | H    | ASP | X | 510 | 51.601 | 37.247 | 22.052 | 0.00 | 0.00 |
| ATOM | 7750 | CA   | ASP | X | 510 | 53.560 | 36.522 | 22.224 | 0.00 | 0.00 |
| ATOM | 7751 | HA   | ASP | X | 510 | 54.346 | 36.751 | 22.943 | 0.00 | 0.00 |
| ATOM | 7752 | CB   | ASP | X | 510 | 53.548 | 35.069 | 21.850 | 0.00 | 0.00 |
| ATOM | 7753 | HB2  | ASP | X | 510 | 53.037 | 34.495 | 22.622 | 0.00 | 0.00 |
| ATOM | 7754 | HB3  | ASP | X | 510 | 53.019 | 34.932 | 20.907 | 0.00 | 0.00 |
| ATOM | 7755 | CG   | ASP | X | 510 | 54.973 | 34.520 | 21.640 | 0.00 | 0.00 |
| ATOM | 7756 | OD1  | ASP | X | 510 | 55.758 | 34.743 | 22.566 | 0.00 | 0.00 |
| ATOM | 7757 | OD2  | ASP | X | 510 | 55.266 | 34.195 | 20.500 | 0.00 | 0.00 |
| ATOM | 7758 | C    | ASP | X | 510 | 54.003 | 37.362 | 20.990 | 0.00 | 0.00 |
| ATOM | 7759 | O    | ASP | X | 510 | 53.263 | 38.043 | 20.319 | 0.00 | 0.00 |
| ATOM | 7760 | N    | LEU | X | 511 | 55.284 | 37.287 | 20.667 | 0.00 | 0.00 |
| ATOM | 7761 | H    | LEU | X | 511 | 55.834 | 36.733 | 21.307 | 0.00 | 0.00 |
| ATOM | 7762 | CA   | LEU | X | 511 | 56.076 | 37.962 | 19.595 | 0.00 | 0.00 |
| ATOM | 7763 | HA   | LEU | X | 511 | 56.017 | 39.049 | 19.650 | 0.00 | 0.00 |
| ATOM | 7764 | CB   | LEU | X | 511 | 57.555 | 37.449 | 19.596 | 0.00 | 0.00 |
| ATOM | 7765 | HB2  | LEU | X | 511 | 57.616 | 36.385 | 19.370 | 0.00 | 0.00 |
| ATOM | 7766 | HB3  | LEU | X | 511 | 57.973 | 38.023 | 18.769 | 0.00 | 0.00 |
| ATOM | 7767 | CG   | LEU | X | 511 | 58.435 | 37.635 | 20.842 | 0.00 | 0.00 |
| ATOM | 7768 | HG   | LEU | X | 511 | 57.981 | 37.179 | 21.722 | 0.00 | 0.00 |
| ATOM | 7769 | CD1  | LEU | X | 511 | 59.834 | 37.053 | 20.779 | 0.00 | 0.00 |
| ATOM | 7770 | HD11 | LEU | X | 511 | 60.365 | 37.228 | 21.715 | 0.00 | 0.00 |
| ATOM | 7771 | HD12 | LEU | X | 511 | 59.758 | 35.983 | 20.585 | 0.00 | 0.00 |
| ATOM | 7772 | HD13 | LEU | X | 511 | 60.357 | 37.560 | 19.969 | 0.00 | 0.00 |
| ATOM | 7773 | CD2  | LEU | X | 511 | 58.570 | 39.162 | 21.187 | 0.00 | 0.00 |
| ATOM | 7774 | HD21 | LEU | X | 511 | 59.103 | 39.130 | 22.137 | 0.00 | 0.00 |
| ATOM | 7775 | HD22 | LEU | X | 511 | 59.275 | 39.656 | 20.519 | 0.00 | 0.00 |
| ATOM | 7776 | HD23 | LEU | X | 511 | 57.551 | 39.547 | 21.233 | 0.00 | 0.00 |
| ATOM | 7777 | C    | LEU | X | 511 | 55.540 | 37.545 | 18.283 | 0.00 | 0.00 |
| ATOM | 7778 | O    | LEU | X | 511 | 55.414 | 38.410 | 17.408 | 0.00 | 0.00 |
| ATOM | 7779 | N    | ARG | X | 512 | 55.101 | 36.305 | 18.125 | 0.00 | 0.00 |
| ATOM | 7780 | H    | ARG | X | 512 | 55.239 | 35.677 | 18.903 | 0.00 | 0.00 |
| ATOM | 7781 | CA   | ARG | X | 512 | 54.419 | 35.820 | 16.955 | 0.00 | 0.00 |
| ATOM | 7782 | HA   | ARG | X | 512 | 55.057 | 36.027 | 16.096 | 0.00 | 0.00 |
| ATOM | 7783 | CB   | ARG | X | 512 | 54.025 | 34.370 | 16.936 | 0.00 | 0.00 |
| ATOM | 7784 | HB2  | ARG | X | 512 | 53.333 | 34.155 | 17.749 | 0.00 | 0.00 |
| ATOM | 7785 | HB3  | ARG | X | 512 | 53.616 | 34.169 | 15.946 | 0.00 | 0.00 |
| ATOM | 7786 | CG   | ARG | X | 512 | 55.264 | 33.522 | 17.031 | 0.00 | 0.00 |
| ATOM | 7787 | HG2  | ARG | X | 512 | 55.518 | 33.309 | 15.993 | 0.00 | 0.00 |
| ATOM | 7788 | HG3  | ARG | X | 512 | 56.062 | 33.889 | 17.676 | 0.00 | 0.00 |
| ATOM | 7789 | CD   | ARG | X | 512 | 54.931 | 32.159 | 17.628 | 0.00 | 0.00 |
| ATOM | 7790 | HD2  | ARG | X | 512 | 54.466 | 32.285 | 18.606 | 0.00 | 0.00 |
| ATOM | 7791 | HD3  | ARG | X | 512 | 54.177 | 31.661 | 17.019 | 0.00 | 0.00 |
| ATOM | 7792 | NE   | ARG | X | 512 | 56.083 | 31.255 | 17.771 | 0.00 | 0.00 |
| ATOM | 7793 | HE   | ARG | X | 512 | 55.922 | 30.345 | 17.365 | 0.00 | 0.00 |
| ATOM | 7794 | CZ   | ARG | X | 512 | 57.010 | 31.267 | 18.720 | 0.00 | 0.00 |
| ATOM | 7795 | NH1  | ARG | X | 512 | 57.173 | 32.281 | 19.555 | 0.00 | 0.00 |
| ATOM | 7796 | HH11 | ARG | X | 512 | 56.551 | 33.065 | 19.689 | 0.00 | 0.00 |
| ATOM | 7797 | HH12 | ARG | X | 512 | 57.993 | 32.308 | 20.145 | 0.00 | 0.00 |
| ATOM | 7798 | NH2  | ARG | X | 512 | 57.864 | 30.310 | 18.884 | 0.00 | 0.00 |
| ATOM | 7799 | HH21 | ARG | X | 512 | 57.803 | 29.522 | 18.255 | 0.00 | 0.00 |
| ATOM | 7800 | HH22 | ARG | X | 512 | 58.347 | 30.145 | 19.756 | 0.00 | 0.00 |
| ATOM | 7801 | C    | ARG | X | 512 | 53.025 | 36.548 | 16.777 | 0.00 | 0.00 |
| ATOM | 7802 | O    | ARG | X | 512 | 52.463 | 36.956 | 17.795 | 0.00 | 0.00 |
| ATOM | 7803 | N    | PRO | X | 513 | 52.443 | 36.899 | 15.662 | 0.00 | 0.00 |
| ATOM | 7804 | CD   | PRO | X | 513 | 53.074 | 37.024 | 14.392 | 0.00 | 0.00 |
| ATOM | 7805 | HD2  | PRO | X | 513 | 53.321 | 36.015 | 14.063 | 0.00 | 0.00 |
| ATOM | 7806 | HD3  | PRO | X | 513 | 53.926 | 37.692 | 14.516 | 0.00 | 0.00 |
| ATOM | 7807 | CG   | PRO | X | 513 | 52.172 | 37.709 | 13.362 | 0.00 | 0.00 |

|      |      |      |     |   |     |        |        |        |      |      |
|------|------|------|-----|---|-----|--------|--------|--------|------|------|
| ATOM | 7808 | HG2  | PRO | X | 513 | 52.423 | 37.388 | 12.351 | 0.00 | 0.00 |
| ATOM | 7809 | HG3  | PRO | X | 513 | 52.246 | 38.795 | 13.430 | 0.00 | 0.00 |
| ATOM | 7810 | CB   | PRO | X | 513 | 50.807 | 37.337 | 13.947 | 0.00 | 0.00 |
| ATOM | 7811 | HB2  | PRO | X | 513 | 50.588 | 36.346 | 13.547 | 0.00 | 0.00 |
| ATOM | 7812 | HB3  | PRO | X | 513 | 50.031 | 38.023 | 13.609 | 0.00 | 0.00 |
| ATOM | 7813 | CA   | PRO | X | 513 | 51.017 | 37.268 | 15.484 | 0.00 | 0.00 |
| ATOM | 7814 | HA   | PRO | X | 513 | 50.942 | 38.268 | 15.911 | 0.00 | 0.00 |
| ATOM | 7815 | C    | PRO | X | 513 | 50.050 | 36.329 | 16.160 | 0.00 | 0.00 |
| ATOM | 7816 | O    | PRO | X | 513 | 50.373 | 35.178 | 16.217 | 0.00 | 0.00 |
| ATOM | 7817 | N    | LEU | X | 514 | 48.943 | 36.886 | 16.615 | 0.00 | 0.00 |
| ATOM | 7818 | H    | LEU | X | 514 | 48.824 | 37.845 | 16.320 | 0.00 | 0.00 |
| ATOM | 7819 | CA   | LEU | X | 514 | 48.019 | 36.315 | 17.590 | 0.00 | 0.00 |
| ATOM | 7820 | HA   | LEU | X | 514 | 48.485 | 36.266 | 18.574 | 0.00 | 0.00 |
| ATOM | 7821 | CB   | LEU | X | 514 | 46.811 | 37.311 | 17.653 | 0.00 | 0.00 |
| ATOM | 7822 | HB2  | LEU | X | 514 | 47.246 | 38.283 | 17.422 | 0.00 | 0.00 |
| ATOM | 7823 | HB3  | LEU | X | 514 | 46.092 | 37.159 | 16.848 | 0.00 | 0.00 |
| ATOM | 7824 | CG   | LEU | X | 514 | 46.097 | 37.358 | 19.015 | 0.00 | 0.00 |
| ATOM | 7825 | HG   | LEU | X | 514 | 46.173 | 36.375 | 19.481 | 0.00 | 0.00 |
| ATOM | 7826 | CD1  | LEU | X | 514 | 46.592 | 38.472 | 19.987 | 0.00 | 0.00 |
| ATOM | 7827 | HD11 | LEU | X | 514 | 47.642 | 38.263 | 20.192 | 0.00 | 0.00 |
| ATOM | 7828 | HD12 | LEU | X | 514 | 46.420 | 39.452 | 19.542 | 0.00 | 0.00 |
| ATOM | 7829 | HD13 | LEU | X | 514 | 46.127 | 38.311 | 20.960 | 0.00 | 0.00 |
| ATOM | 7830 | CD2  | LEU | X | 514 | 44.616 | 37.666 | 18.683 | 0.00 | 0.00 |
| ATOM | 7831 | HD21 | LEU | X | 514 | 44.633 | 38.577 | 18.084 | 0.00 | 0.00 |
| ATOM | 7832 | HD22 | LEU | X | 514 | 44.294 | 36.812 | 18.086 | 0.00 | 0.00 |
| ATOM | 7833 | HD23 | LEU | X | 514 | 43.934 | 37.754 | 19.529 | 0.00 | 0.00 |
| ATOM | 7834 | C    | LEU | X | 514 | 47.539 | 34.977 | 17.193 | 0.00 | 0.00 |
| ATOM | 7835 | O    | LEU | X | 514 | 47.036 | 34.785 | 16.090 | 0.00 | 0.00 |
| ATOM | 7836 | N    | GLU | X | 515 | 47.567 | 34.021 | 18.090 | 0.00 | 0.00 |
| ATOM | 7837 | H    | GLU | X | 515 | 48.051 | 34.250 | 18.946 | 0.00 | 0.00 |
| ATOM | 7838 | CA   | GLU | X | 515 | 47.058 | 32.686 | 17.987 | 0.00 | 0.00 |
| ATOM | 7839 | HA   | GLU | X | 515 | 46.591 | 32.496 | 17.021 | 0.00 | 0.00 |
| ATOM | 7840 | CB   | GLU | X | 515 | 48.281 | 31.730 | 18.155 | 0.00 | 0.00 |
| ATOM | 7841 | HB2  | GLU | X | 515 | 48.840 | 31.798 | 17.222 | 0.00 | 0.00 |
| ATOM | 7842 | HB3  | GLU | X | 515 | 48.951 | 32.199 | 18.876 | 0.00 | 0.00 |
| ATOM | 7843 | CG   | GLU | X | 515 | 48.072 | 30.244 | 18.296 | 0.00 | 0.00 |
| ATOM | 7844 | HG2  | GLU | X | 515 | 47.523 | 30.036 | 19.215 | 0.00 | 0.00 |
| ATOM | 7845 | HG3  | GLU | X | 515 | 47.477 | 29.791 | 17.503 | 0.00 | 0.00 |
| ATOM | 7846 | CD   | GLU | X | 515 | 49.437 | 29.454 | 18.311 | 0.00 | 0.00 |
| ATOM | 7847 | OE1  | GLU | X | 515 | 50.407 | 29.921 | 17.667 | 0.00 | 0.00 |
| ATOM | 7848 | OE2  | GLU | X | 515 | 49.659 | 28.493 | 19.137 | 0.00 | 0.00 |
| ATOM | 7849 | C    | GLU | X | 515 | 45.959 | 32.415 | 19.042 | 0.00 | 0.00 |
| ATOM | 7850 | O    | GLU | X | 515 | 46.174 | 32.593 | 20.214 | 0.00 | 0.00 |
| ATOM | 7851 | N    | VAL | X | 516 | 44.816 | 31.897 | 18.552 | 0.00 | 0.00 |
| ATOM | 7852 | H    | VAL | X | 516 | 44.662 | 31.577 | 17.606 | 0.00 | 0.00 |
| ATOM | 7853 | CA   | VAL | X | 516 | 43.697 | 31.498 | 19.460 | 0.00 | 0.00 |
| ATOM | 7854 | HA   | VAL | X | 516 | 43.808 | 32.161 | 20.318 | 0.00 | 0.00 |
| ATOM | 7855 | CB   | VAL | X | 516 | 42.356 | 31.729 | 18.701 | 0.00 | 0.00 |
| ATOM | 7856 | HB   | VAL | X | 516 | 42.338 | 31.070 | 17.833 | 0.00 | 0.00 |
| ATOM | 7857 | CG1  | VAL | X | 516 | 41.082 | 31.400 | 19.443 | 0.00 | 0.00 |
| ATOM | 7858 | HG11 | VAL | X | 516 | 40.254 | 31.802 | 18.860 | 0.00 | 0.00 |
| ATOM | 7859 | HG12 | VAL | X | 516 | 40.905 | 30.338 | 19.615 | 0.00 | 0.00 |
| ATOM | 7860 | HG13 | VAL | X | 516 | 41.163 | 31.916 | 20.400 | 0.00 | 0.00 |
| ATOM | 7861 | CG2  | VAL | X | 516 | 42.249 | 33.154 | 18.124 | 0.00 | 0.00 |
| ATOM | 7862 | HG21 | VAL | X | 516 | 42.903 | 33.176 | 17.253 | 0.00 | 0.00 |
| ATOM | 7863 | HG22 | VAL | X | 516 | 41.202 | 33.319 | 17.870 | 0.00 | 0.00 |
| ATOM | 7864 | HG23 | VAL | X | 516 | 42.613 | 33.808 | 18.917 | 0.00 | 0.00 |
| ATOM | 7865 | C    | VAL | X | 516 | 43.826 | 29.994 | 19.851 | 0.00 | 0.00 |
| ATOM | 7866 | O    | VAL | X | 516 | 44.370 | 29.143 | 19.131 | 0.00 | 0.00 |
| ATOM | 7867 | N    | ARG | X | 517 | 43.500 | 29.728 | 21.109 | 0.00 | 0.00 |
| ATOM | 7868 | H    | ARG | X | 517 | 43.063 | 30.475 | 21.630 | 0.00 | 0.00 |
| ATOM | 7869 | CA   | ARG | X | 517 | 43.424 | 28.394 | 21.846 | 0.00 | 0.00 |
| ATOM | 7870 | HA   | ARG | X | 517 | 43.522 | 27.601 | 21.104 | 0.00 | 0.00 |
| ATOM | 7871 | CB   | ARG | X | 517 | 44.598 | 28.137 | 22.788 | 0.00 | 0.00 |
| ATOM | 7872 | HB2  | ARG | X | 517 | 44.697 | 29.000 | 23.447 | 0.00 | 0.00 |
| ATOM | 7873 | HB3  | ARG | X | 517 | 44.414 | 27.152 | 23.217 | 0.00 | 0.00 |
| ATOM | 7874 | CG   | ARG | X | 517 | 45.887 | 28.146 | 21.916 | 0.00 | 0.00 |
| ATOM | 7875 | HG2  | ARG | X | 517 | 45.733 | 27.487 | 21.062 | 0.00 | 0.00 |
| ATOM | 7876 | HG3  | ARG | X | 517 | 45.936 | 29.137 | 21.465 | 0.00 | 0.00 |
| ATOM | 7877 | CD   | ARG | X | 517 | 47.172 | 27.673 | 22.705 | 0.00 | 0.00 |

|      |      |      |     |   |     |        |        |        |      |      |
|------|------|------|-----|---|-----|--------|--------|--------|------|------|
| ATOM | 7878 | HD2  | ARG | X | 517 | 47.125 | 27.876 | 23.775 | 0.00 | 0.00 |
| ATOM | 7879 | HD3  | ARG | X | 517 | 47.136 | 26.586 | 22.643 | 0.00 | 0.00 |
| ATOM | 7880 | NE   | ARG | X | 517 | 48.421 | 28.113 | 21.978 | 0.00 | 0.00 |
| ATOM | 7881 | HE   | ARG | X | 517 | 48.449 | 27.997 | 20.975 | 0.00 | 0.00 |
| ATOM | 7882 | CZ   | ARG | X | 517 | 49.447 | 28.699 | 22.633 | 0.00 | 0.00 |
| ATOM | 7883 | NH1  | ARG | X | 517 | 49.618 | 28.778 | 23.888 | 0.00 | 0.00 |
| ATOM | 7884 | HH11 | ARG | X | 517 | 49.027 | 28.247 | 24.510 | 0.00 | 0.00 |
| ATOM | 7885 | HH12 | ARG | X | 517 | 50.346 | 29.373 | 24.256 | 0.00 | 0.00 |
| ATOM | 7886 | NH2  | ARG | X | 517 | 50.348 | 29.191 | 21.805 | 0.00 | 0.00 |
| ATOM | 7887 | HH21 | ARG | X | 517 | 50.223 | 29.057 | 20.812 | 0.00 | 0.00 |
| ATOM | 7888 | HH22 | ARG | X | 517 | 51.247 | 29.524 | 22.121 | 0.00 | 0.00 |
| ATOM | 7889 | C    | ARG | X | 517 | 42.113 | 28.121 | 22.527 | 0.00 | 0.00 |
| ATOM | 7890 | O    | ARG | X | 517 | 41.308 | 29.028 | 22.677 | 0.00 | 0.00 |
| ATOM | 7891 | N    | ARG | X | 518 | 41.848 | 26.885 | 22.947 | 0.00 | 0.00 |
| ATOM | 7892 | H    | ARG | X | 518 | 42.465 | 26.143 | 22.645 | 0.00 | 0.00 |
| ATOM | 7893 | CA   | ARG | X | 518 | 40.465 | 26.470 | 23.284 | 0.00 | 0.00 |
| ATOM | 7894 | HA   | ARG | X | 518 | 39.847 | 27.251 | 23.727 | 0.00 | 0.00 |
| ATOM | 7895 | CB   | ARG | X | 518 | 39.691 | 26.077 | 22.003 | 0.00 | 0.00 |
| ATOM | 7896 | HB2  | ARG | X | 518 | 40.313 | 25.338 | 21.497 | 0.00 | 0.00 |
| ATOM | 7897 | HB3  | ARG | X | 518 | 38.715 | 25.728 | 22.340 | 0.00 | 0.00 |
| ATOM | 7898 | CG   | ARG | X | 518 | 39.437 | 27.289 | 21.074 | 0.00 | 0.00 |
| ATOM | 7899 | HG2  | ARG | X | 518 | 39.027 | 28.114 | 21.656 | 0.00 | 0.00 |
| ATOM | 7900 | HG3  | ARG | X | 518 | 40.396 | 27.637 | 20.692 | 0.00 | 0.00 |
| ATOM | 7901 | CD   | ARG | X | 518 | 38.447 | 26.940 | 19.932 | 0.00 | 0.00 |
| ATOM | 7902 | HD2  | ARG | X | 518 | 38.941 | 26.122 | 19.408 | 0.00 | 0.00 |
| ATOM | 7903 | HD3  | ARG | X | 518 | 37.478 | 26.665 | 20.348 | 0.00 | 0.00 |
| ATOM | 7904 | NE   | ARG | X | 518 | 38.316 | 28.073 | 19.077 | 0.00 | 0.00 |
| ATOM | 7905 | HE   | ARG | X | 518 | 37.402 | 28.490 | 19.179 | 0.00 | 0.00 |
| ATOM | 7906 | CZ   | ARG | X | 518 | 39.264 | 28.659 | 18.307 | 0.00 | 0.00 |
| ATOM | 7907 | NH1  | ARG | X | 518 | 40.426 | 28.126 | 18.059 | 0.00 | 0.00 |
| ATOM | 7908 | HH11 | ARG | X | 518 | 40.642 | 27.283 | 18.572 | 0.00 | 0.00 |
| ATOM | 7909 | HH12 | ARG | X | 518 | 41.049 | 28.494 | 17.354 | 0.00 | 0.00 |
| ATOM | 7910 | NH2  | ARG | X | 518 | 38.838 | 29.725 | 17.725 | 0.00 | 0.00 |
| ATOM | 7911 | HH21 | ARG | X | 518 | 37.990 | 30.151 | 18.071 | 0.00 | 0.00 |
| ATOM | 7912 | HH22 | ARG | X | 518 | 39.436 | 30.153 | 17.032 | 0.00 | 0.00 |
| ATOM | 7913 | C    | ARG | X | 518 | 40.545 | 25.367 | 24.295 | 0.00 | 0.00 |
| ATOM | 7914 | O    | ARG | X | 518 | 41.393 | 24.456 | 24.113 | 0.00 | 0.00 |
| ATOM | 7915 | N    | GLY | X | 519 | 39.591 | 25.319 | 25.251 | 0.00 | 0.00 |
| ATOM | 7916 | H    | GLY | X | 519 | 38.832 | 25.985 | 25.233 | 0.00 | 0.00 |
| ATOM | 7917 | CA   | GLY | X | 519 | 39.673 | 24.566 | 26.511 | 0.00 | 0.00 |
| ATOM | 7918 | HA2  | GLY | X | 519 | 38.657 | 24.433 | 26.995 | 0.00 | 0.00 |
| ATOM | 7919 | HA3  | GLY | X | 519 | 40.058 | 23.636 | 26.185 | 0.00 | 0.00 |
| ATOM | 7920 | C    | GLY | X | 519 | 40.620 | 25.187 | 27.503 | 0.00 | 0.00 |
| ATOM | 7921 | O    | GLY | X | 519 | 41.495 | 24.481 | 27.953 | 0.00 | 0.00 |
| ATOM | 7922 | N    | LEU | X | 520 | 40.343 | 26.458 | 27.952 | 0.00 | 0.00 |
| ATOM | 7923 | H    | LEU | X | 520 | 39.670 | 26.998 | 27.428 | 0.00 | 0.00 |
| ATOM | 7924 | CA   | LEU | X | 520 | 41.115 | 27.177 | 28.949 | 0.00 | 0.00 |
| ATOM | 7925 | HA   | LEU | X | 520 | 42.025 | 27.466 | 28.423 | 0.00 | 0.00 |
| ATOM | 7926 | CB   | LEU | X | 520 | 40.321 | 28.457 | 29.342 | 0.00 | 0.00 |
| ATOM | 7927 | HB2  | LEU | X | 520 | 40.298 | 29.059 | 28.433 | 0.00 | 0.00 |
| ATOM | 7928 | HB3  | LEU | X | 520 | 39.296 | 28.219 | 29.625 | 0.00 | 0.00 |
| ATOM | 7929 | CG   | LEU | X | 520 | 40.878 | 29.342 | 30.441 | 0.00 | 0.00 |
| ATOM | 7930 | HG   | LEU | X | 520 | 41.079 | 28.809 | 31.370 | 0.00 | 0.00 |
| ATOM | 7931 | CD1  | LEU | X | 520 | 42.214 | 29.989 | 29.967 | 0.00 | 0.00 |
| ATOM | 7932 | HD11 | LEU | X | 520 | 43.052 | 29.293 | 29.927 | 0.00 | 0.00 |
| ATOM | 7933 | HD12 | LEU | X | 520 | 42.009 | 30.463 | 29.006 | 0.00 | 0.00 |
| ATOM | 7934 | HD13 | LEU | X | 520 | 42.571 | 30.684 | 30.728 | 0.00 | 0.00 |
| ATOM | 7935 | CD2  | LEU | X | 520 | 39.874 | 30.576 | 30.653 | 0.00 | 0.00 |
| ATOM | 7936 | HD21 | LEU | X | 520 | 39.670 | 31.099 | 29.719 | 0.00 | 0.00 |
| ATOM | 7937 | HD22 | LEU | X | 520 | 38.918 | 30.240 | 31.056 | 0.00 | 0.00 |
| ATOM | 7938 | HD23 | LEU | X | 520 | 40.329 | 31.182 | 31.436 | 0.00 | 0.00 |
| ATOM | 7939 | C    | LEU | X | 520 | 41.377 | 26.265 | 30.179 | 0.00 | 0.00 |
| ATOM | 7940 | O    | LEU | X | 520 | 40.461 | 25.934 | 30.970 | 0.00 | 0.00 |
| ATOM | 7941 | N    | ARG | X | 521 | 42.649 | 25.855 | 30.313 | 0.00 | 0.00 |
| ATOM | 7942 | H    | ARG | X | 521 | 43.276 | 26.269 | 29.638 | 0.00 | 0.00 |
| ATOM | 7943 | CA   | ARG | X | 521 | 43.240 | 24.967 | 31.381 | 0.00 | 0.00 |
| ATOM | 7944 | HA   | ARG | X | 521 | 44.188 | 24.630 | 30.961 | 0.00 | 0.00 |
| ATOM | 7945 | CB   | ARG | X | 521 | 43.558 | 25.830 | 32.654 | 0.00 | 0.00 |
| ATOM | 7946 | HB2  | ARG | X | 521 | 43.910 | 26.842 | 32.456 | 0.00 | 0.00 |
| ATOM | 7947 | HB3  | ARG | X | 521 | 42.591 | 25.884 | 33.153 | 0.00 | 0.00 |

|      |      |      |     |   |     |        |        |        |      |      |
|------|------|------|-----|---|-----|--------|--------|--------|------|------|
| ATOM | 7948 | CG   | ARG | X | 521 | 44.660 | 25.167 | 33.567 | 0.00 | 0.00 |
| ATOM | 7949 | HG2  | ARG | X | 521 | 44.701 | 25.822 | 34.437 | 0.00 | 0.00 |
| ATOM | 7950 | HG3  | ARG | X | 521 | 44.361 | 24.134 | 33.745 | 0.00 | 0.00 |
| ATOM | 7951 | CD   | ARG | X | 521 | 46.069 | 25.141 | 32.979 | 0.00 | 0.00 |
| ATOM | 7952 | HD2  | ARG | X | 521 | 46.003 | 24.517 | 32.087 | 0.00 | 0.00 |
| ATOM | 7953 | HD3  | ARG | X | 521 | 46.303 | 26.194 | 32.824 | 0.00 | 0.00 |
| ATOM | 7954 | NE   | ARG | X | 521 | 47.109 | 24.610 | 33.929 | 0.00 | 0.00 |
| ATOM | 7955 | HE   | ARG | X | 521 | 46.891 | 24.642 | 34.914 | 0.00 | 0.00 |
| ATOM | 7956 | CZ   | ARG | X | 521 | 48.368 | 24.253 | 33.626 | 0.00 | 0.00 |
| ATOM | 7957 | NH1  | ARG | X | 521 | 48.855 | 24.156 | 32.393 | 0.00 | 0.00 |
| ATOM | 7958 | HH11 | ARG | X | 521 | 48.265 | 24.568 | 31.684 | 0.00 | 0.00 |
| ATOM | 7959 | HH12 | ARG | X | 521 | 49.793 | 23.903 | 32.116 | 0.00 | 0.00 |
| ATOM | 7960 | NH2  | ARG | X | 521 | 48.995 | 23.836 | 34.697 | 0.00 | 0.00 |
| ATOM | 7961 | HH21 | ARG | X | 521 | 48.568 | 23.941 | 35.606 | 0.00 | 0.00 |
| ATOM | 7962 | HH22 | ARG | X | 521 | 49.968 | 23.565 | 34.717 | 0.00 | 0.00 |
| ATOM | 7963 | C    | ARG | X | 521 | 42.516 | 23.612 | 31.631 | 0.00 | 0.00 |
| ATOM | 7964 | O    | ARG | X | 521 | 42.599 | 22.968 | 32.667 | 0.00 | 0.00 |
| ATOM | 7965 | N    | ALA | X | 522 | 41.812 | 23.099 | 30.679 | 0.00 | 0.00 |
| ATOM | 7966 | H    | ALA | X | 522 | 41.825 | 23.578 | 29.789 | 0.00 | 0.00 |
| ATOM | 7967 | CA   | ALA | X | 522 | 40.797 | 22.051 | 30.893 | 0.00 | 0.00 |
| ATOM | 7968 | HA   | ALA | X | 522 | 40.026 | 22.385 | 31.587 | 0.00 | 0.00 |
| ATOM | 7969 | CB   | ALA | X | 522 | 40.071 | 21.810 | 29.547 | 0.00 | 0.00 |
| ATOM | 7970 | HB1  | ALA | X | 522 | 40.736 | 21.246 | 28.892 | 0.00 | 0.00 |
| ATOM | 7971 | HB2  | ALA | X | 522 | 39.150 | 21.240 | 29.672 | 0.00 | 0.00 |
| ATOM | 7972 | HB3  | ALA | X | 522 | 39.846 | 22.780 | 29.103 | 0.00 | 0.00 |
| ATOM | 7973 | C    | ALA | X | 522 | 41.392 | 20.799 | 31.458 | 0.00 | 0.00 |
| ATOM | 7974 | O    | ALA | X | 522 | 40.744 | 20.168 | 32.302 | 0.00 | 0.00 |
| ATOM | 7975 | N    | GLN | X | 523 | 42.627 | 20.377 | 31.033 | 0.00 | 0.00 |
| ATOM | 7976 | H    | GLN | X | 523 | 43.205 | 21.004 | 30.492 | 0.00 | 0.00 |
| ATOM | 7977 | CA   | GLN | X | 523 | 43.297 | 19.157 | 31.319 | 0.00 | 0.00 |
| ATOM | 7978 | HA   | GLN | X | 523 | 42.644 | 18.325 | 31.056 | 0.00 | 0.00 |
| ATOM | 7979 | CB   | GLN | X | 523 | 44.535 | 19.196 | 30.338 | 0.00 | 0.00 |
| ATOM | 7980 | HB2  | GLN | X | 523 | 44.683 | 18.204 | 29.910 | 0.00 | 0.00 |
| ATOM | 7981 | HB3  | GLN | X | 523 | 44.234 | 19.719 | 29.430 | 0.00 | 0.00 |
| ATOM | 7982 | CG   | GLN | X | 523 | 45.971 | 19.704 | 30.642 | 0.00 | 0.00 |
| ATOM | 7983 | HG2  | GLN | X | 523 | 46.073 | 19.352 | 31.669 | 0.00 | 0.00 |
| ATOM | 7984 | HG3  | GLN | X | 523 | 46.739 | 19.188 | 30.066 | 0.00 | 0.00 |
| ATOM | 7985 | CD   | GLN | X | 523 | 46.100 | 21.193 | 30.569 | 0.00 | 0.00 |
| ATOM | 7986 | OE1  | GLN | X | 523 | 45.128 | 21.970 | 30.632 | 0.00 | 0.00 |
| ATOM | 7987 | NE2  | GLN | X | 523 | 47.337 | 21.682 | 30.344 | 0.00 | 0.00 |
| ATOM | 7988 | HE21 | GLN | X | 523 | 47.402 | 22.663 | 30.577 | 0.00 | 0.00 |
| ATOM | 7989 | HE22 | GLN | X | 523 | 48.127 | 21.054 | 30.303 | 0.00 | 0.00 |
| ATOM | 7990 | C    | GLN | X | 523 | 43.730 | 19.095 | 32.741 | 0.00 | 0.00 |
| ATOM | 7991 | O    | GLN | X | 523 | 43.948 | 17.995 | 33.211 | 0.00 | 0.00 |
| ATOM | 7992 | N    | ALA | X | 524 | 43.782 | 20.187 | 33.469 | 0.00 | 0.00 |
| ATOM | 7993 | H    | ALA | X | 524 | 43.504 | 21.023 | 32.975 | 0.00 | 0.00 |
| ATOM | 7994 | CA   | ALA | X | 524 | 44.236 | 20.284 | 34.829 | 0.00 | 0.00 |
| ATOM | 7995 | HA   | ALA | X | 524 | 44.462 | 19.315 | 35.274 | 0.00 | 0.00 |
| ATOM | 7996 | CB   | ALA | X | 524 | 45.609 | 21.109 | 34.726 | 0.00 | 0.00 |
| ATOM | 7997 | HB1  | ALA | X | 524 | 46.313 | 20.882 | 35.527 | 0.00 | 0.00 |
| ATOM | 7998 | HB2  | ALA | X | 524 | 46.168 | 21.001 | 33.797 | 0.00 | 0.00 |
| ATOM | 7999 | HB3  | ALA | X | 524 | 45.416 | 22.170 | 34.891 | 0.00 | 0.00 |
| ATOM | 8000 | C    | ALA | X | 524 | 43.176 | 20.857 | 35.829 | 0.00 | 0.00 |
| ATOM | 8001 | O    | ALA | X | 524 | 43.187 | 20.403 | 36.990 | 0.00 | 0.00 |
| ATOM | 8002 | N    | CYX | X | 525 | 42.405 | 21.781 | 35.409 | 0.00 | 0.00 |
| ATOM | 8003 | H    | CYX | X | 525 | 42.676 | 22.314 | 34.594 | 0.00 | 0.00 |
| ATOM | 8004 | CA   | CYX | X | 525 | 41.429 | 22.375 | 36.337 | 0.00 | 0.00 |
| ATOM | 8005 | HA   | CYX | X | 525 | 41.904 | 22.368 | 37.318 | 0.00 | 0.00 |
| ATOM | 8006 | CB   | CYX | X | 525 | 41.121 | 23.838 | 35.991 | 0.00 | 0.00 |
| ATOM | 8007 | HB2  | CYX | X | 525 | 40.653 | 23.863 | 35.007 | 0.00 | 0.00 |
| ATOM | 8008 | HB3  | CYX | X | 525 | 40.300 | 24.254 | 36.576 | 0.00 | 0.00 |
| ATOM | 8009 | SG   | CYX | X | 525 | 42.446 | 25.127 | 36.036 | 0.00 | 0.00 |
| ATOM | 8010 | C    | CYX | X | 525 | 40.176 | 21.505 | 36.371 | 0.00 | 0.00 |
| ATOM | 8011 | O    | CYX | X | 525 | 39.551 | 21.469 | 37.407 | 0.00 | 0.00 |
| ATOM | 8012 | N    | ALA | X | 526 | 39.841 | 20.759 | 35.289 | 0.00 | 0.00 |
| ATOM | 8013 | H    | ALA | X | 526 | 40.377 | 20.728 | 34.434 | 0.00 | 0.00 |
| ATOM | 8014 | CA   | ALA | X | 526 | 38.765 | 19.832 | 35.515 | 0.00 | 0.00 |
| ATOM | 8015 | HA   | ALA | X | 526 | 37.864 | 20.325 | 35.879 | 0.00 | 0.00 |
| ATOM | 8016 | CB   | ALA | X | 526 | 38.382 | 19.292 | 34.154 | 0.00 | 0.00 |
| ATOM | 8017 | HB1  | ALA | X | 526 | 38.142 | 20.008 | 33.368 | 0.00 | 0.00 |

|      |      |      |     |   |     |        |        |        |      |      |
|------|------|------|-----|---|-----|--------|--------|--------|------|------|
| ATOM | 8018 | HB2  | ALA | X | 526 | 39.034 | 18.571 | 33.661 | 0.00 | 0.00 |
| ATOM | 8019 | HB3  | ALA | X | 526 | 37.514 | 18.655 | 34.322 | 0.00 | 0.00 |
| ATOM | 8020 | C    | ALA | X | 526 | 39.155 | 18.703 | 36.492 | 0.00 | 0.00 |
| ATOM | 8021 | O    | ALA | X | 526 | 38.300 | 18.301 | 37.291 | 0.00 | 0.00 |
| ATOM | 8022 | N    | PHE | X | 527 | 40.432 | 18.285 | 36.546 | 0.00 | 0.00 |
| ATOM | 8023 | H    | PHE | X | 527 | 40.948 | 18.401 | 35.685 | 0.00 | 0.00 |
| ATOM | 8024 | CA   | PHE | X | 527 | 41.034 | 17.529 | 37.671 | 0.00 | 0.00 |
| ATOM | 8025 | HA   | PHE | X | 527 | 40.411 | 16.636 | 37.729 | 0.00 | 0.00 |
| ATOM | 8026 | CB   | PHE | X | 527 | 42.472 | 17.086 | 37.274 | 0.00 | 0.00 |
| ATOM | 8027 | HB2  | PHE | X | 527 | 42.411 | 16.328 | 36.493 | 0.00 | 0.00 |
| ATOM | 8028 | HB3  | PHE | X | 527 | 43.017 | 17.914 | 36.820 | 0.00 | 0.00 |
| ATOM | 8029 | CG   | PHE | X | 527 | 43.237 | 16.495 | 38.413 | 0.00 | 0.00 |
| ATOM | 8030 | CD1  | PHE | X | 527 | 43.124 | 15.081 | 38.606 | 0.00 | 0.00 |
| ATOM | 8031 | HD1  | PHE | X | 527 | 42.516 | 14.522 | 37.910 | 0.00 | 0.00 |
| ATOM | 8032 | CE1  | PHE | X | 527 | 43.727 | 14.481 | 39.625 | 0.00 | 0.00 |
| ATOM | 8033 | HE1  | PHE | X | 527 | 43.700 | 13.425 | 39.851 | 0.00 | 0.00 |
| ATOM | 8034 | CZ   | PHE | X | 527 | 44.502 | 15.272 | 40.529 | 0.00 | 0.00 |
| ATOM | 8035 | HZ   | PHE | X | 527 | 45.083 | 14.889 | 41.354 | 0.00 | 0.00 |
| ATOM | 8036 | CE2  | PHE | X | 527 | 44.548 | 16.646 | 40.415 | 0.00 | 0.00 |
| ATOM | 8037 | HE2  | PHE | X | 527 | 45.087 | 17.255 | 41.126 | 0.00 | 0.00 |
| ATOM | 8038 | CD2  | PHE | X | 527 | 43.915 | 17.290 | 39.325 | 0.00 | 0.00 |
| ATOM | 8039 | HD2  | PHE | X | 527 | 43.999 | 18.366 | 39.305 | 0.00 | 0.00 |
| ATOM | 8040 | C    | PHE | X | 527 | 40.731 | 18.247 | 39.042 | 0.00 | 0.00 |
| ATOM | 8041 | O    | PHE | X | 527 | 40.013 | 17.682 | 39.821 | 0.00 | 0.00 |
| ATOM | 8042 | N    | TRP | X | 528 | 41.287 | 19.447 | 39.298 | 0.00 | 0.00 |
| ATOM | 8043 | H    | TRP | X | 528 | 41.791 | 19.866 | 38.530 | 0.00 | 0.00 |
| ATOM | 8044 | CA   | TRP | X | 528 | 41.088 | 20.223 | 40.504 | 0.00 | 0.00 |
| ATOM | 8045 | HA   | TRP | X | 528 | 41.540 | 19.657 | 41.318 | 0.00 | 0.00 |
| ATOM | 8046 | CB   | TRP | X | 528 | 41.864 | 21.544 | 40.605 | 0.00 | 0.00 |
| ATOM | 8047 | HB2  | TRP | X | 528 | 41.738 | 22.210 | 39.751 | 0.00 | 0.00 |
| ATOM | 8048 | HB3  | TRP | X | 528 | 41.415 | 21.968 | 41.503 | 0.00 | 0.00 |
| ATOM | 8049 | CG   | TRP | X | 528 | 43.325 | 21.358 | 40.888 | 0.00 | 0.00 |
| ATOM | 8050 | CD1  | TRP | X | 528 | 44.373 | 21.668 | 40.098 | 0.00 | 0.00 |
| ATOM | 8051 | HD1  | TRP | X | 528 | 44.249 | 21.920 | 39.055 | 0.00 | 0.00 |
| ATOM | 8052 | NE1  | TRP | X | 528 | 45.463 | 21.531 | 40.804 | 0.00 | 0.00 |
| ATOM | 8053 | HE1  | TRP | X | 528 | 46.373 | 21.751 | 40.424 | 0.00 | 0.00 |
| ATOM | 8054 | CE2  | TRP | X | 528 | 45.305 | 21.222 | 42.106 | 0.00 | 0.00 |
| ATOM | 8055 | CZ2  | TRP | X | 528 | 46.100 | 21.152 | 43.203 | 0.00 | 0.00 |
| ATOM | 8056 | HZ2  | TRP | X | 528 | 47.138 | 21.442 | 43.146 | 0.00 | 0.00 |
| ATOM | 8057 | CH2  | TRP | X | 528 | 45.521 | 20.880 | 44.495 | 0.00 | 0.00 |
| ATOM | 8058 | HH2  | TRP | X | 528 | 46.161 | 21.040 | 45.349 | 0.00 | 0.00 |
| ATOM | 8059 | CZ3  | TRP | X | 528 | 44.182 | 20.535 | 44.597 | 0.00 | 0.00 |
| ATOM | 8060 | HZ3  | TRP | X | 528 | 43.752 | 20.393 | 45.578 | 0.00 | 0.00 |
| ATOM | 8061 | CE3  | TRP | X | 528 | 43.348 | 20.696 | 43.420 | 0.00 | 0.00 |
| ATOM | 8062 | HE3  | TRP | X | 528 | 42.292 | 20.477 | 43.374 | 0.00 | 0.00 |
| ATOM | 8063 | CD2  | TRP | X | 528 | 43.911 | 21.063 | 42.191 | 0.00 | 0.00 |
| ATOM | 8064 | C    | TRP | X | 528 | 39.557 | 20.446 | 40.901 | 0.00 | 0.00 |
| ATOM | 8065 | O    | TRP | X | 528 | 39.318 | 20.800 | 42.057 | 0.00 | 0.00 |
| ATOM | 8066 | N    | ASN | X | 529 | 38.567 | 20.180 | 40.017 | 0.00 | 0.00 |
| ATOM | 8067 | H    | ASN | X | 529 | 38.823 | 20.042 | 39.050 | 0.00 | 0.00 |
| ATOM | 8068 | CA   | ASN | X | 529 | 37.125 | 20.487 | 40.344 | 0.00 | 0.00 |
| ATOM | 8069 | HA   | ASN | X | 529 | 37.057 | 20.801 | 41.385 | 0.00 | 0.00 |
| ATOM | 8070 | CB   | ASN | X | 529 | 36.771 | 21.705 | 39.441 | 0.00 | 0.00 |
| ATOM | 8071 | HB2  | ASN | X | 529 | 37.032 | 21.614 | 38.387 | 0.00 | 0.00 |
| ATOM | 8072 | HB3  | ASN | X | 529 | 35.696 | 21.809 | 39.588 | 0.00 | 0.00 |
| ATOM | 8073 | CG   | ASN | X | 529 | 37.319 | 22.982 | 40.067 | 0.00 | 0.00 |
| ATOM | 8074 | OD1  | ASN | X | 529 | 36.698 | 23.634 | 40.908 | 0.00 | 0.00 |
| ATOM | 8075 | ND2  | ASN | X | 529 | 38.583 | 23.248 | 39.849 | 0.00 | 0.00 |
| ATOM | 8076 | HD21 | ASN | X | 529 | 38.944 | 23.886 | 40.544 | 0.00 | 0.00 |
| ATOM | 8077 | HD22 | ASN | X | 529 | 39.188 | 22.672 | 39.282 | 0.00 | 0.00 |
| ATOM | 8078 | C    | ASN | X | 529 | 36.173 | 19.241 | 40.110 | 0.00 | 0.00 |
| ATOM | 8079 | O    | ASN | X | 529 | 35.069 | 19.202 | 40.674 | 0.00 | 0.00 |
| ATOM | 8080 | N    | ARG | X | 530 | 36.628 | 18.225 | 39.386 | 0.00 | 0.00 |
| ATOM | 8081 | H    | ARG | X | 530 | 37.555 | 18.295 | 38.991 | 0.00 | 0.00 |
| ATOM | 8082 | CA   | ARG | X | 530 | 35.982 | 16.977 | 39.074 | 0.00 | 0.00 |
| ATOM | 8083 | HA   | ARG | X | 530 | 35.004 | 17.165 | 39.518 | 0.00 | 0.00 |
| ATOM | 8084 | CB   | ARG | X | 530 | 35.765 | 16.736 | 37.567 | 0.00 | 0.00 |
| ATOM | 8085 | HB2  | ARG | X | 530 | 36.704 | 16.335 | 37.186 | 0.00 | 0.00 |
| ATOM | 8086 | HB3  | ARG | X | 530 | 35.089 | 15.882 | 37.539 | 0.00 | 0.00 |
| ATOM | 8087 | CG   | ARG | X | 530 | 35.216 | 17.828 | 36.713 | 0.00 | 0.00 |

|      |      |      |     |   |     |        |        |        |      |      |
|------|------|------|-----|---|-----|--------|--------|--------|------|------|
| ATOM | 8088 | HG2  | ARG | X | 530 | 34.342 | 18.301 | 37.161 | 0.00 | 0.00 |
| ATOM | 8089 | HG3  | ARG | X | 530 | 35.923 | 18.607 | 36.427 | 0.00 | 0.00 |
| ATOM | 8090 | CD   | ARG | X | 530 | 34.586 | 17.315 | 35.428 | 0.00 | 0.00 |
| ATOM | 8091 | HD2  | ARG | X | 530 | 35.334 | 16.728 | 34.895 | 0.00 | 0.00 |
| ATOM | 8092 | HD3  | ARG | X | 530 | 33.722 | 16.681 | 35.630 | 0.00 | 0.00 |
| ATOM | 8093 | NE   | ARG | X | 530 | 34.077 | 18.319 | 34.468 | 0.00 | 0.00 |
| ATOM | 8094 | HE   | ARG | X | 530 | 34.348 | 19.279 | 34.627 | 0.00 | 0.00 |
| ATOM | 8095 | CZ   | ARG | X | 530 | 33.294 | 18.172 | 33.415 | 0.00 | 0.00 |
| ATOM | 8096 | NH1  | ARG | X | 530 | 33.021 | 16.990 | 32.935 | 0.00 | 0.00 |
| ATOM | 8097 | HH11 | ARG | X | 530 | 33.408 | 16.158 | 33.356 | 0.00 | 0.00 |
| ATOM | 8098 | HH12 | ARG | X | 530 | 32.433 | 16.912 | 32.117 | 0.00 | 0.00 |
| ATOM | 8099 | NH2  | ARG | X | 530 | 32.787 | 19.265 | 32.814 | 0.00 | 0.00 |
| ATOM | 8100 | HH21 | ARG | X | 530 | 32.749 | 20.156 | 33.289 | 0.00 | 0.00 |
| ATOM | 8101 | HH22 | ARG | X | 530 | 32.373 | 19.085 | 31.910 | 0.00 | 0.00 |
| ATOM | 8102 | C    | ARG | X | 530 | 36.555 | 15.742 | 39.707 | 0.00 | 0.00 |
| ATOM | 8103 | O    | ARG | X | 530 | 35.811 | 14.854 | 40.141 | 0.00 | 0.00 |
| ATOM | 8104 | N    | PHE | X | 531 | 37.859 | 15.709 | 39.781 | 0.00 | 0.00 |
| ATOM | 8105 | H    | PHE | X | 531 | 38.381 | 16.513 | 39.462 | 0.00 | 0.00 |
| ATOM | 8106 | CA   | PHE | X | 531 | 38.628 | 14.516 | 40.178 | 0.00 | 0.00 |
| ATOM | 8107 | HA   | PHE | X | 531 | 37.976 | 13.643 | 40.201 | 0.00 | 0.00 |
| ATOM | 8108 | CB   | PHE | X | 531 | 39.862 | 14.325 | 39.276 | 0.00 | 0.00 |
| ATOM | 8109 | HB2  | PHE | X | 531 | 39.652 | 14.575 | 38.236 | 0.00 | 0.00 |
| ATOM | 8110 | HB3  | PHE | X | 531 | 40.627 | 15.006 | 39.649 | 0.00 | 0.00 |
| ATOM | 8111 | CG   | PHE | X | 531 | 40.363 | 12.871 | 39.252 | 0.00 | 0.00 |
| ATOM | 8112 | CD1  | PHE | X | 531 | 41.050 | 12.302 | 40.356 | 0.00 | 0.00 |
| ATOM | 8113 | HD1  | PHE | X | 531 | 41.103 | 12.872 | 41.272 | 0.00 | 0.00 |
| ATOM | 8114 | CE1  | PHE | X | 531 | 41.550 | 10.965 | 40.263 | 0.00 | 0.00 |
| ATOM | 8115 | HE1  | PHE | X | 531 | 41.990 | 10.453 | 41.106 | 0.00 | 0.00 |
| ATOM | 8116 | CZ   | PHE | X | 531 | 41.541 | 10.277 | 39.055 | 0.00 | 0.00 |
| ATOM | 8117 | HZ   | PHE | X | 531 | 42.178 | 9.419  | 38.894 | 0.00 | 0.00 |
| ATOM | 8118 | CE2  | PHE | X | 531 | 40.768 | 10.823 | 37.973 | 0.00 | 0.00 |
| ATOM | 8119 | HE2  | PHE | X | 531 | 40.589 | 10.297 | 37.047 | 0.00 | 0.00 |
| ATOM | 8120 | CD2  | PHE | X | 531 | 40.243 | 12.144 | 38.080 | 0.00 | 0.00 |
| ATOM | 8121 | HD2  | PHE | X | 531 | 39.559 | 12.535 | 37.342 | 0.00 | 0.00 |
| ATOM | 8122 | C    | PHE | X | 531 | 38.977 | 14.643 | 41.702 | 0.00 | 0.00 |
| ATOM | 8123 | O    | PHE | X | 531 | 38.610 | 13.872 | 42.513 | 0.00 | 0.00 |
| ATOM | 8124 | N    | LEU | X | 532 | 39.641 | 15.757 | 41.978 | 0.00 | 0.00 |
| ATOM | 8125 | H    | LEU | X | 532 | 39.913 | 16.389 | 41.238 | 0.00 | 0.00 |
| ATOM | 8126 | CA   | LEU | X | 532 | 40.175 | 15.955 | 43.259 | 0.00 | 0.00 |
| ATOM | 8127 | HA   | LEU | X | 532 | 40.587 | 14.968 | 43.470 | 0.00 | 0.00 |
| ATOM | 8128 | CB   | LEU | X | 532 | 41.228 | 16.985 | 43.033 | 0.00 | 0.00 |
| ATOM | 8129 | HB2  | LEU | X | 532 | 41.696 | 16.721 | 42.085 | 0.00 | 0.00 |
| ATOM | 8130 | HB3  | LEU | X | 532 | 40.766 | 17.927 | 42.738 | 0.00 | 0.00 |
| ATOM | 8131 | CG   | LEU | X | 532 | 42.305 | 17.238 | 44.066 | 0.00 | 0.00 |
| ATOM | 8132 | HG   | LEU | X | 532 | 43.063 | 17.851 | 43.578 | 0.00 | 0.00 |
| ATOM | 8133 | CD1  | LEU | X | 532 | 41.752 | 17.820 | 45.383 | 0.00 | 0.00 |
| ATOM | 8134 | HD11 | LEU | X | 532 | 42.604 | 17.881 | 46.059 | 0.00 | 0.00 |
| ATOM | 8135 | HD12 | LEU | X | 532 | 41.463 | 18.853 | 45.191 | 0.00 | 0.00 |
| ATOM | 8136 | HD13 | LEU | X | 532 | 40.914 | 17.319 | 45.868 | 0.00 | 0.00 |
| ATOM | 8137 | CD2  | LEU | X | 532 | 42.952 | 15.926 | 44.465 | 0.00 | 0.00 |
| ATOM | 8138 | HD21 | LEU | X | 532 | 43.791 | 16.257 | 45.077 | 0.00 | 0.00 |
| ATOM | 8139 | HD22 | LEU | X | 532 | 42.251 | 15.495 | 45.180 | 0.00 | 0.00 |
| ATOM | 8140 | HD23 | LEU | X | 532 | 43.273 | 15.292 | 43.639 | 0.00 | 0.00 |
| ATOM | 8141 | C    | LEU | X | 532 | 39.172 | 16.207 | 44.393 | 0.00 | 0.00 |
| ATOM | 8142 | O    | LEU | X | 532 | 39.272 | 15.606 | 45.448 | 0.00 | 0.00 |
| ATOM | 8143 | N    | PRO | X | 533 | 38.095 | 17.031 | 44.228 | 0.00 | 0.00 |
| ATOM | 8144 | CD   | PRO | X | 533 | 37.718 | 17.969 | 43.179 | 0.00 | 0.00 |
| ATOM | 8145 | HD2  | PRO | X | 533 | 37.675 | 17.487 | 42.202 | 0.00 | 0.00 |
| ATOM | 8146 | HD3  | PRO | X | 533 | 38.405 | 18.815 | 43.151 | 0.00 | 0.00 |
| ATOM | 8147 | CG   | PRO | X | 533 | 36.317 | 18.536 | 43.563 | 0.00 | 0.00 |
| ATOM | 8148 | HG2  | PRO | X | 533 | 35.539 | 17.838 | 43.252 | 0.00 | 0.00 |
| ATOM | 8149 | HG3  | PRO | X | 533 | 36.138 | 19.552 | 43.211 | 0.00 | 0.00 |
| ATOM | 8150 | CB   | PRO | X | 533 | 36.320 | 18.486 | 45.117 | 0.00 | 0.00 |
| ATOM | 8151 | HB2  | PRO | X | 533 | 35.322 | 18.455 | 45.554 | 0.00 | 0.00 |
| ATOM | 8152 | HB3  | PRO | X | 533 | 36.830 | 19.377 | 45.483 | 0.00 | 0.00 |
| ATOM | 8153 | CA   | PRO | X | 533 | 37.104 | 17.153 | 45.353 | 0.00 | 0.00 |
| ATOM | 8154 | HA   | PRO | X | 533 | 37.732 | 17.444 | 46.195 | 0.00 | 0.00 |
| ATOM | 8155 | C    | PRO | X | 533 | 36.353 | 15.866 | 45.622 | 0.00 | 0.00 |
| ATOM | 8156 | O    | PRO | X | 533 | 35.800 | 15.693 | 46.718 | 0.00 | 0.00 |
| ATOM | 8157 | N    | LYS | X | 534 | 36.167 | 15.044 | 44.583 | 0.00 | 0.00 |

|      |      |      |     |   |     |        |        |        |      |      |
|------|------|------|-----|---|-----|--------|--------|--------|------|------|
| ATOM | 8158 | H    | LYS | X | 534 | 36.667 | 15.192 | 43.718 | 0.00 | 0.00 |
| ATOM | 8159 | CA   | LYS | X | 534 | 35.598 | 13.665 | 44.739 | 0.00 | 0.00 |
| ATOM | 8160 | HA   | LYS | X | 534 | 34.692 | 13.759 | 45.338 | 0.00 | 0.00 |
| ATOM | 8161 | CB   | LYS | X | 534 | 35.215 | 13.185 | 43.336 | 0.00 | 0.00 |
| ATOM | 8162 | HB2  | LYS | X | 534 | 34.325 | 13.716 | 42.996 | 0.00 | 0.00 |
| ATOM | 8163 | HB3  | LYS | X | 534 | 35.955 | 13.482 | 42.593 | 0.00 | 0.00 |
| ATOM | 8164 | CG   | LYS | X | 534 | 34.958 | 11.673 | 43.276 | 0.00 | 0.00 |
| ATOM | 8165 | HG2  | LYS | X | 534 | 35.876 | 11.108 | 43.439 | 0.00 | 0.00 |
| ATOM | 8166 | HG3  | LYS | X | 534 | 34.249 | 11.341 | 44.036 | 0.00 | 0.00 |
| ATOM | 8167 | CD   | LYS | X | 534 | 34.270 | 11.306 | 41.951 | 0.00 | 0.00 |
| ATOM | 8168 | HD2  | LYS | X | 534 | 33.282 | 11.762 | 42.004 | 0.00 | 0.00 |
| ATOM | 8169 | HD3  | LYS | X | 534 | 34.860 | 11.702 | 41.124 | 0.00 | 0.00 |
| ATOM | 8170 | CE   | LYS | X | 534 | 34.202 | 9.757  | 41.923 | 0.00 | 0.00 |
| ATOM | 8171 | HE2  | LYS | X | 534 | 33.924 | 9.698  | 40.871 | 0.00 | 0.00 |
| ATOM | 8172 | HE3  | LYS | X | 534 | 35.194 | 9.340  | 42.093 | 0.00 | 0.00 |
| ATOM | 8173 | NZ   | LYS | X | 534 | 33.149 | 9.144  | 42.763 | 0.00 | 0.00 |
| ATOM | 8174 | HZ1  | LYS | X | 534 | 33.139 | 8.134  | 42.743 | 0.00 | 0.00 |
| ATOM | 8175 | HZ2  | LYS | X | 534 | 33.202 | 9.435  | 43.729 | 0.00 | 0.00 |
| ATOM | 8176 | HZ3  | LYS | X | 534 | 32.233 | 9.462  | 42.480 | 0.00 | 0.00 |
| ATOM | 8177 | C    | LYS | X | 534 | 36.435 | 12.660 | 45.569 | 0.00 | 0.00 |
| ATOM | 8178 | O    | LYS | X | 534 | 35.919 | 11.696 | 46.168 | 0.00 | 0.00 |
| ATOM | 8179 | N    | LEU | X | 535 | 37.710 | 12.994 | 45.719 | 0.00 | 0.00 |
| ATOM | 8180 | H    | LEU | X | 535 | 38.031 | 13.820 | 45.236 | 0.00 | 0.00 |
| ATOM | 8181 | CA   | LEU | X | 535 | 38.636 | 12.367 | 46.625 | 0.00 | 0.00 |
| ATOM | 8182 | HA   | LEU | X | 535 | 38.254 | 11.351 | 46.725 | 0.00 | 0.00 |
| ATOM | 8183 | CB   | LEU | X | 535 | 40.005 | 12.241 | 45.884 | 0.00 | 0.00 |
| ATOM | 8184 | HB2  | LEU | X | 535 | 40.238 | 13.211 | 45.445 | 0.00 | 0.00 |
| ATOM | 8185 | HB3  | LEU | X | 535 | 40.800 | 11.984 | 46.583 | 0.00 | 0.00 |
| ATOM | 8186 | CG   | LEU | X | 535 | 40.171 | 11.228 | 44.750 | 0.00 | 0.00 |
| ATOM | 8187 | HG   | LEU | X | 535 | 39.425 | 11.594 | 44.044 | 0.00 | 0.00 |
| ATOM | 8188 | CD1  | LEU | X | 535 | 41.576 | 11.463 | 44.043 | 0.00 | 0.00 |
| ATOM | 8189 | HD11 | LEU | X | 535 | 41.241 | 12.151 | 43.267 | 0.00 | 0.00 |
| ATOM | 8190 | HD12 | LEU | X | 535 | 42.265 | 11.998 | 44.695 | 0.00 | 0.00 |
| ATOM | 8191 | HD13 | LEU | X | 535 | 41.986 | 10.570 | 43.571 | 0.00 | 0.00 |
| ATOM | 8192 | CD2  | LEU | X | 535 | 39.980 | 9.742  | 45.124 | 0.00 | 0.00 |
| ATOM | 8193 | HD21 | LEU | X | 535 | 40.767 | 9.269  | 45.711 | 0.00 | 0.00 |
| ATOM | 8194 | HD22 | LEU | X | 535 | 39.047 | 9.600  | 45.669 | 0.00 | 0.00 |
| ATOM | 8195 | HD23 | LEU | X | 535 | 40.116 | 9.107  | 44.249 | 0.00 | 0.00 |
| ATOM | 8196 | C    | LEU | X | 535 | 38.657 | 12.953 | 48.045 | 0.00 | 0.00 |
| ATOM | 8197 | O    | LEU | X | 535 | 38.657 | 12.234 | 49.023 | 0.00 | 0.00 |
| ATOM | 8198 | N    | LEU | X | 536 | 38.746 | 14.298 | 48.144 | 0.00 | 0.00 |
| ATOM | 8199 | H    | LEU | X | 536 | 38.755 | 14.802 | 47.269 | 0.00 | 0.00 |
| ATOM | 8200 | CA   | LEU | X | 536 | 38.690 | 15.194 | 49.354 | 0.00 | 0.00 |
| ATOM | 8201 | HA   | LEU | X | 536 | 39.501 | 14.908 | 50.024 | 0.00 | 0.00 |
| ATOM | 8202 | CB   | LEU | X | 536 | 38.785 | 16.640 | 48.870 | 0.00 | 0.00 |
| ATOM | 8203 | HB2  | LEU | X | 536 | 39.647 | 16.730 | 48.210 | 0.00 | 0.00 |
| ATOM | 8204 | HB3  | LEU | X | 536 | 37.892 | 16.893 | 48.298 | 0.00 | 0.00 |
| ATOM | 8205 | CG   | LEU | X | 536 | 39.008 | 17.584 | 50.046 | 0.00 | 0.00 |
| ATOM | 8206 | HG   | LEU | X | 536 | 38.419 | 17.280 | 50.912 | 0.00 | 0.00 |
| ATOM | 8207 | CD1  | LEU | X | 536 | 40.432 | 17.565 | 50.466 | 0.00 | 0.00 |
| ATOM | 8208 | HD11 | LEU | X | 536 | 40.983 | 18.101 | 49.693 | 0.00 | 0.00 |
| ATOM | 8209 | HD12 | LEU | X | 536 | 40.533 | 18.077 | 51.423 | 0.00 | 0.00 |
| ATOM | 8210 | HD13 | LEU | X | 536 | 40.739 | 16.520 | 50.516 | 0.00 | 0.00 |
| ATOM | 8211 | CD2  | LEU | X | 536 | 38.394 | 19.037 | 49.864 | 0.00 | 0.00 |
| ATOM | 8212 | HD21 | LEU | X | 536 | 37.308 | 19.022 | 49.771 | 0.00 | 0.00 |
| ATOM | 8213 | HD22 | LEU | X | 536 | 38.632 | 19.652 | 50.732 | 0.00 | 0.00 |
| ATOM | 8214 | HD23 | LEU | X | 536 | 38.870 | 19.367 | 48.940 | 0.00 | 0.00 |
| ATOM | 8215 | C    | LEU | X | 536 | 37.393 | 14.882 | 50.215 | 0.00 | 0.00 |
| ATOM | 8216 | O    | LEU | X | 536 | 37.372 | 14.922 | 51.477 | 0.00 | 0.00 |
| ATOM | 8217 | N    | SER | X | 537 | 36.328 | 14.658 | 49.505 | 0.00 | 0.00 |
| ATOM | 8218 | H    | SER | X | 537 | 36.268 | 14.851 | 48.516 | 0.00 | 0.00 |
| ATOM | 8219 | CA   | SER | X | 537 | 35.134 | 14.019 | 50.021 | 0.00 | 0.00 |
| ATOM | 8220 | HA   | SER | X | 537 | 34.751 | 14.615 | 50.849 | 0.00 | 0.00 |
| ATOM | 8221 | CB   | SER | X | 537 | 34.038 | 14.211 | 49.002 | 0.00 | 0.00 |
| ATOM | 8222 | HB2  | SER | X | 537 | 33.139 | 13.857 | 49.506 | 0.00 | 0.00 |
| ATOM | 8223 | HB3  | SER | X | 537 | 33.892 | 15.213 | 48.598 | 0.00 | 0.00 |
| ATOM | 8224 | OG   | SER | X | 537 | 34.191 | 13.375 | 47.891 | 0.00 | 0.00 |
| ATOM | 8225 | HG   | SER | X | 537 | 33.383 | 13.412 | 47.375 | 0.00 | 0.00 |
| ATOM | 8226 | C    | SER | X | 537 | 35.376 | 12.572 | 50.359 | 0.00 | 0.00 |
| ATOM | 8227 | O    | SER | X | 537 | 35.211 | 12.300 | 51.554 | 0.00 | 0.00 |



|      |      |      |     |   |     |        |        |        |      |      |
|------|------|------|-----|---|-----|--------|--------|--------|------|------|
| ATOM | 8228 | N    | ALA | X | 538 | 35.859 | 11.616 | 49.532 | 0.00 | 0.00 |
| ATOM | 8229 | H    | ALA | X | 538 | 35.730 | 11.776 | 48.543 | 0.00 | 0.00 |
| ATOM | 8230 | CA   | ALA | X | 538 | 36.116 | 10.215 | 49.907 | 0.00 | 0.00 |
| ATOM | 8231 | HA   | ALA | X | 538 | 35.203 | 9.889  | 50.407 | 0.00 | 0.00 |
| ATOM | 8232 | CB   | ALA | X | 538 | 36.143 | 9.443  | 48.539 | 0.00 | 0.00 |
| ATOM | 8233 | HB1  | ALA | X | 538 | 36.957 | 9.826  | 47.925 | 0.00 | 0.00 |
| ATOM | 8234 | HB2  | ALA | X | 538 | 36.225 | 8.378  | 48.754 | 0.00 | 0.00 |
| ATOM | 8235 | HB3  | ALA | X | 538 | 35.221 | 9.642  | 47.992 | 0.00 | 0.00 |
| ATOM | 8236 | C    | ALA | X | 538 | 37.252 | 9.798  | 50.898 | 0.00 | 0.00 |
| ATOM | 8237 | O    | ALA | X | 538 | 37.376 | 8.629  | 51.173 | 0.00 | 0.00 |
| ATOM | 8238 | N    | THR | X | 539 | 37.972 | 10.772 | 51.435 | 0.00 | 0.00 |
| ATOM | 8239 | H    | THR | X | 539 | 37.811 | 11.716 | 51.113 | 0.00 | 0.00 |
| ATOM | 8240 | CA   | THR | X | 539 | 39.056 | 10.437 | 52.425 | 0.00 | 0.00 |
| ATOM | 8241 | HA   | THR | X | 539 | 39.808 | 9.795  | 51.967 | 0.00 | 0.00 |
| ATOM | 8242 | CB   | THR | X | 539 | 39.820 | 11.707 | 52.847 | 0.00 | 0.00 |
| ATOM | 8243 | HB   | THR | X | 539 | 39.086 | 12.407 | 53.243 | 0.00 | 0.00 |
| ATOM | 8244 | CG2  | THR | X | 539 | 40.959 | 11.480 | 53.774 | 0.00 | 0.00 |
| ATOM | 8245 | HG21 | THR | X | 539 | 41.381 | 12.477 | 53.895 | 0.00 | 0.00 |
| ATOM | 8246 | HG22 | THR | X | 539 | 40.638 | 11.159 | 54.766 | 0.00 | 0.00 |
| ATOM | 8247 | HG23 | THR | X | 539 | 41.666 | 10.846 | 53.238 | 0.00 | 0.00 |
| ATOM | 8248 | OG1  | THR | X | 539 | 40.375 | 12.354 | 51.699 | 0.00 | 0.00 |
| ATOM | 8249 | HG1  | THR | X | 539 | 39.609 | 12.180 | 51.148 | 0.00 | 0.00 |
| ATOM | 8250 | C    | THR | X | 539 | 38.535 | 9.716  | 53.664 | 0.00 | 0.00 |
| ATOM | 8251 | O    | THR | X | 539 | 37.359 | 10.130 | 54.113 | 0.00 | 0.00 |
| ATOM | 8252 | OXT  | THR | X | 539 | 39.094 | 8.765  | 54.212 | 0.00 | 0.00 |
| ATOM | 8253 | C    | LIG | X | 540 | 55.485 | 35.655 | 53.306 | 0.00 | 0.00 |
| ATOM | 8254 | C1   | LIG | X | 540 | 54.189 | 35.474 | 52.910 | 0.00 | 0.00 |
| ATOM | 8255 | C2   | LIG | X | 540 | 53.682 | 36.174 | 51.808 | 0.00 | 0.00 |
| ATOM | 8256 | C3   | LIG | X | 540 | 54.463 | 37.004 | 50.985 | 0.00 | 0.00 |
| ATOM | 8257 | C4   | LIG | X | 540 | 55.762 | 37.189 | 51.414 | 0.00 | 0.00 |
| ATOM | 8258 | C5   | LIG | X | 540 | 56.292 | 36.550 | 52.550 | 0.00 | 0.00 |
| ATOM | 8259 | C6   | LIG | X | 540 | 57.703 | 36.695 | 52.900 | 0.00 | 0.00 |
| ATOM | 8260 | N    | LIG | X | 540 | 57.935 | 37.678 | 53.987 | 0.00 | 0.00 |
| ATOM | 8261 | C7   | LIG | X | 540 | 57.521 | 39.015 | 53.704 | 0.00 | 0.00 |
| ATOM | 8262 | C8   | LIG | X | 540 | 58.480 | 39.729 | 52.788 | 0.00 | 0.00 |
| ATOM | 8263 | O    | LIG | X | 540 | 59.739 | 39.804 | 53.446 | 0.00 | 0.00 |
| ATOM | 8264 | C9   | LIG | X | 540 | 60.238 | 38.442 | 53.764 | 0.00 | 0.00 |
| ATOM | 8265 | C10  | LIG | X | 540 | 59.254 | 37.697 | 54.652 | 0.00 | 0.00 |
| ATOM | 8266 | O1   | LIG | X | 540 | 53.928 | 37.711 | 49.934 | 0.00 | 0.00 |
| ATOM | 8267 | C11  | LIG | X | 540 | 54.669 | 38.564 | 49.016 | 0.00 | 0.00 |
| ATOM | 8268 | O2   | LIG | X | 540 | 52.381 | 35.923 | 51.468 | 0.00 | 0.00 |
| ATOM | 8269 | H    | LIG | X | 540 | 52.158 | 36.464 | 50.690 | 0.00 | 0.00 |
| ATOM | 8270 | H1   | LIG | X | 540 | 55.897 | 35.175 | 54.190 | 0.00 | 0.00 |
| ATOM | 8271 | H2   | LIG | X | 540 | 53.519 | 34.758 | 53.378 | 0.00 | 0.00 |
| ATOM | 8272 | H3   | LIG | X | 540 | 56.364 | 37.918 | 50.880 | 0.00 | 0.00 |
| ATOM | 8273 | H4   | LIG | X | 540 | 57.956 | 35.740 | 53.367 | 0.00 | 0.00 |
| ATOM | 8274 | H5   | LIG | X | 540 | 58.466 | 36.824 | 52.128 | 0.00 | 0.00 |
| ATOM | 8275 | H6   | LIG | X | 540 | 57.533 | 39.495 | 54.685 | 0.00 | 0.00 |
| ATOM | 8276 | H7   | LIG | X | 540 | 56.473 | 38.990 | 53.393 | 0.00 | 0.00 |
| ATOM | 8277 | H8   | LIG | X | 540 | 58.684 | 39.064 | 51.945 | 0.00 | 0.00 |
| ATOM | 8278 | H9   | LIG | X | 540 | 58.108 | 40.691 | 52.427 | 0.00 | 0.00 |
| ATOM | 8279 | H10  | LIG | X | 540 | 60.253 | 37.932 | 52.798 | 0.00 | 0.00 |
| ATOM | 8280 | H11  | LIG | X | 540 | 61.286 | 38.512 | 54.069 | 0.00 | 0.00 |
| ATOM | 8281 | H12  | LIG | X | 540 | 59.151 | 38.237 | 55.597 | 0.00 | 0.00 |
| ATOM | 8282 | H13  | LIG | X | 540 | 59.618 | 36.683 | 54.833 | 0.00 | 0.00 |
| ATOM | 8283 | H14  | LIG | X | 540 | 54.994 | 39.476 | 49.524 | 0.00 | 0.00 |
| ATOM | 8284 | H15  | LIG | X | 540 | 54.076 | 38.788 | 48.125 | 0.00 | 0.00 |
| ATOM | 8285 | H16  | LIG | X | 540 | 55.551 | 38.032 | 48.650 | 0.00 | 0.00 |
| ATOM | 8286 | Na+  | Na+ | X | 541 | 59.790 | 44.180 | 38.781 | 0.00 | 0.00 |
| ATOM | 8287 | Na+  | Na+ | X | 542 | 29.775 | -3.616 | 57.669 | 0.00 | 0.00 |
| ATOM | 8288 | Na+  | Na+ | X | 543 | 60.918 | 44.715 | 34.957 | 0.00 | 0.00 |
| ATOM | 8289 | Na+  | Na+ | X | 544 | 38.146 | 22.824 | 53.519 | 0.00 | 0.00 |
| ATOM | 8290 | Na+  | Na+ | X | 545 | 78.084 | -2.682 | 54.894 | 0.00 | 0.00 |
| ATOM | 8291 | Na+  | Na+ | X | 546 | 46.714 | 68.340 | 61.069 | 0.00 | 0.00 |
| ATOM | 8292 | Na+  | Na+ | X | 547 | 16.370 | 37.570 | 53.826 | 0.00 | 0.00 |

END

**1-HCl**

|        |        |        |        |       |       |        |        |        |      |      |
|--------|--------|--------|--------|-------|-------|--------|--------|--------|------|------|
| CRYST1 | 85.102 | 85.102 | 85.102 | 90.00 | 90.00 | 90.00  | P 1    |        |      | 1    |
| ATOM   | 1      | N      | ASP    | X     | 1     | 38.363 | 76.245 | 30.332 | 0.00 | 0.00 |
| ATOM   | 2      | H1     | ASP    | X     | 1     | 38.871 | 76.609 | 29.538 | 0.00 | 0.00 |

|      |    |      |     |   |   |        |        |        |      |      |
|------|----|------|-----|---|---|--------|--------|--------|------|------|
| ATOM | 3  | H2   | ASP | X | 1 | 37.420 | 76.535 | 30.549 | 0.00 | 0.00 |
| ATOM | 4  | H3   | ASP | X | 1 | 38.472 | 75.241 | 30.329 | 0.00 | 0.00 |
| ATOM | 5  | CA   | ASP | X | 1 | 39.238 | 76.571 | 31.516 | 0.00 | 0.00 |
| ATOM | 6  | HA   | ASP | X | 1 | 40.313 | 76.523 | 31.340 | 0.00 | 0.00 |
| ATOM | 7  | CB   | ASP | X | 1 | 39.083 | 78.047 | 31.899 | 0.00 | 0.00 |
| ATOM | 8  | HB2  | ASP | X | 1 | 39.091 | 78.814 | 31.124 | 0.00 | 0.00 |
| ATOM | 9  | HB3  | ASP | X | 1 | 38.128 | 78.232 | 32.389 | 0.00 | 0.00 |
| ATOM | 10 | CG   | ASP | X | 1 | 40.213 | 78.483 | 32.823 | 0.00 | 0.00 |
| ATOM | 11 | OD1  | ASP | X | 1 | 40.068 | 78.838 | 34.018 | 0.00 | 0.00 |
| ATOM | 12 | OD2  | ASP | X | 1 | 41.420 | 78.555 | 32.330 | 0.00 | 0.00 |
| ATOM | 13 | C    | ASP | X | 1 | 38.985 | 75.650 | 32.715 | 0.00 | 0.00 |
| ATOM | 14 | O    | ASP | X | 1 | 39.957 | 75.350 | 33.366 | 0.00 | 0.00 |
| ATOM | 15 | N    | ALA | X | 2 | 37.764 | 75.157 | 33.011 | 0.00 | 0.00 |
| ATOM | 16 | H    | ALA | X | 2 | 36.963 | 75.572 | 32.557 | 0.00 | 0.00 |
| ATOM | 17 | CA   | ALA | X | 2 | 37.508 | 74.369 | 34.193 | 0.00 | 0.00 |
| ATOM | 18 | HA   | ALA | X | 2 | 38.077 | 74.724 | 35.052 | 0.00 | 0.00 |
| ATOM | 19 | CB   | ALA | X | 2 | 35.969 | 74.648 | 34.540 | 0.00 | 0.00 |
| ATOM | 20 | HB1  | ALA | X | 2 | 35.609 | 73.896 | 35.242 | 0.00 | 0.00 |
| ATOM | 21 | HB2  | ALA | X | 2 | 35.841 | 75.664 | 34.914 | 0.00 | 0.00 |
| ATOM | 22 | HB3  | ALA | X | 2 | 35.453 | 74.387 | 33.615 | 0.00 | 0.00 |
| ATOM | 23 | C    | ALA | X | 2 | 37.823 | 72.842 | 34.025 | 0.00 | 0.00 |
| ATOM | 24 | O    | ALA | X | 2 | 37.124 | 72.029 | 34.644 | 0.00 | 0.00 |
| ATOM | 25 | N    | GLU | X | 3 | 38.732 | 72.479 | 33.193 | 0.00 | 0.00 |
| ATOM | 26 | H    | GLU | X | 3 | 39.114 | 73.166 | 32.559 | 0.00 | 0.00 |
| ATOM | 27 | CA   | GLU | X | 3 | 38.911 | 71.087 | 32.695 | 0.00 | 0.00 |
| ATOM | 28 | HA   | GLU | X | 3 | 38.017 | 70.737 | 32.179 | 0.00 | 0.00 |
| ATOM | 29 | CB   | GLU | X | 3 | 40.117 | 71.108 | 31.809 | 0.00 | 0.00 |
| ATOM | 30 | HB2  | GLU | X | 3 | 40.910 | 71.662 | 32.311 | 0.00 | 0.00 |
| ATOM | 31 | HB3  | GLU | X | 3 | 40.474 | 70.082 | 31.713 | 0.00 | 0.00 |
| ATOM | 32 | CG   | GLU | X | 3 | 39.997 | 71.611 | 30.352 | 0.00 | 0.00 |
| ATOM | 33 | HG2  | GLU | X | 3 | 40.926 | 71.513 | 29.792 | 0.00 | 0.00 |
| ATOM | 34 | HG3  | GLU | X | 3 | 39.159 | 71.107 | 29.869 | 0.00 | 0.00 |
| ATOM | 35 | CD   | GLU | X | 3 | 39.598 | 73.093 | 30.279 | 0.00 | 0.00 |
| ATOM | 36 | OE1  | GLU | X | 3 | 38.357 | 73.299 | 30.137 | 0.00 | 0.00 |
| ATOM | 37 | OE2  | GLU | X | 3 | 40.472 | 74.009 | 30.264 | 0.00 | 0.00 |
| ATOM | 38 | C    | GLU | X | 3 | 39.201 | 70.078 | 33.882 | 0.00 | 0.00 |
| ATOM | 39 | O    | GLU | X | 3 | 38.625 | 69.006 | 33.914 | 0.00 | 0.00 |
| ATOM | 40 | N    | LEU | X | 4 | 40.021 | 70.411 | 34.909 | 0.00 | 0.00 |
| ATOM | 41 | H    | LEU | X | 4 | 40.404 | 71.343 | 34.850 | 0.00 | 0.00 |
| ATOM | 42 | CA   | LEU | X | 4 | 40.252 | 69.543 | 36.087 | 0.00 | 0.00 |
| ATOM | 43 | HA   | LEU | X | 4 | 39.843 | 68.545 | 35.932 | 0.00 | 0.00 |
| ATOM | 44 | CB   | LEU | X | 4 | 41.789 | 69.598 | 36.309 | 0.00 | 0.00 |
| ATOM | 45 | HB2  | LEU | X | 4 | 42.136 | 70.631 | 36.277 | 0.00 | 0.00 |
| ATOM | 46 | HB3  | LEU | X | 4 | 42.004 | 69.227 | 37.311 | 0.00 | 0.00 |
| ATOM | 47 | CG   | LEU | X | 4 | 42.603 | 68.890 | 35.224 | 0.00 | 0.00 |
| ATOM | 48 | HG   | LEU | X | 4 | 42.495 | 69.506 | 34.332 | 0.00 | 0.00 |
| ATOM | 49 | CD1  | LEU | X | 4 | 44.095 | 69.010 | 35.568 | 0.00 | 0.00 |
| ATOM | 50 | HD11 | LEU | X | 4 | 44.248 | 68.369 | 36.436 | 0.00 | 0.00 |
| ATOM | 51 | HD12 | LEU | X | 4 | 44.722 | 68.743 | 34.717 | 0.00 | 0.00 |
| ATOM | 52 | HD13 | LEU | X | 4 | 44.214 | 70.044 | 35.890 | 0.00 | 0.00 |
| ATOM | 53 | CD2  | LEU | X | 4 | 42.142 | 67.479 | 34.835 | 0.00 | 0.00 |
| ATOM | 54 | HD21 | LEU | X | 4 | 41.756 | 67.032 | 35.751 | 0.00 | 0.00 |
| ATOM | 55 | HD22 | LEU | X | 4 | 41.424 | 67.546 | 34.018 | 0.00 | 0.00 |
| ATOM | 56 | HD23 | LEU | X | 4 | 43.045 | 67.002 | 34.452 | 0.00 | 0.00 |
| ATOM | 57 | C    | LEU | X | 4 | 39.380 | 69.903 | 37.326 | 0.00 | 0.00 |
| ATOM | 58 | O    | LEU | X | 4 | 39.479 | 69.179 | 38.379 | 0.00 | 0.00 |
| ATOM | 59 | N    | LEU | X | 5 | 38.558 | 70.919 | 37.291 | 0.00 | 0.00 |
| ATOM | 60 | H    | LEU | X | 5 | 38.359 | 71.271 | 36.366 | 0.00 | 0.00 |
| ATOM | 61 | CA   | LEU | X | 5 | 37.608 | 71.235 | 38.398 | 0.00 | 0.00 |
| ATOM | 62 | HA   | LEU | X | 5 | 37.850 | 70.703 | 39.318 | 0.00 | 0.00 |
| ATOM | 63 | CB   | LEU | X | 5 | 37.632 | 72.783 | 38.587 | 0.00 | 0.00 |
| ATOM | 64 | HB2  | LEU | X | 5 | 38.618 | 73.215 | 38.418 | 0.00 | 0.00 |
| ATOM | 65 | HB3  | LEU | X | 5 | 37.038 | 73.144 | 37.748 | 0.00 | 0.00 |
| ATOM | 66 | CG   | LEU | X | 5 | 37.160 | 73.383 | 39.902 | 0.00 | 0.00 |
| ATOM | 67 | HG   | LEU | X | 5 | 37.404 | 74.445 | 39.903 | 0.00 | 0.00 |
| ATOM | 68 | CD1  | LEU | X | 5 | 35.586 | 73.249 | 40.092 | 0.00 | 0.00 |
| ATOM | 69 | HD11 | LEU | X | 5 | 35.359 | 72.199 | 40.277 | 0.00 | 0.00 |
| ATOM | 70 | HD12 | LEU | X | 5 | 35.297 | 73.887 | 40.928 | 0.00 | 0.00 |
| ATOM | 71 | HD13 | LEU | X | 5 | 35.127 | 73.560 | 39.154 | 0.00 | 0.00 |
| ATOM | 72 | CD2  | LEU | X | 5 | 37.839 | 72.657 | 40.994 | 0.00 | 0.00 |

|      |     |      |     |   |   |        |        |        |      |      |
|------|-----|------|-----|---|---|--------|--------|--------|------|------|
| ATOM | 73  | HD21 | LEU | X | 5 | 37.377 | 71.673 | 41.074 | 0.00 | 0.00 |
| ATOM | 74  | HD22 | LEU | X | 5 | 38.859 | 72.432 | 40.681 | 0.00 | 0.00 |
| ATOM | 75  | HD23 | LEU | X | 5 | 37.859 | 73.286 | 41.884 | 0.00 | 0.00 |
| ATOM | 76  | C    | LEU | X | 5 | 36.216 | 70.686 | 37.952 | 0.00 | 0.00 |
| ATOM | 77  | O    | LEU | X | 5 | 35.514 | 71.170 | 37.074 | 0.00 | 0.00 |
| ATOM | 78  | N    | VAL | X | 6 | 35.859 | 69.553 | 38.619 | 0.00 | 0.00 |
| ATOM | 79  | H    | VAL | X | 6 | 36.454 | 69.241 | 39.373 | 0.00 | 0.00 |
| ATOM | 80  | CA   | VAL | X | 6 | 34.622 | 68.746 | 38.311 | 0.00 | 0.00 |
| ATOM | 81  | HA   | VAL | X | 6 | 34.097 | 69.138 | 37.439 | 0.00 | 0.00 |
| ATOM | 82  | CB   | VAL | X | 6 | 35.007 | 67.309 | 37.918 | 0.00 | 0.00 |
| ATOM | 83  | HB   | VAL | X | 6 | 35.561 | 67.356 | 36.980 | 0.00 | 0.00 |
| ATOM | 84  | CG1  | VAL | X | 6 | 35.805 | 66.456 | 38.969 | 0.00 | 0.00 |
| ATOM | 85  | HG11 | VAL | X | 6 | 36.568 | 67.041 | 39.484 | 0.00 | 0.00 |
| ATOM | 86  | HG12 | VAL | X | 6 | 35.020 | 66.096 | 39.634 | 0.00 | 0.00 |
| ATOM | 87  | HG13 | VAL | X | 6 | 36.204 | 65.621 | 38.394 | 0.00 | 0.00 |
| ATOM | 88  | CG2  | VAL | X | 6 | 33.858 | 66.486 | 37.582 | 0.00 | 0.00 |
| ATOM | 89  | HG21 | VAL | X | 6 | 33.458 | 66.903 | 36.658 | 0.00 | 0.00 |
| ATOM | 90  | HG22 | VAL | X | 6 | 34.270 | 65.521 | 37.289 | 0.00 | 0.00 |
| ATOM | 91  | HG23 | VAL | X | 6 | 33.005 | 66.409 | 38.257 | 0.00 | 0.00 |
| ATOM | 92  | C    | VAL | X | 6 | 33.736 | 68.764 | 39.575 | 0.00 | 0.00 |
| ATOM | 93  | O    | VAL | X | 6 | 34.225 | 68.711 | 40.763 | 0.00 | 0.00 |
| ATOM | 94  | N    | THR | X | 7 | 32.454 | 68.996 | 39.380 | 0.00 | 0.00 |
| ATOM | 95  | H    | THR | X | 7 | 32.166 | 68.899 | 38.417 | 0.00 | 0.00 |
| ATOM | 96  | CA   | THR | X | 7 | 31.380 | 68.961 | 40.409 | 0.00 | 0.00 |
| ATOM | 97  | HA   | THR | X | 7 | 31.721 | 69.153 | 41.426 | 0.00 | 0.00 |
| ATOM | 98  | CB   | THR | X | 7 | 30.421 | 70.051 | 39.992 | 0.00 | 0.00 |
| ATOM | 99  | HB   | THR | X | 7 | 29.994 | 69.855 | 39.009 | 0.00 | 0.00 |
| ATOM | 100 | CG2  | THR | X | 7 | 29.247 | 70.240 | 41.044 | 0.00 | 0.00 |
| ATOM | 101 | HG21 | THR | X | 7 | 29.691 | 70.277 | 42.038 | 0.00 | 0.00 |
| ATOM | 102 | HG22 | THR | X | 7 | 28.675 | 71.100 | 40.694 | 0.00 | 0.00 |
| ATOM | 103 | HG23 | THR | X | 7 | 28.751 | 69.270 | 41.052 | 0.00 | 0.00 |
| ATOM | 104 | OG1  | THR | X | 7 | 31.069 | 71.303 | 39.926 | 0.00 | 0.00 |
| ATOM | 105 | HG1  | THR | X | 7 | 30.610 | 71.942 | 39.377 | 0.00 | 0.00 |
| ATOM | 106 | C    | THR | X | 7 | 30.783 | 67.628 | 40.414 | 0.00 | 0.00 |
| ATOM | 107 | O    | THR | X | 7 | 30.511 | 67.123 | 39.376 | 0.00 | 0.00 |
| ATOM | 108 | N    | VAL | X | 8 | 30.697 | 66.985 | 41.578 | 0.00 | 0.00 |
| ATOM | 109 | H    | VAL | X | 8 | 31.069 | 67.478 | 42.377 | 0.00 | 0.00 |
| ATOM | 110 | CA   | VAL | X | 8 | 29.931 | 65.803 | 41.876 | 0.00 | 0.00 |
| ATOM | 111 | HA   | VAL | X | 8 | 29.368 | 65.396 | 41.036 | 0.00 | 0.00 |
| ATOM | 112 | CB   | VAL | X | 8 | 30.791 | 64.656 | 42.407 | 0.00 | 0.00 |
| ATOM | 113 | HB   | VAL | X | 8 | 30.127 | 63.934 | 42.882 | 0.00 | 0.00 |
| ATOM | 114 | CG1  | VAL | X | 8 | 31.668 | 64.104 | 41.307 | 0.00 | 0.00 |
| ATOM | 115 | HG11 | VAL | X | 8 | 32.218 | 63.260 | 41.723 | 0.00 | 0.00 |
| ATOM | 116 | HG12 | VAL | X | 8 | 30.995 | 63.817 | 40.499 | 0.00 | 0.00 |
| ATOM | 117 | HG13 | VAL | X | 8 | 32.340 | 64.783 | 40.783 | 0.00 | 0.00 |
| ATOM | 118 | CG2  | VAL | X | 8 | 31.682 | 65.031 | 43.627 | 0.00 | 0.00 |
| ATOM | 119 | HG21 | VAL | X | 8 | 31.214 | 65.528 | 44.477 | 0.00 | 0.00 |
| ATOM | 120 | HG22 | VAL | X | 8 | 32.027 | 64.133 | 44.140 | 0.00 | 0.00 |
| ATOM | 121 | HG23 | VAL | X | 8 | 32.527 | 65.684 | 43.407 | 0.00 | 0.00 |
| ATOM | 122 | C    | VAL | X | 8 | 28.845 | 66.158 | 42.887 | 0.00 | 0.00 |
| ATOM | 123 | O    | VAL | X | 8 | 28.850 | 67.309 | 43.371 | 0.00 | 0.00 |
| ATOM | 124 | N    | ARG | X | 9 | 27.862 | 65.301 | 43.207 | 0.00 | 0.00 |
| ATOM | 125 | H    | ARG | X | 9 | 28.081 | 64.396 | 42.817 | 0.00 | 0.00 |
| ATOM | 126 | CA   | ARG | X | 9 | 26.691 | 65.593 | 44.045 | 0.00 | 0.00 |
| ATOM | 127 | HA   | ARG | X | 9 | 26.072 | 66.338 | 43.545 | 0.00 | 0.00 |
| ATOM | 128 | CB   | ARG | X | 9 | 25.791 | 64.376 | 44.153 | 0.00 | 0.00 |
| ATOM | 129 | HB2  | ARG | X | 9 | 25.592 | 64.036 | 43.136 | 0.00 | 0.00 |
| ATOM | 130 | HB3  | ARG | X | 9 | 26.191 | 63.617 | 44.826 | 0.00 | 0.00 |
| ATOM | 131 | CG   | ARG | X | 9 | 24.526 | 64.859 | 44.871 | 0.00 | 0.00 |
| ATOM | 132 | HG2  | ARG | X | 9 | 24.658 | 64.777 | 45.950 | 0.00 | 0.00 |
| ATOM | 133 | HG3  | ARG | X | 9 | 24.186 | 65.854 | 44.586 | 0.00 | 0.00 |
| ATOM | 134 | CD   | ARG | X | 9 | 23.378 | 63.891 | 44.513 | 0.00 | 0.00 |
| ATOM | 135 | HD2  | ARG | X | 9 | 23.146 | 63.924 | 43.449 | 0.00 | 0.00 |
| ATOM | 136 | HD3  | ARG | X | 9 | 23.622 | 62.862 | 44.777 | 0.00 | 0.00 |
| ATOM | 137 | NE   | ARG | X | 9 | 22.279 | 64.321 | 45.292 | 0.00 | 0.00 |
| ATOM | 138 | HE   | ARG | X | 9 | 22.537 | 65.038 | 45.955 | 0.00 | 0.00 |
| ATOM | 139 | CZ   | ARG | X | 9 | 21.142 | 63.661 | 45.683 | 0.00 | 0.00 |
| ATOM | 140 | NH1  | ARG | X | 9 | 20.860 | 62.576 | 45.115 | 0.00 | 0.00 |
| ATOM | 141 | HH11 | ARG | X | 9 | 21.193 | 62.299 | 44.203 | 0.00 | 0.00 |
| ATOM | 142 | HH12 | ARG | X | 9 | 20.106 | 61.955 | 45.369 | 0.00 | 0.00 |

|      |     |      |     |   |    |        |        |        |      |      |
|------|-----|------|-----|---|----|--------|--------|--------|------|------|
| ATOM | 143 | NH2  | ARG | X | 9  | 20.212 | 64.010 | 46.570 | 0.00 | 0.00 |
| ATOM | 144 | HH21 | ARG | X | 9  | 20.342 | 64.829 | 47.146 | 0.00 | 0.00 |
| ATOM | 145 | HH22 | ARG | X | 9  | 19.360 | 63.471 | 46.626 | 0.00 | 0.00 |
| ATOM | 146 | C    | ARG | X | 9  | 27.121 | 66.021 | 45.464 | 0.00 | 0.00 |
| ATOM | 147 | O    | ARG | X | 9  | 26.461 | 66.892 | 46.037 | 0.00 | 0.00 |
| ATOM | 148 | N    | GLY | X | 10 | 28.230 | 65.604 | 46.062 | 0.00 | 0.00 |
| ATOM | 149 | H    | GLY | X | 10 | 28.555 | 64.730 | 45.672 | 0.00 | 0.00 |
| ATOM | 150 | CA   | GLY | X | 10 | 28.716 | 65.923 | 47.402 | 0.00 | 0.00 |
| ATOM | 151 | HA2  | GLY | X | 10 | 27.788 | 65.977 | 48.086 | 0.00 | 0.00 |
| ATOM | 152 | HA3  | GLY | X | 10 | 29.415 | 65.116 | 47.635 | 0.00 | 0.00 |
| ATOM | 153 | C    | GLY | X | 10 | 29.465 | 67.304 | 47.454 | 0.00 | 0.00 |
| ATOM | 154 | O    | GLY | X | 10 | 29.113 | 68.056 | 48.343 | 0.00 | 0.00 |
| ATOM | 155 | N    | GLY | X | 11 | 30.251 | 67.647 | 46.392 | 0.00 | 0.00 |
| ATOM | 156 | H    | GLY | X | 11 | 30.401 | 67.007 | 45.625 | 0.00 | 0.00 |
| ATOM | 157 | CA   | GLY | X | 11 | 30.828 | 69.029 | 46.239 | 0.00 | 0.00 |
| ATOM | 158 | HA2  | GLY | X | 11 | 30.018 | 69.618 | 45.957 | 0.00 | 0.00 |
| ATOM | 159 | HA3  | GLY | X | 11 | 31.369 | 69.333 | 47.107 | 0.00 | 0.00 |
| ATOM | 160 | C    | GLY | X | 11 | 31.751 | 69.137 | 45.070 | 0.00 | 0.00 |
| ATOM | 161 | O    | GLY | X | 11 | 31.728 | 68.369 | 44.057 | 0.00 | 0.00 |
| ATOM | 162 | N    | ARG | X | 12 | 32.668 | 70.031 | 45.180 | 0.00 | 0.00 |
| ATOM | 163 | H    | ARG | X | 12 | 32.791 | 70.503 | 46.065 | 0.00 | 0.00 |
| ATOM | 164 | CA   | ARG | X | 12 | 33.656 | 70.293 | 44.137 | 0.00 | 0.00 |
| ATOM | 165 | HA   | ARG | X | 12 | 33.362 | 69.841 | 43.190 | 0.00 | 0.00 |
| ATOM | 166 | CB   | ARG | X | 12 | 34.027 | 71.723 | 44.001 | 0.00 | 0.00 |
| ATOM | 167 | HB2  | ARG | X | 12 | 34.064 | 72.130 | 45.012 | 0.00 | 0.00 |
| ATOM | 168 | HB3  | ARG | X | 12 | 35.030 | 71.864 | 43.598 | 0.00 | 0.00 |
| ATOM | 169 | CG   | ARG | X | 12 | 33.123 | 72.602 | 43.125 | 0.00 | 0.00 |
| ATOM | 170 | HG2  | ARG | X | 12 | 33.478 | 73.628 | 43.233 | 0.00 | 0.00 |
| ATOM | 171 | HG3  | ARG | X | 12 | 33.123 | 72.224 | 42.103 | 0.00 | 0.00 |
| ATOM | 172 | CD   | ARG | X | 12 | 31.717 | 72.773 | 43.578 | 0.00 | 0.00 |
| ATOM | 173 | HD2  | ARG | X | 12 | 31.306 | 71.833 | 43.946 | 0.00 | 0.00 |
| ATOM | 174 | HD3  | ARG | X | 12 | 31.750 | 73.526 | 44.365 | 0.00 | 0.00 |
| ATOM | 175 | NE   | ARG | X | 12 | 30.935 | 73.433 | 42.489 | 0.00 | 0.00 |
| ATOM | 176 | HE   | ARG | X | 12 | 31.480 | 73.867 | 41.758 | 0.00 | 0.00 |
| ATOM | 177 | CZ   | ARG | X | 12 | 29.588 | 73.476 | 42.269 | 0.00 | 0.00 |
| ATOM | 178 | NH1  | ARG | X | 12 | 28.735 | 72.911 | 43.085 | 0.00 | 0.00 |
| ATOM | 179 | HH11 | ARG | X | 12 | 29.039 | 72.712 | 44.027 | 0.00 | 0.00 |
| ATOM | 180 | HH12 | ARG | X | 12 | 27.763 | 73.002 | 42.823 | 0.00 | 0.00 |
| ATOM | 181 | NH2  | ARG | X | 12 | 29.183 | 74.130 | 41.173 | 0.00 | 0.00 |
| ATOM | 182 | HH21 | ARG | X | 12 | 29.846 | 74.533 | 40.526 | 0.00 | 0.00 |
| ATOM | 183 | HH22 | ARG | X | 12 | 28.262 | 74.042 | 40.768 | 0.00 | 0.00 |
| ATOM | 184 | C    | ARG | X | 12 | 34.930 | 69.487 | 44.328 | 0.00 | 0.00 |
| ATOM | 185 | O    | ARG | X | 12 | 35.245 | 69.097 | 45.420 | 0.00 | 0.00 |
| ATOM | 186 | N    | LEU | X | 13 | 35.646 | 69.074 | 43.263 | 0.00 | 0.00 |
| ATOM | 187 | H    | LEU | X | 13 | 35.415 | 69.502 | 42.378 | 0.00 | 0.00 |
| ATOM | 188 | CA   | LEU | X | 13 | 36.788 | 68.162 | 43.359 | 0.00 | 0.00 |
| ATOM | 189 | HA   | LEU | X | 13 | 37.208 | 68.266 | 44.359 | 0.00 | 0.00 |
| ATOM | 190 | CB   | LEU | X | 13 | 36.324 | 66.764 | 43.004 | 0.00 | 0.00 |
| ATOM | 191 | HB2  | LEU | X | 13 | 35.863 | 66.785 | 42.016 | 0.00 | 0.00 |
| ATOM | 192 | HB3  | LEU | X | 13 | 37.205 | 66.151 | 42.818 | 0.00 | 0.00 |
| ATOM | 193 | CG   | LEU | X | 13 | 35.396 | 65.923 | 43.960 | 0.00 | 0.00 |
| ATOM | 194 | HG   | LEU | X | 13 | 34.475 | 66.479 | 44.135 | 0.00 | 0.00 |
| ATOM | 195 | CD1  | LEU | X | 13 | 34.983 | 64.650 | 43.214 | 0.00 | 0.00 |
| ATOM | 196 | HD11 | LEU | X | 13 | 34.695 | 64.868 | 42.185 | 0.00 | 0.00 |
| ATOM | 197 | HD12 | LEU | X | 13 | 35.871 | 64.027 | 43.108 | 0.00 | 0.00 |
| ATOM | 198 | HD13 | LEU | X | 13 | 34.194 | 64.128 | 43.755 | 0.00 | 0.00 |
| ATOM | 199 | CD2  | LEU | X | 13 | 36.222 | 65.594 | 45.264 | 0.00 | 0.00 |
| ATOM | 200 | HD21 | LEU | X | 13 | 36.367 | 66.464 | 45.906 | 0.00 | 0.00 |
| ATOM | 201 | HD22 | LEU | X | 13 | 35.634 | 64.835 | 45.780 | 0.00 | 0.00 |
| ATOM | 202 | HD23 | LEU | X | 13 | 37.231 | 65.230 | 45.072 | 0.00 | 0.00 |
| ATOM | 203 | C    | LEU | X | 13 | 37.725 | 68.583 | 42.323 | 0.00 | 0.00 |
| ATOM | 204 | O    | LEU | X | 13 | 37.366 | 68.951 | 41.174 | 0.00 | 0.00 |
| ATOM | 205 | N    | ARG | X | 14 | 39.049 | 68.647 | 42.596 | 0.00 | 0.00 |
| ATOM | 206 | H    | ARG | X | 14 | 39.264 | 68.469 | 43.567 | 0.00 | 0.00 |
| ATOM | 207 | CA   | ARG | X | 14 | 40.164 | 69.062 | 41.738 | 0.00 | 0.00 |
| ATOM | 208 | HA   | ARG | X | 14 | 39.742 | 69.401 | 40.791 | 0.00 | 0.00 |
| ATOM | 209 | CB   | ARG | X | 14 | 40.953 | 70.140 | 42.470 | 0.00 | 0.00 |
| ATOM | 210 | HB2  | ARG | X | 14 | 40.255 | 70.899 | 42.823 | 0.00 | 0.00 |
| ATOM | 211 | HB3  | ARG | X | 14 | 41.390 | 69.617 | 43.320 | 0.00 | 0.00 |
| ATOM | 212 | CG   | ARG | X | 14 | 41.991 | 70.957 | 41.599 | 0.00 | 0.00 |

|      |     |      |     |   |    |        |        |        |      |      |
|------|-----|------|-----|---|----|--------|--------|--------|------|------|
| ATOM | 213 | HG2  | ARG | X | 14 | 42.520 | 70.231 | 40.981 | 0.00 | 0.00 |
| ATOM | 214 | HG3  | ARG | X | 14 | 41.369 | 71.647 | 41.030 | 0.00 | 0.00 |
| ATOM | 215 | CD   | ARG | X | 14 | 42.972 | 71.858 | 42.427 | 0.00 | 0.00 |
| ATOM | 216 | HD2  | ARG | X | 14 | 42.312 | 72.451 | 43.061 | 0.00 | 0.00 |
| ATOM | 217 | HD3  | ARG | X | 14 | 43.681 | 71.263 | 43.002 | 0.00 | 0.00 |
| ATOM | 218 | NE   | ARG | X | 14 | 43.723 | 72.799 | 41.526 | 0.00 | 0.00 |
| ATOM | 219 | HE   | ARG | X | 14 | 43.902 | 72.346 | 40.641 | 0.00 | 0.00 |
| ATOM | 220 | CZ   | ARG | X | 14 | 44.041 | 74.002 | 41.838 | 0.00 | 0.00 |
| ATOM | 221 | NH1  | ARG | X | 14 | 44.074 | 74.516 | 43.023 | 0.00 | 0.00 |
| ATOM | 222 | HH11 | ARG | X | 14 | 43.849 | 74.036 | 43.883 | 0.00 | 0.00 |
| ATOM | 223 | HH12 | ARG | X | 14 | 44.684 | 75.309 | 43.163 | 0.00 | 0.00 |
| ATOM | 224 | NH2  | ARG | X | 14 | 44.458 | 74.819 | 40.906 | 0.00 | 0.00 |
| ATOM | 225 | HH21 | ARG | X | 14 | 44.630 | 74.424 | 39.992 | 0.00 | 0.00 |
| ATOM | 226 | HH22 | ARG | X | 14 | 45.061 | 75.550 | 41.256 | 0.00 | 0.00 |
| ATOM | 227 | C    | ARG | X | 14 | 41.084 | 67.845 | 41.407 | 0.00 | 0.00 |
| ATOM | 228 | O    | ARG | X | 14 | 41.581 | 67.176 | 42.311 | 0.00 | 0.00 |
| ATOM | 229 | N    | GLY | X | 15 | 41.301 | 67.642 | 40.070 | 0.00 | 0.00 |
| ATOM | 230 | H    | GLY | X | 15 | 40.920 | 68.360 | 39.470 | 0.00 | 0.00 |
| ATOM | 231 | CA   | GLY | X | 15 | 42.102 | 66.532 | 39.485 | 0.00 | 0.00 |
| ATOM | 232 | HA2  | GLY | X | 15 | 42.085 | 65.695 | 40.200 | 0.00 | 0.00 |
| ATOM | 233 | HA3  | GLY | X | 15 | 41.769 | 66.217 | 38.534 | 0.00 | 0.00 |
| ATOM | 234 | C    | GLY | X | 15 | 43.530 | 67.012 | 39.168 | 0.00 | 0.00 |
| ATOM | 235 | O    | GLY | X | 15 | 43.949 | 68.069 | 39.588 | 0.00 | 0.00 |
| ATOM | 236 | N    | ILE | X | 16 | 44.262 | 66.031 | 38.647 | 0.00 | 0.00 |
| ATOM | 237 | H    | ILE | X | 16 | 43.801 | 65.187 | 38.340 | 0.00 | 0.00 |
| ATOM | 238 | CA   | ILE | X | 16 | 45.573 | 66.150 | 37.995 | 0.00 | 0.00 |
| ATOM | 239 | HA   | ILE | X | 16 | 45.755 | 67.223 | 37.923 | 0.00 | 0.00 |
| ATOM | 240 | CB   | ILE | X | 16 | 46.629 | 65.454 | 38.813 | 0.00 | 0.00 |
| ATOM | 241 | HB   | ILE | X | 16 | 47.610 | 65.541 | 38.346 | 0.00 | 0.00 |
| ATOM | 242 | CG2  | ILE | X | 16 | 46.717 | 66.194 | 40.117 | 0.00 | 0.00 |
| ATOM | 243 | HG21 | ILE | X | 16 | 47.563 | 65.812 | 40.688 | 0.00 | 0.00 |
| ATOM | 244 | HG22 | ILE | X | 16 | 46.993 | 67.191 | 39.772 | 0.00 | 0.00 |
| ATOM | 245 | HG23 | ILE | X | 16 | 45.766 | 66.108 | 40.643 | 0.00 | 0.00 |
| ATOM | 246 | CG1  | ILE | X | 16 | 46.314 | 63.939 | 38.918 | 0.00 | 0.00 |
| ATOM | 247 | HG12 | ILE | X | 16 | 45.465 | 63.662 | 39.543 | 0.00 | 0.00 |
| ATOM | 248 | HG13 | ILE | X | 16 | 46.096 | 63.450 | 37.968 | 0.00 | 0.00 |
| ATOM | 249 | CD1  | ILE | X | 16 | 47.560 | 63.216 | 39.420 | 0.00 | 0.00 |
| ATOM | 250 | HD11 | ILE | X | 16 | 47.408 | 62.139 | 39.503 | 0.00 | 0.00 |
| ATOM | 251 | HD12 | ILE | X | 16 | 48.383 | 63.468 | 38.752 | 0.00 | 0.00 |
| ATOM | 252 | HD13 | ILE | X | 16 | 47.790 | 63.702 | 40.368 | 0.00 | 0.00 |
| ATOM | 253 | C    | ILE | X | 16 | 45.493 | 65.647 | 36.540 | 0.00 | 0.00 |
| ATOM | 254 | O    | ILE | X | 16 | 44.523 | 64.957 | 36.224 | 0.00 | 0.00 |
| ATOM | 255 | N    | ARG | X | 17 | 46.522 | 65.892 | 35.762 | 0.00 | 0.00 |
| ATOM | 256 | H    | ARG | X | 17 | 47.355 | 66.351 | 36.102 | 0.00 | 0.00 |
| ATOM | 257 | CA   | ARG | X | 17 | 46.776 | 65.116 | 34.527 | 0.00 | 0.00 |
| ATOM | 258 | HA   | ARG | X | 17 | 45.867 | 64.625 | 34.179 | 0.00 | 0.00 |
| ATOM | 259 | CB   | ARG | X | 17 | 47.187 | 66.002 | 33.321 | 0.00 | 0.00 |
| ATOM | 260 | HB2  | ARG | X | 17 | 47.865 | 66.744 | 33.743 | 0.00 | 0.00 |
| ATOM | 261 | HB3  | ARG | X | 17 | 47.648 | 65.381 | 32.553 | 0.00 | 0.00 |
| ATOM | 262 | CG   | ARG | X | 17 | 45.899 | 66.605 | 32.695 | 0.00 | 0.00 |
| ATOM | 263 | HG2  | ARG | X | 17 | 45.113 | 65.932 | 32.352 | 0.00 | 0.00 |
| ATOM | 264 | HG3  | ARG | X | 17 | 45.340 | 67.069 | 33.508 | 0.00 | 0.00 |
| ATOM | 265 | CD   | ARG | X | 17 | 46.244 | 67.749 | 31.705 | 0.00 | 0.00 |
| ATOM | 266 | HD2  | ARG | X | 17 | 45.369 | 68.107 | 31.162 | 0.00 | 0.00 |
| ATOM | 267 | HD3  | ARG | X | 17 | 46.625 | 68.511 | 32.385 | 0.00 | 0.00 |
| ATOM | 268 | NE   | ARG | X | 17 | 47.370 | 67.523 | 30.628 | 0.00 | 0.00 |
| ATOM | 269 | HE   | ARG | X | 17 | 48.018 | 66.749 | 30.606 | 0.00 | 0.00 |
| ATOM | 270 | CZ   | ARG | X | 17 | 47.604 | 68.099 | 29.456 | 0.00 | 0.00 |
| ATOM | 271 | NH1  | ARG | X | 17 | 46.937 | 69.108 | 29.064 | 0.00 | 0.00 |
| ATOM | 272 | HH11 | ARG | X | 17 | 46.410 | 69.673 | 29.714 | 0.00 | 0.00 |
| ATOM | 273 | HH12 | ARG | X | 17 | 47.288 | 69.568 | 28.236 | 0.00 | 0.00 |
| ATOM | 274 | NH2  | ARG | X | 17 | 48.486 | 67.591 | 28.712 | 0.00 | 0.00 |
| ATOM | 275 | HH21 | ARG | X | 17 | 48.882 | 66.756 | 29.119 | 0.00 | 0.00 |
| ATOM | 276 | HH22 | ARG | X | 17 | 48.640 | 67.853 | 27.749 | 0.00 | 0.00 |
| ATOM | 277 | C    | ARG | X | 17 | 47.795 | 64.018 | 34.726 | 0.00 | 0.00 |
| ATOM | 278 | O    | ARG | X | 17 | 48.646 | 64.118 | 35.609 | 0.00 | 0.00 |
| ATOM | 279 | N    | LEU | X | 18 | 47.755 | 62.898 | 34.027 | 0.00 | 0.00 |
| ATOM | 280 | H    | LEU | X | 18 | 46.943 | 62.835 | 33.430 | 0.00 | 0.00 |
| ATOM | 281 | CA   | LEU | X | 18 | 48.797 | 61.963 | 33.843 | 0.00 | 0.00 |
| ATOM | 282 | HA   | LEU | X | 18 | 49.641 | 62.168 | 34.502 | 0.00 | 0.00 |

|      |     |      |     |   |    |        |        |        |      |      |
|------|-----|------|-----|---|----|--------|--------|--------|------|------|
| ATOM | 283 | CB   | LEU | X | 18 | 48.303 | 60.543 | 34.208 | 0.00 | 0.00 |
| ATOM | 284 | HB2  | LEU | X | 18 | 47.465 | 60.400 | 33.525 | 0.00 | 0.00 |
| ATOM | 285 | HB3  | LEU | X | 18 | 49.000 | 59.773 | 33.878 | 0.00 | 0.00 |
| ATOM | 286 | CG   | LEU | X | 18 | 47.882 | 60.420 | 35.629 | 0.00 | 0.00 |
| ATOM | 287 | HG   | LEU | X | 18 | 47.158 | 61.210 | 35.826 | 0.00 | 0.00 |
| ATOM | 288 | CD1  | LEU | X | 18 | 47.199 | 59.049 | 35.653 | 0.00 | 0.00 |
| ATOM | 289 | HD11 | LEU | X | 18 | 48.005 | 58.339 | 35.467 | 0.00 | 0.00 |
| ATOM | 290 | HD12 | LEU | X | 18 | 46.811 | 58.897 | 36.659 | 0.00 | 0.00 |
| ATOM | 291 | HD13 | LEU | X | 18 | 46.380 | 58.985 | 34.936 | 0.00 | 0.00 |
| ATOM | 292 | CD2  | LEU | X | 18 | 49.042 | 60.559 | 36.573 | 0.00 | 0.00 |
| ATOM | 293 | HD21 | LEU | X | 18 | 48.720 | 60.141 | 37.526 | 0.00 | 0.00 |
| ATOM | 294 | HD22 | LEU | X | 18 | 49.973 | 60.131 | 36.201 | 0.00 | 0.00 |
| ATOM | 295 | HD23 | LEU | X | 18 | 49.256 | 61.599 | 36.819 | 0.00 | 0.00 |
| ATOM | 296 | C    | LEU | X | 18 | 49.277 | 61.968 | 32.383 | 0.00 | 0.00 |
| ATOM | 297 | O    | LEU | X | 18 | 48.561 | 62.287 | 31.374 | 0.00 | 0.00 |
| ATOM | 298 | N    | LYS | X | 19 | 50.553 | 61.632 | 32.277 | 0.00 | 0.00 |
| ATOM | 299 | H    | LYS | X | 19 | 51.142 | 61.617 | 33.097 | 0.00 | 0.00 |
| ATOM | 300 | CA   | LYS | X | 19 | 51.156 | 61.444 | 30.966 | 0.00 | 0.00 |
| ATOM | 301 | HA   | LYS | X | 19 | 50.730 | 62.160 | 30.263 | 0.00 | 0.00 |
| ATOM | 302 | CB   | LYS | X | 19 | 52.701 | 61.640 | 30.978 | 0.00 | 0.00 |
| ATOM | 303 | HB2  | LYS | X | 19 | 53.095 | 61.254 | 31.918 | 0.00 | 0.00 |
| ATOM | 304 | HB3  | LYS | X | 19 | 53.151 | 61.083 | 30.157 | 0.00 | 0.00 |
| ATOM | 305 | CG   | LYS | X | 19 | 53.074 | 63.137 | 31.062 | 0.00 | 0.00 |
| ATOM | 306 | HG2  | LYS | X | 19 | 52.912 | 63.497 | 30.046 | 0.00 | 0.00 |
| ATOM | 307 | HG3  | LYS | X | 19 | 52.439 | 63.748 | 31.704 | 0.00 | 0.00 |
| ATOM | 308 | CD   | LYS | X | 19 | 54.620 | 63.330 | 31.326 | 0.00 | 0.00 |
| ATOM | 309 | HD2  | LYS | X | 19 | 55.178 | 62.543 | 30.818 | 0.00 | 0.00 |
| ATOM | 310 | HD3  | LYS | X | 19 | 54.994 | 64.296 | 30.986 | 0.00 | 0.00 |
| ATOM | 311 | CE   | LYS | X | 19 | 55.159 | 63.262 | 32.788 | 0.00 | 0.00 |
| ATOM | 312 | HE2  | LYS | X | 19 | 55.028 | 62.242 | 33.147 | 0.00 | 0.00 |
| ATOM | 313 | HE3  | LYS | X | 19 | 56.176 | 63.633 | 32.661 | 0.00 | 0.00 |
| ATOM | 314 | NZ   | LYS | X | 19 | 54.558 | 64.182 | 33.752 | 0.00 | 0.00 |
| ATOM | 315 | HZ1  | LYS | X | 19 | 54.910 | 64.196 | 34.698 | 0.00 | 0.00 |
| ATOM | 316 | HZ2  | LYS | X | 19 | 54.549 | 65.078 | 33.285 | 0.00 | 0.00 |
| ATOM | 317 | HZ3  | LYS | X | 19 | 53.566 | 64.001 | 33.807 | 0.00 | 0.00 |
| ATOM | 318 | C    | LYS | X | 19 | 50.861 | 60.040 | 30.393 | 0.00 | 0.00 |
| ATOM | 319 | O    | LYS | X | 19 | 50.674 | 59.112 | 31.219 | 0.00 | 0.00 |
| ATOM | 320 | N    | THR | X | 20 | 50.808 | 59.871 | 29.086 | 0.00 | 0.00 |
| ATOM | 321 | H    | THR | X | 20 | 50.949 | 60.719 | 28.555 | 0.00 | 0.00 |
| ATOM | 322 | CA   | THR | X | 20 | 50.413 | 58.688 | 28.285 | 0.00 | 0.00 |
| ATOM | 323 | HA   | THR | X | 20 | 50.853 | 57.878 | 28.867 | 0.00 | 0.00 |
| ATOM | 324 | CB   | THR | X | 20 | 48.900 | 58.358 | 28.300 | 0.00 | 0.00 |
| ATOM | 325 | HB   | THR | X | 20 | 48.628 | 58.057 | 27.288 | 0.00 | 0.00 |
| ATOM | 326 | CG2  | THR | X | 20 | 48.584 | 57.195 | 29.251 | 0.00 | 0.00 |
| ATOM | 327 | HG21 | THR | X | 20 | 48.961 | 57.466 | 30.237 | 0.00 | 0.00 |
| ATOM | 328 | HG22 | THR | X | 20 | 47.502 | 57.104 | 29.351 | 0.00 | 0.00 |
| ATOM | 329 | HG23 | THR | X | 20 | 48.863 | 56.193 | 28.926 | 0.00 | 0.00 |
| ATOM | 330 | OG1  | THR | X | 20 | 48.071 | 59.498 | 28.720 | 0.00 | 0.00 |
| ATOM | 331 | HG1  | THR | X | 20 | 47.817 | 59.915 | 27.894 | 0.00 | 0.00 |
| ATOM | 332 | C    | THR | X | 20 | 50.899 | 58.941 | 26.847 | 0.00 | 0.00 |
| ATOM | 333 | O    | THR | X | 20 | 50.842 | 60.015 | 26.366 | 0.00 | 0.00 |
| ATOM | 334 | N    | PRO | X | 21 | 51.366 | 57.825 | 26.221 | 0.00 | 0.00 |
| ATOM | 335 | CD   | PRO | X | 21 | 51.045 | 56.490 | 26.606 | 0.00 | 0.00 |
| ATOM | 336 | HD2  | PRO | X | 21 | 50.043 | 56.320 | 26.999 | 0.00 | 0.00 |
| ATOM | 337 | HD3  | PRO | X | 21 | 51.728 | 56.000 | 27.301 | 0.00 | 0.00 |
| ATOM | 338 | CG   | PRO | X | 21 | 51.160 | 55.605 | 25.326 | 0.00 | 0.00 |
| ATOM | 339 | HG2  | PRO | X | 21 | 50.279 | 55.562 | 24.686 | 0.00 | 0.00 |
| ATOM | 340 | HG3  | PRO | X | 21 | 51.448 | 54.564 | 25.476 | 0.00 | 0.00 |
| ATOM | 341 | CB   | PRO | X | 21 | 52.317 | 56.301 | 24.669 | 0.00 | 0.00 |
| ATOM | 342 | HB2  | PRO | X | 21 | 52.377 | 56.188 | 23.586 | 0.00 | 0.00 |
| ATOM | 343 | HB3  | PRO | X | 21 | 53.251 | 56.045 | 25.167 | 0.00 | 0.00 |
| ATOM | 344 | CA   | PRO | X | 21 | 52.021 | 57.835 | 24.921 | 0.00 | 0.00 |
| ATOM | 345 | HA   | PRO | X | 21 | 53.039 | 58.204 | 25.041 | 0.00 | 0.00 |
| ATOM | 346 | C    | PRO | X | 21 | 51.164 | 58.514 | 23.812 | 0.00 | 0.00 |
| ATOM | 347 | O    | PRO | X | 21 | 51.494 | 59.579 | 23.258 | 0.00 | 0.00 |
| ATOM | 348 | N    | GLY | X | 22 | 50.137 | 57.817 | 23.303 | 0.00 | 0.00 |
| ATOM | 349 | H    | GLY | X | 22 | 50.011 | 56.864 | 23.613 | 0.00 | 0.00 |
| ATOM | 350 | CA   | GLY | X | 22 | 49.349 | 58.299 | 22.172 | 0.00 | 0.00 |
| ATOM | 351 | HA2  | GLY | X | 22 | 50.029 | 58.795 | 21.506 | 0.00 | 0.00 |
| ATOM | 352 | HA3  | GLY | X | 22 | 48.856 | 57.480 | 21.731 | 0.00 | 0.00 |

|      |     |      |     |   |    |        |        |        |      |      |
|------|-----|------|-----|---|----|--------|--------|--------|------|------|
| ATOM | 353 | C    | GLY | X | 22 | 48.247 | 59.342 | 22.431 | 0.00 | 0.00 |
| ATOM | 354 | O    | GLY | X | 22 | 47.468 | 59.558 | 21.532 | 0.00 | 0.00 |
| ATOM | 355 | N    | GLY | X | 23 | 48.263 | 59.986 | 23.573 | 0.00 | 0.00 |
| ATOM | 356 | H    | GLY | X | 23 | 48.971 | 59.743 | 24.251 | 0.00 | 0.00 |
| ATOM | 357 | CA   | GLY | X | 23 | 47.414 | 61.094 | 24.011 | 0.00 | 0.00 |
| ATOM | 358 | HA2  | GLY | X | 23 | 47.990 | 62.026 | 23.677 | 0.00 | 0.00 |
| ATOM | 359 | HA3  | GLY | X | 23 | 46.527 | 61.094 | 23.587 | 0.00 | 0.00 |
| ATOM | 360 | C    | GLY | X | 23 | 47.237 | 61.323 | 25.565 | 0.00 | 0.00 |
| ATOM | 361 | O    | GLY | X | 23 | 47.529 | 60.407 | 26.323 | 0.00 | 0.00 |
| ATOM | 362 | N    | PRO | X | 24 | 46.774 | 62.542 | 25.962 | 0.00 | 0.00 |
| ATOM | 363 | CD   | PRO | X | 24 | 46.424 | 63.658 | 25.123 | 0.00 | 0.00 |
| ATOM | 364 | HD2  | PRO | X | 24 | 45.615 | 63.368 | 24.451 | 0.00 | 0.00 |
| ATOM | 365 | HD3  | PRO | X | 24 | 47.274 | 63.811 | 24.458 | 0.00 | 0.00 |
| ATOM | 366 | CG   | PRO | X | 24 | 46.142 | 64.812 | 26.049 | 0.00 | 0.00 |
| ATOM | 367 | HG2  | PRO | X | 24 | 45.095 | 65.108 | 26.117 | 0.00 | 0.00 |
| ATOM | 368 | HG3  | PRO | X | 24 | 46.595 | 65.750 | 25.728 | 0.00 | 0.00 |
| ATOM | 369 | CB   | PRO | X | 24 | 46.658 | 64.433 | 27.378 | 0.00 | 0.00 |
| ATOM | 370 | HB2  | PRO | X | 24 | 46.056 | 64.881 | 28.169 | 0.00 | 0.00 |
| ATOM | 371 | HB3  | PRO | X | 24 | 47.656 | 64.853 | 27.502 | 0.00 | 0.00 |
| ATOM | 372 | CA   | PRO | X | 24 | 46.757 | 62.905 | 27.382 | 0.00 | 0.00 |
| ATOM | 373 | HA   | PRO | X | 24 | 47.632 | 62.479 | 27.873 | 0.00 | 0.00 |
| ATOM | 374 | C    | PRO | X | 24 | 45.512 | 62.323 | 28.166 | 0.00 | 0.00 |
| ATOM | 375 | O    | PRO | X | 24 | 44.457 | 62.241 | 27.675 | 0.00 | 0.00 |
| ATOM | 376 | N    | VAL | X | 25 | 45.729 | 62.152 | 29.455 | 0.00 | 0.00 |
| ATOM | 377 | H    | VAL | X | 25 | 46.600 | 62.414 | 29.893 | 0.00 | 0.00 |
| ATOM | 378 | CA   | VAL | X | 25 | 44.679 | 61.740 | 30.371 | 0.00 | 0.00 |
| ATOM | 379 | HA   | VAL | X | 25 | 43.689 | 61.839 | 29.927 | 0.00 | 0.00 |
| ATOM | 380 | CB   | VAL | X | 25 | 44.738 | 60.191 | 30.618 | 0.00 | 0.00 |
| ATOM | 381 | HB   | VAL | X | 25 | 44.817 | 59.609 | 29.699 | 0.00 | 0.00 |
| ATOM | 382 | CG1  | VAL | X | 25 | 45.906 | 59.752 | 31.456 | 0.00 | 0.00 |
| ATOM | 383 | HG11 | VAL | X | 25 | 46.109 | 58.686 | 31.360 | 0.00 | 0.00 |
| ATOM | 384 | HG12 | VAL | X | 25 | 46.777 | 60.286 | 31.076 | 0.00 | 0.00 |
| ATOM | 385 | HG13 | VAL | X | 25 | 45.684 | 59.929 | 32.508 | 0.00 | 0.00 |
| ATOM | 386 | CG2  | VAL | X | 25 | 43.464 | 59.685 | 31.234 | 0.00 | 0.00 |
| ATOM | 387 | HG21 | VAL | X | 25 | 43.570 | 58.603 | 31.323 | 0.00 | 0.00 |
| ATOM | 388 | HG22 | VAL | X | 25 | 43.331 | 60.036 | 32.257 | 0.00 | 0.00 |
| ATOM | 389 | HG23 | VAL | X | 25 | 42.604 | 60.051 | 30.673 | 0.00 | 0.00 |
| ATOM | 390 | C    | VAL | X | 25 | 44.596 | 62.523 | 31.668 | 0.00 | 0.00 |
| ATOM | 391 | O    | VAL | X | 25 | 45.655 | 62.845 | 32.210 | 0.00 | 0.00 |
| ATOM | 392 | N    | SER | X | 26 | 43.356 | 62.732 | 32.201 | 0.00 | 0.00 |
| ATOM | 393 | H    | SER | X | 26 | 42.537 | 62.296 | 31.800 | 0.00 | 0.00 |
| ATOM | 394 | CA   | SER | X | 26 | 43.117 | 63.259 | 33.504 | 0.00 | 0.00 |
| ATOM | 395 | HA   | SER | X | 26 | 44.019 | 63.737 | 33.887 | 0.00 | 0.00 |
| ATOM | 396 | CB   | SER | X | 26 | 42.064 | 64.391 | 33.393 | 0.00 | 0.00 |
| ATOM | 397 | HB2  | SER | X | 26 | 42.034 | 64.867 | 34.373 | 0.00 | 0.00 |
| ATOM | 398 | HB3  | SER | X | 26 | 42.247 | 65.058 | 32.551 | 0.00 | 0.00 |
| ATOM | 399 | OG   | SER | X | 26 | 40.796 | 63.851 | 33.154 | 0.00 | 0.00 |
| ATOM | 400 | HG   | SER | X | 26 | 40.819 | 63.200 | 32.449 | 0.00 | 0.00 |
| ATOM | 401 | C    | SER | X | 26 | 42.700 | 62.144 | 34.533 | 0.00 | 0.00 |
| ATOM | 402 | O    | SER | X | 26 | 41.996 | 61.163 | 34.217 | 0.00 | 0.00 |
| ATOM | 403 | N    | ALA | X | 27 | 43.106 | 62.442 | 35.783 | 0.00 | 0.00 |
| ATOM | 404 | H    | ALA | X | 27 | 43.544 | 63.343 | 35.913 | 0.00 | 0.00 |
| ATOM | 405 | CA   | ALA | X | 27 | 42.882 | 61.544 | 36.952 | 0.00 | 0.00 |
| ATOM | 406 | HA   | ALA | X | 27 | 42.104 | 60.829 | 36.684 | 0.00 | 0.00 |
| ATOM | 407 | CB   | ALA | X | 27 | 44.236 | 60.905 | 37.230 | 0.00 | 0.00 |
| ATOM | 408 | HB1  | ALA | X | 27 | 44.115 | 59.863 | 37.527 | 0.00 | 0.00 |
| ATOM | 409 | HB2  | ALA | X | 27 | 44.843 | 61.011 | 36.332 | 0.00 | 0.00 |
| ATOM | 410 | HB3  | ALA | X | 27 | 44.786 | 61.489 | 37.968 | 0.00 | 0.00 |
| ATOM | 411 | C    | ALA | X | 27 | 42.461 | 62.319 | 38.194 | 0.00 | 0.00 |
| ATOM | 412 | O    | ALA | X | 27 | 42.918 | 63.451 | 38.476 | 0.00 | 0.00 |
| ATOM | 413 | N    | PHE | X | 28 | 41.643 | 61.656 | 38.985 | 0.00 | 0.00 |
| ATOM | 414 | H    | PHE | X | 28 | 41.371 | 60.714 | 38.742 | 0.00 | 0.00 |
| ATOM | 415 | CA   | PHE | X | 28 | 40.936 | 62.145 | 40.175 | 0.00 | 0.00 |
| ATOM | 416 | HA   | PHE | X | 28 | 41.413 | 63.043 | 40.567 | 0.00 | 0.00 |
| ATOM | 417 | CB   | PHE | X | 28 | 39.506 | 62.557 | 39.833 | 0.00 | 0.00 |
| ATOM | 418 | HB2  | PHE | X | 28 | 38.953 | 61.652 | 39.580 | 0.00 | 0.00 |
| ATOM | 419 | HB3  | PHE | X | 28 | 38.944 | 62.921 | 40.693 | 0.00 | 0.00 |
| ATOM | 420 | CG   | PHE | X | 28 | 39.339 | 63.545 | 38.743 | 0.00 | 0.00 |
| ATOM | 421 | CD1  | PHE | X | 28 | 39.374 | 63.077 | 37.401 | 0.00 | 0.00 |
| ATOM | 422 | HD1  | PHE | X | 28 | 39.568 | 62.034 | 37.201 | 0.00 | 0.00 |

|      |     |      |     |   |    |        |        |        |      |      |
|------|-----|------|-----|---|----|--------|--------|--------|------|------|
| ATOM | 423 | CE1  | PHE | X | 28 | 39.226 | 63.963 | 36.371 | 0.00 | 0.00 |
| ATOM | 424 | HE1  | PHE | X | 28 | 39.318 | 63.674 | 35.334 | 0.00 | 0.00 |
| ATOM | 425 | CZ   | PHE | X | 28 | 39.108 | 65.345 | 36.594 | 0.00 | 0.00 |
| ATOM | 426 | HZ   | PHE | X | 28 | 39.036 | 66.082 | 35.808 | 0.00 | 0.00 |
| ATOM | 427 | CE2  | PHE | X | 28 | 38.980 | 65.795 | 37.895 | 0.00 | 0.00 |
| ATOM | 428 | HE2  | PHE | X | 28 | 38.886 | 66.848 | 38.117 | 0.00 | 0.00 |
| ATOM | 429 | CD2  | PHE | X | 28 | 39.139 | 64.904 | 38.981 | 0.00 | 0.00 |
| ATOM | 430 | HD2  | PHE | X | 28 | 39.080 | 65.245 | 40.005 | 0.00 | 0.00 |
| ATOM | 431 | C    | PHE | X | 28 | 40.947 | 61.096 | 41.257 | 0.00 | 0.00 |
| ATOM | 432 | O    | PHE | X | 28 | 40.177 | 60.146 | 41.125 | 0.00 | 0.00 |
| ATOM | 433 | N    | LEU | X | 29 | 41.850 | 61.154 | 42.203 | 0.00 | 0.00 |
| ATOM | 434 | H    | LEU | X | 29 | 42.485 | 61.911 | 42.415 | 0.00 | 0.00 |
| ATOM | 435 | CA   | LEU | X | 29 | 42.195 | 60.026 | 43.084 | 0.00 | 0.00 |
| ATOM | 436 | HA   | LEU | X | 29 | 41.637 | 59.111 | 42.883 | 0.00 | 0.00 |
| ATOM | 437 | CB   | LEU | X | 29 | 43.729 | 59.778 | 43.002 | 0.00 | 0.00 |
| ATOM | 438 | HB2  | LEU | X | 29 | 44.081 | 60.712 | 43.440 | 0.00 | 0.00 |
| ATOM | 439 | HB3  | LEU | X | 29 | 43.985 | 58.850 | 43.513 | 0.00 | 0.00 |
| ATOM | 440 | CG   | LEU | X | 29 | 44.415 | 59.648 | 41.569 | 0.00 | 0.00 |
| ATOM | 441 | HG   | LEU | X | 29 | 45.416 | 59.244 | 41.719 | 0.00 | 0.00 |
| ATOM | 442 | CD1  | LEU | X | 29 | 43.519 | 58.780 | 40.604 | 0.00 | 0.00 |
| ATOM | 443 | HD11 | LEU | X | 29 | 43.184 | 57.819 | 40.993 | 0.00 | 0.00 |
| ATOM | 444 | HD12 | LEU | X | 29 | 42.670 | 59.279 | 40.136 | 0.00 | 0.00 |
| ATOM | 445 | HD13 | LEU | X | 29 | 44.143 | 58.531 | 39.746 | 0.00 | 0.00 |
| ATOM | 446 | CD2  | LEU | X | 29 | 44.764 | 61.044 | 40.941 | 0.00 | 0.00 |
| ATOM | 447 | HD21 | LEU | X | 29 | 43.950 | 61.768 | 40.984 | 0.00 | 0.00 |
| ATOM | 448 | HD22 | LEU | X | 29 | 45.594 | 61.546 | 41.436 | 0.00 | 0.00 |
| ATOM | 449 | HD23 | LEU | X | 29 | 44.998 | 60.835 | 39.897 | 0.00 | 0.00 |
| ATOM | 450 | C    | LEU | X | 29 | 41.747 | 60.471 | 44.415 | 0.00 | 0.00 |
| ATOM | 451 | O    | LEU | X | 29 | 41.750 | 61.674 | 44.792 | 0.00 | 0.00 |
| ATOM | 452 | N    | GLY | X | 30 | 41.508 | 59.498 | 45.335 | 0.00 | 0.00 |
| ATOM | 453 | H    | GLY | X | 30 | 41.305 | 58.540 | 45.089 | 0.00 | 0.00 |
| ATOM | 454 | CA   | GLY | X | 30 | 41.273 | 59.747 | 46.773 | 0.00 | 0.00 |
| ATOM | 455 | HA2  | GLY | X | 30 | 41.294 | 58.740 | 47.190 | 0.00 | 0.00 |
| ATOM | 456 | HA3  | GLY | X | 30 | 42.158 | 60.265 | 47.112 | 0.00 | 0.00 |
| ATOM | 457 | C    | GLY | X | 30 | 39.999 | 60.458 | 47.070 | 0.00 | 0.00 |
| ATOM | 458 | O    | GLY | X | 30 | 40.063 | 61.429 | 47.787 | 0.00 | 0.00 |
| ATOM | 459 | N    | ILE | X | 31 | 38.882 | 60.055 | 46.434 | 0.00 | 0.00 |
| ATOM | 460 | H    | ILE | X | 31 | 38.927 | 59.256 | 45.818 | 0.00 | 0.00 |
| ATOM | 461 | CA   | ILE | X | 31 | 37.586 | 60.824 | 46.623 | 0.00 | 0.00 |
| ATOM | 462 | HA   | ILE | X | 31 | 37.703 | 61.870 | 46.907 | 0.00 | 0.00 |
| ATOM | 463 | CB   | ILE | X | 31 | 36.764 | 60.731 | 45.340 | 0.00 | 0.00 |
| ATOM | 464 | HB   | ILE | X | 31 | 36.566 | 59.699 | 45.050 | 0.00 | 0.00 |
| ATOM | 465 | CG2  | ILE | X | 31 | 35.320 | 61.322 | 45.464 | 0.00 | 0.00 |
| ATOM | 466 | HG21 | ILE | X | 31 | 34.774 | 60.738 | 46.204 | 0.00 | 0.00 |
| ATOM | 467 | HG22 | ILE | X | 31 | 35.279 | 62.323 | 45.893 | 0.00 | 0.00 |
| ATOM | 468 | HG23 | ILE | X | 31 | 34.770 | 61.296 | 44.523 | 0.00 | 0.00 |
| ATOM | 469 | CG1  | ILE | X | 31 | 37.582 | 61.403 | 44.255 | 0.00 | 0.00 |
| ATOM | 470 | HG12 | ILE | X | 31 | 37.799 | 62.444 | 44.495 | 0.00 | 0.00 |
| ATOM | 471 | HG13 | ILE | X | 31 | 38.568 | 60.971 | 44.083 | 0.00 | 0.00 |
| ATOM | 472 | CD1  | ILE | X | 31 | 36.912 | 61.445 | 42.792 | 0.00 | 0.00 |
| ATOM | 473 | HD11 | ILE | X | 31 | 35.828 | 61.558 | 42.776 | 0.00 | 0.00 |
| ATOM | 474 | HD12 | ILE | X | 31 | 37.370 | 62.158 | 42.106 | 0.00 | 0.00 |
| ATOM | 475 | HD13 | ILE | X | 31 | 37.104 | 60.485 | 42.314 | 0.00 | 0.00 |
| ATOM | 476 | C    | ILE | X | 31 | 36.823 | 60.077 | 47.780 | 0.00 | 0.00 |
| ATOM | 477 | O    | ILE | X | 31 | 36.724 | 58.804 | 47.693 | 0.00 | 0.00 |
| ATOM | 478 | N    | PRO | X | 32 | 36.305 | 60.784 | 48.760 | 0.00 | 0.00 |
| ATOM | 479 | CD   | PRO | X | 32 | 36.422 | 62.228 | 49.000 | 0.00 | 0.00 |
| ATOM | 480 | HD2  | PRO | X | 32 | 36.100 | 62.764 | 48.107 | 0.00 | 0.00 |
| ATOM | 481 | HD3  | PRO | X | 32 | 37.463 | 62.515 | 49.152 | 0.00 | 0.00 |
| ATOM | 482 | CG   | PRO | X | 32 | 35.646 | 62.549 | 50.258 | 0.00 | 0.00 |
| ATOM | 483 | HG2  | PRO | X | 32 | 34.604 | 62.722 | 49.989 | 0.00 | 0.00 |
| ATOM | 484 | HG3  | PRO | X | 32 | 36.144 | 63.218 | 50.961 | 0.00 | 0.00 |
| ATOM | 485 | CB   | PRO | X | 32 | 35.693 | 61.174 | 51.004 | 0.00 | 0.00 |
| ATOM | 486 | HB2  | PRO | X | 32 | 34.844 | 61.103 | 51.683 | 0.00 | 0.00 |
| ATOM | 487 | HB3  | PRO | X | 32 | 36.672 | 61.056 | 51.468 | 0.00 | 0.00 |
| ATOM | 488 | CA   | PRO | X | 32 | 35.645 | 60.124 | 49.946 | 0.00 | 0.00 |
| ATOM | 489 | HA   | PRO | X | 32 | 36.164 | 59.241 | 50.317 | 0.00 | 0.00 |
| ATOM | 490 | C    | PRO | X | 32 | 34.184 | 59.853 | 49.614 | 0.00 | 0.00 |
| ATOM | 491 | O    | PRO | X | 32 | 33.272 | 60.656 | 49.626 | 0.00 | 0.00 |
| ATOM | 492 | N    | PHE | X | 33 | 33.893 | 58.566 | 49.245 | 0.00 | 0.00 |



|      |     |     |     |   |    |        |        |        |      |      |
|------|-----|-----|-----|---|----|--------|--------|--------|------|------|
| ATOM | 493 | H   | PHE | X | 33 | 34.656 | 57.906 | 49.200 | 0.00 | 0.00 |
| ATOM | 494 | CA  | PHE | X | 33 | 32.544 | 58.110 | 49.076 | 0.00 | 0.00 |
| ATOM | 495 | HA  | PHE | X | 33 | 31.959 | 58.875 | 48.565 | 0.00 | 0.00 |
| ATOM | 496 | CB  | PHE | X | 33 | 32.559 | 56.896 | 48.054 | 0.00 | 0.00 |
| ATOM | 497 | HB2 | PHE | X | 33 | 31.547 | 56.702 | 47.698 | 0.00 | 0.00 |
| ATOM | 498 | HB3 | PHE | X | 33 | 33.304 | 57.166 | 47.306 | 0.00 | 0.00 |
| ATOM | 499 | CG  | PHE | X | 33 | 33.082 | 55.643 | 48.618 | 0.00 | 0.00 |
| ATOM | 500 | CD1 | PHE | X | 33 | 32.226 | 54.674 | 49.057 | 0.00 | 0.00 |
| ATOM | 501 | HD1 | PHE | X | 33 | 31.156 | 54.789 | 48.962 | 0.00 | 0.00 |
| ATOM | 502 | CE1 | PHE | X | 33 | 32.701 | 53.399 | 49.413 | 0.00 | 0.00 |
| ATOM | 503 | HE1 | PHE | X | 33 | 32.054 | 52.547 | 49.559 | 0.00 | 0.00 |
| ATOM | 504 | CZ  | PHE | X | 33 | 34.079 | 53.143 | 49.311 | 0.00 | 0.00 |
| ATOM | 505 | HZ  | PHE | X | 33 | 34.370 | 52.144 | 49.599 | 0.00 | 0.00 |
| ATOM | 506 | CE2 | PHE | X | 33 | 34.996 | 54.165 | 48.936 | 0.00 | 0.00 |
| ATOM | 507 | HE2 | PHE | X | 33 | 36.058 | 53.970 | 48.977 | 0.00 | 0.00 |
| ATOM | 508 | CD2 | PHE | X | 33 | 34.488 | 55.382 | 48.510 | 0.00 | 0.00 |
| ATOM | 509 | HD2 | PHE | X | 33 | 35.182 | 56.143 | 48.186 | 0.00 | 0.00 |
| ATOM | 510 | C   | PHE | X | 33 | 31.804 | 57.831 | 50.418 | 0.00 | 0.00 |
| ATOM | 511 | O   | PHE | X | 33 | 30.545 | 57.704 | 50.397 | 0.00 | 0.00 |
| ATOM | 512 | N   | ALA | X | 34 | 32.476 | 57.565 | 51.491 | 0.00 | 0.00 |
| ATOM | 513 | H   | ALA | X | 34 | 33.482 | 57.518 | 51.412 | 0.00 | 0.00 |
| ATOM | 514 | CA  | ALA | X | 34 | 31.875 | 57.115 | 52.719 | 0.00 | 0.00 |
| ATOM | 515 | HA  | ALA | X | 34 | 30.808 | 57.301 | 52.841 | 0.00 | 0.00 |
| ATOM | 516 | CB  | ALA | X | 34 | 32.008 | 55.562 | 52.718 | 0.00 | 0.00 |
| ATOM | 517 | HB1 | ALA | X | 34 | 31.504 | 55.088 | 53.560 | 0.00 | 0.00 |
| ATOM | 518 | HB2 | ALA | X | 34 | 31.872 | 55.134 | 51.725 | 0.00 | 0.00 |
| ATOM | 519 | HB3 | ALA | X | 34 | 33.023 | 55.483 | 53.107 | 0.00 | 0.00 |
| ATOM | 520 | C   | ALA | X | 34 | 32.396 | 57.809 | 53.978 | 0.00 | 0.00 |
| ATOM | 521 | O   | ALA | X | 34 | 33.391 | 58.523 | 54.013 | 0.00 | 0.00 |
| ATOM | 522 | N   | GLU | X | 35 | 31.603 | 57.683 | 55.046 | 0.00 | 0.00 |
| ATOM | 523 | H   | GLU | X | 35 | 30.727 | 57.220 | 54.852 | 0.00 | 0.00 |
| ATOM | 524 | CA  | GLU | X | 35 | 32.036 | 58.006 | 56.426 | 0.00 | 0.00 |
| ATOM | 525 | HA  | GLU | X | 35 | 32.441 | 59.014 | 56.333 | 0.00 | 0.00 |
| ATOM | 526 | CB  | GLU | X | 35 | 30.903 | 58.045 | 57.438 | 0.00 | 0.00 |
| ATOM | 527 | HB2 | GLU | X | 35 | 30.522 | 57.024 | 57.418 | 0.00 | 0.00 |
| ATOM | 528 | HB3 | GLU | X | 35 | 31.299 | 58.405 | 58.387 | 0.00 | 0.00 |
| ATOM | 529 | CG  | GLU | X | 35 | 29.772 | 59.009 | 57.022 | 0.00 | 0.00 |
| ATOM | 530 | HG2 | GLU | X | 35 | 29.555 | 58.979 | 55.954 | 0.00 | 0.00 |
| ATOM | 531 | HG3 | GLU | X | 35 | 28.851 | 58.741 | 57.540 | 0.00 | 0.00 |
| ATOM | 532 | CD  | GLU | X | 35 | 29.991 | 60.549 | 57.223 | 0.00 | 0.00 |
| ATOM | 533 | OE1 | GLU | X | 35 | 30.627 | 61.216 | 56.419 | 0.00 | 0.00 |
| ATOM | 534 | OE2 | GLU | X | 35 | 29.420 | 61.048 | 58.259 | 0.00 | 0.00 |
| ATOM | 535 | C   | GLU | X | 35 | 33.078 | 56.995 | 56.864 | 0.00 | 0.00 |
| ATOM | 536 | O   | GLU | X | 35 | 32.947 | 55.792 | 56.497 | 0.00 | 0.00 |
| ATOM | 537 | N   | PRO | X | 36 | 34.096 | 57.467 | 57.579 | 0.00 | 0.00 |
| ATOM | 538 | CD  | PRO | X | 36 | 34.236 | 58.776 | 58.245 | 0.00 | 0.00 |
| ATOM | 539 | HD2 | PRO | X | 36 | 33.490 | 58.836 | 59.038 | 0.00 | 0.00 |
| ATOM | 540 | HD3 | PRO | X | 36 | 34.030 | 59.508 | 57.464 | 0.00 | 0.00 |
| ATOM | 541 | CG  | PRO | X | 36 | 35.662 | 58.873 | 58.785 | 0.00 | 0.00 |
| ATOM | 542 | HG2 | PRO | X | 36 | 35.711 | 59.565 | 59.625 | 0.00 | 0.00 |
| ATOM | 543 | HG3 | PRO | X | 36 | 36.323 | 59.196 | 57.981 | 0.00 | 0.00 |
| ATOM | 544 | CB  | PRO | X | 36 | 35.849 | 57.424 | 59.193 | 0.00 | 0.00 |
| ATOM | 545 | HB2 | PRO | X | 36 | 35.373 | 57.375 | 60.172 | 0.00 | 0.00 |
| ATOM | 546 | HB3 | PRO | X | 36 | 36.904 | 57.160 | 59.274 | 0.00 | 0.00 |
| ATOM | 547 | CA  | PRO | X | 36 | 35.078 | 56.595 | 58.210 | 0.00 | 0.00 |
| ATOM | 548 | HA  | PRO | X | 36 | 35.720 | 56.206 | 57.420 | 0.00 | 0.00 |
| ATOM | 549 | C   | PRO | X | 36 | 34.409 | 55.360 | 58.990 | 0.00 | 0.00 |
| ATOM | 550 | O   | PRO | X | 36 | 33.688 | 55.639 | 59.896 | 0.00 | 0.00 |
| ATOM | 551 | N   | PRO | X | 37 | 34.621 | 54.095 | 58.609 | 0.00 | 0.00 |
| ATOM | 552 | CD  | PRO | X | 37 | 35.274 | 53.690 | 57.385 | 0.00 | 0.00 |
| ATOM | 553 | HD2 | PRO | X | 37 | 36.325 | 53.966 | 57.297 | 0.00 | 0.00 |
| ATOM | 554 | HD3 | PRO | X | 37 | 34.737 | 54.077 | 56.519 | 0.00 | 0.00 |
| ATOM | 555 | CG  | PRO | X | 37 | 35.273 | 52.134 | 57.287 | 0.00 | 0.00 |
| ATOM | 556 | HG2 | PRO | X | 37 | 36.202 | 51.872 | 57.793 | 0.00 | 0.00 |
| ATOM | 557 | HG3 | PRO | X | 37 | 35.274 | 51.827 | 56.241 | 0.00 | 0.00 |
| ATOM | 558 | CB  | PRO | X | 37 | 34.040 | 51.792 | 58.142 | 0.00 | 0.00 |
| ATOM | 559 | HB2 | PRO | X | 37 | 34.064 | 50.783 | 58.553 | 0.00 | 0.00 |
| ATOM | 560 | HB3 | PRO | X | 37 | 33.105 | 51.824 | 57.583 | 0.00 | 0.00 |
| ATOM | 561 | CA  | PRO | X | 37 | 34.062 | 52.879 | 59.223 | 0.00 | 0.00 |
| ATOM | 562 | HA  | PRO | X | 37 | 33.034 | 53.092 | 59.517 | 0.00 | 0.00 |

|      |     |      |     |   |    |        |        |        |      |      |
|------|-----|------|-----|---|----|--------|--------|--------|------|------|
| ATOM | 563 | C    | PRO | X | 37 | 34.720 | 52.436 | 60.512 | 0.00 | 0.00 |
| ATOM | 564 | O    | PRO | X | 37 | 34.378 | 51.270 | 60.920 | 0.00 | 0.00 |
| ATOM | 565 | N    | MET | X | 38 | 35.492 | 53.293 | 61.171 | 0.00 | 0.00 |
| ATOM | 566 | H    | MET | X | 38 | 35.541 | 54.230 | 60.795 | 0.00 | 0.00 |
| ATOM | 567 | CA   | MET | X | 38 | 36.189 | 53.147 | 62.478 | 0.00 | 0.00 |
| ATOM | 568 | HA   | MET | X | 38 | 36.779 | 52.234 | 62.405 | 0.00 | 0.00 |
| ATOM | 569 | CB   | MET | X | 38 | 37.097 | 54.358 | 62.619 | 0.00 | 0.00 |
| ATOM | 570 | HB2  | MET | X | 38 | 37.824 | 54.354 | 63.431 | 0.00 | 0.00 |
| ATOM | 571 | HB3  | MET | X | 38 | 37.696 | 54.532 | 61.725 | 0.00 | 0.00 |
| ATOM | 572 | CG   | MET | X | 38 | 36.381 | 55.714 | 62.824 | 0.00 | 0.00 |
| ATOM | 573 | HG2  | MET | X | 38 | 35.769 | 55.939 | 61.951 | 0.00 | 0.00 |
| ATOM | 574 | HG3  | MET | X | 38 | 35.716 | 55.735 | 63.688 | 0.00 | 0.00 |
| ATOM | 575 | SD   | MET | X | 38 | 37.478 | 57.216 | 62.871 | 0.00 | 0.00 |
| ATOM | 576 | CE   | MET | X | 38 | 38.138 | 57.075 | 64.479 | 0.00 | 0.00 |
| ATOM | 577 | HE1  | MET | X | 38 | 38.829 | 57.840 | 64.834 | 0.00 | 0.00 |
| ATOM | 578 | HE2  | MET | X | 38 | 37.364 | 56.997 | 65.243 | 0.00 | 0.00 |
| ATOM | 579 | HE3  | MET | X | 38 | 38.759 | 56.186 | 64.595 | 0.00 | 0.00 |
| ATOM | 580 | C    | MET | X | 38 | 35.351 | 52.898 | 63.694 | 0.00 | 0.00 |
| ATOM | 581 | O    | MET | X | 38 | 34.237 | 53.351 | 63.764 | 0.00 | 0.00 |
| ATOM | 582 | N    | GLY | X | 39 | 35.941 | 52.166 | 64.664 | 0.00 | 0.00 |
| ATOM | 583 | H    | GLY | X | 39 | 36.875 | 51.832 | 64.470 | 0.00 | 0.00 |
| ATOM | 584 | CA   | GLY | X | 39 | 35.474 | 52.216 | 65.984 | 0.00 | 0.00 |
| ATOM | 585 | HA2  | GLY | X | 39 | 36.259 | 51.722 | 66.622 | 0.00 | 0.00 |
| ATOM | 586 | HA3  | GLY | X | 39 | 35.446 | 53.274 | 66.281 | 0.00 | 0.00 |
| ATOM | 587 | C    | GLY | X | 39 | 34.154 | 51.549 | 66.243 | 0.00 | 0.00 |
| ATOM | 588 | O    | GLY | X | 39 | 34.165 | 50.300 | 66.264 | 0.00 | 0.00 |
| ATOM | 589 | N    | PRO | X | 40 | 33.052 | 52.326 | 66.511 | 0.00 | 0.00 |
| ATOM | 590 | CD   | PRO | X | 40 | 33.040 | 53.757 | 66.654 | 0.00 | 0.00 |
| ATOM | 591 | HD2  | PRO | X | 40 | 33.273 | 54.085 | 65.641 | 0.00 | 0.00 |
| ATOM | 592 | HD3  | PRO | X | 40 | 33.805 | 54.018 | 67.385 | 0.00 | 0.00 |
| ATOM | 593 | CG   | PRO | X | 40 | 31.606 | 54.125 | 67.152 | 0.00 | 0.00 |
| ATOM | 594 | HG2  | PRO | X | 40 | 31.142 | 55.029 | 66.757 | 0.00 | 0.00 |
| ATOM | 595 | HG3  | PRO | X | 40 | 31.733 | 54.159 | 68.234 | 0.00 | 0.00 |
| ATOM | 596 | CB   | PRO | X | 40 | 30.757 | 52.966 | 66.682 | 0.00 | 0.00 |
| ATOM | 597 | HB2  | PRO | X | 40 | 30.242 | 53.231 | 65.759 | 0.00 | 0.00 |
| ATOM | 598 | HB3  | PRO | X | 40 | 29.993 | 52.796 | 67.441 | 0.00 | 0.00 |
| ATOM | 599 | CA   | PRO | X | 40 | 31.710 | 51.821 | 66.490 | 0.00 | 0.00 |
| ATOM | 600 | HA   | PRO | X | 40 | 31.510 | 51.138 | 67.316 | 0.00 | 0.00 |
| ATOM | 601 | C    | PRO | X | 40 | 31.320 | 51.056 | 65.246 | 0.00 | 0.00 |
| ATOM | 602 | O    | PRO | X | 40 | 30.602 | 50.060 | 65.391 | 0.00 | 0.00 |
| ATOM | 603 | N    | ARG | X | 41 | 31.761 | 51.601 | 64.083 | 0.00 | 0.00 |
| ATOM | 604 | H    | ARG | X | 41 | 32.274 | 52.462 | 63.958 | 0.00 | 0.00 |
| ATOM | 605 | CA   | ARG | X | 41 | 31.326 | 50.975 | 62.772 | 0.00 | 0.00 |
| ATOM | 606 | HA   | ARG | X | 41 | 30.286 | 50.656 | 62.849 | 0.00 | 0.00 |
| ATOM | 607 | CB   | ARG | X | 41 | 31.391 | 51.952 | 61.587 | 0.00 | 0.00 |
| ATOM | 608 | HB2  | ARG | X | 41 | 32.317 | 52.516 | 61.698 | 0.00 | 0.00 |
| ATOM | 609 | HB3  | ARG | X | 41 | 31.335 | 51.485 | 60.604 | 0.00 | 0.00 |
| ATOM | 610 | CG   | ARG | X | 41 | 30.289 | 52.981 | 61.553 | 0.00 | 0.00 |
| ATOM | 611 | HG2  | ARG | X | 41 | 29.302 | 52.599 | 61.294 | 0.00 | 0.00 |
| ATOM | 612 | HG3  | ARG | X | 41 | 30.222 | 53.578 | 62.463 | 0.00 | 0.00 |
| ATOM | 613 | CD   | ARG | X | 41 | 30.537 | 54.038 | 60.397 | 0.00 | 0.00 |
| ATOM | 614 | HD2  | ARG | X | 41 | 31.428 | 54.589 | 60.695 | 0.00 | 0.00 |
| ATOM | 615 | HD3  | ARG | X | 41 | 30.692 | 53.423 | 59.511 | 0.00 | 0.00 |
| ATOM | 616 | NE   | ARG | X | 41 | 29.395 | 54.904 | 60.318 | 0.00 | 0.00 |
| ATOM | 617 | HE   | ARG | X | 41 | 28.435 | 54.597 | 60.252 | 0.00 | 0.00 |
| ATOM | 618 | CZ   | ARG | X | 41 | 29.447 | 56.218 | 60.365 | 0.00 | 0.00 |
| ATOM | 619 | NH1  | ARG | X | 41 | 30.512 | 56.913 | 60.659 | 0.00 | 0.00 |
| ATOM | 620 | HH11 | ARG | X | 41 | 31.366 | 56.428 | 60.896 | 0.00 | 0.00 |
| ATOM | 621 | HH12 | ARG | X | 41 | 30.498 | 57.914 | 60.795 | 0.00 | 0.00 |
| ATOM | 622 | NH2  | ARG | X | 41 | 28.426 | 57.011 | 60.125 | 0.00 | 0.00 |
| ATOM | 623 | HH21 | ARG | X | 41 | 27.476 | 56.680 | 60.034 | 0.00 | 0.00 |
| ATOM | 624 | HH22 | ARG | X | 41 | 28.561 | 57.924 | 60.537 | 0.00 | 0.00 |
| ATOM | 625 | C    | ARG | X | 41 | 32.245 | 49.838 | 62.386 | 0.00 | 0.00 |
| ATOM | 626 | O    | ARG | X | 41 | 31.992 | 49.201 | 61.343 | 0.00 | 0.00 |
| ATOM | 627 | N    | ARG | X | 42 | 33.273 | 49.479 | 63.176 | 0.00 | 0.00 |
| ATOM | 628 | H    | ARG | X | 42 | 33.369 | 49.912 | 64.083 | 0.00 | 0.00 |
| ATOM | 629 | CA   | ARG | X | 42 | 34.125 | 48.342 | 62.953 | 0.00 | 0.00 |
| ATOM | 630 | HA   | ARG | X | 42 | 34.568 | 48.555 | 61.980 | 0.00 | 0.00 |
| ATOM | 631 | CB   | ARG | X | 42 | 35.248 | 48.365 | 63.958 | 0.00 | 0.00 |
| ATOM | 632 | HB2  | ARG | X | 42 | 35.582 | 49.397 | 64.062 | 0.00 | 0.00 |

|      |     |      |     |   |    |        |        |        |      |      |
|------|-----|------|-----|---|----|--------|--------|--------|------|------|
| ATOM | 633 | HB3  | ARG | X | 42 | 34.766 | 48.098 | 64.898 | 0.00 | 0.00 |
| ATOM | 634 | CG   | ARG | X | 42 | 36.376 | 47.347 | 63.795 | 0.00 | 0.00 |
| ATOM | 635 | HG2  | ARG | X | 42 | 35.905 | 46.377 | 63.639 | 0.00 | 0.00 |
| ATOM | 636 | HG3  | ARG | X | 42 | 36.909 | 47.640 | 62.890 | 0.00 | 0.00 |
| ATOM | 637 | CD   | ARG | X | 42 | 37.331 | 47.219 | 64.970 | 0.00 | 0.00 |
| ATOM | 638 | HD2  | ARG | X | 42 | 36.787 | 46.854 | 65.841 | 0.00 | 0.00 |
| ATOM | 639 | HD3  | ARG | X | 42 | 38.106 | 46.513 | 64.673 | 0.00 | 0.00 |
| ATOM | 640 | NE   | ARG | X | 42 | 37.919 | 48.501 | 65.316 | 0.00 | 0.00 |
| ATOM | 641 | HE   | ARG | X | 42 | 37.815 | 49.277 | 64.678 | 0.00 | 0.00 |
| ATOM | 642 | CZ   | ARG | X | 42 | 38.681 | 48.716 | 66.397 | 0.00 | 0.00 |
| ATOM | 643 | NH1  | ARG | X | 42 | 38.952 | 47.782 | 67.272 | 0.00 | 0.00 |
| ATOM | 644 | HH11 | ARG | X | 42 | 38.425 | 46.921 | 67.275 | 0.00 | 0.00 |
| ATOM | 645 | HH12 | ARG | X | 42 | 39.546 | 48.001 | 68.058 | 0.00 | 0.00 |
| ATOM | 646 | NH2  | ARG | X | 42 | 39.067 | 49.979 | 66.510 | 0.00 | 0.00 |
| ATOM | 647 | HH21 | ARG | X | 42 | 38.782 | 50.608 | 65.773 | 0.00 | 0.00 |
| ATOM | 648 | HH22 | ARG | X | 42 | 39.583 | 50.224 | 67.343 | 0.00 | 0.00 |
| ATOM | 649 | C    | ARG | X | 42 | 33.419 | 46.995 | 63.049 | 0.00 | 0.00 |
| ATOM | 650 | O    | ARG | X | 42 | 32.727 | 46.755 | 64.046 | 0.00 | 0.00 |
| ATOM | 651 | N    | PHE | X | 43 | 33.518 | 46.232 | 61.966 | 0.00 | 0.00 |
| ATOM | 652 | H    | PHE | X | 43 | 34.295 | 46.452 | 61.359 | 0.00 | 0.00 |
| ATOM | 653 | CA   | PHE | X | 43 | 32.719 | 45.088 | 61.637 | 0.00 | 0.00 |
| ATOM | 654 | HA   | PHE | X | 43 | 33.206 | 44.594 | 60.796 | 0.00 | 0.00 |
| ATOM | 655 | CB   | PHE | X | 43 | 32.748 | 44.054 | 62.805 | 0.00 | 0.00 |
| ATOM | 656 | HB2  | PHE | X | 43 | 31.994 | 44.169 | 63.583 | 0.00 | 0.00 |
| ATOM | 657 | HB3  | PHE | X | 43 | 32.423 | 43.139 | 62.311 | 0.00 | 0.00 |
| ATOM | 658 | CG   | PHE | X | 43 | 34.121 | 43.898 | 63.520 | 0.00 | 0.00 |
| ATOM | 659 | CD1  | PHE | X | 43 | 35.353 | 43.799 | 62.741 | 0.00 | 0.00 |
| ATOM | 660 | HD1  | PHE | X | 43 | 35.272 | 43.787 | 61.664 | 0.00 | 0.00 |
| ATOM | 661 | CE1  | PHE | X | 43 | 36.555 | 43.660 | 63.455 | 0.00 | 0.00 |
| ATOM | 662 | HE1  | PHE | X | 43 | 37.531 | 43.695 | 62.993 | 0.00 | 0.00 |
| ATOM | 663 | CZ   | PHE | X | 43 | 36.593 | 43.739 | 64.871 | 0.00 | 0.00 |
| ATOM | 664 | HZ   | PHE | X | 43 | 37.524 | 43.710 | 65.418 | 0.00 | 0.00 |
| ATOM | 665 | CE2  | PHE | X | 43 | 35.409 | 43.951 | 65.609 | 0.00 | 0.00 |
| ATOM | 666 | HE2  | PHE | X | 43 | 35.461 | 44.060 | 66.683 | 0.00 | 0.00 |
| ATOM | 667 | CD2  | PHE | X | 43 | 34.184 | 43.854 | 64.926 | 0.00 | 0.00 |
| ATOM | 668 | HD2  | PHE | X | 43 | 33.248 | 43.875 | 65.463 | 0.00 | 0.00 |
| ATOM | 669 | C    | PHE | X | 43 | 31.241 | 45.402 | 61.313 | 0.00 | 0.00 |
| ATOM | 670 | O    | PHE | X | 43 | 30.449 | 44.518 | 61.217 | 0.00 | 0.00 |
| ATOM | 671 | N    | LEU | X | 44 | 30.798 | 46.732 | 61.212 | 0.00 | 0.00 |
| ATOM | 672 | H    | LEU | X | 44 | 31.420 | 47.524 | 61.290 | 0.00 | 0.00 |
| ATOM | 673 | CA   | LEU | X | 44 | 29.436 | 47.093 | 60.859 | 0.00 | 0.00 |
| ATOM | 674 | HA   | LEU | X | 44 | 28.813 | 46.207 | 60.740 | 0.00 | 0.00 |
| ATOM | 675 | CB   | LEU | X | 44 | 28.856 | 48.016 | 61.949 | 0.00 | 0.00 |
| ATOM | 676 | HB2  | LEU | X | 44 | 29.655 | 48.616 | 62.384 | 0.00 | 0.00 |
| ATOM | 677 | HB3  | LEU | X | 44 | 28.093 | 48.648 | 61.494 | 0.00 | 0.00 |
| ATOM | 678 | CG   | LEU | X | 44 | 28.234 | 47.216 | 63.175 | 0.00 | 0.00 |
| ATOM | 679 | HG   | LEU | X | 44 | 28.978 | 46.522 | 63.564 | 0.00 | 0.00 |
| ATOM | 680 | CD1  | LEU | X | 44 | 27.957 | 48.248 | 64.227 | 0.00 | 0.00 |
| ATOM | 681 | HD11 | LEU | X | 44 | 28.857 | 48.504 | 64.786 | 0.00 | 0.00 |
| ATOM | 682 | HD12 | LEU | X | 44 | 27.329 | 49.101 | 63.970 | 0.00 | 0.00 |
| ATOM | 683 | HD13 | LEU | X | 44 | 27.417 | 47.865 | 65.094 | 0.00 | 0.00 |
| ATOM | 684 | CD2  | LEU | X | 44 | 26.842 | 46.584 | 62.804 | 0.00 | 0.00 |
| ATOM | 685 | HD21 | LEU | X | 44 | 26.179 | 47.423 | 62.598 | 0.00 | 0.00 |
| ATOM | 686 | HD22 | LEU | X | 44 | 26.934 | 45.890 | 61.968 | 0.00 | 0.00 |
| ATOM | 687 | HD23 | LEU | X | 44 | 26.376 | 46.157 | 63.692 | 0.00 | 0.00 |
| ATOM | 688 | C    | LEU | X | 44 | 29.439 | 47.794 | 59.473 | 0.00 | 0.00 |
| ATOM | 689 | O    | LEU | X | 44 | 30.464 | 48.102 | 58.926 | 0.00 | 0.00 |
| ATOM | 690 | N    | PRO | X | 45 | 28.273 | 47.867 | 58.769 | 0.00 | 0.00 |
| ATOM | 691 | CD   | PRO | X | 45 | 27.033 | 47.161 | 59.065 | 0.00 | 0.00 |
| ATOM | 692 | HD2  | PRO | X | 45 | 26.474 | 47.402 | 59.969 | 0.00 | 0.00 |
| ATOM | 693 | HD3  | PRO | X | 45 | 27.217 | 46.094 | 59.196 | 0.00 | 0.00 |
| ATOM | 694 | CG   | PRO | X | 45 | 26.180 | 47.259 | 57.775 | 0.00 | 0.00 |
| ATOM | 695 | HG2  | PRO | X | 45 | 25.130 | 47.307 | 58.065 | 0.00 | 0.00 |
| ATOM | 696 | HG3  | PRO | X | 45 | 26.448 | 46.436 | 57.113 | 0.00 | 0.00 |
| ATOM | 697 | CB   | PRO | X | 45 | 26.628 | 48.616 | 57.249 | 0.00 | 0.00 |
| ATOM | 698 | HB2  | PRO | X | 45 | 25.976 | 49.376 | 57.679 | 0.00 | 0.00 |
| ATOM | 699 | HB3  | PRO | X | 45 | 26.526 | 48.682 | 56.165 | 0.00 | 0.00 |
| ATOM | 700 | CA   | PRO | X | 45 | 28.063 | 48.701 | 57.592 | 0.00 | 0.00 |
| ATOM | 701 | HA   | PRO | X | 45 | 28.596 | 48.166 | 56.807 | 0.00 | 0.00 |
| ATOM | 702 | C    | PRO | X | 45 | 28.524 | 50.202 | 57.635 | 0.00 | 0.00 |

|      |     |     |     |   |    |        |        |        |      |      |
|------|-----|-----|-----|---|----|--------|--------|--------|------|------|
| ATOM | 703 | O   | PRO | X | 45 | 28.431 | 50.744 | 58.740 | 0.00 | 0.00 |
| ATOM | 704 | N   | PRO | X | 46 | 28.841 | 50.808 | 56.506 | 0.00 | 0.00 |
| ATOM | 705 | CD  | PRO | X | 46 | 29.211 | 50.102 | 55.285 | 0.00 | 0.00 |
| ATOM | 706 | HD2 | PRO | X | 46 | 28.435 | 49.503 | 54.809 | 0.00 | 0.00 |
| ATOM | 707 | HD3 | PRO | X | 46 | 30.016 | 49.423 | 55.568 | 0.00 | 0.00 |
| ATOM | 708 | CG  | PRO | X | 46 | 29.716 | 51.172 | 54.260 | 0.00 | 0.00 |
| ATOM | 709 | HG2 | PRO | X | 46 | 28.853 | 51.553 | 53.713 | 0.00 | 0.00 |
| ATOM | 710 | HG3 | PRO | X | 46 | 30.582 | 50.770 | 53.735 | 0.00 | 0.00 |
| ATOM | 711 | CB  | PRO | X | 46 | 30.245 | 52.196 | 55.316 | 0.00 | 0.00 |
| ATOM | 712 | HB2 | PRO | X | 46 | 30.434 | 53.183 | 54.893 | 0.00 | 0.00 |
| ATOM | 713 | HB3 | PRO | X | 46 | 31.194 | 51.820 | 55.700 | 0.00 | 0.00 |
| ATOM | 714 | CA  | PRO | X | 46 | 29.211 | 52.258 | 56.430 | 0.00 | 0.00 |
| ATOM | 715 | HA  | PRO | X | 46 | 29.614 | 52.626 | 57.374 | 0.00 | 0.00 |
| ATOM | 716 | C   | PRO | X | 46 | 28.003 | 53.183 | 56.071 | 0.00 | 0.00 |
| ATOM | 717 | O   | PRO | X | 46 | 27.022 | 52.655 | 55.558 | 0.00 | 0.00 |
| ATOM | 718 | N   | GLU | X | 47 | 28.048 | 54.511 | 56.258 | 0.00 | 0.00 |
| ATOM | 719 | H   | GLU | X | 47 | 28.931 | 54.896 | 56.559 | 0.00 | 0.00 |
| ATOM | 720 | CA  | GLU | X | 47 | 27.156 | 55.472 | 55.692 | 0.00 | 0.00 |
| ATOM | 721 | HA  | GLU | X | 47 | 26.333 | 54.951 | 55.201 | 0.00 | 0.00 |
| ATOM | 722 | CB  | GLU | X | 47 | 26.779 | 56.507 | 56.772 | 0.00 | 0.00 |
| ATOM | 723 | HB2 | GLU | X | 47 | 27.590 | 56.851 | 57.413 | 0.00 | 0.00 |
| ATOM | 724 | HB3 | GLU | X | 47 | 26.627 | 57.433 | 56.218 | 0.00 | 0.00 |
| ATOM | 725 | CG  | GLU | X | 47 | 25.640 | 56.047 | 57.644 | 0.00 | 0.00 |
| ATOM | 726 | HG2 | GLU | X | 47 | 24.702 | 55.927 | 57.100 | 0.00 | 0.00 |
| ATOM | 727 | HG3 | GLU | X | 47 | 25.770 | 55.019 | 57.983 | 0.00 | 0.00 |
| ATOM | 728 | CD  | GLU | X | 47 | 25.364 | 56.948 | 58.876 | 0.00 | 0.00 |
| ATOM | 729 | OE1 | GLU | X | 47 | 24.630 | 57.906 | 58.620 | 0.00 | 0.00 |
| ATOM | 730 | OE2 | GLU | X | 47 | 25.746 | 56.713 | 60.046 | 0.00 | 0.00 |
| ATOM | 731 | C   | GLU | X | 47 | 27.867 | 56.311 | 54.617 | 0.00 | 0.00 |
| ATOM | 732 | O   | GLU | X | 47 | 29.091 | 56.324 | 54.606 | 0.00 | 0.00 |
| ATOM | 733 | N   | PRO | X | 48 | 27.155 | 56.968 | 53.691 | 0.00 | 0.00 |
| ATOM | 734 | CD  | PRO | X | 48 | 25.717 | 56.833 | 53.405 | 0.00 | 0.00 |
| ATOM | 735 | HD2 | PRO | X | 48 | 25.085 | 56.990 | 54.279 | 0.00 | 0.00 |
| ATOM | 736 | HD3 | PRO | X | 48 | 25.406 | 55.851 | 53.049 | 0.00 | 0.00 |
| ATOM | 737 | CG  | PRO | X | 48 | 25.235 | 57.950 | 52.445 | 0.00 | 0.00 |
| ATOM | 738 | HG2 | PRO | X | 48 | 25.201 | 58.916 | 52.948 | 0.00 | 0.00 |
| ATOM | 739 | HG3 | PRO | X | 48 | 24.366 | 57.637 | 51.866 | 0.00 | 0.00 |
| ATOM | 740 | CB  | PRO | X | 48 | 26.470 | 57.998 | 51.536 | 0.00 | 0.00 |
| ATOM | 741 | HB2 | PRO | X | 48 | 26.515 | 58.988 | 51.084 | 0.00 | 0.00 |
| ATOM | 742 | HB3 | PRO | X | 48 | 26.585 | 57.121 | 50.899 | 0.00 | 0.00 |
| ATOM | 743 | CA  | PRO | X | 48 | 27.623 | 57.827 | 52.553 | 0.00 | 0.00 |
| ATOM | 744 | HA  | PRO | X | 48 | 28.432 | 57.340 | 52.009 | 0.00 | 0.00 |
| ATOM | 745 | C   | PRO | X | 48 | 28.138 | 59.112 | 53.157 | 0.00 | 0.00 |
| ATOM | 746 | O   | PRO | X | 48 | 27.531 | 59.629 | 54.111 | 0.00 | 0.00 |
| ATOM | 747 | N   | LYS | X | 49 | 29.190 | 59.648 | 52.635 | 0.00 | 0.00 |
| ATOM | 748 | H   | LYS | X | 49 | 29.480 | 59.271 | 51.743 | 0.00 | 0.00 |
| ATOM | 749 | CA  | LYS | X | 49 | 29.863 | 60.901 | 53.019 | 0.00 | 0.00 |
| ATOM | 750 | HA  | LYS | X | 49 | 30.348 | 60.609 | 53.950 | 0.00 | 0.00 |
| ATOM | 751 | CB  | LYS | X | 49 | 31.015 | 61.114 | 51.965 | 0.00 | 0.00 |
| ATOM | 752 | HB2 | LYS | X | 49 | 31.593 | 60.193 | 51.891 | 0.00 | 0.00 |
| ATOM | 753 | HB3 | LYS | X | 49 | 30.572 | 61.255 | 50.980 | 0.00 | 0.00 |
| ATOM | 754 | CG  | LYS | X | 49 | 31.921 | 62.379 | 52.256 | 0.00 | 0.00 |
| ATOM | 755 | HG2 | LYS | X | 49 | 32.779 | 62.448 | 51.587 | 0.00 | 0.00 |
| ATOM | 756 | HG3 | LYS | X | 49 | 31.368 | 63.318 | 52.244 | 0.00 | 0.00 |
| ATOM | 757 | CD  | LYS | X | 49 | 32.564 | 62.272 | 53.724 | 0.00 | 0.00 |
| ATOM | 758 | HD2 | LYS | X | 49 | 31.830 | 62.381 | 54.522 | 0.00 | 0.00 |
| ATOM | 759 | HD3 | LYS | X | 49 | 33.138 | 61.346 | 53.736 | 0.00 | 0.00 |
| ATOM | 760 | CE  | LYS | X | 49 | 33.557 | 63.382 | 53.888 | 0.00 | 0.00 |
| ATOM | 761 | HE2 | LYS | X | 49 | 34.378 | 63.303 | 53.175 | 0.00 | 0.00 |
| ATOM | 762 | HE3 | LYS | X | 49 | 33.018 | 64.310 | 53.699 | 0.00 | 0.00 |
| ATOM | 763 | NZ  | LYS | X | 49 | 34.062 | 63.335 | 55.276 | 0.00 | 0.00 |
| ATOM | 764 | HZ1 | LYS | X | 49 | 34.801 | 62.650 | 55.351 | 0.00 | 0.00 |
| ATOM | 765 | HZ2 | LYS | X | 49 | 34.597 | 64.176 | 55.437 | 0.00 | 0.00 |
| ATOM | 766 | HZ3 | LYS | X | 49 | 33.430 | 63.183 | 56.050 | 0.00 | 0.00 |
| ATOM | 767 | C   | LYS | X | 49 | 28.874 | 62.014 | 53.256 | 0.00 | 0.00 |
| ATOM | 768 | O   | LYS | X | 49 | 27.901 | 62.217 | 52.521 | 0.00 | 0.00 |
| ATOM | 769 | N   | GLN | X | 50 | 29.049 | 62.752 | 54.364 | 0.00 | 0.00 |
| ATOM | 770 | H   | GLN | X | 50 | 29.732 | 62.509 | 55.067 | 0.00 | 0.00 |
| ATOM | 771 | CA  | GLN | X | 50 | 28.519 | 64.115 | 54.567 | 0.00 | 0.00 |
| ATOM | 772 | HA  | GLN | X | 50 | 27.466 | 64.174 | 54.289 | 0.00 | 0.00 |

|      |     |      |     |   |    |        |        |        |      |      |
|------|-----|------|-----|---|----|--------|--------|--------|------|------|
| ATOM | 773 | CB   | GLN | X | 50 | 28.715 | 64.511 | 55.988 | 0.00 | 0.00 |
| ATOM | 774 | HB2  | GLN | X | 50 | 29.716 | 64.278 | 56.351 | 0.00 | 0.00 |
| ATOM | 775 | HB3  | GLN | X | 50 | 28.730 | 65.598 | 56.066 | 0.00 | 0.00 |
| ATOM | 776 | CG   | GLN | X | 50 | 27.732 | 63.940 | 56.999 | 0.00 | 0.00 |
| ATOM | 777 | HG2  | GLN | X | 50 | 26.781 | 64.364 | 56.678 | 0.00 | 0.00 |
| ATOM | 778 | HG3  | GLN | X | 50 | 27.542 | 62.868 | 56.951 | 0.00 | 0.00 |
| ATOM | 779 | CD   | GLN | X | 50 | 28.029 | 64.393 | 58.423 | 0.00 | 0.00 |
| ATOM | 780 | OE1  | GLN | X | 50 | 27.459 | 65.391 | 58.925 | 0.00 | 0.00 |
| ATOM | 781 | NE2  | GLN | X | 50 | 28.925 | 63.640 | 59.108 | 0.00 | 0.00 |
| ATOM | 782 | HE21 | GLN | X | 50 | 28.907 | 63.825 | 60.101 | 0.00 | 0.00 |
| ATOM | 783 | HE22 | GLN | X | 50 | 28.985 | 62.672 | 58.824 | 0.00 | 0.00 |
| ATOM | 784 | C    | GLN | X | 50 | 29.095 | 65.130 | 53.534 | 0.00 | 0.00 |
| ATOM | 785 | O    | GLN | X | 50 | 30.302 | 65.130 | 53.255 | 0.00 | 0.00 |
| ATOM | 786 | N    | PRO | X | 51 | 28.206 | 65.944 | 52.848 | 0.00 | 0.00 |
| ATOM | 787 | CD   | PRO | X | 51 | 26.754 | 66.214 | 53.142 | 0.00 | 0.00 |
| ATOM | 788 | HD2  | PRO | X | 51 | 26.653 | 66.548 | 54.175 | 0.00 | 0.00 |
| ATOM | 789 | HD3  | PRO | X | 51 | 26.157 | 65.361 | 52.819 | 0.00 | 0.00 |
| ATOM | 790 | CG   | PRO | X | 51 | 26.365 | 67.334 | 52.130 | 0.00 | 0.00 |
| ATOM | 791 | HG2  | PRO | X | 51 | 26.570 | 68.324 | 52.537 | 0.00 | 0.00 |
| ATOM | 792 | HG3  | PRO | X | 51 | 25.300 | 67.290 | 51.902 | 0.00 | 0.00 |
| ATOM | 793 | CB   | PRO | X | 51 | 27.265 | 67.217 | 50.958 | 0.00 | 0.00 |
| ATOM | 794 | HB2  | PRO | X | 51 | 27.412 | 68.138 | 50.394 | 0.00 | 0.00 |
| ATOM | 795 | HB3  | PRO | X | 51 | 27.046 | 66.422 | 50.245 | 0.00 | 0.00 |
| ATOM | 796 | CA   | PRO | X | 51 | 28.536 | 66.761 | 51.649 | 0.00 | 0.00 |
| ATOM | 797 | HA   | PRO | X | 51 | 29.162 | 66.315 | 50.876 | 0.00 | 0.00 |
| ATOM | 798 | C    | PRO | X | 51 | 29.430 | 67.952 | 52.027 | 0.00 | 0.00 |
| ATOM | 799 | O    | PRO | X | 51 | 29.410 | 68.460 | 53.149 | 0.00 | 0.00 |
| ATOM | 800 | N    | TRP | X | 52 | 30.309 | 68.385 | 51.144 | 0.00 | 0.00 |
| ATOM | 801 | H    | TRP | X | 52 | 30.212 | 68.041 | 50.200 | 0.00 | 0.00 |
| ATOM | 802 | CA   | TRP | X | 52 | 31.285 | 69.496 | 51.349 | 0.00 | 0.00 |
| ATOM | 803 | HA   | TRP | X | 52 | 31.349 | 69.745 | 52.408 | 0.00 | 0.00 |
| ATOM | 804 | CB   | TRP | X | 52 | 32.698 | 68.916 | 51.077 | 0.00 | 0.00 |
| ATOM | 805 | HB2  | TRP | X | 52 | 33.477 | 69.639 | 51.323 | 0.00 | 0.00 |
| ATOM | 806 | HB3  | TRP | X | 52 | 32.782 | 68.106 | 51.801 | 0.00 | 0.00 |
| ATOM | 807 | CG   | TRP | X | 52 | 32.974 | 68.269 | 49.762 | 0.00 | 0.00 |
| ATOM | 808 | CD1  | TRP | X | 52 | 33.570 | 68.859 | 48.670 | 0.00 | 0.00 |
| ATOM | 809 | HD1  | TRP | X | 52 | 34.028 | 69.832 | 48.768 | 0.00 | 0.00 |
| ATOM | 810 | NE1  | TRP | X | 52 | 33.742 | 67.935 | 47.653 | 0.00 | 0.00 |
| ATOM | 811 | HE1  | TRP | X | 52 | 34.320 | 68.041 | 46.831 | 0.00 | 0.00 |
| ATOM | 812 | CE2  | TRP | X | 52 | 33.018 | 66.772 | 47.959 | 0.00 | 0.00 |
| ATOM | 813 | CZ2  | TRP | X | 52 | 32.854 | 65.585 | 47.313 | 0.00 | 0.00 |
| ATOM | 814 | HZ2  | TRP | X | 52 | 33.199 | 65.526 | 46.292 | 0.00 | 0.00 |
| ATOM | 815 | CH2  | TRP | X | 52 | 31.942 | 64.603 | 47.828 | 0.00 | 0.00 |
| ATOM | 816 | HH2  | TRP | X | 52 | 31.467 | 63.833 | 47.239 | 0.00 | 0.00 |
| ATOM | 817 | CZ3  | TRP | X | 52 | 31.565 | 64.778 | 49.158 | 0.00 | 0.00 |
| ATOM | 818 | HZ3  | TRP | X | 52 | 31.049 | 63.941 | 49.604 | 0.00 | 0.00 |
| ATOM | 819 | CE3  | TRP | X | 52 | 31.984 | 65.885 | 49.872 | 0.00 | 0.00 |
| ATOM | 820 | HE3  | TRP | X | 52 | 31.538 | 65.936 | 50.854 | 0.00 | 0.00 |
| ATOM | 821 | CD2  | TRP | X | 52 | 32.663 | 66.924 | 49.293 | 0.00 | 0.00 |
| ATOM | 822 | C    | TRP | X | 52 | 30.864 | 70.696 | 50.527 | 0.00 | 0.00 |
| ATOM | 823 | O    | TRP | X | 52 | 30.182 | 70.566 | 49.492 | 0.00 | 0.00 |
| ATOM | 824 | N    | SER | X | 53 | 31.193 | 71.869 | 51.052 | 0.00 | 0.00 |
| ATOM | 825 | H    | SER | X | 53 | 31.548 | 71.934 | 51.995 | 0.00 | 0.00 |
| ATOM | 826 | CA   | SER | X | 53 | 30.883 | 73.223 | 50.540 | 0.00 | 0.00 |
| ATOM | 827 | HA   | SER | X | 53 | 29.994 | 73.113 | 49.919 | 0.00 | 0.00 |
| ATOM | 828 | CB   | SER | X | 53 | 30.610 | 74.185 | 51.756 | 0.00 | 0.00 |
| ATOM | 829 | HB2  | SER | X | 53 | 31.518 | 74.171 | 52.359 | 0.00 | 0.00 |
| ATOM | 830 | HB3  | SER | X | 53 | 30.411 | 75.144 | 51.277 | 0.00 | 0.00 |
| ATOM | 831 | OG   | SER | X | 53 | 29.428 | 73.795 | 52.464 | 0.00 | 0.00 |
| ATOM | 832 | HG   | SER | X | 53 | 29.309 | 74.455 | 53.151 | 0.00 | 0.00 |
| ATOM | 833 | C    | SER | X | 53 | 31.975 | 73.676 | 49.592 | 0.00 | 0.00 |
| ATOM | 834 | O    | SER | X | 53 | 31.741 | 74.233 | 48.526 | 0.00 | 0.00 |
| ATOM | 835 | N    | GLY | X | 54 | 33.234 | 73.503 | 50.059 | 0.00 | 0.00 |
| ATOM | 836 | H    | GLY | X | 54 | 33.258 | 73.016 | 50.943 | 0.00 | 0.00 |
| ATOM | 837 | CA   | GLY | X | 54 | 34.437 | 73.879 | 49.284 | 0.00 | 0.00 |
| ATOM | 838 | HA2  | GLY | X | 54 | 34.209 | 74.828 | 48.861 | 0.00 | 0.00 |
| ATOM | 839 | HA3  | GLY | X | 54 | 35.377 | 73.964 | 49.935 | 0.00 | 0.00 |
| ATOM | 840 | C    | GLY | X | 54 | 34.702 | 72.970 | 48.100 | 0.00 | 0.00 |
| ATOM | 841 | O    | GLY | X | 54 | 33.908 | 72.128 | 47.714 | 0.00 | 0.00 |
| ATOM | 842 | N    | VAL | X | 55 | 35.959 | 73.064 | 47.618 | 0.00 | 0.00 |

|      |     |      |     |   |    |        |        |        |      |      |
|------|-----|------|-----|---|----|--------|--------|--------|------|------|
| ATOM | 843 | H    | VAL | X | 55 | 36.547 | 73.819 | 47.940 | 0.00 | 0.00 |
| ATOM | 844 | CA   | VAL | X | 55 | 36.528 | 72.081 | 46.593 | 0.00 | 0.00 |
| ATOM | 845 | HA   | VAL | X | 55 | 35.732 | 71.487 | 46.145 | 0.00 | 0.00 |
| ATOM | 846 | CB   | VAL | X | 55 | 37.306 | 72.834 | 45.414 | 0.00 | 0.00 |
| ATOM | 847 | HB   | VAL | X | 55 | 36.455 | 73.365 | 44.988 | 0.00 | 0.00 |
| ATOM | 848 | CG1  | VAL | X | 55 | 38.242 | 73.877 | 45.877 | 0.00 | 0.00 |
| ATOM | 849 | HG11 | VAL | X | 55 | 37.812 | 74.673 | 46.485 | 0.00 | 0.00 |
| ATOM | 850 | HG12 | VAL | X | 55 | 39.159 | 73.453 | 46.284 | 0.00 | 0.00 |
| ATOM | 851 | HG13 | VAL | X | 55 | 38.558 | 74.344 | 44.944 | 0.00 | 0.00 |
| ATOM | 852 | CG2  | VAL | X | 55 | 38.031 | 71.903 | 44.437 | 0.00 | 0.00 |
| ATOM | 853 | HG21 | VAL | X | 55 | 38.708 | 72.519 | 43.844 | 0.00 | 0.00 |
| ATOM | 854 | HG22 | VAL | X | 55 | 38.474 | 71.056 | 44.961 | 0.00 | 0.00 |
| ATOM | 855 | HG23 | VAL | X | 55 | 37.256 | 71.509 | 43.780 | 0.00 | 0.00 |
| ATOM | 856 | C    | VAL | X | 55 | 37.460 | 71.152 | 47.353 | 0.00 | 0.00 |
| ATOM | 857 | O    | VAL | X | 55 | 38.441 | 71.562 | 47.949 | 0.00 | 0.00 |
| ATOM | 858 | N    | VAL | X | 56 | 37.143 | 69.838 | 47.320 | 0.00 | 0.00 |
| ATOM | 859 | H    | VAL | X | 56 | 36.380 | 69.460 | 46.777 | 0.00 | 0.00 |
| ATOM | 860 | CA   | VAL | X | 56 | 37.996 | 68.807 | 47.994 | 0.00 | 0.00 |
| ATOM | 861 | HA   | VAL | X | 56 | 38.493 | 69.200 | 48.881 | 0.00 | 0.00 |
| ATOM | 862 | CB   | VAL | X | 56 | 37.129 | 67.641 | 48.501 | 0.00 | 0.00 |
| ATOM | 863 | HB   | VAL | X | 56 | 36.354 | 67.356 | 47.789 | 0.00 | 0.00 |
| ATOM | 864 | CG1  | VAL | X | 56 | 38.000 | 66.418 | 48.742 | 0.00 | 0.00 |
| ATOM | 865 | HG11 | VAL | X | 56 | 37.426 | 65.600 | 49.179 | 0.00 | 0.00 |
| ATOM | 866 | HG12 | VAL | X | 56 | 38.398 | 66.148 | 47.764 | 0.00 | 0.00 |
| ATOM | 867 | HG13 | VAL | X | 56 | 38.763 | 66.678 | 49.476 | 0.00 | 0.00 |
| ATOM | 868 | CG2  | VAL | X | 56 | 36.567 | 67.972 | 49.900 | 0.00 | 0.00 |
| ATOM | 869 | HG21 | VAL | X | 56 | 37.304 | 67.859 | 50.695 | 0.00 | 0.00 |
| ATOM | 870 | HG22 | VAL | X | 56 | 36.176 | 68.984 | 50.000 | 0.00 | 0.00 |
| ATOM | 871 | HG23 | VAL | X | 56 | 35.763 | 67.295 | 50.191 | 0.00 | 0.00 |
| ATOM | 872 | C    | VAL | X | 56 | 39.102 | 68.466 | 46.930 | 0.00 | 0.00 |
| ATOM | 873 | O    | VAL | X | 56 | 38.774 | 68.152 | 45.773 | 0.00 | 0.00 |
| ATOM | 874 | N    | ASP | X | 57 | 40.355 | 68.472 | 47.364 | 0.00 | 0.00 |
| ATOM | 875 | H    | ASP | X | 57 | 40.495 | 68.692 | 48.340 | 0.00 | 0.00 |
| ATOM | 876 | CA   | ASP | X | 57 | 41.537 | 67.960 | 46.616 | 0.00 | 0.00 |
| ATOM | 877 | HA   | ASP | X | 57 | 41.537 | 68.555 | 45.703 | 0.00 | 0.00 |
| ATOM | 878 | CB   | ASP | X | 57 | 42.781 | 68.170 | 47.437 | 0.00 | 0.00 |
| ATOM | 879 | HB2  | ASP | X | 57 | 42.794 | 69.154 | 47.906 | 0.00 | 0.00 |
| ATOM | 880 | HB3  | ASP | X | 57 | 42.788 | 67.478 | 48.279 | 0.00 | 0.00 |
| ATOM | 881 | CG   | ASP | X | 57 | 44.077 | 67.913 | 46.700 | 0.00 | 0.00 |
| ATOM | 882 | OD1  | ASP | X | 57 | 44.939 | 68.822 | 46.649 | 0.00 | 0.00 |
| ATOM | 883 | OD2  | ASP | X | 57 | 44.276 | 66.784 | 46.275 | 0.00 | 0.00 |
| ATOM | 884 | C    | ASP | X | 57 | 41.297 | 66.481 | 46.342 | 0.00 | 0.00 |
| ATOM | 885 | O    | ASP | X | 57 | 41.242 | 65.650 | 47.296 | 0.00 | 0.00 |
| ATOM | 886 | N    | ALA | X | 58 | 41.349 | 66.139 | 45.059 | 0.00 | 0.00 |
| ATOM | 887 | H    | ALA | X | 58 | 41.293 | 66.893 | 44.389 | 0.00 | 0.00 |
| ATOM | 888 | CA   | ALA | X | 58 | 41.413 | 64.777 | 44.606 | 0.00 | 0.00 |
| ATOM | 889 | HA   | ALA | X | 58 | 41.538 | 64.202 | 45.524 | 0.00 | 0.00 |
| ATOM | 890 | CB   | ALA | X | 58 | 40.060 | 64.465 | 43.932 | 0.00 | 0.00 |
| ATOM | 891 | HB1  | ALA | X | 58 | 39.321 | 64.496 | 44.732 | 0.00 | 0.00 |
| ATOM | 892 | HB2  | ALA | X | 58 | 39.829 | 65.184 | 43.146 | 0.00 | 0.00 |
| ATOM | 893 | HB3  | ALA | X | 58 | 40.149 | 63.484 | 43.465 | 0.00 | 0.00 |
| ATOM | 894 | C    | ALA | X | 58 | 42.633 | 64.529 | 43.754 | 0.00 | 0.00 |
| ATOM | 895 | O    | ALA | X | 58 | 42.672 | 63.986 | 42.616 | 0.00 | 0.00 |
| ATOM | 896 | N    | THR | X | 59 | 43.786 | 64.970 | 44.260 | 0.00 | 0.00 |
| ATOM | 897 | H    | THR | X | 59 | 43.781 | 65.582 | 45.064 | 0.00 | 0.00 |
| ATOM | 898 | CA   | THR | X | 59 | 45.021 | 65.039 | 43.464 | 0.00 | 0.00 |
| ATOM | 899 | HA   | THR | X | 59 | 44.810 | 64.952 | 42.398 | 0.00 | 0.00 |
| ATOM | 900 | CB   | THR | X | 59 | 45.778 | 66.369 | 43.664 | 0.00 | 0.00 |
| ATOM | 901 | HB   | THR | X | 59 | 46.617 | 66.412 | 42.969 | 0.00 | 0.00 |
| ATOM | 902 | CG2  | THR | X | 59 | 44.890 | 67.582 | 43.458 | 0.00 | 0.00 |
| ATOM | 903 | HG21 | THR | X | 59 | 44.851 | 67.699 | 42.375 | 0.00 | 0.00 |
| ATOM | 904 | HG22 | THR | X | 59 | 43.904 | 67.586 | 43.923 | 0.00 | 0.00 |
| ATOM | 905 | HG23 | THR | X | 59 | 45.317 | 68.503 | 43.852 | 0.00 | 0.00 |
| ATOM | 906 | OG1  | THR | X | 59 | 46.401 | 66.467 | 44.901 | 0.00 | 0.00 |
| ATOM | 907 | HG1  | THR | X | 59 | 45.682 | 66.662 | 45.507 | 0.00 | 0.00 |
| ATOM | 908 | C    | THR | X | 59 | 45.951 | 63.878 | 43.617 | 0.00 | 0.00 |
| ATOM | 909 | O    | THR | X | 59 | 46.993 | 63.892 | 42.868 | 0.00 | 0.00 |
| ATOM | 910 | N    | THR | X | 60 | 45.622 | 62.957 | 44.540 | 0.00 | 0.00 |
| ATOM | 911 | H    | THR | X | 60 | 44.753 | 63.120 | 45.030 | 0.00 | 0.00 |
| ATOM | 912 | CA   | THR | X | 60 | 46.454 | 61.864 | 44.945 | 0.00 | 0.00 |

|      |     |      |     |   |    |        |        |        |      |      |
|------|-----|------|-----|---|----|--------|--------|--------|------|------|
| ATOM | 913 | HA   | THR | X | 60 | 46.719 | 61.319 | 44.039 | 0.00 | 0.00 |
| ATOM | 914 | CB   | THR | X | 60 | 47.793 | 62.343 | 45.562 | 0.00 | 0.00 |
| ATOM | 915 | HB   | THR | X | 60 | 48.190 | 63.202 | 45.020 | 0.00 | 0.00 |
| ATOM | 916 | CG2  | THR | X | 60 | 47.683 | 62.800 | 47.009 | 0.00 | 0.00 |
| ATOM | 917 | HG21 | THR | X | 60 | 48.530 | 63.390 | 47.357 | 0.00 | 0.00 |
| ATOM | 918 | HG22 | THR | X | 60 | 46.750 | 63.352 | 47.128 | 0.00 | 0.00 |
| ATOM | 919 | HG23 | THR | X | 60 | 47.618 | 61.906 | 47.628 | 0.00 | 0.00 |
| ATOM | 920 | OG1  | THR | X | 60 | 48.696 | 61.265 | 45.453 | 0.00 | 0.00 |
| ATOM | 921 | HG1  | THR | X | 60 | 49.588 | 61.596 | 45.579 | 0.00 | 0.00 |
| ATOM | 922 | C    | THR | X | 60 | 45.666 | 60.941 | 45.835 | 0.00 | 0.00 |
| ATOM | 923 | O    | THR | X | 60 | 44.587 | 61.257 | 46.297 | 0.00 | 0.00 |
| ATOM | 924 | N    | PHE | X | 61 | 46.255 | 59.790 | 46.108 | 0.00 | 0.00 |
| ATOM | 925 | H    | PHE | X | 61 | 47.216 | 59.611 | 45.853 | 0.00 | 0.00 |
| ATOM | 926 | CA   | PHE | X | 61 | 45.705 | 58.817 | 46.986 | 0.00 | 0.00 |
| ATOM | 927 | HA   | PHE | X | 61 | 44.655 | 58.644 | 46.750 | 0.00 | 0.00 |
| ATOM | 928 | CB   | PHE | X | 61 | 46.457 | 57.465 | 46.773 | 0.00 | 0.00 |
| ATOM | 929 | HB2  | PHE | X | 61 | 47.495 | 57.508 | 47.103 | 0.00 | 0.00 |
| ATOM | 930 | HB3  | PHE | X | 61 | 45.975 | 56.716 | 47.400 | 0.00 | 0.00 |
| ATOM | 931 | CG   | PHE | X | 61 | 46.449 | 56.960 | 45.344 | 0.00 | 0.00 |
| ATOM | 932 | CD1  | PHE | X | 61 | 45.209 | 56.513 | 44.784 | 0.00 | 0.00 |
| ATOM | 933 | HD1  | PHE | X | 61 | 44.361 | 56.430 | 45.447 | 0.00 | 0.00 |
| ATOM | 934 | CE1  | PHE | X | 61 | 45.103 | 56.078 | 43.449 | 0.00 | 0.00 |
| ATOM | 935 | HE1  | PHE | X | 61 | 44.156 | 55.754 | 43.043 | 0.00 | 0.00 |
| ATOM | 936 | CZ   | PHE | X | 61 | 46.232 | 55.952 | 42.657 | 0.00 | 0.00 |
| ATOM | 937 | HZ   | PHE | X | 61 | 46.060 | 55.636 | 41.638 | 0.00 | 0.00 |
| ATOM | 938 | CE2  | PHE | X | 61 | 47.513 | 56.305 | 43.223 | 0.00 | 0.00 |
| ATOM | 939 | HE2  | PHE | X | 61 | 48.473 | 56.104 | 42.772 | 0.00 | 0.00 |
| ATOM | 940 | CD2  | PHE | X | 61 | 47.574 | 56.884 | 44.499 | 0.00 | 0.00 |
| ATOM | 941 | HD2  | PHE | X | 61 | 48.506 | 57.221 | 44.929 | 0.00 | 0.00 |
| ATOM | 942 | C    | PHE | X | 61 | 45.613 | 59.291 | 48.499 | 0.00 | 0.00 |
| ATOM | 943 | O    | PHE | X | 61 | 46.144 | 60.393 | 48.914 | 0.00 | 0.00 |
| ATOM | 944 | N    | GLN | X | 62 | 45.067 | 58.381 | 49.324 | 0.00 | 0.00 |
| ATOM | 945 | H    | GLN | X | 62 | 45.136 | 57.427 | 48.997 | 0.00 | 0.00 |
| ATOM | 946 | CA   | GLN | X | 62 | 44.724 | 58.473 | 50.741 | 0.00 | 0.00 |
| ATOM | 947 | HA   | GLN | X | 62 | 45.088 | 59.330 | 51.308 | 0.00 | 0.00 |
| ATOM | 948 | CB   | GLN | X | 62 | 43.193 | 58.387 | 50.779 | 0.00 | 0.00 |
| ATOM | 949 | HB2  | GLN | X | 62 | 42.776 | 57.488 | 50.326 | 0.00 | 0.00 |
| ATOM | 950 | HB3  | GLN | X | 62 | 43.025 | 58.291 | 51.852 | 0.00 | 0.00 |
| ATOM | 951 | CG   | GLN | X | 62 | 42.529 | 59.593 | 50.158 | 0.00 | 0.00 |
| ATOM | 952 | HG2  | GLN | X | 62 | 42.877 | 59.770 | 49.140 | 0.00 | 0.00 |
| ATOM | 953 | HG3  | GLN | X | 62 | 41.486 | 59.311 | 50.016 | 0.00 | 0.00 |
| ATOM | 954 | CD   | GLN | X | 62 | 42.625 | 60.869 | 50.952 | 0.00 | 0.00 |
| ATOM | 955 | OE1  | GLN | X | 62 | 42.968 | 60.903 | 52.155 | 0.00 | 0.00 |
| ATOM | 956 | NE2  | GLN | X | 62 | 42.481 | 62.015 | 50.279 | 0.00 | 0.00 |
| ATOM | 957 | HE21 | GLN | X | 62 | 42.454 | 62.807 | 50.905 | 0.00 | 0.00 |
| ATOM | 958 | HE22 | GLN | X | 62 | 42.242 | 62.096 | 49.301 | 0.00 | 0.00 |
| ATOM | 959 | C    | GLN | X | 62 | 45.350 | 57.320 | 51.514 | 0.00 | 0.00 |
| ATOM | 960 | O    | GLN | X | 62 | 46.023 | 56.499 | 50.887 | 0.00 | 0.00 |
| ATOM | 961 | N    | SER | X | 63 | 45.093 | 57.206 | 52.828 | 0.00 | 0.00 |
| ATOM | 962 | H    | SER | X | 63 | 44.478 | 57.827 | 53.333 | 0.00 | 0.00 |
| ATOM | 963 | CA   | SER | X | 63 | 45.249 | 56.010 | 53.565 | 0.00 | 0.00 |
| ATOM | 964 | HA   | SER | X | 63 | 46.311 | 55.785 | 53.467 | 0.00 | 0.00 |
| ATOM | 965 | CB   | SER | X | 63 | 44.949 | 56.135 | 55.093 | 0.00 | 0.00 |
| ATOM | 966 | HB2  | SER | X | 63 | 43.934 | 56.533 | 55.101 | 0.00 | 0.00 |
| ATOM | 967 | HB3  | SER | X | 63 | 44.993 | 55.197 | 55.645 | 0.00 | 0.00 |
| ATOM | 968 | OG   | SER | X | 63 | 45.930 | 57.007 | 55.646 | 0.00 | 0.00 |
| ATOM | 969 | HG   | SER | X | 63 | 46.641 | 57.218 | 55.037 | 0.00 | 0.00 |
| ATOM | 970 | C    | SER | X | 63 | 44.523 | 54.747 | 53.025 | 0.00 | 0.00 |
| ATOM | 971 | O    | SER | X | 63 | 43.719 | 54.804 | 52.090 | 0.00 | 0.00 |
| ATOM | 972 | N    | VAL | X | 64 | 44.798 | 53.616 | 53.624 | 0.00 | 0.00 |
| ATOM | 973 | H    | VAL | X | 64 | 45.531 | 53.642 | 54.319 | 0.00 | 0.00 |
| ATOM | 974 | CA   | VAL | X | 64 | 44.107 | 52.302 | 53.225 | 0.00 | 0.00 |
| ATOM | 975 | HA   | VAL | X | 64 | 43.173 | 52.580 | 52.736 | 0.00 | 0.00 |
| ATOM | 976 | CB   | VAL | X | 64 | 44.859 | 51.504 | 52.168 | 0.00 | 0.00 |
| ATOM | 977 | HB   | VAL | X | 64 | 45.038 | 52.258 | 51.401 | 0.00 | 0.00 |
| ATOM | 978 | CG1  | VAL | X | 64 | 46.121 | 50.806 | 52.680 | 0.00 | 0.00 |
| ATOM | 979 | HG11 | VAL | X | 64 | 46.542 | 50.185 | 51.889 | 0.00 | 0.00 |
| ATOM | 980 | HG12 | VAL | X | 64 | 46.856 | 51.553 | 52.978 | 0.00 | 0.00 |
| ATOM | 981 | HG13 | VAL | X | 64 | 45.847 | 50.225 | 53.561 | 0.00 | 0.00 |
| ATOM | 982 | CG2  | VAL | X | 64 | 43.933 | 50.564 | 51.382 | 0.00 | 0.00 |

|      |      |      |     |   |    |        |        |        |      |      |
|------|------|------|-----|---|----|--------|--------|--------|------|------|
| ATOM | 983  | HG21 | VAL | X | 64 | 43.950 | 49.592 | 51.874 | 0.00 | 0.00 |
| ATOM | 984  | HG22 | VAL | X | 64 | 42.885 | 50.861 | 51.388 | 0.00 | 0.00 |
| ATOM | 985  | HG23 | VAL | X | 64 | 44.319 | 50.485 | 50.366 | 0.00 | 0.00 |
| ATOM | 986  | C    | VAL | X | 64 | 43.804 | 51.423 | 54.481 | 0.00 | 0.00 |
| ATOM | 987  | O    | VAL | X | 64 | 44.325 | 51.646 | 55.561 | 0.00 | 0.00 |
| ATOM | 988  | N    | CYX | X | 65 | 42.837 | 50.444 | 54.249 | 0.00 | 0.00 |
| ATOM | 989  | H    | CYX | X | 65 | 42.348 | 50.413 | 53.366 | 0.00 | 0.00 |
| ATOM | 990  | CA   | CYX | X | 65 | 42.147 | 49.735 | 55.348 | 0.00 | 0.00 |
| ATOM | 991  | HA   | CYX | X | 65 | 41.551 | 50.365 | 56.009 | 0.00 | 0.00 |
| ATOM | 992  | CB   | CYX | X | 65 | 41.012 | 48.917 | 54.756 | 0.00 | 0.00 |
| ATOM | 993  | HB2  | CYX | X | 65 | 41.480 | 48.204 | 54.078 | 0.00 | 0.00 |
| ATOM | 994  | HB3  | CYX | X | 65 | 40.528 | 48.276 | 55.493 | 0.00 | 0.00 |
| ATOM | 995  | SG   | CYX | X | 65 | 39.710 | 49.864 | 53.840 | 0.00 | 0.00 |
| ATOM | 996  | C    | CYX | X | 65 | 43.035 | 48.836 | 56.126 | 0.00 | 0.00 |
| ATOM | 997  | O    | CYX | X | 65 | 43.899 | 48.056 | 55.616 | 0.00 | 0.00 |
| ATOM | 998  | N    | TYR | X | 66 | 42.845 | 48.797 | 57.455 | 0.00 | 0.00 |
| ATOM | 999  | H    | TYR | X | 66 | 42.136 | 49.445 | 57.768 | 0.00 | 0.00 |
| ATOM | 1000 | CA   | TYR | X | 66 | 43.452 | 47.836 | 58.378 | 0.00 | 0.00 |
| ATOM | 1001 | HA   | TYR | X | 66 | 44.532 | 47.962 | 58.300 | 0.00 | 0.00 |
| ATOM | 1002 | CB   | TYR | X | 66 | 42.988 | 48.182 | 59.861 | 0.00 | 0.00 |
| ATOM | 1003 | HB2  | TYR | X | 66 | 42.026 | 48.690 | 59.923 | 0.00 | 0.00 |
| ATOM | 1004 | HB3  | TYR | X | 66 | 43.003 | 47.250 | 60.428 | 0.00 | 0.00 |
| ATOM | 1005 | CG   | TYR | X | 66 | 43.872 | 49.229 | 60.556 | 0.00 | 0.00 |
| ATOM | 1006 | CD1  | TYR | X | 66 | 43.285 | 50.462 | 60.998 | 0.00 | 0.00 |
| ATOM | 1007 | HD1  | TYR | X | 66 | 42.239 | 50.632 | 60.795 | 0.00 | 0.00 |
| ATOM | 1008 | CE1  | TYR | X | 66 | 44.046 | 51.468 | 61.628 | 0.00 | 0.00 |
| ATOM | 1009 | HE1  | TYR | X | 66 | 43.536 | 52.368 | 61.939 | 0.00 | 0.00 |
| ATOM | 1010 | CZ   | TYR | X | 66 | 45.428 | 51.164 | 61.699 | 0.00 | 0.00 |
| ATOM | 1011 | OH   | TYR | X | 66 | 46.310 | 52.018 | 62.227 | 0.00 | 0.00 |
| ATOM | 1012 | HH   | TYR | X | 66 | 45.880 | 52.842 | 62.464 | 0.00 | 0.00 |
| ATOM | 1013 | CE2  | TYR | X | 66 | 46.051 | 49.972 | 61.215 | 0.00 | 0.00 |
| ATOM | 1014 | HE2  | TYR | X | 66 | 47.126 | 49.894 | 61.293 | 0.00 | 0.00 |
| ATOM | 1015 | CD2  | TYR | X | 66 | 45.263 | 48.968 | 60.733 | 0.00 | 0.00 |
| ATOM | 1016 | HD2  | TYR | X | 66 | 45.690 | 48.037 | 60.388 | 0.00 | 0.00 |
| ATOM | 1017 | C    | TYR | X | 66 | 43.199 | 46.352 | 57.988 | 0.00 | 0.00 |
| ATOM | 1018 | O    | TYR | X | 66 | 42.092 | 45.898 | 57.739 | 0.00 | 0.00 |
| ATOM | 1019 | N    | GLN | X | 67 | 44.344 | 45.606 | 57.880 | 0.00 | 0.00 |
| ATOM | 1020 | H    | GLN | X | 67 | 45.211 | 45.940 | 58.275 | 0.00 | 0.00 |
| ATOM | 1021 | CA   | GLN | X | 67 | 44.469 | 44.365 | 57.108 | 0.00 | 0.00 |
| ATOM | 1022 | HA   | GLN | X | 67 | 43.606 | 43.721 | 57.280 | 0.00 | 0.00 |
| ATOM | 1023 | CB   | GLN | X | 67 | 44.673 | 44.741 | 55.645 | 0.00 | 0.00 |
| ATOM | 1024 | HB2  | GLN | X | 67 | 44.681 | 43.782 | 55.127 | 0.00 | 0.00 |
| ATOM | 1025 | HB3  | GLN | X | 67 | 43.839 | 45.386 | 55.369 | 0.00 | 0.00 |
| ATOM | 1026 | CG   | GLN | X | 67 | 45.944 | 45.552 | 55.136 | 0.00 | 0.00 |
| ATOM | 1027 | HG2  | GLN | X | 67 | 46.062 | 46.537 | 55.589 | 0.00 | 0.00 |
| ATOM | 1028 | HG3  | GLN | X | 67 | 46.861 | 45.013 | 55.371 | 0.00 | 0.00 |
| ATOM | 1029 | CD   | GLN | X | 67 | 45.849 | 45.736 | 53.591 | 0.00 | 0.00 |
| ATOM | 1030 | OE1  | GLN | X | 67 | 46.346 | 44.894 | 52.876 | 0.00 | 0.00 |
| ATOM | 1031 | NE2  | GLN | X | 67 | 45.328 | 46.866 | 53.145 | 0.00 | 0.00 |
| ATOM | 1032 | HE21 | GLN | X | 67 | 45.382 | 47.019 | 52.148 | 0.00 | 0.00 |
| ATOM | 1033 | HE22 | GLN | X | 67 | 44.871 | 47.532 | 53.751 | 0.00 | 0.00 |
| ATOM | 1034 | C    | GLN | X | 67 | 45.695 | 43.584 | 57.587 | 0.00 | 0.00 |
| ATOM | 1035 | O    | GLN | X | 67 | 46.531 | 44.161 | 58.204 | 0.00 | 0.00 |
| ATOM | 1036 | N    | TYR | X | 68 | 45.794 | 42.308 | 57.180 | 0.00 | 0.00 |
| ATOM | 1037 | H    | TYR | X | 68 | 45.019 | 41.871 | 56.703 | 0.00 | 0.00 |
| ATOM | 1038 | CA   | TYR | X | 68 | 46.918 | 41.447 | 57.334 | 0.00 | 0.00 |
| ATOM | 1039 | HA   | TYR | X | 68 | 47.479 | 41.692 | 58.236 | 0.00 | 0.00 |
| ATOM | 1040 | CB   | TYR | X | 68 | 46.526 | 39.980 | 57.502 | 0.00 | 0.00 |
| ATOM | 1041 | HB2  | TYR | X | 68 | 45.611 | 39.903 | 58.091 | 0.00 | 0.00 |
| ATOM | 1042 | HB3  | TYR | X | 68 | 46.300 | 39.682 | 56.478 | 0.00 | 0.00 |
| ATOM | 1043 | CG   | TYR | X | 68 | 47.740 | 39.228 | 58.150 | 0.00 | 0.00 |
| ATOM | 1044 | CD1  | TYR | X | 68 | 48.011 | 39.416 | 59.515 | 0.00 | 0.00 |
| ATOM | 1045 | HD1  | TYR | X | 68 | 47.335 | 40.045 | 60.076 | 0.00 | 0.00 |
| ATOM | 1046 | CE1  | TYR | X | 68 | 49.148 | 38.772 | 60.077 | 0.00 | 0.00 |
| ATOM | 1047 | HE1  | TYR | X | 68 | 49.341 | 38.706 | 61.138 | 0.00 | 0.00 |
| ATOM | 1048 | CZ   | TYR | X | 68 | 50.050 | 38.063 | 59.253 | 0.00 | 0.00 |
| ATOM | 1049 | OH   | TYR | X | 68 | 51.128 | 37.408 | 59.807 | 0.00 | 0.00 |
| ATOM | 1050 | HH   | TYR | X | 68 | 51.063 | 37.326 | 60.762 | 0.00 | 0.00 |
| ATOM | 1051 | CE2  | TYR | X | 68 | 49.815 | 38.025 | 57.900 | 0.00 | 0.00 |
| ATOM | 1052 | HE2  | TYR | X | 68 | 50.520 | 37.500 | 57.273 | 0.00 | 0.00 |



|      |      |      |     |   |    |        |        |        |      |      |
|------|------|------|-----|---|----|--------|--------|--------|------|------|
| ATOM | 1053 | CD2  | TYR | X | 68 | 48.708 | 38.572 | 57.299 | 0.00 | 0.00 |
| ATOM | 1054 | HD2  | TYR | X | 68 | 48.536 | 38.499 | 56.235 | 0.00 | 0.00 |
| ATOM | 1055 | C    | TYR | X | 68 | 47.956 | 41.718 | 56.239 | 0.00 | 0.00 |
| ATOM | 1056 | O    | TYR | X | 68 | 47.652 | 41.571 | 55.070 | 0.00 | 0.00 |
| ATOM | 1057 | N    | VAL | X | 69 | 49.131 | 42.309 | 56.564 | 0.00 | 0.00 |
| ATOM | 1058 | H    | VAL | X | 69 | 49.289 | 42.522 | 57.538 | 0.00 | 0.00 |
| ATOM | 1059 | CA   | VAL | X | 69 | 50.112 | 42.711 | 55.580 | 0.00 | 0.00 |
| ATOM | 1060 | HA   | VAL | X | 69 | 49.627 | 43.050 | 54.664 | 0.00 | 0.00 |
| ATOM | 1061 | CB   | VAL | X | 69 | 50.864 | 43.958 | 56.068 | 0.00 | 0.00 |
| ATOM | 1062 | HB   | VAL | X | 69 | 51.155 | 43.735 | 57.094 | 0.00 | 0.00 |
| ATOM | 1063 | CG1  | VAL | X | 69 | 52.122 | 44.136 | 55.240 | 0.00 | 0.00 |
| ATOM | 1064 | HG11 | VAL | X | 69 | 52.463 | 45.137 | 55.503 | 0.00 | 0.00 |
| ATOM | 1065 | HG12 | VAL | X | 69 | 52.726 | 43.282 | 55.546 | 0.00 | 0.00 |
| ATOM | 1066 | HG13 | VAL | X | 69 | 51.822 | 44.266 | 54.200 | 0.00 | 0.00 |
| ATOM | 1067 | CG2  | VAL | X | 69 | 49.969 | 45.217 | 56.158 | 0.00 | 0.00 |
| ATOM | 1068 | HG21 | VAL | X | 69 | 50.329 | 45.826 | 56.987 | 0.00 | 0.00 |
| ATOM | 1069 | HG22 | VAL | X | 69 | 50.140 | 45.725 | 55.209 | 0.00 | 0.00 |
| ATOM | 1070 | HG23 | VAL | X | 69 | 48.901 | 45.070 | 56.318 | 0.00 | 0.00 |
| ATOM | 1071 | C    | VAL | X | 69 | 50.929 | 41.493 | 55.108 | 0.00 | 0.00 |
| ATOM | 1072 | O    | VAL | X | 69 | 51.719 | 40.843 | 55.862 | 0.00 | 0.00 |
| ATOM | 1073 | N    | ASP | X | 70 | 50.834 | 41.191 | 53.798 | 0.00 | 0.00 |
| ATOM | 1074 | H    | ASP | X | 70 | 50.214 | 41.711 | 53.194 | 0.00 | 0.00 |
| ATOM | 1075 | CA   | ASP | X | 70 | 51.590 | 40.094 | 53.226 | 0.00 | 0.00 |
| ATOM | 1076 | HA   | ASP | X | 70 | 51.487 | 39.180 | 53.812 | 0.00 | 0.00 |
| ATOM | 1077 | CB   | ASP | X | 70 | 50.960 | 39.723 | 51.889 | 0.00 | 0.00 |
| ATOM | 1078 | HB2  | ASP | X | 70 | 49.891 | 39.586 | 52.048 | 0.00 | 0.00 |
| ATOM | 1079 | HB3  | ASP | X | 70 | 51.052 | 40.507 | 51.137 | 0.00 | 0.00 |
| ATOM | 1080 | CG   | ASP | X | 70 | 51.459 | 38.314 | 51.347 | 0.00 | 0.00 |
| ATOM | 1081 | OD1  | ASP | X | 70 | 52.663 | 38.059 | 51.388 | 0.00 | 0.00 |
| ATOM | 1082 | OD2  | ASP | X | 70 | 50.631 | 37.473 | 50.957 | 0.00 | 0.00 |
| ATOM | 1083 | C    | ASP | X | 70 | 53.056 | 40.448 | 53.046 | 0.00 | 0.00 |
| ATOM | 1084 | O    | ASP | X | 70 | 53.419 | 41.384 | 52.340 | 0.00 | 0.00 |
| ATOM | 1085 | N    | THR | X | 71 | 53.926 | 39.599 | 53.621 | 0.00 | 0.00 |
| ATOM | 1086 | H    | THR | X | 71 | 53.559 | 38.863 | 54.207 | 0.00 | 0.00 |
| ATOM | 1087 | CA   | THR | X | 71 | 55.370 | 39.808 | 53.634 | 0.00 | 0.00 |
| ATOM | 1088 | HA   | THR | X | 71 | 55.660 | 40.539 | 52.879 | 0.00 | 0.00 |
| ATOM | 1089 | CB   | THR | X | 71 | 55.850 | 40.409 | 54.990 | 0.00 | 0.00 |
| ATOM | 1090 | HB   | THR | X | 71 | 56.925 | 40.584 | 54.957 | 0.00 | 0.00 |
| ATOM | 1091 | CG2  | THR | X | 71 | 55.059 | 41.655 | 55.465 | 0.00 | 0.00 |
| ATOM | 1092 | HG21 | THR | X | 71 | 54.246 | 41.409 | 56.148 | 0.00 | 0.00 |
| ATOM | 1093 | HG22 | THR | X | 71 | 55.773 | 42.228 | 56.056 | 0.00 | 0.00 |
| ATOM | 1094 | HG23 | THR | X | 71 | 54.778 | 42.281 | 54.619 | 0.00 | 0.00 |
| ATOM | 1095 | OG1  | THR | X | 71 | 55.547 | 39.341 | 55.940 | 0.00 | 0.00 |
| ATOM | 1096 | HG1  | THR | X | 71 | 56.366 | 38.866 | 56.100 | 0.00 | 0.00 |
| ATOM | 1097 | C    | THR | X | 71 | 56.106 | 38.548 | 53.211 | 0.00 | 0.00 |
| ATOM | 1098 | O    | THR | X | 71 | 57.270 | 38.363 | 53.522 | 0.00 | 0.00 |
| ATOM | 1099 | N    | LEU | X | 72 | 55.413 | 37.655 | 52.412 | 0.00 | 0.00 |
| ATOM | 1100 | H    | LEU | X | 72 | 54.490 | 37.821 | 52.037 | 0.00 | 0.00 |
| ATOM | 1101 | CA   | LEU | X | 72 | 56.046 | 36.391 | 52.026 | 0.00 | 0.00 |
| ATOM | 1102 | HA   | LEU | X | 72 | 56.327 | 35.796 | 52.895 | 0.00 | 0.00 |
| ATOM | 1103 | CB   | LEU | X | 72 | 55.148 | 35.470 | 51.261 | 0.00 | 0.00 |
| ATOM | 1104 | HB2  | LEU | X | 72 | 54.409 | 35.167 | 52.003 | 0.00 | 0.00 |
| ATOM | 1105 | HB3  | LEU | X | 72 | 54.547 | 35.994 | 50.518 | 0.00 | 0.00 |
| ATOM | 1106 | CG   | LEU | X | 72 | 55.697 | 34.189 | 50.708 | 0.00 | 0.00 |
| ATOM | 1107 | HG   | LEU | X | 72 | 56.506 | 34.469 | 50.033 | 0.00 | 0.00 |
| ATOM | 1108 | CD1  | LEU | X | 72 | 56.256 | 33.171 | 51.834 | 0.00 | 0.00 |
| ATOM | 1109 | HD11 | LEU | X | 72 | 55.444 | 32.942 | 52.524 | 0.00 | 0.00 |
| ATOM | 1110 | HD12 | LEU | X | 72 | 56.644 | 32.279 | 51.342 | 0.00 | 0.00 |
| ATOM | 1111 | HD13 | LEU | X | 72 | 57.026 | 33.600 | 52.475 | 0.00 | 0.00 |
| ATOM | 1112 | CD2  | LEU | X | 72 | 54.583 | 33.470 | 49.878 | 0.00 | 0.00 |
| ATOM | 1113 | HD21 | LEU | X | 72 | 53.562 | 33.699 | 50.184 | 0.00 | 0.00 |
| ATOM | 1114 | HD22 | LEU | X | 72 | 54.754 | 33.718 | 48.831 | 0.00 | 0.00 |
| ATOM | 1115 | HD23 | LEU | X | 72 | 54.576 | 32.408 | 50.123 | 0.00 | 0.00 |
| ATOM | 1116 | C    | LEU | X | 72 | 57.348 | 36.548 | 51.282 | 0.00 | 0.00 |
| ATOM | 1117 | O    | LEU | X | 72 | 58.417 | 35.915 | 51.606 | 0.00 | 0.00 |
| ATOM | 1118 | N    | TYR | X | 73 | 57.339 | 37.424 | 50.297 | 0.00 | 0.00 |
| ATOM | 1119 | H    | TYR | X | 73 | 56.495 | 37.972 | 50.215 | 0.00 | 0.00 |
| ATOM | 1120 | CA   | TYR | X | 73 | 58.592 | 37.886 | 49.555 | 0.00 | 0.00 |
| ATOM | 1121 | HA   | TYR | X | 73 | 59.483 | 37.594 | 50.110 | 0.00 | 0.00 |
| ATOM | 1122 | CB   | TYR | X | 73 | 58.595 | 37.378 | 48.123 | 0.00 | 0.00 |

|      |      |     |     |   |    |        |        |        |      |      |
|------|------|-----|-----|---|----|--------|--------|--------|------|------|
| ATOM | 1123 | HB2 | TYR | X | 73 | 57.830 | 37.883 | 47.533 | 0.00 | 0.00 |
| ATOM | 1124 | HB3 | TYR | X | 73 | 59.539 | 37.730 | 47.709 | 0.00 | 0.00 |
| ATOM | 1125 | CG  | TYR | X | 73 | 58.437 | 35.856 | 48.010 | 0.00 | 0.00 |
| ATOM | 1126 | CD1 | TYR | X | 73 | 59.513 | 35.034 | 48.340 | 0.00 | 0.00 |
| ATOM | 1127 | HD1 | TYR | X | 73 | 60.420 | 35.331 | 48.845 | 0.00 | 0.00 |
| ATOM | 1128 | CE1 | TYR | X | 73 | 59.438 | 33.671 | 48.191 | 0.00 | 0.00 |
| ATOM | 1129 | HE1 | TYR | X | 73 | 60.327 | 33.121 | 48.462 | 0.00 | 0.00 |
| ATOM | 1130 | CZ  | TYR | X | 73 | 58.252 | 33.065 | 47.636 | 0.00 | 0.00 |
| ATOM | 1131 | OH  | TYR | X | 73 | 58.218 | 31.677 | 47.516 | 0.00 | 0.00 |
| ATOM | 1132 | HH  | TYR | X | 73 | 58.937 | 31.323 | 48.046 | 0.00 | 0.00 |
| ATOM | 1133 | CE2 | TYR | X | 73 | 57.173 | 33.897 | 47.264 | 0.00 | 0.00 |
| ATOM | 1134 | HE2 | TYR | X | 73 | 56.334 | 33.489 | 46.720 | 0.00 | 0.00 |
| ATOM | 1135 | CD2 | TYR | X | 73 | 57.301 | 35.285 | 47.425 | 0.00 | 0.00 |
| ATOM | 1136 | HD2 | TYR | X | 73 | 56.517 | 35.922 | 47.042 | 0.00 | 0.00 |
| ATOM | 1137 | C   | TYR | X | 73 | 58.692 | 39.454 | 49.570 | 0.00 | 0.00 |
| ATOM | 1138 | O   | TYR | X | 73 | 58.139 | 40.063 | 48.654 | 0.00 | 0.00 |
| ATOM | 1139 | N   | PRO | X | 74 | 59.220 | 40.047 | 50.644 | 0.00 | 0.00 |
| ATOM | 1140 | CD  | PRO | X | 74 | 59.943 | 39.426 | 51.774 | 0.00 | 0.00 |
| ATOM | 1141 | HD2 | PRO | X | 74 | 60.990 | 39.267 | 51.517 | 0.00 | 0.00 |
| ATOM | 1142 | HD3 | PRO | X | 74 | 59.433 | 38.501 | 52.044 | 0.00 | 0.00 |
| ATOM | 1143 | CG  | PRO | X | 74 | 59.878 | 40.428 | 52.934 | 0.00 | 0.00 |
| ATOM | 1144 | HG2 | PRO | X | 74 | 60.646 | 40.285 | 53.694 | 0.00 | 0.00 |
| ATOM | 1145 | HG3 | PRO | X | 74 | 58.854 | 40.403 | 53.306 | 0.00 | 0.00 |
| ATOM | 1146 | CB  | PRO | X | 74 | 60.070 | 41.757 | 52.164 | 0.00 | 0.00 |
| ATOM | 1147 | HB2 | PRO | X | 74 | 61.064 | 42.161 | 51.976 | 0.00 | 0.00 |
| ATOM | 1148 | HB3 | PRO | X | 74 | 59.496 | 42.520 | 52.689 | 0.00 | 0.00 |
| ATOM | 1149 | CA  | PRO | X | 74 | 59.343 | 41.495 | 50.825 | 0.00 | 0.00 |
| ATOM | 1150 | HA  | PRO | X | 74 | 58.349 | 41.904 | 51.010 | 0.00 | 0.00 |
| ATOM | 1151 | C   | PRO | X | 74 | 60.023 | 42.120 | 49.598 | 0.00 | 0.00 |
| ATOM | 1152 | O   | PRO | X | 74 | 61.227 | 41.814 | 49.265 | 0.00 | 0.00 |
| ATOM | 1153 | N   | GLY | X | 75 | 59.313 | 43.077 | 48.980 | 0.00 | 0.00 |
| ATOM | 1154 | H   | GLY | X | 75 | 58.382 | 43.273 | 49.321 | 0.00 | 0.00 |
| ATOM | 1155 | CA  | GLY | X | 75 | 59.883 | 43.850 | 47.878 | 0.00 | 0.00 |
| ATOM | 1156 | HA2 | GLY | X | 75 | 59.514 | 44.819 | 47.949 | 0.00 | 0.00 |
| ATOM | 1157 | HA3 | GLY | X | 75 | 60.908 | 43.825 | 47.980 | 0.00 | 0.00 |
| ATOM | 1158 | C   | GLY | X | 75 | 59.737 | 43.298 | 46.490 | 0.00 | 0.00 |
| ATOM | 1159 | O   | GLY | X | 75 | 60.186 | 43.983 | 45.562 | 0.00 | 0.00 |
| ATOM | 1160 | N   | PHE | X | 76 | 59.270 | 42.068 | 46.336 | 0.00 | 0.00 |
| ATOM | 1161 | H   | PHE | X | 76 | 58.817 | 41.693 | 47.157 | 0.00 | 0.00 |
| ATOM | 1162 | CA  | PHE | X | 76 | 59.083 | 41.314 | 45.073 | 0.00 | 0.00 |
| ATOM | 1163 | HA  | PHE | X | 76 | 59.902 | 41.563 | 44.399 | 0.00 | 0.00 |
| ATOM | 1164 | CB  | PHE | X | 76 | 59.252 | 39.808 | 45.462 | 0.00 | 0.00 |
| ATOM | 1165 | HB2 | PHE | X | 76 | 60.306 | 39.787 | 45.738 | 0.00 | 0.00 |
| ATOM | 1166 | HB3 | PHE | X | 76 | 58.654 | 39.634 | 46.356 | 0.00 | 0.00 |
| ATOM | 1167 | CG  | PHE | X | 76 | 59.040 | 38.647 | 44.504 | 0.00 | 0.00 |
| ATOM | 1168 | CD1 | PHE | X | 76 | 59.880 | 38.506 | 43.387 | 0.00 | 0.00 |
| ATOM | 1169 | HD1 | PHE | X | 76 | 60.751 | 39.140 | 43.318 | 0.00 | 0.00 |
| ATOM | 1170 | CE1 | PHE | X | 76 | 59.543 | 37.613 | 42.358 | 0.00 | 0.00 |
| ATOM | 1171 | HE1 | PHE | X | 76 | 60.195 | 37.650 | 41.498 | 0.00 | 0.00 |
| ATOM | 1172 | CZ  | PHE | X | 76 | 58.396 | 36.801 | 42.348 | 0.00 | 0.00 |
| ATOM | 1173 | HZ  | PHE | X | 76 | 58.076 | 36.185 | 41.522 | 0.00 | 0.00 |
| ATOM | 1174 | CE2 | PHE | X | 76 | 57.676 | 36.822 | 43.576 | 0.00 | 0.00 |
| ATOM | 1175 | HE2 | PHE | X | 76 | 56.752 | 36.273 | 43.677 | 0.00 | 0.00 |
| ATOM | 1176 | CD2 | PHE | X | 76 | 57.934 | 37.779 | 44.553 | 0.00 | 0.00 |
| ATOM | 1177 | HD2 | PHE | X | 76 | 57.285 | 37.882 | 45.411 | 0.00 | 0.00 |
| ATOM | 1178 | C   | PHE | X | 76 | 57.739 | 41.491 | 44.455 | 0.00 | 0.00 |
| ATOM | 1179 | O   | PHE | X | 76 | 56.779 | 41.533 | 45.164 | 0.00 | 0.00 |
| ATOM | 1180 | N   | GLU | X | 77 | 57.670 | 41.411 | 43.071 | 0.00 | 0.00 |
| ATOM | 1181 | H   | GLU | X | 77 | 58.557 | 41.250 | 42.614 | 0.00 | 0.00 |
| ATOM | 1182 | CA  | GLU | X | 77 | 56.493 | 41.745 | 42.324 | 0.00 | 0.00 |
| ATOM | 1183 | HA  | GLU | X | 77 | 56.301 | 42.813 | 42.426 | 0.00 | 0.00 |
| ATOM | 1184 | CB  | GLU | X | 77 | 56.771 | 41.515 | 40.843 | 0.00 | 0.00 |
| ATOM | 1185 | HB2 | GLU | X | 77 | 57.648 | 42.078 | 40.523 | 0.00 | 0.00 |
| ATOM | 1186 | HB3 | GLU | X | 77 | 56.912 | 40.449 | 40.667 | 0.00 | 0.00 |
| ATOM | 1187 | CG  | GLU | X | 77 | 55.603 | 41.940 | 40.109 | 0.00 | 0.00 |
| ATOM | 1188 | HG2 | GLU | X | 77 | 54.770 | 41.269 | 40.317 | 0.00 | 0.00 |
| ATOM | 1189 | HG3 | GLU | X | 77 | 55.261 | 42.932 | 40.405 | 0.00 | 0.00 |
| ATOM | 1190 | CD  | GLU | X | 77 | 55.867 | 41.788 | 38.645 | 0.00 | 0.00 |
| ATOM | 1191 | OE1 | GLU | X | 77 | 55.200 | 40.860 | 38.079 | 0.00 | 0.00 |
| ATOM | 1192 | OE2 | GLU | X | 77 | 56.672 | 42.522 | 38.098 | 0.00 | 0.00 |

|      |      |      |     |   |    |        |        |        |      |      |
|------|------|------|-----|---|----|--------|--------|--------|------|------|
| ATOM | 1193 | C    | GLU | X | 77 | 55.244 | 40.882 | 42.740 | 0.00 | 0.00 |
| ATOM | 1194 | O    | GLU | X | 77 | 54.135 | 41.283 | 43.018 | 0.00 | 0.00 |
| ATOM | 1195 | N    | GLY | X | 78 | 55.514 | 39.562 | 42.939 | 0.00 | 0.00 |
| ATOM | 1196 | H    | GLY | X | 78 | 56.431 | 39.218 | 42.694 | 0.00 | 0.00 |
| ATOM | 1197 | CA   | GLY | X | 78 | 54.481 | 38.632 | 43.264 | 0.00 | 0.00 |
| ATOM | 1198 | HA2  | GLY | X | 78 | 53.691 | 38.833 | 42.581 | 0.00 | 0.00 |
| ATOM | 1199 | HA3  | GLY | X | 78 | 54.921 | 37.612 | 43.265 | 0.00 | 0.00 |
| ATOM | 1200 | C    | GLY | X | 78 | 53.910 | 38.761 | 44.724 | 0.00 | 0.00 |
| ATOM | 1201 | O    | GLY | X | 78 | 52.900 | 38.075 | 44.946 | 0.00 | 0.00 |
| ATOM | 1202 | N    | THR | X | 79 | 54.473 | 39.634 | 45.612 | 0.00 | 0.00 |
| ATOM | 1203 | H    | THR | X | 79 | 55.365 | 40.047 | 45.379 | 0.00 | 0.00 |
| ATOM | 1204 | CA   | THR | X | 79 | 53.834 | 40.052 | 46.859 | 0.00 | 0.00 |
| ATOM | 1205 | HA   | THR | X | 79 | 52.857 | 39.579 | 46.956 | 0.00 | 0.00 |
| ATOM | 1206 | CB   | THR | X | 79 | 54.749 | 39.741 | 48.075 | 0.00 | 0.00 |
| ATOM | 1207 | HB   | THR | X | 79 | 55.759 | 40.040 | 47.794 | 0.00 | 0.00 |
| ATOM | 1208 | CG2  | THR | X | 79 | 54.433 | 40.292 | 49.485 | 0.00 | 0.00 |
| ATOM | 1209 | HG21 | THR | X | 79 | 55.193 | 39.894 | 50.158 | 0.00 | 0.00 |
| ATOM | 1210 | HG22 | THR | X | 79 | 54.551 | 41.375 | 49.489 | 0.00 | 0.00 |
| ATOM | 1211 | HG23 | THR | X | 79 | 53.419 | 40.024 | 49.780 | 0.00 | 0.00 |
| ATOM | 1212 | OG1  | THR | X | 79 | 54.853 | 38.335 | 48.152 | 0.00 | 0.00 |
| ATOM | 1213 | HG1  | THR | X | 79 | 53.989 | 38.008 | 48.416 | 0.00 | 0.00 |
| ATOM | 1214 | C    | THR | X | 79 | 53.528 | 41.581 | 47.002 | 0.00 | 0.00 |
| ATOM | 1215 | O    | THR | X | 79 | 52.555 | 41.938 | 47.697 | 0.00 | 0.00 |
| ATOM | 1216 | N    | GLU | X | 80 | 54.353 | 42.408 | 46.435 | 0.00 | 0.00 |
| ATOM | 1217 | H    | GLU | X | 80 | 55.110 | 42.001 | 45.904 | 0.00 | 0.00 |
| ATOM | 1218 | CA   | GLU | X | 80 | 54.071 | 43.856 | 46.209 | 0.00 | 0.00 |
| ATOM | 1219 | HA   | GLU | X | 80 | 53.817 | 44.306 | 47.169 | 0.00 | 0.00 |
| ATOM | 1220 | CB   | GLU | X | 80 | 55.275 | 44.489 | 45.524 | 0.00 | 0.00 |
| ATOM | 1221 | HB2  | GLU | X | 80 | 55.567 | 43.898 | 44.656 | 0.00 | 0.00 |
| ATOM | 1222 | HB3  | GLU | X | 80 | 55.079 | 45.497 | 45.158 | 0.00 | 0.00 |
| ATOM | 1223 | CG   | GLU | X | 80 | 56.509 | 44.507 | 46.417 | 0.00 | 0.00 |
| ATOM | 1224 | HG2  | GLU | X | 80 | 56.645 | 43.531 | 46.883 | 0.00 | 0.00 |
| ATOM | 1225 | HG3  | GLU | X | 80 | 57.310 | 44.664 | 45.695 | 0.00 | 0.00 |
| ATOM | 1226 | CD   | GLU | X | 80 | 56.510 | 45.584 | 47.477 | 0.00 | 0.00 |
| ATOM | 1227 | OE1  | GLU | X | 80 | 57.364 | 46.482 | 47.362 | 0.00 | 0.00 |
| ATOM | 1228 | OE2  | GLU | X | 80 | 55.674 | 45.579 | 48.381 | 0.00 | 0.00 |
| ATOM | 1229 | C    | GLU | X | 80 | 52.829 | 44.213 | 45.338 | 0.00 | 0.00 |
| ATOM | 1230 | O    | GLU | X | 80 | 52.365 | 45.323 | 45.512 | 0.00 | 0.00 |
| ATOM | 1231 | N    | MET | X | 81 | 52.314 | 43.252 | 44.631 | 0.00 | 0.00 |
| ATOM | 1232 | H    | MET | X | 81 | 52.890 | 42.425 | 44.563 | 0.00 | 0.00 |
| ATOM | 1233 | CA   | MET | X | 81 | 51.036 | 43.351 | 43.873 | 0.00 | 0.00 |
| ATOM | 1234 | HA   | MET | X | 81 | 50.958 | 44.306 | 43.353 | 0.00 | 0.00 |
| ATOM | 1235 | CB   | MET | X | 81 | 50.897 | 42.252 | 42.878 | 0.00 | 0.00 |
| ATOM | 1236 | HB2  | MET | X | 81 | 49.907 | 42.305 | 42.425 | 0.00 | 0.00 |
| ATOM | 1237 | HB3  | MET | X | 81 | 51.639 | 42.433 | 42.101 | 0.00 | 0.00 |
| ATOM | 1238 | CG   | MET | X | 81 | 51.020 | 40.741 | 43.342 | 0.00 | 0.00 |
| ATOM | 1239 | HG2  | MET | X | 81 | 51.910 | 40.648 | 43.963 | 0.00 | 0.00 |
| ATOM | 1240 | HG3  | MET | X | 81 | 50.182 | 40.485 | 43.990 | 0.00 | 0.00 |
| ATOM | 1241 | SD   | MET | X | 81 | 50.919 | 39.359 | 42.097 | 0.00 | 0.00 |
| ATOM | 1242 | CE   | MET | X | 81 | 51.677 | 40.183 | 40.678 | 0.00 | 0.00 |
| ATOM | 1243 | HE1  | MET | X | 81 | 51.140 | 41.094 | 40.412 | 0.00 | 0.00 |
| ATOM | 1244 | HE2  | MET | X | 81 | 52.705 | 40.434 | 40.937 | 0.00 | 0.00 |
| ATOM | 1245 | HE3  | MET | X | 81 | 51.506 | 39.568 | 39.794 | 0.00 | 0.00 |
| ATOM | 1246 | C    | MET | X | 81 | 49.739 | 43.299 | 44.822 | 0.00 | 0.00 |
| ATOM | 1247 | O    | MET | X | 81 | 48.632 | 43.660 | 44.456 | 0.00 | 0.00 |
| ATOM | 1248 | N    | TRP | X | 82 | 50.027 | 42.830 | 46.039 | 0.00 | 0.00 |
| ATOM | 1249 | H    | TRP | X | 82 | 50.991 | 42.636 | 46.270 | 0.00 | 0.00 |
| ATOM | 1250 | CA   | TRP | X | 82 | 48.966 | 42.669 | 47.001 | 0.00 | 0.00 |
| ATOM | 1251 | HA   | TRP | X | 82 | 47.955 | 42.897 | 46.663 | 0.00 | 0.00 |
| ATOM | 1252 | CB   | TRP | X | 82 | 48.906 | 41.321 | 47.697 | 0.00 | 0.00 |
| ATOM | 1253 | HB2  | TRP | X | 82 | 49.786 | 41.202 | 48.330 | 0.00 | 0.00 |
| ATOM | 1254 | HB3  | TRP | X | 82 | 48.021 | 41.161 | 48.313 | 0.00 | 0.00 |
| ATOM | 1255 | CG   | TRP | X | 82 | 48.992 | 40.136 | 46.740 | 0.00 | 0.00 |
| ATOM | 1256 | CD1  | TRP | X | 82 | 50.070 | 39.238 | 46.682 | 0.00 | 0.00 |
| ATOM | 1257 | HD1  | TRP | X | 82 | 50.888 | 38.995 | 47.344 | 0.00 | 0.00 |
| ATOM | 1258 | NE1  | TRP | X | 82 | 49.821 | 38.427 | 45.603 | 0.00 | 0.00 |
| ATOM | 1259 | HE1  | TRP | X | 82 | 50.559 | 37.814 | 45.287 | 0.00 | 0.00 |
| ATOM | 1260 | CE2  | TRP | X | 82 | 48.721 | 38.721 | 44.894 | 0.00 | 0.00 |
| ATOM | 1261 | CZ2  | TRP | X | 82 | 48.200 | 38.181 | 43.688 | 0.00 | 0.00 |
| ATOM | 1262 | HZ2  | TRP | X | 82 | 48.652 | 37.310 | 43.238 | 0.00 | 0.00 |

|      |      |      |     |   |    |        |        |        |      |      |
|------|------|------|-----|---|----|--------|--------|--------|------|------|
| ATOM | 1263 | CH2  | TRP | X | 82 | 46.999 | 38.737 | 43.168 | 0.00 | 0.00 |
| ATOM | 1264 | HH2  | TRP | X | 82 | 46.540 | 38.319 | 42.284 | 0.00 | 0.00 |
| ATOM | 1265 | CZ3  | TRP | X | 82 | 46.471 | 39.907 | 43.795 | 0.00 | 0.00 |
| ATOM | 1266 | HZ3  | TRP | X | 82 | 45.586 | 40.369 | 43.383 | 0.00 | 0.00 |
| ATOM | 1267 | CE3  | TRP | X | 82 | 46.974 | 40.420 | 45.003 | 0.00 | 0.00 |
| ATOM | 1268 | HE3  | TRP | X | 82 | 46.412 | 41.193 | 45.506 | 0.00 | 0.00 |
| ATOM | 1269 | CD2  | TRP | X | 82 | 48.182 | 39.876 | 45.564 | 0.00 | 0.00 |
| ATOM | 1270 | C    | TRP | X | 82 | 49.289 | 43.660 | 48.071 | 0.00 | 0.00 |
| ATOM | 1271 | O    | TRP | X | 82 | 48.332 | 44.177 | 48.742 | 0.00 | 0.00 |
| ATOM | 1272 | N    | ASN | X | 83 | 50.522 | 43.982 | 48.411 | 0.00 | 0.00 |
| ATOM | 1273 | H    | ASN | X | 83 | 51.265 | 43.503 | 47.922 | 0.00 | 0.00 |
| ATOM | 1274 | CA   | ASN | X | 83 | 51.006 | 44.682 | 49.575 | 0.00 | 0.00 |
| ATOM | 1275 | HA   | ASN | X | 83 | 50.315 | 44.359 | 50.353 | 0.00 | 0.00 |
| ATOM | 1276 | CB   | ASN | X | 83 | 52.423 | 44.162 | 49.853 | 0.00 | 0.00 |
| ATOM | 1277 | HB2  | ASN | X | 83 | 52.466 | 43.105 | 50.116 | 0.00 | 0.00 |
| ATOM | 1278 | HB3  | ASN | X | 83 | 53.126 | 44.424 | 49.063 | 0.00 | 0.00 |
| ATOM | 1279 | CG   | ASN | X | 83 | 52.946 | 44.811 | 51.099 | 0.00 | 0.00 |
| ATOM | 1280 | OD1  | ASN | X | 83 | 52.954 | 46.077 | 51.161 | 0.00 | 0.00 |
| ATOM | 1281 | ND2  | ASN | X | 83 | 53.400 | 44.130 | 52.092 | 0.00 | 0.00 |
| ATOM | 1282 | HD21 | ASN | X | 83 | 53.761 | 44.757 | 52.797 | 0.00 | 0.00 |
| ATOM | 1283 | HD22 | ASN | X | 83 | 53.428 | 43.120 | 52.085 | 0.00 | 0.00 |
| ATOM | 1284 | C    | ASN | X | 83 | 50.770 | 46.210 | 49.359 | 0.00 | 0.00 |
| ATOM | 1285 | O    | ASN | X | 83 | 51.281 | 46.853 | 48.423 | 0.00 | 0.00 |
| ATOM | 1286 | N    | PRO | X | 84 | 50.026 | 46.858 | 50.291 | 0.00 | 0.00 |
| ATOM | 1287 | CD   | PRO | X | 84 | 49.390 | 46.373 | 51.481 | 0.00 | 0.00 |
| ATOM | 1288 | HD2  | PRO | X | 84 | 50.066 | 45.726 | 52.040 | 0.00 | 0.00 |
| ATOM | 1289 | HD3  | PRO | X | 84 | 48.412 | 45.907 | 51.367 | 0.00 | 0.00 |
| ATOM | 1290 | CG   | PRO | X | 84 | 49.086 | 47.614 | 52.272 | 0.00 | 0.00 |
| ATOM | 1291 | HG2  | PRO | X | 84 | 49.932 | 48.116 | 52.741 | 0.00 | 0.00 |
| ATOM | 1292 | HG3  | PRO | X | 84 | 48.221 | 47.468 | 52.920 | 0.00 | 0.00 |
| ATOM | 1293 | CB   | PRO | X | 84 | 48.652 | 48.640 | 51.254 | 0.00 | 0.00 |
| ATOM | 1294 | HB2  | PRO | X | 84 | 48.789 | 49.683 | 51.542 | 0.00 | 0.00 |
| ATOM | 1295 | HB3  | PRO | X | 84 | 47.637 | 48.349 | 50.986 | 0.00 | 0.00 |
| ATOM | 1296 | CA   | PRO | X | 84 | 49.621 | 48.257 | 50.074 | 0.00 | 0.00 |
| ATOM | 1297 | HA   | PRO | X | 84 | 49.017 | 48.293 | 49.167 | 0.00 | 0.00 |
| ATOM | 1298 | C    | PRO | X | 84 | 50.686 | 49.322 | 50.014 | 0.00 | 0.00 |
| ATOM | 1299 | O    | PRO | X | 84 | 51.538 | 49.475 | 50.913 | 0.00 | 0.00 |
| ATOM | 1300 | N    | ASN | X | 85 | 50.626 | 50.200 | 49.005 | 0.00 | 0.00 |
| ATOM | 1301 | H    | ASN | X | 85 | 49.960 | 50.072 | 48.256 | 0.00 | 0.00 |
| ATOM | 1302 | CA   | ASN | X | 85 | 51.619 | 51.279 | 48.957 | 0.00 | 0.00 |
| ATOM | 1303 | HA   | ASN | X | 85 | 52.604 | 50.935 | 49.273 | 0.00 | 0.00 |
| ATOM | 1304 | CB   | ASN | X | 85 | 51.753 | 51.818 | 47.493 | 0.00 | 0.00 |
| ATOM | 1305 | HB2  | ASN | X | 85 | 52.545 | 52.567 | 47.487 | 0.00 | 0.00 |
| ATOM | 1306 | HB3  | ASN | X | 85 | 52.140 | 50.962 | 46.940 | 0.00 | 0.00 |
| ATOM | 1307 | CG   | ASN | X | 85 | 50.516 | 52.255 | 46.777 | 0.00 | 0.00 |
| ATOM | 1308 | OD1  | ASN | X | 85 | 49.411 | 52.226 | 47.281 | 0.00 | 0.00 |
| ATOM | 1309 | ND2  | ASN | X | 85 | 50.625 | 52.670 | 45.536 | 0.00 | 0.00 |
| ATOM | 1310 | HD21 | ASN | X | 85 | 49.820 | 52.733 | 44.930 | 0.00 | 0.00 |
| ATOM | 1311 | HD22 | ASN | X | 85 | 51.525 | 52.466 | 45.125 | 0.00 | 0.00 |
| ATOM | 1312 | C    | ASN | X | 85 | 51.320 | 52.503 | 49.892 | 0.00 | 0.00 |
| ATOM | 1313 | O    | ASN | X | 85 | 52.095 | 53.427 | 49.913 | 0.00 | 0.00 |
| ATOM | 1314 | N    | ARG | X | 86 | 50.198 | 52.498 | 50.617 | 0.00 | 0.00 |
| ATOM | 1315 | H    | ARG | X | 86 | 49.698 | 51.621 | 50.647 | 0.00 | 0.00 |
| ATOM | 1316 | CA   | ARG | X | 86 | 49.707 | 53.575 | 51.527 | 0.00 | 0.00 |
| ATOM | 1317 | HA   | ARG | X | 86 | 50.247 | 54.491 | 51.287 | 0.00 | 0.00 |
| ATOM | 1318 | CB   | ARG | X | 86 | 48.221 | 53.704 | 51.190 | 0.00 | 0.00 |
| ATOM | 1319 | HB2  | ARG | X | 86 | 47.597 | 52.862 | 51.490 | 0.00 | 0.00 |
| ATOM | 1320 | HB3  | ARG | X | 86 | 47.772 | 54.512 | 51.768 | 0.00 | 0.00 |
| ATOM | 1321 | CG   | ARG | X | 86 | 47.878 | 53.932 | 49.699 | 0.00 | 0.00 |
| ATOM | 1322 | HG2  | ARG | X | 86 | 47.848 | 52.929 | 49.272 | 0.00 | 0.00 |
| ATOM | 1323 | HG3  | ARG | X | 86 | 46.844 | 54.271 | 49.640 | 0.00 | 0.00 |
| ATOM | 1324 | CD   | ARG | X | 86 | 48.691 | 54.960 | 48.984 | 0.00 | 0.00 |
| ATOM | 1325 | HD2  | ARG | X | 86 | 49.739 | 54.727 | 49.172 | 0.00 | 0.00 |
| ATOM | 1326 | HD3  | ARG | X | 86 | 48.329 | 55.084 | 47.964 | 0.00 | 0.00 |
| ATOM | 1327 | NE   | ARG | X | 86 | 48.477 | 56.258 | 49.504 | 0.00 | 0.00 |
| ATOM | 1328 | HE   | ARG | X | 86 | 47.757 | 56.197 | 50.209 | 0.00 | 0.00 |
| ATOM | 1329 | CZ   | ARG | X | 86 | 49.089 | 57.374 | 49.248 | 0.00 | 0.00 |
| ATOM | 1330 | NH1  | ARG | X | 86 | 50.143 | 57.542 | 48.478 | 0.00 | 0.00 |
| ATOM | 1331 | HH11 | ARG | X | 86 | 50.567 | 56.717 | 48.079 | 0.00 | 0.00 |
| ATOM | 1332 | HH12 | ARG | X | 86 | 50.625 | 58.429 | 48.440 | 0.00 | 0.00 |

|      |      |      |     |   |    |        |        |        |      |      |
|------|------|------|-----|---|----|--------|--------|--------|------|------|
| ATOM | 1333 | NH2  | ARG | X | 86 | 48.720 | 58.544 | 49.827 | 0.00 | 0.00 |
| ATOM | 1334 | HH21 | ARG | X | 86 | 47.915 | 58.725 | 50.410 | 0.00 | 0.00 |
| ATOM | 1335 | HH22 | ARG | X | 86 | 49.310 | 59.344 | 49.646 | 0.00 | 0.00 |
| ATOM | 1336 | C    | ARG | X | 86 | 49.906 | 53.208 | 52.981 | 0.00 | 0.00 |
| ATOM | 1337 | O    | ARG | X | 86 | 49.872 | 51.992 | 53.363 | 0.00 | 0.00 |
| ATOM | 1338 | N    | GLU | X | 87 | 50.025 | 54.209 | 53.855 | 0.00 | 0.00 |
| ATOM | 1339 | H    | GLU | X | 87 | 50.098 | 55.160 | 53.524 | 0.00 | 0.00 |
| ATOM | 1340 | CA   | GLU | X | 87 | 49.829 | 53.959 | 55.258 | 0.00 | 0.00 |
| ATOM | 1341 | HA   | GLU | X | 87 | 50.554 | 53.199 | 55.551 | 0.00 | 0.00 |
| ATOM | 1342 | CB   | GLU | X | 87 | 50.067 | 55.207 | 56.165 | 0.00 | 0.00 |
| ATOM | 1343 | HB2  | GLU | X | 87 | 49.373 | 55.976 | 55.825 | 0.00 | 0.00 |
| ATOM | 1344 | HB3  | GLU | X | 87 | 49.713 | 55.053 | 57.184 | 0.00 | 0.00 |
| ATOM | 1345 | CG   | GLU | X | 87 | 51.473 | 55.811 | 56.085 | 0.00 | 0.00 |
| ATOM | 1346 | HG2  | GLU | X | 87 | 52.257 | 55.100 | 56.343 | 0.00 | 0.00 |
| ATOM | 1347 | HG3  | GLU | X | 87 | 51.503 | 56.199 | 55.067 | 0.00 | 0.00 |
| ATOM | 1348 | CD   | GLU | X | 87 | 51.612 | 57.084 | 57.065 | 0.00 | 0.00 |
| ATOM | 1349 | OE1  | GLU | X | 87 | 52.306 | 58.070 | 56.761 | 0.00 | 0.00 |
| ATOM | 1350 | OE2  | GLU | X | 87 | 51.015 | 56.991 | 58.123 | 0.00 | 0.00 |
| ATOM | 1351 | C    | GLU | X | 87 | 48.388 | 53.465 | 55.533 | 0.00 | 0.00 |
| ATOM | 1352 | O    | GLU | X | 87 | 47.413 | 53.905 | 54.912 | 0.00 | 0.00 |
| ATOM | 1353 | N    | LEU | X | 88 | 48.185 | 52.639 | 56.549 | 0.00 | 0.00 |
| ATOM | 1354 | H    | LEU | X | 88 | 49.038 | 52.337 | 56.998 | 0.00 | 0.00 |
| ATOM | 1355 | CA   | LEU | X | 88 | 46.924 | 52.065 | 57.003 | 0.00 | 0.00 |
| ATOM | 1356 | HA   | LEU | X | 88 | 46.396 | 51.844 | 56.076 | 0.00 | 0.00 |
| ATOM | 1357 | CB   | LEU | X | 88 | 47.087 | 50.659 | 57.594 | 0.00 | 0.00 |
| ATOM | 1358 | HB2  | LEU | X | 88 | 47.491 | 50.947 | 58.565 | 0.00 | 0.00 |
| ATOM | 1359 | HB3  | LEU | X | 88 | 46.143 | 50.140 | 57.758 | 0.00 | 0.00 |
| ATOM | 1360 | CG   | LEU | X | 88 | 47.933 | 49.668 | 56.965 | 0.00 | 0.00 |
| ATOM | 1361 | HG   | LEU | X | 88 | 48.945 | 50.070 | 56.919 | 0.00 | 0.00 |
| ATOM | 1362 | CD1  | LEU | X | 88 | 48.048 | 48.340 | 57.843 | 0.00 | 0.00 |
| ATOM | 1363 | HD11 | LEU | X | 88 | 48.827 | 47.667 | 57.484 | 0.00 | 0.00 |
| ATOM | 1364 | HD12 | LEU | X | 88 | 48.237 | 48.755 | 58.832 | 0.00 | 0.00 |
| ATOM | 1365 | HD13 | LEU | X | 88 | 47.118 | 47.774 | 57.887 | 0.00 | 0.00 |
| ATOM | 1366 | CD2  | LEU | X | 88 | 47.454 | 49.385 | 55.521 | 0.00 | 0.00 |
| ATOM | 1367 | HD21 | LEU | X | 88 | 47.511 | 50.332 | 54.985 | 0.00 | 0.00 |
| ATOM | 1368 | HD22 | LEU | X | 88 | 48.137 | 48.649 | 55.098 | 0.00 | 0.00 |
| ATOM | 1369 | HD23 | LEU | X | 88 | 46.422 | 49.043 | 55.446 | 0.00 | 0.00 |
| ATOM | 1370 | C    | LEU | X | 88 | 45.990 | 52.987 | 57.796 | 0.00 | 0.00 |
| ATOM | 1371 | O    | LEU | X | 88 | 46.380 | 54.087 | 58.078 | 0.00 | 0.00 |
| ATOM | 1372 | N    | SER | X | 89 | 44.723 | 52.612 | 58.060 | 0.00 | 0.00 |
| ATOM | 1373 | H    | SER | X | 89 | 44.554 | 51.651 | 57.797 | 0.00 | 0.00 |
| ATOM | 1374 | CA   | SER | X | 89 | 43.695 | 53.409 | 58.700 | 0.00 | 0.00 |
| ATOM | 1375 | HA   | SER | X | 89 | 43.924 | 53.595 | 59.749 | 0.00 | 0.00 |
| ATOM | 1376 | CB   | SER | X | 89 | 43.399 | 54.691 | 58.017 | 0.00 | 0.00 |
| ATOM | 1377 | HB2  | SER | X | 89 | 43.562 | 54.477 | 56.961 | 0.00 | 0.00 |
| ATOM | 1378 | HB3  | SER | X | 89 | 42.333 | 54.908 | 58.086 | 0.00 | 0.00 |
| ATOM | 1379 | OG   | SER | X | 89 | 44.213 | 55.638 | 58.528 | 0.00 | 0.00 |
| ATOM | 1380 | HG   | SER | X | 89 | 45.055 | 55.188 | 58.427 | 0.00 | 0.00 |
| ATOM | 1381 | C    | SER | X | 89 | 42.354 | 52.651 | 58.714 | 0.00 | 0.00 |
| ATOM | 1382 | O    | SER | X | 89 | 41.977 | 51.888 | 57.788 | 0.00 | 0.00 |
| ATOM | 1383 | N    | GLU | X | 90 | 41.547 | 52.859 | 59.792 | 0.00 | 0.00 |
| ATOM | 1384 | H    | GLU | X | 90 | 42.012 | 53.349 | 60.543 | 0.00 | 0.00 |
| ATOM | 1385 | CA   | GLU | X | 90 | 40.162 | 52.545 | 59.927 | 0.00 | 0.00 |
| ATOM | 1386 | HA   | GLU | X | 90 | 40.128 | 51.508 | 59.593 | 0.00 | 0.00 |
| ATOM | 1387 | CB   | GLU | X | 90 | 39.732 | 52.792 | 61.379 | 0.00 | 0.00 |
| ATOM | 1388 | HB2  | GLU | X | 90 | 40.024 | 53.757 | 61.793 | 0.00 | 0.00 |
| ATOM | 1389 | HB3  | GLU | X | 90 | 38.647 | 52.725 | 61.298 | 0.00 | 0.00 |
| ATOM | 1390 | CG   | GLU | X | 90 | 40.097 | 51.613 | 62.385 | 0.00 | 0.00 |
| ATOM | 1391 | HG2  | GLU | X | 90 | 39.980 | 50.678 | 61.838 | 0.00 | 0.00 |
| ATOM | 1392 | HG3  | GLU | X | 90 | 41.138 | 51.526 | 62.698 | 0.00 | 0.00 |
| ATOM | 1393 | CD   | GLU | X | 90 | 39.215 | 51.665 | 63.692 | 0.00 | 0.00 |
| ATOM | 1394 | OE1  | GLU | X | 90 | 38.276 | 50.780 | 63.899 | 0.00 | 0.00 |
| ATOM | 1395 | OE2  | GLU | X | 90 | 39.526 | 52.484 | 64.586 | 0.00 | 0.00 |
| ATOM | 1396 | C    | GLU | X | 90 | 39.354 | 53.462 | 59.004 | 0.00 | 0.00 |
| ATOM | 1397 | O    | GLU | X | 90 | 38.479 | 53.027 | 58.322 | 0.00 | 0.00 |
| ATOM | 1398 | N    | ASP | X | 91 | 39.779 | 54.737 | 58.968 | 0.00 | 0.00 |
| ATOM | 1399 | H    | ASP | X | 91 | 40.619 | 54.898 | 59.506 | 0.00 | 0.00 |
| ATOM | 1400 | CA   | ASP | X | 91 | 39.301 | 55.733 | 58.033 | 0.00 | 0.00 |
| ATOM | 1401 | HA   | ASP | X | 91 | 38.214 | 55.781 | 57.968 | 0.00 | 0.00 |
| ATOM | 1402 | CB   | ASP | X | 91 | 39.729 | 57.085 | 58.677 | 0.00 | 0.00 |

|      |      |      |     |   |    |        |        |        |      |      |
|------|------|------|-----|---|----|--------|--------|--------|------|------|
| ATOM | 1403 | HB2  | ASP | X | 91 | 39.325 | 57.206 | 59.682 | 0.00 | 0.00 |
| ATOM | 1404 | HB3  | ASP | X | 91 | 40.818 | 57.049 | 58.682 | 0.00 | 0.00 |
| ATOM | 1405 | CG   | ASP | X | 91 | 39.088 | 58.317 | 58.004 | 0.00 | 0.00 |
| ATOM | 1406 | OD1  | ASP | X | 91 | 38.817 | 59.310 | 58.765 | 0.00 | 0.00 |
| ATOM | 1407 | OD2  | ASP | X | 91 | 38.984 | 58.396 | 56.799 | 0.00 | 0.00 |
| ATOM | 1408 | C    | ASP | X | 91 | 39.984 | 55.475 | 56.647 | 0.00 | 0.00 |
| ATOM | 1409 | O    | ASP | X | 91 | 41.018 | 56.117 | 56.342 | 0.00 | 0.00 |
| ATOM | 1410 | N    | CYX | X | 92 | 39.401 | 54.523 | 55.894 | 0.00 | 0.00 |
| ATOM | 1411 | H    | CYX | X | 92 | 38.677 | 53.971 | 56.329 | 0.00 | 0.00 |
| ATOM | 1412 | CA   | CYX | X | 92 | 39.951 | 54.063 | 54.582 | 0.00 | 0.00 |
| ATOM | 1413 | HA   | CYX | X | 92 | 40.869 | 54.555 | 54.259 | 0.00 | 0.00 |
| ATOM | 1414 | CB   | CYX | X | 92 | 40.481 | 52.589 | 54.741 | 0.00 | 0.00 |
| ATOM | 1415 | HB2  | CYX | X | 92 | 41.001 | 52.314 | 53.823 | 0.00 | 0.00 |
| ATOM | 1416 | HB3  | CYX | X | 92 | 41.125 | 52.577 | 55.621 | 0.00 | 0.00 |
| ATOM | 1417 | SG   | CYX | X | 92 | 39.121 | 51.467 | 55.018 | 0.00 | 0.00 |
| ATOM | 1418 | C    | CYX | X | 92 | 39.104 | 54.103 | 53.308 | 0.00 | 0.00 |
| ATOM | 1419 | O    | CYX | X | 92 | 39.659 | 53.718 | 52.256 | 0.00 | 0.00 |
| ATOM | 1420 | N    | LEU | X | 93 | 37.832 | 54.456 | 53.350 | 0.00 | 0.00 |
| ATOM | 1421 | H    | LEU | X | 93 | 37.403 | 54.717 | 54.227 | 0.00 | 0.00 |
| ATOM | 1422 | CA   | LEU | X | 93 | 36.848 | 54.366 | 52.235 | 0.00 | 0.00 |
| ATOM | 1423 | HA   | LEU | X | 93 | 36.998 | 53.484 | 51.613 | 0.00 | 0.00 |
| ATOM | 1424 | CB   | LEU | X | 93 | 35.490 | 54.121 | 52.839 | 0.00 | 0.00 |
| ATOM | 1425 | HB2  | LEU | X | 93 | 35.192 | 55.036 | 53.351 | 0.00 | 0.00 |
| ATOM | 1426 | HB3  | LEU | X | 93 | 34.808 | 53.973 | 52.001 | 0.00 | 0.00 |
| ATOM | 1427 | CG   | LEU | X | 93 | 35.248 | 52.899 | 53.765 | 0.00 | 0.00 |
| ATOM | 1428 | HG   | LEU | X | 93 | 35.868 | 52.928 | 54.661 | 0.00 | 0.00 |
| ATOM | 1429 | CD1  | LEU | X | 93 | 33.793 | 52.890 | 54.253 | 0.00 | 0.00 |
| ATOM | 1430 | HD11 | LEU | X | 93 | 33.167 | 52.928 | 53.361 | 0.00 | 0.00 |
| ATOM | 1431 | HD12 | LEU | X | 93 | 33.677 | 51.997 | 54.867 | 0.00 | 0.00 |
| ATOM | 1432 | HD13 | LEU | X | 93 | 33.518 | 53.751 | 54.861 | 0.00 | 0.00 |
| ATOM | 1433 | CD2  | LEU | X | 93 | 35.566 | 51.561 | 53.140 | 0.00 | 0.00 |
| ATOM | 1434 | HD21 | LEU | X | 93 | 35.396 | 50.691 | 53.775 | 0.00 | 0.00 |
| ATOM | 1435 | HD22 | LEU | X | 93 | 34.932 | 51.418 | 52.264 | 0.00 | 0.00 |
| ATOM | 1436 | HD23 | LEU | X | 93 | 36.571 | 51.607 | 52.720 | 0.00 | 0.00 |
| ATOM | 1437 | C    | LEU | X | 93 | 37.016 | 55.623 | 51.435 | 0.00 | 0.00 |
| ATOM | 1438 | O    | LEU | X | 93 | 36.204 | 56.550 | 51.555 | 0.00 | 0.00 |
| ATOM | 1439 | N    | TYR | X | 94 | 37.851 | 55.519 | 50.416 | 0.00 | 0.00 |
| ATOM | 1440 | H    | TYR | X | 94 | 38.454 | 54.710 | 50.379 | 0.00 | 0.00 |
| ATOM | 1441 | CA   | TYR | X | 94 | 38.021 | 56.443 | 49.376 | 0.00 | 0.00 |
| ATOM | 1442 | HA   | TYR | X | 94 | 37.172 | 57.127 | 49.370 | 0.00 | 0.00 |
| ATOM | 1443 | CB   | TYR | X | 94 | 39.271 | 57.301 | 49.635 | 0.00 | 0.00 |
| ATOM | 1444 | HB2  | TYR | X | 94 | 40.095 | 56.608 | 49.464 | 0.00 | 0.00 |
| ATOM | 1445 | HB3  | TYR | X | 94 | 39.481 | 58.108 | 48.933 | 0.00 | 0.00 |
| ATOM | 1446 | CG   | TYR | X | 94 | 39.456 | 57.919 | 50.972 | 0.00 | 0.00 |
| ATOM | 1447 | CD1  | TYR | X | 94 | 38.998 | 59.243 | 51.157 | 0.00 | 0.00 |
| ATOM | 1448 | HD1  | TYR | X | 94 | 38.608 | 59.819 | 50.330 | 0.00 | 0.00 |
| ATOM | 1449 | CE1  | TYR | X | 94 | 39.296 | 59.931 | 52.315 | 0.00 | 0.00 |
| ATOM | 1450 | HE1  | TYR | X | 94 | 38.985 | 60.960 | 52.418 | 0.00 | 0.00 |
| ATOM | 1451 | CZ   | TYR | X | 94 | 39.956 | 59.265 | 53.376 | 0.00 | 0.00 |
| ATOM | 1452 | OH   | TYR | X | 94 | 40.319 | 60.024 | 54.439 | 0.00 | 0.00 |
| ATOM | 1453 | HH   | TYR | X | 94 | 40.507 | 59.482 | 55.208 | 0.00 | 0.00 |
| ATOM | 1454 | CE2  | TYR | X | 94 | 40.427 | 57.899 | 53.182 | 0.00 | 0.00 |
| ATOM | 1455 | HE2  | TYR | X | 94 | 41.046 | 57.387 | 53.903 | 0.00 | 0.00 |
| ATOM | 1456 | CD2  | TYR | X | 94 | 40.145 | 57.262 | 51.995 | 0.00 | 0.00 |
| ATOM | 1457 | HD2  | TYR | X | 94 | 40.511 | 56.262 | 51.812 | 0.00 | 0.00 |
| ATOM | 1458 | C    | TYR | X | 94 | 38.154 | 55.713 | 47.986 | 0.00 | 0.00 |
| ATOM | 1459 | O    | TYR | X | 94 | 38.539 | 54.541 | 47.895 | 0.00 | 0.00 |
| ATOM | 1460 | N    | LEU | X | 95 | 37.907 | 56.377 | 46.879 | 0.00 | 0.00 |
| ATOM | 1461 | H    | LEU | X | 95 | 37.591 | 57.333 | 46.959 | 0.00 | 0.00 |
| ATOM | 1462 | CA   | LEU | X | 95 | 37.885 | 55.826 | 45.575 | 0.00 | 0.00 |
| ATOM | 1463 | HA   | LEU | X | 95 | 38.447 | 54.893 | 45.624 | 0.00 | 0.00 |
| ATOM | 1464 | CB   | LEU | X | 95 | 36.500 | 55.512 | 45.064 | 0.00 | 0.00 |
| ATOM | 1465 | HB2  | LEU | X | 95 | 36.589 | 54.922 | 44.151 | 0.00 | 0.00 |
| ATOM | 1466 | HB3  | LEU | X | 95 | 36.017 | 54.874 | 45.804 | 0.00 | 0.00 |
| ATOM | 1467 | CG   | LEU | X | 95 | 35.463 | 56.678 | 44.814 | 0.00 | 0.00 |
| ATOM | 1468 | HG   | LEU | X | 95 | 35.466 | 57.274 | 45.727 | 0.00 | 0.00 |
| ATOM | 1469 | CD1  | LEU | X | 95 | 35.581 | 57.474 | 43.498 | 0.00 | 0.00 |
| ATOM | 1470 | HD11 | LEU | X | 95 | 35.399 | 56.810 | 42.653 | 0.00 | 0.00 |
| ATOM | 1471 | HD12 | LEU | X | 95 | 34.946 | 58.358 | 43.433 | 0.00 | 0.00 |
| ATOM | 1472 | HD13 | LEU | X | 95 | 36.597 | 57.868 | 43.462 | 0.00 | 0.00 |

|      |      |      |     |   |    |        |        |        |      |      |
|------|------|------|-----|---|----|--------|--------|--------|------|------|
| ATOM | 1473 | CD2  | LEU | X | 95 | 34.110 | 55.845 | 44.759 | 0.00 | 0.00 |
| ATOM | 1474 | HD21 | LEU | X | 95 | 33.257 | 56.489 | 44.544 | 0.00 | 0.00 |
| ATOM | 1475 | HD22 | LEU | X | 95 | 34.230 | 55.044 | 44.031 | 0.00 | 0.00 |
| ATOM | 1476 | HD23 | LEU | X | 95 | 33.952 | 55.314 | 45.698 | 0.00 | 0.00 |
| ATOM | 1477 | C    | LEU | X | 95 | 38.636 | 56.680 | 44.583 | 0.00 | 0.00 |
| ATOM | 1478 | O    | LEU | X | 95 | 38.971 | 57.804 | 44.811 | 0.00 | 0.00 |
| ATOM | 1479 | N    | ASN | X | 96 | 38.816 | 56.157 | 43.398 | 0.00 | 0.00 |
| ATOM | 1480 | H    | ASN | X | 96 | 38.471 | 55.226 | 43.209 | 0.00 | 0.00 |
| ATOM | 1481 | CA   | ASN | X | 96 | 39.569 | 56.857 | 42.304 | 0.00 | 0.00 |
| ATOM | 1482 | HA   | ASN | X | 96 | 39.649 | 57.918 | 42.542 | 0.00 | 0.00 |
| ATOM | 1483 | CB   | ASN | X | 96 | 40.930 | 56.170 | 42.130 | 0.00 | 0.00 |
| ATOM | 1484 | HB2  | ASN | X | 96 | 40.784 | 55.241 | 41.578 | 0.00 | 0.00 |
| ATOM | 1485 | HB3  | ASN | X | 96 | 41.583 | 56.666 | 41.413 | 0.00 | 0.00 |
| ATOM | 1486 | CG   | ASN | X | 96 | 41.648 | 55.890 | 43.435 | 0.00 | 0.00 |
| ATOM | 1487 | OD1  | ASN | X | 96 | 42.068 | 56.716 | 44.228 | 0.00 | 0.00 |
| ATOM | 1488 | ND2  | ASN | X | 96 | 41.925 | 54.610 | 43.631 | 0.00 | 0.00 |
| ATOM | 1489 | HD21 | ASN | X | 96 | 42.399 | 54.283 | 44.462 | 0.00 | 0.00 |
| ATOM | 1490 | HD22 | ASN | X | 96 | 41.513 | 53.931 | 43.008 | 0.00 | 0.00 |
| ATOM | 1491 | C    | ASN | X | 96 | 38.853 | 56.681 | 40.932 | 0.00 | 0.00 |
| ATOM | 1492 | O    | ASN | X | 96 | 38.197 | 55.679 | 40.675 | 0.00 | 0.00 |
| ATOM | 1493 | N    | VAL | X | 97 | 39.120 | 57.654 | 40.051 | 0.00 | 0.00 |
| ATOM | 1494 | H    | VAL | X | 97 | 39.540 | 58.522 | 40.355 | 0.00 | 0.00 |
| ATOM | 1495 | CA   | VAL | X | 97 | 38.543 | 57.726 | 38.729 | 0.00 | 0.00 |
| ATOM | 1496 | HA   | VAL | X | 97 | 38.136 | 56.791 | 38.345 | 0.00 | 0.00 |
| ATOM | 1497 | CB   | VAL | X | 97 | 37.335 | 58.821 | 38.676 | 0.00 | 0.00 |
| ATOM | 1498 | HB   | VAL | X | 97 | 37.700 | 59.830 | 38.865 | 0.00 | 0.00 |
| ATOM | 1499 | CG1  | VAL | X | 97 | 36.604 | 58.772 | 37.295 | 0.00 | 0.00 |
| ATOM | 1500 | HG11 | VAL | X | 97 | 36.817 | 57.837 | 36.778 | 0.00 | 0.00 |
| ATOM | 1501 | HG12 | VAL | X | 97 | 35.524 | 58.757 | 37.444 | 0.00 | 0.00 |
| ATOM | 1502 | HG13 | VAL | X | 97 | 36.871 | 59.587 | 36.622 | 0.00 | 0.00 |
| ATOM | 1503 | CG2  | VAL | X | 97 | 36.427 | 58.638 | 39.810 | 0.00 | 0.00 |
| ATOM | 1504 | HG21 | VAL | X | 97 | 35.665 | 59.417 | 39.851 | 0.00 | 0.00 |
| ATOM | 1505 | HG22 | VAL | X | 97 | 35.834 | 57.726 | 39.756 | 0.00 | 0.00 |
| ATOM | 1506 | HG23 | VAL | X | 97 | 37.000 | 58.578 | 40.736 | 0.00 | 0.00 |
| ATOM | 1507 | C    | VAL | X | 97 | 39.613 | 58.264 | 37.682 | 0.00 | 0.00 |
| ATOM | 1508 | O    | VAL | X | 97 | 40.257 | 59.228 | 38.007 | 0.00 | 0.00 |
| ATOM | 1509 | N    | TRP | X | 98 | 39.633 | 57.719 | 36.474 | 0.00 | 0.00 |
| ATOM | 1510 | H    | TRP | X | 98 | 39.102 | 56.870 | 36.343 | 0.00 | 0.00 |
| ATOM | 1511 | CA   | TRP | X | 98 | 40.498 | 58.082 | 35.402 | 0.00 | 0.00 |
| ATOM | 1512 | HA   | TRP | X | 98 | 41.023 | 58.974 | 35.745 | 0.00 | 0.00 |
| ATOM | 1513 | CB   | TRP | X | 98 | 41.491 | 56.937 | 35.122 | 0.00 | 0.00 |
| ATOM | 1514 | HB2  | TRP | X | 98 | 40.896 | 56.039 | 34.956 | 0.00 | 0.00 |
| ATOM | 1515 | HB3  | TRP | X | 98 | 41.999 | 57.157 | 34.184 | 0.00 | 0.00 |
| ATOM | 1516 | CG   | TRP | X | 98 | 42.591 | 56.701 | 36.151 | 0.00 | 0.00 |
| ATOM | 1517 | CD1  | TRP | X | 98 | 43.878 | 57.090 | 36.052 | 0.00 | 0.00 |
| ATOM | 1518 | HD1  | TRP | X | 98 | 44.266 | 57.736 | 35.278 | 0.00 | 0.00 |
| ATOM | 1519 | NE1  | TRP | X | 98 | 44.644 | 56.479 | 37.061 | 0.00 | 0.00 |
| ATOM | 1520 | HE1  | TRP | X | 98 | 45.653 | 56.434 | 37.049 | 0.00 | 0.00 |
| ATOM | 1521 | CE2  | TRP | X | 98 | 43.818 | 55.779 | 37.965 | 0.00 | 0.00 |
| ATOM | 1522 | CZ2  | TRP | X | 98 | 44.132 | 55.025 | 39.076 | 0.00 | 0.00 |
| ATOM | 1523 | HZ2  | TRP | X | 98 | 45.154 | 54.857 | 39.382 | 0.00 | 0.00 |
| ATOM | 1524 | CH2  | TRP | X | 98 | 43.045 | 54.386 | 39.667 | 0.00 | 0.00 |
| ATOM | 1525 | HH2  | TRP | X | 98 | 43.179 | 53.740 | 40.522 | 0.00 | 0.00 |
| ATOM | 1526 | CZ3  | TRP | X | 98 | 41.774 | 54.418 | 39.133 | 0.00 | 0.00 |
| ATOM | 1527 | HZ3  | TRP | X | 98 | 40.993 | 53.844 | 39.609 | 0.00 | 0.00 |
| ATOM | 1528 | CE3  | TRP | X | 98 | 41.491 | 55.165 | 37.957 | 0.00 | 0.00 |
| ATOM | 1529 | HE3  | TRP | X | 98 | 40.483 | 54.998 | 37.607 | 0.00 | 0.00 |
| ATOM | 1530 | CD2  | TRP | X | 98 | 42.511 | 55.900 | 37.364 | 0.00 | 0.00 |
| ATOM | 1531 | C    | TRP | X | 98 | 39.669 | 58.302 | 34.093 | 0.00 | 0.00 |
| ATOM | 1532 | O    | TRP | X | 98 | 38.795 | 57.518 | 33.751 | 0.00 | 0.00 |
| ATOM | 1533 | N    | THR | X | 99 | 39.918 | 59.382 | 33.335 | 0.00 | 0.00 |
| ATOM | 1534 | H    | THR | X | 99 | 40.604 | 60.045 | 33.666 | 0.00 | 0.00 |
| ATOM | 1535 | CA   | THR | X | 99 | 39.016 | 59.808 | 32.227 | 0.00 | 0.00 |
| ATOM | 1536 | HA   | THR | X | 99 | 38.752 | 58.861 | 31.755 | 0.00 | 0.00 |
| ATOM | 1537 | CB   | THR | X | 99 | 37.734 | 60.428 | 32.810 | 0.00 | 0.00 |
| ATOM | 1538 | HB   | THR | X | 99 | 37.358 | 59.622 | 33.440 | 0.00 | 0.00 |
| ATOM | 1539 | CG2  | THR | X | 99 | 37.858 | 61.764 | 33.671 | 0.00 | 0.00 |
| ATOM | 1540 | HG21 | THR | X | 99 | 36.892 | 62.085 | 34.059 | 0.00 | 0.00 |
| ATOM | 1541 | HG22 | THR | X | 99 | 38.482 | 61.608 | 34.552 | 0.00 | 0.00 |
| ATOM | 1542 | HG23 | THR | X | 99 | 38.176 | 62.599 | 33.048 | 0.00 | 0.00 |

|      |      |     |     |   |     |        |        |        |      |      |
|------|------|-----|-----|---|-----|--------|--------|--------|------|------|
| ATOM | 1543 | OG1 | THR | X | 99  | 36.865 | 60.727 | 31.702 | 0.00 | 0.00 |
| ATOM | 1544 | HG1 | THR | X | 99  | 36.125 | 61.190 | 32.103 | 0.00 | 0.00 |
| ATOM | 1545 | C   | THR | X | 99  | 39.792 | 60.780 | 31.259 | 0.00 | 0.00 |
| ATOM | 1546 | O   | THR | X | 99  | 40.590 | 61.519 | 31.728 | 0.00 | 0.00 |
| ATOM | 1547 | N   | PRO | X | 100 | 39.478 | 60.787 | 29.912 | 0.00 | 0.00 |
| ATOM | 1548 | CD  | PRO | X | 100 | 38.452 | 59.996 | 29.188 | 0.00 | 0.00 |
| ATOM | 1549 | HD2 | PRO | X | 100 | 37.550 | 60.603 | 29.273 | 0.00 | 0.00 |
| ATOM | 1550 | HD3 | PRO | X | 100 | 38.212 | 59.014 | 29.597 | 0.00 | 0.00 |
| ATOM | 1551 | CG  | PRO | X | 100 | 39.003 | 59.836 | 27.705 | 0.00 | 0.00 |
| ATOM | 1552 | HG2 | PRO | X | 100 | 38.120 | 59.852 | 27.066 | 0.00 | 0.00 |
| ATOM | 1553 | HG3 | PRO | X | 100 | 39.542 | 58.893 | 27.603 | 0.00 | 0.00 |
| ATOM | 1554 | CB  | PRO | X | 100 | 39.943 | 61.043 | 27.531 | 0.00 | 0.00 |
| ATOM | 1555 | HB2 | PRO | X | 100 | 39.356 | 61.878 | 27.149 | 0.00 | 0.00 |
| ATOM | 1556 | HB3 | PRO | X | 100 | 40.765 | 60.789 | 26.862 | 0.00 | 0.00 |
| ATOM | 1557 | CA  | PRO | X | 100 | 40.431 | 61.402 | 28.974 | 0.00 | 0.00 |
| ATOM | 1558 | HA  | PRO | X | 100 | 41.394 | 60.922 | 29.150 | 0.00 | 0.00 |
| ATOM | 1559 | C   | PRO | X | 100 | 40.546 | 62.931 | 29.181 | 0.00 | 0.00 |
| ATOM | 1560 | O   | PRO | X | 100 | 39.582 | 63.616 | 29.553 | 0.00 | 0.00 |
| ATOM | 1561 | N   | TYR | X | 101 | 41.678 | 63.547 | 28.773 | 0.00 | 0.00 |
| ATOM | 1562 | H   | TYR | X | 101 | 42.426 | 62.967 | 28.422 | 0.00 | 0.00 |
| ATOM | 1563 | CA  | TYR | X | 101 | 41.761 | 64.999 | 28.753 | 0.00 | 0.00 |
| ATOM | 1564 | HA  | TYR | X | 101 | 41.075 | 65.375 | 29.512 | 0.00 | 0.00 |
| ATOM | 1565 | CB  | TYR | X | 101 | 43.131 | 65.362 | 29.306 | 0.00 | 0.00 |
| ATOM | 1566 | HB2 | TYR | X | 101 | 43.111 | 64.979 | 30.327 | 0.00 | 0.00 |
| ATOM | 1567 | HB3 | TYR | X | 101 | 43.861 | 64.794 | 28.730 | 0.00 | 0.00 |
| ATOM | 1568 | CG  | TYR | X | 101 | 43.345 | 66.871 | 29.340 | 0.00 | 0.00 |
| ATOM | 1569 | CD1 | TYR | X | 101 | 43.822 | 67.517 | 28.177 | 0.00 | 0.00 |
| ATOM | 1570 | HD1 | TYR | X | 101 | 44.276 | 66.912 | 27.406 | 0.00 | 0.00 |
| ATOM | 1571 | CE1 | TYR | X | 101 | 43.716 | 68.921 | 28.025 | 0.00 | 0.00 |
| ATOM | 1572 | HE1 | TYR | X | 101 | 44.159 | 69.329 | 27.128 | 0.00 | 0.00 |
| ATOM | 1573 | CZ  | TYR | X | 101 | 43.357 | 69.738 | 29.143 | 0.00 | 0.00 |
| ATOM | 1574 | OH  | TYR | X | 101 | 43.441 | 71.093 | 29.155 | 0.00 | 0.00 |
| ATOM | 1575 | HH  | TYR | X | 101 | 43.562 | 71.367 | 28.243 | 0.00 | 0.00 |
| ATOM | 1576 | CE2 | TYR | X | 101 | 42.871 | 69.083 | 30.277 | 0.00 | 0.00 |
| ATOM | 1577 | HE2 | TYR | X | 101 | 42.620 | 69.670 | 31.148 | 0.00 | 0.00 |
| ATOM | 1578 | CD2 | TYR | X | 101 | 42.852 | 67.680 | 30.391 | 0.00 | 0.00 |
| ATOM | 1579 | HD2 | TYR | X | 101 | 42.544 | 67.302 | 31.355 | 0.00 | 0.00 |
| ATOM | 1580 | C   | TYR | X | 101 | 41.451 | 65.660 | 27.362 | 0.00 | 0.00 |
| ATOM | 1581 | O   | TYR | X | 101 | 42.019 | 65.226 | 26.345 | 0.00 | 0.00 |
| ATOM | 1582 | N   | PRO | X | 102 | 40.787 | 66.822 | 27.220 | 0.00 | 0.00 |
| ATOM | 1583 | CD  | PRO | X | 102 | 40.486 | 67.344 | 25.858 | 0.00 | 0.00 |
| ATOM | 1584 | HD2 | PRO | X | 102 | 39.916 | 66.624 | 25.271 | 0.00 | 0.00 |
| ATOM | 1585 | HD3 | PRO | X | 102 | 41.424 | 67.571 | 25.352 | 0.00 | 0.00 |
| ATOM | 1586 | CG  | PRO | X | 102 | 39.710 | 68.632 | 26.098 | 0.00 | 0.00 |
| ATOM | 1587 | HG2 | PRO | X | 102 | 38.820 | 68.631 | 25.469 | 0.00 | 0.00 |
| ATOM | 1588 | HG3 | PRO | X | 102 | 40.349 | 69.477 | 25.841 | 0.00 | 0.00 |
| ATOM | 1589 | CB  | PRO | X | 102 | 39.183 | 68.655 | 27.535 | 0.00 | 0.00 |
| ATOM | 1590 | HB2 | PRO | X | 102 | 38.114 | 68.477 | 27.656 | 0.00 | 0.00 |
| ATOM | 1591 | HB3 | PRO | X | 102 | 39.378 | 69.675 | 27.867 | 0.00 | 0.00 |
| ATOM | 1592 | CA  | PRO | X | 102 | 39.926 | 67.516 | 28.228 | 0.00 | 0.00 |
| ATOM | 1593 | HA  | PRO | X | 102 | 40.494 | 67.903 | 29.074 | 0.00 | 0.00 |
| ATOM | 1594 | C   | PRO | X | 102 | 38.934 | 66.454 | 28.731 | 0.00 | 0.00 |
| ATOM | 1595 | O   | PRO | X | 102 | 38.240 | 65.817 | 27.985 | 0.00 | 0.00 |
| ATOM | 1596 | N   | ARG | X | 103 | 38.836 | 66.391 | 30.084 | 0.00 | 0.00 |
| ATOM | 1597 | H   | ARG | X | 103 | 39.516 | 66.893 | 30.637 | 0.00 | 0.00 |
| ATOM | 1598 | CA  | ARG | X | 103 | 37.731 | 65.735 | 30.840 | 0.00 | 0.00 |
| ATOM | 1599 | HA  | ARG | X | 103 | 37.961 | 64.671 | 30.895 | 0.00 | 0.00 |
| ATOM | 1600 | CB  | ARG | X | 103 | 37.651 | 66.326 | 32.264 | 0.00 | 0.00 |
| ATOM | 1601 | HB2 | ARG | X | 103 | 38.570 | 66.228 | 32.841 | 0.00 | 0.00 |
| ATOM | 1602 | HB3 | ARG | X | 103 | 37.368 | 67.376 | 32.182 | 0.00 | 0.00 |
| ATOM | 1603 | CG  | ARG | X | 103 | 36.638 | 65.517 | 33.070 | 0.00 | 0.00 |
| ATOM | 1604 | HG2 | ARG | X | 103 | 35.789 | 65.147 | 32.494 | 0.00 | 0.00 |
| ATOM | 1605 | HG3 | ARG | X | 103 | 37.202 | 64.715 | 33.547 | 0.00 | 0.00 |
| ATOM | 1606 | CD  | ARG | X | 103 | 36.165 | 66.187 | 34.382 | 0.00 | 0.00 |
| ATOM | 1607 | HD2 | ARG | X | 103 | 35.778 | 65.459 | 35.094 | 0.00 | 0.00 |
| ATOM | 1608 | HD3 | ARG | X | 103 | 36.978 | 66.697 | 34.898 | 0.00 | 0.00 |
| ATOM | 1609 | NE  | ARG | X | 103 | 34.995 | 67.027 | 34.109 | 0.00 | 0.00 |
| ATOM | 1610 | HE  | ARG | X | 103 | 34.100 | 66.600 | 33.918 | 0.00 | 0.00 |
| ATOM | 1611 | CZ  | ARG | X | 103 | 34.935 | 68.344 | 34.373 | 0.00 | 0.00 |
| ATOM | 1612 | NH1 | ARG | X | 103 | 35.931 | 69.112 | 34.688 | 0.00 | 0.00 |



|      |      |      |     |   |     |        |        |        |      |      |
|------|------|------|-----|---|-----|--------|--------|--------|------|------|
| ATOM | 1613 | HH11 | ARG | X | 103 | 36.835 | 68.669 | 34.613 | 0.00 | 0.00 |
| ATOM | 1614 | HH12 | ARG | X | 103 | 35.851 | 70.061 | 35.026 | 0.00 | 0.00 |
| ATOM | 1615 | NH2  | ARG | X | 103 | 33.798 | 68.918 | 34.200 | 0.00 | 0.00 |
| ATOM | 1616 | HH21 | ARG | X | 103 | 32.987 | 68.323 | 34.105 | 0.00 | 0.00 |
| ATOM | 1617 | HH22 | ARG | X | 103 | 33.622 | 69.827 | 34.604 | 0.00 | 0.00 |
| ATOM | 1618 | C    | ARG | X | 103 | 36.360 | 65.816 | 30.073 | 0.00 | 0.00 |
| ATOM | 1619 | O    | ARG | X | 103 | 35.736 | 66.895 | 30.084 | 0.00 | 0.00 |
| ATOM | 1620 | N    | PRO | X | 104 | 35.824 | 64.787 | 29.402 | 0.00 | 0.00 |
| ATOM | 1621 | CD   | PRO | X | 104 | 36.405 | 63.458 | 29.174 | 0.00 | 0.00 |
| ATOM | 1622 | HD2  | PRO | X | 104 | 36.448 | 62.870 | 30.092 | 0.00 | 0.00 |
| ATOM | 1623 | HD3  | PRO | X | 104 | 37.337 | 63.680 | 28.654 | 0.00 | 0.00 |
| ATOM | 1624 | CG   | PRO | X | 104 | 35.480 | 62.688 | 28.293 | 0.00 | 0.00 |
| ATOM | 1625 | HG2  | PRO | X | 104 | 34.685 | 62.332 | 28.949 | 0.00 | 0.00 |
| ATOM | 1626 | HG3  | PRO | X | 104 | 35.971 | 61.970 | 27.637 | 0.00 | 0.00 |
| ATOM | 1627 | CB   | PRO | X | 104 | 34.927 | 63.759 | 27.462 | 0.00 | 0.00 |
| ATOM | 1628 | HB2  | PRO | X | 104 | 34.000 | 63.468 | 26.969 | 0.00 | 0.00 |
| ATOM | 1629 | HB3  | PRO | X | 104 | 35.675 | 64.049 | 26.723 | 0.00 | 0.00 |
| ATOM | 1630 | CA   | PRO | X | 104 | 34.698 | 64.943 | 28.454 | 0.00 | 0.00 |
| ATOM | 1631 | HA   | PRO | X | 104 | 34.816 | 65.934 | 28.015 | 0.00 | 0.00 |
| ATOM | 1632 | C    | PRO | X | 104 | 33.260 | 64.870 | 29.144 | 0.00 | 0.00 |
| ATOM | 1633 | O    | PRO | X | 104 | 32.925 | 63.996 | 29.996 | 0.00 | 0.00 |
| ATOM | 1634 | N    | THR | X | 105 | 32.371 | 65.662 | 28.576 | 0.00 | 0.00 |
| ATOM | 1635 | H    | THR | X | 105 | 32.674 | 66.223 | 27.793 | 0.00 | 0.00 |
| ATOM | 1636 | CA   | THR | X | 105 | 30.891 | 65.589 | 28.962 | 0.00 | 0.00 |
| ATOM | 1637 | HA   | THR | X | 105 | 30.742 | 65.539 | 30.040 | 0.00 | 0.00 |
| ATOM | 1638 | CB   | THR | X | 105 | 30.240 | 66.863 | 28.483 | 0.00 | 0.00 |
| ATOM | 1639 | HB   | THR | X | 105 | 29.164 | 66.764 | 28.628 | 0.00 | 0.00 |
| ATOM | 1640 | CG2  | THR | X | 105 | 30.800 | 68.156 | 29.091 | 0.00 | 0.00 |
| ATOM | 1641 | HG21 | THR | X | 105 | 31.692 | 68.563 | 28.616 | 0.00 | 0.00 |
| ATOM | 1642 | HG22 | THR | X | 105 | 29.986 | 68.877 | 29.016 | 0.00 | 0.00 |
| ATOM | 1643 | HG23 | THR | X | 105 | 31.037 | 68.055 | 30.150 | 0.00 | 0.00 |
| ATOM | 1644 | OG1  | THR | X | 105 | 30.564 | 66.937 | 27.083 | 0.00 | 0.00 |
| ATOM | 1645 | HG1  | THR | X | 105 | 31.492 | 67.145 | 26.953 | 0.00 | 0.00 |
| ATOM | 1646 | C    | THR | X | 105 | 30.123 | 64.424 | 28.314 | 0.00 | 0.00 |
| ATOM | 1647 | O    | THR | X | 105 | 29.112 | 63.944 | 28.824 | 0.00 | 0.00 |
| ATOM | 1648 | N    | SER | X | 106 | 30.649 | 63.882 | 27.225 | 0.00 | 0.00 |
| ATOM | 1649 | H    | SER | X | 106 | 31.443 | 64.235 | 26.711 | 0.00 | 0.00 |
| ATOM | 1650 | CA   | SER | X | 106 | 30.109 | 62.676 | 26.555 | 0.00 | 0.00 |
| ATOM | 1651 | HA   | SER | X | 106 | 29.051 | 62.733 | 26.299 | 0.00 | 0.00 |
| ATOM | 1652 | CB   | SER | X | 106 | 30.862 | 62.379 | 25.245 | 0.00 | 0.00 |
| ATOM | 1653 | HB2  | SER | X | 106 | 31.703 | 61.704 | 25.404 | 0.00 | 0.00 |
| ATOM | 1654 | HB3  | SER | X | 106 | 30.156 | 61.906 | 24.562 | 0.00 | 0.00 |
| ATOM | 1655 | OG   | SER | X | 106 | 31.431 | 63.561 | 24.760 | 0.00 | 0.00 |
| ATOM | 1656 | HG   | SER | X | 106 | 32.317 | 63.296 | 24.505 | 0.00 | 0.00 |
| ATOM | 1657 | C    | SER | X | 106 | 30.292 | 61.480 | 27.515 | 0.00 | 0.00 |
| ATOM | 1658 | O    | SER | X | 106 | 31.474 | 61.261 | 27.860 | 0.00 | 0.00 |
| ATOM | 1659 | N    | PRO | X | 107 | 29.242 | 60.735 | 27.923 | 0.00 | 0.00 |
| ATOM | 1660 | CD   | PRO | X | 107 | 27.856 | 60.979 | 27.502 | 0.00 | 0.00 |
| ATOM | 1661 | HD2  | PRO | X | 107 | 27.805 | 60.714 | 26.446 | 0.00 | 0.00 |
| ATOM | 1662 | HD3  | PRO | X | 107 | 27.508 | 62.000 | 27.662 | 0.00 | 0.00 |
| ATOM | 1663 | CG   | PRO | X | 107 | 26.965 | 60.058 | 28.342 | 0.00 | 0.00 |
| ATOM | 1664 | HG2  | PRO | X | 107 | 26.407 | 59.437 | 27.641 | 0.00 | 0.00 |
| ATOM | 1665 | HG3  | PRO | X | 107 | 26.181 | 60.518 | 28.944 | 0.00 | 0.00 |
| ATOM | 1666 | CB   | PRO | X | 107 | 27.993 | 59.234 | 29.135 | 0.00 | 0.00 |
| ATOM | 1667 | HB2  | PRO | X | 107 | 27.885 | 58.149 | 29.137 | 0.00 | 0.00 |
| ATOM | 1668 | HB3  | PRO | X | 107 | 28.016 | 59.640 | 30.147 | 0.00 | 0.00 |
| ATOM | 1669 | CA   | PRO | X | 107 | 29.376 | 59.448 | 28.554 | 0.00 | 0.00 |
| ATOM | 1670 | HA   | PRO | X | 107 | 30.112 | 59.566 | 29.349 | 0.00 | 0.00 |
| ATOM | 1671 | C    | PRO | X | 107 | 29.901 | 58.392 | 27.588 | 0.00 | 0.00 |
| ATOM | 1672 | O    | PRO | X | 107 | 29.719 | 58.437 | 26.347 | 0.00 | 0.00 |
| ATOM | 1673 | N    | THR | X | 108 | 30.493 | 57.336 | 28.092 | 0.00 | 0.00 |
| ATOM | 1674 | H    | THR | X | 108 | 30.546 | 57.416 | 29.097 | 0.00 | 0.00 |
| ATOM | 1675 | CA   | THR | X | 108 | 31.163 | 56.088 | 27.499 | 0.00 | 0.00 |
| ATOM | 1676 | HA   | THR | X | 108 | 30.635 | 55.695 | 26.630 | 0.00 | 0.00 |
| ATOM | 1677 | CB   | THR | X | 108 | 32.587 | 56.367 | 27.004 | 0.00 | 0.00 |
| ATOM | 1678 | HB   | THR | X | 108 | 33.158 | 56.763 | 27.843 | 0.00 | 0.00 |
| ATOM | 1679 | CG2  | THR | X | 108 | 33.222 | 55.153 | 26.326 | 0.00 | 0.00 |
| ATOM | 1680 | HG21 | THR | X | 108 | 33.303 | 54.332 | 27.038 | 0.00 | 0.00 |
| ATOM | 1681 | HG22 | THR | X | 108 | 32.653 | 54.830 | 25.454 | 0.00 | 0.00 |
| ATOM | 1682 | HG23 | THR | X | 108 | 34.262 | 55.280 | 26.027 | 0.00 | 0.00 |

|      |      |      |     |   |     |        |        |        |      |      |
|------|------|------|-----|---|-----|--------|--------|--------|------|------|
| ATOM | 1683 | OG1  | THR | X | 108 | 32.392 | 57.294 | 26.045 | 0.00 | 0.00 |
| ATOM | 1684 | HG1  | THR | X | 108 | 31.885 | 57.998 | 26.456 | 0.00 | 0.00 |
| ATOM | 1685 | C    | THR | X | 108 | 31.182 | 55.028 | 28.642 | 0.00 | 0.00 |
| ATOM | 1686 | O    | THR | X | 108 | 31.426 | 55.458 | 29.721 | 0.00 | 0.00 |
| ATOM | 1687 | N    | PRO | X | 109 | 30.931 | 53.705 | 28.270 | 0.00 | 0.00 |
| ATOM | 1688 | CD   | PRO | X | 109 | 30.824 | 53.176 | 26.928 | 0.00 | 0.00 |
| ATOM | 1689 | HD2  | PRO | X | 109 | 31.802 | 52.997 | 26.481 | 0.00 | 0.00 |
| ATOM | 1690 | HD3  | PRO | X | 109 | 30.228 | 53.643 | 26.145 | 0.00 | 0.00 |
| ATOM | 1691 | CG   | PRO | X | 109 | 30.212 | 51.839 | 27.206 | 0.00 | 0.00 |
| ATOM | 1692 | HG2  | PRO | X | 109 | 30.431 | 51.177 | 26.368 | 0.00 | 0.00 |
| ATOM | 1693 | HG3  | PRO | X | 109 | 29.143 | 51.941 | 27.397 | 0.00 | 0.00 |
| ATOM | 1694 | CB   | PRO | X | 109 | 30.875 | 51.316 | 28.533 | 0.00 | 0.00 |
| ATOM | 1695 | HB2  | PRO | X | 109 | 31.901 | 51.069 | 28.263 | 0.00 | 0.00 |
| ATOM | 1696 | HB3  | PRO | X | 109 | 30.320 | 50.484 | 28.968 | 0.00 | 0.00 |
| ATOM | 1697 | CA   | PRO | X | 109 | 30.857 | 52.635 | 29.337 | 0.00 | 0.00 |
| ATOM | 1698 | HA   | PRO | X | 109 | 29.945 | 52.730 | 29.926 | 0.00 | 0.00 |
| ATOM | 1699 | C    | PRO | X | 109 | 31.995 | 52.654 | 30.330 | 0.00 | 0.00 |
| ATOM | 1700 | O    | PRO | X | 109 | 33.162 | 52.912 | 30.016 | 0.00 | 0.00 |
| ATOM | 1701 | N    | VAL | X | 110 | 31.645 | 52.281 | 31.577 | 0.00 | 0.00 |
| ATOM | 1702 | H    | VAL | X | 110 | 30.701 | 51.936 | 31.680 | 0.00 | 0.00 |
| ATOM | 1703 | CA   | VAL | X | 110 | 32.473 | 52.256 | 32.723 | 0.00 | 0.00 |
| ATOM | 1704 | HA   | VAL | X | 110 | 33.312 | 52.900 | 32.458 | 0.00 | 0.00 |
| ATOM | 1705 | CB   | VAL | X | 110 | 31.805 | 52.921 | 33.913 | 0.00 | 0.00 |
| ATOM | 1706 | HB   | VAL | X | 110 | 31.163 | 52.165 | 34.365 | 0.00 | 0.00 |
| ATOM | 1707 | CG1  | VAL | X | 110 | 32.714 | 53.484 | 35.038 | 0.00 | 0.00 |
| ATOM | 1708 | HG11 | VAL | X | 110 | 33.361 | 52.713 | 35.457 | 0.00 | 0.00 |
| ATOM | 1709 | HG12 | VAL | X | 110 | 33.237 | 54.341 | 34.614 | 0.00 | 0.00 |
| ATOM | 1710 | HG13 | VAL | X | 110 | 32.098 | 53.900 | 35.835 | 0.00 | 0.00 |
| ATOM | 1711 | CG2  | VAL | X | 110 | 30.682 | 53.981 | 33.611 | 0.00 | 0.00 |
| ATOM | 1712 | HG21 | VAL | X | 110 | 29.806 | 53.586 | 33.097 | 0.00 | 0.00 |
| ATOM | 1713 | HG22 | VAL | X | 110 | 30.208 | 54.392 | 34.502 | 0.00 | 0.00 |
| ATOM | 1714 | HG23 | VAL | X | 110 | 31.232 | 54.787 | 33.126 | 0.00 | 0.00 |
| ATOM | 1715 | C    | VAL | X | 110 | 32.943 | 50.850 | 33.107 | 0.00 | 0.00 |
| ATOM | 1716 | O    | VAL | X | 110 | 32.121 | 49.929 | 33.006 | 0.00 | 0.00 |
| ATOM | 1717 | N    | LEU | X | 111 | 34.268 | 50.722 | 33.434 | 0.00 | 0.00 |
| ATOM | 1718 | H    | LEU | X | 111 | 34.841 | 51.536 | 33.267 | 0.00 | 0.00 |
| ATOM | 1719 | CA   | LEU | X | 111 | 34.924 | 49.472 | 33.969 | 0.00 | 0.00 |
| ATOM | 1720 | HA   | LEU | X | 111 | 34.219 | 48.643 | 34.022 | 0.00 | 0.00 |
| ATOM | 1721 | CB   | LEU | X | 111 | 36.118 | 48.916 | 33.146 | 0.00 | 0.00 |
| ATOM | 1722 | HB2  | LEU | X | 111 | 36.968 | 49.595 | 33.070 | 0.00 | 0.00 |
| ATOM | 1723 | HB3  | LEU | X | 111 | 36.632 | 48.084 | 33.628 | 0.00 | 0.00 |
| ATOM | 1724 | CG   | LEU | X | 111 | 35.840 | 48.393 | 31.696 | 0.00 | 0.00 |
| ATOM | 1725 | HG   | LEU | X | 111 | 35.450 | 49.211 | 31.090 | 0.00 | 0.00 |
| ATOM | 1726 | CD1  | LEU | X | 111 | 37.181 | 47.999 | 31.024 | 0.00 | 0.00 |
| ATOM | 1727 | HD11 | LEU | X | 111 | 36.993 | 47.785 | 29.972 | 0.00 | 0.00 |
| ATOM | 1728 | HD12 | LEU | X | 111 | 38.007 | 48.684 | 31.213 | 0.00 | 0.00 |
| ATOM | 1729 | HD13 | LEU | X | 111 | 37.557 | 47.160 | 31.609 | 0.00 | 0.00 |
| ATOM | 1730 | CD2  | LEU | X | 111 | 34.877 | 47.182 | 31.689 | 0.00 | 0.00 |
| ATOM | 1731 | HD21 | LEU | X | 111 | 35.266 | 46.369 | 32.304 | 0.00 | 0.00 |
| ATOM | 1732 | HD22 | LEU | X | 111 | 33.950 | 47.334 | 32.241 | 0.00 | 0.00 |
| ATOM | 1733 | HD23 | LEU | X | 111 | 34.676 | 46.684 | 30.741 | 0.00 | 0.00 |
| ATOM | 1734 | C    | LEU | X | 111 | 35.224 | 49.702 | 35.468 | 0.00 | 0.00 |
| ATOM | 1735 | O    | LEU | X | 111 | 36.113 | 50.459 | 35.752 | 0.00 | 0.00 |
| ATOM | 1736 | N    | VAL | X | 112 | 34.539 | 49.021 | 36.362 | 0.00 | 0.00 |
| ATOM | 1737 | H    | VAL | X | 112 | 33.775 | 48.519 | 35.932 | 0.00 | 0.00 |
| ATOM | 1738 | CA   | VAL | X | 112 | 34.852 | 49.067 | 37.774 | 0.00 | 0.00 |
| ATOM | 1739 | HA   | VAL | X | 112 | 35.395 | 49.952 | 38.104 | 0.00 | 0.00 |
| ATOM | 1740 | CB   | VAL | X | 112 | 33.577 | 48.902 | 38.686 | 0.00 | 0.00 |
| ATOM | 1741 | HB   | VAL | X | 112 | 33.028 | 48.018 | 38.359 | 0.00 | 0.00 |
| ATOM | 1742 | CG1  | VAL | X | 112 | 33.962 | 48.847 | 40.163 | 0.00 | 0.00 |
| ATOM | 1743 | HG11 | VAL | X | 112 | 34.631 | 49.681 | 40.377 | 0.00 | 0.00 |
| ATOM | 1744 | HG12 | VAL | X | 112 | 33.106 | 48.875 | 40.837 | 0.00 | 0.00 |
| ATOM | 1745 | HG13 | VAL | X | 112 | 34.301 | 47.831 | 40.365 | 0.00 | 0.00 |
| ATOM | 1746 | CG2  | VAL | X | 112 | 32.765 | 50.168 | 38.442 | 0.00 | 0.00 |
| ATOM | 1747 | HG21 | VAL | X | 112 | 32.371 | 50.152 | 37.425 | 0.00 | 0.00 |
| ATOM | 1748 | HG22 | VAL | X | 112 | 31.909 | 50.231 | 39.114 | 0.00 | 0.00 |
| ATOM | 1749 | HG23 | VAL | X | 112 | 33.293 | 51.108 | 38.596 | 0.00 | 0.00 |
| ATOM | 1750 | C    | VAL | X | 112 | 35.816 | 47.895 | 38.002 | 0.00 | 0.00 |
| ATOM | 1751 | O    | VAL | X | 112 | 35.547 | 46.803 | 37.517 | 0.00 | 0.00 |
| ATOM | 1752 | N    | TRP | X | 113 | 36.949 | 48.167 | 38.734 | 0.00 | 0.00 |

|      |      |      |     |   |     |        |        |        |      |      |
|------|------|------|-----|---|-----|--------|--------|--------|------|------|
| ATOM | 1753 | H    | TRP | X | 113 | 36.916 | 48.990 | 39.319 | 0.00 | 0.00 |
| ATOM | 1754 | CA   | TRP | X | 113 | 38.010 | 47.195 | 39.044 | 0.00 | 0.00 |
| ATOM | 1755 | HA   | TRP | X | 113 | 37.944 | 46.325 | 38.392 | 0.00 | 0.00 |
| ATOM | 1756 | CB   | TRP | X | 113 | 39.343 | 47.873 | 38.918 | 0.00 | 0.00 |
| ATOM | 1757 | HB2  | TRP | X | 113 | 39.496 | 48.357 | 37.954 | 0.00 | 0.00 |
| ATOM | 1758 | HB3  | TRP | X | 113 | 39.460 | 48.748 | 39.558 | 0.00 | 0.00 |
| ATOM | 1759 | CG   | TRP | X | 113 | 40.486 | 46.987 | 39.270 | 0.00 | 0.00 |
| ATOM | 1760 | CD1  | TRP | X | 113 | 41.424 | 47.290 | 40.232 | 0.00 | 0.00 |
| ATOM | 1761 | HD1  | TRP | X | 113 | 41.396 | 48.184 | 40.838 | 0.00 | 0.00 |
| ATOM | 1762 | NE1  | TRP | X | 113 | 42.426 | 46.314 | 40.303 | 0.00 | 0.00 |
| ATOM | 1763 | HE1  | TRP | X | 113 | 43.207 | 46.277 | 40.943 | 0.00 | 0.00 |
| ATOM | 1764 | CE2  | TRP | X | 113 | 42.094 | 45.236 | 39.482 | 0.00 | 0.00 |
| ATOM | 1765 | CZ2  | TRP | X | 113 | 42.775 | 44.041 | 39.204 | 0.00 | 0.00 |
| ATOM | 1766 | HZ2  | TRP | X | 113 | 43.704 | 43.822 | 39.711 | 0.00 | 0.00 |
| ATOM | 1767 | CH2  | TRP | X | 113 | 42.251 | 43.111 | 38.264 | 0.00 | 0.00 |
| ATOM | 1768 | HH2  | TRP | X | 113 | 42.821 | 42.212 | 38.078 | 0.00 | 0.00 |
| ATOM | 1769 | CZ3  | TRP | X | 113 | 40.966 | 43.416 | 37.705 | 0.00 | 0.00 |
| ATOM | 1770 | HZ3  | TRP | X | 113 | 40.493 | 42.678 | 37.075 | 0.00 | 0.00 |
| ATOM | 1771 | CE3  | TRP | X | 113 | 40.330 | 44.668 | 37.914 | 0.00 | 0.00 |
| ATOM | 1772 | HE3  | TRP | X | 113 | 39.425 | 44.919 | 37.382 | 0.00 | 0.00 |
| ATOM | 1773 | CD2  | TRP | X | 113 | 40.891 | 45.613 | 38.827 | 0.00 | 0.00 |
| ATOM | 1774 | C    | TRP | X | 113 | 37.757 | 46.850 | 40.462 | 0.00 | 0.00 |
| ATOM | 1775 | O    | TRP | X | 113 | 37.653 | 47.616 | 41.441 | 0.00 | 0.00 |
| ATOM | 1776 | N    | ILE | X | 114 | 37.704 | 45.545 | 40.698 | 0.00 | 0.00 |
| ATOM | 1777 | H    | ILE | X | 114 | 37.677 | 44.896 | 39.925 | 0.00 | 0.00 |
| ATOM | 1778 | CA   | ILE | X | 114 | 37.651 | 44.990 | 42.050 | 0.00 | 0.00 |
| ATOM | 1779 | HA   | ILE | X | 114 | 37.918 | 45.730 | 42.805 | 0.00 | 0.00 |
| ATOM | 1780 | CB   | ILE | X | 114 | 36.258 | 44.477 | 42.363 | 0.00 | 0.00 |
| ATOM | 1781 | HB   | ILE | X | 114 | 36.039 | 43.707 | 41.622 | 0.00 | 0.00 |
| ATOM | 1782 | CG2  | ILE | X | 114 | 36.307 | 43.882 | 43.827 | 0.00 | 0.00 |
| ATOM | 1783 | HG21 | ILE | X | 114 | 35.306 | 43.559 | 44.116 | 0.00 | 0.00 |
| ATOM | 1784 | HG22 | ILE | X | 114 | 36.935 | 42.993 | 43.758 | 0.00 | 0.00 |
| ATOM | 1785 | HG23 | ILE | X | 114 | 36.774 | 44.529 | 44.570 | 0.00 | 0.00 |
| ATOM | 1786 | CG1  | ILE | X | 114 | 35.167 | 45.648 | 42.465 | 0.00 | 0.00 |
| ATOM | 1787 | HG12 | ILE | X | 114 | 35.442 | 46.352 | 43.250 | 0.00 | 0.00 |
| ATOM | 1788 | HG13 | ILE | X | 114 | 35.110 | 46.172 | 41.510 | 0.00 | 0.00 |
| ATOM | 1789 | CD1  | ILE | X | 114 | 33.609 | 45.339 | 42.738 | 0.00 | 0.00 |
| ATOM | 1790 | HD11 | ILE | X | 114 | 33.126 | 44.573 | 42.131 | 0.00 | 0.00 |
| ATOM | 1791 | HD12 | ILE | X | 114 | 33.465 | 44.956 | 43.748 | 0.00 | 0.00 |
| ATOM | 1792 | HD13 | ILE | X | 114 | 33.074 | 46.280 | 42.612 | 0.00 | 0.00 |
| ATOM | 1793 | C    | ILE | X | 114 | 38.716 | 43.884 | 42.224 | 0.00 | 0.00 |
| ATOM | 1794 | O    | ILE | X | 114 | 38.584 | 42.871 | 41.541 | 0.00 | 0.00 |
| ATOM | 1795 | N    | TYR | X | 115 | 39.762 | 44.215 | 42.867 | 0.00 | 0.00 |
| ATOM | 1796 | H    | TYR | X | 115 | 39.654 | 45.084 | 43.370 | 0.00 | 0.00 |
| ATOM | 1797 | CA   | TYR | X | 115 | 41.112 | 43.506 | 42.917 | 0.00 | 0.00 |
| ATOM | 1798 | HA   | TYR | X | 115 | 41.248 | 43.306 | 41.854 | 0.00 | 0.00 |
| ATOM | 1799 | CB   | TYR | X | 115 | 42.161 | 44.516 | 43.296 | 0.00 | 0.00 |
| ATOM | 1800 | HB2  | TYR | X | 115 | 43.125 | 44.067 | 43.536 | 0.00 | 0.00 |
| ATOM | 1801 | HB3  | TYR | X | 115 | 42.302 | 45.055 | 42.360 | 0.00 | 0.00 |
| ATOM | 1802 | CG   | TYR | X | 115 | 41.731 | 45.503 | 44.327 | 0.00 | 0.00 |
| ATOM | 1803 | CD1  | TYR | X | 115 | 42.123 | 45.176 | 45.663 | 0.00 | 0.00 |
| ATOM | 1804 | HD1  | TYR | X | 115 | 42.509 | 44.199 | 45.911 | 0.00 | 0.00 |
| ATOM | 1805 | CE1  | TYR | X | 115 | 41.857 | 46.131 | 46.712 | 0.00 | 0.00 |
| ATOM | 1806 | HE1  | TYR | X | 115 | 42.116 | 45.922 | 47.740 | 0.00 | 0.00 |
| ATOM | 1807 | CZ   | TYR | X | 115 | 41.098 | 47.317 | 46.398 | 0.00 | 0.00 |
| ATOM | 1808 | OH   | TYR | X | 115 | 40.639 | 48.238 | 47.367 | 0.00 | 0.00 |
| ATOM | 1809 | HH   | TYR | X | 115 | 39.997 | 48.885 | 47.066 | 0.00 | 0.00 |
| ATOM | 1810 | CE2  | TYR | X | 115 | 40.810 | 47.653 | 45.045 | 0.00 | 0.00 |
| ATOM | 1811 | HE2  | TYR | X | 115 | 40.227 | 48.519 | 44.767 | 0.00 | 0.00 |
| ATOM | 1812 | CD2  | TYR | X | 115 | 41.143 | 46.744 | 44.035 | 0.00 | 0.00 |
| ATOM | 1813 | HD2  | TYR | X | 115 | 40.894 | 46.908 | 42.998 | 0.00 | 0.00 |
| ATOM | 1814 | C    | TYR | X | 115 | 41.390 | 42.247 | 43.814 | 0.00 | 0.00 |
| ATOM | 1815 | O    | TYR | X | 115 | 40.733 | 42.093 | 44.818 | 0.00 | 0.00 |
| ATOM | 1816 | N    | GLY | X | 116 | 42.311 | 41.410 | 43.495 | 0.00 | 0.00 |
| ATOM | 1817 | H    | GLY | X | 116 | 42.908 | 41.664 | 42.721 | 0.00 | 0.00 |
| ATOM | 1818 | CA   | GLY | X | 116 | 42.810 | 40.329 | 44.368 | 0.00 | 0.00 |
| ATOM | 1819 | HA2  | GLY | X | 116 | 41.890 | 39.759 | 44.685 | 0.00 | 0.00 |
| ATOM | 1820 | HA3  | GLY | X | 116 | 43.420 | 39.631 | 43.848 | 0.00 | 0.00 |
| ATOM | 1821 | C    | GLY | X | 116 | 43.524 | 40.822 | 45.613 | 0.00 | 0.00 |
| ATOM | 1822 | O    | GLY | X | 116 | 43.583 | 42.018 | 45.872 | 0.00 | 0.00 |

|      |      |     |     |   |     |        |        |        |      |      |
|------|------|-----|-----|---|-----|--------|--------|--------|------|------|
| ATOM | 1823 | N   | GLY | X | 117 | 43.871 | 39.795 | 46.470 | 0.00 | 0.00 |
| ATOM | 1824 | H   | GLY | X | 117 | 43.847 | 38.828 | 46.179 | 0.00 | 0.00 |
| ATOM | 1825 | CA  | GLY | X | 117 | 44.310 | 40.065 | 47.855 | 0.00 | 0.00 |
| ATOM | 1826 | HA2 | GLY | X | 117 | 45.392 | 40.253 | 47.922 | 0.00 | 0.00 |
| ATOM | 1827 | HA3 | GLY | X | 117 | 43.801 | 40.976 | 48.194 | 0.00 | 0.00 |
| ATOM | 1828 | C   | GLY | X | 117 | 43.957 | 38.947 | 48.846 | 0.00 | 0.00 |
| ATOM | 1829 | O   | GLY | X | 117 | 44.187 | 39.028 | 50.053 | 0.00 | 0.00 |
| ATOM | 1830 | N   | GLY | X | 118 | 43.455 | 37.803 | 48.316 | 0.00 | 0.00 |
| ATOM | 1831 | H   | GLY | X | 118 | 43.375 | 37.725 | 47.312 | 0.00 | 0.00 |
| ATOM | 1832 | CA  | GLY | X | 118 | 42.819 | 36.654 | 49.032 | 0.00 | 0.00 |
| ATOM | 1833 | HA2 | GLY | X | 118 | 42.421 | 35.972 | 48.420 | 0.00 | 0.00 |
| ATOM | 1834 | HA3 | GLY | X | 118 | 43.572 | 36.145 | 49.667 | 0.00 | 0.00 |
| ATOM | 1835 | C   | GLY | X | 118 | 41.757 | 37.051 | 50.088 | 0.00 | 0.00 |
| ATOM | 1836 | O   | GLY | X | 118 | 41.444 | 36.258 | 50.950 | 0.00 | 0.00 |
| ATOM | 1837 | N   | PHE | X | 119 | 41.347 | 38.314 | 50.110 | 0.00 | 0.00 |
| ATOM | 1838 | H   | PHE | X | 119 | 41.632 | 38.827 | 49.288 | 0.00 | 0.00 |
| ATOM | 1839 | CA  | PHE | X | 119 | 40.398 | 38.973 | 50.940 | 0.00 | 0.00 |
| ATOM | 1840 | HA  | PHE | X | 119 | 39.945 | 39.763 | 50.341 | 0.00 | 0.00 |
| ATOM | 1841 | CB  | PHE | X | 119 | 39.187 | 38.055 | 51.339 | 0.00 | 0.00 |
| ATOM | 1842 | HB2 | PHE | X | 119 | 39.493 | 37.174 | 51.903 | 0.00 | 0.00 |
| ATOM | 1843 | HB3 | PHE | X | 119 | 38.689 | 38.665 | 52.093 | 0.00 | 0.00 |
| ATOM | 1844 | CG  | PHE | X | 119 | 38.126 | 37.686 | 50.414 | 0.00 | 0.00 |
| ATOM | 1845 | CD1 | PHE | X | 119 | 37.064 | 38.617 | 50.103 | 0.00 | 0.00 |
| ATOM | 1846 | HD1 | PHE | X | 119 | 37.080 | 39.609 | 50.530 | 0.00 | 0.00 |
| ATOM | 1847 | CE1 | PHE | X | 119 | 36.085 | 38.274 | 49.103 | 0.00 | 0.00 |
| ATOM | 1848 | HE1 | PHE | X | 119 | 35.247 | 38.897 | 48.828 | 0.00 | 0.00 |
| ATOM | 1849 | CZ  | PHE | X | 119 | 36.116 | 37.012 | 48.512 | 0.00 | 0.00 |
| ATOM | 1850 | HZ  | PHE | X | 119 | 35.383 | 36.663 | 47.799 | 0.00 | 0.00 |
| ATOM | 1851 | CE2 | PHE | X | 119 | 37.140 | 36.120 | 48.812 | 0.00 | 0.00 |
| ATOM | 1852 | HE2 | PHE | X | 119 | 37.230 | 35.154 | 48.338 | 0.00 | 0.00 |
| ATOM | 1853 | CD2 | PHE | X | 119 | 38.186 | 36.492 | 49.693 | 0.00 | 0.00 |
| ATOM | 1854 | HD2 | PHE | X | 119 | 39.081 | 35.888 | 49.691 | 0.00 | 0.00 |
| ATOM | 1855 | C   | PHE | X | 119 | 41.172 | 39.569 | 52.194 | 0.00 | 0.00 |
| ATOM | 1856 | O   | PHE | X | 119 | 40.663 | 40.388 | 52.932 | 0.00 | 0.00 |
| ATOM | 1857 | N   | TYR | X | 120 | 42.310 | 38.975 | 52.615 | 0.00 | 0.00 |
| ATOM | 1858 | H   | TYR | X | 120 | 42.655 | 38.284 | 51.964 | 0.00 | 0.00 |
| ATOM | 1859 | CA  | TYR | X | 120 | 43.146 | 39.403 | 53.867 | 0.00 | 0.00 |
| ATOM | 1860 | HA  | TYR | X | 120 | 42.383 | 39.690 | 54.590 | 0.00 | 0.00 |
| ATOM | 1861 | CB  | TYR | X | 120 | 43.997 | 38.232 | 54.440 | 0.00 | 0.00 |
| ATOM | 1862 | HB2 | TYR | X | 120 | 44.349 | 38.616 | 55.397 | 0.00 | 0.00 |
| ATOM | 1863 | HB3 | TYR | X | 120 | 43.340 | 37.401 | 54.697 | 0.00 | 0.00 |
| ATOM | 1864 | CG  | TYR | X | 120 | 45.074 | 37.822 | 53.480 | 0.00 | 0.00 |
| ATOM | 1865 | CD1 | TYR | X | 120 | 46.345 | 38.349 | 53.591 | 0.00 | 0.00 |
| ATOM | 1866 | HD1 | TYR | X | 120 | 46.530 | 38.999 | 54.434 | 0.00 | 0.00 |
| ATOM | 1867 | CE1 | TYR | X | 120 | 47.309 | 38.055 | 52.604 | 0.00 | 0.00 |
| ATOM | 1868 | HE1 | TYR | X | 120 | 48.273 | 38.529 | 52.719 | 0.00 | 0.00 |
| ATOM | 1869 | CZ  | TYR | X | 120 | 47.035 | 37.120 | 51.562 | 0.00 | 0.00 |
| ATOM | 1870 | OH  | TYR | X | 120 | 47.968 | 36.798 | 50.569 | 0.00 | 0.00 |
| ATOM | 1871 | HH  | TYR | X | 120 | 48.812 | 37.244 | 50.671 | 0.00 | 0.00 |
| ATOM | 1872 | CE2 | TYR | X | 120 | 45.740 | 36.551 | 51.529 | 0.00 | 0.00 |
| ATOM | 1873 | HE2 | TYR | X | 120 | 45.522 | 35.838 | 50.747 | 0.00 | 0.00 |
| ATOM | 1874 | CD2 | TYR | X | 120 | 44.824 | 36.879 | 52.497 | 0.00 | 0.00 |
| ATOM | 1875 | HD2 | TYR | X | 120 | 43.877 | 36.376 | 52.369 | 0.00 | 0.00 |
| ATOM | 1876 | C   | TYR | X | 120 | 44.016 | 40.665 | 53.700 | 0.00 | 0.00 |
| ATOM | 1877 | O   | TYR | X | 120 | 44.497 | 41.319 | 54.657 | 0.00 | 0.00 |
| ATOM | 1878 | N   | SER | X | 121 | 44.388 | 40.929 | 52.399 | 0.00 | 0.00 |
| ATOM | 1879 | H   | SER | X | 121 | 43.869 | 40.416 | 51.700 | 0.00 | 0.00 |
| ATOM | 1880 | CA  | SER | X | 121 | 45.144 | 42.103 | 51.827 | 0.00 | 0.00 |
| ATOM | 1881 | HA  | SER | X | 121 | 45.152 | 42.898 | 52.573 | 0.00 | 0.00 |
| ATOM | 1882 | CB  | SER | X | 121 | 46.618 | 41.718 | 51.520 | 0.00 | 0.00 |
| ATOM | 1883 | HB2 | SER | X | 121 | 47.160 | 42.523 | 51.024 | 0.00 | 0.00 |
| ATOM | 1884 | HB3 | SER | X | 121 | 47.155 | 41.633 | 52.465 | 0.00 | 0.00 |
| ATOM | 1885 | OG  | SER | X | 121 | 46.736 | 40.523 | 50.724 | 0.00 | 0.00 |
| ATOM | 1886 | HG  | SER | X | 121 | 46.550 | 39.822 | 51.353 | 0.00 | 0.00 |
| ATOM | 1887 | C   | SER | X | 121 | 44.540 | 42.767 | 50.482 | 0.00 | 0.00 |
| ATOM | 1888 | O   | SER | X | 121 | 43.519 | 42.363 | 50.024 | 0.00 | 0.00 |
| ATOM | 1889 | N   | GLY | X | 122 | 45.115 | 43.914 | 50.059 | 0.00 | 0.00 |
| ATOM | 1890 | H   | GLY | X | 122 | 45.930 | 44.232 | 50.564 | 0.00 | 0.00 |
| ATOM | 1891 | CA  | GLY | X | 122 | 44.597 | 44.730 | 48.980 | 0.00 | 0.00 |
| ATOM | 1892 | HA2 | GLY | X | 122 | 45.106 | 44.360 | 48.104 | 0.00 | 0.00 |

|      |      |      |     |   |     |        |        |        |      |      |
|------|------|------|-----|---|-----|--------|--------|--------|------|------|
| ATOM | 1893 | HA3  | GLY | X | 122 | 43.567 | 44.431 | 48.830 | 0.00 | 0.00 |
| ATOM | 1894 | C    | GLY | X | 122 | 44.823 | 46.224 | 49.034 | 0.00 | 0.00 |
| ATOM | 1895 | O    | GLY | X | 122 | 45.147 | 46.705 | 50.083 | 0.00 | 0.00 |
| ATOM | 1896 | N    | ALA | X | 123 | 44.702 | 46.988 | 47.919 | 0.00 | 0.00 |
| ATOM | 1897 | H    | ALA | X | 123 | 44.378 | 46.529 | 47.080 | 0.00 | 0.00 |
| ATOM | 1898 | CA   | ALA | X | 123 | 44.567 | 48.479 | 47.888 | 0.00 | 0.00 |
| ATOM | 1899 | HA   | ALA | X | 123 | 43.669 | 48.711 | 48.460 | 0.00 | 0.00 |
| ATOM | 1900 | CB   | ALA | X | 123 | 45.720 | 49.338 | 48.390 | 0.00 | 0.00 |
| ATOM | 1901 | HB1  | ALA | X | 123 | 46.001 | 48.980 | 49.380 | 0.00 | 0.00 |
| ATOM | 1902 | HB2  | ALA | X | 123 | 46.605 | 49.214 | 47.765 | 0.00 | 0.00 |
| ATOM | 1903 | HB3  | ALA | X | 123 | 45.431 | 50.385 | 48.484 | 0.00 | 0.00 |
| ATOM | 1904 | C    | ALA | X | 123 | 44.359 | 48.932 | 46.489 | 0.00 | 0.00 |
| ATOM | 1905 | O    | ALA | X | 123 | 45.003 | 48.396 | 45.547 | 0.00 | 0.00 |
| ATOM | 1906 | N    | SER | X | 124 | 43.404 | 49.811 | 46.201 | 0.00 | 0.00 |
| ATOM | 1907 | H    | SER | X | 124 | 42.985 | 50.148 | 47.056 | 0.00 | 0.00 |
| ATOM | 1908 | CA   | SER | X | 124 | 43.127 | 50.377 | 44.921 | 0.00 | 0.00 |
| ATOM | 1909 | HA   | SER | X | 124 | 42.913 | 49.633 | 44.153 | 0.00 | 0.00 |
| ATOM | 1910 | CB   | SER | X | 124 | 41.897 | 51.362 | 44.959 | 0.00 | 0.00 |
| ATOM | 1911 | HB2  | SER | X | 124 | 41.736 | 51.855 | 44.000 | 0.00 | 0.00 |
| ATOM | 1912 | HB3  | SER | X | 124 | 41.020 | 50.764 | 45.205 | 0.00 | 0.00 |
| ATOM | 1913 | OG   | SER | X | 124 | 42.117 | 52.405 | 45.856 | 0.00 | 0.00 |
| ATOM | 1914 | HG   | SER | X | 124 | 42.069 | 52.154 | 46.781 | 0.00 | 0.00 |
| ATOM | 1915 | C    | SER | X | 124 | 44.219 | 51.151 | 44.229 | 0.00 | 0.00 |
| ATOM | 1916 | O    | SER | X | 124 | 44.297 | 51.145 | 42.991 | 0.00 | 0.00 |
| ATOM | 1917 | N    | SER | X | 125 | 45.051 | 51.703 | 45.064 | 0.00 | 0.00 |
| ATOM | 1918 | H    | SER | X | 125 | 44.899 | 51.695 | 46.063 | 0.00 | 0.00 |
| ATOM | 1919 | CA   | SER | X | 125 | 46.097 | 52.631 | 44.625 | 0.00 | 0.00 |
| ATOM | 1920 | HA   | SER | X | 125 | 45.726 | 53.123 | 43.726 | 0.00 | 0.00 |
| ATOM | 1921 | CB   | SER | X | 125 | 46.338 | 53.680 | 45.726 | 0.00 | 0.00 |
| ATOM | 1922 | HB2  | SER | X | 125 | 47.184 | 54.333 | 45.514 | 0.00 | 0.00 |
| ATOM | 1923 | HB3  | SER | X | 125 | 45.367 | 54.135 | 45.922 | 0.00 | 0.00 |
| ATOM | 1924 | OG   | SER | X | 125 | 46.783 | 52.976 | 46.840 | 0.00 | 0.00 |
| ATOM | 1925 | HG   | SER | X | 125 | 47.718 | 52.814 | 46.694 | 0.00 | 0.00 |
| ATOM | 1926 | C    | SER | X | 125 | 47.386 | 52.056 | 43.972 | 0.00 | 0.00 |
| ATOM | 1927 | O    | SER | X | 125 | 48.382 | 52.747 | 43.866 | 0.00 | 0.00 |
| ATOM | 1928 | N    | LEU | X | 126 | 47.380 | 50.742 | 43.610 | 0.00 | 0.00 |
| ATOM | 1929 | H    | LEU | X | 126 | 46.563 | 50.200 | 43.851 | 0.00 | 0.00 |
| ATOM | 1930 | CA   | LEU | X | 126 | 48.571 | 50.035 | 43.182 | 0.00 | 0.00 |
| ATOM | 1931 | HA   | LEU | X | 126 | 49.460 | 50.530 | 43.572 | 0.00 | 0.00 |
| ATOM | 1932 | CB   | LEU | X | 126 | 48.367 | 48.575 | 43.640 | 0.00 | 0.00 |
| ATOM | 1933 | HB2  | LEU | X | 126 | 47.475 | 48.160 | 43.170 | 0.00 | 0.00 |
| ATOM | 1934 | HB3  | LEU | X | 126 | 49.251 | 48.038 | 43.297 | 0.00 | 0.00 |
| ATOM | 1935 | CG   | LEU | X | 126 | 48.260 | 48.279 | 45.189 | 0.00 | 0.00 |
| ATOM | 1936 | HG   | LEU | X | 126 | 47.492 | 48.893 | 45.658 | 0.00 | 0.00 |
| ATOM | 1937 | CD1  | LEU | X | 126 | 48.124 | 46.803 | 45.473 | 0.00 | 0.00 |
| ATOM | 1938 | HD11 | LEU | X | 126 | 47.149 | 46.439 | 45.149 | 0.00 | 0.00 |
| ATOM | 1939 | HD12 | LEU | X | 126 | 48.997 | 46.326 | 45.028 | 0.00 | 0.00 |
| ATOM | 1940 | HD13 | LEU | X | 126 | 48.160 | 46.640 | 46.550 | 0.00 | 0.00 |
| ATOM | 1941 | CD2  | LEU | X | 126 | 49.537 | 48.689 | 45.915 | 0.00 | 0.00 |
| ATOM | 1942 | HD21 | LEU | X | 126 | 49.809 | 49.730 | 45.741 | 0.00 | 0.00 |
| ATOM | 1943 | HD22 | LEU | X | 126 | 49.437 | 48.481 | 46.980 | 0.00 | 0.00 |
| ATOM | 1944 | HD23 | LEU | X | 126 | 50.466 | 48.225 | 45.582 | 0.00 | 0.00 |
| ATOM | 1945 | C    | LEU | X | 126 | 48.912 | 50.148 | 41.700 | 0.00 | 0.00 |
| ATOM | 1946 | O    | LEU | X | 126 | 48.054 | 50.518 | 40.893 | 0.00 | 0.00 |
| ATOM | 1947 | N    | ASP | X | 127 | 50.106 | 49.853 | 41.254 | 0.00 | 0.00 |
| ATOM | 1948 | H    | ASP | X | 127 | 50.789 | 49.475 | 41.895 | 0.00 | 0.00 |
| ATOM | 1949 | CA   | ASP | X | 127 | 50.707 | 50.466 | 40.026 | 0.00 | 0.00 |
| ATOM | 1950 | HA   | ASP | X | 127 | 50.567 | 51.538 | 40.162 | 0.00 | 0.00 |
| ATOM | 1951 | CB   | ASP | X | 127 | 52.185 | 50.056 | 40.039 | 0.00 | 0.00 |
| ATOM | 1952 | HB2  | ASP | X | 127 | 52.588 | 50.109 | 41.051 | 0.00 | 0.00 |
| ATOM | 1953 | HB3  | ASP | X | 127 | 52.299 | 48.992 | 39.829 | 0.00 | 0.00 |
| ATOM | 1954 | CG   | ASP | X | 127 | 52.995 | 50.949 | 39.122 | 0.00 | 0.00 |
| ATOM | 1955 | OD1  | ASP | X | 127 | 53.466 | 50.452 | 38.088 | 0.00 | 0.00 |
| ATOM | 1956 | OD2  | ASP | X | 127 | 53.129 | 52.137 | 39.448 | 0.00 | 0.00 |
| ATOM | 1957 | C    | ASP | X | 127 | 50.007 | 49.983 | 38.753 | 0.00 | 0.00 |
| ATOM | 1958 | O    | ASP | X | 127 | 49.549 | 50.743 | 37.898 | 0.00 | 0.00 |
| ATOM | 1959 | N    | VAL | X | 128 | 49.823 | 48.690 | 38.726 | 0.00 | 0.00 |
| ATOM | 1960 | H    | VAL | X | 128 | 50.131 | 48.086 | 39.474 | 0.00 | 0.00 |
| ATOM | 1961 | CA   | VAL | X | 128 | 49.234 | 47.992 | 37.495 | 0.00 | 0.00 |
| ATOM | 1962 | HA   | VAL | X | 128 | 49.682 | 48.506 | 36.644 | 0.00 | 0.00 |

|      |      |      |     |   |     |        |        |        |      |      |
|------|------|------|-----|---|-----|--------|--------|--------|------|------|
| ATOM | 1963 | CB   | VAL | X | 128 | 49.489 | 46.473 | 37.498 | 0.00 | 0.00 |
| ATOM | 1964 | HB   | VAL | X | 128 | 49.108 | 46.075 | 38.438 | 0.00 | 0.00 |
| ATOM | 1965 | CG1  | VAL | X | 128 | 48.840 | 45.498 | 36.427 | 0.00 | 0.00 |
| ATOM | 1966 | HG11 | VAL | X | 128 | 48.881 | 46.020 | 35.471 | 0.00 | 0.00 |
| ATOM | 1967 | HG12 | VAL | X | 128 | 49.333 | 44.526 | 36.414 | 0.00 | 0.00 |
| ATOM | 1968 | HG13 | VAL | X | 128 | 47.811 | 45.243 | 36.681 | 0.00 | 0.00 |
| ATOM | 1969 | CG2  | VAL | X | 128 | 50.976 | 46.119 | 37.513 | 0.00 | 0.00 |
| ATOM | 1970 | HG21 | VAL | X | 128 | 51.514 | 46.414 | 36.612 | 0.00 | 0.00 |
| ATOM | 1971 | HG22 | VAL | X | 128 | 51.489 | 46.674 | 38.300 | 0.00 | 0.00 |
| ATOM | 1972 | HG23 | VAL | X | 128 | 50.975 | 45.049 | 37.720 | 0.00 | 0.00 |
| ATOM | 1973 | C    | VAL | X | 128 | 47.762 | 48.285 | 37.422 | 0.00 | 0.00 |
| ATOM | 1974 | O    | VAL | X | 128 | 47.196 | 48.340 | 36.336 | 0.00 | 0.00 |
| ATOM | 1975 | N    | TYR | X | 129 | 47.113 | 48.569 | 38.576 | 0.00 | 0.00 |
| ATOM | 1976 | H    | TYR | X | 129 | 47.683 | 48.735 | 39.393 | 0.00 | 0.00 |
| ATOM | 1977 | CA   | TYR | X | 129 | 45.627 | 48.895 | 38.605 | 0.00 | 0.00 |
| ATOM | 1978 | HA   | TYR | X | 129 | 45.126 | 48.243 | 37.890 | 0.00 | 0.00 |
| ATOM | 1979 | CB   | TYR | X | 129 | 45.058 | 48.598 | 40.045 | 0.00 | 0.00 |
| ATOM | 1980 | HB2  | TYR | X | 129 | 45.361 | 49.357 | 40.766 | 0.00 | 0.00 |
| ATOM | 1981 | HB3  | TYR | X | 129 | 43.987 | 48.706 | 39.871 | 0.00 | 0.00 |
| ATOM | 1982 | CG   | TYR | X | 129 | 45.326 | 47.308 | 40.794 | 0.00 | 0.00 |
| ATOM | 1983 | CD1  | TYR | X | 129 | 45.695 | 46.159 | 40.037 | 0.00 | 0.00 |
| ATOM | 1984 | HD1  | TYR | X | 129 | 45.923 | 46.241 | 38.985 | 0.00 | 0.00 |
| ATOM | 1985 | CE1  | TYR | X | 129 | 45.880 | 44.978 | 40.711 | 0.00 | 0.00 |
| ATOM | 1986 | HE1  | TYR | X | 129 | 46.094 | 44.034 | 40.233 | 0.00 | 0.00 |
| ATOM | 1987 | CZ   | TYR | X | 129 | 45.481 | 44.817 | 42.043 | 0.00 | 0.00 |
| ATOM | 1988 | OH   | TYR | X | 129 | 45.516 | 43.609 | 42.557 | 0.00 | 0.00 |
| ATOM | 1989 | HH   | TYR | X | 129 | 45.440 | 42.935 | 41.877 | 0.00 | 0.00 |
| ATOM | 1990 | CE2  | TYR | X | 129 | 45.174 | 45.982 | 42.801 | 0.00 | 0.00 |
| ATOM | 1991 | HE2  | TYR | X | 129 | 44.800 | 45.820 | 43.802 | 0.00 | 0.00 |
| ATOM | 1992 | CD2  | TYR | X | 129 | 45.103 | 47.242 | 42.161 | 0.00 | 0.00 |
| ATOM | 1993 | HD2  | TYR | X | 129 | 44.867 | 48.109 | 42.761 | 0.00 | 0.00 |
| ATOM | 1994 | C    | TYR | X | 129 | 45.323 | 50.344 | 38.228 | 0.00 | 0.00 |
| ATOM | 1995 | O    | TYR | X | 129 | 44.173 | 50.745 | 38.398 | 0.00 | 0.00 |
| ATOM | 1996 | N    | ASP | X | 130 | 46.259 | 51.147 | 37.704 | 0.00 | 0.00 |
| ATOM | 1997 | H    | ASP | X | 130 | 47.168 | 50.710 | 37.646 | 0.00 | 0.00 |
| ATOM | 1998 | CA   | ASP | X | 130 | 45.953 | 52.452 | 37.215 | 0.00 | 0.00 |
| ATOM | 1999 | HA   | ASP | X | 130 | 45.212 | 52.899 | 37.877 | 0.00 | 0.00 |
| ATOM | 2000 | CB   | ASP | X | 130 | 47.265 | 53.207 | 37.093 | 0.00 | 0.00 |
| ATOM | 2001 | HB2  | ASP | X | 130 | 47.786 | 53.196 | 38.051 | 0.00 | 0.00 |
| ATOM | 2002 | HB3  | ASP | X | 130 | 47.956 | 52.787 | 36.363 | 0.00 | 0.00 |
| ATOM | 2003 | CG   | ASP | X | 130 | 47.048 | 54.688 | 36.903 | 0.00 | 0.00 |
| ATOM | 2004 | OD1  | ASP | X | 130 | 46.818 | 55.114 | 35.767 | 0.00 | 0.00 |
| ATOM | 2005 | OD2  | ASP | X | 130 | 47.216 | 55.545 | 37.840 | 0.00 | 0.00 |
| ATOM | 2006 | C    | ASP | X | 130 | 45.279 | 52.430 | 35.792 | 0.00 | 0.00 |
| ATOM | 2007 | O    | ASP | X | 130 | 45.661 | 51.617 | 34.947 | 0.00 | 0.00 |
| ATOM | 2008 | N    | GLY | X | 131 | 44.359 | 53.307 | 35.582 | 0.00 | 0.00 |
| ATOM | 2009 | H    | GLY | X | 131 | 44.183 | 53.872 | 36.400 | 0.00 | 0.00 |
| ATOM | 2010 | CA   | GLY | X | 131 | 43.464 | 53.378 | 34.445 | 0.00 | 0.00 |
| ATOM | 2011 | HA2  | GLY | X | 131 | 43.202 | 52.431 | 34.125 | 0.00 | 0.00 |
| ATOM | 2012 | HA3  | GLY | X | 131 | 42.595 | 54.019 | 34.757 | 0.00 | 0.00 |
| ATOM | 2013 | C    | GLY | X | 131 | 43.978 | 54.080 | 33.168 | 0.00 | 0.00 |
| ATOM | 2014 | O    | GLY | X | 131 | 43.338 | 54.058 | 32.106 | 0.00 | 0.00 |
| ATOM | 2015 | N    | ARG | X | 132 | 45.182 | 54.726 | 33.301 | 0.00 | 0.00 |
| ATOM | 2016 | H    | ARG | X | 132 | 45.635 | 54.698 | 34.203 | 0.00 | 0.00 |
| ATOM | 2017 | CA   | ARG | X | 132 | 45.616 | 55.683 | 32.351 | 0.00 | 0.00 |
| ATOM | 2018 | HA   | ARG | X | 132 | 44.837 | 56.440 | 32.255 | 0.00 | 0.00 |
| ATOM | 2019 | CB   | ARG | X | 132 | 46.924 | 56.360 | 32.887 | 0.00 | 0.00 |
| ATOM | 2020 | HB2  | ARG | X | 132 | 47.085 | 57.294 | 32.350 | 0.00 | 0.00 |
| ATOM | 2021 | HB3  | ARG | X | 132 | 46.728 | 56.543 | 33.944 | 0.00 | 0.00 |
| ATOM | 2022 | CG   | ARG | X | 132 | 48.231 | 55.572 | 32.809 | 0.00 | 0.00 |
| ATOM | 2023 | HG2  | ARG | X | 132 | 47.983 | 54.628 | 33.293 | 0.00 | 0.00 |
| ATOM | 2024 | HG3  | ARG | X | 132 | 48.478 | 55.600 | 31.747 | 0.00 | 0.00 |
| ATOM | 2025 | CD   | ARG | X | 132 | 49.508 | 56.051 | 33.549 | 0.00 | 0.00 |
| ATOM | 2026 | HD2  | ARG | X | 132 | 50.355 | 55.450 | 33.216 | 0.00 | 0.00 |
| ATOM | 2027 | HD3  | ARG | X | 132 | 49.667 | 57.091 | 33.264 | 0.00 | 0.00 |
| ATOM | 2028 | NE   | ARG | X | 132 | 49.392 | 55.912 | 34.995 | 0.00 | 0.00 |
| ATOM | 2029 | HE   | ARG | X | 132 | 48.482 | 55.674 | 35.364 | 0.00 | 0.00 |
| ATOM | 2030 | CZ   | ARG | X | 132 | 50.109 | 56.576 | 35.878 | 0.00 | 0.00 |
| ATOM | 2031 | NH1  | ARG | X | 132 | 51.252 | 57.100 | 35.492 | 0.00 | 0.00 |
| ATOM | 2032 | HH11 | ARG | X | 132 | 51.613 | 56.822 | 34.590 | 0.00 | 0.00 |

|      |      |      |     |   |     |        |        |        |      |      |
|------|------|------|-----|---|-----|--------|--------|--------|------|------|
| ATOM | 2033 | HH12 | ARG | X | 132 | 51.666 | 57.794 | 36.098 | 0.00 | 0.00 |
| ATOM | 2034 | NH2  | ARG | X | 132 | 49.714 | 56.695 | 37.139 | 0.00 | 0.00 |
| ATOM | 2035 | HH21 | ARG | X | 132 | 48.860 | 56.193 | 37.338 | 0.00 | 0.00 |
| ATOM | 2036 | HH22 | ARG | X | 132 | 50.240 | 57.162 | 37.864 | 0.00 | 0.00 |
| ATOM | 2037 | C    | ARG | X | 132 | 45.804 | 55.206 | 30.923 | 0.00 | 0.00 |
| ATOM | 2038 | O    | ARG | X | 132 | 45.172 | 55.771 | 30.058 | 0.00 | 0.00 |
| ATOM | 2039 | N    | PHE | X | 133 | 46.577 | 54.150 | 30.686 | 0.00 | 0.00 |
| ATOM | 2040 | H    | PHE | X | 133 | 46.793 | 53.528 | 31.451 | 0.00 | 0.00 |
| ATOM | 2041 | CA   | PHE | X | 133 | 46.786 | 53.598 | 29.348 | 0.00 | 0.00 |
| ATOM | 2042 | HA   | PHE | X | 133 | 47.094 | 54.388 | 28.662 | 0.00 | 0.00 |
| ATOM | 2043 | CB   | PHE | X | 133 | 47.796 | 52.453 | 29.442 | 0.00 | 0.00 |
| ATOM | 2044 | HB2  | PHE | X | 133 | 47.459 | 51.651 | 30.100 | 0.00 | 0.00 |
| ATOM | 2045 | HB3  | PHE | X | 133 | 47.902 | 51.945 | 28.484 | 0.00 | 0.00 |
| ATOM | 2046 | CG   | PHE | X | 133 | 49.200 | 52.825 | 29.998 | 0.00 | 0.00 |
| ATOM | 2047 | CD1  | PHE | X | 133 | 49.648 | 52.596 | 31.346 | 0.00 | 0.00 |
| ATOM | 2048 | HD1  | PHE | X | 133 | 49.014 | 51.939 | 31.923 | 0.00 | 0.00 |
| ATOM | 2049 | CE1  | PHE | X | 133 | 50.833 | 53.081 | 31.854 | 0.00 | 0.00 |
| ATOM | 2050 | HE1  | PHE | X | 133 | 50.964 | 53.027 | 32.924 | 0.00 | 0.00 |
| ATOM | 2051 | CZ   | PHE | X | 133 | 51.565 | 53.902 | 30.995 | 0.00 | 0.00 |
| ATOM | 2052 | HZ   | PHE | X | 133 | 52.440 | 54.365 | 31.428 | 0.00 | 0.00 |
| ATOM | 2053 | CE2  | PHE | X | 133 | 51.206 | 54.143 | 29.653 | 0.00 | 0.00 |
| ATOM | 2054 | HE2  | PHE | X | 133 | 51.866 | 54.734 | 29.035 | 0.00 | 0.00 |
| ATOM | 2055 | CD2  | PHE | X | 133 | 49.880 | 53.734 | 29.304 | 0.00 | 0.00 |
| ATOM | 2056 | HD2  | PHE | X | 133 | 49.507 | 54.002 | 28.326 | 0.00 | 0.00 |
| ATOM | 2057 | C    | PHE | X | 133 | 45.453 | 53.135 | 28.755 | 0.00 | 0.00 |
| ATOM | 2058 | O    | PHE | X | 133 | 45.284 | 53.275 | 27.540 | 0.00 | 0.00 |
| ATOM | 2059 | N    | LEU | X | 134 | 44.575 | 52.569 | 29.541 | 0.00 | 0.00 |
| ATOM | 2060 | H    | LEU | X | 134 | 44.999 | 52.384 | 30.439 | 0.00 | 0.00 |
| ATOM | 2061 | CA   | LEU | X | 134 | 43.273 | 51.999 | 29.119 | 0.00 | 0.00 |
| ATOM | 2062 | HA   | LEU | X | 134 | 43.520 | 51.337 | 28.289 | 0.00 | 0.00 |
| ATOM | 2063 | CB   | LEU | X | 134 | 42.726 | 51.036 | 30.208 | 0.00 | 0.00 |
| ATOM | 2064 | HB2  | LEU | X | 134 | 43.424 | 50.216 | 30.371 | 0.00 | 0.00 |
| ATOM | 2065 | HB3  | LEU | X | 134 | 42.752 | 51.542 | 31.173 | 0.00 | 0.00 |
| ATOM | 2066 | CG   | LEU | X | 134 | 41.304 | 50.461 | 30.067 | 0.00 | 0.00 |
| ATOM | 2067 | HG   | LEU | X | 134 | 40.591 | 51.283 | 30.000 | 0.00 | 0.00 |
| ATOM | 2068 | CD1  | LEU | X | 134 | 41.317 | 49.508 | 28.856 | 0.00 | 0.00 |
| ATOM | 2069 | HD11 | LEU | X | 134 | 42.107 | 48.764 | 28.960 | 0.00 | 0.00 |
| ATOM | 2070 | HD12 | LEU | X | 134 | 40.355 | 49.019 | 28.703 | 0.00 | 0.00 |
| ATOM | 2071 | HD13 | LEU | X | 134 | 41.559 | 50.026 | 27.928 | 0.00 | 0.00 |
| ATOM | 2072 | CD2  | LEU | X | 134 | 40.955 | 49.686 | 31.312 | 0.00 | 0.00 |
| ATOM | 2073 | HD21 | LEU | X | 134 | 39.932 | 49.325 | 31.205 | 0.00 | 0.00 |
| ATOM | 2074 | HD22 | LEU | X | 134 | 41.671 | 48.864 | 31.311 | 0.00 | 0.00 |
| ATOM | 2075 | HD23 | LEU | X | 134 | 41.149 | 50.314 | 32.181 | 0.00 | 0.00 |
| ATOM | 2076 | C    | LEU | X | 134 | 42.291 | 53.058 | 28.686 | 0.00 | 0.00 |
| ATOM | 2077 | O    | LEU | X | 134 | 41.752 | 52.995 | 27.524 | 0.00 | 0.00 |
| ATOM | 2078 | N    | VAL | X | 135 | 42.014 | 54.010 | 29.573 | 0.00 | 0.00 |
| ATOM | 2079 | H    | VAL | X | 135 | 42.373 | 53.865 | 30.506 | 0.00 | 0.00 |
| ATOM | 2080 | CA   | VAL | X | 135 | 41.254 | 55.143 | 29.211 | 0.00 | 0.00 |
| ATOM | 2081 | HA   | VAL | X | 135 | 40.258 | 54.735 | 29.045 | 0.00 | 0.00 |
| ATOM | 2082 | CB   | VAL | X | 135 | 41.215 | 56.108 | 30.385 | 0.00 | 0.00 |
| ATOM | 2083 | HB   | VAL | X | 135 | 42.232 | 56.243 | 30.753 | 0.00 | 0.00 |
| ATOM | 2084 | CG1  | VAL | X | 135 | 40.508 | 57.444 | 30.226 | 0.00 | 0.00 |
| ATOM | 2085 | HG11 | VAL | X | 135 | 40.971 | 57.939 | 29.372 | 0.00 | 0.00 |
| ATOM | 2086 | HG12 | VAL | X | 135 | 39.498 | 57.241 | 29.871 | 0.00 | 0.00 |
| ATOM | 2087 | HG13 | VAL | X | 135 | 40.671 | 58.066 | 31.105 | 0.00 | 0.00 |
| ATOM | 2088 | CG2  | VAL | X | 135 | 40.489 | 55.544 | 31.622 | 0.00 | 0.00 |
| ATOM | 2089 | HG21 | VAL | X | 135 | 40.658 | 56.270 | 32.417 | 0.00 | 0.00 |
| ATOM | 2090 | HG22 | VAL | X | 135 | 39.426 | 55.453 | 31.398 | 0.00 | 0.00 |
| ATOM | 2091 | HG23 | VAL | X | 135 | 40.851 | 54.565 | 31.935 | 0.00 | 0.00 |
| ATOM | 2092 | C    | VAL | X | 135 | 41.799 | 55.755 | 27.956 | 0.00 | 0.00 |
| ATOM | 2093 | O    | VAL | X | 135 | 41.057 | 56.226 | 27.184 | 0.00 | 0.00 |
| ATOM | 2094 | N    | GLN | X | 136 | 43.113 | 55.969 | 27.914 | 0.00 | 0.00 |
| ATOM | 2095 | H    | GLN | X | 136 | 43.677 | 55.682 | 28.701 | 0.00 | 0.00 |
| ATOM | 2096 | CA   | GLN | X | 136 | 43.735 | 56.442 | 26.650 | 0.00 | 0.00 |
| ATOM | 2097 | HA   | GLN | X | 136 | 43.303 | 57.436 | 26.534 | 0.00 | 0.00 |
| ATOM | 2098 | CB   | GLN | X | 136 | 45.292 | 56.609 | 26.794 | 0.00 | 0.00 |
| ATOM | 2099 | HB2  | GLN | X | 136 | 45.519 | 57.054 | 27.763 | 0.00 | 0.00 |
| ATOM | 2100 | HB3  | GLN | X | 136 | 45.735 | 55.632 | 26.988 | 0.00 | 0.00 |
| ATOM | 2101 | CG   | GLN | X | 136 | 45.961 | 57.347 | 25.634 | 0.00 | 0.00 |
| ATOM | 2102 | HG2  | GLN | X | 136 | 45.282 | 57.652 | 24.838 | 0.00 | 0.00 |

|      |      |      |     |   |     |        |        |        |      |      |
|------|------|------|-----|---|-----|--------|--------|--------|------|------|
| ATOM | 2103 | HG3  | GLN | X | 136 | 46.420 | 58.270 | 25.988 | 0.00 | 0.00 |
| ATOM | 2104 | CD   | GLN | X | 136 | 47.146 | 56.596 | 25.022 | 0.00 | 0.00 |
| ATOM | 2105 | OE1  | GLN | X | 136 | 48.296 | 56.757 | 25.317 | 0.00 | 0.00 |
| ATOM | 2106 | NE2  | GLN | X | 136 | 47.039 | 55.709 | 24.044 | 0.00 | 0.00 |
| ATOM | 2107 | HE21 | GLN | X | 136 | 47.827 | 55.387 | 23.500 | 0.00 | 0.00 |
| ATOM | 2108 | HE22 | GLN | X | 136 | 46.112 | 55.458 | 23.732 | 0.00 | 0.00 |
| ATOM | 2109 | C    | GLN | X | 136 | 43.382 | 55.608 | 25.335 | 0.00 | 0.00 |
| ATOM | 2110 | O    | GLN | X | 136 | 42.820 | 56.063 | 24.343 | 0.00 | 0.00 |
| ATOM | 2111 | N    | ALA | X | 137 | 43.678 | 54.259 | 25.270 | 0.00 | 0.00 |
| ATOM | 2112 | H    | ALA | X | 137 | 44.201 | 53.810 | 26.008 | 0.00 | 0.00 |
| ATOM | 2113 | CA   | ALA | X | 137 | 43.648 | 53.416 | 24.075 | 0.00 | 0.00 |
| ATOM | 2114 | HA   | ALA | X | 137 | 44.008 | 54.039 | 23.256 | 0.00 | 0.00 |
| ATOM | 2115 | CB   | ALA | X | 137 | 44.588 | 52.285 | 24.271 | 0.00 | 0.00 |
| ATOM | 2116 | HB1  | ALA | X | 137 | 44.909 | 51.872 | 23.314 | 0.00 | 0.00 |
| ATOM | 2117 | HB2  | ALA | X | 137 | 45.518 | 52.554 | 24.772 | 0.00 | 0.00 |
| ATOM | 2118 | HB3  | ALA | X | 137 | 44.093 | 51.470 | 24.798 | 0.00 | 0.00 |
| ATOM | 2119 | C    | ALA | X | 137 | 42.274 | 52.983 | 23.585 | 0.00 | 0.00 |
| ATOM | 2120 | O    | ALA | X | 137 | 42.089 | 52.852 | 22.367 | 0.00 | 0.00 |
| ATOM | 2121 | N    | GLU | X | 138 | 41.180 | 52.896 | 24.415 | 0.00 | 0.00 |
| ATOM | 2122 | H    | GLU | X | 138 | 41.262 | 53.147 | 25.390 | 0.00 | 0.00 |
| ATOM | 2123 | CA   | GLU | X | 138 | 39.888 | 52.445 | 24.031 | 0.00 | 0.00 |
| ATOM | 2124 | HA   | GLU | X | 138 | 39.675 | 52.776 | 23.015 | 0.00 | 0.00 |
| ATOM | 2125 | CB   | GLU | X | 138 | 39.694 | 50.947 | 24.432 | 0.00 | 0.00 |
| ATOM | 2126 | HB2  | GLU | X | 138 | 40.021 | 50.780 | 25.458 | 0.00 | 0.00 |
| ATOM | 2127 | HB3  | GLU | X | 138 | 38.648 | 50.683 | 24.278 | 0.00 | 0.00 |
| ATOM | 2128 | CG   | GLU | X | 138 | 40.415 | 49.920 | 23.468 | 0.00 | 0.00 |
| ATOM | 2129 | HG2  | GLU | X | 138 | 41.478 | 50.141 | 23.370 | 0.00 | 0.00 |
| ATOM | 2130 | HG3  | GLU | X | 138 | 40.283 | 48.948 | 23.944 | 0.00 | 0.00 |
| ATOM | 2131 | CD   | GLU | X | 138 | 39.927 | 49.891 | 22.010 | 0.00 | 0.00 |
| ATOM | 2132 | OE1  | GLU | X | 138 | 38.711 | 49.929 | 21.792 | 0.00 | 0.00 |
| ATOM | 2133 | OE2  | GLU | X | 138 | 40.686 | 49.777 | 21.039 | 0.00 | 0.00 |
| ATOM | 2134 | C    | GLU | X | 138 | 38.753 | 53.238 | 24.693 | 0.00 | 0.00 |
| ATOM | 2135 | O    | GLU | X | 138 | 37.552 | 53.073 | 24.387 | 0.00 | 0.00 |
| ATOM | 2136 | N    | ARG | X | 139 | 39.035 | 54.222 | 25.586 | 0.00 | 0.00 |
| ATOM | 2137 | H    | ARG | X | 139 | 40.017 | 54.263 | 25.822 | 0.00 | 0.00 |
| ATOM | 2138 | CA   | ARG | X | 139 | 38.189 | 55.331 | 26.048 | 0.00 | 0.00 |
| ATOM | 2139 | HA   | ARG | X | 139 | 38.867 | 55.919 | 26.668 | 0.00 | 0.00 |
| ATOM | 2140 | CB   | ARG | X | 139 | 37.707 | 56.252 | 24.904 | 0.00 | 0.00 |
| ATOM | 2141 | HB2  | ARG | X | 139 | 38.599 | 56.477 | 24.318 | 0.00 | 0.00 |
| ATOM | 2142 | HB3  | ARG | X | 139 | 37.062 | 55.704 | 24.216 | 0.00 | 0.00 |
| ATOM | 2143 | CG   | ARG | X | 139 | 37.042 | 57.553 | 25.295 | 0.00 | 0.00 |
| ATOM | 2144 | HG2  | ARG | X | 139 | 35.984 | 57.415 | 25.521 | 0.00 | 0.00 |
| ATOM | 2145 | HG3  | ARG | X | 139 | 37.551 | 57.969 | 26.164 | 0.00 | 0.00 |
| ATOM | 2146 | CD   | ARG | X | 139 | 37.112 | 58.596 | 24.167 | 0.00 | 0.00 |
| ATOM | 2147 | HD2  | ARG | X | 139 | 38.139 | 58.957 | 24.211 | 0.00 | 0.00 |
| ATOM | 2148 | HD3  | ARG | X | 139 | 36.946 | 58.091 | 23.215 | 0.00 | 0.00 |
| ATOM | 2149 | NE   | ARG | X | 139 | 36.231 | 59.717 | 24.439 | 0.00 | 0.00 |
| ATOM | 2150 | HE   | ARG | X | 139 | 35.561 | 59.589 | 25.184 | 0.00 | 0.00 |
| ATOM | 2151 | CZ   | ARG | X | 139 | 36.232 | 60.974 | 23.928 | 0.00 | 0.00 |
| ATOM | 2152 | NH1  | ARG | X | 139 | 36.880 | 61.270 | 22.847 | 0.00 | 0.00 |
| ATOM | 2153 | HH11 | ARG | X | 139 | 37.443 | 60.573 | 22.381 | 0.00 | 0.00 |
| ATOM | 2154 | HH12 | ARG | X | 139 | 36.808 | 62.201 | 22.463 | 0.00 | 0.00 |
| ATOM | 2155 | NH2  | ARG | X | 139 | 35.589 | 61.869 | 24.578 | 0.00 | 0.00 |
| ATOM | 2156 | HH21 | ARG | X | 139 | 35.074 | 61.599 | 25.403 | 0.00 | 0.00 |
| ATOM | 2157 | HH22 | ARG | X | 139 | 35.573 | 62.845 | 24.318 | 0.00 | 0.00 |
| ATOM | 2158 | C    | ARG | X | 139 | 37.035 | 54.905 | 27.018 | 0.00 | 0.00 |
| ATOM | 2159 | O    | ARG | X | 139 | 36.261 | 55.780 | 27.385 | 0.00 | 0.00 |
| ATOM | 2160 | N    | THR | X | 140 | 37.007 | 53.640 | 27.460 | 0.00 | 0.00 |
| ATOM | 2161 | H    | THR | X | 140 | 37.788 | 53.085 | 27.140 | 0.00 | 0.00 |
| ATOM | 2162 | CA   | THR | X | 140 | 36.240 | 53.185 | 28.640 | 0.00 | 0.00 |
| ATOM | 2163 | HA   | THR | X | 140 | 35.186 | 53.434 | 28.516 | 0.00 | 0.00 |
| ATOM | 2164 | CB   | THR | X | 140 | 36.280 | 51.615 | 28.664 | 0.00 | 0.00 |
| ATOM | 2165 | HB   | THR | X | 140 | 35.994 | 51.360 | 29.684 | 0.00 | 0.00 |
| ATOM | 2166 | CG2  | THR | X | 140 | 35.478 | 50.892 | 27.592 | 0.00 | 0.00 |
| ATOM | 2167 | HG21 | THR | X | 140 | 35.125 | 49.890 | 27.837 | 0.00 | 0.00 |
| ATOM | 2168 | HG22 | THR | X | 140 | 34.608 | 51.516 | 27.390 | 0.00 | 0.00 |
| ATOM | 2169 | HG23 | THR | X | 140 | 36.092 | 51.035 | 26.702 | 0.00 | 0.00 |
| ATOM | 2170 | OG1  | THR | X | 140 | 37.665 | 51.301 | 28.605 | 0.00 | 0.00 |
| ATOM | 2171 | HG1  | THR | X | 140 | 38.126 | 51.901 | 29.195 | 0.00 | 0.00 |
| ATOM | 2172 | C    | THR | X | 140 | 36.822 | 53.715 | 29.874 | 0.00 | 0.00 |



|      |      |      |     |   |     |        |        |        |      |      |
|------|------|------|-----|---|-----|--------|--------|--------|------|------|
| ATOM | 2173 | O    | THR | X | 140 | 37.994 | 53.630 | 30.142 | 0.00 | 0.00 |
| ATOM | 2174 | N    | VAL | X | 141 | 35.951 | 54.293 | 30.720 | 0.00 | 0.00 |
| ATOM | 2175 | H    | VAL | X | 141 | 34.964 | 54.212 | 30.524 | 0.00 | 0.00 |
| ATOM | 2176 | CA   | VAL | X | 141 | 36.291 | 54.937 | 31.940 | 0.00 | 0.00 |
| ATOM | 2177 | HA   | VAL | X | 141 | 37.297 | 55.334 | 31.807 | 0.00 | 0.00 |
| ATOM | 2178 | CB   | VAL | X | 141 | 35.280 | 55.959 | 32.493 | 0.00 | 0.00 |
| ATOM | 2179 | HB   | VAL | X | 141 | 34.294 | 55.546 | 32.280 | 0.00 | 0.00 |
| ATOM | 2180 | CG1  | VAL | X | 141 | 35.358 | 56.361 | 34.067 | 0.00 | 0.00 |
| ATOM | 2181 | HG11 | VAL | X | 141 | 36.299 | 56.884 | 34.233 | 0.00 | 0.00 |
| ATOM | 2182 | HG12 | VAL | X | 141 | 34.457 | 56.850 | 34.440 | 0.00 | 0.00 |
| ATOM | 2183 | HG13 | VAL | X | 141 | 35.633 | 55.493 | 34.665 | 0.00 | 0.00 |
| ATOM | 2184 | CG2  | VAL | X | 141 | 35.474 | 57.187 | 31.585 | 0.00 | 0.00 |
| ATOM | 2185 | HG21 | VAL | X | 141 | 34.605 | 57.818 | 31.769 | 0.00 | 0.00 |
| ATOM | 2186 | HG22 | VAL | X | 141 | 36.410 | 57.707 | 31.789 | 0.00 | 0.00 |
| ATOM | 2187 | HG23 | VAL | X | 141 | 35.499 | 56.958 | 30.519 | 0.00 | 0.00 |
| ATOM | 2188 | C    | VAL | X | 141 | 36.619 | 53.930 | 33.005 | 0.00 | 0.00 |
| ATOM | 2189 | O    | VAL | X | 141 | 35.878 | 53.016 | 33.234 | 0.00 | 0.00 |
| ATOM | 2190 | N    | LEU | X | 142 | 37.702 | 54.043 | 33.771 | 0.00 | 0.00 |
| ATOM | 2191 | H    | LEU | X | 142 | 38.372 | 54.779 | 33.600 | 0.00 | 0.00 |
| ATOM | 2192 | CA   | LEU | X | 142 | 38.131 | 53.041 | 34.803 | 0.00 | 0.00 |
| ATOM | 2193 | HA   | LEU | X | 142 | 37.508 | 52.162 | 34.642 | 0.00 | 0.00 |
| ATOM | 2194 | CB   | LEU | X | 142 | 39.584 | 52.653 | 34.558 | 0.00 | 0.00 |
| ATOM | 2195 | HB2  | LEU | X | 142 | 39.585 | 52.129 | 33.603 | 0.00 | 0.00 |
| ATOM | 2196 | HB3  | LEU | X | 142 | 40.321 | 53.444 | 34.414 | 0.00 | 0.00 |
| ATOM | 2197 | CG   | LEU | X | 142 | 40.342 | 51.653 | 35.413 | 0.00 | 0.00 |
| ATOM | 2198 | HG   | LEU | X | 142 | 41.235 | 51.425 | 34.831 | 0.00 | 0.00 |
| ATOM | 2199 | CD1  | LEU | X | 142 | 40.777 | 52.120 | 36.760 | 0.00 | 0.00 |
| ATOM | 2200 | HD11 | LEU | X | 142 | 41.262 | 53.076 | 36.566 | 0.00 | 0.00 |
| ATOM | 2201 | HD12 | LEU | X | 142 | 39.945 | 52.148 | 37.464 | 0.00 | 0.00 |
| ATOM | 2202 | HD13 | LEU | X | 142 | 41.472 | 51.384 | 37.165 | 0.00 | 0.00 |
| ATOM | 2203 | CD2  | LEU | X | 142 | 39.573 | 50.284 | 35.561 | 0.00 | 0.00 |
| ATOM | 2204 | HD21 | LEU | X | 142 | 40.275 | 49.558 | 35.969 | 0.00 | 0.00 |
| ATOM | 2205 | HD22 | LEU | X | 142 | 38.832 | 50.486 | 36.335 | 0.00 | 0.00 |
| ATOM | 2206 | HD23 | LEU | X | 142 | 39.160 | 50.095 | 34.570 | 0.00 | 0.00 |
| ATOM | 2207 | C    | LEU | X | 142 | 37.829 | 53.698 | 36.244 | 0.00 | 0.00 |
| ATOM | 2208 | O    | LEU | X | 142 | 38.231 | 54.800 | 36.548 | 0.00 | 0.00 |
| ATOM | 2209 | N    | VAL | X | 143 | 37.121 | 52.912 | 37.073 | 0.00 | 0.00 |
| ATOM | 2210 | H    | VAL | X | 143 | 36.924 | 51.967 | 36.774 | 0.00 | 0.00 |
| ATOM | 2211 | CA   | VAL | X | 143 | 36.798 | 53.298 | 38.431 | 0.00 | 0.00 |
| ATOM | 2212 | HA   | VAL | X | 143 | 37.307 | 54.216 | 38.725 | 0.00 | 0.00 |
| ATOM | 2213 | CB   | VAL | X | 143 | 35.284 | 53.407 | 38.634 | 0.00 | 0.00 |
| ATOM | 2214 | HB   | VAL | X | 143 | 34.834 | 52.570 | 38.100 | 0.00 | 0.00 |
| ATOM | 2215 | CG1  | VAL | X | 143 | 34.785 | 53.338 | 40.066 | 0.00 | 0.00 |
| ATOM | 2216 | HG11 | VAL | X | 143 | 34.814 | 52.311 | 40.431 | 0.00 | 0.00 |
| ATOM | 2217 | HG12 | VAL | X | 143 | 35.275 | 54.014 | 40.767 | 0.00 | 0.00 |
| ATOM | 2218 | HG13 | VAL | X | 143 | 33.741 | 53.639 | 39.978 | 0.00 | 0.00 |
| ATOM | 2219 | CG2  | VAL | X | 143 | 34.883 | 54.686 | 38.004 | 0.00 | 0.00 |
| ATOM | 2220 | HG21 | VAL | X | 143 | 35.293 | 55.549 | 38.530 | 0.00 | 0.00 |
| ATOM | 2221 | HG22 | VAL | X | 143 | 35.187 | 54.772 | 36.961 | 0.00 | 0.00 |
| ATOM | 2222 | HG23 | VAL | X | 143 | 33.795 | 54.743 | 38.020 | 0.00 | 0.00 |
| ATOM | 2223 | C    | VAL | X | 143 | 37.331 | 52.201 | 39.426 | 0.00 | 0.00 |
| ATOM | 2224 | O    | VAL | X | 143 | 37.216 | 50.993 | 39.134 | 0.00 | 0.00 |
| ATOM | 2225 | N    | SER | X | 144 | 37.865 | 52.619 | 40.542 | 0.00 | 0.00 |
| ATOM | 2226 | H    | SER | X | 144 | 37.859 | 53.602 | 40.770 | 0.00 | 0.00 |
| ATOM | 2227 | CA   | SER | X | 144 | 38.443 | 51.731 | 41.579 | 0.00 | 0.00 |
| ATOM | 2228 | HA   | SER | X | 144 | 37.878 | 50.800 | 41.561 | 0.00 | 0.00 |
| ATOM | 2229 | CB   | SER | X | 144 | 39.889 | 51.461 | 41.183 | 0.00 | 0.00 |
| ATOM | 2230 | HB2  | SER | X | 144 | 39.905 | 51.108 | 40.152 | 0.00 | 0.00 |
| ATOM | 2231 | HB3  | SER | X | 144 | 40.395 | 52.418 | 41.307 | 0.00 | 0.00 |
| ATOM | 2232 | OG   | SER | X | 144 | 40.454 | 50.466 | 42.001 | 0.00 | 0.00 |
| ATOM | 2233 | HG   | SER | X | 144 | 41.337 | 50.481 | 41.624 | 0.00 | 0.00 |
| ATOM | 2234 | C    | SER | X | 144 | 38.228 | 52.290 | 43.047 | 0.00 | 0.00 |
| ATOM | 2235 | O    | SER | X | 144 | 38.425 | 53.512 | 43.248 | 0.00 | 0.00 |
| ATOM | 2236 | N    | MET | X | 145 | 37.900 | 51.566 | 44.068 | 0.00 | 0.00 |
| ATOM | 2237 | H    | MET | X | 145 | 37.766 | 50.584 | 43.874 | 0.00 | 0.00 |
| ATOM | 2238 | CA   | MET | X | 145 | 37.606 | 51.928 | 45.464 | 0.00 | 0.00 |
| ATOM | 2239 | HA   | MET | X | 145 | 37.863 | 52.987 | 45.489 | 0.00 | 0.00 |
| ATOM | 2240 | CB   | MET | X | 145 | 36.128 | 51.828 | 45.759 | 0.00 | 0.00 |
| ATOM | 2241 | HB2  | MET | X | 145 | 35.941 | 52.625 | 46.478 | 0.00 | 0.00 |
| ATOM | 2242 | HB3  | MET | X | 145 | 35.524 | 52.068 | 44.884 | 0.00 | 0.00 |

|      |      |      |     |   |     |        |        |        |      |      |
|------|------|------|-----|---|-----|--------|--------|--------|------|------|
| ATOM | 2243 | CG   | MET | X | 145 | 35.616 | 50.445 | 46.251 | 0.00 | 0.00 |
| ATOM | 2244 | HG2  | MET | X | 145 | 36.183 | 50.042 | 47.090 | 0.00 | 0.00 |
| ATOM | 2245 | HG3  | MET | X | 145 | 34.577 | 50.523 | 46.569 | 0.00 | 0.00 |
| ATOM | 2246 | SD   | MET | X | 145 | 35.517 | 49.158 | 44.944 | 0.00 | 0.00 |
| ATOM | 2247 | CE   | MET | X | 145 | 34.673 | 50.030 | 43.635 | 0.00 | 0.00 |
| ATOM | 2248 | HE1  | MET | X | 145 | 33.653 | 50.359 | 43.837 | 0.00 | 0.00 |
| ATOM | 2249 | HE2  | MET | X | 145 | 35.245 | 50.893 | 43.295 | 0.00 | 0.00 |
| ATOM | 2250 | HE3  | MET | X | 145 | 34.552 | 49.420 | 42.739 | 0.00 | 0.00 |
| ATOM | 2251 | C    | MET | X | 145 | 38.415 | 51.063 | 46.465 | 0.00 | 0.00 |
| ATOM | 2252 | O    | MET | X | 145 | 38.510 | 49.842 | 46.327 | 0.00 | 0.00 |
| ATOM | 2253 | N    | ASN | X | 146 | 38.897 | 51.724 | 47.521 | 0.00 | 0.00 |
| ATOM | 2254 | H    | ASN | X | 146 | 38.694 | 52.713 | 47.520 | 0.00 | 0.00 |
| ATOM | 2255 | CA   | ASN | X | 146 | 39.342 | 51.074 | 48.809 | 0.00 | 0.00 |
| ATOM | 2256 | HA   | ASN | X | 146 | 39.929 | 50.251 | 48.401 | 0.00 | 0.00 |
| ATOM | 2257 | CB   | ASN | X | 146 | 40.117 | 52.091 | 49.607 | 0.00 | 0.00 |
| ATOM | 2258 | HB2  | ASN | X | 146 | 39.602 | 53.051 | 49.567 | 0.00 | 0.00 |
| ATOM | 2259 | HB3  | ASN | X | 146 | 40.249 | 51.687 | 50.610 | 0.00 | 0.00 |
| ATOM | 2260 | CG   | ASN | X | 146 | 41.573 | 52.417 | 49.160 | 0.00 | 0.00 |
| ATOM | 2261 | OD1  | ASN | X | 146 | 42.169 | 51.706 | 48.384 | 0.00 | 0.00 |
| ATOM | 2262 | ND2  | ASN | X | 146 | 42.095 | 53.500 | 49.723 | 0.00 | 0.00 |
| ATOM | 2263 | HD21 | ASN | X | 146 | 42.948 | 53.855 | 49.315 | 0.00 | 0.00 |
| ATOM | 2264 | HD22 | ASN | X | 146 | 41.645 | 53.998 | 50.478 | 0.00 | 0.00 |
| ATOM | 2265 | C    | ASN | X | 146 | 38.121 | 50.449 | 49.583 | 0.00 | 0.00 |
| ATOM | 2266 | O    | ASN | X | 146 | 36.974 | 50.961 | 49.700 | 0.00 | 0.00 |
| ATOM | 2267 | N    | TYR | X | 147 | 38.377 | 49.255 | 50.059 | 0.00 | 0.00 |
| ATOM | 2268 | H    | TYR | X | 147 | 39.229 | 48.775 | 49.808 | 0.00 | 0.00 |
| ATOM | 2269 | CA   | TYR | X | 147 | 37.466 | 48.508 | 50.938 | 0.00 | 0.00 |
| ATOM | 2270 | HA   | TYR | X | 147 | 36.868 | 49.235 | 51.489 | 0.00 | 0.00 |
| ATOM | 2271 | CB   | TYR | X | 147 | 36.496 | 47.647 | 50.180 | 0.00 | 0.00 |
| ATOM | 2272 | HB2  | TYR | X | 147 | 35.812 | 47.190 | 50.895 | 0.00 | 0.00 |
| ATOM | 2273 | HB3  | TYR | X | 147 | 35.910 | 48.320 | 49.554 | 0.00 | 0.00 |
| ATOM | 2274 | CG   | TYR | X | 147 | 37.132 | 46.639 | 49.177 | 0.00 | 0.00 |
| ATOM | 2275 | CD1  | TYR | X | 147 | 37.457 | 47.168 | 47.938 | 0.00 | 0.00 |
| ATOM | 2276 | HD1  | TYR | X | 147 | 37.192 | 48.192 | 47.718 | 0.00 | 0.00 |
| ATOM | 2277 | CE1  | TYR | X | 147 | 37.940 | 46.394 | 46.894 | 0.00 | 0.00 |
| ATOM | 2278 | HE1  | TYR | X | 147 | 38.098 | 46.860 | 45.933 | 0.00 | 0.00 |
| ATOM | 2279 | CZ   | TYR | X | 147 | 38.384 | 45.036 | 47.175 | 0.00 | 0.00 |
| ATOM | 2280 | OH   | TYR | X | 147 | 39.012 | 44.283 | 46.276 | 0.00 | 0.00 |
| ATOM | 2281 | HH   | TYR | X | 147 | 39.331 | 43.421 | 46.553 | 0.00 | 0.00 |
| ATOM | 2282 | CE2  | TYR | X | 147 | 38.169 | 44.583 | 48.505 | 0.00 | 0.00 |
| ATOM | 2283 | HE2  | TYR | X | 147 | 38.520 | 43.583 | 48.712 | 0.00 | 0.00 |
| ATOM | 2284 | CD2  | TYR | X | 147 | 37.492 | 45.329 | 49.490 | 0.00 | 0.00 |
| ATOM | 2285 | HD2  | TYR | X | 147 | 37.306 | 44.975 | 50.493 | 0.00 | 0.00 |
| ATOM | 2286 | C    | TYR | X | 147 | 38.216 | 47.630 | 52.004 | 0.00 | 0.00 |
| ATOM | 2287 | O    | TYR | X | 147 | 39.416 | 47.327 | 51.937 | 0.00 | 0.00 |
| ATOM | 2288 | N    | ARG | X | 148 | 37.454 | 47.256 | 53.063 | 0.00 | 0.00 |
| ATOM | 2289 | H    | ARG | X | 148 | 36.465 | 47.449 | 53.134 | 0.00 | 0.00 |
| ATOM | 2290 | CA   | ARG | X | 148 | 38.014 | 46.642 | 54.250 | 0.00 | 0.00 |
| ATOM | 2291 | HA   | ARG | X | 148 | 38.870 | 47.239 | 54.564 | 0.00 | 0.00 |
| ATOM | 2292 | CB   | ARG | X | 148 | 37.052 | 46.763 | 55.434 | 0.00 | 0.00 |
| ATOM | 2293 | HB2  | ARG | X | 148 | 36.093 | 46.274 | 55.262 | 0.00 | 0.00 |
| ATOM | 2294 | HB3  | ARG | X | 148 | 37.430 | 46.210 | 56.294 | 0.00 | 0.00 |
| ATOM | 2295 | CG   | ARG | X | 148 | 36.940 | 48.234 | 55.873 | 0.00 | 0.00 |
| ATOM | 2296 | HG2  | ARG | X | 148 | 37.901 | 48.563 | 56.267 | 0.00 | 0.00 |
| ATOM | 2297 | HG3  | ARG | X | 148 | 36.660 | 48.753 | 54.956 | 0.00 | 0.00 |
| ATOM | 2298 | CD   | ARG | X | 148 | 35.835 | 48.382 | 56.986 | 0.00 | 0.00 |
| ATOM | 2299 | HD2  | ARG | X | 148 | 35.891 | 47.502 | 57.627 | 0.00 | 0.00 |
| ATOM | 2300 | HD3  | ARG | X | 148 | 36.008 | 49.308 | 57.533 | 0.00 | 0.00 |
| ATOM | 2301 | NE   | ARG | X | 148 | 34.532 | 48.530 | 56.380 | 0.00 | 0.00 |
| ATOM | 2302 | HE   | ARG | X | 148 | 34.535 | 48.370 | 55.383 | 0.00 | 0.00 |
| ATOM | 2303 | CZ   | ARG | X | 148 | 33.434 | 48.540 | 57.181 | 0.00 | 0.00 |
| ATOM | 2304 | NH1  | ARG | X | 148 | 33.509 | 48.386 | 58.520 | 0.00 | 0.00 |
| ATOM | 2305 | HH11 | ARG | X | 148 | 34.357 | 48.086 | 58.979 | 0.00 | 0.00 |
| ATOM | 2306 | HH12 | ARG | X | 148 | 32.629 | 48.516 | 58.999 | 0.00 | 0.00 |
| ATOM | 2307 | NH2  | ARG | X | 148 | 32.252 | 48.552 | 56.503 | 0.00 | 0.00 |
| ATOM | 2308 | HH21 | ARG | X | 148 | 32.340 | 48.541 | 55.497 | 0.00 | 0.00 |
| ATOM | 2309 | HH22 | ARG | X | 148 | 31.378 | 48.525 | 57.007 | 0.00 | 0.00 |
| ATOM | 2310 | C    | ARG | X | 148 | 38.401 | 45.160 | 53.990 | 0.00 | 0.00 |
| ATOM | 2311 | O    | ARG | X | 148 | 37.745 | 44.263 | 54.486 | 0.00 | 0.00 |
| ATOM | 2312 | N    | VAL | X | 149 | 39.395 | 44.935 | 53.181 | 0.00 | 0.00 |

|      |      |      |     |   |     |        |        |        |      |      |
|------|------|------|-----|---|-----|--------|--------|--------|------|------|
| ATOM | 2313 | H    | VAL | X | 149 | 39.791 | 45.742 | 52.721 | 0.00 | 0.00 |
| ATOM | 2314 | CA   | VAL | X | 149 | 40.235 | 43.737 | 53.160 | 0.00 | 0.00 |
| ATOM | 2315 | HA   | VAL | X | 149 | 39.611 | 42.894 | 52.865 | 0.00 | 0.00 |
| ATOM | 2316 | CB   | VAL | X | 149 | 41.353 | 43.892 | 52.071 | 0.00 | 0.00 |
| ATOM | 2317 | HB   | VAL | X | 149 | 42.025 | 43.047 | 52.225 | 0.00 | 0.00 |
| ATOM | 2318 | CG1  | VAL | X | 149 | 40.632 | 43.922 | 50.691 | 0.00 | 0.00 |
| ATOM | 2319 | HG11 | VAL | X | 149 | 41.450 | 43.844 | 49.974 | 0.00 | 0.00 |
| ATOM | 2320 | HG12 | VAL | X | 149 | 39.923 | 43.100 | 50.589 | 0.00 | 0.00 |
| ATOM | 2321 | HG13 | VAL | X | 149 | 40.196 | 44.918 | 50.611 | 0.00 | 0.00 |
| ATOM | 2322 | CG2  | VAL | X | 149 | 42.183 | 45.177 | 52.253 | 0.00 | 0.00 |
| ATOM | 2323 | HG21 | VAL | X | 149 | 42.742 | 45.147 | 53.188 | 0.00 | 0.00 |
| ATOM | 2324 | HG22 | VAL | X | 149 | 42.851 | 45.187 | 51.392 | 0.00 | 0.00 |
| ATOM | 2325 | HG23 | VAL | X | 149 | 41.603 | 46.093 | 52.361 | 0.00 | 0.00 |
| ATOM | 2326 | C    | VAL | X | 149 | 40.776 | 43.501 | 54.569 | 0.00 | 0.00 |
| ATOM | 2327 | O    | VAL | X | 149 | 41.256 | 44.467 | 55.175 | 0.00 | 0.00 |
| ATOM | 2328 | N    | GLY | X | 150 | 40.766 | 42.307 | 55.135 | 0.00 | 0.00 |
| ATOM | 2329 | H    | GLY | X | 150 | 40.181 | 41.703 | 54.576 | 0.00 | 0.00 |
| ATOM | 2330 | CA   | GLY | X | 150 | 41.145 | 41.895 | 56.505 | 0.00 | 0.00 |
| ATOM | 2331 | HA2  | GLY | X | 150 | 41.490 | 40.900 | 56.307 | 0.00 | 0.00 |
| ATOM | 2332 | HA3  | GLY | X | 150 | 41.867 | 42.503 | 56.945 | 0.00 | 0.00 |
| ATOM | 2333 | C    | GLY | X | 150 | 40.011 | 41.668 | 57.531 | 0.00 | 0.00 |
| ATOM | 2334 | O    | GLY | X | 150 | 38.878 | 41.877 | 57.157 | 0.00 | 0.00 |
| ATOM | 2335 | N    | ALA | X | 151 | 40.343 | 41.302 | 58.793 | 0.00 | 0.00 |
| ATOM | 2336 | H    | ALA | X | 151 | 41.272 | 41.002 | 59.051 | 0.00 | 0.00 |
| ATOM | 2337 | CA   | ALA | X | 151 | 39.345 | 41.055 | 59.847 | 0.00 | 0.00 |
| ATOM | 2338 | HA   | ALA | X | 151 | 38.722 | 40.201 | 59.581 | 0.00 | 0.00 |
| ATOM | 2339 | CB   | ALA | X | 151 | 40.122 | 40.790 | 61.178 | 0.00 | 0.00 |
| ATOM | 2340 | HB1  | ALA | X | 151 | 41.044 | 41.361 | 61.076 | 0.00 | 0.00 |
| ATOM | 2341 | HB2  | ALA | X | 151 | 39.541 | 41.147 | 62.028 | 0.00 | 0.00 |
| ATOM | 2342 | HB3  | ALA | X | 151 | 40.286 | 39.720 | 61.310 | 0.00 | 0.00 |
| ATOM | 2343 | C    | ALA | X | 151 | 38.399 | 42.249 | 60.058 | 0.00 | 0.00 |
| ATOM | 2344 | O    | ALA | X | 151 | 37.228 | 42.062 | 60.359 | 0.00 | 0.00 |
| ATOM | 2345 | N    | PHE | X | 152 | 38.822 | 43.426 | 59.658 | 0.00 | 0.00 |
| ATOM | 2346 | H    | PHE | X | 152 | 39.705 | 43.448 | 59.168 | 0.00 | 0.00 |
| ATOM | 2347 | CA   | PHE | X | 152 | 38.094 | 44.632 | 59.741 | 0.00 | 0.00 |
| ATOM | 2348 | HA   | PHE | X | 152 | 37.991 | 44.848 | 60.804 | 0.00 | 0.00 |
| ATOM | 2349 | CB   | PHE | X | 152 | 39.113 | 45.717 | 59.311 | 0.00 | 0.00 |
| ATOM | 2350 | HB2  | PHE | X | 152 | 40.036 | 45.643 | 59.886 | 0.00 | 0.00 |
| ATOM | 2351 | HB3  | PHE | X | 152 | 39.362 | 45.503 | 58.272 | 0.00 | 0.00 |
| ATOM | 2352 | CG   | PHE | X | 152 | 38.627 | 47.176 | 59.411 | 0.00 | 0.00 |
| ATOM | 2353 | CD1  | PHE | X | 152 | 37.567 | 47.569 | 60.301 | 0.00 | 0.00 |
| ATOM | 2354 | HD1  | PHE | X | 152 | 37.049 | 46.880 | 60.952 | 0.00 | 0.00 |
| ATOM | 2355 | CE1  | PHE | X | 152 | 37.140 | 48.895 | 60.342 | 0.00 | 0.00 |
| ATOM | 2356 | HE1  | PHE | X | 152 | 36.292 | 49.247 | 60.911 | 0.00 | 0.00 |
| ATOM | 2357 | CZ   | PHE | X | 152 | 37.743 | 49.852 | 59.548 | 0.00 | 0.00 |
| ATOM | 2358 | HZ   | PHE | X | 152 | 37.271 | 50.823 | 59.532 | 0.00 | 0.00 |
| ATOM | 2359 | CE2  | PHE | X | 152 | 38.759 | 49.529 | 58.635 | 0.00 | 0.00 |
| ATOM | 2360 | HE2  | PHE | X | 152 | 39.232 | 50.181 | 57.916 | 0.00 | 0.00 |
| ATOM | 2361 | CD2  | PHE | X | 152 | 39.190 | 48.175 | 58.564 | 0.00 | 0.00 |
| ATOM | 2362 | HD2  | PHE | X | 152 | 39.983 | 47.858 | 57.903 | 0.00 | 0.00 |
| ATOM | 2363 | C    | PHE | X | 152 | 36.767 | 44.743 | 58.910 | 0.00 | 0.00 |
| ATOM | 2364 | O    | PHE | X | 152 | 35.768 | 45.287 | 59.363 | 0.00 | 0.00 |
| ATOM | 2365 | N    | GLY | X | 153 | 36.654 | 44.090 | 57.721 | 0.00 | 0.00 |
| ATOM | 2366 | H    | GLY | X | 153 | 37.516 | 43.689 | 57.379 | 0.00 | 0.00 |
| ATOM | 2367 | CA   | GLY | X | 153 | 35.450 | 43.946 | 56.900 | 0.00 | 0.00 |
| ATOM | 2368 | HA2  | GLY | X | 153 | 34.683 | 44.732 | 57.331 | 0.00 | 0.00 |
| ATOM | 2369 | HA3  | GLY | X | 153 | 35.696 | 44.183 | 55.901 | 0.00 | 0.00 |
| ATOM | 2370 | C    | GLY | X | 153 | 34.762 | 42.581 | 56.995 | 0.00 | 0.00 |
| ATOM | 2371 | O    | GLY | X | 153 | 33.709 | 42.436 | 56.386 | 0.00 | 0.00 |
| ATOM | 2372 | N    | PHE | X | 154 | 35.328 | 41.567 | 57.641 | 0.00 | 0.00 |
| ATOM | 2373 | H    | PHE | X | 154 | 36.213 | 41.701 | 58.107 | 0.00 | 0.00 |
| ATOM | 2374 | CA   | PHE | X | 154 | 34.880 | 40.223 | 57.449 | 0.00 | 0.00 |
| ATOM | 2375 | HA   | PHE | X | 154 | 34.004 | 40.151 | 56.804 | 0.00 | 0.00 |
| ATOM | 2376 | CB   | PHE | X | 154 | 35.949 | 39.488 | 56.609 | 0.00 | 0.00 |
| ATOM | 2377 | HB2  | PHE | X | 154 | 36.982 | 39.675 | 56.901 | 0.00 | 0.00 |
| ATOM | 2378 | HB3  | PHE | X | 154 | 35.702 | 38.431 | 56.505 | 0.00 | 0.00 |
| ATOM | 2379 | CG   | PHE | X | 154 | 35.817 | 39.938 | 55.155 | 0.00 | 0.00 |
| ATOM | 2380 | CD1  | PHE | X | 154 | 36.852 | 40.581 | 54.432 | 0.00 | 0.00 |
| ATOM | 2381 | HD1  | PHE | X | 154 | 37.768 | 40.745 | 54.980 | 0.00 | 0.00 |
| ATOM | 2382 | CE1  | PHE | X | 154 | 36.616 | 41.245 | 53.204 | 0.00 | 0.00 |

|      |      |      |     |   |     |        |        |        |      |      |
|------|------|------|-----|---|-----|--------|--------|--------|------|------|
| ATOM | 2383 | HE1  | PHE | X | 154 | 37.430 | 41.819 | 52.788 | 0.00 | 0.00 |
| ATOM | 2384 | CZ   | PHE | X | 154 | 35.439 | 40.995 | 52.501 | 0.00 | 0.00 |
| ATOM | 2385 | HZ   | PHE | X | 154 | 35.240 | 41.531 | 51.585 | 0.00 | 0.00 |
| ATOM | 2386 | CE2  | PHE | X | 154 | 34.421 | 40.287 | 53.147 | 0.00 | 0.00 |
| ATOM | 2387 | HE2  | PHE | X | 154 | 33.465 | 40.116 | 52.676 | 0.00 | 0.00 |
| ATOM | 2388 | CD2  | PHE | X | 154 | 34.607 | 39.761 | 54.438 | 0.00 | 0.00 |
| ATOM | 2389 | HD2  | PHE | X | 154 | 33.793 | 39.227 | 54.905 | 0.00 | 0.00 |
| ATOM | 2390 | C    | PHE | X | 154 | 34.528 | 39.463 | 58.707 | 0.00 | 0.00 |
| ATOM | 2391 | O    | PHE | X | 154 | 33.931 | 38.353 | 58.528 | 0.00 | 0.00 |
| ATOM | 2392 | N    | LEU | X | 155 | 34.778 | 40.012 | 59.932 | 0.00 | 0.00 |
| ATOM | 2393 | H    | LEU | X | 155 | 35.532 | 40.676 | 60.037 | 0.00 | 0.00 |
| ATOM | 2394 | CA   | LEU | X | 155 | 34.265 | 39.400 | 61.181 | 0.00 | 0.00 |
| ATOM | 2395 | HA   | LEU | X | 155 | 34.609 | 38.367 | 61.238 | 0.00 | 0.00 |
| ATOM | 2396 | CB   | LEU | X | 155 | 34.845 | 40.196 | 62.300 | 0.00 | 0.00 |
| ATOM | 2397 | HB2  | LEU | X | 155 | 35.859 | 40.559 | 62.131 | 0.00 | 0.00 |
| ATOM | 2398 | HB3  | LEU | X | 155 | 34.221 | 41.077 | 62.449 | 0.00 | 0.00 |
| ATOM | 2399 | CG   | LEU | X | 155 | 34.852 | 39.385 | 63.626 | 0.00 | 0.00 |
| ATOM | 2400 | HG   | LEU | X | 155 | 35.001 | 38.308 | 63.549 | 0.00 | 0.00 |
| ATOM | 2401 | CD1  | LEU | X | 155 | 35.989 | 39.975 | 64.491 | 0.00 | 0.00 |
| ATOM | 2402 | HD11 | LEU | X | 155 | 35.807 | 41.020 | 64.739 | 0.00 | 0.00 |
| ATOM | 2403 | HD12 | LEU | X | 155 | 36.076 | 39.347 | 65.379 | 0.00 | 0.00 |
| ATOM | 2404 | HD13 | LEU | X | 155 | 36.958 | 40.023 | 63.994 | 0.00 | 0.00 |
| ATOM | 2405 | CD2  | LEU | X | 155 | 33.507 | 39.665 | 64.388 | 0.00 | 0.00 |
| ATOM | 2406 | HD21 | LEU | X | 155 | 33.431 | 40.724 | 64.635 | 0.00 | 0.00 |
| ATOM | 2407 | HD22 | LEU | X | 155 | 32.670 | 39.372 | 63.755 | 0.00 | 0.00 |
| ATOM | 2408 | HD23 | LEU | X | 155 | 33.475 | 39.050 | 65.288 | 0.00 | 0.00 |
| ATOM | 2409 | C    | LEU | X | 155 | 32.772 | 39.261 | 61.120 | 0.00 | 0.00 |
| ATOM | 2410 | O    | LEU | X | 155 | 32.017 | 40.210 | 60.772 | 0.00 | 0.00 |
| ATOM | 2411 | N    | ALA | X | 156 | 32.261 | 38.088 | 61.545 | 0.00 | 0.00 |
| ATOM | 2412 | H    | ALA | X | 156 | 32.890 | 37.375 | 61.887 | 0.00 | 0.00 |
| ATOM | 2413 | CA   | ALA | X | 156 | 30.784 | 37.932 | 61.683 | 0.00 | 0.00 |
| ATOM | 2414 | HA   | ALA | X | 156 | 30.329 | 38.922 | 61.658 | 0.00 | 0.00 |
| ATOM | 2415 | CB   | ALA | X | 156 | 30.129 | 37.283 | 60.455 | 0.00 | 0.00 |
| ATOM | 2416 | HB1  | ALA | X | 156 | 30.725 | 37.616 | 59.605 | 0.00 | 0.00 |
| ATOM | 2417 | HB2  | ALA | X | 156 | 30.159 | 36.195 | 60.415 | 0.00 | 0.00 |
| ATOM | 2418 | HB3  | ALA | X | 156 | 29.125 | 37.703 | 60.389 | 0.00 | 0.00 |
| ATOM | 2419 | C    | ALA | X | 156 | 30.514 | 37.198 | 63.052 | 0.00 | 0.00 |
| ATOM | 2420 | O    | ALA | X | 156 | 31.423 | 36.774 | 63.739 | 0.00 | 0.00 |
| ATOM | 2421 | N    | LEU | X | 157 | 29.240 | 37.063 | 63.370 | 0.00 | 0.00 |
| ATOM | 2422 | H    | LEU | X | 157 | 28.486 | 37.423 | 62.803 | 0.00 | 0.00 |
| ATOM | 2423 | CA   | LEU | X | 157 | 28.743 | 36.486 | 64.667 | 0.00 | 0.00 |
| ATOM | 2424 | HA   | LEU | X | 157 | 29.379 | 35.668 | 65.005 | 0.00 | 0.00 |
| ATOM | 2425 | CB   | LEU | X | 157 | 28.851 | 37.677 | 65.621 | 0.00 | 0.00 |
| ATOM | 2426 | HB2  | LEU | X | 157 | 29.776 | 38.252 | 65.562 | 0.00 | 0.00 |
| ATOM | 2427 | HB3  | LEU | X | 157 | 28.115 | 38.463 | 65.451 | 0.00 | 0.00 |
| ATOM | 2428 | CG   | LEU | X | 157 | 28.700 | 37.264 | 67.100 | 0.00 | 0.00 |
| ATOM | 2429 | HG   | LEU | X | 157 | 27.749 | 36.774 | 67.308 | 0.00 | 0.00 |
| ATOM | 2430 | CD1  | LEU | X | 157 | 29.820 | 36.424 | 67.679 | 0.00 | 0.00 |
| ATOM | 2431 | HD11 | LEU | X | 157 | 29.962 | 35.462 | 67.186 | 0.00 | 0.00 |
| ATOM | 2432 | HD12 | LEU | X | 157 | 30.732 | 37.022 | 67.689 | 0.00 | 0.00 |
| ATOM | 2433 | HD13 | LEU | X | 157 | 29.636 | 36.166 | 68.722 | 0.00 | 0.00 |
| ATOM | 2434 | CD2  | LEU | X | 157 | 28.515 | 38.455 | 67.989 | 0.00 | 0.00 |
| ATOM | 2435 | HD21 | LEU | X | 157 | 27.738 | 39.170 | 67.720 | 0.00 | 0.00 |
| ATOM | 2436 | HD22 | LEU | X | 157 | 28.320 | 38.124 | 69.009 | 0.00 | 0.00 |
| ATOM | 2437 | HD23 | LEU | X | 157 | 29.474 | 38.971 | 68.033 | 0.00 | 0.00 |
| ATOM | 2438 | C    | LEU | X | 157 | 27.282 | 36.005 | 64.586 | 0.00 | 0.00 |
| ATOM | 2439 | O    | LEU | X | 157 | 26.403 | 36.770 | 64.108 | 0.00 | 0.00 |
| ATOM | 2440 | N    | PRO | X | 158 | 26.869 | 34.863 | 65.187 | 0.00 | 0.00 |
| ATOM | 2441 | CD   | PRO | X | 158 | 27.684 | 33.851 | 65.899 | 0.00 | 0.00 |
| ATOM | 2442 | HD2  | PRO | X | 158 | 28.127 | 34.360 | 66.755 | 0.00 | 0.00 |
| ATOM | 2443 | HD3  | PRO | X | 158 | 28.561 | 33.444 | 65.394 | 0.00 | 0.00 |
| ATOM | 2444 | CG   | PRO | X | 158 | 26.689 | 32.741 | 66.342 | 0.00 | 0.00 |
| ATOM | 2445 | HG2  | PRO | X | 158 | 26.301 | 32.985 | 67.331 | 0.00 | 0.00 |
| ATOM | 2446 | HG3  | PRO | X | 158 | 27.156 | 31.756 | 66.358 | 0.00 | 0.00 |
| ATOM | 2447 | CB   | PRO | X | 158 | 25.562 | 32.829 | 65.260 | 0.00 | 0.00 |
| ATOM | 2448 | HB2  | PRO | X | 158 | 24.680 | 32.428 | 65.759 | 0.00 | 0.00 |
| ATOM | 2449 | HB3  | PRO | X | 158 | 25.732 | 32.216 | 64.374 | 0.00 | 0.00 |
| ATOM | 2450 | CA   | PRO | X | 158 | 25.551 | 34.319 | 64.866 | 0.00 | 0.00 |
| ATOM | 2451 | HA   | PRO | X | 158 | 25.402 | 34.254 | 63.789 | 0.00 | 0.00 |
| ATOM | 2452 | C    | PRO | X | 158 | 24.385 | 35.055 | 65.464 | 0.00 | 0.00 |

|      |      |      |     |   |     |        |        |        |      |      |
|------|------|------|-----|---|-----|--------|--------|--------|------|------|
| ATOM | 2453 | O    | PRO | X | 158 | 24.579 | 35.633 | 66.548 | 0.00 | 0.00 |
| ATOM | 2454 | N    | GLY | X | 159 | 23.177 | 34.967 | 64.861 | 0.00 | 0.00 |
| ATOM | 2455 | H    | GLY | X | 159 | 23.123 | 34.364 | 64.053 | 0.00 | 0.00 |
| ATOM | 2456 | CA   | GLY | X | 159 | 21.898 | 35.238 | 65.495 | 0.00 | 0.00 |
| ATOM | 2457 | HA2  | GLY | X | 159 | 21.214 | 34.981 | 64.677 | 0.00 | 0.00 |
| ATOM | 2458 | HA3  | GLY | X | 159 | 21.709 | 34.542 | 66.280 | 0.00 | 0.00 |
| ATOM | 2459 | C    | GLY | X | 159 | 21.584 | 36.714 | 66.043 | 0.00 | 0.00 |
| ATOM | 2460 | O    | GLY | X | 159 | 20.940 | 36.904 | 67.062 | 0.00 | 0.00 |
| ATOM | 2461 | N    | SER | X | 160 | 22.173 | 37.710 | 65.381 | 0.00 | 0.00 |
| ATOM | 2462 | H    | SER | X | 160 | 22.738 | 37.538 | 64.562 | 0.00 | 0.00 |
| ATOM | 2463 | CA   | SER | X | 160 | 22.170 | 39.100 | 65.838 | 0.00 | 0.00 |
| ATOM | 2464 | HA   | SER | X | 160 | 21.128 | 39.343 | 66.047 | 0.00 | 0.00 |
| ATOM | 2465 | CB   | SER | X | 160 | 22.945 | 39.241 | 67.161 | 0.00 | 0.00 |
| ATOM | 2466 | HB2  | SER | X | 160 | 22.881 | 40.265 | 67.530 | 0.00 | 0.00 |
| ATOM | 2467 | HB3  | SER | X | 160 | 22.419 | 38.599 | 67.868 | 0.00 | 0.00 |
| ATOM | 2468 | OG   | SER | X | 160 | 24.387 | 38.941 | 67.026 | 0.00 | 0.00 |
| ATOM | 2469 | HG   | SER | X | 160 | 24.678 | 38.730 | 67.916 | 0.00 | 0.00 |
| ATOM | 2470 | C    | SER | X | 160 | 22.751 | 40.069 | 64.801 | 0.00 | 0.00 |
| ATOM | 2471 | O    | SER | X | 160 | 22.986 | 39.795 | 63.615 | 0.00 | 0.00 |
| ATOM | 2472 | N    | ARG | X | 161 | 23.122 | 41.308 | 65.303 | 0.00 | 0.00 |
| ATOM | 2473 | H    | ARG | X | 161 | 23.051 | 41.405 | 66.306 | 0.00 | 0.00 |
| ATOM | 2474 | CA   | ARG | X | 161 | 23.607 | 42.504 | 64.500 | 0.00 | 0.00 |
| ATOM | 2475 | HA   | ARG | X | 161 | 24.022 | 42.102 | 63.576 | 0.00 | 0.00 |
| ATOM | 2476 | CB   | ARG | X | 161 | 22.433 | 43.546 | 64.262 | 0.00 | 0.00 |
| ATOM | 2477 | HB2  | ARG | X | 161 | 22.268 | 44.000 | 65.239 | 0.00 | 0.00 |
| ATOM | 2478 | HB3  | ARG | X | 161 | 22.759 | 44.234 | 63.481 | 0.00 | 0.00 |
| ATOM | 2479 | CG   | ARG | X | 161 | 21.074 | 42.963 | 63.760 | 0.00 | 0.00 |
| ATOM | 2480 | HG2  | ARG | X | 161 | 21.180 | 42.845 | 62.681 | 0.00 | 0.00 |
| ATOM | 2481 | HG3  | ARG | X | 161 | 20.808 | 42.059 | 64.307 | 0.00 | 0.00 |
| ATOM | 2482 | CD   | ARG | X | 161 | 20.013 | 43.995 | 64.083 | 0.00 | 0.00 |
| ATOM | 2483 | HD2  | ARG | X | 161 | 19.919 | 44.054 | 65.168 | 0.00 | 0.00 |
| ATOM | 2484 | HD3  | ARG | X | 161 | 20.313 | 44.940 | 63.631 | 0.00 | 0.00 |
| ATOM | 2485 | NE   | ARG | X | 161 | 18.728 | 43.602 | 63.511 | 0.00 | 0.00 |
| ATOM | 2486 | HE   | ARG | X | 161 | 18.790 | 42.748 | 62.975 | 0.00 | 0.00 |
| ATOM | 2487 | CZ   | ARG | X | 161 | 17.573 | 44.025 | 63.898 | 0.00 | 0.00 |
| ATOM | 2488 | NH1  | ARG | X | 161 | 17.551 | 45.226 | 64.455 | 0.00 | 0.00 |
| ATOM | 2489 | HH11 | ARG | X | 161 | 18.392 | 45.785 | 64.449 | 0.00 | 0.00 |
| ATOM | 2490 | HH12 | ARG | X | 161 | 16.673 | 45.646 | 64.724 | 0.00 | 0.00 |
| ATOM | 2491 | NH2  | ARG | X | 161 | 16.486 | 43.300 | 63.701 | 0.00 | 0.00 |
| ATOM | 2492 | HH21 | ARG | X | 161 | 16.404 | 42.349 | 63.372 | 0.00 | 0.00 |
| ATOM | 2493 | HH22 | ARG | X | 161 | 15.601 | 43.737 | 63.914 | 0.00 | 0.00 |
| ATOM | 2494 | C    | ARG | X | 161 | 24.699 | 43.343 | 65.239 | 0.00 | 0.00 |
| ATOM | 2495 | O    | ARG | X | 161 | 24.929 | 44.495 | 64.950 | 0.00 | 0.00 |
| ATOM | 2496 | N    | GLU | X | 162 | 25.309 | 42.705 | 66.199 | 0.00 | 0.00 |
| ATOM | 2497 | H    | GLU | X | 162 | 25.038 | 41.746 | 66.364 | 0.00 | 0.00 |
| ATOM | 2498 | CA   | GLU | X | 162 | 26.527 | 43.299 | 66.735 | 0.00 | 0.00 |
| ATOM | 2499 | HA   | GLU | X | 162 | 26.398 | 44.372 | 66.878 | 0.00 | 0.00 |
| ATOM | 2500 | CB   | GLU | X | 162 | 26.987 | 42.561 | 68.033 | 0.00 | 0.00 |
| ATOM | 2501 | HB2  | GLU | X | 162 | 27.277 | 41.541 | 67.781 | 0.00 | 0.00 |
| ATOM | 2502 | HB3  | GLU | X | 162 | 27.869 | 43.079 | 68.410 | 0.00 | 0.00 |
| ATOM | 2503 | CG   | GLU | X | 162 | 25.830 | 42.551 | 69.040 | 0.00 | 0.00 |
| ATOM | 2504 | HG2  | GLU | X | 162 | 25.051 | 41.914 | 68.621 | 0.00 | 0.00 |
| ATOM | 2505 | HG3  | GLU | X | 162 | 26.201 | 42.013 | 69.912 | 0.00 | 0.00 |
| ATOM | 2506 | CD   | GLU | X | 162 | 25.392 | 43.996 | 69.349 | 0.00 | 0.00 |
| ATOM | 2507 | OE1  | GLU | X | 162 | 24.242 | 44.331 | 69.152 | 0.00 | 0.00 |
| ATOM | 2508 | OE2  | GLU | X | 162 | 26.345 | 44.809 | 69.614 | 0.00 | 0.00 |
| ATOM | 2509 | C    | GLU | X | 162 | 27.623 | 43.245 | 65.690 | 0.00 | 0.00 |
| ATOM | 2510 | O    | GLU | X | 162 | 28.190 | 44.274 | 65.335 | 0.00 | 0.00 |
| ATOM | 2511 | N    | ALA | X | 163 | 28.020 | 42.128 | 65.080 | 0.00 | 0.00 |
| ATOM | 2512 | H    | ALA | X | 163 | 27.412 | 41.353 | 65.307 | 0.00 | 0.00 |
| ATOM | 2513 | CA   | ALA | X | 163 | 28.737 | 42.031 | 63.771 | 0.00 | 0.00 |
| ATOM | 2514 | HA   | ALA | X | 163 | 28.897 | 43.036 | 63.380 | 0.00 | 0.00 |
| ATOM | 2515 | CB   | ALA | X | 163 | 30.128 | 41.496 | 64.123 | 0.00 | 0.00 |
| ATOM | 2516 | HB1  | ALA | X | 163 | 29.907 | 40.620 | 64.732 | 0.00 | 0.00 |
| ATOM | 2517 | HB2  | ALA | X | 163 | 30.680 | 41.291 | 63.205 | 0.00 | 0.00 |
| ATOM | 2518 | HB3  | ALA | X | 163 | 30.675 | 42.300 | 64.614 | 0.00 | 0.00 |
| ATOM | 2519 | C    | ALA | X | 163 | 27.913 | 41.153 | 62.862 | 0.00 | 0.00 |
| ATOM | 2520 | O    | ALA | X | 163 | 28.017 | 39.916 | 62.857 | 0.00 | 0.00 |
| ATOM | 2521 | N    | PRO | X | 164 | 27.061 | 41.797 | 62.004 | 0.00 | 0.00 |
| ATOM | 2522 | CD   | PRO | X | 164 | 26.794 | 43.252 | 61.922 | 0.00 | 0.00 |

|      |      |      |     |   |     |        |        |        |      |      |
|------|------|------|-----|---|-----|--------|--------|--------|------|------|
| ATOM | 2523 | HD2  | PRO | X | 164 | 27.750 | 43.744 | 61.740 | 0.00 | 0.00 |
| ATOM | 2524 | HD3  | PRO | X | 164 | 26.174 | 43.637 | 62.731 | 0.00 | 0.00 |
| ATOM | 2525 | CG   | PRO | X | 164 | 25.931 | 43.378 | 60.672 | 0.00 | 0.00 |
| ATOM | 2526 | HG2  | PRO | X | 164 | 26.548 | 43.559 | 59.792 | 0.00 | 0.00 |
| ATOM | 2527 | HG3  | PRO | X | 164 | 25.296 | 44.252 | 60.810 | 0.00 | 0.00 |
| ATOM | 2528 | CB   | PRO | X | 164 | 25.285 | 42.042 | 60.558 | 0.00 | 0.00 |
| ATOM | 2529 | HB2  | PRO | X | 164 | 24.959 | 41.828 | 59.541 | 0.00 | 0.00 |
| ATOM | 2530 | HB3  | PRO | X | 164 | 24.437 | 42.001 | 61.242 | 0.00 | 0.00 |
| ATOM | 2531 | CA   | PRO | X | 164 | 26.243 | 41.024 | 61.050 | 0.00 | 0.00 |
| ATOM | 2532 | HA   | PRO | X | 164 | 25.734 | 40.164 | 61.485 | 0.00 | 0.00 |
| ATOM | 2533 | C    | PRO | X | 164 | 26.946 | 40.392 | 59.861 | 0.00 | 0.00 |
| ATOM | 2534 | O    | PRO | X | 164 | 26.214 | 39.774 | 59.069 | 0.00 | 0.00 |
| ATOM | 2535 | N    | GLY | X | 165 | 28.295 | 40.520 | 59.681 | 0.00 | 0.00 |
| ATOM | 2536 | H    | GLY | X | 165 | 28.818 | 40.942 | 60.435 | 0.00 | 0.00 |
| ATOM | 2537 | CA   | GLY | X | 165 | 29.042 | 39.907 | 58.594 | 0.00 | 0.00 |
| ATOM | 2538 | HA2  | GLY | X | 165 | 30.055 | 39.736 | 58.938 | 0.00 | 0.00 |
| ATOM | 2539 | HA3  | GLY | X | 165 | 28.640 | 38.907 | 58.348 | 0.00 | 0.00 |
| ATOM | 2540 | C    | GLY | X | 165 | 29.214 | 40.808 | 57.361 | 0.00 | 0.00 |
| ATOM | 2541 | O    | GLY | X | 165 | 28.428 | 41.677 | 57.078 | 0.00 | 0.00 |
| ATOM | 2542 | N    | ASN | X | 166 | 30.192 | 40.536 | 56.547 | 0.00 | 0.00 |
| ATOM | 2543 | H    | ASN | X | 166 | 30.771 | 39.765 | 56.850 | 0.00 | 0.00 |
| ATOM | 2544 | CA   | ASN | X | 166 | 30.250 | 40.755 | 55.099 | 0.00 | 0.00 |
| ATOM | 2545 | HA   | ASN | X | 166 | 31.123 | 40.263 | 54.671 | 0.00 | 0.00 |
| ATOM | 2546 | CB   | ASN | X | 166 | 28.956 | 40.205 | 54.308 | 0.00 | 0.00 |
| ATOM | 2547 | HB2  | ASN | X | 166 | 28.017 | 40.574 | 54.720 | 0.00 | 0.00 |
| ATOM | 2548 | HB3  | ASN | X | 166 | 29.078 | 40.476 | 53.259 | 0.00 | 0.00 |
| ATOM | 2549 | CG   | ASN | X | 166 | 28.876 | 38.698 | 54.402 | 0.00 | 0.00 |
| ATOM | 2550 | OD1  | ASN | X | 166 | 29.907 | 38.106 | 54.215 | 0.00 | 0.00 |
| ATOM | 2551 | ND2  | ASN | X | 166 | 27.721 | 38.136 | 54.671 | 0.00 | 0.00 |
| ATOM | 2552 | HD21 | ASN | X | 166 | 27.544 | 37.164 | 54.461 | 0.00 | 0.00 |
| ATOM | 2553 | HD22 | ASN | X | 166 | 26.859 | 38.659 | 54.716 | 0.00 | 0.00 |
| ATOM | 2554 | C    | ASN | X | 166 | 30.472 | 42.236 | 54.752 | 0.00 | 0.00 |
| ATOM | 2555 | O    | ASN | X | 166 | 30.561 | 42.656 | 53.594 | 0.00 | 0.00 |
| ATOM | 2556 | N    | VAL | X | 167 | 30.499 | 43.138 | 55.756 | 0.00 | 0.00 |
| ATOM | 2557 | H    | VAL | X | 167 | 30.441 | 42.793 | 56.703 | 0.00 | 0.00 |
| ATOM | 2558 | CA   | VAL | X | 167 | 30.576 | 44.588 | 55.563 | 0.00 | 0.00 |
| ATOM | 2559 | HA   | VAL | X | 167 | 29.569 | 44.791 | 55.198 | 0.00 | 0.00 |
| ATOM | 2560 | CB   | VAL | X | 167 | 30.722 | 45.296 | 56.877 | 0.00 | 0.00 |
| ATOM | 2561 | HB   | VAL | X | 167 | 30.617 | 46.351 | 56.624 | 0.00 | 0.00 |
| ATOM | 2562 | CG1  | VAL | X | 167 | 29.660 | 44.892 | 57.895 | 0.00 | 0.00 |
| ATOM | 2563 | HG11 | VAL | X | 167 | 29.721 | 45.409 | 58.853 | 0.00 | 0.00 |
| ATOM | 2564 | HG12 | VAL | X | 167 | 28.636 | 44.847 | 57.526 | 0.00 | 0.00 |
| ATOM | 2565 | HG13 | VAL | X | 167 | 29.808 | 43.825 | 58.067 | 0.00 | 0.00 |
| ATOM | 2566 | CG2  | VAL | X | 167 | 32.157 | 45.232 | 57.420 | 0.00 | 0.00 |
| ATOM | 2567 | HG21 | VAL | X | 167 | 32.270 | 45.972 | 58.212 | 0.00 | 0.00 |
| ATOM | 2568 | HG22 | VAL | X | 167 | 32.311 | 44.213 | 57.777 | 0.00 | 0.00 |
| ATOM | 2569 | HG23 | VAL | X | 167 | 32.866 | 45.485 | 56.631 | 0.00 | 0.00 |
| ATOM | 2570 | C    | VAL | X | 167 | 31.677 | 44.965 | 54.595 | 0.00 | 0.00 |
| ATOM | 2571 | O    | VAL | X | 167 | 31.500 | 46.015 | 53.971 | 0.00 | 0.00 |
| ATOM | 2572 | N    | GLY | X | 168 | 32.709 | 44.151 | 54.369 | 0.00 | 0.00 |
| ATOM | 2573 | H    | GLY | X | 168 | 32.729 | 43.242 | 54.808 | 0.00 | 0.00 |
| ATOM | 2574 | CA   | GLY | X | 168 | 33.888 | 44.509 | 53.467 | 0.00 | 0.00 |
| ATOM | 2575 | HA2  | GLY | X | 168 | 34.251 | 45.566 | 53.675 | 0.00 | 0.00 |
| ATOM | 2576 | HA3  | GLY | X | 168 | 34.742 | 43.841 | 53.527 | 0.00 | 0.00 |
| ATOM | 2577 | C    | GLY | X | 168 | 33.529 | 44.430 | 51.986 | 0.00 | 0.00 |
| ATOM | 2578 | O    | GLY | X | 168 | 34.281 | 44.943 | 51.061 | 0.00 | 0.00 |
| ATOM | 2579 | N    | LEU | X | 169 | 32.406 | 43.690 | 51.668 | 0.00 | 0.00 |
| ATOM | 2580 | H    | LEU | X | 169 | 32.104 | 43.117 | 52.443 | 0.00 | 0.00 |
| ATOM | 2581 | CA   | LEU | X | 169 | 31.648 | 43.765 | 50.435 | 0.00 | 0.00 |
| ATOM | 2582 | HA   | LEU | X | 169 | 32.345 | 44.075 | 49.656 | 0.00 | 0.00 |
| ATOM | 2583 | CB   | LEU | X | 169 | 30.954 | 42.461 | 50.056 | 0.00 | 0.00 |
| ATOM | 2584 | HB2  | LEU | X | 169 | 30.340 | 42.241 | 50.930 | 0.00 | 0.00 |
| ATOM | 2585 | HB3  | LEU | X | 169 | 30.357 | 42.669 | 49.169 | 0.00 | 0.00 |
| ATOM | 2586 | CG   | LEU | X | 169 | 31.796 | 41.215 | 49.770 | 0.00 | 0.00 |
| ATOM | 2587 | HG   | LEU | X | 169 | 32.346 | 40.737 | 50.581 | 0.00 | 0.00 |
| ATOM | 2588 | CD1  | LEU | X | 169 | 30.763 | 40.093 | 49.487 | 0.00 | 0.00 |
| ATOM | 2589 | HD11 | LEU | X | 169 | 31.205 | 39.103 | 49.385 | 0.00 | 0.00 |
| ATOM | 2590 | HD12 | LEU | X | 169 | 30.077 | 39.968 | 50.326 | 0.00 | 0.00 |
| ATOM | 2591 | HD13 | LEU | X | 169 | 30.181 | 40.382 | 48.612 | 0.00 | 0.00 |
| ATOM | 2592 | CD2  | LEU | X | 169 | 32.715 | 41.500 | 48.591 | 0.00 | 0.00 |

|      |      |      |     |   |     |        |        |        |      |      |
|------|------|------|-----|---|-----|--------|--------|--------|------|------|
| ATOM | 2593 | HD21 | LEU | X | 169 | 32.190 | 41.905 | 47.726 | 0.00 | 0.00 |
| ATOM | 2594 | HD22 | LEU | X | 169 | 33.434 | 42.286 | 48.824 | 0.00 | 0.00 |
| ATOM | 2595 | HD23 | LEU | X | 169 | 33.133 | 40.548 | 48.264 | 0.00 | 0.00 |
| ATOM | 2596 | C    | LEU | X | 169 | 30.584 | 44.939 | 50.454 | 0.00 | 0.00 |
| ATOM | 2597 | O    | LEU | X | 169 | 30.271 | 45.457 | 49.385 | 0.00 | 0.00 |
| ATOM | 2598 | N    | LEU | X | 170 | 30.031 | 45.320 | 51.584 | 0.00 | 0.00 |
| ATOM | 2599 | H    | LEU | X | 170 | 30.331 | 45.076 | 52.517 | 0.00 | 0.00 |
| ATOM | 2600 | CA   | LEU | X | 170 | 29.023 | 46.432 | 51.633 | 0.00 | 0.00 |
| ATOM | 2601 | HA   | LEU | X | 170 | 28.203 | 46.275 | 50.933 | 0.00 | 0.00 |
| ATOM | 2602 | CB   | LEU | X | 170 | 28.249 | 46.483 | 52.965 | 0.00 | 0.00 |
| ATOM | 2603 | HB2  | LEU | X | 170 | 28.996 | 46.565 | 53.754 | 0.00 | 0.00 |
| ATOM | 2604 | HB3  | LEU | X | 170 | 27.583 | 47.344 | 52.906 | 0.00 | 0.00 |
| ATOM | 2605 | CG   | LEU | X | 170 | 27.401 | 45.156 | 53.288 | 0.00 | 0.00 |
| ATOM | 2606 | HG   | LEU | X | 170 | 27.960 | 44.230 | 53.423 | 0.00 | 0.00 |
| ATOM | 2607 | CD1  | LEU | X | 170 | 26.856 | 45.304 | 54.716 | 0.00 | 0.00 |
| ATOM | 2608 | HD11 | LEU | X | 170 | 26.353 | 46.253 | 54.901 | 0.00 | 0.00 |
| ATOM | 2609 | HD12 | LEU | X | 170 | 26.201 | 44.450 | 54.887 | 0.00 | 0.00 |
| ATOM | 2610 | HD13 | LEU | X | 170 | 27.694 | 45.234 | 55.410 | 0.00 | 0.00 |
| ATOM | 2611 | CD2  | LEU | X | 170 | 26.366 | 44.757 | 52.244 | 0.00 | 0.00 |
| ATOM | 2612 | HD21 | LEU | X | 170 | 25.701 | 45.598 | 52.044 | 0.00 | 0.00 |
| ATOM | 2613 | HD22 | LEU | X | 170 | 27.012 | 44.324 | 51.480 | 0.00 | 0.00 |
| ATOM | 2614 | HD23 | LEU | X | 170 | 25.719 | 43.973 | 52.638 | 0.00 | 0.00 |
| ATOM | 2615 | C    | LEU | X | 170 | 29.720 | 47.758 | 51.331 | 0.00 | 0.00 |
| ATOM | 2616 | O    | LEU | X | 170 | 29.079 | 48.656 | 50.801 | 0.00 | 0.00 |
| ATOM | 2617 | N    | ASP | X | 171 | 30.961 | 47.889 | 51.636 | 0.00 | 0.00 |
| ATOM | 2618 | H    | ASP | X | 171 | 31.308 | 47.245 | 52.332 | 0.00 | 0.00 |
| ATOM | 2619 | CA   | ASP | X | 171 | 31.912 | 48.983 | 51.170 | 0.00 | 0.00 |
| ATOM | 2620 | HA   | ASP | X | 171 | 31.591 | 49.899 | 51.665 | 0.00 | 0.00 |
| ATOM | 2621 | CB   | ASP | X | 171 | 33.366 | 48.665 | 51.661 | 0.00 | 0.00 |
| ATOM | 2622 | HB2  | ASP | X | 171 | 33.687 | 47.754 | 51.156 | 0.00 | 0.00 |
| ATOM | 2623 | HB3  | ASP | X | 171 | 34.072 | 49.454 | 51.402 | 0.00 | 0.00 |
| ATOM | 2624 | CG   | ASP | X | 171 | 33.557 | 48.580 | 53.143 | 0.00 | 0.00 |
| ATOM | 2625 | OD1  | ASP | X | 171 | 32.650 | 49.084 | 53.830 | 0.00 | 0.00 |
| ATOM | 2626 | OD2  | ASP | X | 171 | 34.535 | 47.949 | 53.593 | 0.00 | 0.00 |
| ATOM | 2627 | C    | ASP | X | 171 | 31.886 | 49.101 | 49.646 | 0.00 | 0.00 |
| ATOM | 2628 | O    | ASP | X | 171 | 31.588 | 50.169 | 49.151 | 0.00 | 0.00 |
| ATOM | 2629 | N    | GLN | X | 172 | 32.138 | 48.006 | 48.900 | 0.00 | 0.00 |
| ATOM | 2630 | H    | GLN | X | 172 | 32.247 | 47.136 | 49.401 | 0.00 | 0.00 |
| ATOM | 2631 | CA   | GLN | X | 172 | 31.977 | 47.971 | 47.484 | 0.00 | 0.00 |
| ATOM | 2632 | HA   | GLN | X | 172 | 32.656 | 48.701 | 47.045 | 0.00 | 0.00 |
| ATOM | 2633 | CB   | GLN | X | 172 | 32.477 | 46.602 | 47.011 | 0.00 | 0.00 |
| ATOM | 2634 | HB2  | GLN | X | 172 | 31.914 | 45.820 | 47.520 | 0.00 | 0.00 |
| ATOM | 2635 | HB3  | GLN | X | 172 | 32.288 | 46.536 | 45.940 | 0.00 | 0.00 |
| ATOM | 2636 | CG   | GLN | X | 172 | 33.941 | 46.198 | 47.370 | 0.00 | 0.00 |
| ATOM | 2637 | HG2  | GLN | X | 172 | 34.628 | 46.872 | 46.859 | 0.00 | 0.00 |
| ATOM | 2638 | HG3  | GLN | X | 172 | 34.162 | 46.454 | 48.406 | 0.00 | 0.00 |
| ATOM | 2639 | CD   | GLN | X | 172 | 34.245 | 44.825 | 46.890 | 0.00 | 0.00 |
| ATOM | 2640 | OE1  | GLN | X | 172 | 33.371 | 44.044 | 46.587 | 0.00 | 0.00 |
| ATOM | 2641 | NE2  | GLN | X | 172 | 35.473 | 44.381 | 46.972 | 0.00 | 0.00 |
| ATOM | 2642 | HE21 | GLN | X | 172 | 35.656 | 43.450 | 46.626 | 0.00 | 0.00 |
| ATOM | 2643 | HE22 | GLN | X | 172 | 36.174 | 45.047 | 47.264 | 0.00 | 0.00 |
| ATOM | 2644 | C    | GLN | X | 172 | 30.565 | 48.343 | 46.936 | 0.00 | 0.00 |
| ATOM | 2645 | O    | GLN | X | 172 | 30.624 | 49.225 | 46.081 | 0.00 | 0.00 |
| ATOM | 2646 | N    | ARG | X | 173 | 29.438 | 47.758 | 47.442 | 0.00 | 0.00 |
| ATOM | 2647 | H    | ARG | X | 173 | 29.493 | 47.077 | 48.187 | 0.00 | 0.00 |
| ATOM | 2648 | CA   | ARG | X | 173 | 28.004 | 48.163 | 47.039 | 0.00 | 0.00 |
| ATOM | 2649 | HA   | ARG | X | 173 | 27.855 | 47.880 | 45.997 | 0.00 | 0.00 |
| ATOM | 2650 | CB   | ARG | X | 173 | 27.010 | 47.473 | 47.902 | 0.00 | 0.00 |
| ATOM | 2651 | HB2  | ARG | X | 173 | 27.259 | 46.415 | 47.983 | 0.00 | 0.00 |
| ATOM | 2652 | HB3  | ARG | X | 173 | 27.059 | 47.932 | 48.890 | 0.00 | 0.00 |
| ATOM | 2653 | CG   | ARG | X | 173 | 25.478 | 47.626 | 47.457 | 0.00 | 0.00 |
| ATOM | 2654 | HG2  | ARG | X | 173 | 25.264 | 48.694 | 47.499 | 0.00 | 0.00 |
| ATOM | 2655 | HG3  | ARG | X | 173 | 25.550 | 47.219 | 46.448 | 0.00 | 0.00 |
| ATOM | 2656 | CD   | ARG | X | 173 | 24.415 | 47.025 | 48.441 | 0.00 | 0.00 |
| ATOM | 2657 | HD2  | ARG | X | 173 | 24.606 | 47.265 | 49.487 | 0.00 | 0.00 |
| ATOM | 2658 | HD3  | ARG | X | 173 | 23.403 | 47.292 | 48.137 | 0.00 | 0.00 |
| ATOM | 2659 | NE   | ARG | X | 173 | 24.504 | 45.622 | 48.214 | 0.00 | 0.00 |
| ATOM | 2660 | HE   | ARG | X | 173 | 24.916 | 45.267 | 47.363 | 0.00 | 0.00 |
| ATOM | 2661 | CZ   | ARG | X | 173 | 24.205 | 44.772 | 49.180 | 0.00 | 0.00 |
| ATOM | 2662 | NH1  | ARG | X | 173 | 23.478 | 45.080 | 50.238 | 0.00 | 0.00 |

|      |      |      |     |   |     |        |        |        |      |      |
|------|------|------|-----|---|-----|--------|--------|--------|------|------|
| ATOM | 2663 | HH11 | ARG | X | 173 | 23.041 | 45.991 | 50.233 | 0.00 | 0.00 |
| ATOM | 2664 | HH12 | ARG | X | 173 | 23.298 | 44.390 | 50.954 | 0.00 | 0.00 |
| ATOM | 2665 | NH2  | ARG | X | 173 | 24.614 | 43.468 | 49.076 | 0.00 | 0.00 |
| ATOM | 2666 | HH21 | ARG | X | 173 | 24.773 | 43.136 | 48.136 | 0.00 | 0.00 |
| ATOM | 2667 | HH22 | ARG | X | 173 | 24.245 | 42.754 | 49.688 | 0.00 | 0.00 |
| ATOM | 2668 | C    | ARG | X | 173 | 27.842 | 49.695 | 47.196 | 0.00 | 0.00 |
| ATOM | 2669 | O    | ARG | X | 173 | 27.132 | 50.336 | 46.372 | 0.00 | 0.00 |
| ATOM | 2670 | N    | LEU | X | 174 | 28.305 | 50.334 | 48.282 | 0.00 | 0.00 |
| ATOM | 2671 | H    | LEU | X | 174 | 28.735 | 49.719 | 48.958 | 0.00 | 0.00 |
| ATOM | 2672 | CA   | LEU | X | 174 | 28.235 | 51.773 | 48.522 | 0.00 | 0.00 |
| ATOM | 2673 | HA   | LEU | X | 174 | 27.202 | 52.116 | 48.472 | 0.00 | 0.00 |
| ATOM | 2674 | CB   | LEU | X | 174 | 28.800 | 52.190 | 49.873 | 0.00 | 0.00 |
| ATOM | 2675 | HB2  | LEU | X | 174 | 28.406 | 51.507 | 50.626 | 0.00 | 0.00 |
| ATOM | 2676 | HB3  | LEU | X | 174 | 29.868 | 52.000 | 49.772 | 0.00 | 0.00 |
| ATOM | 2677 | CG   | LEU | X | 174 | 28.577 | 53.555 | 50.382 | 0.00 | 0.00 |
| ATOM | 2678 | HG   | LEU | X | 174 | 28.849 | 54.260 | 49.597 | 0.00 | 0.00 |
| ATOM | 2679 | CD1  | LEU | X | 174 | 27.136 | 53.787 | 50.601 | 0.00 | 0.00 |
| ATOM | 2680 | HD11 | LEU | X | 174 | 26.632 | 53.927 | 49.644 | 0.00 | 0.00 |
| ATOM | 2681 | HD12 | LEU | X | 174 | 26.821 | 52.865 | 51.089 | 0.00 | 0.00 |
| ATOM | 2682 | HD13 | LEU | X | 174 | 26.995 | 54.650 | 51.252 | 0.00 | 0.00 |
| ATOM | 2683 | CD2  | LEU | X | 174 | 29.380 | 53.840 | 51.700 | 0.00 | 0.00 |
| ATOM | 2684 | HD21 | LEU | X | 174 | 28.807 | 53.529 | 52.574 | 0.00 | 0.00 |
| ATOM | 2685 | HD22 | LEU | X | 174 | 30.393 | 53.441 | 51.760 | 0.00 | 0.00 |
| ATOM | 2686 | HD23 | LEU | X | 174 | 29.378 | 54.928 | 51.630 | 0.00 | 0.00 |
| ATOM | 2687 | C    | LEU | X | 174 | 28.966 | 52.548 | 47.425 | 0.00 | 0.00 |
| ATOM | 2688 | O    | LEU | X | 174 | 28.317 | 53.395 | 46.786 | 0.00 | 0.00 |
| ATOM | 2689 | N    | ALA | X | 175 | 30.281 | 52.299 | 47.141 | 0.00 | 0.00 |
| ATOM | 2690 | H    | ALA | X | 175 | 30.736 | 51.569 | 47.671 | 0.00 | 0.00 |
| ATOM | 2691 | CA   | ALA | X | 175 | 30.907 | 52.862 | 46.007 | 0.00 | 0.00 |
| ATOM | 2692 | HA   | ALA | X | 175 | 30.974 | 53.941 | 46.149 | 0.00 | 0.00 |
| ATOM | 2693 | CB   | ALA | X | 175 | 32.389 | 52.268 | 45.890 | 0.00 | 0.00 |
| ATOM | 2694 | HB1  | ALA | X | 175 | 32.941 | 52.674 | 45.042 | 0.00 | 0.00 |
| ATOM | 2695 | HB2  | ALA | X | 175 | 33.032 | 52.447 | 46.751 | 0.00 | 0.00 |
| ATOM | 2696 | HB3  | ALA | X | 175 | 32.405 | 51.182 | 45.796 | 0.00 | 0.00 |
| ATOM | 2697 | C    | ALA | X | 175 | 30.213 | 52.564 | 44.661 | 0.00 | 0.00 |
| ATOM | 2698 | O    | ALA | X | 175 | 29.989 | 53.481 | 43.876 | 0.00 | 0.00 |
| ATOM | 2699 | N    | LEU | X | 176 | 29.698 | 51.340 | 44.431 | 0.00 | 0.00 |
| ATOM | 2700 | H    | LEU | X | 176 | 29.883 | 50.639 | 45.135 | 0.00 | 0.00 |
| ATOM | 2701 | CA   | LEU | X | 176 | 28.805 | 51.004 | 43.263 | 0.00 | 0.00 |
| ATOM | 2702 | HA   | LEU | X | 176 | 29.337 | 51.185 | 42.329 | 0.00 | 0.00 |
| ATOM | 2703 | CB   | LEU | X | 176 | 28.396 | 49.541 | 43.239 | 0.00 | 0.00 |
| ATOM | 2704 | HB2  | LEU | X | 176 | 28.093 | 49.176 | 44.221 | 0.00 | 0.00 |
| ATOM | 2705 | HB3  | LEU | X | 176 | 27.632 | 49.510 | 42.462 | 0.00 | 0.00 |
| ATOM | 2706 | CG   | LEU | X | 176 | 29.498 | 48.497 | 42.787 | 0.00 | 0.00 |
| ATOM | 2707 | HG   | LEU | X | 176 | 30.324 | 48.635 | 43.485 | 0.00 | 0.00 |
| ATOM | 2708 | CD1  | LEU | X | 176 | 28.863 | 47.141 | 42.934 | 0.00 | 0.00 |
| ATOM | 2709 | HD11 | LEU | X | 176 | 27.838 | 47.150 | 42.561 | 0.00 | 0.00 |
| ATOM | 2710 | HD12 | LEU | X | 176 | 29.476 | 46.406 | 42.412 | 0.00 | 0.00 |
| ATOM | 2711 | HD13 | LEU | X | 176 | 28.826 | 46.775 | 43.960 | 0.00 | 0.00 |
| ATOM | 2712 | CD2  | LEU | X | 176 | 30.137 | 48.652 | 41.387 | 0.00 | 0.00 |
| ATOM | 2713 | HD21 | LEU | X | 176 | 29.484 | 48.561 | 40.519 | 0.00 | 0.00 |
| ATOM | 2714 | HD22 | LEU | X | 176 | 30.572 | 49.647 | 41.298 | 0.00 | 0.00 |
| ATOM | 2715 | HD23 | LEU | X | 176 | 30.969 | 47.952 | 41.466 | 0.00 | 0.00 |
| ATOM | 2716 | C    | LEU | X | 176 | 27.559 | 51.979 | 43.120 | 0.00 | 0.00 |
| ATOM | 2717 | O    | LEU | X | 176 | 27.232 | 52.279 | 42.020 | 0.00 | 0.00 |
| ATOM | 2718 | N    | GLN | X | 177 | 26.928 | 52.345 | 44.241 | 0.00 | 0.00 |
| ATOM | 2719 | H    | GLN | X | 177 | 27.278 | 51.962 | 45.108 | 0.00 | 0.00 |
| ATOM | 2720 | CA   | GLN | X | 177 | 25.835 | 53.329 | 44.193 | 0.00 | 0.00 |
| ATOM | 2721 | HA   | GLN | X | 177 | 25.159 | 53.111 | 43.366 | 0.00 | 0.00 |
| ATOM | 2722 | CB   | GLN | X | 177 | 25.016 | 53.268 | 45.471 | 0.00 | 0.00 |
| ATOM | 2723 | HB2  | GLN | X | 177 | 24.687 | 52.234 | 45.583 | 0.00 | 0.00 |
| ATOM | 2724 | HB3  | GLN | X | 177 | 25.646 | 53.386 | 46.352 | 0.00 | 0.00 |
| ATOM | 2725 | CG   | GLN | X | 177 | 23.768 | 54.214 | 45.438 | 0.00 | 0.00 |
| ATOM | 2726 | HG2  | GLN | X | 177 | 24.114 | 55.212 | 45.708 | 0.00 | 0.00 |
| ATOM | 2727 | HG3  | GLN | X | 177 | 23.268 | 54.161 | 44.471 | 0.00 | 0.00 |
| ATOM | 2728 | CD   | GLN | X | 177 | 22.668 | 53.958 | 46.446 | 0.00 | 0.00 |
| ATOM | 2729 | OE1  | GLN | X | 177 | 22.574 | 52.915 | 47.095 | 0.00 | 0.00 |
| ATOM | 2730 | NE2  | GLN | X | 177 | 21.689 | 54.825 | 46.588 | 0.00 | 0.00 |
| ATOM | 2731 | HE21 | GLN | X | 177 | 20.853 | 54.406 | 46.969 | 0.00 | 0.00 |
| ATOM | 2732 | HE22 | GLN | X | 177 | 21.625 | 55.439 | 45.788 | 0.00 | 0.00 |



|      |      |      |     |   |     |        |        |        |      |      |
|------|------|------|-----|---|-----|--------|--------|--------|------|------|
| ATOM | 2733 | C    | GLN | X | 177 | 26.377 | 54.766 | 43.915 | 0.00 | 0.00 |
| ATOM | 2734 | O    | GLN | X | 177 | 25.677 | 55.543 | 43.245 | 0.00 | 0.00 |
| ATOM | 2735 | N    | TRP | X | 178 | 27.606 | 55.150 | 44.482 | 0.00 | 0.00 |
| ATOM | 2736 | H    | TRP | X | 178 | 28.095 | 54.473 | 45.050 | 0.00 | 0.00 |
| ATOM | 2737 | CA   | TRP | X | 178 | 28.347 | 56.435 | 44.207 | 0.00 | 0.00 |
| ATOM | 2738 | HA   | TRP | X | 178 | 27.745 | 57.294 | 44.503 | 0.00 | 0.00 |
| ATOM | 2739 | CB   | TRP | X | 178 | 29.626 | 56.426 | 45.039 | 0.00 | 0.00 |
| ATOM | 2740 | HB2  | TRP | X | 178 | 29.344 | 56.214 | 46.071 | 0.00 | 0.00 |
| ATOM | 2741 | HB3  | TRP | X | 178 | 30.303 | 55.660 | 44.660 | 0.00 | 0.00 |
| ATOM | 2742 | CG   | TRP | X | 178 | 30.361 | 57.745 | 45.111 | 0.00 | 0.00 |
| ATOM | 2743 | CD1  | TRP | X | 178 | 30.194 | 58.717 | 46.034 | 0.00 | 0.00 |
| ATOM | 2744 | HD1  | TRP | X | 178 | 29.573 | 58.630 | 46.914 | 0.00 | 0.00 |
| ATOM | 2745 | NE1  | TRP | X | 178 | 30.924 | 59.836 | 45.723 | 0.00 | 0.00 |
| ATOM | 2746 | HE1  | TRP | X | 178 | 30.951 | 60.679 | 46.279 | 0.00 | 0.00 |
| ATOM | 2747 | CE2  | TRP | X | 178 | 31.620 | 59.678 | 44.529 | 0.00 | 0.00 |
| ATOM | 2748 | CZ2  | TRP | X | 178 | 32.346 | 60.561 | 43.731 | 0.00 | 0.00 |
| ATOM | 2749 | HZ2  | TRP | X | 178 | 32.341 | 61.606 | 44.005 | 0.00 | 0.00 |
| ATOM | 2750 | CH2  | TRP | X | 178 | 32.740 | 60.071 | 42.459 | 0.00 | 0.00 |
| ATOM | 2751 | HH2  | TRP | X | 178 | 33.142 | 60.836 | 41.811 | 0.00 | 0.00 |
| ATOM | 2752 | CZ3  | TRP | X | 178 | 32.517 | 58.738 | 42.036 | 0.00 | 0.00 |
| ATOM | 2753 | HZ3  | TRP | X | 178 | 32.940 | 58.467 | 41.080 | 0.00 | 0.00 |
| ATOM | 2754 | CE3  | TRP | X | 178 | 31.793 | 57.920 | 42.873 | 0.00 | 0.00 |
| ATOM | 2755 | HE3  | TRP | X | 178 | 31.620 | 56.893 | 42.587 | 0.00 | 0.00 |
| ATOM | 2756 | CD2  | TRP | X | 178 | 31.251 | 58.362 | 44.128 | 0.00 | 0.00 |
| ATOM | 2757 | C    | TRP | X | 178 | 28.641 | 56.580 | 42.712 | 0.00 | 0.00 |
| ATOM | 2758 | O    | TRP | X | 178 | 28.340 | 57.606 | 42.126 | 0.00 | 0.00 |
| ATOM | 2759 | N    | VAL | X | 179 | 29.070 | 55.461 | 42.035 | 0.00 | 0.00 |
| ATOM | 2760 | H    | VAL | X | 179 | 29.207 | 54.616 | 42.571 | 0.00 | 0.00 |
| ATOM | 2761 | CA   | VAL | X | 179 | 29.240 | 55.460 | 40.580 | 0.00 | 0.00 |
| ATOM | 2762 | HA   | VAL | X | 179 | 29.901 | 56.255 | 40.234 | 0.00 | 0.00 |
| ATOM | 2763 | CB   | VAL | X | 179 | 29.801 | 54.057 | 40.026 | 0.00 | 0.00 |
| ATOM | 2764 | HB   | VAL | X | 179 | 29.104 | 53.288 | 40.359 | 0.00 | 0.00 |
| ATOM | 2765 | CG1  | VAL | X | 179 | 29.816 | 54.013 | 38.556 | 0.00 | 0.00 |
| ATOM | 2766 | HG11 | VAL | X | 179 | 30.184 | 53.121 | 38.050 | 0.00 | 0.00 |
| ATOM | 2767 | HG12 | VAL | X | 179 | 28.776 | 54.075 | 38.233 | 0.00 | 0.00 |
| ATOM | 2768 | HG13 | VAL | X | 179 | 30.253 | 54.933 | 38.168 | 0.00 | 0.00 |
| ATOM | 2769 | CG2  | VAL | X | 179 | 31.200 | 53.663 | 40.572 | 0.00 | 0.00 |
| ATOM | 2770 | HG21 | VAL | X | 179 | 31.789 | 54.581 | 40.571 | 0.00 | 0.00 |
| ATOM | 2771 | HG22 | VAL | X | 179 | 31.060 | 53.234 | 41.564 | 0.00 | 0.00 |
| ATOM | 2772 | HG23 | VAL | X | 179 | 31.544 | 52.802 | 40.000 | 0.00 | 0.00 |
| ATOM | 2773 | C    | VAL | X | 179 | 27.962 | 55.776 | 39.878 | 0.00 | 0.00 |
| ATOM | 2774 | O    | VAL | X | 179 | 27.948 | 56.662 | 39.026 | 0.00 | 0.00 |
| ATOM | 2775 | N    | GLN | X | 180 | 26.817 | 55.188 | 40.242 | 0.00 | 0.00 |
| ATOM | 2776 | H    | GLN | X | 180 | 26.818 | 54.394 | 40.866 | 0.00 | 0.00 |
| ATOM | 2777 | CA   | GLN | X | 180 | 25.480 | 55.421 | 39.745 | 0.00 | 0.00 |
| ATOM | 2778 | HA   | GLN | X | 180 | 25.483 | 55.443 | 38.655 | 0.00 | 0.00 |
| ATOM | 2779 | CB   | GLN | X | 180 | 24.488 | 54.267 | 40.107 | 0.00 | 0.00 |
| ATOM | 2780 | HB2  | GLN | X | 180 | 24.481 | 54.111 | 41.186 | 0.00 | 0.00 |
| ATOM | 2781 | HB3  | GLN | X | 180 | 23.445 | 54.493 | 39.885 | 0.00 | 0.00 |
| ATOM | 2782 | CG   | GLN | X | 180 | 24.644 | 52.972 | 39.347 | 0.00 | 0.00 |
| ATOM | 2783 | HG2  | GLN | X | 180 | 25.699 | 52.701 | 39.320 | 0.00 | 0.00 |
| ATOM | 2784 | HG3  | GLN | X | 180 | 24.098 | 52.131 | 39.776 | 0.00 | 0.00 |
| ATOM | 2785 | CD   | GLN | X | 180 | 24.192 | 53.263 | 37.894 | 0.00 | 0.00 |
| ATOM | 2786 | OE1  | GLN | X | 180 | 23.430 | 54.140 | 37.560 | 0.00 | 0.00 |
| ATOM | 2787 | NE2  | GLN | X | 180 | 24.678 | 52.480 | 36.969 | 0.00 | 0.00 |
| ATOM | 2788 | HE21 | GLN | X | 180 | 24.157 | 52.669 | 36.125 | 0.00 | 0.00 |
| ATOM | 2789 | HE22 | GLN | X | 180 | 25.117 | 51.613 | 37.243 | 0.00 | 0.00 |
| ATOM | 2790 | C    | GLN | X | 180 | 24.930 | 56.782 | 39.967 | 0.00 | 0.00 |
| ATOM | 2791 | O    | GLN | X | 180 | 23.854 | 57.077 | 39.407 | 0.00 | 0.00 |
| ATOM | 2792 | N    | GLU | X | 181 | 25.478 | 57.673 | 40.858 | 0.00 | 0.00 |
| ATOM | 2793 | H    | GLU | X | 181 | 26.359 | 57.437 | 41.293 | 0.00 | 0.00 |
| ATOM | 2794 | CA   | GLU | X | 181 | 25.106 | 59.112 | 40.987 | 0.00 | 0.00 |
| ATOM | 2795 | HA   | GLU | X | 181 | 24.111 | 59.153 | 40.545 | 0.00 | 0.00 |
| ATOM | 2796 | CB   | GLU | X | 181 | 25.040 | 59.313 | 42.497 | 0.00 | 0.00 |
| ATOM | 2797 | HB2  | GLU | X | 181 | 24.326 | 58.657 | 42.996 | 0.00 | 0.00 |
| ATOM | 2798 | HB3  | GLU | X | 181 | 26.037 | 59.246 | 42.930 | 0.00 | 0.00 |
| ATOM | 2799 | CG   | GLU | X | 181 | 24.596 | 60.776 | 42.915 | 0.00 | 0.00 |
| ATOM | 2800 | HG2  | GLU | X | 181 | 24.742 | 60.964 | 43.978 | 0.00 | 0.00 |
| ATOM | 2801 | HG3  | GLU | X | 181 | 25.216 | 61.533 | 42.435 | 0.00 | 0.00 |
| ATOM | 2802 | CD   | GLU | X | 181 | 23.183 | 61.012 | 42.657 | 0.00 | 0.00 |

|      |      |      |     |   |     |        |        |        |      |      |
|------|------|------|-----|---|-----|--------|--------|--------|------|------|
| ATOM | 2803 | OE1  | GLU | X | 181 | 22.769 | 61.509 | 41.598 | 0.00 | 0.00 |
| ATOM | 2804 | OE2  | GLU | X | 181 | 22.340 | 60.668 | 43.506 | 0.00 | 0.00 |
| ATOM | 2805 | C    | GLU | X | 181 | 26.076 | 60.043 | 40.373 | 0.00 | 0.00 |
| ATOM | 2806 | O    | GLU | X | 181 | 25.672 | 61.067 | 39.906 | 0.00 | 0.00 |
| ATOM | 2807 | N    | ASN | X | 182 | 27.381 | 59.825 | 40.460 | 0.00 | 0.00 |
| ATOM | 2808 | H    | ASN | X | 182 | 27.633 | 58.922 | 40.835 | 0.00 | 0.00 |
| ATOM | 2809 | CA   | ASN | X | 182 | 28.416 | 60.808 | 40.164 | 0.00 | 0.00 |
| ATOM | 2810 | HA   | ASN | X | 182 | 28.026 | 61.825 | 40.122 | 0.00 | 0.00 |
| ATOM | 2811 | CB   | ASN | X | 182 | 29.284 | 60.855 | 41.434 | 0.00 | 0.00 |
| ATOM | 2812 | HB2  | ASN | X | 182 | 29.902 | 59.983 | 41.651 | 0.00 | 0.00 |
| ATOM | 2813 | HB3  | ASN | X | 182 | 30.011 | 61.664 | 41.362 | 0.00 | 0.00 |
| ATOM | 2814 | CG   | ASN | X | 182 | 28.403 | 61.258 | 42.633 | 0.00 | 0.00 |
| ATOM | 2815 | OD1  | ASN | X | 182 | 27.466 | 61.990 | 42.575 | 0.00 | 0.00 |
| ATOM | 2816 | ND2  | ASN | X | 182 | 28.565 | 60.531 | 43.733 | 0.00 | 0.00 |
| ATOM | 2817 | HD21 | ASN | X | 182 | 28.038 | 60.814 | 44.547 | 0.00 | 0.00 |
| ATOM | 2818 | HD22 | ASN | X | 182 | 29.250 | 59.800 | 43.606 | 0.00 | 0.00 |
| ATOM | 2819 | C    | ASN | X | 182 | 29.258 | 60.651 | 38.881 | 0.00 | 0.00 |
| ATOM | 2820 | O    | ASN | X | 182 | 29.855 | 61.674 | 38.517 | 0.00 | 0.00 |
| ATOM | 2821 | N    | VAL | X | 183 | 29.272 | 59.503 | 38.181 | 0.00 | 0.00 |
| ATOM | 2822 | H    | VAL | X | 183 | 28.577 | 58.850 | 38.515 | 0.00 | 0.00 |
| ATOM | 2823 | CA   | VAL | X | 183 | 30.197 | 59.134 | 37.091 | 0.00 | 0.00 |
| ATOM | 2824 | HA   | VAL | X | 183 | 31.222 | 59.334 | 37.401 | 0.00 | 0.00 |
| ATOM | 2825 | CB   | VAL | X | 183 | 30.135 | 57.602 | 36.847 | 0.00 | 0.00 |
| ATOM | 2826 | HB   | VAL | X | 183 | 30.092 | 57.231 | 37.871 | 0.00 | 0.00 |
| ATOM | 2827 | CG1  | VAL | X | 183 | 28.954 | 57.116 | 36.016 | 0.00 | 0.00 |
| ATOM | 2828 | HG11 | VAL | X | 183 | 29.254 | 57.289 | 34.983 | 0.00 | 0.00 |
| ATOM | 2829 | HG12 | VAL | X | 183 | 28.875 | 56.036 | 36.141 | 0.00 | 0.00 |
| ATOM | 2830 | HG13 | VAL | X | 183 | 28.019 | 57.561 | 36.357 | 0.00 | 0.00 |
| ATOM | 2831 | CG2  | VAL | X | 183 | 31.456 | 57.098 | 36.254 | 0.00 | 0.00 |
| ATOM | 2832 | HG21 | VAL | X | 183 | 31.516 | 56.011 | 36.311 | 0.00 | 0.00 |
| ATOM | 2833 | HG22 | VAL | X | 183 | 31.808 | 57.519 | 35.313 | 0.00 | 0.00 |
| ATOM | 2834 | HG23 | VAL | X | 183 | 32.282 | 57.330 | 36.927 | 0.00 | 0.00 |
| ATOM | 2835 | C    | VAL | X | 183 | 29.996 | 59.956 | 35.850 | 0.00 | 0.00 |
| ATOM | 2836 | O    | VAL | X | 183 | 30.873 | 60.191 | 34.987 | 0.00 | 0.00 |
| ATOM | 2837 | N    | ALA | X | 184 | 28.817 | 60.528 | 35.687 | 0.00 | 0.00 |
| ATOM | 2838 | H    | ALA | X | 184 | 28.026 | 60.238 | 36.244 | 0.00 | 0.00 |
| ATOM | 2839 | CA   | ALA | X | 184 | 28.494 | 61.383 | 34.505 | 0.00 | 0.00 |
| ATOM | 2840 | HA   | ALA | X | 184 | 28.635 | 60.694 | 33.673 | 0.00 | 0.00 |
| ATOM | 2841 | CB   | ALA | X | 184 | 26.977 | 61.585 | 34.534 | 0.00 | 0.00 |
| ATOM | 2842 | HB1  | ALA | X | 184 | 26.572 | 61.885 | 33.568 | 0.00 | 0.00 |
| ATOM | 2843 | HB2  | ALA | X | 184 | 26.419 | 60.664 | 34.704 | 0.00 | 0.00 |
| ATOM | 2844 | HB3  | ALA | X | 184 | 26.655 | 62.362 | 35.227 | 0.00 | 0.00 |
| ATOM | 2845 | C    | ALA | X | 184 | 29.378 | 62.610 | 34.309 | 0.00 | 0.00 |
| ATOM | 2846 | O    | ALA | X | 184 | 29.502 | 63.121 | 33.216 | 0.00 | 0.00 |
| ATOM | 2847 | N    | ALA | X | 185 | 29.808 | 63.108 | 35.482 | 0.00 | 0.00 |
| ATOM | 2848 | H    | ALA | X | 185 | 29.529 | 62.634 | 36.330 | 0.00 | 0.00 |
| ATOM | 2849 | CA   | ALA | X | 185 | 30.511 | 64.365 | 35.649 | 0.00 | 0.00 |
| ATOM | 2850 | HA   | ALA | X | 185 | 30.065 | 65.174 | 35.069 | 0.00 | 0.00 |
| ATOM | 2851 | CB   | ALA | X | 185 | 30.621 | 64.525 | 37.175 | 0.00 | 0.00 |
| ATOM | 2852 | HB1  | ALA | X | 185 | 31.220 | 63.732 | 37.623 | 0.00 | 0.00 |
| ATOM | 2853 | HB2  | ALA | X | 185 | 31.086 | 65.471 | 37.451 | 0.00 | 0.00 |
| ATOM | 2854 | HB3  | ALA | X | 185 | 29.642 | 64.657 | 37.636 | 0.00 | 0.00 |
| ATOM | 2855 | C    | ALA | X | 185 | 31.985 | 64.235 | 35.219 | 0.00 | 0.00 |
| ATOM | 2856 | O    | ALA | X | 185 | 32.542 | 65.130 | 34.490 | 0.00 | 0.00 |
| ATOM | 2857 | N    | PHE | X | 186 | 32.536 | 63.002 | 35.261 | 0.00 | 0.00 |
| ATOM | 2858 | H    | PHE | X | 186 | 31.934 | 62.265 | 35.600 | 0.00 | 0.00 |
| ATOM | 2859 | CA   | PHE | X | 186 | 33.786 | 62.537 | 34.668 | 0.00 | 0.00 |
| ATOM | 2860 | HA   | PHE | X | 186 | 34.575 | 63.286 | 34.725 | 0.00 | 0.00 |
| ATOM | 2861 | CB   | PHE | X | 186 | 34.355 | 61.308 | 35.403 | 0.00 | 0.00 |
| ATOM | 2862 | HB2  | PHE | X | 186 | 33.626 | 60.502 | 35.324 | 0.00 | 0.00 |
| ATOM | 2863 | HB3  | PHE | X | 186 | 35.193 | 60.790 | 34.936 | 0.00 | 0.00 |
| ATOM | 2864 | CG   | PHE | X | 186 | 34.562 | 61.620 | 36.872 | 0.00 | 0.00 |
| ATOM | 2865 | CD1  | PHE | X | 186 | 33.633 | 61.243 | 37.814 | 0.00 | 0.00 |
| ATOM | 2866 | HD1  | PHE | X | 186 | 32.695 | 60.797 | 37.518 | 0.00 | 0.00 |
| ATOM | 2867 | CE1  | PHE | X | 186 | 33.725 | 61.721 | 39.126 | 0.00 | 0.00 |
| ATOM | 2868 | HE1  | PHE | X | 186 | 32.909 | 61.652 | 39.830 | 0.00 | 0.00 |
| ATOM | 2869 | CZ   | PHE | X | 186 | 34.915 | 62.355 | 39.500 | 0.00 | 0.00 |
| ATOM | 2870 | HZ   | PHE | X | 186 | 35.090 | 62.506 | 40.555 | 0.00 | 0.00 |
| ATOM | 2871 | CE2  | PHE | X | 186 | 35.834 | 62.763 | 38.536 | 0.00 | 0.00 |
| ATOM | 2872 | HE2  | PHE | X | 186 | 36.735 | 63.307 | 38.776 | 0.00 | 0.00 |

|      |      |      |     |   |     |        |        |        |      |      |
|------|------|------|-----|---|-----|--------|--------|--------|------|------|
| ATOM | 2873 | CD2  | PHE | X | 186 | 35.670 | 62.373 | 37.237 | 0.00 | 0.00 |
| ATOM | 2874 | HD2  | PHE | X | 186 | 36.350 | 62.849 | 36.547 | 0.00 | 0.00 |
| ATOM | 2875 | C    | PHE | X | 186 | 33.711 | 62.335 | 33.064 | 0.00 | 0.00 |
| ATOM | 2876 | O    | PHE | X | 186 | 34.720 | 62.736 | 32.410 | 0.00 | 0.00 |
| ATOM | 2877 | N    | GLY | X | 187 | 32.655 | 61.721 | 32.536 | 0.00 | 0.00 |
| ATOM | 2878 | H    | GLY | X | 187 | 31.893 | 61.607 | 33.188 | 0.00 | 0.00 |
| ATOM | 2879 | CA   | GLY | X | 187 | 32.397 | 61.157 | 31.163 | 0.00 | 0.00 |
| ATOM | 2880 | HA2  | GLY | X | 187 | 31.545 | 61.660 | 30.676 | 0.00 | 0.00 |
| ATOM | 2881 | HA3  | GLY | X | 187 | 33.254 | 61.484 | 30.542 | 0.00 | 0.00 |
| ATOM | 2882 | C    | GLY | X | 187 | 32.225 | 59.622 | 31.075 | 0.00 | 0.00 |
| ATOM | 2883 | O    | GLY | X | 187 | 32.328 | 59.014 | 29.991 | 0.00 | 0.00 |
| ATOM | 2884 | N    | GLY | X | 188 | 32.027 | 58.974 | 32.198 | 0.00 | 0.00 |
| ATOM | 2885 | H    | GLY | X | 188 | 31.886 | 59.480 | 33.061 | 0.00 | 0.00 |
| ATOM | 2886 | CA   | GLY | X | 188 | 31.605 | 57.562 | 32.298 | 0.00 | 0.00 |
| ATOM | 2887 | HA2  | GLY | X | 188 | 31.951 | 56.883 | 31.533 | 0.00 | 0.00 |
| ATOM | 2888 | HA3  | GLY | X | 188 | 31.976 | 57.200 | 33.260 | 0.00 | 0.00 |
| ATOM | 2889 | C    | GLY | X | 188 | 30.074 | 57.466 | 32.128 | 0.00 | 0.00 |
| ATOM | 2890 | O    | GLY | X | 188 | 29.402 | 58.442 | 32.431 | 0.00 | 0.00 |
| ATOM | 2891 | N    | ASP | X | 189 | 29.563 | 56.344 | 31.726 | 0.00 | 0.00 |
| ATOM | 2892 | H    | ASP | X | 189 | 30.214 | 55.709 | 31.287 | 0.00 | 0.00 |
| ATOM | 2893 | CA   | ASP | X | 189 | 28.127 | 56.210 | 31.332 | 0.00 | 0.00 |
| ATOM | 2894 | HA   | ASP | X | 189 | 27.788 | 57.229 | 31.143 | 0.00 | 0.00 |
| ATOM | 2895 | CB   | ASP | X | 189 | 27.962 | 55.478 | 29.986 | 0.00 | 0.00 |
| ATOM | 2896 | HB2  | ASP | X | 189 | 28.566 | 55.943 | 29.207 | 0.00 | 0.00 |
| ATOM | 2897 | HB3  | ASP | X | 189 | 28.389 | 54.492 | 30.169 | 0.00 | 0.00 |
| ATOM | 2898 | CG   | ASP | X | 189 | 26.572 | 55.369 | 29.517 | 0.00 | 0.00 |
| ATOM | 2899 | OD1  | ASP | X | 189 | 26.284 | 54.670 | 28.514 | 0.00 | 0.00 |
| ATOM | 2900 | OD2  | ASP | X | 189 | 25.684 | 55.917 | 30.209 | 0.00 | 0.00 |
| ATOM | 2901 | C    | ASP | X | 189 | 27.294 | 55.445 | 32.424 | 0.00 | 0.00 |
| ATOM | 2902 | O    | ASP | X | 189 | 27.447 | 54.254 | 32.632 | 0.00 | 0.00 |
| ATOM | 2903 | N    | PRO | X | 190 | 26.383 | 56.124 | 33.132 | 0.00 | 0.00 |
| ATOM | 2904 | CD   | PRO | X | 190 | 26.061 | 57.580 | 33.244 | 0.00 | 0.00 |
| ATOM | 2905 | HD2  | PRO | X | 190 | 25.328 | 57.929 | 32.517 | 0.00 | 0.00 |
| ATOM | 2906 | HD3  | PRO | X | 190 | 27.000 | 58.099 | 33.048 | 0.00 | 0.00 |
| ATOM | 2907 | CG   | PRO | X | 190 | 25.456 | 57.920 | 34.581 | 0.00 | 0.00 |
| ATOM | 2908 | HG2  | PRO | X | 190 | 24.733 | 58.727 | 34.461 | 0.00 | 0.00 |
| ATOM | 2909 | HG3  | PRO | X | 190 | 26.198 | 58.017 | 35.374 | 0.00 | 0.00 |
| ATOM | 2910 | CB   | PRO | X | 190 | 24.718 | 56.590 | 34.783 | 0.00 | 0.00 |
| ATOM | 2911 | HB2  | PRO | X | 190 | 23.740 | 56.545 | 34.302 | 0.00 | 0.00 |
| ATOM | 2912 | HB3  | PRO | X | 190 | 24.621 | 56.398 | 35.851 | 0.00 | 0.00 |
| ATOM | 2913 | CA   | PRO | X | 190 | 25.515 | 55.440 | 34.130 | 0.00 | 0.00 |
| ATOM | 2914 | HA   | PRO | X | 190 | 26.079 | 54.896 | 34.888 | 0.00 | 0.00 |
| ATOM | 2915 | C    | PRO | X | 190 | 24.662 | 54.314 | 33.484 | 0.00 | 0.00 |
| ATOM | 2916 | O    | PRO | X | 190 | 24.292 | 53.397 | 34.281 | 0.00 | 0.00 |
| ATOM | 2917 | N    | THR | X | 191 | 24.326 | 54.413 | 32.177 | 0.00 | 0.00 |
| ATOM | 2918 | H    | THR | X | 191 | 24.597 | 55.162 | 31.555 | 0.00 | 0.00 |
| ATOM | 2919 | CA   | THR | X | 191 | 23.533 | 53.448 | 31.510 | 0.00 | 0.00 |
| ATOM | 2920 | HA   | THR | X | 191 | 22.807 | 53.076 | 32.234 | 0.00 | 0.00 |
| ATOM | 2921 | CB   | THR | X | 191 | 22.776 | 54.030 | 30.294 | 0.00 | 0.00 |
| ATOM | 2922 | HB   | THR | X | 191 | 22.075 | 53.242 | 30.020 | 0.00 | 0.00 |
| ATOM | 2923 | CG2  | THR | X | 191 | 21.975 | 55.326 | 30.575 | 0.00 | 0.00 |
| ATOM | 2924 | HG21 | THR | X | 191 | 21.375 | 55.143 | 31.466 | 0.00 | 0.00 |
| ATOM | 2925 | HG22 | THR | X | 191 | 22.577 | 56.218 | 30.746 | 0.00 | 0.00 |
| ATOM | 2926 | HG23 | THR | X | 191 | 21.308 | 55.402 | 29.717 | 0.00 | 0.00 |
| ATOM | 2927 | OG1  | THR | X | 191 | 23.652 | 54.233 | 29.226 | 0.00 | 0.00 |
| ATOM | 2928 | HG1  | THR | X | 191 | 24.348 | 54.816 | 29.539 | 0.00 | 0.00 |
| ATOM | 2929 | C    | THR | X | 191 | 24.451 | 52.238 | 31.097 | 0.00 | 0.00 |
| ATOM | 2930 | O    | THR | X | 191 | 23.946 | 51.277 | 30.549 | 0.00 | 0.00 |
| ATOM | 2931 | N    | SER | X | 192 | 25.770 | 52.290 | 31.304 | 0.00 | 0.00 |
| ATOM | 2932 | H    | SER | X | 192 | 26.147 | 53.077 | 31.812 | 0.00 | 0.00 |
| ATOM | 2933 | CA   | SER | X | 192 | 26.660 | 51.201 | 30.740 | 0.00 | 0.00 |
| ATOM | 2934 | HA   | SER | X | 192 | 26.185 | 50.222 | 30.676 | 0.00 | 0.00 |
| ATOM | 2935 | CB   | SER | X | 192 | 27.085 | 51.560 | 29.318 | 0.00 | 0.00 |
| ATOM | 2936 | HB2  | SER | X | 192 | 27.714 | 52.436 | 29.477 | 0.00 | 0.00 |
| ATOM | 2937 | HB3  | SER | X | 192 | 27.810 | 50.867 | 28.890 | 0.00 | 0.00 |
| ATOM | 2938 | OG   | SER | X | 192 | 26.022 | 51.858 | 28.376 | 0.00 | 0.00 |
| ATOM | 2939 | HG   | SER | X | 192 | 25.928 | 52.812 | 28.330 | 0.00 | 0.00 |
| ATOM | 2940 | C    | SER | X | 192 | 27.803 | 50.887 | 31.700 | 0.00 | 0.00 |
| ATOM | 2941 | O    | SER | X | 192 | 28.994 | 51.179 | 31.416 | 0.00 | 0.00 |
| ATOM | 2942 | N    | VAL | X | 193 | 27.502 | 50.408 | 32.914 | 0.00 | 0.00 |

|      |      |      |     |   |     |        |        |        |      |      |
|------|------|------|-----|---|-----|--------|--------|--------|------|------|
| ATOM | 2943 | H    | VAL | X | 193 | 26.532 | 50.176 | 33.071 | 0.00 | 0.00 |
| ATOM | 2944 | CA   | VAL | X | 193 | 28.426 | 50.073 | 34.047 | 0.00 | 0.00 |
| ATOM | 2945 | HA   | VAL | X | 193 | 29.300 | 50.702 | 33.880 | 0.00 | 0.00 |
| ATOM | 2946 | CB   | VAL | X | 193 | 27.857 | 50.428 | 35.437 | 0.00 | 0.00 |
| ATOM | 2947 | HB   | VAL | X | 193 | 26.903 | 49.927 | 35.598 | 0.00 | 0.00 |
| ATOM | 2948 | CG1  | VAL | X | 193 | 28.866 | 49.960 | 36.547 | 0.00 | 0.00 |
| ATOM | 2949 | HG11 | VAL | X | 193 | 28.384 | 50.149 | 37.506 | 0.00 | 0.00 |
| ATOM | 2950 | HG12 | VAL | X | 193 | 29.026 | 48.889 | 36.420 | 0.00 | 0.00 |
| ATOM | 2951 | HG13 | VAL | X | 193 | 29.858 | 50.388 | 36.399 | 0.00 | 0.00 |
| ATOM | 2952 | CG2  | VAL | X | 193 | 27.658 | 51.992 | 35.576 | 0.00 | 0.00 |
| ATOM | 2953 | HG21 | VAL | X | 193 | 26.828 | 52.288 | 34.935 | 0.00 | 0.00 |
| ATOM | 2954 | HG22 | VAL | X | 193 | 27.421 | 52.183 | 36.622 | 0.00 | 0.00 |
| ATOM | 2955 | HG23 | VAL | X | 193 | 28.578 | 52.530 | 35.345 | 0.00 | 0.00 |
| ATOM | 2956 | C    | VAL | X | 193 | 28.637 | 48.607 | 33.880 | 0.00 | 0.00 |
| ATOM | 2957 | O    | VAL | X | 193 | 27.678 | 47.835 | 33.855 | 0.00 | 0.00 |
| ATOM | 2958 | N    | THR | X | 194 | 29.901 | 48.294 | 33.728 | 0.00 | 0.00 |
| ATOM | 2959 | H    | THR | X | 194 | 30.585 | 49.030 | 33.619 | 0.00 | 0.00 |
| ATOM | 2960 | CA   | THR | X | 194 | 30.433 | 46.897 | 33.879 | 0.00 | 0.00 |
| ATOM | 2961 | HA   | THR | X | 194 | 29.575 | 46.254 | 34.077 | 0.00 | 0.00 |
| ATOM | 2962 | CB   | THR | X | 194 | 31.020 | 46.596 | 32.535 | 0.00 | 0.00 |
| ATOM | 2963 | HB   | THR | X | 194 | 31.818 | 47.309 | 32.327 | 0.00 | 0.00 |
| ATOM | 2964 | CG2  | THR | X | 194 | 31.698 | 45.217 | 32.443 | 0.00 | 0.00 |
| ATOM | 2965 | HG21 | THR | X | 194 | 30.915 | 44.498 | 32.685 | 0.00 | 0.00 |
| ATOM | 2966 | HG22 | THR | X | 194 | 32.063 | 44.836 | 31.490 | 0.00 | 0.00 |
| ATOM | 2967 | HG23 | THR | X | 194 | 32.527 | 45.089 | 33.139 | 0.00 | 0.00 |
| ATOM | 2968 | OG1  | THR | X | 194 | 30.090 | 46.631 | 31.487 | 0.00 | 0.00 |
| ATOM | 2969 | HG1  | THR | X | 194 | 29.863 | 47.542 | 31.290 | 0.00 | 0.00 |
| ATOM | 2970 | C    | THR | X | 194 | 31.424 | 46.783 | 35.076 | 0.00 | 0.00 |
| ATOM | 2971 | O    | THR | X | 194 | 32.077 | 47.768 | 35.455 | 0.00 | 0.00 |
| ATOM | 2972 | N    | LEU | X | 195 | 31.536 | 45.548 | 35.601 | 0.00 | 0.00 |
| ATOM | 2973 | H    | LEU | X | 195 | 30.993 | 44.819 | 35.161 | 0.00 | 0.00 |
| ATOM | 2974 | CA   | LEU | X | 195 | 32.496 | 45.173 | 36.685 | 0.00 | 0.00 |
| ATOM | 2975 | HA   | LEU | X | 195 | 32.917 | 46.015 | 37.234 | 0.00 | 0.00 |
| ATOM | 2976 | CB   | LEU | X | 195 | 31.700 | 44.355 | 37.659 | 0.00 | 0.00 |
| ATOM | 2977 | HB2  | LEU | X | 195 | 31.343 | 43.497 | 37.088 | 0.00 | 0.00 |
| ATOM | 2978 | HB3  | LEU | X | 195 | 32.345 | 44.063 | 38.488 | 0.00 | 0.00 |
| ATOM | 2979 | CG   | LEU | X | 195 | 30.489 | 44.914 | 38.292 | 0.00 | 0.00 |
| ATOM | 2980 | HG   | LEU | X | 195 | 29.688 | 44.852 | 37.555 | 0.00 | 0.00 |
| ATOM | 2981 | CD1  | LEU | X | 195 | 30.010 | 43.939 | 39.358 | 0.00 | 0.00 |
| ATOM | 2982 | HD11 | LEU | X | 195 | 29.623 | 43.049 | 38.861 | 0.00 | 0.00 |
| ATOM | 2983 | HD12 | LEU | X | 195 | 30.732 | 43.825 | 40.166 | 0.00 | 0.00 |
| ATOM | 2984 | HD13 | LEU | X | 195 | 29.132 | 44.369 | 39.841 | 0.00 | 0.00 |
| ATOM | 2985 | CD2  | LEU | X | 195 | 30.544 | 46.381 | 38.842 | 0.00 | 0.00 |
| ATOM | 2986 | HD21 | LEU | X | 195 | 31.434 | 46.516 | 39.456 | 0.00 | 0.00 |
| ATOM | 2987 | HD22 | LEU | X | 195 | 30.681 | 47.024 | 37.973 | 0.00 | 0.00 |
| ATOM | 2988 | HD23 | LEU | X | 195 | 29.598 | 46.638 | 39.318 | 0.00 | 0.00 |
| ATOM | 2989 | C    | LEU | X | 195 | 33.571 | 44.258 | 36.041 | 0.00 | 0.00 |
| ATOM | 2990 | O    | LEU | X | 195 | 33.141 | 43.343 | 35.336 | 0.00 | 0.00 |
| ATOM | 2991 | N    | PHE | X | 196 | 34.837 | 44.292 | 36.429 | 0.00 | 0.00 |
| ATOM | 2992 | H    | PHE | X | 196 | 34.991 | 45.103 | 37.010 | 0.00 | 0.00 |
| ATOM | 2993 | CA   | PHE | X | 196 | 35.902 | 43.350 | 36.261 | 0.00 | 0.00 |
| ATOM | 2994 | HA   | PHE | X | 196 | 35.464 | 42.354 | 36.190 | 0.00 | 0.00 |
| ATOM | 2995 | CB   | PHE | X | 196 | 36.618 | 43.757 | 34.956 | 0.00 | 0.00 |
| ATOM | 2996 | HB2  | PHE | X | 196 | 36.975 | 42.852 | 34.465 | 0.00 | 0.00 |
| ATOM | 2997 | HB3  | PHE | X | 196 | 35.910 | 44.208 | 34.260 | 0.00 | 0.00 |
| ATOM | 2998 | CG   | PHE | X | 196 | 37.783 | 44.796 | 35.056 | 0.00 | 0.00 |
| ATOM | 2999 | CD1  | PHE | X | 196 | 37.546 | 46.128 | 35.173 | 0.00 | 0.00 |
| ATOM | 3000 | HD1  | PHE | X | 196 | 36.528 | 46.454 | 35.324 | 0.00 | 0.00 |
| ATOM | 3001 | CE1  | PHE | X | 196 | 38.579 | 47.126 | 34.979 | 0.00 | 0.00 |
| ATOM | 3002 | HE1  | PHE | X | 196 | 38.400 | 48.188 | 34.900 | 0.00 | 0.00 |
| ATOM | 3003 | CZ   | PHE | X | 196 | 39.864 | 46.677 | 34.650 | 0.00 | 0.00 |
| ATOM | 3004 | HZ   | PHE | X | 196 | 40.666 | 47.356 | 34.401 | 0.00 | 0.00 |
| ATOM | 3005 | CE2  | PHE | X | 196 | 40.121 | 45.294 | 34.624 | 0.00 | 0.00 |
| ATOM | 3006 | HE2  | PHE | X | 196 | 41.130 | 44.954 | 34.442 | 0.00 | 0.00 |
| ATOM | 3007 | CD2  | PHE | X | 196 | 39.065 | 44.335 | 34.640 | 0.00 | 0.00 |
| ATOM | 3008 | HD2  | PHE | X | 196 | 39.270 | 43.283 | 34.509 | 0.00 | 0.00 |
| ATOM | 3009 | C    | PHE | X | 196 | 36.723 | 43.180 | 37.517 | 0.00 | 0.00 |
| ATOM | 3010 | O    | PHE | X | 196 | 36.912 | 44.076 | 38.386 | 0.00 | 0.00 |
| ATOM | 3011 | N    | GLY | X | 197 | 37.406 | 42.007 | 37.599 | 0.00 | 0.00 |
| ATOM | 3012 | H    | GLY | X | 197 | 37.387 | 41.315 | 36.864 | 0.00 | 0.00 |

|      |      |     |     |   |     |        |        |        |      |      |
|------|------|-----|-----|---|-----|--------|--------|--------|------|------|
| ATOM | 3013 | CA  | GLY | X | 197 | 38.213 | 41.738 | 38.782 | 0.00 | 0.00 |
| ATOM | 3014 | HA2 | GLY | X | 197 | 38.853 | 42.597 | 39.012 | 0.00 | 0.00 |
| ATOM | 3015 | HA3 | GLY | X | 197 | 37.456 | 41.637 | 39.555 | 0.00 | 0.00 |
| ATOM | 3016 | C   | GLY | X | 197 | 39.082 | 40.406 | 38.786 | 0.00 | 0.00 |
| ATOM | 3017 | O   | GLY | X | 197 | 38.847 | 39.549 | 37.938 | 0.00 | 0.00 |
| ATOM | 3018 | N   | GLU | X | 198 | 40.170 | 40.338 | 39.628 | 0.00 | 0.00 |
| ATOM | 3019 | H   | GLU | X | 198 | 40.452 | 41.184 | 40.103 | 0.00 | 0.00 |
| ATOM | 3020 | CA  | GLU | X | 198 | 40.972 | 39.108 | 39.838 | 0.00 | 0.00 |
| ATOM | 3021 | HA  | GLU | X | 198 | 40.636 | 38.424 | 39.058 | 0.00 | 0.00 |
| ATOM | 3022 | CB  | GLU | X | 198 | 42.494 | 39.242 | 39.563 | 0.00 | 0.00 |
| ATOM | 3023 | HB2 | GLU | X | 198 | 42.934 | 38.252 | 39.440 | 0.00 | 0.00 |
| ATOM | 3024 | HB3 | GLU | X | 198 | 42.662 | 39.725 | 38.601 | 0.00 | 0.00 |
| ATOM | 3025 | CG  | GLU | X | 198 | 43.263 | 39.967 | 40.760 | 0.00 | 0.00 |
| ATOM | 3026 | HG2 | GLU | X | 198 | 42.631 | 40.812 | 41.033 | 0.00 | 0.00 |
| ATOM | 3027 | HG3 | GLU | X | 198 | 43.343 | 39.375 | 41.671 | 0.00 | 0.00 |
| ATOM | 3028 | CD  | GLU | X | 198 | 44.706 | 40.417 | 40.403 | 0.00 | 0.00 |
| ATOM | 3029 | OE1 | GLU | X | 198 | 45.080 | 41.520 | 40.929 | 0.00 | 0.00 |
| ATOM | 3030 | OE2 | GLU | X | 198 | 45.574 | 39.605 | 39.972 | 0.00 | 0.00 |
| ATOM | 3031 | C   | GLU | X | 198 | 40.871 | 38.386 | 41.127 | 0.00 | 0.00 |
| ATOM | 3032 | O   | GLU | X | 198 | 40.674 | 38.968 | 42.124 | 0.00 | 0.00 |
| ATOM | 3033 | N   | XA1 | X | 199 | 40.903 | 37.041 | 41.140 | 0.00 | 0.00 |
| ATOM | 3034 | CA  | XA1 | X | 199 | 40.977 | 36.212 | 42.353 | 0.00 | 0.00 |
| ATOM | 3035 | C   | XA1 | X | 199 | 39.905 | 36.577 | 43.491 | 0.00 | 0.00 |
| ATOM | 3036 | O   | XA1 | X | 199 | 38.730 | 36.256 | 43.275 | 0.00 | 0.00 |
| ATOM | 3037 | CB  | XA1 | X | 199 | 42.444 | 36.369 | 42.846 | 0.00 | 0.00 |
| ATOM | 3038 | OG  | XA1 | X | 199 | 42.766 | 35.283 | 43.851 | 0.00 | 0.00 |
| ATOM | 3039 | P1  | XA1 | X | 199 | 43.549 | 35.620 | 45.162 | 0.00 | 0.00 |
| ATOM | 3040 | O1  | XA1 | X | 199 | 43.285 | 36.987 | 45.732 | 0.00 | 0.00 |
| ATOM | 3041 | O2  | XA1 | X | 199 | 44.984 | 35.145 | 44.897 | 0.00 | 0.00 |
| ATOM | 3042 | C1  | XA1 | X | 199 | 42.612 | 34.447 | 46.096 | 0.00 | 0.00 |
| ATOM | 3043 | H   | XA1 | X | 199 | 40.895 | 36.537 | 40.265 | 0.00 | 0.00 |
| ATOM | 3044 | HA  | XA1 | X | 199 | 40.915 | 35.166 | 42.054 | 0.00 | 0.00 |
| ATOM | 3045 | HB2 | XA1 | X | 199 | 43.156 | 36.458 | 42.021 | 0.00 | 0.00 |
| ATOM | 3046 | HB3 | XA1 | X | 199 | 42.437 | 37.378 | 43.268 | 0.00 | 0.00 |
| ATOM | 3047 | H11 | XA1 | X | 199 | 41.664 | 34.906 | 46.384 | 0.00 | 0.00 |
| ATOM | 3048 | H12 | XA1 | X | 199 | 42.462 | 33.558 | 45.479 | 0.00 | 0.00 |
| ATOM | 3049 | H13 | XA1 | X | 199 | 43.188 | 34.127 | 46.967 | 0.00 | 0.00 |
| ATOM | 3050 | N   | ALA | X | 200 | 40.294 | 37.234 | 44.630 | 0.00 | 0.00 |
| ATOM | 3051 | H   | ALA | X | 200 | 41.284 | 37.323 | 44.806 | 0.00 | 0.00 |
| ATOM | 3052 | CA  | ALA | X | 200 | 39.375 | 37.621 | 45.687 | 0.00 | 0.00 |
| ATOM | 3053 | HA  | ALA | X | 200 | 38.679 | 36.812 | 45.908 | 0.00 | 0.00 |
| ATOM | 3054 | CB  | ALA | X | 200 | 40.172 | 38.088 | 46.898 | 0.00 | 0.00 |
| ATOM | 3055 | HB1 | ALA | X | 200 | 40.630 | 39.062 | 46.724 | 0.00 | 0.00 |
| ATOM | 3056 | HB2 | ALA | X | 200 | 39.462 | 38.197 | 47.718 | 0.00 | 0.00 |
| ATOM | 3057 | HB3 | ALA | X | 200 | 40.880 | 37.330 | 47.232 | 0.00 | 0.00 |
| ATOM | 3058 | C   | ALA | X | 200 | 38.495 | 38.814 | 45.328 | 0.00 | 0.00 |
| ATOM | 3059 | O   | ALA | X | 200 | 37.488 | 39.102 | 45.978 | 0.00 | 0.00 |
| ATOM | 3060 | N   | GLY | X | 201 | 38.873 | 39.487 | 44.252 | 0.00 | 0.00 |
| ATOM | 3061 | H   | GLY | X | 201 | 39.684 | 39.181 | 43.733 | 0.00 | 0.00 |
| ATOM | 3062 | CA  | GLY | X | 201 | 38.090 | 40.588 | 43.558 | 0.00 | 0.00 |
| ATOM | 3063 | HA2 | GLY | X | 201 | 37.662 | 41.252 | 44.334 | 0.00 | 0.00 |
| ATOM | 3064 | HA3 | GLY | X | 201 | 38.766 | 41.115 | 43.059 | 0.00 | 0.00 |
| ATOM | 3065 | C   | GLY | X | 201 | 37.173 | 39.985 | 42.565 | 0.00 | 0.00 |
| ATOM | 3066 | O   | GLY | X | 201 | 35.948 | 40.280 | 42.621 | 0.00 | 0.00 |
| ATOM | 3067 | N   | ALA | X | 202 | 37.611 | 39.119 | 41.655 | 0.00 | 0.00 |
| ATOM | 3068 | H   | ALA | X | 202 | 38.595 | 38.902 | 41.725 | 0.00 | 0.00 |
| ATOM | 3069 | CA  | ALA | X | 202 | 36.689 | 38.371 | 40.766 | 0.00 | 0.00 |
| ATOM | 3070 | HA  | ALA | X | 202 | 36.185 | 39.108 | 40.140 | 0.00 | 0.00 |
| ATOM | 3071 | CB  | ALA | X | 202 | 37.491 | 37.286 | 39.916 | 0.00 | 0.00 |
| ATOM | 3072 | HB1 | ALA | X | 202 | 38.166 | 37.787 | 39.222 | 0.00 | 0.00 |
| ATOM | 3073 | HB2 | ALA | X | 202 | 38.105 | 36.636 | 40.539 | 0.00 | 0.00 |
| ATOM | 3074 | HB3 | ALA | X | 202 | 36.799 | 36.670 | 39.342 | 0.00 | 0.00 |
| ATOM | 3075 | C   | ALA | X | 202 | 35.653 | 37.657 | 41.666 | 0.00 | 0.00 |
| ATOM | 3076 | O   | ALA | X | 202 | 34.474 | 37.674 | 41.370 | 0.00 | 0.00 |
| ATOM | 3077 | N   | ALA | X | 203 | 36.011 | 37.041 | 42.780 | 0.00 | 0.00 |
| ATOM | 3078 | H   | ALA | X | 203 | 36.973 | 36.844 | 43.015 | 0.00 | 0.00 |
| ATOM | 3079 | CA  | ALA | X | 203 | 35.086 | 36.425 | 43.706 | 0.00 | 0.00 |
| ATOM | 3080 | HA  | ALA | X | 203 | 34.442 | 35.731 | 43.166 | 0.00 | 0.00 |
| ATOM | 3081 | CB  | ALA | X | 203 | 35.787 | 35.647 | 44.743 | 0.00 | 0.00 |
| ATOM | 3082 | HB1 | ALA | X | 203 | 36.184 | 34.752 | 44.262 | 0.00 | 0.00 |

|      |      |      |     |   |     |        |        |        |      |      |
|------|------|------|-----|---|-----|--------|--------|--------|------|------|
| ATOM | 3083 | HB2  | ALA | X | 203 | 36.626 | 36.203 | 45.160 | 0.00 | 0.00 |
| ATOM | 3084 | HB3  | ALA | X | 203 | 35.159 | 35.362 | 45.587 | 0.00 | 0.00 |
| ATOM | 3085 | C    | ALA | X | 203 | 34.148 | 37.488 | 44.407 | 0.00 | 0.00 |
| ATOM | 3086 | O    | ALA | X | 203 | 32.931 | 37.285 | 44.390 | 0.00 | 0.00 |
| ATOM | 3087 | N    | SER | X | 204 | 34.648 | 38.600 | 44.919 | 0.00 | 0.00 |
| ATOM | 3088 | H    | SER | X | 204 | 35.620 | 38.771 | 44.705 | 0.00 | 0.00 |
| ATOM | 3089 | CA   | SER | X | 204 | 33.855 | 39.799 | 45.260 | 0.00 | 0.00 |
| ATOM | 3090 | HA   | SER | X | 204 | 33.286 | 39.552 | 46.157 | 0.00 | 0.00 |
| ATOM | 3091 | CB   | SER | X | 204 | 34.703 | 41.047 | 45.584 | 0.00 | 0.00 |
| ATOM | 3092 | HB2  | SER | X | 204 | 35.252 | 41.431 | 44.724 | 0.00 | 0.00 |
| ATOM | 3093 | HB3  | SER | X | 204 | 33.949 | 41.791 | 45.840 | 0.00 | 0.00 |
| ATOM | 3094 | OG   | SER | X | 204 | 35.590 | 40.857 | 46.668 | 0.00 | 0.00 |
| ATOM | 3095 | HG   | SER | X | 204 | 36.200 | 40.172 | 46.388 | 0.00 | 0.00 |
| ATOM | 3096 | C    | SER | X | 204 | 32.740 | 40.179 | 44.210 | 0.00 | 0.00 |
| ATOM | 3097 | O    | SER | X | 204 | 31.556 | 40.195 | 44.522 | 0.00 | 0.00 |
| ATOM | 3098 | N    | VAL | X | 205 | 33.134 | 40.256 | 42.950 | 0.00 | 0.00 |
| ATOM | 3099 | H    | VAL | X | 205 | 34.122 | 40.395 | 42.794 | 0.00 | 0.00 |
| ATOM | 3100 | CA   | VAL | X | 205 | 32.173 | 40.433 | 41.766 | 0.00 | 0.00 |
| ATOM | 3101 | HA   | VAL | X | 205 | 31.532 | 41.303 | 41.906 | 0.00 | 0.00 |
| ATOM | 3102 | CB   | VAL | X | 205 | 33.021 | 40.695 | 40.460 | 0.00 | 0.00 |
| ATOM | 3103 | HB   | VAL | X | 205 | 33.726 | 39.877 | 40.311 | 0.00 | 0.00 |
| ATOM | 3104 | CG1  | VAL | X | 205 | 32.130 | 40.773 | 39.193 | 0.00 | 0.00 |
| ATOM | 3105 | HG11 | VAL | X | 205 | 31.555 | 41.698 | 39.157 | 0.00 | 0.00 |
| ATOM | 3106 | HG12 | VAL | X | 205 | 32.686 | 40.663 | 38.261 | 0.00 | 0.00 |
| ATOM | 3107 | HG13 | VAL | X | 205 | 31.415 | 39.951 | 39.207 | 0.00 | 0.00 |
| ATOM | 3108 | CG2  | VAL | X | 205 | 33.835 | 41.987 | 40.574 | 0.00 | 0.00 |
| ATOM | 3109 | HG21 | VAL | X | 205 | 34.667 | 41.876 | 41.269 | 0.00 | 0.00 |
| ATOM | 3110 | HG22 | VAL | X | 205 | 34.197 | 42.307 | 39.597 | 0.00 | 0.00 |
| ATOM | 3111 | HG23 | VAL | X | 205 | 33.217 | 42.862 | 40.774 | 0.00 | 0.00 |
| ATOM | 3112 | C    | VAL | X | 205 | 31.163 | 39.289 | 41.520 | 0.00 | 0.00 |
| ATOM | 3113 | O    | VAL | X | 205 | 29.975 | 39.549 | 41.332 | 0.00 | 0.00 |
| ATOM | 3114 | N    | GLY | X | 206 | 31.636 | 38.063 | 41.716 | 0.00 | 0.00 |
| ATOM | 3115 | H    | GLY | X | 206 | 32.637 | 37.934 | 41.734 | 0.00 | 0.00 |
| ATOM | 3116 | CA   | GLY | X | 206 | 30.720 | 36.928 | 41.827 | 0.00 | 0.00 |
| ATOM | 3117 | HA2  | GLY | X | 206 | 30.188 | 36.775 | 40.843 | 0.00 | 0.00 |
| ATOM | 3118 | HA3  | GLY | X | 206 | 31.277 | 36.030 | 41.964 | 0.00 | 0.00 |
| ATOM | 3119 | C    | GLY | X | 206 | 29.664 | 37.112 | 42.963 | 0.00 | 0.00 |
| ATOM | 3120 | O    | GLY | X | 206 | 28.443 | 37.000 | 42.641 | 0.00 | 0.00 |
| ATOM | 3121 | N    | MET | X | 207 | 30.074 | 37.434 | 44.193 | 0.00 | 0.00 |
| ATOM | 3122 | H    | MET | X | 207 | 31.073 | 37.539 | 44.298 | 0.00 | 0.00 |
| ATOM | 3123 | CA   | MET | X | 207 | 29.127 | 37.806 | 45.246 | 0.00 | 0.00 |
| ATOM | 3124 | HA   | MET | X | 207 | 28.491 | 36.937 | 45.410 | 0.00 | 0.00 |
| ATOM | 3125 | CB   | MET | X | 207 | 29.807 | 38.009 | 46.647 | 0.00 | 0.00 |
| ATOM | 3126 | HB2  | MET | X | 207 | 30.239 | 39.009 | 46.678 | 0.00 | 0.00 |
| ATOM | 3127 | HB3  | MET | X | 207 | 29.003 | 37.960 | 47.382 | 0.00 | 0.00 |
| ATOM | 3128 | CG   | MET | X | 207 | 30.748 | 36.893 | 47.055 | 0.00 | 0.00 |
| ATOM | 3129 | HG2  | MET | X | 207 | 31.482 | 36.762 | 46.260 | 0.00 | 0.00 |
| ATOM | 3130 | HG3  | MET | X | 207 | 31.355 | 37.144 | 47.925 | 0.00 | 0.00 |
| ATOM | 3131 | SD   | MET | X | 207 | 29.976 | 35.224 | 47.239 | 0.00 | 0.00 |
| ATOM | 3132 | CE   | MET | X | 207 | 31.623 | 34.469 | 47.380 | 0.00 | 0.00 |
| ATOM | 3133 | HE1  | MET | X | 207 | 31.394 | 33.494 | 47.810 | 0.00 | 0.00 |
| ATOM | 3134 | HE2  | MET | X | 207 | 32.173 | 34.430 | 46.440 | 0.00 | 0.00 |
| ATOM | 3135 | HE3  | MET | X | 207 | 32.191 | 35.028 | 48.124 | 0.00 | 0.00 |
| ATOM | 3136 | C    | MET | X | 207 | 28.095 | 38.837 | 44.768 | 0.00 | 0.00 |
| ATOM | 3137 | O    | MET | X | 207 | 26.864 | 38.667 | 44.885 | 0.00 | 0.00 |
| ATOM | 3138 | N    | HIE | X | 208 | 28.601 | 39.941 | 44.142 | 0.00 | 0.00 |
| ATOM | 3139 | H    | HIE | X | 208 | 29.604 | 40.045 | 44.197 | 0.00 | 0.00 |
| ATOM | 3140 | CA   | HIE | X | 208 | 27.795 | 41.097 | 43.799 | 0.00 | 0.00 |
| ATOM | 3141 | HA   | HIE | X | 208 | 27.216 | 41.412 | 44.668 | 0.00 | 0.00 |
| ATOM | 3142 | CB   | HIE | X | 208 | 28.689 | 42.311 | 43.479 | 0.00 | 0.00 |
| ATOM | 3143 | HB2  | HIE | X | 208 | 29.603 | 41.993 | 42.979 | 0.00 | 0.00 |
| ATOM | 3144 | HB3  | HIE | X | 208 | 28.229 | 43.173 | 42.995 | 0.00 | 0.00 |
| ATOM | 3145 | CG   | HIE | X | 208 | 29.171 | 42.964 | 44.761 | 0.00 | 0.00 |
| ATOM | 3146 | ND1  | HIE | X | 208 | 28.399 | 43.651 | 45.686 | 0.00 | 0.00 |
| ATOM | 3147 | CE1  | HIE | X | 208 | 29.263 | 44.191 | 46.552 | 0.00 | 0.00 |
| ATOM | 3148 | HE1  | HIE | X | 208 | 28.902 | 44.702 | 47.432 | 0.00 | 0.00 |
| ATOM | 3149 | NE2  | HIE | X | 208 | 30.503 | 43.761 | 46.322 | 0.00 | 0.00 |
| ATOM | 3150 | HE2  | HIE | X | 208 | 31.339 | 43.880 | 46.877 | 0.00 | 0.00 |
| ATOM | 3151 | CD2  | HIE | X | 208 | 30.463 | 43.034 | 45.170 | 0.00 | 0.00 |
| ATOM | 3152 | HD2  | HIE | X | 208 | 31.305 | 42.672 | 44.599 | 0.00 | 0.00 |

|      |      |      |     |   |     |        |        |        |      |      |
|------|------|------|-----|---|-----|--------|--------|--------|------|------|
| ATOM | 3153 | C    | HIE | X | 208 | 26.829 | 40.868 | 42.657 | 0.00 | 0.00 |
| ATOM | 3154 | O    | HIE | X | 208 | 25.800 | 41.506 | 42.703 | 0.00 | 0.00 |
| ATOM | 3155 | N    | LEU | X | 209 | 27.111 | 39.817 | 41.807 | 0.00 | 0.00 |
| ATOM | 3156 | H    | LEU | X | 209 | 28.023 | 39.390 | 41.879 | 0.00 | 0.00 |
| ATOM | 3157 | CA   | LEU | X | 209 | 26.295 | 39.238 | 40.752 | 0.00 | 0.00 |
| ATOM | 3158 | HA   | LEU | X | 209 | 25.853 | 40.077 | 40.214 | 0.00 | 0.00 |
| ATOM | 3159 | CB   | LEU | X | 209 | 27.297 | 38.493 | 39.722 | 0.00 | 0.00 |
| ATOM | 3160 | HB2  | LEU | X | 209 | 27.971 | 39.246 | 39.315 | 0.00 | 0.00 |
| ATOM | 3161 | HB3  | LEU | X | 209 | 27.916 | 37.698 | 40.137 | 0.00 | 0.00 |
| ATOM | 3162 | CG   | LEU | X | 209 | 26.545 | 37.925 | 38.453 | 0.00 | 0.00 |
| ATOM | 3163 | HG   | LEU | X | 209 | 25.536 | 38.334 | 38.500 | 0.00 | 0.00 |
| ATOM | 3164 | CD1  | LEU | X | 209 | 27.147 | 38.208 | 37.120 | 0.00 | 0.00 |
| ATOM | 3165 | HD11 | LEU | X | 209 | 26.990 | 39.232 | 36.781 | 0.00 | 0.00 |
| ATOM | 3166 | HD12 | LEU | X | 209 | 28.207 | 37.955 | 37.135 | 0.00 | 0.00 |
| ATOM | 3167 | HD13 | LEU | X | 209 | 26.596 | 37.580 | 36.420 | 0.00 | 0.00 |
| ATOM | 3168 | CD2  | LEU | X | 209 | 26.379 | 36.328 | 38.591 | 0.00 | 0.00 |
| ATOM | 3169 | HD21 | LEU | X | 209 | 25.877 | 35.937 | 37.706 | 0.00 | 0.00 |
| ATOM | 3170 | HD22 | LEU | X | 209 | 27.360 | 35.854 | 38.615 | 0.00 | 0.00 |
| ATOM | 3171 | HD23 | LEU | X | 209 | 25.789 | 36.071 | 39.470 | 0.00 | 0.00 |
| ATOM | 3172 | C    | LEU | X | 209 | 25.179 | 38.364 | 41.378 | 0.00 | 0.00 |
| ATOM | 3173 | O    | LEU | X | 209 | 24.087 | 38.327 | 40.732 | 0.00 | 0.00 |
| ATOM | 3174 | N    | LEU | X | 210 | 25.466 | 37.660 | 42.446 | 0.00 | 0.00 |
| ATOM | 3175 | H    | LEU | X | 210 | 26.334 | 37.782 | 42.946 | 0.00 | 0.00 |
| ATOM | 3176 | CA   | LEU | X | 210 | 24.521 | 36.852 | 43.289 | 0.00 | 0.00 |
| ATOM | 3177 | HA   | LEU | X | 210 | 23.915 | 36.230 | 42.630 | 0.00 | 0.00 |
| ATOM | 3178 | CB   | LEU | X | 210 | 25.440 | 35.920 | 44.093 | 0.00 | 0.00 |
| ATOM | 3179 | HB2  | LEU | X | 210 | 26.412 | 36.387 | 44.248 | 0.00 | 0.00 |
| ATOM | 3180 | HB3  | LEU | X | 210 | 25.052 | 35.884 | 45.111 | 0.00 | 0.00 |
| ATOM | 3181 | CG   | LEU | X | 210 | 25.722 | 34.539 | 43.352 | 0.00 | 0.00 |
| ATOM | 3182 | HG   | LEU | X | 210 | 26.196 | 34.776 | 42.400 | 0.00 | 0.00 |
| ATOM | 3183 | CD1  | LEU | X | 210 | 26.671 | 33.811 | 44.246 | 0.00 | 0.00 |
| ATOM | 3184 | HD11 | LEU | X | 210 | 26.219 | 33.535 | 45.199 | 0.00 | 0.00 |
| ATOM | 3185 | HD12 | LEU | X | 210 | 27.183 | 33.089 | 43.609 | 0.00 | 0.00 |
| ATOM | 3186 | HD13 | LEU | X | 210 | 27.502 | 34.494 | 44.420 | 0.00 | 0.00 |
| ATOM | 3187 | CD2  | LEU | X | 210 | 24.437 | 33.728 | 43.096 | 0.00 | 0.00 |
| ATOM | 3188 | HD21 | LEU | X | 210 | 23.830 | 34.107 | 42.274 | 0.00 | 0.00 |
| ATOM | 3189 | HD22 | LEU | X | 210 | 24.817 | 32.739 | 42.839 | 0.00 | 0.00 |
| ATOM | 3190 | HD23 | LEU | X | 210 | 23.806 | 33.742 | 43.985 | 0.00 | 0.00 |
| ATOM | 3191 | C    | LEU | X | 210 | 23.524 | 37.634 | 44.198 | 0.00 | 0.00 |
| ATOM | 3192 | O    | LEU | X | 210 | 22.440 | 37.136 | 44.464 | 0.00 | 0.00 |
| ATOM | 3193 | N    | SER | X | 211 | 23.926 | 38.805 | 44.754 | 0.00 | 0.00 |
| ATOM | 3194 | H    | SER | X | 211 | 24.866 | 39.088 | 44.519 | 0.00 | 0.00 |
| ATOM | 3195 | CA   | SER | X | 211 | 23.169 | 39.738 | 45.656 | 0.00 | 0.00 |
| ATOM | 3196 | HA   | SER | X | 211 | 22.595 | 39.106 | 46.333 | 0.00 | 0.00 |
| ATOM | 3197 | CB   | SER | X | 211 | 24.209 | 40.527 | 46.437 | 0.00 | 0.00 |
| ATOM | 3198 | HB2  | SER | X | 211 | 24.856 | 39.835 | 46.975 | 0.00 | 0.00 |
| ATOM | 3199 | HB3  | SER | X | 211 | 24.755 | 41.196 | 45.771 | 0.00 | 0.00 |
| ATOM | 3200 | OG   | SER | X | 211 | 23.640 | 41.385 | 47.391 | 0.00 | 0.00 |
| ATOM | 3201 | HG   | SER | X | 211 | 23.074 | 40.843 | 47.945 | 0.00 | 0.00 |
| ATOM | 3202 | C    | SER | X | 211 | 22.288 | 40.721 | 44.824 | 0.00 | 0.00 |
| ATOM | 3203 | O    | SER | X | 211 | 22.863 | 41.534 | 44.068 | 0.00 | 0.00 |
| ATOM | 3204 | N    | PRO | X | 212 | 20.929 | 40.657 | 44.785 | 0.00 | 0.00 |
| ATOM | 3205 | CD   | PRO | X | 212 | 20.110 | 39.527 | 45.378 | 0.00 | 0.00 |
| ATOM | 3206 | HD2  | PRO | X | 212 | 20.361 | 39.281 | 46.409 | 0.00 | 0.00 |
| ATOM | 3207 | HD3  | PRO | X | 212 | 20.334 | 38.646 | 44.776 | 0.00 | 0.00 |
| ATOM | 3208 | CG   | PRO | X | 212 | 18.659 | 39.909 | 45.174 | 0.00 | 0.00 |
| ATOM | 3209 | HG2  | PRO | X | 212 | 18.119 | 40.218 | 46.068 | 0.00 | 0.00 |
| ATOM | 3210 | HG3  | PRO | X | 212 | 18.081 | 39.036 | 44.870 | 0.00 | 0.00 |
| ATOM | 3211 | CB   | PRO | X | 212 | 18.685 | 41.039 | 44.175 | 0.00 | 0.00 |
| ATOM | 3212 | HB2  | PRO | X | 212 | 17.998 | 41.838 | 44.453 | 0.00 | 0.00 |
| ATOM | 3213 | HB3  | PRO | X | 212 | 18.419 | 40.652 | 43.192 | 0.00 | 0.00 |
| ATOM | 3214 | CA   | PRO | X | 212 | 20.095 | 41.591 | 44.049 | 0.00 | 0.00 |
| ATOM | 3215 | HA   | PRO | X | 212 | 20.321 | 41.509 | 42.985 | 0.00 | 0.00 |
| ATOM | 3216 | C    | PRO | X | 212 | 20.213 | 43.071 | 44.336 | 0.00 | 0.00 |
| ATOM | 3217 | O    | PRO | X | 212 | 20.241 | 43.860 | 43.419 | 0.00 | 0.00 |
| ATOM | 3218 | N    | PRO | X | 213 | 20.406 | 43.522 | 45.615 | 0.00 | 0.00 |
| ATOM | 3219 | CD   | PRO | X | 213 | 20.059 | 42.749 | 46.855 | 0.00 | 0.00 |
| ATOM | 3220 | HD2  | PRO | X | 213 | 20.828 | 41.991 | 46.999 | 0.00 | 0.00 |
| ATOM | 3221 | HD3  | PRO | X | 213 | 19.066 | 42.302 | 46.803 | 0.00 | 0.00 |
| ATOM | 3222 | CG   | PRO | X | 213 | 20.057 | 43.716 | 48.045 | 0.00 | 0.00 |

|      |      |      |     |   |     |        |        |        |      |      |
|------|------|------|-----|---|-----|--------|--------|--------|------|------|
| ATOM | 3223 | HG2  | PRO | X | 213 | 20.324 | 43.356 | 49.038 | 0.00 | 0.00 |
| ATOM | 3224 | HG3  | PRO | X | 213 | 19.024 | 44.042 | 48.165 | 0.00 | 0.00 |
| ATOM | 3225 | CB   | PRO | X | 213 | 20.897 | 44.868 | 47.471 | 0.00 | 0.00 |
| ATOM | 3226 | HB2  | PRO | X | 213 | 21.931 | 44.751 | 47.796 | 0.00 | 0.00 |
| ATOM | 3227 | HB3  | PRO | X | 213 | 20.633 | 45.865 | 47.824 | 0.00 | 0.00 |
| ATOM | 3228 | CA   | PRO | X | 213 | 20.744 | 44.857 | 45.944 | 0.00 | 0.00 |
| ATOM | 3229 | HA   | PRO | X | 213 | 19.841 | 45.385 | 45.639 | 0.00 | 0.00 |
| ATOM | 3230 | C    | PRO | X | 213 | 22.052 | 45.402 | 45.389 | 0.00 | 0.00 |
| ATOM | 3231 | O    | PRO | X | 213 | 22.281 | 46.598 | 45.328 | 0.00 | 0.00 |
| ATOM | 3232 | N    | SER | X | 214 | 23.045 | 44.522 | 45.037 | 0.00 | 0.00 |
| ATOM | 3233 | H    | SER | X | 214 | 22.806 | 43.542 | 45.072 | 0.00 | 0.00 |
| ATOM | 3234 | CA   | SER | X | 214 | 24.138 | 45.001 | 44.220 | 0.00 | 0.00 |
| ATOM | 3235 | HA   | SER | X | 214 | 24.254 | 46.050 | 44.495 | 0.00 | 0.00 |
| ATOM | 3236 | CB   | SER | X | 214 | 25.467 | 44.258 | 44.557 | 0.00 | 0.00 |
| ATOM | 3237 | HB2  | SER | X | 214 | 25.306 | 43.187 | 44.432 | 0.00 | 0.00 |
| ATOM | 3238 | HB3  | SER | X | 214 | 26.162 | 44.563 | 43.775 | 0.00 | 0.00 |
| ATOM | 3239 | OG   | SER | X | 214 | 25.832 | 44.523 | 45.911 | 0.00 | 0.00 |
| ATOM | 3240 | HG   | SER | X | 214 | 26.679 | 44.116 | 46.108 | 0.00 | 0.00 |
| ATOM | 3241 | C    | SER | X | 214 | 23.779 | 44.868 | 42.644 | 0.00 | 0.00 |
| ATOM | 3242 | O    | SER | X | 214 | 24.376 | 45.611 | 41.770 | 0.00 | 0.00 |
| ATOM | 3243 | N    | ARG | X | 215 | 23.015 | 43.880 | 42.346 | 0.00 | 0.00 |
| ATOM | 3244 | H    | ARG | X | 215 | 22.810 | 43.229 | 43.091 | 0.00 | 0.00 |
| ATOM | 3245 | CA   | ARG | X | 215 | 22.906 | 43.438 | 40.975 | 0.00 | 0.00 |
| ATOM | 3246 | HA   | ARG | X | 215 | 23.910 | 43.289 | 40.576 | 0.00 | 0.00 |
| ATOM | 3247 | CB   | ARG | X | 215 | 22.160 | 42.129 | 40.831 | 0.00 | 0.00 |
| ATOM | 3248 | HB2  | ARG | X | 215 | 22.669 | 41.343 | 41.389 | 0.00 | 0.00 |
| ATOM | 3249 | HB3  | ARG | X | 215 | 21.155 | 42.308 | 41.213 | 0.00 | 0.00 |
| ATOM | 3250 | CG   | ARG | X | 215 | 22.148 | 41.629 | 39.417 | 0.00 | 0.00 |
| ATOM | 3251 | HG2  | ARG | X | 215 | 21.534 | 42.276 | 38.790 | 0.00 | 0.00 |
| ATOM | 3252 | HG3  | ARG | X | 215 | 23.164 | 41.653 | 39.023 | 0.00 | 0.00 |
| ATOM | 3253 | CD   | ARG | X | 215 | 21.587 | 40.269 | 39.232 | 0.00 | 0.00 |
| ATOM | 3254 | HD2  | ARG | X | 215 | 22.312 | 39.505 | 39.514 | 0.00 | 0.00 |
| ATOM | 3255 | HD3  | ARG | X | 215 | 20.818 | 40.231 | 40.004 | 0.00 | 0.00 |
| ATOM | 3256 | NE   | ARG | X | 215 | 20.944 | 39.980 | 37.945 | 0.00 | 0.00 |
| ATOM | 3257 | HE   | ARG | X | 215 | 21.051 | 40.716 | 37.262 | 0.00 | 0.00 |
| ATOM | 3258 | CZ   | ARG | X | 215 | 20.184 | 38.959 | 37.580 | 0.00 | 0.00 |
| ATOM | 3259 | NH1  | ARG | X | 215 | 19.919 | 38.037 | 38.471 | 0.00 | 0.00 |
| ATOM | 3260 | HH11 | ARG | X | 215 | 20.070 | 38.198 | 39.457 | 0.00 | 0.00 |
| ATOM | 3261 | HH12 | ARG | X | 215 | 19.236 | 37.359 | 38.167 | 0.00 | 0.00 |
| ATOM | 3262 | NH2  | ARG | X | 215 | 19.715 | 38.858 | 36.394 | 0.00 | 0.00 |
| ATOM | 3263 | HH21 | ARG | X | 215 | 19.926 | 39.568 | 35.707 | 0.00 | 0.00 |
| ATOM | 3264 | HH22 | ARG | X | 215 | 19.163 | 38.052 | 36.137 | 0.00 | 0.00 |
| ATOM | 3265 | C    | ARG | X | 215 | 22.228 | 44.561 | 40.113 | 0.00 | 0.00 |
| ATOM | 3266 | O    | ARG | X | 215 | 22.597 | 44.747 | 38.914 | 0.00 | 0.00 |
| ATOM | 3267 | N    | GLY | X | 216 | 21.331 | 45.341 | 40.713 | 0.00 | 0.00 |
| ATOM | 3268 | H    | GLY | X | 216 | 20.948 | 45.053 | 41.602 | 0.00 | 0.00 |
| ATOM | 3269 | CA   | GLY | X | 216 | 20.571 | 46.378 | 40.006 | 0.00 | 0.00 |
| ATOM | 3270 | HA2  | GLY | X | 216 | 20.296 | 46.001 | 39.007 | 0.00 | 0.00 |
| ATOM | 3271 | HA3  | GLY | X | 216 | 19.719 | 46.472 | 40.523 | 0.00 | 0.00 |
| ATOM | 3272 | C    | GLY | X | 216 | 21.268 | 47.717 | 39.825 | 0.00 | 0.00 |
| ATOM | 3273 | O    | GLY | X | 216 | 20.692 | 48.669 | 39.548 | 0.00 | 0.00 |
| ATOM | 3274 | N    | LEU | X | 217 | 22.636 | 47.705 | 39.969 | 0.00 | 0.00 |
| ATOM | 3275 | H    | LEU | X | 217 | 23.048 | 46.801 | 40.153 | 0.00 | 0.00 |
| ATOM | 3276 | CA   | LEU | X | 217 | 23.586 | 48.841 | 39.773 | 0.00 | 0.00 |
| ATOM | 3277 | HA   | LEU | X | 217 | 22.963 | 49.702 | 39.530 | 0.00 | 0.00 |
| ATOM | 3278 | CB   | LEU | X | 217 | 24.364 | 49.073 | 41.108 | 0.00 | 0.00 |
| ATOM | 3279 | HB2  | LEU | X | 217 | 25.070 | 48.266 | 41.307 | 0.00 | 0.00 |
| ATOM | 3280 | HB3  | LEU | X | 217 | 24.961 | 49.959 | 40.892 | 0.00 | 0.00 |
| ATOM | 3281 | CG   | LEU | X | 217 | 23.520 | 49.223 | 42.372 | 0.00 | 0.00 |
| ATOM | 3282 | HG   | LEU | X | 217 | 22.895 | 48.357 | 42.596 | 0.00 | 0.00 |
| ATOM | 3283 | CD1  | LEU | X | 217 | 24.330 | 49.357 | 43.601 | 0.00 | 0.00 |
| ATOM | 3284 | HD11 | LEU | X | 217 | 23.726 | 49.795 | 44.396 | 0.00 | 0.00 |
| ATOM | 3285 | HD12 | LEU | X | 217 | 24.725 | 48.395 | 43.929 | 0.00 | 0.00 |
| ATOM | 3286 | HD13 | LEU | X | 217 | 25.200 | 49.991 | 43.431 | 0.00 | 0.00 |
| ATOM | 3287 | CD2  | LEU | X | 217 | 22.694 | 50.471 | 42.303 | 0.00 | 0.00 |
| ATOM | 3288 | HD21 | LEU | X | 217 | 22.176 | 50.650 | 41.360 | 0.00 | 0.00 |
| ATOM | 3289 | HD22 | LEU | X | 217 | 21.981 | 50.395 | 43.124 | 0.00 | 0.00 |
| ATOM | 3290 | HD23 | LEU | X | 217 | 23.286 | 51.378 | 42.428 | 0.00 | 0.00 |
| ATOM | 3291 | C    | LEU | X | 217 | 24.528 | 48.738 | 38.535 | 0.00 | 0.00 |
| ATOM | 3292 | O    | LEU | X | 217 | 25.360 | 49.605 | 38.223 | 0.00 | 0.00 |



|      |      |      |     |   |     |        |        |        |      |      |
|------|------|------|-----|---|-----|--------|--------|--------|------|------|
| ATOM | 3293 | N    | PHE | X | 218 | 24.482 | 47.653 | 37.802 | 0.00 | 0.00 |
| ATOM | 3294 | H    | PHE | X | 218 | 23.909 | 46.917 | 38.190 | 0.00 | 0.00 |
| ATOM | 3295 | CA   | PHE | X | 218 | 25.335 | 47.326 | 36.676 | 0.00 | 0.00 |
| ATOM | 3296 | HA   | PHE | X | 218 | 25.650 | 48.200 | 36.107 | 0.00 | 0.00 |
| ATOM | 3297 | CB   | PHE | X | 218 | 26.713 | 46.746 | 37.126 | 0.00 | 0.00 |
| ATOM | 3298 | HB2  | PHE | X | 218 | 27.430 | 46.663 | 36.309 | 0.00 | 0.00 |
| ATOM | 3299 | HB3  | PHE | X | 218 | 27.109 | 47.515 | 37.789 | 0.00 | 0.00 |
| ATOM | 3300 | CG   | PHE | X | 218 | 26.657 | 45.479 | 37.954 | 0.00 | 0.00 |
| ATOM | 3301 | CD1  | PHE | X | 218 | 26.448 | 45.473 | 39.375 | 0.00 | 0.00 |
| ATOM | 3302 | HD1  | PHE | X | 218 | 26.303 | 46.397 | 39.915 | 0.00 | 0.00 |
| ATOM | 3303 | CE1  | PHE | X | 218 | 26.360 | 44.239 | 40.032 | 0.00 | 0.00 |
| ATOM | 3304 | HE1  | PHE | X | 218 | 26.274 | 44.179 | 41.107 | 0.00 | 0.00 |
| ATOM | 3305 | CZ   | PHE | X | 218 | 26.277 | 43.010 | 39.326 | 0.00 | 0.00 |
| ATOM | 3306 | HZ   | PHE | X | 218 | 26.025 | 42.143 | 39.920 | 0.00 | 0.00 |
| ATOM | 3307 | CE2  | PHE | X | 218 | 26.368 | 42.983 | 37.912 | 0.00 | 0.00 |
| ATOM | 3308 | HE2  | PHE | X | 218 | 26.209 | 42.103 | 37.306 | 0.00 | 0.00 |
| ATOM | 3309 | CD2  | PHE | X | 218 | 26.661 | 44.216 | 37.281 | 0.00 | 0.00 |
| ATOM | 3310 | HD2  | PHE | X | 218 | 26.647 | 44.256 | 36.202 | 0.00 | 0.00 |
| ATOM | 3311 | C    | PHE | X | 218 | 24.588 | 46.527 | 35.657 | 0.00 | 0.00 |
| ATOM | 3312 | O    | PHE | X | 218 | 23.572 | 45.852 | 35.845 | 0.00 | 0.00 |
| ATOM | 3313 | N    | HIE | X | 219 | 25.116 | 46.583 | 34.413 | 0.00 | 0.00 |
| ATOM | 3314 | H    | HIE | X | 219 | 25.824 | 47.291 | 34.276 | 0.00 | 0.00 |
| ATOM | 3315 | CA   | HIE | X | 219 | 24.553 | 45.972 | 33.164 | 0.00 | 0.00 |
| ATOM | 3316 | HA   | HIE | X | 219 | 23.514 | 45.678 | 33.309 | 0.00 | 0.00 |
| ATOM | 3317 | CB   | HIE | X | 219 | 24.692 | 46.921 | 31.938 | 0.00 | 0.00 |
| ATOM | 3318 | HB2  | HIE | X | 219 | 25.759 | 47.102 | 31.807 | 0.00 | 0.00 |
| ATOM | 3319 | HB3  | HIE | X | 219 | 24.153 | 46.548 | 31.067 | 0.00 | 0.00 |
| ATOM | 3320 | CG   | HIE | X | 219 | 24.064 | 48.228 | 32.403 | 0.00 | 0.00 |
| ATOM | 3321 | ND1  | HIE | X | 219 | 24.806 | 49.307 | 32.928 | 0.00 | 0.00 |
| ATOM | 3322 | CE1  | HIE | X | 219 | 23.913 | 50.276 | 33.267 | 0.00 | 0.00 |
| ATOM | 3323 | HE1  | HIE | X | 219 | 24.170 | 51.269 | 33.606 | 0.00 | 0.00 |
| ATOM | 3324 | NE2  | HIE | X | 219 | 22.623 | 49.795 | 33.015 | 0.00 | 0.00 |
| ATOM | 3325 | HE2  | HIE | X | 219 | 21.721 | 50.249 | 33.045 | 0.00 | 0.00 |
| ATOM | 3326 | CD2  | HIE | X | 219 | 22.688 | 48.476 | 32.593 | 0.00 | 0.00 |
| ATOM | 3327 | HD2  | HIE | X | 219 | 21.794 | 47.902 | 32.397 | 0.00 | 0.00 |
| ATOM | 3328 | C    | HIE | X | 219 | 25.242 | 44.663 | 32.928 | 0.00 | 0.00 |
| ATOM | 3329 | O    | HIE | X | 219 | 24.724 | 43.776 | 32.269 | 0.00 | 0.00 |
| ATOM | 3330 | N    | ARG | X | 220 | 26.496 | 44.453 | 33.389 | 0.00 | 0.00 |
| ATOM | 3331 | H    | ARG | X | 220 | 26.903 | 45.139 | 34.010 | 0.00 | 0.00 |
| ATOM | 3332 | CA   | ARG | X | 220 | 27.465 | 43.388 | 32.929 | 0.00 | 0.00 |
| ATOM | 3333 | HA   | ARG | X | 220 | 26.903 | 42.459 | 32.829 | 0.00 | 0.00 |
| ATOM | 3334 | CB   | ARG | X | 220 | 28.109 | 43.669 | 31.569 | 0.00 | 0.00 |
| ATOM | 3335 | HB2  | ARG | X | 220 | 28.728 | 44.557 | 31.698 | 0.00 | 0.00 |
| ATOM | 3336 | HB3  | ARG | X | 220 | 28.875 | 42.926 | 31.347 | 0.00 | 0.00 |
| ATOM | 3337 | CG   | ARG | X | 220 | 27.150 | 43.961 | 30.386 | 0.00 | 0.00 |
| ATOM | 3338 | HG2  | ARG | X | 220 | 26.744 | 43.018 | 30.020 | 0.00 | 0.00 |
| ATOM | 3339 | HG3  | ARG | X | 220 | 26.290 | 44.551 | 30.705 | 0.00 | 0.00 |
| ATOM | 3340 | CD   | ARG | X | 220 | 27.883 | 44.575 | 29.174 | 0.00 | 0.00 |
| ATOM | 3341 | HD2  | ARG | X | 220 | 28.499 | 45.418 | 29.486 | 0.00 | 0.00 |
| ATOM | 3342 | HD3  | ARG | X | 220 | 28.530 | 43.773 | 28.817 | 0.00 | 0.00 |
| ATOM | 3343 | NE   | ARG | X | 220 | 26.899 | 44.894 | 28.157 | 0.00 | 0.00 |
| ATOM | 3344 | HE   | ARG | X | 220 | 26.559 | 44.068 | 27.686 | 0.00 | 0.00 |
| ATOM | 3345 | CZ   | ARG | X | 220 | 26.374 | 46.120 | 27.922 | 0.00 | 0.00 |
| ATOM | 3346 | NH1  | ARG | X | 220 | 26.659 | 47.191 | 28.527 | 0.00 | 0.00 |
| ATOM | 3347 | HH11 | ARG | X | 220 | 27.311 | 47.181 | 29.298 | 0.00 | 0.00 |
| ATOM | 3348 | HH12 | ARG | X | 220 | 26.111 | 47.999 | 28.268 | 0.00 | 0.00 |
| ATOM | 3349 | NH2  | ARG | X | 220 | 25.374 | 46.118 | 27.087 | 0.00 | 0.00 |
| ATOM | 3350 | HH21 | ARG | X | 220 | 24.994 | 45.310 | 26.615 | 0.00 | 0.00 |
| ATOM | 3351 | HH22 | ARG | X | 220 | 24.881 | 46.973 | 26.871 | 0.00 | 0.00 |
| ATOM | 3352 | C    | ARG | X | 220 | 28.542 | 43.169 | 34.040 | 0.00 | 0.00 |
| ATOM | 3353 | O    | ARG | X | 220 | 28.903 | 43.991 | 34.868 | 0.00 | 0.00 |
| ATOM | 3354 | N    | ALA | X | 221 | 29.152 | 42.006 | 33.932 | 0.00 | 0.00 |
| ATOM | 3355 | H    | ALA | X | 221 | 28.907 | 41.443 | 33.130 | 0.00 | 0.00 |
| ATOM | 3356 | CA   | ALA | X | 221 | 30.319 | 41.645 | 34.802 | 0.00 | 0.00 |
| ATOM | 3357 | HA   | ALA | X | 221 | 30.895 | 42.540 | 35.034 | 0.00 | 0.00 |
| ATOM | 3358 | CB   | ALA | X | 221 | 29.702 | 41.113 | 36.117 | 0.00 | 0.00 |
| ATOM | 3359 | HB1  | ALA | X | 221 | 29.120 | 40.201 | 35.978 | 0.00 | 0.00 |
| ATOM | 3360 | HB2  | ALA | X | 221 | 30.528 | 40.949 | 36.809 | 0.00 | 0.00 |
| ATOM | 3361 | HB3  | ALA | X | 221 | 29.024 | 41.827 | 36.584 | 0.00 | 0.00 |
| ATOM | 3362 | C    | ALA | X | 221 | 31.299 | 40.664 | 34.270 | 0.00 | 0.00 |

|      |      |      |     |   |     |        |        |        |      |      |
|------|------|------|-----|---|-----|--------|--------|--------|------|------|
| ATOM | 3363 | O    | ALA | X | 221 | 31.040 | 39.902 | 33.386 | 0.00 | 0.00 |
| ATOM | 3364 | N    | VAL | X | 222 | 32.515 | 40.730 | 34.716 | 0.00 | 0.00 |
| ATOM | 3365 | H    | VAL | X | 222 | 32.647 | 41.640 | 35.132 | 0.00 | 0.00 |
| ATOM | 3366 | CA   | VAL | X | 222 | 33.717 | 39.962 | 34.303 | 0.00 | 0.00 |
| ATOM | 3367 | HA   | VAL | X | 222 | 33.469 | 39.144 | 33.628 | 0.00 | 0.00 |
| ATOM | 3368 | CB   | VAL | X | 222 | 34.736 | 40.874 | 33.507 | 0.00 | 0.00 |
| ATOM | 3369 | HB   | VAL | X | 222 | 34.906 | 41.789 | 34.074 | 0.00 | 0.00 |
| ATOM | 3370 | CG1  | VAL | X | 222 | 36.071 | 40.141 | 33.141 | 0.00 | 0.00 |
| ATOM | 3371 | HG11 | VAL | X | 222 | 36.607 | 40.735 | 32.401 | 0.00 | 0.00 |
| ATOM | 3372 | HG12 | VAL | X | 222 | 36.646 | 40.137 | 34.067 | 0.00 | 0.00 |
| ATOM | 3373 | HG13 | VAL | X | 222 | 35.907 | 39.185 | 32.643 | 0.00 | 0.00 |
| ATOM | 3374 | CG2  | VAL | X | 222 | 34.015 | 41.344 | 32.230 | 0.00 | 0.00 |
| ATOM | 3375 | HG21 | VAL | X | 222 | 33.503 | 42.295 | 32.379 | 0.00 | 0.00 |
| ATOM | 3376 | HG22 | VAL | X | 222 | 34.719 | 41.526 | 31.418 | 0.00 | 0.00 |
| ATOM | 3377 | HG23 | VAL | X | 222 | 33.321 | 40.604 | 31.832 | 0.00 | 0.00 |
| ATOM | 3378 | C    | VAL | X | 222 | 34.434 | 39.392 | 35.539 | 0.00 | 0.00 |
| ATOM | 3379 | O    | VAL | X | 222 | 34.763 | 40.042 | 36.511 | 0.00 | 0.00 |
| ATOM | 3380 | N    | LEU | X | 223 | 34.939 | 38.125 | 35.488 | 0.00 | 0.00 |
| ATOM | 3381 | H    | LEU | X | 223 | 34.796 | 37.589 | 34.643 | 0.00 | 0.00 |
| ATOM | 3382 | CA   | LEU | X | 223 | 35.600 | 37.419 | 36.552 | 0.00 | 0.00 |
| ATOM | 3383 | HA   | LEU | X | 223 | 35.906 | 38.150 | 37.301 | 0.00 | 0.00 |
| ATOM | 3384 | CB   | LEU | X | 223 | 34.537 | 36.460 | 37.123 | 0.00 | 0.00 |
| ATOM | 3385 | HB2  | LEU | X | 223 | 34.132 | 35.811 | 36.346 | 0.00 | 0.00 |
| ATOM | 3386 | HB3  | LEU | X | 223 | 35.069 | 35.828 | 37.834 | 0.00 | 0.00 |
| ATOM | 3387 | CG   | LEU | X | 223 | 33.272 | 37.040 | 37.860 | 0.00 | 0.00 |
| ATOM | 3388 | HG   | LEU | X | 223 | 33.625 | 37.818 | 38.537 | 0.00 | 0.00 |
| ATOM | 3389 | CD1  | LEU | X | 223 | 32.166 | 37.682 | 36.962 | 0.00 | 0.00 |
| ATOM | 3390 | HD11 | LEU | X | 223 | 31.213 | 37.765 | 37.485 | 0.00 | 0.00 |
| ATOM | 3391 | HD12 | LEU | X | 223 | 32.372 | 38.640 | 36.485 | 0.00 | 0.00 |
| ATOM | 3392 | HD13 | LEU | X | 223 | 31.924 | 37.092 | 36.077 | 0.00 | 0.00 |
| ATOM | 3393 | CD2  | LEU | X | 223 | 32.755 | 35.870 | 38.689 | 0.00 | 0.00 |
| ATOM | 3394 | HD21 | LEU | X | 223 | 32.566 | 34.993 | 38.071 | 0.00 | 0.00 |
| ATOM | 3395 | HD22 | LEU | X | 223 | 33.477 | 35.615 | 39.465 | 0.00 | 0.00 |
| ATOM | 3396 | HD23 | LEU | X | 223 | 31.893 | 36.242 | 39.243 | 0.00 | 0.00 |
| ATOM | 3397 | C    | LEU | X | 223 | 36.898 | 36.624 | 36.115 | 0.00 | 0.00 |
| ATOM | 3398 | O    | LEU | X | 223 | 36.922 | 35.702 | 35.344 | 0.00 | 0.00 |
| ATOM | 3399 | N    | GLN | X | 224 | 38.049 | 37.000 | 36.648 | 0.00 | 0.00 |
| ATOM | 3400 | H    | GLN | X | 224 | 38.012 | 37.758 | 37.314 | 0.00 | 0.00 |
| ATOM | 3401 | CA   | GLN | X | 224 | 39.376 | 36.572 | 36.190 | 0.00 | 0.00 |
| ATOM | 3402 | HA   | GLN | X | 224 | 39.216 | 35.856 | 35.383 | 0.00 | 0.00 |
| ATOM | 3403 | CB   | GLN | X | 224 | 40.180 | 37.806 | 35.596 | 0.00 | 0.00 |
| ATOM | 3404 | HB2  | GLN | X | 224 | 40.419 | 38.388 | 36.486 | 0.00 | 0.00 |
| ATOM | 3405 | HB3  | GLN | X | 224 | 41.123 | 37.448 | 35.183 | 0.00 | 0.00 |
| ATOM | 3406 | CG   | GLN | X | 224 | 39.334 | 38.677 | 34.597 | 0.00 | 0.00 |
| ATOM | 3407 | HG2  | GLN | X | 224 | 38.830 | 38.038 | 33.872 | 0.00 | 0.00 |
| ATOM | 3408 | HG3  | GLN | X | 224 | 38.522 | 39.173 | 35.130 | 0.00 | 0.00 |
| ATOM | 3409 | CD   | GLN | X | 224 | 40.101 | 39.781 | 33.875 | 0.00 | 0.00 |
| ATOM | 3410 | OE1  | GLN | X | 224 | 39.639 | 40.942 | 33.835 | 0.00 | 0.00 |
| ATOM | 3411 | NE2  | GLN | X | 224 | 41.302 | 39.575 | 33.462 | 0.00 | 0.00 |
| ATOM | 3412 | HE21 | GLN | X | 224 | 41.846 | 40.339 | 33.088 | 0.00 | 0.00 |
| ATOM | 3413 | HE22 | GLN | X | 224 | 41.667 | 38.643 | 33.599 | 0.00 | 0.00 |
| ATOM | 3414 | C    | GLN | X | 224 | 40.124 | 35.853 | 37.293 | 0.00 | 0.00 |
| ATOM | 3415 | O    | GLN | X | 224 | 40.267 | 36.378 | 38.397 | 0.00 | 0.00 |
| ATOM | 3416 | N    | SER | X | 225 | 40.574 | 34.653 | 37.067 | 0.00 | 0.00 |
| ATOM | 3417 | H    | SER | X | 225 | 40.440 | 34.312 | 36.125 | 0.00 | 0.00 |
| ATOM | 3418 | CA   | SER | X | 225 | 41.536 | 33.913 | 37.915 | 0.00 | 0.00 |
| ATOM | 3419 | HA   | SER | X | 225 | 41.587 | 32.896 | 37.525 | 0.00 | 0.00 |
| ATOM | 3420 | CB   | SER | X | 225 | 42.923 | 34.496 | 37.868 | 0.00 | 0.00 |
| ATOM | 3421 | HB2  | SER | X | 225 | 42.855 | 35.582 | 37.924 | 0.00 | 0.00 |
| ATOM | 3422 | HB3  | SER | X | 225 | 43.582 | 34.014 | 38.591 | 0.00 | 0.00 |
| ATOM | 3423 | OG   | SER | X | 225 | 43.588 | 34.196 | 36.645 | 0.00 | 0.00 |
| ATOM | 3424 | HG   | SER | X | 225 | 43.714 | 33.245 | 36.619 | 0.00 | 0.00 |
| ATOM | 3425 | C    | SER | X | 225 | 41.000 | 33.636 | 39.328 | 0.00 | 0.00 |
| ATOM | 3426 | O    | SER | X | 225 | 41.741 | 33.425 | 40.267 | 0.00 | 0.00 |
| ATOM | 3427 | N    | GLY | X | 226 | 39.637 | 33.772 | 39.466 | 0.00 | 0.00 |
| ATOM | 3428 | H    | GLY | X | 226 | 39.055 | 33.939 | 38.658 | 0.00 | 0.00 |
| ATOM | 3429 | CA   | GLY | X | 226 | 38.835 | 33.429 | 40.634 | 0.00 | 0.00 |
| ATOM | 3430 | HA2  | GLY | X | 226 | 39.334 | 32.626 | 41.081 | 0.00 | 0.00 |
| ATOM | 3431 | HA3  | GLY | X | 226 | 38.749 | 34.216 | 41.401 | 0.00 | 0.00 |
| ATOM | 3432 | C    | GLY | X | 226 | 37.383 | 32.929 | 40.383 | 0.00 | 0.00 |

|      |      |      |     |   |     |        |        |        |      |      |
|------|------|------|-----|---|-----|--------|--------|--------|------|------|
| ATOM | 3433 | O    | GLY | X | 226 | 36.986 | 32.701 | 39.229 | 0.00 | 0.00 |
| ATOM | 3434 | N    | ALA | X | 227 | 36.589 | 32.718 | 41.462 | 0.00 | 0.00 |
| ATOM | 3435 | H    | ALA | X | 227 | 36.972 | 32.847 | 42.388 | 0.00 | 0.00 |
| ATOM | 3436 | CA   | ALA | X | 227 | 35.255 | 32.206 | 41.374 | 0.00 | 0.00 |
| ATOM | 3437 | HA   | ALA | X | 227 | 34.752 | 32.808 | 40.617 | 0.00 | 0.00 |
| ATOM | 3438 | CB   | ALA | X | 227 | 35.314 | 30.745 | 40.948 | 0.00 | 0.00 |
| ATOM | 3439 | HB1  | ALA | X | 227 | 36.084 | 30.215 | 41.509 | 0.00 | 0.00 |
| ATOM | 3440 | HB2  | ALA | X | 227 | 34.410 | 30.149 | 41.075 | 0.00 | 0.00 |
| ATOM | 3441 | HB3  | ALA | X | 227 | 35.546 | 30.552 | 39.900 | 0.00 | 0.00 |
| ATOM | 3442 | C    | ALA | X | 227 | 34.508 | 32.345 | 42.713 | 0.00 | 0.00 |
| ATOM | 3443 | O    | ALA | X | 227 | 35.117 | 32.136 | 43.777 | 0.00 | 0.00 |
| ATOM | 3444 | N    | PRO | X | 228 | 33.169 | 32.760 | 42.696 | 0.00 | 0.00 |
| ATOM | 3445 | CD   | PRO | X | 228 | 32.455 | 33.317 | 41.541 | 0.00 | 0.00 |
| ATOM | 3446 | HD2  | PRO | X | 228 | 32.597 | 32.699 | 40.654 | 0.00 | 0.00 |
| ATOM | 3447 | HD3  | PRO | X | 228 | 32.586 | 34.375 | 41.316 | 0.00 | 0.00 |
| ATOM | 3448 | CG   | PRO | X | 228 | 31.028 | 33.142 | 41.887 | 0.00 | 0.00 |
| ATOM | 3449 | HG2  | PRO | X | 228 | 30.679 | 32.140 | 41.639 | 0.00 | 0.00 |
| ATOM | 3450 | HG3  | PRO | X | 228 | 30.320 | 33.854 | 41.465 | 0.00 | 0.00 |
| ATOM | 3451 | CB   | PRO | X | 228 | 31.002 | 33.248 | 43.379 | 0.00 | 0.00 |
| ATOM | 3452 | HB2  | PRO | X | 228 | 30.175 | 32.686 | 43.811 | 0.00 | 0.00 |
| ATOM | 3453 | HB3  | PRO | X | 228 | 30.875 | 34.258 | 43.770 | 0.00 | 0.00 |
| ATOM | 3454 | CA   | PRO | X | 228 | 32.354 | 32.702 | 43.908 | 0.00 | 0.00 |
| ATOM | 3455 | HA   | PRO | X | 228 | 32.773 | 33.463 | 44.567 | 0.00 | 0.00 |
| ATOM | 3456 | C    | PRO | X | 228 | 32.243 | 31.313 | 44.471 | 0.00 | 0.00 |
| ATOM | 3457 | O    | PRO | X | 228 | 32.213 | 31.234 | 45.643 | 0.00 | 0.00 |
| ATOM | 3458 | N    | ASN | X | 229 | 32.262 | 30.291 | 43.629 | 0.00 | 0.00 |
| ATOM | 3459 | H    | ASN | X | 229 | 32.180 | 30.547 | 42.655 | 0.00 | 0.00 |
| ATOM | 3460 | CA   | ASN | X | 229 | 32.006 | 28.953 | 44.056 | 0.00 | 0.00 |
| ATOM | 3461 | HA   | ASN | X | 229 | 31.437 | 29.017 | 44.983 | 0.00 | 0.00 |
| ATOM | 3462 | CB   | ASN | X | 229 | 31.091 | 28.220 | 43.002 | 0.00 | 0.00 |
| ATOM | 3463 | HB2  | ASN | X | 229 | 30.879 | 27.192 | 43.292 | 0.00 | 0.00 |
| ATOM | 3464 | HB3  | ASN | X | 229 | 30.076 | 28.582 | 43.168 | 0.00 | 0.00 |
| ATOM | 3465 | CG   | ASN | X | 229 | 31.415 | 28.417 | 41.508 | 0.00 | 0.00 |
| ATOM | 3466 | OD1  | ASN | X | 229 | 31.628 | 29.555 | 41.041 | 0.00 | 0.00 |
| ATOM | 3467 | ND2  | ASN | X | 229 | 31.643 | 27.345 | 40.791 | 0.00 | 0.00 |
| ATOM | 3468 | HD21 | ASN | X | 229 | 31.971 | 27.490 | 39.847 | 0.00 | 0.00 |
| ATOM | 3469 | HD22 | ASN | X | 229 | 31.608 | 26.450 | 41.257 | 0.00 | 0.00 |
| ATOM | 3470 | C    | ASN | X | 229 | 33.188 | 28.108 | 44.313 | 0.00 | 0.00 |
| ATOM | 3471 | O    | ASN | X | 229 | 33.076 | 26.924 | 44.510 | 0.00 | 0.00 |
| ATOM | 3472 | N    | GLY | X | 230 | 34.404 | 28.732 | 44.326 | 0.00 | 0.00 |
| ATOM | 3473 | H    | GLY | X | 230 | 34.470 | 29.733 | 44.213 | 0.00 | 0.00 |
| ATOM | 3474 | CA   | GLY | X | 230 | 35.584 | 28.043 | 44.898 | 0.00 | 0.00 |
| ATOM | 3475 | HA2  | GLY | X | 230 | 35.539 | 27.089 | 44.454 | 0.00 | 0.00 |
| ATOM | 3476 | HA3  | GLY | X | 230 | 36.476 | 28.529 | 44.541 | 0.00 | 0.00 |
| ATOM | 3477 | C    | GLY | X | 230 | 35.531 | 27.799 | 46.445 | 0.00 | 0.00 |
| ATOM | 3478 | O    | GLY | X | 230 | 34.763 | 28.494 | 47.141 | 0.00 | 0.00 |
| ATOM | 3479 | N    | PRO | X | 231 | 36.225 | 26.800 | 47.012 | 0.00 | 0.00 |
| ATOM | 3480 | CD   | PRO | X | 231 | 37.153 | 25.933 | 46.384 | 0.00 | 0.00 |
| ATOM | 3481 | HD2  | PRO | X | 231 | 37.987 | 26.490 | 45.959 | 0.00 | 0.00 |
| ATOM | 3482 | HD3  | PRO | X | 231 | 36.646 | 25.345 | 45.619 | 0.00 | 0.00 |
| ATOM | 3483 | CG   | PRO | X | 231 | 37.697 | 24.918 | 47.420 | 0.00 | 0.00 |
| ATOM | 3484 | HG2  | PRO | X | 231 | 38.693 | 25.176 | 47.781 | 0.00 | 0.00 |
| ATOM | 3485 | HG3  | PRO | X | 231 | 37.661 | 23.905 | 47.019 | 0.00 | 0.00 |
| ATOM | 3486 | CB   | PRO | X | 231 | 36.549 | 24.962 | 48.502 | 0.00 | 0.00 |
| ATOM | 3487 | HB2  | PRO | X | 231 | 36.729 | 24.761 | 49.558 | 0.00 | 0.00 |
| ATOM | 3488 | HB3  | PRO | X | 231 | 35.809 | 24.261 | 48.116 | 0.00 | 0.00 |
| ATOM | 3489 | CA   | PRO | X | 231 | 35.913 | 26.325 | 48.348 | 0.00 | 0.00 |
| ATOM | 3490 | HA   | PRO | X | 231 | 34.838 | 26.175 | 48.446 | 0.00 | 0.00 |
| ATOM | 3491 | C    | PRO | X | 231 | 36.425 | 27.264 | 49.411 | 0.00 | 0.00 |
| ATOM | 3492 | O    | PRO | X | 231 | 35.965 | 27.206 | 50.535 | 0.00 | 0.00 |
| ATOM | 3493 | N    | TRP | X | 232 | 37.521 | 28.054 | 49.154 | 0.00 | 0.00 |
| ATOM | 3494 | H    | TRP | X | 232 | 37.992 | 27.900 | 48.274 | 0.00 | 0.00 |
| ATOM | 3495 | CA   | TRP | X | 232 | 38.205 | 29.018 | 50.071 | 0.00 | 0.00 |
| ATOM | 3496 | HA   | TRP | X | 232 | 38.403 | 28.570 | 51.045 | 0.00 | 0.00 |
| ATOM | 3497 | CB   | TRP | X | 232 | 39.680 | 29.336 | 49.519 | 0.00 | 0.00 |
| ATOM | 3498 | HB2  | TRP | X | 232 | 40.135 | 30.193 | 50.016 | 0.00 | 0.00 |
| ATOM | 3499 | HB3  | TRP | X | 232 | 40.313 | 28.503 | 49.821 | 0.00 | 0.00 |
| ATOM | 3500 | CG   | TRP | X | 232 | 39.636 | 29.645 | 48.008 | 0.00 | 0.00 |
| ATOM | 3501 | CD1  | TRP | X | 232 | 39.810 | 28.672 | 47.042 | 0.00 | 0.00 |
| ATOM | 3502 | HD1  | TRP | X | 232 | 39.950 | 27.627 | 47.276 | 0.00 | 0.00 |

|      |      |      |     |   |     |        |        |        |      |      |
|------|------|------|-----|---|-----|--------|--------|--------|------|------|
| ATOM | 3503 | NE1  | TRP | X | 232 | 39.630 | 29.245 | 45.781 | 0.00 | 0.00 |
| ATOM | 3504 | HE1  | TRP | X | 232 | 39.493 | 28.667 | 44.964 | 0.00 | 0.00 |
| ATOM | 3505 | CE2  | TRP | X | 232 | 39.432 | 30.604 | 45.892 | 0.00 | 0.00 |
| ATOM | 3506 | CZ2  | TRP | X | 232 | 39.344 | 31.650 | 44.953 | 0.00 | 0.00 |
| ATOM | 3507 | HZ2  | TRP | X | 232 | 39.493 | 31.519 | 43.892 | 0.00 | 0.00 |
| ATOM | 3508 | CH2  | TRP | X | 232 | 39.023 | 32.958 | 45.348 | 0.00 | 0.00 |
| ATOM | 3509 | HH2  | TRP | X | 232 | 38.920 | 33.750 | 44.620 | 0.00 | 0.00 |
| ATOM | 3510 | CZ3  | TRP | X | 232 | 38.857 | 33.181 | 46.712 | 0.00 | 0.00 |
| ATOM | 3511 | HZ3  | TRP | X | 232 | 38.691 | 34.195 | 47.043 | 0.00 | 0.00 |
| ATOM | 3512 | CE3  | TRP | X | 232 | 39.189 | 32.253 | 47.696 | 0.00 | 0.00 |
| ATOM | 3513 | HE3  | TRP | X | 232 | 39.282 | 32.629 | 48.704 | 0.00 | 0.00 |
| ATOM | 3514 | CD2  | TRP | X | 232 | 39.396 | 30.887 | 47.314 | 0.00 | 0.00 |
| ATOM | 3515 | C    | TRP | X | 232 | 37.322 | 30.345 | 50.179 | 0.00 | 0.00 |
| ATOM | 3516 | O    | TRP | X | 232 | 37.717 | 31.267 | 50.939 | 0.00 | 0.00 |
| ATOM | 3517 | N    | ALA | X | 233 | 36.261 | 30.566 | 49.426 | 0.00 | 0.00 |
| ATOM | 3518 | H    | ALA | X | 233 | 35.781 | 29.832 | 48.924 | 0.00 | 0.00 |
| ATOM | 3519 | CA   | ALA | X | 233 | 35.677 | 31.910 | 49.333 | 0.00 | 0.00 |
| ATOM | 3520 | HA   | ALA | X | 233 | 36.417 | 32.709 | 49.384 | 0.00 | 0.00 |
| ATOM | 3521 | CB   | ALA | X | 233 | 34.933 | 31.962 | 47.955 | 0.00 | 0.00 |
| ATOM | 3522 | HB1  | ALA | X | 233 | 34.053 | 31.319 | 47.965 | 0.00 | 0.00 |
| ATOM | 3523 | HB2  | ALA | X | 233 | 34.528 | 32.954 | 47.754 | 0.00 | 0.00 |
| ATOM | 3524 | HB3  | ALA | X | 233 | 35.570 | 31.501 | 47.201 | 0.00 | 0.00 |
| ATOM | 3525 | C    | ALA | X | 233 | 34.602 | 32.284 | 50.326 | 0.00 | 0.00 |
| ATOM | 3526 | O    | ALA | X | 233 | 34.230 | 33.439 | 50.336 | 0.00 | 0.00 |
| ATOM | 3527 | N    | THR | X | 234 | 34.013 | 31.301 | 51.068 | 0.00 | 0.00 |
| ATOM | 3528 | H    | THR | X | 234 | 34.396 | 30.367 | 51.039 | 0.00 | 0.00 |
| ATOM | 3529 | CA   | THR | X | 234 | 32.771 | 31.573 | 51.932 | 0.00 | 0.00 |
| ATOM | 3530 | HA   | THR | X | 234 | 32.862 | 32.559 | 52.387 | 0.00 | 0.00 |
| ATOM | 3531 | CB   | THR | X | 234 | 31.493 | 31.301 | 51.252 | 0.00 | 0.00 |
| ATOM | 3532 | HB   | THR | X | 234 | 31.417 | 30.235 | 51.039 | 0.00 | 0.00 |
| ATOM | 3533 | CG2  | THR | X | 234 | 30.265 | 31.721 | 52.051 | 0.00 | 0.00 |
| ATOM | 3534 | HG21 | THR | X | 234 | 30.130 | 31.057 | 52.905 | 0.00 | 0.00 |
| ATOM | 3535 | HG22 | THR | X | 234 | 30.298 | 32.786 | 52.281 | 0.00 | 0.00 |
| ATOM | 3536 | HG23 | THR | X | 234 | 29.420 | 31.529 | 51.390 | 0.00 | 0.00 |
| ATOM | 3537 | OG1  | THR | X | 234 | 31.365 | 31.961 | 50.017 | 0.00 | 0.00 |
| ATOM | 3538 | HG1  | THR | X | 234 | 31.899 | 32.744 | 50.172 | 0.00 | 0.00 |
| ATOM | 3539 | C    | THR | X | 234 | 32.943 | 30.659 | 53.083 | 0.00 | 0.00 |
| ATOM | 3540 | O    | THR | X | 234 | 33.325 | 29.525 | 52.861 | 0.00 | 0.00 |
| ATOM | 3541 | N    | VAL | X | 235 | 32.673 | 31.192 | 54.333 | 0.00 | 0.00 |
| ATOM | 3542 | H    | VAL | X | 235 | 32.562 | 32.194 | 54.387 | 0.00 | 0.00 |
| ATOM | 3543 | CA   | VAL | X | 235 | 32.641 | 30.419 | 55.593 | 0.00 | 0.00 |
| ATOM | 3544 | HA   | VAL | X | 235 | 32.654 | 29.382 | 55.257 | 0.00 | 0.00 |
| ATOM | 3545 | CB   | VAL | X | 235 | 33.923 | 30.584 | 56.417 | 0.00 | 0.00 |
| ATOM | 3546 | HB   | VAL | X | 235 | 34.727 | 30.526 | 55.683 | 0.00 | 0.00 |
| ATOM | 3547 | CG1  | VAL | X | 235 | 34.016 | 31.921 | 57.210 | 0.00 | 0.00 |
| ATOM | 3548 | HG11 | VAL | X | 235 | 33.292 | 31.858 | 58.023 | 0.00 | 0.00 |
| ATOM | 3549 | HG12 | VAL | X | 235 | 35.044 | 32.089 | 57.532 | 0.00 | 0.00 |
| ATOM | 3550 | HG13 | VAL | X | 235 | 33.729 | 32.836 | 56.691 | 0.00 | 0.00 |
| ATOM | 3551 | CG2  | VAL | X | 235 | 34.229 | 29.309 | 57.307 | 0.00 | 0.00 |
| ATOM | 3552 | HG21 | VAL | X | 235 | 33.329 | 28.976 | 57.823 | 0.00 | 0.00 |
| ATOM | 3553 | HG22 | VAL | X | 235 | 34.624 | 28.529 | 56.655 | 0.00 | 0.00 |
| ATOM | 3554 | HG23 | VAL | X | 235 | 34.973 | 29.502 | 58.080 | 0.00 | 0.00 |
| ATOM | 3555 | C    | VAL | X | 235 | 31.310 | 30.660 | 56.384 | 0.00 | 0.00 |
| ATOM | 3556 | O    | VAL | X | 235 | 30.529 | 31.531 | 56.107 | 0.00 | 0.00 |
| ATOM | 3557 | N    | GLY | X | 236 | 30.962 | 29.846 | 57.366 | 0.00 | 0.00 |
| ATOM | 3558 | H    | GLY | X | 236 | 31.613 | 29.077 | 57.436 | 0.00 | 0.00 |
| ATOM | 3559 | CA   | GLY | X | 236 | 29.860 | 30.040 | 58.305 | 0.00 | 0.00 |
| ATOM | 3560 | HA2  | GLY | X | 236 | 29.101 | 30.616 | 57.753 | 0.00 | 0.00 |
| ATOM | 3561 | HA3  | GLY | X | 236 | 29.437 | 29.139 | 58.698 | 0.00 | 0.00 |
| ATOM | 3562 | C    | GLY | X | 236 | 30.082 | 30.916 | 59.613 | 0.00 | 0.00 |
| ATOM | 3563 | O    | GLY | X | 236 | 31.250 | 31.015 | 60.019 | 0.00 | 0.00 |
| ATOM | 3564 | N    | MET | X | 237 | 28.973 | 31.374 | 60.234 | 0.00 | 0.00 |
| ATOM | 3565 | H    | MET | X | 237 | 28.115 | 30.991 | 59.864 | 0.00 | 0.00 |
| ATOM | 3566 | CA   | MET | X | 237 | 28.932 | 32.076 | 61.467 | 0.00 | 0.00 |
| ATOM | 3567 | HA   | MET | X | 237 | 29.459 | 33.030 | 61.458 | 0.00 | 0.00 |
| ATOM | 3568 | CB   | MET | X | 237 | 27.531 | 32.415 | 61.992 | 0.00 | 0.00 |
| ATOM | 3569 | HB2  | MET | X | 237 | 26.951 | 31.493 | 62.001 | 0.00 | 0.00 |
| ATOM | 3570 | HB3  | MET | X | 237 | 27.650 | 32.714 | 63.033 | 0.00 | 0.00 |
| ATOM | 3571 | CG   | MET | X | 237 | 26.748 | 33.381 | 61.108 | 0.00 | 0.00 |
| ATOM | 3572 | HG2  | MET | X | 237 | 26.883 | 33.110 | 60.061 | 0.00 | 0.00 |

|      |      |      |     |   |     |        |        |        |      |      |
|------|------|------|-----|---|-----|--------|--------|--------|------|------|
| ATOM | 3573 | HG3  | MET | X | 237 | 25.690 | 33.289 | 61.354 | 0.00 | 0.00 |
| ATOM | 3574 | SD   | MET | X | 237 | 27.273 | 35.122 | 61.130 | 0.00 | 0.00 |
| ATOM | 3575 | CE   | MET | X | 237 | 26.326 | 35.751 | 59.766 | 0.00 | 0.00 |
| ATOM | 3576 | HE1  | MET | X | 237 | 25.249 | 35.819 | 59.917 | 0.00 | 0.00 |
| ATOM | 3577 | HE2  | MET | X | 237 | 26.623 | 36.792 | 59.644 | 0.00 | 0.00 |
| ATOM | 3578 | HE3  | MET | X | 237 | 26.707 | 35.110 | 58.970 | 0.00 | 0.00 |
| ATOM | 3579 | C    | MET | X | 237 | 29.713 | 31.366 | 62.574 | 0.00 | 0.00 |
| ATOM | 3580 | O    | MET | X | 237 | 30.304 | 32.060 | 63.377 | 0.00 | 0.00 |
| ATOM | 3581 | N    | GLY | X | 238 | 29.655 | 30.023 | 62.679 | 0.00 | 0.00 |
| ATOM | 3582 | H    | GLY | X | 238 | 29.146 | 29.530 | 61.959 | 0.00 | 0.00 |
| ATOM | 3583 | CA   | GLY | X | 238 | 30.277 | 29.280 | 63.770 | 0.00 | 0.00 |
| ATOM | 3584 | HA2  | GLY | X | 238 | 29.764 | 29.588 | 64.607 | 0.00 | 0.00 |
| ATOM | 3585 | HA3  | GLY | X | 238 | 29.983 | 28.255 | 63.710 | 0.00 | 0.00 |
| ATOM | 3586 | C    | GLY | X | 238 | 31.830 | 29.462 | 63.774 | 0.00 | 0.00 |
| ATOM | 3587 | O    | GLY | X | 238 | 32.417 | 29.757 | 64.825 | 0.00 | 0.00 |
| ATOM | 3588 | N    | GLU | X | 239 | 32.451 | 29.298 | 62.587 | 0.00 | 0.00 |
| ATOM | 3589 | H    | GLU | X | 239 | 31.865 | 29.020 | 61.813 | 0.00 | 0.00 |
| ATOM | 3590 | CA   | GLU | X | 239 | 33.888 | 29.541 | 62.387 | 0.00 | 0.00 |
| ATOM | 3591 | HA   | GLU | X | 239 | 34.365 | 28.910 | 63.136 | 0.00 | 0.00 |
| ATOM | 3592 | CB   | GLU | X | 239 | 34.439 | 28.998 | 61.072 | 0.00 | 0.00 |
| ATOM | 3593 | HB2  | GLU | X | 239 | 33.591 | 28.996 | 60.387 | 0.00 | 0.00 |
| ATOM | 3594 | HB3  | GLU | X | 239 | 35.231 | 29.681 | 60.765 | 0.00 | 0.00 |
| ATOM | 3595 | CG   | GLU | X | 239 | 35.067 | 27.595 | 61.115 | 0.00 | 0.00 |
| ATOM | 3596 | HG2  | GLU | X | 239 | 34.361 | 26.828 | 61.435 | 0.00 | 0.00 |
| ATOM | 3597 | HG3  | GLU | X | 239 | 35.409 | 27.218 | 60.151 | 0.00 | 0.00 |
| ATOM | 3598 | CD   | GLU | X | 239 | 36.345 | 27.511 | 62.020 | 0.00 | 0.00 |
| ATOM | 3599 | OE1  | GLU | X | 239 | 37.398 | 28.102 | 61.722 | 0.00 | 0.00 |
| ATOM | 3600 | OE2  | GLU | X | 239 | 36.332 | 26.861 | 63.079 | 0.00 | 0.00 |
| ATOM | 3601 | C    | GLU | X | 239 | 34.270 | 31.040 | 62.576 | 0.00 | 0.00 |
| ATOM | 3602 | O    | GLU | X | 239 | 35.255 | 31.318 | 63.201 | 0.00 | 0.00 |
| ATOM | 3603 | N    | ALA | X | 240 | 33.452 | 31.982 | 62.096 | 0.00 | 0.00 |
| ATOM | 3604 | H    | ALA | X | 240 | 32.666 | 31.666 | 61.545 | 0.00 | 0.00 |
| ATOM | 3605 | CA   | ALA | X | 240 | 33.555 | 33.466 | 62.389 | 0.00 | 0.00 |
| ATOM | 3606 | HA   | ALA | X | 240 | 34.477 | 33.851 | 61.952 | 0.00 | 0.00 |
| ATOM | 3607 | CB   | ALA | X | 240 | 32.500 | 34.154 | 61.557 | 0.00 | 0.00 |
| ATOM | 3608 | HB1  | ALA | X | 240 | 31.569 | 33.676 | 61.862 | 0.00 | 0.00 |
| ATOM | 3609 | HB2  | ALA | X | 240 | 32.362 | 35.204 | 61.815 | 0.00 | 0.00 |
| ATOM | 3610 | HB3  | ALA | X | 240 | 32.733 | 34.061 | 60.496 | 0.00 | 0.00 |
| ATOM | 3611 | C    | ALA | X | 240 | 33.567 | 33.828 | 63.872 | 0.00 | 0.00 |
| ATOM | 3612 | O    | ALA | X | 240 | 34.507 | 34.493 | 64.341 | 0.00 | 0.00 |
| ATOM | 3613 | N    | ARG | X | 241 | 32.636 | 33.268 | 64.620 | 0.00 | 0.00 |
| ATOM | 3614 | H    | ARG | X | 241 | 31.882 | 32.741 | 64.204 | 0.00 | 0.00 |
| ATOM | 3615 | CA   | ARG | X | 241 | 32.623 | 33.375 | 66.081 | 0.00 | 0.00 |
| ATOM | 3616 | HA   | ARG | X | 241 | 32.594 | 34.418 | 66.396 | 0.00 | 0.00 |
| ATOM | 3617 | CB   | ARG | X | 241 | 31.441 | 32.729 | 66.634 | 0.00 | 0.00 |
| ATOM | 3618 | HB2  | ARG | X | 241 | 30.527 | 33.132 | 66.198 | 0.00 | 0.00 |
| ATOM | 3619 | HB3  | ARG | X | 241 | 31.547 | 31.660 | 66.448 | 0.00 | 0.00 |
| ATOM | 3620 | CG   | ARG | X | 241 | 31.311 | 32.827 | 68.108 | 0.00 | 0.00 |
| ATOM | 3621 | HG2  | ARG | X | 241 | 32.223 | 32.506 | 68.610 | 0.00 | 0.00 |
| ATOM | 3622 | HG3  | ARG | X | 241 | 31.239 | 33.904 | 68.260 | 0.00 | 0.00 |
| ATOM | 3623 | CD   | ARG | X | 241 | 30.093 | 32.029 | 68.632 | 0.00 | 0.00 |
| ATOM | 3624 | HD2  | ARG | X | 241 | 29.955 | 32.258 | 69.688 | 0.00 | 0.00 |
| ATOM | 3625 | HD3  | ARG | X | 241 | 29.179 | 32.398 | 68.166 | 0.00 | 0.00 |
| ATOM | 3626 | NE   | ARG | X | 241 | 30.295 | 30.577 | 68.551 | 0.00 | 0.00 |
| ATOM | 3627 | HE   | ARG | X | 241 | 31.249 | 30.246 | 68.527 | 0.00 | 0.00 |
| ATOM | 3628 | CZ   | ARG | X | 241 | 29.428 | 29.589 | 68.642 | 0.00 | 0.00 |
| ATOM | 3629 | NH1  | ARG | X | 241 | 28.182 | 29.776 | 68.887 | 0.00 | 0.00 |
| ATOM | 3630 | HH11 | ARG | X | 241 | 27.798 | 30.661 | 69.188 | 0.00 | 0.00 |
| ATOM | 3631 | HH12 | ARG | X | 241 | 27.566 | 28.980 | 68.976 | 0.00 | 0.00 |
| ATOM | 3632 | NH2  | ARG | X | 241 | 29.723 | 28.363 | 68.383 | 0.00 | 0.00 |
| ATOM | 3633 | HH21 | ARG | X | 241 | 30.603 | 28.120 | 67.950 | 0.00 | 0.00 |
| ATOM | 3634 | HH22 | ARG | X | 241 | 28.914 | 27.761 | 68.439 | 0.00 | 0.00 |
| ATOM | 3635 | C    | ARG | X | 241 | 33.889 | 32.807 | 66.720 | 0.00 | 0.00 |
| ATOM | 3636 | O    | ARG | X | 241 | 34.361 | 33.575 | 67.580 | 0.00 | 0.00 |
| ATOM | 3637 | N    | ARG | X | 242 | 34.363 | 31.620 | 66.340 | 0.00 | 0.00 |
| ATOM | 3638 | H    | ARG | X | 242 | 33.733 | 31.037 | 65.809 | 0.00 | 0.00 |
| ATOM | 3639 | CA   | ARG | X | 242 | 35.575 | 30.940 | 66.953 | 0.00 | 0.00 |
| ATOM | 3640 | HA   | ARG | X | 242 | 35.461 | 30.996 | 68.035 | 0.00 | 0.00 |
| ATOM | 3641 | CB   | ARG | X | 242 | 35.797 | 29.487 | 66.444 | 0.00 | 0.00 |
| ATOM | 3642 | HB2  | ARG | X | 242 | 34.940 | 28.855 | 66.681 | 0.00 | 0.00 |

|      |      |      |     |   |     |        |        |        |      |      |
|------|------|------|-----|---|-----|--------|--------|--------|------|------|
| ATOM | 3643 | HB3  | ARG | X | 242 | 35.961 | 29.444 | 65.367 | 0.00 | 0.00 |
| ATOM | 3644 | CG   | ARG | X | 242 | 37.086 | 28.822 | 67.076 | 0.00 | 0.00 |
| ATOM | 3645 | HG2  | ARG | X | 242 | 37.887 | 29.553 | 66.965 | 0.00 | 0.00 |
| ATOM | 3646 | HG3  | ARG | X | 242 | 36.906 | 28.643 | 68.136 | 0.00 | 0.00 |
| ATOM | 3647 | CD   | ARG | X | 242 | 37.558 | 27.546 | 66.342 | 0.00 | 0.00 |
| ATOM | 3648 | HD2  | ARG | X | 242 | 38.339 | 27.015 | 66.887 | 0.00 | 0.00 |
| ATOM | 3649 | HD3  | ARG | X | 242 | 36.710 | 26.892 | 66.138 | 0.00 | 0.00 |
| ATOM | 3650 | NE   | ARG | X | 242 | 38.062 | 27.758 | 64.995 | 0.00 | 0.00 |
| ATOM | 3651 | HE   | ARG | X | 242 | 37.535 | 27.377 | 64.223 | 0.00 | 0.00 |
| ATOM | 3652 | CZ   | ARG | X | 242 | 39.219 | 28.338 | 64.711 | 0.00 | 0.00 |
| ATOM | 3653 | NH1  | ARG | X | 242 | 39.993 | 28.907 | 65.612 | 0.00 | 0.00 |
| ATOM | 3654 | HH11 | ARG | X | 242 | 39.606 | 29.048 | 66.534 | 0.00 | 0.00 |
| ATOM | 3655 | HH12 | ARG | X | 242 | 40.957 | 29.163 | 65.451 | 0.00 | 0.00 |
| ATOM | 3656 | NH2  | ARG | X | 242 | 39.696 | 28.290 | 63.533 | 0.00 | 0.00 |
| ATOM | 3657 | HH21 | ARG | X | 242 | 39.145 | 28.162 | 62.696 | 0.00 | 0.00 |
| ATOM | 3658 | HH22 | ARG | X | 242 | 40.680 | 28.499 | 63.447 | 0.00 | 0.00 |
| ATOM | 3659 | C    | ARG | X | 242 | 36.782 | 31.844 | 66.775 | 0.00 | 0.00 |
| ATOM | 3660 | O    | ARG | X | 242 | 37.401 | 32.240 | 67.769 | 0.00 | 0.00 |
| ATOM | 3661 | N    | ARG | X | 243 | 37.089 | 32.214 | 65.518 | 0.00 | 0.00 |
| ATOM | 3662 | H    | ARG | X | 243 | 36.497 | 31.893 | 64.765 | 0.00 | 0.00 |
| ATOM | 3663 | CA   | ARG | X | 243 | 38.242 | 32.993 | 65.127 | 0.00 | 0.00 |
| ATOM | 3664 | HA   | ARG | X | 243 | 39.130 | 32.466 | 65.474 | 0.00 | 0.00 |
| ATOM | 3665 | CB   | ARG | X | 243 | 38.312 | 33.138 | 63.603 | 0.00 | 0.00 |
| ATOM | 3666 | HB2  | ARG | X | 243 | 37.374 | 33.587 | 63.277 | 0.00 | 0.00 |
| ATOM | 3667 | HB3  | ARG | X | 243 | 39.019 | 33.895 | 63.263 | 0.00 | 0.00 |
| ATOM | 3668 | CG   | ARG | X | 243 | 38.612 | 31.810 | 62.830 | 0.00 | 0.00 |
| ATOM | 3669 | HG2  | ARG | X | 243 | 39.569 | 31.442 | 63.198 | 0.00 | 0.00 |
| ATOM | 3670 | HG3  | ARG | X | 243 | 37.871 | 31.077 | 63.149 | 0.00 | 0.00 |
| ATOM | 3671 | CD   | ARG | X | 243 | 38.514 | 32.020 | 61.360 | 0.00 | 0.00 |
| ATOM | 3672 | HD2  | ARG | X | 243 | 37.815 | 32.797 | 61.053 | 0.00 | 0.00 |
| ATOM | 3673 | HD3  | ARG | X | 243 | 39.484 | 32.313 | 60.958 | 0.00 | 0.00 |
| ATOM | 3674 | NE   | ARG | X | 243 | 38.203 | 30.705 | 60.714 | 0.00 | 0.00 |
| ATOM | 3675 | HE   | ARG | X | 243 | 37.790 | 30.007 | 61.316 | 0.00 | 0.00 |
| ATOM | 3676 | CZ   | ARG | X | 243 | 38.203 | 30.417 | 59.414 | 0.00 | 0.00 |
| ATOM | 3677 | NH1  | ARG | X | 243 | 38.629 | 31.223 | 58.437 | 0.00 | 0.00 |
| ATOM | 3678 | HH11 | ARG | X | 243 | 38.855 | 32.185 | 58.648 | 0.00 | 0.00 |
| ATOM | 3679 | HH12 | ARG | X | 243 | 38.599 | 30.854 | 57.497 | 0.00 | 0.00 |
| ATOM | 3680 | NH2  | ARG | X | 243 | 37.856 | 29.222 | 59.105 | 0.00 | 0.00 |
| ATOM | 3681 | HH21 | ARG | X | 243 | 37.585 | 28.523 | 59.781 | 0.00 | 0.00 |
| ATOM | 3682 | HH22 | ARG | X | 243 | 37.795 | 28.988 | 58.124 | 0.00 | 0.00 |
| ATOM | 3683 | C    | ARG | X | 243 | 38.165 | 34.352 | 65.819 | 0.00 | 0.00 |
| ATOM | 3684 | O    | ARG | X | 243 | 39.070 | 34.792 | 66.468 | 0.00 | 0.00 |
| ATOM | 3685 | N    | ALA | X | 244 | 36.908 | 34.958 | 65.746 | 0.00 | 0.00 |
| ATOM | 3686 | H    | ALA | X | 244 | 36.163 | 34.682 | 65.124 | 0.00 | 0.00 |
| ATOM | 3687 | CA   | ALA | X | 244 | 36.597 | 36.180 | 66.527 | 0.00 | 0.00 |
| ATOM | 3688 | HA   | ALA | X | 244 | 37.225 | 36.952 | 66.084 | 0.00 | 0.00 |
| ATOM | 3689 | CB   | ALA | X | 244 | 35.199 | 36.616 | 66.257 | 0.00 | 0.00 |
| ATOM | 3690 | HB1  | ALA | X | 244 | 35.096 | 36.843 | 65.196 | 0.00 | 0.00 |
| ATOM | 3691 | HB2  | ALA | X | 244 | 34.402 | 35.934 | 66.553 | 0.00 | 0.00 |
| ATOM | 3692 | HB3  | ALA | X | 244 | 35.106 | 37.583 | 66.752 | 0.00 | 0.00 |
| ATOM | 3693 | C    | ALA | X | 244 | 36.831 | 36.160 | 68.039 | 0.00 | 0.00 |
| ATOM | 3694 | O    | ALA | X | 244 | 37.433 | 37.085 | 68.588 | 0.00 | 0.00 |
| ATOM | 3695 | N    | THR | X | 245 | 36.499 | 35.018 | 68.667 | 0.00 | 0.00 |
| ATOM | 3696 | H    | THR | X | 245 | 35.980 | 34.354 | 68.110 | 0.00 | 0.00 |
| ATOM | 3697 | CA   | THR | X | 245 | 36.569 | 34.854 | 70.165 | 0.00 | 0.00 |
| ATOM | 3698 | HA   | THR | X | 245 | 36.005 | 35.705 | 70.546 | 0.00 | 0.00 |
| ATOM | 3699 | CB   | THR | X | 245 | 35.673 | 33.691 | 70.454 | 0.00 | 0.00 |
| ATOM | 3700 | HB   | THR | X | 245 | 35.961 | 32.799 | 69.897 | 0.00 | 0.00 |
| ATOM | 3701 | CG2  | THR | X | 245 | 35.649 | 33.231 | 71.901 | 0.00 | 0.00 |
| ATOM | 3702 | HG21 | THR | X | 245 | 34.757 | 32.619 | 72.029 | 0.00 | 0.00 |
| ATOM | 3703 | HG22 | THR | X | 245 | 36.521 | 32.645 | 72.192 | 0.00 | 0.00 |
| ATOM | 3704 | HG23 | THR | X | 245 | 35.540 | 34.092 | 72.560 | 0.00 | 0.00 |
| ATOM | 3705 | OG1  | THR | X | 245 | 34.364 | 34.080 | 70.195 | 0.00 | 0.00 |
| ATOM | 3706 | HG1  | THR | X | 245 | 34.287 | 34.099 | 69.238 | 0.00 | 0.00 |
| ATOM | 3707 | C    | THR | X | 245 | 37.975 | 34.725 | 70.748 | 0.00 | 0.00 |
| ATOM | 3708 | O    | THR | X | 245 | 38.342 | 35.386 | 71.700 | 0.00 | 0.00 |
| ATOM | 3709 | N    | GLN | X | 246 | 38.814 | 33.926 | 70.033 | 0.00 | 0.00 |
| ATOM | 3710 | H    | GLN | X | 246 | 38.441 | 33.357 | 69.287 | 0.00 | 0.00 |
| ATOM | 3711 | CA   | GLN | X | 246 | 40.250 | 33.750 | 70.289 | 0.00 | 0.00 |
| ATOM | 3712 | HA   | GLN | X | 246 | 40.450 | 33.596 | 71.349 | 0.00 | 0.00 |

|      |      |      |     |   |     |        |        |        |      |      |
|------|------|------|-----|---|-----|--------|--------|--------|------|------|
| ATOM | 3713 | CB   | GLN | X | 246 | 40.678 | 32.544 | 69.479 | 0.00 | 0.00 |
| ATOM | 3714 | HB2  | GLN | X | 246 | 40.311 | 32.670 | 68.460 | 0.00 | 0.00 |
| ATOM | 3715 | HB3  | GLN | X | 246 | 41.766 | 32.481 | 69.448 | 0.00 | 0.00 |
| ATOM | 3716 | CG   | GLN | X | 246 | 40.103 | 31.208 | 69.935 | 0.00 | 0.00 |
| ATOM | 3717 | HG2  | GLN | X | 246 | 40.183 | 31.046 | 71.010 | 0.00 | 0.00 |
| ATOM | 3718 | HG3  | GLN | X | 246 | 39.069 | 31.278 | 69.597 | 0.00 | 0.00 |
| ATOM | 3719 | CD   | GLN | X | 246 | 40.681 | 30.001 | 69.260 | 0.00 | 0.00 |
| ATOM | 3720 | OE1  | GLN | X | 246 | 40.266 | 29.522 | 68.228 | 0.00 | 0.00 |
| ATOM | 3721 | NE2  | GLN | X | 246 | 41.755 | 29.440 | 69.784 | 0.00 | 0.00 |
| ATOM | 3722 | HE21 | GLN | X | 246 | 42.079 | 28.614 | 69.300 | 0.00 | 0.00 |
| ATOM | 3723 | HE22 | GLN | X | 246 | 42.056 | 29.641 | 70.727 | 0.00 | 0.00 |
| ATOM | 3724 | C    | GLN | X | 246 | 41.087 | 34.955 | 69.875 | 0.00 | 0.00 |
| ATOM | 3725 | O    | GLN | X | 246 | 42.051 | 35.207 | 70.591 | 0.00 | 0.00 |
| ATOM | 3726 | N    | LEU | X | 247 | 40.661 | 35.709 | 68.907 | 0.00 | 0.00 |
| ATOM | 3727 | H    | LEU | X | 247 | 39.959 | 35.368 | 68.266 | 0.00 | 0.00 |
| ATOM | 3728 | CA   | LEU | X | 247 | 41.122 | 37.079 | 68.641 | 0.00 | 0.00 |
| ATOM | 3729 | HA   | LEU | X | 247 | 42.201 | 36.956 | 68.552 | 0.00 | 0.00 |
| ATOM | 3730 | CB   | LEU | X | 247 | 40.622 | 37.511 | 67.230 | 0.00 | 0.00 |
| ATOM | 3731 | HB2  | LEU | X | 247 | 40.690 | 36.594 | 66.644 | 0.00 | 0.00 |
| ATOM | 3732 | HB3  | LEU | X | 247 | 39.550 | 37.696 | 67.300 | 0.00 | 0.00 |
| ATOM | 3733 | CG   | LEU | X | 247 | 41.330 | 38.562 | 66.436 | 0.00 | 0.00 |
| ATOM | 3734 | HG   | LEU | X | 247 | 41.306 | 39.547 | 66.902 | 0.00 | 0.00 |
| ATOM | 3735 | CD1  | LEU | X | 247 | 42.763 | 38.234 | 66.171 | 0.00 | 0.00 |
| ATOM | 3736 | HD11 | LEU | X | 247 | 43.190 | 38.971 | 65.491 | 0.00 | 0.00 |
| ATOM | 3737 | HD12 | LEU | X | 247 | 43.205 | 38.235 | 67.168 | 0.00 | 0.00 |
| ATOM | 3738 | HD13 | LEU | X | 247 | 42.740 | 37.290 | 65.627 | 0.00 | 0.00 |
| ATOM | 3739 | CD2  | LEU | X | 247 | 40.500 | 38.840 | 65.150 | 0.00 | 0.00 |
| ATOM | 3740 | HD21 | LEU | X | 247 | 39.626 | 39.474 | 65.295 | 0.00 | 0.00 |
| ATOM | 3741 | HD22 | LEU | X | 247 | 41.097 | 39.433 | 64.457 | 0.00 | 0.00 |
| ATOM | 3742 | HD23 | LEU | X | 247 | 40.243 | 37.935 | 64.599 | 0.00 | 0.00 |
| ATOM | 3743 | C    | LEU | X | 247 | 40.850 | 37.994 | 69.772 | 0.00 | 0.00 |
| ATOM | 3744 | O    | LEU | X | 247 | 41.756 | 38.668 | 70.227 | 0.00 | 0.00 |
| ATOM | 3745 | N    | ALA | X | 248 | 39.609 | 37.993 | 70.257 | 0.00 | 0.00 |
| ATOM | 3746 | H    | ALA | X | 248 | 38.879 | 37.471 | 69.793 | 0.00 | 0.00 |
| ATOM | 3747 | CA   | ALA | X | 248 | 39.228 | 38.696 | 71.449 | 0.00 | 0.00 |
| ATOM | 3748 | HA   | ALA | X | 248 | 39.481 | 39.750 | 71.332 | 0.00 | 0.00 |
| ATOM | 3749 | CB   | ALA | X | 248 | 37.681 | 38.606 | 71.643 | 0.00 | 0.00 |
| ATOM | 3750 | HB1  | ALA | X | 248 | 37.366 | 37.650 | 72.061 | 0.00 | 0.00 |
| ATOM | 3751 | HB2  | ALA | X | 248 | 37.286 | 39.336 | 72.349 | 0.00 | 0.00 |
| ATOM | 3752 | HB3  | ALA | X | 248 | 37.313 | 38.842 | 70.644 | 0.00 | 0.00 |
| ATOM | 3753 | C    | ALA | X | 248 | 40.092 | 38.318 | 72.630 | 0.00 | 0.00 |
| ATOM | 3754 | O    | ALA | X | 248 | 40.656 | 39.230 | 73.207 | 0.00 | 0.00 |
| ATOM | 3755 | N    | HIE | X | 249 | 40.314 | 37.126 | 73.037 | 0.00 | 0.00 |
| ATOM | 3756 | H    | HIE | X | 249 | 39.748 | 36.474 | 72.514 | 0.00 | 0.00 |
| ATOM | 3757 | CA   | HIE | X | 249 | 41.244 | 36.761 | 74.069 | 0.00 | 0.00 |
| ATOM | 3758 | HA   | HIE | X | 249 | 40.896 | 37.215 | 74.997 | 0.00 | 0.00 |
| ATOM | 3759 | CB   | HIE | X | 249 | 41.201 | 35.186 | 74.164 | 0.00 | 0.00 |
| ATOM | 3760 | HB2  | HIE | X | 249 | 40.204 | 34.748 | 74.121 | 0.00 | 0.00 |
| ATOM | 3761 | HB3  | HIE | X | 249 | 41.731 | 34.759 | 73.313 | 0.00 | 0.00 |
| ATOM | 3762 | CG   | HIE | X | 249 | 41.819 | 34.594 | 75.435 | 0.00 | 0.00 |
| ATOM | 3763 | ND1  | HIE | X | 249 | 41.382 | 34.494 | 76.744 | 0.00 | 0.00 |
| ATOM | 3764 | CE1  | HIE | X | 249 | 42.365 | 33.844 | 77.391 | 0.00 | 0.00 |
| ATOM | 3765 | HE1  | HIE | X | 249 | 42.243 | 33.581 | 78.432 | 0.00 | 0.00 |
| ATOM | 3766 | NE2  | HIE | X | 249 | 43.324 | 33.409 | 76.591 | 0.00 | 0.00 |
| ATOM | 3767 | HE2  | HIE | X | 249 | 44.195 | 33.010 | 76.909 | 0.00 | 0.00 |
| ATOM | 3768 | CD2  | HIE | X | 249 | 43.064 | 34.026 | 75.397 | 0.00 | 0.00 |
| ATOM | 3769 | HD2  | HIE | X | 249 | 43.717 | 33.908 | 74.545 | 0.00 | 0.00 |
| ATOM | 3770 | C    | HIE | X | 249 | 42.660 | 37.298 | 73.760 | 0.00 | 0.00 |
| ATOM | 3771 | O    | HIE | X | 249 | 43.248 | 37.742 | 74.671 | 0.00 | 0.00 |
| ATOM | 3772 | N    | LEU | X | 250 | 43.188 | 37.231 | 72.511 | 0.00 | 0.00 |
| ATOM | 3773 | H    | LEU | X | 250 | 42.785 | 36.586 | 71.847 | 0.00 | 0.00 |
| ATOM | 3774 | CA   | LEU | X | 250 | 44.540 | 37.725 | 72.190 | 0.00 | 0.00 |
| ATOM | 3775 | HA   | LEU | X | 250 | 45.229 | 37.281 | 72.909 | 0.00 | 0.00 |
| ATOM | 3776 | CB   | LEU | X | 250 | 44.937 | 37.184 | 70.800 | 0.00 | 0.00 |
| ATOM | 3777 | HB2  | LEU | X | 250 | 44.204 | 37.412 | 70.026 | 0.00 | 0.00 |
| ATOM | 3778 | HB3  | LEU | X | 250 | 45.776 | 37.753 | 70.398 | 0.00 | 0.00 |
| ATOM | 3779 | CG   | LEU | X | 250 | 45.328 | 35.771 | 70.642 | 0.00 | 0.00 |
| ATOM | 3780 | HG   | LEU | X | 250 | 44.625 | 35.123 | 71.166 | 0.00 | 0.00 |
| ATOM | 3781 | CD1  | LEU | X | 250 | 45.292 | 35.438 | 69.114 | 0.00 | 0.00 |
| ATOM | 3782 | HD11 | LEU | X | 250 | 46.086 | 35.932 | 68.553 | 0.00 | 0.00 |

|      |      |      |     |   |     |        |        |        |      |      |
|------|------|------|-----|---|-----|--------|--------|--------|------|------|
| ATOM | 3783 | HD12 | LEU | X | 250 | 45.423 | 34.361 | 69.005 | 0.00 | 0.00 |
| ATOM | 3784 | HD13 | LEU | X | 250 | 44.289 | 35.588 | 68.715 | 0.00 | 0.00 |
| ATOM | 3785 | CD2  | LEU | X | 250 | 46.723 | 35.430 | 71.165 | 0.00 | 0.00 |
| ATOM | 3786 | HD21 | LEU | X | 250 | 47.344 | 36.168 | 70.658 | 0.00 | 0.00 |
| ATOM | 3787 | HD22 | LEU | X | 250 | 46.789 | 35.672 | 72.226 | 0.00 | 0.00 |
| ATOM | 3788 | HD23 | LEU | X | 250 | 47.117 | 34.433 | 70.966 | 0.00 | 0.00 |
| ATOM | 3789 | C    | LEU | X | 250 | 44.717 | 39.204 | 72.271 | 0.00 | 0.00 |
| ATOM | 3790 | O    | LEU | X | 250 | 45.832 | 39.608 | 72.609 | 0.00 | 0.00 |
| ATOM | 3791 | N    | VAL | X | 251 | 43.672 | 40.018 | 71.945 | 0.00 | 0.00 |
| ATOM | 3792 | H    | VAL | X | 251 | 42.884 | 39.606 | 71.466 | 0.00 | 0.00 |
| ATOM | 3793 | CA   | VAL | X | 251 | 43.657 | 41.526 | 72.139 | 0.00 | 0.00 |
| ATOM | 3794 | HA   | VAL | X | 251 | 44.677 | 41.882 | 71.992 | 0.00 | 0.00 |
| ATOM | 3795 | CB   | VAL | X | 251 | 42.778 | 42.329 | 71.130 | 0.00 | 0.00 |
| ATOM | 3796 | HB   | VAL | X | 251 | 42.960 | 43.400 | 71.212 | 0.00 | 0.00 |
| ATOM | 3797 | CG1  | VAL | X | 251 | 43.238 | 41.965 | 69.695 | 0.00 | 0.00 |
| ATOM | 3798 | HG11 | VAL | X | 251 | 43.209 | 40.885 | 69.553 | 0.00 | 0.00 |
| ATOM | 3799 | HG12 | VAL | X | 251 | 42.649 | 42.386 | 68.879 | 0.00 | 0.00 |
| ATOM | 3800 | HG13 | VAL | X | 251 | 44.263 | 42.329 | 69.635 | 0.00 | 0.00 |
| ATOM | 3801 | CG2  | VAL | X | 251 | 41.319 | 42.052 | 71.372 | 0.00 | 0.00 |
| ATOM | 3802 | HG21 | VAL | X | 251 | 41.038 | 41.015 | 71.186 | 0.00 | 0.00 |
| ATOM | 3803 | HG22 | VAL | X | 251 | 41.030 | 42.241 | 72.406 | 0.00 | 0.00 |
| ATOM | 3804 | HG23 | VAL | X | 251 | 40.724 | 42.780 | 70.822 | 0.00 | 0.00 |
| ATOM | 3805 | C    | VAL | X | 251 | 43.377 | 41.970 | 73.608 | 0.00 | 0.00 |
| ATOM | 3806 | O    | VAL | X | 251 | 43.684 | 43.118 | 73.944 | 0.00 | 0.00 |
| ATOM | 3807 | N    | GLY | X | 252 | 42.827 | 41.135 | 74.492 | 0.00 | 0.00 |
| ATOM | 3808 | H    | GLY | X | 252 | 42.458 | 40.308 | 74.045 | 0.00 | 0.00 |
| ATOM | 3809 | CA   | GLY | X | 252 | 42.414 | 41.443 | 75.863 | 0.00 | 0.00 |
| ATOM | 3810 | HA2  | GLY | X | 252 | 42.813 | 40.591 | 76.465 | 0.00 | 0.00 |
| ATOM | 3811 | HA3  | GLY | X | 252 | 42.867 | 42.370 | 76.333 | 0.00 | 0.00 |
| ATOM | 3812 | C    | GLY | X | 252 | 40.910 | 41.506 | 76.119 | 0.00 | 0.00 |
| ATOM | 3813 | O    | GLY | X | 252 | 40.457 | 42.198 | 77.003 | 0.00 | 0.00 |
| ATOM | 3814 | N    | CYX | X | 253 | 40.079 | 40.843 | 75.324 | 0.00 | 0.00 |
| ATOM | 3815 | H    | CYX | X | 253 | 40.527 | 40.255 | 74.635 | 0.00 | 0.00 |
| ATOM | 3816 | CA   | CYX | X | 253 | 38.593 | 40.907 | 75.439 | 0.00 | 0.00 |
| ATOM | 3817 | HA   | CYX | X | 253 | 38.400 | 41.621 | 76.239 | 0.00 | 0.00 |
| ATOM | 3818 | CB   | CYX | X | 253 | 38.212 | 41.459 | 74.046 | 0.00 | 0.00 |
| ATOM | 3819 | HB2  | CYX | X | 253 | 38.455 | 40.824 | 73.194 | 0.00 | 0.00 |
| ATOM | 3820 | HB3  | CYX | X | 253 | 37.128 | 41.437 | 73.937 | 0.00 | 0.00 |
| ATOM | 3821 | SG   | CYX | X | 253 | 38.770 | 43.170 | 73.752 | 0.00 | 0.00 |
| ATOM | 3822 | C    | CYX | X | 253 | 37.987 | 39.518 | 75.719 | 0.00 | 0.00 |
| ATOM | 3823 | O    | CYX | X | 253 | 38.013 | 38.691 | 74.845 | 0.00 | 0.00 |
| ATOM | 3824 | N    | PRO | X | 254 | 37.272 | 39.306 | 76.842 | 0.00 | 0.00 |
| ATOM | 3825 | CD   | PRO | X | 254 | 36.389 | 38.131 | 76.956 | 0.00 | 0.00 |
| ATOM | 3826 | HD2  | PRO | X | 254 | 36.869 | 37.203 | 76.643 | 0.00 | 0.00 |
| ATOM | 3827 | HD3  | PRO | X | 254 | 35.506 | 38.252 | 76.329 | 0.00 | 0.00 |
| ATOM | 3828 | CG   | PRO | X | 254 | 35.999 | 38.096 | 78.441 | 0.00 | 0.00 |
| ATOM | 3829 | HG2  | PRO | X | 254 | 36.780 | 37.566 | 78.986 | 0.00 | 0.00 |
| ATOM | 3830 | HG3  | PRO | X | 254 | 35.005 | 37.676 | 78.593 | 0.00 | 0.00 |
| ATOM | 3831 | CB   | PRO | X | 254 | 36.070 | 39.567 | 78.799 | 0.00 | 0.00 |
| ATOM | 3832 | HB2  | PRO | X | 254 | 36.307 | 39.718 | 79.852 | 0.00 | 0.00 |
| ATOM | 3833 | HB3  | PRO | X | 254 | 35.148 | 40.054 | 78.482 | 0.00 | 0.00 |
| ATOM | 3834 | CA   | PRO | X | 254 | 37.236 | 40.125 | 77.990 | 0.00 | 0.00 |
| ATOM | 3835 | HA   | PRO | X | 254 | 36.971 | 41.123 | 77.642 | 0.00 | 0.00 |
| ATOM | 3836 | C    | PRO | X | 254 | 38.627 | 40.132 | 78.732 | 0.00 | 0.00 |
| ATOM | 3837 | O    | PRO | X | 254 | 39.280 | 39.079 | 78.693 | 0.00 | 0.00 |
| ATOM | 3838 | N    | PRO | X | 255 | 38.926 | 41.162 | 79.488 | 0.00 | 0.00 |
| ATOM | 3839 | CD   | PRO | X | 255 | 38.150 | 42.401 | 79.650 | 0.00 | 0.00 |
| ATOM | 3840 | HD2  | PRO | X | 255 | 37.085 | 42.319 | 79.867 | 0.00 | 0.00 |
| ATOM | 3841 | HD3  | PRO | X | 255 | 38.203 | 42.824 | 78.647 | 0.00 | 0.00 |
| ATOM | 3842 | CG   | PRO | X | 255 | 38.786 | 43.249 | 80.682 | 0.00 | 0.00 |
| ATOM | 3843 | HG2  | PRO | X | 255 | 38.237 | 43.190 | 81.622 | 0.00 | 0.00 |
| ATOM | 3844 | HG3  | PRO | X | 255 | 38.934 | 44.284 | 80.373 | 0.00 | 0.00 |
| ATOM | 3845 | CB   | PRO | X | 255 | 40.183 | 42.593 | 80.970 | 0.00 | 0.00 |
| ATOM | 3846 | HB2  | PRO | X | 255 | 40.489 | 42.657 | 82.014 | 0.00 | 0.00 |
| ATOM | 3847 | HB3  | PRO | X | 255 | 40.947 | 43.075 | 80.360 | 0.00 | 0.00 |
| ATOM | 3848 | CA   | PRO | X | 255 | 40.056 | 41.135 | 80.476 | 0.00 | 0.00 |
| ATOM | 3849 | HA   | PRO | X | 255 | 40.872 | 40.863 | 79.807 | 0.00 | 0.00 |
| ATOM | 3850 | C    | PRO | X | 255 | 39.907 | 40.083 | 81.536 | 0.00 | 0.00 |
| ATOM | 3851 | O    | PRO | X | 255 | 38.817 | 39.976 | 82.033 | 0.00 | 0.00 |
| ATOM | 3852 | N    | GLY | X | 256 | 40.864 | 39.240 | 81.719 | 0.00 | 0.00 |



|      |      |      |     |   |     |        |        |        |      |      |
|------|------|------|-----|---|-----|--------|--------|--------|------|------|
| ATOM | 3853 | H    | GLY | X | 256 | 41.632 | 39.277 | 81.064 | 0.00 | 0.00 |
| ATOM | 3854 | CA   | GLY | X | 256 | 40.892 | 38.145 | 82.769 | 0.00 | 0.00 |
| ATOM | 3855 | HA2  | GLY | X | 256 | 41.913 | 37.839 | 83.102 | 0.00 | 0.00 |
| ATOM | 3856 | HA3  | GLY | X | 256 | 40.462 | 38.534 | 83.700 | 0.00 | 0.00 |
| ATOM | 3857 | C    | GLY | X | 256 | 40.144 | 36.836 | 82.404 | 0.00 | 0.00 |
| ATOM | 3858 | O    | GLY | X | 256 | 40.083 | 35.944 | 83.279 | 0.00 | 0.00 |
| ATOM | 3859 | N    | GLY | X | 257 | 39.647 | 36.667 | 81.157 | 0.00 | 0.00 |
| ATOM | 3860 | H    | GLY | X | 257 | 39.860 | 37.391 | 80.487 | 0.00 | 0.00 |
| ATOM | 3861 | CA   | GLY | X | 257 | 39.018 | 35.393 | 80.756 | 0.00 | 0.00 |
| ATOM | 3862 | HA2  | GLY | X | 257 | 39.661 | 34.519 | 81.021 | 0.00 | 0.00 |
| ATOM | 3863 | HA3  | GLY | X | 257 | 38.061 | 35.178 | 81.220 | 0.00 | 0.00 |
| ATOM | 3864 | C    | GLY | X | 257 | 38.694 | 35.333 | 79.258 | 0.00 | 0.00 |
| ATOM | 3865 | O    | GLY | X | 257 | 39.219 | 36.146 | 78.454 | 0.00 | 0.00 |
| ATOM | 3866 | N    | THR | X | 258 | 37.861 | 34.313 | 78.857 | 0.00 | 0.00 |
| ATOM | 3867 | H    | THR | X | 258 | 37.508 | 33.704 | 79.581 | 0.00 | 0.00 |
| ATOM | 3868 | CA   | THR | X | 258 | 37.473 | 34.186 | 77.439 | 0.00 | 0.00 |
| ATOM | 3869 | HA   | THR | X | 258 | 37.929 | 34.921 | 76.776 | 0.00 | 0.00 |
| ATOM | 3870 | CB   | THR | X | 258 | 37.930 | 32.772 | 76.966 | 0.00 | 0.00 |
| ATOM | 3871 | HB   | THR | X | 258 | 37.363 | 32.069 | 77.575 | 0.00 | 0.00 |
| ATOM | 3872 | CG2  | THR | X | 258 | 37.956 | 32.520 | 75.426 | 0.00 | 0.00 |
| ATOM | 3873 | HG21 | THR | X | 258 | 38.202 | 31.463 | 75.326 | 0.00 | 0.00 |
| ATOM | 3874 | HG22 | THR | X | 258 | 36.982 | 32.784 | 75.013 | 0.00 | 0.00 |
| ATOM | 3875 | HG23 | THR | X | 258 | 38.642 | 33.194 | 74.913 | 0.00 | 0.00 |
| ATOM | 3876 | OG1  | THR | X | 258 | 39.281 | 32.578 | 77.304 | 0.00 | 0.00 |
| ATOM | 3877 | HG1  | THR | X | 258 | 39.832 | 33.334 | 77.090 | 0.00 | 0.00 |
| ATOM | 3878 | C    | THR | X | 258 | 35.954 | 34.318 | 77.271 | 0.00 | 0.00 |
| ATOM | 3879 | O    | THR | X | 258 | 35.253 | 33.836 | 78.118 | 0.00 | 0.00 |
| ATOM | 3880 | N    | GLY | X | 259 | 35.457 | 34.887 | 76.163 | 0.00 | 0.00 |
| ATOM | 3881 | H    | GLY | X | 259 | 36.208 | 35.076 | 75.515 | 0.00 | 0.00 |
| ATOM | 3882 | CA   | GLY | X | 259 | 34.081 | 34.877 | 75.689 | 0.00 | 0.00 |
| ATOM | 3883 | HA2  | GLY | X | 259 | 33.907 | 35.160 | 74.703 | 0.00 | 0.00 |
| ATOM | 3884 | HA3  | GLY | X | 259 | 33.788 | 33.915 | 75.686 | 0.00 | 0.00 |
| ATOM | 3885 | C    | GLY | X | 259 | 33.225 | 35.670 | 76.628 | 0.00 | 0.00 |
| ATOM | 3886 | O    | GLY | X | 259 | 33.278 | 36.902 | 76.544 | 0.00 | 0.00 |
| ATOM | 3887 | N    | GLY | X | 260 | 32.326 | 35.069 | 77.309 | 0.00 | 0.00 |
| ATOM | 3888 | H    | GLY | X | 260 | 32.428 | 34.064 | 77.308 | 0.00 | 0.00 |
| ATOM | 3889 | CA   | GLY | X | 260 | 31.267 | 35.677 | 78.152 | 0.00 | 0.00 |
| ATOM | 3890 | HA2  | GLY | X | 260 | 30.978 | 34.988 | 78.885 | 0.00 | 0.00 |
| ATOM | 3891 | HA3  | GLY | X | 260 | 31.538 | 36.678 | 78.467 | 0.00 | 0.00 |
| ATOM | 3892 | C    | GLY | X | 260 | 30.048 | 35.911 | 77.300 | 0.00 | 0.00 |
| ATOM | 3893 | O    | GLY | X | 260 | 29.814 | 35.327 | 76.231 | 0.00 | 0.00 |
| ATOM | 3894 | N    | ASN | X | 261 | 29.284 | 36.921 | 77.689 | 0.00 | 0.00 |
| ATOM | 3895 | H    | ASN | X | 261 | 29.196 | 37.063 | 78.685 | 0.00 | 0.00 |
| ATOM | 3896 | CA   | ASN | X | 261 | 28.349 | 37.681 | 76.859 | 0.00 | 0.00 |
| ATOM | 3897 | HA   | ASN | X | 261 | 27.501 | 37.029 | 76.650 | 0.00 | 0.00 |
| ATOM | 3898 | CB   | ASN | X | 261 | 27.829 | 38.931 | 77.608 | 0.00 | 0.00 |
| ATOM | 3899 | HB2  | ASN | X | 261 | 27.473 | 38.747 | 78.621 | 0.00 | 0.00 |
| ATOM | 3900 | HB3  | ASN | X | 261 | 28.728 | 39.536 | 77.723 | 0.00 | 0.00 |
| ATOM | 3901 | CG   | ASN | X | 261 | 26.762 | 39.559 | 76.730 | 0.00 | 0.00 |
| ATOM | 3902 | OD1  | ASN | X | 261 | 26.849 | 40.702 | 76.256 | 0.00 | 0.00 |
| ATOM | 3903 | ND2  | ASN | X | 261 | 25.731 | 38.875 | 76.498 | 0.00 | 0.00 |
| ATOM | 3904 | HD21 | ASN | X | 261 | 24.973 | 39.356 | 76.036 | 0.00 | 0.00 |
| ATOM | 3905 | HD22 | ASN | X | 261 | 25.714 | 37.963 | 76.931 | 0.00 | 0.00 |
| ATOM | 3906 | C    | ASN | X | 261 | 28.991 | 38.139 | 75.542 | 0.00 | 0.00 |
| ATOM | 3907 | O    | ASN | X | 261 | 30.035 | 38.868 | 75.632 | 0.00 | 0.00 |
| ATOM | 3908 | N    | ASP | X | 262 | 28.368 | 37.855 | 74.442 | 0.00 | 0.00 |
| ATOM | 3909 | H    | ASP | X | 262 | 27.589 | 37.214 | 74.486 | 0.00 | 0.00 |
| ATOM | 3910 | CA   | ASP | X | 262 | 28.952 | 38.048 | 73.097 | 0.00 | 0.00 |
| ATOM | 3911 | HA   | ASP | X | 262 | 29.971 | 37.680 | 72.978 | 0.00 | 0.00 |
| ATOM | 3912 | CB   | ASP | X | 262 | 28.262 | 37.182 | 72.006 | 0.00 | 0.00 |
| ATOM | 3913 | HB2  | ASP | X | 262 | 27.234 | 37.543 | 72.048 | 0.00 | 0.00 |
| ATOM | 3914 | HB3  | ASP | X | 262 | 28.692 | 37.500 | 71.055 | 0.00 | 0.00 |
| ATOM | 3915 | CG   | ASP | X | 262 | 28.341 | 35.649 | 72.207 | 0.00 | 0.00 |
| ATOM | 3916 | OD1  | ASP | X | 262 | 27.250 | 35.050 | 72.221 | 0.00 | 0.00 |
| ATOM | 3917 | OD2  | ASP | X | 262 | 29.441 | 35.049 | 72.205 | 0.00 | 0.00 |
| ATOM | 3918 | C    | ASP | X | 262 | 28.947 | 39.484 | 72.620 | 0.00 | 0.00 |
| ATOM | 3919 | O    | ASP | X | 262 | 29.820 | 39.868 | 71.842 | 0.00 | 0.00 |
| ATOM | 3920 | N    | THR | X | 263 | 27.870 | 40.202 | 72.978 | 0.00 | 0.00 |
| ATOM | 3921 | H    | THR | X | 263 | 27.154 | 39.767 | 73.542 | 0.00 | 0.00 |
| ATOM | 3922 | CA   | THR | X | 263 | 27.761 | 41.626 | 72.718 | 0.00 | 0.00 |

|      |      |      |     |   |     |        |        |        |      |      |
|------|------|------|-----|---|-----|--------|--------|--------|------|------|
| ATOM | 3923 | HA   | THR | X | 263 | 27.868 | 41.822 | 71.651 | 0.00 | 0.00 |
| ATOM | 3924 | CB   | THR | X | 263 | 26.464 | 42.121 | 73.188 | 0.00 | 0.00 |
| ATOM | 3925 | HB   | THR | X | 263 | 26.273 | 41.695 | 74.173 | 0.00 | 0.00 |
| ATOM | 3926 | CG2  | THR | X | 263 | 26.285 | 43.618 | 73.022 | 0.00 | 0.00 |
| ATOM | 3927 | HG21 | THR | X | 263 | 26.866 | 44.158 | 73.769 | 0.00 | 0.00 |
| ATOM | 3928 | HG22 | THR | X | 263 | 26.609 | 43.990 | 72.051 | 0.00 | 0.00 |
| ATOM | 3929 | HG23 | THR | X | 263 | 25.225 | 43.820 | 73.177 | 0.00 | 0.00 |
| ATOM | 3930 | OG1  | THR | X | 263 | 25.482 | 41.471 | 72.388 | 0.00 | 0.00 |
| ATOM | 3931 | HG1  | THR | X | 263 | 25.447 | 40.534 | 72.596 | 0.00 | 0.00 |
| ATOM | 3932 | C    | THR | X | 263 | 28.856 | 42.386 | 73.463 | 0.00 | 0.00 |
| ATOM | 3933 | O    | THR | X | 263 | 29.631 | 43.120 | 72.827 | 0.00 | 0.00 |
| ATOM | 3934 | N    | GLU | X | 264 | 29.031 | 42.112 | 74.726 | 0.00 | 0.00 |
| ATOM | 3935 | H    | GLU | X | 264 | 28.372 | 41.416 | 75.043 | 0.00 | 0.00 |
| ATOM | 3936 | CA   | GLU | X | 264 | 30.100 | 42.587 | 75.574 | 0.00 | 0.00 |
| ATOM | 3937 | HA   | GLU | X | 264 | 30.021 | 43.674 | 75.605 | 0.00 | 0.00 |
| ATOM | 3938 | CB   | GLU | X | 264 | 29.756 | 42.144 | 77.015 | 0.00 | 0.00 |
| ATOM | 3939 | HB2  | GLU | X | 264 | 28.701 | 42.298 | 77.243 | 0.00 | 0.00 |
| ATOM | 3940 | HB3  | GLU | X | 264 | 29.997 | 41.096 | 77.197 | 0.00 | 0.00 |
| ATOM | 3941 | CG   | GLU | X | 264 | 30.589 | 42.929 | 78.131 | 0.00 | 0.00 |
| ATOM | 3942 | HG2  | GLU | X | 264 | 31.642 | 42.799 | 77.882 | 0.00 | 0.00 |
| ATOM | 3943 | HG3  | GLU | X | 264 | 30.471 | 44.011 | 78.078 | 0.00 | 0.00 |
| ATOM | 3944 | CD   | GLU | X | 264 | 30.334 | 42.358 | 79.496 | 0.00 | 0.00 |
| ATOM | 3945 | OE1  | GLU | X | 264 | 31.313 | 41.872 | 80.092 | 0.00 | 0.00 |
| ATOM | 3946 | OE2  | GLU | X | 264 | 29.213 | 42.428 | 80.049 | 0.00 | 0.00 |
| ATOM | 3947 | C    | GLU | X | 264 | 31.534 | 42.223 | 75.133 | 0.00 | 0.00 |
| ATOM | 3948 | O    | GLU | X | 264 | 32.495 | 42.981 | 75.273 | 0.00 | 0.00 |
| ATOM | 3949 | N    | LEU | X | 265 | 31.593 | 41.063 | 74.492 | 0.00 | 0.00 |
| ATOM | 3950 | H    | LEU | X | 265 | 30.707 | 40.597 | 74.352 | 0.00 | 0.00 |
| ATOM | 3951 | CA   | LEU | X | 265 | 32.690 | 40.624 | 73.675 | 0.00 | 0.00 |
| ATOM | 3952 | HA   | LEU | X | 265 | 33.570 | 40.681 | 74.315 | 0.00 | 0.00 |
| ATOM | 3953 | CB   | LEU | X | 265 | 32.553 | 39.132 | 73.381 | 0.00 | 0.00 |
| ATOM | 3954 | HB2  | LEU | X | 265 | 32.244 | 38.567 | 74.261 | 0.00 | 0.00 |
| ATOM | 3955 | HB3  | LEU | X | 265 | 31.710 | 38.966 | 72.711 | 0.00 | 0.00 |
| ATOM | 3956 | CG   | LEU | X | 265 | 33.808 | 38.560 | 72.696 | 0.00 | 0.00 |
| ATOM | 3957 | HG   | LEU | X | 265 | 34.751 | 38.906 | 73.120 | 0.00 | 0.00 |
| ATOM | 3958 | CD1  | LEU | X | 265 | 33.699 | 37.042 | 72.810 | 0.00 | 0.00 |
| ATOM | 3959 | HD11 | LEU | X | 265 | 33.485 | 36.850 | 73.862 | 0.00 | 0.00 |
| ATOM | 3960 | HD12 | LEU | X | 265 | 32.840 | 36.752 | 72.206 | 0.00 | 0.00 |
| ATOM | 3961 | HD13 | LEU | X | 265 | 34.613 | 36.503 | 72.559 | 0.00 | 0.00 |
| ATOM | 3962 | CD2  | LEU | X | 265 | 33.790 | 38.777 | 71.171 | 0.00 | 0.00 |
| ATOM | 3963 | HD21 | LEU | X | 265 | 32.776 | 38.497 | 70.884 | 0.00 | 0.00 |
| ATOM | 3964 | HD22 | LEU | X | 265 | 34.016 | 39.814 | 70.926 | 0.00 | 0.00 |
| ATOM | 3965 | HD23 | LEU | X | 265 | 34.438 | 38.142 | 70.566 | 0.00 | 0.00 |
| ATOM | 3966 | C    | LEU | X | 265 | 33.002 | 41.566 | 72.530 | 0.00 | 0.00 |
| ATOM | 3967 | O    | LEU | X | 265 | 34.059 | 42.178 | 72.509 | 0.00 | 0.00 |
| ATOM | 3968 | N    | VAL | X | 266 | 32.023 | 41.752 | 71.592 | 0.00 | 0.00 |
| ATOM | 3969 | H    | VAL | X | 266 | 31.223 | 41.135 | 71.579 | 0.00 | 0.00 |
| ATOM | 3970 | CA   | VAL | X | 266 | 32.229 | 42.506 | 70.395 | 0.00 | 0.00 |
| ATOM | 3971 | HA   | VAL | X | 266 | 33.177 | 42.184 | 69.963 | 0.00 | 0.00 |
| ATOM | 3972 | CB   | VAL | X | 266 | 31.060 | 42.459 | 69.375 | 0.00 | 0.00 |
| ATOM | 3973 | HB   | VAL | X | 266 | 30.135 | 42.753 | 69.870 | 0.00 | 0.00 |
| ATOM | 3974 | CG1  | VAL | X | 266 | 31.325 | 43.378 | 68.235 | 0.00 | 0.00 |
| ATOM | 3975 | HG11 | VAL | X | 266 | 31.144 | 44.410 | 68.537 | 0.00 | 0.00 |
| ATOM | 3976 | HG12 | VAL | X | 266 | 32.232 | 43.111 | 67.694 | 0.00 | 0.00 |
| ATOM | 3977 | HG13 | VAL | X | 266 | 30.637 | 43.230 | 67.403 | 0.00 | 0.00 |
| ATOM | 3978 | CG2  | VAL | X | 266 | 30.861 | 41.028 | 68.801 | 0.00 | 0.00 |
| ATOM | 3979 | HG21 | VAL | X | 266 | 30.004 | 41.058 | 68.128 | 0.00 | 0.00 |
| ATOM | 3980 | HG22 | VAL | X | 266 | 31.690 | 40.645 | 68.206 | 0.00 | 0.00 |
| ATOM | 3981 | HG23 | VAL | X | 266 | 30.483 | 40.340 | 69.557 | 0.00 | 0.00 |
| ATOM | 3982 | C    | VAL | X | 266 | 32.390 | 44.038 | 70.807 | 0.00 | 0.00 |
| ATOM | 3983 | O    | VAL | X | 266 | 33.014 | 44.736 | 70.043 | 0.00 | 0.00 |
| ATOM | 3984 | N    | ALA | X | 267 | 31.902 | 44.445 | 71.980 | 0.00 | 0.00 |
| ATOM | 3985 | H    | ALA | X | 267 | 31.302 | 43.793 | 72.464 | 0.00 | 0.00 |
| ATOM | 3986 | CA   | ALA | X | 267 | 32.044 | 45.779 | 72.510 | 0.00 | 0.00 |
| ATOM | 3987 | HA   | ALA | X | 267 | 31.812 | 46.459 | 71.691 | 0.00 | 0.00 |
| ATOM | 3988 | CB   | ALA | X | 267 | 31.014 | 45.806 | 73.624 | 0.00 | 0.00 |
| ATOM | 3989 | HB1  | ALA | X | 267 | 30.058 | 45.432 | 73.258 | 0.00 | 0.00 |
| ATOM | 3990 | HB2  | ALA | X | 267 | 31.365 | 45.193 | 74.454 | 0.00 | 0.00 |
| ATOM | 3991 | HB3  | ALA | X | 267 | 30.750 | 46.833 | 73.877 | 0.00 | 0.00 |
| ATOM | 3992 | C    | ALA | X | 267 | 33.518 | 46.157 | 72.877 | 0.00 | 0.00 |

|      |      |      |     |   |     |        |        |        |      |      |
|------|------|------|-----|---|-----|--------|--------|--------|------|------|
| ATOM | 3993 | O    | ALA | X | 267 | 33.924 | 47.282 | 72.589 | 0.00 | 0.00 |
| ATOM | 3994 | N    | CYX | X | 268 | 34.255 | 45.192 | 73.364 | 0.00 | 0.00 |
| ATOM | 3995 | H    | CYX | X | 268 | 33.864 | 44.281 | 73.557 | 0.00 | 0.00 |
| ATOM | 3996 | CA   | CYX | X | 268 | 35.644 | 45.354 | 73.694 | 0.00 | 0.00 |
| ATOM | 3997 | HA   | CYX | X | 268 | 35.742 | 46.364 | 74.092 | 0.00 | 0.00 |
| ATOM | 3998 | CB   | CYX | X | 268 | 36.098 | 44.292 | 74.645 | 0.00 | 0.00 |
| ATOM | 3999 | HB2  | CYX | X | 268 | 35.499 | 44.476 | 75.537 | 0.00 | 0.00 |
| ATOM | 4000 | HB3  | CYX | X | 268 | 35.849 | 43.297 | 74.277 | 0.00 | 0.00 |
| ATOM | 4001 | SG   | CYX | X | 268 | 37.843 | 44.309 | 75.097 | 0.00 | 0.00 |
| ATOM | 4002 | C    | CYX | X | 268 | 36.446 | 45.343 | 72.419 | 0.00 | 0.00 |
| ATOM | 4003 | O    | CYX | X | 268 | 37.372 | 46.195 | 72.228 | 0.00 | 0.00 |
| ATOM | 4004 | N    | LEU | X | 269 | 36.142 | 44.369 | 71.543 | 0.00 | 0.00 |
| ATOM | 4005 | H    | LEU | X | 269 | 35.467 | 43.653 | 71.773 | 0.00 | 0.00 |
| ATOM | 4006 | CA   | LEU | X | 269 | 36.794 | 44.285 | 70.252 | 0.00 | 0.00 |
| ATOM | 4007 | HA   | LEU | X | 269 | 37.836 | 43.971 | 70.320 | 0.00 | 0.00 |
| ATOM | 4008 | CB   | LEU | X | 269 | 36.105 | 42.987 | 69.591 | 0.00 | 0.00 |
| ATOM | 4009 | HB2  | LEU | X | 269 | 35.724 | 42.441 | 70.454 | 0.00 | 0.00 |
| ATOM | 4010 | HB3  | LEU | X | 269 | 35.215 | 43.279 | 69.033 | 0.00 | 0.00 |
| ATOM | 4011 | CG   | LEU | X | 269 | 36.980 | 42.147 | 68.706 | 0.00 | 0.00 |
| ATOM | 4012 | HG   | LEU | X | 269 | 37.216 | 42.741 | 67.823 | 0.00 | 0.00 |
| ATOM | 4013 | CD1  | LEU | X | 269 | 38.230 | 41.615 | 69.424 | 0.00 | 0.00 |
| ATOM | 4014 | HD11 | LEU | X | 269 | 38.903 | 42.472 | 69.386 | 0.00 | 0.00 |
| ATOM | 4015 | HD12 | LEU | X | 269 | 37.970 | 41.184 | 70.391 | 0.00 | 0.00 |
| ATOM | 4016 | HD13 | LEU | X | 269 | 38.693 | 40.926 | 68.718 | 0.00 | 0.00 |
| ATOM | 4017 | CD2  | LEU | X | 269 | 36.039 | 41.076 | 68.243 | 0.00 | 0.00 |
| ATOM | 4018 | HD21 | LEU | X | 269 | 35.520 | 40.561 | 69.051 | 0.00 | 0.00 |
| ATOM | 4019 | HD22 | LEU | X | 269 | 35.303 | 41.487 | 67.552 | 0.00 | 0.00 |
| ATOM | 4020 | HD23 | LEU | X | 269 | 36.715 | 40.370 | 67.760 | 0.00 | 0.00 |
| ATOM | 4021 | C    | LEU | X | 269 | 36.683 | 45.511 | 69.420 | 0.00 | 0.00 |
| ATOM | 4022 | O    | LEU | X | 269 | 37.491 | 45.694 | 68.519 | 0.00 | 0.00 |
| ATOM | 4023 | N    | ARG | X | 270 | 35.716 | 46.383 | 69.673 | 0.00 | 0.00 |
| ATOM | 4024 | H    | ARG | X | 270 | 35.100 | 46.204 | 70.453 | 0.00 | 0.00 |
| ATOM | 4025 | CA   | ARG | X | 270 | 35.576 | 47.774 | 69.077 | 0.00 | 0.00 |
| ATOM | 4026 | HA   | ARG | X | 270 | 36.060 | 47.770 | 68.101 | 0.00 | 0.00 |
| ATOM | 4027 | CB   | ARG | X | 270 | 34.101 | 48.127 | 68.819 | 0.00 | 0.00 |
| ATOM | 4028 | HB2  | ARG | X | 270 | 33.450 | 47.958 | 69.676 | 0.00 | 0.00 |
| ATOM | 4029 | HB3  | ARG | X | 270 | 34.144 | 49.157 | 68.466 | 0.00 | 0.00 |
| ATOM | 4030 | CG   | ARG | X | 270 | 33.600 | 47.401 | 67.560 | 0.00 | 0.00 |
| ATOM | 4031 | HG2  | ARG | X | 270 | 34.278 | 47.487 | 66.711 | 0.00 | 0.00 |
| ATOM | 4032 | HG3  | ARG | X | 270 | 33.648 | 46.320 | 67.691 | 0.00 | 0.00 |
| ATOM | 4033 | CD   | ARG | X | 270 | 32.269 | 47.907 | 67.152 | 0.00 | 0.00 |
| ATOM | 4034 | HD2  | ARG | X | 270 | 32.172 | 48.915 | 67.555 | 0.00 | 0.00 |
| ATOM | 4035 | HD3  | ARG | X | 270 | 32.289 | 47.925 | 66.062 | 0.00 | 0.00 |
| ATOM | 4036 | NE   | ARG | X | 270 | 31.087 | 47.223 | 67.710 | 0.00 | 0.00 |
| ATOM | 4037 | HE   | ARG | X | 270 | 30.678 | 47.473 | 68.599 | 0.00 | 0.00 |
| ATOM | 4038 | CZ   | ARG | X | 270 | 30.229 | 46.472 | 66.966 | 0.00 | 0.00 |
| ATOM | 4039 | NH1  | ARG | X | 270 | 30.380 | 46.092 | 65.684 | 0.00 | 0.00 |
| ATOM | 4040 | HH11 | ARG | X | 270 | 31.214 | 46.381 | 65.192 | 0.00 | 0.00 |
| ATOM | 4041 | HH12 | ARG | X | 270 | 29.651 | 45.551 | 65.241 | 0.00 | 0.00 |
| ATOM | 4042 | NH2  | ARG | X | 270 | 29.135 | 45.990 | 67.553 | 0.00 | 0.00 |
| ATOM | 4043 | HH21 | ARG | X | 270 | 29.053 | 45.813 | 68.544 | 0.00 | 0.00 |
| ATOM | 4044 | HH22 | ARG | X | 270 | 28.647 | 45.355 | 66.938 | 0.00 | 0.00 |
| ATOM | 4045 | C    | ARG | X | 270 | 36.284 | 48.878 | 69.964 | 0.00 | 0.00 |
| ATOM | 4046 | O    | ARG | X | 270 | 36.860 | 49.739 | 69.284 | 0.00 | 0.00 |
| ATOM | 4047 | N    | THR | X | 271 | 36.413 | 48.797 | 71.256 | 0.00 | 0.00 |
| ATOM | 4048 | H    | THR | X | 271 | 35.950 | 48.006 | 71.681 | 0.00 | 0.00 |
| ATOM | 4049 | CA   | THR | X | 271 | 37.029 | 49.843 | 72.070 | 0.00 | 0.00 |
| ATOM | 4050 | HA   | THR | X | 271 | 36.745 | 50.776 | 71.584 | 0.00 | 0.00 |
| ATOM | 4051 | CB   | THR | X | 271 | 36.419 | 49.854 | 73.456 | 0.00 | 0.00 |
| ATOM | 4052 | HB   | THR | X | 271 | 36.586 | 48.889 | 73.935 | 0.00 | 0.00 |
| ATOM | 4053 | CG2  | THR | X | 271 | 37.020 | 50.907 | 74.354 | 0.00 | 0.00 |
| ATOM | 4054 | HG21 | THR | X | 271 | 36.645 | 51.920 | 74.207 | 0.00 | 0.00 |
| ATOM | 4055 | HG22 | THR | X | 271 | 36.697 | 50.713 | 75.376 | 0.00 | 0.00 |
| ATOM | 4056 | HG23 | THR | X | 271 | 38.109 | 50.907 | 74.323 | 0.00 | 0.00 |
| ATOM | 4057 | OG1  | THR | X | 271 | 35.021 | 50.052 | 73.259 | 0.00 | 0.00 |
| ATOM | 4058 | HG1  | THR | X | 271 | 34.596 | 50.174 | 74.111 | 0.00 | 0.00 |
| ATOM | 4059 | C    | THR | X | 271 | 38.572 | 49.677 | 72.074 | 0.00 | 0.00 |
| ATOM | 4060 | O    | THR | X | 271 | 39.245 | 50.732 | 72.130 | 0.00 | 0.00 |
| ATOM | 4061 | N    | ARG | X | 272 | 39.131 | 48.497 | 71.801 | 0.00 | 0.00 |
| ATOM | 4062 | H    | ARG | X | 272 | 38.421 | 47.781 | 71.727 | 0.00 | 0.00 |

|      |      |      |     |   |     |        |        |        |      |      |
|------|------|------|-----|---|-----|--------|--------|--------|------|------|
| ATOM | 4063 | CA   | ARG | X | 272 | 40.602 | 48.215 | 71.804 | 0.00 | 0.00 |
| ATOM | 4064 | HA   | ARG | X | 272 | 41.158 | 48.794 | 72.542 | 0.00 | 0.00 |
| ATOM | 4065 | CB   | ARG | X | 272 | 40.925 | 46.741 | 72.038 | 0.00 | 0.00 |
| ATOM | 4066 | HB2  | ARG | X | 272 | 40.345 | 46.207 | 71.285 | 0.00 | 0.00 |
| ATOM | 4067 | HB3  | ARG | X | 272 | 41.997 | 46.625 | 71.875 | 0.00 | 0.00 |
| ATOM | 4068 | CG   | ARG | X | 272 | 40.581 | 46.129 | 73.386 | 0.00 | 0.00 |
| ATOM | 4069 | HG2  | ARG | X | 272 | 39.553 | 46.381 | 73.645 | 0.00 | 0.00 |
| ATOM | 4070 | HG3  | ARG | X | 272 | 40.634 | 45.048 | 73.258 | 0.00 | 0.00 |
| ATOM | 4071 | CD   | ARG | X | 272 | 41.580 | 46.392 | 74.591 | 0.00 | 0.00 |
| ATOM | 4072 | HD2  | ARG | X | 272 | 42.561 | 46.224 | 74.148 | 0.00 | 0.00 |
| ATOM | 4073 | HD3  | ARG | X | 272 | 41.579 | 47.414 | 74.968 | 0.00 | 0.00 |
| ATOM | 4074 | NE   | ARG | X | 272 | 41.230 | 45.483 | 75.711 | 0.00 | 0.00 |
| ATOM | 4075 | HE   | ARG | X | 272 | 40.406 | 44.907 | 75.610 | 0.00 | 0.00 |
| ATOM | 4076 | CZ   | ARG | X | 272 | 41.903 | 45.334 | 76.863 | 0.00 | 0.00 |
| ATOM | 4077 | NH1  | ARG | X | 272 | 43.052 | 45.990 | 77.112 | 0.00 | 0.00 |
| ATOM | 4078 | HH11 | ARG | X | 272 | 43.472 | 46.742 | 76.584 | 0.00 | 0.00 |
| ATOM | 4079 | HH12 | ARG | X | 272 | 43.534 | 45.800 | 77.979 | 0.00 | 0.00 |
| ATOM | 4080 | NH2  | ARG | X | 272 | 41.568 | 44.503 | 77.810 | 0.00 | 0.00 |
| ATOM | 4081 | HH21 | ARG | X | 272 | 40.751 | 43.937 | 77.629 | 0.00 | 0.00 |
| ATOM | 4082 | HH22 | ARG | X | 272 | 42.071 | 44.414 | 78.681 | 0.00 | 0.00 |
| ATOM | 4083 | C    | ARG | X | 272 | 41.152 | 48.671 | 70.404 | 0.00 | 0.00 |
| ATOM | 4084 | O    | ARG | X | 272 | 40.411 | 48.625 | 69.419 | 0.00 | 0.00 |
| ATOM | 4085 | N    | PRO | X | 273 | 42.399 | 49.168 | 70.230 | 0.00 | 0.00 |
| ATOM | 4086 | CD   | PRO | X | 273 | 43.327 | 49.335 | 71.288 | 0.00 | 0.00 |
| ATOM | 4087 | HD2  | PRO | X | 273 | 43.528 | 48.363 | 71.740 | 0.00 | 0.00 |
| ATOM | 4088 | HD3  | PRO | X | 273 | 42.821 | 50.051 | 71.936 | 0.00 | 0.00 |
| ATOM | 4089 | CG   | PRO | X | 273 | 44.575 | 50.016 | 70.666 | 0.00 | 0.00 |
| ATOM | 4090 | HG2  | PRO | X | 273 | 45.403 | 49.330 | 70.488 | 0.00 | 0.00 |
| ATOM | 4091 | HG3  | PRO | X | 273 | 44.911 | 50.834 | 71.305 | 0.00 | 0.00 |
| ATOM | 4092 | CB   | PRO | X | 273 | 44.128 | 50.417 | 69.278 | 0.00 | 0.00 |
| ATOM | 4093 | HB2  | PRO | X | 273 | 44.955 | 50.293 | 68.579 | 0.00 | 0.00 |
| ATOM | 4094 | HB3  | PRO | X | 273 | 43.941 | 51.489 | 69.217 | 0.00 | 0.00 |
| ATOM | 4095 | CA   | PRO | X | 273 | 42.800 | 49.719 | 68.975 | 0.00 | 0.00 |
| ATOM | 4096 | HA   | PRO | X | 273 | 42.143 | 50.553 | 68.730 | 0.00 | 0.00 |
| ATOM | 4097 | C    | PRO | X | 273 | 42.917 | 48.732 | 67.778 | 0.00 | 0.00 |
| ATOM | 4098 | O    | PRO | X | 273 | 43.085 | 47.562 | 67.914 | 0.00 | 0.00 |
| ATOM | 4099 | N    | ALA | X | 274 | 42.817 | 49.278 | 66.530 | 0.00 | 0.00 |
| ATOM | 4100 | H    | ALA | X | 274 | 42.699 | 50.268 | 66.367 | 0.00 | 0.00 |
| ATOM | 4101 | CA   | ALA | X | 274 | 42.652 | 48.468 | 65.359 | 0.00 | 0.00 |
| ATOM | 4102 | HA   | ALA | X | 274 | 41.851 | 47.740 | 65.488 | 0.00 | 0.00 |
| ATOM | 4103 | CB   | ALA | X | 274 | 42.380 | 49.360 | 64.121 | 0.00 | 0.00 |
| ATOM | 4104 | HB1  | ALA | X | 274 | 43.055 | 50.216 | 64.121 | 0.00 | 0.00 |
| ATOM | 4105 | HB2  | ALA | X | 274 | 42.486 | 48.781 | 63.203 | 0.00 | 0.00 |
| ATOM | 4106 | HB3  | ALA | X | 274 | 41.315 | 49.576 | 64.034 | 0.00 | 0.00 |
| ATOM | 4107 | C    | ALA | X | 274 | 43.945 | 47.621 | 65.095 | 0.00 | 0.00 |
| ATOM | 4108 | O    | ALA | X | 274 | 43.841 | 46.483 | 64.688 | 0.00 | 0.00 |
| ATOM | 4109 | N    | GLN | X | 275 | 45.143 | 48.224 | 65.224 | 0.00 | 0.00 |
| ATOM | 4110 | H    | GLN | X | 275 | 45.227 | 49.134 | 65.655 | 0.00 | 0.00 |
| ATOM | 4111 | CA   | GLN | X | 275 | 46.361 | 47.565 | 64.817 | 0.00 | 0.00 |
| ATOM | 4112 | HA   | GLN | X | 275 | 46.146 | 47.257 | 63.794 | 0.00 | 0.00 |
| ATOM | 4113 | CB   | GLN | X | 275 | 47.479 | 48.590 | 64.755 | 0.00 | 0.00 |
| ATOM | 4114 | HB2  | GLN | X | 275 | 47.309 | 49.427 | 64.077 | 0.00 | 0.00 |
| ATOM | 4115 | HB3  | GLN | X | 275 | 47.470 | 49.068 | 65.735 | 0.00 | 0.00 |
| ATOM | 4116 | CG   | GLN | X | 275 | 48.836 | 48.104 | 64.435 | 0.00 | 0.00 |
| ATOM | 4117 | HG2  | GLN | X | 275 | 49.549 | 48.928 | 64.405 | 0.00 | 0.00 |
| ATOM | 4118 | HG3  | GLN | X | 275 | 49.162 | 47.348 | 65.149 | 0.00 | 0.00 |
| ATOM | 4119 | CD   | GLN | X | 275 | 48.938 | 47.526 | 63.016 | 0.00 | 0.00 |
| ATOM | 4120 | OE1  | GLN | X | 275 | 49.303 | 48.214 | 62.025 | 0.00 | 0.00 |
| ATOM | 4121 | NE2  | GLN | X | 275 | 48.497 | 46.299 | 62.817 | 0.00 | 0.00 |
| ATOM | 4122 | HE21 | GLN | X | 275 | 48.569 | 46.025 | 61.848 | 0.00 | 0.00 |
| ATOM | 4123 | HE22 | GLN | X | 275 | 47.949 | 45.768 | 63.479 | 0.00 | 0.00 |
| ATOM | 4124 | C    | GLN | X | 275 | 46.680 | 46.215 | 65.566 | 0.00 | 0.00 |
| ATOM | 4125 | O    | GLN | X | 275 | 46.903 | 45.192 | 64.862 | 0.00 | 0.00 |
| ATOM | 4126 | N    | VAL | X | 276 | 46.782 | 46.134 | 66.926 | 0.00 | 0.00 |
| ATOM | 4127 | H    | VAL | X | 276 | 46.641 | 47.025 | 67.380 | 0.00 | 0.00 |
| ATOM | 4128 | CA   | VAL | X | 276 | 46.915 | 44.888 | 67.670 | 0.00 | 0.00 |
| ATOM | 4129 | HA   | VAL | X | 276 | 47.871 | 44.459 | 67.367 | 0.00 | 0.00 |
| ATOM | 4130 | CB   | VAL | X | 276 | 46.906 | 45.211 | 69.179 | 0.00 | 0.00 |
| ATOM | 4131 | HB   | VAL | X | 276 | 47.778 | 45.856 | 69.288 | 0.00 | 0.00 |
| ATOM | 4132 | CG1  | VAL | X | 276 | 45.630 | 45.940 | 69.704 | 0.00 | 0.00 |

|      |      |      |     |   |     |        |        |        |      |      |
|------|------|------|-----|---|-----|--------|--------|--------|------|------|
| ATOM | 4133 | HG11 | VAL | X | 276 | 44.763 | 45.282 | 69.755 | 0.00 | 0.00 |
| ATOM | 4134 | HG12 | VAL | X | 276 | 45.740 | 46.140 | 70.770 | 0.00 | 0.00 |
| ATOM | 4135 | HG13 | VAL | X | 276 | 45.475 | 46.879 | 69.173 | 0.00 | 0.00 |
| ATOM | 4136 | CG2  | VAL | X | 276 | 47.232 | 44.018 | 70.004 | 0.00 | 0.00 |
| ATOM | 4137 | HG21 | VAL | X | 276 | 47.255 | 44.331 | 71.048 | 0.00 | 0.00 |
| ATOM | 4138 | HG22 | VAL | X | 276 | 46.597 | 43.132 | 70.015 | 0.00 | 0.00 |
| ATOM | 4139 | HG23 | VAL | X | 276 | 48.237 | 43.658 | 69.786 | 0.00 | 0.00 |
| ATOM | 4140 | C    | VAL | X | 276 | 45.825 | 43.898 | 67.309 | 0.00 | 0.00 |
| ATOM | 4141 | O    | VAL | X | 276 | 46.140 | 42.745 | 67.171 | 0.00 | 0.00 |
| ATOM | 4142 | N    | LEU | X | 277 | 44.655 | 44.342 | 66.893 | 0.00 | 0.00 |
| ATOM | 4143 | H    | LEU | X | 277 | 44.478 | 45.336 | 66.896 | 0.00 | 0.00 |
| ATOM | 4144 | CA   | LEU | X | 277 | 43.609 | 43.477 | 66.346 | 0.00 | 0.00 |
| ATOM | 4145 | HA   | LEU | X | 277 | 43.694 | 42.672 | 67.077 | 0.00 | 0.00 |
| ATOM | 4146 | CB   | LEU | X | 277 | 42.210 | 44.144 | 66.277 | 0.00 | 0.00 |
| ATOM | 4147 | HB2  | LEU | X | 277 | 42.089 | 44.634 | 67.244 | 0.00 | 0.00 |
| ATOM | 4148 | HB3  | LEU | X | 277 | 42.139 | 44.857 | 65.456 | 0.00 | 0.00 |
| ATOM | 4149 | CG   | LEU | X | 277 | 41.104 | 43.164 | 66.041 | 0.00 | 0.00 |
| ATOM | 4150 | HG   | LEU | X | 277 | 41.643 | 42.230 | 66.200 | 0.00 | 0.00 |
| ATOM | 4151 | CD1  | LEU | X | 277 | 40.045 | 43.348 | 67.095 | 0.00 | 0.00 |
| ATOM | 4152 | HD11 | LEU | X | 277 | 39.125 | 42.881 | 66.742 | 0.00 | 0.00 |
| ATOM | 4153 | HD12 | LEU | X | 277 | 40.315 | 42.815 | 68.007 | 0.00 | 0.00 |
| ATOM | 4154 | HD13 | LEU | X | 277 | 39.850 | 44.416 | 67.184 | 0.00 | 0.00 |
| ATOM | 4155 | CD2  | LEU | X | 277 | 40.605 | 43.379 | 64.594 | 0.00 | 0.00 |
| ATOM | 4156 | HD21 | LEU | X | 277 | 39.999 | 42.545 | 64.241 | 0.00 | 0.00 |
| ATOM | 4157 | HD22 | LEU | X | 277 | 40.066 | 44.325 | 64.553 | 0.00 | 0.00 |
| ATOM | 4158 | HD23 | LEU | X | 277 | 41.510 | 43.396 | 63.986 | 0.00 | 0.00 |
| ATOM | 4159 | C    | LEU | X | 277 | 43.886 | 42.843 | 64.975 | 0.00 | 0.00 |
| ATOM | 4160 | O    | LEU | X | 277 | 43.689 | 41.656 | 64.942 | 0.00 | 0.00 |
| ATOM | 4161 | N    | VAL | X | 278 | 44.365 | 43.603 | 63.959 | 0.00 | 0.00 |
| ATOM | 4162 | H    | VAL | X | 278 | 44.479 | 44.569 | 64.231 | 0.00 | 0.00 |
| ATOM | 4163 | CA   | VAL | X | 278 | 44.654 | 42.998 | 62.715 | 0.00 | 0.00 |
| ATOM | 4164 | HA   | VAL | X | 278 | 44.000 | 42.137 | 62.578 | 0.00 | 0.00 |
| ATOM | 4165 | CB   | VAL | X | 278 | 44.389 | 43.940 | 61.572 | 0.00 | 0.00 |
| ATOM | 4166 | HB   | VAL | X | 278 | 44.527 | 43.385 | 60.644 | 0.00 | 0.00 |
| ATOM | 4167 | CG1  | VAL | X | 278 | 42.908 | 44.310 | 61.532 | 0.00 | 0.00 |
| ATOM | 4168 | HG11 | VAL | X | 278 | 42.713 | 44.893 | 60.632 | 0.00 | 0.00 |
| ATOM | 4169 | HG12 | VAL | X | 278 | 42.406 | 43.350 | 61.407 | 0.00 | 0.00 |
| ATOM | 4170 | HG13 | VAL | X | 278 | 42.611 | 44.915 | 62.389 | 0.00 | 0.00 |
| ATOM | 4171 | CG2  | VAL | X | 278 | 45.370 | 45.132 | 61.520 | 0.00 | 0.00 |
| ATOM | 4172 | HG21 | VAL | X | 278 | 45.290 | 45.815 | 62.365 | 0.00 | 0.00 |
| ATOM | 4173 | HG22 | VAL | X | 278 | 46.386 | 44.740 | 61.497 | 0.00 | 0.00 |
| ATOM | 4174 | HG23 | VAL | X | 278 | 45.158 | 45.739 | 60.639 | 0.00 | 0.00 |
| ATOM | 4175 | C    | VAL | X | 278 | 46.084 | 42.432 | 62.627 | 0.00 | 0.00 |
| ATOM | 4176 | O    | VAL | X | 278 | 46.281 | 41.492 | 61.884 | 0.00 | 0.00 |
| ATOM | 4177 | N    | ASN | X | 279 | 46.999 | 42.727 | 63.543 | 0.00 | 0.00 |
| ATOM | 4178 | H    | ASN | X | 279 | 46.764 | 43.332 | 64.317 | 0.00 | 0.00 |
| ATOM | 4179 | CA   | ASN | X | 279 | 48.301 | 42.060 | 63.634 | 0.00 | 0.00 |
| ATOM | 4180 | HA   | ASN | X | 279 | 48.740 | 41.988 | 62.639 | 0.00 | 0.00 |
| ATOM | 4181 | CB   | ASN | X | 279 | 49.258 | 42.792 | 64.586 | 0.00 | 0.00 |
| ATOM | 4182 | HB2  | ASN | X | 279 | 49.484 | 43.755 | 64.127 | 0.00 | 0.00 |
| ATOM | 4183 | HB3  | ASN | X | 279 | 48.859 | 42.897 | 65.595 | 0.00 | 0.00 |
| ATOM | 4184 | CG   | ASN | X | 279 | 50.646 | 42.151 | 64.583 | 0.00 | 0.00 |
| ATOM | 4185 | OD1  | ASN | X | 279 | 50.918 | 41.340 | 65.443 | 0.00 | 0.00 |
| ATOM | 4186 | ND2  | ASN | X | 279 | 51.544 | 42.529 | 63.658 | 0.00 | 0.00 |
| ATOM | 4187 | HD21 | ASN | X | 279 | 52.467 | 42.133 | 63.765 | 0.00 | 0.00 |
| ATOM | 4188 | HD22 | ASN | X | 279 | 51.385 | 43.297 | 63.022 | 0.00 | 0.00 |
| ATOM | 4189 | C    | ASN | X | 279 | 48.057 | 40.580 | 64.093 | 0.00 | 0.00 |
| ATOM | 4190 | O    | ASN | X | 279 | 48.517 | 39.639 | 63.398 | 0.00 | 0.00 |
| ATOM | 4191 | N    | HIE | X | 280 | 47.273 | 40.413 | 65.162 | 0.00 | 0.00 |
| ATOM | 4192 | H    | HIE | X | 280 | 46.726 | 41.165 | 65.557 | 0.00 | 0.00 |
| ATOM | 4193 | CA   | HIE | X | 280 | 46.908 | 39.067 | 65.624 | 0.00 | 0.00 |
| ATOM | 4194 | HA   | HIE | X | 280 | 47.821 | 38.479 | 65.725 | 0.00 | 0.00 |
| ATOM | 4195 | CB   | HIE | X | 280 | 46.309 | 39.098 | 67.015 | 0.00 | 0.00 |
| ATOM | 4196 | HB2  | HIE | X | 280 | 45.406 | 39.704 | 66.932 | 0.00 | 0.00 |
| ATOM | 4197 | HB3  | HIE | X | 280 | 46.072 | 38.087 | 67.346 | 0.00 | 0.00 |
| ATOM | 4198 | CG   | HIE | X | 280 | 47.212 | 39.612 | 68.159 | 0.00 | 0.00 |
| ATOM | 4199 | ND1  | HIE | X | 280 | 48.569 | 39.402 | 68.282 | 0.00 | 0.00 |
| ATOM | 4200 | CE1  | HIE | X | 280 | 48.954 | 39.787 | 69.541 | 0.00 | 0.00 |
| ATOM | 4201 | HE1  | HIE | X | 280 | 49.962 | 39.666 | 69.908 | 0.00 | 0.00 |
| ATOM | 4202 | NE2  | HIE | X | 280 | 47.878 | 40.388 | 70.119 | 0.00 | 0.00 |

|      |      |      |     |   |     |        |        |        |      |      |
|------|------|------|-----|---|-----|--------|--------|--------|------|------|
| ATOM | 4203 | HE2  | HIE | X | 280 | 47.906 | 40.889 | 70.996 | 0.00 | 0.00 |
| ATOM | 4204 | CD2  | HIE | X | 280 | 46.785 | 40.233 | 69.287 | 0.00 | 0.00 |
| ATOM | 4205 | HD2  | HIE | X | 280 | 45.803 | 40.594 | 69.555 | 0.00 | 0.00 |
| ATOM | 4206 | C    | HIE | X | 280 | 46.071 | 38.200 | 64.645 | 0.00 | 0.00 |
| ATOM | 4207 | O    | HIE | X | 280 | 45.874 | 36.968 | 64.853 | 0.00 | 0.00 |
| ATOM | 4208 | N    | GLU | X | 281 | 45.609 | 38.767 | 63.527 | 0.00 | 0.00 |
| ATOM | 4209 | H    | GLU | X | 281 | 45.725 | 39.749 | 63.318 | 0.00 | 0.00 |
| ATOM | 4210 | CA   | GLU | X | 281 | 44.655 | 38.086 | 62.646 | 0.00 | 0.00 |
| ATOM | 4211 | HA   | GLU | X | 281 | 43.681 | 38.019 | 63.131 | 0.00 | 0.00 |
| ATOM | 4212 | CB   | GLU | X | 281 | 44.385 | 38.958 | 61.462 | 0.00 | 0.00 |
| ATOM | 4213 | HB2  | GLU | X | 281 | 44.195 | 39.995 | 61.738 | 0.00 | 0.00 |
| ATOM | 4214 | HB3  | GLU | X | 281 | 45.316 | 38.934 | 60.896 | 0.00 | 0.00 |
| ATOM | 4215 | CG   | GLU | X | 281 | 43.223 | 38.462 | 60.656 | 0.00 | 0.00 |
| ATOM | 4216 | HG2  | GLU | X | 281 | 43.523 | 37.438 | 60.432 | 0.00 | 0.00 |
| ATOM | 4217 | HG3  | GLU | X | 281 | 42.353 | 38.452 | 61.312 | 0.00 | 0.00 |
| ATOM | 4218 | CD   | GLU | X | 281 | 43.055 | 39.193 | 59.317 | 0.00 | 0.00 |
| ATOM | 4219 | OE1  | GLU | X | 281 | 42.818 | 40.438 | 59.365 | 0.00 | 0.00 |
| ATOM | 4220 | OE2  | GLU | X | 281 | 42.982 | 38.522 | 58.278 | 0.00 | 0.00 |
| ATOM | 4221 | C    | GLU | X | 281 | 45.061 | 36.670 | 62.266 | 0.00 | 0.00 |
| ATOM | 4222 | O    | GLU | X | 281 | 44.480 | 35.623 | 62.650 | 0.00 | 0.00 |
| ATOM | 4223 | N    | TRP | X | 282 | 46.120 | 36.551 | 61.456 | 0.00 | 0.00 |
| ATOM | 4224 | H    | TRP | X | 282 | 46.497 | 37.408 | 61.077 | 0.00 | 0.00 |
| ATOM | 4225 | CA   | TRP | X | 282 | 46.627 | 35.292 | 61.049 | 0.00 | 0.00 |
| ATOM | 4226 | HA   | TRP | X | 282 | 45.873 | 34.702 | 60.527 | 0.00 | 0.00 |
| ATOM | 4227 | CB   | TRP | X | 282 | 47.714 | 35.556 | 60.009 | 0.00 | 0.00 |
| ATOM | 4228 | HB2  | TRP | X | 282 | 48.364 | 36.394 | 60.264 | 0.00 | 0.00 |
| ATOM | 4229 | HB3  | TRP | X | 282 | 48.298 | 34.637 | 59.948 | 0.00 | 0.00 |
| ATOM | 4230 | CG   | TRP | X | 282 | 47.218 | 35.646 | 58.611 | 0.00 | 0.00 |
| ATOM | 4231 | CD1  | TRP | X | 282 | 46.062 | 36.363 | 58.247 | 0.00 | 0.00 |
| ATOM | 4232 | HD1  | TRP | X | 282 | 45.377 | 36.851 | 58.926 | 0.00 | 0.00 |
| ATOM | 4233 | NE1  | TRP | X | 282 | 45.998 | 36.360 | 56.847 | 0.00 | 0.00 |
| ATOM | 4234 | HE1  | TRP | X | 282 | 45.266 | 36.843 | 56.346 | 0.00 | 0.00 |
| ATOM | 4235 | CE2  | TRP | X | 282 | 47.192 | 35.830 | 56.259 | 0.00 | 0.00 |
| ATOM | 4236 | CZ2  | TRP | X | 282 | 47.472 | 35.706 | 54.876 | 0.00 | 0.00 |
| ATOM | 4237 | HZ2  | TRP | X | 282 | 46.765 | 35.882 | 54.079 | 0.00 | 0.00 |
| ATOM | 4238 | CH2  | TRP | X | 282 | 48.682 | 35.059 | 54.675 | 0.00 | 0.00 |
| ATOM | 4239 | HH2  | TRP | X | 282 | 48.996 | 34.910 | 53.653 | 0.00 | 0.00 |
| ATOM | 4240 | CZ3  | TRP | X | 282 | 49.509 | 34.639 | 55.693 | 0.00 | 0.00 |
| ATOM | 4241 | HZ3  | TRP | X | 282 | 50.376 | 34.049 | 55.438 | 0.00 | 0.00 |
| ATOM | 4242 | CE3  | TRP | X | 282 | 49.232 | 34.879 | 57.052 | 0.00 | 0.00 |
| ATOM | 4243 | HE3  | TRP | X | 282 | 49.890 | 34.618 | 57.868 | 0.00 | 0.00 |
| ATOM | 4244 | CD2  | TRP | X | 282 | 47.956 | 35.498 | 57.370 | 0.00 | 0.00 |
| ATOM | 4245 | C    | TRP | X | 282 | 47.144 | 34.414 | 62.176 | 0.00 | 0.00 |
| ATOM | 4246 | O    | TRP | X | 282 | 47.129 | 33.231 | 61.852 | 0.00 | 0.00 |
| ATOM | 4247 | N    | HIE | X | 283 | 47.204 | 34.771 | 63.507 | 0.00 | 0.00 |
| ATOM | 4248 | H    | HIE | X | 283 | 47.170 | 35.741 | 63.785 | 0.00 | 0.00 |
| ATOM | 4249 | CA   | HIE | X | 283 | 47.244 | 33.849 | 64.612 | 0.00 | 0.00 |
| ATOM | 4250 | HA   | HIE | X | 283 | 48.079 | 33.177 | 64.409 | 0.00 | 0.00 |
| ATOM | 4251 | CB   | HIE | X | 283 | 47.550 | 34.510 | 65.939 | 0.00 | 0.00 |
| ATOM | 4252 | HB2  | HIE | X | 283 | 48.199 | 35.364 | 65.748 | 0.00 | 0.00 |
| ATOM | 4253 | HB3  | HIE | X | 283 | 46.602 | 34.826 | 66.376 | 0.00 | 0.00 |
| ATOM | 4254 | CG   | HIE | X | 283 | 48.418 | 33.857 | 66.892 | 0.00 | 0.00 |
| ATOM | 4255 | ND1  | HIE | X | 283 | 49.332 | 32.897 | 66.568 | 0.00 | 0.00 |
| ATOM | 4256 | CE1  | HIE | X | 283 | 50.107 | 32.693 | 67.593 | 0.00 | 0.00 |
| ATOM | 4257 | HE1  | HIE | X | 283 | 50.942 | 32.014 | 67.682 | 0.00 | 0.00 |
| ATOM | 4258 | NE2  | HIE | X | 283 | 49.752 | 33.558 | 68.556 | 0.00 | 0.00 |
| ATOM | 4259 | HE2  | HIE | X | 283 | 50.342 | 33.731 | 69.357 | 0.00 | 0.00 |
| ATOM | 4260 | CD2  | HIE | X | 283 | 48.661 | 34.224 | 68.231 | 0.00 | 0.00 |
| ATOM | 4261 | HD2  | HIE | X | 283 | 48.173 | 34.936 | 68.880 | 0.00 | 0.00 |
| ATOM | 4262 | C    | HIE | X | 283 | 45.955 | 32.951 | 64.602 | 0.00 | 0.00 |
| ATOM | 4263 | O    | HIE | X | 283 | 46.087 | 31.857 | 65.165 | 0.00 | 0.00 |
| ATOM | 4264 | N    | VAL | X | 284 | 44.825 | 33.305 | 63.934 | 0.00 | 0.00 |
| ATOM | 4265 | H    | VAL | X | 284 | 44.958 | 34.204 | 63.492 | 0.00 | 0.00 |
| ATOM | 4266 | CA   | VAL | X | 284 | 43.589 | 32.532 | 63.817 | 0.00 | 0.00 |
| ATOM | 4267 | HA   | VAL | X | 284 | 43.659 | 31.488 | 64.123 | 0.00 | 0.00 |
| ATOM | 4268 | CB   | VAL | X | 284 | 42.434 | 33.142 | 64.720 | 0.00 | 0.00 |
| ATOM | 4269 | HB   | VAL | X | 284 | 41.557 | 32.499 | 64.649 | 0.00 | 0.00 |
| ATOM | 4270 | CG1  | VAL | X | 284 | 43.045 | 33.047 | 66.188 | 0.00 | 0.00 |
| ATOM | 4271 | HG11 | VAL | X | 284 | 43.453 | 32.054 | 66.376 | 0.00 | 0.00 |
| ATOM | 4272 | HG12 | VAL | X | 284 | 43.744 | 33.868 | 66.347 | 0.00 | 0.00 |

|      |      |      |     |   |     |        |        |        |      |      |
|------|------|------|-----|---|-----|--------|--------|--------|------|------|
| ATOM | 4273 | HG13 | VAL | X | 284 | 42.178 | 33.342 | 66.780 | 0.00 | 0.00 |
| ATOM | 4274 | CG2  | VAL | X | 284 | 42.043 | 34.584 | 64.407 | 0.00 | 0.00 |
| ATOM | 4275 | HG21 | VAL | X | 284 | 42.905 | 35.207 | 64.648 | 0.00 | 0.00 |
| ATOM | 4276 | HG22 | VAL | X | 284 | 41.920 | 34.649 | 63.326 | 0.00 | 0.00 |
| ATOM | 4277 | HG23 | VAL | X | 284 | 41.135 | 34.962 | 64.876 | 0.00 | 0.00 |
| ATOM | 4278 | C    | VAL | X | 284 | 43.172 | 32.343 | 62.312 | 0.00 | 0.00 |
| ATOM | 4279 | O    | VAL | X | 284 | 42.001 | 32.166 | 61.927 | 0.00 | 0.00 |
| ATOM | 4280 | N    | LEU | X | 285 | 44.179 | 32.158 | 61.521 | 0.00 | 0.00 |
| ATOM | 4281 | H    | LEU | X | 285 | 45.136 | 32.210 | 61.840 | 0.00 | 0.00 |
| ATOM | 4282 | CA   | LEU | X | 285 | 44.102 | 31.439 | 60.187 | 0.00 | 0.00 |
| ATOM | 4283 | HA   | LEU | X | 285 | 43.234 | 31.826 | 59.654 | 0.00 | 0.00 |
| ATOM | 4284 | CB   | LEU | X | 285 | 45.500 | 31.718 | 59.500 | 0.00 | 0.00 |
| ATOM | 4285 | HB2  | LEU | X | 285 | 45.740 | 32.776 | 59.604 | 0.00 | 0.00 |
| ATOM | 4286 | HB3  | LEU | X | 285 | 46.263 | 31.170 | 60.053 | 0.00 | 0.00 |
| ATOM | 4287 | CG   | LEU | X | 285 | 45.726 | 31.349 | 57.980 | 0.00 | 0.00 |
| ATOM | 4288 | HG   | LEU | X | 285 | 45.426 | 30.338 | 57.704 | 0.00 | 0.00 |
| ATOM | 4289 | CD1  | LEU | X | 285 | 44.962 | 32.296 | 57.113 | 0.00 | 0.00 |
| ATOM | 4290 | HD11 | LEU | X | 285 | 45.234 | 32.099 | 56.076 | 0.00 | 0.00 |
| ATOM | 4291 | HD12 | LEU | X | 285 | 43.893 | 32.158 | 57.278 | 0.00 | 0.00 |
| ATOM | 4292 | HD13 | LEU | X | 285 | 45.221 | 33.348 | 57.234 | 0.00 | 0.00 |
| ATOM | 4293 | CD2  | LEU | X | 285 | 47.274 | 31.534 | 57.789 | 0.00 | 0.00 |
| ATOM | 4294 | HD21 | LEU | X | 285 | 47.573 | 32.542 | 58.078 | 0.00 | 0.00 |
| ATOM | 4295 | HD22 | LEU | X | 285 | 47.782 | 30.861 | 58.480 | 0.00 | 0.00 |
| ATOM | 4296 | HD23 | LEU | X | 285 | 47.590 | 31.402 | 56.754 | 0.00 | 0.00 |
| ATOM | 4297 | C    | LEU | X | 285 | 43.894 | 29.953 | 60.380 | 0.00 | 0.00 |
| ATOM | 4298 | O    | LEU | X | 285 | 44.394 | 29.446 | 61.450 | 0.00 | 0.00 |
| ATOM | 4299 | N    | PRO | X | 286 | 43.234 | 29.208 | 59.538 | 0.00 | 0.00 |
| ATOM | 4300 | CD   | PRO | X | 286 | 42.430 | 29.759 | 58.461 | 0.00 | 0.00 |
| ATOM | 4301 | HD2  | PRO | X | 286 | 42.921 | 30.474 | 57.802 | 0.00 | 0.00 |
| ATOM | 4302 | HD3  | PRO | X | 286 | 41.566 | 30.277 | 58.878 | 0.00 | 0.00 |
| ATOM | 4303 | CG   | PRO | X | 286 | 42.015 | 28.556 | 57.687 | 0.00 | 0.00 |
| ATOM | 4304 | HG2  | PRO | X | 286 | 42.797 | 28.408 | 56.942 | 0.00 | 0.00 |
| ATOM | 4305 | HG3  | PRO | X | 286 | 41.052 | 28.734 | 57.209 | 0.00 | 0.00 |
| ATOM | 4306 | CB   | PRO | X | 286 | 41.947 | 27.402 | 58.737 | 0.00 | 0.00 |
| ATOM | 4307 | HB2  | PRO | X | 286 | 41.815 | 26.452 | 58.219 | 0.00 | 0.00 |
| ATOM | 4308 | HB3  | PRO | X | 286 | 41.064 | 27.529 | 59.363 | 0.00 | 0.00 |
| ATOM | 4309 | CA   | PRO | X | 286 | 43.184 | 27.695 | 59.572 | 0.00 | 0.00 |
| ATOM | 4310 | HA   | PRO | X | 286 | 43.095 | 27.224 | 60.551 | 0.00 | 0.00 |
| ATOM | 4311 | C    | PRO | X | 286 | 44.499 | 27.184 | 58.931 | 0.00 | 0.00 |
| ATOM | 4312 | O    | PRO | X | 286 | 44.942 | 27.570 | 57.844 | 0.00 | 0.00 |
| ATOM | 4313 | N    | GLN | X | 287 | 45.072 | 26.271 | 59.703 | 0.00 | 0.00 |
| ATOM | 4314 | H    | GLN | X | 287 | 44.642 | 25.904 | 60.541 | 0.00 | 0.00 |
| ATOM | 4315 | CA   | GLN | X | 287 | 46.459 | 25.925 | 59.556 | 0.00 | 0.00 |
| ATOM | 4316 | HA   | GLN | X | 287 | 47.006 | 26.657 | 58.961 | 0.00 | 0.00 |
| ATOM | 4317 | CB   | GLN | X | 287 | 47.125 | 25.925 | 60.923 | 0.00 | 0.00 |
| ATOM | 4318 | HB2  | GLN | X | 287 | 46.674 | 25.192 | 61.592 | 0.00 | 0.00 |
| ATOM | 4319 | HB3  | GLN | X | 287 | 48.190 | 25.693 | 60.879 | 0.00 | 0.00 |
| ATOM | 4320 | CG   | GLN | X | 287 | 47.025 | 27.308 | 61.540 | 0.00 | 0.00 |
| ATOM | 4321 | HG2  | GLN | X | 287 | 46.021 | 27.599 | 61.848 | 0.00 | 0.00 |
| ATOM | 4322 | HG3  | GLN | X | 287 | 47.497 | 27.242 | 62.521 | 0.00 | 0.00 |
| ATOM | 4323 | CD   | GLN | X | 287 | 47.634 | 28.510 | 60.791 | 0.00 | 0.00 |
| ATOM | 4324 | OE1  | GLN | X | 287 | 48.141 | 28.549 | 59.763 | 0.00 | 0.00 |
| ATOM | 4325 | NE2  | GLN | X | 287 | 47.683 | 29.642 | 61.496 | 0.00 | 0.00 |
| ATOM | 4326 | HE21 | GLN | X | 287 | 48.126 | 30.459 | 61.100 | 0.00 | 0.00 |
| ATOM | 4327 | HE22 | GLN | X | 287 | 47.343 | 29.715 | 62.444 | 0.00 | 0.00 |
| ATOM | 4328 | C    | GLN | X | 287 | 46.742 | 24.560 | 58.900 | 0.00 | 0.00 |
| ATOM | 4329 | O    | GLN | X | 287 | 45.893 | 23.696 | 58.943 | 0.00 | 0.00 |
| ATOM | 4330 | N    | GLU | X | 288 | 47.884 | 24.420 | 58.237 | 0.00 | 0.00 |
| ATOM | 4331 | H    | GLU | X | 288 | 48.568 | 25.161 | 58.289 | 0.00 | 0.00 |
| ATOM | 4332 | CA   | GLU | X | 288 | 48.355 | 23.311 | 57.437 | 0.00 | 0.00 |
| ATOM | 4333 | HA   | GLU | X | 288 | 49.368 | 23.528 | 57.101 | 0.00 | 0.00 |
| ATOM | 4334 | CB   | GLU | X | 288 | 48.429 | 22.027 | 58.341 | 0.00 | 0.00 |
| ATOM | 4335 | HB2  | GLU | X | 288 | 47.488 | 21.641 | 58.735 | 0.00 | 0.00 |
| ATOM | 4336 | HB3  | GLU | X | 288 | 48.746 | 21.134 | 57.803 | 0.00 | 0.00 |
| ATOM | 4337 | CG   | GLU | X | 288 | 49.507 | 22.338 | 59.321 | 0.00 | 0.00 |
| ATOM | 4338 | HG2  | GLU | X | 288 | 50.149 | 23.085 | 58.854 | 0.00 | 0.00 |
| ATOM | 4339 | HG3  | GLU | X | 288 | 49.038 | 22.833 | 60.171 | 0.00 | 0.00 |
| ATOM | 4340 | CD   | GLU | X | 288 | 50.258 | 21.093 | 59.800 | 0.00 | 0.00 |
| ATOM | 4341 | OE1  | GLU | X | 288 | 49.916 | 20.529 | 60.844 | 0.00 | 0.00 |
| ATOM | 4342 | OE2  | GLU | X | 288 | 51.237 | 20.699 | 59.135 | 0.00 | 0.00 |

|      |      |      |     |   |     |        |        |        |      |      |
|------|------|------|-----|---|-----|--------|--------|--------|------|------|
| ATOM | 4343 | C    | GLU | X | 288 | 47.520 | 22.975 | 56.186 | 0.00 | 0.00 |
| ATOM | 4344 | O    | GLU | X | 288 | 48.033 | 22.441 | 55.245 | 0.00 | 0.00 |
| ATOM | 4345 | N    | SER | X | 289 | 46.310 | 23.469 | 56.125 | 0.00 | 0.00 |
| ATOM | 4346 | H    | SER | X | 289 | 46.049 | 23.967 | 56.964 | 0.00 | 0.00 |
| ATOM | 4347 | CA   | SER | X | 289 | 45.552 | 23.645 | 54.836 | 0.00 | 0.00 |
| ATOM | 4348 | HA   | SER | X | 289 | 45.616 | 22.783 | 54.171 | 0.00 | 0.00 |
| ATOM | 4349 | CB   | SER | X | 289 | 44.073 | 23.846 | 55.077 | 0.00 | 0.00 |
| ATOM | 4350 | HB2  | SER | X | 289 | 43.991 | 24.708 | 55.738 | 0.00 | 0.00 |
| ATOM | 4351 | HB3  | SER | X | 289 | 43.504 | 23.997 | 54.160 | 0.00 | 0.00 |
| ATOM | 4352 | OG   | SER | X | 289 | 43.549 | 22.806 | 55.842 | 0.00 | 0.00 |
| ATOM | 4353 | HG   | SER | X | 289 | 42.609 | 22.810 | 55.648 | 0.00 | 0.00 |
| ATOM | 4354 | C    | SER | X | 289 | 46.067 | 24.889 | 54.030 | 0.00 | 0.00 |
| ATOM | 4355 | O    | SER | X | 289 | 45.865 | 26.030 | 54.434 | 0.00 | 0.00 |
| ATOM | 4356 | N    | VAL | X | 290 | 46.664 | 24.655 | 52.880 | 0.00 | 0.00 |
| ATOM | 4357 | H    | VAL | X | 290 | 46.604 | 23.686 | 52.599 | 0.00 | 0.00 |
| ATOM | 4358 | CA   | VAL | X | 290 | 47.137 | 25.683 | 51.908 | 0.00 | 0.00 |
| ATOM | 4359 | HA   | VAL | X | 290 | 47.626 | 26.482 | 52.465 | 0.00 | 0.00 |
| ATOM | 4360 | CB   | VAL | X | 290 | 48.014 | 25.070 | 50.805 | 0.00 | 0.00 |
| ATOM | 4361 | HB   | VAL | X | 290 | 47.354 | 24.285 | 50.437 | 0.00 | 0.00 |
| ATOM | 4362 | CG1  | VAL | X | 290 | 48.341 | 26.090 | 49.618 | 0.00 | 0.00 |
| ATOM | 4363 | HG11 | VAL | X | 290 | 49.174 | 25.682 | 49.046 | 0.00 | 0.00 |
| ATOM | 4364 | HG12 | VAL | X | 290 | 47.509 | 26.264 | 48.936 | 0.00 | 0.00 |
| ATOM | 4365 | HG13 | VAL | X | 290 | 48.670 | 26.974 | 50.164 | 0.00 | 0.00 |
| ATOM | 4366 | CG2  | VAL | X | 290 | 49.314 | 24.393 | 51.296 | 0.00 | 0.00 |
| ATOM | 4367 | HG21 | VAL | X | 290 | 49.101 | 23.495 | 51.875 | 0.00 | 0.00 |
| ATOM | 4368 | HG22 | VAL | X | 290 | 49.861 | 24.002 | 50.438 | 0.00 | 0.00 |
| ATOM | 4369 | HG23 | VAL | X | 290 | 49.855 | 25.161 | 51.850 | 0.00 | 0.00 |
| ATOM | 4370 | C    | VAL | X | 290 | 45.863 | 26.350 | 51.325 | 0.00 | 0.00 |
| ATOM | 4371 | O    | VAL | X | 290 | 44.869 | 25.679 | 51.090 | 0.00 | 0.00 |
| ATOM | 4372 | N    | PHE | X | 291 | 46.002 | 27.630 | 50.961 | 0.00 | 0.00 |
| ATOM | 4373 | H    | PHE | X | 291 | 46.936 | 27.969 | 51.143 | 0.00 | 0.00 |
| ATOM | 4374 | CA   | PHE | X | 291 | 45.083 | 28.450 | 50.128 | 0.00 | 0.00 |
| ATOM | 4375 | HA   | PHE | X | 291 | 45.491 | 29.460 | 50.097 | 0.00 | 0.00 |
| ATOM | 4376 | CB   | PHE | X | 291 | 45.146 | 27.954 | 48.692 | 0.00 | 0.00 |
| ATOM | 4377 | HB2  | PHE | X | 291 | 46.134 | 28.068 | 48.246 | 0.00 | 0.00 |
| ATOM | 4378 | HB3  | PHE | X | 291 | 44.910 | 26.890 | 48.703 | 0.00 | 0.00 |
| ATOM | 4379 | CG   | PHE | X | 291 | 44.336 | 28.624 | 47.581 | 0.00 | 0.00 |
| ATOM | 4380 | CD1  | PHE | X | 291 | 43.781 | 29.861 | 47.749 | 0.00 | 0.00 |
| ATOM | 4381 | HD1  | PHE | X | 291 | 43.856 | 30.388 | 48.689 | 0.00 | 0.00 |
| ATOM | 4382 | CE1  | PHE | X | 291 | 43.102 | 30.503 | 46.687 | 0.00 | 0.00 |
| ATOM | 4383 | HE1  | PHE | X | 291 | 42.646 | 31.457 | 46.905 | 0.00 | 0.00 |
| ATOM | 4384 | CZ   | PHE | X | 291 | 42.950 | 29.898 | 45.425 | 0.00 | 0.00 |
| ATOM | 4385 | HZ   | PHE | X | 291 | 42.474 | 30.403 | 44.597 | 0.00 | 0.00 |
| ATOM | 4386 | CE2  | PHE | X | 291 | 43.519 | 28.631 | 45.262 | 0.00 | 0.00 |
| ATOM | 4387 | HE2  | PHE | X | 291 | 43.409 | 28.151 | 44.301 | 0.00 | 0.00 |
| ATOM | 4388 | CD2  | PHE | X | 291 | 44.276 | 28.034 | 46.293 | 0.00 | 0.00 |
| ATOM | 4389 | HD2  | PHE | X | 291 | 44.691 | 27.043 | 46.188 | 0.00 | 0.00 |
| ATOM | 4390 | C    | PHE | X | 291 | 43.636 | 28.514 | 50.777 | 0.00 | 0.00 |
| ATOM | 4391 | O    | PHE | X | 291 | 42.617 | 28.153 | 50.174 | 0.00 | 0.00 |
| ATOM | 4392 | N    | ARG | X | 292 | 43.603 | 28.792 | 52.093 | 0.00 | 0.00 |
| ATOM | 4393 | H    | ARG | X | 292 | 44.508 | 28.928 | 52.519 | 0.00 | 0.00 |
| ATOM | 4394 | CA   | ARG | X | 292 | 42.432 | 29.095 | 52.943 | 0.00 | 0.00 |
| ATOM | 4395 | HA   | ARG | X | 292 | 41.567 | 29.339 | 52.326 | 0.00 | 0.00 |
| ATOM | 4396 | CB   | ARG | X | 292 | 42.211 | 27.802 | 53.731 | 0.00 | 0.00 |
| ATOM | 4397 | HB2  | ARG | X | 292 | 42.606 | 26.957 | 53.167 | 0.00 | 0.00 |
| ATOM | 4398 | HB3  | ARG | X | 292 | 42.718 | 27.895 | 54.691 | 0.00 | 0.00 |
| ATOM | 4399 | CG   | ARG | X | 292 | 40.728 | 27.523 | 53.880 | 0.00 | 0.00 |
| ATOM | 4400 | HG2  | ARG | X | 292 | 40.525 | 27.273 | 54.921 | 0.00 | 0.00 |
| ATOM | 4401 | HG3  | ARG | X | 292 | 40.095 | 28.371 | 53.618 | 0.00 | 0.00 |
| ATOM | 4402 | CD   | ARG | X | 292 | 40.271 | 26.294 | 52.973 | 0.00 | 0.00 |
| ATOM | 4403 | HD2  | ARG | X | 292 | 40.738 | 25.414 | 53.415 | 0.00 | 0.00 |
| ATOM | 4404 | HD3  | ARG | X | 292 | 39.204 | 26.175 | 53.165 | 0.00 | 0.00 |
| ATOM | 4405 | NE   | ARG | X | 292 | 40.716 | 26.503 | 51.567 | 0.00 | 0.00 |
| ATOM | 4406 | HE   | ARG | X | 292 | 41.570 | 27.033 | 51.460 | 0.00 | 0.00 |
| ATOM | 4407 | CZ   | ARG | X | 292 | 40.521 | 25.707 | 50.522 | 0.00 | 0.00 |
| ATOM | 4408 | NH1  | ARG | X | 292 | 39.587 | 24.761 | 50.518 | 0.00 | 0.00 |
| ATOM | 4409 | HH11 | ARG | X | 292 | 39.011 | 24.601 | 51.333 | 0.00 | 0.00 |
| ATOM | 4410 | HH12 | ARG | X | 292 | 39.501 | 24.276 | 49.636 | 0.00 | 0.00 |
| ATOM | 4411 | NH2  | ARG | X | 292 | 41.113 | 25.946 | 49.366 | 0.00 | 0.00 |
| ATOM | 4412 | HH21 | ARG | X | 292 | 41.687 | 26.765 | 49.220 | 0.00 | 0.00 |



|      |      |      |     |   |     |        |        |        |      |      |
|------|------|------|-----|---|-----|--------|--------|--------|------|------|
| ATOM | 4413 | HH22 | ARG | X | 292 | 41.046 | 25.265 | 48.624 | 0.00 | 0.00 |
| ATOM | 4414 | C    | ARG | X | 292 | 42.800 | 30.271 | 53.813 | 0.00 | 0.00 |
| ATOM | 4415 | O    | ARG | X | 292 | 44.028 | 30.485 | 53.986 | 0.00 | 0.00 |
| ATOM | 4416 | N    | PHE | X | 293 | 41.802 | 31.097 | 54.172 | 0.00 | 0.00 |
| ATOM | 4417 | H    | PHE | X | 293 | 40.826 | 30.898 | 54.005 | 0.00 | 0.00 |
| ATOM | 4418 | CA   | PHE | X | 293 | 42.105 | 32.403 | 54.734 | 0.00 | 0.00 |
| ATOM | 4419 | HA   | PHE | X | 293 | 43.174 | 32.546 | 54.894 | 0.00 | 0.00 |
| ATOM | 4420 | CB   | PHE | X | 293 | 41.639 | 33.464 | 53.689 | 0.00 | 0.00 |
| ATOM | 4421 | HB2  | PHE | X | 293 | 40.578 | 33.307 | 53.496 | 0.00 | 0.00 |
| ATOM | 4422 | HB3  | PHE | X | 293 | 41.867 | 34.441 | 54.116 | 0.00 | 0.00 |
| ATOM | 4423 | CG   | PHE | X | 293 | 42.301 | 33.296 | 52.322 | 0.00 | 0.00 |
| ATOM | 4424 | CD1  | PHE | X | 293 | 43.676 | 33.655 | 52.199 | 0.00 | 0.00 |
| ATOM | 4425 | HD1  | PHE | X | 293 | 44.212 | 34.055 | 53.047 | 0.00 | 0.00 |
| ATOM | 4426 | CE1  | PHE | X | 293 | 44.355 | 33.451 | 50.984 | 0.00 | 0.00 |
| ATOM | 4427 | HE1  | PHE | X | 293 | 45.419 | 33.631 | 51.011 | 0.00 | 0.00 |
| ATOM | 4428 | CZ   | PHE | X | 293 | 43.659 | 33.047 | 49.799 | 0.00 | 0.00 |
| ATOM | 4429 | HZ   | PHE | X | 293 | 44.155 | 33.007 | 48.841 | 0.00 | 0.00 |
| ATOM | 4430 | CE2  | PHE | X | 293 | 42.279 | 32.856 | 49.911 | 0.00 | 0.00 |
| ATOM | 4431 | HE2  | PHE | X | 293 | 41.717 | 32.317 | 49.162 | 0.00 | 0.00 |
| ATOM | 4432 | CD2  | PHE | X | 293 | 41.615 | 32.974 | 51.156 | 0.00 | 0.00 |
| ATOM | 4433 | HD2  | PHE | X | 293 | 40.557 | 32.760 | 51.192 | 0.00 | 0.00 |
| ATOM | 4434 | C    | PHE | X | 293 | 41.512 | 32.624 | 56.110 | 0.00 | 0.00 |
| ATOM | 4435 | O    | PHE | X | 293 | 40.686 | 31.870 | 56.584 | 0.00 | 0.00 |
| ATOM | 4436 | N    | SER | X | 294 | 41.940 | 33.686 | 56.766 | 0.00 | 0.00 |
| ATOM | 4437 | H    | SER | X | 294 | 42.529 | 34.356 | 56.293 | 0.00 | 0.00 |
| ATOM | 4438 | CA   | SER | X | 294 | 41.647 | 34.209 | 58.151 | 0.00 | 0.00 |
| ATOM | 4439 | HA   | SER | X | 294 | 41.888 | 33.493 | 58.936 | 0.00 | 0.00 |
| ATOM | 4440 | CB   | SER | X | 294 | 42.589 | 35.431 | 58.492 | 0.00 | 0.00 |
| ATOM | 4441 | HB2  | SER | X | 294 | 41.982 | 35.984 | 59.209 | 0.00 | 0.00 |
| ATOM | 4442 | HB3  | SER | X | 294 | 43.543 | 35.174 | 58.952 | 0.00 | 0.00 |
| ATOM | 4443 | OG   | SER | X | 294 | 42.692 | 36.180 | 57.302 | 0.00 | 0.00 |
| ATOM | 4444 | HG   | SER | X | 294 | 42.854 | 37.090 | 57.562 | 0.00 | 0.00 |
| ATOM | 4445 | C    | SER | X | 294 | 40.111 | 34.538 | 58.297 | 0.00 | 0.00 |
| ATOM | 4446 | O    | SER | X | 294 | 39.375 | 33.876 | 58.993 | 0.00 | 0.00 |
| ATOM | 4447 | N    | PHE | X | 295 | 39.722 | 35.610 | 57.674 | 0.00 | 0.00 |
| ATOM | 4448 | H    | PHE | X | 295 | 40.469 | 36.013 | 57.126 | 0.00 | 0.00 |
| ATOM | 4449 | CA   | PHE | X | 295 | 38.397 | 36.120 | 57.494 | 0.00 | 0.00 |
| ATOM | 4450 | HA   | PHE | X | 295 | 37.744 | 35.341 | 57.888 | 0.00 | 0.00 |
| ATOM | 4451 | CB   | PHE | X | 295 | 38.159 | 37.333 | 58.344 | 0.00 | 0.00 |
| ATOM | 4452 | HB2  | PHE | X | 295 | 38.802 | 38.160 | 58.043 | 0.00 | 0.00 |
| ATOM | 4453 | HB3  | PHE | X | 295 | 37.106 | 37.579 | 58.212 | 0.00 | 0.00 |
| ATOM | 4454 | CG   | PHE | X | 295 | 38.312 | 37.071 | 59.903 | 0.00 | 0.00 |
| ATOM | 4455 | CD1  | PHE | X | 295 | 37.125 | 36.793 | 60.599 | 0.00 | 0.00 |
| ATOM | 4456 | HD1  | PHE | X | 295 | 36.224 | 36.773 | 60.004 | 0.00 | 0.00 |
| ATOM | 4457 | CE1  | PHE | X | 295 | 37.242 | 36.365 | 61.963 | 0.00 | 0.00 |
| ATOM | 4458 | HE1  | PHE | X | 295 | 36.319 | 36.025 | 62.408 | 0.00 | 0.00 |
| ATOM | 4459 | CZ   | PHE | X | 295 | 38.448 | 36.464 | 62.660 | 0.00 | 0.00 |
| ATOM | 4460 | HZ   | PHE | X | 295 | 38.422 | 36.114 | 63.681 | 0.00 | 0.00 |
| ATOM | 4461 | CE2  | PHE | X | 295 | 39.535 | 36.974 | 61.983 | 0.00 | 0.00 |
| ATOM | 4462 | HE2  | PHE | X | 295 | 40.511 | 36.964 | 62.445 | 0.00 | 0.00 |
| ATOM | 4463 | CD2  | PHE | X | 295 | 39.477 | 37.268 | 60.626 | 0.00 | 0.00 |
| ATOM | 4464 | HD2  | PHE | X | 295 | 40.353 | 37.700 | 60.165 | 0.00 | 0.00 |
| ATOM | 4465 | C    | PHE | X | 295 | 38.081 | 36.287 | 55.973 | 0.00 | 0.00 |
| ATOM | 4466 | O    | PHE | X | 295 | 38.976 | 36.631 | 55.184 | 0.00 | 0.00 |
| ATOM | 4467 | N    | VAL | X | 296 | 36.833 | 35.997 | 55.620 | 0.00 | 0.00 |
| ATOM | 4468 | H    | VAL | X | 296 | 36.190 | 35.797 | 56.372 | 0.00 | 0.00 |
| ATOM | 4469 | CA   | VAL | X | 296 | 36.167 | 35.911 | 54.257 | 0.00 | 0.00 |
| ATOM | 4470 | HA   | VAL | X | 296 | 36.697 | 36.601 | 53.599 | 0.00 | 0.00 |
| ATOM | 4471 | CB   | VAL | X | 296 | 36.371 | 34.480 | 53.611 | 0.00 | 0.00 |
| ATOM | 4472 | HB   | VAL | X | 296 | 35.768 | 34.481 | 52.703 | 0.00 | 0.00 |
| ATOM | 4473 | CG1  | VAL | X | 296 | 37.731 | 34.190 | 53.111 | 0.00 | 0.00 |
| ATOM | 4474 | HG11 | VAL | X | 296 | 37.981 | 35.002 | 52.428 | 0.00 | 0.00 |
| ATOM | 4475 | HG12 | VAL | X | 296 | 38.378 | 34.330 | 53.977 | 0.00 | 0.00 |
| ATOM | 4476 | HG13 | VAL | X | 296 | 38.007 | 33.395 | 52.417 | 0.00 | 0.00 |
| ATOM | 4477 | CG2  | VAL | X | 296 | 35.790 | 33.303 | 54.455 | 0.00 | 0.00 |
| ATOM | 4478 | HG21 | VAL | X | 296 | 36.432 | 33.076 | 55.306 | 0.00 | 0.00 |
| ATOM | 4479 | HG22 | VAL | X | 296 | 34.829 | 33.609 | 54.869 | 0.00 | 0.00 |
| ATOM | 4480 | HG23 | VAL | X | 296 | 35.749 | 32.392 | 53.857 | 0.00 | 0.00 |
| ATOM | 4481 | C    | VAL | X | 296 | 34.678 | 36.211 | 54.365 | 0.00 | 0.00 |
| ATOM | 4482 | O    | VAL | X | 296 | 34.192 | 36.225 | 55.462 | 0.00 | 0.00 |

|      |      |      |     |   |     |        |        |        |      |      |
|------|------|------|-----|---|-----|--------|--------|--------|------|------|
| ATOM | 4483 | N    | PRO | X | 297 | 33.966 | 36.413 | 53.200 | 0.00 | 0.00 |
| ATOM | 4484 | CD   | PRO | X | 297 | 34.511 | 36.656 | 51.865 | 0.00 | 0.00 |
| ATOM | 4485 | HD2  | PRO | X | 297 | 34.709 | 35.686 | 51.409 | 0.00 | 0.00 |
| ATOM | 4486 | HD3  | PRO | X | 297 | 35.452 | 37.206 | 51.856 | 0.00 | 0.00 |
| ATOM | 4487 | CG   | PRO | X | 297 | 33.402 | 37.338 | 51.147 | 0.00 | 0.00 |
| ATOM | 4488 | HG2  | PRO | X | 297 | 33.394 | 37.008 | 50.109 | 0.00 | 0.00 |
| ATOM | 4489 | HG3  | PRO | X | 297 | 33.498 | 38.423 | 51.192 | 0.00 | 0.00 |
| ATOM | 4490 | CB   | PRO | X | 297 | 32.074 | 36.862 | 51.848 | 0.00 | 0.00 |
| ATOM | 4491 | HB2  | PRO | X | 297 | 31.791 | 35.959 | 51.306 | 0.00 | 0.00 |
| ATOM | 4492 | HB3  | PRO | X | 297 | 31.259 | 37.584 | 51.800 | 0.00 | 0.00 |
| ATOM | 4493 | CA   | PRO | X | 297 | 32.534 | 36.489 | 53.322 | 0.00 | 0.00 |
| ATOM | 4494 | HA   | PRO | X | 297 | 32.179 | 37.305 | 53.952 | 0.00 | 0.00 |
| ATOM | 4495 | C    | PRO | X | 297 | 31.846 | 35.266 | 53.876 | 0.00 | 0.00 |
| ATOM | 4496 | O    | PRO | X | 297 | 32.353 | 34.129 | 53.886 | 0.00 | 0.00 |
| ATOM | 4497 | N    | VAL | X | 298 | 30.599 | 35.466 | 54.364 | 0.00 | 0.00 |
| ATOM | 4498 | H    | VAL | X | 298 | 30.233 | 36.404 | 54.286 | 0.00 | 0.00 |
| ATOM | 4499 | CA   | VAL | X | 298 | 29.879 | 34.463 | 55.147 | 0.00 | 0.00 |
| ATOM | 4500 | HA   | VAL | X | 298 | 30.343 | 33.514 | 54.880 | 0.00 | 0.00 |
| ATOM | 4501 | CB   | VAL | X | 298 | 29.961 | 34.841 | 56.719 | 0.00 | 0.00 |
| ATOM | 4502 | HB   | VAL | X | 298 | 29.362 | 34.083 | 57.224 | 0.00 | 0.00 |
| ATOM | 4503 | CG1  | VAL | X | 298 | 31.450 | 34.736 | 57.193 | 0.00 | 0.00 |
| ATOM | 4504 | HG11 | VAL | X | 298 | 32.046 | 35.416 | 56.584 | 0.00 | 0.00 |
| ATOM | 4505 | HG12 | VAL | X | 298 | 31.501 | 34.942 | 58.262 | 0.00 | 0.00 |
| ATOM | 4506 | HG13 | VAL | X | 298 | 31.758 | 33.724 | 56.930 | 0.00 | 0.00 |
| ATOM | 4507 | CG2  | VAL | X | 298 | 29.344 | 36.259 | 57.007 | 0.00 | 0.00 |
| ATOM | 4508 | HG21 | VAL | X | 298 | 29.340 | 36.385 | 58.090 | 0.00 | 0.00 |
| ATOM | 4509 | HG22 | VAL | X | 298 | 29.822 | 37.135 | 56.568 | 0.00 | 0.00 |
| ATOM | 4510 | HG23 | VAL | X | 298 | 28.315 | 36.242 | 56.648 | 0.00 | 0.00 |
| ATOM | 4511 | C    | VAL | X | 298 | 28.436 | 34.421 | 54.662 | 0.00 | 0.00 |
| ATOM | 4512 | O    | VAL | X | 298 | 27.908 | 35.410 | 54.214 | 0.00 | 0.00 |
| ATOM | 4513 | N    | VAL | X | 299 | 27.892 | 33.246 | 54.931 | 0.00 | 0.00 |
| ATOM | 4514 | H    | VAL | X | 299 | 28.492 | 32.553 | 55.354 | 0.00 | 0.00 |
| ATOM | 4515 | CA   | VAL | X | 299 | 26.509 | 32.856 | 54.918 | 0.00 | 0.00 |
| ATOM | 4516 | HA   | VAL | X | 299 | 25.950 | 33.155 | 54.032 | 0.00 | 0.00 |
| ATOM | 4517 | CB   | VAL | X | 299 | 26.344 | 31.338 | 54.984 | 0.00 | 0.00 |
| ATOM | 4518 | HB   | VAL | X | 299 | 26.710 | 30.986 | 55.949 | 0.00 | 0.00 |
| ATOM | 4519 | CG1  | VAL | X | 299 | 24.913 | 30.934 | 54.930 | 0.00 | 0.00 |
| ATOM | 4520 | HG11 | VAL | X | 299 | 24.782 | 29.884 | 55.190 | 0.00 | 0.00 |
| ATOM | 4521 | HG12 | VAL | X | 299 | 24.512 | 31.525 | 55.753 | 0.00 | 0.00 |
| ATOM | 4522 | HG13 | VAL | X | 299 | 24.513 | 31.224 | 53.958 | 0.00 | 0.00 |
| ATOM | 4523 | CG2  | VAL | X | 299 | 27.095 | 30.520 | 53.868 | 0.00 | 0.00 |
| ATOM | 4524 | HG21 | VAL | X | 299 | 26.777 | 29.479 | 53.927 | 0.00 | 0.00 |
| ATOM | 4525 | HG22 | VAL | X | 299 | 26.955 | 30.872 | 52.846 | 0.00 | 0.00 |
| ATOM | 4526 | HG23 | VAL | X | 299 | 28.154 | 30.692 | 54.061 | 0.00 | 0.00 |
| ATOM | 4527 | C    | VAL | X | 299 | 25.872 | 33.571 | 56.139 | 0.00 | 0.00 |
| ATOM | 4528 | O    | VAL | X | 299 | 25.892 | 33.099 | 57.264 | 0.00 | 0.00 |
| ATOM | 4529 | N    | ASP | X | 300 | 25.113 | 34.688 | 55.896 | 0.00 | 0.00 |
| ATOM | 4530 | H    | ASP | X | 300 | 25.091 | 34.945 | 54.919 | 0.00 | 0.00 |
| ATOM | 4531 | CA   | ASP | X | 300 | 24.424 | 35.566 | 56.860 | 0.00 | 0.00 |
| ATOM | 4532 | HA   | ASP | X | 300 | 24.543 | 35.132 | 57.854 | 0.00 | 0.00 |
| ATOM | 4533 | CB   | ASP | X | 300 | 24.862 | 37.030 | 56.683 | 0.00 | 0.00 |
| ATOM | 4534 | HB2  | ASP | X | 300 | 24.358 | 37.625 | 57.444 | 0.00 | 0.00 |
| ATOM | 4535 | HB3  | ASP | X | 300 | 25.896 | 37.036 | 57.027 | 0.00 | 0.00 |
| ATOM | 4536 | CG   | ASP | X | 300 | 24.732 | 37.716 | 55.287 | 0.00 | 0.00 |
| ATOM | 4537 | OD1  | ASP | X | 300 | 24.614 | 36.950 | 54.346 | 0.00 | 0.00 |
| ATOM | 4538 | OD2  | ASP | X | 300 | 25.031 | 38.934 | 55.242 | 0.00 | 0.00 |
| ATOM | 4539 | C    | ASP | X | 300 | 22.929 | 35.477 | 56.636 | 0.00 | 0.00 |
| ATOM | 4540 | O    | ASP | X | 300 | 22.121 | 35.811 | 57.565 | 0.00 | 0.00 |
| ATOM | 4541 | N    | GLY | X | 301 | 22.396 | 35.005 | 55.506 | 0.00 | 0.00 |
| ATOM | 4542 | H    | GLY | X | 301 | 23.026 | 34.738 | 54.763 | 0.00 | 0.00 |
| ATOM | 4543 | CA   | GLY | X | 301 | 20.983 | 34.922 | 55.019 | 0.00 | 0.00 |
| ATOM | 4544 | HA2  | GLY | X | 301 | 20.894 | 34.163 | 54.275 | 0.00 | 0.00 |
| ATOM | 4545 | HA3  | GLY | X | 301 | 20.375 | 34.655 | 55.835 | 0.00 | 0.00 |
| ATOM | 4546 | C    | GLY | X | 301 | 20.469 | 36.294 | 54.523 | 0.00 | 0.00 |
| ATOM | 4547 | O    | GLY | X | 301 | 19.269 | 36.475 | 54.441 | 0.00 | 0.00 |
| ATOM | 4548 | N    | ASP | X | 302 | 21.389 | 37.190 | 54.134 | 0.00 | 0.00 |
| ATOM | 4549 | H    | ASP | X | 302 | 22.342 | 36.858 | 54.107 | 0.00 | 0.00 |
| ATOM | 4550 | CA   | ASP | X | 302 | 21.151 | 38.545 | 53.661 | 0.00 | 0.00 |
| ATOM | 4551 | HA   | ASP | X | 302 | 20.105 | 38.646 | 53.371 | 0.00 | 0.00 |
| ATOM | 4552 | CB   | ASP | X | 302 | 21.329 | 39.588 | 54.843 | 0.00 | 0.00 |

|      |      |      |     |   |     |        |        |        |      |      |
|------|------|------|-----|---|-----|--------|--------|--------|------|------|
| ATOM | 4553 | HB2  | ASP | X | 302 | 20.536 | 39.399 | 55.567 | 0.00 | 0.00 |
| ATOM | 4554 | HB3  | ASP | X | 302 | 22.227 | 39.406 | 55.433 | 0.00 | 0.00 |
| ATOM | 4555 | CG   | ASP | X | 302 | 21.230 | 41.041 | 54.275 | 0.00 | 0.00 |
| ATOM | 4556 | OD1  | ASP | X | 302 | 20.148 | 41.466 | 53.774 | 0.00 | 0.00 |
| ATOM | 4557 | OD2  | ASP | X | 302 | 22.261 | 41.731 | 54.189 | 0.00 | 0.00 |
| ATOM | 4558 | C    | ASP | X | 302 | 21.958 | 38.843 | 52.408 | 0.00 | 0.00 |
| ATOM | 4559 | O    | ASP | X | 302 | 21.499 | 39.152 | 51.325 | 0.00 | 0.00 |
| ATOM | 4560 | N    | PHE | X | 303 | 23.243 | 38.517 | 52.452 | 0.00 | 0.00 |
| ATOM | 4561 | H    | PHE | X | 303 | 23.688 | 38.248 | 53.318 | 0.00 | 0.00 |
| ATOM | 4562 | CA   | PHE | X | 303 | 24.154 | 38.639 | 51.299 | 0.00 | 0.00 |
| ATOM | 4563 | HA   | PHE | X | 303 | 23.666 | 39.274 | 50.560 | 0.00 | 0.00 |
| ATOM | 4564 | CB   | PHE | X | 303 | 25.535 | 39.250 | 51.792 | 0.00 | 0.00 |
| ATOM | 4565 | HB2  | PHE | X | 303 | 25.297 | 40.001 | 52.544 | 0.00 | 0.00 |
| ATOM | 4566 | HB3  | PHE | X | 303 | 26.192 | 38.556 | 52.316 | 0.00 | 0.00 |
| ATOM | 4567 | CG   | PHE | X | 303 | 26.291 | 39.977 | 50.683 | 0.00 | 0.00 |
| ATOM | 4568 | CD1  | PHE | X | 303 | 26.524 | 39.319 | 49.453 | 0.00 | 0.00 |
| ATOM | 4569 | HD1  | PHE | X | 303 | 26.142 | 38.315 | 49.349 | 0.00 | 0.00 |
| ATOM | 4570 | CE1  | PHE | X | 303 | 27.268 | 40.016 | 48.485 | 0.00 | 0.00 |
| ATOM | 4571 | HE1  | PHE | X | 303 | 27.553 | 39.630 | 47.518 | 0.00 | 0.00 |
| ATOM | 4572 | CZ   | PHE | X | 303 | 27.729 | 41.379 | 48.649 | 0.00 | 0.00 |
| ATOM | 4573 | HZ   | PHE | X | 303 | 28.347 | 41.879 | 47.919 | 0.00 | 0.00 |
| ATOM | 4574 | CE2  | PHE | X | 303 | 27.514 | 42.004 | 49.892 | 0.00 | 0.00 |
| ATOM | 4575 | HE2  | PHE | X | 303 | 27.864 | 43.024 | 49.941 | 0.00 | 0.00 |
| ATOM | 4576 | CD2  | PHE | X | 303 | 26.718 | 41.335 | 50.855 | 0.00 | 0.00 |
| ATOM | 4577 | HD2  | PHE | X | 303 | 26.410 | 41.817 | 51.771 | 0.00 | 0.00 |
| ATOM | 4578 | C    | PHE | X | 303 | 24.240 | 37.287 | 50.637 | 0.00 | 0.00 |
| ATOM | 4579 | O    | PHE | X | 303 | 23.932 | 37.094 | 49.428 | 0.00 | 0.00 |
| ATOM | 4580 | N    | LEU | X | 304 | 24.533 | 36.282 | 51.408 | 0.00 | 0.00 |
| ATOM | 4581 | H    | LEU | X | 304 | 24.699 | 36.541 | 52.369 | 0.00 | 0.00 |
| ATOM | 4582 | CA   | LEU | X | 304 | 24.591 | 34.876 | 50.978 | 0.00 | 0.00 |
| ATOM | 4583 | HA   | LEU | X | 304 | 24.294 | 34.697 | 49.945 | 0.00 | 0.00 |
| ATOM | 4584 | CB   | LEU | X | 304 | 26.017 | 34.343 | 51.235 | 0.00 | 0.00 |
| ATOM | 4585 | HB2  | LEU | X | 304 | 26.358 | 34.546 | 52.251 | 0.00 | 0.00 |
| ATOM | 4586 | HB3  | LEU | X | 304 | 26.069 | 33.262 | 51.103 | 0.00 | 0.00 |
| ATOM | 4587 | CG   | LEU | X | 304 | 27.030 | 35.085 | 50.307 | 0.00 | 0.00 |
| ATOM | 4588 | HG   | LEU | X | 304 | 27.107 | 36.137 | 50.581 | 0.00 | 0.00 |
| ATOM | 4589 | CD1  | LEU | X | 304 | 28.437 | 34.544 | 50.491 | 0.00 | 0.00 |
| ATOM | 4590 | HD11 | LEU | X | 304 | 28.779 | 34.857 | 51.478 | 0.00 | 0.00 |
| ATOM | 4591 | HD12 | LEU | X | 304 | 28.358 | 33.459 | 50.425 | 0.00 | 0.00 |
| ATOM | 4592 | HD13 | LEU | X | 304 | 29.191 | 34.843 | 49.763 | 0.00 | 0.00 |
| ATOM | 4593 | CD2  | LEU | X | 304 | 26.680 | 35.068 | 48.862 | 0.00 | 0.00 |
| ATOM | 4594 | HD21 | LEU | X | 304 | 27.287 | 35.854 | 48.412 | 0.00 | 0.00 |
| ATOM | 4595 | HD22 | LEU | X | 304 | 27.035 | 34.153 | 48.387 | 0.00 | 0.00 |
| ATOM | 4596 | HD23 | LEU | X | 304 | 25.637 | 35.095 | 48.545 | 0.00 | 0.00 |
| ATOM | 4597 | C    | LEU | X | 304 | 23.575 | 34.090 | 51.853 | 0.00 | 0.00 |
| ATOM | 4598 | O    | LEU | X | 304 | 23.711 | 33.949 | 53.067 | 0.00 | 0.00 |
| ATOM | 4599 | N    | SER | X | 305 | 22.595 | 33.486 | 51.157 | 0.00 | 0.00 |
| ATOM | 4600 | H    | SER | X | 305 | 22.393 | 33.754 | 50.205 | 0.00 | 0.00 |
| ATOM | 4601 | CA   | SER | X | 305 | 21.571 | 32.720 | 51.841 | 0.00 | 0.00 |
| ATOM | 4602 | HA   | SER | X | 305 | 21.603 | 33.034 | 52.884 | 0.00 | 0.00 |
| ATOM | 4603 | CB   | SER | X | 305 | 20.160 | 33.134 | 51.278 | 0.00 | 0.00 |
| ATOM | 4604 | HB2  | SER | X | 305 | 19.423 | 32.833 | 52.022 | 0.00 | 0.00 |
| ATOM | 4605 | HB3  | SER | X | 305 | 20.127 | 34.218 | 51.172 | 0.00 | 0.00 |
| ATOM | 4606 | OG   | SER | X | 305 | 19.830 | 32.644 | 50.006 | 0.00 | 0.00 |
| ATOM | 4607 | HG   | SER | X | 305 | 19.771 | 31.687 | 50.059 | 0.00 | 0.00 |
| ATOM | 4608 | C    | SER | X | 305 | 21.777 | 31.209 | 51.784 | 0.00 | 0.00 |
| ATOM | 4609 | O    | SER | X | 305 | 20.904 | 30.430 | 52.235 | 0.00 | 0.00 |
| ATOM | 4610 | N    | ASP | X | 306 | 22.908 | 30.773 | 51.227 | 0.00 | 0.00 |
| ATOM | 4611 | H    | ASP | X | 306 | 23.549 | 31.347 | 50.698 | 0.00 | 0.00 |
| ATOM | 4612 | CA   | ASP | X | 306 | 23.355 | 29.392 | 51.343 | 0.00 | 0.00 |
| ATOM | 4613 | HA   | ASP | X | 306 | 23.209 | 29.112 | 52.387 | 0.00 | 0.00 |
| ATOM | 4614 | CB   | ASP | X | 306 | 22.453 | 28.559 | 50.429 | 0.00 | 0.00 |
| ATOM | 4615 | HB2  | ASP | X | 306 | 21.401 | 28.820 | 50.313 | 0.00 | 0.00 |
| ATOM | 4616 | HB3  | ASP | X | 306 | 22.852 | 28.750 | 49.433 | 0.00 | 0.00 |
| ATOM | 4617 | CG   | ASP | X | 306 | 22.524 | 27.066 | 50.810 | 0.00 | 0.00 |
| ATOM | 4618 | OD1  | ASP | X | 306 | 23.210 | 26.733 | 51.763 | 0.00 | 0.00 |
| ATOM | 4619 | OD2  | ASP | X | 306 | 21.876 | 26.285 | 50.074 | 0.00 | 0.00 |
| ATOM | 4620 | C    | ASP | X | 306 | 24.810 | 29.393 | 50.846 | 0.00 | 0.00 |
| ATOM | 4621 | O    | ASP | X | 306 | 25.394 | 30.461 | 50.665 | 0.00 | 0.00 |
| ATOM | 4622 | N    | THR | X | 307 | 25.380 | 28.189 | 50.717 | 0.00 | 0.00 |

|      |      |      |     |   |     |        |        |        |      |      |
|------|------|------|-----|---|-----|--------|--------|--------|------|------|
| ATOM | 4623 | H    | THR | X | 307 | 24.808 | 27.414 | 51.020 | 0.00 | 0.00 |
| ATOM | 4624 | CA   | THR | X | 307 | 26.606 | 27.867 | 49.890 | 0.00 | 0.00 |
| ATOM | 4625 | HA   | THR | X | 307 | 27.473 | 28.233 | 50.441 | 0.00 | 0.00 |
| ATOM | 4626 | CB   | THR | X | 307 | 26.629 | 26.338 | 49.735 | 0.00 | 0.00 |
| ATOM | 4627 | HB   | THR | X | 307 | 25.703 | 26.000 | 49.268 | 0.00 | 0.00 |
| ATOM | 4628 | CG2  | THR | X | 307 | 27.824 | 25.797 | 48.901 | 0.00 | 0.00 |
| ATOM | 4629 | HG21 | THR | X | 307 | 27.771 | 26.346 | 47.961 | 0.00 | 0.00 |
| ATOM | 4630 | HG22 | THR | X | 307 | 28.769 | 25.948 | 49.422 | 0.00 | 0.00 |
| ATOM | 4631 | HG23 | THR | X | 307 | 27.615 | 24.731 | 48.803 | 0.00 | 0.00 |
| ATOM | 4632 | OG1  | THR | X | 307 | 26.522 | 25.768 | 51.021 | 0.00 | 0.00 |
| ATOM | 4633 | HG1  | THR | X | 307 | 25.756 | 25.192 | 51.078 | 0.00 | 0.00 |
| ATOM | 4634 | C    | THR | X | 307 | 26.442 | 28.611 | 48.538 | 0.00 | 0.00 |
| ATOM | 4635 | O    | THR | X | 307 | 25.507 | 28.278 | 47.865 | 0.00 | 0.00 |
| ATOM | 4636 | N    | PRO | X | 308 | 27.342 | 29.477 | 48.068 | 0.00 | 0.00 |
| ATOM | 4637 | CD   | PRO | X | 308 | 28.428 | 30.060 | 48.852 | 0.00 | 0.00 |
| ATOM | 4638 | HD2  | PRO | X | 308 | 28.957 | 29.329 | 49.464 | 0.00 | 0.00 |
| ATOM | 4639 | HD3  | PRO | X | 308 | 28.128 | 30.831 | 49.562 | 0.00 | 0.00 |
| ATOM | 4640 | CG   | PRO | X | 308 | 29.346 | 30.882 | 47.984 | 0.00 | 0.00 |
| ATOM | 4641 | HG2  | PRO | X | 308 | 30.277 | 30.359 | 47.766 | 0.00 | 0.00 |
| ATOM | 4642 | HG3  | PRO | X | 308 | 29.555 | 31.911 | 48.276 | 0.00 | 0.00 |
| ATOM | 4643 | CB   | PRO | X | 308 | 28.481 | 31.132 | 46.744 | 0.00 | 0.00 |
| ATOM | 4644 | HB2  | PRO | X | 308 | 29.005 | 30.941 | 45.807 | 0.00 | 0.00 |
| ATOM | 4645 | HB3  | PRO | X | 308 | 28.127 | 32.163 | 46.713 | 0.00 | 0.00 |
| ATOM | 4646 | CA   | PRO | X | 308 | 27.344 | 30.155 | 46.769 | 0.00 | 0.00 |
| ATOM | 4647 | HA   | PRO | X | 308 | 26.411 | 30.707 | 46.652 | 0.00 | 0.00 |
| ATOM | 4648 | C    | PRO | X | 308 | 27.294 | 29.171 | 45.572 | 0.00 | 0.00 |
| ATOM | 4649 | O    | PRO | X | 308 | 26.683 | 29.470 | 44.583 | 0.00 | 0.00 |
| ATOM | 4650 | N    | GLU | X | 309 | 27.843 | 27.974 | 45.578 | 0.00 | 0.00 |
| ATOM | 4651 | H    | GLU | X | 309 | 28.286 | 27.671 | 46.433 | 0.00 | 0.00 |
| ATOM | 4652 | CA   | GLU | X | 309 | 27.614 | 26.900 | 44.580 | 0.00 | 0.00 |
| ATOM | 4653 | HA   | GLU | X | 309 | 27.931 | 27.097 | 43.556 | 0.00 | 0.00 |
| ATOM | 4654 | CB   | GLU | X | 309 | 28.451 | 25.711 | 45.040 | 0.00 | 0.00 |
| ATOM | 4655 | HB2  | GLU | X | 309 | 29.472 | 26.065 | 45.182 | 0.00 | 0.00 |
| ATOM | 4656 | HB3  | GLU | X | 309 | 28.110 | 25.175 | 45.926 | 0.00 | 0.00 |
| ATOM | 4657 | CG   | GLU | X | 309 | 28.433 | 24.740 | 43.859 | 0.00 | 0.00 |
| ATOM | 4658 | HG2  | GLU | X | 309 | 27.408 | 24.370 | 43.835 | 0.00 | 0.00 |
| ATOM | 4659 | HG3  | GLU | X | 309 | 28.626 | 25.254 | 42.917 | 0.00 | 0.00 |
| ATOM | 4660 | CD   | GLU | X | 309 | 29.326 | 23.530 | 44.034 | 0.00 | 0.00 |
| ATOM | 4661 | OE1  | GLU | X | 309 | 28.763 | 22.450 | 44.361 | 0.00 | 0.00 |
| ATOM | 4662 | OE2  | GLU | X | 309 | 30.563 | 23.594 | 43.928 | 0.00 | 0.00 |
| ATOM | 4663 | C    | GLU | X | 309 | 26.131 | 26.577 | 44.501 | 0.00 | 0.00 |
| ATOM | 4664 | O    | GLU | X | 309 | 25.646 | 26.484 | 43.370 | 0.00 | 0.00 |
| ATOM | 4665 | N    | ALA | X | 310 | 25.359 | 26.451 | 45.597 | 0.00 | 0.00 |
| ATOM | 4666 | H    | ALA | X | 310 | 25.836 | 26.561 | 46.481 | 0.00 | 0.00 |
| ATOM | 4667 | CA   | ALA | X | 310 | 23.917 | 26.176 | 45.631 | 0.00 | 0.00 |
| ATOM | 4668 | HA   | ALA | X | 310 | 23.704 | 25.333 | 44.973 | 0.00 | 0.00 |
| ATOM | 4669 | CB   | ALA | X | 310 | 23.542 | 25.714 | 47.027 | 0.00 | 0.00 |
| ATOM | 4670 | HB1  | ALA | X | 310 | 22.472 | 25.509 | 47.046 | 0.00 | 0.00 |
| ATOM | 4671 | HB2  | ALA | X | 310 | 24.162 | 24.915 | 47.433 | 0.00 | 0.00 |
| ATOM | 4672 | HB3  | ALA | X | 310 | 23.751 | 26.577 | 47.660 | 0.00 | 0.00 |
| ATOM | 4673 | C    | ALA | X | 310 | 23.065 | 27.296 | 45.222 | 0.00 | 0.00 |
| ATOM | 4674 | O    | ALA | X | 310 | 22.191 | 27.047 | 44.406 | 0.00 | 0.00 |
| ATOM | 4675 | N    | LEU | X | 311 | 23.383 | 28.550 | 45.608 | 0.00 | 0.00 |
| ATOM | 4676 | H    | LEU | X | 311 | 24.232 | 28.564 | 46.155 | 0.00 | 0.00 |
| ATOM | 4677 | CA   | LEU | X | 311 | 22.950 | 29.836 | 45.020 | 0.00 | 0.00 |
| ATOM | 4678 | HA   | LEU | X | 311 | 21.877 | 29.870 | 45.211 | 0.00 | 0.00 |
| ATOM | 4679 | CB   | LEU | X | 311 | 23.609 | 30.992 | 45.819 | 0.00 | 0.00 |
| ATOM | 4680 | HB2  | LEU | X | 311 | 24.678 | 30.975 | 45.606 | 0.00 | 0.00 |
| ATOM | 4681 | HB3  | LEU | X | 311 | 23.248 | 31.981 | 45.535 | 0.00 | 0.00 |
| ATOM | 4682 | CG   | LEU | X | 311 | 23.345 | 31.180 | 47.325 | 0.00 | 0.00 |
| ATOM | 4683 | HG   | LEU | X | 311 | 23.761 | 30.304 | 47.822 | 0.00 | 0.00 |
| ATOM | 4684 | CD1  | LEU | X | 311 | 24.136 | 32.281 | 47.986 | 0.00 | 0.00 |
| ATOM | 4685 | HD11 | LEU | X | 311 | 23.937 | 33.184 | 47.410 | 0.00 | 0.00 |
| ATOM | 4686 | HD12 | LEU | X | 311 | 23.769 | 32.402 | 49.005 | 0.00 | 0.00 |
| ATOM | 4687 | HD13 | LEU | X | 311 | 25.215 | 32.130 | 47.941 | 0.00 | 0.00 |
| ATOM | 4688 | CD2  | LEU | X | 311 | 21.888 | 31.384 | 47.664 | 0.00 | 0.00 |
| ATOM | 4689 | HD21 | LEU | X | 311 | 21.763 | 31.076 | 48.703 | 0.00 | 0.00 |
| ATOM | 4690 | HD22 | LEU | X | 311 | 21.620 | 32.426 | 47.491 | 0.00 | 0.00 |
| ATOM | 4691 | HD23 | LEU | X | 311 | 21.249 | 30.681 | 47.130 | 0.00 | 0.00 |
| ATOM | 4692 | C    | LEU | X | 311 | 23.110 | 30.015 | 43.601 | 0.00 | 0.00 |

|      |      |      |     |   |     |        |        |        |      |      |
|------|------|------|-----|---|-----|--------|--------|--------|------|------|
| ATOM | 4693 | O    | LEU | X | 311 | 22.091 | 30.400 | 42.976 | 0.00 | 0.00 |
| ATOM | 4694 | N    | ILE | X | 312 | 24.259 | 29.707 | 42.968 | 0.00 | 0.00 |
| ATOM | 4695 | H    | ILE | X | 312 | 24.964 | 29.168 | 43.450 | 0.00 | 0.00 |
| ATOM | 4696 | CA   | ILE | X | 312 | 24.326 | 29.792 | 41.549 | 0.00 | 0.00 |
| ATOM | 4697 | HA   | ILE | X | 312 | 24.001 | 30.781 | 41.226 | 0.00 | 0.00 |
| ATOM | 4698 | CB   | ILE | X | 312 | 25.811 | 29.612 | 41.009 | 0.00 | 0.00 |
| ATOM | 4699 | HB   | ILE | X | 312 | 26.160 | 28.714 | 41.519 | 0.00 | 0.00 |
| ATOM | 4700 | CG2  | ILE | X | 312 | 25.866 | 29.438 | 39.414 | 0.00 | 0.00 |
| ATOM | 4701 | HG21 | ILE | X | 312 | 25.631 | 28.442 | 39.037 | 0.00 | 0.00 |
| ATOM | 4702 | HG22 | ILE | X | 312 | 25.258 | 30.116 | 38.816 | 0.00 | 0.00 |
| ATOM | 4703 | HG23 | ILE | X | 312 | 26.905 | 29.566 | 39.108 | 0.00 | 0.00 |
| ATOM | 4704 | CG1  | ILE | X | 312 | 26.747 | 30.719 | 41.420 | 0.00 | 0.00 |
| ATOM | 4705 | HG12 | ILE | X | 312 | 26.754 | 31.495 | 40.656 | 0.00 | 0.00 |
| ATOM | 4706 | HG13 | ILE | X | 312 | 26.642 | 31.198 | 42.394 | 0.00 | 0.00 |
| ATOM | 4707 | CD1  | ILE | X | 312 | 28.141 | 30.041 | 41.607 | 0.00 | 0.00 |
| ATOM | 4708 | HD11 | ILE | X | 312 | 28.803 | 30.844 | 41.932 | 0.00 | 0.00 |
| ATOM | 4709 | HD12 | ILE | X | 312 | 28.201 | 29.266 | 42.370 | 0.00 | 0.00 |
| ATOM | 4710 | HD13 | ILE | X | 312 | 28.491 | 29.650 | 40.652 | 0.00 | 0.00 |
| ATOM | 4711 | C    | ILE | X | 312 | 23.300 | 28.891 | 40.929 | 0.00 | 0.00 |
| ATOM | 4712 | O    | ILE | X | 312 | 22.463 | 29.348 | 40.161 | 0.00 | 0.00 |
| ATOM | 4713 | N    | ASN | X | 313 | 23.235 | 27.592 | 41.315 | 0.00 | 0.00 |
| ATOM | 4714 | H    | ASN | X | 313 | 23.957 | 27.203 | 41.905 | 0.00 | 0.00 |
| ATOM | 4715 | CA   | ASN | X | 313 | 22.363 | 26.602 | 40.702 | 0.00 | 0.00 |
| ATOM | 4716 | HA   | ASN | X | 313 | 22.499 | 26.704 | 39.625 | 0.00 | 0.00 |
| ATOM | 4717 | CB   | ASN | X | 313 | 22.937 | 25.137 | 41.031 | 0.00 | 0.00 |
| ATOM | 4718 | HB2  | ASN | X | 313 | 24.001 | 24.965 | 40.868 | 0.00 | 0.00 |
| ATOM | 4719 | HB3  | ASN | X | 313 | 22.641 | 24.834 | 42.035 | 0.00 | 0.00 |
| ATOM | 4720 | CG   | ASN | X | 313 | 22.207 | 24.016 | 40.198 | 0.00 | 0.00 |
| ATOM | 4721 | OD1  | ASN | X | 313 | 22.175 | 22.873 | 40.602 | 0.00 | 0.00 |
| ATOM | 4722 | ND2  | ASN | X | 313 | 21.962 | 24.266 | 38.936 | 0.00 | 0.00 |
| ATOM | 4723 | HD21 | ASN | X | 313 | 21.318 | 23.625 | 38.496 | 0.00 | 0.00 |
| ATOM | 4724 | HD22 | ASN | X | 313 | 22.083 | 25.219 | 38.623 | 0.00 | 0.00 |
| ATOM | 4725 | C    | ASN | X | 313 | 20.854 | 26.821 | 41.007 | 0.00 | 0.00 |
| ATOM | 4726 | O    | ASN | X | 313 | 19.980 | 26.340 | 40.317 | 0.00 | 0.00 |
| ATOM | 4727 | N    | ALA | X | 314 | 20.528 | 27.460 | 42.120 | 0.00 | 0.00 |
| ATOM | 4728 | H    | ALA | X | 314 | 21.307 | 27.713 | 42.711 | 0.00 | 0.00 |
| ATOM | 4729 | CA   | ALA | X | 314 | 19.118 | 27.921 | 42.451 | 0.00 | 0.00 |
| ATOM | 4730 | HA   | ALA | X | 314 | 18.450 | 27.132 | 42.104 | 0.00 | 0.00 |
| ATOM | 4731 | CB   | ALA | X | 314 | 19.039 | 28.040 | 43.966 | 0.00 | 0.00 |
| ATOM | 4732 | HB1  | ALA | X | 314 | 19.796 | 28.775 | 44.242 | 0.00 | 0.00 |
| ATOM | 4733 | HB2  | ALA | X | 314 | 18.016 | 28.334 | 44.198 | 0.00 | 0.00 |
| ATOM | 4734 | HB3  | ALA | X | 314 | 19.329 | 27.152 | 44.528 | 0.00 | 0.00 |
| ATOM | 4735 | C    | ALA | X | 314 | 18.618 | 29.241 | 41.749 | 0.00 | 0.00 |
| ATOM | 4736 | O    | ALA | X | 314 | 17.456 | 29.554 | 41.944 | 0.00 | 0.00 |
| ATOM | 4737 | N    | GLY | X | 315 | 19.538 | 30.017 | 41.181 | 0.00 | 0.00 |
| ATOM | 4738 | H    | GLY | X | 315 | 20.435 | 29.559 | 41.107 | 0.00 | 0.00 |
| ATOM | 4739 | CA   | GLY | X | 315 | 19.364 | 31.345 | 40.564 | 0.00 | 0.00 |
| ATOM | 4740 | HA2  | GLY | X | 315 | 18.730 | 31.980 | 41.236 | 0.00 | 0.00 |
| ATOM | 4741 | HA3  | GLY | X | 315 | 20.345 | 31.778 | 40.595 | 0.00 | 0.00 |
| ATOM | 4742 | C    | GLY | X | 315 | 18.839 | 31.411 | 39.124 | 0.00 | 0.00 |
| ATOM | 4743 | O    | GLY | X | 315 | 18.322 | 30.461 | 38.479 | 0.00 | 0.00 |
| ATOM | 4744 | N    | ASP | X | 316 | 18.773 | 32.655 | 38.664 | 0.00 | 0.00 |
| ATOM | 4745 | H    | ASP | X | 316 | 19.097 | 33.434 | 39.219 | 0.00 | 0.00 |
| ATOM | 4746 | CA   | ASP | X | 316 | 18.248 | 33.010 | 37.288 | 0.00 | 0.00 |
| ATOM | 4747 | HA   | ASP | X | 316 | 18.569 | 32.235 | 36.593 | 0.00 | 0.00 |
| ATOM | 4748 | CB   | ASP | X | 316 | 16.669 | 33.150 | 37.333 | 0.00 | 0.00 |
| ATOM | 4749 | HB2  | ASP | X | 316 | 16.385 | 32.098 | 37.383 | 0.00 | 0.00 |
| ATOM | 4750 | HB3  | ASP | X | 316 | 16.348 | 33.522 | 38.306 | 0.00 | 0.00 |
| ATOM | 4751 | CG   | ASP | X | 316 | 15.948 | 33.778 | 36.115 | 0.00 | 0.00 |
| ATOM | 4752 | OD1  | ASP | X | 316 | 15.932 | 35.014 | 35.964 | 0.00 | 0.00 |
| ATOM | 4753 | OD2  | ASP | X | 316 | 15.610 | 32.992 | 35.241 | 0.00 | 0.00 |
| ATOM | 4754 | C    | ASP | X | 316 | 18.900 | 34.288 | 36.850 | 0.00 | 0.00 |
| ATOM | 4755 | O    | ASP | X | 316 | 19.000 | 35.231 | 37.675 | 0.00 | 0.00 |
| ATOM | 4756 | N    | PHE | X | 317 | 19.426 | 34.266 | 35.636 | 0.00 | 0.00 |
| ATOM | 4757 | H    | PHE | X | 317 | 19.156 | 33.506 | 35.028 | 0.00 | 0.00 |
| ATOM | 4758 | CA   | PHE | X | 317 | 20.354 | 35.241 | 35.150 | 0.00 | 0.00 |
| ATOM | 4759 | HA   | PHE | X | 317 | 20.281 | 36.174 | 35.708 | 0.00 | 0.00 |
| ATOM | 4760 | CB   | PHE | X | 317 | 21.804 | 34.650 | 35.280 | 0.00 | 0.00 |
| ATOM | 4761 | HB2  | PHE | X | 317 | 21.882 | 33.695 | 34.760 | 0.00 | 0.00 |
| ATOM | 4762 | HB3  | PHE | X | 317 | 22.487 | 35.355 | 34.807 | 0.00 | 0.00 |

|      |      |      |     |   |     |        |        |        |      |      |
|------|------|------|-----|---|-----|--------|--------|--------|------|------|
| ATOM | 4763 | CG   | PHE | X | 317 | 22.209 | 34.514 | 36.720 | 0.00 | 0.00 |
| ATOM | 4764 | CD1  | PHE | X | 317 | 22.434 | 35.632 | 37.513 | 0.00 | 0.00 |
| ATOM | 4765 | HD1  | PHE | X | 317 | 22.133 | 36.582 | 37.097 | 0.00 | 0.00 |
| ATOM | 4766 | CE1  | PHE | X | 317 | 22.562 | 35.399 | 38.914 | 0.00 | 0.00 |
| ATOM | 4767 | HE1  | PHE | X | 317 | 22.539 | 36.309 | 39.496 | 0.00 | 0.00 |
| ATOM | 4768 | CZ   | PHE | X | 317 | 22.564 | 34.058 | 39.409 | 0.00 | 0.00 |
| ATOM | 4769 | HZ   | PHE | X | 317 | 22.577 | 33.843 | 40.467 | 0.00 | 0.00 |
| ATOM | 4770 | CE2  | PHE | X | 317 | 22.401 | 32.949 | 38.558 | 0.00 | 0.00 |
| ATOM | 4771 | HE2  | PHE | X | 317 | 22.502 | 31.950 | 38.957 | 0.00 | 0.00 |
| ATOM | 4772 | CD2  | PHE | X | 317 | 22.246 | 33.222 | 37.179 | 0.00 | 0.00 |
| ATOM | 4773 | HD2  | PHE | X | 317 | 22.165 | 32.363 | 36.529 | 0.00 | 0.00 |
| ATOM | 4774 | C    | PHE | X | 317 | 19.929 | 35.553 | 33.681 | 0.00 | 0.00 |
| ATOM | 4775 | O    | PHE | X | 317 | 20.786 | 35.866 | 32.860 | 0.00 | 0.00 |
| ATOM | 4776 | N    | HIE | X | 318 | 18.693 | 35.322 | 33.300 | 0.00 | 0.00 |
| ATOM | 4777 | H    | HIE | X | 318 | 18.024 | 35.145 | 34.036 | 0.00 | 0.00 |
| ATOM | 4778 | CA   | HIE | X | 318 | 18.143 | 35.726 | 32.034 | 0.00 | 0.00 |
| ATOM | 4779 | HA   | HIE | X | 318 | 18.532 | 35.026 | 31.295 | 0.00 | 0.00 |
| ATOM | 4780 | CB   | HIE | X | 318 | 16.620 | 35.599 | 32.092 | 0.00 | 0.00 |
| ATOM | 4781 | HB2  | HIE | X | 318 | 16.389 | 34.796 | 32.792 | 0.00 | 0.00 |
| ATOM | 4782 | HB3  | HIE | X | 318 | 16.035 | 36.437 | 32.471 | 0.00 | 0.00 |
| ATOM | 4783 | CG   | HIE | X | 318 | 16.064 | 35.346 | 30.712 | 0.00 | 0.00 |
| ATOM | 4784 | ND1  | HIE | X | 318 | 15.171 | 36.208 | 30.080 | 0.00 | 0.00 |
| ATOM | 4785 | CE1  | HIE | X | 318 | 14.923 | 35.683 | 28.833 | 0.00 | 0.00 |
| ATOM | 4786 | HE1  | HIE | X | 318 | 14.219 | 36.084 | 28.119 | 0.00 | 0.00 |
| ATOM | 4787 | NE2  | HIE | X | 318 | 15.413 | 34.465 | 28.745 | 0.00 | 0.00 |
| ATOM | 4788 | HE2  | HIE | X | 318 | 15.346 | 33.865 | 27.936 | 0.00 | 0.00 |
| ATOM | 4789 | CD2  | HIE | X | 318 | 16.209 | 34.283 | 29.863 | 0.00 | 0.00 |
| ATOM | 4790 | HD2  | HIE | X | 318 | 16.915 | 33.484 | 30.037 | 0.00 | 0.00 |
| ATOM | 4791 | C    | HIE | X | 318 | 18.610 | 37.112 | 31.586 | 0.00 | 0.00 |
| ATOM | 4792 | O    | HIE | X | 318 | 18.532 | 38.069 | 32.384 | 0.00 | 0.00 |
| ATOM | 4793 | N    | GLY | X | 319 | 19.078 | 37.214 | 30.335 | 0.00 | 0.00 |
| ATOM | 4794 | H    | GLY | X | 319 | 19.245 | 36.364 | 29.816 | 0.00 | 0.00 |
| ATOM | 4795 | CA   | GLY | X | 319 | 19.541 | 38.511 | 29.651 | 0.00 | 0.00 |
| ATOM | 4796 | HA2  | GLY | X | 319 | 19.574 | 38.405 | 28.596 | 0.00 | 0.00 |
| ATOM | 4797 | HA3  | GLY | X | 319 | 18.742 | 39.198 | 29.760 | 0.00 | 0.00 |
| ATOM | 4798 | C    | GLY | X | 319 | 20.901 | 39.122 | 30.055 | 0.00 | 0.00 |
| ATOM | 4799 | O    | GLY | X | 319 | 21.491 | 39.718 | 29.163 | 0.00 | 0.00 |
| ATOM | 4800 | N    | LEU | X | 320 | 21.285 | 38.918 | 31.282 | 0.00 | 0.00 |
| ATOM | 4801 | H    | LEU | X | 320 | 20.760 | 38.291 | 31.874 | 0.00 | 0.00 |
| ATOM | 4802 | CA   | LEU | X | 320 | 22.587 | 39.416 | 31.797 | 0.00 | 0.00 |
| ATOM | 4803 | HA   | LEU | X | 320 | 22.646 | 40.498 | 31.921 | 0.00 | 0.00 |
| ATOM | 4804 | CB   | LEU | X | 320 | 22.670 | 38.849 | 33.235 | 0.00 | 0.00 |
| ATOM | 4805 | HB2  | LEU | X | 320 | 21.740 | 39.044 | 33.769 | 0.00 | 0.00 |
| ATOM | 4806 | HB3  | LEU | X | 320 | 22.657 | 37.761 | 33.166 | 0.00 | 0.00 |
| ATOM | 4807 | CG   | LEU | X | 320 | 23.934 | 39.220 | 34.016 | 0.00 | 0.00 |
| ATOM | 4808 | HG   | LEU | X | 320 | 24.824 | 38.695 | 33.669 | 0.00 | 0.00 |
| ATOM | 4809 | CD1  | LEU | X | 320 | 24.483 | 40.735 | 33.893 | 0.00 | 0.00 |
| ATOM | 4810 | HD11 | LEU | X | 320 | 23.652 | 41.436 | 33.980 | 0.00 | 0.00 |
| ATOM | 4811 | HD12 | LEU | X | 320 | 25.293 | 40.880 | 34.608 | 0.00 | 0.00 |
| ATOM | 4812 | HD13 | LEU | X | 320 | 24.893 | 40.958 | 32.908 | 0.00 | 0.00 |
| ATOM | 4813 | CD2  | LEU | X | 320 | 23.759 | 38.975 | 35.535 | 0.00 | 0.00 |
| ATOM | 4814 | HD21 | LEU | X | 320 | 22.864 | 39.405 | 35.984 | 0.00 | 0.00 |
| ATOM | 4815 | HD22 | LEU | X | 320 | 23.605 | 37.897 | 35.566 | 0.00 | 0.00 |
| ATOM | 4816 | HD23 | LEU | X | 320 | 24.575 | 39.136 | 36.239 | 0.00 | 0.00 |
| ATOM | 4817 | C    | LEU | X | 320 | 23.721 | 38.875 | 30.919 | 0.00 | 0.00 |
| ATOM | 4818 | O    | LEU | X | 320 | 23.822 | 37.684 | 30.607 | 0.00 | 0.00 |
| ATOM | 4819 | N    | GLN | X | 321 | 24.736 | 39.702 | 30.553 | 0.00 | 0.00 |
| ATOM | 4820 | H    | GLN | X | 321 | 24.687 | 40.691 | 30.752 | 0.00 | 0.00 |
| ATOM | 4821 | CA   | GLN | X | 321 | 25.914 | 39.121 | 29.843 | 0.00 | 0.00 |
| ATOM | 4822 | HA   | GLN | X | 321 | 25.713 | 38.106 | 29.498 | 0.00 | 0.00 |
| ATOM | 4823 | CB   | GLN | X | 321 | 26.357 | 39.919 | 28.591 | 0.00 | 0.00 |
| ATOM | 4824 | HB2  | GLN | X | 321 | 26.819 | 40.848 | 28.923 | 0.00 | 0.00 |
| ATOM | 4825 | HB3  | GLN | X | 321 | 27.227 | 39.449 | 28.133 | 0.00 | 0.00 |
| ATOM | 4826 | CG   | GLN | X | 321 | 25.293 | 40.262 | 27.517 | 0.00 | 0.00 |
| ATOM | 4827 | HG2  | GLN | X | 321 | 25.828 | 40.392 | 26.576 | 0.00 | 0.00 |
| ATOM | 4828 | HG3  | GLN | X | 321 | 24.482 | 39.535 | 27.531 | 0.00 | 0.00 |
| ATOM | 4829 | CD   | GLN | X | 321 | 24.673 | 41.612 | 27.721 | 0.00 | 0.00 |
| ATOM | 4830 | OE1  | GLN | X | 321 | 25.371 | 42.630 | 27.878 | 0.00 | 0.00 |
| ATOM | 4831 | NE2  | GLN | X | 321 | 23.387 | 41.656 | 27.752 | 0.00 | 0.00 |
| ATOM | 4832 | HE21 | GLN | X | 321 | 22.868 | 42.522 | 27.748 | 0.00 | 0.00 |

|      |      |      |     |   |     |        |        |        |      |      |
|------|------|------|-----|---|-----|--------|--------|--------|------|------|
| ATOM | 4833 | HE22 | GLN | X | 321 | 22.810 | 40.832 | 27.660 | 0.00 | 0.00 |
| ATOM | 4834 | C    | GLN | X | 321 | 27.057 | 38.986 | 30.906 | 0.00 | 0.00 |
| ATOM | 4835 | O    | GLN | X | 321 | 27.132 | 39.949 | 31.712 | 0.00 | 0.00 |
| ATOM | 4836 | N    | VAL | X | 322 | 27.931 | 37.960 | 30.787 | 0.00 | 0.00 |
| ATOM | 4837 | H    | VAL | X | 322 | 27.874 | 37.271 | 30.051 | 0.00 | 0.00 |
| ATOM | 4838 | CA   | VAL | X | 322 | 29.109 | 37.750 | 31.701 | 0.00 | 0.00 |
| ATOM | 4839 | HA   | VAL | X | 322 | 29.225 | 38.669 | 32.276 | 0.00 | 0.00 |
| ATOM | 4840 | CB   | VAL | X | 322 | 28.873 | 36.647 | 32.705 | 0.00 | 0.00 |
| ATOM | 4841 | HB   | VAL | X | 322 | 29.038 | 35.685 | 32.220 | 0.00 | 0.00 |
| ATOM | 4842 | CG1  | VAL | X | 322 | 29.847 | 36.826 | 33.908 | 0.00 | 0.00 |
| ATOM | 4843 | HG11 | VAL | X | 322 | 30.815 | 36.371 | 33.699 | 0.00 | 0.00 |
| ATOM | 4844 | HG12 | VAL | X | 322 | 29.949 | 37.864 | 34.222 | 0.00 | 0.00 |
| ATOM | 4845 | HG13 | VAL | X | 322 | 29.465 | 36.341 | 34.807 | 0.00 | 0.00 |
| ATOM | 4846 | CG2  | VAL | X | 322 | 27.464 | 36.631 | 33.383 | 0.00 | 0.00 |
| ATOM | 4847 | HG21 | VAL | X | 322 | 27.442 | 35.834 | 34.126 | 0.00 | 0.00 |
| ATOM | 4848 | HG22 | VAL | X | 322 | 27.238 | 37.572 | 33.885 | 0.00 | 0.00 |
| ATOM | 4849 | HG23 | VAL | X | 322 | 26.617 | 36.442 | 32.723 | 0.00 | 0.00 |
| ATOM | 4850 | C    | VAL | X | 322 | 30.399 | 37.370 | 30.891 | 0.00 | 0.00 |
| ATOM | 4851 | O    | VAL | X | 322 | 30.312 | 36.758 | 29.830 | 0.00 | 0.00 |
| ATOM | 4852 | N    | LEU | X | 323 | 31.564 | 37.719 | 31.436 | 0.00 | 0.00 |
| ATOM | 4853 | H    | LEU | X | 323 | 31.637 | 38.225 | 32.307 | 0.00 | 0.00 |
| ATOM | 4854 | CA   | LEU | X | 323 | 32.895 | 37.190 | 30.929 | 0.00 | 0.00 |
| ATOM | 4855 | HA   | LEU | X | 323 | 32.713 | 36.515 | 30.093 | 0.00 | 0.00 |
| ATOM | 4856 | CB   | LEU | X | 323 | 33.739 | 38.342 | 30.403 | 0.00 | 0.00 |
| ATOM | 4857 | HB2  | LEU | X | 323 | 33.002 | 39.048 | 30.021 | 0.00 | 0.00 |
| ATOM | 4858 | HB3  | LEU | X | 323 | 34.379 | 38.627 | 31.239 | 0.00 | 0.00 |
| ATOM | 4859 | CG   | LEU | X | 323 | 34.750 | 38.174 | 29.276 | 0.00 | 0.00 |
| ATOM | 4860 | HG   | LEU | X | 323 | 34.530 | 37.226 | 28.784 | 0.00 | 0.00 |
| ATOM | 4861 | CD1  | LEU | X | 323 | 34.638 | 39.177 | 28.139 | 0.00 | 0.00 |
| ATOM | 4862 | HD11 | LEU | X | 323 | 33.619 | 38.924 | 27.845 | 0.00 | 0.00 |
| ATOM | 4863 | HD12 | LEU | X | 323 | 34.836 | 40.205 | 28.445 | 0.00 | 0.00 |
| ATOM | 4864 | HD13 | LEU | X | 323 | 35.216 | 38.848 | 27.276 | 0.00 | 0.00 |
| ATOM | 4865 | CD2  | LEU | X | 323 | 36.199 | 38.207 | 29.688 | 0.00 | 0.00 |
| ATOM | 4866 | HD21 | LEU | X | 323 | 36.447 | 37.364 | 30.332 | 0.00 | 0.00 |
| ATOM | 4867 | HD22 | LEU | X | 323 | 36.922 | 38.009 | 28.896 | 0.00 | 0.00 |
| ATOM | 4868 | HD23 | LEU | X | 323 | 36.281 | 39.113 | 30.287 | 0.00 | 0.00 |
| ATOM | 4869 | C    | LEU | X | 323 | 33.506 | 36.445 | 32.112 | 0.00 | 0.00 |
| ATOM | 4870 | O    | LEU | X | 323 | 33.255 | 36.772 | 33.294 | 0.00 | 0.00 |
| ATOM | 4871 | N    | VAL | X | 324 | 34.253 | 35.353 | 31.887 | 0.00 | 0.00 |
| ATOM | 4872 | H    | VAL | X | 324 | 34.454 | 35.036 | 30.949 | 0.00 | 0.00 |
| ATOM | 4873 | CA   | VAL | X | 324 | 34.909 | 34.593 | 32.951 | 0.00 | 0.00 |
| ATOM | 4874 | HA   | VAL | X | 324 | 35.208 | 35.247 | 33.771 | 0.00 | 0.00 |
| ATOM | 4875 | CB   | VAL | X | 324 | 33.876 | 33.656 | 33.681 | 0.00 | 0.00 |
| ATOM | 4876 | HB   | VAL | X | 324 | 33.006 | 34.269 | 33.917 | 0.00 | 0.00 |
| ATOM | 4877 | CG1  | VAL | X | 324 | 33.243 | 32.578 | 32.865 | 0.00 | 0.00 |
| ATOM | 4878 | HG11 | VAL | X | 324 | 32.923 | 33.039 | 31.931 | 0.00 | 0.00 |
| ATOM | 4879 | HG12 | VAL | X | 324 | 33.962 | 31.807 | 32.587 | 0.00 | 0.00 |
| ATOM | 4880 | HG13 | VAL | X | 324 | 32.372 | 32.120 | 33.333 | 0.00 | 0.00 |
| ATOM | 4881 | CG2  | VAL | X | 324 | 34.360 | 33.210 | 35.126 | 0.00 | 0.00 |
| ATOM | 4882 | HG21 | VAL | X | 324 | 35.013 | 32.350 | 34.977 | 0.00 | 0.00 |
| ATOM | 4883 | HG22 | VAL | X | 324 | 34.977 | 33.929 | 35.665 | 0.00 | 0.00 |
| ATOM | 4884 | HG23 | VAL | X | 324 | 33.492 | 32.839 | 35.671 | 0.00 | 0.00 |
| ATOM | 4885 | C    | VAL | X | 324 | 36.144 | 33.744 | 32.479 | 0.00 | 0.00 |
| ATOM | 4886 | O    | VAL | X | 324 | 36.223 | 33.465 | 31.284 | 0.00 | 0.00 |
| ATOM | 4887 | N    | GLY | X | 325 | 37.082 | 33.356 | 33.378 | 0.00 | 0.00 |
| ATOM | 4888 | H    | GLY | X | 325 | 36.900 | 33.609 | 34.339 | 0.00 | 0.00 |
| ATOM | 4889 | CA   | GLY | X | 325 | 38.255 | 32.562 | 33.018 | 0.00 | 0.00 |
| ATOM | 4890 | HA2  | GLY | X | 325 | 38.108 | 31.472 | 33.112 | 0.00 | 0.00 |
| ATOM | 4891 | HA3  | GLY | X | 325 | 38.452 | 32.671 | 31.878 | 0.00 | 0.00 |
| ATOM | 4892 | C    | GLY | X | 325 | 39.581 | 32.980 | 33.689 | 0.00 | 0.00 |
| ATOM | 4893 | O    | GLY | X | 325 | 39.682 | 33.730 | 34.653 | 0.00 | 0.00 |
| ATOM | 4894 | N    | VAL | X | 326 | 40.632 | 32.479 | 33.151 | 0.00 | 0.00 |
| ATOM | 4895 | H    | VAL | X | 326 | 40.528 | 31.975 | 32.282 | 0.00 | 0.00 |
| ATOM | 4896 | CA   | VAL | X | 326 | 41.806 | 32.103 | 33.991 | 0.00 | 0.00 |
| ATOM | 4897 | HA   | VAL | X | 326 | 41.855 | 32.818 | 34.812 | 0.00 | 0.00 |
| ATOM | 4898 | CB   | VAL | X | 326 | 41.534 | 30.733 | 34.685 | 0.00 | 0.00 |
| ATOM | 4899 | HB   | VAL | X | 326 | 42.439 | 30.355 | 35.161 | 0.00 | 0.00 |
| ATOM | 4900 | CG1  | VAL | X | 326 | 40.385 | 30.702 | 35.753 | 0.00 | 0.00 |
| ATOM | 4901 | HG11 | VAL | X | 326 | 39.518 | 31.293 | 35.458 | 0.00 | 0.00 |
| ATOM | 4902 | HG12 | VAL | X | 326 | 40.064 | 29.724 | 36.112 | 0.00 | 0.00 |

|      |      |      |     |   |     |        |        |        |      |      |
|------|------|------|-----|---|-----|--------|--------|--------|------|------|
| ATOM | 4903 | HG13 | VAL | X | 326 | 40.842 | 31.168 | 36.626 | 0.00 | 0.00 |
| ATOM | 4904 | CG2  | VAL | X | 326 | 41.242 | 29.620 | 33.656 | 0.00 | 0.00 |
| ATOM | 4905 | HG21 | VAL | X | 326 | 40.381 | 29.986 | 33.096 | 0.00 | 0.00 |
| ATOM | 4906 | HG22 | VAL | X | 326 | 42.048 | 29.493 | 32.933 | 0.00 | 0.00 |
| ATOM | 4907 | HG23 | VAL | X | 326 | 41.047 | 28.640 | 34.091 | 0.00 | 0.00 |
| ATOM | 4908 | C    | VAL | X | 326 | 43.108 | 32.047 | 33.138 | 0.00 | 0.00 |
| ATOM | 4909 | O    | VAL | X | 326 | 43.081 | 32.276 | 31.963 | 0.00 | 0.00 |
| ATOM | 4910 | N    | VAL | X | 327 | 44.186 | 31.723 | 33.749 | 0.00 | 0.00 |
| ATOM | 4911 | H    | VAL | X | 327 | 44.185 | 31.539 | 34.742 | 0.00 | 0.00 |
| ATOM | 4912 | CA   | VAL | X | 327 | 45.524 | 31.442 | 33.132 | 0.00 | 0.00 |
| ATOM | 4913 | HA   | VAL | X | 327 | 45.489 | 31.896 | 32.142 | 0.00 | 0.00 |
| ATOM | 4914 | CB   | VAL | X | 327 | 46.762 | 32.131 | 33.733 | 0.00 | 0.00 |
| ATOM | 4915 | HB   | VAL | X | 327 | 47.607 | 32.123 | 33.044 | 0.00 | 0.00 |
| ATOM | 4916 | CG1  | VAL | X | 327 | 46.571 | 33.562 | 34.212 | 0.00 | 0.00 |
| ATOM | 4917 | HG11 | VAL | X | 327 | 45.887 | 33.574 | 35.061 | 0.00 | 0.00 |
| ATOM | 4918 | HG12 | VAL | X | 327 | 47.504 | 34.074 | 34.445 | 0.00 | 0.00 |
| ATOM | 4919 | HG13 | VAL | X | 327 | 46.203 | 34.169 | 33.384 | 0.00 | 0.00 |
| ATOM | 4920 | CG2  | VAL | X | 327 | 47.169 | 31.446 | 34.984 | 0.00 | 0.00 |
| ATOM | 4921 | HG21 | VAL | X | 327 | 47.432 | 30.423 | 34.715 | 0.00 | 0.00 |
| ATOM | 4922 | HG22 | VAL | X | 327 | 48.113 | 31.889 | 35.302 | 0.00 | 0.00 |
| ATOM | 4923 | HG23 | VAL | X | 327 | 46.345 | 31.501 | 35.695 | 0.00 | 0.00 |
| ATOM | 4924 | C    | VAL | X | 327 | 45.756 | 29.904 | 32.959 | 0.00 | 0.00 |
| ATOM | 4925 | O    | VAL | X | 327 | 44.984 | 29.155 | 33.529 | 0.00 | 0.00 |
| ATOM | 4926 | N    | LYS | X | 328 | 46.646 | 29.324 | 32.189 | 0.00 | 0.00 |
| ATOM | 4927 | H    | LYS | X | 328 | 47.064 | 30.016 | 31.583 | 0.00 | 0.00 |
| ATOM | 4928 | CA   | LYS | X | 328 | 47.040 | 27.961 | 32.072 | 0.00 | 0.00 |
| ATOM | 4929 | HA   | LYS | X | 328 | 46.232 | 27.361 | 31.655 | 0.00 | 0.00 |
| ATOM | 4930 | CB   | LYS | X | 328 | 48.153 | 28.003 | 30.933 | 0.00 | 0.00 |
| ATOM | 4931 | HB2  | LYS | X | 328 | 47.789 | 28.531 | 30.052 | 0.00 | 0.00 |
| ATOM | 4932 | HB3  | LYS | X | 328 | 48.981 | 28.552 | 31.381 | 0.00 | 0.00 |
| ATOM | 4933 | CG   | LYS | X | 328 | 48.549 | 26.503 | 30.649 | 0.00 | 0.00 |
| ATOM | 4934 | HG2  | LYS | X | 328 | 49.114 | 26.108 | 31.493 | 0.00 | 0.00 |
| ATOM | 4935 | HG3  | LYS | X | 328 | 47.659 | 25.936 | 30.376 | 0.00 | 0.00 |
| ATOM | 4936 | CD   | LYS | X | 328 | 49.508 | 26.462 | 29.436 | 0.00 | 0.00 |
| ATOM | 4937 | HD2  | LYS | X | 328 | 49.038 | 26.762 | 28.500 | 0.00 | 0.00 |
| ATOM | 4938 | HD3  | LYS | X | 328 | 50.297 | 27.201 | 29.574 | 0.00 | 0.00 |
| ATOM | 4939 | CE   | LYS | X | 328 | 50.248 | 25.144 | 29.319 | 0.00 | 0.00 |
| ATOM | 4940 | HE2  | LYS | X | 328 | 50.967 | 25.364 | 28.530 | 0.00 | 0.00 |
| ATOM | 4941 | HE3  | LYS | X | 328 | 50.794 | 24.918 | 30.235 | 0.00 | 0.00 |
| ATOM | 4942 | NZ   | LYS | X | 328 | 49.249 | 24.051 | 29.046 | 0.00 | 0.00 |
| ATOM | 4943 | HZ1  | LYS | X | 328 | 48.784 | 23.757 | 29.893 | 0.00 | 0.00 |
| ATOM | 4944 | HZ2  | LYS | X | 328 | 48.514 | 24.330 | 28.413 | 0.00 | 0.00 |
| ATOM | 4945 | HZ3  | LYS | X | 328 | 49.659 | 23.211 | 28.664 | 0.00 | 0.00 |
| ATOM | 4946 | C    | LYS | X | 328 | 47.488 | 27.255 | 33.349 | 0.00 | 0.00 |
| ATOM | 4947 | O    | LYS | X | 328 | 46.996 | 26.170 | 33.654 | 0.00 | 0.00 |
| ATOM | 4948 | N    | ASP | X | 329 | 48.195 | 27.998 | 34.202 | 0.00 | 0.00 |
| ATOM | 4949 | H    | ASP | X | 329 | 48.477 | 28.939 | 33.965 | 0.00 | 0.00 |
| ATOM | 4950 | CA   | ASP | X | 329 | 48.715 | 27.509 | 35.477 | 0.00 | 0.00 |
| ATOM | 4951 | HA   | ASP | X | 329 | 48.188 | 26.573 | 35.662 | 0.00 | 0.00 |
| ATOM | 4952 | CB   | ASP | X | 329 | 50.254 | 27.247 | 35.401 | 0.00 | 0.00 |
| ATOM | 4953 | HB2  | ASP | X | 329 | 50.761 | 28.207 | 35.495 | 0.00 | 0.00 |
| ATOM | 4954 | HB3  | ASP | X | 329 | 50.540 | 26.656 | 36.271 | 0.00 | 0.00 |
| ATOM | 4955 | CG   | ASP | X | 329 | 50.849 | 26.502 | 34.197 | 0.00 | 0.00 |
| ATOM | 4956 | OD1  | ASP | X | 329 | 50.934 | 25.241 | 34.320 | 0.00 | 0.00 |
| ATOM | 4957 | OD2  | ASP | X | 329 | 51.237 | 27.175 | 33.237 | 0.00 | 0.00 |
| ATOM | 4958 | C    | ASP | X | 329 | 48.311 | 28.374 | 36.706 | 0.00 | 0.00 |
| ATOM | 4959 | O    | ASP | X | 329 | 49.050 | 29.217 | 37.176 | 0.00 | 0.00 |
| ATOM | 4960 | N    | GLU | X | 330 | 47.033 | 28.284 | 37.094 | 0.00 | 0.00 |
| ATOM | 4961 | H    | GLU | X | 330 | 46.462 | 27.494 | 36.829 | 0.00 | 0.00 |
| ATOM | 4962 | CA   | GLU | X | 330 | 46.566 | 28.899 | 38.313 | 0.00 | 0.00 |
| ATOM | 4963 | HA   | GLU | X | 330 | 46.701 | 29.975 | 38.205 | 0.00 | 0.00 |
| ATOM | 4964 | CB   | GLU | X | 330 | 45.076 | 28.748 | 38.591 | 0.00 | 0.00 |
| ATOM | 4965 | HB2  | GLU | X | 330 | 44.938 | 27.668 | 38.643 | 0.00 | 0.00 |
| ATOM | 4966 | HB3  | GLU | X | 330 | 44.775 | 29.227 | 39.523 | 0.00 | 0.00 |
| ATOM | 4967 | CG   | GLU | X | 330 | 44.260 | 29.411 | 37.484 | 0.00 | 0.00 |
| ATOM | 4968 | HG2  | GLU | X | 330 | 44.639 | 29.044 | 36.531 | 0.00 | 0.00 |
| ATOM | 4969 | HG3  | GLU | X | 330 | 43.203 | 29.179 | 37.609 | 0.00 | 0.00 |
| ATOM | 4970 | CD   | GLU | X | 330 | 44.285 | 30.891 | 37.554 | 0.00 | 0.00 |
| ATOM | 4971 | OE1  | GLU | X | 330 | 44.660 | 31.446 | 38.587 | 0.00 | 0.00 |
| ATOM | 4972 | OE2  | GLU | X | 330 | 43.952 | 31.571 | 36.547 | 0.00 | 0.00 |



|      |      |     |     |   |     |        |        |        |      |      |
|------|------|-----|-----|---|-----|--------|--------|--------|------|------|
| ATOM | 4973 | C   | GLU | X | 330 | 47.356 | 28.391 | 39.534 | 0.00 | 0.00 |
| ATOM | 4974 | O   | GLU | X | 330 | 47.700 | 29.141 | 40.408 | 0.00 | 0.00 |
| ATOM | 4975 | N   | GLY | X | 331 | 47.722 | 27.093 | 39.568 | 0.00 | 0.00 |
| ATOM | 4976 | H   | GLY | X | 331 | 47.706 | 26.645 | 38.663 | 0.00 | 0.00 |
| ATOM | 4977 | CA  | GLY | X | 331 | 48.283 | 26.353 | 40.688 | 0.00 | 0.00 |
| ATOM | 4978 | HA2 | GLY | X | 331 | 47.874 | 26.788 | 41.575 | 0.00 | 0.00 |
| ATOM | 4979 | HA3 | GLY | X | 331 | 47.911 | 25.355 | 40.589 | 0.00 | 0.00 |
| ATOM | 4980 | C   | GLY | X | 331 | 49.801 | 26.192 | 40.796 | 0.00 | 0.00 |
| ATOM | 4981 | O   | GLY | X | 331 | 50.263 | 25.822 | 41.839 | 0.00 | 0.00 |
| ATOM | 4982 | N   | SER | X | 332 | 50.642 | 26.550 | 39.810 | 0.00 | 0.00 |
| ATOM | 4983 | H   | SER | X | 332 | 50.230 | 26.971 | 38.989 | 0.00 | 0.00 |
| ATOM | 4984 | CA  | SER | X | 332 | 52.090 | 26.690 | 40.029 | 0.00 | 0.00 |
| ATOM | 4985 | HA  | SER | X | 332 | 52.544 | 25.777 | 40.413 | 0.00 | 0.00 |
| ATOM | 4986 | CB  | SER | X | 332 | 52.817 | 27.069 | 38.739 | 0.00 | 0.00 |
| ATOM | 4987 | HB2 | SER | X | 332 | 53.787 | 27.459 | 39.045 | 0.00 | 0.00 |
| ATOM | 4988 | HB3 | SER | X | 332 | 52.918 | 26.257 | 38.018 | 0.00 | 0.00 |
| ATOM | 4989 | OG  | SER | X | 332 | 52.135 | 28.009 | 37.914 | 0.00 | 0.00 |
| ATOM | 4990 | HG  | SER | X | 332 | 52.729 | 28.015 | 37.160 | 0.00 | 0.00 |
| ATOM | 4991 | C   | SER | X | 332 | 52.326 | 27.855 | 41.098 | 0.00 | 0.00 |
| ATOM | 4992 | O   | SER | X | 332 | 53.084 | 27.571 | 42.048 | 0.00 | 0.00 |
| ATOM | 4993 | N   | TYR | X | 333 | 51.442 | 28.860 | 41.118 | 0.00 | 0.00 |
| ATOM | 4994 | H   | TYR | X | 333 | 50.720 | 28.812 | 40.414 | 0.00 | 0.00 |
| ATOM | 4995 | CA  | TYR | X | 333 | 51.395 | 30.034 | 42.044 | 0.00 | 0.00 |
| ATOM | 4996 | HA  | TYR | X | 333 | 52.359 | 30.542 | 42.082 | 0.00 | 0.00 |
| ATOM | 4997 | CB  | TYR | X | 333 | 50.413 | 31.011 | 41.450 | 0.00 | 0.00 |
| ATOM | 4998 | HB2 | TYR | X | 333 | 50.712 | 31.160 | 40.412 | 0.00 | 0.00 |
| ATOM | 4999 | HB3 | TYR | X | 333 | 49.388 | 30.641 | 41.416 | 0.00 | 0.00 |
| ATOM | 5000 | CG  | TYR | X | 333 | 50.404 | 32.379 | 42.220 | 0.00 | 0.00 |
| ATOM | 5001 | CD1 | TYR | X | 333 | 51.302 | 33.355 | 41.800 | 0.00 | 0.00 |
| ATOM | 5002 | HD1 | TYR | X | 333 | 51.969 | 33.233 | 40.959 | 0.00 | 0.00 |
| ATOM | 5003 | CE1 | TYR | X | 333 | 51.484 | 34.586 | 42.433 | 0.00 | 0.00 |
| ATOM | 5004 | HE1 | TYR | X | 333 | 52.232 | 35.303 | 42.130 | 0.00 | 0.00 |
| ATOM | 5005 | CZ  | TYR | X | 333 | 50.657 | 34.796 | 43.561 | 0.00 | 0.00 |
| ATOM | 5006 | OH  | TYR | X | 333 | 50.719 | 36.030 | 44.160 | 0.00 | 0.00 |
| ATOM | 5007 | HH  | TYR | X | 333 | 51.422 | 36.544 | 43.757 | 0.00 | 0.00 |
| ATOM | 5008 | CE2 | TYR | X | 333 | 49.727 | 33.822 | 44.028 | 0.00 | 0.00 |
| ATOM | 5009 | HE2 | TYR | X | 333 | 49.218 | 33.888 | 44.978 | 0.00 | 0.00 |
| ATOM | 5010 | CD2 | TYR | X | 333 | 49.647 | 32.612 | 43.333 | 0.00 | 0.00 |
| ATOM | 5011 | HD2 | TYR | X | 333 | 48.969 | 31.859 | 43.708 | 0.00 | 0.00 |
| ATOM | 5012 | C   | TYR | X | 333 | 51.049 | 29.572 | 43.502 | 0.00 | 0.00 |
| ATOM | 5013 | O   | TYR | X | 333 | 51.768 | 29.763 | 44.467 | 0.00 | 0.00 |
| ATOM | 5014 | N   | PHE | X | 334 | 49.859 | 28.987 | 43.712 | 0.00 | 0.00 |
| ATOM | 5015 | H   | PHE | X | 334 | 49.188 | 28.925 | 42.960 | 0.00 | 0.00 |
| ATOM | 5016 | CA  | PHE | X | 334 | 49.370 | 28.339 | 44.924 | 0.00 | 0.00 |
| ATOM | 5017 | HA  | PHE | X | 334 | 49.322 | 29.180 | 45.615 | 0.00 | 0.00 |
| ATOM | 5018 | CB  | PHE | X | 334 | 47.925 | 27.829 | 44.778 | 0.00 | 0.00 |
| ATOM | 5019 | HB2 | PHE | X | 334 | 48.096 | 26.893 | 44.245 | 0.00 | 0.00 |
| ATOM | 5020 | HB3 | PHE | X | 334 | 47.578 | 27.740 | 45.807 | 0.00 | 0.00 |
| ATOM | 5021 | CG  | PHE | X | 334 | 46.997 | 28.674 | 43.966 | 0.00 | 0.00 |
| ATOM | 5022 | CD1 | PHE | X | 334 | 46.189 | 28.020 | 43.081 | 0.00 | 0.00 |
| ATOM | 5023 | HD1 | PHE | X | 334 | 46.240 | 26.957 | 42.899 | 0.00 | 0.00 |
| ATOM | 5024 | CE1 | PHE | X | 334 | 45.214 | 28.754 | 42.386 | 0.00 | 0.00 |
| ATOM | 5025 | HE1 | PHE | X | 334 | 44.600 | 28.194 | 41.697 | 0.00 | 0.00 |
| ATOM | 5026 | CZ  | PHE | X | 334 | 45.061 | 30.128 | 42.678 | 0.00 | 0.00 |
| ATOM | 5027 | HZ  | PHE | X | 334 | 44.282 | 30.639 | 42.132 | 0.00 | 0.00 |
| ATOM | 5028 | CE2 | PHE | X | 334 | 45.918 | 30.822 | 43.598 | 0.00 | 0.00 |
| ATOM | 5029 | HE2 | PHE | X | 334 | 45.760 | 31.858 | 43.859 | 0.00 | 0.00 |
| ATOM | 5030 | CD2 | PHE | X | 334 | 46.927 | 30.057 | 44.245 | 0.00 | 0.00 |
| ATOM | 5031 | HD2 | PHE | X | 334 | 47.519 | 30.445 | 45.061 | 0.00 | 0.00 |
| ATOM | 5032 | C   | PHE | X | 334 | 50.292 | 27.240 | 45.464 | 0.00 | 0.00 |
| ATOM | 5033 | O   | PHE | X | 334 | 50.433 | 27.160 | 46.673 | 0.00 | 0.00 |
| ATOM | 5034 | N   | LEU | X | 335 | 51.037 | 26.464 | 44.641 | 0.00 | 0.00 |
| ATOM | 5035 | H   | LEU | X | 335 | 51.077 | 26.704 | 43.661 | 0.00 | 0.00 |
| ATOM | 5036 | CA  | LEU | X | 335 | 52.200 | 25.647 | 45.091 | 0.00 | 0.00 |
| ATOM | 5037 | HA  | LEU | X | 335 | 51.792 | 24.949 | 45.823 | 0.00 | 0.00 |
| ATOM | 5038 | CB  | LEU | X | 335 | 52.696 | 24.799 | 43.989 | 0.00 | 0.00 |
| ATOM | 5039 | HB2 | LEU | X | 335 | 52.781 | 25.351 | 43.053 | 0.00 | 0.00 |
| ATOM | 5040 | HB3 | LEU | X | 335 | 53.603 | 24.340 | 44.383 | 0.00 | 0.00 |
| ATOM | 5041 | CG  | LEU | X | 335 | 51.736 | 23.612 | 43.773 | 0.00 | 0.00 |
| ATOM | 5042 | HG  | LEU | X | 335 | 50.694 | 23.870 | 43.580 | 0.00 | 0.00 |

|      |      |      |     |   |     |        |        |        |      |      |
|------|------|------|-----|---|-----|--------|--------|--------|------|------|
| ATOM | 5043 | CD1  | LEU | X | 335 | 52.165 | 22.766 | 42.538 | 0.00 | 0.00 |
| ATOM | 5044 | HD11 | LEU | X | 335 | 52.026 | 23.316 | 41.608 | 0.00 | 0.00 |
| ATOM | 5045 | HD12 | LEU | X | 335 | 53.174 | 22.418 | 42.758 | 0.00 | 0.00 |
| ATOM | 5046 | HD13 | LEU | X | 335 | 51.630 | 21.820 | 42.454 | 0.00 | 0.00 |
| ATOM | 5047 | CD2  | LEU | X | 335 | 51.757 | 22.639 | 44.979 | 0.00 | 0.00 |
| ATOM | 5048 | HD21 | LEU | X | 335 | 51.381 | 23.123 | 45.880 | 0.00 | 0.00 |
| ATOM | 5049 | HD22 | LEU | X | 335 | 51.069 | 21.831 | 44.728 | 0.00 | 0.00 |
| ATOM | 5050 | HD23 | LEU | X | 335 | 52.733 | 22.183 | 45.149 | 0.00 | 0.00 |
| ATOM | 5051 | C    | LEU | X | 335 | 53.254 | 26.582 | 45.743 | 0.00 | 0.00 |
| ATOM | 5052 | O    | LEU | X | 335 | 53.431 | 26.511 | 46.904 | 0.00 | 0.00 |
| ATOM | 5053 | N    | VAL | X | 336 | 54.041 | 27.312 | 44.941 | 0.00 | 0.00 |
| ATOM | 5054 | H    | VAL | X | 336 | 53.902 | 27.230 | 43.944 | 0.00 | 0.00 |
| ATOM | 5055 | CA   | VAL | X | 336 | 55.124 | 28.157 | 45.446 | 0.00 | 0.00 |
| ATOM | 5056 | HA   | VAL | X | 336 | 55.797 | 27.427 | 45.895 | 0.00 | 0.00 |
| ATOM | 5057 | CB   | VAL | X | 336 | 55.932 | 28.839 | 44.349 | 0.00 | 0.00 |
| ATOM | 5058 | HB   | VAL | X | 336 | 56.846 | 29.189 | 44.828 | 0.00 | 0.00 |
| ATOM | 5059 | CG1  | VAL | X | 336 | 56.539 | 27.774 | 43.327 | 0.00 | 0.00 |
| ATOM | 5060 | HG11 | VAL | X | 336 | 57.335 | 28.305 | 42.805 | 0.00 | 0.00 |
| ATOM | 5061 | HG12 | VAL | X | 336 | 56.994 | 26.956 | 43.885 | 0.00 | 0.00 |
| ATOM | 5062 | HG13 | VAL | X | 336 | 55.824 | 27.424 | 42.582 | 0.00 | 0.00 |
| ATOM | 5063 | CG2  | VAL | X | 336 | 55.247 | 29.931 | 43.516 | 0.00 | 0.00 |
| ATOM | 5064 | HG21 | VAL | X | 336 | 54.611 | 30.611 | 44.083 | 0.00 | 0.00 |
| ATOM | 5065 | HG22 | VAL | X | 336 | 56.021 | 30.464 | 42.964 | 0.00 | 0.00 |
| ATOM | 5066 | HG23 | VAL | X | 336 | 54.649 | 29.466 | 42.732 | 0.00 | 0.00 |
| ATOM | 5067 | C    | VAL | X | 336 | 54.744 | 29.126 | 46.588 | 0.00 | 0.00 |
| ATOM | 5068 | O    | VAL | X | 336 | 55.551 | 29.351 | 47.490 | 0.00 | 0.00 |
| ATOM | 5069 | N    | TYR | X | 337 | 53.565 | 29.765 | 46.629 | 0.00 | 0.00 |
| ATOM | 5070 | H    | TYR | X | 337 | 52.951 | 29.502 | 45.872 | 0.00 | 0.00 |
| ATOM | 5071 | CA   | TYR | X | 337 | 53.191 | 30.824 | 47.587 | 0.00 | 0.00 |
| ATOM | 5072 | HA   | TYR | X | 337 | 54.101 | 31.400 | 47.757 | 0.00 | 0.00 |
| ATOM | 5073 | CB   | TYR | X | 337 | 52.150 | 31.716 | 46.907 | 0.00 | 0.00 |
| ATOM | 5074 | HB2  | TYR | X | 337 | 52.496 | 31.672 | 45.874 | 0.00 | 0.00 |
| ATOM | 5075 | HB3  | TYR | X | 337 | 51.180 | 31.226 | 46.987 | 0.00 | 0.00 |
| ATOM | 5076 | CG   | TYR | X | 337 | 52.098 | 33.204 | 47.269 | 0.00 | 0.00 |
| ATOM | 5077 | CD1  | TYR | X | 337 | 51.241 | 33.660 | 48.334 | 0.00 | 0.00 |
| ATOM | 5078 | HD1  | TYR | X | 337 | 50.760 | 32.918 | 48.955 | 0.00 | 0.00 |
| ATOM | 5079 | CE1  | TYR | X | 337 | 51.262 | 34.991 | 48.778 | 0.00 | 0.00 |
| ATOM | 5080 | HE1  | TYR | X | 337 | 50.723 | 35.296 | 49.663 | 0.00 | 0.00 |
| ATOM | 5081 | CZ   | TYR | X | 337 | 51.976 | 35.924 | 48.045 | 0.00 | 0.00 |
| ATOM | 5082 | OH   | TYR | X | 337 | 51.944 | 37.257 | 48.507 | 0.00 | 0.00 |
| ATOM | 5083 | HH   | TYR | X | 337 | 51.485 | 37.451 | 49.328 | 0.00 | 0.00 |
| ATOM | 5084 | CE2  | TYR | X | 337 | 52.724 | 35.571 | 46.888 | 0.00 | 0.00 |
| ATOM | 5085 | HE2  | TYR | X | 337 | 53.332 | 36.229 | 46.284 | 0.00 | 0.00 |
| ATOM | 5086 | CD2  | TYR | X | 337 | 52.815 | 34.184 | 46.578 | 0.00 | 0.00 |
| ATOM | 5087 | HD2  | TYR | X | 337 | 53.490 | 33.832 | 45.812 | 0.00 | 0.00 |
| ATOM | 5088 | C    | TYR | X | 337 | 52.485 | 30.233 | 48.891 | 0.00 | 0.00 |
| ATOM | 5089 | O    | TYR | X | 337 | 52.181 | 30.963 | 49.841 | 0.00 | 0.00 |
| ATOM | 5090 | N    | GLY | X | 338 | 52.132 | 28.978 | 48.827 | 0.00 | 0.00 |
| ATOM | 5091 | H    | GLY | X | 338 | 52.353 | 28.589 | 47.922 | 0.00 | 0.00 |
| ATOM | 5092 | CA   | GLY | X | 338 | 51.260 | 28.219 | 49.756 | 0.00 | 0.00 |
| ATOM | 5093 | HA2  | GLY | X | 338 | 51.084 | 28.914 | 50.622 | 0.00 | 0.00 |
| ATOM | 5094 | HA3  | GLY | X | 338 | 50.466 | 28.013 | 49.130 | 0.00 | 0.00 |
| ATOM | 5095 | C    | GLY | X | 338 | 51.746 | 26.911 | 50.338 | 0.00 | 0.00 |
| ATOM | 5096 | O    | GLY | X | 338 | 51.656 | 26.701 | 51.604 | 0.00 | 0.00 |
| ATOM | 5097 | N    | ALA | X | 339 | 52.244 | 26.019 | 49.470 | 0.00 | 0.00 |
| ATOM | 5098 | H    | ALA | X | 339 | 52.304 | 26.315 | 48.506 | 0.00 | 0.00 |
| ATOM | 5099 | CA   | ALA | X | 339 | 52.815 | 24.693 | 49.897 | 0.00 | 0.00 |
| ATOM | 5100 | HA   | ALA | X | 339 | 52.117 | 24.168 | 50.548 | 0.00 | 0.00 |
| ATOM | 5101 | CB   | ALA | X | 339 | 52.939 | 23.828 | 48.643 | 0.00 | 0.00 |
| ATOM | 5102 | HB1  | ALA | X | 339 | 53.714 | 24.071 | 47.915 | 0.00 | 0.00 |
| ATOM | 5103 | HB2  | ALA | X | 339 | 53.095 | 22.801 | 48.973 | 0.00 | 0.00 |
| ATOM | 5104 | HB3  | ALA | X | 339 | 52.037 | 23.828 | 48.032 | 0.00 | 0.00 |
| ATOM | 5105 | C    | ALA | X | 339 | 54.122 | 24.674 | 50.781 | 0.00 | 0.00 |
| ATOM | 5106 | O    | ALA | X | 339 | 54.939 | 25.497 | 50.471 | 0.00 | 0.00 |
| ATOM | 5107 | N    | PRO | X | 340 | 54.431 | 23.688 | 51.630 | 0.00 | 0.00 |
| ATOM | 5108 | CD   | PRO | X | 340 | 53.589 | 22.588 | 52.032 | 0.00 | 0.00 |
| ATOM | 5109 | HD2  | PRO | X | 340 | 52.872 | 22.199 | 51.309 | 0.00 | 0.00 |
| ATOM | 5110 | HD3  | PRO | X | 340 | 53.046 | 22.912 | 52.920 | 0.00 | 0.00 |
| ATOM | 5111 | CG   | PRO | X | 340 | 54.463 | 21.450 | 52.424 | 0.00 | 0.00 |
| ATOM | 5112 | HG2  | PRO | X | 340 | 54.626 | 20.864 | 51.520 | 0.00 | 0.00 |

|      |      |     |     |   |     |        |        |        |      |      |
|------|------|-----|-----|---|-----|--------|--------|--------|------|------|
| ATOM | 5113 | HG3 | PRO | X | 340 | 53.996 | 20.781 | 53.147 | 0.00 | 0.00 |
| ATOM | 5114 | CB  | PRO | X | 340 | 55.791 | 22.117 | 52.798 | 0.00 | 0.00 |
| ATOM | 5115 | HB2 | PRO | X | 340 | 56.687 | 21.526 | 52.613 | 0.00 | 0.00 |
| ATOM | 5116 | HB3 | PRO | X | 340 | 55.734 | 22.455 | 53.832 | 0.00 | 0.00 |
| ATOM | 5117 | CA  | PRO | X | 340 | 55.904 | 23.409 | 52.029 | 0.00 | 0.00 |
| ATOM | 5118 | HA  | PRO | X | 340 | 56.263 | 24.226 | 52.654 | 0.00 | 0.00 |
| ATOM | 5119 | C   | PRO | X | 340 | 56.819 | 23.285 | 50.859 | 0.00 | 0.00 |
| ATOM | 5120 | O   | PRO | X | 340 | 56.446 | 22.701 | 49.886 | 0.00 | 0.00 |
| ATOM | 5121 | N   | GLY | X | 341 | 58.074 | 23.723 | 50.998 | 0.00 | 0.00 |
| ATOM | 5122 | H   | GLY | X | 341 | 58.294 | 24.221 | 51.849 | 0.00 | 0.00 |
| ATOM | 5123 | CA  | GLY | X | 341 | 59.248 | 23.434 | 50.153 | 0.00 | 0.00 |
| ATOM | 5124 | HA2 | GLY | X | 341 | 60.117 | 23.967 | 50.614 | 0.00 | 0.00 |
| ATOM | 5125 | HA3 | GLY | X | 341 | 59.485 | 22.338 | 50.088 | 0.00 | 0.00 |
| ATOM | 5126 | C   | GLY | X | 341 | 59.146 | 23.813 | 48.677 | 0.00 | 0.00 |
| ATOM | 5127 | O   | GLY | X | 341 | 60.096 | 23.743 | 47.948 | 0.00 | 0.00 |
| ATOM | 5128 | N   | PHE | X | 342 | 57.969 | 24.238 | 48.219 | 0.00 | 0.00 |
| ATOM | 5129 | H   | PHE | X | 342 | 57.215 | 24.401 | 48.870 | 0.00 | 0.00 |
| ATOM | 5130 | CA  | PHE | X | 342 | 57.860 | 24.977 | 46.946 | 0.00 | 0.00 |
| ATOM | 5131 | HA  | PHE | X | 342 | 58.595 | 24.552 | 46.262 | 0.00 | 0.00 |
| ATOM | 5132 | CB  | PHE | X | 342 | 56.544 | 24.835 | 46.196 | 0.00 | 0.00 |
| ATOM | 5133 | HB2 | PHE | X | 342 | 55.770 | 25.200 | 46.871 | 0.00 | 0.00 |
| ATOM | 5134 | HB3 | PHE | X | 342 | 56.503 | 25.409 | 45.271 | 0.00 | 0.00 |
| ATOM | 5135 | CG  | PHE | X | 342 | 56.030 | 23.422 | 45.801 | 0.00 | 0.00 |
| ATOM | 5136 | CD1 | PHE | X | 342 | 56.055 | 23.186 | 44.439 | 0.00 | 0.00 |
| ATOM | 5137 | HD1 | PHE | X | 342 | 56.420 | 23.960 | 43.780 | 0.00 | 0.00 |
| ATOM | 5138 | CE1 | PHE | X | 342 | 55.756 | 21.932 | 43.930 | 0.00 | 0.00 |
| ATOM | 5139 | HE1 | PHE | X | 342 | 55.827 | 21.622 | 42.898 | 0.00 | 0.00 |
| ATOM | 5140 | CZ  | PHE | X | 342 | 55.322 | 20.986 | 44.860 | 0.00 | 0.00 |
| ATOM | 5141 | HZ  | PHE | X | 342 | 55.089 | 19.983 | 44.532 | 0.00 | 0.00 |
| ATOM | 5142 | CE2 | PHE | X | 342 | 55.228 | 21.214 | 46.228 | 0.00 | 0.00 |
| ATOM | 5143 | HE2 | PHE | X | 342 | 55.001 | 20.451 | 46.958 | 0.00 | 0.00 |
| ATOM | 5144 | CD2 | PHE | X | 342 | 55.589 | 22.497 | 46.737 | 0.00 | 0.00 |
| ATOM | 5145 | HD2 | PHE | X | 342 | 55.439 | 22.670 | 47.792 | 0.00 | 0.00 |
| ATOM | 5146 | C   | PHE | X | 342 | 58.221 | 26.463 | 47.131 | 0.00 | 0.00 |
| ATOM | 5147 | O   | PHE | X | 342 | 57.862 | 27.049 | 48.173 | 0.00 | 0.00 |
| ATOM | 5148 | N   | SER | X | 343 | 58.852 | 27.116 | 46.214 | 0.00 | 0.00 |
| ATOM | 5149 | H   | SER | X | 343 | 59.118 | 26.567 | 45.409 | 0.00 | 0.00 |
| ATOM | 5150 | CA  | SER | X | 343 | 59.248 | 28.520 | 46.245 | 0.00 | 0.00 |
| ATOM | 5151 | HA  | SER | X | 343 | 58.397 | 29.152 | 46.497 | 0.00 | 0.00 |
| ATOM | 5152 | CB  | SER | X | 343 | 60.319 | 28.730 | 47.397 | 0.00 | 0.00 |
| ATOM | 5153 | HB2 | SER | X | 343 | 59.730 | 28.610 | 48.306 | 0.00 | 0.00 |
| ATOM | 5154 | HB3 | SER | X | 343 | 61.210 | 28.103 | 47.353 | 0.00 | 0.00 |
| ATOM | 5155 | OG  | SER | X | 343 | 60.748 | 30.047 | 47.371 | 0.00 | 0.00 |
| ATOM | 5156 | HG  | SER | X | 343 | 61.009 | 30.252 | 48.271 | 0.00 | 0.00 |
| ATOM | 5157 | C   | SER | X | 343 | 59.857 | 28.890 | 44.901 | 0.00 | 0.00 |
| ATOM | 5158 | O   | SER | X | 343 | 60.191 | 28.087 | 44.017 | 0.00 | 0.00 |
| ATOM | 5159 | N   | LYS | X | 344 | 59.951 | 30.228 | 44.667 | 0.00 | 0.00 |
| ATOM | 5160 | H   | LYS | X | 344 | 59.600 | 30.910 | 45.323 | 0.00 | 0.00 |
| ATOM | 5161 | CA  | LYS | X | 344 | 60.623 | 30.775 | 43.477 | 0.00 | 0.00 |
| ATOM | 5162 | HA  | LYS | X | 344 | 60.105 | 30.393 | 42.597 | 0.00 | 0.00 |
| ATOM | 5163 | CB  | LYS | X | 344 | 60.541 | 32.354 | 43.526 | 0.00 | 0.00 |
| ATOM | 5164 | HB2 | LYS | X | 344 | 61.099 | 32.717 | 42.663 | 0.00 | 0.00 |
| ATOM | 5165 | HB3 | LYS | X | 344 | 59.465 | 32.524 | 43.558 | 0.00 | 0.00 |
| ATOM | 5166 | CG  | LYS | X | 344 | 61.279 | 32.954 | 44.767 | 0.00 | 0.00 |
| ATOM | 5167 | HG2 | LYS | X | 344 | 60.812 | 32.622 | 45.694 | 0.00 | 0.00 |
| ATOM | 5168 | HG3 | LYS | X | 344 | 62.343 | 32.721 | 44.811 | 0.00 | 0.00 |
| ATOM | 5169 | CD  | LYS | X | 344 | 61.201 | 34.508 | 44.812 | 0.00 | 0.00 |
| ATOM | 5170 | HD2 | LYS | X | 344 | 60.200 | 34.885 | 44.603 | 0.00 | 0.00 |
| ATOM | 5171 | HD3 | LYS | X | 344 | 61.658 | 34.822 | 45.751 | 0.00 | 0.00 |
| ATOM | 5172 | CE  | LYS | X | 344 | 62.077 | 35.167 | 43.741 | 0.00 | 0.00 |
| ATOM | 5173 | HE2 | LYS | X | 344 | 61.888 | 34.744 | 42.755 | 0.00 | 0.00 |
| ATOM | 5174 | HE3 | LYS | X | 344 | 61.623 | 36.128 | 43.503 | 0.00 | 0.00 |
| ATOM | 5175 | NZ  | LYS | X | 344 | 63.486 | 35.267 | 44.021 | 0.00 | 0.00 |
| ATOM | 5176 | HZ1 | LYS | X | 344 | 63.882 | 35.892 | 43.333 | 0.00 | 0.00 |
| ATOM | 5177 | HZ2 | LYS | X | 344 | 63.642 | 35.772 | 44.882 | 0.00 | 0.00 |
| ATOM | 5178 | HZ3 | LYS | X | 344 | 63.923 | 34.374 | 43.848 | 0.00 | 0.00 |
| ATOM | 5179 | C   | LYS | X | 344 | 62.056 | 30.235 | 43.320 | 0.00 | 0.00 |
| ATOM | 5180 | O   | LYS | X | 344 | 62.641 | 30.197 | 42.227 | 0.00 | 0.00 |
| ATOM | 5181 | N   | ASP | X | 345 | 62.672 | 29.889 | 44.501 | 0.00 | 0.00 |
| ATOM | 5182 | H   | ASP | X | 345 | 62.083 | 29.953 | 45.320 | 0.00 | 0.00 |

|      |      |      |     |   |     |        |        |        |      |      |
|------|------|------|-----|---|-----|--------|--------|--------|------|------|
| ATOM | 5183 | CA   | ASP | X | 345 | 64.033 | 29.446 | 44.640 | 0.00 | 0.00 |
| ATOM | 5184 | HA   | ASP | X | 345 | 64.672 | 29.967 | 43.928 | 0.00 | 0.00 |
| ATOM | 5185 | CB   | ASP | X | 345 | 64.584 | 29.737 | 46.105 | 0.00 | 0.00 |
| ATOM | 5186 | HB2  | ASP | X | 345 | 64.238 | 30.716 | 46.439 | 0.00 | 0.00 |
| ATOM | 5187 | HB3  | ASP | X | 345 | 64.212 | 29.005 | 46.822 | 0.00 | 0.00 |
| ATOM | 5188 | CG   | ASP | X | 345 | 66.104 | 29.833 | 46.167 | 0.00 | 0.00 |
| ATOM | 5189 | OD1  | ASP | X | 345 | 66.655 | 30.578 | 45.350 | 0.00 | 0.00 |
| ATOM | 5190 | OD2  | ASP | X | 345 | 66.699 | 29.188 | 47.109 | 0.00 | 0.00 |
| ATOM | 5191 | C    | ASP | X | 345 | 64.344 | 27.984 | 44.313 | 0.00 | 0.00 |
| ATOM | 5192 | O    | ASP | X | 345 | 65.500 | 27.554 | 44.385 | 0.00 | 0.00 |
| ATOM | 5193 | N    | ASN | X | 346 | 63.333 | 27.149 | 43.966 | 0.00 | 0.00 |
| ATOM | 5194 | H    | ASN | X | 346 | 62.366 | 27.393 | 44.128 | 0.00 | 0.00 |
| ATOM | 5195 | CA   | ASN | X | 346 | 63.694 | 25.752 | 43.660 | 0.00 | 0.00 |
| ATOM | 5196 | HA   | ASN | X | 346 | 64.744 | 25.686 | 43.374 | 0.00 | 0.00 |
| ATOM | 5197 | CB   | ASN | X | 346 | 63.625 | 24.872 | 44.929 | 0.00 | 0.00 |
| ATOM | 5198 | HB2  | ASN | X | 346 | 64.336 | 25.362 | 45.594 | 0.00 | 0.00 |
| ATOM | 5199 | HB3  | ASN | X | 346 | 62.565 | 24.764 | 45.160 | 0.00 | 0.00 |
| ATOM | 5200 | CG   | ASN | X | 346 | 64.283 | 23.512 | 44.769 | 0.00 | 0.00 |
| ATOM | 5201 | OD1  | ASN | X | 346 | 64.769 | 23.142 | 43.750 | 0.00 | 0.00 |
| ATOM | 5202 | ND2  | ASN | X | 346 | 64.089 | 22.663 | 45.759 | 0.00 | 0.00 |
| ATOM | 5203 | HD21 | ASN | X | 346 | 64.522 | 21.750 | 45.737 | 0.00 | 0.00 |
| ATOM | 5204 | HD22 | ASN | X | 346 | 63.738 | 22.919 | 46.670 | 0.00 | 0.00 |
| ATOM | 5205 | C    | ASN | X | 346 | 62.780 | 25.137 | 42.589 | 0.00 | 0.00 |
| ATOM | 5206 | O    | ASN | X | 346 | 61.580 | 24.969 | 42.767 | 0.00 | 0.00 |
| ATOM | 5207 | N    | GLU | X | 347 | 63.301 | 24.717 | 41.391 | 0.00 | 0.00 |
| ATOM | 5208 | H    | GLU | X | 347 | 64.279 | 24.875 | 41.192 | 0.00 | 0.00 |
| ATOM | 5209 | CA   | GLU | X | 347 | 62.645 | 23.798 | 40.496 | 0.00 | 0.00 |
| ATOM | 5210 | HA   | GLU | X | 347 | 61.599 | 24.090 | 40.413 | 0.00 | 0.00 |
| ATOM | 5211 | CB   | GLU | X | 347 | 63.281 | 23.982 | 39.077 | 0.00 | 0.00 |
| ATOM | 5212 | HB2  | GLU | X | 347 | 63.073 | 25.033 | 38.878 | 0.00 | 0.00 |
| ATOM | 5213 | HB3  | GLU | X | 347 | 64.347 | 23.755 | 39.061 | 0.00 | 0.00 |
| ATOM | 5214 | CG   | GLU | X | 347 | 62.637 | 23.179 | 38.026 | 0.00 | 0.00 |
| ATOM | 5215 | HG2  | GLU | X | 347 | 62.896 | 22.132 | 38.190 | 0.00 | 0.00 |
| ATOM | 5216 | HG3  | GLU | X | 347 | 61.553 | 23.094 | 38.110 | 0.00 | 0.00 |
| ATOM | 5217 | CD   | GLU | X | 347 | 62.968 | 23.480 | 36.603 | 0.00 | 0.00 |
| ATOM | 5218 | OE1  | GLU | X | 347 | 63.534 | 24.588 | 36.305 | 0.00 | 0.00 |
| ATOM | 5219 | OE2  | GLU | X | 347 | 62.573 | 22.626 | 35.735 | 0.00 | 0.00 |
| ATOM | 5220 | C    | GLU | X | 347 | 62.569 | 22.334 | 41.021 | 0.00 | 0.00 |
| ATOM | 5221 | O    | GLU | X | 347 | 63.259 | 21.449 | 40.547 | 0.00 | 0.00 |
| ATOM | 5222 | N    | SER | X | 348 | 61.795 | 22.156 | 42.079 | 0.00 | 0.00 |
| ATOM | 5223 | H    | SER | X | 348 | 61.111 | 22.872 | 42.275 | 0.00 | 0.00 |
| ATOM | 5224 | CA   | SER | X | 348 | 61.779 | 21.014 | 42.998 | 0.00 | 0.00 |
| ATOM | 5225 | HA   | SER | X | 348 | 62.661 | 20.988 | 43.638 | 0.00 | 0.00 |
| ATOM | 5226 | CB   | SER | X | 348 | 60.547 | 21.083 | 43.832 | 0.00 | 0.00 |
| ATOM | 5227 | HB2  | SER | X | 348 | 59.689 | 21.085 | 43.159 | 0.00 | 0.00 |
| ATOM | 5228 | HB3  | SER | X | 348 | 60.421 | 20.155 | 44.389 | 0.00 | 0.00 |
| ATOM | 5229 | OG   | SER | X | 348 | 60.596 | 22.182 | 44.682 | 0.00 | 0.00 |
| ATOM | 5230 | HG   | SER | X | 348 | 60.141 | 21.925 | 45.487 | 0.00 | 0.00 |
| ATOM | 5231 | C    | SER | X | 348 | 61.644 | 19.647 | 42.301 | 0.00 | 0.00 |
| ATOM | 5232 | O    | SER | X | 348 | 60.693 | 19.387 | 41.541 | 0.00 | 0.00 |
| ATOM | 5233 | N    | LEU | X | 349 | 62.565 | 18.753 | 42.742 | 0.00 | 0.00 |
| ATOM | 5234 | H    | LEU | X | 349 | 63.247 | 19.028 | 43.434 | 0.00 | 0.00 |
| ATOM | 5235 | CA   | LEU | X | 349 | 62.559 | 17.321 | 42.330 | 0.00 | 0.00 |
| ATOM | 5236 | HA   | LEU | X | 349 | 62.091 | 17.245 | 41.348 | 0.00 | 0.00 |
| ATOM | 5237 | CB   | LEU | X | 349 | 63.989 | 16.832 | 42.264 | 0.00 | 0.00 |
| ATOM | 5238 | HB2  | LEU | X | 349 | 64.406 | 16.985 | 43.260 | 0.00 | 0.00 |
| ATOM | 5239 | HB3  | LEU | X | 349 | 63.916 | 15.761 | 42.075 | 0.00 | 0.00 |
| ATOM | 5240 | CG   | LEU | X | 349 | 65.029 | 17.451 | 41.272 | 0.00 | 0.00 |
| ATOM | 5241 | HG   | LEU | X | 349 | 65.060 | 18.538 | 41.342 | 0.00 | 0.00 |
| ATOM | 5242 | CD1  | LEU | X | 349 | 66.465 | 16.979 | 41.499 | 0.00 | 0.00 |
| ATOM | 5243 | HD11 | LEU | X | 349 | 67.273 | 17.383 | 40.890 | 0.00 | 0.00 |
| ATOM | 5244 | HD12 | LEU | X | 349 | 66.708 | 17.012 | 42.561 | 0.00 | 0.00 |
| ATOM | 5245 | HD13 | LEU | X | 349 | 66.523 | 15.912 | 41.283 | 0.00 | 0.00 |
| ATOM | 5246 | CD2  | LEU | X | 349 | 64.551 | 17.078 | 39.872 | 0.00 | 0.00 |
| ATOM | 5247 | HD21 | LEU | X | 349 | 64.490 | 15.994 | 39.775 | 0.00 | 0.00 |
| ATOM | 5248 | HD22 | LEU | X | 349 | 63.689 | 17.702 | 39.636 | 0.00 | 0.00 |
| ATOM | 5249 | HD23 | LEU | X | 349 | 65.392 | 17.365 | 39.240 | 0.00 | 0.00 |
| ATOM | 5250 | C    | LEU | X | 349 | 61.678 | 16.506 | 43.406 | 0.00 | 0.00 |
| ATOM | 5251 | O    | LEU | X | 349 | 61.658 | 16.834 | 44.639 | 0.00 | 0.00 |
| ATOM | 5252 | N    | ILE | X | 350 | 60.899 | 15.579 | 42.819 | 0.00 | 0.00 |

|      |      |      |     |   |     |        |        |        |      |      |
|------|------|------|-----|---|-----|--------|--------|--------|------|------|
| ATOM | 5253 | H    | ILE | X | 350 | 61.120 | 15.334 | 41.865 | 0.00 | 0.00 |
| ATOM | 5254 | CA   | ILE | X | 350 | 59.869 | 14.788 | 43.559 | 0.00 | 0.00 |
| ATOM | 5255 | HA   | ILE | X | 350 | 60.166 | 14.608 | 44.592 | 0.00 | 0.00 |
| ATOM | 5256 | CB   | ILE | X | 350 | 58.532 | 15.607 | 43.681 | 0.00 | 0.00 |
| ATOM | 5257 | HB   | ILE | X | 350 | 57.863 | 14.951 | 44.238 | 0.00 | 0.00 |
| ATOM | 5258 | CG2  | ILE | X | 350 | 58.672 | 16.797 | 44.640 | 0.00 | 0.00 |
| ATOM | 5259 | HG21 | ILE | X | 350 | 59.085 | 16.339 | 45.539 | 0.00 | 0.00 |
| ATOM | 5260 | HG22 | ILE | X | 350 | 59.332 | 17.576 | 44.257 | 0.00 | 0.00 |
| ATOM | 5261 | HG23 | ILE | X | 350 | 57.659 | 17.152 | 44.824 | 0.00 | 0.00 |
| ATOM | 5262 | CG1  | ILE | X | 350 | 57.832 | 15.855 | 42.358 | 0.00 | 0.00 |
| ATOM | 5263 | HG12 | ILE | X | 350 | 58.564 | 16.194 | 41.624 | 0.00 | 0.00 |
| ATOM | 5264 | HG13 | ILE | X | 350 | 57.462 | 14.916 | 41.947 | 0.00 | 0.00 |
| ATOM | 5265 | CD1  | ILE | X | 350 | 56.731 | 16.923 | 42.299 | 0.00 | 0.00 |
| ATOM | 5266 | HD11 | ILE | X | 350 | 55.986 | 16.794 | 43.084 | 0.00 | 0.00 |
| ATOM | 5267 | HD12 | ILE | X | 350 | 57.127 | 17.937 | 42.346 | 0.00 | 0.00 |
| ATOM | 5268 | HD13 | ILE | X | 350 | 56.322 | 16.958 | 41.289 | 0.00 | 0.00 |
| ATOM | 5269 | C    | ILE | X | 350 | 59.694 | 13.421 | 42.913 | 0.00 | 0.00 |
| ATOM | 5270 | O    | ILE | X | 350 | 59.734 | 13.265 | 41.682 | 0.00 | 0.00 |
| ATOM | 5271 | N    | SER | X | 351 | 59.437 | 12.384 | 43.748 | 0.00 | 0.00 |
| ATOM | 5272 | H    | SER | X | 351 | 59.496 | 12.480 | 44.752 | 0.00 | 0.00 |
| ATOM | 5273 | CA   | SER | X | 351 | 59.145 | 10.988 | 43.254 | 0.00 | 0.00 |
| ATOM | 5274 | HA   | SER | X | 351 | 59.450 | 10.757 | 42.233 | 0.00 | 0.00 |
| ATOM | 5275 | CB   | SER | X | 351 | 59.855 | 9.987  | 44.253 | 0.00 | 0.00 |
| ATOM | 5276 | HB2  | SER | X | 351 | 59.767 | 8.976  | 43.857 | 0.00 | 0.00 |
| ATOM | 5277 | HB3  | SER | X | 351 | 60.916 | 10.228 | 44.187 | 0.00 | 0.00 |
| ATOM | 5278 | OG   | SER | X | 351 | 59.408 | 10.030 | 45.576 | 0.00 | 0.00 |
| ATOM | 5279 | HG   | SER | X | 351 | 59.826 | 10.839 | 45.879 | 0.00 | 0.00 |
| ATOM | 5280 | C    | SER | X | 351 | 57.624 | 10.633 | 43.347 | 0.00 | 0.00 |
| ATOM | 5281 | O    | SER | X | 351 | 56.892 | 11.475 | 43.796 | 0.00 | 0.00 |
| ATOM | 5282 | N    | ARG | X | 352 | 57.160 | 9.436  | 42.983 | 0.00 | 0.00 |
| ATOM | 5283 | H    | ARG | X | 352 | 57.750 | 8.884  | 42.377 | 0.00 | 0.00 |
| ATOM | 5284 | CA   | ARG | X | 352 | 55.725 | 9.062  | 43.095 | 0.00 | 0.00 |
| ATOM | 5285 | HA   | ARG | X | 352 | 55.136 | 9.820  | 42.579 | 0.00 | 0.00 |
| ATOM | 5286 | CB   | ARG | X | 352 | 55.311 | 7.736  | 42.364 | 0.00 | 0.00 |
| ATOM | 5287 | HB2  | ARG | X | 352 | 55.959 | 6.962  | 42.774 | 0.00 | 0.00 |
| ATOM | 5288 | HB3  | ARG | X | 352 | 54.265 | 7.508  | 42.566 | 0.00 | 0.00 |
| ATOM | 5289 | CG   | ARG | X | 352 | 55.493 | 7.767  | 40.844 | 0.00 | 0.00 |
| ATOM | 5290 | HG2  | ARG | X | 352 | 54.911 | 8.635  | 40.534 | 0.00 | 0.00 |
| ATOM | 5291 | HG3  | ARG | X | 352 | 56.495 | 8.014  | 40.491 | 0.00 | 0.00 |
| ATOM | 5292 | CD   | ARG | X | 352 | 54.977 | 6.412  | 40.223 | 0.00 | 0.00 |
| ATOM | 5293 | HD2  | ARG | X | 352 | 55.374 | 6.383  | 39.209 | 0.00 | 0.00 |
| ATOM | 5294 | HD3  | ARG | X | 352 | 55.418 | 5.531  | 40.688 | 0.00 | 0.00 |
| ATOM | 5295 | NE   | ARG | X | 352 | 53.503 | 6.276  | 40.244 | 0.00 | 0.00 |
| ATOM | 5296 | HE   | ARG | X | 352 | 53.181 | 5.418  | 40.668 | 0.00 | 0.00 |
| ATOM | 5297 | CZ   | ARG | X | 352 | 52.597 | 6.960  | 39.589 | 0.00 | 0.00 |
| ATOM | 5298 | NH1  | ARG | X | 352 | 52.929 | 8.053  | 38.901 | 0.00 | 0.00 |
| ATOM | 5299 | HH11 | ARG | X | 352 | 53.891 | 8.323  | 38.753 | 0.00 | 0.00 |
| ATOM | 5300 | HH12 | ARG | X | 352 | 52.245 | 8.518  | 38.322 | 0.00 | 0.00 |
| ATOM | 5301 | NH2  | ARG | X | 352 | 51.327 | 6.652  | 39.637 | 0.00 | 0.00 |
| ATOM | 5302 | HH21 | ARG | X | 352 | 50.920 | 5.902  | 40.177 | 0.00 | 0.00 |
| ATOM | 5303 | HH22 | ARG | X | 352 | 50.669 | 7.234  | 39.139 | 0.00 | 0.00 |
| ATOM | 5304 | C    | ARG | X | 352 | 55.340 | 9.111  | 44.566 | 0.00 | 0.00 |
| ATOM | 5305 | O    | ARG | X | 352 | 54.228 | 9.389  | 44.880 | 0.00 | 0.00 |
| ATOM | 5306 | N    | ALA | X | 353 | 56.234 | 8.770  | 45.478 | 0.00 | 0.00 |
| ATOM | 5307 | H    | ALA | X | 353 | 57.148 | 8.413  | 45.237 | 0.00 | 0.00 |
| ATOM | 5308 | CA   | ALA | X | 353 | 55.989 | 8.941  | 46.934 | 0.00 | 0.00 |
| ATOM | 5309 | HA   | ALA | X | 353 | 55.055 | 8.481  | 47.258 | 0.00 | 0.00 |
| ATOM | 5310 | CB   | ALA | X | 353 | 57.164 | 8.142  | 47.622 | 0.00 | 0.00 |
| ATOM | 5311 | HB1  | ALA | X | 353 | 57.179 | 8.353  | 48.692 | 0.00 | 0.00 |
| ATOM | 5312 | HB2  | ALA | X | 353 | 57.011 | 7.074  | 47.470 | 0.00 | 0.00 |
| ATOM | 5313 | HB3  | ALA | X | 353 | 58.155 | 8.358  | 47.221 | 0.00 | 0.00 |
| ATOM | 5314 | C    | ALA | X | 353 | 55.774 | 10.365 | 47.313 | 0.00 | 0.00 |
| ATOM | 5315 | O    | ALA | X | 353 | 55.193 | 10.568 | 48.365 | 0.00 | 0.00 |
| ATOM | 5316 | N    | GLU | X | 354 | 56.104 | 11.352 | 46.553 | 0.00 | 0.00 |
| ATOM | 5317 | H    | GLU | X | 354 | 56.479 | 11.160 | 45.635 | 0.00 | 0.00 |
| ATOM | 5318 | CA   | GLU | X | 354 | 56.033 | 12.783 | 46.808 | 0.00 | 0.00 |
| ATOM | 5319 | HA   | GLU | X | 354 | 55.703 | 12.915 | 47.838 | 0.00 | 0.00 |
| ATOM | 5320 | CB   | GLU | X | 354 | 57.373 | 13.354 | 46.550 | 0.00 | 0.00 |
| ATOM | 5321 | HB2  | GLU | X | 354 | 57.746 | 12.826 | 45.672 | 0.00 | 0.00 |
| ATOM | 5322 | HB3  | GLU | X | 354 | 57.395 | 14.441 | 46.469 | 0.00 | 0.00 |

|      |      |      |     |   |     |        |        |        |      |      |
|------|------|------|-----|---|-----|--------|--------|--------|------|------|
| ATOM | 5323 | CG   | GLU | X | 354 | 58.258 | 12.952 | 47.700 | 0.00 | 0.00 |
| ATOM | 5324 | HG2  | GLU | X | 354 | 58.081 | 13.416 | 48.671 | 0.00 | 0.00 |
| ATOM | 5325 | HG3  | GLU | X | 354 | 58.063 | 11.914 | 47.970 | 0.00 | 0.00 |
| ATOM | 5326 | CD   | GLU | X | 354 | 59.693 | 13.197 | 47.363 | 0.00 | 0.00 |
| ATOM | 5327 | OE1  | GLU | X | 354 | 60.311 | 14.233 | 47.774 | 0.00 | 0.00 |
| ATOM | 5328 | OE2  | GLU | X | 354 | 60.290 | 12.384 | 46.626 | 0.00 | 0.00 |
| ATOM | 5329 | C    | GLU | X | 354 | 54.985 | 13.503 | 45.965 | 0.00 | 0.00 |
| ATOM | 5330 | O    | GLU | X | 354 | 54.582 | 14.568 | 46.419 | 0.00 | 0.00 |
| ATOM | 5331 | N    | PHE | X | 355 | 54.596 | 12.899 | 44.875 | 0.00 | 0.00 |
| ATOM | 5332 | H    | PHE | X | 355 | 54.981 | 12.040 | 44.509 | 0.00 | 0.00 |
| ATOM | 5333 | CA   | PHE | X | 355 | 53.348 | 13.225 | 44.278 | 0.00 | 0.00 |
| ATOM | 5334 | HA   | PHE | X | 355 | 53.387 | 14.307 | 44.151 | 0.00 | 0.00 |
| ATOM | 5335 | CB   | PHE | X | 355 | 53.232 | 12.613 | 42.923 | 0.00 | 0.00 |
| ATOM | 5336 | HB2  | PHE | X | 355 | 54.060 | 12.978 | 42.316 | 0.00 | 0.00 |
| ATOM | 5337 | HB3  | PHE | X | 355 | 53.159 | 11.530 | 43.021 | 0.00 | 0.00 |
| ATOM | 5338 | CG   | PHE | X | 355 | 52.069 | 12.939 | 42.117 | 0.00 | 0.00 |
| ATOM | 5339 | CD1  | PHE | X | 355 | 51.523 | 14.249 | 42.032 | 0.00 | 0.00 |
| ATOM | 5340 | HD1  | PHE | X | 355 | 51.895 | 15.060 | 42.640 | 0.00 | 0.00 |
| ATOM | 5341 | CE1  | PHE | X | 355 | 50.457 | 14.479 | 41.083 | 0.00 | 0.00 |
| ATOM | 5342 | HE1  | PHE | X | 355 | 49.880 | 15.390 | 41.033 | 0.00 | 0.00 |
| ATOM | 5343 | CZ   | PHE | X | 355 | 49.956 | 13.421 | 40.274 | 0.00 | 0.00 |
| ATOM | 5344 | HZ   | PHE | X | 355 | 49.058 | 13.537 | 39.686 | 0.00 | 0.00 |
| ATOM | 5345 | CE2  | PHE | X | 355 | 50.582 | 12.114 | 40.347 | 0.00 | 0.00 |
| ATOM | 5346 | HE2  | PHE | X | 355 | 50.238 | 11.241 | 39.813 | 0.00 | 0.00 |
| ATOM | 5347 | CD2  | PHE | X | 355 | 51.590 | 11.879 | 41.308 | 0.00 | 0.00 |
| ATOM | 5348 | HD2  | PHE | X | 355 | 52.094 | 10.926 | 41.367 | 0.00 | 0.00 |
| ATOM | 5349 | C    | PHE | X | 355 | 52.258 | 12.910 | 45.191 | 0.00 | 0.00 |
| ATOM | 5350 | O    | PHE | X | 355 | 51.456 | 13.792 | 45.514 | 0.00 | 0.00 |
| ATOM | 5351 | N    | LEU | X | 356 | 52.197 | 11.641 | 45.663 | 0.00 | 0.00 |
| ATOM | 5352 | H    | LEU | X | 356 | 52.890 | 10.970 | 45.363 | 0.00 | 0.00 |
| ATOM | 5353 | CA   | LEU | X | 356 | 51.177 | 11.253 | 46.652 | 0.00 | 0.00 |
| ATOM | 5354 | HA   | LEU | X | 356 | 50.202 | 11.405 | 46.191 | 0.00 | 0.00 |
| ATOM | 5355 | CB   | LEU | X | 356 | 51.374 | 9.729  | 46.893 | 0.00 | 0.00 |
| ATOM | 5356 | HB2  | LEU | X | 356 | 51.663 | 9.178  | 45.998 | 0.00 | 0.00 |
| ATOM | 5357 | HB3  | LEU | X | 356 | 52.282 | 9.722  | 47.495 | 0.00 | 0.00 |
| ATOM | 5358 | CG   | LEU | X | 356 | 50.329 | 9.062  | 47.793 | 0.00 | 0.00 |
| ATOM | 5359 | HG   | LEU | X | 356 | 50.241 | 9.715  | 48.662 | 0.00 | 0.00 |
| ATOM | 5360 | CD1  | LEU | X | 356 | 48.903 | 8.989  | 47.165 | 0.00 | 0.00 |
| ATOM | 5361 | HD11 | LEU | X | 356 | 48.245 | 8.418  | 47.820 | 0.00 | 0.00 |
| ATOM | 5362 | HD12 | LEU | X | 356 | 48.502 | 9.997  | 47.062 | 0.00 | 0.00 |
| ATOM | 5363 | HD13 | LEU | X | 356 | 49.032 | 8.566  | 46.168 | 0.00 | 0.00 |
| ATOM | 5364 | CD2  | LEU | X | 356 | 50.739 | 7.630  | 48.139 | 0.00 | 0.00 |
| ATOM | 5365 | HD21 | LEU | X | 356 | 51.719 | 7.691  | 48.613 | 0.00 | 0.00 |
| ATOM | 5366 | HD22 | LEU | X | 356 | 50.164 | 7.115  | 48.908 | 0.00 | 0.00 |
| ATOM | 5367 | HD23 | LEU | X | 356 | 50.763 | 6.995  | 47.253 | 0.00 | 0.00 |
| ATOM | 5368 | C    | LEU | X | 356 | 51.087 | 12.136 | 47.860 | 0.00 | 0.00 |
| ATOM | 5369 | O    | LEU | X | 356 | 50.052 | 12.674 | 48.182 | 0.00 | 0.00 |
| ATOM | 5370 | N    | ALA | X | 357 | 52.170 | 12.387 | 48.560 | 0.00 | 0.00 |
| ATOM | 5371 | H    | ALA | X | 357 | 52.984 | 11.803 | 48.434 | 0.00 | 0.00 |
| ATOM | 5372 | CA   | ALA | X | 357 | 52.186 | 13.241 | 49.650 | 0.00 | 0.00 |
| ATOM | 5373 | HA   | ALA | X | 357 | 51.431 | 12.927 | 50.371 | 0.00 | 0.00 |
| ATOM | 5374 | CB   | ALA | X | 357 | 53.605 | 13.130 | 50.308 | 0.00 | 0.00 |
| ATOM | 5375 | HB1  | ALA | X | 357 | 53.903 | 12.108 | 50.543 | 0.00 | 0.00 |
| ATOM | 5376 | HB2  | ALA | X | 357 | 54.250 | 13.613 | 49.573 | 0.00 | 0.00 |
| ATOM | 5377 | HB3  | ALA | X | 357 | 53.460 | 13.661 | 51.248 | 0.00 | 0.00 |
| ATOM | 5378 | C    | ALA | X | 357 | 51.849 | 14.695 | 49.316 | 0.00 | 0.00 |
| ATOM | 5379 | O    | ALA | X | 357 | 51.088 | 15.306 | 50.063 | 0.00 | 0.00 |
| ATOM | 5380 | N    | GLY | X | 358 | 52.319 | 15.205 | 48.144 | 0.00 | 0.00 |
| ATOM | 5381 | H    | GLY | X | 358 | 53.128 | 14.781 | 47.711 | 0.00 | 0.00 |
| ATOM | 5382 | CA   | GLY | X | 358 | 52.072 | 16.553 | 47.673 | 0.00 | 0.00 |
| ATOM | 5383 | HA2  | GLY | X | 358 | 52.433 | 17.318 | 48.237 | 0.00 | 0.00 |
| ATOM | 5384 | HA3  | GLY | X | 358 | 52.618 | 16.639 | 46.729 | 0.00 | 0.00 |
| ATOM | 5385 | C    | GLY | X | 358 | 50.582 | 16.826 | 47.261 | 0.00 | 0.00 |
| ATOM | 5386 | O    | GLY | X | 358 | 50.034 | 17.834 | 47.623 | 0.00 | 0.00 |
| ATOM | 5387 | N    | VAL | X | 359 | 49.809 | 15.915 | 46.686 | 0.00 | 0.00 |
| ATOM | 5388 | H    | VAL | X | 359 | 50.290 | 15.107 | 46.319 | 0.00 | 0.00 |
| ATOM | 5389 | CA   | VAL | X | 359 | 48.281 | 15.938 | 46.739 | 0.00 | 0.00 |
| ATOM | 5390 | HA   | VAL | X | 359 | 47.990 | 16.864 | 46.244 | 0.00 | 0.00 |
| ATOM | 5391 | CB   | VAL | X | 359 | 47.652 | 14.780 | 45.864 | 0.00 | 0.00 |
| ATOM | 5392 | HB   | VAL | X | 359 | 48.118 | 13.804 | 45.996 | 0.00 | 0.00 |

|      |      |      |     |   |     |        |        |        |      |      |
|------|------|------|-----|---|-----|--------|--------|--------|------|------|
| ATOM | 5393 | CG1  | VAL | X | 359 | 46.101 | 14.734 | 45.921 | 0.00 | 0.00 |
| ATOM | 5394 | HG11 | VAL | X | 359 | 45.683 | 15.628 | 45.458 | 0.00 | 0.00 |
| ATOM | 5395 | HG12 | VAL | X | 359 | 45.737 | 13.869 | 45.365 | 0.00 | 0.00 |
| ATOM | 5396 | HG13 | VAL | X | 359 | 45.739 | 14.682 | 46.948 | 0.00 | 0.00 |
| ATOM | 5397 | CG2  | VAL | X | 359 | 48.026 | 14.927 | 44.349 | 0.00 | 0.00 |
| ATOM | 5398 | HG21 | VAL | X | 359 | 47.713 | 13.996 | 43.877 | 0.00 | 0.00 |
| ATOM | 5399 | HG22 | VAL | X | 359 | 47.451 | 15.736 | 43.899 | 0.00 | 0.00 |
| ATOM | 5400 | HG23 | VAL | X | 359 | 49.095 | 15.110 | 44.242 | 0.00 | 0.00 |
| ATOM | 5401 | C    | VAL | X | 359 | 47.725 | 16.060 | 48.160 | 0.00 | 0.00 |
| ATOM | 5402 | O    | VAL | X | 359 | 46.983 | 17.018 | 48.412 | 0.00 | 0.00 |
| ATOM | 5403 | N    | ARG | X | 360 | 48.238 | 15.294 | 49.132 | 0.00 | 0.00 |
| ATOM | 5404 | H    | ARG | X | 360 | 48.923 | 14.558 | 49.038 | 0.00 | 0.00 |
| ATOM | 5405 | CA   | ARG | X | 360 | 47.628 | 15.117 | 50.459 | 0.00 | 0.00 |
| ATOM | 5406 | HA   | ARG | X | 360 | 46.546 | 15.092 | 50.325 | 0.00 | 0.00 |
| ATOM | 5407 | CB   | ARG | X | 360 | 48.026 | 13.868 | 51.205 | 0.00 | 0.00 |
| ATOM | 5408 | HB2  | ARG | X | 360 | 48.326 | 13.127 | 50.464 | 0.00 | 0.00 |
| ATOM | 5409 | HB3  | ARG | X | 360 | 48.909 | 13.921 | 51.842 | 0.00 | 0.00 |
| ATOM | 5410 | CG   | ARG | X | 360 | 46.900 | 13.308 | 52.116 | 0.00 | 0.00 |
| ATOM | 5411 | HG2  | ARG | X | 360 | 46.722 | 14.044 | 52.901 | 0.00 | 0.00 |
| ATOM | 5412 | HG3  | ARG | X | 360 | 46.017 | 13.177 | 51.490 | 0.00 | 0.00 |
| ATOM | 5413 | CD   | ARG | X | 360 | 47.288 | 11.931 | 52.626 | 0.00 | 0.00 |
| ATOM | 5414 | HD2  | ARG | X | 360 | 46.593 | 11.458 | 53.320 | 0.00 | 0.00 |
| ATOM | 5415 | HD3  | ARG | X | 360 | 47.359 | 11.407 | 51.673 | 0.00 | 0.00 |
| ATOM | 5416 | NE   | ARG | X | 360 | 48.575 | 11.990 | 53.300 | 0.00 | 0.00 |
| ATOM | 5417 | HE   | ARG | X | 360 | 48.743 | 12.915 | 53.667 | 0.00 | 0.00 |
| ATOM | 5418 | CZ   | ARG | X | 360 | 49.665 | 11.145 | 53.297 | 0.00 | 0.00 |
| ATOM | 5419 | NH1  | ARG | X | 360 | 49.664 | 10.012 | 52.645 | 0.00 | 0.00 |
| ATOM | 5420 | HH11 | ARG | X | 360 | 48.832 | 9.641  | 52.209 | 0.00 | 0.00 |
| ATOM | 5421 | HH12 | ARG | X | 360 | 50.519 | 9.473  | 52.643 | 0.00 | 0.00 |
| ATOM | 5422 | NH2  | ARG | X | 360 | 50.750 | 11.569 | 53.838 | 0.00 | 0.00 |
| ATOM | 5423 | HH21 | ARG | X | 360 | 50.860 | 12.453 | 54.314 | 0.00 | 0.00 |
| ATOM | 5424 | HH22 | ARG | X | 360 | 51.488 | 10.888 | 53.726 | 0.00 | 0.00 |
| ATOM | 5425 | C    | ARG | X | 360 | 47.825 | 16.389 | 51.335 | 0.00 | 0.00 |
| ATOM | 5426 | O    | ARG | X | 360 | 46.813 | 16.971 | 51.760 | 0.00 | 0.00 |
| ATOM | 5427 | N    | VAL | X | 361 | 49.073 | 16.918 | 51.375 | 0.00 | 0.00 |
| ATOM | 5428 | H    | VAL | X | 361 | 49.851 | 16.413 | 50.975 | 0.00 | 0.00 |
| ATOM | 5429 | CA   | VAL | X | 361 | 49.345 | 18.234 | 51.946 | 0.00 | 0.00 |
| ATOM | 5430 | HA   | VAL | X | 361 | 48.821 | 18.327 | 52.897 | 0.00 | 0.00 |
| ATOM | 5431 | CB   | VAL | X | 361 | 50.797 | 18.318 | 52.490 | 0.00 | 0.00 |
| ATOM | 5432 | HB   | VAL | X | 361 | 50.864 | 19.207 | 53.117 | 0.00 | 0.00 |
| ATOM | 5433 | CG1  | VAL | X | 361 | 51.135 | 17.064 | 53.427 | 0.00 | 0.00 |
| ATOM | 5434 | HG11 | VAL | X | 361 | 51.997 | 17.140 | 54.090 | 0.00 | 0.00 |
| ATOM | 5435 | HG12 | VAL | X | 361 | 50.235 | 17.040 | 54.041 | 0.00 | 0.00 |
| ATOM | 5436 | HG13 | VAL | X | 361 | 51.390 | 16.135 | 52.916 | 0.00 | 0.00 |
| ATOM | 5437 | CG2  | VAL | X | 361 | 51.885 | 18.497 | 51.387 | 0.00 | 0.00 |
| ATOM | 5438 | HG21 | VAL | X | 361 | 51.643 | 17.830 | 50.560 | 0.00 | 0.00 |
| ATOM | 5439 | HG22 | VAL | X | 361 | 51.907 | 19.481 | 50.919 | 0.00 | 0.00 |
| ATOM | 5440 | HG23 | VAL | X | 361 | 52.868 | 18.308 | 51.818 | 0.00 | 0.00 |
| ATOM | 5441 | C    | VAL | X | 361 | 48.915 | 19.493 | 51.059 | 0.00 | 0.00 |
| ATOM | 5442 | O    | VAL | X | 361 | 48.671 | 20.547 | 51.641 | 0.00 | 0.00 |
| ATOM | 5443 | N    | GLY | X | 362 | 48.737 | 19.308 | 49.742 | 0.00 | 0.00 |
| ATOM | 5444 | H    | GLY | X | 362 | 48.877 | 18.366 | 49.406 | 0.00 | 0.00 |
| ATOM | 5445 | CA   | GLY | X | 362 | 48.437 | 20.337 | 48.709 | 0.00 | 0.00 |
| ATOM | 5446 | HA2  | GLY | X | 362 | 49.015 | 21.267 | 48.767 | 0.00 | 0.00 |
| ATOM | 5447 | HA3  | GLY | X | 362 | 48.628 | 19.883 | 47.764 | 0.00 | 0.00 |
| ATOM | 5448 | C    | GLY | X | 362 | 46.924 | 20.731 | 48.740 | 0.00 | 0.00 |
| ATOM | 5449 | O    | GLY | X | 362 | 46.621 | 21.756 | 49.303 | 0.00 | 0.00 |
| ATOM | 5450 | N    | VAL | X | 363 | 46.019 | 19.853 | 48.329 | 0.00 | 0.00 |
| ATOM | 5451 | H    | VAL | X | 363 | 46.255 | 18.872 | 48.292 | 0.00 | 0.00 |
| ATOM | 5452 | CA   | VAL | X | 363 | 44.588 | 20.127 | 48.481 | 0.00 | 0.00 |
| ATOM | 5453 | HA   | VAL | X | 363 | 44.445 | 21.184 | 48.255 | 0.00 | 0.00 |
| ATOM | 5454 | CB   | VAL | X | 363 | 43.767 | 19.408 | 47.416 | 0.00 | 0.00 |
| ATOM | 5455 | HB   | VAL | X | 363 | 44.003 | 18.353 | 47.558 | 0.00 | 0.00 |
| ATOM | 5456 | CG1  | VAL | X | 363 | 42.287 | 19.657 | 47.531 | 0.00 | 0.00 |
| ATOM | 5457 | HG11 | VAL | X | 363 | 41.870 | 19.493 | 48.524 | 0.00 | 0.00 |
| ATOM | 5458 | HG12 | VAL | X | 363 | 42.222 | 20.742 | 47.448 | 0.00 | 0.00 |
| ATOM | 5459 | HG13 | VAL | X | 363 | 41.687 | 19.326 | 46.683 | 0.00 | 0.00 |
| ATOM | 5460 | CG2  | VAL | X | 363 | 44.156 | 19.730 | 45.981 | 0.00 | 0.00 |
| ATOM | 5461 | HG21 | VAL | X | 363 | 45.131 | 19.283 | 45.788 | 0.00 | 0.00 |
| ATOM | 5462 | HG22 | VAL | X | 363 | 43.385 | 19.454 | 45.261 | 0.00 | 0.00 |

|      |      |      |     |   |     |        |        |        |      |      |
|------|------|------|-----|---|-----|--------|--------|--------|------|------|
| ATOM | 5463 | HG23 | VAL | X | 363 | 44.349 | 20.789 | 45.807 | 0.00 | 0.00 |
| ATOM | 5464 | C    | VAL | X | 363 | 44.173 | 19.828 | 49.906 | 0.00 | 0.00 |
| ATOM | 5465 | O    | VAL | X | 363 | 44.541 | 18.692 | 50.299 | 0.00 | 0.00 |
| ATOM | 5466 | N    | PRO | X | 364 | 43.425 | 20.714 | 50.577 | 0.00 | 0.00 |
| ATOM | 5467 | CD   | PRO | X | 364 | 42.957 | 22.030 | 50.196 | 0.00 | 0.00 |
| ATOM | 5468 | HD2  | PRO | X | 364 | 41.984 | 21.901 | 49.721 | 0.00 | 0.00 |
| ATOM | 5469 | HD3  | PRO | X | 364 | 43.719 | 22.568 | 49.633 | 0.00 | 0.00 |
| ATOM | 5470 | CG   | PRO | X | 364 | 42.811 | 22.781 | 51.547 | 0.00 | 0.00 |
| ATOM | 5471 | HG2  | PRO | X | 364 | 42.142 | 23.641 | 51.587 | 0.00 | 0.00 |
| ATOM | 5472 | HG3  | PRO | X | 364 | 43.791 | 23.131 | 51.870 | 0.00 | 0.00 |
| ATOM | 5473 | CB   | PRO | X | 364 | 42.264 | 21.634 | 52.460 | 0.00 | 0.00 |
| ATOM | 5474 | HB2  | PRO | X | 364 | 41.215 | 21.402 | 52.277 | 0.00 | 0.00 |
| ATOM | 5475 | HB3  | PRO | X | 364 | 42.535 | 21.936 | 53.471 | 0.00 | 0.00 |
| ATOM | 5476 | CA   | PRO | X | 364 | 43.053 | 20.386 | 51.995 | 0.00 | 0.00 |
| ATOM | 5477 | HA   | PRO | X | 364 | 44.010 | 20.203 | 52.482 | 0.00 | 0.00 |
| ATOM | 5478 | C    | PRO | X | 364 | 42.176 | 19.154 | 52.232 | 0.00 | 0.00 |
| ATOM | 5479 | O    | PRO | X | 364 | 41.379 | 18.804 | 51.352 | 0.00 | 0.00 |
| ATOM | 5480 | N    | GLN | X | 365 | 42.353 | 18.490 | 53.342 | 0.00 | 0.00 |
| ATOM | 5481 | H    | GLN | X | 365 | 43.194 | 18.687 | 53.865 | 0.00 | 0.00 |
| ATOM | 5482 | CA   | GLN | X | 365 | 41.428 | 17.488 | 53.858 | 0.00 | 0.00 |
| ATOM | 5483 | HA   | GLN | X | 365 | 41.737 | 17.313 | 54.889 | 0.00 | 0.00 |
| ATOM | 5484 | CB   | GLN | X | 365 | 39.950 | 17.958 | 54.048 | 0.00 | 0.00 |
| ATOM | 5485 | HB2  | GLN | X | 365 | 39.511 | 18.151 | 53.069 | 0.00 | 0.00 |
| ATOM | 5486 | HB3  | GLN | X | 365 | 39.410 | 17.166 | 54.568 | 0.00 | 0.00 |
| ATOM | 5487 | CG   | GLN | X | 365 | 39.866 | 19.156 | 54.996 | 0.00 | 0.00 |
| ATOM | 5488 | HG2  | GLN | X | 365 | 40.601 | 19.158 | 55.801 | 0.00 | 0.00 |
| ATOM | 5489 | HG3  | GLN | X | 365 | 40.106 | 20.063 | 54.442 | 0.00 | 0.00 |
| ATOM | 5490 | CD   | GLN | X | 365 | 38.496 | 19.258 | 55.709 | 0.00 | 0.00 |
| ATOM | 5491 | OE1  | GLN | X | 365 | 38.319 | 18.752 | 56.811 | 0.00 | 0.00 |
| ATOM | 5492 | NE2  | GLN | X | 365 | 37.553 | 19.973 | 55.096 | 0.00 | 0.00 |
| ATOM | 5493 | HE21 | GLN | X | 365 | 36.749 | 20.357 | 55.572 | 0.00 | 0.00 |
| ATOM | 5494 | HE22 | GLN | X | 365 | 37.740 | 20.334 | 54.171 | 0.00 | 0.00 |
| ATOM | 5495 | C    | GLN | X | 365 | 41.485 | 16.141 | 53.103 | 0.00 | 0.00 |
| ATOM | 5496 | O    | GLN | X | 365 | 41.215 | 15.120 | 53.726 | 0.00 | 0.00 |
| ATOM | 5497 | N    | VAL | X | 366 | 41.816 | 16.160 | 51.801 | 0.00 | 0.00 |
| ATOM | 5498 | H    | VAL | X | 366 | 41.718 | 17.058 | 51.350 | 0.00 | 0.00 |
| ATOM | 5499 | CA   | VAL | X | 366 | 41.944 | 14.931 | 50.859 | 0.00 | 0.00 |
| ATOM | 5500 | HA   | VAL | X | 366 | 40.941 | 14.593 | 50.599 | 0.00 | 0.00 |
| ATOM | 5501 | CB   | VAL | X | 366 | 42.740 | 15.331 | 49.569 | 0.00 | 0.00 |
| ATOM | 5502 | HB   | VAL | X | 366 | 43.776 | 15.591 | 49.790 | 0.00 | 0.00 |
| ATOM | 5503 | CG1  | VAL | X | 366 | 42.769 | 14.106 | 48.534 | 0.00 | 0.00 |
| ATOM | 5504 | HG11 | VAL | X | 366 | 41.770 | 13.722 | 48.331 | 0.00 | 0.00 |
| ATOM | 5505 | HG12 | VAL | X | 366 | 43.233 | 14.463 | 47.615 | 0.00 | 0.00 |
| ATOM | 5506 | HG13 | VAL | X | 366 | 43.407 | 13.261 | 48.792 | 0.00 | 0.00 |
| ATOM | 5507 | CG2  | VAL | X | 366 | 41.929 | 16.472 | 48.898 | 0.00 | 0.00 |
| ATOM | 5508 | HG21 | VAL | X | 366 | 42.221 | 17.462 | 49.251 | 0.00 | 0.00 |
| ATOM | 5509 | HG22 | VAL | X | 366 | 42.056 | 16.344 | 47.823 | 0.00 | 0.00 |
| ATOM | 5510 | HG23 | VAL | X | 366 | 40.883 | 16.550 | 49.193 | 0.00 | 0.00 |
| ATOM | 5511 | C    | VAL | X | 366 | 42.666 | 13.791 | 51.506 | 0.00 | 0.00 |
| ATOM | 5512 | O    | VAL | X | 366 | 43.735 | 14.000 | 52.053 | 0.00 | 0.00 |
| ATOM | 5513 | N    | SER | X | 367 | 42.093 | 12.588 | 51.530 | 0.00 | 0.00 |
| ATOM | 5514 | H    | SER | X | 367 | 41.162 | 12.521 | 51.146 | 0.00 | 0.00 |
| ATOM | 5515 | CA   | SER | X | 367 | 42.524 | 11.354 | 52.230 | 0.00 | 0.00 |
| ATOM | 5516 | HA   | SER | X | 367 | 43.010 | 11.666 | 53.155 | 0.00 | 0.00 |
| ATOM | 5517 | CB   | SER | X | 367 | 41.251 | 10.408 | 52.487 | 0.00 | 0.00 |
| ATOM | 5518 | HB2  | SER | X | 367 | 41.452 | 9.541  | 53.117 | 0.00 | 0.00 |
| ATOM | 5519 | HB3  | SER | X | 367 | 40.605 | 11.052 | 53.084 | 0.00 | 0.00 |
| ATOM | 5520 | OG   | SER | X | 367 | 40.567 | 10.055 | 51.270 | 0.00 | 0.00 |
| ATOM | 5521 | HG   | SER | X | 367 | 39.866 | 9.454  | 51.534 | 0.00 | 0.00 |
| ATOM | 5522 | C    | SER | X | 367 | 43.556 | 10.712 | 51.456 | 0.00 | 0.00 |
| ATOM | 5523 | O    | SER | X | 367 | 43.662 | 10.776 | 50.218 | 0.00 | 0.00 |
| ATOM | 5524 | N    | ASP | X | 368 | 44.482 | 9.957  | 52.126 | 0.00 | 0.00 |
| ATOM | 5525 | H    | ASP | X | 368 | 44.432 | 9.782  | 53.119 | 0.00 | 0.00 |
| ATOM | 5526 | CA   | ASP | X | 368 | 45.349 | 8.968  | 51.453 | 0.00 | 0.00 |
| ATOM | 5527 | HA   | ASP | X | 368 | 46.053 | 9.586  | 50.896 | 0.00 | 0.00 |
| ATOM | 5528 | CB   | ASP | X | 368 | 46.267 | 8.292  | 52.457 | 0.00 | 0.00 |
| ATOM | 5529 | HB2  | ASP | X | 368 | 46.843 | 8.988  | 53.067 | 0.00 | 0.00 |
| ATOM | 5530 | HB3  | ASP | X | 368 | 45.738 | 7.597  | 53.109 | 0.00 | 0.00 |
| ATOM | 5531 | CG   | ASP | X | 368 | 47.377 | 7.509  | 51.780 | 0.00 | 0.00 |
| ATOM | 5532 | OD1  | ASP | X | 368 | 48.109 | 8.023  | 50.939 | 0.00 | 0.00 |



|      |      |      |     |   |     |        |        |        |      |      |
|------|------|------|-----|---|-----|--------|--------|--------|------|------|
| ATOM | 5533 | OD2  | ASP | X | 368 | 47.551 | 6.320  | 52.162 | 0.00 | 0.00 |
| ATOM | 5534 | C    | ASP | X | 368 | 44.630 | 8.059  | 50.432 | 0.00 | 0.00 |
| ATOM | 5535 | O    | ASP | X | 368 | 45.199 | 7.665  | 49.411 | 0.00 | 0.00 |
| ATOM | 5536 | N    | LEU | X | 369 | 43.362 | 7.672  | 50.656 | 0.00 | 0.00 |
| ATOM | 5537 | H    | LEU | X | 369 | 42.890 | 7.925  | 51.513 | 0.00 | 0.00 |
| ATOM | 5538 | CA   | LEU | X | 369 | 42.594 | 6.941  | 49.662 | 0.00 | 0.00 |
| ATOM | 5539 | HA   | LEU | X | 369 | 43.259 | 6.165  | 49.281 | 0.00 | 0.00 |
| ATOM | 5540 | CB   | LEU | X | 369 | 41.399 | 6.359  | 50.431 | 0.00 | 0.00 |
| ATOM | 5541 | HB2  | LEU | X | 369 | 41.738 | 5.846  | 51.332 | 0.00 | 0.00 |
| ATOM | 5542 | HB3  | LEU | X | 369 | 40.765 | 7.147  | 50.836 | 0.00 | 0.00 |
| ATOM | 5543 | CG   | LEU | X | 369 | 40.588 | 5.272  | 49.729 | 0.00 | 0.00 |
| ATOM | 5544 | HG   | LEU | X | 369 | 40.111 | 5.574  | 48.796 | 0.00 | 0.00 |
| ATOM | 5545 | CD1  | LEU | X | 369 | 41.469 | 4.047  | 49.350 | 0.00 | 0.00 |
| ATOM | 5546 | HD11 | LEU | X | 369 | 40.808 | 3.271  | 48.963 | 0.00 | 0.00 |
| ATOM | 5547 | HD12 | LEU | X | 369 | 42.132 | 4.362  | 48.544 | 0.00 | 0.00 |
| ATOM | 5548 | HD13 | LEU | X | 369 | 41.936 | 3.487  | 50.160 | 0.00 | 0.00 |
| ATOM | 5549 | CD2  | LEU | X | 369 | 39.583 | 4.776  | 50.713 | 0.00 | 0.00 |
| ATOM | 5550 | HD21 | LEU | X | 369 | 39.919 | 4.597  | 51.734 | 0.00 | 0.00 |
| ATOM | 5551 | HD22 | LEU | X | 369 | 38.838 | 5.572  | 50.685 | 0.00 | 0.00 |
| ATOM | 5552 | HD23 | LEU | X | 369 | 39.051 | 3.863  | 50.445 | 0.00 | 0.00 |
| ATOM | 5553 | C    | LEU | X | 369 | 42.111 | 7.793  | 48.433 | 0.00 | 0.00 |
| ATOM | 5554 | O    | LEU | X | 369 | 42.269 | 7.285  | 47.307 | 0.00 | 0.00 |
| ATOM | 5555 | N    | ALA | X | 370 | 41.527 | 8.979  | 48.696 | 0.00 | 0.00 |
| ATOM | 5556 | H    | ALA | X | 370 | 41.388 | 9.294  | 49.646 | 0.00 | 0.00 |
| ATOM | 5557 | CA   | ALA | X | 370 | 41.301 | 9.934  | 47.599 | 0.00 | 0.00 |
| ATOM | 5558 | HA   | ALA | X | 370 | 40.644 | 9.529  | 46.829 | 0.00 | 0.00 |
| ATOM | 5559 | CB   | ALA | X | 370 | 40.666 | 11.192 | 48.210 | 0.00 | 0.00 |
| ATOM | 5560 | HB1  | ALA | X | 370 | 40.339 | 11.855 | 47.410 | 0.00 | 0.00 |
| ATOM | 5561 | HB2  | ALA | X | 370 | 39.763 | 10.870 | 48.729 | 0.00 | 0.00 |
| ATOM | 5562 | HB3  | ALA | X | 370 | 41.273 | 11.796 | 48.884 | 0.00 | 0.00 |
| ATOM | 5563 | C    | ALA | X | 370 | 42.609 | 10.228 | 46.905 | 0.00 | 0.00 |
| ATOM | 5564 | O    | ALA | X | 370 | 42.613 | 10.312 | 45.708 | 0.00 | 0.00 |
| ATOM | 5565 | N    | ALA | X | 371 | 43.797 | 10.436 | 47.541 | 0.00 | 0.00 |
| ATOM | 5566 | H    | ALA | X | 371 | 43.745 | 10.437 | 48.549 | 0.00 | 0.00 |
| ATOM | 5567 | CA   | ALA | X | 371 | 44.966 | 10.942 | 46.915 | 0.00 | 0.00 |
| ATOM | 5568 | HA   | ALA | X | 371 | 44.695 | 11.901 | 46.474 | 0.00 | 0.00 |
| ATOM | 5569 | CB   | ALA | X | 371 | 46.075 | 11.271 | 47.930 | 0.00 | 0.00 |
| ATOM | 5570 | HB1  | ALA | X | 371 | 46.405 | 10.330 | 48.372 | 0.00 | 0.00 |
| ATOM | 5571 | HB2  | ALA | X | 371 | 46.962 | 11.662 | 47.431 | 0.00 | 0.00 |
| ATOM | 5572 | HB3  | ALA | X | 371 | 45.727 | 11.985 | 48.676 | 0.00 | 0.00 |
| ATOM | 5573 | C    | ALA | X | 371 | 45.369 | 9.921  | 45.913 | 0.00 | 0.00 |
| ATOM | 5574 | O    | ALA | X | 371 | 45.644 | 10.254 | 44.792 | 0.00 | 0.00 |
| ATOM | 5575 | N    | GLU | X | 372 | 45.490 | 8.608  | 46.282 | 0.00 | 0.00 |
| ATOM | 5576 | H    | GLU | X | 372 | 45.277 | 8.421  | 47.252 | 0.00 | 0.00 |
| ATOM | 5577 | CA   | GLU | X | 372 | 45.888 | 7.547  | 45.309 | 0.00 | 0.00 |
| ATOM | 5578 | HA   | GLU | X | 372 | 46.810 | 7.865  | 44.822 | 0.00 | 0.00 |
| ATOM | 5579 | CB   | GLU | X | 372 | 46.201 | 6.202  | 45.956 | 0.00 | 0.00 |
| ATOM | 5580 | HB2  | GLU | X | 372 | 46.958 | 6.403  | 46.714 | 0.00 | 0.00 |
| ATOM | 5581 | HB3  | GLU | X | 372 | 45.326 | 5.903  | 46.533 | 0.00 | 0.00 |
| ATOM | 5582 | CG   | GLU | X | 372 | 46.755 | 5.005  | 45.098 | 0.00 | 0.00 |
| ATOM | 5583 | HG2  | GLU | X | 372 | 45.921 | 4.629  | 44.506 | 0.00 | 0.00 |
| ATOM | 5584 | HG3  | GLU | X | 372 | 47.496 | 5.335  | 44.370 | 0.00 | 0.00 |
| ATOM | 5585 | CD   | GLU | X | 372 | 47.182 | 3.697  | 45.806 | 0.00 | 0.00 |
| ATOM | 5586 | OE1  | GLU | X | 372 | 46.338 | 2.943  | 46.309 | 0.00 | 0.00 |
| ATOM | 5587 | OE2  | GLU | X | 372 | 48.413 | 3.422  | 45.871 | 0.00 | 0.00 |
| ATOM | 5588 | C    | GLU | X | 372 | 44.840 | 7.403  | 44.231 | 0.00 | 0.00 |
| ATOM | 5589 | O    | GLU | X | 372 | 45.202 | 6.915  | 43.099 | 0.00 | 0.00 |
| ATOM | 5590 | N    | ALA | X | 373 | 43.612 | 7.915  | 44.356 | 0.00 | 0.00 |
| ATOM | 5591 | H    | ALA | X | 373 | 43.328 | 8.243  | 45.268 | 0.00 | 0.00 |
| ATOM | 5592 | CA   | ALA | X | 373 | 42.642 | 7.973  | 43.250 | 0.00 | 0.00 |
| ATOM | 5593 | HA   | ALA | X | 373 | 42.792 | 7.157  | 42.543 | 0.00 | 0.00 |
| ATOM | 5594 | CB   | ALA | X | 373 | 41.244 | 7.949  | 43.809 | 0.00 | 0.00 |
| ATOM | 5595 | HB1  | ALA | X | 373 | 40.655 | 7.220  | 43.252 | 0.00 | 0.00 |
| ATOM | 5596 | HB2  | ALA | X | 373 | 41.273 | 7.531  | 44.815 | 0.00 | 0.00 |
| ATOM | 5597 | HB3  | ALA | X | 373 | 40.774 | 8.918  | 43.638 | 0.00 | 0.00 |
| ATOM | 5598 | C    | ALA | X | 373 | 42.882 | 9.193  | 42.327 | 0.00 | 0.00 |
| ATOM | 5599 | O    | ALA | X | 373 | 42.712 | 9.064  | 41.088 | 0.00 | 0.00 |
| ATOM | 5600 | N    | VAL | X | 374 | 43.159 | 10.306 | 42.940 | 0.00 | 0.00 |
| ATOM | 5601 | H    | VAL | X | 374 | 43.152 | 10.302 | 43.950 | 0.00 | 0.00 |
| ATOM | 5602 | CA   | VAL | X | 374 | 43.622 | 11.628 | 42.283 | 0.00 | 0.00 |

|      |      |      |     |   |     |        |        |        |      |      |
|------|------|------|-----|---|-----|--------|--------|--------|------|------|
| ATOM | 5603 | HA   | VAL | X | 374 | 42.891 | 11.849 | 41.506 | 0.00 | 0.00 |
| ATOM | 5604 | CB   | VAL | X | 374 | 43.824 | 12.739 | 43.265 | 0.00 | 0.00 |
| ATOM | 5605 | HB   | VAL | X | 374 | 44.380 | 12.492 | 44.169 | 0.00 | 0.00 |
| ATOM | 5606 | CG1  | VAL | X | 374 | 44.559 | 13.887 | 42.629 | 0.00 | 0.00 |
| ATOM | 5607 | HG11 | VAL | X | 374 | 44.054 | 14.344 | 41.777 | 0.00 | 0.00 |
| ATOM | 5608 | HG12 | VAL | X | 374 | 44.899 | 14.648 | 43.331 | 0.00 | 0.00 |
| ATOM | 5609 | HG13 | VAL | X | 374 | 45.492 | 13.458 | 42.263 | 0.00 | 0.00 |
| ATOM | 5610 | CG2  | VAL | X | 374 | 42.440 | 13.191 | 43.764 | 0.00 | 0.00 |
| ATOM | 5611 | HG21 | VAL | X | 374 | 42.459 | 14.010 | 44.483 | 0.00 | 0.00 |
| ATOM | 5612 | HG22 | VAL | X | 374 | 41.885 | 13.621 | 42.929 | 0.00 | 0.00 |
| ATOM | 5613 | HG23 | VAL | X | 374 | 41.869 | 12.399 | 44.248 | 0.00 | 0.00 |
| ATOM | 5614 | C    | VAL | X | 374 | 44.917 | 11.231 | 41.517 | 0.00 | 0.00 |
| ATOM | 5615 | O    | VAL | X | 374 | 45.174 | 11.728 | 40.396 | 0.00 | 0.00 |
| ATOM | 5616 | N    | VAL | X | 375 | 45.830 | 10.390 | 42.047 | 0.00 | 0.00 |
| ATOM | 5617 | H    | VAL | X | 375 | 45.697 | 10.163 | 43.022 | 0.00 | 0.00 |
| ATOM | 5618 | CA   | VAL | X | 375 | 47.066 | 10.043 | 41.454 | 0.00 | 0.00 |
| ATOM | 5619 | HA   | VAL | X | 375 | 47.462 | 10.969 | 41.037 | 0.00 | 0.00 |
| ATOM | 5620 | CB   | VAL | X | 375 | 48.054 | 9.312  | 42.419 | 0.00 | 0.00 |
| ATOM | 5621 | HB   | VAL | X | 375 | 47.532 | 8.691  | 43.147 | 0.00 | 0.00 |
| ATOM | 5622 | CG1  | VAL | X | 375 | 49.212 | 8.517  | 41.735 | 0.00 | 0.00 |
| ATOM | 5623 | HG11 | VAL | X | 375 | 49.794 | 8.027  | 42.516 | 0.00 | 0.00 |
| ATOM | 5624 | HG12 | VAL | X | 375 | 48.947 | 7.728  | 41.031 | 0.00 | 0.00 |
| ATOM | 5625 | HG13 | VAL | X | 375 | 49.831 | 9.190  | 41.142 | 0.00 | 0.00 |
| ATOM | 5626 | CG2  | VAL | X | 375 | 48.698 | 10.364 | 43.340 | 0.00 | 0.00 |
| ATOM | 5627 | HG21 | VAL | X | 375 | 49.357 | 10.040 | 44.146 | 0.00 | 0.00 |
| ATOM | 5628 | HG22 | VAL | X | 375 | 49.294 | 11.012 | 42.698 | 0.00 | 0.00 |
| ATOM | 5629 | HG23 | VAL | X | 375 | 47.985 | 11.054 | 43.791 | 0.00 | 0.00 |
| ATOM | 5630 | C    | VAL | X | 375 | 46.813 | 9.102  | 40.237 | 0.00 | 0.00 |
| ATOM | 5631 | O    | VAL | X | 375 | 47.393 | 9.283  | 39.183 | 0.00 | 0.00 |
| ATOM | 5632 | N    | LEU | X | 376 | 45.937 | 8.077  | 40.442 | 0.00 | 0.00 |
| ATOM | 5633 | H    | LEU | X | 376 | 45.493 | 7.831  | 41.315 | 0.00 | 0.00 |
| ATOM | 5634 | CA   | LEU | X | 376 | 45.411 | 7.233  | 39.328 | 0.00 | 0.00 |
| ATOM | 5635 | HA   | LEU | X | 376 | 46.278 | 6.747  | 38.880 | 0.00 | 0.00 |
| ATOM | 5636 | CB   | LEU | X | 376 | 44.381 | 6.318  | 39.956 | 0.00 | 0.00 |
| ATOM | 5637 | HB2  | LEU | X | 376 | 44.738 | 5.835  | 40.866 | 0.00 | 0.00 |
| ATOM | 5638 | HB3  | LEU | X | 376 | 43.500 | 6.869  | 40.284 | 0.00 | 0.00 |
| ATOM | 5639 | CG   | LEU | X | 376 | 43.931 | 5.215  | 38.994 | 0.00 | 0.00 |
| ATOM | 5640 | HG   | LEU | X | 376 | 43.512 | 5.686  | 38.105 | 0.00 | 0.00 |
| ATOM | 5641 | CD1  | LEU | X | 376 | 45.044 | 4.368  | 38.586 | 0.00 | 0.00 |
| ATOM | 5642 | HD11 | LEU | X | 376 | 45.828 | 4.908  | 38.054 | 0.00 | 0.00 |
| ATOM | 5643 | HD12 | LEU | X | 376 | 45.435 | 3.860  | 39.467 | 0.00 | 0.00 |
| ATOM | 5644 | HD13 | LEU | X | 376 | 44.766 | 3.582  | 37.883 | 0.00 | 0.00 |
| ATOM | 5645 | CD2  | LEU | X | 376 | 42.804 | 4.259  | 39.494 | 0.00 | 0.00 |
| ATOM | 5646 | HD21 | LEU | X | 376 | 41.947 | 4.708  | 39.995 | 0.00 | 0.00 |
| ATOM | 5647 | HD22 | LEU | X | 376 | 42.407 | 3.644  | 38.686 | 0.00 | 0.00 |
| ATOM | 5648 | HD23 | LEU | X | 376 | 43.225 | 3.607  | 40.260 | 0.00 | 0.00 |
| ATOM | 5649 | C    | LEU | X | 376 | 44.923 | 7.904  | 38.100 | 0.00 | 0.00 |
| ATOM | 5650 | O    | LEU | X | 376 | 45.256 | 7.528  | 36.953 | 0.00 | 0.00 |
| ATOM | 5651 | N    | HIE | X | 377 | 44.280 | 9.018  | 38.329 | 0.00 | 0.00 |
| ATOM | 5652 | H    | HIE | X | 377 | 44.004 | 9.041  | 39.300 | 0.00 | 0.00 |
| ATOM | 5653 | CA   | HIE | X | 377 | 43.728 | 9.910  | 37.327 | 0.00 | 0.00 |
| ATOM | 5654 | HA   | HIE | X | 377 | 43.233 | 9.245  | 36.618 | 0.00 | 0.00 |
| ATOM | 5655 | CB   | HIE | X | 377 | 42.649 | 10.803 | 37.853 | 0.00 | 0.00 |
| ATOM | 5656 | HB2  | HIE | X | 377 | 42.037 | 10.210 | 38.533 | 0.00 | 0.00 |
| ATOM | 5657 | HB3  | HIE | X | 377 | 42.899 | 11.602 | 38.551 | 0.00 | 0.00 |
| ATOM | 5658 | CG   | HIE | X | 377 | 41.661 | 11.287 | 36.841 | 0.00 | 0.00 |
| ATOM | 5659 | ND1  | HIE | X | 377 | 40.690 | 10.482 | 36.324 | 0.00 | 0.00 |
| ATOM | 5660 | CE1  | HIE | X | 377 | 39.938 | 11.285 | 35.523 | 0.00 | 0.00 |
| ATOM | 5661 | HE1  | HIE | X | 377 | 39.130 | 10.880 | 34.932 | 0.00 | 0.00 |
| ATOM | 5662 | NE2  | HIE | X | 377 | 40.439 | 12.555 | 35.494 | 0.00 | 0.00 |
| ATOM | 5663 | HE2  | HIE | X | 377 | 40.064 | 13.236 | 34.850 | 0.00 | 0.00 |
| ATOM | 5664 | CD2  | HIE | X | 377 | 41.542 | 12.550 | 36.347 | 0.00 | 0.00 |
| ATOM | 5665 | HD2  | HIE | X | 377 | 42.261 | 13.331 | 36.544 | 0.00 | 0.00 |
| ATOM | 5666 | C    | HIE | X | 377 | 44.758 | 10.649 | 36.490 | 0.00 | 0.00 |
| ATOM | 5667 | O    | HIE | X | 377 | 44.710 | 10.680 | 35.227 | 0.00 | 0.00 |
| ATOM | 5668 | N    | TYR | X | 378 | 45.681 | 11.362 | 37.175 | 0.00 | 0.00 |
| ATOM | 5669 | H    | TYR | X | 378 | 45.620 | 11.396 | 38.182 | 0.00 | 0.00 |
| ATOM | 5670 | CA   | TYR | X | 378 | 46.607 | 12.308 | 36.595 | 0.00 | 0.00 |
| ATOM | 5671 | HA   | TYR | X | 378 | 46.128 | 12.693 | 35.694 | 0.00 | 0.00 |
| ATOM | 5672 | CB   | TYR | X | 378 | 46.831 | 13.411 | 37.593 | 0.00 | 0.00 |

|      |      |      |     |   |     |        |        |        |      |      |
|------|------|------|-----|---|-----|--------|--------|--------|------|------|
| ATOM | 5673 | HB2  | TYR | X | 378 | 47.162 | 12.989 | 38.542 | 0.00 | 0.00 |
| ATOM | 5674 | HB3  | TYR | X | 378 | 47.670 | 13.975 | 37.187 | 0.00 | 0.00 |
| ATOM | 5675 | CG   | TYR | X | 378 | 45.624 | 14.386 | 37.674 | 0.00 | 0.00 |
| ATOM | 5676 | CD1  | TYR | X | 378 | 45.714 | 15.729 | 37.164 | 0.00 | 0.00 |
| ATOM | 5677 | HD1  | TYR | X | 378 | 46.665 | 16.051 | 36.764 | 0.00 | 0.00 |
| ATOM | 5678 | CE1  | TYR | X | 378 | 44.711 | 16.705 | 37.321 | 0.00 | 0.00 |
| ATOM | 5679 | HE1  | TYR | X | 378 | 44.833 | 17.724 | 36.984 | 0.00 | 0.00 |
| ATOM | 5680 | CZ   | TYR | X | 378 | 43.508 | 16.314 | 37.908 | 0.00 | 0.00 |
| ATOM | 5681 | OH   | TYR | X | 378 | 42.550 | 17.207 | 38.100 | 0.00 | 0.00 |
| ATOM | 5682 | HH   | TYR | X | 378 | 42.643 | 18.059 | 37.668 | 0.00 | 0.00 |
| ATOM | 5683 | CE2  | TYR | X | 378 | 43.345 | 14.976 | 38.398 | 0.00 | 0.00 |
| ATOM | 5684 | HE2  | TYR | X | 378 | 42.397 | 14.647 | 38.796 | 0.00 | 0.00 |
| ATOM | 5685 | CD2  | TYR | X | 378 | 44.326 | 14.072 | 38.272 | 0.00 | 0.00 |
| ATOM | 5686 | HD2  | TYR | X | 378 | 44.240 | 13.195 | 38.898 | 0.00 | 0.00 |
| ATOM | 5687 | C    | TYR | X | 378 | 47.906 | 11.753 | 36.194 | 0.00 | 0.00 |
| ATOM | 5688 | O    | TYR | X | 378 | 48.679 | 12.273 | 35.414 | 0.00 | 0.00 |
| ATOM | 5689 | N    | THR | X | 379 | 48.239 | 10.507 | 36.685 | 0.00 | 0.00 |
| ATOM | 5690 | H    | THR | X | 379 | 47.555 | 9.920  | 37.140 | 0.00 | 0.00 |
| ATOM | 5691 | CA   | THR | X | 379 | 49.441 | 9.751  | 36.255 | 0.00 | 0.00 |
| ATOM | 5692 | HA   | THR | X | 379 | 50.360 | 10.232 | 36.591 | 0.00 | 0.00 |
| ATOM | 5693 | CB   | THR | X | 379 | 49.375 | 8.389  | 36.801 | 0.00 | 0.00 |
| ATOM | 5694 | HB   | THR | X | 379 | 48.351 | 8.023  | 36.736 | 0.00 | 0.00 |
| ATOM | 5695 | CG2  | THR | X | 379 | 50.312 | 7.305  | 36.134 | 0.00 | 0.00 |
| ATOM | 5696 | HG21 | THR | X | 379 | 51.329 | 7.567  | 36.425 | 0.00 | 0.00 |
| ATOM | 5697 | HG22 | THR | X | 379 | 50.070 | 6.301  | 36.486 | 0.00 | 0.00 |
| ATOM | 5698 | HG23 | THR | X | 379 | 50.173 | 7.311  | 35.053 | 0.00 | 0.00 |
| ATOM | 5699 | OG1  | THR | X | 379 | 49.659 | 8.551  | 38.214 | 0.00 | 0.00 |
| ATOM | 5700 | HG1  | THR | X | 379 | 48.834 | 8.784  | 38.646 | 0.00 | 0.00 |
| ATOM | 5701 | C    | THR | X | 379 | 49.557 | 9.668  | 34.729 | 0.00 | 0.00 |
| ATOM | 5702 | O    | THR | X | 379 | 48.564 | 9.509  | 33.921 | 0.00 | 0.00 |
| ATOM | 5703 | N    | ASP | X | 380 | 50.889 | 9.707  | 34.411 | 0.00 | 0.00 |
| ATOM | 5704 | H    | ASP | X | 380 | 51.524 | 9.939  | 35.161 | 0.00 | 0.00 |
| ATOM | 5705 | CA   | ASP | X | 380 | 51.386 | 9.627  | 32.993 | 0.00 | 0.00 |
| ATOM | 5706 | HA   | ASP | X | 380 | 50.600 | 10.060 | 32.373 | 0.00 | 0.00 |
| ATOM | 5707 | CB   | ASP | X | 380 | 52.708 | 10.358 | 32.872 | 0.00 | 0.00 |
| ATOM | 5708 | HB2  | ASP | X | 380 | 52.784 | 11.334 | 33.351 | 0.00 | 0.00 |
| ATOM | 5709 | HB3  | ASP | X | 380 | 53.483 | 9.787  | 33.384 | 0.00 | 0.00 |
| ATOM | 5710 | CG   | ASP | X | 380 | 53.065 | 10.398 | 31.388 | 0.00 | 0.00 |
| ATOM | 5711 | OD1  | ASP | X | 380 | 52.304 | 11.189 | 30.741 | 0.00 | 0.00 |
| ATOM | 5712 | OD2  | ASP | X | 380 | 53.785 | 9.571  | 30.801 | 0.00 | 0.00 |
| ATOM | 5713 | C    | ASP | X | 380 | 51.534 | 8.114  | 32.597 | 0.00 | 0.00 |
| ATOM | 5714 | O    | ASP | X | 380 | 52.200 | 7.279  | 33.314 | 0.00 | 0.00 |
| ATOM | 5715 | N    | TRP | X | 381 | 50.997 | 7.751  | 31.398 | 0.00 | 0.00 |
| ATOM | 5716 | H    | TRP | X | 381 | 50.596 | 8.460  | 30.801 | 0.00 | 0.00 |
| ATOM | 5717 | CA   | TRP | X | 381 | 51.021 | 6.414  | 30.810 | 0.00 | 0.00 |
| ATOM | 5718 | HA   | TRP | X | 381 | 50.621 | 5.698  | 31.528 | 0.00 | 0.00 |
| ATOM | 5719 | CB   | TRP | X | 381 | 50.074 | 6.507  | 29.630 | 0.00 | 0.00 |
| ATOM | 5720 | HB2  | TRP | X | 381 | 49.149 | 6.972  | 29.972 | 0.00 | 0.00 |
| ATOM | 5721 | HB3  | TRP | X | 381 | 50.499 | 7.269  | 28.976 | 0.00 | 0.00 |
| ATOM | 5722 | CG   | TRP | X | 381 | 49.819 | 5.272  | 28.868 | 0.00 | 0.00 |
| ATOM | 5723 | CD1  | TRP | X | 381 | 50.489 | 4.838  | 27.790 | 0.00 | 0.00 |
| ATOM | 5724 | HD1  | TRP | X | 381 | 51.377 | 5.285  | 27.367 | 0.00 | 0.00 |
| ATOM | 5725 | NE1  | TRP | X | 381 | 49.976 | 3.611  | 27.347 | 0.00 | 0.00 |
| ATOM | 5726 | HE1  | TRP | X | 381 | 50.304 | 3.115  | 26.531 | 0.00 | 0.00 |
| ATOM | 5727 | CE2  | TRP | X | 381 | 48.809 | 3.302  | 28.004 | 0.00 | 0.00 |
| ATOM | 5728 | CZ2  | TRP | X | 381 | 47.886 | 2.254  | 27.850 | 0.00 | 0.00 |
| ATOM | 5729 | HZ2  | TRP | X | 381 | 48.010 | 1.549  | 27.042 | 0.00 | 0.00 |
| ATOM | 5730 | CH2  | TRP | X | 381 | 46.753 | 2.266  | 28.726 | 0.00 | 0.00 |
| ATOM | 5731 | HH2  | TRP | X | 381 | 46.012 | 1.480  | 28.736 | 0.00 | 0.00 |
| ATOM | 5732 | CZ3  | TRP | X | 381 | 46.646 | 3.280  | 29.687 | 0.00 | 0.00 |
| ATOM | 5733 | HZ3  | TRP | X | 381 | 45.779 | 3.324  | 30.329 | 0.00 | 0.00 |
| ATOM | 5734 | CE3  | TRP | X | 381 | 47.602 | 4.322  | 29.861 | 0.00 | 0.00 |
| ATOM | 5735 | HE3  | TRP | X | 381 | 47.533 | 4.932  | 30.750 | 0.00 | 0.00 |
| ATOM | 5736 | CD2  | TRP | X | 381 | 48.689 | 4.324  | 29.035 | 0.00 | 0.00 |
| ATOM | 5737 | C    | TRP | X | 381 | 52.416 | 5.789  | 30.436 | 0.00 | 0.00 |
| ATOM | 5738 | O    | TRP | X | 381 | 52.579 | 4.557  | 30.519 | 0.00 | 0.00 |
| ATOM | 5739 | N    | LEU | X | 382 | 53.464 | 6.540  | 30.032 | 0.00 | 0.00 |
| ATOM | 5740 | H    | LEU | X | 382 | 53.358 | 7.544  | 30.026 | 0.00 | 0.00 |
| ATOM | 5741 | CA   | LEU | X | 382 | 54.808 | 5.979  | 29.623 | 0.00 | 0.00 |
| ATOM | 5742 | HA   | LEU | X | 382 | 54.734 | 4.894  | 29.699 | 0.00 | 0.00 |

|      |      |      |     |   |     |        |        |        |      |      |
|------|------|------|-----|---|-----|--------|--------|--------|------|------|
| ATOM | 5743 | CB   | LEU | X | 382 | 55.073 | 6.443  | 28.181 | 0.00 | 0.00 |
| ATOM | 5744 | HB2  | LEU | X | 382 | 54.265 | 6.992  | 27.698 | 0.00 | 0.00 |
| ATOM | 5745 | HB3  | LEU | X | 382 | 55.921 | 7.120  | 28.075 | 0.00 | 0.00 |
| ATOM | 5746 | CG   | LEU | X | 382 | 55.588 | 5.289  | 27.299 | 0.00 | 0.00 |
| ATOM | 5747 | HG   | LEU | X | 382 | 56.312 | 4.712  | 27.874 | 0.00 | 0.00 |
| ATOM | 5748 | CD1  | LEU | X | 382 | 54.421 | 4.320  | 27.043 | 0.00 | 0.00 |
| ATOM | 5749 | HD11 | LEU | X | 382 | 54.179 | 3.926  | 28.030 | 0.00 | 0.00 |
| ATOM | 5750 | HD12 | LEU | X | 382 | 53.583 | 4.835  | 26.572 | 0.00 | 0.00 |
| ATOM | 5751 | HD13 | LEU | X | 382 | 54.774 | 3.492  | 26.428 | 0.00 | 0.00 |
| ATOM | 5752 | CD2  | LEU | X | 382 | 56.042 | 5.625  | 25.914 | 0.00 | 0.00 |
| ATOM | 5753 | HD21 | LEU | X | 382 | 56.948 | 6.231  | 25.914 | 0.00 | 0.00 |
| ATOM | 5754 | HD22 | LEU | X | 382 | 56.309 | 4.735  | 25.345 | 0.00 | 0.00 |
| ATOM | 5755 | HD23 | LEU | X | 382 | 55.386 | 6.276  | 25.335 | 0.00 | 0.00 |
| ATOM | 5756 | C    | LEU | X | 382 | 55.951 | 6.267  | 30.590 | 0.00 | 0.00 |
| ATOM | 5757 | O    | LEU | X | 382 | 56.950 | 5.569  | 30.802 | 0.00 | 0.00 |
| ATOM | 5758 | N    | HIE | X | 383 | 55.697 | 7.297  | 31.467 | 0.00 | 0.00 |
| ATOM | 5759 | H    | HIE | X | 383 | 54.912 | 7.906  | 31.285 | 0.00 | 0.00 |
| ATOM | 5760 | CA   | HIE | X | 383 | 56.740 | 7.811  | 32.393 | 0.00 | 0.00 |
| ATOM | 5761 | HA   | HIE | X | 383 | 57.443 | 7.013  | 32.630 | 0.00 | 0.00 |
| ATOM | 5762 | CB   | HIE | X | 383 | 57.388 | 9.005  | 31.734 | 0.00 | 0.00 |
| ATOM | 5763 | HB2  | HIE | X | 383 | 56.610 | 9.685  | 31.389 | 0.00 | 0.00 |
| ATOM | 5764 | HB3  | HIE | X | 383 | 57.914 | 9.592  | 32.487 | 0.00 | 0.00 |
| ATOM | 5765 | CG   | HIE | X | 383 | 58.296 | 8.610  | 30.552 | 0.00 | 0.00 |
| ATOM | 5766 | ND1  | HIE | X | 383 | 59.512 | 8.006  | 30.626 | 0.00 | 0.00 |
| ATOM | 5767 | CE1  | HIE | X | 383 | 59.961 | 7.830  | 29.416 | 0.00 | 0.00 |
| ATOM | 5768 | HE1  | HIE | X | 383 | 60.925 | 7.395  | 29.198 | 0.00 | 0.00 |
| ATOM | 5769 | NE2  | HIE | X | 383 | 59.048 | 8.257  | 28.506 | 0.00 | 0.00 |
| ATOM | 5770 | HE2  | HIE | X | 383 | 59.227 | 8.386  | 27.520 | 0.00 | 0.00 |
| ATOM | 5771 | CD2  | HIE | X | 383 | 57.974 | 8.706  | 29.210 | 0.00 | 0.00 |
| ATOM | 5772 | HD2  | HIE | X | 383 | 57.018 | 9.020  | 28.817 | 0.00 | 0.00 |
| ATOM | 5773 | C    | HIE | X | 383 | 56.115 | 8.129  | 33.768 | 0.00 | 0.00 |
| ATOM | 5774 | O    | HIE | X | 383 | 56.061 | 9.268  | 34.267 | 0.00 | 0.00 |
| ATOM | 5775 | N    | PRO | X | 384 | 55.697 | 7.061  | 34.512 | 0.00 | 0.00 |
| ATOM | 5776 | CD   | PRO | X | 384 | 55.481 | 5.615  | 34.163 | 0.00 | 0.00 |
| ATOM | 5777 | HD2  | PRO | X | 384 | 56.352 | 5.134  | 33.719 | 0.00 | 0.00 |
| ATOM | 5778 | HD3  | PRO | X | 384 | 54.648 | 5.544  | 33.464 | 0.00 | 0.00 |
| ATOM | 5779 | CG   | PRO | X | 384 | 55.057 | 4.885  | 35.491 | 0.00 | 0.00 |
| ATOM | 5780 | HG2  | PRO | X | 384 | 56.011 | 4.683  | 35.979 | 0.00 | 0.00 |
| ATOM | 5781 | HG3  | PRO | X | 384 | 54.369 | 4.063  | 35.296 | 0.00 | 0.00 |
| ATOM | 5782 | CB   | PRO | X | 384 | 54.465 | 6.011  | 36.344 | 0.00 | 0.00 |
| ATOM | 5783 | HB2  | PRO | X | 384 | 54.887 | 5.862  | 37.338 | 0.00 | 0.00 |
| ATOM | 5784 | HB3  | PRO | X | 384 | 53.379 | 6.075  | 36.407 | 0.00 | 0.00 |
| ATOM | 5785 | CA   | PRO | X | 384 | 55.078 | 7.322  | 35.771 | 0.00 | 0.00 |
| ATOM | 5786 | HA   | PRO | X | 384 | 54.244 | 7.986  | 35.543 | 0.00 | 0.00 |
| ATOM | 5787 | C    | PRO | X | 384 | 55.902 | 8.039  | 36.877 | 0.00 | 0.00 |
| ATOM | 5788 | O    | PRO | X | 384 | 55.268 | 8.644  | 37.741 | 0.00 | 0.00 |
| ATOM | 5789 | N    | GLU | X | 385 | 57.236 | 7.989  | 36.870 | 0.00 | 0.00 |
| ATOM | 5790 | H    | GLU | X | 385 | 57.707 | 7.424  | 36.178 | 0.00 | 0.00 |
| ATOM | 5791 | CA   | GLU | X | 385 | 58.091 | 8.483  | 37.953 | 0.00 | 0.00 |
| ATOM | 5792 | HA   | GLU | X | 385 | 57.532 | 8.642  | 38.875 | 0.00 | 0.00 |
| ATOM | 5793 | CB   | GLU | X | 385 | 59.115 | 7.417  | 38.312 | 0.00 | 0.00 |
| ATOM | 5794 | HB2  | GLU | X | 385 | 59.656 | 7.162  | 37.400 | 0.00 | 0.00 |
| ATOM | 5795 | HB3  | GLU | X | 385 | 59.779 | 7.832  | 39.071 | 0.00 | 0.00 |
| ATOM | 5796 | CG   | GLU | X | 385 | 58.569 | 6.136  | 38.867 | 0.00 | 0.00 |
| ATOM | 5797 | HG2  | GLU | X | 385 | 58.203 | 6.397  | 39.861 | 0.00 | 0.00 |
| ATOM | 5798 | HG3  | GLU | X | 385 | 57.781 | 5.677  | 38.270 | 0.00 | 0.00 |
| ATOM | 5799 | CD   | GLU | X | 385 | 59.724 | 5.145  | 38.955 | 0.00 | 0.00 |
| ATOM | 5800 | OE1  | GLU | X | 385 | 60.101 | 4.731  | 40.041 | 0.00 | 0.00 |
| ATOM | 5801 | OE2  | GLU | X | 385 | 60.234 | 4.675  | 37.909 | 0.00 | 0.00 |
| ATOM | 5802 | C    | GLU | X | 385 | 58.852 | 9.756  | 37.626 | 0.00 | 0.00 |
| ATOM | 5803 | O    | GLU | X | 385 | 59.589 | 10.306 | 38.421 | 0.00 | 0.00 |
| ATOM | 5804 | N    | ASP | X | 386 | 58.661 | 10.316 | 36.425 | 0.00 | 0.00 |
| ATOM | 5805 | H    | ASP | X | 386 | 57.797 | 10.027 | 35.988 | 0.00 | 0.00 |
| ATOM | 5806 | CA   | ASP | X | 386 | 59.388 | 11.473 | 35.954 | 0.00 | 0.00 |
| ATOM | 5807 | HA   | ASP | X | 386 | 60.468 | 11.333 | 35.991 | 0.00 | 0.00 |
| ATOM | 5808 | CB   | ASP | X | 386 | 59.086 | 11.790 | 34.492 | 0.00 | 0.00 |
| ATOM | 5809 | HB2  | ASP | X | 386 | 59.436 | 10.965 | 33.871 | 0.00 | 0.00 |
| ATOM | 5810 | HB3  | ASP | X | 386 | 57.999 | 11.861 | 34.455 | 0.00 | 0.00 |
| ATOM | 5811 | CG   | ASP | X | 386 | 59.752 | 13.114 | 33.918 | 0.00 | 0.00 |
| ATOM | 5812 | OD1  | ASP | X | 386 | 60.976 | 13.075 | 33.568 | 0.00 | 0.00 |

|      |      |      |     |   |     |        |        |        |      |      |
|------|------|------|-----|---|-----|--------|--------|--------|------|------|
| ATOM | 5813 | OD2  | ASP | X | 386 | 59.117 | 14.212 | 33.932 | 0.00 | 0.00 |
| ATOM | 5814 | C    | ASP | X | 386 | 59.026 | 12.776 | 36.802 | 0.00 | 0.00 |
| ATOM | 5815 | O    | ASP | X | 386 | 57.887 | 13.183 | 36.770 | 0.00 | 0.00 |
| ATOM | 5816 | N    | PRO | X | 387 | 60.052 | 13.553 | 37.300 | 0.00 | 0.00 |
| ATOM | 5817 | CD   | PRO | X | 387 | 61.509 | 13.379 | 36.987 | 0.00 | 0.00 |
| ATOM | 5818 | HD2  | PRO | X | 387 | 61.684 | 13.417 | 35.912 | 0.00 | 0.00 |
| ATOM | 5819 | HD3  | PRO | X | 387 | 61.879 | 12.458 | 37.439 | 0.00 | 0.00 |
| ATOM | 5820 | CG   | PRO | X | 387 | 62.247 | 14.499 | 37.717 | 0.00 | 0.00 |
| ATOM | 5821 | HG2  | PRO | X | 387 | 62.336 | 15.336 | 37.025 | 0.00 | 0.00 |
| ATOM | 5822 | HG3  | PRO | X | 387 | 63.218 | 14.209 | 38.117 | 0.00 | 0.00 |
| ATOM | 5823 | CB   | PRO | X | 387 | 61.246 | 14.882 | 38.763 | 0.00 | 0.00 |
| ATOM | 5824 | HB2  | PRO | X | 387 | 61.410 | 15.947 | 38.923 | 0.00 | 0.00 |
| ATOM | 5825 | HB3  | PRO | X | 387 | 61.420 | 14.346 | 39.696 | 0.00 | 0.00 |
| ATOM | 5826 | CA   | PRO | X | 387 | 59.901 | 14.560 | 38.299 | 0.00 | 0.00 |
| ATOM | 5827 | HA   | PRO | X | 387 | 59.372 | 14.213 | 39.187 | 0.00 | 0.00 |
| ATOM | 5828 | C    | PRO | X | 387 | 59.154 | 15.882 | 37.816 | 0.00 | 0.00 |
| ATOM | 5829 | O    | PRO | X | 387 | 58.661 | 16.680 | 38.651 | 0.00 | 0.00 |
| ATOM | 5830 | N    | ALA | X | 388 | 59.029 | 16.047 | 36.524 | 0.00 | 0.00 |
| ATOM | 5831 | H    | ALA | X | 388 | 59.321 | 15.314 | 35.893 | 0.00 | 0.00 |
| ATOM | 5832 | CA   | ALA | X | 388 | 58.395 | 17.212 | 35.936 | 0.00 | 0.00 |
| ATOM | 5833 | HA   | ALA | X | 388 | 58.580 | 18.086 | 36.559 | 0.00 | 0.00 |
| ATOM | 5834 | CB   | ALA | X | 388 | 58.983 | 17.603 | 34.572 | 0.00 | 0.00 |
| ATOM | 5835 | HB1  | ALA | X | 388 | 58.918 | 16.724 | 33.931 | 0.00 | 0.00 |
| ATOM | 5836 | HB2  | ALA | X | 388 | 58.470 | 18.422 | 34.068 | 0.00 | 0.00 |
| ATOM | 5837 | HB3  | ALA | X | 388 | 60.056 | 17.795 | 34.584 | 0.00 | 0.00 |
| ATOM | 5838 | C    | ALA | X | 388 | 56.939 | 16.915 | 35.616 | 0.00 | 0.00 |
| ATOM | 5839 | O    | ALA | X | 388 | 56.114 | 17.707 | 36.011 | 0.00 | 0.00 |
| ATOM | 5840 | N    | ARG | X | 389 | 56.615 | 15.747 | 35.091 | 0.00 | 0.00 |
| ATOM | 5841 | H    | ARG | X | 389 | 57.401 | 15.168 | 34.832 | 0.00 | 0.00 |
| ATOM | 5842 | CA   | ARG | X | 389 | 55.240 | 15.274 | 34.857 | 0.00 | 0.00 |
| ATOM | 5843 | HA   | ARG | X | 389 | 54.669 | 16.030 | 34.318 | 0.00 | 0.00 |
| ATOM | 5844 | CB   | ARG | X | 389 | 55.252 | 13.941 | 34.095 | 0.00 | 0.00 |
| ATOM | 5845 | HB2  | ARG | X | 389 | 55.803 | 13.177 | 34.642 | 0.00 | 0.00 |
| ATOM | 5846 | HB3  | ARG | X | 389 | 54.217 | 13.617 | 33.993 | 0.00 | 0.00 |
| ATOM | 5847 | CG   | ARG | X | 389 | 55.858 | 14.095 | 32.684 | 0.00 | 0.00 |
| ATOM | 5848 | HG2  | ARG | X | 389 | 55.253 | 14.819 | 32.138 | 0.00 | 0.00 |
| ATOM | 5849 | HG3  | ARG | X | 389 | 56.826 | 14.595 | 32.715 | 0.00 | 0.00 |
| ATOM | 5850 | CD   | ARG | X | 389 | 55.868 | 12.756 | 31.992 | 0.00 | 0.00 |
| ATOM | 5851 | HD2  | ARG | X | 389 | 56.103 | 12.008 | 32.749 | 0.00 | 0.00 |
| ATOM | 5852 | HD3  | ARG | X | 389 | 54.825 | 12.593 | 31.721 | 0.00 | 0.00 |
| ATOM | 5853 | NE   | ARG | X | 389 | 56.756 | 12.773 | 30.849 | 0.00 | 0.00 |
| ATOM | 5854 | HE   | ARG | X | 389 | 57.693 | 13.107 | 31.022 | 0.00 | 0.00 |
| ATOM | 5855 | CZ   | ARG | X | 389 | 56.484 | 12.350 | 29.602 | 0.00 | 0.00 |
| ATOM | 5856 | NH1  | ARG | X | 389 | 55.413 | 11.639 | 29.308 | 0.00 | 0.00 |
| ATOM | 5857 | HH11 | ARG | X | 389 | 54.836 | 11.327 | 30.075 | 0.00 | 0.00 |
| ATOM | 5858 | HH12 | ARG | X | 389 | 55.150 | 11.317 | 28.387 | 0.00 | 0.00 |
| ATOM | 5859 | NH2  | ARG | X | 389 | 57.346 | 12.629 | 28.704 | 0.00 | 0.00 |
| ATOM | 5860 | HH21 | ARG | X | 389 | 58.190 | 13.177 | 28.790 | 0.00 | 0.00 |
| ATOM | 5861 | HH22 | ARG | X | 389 | 57.204 | 12.204 | 27.799 | 0.00 | 0.00 |
| ATOM | 5862 | C    | ARG | X | 389 | 54.433 | 15.151 | 36.160 | 0.00 | 0.00 |
| ATOM | 5863 | O    | ARG | X | 389 | 53.258 | 15.468 | 36.269 | 0.00 | 0.00 |
| ATOM | 5864 | N    | LEU | X | 390 | 55.078 | 14.707 | 37.258 | 0.00 | 0.00 |
| ATOM | 5865 | H    | LEU | X | 390 | 56.051 | 14.453 | 37.163 | 0.00 | 0.00 |
| ATOM | 5866 | CA   | LEU | X | 390 | 54.639 | 14.842 | 38.654 | 0.00 | 0.00 |
| ATOM | 5867 | HA   | LEU | X | 390 | 53.651 | 14.386 | 38.721 | 0.00 | 0.00 |
| ATOM | 5868 | CB   | LEU | X | 390 | 55.685 | 14.271 | 39.611 | 0.00 | 0.00 |
| ATOM | 5869 | HB2  | LEU | X | 390 | 56.665 | 14.733 | 39.487 | 0.00 | 0.00 |
| ATOM | 5870 | HB3  | LEU | X | 390 | 55.456 | 14.445 | 40.663 | 0.00 | 0.00 |
| ATOM | 5871 | CG   | LEU | X | 390 | 55.807 | 12.726 | 39.359 | 0.00 | 0.00 |
| ATOM | 5872 | HG   | LEU | X | 390 | 56.219 | 12.611 | 38.356 | 0.00 | 0.00 |
| ATOM | 5873 | CD1  | LEU | X | 390 | 56.846 | 12.210 | 40.398 | 0.00 | 0.00 |
| ATOM | 5874 | HD11 | LEU | X | 390 | 57.701 | 12.872 | 40.262 | 0.00 | 0.00 |
| ATOM | 5875 | HD12 | LEU | X | 390 | 56.542 | 12.148 | 41.443 | 0.00 | 0.00 |
| ATOM | 5876 | HD13 | LEU | X | 390 | 57.088 | 11.174 | 40.160 | 0.00 | 0.00 |
| ATOM | 5877 | CD2  | LEU | X | 390 | 54.556 | 11.819 | 39.445 | 0.00 | 0.00 |
| ATOM | 5878 | HD21 | LEU | X | 390 | 54.705 | 10.869 | 38.931 | 0.00 | 0.00 |
| ATOM | 5879 | HD22 | LEU | X | 390 | 54.287 | 11.612 | 40.481 | 0.00 | 0.00 |
| ATOM | 5880 | HD23 | LEU | X | 390 | 53.735 | 12.243 | 38.867 | 0.00 | 0.00 |
| ATOM | 5881 | C    | LEU | X | 390 | 54.337 | 16.336 | 39.052 | 0.00 | 0.00 |
| ATOM | 5882 | O    | LEU | X | 390 | 53.189 | 16.633 | 39.455 | 0.00 | 0.00 |

|      |      |      |     |   |     |        |        |        |      |      |
|------|------|------|-----|---|-----|--------|--------|--------|------|------|
| ATOM | 5883 | N    | ARG | X | 391 | 55.276 | 17.266 | 38.890 | 0.00 | 0.00 |
| ATOM | 5884 | H    | ARG | X | 391 | 56.143 | 16.975 | 38.461 | 0.00 | 0.00 |
| ATOM | 5885 | CA   | ARG | X | 391 | 55.203 | 18.740 | 39.151 | 0.00 | 0.00 |
| ATOM | 5886 | HA   | ARG | X | 391 | 54.970 | 18.827 | 40.213 | 0.00 | 0.00 |
| ATOM | 5887 | CB   | ARG | X | 391 | 56.536 | 19.398 | 38.971 | 0.00 | 0.00 |
| ATOM | 5888 | HB2  | ARG | X | 391 | 57.320 | 18.736 | 39.339 | 0.00 | 0.00 |
| ATOM | 5889 | HB3  | ARG | X | 391 | 56.723 | 19.531 | 37.906 | 0.00 | 0.00 |
| ATOM | 5890 | CG   | ARG | X | 391 | 56.720 | 20.704 | 39.798 | 0.00 | 0.00 |
| ATOM | 5891 | HG2  | ARG | X | 391 | 55.855 | 21.357 | 39.678 | 0.00 | 0.00 |
| ATOM | 5892 | HG3  | ARG | X | 391 | 56.785 | 20.562 | 40.876 | 0.00 | 0.00 |
| ATOM | 5893 | CD   | ARG | X | 391 | 57.929 | 21.442 | 39.410 | 0.00 | 0.00 |
| ATOM | 5894 | HD2  | ARG | X | 391 | 57.637 | 21.955 | 38.494 | 0.00 | 0.00 |
| ATOM | 5895 | HD3  | ARG | X | 391 | 58.130 | 22.280 | 40.077 | 0.00 | 0.00 |
| ATOM | 5896 | NE   | ARG | X | 391 | 59.158 | 20.597 | 39.453 | 0.00 | 0.00 |
| ATOM | 5897 | HE   | ARG | X | 391 | 59.405 | 20.166 | 40.333 | 0.00 | 0.00 |
| ATOM | 5898 | CZ   | ARG | X | 391 | 60.084 | 20.541 | 38.494 | 0.00 | 0.00 |
| ATOM | 5899 | NH1  | ARG | X | 391 | 59.909 | 20.923 | 37.268 | 0.00 | 0.00 |
| ATOM | 5900 | HH11 | ARG | X | 391 | 59.051 | 21.364 | 36.969 | 0.00 | 0.00 |
| ATOM | 5901 | HH12 | ARG | X | 391 | 60.640 | 20.627 | 36.636 | 0.00 | 0.00 |
| ATOM | 5902 | NH2  | ARG | X | 391 | 61.249 | 19.971 | 38.820 | 0.00 | 0.00 |
| ATOM | 5903 | HH21 | ARG | X | 391 | 61.376 | 19.639 | 39.765 | 0.00 | 0.00 |
| ATOM | 5904 | HH22 | ARG | X | 391 | 62.065 | 20.034 | 38.227 | 0.00 | 0.00 |
| ATOM | 5905 | C    | ARG | X | 391 | 54.037 | 19.434 | 38.353 | 0.00 | 0.00 |
| ATOM | 5906 | O    | ARG | X | 391 | 53.238 | 20.171 | 38.976 | 0.00 | 0.00 |
| ATOM | 5907 | N    | GLU | X | 392 | 53.983 | 19.129 | 37.106 | 0.00 | 0.00 |
| ATOM | 5908 | H    | GLU | X | 392 | 54.737 | 18.561 | 36.747 | 0.00 | 0.00 |
| ATOM | 5909 | CA   | GLU | X | 392 | 52.975 | 19.494 | 36.138 | 0.00 | 0.00 |
| ATOM | 5910 | HA   | GLU | X | 392 | 52.942 | 20.568 | 35.955 | 0.00 | 0.00 |
| ATOM | 5911 | CB   | GLU | X | 392 | 53.287 | 18.825 | 34.852 | 0.00 | 0.00 |
| ATOM | 5912 | HB2  | GLU | X | 392 | 54.360 | 18.837 | 34.660 | 0.00 | 0.00 |
| ATOM | 5913 | HB3  | GLU | X | 392 | 53.034 | 17.770 | 34.740 | 0.00 | 0.00 |
| ATOM | 5914 | CG   | GLU | X | 392 | 52.700 | 19.660 | 33.727 | 0.00 | 0.00 |
| ATOM | 5915 | HG2  | GLU | X | 392 | 51.619 | 19.756 | 33.824 | 0.00 | 0.00 |
| ATOM | 5916 | HG3  | GLU | X | 392 | 53.061 | 20.688 | 33.683 | 0.00 | 0.00 |
| ATOM | 5917 | CD   | GLU | X | 392 | 52.958 | 18.982 | 32.421 | 0.00 | 0.00 |
| ATOM | 5918 | OE1  | GLU | X | 392 | 51.955 | 18.497 | 31.793 | 0.00 | 0.00 |
| ATOM | 5919 | OE2  | GLU | X | 392 | 54.056 | 19.083 | 31.844 | 0.00 | 0.00 |
| ATOM | 5920 | C    | GLU | X | 392 | 51.621 | 19.014 | 36.612 | 0.00 | 0.00 |
| ATOM | 5921 | O    | GLU | X | 392 | 50.735 | 19.856 | 36.806 | 0.00 | 0.00 |
| ATOM | 5922 | N    | ALA | X | 393 | 51.401 | 17.723 | 36.949 | 0.00 | 0.00 |
| ATOM | 5923 | H    | ALA | X | 393 | 52.211 | 17.129 | 37.054 | 0.00 | 0.00 |
| ATOM | 5924 | CA   | ALA | X | 393 | 50.102 | 17.221 | 37.526 | 0.00 | 0.00 |
| ATOM | 5925 | HA   | ALA | X | 393 | 49.337 | 17.535 | 36.816 | 0.00 | 0.00 |
| ATOM | 5926 | CB   | ALA | X | 393 | 50.200 | 15.774 | 37.588 | 0.00 | 0.00 |
| ATOM | 5927 | HB1  | ALA | X | 393 | 50.669 | 15.466 | 36.653 | 0.00 | 0.00 |
| ATOM | 5928 | HB2  | ALA | X | 393 | 50.903 | 15.485 | 38.370 | 0.00 | 0.00 |
| ATOM | 5929 | HB3  | ALA | X | 393 | 49.218 | 15.312 | 37.689 | 0.00 | 0.00 |
| ATOM | 5930 | C    | ALA | X | 393 | 49.672 | 17.875 | 38.829 | 0.00 | 0.00 |
| ATOM | 5931 | O    | ALA | X | 393 | 48.486 | 18.198 | 38.985 | 0.00 | 0.00 |
| ATOM | 5932 | N    | LEU | X | 394 | 50.689 | 18.094 | 39.671 | 0.00 | 0.00 |
| ATOM | 5933 | H    | LEU | X | 394 | 51.624 | 17.781 | 39.452 | 0.00 | 0.00 |
| ATOM | 5934 | CA   | LEU | X | 394 | 50.406 | 18.705 | 40.952 | 0.00 | 0.00 |
| ATOM | 5935 | HA   | LEU | X | 394 | 49.598 | 18.202 | 41.483 | 0.00 | 0.00 |
| ATOM | 5936 | CB   | LEU | X | 394 | 51.640 | 18.499 | 41.893 | 0.00 | 0.00 |
| ATOM | 5937 | HB2  | LEU | X | 394 | 51.860 | 17.436 | 41.804 | 0.00 | 0.00 |
| ATOM | 5938 | HB3  | LEU | X | 394 | 52.409 | 19.097 | 41.404 | 0.00 | 0.00 |
| ATOM | 5939 | CG   | LEU | X | 394 | 51.460 | 18.827 | 43.392 | 0.00 | 0.00 |
| ATOM | 5940 | HG   | LEU | X | 394 | 51.570 | 19.903 | 43.534 | 0.00 | 0.00 |
| ATOM | 5941 | CD1  | LEU | X | 394 | 50.106 | 18.308 | 43.966 | 0.00 | 0.00 |
| ATOM | 5942 | HD11 | LEU | X | 394 | 50.207 | 18.442 | 45.043 | 0.00 | 0.00 |
| ATOM | 5943 | HD12 | LEU | X | 394 | 49.281 | 18.922 | 43.604 | 0.00 | 0.00 |
| ATOM | 5944 | HD13 | LEU | X | 394 | 49.990 | 17.258 | 43.696 | 0.00 | 0.00 |
| ATOM | 5945 | CD2  | LEU | X | 394 | 52.597 | 18.254 | 44.271 | 0.00 | 0.00 |
| ATOM | 5946 | HD21 | LEU | X | 394 | 52.452 | 18.644 | 45.278 | 0.00 | 0.00 |
| ATOM | 5947 | HD22 | LEU | X | 394 | 52.523 | 17.175 | 44.408 | 0.00 | 0.00 |
| ATOM | 5948 | HD23 | LEU | X | 394 | 53.570 | 18.545 | 43.873 | 0.00 | 0.00 |
| ATOM | 5949 | C    | LEU | X | 394 | 49.974 | 20.133 | 40.878 | 0.00 | 0.00 |
| ATOM | 5950 | O    | LEU | X | 394 | 49.060 | 20.554 | 41.475 | 0.00 | 0.00 |
| ATOM | 5951 | N    | SER | X | 395 | 50.614 | 20.875 | 39.954 | 0.00 | 0.00 |
| ATOM | 5952 | H    | SER | X | 395 | 51.275 | 20.412 | 39.346 | 0.00 | 0.00 |

|      |      |      |     |   |     |        |        |        |      |      |
|------|------|------|-----|---|-----|--------|--------|--------|------|------|
| ATOM | 5953 | CA   | SER | X | 395 | 50.182 | 22.244 | 39.609 | 0.00 | 0.00 |
| ATOM | 5954 | HA   | SER | X | 395 | 50.196 | 22.869 | 40.502 | 0.00 | 0.00 |
| ATOM | 5955 | CB   | SER | X | 395 | 51.165 | 22.897 | 38.636 | 0.00 | 0.00 |
| ATOM | 5956 | HB2  | SER | X | 395 | 51.059 | 22.492 | 37.630 | 0.00 | 0.00 |
| ATOM | 5957 | HB3  | SER | X | 395 | 50.999 | 23.971 | 38.555 | 0.00 | 0.00 |
| ATOM | 5958 | OG   | SER | X | 395 | 52.529 | 22.762 | 38.980 | 0.00 | 0.00 |
| ATOM | 5959 | HG   | SER | X | 395 | 52.753 | 21.841 | 39.128 | 0.00 | 0.00 |
| ATOM | 5960 | C    | SER | X | 395 | 48.786 | 22.197 | 39.023 | 0.00 | 0.00 |
| ATOM | 5961 | O    | SER | X | 395 | 47.949 | 23.038 | 39.374 | 0.00 | 0.00 |
| ATOM | 5962 | N    | ASP | X | 396 | 48.509 | 21.277 | 38.105 | 0.00 | 0.00 |
| ATOM | 5963 | H    | ASP | X | 396 | 49.248 | 20.676 | 37.769 | 0.00 | 0.00 |
| ATOM | 5964 | CA   | ASP | X | 396 | 47.190 | 21.092 | 37.547 | 0.00 | 0.00 |
| ATOM | 5965 | HA   | ASP | X | 396 | 46.747 | 22.007 | 37.153 | 0.00 | 0.00 |
| ATOM | 5966 | CB   | ASP | X | 396 | 47.331 | 20.054 | 36.489 | 0.00 | 0.00 |
| ATOM | 5967 | HB2  | ASP | X | 396 | 48.344 | 19.933 | 36.104 | 0.00 | 0.00 |
| ATOM | 5968 | HB3  | ASP | X | 396 | 47.085 | 19.066 | 36.879 | 0.00 | 0.00 |
| ATOM | 5969 | CG   | ASP | X | 396 | 46.398 | 20.089 | 35.267 | 0.00 | 0.00 |
| ATOM | 5970 | OD1  | ASP | X | 396 | 46.079 | 19.024 | 34.744 | 0.00 | 0.00 |
| ATOM | 5971 | OD2  | ASP | X | 396 | 46.067 | 21.124 | 34.662 | 0.00 | 0.00 |
| ATOM | 5972 | C    | ASP | X | 396 | 46.122 | 20.754 | 38.661 | 0.00 | 0.00 |
| ATOM | 5973 | O    | ASP | X | 396 | 45.222 | 21.586 | 38.736 | 0.00 | 0.00 |
| ATOM | 5974 | N    | VAL | X | 397 | 46.277 | 19.722 | 39.512 | 0.00 | 0.00 |
| ATOM | 5975 | H    | VAL | X | 397 | 47.030 | 19.094 | 39.270 | 0.00 | 0.00 |
| ATOM | 5976 | CA   | VAL | X | 397 | 45.452 | 19.422 | 40.762 | 0.00 | 0.00 |
| ATOM | 5977 | HA   | VAL | X | 397 | 44.455 | 19.140 | 40.423 | 0.00 | 0.00 |
| ATOM | 5978 | CB   | VAL | X | 397 | 45.950 | 18.160 | 41.447 | 0.00 | 0.00 |
| ATOM | 5979 | HB   | VAL | X | 397 | 47.009 | 18.404 | 41.523 | 0.00 | 0.00 |
| ATOM | 5980 | CG1  | VAL | X | 397 | 45.334 | 17.993 | 42.875 | 0.00 | 0.00 |
| ATOM | 5981 | HG11 | VAL | X | 397 | 45.775 | 18.786 | 43.480 | 0.00 | 0.00 |
| ATOM | 5982 | HG12 | VAL | X | 397 | 44.269 | 18.225 | 42.869 | 0.00 | 0.00 |
| ATOM | 5983 | HG13 | VAL | X | 397 | 45.603 | 17.042 | 43.335 | 0.00 | 0.00 |
| ATOM | 5984 | CG2  | VAL | X | 397 | 45.719 | 16.897 | 40.623 | 0.00 | 0.00 |
| ATOM | 5985 | HG21 | VAL | X | 397 | 46.287 | 16.052 | 41.013 | 0.00 | 0.00 |
| ATOM | 5986 | HG22 | VAL | X | 397 | 44.683 | 16.565 | 40.691 | 0.00 | 0.00 |
| ATOM | 5987 | HG23 | VAL | X | 397 | 45.973 | 17.088 | 39.580 | 0.00 | 0.00 |
| ATOM | 5988 | C    | VAL | X | 397 | 45.247 | 20.645 | 41.658 | 0.00 | 0.00 |
| ATOM | 5989 | O    | VAL | X | 397 | 44.096 | 20.911 | 42.069 | 0.00 | 0.00 |
| ATOM | 5990 | N    | VAL | X | 398 | 46.315 | 21.382 | 42.015 | 0.00 | 0.00 |
| ATOM | 5991 | H    | VAL | X | 398 | 47.248 | 21.095 | 41.754 | 0.00 | 0.00 |
| ATOM | 5992 | CA   | VAL | X | 398 | 46.150 | 22.478 | 42.931 | 0.00 | 0.00 |
| ATOM | 5993 | HA   | VAL | X | 398 | 45.604 | 22.001 | 43.745 | 0.00 | 0.00 |
| ATOM | 5994 | CB   | VAL | X | 398 | 47.540 | 22.889 | 43.414 | 0.00 | 0.00 |
| ATOM | 5995 | HB   | VAL | X | 398 | 48.172 | 22.702 | 42.545 | 0.00 | 0.00 |
| ATOM | 5996 | CG1  | VAL | X | 398 | 47.619 | 24.320 | 44.025 | 0.00 | 0.00 |
| ATOM | 5997 | HG11 | VAL | X | 398 | 48.569 | 24.470 | 44.536 | 0.00 | 0.00 |
| ATOM | 5998 | HG12 | VAL | X | 398 | 47.579 | 25.033 | 43.201 | 0.00 | 0.00 |
| ATOM | 5999 | HG13 | VAL | X | 398 | 46.810 | 24.598 | 44.700 | 0.00 | 0.00 |
| ATOM | 6000 | CG2  | VAL | X | 398 | 47.867 | 21.973 | 44.570 | 0.00 | 0.00 |
| ATOM | 6001 | HG21 | VAL | X | 398 | 47.118 | 21.919 | 45.360 | 0.00 | 0.00 |
| ATOM | 6002 | HG22 | VAL | X | 398 | 47.971 | 20.948 | 44.215 | 0.00 | 0.00 |
| ATOM | 6003 | HG23 | VAL | X | 398 | 48.718 | 22.399 | 45.101 | 0.00 | 0.00 |
| ATOM | 6004 | C    | VAL | X | 398 | 45.291 | 23.632 | 42.327 | 0.00 | 0.00 |
| ATOM | 6005 | O    | VAL | X | 398 | 44.578 | 24.291 | 43.078 | 0.00 | 0.00 |
| ATOM | 6006 | N    | GLY | X | 399 | 45.321 | 23.823 | 41.027 | 0.00 | 0.00 |
| ATOM | 6007 | H    | GLY | X | 399 | 45.974 | 23.290 | 40.471 | 0.00 | 0.00 |
| ATOM | 6008 | CA   | GLY | X | 399 | 44.559 | 24.779 | 40.238 | 0.00 | 0.00 |
| ATOM | 6009 | HA2  | GLY | X | 399 | 44.473 | 25.745 | 40.907 | 0.00 | 0.00 |
| ATOM | 6010 | HA3  | GLY | X | 399 | 44.929 | 24.821 | 39.229 | 0.00 | 0.00 |
| ATOM | 6011 | C    | GLY | X | 399 | 43.087 | 24.382 | 40.062 | 0.00 | 0.00 |
| ATOM | 6012 | O    | GLY | X | 399 | 42.225 | 25.152 | 40.423 | 0.00 | 0.00 |
| ATOM | 6013 | N    | ASP | X | 400 | 42.919 | 23.172 | 39.614 | 0.00 | 0.00 |
| ATOM | 6014 | H    | ASP | X | 400 | 43.719 | 22.723 | 39.191 | 0.00 | 0.00 |
| ATOM | 6015 | CA   | ASP | X | 400 | 41.597 | 22.596 | 39.341 | 0.00 | 0.00 |
| ATOM | 6016 | HA   | ASP | X | 400 | 41.200 | 23.146 | 38.487 | 0.00 | 0.00 |
| ATOM | 6017 | CB   | ASP | X | 400 | 41.787 | 21.078 | 38.974 | 0.00 | 0.00 |
| ATOM | 6018 | HB2  | ASP | X | 400 | 42.546 | 20.625 | 39.612 | 0.00 | 0.00 |
| ATOM | 6019 | HB3  | ASP | X | 400 | 40.857 | 20.539 | 39.152 | 0.00 | 0.00 |
| ATOM | 6020 | CG   | ASP | X | 400 | 42.083 | 20.852 | 37.507 | 0.00 | 0.00 |
| ATOM | 6021 | OD1  | ASP | X | 400 | 41.881 | 21.751 | 36.676 | 0.00 | 0.00 |
| ATOM | 6022 | OD2  | ASP | X | 400 | 42.369 | 19.687 | 37.158 | 0.00 | 0.00 |

|      |      |      |     |   |     |        |        |        |      |      |
|------|------|------|-----|---|-----|--------|--------|--------|------|------|
| ATOM | 6023 | C    | ASP | X | 400 | 40.499 | 22.642 | 40.443 | 0.00 | 0.00 |
| ATOM | 6024 | O    | ASP | X | 400 | 39.648 | 23.493 | 40.340 | 0.00 | 0.00 |
| ATOM | 6025 | N    | HIE | X | 401 | 40.493 | 21.763 | 41.469 | 0.00 | 0.00 |
| ATOM | 6026 | H    | HIE | X | 401 | 41.271 | 21.135 | 41.612 | 0.00 | 0.00 |
| ATOM | 6027 | CA   | HIE | X | 401 | 39.425 | 21.712 | 42.524 | 0.00 | 0.00 |
| ATOM | 6028 | HA   | HIE | X | 401 | 38.428 | 21.470 | 42.155 | 0.00 | 0.00 |
| ATOM | 6029 | CB   | HIE | X | 401 | 39.975 | 20.612 | 43.526 | 0.00 | 0.00 |
| ATOM | 6030 | HB2  | HIE | X | 401 | 40.206 | 19.733 | 42.924 | 0.00 | 0.00 |
| ATOM | 6031 | HB3  | HIE | X | 401 | 40.958 | 20.947 | 43.857 | 0.00 | 0.00 |
| ATOM | 6032 | CG   | HIE | X | 401 | 39.079 | 20.369 | 44.728 | 0.00 | 0.00 |
| ATOM | 6033 | ND1  | HIE | X | 401 | 39.398 | 20.611 | 46.050 | 0.00 | 0.00 |
| ATOM | 6034 | CE1  | HIE | X | 401 | 38.259 | 20.457 | 46.727 | 0.00 | 0.00 |
| ATOM | 6035 | HE1  | HIE | X | 401 | 38.202 | 20.546 | 47.802 | 0.00 | 0.00 |
| ATOM | 6036 | NE2  | HIE | X | 401 | 37.272 | 20.112 | 45.925 | 0.00 | 0.00 |
| ATOM | 6037 | HE2  | HIE | X | 401 | 36.348 | 19.848 | 46.237 | 0.00 | 0.00 |
| ATOM | 6038 | CD2  | HIE | X | 401 | 37.791 | 19.941 | 44.676 | 0.00 | 0.00 |
| ATOM | 6039 | HD2  | HIE | X | 401 | 37.177 | 19.685 | 43.825 | 0.00 | 0.00 |
| ATOM | 6040 | C    | HIE | X | 401 | 39.188 | 23.047 | 43.205 | 0.00 | 0.00 |
| ATOM | 6041 | O    | HIE | X | 401 | 38.063 | 23.458 | 43.489 | 0.00 | 0.00 |
| ATOM | 6042 | N    | ASN | X | 402 | 40.255 | 23.804 | 43.415 | 0.00 | 0.00 |
| ATOM | 6043 | H    | ASN | X | 402 | 41.169 | 23.505 | 43.108 | 0.00 | 0.00 |
| ATOM | 6044 | CA   | ASN | X | 402 | 40.267 | 25.117 | 44.003 | 0.00 | 0.00 |
| ATOM | 6045 | HA   | ASN | X | 402 | 39.645 | 24.965 | 44.885 | 0.00 | 0.00 |
| ATOM | 6046 | CB   | ASN | X | 402 | 41.625 | 25.541 | 44.634 | 0.00 | 0.00 |
| ATOM | 6047 | HB2  | ASN | X | 402 | 42.370 | 25.377 | 43.855 | 0.00 | 0.00 |
| ATOM | 6048 | HB3  | ASN | X | 402 | 41.604 | 26.610 | 44.849 | 0.00 | 0.00 |
| ATOM | 6049 | CG   | ASN | X | 402 | 42.067 | 24.834 | 45.907 | 0.00 | 0.00 |
| ATOM | 6050 | OD1  | ASN | X | 402 | 41.477 | 25.070 | 46.965 | 0.00 | 0.00 |
| ATOM | 6051 | ND2  | ASN | X | 402 | 43.176 | 24.075 | 45.881 | 0.00 | 0.00 |
| ATOM | 6052 | HD21 | ASN | X | 402 | 43.441 | 23.548 | 46.701 | 0.00 | 0.00 |
| ATOM | 6053 | HD22 | ASN | X | 402 | 43.653 | 23.799 | 45.035 | 0.00 | 0.00 |
| ATOM | 6054 | C    | ASN | X | 402 | 39.639 | 26.256 | 43.160 | 0.00 | 0.00 |
| ATOM | 6055 | O    | ASN | X | 402 | 38.860 | 27.008 | 43.786 | 0.00 | 0.00 |
| ATOM | 6056 | N    | VAL | X | 403 | 40.020 | 26.316 | 41.902 | 0.00 | 0.00 |
| ATOM | 6057 | H    | VAL | X | 403 | 40.650 | 25.616 | 41.537 | 0.00 | 0.00 |
| ATOM | 6058 | CA   | VAL | X | 403 | 39.700 | 27.552 | 41.040 | 0.00 | 0.00 |
| ATOM | 6059 | HA   | VAL | X | 403 | 38.859 | 28.036 | 41.537 | 0.00 | 0.00 |
| ATOM | 6060 | CB   | VAL | X | 403 | 40.884 | 28.477 | 40.807 | 0.00 | 0.00 |
| ATOM | 6061 | HB   | VAL | X | 403 | 41.771 | 27.877 | 40.602 | 0.00 | 0.00 |
| ATOM | 6062 | CG1  | VAL | X | 403 | 40.513 | 29.541 | 39.784 | 0.00 | 0.00 |
| ATOM | 6063 | HG11 | VAL | X | 403 | 41.312 | 30.281 | 39.735 | 0.00 | 0.00 |
| ATOM | 6064 | HG12 | VAL | X | 403 | 40.314 | 29.090 | 38.812 | 0.00 | 0.00 |
| ATOM | 6065 | HG13 | VAL | X | 403 | 39.620 | 30.017 | 40.187 | 0.00 | 0.00 |
| ATOM | 6066 | CG2  | VAL | X | 403 | 41.202 | 29.012 | 42.182 | 0.00 | 0.00 |
| ATOM | 6067 | HG21 | VAL | X | 403 | 41.637 | 28.210 | 42.779 | 0.00 | 0.00 |
| ATOM | 6068 | HG22 | VAL | X | 403 | 41.760 | 29.939 | 42.053 | 0.00 | 0.00 |
| ATOM | 6069 | HG23 | VAL | X | 403 | 40.370 | 29.426 | 42.751 | 0.00 | 0.00 |
| ATOM | 6070 | C    | VAL | X | 403 | 39.113 | 27.149 | 39.670 | 0.00 | 0.00 |
| ATOM | 6071 | O    | VAL | X | 403 | 37.972 | 27.523 | 39.286 | 0.00 | 0.00 |
| ATOM | 6072 | N    | VAL | X | 404 | 39.874 | 26.261 | 38.966 | 0.00 | 0.00 |
| ATOM | 6073 | H    | VAL | X | 404 | 40.795 | 26.036 | 39.315 | 0.00 | 0.00 |
| ATOM | 6074 | CA   | VAL | X | 404 | 39.540 | 26.134 | 37.504 | 0.00 | 0.00 |
| ATOM | 6075 | HA   | VAL | X | 404 | 39.356 | 27.125 | 37.090 | 0.00 | 0.00 |
| ATOM | 6076 | CB   | VAL | X | 404 | 40.626 | 25.508 | 36.674 | 0.00 | 0.00 |
| ATOM | 6077 | HB   | VAL | X | 404 | 40.899 | 24.524 | 37.055 | 0.00 | 0.00 |
| ATOM | 6078 | CG1  | VAL | X | 404 | 40.256 | 25.372 | 35.226 | 0.00 | 0.00 |
| ATOM | 6079 | HG11 | VAL | X | 404 | 39.804 | 26.346 | 35.037 | 0.00 | 0.00 |
| ATOM | 6080 | HG12 | VAL | X | 404 | 41.048 | 25.051 | 34.549 | 0.00 | 0.00 |
| ATOM | 6081 | HG13 | VAL | X | 404 | 39.543 | 24.563 | 35.067 | 0.00 | 0.00 |
| ATOM | 6082 | CG2  | VAL | X | 404 | 41.856 | 26.474 | 36.709 | 0.00 | 0.00 |
| ATOM | 6083 | HG21 | VAL | X | 404 | 41.609 | 27.487 | 36.391 | 0.00 | 0.00 |
| ATOM | 6084 | HG22 | VAL | X | 404 | 42.366 | 26.419 | 37.671 | 0.00 | 0.00 |
| ATOM | 6085 | HG23 | VAL | X | 404 | 42.580 | 26.107 | 35.981 | 0.00 | 0.00 |
| ATOM | 6086 | C    | VAL | X | 404 | 38.276 | 25.260 | 37.298 | 0.00 | 0.00 |
| ATOM | 6087 | O    | VAL | X | 404 | 37.379 | 25.608 | 36.513 | 0.00 | 0.00 |
| ATOM | 6088 | N    | CYX | X | 405 | 38.050 | 24.237 | 38.128 | 0.00 | 0.00 |
| ATOM | 6089 | H    | CYX | X | 405 | 38.857 | 23.885 | 38.624 | 0.00 | 0.00 |
| ATOM | 6090 | CA   | CYX | X | 405 | 36.876 | 23.396 | 38.167 | 0.00 | 0.00 |
| ATOM | 6091 | HA   | CYX | X | 405 | 36.716 | 23.189 | 37.109 | 0.00 | 0.00 |
| ATOM | 6092 | CB   | CYX | X | 405 | 37.085 | 22.084 | 38.856 | 0.00 | 0.00 |



|      |      |      |     |   |     |        |        |        |      |      |
|------|------|------|-----|---|-----|--------|--------|--------|------|------|
| ATOM | 6093 | HB2  | CYX | X | 405 | 37.653 | 22.223 | 39.776 | 0.00 | 0.00 |
| ATOM | 6094 | HB3  | CYX | X | 405 | 36.074 | 21.850 | 39.190 | 0.00 | 0.00 |
| ATOM | 6095 | SG   | CYX | X | 405 | 37.843 | 20.695 | 37.852 | 0.00 | 0.00 |
| ATOM | 6096 | C    | CYX | X | 405 | 35.622 | 24.106 | 38.577 | 0.00 | 0.00 |
| ATOM | 6097 | O    | CYX | X | 405 | 34.510 | 23.827 | 38.033 | 0.00 | 0.00 |
| ATOM | 6098 | N    | PRO | X | 406 | 35.685 | 24.935 | 39.642 | 0.00 | 0.00 |
| ATOM | 6099 | CD   | PRO | X | 406 | 36.568 | 24.830 | 40.769 | 0.00 | 0.00 |
| ATOM | 6100 | HD2  | PRO | X | 406 | 37.555 | 25.173 | 40.458 | 0.00 | 0.00 |
| ATOM | 6101 | HD3  | PRO | X | 406 | 36.620 | 23.780 | 41.057 | 0.00 | 0.00 |
| ATOM | 6102 | CG   | PRO | X | 406 | 36.072 | 25.774 | 41.823 | 0.00 | 0.00 |
| ATOM | 6103 | HG2  | PRO | X | 406 | 36.823 | 26.284 | 42.427 | 0.00 | 0.00 |
| ATOM | 6104 | HG3  | PRO | X | 406 | 35.448 | 25.220 | 42.524 | 0.00 | 0.00 |
| ATOM | 6105 | CB   | PRO | X | 406 | 35.162 | 26.724 | 41.104 | 0.00 | 0.00 |
| ATOM | 6106 | HB2  | PRO | X | 406 | 35.801 | 27.592 | 40.943 | 0.00 | 0.00 |
| ATOM | 6107 | HB3  | PRO | X | 406 | 34.351 | 26.990 | 41.781 | 0.00 | 0.00 |
| ATOM | 6108 | CA   | PRO | X | 406 | 34.631 | 25.980 | 39.923 | 0.00 | 0.00 |
| ATOM | 6109 | HA   | PRO | X | 406 | 33.721 | 25.458 | 40.218 | 0.00 | 0.00 |
| ATOM | 6110 | C    | PRO | X | 406 | 34.421 | 26.887 | 38.751 | 0.00 | 0.00 |
| ATOM | 6111 | O    | PRO | X | 406 | 33.274 | 26.838 | 38.256 | 0.00 | 0.00 |
| ATOM | 6112 | N    | VAL | X | 407 | 35.449 | 27.399 | 38.095 | 0.00 | 0.00 |
| ATOM | 6113 | H    | VAL | X | 407 | 36.364 | 27.489 | 38.513 | 0.00 | 0.00 |
| ATOM | 6114 | CA   | VAL | X | 407 | 35.301 | 28.330 | 36.900 | 0.00 | 0.00 |
| ATOM | 6115 | HA   | VAL | X | 407 | 34.524 | 29.029 | 37.210 | 0.00 | 0.00 |
| ATOM | 6116 | CB   | VAL | X | 407 | 36.705 | 28.928 | 36.536 | 0.00 | 0.00 |
| ATOM | 6117 | HB   | VAL | X | 407 | 37.404 | 28.204 | 36.954 | 0.00 | 0.00 |
| ATOM | 6118 | CG1  | VAL | X | 407 | 36.992 | 29.154 | 34.981 | 0.00 | 0.00 |
| ATOM | 6119 | HG11 | VAL | X | 407 | 36.797 | 28.223 | 34.448 | 0.00 | 0.00 |
| ATOM | 6120 | HG12 | VAL | X | 407 | 36.286 | 29.898 | 34.610 | 0.00 | 0.00 |
| ATOM | 6121 | HG13 | VAL | X | 407 | 37.996 | 29.575 | 35.029 | 0.00 | 0.00 |
| ATOM | 6122 | CG2  | VAL | X | 407 | 36.949 | 30.271 | 37.236 | 0.00 | 0.00 |
| ATOM | 6123 | HG21 | VAL | X | 407 | 37.786 | 30.878 | 36.894 | 0.00 | 0.00 |
| ATOM | 6124 | HG22 | VAL | X | 407 | 36.115 | 30.952 | 37.064 | 0.00 | 0.00 |
| ATOM | 6125 | HG23 | VAL | X | 407 | 37.092 | 30.067 | 38.297 | 0.00 | 0.00 |
| ATOM | 6126 | C    | VAL | X | 407 | 34.557 | 27.613 | 35.695 | 0.00 | 0.00 |
| ATOM | 6127 | O    | VAL | X | 407 | 33.919 | 28.247 | 34.928 | 0.00 | 0.00 |
| ATOM | 6128 | N    | ALA | X | 408 | 34.796 | 26.276 | 35.516 | 0.00 | 0.00 |
| ATOM | 6129 | H    | ALA | X | 408 | 35.163 | 25.777 | 36.315 | 0.00 | 0.00 |
| ATOM | 6130 | CA   | ALA | X | 408 | 34.088 | 25.486 | 34.531 | 0.00 | 0.00 |
| ATOM | 6131 | HA   | ALA | X | 408 | 34.088 | 26.058 | 33.604 | 0.00 | 0.00 |
| ATOM | 6132 | CB   | ALA | X | 408 | 34.828 | 24.209 | 34.290 | 0.00 | 0.00 |
| ATOM | 6133 | HB1  | ALA | X | 408 | 35.888 | 24.457 | 34.243 | 0.00 | 0.00 |
| ATOM | 6134 | HB2  | ALA | X | 408 | 34.756 | 23.518 | 35.130 | 0.00 | 0.00 |
| ATOM | 6135 | HB3  | ALA | X | 408 | 34.524 | 23.752 | 33.348 | 0.00 | 0.00 |
| ATOM | 6136 | C    | ALA | X | 408 | 32.562 | 25.342 | 34.796 | 0.00 | 0.00 |
| ATOM | 6137 | O    | ALA | X | 408 | 31.756 | 25.691 | 33.939 | 0.00 | 0.00 |
| ATOM | 6138 | N    | GLN | X | 409 | 32.217 | 24.878 | 36.000 | 0.00 | 0.00 |
| ATOM | 6139 | H    | GLN | X | 409 | 32.913 | 24.467 | 36.606 | 0.00 | 0.00 |
| ATOM | 6140 | CA   | GLN | X | 409 | 30.825 | 24.662 | 36.485 | 0.00 | 0.00 |
| ATOM | 6141 | HA   | GLN | X | 409 | 30.170 | 24.146 | 35.784 | 0.00 | 0.00 |
| ATOM | 6142 | CB   | GLN | X | 409 | 30.856 | 23.766 | 37.725 | 0.00 | 0.00 |
| ATOM | 6143 | HB2  | GLN | X | 409 | 31.489 | 22.983 | 37.309 | 0.00 | 0.00 |
| ATOM | 6144 | HB3  | GLN | X | 409 | 31.360 | 24.176 | 38.601 | 0.00 | 0.00 |
| ATOM | 6145 | CG   | GLN | X | 409 | 29.552 | 23.134 | 38.218 | 0.00 | 0.00 |
| ATOM | 6146 | HG2  | GLN | X | 409 | 28.899 | 23.872 | 38.684 | 0.00 | 0.00 |
| ATOM | 6147 | HG3  | GLN | X | 409 | 29.007 | 22.683 | 37.388 | 0.00 | 0.00 |
| ATOM | 6148 | CD   | GLN | X | 409 | 29.759 | 22.169 | 39.364 | 0.00 | 0.00 |
| ATOM | 6149 | OE1  | GLN | X | 409 | 30.036 | 22.476 | 40.559 | 0.00 | 0.00 |
| ATOM | 6150 | NE2  | GLN | X | 409 | 29.622 | 20.923 | 38.973 | 0.00 | 0.00 |
| ATOM | 6151 | HE21 | GLN | X | 409 | 29.712 | 20.133 | 39.596 | 0.00 | 0.00 |
| ATOM | 6152 | HE22 | GLN | X | 409 | 29.480 | 20.719 | 37.994 | 0.00 | 0.00 |
| ATOM | 6153 | C    | GLN | X | 409 | 30.080 | 25.952 | 36.947 | 0.00 | 0.00 |
| ATOM | 6154 | O    | GLN | X | 409 | 28.915 | 25.906 | 37.308 | 0.00 | 0.00 |
| ATOM | 6155 | N    | LEU | X | 410 | 30.805 | 27.095 | 36.890 | 0.00 | 0.00 |
| ATOM | 6156 | H    | LEU | X | 410 | 31.810 | 27.095 | 36.789 | 0.00 | 0.00 |
| ATOM | 6157 | CA   | LEU | X | 410 | 30.206 | 28.404 | 36.967 | 0.00 | 0.00 |
| ATOM | 6158 | HA   | LEU | X | 410 | 29.369 | 28.447 | 37.665 | 0.00 | 0.00 |
| ATOM | 6159 | CB   | LEU | X | 410 | 31.338 | 29.346 | 37.432 | 0.00 | 0.00 |
| ATOM | 6160 | HB2  | LEU | X | 410 | 31.662 | 28.978 | 38.406 | 0.00 | 0.00 |
| ATOM | 6161 | HB3  | LEU | X | 410 | 32.142 | 29.244 | 36.703 | 0.00 | 0.00 |
| ATOM | 6162 | CG   | LEU | X | 410 | 30.943 | 30.785 | 37.533 | 0.00 | 0.00 |

|      |      |      |     |   |     |        |        |        |      |      |
|------|------|------|-----|---|-----|--------|--------|--------|------|------|
| ATOM | 6163 | HG   | LEU | X | 410 | 30.681 | 31.219 | 36.569 | 0.00 | 0.00 |
| ATOM | 6164 | CD1  | LEU | X | 410 | 29.809 | 31.069 | 38.511 | 0.00 | 0.00 |
| ATOM | 6165 | HD11 | LEU | X | 410 | 28.844 | 30.601 | 38.317 | 0.00 | 0.00 |
| ATOM | 6166 | HD12 | LEU | X | 410 | 30.184 | 30.705 | 39.468 | 0.00 | 0.00 |
| ATOM | 6167 | HD13 | LEU | X | 410 | 29.726 | 32.143 | 38.673 | 0.00 | 0.00 |
| ATOM | 6168 | CD2  | LEU | X | 410 | 32.258 | 31.539 | 37.964 | 0.00 | 0.00 |
| ATOM | 6169 | HD21 | LEU | X | 410 | 32.080 | 32.613 | 37.913 | 0.00 | 0.00 |
| ATOM | 6170 | HD22 | LEU | X | 410 | 32.522 | 31.270 | 38.987 | 0.00 | 0.00 |
| ATOM | 6171 | HD23 | LEU | X | 410 | 33.062 | 31.323 | 37.261 | 0.00 | 0.00 |
| ATOM | 6172 | C    | LEU | X | 410 | 29.568 | 28.732 | 35.579 | 0.00 | 0.00 |
| ATOM | 6173 | O    | LEU | X | 410 | 28.363 | 28.935 | 35.504 | 0.00 | 0.00 |
| ATOM | 6174 | N    | ALA | X | 411 | 30.359 | 28.733 | 34.496 | 0.00 | 0.00 |
| ATOM | 6175 | H    | ALA | X | 411 | 31.344 | 28.610 | 34.680 | 0.00 | 0.00 |
| ATOM | 6176 | CA   | ALA | X | 411 | 29.965 | 29.148 | 33.208 | 0.00 | 0.00 |
| ATOM | 6177 | HA   | ALA | X | 411 | 29.711 | 30.206 | 33.275 | 0.00 | 0.00 |
| ATOM | 6178 | CB   | ALA | X | 411 | 31.200 | 29.123 | 32.360 | 0.00 | 0.00 |
| ATOM | 6179 | HB1  | ALA | X | 411 | 31.677 | 28.147 | 32.447 | 0.00 | 0.00 |
| ATOM | 6180 | HB2  | ALA | X | 411 | 30.933 | 29.483 | 31.366 | 0.00 | 0.00 |
| ATOM | 6181 | HB3  | ALA | X | 411 | 31.900 | 29.829 | 32.805 | 0.00 | 0.00 |
| ATOM | 6182 | C    | ALA | X | 411 | 28.856 | 28.248 | 32.634 | 0.00 | 0.00 |
| ATOM | 6183 | O    | ALA | X | 411 | 28.089 | 28.693 | 31.782 | 0.00 | 0.00 |
| ATOM | 6184 | N    | GLY | X | 412 | 28.817 | 26.927 | 32.910 | 0.00 | 0.00 |
| ATOM | 6185 | H    | GLY | X | 412 | 29.682 | 26.584 | 33.302 | 0.00 | 0.00 |
| ATOM | 6186 | CA   | GLY | X | 412 | 27.712 | 25.995 | 32.420 | 0.00 | 0.00 |
| ATOM | 6187 | HA2  | GLY | X | 412 | 27.598 | 26.089 | 31.314 | 0.00 | 0.00 |
| ATOM | 6188 | HA3  | GLY | X | 412 | 28.025 | 25.076 | 32.777 | 0.00 | 0.00 |
| ATOM | 6189 | C    | GLY | X | 412 | 26.425 | 26.512 | 32.974 | 0.00 | 0.00 |
| ATOM | 6190 | O    | GLY | X | 412 | 25.626 | 27.037 | 32.258 | 0.00 | 0.00 |
| ATOM | 6191 | N    | ARG | X | 413 | 26.226 | 26.424 | 34.258 | 0.00 | 0.00 |
| ATOM | 6192 | H    | ARG | X | 413 | 26.907 | 25.975 | 34.854 | 0.00 | 0.00 |
| ATOM | 6193 | CA   | ARG | X | 413 | 25.027 | 26.889 | 35.026 | 0.00 | 0.00 |
| ATOM | 6194 | HA   | ARG | X | 413 | 24.181 | 26.347 | 34.601 | 0.00 | 0.00 |
| ATOM | 6195 | CB   | ARG | X | 413 | 25.208 | 26.441 | 36.498 | 0.00 | 0.00 |
| ATOM | 6196 | HB2  | ARG | X | 413 | 26.038 | 27.012 | 36.914 | 0.00 | 0.00 |
| ATOM | 6197 | HB3  | ARG | X | 413 | 24.252 | 26.716 | 36.945 | 0.00 | 0.00 |
| ATOM | 6198 | CG   | ARG | X | 413 | 25.344 | 24.942 | 36.713 | 0.00 | 0.00 |
| ATOM | 6199 | HG2  | ARG | X | 413 | 24.372 | 24.525 | 36.449 | 0.00 | 0.00 |
| ATOM | 6200 | HG3  | ARG | X | 413 | 26.208 | 24.629 | 36.126 | 0.00 | 0.00 |
| ATOM | 6201 | CD   | ARG | X | 413 | 25.606 | 24.624 | 38.155 | 0.00 | 0.00 |
| ATOM | 6202 | HD2  | ARG | X | 413 | 26.577 | 25.023 | 38.451 | 0.00 | 0.00 |
| ATOM | 6203 | HD3  | ARG | X | 413 | 24.756 | 25.011 | 38.716 | 0.00 | 0.00 |
| ATOM | 6204 | NE   | ARG | X | 413 | 25.516 | 23.160 | 38.410 | 0.00 | 0.00 |
| ATOM | 6205 | HE   | ARG | X | 413 | 25.297 | 22.572 | 37.619 | 0.00 | 0.00 |
| ATOM | 6206 | CZ   | ARG | X | 413 | 25.900 | 22.542 | 39.494 | 0.00 | 0.00 |
| ATOM | 6207 | NH1  | ARG | X | 413 | 26.223 | 23.208 | 40.549 | 0.00 | 0.00 |
| ATOM | 6208 | HH11 | ARG | X | 413 | 26.208 | 24.213 | 40.652 | 0.00 | 0.00 |
| ATOM | 6209 | HH12 | ARG | X | 413 | 26.426 | 22.567 | 41.303 | 0.00 | 0.00 |
| ATOM | 6210 | NH2  | ARG | X | 413 | 25.900 | 21.266 | 39.565 | 0.00 | 0.00 |
| ATOM | 6211 | HH21 | ARG | X | 413 | 25.664 | 20.669 | 38.785 | 0.00 | 0.00 |
| ATOM | 6212 | HH22 | ARG | X | 413 | 25.907 | 20.873 | 40.496 | 0.00 | 0.00 |
| ATOM | 6213 | C    | ARG | X | 413 | 24.603 | 28.356 | 34.869 | 0.00 | 0.00 |
| ATOM | 6214 | O    | ARG | X | 413 | 23.434 | 28.577 | 34.805 | 0.00 | 0.00 |
| ATOM | 6215 | N    | LEU | X | 414 | 25.490 | 29.354 | 34.808 | 0.00 | 0.00 |
| ATOM | 6216 | H    | LEU | X | 414 | 26.450 | 29.106 | 34.999 | 0.00 | 0.00 |
| ATOM | 6217 | CA   | LEU | X | 414 | 25.071 | 30.763 | 34.526 | 0.00 | 0.00 |
| ATOM | 6218 | HA   | LEU | X | 414 | 24.325 | 31.005 | 35.284 | 0.00 | 0.00 |
| ATOM | 6219 | CB   | LEU | X | 414 | 26.256 | 31.732 | 34.456 | 0.00 | 0.00 |
| ATOM | 6220 | HB2  | LEU | X | 414 | 27.072 | 31.356 | 33.839 | 0.00 | 0.00 |
| ATOM | 6221 | HB3  | LEU | X | 414 | 25.855 | 32.632 | 33.989 | 0.00 | 0.00 |
| ATOM | 6222 | CG   | LEU | X | 414 | 26.834 | 32.100 | 35.843 | 0.00 | 0.00 |
| ATOM | 6223 | HG   | LEU | X | 414 | 26.967 | 31.242 | 36.501 | 0.00 | 0.00 |
| ATOM | 6224 | CD1  | LEU | X | 414 | 28.187 | 32.799 | 35.680 | 0.00 | 0.00 |
| ATOM | 6225 | HD11 | LEU | X | 414 | 28.019 | 33.662 | 35.036 | 0.00 | 0.00 |
| ATOM | 6226 | HD12 | LEU | X | 414 | 28.585 | 33.019 | 36.670 | 0.00 | 0.00 |
| ATOM | 6227 | HD13 | LEU | X | 414 | 28.928 | 32.160 | 35.200 | 0.00 | 0.00 |
| ATOM | 6228 | CD2  | LEU | X | 414 | 25.737 | 32.968 | 36.613 | 0.00 | 0.00 |
| ATOM | 6229 | HD21 | LEU | X | 414 | 24.929 | 32.330 | 36.969 | 0.00 | 0.00 |
| ATOM | 6230 | HD22 | LEU | X | 414 | 26.305 | 33.382 | 37.447 | 0.00 | 0.00 |
| ATOM | 6231 | HD23 | LEU | X | 414 | 25.495 | 33.722 | 35.864 | 0.00 | 0.00 |
| ATOM | 6232 | C    | LEU | X | 414 | 24.433 | 30.839 | 33.072 | 0.00 | 0.00 |

|      |      |      |     |   |     |        |        |        |      |      |
|------|------|------|-----|---|-----|--------|--------|--------|------|------|
| ATOM | 6233 | O    | LEU | X | 414 | 23.264 | 31.128 | 32.903 | 0.00 | 0.00 |
| ATOM | 6234 | N    | ALA | X | 415 | 25.120 | 30.351 | 32.012 | 0.00 | 0.00 |
| ATOM | 6235 | H    | ALA | X | 415 | 26.052 | 29.985 | 32.146 | 0.00 | 0.00 |
| ATOM | 6236 | CA   | ALA | X | 415 | 24.668 | 30.333 | 30.591 | 0.00 | 0.00 |
| ATOM | 6237 | HA   | ALA | X | 415 | 24.425 | 31.361 | 30.320 | 0.00 | 0.00 |
| ATOM | 6238 | CB   | ALA | X | 415 | 25.706 | 29.606 | 29.675 | 0.00 | 0.00 |
| ATOM | 6239 | HB1  | ALA | X | 415 | 25.381 | 29.684 | 28.637 | 0.00 | 0.00 |
| ATOM | 6240 | HB2  | ALA | X | 415 | 26.599 | 30.215 | 29.817 | 0.00 | 0.00 |
| ATOM | 6241 | HB3  | ALA | X | 415 | 25.938 | 28.596 | 30.012 | 0.00 | 0.00 |
| ATOM | 6242 | C    | ALA | X | 415 | 23.265 | 29.516 | 30.531 | 0.00 | 0.00 |
| ATOM | 6243 | O    | ALA | X | 415 | 22.223 | 30.046 | 30.209 | 0.00 | 0.00 |
| ATOM | 6244 | N    | ALA | X | 416 | 23.248 | 28.236 | 30.951 | 0.00 | 0.00 |
| ATOM | 6245 | H    | ALA | X | 416 | 24.113 | 27.849 | 31.301 | 0.00 | 0.00 |
| ATOM | 6246 | CA   | ALA | X | 416 | 22.022 | 27.329 | 30.986 | 0.00 | 0.00 |
| ATOM | 6247 | HA   | ALA | X | 416 | 21.630 | 27.261 | 29.971 | 0.00 | 0.00 |
| ATOM | 6248 | CB   | ALA | X | 416 | 22.432 | 25.993 | 31.481 | 0.00 | 0.00 |
| ATOM | 6249 | HB1  | ALA | X | 416 | 22.774 | 26.206 | 32.494 | 0.00 | 0.00 |
| ATOM | 6250 | HB2  | ALA | X | 416 | 21.611 | 25.280 | 31.406 | 0.00 | 0.00 |
| ATOM | 6251 | HB3  | ALA | X | 416 | 23.261 | 25.643 | 30.866 | 0.00 | 0.00 |
| ATOM | 6252 | C    | ALA | X | 416 | 20.856 | 27.914 | 31.798 | 0.00 | 0.00 |
| ATOM | 6253 | O    | ALA | X | 416 | 19.706 | 27.407 | 31.563 | 0.00 | 0.00 |
| ATOM | 6254 | N    | GLN | X | 417 | 21.088 | 28.825 | 32.692 | 0.00 | 0.00 |
| ATOM | 6255 | H    | GLN | X | 417 | 22.002 | 29.246 | 32.778 | 0.00 | 0.00 |
| ATOM | 6256 | CA   | GLN | X | 417 | 20.013 | 29.541 | 33.423 | 0.00 | 0.00 |
| ATOM | 6257 | HA   | GLN | X | 417 | 19.106 | 28.956 | 33.270 | 0.00 | 0.00 |
| ATOM | 6258 | CB   | GLN | X | 417 | 20.358 | 29.586 | 34.923 | 0.00 | 0.00 |
| ATOM | 6259 | HB2  | GLN | X | 417 | 21.335 | 30.025 | 35.127 | 0.00 | 0.00 |
| ATOM | 6260 | HB3  | GLN | X | 417 | 19.602 | 30.160 | 35.459 | 0.00 | 0.00 |
| ATOM | 6261 | CG   | GLN | X | 417 | 20.445 | 28.196 | 35.540 | 0.00 | 0.00 |
| ATOM | 6262 | HG2  | GLN | X | 417 | 19.441 | 27.789 | 35.666 | 0.00 | 0.00 |
| ATOM | 6263 | HG3  | GLN | X | 417 | 20.978 | 27.428 | 34.981 | 0.00 | 0.00 |
| ATOM | 6264 | CD   | GLN | X | 417 | 21.194 | 28.110 | 36.893 | 0.00 | 0.00 |
| ATOM | 6265 | OE1  | GLN | X | 417 | 21.936 | 27.106 | 37.097 | 0.00 | 0.00 |
| ATOM | 6266 | NE2  | GLN | X | 417 | 20.977 | 28.986 | 37.792 | 0.00 | 0.00 |
| ATOM | 6267 | HE21 | GLN | X | 417 | 21.613 | 29.080 | 38.571 | 0.00 | 0.00 |
| ATOM | 6268 | HE22 | GLN | X | 417 | 20.308 | 29.716 | 37.590 | 0.00 | 0.00 |
| ATOM | 6269 | C    | GLN | X | 417 | 19.743 | 30.978 | 32.970 | 0.00 | 0.00 |
| ATOM | 6270 | O    | GLN | X | 417 | 19.140 | 31.799 | 33.695 | 0.00 | 0.00 |
| ATOM | 6271 | N    | GLY | X | 418 | 20.233 | 31.294 | 31.774 | 0.00 | 0.00 |
| ATOM | 6272 | H    | GLY | X | 418 | 20.830 | 30.645 | 31.281 | 0.00 | 0.00 |
| ATOM | 6273 | CA   | GLY | X | 418 | 19.887 | 32.443 | 30.929 | 0.00 | 0.00 |
| ATOM | 6274 | HA2  | GLY | X | 418 | 19.456 | 32.106 | 30.028 | 0.00 | 0.00 |
| ATOM | 6275 | HA3  | GLY | X | 418 | 19.181 | 33.087 | 31.392 | 0.00 | 0.00 |
| ATOM | 6276 | C    | GLY | X | 418 | 20.850 | 33.570 | 30.594 | 0.00 | 0.00 |
| ATOM | 6277 | O    | GLY | X | 418 | 20.436 | 34.550 | 29.961 | 0.00 | 0.00 |
| ATOM | 6278 | N    | ALA | X | 419 | 22.081 | 33.454 | 31.143 | 0.00 | 0.00 |
| ATOM | 6279 | H    | ALA | X | 419 | 22.357 | 32.576 | 31.559 | 0.00 | 0.00 |
| ATOM | 6280 | CA   | ALA | X | 419 | 23.166 | 34.437 | 30.836 | 0.00 | 0.00 |
| ATOM | 6281 | HA   | ALA | X | 419 | 22.659 | 35.397 | 30.933 | 0.00 | 0.00 |
| ATOM | 6282 | CB   | ALA | X | 419 | 24.259 | 34.249 | 31.880 | 0.00 | 0.00 |
| ATOM | 6283 | HB1  | ALA | X | 419 | 24.857 | 33.355 | 31.698 | 0.00 | 0.00 |
| ATOM | 6284 | HB2  | ALA | X | 419 | 24.878 | 35.145 | 31.922 | 0.00 | 0.00 |
| ATOM | 6285 | HB3  | ALA | X | 419 | 23.756 | 34.150 | 32.842 | 0.00 | 0.00 |
| ATOM | 6286 | C    | ALA | X | 419 | 23.824 | 34.216 | 29.492 | 0.00 | 0.00 |
| ATOM | 6287 | O    | ALA | X | 419 | 23.728 | 33.100 | 28.924 | 0.00 | 0.00 |
| ATOM | 6288 | N    | ARG | X | 420 | 24.440 | 35.245 | 28.936 | 0.00 | 0.00 |
| ATOM | 6289 | H    | ARG | X | 420 | 24.502 | 36.074 | 29.509 | 0.00 | 0.00 |
| ATOM | 6290 | CA   | ARG | X | 420 | 25.416 | 35.149 | 27.794 | 0.00 | 0.00 |
| ATOM | 6291 | HA   | ARG | X | 420 | 25.322 | 34.217 | 27.238 | 0.00 | 0.00 |
| ATOM | 6292 | CB   | ARG | X | 420 | 25.138 | 36.334 | 26.825 | 0.00 | 0.00 |
| ATOM | 6293 | HB2  | ARG | X | 420 | 24.151 | 36.176 | 26.391 | 0.00 | 0.00 |
| ATOM | 6294 | HB3  | ARG | X | 420 | 25.350 | 37.313 | 27.253 | 0.00 | 0.00 |
| ATOM | 6295 | CG   | ARG | X | 420 | 26.037 | 36.275 | 25.587 | 0.00 | 0.00 |
| ATOM | 6296 | HG2  | ARG | X | 420 | 27.020 | 36.303 | 26.057 | 0.00 | 0.00 |
| ATOM | 6297 | HG3  | ARG | X | 420 | 25.946 | 35.299 | 25.111 | 0.00 | 0.00 |
| ATOM | 6298 | CD   | ARG | X | 420 | 25.605 | 37.345 | 24.523 | 0.00 | 0.00 |
| ATOM | 6299 | HD2  | ARG | X | 420 | 24.552 | 37.233 | 24.263 | 0.00 | 0.00 |
| ATOM | 6300 | HD3  | ARG | X | 420 | 25.784 | 38.354 | 24.893 | 0.00 | 0.00 |
| ATOM | 6301 | NE   | ARG | X | 420 | 26.374 | 37.309 | 23.289 | 0.00 | 0.00 |
| ATOM | 6302 | HE   | ARG | X | 420 | 27.195 | 37.890 | 23.188 | 0.00 | 0.00 |

|      |      |      |     |   |     |        |        |        |      |      |
|------|------|------|-----|---|-----|--------|--------|--------|------|------|
| ATOM | 6303 | CZ   | ARG | X | 420 | 25.918 | 36.544 | 22.258 | 0.00 | 0.00 |
| ATOM | 6304 | NH1  | ARG | X | 420 | 24.925 | 35.625 | 22.263 | 0.00 | 0.00 |
| ATOM | 6305 | HH11 | ARG | X | 420 | 24.387 | 35.403 | 23.088 | 0.00 | 0.00 |
| ATOM | 6306 | HH12 | ARG | X | 420 | 24.604 | 35.297 | 21.363 | 0.00 | 0.00 |
| ATOM | 6307 | NH2  | ARG | X | 420 | 26.388 | 36.706 | 21.097 | 0.00 | 0.00 |
| ATOM | 6308 | HH21 | ARG | X | 420 | 26.823 | 37.601 | 20.924 | 0.00 | 0.00 |
| ATOM | 6309 | HH22 | ARG | X | 420 | 26.366 | 36.000 | 20.374 | 0.00 | 0.00 |
| ATOM | 6310 | C    | ARG | X | 420 | 26.813 | 35.217 | 28.395 | 0.00 | 0.00 |
| ATOM | 6311 | O    | ARG | X | 420 | 27.175 | 36.187 | 28.946 | 0.00 | 0.00 |
| ATOM | 6312 | N    | VAL | X | 421 | 27.616 | 34.116 | 28.341 | 0.00 | 0.00 |
| ATOM | 6313 | H    | VAL | X | 421 | 27.206 | 33.268 | 27.976 | 0.00 | 0.00 |
| ATOM | 6314 | CA   | VAL | X | 421 | 28.917 | 33.938 | 29.002 | 0.00 | 0.00 |
| ATOM | 6315 | HA   | VAL | X | 421 | 29.103 | 34.812 | 29.627 | 0.00 | 0.00 |
| ATOM | 6316 | CB   | VAL | X | 421 | 28.836 | 32.713 | 29.935 | 0.00 | 0.00 |
| ATOM | 6317 | HB   | VAL | X | 421 | 28.729 | 31.778 | 29.384 | 0.00 | 0.00 |
| ATOM | 6318 | CG1  | VAL | X | 421 | 30.046 | 32.499 | 30.908 | 0.00 | 0.00 |
| ATOM | 6319 | HG11 | VAL | X | 421 | 30.961 | 32.460 | 30.316 | 0.00 | 0.00 |
| ATOM | 6320 | HG12 | VAL | X | 421 | 30.013 | 33.371 | 31.561 | 0.00 | 0.00 |
| ATOM | 6321 | HG13 | VAL | X | 421 | 29.922 | 31.516 | 31.361 | 0.00 | 0.00 |
| ATOM | 6322 | CG2  | VAL | X | 421 | 27.590 | 32.741 | 30.812 | 0.00 | 0.00 |
| ATOM | 6323 | HG21 | VAL | X | 421 | 26.776 | 32.513 | 30.123 | 0.00 | 0.00 |
| ATOM | 6324 | HG22 | VAL | X | 421 | 27.576 | 32.088 | 31.685 | 0.00 | 0.00 |
| ATOM | 6325 | HG23 | VAL | X | 421 | 27.403 | 33.689 | 31.315 | 0.00 | 0.00 |
| ATOM | 6326 | C    | VAL | X | 421 | 29.998 | 33.829 | 27.989 | 0.00 | 0.00 |
| ATOM | 6327 | O    | VAL | X | 421 | 29.699 | 33.410 | 26.865 | 0.00 | 0.00 |
| ATOM | 6328 | N    | TYR | X | 422 | 31.176 | 34.305 | 28.336 | 0.00 | 0.00 |
| ATOM | 6329 | H    | TYR | X | 422 | 31.275 | 34.897 | 29.148 | 0.00 | 0.00 |
| ATOM | 6330 | CA   | TYR | X | 422 | 32.358 | 34.271 | 27.436 | 0.00 | 0.00 |
| ATOM | 6331 | HA   | TYR | X | 422 | 32.124 | 33.645 | 26.575 | 0.00 | 0.00 |
| ATOM | 6332 | CB   | TYR | X | 422 | 32.595 | 35.591 | 26.804 | 0.00 | 0.00 |
| ATOM | 6333 | HB2  | TYR | X | 422 | 32.505 | 36.376 | 27.554 | 0.00 | 0.00 |
| ATOM | 6334 | HB3  | TYR | X | 422 | 33.614 | 35.680 | 26.427 | 0.00 | 0.00 |
| ATOM | 6335 | CG   | TYR | X | 422 | 31.595 | 35.915 | 25.774 | 0.00 | 0.00 |
| ATOM | 6336 | CD1  | TYR | X | 422 | 31.905 | 35.596 | 24.481 | 0.00 | 0.00 |
| ATOM | 6337 | HD1  | TYR | X | 422 | 32.782 | 35.017 | 24.231 | 0.00 | 0.00 |
| ATOM | 6338 | CE1  | TYR | X | 422 | 31.065 | 36.061 | 23.441 | 0.00 | 0.00 |
| ATOM | 6339 | HE1  | TYR | X | 422 | 31.349 | 35.735 | 22.452 | 0.00 | 0.00 |
| ATOM | 6340 | CZ   | TYR | X | 422 | 29.929 | 36.809 | 23.687 | 0.00 | 0.00 |
| ATOM | 6341 | OH   | TYR | X | 422 | 29.076 | 37.163 | 22.690 | 0.00 | 0.00 |
| ATOM | 6342 | HH   | TYR | X | 422 | 29.372 | 36.846 | 21.833 | 0.00 | 0.00 |
| ATOM | 6343 | CE2  | TYR | X | 422 | 29.692 | 37.172 | 25.027 | 0.00 | 0.00 |
| ATOM | 6344 | HE2  | TYR | X | 422 | 28.820 | 37.761 | 25.268 | 0.00 | 0.00 |
| ATOM | 6345 | CD2  | TYR | X | 422 | 30.488 | 36.690 | 26.068 | 0.00 | 0.00 |
| ATOM | 6346 | HD2  | TYR | X | 422 | 30.275 | 37.021 | 27.073 | 0.00 | 0.00 |
| ATOM | 6347 | C    | TYR | X | 422 | 33.610 | 33.749 | 28.073 | 0.00 | 0.00 |
| ATOM | 6348 | O    | TYR | X | 422 | 34.083 | 34.414 | 28.928 | 0.00 | 0.00 |
| ATOM | 6349 | N    | ALA | X | 423 | 34.148 | 32.585 | 27.764 | 0.00 | 0.00 |
| ATOM | 6350 | H    | ALA | X | 423 | 33.637 | 31.923 | 27.196 | 0.00 | 0.00 |
| ATOM | 6351 | CA   | ALA | X | 423 | 35.365 | 31.981 | 28.373 | 0.00 | 0.00 |
| ATOM | 6352 | HA   | ALA | X | 423 | 35.539 | 32.474 | 29.330 | 0.00 | 0.00 |
| ATOM | 6353 | CB   | ALA | X | 423 | 35.085 | 30.477 | 28.637 | 0.00 | 0.00 |
| ATOM | 6354 | HB1  | ALA | X | 423 | 35.883 | 29.937 | 29.146 | 0.00 | 0.00 |
| ATOM | 6355 | HB2  | ALA | X | 423 | 34.271 | 30.608 | 29.349 | 0.00 | 0.00 |
| ATOM | 6356 | HB3  | ALA | X | 423 | 34.529 | 30.007 | 27.825 | 0.00 | 0.00 |
| ATOM | 6357 | C    | ALA | X | 423 | 36.632 | 32.064 | 27.588 | 0.00 | 0.00 |
| ATOM | 6358 | O    | ALA | X | 423 | 36.664 | 31.884 | 26.354 | 0.00 | 0.00 |
| ATOM | 6359 | N    | TYR | X | 424 | 37.700 | 32.334 | 28.366 | 0.00 | 0.00 |
| ATOM | 6360 | H    | TYR | X | 424 | 37.625 | 32.427 | 29.369 | 0.00 | 0.00 |
| ATOM | 6361 | CA   | TYR | X | 424 | 39.139 | 32.369 | 27.896 | 0.00 | 0.00 |
| ATOM | 6362 | HA   | TYR | X | 424 | 39.218 | 31.969 | 26.885 | 0.00 | 0.00 |
| ATOM | 6363 | CB   | TYR | X | 424 | 39.703 | 33.782 | 27.841 | 0.00 | 0.00 |
| ATOM | 6364 | HB2  | TYR | X | 424 | 40.646 | 33.794 | 27.295 | 0.00 | 0.00 |
| ATOM | 6365 | HB3  | TYR | X | 424 | 39.039 | 34.317 | 27.162 | 0.00 | 0.00 |
| ATOM | 6366 | CG   | TYR | X | 424 | 39.957 | 34.534 | 29.103 | 0.00 | 0.00 |
| ATOM | 6367 | CD1  | TYR | X | 424 | 41.257 | 34.497 | 29.718 | 0.00 | 0.00 |
| ATOM | 6368 | HD1  | TYR | X | 424 | 42.030 | 33.901 | 29.257 | 0.00 | 0.00 |
| ATOM | 6369 | CE1  | TYR | X | 424 | 41.464 | 35.089 | 31.005 | 0.00 | 0.00 |
| ATOM | 6370 | HE1  | TYR | X | 424 | 42.393 | 35.058 | 31.555 | 0.00 | 0.00 |
| ATOM | 6371 | CZ   | TYR | X | 424 | 40.350 | 35.647 | 31.618 | 0.00 | 0.00 |
| ATOM | 6372 | OH   | TYR | X | 424 | 40.566 | 36.216 | 32.823 | 0.00 | 0.00 |

|      |      |      |     |   |     |        |        |        |      |      |
|------|------|------|-----|---|-----|--------|--------|--------|------|------|
| ATOM | 6373 | HH   | TYR | X | 424 | 41.500 | 36.112 | 33.017 | 0.00 | 0.00 |
| ATOM | 6374 | CE2  | TYR | X | 424 | 39.096 | 35.720 | 30.984 | 0.00 | 0.00 |
| ATOM | 6375 | HE2  | TYR | X | 424 | 38.292 | 36.299 | 31.414 | 0.00 | 0.00 |
| ATOM | 6376 | CD2  | TYR | X | 424 | 38.875 | 35.214 | 29.671 | 0.00 | 0.00 |
| ATOM | 6377 | HD2  | TYR | X | 424 | 37.937 | 35.212 | 29.137 | 0.00 | 0.00 |
| ATOM | 6378 | C    | TYR | X | 424 | 40.086 | 31.511 | 28.746 | 0.00 | 0.00 |
| ATOM | 6379 | O    | TYR | X | 424 | 39.842 | 31.304 | 29.904 | 0.00 | 0.00 |
| ATOM | 6380 | N    | VAL | X | 425 | 41.247 | 31.092 | 28.201 | 0.00 | 0.00 |
| ATOM | 6381 | H    | VAL | X | 425 | 41.413 | 31.233 | 27.215 | 0.00 | 0.00 |
| ATOM | 6382 | CA   | VAL | X | 425 | 42.438 | 30.794 | 28.908 | 0.00 | 0.00 |
| ATOM | 6383 | HA   | VAL | X | 425 | 42.201 | 31.067 | 29.936 | 0.00 | 0.00 |
| ATOM | 6384 | CB   | VAL | X | 425 | 42.818 | 29.253 | 28.885 | 0.00 | 0.00 |
| ATOM | 6385 | HB   | VAL | X | 425 | 43.865 | 29.255 | 29.187 | 0.00 | 0.00 |
| ATOM | 6386 | CG1  | VAL | X | 425 | 41.818 | 28.516 | 29.848 | 0.00 | 0.00 |
| ATOM | 6387 | HG11 | VAL | X | 425 | 42.172 | 27.492 | 29.732 | 0.00 | 0.00 |
| ATOM | 6388 | HG12 | VAL | X | 425 | 41.876 | 28.743 | 30.913 | 0.00 | 0.00 |
| ATOM | 6389 | HG13 | VAL | X | 425 | 40.795 | 28.639 | 29.494 | 0.00 | 0.00 |
| ATOM | 6390 | CG2  | VAL | X | 425 | 42.697 | 28.700 | 27.455 | 0.00 | 0.00 |
| ATOM | 6391 | HG21 | VAL | X | 425 | 41.686 | 28.695 | 27.046 | 0.00 | 0.00 |
| ATOM | 6392 | HG22 | VAL | X | 425 | 43.286 | 29.302 | 26.763 | 0.00 | 0.00 |
| ATOM | 6393 | HG23 | VAL | X | 425 | 43.059 | 27.673 | 27.416 | 0.00 | 0.00 |
| ATOM | 6394 | C    | VAL | X | 425 | 43.566 | 31.602 | 28.381 | 0.00 | 0.00 |
| ATOM | 6395 | O    | VAL | X | 425 | 43.597 | 31.764 | 27.156 | 0.00 | 0.00 |
| ATOM | 6396 | N    | PHE | X | 426 | 44.562 | 32.010 | 29.213 | 0.00 | 0.00 |
| ATOM | 6397 | H    | PHE | X | 426 | 44.394 | 31.811 | 30.189 | 0.00 | 0.00 |
| ATOM | 6398 | CA   | PHE | X | 426 | 45.660 | 32.832 | 28.737 | 0.00 | 0.00 |
| ATOM | 6399 | HA   | PHE | X | 426 | 45.635 | 33.159 | 27.698 | 0.00 | 0.00 |
| ATOM | 6400 | CB   | PHE | X | 426 | 45.750 | 34.063 | 29.616 | 0.00 | 0.00 |
| ATOM | 6401 | HB2  | PHE | X | 426 | 44.817 | 34.626 | 29.633 | 0.00 | 0.00 |
| ATOM | 6402 | HB3  | PHE | X | 426 | 45.721 | 33.640 | 30.620 | 0.00 | 0.00 |
| ATOM | 6403 | CG   | PHE | X | 426 | 46.944 | 35.005 | 29.491 | 0.00 | 0.00 |
| ATOM | 6404 | CD1  | PHE | X | 426 | 47.059 | 35.825 | 28.343 | 0.00 | 0.00 |
| ATOM | 6405 | HD1  | PHE | X | 426 | 46.292 | 35.899 | 27.586 | 0.00 | 0.00 |
| ATOM | 6406 | CE1  | PHE | X | 426 | 48.174 | 36.663 | 28.232 | 0.00 | 0.00 |
| ATOM | 6407 | HE1  | PHE | X | 426 | 48.323 | 37.336 | 27.400 | 0.00 | 0.00 |
| ATOM | 6408 | CZ   | PHE | X | 426 | 49.130 | 36.789 | 29.273 | 0.00 | 0.00 |
| ATOM | 6409 | HZ   | PHE | X | 426 | 49.907 | 37.539 | 29.262 | 0.00 | 0.00 |
| ATOM | 6410 | CE2  | PHE | X | 426 | 49.080 | 35.927 | 30.320 | 0.00 | 0.00 |
| ATOM | 6411 | HE2  | PHE | X | 426 | 49.887 | 36.002 | 31.034 | 0.00 | 0.00 |
| ATOM | 6412 | CD2  | PHE | X | 426 | 47.989 | 34.955 | 30.400 | 0.00 | 0.00 |
| ATOM | 6413 | HD2  | PHE | X | 426 | 47.907 | 34.259 | 31.221 | 0.00 | 0.00 |
| ATOM | 6414 | C    | PHE | X | 426 | 46.934 | 32.010 | 28.832 | 0.00 | 0.00 |
| ATOM | 6415 | O    | PHE | X | 426 | 47.112 | 31.382 | 29.938 | 0.00 | 0.00 |
| ATOM | 6416 | N    | GLU | X | 427 | 47.834 | 32.054 | 27.878 | 0.00 | 0.00 |
| ATOM | 6417 | H    | GLU | X | 427 | 47.511 | 32.511 | 27.037 | 0.00 | 0.00 |
| ATOM | 6418 | CA   | GLU | X | 427 | 48.959 | 31.181 | 27.752 | 0.00 | 0.00 |
| ATOM | 6419 | HA   | GLU | X | 427 | 49.187 | 31.074 | 28.813 | 0.00 | 0.00 |
| ATOM | 6420 | CB   | GLU | X | 427 | 48.521 | 29.833 | 27.171 | 0.00 | 0.00 |
| ATOM | 6421 | HB2  | GLU | X | 427 | 49.255 | 29.038 | 27.297 | 0.00 | 0.00 |
| ATOM | 6422 | HB3  | GLU | X | 427 | 47.598 | 29.487 | 27.637 | 0.00 | 0.00 |
| ATOM | 6423 | CG   | GLU | X | 427 | 48.268 | 29.931 | 25.669 | 0.00 | 0.00 |
| ATOM | 6424 | HG2  | GLU | X | 427 | 47.468 | 30.663 | 25.561 | 0.00 | 0.00 |
| ATOM | 6425 | HG3  | GLU | X | 427 | 49.172 | 30.329 | 25.208 | 0.00 | 0.00 |
| ATOM | 6426 | CD   | GLU | X | 427 | 47.754 | 28.559 | 25.092 | 0.00 | 0.00 |
| ATOM | 6427 | OE1  | GLU | X | 427 | 48.521 | 27.807 | 24.465 | 0.00 | 0.00 |
| ATOM | 6428 | OE2  | GLU | X | 427 | 46.567 | 28.264 | 25.235 | 0.00 | 0.00 |
| ATOM | 6429 | C    | GLU | X | 427 | 50.168 | 31.881 | 27.236 | 0.00 | 0.00 |
| ATOM | 6430 | O    | GLU | X | 427 | 51.155 | 31.180 | 27.047 | 0.00 | 0.00 |
| ATOM | 6431 | N    | HIE | X | 428 | 50.154 | 33.180 | 27.033 | 0.00 | 0.00 |
| ATOM | 6432 | H    | HIE | X | 428 | 49.415 | 33.712 | 27.469 | 0.00 | 0.00 |
| ATOM | 6433 | CA   | HIE | X | 428 | 51.407 | 33.811 | 26.839 | 0.00 | 0.00 |
| ATOM | 6434 | HA   | HIE | X | 428 | 52.055 | 33.267 | 26.152 | 0.00 | 0.00 |
| ATOM | 6435 | CB   | HIE | X | 428 | 51.283 | 35.141 | 26.204 | 0.00 | 0.00 |
| ATOM | 6436 | HB2  | HIE | X | 428 | 50.731 | 35.097 | 25.266 | 0.00 | 0.00 |
| ATOM | 6437 | HB3  | HIE | X | 428 | 50.656 | 35.775 | 26.831 | 0.00 | 0.00 |
| ATOM | 6438 | CG   | HIE | X | 428 | 52.549 | 35.839 | 25.852 | 0.00 | 0.00 |
| ATOM | 6439 | ND1  | HIE | X | 428 | 53.544 | 35.306 | 25.020 | 0.00 | 0.00 |
| ATOM | 6440 | CE1  | HIE | X | 428 | 54.346 | 36.361 | 24.777 | 0.00 | 0.00 |
| ATOM | 6441 | HE1  | HIE | X | 428 | 55.204 | 36.356 | 24.121 | 0.00 | 0.00 |
| ATOM | 6442 | NE2  | HIE | X | 428 | 54.022 | 37.418 | 25.446 | 0.00 | 0.00 |

|      |      |      |     |   |     |        |        |        |      |      |
|------|------|------|-----|---|-----|--------|--------|--------|------|------|
| ATOM | 6443 | HE2  | HIE | X | 428 | 54.597 | 38.248 | 25.419 | 0.00 | 0.00 |
| ATOM | 6444 | CD2  | HIE | X | 428 | 52.884 | 37.143 | 26.153 | 0.00 | 0.00 |
| ATOM | 6445 | HD2  | HIE | X | 428 | 52.364 | 37.901 | 26.720 | 0.00 | 0.00 |
| ATOM | 6446 | C    | HIE | X | 428 | 52.194 | 34.011 | 28.171 | 0.00 | 0.00 |
| ATOM | 6447 | O    | HIE | X | 428 | 51.826 | 34.790 | 29.046 | 0.00 | 0.00 |
| ATOM | 6448 | N    | ARG | X | 429 | 53.326 | 33.416 | 28.356 | 0.00 | 0.00 |
| ATOM | 6449 | H    | ARG | X | 429 | 53.585 | 32.809 | 27.591 | 0.00 | 0.00 |
| ATOM | 6450 | CA   | ARG | X | 429 | 54.423 | 33.932 | 29.189 | 0.00 | 0.00 |
| ATOM | 6451 | HA   | ARG | X | 429 | 54.022 | 34.126 | 30.184 | 0.00 | 0.00 |
| ATOM | 6452 | CB   | ARG | X | 429 | 55.501 | 32.849 | 29.329 | 0.00 | 0.00 |
| ATOM | 6453 | HB2  | ARG | X | 429 | 55.252 | 32.013 | 29.982 | 0.00 | 0.00 |
| ATOM | 6454 | HB3  | ARG | X | 429 | 55.545 | 32.449 | 28.316 | 0.00 | 0.00 |
| ATOM | 6455 | CG   | ARG | X | 429 | 56.853 | 33.252 | 29.907 | 0.00 | 0.00 |
| ATOM | 6456 | HG2  | ARG | X | 429 | 57.314 | 34.005 | 29.267 | 0.00 | 0.00 |
| ATOM | 6457 | HG3  | ARG | X | 429 | 56.605 | 33.715 | 30.862 | 0.00 | 0.00 |
| ATOM | 6458 | CD   | ARG | X | 429 | 57.814 | 32.061 | 30.138 | 0.00 | 0.00 |
| ATOM | 6459 | HD2  | ARG | X | 429 | 57.698 | 31.268 | 29.399 | 0.00 | 0.00 |
| ATOM | 6460 | HD3  | ARG | X | 429 | 58.870 | 32.330 | 30.142 | 0.00 | 0.00 |
| ATOM | 6461 | NE   | ARG | X | 429 | 57.612 | 31.481 | 31.449 | 0.00 | 0.00 |
| ATOM | 6462 | HE   | ARG | X | 429 | 56.715 | 31.057 | 31.641 | 0.00 | 0.00 |
| ATOM | 6463 | CZ   | ARG | X | 429 | 58.288 | 31.916 | 32.495 | 0.00 | 0.00 |
| ATOM | 6464 | NH1  | ARG | X | 429 | 59.395 | 32.652 | 32.418 | 0.00 | 0.00 |
| ATOM | 6465 | HH11 | ARG | X | 429 | 59.858 | 32.850 | 31.543 | 0.00 | 0.00 |
| ATOM | 6466 | HH12 | ARG | X | 429 | 59.912 | 32.721 | 33.283 | 0.00 | 0.00 |
| ATOM | 6467 | NH2  | ARG | X | 429 | 57.915 | 31.501 | 33.645 | 0.00 | 0.00 |
| ATOM | 6468 | HH21 | ARG | X | 429 | 56.992 | 31.099 | 33.724 | 0.00 | 0.00 |
| ATOM | 6469 | HH22 | ARG | X | 429 | 58.477 | 31.649 | 34.471 | 0.00 | 0.00 |
| ATOM | 6470 | C    | ARG | X | 429 | 54.931 | 35.234 | 28.536 | 0.00 | 0.00 |
| ATOM | 6471 | O    | ARG | X | 429 | 55.432 | 35.156 | 27.410 | 0.00 | 0.00 |
| ATOM | 6472 | N    | ALA | X | 430 | 54.914 | 36.327 | 29.240 | 0.00 | 0.00 |
| ATOM | 6473 | H    | ALA | X | 430 | 54.389 | 36.394 | 30.100 | 0.00 | 0.00 |
| ATOM | 6474 | CA   | ALA | X | 430 | 55.513 | 37.593 | 28.703 | 0.00 | 0.00 |
| ATOM | 6475 | HA   | ALA | X | 430 | 55.383 | 37.629 | 27.622 | 0.00 | 0.00 |
| ATOM | 6476 | CB   | ALA | X | 430 | 54.828 | 38.812 | 29.309 | 0.00 | 0.00 |
| ATOM | 6477 | HB1  | ALA | X | 430 | 53.757 | 38.779 | 29.108 | 0.00 | 0.00 |
| ATOM | 6478 | HB2  | ALA | X | 430 | 55.121 | 39.042 | 30.333 | 0.00 | 0.00 |
| ATOM | 6479 | HB3  | ALA | X | 430 | 55.225 | 39.656 | 28.746 | 0.00 | 0.00 |
| ATOM | 6480 | C    | ALA | X | 430 | 57.055 | 37.572 | 28.968 | 0.00 | 0.00 |
| ATOM | 6481 | O    | ALA | X | 430 | 57.629 | 36.867 | 29.832 | 0.00 | 0.00 |
| ATOM | 6482 | N    | SER | X | 431 | 57.718 | 38.386 | 28.200 | 0.00 | 0.00 |
| ATOM | 6483 | H    | SER | X | 431 | 57.150 | 38.888 | 27.534 | 0.00 | 0.00 |
| ATOM | 6484 | CA   | SER | X | 431 | 59.193 | 38.446 | 28.180 | 0.00 | 0.00 |
| ATOM | 6485 | HA   | SER | X | 431 | 59.697 | 37.520 | 27.906 | 0.00 | 0.00 |
| ATOM | 6486 | CB   | SER | X | 431 | 59.478 | 39.444 | 26.987 | 0.00 | 0.00 |
| ATOM | 6487 | HB2  | SER | X | 431 | 60.560 | 39.411 | 26.859 | 0.00 | 0.00 |
| ATOM | 6488 | HB3  | SER | X | 431 | 59.083 | 39.055 | 26.048 | 0.00 | 0.00 |
| ATOM | 6489 | OG   | SER | X | 431 | 59.047 | 40.740 | 27.259 | 0.00 | 0.00 |
| ATOM | 6490 | HG   | SER | X | 431 | 58.232 | 40.776 | 26.753 | 0.00 | 0.00 |
| ATOM | 6491 | C    | SER | X | 431 | 59.867 | 39.048 | 29.453 | 0.00 | 0.00 |
| ATOM | 6492 | O    | SER | X | 431 | 61.051 | 39.006 | 29.588 | 0.00 | 0.00 |
| ATOM | 6493 | N    | THR | X | 432 | 59.028 | 39.646 | 30.339 | 0.00 | 0.00 |
| ATOM | 6494 | H    | THR | X | 432 | 58.070 | 39.701 | 30.025 | 0.00 | 0.00 |
| ATOM | 6495 | CA   | THR | X | 432 | 59.421 | 40.259 | 31.633 | 0.00 | 0.00 |
| ATOM | 6496 | HA   | THR | X | 432 | 60.452 | 40.614 | 31.642 | 0.00 | 0.00 |
| ATOM | 6497 | CB   | THR | X | 432 | 58.514 | 41.535 | 31.801 | 0.00 | 0.00 |
| ATOM | 6498 | HB   | THR | X | 432 | 58.670 | 41.976 | 32.785 | 0.00 | 0.00 |
| ATOM | 6499 | CG2  | THR | X | 432 | 58.998 | 42.514 | 30.818 | 0.00 | 0.00 |
| ATOM | 6500 | HG21 | THR | X | 432 | 60.043 | 42.756 | 31.014 | 0.00 | 0.00 |
| ATOM | 6501 | HG22 | THR | X | 432 | 58.985 | 42.084 | 29.817 | 0.00 | 0.00 |
| ATOM | 6502 | HG23 | THR | X | 432 | 58.440 | 43.450 | 30.856 | 0.00 | 0.00 |
| ATOM | 6503 | OG1  | THR | X | 432 | 57.109 | 41.174 | 31.607 | 0.00 | 0.00 |
| ATOM | 6504 | HG1  | THR | X | 432 | 56.524 | 41.694 | 32.163 | 0.00 | 0.00 |
| ATOM | 6505 | C    | THR | X | 432 | 59.043 | 39.455 | 32.902 | 0.00 | 0.00 |
| ATOM | 6506 | O    | THR | X | 432 | 59.435 | 39.971 | 33.995 | 0.00 | 0.00 |
| ATOM | 6507 | N    | LEU | X | 433 | 58.411 | 38.264 | 32.733 | 0.00 | 0.00 |
| ATOM | 6508 | H    | LEU | X | 433 | 58.201 | 37.849 | 31.837 | 0.00 | 0.00 |
| ATOM | 6509 | CA   | LEU | X | 433 | 57.790 | 37.529 | 33.746 | 0.00 | 0.00 |
| ATOM | 6510 | HA   | LEU | X | 433 | 57.246 | 38.280 | 34.320 | 0.00 | 0.00 |
| ATOM | 6511 | CB   | LEU | X | 433 | 56.820 | 36.375 | 33.168 | 0.00 | 0.00 |
| ATOM | 6512 | HB2  | LEU | X | 433 | 56.062 | 36.888 | 32.577 | 0.00 | 0.00 |

|      |      |      |     |   |     |        |        |        |      |      |
|------|------|------|-----|---|-----|--------|--------|--------|------|------|
| ATOM | 6513 | HB3  | LEU | X | 433 | 57.359 | 35.742 | 32.462 | 0.00 | 0.00 |
| ATOM | 6514 | CG   | LEU | X | 433 | 56.115 | 35.441 | 34.243 | 0.00 | 0.00 |
| ATOM | 6515 | HG   | LEU | X | 433 | 56.840 | 35.041 | 34.952 | 0.00 | 0.00 |
| ATOM | 6516 | CD1  | LEU | X | 433 | 55.147 | 36.287 | 35.128 | 0.00 | 0.00 |
| ATOM | 6517 | HD11 | LEU | X | 433 | 54.286 | 36.548 | 34.514 | 0.00 | 0.00 |
| ATOM | 6518 | HD12 | LEU | X | 433 | 54.679 | 35.673 | 35.898 | 0.00 | 0.00 |
| ATOM | 6519 | HD13 | LEU | X | 433 | 55.545 | 37.242 | 35.471 | 0.00 | 0.00 |
| ATOM | 6520 | CD2  | LEU | X | 433 | 55.396 | 34.244 | 33.572 | 0.00 | 0.00 |
| ATOM | 6521 | HD21 | LEU | X | 433 | 56.118 | 33.837 | 32.864 | 0.00 | 0.00 |
| ATOM | 6522 | HD22 | LEU | X | 433 | 55.269 | 33.528 | 34.384 | 0.00 | 0.00 |
| ATOM | 6523 | HD23 | LEU | X | 433 | 54.528 | 34.621 | 33.032 | 0.00 | 0.00 |
| ATOM | 6524 | C    | LEU | X | 433 | 58.825 | 36.980 | 34.730 | 0.00 | 0.00 |
| ATOM | 6525 | O    | LEU | X | 433 | 59.653 | 36.098 | 34.434 | 0.00 | 0.00 |
| ATOM | 6526 | N    | SER | X | 434 | 58.816 | 37.493 | 35.931 | 0.00 | 0.00 |
| ATOM | 6527 | H    | SER | X | 434 | 58.101 | 38.194 | 36.062 | 0.00 | 0.00 |
| ATOM | 6528 | CA   | SER | X | 434 | 59.733 | 37.310 | 37.115 | 0.00 | 0.00 |
| ATOM | 6529 | HA   | SER | X | 434 | 60.754 | 37.366 | 36.740 | 0.00 | 0.00 |
| ATOM | 6530 | CB   | SER | X | 434 | 59.678 | 38.456 | 38.142 | 0.00 | 0.00 |
| ATOM | 6531 | HB2  | SER | X | 434 | 60.306 | 38.339 | 39.024 | 0.00 | 0.00 |
| ATOM | 6532 | HB3  | SER | X | 434 | 59.938 | 39.355 | 37.584 | 0.00 | 0.00 |
| ATOM | 6533 | OG   | SER | X | 434 | 58.300 | 38.598 | 38.654 | 0.00 | 0.00 |
| ATOM | 6534 | HG   | SER | X | 434 | 57.785 | 39.136 | 38.048 | 0.00 | 0.00 |
| ATOM | 6535 | C    | SER | X | 434 | 59.694 | 35.972 | 37.788 | 0.00 | 0.00 |
| ATOM | 6536 | O    | SER | X | 434 | 60.519 | 35.693 | 38.675 | 0.00 | 0.00 |
| ATOM | 6537 | N    | TRP | X | 435 | 58.680 | 35.185 | 37.483 | 0.00 | 0.00 |
| ATOM | 6538 | H    | TRP | X | 435 | 58.184 | 35.432 | 36.639 | 0.00 | 0.00 |
| ATOM | 6539 | CA   | TRP | X | 435 | 58.531 | 33.832 | 37.966 | 0.00 | 0.00 |
| ATOM | 6540 | HA   | TRP | X | 435 | 58.785 | 33.908 | 39.023 | 0.00 | 0.00 |
| ATOM | 6541 | CB   | TRP | X | 435 | 57.046 | 33.540 | 38.002 | 0.00 | 0.00 |
| ATOM | 6542 | HB2  | TRP | X | 435 | 56.613 | 33.699 | 37.015 | 0.00 | 0.00 |
| ATOM | 6543 | HB3  | TRP | X | 435 | 56.879 | 32.485 | 38.221 | 0.00 | 0.00 |
| ATOM | 6544 | CG   | TRP | X | 435 | 56.235 | 34.288 | 39.024 | 0.00 | 0.00 |
| ATOM | 6545 | CD1  | TRP | X | 435 | 55.421 | 35.338 | 38.799 | 0.00 | 0.00 |
| ATOM | 6546 | HD1  | TRP | X | 435 | 55.395 | 35.876 | 37.863 | 0.00 | 0.00 |
| ATOM | 6547 | NE1  | TRP | X | 435 | 54.989 | 35.858 | 40.043 | 0.00 | 0.00 |
| ATOM | 6548 | HE1  | TRP | X | 435 | 54.420 | 36.693 | 40.075 | 0.00 | 0.00 |
| ATOM | 6549 | CE2  | TRP | X | 435 | 55.338 | 34.978 | 41.069 | 0.00 | 0.00 |
| ATOM | 6550 | CZ2  | TRP | X | 435 | 54.954 | 34.872 | 42.376 | 0.00 | 0.00 |
| ATOM | 6551 | HZ2  | TRP | X | 435 | 54.258 | 35.577 | 42.808 | 0.00 | 0.00 |
| ATOM | 6552 | CH2  | TRP | X | 435 | 55.449 | 33.806 | 43.163 | 0.00 | 0.00 |
| ATOM | 6553 | HH2  | TRP | X | 435 | 55.001 | 33.630 | 44.129 | 0.00 | 0.00 |
| ATOM | 6554 | CZ3  | TRP | X | 435 | 56.490 | 33.004 | 42.683 | 0.00 | 0.00 |
| ATOM | 6555 | HZ3  | TRP | X | 435 | 56.918 | 32.215 | 43.284 | 0.00 | 0.00 |
| ATOM | 6556 | CE3  | TRP | X | 435 | 56.853 | 33.155 | 41.353 | 0.00 | 0.00 |
| ATOM | 6557 | HE3  | TRP | X | 435 | 57.538 | 32.451 | 40.903 | 0.00 | 0.00 |
| ATOM | 6558 | CD2  | TRP | X | 435 | 56.195 | 34.020 | 40.475 | 0.00 | 0.00 |
| ATOM | 6559 | C    | TRP | X | 435 | 59.339 | 32.765 | 37.166 | 0.00 | 0.00 |
| ATOM | 6560 | O    | TRP | X | 435 | 59.406 | 32.812 | 35.919 | 0.00 | 0.00 |
| ATOM | 6561 | N    | PRO | X | 436 | 60.013 | 31.795 | 37.757 | 0.00 | 0.00 |
| ATOM | 6562 | CD   | PRO | X | 436 | 59.930 | 31.562 | 39.180 | 0.00 | 0.00 |
| ATOM | 6563 | HD2  | PRO | X | 436 | 58.966 | 31.495 | 39.684 | 0.00 | 0.00 |
| ATOM | 6564 | HD3  | PRO | X | 436 | 60.639 | 32.173 | 39.738 | 0.00 | 0.00 |
| ATOM | 6565 | CG   | PRO | X | 436 | 60.378 | 30.104 | 39.242 | 0.00 | 0.00 |
| ATOM | 6566 | HG2  | PRO | X | 436 | 59.491 | 29.486 | 39.100 | 0.00 | 0.00 |
| ATOM | 6567 | HG3  | PRO | X | 436 | 60.788 | 29.987 | 40.245 | 0.00 | 0.00 |
| ATOM | 6568 | CB   | PRO | X | 436 | 61.476 | 29.926 | 38.143 | 0.00 | 0.00 |
| ATOM | 6569 | HB2  | PRO | X | 436 | 61.620 | 28.922 | 37.741 | 0.00 | 0.00 |
| ATOM | 6570 | HB3  | PRO | X | 436 | 62.430 | 30.354 | 38.450 | 0.00 | 0.00 |
| ATOM | 6571 | CA   | PRO | X | 436 | 60.891 | 30.832 | 37.052 | 0.00 | 0.00 |
| ATOM | 6572 | HA   | PRO | X | 436 | 61.781 | 31.273 | 36.604 | 0.00 | 0.00 |
| ATOM | 6573 | C    | PRO | X | 436 | 60.097 | 30.106 | 35.972 | 0.00 | 0.00 |
| ATOM | 6574 | O    | PRO | X | 436 | 58.889 | 29.926 | 36.106 | 0.00 | 0.00 |
| ATOM | 6575 | N    | LEU | X | 437 | 60.748 | 29.704 | 34.926 | 0.00 | 0.00 |
| ATOM | 6576 | H    | LEU | X | 437 | 61.752 | 29.769 | 35.021 | 0.00 | 0.00 |
| ATOM | 6577 | CA   | LEU | X | 437 | 60.346 | 29.086 | 33.662 | 0.00 | 0.00 |
| ATOM | 6578 | HA   | LEU | X | 437 | 59.706 | 29.787 | 33.127 | 0.00 | 0.00 |
| ATOM | 6579 | CB   | LEU | X | 437 | 61.600 | 28.900 | 32.723 | 0.00 | 0.00 |
| ATOM | 6580 | HB2  | LEU | X | 437 | 62.059 | 29.885 | 32.635 | 0.00 | 0.00 |
| ATOM | 6581 | HB3  | LEU | X | 437 | 62.302 | 28.148 | 33.083 | 0.00 | 0.00 |
| ATOM | 6582 | CG   | LEU | X | 437 | 61.165 | 28.294 | 31.297 | 0.00 | 0.00 |

|      |      |      |     |   |     |        |        |        |      |      |
|------|------|------|-----|---|-----|--------|--------|--------|------|------|
| ATOM | 6583 | HG   | LEU | X | 437 | 60.594 | 27.371 | 31.403 | 0.00 | 0.00 |
| ATOM | 6584 | CD1  | LEU | X | 437 | 60.371 | 29.333 | 30.636 | 0.00 | 0.00 |
| ATOM | 6585 | HD11 | LEU | X | 437 | 60.415 | 29.218 | 29.553 | 0.00 | 0.00 |
| ATOM | 6586 | HD12 | LEU | X | 437 | 59.365 | 29.217 | 31.038 | 0.00 | 0.00 |
| ATOM | 6587 | HD13 | LEU | X | 437 | 60.675 | 30.368 | 30.794 | 0.00 | 0.00 |
| ATOM | 6588 | CD2  | LEU | X | 437 | 62.451 | 27.975 | 30.466 | 0.00 | 0.00 |
| ATOM | 6589 | HD21 | LEU | X | 437 | 62.992 | 27.156 | 30.940 | 0.00 | 0.00 |
| ATOM | 6590 | HD22 | LEU | X | 437 | 62.179 | 27.749 | 29.435 | 0.00 | 0.00 |
| ATOM | 6591 | HD23 | LEU | X | 437 | 63.064 | 28.871 | 30.560 | 0.00 | 0.00 |
| ATOM | 6592 | C    | LEU | X | 437 | 59.526 | 27.829 | 33.923 | 0.00 | 0.00 |
| ATOM | 6593 | O    | LEU | X | 437 | 58.661 | 27.481 | 33.044 | 0.00 | 0.00 |
| ATOM | 6594 | N    | TRP | X | 438 | 59.657 | 27.045 | 35.005 | 0.00 | 0.00 |
| ATOM | 6595 | H    | TRP | X | 438 | 60.467 | 27.217 | 35.584 | 0.00 | 0.00 |
| ATOM | 6596 | CA   | TRP | X | 438 | 58.926 | 25.764 | 35.164 | 0.00 | 0.00 |
| ATOM | 6597 | HA   | TRP | X | 438 | 58.910 | 25.284 | 34.186 | 0.00 | 0.00 |
| ATOM | 6598 | CB   | TRP | X | 438 | 59.608 | 24.776 | 36.147 | 0.00 | 0.00 |
| ATOM | 6599 | HB2  | TRP | X | 438 | 59.128 | 23.799 | 36.083 | 0.00 | 0.00 |
| ATOM | 6600 | HB3  | TRP | X | 438 | 60.625 | 24.696 | 35.762 | 0.00 | 0.00 |
| ATOM | 6601 | CG   | TRP | X | 438 | 59.508 | 25.160 | 37.561 | 0.00 | 0.00 |
| ATOM | 6602 | CD1  | TRP | X | 438 | 60.354 | 25.968 | 38.237 | 0.00 | 0.00 |
| ATOM | 6603 | HD1  | TRP | X | 438 | 61.267 | 26.414 | 37.872 | 0.00 | 0.00 |
| ATOM | 6604 | NE1  | TRP | X | 438 | 59.912 | 26.136 | 39.502 | 0.00 | 0.00 |
| ATOM | 6605 | HE1  | TRP | X | 438 | 60.363 | 26.615 | 40.268 | 0.00 | 0.00 |
| ATOM | 6606 | CE2  | TRP | X | 438 | 58.718 | 25.471 | 39.722 | 0.00 | 0.00 |
| ATOM | 6607 | CZ2  | TRP | X | 438 | 57.857 | 25.460 | 40.824 | 0.00 | 0.00 |
| ATOM | 6608 | HZ2  | TRP | X | 438 | 57.991 | 26.008 | 41.744 | 0.00 | 0.00 |
| ATOM | 6609 | CH2  | TRP | X | 438 | 56.567 | 24.881 | 40.709 | 0.00 | 0.00 |
| ATOM | 6610 | HH2  | TRP | X | 438 | 55.848 | 24.918 | 41.514 | 0.00 | 0.00 |
| ATOM | 6611 | CZ3  | TRP | X | 438 | 56.113 | 24.380 | 39.471 | 0.00 | 0.00 |
| ATOM | 6612 | HZ3  | TRP | X | 438 | 55.113 | 23.975 | 39.420 | 0.00 | 0.00 |
| ATOM | 6613 | CE3  | TRP | X | 438 | 57.036 | 24.421 | 38.357 | 0.00 | 0.00 |
| ATOM | 6614 | HE3  | TRP | X | 438 | 56.685 | 24.073 | 37.397 | 0.00 | 0.00 |
| ATOM | 6615 | CD2  | TRP | X | 438 | 58.344 | 24.926 | 38.438 | 0.00 | 0.00 |
| ATOM | 6616 | C    | TRP | X | 438 | 57.446 | 26.043 | 35.397 | 0.00 | 0.00 |
| ATOM | 6617 | O    | TRP | X | 438 | 56.671 | 25.348 | 34.794 | 0.00 | 0.00 |
| ATOM | 6618 | N    | MET | X | 439 | 57.126 | 27.122 | 36.126 | 0.00 | 0.00 |
| ATOM | 6619 | H    | MET | X | 439 | 57.931 | 27.595 | 36.511 | 0.00 | 0.00 |
| ATOM | 6620 | CA   | MET | X | 439 | 55.836 | 27.539 | 36.572 | 0.00 | 0.00 |
| ATOM | 6621 | HA   | MET | X | 439 | 55.389 | 26.671 | 37.055 | 0.00 | 0.00 |
| ATOM | 6622 | CB   | MET | X | 439 | 56.081 | 28.767 | 37.508 | 0.00 | 0.00 |
| ATOM | 6623 | HB2  | MET | X | 439 | 56.781 | 29.465 | 37.050 | 0.00 | 0.00 |
| ATOM | 6624 | HB3  | MET | X | 439 | 55.160 | 29.344 | 37.593 | 0.00 | 0.00 |
| ATOM | 6625 | CG   | MET | X | 439 | 56.510 | 28.436 | 38.919 | 0.00 | 0.00 |
| ATOM | 6626 | HG2  | MET | X | 439 | 55.932 | 27.583 | 39.274 | 0.00 | 0.00 |
| ATOM | 6627 | HG3  | MET | X | 439 | 57.526 | 28.051 | 38.838 | 0.00 | 0.00 |
| ATOM | 6628 | SD   | MET | X | 439 | 56.745 | 29.814 | 40.059 | 0.00 | 0.00 |
| ATOM | 6629 | CE   | MET | X | 439 | 55.073 | 30.505 | 40.152 | 0.00 | 0.00 |
| ATOM | 6630 | HE1  | MET | X | 439 | 55.180 | 31.441 | 40.700 | 0.00 | 0.00 |
| ATOM | 6631 | HE2  | MET | X | 439 | 54.714 | 30.685 | 39.138 | 0.00 | 0.00 |
| ATOM | 6632 | HE3  | MET | X | 439 | 54.396 | 29.812 | 40.651 | 0.00 | 0.00 |
| ATOM | 6633 | C    | MET | X | 439 | 54.871 | 27.949 | 35.346 | 0.00 | 0.00 |
| ATOM | 6634 | O    | MET | X | 439 | 53.695 | 28.212 | 35.634 | 0.00 | 0.00 |
| ATOM | 6635 | N    | GLY | X | 440 | 55.373 | 28.059 | 34.120 | 0.00 | 0.00 |
| ATOM | 6636 | H    | GLY | X | 440 | 56.367 | 27.906 | 34.026 | 0.00 | 0.00 |
| ATOM | 6637 | CA   | GLY | X | 440 | 54.524 | 28.245 | 32.958 | 0.00 | 0.00 |
| ATOM | 6638 | HA2  | GLY | X | 440 | 55.041 | 28.139 | 32.019 | 0.00 | 0.00 |
| ATOM | 6639 | HA3  | GLY | X | 440 | 53.606 | 27.624 | 32.992 | 0.00 | 0.00 |
| ATOM | 6640 | C    | GLY | X | 440 | 53.984 | 29.723 | 33.127 | 0.00 | 0.00 |
| ATOM | 6641 | O    | GLY | X | 440 | 54.781 | 30.665 | 32.957 | 0.00 | 0.00 |
| ATOM | 6642 | N    | VAL | X | 441 | 52.685 | 29.837 | 33.388 | 0.00 | 0.00 |
| ATOM | 6643 | H    | VAL | X | 441 | 52.133 | 28.998 | 33.495 | 0.00 | 0.00 |
| ATOM | 6644 | CA   | VAL | X | 441 | 51.965 | 31.171 | 33.352 | 0.00 | 0.00 |
| ATOM | 6645 | HA   | VAL | X | 441 | 52.679 | 31.983 | 33.218 | 0.00 | 0.00 |
| ATOM | 6646 | CB   | VAL | X | 441 | 51.071 | 31.279 | 32.050 | 0.00 | 0.00 |
| ATOM | 6647 | HB   | VAL | X | 441 | 50.157 | 30.688 | 32.111 | 0.00 | 0.00 |
| ATOM | 6648 | CG1  | VAL | X | 441 | 50.605 | 32.778 | 31.898 | 0.00 | 0.00 |
| ATOM | 6649 | HG11 | VAL | X | 441 | 49.957 | 33.029 | 32.739 | 0.00 | 0.00 |
| ATOM | 6650 | HG12 | VAL | X | 441 | 51.538 | 33.341 | 31.926 | 0.00 | 0.00 |
| ATOM | 6651 | HG13 | VAL | X | 441 | 49.962 | 32.842 | 31.021 | 0.00 | 0.00 |
| ATOM | 6652 | CG2  | VAL | X | 441 | 51.739 | 30.822 | 30.728 | 0.00 | 0.00 |



|      |      |      |     |   |     |        |        |        |      |      |
|------|------|------|-----|---|-----|--------|--------|--------|------|------|
| ATOM | 6653 | HG21 | VAL | X | 441 | 51.885 | 29.744 | 30.788 | 0.00 | 0.00 |
| ATOM | 6654 | HG22 | VAL | X | 441 | 51.220 | 31.062 | 29.800 | 0.00 | 0.00 |
| ATOM | 6655 | HG23 | VAL | X | 441 | 52.721 | 31.295 | 30.725 | 0.00 | 0.00 |
| ATOM | 6656 | C    | VAL | X | 441 | 51.088 | 31.263 | 34.580 | 0.00 | 0.00 |
| ATOM | 6657 | O    | VAL | X | 441 | 50.071 | 30.585 | 34.623 | 0.00 | 0.00 |
| ATOM | 6658 | N    | PRO | X | 442 | 51.494 | 32.050 | 35.660 | 0.00 | 0.00 |
| ATOM | 6659 | CD   | PRO | X | 442 | 52.561 | 33.013 | 35.477 | 0.00 | 0.00 |
| ATOM | 6660 | HD2  | PRO | X | 442 | 52.269 | 33.908 | 34.926 | 0.00 | 0.00 |
| ATOM | 6661 | HD3  | PRO | X | 442 | 53.351 | 32.479 | 34.949 | 0.00 | 0.00 |
| ATOM | 6662 | CG   | PRO | X | 442 | 52.990 | 33.402 | 36.965 | 0.00 | 0.00 |
| ATOM | 6663 | HG2  | PRO | X | 442 | 52.613 | 34.368 | 37.302 | 0.00 | 0.00 |
| ATOM | 6664 | HG3  | PRO | X | 442 | 54.049 | 33.337 | 37.215 | 0.00 | 0.00 |
| ATOM | 6665 | CB   | PRO | X | 442 | 52.227 | 32.441 | 37.791 | 0.00 | 0.00 |
| ATOM | 6666 | HB2  | PRO | X | 442 | 52.027 | 32.832 | 38.789 | 0.00 | 0.00 |
| ATOM | 6667 | HB3  | PRO | X | 442 | 52.972 | 31.649 | 37.876 | 0.00 | 0.00 |
| ATOM | 6668 | CA   | PRO | X | 442 | 51.009 | 31.951 | 36.992 | 0.00 | 0.00 |
| ATOM | 6669 | HA   | PRO | X | 442 | 50.716 | 30.937 | 37.264 | 0.00 | 0.00 |
| ATOM | 6670 | C    | PRO | X | 442 | 49.786 | 32.871 | 37.209 | 0.00 | 0.00 |
| ATOM | 6671 | O    | PRO | X | 442 | 49.725 | 33.912 | 36.511 | 0.00 | 0.00 |
| ATOM | 6672 | N    | HIP | X | 443 | 48.852 | 32.467 | 38.064 | 0.00 | 0.00 |
| ATOM | 6673 | H    | HIP | X | 443 | 48.982 | 31.505 | 38.347 | 0.00 | 0.00 |
| ATOM | 6674 | CA   | HIP | X | 443 | 47.540 | 33.059 | 38.388 | 0.00 | 0.00 |
| ATOM | 6675 | HA   | HIP | X | 443 | 46.743 | 32.543 | 37.852 | 0.00 | 0.00 |
| ATOM | 6676 | CB   | HIP | X | 443 | 47.410 | 32.671 | 39.835 | 0.00 | 0.00 |
| ATOM | 6677 | HB2  | HIP | X | 443 | 47.360 | 31.584 | 39.771 | 0.00 | 0.00 |
| ATOM | 6678 | HB3  | HIP | X | 443 | 48.368 | 32.879 | 40.311 | 0.00 | 0.00 |
| ATOM | 6679 | CG   | HIP | X | 443 | 46.380 | 33.252 | 40.705 | 0.00 | 0.00 |
| ATOM | 6680 | ND1  | HIP | X | 443 | 45.013 | 33.020 | 40.678 | 0.00 | 0.00 |
| ATOM | 6681 | HD1  | HIP | X | 443 | 44.600 | 32.417 | 39.980 | 0.00 | 0.00 |
| ATOM | 6682 | CE1  | HIP | X | 443 | 44.471 | 33.779 | 41.616 | 0.00 | 0.00 |
| ATOM | 6683 | HE1  | HIP | X | 443 | 43.411 | 33.888 | 41.787 | 0.00 | 0.00 |
| ATOM | 6684 | NE2  | HIP | X | 443 | 45.448 | 34.380 | 42.337 | 0.00 | 0.00 |
| ATOM | 6685 | HE2  | HIP | X | 443 | 45.378 | 34.936 | 43.177 | 0.00 | 0.00 |
| ATOM | 6686 | CD2  | HIP | X | 443 | 46.640 | 33.972 | 41.857 | 0.00 | 0.00 |
| ATOM | 6687 | HD2  | HIP | X | 443 | 47.621 | 34.163 | 42.266 | 0.00 | 0.00 |
| ATOM | 6688 | C    | HIP | X | 443 | 47.439 | 34.659 | 38.132 | 0.00 | 0.00 |
| ATOM | 6689 | O    | HIP | X | 443 | 48.243 | 35.422 | 38.668 | 0.00 | 0.00 |
| ATOM | 6690 | N    | GLY | X | 444 | 46.414 | 35.078 | 37.369 | 0.00 | 0.00 |
| ATOM | 6691 | H    | GLY | X | 444 | 45.894 | 34.361 | 36.883 | 0.00 | 0.00 |
| ATOM | 6692 | CA   | GLY | X | 444 | 45.980 | 36.470 | 37.100 | 0.00 | 0.00 |
| ATOM | 6693 | HA2  | GLY | X | 444 | 45.194 | 36.391 | 36.382 | 0.00 | 0.00 |
| ATOM | 6694 | HA3  | GLY | X | 444 | 45.431 | 36.877 | 37.963 | 0.00 | 0.00 |
| ATOM | 6695 | C    | GLY | X | 444 | 47.052 | 37.406 | 36.576 | 0.00 | 0.00 |
| ATOM | 6696 | O    | GLY | X | 444 | 47.038 | 38.601 | 36.933 | 0.00 | 0.00 |
| ATOM | 6697 | N    | TYR | X | 445 | 48.013 | 36.936 | 35.840 | 0.00 | 0.00 |
| ATOM | 6698 | H    | TYR | X | 445 | 47.925 | 36.003 | 35.464 | 0.00 | 0.00 |
| ATOM | 6699 | CA   | TYR | X | 445 | 48.974 | 37.837 | 35.044 | 0.00 | 0.00 |
| ATOM | 6700 | HA   | TYR | X | 445 | 49.211 | 38.653 | 35.727 | 0.00 | 0.00 |
| ATOM | 6701 | CB   | TYR | X | 445 | 50.391 | 37.107 | 34.944 | 0.00 | 0.00 |
| ATOM | 6702 | HB2  | TYR | X | 445 | 50.360 | 36.018 | 34.935 | 0.00 | 0.00 |
| ATOM | 6703 | HB3  | TYR | X | 445 | 50.929 | 37.444 | 34.058 | 0.00 | 0.00 |
| ATOM | 6704 | CG   | TYR | X | 445 | 51.356 | 37.492 | 36.006 | 0.00 | 0.00 |
| ATOM | 6705 | CD1  | TYR | X | 445 | 52.300 | 38.477 | 35.731 | 0.00 | 0.00 |
| ATOM | 6706 | HD1  | TYR | X | 445 | 52.417 | 38.792 | 34.705 | 0.00 | 0.00 |
| ATOM | 6707 | CE1  | TYR | X | 445 | 53.175 | 38.898 | 36.673 | 0.00 | 0.00 |
| ATOM | 6708 | HE1  | TYR | X | 445 | 53.992 | 39.542 | 36.384 | 0.00 | 0.00 |
| ATOM | 6709 | CZ   | TYR | X | 445 | 53.133 | 38.326 | 37.985 | 0.00 | 0.00 |
| ATOM | 6710 | OH   | TYR | X | 445 | 53.907 | 38.741 | 39.005 | 0.00 | 0.00 |
| ATOM | 6711 | HH   | TYR | X | 445 | 54.445 | 39.487 | 38.729 | 0.00 | 0.00 |
| ATOM | 6712 | CE2  | TYR | X | 445 | 52.139 | 37.282 | 38.270 | 0.00 | 0.00 |
| ATOM | 6713 | HE2  | TYR | X | 445 | 52.179 | 36.751 | 39.209 | 0.00 | 0.00 |
| ATOM | 6714 | CD2  | TYR | X | 445 | 51.367 | 36.777 | 37.199 | 0.00 | 0.00 |
| ATOM | 6715 | HD2  | TYR | X | 445 | 50.632 | 35.990 | 37.280 | 0.00 | 0.00 |
| ATOM | 6716 | C    | TYR | X | 445 | 48.491 | 38.471 | 33.668 | 0.00 | 0.00 |
| ATOM | 6717 | O    | TYR | X | 445 | 49.312 | 39.208 | 33.110 | 0.00 | 0.00 |
| ATOM | 6718 | N    | GLU | X | 446 | 47.310 | 38.113 | 33.178 | 0.00 | 0.00 |
| ATOM | 6719 | H    | GLU | X | 446 | 46.600 | 37.633 | 33.712 | 0.00 | 0.00 |
| ATOM | 6720 | CA   | GLU | X | 446 | 46.821 | 38.709 | 31.941 | 0.00 | 0.00 |
| ATOM | 6721 | HA   | GLU | X | 446 | 47.721 | 38.777 | 31.330 | 0.00 | 0.00 |
| ATOM | 6722 | CB   | GLU | X | 446 | 45.855 | 37.712 | 31.256 | 0.00 | 0.00 |

|      |      |      |     |   |     |        |        |        |      |      |
|------|------|------|-----|---|-----|--------|--------|--------|------|------|
| ATOM | 6723 | HB2  | GLU | X | 446 | 45.792 | 37.722 | 30.168 | 0.00 | 0.00 |
| ATOM | 6724 | HB3  | GLU | X | 446 | 46.281 | 36.723 | 31.422 | 0.00 | 0.00 |
| ATOM | 6725 | CG   | GLU | X | 446 | 44.346 | 37.831 | 31.714 | 0.00 | 0.00 |
| ATOM | 6726 | HG2  | GLU | X | 446 | 44.032 | 38.846 | 31.469 | 0.00 | 0.00 |
| ATOM | 6727 | HG3  | GLU | X | 446 | 43.822 | 37.080 | 31.122 | 0.00 | 0.00 |
| ATOM | 6728 | CD   | GLU | X | 446 | 44.001 | 37.628 | 33.194 | 0.00 | 0.00 |
| ATOM | 6729 | OE1  | GLU | X | 446 | 44.898 | 37.670 | 34.009 | 0.00 | 0.00 |
| ATOM | 6730 | OE2  | GLU | X | 446 | 42.799 | 37.292 | 33.444 | 0.00 | 0.00 |
| ATOM | 6731 | C    | GLU | X | 446 | 46.291 | 40.151 | 32.105 | 0.00 | 0.00 |
| ATOM | 6732 | O    | GLU | X | 446 | 46.381 | 40.883 | 31.147 | 0.00 | 0.00 |
| ATOM | 6733 | N    | ILE | X | 447 | 46.063 | 40.548 | 33.380 | 0.00 | 0.00 |
| ATOM | 6734 | H    | ILE | X | 447 | 45.770 | 39.829 | 34.025 | 0.00 | 0.00 |
| ATOM | 6735 | CA   | ILE | X | 447 | 45.601 | 41.902 | 33.650 | 0.00 | 0.00 |
| ATOM | 6736 | HA   | ILE | X | 447 | 44.736 | 42.027 | 32.999 | 0.00 | 0.00 |
| ATOM | 6737 | CB   | ILE | X | 447 | 45.202 | 42.062 | 35.163 | 0.00 | 0.00 |
| ATOM | 6738 | HB   | ILE | X | 447 | 44.545 | 42.931 | 35.206 | 0.00 | 0.00 |
| ATOM | 6739 | CG2  | ILE | X | 447 | 44.383 | 40.772 | 35.551 | 0.00 | 0.00 |
| ATOM | 6740 | HG21 | ILE | X | 447 | 43.914 | 40.857 | 36.531 | 0.00 | 0.00 |
| ATOM | 6741 | HG22 | ILE | X | 447 | 43.651 | 40.563 | 34.771 | 0.00 | 0.00 |
| ATOM | 6742 | HG23 | ILE | X | 447 | 45.103 | 39.984 | 35.774 | 0.00 | 0.00 |
| ATOM | 6743 | CG1  | ILE | X | 447 | 46.428 | 42.305 | 36.123 | 0.00 | 0.00 |
| ATOM | 6744 | HG12 | ILE | X | 447 | 46.838 | 41.296 | 36.155 | 0.00 | 0.00 |
| ATOM | 6745 | HG13 | ILE | X | 447 | 47.169 | 42.948 | 35.647 | 0.00 | 0.00 |
| ATOM | 6746 | CD1  | ILE | X | 447 | 46.098 | 42.741 | 37.512 | 0.00 | 0.00 |
| ATOM | 6747 | HD11 | ILE | X | 447 | 45.653 | 43.736 | 37.523 | 0.00 | 0.00 |
| ATOM | 6748 | HD12 | ILE | X | 447 | 45.427 | 41.994 | 37.935 | 0.00 | 0.00 |
| ATOM | 6749 | HD13 | ILE | X | 447 | 46.910 | 42.833 | 38.234 | 0.00 | 0.00 |
| ATOM | 6750 | C    | ILE | X | 447 | 46.590 | 42.940 | 33.157 | 0.00 | 0.00 |
| ATOM | 6751 | O    | ILE | X | 447 | 46.116 | 43.968 | 32.627 | 0.00 | 0.00 |
| ATOM | 6752 | N    | GLU | X | 448 | 47.917 | 42.632 | 33.146 | 0.00 | 0.00 |
| ATOM | 6753 | H    | GLU | X | 448 | 48.255 | 41.706 | 33.367 | 0.00 | 0.00 |
| ATOM | 6754 | CA   | GLU | X | 448 | 48.911 | 43.641 | 32.698 | 0.00 | 0.00 |
| ATOM | 6755 | HA   | GLU | X | 448 | 48.855 | 44.465 | 33.409 | 0.00 | 0.00 |
| ATOM | 6756 | CB   | GLU | X | 448 | 50.322 | 43.024 | 32.739 | 0.00 | 0.00 |
| ATOM | 6757 | HB2  | GLU | X | 448 | 50.541 | 42.272 | 31.981 | 0.00 | 0.00 |
| ATOM | 6758 | HB3  | GLU | X | 448 | 51.036 | 43.740 | 32.331 | 0.00 | 0.00 |
| ATOM | 6759 | CG   | GLU | X | 448 | 50.840 | 42.542 | 34.092 | 0.00 | 0.00 |
| ATOM | 6760 | HG2  | GLU | X | 448 | 50.889 | 43.441 | 34.705 | 0.00 | 0.00 |
| ATOM | 6761 | HG3  | GLU | X | 448 | 50.290 | 41.759 | 34.615 | 0.00 | 0.00 |
| ATOM | 6762 | CD   | GLU | X | 448 | 52.307 | 42.152 | 34.005 | 0.00 | 0.00 |
| ATOM | 6763 | OE1  | GLU | X | 448 | 53.147 | 42.516 | 34.805 | 0.00 | 0.00 |
| ATOM | 6764 | OE2  | GLU | X | 448 | 52.731 | 41.412 | 33.043 | 0.00 | 0.00 |
| ATOM | 6765 | C    | GLU | X | 448 | 48.616 | 44.160 | 31.218 | 0.00 | 0.00 |
| ATOM | 6766 | O    | GLU | X | 448 | 48.703 | 45.337 | 30.891 | 0.00 | 0.00 |
| ATOM | 6767 | N    | PHE | X | 449 | 48.183 | 43.222 | 30.370 | 0.00 | 0.00 |
| ATOM | 6768 | H    | PHE | X | 449 | 48.176 | 42.299 | 30.781 | 0.00 | 0.00 |
| ATOM | 6769 | CA   | PHE | X | 449 | 47.809 | 43.429 | 28.989 | 0.00 | 0.00 |
| ATOM | 6770 | HA   | PHE | X | 449 | 48.546 | 44.130 | 28.598 | 0.00 | 0.00 |
| ATOM | 6771 | CB   | PHE | X | 449 | 47.866 | 42.121 | 28.274 | 0.00 | 0.00 |
| ATOM | 6772 | HB2  | PHE | X | 449 | 47.329 | 41.496 | 28.988 | 0.00 | 0.00 |
| ATOM | 6773 | HB3  | PHE | X | 449 | 47.265 | 42.112 | 27.365 | 0.00 | 0.00 |
| ATOM | 6774 | CG   | PHE | X | 449 | 49.266 | 41.623 | 27.939 | 0.00 | 0.00 |
| ATOM | 6775 | CD1  | PHE | X | 449 | 49.882 | 40.697 | 28.830 | 0.00 | 0.00 |
| ATOM | 6776 | HD1  | PHE | X | 449 | 49.302 | 40.304 | 29.652 | 0.00 | 0.00 |
| ATOM | 6777 | CE1  | PHE | X | 449 | 51.197 | 40.285 | 28.550 | 0.00 | 0.00 |
| ATOM | 6778 | HE1  | PHE | X | 449 | 51.726 | 39.588 | 29.184 | 0.00 | 0.00 |
| ATOM | 6779 | CZ   | PHE | X | 449 | 51.937 | 40.874 | 27.508 | 0.00 | 0.00 |
| ATOM | 6780 | HZ   | PHE | X | 449 | 52.972 | 40.590 | 27.389 | 0.00 | 0.00 |
| ATOM | 6781 | CE2  | PHE | X | 449 | 51.309 | 41.760 | 26.617 | 0.00 | 0.00 |
| ATOM | 6782 | HE2  | PHE | X | 449 | 51.865 | 42.275 | 25.848 | 0.00 | 0.00 |
| ATOM | 6783 | CD2  | PHE | X | 449 | 49.937 | 42.075 | 26.843 | 0.00 | 0.00 |
| ATOM | 6784 | HD2  | PHE | X | 449 | 49.402 | 42.728 | 26.169 | 0.00 | 0.00 |
| ATOM | 6785 | C    | PHE | X | 449 | 46.412 | 43.930 | 28.850 | 0.00 | 0.00 |
| ATOM | 6786 | O    | PHE | X | 449 | 46.098 | 44.550 | 27.836 | 0.00 | 0.00 |
| ATOM | 6787 | N    | ILE | X | 450 | 45.535 | 43.739 | 29.879 | 0.00 | 0.00 |
| ATOM | 6788 | H    | ILE | X | 450 | 45.931 | 43.466 | 30.767 | 0.00 | 0.00 |
| ATOM | 6789 | CA   | ILE | X | 450 | 44.186 | 44.342 | 29.909 | 0.00 | 0.00 |
| ATOM | 6790 | HA   | ILE | X | 450 | 43.932 | 44.362 | 28.849 | 0.00 | 0.00 |
| ATOM | 6791 | CB   | ILE | X | 450 | 43.095 | 43.503 | 30.603 | 0.00 | 0.00 |
| ATOM | 6792 | HB   | ILE | X | 450 | 43.142 | 43.620 | 31.685 | 0.00 | 0.00 |

|      |      |      |     |   |     |        |        |        |      |      |
|------|------|------|-----|---|-----|--------|--------|--------|------|------|
| ATOM | 6793 | CG2  | ILE | X | 450 | 41.797 | 44.201 | 30.221 | 0.00 | 0.00 |
| ATOM | 6794 | HG21 | ILE | X | 450 | 41.771 | 45.178 | 30.703 | 0.00 | 0.00 |
| ATOM | 6795 | HG22 | ILE | X | 450 | 41.741 | 44.462 | 29.165 | 0.00 | 0.00 |
| ATOM | 6796 | HG23 | ILE | X | 450 | 40.889 | 43.672 | 30.512 | 0.00 | 0.00 |
| ATOM | 6797 | CG1  | ILE | X | 450 | 43.064 | 41.996 | 30.276 | 0.00 | 0.00 |
| ATOM | 6798 | HG12 | ILE | X | 450 | 43.890 | 41.685 | 30.917 | 0.00 | 0.00 |
| ATOM | 6799 | HG13 | ILE | X | 450 | 42.165 | 41.509 | 30.654 | 0.00 | 0.00 |
| ATOM | 6800 | CD1  | ILE | X | 450 | 43.363 | 41.666 | 28.780 | 0.00 | 0.00 |
| ATOM | 6801 | HD11 | ILE | X | 450 | 42.530 | 41.913 | 28.123 | 0.00 | 0.00 |
| ATOM | 6802 | HD12 | ILE | X | 450 | 44.348 | 42.021 | 28.476 | 0.00 | 0.00 |
| ATOM | 6803 | HD13 | ILE | X | 450 | 43.434 | 40.608 | 28.528 | 0.00 | 0.00 |
| ATOM | 6804 | C    | ILE | X | 450 | 44.191 | 45.788 | 30.269 | 0.00 | 0.00 |
| ATOM | 6805 | O    | ILE | X | 450 | 43.576 | 46.574 | 29.632 | 0.00 | 0.00 |
| ATOM | 6806 | N    | PHE | X | 451 | 45.032 | 46.160 | 31.197 | 0.00 | 0.00 |
| ATOM | 6807 | H    | PHE | X | 451 | 45.502 | 45.421 | 31.701 | 0.00 | 0.00 |
| ATOM | 6808 | CA   | PHE | X | 451 | 45.352 | 47.501 | 31.645 | 0.00 | 0.00 |
| ATOM | 6809 | HA   | PHE | X | 451 | 44.438 | 48.092 | 31.702 | 0.00 | 0.00 |
| ATOM | 6810 | CB   | PHE | X | 451 | 45.902 | 47.352 | 33.091 | 0.00 | 0.00 |
| ATOM | 6811 | HB2  | PHE | X | 451 | 46.481 | 46.432 | 33.167 | 0.00 | 0.00 |
| ATOM | 6812 | HB3  | PHE | X | 451 | 46.491 | 48.240 | 33.320 | 0.00 | 0.00 |
| ATOM | 6813 | CG   | PHE | X | 451 | 44.803 | 47.291 | 34.164 | 0.00 | 0.00 |
| ATOM | 6814 | CD1  | PHE | X | 451 | 44.666 | 46.105 | 34.948 | 0.00 | 0.00 |
| ATOM | 6815 | HD1  | PHE | X | 451 | 45.187 | 45.197 | 34.684 | 0.00 | 0.00 |
| ATOM | 6816 | CE1  | PHE | X | 451 | 43.819 | 46.169 | 36.032 | 0.00 | 0.00 |
| ATOM | 6817 | HE1  | PHE | X | 451 | 43.664 | 45.265 | 36.603 | 0.00 | 0.00 |
| ATOM | 6818 | CZ   | PHE | X | 451 | 43.079 | 47.286 | 36.355 | 0.00 | 0.00 |
| ATOM | 6819 | HZ   | PHE | X | 451 | 42.425 | 47.250 | 37.213 | 0.00 | 0.00 |
| ATOM | 6820 | CE2  | PHE | X | 451 | 43.118 | 48.464 | 35.560 | 0.00 | 0.00 |
| ATOM | 6821 | HE2  | PHE | X | 451 | 42.612 | 49.381 | 35.824 | 0.00 | 0.00 |
| ATOM | 6822 | CD2  | PHE | X | 451 | 44.071 | 48.469 | 34.488 | 0.00 | 0.00 |
| ATOM | 6823 | HD2  | PHE | X | 451 | 44.207 | 49.354 | 33.885 | 0.00 | 0.00 |
| ATOM | 6824 | C    | PHE | X | 451 | 46.266 | 48.243 | 30.680 | 0.00 | 0.00 |
| ATOM | 6825 | O    | PHE | X | 451 | 46.221 | 49.535 | 30.616 | 0.00 | 0.00 |
| ATOM | 6826 | N    | GLY | X | 452 | 46.918 | 47.454 | 29.774 | 0.00 | 0.00 |
| ATOM | 6827 | H    | GLY | X | 452 | 46.844 | 46.448 | 29.822 | 0.00 | 0.00 |
| ATOM | 6828 | CA   | GLY | X | 452 | 47.906 | 48.047 | 28.880 | 0.00 | 0.00 |
| ATOM | 6829 | HA2  | GLY | X | 452 | 48.227 | 47.250 | 28.125 | 0.00 | 0.00 |
| ATOM | 6830 | HA3  | GLY | X | 452 | 47.351 | 48.864 | 28.450 | 0.00 | 0.00 |
| ATOM | 6831 | C    | GLY | X | 452 | 49.173 | 48.659 | 29.600 | 0.00 | 0.00 |
| ATOM | 6832 | O    | GLY | X | 452 | 49.686 | 49.732 | 29.255 | 0.00 | 0.00 |
| ATOM | 6833 | N    | ILE | X | 453 | 49.642 | 48.037 | 30.712 | 0.00 | 0.00 |
| ATOM | 6834 | H    | ILE | X | 453 | 49.173 | 47.163 | 30.904 | 0.00 | 0.00 |
| ATOM | 6835 | CA   | ILE | X | 453 | 50.886 | 48.444 | 31.407 | 0.00 | 0.00 |
| ATOM | 6836 | HA   | ILE | X | 453 | 50.781 | 49.528 | 31.432 | 0.00 | 0.00 |
| ATOM | 6837 | CB   | ILE | X | 453 | 50.885 | 47.882 | 32.854 | 0.00 | 0.00 |
| ATOM | 6838 | HB   | ILE | X | 453 | 49.833 | 47.638 | 33.006 | 0.00 | 0.00 |
| ATOM | 6839 | CG2  | ILE | X | 453 | 51.642 | 46.563 | 33.060 | 0.00 | 0.00 |
| ATOM | 6840 | HG21 | ILE | X | 453 | 50.989 | 45.750 | 32.742 | 0.00 | 0.00 |
| ATOM | 6841 | HG22 | ILE | X | 453 | 52.562 | 46.603 | 32.476 | 0.00 | 0.00 |
| ATOM | 6842 | HG23 | ILE | X | 453 | 51.933 | 46.409 | 34.099 | 0.00 | 0.00 |
| ATOM | 6843 | CG1  | ILE | X | 453 | 51.086 | 48.902 | 33.992 | 0.00 | 0.00 |
| ATOM | 6844 | HG12 | ILE | X | 453 | 50.482 | 49.789 | 33.797 | 0.00 | 0.00 |
| ATOM | 6845 | HG13 | ILE | X | 453 | 50.688 | 48.472 | 34.912 | 0.00 | 0.00 |
| ATOM | 6846 | CD1  | ILE | X | 453 | 52.562 | 49.291 | 34.140 | 0.00 | 0.00 |
| ATOM | 6847 | HD11 | ILE | X | 453 | 53.177 | 48.479 | 34.527 | 0.00 | 0.00 |
| ATOM | 6848 | HD12 | ILE | X | 453 | 52.969 | 49.606 | 33.179 | 0.00 | 0.00 |
| ATOM | 6849 | HD13 | ILE | X | 453 | 52.580 | 50.146 | 34.816 | 0.00 | 0.00 |
| ATOM | 6850 | C    | ILE | X | 453 | 52.176 | 48.219 | 30.441 | 0.00 | 0.00 |
| ATOM | 6851 | O    | ILE | X | 453 | 53.219 | 48.877 | 30.684 | 0.00 | 0.00 |
| ATOM | 6852 | N    | PRO | X | 454 | 52.203 | 47.473 | 29.309 | 0.00 | 0.00 |
| ATOM | 6853 | CD   | PRO | X | 454 | 51.325 | 46.404 | 28.908 | 0.00 | 0.00 |
| ATOM | 6854 | HD2  | PRO | X | 454 | 50.577 | 46.817 | 28.232 | 0.00 | 0.00 |
| ATOM | 6855 | HD3  | PRO | X | 454 | 50.981 | 45.903 | 29.813 | 0.00 | 0.00 |
| ATOM | 6856 | CG   | PRO | X | 454 | 52.185 | 45.449 | 28.176 | 0.00 | 0.00 |
| ATOM | 6857 | HG2  | PRO | X | 454 | 51.476 | 44.809 | 27.651 | 0.00 | 0.00 |
| ATOM | 6858 | HG3  | PRO | X | 454 | 52.787 | 44.920 | 28.915 | 0.00 | 0.00 |
| ATOM | 6859 | CB   | PRO | X | 454 | 53.075 | 46.412 | 27.354 | 0.00 | 0.00 |
| ATOM | 6860 | HB2  | PRO | X | 454 | 52.644 | 46.779 | 26.422 | 0.00 | 0.00 |
| ATOM | 6861 | HB3  | PRO | X | 454 | 54.070 | 46.027 | 27.129 | 0.00 | 0.00 |
| ATOM | 6862 | CA   | PRO | X | 454 | 53.291 | 47.553 | 28.375 | 0.00 | 0.00 |

|      |      |      |     |   |     |        |        |        |      |      |
|------|------|------|-----|---|-----|--------|--------|--------|------|------|
| ATOM | 6863 | HA   | PRO | X | 454 | 54.200 | 47.418 | 28.962 | 0.00 | 0.00 |
| ATOM | 6864 | C    | PRO | X | 454 | 53.263 | 48.859 | 27.609 | 0.00 | 0.00 |
| ATOM | 6865 | O    | PRO | X | 454 | 54.256 | 49.082 | 26.912 | 0.00 | 0.00 |
| ATOM | 6866 | N    | LEU | X | 455 | 52.209 | 49.718 | 27.732 | 0.00 | 0.00 |
| ATOM | 6867 | H    | LEU | X | 455 | 51.373 | 49.400 | 28.202 | 0.00 | 0.00 |
| ATOM | 6868 | CA   | LEU | X | 455 | 52.336 | 51.163 | 27.153 | 0.00 | 0.00 |
| ATOM | 6869 | HA   | LEU | X | 455 | 52.929 | 51.095 | 26.240 | 0.00 | 0.00 |
| ATOM | 6870 | CB   | LEU | X | 455 | 50.937 | 51.700 | 26.813 | 0.00 | 0.00 |
| ATOM | 6871 | HB2  | LEU | X | 455 | 50.374 | 51.806 | 27.740 | 0.00 | 0.00 |
| ATOM | 6872 | HB3  | LEU | X | 455 | 51.112 | 52.718 | 26.465 | 0.00 | 0.00 |
| ATOM | 6873 | CG   | LEU | X | 455 | 50.188 | 50.782 | 25.812 | 0.00 | 0.00 |
| ATOM | 6874 | HG   | LEU | X | 455 | 49.984 | 49.788 | 26.208 | 0.00 | 0.00 |
| ATOM | 6875 | CD1  | LEU | X | 455 | 48.762 | 51.412 | 25.507 | 0.00 | 0.00 |
| ATOM | 6876 | HD11 | LEU | X | 455 | 48.190 | 51.340 | 26.432 | 0.00 | 0.00 |
| ATOM | 6877 | HD12 | LEU | X | 455 | 48.780 | 52.467 | 25.231 | 0.00 | 0.00 |
| ATOM | 6878 | HD13 | LEU | X | 455 | 48.307 | 50.873 | 24.677 | 0.00 | 0.00 |
| ATOM | 6879 | CD2  | LEU | X | 455 | 50.830 | 50.716 | 24.438 | 0.00 | 0.00 |
| ATOM | 6880 | HD21 | LEU | X | 455 | 51.048 | 51.710 | 24.046 | 0.00 | 0.00 |
| ATOM | 6881 | HD22 | LEU | X | 455 | 51.797 | 50.220 | 24.515 | 0.00 | 0.00 |
| ATOM | 6882 | HD23 | LEU | X | 455 | 50.200 | 50.143 | 23.757 | 0.00 | 0.00 |
| ATOM | 6883 | C    | LEU | X | 455 | 53.265 | 52.020 | 28.020 | 0.00 | 0.00 |
| ATOM | 6884 | O    | LEU | X | 455 | 53.500 | 53.163 | 27.592 | 0.00 | 0.00 |
| ATOM | 6885 | N    | ASP | X | 456 | 53.903 | 51.621 | 29.144 | 0.00 | 0.00 |
| ATOM | 6886 | H    | ASP | X | 456 | 53.720 | 50.735 | 29.592 | 0.00 | 0.00 |
| ATOM | 6887 | CA   | ASP | X | 456 | 54.684 | 52.542 | 29.985 | 0.00 | 0.00 |
| ATOM | 6888 | HA   | ASP | X | 456 | 54.228 | 53.515 | 30.170 | 0.00 | 0.00 |
| ATOM | 6889 | CB   | ASP | X | 456 | 54.661 | 51.860 | 31.375 | 0.00 | 0.00 |
| ATOM | 6890 | HB2  | ASP | X | 456 | 53.686 | 51.525 | 31.729 | 0.00 | 0.00 |
| ATOM | 6891 | HB3  | ASP | X | 456 | 55.330 | 51.000 | 31.339 | 0.00 | 0.00 |
| ATOM | 6892 | CG   | ASP | X | 456 | 55.243 | 52.841 | 32.366 | 0.00 | 0.00 |
| ATOM | 6893 | OD1  | ASP | X | 456 | 56.504 | 52.979 | 32.496 | 0.00 | 0.00 |
| ATOM | 6894 | OD2  | ASP | X | 456 | 54.355 | 53.519 | 32.969 | 0.00 | 0.00 |
| ATOM | 6895 | C    | ASP | X | 456 | 56.079 | 52.746 | 29.390 | 0.00 | 0.00 |
| ATOM | 6896 | O    | ASP | X | 456 | 56.736 | 51.838 | 28.868 | 0.00 | 0.00 |
| ATOM | 6897 | N    | PRO | X | 457 | 56.678 | 53.987 | 29.430 | 0.00 | 0.00 |
| ATOM | 6898 | CD   | PRO | X | 457 | 56.126 | 55.244 | 29.985 | 0.00 | 0.00 |
| ATOM | 6899 | HD2  | PRO | X | 457 | 56.294 | 55.213 | 31.061 | 0.00 | 0.00 |
| ATOM | 6900 | HD3  | PRO | X | 457 | 55.079 | 55.290 | 29.684 | 0.00 | 0.00 |
| ATOM | 6901 | CG   | PRO | X | 457 | 56.945 | 56.435 | 29.434 | 0.00 | 0.00 |
| ATOM | 6902 | HG2  | PRO | X | 457 | 56.926 | 57.372 | 29.990 | 0.00 | 0.00 |
| ATOM | 6903 | HG3  | PRO | X | 457 | 56.496 | 56.530 | 28.446 | 0.00 | 0.00 |
| ATOM | 6904 | CB   | PRO | X | 457 | 58.364 | 55.765 | 29.267 | 0.00 | 0.00 |
| ATOM | 6905 | HB2  | PRO | X | 457 | 58.796 | 55.946 | 30.251 | 0.00 | 0.00 |
| ATOM | 6906 | HB3  | PRO | X | 457 | 58.909 | 56.272 | 28.471 | 0.00 | 0.00 |
| ATOM | 6907 | CA   | PRO | X | 457 | 58.068 | 54.276 | 29.030 | 0.00 | 0.00 |
| ATOM | 6908 | HA   | PRO | X | 457 | 58.017 | 53.913 | 28.003 | 0.00 | 0.00 |
| ATOM | 6909 | C    | PRO | X | 457 | 59.082 | 53.318 | 29.818 | 0.00 | 0.00 |
| ATOM | 6910 | O    | PRO | X | 457 | 59.938 | 52.852 | 29.110 | 0.00 | 0.00 |
| ATOM | 6911 | N    | SER | X | 458 | 58.932 | 53.211 | 31.162 | 0.00 | 0.00 |
| ATOM | 6912 | H    | SER | X | 458 | 58.063 | 53.677 | 31.381 | 0.00 | 0.00 |
| ATOM | 6913 | CA   | SER | X | 458 | 59.880 | 52.626 | 32.050 | 0.00 | 0.00 |
| ATOM | 6914 | HA   | SER | X | 458 | 60.849 | 53.049 | 31.786 | 0.00 | 0.00 |
| ATOM | 6915 | CB   | SER | X | 458 | 59.610 | 52.996 | 33.566 | 0.00 | 0.00 |
| ATOM | 6916 | HB2  | SER | X | 458 | 60.394 | 52.524 | 34.157 | 0.00 | 0.00 |
| ATOM | 6917 | HB3  | SER | X | 458 | 59.740 | 54.073 | 33.677 | 0.00 | 0.00 |
| ATOM | 6918 | OG   | SER | X | 458 | 58.366 | 52.546 | 34.090 | 0.00 | 0.00 |
| ATOM | 6919 | HG   | SER | X | 458 | 57.678 | 52.735 | 33.448 | 0.00 | 0.00 |
| ATOM | 6920 | C    | SER | X | 458 | 59.825 | 51.147 | 31.965 | 0.00 | 0.00 |
| ATOM | 6921 | O    | SER | X | 458 | 60.835 | 50.417 | 32.214 | 0.00 | 0.00 |
| ATOM | 6922 | N    | ARG | X | 459 | 58.642 | 50.489 | 31.732 | 0.00 | 0.00 |
| ATOM | 6923 | H    | ARG | X | 459 | 57.833 | 51.072 | 31.573 | 0.00 | 0.00 |
| ATOM | 6924 | CA   | ARG | X | 459 | 58.512 | 49.018 | 31.569 | 0.00 | 0.00 |
| ATOM | 6925 | HA   | ARG | X | 459 | 59.036 | 48.565 | 32.411 | 0.00 | 0.00 |
| ATOM | 6926 | CB   | ARG | X | 459 | 57.007 | 48.717 | 31.772 | 0.00 | 0.00 |
| ATOM | 6927 | HB2  | ARG | X | 459 | 56.568 | 49.022 | 30.823 | 0.00 | 0.00 |
| ATOM | 6928 | HB3  | ARG | X | 459 | 56.833 | 47.641 | 31.754 | 0.00 | 0.00 |
| ATOM | 6929 | CG   | ARG | X | 459 | 56.249 | 49.091 | 32.967 | 0.00 | 0.00 |
| ATOM | 6930 | HG2  | ARG | X | 459 | 56.279 | 50.170 | 33.116 | 0.00 | 0.00 |
| ATOM | 6931 | HG3  | ARG | X | 459 | 55.261 | 48.679 | 32.765 | 0.00 | 0.00 |
| ATOM | 6932 | CD   | ARG | X | 459 | 56.866 | 48.581 | 34.187 | 0.00 | 0.00 |

|      |      |      |     |   |     |        |        |        |      |      |
|------|------|------|-----|---|-----|--------|--------|--------|------|------|
| ATOM | 6933 | HD2  | ARG | X | 459 | 57.167 | 47.541 | 34.060 | 0.00 | 0.00 |
| ATOM | 6934 | HD3  | ARG | X | 459 | 57.737 | 49.176 | 34.459 | 0.00 | 0.00 |
| ATOM | 6935 | NE   | ARG | X | 459 | 55.923 | 48.726 | 35.273 | 0.00 | 0.00 |
| ATOM | 6936 | HE   | ARG | X | 459 | 55.472 | 49.609 | 35.464 | 0.00 | 0.00 |
| ATOM | 6937 | CZ   | ARG | X | 459 | 55.715 | 47.833 | 36.258 | 0.00 | 0.00 |
| ATOM | 6938 | NH1  | ARG | X | 459 | 56.509 | 46.830 | 36.430 | 0.00 | 0.00 |
| ATOM | 6939 | HH11 | ARG | X | 459 | 57.319 | 46.747 | 35.832 | 0.00 | 0.00 |
| ATOM | 6940 | HH12 | ARG | X | 459 | 56.399 | 46.212 | 37.221 | 0.00 | 0.00 |
| ATOM | 6941 | NH2  | ARG | X | 459 | 54.746 | 47.948 | 37.112 | 0.00 | 0.00 |
| ATOM | 6942 | HH21 | ARG | X | 459 | 54.201 | 48.798 | 37.102 | 0.00 | 0.00 |
| ATOM | 6943 | HH22 | ARG | X | 459 | 54.570 | 47.098 | 37.627 | 0.00 | 0.00 |
| ATOM | 6944 | C    | ARG | X | 459 | 59.149 | 48.445 | 30.317 | 0.00 | 0.00 |
| ATOM | 6945 | O    | ARG | X | 459 | 59.555 | 49.233 | 29.455 | 0.00 | 0.00 |
| ATOM | 6946 | N    | ASN | X | 460 | 59.377 | 47.115 | 30.359 | 0.00 | 0.00 |
| ATOM | 6947 | H    | ASN | X | 460 | 58.931 | 46.630 | 31.124 | 0.00 | 0.00 |
| ATOM | 6948 | CA   | ASN | X | 460 | 60.413 | 46.403 | 29.649 | 0.00 | 0.00 |
| ATOM | 6949 | HA   | ASN | X | 460 | 60.913 | 47.180 | 29.070 | 0.00 | 0.00 |
| ATOM | 6950 | CB   | ASN | X | 460 | 61.455 | 45.805 | 30.635 | 0.00 | 0.00 |
| ATOM | 6951 | HB2  | ASN | X | 460 | 61.685 | 46.433 | 31.496 | 0.00 | 0.00 |
| ATOM | 6952 | HB3  | ASN | X | 460 | 60.994 | 44.954 | 31.136 | 0.00 | 0.00 |
| ATOM | 6953 | CG   | ASN | X | 460 | 62.791 | 45.442 | 29.913 | 0.00 | 0.00 |
| ATOM | 6954 | OD1  | ASN | X | 460 | 63.158 | 44.232 | 29.764 | 0.00 | 0.00 |
| ATOM | 6955 | ND2  | ASN | X | 460 | 63.609 | 46.389 | 29.427 | 0.00 | 0.00 |
| ATOM | 6956 | HD21 | ASN | X | 460 | 64.357 | 46.122 | 28.803 | 0.00 | 0.00 |
| ATOM | 6957 | HD22 | ASN | X | 460 | 63.290 | 47.344 | 29.506 | 0.00 | 0.00 |
| ATOM | 6958 | C    | ASN | X | 460 | 59.837 | 45.329 | 28.716 | 0.00 | 0.00 |
| ATOM | 6959 | O    | ASN | X | 460 | 60.334 | 44.229 | 28.826 | 0.00 | 0.00 |
| ATOM | 6960 | N    | TYR | X | 461 | 58.805 | 45.584 | 27.953 | 0.00 | 0.00 |
| ATOM | 6961 | H    | TYR | X | 461 | 58.307 | 46.462 | 27.913 | 0.00 | 0.00 |
| ATOM | 6962 | CA   | TYR | X | 461 | 58.206 | 44.521 | 27.087 | 0.00 | 0.00 |
| ATOM | 6963 | HA   | TYR | X | 461 | 58.540 | 43.567 | 27.494 | 0.00 | 0.00 |
| ATOM | 6964 | CB   | TYR | X | 461 | 56.707 | 44.588 | 27.056 | 0.00 | 0.00 |
| ATOM | 6965 | HB2  | TYR | X | 461 | 56.417 | 45.516 | 26.564 | 0.00 | 0.00 |
| ATOM | 6966 | HB3  | TYR | X | 461 | 56.342 | 43.791 | 26.407 | 0.00 | 0.00 |
| ATOM | 6967 | CG   | TYR | X | 461 | 55.933 | 44.362 | 28.355 | 0.00 | 0.00 |
| ATOM | 6968 | CD1  | TYR | X | 461 | 55.953 | 45.297 | 29.422 | 0.00 | 0.00 |
| ATOM | 6969 | HD1  | TYR | X | 461 | 56.530 | 46.210 | 29.390 | 0.00 | 0.00 |
| ATOM | 6970 | CE1  | TYR | X | 461 | 55.256 | 44.947 | 30.612 | 0.00 | 0.00 |
| ATOM | 6971 | HE1  | TYR | X | 461 | 55.273 | 45.607 | 31.466 | 0.00 | 0.00 |
| ATOM | 6972 | CZ   | TYR | X | 461 | 54.686 | 43.701 | 30.816 | 0.00 | 0.00 |
| ATOM | 6973 | OH   | TYR | X | 461 | 54.071 | 43.465 | 31.984 | 0.00 | 0.00 |
| ATOM | 6974 | HH   | TYR | X | 461 | 53.585 | 42.637 | 31.976 | 0.00 | 0.00 |
| ATOM | 6975 | CE2  | TYR | X | 461 | 54.756 | 42.733 | 29.805 | 0.00 | 0.00 |
| ATOM | 6976 | HE2  | TYR | X | 461 | 54.292 | 41.781 | 30.018 | 0.00 | 0.00 |
| ATOM | 6977 | CD2  | TYR | X | 461 | 55.322 | 43.104 | 28.546 | 0.00 | 0.00 |
| ATOM | 6978 | HD2  | TYR | X | 461 | 55.284 | 42.473 | 27.671 | 0.00 | 0.00 |
| ATOM | 6979 | C    | TYR | X | 461 | 58.784 | 44.701 | 25.673 | 0.00 | 0.00 |
| ATOM | 6980 | O    | TYR | X | 461 | 59.585 | 45.643 | 25.422 | 0.00 | 0.00 |
| ATOM | 6981 | N    | THR | X | 462 | 58.398 | 43.799 | 24.749 | 0.00 | 0.00 |
| ATOM | 6982 | H    | THR | X | 462 | 57.650 | 43.147 | 24.935 | 0.00 | 0.00 |
| ATOM | 6983 | CA   | THR | X | 462 | 58.716 | 44.024 | 23.275 | 0.00 | 0.00 |
| ATOM | 6984 | HA   | THR | X | 462 | 59.525 | 44.755 | 23.247 | 0.00 | 0.00 |
| ATOM | 6985 | CB   | THR | X | 462 | 59.094 | 42.757 | 22.556 | 0.00 | 0.00 |
| ATOM | 6986 | HB   | THR | X | 462 | 59.316 | 43.047 | 21.529 | 0.00 | 0.00 |
| ATOM | 6987 | CG2  | THR | X | 462 | 60.351 | 41.988 | 23.105 | 0.00 | 0.00 |
| ATOM | 6988 | HG21 | THR | X | 462 | 60.328 | 40.933 | 22.829 | 0.00 | 0.00 |
| ATOM | 6989 | HG22 | THR | X | 462 | 61.246 | 42.351 | 22.601 | 0.00 | 0.00 |
| ATOM | 6990 | HG23 | THR | X | 462 | 60.543 | 42.244 | 24.147 | 0.00 | 0.00 |
| ATOM | 6991 | OG1  | THR | X | 462 | 57.988 | 41.908 | 22.528 | 0.00 | 0.00 |
| ATOM | 6992 | HG1  | THR | X | 462 | 57.739 | 41.721 | 23.437 | 0.00 | 0.00 |
| ATOM | 6993 | C    | THR | X | 462 | 57.578 | 44.676 | 22.510 | 0.00 | 0.00 |
| ATOM | 6994 | O    | THR | X | 462 | 56.453 | 44.740 | 22.944 | 0.00 | 0.00 |
| ATOM | 6995 | N    | ALA | X | 463 | 57.879 | 45.275 | 21.321 | 0.00 | 0.00 |
| ATOM | 6996 | H    | ALA | X | 463 | 58.801 | 45.193 | 20.916 | 0.00 | 0.00 |
| ATOM | 6997 | CA   | ALA | X | 463 | 56.860 | 46.044 | 20.608 | 0.00 | 0.00 |
| ATOM | 6998 | HA   | ALA | X | 463 | 56.621 | 46.841 | 21.311 | 0.00 | 0.00 |
| ATOM | 6999 | CB   | ALA | X | 463 | 57.630 | 46.605 | 19.450 | 0.00 | 0.00 |
| ATOM | 7000 | HB1  | ALA | X | 463 | 58.241 | 45.818 | 19.007 | 0.00 | 0.00 |
| ATOM | 7001 | HB2  | ALA | X | 463 | 56.940 | 47.033 | 18.723 | 0.00 | 0.00 |
| ATOM | 7002 | HB3  | ALA | X | 463 | 58.257 | 47.408 | 19.838 | 0.00 | 0.00 |

|      |      |      |     |   |     |        |        |        |      |      |
|------|------|------|-----|---|-----|--------|--------|--------|------|------|
| ATOM | 7003 | C    | ALA | X | 463 | 55.634 | 45.215 | 20.138 | 0.00 | 0.00 |
| ATOM | 7004 | O    | ALA | X | 463 | 54.480 | 45.722 | 20.181 | 0.00 | 0.00 |
| ATOM | 7005 | N    | GLU | X | 464 | 55.879 | 43.948 | 19.740 | 0.00 | 0.00 |
| ATOM | 7006 | H    | GLU | X | 464 | 56.803 | 43.541 | 19.772 | 0.00 | 0.00 |
| ATOM | 7007 | CA   | GLU | X | 464 | 54.836 | 43.061 | 19.342 | 0.00 | 0.00 |
| ATOM | 7008 | HA   | GLU | X | 464 | 54.297 | 43.589 | 18.555 | 0.00 | 0.00 |
| ATOM | 7009 | CB   | GLU | X | 464 | 55.454 | 41.839 | 18.727 | 0.00 | 0.00 |
| ATOM | 7010 | HB2  | GLU | X | 464 | 54.621 | 41.139 | 18.653 | 0.00 | 0.00 |
| ATOM | 7011 | HB3  | GLU | X | 464 | 55.912 | 42.202 | 17.808 | 0.00 | 0.00 |
| ATOM | 7012 | CG   | GLU | X | 464 | 56.415 | 41.078 | 19.705 | 0.00 | 0.00 |
| ATOM | 7013 | HG2  | GLU | X | 464 | 57.233 | 41.696 | 20.077 | 0.00 | 0.00 |
| ATOM | 7014 | HG3  | GLU | X | 464 | 55.865 | 40.668 | 20.552 | 0.00 | 0.00 |
| ATOM | 7015 | CD   | GLU | X | 464 | 57.151 | 39.881 | 19.028 | 0.00 | 0.00 |
| ATOM | 7016 | OE1  | GLU | X | 464 | 58.132 | 39.459 | 19.711 | 0.00 | 0.00 |
| ATOM | 7017 | OE2  | GLU | X | 464 | 56.923 | 39.571 | 17.821 | 0.00 | 0.00 |
| ATOM | 7018 | C    | GLU | X | 464 | 53.914 | 42.719 | 20.527 | 0.00 | 0.00 |
| ATOM | 7019 | O    | GLU | X | 464 | 52.708 | 42.661 | 20.301 | 0.00 | 0.00 |
| ATOM | 7020 | N    | GLU | X | 465 | 54.432 | 42.692 | 21.769 | 0.00 | 0.00 |
| ATOM | 7021 | H    | GLU | X | 465 | 55.347 | 43.119 | 21.773 | 0.00 | 0.00 |
| ATOM | 7022 | CA   | GLU | X | 465 | 53.634 | 42.519 | 23.015 | 0.00 | 0.00 |
| ATOM | 7023 | HA   | GLU | X | 465 | 52.877 | 41.760 | 22.813 | 0.00 | 0.00 |
| ATOM | 7024 | CB   | GLU | X | 465 | 54.572 | 42.129 | 24.157 | 0.00 | 0.00 |
| ATOM | 7025 | HB2  | GLU | X | 465 | 55.229 | 42.997 | 24.213 | 0.00 | 0.00 |
| ATOM | 7026 | HB3  | GLU | X | 465 | 54.018 | 42.136 | 25.095 | 0.00 | 0.00 |
| ATOM | 7027 | CG   | GLU | X | 465 | 55.190 | 40.745 | 24.015 | 0.00 | 0.00 |
| ATOM | 7028 | HG2  | GLU | X | 465 | 54.430 | 39.974 | 24.139 | 0.00 | 0.00 |
| ATOM | 7029 | HG3  | GLU | X | 465 | 55.615 | 40.526 | 23.035 | 0.00 | 0.00 |
| ATOM | 7030 | CD   | GLU | X | 465 | 56.279 | 40.455 | 25.065 | 0.00 | 0.00 |
| ATOM | 7031 | OE1  | GLU | X | 465 | 57.279 | 41.239 | 25.101 | 0.00 | 0.00 |
| ATOM | 7032 | OE2  | GLU | X | 465 | 56.237 | 39.479 | 25.889 | 0.00 | 0.00 |
| ATOM | 7033 | C    | GLU | X | 465 | 52.688 | 43.771 | 23.267 | 0.00 | 0.00 |
| ATOM | 7034 | O    | GLU | X | 465 | 51.620 | 43.683 | 23.890 | 0.00 | 0.00 |
| ATOM | 7035 | N    | LYS | X | 466 | 53.114 | 44.981 | 22.813 | 0.00 | 0.00 |
| ATOM | 7036 | H    | LYS | X | 466 | 54.029 | 44.970 | 22.385 | 0.00 | 0.00 |
| ATOM | 7037 | CA   | LYS | X | 466 | 52.342 | 46.232 | 22.936 | 0.00 | 0.00 |
| ATOM | 7038 | HA   | LYS | X | 466 | 51.934 | 46.201 | 23.947 | 0.00 | 0.00 |
| ATOM | 7039 | CB   | LYS | X | 466 | 53.237 | 47.411 | 22.566 | 0.00 | 0.00 |
| ATOM | 7040 | HB2  | LYS | X | 466 | 53.437 | 47.358 | 21.496 | 0.00 | 0.00 |
| ATOM | 7041 | HB3  | LYS | X | 466 | 52.667 | 48.332 | 22.689 | 0.00 | 0.00 |
| ATOM | 7042 | CG   | LYS | X | 466 | 54.534 | 47.540 | 23.399 | 0.00 | 0.00 |
| ATOM | 7043 | HG2  | LYS | X | 466 | 54.190 | 47.584 | 24.432 | 0.00 | 0.00 |
| ATOM | 7044 | HG3  | LYS | X | 466 | 55.093 | 46.625 | 23.201 | 0.00 | 0.00 |
| ATOM | 7045 | CD   | LYS | X | 466 | 55.256 | 48.749 | 22.975 | 0.00 | 0.00 |
| ATOM | 7046 | HD2  | LYS | X | 466 | 55.652 | 48.651 | 21.964 | 0.00 | 0.00 |
| ATOM | 7047 | HD3  | LYS | X | 466 | 54.633 | 49.644 | 22.964 | 0.00 | 0.00 |
| ATOM | 7048 | CE   | LYS | X | 466 | 56.424 | 49.037 | 23.925 | 0.00 | 0.00 |
| ATOM | 7049 | HE2  | LYS | X | 466 | 56.195 | 48.795 | 24.963 | 0.00 | 0.00 |
| ATOM | 7050 | HE3  | LYS | X | 466 | 57.221 | 48.315 | 23.747 | 0.00 | 0.00 |
| ATOM | 7051 | NZ   | LYS | X | 466 | 57.018 | 50.364 | 23.665 | 0.00 | 0.00 |
| ATOM | 7052 | HZ1  | LYS | X | 466 | 56.845 | 50.699 | 22.728 | 0.00 | 0.00 |
| ATOM | 7053 | HZ2  | LYS | X | 466 | 56.765 | 51.055 | 24.357 | 0.00 | 0.00 |
| ATOM | 7054 | HZ3  | LYS | X | 466 | 58.006 | 50.160 | 23.720 | 0.00 | 0.00 |
| ATOM | 7055 | C    | LYS | X | 466 | 51.134 | 46.361 | 21.965 | 0.00 | 0.00 |
| ATOM | 7056 | O    | LYS | X | 466 | 50.039 | 46.771 | 22.421 | 0.00 | 0.00 |
| ATOM | 7057 | N    | ILE | X | 467 | 51.255 | 45.702 | 20.756 | 0.00 | 0.00 |
| ATOM | 7058 | H    | ILE | X | 467 | 52.161 | 45.367 | 20.461 | 0.00 | 0.00 |
| ATOM | 7059 | CA   | ILE | X | 467 | 50.146 | 45.195 | 19.906 | 0.00 | 0.00 |
| ATOM | 7060 | HA   | ILE | X | 467 | 49.489 | 46.034 | 19.681 | 0.00 | 0.00 |
| ATOM | 7061 | CB   | ILE | X | 467 | 50.673 | 44.762 | 18.488 | 0.00 | 0.00 |
| ATOM | 7062 | HB   | ILE | X | 467 | 51.271 | 43.855 | 18.577 | 0.00 | 0.00 |
| ATOM | 7063 | CG2  | ILE | X | 467 | 49.403 | 44.307 | 17.692 | 0.00 | 0.00 |
| ATOM | 7064 | HG21 | ILE | X | 467 | 49.680 | 43.978 | 16.690 | 0.00 | 0.00 |
| ATOM | 7065 | HG22 | ILE | X | 467 | 48.827 | 43.514 | 18.168 | 0.00 | 0.00 |
| ATOM | 7066 | HG23 | ILE | X | 467 | 48.756 | 45.168 | 17.531 | 0.00 | 0.00 |
| ATOM | 7067 | CG1  | ILE | X | 467 | 51.524 | 45.837 | 17.794 | 0.00 | 0.00 |
| ATOM | 7068 | HG12 | ILE | X | 467 | 50.921 | 46.743 | 17.754 | 0.00 | 0.00 |
| ATOM | 7069 | HG13 | ILE | X | 467 | 52.379 | 46.118 | 18.410 | 0.00 | 0.00 |
| ATOM | 7070 | CD1  | ILE | X | 467 | 52.171 | 45.574 | 16.414 | 0.00 | 0.00 |
| ATOM | 7071 | HD11 | ILE | X | 467 | 52.635 | 44.590 | 16.350 | 0.00 | 0.00 |
| ATOM | 7072 | HD12 | ILE | X | 467 | 51.353 | 45.759 | 15.718 | 0.00 | 0.00 |

|      |      |      |     |   |     |        |        |        |      |      |
|------|------|------|-----|---|-----|--------|--------|--------|------|------|
| ATOM | 7073 | HD13 | ILE | X | 467 | 52.934 | 46.329 | 16.224 | 0.00 | 0.00 |
| ATOM | 7074 | C    | ILE | X | 467 | 49.192 | 44.202 | 20.548 | 0.00 | 0.00 |
| ATOM | 7075 | O    | ILE | X | 467 | 47.970 | 44.381 | 20.541 | 0.00 | 0.00 |
| ATOM | 7076 | N    | PHE | X | 468 | 49.751 | 43.248 | 21.360 | 0.00 | 0.00 |
| ATOM | 7077 | H    | PHE | X | 468 | 50.758 | 43.258 | 21.438 | 0.00 | 0.00 |
| ATOM | 7078 | CA   | PHE | X | 468 | 49.052 | 42.277 | 22.160 | 0.00 | 0.00 |
| ATOM | 7079 | HA   | PHE | X | 468 | 48.294 | 41.898 | 21.475 | 0.00 | 0.00 |
| ATOM | 7080 | CB   | PHE | X | 468 | 50.099 | 41.244 | 22.531 | 0.00 | 0.00 |
| ATOM | 7081 | HB2  | PHE | X | 468 | 50.699 | 41.032 | 21.646 | 0.00 | 0.00 |
| ATOM | 7082 | HB3  | PHE | X | 468 | 50.791 | 41.730 | 23.218 | 0.00 | 0.00 |
| ATOM | 7083 | CG   | PHE | X | 468 | 49.579 | 39.956 | 23.206 | 0.00 | 0.00 |
| ATOM | 7084 | CD1  | PHE | X | 468 | 48.432 | 39.324 | 22.781 | 0.00 | 0.00 |
| ATOM | 7085 | HD1  | PHE | X | 468 | 47.836 | 39.739 | 21.982 | 0.00 | 0.00 |
| ATOM | 7086 | CE1  | PHE | X | 468 | 47.843 | 38.341 | 23.560 | 0.00 | 0.00 |
| ATOM | 7087 | HE1  | PHE | X | 468 | 46.886 | 37.957 | 23.238 | 0.00 | 0.00 |
| ATOM | 7088 | CZ   | PHE | X | 468 | 48.508 | 37.908 | 24.711 | 0.00 | 0.00 |
| ATOM | 7089 | HZ   | PHE | X | 468 | 48.006 | 37.059 | 25.150 | 0.00 | 0.00 |
| ATOM | 7090 | CE2  | PHE | X | 468 | 49.782 | 38.434 | 25.164 | 0.00 | 0.00 |
| ATOM | 7091 | HE2  | PHE | X | 468 | 50.261 | 38.147 | 26.089 | 0.00 | 0.00 |
| ATOM | 7092 | CD2  | PHE | X | 468 | 50.258 | 39.436 | 24.343 | 0.00 | 0.00 |
| ATOM | 7093 | HD2  | PHE | X | 468 | 51.241 | 39.840 | 24.538 | 0.00 | 0.00 |
| ATOM | 7094 | C    | PHE | X | 468 | 48.222 | 42.851 | 23.327 | 0.00 | 0.00 |
| ATOM | 7095 | O    | PHE | X | 468 | 47.092 | 42.384 | 23.644 | 0.00 | 0.00 |
| ATOM | 7096 | N    | ALA | X | 469 | 48.645 | 43.979 | 23.825 | 0.00 | 0.00 |
| ATOM | 7097 | H    | ALA | X | 469 | 49.549 | 44.310 | 23.519 | 0.00 | 0.00 |
| ATOM | 7098 | CA   | ALA | X | 469 | 47.866 | 44.762 | 24.826 | 0.00 | 0.00 |
| ATOM | 7099 | HA   | ALA | X | 469 | 47.398 | 44.145 | 25.593 | 0.00 | 0.00 |
| ATOM | 7100 | CB   | ALA | X | 469 | 48.855 | 45.846 | 25.371 | 0.00 | 0.00 |
| ATOM | 7101 | HB1  | ALA | X | 469 | 49.470 | 46.257 | 24.570 | 0.00 | 0.00 |
| ATOM | 7102 | HB2  | ALA | X | 469 | 48.397 | 46.726 | 25.823 | 0.00 | 0.00 |
| ATOM | 7103 | HB3  | ALA | X | 469 | 49.536 | 45.374 | 26.079 | 0.00 | 0.00 |
| ATOM | 7104 | C    | ALA | X | 469 | 46.701 | 45.391 | 24.061 | 0.00 | 0.00 |
| ATOM | 7105 | O    | ALA | X | 469 | 45.515 | 45.133 | 24.317 | 0.00 | 0.00 |
| ATOM | 7106 | N    | GLN | X | 470 | 46.961 | 46.222 | 23.063 | 0.00 | 0.00 |
| ATOM | 7107 | H    | GLN | X | 470 | 47.930 | 46.451 | 22.896 | 0.00 | 0.00 |
| ATOM | 7108 | CA   | GLN | X | 470 | 46.038 | 47.017 | 22.202 | 0.00 | 0.00 |
| ATOM | 7109 | HA   | GLN | X | 470 | 45.334 | 47.559 | 22.833 | 0.00 | 0.00 |
| ATOM | 7110 | CB   | GLN | X | 470 | 46.878 | 47.908 | 21.199 | 0.00 | 0.00 |
| ATOM | 7111 | HB2  | GLN | X | 470 | 47.680 | 47.279 | 20.815 | 0.00 | 0.00 |
| ATOM | 7112 | HB3  | GLN | X | 470 | 46.174 | 48.332 | 20.482 | 0.00 | 0.00 |
| ATOM | 7113 | CG   | GLN | X | 470 | 47.396 | 49.084 | 22.075 | 0.00 | 0.00 |
| ATOM | 7114 | HG2  | GLN | X | 470 | 46.540 | 49.640 | 22.458 | 0.00 | 0.00 |
| ATOM | 7115 | HG3  | GLN | X | 470 | 48.078 | 48.773 | 22.867 | 0.00 | 0.00 |
| ATOM | 7116 | CD   | GLN | X | 470 | 48.089 | 50.145 | 21.235 | 0.00 | 0.00 |
| ATOM | 7117 | OE1  | GLN | X | 470 | 49.290 | 50.496 | 21.312 | 0.00 | 0.00 |
| ATOM | 7118 | NE2  | GLN | X | 470 | 47.332 | 50.870 | 20.420 | 0.00 | 0.00 |
| ATOM | 7119 | HE21 | GLN | X | 470 | 47.714 | 51.621 | 19.863 | 0.00 | 0.00 |
| ATOM | 7120 | HE22 | GLN | X | 470 | 46.389 | 50.589 | 20.195 | 0.00 | 0.00 |
| ATOM | 7121 | C    | GLN | X | 470 | 45.030 | 46.111 | 21.430 | 0.00 | 0.00 |
| ATOM | 7122 | O    | GLN | X | 470 | 43.996 | 46.572 | 20.931 | 0.00 | 0.00 |
| ATOM | 7123 | N    | ARG | X | 471 | 45.274 | 44.810 | 21.408 | 0.00 | 0.00 |
| ATOM | 7124 | H    | ARG | X | 471 | 46.211 | 44.494 | 21.615 | 0.00 | 0.00 |
| ATOM | 7125 | CA   | ARG | X | 471 | 44.484 | 43.694 | 20.892 | 0.00 | 0.00 |
| ATOM | 7126 | HA   | ARG | X | 471 | 43.719 | 44.047 | 20.200 | 0.00 | 0.00 |
| ATOM | 7127 | CB   | ARG | X | 471 | 45.441 | 42.687 | 20.130 | 0.00 | 0.00 |
| ATOM | 7128 | HB2  | ARG | X | 471 | 46.015 | 43.139 | 19.321 | 0.00 | 0.00 |
| ATOM | 7129 | HB3  | ARG | X | 471 | 46.147 | 42.216 | 20.814 | 0.00 | 0.00 |
| ATOM | 7130 | CG   | ARG | X | 471 | 44.602 | 41.524 | 19.434 | 0.00 | 0.00 |
| ATOM | 7131 | HG2  | ARG | X | 471 | 44.002 | 40.958 | 20.147 | 0.00 | 0.00 |
| ATOM | 7132 | HG3  | ARG | X | 471 | 43.888 | 41.978 | 18.748 | 0.00 | 0.00 |
| ATOM | 7133 | CD   | ARG | X | 471 | 45.492 | 40.621 | 18.653 | 0.00 | 0.00 |
| ATOM | 7134 | HD2  | ARG | X | 471 | 45.536 | 40.937 | 17.611 | 0.00 | 0.00 |
| ATOM | 7135 | HD3  | ARG | X | 471 | 46.490 | 40.717 | 19.079 | 0.00 | 0.00 |
| ATOM | 7136 | NE   | ARG | X | 471 | 44.936 | 39.302 | 18.737 | 0.00 | 0.00 |
| ATOM | 7137 | HE   | ARG | X | 471 | 44.106 | 39.141 | 18.184 | 0.00 | 0.00 |
| ATOM | 7138 | CZ   | ARG | X | 471 | 45.434 | 38.224 | 19.326 | 0.00 | 0.00 |
| ATOM | 7139 | NH1  | ARG | X | 471 | 46.615 | 38.229 | 19.914 | 0.00 | 0.00 |
| ATOM | 7140 | HH11 | ARG | X | 471 | 47.241 | 39.007 | 19.764 | 0.00 | 0.00 |
| ATOM | 7141 | HH12 | ARG | X | 471 | 46.981 | 37.335 | 20.206 | 0.00 | 0.00 |
| ATOM | 7142 | NH2  | ARG | X | 471 | 44.761 | 37.082 | 19.289 | 0.00 | 0.00 |

|      |      |      |     |   |     |        |        |        |      |      |
|------|------|------|-----|---|-----|--------|--------|--------|------|------|
| ATOM | 7143 | HH21 | ARG | X | 471 | 43.866 | 37.011 | 18.826 | 0.00 | 0.00 |
| ATOM | 7144 | HH22 | ARG | X | 471 | 45.110 | 36.348 | 19.888 | 0.00 | 0.00 |
| ATOM | 7145 | C    | ARG | X | 471 | 43.523 | 43.047 | 21.864 | 0.00 | 0.00 |
| ATOM | 7146 | O    | ARG | X | 471 | 42.321 | 42.808 | 21.649 | 0.00 | 0.00 |
| ATOM | 7147 | N    | LEU | X | 472 | 44.032 | 42.851 | 23.099 | 0.00 | 0.00 |
| ATOM | 7148 | H    | LEU | X | 472 | 45.031 | 42.862 | 23.246 | 0.00 | 0.00 |
| ATOM | 7149 | CA   | LEU | X | 472 | 43.133 | 42.348 | 24.265 | 0.00 | 0.00 |
| ATOM | 7150 | HA   | LEU | X | 472 | 42.438 | 41.585 | 23.916 | 0.00 | 0.00 |
| ATOM | 7151 | CB   | LEU | X | 472 | 44.123 | 41.582 | 25.200 | 0.00 | 0.00 |
| ATOM | 7152 | HB2  | LEU | X | 472 | 44.915 | 42.206 | 25.613 | 0.00 | 0.00 |
| ATOM | 7153 | HB3  | LEU | X | 472 | 43.525 | 41.374 | 26.087 | 0.00 | 0.00 |
| ATOM | 7154 | CG   | LEU | X | 472 | 44.696 | 40.241 | 24.680 | 0.00 | 0.00 |
| ATOM | 7155 | HG   | LEU | X | 472 | 45.512 | 40.432 | 23.983 | 0.00 | 0.00 |
| ATOM | 7156 | CD1  | LEU | X | 472 | 45.361 | 39.507 | 25.896 | 0.00 | 0.00 |
| ATOM | 7157 | HD11 | LEU | X | 472 | 46.219 | 40.052 | 26.289 | 0.00 | 0.00 |
| ATOM | 7158 | HD12 | LEU | X | 472 | 44.593 | 39.462 | 26.668 | 0.00 | 0.00 |
| ATOM | 7159 | HD13 | LEU | X | 472 | 45.747 | 38.540 | 25.573 | 0.00 | 0.00 |
| ATOM | 7160 | CD2  | LEU | X | 472 | 43.673 | 39.285 | 24.015 | 0.00 | 0.00 |
| ATOM | 7161 | HD21 | LEU | X | 472 | 43.387 | 39.497 | 22.985 | 0.00 | 0.00 |
| ATOM | 7162 | HD22 | LEU | X | 472 | 44.193 | 38.335 | 23.894 | 0.00 | 0.00 |
| ATOM | 7163 | HD23 | LEU | X | 472 | 42.858 | 39.091 | 24.713 | 0.00 | 0.00 |
| ATOM | 7164 | C    | LEU | X | 472 | 42.380 | 43.374 | 25.052 | 0.00 | 0.00 |
| ATOM | 7165 | O    | LEU | X | 472 | 41.249 | 43.157 | 25.407 | 0.00 | 0.00 |
| ATOM | 7166 | N    | MET | X | 473 | 42.858 | 44.602 | 25.130 | 0.00 | 0.00 |
| ATOM | 7167 | H    | MET | X | 473 | 43.829 | 44.719 | 24.876 | 0.00 | 0.00 |
| ATOM | 7168 | CA   | MET | X | 473 | 42.179 | 45.786 | 25.648 | 0.00 | 0.00 |
| ATOM | 7169 | HA   | MET | X | 473 | 41.869 | 45.713 | 26.691 | 0.00 | 0.00 |
| ATOM | 7170 | CB   | MET | X | 473 | 43.053 | 47.072 | 25.429 | 0.00 | 0.00 |
| ATOM | 7171 | HB2  | MET | X | 473 | 43.396 | 47.152 | 24.397 | 0.00 | 0.00 |
| ATOM | 7172 | HB3  | MET | X | 473 | 42.562 | 48.031 | 25.600 | 0.00 | 0.00 |
| ATOM | 7173 | CG   | MET | X | 473 | 44.266 | 47.061 | 26.398 | 0.00 | 0.00 |
| ATOM | 7174 | HG2  | MET | X | 473 | 43.927 | 47.250 | 27.417 | 0.00 | 0.00 |
| ATOM | 7175 | HG3  | MET | X | 473 | 44.692 | 46.057 | 26.406 | 0.00 | 0.00 |
| ATOM | 7176 | SD   | MET | X | 473 | 45.593 | 48.149 | 25.963 | 0.00 | 0.00 |
| ATOM | 7177 | CE   | MET | X | 473 | 44.970 | 49.538 | 26.973 | 0.00 | 0.00 |
| ATOM | 7178 | HE1  | MET | X | 473 | 43.917 | 49.822 | 26.969 | 0.00 | 0.00 |
| ATOM | 7179 | HE2  | MET | X | 473 | 45.075 | 49.314 | 28.035 | 0.00 | 0.00 |
| ATOM | 7180 | HE3  | MET | X | 473 | 45.461 | 50.451 | 26.637 | 0.00 | 0.00 |
| ATOM | 7181 | C    | MET | X | 473 | 40.874 | 45.962 | 24.835 | 0.00 | 0.00 |
| ATOM | 7182 | O    | MET | X | 473 | 39.847 | 46.424 | 25.375 | 0.00 | 0.00 |
| ATOM | 7183 | N    | ARG | X | 474 | 40.948 | 45.683 | 23.526 | 0.00 | 0.00 |
| ATOM | 7184 | H    | ARG | X | 474 | 41.638 | 44.994 | 23.259 | 0.00 | 0.00 |
| ATOM | 7185 | CA   | ARG | X | 474 | 39.711 | 45.824 | 22.731 | 0.00 | 0.00 |
| ATOM | 7186 | HA   | ARG | X | 474 | 39.318 | 46.829 | 22.886 | 0.00 | 0.00 |
| ATOM | 7187 | CB   | ARG | X | 474 | 40.036 | 45.707 | 21.242 | 0.00 | 0.00 |
| ATOM | 7188 | HB2  | ARG | X | 474 | 40.868 | 46.380 | 21.035 | 0.00 | 0.00 |
| ATOM | 7189 | HB3  | ARG | X | 474 | 40.515 | 44.733 | 21.149 | 0.00 | 0.00 |
| ATOM | 7190 | CG   | ARG | X | 474 | 38.969 | 45.845 | 20.197 | 0.00 | 0.00 |
| ATOM | 7191 | HG2  | ARG | X | 474 | 39.359 | 45.663 | 19.195 | 0.00 | 0.00 |
| ATOM | 7192 | HG3  | ARG | X | 474 | 38.166 | 45.151 | 20.445 | 0.00 | 0.00 |
| ATOM | 7193 | CD   | ARG | X | 474 | 38.319 | 47.208 | 20.214 | 0.00 | 0.00 |
| ATOM | 7194 | HD2  | ARG | X | 474 | 37.674 | 47.265 | 21.091 | 0.00 | 0.00 |
| ATOM | 7195 | HD3  | ARG | X | 474 | 39.060 | 48.003 | 20.293 | 0.00 | 0.00 |
| ATOM | 7196 | NE   | ARG | X | 474 | 37.456 | 47.461 | 19.021 | 0.00 | 0.00 |
| ATOM | 7197 | HE   | ARG | X | 474 | 37.203 | 46.688 | 18.422 | 0.00 | 0.00 |
| ATOM | 7198 | CZ   | ARG | X | 474 | 37.065 | 48.623 | 18.599 | 0.00 | 0.00 |
| ATOM | 7199 | NH1  | ARG | X | 474 | 37.297 | 49.696 | 19.324 | 0.00 | 0.00 |
| ATOM | 7200 | HH11 | ARG | X | 474 | 37.984 | 49.605 | 20.059 | 0.00 | 0.00 |
| ATOM | 7201 | HH12 | ARG | X | 474 | 36.876 | 50.554 | 18.997 | 0.00 | 0.00 |
| ATOM | 7202 | NH2  | ARG | X | 474 | 36.541 | 48.775 | 17.411 | 0.00 | 0.00 |
| ATOM | 7203 | HH21 | ARG | X | 474 | 36.391 | 47.940 | 16.863 | 0.00 | 0.00 |
| ATOM | 7204 | HH22 | ARG | X | 474 | 36.253 | 49.650 | 16.996 | 0.00 | 0.00 |
| ATOM | 7205 | C    | ARG | X | 474 | 38.540 | 44.915 | 23.228 | 0.00 | 0.00 |
| ATOM | 7206 | O    | ARG | X | 474 | 37.416 | 45.398 | 23.220 | 0.00 | 0.00 |
| ATOM | 7207 | N    | TYR | X | 475 | 38.773 | 43.630 | 23.566 | 0.00 | 0.00 |
| ATOM | 7208 | H    | TYR | X | 475 | 39.757 | 43.444 | 23.703 | 0.00 | 0.00 |
| ATOM | 7209 | CA   | TYR | X | 475 | 37.679 | 42.704 | 23.880 | 0.00 | 0.00 |
| ATOM | 7210 | HA   | TYR | X | 475 | 37.035 | 42.793 | 23.005 | 0.00 | 0.00 |
| ATOM | 7211 | CB   | TYR | X | 475 | 38.202 | 41.317 | 23.999 | 0.00 | 0.00 |
| ATOM | 7212 | HB2  | TYR | X | 475 | 38.906 | 41.327 | 24.831 | 0.00 | 0.00 |



|      |      |      |     |   |     |        |        |        |      |      |
|------|------|------|-----|---|-----|--------|--------|--------|------|------|
| ATOM | 7213 | HB3  | TYR | X | 475 | 37.362 | 40.728 | 24.367 | 0.00 | 0.00 |
| ATOM | 7214 | CG   | TYR | X | 475 | 38.725 | 40.642 | 22.744 | 0.00 | 0.00 |
| ATOM | 7215 | CD1  | TYR | X | 475 | 37.954 | 40.402 | 21.608 | 0.00 | 0.00 |
| ATOM | 7216 | HD1  | TYR | X | 475 | 36.922 | 40.719 | 21.620 | 0.00 | 0.00 |
| ATOM | 7217 | CE1  | TYR | X | 475 | 38.411 | 39.594 | 20.576 | 0.00 | 0.00 |
| ATOM | 7218 | HE1  | TYR | X | 475 | 37.682 | 39.287 | 19.840 | 0.00 | 0.00 |
| ATOM | 7219 | CZ   | TYR | X | 475 | 39.664 | 39.028 | 20.577 | 0.00 | 0.00 |
| ATOM | 7220 | OH   | TYR | X | 475 | 39.967 | 38.097 | 19.616 | 0.00 | 0.00 |
| ATOM | 7221 | HH   | TYR | X | 475 | 39.366 | 37.954 | 18.881 | 0.00 | 0.00 |
| ATOM | 7222 | CE2  | TYR | X | 475 | 40.550 | 39.360 | 21.617 | 0.00 | 0.00 |
| ATOM | 7223 | HE2  | TYR | X | 475 | 41.592 | 39.080 | 21.668 | 0.00 | 0.00 |
| ATOM | 7224 | CD2  | TYR | X | 475 | 40.068 | 40.170 | 22.699 | 0.00 | 0.00 |
| ATOM | 7225 | HD2  | TYR | X | 475 | 40.721 | 40.267 | 23.553 | 0.00 | 0.00 |
| ATOM | 7226 | C    | TYR | X | 475 | 36.902 | 43.104 | 25.127 | 0.00 | 0.00 |
| ATOM | 7227 | O    | TYR | X | 475 | 35.679 | 43.051 | 25.103 | 0.00 | 0.00 |
| ATOM | 7228 | N    | TRP | X | 476 | 37.636 | 43.660 | 26.144 | 0.00 | 0.00 |
| ATOM | 7229 | H    | TRP | X | 476 | 38.638 | 43.608 | 26.033 | 0.00 | 0.00 |
| ATOM | 7230 | CA   | TRP | X | 476 | 36.955 | 44.009 | 27.420 | 0.00 | 0.00 |
| ATOM | 7231 | HA   | TRP | X | 476 | 36.234 | 43.259 | 27.744 | 0.00 | 0.00 |
| ATOM | 7232 | CB   | TRP | X | 476 | 37.976 | 44.181 | 28.558 | 0.00 | 0.00 |
| ATOM | 7233 | HB2  | TRP | X | 476 | 38.839 | 44.790 | 28.286 | 0.00 | 0.00 |
| ATOM | 7234 | HB3  | TRP | X | 476 | 37.493 | 44.836 | 29.282 | 0.00 | 0.00 |
| ATOM | 7235 | CG   | TRP | X | 476 | 38.414 | 42.982 | 29.434 | 0.00 | 0.00 |
| ATOM | 7236 | CD1  | TRP | X | 476 | 38.302 | 42.972 | 30.755 | 0.00 | 0.00 |
| ATOM | 7237 | HD1  | TRP | X | 476 | 37.882 | 43.701 | 31.433 | 0.00 | 0.00 |
| ATOM | 7238 | NE1  | TRP | X | 476 | 38.876 | 41.856 | 31.255 | 0.00 | 0.00 |
| ATOM | 7239 | HE1  | TRP | X | 476 | 38.844 | 41.586 | 32.228 | 0.00 | 0.00 |
| ATOM | 7240 | CE2  | TRP | X | 476 | 39.257 | 41.009 | 30.244 | 0.00 | 0.00 |
| ATOM | 7241 | CZ2  | TRP | X | 476 | 39.726 | 39.725 | 30.144 | 0.00 | 0.00 |
| ATOM | 7242 | HZ2  | TRP | X | 476 | 39.643 | 39.076 | 31.003 | 0.00 | 0.00 |
| ATOM | 7243 | CH2  | TRP | X | 476 | 39.908 | 39.005 | 28.946 | 0.00 | 0.00 |
| ATOM | 7244 | HH2  | TRP | X | 476 | 40.297 | 37.998 | 28.919 | 0.00 | 0.00 |
| ATOM | 7245 | CZ3  | TRP | X | 476 | 39.831 | 39.783 | 27.772 | 0.00 | 0.00 |
| ATOM | 7246 | HZ3  | TRP | X | 476 | 40.157 | 39.329 | 26.848 | 0.00 | 0.00 |
| ATOM | 7247 | CE3  | TRP | X | 476 | 39.364 | 41.145 | 27.757 | 0.00 | 0.00 |
| ATOM | 7248 | HE3  | TRP | X | 476 | 39.355 | 41.618 | 26.786 | 0.00 | 0.00 |
| ATOM | 7249 | CD2  | TRP | X | 476 | 38.968 | 41.726 | 29.028 | 0.00 | 0.00 |
| ATOM | 7250 | C    | TRP | X | 476 | 36.234 | 45.411 | 27.285 | 0.00 | 0.00 |
| ATOM | 7251 | O    | TRP | X | 476 | 35.122 | 45.598 | 27.714 | 0.00 | 0.00 |
| ATOM | 7252 | N    | ALA | X | 477 | 36.818 | 46.356 | 26.464 | 0.00 | 0.00 |
| ATOM | 7253 | H    | ALA | X | 477 | 37.762 | 46.195 | 26.143 | 0.00 | 0.00 |
| ATOM | 7254 | CA   | ALA | X | 477 | 36.124 | 47.579 | 26.055 | 0.00 | 0.00 |
| ATOM | 7255 | HA   | ALA | X | 477 | 35.826 | 48.197 | 26.902 | 0.00 | 0.00 |
| ATOM | 7256 | CB   | ALA | X | 477 | 37.126 | 48.464 | 25.317 | 0.00 | 0.00 |
| ATOM | 7257 | HB1  | ALA | X | 477 | 37.950 | 48.678 | 25.998 | 0.00 | 0.00 |
| ATOM | 7258 | HB2  | ALA | X | 477 | 37.506 | 47.996 | 24.408 | 0.00 | 0.00 |
| ATOM | 7259 | HB3  | ALA | X | 477 | 36.688 | 49.424 | 25.044 | 0.00 | 0.00 |
| ATOM | 7260 | C    | ALA | X | 477 | 34.854 | 47.323 | 25.264 | 0.00 | 0.00 |
| ATOM | 7261 | O    | ALA | X | 477 | 33.727 | 47.885 | 25.617 | 0.00 | 0.00 |
| ATOM | 7262 | N    | ASN | X | 478 | 34.798 | 46.386 | 24.269 | 0.00 | 0.00 |
| ATOM | 7263 | H    | ASN | X | 478 | 35.572 | 45.768 | 24.074 | 0.00 | 0.00 |
| ATOM | 7264 | CA   | ASN | X | 478 | 33.631 | 45.966 | 23.517 | 0.00 | 0.00 |
| ATOM | 7265 | HA   | ASN | X | 478 | 33.088 | 46.875 | 23.259 | 0.00 | 0.00 |
| ATOM | 7266 | CB   | ASN | X | 478 | 33.942 | 45.016 | 22.396 | 0.00 | 0.00 |
| ATOM | 7267 | HB2  | ASN | X | 478 | 34.587 | 44.208 | 22.740 | 0.00 | 0.00 |
| ATOM | 7268 | HB3  | ASN | X | 478 | 33.035 | 44.593 | 21.965 | 0.00 | 0.00 |
| ATOM | 7269 | CG   | ASN | X | 478 | 34.729 | 45.590 | 21.182 | 0.00 | 0.00 |
| ATOM | 7270 | OD1  | ASN | X | 478 | 34.982 | 46.753 | 20.978 | 0.00 | 0.00 |
| ATOM | 7271 | ND2  | ASN | X | 478 | 35.279 | 44.718 | 20.305 | 0.00 | 0.00 |
| ATOM | 7272 | HD21 | ASN | X | 478 | 35.751 | 45.063 | 19.482 | 0.00 | 0.00 |
| ATOM | 7273 | HD22 | ASN | X | 478 | 35.179 | 43.723 | 20.448 | 0.00 | 0.00 |
| ATOM | 7274 | C    | ASN | X | 478 | 32.587 | 45.273 | 24.483 | 0.00 | 0.00 |
| ATOM | 7275 | O    | ASN | X | 478 | 31.412 | 45.648 | 24.355 | 0.00 | 0.00 |
| ATOM | 7276 | N    | PHE | X | 479 | 32.941 | 44.346 | 25.378 | 0.00 | 0.00 |
| ATOM | 7277 | H    | PHE | X | 479 | 33.931 | 44.155 | 25.317 | 0.00 | 0.00 |
| ATOM | 7278 | CA   | PHE | X | 479 | 31.995 | 43.768 | 26.343 | 0.00 | 0.00 |
| ATOM | 7279 | HA   | PHE | X | 479 | 31.122 | 43.460 | 25.767 | 0.00 | 0.00 |
| ATOM | 7280 | CB   | PHE | X | 479 | 32.707 | 42.572 | 27.025 | 0.00 | 0.00 |
| ATOM | 7281 | HB2  | PHE | X | 479 | 33.015 | 41.777 | 26.346 | 0.00 | 0.00 |
| ATOM | 7282 | HB3  | PHE | X | 479 | 33.633 | 42.886 | 27.506 | 0.00 | 0.00 |

|      |      |      |     |   |     |        |        |        |      |      |
|------|------|------|-----|---|-----|--------|--------|--------|------|------|
| ATOM | 7283 | CG   | PHE | X | 479 | 31.941 | 41.908 | 28.153 | 0.00 | 0.00 |
| ATOM | 7284 | CD1  | PHE | X | 479 | 31.028 | 40.863 | 27.830 | 0.00 | 0.00 |
| ATOM | 7285 | HD1  | PHE | X | 479 | 30.974 | 40.418 | 26.848 | 0.00 | 0.00 |
| ATOM | 7286 | CE1  | PHE | X | 479 | 30.295 | 40.248 | 28.885 | 0.00 | 0.00 |
| ATOM | 7287 | HE1  | PHE | X | 479 | 29.574 | 39.510 | 28.566 | 0.00 | 0.00 |
| ATOM | 7288 | CZ   | PHE | X | 479 | 30.313 | 40.788 | 30.120 | 0.00 | 0.00 |
| ATOM | 7289 | HZ   | PHE | X | 479 | 29.766 | 40.296 | 30.910 | 0.00 | 0.00 |
| ATOM | 7290 | CE2  | PHE | X | 479 | 31.258 | 41.821 | 30.427 | 0.00 | 0.00 |
| ATOM | 7291 | HE2  | PHE | X | 479 | 31.408 | 42.162 | 31.441 | 0.00 | 0.00 |
| ATOM | 7292 | CD2  | PHE | X | 479 | 32.097 | 42.270 | 29.481 | 0.00 | 0.00 |
| ATOM | 7293 | HD2  | PHE | X | 479 | 32.773 | 43.071 | 29.745 | 0.00 | 0.00 |
| ATOM | 7294 | C    | PHE | X | 479 | 31.415 | 44.879 | 27.254 | 0.00 | 0.00 |
| ATOM | 7295 | O    | PHE | X | 479 | 30.281 | 44.662 | 27.624 | 0.00 | 0.00 |
| ATOM | 7296 | N    | ALA | X | 480 | 32.052 | 46.032 | 27.470 | 0.00 | 0.00 |
| ATOM | 7297 | H    | ALA | X | 480 | 32.998 | 46.129 | 27.130 | 0.00 | 0.00 |
| ATOM | 7298 | CA   | ALA | X | 480 | 31.420 | 47.208 | 28.029 | 0.00 | 0.00 |
| ATOM | 7299 | HA   | ALA | X | 480 | 30.987 | 46.809 | 28.947 | 0.00 | 0.00 |
| ATOM | 7300 | CB   | ALA | X | 480 | 32.508 | 48.129 | 28.543 | 0.00 | 0.00 |
| ATOM | 7301 | HB1  | ALA | X | 480 | 32.789 | 49.002 | 27.954 | 0.00 | 0.00 |
| ATOM | 7302 | HB2  | ALA | X | 480 | 32.170 | 48.646 | 29.441 | 0.00 | 0.00 |
| ATOM | 7303 | HB3  | ALA | X | 480 | 33.426 | 47.588 | 28.773 | 0.00 | 0.00 |
| ATOM | 7304 | C    | ALA | X | 480 | 30.420 | 47.856 | 27.089 | 0.00 | 0.00 |
| ATOM | 7305 | O    | ALA | X | 480 | 29.309 | 48.214 | 27.558 | 0.00 | 0.00 |
| ATOM | 7306 | N    | ARG | X | 481 | 30.757 | 47.907 | 25.790 | 0.00 | 0.00 |
| ATOM | 7307 | H    | ARG | X | 481 | 31.691 | 47.619 | 25.536 | 0.00 | 0.00 |
| ATOM | 7308 | CA   | ARG | X | 481 | 29.980 | 48.493 | 24.689 | 0.00 | 0.00 |
| ATOM | 7309 | HA   | ARG | X | 481 | 29.669 | 49.519 | 24.882 | 0.00 | 0.00 |
| ATOM | 7310 | CB   | ARG | X | 481 | 30.731 | 48.601 | 23.349 | 0.00 | 0.00 |
| ATOM | 7311 | HB2  | ARG | X | 481 | 31.033 | 47.588 | 23.083 | 0.00 | 0.00 |
| ATOM | 7312 | HB3  | ARG | X | 481 | 29.994 | 48.871 | 22.593 | 0.00 | 0.00 |
| ATOM | 7313 | CG   | ARG | X | 481 | 31.932 | 49.608 | 23.378 | 0.00 | 0.00 |
| ATOM | 7314 | HG2  | ARG | X | 481 | 31.459 | 50.589 | 23.351 | 0.00 | 0.00 |
| ATOM | 7315 | HG3  | ARG | X | 481 | 32.501 | 49.527 | 24.304 | 0.00 | 0.00 |
| ATOM | 7316 | CD   | ARG | X | 481 | 32.738 | 49.668 | 22.099 | 0.00 | 0.00 |
| ATOM | 7317 | HD2  | ARG | X | 481 | 33.171 | 48.689 | 21.896 | 0.00 | 0.00 |
| ATOM | 7318 | HD3  | ARG | X | 481 | 32.157 | 50.125 | 21.298 | 0.00 | 0.00 |
| ATOM | 7319 | NE   | ARG | X | 481 | 33.903 | 50.632 | 22.226 | 0.00 | 0.00 |
| ATOM | 7320 | HE   | ARG | X | 481 | 33.726 | 51.595 | 21.981 | 0.00 | 0.00 |
| ATOM | 7321 | CZ   | ARG | X | 481 | 35.205 | 50.370 | 22.369 | 0.00 | 0.00 |
| ATOM | 7322 | NH1  | ARG | X | 481 | 35.806 | 49.147 | 22.443 | 0.00 | 0.00 |
| ATOM | 7323 | HH11 | ARG | X | 481 | 35.337 | 48.252 | 22.435 | 0.00 | 0.00 |
| ATOM | 7324 | HH12 | ARG | X | 481 | 36.812 | 49.118 | 22.362 | 0.00 | 0.00 |
| ATOM | 7325 | NH2  | ARG | X | 481 | 36.045 | 51.381 | 22.493 | 0.00 | 0.00 |
| ATOM | 7326 | HH21 | ARG | X | 481 | 35.617 | 52.292 | 22.568 | 0.00 | 0.00 |
| ATOM | 7327 | HH22 | ARG | X | 481 | 37.047 | 51.261 | 22.460 | 0.00 | 0.00 |
| ATOM | 7328 | C    | ARG | X | 481 | 28.606 | 47.815 | 24.435 | 0.00 | 0.00 |
| ATOM | 7329 | O    | ARG | X | 481 | 27.571 | 48.474 | 24.384 | 0.00 | 0.00 |
| ATOM | 7330 | N    | THR | X | 482 | 28.690 | 46.516 | 24.313 | 0.00 | 0.00 |
| ATOM | 7331 | H    | THR | X | 482 | 29.632 | 46.153 | 24.356 | 0.00 | 0.00 |
| ATOM | 7332 | CA   | THR | X | 482 | 27.647 | 45.651 | 23.758 | 0.00 | 0.00 |
| ATOM | 7333 | HA   | THR | X | 482 | 26.691 | 46.174 | 23.735 | 0.00 | 0.00 |
| ATOM | 7334 | CB   | THR | X | 482 | 27.953 | 45.269 | 22.286 | 0.00 | 0.00 |
| ATOM | 7335 | HB   | THR | X | 482 | 27.247 | 44.476 | 22.041 | 0.00 | 0.00 |
| ATOM | 7336 | CG2  | THR | X | 482 | 27.912 | 46.465 | 21.370 | 0.00 | 0.00 |
| ATOM | 7337 | HG21 | THR | X | 482 | 28.727 | 47.172 | 21.520 | 0.00 | 0.00 |
| ATOM | 7338 | HG22 | THR | X | 482 | 28.081 | 46.103 | 20.356 | 0.00 | 0.00 |
| ATOM | 7339 | HG23 | THR | X | 482 | 26.971 | 46.995 | 21.519 | 0.00 | 0.00 |
| ATOM | 7340 | OG1  | THR | X | 482 | 29.197 | 44.630 | 22.229 | 0.00 | 0.00 |
| ATOM | 7341 | HG1  | THR | X | 482 | 29.505 | 44.414 | 21.346 | 0.00 | 0.00 |
| ATOM | 7342 | C    | THR | X | 482 | 27.472 | 44.244 | 24.428 | 0.00 | 0.00 |
| ATOM | 7343 | O    | THR | X | 482 | 26.380 | 43.702 | 24.393 | 0.00 | 0.00 |
| ATOM | 7344 | N    | GLY | X | 483 | 28.495 | 43.698 | 25.007 | 0.00 | 0.00 |
| ATOM | 7345 | H    | GLY | X | 483 | 29.330 | 44.267 | 25.026 | 0.00 | 0.00 |
| ATOM | 7346 | CA   | GLY | X | 483 | 28.465 | 42.453 | 25.808 | 0.00 | 0.00 |
| ATOM | 7347 | HA2  | GLY | X | 483 | 29.170 | 42.413 | 26.636 | 0.00 | 0.00 |
| ATOM | 7348 | HA3  | GLY | X | 483 | 27.401 | 42.160 | 26.122 | 0.00 | 0.00 |
| ATOM | 7349 | C    | GLY | X | 483 | 28.906 | 41.363 | 24.857 | 0.00 | 0.00 |
| ATOM | 7350 | O    | GLY | X | 483 | 28.925 | 40.194 | 25.168 | 0.00 | 0.00 |
| ATOM | 7351 | N    | ASP | X | 484 | 29.298 | 41.685 | 23.623 | 0.00 | 0.00 |
| ATOM | 7352 | H    | ASP | X | 484 | 29.267 | 42.678 | 23.437 | 0.00 | 0.00 |

|      |      |      |     |   |     |        |        |        |      |      |
|------|------|------|-----|---|-----|--------|--------|--------|------|------|
| ATOM | 7353 | CA   | ASP | X | 484 | 29.907 | 40.770 | 22.694 | 0.00 | 0.00 |
| ATOM | 7354 | HA   | ASP | X | 484 | 29.961 | 39.802 | 23.190 | 0.00 | 0.00 |
| ATOM | 7355 | CB   | ASP | X | 484 | 29.180 | 40.647 | 21.351 | 0.00 | 0.00 |
| ATOM | 7356 | HB2  | ASP | X | 484 | 28.828 | 41.646 | 21.090 | 0.00 | 0.00 |
| ATOM | 7357 | HB3  | ASP | X | 484 | 29.890 | 40.431 | 20.553 | 0.00 | 0.00 |
| ATOM | 7358 | CG   | ASP | X | 484 | 28.040 | 39.627 | 21.266 | 0.00 | 0.00 |
| ATOM | 7359 | OD1  | ASP | X | 484 | 28.094 | 38.827 | 20.324 | 0.00 | 0.00 |
| ATOM | 7360 | OD2  | ASP | X | 484 | 27.048 | 39.692 | 21.984 | 0.00 | 0.00 |
| ATOM | 7361 | C    | ASP | X | 484 | 31.345 | 41.260 | 22.466 | 0.00 | 0.00 |
| ATOM | 7362 | O    | ASP | X | 484 | 31.590 | 42.421 | 22.190 | 0.00 | 0.00 |
| ATOM | 7363 | N    | PRO | X | 485 | 32.332 | 40.484 | 22.852 | 0.00 | 0.00 |
| ATOM | 7364 | CD   | PRO | X | 485 | 32.238 | 39.131 | 23.408 | 0.00 | 0.00 |
| ATOM | 7365 | HD2  | PRO | X | 485 | 31.731 | 38.415 | 22.760 | 0.00 | 0.00 |
| ATOM | 7366 | HD3  | PRO | X | 485 | 31.800 | 39.151 | 24.406 | 0.00 | 0.00 |
| ATOM | 7367 | CG   | PRO | X | 485 | 33.678 | 38.663 | 23.515 | 0.00 | 0.00 |
| ATOM | 7368 | HG2  | PRO | X | 485 | 33.941 | 38.210 | 22.559 | 0.00 | 0.00 |
| ATOM | 7369 | HG3  | PRO | X | 485 | 33.788 | 37.895 | 24.281 | 0.00 | 0.00 |
| ATOM | 7370 | CB   | PRO | X | 485 | 34.461 | 39.852 | 23.716 | 0.00 | 0.00 |
| ATOM | 7371 | HB2  | PRO | X | 485 | 35.462 | 39.710 | 23.310 | 0.00 | 0.00 |
| ATOM | 7372 | HB3  | PRO | X | 485 | 34.427 | 39.958 | 24.801 | 0.00 | 0.00 |
| ATOM | 7373 | CA   | PRO | X | 485 | 33.722 | 40.932 | 22.936 | 0.00 | 0.00 |
| ATOM | 7374 | HA   | PRO | X | 485 | 33.725 | 41.904 | 23.429 | 0.00 | 0.00 |
| ATOM | 7375 | C    | PRO | X | 485 | 34.331 | 41.119 | 21.600 | 0.00 | 0.00 |
| ATOM | 7376 | O    | PRO | X | 485 | 35.133 | 42.019 | 21.428 | 0.00 | 0.00 |
| ATOM | 7377 | N    | ASN | X | 486 | 33.933 | 40.295 | 20.611 | 0.00 | 0.00 |
| ATOM | 7378 | H    | ASN | X | 486 | 33.276 | 39.552 | 20.802 | 0.00 | 0.00 |
| ATOM | 7379 | CA   | ASN | X | 486 | 34.207 | 40.511 | 19.137 | 0.00 | 0.00 |
| ATOM | 7380 | HA   | ASN | X | 486 | 35.263 | 40.406 | 18.886 | 0.00 | 0.00 |
| ATOM | 7381 | CB   | ASN | X | 486 | 33.579 | 39.271 | 18.422 | 0.00 | 0.00 |
| ATOM | 7382 | HB2  | ASN | X | 486 | 33.757 | 39.366 | 17.350 | 0.00 | 0.00 |
| ATOM | 7383 | HB3  | ASN | X | 486 | 33.990 | 38.346 | 18.826 | 0.00 | 0.00 |
| ATOM | 7384 | CG   | ASN | X | 486 | 32.096 | 39.185 | 18.683 | 0.00 | 0.00 |
| ATOM | 7385 | OD1  | ASN | X | 486 | 31.597 | 38.671 | 19.661 | 0.00 | 0.00 |
| ATOM | 7386 | ND2  | ASN | X | 486 | 31.326 | 39.767 | 17.738 | 0.00 | 0.00 |
| ATOM | 7387 | HD21 | ASN | X | 486 | 30.390 | 40.079 | 17.957 | 0.00 | 0.00 |
| ATOM | 7388 | HD22 | ASN | X | 486 | 31.744 | 40.194 | 16.925 | 0.00 | 0.00 |
| ATOM | 7389 | C    | ASN | X | 486 | 33.767 | 41.775 | 18.489 | 0.00 | 0.00 |
| ATOM | 7390 | O    | ASN | X | 486 | 32.901 | 42.502 | 19.019 | 0.00 | 0.00 |
| ATOM | 7391 | N    | GLU | X | 487 | 34.360 | 42.090 | 17.293 | 0.00 | 0.00 |
| ATOM | 7392 | H    | GLU | X | 487 | 35.092 | 41.475 | 16.967 | 0.00 | 0.00 |
| ATOM | 7393 | CA   | GLU | X | 487 | 33.901 | 43.172 | 16.454 | 0.00 | 0.00 |
| ATOM | 7394 | HA   | GLU | X | 487 | 33.805 | 44.046 | 17.099 | 0.00 | 0.00 |
| ATOM | 7395 | CB   | GLU | X | 487 | 34.852 | 43.252 | 15.252 | 0.00 | 0.00 |
| ATOM | 7396 | HB2  | GLU | X | 487 | 35.157 | 42.263 | 14.912 | 0.00 | 0.00 |
| ATOM | 7397 | HB3  | GLU | X | 487 | 34.455 | 43.682 | 14.333 | 0.00 | 0.00 |
| ATOM | 7398 | CG   | GLU | X | 487 | 36.125 | 44.047 | 15.646 | 0.00 | 0.00 |
| ATOM | 7399 | HG2  | GLU | X | 487 | 36.731 | 43.602 | 16.435 | 0.00 | 0.00 |
| ATOM | 7400 | HG3  | GLU | X | 487 | 36.705 | 44.183 | 14.733 | 0.00 | 0.00 |
| ATOM | 7401 | CD   | GLU | X | 487 | 35.939 | 45.485 | 16.160 | 0.00 | 0.00 |
| ATOM | 7402 | OE1  | GLU | X | 487 | 35.768 | 46.467 | 15.367 | 0.00 | 0.00 |
| ATOM | 7403 | OE2  | GLU | X | 487 | 36.082 | 45.708 | 17.383 | 0.00 | 0.00 |
| ATOM | 7404 | C    | GLU | X | 487 | 32.467 | 42.815 | 15.839 | 0.00 | 0.00 |
| ATOM | 7405 | O    | GLU | X | 487 | 32.175 | 41.636 | 15.742 | 0.00 | 0.00 |
| ATOM | 7406 | N    | PRO | X | 488 | 31.707 | 43.804 | 15.305 | 0.00 | 0.00 |
| ATOM | 7407 | CD   | PRO | X | 488 | 32.175 | 45.190 | 15.276 | 0.00 | 0.00 |
| ATOM | 7408 | HD2  | PRO | X | 488 | 33.110 | 45.297 | 14.727 | 0.00 | 0.00 |
| ATOM | 7409 | HD3  | PRO | X | 488 | 32.323 | 45.606 | 16.273 | 0.00 | 0.00 |
| ATOM | 7410 | CG   | PRO | X | 488 | 31.155 | 45.945 | 14.521 | 0.00 | 0.00 |
| ATOM | 7411 | HG2  | PRO | X | 488 | 31.512 | 46.061 | 13.498 | 0.00 | 0.00 |
| ATOM | 7412 | HG3  | PRO | X | 488 | 30.905 | 46.884 | 15.014 | 0.00 | 0.00 |
| ATOM | 7413 | CB   | PRO | X | 488 | 29.829 | 45.108 | 14.553 | 0.00 | 0.00 |
| ATOM | 7414 | HB2  | PRO | X | 488 | 29.343 | 45.271 | 13.592 | 0.00 | 0.00 |
| ATOM | 7415 | HB3  | PRO | X | 488 | 29.160 | 45.449 | 15.343 | 0.00 | 0.00 |
| ATOM | 7416 | CA   | PRO | X | 488 | 30.425 | 43.689 | 14.635 | 0.00 | 0.00 |
| ATOM | 7417 | HA   | PRO | X | 488 | 29.749 | 43.057 | 15.211 | 0.00 | 0.00 |
| ATOM | 7418 | C    | PRO | X | 488 | 30.530 | 43.069 | 13.202 | 0.00 | 0.00 |
| ATOM | 7419 | O    | PRO | X | 488 | 29.548 | 42.392 | 12.882 | 0.00 | 0.00 |
| ATOM | 7420 | N    | ARG | X | 489 | 31.628 | 43.293 | 12.472 | 0.00 | 0.00 |
| ATOM | 7421 | H    | ARG | X | 489 | 32.375 | 43.810 | 12.913 | 0.00 | 0.00 |
| ATOM | 7422 | CA   | ARG | X | 489 | 32.010 | 42.714 | 11.229 | 0.00 | 0.00 |

|      |      |      |     |   |     |        |        |        |      |      |
|------|------|------|-----|---|-----|--------|--------|--------|------|------|
| ATOM | 7423 | HA   | ARG | X | 489 | 31.322 | 41.897 | 11.011 | 0.00 | 0.00 |
| ATOM | 7424 | CB   | ARG | X | 489 | 31.672 | 43.739 | 10.127 | 0.00 | 0.00 |
| ATOM | 7425 | HB2  | ARG | X | 489 | 31.946 | 43.344 | 9.148  | 0.00 | 0.00 |
| ATOM | 7426 | HB3  | ARG | X | 489 | 30.588 | 43.845 | 10.147 | 0.00 | 0.00 |
| ATOM | 7427 | CG   | ARG | X | 489 | 32.501 | 44.966 | 10.160 | 0.00 | 0.00 |
| ATOM | 7428 | HG2  | ARG | X | 489 | 32.315 | 45.486 | 11.100 | 0.00 | 0.00 |
| ATOM | 7429 | HG3  | ARG | X | 489 | 33.554 | 44.684 | 10.173 | 0.00 | 0.00 |
| ATOM | 7430 | CD   | ARG | X | 489 | 32.204 | 45.894 | 9.012  | 0.00 | 0.00 |
| ATOM | 7431 | HD2  | ARG | X | 489 | 32.556 | 45.343 | 8.140  | 0.00 | 0.00 |
| ATOM | 7432 | HD3  | ARG | X | 489 | 31.119 | 45.989 | 8.965  | 0.00 | 0.00 |
| ATOM | 7433 | NE   | ARG | X | 489 | 32.792 | 47.179 | 9.308  | 0.00 | 0.00 |
| ATOM | 7434 | HE   | ARG | X | 489 | 33.736 | 47.342 | 8.989  | 0.00 | 0.00 |
| ATOM | 7435 | CZ   | ARG | X | 489 | 32.190 | 48.298 | 9.799  | 0.00 | 0.00 |
| ATOM | 7436 | NH1  | ARG | X | 489 | 32.595 | 49.428 | 9.391  | 0.00 | 0.00 |
| ATOM | 7437 | HH11 | ARG | X | 489 | 33.330 | 49.578 | 8.714  | 0.00 | 0.00 |
| ATOM | 7438 | HH12 | ARG | X | 489 | 32.157 | 50.281 | 9.708  | 0.00 | 0.00 |
| ATOM | 7439 | NH2  | ARG | X | 489 | 31.164 | 48.186 | 10.554 | 0.00 | 0.00 |
| ATOM | 7440 | HH21 | ARG | X | 489 | 30.540 | 47.402 | 10.431 | 0.00 | 0.00 |
| ATOM | 7441 | HH22 | ARG | X | 489 | 30.739 | 49.044 | 10.875 | 0.00 | 0.00 |
| ATOM | 7442 | C    | ARG | X | 489 | 33.386 | 42.112 | 11.285 | 0.00 | 0.00 |
| ATOM | 7443 | O    | ARG | X | 489 | 34.242 | 42.737 | 11.905 | 0.00 | 0.00 |
| ATOM | 7444 | N    | ASP | X | 490 | 33.537 | 40.879 | 10.770 | 0.00 | 0.00 |
| ATOM | 7445 | H    | ASP | X | 490 | 32.723 | 40.368 | 10.461 | 0.00 | 0.00 |
| ATOM | 7446 | CA   | ASP | X | 490 | 34.705 | 40.065 | 11.021 | 0.00 | 0.00 |
| ATOM | 7447 | HA   | ASP | X | 490 | 35.547 | 40.735 | 11.197 | 0.00 | 0.00 |
| ATOM | 7448 | CB   | ASP | X | 490 | 34.536 | 39.166 | 12.227 | 0.00 | 0.00 |
| ATOM | 7449 | HB2  | ASP | X | 490 | 35.434 | 38.594 | 12.458 | 0.00 | 0.00 |
| ATOM | 7450 | HB3  | ASP | X | 490 | 34.326 | 39.804 | 13.086 | 0.00 | 0.00 |
| ATOM | 7451 | CG   | ASP | X | 490 | 33.525 | 38.100 | 12.065 | 0.00 | 0.00 |
| ATOM | 7452 | OD1  | ASP | X | 490 | 33.925 | 36.956 | 11.701 | 0.00 | 0.00 |
| ATOM | 7453 | OD2  | ASP | X | 490 | 32.309 | 38.399 | 12.203 | 0.00 | 0.00 |
| ATOM | 7454 | C    | ASP | X | 490 | 35.149 | 39.266 | 9.757  | 0.00 | 0.00 |
| ATOM | 7455 | O    | ASP | X | 490 | 34.328 | 39.033 | 8.836  | 0.00 | 0.00 |
| ATOM | 7456 | N    | PRO | X | 491 | 36.462 | 38.932 | 9.628  | 0.00 | 0.00 |
| ATOM | 7457 | CD   | PRO | X | 491 | 37.557 | 39.336 | 10.515 | 0.00 | 0.00 |
| ATOM | 7458 | HD2  | PRO | X | 491 | 37.501 | 38.882 | 11.504 | 0.00 | 0.00 |
| ATOM | 7459 | HD3  | PRO | X | 491 | 37.541 | 40.425 | 10.473 | 0.00 | 0.00 |
| ATOM | 7460 | CG   | PRO | X | 491 | 38.840 | 38.786 | 9.852  | 0.00 | 0.00 |
| ATOM | 7461 | HG2  | PRO | X | 491 | 38.960 | 37.872 | 10.435 | 0.00 | 0.00 |
| ATOM | 7462 | HG3  | PRO | X | 491 | 39.666 | 39.475 | 10.028 | 0.00 | 0.00 |
| ATOM | 7463 | CB   | PRO | X | 491 | 38.532 | 38.537 | 8.367  | 0.00 | 0.00 |
| ATOM | 7464 | HB2  | PRO | X | 491 | 39.077 | 37.718 | 7.897  | 0.00 | 0.00 |
| ATOM | 7465 | HB3  | PRO | X | 491 | 38.597 | 39.509 | 7.879  | 0.00 | 0.00 |
| ATOM | 7466 | CA   | PRO | X | 491 | 37.030 | 38.325 | 8.402  | 0.00 | 0.00 |
| ATOM | 7467 | HA   | PRO | X | 491 | 36.665 | 38.903 | 7.552  | 0.00 | 0.00 |
| ATOM | 7468 | C    | PRO | X | 491 | 36.670 | 36.808 | 8.339  | 0.00 | 0.00 |
| ATOM | 7469 | O    | PRO | X | 491 | 36.044 | 36.313 | 9.263  | 0.00 | 0.00 |
| ATOM | 7470 | N    | LYS | X | 492 | 37.334 | 35.995 | 7.433  | 0.00 | 0.00 |
| ATOM | 7471 | H    | LYS | X | 492 | 37.885 | 36.358 | 6.669  | 0.00 | 0.00 |
| ATOM | 7472 | CA   | LYS | X | 492 | 37.145 | 34.551 | 7.430  | 0.00 | 0.00 |
| ATOM | 7473 | HA   | LYS | X | 492 | 36.091 | 34.353 | 7.624  | 0.00 | 0.00 |
| ATOM | 7474 | CB   | LYS | X | 492 | 37.503 | 33.866 | 6.034  | 0.00 | 0.00 |
| ATOM | 7475 | HB2  | LYS | X | 492 | 38.544 | 34.105 | 5.821  | 0.00 | 0.00 |
| ATOM | 7476 | HB3  | LYS | X | 492 | 37.289 | 32.797 | 6.023  | 0.00 | 0.00 |
| ATOM | 7477 | CG   | LYS | X | 492 | 36.647 | 34.422 | 4.924  | 0.00 | 0.00 |
| ATOM | 7478 | HG2  | LYS | X | 492 | 35.664 | 34.648 | 5.338  | 0.00 | 0.00 |
| ATOM | 7479 | HG3  | LYS | X | 492 | 37.045 | 35.395 | 4.636  | 0.00 | 0.00 |
| ATOM | 7480 | CD   | LYS | X | 492 | 36.606 | 33.608 | 3.648  | 0.00 | 0.00 |
| ATOM | 7481 | HD2  | LYS | X | 492 | 37.643 | 33.422 | 3.368  | 0.00 | 0.00 |
| ATOM | 7482 | HD3  | LYS | X | 492 | 36.113 | 32.695 | 3.982  | 0.00 | 0.00 |
| ATOM | 7483 | CE   | LYS | X | 492 | 35.752 | 34.238 | 2.547  | 0.00 | 0.00 |
| ATOM | 7484 | HE2  | LYS | X | 492 | 34.723 | 34.355 | 2.890  | 0.00 | 0.00 |
| ATOM | 7485 | HE3  | LYS | X | 492 | 36.101 | 35.240 | 2.296  | 0.00 | 0.00 |
| ATOM | 7486 | NZ   | LYS | X | 492 | 35.660 | 33.310 | 1.441  | 0.00 | 0.00 |
| ATOM | 7487 | HZ1  | LYS | X | 492 | 35.371 | 33.808 | 0.611  | 0.00 | 0.00 |
| ATOM | 7488 | HZ2  | LYS | X | 492 | 36.553 | 32.853 | 1.327  | 0.00 | 0.00 |
| ATOM | 7489 | HZ3  | LYS | X | 492 | 34.981 | 32.616 | 1.716  | 0.00 | 0.00 |
| ATOM | 7490 | C    | LYS | X | 492 | 37.769 | 33.792 | 8.587  | 0.00 | 0.00 |
| ATOM | 7491 | O    | LYS | X | 492 | 37.812 | 32.575 | 8.620  | 0.00 | 0.00 |
| ATOM | 7492 | N    | ALA | X | 493 | 38.260 | 34.531 | 9.547  | 0.00 | 0.00 |

|      |      |      |     |   |     |        |        |        |      |      |
|------|------|------|-----|---|-----|--------|--------|--------|------|------|
| ATOM | 7493 | H    | ALA | X | 493 | 38.133 | 35.532 | 9.519  | 0.00 | 0.00 |
| ATOM | 7494 | CA   | ALA | X | 493 | 38.854 | 34.025 | 10.826 | 0.00 | 0.00 |
| ATOM | 7495 | HA   | ALA | X | 493 | 39.328 | 33.054 | 10.683 | 0.00 | 0.00 |
| ATOM | 7496 | CB   | ALA | X | 493 | 39.902 | 35.051 | 11.263 | 0.00 | 0.00 |
| ATOM | 7497 | HB1  | ALA | X | 493 | 40.758 | 35.118 | 10.591 | 0.00 | 0.00 |
| ATOM | 7498 | HB2  | ALA | X | 493 | 39.240 | 35.915 | 11.299 | 0.00 | 0.00 |
| ATOM | 7499 | HB3  | ALA | X | 493 | 40.171 | 34.855 | 12.301 | 0.00 | 0.00 |
| ATOM | 7500 | C    | ALA | X | 493 | 37.814 | 33.884 | 11.923 | 0.00 | 0.00 |
| ATOM | 7501 | O    | ALA | X | 493 | 36.890 | 34.677 | 12.029 | 0.00 | 0.00 |
| ATOM | 7502 | N    | PRO | X | 494 | 38.034 | 32.992 | 12.922 | 0.00 | 0.00 |
| ATOM | 7503 | CD   | PRO | X | 494 | 39.151 | 32.013 | 13.031 | 0.00 | 0.00 |
| ATOM | 7504 | HD2  | PRO | X | 494 | 40.143 | 32.442 | 12.891 | 0.00 | 0.00 |
| ATOM | 7505 | HD3  | PRO | X | 494 | 39.027 | 31.258 | 12.254 | 0.00 | 0.00 |
| ATOM | 7506 | CG   | PRO | X | 494 | 39.032 | 31.314 | 14.359 | 0.00 | 0.00 |
| ATOM | 7507 | HG2  | PRO | X | 494 | 39.418 | 31.859 | 15.220 | 0.00 | 0.00 |
| ATOM | 7508 | HG3  | PRO | X | 494 | 39.374 | 30.280 | 14.307 | 0.00 | 0.00 |
| ATOM | 7509 | CB   | PRO | X | 494 | 37.499 | 31.289 | 14.452 | 0.00 | 0.00 |
| ATOM | 7510 | HB2  | PRO | X | 494 | 37.109 | 31.023 | 15.435 | 0.00 | 0.00 |
| ATOM | 7511 | HB3  | PRO | X | 494 | 37.066 | 30.617 | 13.711 | 0.00 | 0.00 |
| ATOM | 7512 | CA   | PRO | X | 494 | 37.048 | 32.671 | 13.977 | 0.00 | 0.00 |
| ATOM | 7513 | HA   | PRO | X | 494 | 36.032 | 32.597 | 13.589 | 0.00 | 0.00 |
| ATOM | 7514 | C    | PRO | X | 494 | 37.082 | 33.746 | 15.042 | 0.00 | 0.00 |
| ATOM | 7515 | O    | PRO | X | 494 | 38.066 | 34.443 | 15.186 | 0.00 | 0.00 |
| ATOM | 7516 | N    | GLN | X | 495 | 35.993 | 33.787 | 15.794 | 0.00 | 0.00 |
| ATOM | 7517 | H    | GLN | X | 495 | 35.251 | 33.109 | 15.696 | 0.00 | 0.00 |
| ATOM | 7518 | CA   | GLN | X | 495 | 35.696 | 34.910 | 16.812 | 0.00 | 0.00 |
| ATOM | 7519 | HA   | GLN | X | 495 | 36.605 | 35.496 | 16.949 | 0.00 | 0.00 |
| ATOM | 7520 | CB   | GLN | X | 495 | 34.527 | 35.817 | 16.222 | 0.00 | 0.00 |
| ATOM | 7521 | HB2  | GLN | X | 495 | 33.586 | 35.270 | 16.155 | 0.00 | 0.00 |
| ATOM | 7522 | HB3  | GLN | X | 495 | 34.312 | 36.489 | 17.052 | 0.00 | 0.00 |
| ATOM | 7523 | CG   | GLN | X | 495 | 34.711 | 36.667 | 14.967 | 0.00 | 0.00 |
| ATOM | 7524 | HG2  | GLN | X | 495 | 34.791 | 36.108 | 14.035 | 0.00 | 0.00 |
| ATOM | 7525 | HG3  | GLN | X | 495 | 33.888 | 37.382 | 14.961 | 0.00 | 0.00 |
| ATOM | 7526 | CD   | GLN | X | 495 | 35.999 | 37.427 | 15.091 | 0.00 | 0.00 |
| ATOM | 7527 | OE1  | GLN | X | 495 | 36.190 | 38.296 | 15.870 | 0.00 | 0.00 |
| ATOM | 7528 | NE2  | GLN | X | 495 | 36.943 | 37.163 | 14.211 | 0.00 | 0.00 |
| ATOM | 7529 | HE21 | GLN | X | 495 | 37.648 | 37.850 | 13.982 | 0.00 | 0.00 |
| ATOM | 7530 | HE22 | GLN | X | 495 | 36.747 | 36.466 | 13.507 | 0.00 | 0.00 |
| ATOM | 7531 | C    | GLN | X | 495 | 35.176 | 34.280 | 18.152 | 0.00 | 0.00 |
| ATOM | 7532 | O    | GLN | X | 495 | 34.850 | 33.073 | 18.204 | 0.00 | 0.00 |
| ATOM | 7533 | N    | TRP | X | 496 | 35.409 | 34.957 | 19.252 | 0.00 | 0.00 |
| ATOM | 7534 | H    | TRP | X | 496 | 35.828 | 35.873 | 19.173 | 0.00 | 0.00 |
| ATOM | 7535 | CA   | TRP | X | 496 | 35.123 | 34.473 | 20.599 | 0.00 | 0.00 |
| ATOM | 7536 | HA   | TRP | X | 496 | 35.739 | 33.577 | 20.685 | 0.00 | 0.00 |
| ATOM | 7537 | CB   | TRP | X | 496 | 35.688 | 35.492 | 21.629 | 0.00 | 0.00 |
| ATOM | 7538 | HB2  | TRP | X | 496 | 36.686 | 35.865 | 21.396 | 0.00 | 0.00 |
| ATOM | 7539 | HB3  | TRP | X | 496 | 35.009 | 36.342 | 21.577 | 0.00 | 0.00 |
| ATOM | 7540 | CG   | TRP | X | 496 | 35.797 | 35.129 | 23.063 | 0.00 | 0.00 |
| ATOM | 7541 | CD1  | TRP | X | 496 | 35.282 | 34.042 | 23.690 | 0.00 | 0.00 |
| ATOM | 7542 | HD1  | TRP | X | 496 | 34.780 | 33.251 | 23.151 | 0.00 | 0.00 |
| ATOM | 7543 | NE1  | TRP | X | 496 | 35.494 | 34.097 | 25.053 | 0.00 | 0.00 |
| ATOM | 7544 | HE1  | TRP | X | 496 | 35.466 | 33.238 | 25.582 | 0.00 | 0.00 |
| ATOM | 7545 | CE2  | TRP | X | 496 | 36.187 | 35.234 | 25.353 | 0.00 | 0.00 |
| ATOM | 7546 | CZ2  | TRP | X | 496 | 36.813 | 35.633 | 26.508 | 0.00 | 0.00 |
| ATOM | 7547 | HZ2  | TRP | X | 496 | 36.731 | 34.928 | 27.322 | 0.00 | 0.00 |
| ATOM | 7548 | CH2  | TRP | X | 496 | 37.542 | 36.847 | 26.529 | 0.00 | 0.00 |
| ATOM | 7549 | HH2  | TRP | X | 496 | 38.047 | 37.093 | 27.451 | 0.00 | 0.00 |
| ATOM | 7550 | CZ3  | TRP | X | 496 | 37.584 | 37.716 | 25.416 | 0.00 | 0.00 |
| ATOM | 7551 | HZ3  | TRP | X | 496 | 38.097 | 38.666 | 25.447 | 0.00 | 0.00 |
| ATOM | 7552 | CE3  | TRP | X | 496 | 36.967 | 37.230 | 24.205 | 0.00 | 0.00 |
| ATOM | 7553 | HE3  | TRP | X | 496 | 37.084 | 37.708 | 23.243 | 0.00 | 0.00 |
| ATOM | 7554 | CD2  | TRP | X | 496 | 36.355 | 35.969 | 24.150 | 0.00 | 0.00 |
| ATOM | 7555 | C    | TRP | X | 496 | 33.625 | 34.057 | 20.746 | 0.00 | 0.00 |
| ATOM | 7556 | O    | TRP | X | 496 | 32.766 | 34.916 | 20.636 | 0.00 | 0.00 |
| ATOM | 7557 | N    | PRO | X | 497 | 33.289 | 32.774 | 20.986 | 0.00 | 0.00 |
| ATOM | 7558 | CD   | PRO | X | 497 | 34.158 | 31.656 | 21.031 | 0.00 | 0.00 |
| ATOM | 7559 | HD2  | PRO | X | 497 | 34.955 | 31.798 | 21.760 | 0.00 | 0.00 |
| ATOM | 7560 | HD3  | PRO | X | 497 | 34.663 | 31.657 | 20.065 | 0.00 | 0.00 |
| ATOM | 7561 | CG   | PRO | X | 497 | 33.258 | 30.430 | 21.295 | 0.00 | 0.00 |
| ATOM | 7562 | HG2  | PRO | X | 497 | 33.119 | 30.282 | 22.366 | 0.00 | 0.00 |

|      |      |      |     |   |     |        |        |        |      |      |
|------|------|------|-----|---|-----|--------|--------|--------|------|------|
| ATOM | 7563 | HG3  | PRO | X | 497 | 33.837 | 29.642 | 20.813 | 0.00 | 0.00 |
| ATOM | 7564 | CB   | PRO | X | 497 | 31.972 | 30.789 | 20.570 | 0.00 | 0.00 |
| ATOM | 7565 | HB2  | PRO | X | 497 | 31.165 | 30.169 | 20.959 | 0.00 | 0.00 |
| ATOM | 7566 | HB3  | PRO | X | 497 | 32.076 | 30.858 | 19.487 | 0.00 | 0.00 |
| ATOM | 7567 | CA   | PRO | X | 497 | 31.859 | 32.302 | 20.942 | 0.00 | 0.00 |
| ATOM | 7568 | HA   | PRO | X | 497 | 31.290 | 32.796 | 20.154 | 0.00 | 0.00 |
| ATOM | 7569 | C    | PRO | X | 497 | 31.192 | 32.381 | 22.340 | 0.00 | 0.00 |
| ATOM | 7570 | O    | PRO | X | 497 | 31.890 | 32.541 | 23.308 | 0.00 | 0.00 |
| ATOM | 7571 | N    | PRO | X | 498 | 29.791 | 32.320 | 22.423 | 0.00 | 0.00 |
| ATOM | 7572 | CD   | PRO | X | 498 | 28.868 | 32.774 | 21.405 | 0.00 | 0.00 |
| ATOM | 7573 | HD2  | PRO | X | 498 | 29.099 | 32.377 | 20.417 | 0.00 | 0.00 |
| ATOM | 7574 | HD3  | PRO | X | 498 | 28.826 | 33.859 | 21.312 | 0.00 | 0.00 |
| ATOM | 7575 | CG   | PRO | X | 498 | 27.412 | 32.422 | 21.899 | 0.00 | 0.00 |
| ATOM | 7576 | HG2  | PRO | X | 498 | 27.117 | 31.373 | 21.869 | 0.00 | 0.00 |
| ATOM | 7577 | HG3  | PRO | X | 498 | 26.636 | 33.109 | 21.560 | 0.00 | 0.00 |
| ATOM | 7578 | CB   | PRO | X | 498 | 27.613 | 32.682 | 23.364 | 0.00 | 0.00 |
| ATOM | 7579 | HB2  | PRO | X | 498 | 26.919 | 32.033 | 23.898 | 0.00 | 0.00 |
| ATOM | 7580 | HB3  | PRO | X | 498 | 27.491 | 33.713 | 23.698 | 0.00 | 0.00 |
| ATOM | 7581 | CA   | PRO | X | 498 | 29.067 | 32.256 | 23.663 | 0.00 | 0.00 |
| ATOM | 7582 | HA   | PRO | X | 498 | 29.489 | 33.059 | 24.268 | 0.00 | 0.00 |
| ATOM | 7583 | C    | PRO | X | 498 | 29.250 | 30.836 | 24.313 | 0.00 | 0.00 |
| ATOM | 7584 | O    | PRO | X | 498 | 29.396 | 29.866 | 23.594 | 0.00 | 0.00 |
| ATOM | 7585 | N    | TYR | X | 499 | 29.059 | 30.725 | 25.636 | 0.00 | 0.00 |
| ATOM | 7586 | H    | TYR | X | 499 | 29.006 | 31.623 | 26.094 | 0.00 | 0.00 |
| ATOM | 7587 | CA   | TYR | X | 499 | 29.103 | 29.403 | 26.323 | 0.00 | 0.00 |
| ATOM | 7588 | HA   | TYR | X | 499 | 29.902 | 28.857 | 25.823 | 0.00 | 0.00 |
| ATOM | 7589 | CB   | TYR | X | 499 | 29.606 | 29.591 | 27.764 | 0.00 | 0.00 |
| ATOM | 7590 | HB2  | TYR | X | 499 | 30.227 | 30.483 | 27.847 | 0.00 | 0.00 |
| ATOM | 7591 | HB3  | TYR | X | 499 | 28.801 | 29.879 | 28.441 | 0.00 | 0.00 |
| ATOM | 7592 | CG   | TYR | X | 499 | 30.335 | 28.380 | 28.371 | 0.00 | 0.00 |
| ATOM | 7593 | CD1  | TYR | X | 499 | 29.646 | 27.520 | 29.252 | 0.00 | 0.00 |
| ATOM | 7594 | HD1  | TYR | X | 499 | 28.584 | 27.611 | 29.423 | 0.00 | 0.00 |
| ATOM | 7595 | CE1  | TYR | X | 499 | 30.276 | 26.398 | 29.803 | 0.00 | 0.00 |
| ATOM | 7596 | HE1  | TYR | X | 499 | 29.666 | 25.837 | 30.495 | 0.00 | 0.00 |
| ATOM | 7597 | CZ   | TYR | X | 499 | 31.595 | 26.017 | 29.472 | 0.00 | 0.00 |
| ATOM | 7598 | OH   | TYR | X | 499 | 32.174 | 24.899 | 30.007 | 0.00 | 0.00 |
| ATOM | 7599 | HH   | TYR | X | 499 | 31.498 | 24.464 | 30.531 | 0.00 | 0.00 |
| ATOM | 7600 | CE2  | TYR | X | 499 | 32.256 | 26.889 | 28.583 | 0.00 | 0.00 |
| ATOM | 7601 | HE2  | TYR | X | 499 | 33.248 | 26.619 | 28.254 | 0.00 | 0.00 |
| ATOM | 7602 | CD2  | TYR | X | 499 | 31.663 | 28.021 | 28.010 | 0.00 | 0.00 |
| ATOM | 7603 | HD2  | TYR | X | 499 | 32.124 | 28.741 | 27.350 | 0.00 | 0.00 |
| ATOM | 7604 | C    | TYR | X | 499 | 27.804 | 28.693 | 26.371 | 0.00 | 0.00 |
| ATOM | 7605 | O    | TYR | X | 499 | 26.838 | 29.182 | 26.823 | 0.00 | 0.00 |
| ATOM | 7606 | N    | THR | X | 500 | 27.896 | 27.386 | 26.047 | 0.00 | 0.00 |
| ATOM | 7607 | H    | THR | X | 500 | 28.746 | 27.013 | 25.650 | 0.00 | 0.00 |
| ATOM | 7608 | CA   | THR | X | 500 | 26.781 | 26.451 | 26.261 | 0.00 | 0.00 |
| ATOM | 7609 | HA   | THR | X | 500 | 25.865 | 26.823 | 26.719 | 0.00 | 0.00 |
| ATOM | 7610 | CB   | THR | X | 500 | 26.495 | 25.902 | 24.869 | 0.00 | 0.00 |
| ATOM | 7611 | HB   | THR | X | 500 | 25.577 | 25.317 | 24.936 | 0.00 | 0.00 |
| ATOM | 7612 | CG2  | THR | X | 500 | 26.220 | 26.998 | 23.776 | 0.00 | 0.00 |
| ATOM | 7613 | HG21 | THR | X | 500 | 25.857 | 26.579 | 22.837 | 0.00 | 0.00 |
| ATOM | 7614 | HG22 | THR | X | 500 | 25.377 | 27.576 | 24.156 | 0.00 | 0.00 |
| ATOM | 7615 | HG23 | THR | X | 500 | 27.096 | 27.616 | 23.577 | 0.00 | 0.00 |
| ATOM | 7616 | OG1  | THR | X | 500 | 27.621 | 25.279 | 24.333 | 0.00 | 0.00 |
| ATOM | 7617 | HG1  | THR | X | 500 | 27.260 | 24.629 | 23.726 | 0.00 | 0.00 |
| ATOM | 7618 | C    | THR | X | 500 | 27.292 | 25.341 | 27.105 | 0.00 | 0.00 |
| ATOM | 7619 | O    | THR | X | 500 | 28.494 | 24.989 | 27.197 | 0.00 | 0.00 |
| ATOM | 7620 | N    | ALA | X | 501 | 26.309 | 24.528 | 27.653 | 0.00 | 0.00 |
| ATOM | 7621 | H    | ALA | X | 501 | 25.352 | 24.791 | 27.465 | 0.00 | 0.00 |
| ATOM | 7622 | CA   | ALA | X | 501 | 26.491 | 23.373 | 28.418 | 0.00 | 0.00 |
| ATOM | 7623 | HA   | ALA | X | 501 | 27.336 | 23.487 | 29.098 | 0.00 | 0.00 |
| ATOM | 7624 | CB   | ALA | X | 501 | 25.159 | 23.217 | 29.247 | 0.00 | 0.00 |
| ATOM | 7625 | HB1  | ALA | X | 501 | 24.391 | 22.808 | 28.591 | 0.00 | 0.00 |
| ATOM | 7626 | HB2  | ALA | X | 501 | 25.413 | 22.473 | 30.003 | 0.00 | 0.00 |
| ATOM | 7627 | HB3  | ALA | X | 501 | 24.793 | 24.196 | 29.556 | 0.00 | 0.00 |
| ATOM | 7628 | C    | ALA | X | 501 | 26.800 | 22.082 | 27.552 | 0.00 | 0.00 |
| ATOM | 7629 | O    | ALA | X | 501 | 27.275 | 21.161 | 28.187 | 0.00 | 0.00 |
| ATOM | 7630 | N    | GLY | X | 502 | 26.475 | 22.074 | 26.272 | 0.00 | 0.00 |
| ATOM | 7631 | H    | GLY | X | 502 | 26.050 | 22.910 | 25.899 | 0.00 | 0.00 |
| ATOM | 7632 | CA   | GLY | X | 502 | 26.820 | 21.017 | 25.299 | 0.00 | 0.00 |

|      |      |      |     |   |     |        |        |        |      |      |
|------|------|------|-----|---|-----|--------|--------|--------|------|------|
| ATOM | 7633 | HA2  | GLY | X | 502 | 26.767 | 19.969 | 25.668 | 0.00 | 0.00 |
| ATOM | 7634 | HA3  | GLY | X | 502 | 26.145 | 21.194 | 24.409 | 0.00 | 0.00 |
| ATOM | 7635 | C    | GLY | X | 502 | 28.255 | 21.179 | 24.801 | 0.00 | 0.00 |
| ATOM | 7636 | O    | GLY | X | 502 | 29.168 | 20.457 | 25.233 | 0.00 | 0.00 |
| ATOM | 7637 | N    | ALA | X | 503 | 28.431 | 22.017 | 23.759 | 0.00 | 0.00 |
| ATOM | 7638 | H    | ALA | X | 503 | 27.652 | 22.628 | 23.559 | 0.00 | 0.00 |
| ATOM | 7639 | CA   | ALA | X | 503 | 29.694 | 22.280 | 23.087 | 0.00 | 0.00 |
| ATOM | 7640 | HA   | ALA | X | 503 | 30.028 | 21.375 | 22.578 | 0.00 | 0.00 |
| ATOM | 7641 | CB   | ALA | X | 503 | 29.356 | 23.225 | 21.936 | 0.00 | 0.00 |
| ATOM | 7642 | HB1  | ALA | X | 503 | 28.983 | 24.210 | 22.214 | 0.00 | 0.00 |
| ATOM | 7643 | HB2  | ALA | X | 503 | 30.235 | 23.551 | 21.380 | 0.00 | 0.00 |
| ATOM | 7644 | HB3  | ALA | X | 503 | 28.635 | 22.788 | 21.245 | 0.00 | 0.00 |
| ATOM | 7645 | C    | ALA | X | 503 | 30.811 | 22.844 | 24.009 | 0.00 | 0.00 |
| ATOM | 7646 | O    | ALA | X | 503 | 32.000 | 22.485 | 23.923 | 0.00 | 0.00 |
| ATOM | 7647 | N    | GLN | X | 504 | 30.456 | 23.724 | 24.964 | 0.00 | 0.00 |
| ATOM | 7648 | H    | GLN | X | 504 | 29.486 | 24.002 | 24.938 | 0.00 | 0.00 |
| ATOM | 7649 | CA   | GLN | X | 504 | 31.382 | 24.331 | 26.049 | 0.00 | 0.00 |
| ATOM | 7650 | HA   | GLN | X | 504 | 30.867 | 25.081 | 26.648 | 0.00 | 0.00 |
| ATOM | 7651 | CB   | GLN | X | 504 | 31.686 | 23.302 | 27.086 | 0.00 | 0.00 |
| ATOM | 7652 | HB2  | GLN | X | 504 | 32.271 | 22.614 | 26.475 | 0.00 | 0.00 |
| ATOM | 7653 | HB3  | GLN | X | 504 | 32.385 | 23.758 | 27.787 | 0.00 | 0.00 |
| ATOM | 7654 | CG   | GLN | X | 504 | 30.513 | 22.595 | 27.762 | 0.00 | 0.00 |
| ATOM | 7655 | HG2  | GLN | X | 504 | 30.105 | 23.362 | 28.420 | 0.00 | 0.00 |
| ATOM | 7656 | HG3  | GLN | X | 504 | 29.710 | 22.365 | 27.062 | 0.00 | 0.00 |
| ATOM | 7657 | CD   | GLN | X | 504 | 30.994 | 21.368 | 28.582 | 0.00 | 0.00 |
| ATOM | 7658 | OE1  | GLN | X | 504 | 31.460 | 21.547 | 29.718 | 0.00 | 0.00 |
| ATOM | 7659 | NE2  | GLN | X | 504 | 30.930 | 20.146 | 28.100 | 0.00 | 0.00 |
| ATOM | 7660 | HE21 | GLN | X | 504 | 31.441 | 19.445 | 28.616 | 0.00 | 0.00 |
| ATOM | 7661 | HE22 | GLN | X | 504 | 30.535 | 19.942 | 27.193 | 0.00 | 0.00 |
| ATOM | 7662 | C    | GLN | X | 504 | 32.630 | 24.898 | 25.378 | 0.00 | 0.00 |
| ATOM | 7663 | O    | GLN | X | 504 | 33.715 | 24.463 | 25.787 | 0.00 | 0.00 |
| ATOM | 7664 | N    | GLN | X | 505 | 32.460 | 25.838 | 24.465 | 0.00 | 0.00 |
| ATOM | 7665 | H    | GLN | X | 505 | 31.534 | 26.072 | 24.136 | 0.00 | 0.00 |
| ATOM | 7666 | CA   | GLN | X | 505 | 33.568 | 26.446 | 23.718 | 0.00 | 0.00 |
| ATOM | 7667 | HA   | GLN | X | 505 | 34.291 | 25.631 | 23.694 | 0.00 | 0.00 |
| ATOM | 7668 | CB   | GLN | X | 505 | 33.018 | 26.868 | 22.359 | 0.00 | 0.00 |
| ATOM | 7669 | HB2  | GLN | X | 505 | 32.376 | 27.740 | 22.485 | 0.00 | 0.00 |
| ATOM | 7670 | HB3  | GLN | X | 505 | 33.931 | 27.105 | 21.812 | 0.00 | 0.00 |
| ATOM | 7671 | CG   | GLN | X | 505 | 32.264 | 25.736 | 21.645 | 0.00 | 0.00 |
| ATOM | 7672 | HG2  | GLN | X | 505 | 32.876 | 24.836 | 21.585 | 0.00 | 0.00 |
| ATOM | 7673 | HG3  | GLN | X | 505 | 31.333 | 25.556 | 22.183 | 0.00 | 0.00 |
| ATOM | 7674 | CD   | GLN | X | 505 | 31.991 | 26.120 | 20.157 | 0.00 | 0.00 |
| ATOM | 7675 | OE1  | GLN | X | 505 | 32.483 | 25.512 | 19.279 | 0.00 | 0.00 |
| ATOM | 7676 | NE2  | GLN | X | 505 | 31.166 | 27.123 | 19.940 | 0.00 | 0.00 |
| ATOM | 7677 | HE21 | GLN | X | 505 | 30.958 | 27.499 | 19.026 | 0.00 | 0.00 |
| ATOM | 7678 | HE22 | GLN | X | 505 | 30.578 | 27.430 | 20.702 | 0.00 | 0.00 |
| ATOM | 7679 | C    | GLN | X | 505 | 34.276 | 27.592 | 24.415 | 0.00 | 0.00 |
| ATOM | 7680 | O    | GLN | X | 505 | 33.698 | 28.325 | 25.209 | 0.00 | 0.00 |
| ATOM | 7681 | N    | TYR | X | 506 | 35.559 | 27.795 | 24.108 | 0.00 | 0.00 |
| ATOM | 7682 | H    | TYR | X | 506 | 35.863 | 27.443 | 23.211 | 0.00 | 0.00 |
| ATOM | 7683 | CA   | TYR | X | 506 | 36.385 | 28.729 | 24.724 | 0.00 | 0.00 |
| ATOM | 7684 | HA   | TYR | X | 506 | 35.871 | 29.670 | 24.921 | 0.00 | 0.00 |
| ATOM | 7685 | CB   | TYR | X | 506 | 36.857 | 28.258 | 26.161 | 0.00 | 0.00 |
| ATOM | 7686 | HB2  | TYR | X | 506 | 37.498 | 29.026 | 26.594 | 0.00 | 0.00 |
| ATOM | 7687 | HB3  | TYR | X | 506 | 35.968 | 28.039 | 26.752 | 0.00 | 0.00 |
| ATOM | 7688 | CG   | TYR | X | 506 | 37.773 | 27.058 | 26.032 | 0.00 | 0.00 |
| ATOM | 7689 | CD1  | TYR | X | 506 | 37.202 | 25.791 | 25.857 | 0.00 | 0.00 |
| ATOM | 7690 | HD1  | TYR | X | 506 | 36.137 | 25.751 | 25.677 | 0.00 | 0.00 |
| ATOM | 7691 | CE1  | TYR | X | 506 | 37.998 | 24.664 | 25.796 | 0.00 | 0.00 |
| ATOM | 7692 | HE1  | TYR | X | 506 | 37.569 | 23.704 | 25.552 | 0.00 | 0.00 |
| ATOM | 7693 | CZ   | TYR | X | 506 | 39.375 | 24.736 | 26.104 | 0.00 | 0.00 |
| ATOM | 7694 | OH   | TYR | X | 506 | 40.142 | 23.645 | 25.898 | 0.00 | 0.00 |
| ATOM | 7695 | HH   | TYR | X | 506 | 39.604 | 22.885 | 25.666 | 0.00 | 0.00 |
| ATOM | 7696 | CE2  | TYR | X | 506 | 39.927 | 25.955 | 26.434 | 0.00 | 0.00 |
| ATOM | 7697 | HE2  | TYR | X | 506 | 40.985 | 26.094 | 26.602 | 0.00 | 0.00 |
| ATOM | 7698 | CD2  | TYR | X | 506 | 39.113 | 27.113 | 26.348 | 0.00 | 0.00 |
| ATOM | 7699 | HD2  | TYR | X | 506 | 39.444 | 28.113 | 26.588 | 0.00 | 0.00 |
| ATOM | 7700 | C    | TYR | X | 506 | 37.644 | 29.205 | 23.868 | 0.00 | 0.00 |
| ATOM | 7701 | O    | TYR | X | 506 | 38.053 | 28.522 | 22.925 | 0.00 | 0.00 |
| ATOM | 7702 | N    | VAL | X | 507 | 38.109 | 30.439 | 24.163 | 0.00 | 0.00 |

|      |      |      |     |   |     |        |        |        |      |      |
|------|------|------|-----|---|-----|--------|--------|--------|------|------|
| ATOM | 7703 | H    | VAL | X | 507 | 37.618 | 30.975 | 24.864 | 0.00 | 0.00 |
| ATOM | 7704 | CA   | VAL | X | 507 | 39.292 | 31.038 | 23.460 | 0.00 | 0.00 |
| ATOM | 7705 | HA   | VAL | X | 507 | 39.499 | 30.542 | 22.511 | 0.00 | 0.00 |
| ATOM | 7706 | CB   | VAL | X | 507 | 39.329 | 32.589 | 23.145 | 0.00 | 0.00 |
| ATOM | 7707 | HB   | VAL | X | 507 | 40.264 | 32.812 | 22.632 | 0.00 | 0.00 |
| ATOM | 7708 | CG1  | VAL | X | 507 | 38.117 | 32.871 | 22.155 | 0.00 | 0.00 |
| ATOM | 7709 | HG11 | VAL | X | 507 | 38.008 | 33.954 | 22.211 | 0.00 | 0.00 |
| ATOM | 7710 | HG12 | VAL | X | 507 | 38.347 | 32.571 | 21.133 | 0.00 | 0.00 |
| ATOM | 7711 | HG13 | VAL | X | 507 | 37.188 | 32.401 | 22.477 | 0.00 | 0.00 |
| ATOM | 7712 | CG2  | VAL | X | 507 | 39.232 | 33.511 | 24.380 | 0.00 | 0.00 |
| ATOM | 7713 | HG21 | VAL | X | 507 | 38.289 | 33.433 | 24.920 | 0.00 | 0.00 |
| ATOM | 7714 | HG22 | VAL | X | 507 | 40.066 | 33.341 | 25.060 | 0.00 | 0.00 |
| ATOM | 7715 | HG23 | VAL | X | 507 | 39.408 | 34.527 | 24.025 | 0.00 | 0.00 |
| ATOM | 7716 | C    | VAL | X | 507 | 40.654 | 30.645 | 24.154 | 0.00 | 0.00 |
| ATOM | 7717 | O    | VAL | X | 507 | 40.759 | 30.555 | 25.368 | 0.00 | 0.00 |
| ATOM | 7718 | N    | SER | X | 508 | 41.683 | 30.695 | 23.373 | 0.00 | 0.00 |
| ATOM | 7719 | H    | SER | X | 508 | 41.517 | 30.834 | 22.386 | 0.00 | 0.00 |
| ATOM | 7720 | CA   | SER | X | 508 | 43.024 | 30.701 | 23.884 | 0.00 | 0.00 |
| ATOM | 7721 | HA   | SER | X | 508 | 43.109 | 30.806 | 24.965 | 0.00 | 0.00 |
| ATOM | 7722 | CB   | SER | X | 508 | 43.777 | 29.468 | 23.446 | 0.00 | 0.00 |
| ATOM | 7723 | HB2  | SER | X | 508 | 43.535 | 28.607 | 24.070 | 0.00 | 0.00 |
| ATOM | 7724 | HB3  | SER | X | 508 | 43.487 | 29.217 | 22.426 | 0.00 | 0.00 |
| ATOM | 7725 | OG   | SER | X | 508 | 45.211 | 29.666 | 23.481 | 0.00 | 0.00 |
| ATOM | 7726 | HG   | SER | X | 508 | 45.616 | 29.305 | 24.273 | 0.00 | 0.00 |
| ATOM | 7727 | C    | SER | X | 508 | 43.599 | 32.039 | 23.389 | 0.00 | 0.00 |
| ATOM | 7728 | O    | SER | X | 508 | 43.674 | 32.311 | 22.199 | 0.00 | 0.00 |
| ATOM | 7729 | N    | LEU | X | 509 | 43.923 | 32.850 | 24.362 | 0.00 | 0.00 |
| ATOM | 7730 | H    | LEU | X | 509 | 43.970 | 32.366 | 25.248 | 0.00 | 0.00 |
| ATOM | 7731 | CA   | LEU | X | 509 | 44.666 | 34.147 | 24.262 | 0.00 | 0.00 |
| ATOM | 7732 | HA   | LEU | X | 509 | 44.580 | 34.587 | 23.269 | 0.00 | 0.00 |
| ATOM | 7733 | CB   | LEU | X | 509 | 44.113 | 35.144 | 25.264 | 0.00 | 0.00 |
| ATOM | 7734 | HB2  | LEU | X | 509 | 44.455 | 34.946 | 26.280 | 0.00 | 0.00 |
| ATOM | 7735 | HB3  | LEU | X | 509 | 44.516 | 36.126 | 25.014 | 0.00 | 0.00 |
| ATOM | 7736 | CG   | LEU | X | 509 | 42.604 | 35.252 | 25.245 | 0.00 | 0.00 |
| ATOM | 7737 | HG   | LEU | X | 509 | 42.067 | 34.406 | 25.672 | 0.00 | 0.00 |
| ATOM | 7738 | CD1  | LEU | X | 509 | 42.261 | 36.419 | 26.256 | 0.00 | 0.00 |
| ATOM | 7739 | HD11 | LEU | X | 509 | 42.729 | 37.370 | 26.000 | 0.00 | 0.00 |
| ATOM | 7740 | HD12 | LEU | X | 509 | 41.188 | 36.607 | 26.295 | 0.00 | 0.00 |
| ATOM | 7741 | HD13 | LEU | X | 509 | 42.528 | 36.284 | 27.304 | 0.00 | 0.00 |
| ATOM | 7742 | CD2  | LEU | X | 509 | 41.982 | 35.592 | 23.862 | 0.00 | 0.00 |
| ATOM | 7743 | HD21 | LEU | X | 509 | 42.070 | 34.714 | 23.223 | 0.00 | 0.00 |
| ATOM | 7744 | HD22 | LEU | X | 509 | 40.962 | 35.896 | 24.098 | 0.00 | 0.00 |
| ATOM | 7745 | HD23 | LEU | X | 509 | 42.448 | 36.447 | 23.372 | 0.00 | 0.00 |
| ATOM | 7746 | C    | LEU | X | 509 | 46.136 | 33.976 | 24.477 | 0.00 | 0.00 |
| ATOM | 7747 | O    | LEU | X | 509 | 46.490 | 33.381 | 25.534 | 0.00 | 0.00 |
| ATOM | 7748 | N    | ASP | X | 510 | 46.944 | 34.485 | 23.489 | 0.00 | 0.00 |
| ATOM | 7749 | H    | ASP | X | 510 | 46.513 | 35.124 | 22.836 | 0.00 | 0.00 |
| ATOM | 7750 | CA   | ASP | X | 510 | 48.328 | 34.136 | 23.202 | 0.00 | 0.00 |
| ATOM | 7751 | HA   | ASP | X | 510 | 48.845 | 34.126 | 24.162 | 0.00 | 0.00 |
| ATOM | 7752 | CB   | ASP | X | 510 | 48.409 | 32.684 | 22.692 | 0.00 | 0.00 |
| ATOM | 7753 | HB2  | ASP | X | 510 | 47.895 | 32.019 | 23.385 | 0.00 | 0.00 |
| ATOM | 7754 | HB3  | ASP | X | 510 | 47.989 | 32.683 | 21.686 | 0.00 | 0.00 |
| ATOM | 7755 | CG   | ASP | X | 510 | 49.748 | 32.006 | 22.684 | 0.00 | 0.00 |
| ATOM | 7756 | OD1  | ASP | X | 510 | 50.807 | 32.698 | 22.806 | 0.00 | 0.00 |
| ATOM | 7757 | OD2  | ASP | X | 510 | 49.687 | 30.790 | 22.483 | 0.00 | 0.00 |
| ATOM | 7758 | C    | ASP | X | 510 | 48.894 | 35.284 | 22.289 | 0.00 | 0.00 |
| ATOM | 7759 | O    | ASP | X | 510 | 48.126 | 36.072 | 21.736 | 0.00 | 0.00 |
| ATOM | 7760 | N    | LEU | X | 511 | 50.156 | 35.375 | 22.049 | 0.00 | 0.00 |
| ATOM | 7761 | H    | LEU | X | 511 | 50.782 | 34.818 | 22.613 | 0.00 | 0.00 |
| ATOM | 7762 | CA   | LEU | X | 511 | 50.864 | 36.309 | 21.150 | 0.00 | 0.00 |
| ATOM | 7763 | HA   | LEU | X | 511 | 50.590 | 37.328 | 21.424 | 0.00 | 0.00 |
| ATOM | 7764 | CB   | LEU | X | 511 | 52.390 | 36.323 | 21.449 | 0.00 | 0.00 |
| ATOM | 7765 | HB2  | LEU | X | 511 | 52.423 | 36.651 | 22.488 | 0.00 | 0.00 |
| ATOM | 7766 | HB3  | LEU | X | 511 | 52.693 | 35.277 | 21.509 | 0.00 | 0.00 |
| ATOM | 7767 | CG   | LEU | X | 511 | 53.321 | 37.272 | 20.651 | 0.00 | 0.00 |
| ATOM | 7768 | HG   | LEU | X | 511 | 53.173 | 37.088 | 19.587 | 0.00 | 0.00 |
| ATOM | 7769 | CD1  | LEU | X | 511 | 53.103 | 38.811 | 21.068 | 0.00 | 0.00 |
| ATOM | 7770 | HD11 | LEU | X | 511 | 53.602 | 39.546 | 20.436 | 0.00 | 0.00 |
| ATOM | 7771 | HD12 | LEU | X | 511 | 52.027 | 38.974 | 21.009 | 0.00 | 0.00 |
| ATOM | 7772 | HD13 | LEU | X | 511 | 53.414 | 38.879 | 22.110 | 0.00 | 0.00 |



|      |      |      |     |   |     |        |        |        |      |      |
|------|------|------|-----|---|-----|--------|--------|--------|------|------|
| ATOM | 7773 | CD2  | LEU | X | 511 | 54.844 | 36.972 | 20.830 | 0.00 | 0.00 |
| ATOM | 7774 | HD21 | LEU | X | 511 | 54.878 | 35.912 | 20.577 | 0.00 | 0.00 |
| ATOM | 7775 | HD22 | LEU | X | 511 | 55.467 | 37.555 | 20.152 | 0.00 | 0.00 |
| ATOM | 7776 | HD23 | LEU | X | 511 | 55.099 | 37.182 | 21.869 | 0.00 | 0.00 |
| ATOM | 7777 | C    | LEU | X | 511 | 50.506 | 36.111 | 19.704 | 0.00 | 0.00 |
| ATOM | 7778 | O    | LEU | X | 511 | 50.618 | 36.955 | 18.850 | 0.00 | 0.00 |
| ATOM | 7779 | N    | ARG | X | 512 | 50.066 | 34.880 | 19.466 | 0.00 | 0.00 |
| ATOM | 7780 | H    | ARG | X | 512 | 49.982 | 34.349 | 20.321 | 0.00 | 0.00 |
| ATOM | 7781 | CA   | ARG | X | 512 | 49.445 | 34.400 | 18.220 | 0.00 | 0.00 |
| ATOM | 7782 | HA   | ARG | X | 512 | 50.049 | 34.727 | 17.373 | 0.00 | 0.00 |
| ATOM | 7783 | CB   | ARG | X | 512 | 49.306 | 32.930 | 18.332 | 0.00 | 0.00 |
| ATOM | 7784 | HB2  | ARG | X | 512 | 48.459 | 32.632 | 18.950 | 0.00 | 0.00 |
| ATOM | 7785 | HB3  | ARG | X | 512 | 48.976 | 32.688 | 17.322 | 0.00 | 0.00 |
| ATOM | 7786 | CG   | ARG | X | 512 | 50.555 | 32.149 | 18.785 | 0.00 | 0.00 |
| ATOM | 7787 | HG2  | ARG | X | 512 | 51.324 | 32.397 | 18.054 | 0.00 | 0.00 |
| ATOM | 7788 | HG3  | ARG | X | 512 | 51.053 | 32.446 | 19.708 | 0.00 | 0.00 |
| ATOM | 7789 | CD   | ARG | X | 512 | 50.319 | 30.632 | 18.987 | 0.00 | 0.00 |
| ATOM | 7790 | HD2  | ARG | X | 512 | 49.974 | 30.628 | 20.021 | 0.00 | 0.00 |
| ATOM | 7791 | HD3  | ARG | X | 512 | 49.501 | 30.330 | 18.332 | 0.00 | 0.00 |
| ATOM | 7792 | NE   | ARG | X | 512 | 51.546 | 29.876 | 18.800 | 0.00 | 0.00 |
| ATOM | 7793 | HE   | ARG | X | 512 | 51.633 | 29.424 | 17.901 | 0.00 | 0.00 |
| ATOM | 7794 | CZ   | ARG | X | 512 | 52.418 | 29.592 | 19.717 | 0.00 | 0.00 |
| ATOM | 7795 | NH1  | ARG | X | 512 | 52.241 | 29.827 | 21.028 | 0.00 | 0.00 |
| ATOM | 7796 | HH11 | ARG | X | 512 | 51.551 | 30.443 | 21.435 | 0.00 | 0.00 |
| ATOM | 7797 | HH12 | ARG | X | 512 | 52.992 | 29.584 | 21.658 | 0.00 | 0.00 |
| ATOM | 7798 | NH2  | ARG | X | 512 | 53.528 | 28.965 | 19.467 | 0.00 | 0.00 |
| ATOM | 7799 | HH21 | ARG | X | 512 | 53.840 | 28.577 | 18.588 | 0.00 | 0.00 |
| ATOM | 7800 | HH22 | ARG | X | 512 | 54.213 | 28.854 | 20.201 | 0.00 | 0.00 |
| ATOM | 7801 | C    | ARG | X | 512 | 48.074 | 35.048 | 17.845 | 0.00 | 0.00 |
| ATOM | 7802 | O    | ARG | X | 512 | 47.468 | 35.753 | 18.698 | 0.00 | 0.00 |
| ATOM | 7803 | N    | PRO | X | 513 | 47.517 | 34.982 | 16.636 | 0.00 | 0.00 |
| ATOM | 7804 | CD   | PRO | X | 513 | 48.220 | 34.555 | 15.398 | 0.00 | 0.00 |
| ATOM | 7805 | HD2  | PRO | X | 513 | 48.065 | 33.476 | 15.396 | 0.00 | 0.00 |
| ATOM | 7806 | HD3  | PRO | X | 513 | 49.258 | 34.887 | 15.420 | 0.00 | 0.00 |
| ATOM | 7807 | CG   | PRO | X | 513 | 47.364 | 35.142 | 14.257 | 0.00 | 0.00 |
| ATOM | 7808 | HG2  | PRO | X | 513 | 47.576 | 34.537 | 13.375 | 0.00 | 0.00 |
| ATOM | 7809 | HG3  | PRO | X | 513 | 47.546 | 36.213 | 14.170 | 0.00 | 0.00 |
| ATOM | 7810 | CB   | PRO | X | 513 | 46.005 | 34.893 | 14.872 | 0.00 | 0.00 |
| ATOM | 7811 | HB2  | PRO | X | 513 | 45.714 | 33.846 | 14.787 | 0.00 | 0.00 |
| ATOM | 7812 | HB3  | PRO | X | 513 | 45.333 | 35.569 | 14.344 | 0.00 | 0.00 |
| ATOM | 7813 | CA   | PRO | X | 513 | 46.124 | 35.241 | 16.363 | 0.00 | 0.00 |
| ATOM | 7814 | HA   | PRO | X | 513 | 45.865 | 36.293 | 16.490 | 0.00 | 0.00 |
| ATOM | 7815 | C    | PRO | X | 513 | 45.167 | 34.408 | 17.163 | 0.00 | 0.00 |
| ATOM | 7816 | O    | PRO | X | 513 | 45.565 | 33.485 | 17.869 | 0.00 | 0.00 |
| ATOM | 7817 | N    | LEU | X | 514 | 43.887 | 34.699 | 17.296 | 0.00 | 0.00 |
| ATOM | 7818 | H    | LEU | X | 514 | 43.662 | 35.529 | 16.766 | 0.00 | 0.00 |
| ATOM | 7819 | CA   | LEU | X | 514 | 42.889 | 34.032 | 18.094 | 0.00 | 0.00 |
| ATOM | 7820 | HA   | LEU | X | 514 | 43.378 | 34.016 | 19.068 | 0.00 | 0.00 |
| ATOM | 7821 | CB   | LEU | X | 514 | 41.587 | 34.797 | 18.084 | 0.00 | 0.00 |
| ATOM | 7822 | HB2  | LEU | X | 514 | 41.758 | 35.873 | 18.112 | 0.00 | 0.00 |
| ATOM | 7823 | HB3  | LEU | X | 514 | 41.167 | 34.614 | 17.095 | 0.00 | 0.00 |
| ATOM | 7824 | CG   | LEU | X | 514 | 40.611 | 34.407 | 19.145 | 0.00 | 0.00 |
| ATOM | 7825 | HG   | LEU | X | 514 | 40.492 | 33.328 | 19.248 | 0.00 | 0.00 |
| ATOM | 7826 | CD1  | LEU | X | 514 | 41.117 | 34.712 | 20.586 | 0.00 | 0.00 |
| ATOM | 7827 | HD11 | LEU | X | 514 | 40.252 | 34.864 | 21.232 | 0.00 | 0.00 |
| ATOM | 7828 | HD12 | LEU | X | 514 | 41.661 | 33.827 | 20.913 | 0.00 | 0.00 |
| ATOM | 7829 | HD13 | LEU | X | 514 | 41.772 | 35.578 | 20.682 | 0.00 | 0.00 |
| ATOM | 7830 | CD2  | LEU | X | 514 | 39.224 | 34.930 | 18.841 | 0.00 | 0.00 |
| ATOM | 7831 | HD21 | LEU | X | 514 | 39.201 | 35.747 | 18.120 | 0.00 | 0.00 |
| ATOM | 7832 | HD22 | LEU | X | 514 | 38.602 | 34.108 | 18.488 | 0.00 | 0.00 |
| ATOM | 7833 | HD23 | LEU | X | 514 | 38.722 | 35.291 | 19.739 | 0.00 | 0.00 |
| ATOM | 7834 | C    | LEU | X | 514 | 42.789 | 32.545 | 17.734 | 0.00 | 0.00 |
| ATOM | 7835 | O    | LEU | X | 514 | 42.708 | 32.137 | 16.570 | 0.00 | 0.00 |
| ATOM | 7836 | N    | GLU | X | 515 | 42.840 | 31.690 | 18.788 | 0.00 | 0.00 |
| ATOM | 7837 | H    | GLU | X | 515 | 42.846 | 32.186 | 19.667 | 0.00 | 0.00 |
| ATOM | 7838 | CA   | GLU | X | 515 | 42.455 | 30.279 | 18.683 | 0.00 | 0.00 |
| ATOM | 7839 | HA   | GLU | X | 515 | 42.279 | 29.917 | 17.670 | 0.00 | 0.00 |
| ATOM | 7840 | CB   | GLU | X | 515 | 43.642 | 29.466 | 19.247 | 0.00 | 0.00 |
| ATOM | 7841 | HB2  | GLU | X | 515 | 44.527 | 29.948 | 18.832 | 0.00 | 0.00 |
| ATOM | 7842 | HB3  | GLU | X | 515 | 43.504 | 29.531 | 20.327 | 0.00 | 0.00 |

|      |      |      |     |   |     |        |        |        |      |      |
|------|------|------|-----|---|-----|--------|--------|--------|------|------|
| ATOM | 7843 | CG   | GLU | X | 515 | 43.660 | 28.045 | 18.795 | 0.00 | 0.00 |
| ATOM | 7844 | HG2  | GLU | X | 515 | 42.849 | 27.532 | 19.313 | 0.00 | 0.00 |
| ATOM | 7845 | HG3  | GLU | X | 515 | 43.488 | 27.993 | 17.720 | 0.00 | 0.00 |
| ATOM | 7846 | CD   | GLU | X | 515 | 44.921 | 27.261 | 19.114 | 0.00 | 0.00 |
| ATOM | 7847 | OE1  | GLU | X | 515 | 45.140 | 26.820 | 20.246 | 0.00 | 0.00 |
| ATOM | 7848 | OE2  | GLU | X | 515 | 45.857 | 27.166 | 18.261 | 0.00 | 0.00 |
| ATOM | 7849 | C    | GLU | X | 515 | 41.171 | 30.023 | 19.441 | 0.00 | 0.00 |
| ATOM | 7850 | O    | GLU | X | 515 | 40.963 | 30.726 | 20.419 | 0.00 | 0.00 |
| ATOM | 7851 | N    | VAL | X | 516 | 40.423 | 29.003 | 18.986 | 0.00 | 0.00 |
| ATOM | 7852 | H    | VAL | X | 516 | 40.619 | 28.611 | 18.076 | 0.00 | 0.00 |
| ATOM | 7853 | CA   | VAL | X | 516 | 39.163 | 28.596 | 19.642 | 0.00 | 0.00 |
| ATOM | 7854 | HA   | VAL | X | 516 | 39.011 | 29.118 | 20.586 | 0.00 | 0.00 |
| ATOM | 7855 | CB   | VAL | X | 516 | 37.899 | 28.962 | 18.792 | 0.00 | 0.00 |
| ATOM | 7856 | HB   | VAL | X | 516 | 37.737 | 28.335 | 17.915 | 0.00 | 0.00 |
| ATOM | 7857 | CG1  | VAL | X | 516 | 36.620 | 28.720 | 19.659 | 0.00 | 0.00 |
| ATOM | 7858 | HG11 | VAL | X | 516 | 35.756 | 29.185 | 19.184 | 0.00 | 0.00 |
| ATOM | 7859 | HG12 | VAL | X | 516 | 36.449 | 27.648 | 19.762 | 0.00 | 0.00 |
| ATOM | 7860 | HG13 | VAL | X | 516 | 36.739 | 29.044 | 20.693 | 0.00 | 0.00 |
| ATOM | 7861 | CG2  | VAL | X | 516 | 38.005 | 30.454 | 18.449 | 0.00 | 0.00 |
| ATOM | 7862 | HG21 | VAL | X | 516 | 38.270 | 31.033 | 19.334 | 0.00 | 0.00 |
| ATOM | 7863 | HG22 | VAL | X | 516 | 38.714 | 30.673 | 17.651 | 0.00 | 0.00 |
| ATOM | 7864 | HG23 | VAL | X | 516 | 37.009 | 30.748 | 18.119 | 0.00 | 0.00 |
| ATOM | 7865 | C    | VAL | X | 516 | 39.228 | 27.086 | 19.744 | 0.00 | 0.00 |
| ATOM | 7866 | O    | VAL | X | 516 | 39.558 | 26.394 | 18.802 | 0.00 | 0.00 |
| ATOM | 7867 | N    | ARG | X | 517 | 38.821 | 26.684 | 20.948 | 0.00 | 0.00 |
| ATOM | 7868 | H    | ARG | X | 517 | 38.396 | 27.393 | 21.528 | 0.00 | 0.00 |
| ATOM | 7869 | CA   | ARG | X | 517 | 38.795 | 25.346 | 21.517 | 0.00 | 0.00 |
| ATOM | 7870 | HA   | ARG | X | 517 | 38.971 | 24.611 | 20.731 | 0.00 | 0.00 |
| ATOM | 7871 | CB   | ARG | X | 517 | 39.955 | 25.235 | 22.535 | 0.00 | 0.00 |
| ATOM | 7872 | HB2  | ARG | X | 517 | 39.679 | 25.845 | 23.395 | 0.00 | 0.00 |
| ATOM | 7873 | HB3  | ARG | X | 517 | 40.049 | 24.180 | 22.794 | 0.00 | 0.00 |
| ATOM | 7874 | CG   | ARG | X | 517 | 41.423 | 25.524 | 22.070 | 0.00 | 0.00 |
| ATOM | 7875 | HG2  | ARG | X | 517 | 41.681 | 24.790 | 21.307 | 0.00 | 0.00 |
| ATOM | 7876 | HG3  | ARG | X | 517 | 41.491 | 26.540 | 21.682 | 0.00 | 0.00 |
| ATOM | 7877 | CD   | ARG | X | 517 | 42.366 | 25.317 | 23.187 | 0.00 | 0.00 |
| ATOM | 7878 | HD2  | ARG | X | 517 | 42.059 | 25.852 | 24.086 | 0.00 | 0.00 |
| ATOM | 7879 | HD3  | ARG | X | 517 | 42.441 | 24.241 | 23.345 | 0.00 | 0.00 |
| ATOM | 7880 | NE   | ARG | X | 517 | 43.743 | 25.627 | 22.733 | 0.00 | 0.00 |
| ATOM | 7881 | HE   | ARG | X | 517 | 43.966 | 25.508 | 21.755 | 0.00 | 0.00 |
| ATOM | 7882 | CZ   | ARG | X | 517 | 44.689 | 26.200 | 23.478 | 0.00 | 0.00 |
| ATOM | 7883 | NH1  | ARG | X | 517 | 44.590 | 26.364 | 24.758 | 0.00 | 0.00 |
| ATOM | 7884 | HH11 | ARG | X | 517 | 43.871 | 25.900 | 25.294 | 0.00 | 0.00 |
| ATOM | 7885 | HH12 | ARG | X | 517 | 45.285 | 26.973 | 25.167 | 0.00 | 0.00 |
| ATOM | 7886 | NH2  | ARG | X | 517 | 45.753 | 26.701 | 22.864 | 0.00 | 0.00 |
| ATOM | 7887 | HH21 | ARG | X | 517 | 45.833 | 26.618 | 21.861 | 0.00 | 0.00 |
| ATOM | 7888 | HH22 | ARG | X | 517 | 46.469 | 27.222 | 23.350 | 0.00 | 0.00 |
| ATOM | 7889 | C    | ARG | X | 517 | 37.447 | 24.922 | 22.122 | 0.00 | 0.00 |
| ATOM | 7890 | O    | ARG | X | 517 | 36.603 | 25.769 | 22.403 | 0.00 | 0.00 |
| ATOM | 7891 | N    | ARG | X | 518 | 37.213 | 23.648 | 22.475 | 0.00 | 0.00 |
| ATOM | 7892 | H    | ARG | X | 518 | 38.038 | 23.087 | 22.321 | 0.00 | 0.00 |
| ATOM | 7893 | CA   | ARG | X | 518 | 35.936 | 23.085 | 22.847 | 0.00 | 0.00 |
| ATOM | 7894 | HA   | ARG | X | 518 | 35.246 | 23.840 | 23.224 | 0.00 | 0.00 |
| ATOM | 7895 | CB   | ARG | X | 518 | 35.163 | 22.578 | 21.601 | 0.00 | 0.00 |
| ATOM | 7896 | HB2  | ARG | X | 518 | 34.163 | 22.326 | 21.954 | 0.00 | 0.00 |
| ATOM | 7897 | HB3  | ARG | X | 518 | 35.095 | 23.381 | 20.866 | 0.00 | 0.00 |
| ATOM | 7898 | CG   | ARG | X | 518 | 35.910 | 21.297 | 20.996 | 0.00 | 0.00 |
| ATOM | 7899 | HG2  | ARG | X | 518 | 36.918 | 21.593 | 20.706 | 0.00 | 0.00 |
| ATOM | 7900 | HG3  | ARG | X | 518 | 35.852 | 20.488 | 21.725 | 0.00 | 0.00 |
| ATOM | 7901 | CD   | ARG | X | 518 | 35.139 | 20.889 | 19.687 | 0.00 | 0.00 |
| ATOM | 7902 | HD2  | ARG | X | 518 | 35.177 | 21.628 | 18.886 | 0.00 | 0.00 |
| ATOM | 7903 | HD3  | ARG | X | 518 | 35.785 | 20.135 | 19.236 | 0.00 | 0.00 |
| ATOM | 7904 | NE   | ARG | X | 518 | 33.761 | 20.495 | 19.861 | 0.00 | 0.00 |
| ATOM | 7905 | HE   | ARG | X | 518 | 33.667 | 19.599 | 20.318 | 0.00 | 0.00 |
| ATOM | 7906 | CZ   | ARG | X | 518 | 32.712 | 21.230 | 19.717 | 0.00 | 0.00 |
| ATOM | 7907 | NH1  | ARG | X | 518 | 32.672 | 22.424 | 19.185 | 0.00 | 0.00 |
| ATOM | 7908 | HH11 | ARG | X | 518 | 33.431 | 22.788 | 18.627 | 0.00 | 0.00 |
| ATOM | 7909 | HH12 | ARG | X | 518 | 31.803 | 22.922 | 19.057 | 0.00 | 0.00 |
| ATOM | 7910 | NH2  | ARG | X | 518 | 31.563 | 20.684 | 20.069 | 0.00 | 0.00 |
| ATOM | 7911 | HH21 | ARG | X | 518 | 31.479 | 19.697 | 20.266 | 0.00 | 0.00 |
| ATOM | 7912 | HH22 | ARG | X | 518 | 30.700 | 21.207 | 20.020 | 0.00 | 0.00 |

|      |      |      |     |   |     |        |        |        |      |      |
|------|------|------|-----|---|-----|--------|--------|--------|------|------|
| ATOM | 7913 | C    | ARG | X | 518 | 36.002 | 21.988 | 23.880 | 0.00 | 0.00 |
| ATOM | 7914 | O    | ARG | X | 518 | 37.037 | 21.302 | 24.015 | 0.00 | 0.00 |
| ATOM | 7915 | N    | GLY | X | 519 | 34.950 | 21.879 | 24.668 | 0.00 | 0.00 |
| ATOM | 7916 | H    | GLY | X | 519 | 34.262 | 22.609 | 24.789 | 0.00 | 0.00 |
| ATOM | 7917 | CA   | GLY | X | 519 | 34.981 | 20.857 | 25.722 | 0.00 | 0.00 |
| ATOM | 7918 | HA2  | GLY | X | 519 | 33.976 | 20.730 | 26.060 | 0.00 | 0.00 |
| ATOM | 7919 | HA3  | GLY | X | 519 | 35.261 | 19.916 | 25.296 | 0.00 | 0.00 |
| ATOM | 7920 | C    | GLY | X | 519 | 35.739 | 21.295 | 27.045 | 0.00 | 0.00 |
| ATOM | 7921 | O    | GLY | X | 519 | 36.308 | 20.403 | 27.707 | 0.00 | 0.00 |
| ATOM | 7922 | N    | LEU | X | 520 | 35.617 | 22.529 | 27.475 | 0.00 | 0.00 |
| ATOM | 7923 | H    | LEU | X | 520 | 35.079 | 23.111 | 26.849 | 0.00 | 0.00 |
| ATOM | 7924 | CA   | LEU | X | 520 | 36.337 | 23.216 | 28.610 | 0.00 | 0.00 |
| ATOM | 7925 | HA   | LEU | X | 520 | 37.379 | 23.415 | 28.359 | 0.00 | 0.00 |
| ATOM | 7926 | CB   | LEU | X | 520 | 35.572 | 24.532 | 28.867 | 0.00 | 0.00 |
| ATOM | 7927 | HB2  | LEU | X | 520 | 35.598 | 25.146 | 27.966 | 0.00 | 0.00 |
| ATOM | 7928 | HB3  | LEU | X | 520 | 34.524 | 24.395 | 29.133 | 0.00 | 0.00 |
| ATOM | 7929 | CG   | LEU | X | 520 | 36.356 | 25.335 | 29.948 | 0.00 | 0.00 |
| ATOM | 7930 | HG   | LEU | X | 520 | 36.343 | 24.760 | 30.874 | 0.00 | 0.00 |
| ATOM | 7931 | CD1  | LEU | X | 520 | 37.811 | 25.662 | 29.559 | 0.00 | 0.00 |
| ATOM | 7932 | HD11 | LEU | X | 520 | 38.451 | 24.779 | 29.555 | 0.00 | 0.00 |
| ATOM | 7933 | HD12 | LEU | X | 520 | 37.885 | 25.999 | 28.525 | 0.00 | 0.00 |
| ATOM | 7934 | HD13 | LEU | X | 520 | 38.175 | 26.351 | 30.322 | 0.00 | 0.00 |
| ATOM | 7935 | CD2  | LEU | X | 520 | 35.715 | 26.663 | 30.192 | 0.00 | 0.00 |
| ATOM | 7936 | HD21 | LEU | X | 520 | 34.639 | 26.536 | 30.307 | 0.00 | 0.00 |
| ATOM | 7937 | HD22 | LEU | X | 520 | 36.162 | 27.299 | 30.956 | 0.00 | 0.00 |
| ATOM | 7938 | HD23 | LEU | X | 520 | 35.861 | 27.275 | 29.302 | 0.00 | 0.00 |
| ATOM | 7939 | C    | LEU | X | 520 | 36.300 | 22.285 | 29.928 | 0.00 | 0.00 |
| ATOM | 7940 | O    | LEU | X | 520 | 35.328 | 22.194 | 30.633 | 0.00 | 0.00 |
| ATOM | 7941 | N    | ARG | X | 521 | 37.454 | 21.764 | 30.275 | 0.00 | 0.00 |
| ATOM | 7942 | H    | ARG | X | 521 | 38.226 | 21.864 | 29.631 | 0.00 | 0.00 |
| ATOM | 7943 | CA   | ARG | X | 521 | 37.745 | 20.973 | 31.536 | 0.00 | 0.00 |
| ATOM | 7944 | HA   | ARG | X | 521 | 38.739 | 20.525 | 31.528 | 0.00 | 0.00 |
| ATOM | 7945 | CB   | ARG | X | 521 | 37.681 | 21.859 | 32.776 | 0.00 | 0.00 |
| ATOM | 7946 | HB2  | ARG | X | 521 | 37.744 | 22.898 | 32.454 | 0.00 | 0.00 |
| ATOM | 7947 | HB3  | ARG | X | 521 | 36.673 | 21.819 | 33.190 | 0.00 | 0.00 |
| ATOM | 7948 | CG   | ARG | X | 521 | 38.632 | 21.551 | 33.886 | 0.00 | 0.00 |
| ATOM | 7949 | HG2  | ARG | X | 521 | 38.382 | 22.332 | 34.605 | 0.00 | 0.00 |
| ATOM | 7950 | HG3  | ARG | X | 521 | 38.493 | 20.553 | 34.301 | 0.00 | 0.00 |
| ATOM | 7951 | CD   | ARG | X | 521 | 40.044 | 21.862 | 33.404 | 0.00 | 0.00 |
| ATOM | 7952 | HD2  | ARG | X | 521 | 40.192 | 21.644 | 32.346 | 0.00 | 0.00 |
| ATOM | 7953 | HD3  | ARG | X | 521 | 40.152 | 22.936 | 33.557 | 0.00 | 0.00 |
| ATOM | 7954 | NE   | ARG | X | 521 | 41.096 | 21.155 | 34.052 | 0.00 | 0.00 |
| ATOM | 7955 | HE   | ARG | X | 521 | 41.105 | 21.314 | 35.049 | 0.00 | 0.00 |
| ATOM | 7956 | CZ   | ARG | X | 521 | 42.219 | 20.722 | 33.478 | 0.00 | 0.00 |
| ATOM | 7957 | NH1  | ARG | X | 521 | 42.457 | 20.780 | 32.197 | 0.00 | 0.00 |
| ATOM | 7958 | HH11 | ARG | X | 521 | 41.838 | 21.069 | 31.453 | 0.00 | 0.00 |
| ATOM | 7959 | HH12 | ARG | X | 521 | 43.363 | 20.436 | 31.913 | 0.00 | 0.00 |
| ATOM | 7960 | NH2  | ARG | X | 521 | 43.191 | 20.191 | 34.224 | 0.00 | 0.00 |
| ATOM | 7961 | HH21 | ARG | X | 521 | 43.018 | 20.133 | 35.218 | 0.00 | 0.00 |
| ATOM | 7962 | HH22 | ARG | X | 521 | 44.069 | 19.833 | 33.878 | 0.00 | 0.00 |
| ATOM | 7963 | C    | ARG | X | 521 | 36.809 | 19.785 | 31.811 | 0.00 | 0.00 |
| ATOM | 7964 | O    | ARG | X | 521 | 36.604 | 19.350 | 32.965 | 0.00 | 0.00 |
| ATOM | 7965 | N    | ALA | X | 522 | 36.275 | 19.095 | 30.791 | 0.00 | 0.00 |
| ATOM | 7966 | H    | ALA | X | 522 | 36.553 | 19.369 | 29.859 | 0.00 | 0.00 |
| ATOM | 7967 | CA   | ALA | X | 522 | 35.209 | 18.190 | 31.001 | 0.00 | 0.00 |
| ATOM | 7968 | HA   | ALA | X | 522 | 34.543 | 18.630 | 31.744 | 0.00 | 0.00 |
| ATOM | 7969 | CB   | ALA | X | 522 | 34.449 | 18.208 | 29.685 | 0.00 | 0.00 |
| ATOM | 7970 | HB1  | ALA | X | 522 | 34.355 | 19.280 | 29.509 | 0.00 | 0.00 |
| ATOM | 7971 | HB2  | ALA | X | 522 | 34.979 | 17.821 | 28.814 | 0.00 | 0.00 |
| ATOM | 7972 | HB3  | ALA | X | 522 | 33.449 | 17.774 | 29.676 | 0.00 | 0.00 |
| ATOM | 7973 | C    | ALA | X | 522 | 35.777 | 16.821 | 31.506 | 0.00 | 0.00 |
| ATOM | 7974 | O    | ALA | X | 522 | 34.934 | 15.952 | 31.908 | 0.00 | 0.00 |
| ATOM | 7975 | N    | GLN | X | 523 | 37.079 | 16.469 | 31.373 | 0.00 | 0.00 |
| ATOM | 7976 | H    | GLN | X | 523 | 37.784 | 17.174 | 31.210 | 0.00 | 0.00 |
| ATOM | 7977 | CA   | GLN | X | 523 | 37.575 | 15.170 | 31.834 | 0.00 | 0.00 |
| ATOM | 7978 | HA   | GLN | X | 523 | 36.942 | 14.284 | 31.786 | 0.00 | 0.00 |
| ATOM | 7979 | CB   | GLN | X | 523 | 38.823 | 14.689 | 31.005 | 0.00 | 0.00 |
| ATOM | 7980 | HB2  | GLN | X | 523 | 39.628 | 15.409 | 30.861 | 0.00 | 0.00 |
| ATOM | 7981 | HB3  | GLN | X | 523 | 39.238 | 13.823 | 31.520 | 0.00 | 0.00 |
| ATOM | 7982 | CG   | GLN | X | 523 | 38.363 | 14.179 | 29.638 | 0.00 | 0.00 |

|      |      |      |     |   |     |        |        |        |      |      |
|------|------|------|-----|---|-----|--------|--------|--------|------|------|
| ATOM | 7983 | HG2  | GLN | X | 523 | 39.279 | 13.995 | 29.077 | 0.00 | 0.00 |
| ATOM | 7984 | HG3  | GLN | X | 523 | 37.747 | 13.302 | 29.835 | 0.00 | 0.00 |
| ATOM | 7985 | CD   | GLN | X | 523 | 37.606 | 15.206 | 28.768 | 0.00 | 0.00 |
| ATOM | 7986 | OE1  | GLN | X | 523 | 36.480 | 14.912 | 28.446 | 0.00 | 0.00 |
| ATOM | 7987 | NE2  | GLN | X | 523 | 38.202 | 16.309 | 28.250 | 0.00 | 0.00 |
| ATOM | 7988 | HE21 | GLN | X | 523 | 37.820 | 16.705 | 27.403 | 0.00 | 0.00 |
| ATOM | 7989 | HE22 | GLN | X | 523 | 39.122 | 16.583 | 28.565 | 0.00 | 0.00 |
| ATOM | 7990 | C    | GLN | X | 523 | 37.983 | 15.251 | 33.351 | 0.00 | 0.00 |
| ATOM | 7991 | O    | GLN | X | 523 | 37.623 | 14.379 | 34.135 | 0.00 | 0.00 |
| ATOM | 7992 | N    | ALA | X | 524 | 38.748 | 16.296 | 33.649 | 0.00 | 0.00 |
| ATOM | 7993 | H    | ALA | X | 524 | 38.990 | 16.946 | 32.915 | 0.00 | 0.00 |
| ATOM | 7994 | CA   | ALA | X | 524 | 39.205 | 16.638 | 35.049 | 0.00 | 0.00 |
| ATOM | 7995 | HA   | ALA | X | 524 | 39.848 | 15.829 | 35.396 | 0.00 | 0.00 |
| ATOM | 7996 | CB   | ALA | X | 524 | 40.102 | 17.890 | 35.008 | 0.00 | 0.00 |
| ATOM | 7997 | HB1  | ALA | X | 524 | 40.018 | 18.379 | 35.979 | 0.00 | 0.00 |
| ATOM | 7998 | HB2  | ALA | X | 524 | 41.152 | 17.639 | 34.865 | 0.00 | 0.00 |
| ATOM | 7999 | HB3  | ALA | X | 524 | 39.781 | 18.468 | 34.141 | 0.00 | 0.00 |
| ATOM | 8000 | C    | ALA | X | 524 | 38.008 | 16.807 | 36.015 | 0.00 | 0.00 |
| ATOM | 8001 | O    | ALA | X | 524 | 37.956 | 16.008 | 36.907 | 0.00 | 0.00 |
| ATOM | 8002 | N    | CYX | X | 525 | 37.073 | 17.771 | 35.747 | 0.00 | 0.00 |
| ATOM | 8003 | H    | CYX | X | 525 | 37.315 | 18.535 | 35.131 | 0.00 | 0.00 |
| ATOM | 8004 | CA   | CYX | X | 525 | 36.105 | 18.038 | 36.764 | 0.00 | 0.00 |
| ATOM | 8005 | HA   | CYX | X | 525 | 36.629 | 18.108 | 37.717 | 0.00 | 0.00 |
| ATOM | 8006 | CB   | CYX | X | 525 | 35.433 | 19.383 | 36.503 | 0.00 | 0.00 |
| ATOM | 8007 | HB2  | CYX | X | 525 | 34.702 | 19.380 | 35.694 | 0.00 | 0.00 |
| ATOM | 8008 | HB3  | CYX | X | 525 | 35.025 | 19.643 | 37.479 | 0.00 | 0.00 |
| ATOM | 8009 | SG   | CYX | X | 525 | 36.629 | 20.666 | 36.164 | 0.00 | 0.00 |
| ATOM | 8010 | C    | CYX | X | 525 | 34.953 | 16.988 | 36.816 | 0.00 | 0.00 |
| ATOM | 8011 | O    | CYX | X | 525 | 34.320 | 16.967 | 37.901 | 0.00 | 0.00 |
| ATOM | 8012 | N    | ALA | X | 526 | 34.757 | 16.160 | 35.809 | 0.00 | 0.00 |
| ATOM | 8013 | H    | ALA | X | 526 | 35.521 | 16.107 | 35.150 | 0.00 | 0.00 |
| ATOM | 8014 | CA   | ALA | X | 526 | 33.771 | 15.083 | 35.932 | 0.00 | 0.00 |
| ATOM | 8015 | HA   | ALA | X | 526 | 32.866 | 15.607 | 36.239 | 0.00 | 0.00 |
| ATOM | 8016 | CB   | ALA | X | 526 | 33.599 | 14.427 | 34.603 | 0.00 | 0.00 |
| ATOM | 8017 | HB1  | ALA | X | 526 | 34.514 | 14.126 | 34.092 | 0.00 | 0.00 |
| ATOM | 8018 | HB2  | ALA | X | 526 | 33.108 | 13.466 | 34.756 | 0.00 | 0.00 |
| ATOM | 8019 | HB3  | ALA | X | 526 | 33.086 | 15.124 | 33.942 | 0.00 | 0.00 |
| ATOM | 8020 | C    | ALA | X | 526 | 34.101 | 14.023 | 36.935 | 0.00 | 0.00 |
| ATOM | 8021 | O    | ALA | X | 526 | 33.294 | 13.700 | 37.817 | 0.00 | 0.00 |
| ATOM | 8022 | N    | PHE | X | 527 | 35.349 | 13.503 | 36.912 | 0.00 | 0.00 |
| ATOM | 8023 | H    | PHE | X | 527 | 35.973 | 13.811 | 36.180 | 0.00 | 0.00 |
| ATOM | 8024 | CA   | PHE | X | 527 | 36.042 | 12.903 | 38.080 | 0.00 | 0.00 |
| ATOM | 8025 | HA   | PHE | X | 527 | 35.682 | 11.900 | 38.309 | 0.00 | 0.00 |
| ATOM | 8026 | CB   | PHE | X | 527 | 37.504 | 12.720 | 37.699 | 0.00 | 0.00 |
| ATOM | 8027 | HB2  | PHE | X | 527 | 37.451 | 11.899 | 36.984 | 0.00 | 0.00 |
| ATOM | 8028 | HB3  | PHE | X | 527 | 37.783 | 13.565 | 37.069 | 0.00 | 0.00 |
| ATOM | 8029 | CG   | PHE | X | 527 | 38.449 | 12.535 | 38.809 | 0.00 | 0.00 |
| ATOM | 8030 | CD1  | PHE | X | 527 | 38.457 | 11.382 | 39.597 | 0.00 | 0.00 |
| ATOM | 8031 | HD1  | PHE | X | 527 | 37.909 | 10.506 | 39.282 | 0.00 | 0.00 |
| ATOM | 8032 | CE1  | PHE | X | 527 | 39.316 | 11.250 | 40.673 | 0.00 | 0.00 |
| ATOM | 8033 | HE1  | PHE | X | 527 | 39.335 | 10.342 | 41.256 | 0.00 | 0.00 |
| ATOM | 8034 | CZ   | PHE | X | 527 | 40.075 | 12.310 | 41.079 | 0.00 | 0.00 |
| ATOM | 8035 | HZ   | PHE | X | 527 | 40.704 | 12.070 | 41.924 | 0.00 | 0.00 |
| ATOM | 8036 | CE2  | PHE | X | 527 | 39.977 | 13.475 | 40.306 | 0.00 | 0.00 |
| ATOM | 8037 | HE2  | PHE | X | 527 | 40.577 | 14.314 | 40.626 | 0.00 | 0.00 |
| ATOM | 8038 | CD2  | PHE | X | 527 | 39.180 | 13.635 | 39.200 | 0.00 | 0.00 |
| ATOM | 8039 | HD2  | PHE | X | 527 | 39.063 | 14.595 | 38.719 | 0.00 | 0.00 |
| ATOM | 8040 | C    | PHE | X | 527 | 35.814 | 13.719 | 39.375 | 0.00 | 0.00 |
| ATOM | 8041 | O    | PHE | X | 527 | 35.091 | 13.192 | 40.213 | 0.00 | 0.00 |
| ATOM | 8042 | N    | TRP | X | 528 | 36.251 | 14.958 | 39.500 | 0.00 | 0.00 |
| ATOM | 8043 | H    | TRP | X | 528 | 36.731 | 15.344 | 38.700 | 0.00 | 0.00 |
| ATOM | 8044 | CA   | TRP | X | 528 | 36.170 | 15.703 | 40.765 | 0.00 | 0.00 |
| ATOM | 8045 | HA   | TRP | X | 528 | 36.738 | 15.104 | 41.477 | 0.00 | 0.00 |
| ATOM | 8046 | CB   | TRP | X | 528 | 36.820 | 17.045 | 40.739 | 0.00 | 0.00 |
| ATOM | 8047 | HB2  | TRP | X | 528 | 36.569 | 17.672 | 39.884 | 0.00 | 0.00 |
| ATOM | 8048 | HB3  | TRP | X | 528 | 36.551 | 17.607 | 41.633 | 0.00 | 0.00 |
| ATOM | 8049 | CG   | TRP | X | 528 | 38.330 | 16.983 | 40.698 | 0.00 | 0.00 |
| ATOM | 8050 | CD1  | TRP | X | 528 | 39.151 | 17.101 | 39.713 | 0.00 | 0.00 |
| ATOM | 8051 | HD1  | TRP | X | 528 | 38.826 | 17.127 | 38.684 | 0.00 | 0.00 |
| ATOM | 8052 | NE1  | TRP | X | 528 | 40.464 | 16.928 | 40.120 | 0.00 | 0.00 |

|      |      |      |     |   |     |        |        |        |      |      |
|------|------|------|-----|---|-----|--------|--------|--------|------|------|
| ATOM | 8053 | HE1  | TRP | X | 528 | 41.208 | 17.210 | 39.499 | 0.00 | 0.00 |
| ATOM | 8054 | CE2  | TRP | X | 528 | 40.573 | 17.029 | 41.415 | 0.00 | 0.00 |
| ATOM | 8055 | CZ2  | TRP | X | 528 | 41.660 | 17.000 | 42.329 | 0.00 | 0.00 |
| ATOM | 8056 | HZ2  | TRP | X | 528 | 42.673 | 17.106 | 41.970 | 0.00 | 0.00 |
| ATOM | 8057 | CH2  | TRP | X | 528 | 41.417 | 17.090 | 43.694 | 0.00 | 0.00 |
| ATOM | 8058 | HH2  | TRP | X | 528 | 42.203 | 17.245 | 44.419 | 0.00 | 0.00 |
| ATOM | 8059 | CZ3  | TRP | X | 528 | 40.098 | 17.078 | 44.190 | 0.00 | 0.00 |
| ATOM | 8060 | HZ3  | TRP | X | 528 | 39.836 | 16.976 | 45.233 | 0.00 | 0.00 |
| ATOM | 8061 | CE3  | TRP | X | 528 | 38.994 | 17.038 | 43.291 | 0.00 | 0.00 |
| ATOM | 8062 | HE3  | TRP | X | 528 | 38.013 | 17.116 | 43.736 | 0.00 | 0.00 |
| ATOM | 8063 | CD2  | TRP | X | 528 | 39.228 | 17.019 | 41.882 | 0.00 | 0.00 |
| ATOM | 8064 | C    | TRP | X | 528 | 34.694 | 15.949 | 41.308 | 0.00 | 0.00 |
| ATOM | 8065 | O    | TRP | X | 528 | 34.520 | 16.256 | 42.526 | 0.00 | 0.00 |
| ATOM | 8066 | N    | ASN | X | 529 | 33.698 | 15.895 | 40.459 | 0.00 | 0.00 |
| ATOM | 8067 | H    | ASN | X | 529 | 33.914 | 15.675 | 39.497 | 0.00 | 0.00 |
| ATOM | 8068 | CA   | ASN | X | 529 | 32.254 | 16.009 | 40.806 | 0.00 | 0.00 |
| ATOM | 8069 | HA   | ASN | X | 529 | 32.204 | 16.627 | 41.702 | 0.00 | 0.00 |
| ATOM | 8070 | CB   | ASN | X | 529 | 31.766 | 16.916 | 39.647 | 0.00 | 0.00 |
| ATOM | 8071 | HB2  | ASN | X | 529 | 32.322 | 17.851 | 39.577 | 0.00 | 0.00 |
| ATOM | 8072 | HB3  | ASN | X | 529 | 31.846 | 16.378 | 38.702 | 0.00 | 0.00 |
| ATOM | 8073 | CG   | ASN | X | 529 | 30.281 | 17.146 | 39.742 | 0.00 | 0.00 |
| ATOM | 8074 | OD1  | ASN | X | 529 | 29.549 | 16.593 | 38.957 | 0.00 | 0.00 |
| ATOM | 8075 | ND2  | ASN | X | 529 | 29.863 | 18.036 | 40.660 | 0.00 | 0.00 |
| ATOM | 8076 | HD21 | ASN | X | 529 | 28.893 | 18.132 | 40.924 | 0.00 | 0.00 |
| ATOM | 8077 | HD22 | ASN | X | 529 | 30.567 | 18.424 | 41.272 | 0.00 | 0.00 |
| ATOM | 8078 | C    | ASN | X | 529 | 31.522 | 14.650 | 41.122 | 0.00 | 0.00 |
| ATOM | 8079 | O    | ASN | X | 529 | 30.785 | 14.449 | 42.104 | 0.00 | 0.00 |
| ATOM | 8080 | N    | ARG | X | 530 | 31.669 | 13.661 | 40.261 | 0.00 | 0.00 |
| ATOM | 8081 | H    | ARG | X | 530 | 32.139 | 13.923 | 39.406 | 0.00 | 0.00 |
| ATOM | 8082 | CA   | ARG | X | 530 | 30.929 | 12.365 | 40.291 | 0.00 | 0.00 |
| ATOM | 8083 | HA   | ARG | X | 530 | 29.965 | 12.528 | 40.772 | 0.00 | 0.00 |
| ATOM | 8084 | CB   | ARG | X | 530 | 30.754 | 11.946 | 38.874 | 0.00 | 0.00 |
| ATOM | 8085 | HB2  | ARG | X | 530 | 31.705 | 11.744 | 38.383 | 0.00 | 0.00 |
| ATOM | 8086 | HB3  | ARG | X | 530 | 30.356 | 10.932 | 38.915 | 0.00 | 0.00 |
| ATOM | 8087 | CG   | ARG | X | 530 | 29.971 | 12.929 | 37.875 | 0.00 | 0.00 |
| ATOM | 8088 | HG2  | ARG | X | 530 | 28.951 | 12.966 | 38.258 | 0.00 | 0.00 |
| ATOM | 8089 | HG3  | ARG | X | 530 | 30.461 | 13.901 | 37.824 | 0.00 | 0.00 |
| ATOM | 8090 | CD   | ARG | X | 530 | 30.162 | 12.307 | 36.441 | 0.00 | 0.00 |
| ATOM | 8091 | HD2  | ARG | X | 530 | 31.242 | 12.376 | 36.310 | 0.00 | 0.00 |
| ATOM | 8092 | HD3  | ARG | X | 530 | 29.765 | 11.294 | 36.506 | 0.00 | 0.00 |
| ATOM | 8093 | NE   | ARG | X | 530 | 29.565 | 13.247 | 35.433 | 0.00 | 0.00 |
| ATOM | 8094 | HE   | ARG | X | 530 | 29.158 | 14.071 | 35.852 | 0.00 | 0.00 |
| ATOM | 8095 | CZ   | ARG | X | 530 | 29.733 | 13.218 | 34.122 | 0.00 | 0.00 |
| ATOM | 8096 | NH1  | ARG | X | 530 | 30.386 | 12.235 | 33.632 | 0.00 | 0.00 |
| ATOM | 8097 | HH11 | ARG | X | 530 | 30.889 | 11.650 | 34.283 | 0.00 | 0.00 |
| ATOM | 8098 | HH12 | ARG | X | 530 | 30.784 | 12.230 | 32.704 | 0.00 | 0.00 |
| ATOM | 8099 | NH2  | ARG | X | 530 | 29.260 | 14.104 | 33.448 | 0.00 | 0.00 |
| ATOM | 8100 | HH21 | ARG | X | 530 | 28.724 | 14.775 | 33.979 | 0.00 | 0.00 |
| ATOM | 8101 | HH22 | ARG | X | 530 | 29.220 | 13.998 | 32.444 | 0.00 | 0.00 |
| ATOM | 8102 | C    | ARG | X | 530 | 31.663 | 11.266 | 41.149 | 0.00 | 0.00 |
| ATOM | 8103 | O    | ARG | X | 530 | 30.975 | 10.587 | 41.916 | 0.00 | 0.00 |
| ATOM | 8104 | N    | PHE | X | 531 | 33.009 | 11.210 | 41.159 | 0.00 | 0.00 |
| ATOM | 8105 | H    | PHE | X | 531 | 33.507 | 11.854 | 40.562 | 0.00 | 0.00 |
| ATOM | 8106 | CA   | PHE | X | 531 | 33.804 | 10.060 | 41.628 | 0.00 | 0.00 |
| ATOM | 8107 | HA   | PHE | X | 531 | 33.241 | 9.211  | 42.015 | 0.00 | 0.00 |
| ATOM | 8108 | CB   | PHE | X | 531 | 34.689 | 9.652  | 40.480 | 0.00 | 0.00 |
| ATOM | 8109 | HB2  | PHE | X | 531 | 34.148 | 9.525  | 39.543 | 0.00 | 0.00 |
| ATOM | 8110 | HB3  | PHE | X | 531 | 35.395 | 10.480 | 40.413 | 0.00 | 0.00 |
| ATOM | 8111 | CG   | PHE | X | 531 | 35.479 | 8.423  | 40.747 | 0.00 | 0.00 |
| ATOM | 8112 | CD1  | PHE | X | 531 | 36.816 | 8.581  | 41.290 | 0.00 | 0.00 |
| ATOM | 8113 | HD1  | PHE | X | 531 | 37.233 | 9.546  | 41.537 | 0.00 | 0.00 |
| ATOM | 8114 | CE1  | PHE | X | 531 | 37.495 | 7.449  | 41.630 | 0.00 | 0.00 |
| ATOM | 8115 | HE1  | PHE | X | 531 | 38.425 | 7.473  | 42.180 | 0.00 | 0.00 |
| ATOM | 8116 | CZ   | PHE | X | 531 | 36.973 | 6.229  | 41.294 | 0.00 | 0.00 |
| ATOM | 8117 | HZ   | PHE | X | 531 | 37.558 | 5.346  | 41.505 | 0.00 | 0.00 |
| ATOM | 8118 | CE2  | PHE | X | 531 | 35.687 | 6.004  | 40.807 | 0.00 | 0.00 |
| ATOM | 8119 | HE2  | PHE | X | 531 | 35.254 | 5.018  | 40.736 | 0.00 | 0.00 |
| ATOM | 8120 | CD2  | PHE | X | 531 | 34.952 | 7.126  | 40.491 | 0.00 | 0.00 |
| ATOM | 8121 | HD2  | PHE | X | 531 | 33.965 | 6.986  | 40.076 | 0.00 | 0.00 |
| ATOM | 8122 | C    | PHE | X | 531 | 34.628 | 10.469 | 42.842 | 0.00 | 0.00 |

|      |      |      |     |   |     |        |        |        |      |      |
|------|------|------|-----|---|-----|--------|--------|--------|------|------|
| ATOM | 8123 | O    | PHE | X | 531 | 34.668 | 9.708  | 43.831 | 0.00 | 0.00 |
| ATOM | 8124 | N    | LEU | X | 532 | 35.348 | 11.562 | 42.807 | 0.00 | 0.00 |
| ATOM | 8125 | H    | LEU | X | 532 | 35.414 | 11.989 | 41.894 | 0.00 | 0.00 |
| ATOM | 8126 | CA   | LEU | X | 532 | 36.279 | 11.862 | 43.905 | 0.00 | 0.00 |
| ATOM | 8127 | HA   | LEU | X | 532 | 37.049 | 11.091 | 43.917 | 0.00 | 0.00 |
| ATOM | 8128 | CB   | LEU | X | 532 | 37.032 | 13.198 | 43.589 | 0.00 | 0.00 |
| ATOM | 8129 | HB2  | LEU | X | 532 | 37.299 | 13.251 | 42.534 | 0.00 | 0.00 |
| ATOM | 8130 | HB3  | LEU | X | 532 | 36.508 | 14.152 | 43.651 | 0.00 | 0.00 |
| ATOM | 8131 | CG   | LEU | X | 532 | 38.373 | 13.438 | 44.300 | 0.00 | 0.00 |
| ATOM | 8132 | HG   | LEU | X | 532 | 39.021 | 13.868 | 43.536 | 0.00 | 0.00 |
| ATOM | 8133 | CD1  | LEU | X | 532 | 38.142 | 14.379 | 45.507 | 0.00 | 0.00 |
| ATOM | 8134 | HD11 | LEU | X | 532 | 39.108 | 14.750 | 45.850 | 0.00 | 0.00 |
| ATOM | 8135 | HD12 | LEU | X | 532 | 37.614 | 15.309 | 45.296 | 0.00 | 0.00 |
| ATOM | 8136 | HD13 | LEU | X | 532 | 37.709 | 13.853 | 46.357 | 0.00 | 0.00 |
| ATOM | 8137 | CD2  | LEU | X | 532 | 39.002 | 12.125 | 44.809 | 0.00 | 0.00 |
| ATOM | 8138 | HD21 | LEU | X | 532 | 39.981 | 12.344 | 45.237 | 0.00 | 0.00 |
| ATOM | 8139 | HD22 | LEU | X | 532 | 38.359 | 11.499 | 45.427 | 0.00 | 0.00 |
| ATOM | 8140 | HD23 | LEU | X | 532 | 39.220 | 11.506 | 43.939 | 0.00 | 0.00 |
| ATOM | 8141 | C    | LEU | X | 532 | 35.476 | 11.957 | 45.234 | 0.00 | 0.00 |
| ATOM | 8142 | O    | LEU | X | 532 | 35.868 | 11.365 | 46.262 | 0.00 | 0.00 |
| ATOM | 8143 | N    | PRO | X | 533 | 34.313 | 12.699 | 45.338 | 0.00 | 0.00 |
| ATOM | 8144 | CD   | PRO | X | 533 | 33.775 | 13.642 | 44.415 | 0.00 | 0.00 |
| ATOM | 8145 | HD2  | PRO | X | 533 | 33.688 | 13.188 | 43.428 | 0.00 | 0.00 |
| ATOM | 8146 | HD3  | PRO | X | 533 | 34.437 | 14.502 | 44.315 | 0.00 | 0.00 |
| ATOM | 8147 | CG   | PRO | X | 533 | 32.525 | 14.145 | 44.962 | 0.00 | 0.00 |
| ATOM | 8148 | HG2  | PRO | X | 533 | 31.738 | 13.405 | 44.818 | 0.00 | 0.00 |
| ATOM | 8149 | HG3  | PRO | X | 533 | 32.308 | 15.100 | 44.484 | 0.00 | 0.00 |
| ATOM | 8150 | CB   | PRO | X | 533 | 32.729 | 14.090 | 46.455 | 0.00 | 0.00 |
| ATOM | 8151 | HB2  | PRO | X | 533 | 31.761 | 14.011 | 46.949 | 0.00 | 0.00 |
| ATOM | 8152 | HB3  | PRO | X | 533 | 33.245 | 14.968 | 46.845 | 0.00 | 0.00 |
| ATOM | 8153 | CA   | PRO | X | 533 | 33.623 | 12.861 | 46.616 | 0.00 | 0.00 |
| ATOM | 8154 | HA   | PRO | X | 533 | 34.324 | 12.936 | 47.447 | 0.00 | 0.00 |
| ATOM | 8155 | C    | PRO | X | 533 | 33.052 | 11.549 | 47.032 | 0.00 | 0.00 |
| ATOM | 8156 | O    | PRO | X | 533 | 32.846 | 11.424 | 48.270 | 0.00 | 0.00 |
| ATOM | 8157 | N    | LYS | X | 534 | 32.778 | 10.549 | 46.124 | 0.00 | 0.00 |
| ATOM | 8158 | H    | LYS | X | 534 | 33.027 | 10.741 | 45.164 | 0.00 | 0.00 |
| ATOM | 8159 | CA   | LYS | X | 534 | 32.201 | 9.274  | 46.405 | 0.00 | 0.00 |
| ATOM | 8160 | HA   | LYS | X | 534 | 31.319 | 9.360  | 47.039 | 0.00 | 0.00 |
| ATOM | 8161 | CB   | LYS | X | 534 | 31.688 | 8.812  | 44.987 | 0.00 | 0.00 |
| ATOM | 8162 | HB2  | LYS | X | 534 | 31.075 | 9.605  | 44.560 | 0.00 | 0.00 |
| ATOM | 8163 | HB3  | LYS | X | 534 | 32.565 | 8.634  | 44.365 | 0.00 | 0.00 |
| ATOM | 8164 | CG   | LYS | X | 534 | 30.932 | 7.495  | 44.969 | 0.00 | 0.00 |
| ATOM | 8165 | HG2  | LYS | X | 534 | 31.479 | 6.688  | 45.457 | 0.00 | 0.00 |
| ATOM | 8166 | HG3  | LYS | X | 534 | 29.989 | 7.623  | 45.501 | 0.00 | 0.00 |
| ATOM | 8167 | CD   | LYS | X | 534 | 30.612 | 7.180  | 43.523 | 0.00 | 0.00 |
| ATOM | 8168 | HD2  | LYS | X | 534 | 30.023 | 8.034  | 43.188 | 0.00 | 0.00 |
| ATOM | 8169 | HD3  | LYS | X | 534 | 31.564 | 7.026  | 43.016 | 0.00 | 0.00 |
| ATOM | 8170 | CE   | LYS | X | 534 | 29.792 | 5.843  | 43.333 | 0.00 | 0.00 |
| ATOM | 8171 | HE2  | LYS | X | 534 | 30.357 | 5.182  | 43.989 | 0.00 | 0.00 |
| ATOM | 8172 | HE3  | LYS | X | 534 | 28.789 | 5.955  | 43.745 | 0.00 | 0.00 |
| ATOM | 8173 | NZ   | LYS | X | 534 | 29.776 | 5.420  | 41.959 | 0.00 | 0.00 |
| ATOM | 8174 | HZ1  | LYS | X | 534 | 29.248 | 4.562  | 41.888 | 0.00 | 0.00 |
| ATOM | 8175 | HZ2  | LYS | X | 534 | 29.343 | 6.117  | 41.369 | 0.00 | 0.00 |
| ATOM | 8176 | HZ3  | LYS | X | 534 | 30.700 | 5.160  | 41.647 | 0.00 | 0.00 |
| ATOM | 8177 | C    | LYS | X | 534 | 33.207 | 8.279  | 47.039 | 0.00 | 0.00 |
| ATOM | 8178 | O    | LYS | X | 534 | 32.851 | 7.341  | 47.741 | 0.00 | 0.00 |
| ATOM | 8179 | N    | LEU | X | 535 | 34.533 | 8.482  | 46.941 | 0.00 | 0.00 |
| ATOM | 8180 | H    | LEU | X | 535 | 34.886 | 9.313  | 46.488 | 0.00 | 0.00 |
| ATOM | 8181 | CA   | LEU | X | 535 | 35.615 | 7.684  | 47.681 | 0.00 | 0.00 |
| ATOM | 8182 | HA   | LEU | X | 535 | 35.110 | 6.874  | 48.207 | 0.00 | 0.00 |
| ATOM | 8183 | CB   | LEU | X | 535 | 36.824 | 7.326  | 46.707 | 0.00 | 0.00 |
| ATOM | 8184 | HB2  | LEU | X | 535 | 37.056 | 8.120  | 45.997 | 0.00 | 0.00 |
| ATOM | 8185 | HB3  | LEU | X | 535 | 37.723 | 7.148  | 47.298 | 0.00 | 0.00 |
| ATOM | 8186 | CG   | LEU | X | 535 | 36.541 | 6.043  | 45.863 | 0.00 | 0.00 |
| ATOM | 8187 | HG   | LEU | X | 535 | 36.586 | 5.158  | 46.498 | 0.00 | 0.00 |
| ATOM | 8188 | CD1  | LEU | X | 535 | 35.286 | 6.080  | 44.973 | 0.00 | 0.00 |
| ATOM | 8189 | HD11 | LEU | X | 535 | 35.330 | 6.910  | 44.268 | 0.00 | 0.00 |
| ATOM | 8190 | HD12 | LEU | X | 535 | 35.176 | 5.217  | 44.316 | 0.00 | 0.00 |
| ATOM | 8191 | HD13 | LEU | X | 535 | 34.359 | 6.201  | 45.533 | 0.00 | 0.00 |
| ATOM | 8192 | CD2  | LEU | X | 535 | 37.774 | 5.858  | 44.924 | 0.00 | 0.00 |

|      |      |      |     |   |     |        |        |        |      |      |
|------|------|------|-----|---|-----|--------|--------|--------|------|------|
| ATOM | 8193 | HD21 | LEU | X | 535 | 37.519 | 5.123  | 44.161 | 0.00 | 0.00 |
| ATOM | 8194 | HD22 | LEU | X | 535 | 37.946 | 6.792  | 44.389 | 0.00 | 0.00 |
| ATOM | 8195 | HD23 | LEU | X | 535 | 38.633 | 5.589  | 45.538 | 0.00 | 0.00 |
| ATOM | 8196 | C    | LEU | X | 535 | 36.065 | 8.349  | 49.009 | 0.00 | 0.00 |
| ATOM | 8197 | O    | LEU | X | 535 | 36.445 | 7.667  | 49.938 | 0.00 | 0.00 |
| ATOM | 8198 | N    | LEU | X | 536 | 36.054 | 9.704  | 48.969 | 0.00 | 0.00 |
| ATOM | 8199 | H    | LEU | X | 536 | 36.030 | 10.219 | 48.100 | 0.00 | 0.00 |
| ATOM | 8200 | CA   | LEU | X | 536 | 36.439 | 10.548 | 50.109 | 0.00 | 0.00 |
| ATOM | 8201 | HA   | LEU | X | 536 | 37.398 | 10.247 | 50.531 | 0.00 | 0.00 |
| ATOM | 8202 | CB   | LEU | X | 536 | 36.645 | 12.008 | 49.524 | 0.00 | 0.00 |
| ATOM | 8203 | HB2  | LEU | X | 536 | 37.142 | 12.042 | 48.554 | 0.00 | 0.00 |
| ATOM | 8204 | HB3  | LEU | X | 536 | 35.630 | 12.334 | 49.302 | 0.00 | 0.00 |
| ATOM | 8205 | CG   | LEU | X | 536 | 37.321 | 13.017 | 50.471 | 0.00 | 0.00 |
| ATOM | 8206 | HG   | LEU | X | 536 | 36.537 | 13.261 | 51.188 | 0.00 | 0.00 |
| ATOM | 8207 | CD1  | LEU | X | 536 | 38.564 | 12.523 | 51.192 | 0.00 | 0.00 |
| ATOM | 8208 | HD11 | LEU | X | 536 | 38.921 | 13.248 | 51.924 | 0.00 | 0.00 |
| ATOM | 8209 | HD12 | LEU | X | 536 | 38.418 | 11.616 | 51.778 | 0.00 | 0.00 |
| ATOM | 8210 | HD13 | LEU | X | 536 | 39.405 | 12.459 | 50.502 | 0.00 | 0.00 |
| ATOM | 8211 | CD2  | LEU | X | 536 | 37.690 | 14.284 | 49.720 | 0.00 | 0.00 |
| ATOM | 8212 | HD21 | LEU | X | 536 | 38.477 | 14.815 | 50.254 | 0.00 | 0.00 |
| ATOM | 8213 | HD22 | LEU | X | 536 | 38.119 | 14.055 | 48.744 | 0.00 | 0.00 |
| ATOM | 8214 | HD23 | LEU | X | 536 | 36.804 | 14.884 | 49.511 | 0.00 | 0.00 |
| ATOM | 8215 | C    | LEU | X | 536 | 35.494 | 10.553 | 51.331 | 0.00 | 0.00 |
| ATOM | 8216 | O    | LEU | X | 536 | 35.978 | 10.252 | 52.458 | 0.00 | 0.00 |
| ATOM | 8217 | N    | SER | X | 537 | 34.164 | 10.591 | 51.069 | 0.00 | 0.00 |
| ATOM | 8218 | H    | SER | X | 537 | 33.917 | 10.994 | 50.176 | 0.00 | 0.00 |
| ATOM | 8219 | CA   | SER | X | 537 | 33.175 | 10.364 | 52.020 | 0.00 | 0.00 |
| ATOM | 8220 | HA   | SER | X | 537 | 33.092 | 11.187 | 52.730 | 0.00 | 0.00 |
| ATOM | 8221 | CB   | SER | X | 537 | 31.811 | 10.546 | 51.302 | 0.00 | 0.00 |
| ATOM | 8222 | HB2  | SER | X | 537 | 30.962 | 10.387 | 51.967 | 0.00 | 0.00 |
| ATOM | 8223 | HB3  | SER | X | 537 | 31.694 | 11.550 | 50.894 | 0.00 | 0.00 |
| ATOM | 8224 | OG   | SER | X | 537 | 31.609 | 9.686  | 50.217 | 0.00 | 0.00 |
| ATOM | 8225 | HG   | SER | X | 537 | 31.399 | 10.309 | 49.517 | 0.00 | 0.00 |
| ATOM | 8226 | C    | SER | X | 537 | 33.330 | 9.031  | 52.655 | 0.00 | 0.00 |
| ATOM | 8227 | O    | SER | X | 537 | 33.105 | 8.916  | 53.900 | 0.00 | 0.00 |
| ATOM | 8228 | N    | ALA | X | 538 | 33.626 | 7.981  | 51.857 | 0.00 | 0.00 |
| ATOM | 8229 | H    | ALA | X | 538 | 33.703 | 8.296  | 50.901 | 0.00 | 0.00 |
| ATOM | 8230 | CA   | ALA | X | 538 | 33.512 | 6.528  | 52.114 | 0.00 | 0.00 |
| ATOM | 8231 | HA   | ALA | X | 538 | 32.753 | 6.341  | 52.874 | 0.00 | 0.00 |
| ATOM | 8232 | CB   | ALA | X | 538 | 33.264 | 5.816  | 50.753 | 0.00 | 0.00 |
| ATOM | 8233 | HB1  | ALA | X | 538 | 32.989 | 4.798  | 51.029 | 0.00 | 0.00 |
| ATOM | 8234 | HB2  | ALA | X | 538 | 32.366 | 6.184  | 50.256 | 0.00 | 0.00 |
| ATOM | 8235 | HB3  | ALA | X | 538 | 34.177 | 5.891  | 50.162 | 0.00 | 0.00 |
| ATOM | 8236 | C    | ALA | X | 538 | 34.778 | 6.028  | 52.802 | 0.00 | 0.00 |
| ATOM | 8237 | O    | ALA | X | 538 | 34.956 | 4.859  | 52.989 | 0.00 | 0.00 |
| ATOM | 8238 | N    | THR | X | 539 | 35.807 | 6.804  | 53.260 | 0.00 | 0.00 |
| ATOM | 8239 | H    | THR | X | 539 | 35.780 | 7.781  | 53.007 | 0.00 | 0.00 |
| ATOM | 8240 | CA   | THR | X | 539 | 37.115 | 6.370  | 53.691 | 0.00 | 0.00 |
| ATOM | 8241 | HA   | THR | X | 539 | 37.431 | 5.583  | 53.006 | 0.00 | 0.00 |
| ATOM | 8242 | CB   | THR | X | 539 | 38.233 | 7.472  | 53.695 | 0.00 | 0.00 |
| ATOM | 8243 | HB   | THR | X | 539 | 38.009 | 8.310  | 54.355 | 0.00 | 0.00 |
| ATOM | 8244 | CG2  | THR | X | 539 | 39.560 | 6.899  | 54.194 | 0.00 | 0.00 |
| ATOM | 8245 | HG21 | THR | X | 539 | 39.739 | 6.030  | 53.561 | 0.00 | 0.00 |
| ATOM | 8246 | HG22 | THR | X | 539 | 40.320 | 7.672  | 54.078 | 0.00 | 0.00 |
| ATOM | 8247 | HG23 | THR | X | 539 | 39.495 | 6.619  | 55.245 | 0.00 | 0.00 |
| ATOM | 8248 | OG1  | THR | X | 539 | 38.450 | 7.954  | 52.349 | 0.00 | 0.00 |
| ATOM | 8249 | HG1  | THR | X | 539 | 37.819 | 7.621  | 51.706 | 0.00 | 0.00 |
| ATOM | 8250 | C    | THR | X | 539 | 36.961 | 5.623  | 55.038 | 0.00 | 0.00 |
| ATOM | 8251 | O    | THR | X | 539 | 36.427 | 6.212  | 56.030 | 0.00 | 0.00 |
| ATOM | 8252 | OXT  | THR | X | 539 | 37.567 | 4.548  | 55.164 | 0.00 | 0.00 |
| ATOM | 8253 | C    | LIG | X | 540 | 46.872 | 33.570 | 48.295 | 0.00 | 0.00 |
| ATOM | 8254 | C1   | LIG | X | 540 | 47.569 | 33.353 | 49.443 | 0.00 | 0.00 |
| ATOM | 8255 | C2   | LIG | X | 540 | 48.120 | 32.100 | 49.679 | 0.00 | 0.00 |
| ATOM | 8256 | C3   | LIG | X | 540 | 47.807 | 30.986 | 48.905 | 0.00 | 0.00 |
| ATOM | 8257 | C4   | LIG | X | 540 | 47.072 | 31.179 | 47.787 | 0.00 | 0.00 |
| ATOM | 8258 | C5   | LIG | X | 540 | 46.639 | 32.491 | 47.416 | 0.00 | 0.00 |
| ATOM | 8259 | C6   | LIG | X | 540 | 46.386 | 34.969 | 48.015 | 0.00 | 0.00 |
| ATOM | 8260 | N    | LIG | X | 540 | 46.932 | 35.669 | 46.843 | 0.00 | 0.00 |
| ATOM | 8261 | C7   | LIG | X | 540 | 48.468 | 35.688 | 46.876 | 0.00 | 0.00 |
| ATOM | 8262 | H    | LIG | X | 540 | 46.548 | 35.252 | 45.979 | 0.00 | 0.00 |

|      |      |     |     |   |     |        |         |        |      |      |
|------|------|-----|-----|---|-----|--------|---------|--------|------|------|
| ATOM | 8263 | C8  | LIG | X | 540 | 46.485 | 37.147  | 46.802 | 0.00 | 0.00 |
| ATOM | 8264 | O   | LIG | X | 540 | 48.708 | 31.918  | 50.836 | 0.00 | 0.00 |
| ATOM | 8265 | C9  | LIG | X | 540 | 48.710 | 32.787  | 52.001 | 0.00 | 0.00 |
| ATOM | 8266 | O1  | LIG | X | 540 | 48.073 | 29.685  | 49.296 | 0.00 | 0.00 |
| ATOM | 8267 | H1  | LIG | X | 540 | 48.593 | 29.753  | 50.117 | 0.00 | 0.00 |
| ATOM | 8268 | H2  | LIG | X | 540 | 47.749 | 34.235  | 50.054 | 0.00 | 0.00 |
| ATOM | 8269 | H3  | LIG | X | 540 | 46.806 | 30.268  | 47.257 | 0.00 | 0.00 |
| ATOM | 8270 | H4  | LIG | X | 540 | 45.996 | 32.756  | 46.581 | 0.00 | 0.00 |
| ATOM | 8271 | H5  | LIG | X | 540 | 46.657 | 35.636  | 48.834 | 0.00 | 0.00 |
| ATOM | 8272 | H6  | LIG | X | 540 | 45.298 | 34.959  | 47.932 | 0.00 | 0.00 |
| ATOM | 8273 | H7  | LIG | X | 540 | 46.950 | 37.682  | 47.631 | 0.00 | 0.00 |
| ATOM | 8274 | H8  | LIG | X | 540 | 45.399 | 37.048  | 46.762 | 0.00 | 0.00 |
| ATOM | 8275 | H9  | LIG | X | 540 | 46.852 | 37.538  | 45.852 | 0.00 | 0.00 |
| ATOM | 8276 | H10 | LIG | X | 540 | 48.813 | 35.929  | 45.869 | 0.00 | 0.00 |
| ATOM | 8277 | H11 | LIG | X | 540 | 48.813 | 36.428  | 47.599 | 0.00 | 0.00 |
| ATOM | 8278 | H12 | LIG | X | 540 | 48.819 | 34.675  | 47.082 | 0.00 | 0.00 |
| ATOM | 8279 | H13 | LIG | X | 540 | 47.707 | 33.063  | 52.339 | 0.00 | 0.00 |
| ATOM | 8280 | H14 | LIG | X | 540 | 49.223 | 32.260  | 52.809 | 0.00 | 0.00 |
| ATOM | 8281 | H15 | LIG | X | 540 | 49.274 | 33.687  | 51.743 | 0.00 | 0.00 |
| ATOM | 8282 | Na+ | Na+ | X | 541 | 53.148 | 53.826  | 37.744 | 0.00 | 0.00 |
| ATOM | 8283 | Na+ | Na+ | X | 542 | 74.705 | 0.850   | 9.281  | 0.00 | 0.00 |
| ATOM | 8284 | Na+ | Na+ | X | 543 | 34.790 | -10.979 | 61.099 | 0.00 | 0.00 |
| ATOM | 8285 | Na+ | Na+ | X | 544 | 48.093 | 1.386   | 47.212 | 0.00 | 0.00 |
| ATOM | 8286 | Na+ | Na+ | X | 545 | 55.666 | 23.401  | 29.220 | 0.00 | 0.00 |
| ATOM | 8287 | Na+ | Na+ | X | 546 | 7.678  | 20.979  | 55.645 | 0.00 | 0.00 |
| ATOM | 8288 | Na+ | Na+ | X | 547 | 47.486 | 40.044  | 38.802 | 0.00 | 0.00 |

END

**2-HCl**

| CRYST1 | 87.125 | 87.125 | 87.125 | 90.00 | 90.00 | 90.00  | P 1    | 1      |      |      |
|--------|--------|--------|--------|-------|-------|--------|--------|--------|------|------|
| ATOM   | 1      | N      | ASP    | X     | 1     | 51.010 | 74.687 | 26.447 | 0.00 | 0.00 |
| ATOM   | 2      | H1     | ASP    | X     | 1     | 51.152 | 73.699 | 26.292 | 0.00 | 0.00 |
| ATOM   | 3      | H2     | ASP    | X     | 1     | 50.922 | 75.100 | 25.530 | 0.00 | 0.00 |
| ATOM   | 4      | H3     | ASP    | X     | 1     | 50.144 | 74.743 | 26.964 | 0.00 | 0.00 |
| ATOM   | 5      | CA     | ASP    | X     | 1     | 52.027 | 75.380 | 27.267 | 0.00 | 0.00 |
| ATOM   | 6      | HA     | ASP    | X     | 1     | 53.008 | 75.369 | 26.791 | 0.00 | 0.00 |
| ATOM   | 7      | CB     | ASP    | X     | 1     | 51.595 | 76.777 | 27.502 | 0.00 | 0.00 |
| ATOM   | 8      | HB2    | ASP    | X     | 1     | 51.157 | 77.180 | 26.588 | 0.00 | 0.00 |
| ATOM   | 9      | HB3    | ASP    | X     | 1     | 50.846 | 76.900 | 28.283 | 0.00 | 0.00 |
| ATOM   | 10     | CG     | ASP    | X     | 1     | 52.734 | 77.675 | 27.928 | 0.00 | 0.00 |
| ATOM   | 11     | OD1    | ASP    | X     | 1     | 53.586 | 78.171 | 27.123 | 0.00 | 0.00 |
| ATOM   | 12     | OD2    | ASP    | X     | 1     | 53.111 | 77.627 | 29.125 | 0.00 | 0.00 |
| ATOM   | 13     | C      | ASP    | X     | 1     | 52.216 | 74.654 | 28.641 | 0.00 | 0.00 |
| ATOM   | 14     | O      | ASP    | X     | 1     | 53.339 | 74.289 | 28.979 | 0.00 | 0.00 |
| ATOM   | 15     | N      | ALA    | X     | 2     | 51.219 | 74.593 | 29.482 | 0.00 | 0.00 |
| ATOM   | 16     | H      | ALA    | X     | 2     | 50.346 | 75.023 | 29.213 | 0.00 | 0.00 |
| ATOM   | 17     | CA     | ALA    | X     | 2     | 51.313 | 73.979 | 30.854 | 0.00 | 0.00 |
| ATOM   | 18     | HA     | ALA    | X     | 2     | 52.378 | 73.887 | 31.069 | 0.00 | 0.00 |
| ATOM   | 19     | CB     | ALA    | X     | 2     | 50.676 | 74.962 | 31.845 | 0.00 | 0.00 |
| ATOM   | 20     | HB1    | ALA    | X     | 2     | 50.993 | 74.536 | 32.797 | 0.00 | 0.00 |
| ATOM   | 21     | HB2    | ALA    | X     | 2     | 51.049 | 75.962 | 31.626 | 0.00 | 0.00 |
| ATOM   | 22     | HB3    | ALA    | X     | 2     | 49.586 | 74.936 | 31.820 | 0.00 | 0.00 |
| ATOM   | 23     | C      | ALA    | X     | 2     | 50.866 | 72.535 | 30.956 | 0.00 | 0.00 |
| ATOM   | 24     | O      | ALA    | X     | 2     | 50.148 | 72.074 | 31.843 | 0.00 | 0.00 |
| ATOM   | 25     | N      | GLU    | X     | 3     | 51.384 | 71.683 | 30.018 | 0.00 | 0.00 |
| ATOM   | 26     | H      | GLU    | X     | 3     | 51.904 | 72.029 | 29.224 | 0.00 | 0.00 |
| ATOM   | 27     | CA     | GLU    | X     | 3     | 51.000 | 70.253 | 29.987 | 0.00 | 0.00 |
| ATOM   | 28     | HA     | GLU    | X     | 3     | 49.915 | 70.182 | 30.060 | 0.00 | 0.00 |
| ATOM   | 29     | CB     | GLU    | X     | 3     | 51.408 | 69.630 | 28.634 | 0.00 | 0.00 |
| ATOM   | 30     | HB2    | GLU    | X     | 3     | 52.406 | 69.959 | 28.343 | 0.00 | 0.00 |
| ATOM   | 31     | HB3    | GLU    | X     | 3     | 51.356 | 68.542 | 28.680 | 0.00 | 0.00 |
| ATOM   | 32     | CG     | GLU    | X     | 3     | 50.448 | 70.088 | 27.495 | 0.00 | 0.00 |
| ATOM   | 33     | HG2    | GLU    | X     | 3     | 50.704 | 69.571 | 26.570 | 0.00 | 0.00 |
| ATOM   | 34     | HG3    | GLU    | X     | 3     | 49.411 | 69.854 | 27.737 | 0.00 | 0.00 |
| ATOM   | 35     | CD     | GLU    | X     | 3     | 50.571 | 71.551 | 27.206 | 0.00 | 0.00 |
| ATOM   | 36     | OE1    | GLU    | X     | 3     | 49.596 | 72.320 | 27.164 | 0.00 | 0.00 |
| ATOM   | 37     | OE2    | GLU    | X     | 3     | 51.688 | 72.008 | 26.805 | 0.00 | 0.00 |
| ATOM   | 38     | C      | GLU    | X     | 3     | 51.434 | 69.386 | 31.197 | 0.00 | 0.00 |
| ATOM   | 39     | O      | GLU    | X     | 3     | 50.914 | 68.239 | 31.272 | 0.00 | 0.00 |
| ATOM   | 40     | N      | LEU    | X     | 4     | 52.330 | 69.879 | 32.071 | 0.00 | 0.00 |
| ATOM   | 41     | H      | LEU    | X     | 4     | 52.805 | 70.744 | 31.854 | 0.00 | 0.00 |



|      |     |      |     |   |   |        |        |        |      |      |
|------|-----|------|-----|---|---|--------|--------|--------|------|------|
| ATOM | 42  | CA   | LEU | X | 4 | 52.666 | 69.236 | 33.480 | 0.00 | 0.00 |
| ATOM | 43  | HA   | LEU | X | 4 | 52.356 | 68.196 | 33.381 | 0.00 | 0.00 |
| ATOM | 44  | CB   | LEU | X | 4 | 54.192 | 69.215 | 33.610 | 0.00 | 0.00 |
| ATOM | 45  | HB2  | LEU | X | 4 | 54.601 | 70.224 | 33.582 | 0.00 | 0.00 |
| ATOM | 46  | HB3  | LEU | X | 4 | 54.490 | 68.849 | 34.592 | 0.00 | 0.00 |
| ATOM | 47  | CG   | LEU | X | 4 | 54.892 | 68.404 | 32.527 | 0.00 | 0.00 |
| ATOM | 48  | HG   | LEU | X | 4 | 54.769 | 68.917 | 31.573 | 0.00 | 0.00 |
| ATOM | 49  | CD1  | LEU | X | 4 | 56.426 | 68.437 | 32.924 | 0.00 | 0.00 |
| ATOM | 50  | HD11 | LEU | X | 4 | 57.012 | 68.182 | 32.041 | 0.00 | 0.00 |
| ATOM | 51  | HD12 | LEU | X | 4 | 56.784 | 69.385 | 33.326 | 0.00 | 0.00 |
| ATOM | 52  | HD13 | LEU | X | 4 | 56.525 | 67.642 | 33.664 | 0.00 | 0.00 |
| ATOM | 53  | CD2  | LEU | X | 4 | 54.275 | 67.004 | 32.407 | 0.00 | 0.00 |
| ATOM | 54  | HD21 | LEU | X | 4 | 54.855 | 66.388 | 31.720 | 0.00 | 0.00 |
| ATOM | 55  | HD22 | LEU | X | 4 | 54.134 | 66.498 | 33.362 | 0.00 | 0.00 |
| ATOM | 56  | HD23 | LEU | X | 4 | 53.279 | 66.981 | 31.963 | 0.00 | 0.00 |
| ATOM | 57  | C    | LEU | X | 4 | 52.002 | 69.879 | 34.691 | 0.00 | 0.00 |
| ATOM | 58  | O    | LEU | X | 4 | 52.079 | 69.419 | 35.776 | 0.00 | 0.00 |
| ATOM | 59  | N    | LEU | X | 5 | 51.118 | 70.839 | 34.457 | 0.00 | 0.00 |
| ATOM | 60  | H    | LEU | X | 5 | 51.034 | 71.113 | 33.489 | 0.00 | 0.00 |
| ATOM | 61  | CA   | LEU | X | 5 | 50.112 | 71.276 | 35.397 | 0.00 | 0.00 |
| ATOM | 62  | HA   | LEU | X | 5 | 50.360 | 70.923 | 36.398 | 0.00 | 0.00 |
| ATOM | 63  | CB   | LEU | X | 5 | 50.043 | 72.810 | 35.371 | 0.00 | 0.00 |
| ATOM | 64  | HB2  | LEU | X | 5 | 50.076 | 73.163 | 34.340 | 0.00 | 0.00 |
| ATOM | 65  | HB3  | LEU | X | 5 | 49.053 | 73.073 | 35.743 | 0.00 | 0.00 |
| ATOM | 66  | CG   | LEU | X | 5 | 50.991 | 73.695 | 36.210 | 0.00 | 0.00 |
| ATOM | 67  | HG   | LEU | X | 5 | 50.589 | 74.708 | 36.252 | 0.00 | 0.00 |
| ATOM | 68  | CD1  | LEU | X | 5 | 51.196 | 73.287 | 37.668 | 0.00 | 0.00 |
| ATOM | 69  | HD11 | LEU | X | 5 | 50.236 | 73.415 | 38.168 | 0.00 | 0.00 |
| ATOM | 70  | HD12 | LEU | X | 5 | 51.608 | 72.278 | 37.695 | 0.00 | 0.00 |
| ATOM | 71  | HD13 | LEU | X | 5 | 51.913 | 73.980 | 38.107 | 0.00 | 0.00 |
| ATOM | 72  | CD2  | LEU | X | 5 | 52.360 | 73.806 | 35.560 | 0.00 | 0.00 |
| ATOM | 73  | HD21 | LEU | X | 5 | 52.940 | 72.884 | 35.576 | 0.00 | 0.00 |
| ATOM | 74  | HD22 | LEU | X | 5 | 52.287 | 74.165 | 34.533 | 0.00 | 0.00 |
| ATOM | 75  | HD23 | LEU | X | 5 | 53.000 | 74.560 | 36.020 | 0.00 | 0.00 |
| ATOM | 76  | C    | LEU | X | 5 | 48.752 | 70.701 | 35.032 | 0.00 | 0.00 |
| ATOM | 77  | O    | LEU | X | 5 | 48.546 | 70.532 | 33.837 | 0.00 | 0.00 |
| ATOM | 78  | N    | VAL | X | 6 | 47.901 | 70.346 | 36.010 | 0.00 | 0.00 |
| ATOM | 79  | H    | VAL | X | 6 | 48.152 | 70.437 | 36.984 | 0.00 | 0.00 |
| ATOM | 80  | CA   | VAL | X | 6 | 46.567 | 69.831 | 35.638 | 0.00 | 0.00 |
| ATOM | 81  | HA   | VAL | X | 6 | 46.283 | 70.395 | 34.749 | 0.00 | 0.00 |
| ATOM | 82  | CB   | VAL | X | 6 | 46.578 | 68.335 | 35.301 | 0.00 | 0.00 |
| ATOM | 83  | HB   | VAL | X | 6 | 47.444 | 68.056 | 34.700 | 0.00 | 0.00 |
| ATOM | 84  | CG1  | VAL | X | 6 | 46.650 | 67.481 | 36.515 | 0.00 | 0.00 |
| ATOM | 85  | HG11 | VAL | X | 6 | 45.733 | 67.402 | 37.100 | 0.00 | 0.00 |
| ATOM | 86  | HG12 | VAL | X | 6 | 47.034 | 66.516 | 36.185 | 0.00 | 0.00 |
| ATOM | 87  | HG13 | VAL | X | 6 | 47.469 | 67.820 | 37.149 | 0.00 | 0.00 |
| ATOM | 88  | CG2  | VAL | X | 6 | 45.304 | 67.932 | 34.520 | 0.00 | 0.00 |
| ATOM | 89  | HG21 | VAL | X | 6 | 44.405 | 67.920 | 35.135 | 0.00 | 0.00 |
| ATOM | 90  | HG22 | VAL | X | 6 | 45.131 | 68.650 | 33.717 | 0.00 | 0.00 |
| ATOM | 91  | HG23 | VAL | X | 6 | 45.400 | 66.926 | 34.111 | 0.00 | 0.00 |
| ATOM | 92  | C    | VAL | X | 6 | 45.550 | 70.039 | 36.711 | 0.00 | 0.00 |
| ATOM | 93  | O    | VAL | X | 6 | 45.976 | 70.080 | 37.867 | 0.00 | 0.00 |
| ATOM | 94  | N    | THR | X | 7 | 44.311 | 70.435 | 36.351 | 0.00 | 0.00 |
| ATOM | 95  | H    | THR | X | 7 | 44.114 | 70.462 | 35.361 | 0.00 | 0.00 |
| ATOM | 96  | CA   | THR | X | 7 | 43.247 | 70.699 | 37.300 | 0.00 | 0.00 |
| ATOM | 97  | HA   | THR | X | 7 | 43.741 | 70.721 | 38.272 | 0.00 | 0.00 |
| ATOM | 98  | CB   | THR | X | 7 | 42.728 | 72.100 | 36.927 | 0.00 | 0.00 |
| ATOM | 99  | HB   | THR | X | 7 | 42.185 | 71.929 | 35.998 | 0.00 | 0.00 |
| ATOM | 100 | CG2  | THR | X | 7 | 41.745 | 72.580 | 37.961 | 0.00 | 0.00 |
| ATOM | 101 | HG21 | THR | X | 7 | 42.183 | 72.595 | 38.959 | 0.00 | 0.00 |
| ATOM | 102 | HG22 | THR | X | 7 | 41.395 | 73.579 | 37.700 | 0.00 | 0.00 |
| ATOM | 103 | HG23 | THR | X | 7 | 40.898 | 71.894 | 37.966 | 0.00 | 0.00 |
| ATOM | 104 | OG1  | THR | X | 7 | 43.753 | 73.017 | 36.887 | 0.00 | 0.00 |
| ATOM | 105 | HG1  | THR | X | 7 | 43.409 | 73.894 | 36.703 | 0.00 | 0.00 |
| ATOM | 106 | C    | THR | X | 7 | 42.201 | 69.586 | 37.376 | 0.00 | 0.00 |
| ATOM | 107 | O    | THR | X | 7 | 41.960 | 68.930 | 36.385 | 0.00 | 0.00 |
| ATOM | 108 | N    | VAL | X | 8 | 41.768 | 69.341 | 38.618 | 0.00 | 0.00 |
| ATOM | 109 | H    | VAL | X | 8 | 41.978 | 69.993 | 39.360 | 0.00 | 0.00 |
| ATOM | 110 | CA   | VAL | X | 8 | 40.659 | 68.393 | 38.978 | 0.00 | 0.00 |
| ATOM | 111 | HA   | VAL | X | 8 | 40.162 | 68.227 | 38.022 | 0.00 | 0.00 |

|      |     |      |     |   |    |        |        |        |      |      |
|------|-----|------|-----|---|----|--------|--------|--------|------|------|
| ATOM | 112 | CB   | VAL | X | 8  | 41.268 | 67.107 | 39.571 | 0.00 | 0.00 |
| ATOM | 113 | HB   | VAL | X | 8  | 40.506 | 66.410 | 39.921 | 0.00 | 0.00 |
| ATOM | 114 | CG1  | VAL | X | 8  | 42.105 | 66.320 | 38.654 | 0.00 | 0.00 |
| ATOM | 115 | HG11 | VAL | X | 8  | 42.254 | 65.332 | 39.089 | 0.00 | 0.00 |
| ATOM | 116 | HG12 | VAL | X | 8  | 41.673 | 66.213 | 37.659 | 0.00 | 0.00 |
| ATOM | 117 | HG13 | VAL | X | 8  | 43.074 | 66.799 | 38.514 | 0.00 | 0.00 |
| ATOM | 118 | CG2  | VAL | X | 8  | 42.017 | 67.382 | 40.860 | 0.00 | 0.00 |
| ATOM | 119 | HG21 | VAL | X | 8  | 42.793 | 68.134 | 40.717 | 0.00 | 0.00 |
| ATOM | 120 | HG22 | VAL | X | 8  | 41.211 | 67.653 | 41.542 | 0.00 | 0.00 |
| ATOM | 121 | HG23 | VAL | X | 8  | 42.514 | 66.462 | 41.169 | 0.00 | 0.00 |
| ATOM | 122 | C    | VAL | X | 8  | 39.567 | 69.109 | 39.868 | 0.00 | 0.00 |
| ATOM | 123 | O    | VAL | X | 8  | 39.796 | 70.183 | 40.374 | 0.00 | 0.00 |
| ATOM | 124 | N    | ARG | X | 9  | 38.510 | 68.386 | 40.175 | 0.00 | 0.00 |
| ATOM | 125 | H    | ARG | X | 9  | 38.290 | 67.577 | 39.612 | 0.00 | 0.00 |
| ATOM | 126 | CA   | ARG | X | 9  | 37.490 | 68.881 | 41.082 | 0.00 | 0.00 |
| ATOM | 127 | HA   | ARG | X | 9  | 36.952 | 69.556 | 40.416 | 0.00 | 0.00 |
| ATOM | 128 | CB   | ARG | X | 9  | 36.648 | 67.729 | 41.535 | 0.00 | 0.00 |
| ATOM | 129 | HB2  | ARG | X | 9  | 36.413 | 67.082 | 40.689 | 0.00 | 0.00 |
| ATOM | 130 | HB3  | ARG | X | 9  | 37.233 | 67.042 | 42.147 | 0.00 | 0.00 |
| ATOM | 131 | CG   | ARG | X | 9  | 35.379 | 68.220 | 42.267 | 0.00 | 0.00 |
| ATOM | 132 | HG2  | ARG | X | 9  | 35.613 | 68.405 | 43.316 | 0.00 | 0.00 |
| ATOM | 133 | HG3  | ARG | X | 9  | 34.975 | 69.148 | 41.862 | 0.00 | 0.00 |
| ATOM | 134 | CD   | ARG | X | 9  | 34.292 | 67.189 | 42.254 | 0.00 | 0.00 |
| ATOM | 135 | HD2  | ARG | X | 9  | 34.423 | 66.435 | 41.478 | 0.00 | 0.00 |
| ATOM | 136 | HD3  | ARG | X | 9  | 34.303 | 66.573 | 43.153 | 0.00 | 0.00 |
| ATOM | 137 | NE   | ARG | X | 9  | 32.945 | 67.751 | 42.050 | 0.00 | 0.00 |
| ATOM | 138 | HE   | ARG | X | 9  | 32.947 | 68.731 | 41.806 | 0.00 | 0.00 |
| ATOM | 139 | CZ   | ARG | X | 9  | 31.806 | 67.088 | 41.952 | 0.00 | 0.00 |
| ATOM | 140 | NH1  | ARG | X | 9  | 31.738 | 65.876 | 42.167 | 0.00 | 0.00 |
| ATOM | 141 | HH11 | ARG | X | 9  | 32.591 | 65.416 | 42.453 | 0.00 | 0.00 |
| ATOM | 142 | HH12 | ARG | X | 9  | 30.868 | 65.368 | 42.096 | 0.00 | 0.00 |
| ATOM | 143 | NH2  | ARG | X | 9  | 30.756 | 67.781 | 41.675 | 0.00 | 0.00 |
| ATOM | 144 | HH21 | ARG | X | 9  | 30.831 | 68.778 | 41.529 | 0.00 | 0.00 |
| ATOM | 145 | HH22 | ARG | X | 9  | 29.910 | 67.258 | 41.851 | 0.00 | 0.00 |
| ATOM | 146 | C    | ARG | X | 9  | 38.003 | 69.588 | 42.322 | 0.00 | 0.00 |
| ATOM | 147 | O    | ARG | X | 9  | 37.552 | 70.733 | 42.573 | 0.00 | 0.00 |
| ATOM | 148 | N    | GLY | X | 10 | 38.992 | 68.910 | 42.975 | 0.00 | 0.00 |
| ATOM | 149 | H    | GLY | X | 10 | 39.175 | 67.960 | 42.686 | 0.00 | 0.00 |
| ATOM | 150 | CA   | GLY | X | 10 | 39.584 | 69.544 | 44.239 | 0.00 | 0.00 |
| ATOM | 151 | HA2  | GLY | X | 10 | 38.788 | 69.830 | 44.875 | 0.00 | 0.00 |
| ATOM | 152 | HA3  | GLY | X | 10 | 40.218 | 68.785 | 44.696 | 0.00 | 0.00 |
| ATOM | 153 | C    | GLY | X | 10 | 40.466 | 70.814 | 43.940 | 0.00 | 0.00 |
| ATOM | 154 | O    | GLY | X | 10 | 40.424 | 71.825 | 44.603 | 0.00 | 0.00 |
| ATOM | 155 | N    | GLY | X | 11 | 41.343 | 70.690 | 42.949 | 0.00 | 0.00 |
| ATOM | 156 | H    | GLY | X | 11 | 41.258 | 69.916 | 42.306 | 0.00 | 0.00 |
| ATOM | 157 | CA   | GLY | X | 11 | 42.169 | 71.820 | 42.518 | 0.00 | 0.00 |
| ATOM | 158 | HA2  | GLY | X | 11 | 41.592 | 72.512 | 42.000 | 0.00 | 0.00 |
| ATOM | 159 | HA3  | GLY | X | 11 | 42.582 | 72.295 | 43.471 | 0.00 | 0.00 |
| ATOM | 160 | C    | GLY | X | 11 | 43.342 | 71.458 | 41.640 | 0.00 | 0.00 |
| ATOM | 161 | O    | GLY | X | 11 | 43.294 | 70.580 | 40.841 | 0.00 | 0.00 |
| ATOM | 162 | N    | ARG | X | 12 | 44.435 | 72.281 | 41.709 | 0.00 | 0.00 |
| ATOM | 163 | H    | ARG | X | 12 | 44.353 | 72.984 | 42.430 | 0.00 | 0.00 |
| ATOM | 164 | CA   | ARG | X | 12 | 45.581 | 72.332 | 40.863 | 0.00 | 0.00 |
| ATOM | 165 | HA   | ARG | X | 12 | 45.172 | 71.971 | 39.919 | 0.00 | 0.00 |
| ATOM | 166 | CB   | ARG | X | 12 | 46.115 | 73.751 | 40.716 | 0.00 | 0.00 |
| ATOM | 167 | HB2  | ARG | X | 12 | 46.804 | 74.045 | 41.508 | 0.00 | 0.00 |
| ATOM | 168 | HB3  | ARG | X | 12 | 46.749 | 73.762 | 39.829 | 0.00 | 0.00 |
| ATOM | 169 | CG   | ARG | X | 12 | 45.157 | 74.981 | 40.483 | 0.00 | 0.00 |
| ATOM | 170 | HG2  | ARG | X | 12 | 44.629 | 74.625 | 39.598 | 0.00 | 0.00 |
| ATOM | 171 | HG3  | ARG | X | 12 | 44.529 | 75.164 | 41.354 | 0.00 | 0.00 |
| ATOM | 172 | CD   | ARG | X | 12 | 46.024 | 76.217 | 40.164 | 0.00 | 0.00 |
| ATOM | 173 | HD2  | ARG | X | 12 | 45.367 | 77.087 | 40.194 | 0.00 | 0.00 |
| ATOM | 174 | HD3  | ARG | X | 12 | 46.669 | 76.261 | 41.041 | 0.00 | 0.00 |
| ATOM | 175 | NE   | ARG | X | 12 | 46.659 | 76.065 | 38.887 | 0.00 | 0.00 |
| ATOM | 176 | HE   | ARG | X | 12 | 46.219 | 75.438 | 38.229 | 0.00 | 0.00 |
| ATOM | 177 | CZ   | ARG | X | 12 | 47.781 | 76.607 | 38.392 | 0.00 | 0.00 |
| ATOM | 178 | NH1  | ARG | X | 12 | 48.426 | 77.596 | 39.018 | 0.00 | 0.00 |
| ATOM | 179 | HH11 | ARG | X | 12 | 47.991 | 77.995 | 39.838 | 0.00 | 0.00 |
| ATOM | 180 | HH12 | ARG | X | 12 | 49.183 | 78.059 | 38.535 | 0.00 | 0.00 |
| ATOM | 181 | NH2  | ARG | X | 12 | 48.141 | 76.149 | 37.234 | 0.00 | 0.00 |

|      |     |      |     |   |    |        |        |        |      |      |
|------|-----|------|-----|---|----|--------|--------|--------|------|------|
| ATOM | 182 | HH21 | ARG | X | 12 | 47.621 | 75.384 | 36.828 | 0.00 | 0.00 |
| ATOM | 183 | HH22 | ARG | X | 12 | 48.711 | 76.732 | 36.638 | 0.00 | 0.00 |
| ATOM | 184 | C    | ARG | X | 12 | 46.632 | 71.243 | 41.335 | 0.00 | 0.00 |
| ATOM | 185 | O    | ARG | X | 12 | 47.030 | 71.171 | 42.502 | 0.00 | 0.00 |
| ATOM | 186 | N    | LEU | X | 13 | 47.163 | 70.461 | 40.401 | 0.00 | 0.00 |
| ATOM | 187 | H    | LEU | X | 13 | 46.834 | 70.695 | 39.475 | 0.00 | 0.00 |
| ATOM | 188 | CA   | LEU | X | 13 | 48.220 | 69.415 | 40.519 | 0.00 | 0.00 |
| ATOM | 189 | HA   | LEU | X | 13 | 48.601 | 69.435 | 41.540 | 0.00 | 0.00 |
| ATOM | 190 | CB   | LEU | X | 13 | 47.445 | 68.117 | 40.209 | 0.00 | 0.00 |
| ATOM | 191 | HB2  | LEU | X | 13 | 47.043 | 68.253 | 39.205 | 0.00 | 0.00 |
| ATOM | 192 | HB3  | LEU | X | 13 | 48.239 | 67.411 | 40.452 | 0.00 | 0.00 |
| ATOM | 193 | CG   | LEU | X | 13 | 46.248 | 67.758 | 41.122 | 0.00 | 0.00 |
| ATOM | 194 | HG   | LEU | X | 13 | 45.605 | 68.637 | 41.171 | 0.00 | 0.00 |
| ATOM | 195 | CD1  | LEU | X | 13 | 45.491 | 66.632 | 40.400 | 0.00 | 0.00 |
| ATOM | 196 | HD11 | LEU | X | 13 | 46.057 | 65.815 | 39.953 | 0.00 | 0.00 |
| ATOM | 197 | HD12 | LEU | X | 13 | 44.894 | 66.114 | 41.151 | 0.00 | 0.00 |
| ATOM | 198 | HD13 | LEU | X | 13 | 44.996 | 67.222 | 39.628 | 0.00 | 0.00 |
| ATOM | 199 | CD2  | LEU | X | 13 | 46.640 | 67.534 | 42.586 | 0.00 | 0.00 |
| ATOM | 200 | HD21 | LEU | X | 13 | 45.722 | 67.235 | 43.092 | 0.00 | 0.00 |
| ATOM | 201 | HD22 | LEU | X | 13 | 47.410 | 66.782 | 42.760 | 0.00 | 0.00 |
| ATOM | 202 | HD23 | LEU | X | 13 | 47.112 | 68.390 | 43.069 | 0.00 | 0.00 |
| ATOM | 203 | C    | LEU | X | 13 | 49.420 | 69.576 | 39.580 | 0.00 | 0.00 |
| ATOM | 204 | O    | LEU | X | 13 | 49.240 | 69.959 | 38.405 | 0.00 | 0.00 |
| ATOM | 205 | N    | ARG | X | 14 | 50.665 | 69.412 | 40.067 | 0.00 | 0.00 |
| ATOM | 206 | H    | ARG | X | 14 | 50.766 | 69.152 | 41.037 | 0.00 | 0.00 |
| ATOM | 207 | CA   | ARG | X | 14 | 51.859 | 69.370 | 39.234 | 0.00 | 0.00 |
| ATOM | 208 | HA   | ARG | X | 14 | 51.678 | 69.630 | 38.191 | 0.00 | 0.00 |
| ATOM | 209 | CB   | ARG | X | 14 | 52.859 | 70.402 | 39.730 | 0.00 | 0.00 |
| ATOM | 210 | HB2  | ARG | X | 14 | 52.415 | 71.397 | 39.754 | 0.00 | 0.00 |
| ATOM | 211 | HB3  | ARG | X | 14 | 53.037 | 70.063 | 40.750 | 0.00 | 0.00 |
| ATOM | 212 | CG   | ARG | X | 14 | 54.185 | 70.440 | 39.008 | 0.00 | 0.00 |
| ATOM | 213 | HG2  | ARG | X | 14 | 54.753 | 69.522 | 39.153 | 0.00 | 0.00 |
| ATOM | 214 | HG3  | ARG | X | 14 | 54.067 | 70.674 | 37.950 | 0.00 | 0.00 |
| ATOM | 215 | CD   | ARG | X | 14 | 55.083 | 71.456 | 39.628 | 0.00 | 0.00 |
| ATOM | 216 | HD2  | ARG | X | 14 | 56.043 | 71.512 | 39.116 | 0.00 | 0.00 |
| ATOM | 217 | HD3  | ARG | X | 14 | 54.800 | 72.500 | 39.493 | 0.00 | 0.00 |
| ATOM | 218 | NE   | ARG | X | 14 | 55.257 | 71.272 | 41.159 | 0.00 | 0.00 |
| ATOM | 219 | HE   | ARG | X | 14 | 55.353 | 70.298 | 41.410 | 0.00 | 0.00 |
| ATOM | 220 | CZ   | ARG | X | 14 | 54.940 | 72.065 | 42.160 | 0.00 | 0.00 |
| ATOM | 221 | NH1  | ARG | X | 14 | 54.484 | 73.233 | 41.942 | 0.00 | 0.00 |
| ATOM | 222 | HH11 | ARG | X | 14 | 54.381 | 73.708 | 41.057 | 0.00 | 0.00 |
| ATOM | 223 | HH12 | ARG | X | 14 | 54.358 | 73.752 | 42.800 | 0.00 | 0.00 |
| ATOM | 224 | NH2  | ARG | X | 14 | 55.090 | 71.651 | 43.416 | 0.00 | 0.00 |
| ATOM | 225 | HH21 | ARG | X | 14 | 55.426 | 70.718 | 43.609 | 0.00 | 0.00 |
| ATOM | 226 | HH22 | ARG | X | 14 | 54.733 | 72.293 | 44.108 | 0.00 | 0.00 |
| ATOM | 227 | C    | ARG | X | 14 | 52.469 | 67.946 | 39.158 | 0.00 | 0.00 |
| ATOM | 228 | O    | ARG | X | 14 | 52.615 | 67.263 | 40.158 | 0.00 | 0.00 |
| ATOM | 229 | N    | GLY | X | 15 | 52.750 | 67.542 | 37.920 | 0.00 | 0.00 |
| ATOM | 230 | H    | GLY | X | 15 | 52.398 | 68.044 | 37.118 | 0.00 | 0.00 |
| ATOM | 231 | CA   | GLY | X | 15 | 53.348 | 66.196 | 37.671 | 0.00 | 0.00 |
| ATOM | 232 | HA2  | GLY | X | 15 | 53.549 | 65.617 | 38.580 | 0.00 | 0.00 |
| ATOM | 233 | HA3  | GLY | X | 15 | 52.638 | 65.644 | 37.088 | 0.00 | 0.00 |
| ATOM | 234 | C    | GLY | X | 15 | 54.667 | 66.386 | 36.891 | 0.00 | 0.00 |
| ATOM | 235 | O    | GLY | X | 15 | 55.383 | 67.350 | 36.998 | 0.00 | 0.00 |
| ATOM | 236 | N    | ILE | X | 16 | 54.984 | 65.445 | 36.059 | 0.00 | 0.00 |
| ATOM | 237 | H    | ILE | X | 16 | 54.409 | 64.614 | 36.035 | 0.00 | 0.00 |
| ATOM | 238 | CA   | ILE | X | 16 | 56.328 | 65.228 | 35.587 | 0.00 | 0.00 |
| ATOM | 239 | HA   | ILE | X | 16 | 56.848 | 66.185 | 35.630 | 0.00 | 0.00 |
| ATOM | 240 | CB   | ILE | X | 16 | 57.150 | 64.342 | 36.581 | 0.00 | 0.00 |
| ATOM | 241 | HB   | ILE | X | 16 | 58.053 | 64.040 | 36.051 | 0.00 | 0.00 |
| ATOM | 242 | CG2  | ILE | X | 16 | 57.569 | 65.081 | 37.813 | 0.00 | 0.00 |
| ATOM | 243 | HG21 | ILE | X | 16 | 56.709 | 65.333 | 38.433 | 0.00 | 0.00 |
| ATOM | 244 | HG22 | ILE | X | 16 | 58.345 | 64.502 | 38.313 | 0.00 | 0.00 |
| ATOM | 245 | HG23 | ILE | X | 16 | 58.102 | 65.992 | 37.540 | 0.00 | 0.00 |
| ATOM | 246 | CG1  | ILE | X | 16 | 56.417 | 62.966 | 36.923 | 0.00 | 0.00 |
| ATOM | 247 | HG12 | ILE | X | 16 | 55.587 | 63.318 | 37.535 | 0.00 | 0.00 |
| ATOM | 248 | HG13 | ILE | X | 16 | 55.869 | 62.654 | 36.033 | 0.00 | 0.00 |
| ATOM | 249 | CD1  | ILE | X | 16 | 57.213 | 61.832 | 37.597 | 0.00 | 0.00 |
| ATOM | 250 | HD11 | ILE | X | 16 | 58.162 | 61.741 | 37.067 | 0.00 | 0.00 |
| ATOM | 251 | HD12 | ILE | X | 16 | 57.412 | 62.065 | 38.643 | 0.00 | 0.00 |

|      |     |      |     |   |    |        |        |        |      |      |
|------|-----|------|-----|---|----|--------|--------|--------|------|------|
| ATOM | 252 | HD13 | ILE | X | 16 | 56.638 | 60.911 | 37.692 | 0.00 | 0.00 |
| ATOM | 253 | C    | ILE | X | 16 | 56.359 | 64.570 | 34.215 | 0.00 | 0.00 |
| ATOM | 254 | O    | ILE | X | 16 | 55.543 | 63.725 | 33.805 | 0.00 | 0.00 |
| ATOM | 255 | N    | ARG | X | 17 | 57.482 | 64.893 | 33.425 | 0.00 | 0.00 |
| ATOM | 256 | H    | ARG | X | 17 | 58.066 | 65.654 | 33.742 | 0.00 | 0.00 |
| ATOM | 257 | CA   | ARG | X | 17 | 57.865 | 64.087 | 32.256 | 0.00 | 0.00 |
| ATOM | 258 | HA   | ARG | X | 17 | 56.947 | 63.795 | 31.746 | 0.00 | 0.00 |
| ATOM | 259 | CB   | ARG | X | 17 | 58.800 | 64.872 | 31.320 | 0.00 | 0.00 |
| ATOM | 260 | HB2  | ARG | X | 17 | 58.578 | 65.937 | 31.260 | 0.00 | 0.00 |
| ATOM | 261 | HB3  | ARG | X | 17 | 59.821 | 64.760 | 31.685 | 0.00 | 0.00 |
| ATOM | 262 | CG   | ARG | X | 17 | 58.920 | 64.248 | 29.941 | 0.00 | 0.00 |
| ATOM | 263 | HG2  | ARG | X | 17 | 59.517 | 63.336 | 29.931 | 0.00 | 0.00 |
| ATOM | 264 | HG3  | ARG | X | 17 | 57.900 | 64.007 | 29.639 | 0.00 | 0.00 |
| ATOM | 265 | CD   | ARG | X | 17 | 59.546 | 65.225 | 28.934 | 0.00 | 0.00 |
| ATOM | 266 | HD2  | ARG | X | 17 | 59.642 | 64.745 | 27.960 | 0.00 | 0.00 |
| ATOM | 267 | HD3  | ARG | X | 17 | 58.752 | 65.965 | 28.826 | 0.00 | 0.00 |
| ATOM | 268 | NE   | ARG | X | 17 | 60.814 | 65.845 | 29.478 | 0.00 | 0.00 |
| ATOM | 269 | HE   | ARG | X | 17 | 61.502 | 65.194 | 29.828 | 0.00 | 0.00 |
| ATOM | 270 | CZ   | ARG | X | 17 | 61.303 | 67.020 | 28.990 | 0.00 | 0.00 |
| ATOM | 271 | NH1  | ARG | X | 17 | 60.564 | 67.876 | 28.326 | 0.00 | 0.00 |
| ATOM | 272 | HH11 | ARG | X | 17 | 59.632 | 67.557 | 28.101 | 0.00 | 0.00 |
| ATOM | 273 | HH12 | ARG | X | 17 | 60.927 | 68.693 | 27.857 | 0.00 | 0.00 |
| ATOM | 274 | NH2  | ARG | X | 17 | 62.528 | 67.220 | 29.221 | 0.00 | 0.00 |
| ATOM | 275 | HH21 | ARG | X | 17 | 63.163 | 66.578 | 29.673 | 0.00 | 0.00 |
| ATOM | 276 | HH22 | ARG | X | 17 | 62.928 | 68.051 | 28.810 | 0.00 | 0.00 |
| ATOM | 277 | C    | ARG | X | 17 | 58.504 | 62.807 | 32.690 | 0.00 | 0.00 |
| ATOM | 278 | O    | ARG | X | 17 | 59.298 | 62.870 | 33.674 | 0.00 | 0.00 |
| ATOM | 279 | N    | LEU | X | 18 | 58.238 | 61.699 | 31.964 | 0.00 | 0.00 |
| ATOM | 280 | H    | LEU | X | 18 | 57.593 | 61.788 | 31.191 | 0.00 | 0.00 |
| ATOM | 281 | CA   | LEU | X | 18 | 59.029 | 60.459 | 32.058 | 0.00 | 0.00 |
| ATOM | 282 | HA   | LEU | X | 18 | 59.711 | 60.595 | 32.898 | 0.00 | 0.00 |
| ATOM | 283 | CB   | LEU | X | 18 | 58.135 | 59.209 | 32.498 | 0.00 | 0.00 |
| ATOM | 284 | HB2  | LEU | X | 18 | 57.323 | 59.140 | 31.775 | 0.00 | 0.00 |
| ATOM | 285 | HB3  | LEU | X | 18 | 58.858 | 58.393 | 32.503 | 0.00 | 0.00 |
| ATOM | 286 | CG   | LEU | X | 18 | 57.480 | 59.416 | 33.885 | 0.00 | 0.00 |
| ATOM | 287 | HG   | LEU | X | 18 | 57.042 | 60.413 | 33.920 | 0.00 | 0.00 |
| ATOM | 288 | CD1  | LEU | X | 18 | 56.320 | 58.408 | 33.951 | 0.00 | 0.00 |
| ATOM | 289 | HD11 | LEU | X | 18 | 55.645 | 58.426 | 33.095 | 0.00 | 0.00 |
| ATOM | 290 | HD12 | LEU | X | 18 | 56.716 | 57.395 | 34.015 | 0.00 | 0.00 |
| ATOM | 291 | HD13 | LEU | X | 18 | 55.870 | 58.601 | 34.925 | 0.00 | 0.00 |
| ATOM | 292 | CD2  | LEU | X | 18 | 58.507 | 59.352 | 35.038 | 0.00 | 0.00 |
| ATOM | 293 | HD21 | LEU | X | 18 | 58.880 | 58.331 | 35.123 | 0.00 | 0.00 |
| ATOM | 294 | HD22 | LEU | X | 18 | 59.217 | 60.149 | 34.817 | 0.00 | 0.00 |
| ATOM | 295 | HD23 | LEU | X | 18 | 57.967 | 59.470 | 35.977 | 0.00 | 0.00 |
| ATOM | 296 | C    | LEU | X | 18 | 59.840 | 60.080 | 30.766 | 0.00 | 0.00 |
| ATOM | 297 | O    | LEU | X | 18 | 59.358 | 60.234 | 29.638 | 0.00 | 0.00 |
| ATOM | 298 | N    | LYS | X | 19 | 61.034 | 59.558 | 30.933 | 0.00 | 0.00 |
| ATOM | 299 | H    | LYS | X | 19 | 61.393 | 59.419 | 31.867 | 0.00 | 0.00 |
| ATOM | 300 | CA   | LYS | X | 19 | 61.864 | 58.938 | 29.856 | 0.00 | 0.00 |
| ATOM | 301 | HA   | LYS | X | 19 | 61.867 | 59.560 | 28.961 | 0.00 | 0.00 |
| ATOM | 302 | CB   | LYS | X | 19 | 63.369 | 58.698 | 30.335 | 0.00 | 0.00 |
| ATOM | 303 | HB2  | LYS | X | 19 | 63.310 | 58.230 | 31.317 | 0.00 | 0.00 |
| ATOM | 304 | HB3  | LYS | X | 19 | 63.751 | 58.001 | 29.590 | 0.00 | 0.00 |
| ATOM | 305 | CG   | LYS | X | 19 | 64.268 | 59.974 | 30.515 | 0.00 | 0.00 |
| ATOM | 306 | HG2  | LYS | X | 19 | 64.258 | 60.516 | 29.569 | 0.00 | 0.00 |
| ATOM | 307 | HG3  | LYS | X | 19 | 63.885 | 60.664 | 31.267 | 0.00 | 0.00 |
| ATOM | 308 | CD   | LYS | X | 19 | 65.696 | 59.709 | 31.075 | 0.00 | 0.00 |
| ATOM | 309 | HD2  | LYS | X | 19 | 66.222 | 59.027 | 30.406 | 0.00 | 0.00 |
| ATOM | 310 | HD3  | LYS | X | 19 | 66.288 | 60.612 | 31.223 | 0.00 | 0.00 |
| ATOM | 311 | CE   | LYS | X | 19 | 65.457 | 59.035 | 32.415 | 0.00 | 0.00 |
| ATOM | 312 | HE2  | LYS | X | 19 | 64.843 | 59.581 | 33.131 | 0.00 | 0.00 |
| ATOM | 313 | HE3  | LYS | X | 19 | 64.962 | 58.096 | 32.166 | 0.00 | 0.00 |
| ATOM | 314 | NZ   | LYS | X | 19 | 66.716 | 58.708 | 33.133 | 0.00 | 0.00 |
| ATOM | 315 | HZ1  | LYS | X | 19 | 67.054 | 59.547 | 33.581 | 0.00 | 0.00 |
| ATOM | 316 | HZ2  | LYS | X | 19 | 66.405 | 58.133 | 33.904 | 0.00 | 0.00 |
| ATOM | 317 | HZ3  | LYS | X | 19 | 67.460 | 58.227 | 32.649 | 0.00 | 0.00 |
| ATOM | 318 | C    | LYS | X | 19 | 61.183 | 57.599 | 29.426 | 0.00 | 0.00 |
| ATOM | 319 | O    | LYS | X | 19 | 60.581 | 56.846 | 30.180 | 0.00 | 0.00 |
| ATOM | 320 | N    | THR | X | 20 | 61.306 | 57.285 | 28.106 | 0.00 | 0.00 |
| ATOM | 321 | H    | THR | X | 20 | 61.528 | 58.077 | 27.520 | 0.00 | 0.00 |

|      |     |      |     |   |    |        |        |        |      |      |
|------|-----|------|-----|---|----|--------|--------|--------|------|------|
| ATOM | 322 | CA   | THR | X | 20 | 60.846 | 55.957 | 27.533 | 0.00 | 0.00 |
| ATOM | 323 | HA   | THR | X | 20 | 61.053 | 55.130 | 28.212 | 0.00 | 0.00 |
| ATOM | 324 | CB   | THR | X | 20 | 59.349 | 55.937 | 27.218 | 0.00 | 0.00 |
| ATOM | 325 | HB   | THR | X | 20 | 59.042 | 55.785 | 26.184 | 0.00 | 0.00 |
| ATOM | 326 | CG2  | THR | X | 20 | 58.614 | 54.952 | 28.109 | 0.00 | 0.00 |
| ATOM | 327 | HG21 | THR | X | 20 | 59.079 | 54.960 | 29.095 | 0.00 | 0.00 |
| ATOM | 328 | HG22 | THR | X | 20 | 57.554 | 55.209 | 28.089 | 0.00 | 0.00 |
| ATOM | 329 | HG23 | THR | X | 20 | 58.728 | 53.930 | 27.747 | 0.00 | 0.00 |
| ATOM | 330 | OG1  | THR | X | 20 | 58.780 | 57.182 | 27.555 | 0.00 | 0.00 |
| ATOM | 331 | HG1  | THR | X | 20 | 58.723 | 57.541 | 26.667 | 0.00 | 0.00 |
| ATOM | 332 | C    | THR | X | 20 | 61.527 | 55.762 | 26.144 | 0.00 | 0.00 |
| ATOM | 333 | O    | THR | X | 20 | 61.806 | 56.788 | 25.482 | 0.00 | 0.00 |
| ATOM | 334 | N    | PRO | X | 21 | 61.802 | 54.523 | 25.665 | 0.00 | 0.00 |
| ATOM | 335 | CD   | PRO | X | 21 | 61.562 | 53.236 | 26.355 | 0.00 | 0.00 |
| ATOM | 336 | HD2  | PRO | X | 21 | 60.488 | 53.059 | 26.424 | 0.00 | 0.00 |
| ATOM | 337 | HD3  | PRO | X | 21 | 62.003 | 53.140 | 27.347 | 0.00 | 0.00 |
| ATOM | 338 | CG   | PRO | X | 21 | 62.126 | 52.180 | 25.543 | 0.00 | 0.00 |
| ATOM | 339 | HG2  | PRO | X | 21 | 61.406 | 51.696 | 24.883 | 0.00 | 0.00 |
| ATOM | 340 | HG3  | PRO | X | 21 | 62.594 | 51.404 | 26.149 | 0.00 | 0.00 |
| ATOM | 341 | CB   | PRO | X | 21 | 63.146 | 52.932 | 24.674 | 0.00 | 0.00 |
| ATOM | 342 | HB2  | PRO | X | 21 | 63.308 | 52.513 | 23.681 | 0.00 | 0.00 |
| ATOM | 343 | HB3  | PRO | X | 21 | 64.124 | 52.930 | 25.157 | 0.00 | 0.00 |
| ATOM | 344 | CA   | PRO | X | 21 | 62.764 | 54.392 | 24.612 | 0.00 | 0.00 |
| ATOM | 345 | HA   | PRO | X | 21 | 63.720 | 54.889 | 24.777 | 0.00 | 0.00 |
| ATOM | 346 | C    | PRO | X | 21 | 62.330 | 54.870 | 23.175 | 0.00 | 0.00 |
| ATOM | 347 | O    | PRO | X | 21 | 63.183 | 54.989 | 22.304 | 0.00 | 0.00 |
| ATOM | 348 | N    | GLY | X | 22 | 61.023 | 54.922 | 23.027 | 0.00 | 0.00 |
| ATOM | 349 | H    | GLY | X | 22 | 60.470 | 54.502 | 23.760 | 0.00 | 0.00 |
| ATOM | 350 | CA   | GLY | X | 22 | 60.353 | 55.379 | 21.837 | 0.00 | 0.00 |
| ATOM | 351 | HA2  | GLY | X | 22 | 60.993 | 55.388 | 20.953 | 0.00 | 0.00 |
| ATOM | 352 | HA3  | GLY | X | 22 | 59.561 | 54.729 | 21.617 | 0.00 | 0.00 |
| ATOM | 353 | C    | GLY | X | 22 | 59.895 | 56.841 | 22.010 | 0.00 | 0.00 |
| ATOM | 354 | O    | GLY | X | 22 | 59.053 | 57.295 | 21.248 | 0.00 | 0.00 |
| ATOM | 355 | N    | GLY | X | 23 | 60.429 | 57.576 | 22.996 | 0.00 | 0.00 |
| ATOM | 356 | H    | GLY | X | 23 | 61.082 | 57.023 | 23.532 | 0.00 | 0.00 |
| ATOM | 357 | CA   | GLY | X | 23 | 60.172 | 58.977 | 23.279 | 0.00 | 0.00 |
| ATOM | 358 | HA2  | GLY | X | 23 | 61.115 | 59.535 | 23.362 | 0.00 | 0.00 |
| ATOM | 359 | HA3  | GLY | X | 23 | 59.636 | 59.481 | 22.520 | 0.00 | 0.00 |
| ATOM | 360 | C    | GLY | X | 23 | 59.277 | 59.169 | 24.539 | 0.00 | 0.00 |
| ATOM | 361 | O    | GLY | X | 23 | 58.594 | 58.258 | 25.021 | 0.00 | 0.00 |
| ATOM | 362 | N    | PRO | X | 24 | 59.467 | 60.355 | 25.193 | 0.00 | 0.00 |
| ATOM | 363 | CD   | PRO | X | 24 | 60.081 | 61.599 | 24.677 | 0.00 | 0.00 |
| ATOM | 364 | HD2  | PRO | X | 24 | 59.458 | 61.974 | 23.865 | 0.00 | 0.00 |
| ATOM | 365 | HD3  | PRO | X | 24 | 61.088 | 61.543 | 24.263 | 0.00 | 0.00 |
| ATOM | 366 | CG   | PRO | X | 24 | 60.062 | 62.590 | 25.813 | 0.00 | 0.00 |
| ATOM | 367 | HG2  | PRO | X | 24 | 59.622 | 63.505 | 25.416 | 0.00 | 0.00 |
| ATOM | 368 | HG3  | PRO | X | 24 | 61.051 | 62.997 | 26.024 | 0.00 | 0.00 |
| ATOM | 369 | CB   | PRO | X | 24 | 59.438 | 61.998 | 27.008 | 0.00 | 0.00 |
| ATOM | 370 | HB2  | PRO | X | 24 | 58.628 | 62.631 | 27.371 | 0.00 | 0.00 |
| ATOM | 371 | HB3  | PRO | X | 24 | 60.241 | 61.737 | 27.697 | 0.00 | 0.00 |
| ATOM | 372 | CA   | PRO | X | 24 | 58.946 | 60.572 | 26.509 | 0.00 | 0.00 |
| ATOM | 373 | HA   | PRO | X | 24 | 59.387 | 59.809 | 27.152 | 0.00 | 0.00 |
| ATOM | 374 | C    | PRO | X | 24 | 57.400 | 60.414 | 26.489 | 0.00 | 0.00 |
| ATOM | 375 | O    | PRO | X | 24 | 56.763 | 60.594 | 25.482 | 0.00 | 0.00 |
| ATOM | 376 | N    | VAL | X | 25 | 56.826 | 60.295 | 27.724 | 0.00 | 0.00 |
| ATOM | 377 | H    | VAL | X | 25 | 57.574 | 60.389 | 28.395 | 0.00 | 0.00 |
| ATOM | 378 | CA   | VAL | X | 25 | 55.444 | 60.424 | 28.190 | 0.00 | 0.00 |
| ATOM | 379 | HA   | VAL | X | 25 | 54.951 | 60.968 | 27.384 | 0.00 | 0.00 |
| ATOM | 380 | CB   | VAL | X | 25 | 54.875 | 58.947 | 28.424 | 0.00 | 0.00 |
| ATOM | 381 | HB   | VAL | X | 25 | 53.789 | 58.966 | 28.517 | 0.00 | 0.00 |
| ATOM | 382 | CG1  | VAL | X | 25 | 55.186 | 57.913 | 27.376 | 0.00 | 0.00 |
| ATOM | 383 | HG11 | VAL | X | 25 | 54.700 | 56.968 | 27.619 | 0.00 | 0.00 |
| ATOM | 384 | HG12 | VAL | X | 25 | 55.011 | 58.298 | 26.371 | 0.00 | 0.00 |
| ATOM | 385 | HG13 | VAL | X | 25 | 56.246 | 57.664 | 27.330 | 0.00 | 0.00 |
| ATOM | 386 | CG2  | VAL | X | 25 | 55.377 | 58.264 | 29.768 | 0.00 | 0.00 |
| ATOM | 387 | HG21 | VAL | X | 25 | 54.982 | 58.738 | 30.666 | 0.00 | 0.00 |
| ATOM | 388 | HG22 | VAL | X | 25 | 55.098 | 57.213 | 29.851 | 0.00 | 0.00 |
| ATOM | 389 | HG23 | VAL | X | 25 | 56.466 | 58.302 | 29.766 | 0.00 | 0.00 |
| ATOM | 390 | C    | VAL | X | 25 | 55.416 | 61.353 | 29.487 | 0.00 | 0.00 |
| ATOM | 391 | O    | VAL | X | 25 | 56.443 | 61.999 | 29.755 | 0.00 | 0.00 |

|      |     |      |     |   |    |        |        |        |      |      |
|------|-----|------|-----|---|----|--------|--------|--------|------|------|
| ATOM | 392 | N    | SER | X | 26 | 54.355 | 61.375 | 30.337 | 0.00 | 0.00 |
| ATOM | 393 | H    | SER | X | 26 | 53.495 | 60.862 | 30.199 | 0.00 | 0.00 |
| ATOM | 394 | CA   | SER | X | 26 | 54.281 | 62.046 | 31.639 | 0.00 | 0.00 |
| ATOM | 395 | HA   | SER | X | 26 | 55.293 | 62.131 | 32.034 | 0.00 | 0.00 |
| ATOM | 396 | CB   | SER | X | 26 | 53.669 | 63.463 | 31.541 | 0.00 | 0.00 |
| ATOM | 397 | HB2  | SER | X | 26 | 53.417 | 63.896 | 32.509 | 0.00 | 0.00 |
| ATOM | 398 | HB3  | SER | X | 26 | 54.370 | 64.111 | 31.014 | 0.00 | 0.00 |
| ATOM | 399 | OG   | SER | X | 26 | 52.457 | 63.451 | 30.831 | 0.00 | 0.00 |
| ATOM | 400 | HG   | SER | X | 26 | 52.270 | 62.629 | 30.372 | 0.00 | 0.00 |
| ATOM | 401 | C    | SER | X | 26 | 53.545 | 61.152 | 32.658 | 0.00 | 0.00 |
| ATOM | 402 | O    | SER | X | 26 | 52.841 | 60.178 | 32.329 | 0.00 | 0.00 |
| ATOM | 403 | N    | ALA | X | 27 | 53.670 | 61.572 | 33.931 | 0.00 | 0.00 |
| ATOM | 404 | H    | ALA | X | 27 | 54.304 | 62.344 | 34.080 | 0.00 | 0.00 |
| ATOM | 405 | CA   | ALA | X | 27 | 52.782 | 61.110 | 34.929 | 0.00 | 0.00 |
| ATOM | 406 | HA   | ALA | X | 27 | 51.784 | 61.008 | 34.504 | 0.00 | 0.00 |
| ATOM | 407 | CB   | ALA | X | 27 | 53.218 | 59.778 | 35.536 | 0.00 | 0.00 |
| ATOM | 408 | HB1  | ALA | X | 27 | 54.263 | 59.835 | 35.842 | 0.00 | 0.00 |
| ATOM | 409 | HB2  | ALA | X | 27 | 52.505 | 59.437 | 36.286 | 0.00 | 0.00 |
| ATOM | 410 | HB3  | ALA | X | 27 | 53.123 | 59.073 | 34.710 | 0.00 | 0.00 |
| ATOM | 411 | C    | ALA | X | 27 | 52.614 | 62.192 | 35.937 | 0.00 | 0.00 |
| ATOM | 412 | O    | ALA | X | 27 | 53.193 | 63.305 | 35.815 | 0.00 | 0.00 |
| ATOM | 413 | N    | PHE | X | 28 | 51.654 | 61.923 | 36.845 | 0.00 | 0.00 |
| ATOM | 414 | H    | PHE | X | 28 | 51.072 | 61.116 | 36.670 | 0.00 | 0.00 |
| ATOM | 415 | CA   | PHE | X | 28 | 51.325 | 62.705 | 38.048 | 0.00 | 0.00 |
| ATOM | 416 | HA   | PHE | X | 28 | 52.232 | 63.283 | 38.224 | 0.00 | 0.00 |
| ATOM | 417 | CB   | PHE | X | 28 | 50.082 | 63.538 | 37.744 | 0.00 | 0.00 |
| ATOM | 418 | HB2  | PHE | X | 28 | 49.235 | 62.858 | 37.646 | 0.00 | 0.00 |
| ATOM | 419 | HB3  | PHE | X | 28 | 49.884 | 64.022 | 38.701 | 0.00 | 0.00 |
| ATOM | 420 | CG   | PHE | X | 28 | 50.084 | 64.662 | 36.656 | 0.00 | 0.00 |
| ATOM | 421 | CD1  | PHE | X | 28 | 50.012 | 64.233 | 35.302 | 0.00 | 0.00 |
| ATOM | 422 | HD1  | PHE | X | 28 | 49.937 | 63.185 | 35.050 | 0.00 | 0.00 |
| ATOM | 423 | CE1  | PHE | X | 28 | 50.081 | 65.126 | 34.225 | 0.00 | 0.00 |
| ATOM | 424 | HE1  | PHE | X | 28 | 50.055 | 64.761 | 33.209 | 0.00 | 0.00 |
| ATOM | 425 | CZ   | PHE | X | 28 | 50.213 | 66.520 | 34.551 | 0.00 | 0.00 |
| ATOM | 426 | HZ   | PHE | X | 28 | 50.420 | 67.271 | 33.802 | 0.00 | 0.00 |
| ATOM | 427 | CE2  | PHE | X | 28 | 50.154 | 67.002 | 35.891 | 0.00 | 0.00 |
| ATOM | 428 | HE2  | PHE | X | 28 | 49.994 | 68.039 | 36.147 | 0.00 | 0.00 |
| ATOM | 429 | CD2  | PHE | X | 28 | 50.170 | 66.060 | 36.926 | 0.00 | 0.00 |
| ATOM | 430 | HD2  | PHE | X | 28 | 50.042 | 66.376 | 37.951 | 0.00 | 0.00 |
| ATOM | 431 | C    | PHE | X | 28 | 51.024 | 61.610 | 39.059 | 0.00 | 0.00 |
| ATOM | 432 | O    | PHE | X | 28 | 50.311 | 60.641 | 38.709 | 0.00 | 0.00 |
| ATOM | 433 | N    | LEU | X | 29 | 51.663 | 61.627 | 40.215 | 0.00 | 0.00 |
| ATOM | 434 | H    | LEU | X | 29 | 52.320 | 62.363 | 40.431 | 0.00 | 0.00 |
| ATOM | 435 | CA   | LEU | X | 29 | 51.738 | 60.535 | 41.099 | 0.00 | 0.00 |
| ATOM | 436 | HA   | LEU | X | 29 | 51.075 | 59.732 | 40.778 | 0.00 | 0.00 |
| ATOM | 437 | CB   | LEU | X | 29 | 53.156 | 60.089 | 41.014 | 0.00 | 0.00 |
| ATOM | 438 | HB2  | LEU | X | 29 | 53.815 | 60.899 | 41.327 | 0.00 | 0.00 |
| ATOM | 439 | HB3  | LEU | X | 29 | 53.250 | 59.224 | 41.672 | 0.00 | 0.00 |
| ATOM | 440 | CG   | LEU | X | 29 | 53.764 | 59.676 | 39.708 | 0.00 | 0.00 |
| ATOM | 441 | HG   | LEU | X | 29 | 53.584 | 60.420 | 38.932 | 0.00 | 0.00 |
| ATOM | 442 | CD1  | LEU | X | 29 | 55.266 | 59.525 | 39.819 | 0.00 | 0.00 |
| ATOM | 443 | HD11 | LEU | X | 29 | 55.497 | 58.921 | 40.697 | 0.00 | 0.00 |
| ATOM | 444 | HD12 | LEU | X | 29 | 55.715 | 59.077 | 38.932 | 0.00 | 0.00 |
| ATOM | 445 | HD13 | LEU | X | 29 | 55.758 | 60.483 | 39.985 | 0.00 | 0.00 |
| ATOM | 446 | CD2  | LEU | X | 29 | 53.186 | 58.317 | 39.229 | 0.00 | 0.00 |
| ATOM | 447 | HD21 | LEU | X | 29 | 52.113 | 58.408 | 39.059 | 0.00 | 0.00 |
| ATOM | 448 | HD22 | LEU | X | 29 | 53.606 | 58.098 | 38.247 | 0.00 | 0.00 |
| ATOM | 449 | HD23 | LEU | X | 29 | 53.450 | 57.524 | 39.929 | 0.00 | 0.00 |
| ATOM | 450 | C    | LEU | X | 29 | 51.393 | 61.048 | 42.525 | 0.00 | 0.00 |
| ATOM | 451 | O    | LEU | X | 29 | 51.825 | 62.172 | 42.785 | 0.00 | 0.00 |
| ATOM | 452 | N    | GLY | X | 30 | 50.882 | 60.214 | 43.456 | 0.00 | 0.00 |
| ATOM | 453 | H    | GLY | X | 30 | 50.625 | 59.261 | 43.242 | 0.00 | 0.00 |
| ATOM | 454 | CA   | GLY | X | 30 | 50.709 | 60.658 | 44.861 | 0.00 | 0.00 |
| ATOM | 455 | HA2  | GLY | X | 30 | 50.419 | 59.718 | 45.438 | 0.00 | 0.00 |
| ATOM | 456 | HA3  | GLY | X | 30 | 51.547 | 61.100 | 45.326 | 0.00 | 0.00 |
| ATOM | 457 | C    | GLY | X | 30 | 49.566 | 61.664 | 44.985 | 0.00 | 0.00 |
| ATOM | 458 | O    | GLY | X | 30 | 49.605 | 62.468 | 45.935 | 0.00 | 0.00 |
| ATOM | 459 | N    | ILE | X | 31 | 48.589 | 61.730 | 44.063 | 0.00 | 0.00 |
| ATOM | 460 | H    | ILE | X | 31 | 48.705 | 61.066 | 43.310 | 0.00 | 0.00 |
| ATOM | 461 | CA   | ILE | X | 31 | 47.420 | 62.524 | 44.058 | 0.00 | 0.00 |

|      |     |      |     |   |    |        |        |        |      |      |
|------|-----|------|-----|---|----|--------|--------|--------|------|------|
| ATOM | 462 | HA   | ILE | X | 31 | 47.735 | 63.562 | 44.171 | 0.00 | 0.00 |
| ATOM | 463 | CB   | ILE | X | 31 | 46.768 | 62.473 | 42.708 | 0.00 | 0.00 |
| ATOM | 464 | HB   | ILE | X | 31 | 46.469 | 61.445 | 42.502 | 0.00 | 0.00 |
| ATOM | 465 | CG2  | ILE | X | 31 | 45.541 | 63.403 | 42.757 | 0.00 | 0.00 |
| ATOM | 466 | HG21 | ILE | X | 31 | 45.758 | 64.438 | 43.019 | 0.00 | 0.00 |
| ATOM | 467 | HG22 | ILE | X | 31 | 44.966 | 63.352 | 41.833 | 0.00 | 0.00 |
| ATOM | 468 | HG23 | ILE | X | 31 | 44.880 | 62.977 | 43.512 | 0.00 | 0.00 |
| ATOM | 469 | CG1  | ILE | X | 31 | 47.719 | 63.022 | 41.661 | 0.00 | 0.00 |
| ATOM | 470 | HG12 | ILE | X | 31 | 47.818 | 64.107 | 41.695 | 0.00 | 0.00 |
| ATOM | 471 | HG13 | ILE | X | 31 | 48.722 | 62.639 | 41.847 | 0.00 | 0.00 |
| ATOM | 472 | CD1  | ILE | X | 31 | 47.240 | 62.725 | 40.167 | 0.00 | 0.00 |
| ATOM | 473 | HD11 | ILE | X | 31 | 46.768 | 61.749 | 40.055 | 0.00 | 0.00 |
| ATOM | 474 | HD12 | ILE | X | 31 | 46.527 | 63.510 | 39.916 | 0.00 | 0.00 |
| ATOM | 475 | HD13 | ILE | X | 31 | 47.958 | 62.800 | 39.351 | 0.00 | 0.00 |
| ATOM | 476 | C    | ILE | X | 31 | 46.416 | 62.175 | 45.164 | 0.00 | 0.00 |
| ATOM | 477 | O    | ILE | X | 31 | 45.965 | 61.034 | 45.174 | 0.00 | 0.00 |
| ATOM | 478 | N    | PRO | X | 32 | 45.960 | 63.095 | 46.041 | 0.00 | 0.00 |
| ATOM | 479 | CD   | PRO | X | 32 | 46.434 | 64.503 | 46.137 | 0.00 | 0.00 |
| ATOM | 480 | HD2  | PRO | X | 32 | 45.802 | 65.167 | 45.547 | 0.00 | 0.00 |
| ATOM | 481 | HD3  | PRO | X | 32 | 47.503 | 64.540 | 45.926 | 0.00 | 0.00 |
| ATOM | 482 | CG   | PRO | X | 32 | 46.354 | 64.874 | 47.552 | 0.00 | 0.00 |
| ATOM | 483 | HG2  | PRO | X | 32 | 46.170 | 65.946 | 47.626 | 0.00 | 0.00 |
| ATOM | 484 | HG3  | PRO | X | 32 | 47.272 | 64.536 | 48.032 | 0.00 | 0.00 |
| ATOM | 485 | CB   | PRO | X | 32 | 45.077 | 64.145 | 47.986 | 0.00 | 0.00 |
| ATOM | 486 | HB2  | PRO | X | 32 | 44.256 | 64.848 | 47.848 | 0.00 | 0.00 |
| ATOM | 487 | HB3  | PRO | X | 32 | 45.040 | 63.856 | 49.037 | 0.00 | 0.00 |
| ATOM | 488 | CA   | PRO | X | 32 | 44.921 | 62.918 | 47.049 | 0.00 | 0.00 |
| ATOM | 489 | HA   | PRO | X | 32 | 45.119 | 61.989 | 47.583 | 0.00 | 0.00 |
| ATOM | 490 | C    | PRO | X | 32 | 43.471 | 62.966 | 46.372 | 0.00 | 0.00 |
| ATOM | 491 | O    | PRO | X | 32 | 42.958 | 63.920 | 45.823 | 0.00 | 0.00 |
| ATOM | 492 | N    | PHE | X | 33 | 42.813 | 61.864 | 46.581 | 0.00 | 0.00 |
| ATOM | 493 | H    | PHE | X | 33 | 43.304 | 61.034 | 46.880 | 0.00 | 0.00 |
| ATOM | 494 | CA   | PHE | X | 33 | 41.364 | 61.568 | 46.272 | 0.00 | 0.00 |
| ATOM | 495 | HA   | PHE | X | 33 | 40.958 | 62.335 | 45.612 | 0.00 | 0.00 |
| ATOM | 496 | CB   | PHE | X | 33 | 41.282 | 60.275 | 45.409 | 0.00 | 0.00 |
| ATOM | 497 | HB2  | PHE | X | 33 | 40.361 | 60.310 | 44.827 | 0.00 | 0.00 |
| ATOM | 498 | HB3  | PHE | X | 33 | 42.080 | 60.100 | 44.687 | 0.00 | 0.00 |
| ATOM | 499 | CG   | PHE | X | 33 | 41.438 | 59.004 | 46.181 | 0.00 | 0.00 |
| ATOM | 500 | CD1  | PHE | X | 33 | 40.286 | 58.295 | 46.532 | 0.00 | 0.00 |
| ATOM | 501 | HD1  | PHE | X | 33 | 39.305 | 58.706 | 46.345 | 0.00 | 0.00 |
| ATOM | 502 | CE1  | PHE | X | 33 | 40.351 | 57.057 | 47.173 | 0.00 | 0.00 |
| ATOM | 503 | HE1  | PHE | X | 33 | 39.420 | 56.574 | 47.429 | 0.00 | 0.00 |
| ATOM | 504 | CZ   | PHE | X | 33 | 41.578 | 56.438 | 47.409 | 0.00 | 0.00 |
| ATOM | 505 | HZ   | PHE | X | 33 | 41.602 | 55.456 | 47.858 | 0.00 | 0.00 |
| ATOM | 506 | CE2  | PHE | X | 33 | 42.721 | 57.035 | 46.936 | 0.00 | 0.00 |
| ATOM | 507 | HE2  | PHE | X | 33 | 43.705 | 56.621 | 47.104 | 0.00 | 0.00 |
| ATOM | 508 | CD2  | PHE | X | 33 | 42.668 | 58.289 | 46.305 | 0.00 | 0.00 |
| ATOM | 509 | HD2  | PHE | X | 33 | 43.617 | 58.662 | 45.948 | 0.00 | 0.00 |
| ATOM | 510 | C    | PHE | X | 33 | 40.445 | 61.542 | 47.532 | 0.00 | 0.00 |
| ATOM | 511 | O    | PHE | X | 33 | 39.243 | 61.782 | 47.427 | 0.00 | 0.00 |
| ATOM | 512 | N    | ALA | X | 34 | 40.994 | 61.496 | 48.722 | 0.00 | 0.00 |
| ATOM | 513 | H    | ALA | X | 34 | 42.003 | 61.512 | 48.760 | 0.00 | 0.00 |
| ATOM | 514 | CA   | ALA | X | 34 | 40.318 | 61.449 | 50.025 | 0.00 | 0.00 |
| ATOM | 515 | HA   | ALA | X | 34 | 39.348 | 61.925 | 49.878 | 0.00 | 0.00 |
| ATOM | 516 | CB   | ALA | X | 34 | 40.236 | 59.955 | 50.413 | 0.00 | 0.00 |
| ATOM | 517 | HB1  | ALA | X | 34 | 39.581 | 59.463 | 49.694 | 0.00 | 0.00 |
| ATOM | 518 | HB2  | ALA | X | 34 | 41.234 | 59.516 | 50.449 | 0.00 | 0.00 |
| ATOM | 519 | HB3  | ALA | X | 34 | 39.662 | 59.953 | 51.339 | 0.00 | 0.00 |
| ATOM | 520 | C    | ALA | X | 34 | 40.997 | 62.162 | 51.275 | 0.00 | 0.00 |
| ATOM | 521 | O    | ALA | X | 34 | 42.201 | 62.282 | 51.371 | 0.00 | 0.00 |
| ATOM | 522 | N    | GLU | X | 35 | 40.200 | 62.399 | 52.322 | 0.00 | 0.00 |
| ATOM | 523 | H    | GLU | X | 35 | 39.236 | 62.104 | 52.371 | 0.00 | 0.00 |
| ATOM | 524 | CA   | GLU | X | 35 | 40.584 | 62.689 | 53.648 | 0.00 | 0.00 |
| ATOM | 525 | HA   | GLU | X | 35 | 41.309 | 63.501 | 53.605 | 0.00 | 0.00 |
| ATOM | 526 | CB   | GLU | X | 35 | 39.358 | 62.971 | 54.530 | 0.00 | 0.00 |
| ATOM | 527 | HB2  | GLU | X | 35 | 38.621 | 62.178 | 54.656 | 0.00 | 0.00 |
| ATOM | 528 | HB3  | GLU | X | 35 | 39.779 | 63.245 | 55.497 | 0.00 | 0.00 |
| ATOM | 529 | CG   | GLU | X | 35 | 38.600 | 64.293 | 54.140 | 0.00 | 0.00 |
| ATOM | 530 | HG2  | GLU | X | 35 | 37.980 | 64.281 | 53.245 | 0.00 | 0.00 |
| ATOM | 531 | HG3  | GLU | X | 35 | 37.905 | 64.572 | 54.932 | 0.00 | 0.00 |

|      |     |     |     |   |    |        |        |        |      |      |
|------|-----|-----|-----|---|----|--------|--------|--------|------|------|
| ATOM | 532 | CD  | GLU | X | 35 | 39.656 | 65.404 | 54.008 | 0.00 | 0.00 |
| ATOM | 533 | OE1 | GLU | X | 35 | 40.198 | 65.565 | 52.888 | 0.00 | 0.00 |
| ATOM | 534 | OE2 | GLU | X | 35 | 39.965 | 66.044 | 55.030 | 0.00 | 0.00 |
| ATOM | 535 | C   | GLU | X | 35 | 41.348 | 61.506 | 54.268 | 0.00 | 0.00 |
| ATOM | 536 | O   | GLU | X | 35 | 41.033 | 60.401 | 53.939 | 0.00 | 0.00 |
| ATOM | 537 | N   | PRO | X | 36 | 42.437 | 61.718 | 55.041 | 0.00 | 0.00 |
| ATOM | 538 | CD  | PRO | X | 36 | 42.856 | 63.012 | 55.501 | 0.00 | 0.00 |
| ATOM | 539 | HD2 | PRO | X | 36 | 42.036 | 63.614 | 55.892 | 0.00 | 0.00 |
| ATOM | 540 | HD3 | PRO | X | 36 | 43.426 | 63.546 | 54.741 | 0.00 | 0.00 |
| ATOM | 541 | CG  | PRO | X | 36 | 43.630 | 62.746 | 56.798 | 0.00 | 0.00 |
| ATOM | 542 | HG2 | PRO | X | 36 | 43.024 | 62.611 | 57.693 | 0.00 | 0.00 |
| ATOM | 543 | HG3 | PRO | X | 36 | 44.503 | 63.382 | 56.947 | 0.00 | 0.00 |
| ATOM | 544 | CB  | PRO | X | 36 | 44.220 | 61.382 | 56.459 | 0.00 | 0.00 |
| ATOM | 545 | HB2 | PRO | X | 36 | 44.424 | 60.858 | 57.394 | 0.00 | 0.00 |
| ATOM | 546 | HB3 | PRO | X | 36 | 45.138 | 61.466 | 55.877 | 0.00 | 0.00 |
| ATOM | 547 | CA  | PRO | X | 36 | 43.169 | 60.582 | 55.628 | 0.00 | 0.00 |
| ATOM | 548 | HA  | PRO | X | 36 | 43.591 | 60.076 | 54.760 | 0.00 | 0.00 |
| ATOM | 549 | C   | PRO | X | 36 | 42.182 | 59.627 | 56.461 | 0.00 | 0.00 |
| ATOM | 550 | O   | PRO | X | 36 | 41.201 | 60.083 | 57.080 | 0.00 | 0.00 |
| ATOM | 551 | N   | PRO | X | 37 | 42.337 | 58.287 | 56.307 | 0.00 | 0.00 |
| ATOM | 552 | CD  | PRO | X | 37 | 43.380 | 57.686 | 55.607 | 0.00 | 0.00 |
| ATOM | 553 | HD2 | PRO | X | 37 | 44.338 | 57.829 | 56.108 | 0.00 | 0.00 |
| ATOM | 554 | HD3 | PRO | X | 37 | 43.330 | 57.950 | 54.551 | 0.00 | 0.00 |
| ATOM | 555 | CG  | PRO | X | 37 | 43.111 | 56.111 | 55.724 | 0.00 | 0.00 |
| ATOM | 556 | HG2 | PRO | X | 37 | 43.696 | 55.700 | 56.546 | 0.00 | 0.00 |
| ATOM | 557 | HG3 | PRO | X | 37 | 43.297 | 55.706 | 54.729 | 0.00 | 0.00 |
| ATOM | 558 | CB  | PRO | X | 37 | 41.601 | 56.087 | 56.086 | 0.00 | 0.00 |
| ATOM | 559 | HB2 | PRO | X | 37 | 41.305 | 55.126 | 56.508 | 0.00 | 0.00 |
| ATOM | 560 | HB3 | PRO | X | 37 | 41.030 | 56.303 | 55.183 | 0.00 | 0.00 |
| ATOM | 561 | CA  | PRO | X | 37 | 41.410 | 57.329 | 56.965 | 0.00 | 0.00 |
| ATOM | 562 | HA  | PRO | X | 37 | 40.364 | 57.627 | 56.889 | 0.00 | 0.00 |
| ATOM | 563 | C   | PRO | X | 37 | 41.845 | 57.000 | 58.360 | 0.00 | 0.00 |
| ATOM | 564 | O   | PRO | X | 37 | 41.384 | 55.965 | 58.867 | 0.00 | 0.00 |
| ATOM | 565 | N   | MET | X | 38 | 42.690 | 57.815 | 59.084 | 0.00 | 0.00 |
| ATOM | 566 | H   | MET | X | 38 | 42.972 | 58.712 | 58.714 | 0.00 | 0.00 |
| ATOM | 567 | CA  | MET | X | 38 | 43.304 | 57.345 | 60.329 | 0.00 | 0.00 |
| ATOM | 568 | HA  | MET | X | 38 | 43.520 | 56.284 | 60.202 | 0.00 | 0.00 |
| ATOM | 569 | CB  | MET | X | 38 | 44.674 | 58.037 | 60.553 | 0.00 | 0.00 |
| ATOM | 570 | HB2 | MET | X | 38 | 45.200 | 57.585 | 61.394 | 0.00 | 0.00 |
| ATOM | 571 | HB3 | MET | X | 38 | 45.210 | 58.059 | 59.605 | 0.00 | 0.00 |
| ATOM | 572 | CG  | MET | X | 38 | 44.610 | 59.550 | 60.971 | 0.00 | 0.00 |
| ATOM | 573 | HG2 | MET | X | 38 | 44.103 | 60.168 | 60.230 | 0.00 | 0.00 |
| ATOM | 574 | HG3 | MET | X | 38 | 44.193 | 59.705 | 61.967 | 0.00 | 0.00 |
| ATOM | 575 | SD  | MET | X | 38 | 46.311 | 60.149 | 61.157 | 0.00 | 0.00 |
| ATOM | 576 | CE  | MET | X | 38 | 46.897 | 60.000 | 59.437 | 0.00 | 0.00 |
| ATOM | 577 | HE1 | MET | X | 38 | 47.869 | 60.468 | 59.279 | 0.00 | 0.00 |
| ATOM | 578 | HE2 | MET | X | 38 | 46.989 | 58.935 | 59.224 | 0.00 | 0.00 |
| ATOM | 579 | HE3 | MET | X | 38 | 46.256 | 60.510 | 58.718 | 0.00 | 0.00 |
| ATOM | 580 | C   | MET | X | 38 | 42.432 | 57.642 | 61.563 | 0.00 | 0.00 |
| ATOM | 581 | O   | MET | X | 38 | 41.584 | 58.539 | 61.540 | 0.00 | 0.00 |
| ATOM | 582 | N   | GLY | X | 39 | 42.721 | 56.997 | 62.693 | 0.00 | 0.00 |
| ATOM | 583 | H   | GLY | X | 39 | 43.489 | 56.343 | 62.733 | 0.00 | 0.00 |
| ATOM | 584 | CA  | GLY | X | 39 | 42.202 | 57.477 | 64.012 | 0.00 | 0.00 |
| ATOM | 585 | HA2 | GLY | X | 39 | 42.618 | 56.859 | 64.808 | 0.00 | 0.00 |
| ATOM | 586 | HA3 | GLY | X | 39 | 42.544 | 58.436 | 64.169 | 0.00 | 0.00 |
| ATOM | 587 | C   | GLY | X | 39 | 40.686 | 57.429 | 64.133 | 0.00 | 0.00 |
| ATOM | 588 | O   | GLY | X | 39 | 40.163 | 56.304 | 64.247 | 0.00 | 0.00 |
| ATOM | 589 | N   | PRO | X | 40 | 39.897 | 58.497 | 63.974 | 0.00 | 0.00 |
| ATOM | 590 | CD  | PRO | X | 40 | 40.288 | 59.921 | 64.022 | 0.00 | 0.00 |
| ATOM | 591 | HD2 | PRO | X | 40 | 40.554 | 60.363 | 63.061 | 0.00 | 0.00 |
| ATOM | 592 | HD3 | PRO | X | 40 | 41.111 | 60.053 | 64.725 | 0.00 | 0.00 |
| ATOM | 593 | CG  | PRO | X | 40 | 39.016 | 60.648 | 64.566 | 0.00 | 0.00 |
| ATOM | 594 | HG2 | PRO | X | 40 | 38.994 | 61.649 | 64.135 | 0.00 | 0.00 |
| ATOM | 595 | HG3 | PRO | X | 40 | 39.108 | 60.777 | 65.645 | 0.00 | 0.00 |
| ATOM | 596 | CB  | PRO | X | 40 | 37.875 | 59.778 | 64.171 | 0.00 | 0.00 |
| ATOM | 597 | HB2 | PRO | X | 40 | 37.415 | 60.044 | 63.220 | 0.00 | 0.00 |
| ATOM | 598 | HB3 | PRO | X | 40 | 37.153 | 59.976 | 64.964 | 0.00 | 0.00 |
| ATOM | 599 | CA  | PRO | X | 40 | 38.437 | 58.370 | 64.188 | 0.00 | 0.00 |
| ATOM | 600 | HA  | PRO | X | 40 | 38.269 | 57.967 | 65.186 | 0.00 | 0.00 |
| ATOM | 601 | C   | PRO | X | 40 | 37.895 | 57.617 | 63.050 | 0.00 | 0.00 |



|      |     |      |     |   |    |        |        |        |      |      |
|------|-----|------|-----|---|----|--------|--------|--------|------|------|
| ATOM | 602 | O    | PRO | X | 40 | 36.924 | 56.935 | 63.284 | 0.00 | 0.00 |
| ATOM | 603 | N    | ARG | X | 41 | 38.439 | 57.775 | 61.812 | 0.00 | 0.00 |
| ATOM | 604 | H    | ARG | X | 41 | 39.213 | 58.392 | 61.612 | 0.00 | 0.00 |
| ATOM | 605 | CA   | ARG | X | 41 | 37.956 | 57.098 | 60.606 | 0.00 | 0.00 |
| ATOM | 606 | HA   | ARG | X | 41 | 36.870 | 57.059 | 60.688 | 0.00 | 0.00 |
| ATOM | 607 | CB   | ARG | X | 41 | 38.246 | 57.861 | 59.265 | 0.00 | 0.00 |
| ATOM | 608 | HB2  | ARG | X | 41 | 39.298 | 58.117 | 59.393 | 0.00 | 0.00 |
| ATOM | 609 | HB3  | ARG | X | 41 | 38.160 | 57.119 | 58.471 | 0.00 | 0.00 |
| ATOM | 610 | CG   | ARG | X | 41 | 37.314 | 59.060 | 59.129 | 0.00 | 0.00 |
| ATOM | 611 | HG2  | ARG | X | 41 | 36.276 | 58.728 | 59.149 | 0.00 | 0.00 |
| ATOM | 612 | HG3  | ARG | X | 41 | 37.513 | 59.860 | 59.843 | 0.00 | 0.00 |
| ATOM | 613 | CD   | ARG | X | 41 | 37.673 | 59.614 | 57.701 | 0.00 | 0.00 |
| ATOM | 614 | HD2  | ARG | X | 41 | 38.762 | 59.601 | 57.661 | 0.00 | 0.00 |
| ATOM | 615 | HD3  | ARG | X | 41 | 37.249 | 58.938 | 56.958 | 0.00 | 0.00 |
| ATOM | 616 | NE   | ARG | X | 41 | 37.175 | 60.997 | 57.550 | 0.00 | 0.00 |
| ATOM | 617 | HE   | ARG | X | 41 | 36.177 | 61.140 | 57.500 | 0.00 | 0.00 |
| ATOM | 618 | CZ   | ARG | X | 41 | 37.960 | 62.055 | 57.692 | 0.00 | 0.00 |
| ATOM | 619 | NH1  | ARG | X | 41 | 39.257 | 61.959 | 57.807 | 0.00 | 0.00 |
| ATOM | 620 | HH11 | ARG | X | 41 | 39.710 | 61.092 | 58.060 | 0.00 | 0.00 |
| ATOM | 621 | HH12 | ARG | X | 41 | 39.783 | 62.815 | 57.913 | 0.00 | 0.00 |
| ATOM | 622 | NH2  | ARG | X | 41 | 37.424 | 63.275 | 57.620 | 0.00 | 0.00 |
| ATOM | 623 | HH21 | ARG | X | 41 | 36.503 | 63.332 | 57.211 | 0.00 | 0.00 |
| ATOM | 624 | HH22 | ARG | X | 41 | 37.981 | 64.114 | 57.694 | 0.00 | 0.00 |
| ATOM | 625 | C    | ARG | X | 41 | 38.469 | 55.696 | 60.560 | 0.00 | 0.00 |
| ATOM | 626 | O    | ARG | X | 41 | 38.168 | 54.945 | 59.630 | 0.00 | 0.00 |
| ATOM | 627 | N    | ARG | X | 42 | 39.351 | 55.204 | 61.491 | 0.00 | 0.00 |
| ATOM | 628 | H    | ARG | X | 42 | 39.547 | 55.825 | 62.262 | 0.00 | 0.00 |
| ATOM | 629 | CA   | ARG | X | 42 | 39.838 | 53.859 | 61.459 | 0.00 | 0.00 |
| ATOM | 630 | HA   | ARG | X | 42 | 40.354 | 53.691 | 60.513 | 0.00 | 0.00 |
| ATOM | 631 | CB   | ARG | X | 42 | 40.861 | 53.624 | 62.569 | 0.00 | 0.00 |
| ATOM | 632 | HB2  | ARG | X | 42 | 41.461 | 54.534 | 62.602 | 0.00 | 0.00 |
| ATOM | 633 | HB3  | ARG | X | 42 | 40.364 | 53.603 | 63.539 | 0.00 | 0.00 |
| ATOM | 634 | CG   | ARG | X | 42 | 41.703 | 52.383 | 62.336 | 0.00 | 0.00 |
| ATOM | 635 | HG2  | ARG | X | 42 | 41.153 | 51.486 | 62.052 | 0.00 | 0.00 |
| ATOM | 636 | HG3  | ARG | X | 42 | 42.392 | 52.606 | 61.522 | 0.00 | 0.00 |
| ATOM | 637 | CD   | ARG | X | 42 | 42.466 | 52.106 | 63.672 | 0.00 | 0.00 |
| ATOM | 638 | HD2  | ARG | X | 42 | 41.740 | 52.307 | 64.460 | 0.00 | 0.00 |
| ATOM | 639 | HD3  | ARG | X | 42 | 42.828 | 51.078 | 63.675 | 0.00 | 0.00 |
| ATOM | 640 | NE   | ARG | X | 42 | 43.579 | 53.080 | 63.878 | 0.00 | 0.00 |
| ATOM | 641 | HE   | ARG | X | 42 | 43.760 | 53.776 | 63.170 | 0.00 | 0.00 |
| ATOM | 642 | CZ   | ARG | X | 42 | 44.390 | 53.126 | 64.903 | 0.00 | 0.00 |
| ATOM | 643 | NH1  | ARG | X | 42 | 44.197 | 52.346 | 65.958 | 0.00 | 0.00 |
| ATOM | 644 | HH11 | ARG | X | 42 | 43.623 | 51.517 | 65.896 | 0.00 | 0.00 |
| ATOM | 645 | HH12 | ARG | X | 42 | 44.663 | 52.458 | 66.847 | 0.00 | 0.00 |
| ATOM | 646 | NH2  | ARG | X | 42 | 45.316 | 54.061 | 64.954 | 0.00 | 0.00 |
| ATOM | 647 | HH21 | ARG | X | 42 | 45.682 | 54.460 | 64.101 | 0.00 | 0.00 |
| ATOM | 648 | HH22 | ARG | X | 42 | 45.746 | 54.365 | 65.815 | 0.00 | 0.00 |
| ATOM | 649 | C    | ARG | X | 42 | 38.755 | 52.780 | 61.473 | 0.00 | 0.00 |
| ATOM | 650 | O    | ARG | X | 42 | 37.752 | 52.923 | 62.214 | 0.00 | 0.00 |
| ATOM | 651 | N    | PHE | X | 43 | 38.781 | 51.851 | 60.504 | 0.00 | 0.00 |
| ATOM | 652 | H    | PHE | X | 43 | 39.648 | 51.904 | 59.988 | 0.00 | 0.00 |
| ATOM | 653 | CA   | PHE | X | 43 | 37.828 | 50.857 | 60.084 | 0.00 | 0.00 |
| ATOM | 654 | HA   | PHE | X | 43 | 38.271 | 50.222 | 59.316 | 0.00 | 0.00 |
| ATOM | 655 | CB   | PHE | X | 43 | 37.490 | 49.932 | 61.248 | 0.00 | 0.00 |
| ATOM | 656 | HB2  | PHE | X | 43 | 36.714 | 50.414 | 61.842 | 0.00 | 0.00 |
| ATOM | 657 | HB3  | PHE | X | 43 | 37.061 | 49.010 | 60.856 | 0.00 | 0.00 |
| ATOM | 658 | CG   | PHE | X | 43 | 38.575 | 49.522 | 62.138 | 0.00 | 0.00 |
| ATOM | 659 | CD1  | PHE | X | 43 | 39.709 | 48.730 | 61.675 | 0.00 | 0.00 |
| ATOM | 660 | HD1  | PHE | X | 43 | 39.762 | 48.376 | 60.656 | 0.00 | 0.00 |
| ATOM | 661 | CE1  | PHE | X | 43 | 40.834 | 48.417 | 62.508 | 0.00 | 0.00 |
| ATOM | 662 | HE1  | PHE | X | 43 | 41.714 | 47.905 | 62.149 | 0.00 | 0.00 |
| ATOM | 663 | CZ   | PHE | X | 43 | 40.731 | 48.795 | 63.832 | 0.00 | 0.00 |
| ATOM | 664 | HZ   | PHE | X | 43 | 41.561 | 48.480 | 64.447 | 0.00 | 0.00 |
| ATOM | 665 | CE2  | PHE | X | 43 | 39.678 | 49.608 | 64.286 | 0.00 | 0.00 |
| ATOM | 666 | HE2  | PHE | X | 43 | 39.579 | 49.832 | 65.338 | 0.00 | 0.00 |
| ATOM | 667 | CD2  | PHE | X | 43 | 38.538 | 49.837 | 63.492 | 0.00 | 0.00 |
| ATOM | 668 | HD2  | PHE | X | 43 | 37.768 | 50.459 | 63.923 | 0.00 | 0.00 |
| ATOM | 669 | C    | PHE | X | 43 | 36.575 | 51.479 | 59.369 | 0.00 | 0.00 |
| ATOM | 670 | O    | PHE | X | 43 | 35.815 | 50.666 | 58.844 | 0.00 | 0.00 |
| ATOM | 671 | N    | LEU | X | 44 | 36.368 | 52.796 | 59.414 | 0.00 | 0.00 |

|      |     |      |     |   |    |        |        |        |      |      |
|------|-----|------|-----|---|----|--------|--------|--------|------|------|
| ATOM | 672 | H    | LEU | X | 44 | 37.025 | 53.378 | 59.914 | 0.00 | 0.00 |
| ATOM | 673 | CA   | LEU | X | 44 | 35.123 | 53.414 | 58.888 | 0.00 | 0.00 |
| ATOM | 674 | HA   | LEU | X | 44 | 34.296 | 52.706 | 58.941 | 0.00 | 0.00 |
| ATOM | 675 | CB   | LEU | X | 44 | 34.718 | 54.722 | 59.708 | 0.00 | 0.00 |
| ATOM | 676 | HB2  | LEU | X | 44 | 35.645 | 55.291 | 59.626 | 0.00 | 0.00 |
| ATOM | 677 | HB3  | LEU | X | 44 | 33.934 | 55.305 | 59.225 | 0.00 | 0.00 |
| ATOM | 678 | CG   | LEU | X | 44 | 34.324 | 54.525 | 61.181 | 0.00 | 0.00 |
| ATOM | 679 | HG   | LEU | X | 44 | 35.226 | 54.099 | 61.620 | 0.00 | 0.00 |
| ATOM | 680 | CD1  | LEU | X | 44 | 34.011 | 55.875 | 61.844 | 0.00 | 0.00 |
| ATOM | 681 | HD11 | LEU | X | 44 | 33.007 | 56.215 | 61.590 | 0.00 | 0.00 |
| ATOM | 682 | HD12 | LEU | X | 44 | 34.122 | 55.704 | 62.915 | 0.00 | 0.00 |
| ATOM | 683 | HD13 | LEU | X | 44 | 34.753 | 56.606 | 61.521 | 0.00 | 0.00 |
| ATOM | 684 | CD2  | LEU | X | 44 | 33.200 | 53.505 | 61.443 | 0.00 | 0.00 |
| ATOM | 685 | HD21 | LEU | X | 44 | 33.586 | 52.493 | 61.326 | 0.00 | 0.00 |
| ATOM | 686 | HD22 | LEU | X | 44 | 32.887 | 53.598 | 62.483 | 0.00 | 0.00 |
| ATOM | 687 | HD23 | LEU | X | 44 | 32.263 | 53.626 | 60.900 | 0.00 | 0.00 |
| ATOM | 688 | C    | LEU | X | 44 | 35.186 | 53.705 | 57.400 | 0.00 | 0.00 |
| ATOM | 689 | O    | LEU | X | 44 | 36.257 | 53.666 | 56.834 | 0.00 | 0.00 |
| ATOM | 690 | N    | PRO | X | 45 | 34.020 | 53.894 | 56.692 | 0.00 | 0.00 |
| ATOM | 691 | CD   | PRO | X | 45 | 32.673 | 53.698 | 57.138 | 0.00 | 0.00 |
| ATOM | 692 | HD2  | PRO | X | 45 | 32.557 | 53.900 | 58.203 | 0.00 | 0.00 |
| ATOM | 693 | HD3  | PRO | X | 45 | 32.492 | 52.651 | 56.896 | 0.00 | 0.00 |
| ATOM | 694 | CG   | PRO | X | 45 | 31.715 | 54.619 | 56.256 | 0.00 | 0.00 |
| ATOM | 695 | HG2  | PRO | X | 45 | 31.668 | 55.663 | 56.565 | 0.00 | 0.00 |
| ATOM | 696 | HG3  | PRO | X | 45 | 30.710 | 54.254 | 56.041 | 0.00 | 0.00 |
| ATOM | 697 | CB   | PRO | X | 45 | 32.535 | 54.618 | 54.911 | 0.00 | 0.00 |
| ATOM | 698 | HB2  | PRO | X | 45 | 32.555 | 55.553 | 54.351 | 0.00 | 0.00 |
| ATOM | 699 | HB3  | PRO | X | 45 | 32.149 | 53.846 | 54.245 | 0.00 | 0.00 |
| ATOM | 700 | CA   | PRO | X | 45 | 34.024 | 54.404 | 55.307 | 0.00 | 0.00 |
| ATOM | 701 | HA   | PRO | X | 45 | 34.506 | 53.631 | 54.708 | 0.00 | 0.00 |
| ATOM | 702 | C    | PRO | X | 45 | 34.862 | 55.652 | 55.081 | 0.00 | 0.00 |
| ATOM | 703 | O    | PRO | X | 45 | 34.792 | 56.499 | 55.992 | 0.00 | 0.00 |
| ATOM | 704 | N    | PRO | X | 46 | 35.524 | 55.944 | 53.954 | 0.00 | 0.00 |
| ATOM | 705 | CD   | PRO | X | 46 | 35.590 | 55.014 | 52.785 | 0.00 | 0.00 |
| ATOM | 706 | HD2  | PRO | X | 46 | 34.663 | 54.672 | 52.326 | 0.00 | 0.00 |
| ATOM | 707 | HD3  | PRO | X | 46 | 36.238 | 54.209 | 53.131 | 0.00 | 0.00 |
| ATOM | 708 | CG   | PRO | X | 46 | 36.405 | 55.795 | 51.759 | 0.00 | 0.00 |
| ATOM | 709 | HG2  | PRO | X | 46 | 35.738 | 56.288 | 51.051 | 0.00 | 0.00 |
| ATOM | 710 | HG3  | PRO | X | 46 | 36.981 | 55.104 | 51.144 | 0.00 | 0.00 |
| ATOM | 711 | CB   | PRO | X | 46 | 37.201 | 56.818 | 52.600 | 0.00 | 0.00 |
| ATOM | 712 | HB2  | PRO | X | 46 | 37.508 | 57.685 | 52.015 | 0.00 | 0.00 |
| ATOM | 713 | HB3  | PRO | X | 46 | 38.109 | 56.381 | 53.014 | 0.00 | 0.00 |
| ATOM | 714 | CA   | PRO | X | 46 | 36.264 | 57.199 | 53.698 | 0.00 | 0.00 |
| ATOM | 715 | HA   | PRO | X | 46 | 36.733 | 57.438 | 54.653 | 0.00 | 0.00 |
| ATOM | 716 | C    | PRO | X | 46 | 35.331 | 58.375 | 53.328 | 0.00 | 0.00 |
| ATOM | 717 | O    | PRO | X | 46 | 34.142 | 58.203 | 53.259 | 0.00 | 0.00 |
| ATOM | 718 | N    | GLU | X | 47 | 35.911 | 59.507 | 52.932 | 0.00 | 0.00 |
| ATOM | 719 | H    | GLU | X | 47 | 36.906 | 59.451 | 52.770 | 0.00 | 0.00 |
| ATOM | 720 | CA   | GLU | X | 47 | 35.252 | 60.620 | 52.313 | 0.00 | 0.00 |
| ATOM | 721 | HA   | GLU | X | 47 | 34.351 | 60.242 | 51.831 | 0.00 | 0.00 |
| ATOM | 722 | CB   | GLU | X | 47 | 34.727 | 61.623 | 53.345 | 0.00 | 0.00 |
| ATOM | 723 | HB2  | GLU | X | 47 | 34.180 | 62.426 | 52.851 | 0.00 | 0.00 |
| ATOM | 724 | HB3  | GLU | X | 47 | 34.117 | 61.014 | 54.012 | 0.00 | 0.00 |
| ATOM | 725 | CG   | GLU | X | 47 | 35.771 | 62.270 | 54.253 | 0.00 | 0.00 |
| ATOM | 726 | HG2  | GLU | X | 47 | 36.275 | 61.501 | 54.838 | 0.00 | 0.00 |
| ATOM | 727 | HG3  | GLU | X | 47 | 36.497 | 62.666 | 53.543 | 0.00 | 0.00 |
| ATOM | 728 | CD   | GLU | X | 47 | 35.005 | 63.169 | 55.172 | 0.00 | 0.00 |
| ATOM | 729 | OE1  | GLU | X | 47 | 35.080 | 62.922 | 56.390 | 0.00 | 0.00 |
| ATOM | 730 | OE2  | GLU | X | 47 | 34.467 | 64.166 | 54.606 | 0.00 | 0.00 |
| ATOM | 731 | C    | GLU | X | 47 | 36.194 | 61.288 | 51.328 | 0.00 | 0.00 |
| ATOM | 732 | O    | GLU | X | 47 | 37.469 | 61.372 | 51.456 | 0.00 | 0.00 |
| ATOM | 733 | N    | PRO | X | 48 | 35.603 | 61.906 | 50.270 | 0.00 | 0.00 |
| ATOM | 734 | CD   | PRO | X | 48 | 34.256 | 61.821 | 49.753 | 0.00 | 0.00 |
| ATOM | 735 | HD2  | PRO | X | 48 | 33.501 | 62.279 | 50.391 | 0.00 | 0.00 |
| ATOM | 736 | HD3  | PRO | X | 48 | 34.003 | 60.763 | 49.684 | 0.00 | 0.00 |
| ATOM | 737 | CG   | PRO | X | 48 | 34.219 | 62.502 | 48.343 | 0.00 | 0.00 |
| ATOM | 738 | HG2  | PRO | X | 48 | 33.535 | 63.351 | 48.338 | 0.00 | 0.00 |
| ATOM | 739 | HG3  | PRO | X | 48 | 33.957 | 61.696 | 47.658 | 0.00 | 0.00 |
| ATOM | 740 | CB   | PRO | X | 48 | 35.574 | 62.870 | 48.093 | 0.00 | 0.00 |
| ATOM | 741 | HB2  | PRO | X | 48 | 35.542 | 63.956 | 48.008 | 0.00 | 0.00 |

|      |     |      |     |   |    |        |        |        |      |      |
|------|-----|------|-----|---|----|--------|--------|--------|------|------|
| ATOM | 742 | HB3  | PRO | X | 48 | 36.085 | 62.506 | 47.202 | 0.00 | 0.00 |
| ATOM | 743 | CA   | PRO | X | 48 | 36.376 | 62.549 | 49.246 | 0.00 | 0.00 |
| ATOM | 744 | HA   | PRO | X | 48 | 37.107 | 61.865 | 48.813 | 0.00 | 0.00 |
| ATOM | 745 | C    | PRO | X | 48 | 37.138 | 63.806 | 49.744 | 0.00 | 0.00 |
| ATOM | 746 | O    | PRO | X | 48 | 36.604 | 64.620 | 50.381 | 0.00 | 0.00 |
| ATOM | 747 | N    | LYS | X | 49 | 38.378 | 64.003 | 49.194 | 0.00 | 0.00 |
| ATOM | 748 | H    | LYS | X | 49 | 38.795 | 63.270 | 48.638 | 0.00 | 0.00 |
| ATOM | 749 | CA   | LYS | X | 49 | 39.295 | 65.143 | 49.438 | 0.00 | 0.00 |
| ATOM | 750 | HA   | LYS | X | 49 | 39.927 | 64.874 | 50.284 | 0.00 | 0.00 |
| ATOM | 751 | CB   | LYS | X | 49 | 40.301 | 65.131 | 48.315 | 0.00 | 0.00 |
| ATOM | 752 | HB2  | LYS | X | 49 | 40.949 | 64.258 | 48.392 | 0.00 | 0.00 |
| ATOM | 753 | HB3  | LYS | X | 49 | 39.830 | 64.931 | 47.352 | 0.00 | 0.00 |
| ATOM | 754 | CG   | LYS | X | 49 | 41.375 | 66.255 | 48.255 | 0.00 | 0.00 |
| ATOM | 755 | HG2  | LYS | X | 49 | 42.031 | 66.096 | 47.400 | 0.00 | 0.00 |
| ATOM | 756 | HG3  | LYS | X | 49 | 40.860 | 67.162 | 47.941 | 0.00 | 0.00 |
| ATOM | 757 | CD   | LYS | X | 49 | 42.112 | 66.535 | 49.563 | 0.00 | 0.00 |
| ATOM | 758 | HD2  | LYS | X | 49 | 41.431 | 67.016 | 50.264 | 0.00 | 0.00 |
| ATOM | 759 | HD3  | LYS | X | 49 | 42.488 | 65.627 | 50.034 | 0.00 | 0.00 |
| ATOM | 760 | CE   | LYS | X | 49 | 43.231 | 67.498 | 49.376 | 0.00 | 0.00 |
| ATOM | 761 | HE2  | LYS | X | 49 | 43.872 | 67.064 | 48.608 | 0.00 | 0.00 |
| ATOM | 762 | HE3  | LYS | X | 49 | 42.989 | 68.493 | 49.003 | 0.00 | 0.00 |
| ATOM | 763 | NZ   | LYS | X | 49 | 43.992 | 67.732 | 50.616 | 0.00 | 0.00 |
| ATOM | 764 | HZ1  | LYS | X | 49 | 44.823 | 68.294 | 50.499 | 0.00 | 0.00 |
| ATOM | 765 | HZ2  | LYS | X | 49 | 43.351 | 68.383 | 51.046 | 0.00 | 0.00 |
| ATOM | 766 | HZ3  | LYS | X | 49 | 44.062 | 66.909 | 51.198 | 0.00 | 0.00 |
| ATOM | 767 | C    | LYS | X | 49 | 38.602 | 66.481 | 49.637 | 0.00 | 0.00 |
| ATOM | 768 | O    | LYS | X | 49 | 37.932 | 67.046 | 48.790 | 0.00 | 0.00 |
| ATOM | 769 | N    | GLN | X | 50 | 38.765 | 67.146 | 50.820 | 0.00 | 0.00 |
| ATOM | 770 | H    | GLN | X | 50 | 39.203 | 66.764 | 51.646 | 0.00 | 0.00 |
| ATOM | 771 | CA   | GLN | X | 50 | 38.551 | 68.586 | 50.932 | 0.00 | 0.00 |
| ATOM | 772 | HA   | GLN | X | 50 | 37.470 | 68.706 | 50.865 | 0.00 | 0.00 |
| ATOM | 773 | CB   | GLN | X | 50 | 39.149 | 69.076 | 52.312 | 0.00 | 0.00 |
| ATOM | 774 | HB2  | GLN | X | 50 | 40.015 | 68.447 | 52.520 | 0.00 | 0.00 |
| ATOM | 775 | HB3  | GLN | X | 50 | 39.515 | 70.097 | 52.206 | 0.00 | 0.00 |
| ATOM | 776 | CG   | GLN | X | 50 | 38.178 | 68.769 | 53.471 | 0.00 | 0.00 |
| ATOM | 777 | HG2  | GLN | X | 50 | 37.165 | 69.147 | 53.331 | 0.00 | 0.00 |
| ATOM | 778 | HG3  | GLN | X | 50 | 37.966 | 67.726 | 53.706 | 0.00 | 0.00 |
| ATOM | 779 | CD   | GLN | X | 50 | 38.639 | 69.357 | 54.754 | 0.00 | 0.00 |
| ATOM | 780 | OE1  | GLN | X | 50 | 38.406 | 70.567 | 55.032 | 0.00 | 0.00 |
| ATOM | 781 | NE2  | GLN | X | 50 | 39.465 | 68.649 | 55.473 | 0.00 | 0.00 |
| ATOM | 782 | HE21 | GLN | X | 50 | 39.847 | 69.044 | 56.321 | 0.00 | 0.00 |
| ATOM | 783 | HE22 | GLN | X | 50 | 39.623 | 67.692 | 55.192 | 0.00 | 0.00 |
| ATOM | 784 | C    | GLN | X | 50 | 39.295 | 69.400 | 49.840 | 0.00 | 0.00 |
| ATOM | 785 | O    | GLN | X | 50 | 40.504 | 69.242 | 49.834 | 0.00 | 0.00 |
| ATOM | 786 | N    | PRO | X | 51 | 38.701 | 70.277 | 49.013 | 0.00 | 0.00 |
| ATOM | 787 | CD   | PRO | X | 51 | 37.225 | 70.390 | 48.795 | 0.00 | 0.00 |
| ATOM | 788 | HD2  | PRO | X | 51 | 36.620 | 70.415 | 49.702 | 0.00 | 0.00 |
| ATOM | 789 | HD3  | PRO | X | 51 | 36.765 | 69.591 | 48.213 | 0.00 | 0.00 |
| ATOM | 790 | CG   | PRO | X | 51 | 37.023 | 71.733 | 48.117 | 0.00 | 0.00 |
| ATOM | 791 | HG2  | PRO | X | 51 | 37.034 | 72.599 | 48.779 | 0.00 | 0.00 |
| ATOM | 792 | HG3  | PRO | X | 51 | 36.128 | 71.877 | 47.511 | 0.00 | 0.00 |
| ATOM | 793 | CB   | PRO | X | 51 | 38.300 | 71.983 | 47.306 | 0.00 | 0.00 |
| ATOM | 794 | HB2  | PRO | X | 51 | 38.445 | 73.061 | 47.372 | 0.00 | 0.00 |
| ATOM | 795 | HB3  | PRO | X | 51 | 38.289 | 71.665 | 46.263 | 0.00 | 0.00 |
| ATOM | 796 | CA   | PRO | X | 51 | 39.398 | 71.210 | 48.103 | 0.00 | 0.00 |
| ATOM | 797 | HA   | PRO | X | 51 | 39.957 | 70.562 | 47.428 | 0.00 | 0.00 |
| ATOM | 798 | C    | PRO | X | 51 | 40.328 | 72.082 | 48.799 | 0.00 | 0.00 |
| ATOM | 799 | O    | PRO | X | 51 | 40.264 | 72.313 | 49.975 | 0.00 | 0.00 |
| ATOM | 800 | N    | TRP | X | 52 | 41.300 | 72.600 | 48.023 | 0.00 | 0.00 |
| ATOM | 801 | H    | TRP | X | 52 | 41.358 | 72.280 | 47.067 | 0.00 | 0.00 |
| ATOM | 802 | CA   | TRP | X | 52 | 42.455 | 73.404 | 48.453 | 0.00 | 0.00 |
| ATOM | 803 | HA   | TRP | X | 52 | 42.232 | 73.776 | 49.453 | 0.00 | 0.00 |
| ATOM | 804 | CB   | TRP | X | 52 | 43.807 | 72.582 | 48.451 | 0.00 | 0.00 |
| ATOM | 805 | HB2  | TRP | X | 52 | 44.658 | 73.219 | 48.691 | 0.00 | 0.00 |
| ATOM | 806 | HB3  | TRP | X | 52 | 43.703 | 71.755 | 49.154 | 0.00 | 0.00 |
| ATOM | 807 | CG   | TRP | X | 52 | 44.146 | 72.005 | 47.146 | 0.00 | 0.00 |
| ATOM | 808 | CD1  | TRP | X | 52 | 44.959 | 72.693 | 46.298 | 0.00 | 0.00 |
| ATOM | 809 | HD1  | TRP | X | 52 | 45.374 | 73.665 | 46.523 | 0.00 | 0.00 |
| ATOM | 810 | NE1  | TRP | X | 52 | 45.144 | 71.913 | 45.137 | 0.00 | 0.00 |
| ATOM | 811 | HE1  | TRP | X | 52 | 45.853 | 72.117 | 44.448 | 0.00 | 0.00 |

|      |     |      |     |   |    |        |        |        |      |      |
|------|-----|------|-----|---|----|--------|--------|--------|------|------|
| ATOM | 812 | CE2  | TRP | X | 52 | 44.513 | 70.694 | 45.185 | 0.00 | 0.00 |
| ATOM | 813 | CZ2  | TRP | X | 52 | 44.470 | 69.548 | 44.396 | 0.00 | 0.00 |
| ATOM | 814 | HZ2  | TRP | X | 52 | 45.171 | 69.441 | 43.581 | 0.00 | 0.00 |
| ATOM | 815 | CH2  | TRP | X | 52 | 43.490 | 68.541 | 44.630 | 0.00 | 0.00 |
| ATOM | 816 | HH2  | TRP | X | 52 | 43.437 | 67.642 | 44.034 | 0.00 | 0.00 |
| ATOM | 817 | CZ3  | TRP | X | 52 | 42.835 | 68.626 | 45.843 | 0.00 | 0.00 |
| ATOM | 818 | HZ3  | TRP | X | 52 | 42.224 | 67.806 | 46.190 | 0.00 | 0.00 |
| ATOM | 819 | CE3  | TRP | X | 52 | 42.975 | 69.729 | 46.759 | 0.00 | 0.00 |
| ATOM | 820 | HE3  | TRP | X | 52 | 42.334 | 69.791 | 47.626 | 0.00 | 0.00 |
| ATOM | 821 | CD2  | TRP | X | 52 | 43.872 | 70.723 | 46.473 | 0.00 | 0.00 |
| ATOM | 822 | C    | TRP | X | 52 | 42.745 | 74.550 | 47.483 | 0.00 | 0.00 |
| ATOM | 823 | O    | TRP | X | 52 | 42.260 | 74.685 | 46.347 | 0.00 | 0.00 |
| ATOM | 824 | N    | SER | X | 53 | 43.570 | 75.481 | 47.872 | 0.00 | 0.00 |
| ATOM | 825 | H    | SER | X | 53 | 43.971 | 75.432 | 48.797 | 0.00 | 0.00 |
| ATOM | 826 | CA   | SER | X | 53 | 44.074 | 76.720 | 47.158 | 0.00 | 0.00 |
| ATOM | 827 | HA   | SER | X | 53 | 43.258 | 76.915 | 46.463 | 0.00 | 0.00 |
| ATOM | 828 | CB   | SER | X | 53 | 44.124 | 77.925 | 48.117 | 0.00 | 0.00 |
| ATOM | 829 | HB2  | SER | X | 53 | 44.917 | 77.747 | 48.844 | 0.00 | 0.00 |
| ATOM | 830 | HB3  | SER | X | 53 | 44.241 | 78.853 | 47.557 | 0.00 | 0.00 |
| ATOM | 831 | OG   | SER | X | 53 | 42.907 | 78.187 | 48.811 | 0.00 | 0.00 |
| ATOM | 832 | HG   | SER | X | 53 | 42.846 | 77.459 | 49.433 | 0.00 | 0.00 |
| ATOM | 833 | C    | SER | X | 53 | 45.357 | 76.477 | 46.392 | 0.00 | 0.00 |
| ATOM | 834 | O    | SER | X | 53 | 46.301 | 75.818 | 46.865 | 0.00 | 0.00 |
| ATOM | 835 | N    | GLY | X | 54 | 45.539 | 76.939 | 45.142 | 0.00 | 0.00 |
| ATOM | 836 | H    | GLY | X | 54 | 44.934 | 77.670 | 44.796 | 0.00 | 0.00 |
| ATOM | 837 | CA   | GLY | X | 54 | 46.800 | 76.801 | 44.411 | 0.00 | 0.00 |
| ATOM | 838 | HA2  | GLY | X | 54 | 46.665 | 77.369 | 43.408 | 0.00 | 0.00 |
| ATOM | 839 | HA3  | GLY | X | 54 | 47.672 | 77.295 | 44.916 | 0.00 | 0.00 |
| ATOM | 840 | C    | GLY | X | 54 | 47.115 | 75.337 | 44.114 | 0.00 | 0.00 |
| ATOM | 841 | O    | GLY | X | 54 | 46.206 | 74.528 | 44.040 | 0.00 | 0.00 |
| ATOM | 842 | N    | VAL | X | 55 | 48.361 | 75.036 | 43.901 | 0.00 | 0.00 |
| ATOM | 843 | H    | VAL | X | 55 | 49.092 | 75.713 | 44.065 | 0.00 | 0.00 |
| ATOM | 844 | CA   | VAL | X | 55 | 48.796 | 73.700 | 43.519 | 0.00 | 0.00 |
| ATOM | 845 | HA   | VAL | X | 55 | 47.949 | 73.285 | 42.974 | 0.00 | 0.00 |
| ATOM | 846 | CB   | VAL | X | 55 | 50.029 | 73.806 | 42.591 | 0.00 | 0.00 |
| ATOM | 847 | HB   | VAL | X | 55 | 50.850 | 74.329 | 43.082 | 0.00 | 0.00 |
| ATOM | 848 | CG1  | VAL | X | 55 | 50.522 | 72.438 | 42.197 | 0.00 | 0.00 |
| ATOM | 849 | HG11 | VAL | X | 55 | 49.764 | 71.791 | 41.757 | 0.00 | 0.00 |
| ATOM | 850 | HG12 | VAL | X | 55 | 51.309 | 72.560 | 41.453 | 0.00 | 0.00 |
| ATOM | 851 | HG13 | VAL | X | 55 | 50.961 | 71.981 | 43.085 | 0.00 | 0.00 |
| ATOM | 852 | CG2  | VAL | X | 55 | 49.757 | 74.584 | 41.252 | 0.00 | 0.00 |
| ATOM | 853 | HG21 | VAL | X | 55 | 50.569 | 74.661 | 40.530 | 0.00 | 0.00 |
| ATOM | 854 | HG22 | VAL | X | 55 | 48.843 | 74.257 | 40.756 | 0.00 | 0.00 |
| ATOM | 855 | HG23 | VAL | X | 55 | 49.493 | 75.618 | 41.474 | 0.00 | 0.00 |
| ATOM | 856 | C    | VAL | X | 55 | 49.077 | 72.845 | 44.733 | 0.00 | 0.00 |
| ATOM | 857 | O    | VAL | X | 55 | 49.508 | 73.341 | 45.763 | 0.00 | 0.00 |
| ATOM | 858 | N    | VAL | X | 56 | 48.763 | 71.603 | 44.598 | 0.00 | 0.00 |
| ATOM | 859 | H    | VAL | X | 56 | 48.355 | 71.268 | 43.737 | 0.00 | 0.00 |
| ATOM | 860 | CA   | VAL | X | 56 | 49.248 | 70.525 | 45.448 | 0.00 | 0.00 |
| ATOM | 861 | HA   | VAL | X | 56 | 49.883 | 70.863 | 46.267 | 0.00 | 0.00 |
| ATOM | 862 | CB   | VAL | X | 56 | 48.072 | 69.738 | 46.031 | 0.00 | 0.00 |
| ATOM | 863 | HB   | VAL | X | 56 | 47.350 | 69.617 | 45.223 | 0.00 | 0.00 |
| ATOM | 864 | CG1  | VAL | X | 56 | 48.400 | 68.325 | 46.546 | 0.00 | 0.00 |
| ATOM | 865 | HG11 | VAL | X | 56 | 48.511 | 67.664 | 45.686 | 0.00 | 0.00 |
| ATOM | 866 | HG12 | VAL | X | 56 | 49.314 | 68.393 | 47.136 | 0.00 | 0.00 |
| ATOM | 867 | HG13 | VAL | X | 56 | 47.530 | 67.909 | 47.054 | 0.00 | 0.00 |
| ATOM | 868 | CG2  | VAL | X | 56 | 47.466 | 70.509 | 47.165 | 0.00 | 0.00 |
| ATOM | 869 | HG21 | VAL | X | 56 | 47.385 | 71.570 | 46.931 | 0.00 | 0.00 |
| ATOM | 870 | HG22 | VAL | X | 56 | 46.437 | 70.199 | 47.351 | 0.00 | 0.00 |
| ATOM | 871 | HG23 | VAL | X | 56 | 48.047 | 70.508 | 48.088 | 0.00 | 0.00 |
| ATOM | 872 | C    | VAL | X | 56 | 50.160 | 69.636 | 44.595 | 0.00 | 0.00 |
| ATOM | 873 | O    | VAL | X | 56 | 49.817 | 69.137 | 43.563 | 0.00 | 0.00 |
| ATOM | 874 | N    | ASP | X | 57 | 51.450 | 69.609 | 44.905 | 0.00 | 0.00 |
| ATOM | 875 | H    | ASP | X | 57 | 51.727 | 70.146 | 45.714 | 0.00 | 0.00 |
| ATOM | 876 | CA   | ASP | X | 57 | 52.433 | 68.763 | 44.244 | 0.00 | 0.00 |
| ATOM | 877 | HA   | ASP | X | 57 | 52.552 | 69.270 | 43.287 | 0.00 | 0.00 |
| ATOM | 878 | CB   | ASP | X | 57 | 53.760 | 68.793 | 44.967 | 0.00 | 0.00 |
| ATOM | 879 | HB2  | ASP | X | 57 | 54.041 | 69.824 | 45.183 | 0.00 | 0.00 |
| ATOM | 880 | HB3  | ASP | X | 57 | 53.740 | 68.370 | 45.971 | 0.00 | 0.00 |
| ATOM | 881 | CG   | ASP | X | 57 | 54.841 | 68.091 | 44.123 | 0.00 | 0.00 |

|      |     |      |     |   |    |        |        |        |      |      |
|------|-----|------|-----|---|----|--------|--------|--------|------|------|
| ATOM | 882 | OD1  | ASP | X | 57 | 54.961 | 66.853 | 44.171 | 0.00 | 0.00 |
| ATOM | 883 | OD2  | ASP | X | 57 | 55.471 | 68.833 | 43.303 | 0.00 | 0.00 |
| ATOM | 884 | C    | ASP | X | 57 | 52.032 | 67.230 | 44.166 | 0.00 | 0.00 |
| ATOM | 885 | O    | ASP | X | 57 | 51.636 | 66.677 | 45.172 | 0.00 | 0.00 |
| ATOM | 886 | N    | ALA | X | 58 | 52.161 | 66.627 | 42.976 | 0.00 | 0.00 |
| ATOM | 887 | H    | ALA | X | 58 | 52.521 | 67.243 | 42.261 | 0.00 | 0.00 |
| ATOM | 888 | CA   | ALA | X | 58 | 51.996 | 65.200 | 42.655 | 0.00 | 0.00 |
| ATOM | 889 | HA   | ALA | X | 58 | 51.950 | 64.604 | 43.566 | 0.00 | 0.00 |
| ATOM | 890 | CB   | ALA | X | 58 | 50.628 | 65.065 | 42.026 | 0.00 | 0.00 |
| ATOM | 891 | HB1  | ALA | X | 58 | 50.644 | 65.711 | 41.149 | 0.00 | 0.00 |
| ATOM | 892 | HB2  | ALA | X | 58 | 50.533 | 64.014 | 41.754 | 0.00 | 0.00 |
| ATOM | 893 | HB3  | ALA | X | 58 | 49.922 | 65.383 | 42.794 | 0.00 | 0.00 |
| ATOM | 894 | C    | ALA | X | 58 | 53.095 | 64.677 | 41.779 | 0.00 | 0.00 |
| ATOM | 895 | O    | ALA | X | 58 | 52.859 | 64.119 | 40.722 | 0.00 | 0.00 |
| ATOM | 896 | N    | THR | X | 59 | 54.274 | 65.120 | 41.972 | 0.00 | 0.00 |
| ATOM | 897 | H    | THR | X | 59 | 54.407 | 65.782 | 42.723 | 0.00 | 0.00 |
| ATOM | 898 | CA   | THR | X | 59 | 55.484 | 64.676 | 41.329 | 0.00 | 0.00 |
| ATOM | 899 | HA   | THR | X | 59 | 55.328 | 64.585 | 40.254 | 0.00 | 0.00 |
| ATOM | 900 | CB   | THR | X | 59 | 56.490 | 65.826 | 41.410 | 0.00 | 0.00 |
| ATOM | 901 | HB   | THR | X | 59 | 57.393 | 65.536 | 40.873 | 0.00 | 0.00 |
| ATOM | 902 | CG2  | THR | X | 59 | 56.146 | 67.101 | 40.733 | 0.00 | 0.00 |
| ATOM | 903 | HG21 | THR | X | 59 | 56.946 | 67.826 | 40.882 | 0.00 | 0.00 |
| ATOM | 904 | HG22 | THR | X | 59 | 56.049 | 66.855 | 39.676 | 0.00 | 0.00 |
| ATOM | 905 | HG23 | THR | X | 59 | 55.285 | 67.664 | 41.095 | 0.00 | 0.00 |
| ATOM | 906 | OG1  | THR | X | 59 | 56.923 | 66.046 | 42.783 | 0.00 | 0.00 |
| ATOM | 907 | HG1  | THR | X | 59 | 56.145 | 66.298 | 43.285 | 0.00 | 0.00 |
| ATOM | 908 | C    | THR | X | 59 | 56.170 | 63.428 | 41.767 | 0.00 | 0.00 |
| ATOM | 909 | O    | THR | X | 59 | 57.218 | 63.105 | 41.233 | 0.00 | 0.00 |
| ATOM | 910 | N    | THR | X | 60 | 55.630 | 62.806 | 42.781 | 0.00 | 0.00 |
| ATOM | 911 | H    | THR | X | 60 | 54.827 | 63.289 | 43.156 | 0.00 | 0.00 |
| ATOM | 912 | CA   | THR | X | 60 | 56.204 | 61.626 | 43.482 | 0.00 | 0.00 |
| ATOM | 913 | HA   | THR | X | 60 | 56.352 | 60.819 | 42.765 | 0.00 | 0.00 |
| ATOM | 914 | CB   | THR | X | 60 | 57.512 | 61.953 | 44.277 | 0.00 | 0.00 |
| ATOM | 915 | HB   | THR | X | 60 | 58.157 | 62.265 | 43.456 | 0.00 | 0.00 |
| ATOM | 916 | CG2  | THR | X | 60 | 57.406 | 63.019 | 45.399 | 0.00 | 0.00 |
| ATOM | 917 | HG21 | THR | X | 60 | 56.944 | 63.928 | 45.011 | 0.00 | 0.00 |
| ATOM | 918 | HG22 | THR | X | 60 | 56.882 | 62.654 | 46.282 | 0.00 | 0.00 |
| ATOM | 919 | HG23 | THR | X | 60 | 58.440 | 63.217 | 45.680 | 0.00 | 0.00 |
| ATOM | 920 | OG1  | THR | X | 60 | 57.882 | 60.763 | 44.866 | 0.00 | 0.00 |
| ATOM | 921 | HG1  | THR | X | 60 | 57.995 | 60.047 | 44.236 | 0.00 | 0.00 |
| ATOM | 922 | C    | THR | X | 60 | 55.150 | 61.101 | 44.510 | 0.00 | 0.00 |
| ATOM | 923 | O    | THR | X | 60 | 54.301 | 61.889 | 44.906 | 0.00 | 0.00 |
| ATOM | 924 | N    | PHE | X | 61 | 55.222 | 59.817 | 44.919 | 0.00 | 0.00 |
| ATOM | 925 | H    | PHE | X | 61 | 55.986 | 59.253 | 44.575 | 0.00 | 0.00 |
| ATOM | 926 | CA   | PHE | X | 61 | 54.169 | 59.169 | 45.780 | 0.00 | 0.00 |
| ATOM | 927 | HA   | PHE | X | 61 | 53.249 | 59.642 | 45.437 | 0.00 | 0.00 |
| ATOM | 928 | CB   | PHE | X | 61 | 54.344 | 57.659 | 45.560 | 0.00 | 0.00 |
| ATOM | 929 | HB2  | PHE | X | 61 | 54.646 | 57.486 | 44.527 | 0.00 | 0.00 |
| ATOM | 930 | HB3  | PHE | X | 61 | 55.139 | 57.293 | 46.209 | 0.00 | 0.00 |
| ATOM | 931 | CG   | PHE | X | 61 | 53.141 | 56.981 | 45.954 | 0.00 | 0.00 |
| ATOM | 932 | CD1  | PHE | X | 61 | 52.910 | 56.415 | 47.232 | 0.00 | 0.00 |
| ATOM | 933 | HD1  | PHE | X | 61 | 53.628 | 56.472 | 48.036 | 0.00 | 0.00 |
| ATOM | 934 | CE1  | PHE | X | 61 | 51.798 | 55.650 | 47.526 | 0.00 | 0.00 |
| ATOM | 935 | HE1  | PHE | X | 61 | 51.724 | 55.156 | 48.483 | 0.00 | 0.00 |
| ATOM | 936 | CZ   | PHE | X | 61 | 50.802 | 55.501 | 46.560 | 0.00 | 0.00 |
| ATOM | 937 | HZ   | PHE | X | 61 | 49.911 | 54.965 | 46.852 | 0.00 | 0.00 |
| ATOM | 938 | CE2  | PHE | X | 61 | 50.966 | 56.082 | 45.291 | 0.00 | 0.00 |
| ATOM | 939 | HE2  | PHE | X | 61 | 50.204 | 55.908 | 44.546 | 0.00 | 0.00 |
| ATOM | 940 | CD2  | PHE | X | 61 | 52.135 | 56.866 | 45.033 | 0.00 | 0.00 |
| ATOM | 941 | HD2  | PHE | X | 61 | 52.274 | 57.341 | 44.073 | 0.00 | 0.00 |
| ATOM | 942 | C    | PHE | X | 61 | 54.428 | 59.533 | 47.238 | 0.00 | 0.00 |
| ATOM | 943 | O    | PHE | X | 61 | 55.459 | 60.161 | 47.649 | 0.00 | 0.00 |
| ATOM | 944 | N    | GLN | X | 62 | 53.456 | 59.251 | 48.091 | 0.00 | 0.00 |
| ATOM | 945 | H    | GLN | X | 62 | 52.713 | 58.655 | 47.756 | 0.00 | 0.00 |
| ATOM | 946 | CA   | GLN | X | 62 | 53.482 | 59.678 | 49.517 | 0.00 | 0.00 |
| ATOM | 947 | HA   | GLN | X | 62 | 54.212 | 60.479 | 49.636 | 0.00 | 0.00 |
| ATOM | 948 | CB   | GLN | X | 62 | 52.111 | 60.188 | 49.920 | 0.00 | 0.00 |
| ATOM | 949 | HB2  | GLN | X | 62 | 51.349 | 59.642 | 49.364 | 0.00 | 0.00 |
| ATOM | 950 | HB3  | GLN | X | 62 | 51.960 | 60.128 | 50.997 | 0.00 | 0.00 |
| ATOM | 951 | CG   | GLN | X | 62 | 51.949 | 61.682 | 49.535 | 0.00 | 0.00 |

|      |      |      |     |   |    |        |        |        |      |      |
|------|------|------|-----|---|----|--------|--------|--------|------|------|
| ATOM | 952  | HG2  | GLN | X | 62 | 52.163 | 61.874 | 48.484 | 0.00 | 0.00 |
| ATOM | 953  | HG3  | GLN | X | 62 | 50.959 | 62.088 | 49.747 | 0.00 | 0.00 |
| ATOM | 954  | CD   | GLN | X | 62 | 52.938 | 62.533 | 50.310 | 0.00 | 0.00 |
| ATOM | 955  | OE1  | GLN | X | 62 | 53.183 | 62.318 | 51.451 | 0.00 | 0.00 |
| ATOM | 956  | NE2  | GLN | X | 62 | 53.678 | 63.344 | 49.556 | 0.00 | 0.00 |
| ATOM | 957  | HE21 | GLN | X | 62 | 54.407 | 63.870 | 50.016 | 0.00 | 0.00 |
| ATOM | 958  | HE22 | GLN | X | 62 | 53.422 | 63.477 | 48.588 | 0.00 | 0.00 |
| ATOM | 959  | C    | GLN | X | 62 | 53.989 | 58.382 | 50.323 | 0.00 | 0.00 |
| ATOM | 960  | O    | GLN | X | 62 | 54.818 | 57.641 | 49.774 | 0.00 | 0.00 |
| ATOM | 961  | N    | SER | X | 63 | 53.404 | 58.069 | 51.482 | 0.00 | 0.00 |
| ATOM | 962  | H    | SER | X | 63 | 52.658 | 58.631 | 51.868 | 0.00 | 0.00 |
| ATOM | 963  | CA   | SER | X | 63 | 53.667 | 56.811 | 52.189 | 0.00 | 0.00 |
| ATOM | 964  | HA   | SER | X | 63 | 54.598 | 56.432 | 51.768 | 0.00 | 0.00 |
| ATOM | 965  | CB   | SER | X | 63 | 53.747 | 57.032 | 53.706 | 0.00 | 0.00 |
| ATOM | 966  | HB2  | SER | X | 63 | 52.784 | 57.234 | 54.174 | 0.00 | 0.00 |
| ATOM | 967  | HB3  | SER | X | 63 | 53.962 | 56.090 | 54.211 | 0.00 | 0.00 |
| ATOM | 968  | OG   | SER | X | 63 | 54.701 | 58.096 | 53.963 | 0.00 | 0.00 |
| ATOM | 969  | HG   | SER | X | 63 | 54.278 | 58.954 | 53.884 | 0.00 | 0.00 |
| ATOM | 970  | C    | SER | X | 63 | 52.579 | 55.743 | 51.861 | 0.00 | 0.00 |
| ATOM | 971  | O    | SER | X | 63 | 51.686 | 56.137 | 51.055 | 0.00 | 0.00 |
| ATOM | 972  | N    | VAL | X | 64 | 52.573 | 54.530 | 52.358 | 0.00 | 0.00 |
| ATOM | 973  | H    | VAL | X | 64 | 53.367 | 54.299 | 52.938 | 0.00 | 0.00 |
| ATOM | 974  | CA   | VAL | X | 64 | 51.480 | 53.507 | 52.176 | 0.00 | 0.00 |
| ATOM | 975  | HA   | VAL | X | 64 | 50.709 | 54.009 | 51.591 | 0.00 | 0.00 |
| ATOM | 976  | CB   | VAL | X | 64 | 52.012 | 52.248 | 51.447 | 0.00 | 0.00 |
| ATOM | 977  | HB   | VAL | X | 64 | 51.178 | 51.546 | 51.449 | 0.00 | 0.00 |
| ATOM | 978  | CG1  | VAL | X | 64 | 52.334 | 52.579 | 49.979 | 0.00 | 0.00 |
| ATOM | 979  | HG11 | VAL | X | 64 | 53.218 | 52.074 | 49.589 | 0.00 | 0.00 |
| ATOM | 980  | HG12 | VAL | X | 64 | 51.449 | 52.273 | 49.422 | 0.00 | 0.00 |
| ATOM | 981  | HG13 | VAL | X | 64 | 52.611 | 53.625 | 49.845 | 0.00 | 0.00 |
| ATOM | 982  | CG2  | VAL | X | 64 | 53.216 | 51.555 | 52.066 | 0.00 | 0.00 |
| ATOM | 983  | HG21 | VAL | X | 64 | 53.367 | 50.570 | 51.624 | 0.00 | 0.00 |
| ATOM | 984  | HG22 | VAL | X | 64 | 54.176 | 52.008 | 51.819 | 0.00 | 0.00 |
| ATOM | 985  | HG23 | VAL | X | 64 | 52.946 | 51.480 | 53.119 | 0.00 | 0.00 |
| ATOM | 986  | C    | VAL | X | 64 | 50.894 | 53.112 | 53.484 | 0.00 | 0.00 |
| ATOM | 987  | O    | VAL | X | 64 | 51.407 | 53.378 | 54.574 | 0.00 | 0.00 |
| ATOM | 988  | N    | CYX | X | 65 | 49.789 | 52.310 | 53.421 | 0.00 | 0.00 |
| ATOM | 989  | H    | CYX | X | 65 | 49.563 | 51.945 | 52.507 | 0.00 | 0.00 |
| ATOM | 990  | CA   | CYX | X | 65 | 49.036 | 51.795 | 54.525 | 0.00 | 0.00 |
| ATOM | 991  | HA   | CYX | X | 65 | 48.749 | 52.597 | 55.204 | 0.00 | 0.00 |
| ATOM | 992  | CB   | CYX | X | 65 | 47.751 | 51.208 | 53.962 | 0.00 | 0.00 |
| ATOM | 993  | HB2  | CYX | X | 65 | 47.908 | 50.240 | 53.486 | 0.00 | 0.00 |
| ATOM | 994  | HB3  | CYX | X | 65 | 47.141 | 50.990 | 54.839 | 0.00 | 0.00 |
| ATOM | 995  | SG   | CYX | X | 65 | 46.955 | 52.231 | 52.728 | 0.00 | 0.00 |
| ATOM | 996  | C    | CYX | X | 65 | 49.876 | 50.708 | 55.305 | 0.00 | 0.00 |
| ATOM | 997  | O    | CYX | X | 65 | 50.576 | 49.860 | 54.725 | 0.00 | 0.00 |
| ATOM | 998  | N    | TYR | X | 66 | 49.901 | 50.798 | 56.624 | 0.00 | 0.00 |
| ATOM | 999  | H    | TYR | X | 66 | 49.443 | 51.613 | 57.007 | 0.00 | 0.00 |
| ATOM | 1000 | CA   | TYR | X | 66 | 50.428 | 49.714 | 57.504 | 0.00 | 0.00 |
| ATOM | 1001 | HA   | TYR | X | 66 | 51.512 | 49.781 | 57.414 | 0.00 | 0.00 |
| ATOM | 1002 | CB   | TYR | X | 66 | 49.978 | 49.987 | 58.933 | 0.00 | 0.00 |
| ATOM | 1003 | HB2  | TYR | X | 66 | 48.976 | 50.416 | 58.931 | 0.00 | 0.00 |
| ATOM | 1004 | HB3  | TYR | X | 66 | 49.851 | 49.102 | 59.555 | 0.00 | 0.00 |
| ATOM | 1005 | CG   | TYR | X | 66 | 50.786 | 51.014 | 59.715 | 0.00 | 0.00 |
| ATOM | 1006 | CD1  | TYR | X | 66 | 50.171 | 52.184 | 60.195 | 0.00 | 0.00 |
| ATOM | 1007 | HD1  | TYR | X | 66 | 49.106 | 52.340 | 60.114 | 0.00 | 0.00 |
| ATOM | 1008 | CE1  | TYR | X | 66 | 50.930 | 53.110 | 61.025 | 0.00 | 0.00 |
| ATOM | 1009 | HE1  | TYR | X | 66 | 50.532 | 54.037 | 61.410 | 0.00 | 0.00 |
| ATOM | 1010 | CZ   | TYR | X | 66 | 52.351 | 52.939 | 61.216 | 0.00 | 0.00 |
| ATOM | 1011 | OH   | TYR | X | 66 | 53.071 | 53.985 | 61.762 | 0.00 | 0.00 |
| ATOM | 1012 | HH   | TYR | X | 66 | 52.480 | 54.590 | 62.216 | 0.00 | 0.00 |
| ATOM | 1013 | CE2  | TYR | X | 66 | 52.970 | 51.774 | 60.679 | 0.00 | 0.00 |
| ATOM | 1014 | HE2  | TYR | X | 66 | 54.035 | 51.674 | 60.827 | 0.00 | 0.00 |
| ATOM | 1015 | CD2  | TYR | X | 66 | 52.185 | 50.810 | 60.061 | 0.00 | 0.00 |
| ATOM | 1016 | HD2  | TYR | X | 66 | 52.698 | 49.884 | 59.845 | 0.00 | 0.00 |
| ATOM | 1017 | C    | TYR | X | 66 | 50.011 | 48.274 | 57.095 | 0.00 | 0.00 |
| ATOM | 1018 | O    | TYR | X | 66 | 48.899 | 47.973 | 56.673 | 0.00 | 0.00 |
| ATOM | 1019 | N    | GLN | X | 67 | 50.914 | 47.352 | 57.320 | 0.00 | 0.00 |
| ATOM | 1020 | H    | GLN | X | 67 | 51.843 | 47.614 | 57.617 | 0.00 | 0.00 |
| ATOM | 1021 | CA   | GLN | X | 67 | 50.866 | 45.973 | 56.857 | 0.00 | 0.00 |

|      |      |      |     |   |    |        |        |        |      |      |
|------|------|------|-----|---|----|--------|--------|--------|------|------|
| ATOM | 1022 | HA   | GLN | X | 67 | 49.937 | 45.530 | 57.215 | 0.00 | 0.00 |
| ATOM | 1023 | CB   | GLN | X | 67 | 50.779 | 46.052 | 55.325 | 0.00 | 0.00 |
| ATOM | 1024 | HB2  | GLN | X | 67 | 50.769 | 45.000 | 55.042 | 0.00 | 0.00 |
| ATOM | 1025 | HB3  | GLN | X | 67 | 49.872 | 46.530 | 54.954 | 0.00 | 0.00 |
| ATOM | 1026 | CG   | GLN | X | 67 | 51.976 | 46.759 | 54.701 | 0.00 | 0.00 |
| ATOM | 1027 | HG2  | GLN | X | 67 | 52.112 | 47.748 | 55.140 | 0.00 | 0.00 |
| ATOM | 1028 | HG3  | GLN | X | 67 | 52.893 | 46.257 | 55.009 | 0.00 | 0.00 |
| ATOM | 1029 | CD   | GLN | X | 67 | 51.755 | 46.777 | 53.218 | 0.00 | 0.00 |
| ATOM | 1030 | OE1  | GLN | X | 67 | 52.396 | 45.995 | 52.550 | 0.00 | 0.00 |
| ATOM | 1031 | NE2  | GLN | X | 67 | 50.957 | 47.620 | 52.672 | 0.00 | 0.00 |
| ATOM | 1032 | HE21 | GLN | X | 67 | 50.728 | 47.665 | 51.689 | 0.00 | 0.00 |
| ATOM | 1033 | HE22 | GLN | X | 67 | 50.611 | 48.323 | 53.309 | 0.00 | 0.00 |
| ATOM | 1034 | C    | GLN | X | 67 | 52.063 | 45.224 | 57.421 | 0.00 | 0.00 |
| ATOM | 1035 | O    | GLN | X | 67 | 53.120 | 45.743 | 57.801 | 0.00 | 0.00 |
| ATOM | 1036 | N    | TYR | X | 68 | 51.827 | 43.893 | 57.372 | 0.00 | 0.00 |
| ATOM | 1037 | H    | TYR | X | 68 | 50.879 | 43.563 | 57.264 | 0.00 | 0.00 |
| ATOM | 1038 | CA   | TYR | X | 68 | 52.890 | 42.971 | 57.672 | 0.00 | 0.00 |
| ATOM | 1039 | HA   | TYR | X | 68 | 53.256 | 43.050 | 58.696 | 0.00 | 0.00 |
| ATOM | 1040 | CB   | TYR | X | 68 | 52.360 | 41.518 | 57.610 | 0.00 | 0.00 |
| ATOM | 1041 | HB2  | TYR | X | 68 | 51.555 | 41.579 | 58.342 | 0.00 | 0.00 |
| ATOM | 1042 | HB3  | TYR | X | 68 | 51.920 | 41.399 | 56.620 | 0.00 | 0.00 |
| ATOM | 1043 | CG   | TYR | X | 68 | 53.444 | 40.426 | 57.877 | 0.00 | 0.00 |
| ATOM | 1044 | CD1  | TYR | X | 68 | 53.873 | 40.094 | 59.199 | 0.00 | 0.00 |
| ATOM | 1045 | HD1  | TYR | X | 68 | 53.390 | 40.608 | 60.017 | 0.00 | 0.00 |
| ATOM | 1046 | CE1  | TYR | X | 68 | 54.786 | 39.139 | 59.458 | 0.00 | 0.00 |
| ATOM | 1047 | HE1  | TYR | X | 68 | 54.933 | 38.909 | 60.503 | 0.00 | 0.00 |
| ATOM | 1048 | CZ   | TYR | X | 68 | 55.255 | 38.362 | 58.325 | 0.00 | 0.00 |
| ATOM | 1049 | OH   | TYR | X | 68 | 56.024 | 37.287 | 58.529 | 0.00 | 0.00 |
| ATOM | 1050 | HH   | TYR | X | 68 | 56.016 | 37.111 | 59.472 | 0.00 | 0.00 |
| ATOM | 1051 | CE2  | TYR | X | 68 | 54.976 | 38.780 | 57.002 | 0.00 | 0.00 |
| ATOM | 1052 | HE2  | TYR | X | 68 | 55.413 | 38.295 | 56.142 | 0.00 | 0.00 |
| ATOM | 1053 | CD2  | TYR | X | 68 | 54.017 | 39.784 | 56.787 | 0.00 | 0.00 |
| ATOM | 1054 | HD2  | TYR | X | 68 | 53.824 | 40.136 | 55.784 | 0.00 | 0.00 |
| ATOM | 1055 | C    | TYR | X | 68 | 54.106 | 42.996 | 56.651 | 0.00 | 0.00 |
| ATOM | 1056 | O    | TYR | X | 68 | 53.893 | 43.101 | 55.409 | 0.00 | 0.00 |
| ATOM | 1057 | N    | VAL | X | 69 | 55.355 | 42.983 | 57.137 | 0.00 | 0.00 |
| ATOM | 1058 | H    | VAL | X | 69 | 55.450 | 42.879 | 58.137 | 0.00 | 0.00 |
| ATOM | 1059 | CA   | VAL | X | 69 | 56.636 | 43.024 | 56.329 | 0.00 | 0.00 |
| ATOM | 1060 | HA   | VAL | X | 69 | 56.441 | 43.467 | 55.352 | 0.00 | 0.00 |
| ATOM | 1061 | CB   | VAL | X | 69 | 57.746 | 43.985 | 56.915 | 0.00 | 0.00 |
| ATOM | 1062 | HB   | VAL | X | 69 | 58.538 | 44.113 | 56.177 | 0.00 | 0.00 |
| ATOM | 1063 | CG1  | VAL | X | 69 | 57.126 | 45.387 | 57.104 | 0.00 | 0.00 |
| ATOM | 1064 | HG11 | VAL | X | 69 | 57.796 | 46.154 | 57.493 | 0.00 | 0.00 |
| ATOM | 1065 | HG12 | VAL | X | 69 | 56.580 | 45.811 | 56.262 | 0.00 | 0.00 |
| ATOM | 1066 | HG13 | VAL | X | 69 | 56.330 | 45.298 | 57.843 | 0.00 | 0.00 |
| ATOM | 1067 | CG2  | VAL | X | 69 | 58.369 | 43.453 | 58.259 | 0.00 | 0.00 |
| ATOM | 1068 | HG21 | VAL | X | 69 | 57.627 | 43.202 | 59.017 | 0.00 | 0.00 |
| ATOM | 1069 | HG22 | VAL | X | 69 | 58.932 | 42.522 | 58.192 | 0.00 | 0.00 |
| ATOM | 1070 | HG23 | VAL | X | 69 | 59.073 | 44.138 | 58.731 | 0.00 | 0.00 |
| ATOM | 1071 | C    | VAL | X | 69 | 57.210 | 41.630 | 56.259 | 0.00 | 0.00 |
| ATOM | 1072 | O    | VAL | X | 69 | 57.339 | 40.952 | 57.286 | 0.00 | 0.00 |
| ATOM | 1073 | N    | ASP | X | 70 | 57.658 | 41.256 | 55.072 | 0.00 | 0.00 |
| ATOM | 1074 | H    | ASP | X | 70 | 57.450 | 41.818 | 54.259 | 0.00 | 0.00 |
| ATOM | 1075 | CA   | ASP | X | 70 | 58.505 | 40.079 | 54.883 | 0.00 | 0.00 |
| ATOM | 1076 | HA   | ASP | X | 70 | 58.042 | 39.165 | 55.254 | 0.00 | 0.00 |
| ATOM | 1077 | CB   | ASP | X | 70 | 58.890 | 39.902 | 53.449 | 0.00 | 0.00 |
| ATOM | 1078 | HB2  | ASP | X | 70 | 58.032 | 39.589 | 52.855 | 0.00 | 0.00 |
| ATOM | 1079 | HB3  | ASP | X | 70 | 59.241 | 40.858 | 53.059 | 0.00 | 0.00 |
| ATOM | 1080 | CG   | ASP | X | 70 | 59.941 | 38.897 | 53.230 | 0.00 | 0.00 |
| ATOM | 1081 | OD1  | ASP | X | 70 | 61.070 | 39.355 | 53.035 | 0.00 | 0.00 |
| ATOM | 1082 | OD2  | ASP | X | 70 | 59.708 | 37.649 | 53.392 | 0.00 | 0.00 |
| ATOM | 1083 | C    | ASP | X | 70 | 59.802 | 40.181 | 55.806 | 0.00 | 0.00 |
| ATOM | 1084 | O    | ASP | X | 70 | 60.520 | 41.177 | 55.782 | 0.00 | 0.00 |
| ATOM | 1085 | N    | THR | X | 71 | 60.082 | 39.092 | 56.484 | 0.00 | 0.00 |
| ATOM | 1086 | H    | THR | X | 71 | 59.352 | 38.397 | 56.416 | 0.00 | 0.00 |
| ATOM | 1087 | CA   | THR | X | 71 | 61.333 | 38.704 | 57.204 | 0.00 | 0.00 |
| ATOM | 1088 | HA   | THR | X | 71 | 61.981 | 39.577 | 57.294 | 0.00 | 0.00 |
| ATOM | 1089 | CB   | THR | X | 71 | 60.926 | 38.261 | 58.647 | 0.00 | 0.00 |
| ATOM | 1090 | HB   | THR | X | 71 | 61.790 | 37.889 | 59.197 | 0.00 | 0.00 |
| ATOM | 1091 | CG2  | THR | X | 71 | 60.392 | 39.481 | 59.358 | 0.00 | 0.00 |

|      |      |      |     |   |    |        |        |        |      |      |
|------|------|------|-----|---|----|--------|--------|--------|------|------|
| ATOM | 1092 | HG21 | THR | X | 71 | 60.325 | 39.335 | 60.436 | 0.00 | 0.00 |
| ATOM | 1093 | HG22 | THR | X | 71 | 61.069 | 40.317 | 59.182 | 0.00 | 0.00 |
| ATOM | 1094 | HG23 | THR | X | 71 | 59.429 | 39.882 | 59.041 | 0.00 | 0.00 |
| ATOM | 1095 | OG1  | THR | X | 71 | 59.955 | 37.225 | 58.668 | 0.00 | 0.00 |
| ATOM | 1096 | HG1  | THR | X | 71 | 59.778 | 37.150 | 59.609 | 0.00 | 0.00 |
| ATOM | 1097 | C    | THR | X | 71 | 62.061 | 37.488 | 56.535 | 0.00 | 0.00 |
| ATOM | 1098 | O    | THR | X | 71 | 63.255 | 37.250 | 56.735 | 0.00 | 0.00 |
| ATOM | 1099 | N    | LEU | X | 72 | 61.475 | 36.726 | 55.625 | 0.00 | 0.00 |
| ATOM | 1100 | H    | LEU | X | 72 | 60.585 | 37.054 | 55.278 | 0.00 | 0.00 |
| ATOM | 1101 | CA   | LEU | X | 72 | 62.085 | 35.547 | 55.026 | 0.00 | 0.00 |
| ATOM | 1102 | HA   | LEU | X | 72 | 62.502 | 34.885 | 55.785 | 0.00 | 0.00 |
| ATOM | 1103 | CB   | LEU | X | 72 | 60.873 | 34.716 | 54.452 | 0.00 | 0.00 |
| ATOM | 1104 | HB2  | LEU | X | 72 | 59.992 | 34.793 | 55.089 | 0.00 | 0.00 |
| ATOM | 1105 | HB3  | LEU | X | 72 | 60.617 | 35.083 | 53.458 | 0.00 | 0.00 |
| ATOM | 1106 | CG   | LEU | X | 72 | 61.182 | 33.168 | 54.486 | 0.00 | 0.00 |
| ATOM | 1107 | HG   | LEU | X | 72 | 62.149 | 33.050 | 53.996 | 0.00 | 0.00 |
| ATOM | 1108 | CD1  | LEU | X | 72 | 61.405 | 32.662 | 55.985 | 0.00 | 0.00 |
| ATOM | 1109 | HD11 | LEU | X | 72 | 61.637 | 31.598 | 55.938 | 0.00 | 0.00 |
| ATOM | 1110 | HD12 | LEU | X | 72 | 62.404 | 32.943 | 56.319 | 0.00 | 0.00 |
| ATOM | 1111 | HD13 | LEU | X | 72 | 60.563 | 32.897 | 56.637 | 0.00 | 0.00 |
| ATOM | 1112 | CD2  | LEU | X | 72 | 60.150 | 32.357 | 53.687 | 0.00 | 0.00 |
| ATOM | 1113 | HD21 | LEU | X | 72 | 59.702 | 32.905 | 52.857 | 0.00 | 0.00 |
| ATOM | 1114 | HD22 | LEU | X | 72 | 60.572 | 31.407 | 53.359 | 0.00 | 0.00 |
| ATOM | 1115 | HD23 | LEU | X | 72 | 59.222 | 32.248 | 54.248 | 0.00 | 0.00 |
| ATOM | 1116 | C    | LEU | X | 72 | 63.019 | 35.773 | 53.882 | 0.00 | 0.00 |
| ATOM | 1117 | O    | LEU | X | 72 | 64.022 | 35.044 | 53.815 | 0.00 | 0.00 |
| ATOM | 1118 | N    | TYR | X | 73 | 62.745 | 36.730 | 53.020 | 0.00 | 0.00 |
| ATOM | 1119 | H    | TYR | X | 73 | 61.818 | 37.117 | 53.118 | 0.00 | 0.00 |
| ATOM | 1120 | CA   | TYR | X | 73 | 63.650 | 37.055 | 51.915 | 0.00 | 0.00 |
| ATOM | 1121 | HA   | TYR | X | 73 | 64.584 | 36.536 | 52.132 | 0.00 | 0.00 |
| ATOM | 1122 | CB   | TYR | X | 73 | 63.085 | 36.555 | 50.596 | 0.00 | 0.00 |
| ATOM | 1123 | HB2  | TYR | X | 73 | 62.077 | 36.968 | 50.560 | 0.00 | 0.00 |
| ATOM | 1124 | HB3  | TYR | X | 73 | 63.816 | 36.730 | 49.806 | 0.00 | 0.00 |
| ATOM | 1125 | CG   | TYR | X | 73 | 62.923 | 35.043 | 50.591 | 0.00 | 0.00 |
| ATOM | 1126 | CD1  | TYR | X | 73 | 64.090 | 34.206 | 50.361 | 0.00 | 0.00 |
| ATOM | 1127 | HD1  | TYR | X | 73 | 65.083 | 34.606 | 50.217 | 0.00 | 0.00 |
| ATOM | 1128 | CE1  | TYR | X | 73 | 63.870 | 32.837 | 50.233 | 0.00 | 0.00 |
| ATOM | 1129 | HE1  | TYR | X | 73 | 64.698 | 32.164 | 50.070 | 0.00 | 0.00 |
| ATOM | 1130 | CZ   | TYR | X | 73 | 62.608 | 32.325 | 50.099 | 0.00 | 0.00 |
| ATOM | 1131 | OH   | TYR | X | 73 | 62.469 | 31.037 | 49.670 | 0.00 | 0.00 |
| ATOM | 1132 | HH   | TYR | X | 73 | 61.549 | 30.768 | 49.720 | 0.00 | 0.00 |
| ATOM | 1133 | CE2  | TYR | X | 73 | 61.490 | 33.128 | 50.377 | 0.00 | 0.00 |
| ATOM | 1134 | HE2  | TYR | X | 73 | 60.492 | 32.787 | 50.145 | 0.00 | 0.00 |
| ATOM | 1135 | CD2  | TYR | X | 73 | 61.633 | 34.517 | 50.612 | 0.00 | 0.00 |
| ATOM | 1136 | HD2  | TYR | X | 73 | 60.738 | 35.122 | 50.616 | 0.00 | 0.00 |
| ATOM | 1137 | C    | TYR | X | 73 | 64.037 | 38.553 | 51.807 | 0.00 | 0.00 |
| ATOM | 1138 | O    | TYR | X | 73 | 63.626 | 39.207 | 50.852 | 0.00 | 0.00 |
| ATOM | 1139 | N    | PRO | X | 74 | 64.807 | 39.019 | 52.808 | 0.00 | 0.00 |
| ATOM | 1140 | CD   | PRO | X | 74 | 65.072 | 38.419 | 54.081 | 0.00 | 0.00 |
| ATOM | 1141 | HD2  | PRO | X | 74 | 65.478 | 37.408 | 54.067 | 0.00 | 0.00 |
| ATOM | 1142 | HD3  | PRO | X | 74 | 64.160 | 38.319 | 54.669 | 0.00 | 0.00 |
| ATOM | 1143 | CG   | PRO | X | 74 | 66.052 | 39.371 | 54.783 | 0.00 | 0.00 |
| ATOM | 1144 | HG2  | PRO | X | 74 | 67.096 | 39.133 | 54.577 | 0.00 | 0.00 |
| ATOM | 1145 | HG3  | PRO | X | 74 | 65.836 | 39.506 | 55.843 | 0.00 | 0.00 |
| ATOM | 1146 | CB   | PRO | X | 74 | 65.818 | 40.726 | 54.085 | 0.00 | 0.00 |
| ATOM | 1147 | HB2  | PRO | X | 74 | 66.750 | 41.284 | 53.999 | 0.00 | 0.00 |
| ATOM | 1148 | HB3  | PRO | X | 74 | 65.076 | 41.333 | 54.604 | 0.00 | 0.00 |
| ATOM | 1149 | CA   | PRO | X | 74 | 65.392 | 40.277 | 52.628 | 0.00 | 0.00 |
| ATOM | 1150 | HA   | PRO | X | 74 | 64.587 | 40.965 | 52.370 | 0.00 | 0.00 |
| ATOM | 1151 | C    | PRO | X | 74 | 66.644 | 40.238 | 51.708 | 0.00 | 0.00 |
| ATOM | 1152 | O    | PRO | X | 74 | 67.428 | 39.286 | 51.902 | 0.00 | 0.00 |
| ATOM | 1153 | N    | GLY | X | 75 | 66.849 | 41.279 | 50.935 | 0.00 | 0.00 |
| ATOM | 1154 | H    | GLY | X | 75 | 66.294 | 42.106 | 51.098 | 0.00 | 0.00 |
| ATOM | 1155 | CA   | GLY | X | 75 | 67.888 | 41.581 | 50.023 | 0.00 | 0.00 |
| ATOM | 1156 | HA2  | GLY | X | 75 | 68.042 | 42.669 | 49.881 | 0.00 | 0.00 |
| ATOM | 1157 | HA3  | GLY | X | 75 | 68.779 | 41.258 | 50.501 | 0.00 | 0.00 |
| ATOM | 1158 | C    | GLY | X | 75 | 67.893 | 40.766 | 48.766 | 0.00 | 0.00 |
| ATOM | 1159 | O    | GLY | X | 75 | 68.613 | 41.035 | 47.845 | 0.00 | 0.00 |
| ATOM | 1160 | N    | PHE | X | 76 | 67.009 | 39.813 | 48.570 | 0.00 | 0.00 |
| ATOM | 1161 | H    | PHE | X | 76 | 66.375 | 39.537 | 49.306 | 0.00 | 0.00 |



|      |      |      |     |   |    |        |        |        |      |      |
|------|------|------|-----|---|----|--------|--------|--------|------|------|
| ATOM | 1162 | CA   | PHE | X | 76 | 66.844 | 39.052 | 47.367 | 0.00 | 0.00 |
| ATOM | 1163 | HA   | PHE | X | 76 | 67.815 | 38.888 | 46.898 | 0.00 | 0.00 |
| ATOM | 1164 | CB   | PHE | X | 76 | 66.293 | 37.628 | 47.815 | 0.00 | 0.00 |
| ATOM | 1165 | HB2  | PHE | X | 76 | 66.968 | 37.070 | 48.463 | 0.00 | 0.00 |
| ATOM | 1166 | HB3  | PHE | X | 76 | 65.444 | 37.890 | 48.447 | 0.00 | 0.00 |
| ATOM | 1167 | CG   | PHE | X | 76 | 65.826 | 36.736 | 46.717 | 0.00 | 0.00 |
| ATOM | 1168 | CD1  | PHE | X | 76 | 66.698 | 36.330 | 45.756 | 0.00 | 0.00 |
| ATOM | 1169 | HD1  | PHE | X | 76 | 67.758 | 36.520 | 45.840 | 0.00 | 0.00 |
| ATOM | 1170 | CE1  | PHE | X | 76 | 66.231 | 35.646 | 44.646 | 0.00 | 0.00 |
| ATOM | 1171 | HE1  | PHE | X | 76 | 66.821 | 35.370 | 43.784 | 0.00 | 0.00 |
| ATOM | 1172 | CZ   | PHE | X | 76 | 64.886 | 35.204 | 44.606 | 0.00 | 0.00 |
| ATOM | 1173 | HZ   | PHE | X | 76 | 64.479 | 34.726 | 43.727 | 0.00 | 0.00 |
| ATOM | 1174 | CE2  | PHE | X | 76 | 64.028 | 35.530 | 45.684 | 0.00 | 0.00 |
| ATOM | 1175 | HE2  | PHE | X | 76 | 63.018 | 35.158 | 45.771 | 0.00 | 0.00 |
| ATOM | 1176 | CD2  | PHE | X | 76 | 64.509 | 36.355 | 46.723 | 0.00 | 0.00 |
| ATOM | 1177 | HD2  | PHE | X | 76 | 63.768 | 36.522 | 47.491 | 0.00 | 0.00 |
| ATOM | 1178 | C    | PHE | X | 76 | 65.814 | 39.748 | 46.422 | 0.00 | 0.00 |
| ATOM | 1179 | O    | PHE | X | 76 | 64.681 | 40.038 | 46.774 | 0.00 | 0.00 |
| ATOM | 1180 | N    | GLU | X | 77 | 66.189 | 40.002 | 45.126 | 0.00 | 0.00 |
| ATOM | 1181 | H    | GLU | X | 77 | 67.160 | 39.836 | 44.905 | 0.00 | 0.00 |
| ATOM | 1182 | CA   | GLU | X | 77 | 65.392 | 40.723 | 44.096 | 0.00 | 0.00 |
| ATOM | 1183 | HA   | GLU | X | 77 | 65.336 | 41.703 | 44.570 | 0.00 | 0.00 |
| ATOM | 1184 | CB   | GLU | X | 77 | 66.217 | 40.855 | 42.815 | 0.00 | 0.00 |
| ATOM | 1185 | HB2  | GLU | X | 77 | 67.250 | 41.149 | 43.001 | 0.00 | 0.00 |
| ATOM | 1186 | HB3  | GLU | X | 77 | 66.338 | 39.881 | 42.342 | 0.00 | 0.00 |
| ATOM | 1187 | CG   | GLU | X | 77 | 65.655 | 41.868 | 41.746 | 0.00 | 0.00 |
| ATOM | 1188 | HG2  | GLU | X | 77 | 65.896 | 41.497 | 40.750 | 0.00 | 0.00 |
| ATOM | 1189 | HG3  | GLU | X | 77 | 64.584 | 42.074 | 41.748 | 0.00 | 0.00 |
| ATOM | 1190 | CD   | GLU | X | 77 | 66.220 | 43.285 | 41.932 | 0.00 | 0.00 |
| ATOM | 1191 | OE1  | GLU | X | 77 | 66.311 | 44.095 | 40.990 | 0.00 | 0.00 |
| ATOM | 1192 | OE2  | GLU | X | 77 | 66.463 | 43.675 | 43.093 | 0.00 | 0.00 |
| ATOM | 1193 | C    | GLU | X | 77 | 63.975 | 40.182 | 43.872 | 0.00 | 0.00 |
| ATOM | 1194 | O    | GLU | X | 77 | 63.010 | 40.913 | 43.602 | 0.00 | 0.00 |
| ATOM | 1195 | N    | GLY | X | 78 | 63.826 | 38.854 | 44.115 | 0.00 | 0.00 |
| ATOM | 1196 | H    | GLY | X | 78 | 64.615 | 38.442 | 44.592 | 0.00 | 0.00 |
| ATOM | 1197 | CA   | GLY | X | 78 | 62.563 | 38.129 | 44.111 | 0.00 | 0.00 |
| ATOM | 1198 | HA2  | GLY | X | 78 | 61.953 | 38.382 | 43.163 | 0.00 | 0.00 |
| ATOM | 1199 | HA3  | GLY | X | 78 | 62.796 | 37.099 | 44.098 | 0.00 | 0.00 |
| ATOM | 1200 | C    | GLY | X | 78 | 61.559 | 38.443 | 45.191 | 0.00 | 0.00 |
| ATOM | 1201 | O    | GLY | X | 78 | 60.434 | 37.979 | 45.039 | 0.00 | 0.00 |
| ATOM | 1202 | N    | THR | X | 79 | 61.919 | 39.153 | 46.245 | 0.00 | 0.00 |
| ATOM | 1203 | H    | THR | X | 79 | 62.911 | 39.339 | 46.257 | 0.00 | 0.00 |
| ATOM | 1204 | CA   | THR | X | 79 | 61.058 | 39.721 | 47.320 | 0.00 | 0.00 |
| ATOM | 1205 | HA   | THR | X | 79 | 60.048 | 39.552 | 46.948 | 0.00 | 0.00 |
| ATOM | 1206 | CB   | THR | X | 79 | 61.207 | 38.872 | 48.594 | 0.00 | 0.00 |
| ATOM | 1207 | HB   | THR | X | 79 | 62.267 | 38.707 | 48.789 | 0.00 | 0.00 |
| ATOM | 1208 | CG2  | THR | X | 79 | 60.564 | 39.522 | 49.798 | 0.00 | 0.00 |
| ATOM | 1209 | HG21 | THR | X | 79 | 60.957 | 40.499 | 50.075 | 0.00 | 0.00 |
| ATOM | 1210 | HG22 | THR | X | 79 | 59.487 | 39.645 | 49.678 | 0.00 | 0.00 |
| ATOM | 1211 | HG23 | THR | X | 79 | 60.738 | 38.811 | 50.606 | 0.00 | 0.00 |
| ATOM | 1212 | OG1  | THR | X | 79 | 60.623 | 37.636 | 48.332 | 0.00 | 0.00 |
| ATOM | 1213 | HG1  | THR | X | 79 | 60.285 | 37.289 | 49.161 | 0.00 | 0.00 |
| ATOM | 1214 | C    | THR | X | 79 | 61.244 | 41.194 | 47.480 | 0.00 | 0.00 |
| ATOM | 1215 | O    | THR | X | 79 | 60.281 | 41.962 | 47.523 | 0.00 | 0.00 |
| ATOM | 1216 | N    | GLU | X | 80 | 62.489 | 41.654 | 47.437 | 0.00 | 0.00 |
| ATOM | 1217 | H    | GLU | X | 80 | 63.270 | 41.014 | 47.449 | 0.00 | 0.00 |
| ATOM | 1218 | CA   | GLU | X | 80 | 62.773 | 43.065 | 47.527 | 0.00 | 0.00 |
| ATOM | 1219 | HA   | GLU | X | 80 | 62.163 | 43.375 | 48.375 | 0.00 | 0.00 |
| ATOM | 1220 | CB   | GLU | X | 80 | 64.276 | 43.199 | 47.811 | 0.00 | 0.00 |
| ATOM | 1221 | HB2  | GLU | X | 80 | 64.525 | 42.436 | 48.548 | 0.00 | 0.00 |
| ATOM | 1222 | HB3  | GLU | X | 80 | 64.815 | 42.915 | 46.907 | 0.00 | 0.00 |
| ATOM | 1223 | CG   | GLU | X | 80 | 64.784 | 44.607 | 48.381 | 0.00 | 0.00 |
| ATOM | 1224 | HG2  | GLU | X | 80 | 64.308 | 45.428 | 47.846 | 0.00 | 0.00 |
| ATOM | 1225 | HG3  | GLU | X | 80 | 64.527 | 44.742 | 49.432 | 0.00 | 0.00 |
| ATOM | 1226 | CD   | GLU | X | 80 | 66.280 | 44.824 | 48.254 | 0.00 | 0.00 |
| ATOM | 1227 | OE1  | GLU | X | 80 | 66.936 | 45.010 | 49.250 | 0.00 | 0.00 |
| ATOM | 1228 | OE2  | GLU | X | 80 | 66.815 | 44.797 | 47.091 | 0.00 | 0.00 |
| ATOM | 1229 | C    | GLU | X | 80 | 62.231 | 44.029 | 46.424 | 0.00 | 0.00 |
| ATOM | 1230 | O    | GLU | X | 80 | 62.128 | 45.199 | 46.699 | 0.00 | 0.00 |
| ATOM | 1231 | N    | MET | X | 81 | 61.726 | 43.523 | 45.322 | 0.00 | 0.00 |

|      |      |      |     |   |    |        |        |        |      |      |
|------|------|------|-----|---|----|--------|--------|--------|------|------|
| ATOM | 1232 | H    | MET | X | 81 | 61.910 | 42.545 | 45.145 | 0.00 | 0.00 |
| ATOM | 1233 | CA   | MET | X | 81 | 60.961 | 44.282 | 44.275 | 0.00 | 0.00 |
| ATOM | 1234 | HA   | MET | X | 81 | 61.140 | 45.357 | 44.258 | 0.00 | 0.00 |
| ATOM | 1235 | CB   | MET | X | 81 | 61.158 | 43.745 | 42.849 | 0.00 | 0.00 |
| ATOM | 1236 | HB2  | MET | X | 81 | 61.091 | 42.663 | 42.962 | 0.00 | 0.00 |
| ATOM | 1237 | HB3  | MET | X | 81 | 60.327 | 44.040 | 42.208 | 0.00 | 0.00 |
| ATOM | 1238 | CG   | MET | X | 81 | 62.488 | 44.232 | 42.238 | 0.00 | 0.00 |
| ATOM | 1239 | HG2  | MET | X | 81 | 63.231 | 44.373 | 43.023 | 0.00 | 0.00 |
| ATOM | 1240 | HG3  | MET | X | 81 | 62.813 | 43.499 | 41.499 | 0.00 | 0.00 |
| ATOM | 1241 | SD   | MET | X | 81 | 62.447 | 45.803 | 41.306 | 0.00 | 0.00 |
| ATOM | 1242 | CE   | MET | X | 81 | 61.241 | 45.478 | 40.078 | 0.00 | 0.00 |
| ATOM | 1243 | HE1  | MET | X | 81 | 61.463 | 44.603 | 39.467 | 0.00 | 0.00 |
| ATOM | 1244 | HE2  | MET | X | 81 | 60.246 | 45.291 | 40.481 | 0.00 | 0.00 |
| ATOM | 1245 | HE3  | MET | X | 81 | 61.196 | 46.379 | 39.467 | 0.00 | 0.00 |
| ATOM | 1246 | C    | MET | X | 81 | 59.443 | 44.322 | 44.623 | 0.00 | 0.00 |
| ATOM | 1247 | O    | MET | X | 81 | 58.625 | 44.915 | 43.904 | 0.00 | 0.00 |
| ATOM | 1248 | N    | TRP | X | 82 | 58.925 | 43.635 | 45.708 | 0.00 | 0.00 |
| ATOM | 1249 | H    | TRP | X | 82 | 59.600 | 43.088 | 46.222 | 0.00 | 0.00 |
| ATOM | 1250 | CA   | TRP | X | 82 | 57.507 | 43.455 | 46.049 | 0.00 | 0.00 |
| ATOM | 1251 | HA   | TRP | X | 82 | 56.832 | 44.081 | 45.465 | 0.00 | 0.00 |
| ATOM | 1252 | CB   | TRP | X | 82 | 57.215 | 41.898 | 45.740 | 0.00 | 0.00 |
| ATOM | 1253 | HB2  | TRP | X | 82 | 57.729 | 41.273 | 46.470 | 0.00 | 0.00 |
| ATOM | 1254 | HB3  | TRP | X | 82 | 56.133 | 41.784 | 45.791 | 0.00 | 0.00 |
| ATOM | 1255 | CG   | TRP | X | 82 | 57.549 | 41.481 | 44.327 | 0.00 | 0.00 |
| ATOM | 1256 | CD1  | TRP | X | 82 | 58.587 | 40.839 | 43.862 | 0.00 | 0.00 |
| ATOM | 1257 | HD1  | TRP | X | 82 | 59.460 | 40.555 | 44.430 | 0.00 | 0.00 |
| ATOM | 1258 | NE1  | TRP | X | 82 | 58.523 | 40.637 | 42.479 | 0.00 | 0.00 |
| ATOM | 1259 | HE1  | TRP | X | 82 | 59.181 | 40.254 | 41.815 | 0.00 | 0.00 |
| ATOM | 1260 | CE2  | TRP | X | 82 | 57.398 | 41.265 | 41.980 | 0.00 | 0.00 |
| ATOM | 1261 | CZ2  | TRP | X | 82 | 56.928 | 41.362 | 40.659 | 0.00 | 0.00 |
| ATOM | 1262 | HZ2  | TRP | X | 82 | 57.397 | 40.788 | 39.873 | 0.00 | 0.00 |
| ATOM | 1263 | CH2  | TRP | X | 82 | 55.693 | 41.955 | 40.485 | 0.00 | 0.00 |
| ATOM | 1264 | HH2  | TRP | X | 82 | 55.214 | 41.977 | 39.517 | 0.00 | 0.00 |
| ATOM | 1265 | CZ3  | TRP | X | 82 | 55.045 | 42.445 | 41.622 | 0.00 | 0.00 |
| ATOM | 1266 | HZ3  | TRP | X | 82 | 54.103 | 42.940 | 41.440 | 0.00 | 0.00 |
| ATOM | 1267 | CE3  | TRP | X | 82 | 55.608 | 42.567 | 42.872 | 0.00 | 0.00 |
| ATOM | 1268 | HE3  | TRP | X | 82 | 55.087 | 43.088 | 43.662 | 0.00 | 0.00 |
| ATOM | 1269 | CD2  | TRP | X | 82 | 56.728 | 41.761 | 43.118 | 0.00 | 0.00 |
| ATOM | 1270 | C    | TRP | X | 82 | 57.258 | 43.849 | 47.468 | 0.00 | 0.00 |
| ATOM | 1271 | O    | TRP | X | 82 | 56.098 | 44.191 | 47.766 | 0.00 | 0.00 |
| ATOM | 1272 | N    | ASN | X | 83 | 58.216 | 43.738 | 48.433 | 0.00 | 0.00 |
| ATOM | 1273 | H    | ASN | X | 83 | 59.150 | 43.428 | 48.210 | 0.00 | 0.00 |
| ATOM | 1274 | CA   | ASN | X | 83 | 58.065 | 44.433 | 49.735 | 0.00 | 0.00 |
| ATOM | 1275 | HA   | ASN | X | 83 | 57.093 | 44.209 | 50.175 | 0.00 | 0.00 |
| ATOM | 1276 | CB   | ASN | X | 83 | 59.201 | 43.987 | 50.688 | 0.00 | 0.00 |
| ATOM | 1277 | HB2  | ASN | X | 83 | 59.114 | 42.918 | 50.882 | 0.00 | 0.00 |
| ATOM | 1278 | HB3  | ASN | X | 83 | 60.200 | 44.276 | 50.363 | 0.00 | 0.00 |
| ATOM | 1279 | CG   | ASN | X | 83 | 59.060 | 44.623 | 52.038 | 0.00 | 0.00 |
| ATOM | 1280 | OD1  | ASN | X | 83 | 59.885 | 45.479 | 52.432 | 0.00 | 0.00 |
| ATOM | 1281 | ND2  | ASN | X | 83 | 58.098 | 44.234 | 52.792 | 0.00 | 0.00 |
| ATOM | 1282 | HD21 | ASN | X | 83 | 57.940 | 44.792 | 53.619 | 0.00 | 0.00 |
| ATOM | 1283 | HD22 | ASN | X | 83 | 57.631 | 43.356 | 52.613 | 0.00 | 0.00 |
| ATOM | 1284 | C    | ASN | X | 83 | 58.119 | 45.946 | 49.511 | 0.00 | 0.00 |
| ATOM | 1285 | O    | ASN | X | 83 | 59.124 | 46.313 | 48.948 | 0.00 | 0.00 |
| ATOM | 1286 | N    | PRO | X | 84 | 57.049 | 46.674 | 49.852 | 0.00 | 0.00 |
| ATOM | 1287 | CD   | PRO | X | 84 | 55.978 | 46.343 | 50.813 | 0.00 | 0.00 |
| ATOM | 1288 | HD2  | PRO | X | 84 | 56.329 | 45.901 | 51.746 | 0.00 | 0.00 |
| ATOM | 1289 | HD3  | PRO | X | 84 | 55.156 | 45.827 | 50.318 | 0.00 | 0.00 |
| ATOM | 1290 | CG   | PRO | X | 84 | 55.280 | 47.632 | 51.224 | 0.00 | 0.00 |
| ATOM | 1291 | HG2  | PRO | X | 84 | 55.934 | 48.110 | 51.954 | 0.00 | 0.00 |
| ATOM | 1292 | HG3  | PRO | X | 84 | 54.267 | 47.445 | 51.580 | 0.00 | 0.00 |
| ATOM | 1293 | CB   | PRO | X | 84 | 55.353 | 48.443 | 49.922 | 0.00 | 0.00 |
| ATOM | 1294 | HB2  | PRO | X | 84 | 55.373 | 49.464 | 50.303 | 0.00 | 0.00 |
| ATOM | 1295 | HB3  | PRO | X | 84 | 54.517 | 48.166 | 49.280 | 0.00 | 0.00 |
| ATOM | 1296 | CA   | PRO | X | 84 | 56.734 | 47.975 | 49.223 | 0.00 | 0.00 |
| ATOM | 1297 | HA   | PRO | X | 84 | 56.556 | 47.871 | 48.153 | 0.00 | 0.00 |
| ATOM | 1298 | C    | PRO | X | 84 | 57.811 | 48.989 | 49.520 | 0.00 | 0.00 |
| ATOM | 1299 | O    | PRO | X | 84 | 58.409 | 48.926 | 50.650 | 0.00 | 0.00 |
| ATOM | 1300 | N    | ASN | X | 85 | 58.112 | 49.914 | 48.603 | 0.00 | 0.00 |
| ATOM | 1301 | H    | ASN | X | 85 | 57.518 | 49.994 | 47.790 | 0.00 | 0.00 |

|      |      |      |     |   |    |        |        |        |      |      |
|------|------|------|-----|---|----|--------|--------|--------|------|------|
| ATOM | 1302 | CA   | ASN | X | 85 | 59.285 | 50.764 | 48.588 | 0.00 | 0.00 |
| ATOM | 1303 | HA   | ASN | X | 85 | 60.119 | 50.322 | 49.134 | 0.00 | 0.00 |
| ATOM | 1304 | CB   | ASN | X | 85 | 59.775 | 50.964 | 47.163 | 0.00 | 0.00 |
| ATOM | 1305 | HB2  | ASN | X | 85 | 60.579 | 51.688 | 47.294 | 0.00 | 0.00 |
| ATOM | 1306 | HB3  | ASN | X | 85 | 60.130 | 50.042 | 46.703 | 0.00 | 0.00 |
| ATOM | 1307 | CG   | ASN | X | 85 | 58.674 | 51.532 | 46.256 | 0.00 | 0.00 |
| ATOM | 1308 | OD1  | ASN | X | 85 | 57.652 | 52.133 | 46.668 | 0.00 | 0.00 |
| ATOM | 1309 | ND2  | ASN | X | 85 | 58.849 | 51.432 | 44.977 | 0.00 | 0.00 |
| ATOM | 1310 | HD21 | ASN | X | 85 | 58.135 | 51.833 | 44.385 | 0.00 | 0.00 |
| ATOM | 1311 | HD22 | ASN | X | 85 | 59.516 | 50.767 | 44.613 | 0.00 | 0.00 |
| ATOM | 1312 | C    | ASN | X | 85 | 59.022 | 52.095 | 49.307 | 0.00 | 0.00 |
| ATOM | 1313 | O    | ASN | X | 85 | 60.008 | 52.794 | 49.481 | 0.00 | 0.00 |
| ATOM | 1314 | N    | ARG | X | 86 | 57.818 | 52.274 | 49.867 | 0.00 | 0.00 |
| ATOM | 1315 | H    | ARG | X | 86 | 57.148 | 51.525 | 49.762 | 0.00 | 0.00 |
| ATOM | 1316 | CA   | ARG | X | 86 | 57.571 | 53.417 | 50.722 | 0.00 | 0.00 |
| ATOM | 1317 | HA   | ARG | X | 86 | 58.364 | 54.165 | 50.740 | 0.00 | 0.00 |
| ATOM | 1318 | CB   | ARG | X | 86 | 56.361 | 54.109 | 50.240 | 0.00 | 0.00 |
| ATOM | 1319 | HB2  | ARG | X | 86 | 55.565 | 53.374 | 50.362 | 0.00 | 0.00 |
| ATOM | 1320 | HB3  | ARG | X | 86 | 56.095 | 55.002 | 50.805 | 0.00 | 0.00 |
| ATOM | 1321 | CG   | ARG | X | 86 | 56.354 | 54.488 | 48.726 | 0.00 | 0.00 |
| ATOM | 1322 | HG2  | ARG | X | 86 | 56.434 | 53.510 | 48.251 | 0.00 | 0.00 |
| ATOM | 1323 | HG3  | ARG | X | 86 | 55.454 | 55.077 | 48.548 | 0.00 | 0.00 |
| ATOM | 1324 | CD   | ARG | X | 86 | 57.406 | 55.313 | 48.053 | 0.00 | 0.00 |
| ATOM | 1325 | HD2  | ARG | X | 86 | 58.367 | 54.891 | 48.349 | 0.00 | 0.00 |
| ATOM | 1326 | HD3  | ARG | X | 86 | 57.200 | 55.339 | 46.983 | 0.00 | 0.00 |
| ATOM | 1327 | NE   | ARG | X | 86 | 57.497 | 56.633 | 48.693 | 0.00 | 0.00 |
| ATOM | 1328 | HE   | ARG | X | 86 | 56.919 | 56.697 | 49.519 | 0.00 | 0.00 |
| ATOM | 1329 | CZ   | ARG | X | 86 | 57.928 | 57.733 | 48.212 | 0.00 | 0.00 |
| ATOM | 1330 | NH1  | ARG | X | 86 | 58.478 | 57.813 | 47.022 | 0.00 | 0.00 |
| ATOM | 1331 | HH11 | ARG | X | 86 | 58.602 | 56.923 | 46.561 | 0.00 | 0.00 |
| ATOM | 1332 | HH12 | ARG | X | 86 | 58.815 | 58.643 | 46.556 | 0.00 | 0.00 |
| ATOM | 1333 | NH2  | ARG | X | 86 | 57.854 | 58.811 | 48.971 | 0.00 | 0.00 |
| ATOM | 1334 | HH21 | ARG | X | 86 | 57.443 | 58.729 | 49.890 | 0.00 | 0.00 |
| ATOM | 1335 | HH22 | ARG | X | 86 | 58.193 | 59.707 | 48.651 | 0.00 | 0.00 |
| ATOM | 1336 | C    | ARG | X | 86 | 57.367 | 53.010 | 52.256 | 0.00 | 0.00 |
| ATOM | 1337 | O    | ARG | X | 86 | 57.256 | 51.817 | 52.552 | 0.00 | 0.00 |
| ATOM | 1338 | N    | GLU | X | 87 | 57.452 | 54.025 | 53.131 | 0.00 | 0.00 |
| ATOM | 1339 | H    | GLU | X | 87 | 57.490 | 54.942 | 52.710 | 0.00 | 0.00 |
| ATOM | 1340 | CA   | GLU | X | 87 | 57.252 | 53.971 | 54.552 | 0.00 | 0.00 |
| ATOM | 1341 | HA   | GLU | X | 87 | 57.866 | 53.210 | 55.033 | 0.00 | 0.00 |
| ATOM | 1342 | CB   | GLU | X | 87 | 57.644 | 55.339 | 55.263 | 0.00 | 0.00 |
| ATOM | 1343 | HB2  | GLU | X | 87 | 57.030 | 56.160 | 54.893 | 0.00 | 0.00 |
| ATOM | 1344 | HB3  | GLU | X | 87 | 57.335 | 55.102 | 56.281 | 0.00 | 0.00 |
| ATOM | 1345 | CG   | GLU | X | 87 | 59.077 | 55.819 | 55.068 | 0.00 | 0.00 |
| ATOM | 1346 | HG2  | GLU | X | 87 | 59.821 | 55.022 | 55.092 | 0.00 | 0.00 |
| ATOM | 1347 | HG3  | GLU | X | 87 | 59.207 | 56.277 | 54.087 | 0.00 | 0.00 |
| ATOM | 1348 | CD   | GLU | X | 87 | 59.450 | 56.837 | 56.113 | 0.00 | 0.00 |
| ATOM | 1349 | OE1  | GLU | X | 87 | 59.646 | 56.554 | 57.293 | 0.00 | 0.00 |
| ATOM | 1350 | OE2  | GLU | X | 87 | 59.328 | 58.087 | 55.807 | 0.00 | 0.00 |
| ATOM | 1351 | C    | GLU | X | 87 | 55.772 | 53.601 | 54.884 | 0.00 | 0.00 |
| ATOM | 1352 | O    | GLU | X | 87 | 54.834 | 53.750 | 54.046 | 0.00 | 0.00 |
| ATOM | 1353 | N    | LEU | X | 88 | 55.518 | 53.075 | 56.079 | 0.00 | 0.00 |
| ATOM | 1354 | H    | LEU | X | 88 | 56.219 | 53.115 | 56.805 | 0.00 | 0.00 |
| ATOM | 1355 | CA   | LEU | X | 88 | 54.205 | 52.717 | 56.579 | 0.00 | 0.00 |
| ATOM | 1356 | HA   | LEU | X | 88 | 53.580 | 52.508 | 55.710 | 0.00 | 0.00 |
| ATOM | 1357 | CB   | LEU | X | 88 | 54.347 | 51.395 | 57.379 | 0.00 | 0.00 |
| ATOM | 1358 | HB2  | LEU | X | 88 | 54.933 | 51.590 | 58.278 | 0.00 | 0.00 |
| ATOM | 1359 | HB3  | LEU | X | 88 | 53.359 | 51.067 | 57.702 | 0.00 | 0.00 |
| ATOM | 1360 | CG   | LEU | X | 88 | 55.119 | 50.201 | 56.753 | 0.00 | 0.00 |
| ATOM | 1361 | HG   | LEU | X | 88 | 56.157 | 50.478 | 56.568 | 0.00 | 0.00 |
| ATOM | 1362 | CD1  | LEU | X | 88 | 55.015 | 48.940 | 57.713 | 0.00 | 0.00 |
| ATOM | 1363 | HD11 | LEU | X | 88 | 54.017 | 48.528 | 57.562 | 0.00 | 0.00 |
| ATOM | 1364 | HD12 | LEU | X | 88 | 55.708 | 48.168 | 57.380 | 0.00 | 0.00 |
| ATOM | 1365 | HD13 | LEU | X | 88 | 55.247 | 49.221 | 58.740 | 0.00 | 0.00 |
| ATOM | 1366 | CD2  | LEU | X | 88 | 54.608 | 49.663 | 55.441 | 0.00 | 0.00 |
| ATOM | 1367 | HD21 | LEU | X | 88 | 54.577 | 50.402 | 54.640 | 0.00 | 0.00 |
| ATOM | 1368 | HD22 | LEU | X | 88 | 55.246 | 48.838 | 55.124 | 0.00 | 0.00 |
| ATOM | 1369 | HD23 | LEU | X | 88 | 53.613 | 49.304 | 55.704 | 0.00 | 0.00 |
| ATOM | 1370 | C    | LEU | X | 88 | 53.569 | 53.686 | 57.500 | 0.00 | 0.00 |
| ATOM | 1371 | O    | LEU | X | 88 | 54.209 | 54.320 | 58.296 | 0.00 | 0.00 |

|      |      |      |     |   |    |        |        |        |      |      |
|------|------|------|-----|---|----|--------|--------|--------|------|------|
| ATOM | 1372 | N    | SER | X | 89 | 52.271 | 53.892 | 57.235 | 0.00 | 0.00 |
| ATOM | 1373 | H    | SER | X | 89 | 51.820 | 53.503 | 56.419 | 0.00 | 0.00 |
| ATOM | 1374 | CA   | SER | X | 89 | 51.429 | 54.863 | 57.981 | 0.00 | 0.00 |
| ATOM | 1375 | HA   | SER | X | 89 | 51.756 | 54.608 | 58.989 | 0.00 | 0.00 |
| ATOM | 1376 | CB   | SER | X | 89 | 51.808 | 56.210 | 57.316 | 0.00 | 0.00 |
| ATOM | 1377 | HB2  | SER | X | 89 | 52.890 | 56.331 | 57.259 | 0.00 | 0.00 |
| ATOM | 1378 | HB3  | SER | X | 89 | 51.399 | 56.285 | 56.308 | 0.00 | 0.00 |
| ATOM | 1379 | OG   | SER | X | 89 | 51.419 | 57.232 | 58.189 | 0.00 | 0.00 |
| ATOM | 1380 | HG   | SER | X | 89 | 51.594 | 58.076 | 57.766 | 0.00 | 0.00 |
| ATOM | 1381 | C    | SER | X | 89 | 49.964 | 54.609 | 57.908 | 0.00 | 0.00 |
| ATOM | 1382 | O    | SER | X | 89 | 49.456 | 53.773 | 57.194 | 0.00 | 0.00 |
| ATOM | 1383 | N    | GLU | X | 90 | 49.107 | 55.373 | 58.581 | 0.00 | 0.00 |
| ATOM | 1384 | H    | GLU | X | 90 | 49.465 | 55.991 | 59.295 | 0.00 | 0.00 |
| ATOM | 1385 | CA   | GLU | X | 90 | 47.613 | 55.420 | 58.388 | 0.00 | 0.00 |
| ATOM | 1386 | HA   | GLU | X | 90 | 47.285 | 54.438 | 58.048 | 0.00 | 0.00 |
| ATOM | 1387 | CB   | GLU | X | 90 | 46.891 | 55.776 | 59.722 | 0.00 | 0.00 |
| ATOM | 1388 | HB2  | GLU | X | 90 | 47.275 | 56.715 | 60.121 | 0.00 | 0.00 |
| ATOM | 1389 | HB3  | GLU | X | 90 | 45.830 | 55.848 | 59.486 | 0.00 | 0.00 |
| ATOM | 1390 | CG   | GLU | X | 90 | 46.999 | 54.751 | 60.842 | 0.00 | 0.00 |
| ATOM | 1391 | HG2  | GLU | X | 90 | 46.579 | 53.864 | 60.367 | 0.00 | 0.00 |
| ATOM | 1392 | HG3  | GLU | X | 90 | 48.041 | 54.581 | 61.112 | 0.00 | 0.00 |
| ATOM | 1393 | CD   | GLU | X | 90 | 46.206 | 55.137 | 62.037 | 0.00 | 0.00 |
| ATOM | 1394 | OE1  | GLU | X | 90 | 44.969 | 54.898 | 62.034 | 0.00 | 0.00 |
| ATOM | 1395 | OE2  | GLU | X | 90 | 46.835 | 55.629 | 63.037 | 0.00 | 0.00 |
| ATOM | 1396 | C    | GLU | X | 90 | 47.257 | 56.368 | 57.221 | 0.00 | 0.00 |
| ATOM | 1397 | O    | GLU | X | 90 | 46.164 | 56.207 | 56.742 | 0.00 | 0.00 |
| ATOM | 1398 | N    | ASP | X | 91 | 48.169 | 57.313 | 56.791 | 0.00 | 0.00 |
| ATOM | 1399 | H    | ASP | X | 91 | 48.985 | 57.426 | 57.375 | 0.00 | 0.00 |
| ATOM | 1400 | CA   | ASP | X | 91 | 47.978 | 58.155 | 55.590 | 0.00 | 0.00 |
| ATOM | 1401 | HA   | ASP | X | 91 | 46.904 | 58.334 | 55.542 | 0.00 | 0.00 |
| ATOM | 1402 | CB   | ASP | X | 91 | 48.579 | 59.519 | 55.871 | 0.00 | 0.00 |
| ATOM | 1403 | HB2  | ASP | X | 91 | 48.077 | 60.086 | 56.655 | 0.00 | 0.00 |
| ATOM | 1404 | HB3  | ASP | X | 91 | 49.598 | 59.429 | 56.248 | 0.00 | 0.00 |
| ATOM | 1405 | CG   | ASP | X | 91 | 48.471 | 60.466 | 54.712 | 0.00 | 0.00 |
| ATOM | 1406 | OD1  | ASP | X | 91 | 47.307 | 60.708 | 54.367 | 0.00 | 0.00 |
| ATOM | 1407 | OD2  | ASP | X | 91 | 49.455 | 60.963 | 54.165 | 0.00 | 0.00 |
| ATOM | 1408 | C    | ASP | X | 91 | 48.541 | 57.473 | 54.303 | 0.00 | 0.00 |
| ATOM | 1409 | O    | ASP | X | 91 | 49.771 | 57.331 | 54.201 | 0.00 | 0.00 |
| ATOM | 1410 | N    | CYX | X | 92 | 47.625 | 57.155 | 53.370 | 0.00 | 0.00 |
| ATOM | 1411 | H    | CYX | X | 92 | 46.643 | 57.205 | 53.598 | 0.00 | 0.00 |
| ATOM | 1412 | CA   | CYX | X | 92 | 47.973 | 56.330 | 52.274 | 0.00 | 0.00 |
| ATOM | 1413 | HA   | CYX | X | 92 | 48.947 | 56.678 | 51.930 | 0.00 | 0.00 |
| ATOM | 1414 | CB   | CYX | X | 92 | 48.165 | 54.914 | 52.700 | 0.00 | 0.00 |
| ATOM | 1415 | HB2  | CYX | X | 92 | 48.574 | 54.311 | 51.890 | 0.00 | 0.00 |
| ATOM | 1416 | HB3  | CYX | X | 92 | 48.855 | 54.936 | 53.544 | 0.00 | 0.00 |
| ATOM | 1417 | SG   | CYX | X | 92 | 46.610 | 54.178 | 53.335 | 0.00 | 0.00 |
| ATOM | 1418 | C    | CYX | X | 92 | 47.044 | 56.381 | 51.057 | 0.00 | 0.00 |
| ATOM | 1419 | O    | CYX | X | 92 | 47.136 | 55.612 | 50.114 | 0.00 | 0.00 |
| ATOM | 1420 | N    | LEU | X | 93 | 45.949 | 57.156 | 51.113 | 0.00 | 0.00 |
| ATOM | 1421 | H    | LEU | X | 93 | 45.902 | 57.748 | 51.930 | 0.00 | 0.00 |
| ATOM | 1422 | CA   | LEU | X | 93 | 44.841 | 57.248 | 50.101 | 0.00 | 0.00 |
| ATOM | 1423 | HA   | LEU | X | 93 | 44.761 | 56.292 | 49.583 | 0.00 | 0.00 |
| ATOM | 1424 | CB   | LEU | X | 93 | 43.466 | 57.420 | 50.709 | 0.00 | 0.00 |
| ATOM | 1425 | HB2  | LEU | X | 93 | 43.346 | 58.416 | 51.135 | 0.00 | 0.00 |
| ATOM | 1426 | HB3  | LEU | X | 93 | 42.753 | 57.177 | 49.921 | 0.00 | 0.00 |
| ATOM | 1427 | CG   | LEU | X | 93 | 43.115 | 56.382 | 51.807 | 0.00 | 0.00 |
| ATOM | 1428 | HG   | LEU | X | 93 | 43.746 | 56.625 | 52.661 | 0.00 | 0.00 |
| ATOM | 1429 | CD1  | LEU | X | 93 | 41.711 | 56.685 | 52.323 | 0.00 | 0.00 |
| ATOM | 1430 | HD11 | LEU | X | 93 | 40.915 | 56.623 | 51.581 | 0.00 | 0.00 |
| ATOM | 1431 | HD12 | LEU | X | 93 | 41.469 | 56.044 | 53.171 | 0.00 | 0.00 |
| ATOM | 1432 | HD13 | LEU | X | 93 | 41.701 | 57.703 | 52.711 | 0.00 | 0.00 |
| ATOM | 1433 | CD2  | LEU | X | 93 | 43.283 | 54.970 | 51.318 | 0.00 | 0.00 |
| ATOM | 1434 | HD21 | LEU | X | 93 | 42.865 | 54.234 | 52.004 | 0.00 | 0.00 |
| ATOM | 1435 | HD22 | LEU | X | 93 | 42.788 | 54.830 | 50.357 | 0.00 | 0.00 |
| ATOM | 1436 | HD23 | LEU | X | 93 | 44.313 | 54.670 | 51.123 | 0.00 | 0.00 |
| ATOM | 1437 | C    | LEU | X | 93 | 45.179 | 58.202 | 48.983 | 0.00 | 0.00 |
| ATOM | 1438 | O    | LEU | X | 93 | 44.609 | 59.289 | 48.901 | 0.00 | 0.00 |
| ATOM | 1439 | N    | TYR | X | 94 | 46.016 | 57.674 | 48.106 | 0.00 | 0.00 |
| ATOM | 1440 | H    | TYR | X | 94 | 46.279 | 56.707 | 48.237 | 0.00 | 0.00 |
| ATOM | 1441 | CA   | TYR | X | 94 | 46.615 | 58.365 | 46.966 | 0.00 | 0.00 |

|      |      |      |     |   |    |        |        |        |      |      |
|------|------|------|-----|---|----|--------|--------|--------|------|------|
| ATOM | 1442 | HA   | TYR | X | 94 | 45.973 | 59.243 | 46.901 | 0.00 | 0.00 |
| ATOM | 1443 | CB   | TYR | X | 94 | 48.005 | 58.787 | 47.263 | 0.00 | 0.00 |
| ATOM | 1444 | HB2  | TYR | X | 94 | 48.669 | 57.925 | 47.311 | 0.00 | 0.00 |
| ATOM | 1445 | HB3  | TYR | X | 94 | 48.411 | 59.355 | 46.426 | 0.00 | 0.00 |
| ATOM | 1446 | CG   | TYR | X | 94 | 48.152 | 59.619 | 48.539 | 0.00 | 0.00 |
| ATOM | 1447 | CD1  | TYR | X | 94 | 47.751 | 61.003 | 48.517 | 0.00 | 0.00 |
| ATOM | 1448 | HD1  | TYR | X | 94 | 47.485 | 61.451 | 47.571 | 0.00 | 0.00 |
| ATOM | 1449 | CE1  | TYR | X | 94 | 47.850 | 61.833 | 49.641 | 0.00 | 0.00 |
| ATOM | 1450 | HE1  | TYR | X | 94 | 47.527 | 62.862 | 49.590 | 0.00 | 0.00 |
| ATOM | 1451 | CZ   | TYR | X | 94 | 48.208 | 61.234 | 50.883 | 0.00 | 0.00 |
| ATOM | 1452 | OH   | TYR | X | 94 | 48.181 | 61.981 | 51.948 | 0.00 | 0.00 |
| ATOM | 1453 | HH   | TYR | X | 94 | 48.293 | 61.404 | 52.707 | 0.00 | 0.00 |
| ATOM | 1454 | CE2  | TYR | X | 94 | 48.633 | 59.863 | 50.876 | 0.00 | 0.00 |
| ATOM | 1455 | HE2  | TYR | X | 94 | 48.994 | 59.448 | 51.806 | 0.00 | 0.00 |
| ATOM | 1456 | CD2  | TYR | X | 94 | 48.647 | 59.008 | 49.744 | 0.00 | 0.00 |
| ATOM | 1457 | HD2  | TYR | X | 94 | 48.973 | 57.981 | 49.806 | 0.00 | 0.00 |
| ATOM | 1458 | C    | TYR | X | 94 | 46.563 | 57.524 | 45.609 | 0.00 | 0.00 |
| ATOM | 1459 | O    | TYR | X | 94 | 46.342 | 56.320 | 45.615 | 0.00 | 0.00 |
| ATOM | 1460 | N    | LEU | X | 95 | 46.659 | 58.224 | 44.452 | 0.00 | 0.00 |
| ATOM | 1461 | H    | LEU | X | 95 | 46.807 | 59.218 | 44.556 | 0.00 | 0.00 |
| ATOM | 1462 | CA   | LEU | X | 95 | 46.574 | 57.628 | 43.103 | 0.00 | 0.00 |
| ATOM | 1463 | HA   | LEU | X | 95 | 46.915 | 56.594 | 43.159 | 0.00 | 0.00 |
| ATOM | 1464 | CB   | LEU | X | 95 | 45.152 | 57.541 | 42.606 | 0.00 | 0.00 |
| ATOM | 1465 | HB2  | LEU | X | 95 | 45.082 | 57.077 | 41.623 | 0.00 | 0.00 |
| ATOM | 1466 | HB3  | LEU | X | 95 | 44.672 | 56.957 | 43.391 | 0.00 | 0.00 |
| ATOM | 1467 | CG   | LEU | X | 95 | 44.257 | 58.791 | 42.470 | 0.00 | 0.00 |
| ATOM | 1468 | HG   | LEU | X | 95 | 44.481 | 59.545 | 43.225 | 0.00 | 0.00 |
| ATOM | 1469 | CD1  | LEU | X | 95 | 44.714 | 59.440 | 41.150 | 0.00 | 0.00 |
| ATOM | 1470 | HD11 | LEU | X | 95 | 45.772 | 59.705 | 41.146 | 0.00 | 0.00 |
| ATOM | 1471 | HD12 | LEU | X | 95 | 44.493 | 58.668 | 40.413 | 0.00 | 0.00 |
| ATOM | 1472 | HD13 | LEU | X | 95 | 44.032 | 60.285 | 41.060 | 0.00 | 0.00 |
| ATOM | 1473 | CD2  | LEU | X | 95 | 42.770 | 58.428 | 42.437 | 0.00 | 0.00 |
| ATOM | 1474 | HD21 | LEU | X | 95 | 42.491 | 57.906 | 43.352 | 0.00 | 0.00 |
| ATOM | 1475 | HD22 | LEU | X | 95 | 42.093 | 59.272 | 42.303 | 0.00 | 0.00 |
| ATOM | 1476 | HD23 | LEU | X | 95 | 42.716 | 57.791 | 41.554 | 0.00 | 0.00 |
| ATOM | 1477 | C    | LEU | X | 95 | 47.632 | 58.364 | 42.168 | 0.00 | 0.00 |
| ATOM | 1478 | O    | LEU | X | 95 | 48.273 | 59.379 | 42.469 | 0.00 | 0.00 |
| ATOM | 1479 | N    | ASN | X | 96 | 47.831 | 57.607 | 41.092 | 0.00 | 0.00 |
| ATOM | 1480 | H    | ASN | X | 96 | 47.237 | 56.797 | 40.991 | 0.00 | 0.00 |
| ATOM | 1481 | CA   | ASN | X | 96 | 48.758 | 57.894 | 40.020 | 0.00 | 0.00 |
| ATOM | 1482 | HA   | ASN | X | 96 | 49.115 | 58.916 | 40.145 | 0.00 | 0.00 |
| ATOM | 1483 | CB   | ASN | X | 96 | 49.878 | 56.916 | 39.947 | 0.00 | 0.00 |
| ATOM | 1484 | HB2  | ASN | X | 96 | 49.516 | 55.933 | 39.645 | 0.00 | 0.00 |
| ATOM | 1485 | HB3  | ASN | X | 96 | 50.494 | 57.290 | 39.129 | 0.00 | 0.00 |
| ATOM | 1486 | CG   | ASN | X | 96 | 50.712 | 56.662 | 41.140 | 0.00 | 0.00 |
| ATOM | 1487 | OD1  | ASN | X | 96 | 51.185 | 57.602 | 41.790 | 0.00 | 0.00 |
| ATOM | 1488 | ND2  | ASN | X | 96 | 50.981 | 55.409 | 41.586 | 0.00 | 0.00 |
| ATOM | 1489 | HD21 | ASN | X | 96 | 51.519 | 55.322 | 42.436 | 0.00 | 0.00 |
| ATOM | 1490 | HD22 | ASN | X | 96 | 50.593 | 54.594 | 41.133 | 0.00 | 0.00 |
| ATOM | 1491 | C    | ASN | X | 96 | 47.944 | 57.991 | 38.715 | 0.00 | 0.00 |
| ATOM | 1492 | O    | ASN | X | 96 | 46.943 | 57.336 | 38.471 | 0.00 | 0.00 |
| ATOM | 1493 | N    | VAL | X | 97 | 48.466 | 58.806 | 37.788 | 0.00 | 0.00 |
| ATOM | 1494 | H    | VAL | X | 97 | 49.308 | 59.330 | 37.974 | 0.00 | 0.00 |
| ATOM | 1495 | CA   | VAL | X | 97 | 47.971 | 58.849 | 36.381 | 0.00 | 0.00 |
| ATOM | 1496 | HA   | VAL | X | 97 | 47.487 | 57.893 | 36.184 | 0.00 | 0.00 |
| ATOM | 1497 | CB   | VAL | X | 97 | 46.895 | 60.019 | 36.091 | 0.00 | 0.00 |
| ATOM | 1498 | HB   | VAL | X | 97 | 47.413 | 60.972 | 36.198 | 0.00 | 0.00 |
| ATOM | 1499 | CG1  | VAL | X | 97 | 46.303 | 59.887 | 34.648 | 0.00 | 0.00 |
| ATOM | 1500 | HG11 | VAL | X | 97 | 45.952 | 58.878 | 34.430 | 0.00 | 0.00 |
| ATOM | 1501 | HG12 | VAL | X | 97 | 45.494 | 60.610 | 34.536 | 0.00 | 0.00 |
| ATOM | 1502 | HG13 | VAL | X | 97 | 47.183 | 60.061 | 34.029 | 0.00 | 0.00 |
| ATOM | 1503 | CG2  | VAL | X | 97 | 45.696 | 60.228 | 37.035 | 0.00 | 0.00 |
| ATOM | 1504 | HG21 | VAL | X | 97 | 44.987 | 59.406 | 36.932 | 0.00 | 0.00 |
| ATOM | 1505 | HG22 | VAL | X | 97 | 46.025 | 60.378 | 38.063 | 0.00 | 0.00 |
| ATOM | 1506 | HG23 | VAL | X | 97 | 45.263 | 61.190 | 36.761 | 0.00 | 0.00 |
| ATOM | 1507 | C    | VAL | X | 97 | 49.103 | 58.988 | 35.443 | 0.00 | 0.00 |
| ATOM | 1508 | O    | VAL | X | 97 | 49.990 | 59.873 | 35.677 | 0.00 | 0.00 |
| ATOM | 1509 | N    | TRP | X | 98 | 49.229 | 58.199 | 34.366 | 0.00 | 0.00 |
| ATOM | 1510 | H    | TRP | X | 98 | 48.529 | 57.513 | 34.126 | 0.00 | 0.00 |
| ATOM | 1511 | CA   | TRP | X | 98 | 50.226 | 58.304 | 33.303 | 0.00 | 0.00 |

|      |      |      |     |   |     |        |        |        |      |      |
|------|------|------|-----|---|-----|--------|--------|--------|------|------|
| ATOM | 1512 | HA   | TRP | X | 98  | 50.950 | 59.047 | 33.638 | 0.00 | 0.00 |
| ATOM | 1513 | CB   | TRP | X | 98  | 50.967 | 56.982 | 33.038 | 0.00 | 0.00 |
| ATOM | 1514 | HB2  | TRP | X | 98  | 50.241 | 56.172 | 32.961 | 0.00 | 0.00 |
| ATOM | 1515 | HB3  | TRP | X | 98  | 51.438 | 57.024 | 32.056 | 0.00 | 0.00 |
| ATOM | 1516 | CG   | TRP | X | 98  | 52.028 | 56.632 | 33.969 | 0.00 | 0.00 |
| ATOM | 1517 | CD1  | TRP | X | 98  | 53.374 | 56.740 | 33.676 | 0.00 | 0.00 |
| ATOM | 1518 | HD1  | TRP | X | 98  | 53.721 | 57.117 | 32.726 | 0.00 | 0.00 |
| ATOM | 1519 | NE1  | TRP | X | 98  | 54.078 | 56.192 | 34.749 | 0.00 | 0.00 |
| ATOM | 1520 | HE1  | TRP | X | 98  | 55.054 | 55.940 | 34.694 | 0.00 | 0.00 |
| ATOM | 1521 | CE2  | TRP | X | 98  | 53.308 | 55.868 | 35.791 | 0.00 | 0.00 |
| ATOM | 1522 | CZ2  | TRP | X | 98  | 53.607 | 55.457 | 37.043 | 0.00 | 0.00 |
| ATOM | 1523 | HZ2  | TRP | X | 98  | 54.599 | 55.430 | 37.470 | 0.00 | 0.00 |
| ATOM | 1524 | CH2  | TRP | X | 98  | 52.593 | 54.943 | 37.863 | 0.00 | 0.00 |
| ATOM | 1525 | HH2  | TRP | X | 98  | 52.792 | 54.482 | 38.819 | 0.00 | 0.00 |
| ATOM | 1526 | CZ3  | TRP | X | 98  | 51.286 | 55.012 | 37.438 | 0.00 | 0.00 |
| ATOM | 1527 | HZ3  | TRP | X | 98  | 50.460 | 54.645 | 38.029 | 0.00 | 0.00 |
| ATOM | 1528 | CE3  | TRP | X | 98  | 50.999 | 55.519 | 36.158 | 0.00 | 0.00 |
| ATOM | 1529 | HE3  | TRP | X | 98  | 50.014 | 55.606 | 35.724 | 0.00 | 0.00 |
| ATOM | 1530 | CD2  | TRP | X | 98  | 51.995 | 56.048 | 35.283 | 0.00 | 0.00 |
| ATOM | 1531 | C    | TRP | X | 98  | 49.540 | 58.789 | 32.044 | 0.00 | 0.00 |
| ATOM | 1532 | O    | TRP | X | 98  | 48.450 | 58.358 | 31.774 | 0.00 | 0.00 |
| ATOM | 1533 | N    | THR | X | 99  | 50.189 | 59.676 | 31.337 | 0.00 | 0.00 |
| ATOM | 1534 | H    | THR | X | 99  | 51.091 | 59.952 | 31.696 | 0.00 | 0.00 |
| ATOM | 1535 | CA   | THR | X | 99  | 49.546 | 60.306 | 30.125 | 0.00 | 0.00 |
| ATOM | 1536 | HA   | THR | X | 99  | 48.976 | 59.508 | 29.649 | 0.00 | 0.00 |
| ATOM | 1537 | CB   | THR | X | 99  | 48.426 | 61.384 | 30.462 | 0.00 | 0.00 |
| ATOM | 1538 | HB   | THR | X | 99  | 47.715 | 60.969 | 31.176 | 0.00 | 0.00 |
| ATOM | 1539 | CG2  | THR | X | 99  | 49.039 | 62.609 | 31.113 | 0.00 | 0.00 |
| ATOM | 1540 | HG21 | THR | X | 99  | 49.556 | 63.199 | 30.356 | 0.00 | 0.00 |
| ATOM | 1541 | HG22 | THR | X | 99  | 48.288 | 63.224 | 31.608 | 0.00 | 0.00 |
| ATOM | 1542 | HG23 | THR | X | 99  | 49.770 | 62.214 | 31.818 | 0.00 | 0.00 |
| ATOM | 1543 | OG1  | THR | X | 99  | 47.788 | 61.742 | 29.240 | 0.00 | 0.00 |
| ATOM | 1544 | HG1  | THR | X | 99  | 47.033 | 62.268 | 29.515 | 0.00 | 0.00 |
| ATOM | 1545 | C    | THR | X | 99  | 50.588 | 60.826 | 29.153 | 0.00 | 0.00 |
| ATOM | 1546 | O    | THR | X | 99  | 51.629 | 61.279 | 29.616 | 0.00 | 0.00 |
| ATOM | 1547 | N    | PRO | X | 100 | 50.343 | 60.688 | 27.821 | 0.00 | 0.00 |
| ATOM | 1548 | CD   | PRO | X | 100 | 49.245 | 59.956 | 27.135 | 0.00 | 0.00 |
| ATOM | 1549 | HD2  | PRO | X | 100 | 48.363 | 60.597 | 27.147 | 0.00 | 0.00 |
| ATOM | 1550 | HD3  | PRO | X | 100 | 48.950 | 59.081 | 27.714 | 0.00 | 0.00 |
| ATOM | 1551 | CG   | PRO | X | 100 | 49.673 | 59.652 | 25.683 | 0.00 | 0.00 |
| ATOM | 1552 | HG2  | PRO | X | 100 | 48.783 | 59.668 | 25.055 | 0.00 | 0.00 |
| ATOM | 1553 | HG3  | PRO | X | 100 | 50.128 | 58.662 | 25.639 | 0.00 | 0.00 |
| ATOM | 1554 | CB   | PRO | X | 100 | 50.673 | 60.766 | 25.388 | 0.00 | 0.00 |
| ATOM | 1555 | HB2  | PRO | X | 100 | 50.179 | 61.672 | 25.036 | 0.00 | 0.00 |
| ATOM | 1556 | HB3  | PRO | X | 100 | 51.375 | 60.482 | 24.604 | 0.00 | 0.00 |
| ATOM | 1557 | CA   | PRO | X | 100 | 51.359 | 61.055 | 26.811 | 0.00 | 0.00 |
| ATOM | 1558 | HA   | PRO | X | 100 | 52.257 | 60.443 | 26.902 | 0.00 | 0.00 |
| ATOM | 1559 | C    | PRO | X | 100 | 51.894 | 62.490 | 26.905 | 0.00 | 0.00 |
| ATOM | 1560 | O    | PRO | X | 100 | 51.269 | 63.345 | 27.537 | 0.00 | 0.00 |
| ATOM | 1561 | N    | TYR | X | 101 | 52.966 | 62.726 | 26.197 | 0.00 | 0.00 |
| ATOM | 1562 | H    | TYR | X | 101 | 53.490 | 61.916 | 25.899 | 0.00 | 0.00 |
| ATOM | 1563 | CA   | TYR | X | 101 | 53.704 | 63.981 | 26.093 | 0.00 | 0.00 |
| ATOM | 1564 | HA   | TYR | X | 101 | 53.265 | 64.676 | 26.809 | 0.00 | 0.00 |
| ATOM | 1565 | CB   | TYR | X | 101 | 55.112 | 63.700 | 26.591 | 0.00 | 0.00 |
| ATOM | 1566 | HB2  | TYR | X | 101 | 55.025 | 63.093 | 27.492 | 0.00 | 0.00 |
| ATOM | 1567 | HB3  | TYR | X | 101 | 55.803 | 63.188 | 25.922 | 0.00 | 0.00 |
| ATOM | 1568 | CG   | TYR | X | 101 | 55.773 | 64.994 | 26.937 | 0.00 | 0.00 |
| ATOM | 1569 | CD1  | TYR | X | 101 | 56.197 | 65.968 | 25.935 | 0.00 | 0.00 |
| ATOM | 1570 | HD1  | TYR | X | 101 | 56.031 | 65.673 | 24.910 | 0.00 | 0.00 |
| ATOM | 1571 | CE1  | TYR | X | 101 | 56.756 | 67.220 | 26.309 | 0.00 | 0.00 |
| ATOM | 1572 | HE1  | TYR | X | 101 | 57.023 | 67.958 | 25.567 | 0.00 | 0.00 |
| ATOM | 1573 | CZ   | TYR | X | 101 | 56.767 | 67.566 | 27.690 | 0.00 | 0.00 |
| ATOM | 1574 | OH   | TYR | X | 101 | 57.211 | 68.753 | 28.166 | 0.00 | 0.00 |
| ATOM | 1575 | HH   | TYR | X | 101 | 57.447 | 69.380 | 27.478 | 0.00 | 0.00 |
| ATOM | 1576 | CE2  | TYR | X | 101 | 56.335 | 66.634 | 28.684 | 0.00 | 0.00 |
| ATOM | 1577 | HE2  | TYR | X | 101 | 56.196 | 67.074 | 29.660 | 0.00 | 0.00 |
| ATOM | 1578 | CD2  | TYR | X | 101 | 55.826 | 65.422 | 28.279 | 0.00 | 0.00 |
| ATOM | 1579 | HD2  | TYR | X | 101 | 55.437 | 64.683 | 28.963 | 0.00 | 0.00 |
| ATOM | 1580 | C    | TYR | X | 101 | 53.651 | 64.548 | 24.690 | 0.00 | 0.00 |
| ATOM | 1581 | O    | TYR | X | 101 | 54.294 | 64.034 | 23.842 | 0.00 | 0.00 |

|      |      |      |     |   |     |        |        |        |      |      |
|------|------|------|-----|---|-----|--------|--------|--------|------|------|
| ATOM | 1582 | N    | PRO | X | 102 | 53.045 | 65.769 | 24.482 | 0.00 | 0.00 |
| ATOM | 1583 | CD   | PRO | X | 102 | 53.147 | 66.448 | 23.142 | 0.00 | 0.00 |
| ATOM | 1584 | HD2  | PRO | X | 102 | 52.805 | 65.806 | 22.331 | 0.00 | 0.00 |
| ATOM | 1585 | HD3  | PRO | X | 102 | 54.207 | 66.676 | 23.027 | 0.00 | 0.00 |
| ATOM | 1586 | CG   | PRO | X | 102 | 52.251 | 67.630 | 23.153 | 0.00 | 0.00 |
| ATOM | 1587 | HG2  | PRO | X | 102 | 51.250 | 67.337 | 22.837 | 0.00 | 0.00 |
| ATOM | 1588 | HG3  | PRO | X | 102 | 52.741 | 68.442 | 22.616 | 0.00 | 0.00 |
| ATOM | 1589 | CB   | PRO | X | 102 | 52.286 | 67.913 | 24.630 | 0.00 | 0.00 |
| ATOM | 1590 | HB2  | PRO | X | 102 | 51.385 | 68.462 | 24.904 | 0.00 | 0.00 |
| ATOM | 1591 | HB3  | PRO | X | 102 | 53.183 | 68.503 | 24.815 | 0.00 | 0.00 |
| ATOM | 1592 | CA   | PRO | X | 102 | 52.363 | 66.612 | 25.359 | 0.00 | 0.00 |
| ATOM | 1593 | HA   | PRO | X | 102 | 52.835 | 66.744 | 26.332 | 0.00 | 0.00 |
| ATOM | 1594 | C    | PRO | X | 102 | 51.015 | 66.032 | 25.648 | 0.00 | 0.00 |
| ATOM | 1595 | O    | PRO | X | 102 | 50.527 | 65.068 | 25.077 | 0.00 | 0.00 |
| ATOM | 1596 | N    | ARG | X | 103 | 50.375 | 66.618 | 26.658 | 0.00 | 0.00 |
| ATOM | 1597 | H    | ARG | X | 103 | 50.759 | 67.464 | 27.054 | 0.00 | 0.00 |
| ATOM | 1598 | CA   | ARG | X | 103 | 49.177 | 65.976 | 27.239 | 0.00 | 0.00 |
| ATOM | 1599 | HA   | ARG | X | 103 | 49.306 | 64.916 | 27.458 | 0.00 | 0.00 |
| ATOM | 1600 | CB   | ARG | X | 103 | 48.789 | 66.495 | 28.661 | 0.00 | 0.00 |
| ATOM | 1601 | HB2  | ARG | X | 103 | 49.703 | 66.580 | 29.249 | 0.00 | 0.00 |
| ATOM | 1602 | HB3  | ARG | X | 103 | 48.223 | 67.417 | 28.532 | 0.00 | 0.00 |
| ATOM | 1603 | CG   | ARG | X | 103 | 47.888 | 65.525 | 29.394 | 0.00 | 0.00 |
| ATOM | 1604 | HG2  | ARG | X | 103 | 46.978 | 65.228 | 28.873 | 0.00 | 0.00 |
| ATOM | 1605 | HG3  | ARG | X | 103 | 48.541 | 64.662 | 29.525 | 0.00 | 0.00 |
| ATOM | 1606 | CD   | ARG | X | 103 | 47.519 | 65.958 | 30.771 | 0.00 | 0.00 |
| ATOM | 1607 | HD2  | ARG | X | 103 | 47.218 | 65.071 | 31.328 | 0.00 | 0.00 |
| ATOM | 1608 | HD3  | ARG | X | 103 | 48.436 | 66.309 | 31.243 | 0.00 | 0.00 |
| ATOM | 1609 | NE   | ARG | X | 103 | 46.482 | 66.957 | 31.008 | 0.00 | 0.00 |
| ATOM | 1610 | HE   | ARG | X | 103 | 45.543 | 66.731 | 30.712 | 0.00 | 0.00 |
| ATOM | 1611 | CZ   | ARG | X | 103 | 46.637 | 68.244 | 31.303 | 0.00 | 0.00 |
| ATOM | 1612 | NH1  | ARG | X | 103 | 47.813 | 68.679 | 31.606 | 0.00 | 0.00 |
| ATOM | 1613 | HH11 | ARG | X | 103 | 48.527 | 67.976 | 31.738 | 0.00 | 0.00 |
| ATOM | 1614 | HH12 | ARG | X | 103 | 47.901 | 69.666 | 31.800 | 0.00 | 0.00 |
| ATOM | 1615 | NH2  | ARG | X | 103 | 45.634 | 69.113 | 31.147 | 0.00 | 0.00 |
| ATOM | 1616 | HH21 | ARG | X | 103 | 44.742 | 68.716 | 30.890 | 0.00 | 0.00 |
| ATOM | 1617 | HH22 | ARG | X | 103 | 45.844 | 70.101 | 31.170 | 0.00 | 0.00 |
| ATOM | 1618 | C    | ARG | X | 103 | 47.960 | 66.033 | 26.323 | 0.00 | 0.00 |
| ATOM | 1619 | O    | ARG | X | 103 | 47.617 | 67.160 | 25.926 | 0.00 | 0.00 |
| ATOM | 1620 | N    | PRO | X | 104 | 47.382 | 64.889 | 25.871 | 0.00 | 0.00 |
| ATOM | 1621 | CD   | PRO | X | 104 | 47.825 | 63.502 | 26.176 | 0.00 | 0.00 |
| ATOM | 1622 | HD2  | PRO | X | 104 | 48.187 | 63.308 | 27.186 | 0.00 | 0.00 |
| ATOM | 1623 | HD3  | PRO | X | 104 | 48.701 | 63.284 | 25.565 | 0.00 | 0.00 |
| ATOM | 1624 | CG   | PRO | X | 104 | 46.684 | 62.601 | 25.752 | 0.00 | 0.00 |
| ATOM | 1625 | HG2  | PRO | X | 104 | 45.957 | 62.365 | 26.528 | 0.00 | 0.00 |
| ATOM | 1626 | HG3  | PRO | X | 104 | 47.077 | 61.696 | 25.286 | 0.00 | 0.00 |
| ATOM | 1627 | CB   | PRO | X | 104 | 46.080 | 63.426 | 24.648 | 0.00 | 0.00 |
| ATOM | 1628 | HB2  | PRO | X | 104 | 45.072 | 63.068 | 24.440 | 0.00 | 0.00 |
| ATOM | 1629 | HB3  | PRO | X | 104 | 46.492 | 63.171 | 23.671 | 0.00 | 0.00 |
| ATOM | 1630 | CA   | PRO | X | 104 | 46.287 | 64.916 | 24.891 | 0.00 | 0.00 |
| ATOM | 1631 | HA   | PRO | X | 104 | 46.749 | 65.288 | 23.976 | 0.00 | 0.00 |
| ATOM | 1632 | C    | PRO | X | 104 | 45.025 | 65.623 | 25.364 | 0.00 | 0.00 |
| ATOM | 1633 | O    | PRO | X | 104 | 44.807 | 65.698 | 26.570 | 0.00 | 0.00 |
| ATOM | 1634 | N    | THR | X | 105 | 44.212 | 66.027 | 24.409 | 0.00 | 0.00 |
| ATOM | 1635 | H    | THR | X | 105 | 44.566 | 65.954 | 23.465 | 0.00 | 0.00 |
| ATOM | 1636 | CA   | THR | X | 105 | 42.812 | 66.440 | 24.558 | 0.00 | 0.00 |
| ATOM | 1637 | HA   | THR | X | 105 | 42.571 | 66.257 | 25.606 | 0.00 | 0.00 |
| ATOM | 1638 | CB   | THR | X | 105 | 42.529 | 67.868 | 24.257 | 0.00 | 0.00 |
| ATOM | 1639 | HB   | THR | X | 105 | 41.475 | 68.140 | 24.194 | 0.00 | 0.00 |
| ATOM | 1640 | CG2  | THR | X | 105 | 43.043 | 68.719 | 25.415 | 0.00 | 0.00 |
| ATOM | 1641 | HG21 | THR | X | 105 | 43.883 | 68.248 | 25.925 | 0.00 | 0.00 |
| ATOM | 1642 | HG22 | THR | X | 105 | 43.311 | 69.718 | 25.073 | 0.00 | 0.00 |
| ATOM | 1643 | HG23 | THR | X | 105 | 42.295 | 68.868 | 26.194 | 0.00 | 0.00 |
| ATOM | 1644 | OG1  | THR | X | 105 | 43.260 | 68.245 | 23.032 | 0.00 | 0.00 |
| ATOM | 1645 | HG1  | THR | X | 105 | 42.765 | 68.967 | 22.638 | 0.00 | 0.00 |
| ATOM | 1646 | C    | THR | X | 105 | 41.837 | 65.497 | 23.844 | 0.00 | 0.00 |
| ATOM | 1647 | O    | THR | X | 105 | 40.656 | 65.426 | 24.243 | 0.00 | 0.00 |
| ATOM | 1648 | N    | SER | X | 106 | 42.225 | 64.773 | 22.819 | 0.00 | 0.00 |
| ATOM | 1649 | H    | SER | X | 106 | 43.183 | 64.884 | 22.518 | 0.00 | 0.00 |
| ATOM | 1650 | CA   | SER | X | 106 | 41.571 | 63.607 | 22.280 | 0.00 | 0.00 |
| ATOM | 1651 | HA   | SER | X | 106 | 40.666 | 63.862 | 21.728 | 0.00 | 0.00 |

|      |      |      |     |   |     |        |        |        |      |      |
|------|------|------|-----|---|-----|--------|--------|--------|------|------|
| ATOM | 1652 | CB   | SER | X | 106 | 42.424 | 62.878 | 21.178 | 0.00 | 0.00 |
| ATOM | 1653 | HB2  | SER | X | 106 | 43.332 | 62.501 | 21.647 | 0.00 | 0.00 |
| ATOM | 1654 | HB3  | SER | X | 106 | 41.923 | 61.997 | 20.776 | 0.00 | 0.00 |
| ATOM | 1655 | OG   | SER | X | 106 | 42.886 | 63.753 | 20.139 | 0.00 | 0.00 |
| ATOM | 1656 | HG   | SER | X | 106 | 42.166 | 64.262 | 19.757 | 0.00 | 0.00 |
| ATOM | 1657 | C    | SER | X | 106 | 41.243 | 62.579 | 23.338 | 0.00 | 0.00 |
| ATOM | 1658 | O    | SER | X | 106 | 42.151 | 62.450 | 24.238 | 0.00 | 0.00 |
| ATOM | 1659 | N    | PRO | X | 107 | 40.169 | 61.725 | 23.214 | 0.00 | 0.00 |
| ATOM | 1660 | CD   | PRO | X | 107 | 39.137 | 61.953 | 22.259 | 0.00 | 0.00 |
| ATOM | 1661 | HD2  | PRO | X | 107 | 39.610 | 62.026 | 21.280 | 0.00 | 0.00 |
| ATOM | 1662 | HD3  | PRO | X | 107 | 38.581 | 62.865 | 22.472 | 0.00 | 0.00 |
| ATOM | 1663 | CG   | PRO | X | 107 | 38.182 | 60.768 | 22.426 | 0.00 | 0.00 |
| ATOM | 1664 | HG2  | PRO | X | 107 | 38.309 | 59.986 | 21.678 | 0.00 | 0.00 |
| ATOM | 1665 | HG3  | PRO | X | 107 | 37.180 | 61.190 | 22.347 | 0.00 | 0.00 |
| ATOM | 1666 | CB   | PRO | X | 107 | 38.403 | 60.213 | 23.785 | 0.00 | 0.00 |
| ATOM | 1667 | HB2  | PRO | X | 107 | 38.263 | 59.134 | 23.853 | 0.00 | 0.00 |
| ATOM | 1668 | HB3  | PRO | X | 107 | 37.683 | 60.721 | 24.427 | 0.00 | 0.00 |
| ATOM | 1669 | CA   | PRO | X | 107 | 39.865 | 60.597 | 24.078 | 0.00 | 0.00 |
| ATOM | 1670 | HA   | PRO | X | 107 | 39.917 | 60.874 | 25.131 | 0.00 | 0.00 |
| ATOM | 1671 | C    | PRO | X | 107 | 40.697 | 59.361 | 23.862 | 0.00 | 0.00 |
| ATOM | 1672 | O    | PRO | X | 107 | 41.178 | 59.119 | 22.738 | 0.00 | 0.00 |
| ATOM | 1673 | N    | THR | X | 108 | 40.894 | 58.489 | 24.864 | 0.00 | 0.00 |
| ATOM | 1674 | H    | THR | X | 108 | 40.499 | 58.676 | 25.775 | 0.00 | 0.00 |
| ATOM | 1675 | CA   | THR | X | 108 | 41.672 | 57.229 | 24.673 | 0.00 | 0.00 |
| ATOM | 1676 | HA   | THR | X | 108 | 41.503 | 56.803 | 23.684 | 0.00 | 0.00 |
| ATOM | 1677 | CB   | THR | X | 108 | 43.171 | 57.419 | 24.744 | 0.00 | 0.00 |
| ATOM | 1678 | HB   | THR | X | 108 | 43.442 | 58.237 | 24.076 | 0.00 | 0.00 |
| ATOM | 1679 | CG2  | THR | X | 108 | 43.695 | 57.741 | 26.217 | 0.00 | 0.00 |
| ATOM | 1680 | HG21 | THR | X | 108 | 44.707 | 58.141 | 26.268 | 0.00 | 0.00 |
| ATOM | 1681 | HG22 | THR | X | 108 | 43.086 | 58.555 | 26.610 | 0.00 | 0.00 |
| ATOM | 1682 | HG23 | THR | X | 108 | 43.610 | 56.880 | 26.879 | 0.00 | 0.00 |
| ATOM | 1683 | OG1  | THR | X | 108 | 43.744 | 56.198 | 24.417 | 0.00 | 0.00 |
| ATOM | 1684 | HG1  | THR | X | 108 | 44.616 | 56.198 | 24.818 | 0.00 | 0.00 |
| ATOM | 1685 | C    | THR | X | 108 | 41.188 | 56.206 | 25.745 | 0.00 | 0.00 |
| ATOM | 1686 | O    | THR | X | 108 | 40.893 | 56.625 | 26.845 | 0.00 | 0.00 |
| ATOM | 1687 | N    | PRO | X | 109 | 41.130 | 54.853 | 25.542 | 0.00 | 0.00 |
| ATOM | 1688 | CD   | PRO | X | 109 | 41.298 | 54.190 | 24.332 | 0.00 | 0.00 |
| ATOM | 1689 | HD2  | PRO | X | 109 | 42.348 | 54.131 | 24.048 | 0.00 | 0.00 |
| ATOM | 1690 | HD3  | PRO | X | 109 | 40.672 | 54.690 | 23.592 | 0.00 | 0.00 |
| ATOM | 1691 | CG   | PRO | X | 109 | 40.696 | 52.802 | 24.492 | 0.00 | 0.00 |
| ATOM | 1692 | HG2  | PRO | X | 109 | 41.295 | 52.039 | 23.996 | 0.00 | 0.00 |
| ATOM | 1693 | HG3  | PRO | X | 109 | 39.647 | 52.826 | 24.195 | 0.00 | 0.00 |
| ATOM | 1694 | CB   | PRO | X | 109 | 40.598 | 52.573 | 26.044 | 0.00 | 0.00 |
| ATOM | 1695 | HB2  | PRO | X | 109 | 41.286 | 51.783 | 26.346 | 0.00 | 0.00 |
| ATOM | 1696 | HB3  | PRO | X | 109 | 39.590 | 52.275 | 26.330 | 0.00 | 0.00 |
| ATOM | 1697 | CA   | PRO | X | 109 | 40.829 | 53.963 | 26.638 | 0.00 | 0.00 |
| ATOM | 1698 | HA   | PRO | X | 109 | 39.855 | 54.270 | 27.019 | 0.00 | 0.00 |
| ATOM | 1699 | C    | PRO | X | 109 | 41.791 | 53.964 | 27.791 | 0.00 | 0.00 |
| ATOM | 1700 | O    | PRO | X | 109 | 42.949 | 54.258 | 27.720 | 0.00 | 0.00 |
| ATOM | 1701 | N    | VAL | X | 110 | 41.194 | 53.742 | 28.997 | 0.00 | 0.00 |
| ATOM | 1702 | H    | VAL | X | 110 | 40.237 | 53.425 | 29.051 | 0.00 | 0.00 |
| ATOM | 1703 | CA   | VAL | X | 110 | 41.856 | 53.786 | 30.360 | 0.00 | 0.00 |
| ATOM | 1704 | HA   | VAL | X | 110 | 42.874 | 54.138 | 30.190 | 0.00 | 0.00 |
| ATOM | 1705 | CB   | VAL | X | 110 | 41.124 | 54.680 | 31.316 | 0.00 | 0.00 |
| ATOM | 1706 | HB   | VAL | X | 110 | 40.151 | 54.243 | 31.545 | 0.00 | 0.00 |
| ATOM | 1707 | CG1  | VAL | X | 110 | 41.739 | 54.878 | 32.758 | 0.00 | 0.00 |
| ATOM | 1708 | HG11 | VAL | X | 110 | 42.627 | 55.505 | 32.827 | 0.00 | 0.00 |
| ATOM | 1709 | HG12 | VAL | X | 110 | 40.960 | 55.430 | 33.283 | 0.00 | 0.00 |
| ATOM | 1710 | HG13 | VAL | X | 110 | 41.740 | 53.914 | 33.267 | 0.00 | 0.00 |
| ATOM | 1711 | CG2  | VAL | X | 110 | 40.804 | 56.045 | 30.790 | 0.00 | 0.00 |
| ATOM | 1712 | HG21 | VAL | X | 110 | 39.856 | 56.364 | 31.223 | 0.00 | 0.00 |
| ATOM | 1713 | HG22 | VAL | X | 110 | 41.589 | 56.775 | 30.991 | 0.00 | 0.00 |
| ATOM | 1714 | HG23 | VAL | X | 110 | 40.600 | 56.047 | 29.720 | 0.00 | 0.00 |
| ATOM | 1715 | C    | VAL | X | 110 | 42.008 | 52.369 | 30.909 | 0.00 | 0.00 |
| ATOM | 1716 | O    | VAL | X | 110 | 41.052 | 51.645 | 30.835 | 0.00 | 0.00 |
| ATOM | 1717 | N    | LEU | X | 111 | 43.142 | 52.044 | 31.482 | 0.00 | 0.00 |
| ATOM | 1718 | H    | LEU | X | 111 | 43.921 | 52.683 | 31.409 | 0.00 | 0.00 |
| ATOM | 1719 | CA   | LEU | X | 111 | 43.365 | 50.963 | 32.419 | 0.00 | 0.00 |
| ATOM | 1720 | HA   | LEU | X | 111 | 42.487 | 50.316 | 32.420 | 0.00 | 0.00 |
| ATOM | 1721 | CB   | LEU | X | 111 | 44.450 | 49.953 | 31.887 | 0.00 | 0.00 |



|      |      |      |     |   |     |        |        |        |      |      |
|------|------|------|-----|---|-----|--------|--------|--------|------|------|
| ATOM | 1722 | HB2  | LEU | X | 111 | 45.306 | 50.544 | 31.562 | 0.00 | 0.00 |
| ATOM | 1723 | HB3  | LEU | X | 111 | 44.730 | 49.297 | 32.712 | 0.00 | 0.00 |
| ATOM | 1724 | CG   | LEU | X | 111 | 44.003 | 48.969 | 30.744 | 0.00 | 0.00 |
| ATOM | 1725 | HG   | LEU | X | 111 | 43.409 | 49.542 | 30.032 | 0.00 | 0.00 |
| ATOM | 1726 | CD1  | LEU | X | 111 | 45.241 | 48.458 | 30.000 | 0.00 | 0.00 |
| ATOM | 1727 | HD11 | LEU | X | 111 | 45.807 | 49.260 | 29.527 | 0.00 | 0.00 |
| ATOM | 1728 | HD12 | LEU | X | 111 | 45.821 | 47.854 | 30.698 | 0.00 | 0.00 |
| ATOM | 1729 | HD13 | LEU | X | 111 | 44.926 | 47.800 | 29.191 | 0.00 | 0.00 |
| ATOM | 1730 | CD2  | LEU | X | 111 | 43.137 | 47.749 | 31.310 | 0.00 | 0.00 |
| ATOM | 1731 | HD21 | LEU | X | 111 | 43.837 | 47.011 | 31.703 | 0.00 | 0.00 |
| ATOM | 1732 | HD22 | LEU | X | 111 | 42.553 | 48.062 | 32.176 | 0.00 | 0.00 |
| ATOM | 1733 | HD23 | LEU | X | 111 | 42.516 | 47.423 | 30.476 | 0.00 | 0.00 |
| ATOM | 1734 | C    | LEU | X | 111 | 43.737 | 51.478 | 33.782 | 0.00 | 0.00 |
| ATOM | 1735 | O    | LEU | X | 111 | 44.692 | 52.182 | 33.878 | 0.00 | 0.00 |
| ATOM | 1736 | N    | VAL | X | 112 | 42.934 | 51.045 | 34.778 | 0.00 | 0.00 |
| ATOM | 1737 | H    | VAL | X | 112 | 42.138 | 50.494 | 34.492 | 0.00 | 0.00 |
| ATOM | 1738 | CA   | VAL | X | 112 | 43.266 | 51.252 | 36.173 | 0.00 | 0.00 |
| ATOM | 1739 | HA   | VAL | X | 112 | 43.950 | 52.090 | 36.310 | 0.00 | 0.00 |
| ATOM | 1740 | CB   | VAL | X | 112 | 42.040 | 51.766 | 36.996 | 0.00 | 0.00 |
| ATOM | 1741 | HB   | VAL | X | 112 | 41.350 | 50.922 | 37.014 | 0.00 | 0.00 |
| ATOM | 1742 | CG1  | VAL | X | 112 | 42.421 | 52.068 | 38.471 | 0.00 | 0.00 |
| ATOM | 1743 | HG11 | VAL | X | 112 | 43.352 | 52.623 | 38.351 | 0.00 | 0.00 |
| ATOM | 1744 | HG12 | VAL | X | 112 | 41.647 | 52.655 | 38.966 | 0.00 | 0.00 |
| ATOM | 1745 | HG13 | VAL | X | 112 | 42.592 | 51.104 | 38.950 | 0.00 | 0.00 |
| ATOM | 1746 | CG2  | VAL | X | 112 | 41.238 | 52.998 | 36.463 | 0.00 | 0.00 |
| ATOM | 1747 | HG21 | VAL | X | 112 | 40.288 | 53.109 | 36.987 | 0.00 | 0.00 |
| ATOM | 1748 | HG22 | VAL | X | 112 | 41.894 | 53.856 | 36.612 | 0.00 | 0.00 |
| ATOM | 1749 | HG23 | VAL | X | 112 | 40.925 | 52.913 | 35.422 | 0.00 | 0.00 |
| ATOM | 1750 | C    | VAL | X | 112 | 43.823 | 49.995 | 36.858 | 0.00 | 0.00 |
| ATOM | 1751 | O    | VAL | X | 112 | 43.027 | 49.101 | 36.903 | 0.00 | 0.00 |
| ATOM | 1752 | N    | TRP | X | 113 | 45.027 | 50.086 | 37.402 | 0.00 | 0.00 |
| ATOM | 1753 | H    | TRP | X | 113 | 45.546 | 50.936 | 37.235 | 0.00 | 0.00 |
| ATOM | 1754 | CA   | TRP | X | 113 | 45.628 | 49.015 | 38.182 | 0.00 | 0.00 |
| ATOM | 1755 | HA   | TRP | X | 113 | 45.240 | 48.116 | 37.703 | 0.00 | 0.00 |
| ATOM | 1756 | CB   | TRP | X | 113 | 47.106 | 49.219 | 38.113 | 0.00 | 0.00 |
| ATOM | 1757 | HB2  | TRP | X | 113 | 47.477 | 49.248 | 37.088 | 0.00 | 0.00 |
| ATOM | 1758 | HB3  | TRP | X | 113 | 47.276 | 50.198 | 38.561 | 0.00 | 0.00 |
| ATOM | 1759 | CG   | TRP | X | 113 | 47.933 | 48.285 | 38.847 | 0.00 | 0.00 |
| ATOM | 1760 | CD1  | TRP | X | 113 | 48.737 | 48.642 | 39.851 | 0.00 | 0.00 |
| ATOM | 1761 | HD1  | TRP | X | 113 | 48.966 | 49.670 | 40.089 | 0.00 | 0.00 |
| ATOM | 1762 | NE1  | TRP | X | 113 | 49.246 | 47.473 | 40.313 | 0.00 | 0.00 |
| ATOM | 1763 | HE1  | TRP | X | 113 | 49.946 | 47.475 | 41.042 | 0.00 | 0.00 |
| ATOM | 1764 | CE2  | TRP | X | 113 | 48.827 | 46.348 | 39.605 | 0.00 | 0.00 |
| ATOM | 1765 | CZ2  | TRP | X | 113 | 49.213 | 44.998 | 39.690 | 0.00 | 0.00 |
| ATOM | 1766 | HZ2  | TRP | X | 113 | 49.964 | 44.725 | 40.416 | 0.00 | 0.00 |
| ATOM | 1767 | CH2  | TRP | X | 113 | 48.853 | 44.193 | 38.579 | 0.00 | 0.00 |
| ATOM | 1768 | HH2  | TRP | X | 113 | 49.288 | 43.222 | 38.392 | 0.00 | 0.00 |
| ATOM | 1769 | CZ3  | TRP | X | 113 | 47.952 | 44.653 | 37.583 | 0.00 | 0.00 |
| ATOM | 1770 | HZ3  | TRP | X | 113 | 47.866 | 44.083 | 36.669 | 0.00 | 0.00 |
| ATOM | 1771 | CE3  | TRP | X | 113 | 47.473 | 45.970 | 37.653 | 0.00 | 0.00 |
| ATOM | 1772 | HE3  | TRP | X | 113 | 46.731 | 46.237 | 36.916 | 0.00 | 0.00 |
| ATOM | 1773 | CD2  | TRP | X | 113 | 48.053 | 46.894 | 38.576 | 0.00 | 0.00 |
| ATOM | 1774 | C    | TRP | X | 113 | 45.044 | 48.998 | 39.654 | 0.00 | 0.00 |
| ATOM | 1775 | O    | TRP | X | 113 | 44.978 | 49.977 | 40.395 | 0.00 | 0.00 |
| ATOM | 1776 | N    | ILE | X | 114 | 44.828 | 47.728 | 40.051 | 0.00 | 0.00 |
| ATOM | 1777 | H    | ILE | X | 114 | 44.964 | 46.986 | 39.379 | 0.00 | 0.00 |
| ATOM | 1778 | CA   | ILE | X | 114 | 44.537 | 47.404 | 41.516 | 0.00 | 0.00 |
| ATOM | 1779 | HA   | ILE | X | 114 | 44.631 | 48.295 | 42.137 | 0.00 | 0.00 |
| ATOM | 1780 | CB   | ILE | X | 114 | 43.084 | 46.886 | 41.592 | 0.00 | 0.00 |
| ATOM | 1781 | HB   | ILE | X | 114 | 42.965 | 45.941 | 41.061 | 0.00 | 0.00 |
| ATOM | 1782 | CG2  | ILE | X | 114 | 42.703 | 46.652 | 43.089 | 0.00 | 0.00 |
| ATOM | 1783 | HG21 | ILE | X | 114 | 41.645 | 46.413 | 42.986 | 0.00 | 0.00 |
| ATOM | 1784 | HG22 | ILE | X | 114 | 43.162 | 45.746 | 43.485 | 0.00 | 0.00 |
| ATOM | 1785 | HG23 | ILE | X | 114 | 42.749 | 47.551 | 43.703 | 0.00 | 0.00 |
| ATOM | 1786 | CG1  | ILE | X | 114 | 42.077 | 47.900 | 40.877 | 0.00 | 0.00 |
| ATOM | 1787 | HG12 | ILE | X | 114 | 42.097 | 48.843 | 41.425 | 0.00 | 0.00 |
| ATOM | 1788 | HG13 | ILE | X | 114 | 42.417 | 48.129 | 39.867 | 0.00 | 0.00 |
| ATOM | 1789 | CD1  | ILE | X | 114 | 40.640 | 47.470 | 40.620 | 0.00 | 0.00 |
| ATOM | 1790 | HD11 | ILE | X | 114 | 40.618 | 46.675 | 39.875 | 0.00 | 0.00 |
| ATOM | 1791 | HD12 | ILE | X | 114 | 40.125 | 47.101 | 41.507 | 0.00 | 0.00 |

|      |      |      |     |   |     |        |        |        |      |      |
|------|------|------|-----|---|-----|--------|--------|--------|------|------|
| ATOM | 1792 | HD13 | ILE | X | 114 | 40.194 | 48.389 | 40.240 | 0.00 | 0.00 |
| ATOM | 1793 | C    | ILE | X | 114 | 45.518 | 46.310 | 42.011 | 0.00 | 0.00 |
| ATOM | 1794 | O    | ILE | X | 114 | 45.621 | 45.268 | 41.358 | 0.00 | 0.00 |
| ATOM | 1795 | N    | TYR | X | 115 | 46.180 | 46.464 | 43.200 | 0.00 | 0.00 |
| ATOM | 1796 | H    | TYR | X | 115 | 46.037 | 47.350 | 43.665 | 0.00 | 0.00 |
| ATOM | 1797 | CA   | TYR | X | 115 | 47.383 | 45.725 | 43.621 | 0.00 | 0.00 |
| ATOM | 1798 | HA   | TYR | X | 115 | 47.856 | 45.393 | 42.696 | 0.00 | 0.00 |
| ATOM | 1799 | CB   | TYR | X | 115 | 48.372 | 46.743 | 44.360 | 0.00 | 0.00 |
| ATOM | 1800 | HB2  | TYR | X | 115 | 49.290 | 46.161 | 44.445 | 0.00 | 0.00 |
| ATOM | 1801 | HB3  | TYR | X | 115 | 48.548 | 47.597 | 43.706 | 0.00 | 0.00 |
| ATOM | 1802 | CG   | TYR | X | 115 | 47.959 | 47.310 | 45.716 | 0.00 | 0.00 |
| ATOM | 1803 | CD1  | TYR | X | 115 | 48.061 | 46.444 | 46.853 | 0.00 | 0.00 |
| ATOM | 1804 | HD1  | TYR | X | 115 | 48.335 | 45.409 | 46.712 | 0.00 | 0.00 |
| ATOM | 1805 | CE1  | TYR | X | 115 | 47.699 | 46.841 | 48.173 | 0.00 | 0.00 |
| ATOM | 1806 | HE1  | TYR | X | 115 | 47.590 | 46.194 | 49.031 | 0.00 | 0.00 |
| ATOM | 1807 | CZ   | TYR | X | 115 | 47.487 | 48.235 | 48.377 | 0.00 | 0.00 |
| ATOM | 1808 | OH   | TYR | X | 115 | 47.143 | 48.694 | 49.584 | 0.00 | 0.00 |
| ATOM | 1809 | HH   | TYR | X | 115 | 46.707 | 49.546 | 49.505 | 0.00 | 0.00 |
| ATOM | 1810 | CE2  | TYR | X | 115 | 47.452 | 49.079 | 47.240 | 0.00 | 0.00 |
| ATOM | 1811 | HE2  | TYR | X | 115 | 47.258 | 50.130 | 47.396 | 0.00 | 0.00 |
| ATOM | 1812 | CD2  | TYR | X | 115 | 47.751 | 48.695 | 45.952 | 0.00 | 0.00 |
| ATOM | 1813 | HD2  | TYR | X | 115 | 47.824 | 49.448 | 45.182 | 0.00 | 0.00 |
| ATOM | 1814 | C    | TYR | X | 115 | 47.019 | 44.444 | 44.405 | 0.00 | 0.00 |
| ATOM | 1815 | O    | TYR | X | 115 | 46.262 | 44.397 | 45.360 | 0.00 | 0.00 |
| ATOM | 1816 | N    | GLY | X | 116 | 47.696 | 43.328 | 44.072 | 0.00 | 0.00 |
| ATOM | 1817 | H    | GLY | X | 116 | 48.444 | 43.543 | 43.428 | 0.00 | 0.00 |
| ATOM | 1818 | CA   | GLY | X | 116 | 47.816 | 42.090 | 44.907 | 0.00 | 0.00 |
| ATOM | 1819 | HA2  | GLY | X | 116 | 46.780 | 41.816 | 45.169 | 0.00 | 0.00 |
| ATOM | 1820 | HA3  | GLY | X | 116 | 48.337 | 41.306 | 44.297 | 0.00 | 0.00 |
| ATOM | 1821 | C    | GLY | X | 116 | 48.574 | 42.260 | 46.221 | 0.00 | 0.00 |
| ATOM | 1822 | O    | GLY | X | 116 | 49.283 | 43.254 | 46.323 | 0.00 | 0.00 |
| ATOM | 1823 | N    | GLY | X | 117 | 48.421 | 41.260 | 47.114 | 0.00 | 0.00 |
| ATOM | 1824 | H    | GLY | X | 117 | 47.753 | 40.550 | 46.850 | 0.00 | 0.00 |
| ATOM | 1825 | CA   | GLY | X | 117 | 49.050 | 41.038 | 48.444 | 0.00 | 0.00 |
| ATOM | 1826 | HA2  | GLY | X | 117 | 49.863 | 40.316 | 48.407 | 0.00 | 0.00 |
| ATOM | 1827 | HA3  | GLY | X | 117 | 49.577 | 41.978 | 48.838 | 0.00 | 0.00 |
| ATOM | 1828 | C    | GLY | X | 117 | 48.086 | 40.487 | 49.509 | 0.00 | 0.00 |
| ATOM | 1829 | O    | GLY | X | 117 | 48.106 | 41.056 | 50.636 | 0.00 | 0.00 |
| ATOM | 1830 | N    | GLY | X | 118 | 47.179 | 39.534 | 49.097 | 0.00 | 0.00 |
| ATOM | 1831 | H    | GLY | X | 118 | 47.288 | 39.280 | 48.125 | 0.00 | 0.00 |
| ATOM | 1832 | CA   | GLY | X | 118 | 46.203 | 38.854 | 49.875 | 0.00 | 0.00 |
| ATOM | 1833 | HA2  | GLY | X | 118 | 45.556 | 38.251 | 49.247 | 0.00 | 0.00 |
| ATOM | 1834 | HA3  | GLY | X | 118 | 46.771 | 38.204 | 50.559 | 0.00 | 0.00 |
| ATOM | 1835 | C    | GLY | X | 118 | 45.238 | 39.739 | 50.692 | 0.00 | 0.00 |
| ATOM | 1836 | O    | GLY | X | 118 | 44.736 | 39.279 | 51.745 | 0.00 | 0.00 |
| ATOM | 1837 | N    | PHE | X | 119 | 45.122 | 40.994 | 50.281 | 0.00 | 0.00 |
| ATOM | 1838 | H    | PHE | X | 119 | 45.735 | 41.215 | 49.509 | 0.00 | 0.00 |
| ATOM | 1839 | CA   | PHE | X | 119 | 44.505 | 42.132 | 51.026 | 0.00 | 0.00 |
| ATOM | 1840 | HA   | PHE | X | 119 | 44.655 | 43.047 | 50.454 | 0.00 | 0.00 |
| ATOM | 1841 | CB   | PHE | X | 119 | 42.953 | 41.926 | 51.187 | 0.00 | 0.00 |
| ATOM | 1842 | HB2  | PHE | X | 119 | 42.842 | 41.058 | 51.837 | 0.00 | 0.00 |
| ATOM | 1843 | HB3  | PHE | X | 119 | 42.500 | 42.834 | 51.584 | 0.00 | 0.00 |
| ATOM | 1844 | CG   | PHE | X | 119 | 42.150 | 41.623 | 49.847 | 0.00 | 0.00 |
| ATOM | 1845 | CD1  | PHE | X | 119 | 41.442 | 42.518 | 49.106 | 0.00 | 0.00 |
| ATOM | 1846 | HD1  | PHE | X | 119 | 41.586 | 43.570 | 49.302 | 0.00 | 0.00 |
| ATOM | 1847 | CE1  | PHE | X | 119 | 40.501 | 42.138 | 48.174 | 0.00 | 0.00 |
| ATOM | 1848 | HE1  | PHE | X | 119 | 39.826 | 42.873 | 47.761 | 0.00 | 0.00 |
| ATOM | 1849 | CZ   | PHE | X | 119 | 40.225 | 40.756 | 47.976 | 0.00 | 0.00 |
| ATOM | 1850 | HZ   | PHE | X | 119 | 39.367 | 40.475 | 47.384 | 0.00 | 0.00 |
| ATOM | 1851 | CE2  | PHE | X | 119 | 41.076 | 39.844 | 48.580 | 0.00 | 0.00 |
| ATOM | 1852 | HE2  | PHE | X | 119 | 40.814 | 38.819 | 48.361 | 0.00 | 0.00 |
| ATOM | 1853 | CD2  | PHE | X | 119 | 42.013 | 40.248 | 49.539 | 0.00 | 0.00 |
| ATOM | 1854 | HD2  | PHE | X | 119 | 42.629 | 39.497 | 50.013 | 0.00 | 0.00 |
| ATOM | 1855 | C    | PHE | X | 119 | 45.102 | 42.517 | 52.380 | 0.00 | 0.00 |
| ATOM | 1856 | O    | PHE | X | 119 | 44.665 | 43.493 | 52.968 | 0.00 | 0.00 |
| ATOM | 1857 | N    | TYR | X | 120 | 46.133 | 41.825 | 52.850 | 0.00 | 0.00 |
| ATOM | 1858 | H    | TYR | X | 120 | 46.203 | 40.905 | 52.439 | 0.00 | 0.00 |
| ATOM | 1859 | CA   | TYR | X | 120 | 46.771 | 42.256 | 54.179 | 0.00 | 0.00 |
| ATOM | 1860 | HA   | TYR | X | 120 | 46.017 | 42.679 | 54.842 | 0.00 | 0.00 |
| ATOM | 1861 | CB   | TYR | X | 120 | 47.193 | 41.006 | 55.042 | 0.00 | 0.00 |

|      |      |     |     |   |     |        |        |        |      |      |
|------|------|-----|-----|---|-----|--------|--------|--------|------|------|
| ATOM | 1862 | HB2 | TYR | X | 120 | 47.359 | 41.338 | 56.067 | 0.00 | 0.00 |
| ATOM | 1863 | HB3 | TYR | X | 120 | 46.309 | 40.393 | 55.214 | 0.00 | 0.00 |
| ATOM | 1864 | CG  | TYR | X | 120 | 48.372 | 40.080 | 54.665 | 0.00 | 0.00 |
| ATOM | 1865 | CD1 | TYR | X | 120 | 49.533 | 39.905 | 55.483 | 0.00 | 0.00 |
| ATOM | 1866 | HD1 | TYR | X | 120 | 49.698 | 40.513 | 56.361 | 0.00 | 0.00 |
| ATOM | 1867 | CE1 | TYR | X | 120 | 50.518 | 38.986 | 55.036 | 0.00 | 0.00 |
| ATOM | 1868 | HE1 | TYR | X | 120 | 51.467 | 38.876 | 55.540 | 0.00 | 0.00 |
| ATOM | 1869 | CZ  | TYR | X | 120 | 50.231 | 38.051 | 53.987 | 0.00 | 0.00 |
| ATOM | 1870 | OH  | TYR | X | 120 | 51.094 | 37.041 | 53.767 | 0.00 | 0.00 |
| ATOM | 1871 | HH  | TYR | X | 120 | 51.808 | 37.052 | 54.409 | 0.00 | 0.00 |
| ATOM | 1872 | CE2 | TYR | X | 120 | 49.038 | 38.231 | 53.232 | 0.00 | 0.00 |
| ATOM | 1873 | HE2 | TYR | X | 120 | 48.904 | 37.649 | 52.332 | 0.00 | 0.00 |
| ATOM | 1874 | CD2 | TYR | X | 120 | 48.099 | 39.221 | 53.635 | 0.00 | 0.00 |
| ATOM | 1875 | HD2 | TYR | X | 120 | 47.194 | 39.234 | 53.046 | 0.00 | 0.00 |
| ATOM | 1876 | C   | TYR | X | 120 | 47.930 | 43.222 | 53.997 | 0.00 | 0.00 |
| ATOM | 1877 | O   | TYR | X | 120 | 48.573 | 43.600 | 55.020 | 0.00 | 0.00 |
| ATOM | 1878 | N   | SER | X | 121 | 48.297 | 43.533 | 52.788 | 0.00 | 0.00 |
| ATOM | 1879 | H   | SER | X | 121 | 47.782 | 43.116 | 52.026 | 0.00 | 0.00 |
| ATOM | 1880 | CA  | SER | X | 121 | 49.627 | 44.053 | 52.378 | 0.00 | 0.00 |
| ATOM | 1881 | HA  | SER | X | 121 | 49.860 | 44.949 | 52.953 | 0.00 | 0.00 |
| ATOM | 1882 | CB  | SER | X | 121 | 50.719 | 43.054 | 52.607 | 0.00 | 0.00 |
| ATOM | 1883 | HB2 | SER | X | 121 | 51.713 | 43.443 | 52.384 | 0.00 | 0.00 |
| ATOM | 1884 | HB3 | SER | X | 121 | 50.624 | 42.903 | 53.682 | 0.00 | 0.00 |
| ATOM | 1885 | OG  | SER | X | 121 | 50.501 | 41.848 | 51.847 | 0.00 | 0.00 |
| ATOM | 1886 | HG  | SER | X | 121 | 49.582 | 41.572 | 51.891 | 0.00 | 0.00 |
| ATOM | 1887 | C   | SER | X | 121 | 49.565 | 44.433 | 50.845 | 0.00 | 0.00 |
| ATOM | 1888 | O   | SER | X | 121 | 48.556 | 44.265 | 50.120 | 0.00 | 0.00 |
| ATOM | 1889 | N   | GLY | X | 122 | 50.714 | 44.914 | 50.314 | 0.00 | 0.00 |
| ATOM | 1890 | H   | GLY | X | 122 | 51.538 | 45.080 | 50.873 | 0.00 | 0.00 |
| ATOM | 1891 | CA  | GLY | X | 122 | 50.823 | 45.567 | 49.017 | 0.00 | 0.00 |
| ATOM | 1892 | HA2 | GLY | X | 122 | 51.764 | 45.261 | 48.430 | 0.00 | 0.00 |
| ATOM | 1893 | HA3 | GLY | X | 122 | 50.039 | 45.307 | 48.314 | 0.00 | 0.00 |
| ATOM | 1894 | C   | GLY | X | 122 | 50.694 | 47.080 | 48.985 | 0.00 | 0.00 |
| ATOM | 1895 | O   | GLY | X | 122 | 50.269 | 47.782 | 49.931 | 0.00 | 0.00 |
| ATOM | 1896 | N   | ALA | X | 123 | 51.094 | 47.622 | 47.837 | 0.00 | 0.00 |
| ATOM | 1897 | H   | ALA | X | 123 | 51.483 | 47.053 | 47.098 | 0.00 | 0.00 |
| ATOM | 1898 | CA  | ALA | X | 123 | 51.128 | 49.014 | 47.521 | 0.00 | 0.00 |
| ATOM | 1899 | HA  | ALA | X | 123 | 50.252 | 49.492 | 47.960 | 0.00 | 0.00 |
| ATOM | 1900 | CB  | ALA | X | 123 | 52.283 | 49.586 | 48.277 | 0.00 | 0.00 |
| ATOM | 1901 | HB1 | ALA | X | 123 | 52.195 | 50.672 | 48.298 | 0.00 | 0.00 |
| ATOM | 1902 | HB2 | ALA | X | 123 | 52.236 | 49.263 | 49.317 | 0.00 | 0.00 |
| ATOM | 1903 | HB3 | ALA | X | 123 | 53.242 | 49.343 | 47.819 | 0.00 | 0.00 |
| ATOM | 1904 | C   | ALA | X | 123 | 51.134 | 49.309 | 45.986 | 0.00 | 0.00 |
| ATOM | 1905 | O   | ALA | X | 123 | 51.768 | 48.601 | 45.200 | 0.00 | 0.00 |
| ATOM | 1906 | N   | SER | X | 124 | 50.653 | 50.469 | 45.549 | 0.00 | 0.00 |
| ATOM | 1907 | H   | SER | X | 124 | 50.044 | 51.038 | 46.121 | 0.00 | 0.00 |
| ATOM | 1908 | CA  | SER | X | 124 | 50.703 | 50.807 | 44.076 | 0.00 | 0.00 |
| ATOM | 1909 | HA  | SER | X | 124 | 50.511 | 49.901 | 43.501 | 0.00 | 0.00 |
| ATOM | 1910 | CB  | SER | X | 124 | 49.608 | 51.862 | 43.685 | 0.00 | 0.00 |
| ATOM | 1911 | HB2 | SER | X | 124 | 49.223 | 52.385 | 44.561 | 0.00 | 0.00 |
| ATOM | 1912 | HB3 | SER | X | 124 | 49.934 | 52.529 | 42.887 | 0.00 | 0.00 |
| ATOM | 1913 | OG  | SER | X | 124 | 48.551 | 51.176 | 43.031 | 0.00 | 0.00 |
| ATOM | 1914 | HG  | SER | X | 124 | 47.775 | 51.269 | 43.588 | 0.00 | 0.00 |
| ATOM | 1915 | C   | SER | X | 124 | 52.039 | 51.458 | 43.658 | 0.00 | 0.00 |
| ATOM | 1916 | O   | SER | X | 124 | 52.326 | 51.551 | 42.451 | 0.00 | 0.00 |
| ATOM | 1917 | N   | SER | X | 125 | 52.765 | 51.925 | 44.670 | 0.00 | 0.00 |
| ATOM | 1918 | H   | SER | X | 125 | 52.438 | 51.672 | 45.591 | 0.00 | 0.00 |
| ATOM | 1919 | CA  | SER | X | 125 | 53.995 | 52.720 | 44.471 | 0.00 | 0.00 |
| ATOM | 1920 | HA  | SER | X | 125 | 53.956 | 53.510 | 43.722 | 0.00 | 0.00 |
| ATOM | 1921 | CB  | SER | X | 125 | 54.292 | 53.318 | 45.850 | 0.00 | 0.00 |
| ATOM | 1922 | HB2 | SER | X | 125 | 55.214 | 53.858 | 45.635 | 0.00 | 0.00 |
| ATOM | 1923 | HB3 | SER | X | 125 | 53.446 | 53.943 | 46.139 | 0.00 | 0.00 |
| ATOM | 1924 | OG  | SER | X | 125 | 54.548 | 52.387 | 46.873 | 0.00 | 0.00 |
| ATOM | 1925 | HG  | SER | X | 125 | 55.486 | 52.196 | 46.951 | 0.00 | 0.00 |
| ATOM | 1926 | C   | SER | X | 125 | 55.246 | 51.907 | 43.924 | 0.00 | 0.00 |
| ATOM | 1927 | O   | SER | X | 125 | 56.346 | 52.428 | 43.780 | 0.00 | 0.00 |
| ATOM | 1928 | N   | LEU | X | 126 | 54.975 | 50.580 | 43.591 | 0.00 | 0.00 |
| ATOM | 1929 | H   | LEU | X | 126 | 54.034 | 50.225 | 43.680 | 0.00 | 0.00 |
| ATOM | 1930 | CA  | LEU | X | 126 | 56.005 | 49.595 | 43.140 | 0.00 | 0.00 |
| ATOM | 1931 | HA  | LEU | X | 126 | 56.755 | 49.774 | 43.910 | 0.00 | 0.00 |

|      |      |      |     |   |     |        |        |        |      |      |
|------|------|------|-----|---|-----|--------|--------|--------|------|------|
| ATOM | 1932 | CB   | LEU | X | 126 | 55.521 | 48.187 | 43.108 | 0.00 | 0.00 |
| ATOM | 1933 | HB2  | LEU | X | 126 | 54.804 | 48.085 | 42.293 | 0.00 | 0.00 |
| ATOM | 1934 | HB3  | LEU | X | 126 | 56.343 | 47.541 | 42.799 | 0.00 | 0.00 |
| ATOM | 1935 | CG   | LEU | X | 126 | 55.049 | 47.526 | 44.432 | 0.00 | 0.00 |
| ATOM | 1936 | HG   | LEU | X | 126 | 54.091 | 47.945 | 44.739 | 0.00 | 0.00 |
| ATOM | 1937 | CD1  | LEU | X | 126 | 54.913 | 46.013 | 44.202 | 0.00 | 0.00 |
| ATOM | 1938 | HD11 | LEU | X | 126 | 54.454 | 45.477 | 45.033 | 0.00 | 0.00 |
| ATOM | 1939 | HD12 | LEU | X | 126 | 54.459 | 45.788 | 43.237 | 0.00 | 0.00 |
| ATOM | 1940 | HD13 | LEU | X | 126 | 55.948 | 45.698 | 44.063 | 0.00 | 0.00 |
| ATOM | 1941 | CD2  | LEU | X | 126 | 55.997 | 47.773 | 45.618 | 0.00 | 0.00 |
| ATOM | 1942 | HD21 | LEU | X | 126 | 56.952 | 47.316 | 45.357 | 0.00 | 0.00 |
| ATOM | 1943 | HD22 | LEU | X | 126 | 56.061 | 48.835 | 45.851 | 0.00 | 0.00 |
| ATOM | 1944 | HD23 | LEU | X | 126 | 55.703 | 47.232 | 46.518 | 0.00 | 0.00 |
| ATOM | 1945 | C    | LEU | X | 126 | 56.553 | 50.108 | 41.790 | 0.00 | 0.00 |
| ATOM | 1946 | O    | LEU | X | 126 | 55.752 | 50.617 | 41.022 | 0.00 | 0.00 |
| ATOM | 1947 | N    | ASP | X | 127 | 57.800 | 49.861 | 41.492 | 0.00 | 0.00 |
| ATOM | 1948 | H    | ASP | X | 127 | 58.352 | 49.283 | 42.109 | 0.00 | 0.00 |
| ATOM | 1949 | CA   | ASP | X | 127 | 58.347 | 50.203 | 40.167 | 0.00 | 0.00 |
| ATOM | 1950 | HA   | ASP | X | 127 | 57.983 | 51.212 | 39.974 | 0.00 | 0.00 |
| ATOM | 1951 | CB   | ASP | X | 127 | 59.870 | 50.143 | 40.299 | 0.00 | 0.00 |
| ATOM | 1952 | HB2  | ASP | X | 127 | 60.137 | 50.823 | 41.108 | 0.00 | 0.00 |
| ATOM | 1953 | HB3  | ASP | X | 127 | 60.187 | 49.160 | 40.646 | 0.00 | 0.00 |
| ATOM | 1954 | CG   | ASP | X | 127 | 60.569 | 50.702 | 39.111 | 0.00 | 0.00 |
| ATOM | 1955 | OD1  | ASP | X | 127 | 60.499 | 51.899 | 38.798 | 0.00 | 0.00 |
| ATOM | 1956 | OD2  | ASP | X | 127 | 61.203 | 49.806 | 38.473 | 0.00 | 0.00 |
| ATOM | 1957 | C    | ASP | X | 127 | 57.944 | 49.165 | 39.065 | 0.00 | 0.00 |
| ATOM | 1958 | O    | ASP | X | 127 | 58.071 | 49.435 | 37.834 | 0.00 | 0.00 |
| ATOM | 1959 | N    | VAL | X | 128 | 57.429 | 48.030 | 39.463 | 0.00 | 0.00 |
| ATOM | 1960 | H    | VAL | X | 128 | 57.455 | 47.835 | 40.454 | 0.00 | 0.00 |
| ATOM | 1961 | CA   | VAL | X | 128 | 56.870 | 47.038 | 38.555 | 0.00 | 0.00 |
| ATOM | 1962 | HA   | VAL | X | 128 | 57.546 | 47.038 | 37.700 | 0.00 | 0.00 |
| ATOM | 1963 | CB   | VAL | X | 128 | 56.924 | 45.685 | 39.232 | 0.00 | 0.00 |
| ATOM | 1964 | HB   | VAL | X | 128 | 57.929 | 45.537 | 39.627 | 0.00 | 0.00 |
| ATOM | 1965 | CG1  | VAL | X | 128 | 55.895 | 45.586 | 40.375 | 0.00 | 0.00 |
| ATOM | 1966 | HG11 | VAL | X | 128 | 55.557 | 46.552 | 40.750 | 0.00 | 0.00 |
| ATOM | 1967 | HG12 | VAL | X | 128 | 55.067 | 44.941 | 40.082 | 0.00 | 0.00 |
| ATOM | 1968 | HG13 | VAL | X | 128 | 56.375 | 45.123 | 41.237 | 0.00 | 0.00 |
| ATOM | 1969 | CG2  | VAL | X | 128 | 56.786 | 44.516 | 38.298 | 0.00 | 0.00 |
| ATOM | 1970 | HG21 | VAL | X | 128 | 57.031 | 43.599 | 38.834 | 0.00 | 0.00 |
| ATOM | 1971 | HG22 | VAL | X | 128 | 55.749 | 44.392 | 37.985 | 0.00 | 0.00 |
| ATOM | 1972 | HG23 | VAL | X | 128 | 57.502 | 44.647 | 37.487 | 0.00 | 0.00 |
| ATOM | 1973 | C    | VAL | X | 128 | 55.466 | 47.372 | 38.090 | 0.00 | 0.00 |
| ATOM | 1974 | O    | VAL | X | 128 | 54.950 | 46.750 | 37.142 | 0.00 | 0.00 |
| ATOM | 1975 | N    | TYR | X | 129 | 54.817 | 48.395 | 38.717 | 0.00 | 0.00 |
| ATOM | 1976 | H    | TYR | X | 129 | 55.301 | 48.860 | 39.472 | 0.00 | 0.00 |
| ATOM | 1977 | CA   | TYR | X | 129 | 53.515 | 48.944 | 38.307 | 0.00 | 0.00 |
| ATOM | 1978 | HA   | TYR | X | 129 | 53.116 | 48.303 | 37.521 | 0.00 | 0.00 |
| ATOM | 1979 | CB   | TYR | X | 129 | 52.629 | 48.927 | 39.584 | 0.00 | 0.00 |
| ATOM | 1980 | HB2  | TYR | X | 129 | 53.095 | 49.657 | 40.246 | 0.00 | 0.00 |
| ATOM | 1981 | HB3  | TYR | X | 129 | 51.622 | 49.265 | 39.342 | 0.00 | 0.00 |
| ATOM | 1982 | CG   | TYR | X | 129 | 52.404 | 47.706 | 40.526 | 0.00 | 0.00 |
| ATOM | 1983 | CD1  | TYR | X | 129 | 52.434 | 46.390 | 40.063 | 0.00 | 0.00 |
| ATOM | 1984 | HD1  | TYR | X | 129 | 52.654 | 46.216 | 39.020 | 0.00 | 0.00 |
| ATOM | 1985 | CE1  | TYR | X | 129 | 52.438 | 45.268 | 40.880 | 0.00 | 0.00 |
| ATOM | 1986 | HE1  | TYR | X | 129 | 52.456 | 44.273 | 40.461 | 0.00 | 0.00 |
| ATOM | 1987 | CZ   | TYR | X | 129 | 52.016 | 45.484 | 42.269 | 0.00 | 0.00 |
| ATOM | 1988 | OH   | TYR | X | 129 | 51.822 | 44.385 | 43.080 | 0.00 | 0.00 |
| ATOM | 1989 | HH   | TYR | X | 129 | 51.885 | 43.556 | 42.601 | 0.00 | 0.00 |
| ATOM | 1990 | CE2  | TYR | X | 129 | 51.832 | 46.804 | 42.670 | 0.00 | 0.00 |
| ATOM | 1991 | HE2  | TYR | X | 129 | 51.483 | 46.921 | 43.686 | 0.00 | 0.00 |
| ATOM | 1992 | CD2  | TYR | X | 129 | 52.243 | 47.898 | 41.898 | 0.00 | 0.00 |
| ATOM | 1993 | HD2  | TYR | X | 129 | 52.070 | 48.898 | 42.268 | 0.00 | 0.00 |
| ATOM | 1994 | C    | TYR | X | 129 | 53.523 | 50.350 | 37.674 | 0.00 | 0.00 |
| ATOM | 1995 | O    | TYR | X | 129 | 52.543 | 51.036 | 37.396 | 0.00 | 0.00 |
| ATOM | 1996 | N    | ASP | X | 130 | 54.741 | 50.764 | 37.252 | 0.00 | 0.00 |
| ATOM | 1997 | H    | ASP | X | 130 | 55.485 | 50.094 | 37.387 | 0.00 | 0.00 |
| ATOM | 1998 | CA   | ASP | X | 130 | 54.969 | 52.049 | 36.464 | 0.00 | 0.00 |
| ATOM | 1999 | HA   | ASP | X | 130 | 54.323 | 52.849 | 36.827 | 0.00 | 0.00 |
| ATOM | 2000 | CB   | ASP | X | 130 | 56.405 | 52.432 | 36.479 | 0.00 | 0.00 |
| ATOM | 2001 | HB2  | ASP | X | 130 | 56.741 | 52.372 | 37.514 | 0.00 | 0.00 |

|      |      |      |     |   |     |        |        |        |      |      |
|------|------|------|-----|---|-----|--------|--------|--------|------|------|
| ATOM | 2002 | HB3  | ASP | X | 130 | 56.924 | 51.736 | 35.820 | 0.00 | 0.00 |
| ATOM | 2003 | CG   | ASP | X | 130 | 56.510 | 53.922 | 35.924 | 0.00 | 0.00 |
| ATOM | 2004 | OD1  | ASP | X | 130 | 56.214 | 54.278 | 34.759 | 0.00 | 0.00 |
| ATOM | 2005 | OD2  | ASP | X | 130 | 56.838 | 54.737 | 36.773 | 0.00 | 0.00 |
| ATOM | 2006 | C    | ASP | X | 130 | 54.429 | 51.887 | 34.967 | 0.00 | 0.00 |
| ATOM | 2007 | O    | ASP | X | 130 | 54.913 | 51.032 | 34.203 | 0.00 | 0.00 |
| ATOM | 2008 | N    | GLY | X | 131 | 53.414 | 52.733 | 34.650 | 0.00 | 0.00 |
| ATOM | 2009 | H    | GLY | X | 131 | 53.050 | 53.456 | 35.255 | 0.00 | 0.00 |
| ATOM | 2010 | CA   | GLY | X | 131 | 52.686 | 52.728 | 33.355 | 0.00 | 0.00 |
| ATOM | 2011 | HA2  | GLY | X | 131 | 52.401 | 51.668 | 33.097 | 0.00 | 0.00 |
| ATOM | 2012 | HA3  | GLY | X | 131 | 51.875 | 53.299 | 33.486 | 0.00 | 0.00 |
| ATOM | 2013 | C    | GLY | X | 131 | 53.411 | 53.391 | 32.097 | 0.00 | 0.00 |
| ATOM | 2014 | O    | GLY | X | 131 | 52.723 | 53.468 | 31.089 | 0.00 | 0.00 |
| ATOM | 2015 | N    | ARG | X | 132 | 54.653 | 53.825 | 32.260 | 0.00 | 0.00 |
| ATOM | 2016 | H    | ARG | X | 132 | 55.047 | 53.871 | 33.189 | 0.00 | 0.00 |
| ATOM | 2017 | CA   | ARG | X | 132 | 55.311 | 54.631 | 31.174 | 0.00 | 0.00 |
| ATOM | 2018 | HA   | ARG | X | 132 | 54.697 | 55.522 | 31.043 | 0.00 | 0.00 |
| ATOM | 2019 | CB   | ARG | X | 132 | 56.716 | 55.042 | 31.664 | 0.00 | 0.00 |
| ATOM | 2020 | HB2  | ARG | X | 132 | 57.098 | 55.735 | 30.914 | 0.00 | 0.00 |
| ATOM | 2021 | HB3  | ARG | X | 132 | 56.515 | 55.687 | 32.520 | 0.00 | 0.00 |
| ATOM | 2022 | CG   | ARG | X | 132 | 57.838 | 54.060 | 31.925 | 0.00 | 0.00 |
| ATOM | 2023 | HG2  | ARG | X | 132 | 57.437 | 53.326 | 32.624 | 0.00 | 0.00 |
| ATOM | 2024 | HG3  | ARG | X | 132 | 57.981 | 53.508 | 30.996 | 0.00 | 0.00 |
| ATOM | 2025 | CD   | ARG | X | 132 | 59.044 | 54.843 | 32.551 | 0.00 | 0.00 |
| ATOM | 2026 | HD2  | ARG | X | 132 | 59.927 | 54.204 | 32.566 | 0.00 | 0.00 |
| ATOM | 2027 | HD3  | ARG | X | 132 | 59.268 | 55.657 | 31.862 | 0.00 | 0.00 |
| ATOM | 2028 | NE   | ARG | X | 132 | 58.777 | 55.253 | 33.927 | 0.00 | 0.00 |
| ATOM | 2029 | HE   | ARG | X | 132 | 57.827 | 55.130 | 34.245 | 0.00 | 0.00 |
| ATOM | 2030 | CZ   | ARG | X | 132 | 59.725 | 55.584 | 34.765 | 0.00 | 0.00 |
| ATOM | 2031 | NH1  | ARG | X | 132 | 60.953 | 55.754 | 34.459 | 0.00 | 0.00 |
| ATOM | 2032 | HH11 | ARG | X | 132 | 61.322 | 55.563 | 33.539 | 0.00 | 0.00 |
| ATOM | 2033 | HH12 | ARG | X | 132 | 61.610 | 56.065 | 35.160 | 0.00 | 0.00 |
| ATOM | 2034 | NH2  | ARG | X | 132 | 59.401 | 55.791 | 36.069 | 0.00 | 0.00 |
| ATOM | 2035 | HH21 | ARG | X | 132 | 58.428 | 55.624 | 36.283 | 0.00 | 0.00 |
| ATOM | 2036 | HH22 | ARG | X | 132 | 59.996 | 56.293 | 36.713 | 0.00 | 0.00 |
| ATOM | 2037 | C    | ARG | X | 132 | 55.370 | 53.827 | 29.900 | 0.00 | 0.00 |
| ATOM | 2038 | O    | ARG | X | 132 | 55.201 | 54.342 | 28.834 | 0.00 | 0.00 |
| ATOM | 2039 | N    | PHE | X | 133 | 55.563 | 52.525 | 29.950 | 0.00 | 0.00 |
| ATOM | 2040 | H    | PHE | X | 133 | 55.533 | 52.048 | 30.840 | 0.00 | 0.00 |
| ATOM | 2041 | CA   | PHE | X | 133 | 55.851 | 51.672 | 28.756 | 0.00 | 0.00 |
| ATOM | 2042 | HA   | PHE | X | 133 | 56.393 | 52.310 | 28.057 | 0.00 | 0.00 |
| ATOM | 2043 | CB   | PHE | X | 133 | 56.753 | 50.492 | 29.178 | 0.00 | 0.00 |
| ATOM | 2044 | HB2  | PHE | X | 133 | 56.200 | 49.777 | 29.787 | 0.00 | 0.00 |
| ATOM | 2045 | HB3  | PHE | X | 133 | 57.105 | 49.913 | 28.324 | 0.00 | 0.00 |
| ATOM | 2046 | CG   | PHE | X | 133 | 58.097 | 50.838 | 29.869 | 0.00 | 0.00 |
| ATOM | 2047 | CD1  | PHE | X | 133 | 58.365 | 50.458 | 31.249 | 0.00 | 0.00 |
| ATOM | 2048 | HD1  | PHE | X | 133 | 57.579 | 49.901 | 31.735 | 0.00 | 0.00 |
| ATOM | 2049 | CE1  | PHE | X | 133 | 59.506 | 50.887 | 31.909 | 0.00 | 0.00 |
| ATOM | 2050 | HE1  | PHE | X | 133 | 59.668 | 50.624 | 32.944 | 0.00 | 0.00 |
| ATOM | 2051 | CZ   | PHE | X | 133 | 60.467 | 51.631 | 31.181 | 0.00 | 0.00 |
| ATOM | 2052 | HZ   | PHE | X | 133 | 61.305 | 52.054 | 31.715 | 0.00 | 0.00 |
| ATOM | 2053 | CE2  | PHE | X | 133 | 60.204 | 52.096 | 29.859 | 0.00 | 0.00 |
| ATOM | 2054 | HE2  | PHE | X | 133 | 60.867 | 52.674 | 29.232 | 0.00 | 0.00 |
| ATOM | 2055 | CD2  | PHE | X | 133 | 59.071 | 51.592 | 29.158 | 0.00 | 0.00 |
| ATOM | 2056 | HD2  | PHE | X | 133 | 58.939 | 51.782 | 28.104 | 0.00 | 0.00 |
| ATOM | 2057 | C    | PHE | X | 133 | 54.653 | 51.294 | 27.937 | 0.00 | 0.00 |
| ATOM | 2058 | O    | PHE | X | 133 | 54.681 | 51.251 | 26.715 | 0.00 | 0.00 |
| ATOM | 2059 | N    | LEU | X | 134 | 53.541 | 51.001 | 28.648 | 0.00 | 0.00 |
| ATOM | 2060 | H    | LEU | X | 134 | 53.531 | 51.143 | 29.648 | 0.00 | 0.00 |
| ATOM | 2061 | CA   | LEU | X | 134 | 52.215 | 50.732 | 28.007 | 0.00 | 0.00 |
| ATOM | 2062 | HA   | LEU | X | 134 | 52.390 | 50.043 | 27.181 | 0.00 | 0.00 |
| ATOM | 2063 | CB   | LEU | X | 134 | 51.298 | 50.159 | 29.121 | 0.00 | 0.00 |
| ATOM | 2064 | HB2  | LEU | X | 134 | 51.835 | 49.350 | 29.616 | 0.00 | 0.00 |
| ATOM | 2065 | HB3  | LEU | X | 134 | 50.936 | 51.016 | 29.689 | 0.00 | 0.00 |
| ATOM | 2066 | CG   | LEU | X | 134 | 50.024 | 49.533 | 28.526 | 0.00 | 0.00 |
| ATOM | 2067 | HG   | LEU | X | 134 | 49.438 | 50.304 | 28.027 | 0.00 | 0.00 |
| ATOM | 2068 | CD1  | LEU | X | 134 | 50.370 | 48.482 | 27.377 | 0.00 | 0.00 |
| ATOM | 2069 | HD11 | LEU | X | 134 | 51.021 | 47.698 | 27.766 | 0.00 | 0.00 |
| ATOM | 2070 | HD12 | LEU | X | 134 | 49.393 | 48.089 | 27.095 | 0.00 | 0.00 |
| ATOM | 2071 | HD13 | LEU | X | 134 | 50.826 | 49.002 | 26.535 | 0.00 | 0.00 |

|      |      |      |     |   |     |        |        |        |      |      |
|------|------|------|-----|---|-----|--------|--------|--------|------|------|
| ATOM | 2072 | CD2  | LEU | X | 134 | 49.069 | 48.929 | 29.569 | 0.00 | 0.00 |
| ATOM | 2073 | HD21 | LEU | X | 134 | 48.214 | 48.393 | 29.157 | 0.00 | 0.00 |
| ATOM | 2074 | HD22 | LEU | X | 134 | 49.647 | 48.175 | 30.103 | 0.00 | 0.00 |
| ATOM | 2075 | HD23 | LEU | X | 134 | 48.862 | 49.620 | 30.387 | 0.00 | 0.00 |
| ATOM | 2076 | C    | LEU | X | 134 | 51.620 | 51.972 | 27.266 | 0.00 | 0.00 |
| ATOM | 2077 | O    | LEU | X | 134 | 51.251 | 51.785 | 26.120 | 0.00 | 0.00 |
| ATOM | 2078 | N    | VAL | X | 135 | 51.595 | 53.140 | 27.998 | 0.00 | 0.00 |
| ATOM | 2079 | H    | VAL | X | 135 | 51.877 | 53.077 | 28.965 | 0.00 | 0.00 |
| ATOM | 2080 | CA   | VAL | X | 135 | 51.124 | 54.408 | 27.414 | 0.00 | 0.00 |
| ATOM | 2081 | HA   | VAL | X | 135 | 50.078 | 54.360 | 27.110 | 0.00 | 0.00 |
| ATOM | 2082 | CB   | VAL | X | 135 | 51.240 | 55.532 | 28.505 | 0.00 | 0.00 |
| ATOM | 2083 | HB   | VAL | X | 135 | 52.178 | 55.504 | 29.060 | 0.00 | 0.00 |
| ATOM | 2084 | CG1  | VAL | X | 135 | 50.985 | 56.985 | 27.973 | 0.00 | 0.00 |
| ATOM | 2085 | HG11 | VAL | X | 135 | 50.196 | 56.911 | 27.225 | 0.00 | 0.00 |
| ATOM | 2086 | HG12 | VAL | X | 135 | 50.590 | 57.661 | 28.732 | 0.00 | 0.00 |
| ATOM | 2087 | HG13 | VAL | X | 135 | 51.940 | 57.318 | 27.566 | 0.00 | 0.00 |
| ATOM | 2088 | CG2  | VAL | X | 135 | 50.174 | 55.338 | 29.612 | 0.00 | 0.00 |
| ATOM | 2089 | HG21 | VAL | X | 135 | 50.248 | 55.993 | 30.480 | 0.00 | 0.00 |
| ATOM | 2090 | HG22 | VAL | X | 135 | 49.211 | 55.588 | 29.167 | 0.00 | 0.00 |
| ATOM | 2091 | HG23 | VAL | X | 135 | 50.211 | 54.274 | 29.847 | 0.00 | 0.00 |
| ATOM | 2092 | C    | VAL | X | 135 | 51.997 | 54.841 | 26.234 | 0.00 | 0.00 |
| ATOM | 2093 | O    | VAL | X | 135 | 51.483 | 55.417 | 25.292 | 0.00 | 0.00 |
| ATOM | 2094 | N    | GLN | X | 136 | 53.280 | 54.490 | 26.262 | 0.00 | 0.00 |
| ATOM | 2095 | H    | GLN | X | 136 | 53.621 | 54.085 | 27.122 | 0.00 | 0.00 |
| ATOM | 2096 | CA   | GLN | X | 136 | 54.193 | 54.812 | 25.128 | 0.00 | 0.00 |
| ATOM | 2097 | HA   | GLN | X | 136 | 53.996 | 55.781 | 24.669 | 0.00 | 0.00 |
| ATOM | 2098 | CB   | GLN | X | 136 | 55.620 | 54.748 | 25.618 | 0.00 | 0.00 |
| ATOM | 2099 | HB2  | GLN | X | 136 | 55.762 | 55.396 | 26.483 | 0.00 | 0.00 |
| ATOM | 2100 | HB3  | GLN | X | 136 | 55.827 | 53.692 | 25.795 | 0.00 | 0.00 |
| ATOM | 2101 | CG   | GLN | X | 136 | 56.716 | 55.259 | 24.626 | 0.00 | 0.00 |
| ATOM | 2102 | HG2  | GLN | X | 136 | 56.223 | 55.710 | 23.765 | 0.00 | 0.00 |
| ATOM | 2103 | HG3  | GLN | X | 136 | 57.402 | 55.999 | 25.038 | 0.00 | 0.00 |
| ATOM | 2104 | CD   | GLN | X | 136 | 57.541 | 54.101 | 24.113 | 0.00 | 0.00 |
| ATOM | 2105 | OE1  | GLN | X | 136 | 58.612 | 53.770 | 24.591 | 0.00 | 0.00 |
| ATOM | 2106 | NE2  | GLN | X | 136 | 57.031 | 53.246 | 23.195 | 0.00 | 0.00 |
| ATOM | 2107 | HE21 | GLN | X | 136 | 57.650 | 52.489 | 22.943 | 0.00 | 0.00 |
| ATOM | 2108 | HE22 | GLN | X | 136 | 56.069 | 53.321 | 22.899 | 0.00 | 0.00 |
| ATOM | 2109 | C    | GLN | X | 136 | 53.954 | 53.916 | 23.877 | 0.00 | 0.00 |
| ATOM | 2110 | O    | GLN | X | 136 | 53.732 | 54.439 | 22.735 | 0.00 | 0.00 |
| ATOM | 2111 | N    | ALA | X | 137 | 54.144 | 52.601 | 23.928 | 0.00 | 0.00 |
| ATOM | 2112 | H    | ALA | X | 137 | 54.360 | 52.125 | 24.792 | 0.00 | 0.00 |
| ATOM | 2113 | CA   | ALA | X | 137 | 53.898 | 51.699 | 22.777 | 0.00 | 0.00 |
| ATOM | 2114 | HA   | ALA | X | 137 | 54.582 | 51.988 | 21.979 | 0.00 | 0.00 |
| ATOM | 2115 | CB   | ALA | X | 137 | 54.168 | 50.218 | 23.136 | 0.00 | 0.00 |
| ATOM | 2116 | HB1  | ALA | X | 137 | 55.220 | 50.214 | 23.424 | 0.00 | 0.00 |
| ATOM | 2117 | HB2  | ALA | X | 137 | 53.560 | 49.798 | 23.937 | 0.00 | 0.00 |
| ATOM | 2118 | HB3  | ALA | X | 137 | 53.918 | 49.660 | 22.234 | 0.00 | 0.00 |
| ATOM | 2119 | C    | ALA | X | 137 | 52.471 | 51.701 | 22.198 | 0.00 | 0.00 |
| ATOM | 2120 | O    | ALA | X | 137 | 52.274 | 51.588 | 21.015 | 0.00 | 0.00 |
| ATOM | 2121 | N    | GLU | X | 138 | 51.410 | 51.790 | 23.079 | 0.00 | 0.00 |
| ATOM | 2122 | H    | GLU | X | 138 | 51.727 | 51.996 | 24.016 | 0.00 | 0.00 |
| ATOM | 2123 | CA   | GLU | X | 138 | 49.955 | 51.586 | 22.778 | 0.00 | 0.00 |
| ATOM | 2124 | HA   | GLU | X | 138 | 49.957 | 51.714 | 21.695 | 0.00 | 0.00 |
| ATOM | 2125 | CB   | GLU | X | 138 | 49.541 | 50.240 | 23.280 | 0.00 | 0.00 |
| ATOM | 2126 | HB2  | GLU | X | 138 | 49.452 | 50.207 | 24.366 | 0.00 | 0.00 |
| ATOM | 2127 | HB3  | GLU | X | 138 | 48.540 | 50.002 | 22.920 | 0.00 | 0.00 |
| ATOM | 2128 | CG   | GLU | X | 138 | 50.370 | 49.030 | 22.806 | 0.00 | 0.00 |
| ATOM | 2129 | HG2  | GLU | X | 138 | 51.402 | 48.989 | 23.156 | 0.00 | 0.00 |
| ATOM | 2130 | HG3  | GLU | X | 138 | 49.924 | 48.141 | 23.251 | 0.00 | 0.00 |
| ATOM | 2131 | CD   | GLU | X | 138 | 50.362 | 48.807 | 21.326 | 0.00 | 0.00 |
| ATOM | 2132 | OE1  | GLU | X | 138 | 49.451 | 49.091 | 20.558 | 0.00 | 0.00 |
| ATOM | 2133 | OE2  | GLU | X | 138 | 51.333 | 48.181 | 20.956 | 0.00 | 0.00 |
| ATOM | 2134 | C    | GLU | X | 138 | 48.942 | 52.673 | 23.258 | 0.00 | 0.00 |
| ATOM | 2135 | O    | GLU | X | 138 | 47.761 | 52.606 | 22.855 | 0.00 | 0.00 |
| ATOM | 2136 | N    | ARG | X | 139 | 49.288 | 53.770 | 23.899 | 0.00 | 0.00 |
| ATOM | 2137 | H    | ARG | X | 139 | 50.291 | 53.844 | 23.994 | 0.00 | 0.00 |
| ATOM | 2138 | CA   | ARG | X | 139 | 48.491 | 55.029 | 24.043 | 0.00 | 0.00 |
| ATOM | 2139 | HA   | ARG | X | 139 | 49.057 | 55.573 | 24.799 | 0.00 | 0.00 |
| ATOM | 2140 | CB   | ARG | X | 139 | 48.409 | 55.720 | 22.656 | 0.00 | 0.00 |
| ATOM | 2141 | HB2  | ARG | X | 139 | 49.457 | 55.884 | 22.403 | 0.00 | 0.00 |

|      |      |      |     |   |     |        |        |        |      |      |
|------|------|------|-----|---|-----|--------|--------|--------|------|------|
| ATOM | 2142 | HB3  | ARG | X | 139 | 47.898 | 54.960 | 22.067 | 0.00 | 0.00 |
| ATOM | 2143 | CG   | ARG | X | 139 | 47.582 | 56.959 | 22.614 | 0.00 | 0.00 |
| ATOM | 2144 | HG2  | ARG | X | 139 | 46.519 | 56.723 | 22.648 | 0.00 | 0.00 |
| ATOM | 2145 | HG3  | ARG | X | 139 | 47.897 | 57.613 | 23.428 | 0.00 | 0.00 |
| ATOM | 2146 | CD   | ARG | X | 139 | 47.903 | 57.738 | 21.279 | 0.00 | 0.00 |
| ATOM | 2147 | HD2  | ARG | X | 139 | 48.274 | 57.043 | 20.526 | 0.00 | 0.00 |
| ATOM | 2148 | HD3  | ARG | X | 139 | 46.957 | 58.138 | 20.915 | 0.00 | 0.00 |
| ATOM | 2149 | NE   | ARG | X | 139 | 49.040 | 58.671 | 21.487 | 0.00 | 0.00 |
| ATOM | 2150 | HE   | ARG | X | 139 | 49.951 | 58.240 | 21.420 | 0.00 | 0.00 |
| ATOM | 2151 | CZ   | ARG | X | 139 | 48.967 | 60.027 | 21.426 | 0.00 | 0.00 |
| ATOM | 2152 | NH1  | ARG | X | 139 | 47.809 | 60.678 | 21.453 | 0.00 | 0.00 |
| ATOM | 2153 | HH11 | ARG | X | 139 | 46.968 | 60.119 | 21.471 | 0.00 | 0.00 |
| ATOM | 2154 | HH12 | ARG | X | 139 | 47.851 | 61.687 | 21.472 | 0.00 | 0.00 |
| ATOM | 2155 | NH2  | ARG | X | 139 | 50.124 | 60.673 | 21.339 | 0.00 | 0.00 |
| ATOM | 2156 | HH21 | ARG | X | 139 | 50.892 | 60.050 | 21.136 | 0.00 | 0.00 |
| ATOM | 2157 | HH22 | ARG | X | 139 | 50.189 | 61.681 | 21.371 | 0.00 | 0.00 |
| ATOM | 2158 | C    | ARG | X | 139 | 47.189 | 54.869 | 24.818 | 0.00 | 0.00 |
| ATOM | 2159 | O    | ARG | X | 139 | 46.425 | 55.739 | 25.071 | 0.00 | 0.00 |
| ATOM | 2160 | N    | THR | X | 140 | 46.852 | 53.596 | 25.101 | 0.00 | 0.00 |
| ATOM | 2161 | H    | THR | X | 140 | 47.453 | 52.881 | 24.718 | 0.00 | 0.00 |
| ATOM | 2162 | CA   | THR | X | 140 | 45.862 | 53.236 | 26.153 | 0.00 | 0.00 |
| ATOM | 2163 | HA   | THR | X | 140 | 44.929 | 53.788 | 26.030 | 0.00 | 0.00 |
| ATOM | 2164 | CB   | THR | X | 140 | 45.648 | 51.710 | 26.130 | 0.00 | 0.00 |
| ATOM | 2165 | HB   | THR | X | 140 | 45.015 | 51.362 | 26.946 | 0.00 | 0.00 |
| ATOM | 2166 | CG2  | THR | X | 140 | 45.044 | 51.307 | 24.851 | 0.00 | 0.00 |
| ATOM | 2167 | HG21 | THR | X | 140 | 44.224 | 51.992 | 24.633 | 0.00 | 0.00 |
| ATOM | 2168 | HG22 | THR | X | 140 | 45.829 | 51.287 | 24.095 | 0.00 | 0.00 |
| ATOM | 2169 | HG23 | THR | X | 140 | 44.620 | 50.315 | 25.005 | 0.00 | 0.00 |
| ATOM | 2170 | OG1  | THR | X | 140 | 46.982 | 51.140 | 26.233 | 0.00 | 0.00 |
| ATOM | 2171 | HG1  | THR | X | 140 | 47.374 | 51.752 | 26.860 | 0.00 | 0.00 |
| ATOM | 2172 | C    | THR | X | 140 | 46.467 | 53.732 | 27.458 | 0.00 | 0.00 |
| ATOM | 2173 | O    | THR | X | 140 | 47.657 | 53.544 | 27.706 | 0.00 | 0.00 |
| ATOM | 2174 | N    | VAL | X | 141 | 45.661 | 54.422 | 28.313 | 0.00 | 0.00 |
| ATOM | 2175 | H    | VAL | X | 141 | 44.662 | 54.486 | 28.183 | 0.00 | 0.00 |
| ATOM | 2176 | CA   | VAL | X | 141 | 46.152 | 55.219 | 29.405 | 0.00 | 0.00 |
| ATOM | 2177 | HA   | VAL | X | 141 | 47.173 | 55.469 | 29.117 | 0.00 | 0.00 |
| ATOM | 2178 | CB   | VAL | X | 141 | 45.286 | 56.450 | 29.621 | 0.00 | 0.00 |
| ATOM | 2179 | HB   | VAL | X | 141 | 44.396 | 56.265 | 29.019 | 0.00 | 0.00 |
| ATOM | 2180 | CG1  | VAL | X | 141 | 44.827 | 56.850 | 31.035 | 0.00 | 0.00 |
| ATOM | 2181 | HG11 | VAL | X | 141 | 44.011 | 57.571 | 31.074 | 0.00 | 0.00 |
| ATOM | 2182 | HG12 | VAL | X | 141 | 44.603 | 55.935 | 31.583 | 0.00 | 0.00 |
| ATOM | 2183 | HG13 | VAL | X | 141 | 45.682 | 57.191 | 31.618 | 0.00 | 0.00 |
| ATOM | 2184 | CG2  | VAL | X | 141 | 46.031 | 57.658 | 29.022 | 0.00 | 0.00 |
| ATOM | 2185 | HG21 | VAL | X | 141 | 45.914 | 57.592 | 27.940 | 0.00 | 0.00 |
| ATOM | 2186 | HG22 | VAL | X | 141 | 45.598 | 58.609 | 29.331 | 0.00 | 0.00 |
| ATOM | 2187 | HG23 | VAL | X | 141 | 47.099 | 57.627 | 29.238 | 0.00 | 0.00 |
| ATOM | 2188 | C    | VAL | X | 141 | 46.273 | 54.382 | 30.661 | 0.00 | 0.00 |
| ATOM | 2189 | O    | VAL | X | 141 | 45.438 | 53.452 | 30.843 | 0.00 | 0.00 |
| ATOM | 2190 | N    | LEU | X | 142 | 47.283 | 54.582 | 31.529 | 0.00 | 0.00 |
| ATOM | 2191 | H    | LEU | X | 142 | 47.953 | 55.329 | 31.414 | 0.00 | 0.00 |
| ATOM | 2192 | CA   | LEU | X | 142 | 47.517 | 53.793 | 32.739 | 0.00 | 0.00 |
| ATOM | 2193 | HA   | LEU | X | 142 | 46.853 | 52.930 | 32.706 | 0.00 | 0.00 |
| ATOM | 2194 | CB   | LEU | X | 142 | 48.945 | 53.266 | 32.765 | 0.00 | 0.00 |
| ATOM | 2195 | HB2  | LEU | X | 142 | 49.138 | 52.865 | 31.770 | 0.00 | 0.00 |
| ATOM | 2196 | HB3  | LEU | X | 142 | 49.714 | 54.035 | 32.853 | 0.00 | 0.00 |
| ATOM | 2197 | CG   | LEU | X | 142 | 49.296 | 51.975 | 33.655 | 0.00 | 0.00 |
| ATOM | 2198 | HG   | LEU | X | 142 | 50.330 | 51.692 | 33.457 | 0.00 | 0.00 |
| ATOM | 2199 | CD1  | LEU | X | 142 | 49.297 | 52.324 | 35.130 | 0.00 | 0.00 |
| ATOM | 2200 | HD11 | LEU | X | 142 | 48.347 | 52.804 | 35.365 | 0.00 | 0.00 |
| ATOM | 2201 | HD12 | LEU | X | 142 | 49.433 | 51.359 | 35.618 | 0.00 | 0.00 |
| ATOM | 2202 | HD13 | LEU | X | 142 | 50.131 | 52.958 | 35.430 | 0.00 | 0.00 |
| ATOM | 2203 | CD2  | LEU | X | 142 | 48.337 | 50.795 | 33.431 | 0.00 | 0.00 |
| ATOM | 2204 | HD21 | LEU | X | 142 | 48.811 | 49.925 | 33.885 | 0.00 | 0.00 |
| ATOM | 2205 | HD22 | LEU | X | 142 | 47.427 | 51.061 | 33.969 | 0.00 | 0.00 |
| ATOM | 2206 | HD23 | LEU | X | 142 | 48.069 | 50.718 | 32.378 | 0.00 | 0.00 |
| ATOM | 2207 | C    | LEU | X | 142 | 47.239 | 54.724 | 33.950 | 0.00 | 0.00 |
| ATOM | 2208 | O    | LEU | X | 142 | 47.834 | 55.804 | 34.112 | 0.00 | 0.00 |
| ATOM | 2209 | N    | VAL | X | 143 | 46.326 | 54.343 | 34.792 | 0.00 | 0.00 |
| ATOM | 2210 | H    | VAL | X | 143 | 45.798 | 53.529 | 34.511 | 0.00 | 0.00 |
| ATOM | 2211 | CA   | VAL | X | 143 | 46.027 | 54.919 | 36.208 | 0.00 | 0.00 |

|      |      |      |     |   |     |        |        |        |      |      |
|------|------|------|-----|---|-----|--------|--------|--------|------|------|
| ATOM | 2212 | HA   | VAL | X | 143 | 46.725 | 55.745 | 36.344 | 0.00 | 0.00 |
| ATOM | 2213 | CB   | VAL | X | 143 | 44.516 | 55.415 | 36.317 | 0.00 | 0.00 |
| ATOM | 2214 | HB   | VAL | X | 143 | 43.867 | 54.564 | 36.112 | 0.00 | 0.00 |
| ATOM | 2215 | CG1  | VAL | X | 143 | 44.067 | 55.838 | 37.756 | 0.00 | 0.00 |
| ATOM | 2216 | HG11 | VAL | X | 143 | 44.405 | 56.845 | 38.001 | 0.00 | 0.00 |
| ATOM | 2217 | HG12 | VAL | X | 143 | 42.981 | 55.912 | 37.817 | 0.00 | 0.00 |
| ATOM | 2218 | HG13 | VAL | X | 143 | 44.334 | 55.042 | 38.451 | 0.00 | 0.00 |
| ATOM | 2219 | CG2  | VAL | X | 143 | 44.207 | 56.428 | 35.266 | 0.00 | 0.00 |
| ATOM | 2220 | HG21 | VAL | X | 143 | 44.406 | 56.011 | 34.279 | 0.00 | 0.00 |
| ATOM | 2221 | HG22 | VAL | X | 143 | 43.123 | 56.538 | 35.241 | 0.00 | 0.00 |
| ATOM | 2222 | HG23 | VAL | X | 143 | 44.727 | 57.354 | 35.516 | 0.00 | 0.00 |
| ATOM | 2223 | C    | VAL | X | 143 | 46.441 | 53.830 | 37.241 | 0.00 | 0.00 |
| ATOM | 2224 | O    | VAL | X | 143 | 46.540 | 52.663 | 36.888 | 0.00 | 0.00 |
| ATOM | 2225 | N    | SER | X | 144 | 46.693 | 54.137 | 38.503 | 0.00 | 0.00 |
| ATOM | 2226 | H    | SER | X | 144 | 46.612 | 55.133 | 38.650 | 0.00 | 0.00 |
| ATOM | 2227 | CA   | SER | X | 144 | 46.900 | 53.272 | 39.651 | 0.00 | 0.00 |
| ATOM | 2228 | HA   | SER | X | 144 | 46.278 | 52.388 | 39.515 | 0.00 | 0.00 |
| ATOM | 2229 | CB   | SER | X | 144 | 48.262 | 52.672 | 39.718 | 0.00 | 0.00 |
| ATOM | 2230 | HB2  | SER | X | 144 | 48.171 | 51.840 | 40.416 | 0.00 | 0.00 |
| ATOM | 2231 | HB3  | SER | X | 144 | 48.589 | 52.254 | 38.766 | 0.00 | 0.00 |
| ATOM | 2232 | OG   | SER | X | 144 | 49.301 | 53.530 | 40.147 | 0.00 | 0.00 |
| ATOM | 2233 | HG   | SER | X | 144 | 50.105 | 53.213 | 39.727 | 0.00 | 0.00 |
| ATOM | 2234 | C    | SER | X | 144 | 46.368 | 53.889 | 40.870 | 0.00 | 0.00 |
| ATOM | 2235 | O    | SER | X | 144 | 46.284 | 55.118 | 40.956 | 0.00 | 0.00 |
| ATOM | 2236 | N    | MET | X | 145 | 45.861 | 53.089 | 41.827 | 0.00 | 0.00 |
| ATOM | 2237 | H    | MET | X | 145 | 45.722 | 52.127 | 41.556 | 0.00 | 0.00 |
| ATOM | 2238 | CA   | MET | X | 145 | 45.337 | 53.589 | 43.106 | 0.00 | 0.00 |
| ATOM | 2239 | HA   | MET | X | 145 | 45.496 | 54.668 | 43.111 | 0.00 | 0.00 |
| ATOM | 2240 | CB   | MET | X | 145 | 43.805 | 53.460 | 43.176 | 0.00 | 0.00 |
| ATOM | 2241 | HB2  | MET | X | 145 | 43.414 | 53.736 | 44.155 | 0.00 | 0.00 |
| ATOM | 2242 | HB3  | MET | X | 145 | 43.397 | 54.193 | 42.480 | 0.00 | 0.00 |
| ATOM | 2243 | CG   | MET | X | 145 | 43.410 | 51.977 | 42.788 | 0.00 | 0.00 |
| ATOM | 2244 | HG2  | MET | X | 145 | 43.479 | 51.782 | 41.718 | 0.00 | 0.00 |
| ATOM | 2245 | HG3  | MET | X | 145 | 44.099 | 51.268 | 43.248 | 0.00 | 0.00 |
| ATOM | 2246 | SD   | MET | X | 145 | 41.733 | 51.444 | 43.320 | 0.00 | 0.00 |
| ATOM | 2247 | CE   | MET | X | 145 | 40.783 | 52.274 | 42.051 | 0.00 | 0.00 |
| ATOM | 2248 | HE1  | MET | X | 145 | 41.107 | 53.310 | 41.947 | 0.00 | 0.00 |
| ATOM | 2249 | HE2  | MET | X | 145 | 40.911 | 51.721 | 41.121 | 0.00 | 0.00 |
| ATOM | 2250 | HE3  | MET | X | 145 | 39.729 | 52.172 | 42.308 | 0.00 | 0.00 |
| ATOM | 2251 | C    | MET | X | 145 | 45.977 | 52.928 | 44.336 | 0.00 | 0.00 |
| ATOM | 2252 | O    | MET | X | 145 | 46.479 | 51.833 | 44.294 | 0.00 | 0.00 |
| ATOM | 2253 | N    | ASN | X | 146 | 45.726 | 53.567 | 45.533 | 0.00 | 0.00 |
| ATOM | 2254 | H    | ASN | X | 146 | 45.297 | 54.480 | 45.470 | 0.00 | 0.00 |
| ATOM | 2255 | CA   | ASN | X | 146 | 46.029 | 52.994 | 46.801 | 0.00 | 0.00 |
| ATOM | 2256 | HA   | ASN | X | 146 | 46.348 | 51.959 | 46.674 | 0.00 | 0.00 |
| ATOM | 2257 | CB   | ASN | X | 146 | 47.298 | 53.743 | 47.281 | 0.00 | 0.00 |
| ATOM | 2258 | HB2  | ASN | X | 146 | 47.835 | 54.108 | 46.405 | 0.00 | 0.00 |
| ATOM | 2259 | HB3  | ASN | X | 146 | 47.047 | 54.584 | 47.927 | 0.00 | 0.00 |
| ATOM | 2260 | CG   | ASN | X | 146 | 48.164 | 52.753 | 47.996 | 0.00 | 0.00 |
| ATOM | 2261 | OD1  | ASN | X | 146 | 48.962 | 52.027 | 47.345 | 0.00 | 0.00 |
| ATOM | 2262 | ND2  | ASN | X | 146 | 48.019 | 52.645 | 49.294 | 0.00 | 0.00 |
| ATOM | 2263 | HD21 | ASN | X | 146 | 48.565 | 51.924 | 49.744 | 0.00 | 0.00 |
| ATOM | 2264 | HD22 | ASN | X | 146 | 47.467 | 53.295 | 49.836 | 0.00 | 0.00 |
| ATOM | 2265 | C    | ASN | X | 146 | 44.742 | 53.061 | 47.689 | 0.00 | 0.00 |
| ATOM | 2266 | O    | ASN | X | 146 | 43.796 | 53.790 | 47.507 | 0.00 | 0.00 |
| ATOM | 2267 | N    | TYR | X | 147 | 44.725 | 52.187 | 48.745 | 0.00 | 0.00 |
| ATOM | 2268 | H    | TYR | X | 147 | 45.577 | 51.653 | 48.847 | 0.00 | 0.00 |
| ATOM | 2269 | CA   | TYR | X | 147 | 43.576 | 51.792 | 49.579 | 0.00 | 0.00 |
| ATOM | 2270 | HA   | TYR | X | 147 | 43.033 | 52.645 | 49.986 | 0.00 | 0.00 |
| ATOM | 2271 | CB   | TYR | X | 147 | 42.619 | 51.002 | 48.576 | 0.00 | 0.00 |
| ATOM | 2272 | HB2  | TYR | X | 147 | 41.997 | 50.391 | 49.230 | 0.00 | 0.00 |
| ATOM | 2273 | HB3  | TYR | X | 147 | 41.984 | 51.651 | 47.974 | 0.00 | 0.00 |
| ATOM | 2274 | CG   | TYR | X | 147 | 43.305 | 49.959 | 47.766 | 0.00 | 0.00 |
| ATOM | 2275 | CD1  | TYR | X | 147 | 43.604 | 50.163 | 46.413 | 0.00 | 0.00 |
| ATOM | 2276 | HD1  | TYR | X | 147 | 43.393 | 51.095 | 45.911 | 0.00 | 0.00 |
| ATOM | 2277 | CE1  | TYR | X | 147 | 44.315 | 49.182 | 45.735 | 0.00 | 0.00 |
| ATOM | 2278 | HE1  | TYR | X | 147 | 44.527 | 49.204 | 44.677 | 0.00 | 0.00 |
| ATOM | 2279 | CZ   | TYR | X | 147 | 44.484 | 47.867 | 46.381 | 0.00 | 0.00 |
| ATOM | 2280 | OH   | TYR | X | 147 | 44.781 | 46.856 | 45.558 | 0.00 | 0.00 |
| ATOM | 2281 | HH   | TYR | X | 147 | 44.834 | 46.058 | 46.089 | 0.00 | 0.00 |



|      |      |      |     |   |     |        |        |        |      |      |
|------|------|------|-----|---|-----|--------|--------|--------|------|------|
| ATOM | 2282 | CE2  | TYR | X | 147 | 44.178 | 47.711 | 47.742 | 0.00 | 0.00 |
| ATOM | 2283 | HE2  | TYR | X | 147 | 44.369 | 46.691 | 48.044 | 0.00 | 0.00 |
| ATOM | 2284 | CD2  | TYR | X | 147 | 43.577 | 48.681 | 48.444 | 0.00 | 0.00 |
| ATOM | 2285 | HD2  | TYR | X | 147 | 43.308 | 48.558 | 49.482 | 0.00 | 0.00 |
| ATOM | 2286 | C    | TYR | X | 147 | 44.016 | 51.006 | 50.782 | 0.00 | 0.00 |
| ATOM | 2287 | O    | TYR | X | 147 | 45.041 | 50.384 | 50.876 | 0.00 | 0.00 |
| ATOM | 2288 | N    | ARG | X | 148 | 43.204 | 50.998 | 51.875 | 0.00 | 0.00 |
| ATOM | 2289 | H    | ARG | X | 148 | 42.341 | 51.523 | 51.869 | 0.00 | 0.00 |
| ATOM | 2290 | CA   | ARG | X | 148 | 43.497 | 50.264 | 53.157 | 0.00 | 0.00 |
| ATOM | 2291 | HA   | ARG | X | 148 | 44.501 | 50.621 | 53.388 | 0.00 | 0.00 |
| ATOM | 2292 | CB   | ARG | X | 148 | 42.503 | 50.605 | 54.334 | 0.00 | 0.00 |
| ATOM | 2293 | HB2  | ARG | X | 148 | 41.476 | 50.384 | 54.046 | 0.00 | 0.00 |
| ATOM | 2294 | HB3  | ARG | X | 148 | 42.863 | 50.091 | 55.226 | 0.00 | 0.00 |
| ATOM | 2295 | CG   | ARG | X | 148 | 42.634 | 52.080 | 54.707 | 0.00 | 0.00 |
| ATOM | 2296 | HG2  | ARG | X | 148 | 43.562 | 52.252 | 55.251 | 0.00 | 0.00 |
| ATOM | 2297 | HG3  | ARG | X | 148 | 42.604 | 52.712 | 53.820 | 0.00 | 0.00 |
| ATOM | 2298 | CD   | ARG | X | 148 | 41.600 | 52.551 | 55.755 | 0.00 | 0.00 |
| ATOM | 2299 | HD2  | ARG | X | 148 | 41.557 | 51.688 | 56.419 | 0.00 | 0.00 |
| ATOM | 2300 | HD3  | ARG | X | 148 | 42.011 | 53.378 | 56.334 | 0.00 | 0.00 |
| ATOM | 2301 | NE   | ARG | X | 148 | 40.402 | 52.939 | 54.983 | 0.00 | 0.00 |
| ATOM | 2302 | HE   | ARG | X | 148 | 40.484 | 52.848 | 53.980 | 0.00 | 0.00 |
| ATOM | 2303 | CZ   | ARG | X | 148 | 39.286 | 53.435 | 55.510 | 0.00 | 0.00 |
| ATOM | 2304 | NH1  | ARG | X | 148 | 39.078 | 53.624 | 56.802 | 0.00 | 0.00 |
| ATOM | 2305 | HH11 | ARG | X | 148 | 39.914 | 53.749 | 57.354 | 0.00 | 0.00 |
| ATOM | 2306 | HH12 | ARG | X | 148 | 38.154 | 53.774 | 57.182 | 0.00 | 0.00 |
| ATOM | 2307 | NH2  | ARG | X | 148 | 38.266 | 53.737 | 54.745 | 0.00 | 0.00 |
| ATOM | 2308 | HH21 | ARG | X | 148 | 38.416 | 53.724 | 53.746 | 0.00 | 0.00 |
| ATOM | 2309 | HH22 | ARG | X | 148 | 37.331 | 53.845 | 55.111 | 0.00 | 0.00 |
| ATOM | 2310 | C    | ARG | X | 148 | 43.575 | 48.768 | 52.963 | 0.00 | 0.00 |
| ATOM | 2311 | O    | ARG | X | 148 | 42.737 | 48.093 | 52.387 | 0.00 | 0.00 |
| ATOM | 2312 | N    | VAL | X | 149 | 44.495 | 48.194 | 53.716 | 0.00 | 0.00 |
| ATOM | 2313 | H    | VAL | X | 149 | 45.144 | 48.750 | 54.254 | 0.00 | 0.00 |
| ATOM | 2314 | CA   | VAL | X | 149 | 44.867 | 46.762 | 53.638 | 0.00 | 0.00 |
| ATOM | 2315 | HA   | VAL | X | 149 | 44.083 | 46.256 | 53.073 | 0.00 | 0.00 |
| ATOM | 2316 | CB   | VAL | X | 149 | 46.145 | 46.486 | 52.832 | 0.00 | 0.00 |
| ATOM | 2317 | HB   | VAL | X | 149 | 46.541 | 45.532 | 53.180 | 0.00 | 0.00 |
| ATOM | 2318 | CG1  | VAL | X | 149 | 45.834 | 46.153 | 51.351 | 0.00 | 0.00 |
| ATOM | 2319 | HG11 | VAL | X | 149 | 45.342 | 46.953 | 50.799 | 0.00 | 0.00 |
| ATOM | 2320 | HG12 | VAL | X | 149 | 46.767 | 45.791 | 50.919 | 0.00 | 0.00 |
| ATOM | 2321 | HG13 | VAL | X | 149 | 45.343 | 45.180 | 51.301 | 0.00 | 0.00 |
| ATOM | 2322 | CG2  | VAL | X | 149 | 47.238 | 47.552 | 53.116 | 0.00 | 0.00 |
| ATOM | 2323 | HG21 | VAL | X | 149 | 46.961 | 48.542 | 52.754 | 0.00 | 0.00 |
| ATOM | 2324 | HG22 | VAL | X | 149 | 47.503 | 47.679 | 54.165 | 0.00 | 0.00 |
| ATOM | 2325 | HG23 | VAL | X | 149 | 48.176 | 47.350 | 52.599 | 0.00 | 0.00 |
| ATOM | 2326 | C    | VAL | X | 149 | 45.003 | 46.279 | 55.087 | 0.00 | 0.00 |
| ATOM | 2327 | O    | VAL | X | 149 | 45.279 | 47.115 | 55.955 | 0.00 | 0.00 |
| ATOM | 2328 | N    | GLY | X | 150 | 44.797 | 44.997 | 55.341 | 0.00 | 0.00 |
| ATOM | 2329 | H    | GLY | X | 150 | 44.636 | 44.442 | 54.512 | 0.00 | 0.00 |
| ATOM | 2330 | CA   | GLY | X | 150 | 44.722 | 44.407 | 56.683 | 0.00 | 0.00 |
| ATOM | 2331 | HA2  | GLY | X | 150 | 44.643 | 43.321 | 56.638 | 0.00 | 0.00 |
| ATOM | 2332 | HA3  | GLY | X | 150 | 45.620 | 44.672 | 57.209 | 0.00 | 0.00 |
| ATOM | 2333 | C    | GLY | X | 150 | 43.571 | 44.833 | 57.520 | 0.00 | 0.00 |
| ATOM | 2334 | O    | GLY | X | 150 | 42.550 | 45.283 | 57.053 | 0.00 | 0.00 |
| ATOM | 2335 | N    | ALA | X | 151 | 43.724 | 44.627 | 58.832 | 0.00 | 0.00 |
| ATOM | 2336 | H    | ALA | X | 151 | 44.576 | 44.175 | 59.132 | 0.00 | 0.00 |
| ATOM | 2337 | CA   | ALA | X | 151 | 42.765 | 45.033 | 59.881 | 0.00 | 0.00 |
| ATOM | 2338 | HA   | ALA | X | 151 | 41.969 | 44.293 | 59.963 | 0.00 | 0.00 |
| ATOM | 2339 | CB   | ALA | X | 151 | 43.383 | 45.083 | 61.308 | 0.00 | 0.00 |
| ATOM | 2340 | HB1  | ALA | X | 151 | 42.625 | 45.314 | 62.056 | 0.00 | 0.00 |
| ATOM | 2341 | HB2  | ALA | X | 151 | 43.857 | 44.126 | 61.529 | 0.00 | 0.00 |
| ATOM | 2342 | HB3  | ALA | X | 151 | 44.089 | 45.909 | 61.394 | 0.00 | 0.00 |
| ATOM | 2343 | C    | ALA | X | 151 | 42.160 | 46.421 | 59.696 | 0.00 | 0.00 |
| ATOM | 2344 | O    | ALA | X | 151 | 40.958 | 46.554 | 59.792 | 0.00 | 0.00 |
| ATOM | 2345 | N    | PHE | X | 152 | 42.972 | 47.461 | 59.474 | 0.00 | 0.00 |
| ATOM | 2346 | H    | PHE | X | 152 | 43.927 | 47.135 | 59.474 | 0.00 | 0.00 |
| ATOM | 2347 | CA   | PHE | X | 152 | 42.605 | 48.895 | 59.253 | 0.00 | 0.00 |
| ATOM | 2348 | HA   | PHE | X | 152 | 42.393 | 49.251 | 60.262 | 0.00 | 0.00 |
| ATOM | 2349 | CB   | PHE | X | 152 | 43.874 | 49.548 | 58.718 | 0.00 | 0.00 |
| ATOM | 2350 | HB2  | PHE | X | 152 | 44.193 | 48.979 | 57.845 | 0.00 | 0.00 |
| ATOM | 2351 | HB3  | PHE | X | 152 | 43.739 | 50.595 | 58.445 | 0.00 | 0.00 |

|      |      |      |     |   |     |        |        |        |      |      |
|------|------|------|-----|---|-----|--------|--------|--------|------|------|
| ATOM | 2352 | CG   | PHE | X | 152 | 45.039 | 49.599 | 59.667 | 0.00 | 0.00 |
| ATOM | 2353 | CD1  | PHE | X | 152 | 45.966 | 48.520 | 59.789 | 0.00 | 0.00 |
| ATOM | 2354 | HD1  | PHE | X | 152 | 45.764 | 47.674 | 59.149 | 0.00 | 0.00 |
| ATOM | 2355 | CE1  | PHE | X | 152 | 46.915 | 48.534 | 60.828 | 0.00 | 0.00 |
| ATOM | 2356 | HE1  | PHE | X | 152 | 47.505 | 47.645 | 60.993 | 0.00 | 0.00 |
| ATOM | 2357 | CZ   | PHE | X | 152 | 47.099 | 49.675 | 61.546 | 0.00 | 0.00 |
| ATOM | 2358 | HZ   | PHE | X | 152 | 47.910 | 49.791 | 62.249 | 0.00 | 0.00 |
| ATOM | 2359 | CE2  | PHE | X | 152 | 46.243 | 50.849 | 61.321 | 0.00 | 0.00 |
| ATOM | 2360 | HE2  | PHE | X | 152 | 46.479 | 51.743 | 61.879 | 0.00 | 0.00 |
| ATOM | 2361 | CD2  | PHE | X | 152 | 45.195 | 50.789 | 60.430 | 0.00 | 0.00 |
| ATOM | 2362 | HD2  | PHE | X | 152 | 44.445 | 51.563 | 60.355 | 0.00 | 0.00 |
| ATOM | 2363 | C    | PHE | X | 152 | 41.534 | 49.075 | 58.162 | 0.00 | 0.00 |
| ATOM | 2364 | O    | PHE | X | 152 | 40.796 | 50.067 | 58.343 | 0.00 | 0.00 |
| ATOM | 2365 | N    | GLY | X | 153 | 41.397 | 48.223 | 57.135 | 0.00 | 0.00 |
| ATOM | 2366 | H    | GLY | X | 153 | 41.863 | 47.329 | 57.197 | 0.00 | 0.00 |
| ATOM | 2367 | CA   | GLY | X | 153 | 40.495 | 48.257 | 56.036 | 0.00 | 0.00 |
| ATOM | 2368 | HA2  | GLY | X | 153 | 39.946 | 49.240 | 55.916 | 0.00 | 0.00 |
| ATOM | 2369 | HA3  | GLY | X | 153 | 41.085 | 48.174 | 55.071 | 0.00 | 0.00 |
| ATOM | 2370 | C    | GLY | X | 153 | 39.407 | 47.147 | 55.968 | 0.00 | 0.00 |
| ATOM | 2371 | O    | GLY | X | 153 | 38.561 | 47.181 | 55.080 | 0.00 | 0.00 |
| ATOM | 2372 | N    | PHE | X | 154 | 39.424 | 46.157 | 56.841 | 0.00 | 0.00 |
| ATOM | 2373 | H    | PHE | X | 154 | 40.110 | 46.123 | 57.582 | 0.00 | 0.00 |
| ATOM | 2374 | CA   | PHE | X | 154 | 38.584 | 44.922 | 56.591 | 0.00 | 0.00 |
| ATOM | 2375 | HA   | PHE | X | 154 | 37.736 | 45.064 | 55.921 | 0.00 | 0.00 |
| ATOM | 2376 | CB   | PHE | X | 154 | 39.504 | 43.914 | 55.871 | 0.00 | 0.00 |
| ATOM | 2377 | HB2  | PHE | X | 154 | 40.435 | 43.945 | 56.436 | 0.00 | 0.00 |
| ATOM | 2378 | HB3  | PHE | X | 154 | 38.982 | 42.957 | 55.852 | 0.00 | 0.00 |
| ATOM | 2379 | CG   | PHE | X | 154 | 39.820 | 44.351 | 54.426 | 0.00 | 0.00 |
| ATOM | 2380 | CD1  | PHE | X | 154 | 41.110 | 44.624 | 53.993 | 0.00 | 0.00 |
| ATOM | 2381 | HD1  | PHE | X | 154 | 41.927 | 44.402 | 54.664 | 0.00 | 0.00 |
| ATOM | 2382 | CE1  | PHE | X | 154 | 41.427 | 45.130 | 52.731 | 0.00 | 0.00 |
| ATOM | 2383 | HE1  | PHE | X | 154 | 42.438 | 45.226 | 52.365 | 0.00 | 0.00 |
| ATOM | 2384 | CZ   | PHE | X | 154 | 40.389 | 45.246 | 51.820 | 0.00 | 0.00 |
| ATOM | 2385 | HZ   | PHE | X | 154 | 40.551 | 45.513 | 50.786 | 0.00 | 0.00 |
| ATOM | 2386 | CE2  | PHE | X | 154 | 39.118 | 44.855 | 52.106 | 0.00 | 0.00 |
| ATOM | 2387 | HE2  | PHE | X | 154 | 38.358 | 45.006 | 51.354 | 0.00 | 0.00 |
| ATOM | 2388 | CD2  | PHE | X | 154 | 38.832 | 44.397 | 53.392 | 0.00 | 0.00 |
| ATOM | 2389 | HD2  | PHE | X | 154 | 37.842 | 44.315 | 53.816 | 0.00 | 0.00 |
| ATOM | 2390 | C    | PHE | X | 154 | 37.929 | 44.387 | 57.868 | 0.00 | 0.00 |
| ATOM | 2391 | O    | PHE | X | 154 | 37.287 | 43.274 | 57.835 | 0.00 | 0.00 |
| ATOM | 2392 | N    | LEU | X | 155 | 38.052 | 44.933 | 59.057 | 0.00 | 0.00 |
| ATOM | 2393 | H    | LEU | X | 155 | 38.504 | 45.835 | 59.084 | 0.00 | 0.00 |
| ATOM | 2394 | CA   | LEU | X | 155 | 37.517 | 44.433 | 60.303 | 0.00 | 0.00 |
| ATOM | 2395 | HA   | LEU | X | 155 | 37.522 | 43.344 | 60.264 | 0.00 | 0.00 |
| ATOM | 2396 | CB   | LEU | X | 155 | 38.454 | 44.883 | 61.460 | 0.00 | 0.00 |
| ATOM | 2397 | HB2  | LEU | X | 155 | 39.449 | 44.495 | 61.242 | 0.00 | 0.00 |
| ATOM | 2398 | HB3  | LEU | X | 155 | 38.528 | 45.970 | 61.504 | 0.00 | 0.00 |
| ATOM | 2399 | CG   | LEU | X | 155 | 38.199 | 44.469 | 62.898 | 0.00 | 0.00 |
| ATOM | 2400 | HG   | LEU | X | 155 | 38.130 | 43.381 | 62.900 | 0.00 | 0.00 |
| ATOM | 2401 | CD1  | LEU | X | 155 | 39.407 | 44.880 | 63.773 | 0.00 | 0.00 |
| ATOM | 2402 | HD11 | LEU | X | 155 | 40.240 | 44.299 | 63.378 | 0.00 | 0.00 |
| ATOM | 2403 | HD12 | LEU | X | 155 | 39.588 | 45.941 | 63.601 | 0.00 | 0.00 |
| ATOM | 2404 | HD13 | LEU | X | 155 | 39.192 | 44.781 | 64.837 | 0.00 | 0.00 |
| ATOM | 2405 | CD2  | LEU | X | 155 | 36.979 | 45.096 | 63.538 | 0.00 | 0.00 |
| ATOM | 2406 | HD21 | LEU | X | 155 | 36.054 | 44.680 | 63.140 | 0.00 | 0.00 |
| ATOM | 2407 | HD22 | LEU | X | 155 | 36.959 | 44.844 | 64.599 | 0.00 | 0.00 |
| ATOM | 2408 | HD23 | LEU | X | 155 | 37.003 | 46.182 | 63.440 | 0.00 | 0.00 |
| ATOM | 2409 | C    | LEU | X | 155 | 36.059 | 44.855 | 60.451 | 0.00 | 0.00 |
| ATOM | 2410 | O    | LEU | X | 155 | 35.695 | 45.976 | 60.331 | 0.00 | 0.00 |
| ATOM | 2411 | N    | ALA | X | 156 | 35.313 | 43.827 | 60.862 | 0.00 | 0.00 |
| ATOM | 2412 | H    | ALA | X | 156 | 35.701 | 42.895 | 60.825 | 0.00 | 0.00 |
| ATOM | 2413 | CA   | ALA | X | 156 | 33.911 | 43.925 | 61.191 | 0.00 | 0.00 |
| ATOM | 2414 | HA   | ALA | X | 156 | 33.642 | 44.956 | 61.419 | 0.00 | 0.00 |
| ATOM | 2415 | CB   | ALA | X | 156 | 33.024 | 43.473 | 60.032 | 0.00 | 0.00 |
| ATOM | 2416 | HB1  | ALA | X | 156 | 32.028 | 43.256 | 60.418 | 0.00 | 0.00 |
| ATOM | 2417 | HB2  | ALA | X | 156 | 32.994 | 44.234 | 59.252 | 0.00 | 0.00 |
| ATOM | 2418 | HB3  | ALA | X | 156 | 33.435 | 42.499 | 59.766 | 0.00 | 0.00 |
| ATOM | 2419 | C    | ALA | X | 156 | 33.570 | 43.111 | 62.425 | 0.00 | 0.00 |
| ATOM | 2420 | O    | ALA | X | 156 | 34.052 | 42.024 | 62.644 | 0.00 | 0.00 |
| ATOM | 2421 | N    | LEU | X | 157 | 32.544 | 43.580 | 63.129 | 0.00 | 0.00 |

|      |      |      |     |   |     |        |        |        |      |      |
|------|------|------|-----|---|-----|--------|--------|--------|------|------|
| ATOM | 2422 | H    | LEU | X | 157 | 32.283 | 44.554 | 63.058 | 0.00 | 0.00 |
| ATOM | 2423 | CA   | LEU | X | 157 | 31.838 | 42.788 | 64.099 | 0.00 | 0.00 |
| ATOM | 2424 | HA   | LEU | X | 157 | 32.249 | 41.779 | 64.138 | 0.00 | 0.00 |
| ATOM | 2425 | CB   | LEU | X | 157 | 31.906 | 43.632 | 65.377 | 0.00 | 0.00 |
| ATOM | 2426 | HB2  | LEU | X | 157 | 31.655 | 44.669 | 65.153 | 0.00 | 0.00 |
| ATOM | 2427 | HB3  | LEU | X | 157 | 31.144 | 43.292 | 66.078 | 0.00 | 0.00 |
| ATOM | 2428 | CG   | LEU | X | 157 | 33.223 | 43.680 | 66.156 | 0.00 | 0.00 |
| ATOM | 2429 | HG   | LEU | X | 157 | 33.869 | 43.997 | 65.337 | 0.00 | 0.00 |
| ATOM | 2430 | CD1  | LEU | X | 157 | 33.133 | 44.617 | 67.321 | 0.00 | 0.00 |
| ATOM | 2431 | HD11 | LEU | X | 157 | 32.286 | 44.330 | 67.945 | 0.00 | 0.00 |
| ATOM | 2432 | HD12 | LEU | X | 157 | 34.077 | 44.509 | 67.856 | 0.00 | 0.00 |
| ATOM | 2433 | HD13 | LEU | X | 157 | 33.013 | 45.670 | 67.067 | 0.00 | 0.00 |
| ATOM | 2434 | CD2  | LEU | X | 157 | 33.766 | 42.364 | 66.770 | 0.00 | 0.00 |
| ATOM | 2435 | HD21 | LEU | X | 157 | 33.156 | 42.005 | 67.598 | 0.00 | 0.00 |
| ATOM | 2436 | HD22 | LEU | X | 157 | 33.819 | 41.642 | 65.956 | 0.00 | 0.00 |
| ATOM | 2437 | HD23 | LEU | X | 157 | 34.741 | 42.434 | 67.252 | 0.00 | 0.00 |
| ATOM | 2438 | C    | LEU | X | 157 | 30.369 | 42.701 | 63.636 | 0.00 | 0.00 |
| ATOM | 2439 | O    | LEU | X | 157 | 29.905 | 43.597 | 62.908 | 0.00 | 0.00 |
| ATOM | 2440 | N    | PRO | X | 158 | 29.652 | 41.672 | 64.076 | 0.00 | 0.00 |
| ATOM | 2441 | CD   | PRO | X | 158 | 30.158 | 40.778 | 65.181 | 0.00 | 0.00 |
| ATOM | 2442 | HD2  | PRO | X | 158 | 30.514 | 41.364 | 66.028 | 0.00 | 0.00 |
| ATOM | 2443 | HD3  | PRO | X | 158 | 31.041 | 40.265 | 64.801 | 0.00 | 0.00 |
| ATOM | 2444 | CG   | PRO | X | 158 | 28.972 | 39.869 | 65.439 | 0.00 | 0.00 |
| ATOM | 2445 | HG2  | PRO | X | 158 | 28.429 | 40.239 | 66.309 | 0.00 | 0.00 |
| ATOM | 2446 | HG3  | PRO | X | 158 | 29.396 | 38.871 | 65.555 | 0.00 | 0.00 |
| ATOM | 2447 | CB   | PRO | X | 158 | 27.970 | 40.005 | 64.290 | 0.00 | 0.00 |
| ATOM | 2448 | HB2  | PRO | X | 158 | 26.938 | 39.884 | 64.618 | 0.00 | 0.00 |
| ATOM | 2449 | HB3  | PRO | X | 158 | 28.222 | 39.191 | 63.611 | 0.00 | 0.00 |
| ATOM | 2450 | CA   | PRO | X | 158 | 28.265 | 41.369 | 63.663 | 0.00 | 0.00 |
| ATOM | 2451 | HA   | PRO | X | 158 | 28.178 | 41.201 | 62.589 | 0.00 | 0.00 |
| ATOM | 2452 | C    | PRO | X | 158 | 27.295 | 42.425 | 64.081 | 0.00 | 0.00 |
| ATOM | 2453 | O    | PRO | X | 158 | 27.281 | 42.692 | 65.261 | 0.00 | 0.00 |
| ATOM | 2454 | N    | GLY | X | 159 | 26.561 | 43.025 | 63.126 | 0.00 | 0.00 |
| ATOM | 2455 | H    | GLY | X | 159 | 26.698 | 42.753 | 62.163 | 0.00 | 0.00 |
| ATOM | 2456 | CA   | GLY | X | 159 | 25.549 | 44.104 | 63.420 | 0.00 | 0.00 |
| ATOM | 2457 | HA2  | GLY | X | 159 | 24.836 | 44.328 | 62.584 | 0.00 | 0.00 |
| ATOM | 2458 | HA3  | GLY | X | 159 | 25.007 | 43.881 | 64.325 | 0.00 | 0.00 |
| ATOM | 2459 | C    | GLY | X | 159 | 26.190 | 45.487 | 63.674 | 0.00 | 0.00 |
| ATOM | 2460 | O    | GLY | X | 159 | 25.521 | 46.429 | 63.939 | 0.00 | 0.00 |
| ATOM | 2461 | N    | SER | X | 160 | 27.475 | 45.540 | 63.552 | 0.00 | 0.00 |
| ATOM | 2462 | H    | SER | X | 160 | 27.967 | 44.701 | 63.277 | 0.00 | 0.00 |
| ATOM | 2463 | CA   | SER | X | 160 | 28.232 | 46.776 | 63.891 | 0.00 | 0.00 |
| ATOM | 2464 | HA   | SER | X | 160 | 27.896 | 47.226 | 64.826 | 0.00 | 0.00 |
| ATOM | 2465 | CB   | SER | X | 160 | 29.669 | 46.403 | 64.089 | 0.00 | 0.00 |
| ATOM | 2466 | HB2  | SER | X | 160 | 29.758 | 45.467 | 64.642 | 0.00 | 0.00 |
| ATOM | 2467 | HB3  | SER | X | 160 | 30.114 | 46.224 | 63.110 | 0.00 | 0.00 |
| ATOM | 2468 | OG   | SER | X | 160 | 30.370 | 47.353 | 64.838 | 0.00 | 0.00 |
| ATOM | 2469 | HG   | SER | X | 160 | 30.376 | 47.035 | 65.744 | 0.00 | 0.00 |
| ATOM | 2470 | C    | SER | X | 160 | 28.265 | 47.899 | 62.775 | 0.00 | 0.00 |
| ATOM | 2471 | O    | SER | X | 160 | 28.609 | 47.635 | 61.619 | 0.00 | 0.00 |
| ATOM | 2472 | N    | ARG | X | 161 | 28.142 | 49.132 | 63.179 | 0.00 | 0.00 |
| ATOM | 2473 | H    | ARG | X | 161 | 27.805 | 49.247 | 64.124 | 0.00 | 0.00 |
| ATOM | 2474 | CA   | ARG | X | 161 | 28.520 | 50.277 | 62.408 | 0.00 | 0.00 |
| ATOM | 2475 | HA   | ARG | X | 161 | 28.648 | 50.120 | 61.337 | 0.00 | 0.00 |
| ATOM | 2476 | CB   | ARG | X | 161 | 27.498 | 51.428 | 62.696 | 0.00 | 0.00 |
| ATOM | 2477 | HB2  | ARG | X | 161 | 27.685 | 51.851 | 63.683 | 0.00 | 0.00 |
| ATOM | 2478 | HB3  | ARG | X | 161 | 27.907 | 52.193 | 62.037 | 0.00 | 0.00 |
| ATOM | 2479 | CG   | ARG | X | 161 | 26.014 | 51.173 | 62.511 | 0.00 | 0.00 |
| ATOM | 2480 | HG2  | ARG | X | 161 | 25.783 | 50.697 | 61.559 | 0.00 | 0.00 |
| ATOM | 2481 | HG3  | ARG | X | 161 | 25.696 | 50.417 | 63.229 | 0.00 | 0.00 |
| ATOM | 2482 | CD   | ARG | X | 161 | 25.232 | 52.488 | 62.717 | 0.00 | 0.00 |
| ATOM | 2483 | HD2  | ARG | X | 161 | 25.420 | 53.152 | 61.873 | 0.00 | 0.00 |
| ATOM | 2484 | HD3  | ARG | X | 161 | 24.176 | 52.227 | 62.780 | 0.00 | 0.00 |
| ATOM | 2485 | NE   | ARG | X | 161 | 25.567 | 53.272 | 63.904 | 0.00 | 0.00 |
| ATOM | 2486 | HE   | ARG | X | 161 | 26.344 | 52.978 | 64.478 | 0.00 | 0.00 |
| ATOM | 2487 | CZ   | ARG | X | 161 | 24.924 | 54.389 | 64.342 | 0.00 | 0.00 |
| ATOM | 2488 | NH1  | ARG | X | 161 | 23.829 | 54.818 | 63.735 | 0.00 | 0.00 |
| ATOM | 2489 | HH11 | ARG | X | 161 | 23.613 | 54.397 | 62.842 | 0.00 | 0.00 |
| ATOM | 2490 | HH12 | ARG | X | 161 | 23.162 | 55.456 | 64.145 | 0.00 | 0.00 |
| ATOM | 2491 | NH2  | ARG | X | 161 | 25.406 | 55.110 | 65.356 | 0.00 | 0.00 |

|      |      |      |     |   |     |        |        |        |      |      |
|------|------|------|-----|---|-----|--------|--------|--------|------|------|
| ATOM | 2492 | HH21 | ARG | X | 161 | 26.168 | 54.675 | 65.856 | 0.00 | 0.00 |
| ATOM | 2493 | HH22 | ARG | X | 161 | 24.912 | 55.795 | 65.910 | 0.00 | 0.00 |
| ATOM | 2494 | C    | ARG | X | 161 | 29.926 | 50.778 | 62.956 | 0.00 | 0.00 |
| ATOM | 2495 | O    | ARG | X | 161 | 30.585 | 51.473 | 62.182 | 0.00 | 0.00 |
| ATOM | 2496 | N    | GLU | X | 162 | 30.292 | 50.474 | 64.251 | 0.00 | 0.00 |
| ATOM | 2497 | H    | GLU | X | 162 | 29.540 | 50.158 | 64.848 | 0.00 | 0.00 |
| ATOM | 2498 | CA   | GLU | X | 162 | 31.622 | 50.764 | 64.860 | 0.00 | 0.00 |
| ATOM | 2499 | HA   | GLU | X | 162 | 31.777 | 51.843 | 64.849 | 0.00 | 0.00 |
| ATOM | 2500 | CB   | GLU | X | 162 | 31.772 | 50.294 | 66.342 | 0.00 | 0.00 |
| ATOM | 2501 | HB2  | GLU | X | 162 | 31.772 | 49.208 | 66.437 | 0.00 | 0.00 |
| ATOM | 2502 | HB3  | GLU | X | 162 | 32.754 | 50.607 | 66.697 | 0.00 | 0.00 |
| ATOM | 2503 | CG   | GLU | X | 162 | 30.895 | 50.916 | 67.397 | 0.00 | 0.00 |
| ATOM | 2504 | HG2  | GLU | X | 162 | 31.438 | 51.094 | 68.326 | 0.00 | 0.00 |
| ATOM | 2505 | HG3  | GLU | X | 162 | 30.571 | 51.884 | 67.014 | 0.00 | 0.00 |
| ATOM | 2506 | CD   | GLU | X | 162 | 29.699 | 50.043 | 67.668 | 0.00 | 0.00 |
| ATOM | 2507 | OE1  | GLU | X | 162 | 28.847 | 49.825 | 66.768 | 0.00 | 0.00 |
| ATOM | 2508 | OE2  | GLU | X | 162 | 29.592 | 49.416 | 68.754 | 0.00 | 0.00 |
| ATOM | 2509 | C    | GLU | X | 162 | 32.737 | 50.168 | 64.050 | 0.00 | 0.00 |
| ATOM | 2510 | O    | GLU | X | 162 | 33.644 | 50.868 | 63.626 | 0.00 | 0.00 |
| ATOM | 2511 | N    | ALA | X | 163 | 32.647 | 48.868 | 63.675 | 0.00 | 0.00 |
| ATOM | 2512 | H    | ALA | X | 163 | 31.846 | 48.368 | 64.032 | 0.00 | 0.00 |
| ATOM | 2513 | CA   | ALA | X | 163 | 33.433 | 48.150 | 62.651 | 0.00 | 0.00 |
| ATOM | 2514 | HA   | ALA | X | 163 | 34.200 | 48.828 | 62.278 | 0.00 | 0.00 |
| ATOM | 2515 | CB   | ALA | X | 163 | 34.096 | 46.981 | 63.280 | 0.00 | 0.00 |
| ATOM | 2516 | HB1  | ALA | X | 163 | 33.320 | 46.275 | 63.574 | 0.00 | 0.00 |
| ATOM | 2517 | HB2  | ALA | X | 163 | 34.856 | 46.672 | 62.561 | 0.00 | 0.00 |
| ATOM | 2518 | HB3  | ALA | X | 163 | 34.588 | 47.295 | 64.200 | 0.00 | 0.00 |
| ATOM | 2519 | C    | ALA | X | 163 | 32.524 | 47.735 | 61.434 | 0.00 | 0.00 |
| ATOM | 2520 | O    | ALA | X | 163 | 31.962 | 46.653 | 61.420 | 0.00 | 0.00 |
| ATOM | 2521 | N    | PRO | X | 164 | 32.451 | 48.654 | 60.384 | 0.00 | 0.00 |
| ATOM | 2522 | CD   | PRO | X | 164 | 32.907 | 50.040 | 60.360 | 0.00 | 0.00 |
| ATOM | 2523 | HD2  | PRO | X | 164 | 33.989 | 50.000 | 60.482 | 0.00 | 0.00 |
| ATOM | 2524 | HD3  | PRO | X | 164 | 32.610 | 50.654 | 61.210 | 0.00 | 0.00 |
| ATOM | 2525 | CG   | PRO | X | 164 | 32.338 | 50.604 | 59.058 | 0.00 | 0.00 |
| ATOM | 2526 | HG2  | PRO | X | 164 | 33.131 | 50.417 | 58.334 | 0.00 | 0.00 |
| ATOM | 2527 | HG3  | PRO | X | 164 | 32.156 | 51.679 | 59.063 | 0.00 | 0.00 |
| ATOM | 2528 | CB   | PRO | X | 164 | 31.155 | 49.760 | 58.701 | 0.00 | 0.00 |
| ATOM | 2529 | HB2  | PRO | X | 164 | 31.007 | 49.830 | 57.623 | 0.00 | 0.00 |
| ATOM | 2530 | HB3  | PRO | X | 164 | 30.241 | 50.172 | 59.127 | 0.00 | 0.00 |
| ATOM | 2531 | CA   | PRO | X | 164 | 31.580 | 48.406 | 59.292 | 0.00 | 0.00 |
| ATOM | 2532 | HA   | PRO | X | 164 | 30.710 | 47.877 | 59.681 | 0.00 | 0.00 |
| ATOM | 2533 | C    | PRO | X | 164 | 31.997 | 47.421 | 58.193 | 0.00 | 0.00 |
| ATOM | 2534 | O    | PRO | X | 164 | 31.182 | 47.123 | 57.317 | 0.00 | 0.00 |
| ATOM | 2535 | N    | GLY | X | 165 | 33.291 | 47.017 | 58.129 | 0.00 | 0.00 |
| ATOM | 2536 | H    | GLY | X | 165 | 33.864 | 47.243 | 58.930 | 0.00 | 0.00 |
| ATOM | 2537 | CA   | GLY | X | 165 | 33.716 | 45.893 | 57.249 | 0.00 | 0.00 |
| ATOM | 2538 | HA2  | GLY | X | 165 | 34.323 | 45.160 | 57.830 | 0.00 | 0.00 |
| ATOM | 2539 | HA3  | GLY | X | 165 | 32.845 | 45.354 | 56.845 | 0.00 | 0.00 |
| ATOM | 2540 | C    | GLY | X | 165 | 34.653 | 46.329 | 56.134 | 0.00 | 0.00 |
| ATOM | 2541 | O    | GLY | X | 165 | 35.747 | 46.781 | 56.418 | 0.00 | 0.00 |
| ATOM | 2542 | N    | ASN | X | 166 | 34.226 | 46.151 | 54.881 | 0.00 | 0.00 |
| ATOM | 2543 | H    | ASN | X | 166 | 33.273 | 45.884 | 54.678 | 0.00 | 0.00 |
| ATOM | 2544 | CA   | ASN | X | 166 | 35.149 | 46.169 | 53.703 | 0.00 | 0.00 |
| ATOM | 2545 | HA   | ASN | X | 166 | 36.089 | 45.687 | 53.969 | 0.00 | 0.00 |
| ATOM | 2546 | CB   | ASN | X | 166 | 34.471 | 45.379 | 52.504 | 0.00 | 0.00 |
| ATOM | 2547 | HB2  | ASN | X | 166 | 33.560 | 45.848 | 52.132 | 0.00 | 0.00 |
| ATOM | 2548 | HB3  | ASN | X | 166 | 35.224 | 45.411 | 51.716 | 0.00 | 0.00 |
| ATOM | 2549 | CG   | ASN | X | 166 | 34.188 | 43.963 | 52.735 | 0.00 | 0.00 |
| ATOM | 2550 | OD1  | ASN | X | 166 | 34.852 | 43.355 | 53.556 | 0.00 | 0.00 |
| ATOM | 2551 | ND2  | ASN | X | 166 | 33.324 | 43.243 | 52.043 | 0.00 | 0.00 |
| ATOM | 2552 | HD21 | ASN | X | 166 | 33.084 | 42.275 | 52.205 | 0.00 | 0.00 |
| ATOM | 2553 | HD22 | ASN | X | 166 | 32.625 | 43.691 | 51.467 | 0.00 | 0.00 |
| ATOM | 2554 | C    | ASN | X | 166 | 35.652 | 47.628 | 53.334 | 0.00 | 0.00 |
| ATOM | 2555 | O    | ASN | X | 166 | 35.601 | 47.921 | 52.133 | 0.00 | 0.00 |
| ATOM | 2556 | N    | VAL | X | 167 | 35.993 | 48.564 | 54.226 | 0.00 | 0.00 |
| ATOM | 2557 | H    | VAL | X | 167 | 36.172 | 48.278 | 55.178 | 0.00 | 0.00 |
| ATOM | 2558 | CA   | VAL | X | 167 | 36.226 | 49.964 | 53.903 | 0.00 | 0.00 |
| ATOM | 2559 | HA   | VAL | X | 167 | 35.376 | 50.315 | 53.318 | 0.00 | 0.00 |
| ATOM | 2560 | CB   | VAL | X | 167 | 36.224 | 50.821 | 55.188 | 0.00 | 0.00 |
| ATOM | 2561 | HB   | VAL | X | 167 | 36.312 | 51.865 | 54.888 | 0.00 | 0.00 |

|      |      |      |     |   |     |        |        |        |      |      |
|------|------|------|-----|---|-----|--------|--------|--------|------|------|
| ATOM | 2562 | CG1  | VAL | X | 167 | 34.791 | 50.663 | 55.756 | 0.00 | 0.00 |
| ATOM | 2563 | HG11 | VAL | X | 167 | 34.902 | 51.108 | 56.745 | 0.00 | 0.00 |
| ATOM | 2564 | HG12 | VAL | X | 167 | 34.125 | 51.269 | 55.143 | 0.00 | 0.00 |
| ATOM | 2565 | HG13 | VAL | X | 167 | 34.632 | 49.603 | 55.952 | 0.00 | 0.00 |
| ATOM | 2566 | CG2  | VAL | X | 167 | 37.498 | 50.386 | 56.043 | 0.00 | 0.00 |
| ATOM | 2567 | HG21 | VAL | X | 167 | 37.592 | 50.905 | 56.996 | 0.00 | 0.00 |
| ATOM | 2568 | HG22 | VAL | X | 167 | 37.385 | 49.312 | 56.190 | 0.00 | 0.00 |
| ATOM | 2569 | HG23 | VAL | X | 167 | 38.434 | 50.573 | 55.517 | 0.00 | 0.00 |
| ATOM | 2570 | C    | VAL | X | 167 | 37.404 | 50.112 | 52.949 | 0.00 | 0.00 |
| ATOM | 2571 | O    | VAL | X | 167 | 37.594 | 51.053 | 52.229 | 0.00 | 0.00 |
| ATOM | 2572 | N    | GLY | X | 168 | 38.292 | 49.079 | 52.906 | 0.00 | 0.00 |
| ATOM | 2573 | H    | GLY | X | 168 | 38.247 | 48.309 | 53.558 | 0.00 | 0.00 |
| ATOM | 2574 | CA   | GLY | X | 168 | 39.331 | 48.957 | 51.804 | 0.00 | 0.00 |
| ATOM | 2575 | HA2  | GLY | X | 168 | 39.783 | 49.944 | 51.742 | 0.00 | 0.00 |
| ATOM | 2576 | HA3  | GLY | X | 168 | 40.068 | 48.161 | 52.157 | 0.00 | 0.00 |
| ATOM | 2577 | C    | GLY | X | 168 | 38.885 | 48.605 | 50.402 | 0.00 | 0.00 |
| ATOM | 2578 | O    | GLY | X | 168 | 39.514 | 48.948 | 49.397 | 0.00 | 0.00 |
| ATOM | 2579 | N    | LEU | X | 169 | 37.613 | 48.061 | 50.220 | 0.00 | 0.00 |
| ATOM | 2580 | H    | LEU | X | 169 | 37.008 | 47.850 | 51.000 | 0.00 | 0.00 |
| ATOM | 2581 | CA   | LEU | X | 169 | 37.039 | 48.111 | 48.902 | 0.00 | 0.00 |
| ATOM | 2582 | HA   | LEU | X | 169 | 37.781 | 48.014 | 48.109 | 0.00 | 0.00 |
| ATOM | 2583 | CB   | LEU | X | 169 | 35.983 | 46.923 | 48.820 | 0.00 | 0.00 |
| ATOM | 2584 | HB2  | LEU | X | 169 | 35.414 | 46.842 | 49.747 | 0.00 | 0.00 |
| ATOM | 2585 | HB3  | LEU | X | 169 | 35.318 | 47.149 | 47.987 | 0.00 | 0.00 |
| ATOM | 2586 | CG   | LEU | X | 169 | 36.623 | 45.513 | 48.509 | 0.00 | 0.00 |
| ATOM | 2587 | HG   | LEU | X | 169 | 37.503 | 45.298 | 49.115 | 0.00 | 0.00 |
| ATOM | 2588 | CD1  | LEU | X | 169 | 35.634 | 44.402 | 48.848 | 0.00 | 0.00 |
| ATOM | 2589 | HD11 | LEU | X | 169 | 35.348 | 44.525 | 49.892 | 0.00 | 0.00 |
| ATOM | 2590 | HD12 | LEU | X | 169 | 34.780 | 44.381 | 48.171 | 0.00 | 0.00 |
| ATOM | 2591 | HD13 | LEU | X | 169 | 36.069 | 43.406 | 48.769 | 0.00 | 0.00 |
| ATOM | 2592 | CD2  | LEU | X | 169 | 36.974 | 45.424 | 47.028 | 0.00 | 0.00 |
| ATOM | 2593 | HD21 | LEU | X | 169 | 37.506 | 44.492 | 46.838 | 0.00 | 0.00 |
| ATOM | 2594 | HD22 | LEU | X | 169 | 36.105 | 45.544 | 46.381 | 0.00 | 0.00 |
| ATOM | 2595 | HD23 | LEU | X | 169 | 37.642 | 46.231 | 46.725 | 0.00 | 0.00 |
| ATOM | 2596 | C    | LEU | X | 169 | 36.367 | 49.491 | 48.719 | 0.00 | 0.00 |
| ATOM | 2597 | O    | LEU | X | 169 | 36.304 | 50.028 | 47.614 | 0.00 | 0.00 |
| ATOM | 2598 | N    | LEU | X | 170 | 35.726 | 50.005 | 49.794 | 0.00 | 0.00 |
| ATOM | 2599 | H    | LEU | X | 170 | 35.750 | 49.491 | 50.663 | 0.00 | 0.00 |
| ATOM | 2600 | CA   | LEU | X | 170 | 35.182 | 51.368 | 49.721 | 0.00 | 0.00 |
| ATOM | 2601 | HA   | LEU | X | 170 | 34.407 | 51.414 | 48.956 | 0.00 | 0.00 |
| ATOM | 2602 | CB   | LEU | X | 170 | 34.439 | 51.683 | 50.968 | 0.00 | 0.00 |
| ATOM | 2603 | HB2  | LEU | X | 170 | 35.154 | 51.777 | 51.785 | 0.00 | 0.00 |
| ATOM | 2604 | HB3  | LEU | X | 170 | 34.080 | 52.679 | 50.707 | 0.00 | 0.00 |
| ATOM | 2605 | CG   | LEU | X | 170 | 33.297 | 50.704 | 51.372 | 0.00 | 0.00 |
| ATOM | 2606 | HG   | LEU | X | 170 | 33.689 | 49.892 | 51.984 | 0.00 | 0.00 |
| ATOM | 2607 | CD1  | LEU | X | 170 | 32.360 | 51.563 | 52.188 | 0.00 | 0.00 |
| ATOM | 2608 | HD11 | LEU | X | 170 | 32.057 | 52.502 | 51.724 | 0.00 | 0.00 |
| ATOM | 2609 | HD12 | LEU | X | 170 | 31.369 | 51.121 | 52.287 | 0.00 | 0.00 |
| ATOM | 2610 | HD13 | LEU | X | 170 | 32.715 | 51.598 | 53.218 | 0.00 | 0.00 |
| ATOM | 2611 | CD2  | LEU | X | 170 | 32.401 | 50.318 | 50.175 | 0.00 | 0.00 |
| ATOM | 2612 | HD21 | LEU | X | 170 | 32.873 | 49.587 | 49.518 | 0.00 | 0.00 |
| ATOM | 2613 | HD22 | LEU | X | 170 | 31.517 | 49.860 | 50.618 | 0.00 | 0.00 |
| ATOM | 2614 | HD23 | LEU | X | 170 | 32.244 | 51.162 | 49.504 | 0.00 | 0.00 |
| ATOM | 2615 | C    | LEU | X | 170 | 36.176 | 52.406 | 49.292 | 0.00 | 0.00 |
| ATOM | 2616 | O    | LEU | X | 170 | 35.823 | 53.254 | 48.464 | 0.00 | 0.00 |
| ATOM | 2617 | N    | ASP | X | 171 | 37.420 | 52.425 | 49.805 | 0.00 | 0.00 |
| ATOM | 2618 | H    | ASP | X | 171 | 37.635 | 51.791 | 50.562 | 0.00 | 0.00 |
| ATOM | 2619 | CA   | ASP | X | 171 | 38.461 | 53.211 | 49.205 | 0.00 | 0.00 |
| ATOM | 2620 | HA   | ASP | X | 171 | 38.251 | 54.247 | 49.472 | 0.00 | 0.00 |
| ATOM | 2621 | CB   | ASP | X | 171 | 39.750 | 52.898 | 50.018 | 0.00 | 0.00 |
| ATOM | 2622 | HB2  | ASP | X | 171 | 40.055 | 51.860 | 49.889 | 0.00 | 0.00 |
| ATOM | 2623 | HB3  | ASP | X | 171 | 40.601 | 53.425 | 49.587 | 0.00 | 0.00 |
| ATOM | 2624 | CG   | ASP | X | 171 | 39.842 | 53.180 | 51.550 | 0.00 | 0.00 |
| ATOM | 2625 | OD1  | ASP | X | 171 | 38.922 | 53.833 | 52.028 | 0.00 | 0.00 |
| ATOM | 2626 | OD2  | ASP | X | 171 | 40.820 | 52.790 | 52.257 | 0.00 | 0.00 |
| ATOM | 2627 | C    | ASP | X | 171 | 38.766 | 53.061 | 47.758 | 0.00 | 0.00 |
| ATOM | 2628 | O    | ASP | X | 171 | 38.989 | 54.028 | 47.026 | 0.00 | 0.00 |
| ATOM | 2629 | N    | GLN | X | 172 | 38.669 | 51.841 | 47.223 | 0.00 | 0.00 |
| ATOM | 2630 | H    | GLN | X | 172 | 38.296 | 51.123 | 47.828 | 0.00 | 0.00 |
| ATOM | 2631 | CA   | GLN | X | 172 | 38.891 | 51.544 | 45.814 | 0.00 | 0.00 |

|      |      |      |     |   |     |        |        |        |      |      |
|------|------|------|-----|---|-----|--------|--------|--------|------|------|
| ATOM | 2632 | HA   | GLN | X | 172 | 39.746 | 52.060 | 45.378 | 0.00 | 0.00 |
| ATOM | 2633 | CB   | GLN | X | 172 | 38.977 | 50.026 | 45.595 | 0.00 | 0.00 |
| ATOM | 2634 | HB2  | GLN | X | 172 | 38.160 | 49.599 | 46.178 | 0.00 | 0.00 |
| ATOM | 2635 | HB3  | GLN | X | 172 | 38.756 | 49.835 | 44.545 | 0.00 | 0.00 |
| ATOM | 2636 | CG   | GLN | X | 172 | 40.297 | 49.483 | 46.105 | 0.00 | 0.00 |
| ATOM | 2637 | HG2  | GLN | X | 172 | 41.105 | 49.913 | 45.513 | 0.00 | 0.00 |
| ATOM | 2638 | HG3  | GLN | X | 172 | 40.411 | 49.708 | 47.165 | 0.00 | 0.00 |
| ATOM | 2639 | CD   | GLN | X | 172 | 40.362 | 47.997 | 45.911 | 0.00 | 0.00 |
| ATOM | 2640 | OE1  | GLN | X | 172 | 39.900 | 47.450 | 44.927 | 0.00 | 0.00 |
| ATOM | 2641 | NE2  | GLN | X | 172 | 41.065 | 47.305 | 46.731 | 0.00 | 0.00 |
| ATOM | 2642 | HE21 | GLN | X | 172 | 41.052 | 46.321 | 46.503 | 0.00 | 0.00 |
| ATOM | 2643 | HE22 | GLN | X | 172 | 41.588 | 47.807 | 47.434 | 0.00 | 0.00 |
| ATOM | 2644 | C    | GLN | X | 172 | 37.734 | 52.152 | 44.947 | 0.00 | 0.00 |
| ATOM | 2645 | O    | GLN | X | 172 | 38.024 | 52.800 | 43.940 | 0.00 | 0.00 |
| ATOM | 2646 | N    | ARG | X | 173 | 36.504 | 51.912 | 45.353 | 0.00 | 0.00 |
| ATOM | 2647 | H    | ARG | X | 173 | 36.363 | 51.371 | 46.194 | 0.00 | 0.00 |
| ATOM | 2648 | CA   | ARG | X | 173 | 35.278 | 52.513 | 44.755 | 0.00 | 0.00 |
| ATOM | 2649 | HA   | ARG | X | 173 | 35.251 | 52.302 | 43.686 | 0.00 | 0.00 |
| ATOM | 2650 | CB   | ARG | X | 173 | 34.024 | 51.967 | 45.401 | 0.00 | 0.00 |
| ATOM | 2651 | HB2  | ARG | X | 173 | 34.090 | 50.894 | 45.580 | 0.00 | 0.00 |
| ATOM | 2652 | HB3  | ARG | X | 173 | 33.969 | 52.496 | 46.352 | 0.00 | 0.00 |
| ATOM | 2653 | CG   | ARG | X | 173 | 32.734 | 52.309 | 44.632 | 0.00 | 0.00 |
| ATOM | 2654 | HG2  | ARG | X | 173 | 32.783 | 53.344 | 44.294 | 0.00 | 0.00 |
| ATOM | 2655 | HG3  | ARG | X | 173 | 32.692 | 51.793 | 43.672 | 0.00 | 0.00 |
| ATOM | 2656 | CD   | ARG | X | 173 | 31.492 | 52.138 | 45.490 | 0.00 | 0.00 |
| ATOM | 2657 | HD2  | ARG | X | 173 | 31.670 | 52.511 | 46.499 | 0.00 | 0.00 |
| ATOM | 2658 | HD3  | ARG | X | 173 | 30.751 | 52.770 | 44.999 | 0.00 | 0.00 |
| ATOM | 2659 | NE   | ARG | X | 173 | 31.123 | 50.727 | 45.724 | 0.00 | 0.00 |
| ATOM | 2660 | HE   | ARG | X | 173 | 31.356 | 50.129 | 44.944 | 0.00 | 0.00 |
| ATOM | 2661 | CZ   | ARG | X | 173 | 30.385 | 50.157 | 46.749 | 0.00 | 0.00 |
| ATOM | 2662 | NH1  | ARG | X | 173 | 29.938 | 50.935 | 47.655 | 0.00 | 0.00 |
| ATOM | 2663 | HH11 | ARG | X | 173 | 30.170 | 51.917 | 47.608 | 0.00 | 0.00 |
| ATOM | 2664 | HH12 | ARG | X | 173 | 29.281 | 50.639 | 48.363 | 0.00 | 0.00 |
| ATOM | 2665 | NH2  | ARG | X | 173 | 30.132 | 48.899 | 46.730 | 0.00 | 0.00 |
| ATOM | 2666 | HH21 | ARG | X | 173 | 30.362 | 48.324 | 45.932 | 0.00 | 0.00 |
| ATOM | 2667 | HH22 | ARG | X | 173 | 29.593 | 48.549 | 47.509 | 0.00 | 0.00 |
| ATOM | 2668 | C    | ARG | X | 173 | 35.310 | 54.058 | 44.799 | 0.00 | 0.00 |
| ATOM | 2669 | O    | ARG | X | 173 | 34.908 | 54.679 | 43.865 | 0.00 | 0.00 |
| ATOM | 2670 | N    | LEU | X | 174 | 35.769 | 54.597 | 45.912 | 0.00 | 0.00 |
| ATOM | 2671 | H    | LEU | X | 174 | 36.072 | 53.995 | 46.665 | 0.00 | 0.00 |
| ATOM | 2672 | CA   | LEU | X | 174 | 35.991 | 56.058 | 46.059 | 0.00 | 0.00 |
| ATOM | 2673 | HA   | LEU | X | 174 | 35.128 | 56.663 | 45.781 | 0.00 | 0.00 |
| ATOM | 2674 | CB   | LEU | X | 174 | 36.210 | 56.359 | 47.581 | 0.00 | 0.00 |
| ATOM | 2675 | HB2  | LEU | X | 174 | 35.524 | 55.712 | 48.128 | 0.00 | 0.00 |
| ATOM | 2676 | HB3  | LEU | X | 174 | 37.209 | 56.154 | 47.966 | 0.00 | 0.00 |
| ATOM | 2677 | CG   | LEU | X | 174 | 35.773 | 57.789 | 47.994 | 0.00 | 0.00 |
| ATOM | 2678 | HG   | LEU | X | 174 | 35.726 | 58.364 | 47.069 | 0.00 | 0.00 |
| ATOM | 2679 | CD1  | LEU | X | 174 | 34.382 | 57.857 | 48.622 | 0.00 | 0.00 |
| ATOM | 2680 | HD11 | LEU | X | 174 | 33.781 | 57.191 | 48.003 | 0.00 | 0.00 |
| ATOM | 2681 | HD12 | LEU | X | 174 | 34.479 | 57.352 | 49.583 | 0.00 | 0.00 |
| ATOM | 2682 | HD13 | LEU | X | 174 | 34.019 | 58.885 | 48.624 | 0.00 | 0.00 |
| ATOM | 2683 | CD2  | LEU | X | 174 | 36.800 | 58.463 | 48.938 | 0.00 | 0.00 |
| ATOM | 2684 | HD21 | LEU | X | 174 | 36.424 | 59.482 | 49.024 | 0.00 | 0.00 |
| ATOM | 2685 | HD22 | LEU | X | 174 | 36.899 | 58.000 | 49.920 | 0.00 | 0.00 |
| ATOM | 2686 | HD23 | LEU | X | 174 | 37.759 | 58.532 | 48.425 | 0.00 | 0.00 |
| ATOM | 2687 | C    | LEU | X | 174 | 37.140 | 56.558 | 45.210 | 0.00 | 0.00 |
| ATOM | 2688 | O    | LEU | X | 174 | 37.088 | 57.666 | 44.676 | 0.00 | 0.00 |
| ATOM | 2689 | N    | ALA | X | 175 | 38.157 | 55.729 | 44.909 | 0.00 | 0.00 |
| ATOM | 2690 | H    | ALA | X | 175 | 38.226 | 54.824 | 45.352 | 0.00 | 0.00 |
| ATOM | 2691 | CA   | ALA | X | 175 | 39.145 | 55.996 | 43.875 | 0.00 | 0.00 |
| ATOM | 2692 | HA   | ALA | X | 175 | 39.595 | 56.972 | 44.060 | 0.00 | 0.00 |
| ATOM | 2693 | CB   | ALA | X | 175 | 40.321 | 55.069 | 43.991 | 0.00 | 0.00 |
| ATOM | 2694 | HB1  | ALA | X | 175 | 40.867 | 55.260 | 43.068 | 0.00 | 0.00 |
| ATOM | 2695 | HB2  | ALA | X | 175 | 40.965 | 55.302 | 44.839 | 0.00 | 0.00 |
| ATOM | 2696 | HB3  | ALA | X | 175 | 39.978 | 54.038 | 44.078 | 0.00 | 0.00 |
| ATOM | 2697 | C    | ALA | X | 175 | 38.455 | 56.031 | 42.443 | 0.00 | 0.00 |
| ATOM | 2698 | O    | ALA | X | 175 | 38.679 | 56.907 | 41.660 | 0.00 | 0.00 |
| ATOM | 2699 | N    | LEU | X | 176 | 37.656 | 54.978 | 42.158 | 0.00 | 0.00 |
| ATOM | 2700 | H    | LEU | X | 176 | 37.959 | 54.151 | 42.652 | 0.00 | 0.00 |
| ATOM | 2701 | CA   | LEU | X | 176 | 36.899 | 54.947 | 40.906 | 0.00 | 0.00 |

|      |      |      |     |   |     |        |        |        |      |      |
|------|------|------|-----|---|-----|--------|--------|--------|------|------|
| ATOM | 2702 | HA   | LEU | X | 176 | 37.620 | 55.109 | 40.105 | 0.00 | 0.00 |
| ATOM | 2703 | CB   | LEU | X | 176 | 36.115 | 53.598 | 40.789 | 0.00 | 0.00 |
| ATOM | 2704 | HB2  | LEU | X | 176 | 35.614 | 53.471 | 41.749 | 0.00 | 0.00 |
| ATOM | 2705 | HB3  | LEU | X | 176 | 35.350 | 53.704 | 40.019 | 0.00 | 0.00 |
| ATOM | 2706 | CG   | LEU | X | 176 | 37.120 | 52.499 | 40.373 | 0.00 | 0.00 |
| ATOM | 2707 | HG   | LEU | X | 176 | 37.657 | 52.170 | 41.262 | 0.00 | 0.00 |
| ATOM | 2708 | CD1  | LEU | X | 176 | 36.354 | 51.384 | 39.633 | 0.00 | 0.00 |
| ATOM | 2709 | HD11 | LEU | X | 176 | 35.440 | 51.097 | 40.153 | 0.00 | 0.00 |
| ATOM | 2710 | HD12 | LEU | X | 176 | 35.916 | 51.795 | 38.724 | 0.00 | 0.00 |
| ATOM | 2711 | HD13 | LEU | X | 176 | 36.972 | 50.487 | 39.577 | 0.00 | 0.00 |
| ATOM | 2712 | CD2  | LEU | X | 176 | 38.272 | 52.872 | 39.429 | 0.00 | 0.00 |
| ATOM | 2713 | HD21 | LEU | X | 176 | 39.051 | 53.382 | 39.996 | 0.00 | 0.00 |
| ATOM | 2714 | HD22 | LEU | X | 176 | 38.688 | 51.965 | 38.990 | 0.00 | 0.00 |
| ATOM | 2715 | HD23 | LEU | X | 176 | 37.967 | 53.454 | 38.559 | 0.00 | 0.00 |
| ATOM | 2716 | C    | LEU | X | 176 | 35.961 | 56.121 | 40.699 | 0.00 | 0.00 |
| ATOM | 2717 | O    | LEU | X | 176 | 35.892 | 56.587 | 39.566 | 0.00 | 0.00 |
| ATOM | 2718 | N    | GLN | X | 177 | 35.301 | 56.602 | 41.749 | 0.00 | 0.00 |
| ATOM | 2719 | H    | GLN | X | 177 | 35.382 | 56.121 | 42.634 | 0.00 | 0.00 |
| ATOM | 2720 | CA   | GLN | X | 177 | 34.425 | 57.748 | 41.719 | 0.00 | 0.00 |
| ATOM | 2721 | HA   | GLN | X | 177 | 33.759 | 57.625 | 40.864 | 0.00 | 0.00 |
| ATOM | 2722 | CB   | GLN | X | 177 | 33.586 | 57.804 | 42.989 | 0.00 | 0.00 |
| ATOM | 2723 | HB2  | GLN | X | 177 | 34.339 | 57.776 | 43.777 | 0.00 | 0.00 |
| ATOM | 2724 | HB3  | GLN | X | 177 | 33.154 | 58.797 | 43.110 | 0.00 | 0.00 |
| ATOM | 2725 | CG   | GLN | X | 177 | 32.517 | 56.733 | 43.241 | 0.00 | 0.00 |
| ATOM | 2726 | HG2  | GLN | X | 177 | 31.634 | 57.087 | 42.708 | 0.00 | 0.00 |
| ATOM | 2727 | HG3  | GLN | X | 177 | 32.829 | 55.725 | 42.969 | 0.00 | 0.00 |
| ATOM | 2728 | CD   | GLN | X | 177 | 32.125 | 56.751 | 44.730 | 0.00 | 0.00 |
| ATOM | 2729 | OE1  | GLN | X | 177 | 32.687 | 56.011 | 45.562 | 0.00 | 0.00 |
| ATOM | 2730 | NE2  | GLN | X | 177 | 31.211 | 57.645 | 45.246 | 0.00 | 0.00 |
| ATOM | 2731 | HE21 | GLN | X | 177 | 31.059 | 57.590 | 46.243 | 0.00 | 0.00 |
| ATOM | 2732 | HE22 | GLN | X | 177 | 30.715 | 58.284 | 44.641 | 0.00 | 0.00 |
| ATOM | 2733 | C    | GLN | X | 177 | 35.218 | 59.025 | 41.431 | 0.00 | 0.00 |
| ATOM | 2734 | O    | GLN | X | 177 | 34.631 | 59.920 | 40.857 | 0.00 | 0.00 |
| ATOM | 2735 | N    | TRP | X | 178 | 36.528 | 59.089 | 41.807 | 0.00 | 0.00 |
| ATOM | 2736 | H    | TRP | X | 178 | 36.962 | 58.296 | 42.258 | 0.00 | 0.00 |
| ATOM | 2737 | CA   | TRP | X | 178 | 37.524 | 60.041 | 41.275 | 0.00 | 0.00 |
| ATOM | 2738 | HA   | TRP | X | 178 | 37.059 | 61.026 | 41.308 | 0.00 | 0.00 |
| ATOM | 2739 | CB   | TRP | X | 178 | 38.793 | 60.066 | 42.198 | 0.00 | 0.00 |
| ATOM | 2740 | HB2  | TRP | X | 178 | 38.584 | 60.234 | 43.255 | 0.00 | 0.00 |
| ATOM | 2741 | HB3  | TRP | X | 178 | 39.316 | 59.134 | 41.980 | 0.00 | 0.00 |
| ATOM | 2742 | CG   | TRP | X | 178 | 39.785 | 61.074 | 41.769 | 0.00 | 0.00 |
| ATOM | 2743 | CD1  | TRP | X | 178 | 39.977 | 62.306 | 42.360 | 0.00 | 0.00 |
| ATOM | 2744 | HD1  | TRP | X | 178 | 39.455 | 62.763 | 43.187 | 0.00 | 0.00 |
| ATOM | 2745 | NE1  | TRP | X | 178 | 41.035 | 62.955 | 41.740 | 0.00 | 0.00 |
| ATOM | 2746 | HE1  | TRP | X | 178 | 41.209 | 63.948 | 41.807 | 0.00 | 0.00 |
| ATOM | 2747 | CE2  | TRP | X | 178 | 41.593 | 62.172 | 40.783 | 0.00 | 0.00 |
| ATOM | 2748 | CZ2  | TRP | X | 178 | 42.520 | 62.534 | 39.818 | 0.00 | 0.00 |
| ATOM | 2749 | HZ2  | TRP | X | 178 | 43.106 | 63.438 | 39.899 | 0.00 | 0.00 |
| ATOM | 2750 | CH2  | TRP | X | 178 | 42.831 | 61.543 | 38.821 | 0.00 | 0.00 |
| ATOM | 2751 | HH2  | TRP | X | 178 | 43.532 | 61.739 | 38.023 | 0.00 | 0.00 |
| ATOM | 2752 | CZ3  | TRP | X | 178 | 42.199 | 60.338 | 38.763 | 0.00 | 0.00 |
| ATOM | 2753 | HZ3  | TRP | X | 178 | 42.383 | 59.689 | 37.919 | 0.00 | 0.00 |
| ATOM | 2754 | CE3  | TRP | X | 178 | 41.303 | 59.973 | 39.797 | 0.00 | 0.00 |
| ATOM | 2755 | HE3  | TRP | X | 178 | 40.918 | 58.966 | 39.874 | 0.00 | 0.00 |
| ATOM | 2756 | CD2  | TRP | X | 178 | 40.813 | 60.933 | 40.730 | 0.00 | 0.00 |
| ATOM | 2757 | C    | TRP | X | 178 | 37.807 | 59.860 | 39.790 | 0.00 | 0.00 |
| ATOM | 2758 | O    | TRP | X | 178 | 37.534 | 60.857 | 39.092 | 0.00 | 0.00 |
| ATOM | 2759 | N    | VAL | X | 179 | 38.178 | 58.654 | 39.375 | 0.00 | 0.00 |
| ATOM | 2760 | H    | VAL | X | 179 | 38.153 | 57.862 | 40.002 | 0.00 | 0.00 |
| ATOM | 2761 | CA   | VAL | X | 179 | 38.615 | 58.443 | 37.972 | 0.00 | 0.00 |
| ATOM | 2762 | HA   | VAL | X | 179 | 39.412 | 59.185 | 37.909 | 0.00 | 0.00 |
| ATOM | 2763 | CB   | VAL | X | 179 | 39.014 | 57.029 | 37.641 | 0.00 | 0.00 |
| ATOM | 2764 | HB   | VAL | X | 179 | 38.224 | 56.322 | 37.895 | 0.00 | 0.00 |
| ATOM | 2765 | CG1  | VAL | X | 179 | 39.300 | 56.744 | 36.162 | 0.00 | 0.00 |
| ATOM | 2766 | HG11 | VAL | X | 179 | 40.178 | 57.315 | 35.861 | 0.00 | 0.00 |
| ATOM | 2767 | HG12 | VAL | X | 179 | 39.596 | 55.707 | 36.005 | 0.00 | 0.00 |
| ATOM | 2768 | HG13 | VAL | X | 179 | 38.421 | 56.992 | 35.567 | 0.00 | 0.00 |
| ATOM | 2769 | CG2  | VAL | X | 179 | 40.243 | 56.641 | 38.471 | 0.00 | 0.00 |
| ATOM | 2770 | HG21 | VAL | X | 179 | 40.533 | 55.610 | 38.269 | 0.00 | 0.00 |
| ATOM | 2771 | HG22 | VAL | X | 179 | 41.140 | 57.230 | 38.279 | 0.00 | 0.00 |

|      |      |      |     |   |     |        |        |        |      |      |
|------|------|------|-----|---|-----|--------|--------|--------|------|------|
| ATOM | 2772 | HG23 | VAL | X | 179 | 40.109 | 56.635 | 39.553 | 0.00 | 0.00 |
| ATOM | 2773 | C    | VAL | X | 179 | 37.592 | 58.969 | 36.979 | 0.00 | 0.00 |
| ATOM | 2774 | O    | VAL | X | 179 | 37.903 | 59.707 | 36.055 | 0.00 | 0.00 |
| ATOM | 2775 | N    | GLN | X | 180 | 36.342 | 58.629 | 37.201 | 0.00 | 0.00 |
| ATOM | 2776 | H    | GLN | X | 180 | 36.279 | 58.049 | 38.025 | 0.00 | 0.00 |
| ATOM | 2777 | CA   | GLN | X | 180 | 35.149 | 58.936 | 36.405 | 0.00 | 0.00 |
| ATOM | 2778 | HA   | GLN | X | 180 | 35.257 | 58.541 | 35.395 | 0.00 | 0.00 |
| ATOM | 2779 | CB   | GLN | X | 180 | 33.828 | 58.302 | 36.964 | 0.00 | 0.00 |
| ATOM | 2780 | HB2  | GLN | X | 180 | 33.765 | 58.428 | 38.044 | 0.00 | 0.00 |
| ATOM | 2781 | HB3  | GLN | X | 180 | 33.011 | 58.952 | 36.649 | 0.00 | 0.00 |
| ATOM | 2782 | CG   | GLN | X | 180 | 33.403 | 56.900 | 36.465 | 0.00 | 0.00 |
| ATOM | 2783 | HG2  | GLN | X | 180 | 34.109 | 56.087 | 36.633 | 0.00 | 0.00 |
| ATOM | 2784 | HG3  | GLN | X | 180 | 32.501 | 56.638 | 37.017 | 0.00 | 0.00 |
| ATOM | 2785 | CD   | GLN | X | 180 | 33.084 | 56.889 | 34.974 | 0.00 | 0.00 |
| ATOM | 2786 | OE1  | GLN | X | 180 | 32.877 | 57.935 | 34.377 | 0.00 | 0.00 |
| ATOM | 2787 | NE2  | GLN | X | 180 | 33.287 | 55.798 | 34.222 | 0.00 | 0.00 |
| ATOM | 2788 | HE21 | GLN | X | 180 | 33.146 | 55.791 | 33.222 | 0.00 | 0.00 |
| ATOM | 2789 | HE22 | GLN | X | 180 | 33.549 | 54.920 | 34.647 | 0.00 | 0.00 |
| ATOM | 2790 | C    | GLN | X | 180 | 35.084 | 60.482 | 36.340 | 0.00 | 0.00 |
| ATOM | 2791 | O    | GLN | X | 180 | 34.891 | 60.986 | 35.246 | 0.00 | 0.00 |
| ATOM | 2792 | N    | GLU | X | 181 | 35.189 | 61.235 | 37.406 | 0.00 | 0.00 |
| ATOM | 2793 | H    | GLU | X | 181 | 35.472 | 60.775 | 38.259 | 0.00 | 0.00 |
| ATOM | 2794 | CA   | GLU | X | 181 | 34.922 | 62.649 | 37.519 | 0.00 | 0.00 |
| ATOM | 2795 | HA   | GLU | X | 181 | 34.110 | 63.088 | 36.941 | 0.00 | 0.00 |
| ATOM | 2796 | CB   | GLU | X | 181 | 34.567 | 62.837 | 39.036 | 0.00 | 0.00 |
| ATOM | 2797 | HB2  | GLU | X | 181 | 33.711 | 62.182 | 39.197 | 0.00 | 0.00 |
| ATOM | 2798 | HB3  | GLU | X | 181 | 35.327 | 62.434 | 39.706 | 0.00 | 0.00 |
| ATOM | 2799 | CG   | GLU | X | 181 | 34.154 | 64.296 | 39.352 | 0.00 | 0.00 |
| ATOM | 2800 | HG2  | GLU | X | 181 | 33.786 | 64.346 | 40.377 | 0.00 | 0.00 |
| ATOM | 2801 | HG3  | GLU | X | 181 | 35.044 | 64.919 | 39.435 | 0.00 | 0.00 |
| ATOM | 2802 | CD   | GLU | X | 181 | 33.042 | 64.866 | 38.492 | 0.00 | 0.00 |
| ATOM | 2803 | OE1  | GLU | X | 181 | 33.027 | 66.085 | 38.251 | 0.00 | 0.00 |
| ATOM | 2804 | OE2  | GLU | X | 181 | 32.139 | 64.060 | 38.203 | 0.00 | 0.00 |
| ATOM | 2805 | C    | GLU | X | 181 | 36.116 | 63.461 | 37.008 | 0.00 | 0.00 |
| ATOM | 2806 | O    | GLU | X | 181 | 35.850 | 64.580 | 36.699 | 0.00 | 0.00 |
| ATOM | 2807 | N    | ASN | X | 182 | 37.371 | 63.015 | 36.946 | 0.00 | 0.00 |
| ATOM | 2808 | H    | ASN | X | 182 | 37.370 | 62.115 | 37.404 | 0.00 | 0.00 |
| ATOM | 2809 | CA   | ASN | X | 182 | 38.528 | 63.774 | 36.639 | 0.00 | 0.00 |
| ATOM | 2810 | HA   | ASN | X | 182 | 38.268 | 64.804 | 36.396 | 0.00 | 0.00 |
| ATOM | 2811 | CB   | ASN | X | 182 | 39.236 | 63.927 | 38.005 | 0.00 | 0.00 |
| ATOM | 2812 | HB2  | ASN | X | 182 | 39.422 | 62.913 | 38.360 | 0.00 | 0.00 |
| ATOM | 2813 | HB3  | ASN | X | 182 | 40.164 | 64.470 | 37.823 | 0.00 | 0.00 |
| ATOM | 2814 | CG   | ASN | X | 182 | 38.400 | 64.644 | 39.109 | 0.00 | 0.00 |
| ATOM | 2815 | OD1  | ASN | X | 182 | 37.917 | 65.722 | 38.885 | 0.00 | 0.00 |
| ATOM | 2816 | ND2  | ASN | X | 182 | 38.159 | 63.927 | 40.158 | 0.00 | 0.00 |
| ATOM | 2817 | HD21 | ASN | X | 182 | 37.637 | 64.261 | 40.956 | 0.00 | 0.00 |
| ATOM | 2818 | HD22 | ASN | X | 182 | 38.500 | 62.977 | 40.186 | 0.00 | 0.00 |
| ATOM | 2819 | C    | ASN | X | 182 | 39.445 | 63.343 | 35.510 | 0.00 | 0.00 |
| ATOM | 2820 | O    | ASN | X | 182 | 40.179 | 64.194 | 35.034 | 0.00 | 0.00 |
| ATOM | 2821 | N    | VAL | X | 183 | 39.465 | 62.065 | 35.069 | 0.00 | 0.00 |
| ATOM | 2822 | H    | VAL | X | 183 | 38.865 | 61.377 | 35.501 | 0.00 | 0.00 |
| ATOM | 2823 | CA   | VAL | X | 183 | 40.453 | 61.522 | 34.096 | 0.00 | 0.00 |
| ATOM | 2824 | HA   | VAL | X | 183 | 41.451 | 61.758 | 34.467 | 0.00 | 0.00 |
| ATOM | 2825 | CB   | VAL | X | 183 | 40.452 | 60.002 | 34.027 | 0.00 | 0.00 |
| ATOM | 2826 | HB   | VAL | X | 183 | 40.289 | 59.631 | 35.039 | 0.00 | 0.00 |
| ATOM | 2827 | CG1  | VAL | X | 183 | 39.292 | 59.438 | 33.198 | 0.00 | 0.00 |
| ATOM | 2828 | HG11 | VAL | X | 183 | 38.394 | 59.983 | 33.490 | 0.00 | 0.00 |
| ATOM | 2829 | HG12 | VAL | X | 183 | 39.542 | 59.510 | 32.139 | 0.00 | 0.00 |
| ATOM | 2830 | HG13 | VAL | X | 183 | 39.101 | 58.371 | 33.313 | 0.00 | 0.00 |
| ATOM | 2831 | CG2  | VAL | X | 183 | 41.757 | 59.424 | 33.521 | 0.00 | 0.00 |
| ATOM | 2832 | HG21 | VAL | X | 183 | 42.467 | 59.626 | 34.323 | 0.00 | 0.00 |
| ATOM | 2833 | HG22 | VAL | X | 183 | 41.566 | 58.351 | 33.499 | 0.00 | 0.00 |
| ATOM | 2834 | HG23 | VAL | X | 183 | 41.979 | 59.819 | 32.529 | 0.00 | 0.00 |
| ATOM | 2835 | C    | VAL | X | 183 | 40.446 | 62.161 | 32.755 | 0.00 | 0.00 |
| ATOM | 2836 | O    | VAL | X | 183 | 41.418 | 62.318 | 31.971 | 0.00 | 0.00 |
| ATOM | 2837 | N    | ALA | X | 184 | 39.242 | 62.674 | 32.327 | 0.00 | 0.00 |
| ATOM | 2838 | H    | ALA | X | 184 | 38.456 | 62.529 | 32.944 | 0.00 | 0.00 |
| ATOM | 2839 | CA   | ALA | X | 184 | 38.988 | 63.504 | 31.145 | 0.00 | 0.00 |
| ATOM | 2840 | HA   | ALA | X | 184 | 39.207 | 62.936 | 30.241 | 0.00 | 0.00 |
| ATOM | 2841 | CB   | ALA | X | 184 | 37.557 | 63.930 | 31.131 | 0.00 | 0.00 |



|      |      |     |     |   |     |        |        |        |      |      |
|------|------|-----|-----|---|-----|--------|--------|--------|------|------|
| ATOM | 2842 | HB1 | ALA | X | 184 | 37.375 | 64.459 | 32.067 | 0.00 | 0.00 |
| ATOM | 2843 | HB2 | ALA | X | 184 | 37.338 | 64.620 | 30.316 | 0.00 | 0.00 |
| ATOM | 2844 | HB3 | ALA | X | 184 | 36.972 | 63.030 | 30.941 | 0.00 | 0.00 |
| ATOM | 2845 | C   | ALA | X | 184 | 39.954 | 64.685 | 31.109 | 0.00 | 0.00 |
| ATOM | 2846 | O   | ALA | X | 184 | 40.478 | 65.036 | 30.018 | 0.00 | 0.00 |
| ATOM | 2847 | N   | ALA | X | 185 | 40.451 | 65.266 | 32.209 | 0.00 | 0.00 |
| ATOM | 2848 | H   | ALA | X | 185 | 40.087 | 65.052 | 33.127 | 0.00 | 0.00 |
| ATOM | 2849 | CA  | ALA | X | 185 | 41.359 | 66.431 | 32.232 | 0.00 | 0.00 |
| ATOM | 2850 | HA  | ALA | X | 185 | 41.095 | 67.103 | 31.415 | 0.00 | 0.00 |
| ATOM | 2851 | CB  | ALA | X | 185 | 41.241 | 67.342 | 33.450 | 0.00 | 0.00 |
| ATOM | 2852 | HB1 | ALA | X | 185 | 42.057 | 68.049 | 33.297 | 0.00 | 0.00 |
| ATOM | 2853 | HB2 | ALA | X | 185 | 40.299 | 67.877 | 33.572 | 0.00 | 0.00 |
| ATOM | 2854 | HB3 | ALA | X | 185 | 41.471 | 66.798 | 34.366 | 0.00 | 0.00 |
| ATOM | 2855 | C   | ALA | X | 185 | 42.834 | 66.010 | 32.082 | 0.00 | 0.00 |
| ATOM | 2856 | O   | ALA | X | 185 | 43.526 | 66.756 | 31.433 | 0.00 | 0.00 |
| ATOM | 2857 | N   | PHE | X | 186 | 43.200 | 64.758 | 32.407 | 0.00 | 0.00 |
| ATOM | 2858 | H   | PHE | X | 186 | 42.648 | 64.259 | 33.090 | 0.00 | 0.00 |
| ATOM | 2859 | CA  | PHE | X | 186 | 44.469 | 64.102 | 32.073 | 0.00 | 0.00 |
| ATOM | 2860 | HA  | PHE | X | 186 | 45.241 | 64.861 | 32.197 | 0.00 | 0.00 |
| ATOM | 2861 | CB  | PHE | X | 186 | 44.710 | 62.886 | 33.068 | 0.00 | 0.00 |
| ATOM | 2862 | HB2 | PHE | X | 186 | 43.852 | 62.229 | 32.928 | 0.00 | 0.00 |
| ATOM | 2863 | HB3 | PHE | X | 186 | 45.573 | 62.303 | 32.747 | 0.00 | 0.00 |
| ATOM | 2864 | CG  | PHE | X | 186 | 44.873 | 63.281 | 34.536 | 0.00 | 0.00 |
| ATOM | 2865 | CD1 | PHE | X | 186 | 43.721 | 63.603 | 35.260 | 0.00 | 0.00 |
| ATOM | 2866 | HD1 | PHE | X | 186 | 42.746 | 63.448 | 34.823 | 0.00 | 0.00 |
| ATOM | 2867 | CE1 | PHE | X | 186 | 43.815 | 64.195 | 36.489 | 0.00 | 0.00 |
| ATOM | 2868 | HE1 | PHE | X | 186 | 42.881 | 64.556 | 36.894 | 0.00 | 0.00 |
| ATOM | 2869 | CZ  | PHE | X | 186 | 45.040 | 64.400 | 37.080 | 0.00 | 0.00 |
| ATOM | 2870 | HZ  | PHE | X | 186 | 45.104 | 64.746 | 38.102 | 0.00 | 0.00 |
| ATOM | 2871 | CE2 | PHE | X | 186 | 46.260 | 64.125 | 36.342 | 0.00 | 0.00 |
| ATOM | 2872 | HE2 | PHE | X | 186 | 47.245 | 64.313 | 36.742 | 0.00 | 0.00 |
| ATOM | 2873 | CD2 | PHE | X | 186 | 46.113 | 63.609 | 35.033 | 0.00 | 0.00 |
| ATOM | 2874 | HD2 | PHE | X | 186 | 46.958 | 63.429 | 34.385 | 0.00 | 0.00 |
| ATOM | 2875 | C   | PHE | X | 186 | 44.607 | 63.570 | 30.599 | 0.00 | 0.00 |
| ATOM | 2876 | O   | PHE | X | 186 | 45.696 | 63.298 | 30.092 | 0.00 | 0.00 |
| ATOM | 2877 | N   | GLY | X | 187 | 43.481 | 63.519 | 29.904 | 0.00 | 0.00 |
| ATOM | 2878 | H   | GLY | X | 187 | 42.588 | 63.707 | 30.336 | 0.00 | 0.00 |
| ATOM | 2879 | CA  | GLY | X | 187 | 43.345 | 63.165 | 28.513 | 0.00 | 0.00 |
| ATOM | 2880 | HA2 | GLY | X | 187 | 42.723 | 63.847 | 27.905 | 0.00 | 0.00 |
| ATOM | 2881 | HA3 | GLY | X | 187 | 44.298 | 63.178 | 27.971 | 0.00 | 0.00 |
| ATOM | 2882 | C   | GLY | X | 187 | 42.742 | 61.776 | 28.276 | 0.00 | 0.00 |
| ATOM | 2883 | O   | GLY | X | 187 | 42.726 | 61.334 | 27.165 | 0.00 | 0.00 |
| ATOM | 2884 | N   | GLY | X | 188 | 42.388 | 60.943 | 29.282 | 0.00 | 0.00 |
| ATOM | 2885 | H   | GLY | X | 188 | 42.503 | 61.309 | 30.216 | 0.00 | 0.00 |
| ATOM | 2886 | CA  | GLY | X | 188 | 41.841 | 59.610 | 29.215 | 0.00 | 0.00 |
| ATOM | 2887 | HA2 | GLY | X | 188 | 42.271 | 59.005 | 28.416 | 0.00 | 0.00 |
| ATOM | 2888 | HA3 | GLY | X | 188 | 42.147 | 59.110 | 30.135 | 0.00 | 0.00 |
| ATOM | 2889 | C   | GLY | X | 188 | 40.329 | 59.624 | 29.105 | 0.00 | 0.00 |
| ATOM | 2890 | O   | GLY | X | 188 | 39.707 | 60.647 | 29.542 | 0.00 | 0.00 |
| ATOM | 2891 | N   | ASP | X | 189 | 39.717 | 58.576 | 28.535 | 0.00 | 0.00 |
| ATOM | 2892 | H   | ASP | X | 189 | 40.296 | 57.779 | 28.314 | 0.00 | 0.00 |
| ATOM | 2893 | CA  | ASP | X | 189 | 38.263 | 58.440 | 28.314 | 0.00 | 0.00 |
| ATOM | 2894 | HA  | ASP | X | 189 | 37.922 | 59.463 | 28.154 | 0.00 | 0.00 |
| ATOM | 2895 | CB  | ASP | X | 189 | 38.028 | 57.770 | 26.989 | 0.00 | 0.00 |
| ATOM | 2896 | HB2 | ASP | X | 189 | 38.578 | 58.341 | 26.241 | 0.00 | 0.00 |
| ATOM | 2897 | HB3 | ASP | X | 189 | 38.403 | 56.746 | 26.997 | 0.00 | 0.00 |
| ATOM | 2898 | CG  | ASP | X | 189 | 36.503 | 57.684 | 26.615 | 0.00 | 0.00 |
| ATOM | 2899 | OD1 | ASP | X | 189 | 35.835 | 58.722 | 26.711 | 0.00 | 0.00 |
| ATOM | 2900 | OD2 | ASP | X | 189 | 35.949 | 56.627 | 26.243 | 0.00 | 0.00 |
| ATOM | 2901 | C   | ASP | X | 189 | 37.492 | 57.827 | 29.496 | 0.00 | 0.00 |
| ATOM | 2902 | O   | ASP | X | 189 | 37.669 | 56.640 | 29.701 | 0.00 | 0.00 |
| ATOM | 2903 | N   | PRO | X | 190 | 36.599 | 58.558 | 30.223 | 0.00 | 0.00 |
| ATOM | 2904 | CD  | PRO | X | 190 | 36.450 | 59.993 | 30.204 | 0.00 | 0.00 |
| ATOM | 2905 | HD2 | PRO | X | 190 | 36.310 | 60.390 | 29.199 | 0.00 | 0.00 |
| ATOM | 2906 | HD3 | PRO | X | 190 | 37.362 | 60.430 | 30.610 | 0.00 | 0.00 |
| ATOM | 2907 | CG  | PRO | X | 190 | 35.246 | 60.347 | 31.101 | 0.00 | 0.00 |
| ATOM | 2908 | HG2 | PRO | X | 190 | 34.274 | 60.236 | 30.619 | 0.00 | 0.00 |
| ATOM | 2909 | HG3 | PRO | X | 190 | 35.475 | 61.279 | 31.618 | 0.00 | 0.00 |
| ATOM | 2910 | CB  | PRO | X | 190 | 35.302 | 59.161 | 32.046 | 0.00 | 0.00 |
| ATOM | 2911 | HB2 | PRO | X | 190 | 34.352 | 59.039 | 32.567 | 0.00 | 0.00 |

|      |      |      |     |   |     |        |        |        |      |      |
|------|------|------|-----|---|-----|--------|--------|--------|------|------|
| ATOM | 2912 | HB3  | PRO | X | 190 | 36.075 | 59.252 | 32.810 | 0.00 | 0.00 |
| ATOM | 2913 | CA   | PRO | X | 190 | 35.679 | 57.987 | 31.163 | 0.00 | 0.00 |
| ATOM | 2914 | HA   | PRO | X | 190 | 36.258 | 57.354 | 31.836 | 0.00 | 0.00 |
| ATOM | 2915 | C    | PRO | X | 190 | 34.457 | 57.171 | 30.647 | 0.00 | 0.00 |
| ATOM | 2916 | O    | PRO | X | 190 | 33.825 | 56.505 | 31.403 | 0.00 | 0.00 |
| ATOM | 2917 | N    | THR | X | 191 | 34.360 | 57.066 | 29.279 | 0.00 | 0.00 |
| ATOM | 2918 | H    | THR | X | 191 | 34.809 | 57.647 | 28.586 | 0.00 | 0.00 |
| ATOM | 2919 | CA   | THR | X | 191 | 33.441 | 56.084 | 28.640 | 0.00 | 0.00 |
| ATOM | 2920 | HA   | THR | X | 191 | 32.749 | 55.783 | 29.426 | 0.00 | 0.00 |
| ATOM | 2921 | CB   | THR | X | 191 | 32.626 | 56.746 | 27.498 | 0.00 | 0.00 |
| ATOM | 2922 | HB   | THR | X | 191 | 32.807 | 56.196 | 26.575 | 0.00 | 0.00 |
| ATOM | 2923 | CG2  | THR | X | 191 | 31.124 | 56.771 | 27.688 | 0.00 | 0.00 |
| ATOM | 2924 | HG21 | THR | X | 191 | 30.808 | 55.767 | 27.970 | 0.00 | 0.00 |
| ATOM | 2925 | HG22 | THR | X | 191 | 30.990 | 57.380 | 28.582 | 0.00 | 0.00 |
| ATOM | 2926 | HG23 | THR | X | 191 | 30.585 | 57.176 | 26.832 | 0.00 | 0.00 |
| ATOM | 2927 | OG1  | THR | X | 191 | 32.980 | 58.157 | 27.371 | 0.00 | 0.00 |
| ATOM | 2928 | HG1  | THR | X | 191 | 33.838 | 58.110 | 26.943 | 0.00 | 0.00 |
| ATOM | 2929 | C    | THR | X | 191 | 34.209 | 54.777 | 28.159 | 0.00 | 0.00 |
| ATOM | 2930 | O    | THR | X | 191 | 33.573 | 53.950 | 27.474 | 0.00 | 0.00 |
| ATOM | 2931 | N    | SER | X | 192 | 35.454 | 54.674 | 28.527 | 0.00 | 0.00 |
| ATOM | 2932 | H    | SER | X | 192 | 35.971 | 55.376 | 29.036 | 0.00 | 0.00 |
| ATOM | 2933 | CA   | SER | X | 192 | 36.274 | 53.484 | 28.205 | 0.00 | 0.00 |
| ATOM | 2934 | HA   | SER | X | 192 | 35.636 | 52.602 | 28.143 | 0.00 | 0.00 |
| ATOM | 2935 | CB   | SER | X | 192 | 36.979 | 53.814 | 26.888 | 0.00 | 0.00 |
| ATOM | 2936 | HB2  | SER | X | 192 | 37.674 | 54.641 | 27.030 | 0.00 | 0.00 |
| ATOM | 2937 | HB3  | SER | X | 192 | 37.537 | 52.944 | 26.541 | 0.00 | 0.00 |
| ATOM | 2938 | OG   | SER | X | 192 | 36.149 | 54.137 | 25.835 | 0.00 | 0.00 |
| ATOM | 2939 | HG   | SER | X | 192 | 35.958 | 55.058 | 26.027 | 0.00 | 0.00 |
| ATOM | 2940 | C    | SER | X | 192 | 37.323 | 53.186 | 29.346 | 0.00 | 0.00 |
| ATOM | 2941 | O    | SER | X | 192 | 38.515 | 52.908 | 29.003 | 0.00 | 0.00 |
| ATOM | 2942 | N    | VAL | X | 193 | 36.832 | 53.145 | 30.600 | 0.00 | 0.00 |
| ATOM | 2943 | H    | VAL | X | 193 | 35.881 | 53.396 | 30.826 | 0.00 | 0.00 |
| ATOM | 2944 | CA   | VAL | X | 193 | 37.574 | 52.603 | 31.697 | 0.00 | 0.00 |
| ATOM | 2945 | HA   | VAL | X | 193 | 38.606 | 52.836 | 31.436 | 0.00 | 0.00 |
| ATOM | 2946 | CB   | VAL | X | 193 | 37.071 | 53.239 | 33.032 | 0.00 | 0.00 |
| ATOM | 2947 | HB   | VAL | X | 193 | 35.995 | 53.062 | 33.059 | 0.00 | 0.00 |
| ATOM | 2948 | CG1  | VAL | X | 193 | 37.791 | 52.672 | 34.282 | 0.00 | 0.00 |
| ATOM | 2949 | HG11 | VAL | X | 193 | 38.874 | 52.678 | 34.155 | 0.00 | 0.00 |
| ATOM | 2950 | HG12 | VAL | X | 193 | 37.553 | 53.260 | 35.169 | 0.00 | 0.00 |
| ATOM | 2951 | HG13 | VAL | X | 193 | 37.383 | 51.676 | 34.454 | 0.00 | 0.00 |
| ATOM | 2952 | CG2  | VAL | X | 193 | 37.242 | 54.758 | 32.920 | 0.00 | 0.00 |
| ATOM | 2953 | HG21 | VAL | X | 193 | 38.289 | 54.955 | 32.693 | 0.00 | 0.00 |
| ATOM | 2954 | HG22 | VAL | X | 193 | 36.675 | 55.178 | 32.090 | 0.00 | 0.00 |
| ATOM | 2955 | HG23 | VAL | X | 193 | 36.957 | 55.224 | 33.864 | 0.00 | 0.00 |
| ATOM | 2956 | C    | VAL | X | 193 | 37.487 | 51.070 | 31.764 | 0.00 | 0.00 |
| ATOM | 2957 | O    | VAL | X | 193 | 36.420 | 50.537 | 32.036 | 0.00 | 0.00 |
| ATOM | 2958 | N    | THR | X | 194 | 38.658 | 50.396 | 31.767 | 0.00 | 0.00 |
| ATOM | 2959 | H    | THR | X | 194 | 39.523 | 50.854 | 31.519 | 0.00 | 0.00 |
| ATOM | 2960 | CA   | THR | X | 194 | 38.961 | 48.975 | 32.249 | 0.00 | 0.00 |
| ATOM | 2961 | HA   | THR | X | 194 | 37.954 | 48.559 | 32.275 | 0.00 | 0.00 |
| ATOM | 2962 | CB   | THR | X | 194 | 39.698 | 48.175 | 31.173 | 0.00 | 0.00 |
| ATOM | 2963 | HB   | THR | X | 194 | 40.623 | 48.686 | 30.904 | 0.00 | 0.00 |
| ATOM | 2964 | CG2  | THR | X | 194 | 39.957 | 46.726 | 31.523 | 0.00 | 0.00 |
| ATOM | 2965 | HG21 | THR | X | 194 | 40.614 | 46.578 | 32.380 | 0.00 | 0.00 |
| ATOM | 2966 | HG22 | THR | X | 194 | 39.021 | 46.233 | 31.786 | 0.00 | 0.00 |
| ATOM | 2967 | HG23 | THR | X | 194 | 40.389 | 46.320 | 30.609 | 0.00 | 0.00 |
| ATOM | 2968 | OG1  | THR | X | 194 | 38.954 | 48.149 | 29.992 | 0.00 | 0.00 |
| ATOM | 2969 | HG1  | THR | X | 194 | 39.069 | 48.985 | 29.535 | 0.00 | 0.00 |
| ATOM | 2970 | C    | THR | X | 194 | 39.667 | 48.941 | 33.597 | 0.00 | 0.00 |
| ATOM | 2971 | O    | THR | X | 194 | 40.517 | 49.783 | 33.838 | 0.00 | 0.00 |
| ATOM | 2972 | N    | LEU | X | 195 | 39.288 | 47.988 | 34.473 | 0.00 | 0.00 |
| ATOM | 2973 | H    | LEU | X | 195 | 38.597 | 47.324 | 34.152 | 0.00 | 0.00 |
| ATOM | 2974 | CA   | LEU | X | 195 | 39.965 | 47.740 | 35.726 | 0.00 | 0.00 |
| ATOM | 2975 | HA   | LEU | X | 195 | 40.697 | 48.484 | 36.039 | 0.00 | 0.00 |
| ATOM | 2976 | CB   | LEU | X | 195 | 38.972 | 47.412 | 36.827 | 0.00 | 0.00 |
| ATOM | 2977 | HB2  | LEU | X | 195 | 38.457 | 46.473 | 36.623 | 0.00 | 0.00 |
| ATOM | 2978 | HB3  | LEU | X | 195 | 39.491 | 47.183 | 37.757 | 0.00 | 0.00 |
| ATOM | 2979 | CG   | LEU | X | 195 | 37.880 | 48.480 | 37.138 | 0.00 | 0.00 |
| ATOM | 2980 | HG   | LEU | X | 195 | 37.340 | 48.557 | 36.195 | 0.00 | 0.00 |
| ATOM | 2981 | CD1  | LEU | X | 195 | 37.051 | 48.055 | 38.344 | 0.00 | 0.00 |

|      |      |      |     |   |     |        |        |        |      |      |
|------|------|------|-----|---|-----|--------|--------|--------|------|------|
| ATOM | 2982 | HD11 | LEU | X | 195 | 37.661 | 47.955 | 39.243 | 0.00 | 0.00 |
| ATOM | 2983 | HD12 | LEU | X | 195 | 36.237 | 48.749 | 38.550 | 0.00 | 0.00 |
| ATOM | 2984 | HD13 | LEU | X | 195 | 36.721 | 47.020 | 38.250 | 0.00 | 0.00 |
| ATOM | 2985 | CD2  | LEU | X | 195 | 38.424 | 49.832 | 37.296 | 0.00 | 0.00 |
| ATOM | 2986 | HD21 | LEU | X | 195 | 39.036 | 50.036 | 38.176 | 0.00 | 0.00 |
| ATOM | 2987 | HD22 | LEU | X | 195 | 38.976 | 50.140 | 36.408 | 0.00 | 0.00 |
| ATOM | 2988 | HD23 | LEU | X | 195 | 37.624 | 50.566 | 37.387 | 0.00 | 0.00 |
| ATOM | 2989 | C    | LEU | X | 195 | 40.796 | 46.424 | 35.539 | 0.00 | 0.00 |
| ATOM | 2990 | O    | LEU | X | 195 | 40.265 | 45.406 | 35.040 | 0.00 | 0.00 |
| ATOM | 2991 | N    | PHE | X | 196 | 42.029 | 46.390 | 35.992 | 0.00 | 0.00 |
| ATOM | 2992 | H    | PHE | X | 196 | 42.369 | 47.177 | 36.527 | 0.00 | 0.00 |
| ATOM | 2993 | CA   | PHE | X | 196 | 42.869 | 45.195 | 36.030 | 0.00 | 0.00 |
| ATOM | 2994 | HA   | PHE | X | 196 | 42.149 | 44.376 | 36.013 | 0.00 | 0.00 |
| ATOM | 2995 | CB   | PHE | X | 196 | 43.761 | 45.102 | 34.706 | 0.00 | 0.00 |
| ATOM | 2996 | HB2  | PHE | X | 196 | 43.933 | 44.054 | 34.460 | 0.00 | 0.00 |
| ATOM | 2997 | HB3  | PHE | X | 196 | 43.205 | 45.486 | 33.851 | 0.00 | 0.00 |
| ATOM | 2998 | CG   | PHE | X | 196 | 45.157 | 45.807 | 34.760 | 0.00 | 0.00 |
| ATOM | 2999 | CD1  | PHE | X | 196 | 45.314 | 47.162 | 34.697 | 0.00 | 0.00 |
| ATOM | 3000 | HD1  | PHE | X | 196 | 44.440 | 47.797 | 34.712 | 0.00 | 0.00 |
| ATOM | 3001 | CE1  | PHE | X | 196 | 46.567 | 47.759 | 34.575 | 0.00 | 0.00 |
| ATOM | 3002 | HE1  | PHE | X | 196 | 46.636 | 48.826 | 34.427 | 0.00 | 0.00 |
| ATOM | 3003 | CZ   | PHE | X | 196 | 47.713 | 47.034 | 34.514 | 0.00 | 0.00 |
| ATOM | 3004 | HZ   | PHE | X | 196 | 48.647 | 47.540 | 34.319 | 0.00 | 0.00 |
| ATOM | 3005 | CE2  | PHE | X | 196 | 47.600 | 45.608 | 34.459 | 0.00 | 0.00 |
| ATOM | 3006 | HE2  | PHE | X | 196 | 48.434 | 44.971 | 34.205 | 0.00 | 0.00 |
| ATOM | 3007 | CD2  | PHE | X | 196 | 46.344 | 44.955 | 34.684 | 0.00 | 0.00 |
| ATOM | 3008 | HD2  | PHE | X | 196 | 46.268 | 43.878 | 34.721 | 0.00 | 0.00 |
| ATOM | 3009 | C    | PHE | X | 196 | 43.752 | 45.105 | 37.304 | 0.00 | 0.00 |
| ATOM | 3010 | O    | PHE | X | 196 | 44.067 | 46.103 | 37.891 | 0.00 | 0.00 |
| ATOM | 3011 | N    | GLY | X | 197 | 44.279 | 43.902 | 37.569 | 0.00 | 0.00 |
| ATOM | 3012 | H    | GLY | X | 197 | 44.005 | 43.079 | 37.052 | 0.00 | 0.00 |
| ATOM | 3013 | CA   | GLY | X | 197 | 44.948 | 43.612 | 38.821 | 0.00 | 0.00 |
| ATOM | 3014 | HA2  | GLY | X | 197 | 45.740 | 44.256 | 39.036 | 0.00 | 0.00 |
| ATOM | 3015 | HA3  | GLY | X | 197 | 44.241 | 43.806 | 39.668 | 0.00 | 0.00 |
| ATOM | 3016 | C    | GLY | X | 197 | 45.421 | 42.156 | 38.994 | 0.00 | 0.00 |
| ATOM | 3017 | O    | GLY | X | 197 | 44.539 | 41.329 | 38.708 | 0.00 | 0.00 |
| ATOM | 3018 | N    | GLU | X | 198 | 46.556 | 41.870 | 39.588 | 0.00 | 0.00 |
| ATOM | 3019 | H    | GLU | X | 198 | 47.136 | 42.667 | 39.810 | 0.00 | 0.00 |
| ATOM | 3020 | CA   | GLU | X | 198 | 46.922 | 40.536 | 40.155 | 0.00 | 0.00 |
| ATOM | 3021 | HA   | GLU | X | 198 | 46.644 | 39.826 | 39.376 | 0.00 | 0.00 |
| ATOM | 3022 | CB   | GLU | X | 198 | 48.448 | 40.448 | 40.313 | 0.00 | 0.00 |
| ATOM | 3023 | HB2  | GLU | X | 198 | 48.583 | 39.503 | 40.839 | 0.00 | 0.00 |
| ATOM | 3024 | HB3  | GLU | X | 198 | 48.930 | 40.288 | 39.348 | 0.00 | 0.00 |
| ATOM | 3025 | CG   | GLU | X | 198 | 49.103 | 41.647 | 41.085 | 0.00 | 0.00 |
| ATOM | 3026 | HG2  | GLU | X | 198 | 49.418 | 42.440 | 40.406 | 0.00 | 0.00 |
| ATOM | 3027 | HG3  | GLU | X | 198 | 48.436 | 42.221 | 41.728 | 0.00 | 0.00 |
| ATOM | 3028 | CD   | GLU | X | 198 | 50.278 | 41.321 | 42.023 | 0.00 | 0.00 |
| ATOM | 3029 | OE1  | GLU | X | 198 | 51.396 | 41.861 | 41.921 | 0.00 | 0.00 |
| ATOM | 3030 | OE2  | GLU | X | 198 | 50.080 | 40.441 | 42.849 | 0.00 | 0.00 |
| ATOM | 3031 | C    | GLU | X | 198 | 46.193 | 40.188 | 41.470 | 0.00 | 0.00 |
| ATOM | 3032 | O    | GLU | X | 198 | 46.136 | 40.985 | 42.396 | 0.00 | 0.00 |
| ATOM | 3033 | N    | XA1 | X | 199 | 45.679 | 38.942 | 41.592 | 0.00 | 0.00 |
| ATOM | 3034 | CA   | XA1 | X | 199 | 45.581 | 38.224 | 42.860 | 0.00 | 0.00 |
| ATOM | 3035 | C    | XA1 | X | 199 | 44.522 | 38.939 | 43.743 | 0.00 | 0.00 |
| ATOM | 3036 | O    | XA1 | X | 199 | 43.355 | 39.053 | 43.333 | 0.00 | 0.00 |
| ATOM | 3037 | CB   | XA1 | X | 199 | 46.942 | 37.930 | 43.506 | 0.00 | 0.00 |
| ATOM | 3038 | OG   | XA1 | X | 199 | 46.869 | 36.971 | 44.533 | 0.00 | 0.00 |
| ATOM | 3039 | P1   | XA1 | X | 199 | 47.388 | 37.411 | 45.930 | 0.00 | 0.00 |
| ATOM | 3040 | O1   | XA1 | X | 199 | 47.436 | 38.804 | 46.302 | 0.00 | 0.00 |
| ATOM | 3041 | O2   | XA1 | X | 199 | 48.700 | 36.820 | 46.312 | 0.00 | 0.00 |
| ATOM | 3042 | C1   | XA1 | X | 199 | 46.090 | 36.510 | 46.715 | 0.00 | 0.00 |
| ATOM | 3043 | H    | XA1 | X | 199 | 45.649 | 38.380 | 40.753 | 0.00 | 0.00 |
| ATOM | 3044 | HA   | XA1 | X | 199 | 45.193 | 37.253 | 42.550 | 0.00 | 0.00 |
| ATOM | 3045 | HB2  | XA1 | X | 199 | 47.553 | 37.650 | 42.644 | 0.00 | 0.00 |
| ATOM | 3046 | HB3  | XA1 | X | 199 | 47.165 | 38.912 | 43.932 | 0.00 | 0.00 |
| ATOM | 3047 | H11  | XA1 | X | 199 | 45.982 | 35.518 | 46.269 | 0.00 | 0.00 |
| ATOM | 3048 | H12  | XA1 | X | 199 | 46.256 | 36.536 | 47.794 | 0.00 | 0.00 |
| ATOM | 3049 | H13  | XA1 | X | 199 | 45.157 | 37.065 | 46.601 | 0.00 | 0.00 |
| ATOM | 3050 | N    | ALA | X | 200 | 44.859 | 39.448 | 44.989 | 0.00 | 0.00 |
| ATOM | 3051 | H    | ALA | X | 200 | 45.827 | 39.340 | 45.258 | 0.00 | 0.00 |

|      |      |      |     |   |     |        |        |        |      |      |
|------|------|------|-----|---|-----|--------|--------|--------|------|------|
| ATOM | 3052 | CA   | ALA | X | 200 | 43.986 | 40.277 | 45.792 | 0.00 | 0.00 |
| ATOM | 3053 | HA   | ALA | X | 200 | 43.087 | 39.732 | 46.081 | 0.00 | 0.00 |
| ATOM | 3054 | CB   | ALA | X | 200 | 44.591 | 40.720 | 47.116 | 0.00 | 0.00 |
| ATOM | 3055 | HB1  | ALA | X | 200 | 43.714 | 41.111 | 47.630 | 0.00 | 0.00 |
| ATOM | 3056 | HB2  | ALA | X | 200 | 44.883 | 39.832 | 47.678 | 0.00 | 0.00 |
| ATOM | 3057 | HB3  | ALA | X | 200 | 45.416 | 41.422 | 46.995 | 0.00 | 0.00 |
| ATOM | 3058 | C    | ALA | X | 200 | 43.433 | 41.435 | 44.971 | 0.00 | 0.00 |
| ATOM | 3059 | O    | ALA | X | 200 | 42.363 | 41.996 | 45.282 | 0.00 | 0.00 |
| ATOM | 3060 | N    | GLY | X | 201 | 44.110 | 41.857 | 43.915 | 0.00 | 0.00 |
| ATOM | 3061 | H    | GLY | X | 201 | 44.949 | 41.357 | 43.655 | 0.00 | 0.00 |
| ATOM | 3062 | CA   | GLY | X | 201 | 43.496 | 42.853 | 43.009 | 0.00 | 0.00 |
| ATOM | 3063 | HA2  | GLY | X | 201 | 42.973 | 43.568 | 43.603 | 0.00 | 0.00 |
| ATOM | 3064 | HA3  | GLY | X | 201 | 44.232 | 43.246 | 42.412 | 0.00 | 0.00 |
| ATOM | 3065 | C    | GLY | X | 201 | 42.517 | 42.308 | 41.987 | 0.00 | 0.00 |
| ATOM | 3066 | O    | GLY | X | 201 | 41.464 | 42.913 | 41.683 | 0.00 | 0.00 |
| ATOM | 3067 | N    | ALA | X | 202 | 42.842 | 41.069 | 41.450 | 0.00 | 0.00 |
| ATOM | 3068 | H    | ALA | X | 202 | 43.678 | 40.548 | 41.674 | 0.00 | 0.00 |
| ATOM | 3069 | CA   | ALA | X | 202 | 41.810 | 40.297 | 40.699 | 0.00 | 0.00 |
| ATOM | 3070 | HA   | ALA | X | 202 | 41.609 | 40.932 | 39.836 | 0.00 | 0.00 |
| ATOM | 3071 | CB   | ALA | X | 202 | 42.459 | 39.017 | 40.116 | 0.00 | 0.00 |
| ATOM | 3072 | HB1  | ALA | X | 202 | 42.866 | 38.562 | 41.019 | 0.00 | 0.00 |
| ATOM | 3073 | HB2  | ALA | X | 202 | 41.812 | 38.414 | 39.478 | 0.00 | 0.00 |
| ATOM | 3074 | HB3  | ALA | X | 202 | 43.276 | 39.194 | 39.417 | 0.00 | 0.00 |
| ATOM | 3075 | C    | ALA | X | 202 | 40.581 | 39.955 | 41.450 | 0.00 | 0.00 |
| ATOM | 3076 | O    | ALA | X | 202 | 39.504 | 40.243 | 40.992 | 0.00 | 0.00 |
| ATOM | 3077 | N    | ALA | X | 203 | 40.634 | 39.455 | 42.738 | 0.00 | 0.00 |
| ATOM | 3078 | H    | ALA | X | 203 | 41.565 | 39.188 | 43.025 | 0.00 | 0.00 |
| ATOM | 3079 | CA   | ALA | X | 203 | 39.566 | 39.360 | 43.708 | 0.00 | 0.00 |
| ATOM | 3080 | HA   | ALA | X | 203 | 38.693 | 38.824 | 43.335 | 0.00 | 0.00 |
| ATOM | 3081 | CB   | ALA | X | 203 | 40.028 | 38.592 | 44.946 | 0.00 | 0.00 |
| ATOM | 3082 | HB1  | ALA | X | 203 | 39.180 | 38.517 | 45.626 | 0.00 | 0.00 |
| ATOM | 3083 | HB2  | ALA | X | 203 | 40.403 | 37.643 | 44.564 | 0.00 | 0.00 |
| ATOM | 3084 | HB3  | ALA | X | 203 | 40.837 | 39.159 | 45.406 | 0.00 | 0.00 |
| ATOM | 3085 | C    | ALA | X | 203 | 38.943 | 40.734 | 44.064 | 0.00 | 0.00 |
| ATOM | 3086 | O    | ALA | X | 203 | 37.661 | 40.845 | 44.182 | 0.00 | 0.00 |
| ATOM | 3087 | N    | SER | X | 204 | 39.689 | 41.809 | 44.198 | 0.00 | 0.00 |
| ATOM | 3088 | H    | SER | X | 204 | 40.693 | 41.770 | 44.295 | 0.00 | 0.00 |
| ATOM | 3089 | CA   | SER | X | 204 | 39.093 | 43.126 | 44.205 | 0.00 | 0.00 |
| ATOM | 3090 | HA   | SER | X | 204 | 38.446 | 43.077 | 45.080 | 0.00 | 0.00 |
| ATOM | 3091 | CB   | SER | X | 204 | 40.163 | 44.239 | 44.424 | 0.00 | 0.00 |
| ATOM | 3092 | HB2  | SER | X | 204 | 40.974 | 44.068 | 43.716 | 0.00 | 0.00 |
| ATOM | 3093 | HB3  | SER | X | 204 | 39.763 | 45.213 | 44.141 | 0.00 | 0.00 |
| ATOM | 3094 | OG   | SER | X | 204 | 40.642 | 44.324 | 45.764 | 0.00 | 0.00 |
| ATOM | 3095 | HG   | SER | X | 204 | 41.311 | 43.637 | 45.814 | 0.00 | 0.00 |
| ATOM | 3096 | C    | SER | X | 204 | 38.228 | 43.408 | 42.960 | 0.00 | 0.00 |
| ATOM | 3097 | O    | SER | X | 204 | 37.094 | 43.782 | 43.051 | 0.00 | 0.00 |
| ATOM | 3098 | N    | VAL | X | 205 | 38.703 | 43.064 | 41.729 | 0.00 | 0.00 |
| ATOM | 3099 | H    | VAL | X | 205 | 39.664 | 42.754 | 41.705 | 0.00 | 0.00 |
| ATOM | 3100 | CA   | VAL | X | 205 | 38.131 | 43.351 | 40.432 | 0.00 | 0.00 |
| ATOM | 3101 | HA   | VAL | X | 205 | 38.054 | 44.434 | 40.330 | 0.00 | 0.00 |
| ATOM | 3102 | CB   | VAL | X | 205 | 39.108 | 42.978 | 39.293 | 0.00 | 0.00 |
| ATOM | 3103 | HB   | VAL | X | 205 | 39.742 | 42.128 | 39.543 | 0.00 | 0.00 |
| ATOM | 3104 | CG1  | VAL | X | 205 | 38.512 | 42.637 | 37.893 | 0.00 | 0.00 |
| ATOM | 3105 | HG11 | VAL | X | 205 | 39.337 | 42.320 | 37.255 | 0.00 | 0.00 |
| ATOM | 3106 | HG12 | VAL | X | 205 | 37.857 | 41.768 | 37.960 | 0.00 | 0.00 |
| ATOM | 3107 | HG13 | VAL | X | 205 | 38.094 | 43.541 | 37.450 | 0.00 | 0.00 |
| ATOM | 3108 | CG2  | VAL | X | 205 | 40.140 | 44.136 | 39.110 | 0.00 | 0.00 |
| ATOM | 3109 | HG21 | VAL | X | 205 | 39.659 | 44.989 | 38.632 | 0.00 | 0.00 |
| ATOM | 3110 | HG22 | VAL | X | 205 | 40.615 | 44.495 | 40.022 | 0.00 | 0.00 |
| ATOM | 3111 | HG23 | VAL | X | 205 | 40.905 | 43.811 | 38.404 | 0.00 | 0.00 |
| ATOM | 3112 | C    | VAL | X | 205 | 36.758 | 42.684 | 40.289 | 0.00 | 0.00 |
| ATOM | 3113 | O    | VAL | X | 205 | 35.944 | 43.309 | 39.721 | 0.00 | 0.00 |
| ATOM | 3114 | N    | GLY | X | 206 | 36.556 | 41.459 | 40.771 | 0.00 | 0.00 |
| ATOM | 3115 | H    | GLY | X | 206 | 37.411 | 41.060 | 41.130 | 0.00 | 0.00 |
| ATOM | 3116 | CA   | GLY | X | 206 | 35.327 | 40.704 | 40.677 | 0.00 | 0.00 |
| ATOM | 3117 | HA2  | GLY | X | 206 | 34.931 | 41.012 | 39.680 | 0.00 | 0.00 |
| ATOM | 3118 | HA3  | GLY | X | 206 | 35.520 | 39.642 | 40.724 | 0.00 | 0.00 |
| ATOM | 3119 | C    | GLY | X | 206 | 34.348 | 41.129 | 41.787 | 0.00 | 0.00 |
| ATOM | 3120 | O    | GLY | X | 206 | 33.226 | 41.212 | 41.367 | 0.00 | 0.00 |
| ATOM | 3121 | N    | MET | X | 207 | 34.716 | 41.304 | 43.083 | 0.00 | 0.00 |

|      |      |      |     |   |     |        |        |        |      |      |
|------|------|------|-----|---|-----|--------|--------|--------|------|------|
| ATOM | 3122 | H    | MET | X | 207 | 35.698 | 41.140 | 43.252 | 0.00 | 0.00 |
| ATOM | 3123 | CA   | MET | X | 207 | 33.858 | 41.887 | 44.151 | 0.00 | 0.00 |
| ATOM | 3124 | HA   | MET | X | 207 | 32.955 | 41.283 | 44.238 | 0.00 | 0.00 |
| ATOM | 3125 | CB   | MET | X | 207 | 34.547 | 42.058 | 45.504 | 0.00 | 0.00 |
| ATOM | 3126 | HB2  | MET | X | 207 | 35.396 | 42.741 | 45.531 | 0.00 | 0.00 |
| ATOM | 3127 | HB3  | MET | X | 207 | 33.882 | 42.482 | 46.257 | 0.00 | 0.00 |
| ATOM | 3128 | CG   | MET | X | 207 | 35.106 | 40.703 | 46.002 | 0.00 | 0.00 |
| ATOM | 3129 | HG2  | MET | X | 207 | 34.246 | 40.046 | 46.131 | 0.00 | 0.00 |
| ATOM | 3130 | HG3  | MET | X | 207 | 35.809 | 40.335 | 45.255 | 0.00 | 0.00 |
| ATOM | 3131 | SD   | MET | X | 207 | 35.950 | 40.841 | 47.673 | 0.00 | 0.00 |
| ATOM | 3132 | CE   | MET | X | 207 | 36.591 | 39.167 | 47.625 | 0.00 | 0.00 |
| ATOM | 3133 | HE1  | MET | X | 207 | 37.158 | 39.002 | 48.541 | 0.00 | 0.00 |
| ATOM | 3134 | HE2  | MET | X | 207 | 35.846 | 38.384 | 47.492 | 0.00 | 0.00 |
| ATOM | 3135 | HE3  | MET | X | 207 | 37.372 | 39.055 | 46.873 | 0.00 | 0.00 |
| ATOM | 3136 | C    | MET | X | 207 | 33.261 | 43.199 | 43.610 | 0.00 | 0.00 |
| ATOM | 3137 | O    | MET | X | 207 | 32.041 | 43.360 | 43.799 | 0.00 | 0.00 |
| ATOM | 3138 | N    | HIE | X | 208 | 34.083 | 44.039 | 42.958 | 0.00 | 0.00 |
| ATOM | 3139 | H    | HIE | X | 208 | 35.062 | 43.792 | 42.914 | 0.00 | 0.00 |
| ATOM | 3140 | CA   | HIE | X | 208 | 33.567 | 45.231 | 42.180 | 0.00 | 0.00 |
| ATOM | 3141 | HA   | HIE | X | 208 | 33.033 | 45.844 | 42.906 | 0.00 | 0.00 |
| ATOM | 3142 | CB   | HIE | X | 208 | 34.711 | 46.110 | 41.542 | 0.00 | 0.00 |
| ATOM | 3143 | HB2  | HIE | X | 208 | 35.274 | 45.475 | 40.858 | 0.00 | 0.00 |
| ATOM | 3144 | HB3  | HIE | X | 208 | 34.318 | 46.955 | 40.976 | 0.00 | 0.00 |
| ATOM | 3145 | CG   | HIE | X | 208 | 35.557 | 46.773 | 42.621 | 0.00 | 0.00 |
| ATOM | 3146 | ND1  | HIE | X | 208 | 35.000 | 47.624 | 43.621 | 0.00 | 0.00 |
| ATOM | 3147 | CE1  | HIE | X | 208 | 36.091 | 48.024 | 44.315 | 0.00 | 0.00 |
| ATOM | 3148 | HE1  | HIE | X | 208 | 36.171 | 48.774 | 45.088 | 0.00 | 0.00 |
| ATOM | 3149 | NE2  | HIE | X | 208 | 37.207 | 47.484 | 43.841 | 0.00 | 0.00 |
| ATOM | 3150 | HE2  | HIE | X | 208 | 38.140 | 47.665 | 44.181 | 0.00 | 0.00 |
| ATOM | 3151 | CD2  | HIE | X | 208 | 36.932 | 46.759 | 42.743 | 0.00 | 0.00 |
| ATOM | 3152 | HD2  | HIE | X | 208 | 37.665 | 46.283 | 42.109 | 0.00 | 0.00 |
| ATOM | 3153 | C    | HIE | X | 208 | 32.558 | 44.970 | 40.991 | 0.00 | 0.00 |
| ATOM | 3154 | O    | HIE | X | 208 | 31.632 | 45.718 | 40.800 | 0.00 | 0.00 |
| ATOM | 3155 | N    | LEU | X | 209 | 32.709 | 43.842 | 40.220 | 0.00 | 0.00 |
| ATOM | 3156 | H    | LEU | X | 209 | 33.525 | 43.276 | 40.403 | 0.00 | 0.00 |
| ATOM | 3157 | CA   | LEU | X | 209 | 31.769 | 43.380 | 39.219 | 0.00 | 0.00 |
| ATOM | 3158 | HA   | LEU | X | 209 | 31.454 | 44.253 | 38.648 | 0.00 | 0.00 |
| ATOM | 3159 | CB   | LEU | X | 209 | 32.502 | 42.266 | 38.367 | 0.00 | 0.00 |
| ATOM | 3160 | HB2  | LEU | X | 209 | 33.519 | 42.597 | 38.157 | 0.00 | 0.00 |
| ATOM | 3161 | HB3  | LEU | X | 209 | 32.602 | 41.359 | 38.962 | 0.00 | 0.00 |
| ATOM | 3162 | CG   | LEU | X | 209 | 31.909 | 41.825 | 37.019 | 0.00 | 0.00 |
| ATOM | 3163 | HG   | LEU | X | 209 | 31.147 | 41.063 | 37.186 | 0.00 | 0.00 |
| ATOM | 3164 | CD1  | LEU | X | 209 | 31.241 | 42.995 | 36.212 | 0.00 | 0.00 |
| ATOM | 3165 | HD11 | LEU | X | 209 | 31.030 | 42.510 | 35.259 | 0.00 | 0.00 |
| ATOM | 3166 | HD12 | LEU | X | 209 | 30.270 | 43.401 | 36.497 | 0.00 | 0.00 |
| ATOM | 3167 | HD13 | LEU | X | 209 | 32.017 | 43.668 | 35.849 | 0.00 | 0.00 |
| ATOM | 3168 | CD2  | LEU | X | 209 | 32.942 | 40.944 | 36.263 | 0.00 | 0.00 |
| ATOM | 3169 | HD21 | LEU | X | 209 | 33.690 | 41.592 | 35.806 | 0.00 | 0.00 |
| ATOM | 3170 | HD22 | LEU | X | 209 | 33.419 | 40.122 | 36.797 | 0.00 | 0.00 |
| ATOM | 3171 | HD23 | LEU | X | 209 | 32.428 | 40.379 | 35.485 | 0.00 | 0.00 |
| ATOM | 3172 | C    | LEU | X | 209 | 30.521 | 42.668 | 39.764 | 0.00 | 0.00 |
| ATOM | 3173 | O    | LEU | X | 209 | 29.505 | 42.620 | 39.091 | 0.00 | 0.00 |
| ATOM | 3174 | N    | LEU | X | 210 | 30.640 | 42.136 | 41.002 | 0.00 | 0.00 |
| ATOM | 3175 | H    | LEU | X | 210 | 31.486 | 42.267 | 41.539 | 0.00 | 0.00 |
| ATOM | 3176 | CA   | LEU | X | 210 | 29.493 | 41.573 | 41.805 | 0.00 | 0.00 |
| ATOM | 3177 | HA   | LEU | X | 210 | 28.769 | 41.165 | 41.099 | 0.00 | 0.00 |
| ATOM | 3178 | CB   | LEU | X | 210 | 29.933 | 40.456 | 42.802 | 0.00 | 0.00 |
| ATOM | 3179 | HB2  | LEU | X | 210 | 30.668 | 40.960 | 43.430 | 0.00 | 0.00 |
| ATOM | 3180 | HB3  | LEU | X | 210 | 29.109 | 40.147 | 43.444 | 0.00 | 0.00 |
| ATOM | 3181 | CG   | LEU | X | 210 | 30.549 | 39.186 | 42.091 | 0.00 | 0.00 |
| ATOM | 3182 | HG   | LEU | X | 210 | 31.349 | 39.426 | 41.391 | 0.00 | 0.00 |
| ATOM | 3183 | CD1  | LEU | X | 210 | 31.274 | 38.193 | 43.049 | 0.00 | 0.00 |
| ATOM | 3184 | HD11 | LEU | X | 210 | 31.666 | 37.275 | 42.610 | 0.00 | 0.00 |
| ATOM | 3185 | HD12 | LEU | X | 210 | 32.180 | 38.583 | 43.512 | 0.00 | 0.00 |
| ATOM | 3186 | HD13 | LEU | X | 210 | 30.590 | 37.891 | 43.842 | 0.00 | 0.00 |
| ATOM | 3187 | CD2  | LEU | X | 210 | 29.399 | 38.418 | 41.401 | 0.00 | 0.00 |
| ATOM | 3188 | HD21 | LEU | X | 210 | 29.916 | 37.620 | 40.867 | 0.00 | 0.00 |
| ATOM | 3189 | HD22 | LEU | X | 210 | 28.597 | 38.056 | 42.044 | 0.00 | 0.00 |
| ATOM | 3190 | HD23 | LEU | X | 210 | 29.037 | 39.047 | 40.588 | 0.00 | 0.00 |
| ATOM | 3191 | C    | LEU | X | 210 | 28.755 | 42.607 | 42.592 | 0.00 | 0.00 |

|      |      |      |     |   |     |        |        |        |      |      |
|------|------|------|-----|---|-----|--------|--------|--------|------|------|
| ATOM | 3192 | O    | LEU | X | 210 | 27.641 | 42.268 | 42.981 | 0.00 | 0.00 |
| ATOM | 3193 | N    | SER | X | 211 | 29.289 | 43.788 | 42.865 | 0.00 | 0.00 |
| ATOM | 3194 | H    | SER | X | 211 | 30.276 | 43.916 | 42.695 | 0.00 | 0.00 |
| ATOM | 3195 | CA   | SER | X | 211 | 28.594 | 44.861 | 43.657 | 0.00 | 0.00 |
| ATOM | 3196 | HA   | SER | X | 211 | 27.836 | 44.264 | 44.163 | 0.00 | 0.00 |
| ATOM | 3197 | CB   | SER | X | 211 | 29.427 | 45.537 | 44.719 | 0.00 | 0.00 |
| ATOM | 3198 | HB2  | SER | X | 211 | 29.892 | 44.747 | 45.309 | 0.00 | 0.00 |
| ATOM | 3199 | HB3  | SER | X | 211 | 30.269 | 46.117 | 44.341 | 0.00 | 0.00 |
| ATOM | 3200 | OG   | SER | X | 211 | 28.586 | 46.378 | 45.534 | 0.00 | 0.00 |
| ATOM | 3201 | HG   | SER | X | 211 | 27.870 | 45.860 | 45.907 | 0.00 | 0.00 |
| ATOM | 3202 | C    | SER | X | 211 | 28.009 | 45.890 | 42.657 | 0.00 | 0.00 |
| ATOM | 3203 | O    | SER | X | 211 | 28.774 | 46.610 | 42.019 | 0.00 | 0.00 |
| ATOM | 3204 | N    | PRO | X | 212 | 26.641 | 46.000 | 42.537 | 0.00 | 0.00 |
| ATOM | 3205 | CD   | PRO | X | 212 | 25.672 | 45.026 | 43.103 | 0.00 | 0.00 |
| ATOM | 3206 | HD2  | PRO | X | 212 | 25.597 | 45.296 | 44.156 | 0.00 | 0.00 |
| ATOM | 3207 | HD3  | PRO | X | 212 | 25.825 | 43.952 | 42.998 | 0.00 | 0.00 |
| ATOM | 3208 | CG   | PRO | X | 212 | 24.353 | 45.278 | 42.370 | 0.00 | 0.00 |
| ATOM | 3209 | HG2  | PRO | X | 212 | 23.426 | 45.160 | 42.931 | 0.00 | 0.00 |
| ATOM | 3210 | HG3  | PRO | X | 212 | 24.297 | 44.744 | 41.421 | 0.00 | 0.00 |
| ATOM | 3211 | CB   | PRO | X | 212 | 24.486 | 46.781 | 42.031 | 0.00 | 0.00 |
| ATOM | 3212 | HB2  | PRO | X | 212 | 24.198 | 47.389 | 42.887 | 0.00 | 0.00 |
| ATOM | 3213 | HB3  | PRO | X | 212 | 23.933 | 47.061 | 41.134 | 0.00 | 0.00 |
| ATOM | 3214 | CA   | PRO | X | 212 | 25.947 | 46.995 | 41.667 | 0.00 | 0.00 |
| ATOM | 3215 | HA   | PRO | X | 212 | 26.034 | 46.681 | 40.627 | 0.00 | 0.00 |
| ATOM | 3216 | C    | PRO | X | 212 | 26.539 | 48.457 | 41.799 | 0.00 | 0.00 |
| ATOM | 3217 | O    | PRO | X | 212 | 26.927 | 48.953 | 40.738 | 0.00 | 0.00 |
| ATOM | 3218 | N    | PRO | X | 213 | 26.769 | 49.040 | 43.031 | 0.00 | 0.00 |
| ATOM | 3219 | CD   | PRO | X | 213 | 26.222 | 48.534 | 44.289 | 0.00 | 0.00 |
| ATOM | 3220 | HD2  | PRO | X | 213 | 26.470 | 47.482 | 44.429 | 0.00 | 0.00 |
| ATOM | 3221 | HD3  | PRO | X | 213 | 25.148 | 48.722 | 44.313 | 0.00 | 0.00 |
| ATOM | 3222 | CG   | PRO | X | 213 | 26.892 | 49.423 | 45.374 | 0.00 | 0.00 |
| ATOM | 3223 | HG2  | PRO | X | 213 | 27.922 | 49.175 | 45.630 | 0.00 | 0.00 |
| ATOM | 3224 | HG3  | PRO | X | 213 | 26.221 | 49.425 | 46.233 | 0.00 | 0.00 |
| ATOM | 3225 | CB   | PRO | X | 213 | 26.850 | 50.799 | 44.722 | 0.00 | 0.00 |
| ATOM | 3226 | HB2  | PRO | X | 213 | 27.408 | 51.639 | 45.135 | 0.00 | 0.00 |
| ATOM | 3227 | HB3  | PRO | X | 213 | 25.781 | 51.005 | 44.678 | 0.00 | 0.00 |
| ATOM | 3228 | CA   | PRO | X | 213 | 27.285 | 50.469 | 43.239 | 0.00 | 0.00 |
| ATOM | 3229 | HA   | PRO | X | 213 | 26.714 | 51.093 | 42.550 | 0.00 | 0.00 |
| ATOM | 3230 | C    | PRO | X | 213 | 28.866 | 50.569 | 43.031 | 0.00 | 0.00 |
| ATOM | 3231 | O    | PRO | X | 213 | 29.452 | 51.652 | 43.149 | 0.00 | 0.00 |
| ATOM | 3232 | N    | SER | X | 214 | 29.504 | 49.430 | 42.757 | 0.00 | 0.00 |
| ATOM | 3233 | H    | SER | X | 214 | 28.987 | 48.570 | 42.638 | 0.00 | 0.00 |
| ATOM | 3234 | CA   | SER | X | 214 | 30.787 | 49.491 | 41.985 | 0.00 | 0.00 |
| ATOM | 3235 | HA   | SER | X | 214 | 31.203 | 50.498 | 42.029 | 0.00 | 0.00 |
| ATOM | 3236 | CB   | SER | X | 214 | 31.743 | 48.418 | 42.505 | 0.00 | 0.00 |
| ATOM | 3237 | HB2  | SER | X | 214 | 31.242 | 47.481 | 42.752 | 0.00 | 0.00 |
| ATOM | 3238 | HB3  | SER | X | 214 | 32.620 | 48.187 | 41.900 | 0.00 | 0.00 |
| ATOM | 3239 | OG   | SER | X | 214 | 32.255 | 48.929 | 43.705 | 0.00 | 0.00 |
| ATOM | 3240 | HG   | SER | X | 214 | 33.061 | 48.457 | 43.926 | 0.00 | 0.00 |
| ATOM | 3241 | C    | SER | X | 214 | 30.694 | 49.329 | 40.503 | 0.00 | 0.00 |
| ATOM | 3242 | O    | SER | X | 214 | 31.274 | 50.139 | 39.806 | 0.00 | 0.00 |
| ATOM | 3243 | N    | ARG | X | 215 | 30.023 | 48.272 | 39.980 | 0.00 | 0.00 |
| ATOM | 3244 | H    | ARG | X | 215 | 29.544 | 47.758 | 40.705 | 0.00 | 0.00 |
| ATOM | 3245 | CA   | ARG | X | 215 | 29.853 | 47.930 | 38.567 | 0.00 | 0.00 |
| ATOM | 3246 | HA   | ARG | X | 215 | 30.797 | 47.689 | 38.077 | 0.00 | 0.00 |
| ATOM | 3247 | CB   | ARG | X | 215 | 28.853 | 46.697 | 38.513 | 0.00 | 0.00 |
| ATOM | 3248 | HB2  | ARG | X | 215 | 29.198 | 45.852 | 39.109 | 0.00 | 0.00 |
| ATOM | 3249 | HB3  | ARG | X | 215 | 27.958 | 46.879 | 39.108 | 0.00 | 0.00 |
| ATOM | 3250 | CG   | ARG | X | 215 | 28.504 | 46.113 | 37.169 | 0.00 | 0.00 |
| ATOM | 3251 | HG2  | ARG | X | 215 | 27.990 | 46.843 | 36.544 | 0.00 | 0.00 |
| ATOM | 3252 | HG3  | ARG | X | 215 | 29.428 | 45.844 | 36.658 | 0.00 | 0.00 |
| ATOM | 3253 | CD   | ARG | X | 215 | 27.634 | 44.897 | 37.239 | 0.00 | 0.00 |
| ATOM | 3254 | HD2  | ARG | X | 215 | 28.181 | 44.018 | 37.582 | 0.00 | 0.00 |
| ATOM | 3255 | HD3  | ARG | X | 215 | 26.895 | 45.174 | 37.990 | 0.00 | 0.00 |
| ATOM | 3256 | NE   | ARG | X | 215 | 26.839 | 44.681 | 36.069 | 0.00 | 0.00 |
| ATOM | 3257 | HE   | ARG | X | 215 | 26.978 | 45.410 | 35.383 | 0.00 | 0.00 |
| ATOM | 3258 | CZ   | ARG | X | 215 | 26.096 | 43.598 | 35.837 | 0.00 | 0.00 |
| ATOM | 3259 | NH1  | ARG | X | 215 | 25.881 | 42.645 | 36.728 | 0.00 | 0.00 |
| ATOM | 3260 | HH11 | ARG | X | 215 | 26.212 | 42.656 | 37.682 | 0.00 | 0.00 |
| ATOM | 3261 | HH12 | ARG | X | 215 | 25.373 | 41.823 | 36.436 | 0.00 | 0.00 |

|      |      |      |     |   |     |        |        |        |      |      |
|------|------|------|-----|---|-----|--------|--------|--------|------|------|
| ATOM | 3262 | NH2  | ARG | X | 215 | 25.522 | 43.489 | 34.694 | 0.00 | 0.00 |
| ATOM | 3263 | HH21 | ARG | X | 215 | 25.451 | 44.342 | 34.158 | 0.00 | 0.00 |
| ATOM | 3264 | HH22 | ARG | X | 215 | 24.912 | 42.726 | 34.437 | 0.00 | 0.00 |
| ATOM | 3265 | C    | ARG | X | 215 | 29.344 | 49.179 | 37.727 | 0.00 | 0.00 |
| ATOM | 3266 | O    | ARG | X | 215 | 29.511 | 49.109 | 36.491 | 0.00 | 0.00 |
| ATOM | 3267 | N    | GLY | X | 216 | 28.829 | 50.241 | 38.299 | 0.00 | 0.00 |
| ATOM | 3268 | H    | GLY | X | 216 | 28.992 | 50.267 | 39.296 | 0.00 | 0.00 |
| ATOM | 3269 | CA   | GLY | X | 216 | 28.498 | 51.553 | 37.636 | 0.00 | 0.00 |
| ATOM | 3270 | HA2  | GLY | X | 216 | 28.017 | 51.403 | 36.659 | 0.00 | 0.00 |
| ATOM | 3271 | HA3  | GLY | X | 216 | 27.894 | 52.191 | 38.247 | 0.00 | 0.00 |
| ATOM | 3272 | C    | GLY | X | 216 | 29.678 | 52.435 | 37.208 | 0.00 | 0.00 |
| ATOM | 3273 | O    | GLY | X | 216 | 29.524 | 53.427 | 36.573 | 0.00 | 0.00 |
| ATOM | 3274 | N    | LEU | X | 217 | 30.880 | 52.078 | 37.599 | 0.00 | 0.00 |
| ATOM | 3275 | H    | LEU | X | 217 | 30.909 | 51.387 | 38.335 | 0.00 | 0.00 |
| ATOM | 3276 | CA   | LEU | X | 217 | 31.998 | 52.993 | 37.475 | 0.00 | 0.00 |
| ATOM | 3277 | HA   | LEU | X | 217 | 31.670 | 53.992 | 37.190 | 0.00 | 0.00 |
| ATOM | 3278 | CB   | LEU | X | 217 | 32.657 | 53.042 | 38.868 | 0.00 | 0.00 |
| ATOM | 3279 | HB2  | LEU | X | 217 | 32.891 | 52.068 | 39.296 | 0.00 | 0.00 |
| ATOM | 3280 | HB3  | LEU | X | 217 | 33.632 | 53.530 | 38.857 | 0.00 | 0.00 |
| ATOM | 3281 | CG   | LEU | X | 217 | 31.830 | 53.719 | 39.961 | 0.00 | 0.00 |
| ATOM | 3282 | HG   | LEU | X | 217 | 30.836 | 53.274 | 40.016 | 0.00 | 0.00 |
| ATOM | 3283 | CD1  | LEU | X | 217 | 32.450 | 53.482 | 41.350 | 0.00 | 0.00 |
| ATOM | 3284 | HD11 | LEU | X | 217 | 33.395 | 54.024 | 41.382 | 0.00 | 0.00 |
| ATOM | 3285 | HD12 | LEU | X | 217 | 31.774 | 53.870 | 42.111 | 0.00 | 0.00 |
| ATOM | 3286 | HD13 | LEU | X | 217 | 32.617 | 52.427 | 41.565 | 0.00 | 0.00 |
| ATOM | 3287 | CD2  | LEU | X | 217 | 31.716 | 55.216 | 39.732 | 0.00 | 0.00 |
| ATOM | 3288 | HD21 | LEU | X | 217 | 32.703 | 55.600 | 39.472 | 0.00 | 0.00 |
| ATOM | 3289 | HD22 | LEU | X | 217 | 31.025 | 55.299 | 38.893 | 0.00 | 0.00 |
| ATOM | 3290 | HD23 | LEU | X | 217 | 31.228 | 55.685 | 40.586 | 0.00 | 0.00 |
| ATOM | 3291 | C    | LEU | X | 217 | 33.094 | 52.589 | 36.423 | 0.00 | 0.00 |
| ATOM | 3292 | O    | LEU | X | 217 | 34.019 | 53.424 | 36.205 | 0.00 | 0.00 |
| ATOM | 3293 | N    | PHE | X | 218 | 32.876 | 51.513 | 35.674 | 0.00 | 0.00 |
| ATOM | 3294 | H    | PHE | X | 218 | 32.029 | 51.031 | 35.940 | 0.00 | 0.00 |
| ATOM | 3295 | CA   | PHE | X | 218 | 33.731 | 50.870 | 34.703 | 0.00 | 0.00 |
| ATOM | 3296 | HA   | PHE | X | 218 | 34.286 | 51.701 | 34.268 | 0.00 | 0.00 |
| ATOM | 3297 | CB   | PHE | X | 218 | 34.792 | 50.005 | 35.446 | 0.00 | 0.00 |
| ATOM | 3298 | HB2  | PHE | X | 218 | 35.423 | 49.574 | 34.668 | 0.00 | 0.00 |
| ATOM | 3299 | HB3  | PHE | X | 218 | 35.461 | 50.656 | 36.008 | 0.00 | 0.00 |
| ATOM | 3300 | CG   | PHE | X | 218 | 34.187 | 48.841 | 36.287 | 0.00 | 0.00 |
| ATOM | 3301 | CD1  | PHE | X | 218 | 33.903 | 49.070 | 37.623 | 0.00 | 0.00 |
| ATOM | 3302 | HD1  | PHE | X | 218 | 33.949 | 50.107 | 37.920 | 0.00 | 0.00 |
| ATOM | 3303 | CE1  | PHE | X | 218 | 33.538 | 48.023 | 38.483 | 0.00 | 0.00 |
| ATOM | 3304 | HE1  | PHE | X | 218 | 33.317 | 48.253 | 39.515 | 0.00 | 0.00 |
| ATOM | 3305 | CZ   | PHE | X | 218 | 33.508 | 46.693 | 38.048 | 0.00 | 0.00 |
| ATOM | 3306 | HZ   | PHE | X | 218 | 33.293 | 45.831 | 38.663 | 0.00 | 0.00 |
| ATOM | 3307 | CE2  | PHE | X | 218 | 33.856 | 46.488 | 36.712 | 0.00 | 0.00 |
| ATOM | 3308 | HE2  | PHE | X | 218 | 33.832 | 45.470 | 36.353 | 0.00 | 0.00 |
| ATOM | 3309 | CD2  | PHE | X | 218 | 34.156 | 47.528 | 35.860 | 0.00 | 0.00 |
| ATOM | 3310 | HD2  | PHE | X | 218 | 34.439 | 47.365 | 34.831 | 0.00 | 0.00 |
| ATOM | 3311 | C    | PHE | X | 218 | 32.983 | 50.051 | 33.612 | 0.00 | 0.00 |
| ATOM | 3312 | O    | PHE | X | 218 | 31.855 | 49.575 | 33.830 | 0.00 | 0.00 |
| ATOM | 3313 | N    | HIE | X | 219 | 33.664 | 49.971 | 32.466 | 0.00 | 0.00 |
| ATOM | 3314 | H    | HIE | X | 219 | 34.455 | 50.598 | 32.433 | 0.00 | 0.00 |
| ATOM | 3315 | CA   | HIE | X | 219 | 33.244 | 49.331 | 31.286 | 0.00 | 0.00 |
| ATOM | 3316 | HA   | HIE | X | 219 | 32.157 | 49.311 | 31.201 | 0.00 | 0.00 |
| ATOM | 3317 | CB   | HIE | X | 219 | 33.710 | 50.232 | 30.122 | 0.00 | 0.00 |
| ATOM | 3318 | HB2  | HIE | X | 219 | 34.788 | 50.389 | 30.077 | 0.00 | 0.00 |
| ATOM | 3319 | HB3  | HIE | X | 219 | 33.563 | 49.783 | 29.140 | 0.00 | 0.00 |
| ATOM | 3320 | CG   | HIE | X | 219 | 33.053 | 51.566 | 30.162 | 0.00 | 0.00 |
| ATOM | 3321 | ND1  | HIE | X | 219 | 33.626 | 52.617 | 30.827 | 0.00 | 0.00 |
| ATOM | 3322 | CE1  | HIE | X | 219 | 32.633 | 53.452 | 31.024 | 0.00 | 0.00 |
| ATOM | 3323 | HE1  | HIE | X | 219 | 32.616 | 54.293 | 31.701 | 0.00 | 0.00 |
| ATOM | 3324 | NE2  | HIE | X | 219 | 31.432 | 52.958 | 30.590 | 0.00 | 0.00 |
| ATOM | 3325 | HE2  | HIE | X | 219 | 30.508 | 53.237 | 30.886 | 0.00 | 0.00 |
| ATOM | 3326 | CD2  | HIE | X | 219 | 31.641 | 51.775 | 30.045 | 0.00 | 0.00 |
| ATOM | 3327 | HD2  | HIE | X | 219 | 30.914 | 51.103 | 29.612 | 0.00 | 0.00 |
| ATOM | 3328 | C    | HIE | X | 219 | 33.627 | 47.861 | 31.089 | 0.00 | 0.00 |
| ATOM | 3329 | O    | HIE | X | 219 | 32.855 | 47.123 | 30.495 | 0.00 | 0.00 |
| ATOM | 3330 | N    | ARG | X | 220 | 34.799 | 47.461 | 31.630 | 0.00 | 0.00 |
| ATOM | 3331 | H    | ARG | X | 220 | 35.282 | 48.182 | 32.145 | 0.00 | 0.00 |

|      |      |      |     |   |     |        |        |        |      |      |
|------|------|------|-----|---|-----|--------|--------|--------|------|------|
| ATOM | 3332 | CA   | ARG | X | 220 | 35.457 | 46.160 | 31.400 | 0.00 | 0.00 |
| ATOM | 3333 | HA   | ARG | X | 220 | 34.745 | 45.341 | 31.300 | 0.00 | 0.00 |
| ATOM | 3334 | CB   | ARG | X | 220 | 36.358 | 46.106 | 30.184 | 0.00 | 0.00 |
| ATOM | 3335 | HB2  | ARG | X | 220 | 37.197 | 46.763 | 30.415 | 0.00 | 0.00 |
| ATOM | 3336 | HB3  | ARG | X | 220 | 36.743 | 45.107 | 29.979 | 0.00 | 0.00 |
| ATOM | 3337 | CG   | ARG | X | 220 | 35.723 | 46.546 | 28.875 | 0.00 | 0.00 |
| ATOM | 3338 | HG2  | ARG | X | 220 | 34.776 | 46.049 | 28.665 | 0.00 | 0.00 |
| ATOM | 3339 | HG3  | ARG | X | 220 | 35.649 | 47.633 | 28.894 | 0.00 | 0.00 |
| ATOM | 3340 | CD   | ARG | X | 220 | 36.606 | 46.207 | 27.734 | 0.00 | 0.00 |
| ATOM | 3341 | HD2  | ARG | X | 220 | 37.574 | 46.684 | 27.893 | 0.00 | 0.00 |
| ATOM | 3342 | HD3  | ARG | X | 220 | 36.703 | 45.122 | 27.730 | 0.00 | 0.00 |
| ATOM | 3343 | NE   | ARG | X | 220 | 35.980 | 46.726 | 26.528 | 0.00 | 0.00 |
| ATOM | 3344 | HE   | ARG | X | 220 | 35.161 | 46.238 | 26.195 | 0.00 | 0.00 |
| ATOM | 3345 | CZ   | ARG | X | 220 | 36.229 | 47.872 | 25.891 | 0.00 | 0.00 |
| ATOM | 3346 | NH1  | ARG | X | 220 | 37.033 | 48.770 | 26.345 | 0.00 | 0.00 |
| ATOM | 3347 | HH11 | ARG | X | 220 | 37.530 | 48.649 | 27.216 | 0.00 | 0.00 |
| ATOM | 3348 | HH12 | ARG | X | 220 | 37.329 | 49.476 | 25.686 | 0.00 | 0.00 |
| ATOM | 3349 | NH2  | ARG | X | 220 | 35.601 | 48.084 | 24.707 | 0.00 | 0.00 |
| ATOM | 3350 | HH21 | ARG | X | 220 | 35.069 | 47.293 | 24.374 | 0.00 | 0.00 |
| ATOM | 3351 | HH22 | ARG | X | 220 | 35.679 | 48.862 | 24.068 | 0.00 | 0.00 |
| ATOM | 3352 | C    | ARG | X | 220 | 36.368 | 45.753 | 32.677 | 0.00 | 0.00 |
| ATOM | 3353 | O    | ARG | X | 220 | 36.828 | 46.589 | 33.456 | 0.00 | 0.00 |
| ATOM | 3354 | N    | ALA | X | 221 | 36.667 | 44.459 | 32.814 | 0.00 | 0.00 |
| ATOM | 3355 | H    | ALA | X | 221 | 36.511 | 43.933 | 31.967 | 0.00 | 0.00 |
| ATOM | 3356 | CA   | ALA | X | 221 | 37.349 | 43.941 | 34.018 | 0.00 | 0.00 |
| ATOM | 3357 | HA   | ALA | X | 221 | 37.899 | 44.795 | 34.414 | 0.00 | 0.00 |
| ATOM | 3358 | CB   | ALA | X | 221 | 36.399 | 43.293 | 35.086 | 0.00 | 0.00 |
| ATOM | 3359 | HB1  | ALA | X | 221 | 35.626 | 43.912 | 35.541 | 0.00 | 0.00 |
| ATOM | 3360 | HB2  | ALA | X | 221 | 35.857 | 42.463 | 34.633 | 0.00 | 0.00 |
| ATOM | 3361 | HB3  | ALA | X | 221 | 36.892 | 42.748 | 35.892 | 0.00 | 0.00 |
| ATOM | 3362 | C    | ALA | X | 221 | 38.341 | 42.911 | 33.540 | 0.00 | 0.00 |
| ATOM | 3363 | O    | ALA | X | 221 | 38.009 | 42.085 | 32.688 | 0.00 | 0.00 |
| ATOM | 3364 | N    | VAL | X | 222 | 39.527 | 42.785 | 34.147 | 0.00 | 0.00 |
| ATOM | 3365 | H    | VAL | X | 222 | 39.691 | 43.575 | 34.755 | 0.00 | 0.00 |
| ATOM | 3366 | CA   | VAL | X | 222 | 40.639 | 41.932 | 33.700 | 0.00 | 0.00 |
| ATOM | 3367 | HA   | VAL | X | 222 | 40.300 | 41.225 | 32.942 | 0.00 | 0.00 |
| ATOM | 3368 | CB   | VAL | X | 222 | 41.798 | 42.665 | 33.051 | 0.00 | 0.00 |
| ATOM | 3369 | HB   | VAL | X | 222 | 41.921 | 43.560 | 33.662 | 0.00 | 0.00 |
| ATOM | 3370 | CG1  | VAL | X | 222 | 43.181 | 41.886 | 32.860 | 0.00 | 0.00 |
| ATOM | 3371 | HG11 | VAL | X | 222 | 43.547 | 41.427 | 33.779 | 0.00 | 0.00 |
| ATOM | 3372 | HG12 | VAL | X | 222 | 42.927 | 41.076 | 32.177 | 0.00 | 0.00 |
| ATOM | 3373 | HG13 | VAL | X | 222 | 43.951 | 42.501 | 32.394 | 0.00 | 0.00 |
| ATOM | 3374 | CG2  | VAL | X | 222 | 41.376 | 43.168 | 31.675 | 0.00 | 0.00 |
| ATOM | 3375 | HG21 | VAL | X | 222 | 42.167 | 43.778 | 31.239 | 0.00 | 0.00 |
| ATOM | 3376 | HG22 | VAL | X | 222 | 41.166 | 42.431 | 30.900 | 0.00 | 0.00 |
| ATOM | 3377 | HG23 | VAL | X | 222 | 40.401 | 43.655 | 31.673 | 0.00 | 0.00 |
| ATOM | 3378 | C    | VAL | X | 222 | 41.174 | 41.289 | 34.958 | 0.00 | 0.00 |
| ATOM | 3379 | O    | VAL | X | 222 | 41.748 | 42.019 | 35.792 | 0.00 | 0.00 |
| ATOM | 3380 | N    | LEU | X | 223 | 40.938 | 39.992 | 35.063 | 0.00 | 0.00 |
| ATOM | 3381 | H    | LEU | X | 223 | 40.550 | 39.517 | 34.261 | 0.00 | 0.00 |
| ATOM | 3382 | CA   | LEU | X | 223 | 41.422 | 39.195 | 36.136 | 0.00 | 0.00 |
| ATOM | 3383 | HA   | LEU | X | 223 | 41.589 | 39.890 | 36.958 | 0.00 | 0.00 |
| ATOM | 3384 | CB   | LEU | X | 223 | 40.390 | 38.139 | 36.592 | 0.00 | 0.00 |
| ATOM | 3385 | HB2  | LEU | X | 223 | 40.094 | 37.499 | 35.760 | 0.00 | 0.00 |
| ATOM | 3386 | HB3  | LEU | X | 223 | 40.779 | 37.504 | 37.388 | 0.00 | 0.00 |
| ATOM | 3387 | CG   | LEU | X | 223 | 39.130 | 38.837 | 37.216 | 0.00 | 0.00 |
| ATOM | 3388 | HG   | LEU | X | 223 | 39.473 | 39.784 | 37.634 | 0.00 | 0.00 |
| ATOM | 3389 | CD1  | LEU | X | 223 | 37.920 | 39.059 | 36.212 | 0.00 | 0.00 |
| ATOM | 3390 | HD11 | LEU | X | 223 | 38.178 | 39.720 | 35.385 | 0.00 | 0.00 |
| ATOM | 3391 | HD12 | LEU | X | 223 | 37.461 | 38.160 | 35.800 | 0.00 | 0.00 |
| ATOM | 3392 | HD13 | LEU | X | 223 | 37.027 | 39.324 | 36.778 | 0.00 | 0.00 |
| ATOM | 3393 | CD2  | LEU | X | 223 | 38.621 | 37.948 | 38.371 | 0.00 | 0.00 |
| ATOM | 3394 | HD21 | LEU | X | 223 | 39.297 | 37.970 | 39.225 | 0.00 | 0.00 |
| ATOM | 3395 | HD22 | LEU | X | 223 | 37.636 | 38.244 | 38.733 | 0.00 | 0.00 |
| ATOM | 3396 | HD23 | LEU | X | 223 | 38.584 | 36.900 | 38.072 | 0.00 | 0.00 |
| ATOM | 3397 | C    | LEU | X | 223 | 42.812 | 38.516 | 35.775 | 0.00 | 0.00 |
| ATOM | 3398 | O    | LEU | X | 223 | 42.901 | 38.037 | 34.658 | 0.00 | 0.00 |
| ATOM | 3399 | N    | GLN | X | 224 | 43.777 | 38.512 | 36.702 | 0.00 | 0.00 |
| ATOM | 3400 | H    | GLN | X | 224 | 43.595 | 38.937 | 37.600 | 0.00 | 0.00 |
| ATOM | 3401 | CA   | GLN | X | 224 | 45.048 | 37.739 | 36.615 | 0.00 | 0.00 |



|      |      |      |     |   |     |        |        |        |      |      |
|------|------|------|-----|---|-----|--------|--------|--------|------|------|
| ATOM | 3402 | HA   | GLN | X | 224 | 44.832 | 36.956 | 35.888 | 0.00 | 0.00 |
| ATOM | 3403 | CB   | GLN | X | 224 | 46.135 | 38.708 | 36.137 | 0.00 | 0.00 |
| ATOM | 3404 | HB2  | GLN | X | 224 | 46.361 | 39.343 | 36.994 | 0.00 | 0.00 |
| ATOM | 3405 | HB3  | GLN | X | 224 | 46.979 | 38.052 | 35.924 | 0.00 | 0.00 |
| ATOM | 3406 | CG   | GLN | X | 224 | 45.988 | 39.532 | 34.882 | 0.00 | 0.00 |
| ATOM | 3407 | HG2  | GLN | X | 224 | 45.597 | 38.864 | 34.114 | 0.00 | 0.00 |
| ATOM | 3408 | HG3  | GLN | X | 224 | 45.309 | 40.358 | 35.093 | 0.00 | 0.00 |
| ATOM | 3409 | CD   | GLN | X | 224 | 47.226 | 40.201 | 34.273 | 0.00 | 0.00 |
| ATOM | 3410 | OE1  | GLN | X | 224 | 47.243 | 41.339 | 33.924 | 0.00 | 0.00 |
| ATOM | 3411 | NE2  | GLN | X | 224 | 48.273 | 39.439 | 34.110 | 0.00 | 0.00 |
| ATOM | 3412 | HE21 | GLN | X | 224 | 49.073 | 39.916 | 33.719 | 0.00 | 0.00 |
| ATOM | 3413 | HE22 | GLN | X | 224 | 48.308 | 38.540 | 34.569 | 0.00 | 0.00 |
| ATOM | 3414 | C    | GLN | X | 224 | 45.547 | 37.118 | 37.996 | 0.00 | 0.00 |
| ATOM | 3415 | O    | GLN | X | 224 | 45.288 | 37.797 | 39.022 | 0.00 | 0.00 |
| ATOM | 3416 | N    | SER | X | 225 | 46.122 | 35.944 | 38.039 | 0.00 | 0.00 |
| ATOM | 3417 | H    | SER | X | 225 | 46.201 | 35.461 | 37.156 | 0.00 | 0.00 |
| ATOM | 3418 | CA   | SER | X | 225 | 46.511 | 35.072 | 39.167 | 0.00 | 0.00 |
| ATOM | 3419 | HA   | SER | X | 225 | 46.453 | 34.068 | 38.746 | 0.00 | 0.00 |
| ATOM | 3420 | CB   | SER | X | 225 | 47.963 | 35.331 | 39.568 | 0.00 | 0.00 |
| ATOM | 3421 | HB2  | SER | X | 225 | 48.132 | 36.400 | 39.702 | 0.00 | 0.00 |
| ATOM | 3422 | HB3  | SER | X | 225 | 48.202 | 34.830 | 40.505 | 0.00 | 0.00 |
| ATOM | 3423 | OG   | SER | X | 225 | 48.850 | 35.022 | 38.539 | 0.00 | 0.00 |
| ATOM | 3424 | HG   | SER | X | 225 | 48.865 | 34.071 | 38.408 | 0.00 | 0.00 |
| ATOM | 3425 | C    | SER | X | 225 | 45.531 | 35.162 | 40.455 | 0.00 | 0.00 |
| ATOM | 3426 | O    | SER | X | 225 | 45.963 | 35.071 | 41.577 | 0.00 | 0.00 |
| ATOM | 3427 | N    | GLY | X | 226 | 44.253 | 35.373 | 40.236 | 0.00 | 0.00 |
| ATOM | 3428 | H    | GLY | X | 226 | 44.020 | 35.364 | 39.253 | 0.00 | 0.00 |
| ATOM | 3429 | CA   | GLY | X | 226 | 43.318 | 35.694 | 41.347 | 0.00 | 0.00 |
| ATOM | 3430 | HA2  | GLY | X | 226 | 43.578 | 35.009 | 42.157 | 0.00 | 0.00 |
| ATOM | 3431 | HA3  | GLY | X | 226 | 43.351 | 36.699 | 41.676 | 0.00 | 0.00 |
| ATOM | 3432 | C    | GLY | X | 226 | 41.821 | 35.619 | 40.921 | 0.00 | 0.00 |
| ATOM | 3433 | O    | GLY | X | 226 | 41.348 | 35.540 | 39.772 | 0.00 | 0.00 |
| ATOM | 3434 | N    | ALA | X | 227 | 40.957 | 35.737 | 41.999 | 0.00 | 0.00 |
| ATOM | 3435 | H    | ALA | X | 227 | 41.321 | 35.713 | 42.941 | 0.00 | 0.00 |
| ATOM | 3436 | CA   | ALA | X | 227 | 39.477 | 35.524 | 41.792 | 0.00 | 0.00 |
| ATOM | 3437 | HA   | ALA | X | 227 | 39.272 | 36.261 | 41.015 | 0.00 | 0.00 |
| ATOM | 3438 | CB   | ALA | X | 227 | 39.115 | 34.166 | 41.228 | 0.00 | 0.00 |
| ATOM | 3439 | HB1  | ALA | X | 227 | 38.100 | 34.243 | 40.837 | 0.00 | 0.00 |
| ATOM | 3440 | HB2  | ALA | X | 227 | 39.757 | 33.954 | 40.373 | 0.00 | 0.00 |
| ATOM | 3441 | HB3  | ALA | X | 227 | 39.218 | 33.328 | 41.917 | 0.00 | 0.00 |
| ATOM | 3442 | C    | ALA | X | 227 | 38.682 | 35.719 | 43.132 | 0.00 | 0.00 |
| ATOM | 3443 | O    | ALA | X | 227 | 39.152 | 35.347 | 44.256 | 0.00 | 0.00 |
| ATOM | 3444 | N    | PRO | X | 228 | 37.476 | 36.374 | 43.150 | 0.00 | 0.00 |
| ATOM | 3445 | CD   | PRO | X | 228 | 36.749 | 36.798 | 42.030 | 0.00 | 0.00 |
| ATOM | 3446 | HD2  | PRO | X | 228 | 36.647 | 35.877 | 41.456 | 0.00 | 0.00 |
| ATOM | 3447 | HD3  | PRO | X | 228 | 37.209 | 37.608 | 41.463 | 0.00 | 0.00 |
| ATOM | 3448 | CG   | PRO | X | 228 | 35.360 | 37.215 | 42.542 | 0.00 | 0.00 |
| ATOM | 3449 | HG2  | PRO | X | 228 | 34.599 | 36.442 | 42.434 | 0.00 | 0.00 |
| ATOM | 3450 | HG3  | PRO | X | 228 | 35.055 | 38.068 | 41.936 | 0.00 | 0.00 |
| ATOM | 3451 | CB   | PRO | X | 228 | 35.660 | 37.680 | 43.957 | 0.00 | 0.00 |
| ATOM | 3452 | HB2  | PRO | X | 228 | 34.813 | 37.724 | 44.642 | 0.00 | 0.00 |
| ATOM | 3453 | HB3  | PRO | X | 228 | 36.011 | 38.705 | 43.847 | 0.00 | 0.00 |
| ATOM | 3454 | CA   | PRO | X | 228 | 36.798 | 36.697 | 44.368 | 0.00 | 0.00 |
| ATOM | 3455 | HA   | PRO | X | 228 | 37.418 | 37.161 | 45.135 | 0.00 | 0.00 |
| ATOM | 3456 | C    | PRO | X | 228 | 36.119 | 35.491 | 44.982 | 0.00 | 0.00 |
| ATOM | 3457 | O    | PRO | X | 228 | 35.993 | 35.382 | 46.176 | 0.00 | 0.00 |
| ATOM | 3458 | N    | ASN | X | 229 | 35.704 | 34.497 | 44.134 | 0.00 | 0.00 |
| ATOM | 3459 | H    | ASN | X | 229 | 35.709 | 34.689 | 43.142 | 0.00 | 0.00 |
| ATOM | 3460 | CA   | ASN | X | 229 | 35.189 | 33.172 | 44.468 | 0.00 | 0.00 |
| ATOM | 3461 | HA   | ASN | X | 229 | 34.623 | 33.238 | 45.397 | 0.00 | 0.00 |
| ATOM | 3462 | CB   | ASN | X | 229 | 34.242 | 32.538 | 43.387 | 0.00 | 0.00 |
| ATOM | 3463 | HB2  | ASN | X | 229 | 33.972 | 31.517 | 43.657 | 0.00 | 0.00 |
| ATOM | 3464 | HB3  | ASN | X | 229 | 33.315 | 33.101 | 43.277 | 0.00 | 0.00 |
| ATOM | 3465 | CG   | ASN | X | 229 | 34.899 | 32.450 | 42.064 | 0.00 | 0.00 |
| ATOM | 3466 | OD1  | ASN | X | 229 | 35.312 | 33.451 | 41.601 | 0.00 | 0.00 |
| ATOM | 3467 | ND2  | ASN | X | 229 | 34.856 | 31.359 | 41.225 | 0.00 | 0.00 |
| ATOM | 3468 | HD21 | ASN | X | 229 | 35.366 | 31.465 | 40.360 | 0.00 | 0.00 |
| ATOM | 3469 | HD22 | ASN | X | 229 | 34.425 | 30.484 | 41.485 | 0.00 | 0.00 |
| ATOM | 3470 | C    | ASN | X | 229 | 36.348 | 32.195 | 44.811 | 0.00 | 0.00 |
| ATOM | 3471 | O    | ASN | X | 229 | 36.158 | 30.961 | 44.773 | 0.00 | 0.00 |

|      |      |      |     |   |     |        |        |        |      |      |
|------|------|------|-----|---|-----|--------|--------|--------|------|------|
| ATOM | 3472 | N    | GLY | X | 230 | 37.526 | 32.722 | 45.137 | 0.00 | 0.00 |
| ATOM | 3473 | H    | GLY | X | 230 | 37.653 | 33.718 | 45.245 | 0.00 | 0.00 |
| ATOM | 3474 | CA   | GLY | X | 230 | 38.642 | 32.083 | 45.689 | 0.00 | 0.00 |
| ATOM | 3475 | HA2  | GLY | X | 230 | 38.759 | 31.170 | 45.064 | 0.00 | 0.00 |
| ATOM | 3476 | HA3  | GLY | X | 230 | 39.496 | 32.799 | 45.767 | 0.00 | 0.00 |
| ATOM | 3477 | C    | GLY | X | 230 | 38.368 | 31.706 | 47.219 | 0.00 | 0.00 |
| ATOM | 3478 | O    | GLY | X | 230 | 37.796 | 32.557 | 47.890 | 0.00 | 0.00 |
| ATOM | 3479 | N    | PRO | X | 231 | 38.826 | 30.525 | 47.642 | 0.00 | 0.00 |
| ATOM | 3480 | CD   | PRO | X | 231 | 39.382 | 29.413 | 46.830 | 0.00 | 0.00 |
| ATOM | 3481 | HD2  | PRO | X | 231 | 40.341 | 29.629 | 46.358 | 0.00 | 0.00 |
| ATOM | 3482 | HD3  | PRO | X | 231 | 38.579 | 29.084 | 46.170 | 0.00 | 0.00 |
| ATOM | 3483 | CG   | PRO | X | 231 | 39.587 | 28.217 | 47.787 | 0.00 | 0.00 |
| ATOM | 3484 | HG2  | PRO | X | 231 | 40.587 | 28.207 | 48.222 | 0.00 | 0.00 |
| ATOM | 3485 | HG3  | PRO | X | 231 | 39.364 | 27.272 | 47.292 | 0.00 | 0.00 |
| ATOM | 3486 | CB   | PRO | X | 231 | 38.631 | 28.560 | 48.865 | 0.00 | 0.00 |
| ATOM | 3487 | HB2  | PRO | X | 231 | 38.824 | 28.039 | 49.803 | 0.00 | 0.00 |
| ATOM | 3488 | HB3  | PRO | X | 231 | 37.648 | 28.204 | 48.556 | 0.00 | 0.00 |
| ATOM | 3489 | CA   | PRO | X | 231 | 38.575 | 30.093 | 48.994 | 0.00 | 0.00 |
| ATOM | 3490 | HA   | PRO | X | 231 | 37.565 | 30.309 | 49.340 | 0.00 | 0.00 |
| ATOM | 3491 | C    | PRO | X | 231 | 39.505 | 30.752 | 50.030 | 0.00 | 0.00 |
| ATOM | 3492 | O    | PRO | X | 231 | 39.153 | 30.918 | 51.189 | 0.00 | 0.00 |
| ATOM | 3493 | N    | TRP | X | 232 | 40.564 | 31.426 | 49.551 | 0.00 | 0.00 |
| ATOM | 3494 | H    | TRP | X | 232 | 40.836 | 31.290 | 48.588 | 0.00 | 0.00 |
| ATOM | 3495 | CA   | TRP | X | 232 | 41.407 | 32.290 | 50.341 | 0.00 | 0.00 |
| ATOM | 3496 | HA   | TRP | X | 232 | 41.680 | 31.810 | 51.281 | 0.00 | 0.00 |
| ATOM | 3497 | CB   | TRP | X | 232 | 42.802 | 32.370 | 49.690 | 0.00 | 0.00 |
| ATOM | 3498 | HB2  | TRP | X | 232 | 43.439 | 32.957 | 50.353 | 0.00 | 0.00 |
| ATOM | 3499 | HB3  | TRP | X | 232 | 43.317 | 31.410 | 49.652 | 0.00 | 0.00 |
| ATOM | 3500 | CG   | TRP | X | 232 | 42.719 | 32.936 | 48.315 | 0.00 | 0.00 |
| ATOM | 3501 | CD1  | TRP | X | 232 | 42.579 | 32.114 | 47.187 | 0.00 | 0.00 |
| ATOM | 3502 | HD1  | TRP | X | 232 | 42.618 | 31.035 | 47.147 | 0.00 | 0.00 |
| ATOM | 3503 | NE1  | TRP | X | 232 | 42.628 | 32.871 | 46.050 | 0.00 | 0.00 |
| ATOM | 3504 | HE1  | TRP | X | 232 | 42.659 | 32.438 | 45.138 | 0.00 | 0.00 |
| ATOM | 3505 | CE2  | TRP | X | 232 | 42.625 | 34.195 | 46.356 | 0.00 | 0.00 |
| ATOM | 3506 | CZ2  | TRP | X | 232 | 42.716 | 35.323 | 45.599 | 0.00 | 0.00 |
| ATOM | 3507 | HZ2  | TRP | X | 232 | 42.761 | 35.217 | 44.525 | 0.00 | 0.00 |
| ATOM | 3508 | CH2  | TRP | X | 232 | 42.738 | 36.600 | 46.158 | 0.00 | 0.00 |
| ATOM | 3509 | HH2  | TRP | X | 232 | 42.918 | 37.424 | 45.483 | 0.00 | 0.00 |
| ATOM | 3510 | CZ3  | TRP | X | 232 | 42.798 | 36.791 | 47.557 | 0.00 | 0.00 |
| ATOM | 3511 | HZ3  | TRP | X | 232 | 43.001 | 37.769 | 47.968 | 0.00 | 0.00 |
| ATOM | 3512 | CE3  | TRP | X | 232 | 42.774 | 35.609 | 48.380 | 0.00 | 0.00 |
| ATOM | 3513 | HE3  | TRP | X | 232 | 42.777 | 35.726 | 49.454 | 0.00 | 0.00 |
| ATOM | 3514 | CD2  | TRP | X | 232 | 42.622 | 34.259 | 47.796 | 0.00 | 0.00 |
| ATOM | 3515 | C    | TRP | X | 232 | 40.827 | 33.683 | 50.654 | 0.00 | 0.00 |
| ATOM | 3516 | O    | TRP | X | 232 | 41.317 | 34.339 | 51.599 | 0.00 | 0.00 |
| ATOM | 3517 | N    | ALA | X | 233 | 39.921 | 34.114 | 49.779 | 0.00 | 0.00 |
| ATOM | 3518 | H    | ALA | X | 233 | 39.739 | 33.371 | 49.119 | 0.00 | 0.00 |
| ATOM | 3519 | CA   | ALA | X | 233 | 39.539 | 35.493 | 49.363 | 0.00 | 0.00 |
| ATOM | 3520 | HA   | ALA | X | 233 | 40.338 | 36.227 | 49.462 | 0.00 | 0.00 |
| ATOM | 3521 | CB   | ALA | X | 233 | 39.197 | 35.505 | 47.854 | 0.00 | 0.00 |
| ATOM | 3522 | HB1  | ALA | X | 233 | 38.200 | 35.089 | 47.709 | 0.00 | 0.00 |
| ATOM | 3523 | HB2  | ALA | X | 233 | 39.295 | 36.550 | 47.560 | 0.00 | 0.00 |
| ATOM | 3524 | HB3  | ALA | X | 233 | 39.922 | 34.912 | 47.298 | 0.00 | 0.00 |
| ATOM | 3525 | C    | ALA | X | 233 | 38.325 | 36.066 | 50.072 | 0.00 | 0.00 |
| ATOM | 3526 | O    | ALA | X | 233 | 38.110 | 37.253 | 49.849 | 0.00 | 0.00 |
| ATOM | 3527 | N    | THR | X | 234 | 37.630 | 35.361 | 50.921 | 0.00 | 0.00 |
| ATOM | 3528 | H    | THR | X | 234 | 37.797 | 34.366 | 50.962 | 0.00 | 0.00 |
| ATOM | 3529 | CA   | THR | X | 234 | 36.474 | 35.930 | 51.664 | 0.00 | 0.00 |
| ATOM | 3530 | HA   | THR | X | 234 | 36.709 | 36.932 | 52.025 | 0.00 | 0.00 |
| ATOM | 3531 | CB   | THR | X | 234 | 35.157 | 35.916 | 50.852 | 0.00 | 0.00 |
| ATOM | 3532 | HB   | THR | X | 234 | 34.717 | 34.936 | 51.036 | 0.00 | 0.00 |
| ATOM | 3533 | CG2  | THR | X | 234 | 34.196 | 36.999 | 51.367 | 0.00 | 0.00 |
| ATOM | 3534 | HG21 | THR | X | 234 | 34.688 | 37.927 | 51.079 | 0.00 | 0.00 |
| ATOM | 3535 | HG22 | THR | X | 234 | 33.301 | 36.773 | 50.787 | 0.00 | 0.00 |
| ATOM | 3536 | HG23 | THR | X | 234 | 33.985 | 36.910 | 52.433 | 0.00 | 0.00 |
| ATOM | 3537 | OG1  | THR | X | 234 | 35.403 | 36.189 | 49.465 | 0.00 | 0.00 |
| ATOM | 3538 | HG1  | THR | X | 234 | 36.014 | 36.930 | 49.465 | 0.00 | 0.00 |
| ATOM | 3539 | C    | THR | X | 234 | 36.381 | 35.265 | 53.007 | 0.00 | 0.00 |
| ATOM | 3540 | O    | THR | X | 234 | 36.950 | 34.177 | 53.221 | 0.00 | 0.00 |
| ATOM | 3541 | N    | VAL | X | 235 | 35.618 | 35.855 | 53.950 | 0.00 | 0.00 |

|      |      |      |     |   |     |        |        |        |      |      |
|------|------|------|-----|---|-----|--------|--------|--------|------|------|
| ATOM | 3542 | H    | VAL | X | 235 | 35.367 | 36.803 | 53.707 | 0.00 | 0.00 |
| ATOM | 3543 | CA   | VAL | X | 235 | 35.286 | 35.419 | 55.313 | 0.00 | 0.00 |
| ATOM | 3544 | HA   | VAL | X | 235 | 35.264 | 34.330 | 55.258 | 0.00 | 0.00 |
| ATOM | 3545 | CB   | VAL | X | 235 | 36.334 | 35.798 | 56.305 | 0.00 | 0.00 |
| ATOM | 3546 | HB   | VAL | X | 235 | 37.304 | 35.665 | 55.828 | 0.00 | 0.00 |
| ATOM | 3547 | CG1  | VAL | X | 235 | 36.200 | 37.257 | 56.692 | 0.00 | 0.00 |
| ATOM | 3548 | HG11 | VAL | X | 235 | 35.831 | 37.802 | 55.823 | 0.00 | 0.00 |
| ATOM | 3549 | HG12 | VAL | X | 235 | 35.522 | 37.392 | 57.535 | 0.00 | 0.00 |
| ATOM | 3550 | HG13 | VAL | X | 235 | 37.136 | 37.710 | 57.018 | 0.00 | 0.00 |
| ATOM | 3551 | CG2  | VAL | X | 235 | 36.390 | 34.847 | 57.511 | 0.00 | 0.00 |
| ATOM | 3552 | HG21 | VAL | X | 235 | 35.486 | 35.031 | 58.092 | 0.00 | 0.00 |
| ATOM | 3553 | HG22 | VAL | X | 235 | 36.484 | 33.826 | 57.141 | 0.00 | 0.00 |
| ATOM | 3554 | HG23 | VAL | X | 235 | 37.214 | 35.161 | 58.152 | 0.00 | 0.00 |
| ATOM | 3555 | C    | VAL | X | 235 | 33.911 | 35.829 | 55.757 | 0.00 | 0.00 |
| ATOM | 3556 | O    | VAL | X | 235 | 33.281 | 36.647 | 55.118 | 0.00 | 0.00 |
| ATOM | 3557 | N    | GLY | X | 236 | 33.425 | 35.299 | 56.918 | 0.00 | 0.00 |
| ATOM | 3558 | H    | GLY | X | 236 | 33.924 | 34.600 | 57.450 | 0.00 | 0.00 |
| ATOM | 3559 | CA   | GLY | X | 236 | 32.128 | 35.737 | 57.487 | 0.00 | 0.00 |
| ATOM | 3560 | HA2  | GLY | X | 236 | 31.649 | 36.550 | 56.857 | 0.00 | 0.00 |
| ATOM | 3561 | HA3  | GLY | X | 236 | 31.525 | 34.801 | 57.441 | 0.00 | 0.00 |
| ATOM | 3562 | C    | GLY | X | 236 | 32.220 | 36.176 | 58.972 | 0.00 | 0.00 |
| ATOM | 3563 | O    | GLY | X | 236 | 33.262 | 36.145 | 59.617 | 0.00 | 0.00 |
| ATOM | 3564 | N    | MET | X | 237 | 31.126 | 36.699 | 59.457 | 0.00 | 0.00 |
| ATOM | 3565 | H    | MET | X | 237 | 30.251 | 36.665 | 58.953 | 0.00 | 0.00 |
| ATOM | 3566 | CA   | MET | X | 237 | 31.122 | 37.614 | 60.706 | 0.00 | 0.00 |
| ATOM | 3567 | HA   | MET | X | 237 | 31.800 | 38.439 | 60.487 | 0.00 | 0.00 |
| ATOM | 3568 | CB   | MET | X | 237 | 29.685 | 38.153 | 60.921 | 0.00 | 0.00 |
| ATOM | 3569 | HB2  | MET | X | 237 | 29.018 | 37.291 | 60.883 | 0.00 | 0.00 |
| ATOM | 3570 | HB3  | MET | X | 237 | 29.607 | 38.749 | 61.830 | 0.00 | 0.00 |
| ATOM | 3571 | CG   | MET | X | 237 | 29.371 | 39.158 | 59.836 | 0.00 | 0.00 |
| ATOM | 3572 | HG2  | MET | X | 237 | 29.900 | 38.852 | 58.934 | 0.00 | 0.00 |
| ATOM | 3573 | HG3  | MET | X | 237 | 28.308 | 39.204 | 59.600 | 0.00 | 0.00 |
| ATOM | 3574 | SD   | MET | X | 237 | 29.956 | 40.861 | 60.193 | 0.00 | 0.00 |
| ATOM | 3575 | CE   | MET | X | 237 | 29.976 | 41.507 | 58.455 | 0.00 | 0.00 |
| ATOM | 3576 | HE1  | MET | X | 237 | 28.955 | 41.777 | 58.185 | 0.00 | 0.00 |
| ATOM | 3577 | HE2  | MET | X | 237 | 30.535 | 42.443 | 58.435 | 0.00 | 0.00 |
| ATOM | 3578 | HE3  | MET | X | 237 | 30.503 | 40.709 | 57.932 | 0.00 | 0.00 |
| ATOM | 3579 | C    | MET | X | 237 | 31.622 | 36.961 | 62.028 | 0.00 | 0.00 |
| ATOM | 3580 | O    | MET | X | 237 | 32.176 | 37.700 | 62.862 | 0.00 | 0.00 |
| ATOM | 3581 | N    | GLY | X | 238 | 31.444 | 35.636 | 62.141 | 0.00 | 0.00 |
| ATOM | 3582 | H    | GLY | X | 238 | 31.180 | 35.091 | 61.332 | 0.00 | 0.00 |
| ATOM | 3583 | CA   | GLY | X | 238 | 31.930 | 34.820 | 63.252 | 0.00 | 0.00 |
| ATOM | 3584 | HA2  | GLY | X | 238 | 31.562 | 35.152 | 64.278 | 0.00 | 0.00 |
| ATOM | 3585 | HA3  | GLY | X | 238 | 31.527 | 33.827 | 63.119 | 0.00 | 0.00 |
| ATOM | 3586 | C    | GLY | X | 238 | 33.477 | 34.859 | 63.326 | 0.00 | 0.00 |
| ATOM | 3587 | O    | GLY | X | 238 | 34.071 | 35.347 | 64.251 | 0.00 | 0.00 |
| ATOM | 3588 | N    | GLU | X | 239 | 34.166 | 34.533 | 62.252 | 0.00 | 0.00 |
| ATOM | 3589 | H    | GLU | X | 239 | 33.709 | 34.127 | 61.448 | 0.00 | 0.00 |
| ATOM | 3590 | CA   | GLU | X | 239 | 35.631 | 34.707 | 62.140 | 0.00 | 0.00 |
| ATOM | 3591 | HA   | GLU | X | 239 | 36.083 | 34.188 | 62.985 | 0.00 | 0.00 |
| ATOM | 3592 | CB   | GLU | X | 239 | 36.126 | 33.983 | 60.856 | 0.00 | 0.00 |
| ATOM | 3593 | HB2  | GLU | X | 239 | 35.306 | 33.956 | 60.138 | 0.00 | 0.00 |
| ATOM | 3594 | HB3  | GLU | X | 239 | 36.973 | 34.514 | 60.422 | 0.00 | 0.00 |
| ATOM | 3595 | CG   | GLU | X | 239 | 36.382 | 32.540 | 61.066 | 0.00 | 0.00 |
| ATOM | 3596 | HG2  | GLU | X | 239 | 35.598 | 31.990 | 61.585 | 0.00 | 0.00 |
| ATOM | 3597 | HG3  | GLU | X | 239 | 36.337 | 31.988 | 60.127 | 0.00 | 0.00 |
| ATOM | 3598 | CD   | GLU | X | 239 | 37.704 | 32.349 | 61.785 | 0.00 | 0.00 |
| ATOM | 3599 | OE1  | GLU | X | 239 | 37.686 | 31.917 | 62.935 | 0.00 | 0.00 |
| ATOM | 3600 | OE2  | GLU | X | 239 | 38.826 | 32.650 | 61.263 | 0.00 | 0.00 |
| ATOM | 3601 | C    | GLU | X | 239 | 36.111 | 36.154 | 62.161 | 0.00 | 0.00 |
| ATOM | 3602 | O    | GLU | X | 239 | 37.195 | 36.401 | 62.642 | 0.00 | 0.00 |
| ATOM | 3603 | N    | ALA | X | 240 | 35.327 | 37.187 | 61.706 | 0.00 | 0.00 |
| ATOM | 3604 | H    | ALA | X | 240 | 34.459 | 36.930 | 61.258 | 0.00 | 0.00 |
| ATOM | 3605 | CA   | ALA | X | 240 | 35.619 | 38.584 | 61.804 | 0.00 | 0.00 |
| ATOM | 3606 | HA   | ALA | X | 240 | 36.599 | 38.864 | 61.417 | 0.00 | 0.00 |
| ATOM | 3607 | CB   | ALA | X | 240 | 34.729 | 39.360 | 60.752 | 0.00 | 0.00 |
| ATOM | 3608 | HB1  | ALA | X | 240 | 34.691 | 40.443 | 60.871 | 0.00 | 0.00 |
| ATOM | 3609 | HB2  | ALA | X | 240 | 35.115 | 39.109 | 59.764 | 0.00 | 0.00 |
| ATOM | 3610 | HB3  | ALA | X | 240 | 33.729 | 38.941 | 60.864 | 0.00 | 0.00 |
| ATOM | 3611 | C    | ALA | X | 240 | 35.578 | 38.973 | 63.353 | 0.00 | 0.00 |

|      |      |      |     |   |     |        |        |        |      |      |
|------|------|------|-----|---|-----|--------|--------|--------|------|------|
| ATOM | 3612 | O    | ALA | X | 240 | 36.463 | 39.650 | 63.915 | 0.00 | 0.00 |
| ATOM | 3613 | N    | ARG | X | 241 | 34.604 | 38.387 | 64.017 | 0.00 | 0.00 |
| ATOM | 3614 | H    | ARG | X | 241 | 33.901 | 37.840 | 63.542 | 0.00 | 0.00 |
| ATOM | 3615 | CA   | ARG | X | 241 | 34.456 | 38.653 | 65.438 | 0.00 | 0.00 |
| ATOM | 3616 | HA   | ARG | X | 241 | 34.438 | 39.735 | 65.564 | 0.00 | 0.00 |
| ATOM | 3617 | CB   | ARG | X | 241 | 33.202 | 38.069 | 65.952 | 0.00 | 0.00 |
| ATOM | 3618 | HB2  | ARG | X | 241 | 32.395 | 38.402 | 65.300 | 0.00 | 0.00 |
| ATOM | 3619 | HB3  | ARG | X | 241 | 33.207 | 36.980 | 65.903 | 0.00 | 0.00 |
| ATOM | 3620 | CG   | ARG | X | 241 | 32.903 | 38.520 | 67.390 | 0.00 | 0.00 |
| ATOM | 3621 | HG2  | ARG | X | 241 | 33.759 | 38.369 | 68.047 | 0.00 | 0.00 |
| ATOM | 3622 | HG3  | ARG | X | 241 | 32.792 | 39.601 | 67.311 | 0.00 | 0.00 |
| ATOM | 3623 | CD   | ARG | X | 241 | 31.570 | 37.932 | 67.942 | 0.00 | 0.00 |
| ATOM | 3624 | HD2  | ARG | X | 241 | 30.861 | 37.833 | 67.119 | 0.00 | 0.00 |
| ATOM | 3625 | HD3  | ARG | X | 241 | 31.821 | 36.937 | 68.309 | 0.00 | 0.00 |
| ATOM | 3626 | NE   | ARG | X | 241 | 30.984 | 38.789 | 68.957 | 0.00 | 0.00 |
| ATOM | 3627 | HE   | ARG | X | 241 | 31.650 | 39.307 | 69.512 | 0.00 | 0.00 |
| ATOM | 3628 | CZ   | ARG | X | 241 | 29.732 | 39.037 | 69.168 | 0.00 | 0.00 |
| ATOM | 3629 | NH1  | ARG | X | 241 | 28.722 | 38.276 | 68.842 | 0.00 | 0.00 |
| ATOM | 3630 | HH11 | ARG | X | 241 | 28.854 | 37.483 | 68.231 | 0.00 | 0.00 |
| ATOM | 3631 | HH12 | ARG | X | 241 | 27.789 | 38.492 | 69.165 | 0.00 | 0.00 |
| ATOM | 3632 | NH2  | ARG | X | 241 | 29.454 | 40.088 | 69.874 | 0.00 | 0.00 |
| ATOM | 3633 | HH21 | ARG | X | 241 | 30.166 | 40.576 | 70.398 | 0.00 | 0.00 |
| ATOM | 3634 | HH22 | ARG | X | 241 | 28.467 | 40.281 | 69.962 | 0.00 | 0.00 |
| ATOM | 3635 | C    | ARG | X | 241 | 35.609 | 38.184 | 66.279 | 0.00 | 0.00 |
| ATOM | 3636 | O    | ARG | X | 241 | 36.088 | 38.980 | 67.064 | 0.00 | 0.00 |
| ATOM | 3637 | N    | ARG | X | 242 | 35.965 | 36.906 | 66.022 | 0.00 | 0.00 |
| ATOM | 3638 | H    | ARG | X | 242 | 35.459 | 36.417 | 65.298 | 0.00 | 0.00 |
| ATOM | 3639 | CA   | ARG | X | 242 | 37.162 | 36.247 | 66.555 | 0.00 | 0.00 |
| ATOM | 3640 | HA   | ARG | X | 242 | 37.190 | 36.230 | 67.644 | 0.00 | 0.00 |
| ATOM | 3641 | CB   | ARG | X | 242 | 37.280 | 34.779 | 66.117 | 0.00 | 0.00 |
| ATOM | 3642 | HB2  | ARG | X | 242 | 36.391 | 34.314 | 66.544 | 0.00 | 0.00 |
| ATOM | 3643 | HB3  | ARG | X | 242 | 37.326 | 34.819 | 65.029 | 0.00 | 0.00 |
| ATOM | 3644 | CG   | ARG | X | 242 | 38.509 | 34.125 | 66.728 | 0.00 | 0.00 |
| ATOM | 3645 | HG2  | ARG | X | 242 | 39.383 | 34.765 | 66.605 | 0.00 | 0.00 |
| ATOM | 3646 | HG3  | ARG | X | 242 | 38.442 | 34.150 | 67.816 | 0.00 | 0.00 |
| ATOM | 3647 | CD   | ARG | X | 242 | 38.973 | 32.767 | 66.210 | 0.00 | 0.00 |
| ATOM | 3648 | HD2  | ARG | X | 242 | 39.771 | 32.363 | 66.832 | 0.00 | 0.00 |
| ATOM | 3649 | HD3  | ARG | X | 242 | 38.053 | 32.182 | 66.222 | 0.00 | 0.00 |
| ATOM | 3650 | NE   | ARG | X | 242 | 39.397 | 32.906 | 64.771 | 0.00 | 0.00 |
| ATOM | 3651 | HE   | ARG | X | 242 | 38.658 | 32.646 | 64.133 | 0.00 | 0.00 |
| ATOM | 3652 | CZ   | ARG | X | 242 | 40.650 | 33.075 | 64.288 | 0.00 | 0.00 |
| ATOM | 3653 | NH1  | ARG | X | 242 | 41.701 | 33.271 | 65.080 | 0.00 | 0.00 |
| ATOM | 3654 | HH11 | ARG | X | 242 | 41.495 | 33.602 | 66.012 | 0.00 | 0.00 |
| ATOM | 3655 | HH12 | ARG | X | 242 | 42.666 | 33.215 | 64.788 | 0.00 | 0.00 |
| ATOM | 3656 | NH2  | ARG | X | 242 | 40.816 | 32.997 | 63.007 | 0.00 | 0.00 |
| ATOM | 3657 | HH21 | ARG | X | 242 | 40.002 | 32.761 | 62.457 | 0.00 | 0.00 |
| ATOM | 3658 | HH22 | ARG | X | 242 | 41.711 | 33.312 | 62.660 | 0.00 | 0.00 |
| ATOM | 3659 | C    | ARG | X | 242 | 38.437 | 37.078 | 66.353 | 0.00 | 0.00 |
| ATOM | 3660 | O    | ARG | X | 242 | 38.985 | 37.613 | 67.348 | 0.00 | 0.00 |
| ATOM | 3661 | N    | ARG | X | 243 | 38.722 | 37.282 | 65.086 | 0.00 | 0.00 |
| ATOM | 3662 | H    | ARG | X | 243 | 38.263 | 36.785 | 64.336 | 0.00 | 0.00 |
| ATOM | 3663 | CA   | ARG | X | 243 | 39.935 | 38.017 | 64.693 | 0.00 | 0.00 |
| ATOM | 3664 | HA   | ARG | X | 243 | 40.790 | 37.496 | 65.123 | 0.00 | 0.00 |
| ATOM | 3665 | CB   | ARG | X | 243 | 39.979 | 38.046 | 63.223 | 0.00 | 0.00 |
| ATOM | 3666 | HB2  | ARG | X | 243 | 38.957 | 38.279 | 62.925 | 0.00 | 0.00 |
| ATOM | 3667 | HB3  | ARG | X | 243 | 40.652 | 38.820 | 62.852 | 0.00 | 0.00 |
| ATOM | 3668 | CG   | ARG | X | 243 | 40.258 | 36.650 | 62.658 | 0.00 | 0.00 |
| ATOM | 3669 | HG2  | ARG | X | 243 | 41.250 | 36.337 | 62.983 | 0.00 | 0.00 |
| ATOM | 3670 | HG3  | ARG | X | 243 | 39.531 | 35.909 | 62.988 | 0.00 | 0.00 |
| ATOM | 3671 | CD   | ARG | X | 243 | 40.158 | 36.687 | 61.090 | 0.00 | 0.00 |
| ATOM | 3672 | HD2  | ARG | X | 243 | 39.332 | 37.316 | 60.759 | 0.00 | 0.00 |
| ATOM | 3673 | HD3  | ARG | X | 243 | 41.181 | 36.963 | 60.833 | 0.00 | 0.00 |
| ATOM | 3674 | NE   | ARG | X | 243 | 39.941 | 35.301 | 60.630 | 0.00 | 0.00 |
| ATOM | 3675 | HE   | ARG | X | 243 | 39.484 | 34.675 | 61.277 | 0.00 | 0.00 |
| ATOM | 3676 | CZ   | ARG | X | 243 | 40.193 | 34.941 | 59.363 | 0.00 | 0.00 |
| ATOM | 3677 | NH1  | ARG | X | 243 | 40.713 | 35.747 | 58.520 | 0.00 | 0.00 |
| ATOM | 3678 | HH11 | ARG | X | 243 | 41.058 | 36.661 | 58.774 | 0.00 | 0.00 |
| ATOM | 3679 | HH12 | ARG | X | 243 | 40.846 | 35.368 | 57.593 | 0.00 | 0.00 |
| ATOM | 3680 | NH2  | ARG | X | 243 | 39.884 | 33.767 | 58.976 | 0.00 | 0.00 |
| ATOM | 3681 | HH21 | ARG | X | 243 | 39.538 | 33.105 | 59.655 | 0.00 | 0.00 |

|      |      |      |     |   |     |        |        |        |      |      |
|------|------|------|-----|---|-----|--------|--------|--------|------|------|
| ATOM | 3682 | HH22 | ARG | X | 243 | 40.082 | 33.500 | 58.022 | 0.00 | 0.00 |
| ATOM | 3683 | C    | ARG | X | 243 | 40.036 | 39.432 | 65.229 | 0.00 | 0.00 |
| ATOM | 3684 | O    | ARG | X | 243 | 41.119 | 39.908 | 65.580 | 0.00 | 0.00 |
| ATOM | 3685 | N    | ALA | X | 244 | 38.872 | 40.172 | 65.294 | 0.00 | 0.00 |
| ATOM | 3686 | H    | ALA | X | 244 | 38.023 | 39.723 | 64.980 | 0.00 | 0.00 |
| ATOM | 3687 | CA   | ALA | X | 244 | 38.752 | 41.409 | 66.074 | 0.00 | 0.00 |
| ATOM | 3688 | HA   | ALA | X | 244 | 39.445 | 42.174 | 65.723 | 0.00 | 0.00 |
| ATOM | 3689 | CB   | ALA | X | 244 | 37.358 | 41.987 | 65.851 | 0.00 | 0.00 |
| ATOM | 3690 | HB1  | ALA | X | 244 | 37.114 | 42.149 | 64.801 | 0.00 | 0.00 |
| ATOM | 3691 | HB2  | ALA | X | 244 | 36.622 | 41.371 | 66.368 | 0.00 | 0.00 |
| ATOM | 3692 | HB3  | ALA | X | 244 | 37.272 | 42.950 | 66.355 | 0.00 | 0.00 |
| ATOM | 3693 | C    | ALA | X | 244 | 39.114 | 41.397 | 67.574 | 0.00 | 0.00 |
| ATOM | 3694 | O    | ALA | X | 244 | 40.070 | 42.061 | 67.975 | 0.00 | 0.00 |
| ATOM | 3695 | N    | THR | X | 245 | 38.459 | 40.521 | 68.341 | 0.00 | 0.00 |
| ATOM | 3696 | H    | THR | X | 245 | 37.750 | 39.951 | 67.903 | 0.00 | 0.00 |
| ATOM | 3697 | CA   | THR | X | 245 | 38.781 | 40.217 | 69.796 | 0.00 | 0.00 |
| ATOM | 3698 | HA   | THR | X | 245 | 38.566 | 41.174 | 70.271 | 0.00 | 0.00 |
| ATOM | 3699 | CB   | THR | X | 245 | 37.771 | 39.140 | 70.332 | 0.00 | 0.00 |
| ATOM | 3700 | HB   | THR | X | 245 | 37.979 | 38.176 | 69.868 | 0.00 | 0.00 |
| ATOM | 3701 | CG2  | THR | X | 245 | 37.926 | 38.952 | 71.852 | 0.00 | 0.00 |
| ATOM | 3702 | HG21 | THR | X | 245 | 36.943 | 38.680 | 72.235 | 0.00 | 0.00 |
| ATOM | 3703 | HG22 | THR | X | 245 | 38.619 | 38.168 | 72.159 | 0.00 | 0.00 |
| ATOM | 3704 | HG23 | THR | X | 245 | 38.254 | 39.886 | 72.310 | 0.00 | 0.00 |
| ATOM | 3705 | OG1  | THR | X | 245 | 36.433 | 39.559 | 70.081 | 0.00 | 0.00 |
| ATOM | 3706 | HG1  | THR | X | 245 | 35.940 | 38.766 | 69.860 | 0.00 | 0.00 |
| ATOM | 3707 | C    | THR | X | 245 | 40.290 | 39.868 | 70.040 | 0.00 | 0.00 |
| ATOM | 3708 | O    | THR | X | 245 | 40.751 | 40.357 | 71.044 | 0.00 | 0.00 |
| ATOM | 3709 | N    | GLN | X | 246 | 40.904 | 39.124 | 69.081 | 0.00 | 0.00 |
| ATOM | 3710 | H    | GLN | X | 246 | 40.275 | 38.952 | 68.310 | 0.00 | 0.00 |
| ATOM | 3711 | CA   | GLN | X | 246 | 42.240 | 38.621 | 69.138 | 0.00 | 0.00 |
| ATOM | 3712 | HA   | GLN | X | 246 | 42.507 | 38.523 | 70.190 | 0.00 | 0.00 |
| ATOM | 3713 | CB   | GLN | X | 246 | 42.365 | 37.235 | 68.568 | 0.00 | 0.00 |
| ATOM | 3714 | HB2  | GLN | X | 246 | 42.118 | 37.244 | 67.506 | 0.00 | 0.00 |
| ATOM | 3715 | HB3  | GLN | X | 246 | 43.404 | 37.008 | 68.805 | 0.00 | 0.00 |
| ATOM | 3716 | CG   | GLN | X | 246 | 41.500 | 36.223 | 69.298 | 0.00 | 0.00 |
| ATOM | 3717 | HG2  | GLN | X | 246 | 41.752 | 36.309 | 70.355 | 0.00 | 0.00 |
| ATOM | 3718 | HG3  | GLN | X | 246 | 40.461 | 36.418 | 69.034 | 0.00 | 0.00 |
| ATOM | 3719 | CD   | GLN | X | 246 | 41.840 | 34.811 | 68.854 | 0.00 | 0.00 |
| ATOM | 3720 | OE1  | GLN | X | 246 | 41.720 | 34.482 | 67.672 | 0.00 | 0.00 |
| ATOM | 3721 | NE2  | GLN | X | 246 | 42.092 | 33.888 | 69.695 | 0.00 | 0.00 |
| ATOM | 3722 | HE21 | GLN | X | 246 | 41.875 | 33.014 | 69.238 | 0.00 | 0.00 |
| ATOM | 3723 | HE22 | GLN | X | 246 | 41.872 | 34.006 | 70.673 | 0.00 | 0.00 |
| ATOM | 3724 | C    | GLN | X | 246 | 43.307 | 39.655 | 68.605 | 0.00 | 0.00 |
| ATOM | 3725 | O    | GLN | X | 246 | 44.442 | 39.530 | 69.059 | 0.00 | 0.00 |
| ATOM | 3726 | N    | LEU | X | 247 | 42.971 | 40.715 | 67.824 | 0.00 | 0.00 |
| ATOM | 3727 | H    | LEU | X | 247 | 41.987 | 40.882 | 67.666 | 0.00 | 0.00 |
| ATOM | 3728 | CA   | LEU | X | 247 | 43.929 | 41.823 | 67.726 | 0.00 | 0.00 |
| ATOM | 3729 | HA   | LEU | X | 247 | 44.960 | 41.553 | 67.497 | 0.00 | 0.00 |
| ATOM | 3730 | CB   | LEU | X | 247 | 43.525 | 42.587 | 66.464 | 0.00 | 0.00 |
| ATOM | 3731 | HB2  | LEU | X | 247 | 43.414 | 41.890 | 65.633 | 0.00 | 0.00 |
| ATOM | 3732 | HB3  | LEU | X | 247 | 42.539 | 42.995 | 66.684 | 0.00 | 0.00 |
| ATOM | 3733 | CG   | LEU | X | 247 | 44.479 | 43.697 | 65.999 | 0.00 | 0.00 |
| ATOM | 3734 | HG   | LEU | X | 247 | 44.374 | 44.569 | 66.645 | 0.00 | 0.00 |
| ATOM | 3735 | CD1  | LEU | X | 247 | 45.885 | 43.113 | 65.889 | 0.00 | 0.00 |
| ATOM | 3736 | HD11 | LEU | X | 247 | 46.379 | 43.110 | 66.861 | 0.00 | 0.00 |
| ATOM | 3737 | HD12 | LEU | X | 247 | 45.882 | 42.121 | 65.437 | 0.00 | 0.00 |
| ATOM | 3738 | HD13 | LEU | X | 247 | 46.521 | 43.758 | 65.283 | 0.00 | 0.00 |
| ATOM | 3739 | CD2  | LEU | X | 247 | 44.003 | 44.028 | 64.556 | 0.00 | 0.00 |
| ATOM | 3740 | HD21 | LEU | X | 247 | 44.199 | 43.297 | 63.771 | 0.00 | 0.00 |
| ATOM | 3741 | HD22 | LEU | X | 247 | 42.916 | 44.077 | 64.622 | 0.00 | 0.00 |
| ATOM | 3742 | HD23 | LEU | X | 247 | 44.330 | 45.010 | 64.213 | 0.00 | 0.00 |
| ATOM | 3743 | C    | LEU | X | 247 | 43.828 | 42.708 | 68.952 | 0.00 | 0.00 |
| ATOM | 3744 | O    | LEU | X | 247 | 44.830 | 43.079 | 69.556 | 0.00 | 0.00 |
| ATOM | 3745 | N    | ALA | X | 248 | 42.559 | 42.980 | 69.342 | 0.00 | 0.00 |
| ATOM | 3746 | H    | ALA | X | 248 | 41.800 | 42.649 | 68.764 | 0.00 | 0.00 |
| ATOM | 3747 | CA   | ALA | X | 248 | 42.210 | 43.735 | 70.531 | 0.00 | 0.00 |
| ATOM | 3748 | HA   | ALA | X | 248 | 42.605 | 44.733 | 70.343 | 0.00 | 0.00 |
| ATOM | 3749 | CB   | ALA | X | 248 | 40.712 | 43.758 | 70.542 | 0.00 | 0.00 |
| ATOM | 3750 | HB1  | ALA | X | 248 | 40.285 | 44.087 | 69.594 | 0.00 | 0.00 |
| ATOM | 3751 | HB2  | ALA | X | 248 | 40.171 | 42.883 | 70.902 | 0.00 | 0.00 |

|      |      |      |     |   |     |        |        |        |      |      |
|------|------|------|-----|---|-----|--------|--------|--------|------|------|
| ATOM | 3752 | HB3  | ALA | X | 248 | 40.502 | 44.535 | 71.277 | 0.00 | 0.00 |
| ATOM | 3753 | C    | ALA | X | 248 | 42.851 | 43.208 | 71.821 | 0.00 | 0.00 |
| ATOM | 3754 | O    | ALA | X | 248 | 43.374 | 43.972 | 72.669 | 0.00 | 0.00 |
| ATOM | 3755 | N    | HIE | X | 249 | 42.852 | 41.935 | 72.023 | 0.00 | 0.00 |
| ATOM | 3756 | H    | HIE | X | 249 | 42.435 | 41.444 | 71.244 | 0.00 | 0.00 |
| ATOM | 3757 | CA   | HIE | X | 249 | 43.604 | 41.176 | 73.017 | 0.00 | 0.00 |
| ATOM | 3758 | HA   | HIE | X | 249 | 43.010 | 41.230 | 73.930 | 0.00 | 0.00 |
| ATOM | 3759 | CB   | HIE | X | 249 | 43.608 | 39.679 | 72.707 | 0.00 | 0.00 |
| ATOM | 3760 | HB2  | HIE | X | 249 | 42.564 | 39.367 | 72.686 | 0.00 | 0.00 |
| ATOM | 3761 | HB3  | HIE | X | 249 | 44.042 | 39.389 | 71.750 | 0.00 | 0.00 |
| ATOM | 3762 | CG   | HIE | X | 249 | 44.301 | 38.877 | 73.760 | 0.00 | 0.00 |
| ATOM | 3763 | ND1  | HIE | X | 249 | 45.097 | 37.747 | 73.421 | 0.00 | 0.00 |
| ATOM | 3764 | CE1  | HIE | X | 249 | 45.370 | 37.143 | 74.604 | 0.00 | 0.00 |
| ATOM | 3765 | HE1  | HIE | X | 249 | 45.967 | 36.255 | 74.750 | 0.00 | 0.00 |
| ATOM | 3766 | NE2  | HIE | X | 249 | 44.845 | 37.858 | 75.622 | 0.00 | 0.00 |
| ATOM | 3767 | HE2  | HIE | X | 249 | 44.957 | 37.535 | 76.573 | 0.00 | 0.00 |
| ATOM | 3768 | CD2  | HIE | X | 249 | 44.199 | 38.937 | 75.100 | 0.00 | 0.00 |
| ATOM | 3769 | HD2  | HIE | X | 249 | 43.562 | 39.655 | 75.595 | 0.00 | 0.00 |
| ATOM | 3770 | C    | HIE | X | 249 | 45.042 | 41.676 | 73.227 | 0.00 | 0.00 |
| ATOM | 3771 | O    | HIE | X | 249 | 45.379 | 42.141 | 74.339 | 0.00 | 0.00 |
| ATOM | 3772 | N    | LEU | X | 250 | 45.857 | 41.614 | 72.112 | 0.00 | 0.00 |
| ATOM | 3773 | H    | LEU | X | 250 | 45.417 | 41.232 | 71.287 | 0.00 | 0.00 |
| ATOM | 3774 | CA   | LEU | X | 250 | 47.271 | 41.898 | 72.029 | 0.00 | 0.00 |
| ATOM | 3775 | HA   | LEU | X | 250 | 47.687 | 41.429 | 72.920 | 0.00 | 0.00 |
| ATOM | 3776 | CB   | LEU | X | 250 | 47.813 | 41.211 | 70.750 | 0.00 | 0.00 |
| ATOM | 3777 | HB2  | LEU | X | 250 | 47.257 | 41.571 | 69.884 | 0.00 | 0.00 |
| ATOM | 3778 | HB3  | LEU | X | 250 | 48.855 | 41.511 | 70.636 | 0.00 | 0.00 |
| ATOM | 3779 | CG   | LEU | X | 250 | 47.846 | 39.691 | 70.672 | 0.00 | 0.00 |
| ATOM | 3780 | HG   | LEU | X | 250 | 46.846 | 39.308 | 70.874 | 0.00 | 0.00 |
| ATOM | 3781 | CD1  | LEU | X | 250 | 48.392 | 39.275 | 69.274 | 0.00 | 0.00 |
| ATOM | 3782 | HD11 | LEU | X | 250 | 48.058 | 39.871 | 68.425 | 0.00 | 0.00 |
| ATOM | 3783 | HD12 | LEU | X | 250 | 49.478 | 39.334 | 69.346 | 0.00 | 0.00 |
| ATOM | 3784 | HD13 | LEU | X | 250 | 48.203 | 38.204 | 69.189 | 0.00 | 0.00 |
| ATOM | 3785 | CD2  | LEU | X | 250 | 48.730 | 39.141 | 71.800 | 0.00 | 0.00 |
| ATOM | 3786 | HD21 | LEU | X | 250 | 48.229 | 39.154 | 72.768 | 0.00 | 0.00 |
| ATOM | 3787 | HD22 | LEU | X | 250 | 48.821 | 38.087 | 71.535 | 0.00 | 0.00 |
| ATOM | 3788 | HD23 | LEU | X | 250 | 49.681 | 39.655 | 71.934 | 0.00 | 0.00 |
| ATOM | 3789 | C    | LEU | X | 250 | 47.478 | 43.423 | 72.149 | 0.00 | 0.00 |
| ATOM | 3790 | O    | LEU | X | 250 | 48.269 | 43.818 | 72.974 | 0.00 | 0.00 |
| ATOM | 3791 | N    | VAL | X | 251 | 46.723 | 44.175 | 71.421 | 0.00 | 0.00 |
| ATOM | 3792 | H    | VAL | X | 251 | 45.988 | 43.693 | 70.923 | 0.00 | 0.00 |
| ATOM | 3793 | CA   | VAL | X | 251 | 46.773 | 45.692 | 71.375 | 0.00 | 0.00 |
| ATOM | 3794 | HA   | VAL | X | 251 | 47.810 | 45.945 | 71.154 | 0.00 | 0.00 |
| ATOM | 3795 | CB   | VAL | X | 251 | 45.858 | 46.252 | 70.279 | 0.00 | 0.00 |
| ATOM | 3796 | HB   | VAL | X | 251 | 44.868 | 45.917 | 70.591 | 0.00 | 0.00 |
| ATOM | 3797 | CG1  | VAL | X | 251 | 45.849 | 47.806 | 70.265 | 0.00 | 0.00 |
| ATOM | 3798 | HG11 | VAL | X | 251 | 46.851 | 48.214 | 70.395 | 0.00 | 0.00 |
| ATOM | 3799 | HG12 | VAL | X | 251 | 45.340 | 48.020 | 69.325 | 0.00 | 0.00 |
| ATOM | 3800 | HG13 | VAL | X | 251 | 45.168 | 48.213 | 71.012 | 0.00 | 0.00 |
| ATOM | 3801 | CG2  | VAL | X | 251 | 46.311 | 45.808 | 68.896 | 0.00 | 0.00 |
| ATOM | 3802 | HG21 | VAL | X | 251 | 45.619 | 45.967 | 68.068 | 0.00 | 0.00 |
| ATOM | 3803 | HG22 | VAL | X | 251 | 47.183 | 46.422 | 68.672 | 0.00 | 0.00 |
| ATOM | 3804 | HG23 | VAL | X | 251 | 46.718 | 44.797 | 68.887 | 0.00 | 0.00 |
| ATOM | 3805 | C    | VAL | X | 251 | 46.509 | 46.504 | 72.689 | 0.00 | 0.00 |
| ATOM | 3806 | O    | VAL | X | 251 | 47.048 | 47.585 | 72.957 | 0.00 | 0.00 |
| ATOM | 3807 | N    | GLY | X | 252 | 45.820 | 45.866 | 73.663 | 0.00 | 0.00 |
| ATOM | 3808 | H    | GLY | X | 252 | 45.315 | 45.020 | 73.441 | 0.00 | 0.00 |
| ATOM | 3809 | CA   | GLY | X | 252 | 45.584 | 46.426 | 75.036 | 0.00 | 0.00 |
| ATOM | 3810 | HA2  | GLY | X | 252 | 45.693 | 45.583 | 75.667 | 0.00 | 0.00 |
| ATOM | 3811 | HA3  | GLY | X | 252 | 46.382 | 47.256 | 75.213 | 0.00 | 0.00 |
| ATOM | 3812 | C    | GLY | X | 252 | 44.150 | 46.845 | 75.251 | 0.00 | 0.00 |
| ATOM | 3813 | O    | GLY | X | 252 | 43.914 | 47.755 | 76.036 | 0.00 | 0.00 |
| ATOM | 3814 | N    | CYX | X | 253 | 43.230 | 46.255 | 74.442 | 0.00 | 0.00 |
| ATOM | 3815 | H    | CYX | X | 253 | 43.602 | 45.522 | 73.855 | 0.00 | 0.00 |
| ATOM | 3816 | CA   | CYX | X | 253 | 41.816 | 46.531 | 74.451 | 0.00 | 0.00 |
| ATOM | 3817 | HA   | CYX | X | 253 | 41.585 | 47.332 | 75.153 | 0.00 | 0.00 |
| ATOM | 3818 | CB   | CYX | X | 253 | 41.479 | 46.858 | 72.997 | 0.00 | 0.00 |
| ATOM | 3819 | HB2  | CYX | X | 253 | 41.509 | 45.991 | 72.337 | 0.00 | 0.00 |
| ATOM | 3820 | HB3  | CYX | X | 253 | 40.422 | 47.084 | 73.138 | 0.00 | 0.00 |
| ATOM | 3821 | SG   | CYX | X | 253 | 42.441 | 48.236 | 72.354 | 0.00 | 0.00 |

|      |      |      |     |   |     |        |        |        |      |      |
|------|------|------|-----|---|-----|--------|--------|--------|------|------|
| ATOM | 3822 | C    | CYX | X | 253 | 40.993 | 45.266 | 74.815 | 0.00 | 0.00 |
| ATOM | 3823 | O    | CYX | X | 253 | 40.755 | 44.403 | 73.948 | 0.00 | 0.00 |
| ATOM | 3824 | N    | PRO | X | 254 | 40.472 | 45.235 | 76.052 | 0.00 | 0.00 |
| ATOM | 3825 | CD   | PRO | X | 254 | 39.572 | 44.202 | 76.510 | 0.00 | 0.00 |
| ATOM | 3826 | HD2  | PRO | X | 254 | 40.092 | 43.249 | 76.410 | 0.00 | 0.00 |
| ATOM | 3827 | HD3  | PRO | X | 254 | 38.621 | 44.065 | 75.995 | 0.00 | 0.00 |
| ATOM | 3828 | CG   | PRO | X | 254 | 39.323 | 44.418 | 78.015 | 0.00 | 0.00 |
| ATOM | 3829 | HG2  | PRO | X | 254 | 40.214 | 43.960 | 78.444 | 0.00 | 0.00 |
| ATOM | 3830 | HG3  | PRO | X | 254 | 38.368 | 44.030 | 78.370 | 0.00 | 0.00 |
| ATOM | 3831 | CB   | PRO | X | 254 | 39.572 | 45.885 | 78.164 | 0.00 | 0.00 |
| ATOM | 3832 | HB2  | PRO | X | 254 | 39.799 | 46.089 | 79.211 | 0.00 | 0.00 |
| ATOM | 3833 | HB3  | PRO | X | 254 | 38.656 | 46.353 | 77.803 | 0.00 | 0.00 |
| ATOM | 3834 | CA   | PRO | X | 254 | 40.782 | 46.102 | 77.225 | 0.00 | 0.00 |
| ATOM | 3835 | HA   | PRO | X | 254 | 40.741 | 47.144 | 76.908 | 0.00 | 0.00 |
| ATOM | 3836 | C    | PRO | X | 254 | 42.105 | 45.689 | 77.909 | 0.00 | 0.00 |
| ATOM | 3837 | O    | PRO | X | 254 | 42.552 | 44.553 | 77.728 | 0.00 | 0.00 |
| ATOM | 3838 | N    | PRO | X | 255 | 42.704 | 46.595 | 78.734 | 0.00 | 0.00 |
| ATOM | 3839 | CD   | PRO | X | 255 | 42.101 | 47.913 | 79.038 | 0.00 | 0.00 |
| ATOM | 3840 | HD2  | PRO | X | 255 | 41.158 | 47.866 | 79.583 | 0.00 | 0.00 |
| ATOM | 3841 | HD3  | PRO | X | 255 | 41.965 | 48.409 | 78.077 | 0.00 | 0.00 |
| ATOM | 3842 | CG   | PRO | X | 255 | 43.143 | 48.682 | 79.814 | 0.00 | 0.00 |
| ATOM | 3843 | HG2  | PRO | X | 255 | 42.647 | 49.154 | 80.663 | 0.00 | 0.00 |
| ATOM | 3844 | HG3  | PRO | X | 255 | 43.552 | 49.466 | 79.176 | 0.00 | 0.00 |
| ATOM | 3845 | CB   | PRO | X | 255 | 44.106 | 47.627 | 80.317 | 0.00 | 0.00 |
| ATOM | 3846 | HB2  | PRO | X | 255 | 43.839 | 47.456 | 81.360 | 0.00 | 0.00 |
| ATOM | 3847 | HB3  | PRO | X | 255 | 45.118 | 48.018 | 80.218 | 0.00 | 0.00 |
| ATOM | 3848 | CA   | PRO | X | 255 | 43.905 | 46.382 | 79.477 | 0.00 | 0.00 |
| ATOM | 3849 | HA   | PRO | X | 255 | 44.745 | 46.305 | 78.787 | 0.00 | 0.00 |
| ATOM | 3850 | C    | PRO | X | 255 | 43.774 | 45.075 | 80.364 | 0.00 | 0.00 |
| ATOM | 3851 | O    | PRO | X | 255 | 42.705 | 44.902 | 80.915 | 0.00 | 0.00 |
| ATOM | 3852 | N    | GLY | X | 256 | 44.820 | 44.251 | 80.475 | 0.00 | 0.00 |
| ATOM | 3853 | H    | GLY | X | 256 | 45.552 | 44.241 | 79.778 | 0.00 | 0.00 |
| ATOM | 3854 | CA   | GLY | X | 256 | 44.648 | 43.116 | 81.344 | 0.00 | 0.00 |
| ATOM | 3855 | HA2  | GLY | X | 256 | 45.620 | 42.581 | 81.534 | 0.00 | 0.00 |
| ATOM | 3856 | HA3  | GLY | X | 256 | 44.222 | 43.575 | 82.227 | 0.00 | 0.00 |
| ATOM | 3857 | C    | GLY | X | 256 | 43.580 | 42.111 | 80.966 | 0.00 | 0.00 |
| ATOM | 3858 | O    | GLY | X | 256 | 43.260 | 41.295 | 81.810 | 0.00 | 0.00 |
| ATOM | 3859 | N    | GLY | X | 257 | 42.817 | 42.221 | 79.794 | 0.00 | 0.00 |
| ATOM | 3860 | H    | GLY | X | 257 | 43.023 | 42.940 | 79.115 | 0.00 | 0.00 |
| ATOM | 3861 | CA   | GLY | X | 257 | 41.634 | 41.427 | 79.563 | 0.00 | 0.00 |
| ATOM | 3862 | HA2  | GLY | X | 257 | 41.614 | 40.455 | 80.058 | 0.00 | 0.00 |
| ATOM | 3863 | HA3  | GLY | X | 257 | 40.791 | 41.950 | 79.999 | 0.00 | 0.00 |
| ATOM | 3864 | C    | GLY | X | 257 | 41.360 | 41.185 | 78.033 | 0.00 | 0.00 |
| ATOM | 3865 | O    | GLY | X | 257 | 42.110 | 41.591 | 77.154 | 0.00 | 0.00 |
| ATOM | 3866 | N    | THR | X | 258 | 40.226 | 40.502 | 77.810 | 0.00 | 0.00 |
| ATOM | 3867 | H    | THR | X | 258 | 39.769 | 40.024 | 78.574 | 0.00 | 0.00 |
| ATOM | 3868 | CA   | THR | X | 258 | 39.745 | 40.228 | 76.432 | 0.00 | 0.00 |
| ATOM | 3869 | HA   | THR | X | 258 | 40.240 | 40.832 | 75.671 | 0.00 | 0.00 |
| ATOM | 3870 | CB   | THR | X | 258 | 39.866 | 38.720 | 76.126 | 0.00 | 0.00 |
| ATOM | 3871 | HB   | THR | X | 258 | 39.088 | 38.246 | 76.724 | 0.00 | 0.00 |
| ATOM | 3872 | CG2  | THR | X | 258 | 39.743 | 38.409 | 74.651 | 0.00 | 0.00 |
| ATOM | 3873 | HG21 | THR | X | 258 | 39.844 | 39.394 | 74.195 | 0.00 | 0.00 |
| ATOM | 3874 | HG22 | THR | X | 258 | 40.594 | 37.823 | 74.304 | 0.00 | 0.00 |
| ATOM | 3875 | HG23 | THR | X | 258 | 38.776 | 38.006 | 74.348 | 0.00 | 0.00 |
| ATOM | 3876 | OG1  | THR | X | 258 | 41.102 | 38.270 | 76.425 | 0.00 | 0.00 |
| ATOM | 3877 | HG1  | THR | X | 258 | 41.632 | 38.044 | 75.657 | 0.00 | 0.00 |
| ATOM | 3878 | C    | THR | X | 258 | 38.276 | 40.437 | 76.354 | 0.00 | 0.00 |
| ATOM | 3879 | O    | THR | X | 258 | 37.577 | 40.129 | 77.304 | 0.00 | 0.00 |
| ATOM | 3880 | N    | GLY | X | 259 | 37.745 | 41.145 | 75.376 | 0.00 | 0.00 |
| ATOM | 3881 | H    | GLY | X | 259 | 38.415 | 41.514 | 74.717 | 0.00 | 0.00 |
| ATOM | 3882 | CA   | GLY | X | 259 | 36.310 | 41.431 | 75.246 | 0.00 | 0.00 |
| ATOM | 3883 | HA2  | GLY | X | 259 | 36.212 | 41.764 | 74.234 | 0.00 | 0.00 |
| ATOM | 3884 | HA3  | GLY | X | 259 | 35.695 | 40.562 | 75.465 | 0.00 | 0.00 |
| ATOM | 3885 | C    | GLY | X | 259 | 35.797 | 42.597 | 75.977 | 0.00 | 0.00 |
| ATOM | 3886 | O    | GLY | X | 259 | 36.229 | 43.733 | 75.646 | 0.00 | 0.00 |
| ATOM | 3887 | N    | GLY | X | 260 | 34.809 | 42.268 | 76.865 | 0.00 | 0.00 |
| ATOM | 3888 | H    | GLY | X | 260 | 34.533 | 41.303 | 76.979 | 0.00 | 0.00 |
| ATOM | 3889 | CA   | GLY | X | 260 | 33.986 | 43.373 | 77.462 | 0.00 | 0.00 |
| ATOM | 3890 | HA2  | GLY | X | 260 | 33.516 | 43.193 | 78.396 | 0.00 | 0.00 |
| ATOM | 3891 | HA3  | GLY | X | 260 | 34.741 | 44.228 | 77.630 | 0.00 | 0.00 |

|      |      |      |     |   |     |        |        |        |      |      |
|------|------|------|-----|---|-----|--------|--------|--------|------|------|
| ATOM | 3892 | C    | GLY | X | 260 | 32.933 | 43.868 | 76.510 | 0.00 | 0.00 |
| ATOM | 3893 | O    | GLY | X | 260 | 32.534 | 43.175 | 75.549 | 0.00 | 0.00 |
| ATOM | 3894 | N    | ASN | X | 261 | 32.627 | 45.125 | 76.603 | 0.00 | 0.00 |
| ATOM | 3895 | H    | ASN | X | 261 | 33.188 | 45.673 | 77.240 | 0.00 | 0.00 |
| ATOM | 3896 | CA   | ASN | X | 261 | 31.731 | 45.856 | 75.688 | 0.00 | 0.00 |
| ATOM | 3897 | HA   | ASN | X | 261 | 30.776 | 45.354 | 75.535 | 0.00 | 0.00 |
| ATOM | 3898 | CB   | ASN | X | 261 | 31.363 | 47.213 | 76.305 | 0.00 | 0.00 |
| ATOM | 3899 | HB2  | ASN | X | 261 | 30.704 | 47.105 | 77.167 | 0.00 | 0.00 |
| ATOM | 3900 | HB3  | ASN | X | 261 | 32.289 | 47.738 | 76.543 | 0.00 | 0.00 |
| ATOM | 3901 | CG   | ASN | X | 261 | 30.568 | 48.034 | 75.360 | 0.00 | 0.00 |
| ATOM | 3902 | OD1  | ASN | X | 261 | 31.071 | 48.782 | 74.512 | 0.00 | 0.00 |
| ATOM | 3903 | ND2  | ASN | X | 261 | 29.228 | 47.966 | 75.381 | 0.00 | 0.00 |
| ATOM | 3904 | HD21 | ASN | X | 261 | 28.696 | 48.393 | 74.636 | 0.00 | 0.00 |
| ATOM | 3905 | HD22 | ASN | X | 261 | 28.680 | 47.306 | 75.915 | 0.00 | 0.00 |
| ATOM | 3906 | C    | ASN | X | 261 | 32.406 | 46.118 | 74.285 | 0.00 | 0.00 |
| ATOM | 3907 | O    | ASN | X | 261 | 33.598 | 46.543 | 74.216 | 0.00 | 0.00 |
| ATOM | 3908 | N    | ASP | X | 262 | 31.661 | 45.874 | 73.103 | 0.00 | 0.00 |
| ATOM | 3909 | H    | ASP | X | 262 | 30.671 | 45.758 | 73.267 | 0.00 | 0.00 |
| ATOM | 3910 | CA   | ASP | X | 262 | 32.128 | 45.787 | 71.746 | 0.00 | 0.00 |
| ATOM | 3911 | HA   | ASP | X | 262 | 32.941 | 45.067 | 71.651 | 0.00 | 0.00 |
| ATOM | 3912 | CB   | ASP | X | 262 | 31.006 | 45.309 | 70.767 | 0.00 | 0.00 |
| ATOM | 3913 | HB2  | ASP | X | 262 | 30.059 | 45.806 | 70.978 | 0.00 | 0.00 |
| ATOM | 3914 | HB3  | ASP | X | 262 | 31.369 | 45.464 | 69.751 | 0.00 | 0.00 |
| ATOM | 3915 | CG   | ASP | X | 262 | 30.750 | 43.769 | 70.924 | 0.00 | 0.00 |
| ATOM | 3916 | OD1  | ASP | X | 262 | 29.603 | 43.357 | 70.648 | 0.00 | 0.00 |
| ATOM | 3917 | OD2  | ASP | X | 262 | 31.649 | 43.073 | 71.376 | 0.00 | 0.00 |
| ATOM | 3918 | C    | ASP | X | 262 | 32.534 | 47.162 | 71.203 | 0.00 | 0.00 |
| ATOM | 3919 | O    | ASP | X | 262 | 33.554 | 47.258 | 70.581 | 0.00 | 0.00 |
| ATOM | 3920 | N    | THR | X | 263 | 31.767 | 48.167 | 71.610 | 0.00 | 0.00 |
| ATOM | 3921 | H    | THR | X | 263 | 31.128 | 47.959 | 72.364 | 0.00 | 0.00 |
| ATOM | 3922 | CA   | THR | X | 263 | 32.026 | 49.600 | 71.317 | 0.00 | 0.00 |
| ATOM | 3923 | HA   | THR | X | 263 | 32.158 | 49.609 | 70.235 | 0.00 | 0.00 |
| ATOM | 3924 | CB   | THR | X | 263 | 30.889 | 50.487 | 71.777 | 0.00 | 0.00 |
| ATOM | 3925 | HB   | THR | X | 263 | 30.845 | 50.559 | 72.863 | 0.00 | 0.00 |
| ATOM | 3926 | CG2  | THR | X | 263 | 31.208 | 51.903 | 71.373 | 0.00 | 0.00 |
| ATOM | 3927 | HG21 | THR | X | 263 | 31.471 | 51.979 | 70.317 | 0.00 | 0.00 |
| ATOM | 3928 | HG22 | THR | X | 263 | 30.425 | 52.613 | 71.639 | 0.00 | 0.00 |
| ATOM | 3929 | HG23 | THR | X | 263 | 32.048 | 52.313 | 71.933 | 0.00 | 0.00 |
| ATOM | 3930 | OG1  | THR | X | 263 | 29.674 | 50.041 | 71.208 | 0.00 | 0.00 |
| ATOM | 3931 | HG1  | THR | X | 263 | 29.847 | 49.995 | 70.265 | 0.00 | 0.00 |
| ATOM | 3932 | C    | THR | X | 263 | 33.388 | 49.997 | 71.942 | 0.00 | 0.00 |
| ATOM | 3933 | O    | THR | X | 263 | 34.227 | 50.585 | 71.285 | 0.00 | 0.00 |
| ATOM | 3934 | N    | GLU | X | 264 | 33.643 | 49.604 | 73.190 | 0.00 | 0.00 |
| ATOM | 3935 | H    | GLU | X | 264 | 32.938 | 49.195 | 73.786 | 0.00 | 0.00 |
| ATOM | 3936 | CA   | GLU | X | 264 | 34.863 | 50.104 | 73.930 | 0.00 | 0.00 |
| ATOM | 3937 | HA   | GLU | X | 264 | 34.996 | 51.180 | 73.815 | 0.00 | 0.00 |
| ATOM | 3938 | CB   | GLU | X | 264 | 34.766 | 49.941 | 75.426 | 0.00 | 0.00 |
| ATOM | 3939 | HB2  | GLU | X | 264 | 34.198 | 49.024 | 75.580 | 0.00 | 0.00 |
| ATOM | 3940 | HB3  | GLU | X | 264 | 35.760 | 49.773 | 75.841 | 0.00 | 0.00 |
| ATOM | 3941 | CG   | GLU | X | 264 | 34.040 | 51.080 | 76.183 | 0.00 | 0.00 |
| ATOM | 3942 | HG2  | GLU | X | 264 | 33.075 | 51.212 | 75.693 | 0.00 | 0.00 |
| ATOM | 3943 | HG3  | GLU | X | 264 | 33.848 | 50.832 | 77.227 | 0.00 | 0.00 |
| ATOM | 3944 | CD   | GLU | X | 264 | 34.986 | 52.371 | 76.049 | 0.00 | 0.00 |
| ATOM | 3945 | OE1  | GLU | X | 264 | 34.497 | 53.414 | 75.508 | 0.00 | 0.00 |
| ATOM | 3946 | OE2  | GLU | X | 264 | 36.125 | 52.316 | 76.544 | 0.00 | 0.00 |
| ATOM | 3947 | C    | GLU | X | 264 | 36.100 | 49.381 | 73.391 | 0.00 | 0.00 |
| ATOM | 3948 | O    | GLU | X | 264 | 37.247 | 49.827 | 73.509 | 0.00 | 0.00 |
| ATOM | 3949 | N    | LEU | X | 265 | 35.909 | 48.150 | 72.818 | 0.00 | 0.00 |
| ATOM | 3950 | H    | LEU | X | 265 | 34.967 | 47.795 | 72.891 | 0.00 | 0.00 |
| ATOM | 3951 | CA   | LEU | X | 265 | 36.974 | 47.358 | 72.208 | 0.00 | 0.00 |
| ATOM | 3952 | HA   | LEU | X | 265 | 37.846 | 47.239 | 72.852 | 0.00 | 0.00 |
| ATOM | 3953 | CB   | LEU | X | 265 | 36.351 | 45.971 | 72.029 | 0.00 | 0.00 |
| ATOM | 3954 | HB2  | LEU | X | 265 | 36.141 | 45.695 | 73.062 | 0.00 | 0.00 |
| ATOM | 3955 | HB3  | LEU | X | 265 | 35.430 | 46.007 | 71.447 | 0.00 | 0.00 |
| ATOM | 3956 | CG   | LEU | X | 265 | 37.233 | 44.894 | 71.362 | 0.00 | 0.00 |
| ATOM | 3957 | HG   | LEU | X | 265 | 38.246 | 45.027 | 71.742 | 0.00 | 0.00 |
| ATOM | 3958 | CD1  | LEU | X | 265 | 36.781 | 43.474 | 71.603 | 0.00 | 0.00 |
| ATOM | 3959 | HD11 | LEU | X | 265 | 35.720 | 43.329 | 71.395 | 0.00 | 0.00 |
| ATOM | 3960 | HD12 | LEU | X | 265 | 37.418 | 42.704 | 71.168 | 0.00 | 0.00 |
| ATOM | 3961 | HD13 | LEU | X | 265 | 36.769 | 43.386 | 72.689 | 0.00 | 0.00 |



|      |      |      |     |   |     |        |        |        |      |      |
|------|------|------|-----|---|-----|--------|--------|--------|------|------|
| ATOM | 3962 | CD2  | LEU | X | 265 | 37.224 | 45.004 | 69.815 | 0.00 | 0.00 |
| ATOM | 3963 | HD21 | LEU | X | 265 | 37.634 | 44.050 | 69.483 | 0.00 | 0.00 |
| ATOM | 3964 | HD22 | LEU | X | 265 | 36.271 | 45.317 | 69.387 | 0.00 | 0.00 |
| ATOM | 3965 | HD23 | LEU | X | 265 | 37.984 | 45.747 | 69.570 | 0.00 | 0.00 |
| ATOM | 3966 | C    | LEU | X | 265 | 37.426 | 47.963 | 70.868 | 0.00 | 0.00 |
| ATOM | 3967 | O    | LEU | X | 265 | 38.580 | 48.243 | 70.669 | 0.00 | 0.00 |
| ATOM | 3968 | N    | VAL | X | 266 | 36.455 | 48.312 | 70.050 | 0.00 | 0.00 |
| ATOM | 3969 | H    | VAL | X | 266 | 35.535 | 47.951 | 70.261 | 0.00 | 0.00 |
| ATOM | 3970 | CA   | VAL | X | 266 | 36.697 | 49.011 | 68.798 | 0.00 | 0.00 |
| ATOM | 3971 | HA   | VAL | X | 266 | 37.524 | 48.529 | 68.277 | 0.00 | 0.00 |
| ATOM | 3972 | CB   | VAL | X | 266 | 35.581 | 48.881 | 67.836 | 0.00 | 0.00 |
| ATOM | 3973 | HB   | VAL | X | 266 | 34.683 | 49.377 | 68.203 | 0.00 | 0.00 |
| ATOM | 3974 | CG1  | VAL | X | 266 | 35.866 | 49.581 | 66.529 | 0.00 | 0.00 |
| ATOM | 3975 | HG11 | VAL | X | 266 | 36.115 | 50.636 | 66.642 | 0.00 | 0.00 |
| ATOM | 3976 | HG12 | VAL | X | 266 | 36.633 | 49.118 | 65.908 | 0.00 | 0.00 |
| ATOM | 3977 | HG13 | VAL | X | 266 | 34.962 | 49.548 | 65.920 | 0.00 | 0.00 |
| ATOM | 3978 | CG2  | VAL | X | 266 | 35.321 | 47.420 | 67.434 | 0.00 | 0.00 |
| ATOM | 3979 | HG21 | VAL | X | 266 | 34.532 | 47.393 | 66.684 | 0.00 | 0.00 |
| ATOM | 3980 | HG22 | VAL | X | 266 | 36.183 | 46.823 | 67.135 | 0.00 | 0.00 |
| ATOM | 3981 | HG23 | VAL | X | 266 | 34.813 | 46.949 | 68.275 | 0.00 | 0.00 |
| ATOM | 3982 | C    | VAL | X | 266 | 37.114 | 50.490 | 68.983 | 0.00 | 0.00 |
| ATOM | 3983 | O    | VAL | X | 266 | 38.016 | 51.014 | 68.253 | 0.00 | 0.00 |
| ATOM | 3984 | N    | ALA | X | 267 | 36.680 | 51.149 | 70.073 | 0.00 | 0.00 |
| ATOM | 3985 | H    | ALA | X | 267 | 35.987 | 50.650 | 70.612 | 0.00 | 0.00 |
| ATOM | 3986 | CA   | ALA | X | 267 | 37.112 | 52.422 | 70.544 | 0.00 | 0.00 |
| ATOM | 3987 | HA   | ALA | X | 267 | 37.028 | 53.126 | 69.716 | 0.00 | 0.00 |
| ATOM | 3988 | CB   | ALA | X | 267 | 36.187 | 52.926 | 71.692 | 0.00 | 0.00 |
| ATOM | 3989 | HB1  | ALA | X | 267 | 36.252 | 52.180 | 72.484 | 0.00 | 0.00 |
| ATOM | 3990 | HB2  | ALA | X | 267 | 36.655 | 53.741 | 72.243 | 0.00 | 0.00 |
| ATOM | 3991 | HB3  | ALA | X | 267 | 35.204 | 53.234 | 71.334 | 0.00 | 0.00 |
| ATOM | 3992 | C    | ALA | X | 267 | 38.561 | 52.504 | 71.017 | 0.00 | 0.00 |
| ATOM | 3993 | O    | ALA | X | 267 | 39.268 | 53.447 | 70.633 | 0.00 | 0.00 |
| ATOM | 3994 | N    | CYX | X | 268 | 38.989 | 51.555 | 71.899 | 0.00 | 0.00 |
| ATOM | 3995 | H    | CYX | X | 268 | 38.233 | 50.960 | 72.207 | 0.00 | 0.00 |
| ATOM | 3996 | CA   | CYX | X | 268 | 40.396 | 51.299 | 72.211 | 0.00 | 0.00 |
| ATOM | 3997 | HA   | CYX | X | 268 | 40.742 | 52.215 | 72.690 | 0.00 | 0.00 |
| ATOM | 3998 | CB   | CYX | X | 268 | 40.495 | 50.180 | 73.154 | 0.00 | 0.00 |
| ATOM | 3999 | HB2  | CYX | X | 268 | 39.949 | 50.420 | 74.067 | 0.00 | 0.00 |
| ATOM | 4000 | HB3  | CYX | X | 268 | 40.036 | 49.277 | 72.753 | 0.00 | 0.00 |
| ATOM | 4001 | SG   | CYX | X | 268 | 42.123 | 49.750 | 73.701 | 0.00 | 0.00 |
| ATOM | 4002 | C    | CYX | X | 268 | 41.223 | 50.999 | 71.005 | 0.00 | 0.00 |
| ATOM | 4003 | O    | CYX | X | 268 | 42.330 | 51.588 | 70.870 | 0.00 | 0.00 |
| ATOM | 4004 | N    | LEU | X | 269 | 40.695 | 50.136 | 70.122 | 0.00 | 0.00 |
| ATOM | 4005 | H    | LEU | X | 269 | 39.769 | 49.749 | 70.228 | 0.00 | 0.00 |
| ATOM | 4006 | CA   | LEU | X | 269 | 41.416 | 49.758 | 68.953 | 0.00 | 0.00 |
| ATOM | 4007 | HA   | LEU | X | 269 | 42.470 | 49.667 | 69.215 | 0.00 | 0.00 |
| ATOM | 4008 | CB   | LEU | X | 269 | 40.765 | 48.423 | 68.530 | 0.00 | 0.00 |
| ATOM | 4009 | HB2  | LEU | X | 269 | 40.789 | 47.760 | 69.395 | 0.00 | 0.00 |
| ATOM | 4010 | HB3  | LEU | X | 269 | 39.706 | 48.533 | 68.298 | 0.00 | 0.00 |
| ATOM | 4011 | CG   | LEU | X | 269 | 41.407 | 47.608 | 67.428 | 0.00 | 0.00 |
| ATOM | 4012 | HG   | LEU | X | 269 | 41.711 | 48.361 | 66.702 | 0.00 | 0.00 |
| ATOM | 4013 | CD1  | LEU | X | 269 | 42.626 | 46.853 | 67.934 | 0.00 | 0.00 |
| ATOM | 4014 | HD11 | LEU | X | 269 | 43.035 | 46.244 | 67.128 | 0.00 | 0.00 |
| ATOM | 4015 | HD12 | LEU | X | 269 | 43.426 | 47.569 | 68.126 | 0.00 | 0.00 |
| ATOM | 4016 | HD13 | LEU | X | 269 | 42.313 | 46.375 | 68.862 | 0.00 | 0.00 |
| ATOM | 4017 | CD2  | LEU | X | 269 | 40.300 | 46.681 | 66.840 | 0.00 | 0.00 |
| ATOM | 4018 | HD21 | LEU | X | 269 | 40.695 | 46.318 | 65.892 | 0.00 | 0.00 |
| ATOM | 4019 | HD22 | LEU | X | 269 | 39.994 | 45.931 | 67.570 | 0.00 | 0.00 |
| ATOM | 4020 | HD23 | LEU | X | 269 | 39.426 | 47.278 | 66.579 | 0.00 | 0.00 |
| ATOM | 4021 | C    | LEU | X | 269 | 41.328 | 50.834 | 67.891 | 0.00 | 0.00 |
| ATOM | 4022 | O    | LEU | X | 269 | 41.847 | 50.709 | 66.801 | 0.00 | 0.00 |
| ATOM | 4023 | N    | ARG | X | 270 | 40.882 | 52.073 | 68.249 | 0.00 | 0.00 |
| ATOM | 4024 | H    | ARG | X | 270 | 40.275 | 52.136 | 69.053 | 0.00 | 0.00 |
| ATOM | 4025 | CA   | ARG | X | 270 | 41.106 | 53.302 | 67.439 | 0.00 | 0.00 |
| ATOM | 4026 | HA   | ARG | X | 270 | 41.581 | 53.093 | 66.481 | 0.00 | 0.00 |
| ATOM | 4027 | CB   | ARG | X | 270 | 39.690 | 53.837 | 67.165 | 0.00 | 0.00 |
| ATOM | 4028 | HB2  | ARG | X | 270 | 39.024 | 53.731 | 68.022 | 0.00 | 0.00 |
| ATOM | 4029 | HB3  | ARG | X | 270 | 39.809 | 54.913 | 67.038 | 0.00 | 0.00 |
| ATOM | 4030 | CG   | ARG | X | 270 | 39.000 | 53.245 | 65.972 | 0.00 | 0.00 |
| ATOM | 4031 | HG2  | ARG | X | 270 | 39.787 | 53.082 | 65.236 | 0.00 | 0.00 |

|      |      |      |     |   |     |        |        |        |      |      |
|------|------|------|-----|---|-----|--------|--------|--------|------|------|
| ATOM | 4032 | HG3  | ARG | X | 270 | 38.584 | 52.277 | 66.250 | 0.00 | 0.00 |
| ATOM | 4033 | CD   | ARG | X | 270 | 37.989 | 54.259 | 65.411 | 0.00 | 0.00 |
| ATOM | 4034 | HD2  | ARG | X | 270 | 38.309 | 55.293 | 65.545 | 0.00 | 0.00 |
| ATOM | 4035 | HD3  | ARG | X | 270 | 38.109 | 54.061 | 64.345 | 0.00 | 0.00 |
| ATOM | 4036 | NE   | ARG | X | 270 | 36.557 | 54.025 | 65.878 | 0.00 | 0.00 |
| ATOM | 4037 | HE   | ARG | X | 270 | 36.251 | 54.364 | 66.779 | 0.00 | 0.00 |
| ATOM | 4038 | CZ   | ARG | X | 270 | 35.578 | 53.273 | 65.339 | 0.00 | 0.00 |
| ATOM | 4039 | NH1  | ARG | X | 270 | 35.655 | 52.695 | 64.197 | 0.00 | 0.00 |
| ATOM | 4040 | HH11 | ARG | X | 270 | 36.511 | 52.813 | 63.673 | 0.00 | 0.00 |
| ATOM | 4041 | HH12 | ARG | X | 270 | 34.897 | 52.112 | 63.873 | 0.00 | 0.00 |
| ATOM | 4042 | NH2  | ARG | X | 270 | 34.465 | 53.055 | 66.050 | 0.00 | 0.00 |
| ATOM | 4043 | HH21 | ARG | X | 270 | 34.455 | 53.373 | 67.008 | 0.00 | 0.00 |
| ATOM | 4044 | HH22 | ARG | X | 270 | 33.874 | 52.255 | 65.869 | 0.00 | 0.00 |
| ATOM | 4045 | C    | ARG | X | 270 | 41.989 | 54.226 | 68.196 | 0.00 | 0.00 |
| ATOM | 4046 | O    | ARG | X | 270 | 42.854 | 54.945 | 67.659 | 0.00 | 0.00 |
| ATOM | 4047 | N    | THR | X | 271 | 41.819 | 54.383 | 69.555 | 0.00 | 0.00 |
| ATOM | 4048 | H    | THR | X | 271 | 41.026 | 53.938 | 69.995 | 0.00 | 0.00 |
| ATOM | 4049 | CA   | THR | X | 271 | 42.671 | 55.234 | 70.417 | 0.00 | 0.00 |
| ATOM | 4050 | HA   | THR | X | 271 | 42.682 | 56.223 | 69.958 | 0.00 | 0.00 |
| ATOM | 4051 | CB   | THR | X | 271 | 42.081 | 55.197 | 71.846 | 0.00 | 0.00 |
| ATOM | 4052 | HB   | THR | X | 271 | 42.012 | 54.234 | 72.351 | 0.00 | 0.00 |
| ATOM | 4053 | CG2  | THR | X | 271 | 42.838 | 56.117 | 72.780 | 0.00 | 0.00 |
| ATOM | 4054 | HG21 | THR | X | 271 | 43.826 | 55.659 | 72.834 | 0.00 | 0.00 |
| ATOM | 4055 | HG22 | THR | X | 271 | 42.767 | 57.108 | 72.331 | 0.00 | 0.00 |
| ATOM | 4056 | HG23 | THR | X | 271 | 42.395 | 56.173 | 73.774 | 0.00 | 0.00 |
| ATOM | 4057 | OG1  | THR | X | 271 | 40.824 | 55.779 | 71.819 | 0.00 | 0.00 |
| ATOM | 4058 | HG1  | THR | X | 271 | 40.479 | 55.689 | 72.710 | 0.00 | 0.00 |
| ATOM | 4059 | C    | THR | X | 271 | 44.107 | 54.711 | 70.408 | 0.00 | 0.00 |
| ATOM | 4060 | O    | THR | X | 271 | 45.050 | 55.537 | 70.288 | 0.00 | 0.00 |
| ATOM | 4061 | N    | ARG | X | 272 | 44.372 | 53.399 | 70.604 | 0.00 | 0.00 |
| ATOM | 4062 | H    | ARG | X | 272 | 43.607 | 52.742 | 70.550 | 0.00 | 0.00 |
| ATOM | 4063 | CA   | ARG | X | 272 | 45.689 | 52.811 | 70.638 | 0.00 | 0.00 |
| ATOM | 4064 | HA   | ARG | X | 272 | 46.167 | 53.348 | 71.457 | 0.00 | 0.00 |
| ATOM | 4065 | CB   | ARG | X | 272 | 45.715 | 51.289 | 71.129 | 0.00 | 0.00 |
| ATOM | 4066 | HB2  | ARG | X | 272 | 45.082 | 50.691 | 70.475 | 0.00 | 0.00 |
| ATOM | 4067 | HB3  | ARG | X | 272 | 46.699 | 50.840 | 70.997 | 0.00 | 0.00 |
| ATOM | 4068 | CG   | ARG | X | 272 | 45.076 | 51.103 | 72.536 | 0.00 | 0.00 |
| ATOM | 4069 | HG2  | ARG | X | 272 | 44.153 | 51.680 | 72.575 | 0.00 | 0.00 |
| ATOM | 4070 | HG3  | ARG | X | 272 | 44.772 | 50.062 | 72.643 | 0.00 | 0.00 |
| ATOM | 4071 | CD   | ARG | X | 272 | 46.015 | 51.378 | 73.666 | 0.00 | 0.00 |
| ATOM | 4072 | HD2  | ARG | X | 272 | 46.898 | 50.746 | 73.562 | 0.00 | 0.00 |
| ATOM | 4073 | HD3  | ARG | X | 272 | 46.331 | 52.419 | 73.737 | 0.00 | 0.00 |
| ATOM | 4074 | NE   | ARG | X | 272 | 45.510 | 50.943 | 74.918 | 0.00 | 0.00 |
| ATOM | 4075 | HE   | ARG | X | 272 | 44.533 | 50.691 | 74.937 | 0.00 | 0.00 |
| ATOM | 4076 | CZ   | ARG | X | 272 | 46.174 | 50.463 | 75.985 | 0.00 | 0.00 |
| ATOM | 4077 | NH1  | ARG | X | 272 | 47.402 | 50.875 | 76.141 | 0.00 | 0.00 |
| ATOM | 4078 | HH11 | ARG | X | 272 | 47.797 | 51.649 | 75.627 | 0.00 | 0.00 |
| ATOM | 4079 | HH12 | ARG | X | 272 | 47.927 | 50.581 | 76.952 | 0.00 | 0.00 |
| ATOM | 4080 | NH2  | ARG | X | 272 | 45.599 | 49.833 | 76.986 | 0.00 | 0.00 |
| ATOM | 4081 | HH21 | ARG | X | 272 | 44.659 | 49.475 | 76.896 | 0.00 | 0.00 |
| ATOM | 4082 | HH22 | ARG | X | 272 | 46.115 | 49.544 | 77.805 | 0.00 | 0.00 |
| ATOM | 4083 | C    | ARG | X | 272 | 46.517 | 52.949 | 69.284 | 0.00 | 0.00 |
| ATOM | 4084 | O    | ARG | X | 272 | 45.965 | 52.769 | 68.158 | 0.00 | 0.00 |
| ATOM | 4085 | N    | PRO | X | 273 | 47.789 | 53.165 | 69.303 | 0.00 | 0.00 |
| ATOM | 4086 | CD   | PRO | X | 273 | 48.663 | 53.081 | 70.448 | 0.00 | 0.00 |
| ATOM | 4087 | HD2  | PRO | X | 273 | 49.088 | 52.084 | 70.334 | 0.00 | 0.00 |
| ATOM | 4088 | HD3  | PRO | X | 273 | 48.100 | 53.274 | 71.361 | 0.00 | 0.00 |
| ATOM | 4089 | CG   | PRO | X | 273 | 49.759 | 54.089 | 70.255 | 0.00 | 0.00 |
| ATOM | 4090 | HG2  | PRO | X | 273 | 50.621 | 53.857 | 70.881 | 0.00 | 0.00 |
| ATOM | 4091 | HG3  | PRO | X | 273 | 49.410 | 55.096 | 70.482 | 0.00 | 0.00 |
| ATOM | 4092 | CB   | PRO | X | 273 | 49.999 | 53.959 | 68.737 | 0.00 | 0.00 |
| ATOM | 4093 | HB2  | PRO | X | 273 | 50.764 | 53.206 | 68.548 | 0.00 | 0.00 |
| ATOM | 4094 | HB3  | PRO | X | 273 | 50.409 | 54.819 | 68.207 | 0.00 | 0.00 |
| ATOM | 4095 | CA   | PRO | X | 273 | 48.661 | 53.454 | 68.153 | 0.00 | 0.00 |
| ATOM | 4096 | HA   | PRO | X | 273 | 48.350 | 54.344 | 67.607 | 0.00 | 0.00 |
| ATOM | 4097 | C    | PRO | X | 273 | 48.856 | 52.331 | 67.158 | 0.00 | 0.00 |
| ATOM | 4098 | O    | PRO | X | 273 | 49.105 | 51.245 | 67.630 | 0.00 | 0.00 |
| ATOM | 4099 | N    | ALA | X | 274 | 48.785 | 52.622 | 65.893 | 0.00 | 0.00 |
| ATOM | 4100 | H    | ALA | X | 274 | 48.570 | 53.590 | 65.703 | 0.00 | 0.00 |
| ATOM | 4101 | CA   | ALA | X | 274 | 48.855 | 51.713 | 64.727 | 0.00 | 0.00 |

|      |      |      |     |   |     |        |        |        |      |      |
|------|------|------|-----|---|-----|--------|--------|--------|------|------|
| ATOM | 4102 | HA   | ALA | X | 274 | 47.965 | 51.084 | 64.751 | 0.00 | 0.00 |
| ATOM | 4103 | CB   | ALA | X | 274 | 49.003 | 52.543 | 63.469 | 0.00 | 0.00 |
| ATOM | 4104 | HB1  | ALA | X | 274 | 49.141 | 51.941 | 62.571 | 0.00 | 0.00 |
| ATOM | 4105 | HB2  | ALA | X | 274 | 48.141 | 53.158 | 63.211 | 0.00 | 0.00 |
| ATOM | 4106 | HB3  | ALA | X | 274 | 49.837 | 53.240 | 63.556 | 0.00 | 0.00 |
| ATOM | 4107 | C    | ALA | X | 274 | 50.108 | 50.792 | 64.759 | 0.00 | 0.00 |
| ATOM | 4108 | O    | ALA | X | 274 | 50.058 | 49.590 | 64.413 | 0.00 | 0.00 |
| ATOM | 4109 | N    | GLN | X | 275 | 51.152 | 51.347 | 65.355 | 0.00 | 0.00 |
| ATOM | 4110 | H    | GLN | X | 275 | 51.154 | 52.323 | 65.614 | 0.00 | 0.00 |
| ATOM | 4111 | CA   | GLN | X | 275 | 52.450 | 50.557 | 65.432 | 0.00 | 0.00 |
| ATOM | 4112 | HA   | GLN | X | 275 | 52.682 | 50.077 | 64.481 | 0.00 | 0.00 |
| ATOM | 4113 | CB   | GLN | X | 275 | 53.673 | 51.492 | 65.739 | 0.00 | 0.00 |
| ATOM | 4114 | HB2  | GLN | X | 275 | 53.349 | 52.076 | 66.600 | 0.00 | 0.00 |
| ATOM | 4115 | HB3  | GLN | X | 275 | 54.533 | 50.902 | 66.055 | 0.00 | 0.00 |
| ATOM | 4116 | CG   | GLN | X | 275 | 53.973 | 52.440 | 64.567 | 0.00 | 0.00 |
| ATOM | 4117 | HG2  | GLN | X | 275 | 54.462 | 51.851 | 63.792 | 0.00 | 0.00 |
| ATOM | 4118 | HG3  | GLN | X | 275 | 53.112 | 53.002 | 64.205 | 0.00 | 0.00 |
| ATOM | 4119 | CD   | GLN | X | 275 | 54.995 | 53.490 | 65.018 | 0.00 | 0.00 |
| ATOM | 4120 | OE1  | GLN | X | 275 | 56.003 | 53.624 | 64.385 | 0.00 | 0.00 |
| ATOM | 4121 | NE2  | GLN | X | 275 | 54.885 | 54.147 | 66.152 | 0.00 | 0.00 |
| ATOM | 4122 | HE21 | GLN | X | 275 | 55.447 | 54.962 | 66.355 | 0.00 | 0.00 |
| ATOM | 4123 | HE22 | GLN | X | 275 | 54.045 | 54.076 | 66.709 | 0.00 | 0.00 |
| ATOM | 4124 | C    | GLN | X | 275 | 52.265 | 49.320 | 66.387 | 0.00 | 0.00 |
| ATOM | 4125 | O    | GLN | X | 275 | 52.980 | 48.357 | 66.332 | 0.00 | 0.00 |
| ATOM | 4126 | N    | VAL | X | 276 | 51.270 | 49.411 | 67.308 | 0.00 | 0.00 |
| ATOM | 4127 | H    | VAL | X | 276 | 50.786 | 50.285 | 67.459 | 0.00 | 0.00 |
| ATOM | 4128 | CA   | VAL | X | 276 | 50.869 | 48.253 | 68.179 | 0.00 | 0.00 |
| ATOM | 4129 | HA   | VAL | X | 276 | 51.858 | 47.864 | 68.424 | 0.00 | 0.00 |
| ATOM | 4130 | CB   | VAL | X | 276 | 50.254 | 48.832 | 69.450 | 0.00 | 0.00 |
| ATOM | 4131 | HB   | VAL | X | 276 | 49.239 | 49.159 | 69.224 | 0.00 | 0.00 |
| ATOM | 4132 | CG1  | VAL | X | 276 | 50.083 | 47.695 | 70.564 | 0.00 | 0.00 |
| ATOM | 4133 | HG11 | VAL | X | 276 | 51.040 | 47.239 | 70.816 | 0.00 | 0.00 |
| ATOM | 4134 | HG12 | VAL | X | 276 | 49.560 | 48.238 | 71.352 | 0.00 | 0.00 |
| ATOM | 4135 | HG13 | VAL | X | 276 | 49.448 | 46.846 | 70.311 | 0.00 | 0.00 |
| ATOM | 4136 | CG2  | VAL | X | 276 | 50.880 | 50.131 | 70.076 | 0.00 | 0.00 |
| ATOM | 4137 | HG21 | VAL | X | 276 | 51.053 | 50.880 | 69.303 | 0.00 | 0.00 |
| ATOM | 4138 | HG22 | VAL | X | 276 | 50.294 | 50.489 | 70.922 | 0.00 | 0.00 |
| ATOM | 4139 | HG23 | VAL | X | 276 | 51.905 | 49.916 | 70.378 | 0.00 | 0.00 |
| ATOM | 4140 | C    | VAL | X | 276 | 49.907 | 47.223 | 67.420 | 0.00 | 0.00 |
| ATOM | 4141 | O    | VAL | X | 276 | 50.110 | 46.046 | 67.529 | 0.00 | 0.00 |
| ATOM | 4142 | N    | LEU | X | 277 | 49.112 | 47.767 | 66.460 | 0.00 | 0.00 |
| ATOM | 4143 | H    | LEU | X | 277 | 49.236 | 48.753 | 66.278 | 0.00 | 0.00 |
| ATOM | 4144 | CA   | LEU | X | 277 | 48.256 | 46.950 | 65.574 | 0.00 | 0.00 |
| ATOM | 4145 | HA   | LEU | X | 277 | 47.750 | 46.217 | 66.201 | 0.00 | 0.00 |
| ATOM | 4146 | CB   | LEU | X | 277 | 47.204 | 47.778 | 64.758 | 0.00 | 0.00 |
| ATOM | 4147 | HB2  | LEU | X | 277 | 47.752 | 48.638 | 64.371 | 0.00 | 0.00 |
| ATOM | 4148 | HB3  | LEU | X | 277 | 46.873 | 47.102 | 63.970 | 0.00 | 0.00 |
| ATOM | 4149 | CG   | LEU | X | 277 | 45.984 | 48.363 | 65.523 | 0.00 | 0.00 |
| ATOM | 4150 | HG   | LEU | X | 277 | 45.319 | 47.554 | 65.825 | 0.00 | 0.00 |
| ATOM | 4151 | CD1  | LEU | X | 277 | 46.239 | 49.339 | 66.724 | 0.00 | 0.00 |
| ATOM | 4152 | HD11 | LEU | X | 277 | 47.012 | 50.029 | 66.384 | 0.00 | 0.00 |
| ATOM | 4153 | HD12 | LEU | X | 277 | 45.294 | 49.727 | 67.104 | 0.00 | 0.00 |
| ATOM | 4154 | HD13 | LEU | X | 277 | 46.618 | 48.721 | 67.538 | 0.00 | 0.00 |
| ATOM | 4155 | CD2  | LEU | X | 277 | 45.192 | 49.193 | 64.491 | 0.00 | 0.00 |
| ATOM | 4156 | HD21 | LEU | X | 277 | 45.038 | 48.581 | 63.603 | 0.00 | 0.00 |
| ATOM | 4157 | HD22 | LEU | X | 277 | 44.231 | 49.420 | 64.952 | 0.00 | 0.00 |
| ATOM | 4158 | HD23 | LEU | X | 277 | 45.693 | 50.122 | 64.221 | 0.00 | 0.00 |
| ATOM | 4159 | C    | LEU | X | 277 | 49.136 | 46.188 | 64.556 | 0.00 | 0.00 |
| ATOM | 4160 | O    | LEU | X | 277 | 48.980 | 44.969 | 64.421 | 0.00 | 0.00 |
| ATOM | 4161 | N    | VAL | X | 278 | 50.063 | 46.834 | 63.810 | 0.00 | 0.00 |
| ATOM | 4162 | H    | VAL | X | 278 | 50.190 | 47.818 | 63.999 | 0.00 | 0.00 |
| ATOM | 4163 | CA   | VAL | X | 278 | 50.904 | 46.226 | 62.739 | 0.00 | 0.00 |
| ATOM | 4164 | HA   | VAL | X | 278 | 50.148 | 45.703 | 62.153 | 0.00 | 0.00 |
| ATOM | 4165 | CB   | VAL | X | 278 | 51.544 | 47.413 | 61.899 | 0.00 | 0.00 |
| ATOM | 4166 | HB   | VAL | X | 278 | 50.882 | 48.279 | 61.879 | 0.00 | 0.00 |
| ATOM | 4167 | CG1  | VAL | X | 278 | 52.882 | 47.964 | 62.531 | 0.00 | 0.00 |
| ATOM | 4168 | HG11 | VAL | X | 278 | 52.761 | 48.211 | 63.585 | 0.00 | 0.00 |
| ATOM | 4169 | HG12 | VAL | X | 278 | 53.570 | 47.129 | 62.401 | 0.00 | 0.00 |
| ATOM | 4170 | HG13 | VAL | X | 278 | 53.324 | 48.778 | 61.956 | 0.00 | 0.00 |
| ATOM | 4171 | CG2  | VAL | X | 278 | 51.740 | 46.925 | 60.492 | 0.00 | 0.00 |

|      |      |      |     |   |     |        |        |        |      |      |
|------|------|------|-----|---|-----|--------|--------|--------|------|------|
| ATOM | 4172 | HG21 | VAL | X | 278 | 50.807 | 47.028 | 59.938 | 0.00 | 0.00 |
| ATOM | 4173 | HG22 | VAL | X | 278 | 52.469 | 47.548 | 59.974 | 0.00 | 0.00 |
| ATOM | 4174 | HG23 | VAL | X | 278 | 52.100 | 45.901 | 60.392 | 0.00 | 0.00 |
| ATOM | 4175 | C    | VAL | X | 278 | 51.911 | 45.242 | 63.253 | 0.00 | 0.00 |
| ATOM | 4176 | O    | VAL | X | 278 | 52.187 | 44.319 | 62.484 | 0.00 | 0.00 |
| ATOM | 4177 | N    | ASN | X | 279 | 52.304 | 45.426 | 64.508 | 0.00 | 0.00 |
| ATOM | 4178 | H    | ASN | X | 279 | 51.937 | 46.168 | 65.087 | 0.00 | 0.00 |
| ATOM | 4179 | CA   | ASN | X | 279 | 53.044 | 44.415 | 65.219 | 0.00 | 0.00 |
| ATOM | 4180 | HA   | ASN | X | 279 | 53.905 | 44.185 | 64.590 | 0.00 | 0.00 |
| ATOM | 4181 | CB   | ASN | X | 279 | 53.527 | 45.052 | 66.509 | 0.00 | 0.00 |
| ATOM | 4182 | HB2  | ASN | X | 279 | 54.158 | 45.908 | 66.266 | 0.00 | 0.00 |
| ATOM | 4183 | HB3  | ASN | X | 279 | 52.818 | 45.377 | 67.270 | 0.00 | 0.00 |
| ATOM | 4184 | CG   | ASN | X | 279 | 54.369 | 44.114 | 67.350 | 0.00 | 0.00 |
| ATOM | 4185 | OD1  | ASN | X | 279 | 55.579 | 43.895 | 67.028 | 0.00 | 0.00 |
| ATOM | 4186 | ND2  | ASN | X | 279 | 53.819 | 43.529 | 68.385 | 0.00 | 0.00 |
| ATOM | 4187 | HD21 | ASN | X | 279 | 54.290 | 42.742 | 68.807 | 0.00 | 0.00 |
| ATOM | 4188 | HD22 | ASN | X | 279 | 52.881 | 43.737 | 68.699 | 0.00 | 0.00 |
| ATOM | 4189 | C    | ASN | X | 279 | 52.275 | 43.109 | 65.456 | 0.00 | 0.00 |
| ATOM | 4190 | O    | ASN | X | 279 | 52.652 | 41.998 | 65.129 | 0.00 | 0.00 |
| ATOM | 4191 | N    | HIE | X | 280 | 51.008 | 43.301 | 65.915 | 0.00 | 0.00 |
| ATOM | 4192 | H    | HIE | X | 280 | 50.562 | 44.205 | 65.985 | 0.00 | 0.00 |
| ATOM | 4193 | CA   | HIE | X | 280 | 50.265 | 42.209 | 66.557 | 0.00 | 0.00 |
| ATOM | 4194 | HA   | HIE | X | 280 | 50.958 | 41.508 | 67.022 | 0.00 | 0.00 |
| ATOM | 4195 | CB   | HIE | X | 280 | 49.404 | 42.851 | 67.612 | 0.00 | 0.00 |
| ATOM | 4196 | HB2  | HIE | X | 280 | 48.722 | 43.642 | 67.297 | 0.00 | 0.00 |
| ATOM | 4197 | HB3  | HIE | X | 280 | 48.727 | 42.079 | 67.978 | 0.00 | 0.00 |
| ATOM | 4198 | CG   | HIE | X | 280 | 50.106 | 43.194 | 68.891 | 0.00 | 0.00 |
| ATOM | 4199 | ND1  | HIE | X | 280 | 51.011 | 42.357 | 69.464 | 0.00 | 0.00 |
| ATOM | 4200 | CE1  | HIE | X | 280 | 51.277 | 42.980 | 70.652 | 0.00 | 0.00 |
| ATOM | 4201 | HE1  | HIE | X | 280 | 52.047 | 42.674 | 71.346 | 0.00 | 0.00 |
| ATOM | 4202 | NE2  | HIE | X | 280 | 50.485 | 44.029 | 70.797 | 0.00 | 0.00 |
| ATOM | 4203 | HE2  | HIE | X | 280 | 50.708 | 44.856 | 71.333 | 0.00 | 0.00 |
| ATOM | 4204 | CD2  | HIE | X | 280 | 49.648 | 44.095 | 69.767 | 0.00 | 0.00 |
| ATOM | 4205 | HD2  | HIE | X | 280 | 48.775 | 44.720 | 69.651 | 0.00 | 0.00 |
| ATOM | 4206 | C    | HIE | X | 280 | 49.331 | 41.379 | 65.567 | 0.00 | 0.00 |
| ATOM | 4207 | O    | HIE | X | 280 | 48.848 | 40.346 | 65.963 | 0.00 | 0.00 |
| ATOM | 4208 | N    | GLU | X | 281 | 49.161 | 41.875 | 64.325 | 0.00 | 0.00 |
| ATOM | 4209 | H    | GLU | X | 281 | 49.644 | 42.722 | 64.062 | 0.00 | 0.00 |
| ATOM | 4210 | CA   | GLU | X | 281 | 48.396 | 41.102 | 63.333 | 0.00 | 0.00 |
| ATOM | 4211 | HA   | GLU | X | 281 | 47.388 | 40.851 | 63.665 | 0.00 | 0.00 |
| ATOM | 4212 | CB   | GLU | X | 281 | 48.245 | 41.902 | 62.045 | 0.00 | 0.00 |
| ATOM | 4213 | HB2  | GLU | X | 281 | 48.351 | 42.942 | 62.354 | 0.00 | 0.00 |
| ATOM | 4214 | HB3  | GLU | X | 281 | 49.072 | 41.657 | 61.379 | 0.00 | 0.00 |
| ATOM | 4215 | CG   | GLU | X | 281 | 46.905 | 41.709 | 61.280 | 0.00 | 0.00 |
| ATOM | 4216 | HG2  | GLU | X | 281 | 46.594 | 40.664 | 61.282 | 0.00 | 0.00 |
| ATOM | 4217 | HG3  | GLU | X | 281 | 46.158 | 42.277 | 61.835 | 0.00 | 0.00 |
| ATOM | 4218 | CD   | GLU | X | 281 | 46.873 | 42.234 | 59.843 | 0.00 | 0.00 |
| ATOM | 4219 | OE1  | GLU | X | 281 | 46.202 | 43.267 | 59.563 | 0.00 | 0.00 |
| ATOM | 4220 | OE2  | GLU | X | 281 | 47.456 | 41.554 | 58.980 | 0.00 | 0.00 |
| ATOM | 4221 | C    | GLU | X | 281 | 49.088 | 39.733 | 62.914 | 0.00 | 0.00 |
| ATOM | 4222 | O    | GLU | X | 281 | 48.457 | 38.792 | 62.432 | 0.00 | 0.00 |
| ATOM | 4223 | N    | TRP | X | 282 | 50.428 | 39.573 | 63.175 | 0.00 | 0.00 |
| ATOM | 4224 | H    | TRP | X | 282 | 50.981 | 40.284 | 63.630 | 0.00 | 0.00 |
| ATOM | 4225 | CA   | TRP | X | 282 | 51.108 | 38.330 | 62.688 | 0.00 | 0.00 |
| ATOM | 4226 | HA   | TRP | X | 282 | 50.827 | 38.265 | 61.637 | 0.00 | 0.00 |
| ATOM | 4227 | CB   | TRP | X | 282 | 52.694 | 38.486 | 62.795 | 0.00 | 0.00 |
| ATOM | 4228 | HB2  | TRP | X | 282 | 53.001 | 39.398 | 62.282 | 0.00 | 0.00 |
| ATOM | 4229 | HB3  | TRP | X | 282 | 52.803 | 38.731 | 63.851 | 0.00 | 0.00 |
| ATOM | 4230 | CG   | TRP | X | 282 | 53.471 | 37.316 | 62.457 | 0.00 | 0.00 |
| ATOM | 4231 | CD1  | TRP | X | 282 | 53.370 | 36.638 | 61.284 | 0.00 | 0.00 |
| ATOM | 4232 | HD1  | TRP | X | 282 | 52.782 | 36.839 | 60.400 | 0.00 | 0.00 |
| ATOM | 4233 | NE1  | TRP | X | 282 | 54.265 | 35.656 | 61.233 | 0.00 | 0.00 |
| ATOM | 4234 | HE1  | TRP | X | 282 | 54.344 | 34.980 | 60.486 | 0.00 | 0.00 |
| ATOM | 4235 | CE2  | TRP | X | 282 | 55.004 | 35.595 | 62.400 | 0.00 | 0.00 |
| ATOM | 4236 | CZ2  | TRP | X | 282 | 56.000 | 34.750 | 62.799 | 0.00 | 0.00 |
| ATOM | 4237 | HZ2  | TRP | X | 282 | 56.168 | 33.892 | 62.165 | 0.00 | 0.00 |
| ATOM | 4238 | CH2  | TRP | X | 282 | 56.604 | 34.944 | 64.077 | 0.00 | 0.00 |
| ATOM | 4239 | HH2  | TRP | X | 282 | 57.395 | 34.270 | 64.371 | 0.00 | 0.00 |
| ATOM | 4240 | CZ3  | TRP | X | 282 | 56.165 | 36.032 | 64.885 | 0.00 | 0.00 |
| ATOM | 4241 | HZ3  | TRP | X | 282 | 56.566 | 36.082 | 65.886 | 0.00 | 0.00 |

|      |      |      |     |   |     |        |        |        |      |      |
|------|------|------|-----|---|-----|--------|--------|--------|------|------|
| ATOM | 4242 | CE3  | TRP | X | 282 | 55.129 | 36.882 | 64.467 | 0.00 | 0.00 |
| ATOM | 4243 | HE3  | TRP | X | 282 | 54.860 | 37.716 | 65.099 | 0.00 | 0.00 |
| ATOM | 4244 | CD2  | TRP | X | 282 | 54.553 | 36.698 | 63.204 | 0.00 | 0.00 |
| ATOM | 4245 | C    | TRP | X | 282 | 50.581 | 36.981 | 63.360 | 0.00 | 0.00 |
| ATOM | 4246 | O    | TRP | X | 282 | 50.770 | 35.902 | 62.772 | 0.00 | 0.00 |
| ATOM | 4247 | N    | HIE | X | 283 | 49.853 | 37.174 | 64.481 | 0.00 | 0.00 |
| ATOM | 4248 | H    | HIE | X | 283 | 49.845 | 38.119 | 64.838 | 0.00 | 0.00 |
| ATOM | 4249 | CA   | HIE | X | 283 | 49.078 | 36.101 | 65.186 | 0.00 | 0.00 |
| ATOM | 4250 | HA   | HIE | X | 283 | 49.554 | 35.127 | 65.072 | 0.00 | 0.00 |
| ATOM | 4251 | CB   | HIE | X | 283 | 49.039 | 36.485 | 66.724 | 0.00 | 0.00 |
| ATOM | 4252 | HB2  | HIE | X | 283 | 50.056 | 36.525 | 67.113 | 0.00 | 0.00 |
| ATOM | 4253 | HB3  | HIE | X | 283 | 48.514 | 37.434 | 66.834 | 0.00 | 0.00 |
| ATOM | 4254 | CG   | HIE | X | 283 | 48.328 | 35.416 | 67.599 | 0.00 | 0.00 |
| ATOM | 4255 | ND1  | HIE | X | 283 | 48.821 | 34.132 | 67.858 | 0.00 | 0.00 |
| ATOM | 4256 | CE1  | HIE | X | 283 | 47.828 | 33.566 | 68.586 | 0.00 | 0.00 |
| ATOM | 4257 | HE1  | HIE | X | 283 | 47.787 | 32.509 | 68.804 | 0.00 | 0.00 |
| ATOM | 4258 | NE2  | HIE | X | 283 | 46.794 | 34.375 | 68.833 | 0.00 | 0.00 |
| ATOM | 4259 | HE2  | HIE | X | 283 | 45.940 | 34.221 | 69.349 | 0.00 | 0.00 |
| ATOM | 4260 | CD2  | HIE | X | 283 | 47.075 | 35.526 | 68.144 | 0.00 | 0.00 |
| ATOM | 4261 | HD2  | HIE | X | 283 | 46.399 | 36.354 | 67.985 | 0.00 | 0.00 |
| ATOM | 4262 | C    | HIE | X | 283 | 47.628 | 35.902 | 64.628 | 0.00 | 0.00 |
| ATOM | 4263 | O    | HIE | X | 283 | 46.928 | 34.928 | 64.862 | 0.00 | 0.00 |
| ATOM | 4264 | N    | VAL | X | 284 | 47.165 | 36.934 | 63.953 | 0.00 | 0.00 |
| ATOM | 4265 | H    | VAL | X | 284 | 47.775 | 37.703 | 63.713 | 0.00 | 0.00 |
| ATOM | 4266 | CA   | VAL | X | 284 | 45.849 | 36.933 | 63.226 | 0.00 | 0.00 |
| ATOM | 4267 | HA   | VAL | X | 284 | 45.173 | 36.249 | 63.739 | 0.00 | 0.00 |
| ATOM | 4268 | CB   | VAL | X | 284 | 45.159 | 38.263 | 63.206 | 0.00 | 0.00 |
| ATOM | 4269 | HB   | VAL | X | 284 | 45.704 | 38.915 | 62.524 | 0.00 | 0.00 |
| ATOM | 4270 | CG1  | VAL | X | 284 | 43.732 | 38.083 | 62.684 | 0.00 | 0.00 |
| ATOM | 4271 | HG11 | VAL | X | 284 | 43.194 | 37.346 | 63.281 | 0.00 | 0.00 |
| ATOM | 4272 | HG12 | VAL | X | 284 | 43.179 | 39.017 | 62.780 | 0.00 | 0.00 |
| ATOM | 4273 | HG13 | VAL | X | 284 | 43.683 | 37.833 | 61.624 | 0.00 | 0.00 |
| ATOM | 4274 | CG2  | VAL | X | 284 | 45.260 | 39.065 | 64.509 | 0.00 | 0.00 |
| ATOM | 4275 | HG21 | VAL | X | 284 | 44.638 | 39.947 | 64.355 | 0.00 | 0.00 |
| ATOM | 4276 | HG22 | VAL | X | 284 | 44.925 | 38.506 | 65.383 | 0.00 | 0.00 |
| ATOM | 4277 | HG23 | VAL | X | 284 | 46.277 | 39.318 | 64.807 | 0.00 | 0.00 |
| ATOM | 4278 | C    | VAL | X | 284 | 46.118 | 36.374 | 61.856 | 0.00 | 0.00 |
| ATOM | 4279 | O    | VAL | X | 284 | 45.200 | 35.826 | 61.183 | 0.00 | 0.00 |
| ATOM | 4280 | N    | LEU | X | 285 | 47.376 | 36.336 | 61.302 | 0.00 | 0.00 |
| ATOM | 4281 | H    | LEU | X | 285 | 48.135 | 36.848 | 61.729 | 0.00 | 0.00 |
| ATOM | 4282 | CA   | LEU | X | 285 | 47.780 | 35.559 | 60.077 | 0.00 | 0.00 |
| ATOM | 4283 | HA   | LEU | X | 285 | 46.951 | 35.808 | 59.415 | 0.00 | 0.00 |
| ATOM | 4284 | CB   | LEU | X | 285 | 49.056 | 36.188 | 59.496 | 0.00 | 0.00 |
| ATOM | 4285 | HB2  | LEU | X | 285 | 48.858 | 37.259 | 59.474 | 0.00 | 0.00 |
| ATOM | 4286 | HB3  | LEU | X | 285 | 49.887 | 36.075 | 60.193 | 0.00 | 0.00 |
| ATOM | 4287 | CG   | LEU | X | 285 | 49.634 | 35.721 | 58.104 | 0.00 | 0.00 |
| ATOM | 4288 | HG   | LEU | X | 285 | 49.443 | 34.650 | 58.035 | 0.00 | 0.00 |
| ATOM | 4289 | CD1  | LEU | X | 285 | 48.968 | 36.440 | 56.951 | 0.00 | 0.00 |
| ATOM | 4290 | HD11 | LEU | X | 285 | 47.897 | 36.259 | 57.051 | 0.00 | 0.00 |
| ATOM | 4291 | HD12 | LEU | X | 285 | 49.185 | 37.508 | 56.916 | 0.00 | 0.00 |
| ATOM | 4292 | HD13 | LEU | X | 285 | 49.220 | 36.034 | 55.971 | 0.00 | 0.00 |
| ATOM | 4293 | CD2  | LEU | X | 285 | 51.145 | 36.001 | 57.839 | 0.00 | 0.00 |
| ATOM | 4294 | HD21 | LEU | X | 285 | 51.296 | 35.897 | 56.765 | 0.00 | 0.00 |
| ATOM | 4295 | HD22 | LEU | X | 285 | 51.419 | 36.980 | 58.231 | 0.00 | 0.00 |
| ATOM | 4296 | HD23 | LEU | X | 285 | 51.757 | 35.312 | 58.422 | 0.00 | 0.00 |
| ATOM | 4297 | C    | LEU | X | 285 | 47.874 | 34.119 | 60.484 | 0.00 | 0.00 |
| ATOM | 4298 | O    | LEU | X | 285 | 48.498 | 33.906 | 61.526 | 0.00 | 0.00 |
| ATOM | 4299 | N    | PRO | X | 286 | 47.210 | 33.227 | 59.764 | 0.00 | 0.00 |
| ATOM | 4300 | CD   | PRO | X | 286 | 46.374 | 33.558 | 58.641 | 0.00 | 0.00 |
| ATOM | 4301 | HD2  | PRO | X | 286 | 47.008 | 33.915 | 57.830 | 0.00 | 0.00 |
| ATOM | 4302 | HD3  | PRO | X | 286 | 45.693 | 34.404 | 58.739 | 0.00 | 0.00 |
| ATOM | 4303 | CG   | PRO | X | 286 | 45.650 | 32.231 | 58.266 | 0.00 | 0.00 |
| ATOM | 4304 | HG2  | PRO | X | 286 | 46.011 | 31.911 | 57.289 | 0.00 | 0.00 |
| ATOM | 4305 | HG3  | PRO | X | 286 | 44.595 | 32.394 | 58.047 | 0.00 | 0.00 |
| ATOM | 4306 | CB   | PRO | X | 286 | 45.924 | 31.259 | 59.426 | 0.00 | 0.00 |
| ATOM | 4307 | HB2  | PRO | X | 286 | 46.108 | 30.275 | 58.996 | 0.00 | 0.00 |
| ATOM | 4308 | HB3  | PRO | X | 286 | 45.050 | 31.278 | 60.077 | 0.00 | 0.00 |
| ATOM | 4309 | CA   | PRO | X | 286 | 47.055 | 31.804 | 60.230 | 0.00 | 0.00 |
| ATOM | 4310 | HA   | PRO | X | 286 | 46.812 | 31.820 | 61.292 | 0.00 | 0.00 |
| ATOM | 4311 | C    | PRO | X | 286 | 48.333 | 30.962 | 60.005 | 0.00 | 0.00 |

|      |      |      |     |   |     |        |        |        |      |      |
|------|------|------|-----|---|-----|--------|--------|--------|------|------|
| ATOM | 4312 | O    | PRO | X | 286 | 49.314 | 31.468 | 59.436 | 0.00 | 0.00 |
| ATOM | 4313 | N    | GLN | X | 287 | 48.393 | 29.802 | 60.636 | 0.00 | 0.00 |
| ATOM | 4314 | H    | GLN | X | 287 | 47.512 | 29.492 | 61.021 | 0.00 | 0.00 |
| ATOM | 4315 | CA   | GLN | X | 287 | 49.538 | 28.898 | 60.829 | 0.00 | 0.00 |
| ATOM | 4316 | HA   | GLN | X | 287 | 50.429 | 29.146 | 60.252 | 0.00 | 0.00 |
| ATOM | 4317 | CB   | GLN | X | 287 | 49.917 | 28.936 | 62.345 | 0.00 | 0.00 |
| ATOM | 4318 | HB2  | GLN | X | 287 | 49.015 | 28.835 | 62.948 | 0.00 | 0.00 |
| ATOM | 4319 | HB3  | GLN | X | 287 | 50.495 | 28.025 | 62.500 | 0.00 | 0.00 |
| ATOM | 4320 | CG   | GLN | X | 287 | 50.716 | 30.025 | 63.008 | 0.00 | 0.00 |
| ATOM | 4321 | HG2  | GLN | X | 287 | 51.631 | 30.156 | 62.431 | 0.00 | 0.00 |
| ATOM | 4322 | HG3  | GLN | X | 287 | 50.167 | 30.967 | 62.992 | 0.00 | 0.00 |
| ATOM | 4323 | CD   | GLN | X | 287 | 51.134 | 29.747 | 64.461 | 0.00 | 0.00 |
| ATOM | 4324 | OE1  | GLN | X | 287 | 50.535 | 29.066 | 65.262 | 0.00 | 0.00 |
| ATOM | 4325 | NE2  | GLN | X | 287 | 52.229 | 30.325 | 64.984 | 0.00 | 0.00 |
| ATOM | 4326 | HE21 | GLN | X | 287 | 52.484 | 30.117 | 65.939 | 0.00 | 0.00 |
| ATOM | 4327 | HE22 | GLN | X | 287 | 52.597 | 31.086 | 64.431 | 0.00 | 0.00 |
| ATOM | 4328 | C    | GLN | X | 287 | 49.106 | 27.533 | 60.363 | 0.00 | 0.00 |
| ATOM | 4329 | O    | GLN | X | 287 | 47.945 | 27.112 | 60.612 | 0.00 | 0.00 |
| ATOM | 4330 | N    | GLU | X | 288 | 49.985 | 26.779 | 59.726 | 0.00 | 0.00 |
| ATOM | 4331 | H    | GLU | X | 288 | 50.972 | 26.986 | 59.792 | 0.00 | 0.00 |
| ATOM | 4332 | CA   | GLU | X | 288 | 49.728 | 25.382 | 59.227 | 0.00 | 0.00 |
| ATOM | 4333 | HA   | GLU | X | 288 | 50.616 | 25.209 | 58.620 | 0.00 | 0.00 |
| ATOM | 4334 | CB   | GLU | X | 288 | 49.658 | 24.348 | 60.304 | 0.00 | 0.00 |
| ATOM | 4335 | HB2  | GLU | X | 288 | 48.768 | 24.508 | 60.913 | 0.00 | 0.00 |
| ATOM | 4336 | HB3  | GLU | X | 288 | 49.553 | 23.364 | 59.847 | 0.00 | 0.00 |
| ATOM | 4337 | CG   | GLU | X | 288 | 50.907 | 24.472 | 61.263 | 0.00 | 0.00 |
| ATOM | 4338 | HG2  | GLU | X | 288 | 51.790 | 24.371 | 60.633 | 0.00 | 0.00 |
| ATOM | 4339 | HG3  | GLU | X | 288 | 50.836 | 25.391 | 61.845 | 0.00 | 0.00 |
| ATOM | 4340 | CD   | GLU | X | 288 | 50.944 | 23.360 | 62.346 | 0.00 | 0.00 |
| ATOM | 4341 | OE1  | GLU | X | 288 | 51.259 | 23.681 | 63.552 | 0.00 | 0.00 |
| ATOM | 4342 | OE2  | GLU | X | 288 | 50.619 | 22.207 | 61.994 | 0.00 | 0.00 |
| ATOM | 4343 | C    | GLU | X | 288 | 48.805 | 25.287 | 58.050 | 0.00 | 0.00 |
| ATOM | 4344 | O    | GLU | X | 288 | 48.037 | 24.310 | 57.933 | 0.00 | 0.00 |
| ATOM | 4345 | N    | SER | X | 289 | 48.762 | 26.297 | 57.191 | 0.00 | 0.00 |
| ATOM | 4346 | H    | SER | X | 289 | 49.262 | 27.134 | 57.455 | 0.00 | 0.00 |
| ATOM | 4347 | CA   | SER | X | 289 | 47.676 | 26.498 | 56.198 | 0.00 | 0.00 |
| ATOM | 4348 | HA   | SER | X | 289 | 47.381 | 25.496 | 55.886 | 0.00 | 0.00 |
| ATOM | 4349 | CB   | SER | X | 289 | 46.482 | 27.344 | 56.635 | 0.00 | 0.00 |
| ATOM | 4350 | HB2  | SER | X | 289 | 46.048 | 26.783 | 57.463 | 0.00 | 0.00 |
| ATOM | 4351 | HB3  | SER | X | 289 | 46.773 | 28.265 | 57.141 | 0.00 | 0.00 |
| ATOM | 4352 | OG   | SER | X | 289 | 45.383 | 27.374 | 55.757 | 0.00 | 0.00 |
| ATOM | 4353 | HG   | SER | X | 289 | 44.600 | 27.539 | 56.289 | 0.00 | 0.00 |
| ATOM | 4354 | C    | SER | X | 289 | 48.343 | 27.378 | 55.066 | 0.00 | 0.00 |
| ATOM | 4355 | O    | SER | X | 289 | 48.803 | 28.488 | 55.319 | 0.00 | 0.00 |
| ATOM | 4356 | N    | VAL | X | 290 | 48.368 | 26.943 | 53.837 | 0.00 | 0.00 |
| ATOM | 4357 | H    | VAL | X | 290 | 47.880 | 26.074 | 53.671 | 0.00 | 0.00 |
| ATOM | 4358 | CA   | VAL | X | 290 | 49.175 | 27.638 | 52.800 | 0.00 | 0.00 |
| ATOM | 4359 | HA   | VAL | X | 290 | 49.820 | 28.376 | 53.277 | 0.00 | 0.00 |
| ATOM | 4360 | CB   | VAL | X | 290 | 50.077 | 26.658 | 52.036 | 0.00 | 0.00 |
| ATOM | 4361 | HB   | VAL | X | 290 | 49.432 | 25.896 | 51.599 | 0.00 | 0.00 |
| ATOM | 4362 | CG1  | VAL | X | 290 | 50.878 | 27.317 | 50.873 | 0.00 | 0.00 |
| ATOM | 4363 | HG11 | VAL | X | 290 | 51.395 | 28.203 | 51.242 | 0.00 | 0.00 |
| ATOM | 4364 | HG12 | VAL | X | 290 | 51.428 | 26.520 | 50.371 | 0.00 | 0.00 |
| ATOM | 4365 | HG13 | VAL | X | 290 | 50.185 | 27.663 | 50.106 | 0.00 | 0.00 |
| ATOM | 4366 | CG2  | VAL | X | 290 | 51.137 | 26.036 | 52.954 | 0.00 | 0.00 |
| ATOM | 4367 | HG21 | VAL | X | 290 | 51.518 | 25.185 | 52.388 | 0.00 | 0.00 |
| ATOM | 4368 | HG22 | VAL | X | 290 | 51.899 | 26.774 | 53.204 | 0.00 | 0.00 |
| ATOM | 4369 | HG23 | VAL | X | 290 | 50.618 | 25.620 | 53.818 | 0.00 | 0.00 |
| ATOM | 4370 | C    | VAL | X | 290 | 48.104 | 28.378 | 51.994 | 0.00 | 0.00 |
| ATOM | 4371 | O    | VAL | X | 290 | 47.119 | 27.820 | 51.533 | 0.00 | 0.00 |
| ATOM | 4372 | N    | PHE | X | 291 | 48.342 | 29.653 | 51.682 | 0.00 | 0.00 |
| ATOM | 4373 | H    | PHE | X | 291 | 49.142 | 30.135 | 52.067 | 0.00 | 0.00 |
| ATOM | 4374 | CA   | PHE | X | 291 | 47.515 | 30.536 | 50.877 | 0.00 | 0.00 |
| ATOM | 4375 | HA   | PHE | X | 291 | 48.070 | 31.471 | 50.796 | 0.00 | 0.00 |
| ATOM | 4376 | CB   | PHE | X | 291 | 47.222 | 29.960 | 49.465 | 0.00 | 0.00 |
| ATOM | 4377 | HB2  | PHE | X | 291 | 48.055 | 29.323 | 49.169 | 0.00 | 0.00 |
| ATOM | 4378 | HB3  | PHE | X | 291 | 46.246 | 29.484 | 49.375 | 0.00 | 0.00 |
| ATOM | 4379 | CG   | PHE | X | 291 | 47.322 | 30.916 | 48.315 | 0.00 | 0.00 |
| ATOM | 4380 | CD1  | PHE | X | 291 | 46.463 | 31.942 | 48.270 | 0.00 | 0.00 |
| ATOM | 4381 | HD1  | PHE | X | 291 | 45.779 | 32.125 | 49.086 | 0.00 | 0.00 |

|      |      |      |     |   |     |        |        |        |      |      |
|------|------|------|-----|---|-----|--------|--------|--------|------|------|
| ATOM | 4382 | CE1  | PHE | X | 291 | 46.386 | 32.686 | 47.093 | 0.00 | 0.00 |
| ATOM | 4383 | HE1  | PHE | X | 291 | 45.735 | 33.541 | 46.978 | 0.00 | 0.00 |
| ATOM | 4384 | CZ   | PHE | X | 291 | 47.084 | 32.313 | 45.912 | 0.00 | 0.00 |
| ATOM | 4385 | HZ   | PHE | X | 291 | 46.962 | 32.900 | 45.014 | 0.00 | 0.00 |
| ATOM | 4386 | CE2  | PHE | X | 291 | 47.898 | 31.189 | 45.897 | 0.00 | 0.00 |
| ATOM | 4387 | HE2  | PHE | X | 291 | 48.337 | 30.739 | 45.019 | 0.00 | 0.00 |
| ATOM | 4388 | CD2  | PHE | X | 291 | 48.024 | 30.516 | 47.131 | 0.00 | 0.00 |
| ATOM | 4389 | HD2  | PHE | X | 291 | 48.477 | 29.537 | 47.089 | 0.00 | 0.00 |
| ATOM | 4390 | C    | PHE | X | 291 | 46.291 | 30.988 | 51.671 | 0.00 | 0.00 |
| ATOM | 4391 | O    | PHE | X | 291 | 45.180 | 30.961 | 51.113 | 0.00 | 0.00 |
| ATOM | 4392 | N    | ARG | X | 292 | 46.489 | 31.285 | 52.942 | 0.00 | 0.00 |
| ATOM | 4393 | H    | ARG | X | 292 | 47.385 | 31.021 | 53.327 | 0.00 | 0.00 |
| ATOM | 4394 | CA   | ARG | X | 292 | 45.407 | 31.887 | 53.833 | 0.00 | 0.00 |
| ATOM | 4395 | HA   | ARG | X | 292 | 44.782 | 32.431 | 53.124 | 0.00 | 0.00 |
| ATOM | 4396 | CB   | ARG | X | 292 | 44.725 | 30.786 | 54.615 | 0.00 | 0.00 |
| ATOM | 4397 | HB2  | ARG | X | 292 | 45.519 | 30.335 | 55.210 | 0.00 | 0.00 |
| ATOM | 4398 | HB3  | ARG | X | 292 | 43.993 | 31.247 | 55.278 | 0.00 | 0.00 |
| ATOM | 4399 | CG   | ARG | X | 292 | 44.114 | 29.611 | 53.861 | 0.00 | 0.00 |
| ATOM | 4400 | HG2  | ARG | X | 292 | 44.866 | 29.260 | 53.155 | 0.00 | 0.00 |
| ATOM | 4401 | HG3  | ARG | X | 292 | 43.788 | 28.856 | 54.577 | 0.00 | 0.00 |
| ATOM | 4402 | CD   | ARG | X | 292 | 42.876 | 29.957 | 53.095 | 0.00 | 0.00 |
| ATOM | 4403 | HD2  | ARG | X | 292 | 42.025 | 29.849 | 53.767 | 0.00 | 0.00 |
| ATOM | 4404 | HD3  | ARG | X | 292 | 42.893 | 31.039 | 52.961 | 0.00 | 0.00 |
| ATOM | 4405 | NE   | ARG | X | 292 | 42.726 | 29.135 | 51.827 | 0.00 | 0.00 |
| ATOM | 4406 | HE   | ARG | X | 292 | 43.404 | 29.318 | 51.101 | 0.00 | 0.00 |
| ATOM | 4407 | CZ   | ARG | X | 292 | 41.736 | 28.246 | 51.587 | 0.00 | 0.00 |
| ATOM | 4408 | NH1  | ARG | X | 292 | 40.865 | 27.902 | 52.499 | 0.00 | 0.00 |
| ATOM | 4409 | HH11 | ARG | X | 292 | 41.020 | 28.220 | 53.445 | 0.00 | 0.00 |
| ATOM | 4410 | HH12 | ARG | X | 292 | 39.982 | 27.469 | 52.267 | 0.00 | 0.00 |
| ATOM | 4411 | NH2  | ARG | X | 292 | 41.715 | 27.561 | 50.489 | 0.00 | 0.00 |
| ATOM | 4412 | HH21 | ARG | X | 292 | 42.345 | 27.695 | 49.710 | 0.00 | 0.00 |
| ATOM | 4413 | HH22 | ARG | X | 292 | 41.120 | 26.754 | 50.367 | 0.00 | 0.00 |
| ATOM | 4414 | C    | ARG | X | 292 | 45.994 | 32.978 | 54.739 | 0.00 | 0.00 |
| ATOM | 4415 | O    | ARG | X | 292 | 47.137 | 32.975 | 55.144 | 0.00 | 0.00 |
| ATOM | 4416 | N    | PHE | X | 293 | 45.069 | 33.871 | 55.104 | 0.00 | 0.00 |
| ATOM | 4417 | H    | PHE | X | 293 | 44.145 | 33.603 | 54.799 | 0.00 | 0.00 |
| ATOM | 4418 | CA   | PHE | X | 293 | 45.319 | 35.296 | 55.481 | 0.00 | 0.00 |
| ATOM | 4419 | HA   | PHE | X | 293 | 46.370 | 35.521 | 55.662 | 0.00 | 0.00 |
| ATOM | 4420 | CB   | PHE | X | 293 | 45.041 | 36.125 | 54.205 | 0.00 | 0.00 |
| ATOM | 4421 | HB2  | PHE | X | 293 | 43.971 | 36.305 | 54.094 | 0.00 | 0.00 |
| ATOM | 4422 | HB3  | PHE | X | 293 | 45.411 | 37.147 | 54.281 | 0.00 | 0.00 |
| ATOM | 4423 | CG   | PHE | X | 293 | 45.708 | 35.605 | 52.910 | 0.00 | 0.00 |
| ATOM | 4424 | CD1  | PHE | X | 293 | 47.070 | 35.338 | 52.967 | 0.00 | 0.00 |
| ATOM | 4425 | HD1  | PHE | X | 293 | 47.635 | 35.593 | 53.852 | 0.00 | 0.00 |
| ATOM | 4426 | CE1  | PHE | X | 293 | 47.845 | 34.856 | 51.847 | 0.00 | 0.00 |
| ATOM | 4427 | HE1  | PHE | X | 293 | 48.904 | 34.648 | 51.806 | 0.00 | 0.00 |
| ATOM | 4428 | CZ   | PHE | X | 293 | 47.126 | 34.645 | 50.675 | 0.00 | 0.00 |
| ATOM | 4429 | HZ   | PHE | X | 293 | 47.591 | 34.204 | 49.806 | 0.00 | 0.00 |
| ATOM | 4430 | CE2  | PHE | X | 293 | 45.727 | 34.902 | 50.570 | 0.00 | 0.00 |
| ATOM | 4431 | HE2  | PHE | X | 293 | 45.263 | 34.513 | 49.676 | 0.00 | 0.00 |
| ATOM | 4432 | CD2  | PHE | X | 293 | 45.060 | 35.351 | 51.715 | 0.00 | 0.00 |
| ATOM | 4433 | HD2  | PHE | X | 293 | 43.983 | 35.414 | 51.648 | 0.00 | 0.00 |
| ATOM | 4434 | C    | PHE | X | 293 | 44.641 | 35.850 | 56.711 | 0.00 | 0.00 |
| ATOM | 4435 | O    | PHE | X | 293 | 43.612 | 35.316 | 57.121 | 0.00 | 0.00 |
| ATOM | 4436 | N    | SER | X | 294 | 45.121 | 36.967 | 57.266 | 0.00 | 0.00 |
| ATOM | 4437 | H    | SER | X | 294 | 45.820 | 37.488 | 56.755 | 0.00 | 0.00 |
| ATOM | 4438 | CA   | SER | X | 294 | 44.625 | 37.744 | 58.398 | 0.00 | 0.00 |
| ATOM | 4439 | HA   | SER | X | 294 | 44.503 | 37.060 | 59.238 | 0.00 | 0.00 |
| ATOM | 4440 | CB   | SER | X | 294 | 45.714 | 38.734 | 58.821 | 0.00 | 0.00 |
| ATOM | 4441 | HB2  | SER | X | 294 | 45.347 | 39.296 | 59.679 | 0.00 | 0.00 |
| ATOM | 4442 | HB3  | SER | X | 294 | 46.621 | 38.174 | 59.049 | 0.00 | 0.00 |
| ATOM | 4443 | OG   | SER | X | 294 | 46.091 | 39.584 | 57.748 | 0.00 | 0.00 |
| ATOM | 4444 | HG   | SER | X | 294 | 46.737 | 40.244 | 58.008 | 0.00 | 0.00 |
| ATOM | 4445 | C    | SER | X | 294 | 43.311 | 38.420 | 58.143 | 0.00 | 0.00 |
| ATOM | 4446 | O    | SER | X | 294 | 42.300 | 37.943 | 58.709 | 0.00 | 0.00 |
| ATOM | 4447 | N    | PHE | X | 295 | 43.278 | 39.401 | 57.288 | 0.00 | 0.00 |
| ATOM | 4448 | H    | PHE | X | 295 | 44.004 | 39.508 | 56.594 | 0.00 | 0.00 |
| ATOM | 4449 | CA   | PHE | X | 295 | 42.032 | 40.120 | 57.008 | 0.00 | 0.00 |
| ATOM | 4450 | HA   | PHE | X | 295 | 41.222 | 39.621 | 57.540 | 0.00 | 0.00 |
| ATOM | 4451 | CB   | PHE | X | 295 | 42.061 | 41.523 | 57.623 | 0.00 | 0.00 |

|      |      |      |     |   |     |        |        |        |      |      |
|------|------|------|-----|---|-----|--------|--------|--------|------|------|
| ATOM | 4452 | HB2  | PHE | X | 295 | 42.990 | 42.035 | 57.370 | 0.00 | 0.00 |
| ATOM | 4453 | HB3  | PHE | X | 295 | 41.206 | 42.074 | 57.230 | 0.00 | 0.00 |
| ATOM | 4454 | CG   | PHE | X | 295 | 41.885 | 41.427 | 59.156 | 0.00 | 0.00 |
| ATOM | 4455 | CD1  | PHE | X | 295 | 40.654 | 41.759 | 59.698 | 0.00 | 0.00 |
| ATOM | 4456 | HD1  | PHE | X | 295 | 39.782 | 41.930 | 59.083 | 0.00 | 0.00 |
| ATOM | 4457 | CE1  | PHE | X | 295 | 40.441 | 41.697 | 61.083 | 0.00 | 0.00 |
| ATOM | 4458 | HE1  | PHE | X | 295 | 39.491 | 41.792 | 61.588 | 0.00 | 0.00 |
| ATOM | 4459 | CZ   | PHE | X | 295 | 41.560 | 41.564 | 61.981 | 0.00 | 0.00 |
| ATOM | 4460 | HZ   | PHE | X | 295 | 41.475 | 41.727 | 63.045 | 0.00 | 0.00 |
| ATOM | 4461 | CE2  | PHE | X | 295 | 42.839 | 41.334 | 61.357 | 0.00 | 0.00 |
| ATOM | 4462 | HE2  | PHE | X | 295 | 43.646 | 41.241 | 62.068 | 0.00 | 0.00 |
| ATOM | 4463 | CD2  | PHE | X | 295 | 42.976 | 41.167 | 59.956 | 0.00 | 0.00 |
| ATOM | 4464 | HD2  | PHE | X | 295 | 43.948 | 41.039 | 59.502 | 0.00 | 0.00 |
| ATOM | 4465 | C    | PHE | X | 295 | 41.747 | 40.308 | 55.485 | 0.00 | 0.00 |
| ATOM | 4466 | O    | PHE | X | 295 | 42.405 | 41.104 | 54.785 | 0.00 | 0.00 |
| ATOM | 4467 | N    | VAL | X | 296 | 40.793 | 39.486 | 55.024 | 0.00 | 0.00 |
| ATOM | 4468 | H    | VAL | X | 296 | 40.260 | 38.941 | 55.686 | 0.00 | 0.00 |
| ATOM | 4469 | CA   | VAL | X | 296 | 40.210 | 39.573 | 53.692 | 0.00 | 0.00 |
| ATOM | 4470 | HA   | VAL | X | 296 | 40.721 | 40.280 | 53.040 | 0.00 | 0.00 |
| ATOM | 4471 | CB   | VAL | X | 296 | 40.203 | 38.134 | 52.954 | 0.00 | 0.00 |
| ATOM | 4472 | HB   | VAL | X | 296 | 39.787 | 38.250 | 51.953 | 0.00 | 0.00 |
| ATOM | 4473 | CG1  | VAL | X | 296 | 41.598 | 37.619 | 52.797 | 0.00 | 0.00 |
| ATOM | 4474 | HG11 | VAL | X | 296 | 42.215 | 38.444 | 52.441 | 0.00 | 0.00 |
| ATOM | 4475 | HG12 | VAL | X | 296 | 41.972 | 37.244 | 53.749 | 0.00 | 0.00 |
| ATOM | 4476 | HG13 | VAL | X | 296 | 41.578 | 36.896 | 51.982 | 0.00 | 0.00 |
| ATOM | 4477 | CG2  | VAL | X | 296 | 39.487 | 37.098 | 53.770 | 0.00 | 0.00 |
| ATOM | 4478 | HG21 | VAL | X | 296 | 39.577 | 36.091 | 53.362 | 0.00 | 0.00 |
| ATOM | 4479 | HG22 | VAL | X | 296 | 39.916 | 37.099 | 54.772 | 0.00 | 0.00 |
| ATOM | 4480 | HG23 | VAL | X | 296 | 38.448 | 37.403 | 53.895 | 0.00 | 0.00 |
| ATOM | 4481 | C    | VAL | X | 296 | 38.792 | 40.070 | 53.897 | 0.00 | 0.00 |
| ATOM | 4482 | O    | VAL | X | 296 | 38.278 | 39.895 | 54.989 | 0.00 | 0.00 |
| ATOM | 4483 | N    | PRO | X | 297 | 38.105 | 40.535 | 52.805 | 0.00 | 0.00 |
| ATOM | 4484 | CD   | PRO | X | 297 | 38.722 | 40.783 | 51.496 | 0.00 | 0.00 |
| ATOM | 4485 | HD2  | PRO | X | 297 | 39.052 | 39.841 | 51.058 | 0.00 | 0.00 |
| ATOM | 4486 | HD3  | PRO | X | 297 | 39.681 | 41.287 | 51.619 | 0.00 | 0.00 |
| ATOM | 4487 | CG   | PRO | X | 297 | 37.681 | 41.441 | 50.614 | 0.00 | 0.00 |
| ATOM | 4488 | HG2  | PRO | X | 297 | 37.908 | 41.344 | 49.552 | 0.00 | 0.00 |
| ATOM | 4489 | HG3  | PRO | X | 297 | 37.705 | 42.508 | 50.839 | 0.00 | 0.00 |
| ATOM | 4490 | CB   | PRO | X | 297 | 36.409 | 40.876 | 51.165 | 0.00 | 0.00 |
| ATOM | 4491 | HB2  | PRO | X | 297 | 36.222 | 39.840 | 50.882 | 0.00 | 0.00 |
| ATOM | 4492 | HB3  | PRO | X | 297 | 35.520 | 41.415 | 50.836 | 0.00 | 0.00 |
| ATOM | 4493 | CA   | PRO | X | 297 | 36.685 | 40.827 | 52.686 | 0.00 | 0.00 |
| ATOM | 4494 | HA   | PRO | X | 297 | 36.566 | 41.832 | 53.091 | 0.00 | 0.00 |
| ATOM | 4495 | C    | PRO | X | 297 | 35.744 | 39.905 | 53.496 | 0.00 | 0.00 |
| ATOM | 4496 | O    | PRO | X | 297 | 35.720 | 38.674 | 53.364 | 0.00 | 0.00 |
| ATOM | 4497 | N    | VAL | X | 298 | 34.919 | 40.563 | 54.315 | 0.00 | 0.00 |
| ATOM | 4498 | H    | VAL | X | 298 | 34.998 | 41.569 | 54.367 | 0.00 | 0.00 |
| ATOM | 4499 | CA   | VAL | X | 298 | 33.725 | 39.997 | 54.898 | 0.00 | 0.00 |
| ATOM | 4500 | HA   | VAL | X | 298 | 34.133 | 39.017 | 55.148 | 0.00 | 0.00 |
| ATOM | 4501 | CB   | VAL | X | 298 | 33.362 | 40.726 | 56.224 | 0.00 | 0.00 |
| ATOM | 4502 | HB   | VAL | X | 298 | 32.410 | 40.384 | 56.630 | 0.00 | 0.00 |
| ATOM | 4503 | CG1  | VAL | X | 298 | 34.390 | 40.475 | 57.375 | 0.00 | 0.00 |
| ATOM | 4504 | HG11 | VAL | X | 298 | 35.343 | 40.975 | 57.199 | 0.00 | 0.00 |
| ATOM | 4505 | HG12 | VAL | X | 298 | 34.018 | 40.736 | 58.365 | 0.00 | 0.00 |
| ATOM | 4506 | HG13 | VAL | X | 298 | 34.605 | 39.407 | 57.424 | 0.00 | 0.00 |
| ATOM | 4507 | CG2  | VAL | X | 298 | 33.104 | 42.231 | 56.023 | 0.00 | 0.00 |
| ATOM | 4508 | HG21 | VAL | X | 298 | 32.317 | 42.319 | 55.274 | 0.00 | 0.00 |
| ATOM | 4509 | HG22 | VAL | X | 298 | 32.742 | 42.605 | 56.981 | 0.00 | 0.00 |
| ATOM | 4510 | HG23 | VAL | X | 298 | 34.013 | 42.798 | 55.819 | 0.00 | 0.00 |
| ATOM | 4511 | C    | VAL | X | 298 | 32.542 | 39.893 | 53.901 | 0.00 | 0.00 |
| ATOM | 4512 | O    | VAL | X | 298 | 32.314 | 40.765 | 53.057 | 0.00 | 0.00 |
| ATOM | 4513 | N    | VAL | X | 299 | 31.810 | 38.780 | 54.047 | 0.00 | 0.00 |
| ATOM | 4514 | H    | VAL | X | 299 | 32.206 | 38.003 | 54.556 | 0.00 | 0.00 |
| ATOM | 4515 | CA   | VAL | X | 299 | 30.471 | 38.733 | 53.440 | 0.00 | 0.00 |
| ATOM | 4516 | HA   | VAL | X | 299 | 30.514 | 39.259 | 52.487 | 0.00 | 0.00 |
| ATOM | 4517 | CB   | VAL | X | 299 | 29.851 | 37.332 | 53.274 | 0.00 | 0.00 |
| ATOM | 4518 | HB   | VAL | X | 299 | 29.898 | 36.867 | 54.259 | 0.00 | 0.00 |
| ATOM | 4519 | CG1  | VAL | X | 299 | 28.341 | 37.350 | 52.849 | 0.00 | 0.00 |
| ATOM | 4520 | HG11 | VAL | X | 299 | 27.656 | 37.588 | 53.662 | 0.00 | 0.00 |
| ATOM | 4521 | HG12 | VAL | X | 299 | 28.156 | 37.820 | 51.883 | 0.00 | 0.00 |



|      |      |      |     |   |     |        |        |        |      |      |
|------|------|------|-----|---|-----|--------|--------|--------|------|------|
| ATOM | 4522 | HG13 | VAL | X | 299 | 28.044 | 36.313 | 52.692 | 0.00 | 0.00 |
| ATOM | 4523 | CG2  | VAL | X | 299 | 30.528 | 36.549 | 52.146 | 0.00 | 0.00 |
| ATOM | 4524 | HG21 | VAL | X | 299 | 30.086 | 35.559 | 52.036 | 0.00 | 0.00 |
| ATOM | 4525 | HG22 | VAL | X | 299 | 30.525 | 37.093 | 51.202 | 0.00 | 0.00 |
| ATOM | 4526 | HG23 | VAL | X | 299 | 31.557 | 36.439 | 52.489 | 0.00 | 0.00 |
| ATOM | 4527 | C    | VAL | X | 299 | 29.542 | 39.615 | 54.291 | 0.00 | 0.00 |
| ATOM | 4528 | O    | VAL | X | 299 | 29.090 | 39.162 | 55.332 | 0.00 | 0.00 |
| ATOM | 4529 | N    | ASP | X | 300 | 29.242 | 40.823 | 53.811 | 0.00 | 0.00 |
| ATOM | 4530 | H    | ASP | X | 300 | 29.597 | 41.110 | 52.911 | 0.00 | 0.00 |
| ATOM | 4531 | CA   | ASP | X | 300 | 28.634 | 41.909 | 54.619 | 0.00 | 0.00 |
| ATOM | 4532 | HA   | ASP | X | 300 | 28.783 | 41.737 | 55.685 | 0.00 | 0.00 |
| ATOM | 4533 | CB   | ASP | X | 300 | 29.411 | 43.213 | 54.306 | 0.00 | 0.00 |
| ATOM | 4534 | HB2  | ASP | X | 300 | 29.330 | 43.907 | 55.142 | 0.00 | 0.00 |
| ATOM | 4535 | HB3  | ASP | X | 300 | 30.465 | 42.936 | 54.292 | 0.00 | 0.00 |
| ATOM | 4536 | CG   | ASP | X | 300 | 29.107 | 44.000 | 53.043 | 0.00 | 0.00 |
| ATOM | 4537 | OD1  | ASP | X | 300 | 29.035 | 43.328 | 51.999 | 0.00 | 0.00 |
| ATOM | 4538 | OD2  | ASP | X | 300 | 28.922 | 45.253 | 53.096 | 0.00 | 0.00 |
| ATOM | 4539 | C    | ASP | X | 300 | 27.116 | 42.188 | 54.387 | 0.00 | 0.00 |
| ATOM | 4540 | O    | ASP | X | 300 | 26.422 | 42.883 | 55.150 | 0.00 | 0.00 |
| ATOM | 4541 | N    | GLY | X | 301 | 26.588 | 41.746 | 53.244 | 0.00 | 0.00 |
| ATOM | 4542 | H    | GLY | X | 301 | 27.019 | 41.015 | 52.697 | 0.00 | 0.00 |
| ATOM | 4543 | CA   | GLY | X | 301 | 25.203 | 41.905 | 52.916 | 0.00 | 0.00 |
| ATOM | 4544 | HA2  | GLY | X | 301 | 24.899 | 41.039 | 52.268 | 0.00 | 0.00 |
| ATOM | 4545 | HA3  | GLY | X | 301 | 24.475 | 41.867 | 53.735 | 0.00 | 0.00 |
| ATOM | 4546 | C    | GLY | X | 301 | 24.835 | 43.120 | 52.101 | 0.00 | 0.00 |
| ATOM | 4547 | O    | GLY | X | 301 | 23.639 | 43.449 | 51.921 | 0.00 | 0.00 |
| ATOM | 4548 | N    | ASP | X | 302 | 25.773 | 43.895 | 51.517 | 0.00 | 0.00 |
| ATOM | 4549 | H    | ASP | X | 302 | 26.718 | 43.657 | 51.782 | 0.00 | 0.00 |
| ATOM | 4550 | CA   | ASP | X | 302 | 25.629 | 45.115 | 50.717 | 0.00 | 0.00 |
| ATOM | 4551 | HA   | ASP | X | 302 | 24.662 | 45.146 | 50.215 | 0.00 | 0.00 |
| ATOM | 4552 | CB   | ASP | X | 302 | 25.579 | 46.370 | 51.689 | 0.00 | 0.00 |
| ATOM | 4553 | HB2  | ASP | X | 302 | 24.666 | 46.398 | 52.282 | 0.00 | 0.00 |
| ATOM | 4554 | HB3  | ASP | X | 302 | 26.381 | 46.171 | 52.401 | 0.00 | 0.00 |
| ATOM | 4555 | CG   | ASP | X | 302 | 25.660 | 47.732 | 50.896 | 0.00 | 0.00 |
| ATOM | 4556 | OD1  | ASP | X | 302 | 26.766 | 48.217 | 50.650 | 0.00 | 0.00 |
| ATOM | 4557 | OD2  | ASP | X | 302 | 24.622 | 48.350 | 50.619 | 0.00 | 0.00 |
| ATOM | 4558 | C    | ASP | X | 302 | 26.814 | 45.307 | 49.663 | 0.00 | 0.00 |
| ATOM | 4559 | O    | ASP | X | 302 | 26.545 | 45.718 | 48.519 | 0.00 | 0.00 |
| ATOM | 4560 | N    | PHE | X | 303 | 28.094 | 45.007 | 49.971 | 0.00 | 0.00 |
| ATOM | 4561 | H    | PHE | X | 303 | 28.467 | 44.868 | 50.899 | 0.00 | 0.00 |
| ATOM | 4562 | CA   | PHE | X | 303 | 29.196 | 44.835 | 48.974 | 0.00 | 0.00 |
| ATOM | 4563 | HA   | PHE | X | 303 | 29.009 | 45.580 | 48.200 | 0.00 | 0.00 |
| ATOM | 4564 | CB   | PHE | X | 303 | 30.523 | 45.206 | 49.541 | 0.00 | 0.00 |
| ATOM | 4565 | HB2  | PHE | X | 303 | 30.443 | 45.939 | 50.343 | 0.00 | 0.00 |
| ATOM | 4566 | HB3  | PHE | X | 303 | 30.920 | 44.284 | 49.966 | 0.00 | 0.00 |
| ATOM | 4567 | CG   | PHE | X | 303 | 31.502 | 45.738 | 48.497 | 0.00 | 0.00 |
| ATOM | 4568 | CD1  | PHE | X | 303 | 31.930 | 44.972 | 47.361 | 0.00 | 0.00 |
| ATOM | 4569 | HD1  | PHE | X | 303 | 31.429 | 44.017 | 47.301 | 0.00 | 0.00 |
| ATOM | 4570 | CE1  | PHE | X | 303 | 32.880 | 45.538 | 46.459 | 0.00 | 0.00 |
| ATOM | 4571 | HE1  | PHE | X | 303 | 33.278 | 44.979 | 45.625 | 0.00 | 0.00 |
| ATOM | 4572 | CZ   | PHE | X | 303 | 33.164 | 46.921 | 46.609 | 0.00 | 0.00 |
| ATOM | 4573 | HZ   | PHE | X | 303 | 33.811 | 47.406 | 45.893 | 0.00 | 0.00 |
| ATOM | 4574 | CE2  | PHE | X | 303 | 32.814 | 47.601 | 47.756 | 0.00 | 0.00 |
| ATOM | 4575 | HE2  | PHE | X | 303 | 33.031 | 48.658 | 47.729 | 0.00 | 0.00 |
| ATOM | 4576 | CD2  | PHE | X | 303 | 32.073 | 47.000 | 48.755 | 0.00 | 0.00 |
| ATOM | 4577 | HD2  | PHE | X | 303 | 31.858 | 47.559 | 49.654 | 0.00 | 0.00 |
| ATOM | 4578 | C    | PHE | X | 303 | 29.089 | 43.354 | 48.400 | 0.00 | 0.00 |
| ATOM | 4579 | O    | PHE | X | 303 | 29.191 | 43.174 | 47.146 | 0.00 | 0.00 |
| ATOM | 4580 | N    | LEU | X | 304 | 28.919 | 42.381 | 49.286 | 0.00 | 0.00 |
| ATOM | 4581 | H    | LEU | X | 304 | 28.857 | 42.703 | 50.241 | 0.00 | 0.00 |
| ATOM | 4582 | CA   | LEU | X | 304 | 28.682 | 40.948 | 48.993 | 0.00 | 0.00 |
| ATOM | 4583 | HA   | LEU | X | 304 | 28.512 | 40.803 | 47.927 | 0.00 | 0.00 |
| ATOM | 4584 | CB   | LEU | X | 304 | 29.926 | 40.136 | 49.459 | 0.00 | 0.00 |
| ATOM | 4585 | HB2  | LEU | X | 304 | 30.095 | 40.154 | 50.535 | 0.00 | 0.00 |
| ATOM | 4586 | HB3  | LEU | X | 304 | 29.618 | 39.109 | 49.266 | 0.00 | 0.00 |
| ATOM | 4587 | CG   | LEU | X | 304 | 31.346 | 40.471 | 48.819 | 0.00 | 0.00 |
| ATOM | 4588 | HG   | LEU | X | 304 | 31.532 | 41.538 | 48.942 | 0.00 | 0.00 |
| ATOM | 4589 | CD1  | LEU | X | 304 | 32.357 | 39.533 | 49.486 | 0.00 | 0.00 |
| ATOM | 4590 | HD11 | LEU | X | 304 | 32.929 | 39.946 | 50.317 | 0.00 | 0.00 |
| ATOM | 4591 | HD12 | LEU | X | 304 | 31.847 | 38.643 | 49.855 | 0.00 | 0.00 |

|      |      |      |     |   |     |        |        |        |      |      |
|------|------|------|-----|---|-----|--------|--------|--------|------|------|
| ATOM | 4592 | HD13 | LEU | X | 304 | 33.189 | 39.386 | 48.798 | 0.00 | 0.00 |
| ATOM | 4593 | CD2  | LEU | X | 304 | 31.250 | 40.143 | 47.360 | 0.00 | 0.00 |
| ATOM | 4594 | HD21 | LEU | X | 304 | 31.079 | 39.074 | 47.230 | 0.00 | 0.00 |
| ATOM | 4595 | HD22 | LEU | X | 304 | 30.474 | 40.730 | 46.869 | 0.00 | 0.00 |
| ATOM | 4596 | HD23 | LEU | X | 304 | 32.218 | 40.488 | 46.997 | 0.00 | 0.00 |
| ATOM | 4597 | C    | LEU | X | 304 | 27.371 | 40.609 | 49.680 | 0.00 | 0.00 |
| ATOM | 4598 | O    | LEU | X | 304 | 27.352 | 40.296 | 50.880 | 0.00 | 0.00 |
| ATOM | 4599 | N    | SER | X | 305 | 26.287 | 40.542 | 48.893 | 0.00 | 0.00 |
| ATOM | 4600 | H    | SER | X | 305 | 26.259 | 40.904 | 47.950 | 0.00 | 0.00 |
| ATOM | 4601 | CA   | SER | X | 305 | 24.972 | 40.000 | 49.389 | 0.00 | 0.00 |
| ATOM | 4602 | HA   | SER | X | 305 | 24.642 | 40.624 | 50.220 | 0.00 | 0.00 |
| ATOM | 4603 | CB   | SER | X | 305 | 23.900 | 40.154 | 48.350 | 0.00 | 0.00 |
| ATOM | 4604 | HB2  | SER | X | 305 | 24.141 | 39.439 | 47.563 | 0.00 | 0.00 |
| ATOM | 4605 | HB3  | SER | X | 305 | 22.911 | 39.806 | 48.647 | 0.00 | 0.00 |
| ATOM | 4606 | OG   | SER | X | 305 | 23.824 | 41.493 | 47.919 | 0.00 | 0.00 |
| ATOM | 4607 | HG   | SER | X | 305 | 23.050 | 41.751 | 48.425 | 0.00 | 0.00 |
| ATOM | 4608 | C    | SER | X | 305 | 25.018 | 38.598 | 49.955 | 0.00 | 0.00 |
| ATOM | 4609 | O    | SER | X | 305 | 24.132 | 38.328 | 50.791 | 0.00 | 0.00 |
| ATOM | 4610 | N    | ASP | X | 306 | 25.974 | 37.751 | 49.463 | 0.00 | 0.00 |
| ATOM | 4611 | H    | ASP | X | 306 | 26.708 | 38.162 | 48.904 | 0.00 | 0.00 |
| ATOM | 4612 | CA   | ASP | X | 306 | 26.154 | 36.373 | 49.823 | 0.00 | 0.00 |
| ATOM | 4613 | HA   | ASP | X | 306 | 26.159 | 36.418 | 50.912 | 0.00 | 0.00 |
| ATOM | 4614 | CB   | ASP | X | 306 | 25.060 | 35.415 | 49.305 | 0.00 | 0.00 |
| ATOM | 4615 | HB2  | ASP | X | 306 | 24.097 | 35.726 | 49.711 | 0.00 | 0.00 |
| ATOM | 4616 | HB3  | ASP | X | 306 | 24.997 | 35.462 | 48.218 | 0.00 | 0.00 |
| ATOM | 4617 | CG   | ASP | X | 306 | 25.179 | 33.939 | 49.900 | 0.00 | 0.00 |
| ATOM | 4618 | OD1  | ASP | X | 306 | 24.869 | 33.015 | 49.135 | 0.00 | 0.00 |
| ATOM | 4619 | OD2  | ASP | X | 306 | 25.644 | 33.822 | 51.021 | 0.00 | 0.00 |
| ATOM | 4620 | C    | ASP | X | 306 | 27.578 | 35.939 | 49.411 | 0.00 | 0.00 |
| ATOM | 4621 | O    | ASP | X | 306 | 28.221 | 36.697 | 48.713 | 0.00 | 0.00 |
| ATOM | 4622 | N    | THR | X | 307 | 27.993 | 34.725 | 49.744 | 0.00 | 0.00 |
| ATOM | 4623 | H    | THR | X | 307 | 27.351 | 34.344 | 50.424 | 0.00 | 0.00 |
| ATOM | 4624 | CA   | THR | X | 307 | 29.296 | 34.099 | 49.456 | 0.00 | 0.00 |
| ATOM | 4625 | HA   | THR | X | 307 | 30.070 | 34.725 | 49.900 | 0.00 | 0.00 |
| ATOM | 4626 | CB   | THR | X | 307 | 29.470 | 32.677 | 50.047 | 0.00 | 0.00 |
| ATOM | 4627 | HB   | THR | X | 307 | 28.763 | 32.073 | 49.477 | 0.00 | 0.00 |
| ATOM | 4628 | CG2  | THR | X | 307 | 30.815 | 32.063 | 49.747 | 0.00 | 0.00 |
| ATOM | 4629 | HG21 | THR | X | 307 | 31.010 | 31.127 | 50.271 | 0.00 | 0.00 |
| ATOM | 4630 | HG22 | THR | X | 307 | 30.899 | 31.909 | 48.671 | 0.00 | 0.00 |
| ATOM | 4631 | HG23 | THR | X | 307 | 31.642 | 32.672 | 50.110 | 0.00 | 0.00 |
| ATOM | 4632 | OG1  | THR | X | 307 | 29.331 | 32.716 | 51.379 | 0.00 | 0.00 |
| ATOM | 4633 | HG1  | THR | X | 307 | 29.147 | 31.820 | 51.670 | 0.00 | 0.00 |
| ATOM | 4634 | C    | THR | X | 307 | 29.617 | 34.211 | 47.989 | 0.00 | 0.00 |
| ATOM | 4635 | O    | THR | X | 307 | 28.814 | 33.648 | 47.289 | 0.00 | 0.00 |
| ATOM | 4636 | N    | PRO | X | 308 | 30.781 | 34.844 | 47.586 | 0.00 | 0.00 |
| ATOM | 4637 | CD   | PRO | X | 308 | 31.847 | 35.484 | 48.355 | 0.00 | 0.00 |
| ATOM | 4638 | HD2  | PRO | X | 308 | 32.361 | 34.676 | 48.875 | 0.00 | 0.00 |
| ATOM | 4639 | HD3  | PRO | X | 308 | 31.245 | 36.105 | 49.018 | 0.00 | 0.00 |
| ATOM | 4640 | CG   | PRO | X | 308 | 32.719 | 36.231 | 47.401 | 0.00 | 0.00 |
| ATOM | 4641 | HG2  | PRO | X | 308 | 33.753 | 36.119 | 47.726 | 0.00 | 0.00 |
| ATOM | 4642 | HG3  | PRO | X | 308 | 32.424 | 37.275 | 47.297 | 0.00 | 0.00 |
| ATOM | 4643 | CB   | PRO | X | 308 | 32.470 | 35.447 | 46.148 | 0.00 | 0.00 |
| ATOM | 4644 | HB2  | PRO | X | 308 | 33.024 | 34.512 | 46.070 | 0.00 | 0.00 |
| ATOM | 4645 | HB3  | PRO | X | 308 | 32.731 | 36.051 | 45.279 | 0.00 | 0.00 |
| ATOM | 4646 | CA   | PRO | X | 308 | 31.047 | 35.057 | 46.179 | 0.00 | 0.00 |
| ATOM | 4647 | HA   | PRO | X | 308 | 30.500 | 35.862 | 45.688 | 0.00 | 0.00 |
| ATOM | 4648 | C    | PRO | X | 308 | 30.813 | 33.772 | 45.279 | 0.00 | 0.00 |
| ATOM | 4649 | O    | PRO | X | 308 | 30.390 | 33.926 | 44.142 | 0.00 | 0.00 |
| ATOM | 4650 | N    | GLU | X | 309 | 31.113 | 32.492 | 45.687 | 0.00 | 0.00 |
| ATOM | 4651 | H    | GLU | X | 309 | 31.583 | 32.310 | 46.563 | 0.00 | 0.00 |
| ATOM | 4652 | CA   | GLU | X | 309 | 30.844 | 31.294 | 44.869 | 0.00 | 0.00 |
| ATOM | 4653 | HA   | GLU | X | 309 | 31.396 | 31.458 | 43.943 | 0.00 | 0.00 |
| ATOM | 4654 | CB   | GLU | X | 309 | 31.450 | 30.010 | 45.501 | 0.00 | 0.00 |
| ATOM | 4655 | HB2  | GLU | X | 309 | 32.491 | 30.293 | 45.654 | 0.00 | 0.00 |
| ATOM | 4656 | HB3  | GLU | X | 309 | 30.955 | 29.863 | 46.461 | 0.00 | 0.00 |
| ATOM | 4657 | CG   | GLU | X | 309 | 31.531 | 28.808 | 44.551 | 0.00 | 0.00 |
| ATOM | 4658 | HG2  | GLU | X | 309 | 30.528 | 28.401 | 44.431 | 0.00 | 0.00 |
| ATOM | 4659 | HG3  | GLU | X | 309 | 32.051 | 29.051 | 43.624 | 0.00 | 0.00 |
| ATOM | 4660 | CD   | GLU | X | 309 | 32.207 | 27.669 | 45.216 | 0.00 | 0.00 |
| ATOM | 4661 | OE1  | GLU | X | 309 | 31.580 | 26.663 | 45.498 | 0.00 | 0.00 |

|      |      |      |     |   |     |        |        |        |      |      |
|------|------|------|-----|---|-----|--------|--------|--------|------|------|
| ATOM | 4662 | OE2  | GLU | X | 309 | 33.471 | 27.702 | 45.389 | 0.00 | 0.00 |
| ATOM | 4663 | C    | GLU | X | 309 | 29.306 | 31.094 | 44.545 | 0.00 | 0.00 |
| ATOM | 4664 | O    | GLU | X | 309 | 28.920 | 30.548 | 43.506 | 0.00 | 0.00 |
| ATOM | 4665 | N    | ALA | X | 310 | 28.474 | 31.608 | 45.378 | 0.00 | 0.00 |
| ATOM | 4666 | H    | ALA | X | 310 | 28.781 | 31.951 | 46.278 | 0.00 | 0.00 |
| ATOM | 4667 | CA   | ALA | X | 310 | 27.074 | 31.764 | 45.168 | 0.00 | 0.00 |
| ATOM | 4668 | HA   | ALA | X | 310 | 26.792 | 30.880 | 44.596 | 0.00 | 0.00 |
| ATOM | 4669 | CB   | ALA | X | 310 | 26.303 | 31.670 | 46.496 | 0.00 | 0.00 |
| ATOM | 4670 | HB1  | ALA | X | 310 | 26.187 | 32.650 | 46.960 | 0.00 | 0.00 |
| ATOM | 4671 | HB2  | ALA | X | 310 | 25.335 | 31.206 | 46.308 | 0.00 | 0.00 |
| ATOM | 4672 | HB3  | ALA | X | 310 | 26.856 | 31.152 | 47.279 | 0.00 | 0.00 |
| ATOM | 4673 | C    | ALA | X | 310 | 26.683 | 32.915 | 44.219 | 0.00 | 0.00 |
| ATOM | 4674 | O    | ALA | X | 310 | 25.782 | 32.775 | 43.350 | 0.00 | 0.00 |
| ATOM | 4675 | N    | LEU | X | 311 | 27.341 | 34.048 | 44.343 | 0.00 | 0.00 |
| ATOM | 4676 | H    | LEU | X | 311 | 28.200 | 33.947 | 44.864 | 0.00 | 0.00 |
| ATOM | 4677 | CA   | LEU | X | 311 | 27.020 | 35.300 | 43.676 | 0.00 | 0.00 |
| ATOM | 4678 | HA   | LEU | X | 311 | 25.941 | 35.434 | 43.757 | 0.00 | 0.00 |
| ATOM | 4679 | CB   | LEU | X | 311 | 27.687 | 36.515 | 44.240 | 0.00 | 0.00 |
| ATOM | 4680 | HB2  | LEU | X | 311 | 28.762 | 36.397 | 44.105 | 0.00 | 0.00 |
| ATOM | 4681 | HB3  | LEU | X | 311 | 27.385 | 37.373 | 43.639 | 0.00 | 0.00 |
| ATOM | 4682 | CG   | LEU | X | 311 | 27.367 | 36.929 | 45.675 | 0.00 | 0.00 |
| ATOM | 4683 | HG   | LEU | X | 311 | 27.643 | 36.106 | 46.335 | 0.00 | 0.00 |
| ATOM | 4684 | CD1  | LEU | X | 311 | 28.237 | 38.081 | 46.115 | 0.00 | 0.00 |
| ATOM | 4685 | HD11 | LEU | X | 311 | 29.289 | 37.796 | 46.105 | 0.00 | 0.00 |
| ATOM | 4686 | HD12 | LEU | X | 311 | 28.142 | 38.888 | 45.389 | 0.00 | 0.00 |
| ATOM | 4687 | HD13 | LEU | X | 311 | 27.853 | 38.513 | 47.039 | 0.00 | 0.00 |
| ATOM | 4688 | CD2  | LEU | X | 311 | 25.885 | 37.211 | 45.780 | 0.00 | 0.00 |
| ATOM | 4689 | HD21 | LEU | X | 311 | 25.353 | 36.262 | 45.839 | 0.00 | 0.00 |
| ATOM | 4690 | HD22 | LEU | X | 311 | 25.797 | 37.713 | 46.744 | 0.00 | 0.00 |
| ATOM | 4691 | HD23 | LEU | X | 311 | 25.585 | 37.996 | 45.086 | 0.00 | 0.00 |
| ATOM | 4692 | C    | LEU | X | 311 | 27.420 | 35.138 | 42.196 | 0.00 | 0.00 |
| ATOM | 4693 | O    | LEU | X | 311 | 26.681 | 35.639 | 41.353 | 0.00 | 0.00 |
| ATOM | 4694 | N    | ILE | X | 312 | 28.481 | 34.446 | 41.894 | 0.00 | 0.00 |
| ATOM | 4695 | H    | ILE | X | 312 | 29.125 | 34.243 | 42.646 | 0.00 | 0.00 |
| ATOM | 4696 | CA   | ILE | X | 312 | 28.912 | 34.346 | 40.462 | 0.00 | 0.00 |
| ATOM | 4697 | HA   | ILE | X | 312 | 28.826 | 35.373 | 40.107 | 0.00 | 0.00 |
| ATOM | 4698 | CB   | ILE | X | 312 | 30.389 | 33.936 | 40.397 | 0.00 | 0.00 |
| ATOM | 4699 | HB   | ILE | X | 312 | 30.981 | 34.710 | 40.886 | 0.00 | 0.00 |
| ATOM | 4700 | CG2  | ILE | X | 312 | 30.708 | 32.568 | 40.993 | 0.00 | 0.00 |
| ATOM | 4701 | HG21 | ILE | X | 312 | 30.136 | 32.259 | 41.868 | 0.00 | 0.00 |
| ATOM | 4702 | HG22 | ILE | X | 312 | 30.452 | 31.802 | 40.261 | 0.00 | 0.00 |
| ATOM | 4703 | HG23 | ILE | X | 312 | 31.786 | 32.597 | 41.145 | 0.00 | 0.00 |
| ATOM | 4704 | CG1  | ILE | X | 312 | 30.965 | 34.044 | 38.963 | 0.00 | 0.00 |
| ATOM | 4705 | HG12 | ILE | X | 312 | 31.953 | 33.585 | 39.006 | 0.00 | 0.00 |
| ATOM | 4706 | HG13 | ILE | X | 312 | 30.286 | 33.470 | 38.332 | 0.00 | 0.00 |
| ATOM | 4707 | CD1  | ILE | X | 312 | 31.208 | 35.511 | 38.554 | 0.00 | 0.00 |
| ATOM | 4708 | HD11 | ILE | X | 312 | 31.321 | 35.581 | 37.472 | 0.00 | 0.00 |
| ATOM | 4709 | HD12 | ILE | X | 312 | 30.322 | 36.138 | 38.650 | 0.00 | 0.00 |
| ATOM | 4710 | HD13 | ILE | X | 312 | 32.138 | 35.876 | 38.992 | 0.00 | 0.00 |
| ATOM | 4711 | C    | ILE | X | 312 | 27.917 | 33.490 | 39.625 | 0.00 | 0.00 |
| ATOM | 4712 | O    | ILE | X | 312 | 27.915 | 33.731 | 38.363 | 0.00 | 0.00 |
| ATOM | 4713 | N    | ASN | X | 313 | 26.990 | 32.704 | 40.199 | 0.00 | 0.00 |
| ATOM | 4714 | H    | ASN | X | 313 | 27.025 | 32.618 | 41.205 | 0.00 | 0.00 |
| ATOM | 4715 | CA   | ASN | X | 313 | 25.896 | 32.113 | 39.364 | 0.00 | 0.00 |
| ATOM | 4716 | HA   | ASN | X | 313 | 26.058 | 32.004 | 38.291 | 0.00 | 0.00 |
| ATOM | 4717 | CB   | ASN | X | 313 | 25.596 | 30.691 | 39.954 | 0.00 | 0.00 |
| ATOM | 4718 | HB2  | ASN | X | 313 | 26.432 | 30.005 | 39.814 | 0.00 | 0.00 |
| ATOM | 4719 | HB3  | ASN | X | 313 | 25.302 | 30.792 | 40.999 | 0.00 | 0.00 |
| ATOM | 4720 | CG   | ASN | X | 313 | 24.304 | 30.165 | 39.258 | 0.00 | 0.00 |
| ATOM | 4721 | OD1  | ASN | X | 313 | 24.223 | 29.917 | 38.023 | 0.00 | 0.00 |
| ATOM | 4722 | ND2  | ASN | X | 313 | 23.144 | 30.232 | 39.910 | 0.00 | 0.00 |
| ATOM | 4723 | HD21 | ASN | X | 313 | 22.304 | 30.134 | 39.358 | 0.00 | 0.00 |
| ATOM | 4724 | HD22 | ASN | X | 313 | 23.133 | 30.446 | 40.897 | 0.00 | 0.00 |
| ATOM | 4725 | C    | ASN | X | 313 | 24.560 | 33.009 | 39.325 | 0.00 | 0.00 |
| ATOM | 4726 | O    | ASN | X | 313 | 23.797 | 33.069 | 38.353 | 0.00 | 0.00 |
| ATOM | 4727 | N    | ALA | X | 314 | 24.355 | 33.740 | 40.383 | 0.00 | 0.00 |
| ATOM | 4728 | H    | ALA | X | 314 | 25.173 | 33.862 | 40.962 | 0.00 | 0.00 |
| ATOM | 4729 | CA   | ALA | X | 314 | 23.132 | 34.570 | 40.689 | 0.00 | 0.00 |
| ATOM | 4730 | HA   | ALA | X | 314 | 22.266 | 33.909 | 40.660 | 0.00 | 0.00 |
| ATOM | 4731 | CB   | ALA | X | 314 | 23.320 | 35.047 | 42.181 | 0.00 | 0.00 |

|      |      |     |     |   |     |        |        |        |      |      |
|------|------|-----|-----|---|-----|--------|--------|--------|------|------|
| ATOM | 4732 | HB1 | ALA | X | 314 | 22.431 | 35.575 | 42.526 | 0.00 | 0.00 |
| ATOM | 4733 | HB2 | ALA | X | 314 | 23.481 | 34.208 | 42.858 | 0.00 | 0.00 |
| ATOM | 4734 | HB3 | ALA | X | 314 | 24.208 | 35.665 | 42.319 | 0.00 | 0.00 |
| ATOM | 4735 | C   | ALA | X | 314 | 22.955 | 35.779 | 39.785 | 0.00 | 0.00 |
| ATOM | 4736 | O   | ALA | X | 314 | 21.865 | 36.408 | 39.810 | 0.00 | 0.00 |
| ATOM | 4737 | N   | GLY | X | 315 | 23.963 | 36.315 | 39.097 | 0.00 | 0.00 |
| ATOM | 4738 | H   | GLY | X | 315 | 24.874 | 35.902 | 39.236 | 0.00 | 0.00 |
| ATOM | 4739 | CA  | GLY | X | 315 | 24.021 | 37.668 | 38.403 | 0.00 | 0.00 |
| ATOM | 4740 | HA2 | GLY | X | 315 | 23.243 | 38.323 | 38.855 | 0.00 | 0.00 |
| ATOM | 4741 | HA3 | GLY | X | 315 | 25.009 | 38.099 | 38.456 | 0.00 | 0.00 |
| ATOM | 4742 | C   | GLY | X | 315 | 23.701 | 37.539 | 36.906 | 0.00 | 0.00 |
| ATOM | 4743 | O   | GLY | X | 315 | 24.178 | 36.688 | 36.169 | 0.00 | 0.00 |
| ATOM | 4744 | N   | ASP | X | 316 | 23.069 | 38.555 | 36.450 | 0.00 | 0.00 |
| ATOM | 4745 | H   | ASP | X | 316 | 22.722 | 39.173 | 37.170 | 0.00 | 0.00 |
| ATOM | 4746 | CA  | ASP | X | 316 | 22.981 | 38.959 | 35.012 | 0.00 | 0.00 |
| ATOM | 4747 | HA  | ASP | X | 316 | 23.013 | 38.023 | 34.454 | 0.00 | 0.00 |
| ATOM | 4748 | CB  | ASP | X | 316 | 21.645 | 39.612 | 34.743 | 0.00 | 0.00 |
| ATOM | 4749 | HB2 | ASP | X | 316 | 20.834 | 39.131 | 35.290 | 0.00 | 0.00 |
| ATOM | 4750 | HB3 | ASP | X | 316 | 21.659 | 40.647 | 35.086 | 0.00 | 0.00 |
| ATOM | 4751 | CG  | ASP | X | 316 | 21.175 | 39.525 | 33.252 | 0.00 | 0.00 |
| ATOM | 4752 | OD1 | ASP | X | 316 | 21.861 | 40.166 | 32.396 | 0.00 | 0.00 |
| ATOM | 4753 | OD2 | ASP | X | 316 | 20.213 | 38.806 | 32.881 | 0.00 | 0.00 |
| ATOM | 4754 | C   | ASP | X | 316 | 24.178 | 39.775 | 34.523 | 0.00 | 0.00 |
| ATOM | 4755 | O   | ASP | X | 316 | 24.565 | 40.675 | 35.271 | 0.00 | 0.00 |
| ATOM | 4756 | N   | PHE | X | 317 | 24.821 | 39.452 | 33.414 | 0.00 | 0.00 |
| ATOM | 4757 | H   | PHE | X | 317 | 24.356 | 38.800 | 32.799 | 0.00 | 0.00 |
| ATOM | 4758 | CA  | PHE | X | 317 | 26.095 | 40.086 | 32.881 | 0.00 | 0.00 |
| ATOM | 4759 | HA  | PHE | X | 317 | 26.260 | 41.098 | 33.251 | 0.00 | 0.00 |
| ATOM | 4760 | CB  | PHE | X | 317 | 27.259 | 39.170 | 33.340 | 0.00 | 0.00 |
| ATOM | 4761 | HB2 | PHE | X | 317 | 26.935 | 38.224 | 32.908 | 0.00 | 0.00 |
| ATOM | 4762 | HB3 | PHE | X | 317 | 28.178 | 39.496 | 32.854 | 0.00 | 0.00 |
| ATOM | 4763 | CG  | PHE | X | 317 | 27.482 | 39.009 | 34.726 | 0.00 | 0.00 |
| ATOM | 4764 | CD1 | PHE | X | 317 | 27.985 | 40.017 | 35.566 | 0.00 | 0.00 |
| ATOM | 4765 | HD1 | PHE | X | 317 | 28.108 | 41.042 | 35.246 | 0.00 | 0.00 |
| ATOM | 4766 | CE1 | PHE | X | 317 | 28.134 | 39.787 | 36.912 | 0.00 | 0.00 |
| ATOM | 4767 | HE1 | PHE | X | 317 | 28.513 | 40.571 | 37.550 | 0.00 | 0.00 |
| ATOM | 4768 | CZ  | PHE | X | 317 | 27.917 | 38.511 | 37.494 | 0.00 | 0.00 |
| ATOM | 4769 | HZ  | PHE | X | 317 | 28.054 | 38.401 | 38.559 | 0.00 | 0.00 |
| ATOM | 4770 | CE2 | PHE | X | 317 | 27.368 | 37.547 | 36.671 | 0.00 | 0.00 |
| ATOM | 4771 | HE2 | PHE | X | 317 | 27.131 | 36.571 | 37.067 | 0.00 | 0.00 |
| ATOM | 4772 | CD2 | PHE | X | 317 | 27.195 | 37.749 | 35.325 | 0.00 | 0.00 |
| ATOM | 4773 | HD2 | PHE | X | 317 | 26.674 | 37.045 | 34.693 | 0.00 | 0.00 |
| ATOM | 4774 | C   | PHE | X | 317 | 26.050 | 40.347 | 31.401 | 0.00 | 0.00 |
| ATOM | 4775 | O   | PHE | X | 317 | 26.999 | 40.081 | 30.692 | 0.00 | 0.00 |
| ATOM | 4776 | N   | HIE | X | 318 | 24.838 | 40.637 | 30.878 | 0.00 | 0.00 |
| ATOM | 4777 | H   | HIE | X | 318 | 24.164 | 40.878 | 31.590 | 0.00 | 0.00 |
| ATOM | 4778 | CA  | HIE | X | 318 | 24.627 | 40.823 | 29.464 | 0.00 | 0.00 |
| ATOM | 4779 | HA  | HIE | X | 318 | 24.799 | 39.844 | 29.016 | 0.00 | 0.00 |
| ATOM | 4780 | CB  | HIE | X | 318 | 23.172 | 41.099 | 29.125 | 0.00 | 0.00 |
| ATOM | 4781 | HB2 | HIE | X | 318 | 22.440 | 40.392 | 29.516 | 0.00 | 0.00 |
| ATOM | 4782 | HB3 | HIE | X | 318 | 22.835 | 41.984 | 29.663 | 0.00 | 0.00 |
| ATOM | 4783 | CG  | HIE | X | 318 | 23.015 | 41.191 | 27.665 | 0.00 | 0.00 |
| ATOM | 4784 | ND1 | HIE | X | 318 | 23.445 | 40.181 | 26.789 | 0.00 | 0.00 |
| ATOM | 4785 | CE1 | HIE | X | 318 | 23.235 | 40.741 | 25.577 | 0.00 | 0.00 |
| ATOM | 4786 | HE1 | HIE | X | 318 | 23.155 | 40.230 | 24.629 | 0.00 | 0.00 |
| ATOM | 4787 | NE2 | HIE | X | 318 | 22.857 | 42.015 | 25.653 | 0.00 | 0.00 |
| ATOM | 4788 | HE2 | HIE | X | 318 | 22.619 | 42.598 | 24.864 | 0.00 | 0.00 |
| ATOM | 4789 | CD2 | HIE | X | 318 | 22.713 | 42.312 | 26.961 | 0.00 | 0.00 |
| ATOM | 4790 | HD2 | HIE | X | 318 | 22.343 | 43.271 | 27.293 | 0.00 | 0.00 |
| ATOM | 4791 | C   | HIE | X | 318 | 25.661 | 41.922 | 28.839 | 0.00 | 0.00 |
| ATOM | 4792 | O   | HIE | X | 318 | 25.902 | 43.025 | 29.394 | 0.00 | 0.00 |
| ATOM | 4793 | N   | GLY | X | 319 | 26.127 | 41.793 | 27.624 | 0.00 | 0.00 |
| ATOM | 4794 | H   | GLY | X | 319 | 25.913 | 40.950 | 27.112 | 0.00 | 0.00 |
| ATOM | 4795 | CA  | GLY | X | 319 | 26.887 | 42.859 | 26.841 | 0.00 | 0.00 |
| ATOM | 4796 | HA2 | GLY | X | 319 | 26.896 | 42.556 | 25.788 | 0.00 | 0.00 |
| ATOM | 4797 | HA3 | GLY | X | 319 | 26.369 | 43.787 | 26.840 | 0.00 | 0.00 |
| ATOM | 4798 | C   | GLY | X | 319 | 28.351 | 43.046 | 27.197 | 0.00 | 0.00 |
| ATOM | 4799 | O   | GLY | X | 319 | 28.969 | 44.014 | 26.764 | 0.00 | 0.00 |
| ATOM | 4800 | N   | LEU | X | 320 | 28.873 | 42.298 | 28.232 | 0.00 | 0.00 |
| ATOM | 4801 | H   | LEU | X | 320 | 28.325 | 41.503 | 28.527 | 0.00 | 0.00 |

|      |      |      |     |   |     |        |        |        |      |      |
|------|------|------|-----|---|-----|--------|--------|--------|------|------|
| ATOM | 4802 | CA   | LEU | X | 320 | 30.141 | 42.608 | 28.870 | 0.00 | 0.00 |
| ATOM | 4803 | HA   | LEU | X | 320 | 30.380 | 43.671 | 28.815 | 0.00 | 0.00 |
| ATOM | 4804 | CB   | LEU | X | 320 | 30.188 | 42.203 | 30.355 | 0.00 | 0.00 |
| ATOM | 4805 | HB2  | LEU | X | 320 | 29.844 | 41.178 | 30.492 | 0.00 | 0.00 |
| ATOM | 4806 | HB3  | LEU | X | 320 | 31.176 | 42.235 | 30.813 | 0.00 | 0.00 |
| ATOM | 4807 | CG   | LEU | X | 320 | 29.146 | 42.994 | 31.197 | 0.00 | 0.00 |
| ATOM | 4808 | HG   | LEU | X | 320 | 28.129 | 42.768 | 30.876 | 0.00 | 0.00 |
| ATOM | 4809 | CD1  | LEU | X | 320 | 29.026 | 42.712 | 32.686 | 0.00 | 0.00 |
| ATOM | 4810 | HD11 | LEU | X | 320 | 29.910 | 43.134 | 33.163 | 0.00 | 0.00 |
| ATOM | 4811 | HD12 | LEU | X | 320 | 28.127 | 43.148 | 33.122 | 0.00 | 0.00 |
| ATOM | 4812 | HD13 | LEU | X | 320 | 28.883 | 41.650 | 32.885 | 0.00 | 0.00 |
| ATOM | 4813 | CD2  | LEU | X | 320 | 29.484 | 44.495 | 31.057 | 0.00 | 0.00 |
| ATOM | 4814 | HD21 | LEU | X | 320 | 30.547 | 44.736 | 31.014 | 0.00 | 0.00 |
| ATOM | 4815 | HD22 | LEU | X | 320 | 28.945 | 44.884 | 30.194 | 0.00 | 0.00 |
| ATOM | 4816 | HD23 | LEU | X | 320 | 29.006 | 45.074 | 31.848 | 0.00 | 0.00 |
| ATOM | 4817 | C    | LEU | X | 320 | 31.258 | 42.011 | 28.099 | 0.00 | 0.00 |
| ATOM | 4818 | O    | LEU | X | 320 | 31.053 | 40.993 | 27.458 | 0.00 | 0.00 |
| ATOM | 4819 | N    | GLN | X | 321 | 32.455 | 42.589 | 28.234 | 0.00 | 0.00 |
| ATOM | 4820 | H    | GLN | X | 321 | 32.511 | 43.491 | 28.684 | 0.00 | 0.00 |
| ATOM | 4821 | CA   | GLN | X | 321 | 33.748 | 41.958 | 27.809 | 0.00 | 0.00 |
| ATOM | 4822 | HA   | GLN | X | 321 | 33.549 | 41.032 | 27.269 | 0.00 | 0.00 |
| ATOM | 4823 | CB   | GLN | X | 321 | 34.429 | 42.957 | 26.852 | 0.00 | 0.00 |
| ATOM | 4824 | HB2  | GLN | X | 321 | 34.295 | 43.964 | 27.247 | 0.00 | 0.00 |
| ATOM | 4825 | HB3  | GLN | X | 321 | 35.499 | 42.810 | 26.706 | 0.00 | 0.00 |
| ATOM | 4826 | CG   | GLN | X | 321 | 33.646 | 43.024 | 25.537 | 0.00 | 0.00 |
| ATOM | 4827 | HG2  | GLN | X | 321 | 34.173 | 42.615 | 24.674 | 0.00 | 0.00 |
| ATOM | 4828 | HG3  | GLN | X | 321 | 32.733 | 42.433 | 25.611 | 0.00 | 0.00 |
| ATOM | 4829 | CD   | GLN | X | 321 | 33.083 | 44.401 | 25.247 | 0.00 | 0.00 |
| ATOM | 4830 | OE1  | GLN | X | 321 | 33.789 | 45.422 | 25.245 | 0.00 | 0.00 |
| ATOM | 4831 | NE2  | GLN | X | 321 | 31.810 | 44.518 | 25.189 | 0.00 | 0.00 |
| ATOM | 4832 | HE21 | GLN | X | 321 | 31.262 | 45.366 | 25.200 | 0.00 | 0.00 |
| ATOM | 4833 | HE22 | GLN | X | 321 | 31.347 | 43.627 | 25.079 | 0.00 | 0.00 |
| ATOM | 4834 | C    | GLN | X | 321 | 34.584 | 41.662 | 29.055 | 0.00 | 0.00 |
| ATOM | 4835 | O    | GLN | X | 321 | 34.423 | 42.288 | 30.088 | 0.00 | 0.00 |
| ATOM | 4836 | N    | VAL | X | 322 | 35.428 | 40.633 | 29.096 | 0.00 | 0.00 |
| ATOM | 4837 | H    | VAL | X | 322 | 35.460 | 40.044 | 28.276 | 0.00 | 0.00 |
| ATOM | 4838 | CA   | VAL | X | 322 | 36.152 | 40.189 | 30.278 | 0.00 | 0.00 |
| ATOM | 4839 | HA   | VAL | X | 322 | 36.599 | 40.944 | 30.925 | 0.00 | 0.00 |
| ATOM | 4840 | CB   | VAL | X | 322 | 35.372 | 39.231 | 31.268 | 0.00 | 0.00 |
| ATOM | 4841 | HB   | VAL | X | 322 | 35.474 | 38.216 | 30.884 | 0.00 | 0.00 |
| ATOM | 4842 | CG1  | VAL | X | 322 | 35.972 | 39.281 | 32.719 | 0.00 | 0.00 |
| ATOM | 4843 | HG11 | VAL | X | 322 | 35.567 | 38.525 | 33.393 | 0.00 | 0.00 |
| ATOM | 4844 | HG12 | VAL | X | 322 | 37.059 | 39.228 | 32.662 | 0.00 | 0.00 |
| ATOM | 4845 | HG13 | VAL | X | 322 | 35.734 | 40.292 | 33.049 | 0.00 | 0.00 |
| ATOM | 4846 | CG2  | VAL | X | 322 | 33.834 | 39.345 | 31.449 | 0.00 | 0.00 |
| ATOM | 4847 | HG21 | VAL | X | 322 | 33.633 | 40.263 | 32.002 | 0.00 | 0.00 |
| ATOM | 4848 | HG22 | VAL | X | 322 | 33.174 | 39.488 | 30.593 | 0.00 | 0.00 |
| ATOM | 4849 | HG23 | VAL | X | 322 | 33.500 | 38.568 | 32.137 | 0.00 | 0.00 |
| ATOM | 4850 | C    | VAL | X | 322 | 37.405 | 39.403 | 29.824 | 0.00 | 0.00 |
| ATOM | 4851 | O    | VAL | X | 322 | 37.458 | 38.855 | 28.737 | 0.00 | 0.00 |
| ATOM | 4852 | N    | LEU | X | 323 | 38.520 | 39.445 | 30.517 | 0.00 | 0.00 |
| ATOM | 4853 | H    | LEU | X | 323 | 38.492 | 40.107 | 31.279 | 0.00 | 0.00 |
| ATOM | 4854 | CA   | LEU | X | 323 | 39.746 | 38.703 | 30.291 | 0.00 | 0.00 |
| ATOM | 4855 | HA   | LEU | X | 323 | 39.689 | 37.905 | 29.552 | 0.00 | 0.00 |
| ATOM | 4856 | CB   | LEU | X | 323 | 40.847 | 39.662 | 29.801 | 0.00 | 0.00 |
| ATOM | 4857 | HB2  | LEU | X | 323 | 40.321 | 40.451 | 29.264 | 0.00 | 0.00 |
| ATOM | 4858 | HB3  | LEU | X | 323 | 41.238 | 40.193 | 30.669 | 0.00 | 0.00 |
| ATOM | 4859 | CG   | LEU | X | 323 | 42.015 | 39.023 | 28.945 | 0.00 | 0.00 |
| ATOM | 4860 | HG   | LEU | X | 323 | 41.512 | 38.490 | 28.137 | 0.00 | 0.00 |
| ATOM | 4861 | CD1  | LEU | X | 323 | 42.845 | 40.205 | 28.393 | 0.00 | 0.00 |
| ATOM | 4862 | HD11 | LEU | X | 323 | 42.245 | 40.934 | 27.849 | 0.00 | 0.00 |
| ATOM | 4863 | HD12 | LEU | X | 323 | 43.319 | 40.725 | 29.225 | 0.00 | 0.00 |
| ATOM | 4864 | HD13 | LEU | X | 323 | 43.525 | 39.851 | 27.617 | 0.00 | 0.00 |
| ATOM | 4865 | CD2  | LEU | X | 323 | 42.961 | 38.157 | 29.790 | 0.00 | 0.00 |
| ATOM | 4866 | HD21 | LEU | X | 323 | 43.954 | 38.036 | 29.358 | 0.00 | 0.00 |
| ATOM | 4867 | HD22 | LEU | X | 323 | 42.976 | 38.494 | 30.826 | 0.00 | 0.00 |
| ATOM | 4868 | HD23 | LEU | X | 323 | 42.446 | 37.196 | 29.807 | 0.00 | 0.00 |
| ATOM | 4869 | C    | LEU | X | 323 | 40.019 | 38.050 | 31.623 | 0.00 | 0.00 |
| ATOM | 4870 | O    | LEU | X | 323 | 39.800 | 38.638 | 32.708 | 0.00 | 0.00 |
| ATOM | 4871 | N    | VAL | X | 324 | 40.516 | 36.803 | 31.559 | 0.00 | 0.00 |

|      |      |      |     |   |     |        |        |        |      |      |
|------|------|------|-----|---|-----|--------|--------|--------|------|------|
| ATOM | 4872 | H    | VAL | X | 324 | 40.834 | 36.503 | 30.649 | 0.00 | 0.00 |
| ATOM | 4873 | CA   | VAL | X | 324 | 40.756 | 35.929 | 32.687 | 0.00 | 0.00 |
| ATOM | 4874 | HA   | VAL | X | 324 | 40.660 | 36.465 | 33.631 | 0.00 | 0.00 |
| ATOM | 4875 | CB   | VAL | X | 324 | 39.540 | 35.004 | 32.952 | 0.00 | 0.00 |
| ATOM | 4876 | HB   | VAL | X | 324 | 39.910 | 34.370 | 33.758 | 0.00 | 0.00 |
| ATOM | 4877 | CG1  | VAL | X | 324 | 38.246 | 35.673 | 33.387 | 0.00 | 0.00 |
| ATOM | 4878 | HG11 | VAL | X | 324 | 37.646 | 34.877 | 33.826 | 0.00 | 0.00 |
| ATOM | 4879 | HG12 | VAL | X | 324 | 38.327 | 36.529 | 34.057 | 0.00 | 0.00 |
| ATOM | 4880 | HG13 | VAL | X | 324 | 37.705 | 35.975 | 32.491 | 0.00 | 0.00 |
| ATOM | 4881 | CG2  | VAL | X | 324 | 39.223 | 34.135 | 31.729 | 0.00 | 0.00 |
| ATOM | 4882 | HG21 | VAL | X | 324 | 40.102 | 33.572 | 31.414 | 0.00 | 0.00 |
| ATOM | 4883 | HG22 | VAL | X | 324 | 38.368 | 33.478 | 31.885 | 0.00 | 0.00 |
| ATOM | 4884 | HG23 | VAL | X | 324 | 38.892 | 34.727 | 30.876 | 0.00 | 0.00 |
| ATOM | 4885 | C    | VAL | X | 324 | 42.136 | 35.246 | 32.528 | 0.00 | 0.00 |
| ATOM | 4886 | O    | VAL | X | 324 | 42.638 | 35.106 | 31.486 | 0.00 | 0.00 |
| ATOM | 4887 | N    | GLY | X | 325 | 42.663 | 34.695 | 33.621 | 0.00 | 0.00 |
| ATOM | 4888 | H    | GLY | X | 325 | 42.391 | 35.158 | 34.477 | 0.00 | 0.00 |
| ATOM | 4889 | CA   | GLY | X | 325 | 43.705 | 33.633 | 33.506 | 0.00 | 0.00 |
| ATOM | 4890 | HA2  | GLY | X | 325 | 43.248 | 32.689 | 33.298 | 0.00 | 0.00 |
| ATOM | 4891 | HA3  | GLY | X | 325 | 44.295 | 33.950 | 32.719 | 0.00 | 0.00 |
| ATOM | 4892 | C    | GLY | X | 325 | 44.731 | 33.525 | 34.620 | 0.00 | 0.00 |
| ATOM | 4893 | O    | GLY | X | 325 | 44.504 | 33.883 | 35.755 | 0.00 | 0.00 |
| ATOM | 4894 | N    | VAL | X | 326 | 45.926 | 32.909 | 34.353 | 0.00 | 0.00 |
| ATOM | 4895 | H    | VAL | X | 326 | 46.164 | 32.694 | 33.395 | 0.00 | 0.00 |
| ATOM | 4896 | CA   | VAL | X | 326 | 46.916 | 32.447 | 35.368 | 0.00 | 0.00 |
| ATOM | 4897 | HA   | VAL | X | 326 | 47.019 | 33.224 | 36.125 | 0.00 | 0.00 |
| ATOM | 4898 | CB   | VAL | X | 326 | 46.465 | 31.124 | 36.050 | 0.00 | 0.00 |
| ATOM | 4899 | HB   | VAL | X | 326 | 47.262 | 30.836 | 36.735 | 0.00 | 0.00 |
| ATOM | 4900 | CG1  | VAL | X | 326 | 45.281 | 31.139 | 37.028 | 0.00 | 0.00 |
| ATOM | 4901 | HG11 | VAL | X | 326 | 44.321 | 31.450 | 36.615 | 0.00 | 0.00 |
| ATOM | 4902 | HG12 | VAL | X | 326 | 45.245 | 30.138 | 37.457 | 0.00 | 0.00 |
| ATOM | 4903 | HG13 | VAL | X | 326 | 45.653 | 31.932 | 37.677 | 0.00 | 0.00 |
| ATOM | 4904 | CG2  | VAL | X | 326 | 46.345 | 30.060 | 35.027 | 0.00 | 0.00 |
| ATOM | 4905 | HG21 | VAL | X | 326 | 45.523 | 30.309 | 34.355 | 0.00 | 0.00 |
| ATOM | 4906 | HG22 | VAL | X | 326 | 47.349 | 29.946 | 34.619 | 0.00 | 0.00 |
| ATOM | 4907 | HG23 | VAL | X | 326 | 46.074 | 29.119 | 35.506 | 0.00 | 0.00 |
| ATOM | 4908 | C    | VAL | X | 326 | 48.312 | 32.253 | 34.861 | 0.00 | 0.00 |
| ATOM | 4909 | O    | VAL | X | 326 | 48.460 | 32.281 | 33.619 | 0.00 | 0.00 |
| ATOM | 4910 | N    | VAL | X | 327 | 49.328 | 32.093 | 35.725 | 0.00 | 0.00 |
| ATOM | 4911 | H    | VAL | X | 327 | 49.124 | 32.095 | 36.715 | 0.00 | 0.00 |
| ATOM | 4912 | CA   | VAL | X | 327 | 50.666 | 31.661 | 35.311 | 0.00 | 0.00 |
| ATOM | 4913 | HA   | VAL | X | 327 | 50.853 | 31.919 | 34.268 | 0.00 | 0.00 |
| ATOM | 4914 | CB   | VAL | X | 327 | 51.808 | 32.300 | 36.133 | 0.00 | 0.00 |
| ATOM | 4915 | HB   | VAL | X | 327 | 52.755 | 31.953 | 35.721 | 0.00 | 0.00 |
| ATOM | 4916 | CG1  | VAL | X | 327 | 51.988 | 33.805 | 36.234 | 0.00 | 0.00 |
| ATOM | 4917 | HG11 | VAL | X | 327 | 51.667 | 34.297 | 35.316 | 0.00 | 0.00 |
| ATOM | 4918 | HG12 | VAL | X | 327 | 51.352 | 34.227 | 37.013 | 0.00 | 0.00 |
| ATOM | 4919 | HG13 | VAL | X | 327 | 53.010 | 34.174 | 36.315 | 0.00 | 0.00 |
| ATOM | 4920 | CG2  | VAL | X | 327 | 51.926 | 31.764 | 37.518 | 0.00 | 0.00 |
| ATOM | 4921 | HG21 | VAL | X | 327 | 51.021 | 31.980 | 38.085 | 0.00 | 0.00 |
| ATOM | 4922 | HG22 | VAL | X | 327 | 52.150 | 30.698 | 37.551 | 0.00 | 0.00 |
| ATOM | 4923 | HG23 | VAL | X | 327 | 52.701 | 32.271 | 38.093 | 0.00 | 0.00 |
| ATOM | 4924 | C    | VAL | X | 327 | 50.802 | 30.153 | 35.412 | 0.00 | 0.00 |
| ATOM | 4925 | O    | VAL | X | 327 | 49.930 | 29.449 | 36.051 | 0.00 | 0.00 |
| ATOM | 4926 | N    | LYS | X | 328 | 51.820 | 29.590 | 34.821 | 0.00 | 0.00 |
| ATOM | 4927 | H    | LYS | X | 328 | 52.501 | 30.227 | 34.432 | 0.00 | 0.00 |
| ATOM | 4928 | CA   | LYS | X | 328 | 52.001 | 28.112 | 34.855 | 0.00 | 0.00 |
| ATOM | 4929 | HA   | LYS | X | 328 | 51.089 | 27.861 | 34.313 | 0.00 | 0.00 |
| ATOM | 4930 | CB   | LYS | X | 328 | 53.220 | 27.757 | 34.018 | 0.00 | 0.00 |
| ATOM | 4931 | HB2  | LYS | X | 328 | 53.252 | 28.364 | 33.113 | 0.00 | 0.00 |
| ATOM | 4932 | HB3  | LYS | X | 328 | 54.157 | 27.974 | 34.531 | 0.00 | 0.00 |
| ATOM | 4933 | CG   | LYS | X | 328 | 53.189 | 26.271 | 33.617 | 0.00 | 0.00 |
| ATOM | 4934 | HG2  | LYS | X | 328 | 53.275 | 25.649 | 34.508 | 0.00 | 0.00 |
| ATOM | 4935 | HG3  | LYS | X | 328 | 52.249 | 26.213 | 33.068 | 0.00 | 0.00 |
| ATOM | 4936 | CD   | LYS | X | 328 | 54.391 | 26.083 | 32.681 | 0.00 | 0.00 |
| ATOM | 4937 | HD2  | LYS | X | 328 | 54.102 | 25.255 | 32.033 | 0.00 | 0.00 |
| ATOM | 4938 | HD3  | LYS | X | 328 | 54.510 | 26.940 | 32.018 | 0.00 | 0.00 |
| ATOM | 4939 | CE   | LYS | X | 328 | 55.736 | 25.742 | 33.399 | 0.00 | 0.00 |
| ATOM | 4940 | HE2  | LYS | X | 328 | 56.500 | 25.533 | 32.651 | 0.00 | 0.00 |
| ATOM | 4941 | HE3  | LYS | X | 328 | 56.109 | 26.620 | 33.925 | 0.00 | 0.00 |

|      |      |     |     |   |     |        |        |        |      |      |
|------|------|-----|-----|---|-----|--------|--------|--------|------|------|
| ATOM | 4942 | NZ  | LYS | X | 328 | 55.670 | 24.582 | 34.315 | 0.00 | 0.00 |
| ATOM | 4943 | HZ1 | LYS | X | 328 | 55.203 | 24.824 | 35.177 | 0.00 | 0.00 |
| ATOM | 4944 | HZ2 | LYS | X | 328 | 55.285 | 23.765 | 33.862 | 0.00 | 0.00 |
| ATOM | 4945 | HZ3 | LYS | X | 328 | 56.617 | 24.415 | 34.626 | 0.00 | 0.00 |
| ATOM | 4946 | C   | LYS | X | 328 | 51.921 | 27.547 | 36.294 | 0.00 | 0.00 |
| ATOM | 4947 | O   | LYS | X | 328 | 51.233 | 26.526 | 36.473 | 0.00 | 0.00 |
| ATOM | 4948 | N   | ASP | X | 329 | 52.669 | 28.114 | 37.249 | 0.00 | 0.00 |
| ATOM | 4949 | H   | ASP | X | 329 | 53.331 | 28.820 | 36.959 | 0.00 | 0.00 |
| ATOM | 4950 | CA  | ASP | X | 329 | 52.986 | 27.383 | 38.541 | 0.00 | 0.00 |
| ATOM | 4951 | HA  | ASP | X | 329 | 52.238 | 26.591 | 38.558 | 0.00 | 0.00 |
| ATOM | 4952 | CB  | ASP | X | 329 | 54.458 | 26.799 | 38.501 | 0.00 | 0.00 |
| ATOM | 4953 | HB2 | ASP | X | 329 | 55.228 | 27.528 | 38.751 | 0.00 | 0.00 |
| ATOM | 4954 | HB3 | ASP | X | 329 | 54.428 | 25.996 | 39.238 | 0.00 | 0.00 |
| ATOM | 4955 | CG  | ASP | X | 329 | 54.838 | 26.174 | 37.132 | 0.00 | 0.00 |
| ATOM | 4956 | OD1 | ASP | X | 329 | 54.650 | 24.984 | 36.899 | 0.00 | 0.00 |
| ATOM | 4957 | OD2 | ASP | X | 329 | 55.399 | 26.948 | 36.342 | 0.00 | 0.00 |
| ATOM | 4958 | C   | ASP | X | 329 | 52.672 | 28.184 | 39.763 | 0.00 | 0.00 |
| ATOM | 4959 | O   | ASP | X | 329 | 53.371 | 28.131 | 40.755 | 0.00 | 0.00 |
| ATOM | 4960 | N   | GLU | X | 330 | 51.519 | 28.894 | 39.822 | 0.00 | 0.00 |
| ATOM | 4961 | H   | GLU | X | 330 | 50.944 | 28.790 | 38.999 | 0.00 | 0.00 |
| ATOM | 4962 | CA  | GLU | X | 330 | 50.905 | 29.617 | 40.987 | 0.00 | 0.00 |
| ATOM | 4963 | HA  | GLU | X | 330 | 51.254 | 30.648 | 40.931 | 0.00 | 0.00 |
| ATOM | 4964 | CB  | GLU | X | 330 | 49.376 | 29.660 | 40.839 | 0.00 | 0.00 |
| ATOM | 4965 | HB2 | GLU | X | 330 | 48.936 | 28.665 | 40.779 | 0.00 | 0.00 |
| ATOM | 4966 | HB3 | GLU | X | 330 | 48.936 | 30.142 | 41.712 | 0.00 | 0.00 |
| ATOM | 4967 | CG  | GLU | X | 330 | 48.727 | 30.331 | 39.587 | 0.00 | 0.00 |
| ATOM | 4968 | HG2 | GLU | X | 330 | 49.064 | 29.856 | 38.666 | 0.00 | 0.00 |
| ATOM | 4969 | HG3 | GLU | X | 330 | 47.648 | 30.175 | 39.614 | 0.00 | 0.00 |
| ATOM | 4970 | CD  | GLU | X | 330 | 48.912 | 31.880 | 39.518 | 0.00 | 0.00 |
| ATOM | 4971 | OE1 | GLU | X | 330 | 49.426 | 32.499 | 40.499 | 0.00 | 0.00 |
| ATOM | 4972 | OE2 | GLU | X | 330 | 48.614 | 32.436 | 38.420 | 0.00 | 0.00 |
| ATOM | 4973 | C   | GLU | X | 330 | 51.220 | 29.039 | 42.400 | 0.00 | 0.00 |
| ATOM | 4974 | O   | GLU | X | 330 | 51.441 | 29.876 | 43.321 | 0.00 | 0.00 |
| ATOM | 4975 | N   | GLY | X | 331 | 51.273 | 27.688 | 42.580 | 0.00 | 0.00 |
| ATOM | 4976 | H   | GLY | X | 331 | 51.192 | 27.119 | 41.750 | 0.00 | 0.00 |
| ATOM | 4977 | CA  | GLY | X | 331 | 51.543 | 27.044 | 43.833 | 0.00 | 0.00 |
| ATOM | 4978 | HA2 | GLY | X | 331 | 51.248 | 27.744 | 44.593 | 0.00 | 0.00 |
| ATOM | 4979 | HA3 | GLY | X | 331 | 51.068 | 26.007 | 43.863 | 0.00 | 0.00 |
| ATOM | 4980 | C   | GLY | X | 331 | 52.969 | 26.727 | 44.175 | 0.00 | 0.00 |
| ATOM | 4981 | O   | GLY | X | 331 | 53.191 | 26.316 | 45.308 | 0.00 | 0.00 |
| ATOM | 4982 | N   | SER | X | 332 | 53.944 | 26.928 | 43.269 | 0.00 | 0.00 |
| ATOM | 4983 | H   | SER | X | 332 | 53.677 | 27.184 | 42.330 | 0.00 | 0.00 |
| ATOM | 4984 | CA  | SER | X | 332 | 55.371 | 26.887 | 43.644 | 0.00 | 0.00 |
| ATOM | 4985 | HA  | SER | X | 332 | 55.628 | 25.925 | 44.087 | 0.00 | 0.00 |
| ATOM | 4986 | CB  | SER | X | 332 | 56.234 | 26.977 | 42.337 | 0.00 | 0.00 |
| ATOM | 4987 | HB2 | SER | X | 332 | 56.089 | 27.920 | 41.810 | 0.00 | 0.00 |
| ATOM | 4988 | HB3 | SER | X | 332 | 57.270 | 26.957 | 42.675 | 0.00 | 0.00 |
| ATOM | 4989 | OG  | SER | X | 332 | 56.023 | 25.886 | 41.409 | 0.00 | 0.00 |
| ATOM | 4990 | HG  | SER | X | 332 | 55.640 | 26.254 | 40.609 | 0.00 | 0.00 |
| ATOM | 4991 | C   | SER | X | 332 | 55.785 | 27.965 | 44.665 | 0.00 | 0.00 |
| ATOM | 4992 | O   | SER | X | 332 | 56.340 | 27.671 | 45.700 | 0.00 | 0.00 |
| ATOM | 4993 | N   | TYR | X | 333 | 55.384 | 29.202 | 44.368 | 0.00 | 0.00 |
| ATOM | 4994 | H   | TYR | X | 333 | 54.713 | 29.302 | 43.619 | 0.00 | 0.00 |
| ATOM | 4995 | CA  | TYR | X | 333 | 55.654 | 30.386 | 45.143 | 0.00 | 0.00 |
| ATOM | 4996 | HA  | TYR | X | 333 | 56.693 | 30.710 | 45.089 | 0.00 | 0.00 |
| ATOM | 4997 | CB  | TYR | X | 333 | 54.858 | 31.551 | 44.463 | 0.00 | 0.00 |
| ATOM | 4998 | HB2 | TYR | X | 333 | 55.071 | 31.664 | 43.400 | 0.00 | 0.00 |
| ATOM | 4999 | HB3 | TYR | X | 333 | 53.802 | 31.287 | 44.534 | 0.00 | 0.00 |
| ATOM | 5000 | CG  | TYR | X | 333 | 55.118 | 32.946 | 45.022 | 0.00 | 0.00 |
| ATOM | 5001 | CD1 | TYR | X | 333 | 56.329 | 33.616 | 44.705 | 0.00 | 0.00 |
| ATOM | 5002 | HD1 | TYR | X | 333 | 57.051 | 33.112 | 44.080 | 0.00 | 0.00 |
| ATOM | 5003 | CE1 | TYR | X | 333 | 56.501 | 34.943 | 45.123 | 0.00 | 0.00 |
| ATOM | 5004 | HE1 | TYR | X | 333 | 57.373 | 35.484 | 44.786 | 0.00 | 0.00 |
| ATOM | 5005 | CZ  | TYR | X | 333 | 55.557 | 35.610 | 45.830 | 0.00 | 0.00 |
| ATOM | 5006 | OH  | TYR | X | 333 | 55.791 | 36.866 | 46.194 | 0.00 | 0.00 |
| ATOM | 5007 | HH  | TYR | X | 333 | 56.438 | 37.322 | 45.650 | 0.00 | 0.00 |
| ATOM | 5008 | CE2 | TYR | X | 333 | 54.359 | 34.923 | 46.197 | 0.00 | 0.00 |
| ATOM | 5009 | HE2 | TYR | X | 333 | 53.688 | 35.459 | 46.853 | 0.00 | 0.00 |
| ATOM | 5010 | CD2 | TYR | X | 333 | 54.187 | 33.549 | 45.860 | 0.00 | 0.00 |
| ATOM | 5011 | HD2 | TYR | X | 333 | 53.280 | 33.050 | 46.169 | 0.00 | 0.00 |

|      |      |      |     |   |     |        |        |        |      |      |
|------|------|------|-----|---|-----|--------|--------|--------|------|------|
| ATOM | 5012 | C    | TYR | X | 333 | 55.289 | 30.329 | 46.607 | 0.00 | 0.00 |
| ATOM | 5013 | O    | TYR | X | 333 | 56.168 | 30.663 | 47.377 | 0.00 | 0.00 |
| ATOM | 5014 | N    | PHE | X | 334 | 54.038 | 29.976 | 46.999 | 0.00 | 0.00 |
| ATOM | 5015 | H    | PHE | X | 334 | 53.338 | 29.781 | 46.297 | 0.00 | 0.00 |
| ATOM | 5016 | CA   | PHE | X | 334 | 53.750 | 29.873 | 48.467 | 0.00 | 0.00 |
| ATOM | 5017 | HA   | PHE | X | 334 | 54.151 | 30.789 | 48.901 | 0.00 | 0.00 |
| ATOM | 5018 | CB   | PHE | X | 334 | 52.247 | 29.983 | 48.732 | 0.00 | 0.00 |
| ATOM | 5019 | HB2  | PHE | X | 334 | 51.790 | 29.180 | 48.155 | 0.00 | 0.00 |
| ATOM | 5020 | HB3  | PHE | X | 334 | 52.021 | 29.795 | 49.782 | 0.00 | 0.00 |
| ATOM | 5021 | CG   | PHE | X | 334 | 51.676 | 31.335 | 48.370 | 0.00 | 0.00 |
| ATOM | 5022 | CD1  | PHE | X | 334 | 51.043 | 31.560 | 47.156 | 0.00 | 0.00 |
| ATOM | 5023 | HD1  | PHE | X | 334 | 50.943 | 30.701 | 46.508 | 0.00 | 0.00 |
| ATOM | 5024 | CE1  | PHE | X | 334 | 50.439 | 32.779 | 46.850 | 0.00 | 0.00 |
| ATOM | 5025 | HE1  | PHE | X | 334 | 50.061 | 32.946 | 45.852 | 0.00 | 0.00 |
| ATOM | 5026 | CZ   | PHE | X | 334 | 50.469 | 33.829 | 47.763 | 0.00 | 0.00 |
| ATOM | 5027 | HZ   | PHE | X | 334 | 50.050 | 34.751 | 47.386 | 0.00 | 0.00 |
| ATOM | 5028 | CE2  | PHE | X | 334 | 51.095 | 33.671 | 49.005 | 0.00 | 0.00 |
| ATOM | 5029 | HE2  | PHE | X | 334 | 51.242 | 34.479 | 49.706 | 0.00 | 0.00 |
| ATOM | 5030 | CD2  | PHE | X | 334 | 51.722 | 32.421 | 49.297 | 0.00 | 0.00 |
| ATOM | 5031 | HD2  | PHE | X | 334 | 52.263 | 32.391 | 50.232 | 0.00 | 0.00 |
| ATOM | 5032 | C    | PHE | X | 334 | 54.421 | 28.707 | 49.154 | 0.00 | 0.00 |
| ATOM | 5033 | O    | PHE | X | 334 | 54.692 | 28.876 | 50.395 | 0.00 | 0.00 |
| ATOM | 5034 | N    | LEU | X | 335 | 54.798 | 27.600 | 48.496 | 0.00 | 0.00 |
| ATOM | 5035 | H    | LEU | X | 335 | 54.592 | 27.519 | 47.510 | 0.00 | 0.00 |
| ATOM | 5036 | CA   | LEU | X | 335 | 55.541 | 26.432 | 49.050 | 0.00 | 0.00 |
| ATOM | 5037 | HA   | LEU | X | 335 | 54.989 | 25.972 | 49.869 | 0.00 | 0.00 |
| ATOM | 5038 | CB   | LEU | X | 335 | 55.764 | 25.294 | 48.059 | 0.00 | 0.00 |
| ATOM | 5039 | HB2  | LEU | X | 335 | 55.777 | 25.751 | 47.069 | 0.00 | 0.00 |
| ATOM | 5040 | HB3  | LEU | X | 335 | 56.692 | 24.775 | 48.298 | 0.00 | 0.00 |
| ATOM | 5041 | CG   | LEU | X | 335 | 54.568 | 24.278 | 48.047 | 0.00 | 0.00 |
| ATOM | 5042 | HG   | LEU | X | 335 | 53.599 | 24.756 | 47.898 | 0.00 | 0.00 |
| ATOM | 5043 | CD1  | LEU | X | 335 | 54.667 | 23.418 | 46.742 | 0.00 | 0.00 |
| ATOM | 5044 | HD11 | LEU | X | 335 | 55.429 | 22.644 | 46.830 | 0.00 | 0.00 |
| ATOM | 5045 | HD12 | LEU | X | 335 | 53.681 | 23.032 | 46.483 | 0.00 | 0.00 |
| ATOM | 5046 | HD13 | LEU | X | 335 | 55.002 | 24.134 | 45.991 | 0.00 | 0.00 |
| ATOM | 5047 | CD2  | LEU | X | 335 | 54.428 | 23.465 | 49.241 | 0.00 | 0.00 |
| ATOM | 5048 | HD21 | LEU | X | 335 | 53.590 | 22.786 | 49.083 | 0.00 | 0.00 |
| ATOM | 5049 | HD22 | LEU | X | 335 | 55.346 | 22.903 | 49.415 | 0.00 | 0.00 |
| ATOM | 5050 | HD23 | LEU | X | 335 | 54.456 | 24.064 | 50.152 | 0.00 | 0.00 |
| ATOM | 5051 | C    | LEU | X | 335 | 56.901 | 26.974 | 49.583 | 0.00 | 0.00 |
| ATOM | 5052 | O    | LEU | X | 335 | 57.167 | 26.737 | 50.733 | 0.00 | 0.00 |
| ATOM | 5053 | N    | VAL | X | 336 | 57.711 | 27.620 | 48.764 | 0.00 | 0.00 |
| ATOM | 5054 | H    | VAL | X | 336 | 57.451 | 27.678 | 47.790 | 0.00 | 0.00 |
| ATOM | 5055 | CA   | VAL | X | 336 | 58.998 | 28.321 | 49.218 | 0.00 | 0.00 |
| ATOM | 5056 | HA   | VAL | X | 336 | 59.585 | 27.534 | 49.692 | 0.00 | 0.00 |
| ATOM | 5057 | CB   | VAL | X | 336 | 59.907 | 28.758 | 48.019 | 0.00 | 0.00 |
| ATOM | 5058 | HB   | VAL | X | 336 | 60.835 | 29.097 | 48.478 | 0.00 | 0.00 |
| ATOM | 5059 | CG1  | VAL | X | 336 | 60.273 | 27.595 | 47.135 | 0.00 | 0.00 |
| ATOM | 5060 | HG11 | VAL | X | 336 | 60.755 | 26.797 | 47.700 | 0.00 | 0.00 |
| ATOM | 5061 | HG12 | VAL | X | 336 | 59.440 | 27.161 | 46.582 | 0.00 | 0.00 |
| ATOM | 5062 | HG13 | VAL | X | 336 | 60.988 | 27.817 | 46.343 | 0.00 | 0.00 |
| ATOM | 5063 | CG2  | VAL | X | 336 | 59.246 | 29.914 | 47.264 | 0.00 | 0.00 |
| ATOM | 5064 | HG21 | VAL | X | 336 | 58.290 | 29.688 | 46.792 | 0.00 | 0.00 |
| ATOM | 5065 | HG22 | VAL | X | 336 | 59.136 | 30.782 | 47.914 | 0.00 | 0.00 |
| ATOM | 5066 | HG23 | VAL | X | 336 | 60.118 | 30.142 | 46.650 | 0.00 | 0.00 |
| ATOM | 5067 | C    | VAL | X | 336 | 58.786 | 29.408 | 50.264 | 0.00 | 0.00 |
| ATOM | 5068 | O    | VAL | X | 336 | 59.746 | 30.089 | 50.655 | 0.00 | 0.00 |
| ATOM | 5069 | N    | TYR | X | 337 | 57.547 | 29.623 | 50.803 | 0.00 | 0.00 |
| ATOM | 5070 | H    | TYR | X | 337 | 56.739 | 29.244 | 50.330 | 0.00 | 0.00 |
| ATOM | 5071 | CA   | TYR | X | 337 | 57.126 | 30.722 | 51.671 | 0.00 | 0.00 |
| ATOM | 5072 | HA   | TYR | X | 337 | 58.058 | 31.160 | 52.028 | 0.00 | 0.00 |
| ATOM | 5073 | CB   | TYR | X | 337 | 56.452 | 31.735 | 50.759 | 0.00 | 0.00 |
| ATOM | 5074 | HB2  | TYR | X | 337 | 56.717 | 31.357 | 49.771 | 0.00 | 0.00 |
| ATOM | 5075 | HB3  | TYR | X | 337 | 55.369 | 31.754 | 50.880 | 0.00 | 0.00 |
| ATOM | 5076 | CG   | TYR | X | 337 | 57.067 | 33.107 | 50.778 | 0.00 | 0.00 |
| ATOM | 5077 | CD1  | TYR | X | 337 | 57.324 | 33.793 | 51.992 | 0.00 | 0.00 |
| ATOM | 5078 | HD1  | TYR | X | 337 | 57.248 | 33.431 | 53.006 | 0.00 | 0.00 |
| ATOM | 5079 | CE1  | TYR | X | 337 | 57.985 | 35.036 | 51.936 | 0.00 | 0.00 |
| ATOM | 5080 | HE1  | TYR | X | 337 | 58.265 | 35.487 | 52.877 | 0.00 | 0.00 |
| ATOM | 5081 | CZ   | TYR | X | 337 | 58.188 | 35.711 | 50.734 | 0.00 | 0.00 |



|      |      |     |     |   |     |        |        |        |      |      |
|------|------|-----|-----|---|-----|--------|--------|--------|------|------|
| ATOM | 5082 | OH  | TYR | X | 337 | 58.914 | 36.816 | 50.828 | 0.00 | 0.00 |
| ATOM | 5083 | HH  | TYR | X | 337 | 59.126 | 37.105 | 51.718 | 0.00 | 0.00 |
| ATOM | 5084 | CE2 | TYR | X | 337 | 57.890 | 35.044 | 49.537 | 0.00 | 0.00 |
| ATOM | 5085 | HE2 | TYR | X | 337 | 58.189 | 35.478 | 48.594 | 0.00 | 0.00 |
| ATOM | 5086 | CD2 | TYR | X | 337 | 57.222 | 33.811 | 49.585 | 0.00 | 0.00 |
| ATOM | 5087 | HD2 | TYR | X | 337 | 56.916 | 33.277 | 48.698 | 0.00 | 0.00 |
| ATOM | 5088 | C   | TYR | X | 337 | 56.275 | 30.313 | 52.950 | 0.00 | 0.00 |
| ATOM | 5089 | O   | TYR | X | 337 | 55.883 | 31.142 | 53.735 | 0.00 | 0.00 |
| ATOM | 5090 | N   | GLY | X | 338 | 55.987 | 28.987 | 53.037 | 0.00 | 0.00 |
| ATOM | 5091 | H   | GLY | X | 338 | 56.249 | 28.351 | 52.297 | 0.00 | 0.00 |
| ATOM | 5092 | CA  | GLY | X | 338 | 54.970 | 28.504 | 53.975 | 0.00 | 0.00 |
| ATOM | 5093 | HA2 | GLY | X | 338 | 55.142 | 28.971 | 54.971 | 0.00 | 0.00 |
| ATOM | 5094 | HA3 | GLY | X | 338 | 53.990 | 28.924 | 53.607 | 0.00 | 0.00 |
| ATOM | 5095 | C   | GLY | X | 338 | 54.810 | 27.018 | 54.191 | 0.00 | 0.00 |
| ATOM | 5096 | O   | GLY | X | 338 | 54.041 | 26.649 | 55.092 | 0.00 | 0.00 |
| ATOM | 5097 | N   | ALA | X | 339 | 55.499 | 26.135 | 53.477 | 0.00 | 0.00 |
| ATOM | 5098 | H   | ALA | X | 339 | 56.117 | 26.543 | 52.791 | 0.00 | 0.00 |
| ATOM | 5099 | CA  | ALA | X | 339 | 55.658 | 24.792 | 53.923 | 0.00 | 0.00 |
| ATOM | 5100 | HA  | ALA | X | 339 | 54.943 | 24.631 | 54.729 | 0.00 | 0.00 |
| ATOM | 5101 | CB  | ALA | X | 339 | 55.497 | 23.782 | 52.857 | 0.00 | 0.00 |
| ATOM | 5102 | HB1 | ALA | X | 339 | 56.242 | 23.911 | 52.071 | 0.00 | 0.00 |
| ATOM | 5103 | HB2 | ALA | X | 339 | 55.623 | 22.818 | 53.350 | 0.00 | 0.00 |
| ATOM | 5104 | HB3 | ALA | X | 339 | 54.510 | 23.750 | 52.397 | 0.00 | 0.00 |
| ATOM | 5105 | C   | ALA | X | 339 | 56.988 | 24.674 | 54.601 | 0.00 | 0.00 |
| ATOM | 5106 | O   | ALA | X | 339 | 57.944 | 25.240 | 54.156 | 0.00 | 0.00 |
| ATOM | 5107 | N   | PRO | X | 340 | 57.077 | 23.922 | 55.721 | 0.00 | 0.00 |
| ATOM | 5108 | CD  | PRO | X | 340 | 56.076 | 23.295 | 56.505 | 0.00 | 0.00 |
| ATOM | 5109 | HD2 | PRO | X | 340 | 55.333 | 22.762 | 55.912 | 0.00 | 0.00 |
| ATOM | 5110 | HD3 | PRO | X | 340 | 55.598 | 24.119 | 57.035 | 0.00 | 0.00 |
| ATOM | 5111 | CG  | PRO | X | 340 | 56.774 | 22.268 | 57.447 | 0.00 | 0.00 |
| ATOM | 5112 | HG2 | PRO | X | 340 | 56.684 | 21.299 | 56.957 | 0.00 | 0.00 |
| ATOM | 5113 | HG3 | PRO | X | 340 | 56.320 | 22.131 | 58.428 | 0.00 | 0.00 |
| ATOM | 5114 | CB  | PRO | X | 340 | 58.163 | 22.795 | 57.554 | 0.00 | 0.00 |
| ATOM | 5115 | HB2 | PRO | X | 340 | 58.927 | 22.019 | 57.545 | 0.00 | 0.00 |
| ATOM | 5116 | HB3 | PRO | X | 340 | 58.284 | 23.478 | 58.396 | 0.00 | 0.00 |
| ATOM | 5117 | CA  | PRO | X | 340 | 58.370 | 23.539 | 56.299 | 0.00 | 0.00 |
| ATOM | 5118 | HA  | PRO | X | 340 | 58.853 | 24.498 | 56.484 | 0.00 | 0.00 |
| ATOM | 5119 | C   | PRO | X | 340 | 59.218 | 22.765 | 55.288 | 0.00 | 0.00 |
| ATOM | 5120 | O   | PRO | X | 340 | 58.699 | 22.075 | 54.384 | 0.00 | 0.00 |
| ATOM | 5121 | N   | GLY | X | 341 | 60.586 | 22.867 | 55.299 | 0.00 | 0.00 |
| ATOM | 5122 | H   | GLY | X | 341 | 60.962 | 23.280 | 56.140 | 0.00 | 0.00 |
| ATOM | 5123 | CA  | GLY | X | 341 | 61.534 | 22.281 | 54.422 | 0.00 | 0.00 |
| ATOM | 5124 | HA2 | GLY | X | 341 | 62.496 | 22.284 | 54.919 | 0.00 | 0.00 |
| ATOM | 5125 | HA3 | GLY | X | 341 | 61.368 | 21.243 | 54.341 | 0.00 | 0.00 |
| ATOM | 5126 | C   | GLY | X | 341 | 61.692 | 22.946 | 53.045 | 0.00 | 0.00 |
| ATOM | 5127 | O   | GLY | X | 341 | 62.777 | 23.231 | 52.550 | 0.00 | 0.00 |
| ATOM | 5128 | N   | PHE | X | 342 | 60.592 | 23.292 | 52.360 | 0.00 | 0.00 |
| ATOM | 5129 | H   | PHE | X | 342 | 59.704 | 22.913 | 52.656 | 0.00 | 0.00 |
| ATOM | 5130 | CA  | PHE | X | 342 | 60.533 | 24.059 | 51.142 | 0.00 | 0.00 |
| ATOM | 5131 | HA  | PHE | X | 342 | 61.064 | 23.488 | 50.381 | 0.00 | 0.00 |
| ATOM | 5132 | CB  | PHE | X | 342 | 59.122 | 24.309 | 50.668 | 0.00 | 0.00 |
| ATOM | 5133 | HB2 | PHE | X | 342 | 58.609 | 24.605 | 51.584 | 0.00 | 0.00 |
| ATOM | 5134 | HB3 | PHE | X | 342 | 59.103 | 25.178 | 50.011 | 0.00 | 0.00 |
| ATOM | 5135 | CG  | PHE | X | 342 | 58.407 | 23.131 | 50.062 | 0.00 | 0.00 |
| ATOM | 5136 | CD1 | PHE | X | 342 | 58.476 | 22.972 | 48.695 | 0.00 | 0.00 |
| ATOM | 5137 | HD1 | PHE | X | 342 | 59.031 | 23.709 | 48.133 | 0.00 | 0.00 |
| ATOM | 5138 | CE1 | PHE | X | 342 | 57.962 | 21.893 | 48.020 | 0.00 | 0.00 |
| ATOM | 5139 | HE1 | PHE | X | 342 | 57.956 | 21.877 | 46.940 | 0.00 | 0.00 |
| ATOM | 5140 | CZ  | PHE | X | 342 | 57.314 | 20.931 | 48.800 | 0.00 | 0.00 |
| ATOM | 5141 | HZ  | PHE | X | 342 | 56.816 | 20.128 | 48.277 | 0.00 | 0.00 |
| ATOM | 5142 | CE2 | PHE | X | 342 | 57.254 | 21.014 | 50.182 | 0.00 | 0.00 |
| ATOM | 5143 | HE2 | PHE | X | 342 | 56.637 | 20.300 | 50.707 | 0.00 | 0.00 |
| ATOM | 5144 | CD2 | PHE | X | 342 | 57.828 | 22.120 | 50.826 | 0.00 | 0.00 |
| ATOM | 5145 | HD2 | PHE | X | 342 | 57.651 | 22.317 | 51.873 | 0.00 | 0.00 |
| ATOM | 5146 | C   | PHE | X | 342 | 61.254 | 25.365 | 51.267 | 0.00 | 0.00 |
| ATOM | 5147 | O   | PHE | X | 342 | 61.076 | 26.141 | 52.201 | 0.00 | 0.00 |
| ATOM | 5148 | N   | SER | X | 343 | 62.098 | 25.728 | 50.291 | 0.00 | 0.00 |
| ATOM | 5149 | H   | SER | X | 343 | 62.309 | 25.124 | 49.510 | 0.00 | 0.00 |
| ATOM | 5150 | CA  | SER | X | 343 | 62.737 | 27.078 | 50.231 | 0.00 | 0.00 |
| ATOM | 5151 | HA  | SER | X | 343 | 62.004 | 27.872 | 50.380 | 0.00 | 0.00 |

|      |      |      |     |   |     |        |        |        |      |      |
|------|------|------|-----|---|-----|--------|--------|--------|------|------|
| ATOM | 5152 | CB   | SER | X | 343 | 63.947 | 27.188 | 51.222 | 0.00 | 0.00 |
| ATOM | 5153 | HB2  | SER | X | 343 | 63.740 | 26.676 | 52.161 | 0.00 | 0.00 |
| ATOM | 5154 | HB3  | SER | X | 343 | 64.877 | 26.804 | 50.802 | 0.00 | 0.00 |
| ATOM | 5155 | OG   | SER | X | 343 | 63.984 | 28.561 | 51.461 | 0.00 | 0.00 |
| ATOM | 5156 | HG   | SER | X | 343 | 64.376 | 28.707 | 52.326 | 0.00 | 0.00 |
| ATOM | 5157 | C    | SER | X | 343 | 63.383 | 27.320 | 48.856 | 0.00 | 0.00 |
| ATOM | 5158 | O    | SER | X | 343 | 63.582 | 26.360 | 48.122 | 0.00 | 0.00 |
| ATOM | 5159 | N    | LYS | X | 344 | 63.654 | 28.560 | 48.408 | 0.00 | 0.00 |
| ATOM | 5160 | H    | LYS | X | 344 | 63.490 | 29.382 | 48.972 | 0.00 | 0.00 |
| ATOM | 5161 | CA   | LYS | X | 344 | 64.438 | 28.661 | 47.151 | 0.00 | 0.00 |
| ATOM | 5162 | HA   | LYS | X | 344 | 63.933 | 28.075 | 46.384 | 0.00 | 0.00 |
| ATOM | 5163 | CB   | LYS | X | 344 | 64.438 | 30.083 | 46.571 | 0.00 | 0.00 |
| ATOM | 5164 | HB2  | LYS | X | 344 | 64.763 | 30.177 | 45.535 | 0.00 | 0.00 |
| ATOM | 5165 | HB3  | LYS | X | 344 | 63.409 | 30.430 | 46.473 | 0.00 | 0.00 |
| ATOM | 5166 | CG   | LYS | X | 344 | 65.375 | 31.046 | 47.309 | 0.00 | 0.00 |
| ATOM | 5167 | HG2  | LYS | X | 344 | 65.040 | 31.108 | 48.345 | 0.00 | 0.00 |
| ATOM | 5168 | HG3  | LYS | X | 344 | 66.384 | 30.632 | 47.298 | 0.00 | 0.00 |
| ATOM | 5169 | CD   | LYS | X | 344 | 65.333 | 32.405 | 46.708 | 0.00 | 0.00 |
| ATOM | 5170 | HD2  | LYS | X | 344 | 65.267 | 32.413 | 45.620 | 0.00 | 0.00 |
| ATOM | 5171 | HD3  | LYS | X | 344 | 64.475 | 32.890 | 47.172 | 0.00 | 0.00 |
| ATOM | 5172 | CE   | LYS | X | 344 | 66.514 | 33.331 | 47.128 | 0.00 | 0.00 |
| ATOM | 5173 | HE2  | LYS | X | 344 | 66.355 | 34.351 | 46.778 | 0.00 | 0.00 |
| ATOM | 5174 | HE3  | LYS | X | 344 | 66.567 | 33.451 | 48.210 | 0.00 | 0.00 |
| ATOM | 5175 | NZ   | LYS | X | 344 | 67.726 | 32.779 | 46.597 | 0.00 | 0.00 |
| ATOM | 5176 | HZ1  | LYS | X | 344 | 67.799 | 32.805 | 45.590 | 0.00 | 0.00 |
| ATOM | 5177 | HZ2  | LYS | X | 344 | 68.465 | 33.385 | 46.924 | 0.00 | 0.00 |
| ATOM | 5178 | HZ3  | LYS | X | 344 | 67.985 | 31.857 | 46.920 | 0.00 | 0.00 |
| ATOM | 5179 | C    | LYS | X | 344 | 65.924 | 28.103 | 47.194 | 0.00 | 0.00 |
| ATOM | 5180 | O    | LYS | X | 344 | 66.502 | 27.743 | 46.141 | 0.00 | 0.00 |
| ATOM | 5181 | N    | ASP | X | 345 | 66.448 | 28.016 | 48.450 | 0.00 | 0.00 |
| ATOM | 5182 | H    | ASP | X | 345 | 65.950 | 28.552 | 49.147 | 0.00 | 0.00 |
| ATOM | 5183 | CA   | ASP | X | 345 | 67.755 | 27.360 | 48.848 | 0.00 | 0.00 |
| ATOM | 5184 | HA   | ASP | X | 345 | 68.550 | 27.882 | 48.316 | 0.00 | 0.00 |
| ATOM | 5185 | CB   | ASP | X | 345 | 67.823 | 27.588 | 50.372 | 0.00 | 0.00 |
| ATOM | 5186 | HB2  | ASP | X | 345 | 67.651 | 28.627 | 50.655 | 0.00 | 0.00 |
| ATOM | 5187 | HB3  | ASP | X | 345 | 67.073 | 26.908 | 50.775 | 0.00 | 0.00 |
| ATOM | 5188 | CG   | ASP | X | 345 | 69.214 | 27.292 | 50.969 | 0.00 | 0.00 |
| ATOM | 5189 | OD1  | ASP | X | 345 | 69.511 | 26.089 | 51.301 | 0.00 | 0.00 |
| ATOM | 5190 | OD2  | ASP | X | 345 | 70.084 | 28.132 | 50.920 | 0.00 | 0.00 |
| ATOM | 5191 | C    | ASP | X | 345 | 67.868 | 25.855 | 48.566 | 0.00 | 0.00 |
| ATOM | 5192 | O    | ASP | X | 345 | 69.047 | 25.332 | 48.465 | 0.00 | 0.00 |
| ATOM | 5193 | N    | ASN | X | 346 | 66.717 | 25.114 | 48.476 | 0.00 | 0.00 |
| ATOM | 5194 | H    | ASN | X | 346 | 65.851 | 25.631 | 48.429 | 0.00 | 0.00 |
| ATOM | 5195 | CA   | ASN | X | 346 | 66.724 | 23.694 | 48.281 | 0.00 | 0.00 |
| ATOM | 5196 | HA   | ASN | X | 346 | 67.708 | 23.246 | 48.141 | 0.00 | 0.00 |
| ATOM | 5197 | CB   | ASN | X | 346 | 66.097 | 23.135 | 49.644 | 0.00 | 0.00 |
| ATOM | 5198 | HB2  | ASN | X | 346 | 66.649 | 23.533 | 50.496 | 0.00 | 0.00 |
| ATOM | 5199 | HB3  | ASN | X | 346 | 65.058 | 23.455 | 49.735 | 0.00 | 0.00 |
| ATOM | 5200 | CG   | ASN | X | 346 | 66.219 | 21.660 | 49.610 | 0.00 | 0.00 |
| ATOM | 5201 | OD1  | ASN | X | 346 | 65.232 | 20.978 | 49.449 | 0.00 | 0.00 |
| ATOM | 5202 | ND2  | ASN | X | 346 | 67.455 | 21.047 | 49.578 | 0.00 | 0.00 |
| ATOM | 5203 | HD21 | ASN | X | 346 | 67.529 | 20.044 | 49.479 | 0.00 | 0.00 |
| ATOM | 5204 | HD22 | ASN | X | 346 | 68.305 | 21.591 | 49.605 | 0.00 | 0.00 |
| ATOM | 5205 | C    | ASN | X | 346 | 65.774 | 23.276 | 47.118 | 0.00 | 0.00 |
| ATOM | 5206 | O    | ASN | X | 346 | 64.714 | 23.785 | 46.918 | 0.00 | 0.00 |
| ATOM | 5207 | N    | GLU | X | 347 | 66.197 | 22.243 | 46.365 | 0.00 | 0.00 |
| ATOM | 5208 | H    | GLU | X | 347 | 67.067 | 21.756 | 46.523 | 0.00 | 0.00 |
| ATOM | 5209 | CA   | GLU | X | 347 | 65.391 | 21.666 | 45.271 | 0.00 | 0.00 |
| ATOM | 5210 | HA   | GLU | X | 347 | 65.177 | 22.467 | 44.564 | 0.00 | 0.00 |
| ATOM | 5211 | CB   | GLU | X | 347 | 66.099 | 20.639 | 44.327 | 0.00 | 0.00 |
| ATOM | 5212 | HB2  | GLU | X | 347 | 66.366 | 19.791 | 44.957 | 0.00 | 0.00 |
| ATOM | 5213 | HB3  | GLU | X | 347 | 65.422 | 20.278 | 43.553 | 0.00 | 0.00 |
| ATOM | 5214 | CG   | GLU | X | 347 | 67.425 | 21.199 | 43.589 | 0.00 | 0.00 |
| ATOM | 5215 | HG2  | GLU | X | 347 | 67.765 | 20.273 | 43.124 | 0.00 | 0.00 |
| ATOM | 5216 | HG3  | GLU | X | 347 | 67.199 | 22.032 | 42.922 | 0.00 | 0.00 |
| ATOM | 5217 | CD   | GLU | X | 347 | 68.576 | 21.661 | 44.526 | 0.00 | 0.00 |
| ATOM | 5218 | OE1  | GLU | X | 347 | 68.662 | 21.318 | 45.708 | 0.00 | 0.00 |
| ATOM | 5219 | OE2  | GLU | X | 347 | 69.288 | 22.624 | 44.090 | 0.00 | 0.00 |
| ATOM | 5220 | C    | GLU | X | 347 | 64.009 | 21.117 | 45.740 | 0.00 | 0.00 |
| ATOM | 5221 | O    | GLU | X | 347 | 63.133 | 20.897 | 44.937 | 0.00 | 0.00 |

|      |      |      |     |   |     |        |        |        |      |      |
|------|------|------|-----|---|-----|--------|--------|--------|------|------|
| ATOM | 5222 | N    | SER | X | 348 | 63.796 | 20.886 | 47.005 | 0.00 | 0.00 |
| ATOM | 5223 | H    | SER | X | 348 | 64.559 | 20.833 | 47.665 | 0.00 | 0.00 |
| ATOM | 5224 | CA   | SER | X | 348 | 62.469 | 20.696 | 47.621 | 0.00 | 0.00 |
| ATOM | 5225 | HA   | SER | X | 348 | 62.596 | 20.668 | 48.703 | 0.00 | 0.00 |
| ATOM | 5226 | CB   | SER | X | 348 | 61.660 | 21.983 | 47.371 | 0.00 | 0.00 |
| ATOM | 5227 | HB2  | SER | X | 348 | 61.650 | 22.142 | 46.293 | 0.00 | 0.00 |
| ATOM | 5228 | HB3  | SER | X | 348 | 60.613 | 21.834 | 47.637 | 0.00 | 0.00 |
| ATOM | 5229 | OG   | SER | X | 348 | 62.093 | 23.178 | 47.950 | 0.00 | 0.00 |
| ATOM | 5230 | HG   | SER | X | 348 | 62.833 | 23.547 | 47.462 | 0.00 | 0.00 |
| ATOM | 5231 | C    | SER | X | 348 | 61.706 | 19.394 | 47.249 | 0.00 | 0.00 |
| ATOM | 5232 | O    | SER | X | 348 | 60.505 | 19.299 | 47.219 | 0.00 | 0.00 |
| ATOM | 5233 | N    | LEU | X | 349 | 62.422 | 18.347 | 46.952 | 0.00 | 0.00 |
| ATOM | 5234 | H    | LEU | X | 349 | 63.423 | 18.410 | 46.836 | 0.00 | 0.00 |
| ATOM | 5235 | CA   | LEU | X | 349 | 61.845 | 16.964 | 46.771 | 0.00 | 0.00 |
| ATOM | 5236 | HA   | LEU | X | 349 | 61.156 | 17.028 | 45.928 | 0.00 | 0.00 |
| ATOM | 5237 | CB   | LEU | X | 349 | 62.946 | 16.046 | 46.322 | 0.00 | 0.00 |
| ATOM | 5238 | HB2  | LEU | X | 349 | 63.569 | 15.980 | 47.214 | 0.00 | 0.00 |
| ATOM | 5239 | HB3  | LEU | X | 349 | 62.602 | 15.026 | 46.152 | 0.00 | 0.00 |
| ATOM | 5240 | CG   | LEU | X | 349 | 63.842 | 16.416 | 45.113 | 0.00 | 0.00 |
| ATOM | 5241 | HG   | LEU | X | 349 | 64.147 | 17.452 | 45.260 | 0.00 | 0.00 |
| ATOM | 5242 | CD1  | LEU | X | 349 | 65.079 | 15.488 | 45.147 | 0.00 | 0.00 |
| ATOM | 5243 | HD11 | LEU | X | 349 | 65.825 | 15.833 | 44.431 | 0.00 | 0.00 |
| ATOM | 5244 | HD12 | LEU | X | 349 | 65.513 | 15.495 | 46.147 | 0.00 | 0.00 |
| ATOM | 5245 | HD13 | LEU | X | 349 | 64.743 | 14.472 | 44.940 | 0.00 | 0.00 |
| ATOM | 5246 | CD2  | LEU | X | 349 | 63.212 | 16.357 | 43.670 | 0.00 | 0.00 |
| ATOM | 5247 | HD21 | LEU | X | 349 | 62.699 | 15.413 | 43.489 | 0.00 | 0.00 |
| ATOM | 5248 | HD22 | LEU | X | 349 | 62.381 | 17.031 | 43.462 | 0.00 | 0.00 |
| ATOM | 5249 | HD23 | LEU | X | 349 | 63.978 | 16.380 | 42.894 | 0.00 | 0.00 |
| ATOM | 5250 | C    | LEU | X | 349 | 61.112 | 16.434 | 48.003 | 0.00 | 0.00 |
| ATOM | 5251 | O    | LEU | X | 349 | 61.501 | 16.754 | 49.132 | 0.00 | 0.00 |
| ATOM | 5252 | N    | ILE | X | 350 | 60.163 | 15.513 | 47.774 | 0.00 | 0.00 |
| ATOM | 5253 | H    | ILE | X | 350 | 59.866 | 15.356 | 46.821 | 0.00 | 0.00 |
| ATOM | 5254 | CA   | ILE | X | 350 | 59.135 | 15.111 | 48.819 | 0.00 | 0.00 |
| ATOM | 5255 | HA   | ILE | X | 350 | 59.636 | 15.132 | 49.787 | 0.00 | 0.00 |
| ATOM | 5256 | CB   | ILE | X | 350 | 57.907 | 16.057 | 48.923 | 0.00 | 0.00 |
| ATOM | 5257 | HB   | ILE | X | 350 | 57.114 | 15.595 | 49.511 | 0.00 | 0.00 |
| ATOM | 5258 | CG2  | ILE | X | 350 | 58.367 | 17.404 | 49.515 | 0.00 | 0.00 |
| ATOM | 5259 | HG21 | ILE | X | 350 | 58.989 | 17.915 | 48.780 | 0.00 | 0.00 |
| ATOM | 5260 | HG22 | ILE | X | 350 | 57.480 | 18.037 | 49.564 | 0.00 | 0.00 |
| ATOM | 5261 | HG23 | ILE | X | 350 | 58.924 | 17.184 | 50.425 | 0.00 | 0.00 |
| ATOM | 5262 | CG1  | ILE | X | 350 | 57.299 | 16.334 | 47.578 | 0.00 | 0.00 |
| ATOM | 5263 | HG12 | ILE | X | 350 | 57.843 | 17.095 | 47.019 | 0.00 | 0.00 |
| ATOM | 5264 | HG13 | ILE | X | 350 | 57.223 | 15.437 | 46.963 | 0.00 | 0.00 |
| ATOM | 5265 | CD1  | ILE | X | 350 | 55.796 | 16.778 | 47.746 | 0.00 | 0.00 |
| ATOM | 5266 | HD11 | ILE | X | 350 | 55.296 | 15.947 | 48.244 | 0.00 | 0.00 |
| ATOM | 5267 | HD12 | ILE | X | 350 | 55.639 | 17.667 | 48.357 | 0.00 | 0.00 |
| ATOM | 5268 | HD13 | ILE | X | 350 | 55.297 | 17.037 | 46.812 | 0.00 | 0.00 |
| ATOM | 5269 | C    | ILE | X | 350 | 58.707 | 13.632 | 48.621 | 0.00 | 0.00 |
| ATOM | 5270 | O    | ILE | X | 350 | 58.426 | 13.132 | 47.520 | 0.00 | 0.00 |
| ATOM | 5271 | N    | SER | X | 351 | 58.571 | 12.911 | 49.698 | 0.00 | 0.00 |
| ATOM | 5272 | H    | SER | X | 351 | 58.958 | 13.235 | 50.573 | 0.00 | 0.00 |
| ATOM | 5273 | CA   | SER | X | 351 | 58.046 | 11.502 | 49.609 | 0.00 | 0.00 |
| ATOM | 5274 | HA   | SER | X | 351 | 58.332 | 11.111 | 48.633 | 0.00 | 0.00 |
| ATOM | 5275 | CB   | SER | X | 351 | 58.653 | 10.693 | 50.693 | 0.00 | 0.00 |
| ATOM | 5276 | HB2  | SER | X | 351 | 58.459 | 9.652  | 50.433 | 0.00 | 0.00 |
| ATOM | 5277 | HB3  | SER | X | 351 | 59.742 | 10.719 | 50.690 | 0.00 | 0.00 |
| ATOM | 5278 | OG   | SER | X | 351 | 58.262 | 10.889 | 52.052 | 0.00 | 0.00 |
| ATOM | 5279 | HG   | SER | X | 351 | 58.899 | 11.478 | 52.462 | 0.00 | 0.00 |
| ATOM | 5280 | C    | SER | X | 351 | 56.484 | 11.491 | 49.680 | 0.00 | 0.00 |
| ATOM | 5281 | O    | SER | X | 351 | 55.803 | 12.362 | 50.108 | 0.00 | 0.00 |
| ATOM | 5282 | N    | ARG | X | 352 | 55.863 | 10.348 | 49.280 | 0.00 | 0.00 |
| ATOM | 5283 | H    | ARG | X | 352 | 56.388 | 9.562  | 48.925 | 0.00 | 0.00 |
| ATOM | 5284 | CA   | ARG | X | 352 | 54.376 | 10.253 | 49.241 | 0.00 | 0.00 |
| ATOM | 5285 | HA   | ARG | X | 352 | 53.978 | 10.986 | 48.539 | 0.00 | 0.00 |
| ATOM | 5286 | CB   | ARG | X | 352 | 53.969 | 8.869  | 48.709 | 0.00 | 0.00 |
| ATOM | 5287 | HB2  | ARG | X | 352 | 54.657 | 8.702  | 47.881 | 0.00 | 0.00 |
| ATOM | 5288 | HB3  | ARG | X | 352 | 54.282 | 8.081  | 49.395 | 0.00 | 0.00 |
| ATOM | 5289 | CG   | ARG | X | 352 | 52.472 | 8.754  | 48.239 | 0.00 | 0.00 |
| ATOM | 5290 | HG2  | ARG | X | 352 | 51.770 | 9.130  | 48.983 | 0.00 | 0.00 |
| ATOM | 5291 | HG3  | ARG | X | 352 | 52.498 | 9.287  | 47.288 | 0.00 | 0.00 |

|      |      |      |     |   |     |        |        |        |      |      |
|------|------|------|-----|---|-----|--------|--------|--------|------|------|
| ATOM | 5292 | CD   | ARG | X | 352 | 52.169 | 7.232  | 48.170 | 0.00 | 0.00 |
| ATOM | 5293 | HD2  | ARG | X | 352 | 52.628 | 6.742  | 47.311 | 0.00 | 0.00 |
| ATOM | 5294 | HD3  | ARG | X | 352 | 52.348 | 6.682  | 49.093 | 0.00 | 0.00 |
| ATOM | 5295 | NE   | ARG | X | 352 | 50.730 | 7.082  | 47.854 | 0.00 | 0.00 |
| ATOM | 5296 | HE   | ARG | X | 352 | 50.471 | 7.066  | 46.878 | 0.00 | 0.00 |
| ATOM | 5297 | CZ   | ARG | X | 352 | 49.752 | 7.154  | 48.733 | 0.00 | 0.00 |
| ATOM | 5298 | NH1  | ARG | X | 352 | 50.022 | 7.178  | 49.959 | 0.00 | 0.00 |
| ATOM | 5299 | HH11 | ARG | X | 352 | 50.955 | 7.011  | 50.309 | 0.00 | 0.00 |
| ATOM | 5300 | HH12 | ARG | X | 352 | 49.204 | 7.187  | 50.551 | 0.00 | 0.00 |
| ATOM | 5301 | NH2  | ARG | X | 352 | 48.531 | 7.079  | 48.335 | 0.00 | 0.00 |
| ATOM | 5302 | HH21 | ARG | X | 352 | 48.332 | 7.273  | 47.364 | 0.00 | 0.00 |
| ATOM | 5303 | HH22 | ARG | X | 352 | 47.771 | 7.138  | 48.998 | 0.00 | 0.00 |
| ATOM | 5304 | C    | ARG | X | 352 | 53.744 | 10.589 | 50.612 | 0.00 | 0.00 |
| ATOM | 5305 | O    | ARG | X | 352 | 52.787 | 11.372 | 50.699 | 0.00 | 0.00 |
| ATOM | 5306 | N    | ALA | X | 353 | 54.244 | 10.057 | 51.763 | 0.00 | 0.00 |
| ATOM | 5307 | H    | ALA | X | 353 | 54.988 | 9.374  | 51.726 | 0.00 | 0.00 |
| ATOM | 5308 | CA   | ALA | X | 353 | 53.832 | 10.428 | 53.141 | 0.00 | 0.00 |
| ATOM | 5309 | HA   | ALA | X | 353 | 52.821 | 10.022 | 53.161 | 0.00 | 0.00 |
| ATOM | 5310 | CB   | ALA | X | 353 | 54.608 | 9.608  | 54.183 | 0.00 | 0.00 |
| ATOM | 5311 | HB1  | ALA | X | 353 | 54.486 | 8.545  | 53.979 | 0.00 | 0.00 |
| ATOM | 5312 | HB2  | ALA | X | 353 | 55.650 | 9.915  | 54.092 | 0.00 | 0.00 |
| ATOM | 5313 | HB3  | ALA | X | 353 | 54.132 | 9.823  | 55.140 | 0.00 | 0.00 |
| ATOM | 5314 | C    | ALA | X | 353 | 53.787 | 11.979 | 53.441 | 0.00 | 0.00 |
| ATOM | 5315 | O    | ALA | X | 353 | 52.956 | 12.488 | 54.192 | 0.00 | 0.00 |
| ATOM | 5316 | N    | GLU | X | 354 | 54.753 | 12.660 | 52.740 | 0.00 | 0.00 |
| ATOM | 5317 | H    | GLU | X | 354 | 55.248 | 12.105 | 52.057 | 0.00 | 0.00 |
| ATOM | 5318 | CA   | GLU | X | 354 | 55.082 | 14.082 | 52.752 | 0.00 | 0.00 |
| ATOM | 5319 | HA   | GLU | X | 354 | 54.752 | 14.458 | 53.721 | 0.00 | 0.00 |
| ATOM | 5320 | CB   | GLU | X | 354 | 56.625 | 14.274 | 52.589 | 0.00 | 0.00 |
| ATOM | 5321 | HB2  | GLU | X | 354 | 56.923 | 13.919 | 51.603 | 0.00 | 0.00 |
| ATOM | 5322 | HB3  | GLU | X | 354 | 56.834 | 15.343 | 52.544 | 0.00 | 0.00 |
| ATOM | 5323 | CG   | GLU | X | 354 | 57.375 | 13.552 | 53.754 | 0.00 | 0.00 |
| ATOM | 5324 | HG2  | GLU | X | 354 | 57.142 | 13.990 | 54.724 | 0.00 | 0.00 |
| ATOM | 5325 | HG3  | GLU | X | 354 | 57.102 | 12.498 | 53.811 | 0.00 | 0.00 |
| ATOM | 5326 | CD   | GLU | X | 354 | 58.873 | 13.643 | 53.518 | 0.00 | 0.00 |
| ATOM | 5327 | OE1  | GLU | X | 354 | 59.373 | 13.395 | 52.387 | 0.00 | 0.00 |
| ATOM | 5328 | OE2  | GLU | X | 354 | 59.606 | 13.859 | 54.530 | 0.00 | 0.00 |
| ATOM | 5329 | C    | GLU | X | 354 | 54.317 | 14.879 | 51.753 | 0.00 | 0.00 |
| ATOM | 5330 | O    | GLU | X | 354 | 54.100 | 16.064 | 51.911 | 0.00 | 0.00 |
| ATOM | 5331 | N    | PHE | X | 355 | 53.769 | 14.201 | 50.715 | 0.00 | 0.00 |
| ATOM | 5332 | H    | PHE | X | 355 | 54.048 | 13.241 | 50.570 | 0.00 | 0.00 |
| ATOM | 5333 | CA   | PHE | X | 355 | 52.694 | 14.698 | 49.771 | 0.00 | 0.00 |
| ATOM | 5334 | HA   | PHE | X | 355 | 52.899 | 15.738 | 49.516 | 0.00 | 0.00 |
| ATOM | 5335 | CB   | PHE | X | 355 | 52.788 | 13.937 | 48.488 | 0.00 | 0.00 |
| ATOM | 5336 | HB2  | PHE | X | 355 | 53.832 | 14.069 | 48.201 | 0.00 | 0.00 |
| ATOM | 5337 | HB3  | PHE | X | 355 | 52.583 | 12.874 | 48.617 | 0.00 | 0.00 |
| ATOM | 5338 | CG   | PHE | X | 355 | 51.800 | 14.354 | 47.363 | 0.00 | 0.00 |
| ATOM | 5339 | CD1  | PHE | X | 355 | 51.633 | 15.719 | 47.137 | 0.00 | 0.00 |
| ATOM | 5340 | HD1  | PHE | X | 355 | 52.296 | 16.457 | 47.564 | 0.00 | 0.00 |
| ATOM | 5341 | CE1  | PHE | X | 355 | 50.608 | 16.171 | 46.346 | 0.00 | 0.00 |
| ATOM | 5342 | HE1  | PHE | X | 355 | 50.421 | 17.226 | 46.206 | 0.00 | 0.00 |
| ATOM | 5343 | CZ   | PHE | X | 355 | 49.807 | 15.207 | 45.655 | 0.00 | 0.00 |
| ATOM | 5344 | HZ   | PHE | X | 355 | 48.915 | 15.527 | 45.136 | 0.00 | 0.00 |
| ATOM | 5345 | CE2  | PHE | X | 355 | 50.083 | 13.835 | 45.832 | 0.00 | 0.00 |
| ATOM | 5346 | HE2  | PHE | X | 355 | 49.486 | 13.129 | 45.274 | 0.00 | 0.00 |
| ATOM | 5347 | CD2  | PHE | X | 355 | 51.021 | 13.389 | 46.783 | 0.00 | 0.00 |
| ATOM | 5348 | HD2  | PHE | X | 355 | 51.315 | 12.382 | 47.042 | 0.00 | 0.00 |
| ATOM | 5349 | C    | PHE | X | 355 | 51.379 | 14.757 | 50.437 | 0.00 | 0.00 |
| ATOM | 5350 | O    | PHE | X | 355 | 50.720 | 15.844 | 50.331 | 0.00 | 0.00 |
| ATOM | 5351 | N    | LEU | X | 356 | 50.994 | 13.681 | 51.128 | 0.00 | 0.00 |
| ATOM | 5352 | H    | LEU | X | 356 | 51.554 | 12.841 | 51.146 | 0.00 | 0.00 |
| ATOM | 5353 | CA   | LEU | X | 356 | 49.898 | 13.652 | 52.073 | 0.00 | 0.00 |
| ATOM | 5354 | HA   | LEU | X | 356 | 49.022 | 13.752 | 51.433 | 0.00 | 0.00 |
| ATOM | 5355 | CB   | LEU | X | 356 | 49.787 | 12.283 | 52.730 | 0.00 | 0.00 |
| ATOM | 5356 | HB2  | LEU | X | 356 | 49.944 | 11.510 | 51.977 | 0.00 | 0.00 |
| ATOM | 5357 | HB3  | LEU | X | 356 | 50.608 | 12.240 | 53.447 | 0.00 | 0.00 |
| ATOM | 5358 | CG   | LEU | X | 356 | 48.449 | 12.045 | 53.492 | 0.00 | 0.00 |
| ATOM | 5359 | HG   | LEU | X | 356 | 48.567 | 11.085 | 53.996 | 0.00 | 0.00 |
| ATOM | 5360 | CD1  | LEU | X | 356 | 48.094 | 13.032 | 54.516 | 0.00 | 0.00 |
| ATOM | 5361 | HD11 | LEU | X | 356 | 48.883 | 13.143 | 55.259 | 0.00 | 0.00 |

|      |      |      |     |   |     |        |        |        |      |      |
|------|------|------|-----|---|-----|--------|--------|--------|------|------|
| ATOM | 5362 | HD12 | LEU | X | 356 | 47.652 | 13.940 | 54.107 | 0.00 | 0.00 |
| ATOM | 5363 | HD13 | LEU | X | 356 | 47.162 | 12.715 | 54.982 | 0.00 | 0.00 |
| ATOM | 5364 | CD2  | LEU | X | 356 | 47.234 | 11.730 | 52.546 | 0.00 | 0.00 |
| ATOM | 5365 | HD21 | LEU | X | 356 | 47.114 | 12.564 | 51.854 | 0.00 | 0.00 |
| ATOM | 5366 | HD22 | LEU | X | 356 | 47.359 | 10.832 | 51.940 | 0.00 | 0.00 |
| ATOM | 5367 | HD23 | LEU | X | 356 | 46.328 | 11.475 | 53.096 | 0.00 | 0.00 |
| ATOM | 5368 | C    | LEU | X | 356 | 49.972 | 14.759 | 53.088 | 0.00 | 0.00 |
| ATOM | 5369 | O    | LEU | X | 356 | 49.117 | 15.714 | 53.110 | 0.00 | 0.00 |
| ATOM | 5370 | N    | ALA | X | 357 | 50.961 | 14.813 | 53.964 | 0.00 | 0.00 |
| ATOM | 5371 | H    | ALA | X | 357 | 51.671 | 14.095 | 53.922 | 0.00 | 0.00 |
| ATOM | 5372 | CA   | ALA | X | 357 | 51.184 | 15.924 | 54.834 | 0.00 | 0.00 |
| ATOM | 5373 | HA   | ALA | X | 357 | 50.323 | 15.890 | 55.502 | 0.00 | 0.00 |
| ATOM | 5374 | CB   | ALA | X | 357 | 52.476 | 15.743 | 55.690 | 0.00 | 0.00 |
| ATOM | 5375 | HB1  | ALA | X | 357 | 52.584 | 14.727 | 56.070 | 0.00 | 0.00 |
| ATOM | 5376 | HB2  | ALA | X | 357 | 53.380 | 15.926 | 55.108 | 0.00 | 0.00 |
| ATOM | 5377 | HB3  | ALA | X | 357 | 52.282 | 16.333 | 56.585 | 0.00 | 0.00 |
| ATOM | 5378 | C    | ALA | X | 357 | 51.065 | 17.319 | 54.198 | 0.00 | 0.00 |
| ATOM | 5379 | O    | ALA | X | 357 | 50.536 | 18.272 | 54.761 | 0.00 | 0.00 |
| ATOM | 5380 | N    | GLY | X | 358 | 51.604 | 17.455 | 52.964 | 0.00 | 0.00 |
| ATOM | 5381 | H    | GLY | X | 358 | 52.219 | 16.766 | 52.555 | 0.00 | 0.00 |
| ATOM | 5382 | CA   | GLY | X | 358 | 51.600 | 18.758 | 52.291 | 0.00 | 0.00 |
| ATOM | 5383 | HA2  | GLY | X | 358 | 52.049 | 19.473 | 52.943 | 0.00 | 0.00 |
| ATOM | 5384 | HA3  | GLY | X | 358 | 52.309 | 18.616 | 51.469 | 0.00 | 0.00 |
| ATOM | 5385 | C    | GLY | X | 358 | 50.260 | 19.178 | 51.756 | 0.00 | 0.00 |
| ATOM | 5386 | O    | GLY | X | 358 | 49.824 | 20.273 | 52.107 | 0.00 | 0.00 |
| ATOM | 5387 | N    | VAL | X | 359 | 49.452 | 18.256 | 51.213 | 0.00 | 0.00 |
| ATOM | 5388 | H    | VAL | X | 359 | 49.908 | 17.409 | 50.905 | 0.00 | 0.00 |
| ATOM | 5389 | CA   | VAL | X | 359 | 48.014 | 18.378 | 50.992 | 0.00 | 0.00 |
| ATOM | 5390 | HA   | VAL | X | 359 | 47.913 | 19.144 | 50.223 | 0.00 | 0.00 |
| ATOM | 5391 | CB   | VAL | X | 359 | 47.373 | 17.098 | 50.521 | 0.00 | 0.00 |
| ATOM | 5392 | HB   | VAL | X | 359 | 47.898 | 16.339 | 51.102 | 0.00 | 0.00 |
| ATOM | 5393 | CG1  | VAL | X | 359 | 45.881 | 16.930 | 50.735 | 0.00 | 0.00 |
| ATOM | 5394 | HG11 | VAL | X | 359 | 45.577 | 15.889 | 50.627 | 0.00 | 0.00 |
| ATOM | 5395 | HG12 | VAL | X | 359 | 45.683 | 17.066 | 51.799 | 0.00 | 0.00 |
| ATOM | 5396 | HG13 | VAL | X | 359 | 45.284 | 17.563 | 50.078 | 0.00 | 0.00 |
| ATOM | 5397 | CG2  | VAL | X | 359 | 47.786 | 16.848 | 49.063 | 0.00 | 0.00 |
| ATOM | 5398 | HG21 | VAL | X | 359 | 48.064 | 15.800 | 48.956 | 0.00 | 0.00 |
| ATOM | 5399 | HG22 | VAL | X | 359 | 47.033 | 17.014 | 48.292 | 0.00 | 0.00 |
| ATOM | 5400 | HG23 | VAL | X | 359 | 48.718 | 17.300 | 48.724 | 0.00 | 0.00 |
| ATOM | 5401 | C    | VAL | X | 359 | 47.283 | 18.896 | 52.220 | 0.00 | 0.00 |
| ATOM | 5402 | O    | VAL | X | 359 | 46.529 | 19.865 | 52.172 | 0.00 | 0.00 |
| ATOM | 5403 | N    | ARG | X | 360 | 47.579 | 18.309 | 53.407 | 0.00 | 0.00 |
| ATOM | 5404 | H    | ARG | X | 360 | 48.328 | 17.633 | 53.452 | 0.00 | 0.00 |
| ATOM | 5405 | CA   | ARG | X | 360 | 46.916 | 18.711 | 54.667 | 0.00 | 0.00 |
| ATOM | 5406 | HA   | ARG | X | 360 | 45.839 | 18.737 | 54.506 | 0.00 | 0.00 |
| ATOM | 5407 | CB   | ARG | X | 360 | 47.235 | 17.675 | 55.789 | 0.00 | 0.00 |
| ATOM | 5408 | HB2  | ARG | X | 360 | 48.234 | 17.285 | 55.596 | 0.00 | 0.00 |
| ATOM | 5409 | HB3  | ARG | X | 360 | 47.127 | 18.100 | 56.787 | 0.00 | 0.00 |
| ATOM | 5410 | CG   | ARG | X | 360 | 46.326 | 16.484 | 55.690 | 0.00 | 0.00 |
| ATOM | 5411 | HG2  | ARG | X | 360 | 45.276 | 16.772 | 55.735 | 0.00 | 0.00 |
| ATOM | 5412 | HG3  | ARG | X | 360 | 46.584 | 16.009 | 54.744 | 0.00 | 0.00 |
| ATOM | 5413 | CD   | ARG | X | 360 | 46.545 | 15.435 | 56.753 | 0.00 | 0.00 |
| ATOM | 5414 | HD2  | ARG | X | 360 | 47.213 | 14.704 | 56.296 | 0.00 | 0.00 |
| ATOM | 5415 | HD3  | ARG | X | 360 | 47.112 | 15.855 | 57.583 | 0.00 | 0.00 |
| ATOM | 5416 | NE   | ARG | X | 360 | 45.271 | 14.782 | 57.168 | 0.00 | 0.00 |
| ATOM | 5417 | HE   | ARG | X | 360 | 45.069 | 13.828 | 56.904 | 0.00 | 0.00 |
| ATOM | 5418 | CZ   | ARG | X | 360 | 44.248 | 15.261 | 57.867 | 0.00 | 0.00 |
| ATOM | 5419 | NH1  | ARG | X | 360 | 44.191 | 16.442 | 58.408 | 0.00 | 0.00 |
| ATOM | 5420 | HH11 | ARG | X | 360 | 44.867 | 17.161 | 58.192 | 0.00 | 0.00 |
| ATOM | 5421 | HH12 | ARG | X | 360 | 43.392 | 16.576 | 59.011 | 0.00 | 0.00 |
| ATOM | 5422 | NH2  | ARG | X | 360 | 43.224 | 14.438 | 57.997 | 0.00 | 0.00 |
| ATOM | 5423 | HH21 | ARG | X | 360 | 43.302 | 13.537 | 57.547 | 0.00 | 0.00 |
| ATOM | 5424 | HH22 | ARG | X | 360 | 42.414 | 14.774 | 58.498 | 0.00 | 0.00 |
| ATOM | 5425 | C    | ARG | X | 360 | 47.249 | 20.136 | 55.186 | 0.00 | 0.00 |
| ATOM | 5426 | O    | ARG | X | 360 | 46.405 | 20.649 | 55.840 | 0.00 | 0.00 |
| ATOM | 5427 | N    | VAL | X | 361 | 48.401 | 20.695 | 54.734 | 0.00 | 0.00 |
| ATOM | 5428 | H    | VAL | X | 361 | 48.993 | 20.128 | 54.144 | 0.00 | 0.00 |
| ATOM | 5429 | CA   | VAL | X | 361 | 48.665 | 22.119 | 54.942 | 0.00 | 0.00 |
| ATOM | 5430 | HA   | VAL | X | 361 | 48.094 | 22.291 | 55.855 | 0.00 | 0.00 |
| ATOM | 5431 | CB   | VAL | X | 361 | 50.154 | 22.387 | 55.408 | 0.00 | 0.00 |

|      |      |      |     |   |     |        |        |        |      |      |
|------|------|------|-----|---|-----|--------|--------|--------|------|------|
| ATOM | 5432 | HB   | VAL | X | 361 | 50.170 | 23.417 | 55.763 | 0.00 | 0.00 |
| ATOM | 5433 | CG1  | VAL | X | 361 | 50.478 | 21.512 | 56.597 | 0.00 | 0.00 |
| ATOM | 5434 | HG11 | VAL | X | 361 | 51.322 | 21.907 | 57.163 | 0.00 | 0.00 |
| ATOM | 5435 | HG12 | VAL | X | 361 | 49.617 | 21.469 | 57.263 | 0.00 | 0.00 |
| ATOM | 5436 | HG13 | VAL | X | 361 | 50.726 | 20.485 | 56.331 | 0.00 | 0.00 |
| ATOM | 5437 | CG2  | VAL | X | 361 | 51.232 | 22.375 | 54.298 | 0.00 | 0.00 |
| ATOM | 5438 | HG21 | VAL | X | 361 | 52.222 | 22.620 | 54.685 | 0.00 | 0.00 |
| ATOM | 5439 | HG22 | VAL | X | 361 | 51.210 | 21.380 | 53.854 | 0.00 | 0.00 |
| ATOM | 5440 | HG23 | VAL | X | 361 | 50.957 | 23.053 | 53.490 | 0.00 | 0.00 |
| ATOM | 5441 | C    | VAL | X | 361 | 48.279 | 23.109 | 53.776 | 0.00 | 0.00 |
| ATOM | 5442 | O    | VAL | X | 361 | 48.491 | 24.306 | 53.952 | 0.00 | 0.00 |
| ATOM | 5443 | N    | GLY | X | 362 | 47.720 | 22.588 | 52.629 | 0.00 | 0.00 |
| ATOM | 5444 | H    | GLY | X | 362 | 47.595 | 21.590 | 52.546 | 0.00 | 0.00 |
| ATOM | 5445 | CA   | GLY | X | 362 | 47.153 | 23.377 | 51.559 | 0.00 | 0.00 |
| ATOM | 5446 | HA2  | GLY | X | 362 | 47.418 | 24.443 | 51.585 | 0.00 | 0.00 |
| ATOM | 5447 | HA3  | GLY | X | 362 | 47.417 | 22.895 | 50.663 | 0.00 | 0.00 |
| ATOM | 5448 | C    | GLY | X | 362 | 45.670 | 23.352 | 51.585 | 0.00 | 0.00 |
| ATOM | 5449 | O    | GLY | X | 362 | 45.124 | 24.176 | 50.865 | 0.00 | 0.00 |
| ATOM | 5450 | N    | VAL | X | 363 | 45.013 | 22.443 | 52.292 | 0.00 | 0.00 |
| ATOM | 5451 | H    | VAL | X | 363 | 45.544 | 21.623 | 52.546 | 0.00 | 0.00 |
| ATOM | 5452 | CA   | VAL | X | 363 | 43.499 | 22.477 | 52.510 | 0.00 | 0.00 |
| ATOM | 5453 | HA   | VAL | X | 363 | 43.138 | 23.425 | 52.110 | 0.00 | 0.00 |
| ATOM | 5454 | CB   | VAL | X | 363 | 42.700 | 21.336 | 51.848 | 0.00 | 0.00 |
| ATOM | 5455 | HB   | VAL | X | 363 | 41.782 | 21.211 | 52.422 | 0.00 | 0.00 |
| ATOM | 5456 | CG1  | VAL | X | 363 | 42.273 | 21.836 | 50.422 | 0.00 | 0.00 |
| ATOM | 5457 | HG11 | VAL | X | 363 | 43.153 | 22.172 | 49.873 | 0.00 | 0.00 |
| ATOM | 5458 | HG12 | VAL | X | 363 | 41.702 | 21.125 | 49.824 | 0.00 | 0.00 |
| ATOM | 5459 | HG13 | VAL | X | 363 | 41.525 | 22.622 | 50.531 | 0.00 | 0.00 |
| ATOM | 5460 | CG2  | VAL | X | 363 | 43.378 | 19.995 | 51.607 | 0.00 | 0.00 |
| ATOM | 5461 | HG21 | VAL | X | 363 | 42.739 | 19.329 | 51.027 | 0.00 | 0.00 |
| ATOM | 5462 | HG22 | VAL | X | 363 | 44.302 | 20.067 | 51.034 | 0.00 | 0.00 |
| ATOM | 5463 | HG23 | VAL | X | 363 | 43.693 | 19.475 | 52.512 | 0.00 | 0.00 |
| ATOM | 5464 | C    | VAL | X | 363 | 43.242 | 22.444 | 53.978 | 0.00 | 0.00 |
| ATOM | 5465 | O    | VAL | X | 363 | 43.584 | 21.520 | 54.685 | 0.00 | 0.00 |
| ATOM | 5466 | N    | PRO | X | 364 | 42.622 | 23.484 | 54.603 | 0.00 | 0.00 |
| ATOM | 5467 | CD   | PRO | X | 364 | 42.196 | 24.806 | 53.959 | 0.00 | 0.00 |
| ATOM | 5468 | HD2  | PRO | X | 364 | 41.622 | 24.631 | 53.049 | 0.00 | 0.00 |
| ATOM | 5469 | HD3  | PRO | X | 364 | 43.062 | 25.430 | 53.738 | 0.00 | 0.00 |
| ATOM | 5470 | CG   | PRO | X | 364 | 41.422 | 25.512 | 55.006 | 0.00 | 0.00 |
| ATOM | 5471 | HG2  | PRO | X | 364 | 40.341 | 25.442 | 54.887 | 0.00 | 0.00 |
| ATOM | 5472 | HG3  | PRO | X | 364 | 41.706 | 26.565 | 55.003 | 0.00 | 0.00 |
| ATOM | 5473 | CB   | PRO | X | 364 | 41.821 | 24.962 | 56.389 | 0.00 | 0.00 |
| ATOM | 5474 | HB2  | PRO | X | 364 | 41.009 | 24.911 | 57.115 | 0.00 | 0.00 |
| ATOM | 5475 | HB3  | PRO | X | 364 | 42.620 | 25.557 | 56.831 | 0.00 | 0.00 |
| ATOM | 5476 | CA   | PRO | X | 364 | 42.393 | 23.583 | 56.066 | 0.00 | 0.00 |
| ATOM | 5477 | HA   | PRO | X | 364 | 43.268 | 23.292 | 56.648 | 0.00 | 0.00 |
| ATOM | 5478 | C    | PRO | X | 364 | 41.383 | 22.591 | 56.444 | 0.00 | 0.00 |
| ATOM | 5479 | O    | PRO | X | 364 | 40.452 | 22.365 | 55.727 | 0.00 | 0.00 |
| ATOM | 5480 | N    | GLN | X | 365 | 41.548 | 22.051 | 57.680 | 0.00 | 0.00 |
| ATOM | 5481 | H    | GLN | X | 365 | 42.426 | 22.342 | 58.086 | 0.00 | 0.00 |
| ATOM | 5482 | CA   | GLN | X | 365 | 40.621 | 21.161 | 58.448 | 0.00 | 0.00 |
| ATOM | 5483 | HA   | GLN | X | 365 | 41.225 | 20.786 | 59.274 | 0.00 | 0.00 |
| ATOM | 5484 | CB   | GLN | X | 365 | 39.479 | 21.983 | 59.083 | 0.00 | 0.00 |
| ATOM | 5485 | HB2  | GLN | X | 365 | 38.742 | 22.390 | 58.390 | 0.00 | 0.00 |
| ATOM | 5486 | HB3  | GLN | X | 365 | 39.025 | 21.442 | 59.912 | 0.00 | 0.00 |
| ATOM | 5487 | CG   | GLN | X | 365 | 39.986 | 23.295 | 59.776 | 0.00 | 0.00 |
| ATOM | 5488 | HG2  | GLN | X | 365 | 40.734 | 22.816 | 60.407 | 0.00 | 0.00 |
| ATOM | 5489 | HG3  | GLN | X | 365 | 40.530 | 23.885 | 59.038 | 0.00 | 0.00 |
| ATOM | 5490 | CD   | GLN | X | 365 | 38.987 | 24.085 | 60.632 | 0.00 | 0.00 |
| ATOM | 5491 | OE1  | GLN | X | 365 | 37.861 | 23.657 | 60.895 | 0.00 | 0.00 |
| ATOM | 5492 | NE2  | GLN | X | 365 | 39.347 | 25.256 | 61.035 | 0.00 | 0.00 |
| ATOM | 5493 | HE21 | GLN | X | 365 | 38.656 | 25.744 | 61.587 | 0.00 | 0.00 |
| ATOM | 5494 | HE22 | GLN | X | 365 | 40.161 | 25.740 | 60.683 | 0.00 | 0.00 |
| ATOM | 5495 | C    | GLN | X | 365 | 40.070 | 20.007 | 57.656 | 0.00 | 0.00 |
| ATOM | 5496 | O    | GLN | X | 365 | 38.825 | 19.754 | 57.590 | 0.00 | 0.00 |
| ATOM | 5497 | N    | VAL | X | 366 | 40.908 | 19.312 | 56.908 | 0.00 | 0.00 |
| ATOM | 5498 | H    | VAL | X | 366 | 41.879 | 19.591 | 56.921 | 0.00 | 0.00 |
| ATOM | 5499 | CA   | VAL | X | 366 | 40.471 | 18.378 | 55.818 | 0.00 | 0.00 |
| ATOM | 5500 | HA   | VAL | X | 366 | 39.522 | 18.737 | 55.418 | 0.00 | 0.00 |
| ATOM | 5501 | CB   | VAL | X | 366 | 41.446 | 18.272 | 54.622 | 0.00 | 0.00 |

|      |      |      |     |   |     |        |        |        |      |      |
|------|------|------|-----|---|-----|--------|--------|--------|------|------|
| ATOM | 5502 | HB   | VAL | X | 366 | 41.807 | 19.280 | 54.419 | 0.00 | 0.00 |
| ATOM | 5503 | CG1  | VAL | X | 366 | 42.652 | 17.409 | 54.866 | 0.00 | 0.00 |
| ATOM | 5504 | HG11 | VAL | X | 366 | 43.211 | 17.589 | 55.784 | 0.00 | 0.00 |
| ATOM | 5505 | HG12 | VAL | X | 366 | 42.450 | 16.339 | 54.897 | 0.00 | 0.00 |
| ATOM | 5506 | HG13 | VAL | X | 366 | 43.338 | 17.684 | 54.065 | 0.00 | 0.00 |
| ATOM | 5507 | CG2  | VAL | X | 366 | 40.888 | 17.649 | 53.317 | 0.00 | 0.00 |
| ATOM | 5508 | HG21 | VAL | X | 366 | 40.650 | 16.591 | 53.424 | 0.00 | 0.00 |
| ATOM | 5509 | HG22 | VAL | X | 366 | 40.054 | 18.258 | 52.970 | 0.00 | 0.00 |
| ATOM | 5510 | HG23 | VAL | X | 366 | 41.722 | 17.752 | 52.623 | 0.00 | 0.00 |
| ATOM | 5511 | C    | VAL | X | 366 | 40.233 | 17.043 | 56.408 | 0.00 | 0.00 |
| ATOM | 5512 | O    | VAL | X | 366 | 40.867 | 16.645 | 57.380 | 0.00 | 0.00 |
| ATOM | 5513 | N    | SER | X | 367 | 39.263 | 16.286 | 55.843 | 0.00 | 0.00 |
| ATOM | 5514 | H    | SER | X | 367 | 38.800 | 16.611 | 55.006 | 0.00 | 0.00 |
| ATOM | 5515 | CA   | SER | X | 367 | 39.175 | 14.887 | 56.203 | 0.00 | 0.00 |
| ATOM | 5516 | HA   | SER | X | 367 | 39.138 | 14.871 | 57.292 | 0.00 | 0.00 |
| ATOM | 5517 | CB   | SER | X | 367 | 37.826 | 14.224 | 55.766 | 0.00 | 0.00 |
| ATOM | 5518 | HB2  | SER | X | 367 | 37.759 | 14.146 | 54.681 | 0.00 | 0.00 |
| ATOM | 5519 | HB3  | SER | X | 367 | 37.772 | 13.268 | 56.288 | 0.00 | 0.00 |
| ATOM | 5520 | OG   | SER | X | 367 | 36.759 | 15.088 | 56.201 | 0.00 | 0.00 |
| ATOM | 5521 | HG   | SER | X | 367 | 35.883 | 14.701 | 56.132 | 0.00 | 0.00 |
| ATOM | 5522 | C    | SER | X | 367 | 40.317 | 14.101 | 55.680 | 0.00 | 0.00 |
| ATOM | 5523 | O    | SER | X | 367 | 40.718 | 14.211 | 54.500 | 0.00 | 0.00 |
| ATOM | 5524 | N    | ASP | X | 368 | 40.818 | 13.162 | 56.411 | 0.00 | 0.00 |
| ATOM | 5525 | H    | ASP | X | 368 | 40.411 | 13.163 | 57.336 | 0.00 | 0.00 |
| ATOM | 5526 | CA   | ASP | X | 368 | 41.602 | 12.104 | 56.018 | 0.00 | 0.00 |
| ATOM | 5527 | HA   | ASP | X | 368 | 42.657 | 12.347 | 55.886 | 0.00 | 0.00 |
| ATOM | 5528 | CB   | ASP | X | 368 | 41.667 | 11.137 | 57.236 | 0.00 | 0.00 |
| ATOM | 5529 | HB2  | ASP | X | 368 | 42.242 | 11.545 | 58.067 | 0.00 | 0.00 |
| ATOM | 5530 | HB3  | ASP | X | 368 | 40.675 | 10.852 | 57.587 | 0.00 | 0.00 |
| ATOM | 5531 | CG   | ASP | X | 368 | 42.330 | 9.743  | 57.039 | 0.00 | 0.00 |
| ATOM | 5532 | OD1  | ASP | X | 368 | 41.803 | 8.649  | 57.423 | 0.00 | 0.00 |
| ATOM | 5533 | OD2  | ASP | X | 368 | 43.463 | 9.740  | 56.512 | 0.00 | 0.00 |
| ATOM | 5534 | C    | ASP | X | 368 | 41.071 | 11.355 | 54.826 | 0.00 | 0.00 |
| ATOM | 5535 | O    | ASP | X | 368 | 41.809 | 11.046 | 53.886 | 0.00 | 0.00 |
| ATOM | 5536 | N    | LEU | X | 369 | 39.809 | 10.969 | 54.788 | 0.00 | 0.00 |
| ATOM | 5537 | H    | LEU | X | 369 | 39.329 | 10.984 | 55.676 | 0.00 | 0.00 |
| ATOM | 5538 | CA   | LEU | X | 369 | 39.139 | 10.314 | 53.579 | 0.00 | 0.00 |
| ATOM | 5539 | HA   | LEU | X | 369 | 39.747 | 9.437  | 53.357 | 0.00 | 0.00 |
| ATOM | 5540 | CB   | LEU | X | 369 | 37.702 | 9.906  | 53.840 | 0.00 | 0.00 |
| ATOM | 5541 | HB2  | LEU | X | 369 | 37.618 | 9.346  | 54.771 | 0.00 | 0.00 |
| ATOM | 5542 | HB3  | LEU | X | 369 | 37.188 | 10.839 | 54.071 | 0.00 | 0.00 |
| ATOM | 5543 | CG   | LEU | X | 369 | 37.049 | 9.158  | 52.689 | 0.00 | 0.00 |
| ATOM | 5544 | HG   | LEU | X | 369 | 37.351 | 9.609  | 51.744 | 0.00 | 0.00 |
| ATOM | 5545 | CD1  | LEU | X | 369 | 37.512 | 7.680  | 52.616 | 0.00 | 0.00 |
| ATOM | 5546 | HD11 | LEU | X | 369 | 37.063 | 7.178  | 53.474 | 0.00 | 0.00 |
| ATOM | 5547 | HD12 | LEU | X | 369 | 37.097 | 7.299  | 51.683 | 0.00 | 0.00 |
| ATOM | 5548 | HD13 | LEU | X | 369 | 38.595 | 7.558  | 52.637 | 0.00 | 0.00 |
| ATOM | 5549 | CD2  | LEU | X | 369 | 35.458 | 9.161  | 52.691 | 0.00 | 0.00 |
| ATOM | 5550 | HD21 | LEU | X | 369 | 35.082 | 9.101  | 51.670 | 0.00 | 0.00 |
| ATOM | 5551 | HD22 | LEU | X | 369 | 35.235 | 8.321  | 53.349 | 0.00 | 0.00 |
| ATOM | 5552 | HD23 | LEU | X | 369 | 35.041 | 10.074 | 53.115 | 0.00 | 0.00 |
| ATOM | 5553 | C    | LEU | X | 369 | 39.267 | 11.200 | 52.309 | 0.00 | 0.00 |
| ATOM | 5554 | O    | LEU | X | 369 | 39.569 | 10.707 | 51.189 | 0.00 | 0.00 |
| ATOM | 5555 | N    | ALA | X | 370 | 39.157 | 12.529 | 52.457 | 0.00 | 0.00 |
| ATOM | 5556 | H    | ALA | X | 370 | 39.152 | 12.899 | 53.397 | 0.00 | 0.00 |
| ATOM | 5557 | CA   | ALA | X | 370 | 39.238 | 13.533 | 51.417 | 0.00 | 0.00 |
| ATOM | 5558 | HA   | ALA | X | 370 | 38.681 | 13.069 | 50.602 | 0.00 | 0.00 |
| ATOM | 5559 | CB   | ALA | X | 370 | 38.642 | 14.889 | 51.897 | 0.00 | 0.00 |
| ATOM | 5560 | HB1  | ALA | X | 370 | 38.912 | 15.147 | 52.920 | 0.00 | 0.00 |
| ATOM | 5561 | HB2  | ALA | X | 370 | 39.064 | 15.614 | 51.201 | 0.00 | 0.00 |
| ATOM | 5562 | HB3  | ALA | X | 370 | 37.566 | 14.967 | 51.739 | 0.00 | 0.00 |
| ATOM | 5563 | C    | ALA | X | 370 | 40.742 | 13.650 | 50.971 | 0.00 | 0.00 |
| ATOM | 5564 | O    | ALA | X | 370 | 40.946 | 13.496 | 49.760 | 0.00 | 0.00 |
| ATOM | 5565 | N    | ALA | X | 371 | 41.731 | 13.843 | 51.823 | 0.00 | 0.00 |
| ATOM | 5566 | H    | ALA | X | 371 | 41.454 | 13.992 | 52.782 | 0.00 | 0.00 |
| ATOM | 5567 | CA   | ALA | X | 371 | 43.186 | 13.864 | 51.652 | 0.00 | 0.00 |
| ATOM | 5568 | HA   | ALA | X | 371 | 43.408 | 14.756 | 51.066 | 0.00 | 0.00 |
| ATOM | 5569 | CB   | ALA | X | 371 | 43.719 | 14.121 | 53.075 | 0.00 | 0.00 |
| ATOM | 5570 | HB1  | ALA | X | 371 | 44.787 | 14.309 | 52.962 | 0.00 | 0.00 |
| ATOM | 5571 | HB2  | ALA | X | 371 | 43.159 | 14.915 | 53.569 | 0.00 | 0.00 |

|      |      |      |     |   |     |        |        |        |      |      |
|------|------|------|-----|---|-----|--------|--------|--------|------|------|
| ATOM | 5572 | HB3  | ALA | X | 371 | 43.647 | 13.214 | 53.675 | 0.00 | 0.00 |
| ATOM | 5573 | C    | ALA | X | 371 | 43.727 | 12.625 | 50.969 | 0.00 | 0.00 |
| ATOM | 5574 | O    | ALA | X | 371 | 44.399 | 12.698 | 49.972 | 0.00 | 0.00 |
| ATOM | 5575 | N    | GLU | X | 372 | 43.264 | 11.455 | 51.320 | 0.00 | 0.00 |
| ATOM | 5576 | H    | GLU | X | 372 | 42.497 | 11.423 | 51.976 | 0.00 | 0.00 |
| ATOM | 5577 | CA   | GLU | X | 372 | 43.580 | 10.197 | 50.585 | 0.00 | 0.00 |
| ATOM | 5578 | HA   | GLU | X | 372 | 44.656 | 10.032 | 50.650 | 0.00 | 0.00 |
| ATOM | 5579 | CB   | GLU | X | 372 | 43.057 | 9.010  | 51.366 | 0.00 | 0.00 |
| ATOM | 5580 | HB2  | GLU | X | 372 | 43.067 | 9.176  | 52.443 | 0.00 | 0.00 |
| ATOM | 5581 | HB3  | GLU | X | 372 | 41.984 | 8.944  | 51.186 | 0.00 | 0.00 |
| ATOM | 5582 | CG   | GLU | X | 372 | 43.725 | 7.670  | 51.144 | 0.00 | 0.00 |
| ATOM | 5583 | HG2  | GLU | X | 372 | 43.191 | 6.935  | 51.747 | 0.00 | 0.00 |
| ATOM | 5584 | HG3  | GLU | X | 372 | 43.654 | 7.289  | 50.125 | 0.00 | 0.00 |
| ATOM | 5585 | CD   | GLU | X | 372 | 45.177 | 7.586  | 51.601 | 0.00 | 0.00 |
| ATOM | 5586 | OE1  | GLU | X | 372 | 45.946 | 7.199  | 50.683 | 0.00 | 0.00 |
| ATOM | 5587 | OE2  | GLU | X | 372 | 45.530 | 7.902  | 52.778 | 0.00 | 0.00 |
| ATOM | 5588 | C    | GLU | X | 372 | 43.083 | 10.141 | 49.150 | 0.00 | 0.00 |
| ATOM | 5589 | O    | GLU | X | 372 | 43.778 | 9.651  | 48.285 | 0.00 | 0.00 |
| ATOM | 5590 | N    | ALA | X | 373 | 41.878 | 10.758 | 48.868 | 0.00 | 0.00 |
| ATOM | 5591 | H    | ALA | X | 373 | 41.214 | 10.840 | 49.626 | 0.00 | 0.00 |
| ATOM | 5592 | CA   | ALA | X | 373 | 41.338 | 10.796 | 47.500 | 0.00 | 0.00 |
| ATOM | 5593 | HA   | ALA | X | 373 | 41.370 | 9.772  | 47.127 | 0.00 | 0.00 |
| ATOM | 5594 | CB   | ALA | X | 373 | 39.836 | 11.197 | 47.514 | 0.00 | 0.00 |
| ATOM | 5595 | HB1  | ALA | X | 373 | 39.266 | 10.288 | 47.706 | 0.00 | 0.00 |
| ATOM | 5596 | HB2  | ALA | X | 373 | 39.580 | 11.900 | 48.307 | 0.00 | 0.00 |
| ATOM | 5597 | HB3  | ALA | X | 373 | 39.494 | 11.591 | 46.557 | 0.00 | 0.00 |
| ATOM | 5598 | C    | ALA | X | 373 | 42.101 | 11.774 | 46.636 | 0.00 | 0.00 |
| ATOM | 5599 | O    | ALA | X | 373 | 42.532 | 11.516 | 45.548 | 0.00 | 0.00 |
| ATOM | 5600 | N    | VAL | X | 374 | 42.326 | 12.965 | 47.210 | 0.00 | 0.00 |
| ATOM | 5601 | H    | VAL | X | 374 | 41.951 | 12.998 | 48.147 | 0.00 | 0.00 |
| ATOM | 5602 | CA   | VAL | X | 374 | 43.210 | 14.002 | 46.678 | 0.00 | 0.00 |
| ATOM | 5603 | HA   | VAL | X | 374 | 42.726 | 14.425 | 45.798 | 0.00 | 0.00 |
| ATOM | 5604 | CB   | VAL | X | 374 | 43.401 | 15.129 | 47.686 | 0.00 | 0.00 |
| ATOM | 5605 | HB   | VAL | X | 374 | 43.699 | 14.668 | 48.628 | 0.00 | 0.00 |
| ATOM | 5606 | CG1  | VAL | X | 374 | 44.604 | 16.040 | 47.116 | 0.00 | 0.00 |
| ATOM | 5607 | HG11 | VAL | X | 374 | 45.545 | 15.620 | 47.470 | 0.00 | 0.00 |
| ATOM | 5608 | HG12 | VAL | X | 374 | 44.494 | 16.246 | 46.051 | 0.00 | 0.00 |
| ATOM | 5609 | HG13 | VAL | X | 374 | 44.522 | 17.014 | 47.598 | 0.00 | 0.00 |
| ATOM | 5610 | CG2  | VAL | X | 374 | 42.111 | 15.916 | 47.852 | 0.00 | 0.00 |
| ATOM | 5611 | HG21 | VAL | X | 374 | 41.219 | 15.291 | 47.901 | 0.00 | 0.00 |
| ATOM | 5612 | HG22 | VAL | X | 374 | 42.008 | 16.638 | 48.662 | 0.00 | 0.00 |
| ATOM | 5613 | HG23 | VAL | X | 374 | 41.945 | 16.555 | 46.985 | 0.00 | 0.00 |
| ATOM | 5614 | C    | VAL | X | 374 | 44.544 | 13.368 | 46.249 | 0.00 | 0.00 |
| ATOM | 5615 | O    | VAL | X | 374 | 44.888 | 13.433 | 45.031 | 0.00 | 0.00 |
| ATOM | 5616 | N    | VAL | X | 375 | 45.281 | 12.731 | 47.117 | 0.00 | 0.00 |
| ATOM | 5617 | H    | VAL | X | 375 | 44.972 | 12.698 | 48.078 | 0.00 | 0.00 |
| ATOM | 5618 | CA   | VAL | X | 375 | 46.613 | 12.095 | 46.771 | 0.00 | 0.00 |
| ATOM | 5619 | HA   | VAL | X | 375 | 47.223 | 12.936 | 46.443 | 0.00 | 0.00 |
| ATOM | 5620 | CB   | VAL | X | 375 | 47.289 | 11.462 | 47.959 | 0.00 | 0.00 |
| ATOM | 5621 | HB   | VAL | X | 375 | 46.536 | 10.855 | 48.462 | 0.00 | 0.00 |
| ATOM | 5622 | CG1  | VAL | X | 375 | 48.422 | 10.536 | 47.564 | 0.00 | 0.00 |
| ATOM | 5623 | HG11 | VAL | X | 375 | 47.999 | 9.744  | 46.946 | 0.00 | 0.00 |
| ATOM | 5624 | HG12 | VAL | X | 375 | 49.209 | 10.974 | 46.949 | 0.00 | 0.00 |
| ATOM | 5625 | HG13 | VAL | X | 375 | 48.854 | 10.038 | 48.432 | 0.00 | 0.00 |
| ATOM | 5626 | CG2  | VAL | X | 375 | 47.863 | 12.470 | 48.958 | 0.00 | 0.00 |
| ATOM | 5627 | HG21 | VAL | X | 375 | 48.389 | 11.977 | 49.776 | 0.00 | 0.00 |
| ATOM | 5628 | HG22 | VAL | X | 375 | 48.529 | 13.068 | 48.336 | 0.00 | 0.00 |
| ATOM | 5629 | HG23 | VAL | X | 375 | 47.075 | 13.007 | 49.486 | 0.00 | 0.00 |
| ATOM | 5630 | C    | VAL | X | 375 | 46.522 | 11.170 | 45.539 | 0.00 | 0.00 |
| ATOM | 5631 | O    | VAL | X | 375 | 47.419 | 11.325 | 44.718 | 0.00 | 0.00 |
| ATOM | 5632 | N    | LEU | X | 376 | 45.506 | 10.291 | 45.447 | 0.00 | 0.00 |
| ATOM | 5633 | H    | LEU | X | 376 | 44.771 | 10.288 | 46.140 | 0.00 | 0.00 |
| ATOM | 5634 | CA   | LEU | X | 376 | 45.277 | 9.441  | 44.306 | 0.00 | 0.00 |
| ATOM | 5635 | HA   | LEU | X | 376 | 46.152 | 8.832  | 44.077 | 0.00 | 0.00 |
| ATOM | 5636 | CB   | LEU | X | 376 | 44.038 | 8.537  | 44.596 | 0.00 | 0.00 |
| ATOM | 5637 | HB2  | LEU | X | 376 | 44.187 | 7.886  | 45.457 | 0.00 | 0.00 |
| ATOM | 5638 | HB3  | LEU | X | 376 | 43.225 | 9.189  | 44.916 | 0.00 | 0.00 |
| ATOM | 5639 | CG   | LEU | X | 376 | 43.519 | 7.504  | 43.577 | 0.00 | 0.00 |
| ATOM | 5640 | HG   | LEU | X | 376 | 43.038 | 8.124  | 42.820 | 0.00 | 0.00 |
| ATOM | 5641 | CD1  | LEU | X | 376 | 44.631 | 6.637  | 43.027 | 0.00 | 0.00 |



|      |      |      |     |   |     |        |        |        |      |      |
|------|------|------|-----|---|-----|--------|--------|--------|------|------|
| ATOM | 5642 | HD11 | LEU | X | 376 | 44.197 | 5.731  | 42.604 | 0.00 | 0.00 |
| ATOM | 5643 | HD12 | LEU | X | 376 | 45.197 | 7.138  | 42.242 | 0.00 | 0.00 |
| ATOM | 5644 | HD13 | LEU | X | 376 | 45.353 | 6.377  | 43.801 | 0.00 | 0.00 |
| ATOM | 5645 | CD2  | LEU | X | 376 | 42.394 | 6.668  | 44.132 | 0.00 | 0.00 |
| ATOM | 5646 | HD21 | LEU | X | 376 | 41.999 | 5.962  | 43.402 | 0.00 | 0.00 |
| ATOM | 5647 | HD22 | LEU | X | 376 | 42.790 | 6.086  | 44.964 | 0.00 | 0.00 |
| ATOM | 5648 | HD23 | LEU | X | 376 | 41.687 | 7.329  | 44.634 | 0.00 | 0.00 |
| ATOM | 5649 | C    | LEU | X | 376 | 45.109 | 10.225 | 42.998 | 0.00 | 0.00 |
| ATOM | 5650 | O    | LEU | X | 376 | 45.824 | 9.972  | 42.047 | 0.00 | 0.00 |
| ATOM | 5651 | N    | HIE | X | 377 | 44.301 | 11.253 | 43.012 | 0.00 | 0.00 |
| ATOM | 5652 | H    | HIE | X | 377 | 43.662 | 11.412 | 43.778 | 0.00 | 0.00 |
| ATOM | 5653 | CA   | HIE | X | 377 | 43.898 | 12.101 | 41.882 | 0.00 | 0.00 |
| ATOM | 5654 | HA   | HIE | X | 377 | 43.589 | 11.538 | 41.001 | 0.00 | 0.00 |
| ATOM | 5655 | CB   | HIE | X | 377 | 42.684 | 12.952 | 42.381 | 0.00 | 0.00 |
| ATOM | 5656 | HB2  | HIE | X | 377 | 41.792 | 12.335 | 42.489 | 0.00 | 0.00 |
| ATOM | 5657 | HB3  | HIE | X | 377 | 43.019 | 13.411 | 43.311 | 0.00 | 0.00 |
| ATOM | 5658 | CG   | HIE | X | 377 | 42.385 | 14.068 | 41.408 | 0.00 | 0.00 |
| ATOM | 5659 | ND1  | HIE | X | 377 | 41.905 | 13.950 | 40.121 | 0.00 | 0.00 |
| ATOM | 5660 | CE1  | HIE | X | 377 | 41.722 | 15.237 | 39.747 | 0.00 | 0.00 |
| ATOM | 5661 | HE1  | HIE | X | 377 | 41.394 | 15.583 | 38.779 | 0.00 | 0.00 |
| ATOM | 5662 | NE2  | HIE | X | 377 | 41.974 | 16.099 | 40.706 | 0.00 | 0.00 |
| ATOM | 5663 | HE2  | HIE | X | 377 | 41.976 | 17.101 | 40.579 | 0.00 | 0.00 |
| ATOM | 5664 | CD2  | HIE | X | 377 | 42.284 | 15.364 | 41.746 | 0.00 | 0.00 |
| ATOM | 5665 | HD2  | HIE | X | 377 | 42.612 | 15.709 | 42.715 | 0.00 | 0.00 |
| ATOM | 5666 | C    | HIE | X | 377 | 45.114 | 12.944 | 41.393 | 0.00 | 0.00 |
| ATOM | 5667 | O    | HIE | X | 377 | 44.951 | 13.508 | 40.299 | 0.00 | 0.00 |
| ATOM | 5668 | N    | TYR | X | 378 | 46.318 | 12.973 | 41.992 | 0.00 | 0.00 |
| ATOM | 5669 | H    | TYR | X | 378 | 46.422 | 12.472 | 42.863 | 0.00 | 0.00 |
| ATOM | 5670 | CA   | TYR | X | 378 | 47.498 | 13.639 | 41.509 | 0.00 | 0.00 |
| ATOM | 5671 | HA   | TYR | X | 378 | 47.303 | 13.954 | 40.484 | 0.00 | 0.00 |
| ATOM | 5672 | CB   | TYR | X | 378 | 47.803 | 14.804 | 42.480 | 0.00 | 0.00 |
| ATOM | 5673 | HB2  | TYR | X | 378 | 47.697 | 14.427 | 43.497 | 0.00 | 0.00 |
| ATOM | 5674 | HB3  | TYR | X | 378 | 48.844 | 15.127 | 42.502 | 0.00 | 0.00 |
| ATOM | 5675 | CG   | TYR | X | 378 | 46.928 | 16.021 | 42.287 | 0.00 | 0.00 |
| ATOM | 5676 | CD1  | TYR | X | 378 | 47.414 | 17.043 | 41.513 | 0.00 | 0.00 |
| ATOM | 5677 | HD1  | TYR | X | 378 | 48.349 | 16.973 | 40.978 | 0.00 | 0.00 |
| ATOM | 5678 | CE1  | TYR | X | 378 | 46.790 | 18.262 | 41.471 | 0.00 | 0.00 |
| ATOM | 5679 | HE1  | TYR | X | 378 | 47.214 | 19.080 | 40.908 | 0.00 | 0.00 |
| ATOM | 5680 | CZ   | TYR | X | 378 | 45.542 | 18.354 | 42.107 | 0.00 | 0.00 |
| ATOM | 5681 | OH   | TYR | X | 378 | 44.821 | 19.471 | 42.009 | 0.00 | 0.00 |
| ATOM | 5682 | HH   | TYR | X | 378 | 45.343 | 20.107 | 41.515 | 0.00 | 0.00 |
| ATOM | 5683 | CE2  | TYR | X | 378 | 44.979 | 17.287 | 42.834 | 0.00 | 0.00 |
| ATOM | 5684 | HE2  | TYR | X | 378 | 44.080 | 17.444 | 43.411 | 0.00 | 0.00 |
| ATOM | 5685 | CD2  | TYR | X | 378 | 45.671 | 16.091 | 42.827 | 0.00 | 0.00 |
| ATOM | 5686 | HD2  | TYR | X | 378 | 45.311 | 15.254 | 43.407 | 0.00 | 0.00 |
| ATOM | 5687 | C    | TYR | X | 378 | 48.714 | 12.747 | 41.428 | 0.00 | 0.00 |
| ATOM | 5688 | O    | TYR | X | 378 | 49.807 | 13.221 | 41.109 | 0.00 | 0.00 |
| ATOM | 5689 | N    | THR | X | 379 | 48.466 | 11.452 | 41.786 | 0.00 | 0.00 |
| ATOM | 5690 | H    | THR | X | 379 | 47.509 | 11.200 | 41.990 | 0.00 | 0.00 |
| ATOM | 5691 | CA   | THR | X | 379 | 49.442 | 10.372 | 41.729 | 0.00 | 0.00 |
| ATOM | 5692 | HA   | THR | X | 379 | 50.388 | 10.769 | 42.095 | 0.00 | 0.00 |
| ATOM | 5693 | CB   | THR | X | 379 | 49.031 | 9.200  | 42.594 | 0.00 | 0.00 |
| ATOM | 5694 | HB   | THR | X | 379 | 47.963 | 8.991  | 42.540 | 0.00 | 0.00 |
| ATOM | 5695 | CG2  | THR | X | 379 | 49.706 | 7.847  | 42.257 | 0.00 | 0.00 |
| ATOM | 5696 | HG21 | THR | X | 379 | 49.434 | 7.536  | 41.248 | 0.00 | 0.00 |
| ATOM | 5697 | HG22 | THR | X | 379 | 50.788 | 7.928  | 42.366 | 0.00 | 0.00 |
| ATOM | 5698 | HG23 | THR | X | 379 | 49.333 | 7.031  | 42.876 | 0.00 | 0.00 |
| ATOM | 5699 | OG1  | THR | X | 379 | 49.362 | 9.493  | 43.926 | 0.00 | 0.00 |
| ATOM | 5700 | HG1  | THR | X | 379 | 48.716 | 10.149 | 44.198 | 0.00 | 0.00 |
| ATOM | 5701 | C    | THR | X | 379 | 49.655 | 9.972  | 40.268 | 0.00 | 0.00 |
| ATOM | 5702 | O    | THR | X | 379 | 48.712 | 9.711  | 39.593 | 0.00 | 0.00 |
| ATOM | 5703 | N    | ASP | X | 380 | 50.860 | 10.043 | 39.757 | 0.00 | 0.00 |
| ATOM | 5704 | H    | ASP | X | 380 | 51.574 | 10.288 | 40.427 | 0.00 | 0.00 |
| ATOM | 5705 | CA   | ASP | X | 380 | 51.219 | 9.778  | 38.358 | 0.00 | 0.00 |
| ATOM | 5706 | HA   | ASP | X | 380 | 50.531 | 10.343 | 37.730 | 0.00 | 0.00 |
| ATOM | 5707 | CB   | ASP | X | 380 | 52.690 | 10.215 | 38.110 | 0.00 | 0.00 |
| ATOM | 5708 | HB2  | ASP | X | 380 | 52.872 | 11.118 | 38.693 | 0.00 | 0.00 |
| ATOM | 5709 | HB3  | ASP | X | 380 | 53.361 | 9.460  | 38.520 | 0.00 | 0.00 |
| ATOM | 5710 | CG   | ASP | X | 380 | 52.809 | 10.431 | 36.591 | 0.00 | 0.00 |
| ATOM | 5711 | OD1  | ASP | X | 380 | 53.448 | 9.625  | 35.899 | 0.00 | 0.00 |

|      |      |      |     |   |     |        |        |        |      |      |
|------|------|------|-----|---|-----|--------|--------|--------|------|------|
| ATOM | 5712 | OD2  | ASP | X | 380 | 52.292 | 11.459 | 36.178 | 0.00 | 0.00 |
| ATOM | 5713 | C    | ASP | X | 380 | 51.075 | 8.345  | 37.851 | 0.00 | 0.00 |
| ATOM | 5714 | O    | ASP | X | 380 | 51.397 | 7.417  | 38.550 | 0.00 | 0.00 |
| ATOM | 5715 | N    | TRP | X | 381 | 50.550 | 8.068  | 36.650 | 0.00 | 0.00 |
| ATOM | 5716 | H    | TRP | X | 381 | 50.610 | 8.870  | 36.040 | 0.00 | 0.00 |
| ATOM | 5717 | CA   | TRP | X | 381 | 50.242 | 6.752  | 36.047 | 0.00 | 0.00 |
| ATOM | 5718 | HA   | TRP | X | 381 | 49.744 | 6.229  | 36.863 | 0.00 | 0.00 |
| ATOM | 5719 | CB   | TRP | X | 381 | 49.194 | 6.935  | 34.920 | 0.00 | 0.00 |
| ATOM | 5720 | HB2  | TRP | X | 381 | 48.377 | 7.594  | 35.214 | 0.00 | 0.00 |
| ATOM | 5721 | HB3  | TRP | X | 381 | 49.755 | 7.464  | 34.150 | 0.00 | 0.00 |
| ATOM | 5722 | CG   | TRP | X | 381 | 48.552 | 5.661  | 34.337 | 0.00 | 0.00 |
| ATOM | 5723 | CD1  | TRP | X | 381 | 47.469 | 4.975  | 34.806 | 0.00 | 0.00 |
| ATOM | 5724 | HD1  | TRP | X | 381 | 46.899 | 5.299  | 35.665 | 0.00 | 0.00 |
| ATOM | 5725 | NE1  | TRP | X | 381 | 47.309 | 3.779  | 34.076 | 0.00 | 0.00 |
| ATOM | 5726 | HE1  | TRP | X | 381 | 46.558 | 3.124  | 34.240 | 0.00 | 0.00 |
| ATOM | 5727 | CE2  | TRP | X | 381 | 48.350 | 3.596  | 33.149 | 0.00 | 0.00 |
| ATOM | 5728 | CZ2  | TRP | X | 381 | 48.777 | 2.545  | 32.390 | 0.00 | 0.00 |
| ATOM | 5729 | HZ2  | TRP | X | 381 | 48.187 | 1.641  | 32.379 | 0.00 | 0.00 |
| ATOM | 5730 | CH2  | TRP | X | 381 | 49.983 | 2.668  | 31.691 | 0.00 | 0.00 |
| ATOM | 5731 | HH2  | TRP | X | 381 | 50.461 | 1.858  | 31.160 | 0.00 | 0.00 |
| ATOM | 5732 | CZ3  | TRP | X | 381 | 50.787 | 3.809  | 31.826 | 0.00 | 0.00 |
| ATOM | 5733 | HZ3  | TRP | X | 381 | 51.764 | 3.806  | 31.365 | 0.00 | 0.00 |
| ATOM | 5734 | CE3  | TRP | X | 381 | 50.374 | 4.840  | 32.626 | 0.00 | 0.00 |
| ATOM | 5735 | HE3  | TRP | X | 381 | 51.089 | 5.649  | 32.653 | 0.00 | 0.00 |
| ATOM | 5736 | CD2  | TRP | X | 381 | 49.186 | 4.757  | 33.394 | 0.00 | 0.00 |
| ATOM | 5737 | C    | TRP | X | 381 | 51.572 | 5.941  | 35.746 | 0.00 | 0.00 |
| ATOM | 5738 | O    | TRP | X | 381 | 51.447 | 4.708  | 35.574 | 0.00 | 0.00 |
| ATOM | 5739 | N    | LEU | X | 382 | 52.763 | 6.573  | 35.718 | 0.00 | 0.00 |
| ATOM | 5740 | H    | LEU | X | 382 | 52.867 | 7.531  | 36.020 | 0.00 | 0.00 |
| ATOM | 5741 | CA   | LEU | X | 382 | 54.116 | 5.955  | 35.463 | 0.00 | 0.00 |
| ATOM | 5742 | HA   | LEU | X | 382 | 53.958 | 4.877  | 35.441 | 0.00 | 0.00 |
| ATOM | 5743 | CB   | LEU | X | 382 | 54.475 | 6.461  | 34.026 | 0.00 | 0.00 |
| ATOM | 5744 | HB2  | LEU | X | 382 | 53.644 | 6.178  | 33.380 | 0.00 | 0.00 |
| ATOM | 5745 | HB3  | LEU | X | 382 | 54.548 | 7.542  | 33.904 | 0.00 | 0.00 |
| ATOM | 5746 | CG   | LEU | X | 382 | 55.737 | 5.764  | 33.446 | 0.00 | 0.00 |
| ATOM | 5747 | HG   | LEU | X | 382 | 56.611 | 6.225  | 33.905 | 0.00 | 0.00 |
| ATOM | 5748 | CD1  | LEU | X | 382 | 55.899 | 4.252  | 33.572 | 0.00 | 0.00 |
| ATOM | 5749 | HD11 | LEU | X | 382 | 56.532 | 3.926  | 34.397 | 0.00 | 0.00 |
| ATOM | 5750 | HD12 | LEU | X | 382 | 54.910 | 3.815  | 33.711 | 0.00 | 0.00 |
| ATOM | 5751 | HD13 | LEU | X | 382 | 56.285 | 3.881  | 32.623 | 0.00 | 0.00 |
| ATOM | 5752 | CD2  | LEU | X | 382 | 55.729 | 6.227  | 31.920 | 0.00 | 0.00 |
| ATOM | 5753 | HD21 | LEU | X | 382 | 56.615 | 5.886  | 31.385 | 0.00 | 0.00 |
| ATOM | 5754 | HD22 | LEU | X | 382 | 54.898 | 5.753  | 31.399 | 0.00 | 0.00 |
| ATOM | 5755 | HD23 | LEU | X | 382 | 55.714 | 7.317  | 31.931 | 0.00 | 0.00 |
| ATOM | 5756 | C    | LEU | X | 382 | 55.252 | 6.188  | 36.463 | 0.00 | 0.00 |
| ATOM | 5757 | O    | LEU | X | 382 | 56.095 | 5.338  | 36.629 | 0.00 | 0.00 |
| ATOM | 5758 | N    | HIE | X | 383 | 55.213 | 7.293  | 37.239 | 0.00 | 0.00 |
| ATOM | 5759 | H    | HIE | X | 383 | 54.468 | 7.943  | 37.032 | 0.00 | 0.00 |
| ATOM | 5760 | CA   | HIE | X | 383 | 56.150 | 7.646  | 38.251 | 0.00 | 0.00 |
| ATOM | 5761 | HA   | HIE | X | 383 | 56.895 | 6.876  | 38.452 | 0.00 | 0.00 |
| ATOM | 5762 | CB   | HIE | X | 383 | 56.917 | 8.861  | 37.757 | 0.00 | 0.00 |
| ATOM | 5763 | HB2  | HIE | X | 383 | 56.262 | 9.732  | 37.755 | 0.00 | 0.00 |
| ATOM | 5764 | HB3  | HIE | X | 383 | 57.656 | 9.102  | 38.521 | 0.00 | 0.00 |
| ATOM | 5765 | CG   | HIE | X | 383 | 57.726 | 8.606  | 36.494 | 0.00 | 0.00 |
| ATOM | 5766 | ND1  | HIE | X | 383 | 59.056 | 8.205  | 36.445 | 0.00 | 0.00 |
| ATOM | 5767 | CE1  | HIE | X | 383 | 59.417 | 8.273  | 35.149 | 0.00 | 0.00 |
| ATOM | 5768 | HE1  | HIE | X | 383 | 60.420 | 8.092  | 34.792 | 0.00 | 0.00 |
| ATOM | 5769 | NE2  | HIE | X | 383 | 58.400 | 8.666  | 34.387 | 0.00 | 0.00 |
| ATOM | 5770 | HE2  | HIE | X | 383 | 58.405 | 8.745  | 33.380 | 0.00 | 0.00 |
| ATOM | 5771 | CD2  | HIE | X | 383 | 57.281 | 8.827  | 35.206 | 0.00 | 0.00 |
| ATOM | 5772 | HD2  | HIE | X | 383 | 56.281 | 9.128  | 34.933 | 0.00 | 0.00 |
| ATOM | 5773 | C    | HIE | X | 383 | 55.470 | 7.868  | 39.680 | 0.00 | 0.00 |
| ATOM | 5774 | O    | HIE | X | 383 | 55.598 | 9.027  | 40.186 | 0.00 | 0.00 |
| ATOM | 5775 | N    | PRO | X | 384 | 54.744 | 6.906  | 40.246 | 0.00 | 0.00 |
| ATOM | 5776 | CD   | PRO | X | 384 | 54.657 | 5.492  | 39.834 | 0.00 | 0.00 |
| ATOM | 5777 | HD2  | PRO | X | 384 | 55.627 | 5.082  | 39.554 | 0.00 | 0.00 |
| ATOM | 5778 | HD3  | PRO | X | 384 | 54.043 | 5.249  | 38.967 | 0.00 | 0.00 |
| ATOM | 5779 | CG   | PRO | X | 384 | 54.120 | 4.797  | 41.109 | 0.00 | 0.00 |
| ATOM | 5780 | HG2  | PRO | X | 384 | 54.922 | 4.767  | 41.847 | 0.00 | 0.00 |
| ATOM | 5781 | HG3  | PRO | X | 384 | 53.729 | 3.803  | 40.894 | 0.00 | 0.00 |

|      |      |     |     |   |     |        |        |        |      |      |
|------|------|-----|-----|---|-----|--------|--------|--------|------|------|
| ATOM | 5782 | CB  | PRO | X | 384 | 52.995 | 5.783  | 41.493 | 0.00 | 0.00 |
| ATOM | 5783 | HB2 | PRO | X | 384 | 52.751 | 5.623  | 42.543 | 0.00 | 0.00 |
| ATOM | 5784 | HB3 | PRO | X | 384 | 52.201 | 5.730  | 40.748 | 0.00 | 0.00 |
| ATOM | 5785 | CA  | PRO | X | 384 | 53.766 | 7.149  | 41.308 | 0.00 | 0.00 |
| ATOM | 5786 | HA  | PRO | X | 384 | 52.942 | 7.819  | 41.064 | 0.00 | 0.00 |
| ATOM | 5787 | C   | PRO | X | 384 | 54.309 | 7.617  | 42.591 | 0.00 | 0.00 |
| ATOM | 5788 | O   | PRO | X | 384 | 53.565 | 8.038  | 43.445 | 0.00 | 0.00 |
| ATOM | 5789 | N   | GLU | X | 385 | 55.586 | 7.406  | 42.816 | 0.00 | 0.00 |
| ATOM | 5790 | H   | GLU | X | 385 | 56.197 | 7.047  | 42.096 | 0.00 | 0.00 |
| ATOM | 5791 | CA  | GLU | X | 385 | 56.271 | 7.860  | 44.065 | 0.00 | 0.00 |
| ATOM | 5792 | HA  | GLU | X | 385 | 55.669 | 8.641  | 44.529 | 0.00 | 0.00 |
| ATOM | 5793 | CB  | GLU | X | 385 | 56.400 | 6.710  | 45.106 | 0.00 | 0.00 |
| ATOM | 5794 | HB2 | GLU | X | 385 | 57.235 | 6.075  | 44.810 | 0.00 | 0.00 |
| ATOM | 5795 | HB3 | GLU | X | 385 | 56.696 | 7.241  | 46.011 | 0.00 | 0.00 |
| ATOM | 5796 | CG  | GLU | X | 385 | 55.119 | 5.955  | 45.508 | 0.00 | 0.00 |
| ATOM | 5797 | HG2 | GLU | X | 385 | 54.356 | 6.674  | 45.808 | 0.00 | 0.00 |
| ATOM | 5798 | HG3 | GLU | X | 385 | 54.732 | 5.477  | 44.608 | 0.00 | 0.00 |
| ATOM | 5799 | CD  | GLU | X | 385 | 55.428 | 4.927  | 46.606 | 0.00 | 0.00 |
| ATOM | 5800 | OE1 | GLU | X | 385 | 55.616 | 5.305  | 47.786 | 0.00 | 0.00 |
| ATOM | 5801 | OE2 | GLU | X | 385 | 55.453 | 3.744  | 46.255 | 0.00 | 0.00 |
| ATOM | 5802 | C   | GLU | X | 385 | 57.655 | 8.537  | 43.848 | 0.00 | 0.00 |
| ATOM | 5803 | O   | GLU | X | 385 | 58.426 | 8.747  | 44.767 | 0.00 | 0.00 |
| ATOM | 5804 | N   | ASP | X | 386 | 57.985 | 8.894  | 42.618 | 0.00 | 0.00 |
| ATOM | 5805 | H   | ASP | X | 386 | 57.263 | 8.813  | 41.918 | 0.00 | 0.00 |
| ATOM | 5806 | CA  | ASP | X | 386 | 59.100 | 9.750  | 42.242 | 0.00 | 0.00 |
| ATOM | 5807 | HA  | ASP | X | 386 | 60.042 | 9.226  | 42.402 | 0.00 | 0.00 |
| ATOM | 5808 | CB  | ASP | X | 386 | 58.980 | 10.052 | 40.753 | 0.00 | 0.00 |
| ATOM | 5809 | HB2 | ASP | X | 386 | 59.138 | 9.063  | 40.322 | 0.00 | 0.00 |
| ATOM | 5810 | HB3 | ASP | X | 386 | 57.993 | 10.489 | 40.604 | 0.00 | 0.00 |
| ATOM | 5811 | CG  | ASP | X | 386 | 60.148 | 10.914 | 40.236 | 0.00 | 0.00 |
| ATOM | 5812 | OD1 | ASP | X | 386 | 61.285 | 10.578 | 40.628 | 0.00 | 0.00 |
| ATOM | 5813 | OD2 | ASP | X | 386 | 59.823 | 11.900 | 39.543 | 0.00 | 0.00 |
| ATOM | 5814 | C   | ASP | X | 386 | 59.041 | 11.168 | 42.948 | 0.00 | 0.00 |
| ATOM | 5815 | O   | ASP | X | 386 | 58.116 | 11.947 | 42.689 | 0.00 | 0.00 |
| ATOM | 5816 | N   | PRO | X | 387 | 60.073 | 11.562 | 43.732 | 0.00 | 0.00 |
| ATOM | 5817 | CD  | PRO | X | 387 | 61.192 | 10.691 | 44.039 | 0.00 | 0.00 |
| ATOM | 5818 | HD2 | PRO | X | 387 | 61.874 | 10.657 | 43.189 | 0.00 | 0.00 |
| ATOM | 5819 | HD3 | PRO | X | 387 | 60.926 | 9.703  | 44.416 | 0.00 | 0.00 |
| ATOM | 5820 | CG  | PRO | X | 387 | 62.023 | 11.325 | 45.174 | 0.00 | 0.00 |
| ATOM | 5821 | HG2 | PRO | X | 387 | 63.071 | 11.162 | 44.923 | 0.00 | 0.00 |
| ATOM | 5822 | HG3 | PRO | X | 387 | 61.613 | 10.912 | 46.096 | 0.00 | 0.00 |
| ATOM | 5823 | CB  | PRO | X | 387 | 61.602 | 12.875 | 45.074 | 0.00 | 0.00 |
| ATOM | 5824 | HB2 | PRO | X | 387 | 62.320 | 13.306 | 44.375 | 0.00 | 0.00 |
| ATOM | 5825 | HB3 | PRO | X | 387 | 61.540 | 13.390 | 46.032 | 0.00 | 0.00 |
| ATOM | 5826 | CA  | PRO | X | 387 | 60.147 | 12.817 | 44.480 | 0.00 | 0.00 |
| ATOM | 5827 | HA  | PRO | X | 387 | 59.370 | 12.759 | 45.241 | 0.00 | 0.00 |
| ATOM | 5828 | C   | PRO | X | 387 | 59.872 | 14.109 | 43.741 | 0.00 | 0.00 |
| ATOM | 5829 | O   | PRO | X | 387 | 59.258 | 15.042 | 44.298 | 0.00 | 0.00 |
| ATOM | 5830 | N   | ALA | X | 388 | 60.212 | 14.192 | 42.455 | 0.00 | 0.00 |
| ATOM | 5831 | H   | ALA | X | 388 | 60.803 | 13.507 | 42.007 | 0.00 | 0.00 |
| ATOM | 5832 | CA  | ALA | X | 388 | 59.921 | 15.355 | 41.561 | 0.00 | 0.00 |
| ATOM | 5833 | HA  | ALA | X | 388 | 60.079 | 16.228 | 42.195 | 0.00 | 0.00 |
| ATOM | 5834 | CB  | ALA | X | 388 | 60.984 | 15.291 | 40.439 | 0.00 | 0.00 |
| ATOM | 5835 | HB1 | ALA | X | 388 | 61.103 | 16.219 | 39.880 | 0.00 | 0.00 |
| ATOM | 5836 | HB2 | ALA | X | 388 | 61.874 | 14.937 | 40.959 | 0.00 | 0.00 |
| ATOM | 5837 | HB3 | ALA | X | 388 | 60.618 | 14.537 | 39.741 | 0.00 | 0.00 |
| ATOM | 5838 | C   | ALA | X | 388 | 58.458 | 15.393 | 41.051 | 0.00 | 0.00 |
| ATOM | 5839 | O   | ALA | X | 388 | 57.863 | 16.480 | 40.965 | 0.00 | 0.00 |
| ATOM | 5840 | N   | ARG | X | 389 | 57.797 | 14.290 | 40.756 | 0.00 | 0.00 |
| ATOM | 5841 | H   | ARG | X | 389 | 58.341 | 13.439 | 40.737 | 0.00 | 0.00 |
| ATOM | 5842 | CA  | ARG | X | 389 | 56.440 | 14.206 | 40.339 | 0.00 | 0.00 |
| ATOM | 5843 | HA  | ARG | X | 389 | 56.218 | 14.930 | 39.555 | 0.00 | 0.00 |
| ATOM | 5844 | CB  | ARG | X | 389 | 56.026 | 12.799 | 39.849 | 0.00 | 0.00 |
| ATOM | 5845 | HB2 | ARG | X | 389 | 56.627 | 11.971 | 40.226 | 0.00 | 0.00 |
| ATOM | 5846 | HB3 | ARG | X | 389 | 55.046 | 12.566 | 40.264 | 0.00 | 0.00 |
| ATOM | 5847 | CG  | ARG | X | 389 | 56.068 | 12.766 | 38.342 | 0.00 | 0.00 |
| ATOM | 5848 | HG2 | ARG | X | 389 | 55.484 | 11.894 | 38.048 | 0.00 | 0.00 |
| ATOM | 5849 | HG3 | ARG | X | 389 | 55.687 | 13.682 | 37.891 | 0.00 | 0.00 |
| ATOM | 5850 | CD  | ARG | X | 389 | 57.451 | 12.529 | 37.796 | 0.00 | 0.00 |
| ATOM | 5851 | HD2 | ARG | X | 389 | 58.063 | 13.391 | 38.064 | 0.00 | 0.00 |

|      |      |      |     |   |     |        |        |        |      |      |
|------|------|------|-----|---|-----|--------|--------|--------|------|------|
| ATOM | 5852 | HD3  | ARG | X | 389 | 57.841 | 11.610 | 38.234 | 0.00 | 0.00 |
| ATOM | 5853 | NE   | ARG | X | 389 | 57.533 | 12.487 | 36.395 | 0.00 | 0.00 |
| ATOM | 5854 | HE   | ARG | X | 389 | 56.680 | 12.201 | 35.936 | 0.00 | 0.00 |
| ATOM | 5855 | CZ   | ARG | X | 389 | 58.606 | 12.390 | 35.638 | 0.00 | 0.00 |
| ATOM | 5856 | NH1  | ARG | X | 389 | 59.841 | 12.631 | 36.046 | 0.00 | 0.00 |
| ATOM | 5857 | HH11 | ARG | X | 389 | 60.034 | 12.705 | 37.035 | 0.00 | 0.00 |
| ATOM | 5858 | HH12 | ARG | X | 389 | 60.547 | 12.656 | 35.325 | 0.00 | 0.00 |
| ATOM | 5859 | NH2  | ARG | X | 389 | 58.440 | 12.034 | 34.386 | 0.00 | 0.00 |
| ATOM | 5860 | HH21 | ARG | X | 389 | 57.471 | 11.964 | 34.110 | 0.00 | 0.00 |
| ATOM | 5861 | HH22 | ARG | X | 389 | 59.209 | 11.956 | 33.736 | 0.00 | 0.00 |
| ATOM | 5862 | C    | ARG | X | 389 | 55.578 | 14.636 | 41.546 | 0.00 | 0.00 |
| ATOM | 5863 | O    | ARG | X | 389 | 54.567 | 15.299 | 41.316 | 0.00 | 0.00 |
| ATOM | 5864 | N    | LEU | X | 390 | 55.914 | 14.061 | 42.731 | 0.00 | 0.00 |
| ATOM | 5865 | H    | LEU | X | 390 | 56.738 | 13.478 | 42.738 | 0.00 | 0.00 |
| ATOM | 5866 | CA   | LEU | X | 390 | 55.279 | 14.515 | 44.013 | 0.00 | 0.00 |
| ATOM | 5867 | HA   | LEU | X | 390 | 54.217 | 14.290 | 43.913 | 0.00 | 0.00 |
| ATOM | 5868 | CB   | LEU | X | 390 | 55.922 | 13.690 | 45.135 | 0.00 | 0.00 |
| ATOM | 5869 | HB2  | LEU | X | 390 | 57.005 | 13.800 | 45.074 | 0.00 | 0.00 |
| ATOM | 5870 | HB3  | LEU | X | 390 | 55.485 | 14.084 | 46.053 | 0.00 | 0.00 |
| ATOM | 5871 | CG   | LEU | X | 390 | 55.533 | 12.196 | 45.063 | 0.00 | 0.00 |
| ATOM | 5872 | HG   | LEU | X | 390 | 55.920 | 11.867 | 44.099 | 0.00 | 0.00 |
| ATOM | 5873 | CD1  | LEU | X | 390 | 56.321 | 11.453 | 46.159 | 0.00 | 0.00 |
| ATOM | 5874 | HD11 | LEU | X | 390 | 57.375 | 11.627 | 45.943 | 0.00 | 0.00 |
| ATOM | 5875 | HD12 | LEU | X | 390 | 56.189 | 11.874 | 47.156 | 0.00 | 0.00 |
| ATOM | 5876 | HD13 | LEU | X | 390 | 56.153 | 10.387 | 46.005 | 0.00 | 0.00 |
| ATOM | 5877 | CD2  | LEU | X | 390 | 54.010 | 11.818 | 45.204 | 0.00 | 0.00 |
| ATOM | 5878 | HD21 | LEU | X | 390 | 53.896 | 10.745 | 45.045 | 0.00 | 0.00 |
| ATOM | 5879 | HD22 | LEU | X | 390 | 53.760 | 12.013 | 46.247 | 0.00 | 0.00 |
| ATOM | 5880 | HD23 | LEU | X | 390 | 53.410 | 12.417 | 44.518 | 0.00 | 0.00 |
| ATOM | 5881 | C    | LEU | X | 390 | 55.350 | 16.019 | 44.285 | 0.00 | 0.00 |
| ATOM | 5882 | O    | LEU | X | 390 | 54.347 | 16.676 | 44.589 | 0.00 | 0.00 |
| ATOM | 5883 | N    | ARG | X | 391 | 56.582 | 16.604 | 44.222 | 0.00 | 0.00 |
| ATOM | 5884 | H    | ARG | X | 391 | 57.379 | 16.001 | 44.076 | 0.00 | 0.00 |
| ATOM | 5885 | CA   | ARG | X | 391 | 56.889 | 18.021 | 44.484 | 0.00 | 0.00 |
| ATOM | 5886 | HA   | ARG | X | 391 | 56.535 | 18.367 | 45.454 | 0.00 | 0.00 |
| ATOM | 5887 | CB   | ARG | X | 391 | 58.428 | 18.250 | 44.322 | 0.00 | 0.00 |
| ATOM | 5888 | HB2  | ARG | X | 391 | 58.900 | 17.518 | 44.978 | 0.00 | 0.00 |
| ATOM | 5889 | HB3  | ARG | X | 391 | 58.786 | 18.036 | 43.315 | 0.00 | 0.00 |
| ATOM | 5890 | CG   | ARG | X | 391 | 58.749 | 19.717 | 44.629 | 0.00 | 0.00 |
| ATOM | 5891 | HG2  | ARG | X | 391 | 57.939 | 20.315 | 44.210 | 0.00 | 0.00 |
| ATOM | 5892 | HG3  | ARG | X | 391 | 58.712 | 19.851 | 45.710 | 0.00 | 0.00 |
| ATOM | 5893 | CD   | ARG | X | 391 | 60.146 | 20.264 | 44.209 | 0.00 | 0.00 |
| ATOM | 5894 | HD2  | ARG | X | 391 | 60.202 | 21.334 | 44.407 | 0.00 | 0.00 |
| ATOM | 5895 | HD3  | ARG | X | 391 | 60.889 | 19.708 | 44.782 | 0.00 | 0.00 |
| ATOM | 5896 | NE   | ARG | X | 391 | 60.370 | 20.070 | 42.764 | 0.00 | 0.00 |
| ATOM | 5897 | HE   | ARG | X | 391 | 61.259 | 19.638 | 42.559 | 0.00 | 0.00 |
| ATOM | 5898 | CZ   | ARG | X | 391 | 59.560 | 20.416 | 41.745 | 0.00 | 0.00 |
| ATOM | 5899 | NH1  | ARG | X | 391 | 58.497 | 21.114 | 41.911 | 0.00 | 0.00 |
| ATOM | 5900 | HH11 | ARG | X | 391 | 58.150 | 21.300 | 42.842 | 0.00 | 0.00 |
| ATOM | 5901 | HH12 | ARG | X | 391 | 58.030 | 21.525 | 41.115 | 0.00 | 0.00 |
| ATOM | 5902 | NH2  | ARG | X | 391 | 59.765 | 20.109 | 40.507 | 0.00 | 0.00 |
| ATOM | 5903 | HH21 | ARG | X | 391 | 60.629 | 19.630 | 40.295 | 0.00 | 0.00 |
| ATOM | 5904 | HH22 | ARG | X | 391 | 59.050 | 20.456 | 39.884 | 0.00 | 0.00 |
| ATOM | 5905 | C    | ARG | X | 391 | 56.060 | 18.816 | 43.559 | 0.00 | 0.00 |
| ATOM | 5906 | O    | ARG | X | 391 | 55.542 | 19.884 | 43.981 | 0.00 | 0.00 |
| ATOM | 5907 | N    | GLU | X | 392 | 55.951 | 18.397 | 42.319 | 0.00 | 0.00 |
| ATOM | 5908 | H    | GLU | X | 392 | 56.548 | 17.628 | 42.051 | 0.00 | 0.00 |
| ATOM | 5909 | CA   | GLU | X | 392 | 55.350 | 19.225 | 41.261 | 0.00 | 0.00 |
| ATOM | 5910 | HA   | GLU | X | 392 | 55.669 | 20.263 | 41.353 | 0.00 | 0.00 |
| ATOM | 5911 | CB   | GLU | X | 392 | 55.831 | 18.705 | 39.950 | 0.00 | 0.00 |
| ATOM | 5912 | HB2  | GLU | X | 392 | 56.916 | 18.627 | 40.020 | 0.00 | 0.00 |
| ATOM | 5913 | HB3  | GLU | X | 392 | 55.275 | 17.771 | 39.867 | 0.00 | 0.00 |
| ATOM | 5914 | CG   | GLU | X | 392 | 55.505 | 19.687 | 38.748 | 0.00 | 0.00 |
| ATOM | 5915 | HG2  | GLU | X | 392 | 55.719 | 19.238 | 37.778 | 0.00 | 0.00 |
| ATOM | 5916 | HG3  | GLU | X | 392 | 54.430 | 19.863 | 38.792 | 0.00 | 0.00 |
| ATOM | 5917 | CD   | GLU | X | 392 | 56.309 | 20.994 | 38.861 | 0.00 | 0.00 |
| ATOM | 5918 | OE1  | GLU | X | 392 | 55.702 | 22.077 | 38.826 | 0.00 | 0.00 |
| ATOM | 5919 | OE2  | GLU | X | 392 | 57.526 | 20.915 | 38.981 | 0.00 | 0.00 |
| ATOM | 5920 | C    | GLU | X | 392 | 53.847 | 19.125 | 41.352 | 0.00 | 0.00 |
| ATOM | 5921 | O    | GLU | X | 392 | 53.197 | 20.128 | 41.099 | 0.00 | 0.00 |

|      |      |      |     |   |     |        |        |        |      |      |
|------|------|------|-----|---|-----|--------|--------|--------|------|------|
| ATOM | 5922 | N    | ALA | X | 393 | 53.248 | 17.990 | 41.686 | 0.00 | 0.00 |
| ATOM | 5923 | H    | ALA | X | 393 | 53.751 | 17.122 | 41.804 | 0.00 | 0.00 |
| ATOM | 5924 | CA   | ALA | X | 393 | 51.842 | 17.854 | 42.023 | 0.00 | 0.00 |
| ATOM | 5925 | HA   | ALA | X | 393 | 51.264 | 18.355 | 41.246 | 0.00 | 0.00 |
| ATOM | 5926 | CB   | ALA | X | 393 | 51.403 | 16.462 | 42.026 | 0.00 | 0.00 |
| ATOM | 5927 | HB1  | ALA | X | 393 | 50.314 | 16.445 | 41.997 | 0.00 | 0.00 |
| ATOM | 5928 | HB2  | ALA | X | 393 | 51.685 | 16.029 | 41.066 | 0.00 | 0.00 |
| ATOM | 5929 | HB3  | ALA | X | 393 | 51.816 | 15.791 | 42.781 | 0.00 | 0.00 |
| ATOM | 5930 | C    | ALA | X | 393 | 51.431 | 18.764 | 43.189 | 0.00 | 0.00 |
| ATOM | 5931 | O    | ALA | X | 393 | 50.446 | 19.509 | 43.131 | 0.00 | 0.00 |
| ATOM | 5932 | N    | LEU | X | 394 | 52.244 | 18.829 | 44.235 | 0.00 | 0.00 |
| ATOM | 5933 | H    | LEU | X | 394 | 52.979 | 18.144 | 44.332 | 0.00 | 0.00 |
| ATOM | 5934 | CA   | LEU | X | 394 | 51.926 | 19.781 | 45.291 | 0.00 | 0.00 |
| ATOM | 5935 | HA   | LEU | X | 394 | 50.903 | 19.698 | 45.657 | 0.00 | 0.00 |
| ATOM | 5936 | CB   | LEU | X | 394 | 52.849 | 19.360 | 46.436 | 0.00 | 0.00 |
| ATOM | 5937 | HB2  | LEU | X | 394 | 52.881 | 18.270 | 46.459 | 0.00 | 0.00 |
| ATOM | 5938 | HB3  | LEU | X | 394 | 53.847 | 19.643 | 46.100 | 0.00 | 0.00 |
| ATOM | 5939 | CG   | LEU | X | 394 | 52.522 | 20.078 | 47.781 | 0.00 | 0.00 |
| ATOM | 5940 | HG   | LEU | X | 394 | 52.654 | 21.154 | 47.665 | 0.00 | 0.00 |
| ATOM | 5941 | CD1  | LEU | X | 394 | 51.129 | 19.919 | 48.419 | 0.00 | 0.00 |
| ATOM | 5942 | HD11 | LEU | X | 394 | 50.434 | 20.192 | 47.626 | 0.00 | 0.00 |
| ATOM | 5943 | HD12 | LEU | X | 394 | 50.723 | 18.925 | 48.603 | 0.00 | 0.00 |
| ATOM | 5944 | HD13 | LEU | X | 394 | 50.932 | 20.562 | 49.277 | 0.00 | 0.00 |
| ATOM | 5945 | CD2  | LEU | X | 394 | 53.443 | 19.549 | 48.874 | 0.00 | 0.00 |
| ATOM | 5946 | HD21 | LEU | X | 394 | 54.469 | 19.794 | 48.597 | 0.00 | 0.00 |
| ATOM | 5947 | HD22 | LEU | X | 394 | 53.191 | 20.014 | 49.826 | 0.00 | 0.00 |
| ATOM | 5948 | HD23 | LEU | X | 394 | 53.325 | 18.470 | 48.980 | 0.00 | 0.00 |
| ATOM | 5949 | C    | LEU | X | 394 | 51.968 | 21.279 | 44.947 | 0.00 | 0.00 |
| ATOM | 5950 | O    | LEU | X | 394 | 51.051 | 22.041 | 45.302 | 0.00 | 0.00 |
| ATOM | 5951 | N    | SER | X | 395 | 52.867 | 21.670 | 44.050 | 0.00 | 0.00 |
| ATOM | 5952 | H    | SER | X | 395 | 53.703 | 21.167 | 43.792 | 0.00 | 0.00 |
| ATOM | 5953 | CA   | SER | X | 395 | 52.894 | 22.977 | 43.550 | 0.00 | 0.00 |
| ATOM | 5954 | HA   | SER | X | 395 | 52.868 | 23.631 | 44.422 | 0.00 | 0.00 |
| ATOM | 5955 | CB   | SER | X | 395 | 54.232 | 23.332 | 42.828 | 0.00 | 0.00 |
| ATOM | 5956 | HB2  | SER | X | 395 | 54.130 | 23.122 | 41.764 | 0.00 | 0.00 |
| ATOM | 5957 | HB3  | SER | X | 395 | 54.443 | 24.400 | 42.884 | 0.00 | 0.00 |
| ATOM | 5958 | OG   | SER | X | 395 | 55.433 | 22.727 | 43.254 | 0.00 | 0.00 |
| ATOM | 5959 | HG   | SER | X | 395 | 56.063 | 22.823 | 42.536 | 0.00 | 0.00 |
| ATOM | 5960 | C    | SER | X | 395 | 51.750 | 23.117 | 42.522 | 0.00 | 0.00 |
| ATOM | 5961 | O    | SER | X | 395 | 51.391 | 24.241 | 42.185 | 0.00 | 0.00 |
| ATOM | 5962 | N    | ASP | X | 396 | 51.236 | 22.066 | 41.937 | 0.00 | 0.00 |
| ATOM | 5963 | H    | ASP | X | 396 | 51.677 | 21.158 | 41.977 | 0.00 | 0.00 |
| ATOM | 5964 | CA   | ASP | X | 396 | 49.935 | 22.170 | 41.264 | 0.00 | 0.00 |
| ATOM | 5965 | HA   | ASP | X | 396 | 50.082 | 23.040 | 40.623 | 0.00 | 0.00 |
| ATOM | 5966 | CB   | ASP | X | 396 | 49.693 | 20.922 | 40.356 | 0.00 | 0.00 |
| ATOM | 5967 | HB2  | ASP | X | 396 | 50.023 | 19.997 | 40.828 | 0.00 | 0.00 |
| ATOM | 5968 | HB3  | ASP | X | 396 | 48.615 | 20.879 | 40.200 | 0.00 | 0.00 |
| ATOM | 5969 | CG   | ASP | X | 396 | 50.146 | 20.935 | 38.862 | 0.00 | 0.00 |
| ATOM | 5970 | OD1  | ASP | X | 396 | 49.751 | 21.833 | 38.079 | 0.00 | 0.00 |
| ATOM | 5971 | OD2  | ASP | X | 396 | 50.630 | 19.858 | 38.499 | 0.00 | 0.00 |
| ATOM | 5972 | C    | ASP | X | 396 | 48.750 | 22.292 | 42.243 | 0.00 | 0.00 |
| ATOM | 5973 | O    | ASP | X | 396 | 47.950 | 23.215 | 42.057 | 0.00 | 0.00 |
| ATOM | 5974 | N    | VAL | X | 397 | 48.661 | 21.445 | 43.213 | 0.00 | 0.00 |
| ATOM | 5975 | H    | VAL | X | 397 | 49.245 | 20.627 | 43.311 | 0.00 | 0.00 |
| ATOM | 5976 | CA   | VAL | X | 397 | 47.542 | 21.509 | 44.223 | 0.00 | 0.00 |
| ATOM | 5977 | HA   | VAL | X | 397 | 46.559 | 21.308 | 43.797 | 0.00 | 0.00 |
| ATOM | 5978 | CB   | VAL | X | 397 | 47.625 | 20.546 | 45.459 | 0.00 | 0.00 |
| ATOM | 5979 | HB   | VAL | X | 397 | 48.582 | 20.836 | 45.892 | 0.00 | 0.00 |
| ATOM | 5980 | CG1  | VAL | X | 397 | 46.525 | 20.764 | 46.521 | 0.00 | 0.00 |
| ATOM | 5981 | HG11 | VAL | X | 397 | 46.658 | 21.765 | 46.931 | 0.00 | 0.00 |
| ATOM | 5982 | HG12 | VAL | X | 397 | 45.512 | 20.632 | 46.141 | 0.00 | 0.00 |
| ATOM | 5983 | HG13 | VAL | X | 397 | 46.759 | 20.163 | 47.400 | 0.00 | 0.00 |
| ATOM | 5984 | CG2  | VAL | X | 397 | 47.756 | 19.078 | 45.174 | 0.00 | 0.00 |
| ATOM | 5985 | HG21 | VAL | X | 397 | 48.374 | 18.497 | 45.859 | 0.00 | 0.00 |
| ATOM | 5986 | HG22 | VAL | X | 397 | 46.778 | 18.640 | 44.976 | 0.00 | 0.00 |
| ATOM | 5987 | HG23 | VAL | X | 397 | 48.287 | 18.936 | 44.232 | 0.00 | 0.00 |
| ATOM | 5988 | C    | VAL | X | 397 | 47.426 | 22.954 | 44.821 | 0.00 | 0.00 |
| ATOM | 5989 | O    | VAL | X | 397 | 46.342 | 23.509 | 44.759 | 0.00 | 0.00 |
| ATOM | 5990 | N    | VAL | X | 398 | 48.491 | 23.502 | 45.435 | 0.00 | 0.00 |
| ATOM | 5991 | H    | VAL | X | 398 | 49.415 | 23.095 | 45.431 | 0.00 | 0.00 |

|      |      |      |     |   |     |        |        |        |      |      |
|------|------|------|-----|---|-----|--------|--------|--------|------|------|
| ATOM | 5992 | CA   | VAL | X | 398 | 48.428 | 24.858 | 46.108 | 0.00 | 0.00 |
| ATOM | 5993 | HA   | VAL | X | 398 | 47.745 | 24.782 | 46.954 | 0.00 | 0.00 |
| ATOM | 5994 | CB   | VAL | X | 398 | 49.845 | 25.193 | 46.583 | 0.00 | 0.00 |
| ATOM | 5995 | HB   | VAL | X | 398 | 50.580 | 25.033 | 45.794 | 0.00 | 0.00 |
| ATOM | 5996 | CG1  | VAL | X | 398 | 50.007 | 26.474 | 47.388 | 0.00 | 0.00 |
| ATOM | 5997 | HG11 | VAL | X | 398 | 49.236 | 26.409 | 48.155 | 0.00 | 0.00 |
| ATOM | 5998 | HG12 | VAL | X | 398 | 51.033 | 26.450 | 47.756 | 0.00 | 0.00 |
| ATOM | 5999 | HG13 | VAL | X | 398 | 49.761 | 27.392 | 46.853 | 0.00 | 0.00 |
| ATOM | 6000 | CG2  | VAL | X | 398 | 50.313 | 24.068 | 47.584 | 0.00 | 0.00 |
| ATOM | 6001 | HG21 | VAL | X | 398 | 50.159 | 23.039 | 47.258 | 0.00 | 0.00 |
| ATOM | 6002 | HG22 | VAL | X | 398 | 51.355 | 24.313 | 47.789 | 0.00 | 0.00 |
| ATOM | 6003 | HG23 | VAL | X | 398 | 49.723 | 24.157 | 48.496 | 0.00 | 0.00 |
| ATOM | 6004 | C    | VAL | X | 398 | 47.943 | 25.974 | 45.238 | 0.00 | 0.00 |
| ATOM | 6005 | O    | VAL | X | 398 | 47.265 | 26.875 | 45.695 | 0.00 | 0.00 |
| ATOM | 6006 | N    | GLY | X | 399 | 48.121 | 25.882 | 43.921 | 0.00 | 0.00 |
| ATOM | 6007 | H    | GLY | X | 399 | 48.529 | 25.031 | 43.562 | 0.00 | 0.00 |
| ATOM | 6008 | CA   | GLY | X | 399 | 47.516 | 26.862 | 42.932 | 0.00 | 0.00 |
| ATOM | 6009 | HA2  | GLY | X | 399 | 47.499 | 27.835 | 43.348 | 0.00 | 0.00 |
| ATOM | 6010 | HA3  | GLY | X | 399 | 48.154 | 26.880 | 42.040 | 0.00 | 0.00 |
| ATOM | 6011 | C    | GLY | X | 399 | 46.152 | 26.394 | 42.456 | 0.00 | 0.00 |
| ATOM | 6012 | O    | GLY | X | 399 | 45.329 | 27.283 | 42.142 | 0.00 | 0.00 |
| ATOM | 6013 | N    | ASP | X | 400 | 45.733 | 25.177 | 42.476 | 0.00 | 0.00 |
| ATOM | 6014 | H    | ASP | X | 400 | 46.334 | 24.393 | 42.686 | 0.00 | 0.00 |
| ATOM | 6015 | CA   | ASP | X | 400 | 44.528 | 24.742 | 41.701 | 0.00 | 0.00 |
| ATOM | 6016 | HA   | ASP | X | 400 | 44.562 | 25.241 | 40.732 | 0.00 | 0.00 |
| ATOM | 6017 | CB   | ASP | X | 400 | 44.371 | 23.251 | 41.315 | 0.00 | 0.00 |
| ATOM | 6018 | HB2  | ASP | X | 400 | 44.495 | 22.673 | 42.230 | 0.00 | 0.00 |
| ATOM | 6019 | HB3  | ASP | X | 400 | 43.414 | 23.023 | 40.844 | 0.00 | 0.00 |
| ATOM | 6020 | CG   | ASP | X | 400 | 45.320 | 22.689 | 40.263 | 0.00 | 0.00 |
| ATOM | 6021 | OD1  | ASP | X | 400 | 45.640 | 23.516 | 39.354 | 0.00 | 0.00 |
| ATOM | 6022 | OD2  | ASP | X | 400 | 45.812 | 21.590 | 40.416 | 0.00 | 0.00 |
| ATOM | 6023 | C    | ASP | X | 400 | 43.206 | 25.276 | 42.326 | 0.00 | 0.00 |
| ATOM | 6024 | O    | ASP | X | 400 | 42.486 | 26.115 | 41.743 | 0.00 | 0.00 |
| ATOM | 6025 | N    | HIE | X | 401 | 42.968 | 24.860 | 43.574 | 0.00 | 0.00 |
| ATOM | 6026 | H    | HIE | X | 401 | 43.689 | 24.359 | 44.073 | 0.00 | 0.00 |
| ATOM | 6027 | CA   | HIE | X | 401 | 41.751 | 25.086 | 44.374 | 0.00 | 0.00 |
| ATOM | 6028 | HA   | HIE | X | 401 | 40.926 | 24.981 | 43.669 | 0.00 | 0.00 |
| ATOM | 6029 | CB   | HIE | X | 401 | 41.595 | 24.080 | 45.524 | 0.00 | 0.00 |
| ATOM | 6030 | HB2  | HIE | X | 401 | 40.546 | 24.128 | 45.815 | 0.00 | 0.00 |
| ATOM | 6031 | HB3  | HIE | X | 401 | 41.820 | 23.064 | 45.199 | 0.00 | 0.00 |
| ATOM | 6032 | CG   | HIE | X | 401 | 42.333 | 24.405 | 46.747 | 0.00 | 0.00 |
| ATOM | 6033 | ND1  | HIE | X | 401 | 41.769 | 24.783 | 48.005 | 0.00 | 0.00 |
| ATOM | 6034 | CE1  | HIE | X | 401 | 42.807 | 24.943 | 48.834 | 0.00 | 0.00 |
| ATOM | 6035 | HE1  | HIE | X | 401 | 42.664 | 25.158 | 49.883 | 0.00 | 0.00 |
| ATOM | 6036 | NE2  | HIE | X | 401 | 43.952 | 24.618 | 48.261 | 0.00 | 0.00 |
| ATOM | 6037 | HE2  | HIE | X | 401 | 44.874 | 24.553 | 48.668 | 0.00 | 0.00 |
| ATOM | 6038 | CD2  | HIE | X | 401 | 43.626 | 24.233 | 46.999 | 0.00 | 0.00 |
| ATOM | 6039 | HD2  | HIE | X | 401 | 44.305 | 23.902 | 46.228 | 0.00 | 0.00 |
| ATOM | 6040 | C    | HIE | X | 401 | 41.666 | 26.555 | 44.797 | 0.00 | 0.00 |
| ATOM | 6041 | O    | HIE | X | 401 | 40.604 | 27.174 | 44.921 | 0.00 | 0.00 |
| ATOM | 6042 | N    | ASN | X | 402 | 42.822 | 27.202 | 44.918 | 0.00 | 0.00 |
| ATOM | 6043 | H    | ASN | X | 402 | 43.642 | 26.652 | 45.131 | 0.00 | 0.00 |
| ATOM | 6044 | CA   | ASN | X | 402 | 42.934 | 28.624 | 45.298 | 0.00 | 0.00 |
| ATOM | 6045 | HA   | ASN | X | 402 | 42.126 | 28.841 | 45.996 | 0.00 | 0.00 |
| ATOM | 6046 | CB   | ASN | X | 402 | 44.226 | 28.794 | 46.090 | 0.00 | 0.00 |
| ATOM | 6047 | HB2  | ASN | X | 402 | 45.042 | 28.323 | 45.541 | 0.00 | 0.00 |
| ATOM | 6048 | HB3  | ASN | X | 402 | 44.518 | 29.841 | 46.173 | 0.00 | 0.00 |
| ATOM | 6049 | CG   | ASN | X | 402 | 44.221 | 28.232 | 47.491 | 0.00 | 0.00 |
| ATOM | 6050 | OD1  | ASN | X | 402 | 43.319 | 28.493 | 48.311 | 0.00 | 0.00 |
| ATOM | 6051 | ND2  | ASN | X | 402 | 45.208 | 27.449 | 47.833 | 0.00 | 0.00 |
| ATOM | 6052 | HD21 | ASN | X | 402 | 45.310 | 27.111 | 48.780 | 0.00 | 0.00 |
| ATOM | 6053 | HD22 | ASN | X | 402 | 45.887 | 27.286 | 47.102 | 0.00 | 0.00 |
| ATOM | 6054 | C    | ASN | X | 402 | 42.771 | 29.578 | 44.128 | 0.00 | 0.00 |
| ATOM | 6055 | O    | ASN | X | 402 | 42.254 | 30.705 | 44.330 | 0.00 | 0.00 |
| ATOM | 6056 | N    | VAL | X | 403 | 43.292 | 29.198 | 42.991 | 0.00 | 0.00 |
| ATOM | 6057 | H    | VAL | X | 403 | 43.688 | 28.273 | 42.905 | 0.00 | 0.00 |
| ATOM | 6058 | CA   | VAL | X | 403 | 43.623 | 30.079 | 41.852 | 0.00 | 0.00 |
| ATOM | 6059 | HA   | VAL | X | 403 | 43.130 | 31.028 | 42.064 | 0.00 | 0.00 |
| ATOM | 6060 | CB   | VAL | X | 403 | 45.132 | 30.533 | 41.641 | 0.00 | 0.00 |
| ATOM | 6061 | HB   | VAL | X | 403 | 45.767 | 29.685 | 41.381 | 0.00 | 0.00 |

|      |      |      |     |   |     |        |        |        |      |      |
|------|------|------|-----|---|-----|--------|--------|--------|------|------|
| ATOM | 6062 | CG1  | VAL | X | 403 | 45.115 | 31.530 | 40.413 | 0.00 | 0.00 |
| ATOM | 6063 | HG11 | VAL | X | 403 | 44.267 | 32.211 | 40.490 | 0.00 | 0.00 |
| ATOM | 6064 | HG12 | VAL | X | 403 | 46.056 | 32.078 | 40.352 | 0.00 | 0.00 |
| ATOM | 6065 | HG13 | VAL | X | 403 | 44.951 | 30.899 | 39.539 | 0.00 | 0.00 |
| ATOM | 6066 | CG2  | VAL | X | 403 | 45.758 | 31.351 | 42.826 | 0.00 | 0.00 |
| ATOM | 6067 | HG21 | VAL | X | 403 | 46.792 | 31.608 | 42.597 | 0.00 | 0.00 |
| ATOM | 6068 | HG22 | VAL | X | 403 | 45.117 | 32.215 | 43.001 | 0.00 | 0.00 |
| ATOM | 6069 | HG23 | VAL | X | 403 | 45.688 | 30.674 | 43.677 | 0.00 | 0.00 |
| ATOM | 6070 | C    | VAL | X | 403 | 43.001 | 29.536 | 40.512 | 0.00 | 0.00 |
| ATOM | 6071 | O    | VAL | X | 403 | 41.919 | 30.056 | 40.212 | 0.00 | 0.00 |
| ATOM | 6072 | N    | VAL | X | 404 | 43.496 | 28.467 | 39.977 | 0.00 | 0.00 |
| ATOM | 6073 | H    | VAL | X | 404 | 44.235 | 27.998 | 40.480 | 0.00 | 0.00 |
| ATOM | 6074 | CA   | VAL | X | 404 | 43.298 | 28.166 | 38.542 | 0.00 | 0.00 |
| ATOM | 6075 | HA   | VAL | X | 404 | 43.381 | 29.014 | 37.862 | 0.00 | 0.00 |
| ATOM | 6076 | CB   | VAL | X | 404 | 44.155 | 26.995 | 38.029 | 0.00 | 0.00 |
| ATOM | 6077 | HB   | VAL | X | 404 | 43.634 | 26.177 | 38.528 | 0.00 | 0.00 |
| ATOM | 6078 | CG1  | VAL | X | 404 | 44.063 | 26.791 | 36.562 | 0.00 | 0.00 |
| ATOM | 6079 | HG11 | VAL | X | 404 | 44.591 | 25.870 | 36.315 | 0.00 | 0.00 |
| ATOM | 6080 | HG12 | VAL | X | 404 | 43.033 | 26.539 | 36.311 | 0.00 | 0.00 |
| ATOM | 6081 | HG13 | VAL | X | 404 | 44.251 | 27.707 | 36.002 | 0.00 | 0.00 |
| ATOM | 6082 | CG2  | VAL | X | 404 | 45.631 | 26.954 | 38.469 | 0.00 | 0.00 |
| ATOM | 6083 | HG21 | VAL | X | 404 | 45.715 | 27.067 | 39.550 | 0.00 | 0.00 |
| ATOM | 6084 | HG22 | VAL | X | 404 | 46.010 | 25.947 | 38.296 | 0.00 | 0.00 |
| ATOM | 6085 | HG23 | VAL | X | 404 | 46.239 | 27.751 | 38.040 | 0.00 | 0.00 |
| ATOM | 6086 | C    | VAL | X | 404 | 41.848 | 27.736 | 38.424 | 0.00 | 0.00 |
| ATOM | 6087 | O    | VAL | X | 404 | 41.190 | 28.067 | 37.459 | 0.00 | 0.00 |
| ATOM | 6088 | N    | CYX | X | 405 | 41.295 | 27.059 | 39.459 | 0.00 | 0.00 |
| ATOM | 6089 | H    | CYX | X | 405 | 41.838 | 26.827 | 40.278 | 0.00 | 0.00 |
| ATOM | 6090 | CA   | CYX | X | 405 | 39.914 | 26.549 | 39.363 | 0.00 | 0.00 |
| ATOM | 6091 | HA   | CYX | X | 405 | 39.838 | 26.284 | 38.309 | 0.00 | 0.00 |
| ATOM | 6092 | CB   | CYX | X | 405 | 39.800 | 25.195 | 40.138 | 0.00 | 0.00 |
| ATOM | 6093 | HB2  | CYX | X | 405 | 40.154 | 25.238 | 41.168 | 0.00 | 0.00 |
| ATOM | 6094 | HB3  | CYX | X | 405 | 38.778 | 24.862 | 39.955 | 0.00 | 0.00 |
| ATOM | 6095 | SG   | CYX | X | 405 | 40.868 | 23.977 | 39.372 | 0.00 | 0.00 |
| ATOM | 6096 | C    | CYX | X | 405 | 38.830 | 27.576 | 39.660 | 0.00 | 0.00 |
| ATOM | 6097 | O    | CYX | X | 405 | 37.771 | 27.543 | 39.036 | 0.00 | 0.00 |
| ATOM | 6098 | N    | PRO | X | 406 | 38.983 | 28.470 | 40.693 | 0.00 | 0.00 |
| ATOM | 6099 | CD   | PRO | X | 406 | 39.680 | 28.297 | 41.948 | 0.00 | 0.00 |
| ATOM | 6100 | HD2  | PRO | X | 406 | 40.745 | 28.495 | 41.822 | 0.00 | 0.00 |
| ATOM | 6101 | HD3  | PRO | X | 406 | 39.640 | 27.235 | 42.194 | 0.00 | 0.00 |
| ATOM | 6102 | CG   | PRO | X | 406 | 39.035 | 29.236 | 42.959 | 0.00 | 0.00 |
| ATOM | 6103 | HG2  | PRO | X | 406 | 39.753 | 29.743 | 43.604 | 0.00 | 0.00 |
| ATOM | 6104 | HG3  | PRO | X | 406 | 38.299 | 28.612 | 43.465 | 0.00 | 0.00 |
| ATOM | 6105 | CB   | PRO | X | 406 | 38.293 | 30.295 | 42.182 | 0.00 | 0.00 |
| ATOM | 6106 | HB2  | PRO | X | 406 | 38.908 | 31.138 | 41.867 | 0.00 | 0.00 |
| ATOM | 6107 | HB3  | PRO | X | 406 | 37.364 | 30.555 | 42.690 | 0.00 | 0.00 |
| ATOM | 6108 | CA   | PRO | X | 406 | 38.003 | 29.572 | 40.874 | 0.00 | 0.00 |
| ATOM | 6109 | HA   | PRO | X | 406 | 37.042 | 29.063 | 40.958 | 0.00 | 0.00 |
| ATOM | 6110 | C    | PRO | X | 406 | 38.057 | 30.525 | 39.647 | 0.00 | 0.00 |
| ATOM | 6111 | O    | PRO | X | 406 | 36.975 | 31.008 | 39.250 | 0.00 | 0.00 |
| ATOM | 6112 | N    | VAL | X | 407 | 39.215 | 30.710 | 38.956 | 0.00 | 0.00 |
| ATOM | 6113 | H    | VAL | X | 407 | 40.074 | 30.431 | 39.407 | 0.00 | 0.00 |
| ATOM | 6114 | CA   | VAL | X | 407 | 39.273 | 31.347 | 37.631 | 0.00 | 0.00 |
| ATOM | 6115 | HA   | VAL | X | 407 | 38.802 | 32.327 | 37.708 | 0.00 | 0.00 |
| ATOM | 6116 | CB   | VAL | X | 407 | 40.761 | 31.573 | 37.260 | 0.00 | 0.00 |
| ATOM | 6117 | HB   | VAL | X | 407 | 41.222 | 30.614 | 37.492 | 0.00 | 0.00 |
| ATOM | 6118 | CG1  | VAL | X | 407 | 40.932 | 31.804 | 35.761 | 0.00 | 0.00 |
| ATOM | 6119 | HG11 | VAL | X | 407 | 40.715 | 30.867 | 35.247 | 0.00 | 0.00 |
| ATOM | 6120 | HG12 | VAL | X | 407 | 40.238 | 32.612 | 35.532 | 0.00 | 0.00 |
| ATOM | 6121 | HG13 | VAL | X | 407 | 41.976 | 32.039 | 35.550 | 0.00 | 0.00 |
| ATOM | 6122 | CG2  | VAL | X | 407 | 41.607 | 32.628 | 37.965 | 0.00 | 0.00 |
| ATOM | 6123 | HG21 | VAL | X | 407 | 41.381 | 32.535 | 39.027 | 0.00 | 0.00 |
| ATOM | 6124 | HG22 | VAL | X | 407 | 42.686 | 32.604 | 37.809 | 0.00 | 0.00 |
| ATOM | 6125 | HG23 | VAL | X | 407 | 41.261 | 33.551 | 37.500 | 0.00 | 0.00 |
| ATOM | 6126 | C    | VAL | X | 407 | 38.471 | 30.513 | 36.538 | 0.00 | 0.00 |
| ATOM | 6127 | O    | VAL | X | 407 | 37.806 | 31.137 | 35.760 | 0.00 | 0.00 |
| ATOM | 6128 | N    | ALA | X | 408 | 38.693 | 29.223 | 36.427 | 0.00 | 0.00 |
| ATOM | 6129 | H    | ALA | X | 408 | 39.271 | 28.697 | 37.066 | 0.00 | 0.00 |
| ATOM | 6130 | CA   | ALA | X | 408 | 38.142 | 28.398 | 35.374 | 0.00 | 0.00 |
| ATOM | 6131 | HA   | ALA | X | 408 | 38.339 | 29.044 | 34.518 | 0.00 | 0.00 |

|      |      |      |     |   |     |        |        |        |      |      |
|------|------|------|-----|---|-----|--------|--------|--------|------|------|
| ATOM | 6132 | CB   | ALA | X | 408 | 38.838 | 27.000 | 35.324 | 0.00 | 0.00 |
| ATOM | 6133 | HB1  | ALA | X | 408 | 38.554 | 26.432 | 36.210 | 0.00 | 0.00 |
| ATOM | 6134 | HB2  | ALA | X | 408 | 38.509 | 26.485 | 34.422 | 0.00 | 0.00 |
| ATOM | 6135 | HB3  | ALA | X | 408 | 39.912 | 27.114 | 35.470 | 0.00 | 0.00 |
| ATOM | 6136 | C    | ALA | X | 408 | 36.531 | 28.345 | 35.522 | 0.00 | 0.00 |
| ATOM | 6137 | O    | ALA | X | 408 | 35.822 | 28.637 | 34.572 | 0.00 | 0.00 |
| ATOM | 6138 | N    | GLN | X | 409 | 36.085 | 28.188 | 36.752 | 0.00 | 0.00 |
| ATOM | 6139 | H    | GLN | X | 409 | 36.757 | 27.986 | 37.479 | 0.00 | 0.00 |
| ATOM | 6140 | CA   | GLN | X | 409 | 34.733 | 28.362 | 37.162 | 0.00 | 0.00 |
| ATOM | 6141 | HA   | GLN | X | 409 | 34.116 | 27.682 | 36.575 | 0.00 | 0.00 |
| ATOM | 6142 | CB   | GLN | X | 409 | 34.603 | 28.007 | 38.592 | 0.00 | 0.00 |
| ATOM | 6143 | HB2  | GLN | X | 409 | 35.209 | 27.113 | 38.735 | 0.00 | 0.00 |
| ATOM | 6144 | HB3  | GLN | X | 409 | 35.131 | 28.777 | 39.155 | 0.00 | 0.00 |
| ATOM | 6145 | CG   | GLN | X | 409 | 33.110 | 27.901 | 38.981 | 0.00 | 0.00 |
| ATOM | 6146 | HG2  | GLN | X | 409 | 32.488 | 28.750 | 38.697 | 0.00 | 0.00 |
| ATOM | 6147 | HG3  | GLN | X | 409 | 32.763 | 26.991 | 38.491 | 0.00 | 0.00 |
| ATOM | 6148 | CD   | GLN | X | 409 | 33.003 | 27.706 | 40.436 | 0.00 | 0.00 |
| ATOM | 6149 | OE1  | GLN | X | 409 | 33.760 | 28.221 | 41.282 | 0.00 | 0.00 |
| ATOM | 6150 | NE2  | GLN | X | 409 | 31.994 | 26.940 | 40.905 | 0.00 | 0.00 |
| ATOM | 6151 | HE21 | GLN | X | 409 | 31.977 | 26.719 | 41.891 | 0.00 | 0.00 |
| ATOM | 6152 | HE22 | GLN | X | 409 | 31.482 | 26.290 | 40.326 | 0.00 | 0.00 |
| ATOM | 6153 | C    | GLN | X | 409 | 34.166 | 29.808 | 36.968 | 0.00 | 0.00 |
| ATOM | 6154 | O    | GLN | X | 409 | 33.102 | 29.962 | 36.352 | 0.00 | 0.00 |
| ATOM | 6155 | N    | LEU | X | 410 | 34.869 | 30.912 | 37.261 | 0.00 | 0.00 |
| ATOM | 6156 | H    | LEU | X | 410 | 35.781 | 30.784 | 37.676 | 0.00 | 0.00 |
| ATOM | 6157 | CA   | LEU | X | 410 | 34.413 | 32.316 | 37.087 | 0.00 | 0.00 |
| ATOM | 6158 | HA   | LEU | X | 410 | 33.376 | 32.498 | 37.370 | 0.00 | 0.00 |
| ATOM | 6159 | CB   | LEU | X | 410 | 35.394 | 33.301 | 37.834 | 0.00 | 0.00 |
| ATOM | 6160 | HB2  | LEU | X | 410 | 35.036 | 33.230 | 38.861 | 0.00 | 0.00 |
| ATOM | 6161 | HB3  | LEU | X | 410 | 36.415 | 32.924 | 37.772 | 0.00 | 0.00 |
| ATOM | 6162 | CG   | LEU | X | 410 | 35.380 | 34.820 | 37.459 | 0.00 | 0.00 |
| ATOM | 6163 | HG   | LEU | X | 410 | 34.366 | 35.153 | 37.237 | 0.00 | 0.00 |
| ATOM | 6164 | CD1  | LEU | X | 410 | 35.666 | 35.724 | 38.719 | 0.00 | 0.00 |
| ATOM | 6165 | HD11 | LEU | X | 410 | 34.980 | 35.367 | 39.487 | 0.00 | 0.00 |
| ATOM | 6166 | HD12 | LEU | X | 410 | 36.700 | 35.469 | 38.948 | 0.00 | 0.00 |
| ATOM | 6167 | HD13 | LEU | X | 410 | 35.540 | 36.788 | 38.517 | 0.00 | 0.00 |
| ATOM | 6168 | CD2  | LEU | X | 410 | 36.262 | 35.196 | 36.272 | 0.00 | 0.00 |
| ATOM | 6169 | HD21 | LEU | X | 410 | 35.937 | 36.168 | 35.899 | 0.00 | 0.00 |
| ATOM | 6170 | HD22 | LEU | X | 410 | 37.285 | 35.399 | 36.590 | 0.00 | 0.00 |
| ATOM | 6171 | HD23 | LEU | X | 410 | 36.175 | 34.355 | 35.585 | 0.00 | 0.00 |
| ATOM | 6172 | C    | LEU | X | 410 | 34.232 | 32.667 | 35.564 | 0.00 | 0.00 |
| ATOM | 6173 | O    | LEU | X | 410 | 33.207 | 33.223 | 35.157 | 0.00 | 0.00 |
| ATOM | 6174 | N    | ALA | X | 411 | 35.169 | 32.234 | 34.723 | 0.00 | 0.00 |
| ATOM | 6175 | H    | ALA | X | 411 | 35.963 | 31.783 | 35.154 | 0.00 | 0.00 |
| ATOM | 6176 | CA   | ALA | X | 411 | 35.143 | 32.544 | 33.308 | 0.00 | 0.00 |
| ATOM | 6177 | HA   | ALA | X | 411 | 34.968 | 33.617 | 33.229 | 0.00 | 0.00 |
| ATOM | 6178 | CB   | ALA | X | 411 | 36.473 | 32.052 | 32.851 | 0.00 | 0.00 |
| ATOM | 6179 | HB1  | ALA | X | 411 | 37.247 | 32.431 | 33.517 | 0.00 | 0.00 |
| ATOM | 6180 | HB2  | ALA | X | 411 | 36.476 | 30.963 | 32.807 | 0.00 | 0.00 |
| ATOM | 6181 | HB3  | ALA | X | 411 | 36.685 | 32.289 | 31.808 | 0.00 | 0.00 |
| ATOM | 6182 | C    | ALA | X | 411 | 34.018 | 31.839 | 32.560 | 0.00 | 0.00 |
| ATOM | 6183 | O    | ALA | X | 411 | 33.405 | 32.374 | 31.727 | 0.00 | 0.00 |
| ATOM | 6184 | N    | GLY | X | 412 | 33.692 | 30.614 | 32.996 | 0.00 | 0.00 |
| ATOM | 6185 | H    | GLY | X | 412 | 34.265 | 30.154 | 33.689 | 0.00 | 0.00 |
| ATOM | 6186 | CA   | GLY | X | 412 | 32.589 | 29.799 | 32.470 | 0.00 | 0.00 |
| ATOM | 6187 | HA2  | GLY | X | 412 | 32.505 | 29.736 | 31.383 | 0.00 | 0.00 |
| ATOM | 6188 | HA3  | GLY | X | 412 | 32.430 | 28.827 | 32.948 | 0.00 | 0.00 |
| ATOM | 6189 | C    | GLY | X | 412 | 31.333 | 30.586 | 32.855 | 0.00 | 0.00 |
| ATOM | 6190 | O    | GLY | X | 412 | 30.515 | 30.825 | 31.977 | 0.00 | 0.00 |
| ATOM | 6191 | N    | ARG | X | 413 | 31.090 | 30.997 | 34.132 | 0.00 | 0.00 |
| ATOM | 6192 | H    | ARG | X | 413 | 31.739 | 30.578 | 34.783 | 0.00 | 0.00 |
| ATOM | 6193 | CA   | ARG | X | 413 | 29.856 | 31.637 | 34.678 | 0.00 | 0.00 |
| ATOM | 6194 | HA   | ARG | X | 413 | 28.972 | 31.023 | 34.508 | 0.00 | 0.00 |
| ATOM | 6195 | CB   | ARG | X | 413 | 30.084 | 31.834 | 36.189 | 0.00 | 0.00 |
| ATOM | 6196 | HB2  | ARG | X | 413 | 31.056 | 32.305 | 36.337 | 0.00 | 0.00 |
| ATOM | 6197 | HB3  | ARG | X | 413 | 29.350 | 32.572 | 36.513 | 0.00 | 0.00 |
| ATOM | 6198 | CG   | ARG | X | 413 | 30.086 | 30.532 | 37.052 | 0.00 | 0.00 |
| ATOM | 6199 | HG2  | ARG | X | 413 | 30.627 | 29.733 | 36.543 | 0.00 | 0.00 |
| ATOM | 6200 | HG3  | ARG | X | 413 | 30.769 | 30.738 | 37.876 | 0.00 | 0.00 |
| ATOM | 6201 | CD   | ARG | X | 413 | 28.751 | 30.089 | 37.618 | 0.00 | 0.00 |



|      |      |      |     |   |     |        |        |        |      |      |
|------|------|------|-----|---|-----|--------|--------|--------|------|------|
| ATOM | 6202 | HD2  | ARG | X | 413 | 28.250 | 30.936 | 38.087 | 0.00 | 0.00 |
| ATOM | 6203 | HD3  | ARG | X | 413 | 28.108 | 29.707 | 36.826 | 0.00 | 0.00 |
| ATOM | 6204 | NE   | ARG | X | 413 | 28.968 | 29.163 | 38.712 | 0.00 | 0.00 |
| ATOM | 6205 | HE   | ARG | X | 413 | 28.802 | 29.500 | 39.649 | 0.00 | 0.00 |
| ATOM | 6206 | CZ   | ARG | X | 413 | 29.069 | 27.851 | 38.539 | 0.00 | 0.00 |
| ATOM | 6207 | NH1  | ARG | X | 413 | 29.159 | 27.264 | 37.374 | 0.00 | 0.00 |
| ATOM | 6208 | HH11 | ARG | X | 413 | 28.912 | 27.731 | 36.514 | 0.00 | 0.00 |
| ATOM | 6209 | HH12 | ARG | X | 413 | 29.259 | 26.262 | 37.290 | 0.00 | 0.00 |
| ATOM | 6210 | NH2  | ARG | X | 413 | 29.139 | 27.118 | 39.621 | 0.00 | 0.00 |
| ATOM | 6211 | HH21 | ARG | X | 413 | 29.011 | 27.439 | 40.570 | 0.00 | 0.00 |
| ATOM | 6212 | HH22 | ARG | X | 413 | 29.197 | 26.110 | 39.575 | 0.00 | 0.00 |
| ATOM | 6213 | C    | ARG | X | 413 | 29.652 | 32.938 | 33.982 | 0.00 | 0.00 |
| ATOM | 6214 | O    | ARG | X | 413 | 28.570 | 33.212 | 33.370 | 0.00 | 0.00 |
| ATOM | 6215 | N    | LEU | X | 414 | 30.663 | 33.777 | 33.858 | 0.00 | 0.00 |
| ATOM | 6216 | H    | LEU | X | 414 | 31.513 | 33.527 | 34.342 | 0.00 | 0.00 |
| ATOM | 6217 | CA   | LEU | X | 414 | 30.564 | 35.049 | 33.066 | 0.00 | 0.00 |
| ATOM | 6218 | HA   | LEU | X | 414 | 29.685 | 35.571 | 33.443 | 0.00 | 0.00 |
| ATOM | 6219 | CB   | LEU | X | 414 | 31.862 | 35.926 | 33.231 | 0.00 | 0.00 |
| ATOM | 6220 | HB2  | LEU | X | 414 | 32.688 | 35.264 | 32.972 | 0.00 | 0.00 |
| ATOM | 6221 | HB3  | LEU | X | 414 | 31.917 | 36.662 | 32.430 | 0.00 | 0.00 |
| ATOM | 6222 | CG   | LEU | X | 414 | 32.077 | 36.574 | 34.563 | 0.00 | 0.00 |
| ATOM | 6223 | HG   | LEU | X | 414 | 32.165 | 35.707 | 35.218 | 0.00 | 0.00 |
| ATOM | 6224 | CD1  | LEU | X | 414 | 33.478 | 37.284 | 34.666 | 0.00 | 0.00 |
| ATOM | 6225 | HD11 | LEU | X | 414 | 33.710 | 37.324 | 35.731 | 0.00 | 0.00 |
| ATOM | 6226 | HD12 | LEU | X | 414 | 34.230 | 36.636 | 34.216 | 0.00 | 0.00 |
| ATOM | 6227 | HD13 | LEU | X | 414 | 33.540 | 38.240 | 34.146 | 0.00 | 0.00 |
| ATOM | 6228 | CD2  | LEU | X | 414 | 30.889 | 37.398 | 35.155 | 0.00 | 0.00 |
| ATOM | 6229 | HD21 | LEU | X | 414 | 31.269 | 38.239 | 35.735 | 0.00 | 0.00 |
| ATOM | 6230 | HD22 | LEU | X | 414 | 30.133 | 37.545 | 34.385 | 0.00 | 0.00 |
| ATOM | 6231 | HD23 | LEU | X | 414 | 30.310 | 36.771 | 35.832 | 0.00 | 0.00 |
| ATOM | 6232 | C    | LEU | X | 414 | 30.296 | 34.827 | 31.557 | 0.00 | 0.00 |
| ATOM | 6233 | O    | LEU | X | 414 | 29.374 | 35.498 | 31.094 | 0.00 | 0.00 |
| ATOM | 6234 | N    | ALA | X | 415 | 30.926 | 33.847 | 30.913 | 0.00 | 0.00 |
| ATOM | 6235 | H    | ALA | X | 415 | 31.507 | 33.143 | 31.344 | 0.00 | 0.00 |
| ATOM | 6236 | CA   | ALA | X | 415 | 30.514 | 33.504 | 29.523 | 0.00 | 0.00 |
| ATOM | 6237 | HA   | ALA | X | 415 | 30.597 | 34.437 | 28.965 | 0.00 | 0.00 |
| ATOM | 6238 | CB   | ALA | X | 415 | 31.585 | 32.550 | 28.970 | 0.00 | 0.00 |
| ATOM | 6239 | HB1  | ALA | X | 415 | 31.397 | 32.520 | 27.897 | 0.00 | 0.00 |
| ATOM | 6240 | HB2  | ALA | X | 415 | 32.622 | 32.825 | 29.163 | 0.00 | 0.00 |
| ATOM | 6241 | HB3  | ALA | X | 415 | 31.442 | 31.513 | 29.272 | 0.00 | 0.00 |
| ATOM | 6242 | C    | ALA | X | 415 | 29.041 | 33.011 | 29.324 | 0.00 | 0.00 |
| ATOM | 6243 | O    | ALA | X | 415 | 28.440 | 33.242 | 28.233 | 0.00 | 0.00 |
| ATOM | 6244 | N    | ALA | X | 416 | 28.496 | 32.328 | 30.349 | 0.00 | 0.00 |
| ATOM | 6245 | H    | ALA | X | 416 | 29.119 | 32.159 | 31.126 | 0.00 | 0.00 |
| ATOM | 6246 | CA   | ALA | X | 416 | 27.140 | 31.707 | 30.445 | 0.00 | 0.00 |
| ATOM | 6247 | HA   | ALA | X | 416 | 27.035 | 31.149 | 29.515 | 0.00 | 0.00 |
| ATOM | 6248 | CB   | ALA | X | 416 | 27.159 | 30.779 | 31.640 | 0.00 | 0.00 |
| ATOM | 6249 | HB1  | ALA | X | 416 | 26.174 | 30.314 | 31.668 | 0.00 | 0.00 |
| ATOM | 6250 | HB2  | ALA | X | 416 | 27.978 | 30.070 | 31.518 | 0.00 | 0.00 |
| ATOM | 6251 | HB3  | ALA | X | 416 | 27.308 | 31.304 | 32.583 | 0.00 | 0.00 |
| ATOM | 6252 | C    | ALA | X | 416 | 26.031 | 32.727 | 30.522 | 0.00 | 0.00 |
| ATOM | 6253 | O    | ALA | X | 416 | 24.971 | 32.662 | 29.855 | 0.00 | 0.00 |
| ATOM | 6254 | N    | GLN | X | 417 | 26.356 | 33.751 | 31.291 | 0.00 | 0.00 |
| ATOM | 6255 | H    | GLN | X | 417 | 27.291 | 33.729 | 31.671 | 0.00 | 0.00 |
| ATOM | 6256 | CA   | GLN | X | 417 | 25.376 | 34.664 | 31.853 | 0.00 | 0.00 |
| ATOM | 6257 | HA   | GLN | X | 417 | 24.396 | 34.205 | 31.722 | 0.00 | 0.00 |
| ATOM | 6258 | CB   | GLN | X | 417 | 25.638 | 34.787 | 33.367 | 0.00 | 0.00 |
| ATOM | 6259 | HB2  | GLN | X | 417 | 26.675 | 34.965 | 33.654 | 0.00 | 0.00 |
| ATOM | 6260 | HB3  | GLN | X | 417 | 25.000 | 35.556 | 33.803 | 0.00 | 0.00 |
| ATOM | 6261 | CG   | GLN | X | 417 | 25.242 | 33.530 | 34.140 | 0.00 | 0.00 |
| ATOM | 6262 | HG2  | GLN | X | 417 | 24.166 | 33.626 | 34.285 | 0.00 | 0.00 |
| ATOM | 6263 | HG3  | GLN | X | 417 | 25.384 | 32.649 | 33.514 | 0.00 | 0.00 |
| ATOM | 6264 | CD   | GLN | X | 417 | 25.961 | 33.410 | 35.473 | 0.00 | 0.00 |
| ATOM | 6265 | OE1  | GLN | X | 417 | 26.619 | 32.443 | 35.727 | 0.00 | 0.00 |
| ATOM | 6266 | NE2  | GLN | X | 417 | 25.938 | 34.404 | 36.345 | 0.00 | 0.00 |
| ATOM | 6267 | HE21 | GLN | X | 417 | 26.543 | 34.045 | 37.069 | 0.00 | 0.00 |
| ATOM | 6268 | HE22 | GLN | X | 417 | 25.466 | 35.297 | 36.362 | 0.00 | 0.00 |
| ATOM | 6269 | C    | GLN | X | 417 | 25.287 | 35.966 | 31.100 | 0.00 | 0.00 |
| ATOM | 6270 | O    | GLN | X | 417 | 24.577 | 36.873 | 31.552 | 0.00 | 0.00 |
| ATOM | 6271 | N    | GLY | X | 418 | 26.117 | 36.119 | 30.060 | 0.00 | 0.00 |

|      |      |      |     |   |     |        |        |        |      |      |
|------|------|------|-----|---|-----|--------|--------|--------|------|------|
| ATOM | 6272 | H    | GLY | X | 418 | 26.858 | 35.435 | 29.998 | 0.00 | 0.00 |
| ATOM | 6273 | CA   | GLY | X | 418 | 25.968 | 37.139 | 29.018 | 0.00 | 0.00 |
| ATOM | 6274 | HA2  | GLY | X | 418 | 25.627 | 36.633 | 28.105 | 0.00 | 0.00 |
| ATOM | 6275 | HA3  | GLY | X | 418 | 25.372 | 37.988 | 29.363 | 0.00 | 0.00 |
| ATOM | 6276 | C    | GLY | X | 418 | 27.245 | 37.797 | 28.585 | 0.00 | 0.00 |
| ATOM | 6277 | O    | GLY | X | 418 | 27.178 | 38.695 | 27.770 | 0.00 | 0.00 |
| ATOM | 6278 | N    | ALA | X | 419 | 28.408 | 37.409 | 29.104 | 0.00 | 0.00 |
| ATOM | 6279 | H    | ALA | X | 419 | 28.412 | 36.720 | 29.843 | 0.00 | 0.00 |
| ATOM | 6280 | CA   | ALA | X | 419 | 29.619 | 38.090 | 28.799 | 0.00 | 0.00 |
| ATOM | 6281 | HA   | ALA | X | 419 | 29.455 | 39.147 | 28.590 | 0.00 | 0.00 |
| ATOM | 6282 | CB   | ALA | X | 419 | 30.537 | 38.142 | 30.065 | 0.00 | 0.00 |
| ATOM | 6283 | HB1  | ALA | X | 419 | 29.967 | 38.589 | 30.879 | 0.00 | 0.00 |
| ATOM | 6284 | HB2  | ALA | X | 419 | 30.827 | 37.110 | 30.262 | 0.00 | 0.00 |
| ATOM | 6285 | HB3  | ALA | X | 419 | 31.406 | 38.774 | 29.880 | 0.00 | 0.00 |
| ATOM | 6286 | C    | ALA | X | 419 | 30.260 | 37.469 | 27.576 | 0.00 | 0.00 |
| ATOM | 6287 | O    | ALA | X | 419 | 29.957 | 36.314 | 27.205 | 0.00 | 0.00 |
| ATOM | 6288 | N    | ARG | X | 420 | 31.178 | 38.225 | 26.995 | 0.00 | 0.00 |
| ATOM | 6289 | H    | ARG | X | 420 | 31.342 | 39.179 | 27.281 | 0.00 | 0.00 |
| ATOM | 6290 | CA   | ARG | X | 420 | 32.301 | 37.629 | 26.210 | 0.00 | 0.00 |
| ATOM | 6291 | HA   | ARG | X | 420 | 32.029 | 36.576 | 26.136 | 0.00 | 0.00 |
| ATOM | 6292 | CB   | ARG | X | 420 | 32.383 | 38.347 | 24.818 | 0.00 | 0.00 |
| ATOM | 6293 | HB2  | ARG | X | 420 | 32.380 | 39.427 | 24.962 | 0.00 | 0.00 |
| ATOM | 6294 | HB3  | ARG | X | 420 | 33.366 | 38.129 | 24.399 | 0.00 | 0.00 |
| ATOM | 6295 | CG   | ARG | X | 420 | 31.301 | 38.012 | 23.881 | 0.00 | 0.00 |
| ATOM | 6296 | HG2  | ARG | X | 420 | 31.518 | 37.023 | 23.478 | 0.00 | 0.00 |
| ATOM | 6297 | HG3  | ARG | X | 420 | 30.365 | 37.978 | 24.439 | 0.00 | 0.00 |
| ATOM | 6298 | CD   | ARG | X | 420 | 31.110 | 38.868 | 22.589 | 0.00 | 0.00 |
| ATOM | 6299 | HD2  | ARG | X | 420 | 30.423 | 38.373 | 21.903 | 0.00 | 0.00 |
| ATOM | 6300 | HD3  | ARG | X | 420 | 30.705 | 39.817 | 22.940 | 0.00 | 0.00 |
| ATOM | 6301 | NE   | ARG | X | 420 | 32.381 | 39.089 | 21.778 | 0.00 | 0.00 |
| ATOM | 6302 | HE   | ARG | X | 420 | 32.686 | 38.318 | 21.202 | 0.00 | 0.00 |
| ATOM | 6303 | CZ   | ARG | X | 420 | 33.167 | 40.179 | 21.802 | 0.00 | 0.00 |
| ATOM | 6304 | NH1  | ARG | X | 420 | 32.990 | 41.096 | 22.761 | 0.00 | 0.00 |
| ATOM | 6305 | HH11 | ARG | X | 420 | 32.098 | 41.077 | 23.233 | 0.00 | 0.00 |
| ATOM | 6306 | HH12 | ARG | X | 420 | 33.552 | 41.935 | 22.749 | 0.00 | 0.00 |
| ATOM | 6307 | NH2  | ARG | X | 420 | 34.162 | 40.274 | 20.925 | 0.00 | 0.00 |
| ATOM | 6308 | HH21 | ARG | X | 420 | 34.387 | 39.620 | 20.189 | 0.00 | 0.00 |
| ATOM | 6309 | HH22 | ARG | X | 420 | 34.815 | 40.985 | 21.223 | 0.00 | 0.00 |
| ATOM | 6310 | C    | ARG | X | 420 | 33.670 | 37.676 | 26.955 | 0.00 | 0.00 |
| ATOM | 6311 | O    | ARG | X | 420 | 33.972 | 38.630 | 27.683 | 0.00 | 0.00 |
| ATOM | 6312 | N    | VAL | X | 421 | 34.453 | 36.622 | 26.798 | 0.00 | 0.00 |
| ATOM | 6313 | H    | VAL | X | 421 | 34.094 | 35.929 | 26.157 | 0.00 | 0.00 |
| ATOM | 6314 | CA   | VAL | X | 421 | 35.563 | 36.256 | 27.770 | 0.00 | 0.00 |
| ATOM | 6315 | HA   | VAL | X | 421 | 35.921 | 37.162 | 28.260 | 0.00 | 0.00 |
| ATOM | 6316 | CB   | VAL | X | 421 | 35.121 | 35.138 | 28.764 | 0.00 | 0.00 |
| ATOM | 6317 | HB   | VAL | X | 421 | 34.744 | 34.246 | 28.263 | 0.00 | 0.00 |
| ATOM | 6318 | CG1  | VAL | X | 421 | 36.185 | 34.795 | 29.845 | 0.00 | 0.00 |
| ATOM | 6319 | HG11 | VAL | X | 421 | 36.964 | 34.240 | 29.323 | 0.00 | 0.00 |
| ATOM | 6320 | HG12 | VAL | X | 421 | 36.708 | 35.699 | 30.160 | 0.00 | 0.00 |
| ATOM | 6321 | HG13 | VAL | X | 421 | 35.817 | 34.149 | 30.642 | 0.00 | 0.00 |
| ATOM | 6322 | CG2  | VAL | X | 421 | 34.003 | 35.646 | 29.677 | 0.00 | 0.00 |
| ATOM | 6323 | HG21 | VAL | X | 421 | 33.660 | 34.738 | 30.174 | 0.00 | 0.00 |
| ATOM | 6324 | HG22 | VAL | X | 421 | 34.454 | 36.369 | 30.356 | 0.00 | 0.00 |
| ATOM | 6325 | HG23 | VAL | X | 421 | 33.204 | 35.993 | 29.022 | 0.00 | 0.00 |
| ATOM | 6326 | C    | VAL | X | 421 | 36.836 | 35.678 | 26.990 | 0.00 | 0.00 |
| ATOM | 6327 | O    | VAL | X | 421 | 36.549 | 34.973 | 25.970 | 0.00 | 0.00 |
| ATOM | 6328 | N    | TYR | X | 422 | 38.057 | 35.828 | 27.480 | 0.00 | 0.00 |
| ATOM | 6329 | H    | TYR | X | 422 | 38.148 | 36.434 | 28.283 | 0.00 | 0.00 |
| ATOM | 6330 | CA   | TYR | X | 422 | 39.296 | 35.453 | 26.849 | 0.00 | 0.00 |
| ATOM | 6331 | HA   | TYR | X | 422 | 39.197 | 34.560 | 26.232 | 0.00 | 0.00 |
| ATOM | 6332 | CB   | TYR | X | 422 | 39.808 | 36.580 | 25.978 | 0.00 | 0.00 |
| ATOM | 6333 | HB2  | TYR | X | 422 | 39.921 | 37.478 | 26.585 | 0.00 | 0.00 |
| ATOM | 6334 | HB3  | TYR | X | 422 | 40.831 | 36.371 | 25.666 | 0.00 | 0.00 |
| ATOM | 6335 | CG   | TYR | X | 422 | 39.026 | 36.902 | 24.750 | 0.00 | 0.00 |
| ATOM | 6336 | CD1  | TYR | X | 422 | 39.229 | 36.165 | 23.557 | 0.00 | 0.00 |
| ATOM | 6337 | HD1  | TYR | X | 422 | 39.943 | 35.355 | 23.540 | 0.00 | 0.00 |
| ATOM | 6338 | CE1  | TYR | X | 422 | 38.423 | 36.377 | 22.448 | 0.00 | 0.00 |
| ATOM | 6339 | HE1  | TYR | X | 422 | 38.519 | 35.733 | 21.587 | 0.00 | 0.00 |
| ATOM | 6340 | CZ   | TYR | X | 422 | 37.409 | 37.369 | 22.494 | 0.00 | 0.00 |
| ATOM | 6341 | OH   | TYR | X | 422 | 36.605 | 37.616 | 21.380 | 0.00 | 0.00 |

|      |      |      |     |   |     |        |        |        |      |      |
|------|------|------|-----|---|-----|--------|--------|--------|------|------|
| ATOM | 6342 | HH   | TYR | X | 422 | 36.646 | 36.951 | 20.689 | 0.00 | 0.00 |
| ATOM | 6343 | CE2  | TYR | X | 422 | 37.184 | 38.139 | 23.686 | 0.00 | 0.00 |
| ATOM | 6344 | HE2  | TYR | X | 422 | 36.487 | 38.960 | 23.764 | 0.00 | 0.00 |
| ATOM | 6345 | CD2  | TYR | X | 422 | 38.041 | 37.939 | 24.792 | 0.00 | 0.00 |
| ATOM | 6346 | HD2  | TYR | X | 422 | 37.791 | 38.517 | 25.669 | 0.00 | 0.00 |
| ATOM | 6347 | C    | TYR | X | 422 | 40.301 | 35.023 | 27.878 | 0.00 | 0.00 |
| ATOM | 6348 | O    | TYR | X | 422 | 40.597 | 35.838 | 28.747 | 0.00 | 0.00 |
| ATOM | 6349 | N    | ALA | X | 423 | 40.746 | 33.779 | 27.876 | 0.00 | 0.00 |
| ATOM | 6350 | H    | ALA | X | 423 | 40.520 | 33.248 | 27.047 | 0.00 | 0.00 |
| ATOM | 6351 | CA   | ALA | X | 423 | 41.627 | 33.121 | 28.829 | 0.00 | 0.00 |
| ATOM | 6352 | HA   | ALA | X | 423 | 41.704 | 33.831 | 29.652 | 0.00 | 0.00 |
| ATOM | 6353 | CB   | ALA | X | 423 | 40.928 | 31.780 | 29.259 | 0.00 | 0.00 |
| ATOM | 6354 | HB1  | ALA | X | 423 | 40.907 | 31.035 | 28.463 | 0.00 | 0.00 |
| ATOM | 6355 | HB2  | ALA | X | 423 | 41.598 | 31.322 | 29.986 | 0.00 | 0.00 |
| ATOM | 6356 | HB3  | ALA | X | 423 | 39.929 | 31.936 | 29.668 | 0.00 | 0.00 |
| ATOM | 6357 | C    | ALA | X | 423 | 43.066 | 32.913 | 28.339 | 0.00 | 0.00 |
| ATOM | 6358 | O    | ALA | X | 423 | 43.230 | 32.450 | 27.199 | 0.00 | 0.00 |
| ATOM | 6359 | N    | TYR | X | 424 | 44.093 | 33.003 | 29.184 | 0.00 | 0.00 |
| ATOM | 6360 | H    | TYR | X | 424 | 43.843 | 33.447 | 30.056 | 0.00 | 0.00 |
| ATOM | 6361 | CA   | TYR | X | 424 | 45.462 | 32.616 | 28.984 | 0.00 | 0.00 |
| ATOM | 6362 | HA   | TYR | X | 424 | 45.434 | 32.037 | 28.060 | 0.00 | 0.00 |
| ATOM | 6363 | CB   | TYR | X | 424 | 46.363 | 33.802 | 28.871 | 0.00 | 0.00 |
| ATOM | 6364 | HB2  | TYR | X | 424 | 47.313 | 33.348 | 28.588 | 0.00 | 0.00 |
| ATOM | 6365 | HB3  | TYR | X | 424 | 45.976 | 34.349 | 28.011 | 0.00 | 0.00 |
| ATOM | 6366 | CG   | TYR | X | 424 | 46.507 | 34.594 | 30.175 | 0.00 | 0.00 |
| ATOM | 6367 | CD1  | TYR | X | 424 | 47.679 | 34.294 | 30.984 | 0.00 | 0.00 |
| ATOM | 6368 | HD1  | TYR | X | 424 | 48.476 | 33.608 | 30.735 | 0.00 | 0.00 |
| ATOM | 6369 | CE1  | TYR | X | 424 | 47.781 | 35.139 | 32.195 | 0.00 | 0.00 |
| ATOM | 6370 | HE1  | TYR | X | 424 | 48.654 | 35.056 | 32.825 | 0.00 | 0.00 |
| ATOM | 6371 | CZ   | TYR | X | 424 | 46.782 | 35.943 | 32.594 | 0.00 | 0.00 |
| ATOM | 6372 | OH   | TYR | X | 424 | 46.729 | 36.548 | 33.817 | 0.00 | 0.00 |
| ATOM | 6373 | HH   | TYR | X | 424 | 47.592 | 36.471 | 34.230 | 0.00 | 0.00 |
| ATOM | 6374 | CE2  | TYR | X | 424 | 45.576 | 36.036 | 31.822 | 0.00 | 0.00 |
| ATOM | 6375 | HE2  | TYR | X | 424 | 44.737 | 36.501 | 32.319 | 0.00 | 0.00 |
| ATOM | 6376 | CD2  | TYR | X | 424 | 45.452 | 35.394 | 30.621 | 0.00 | 0.00 |
| ATOM | 6377 | HD2  | TYR | X | 424 | 44.515 | 35.494 | 30.094 | 0.00 | 0.00 |
| ATOM | 6378 | C    | TYR | X | 424 | 45.968 | 31.621 | 30.118 | 0.00 | 0.00 |
| ATOM | 6379 | O    | TYR | X | 424 | 45.452 | 31.469 | 31.250 | 0.00 | 0.00 |
| ATOM | 6380 | N    | VAL | X | 425 | 47.074 | 30.938 | 29.769 | 0.00 | 0.00 |
| ATOM | 6381 | H    | VAL | X | 425 | 47.353 | 31.033 | 28.803 | 0.00 | 0.00 |
| ATOM | 6382 | CA   | VAL | X | 425 | 47.961 | 30.313 | 30.730 | 0.00 | 0.00 |
| ATOM | 6383 | HA   | VAL | X | 425 | 47.831 | 30.635 | 31.764 | 0.00 | 0.00 |
| ATOM | 6384 | CB   | VAL | X | 425 | 47.935 | 28.757 | 30.837 | 0.00 | 0.00 |
| ATOM | 6385 | HB   | VAL | X | 425 | 48.037 | 28.366 | 29.825 | 0.00 | 0.00 |
| ATOM | 6386 | CG1  | VAL | X | 425 | 48.867 | 28.075 | 31.819 | 0.00 | 0.00 |
| ATOM | 6387 | HG11 | VAL | X | 425 | 49.820 | 28.594 | 31.716 | 0.00 | 0.00 |
| ATOM | 6388 | HG12 | VAL | X | 425 | 48.564 | 28.020 | 32.864 | 0.00 | 0.00 |
| ATOM | 6389 | HG13 | VAL | X | 425 | 48.958 | 27.057 | 31.441 | 0.00 | 0.00 |
| ATOM | 6390 | CG2  | VAL | X | 425 | 46.555 | 28.434 | 31.372 | 0.00 | 0.00 |
| ATOM | 6391 | HG21 | VAL | X | 425 | 46.443 | 27.354 | 31.468 | 0.00 | 0.00 |
| ATOM | 6392 | HG22 | VAL | X | 425 | 46.445 | 28.818 | 32.387 | 0.00 | 0.00 |
| ATOM | 6393 | HG23 | VAL | X | 425 | 45.792 | 28.783 | 30.676 | 0.00 | 0.00 |
| ATOM | 6394 | C    | VAL | X | 425 | 49.293 | 30.745 | 30.187 | 0.00 | 0.00 |
| ATOM | 6395 | O    | VAL | X | 425 | 49.651 | 30.477 | 29.054 | 0.00 | 0.00 |
| ATOM | 6396 | N    | PHE | X | 426 | 50.024 | 31.499 | 31.024 | 0.00 | 0.00 |
| ATOM | 6397 | H    | PHE | X | 426 | 49.578 | 31.677 | 31.912 | 0.00 | 0.00 |
| ATOM | 6398 | CA   | PHE | X | 426 | 51.329 | 32.045 | 30.715 | 0.00 | 0.00 |
| ATOM | 6399 | HA   | PHE | X | 426 | 51.492 | 32.292 | 29.666 | 0.00 | 0.00 |
| ATOM | 6400 | CB   | PHE | X | 426 | 51.465 | 33.383 | 31.520 | 0.00 | 0.00 |
| ATOM | 6401 | HB2  | PHE | X | 426 | 50.763 | 34.103 | 31.098 | 0.00 | 0.00 |
| ATOM | 6402 | HB3  | PHE | X | 426 | 51.194 | 33.167 | 32.553 | 0.00 | 0.00 |
| ATOM | 6403 | CG   | PHE | X | 426 | 52.860 | 33.984 | 31.479 | 0.00 | 0.00 |
| ATOM | 6404 | CD1  | PHE | X | 426 | 53.234 | 34.781 | 30.371 | 0.00 | 0.00 |
| ATOM | 6405 | HD1  | PHE | X | 426 | 52.536 | 34.830 | 29.549 | 0.00 | 0.00 |
| ATOM | 6406 | CE1  | PHE | X | 426 | 54.538 | 35.236 | 30.324 | 0.00 | 0.00 |
| ATOM | 6407 | HE1  | PHE | X | 426 | 54.835 | 35.892 | 29.519 | 0.00 | 0.00 |
| ATOM | 6408 | CZ   | PHE | X | 426 | 55.514 | 34.966 | 31.271 | 0.00 | 0.00 |
| ATOM | 6409 | HZ   | PHE | X | 426 | 56.541 | 35.236 | 31.072 | 0.00 | 0.00 |
| ATOM | 6410 | CE2  | PHE | X | 426 | 55.114 | 34.319 | 32.428 | 0.00 | 0.00 |
| ATOM | 6411 | HE2  | PHE | X | 426 | 55.790 | 34.223 | 33.265 | 0.00 | 0.00 |

|      |      |      |     |   |     |        |        |        |      |      |
|------|------|------|-----|---|-----|--------|--------|--------|------|------|
| ATOM | 6412 | CD2  | PHE | X | 426 | 53.820 | 33.743 | 32.472 | 0.00 | 0.00 |
| ATOM | 6413 | HD2  | PHE | X | 426 | 53.453 | 33.215 | 33.340 | 0.00 | 0.00 |
| ATOM | 6414 | C    | PHE | X | 426 | 52.469 | 31.082 | 31.194 | 0.00 | 0.00 |
| ATOM | 6415 | O    | PHE | X | 426 | 52.520 | 30.592 | 32.266 | 0.00 | 0.00 |
| ATOM | 6416 | N    | GLU | X | 427 | 53.482 | 30.929 | 30.277 | 0.00 | 0.00 |
| ATOM | 6417 | H    | GLU | X | 427 | 53.382 | 31.479 | 29.435 | 0.00 | 0.00 |
| ATOM | 6418 | CA   | GLU | X | 427 | 54.436 | 29.782 | 30.337 | 0.00 | 0.00 |
| ATOM | 6419 | HA   | GLU | X | 427 | 54.463 | 29.345 | 31.335 | 0.00 | 0.00 |
| ATOM | 6420 | CB   | GLU | X | 427 | 54.089 | 28.738 | 29.368 | 0.00 | 0.00 |
| ATOM | 6421 | HB2  | GLU | X | 427 | 54.406 | 29.052 | 28.373 | 0.00 | 0.00 |
| ATOM | 6422 | HB3  | GLU | X | 427 | 54.801 | 27.947 | 29.603 | 0.00 | 0.00 |
| ATOM | 6423 | CG   | GLU | X | 427 | 52.720 | 28.031 | 29.471 | 0.00 | 0.00 |
| ATOM | 6424 | HG2  | GLU | X | 427 | 52.571 | 27.868 | 30.539 | 0.00 | 0.00 |
| ATOM | 6425 | HG3  | GLU | X | 427 | 52.004 | 28.752 | 29.077 | 0.00 | 0.00 |
| ATOM | 6426 | CD   | GLU | X | 427 | 52.686 | 26.734 | 28.690 | 0.00 | 0.00 |
| ATOM | 6427 | OE1  | GLU | X | 427 | 53.023 | 26.612 | 27.511 | 0.00 | 0.00 |
| ATOM | 6428 | OE2  | GLU | X | 427 | 52.324 | 25.727 | 29.333 | 0.00 | 0.00 |
| ATOM | 6429 | C    | GLU | X | 427 | 55.921 | 30.096 | 30.147 | 0.00 | 0.00 |
| ATOM | 6430 | O    | GLU | X | 427 | 56.751 | 29.186 | 30.180 | 0.00 | 0.00 |
| ATOM | 6431 | N    | HIE | X | 428 | 56.434 | 31.347 | 30.078 | 0.00 | 0.00 |
| ATOM | 6432 | H    | HIE | X | 428 | 55.791 | 32.125 | 30.105 | 0.00 | 0.00 |
| ATOM | 6433 | CA   | HIE | X | 428 | 57.835 | 31.672 | 29.964 | 0.00 | 0.00 |
| ATOM | 6434 | HA   | HIE | X | 428 | 58.396 | 30.862 | 29.497 | 0.00 | 0.00 |
| ATOM | 6435 | CB   | HIE | X | 428 | 57.962 | 32.912 | 29.067 | 0.00 | 0.00 |
| ATOM | 6436 | HB2  | HIE | X | 428 | 57.534 | 32.639 | 28.102 | 0.00 | 0.00 |
| ATOM | 6437 | HB3  | HIE | X | 428 | 57.279 | 33.670 | 29.449 | 0.00 | 0.00 |
| ATOM | 6438 | CG   | HIE | X | 428 | 59.308 | 33.422 | 28.917 | 0.00 | 0.00 |
| ATOM | 6439 | ND1  | HIE | X | 428 | 60.372 | 32.671 | 28.393 | 0.00 | 0.00 |
| ATOM | 6440 | CE1  | HIE | X | 428 | 61.421 | 33.462 | 28.484 | 0.00 | 0.00 |
| ATOM | 6441 | HE1  | HIE | X | 428 | 62.475 | 33.286 | 28.330 | 0.00 | 0.00 |
| ATOM | 6442 | NE2  | HIE | X | 428 | 61.114 | 34.643 | 29.061 | 0.00 | 0.00 |
| ATOM | 6443 | HE2  | HIE | X | 428 | 61.799 | 35.340 | 29.314 | 0.00 | 0.00 |
| ATOM | 6444 | CD2  | HIE | X | 428 | 59.761 | 34.649 | 29.317 | 0.00 | 0.00 |
| ATOM | 6445 | HD2  | HIE | X | 428 | 59.194 | 35.337 | 29.927 | 0.00 | 0.00 |
| ATOM | 6446 | C    | HIE | X | 428 | 58.459 | 32.088 | 31.347 | 0.00 | 0.00 |
| ATOM | 6447 | O    | HIE | X | 428 | 58.041 | 33.098 | 31.857 | 0.00 | 0.00 |
| ATOM | 6448 | N    | ARG | X | 429 | 59.614 | 31.557 | 31.786 | 0.00 | 0.00 |
| ATOM | 6449 | H    | ARG | X | 429 | 60.059 | 30.890 | 31.172 | 0.00 | 0.00 |
| ATOM | 6450 | CA   | ARG | X | 429 | 60.475 | 32.042 | 32.819 | 0.00 | 0.00 |
| ATOM | 6451 | HA   | ARG | X | 429 | 59.954 | 32.540 | 33.637 | 0.00 | 0.00 |
| ATOM | 6452 | CB   | ARG | X | 429 | 61.205 | 30.861 | 33.548 | 0.00 | 0.00 |
| ATOM | 6453 | HB2  | ARG | X | 429 | 60.440 | 30.258 | 34.037 | 0.00 | 0.00 |
| ATOM | 6454 | HB3  | ARG | X | 429 | 61.767 | 30.277 | 32.820 | 0.00 | 0.00 |
| ATOM | 6455 | CG   | ARG | X | 429 | 62.185 | 31.349 | 34.600 | 0.00 | 0.00 |
| ATOM | 6456 | HG2  | ARG | X | 429 | 63.049 | 31.565 | 33.972 | 0.00 | 0.00 |
| ATOM | 6457 | HG3  | ARG | X | 429 | 61.792 | 32.266 | 35.037 | 0.00 | 0.00 |
| ATOM | 6458 | CD   | ARG | X | 429 | 62.677 | 30.211 | 35.541 | 0.00 | 0.00 |
| ATOM | 6459 | HD2  | ARG | X | 429 | 61.872 | 29.898 | 36.206 | 0.00 | 0.00 |
| ATOM | 6460 | HD3  | ARG | X | 429 | 62.997 | 29.365 | 34.932 | 0.00 | 0.00 |
| ATOM | 6461 | NE   | ARG | X | 429 | 63.822 | 30.471 | 36.495 | 0.00 | 0.00 |
| ATOM | 6462 | HE   | ARG | X | 429 | 63.538 | 30.628 | 37.452 | 0.00 | 0.00 |
| ATOM | 6463 | CZ   | ARG | X | 429 | 65.148 | 30.502 | 36.288 | 0.00 | 0.00 |
| ATOM | 6464 | NH1  | ARG | X | 429 | 65.674 | 30.098 | 35.127 | 0.00 | 0.00 |
| ATOM | 6465 | HH11 | ARG | X | 429 | 65.104 | 29.782 | 34.355 | 0.00 | 0.00 |
| ATOM | 6466 | HH12 | ARG | X | 429 | 66.680 | 30.078 | 35.040 | 0.00 | 0.00 |
| ATOM | 6467 | NH2  | ARG | X | 429 | 66.030 | 30.871 | 37.205 | 0.00 | 0.00 |
| ATOM | 6468 | HH21 | ARG | X | 429 | 65.757 | 31.444 | 37.990 | 0.00 | 0.00 |
| ATOM | 6469 | HH22 | ARG | X | 429 | 67.011 | 30.639 | 37.140 | 0.00 | 0.00 |
| ATOM | 6470 | C    | ARG | X | 429 | 61.573 | 32.997 | 32.245 | 0.00 | 0.00 |
| ATOM | 6471 | O    | ARG | X | 429 | 62.423 | 32.591 | 31.450 | 0.00 | 0.00 |
| ATOM | 6472 | N    | ALA | X | 430 | 61.632 | 34.272 | 32.600 | 0.00 | 0.00 |
| ATOM | 6473 | H    | ALA | X | 430 | 60.883 | 34.642 | 33.167 | 0.00 | 0.00 |
| ATOM | 6474 | CA   | ALA | X | 430 | 62.604 | 35.162 | 31.939 | 0.00 | 0.00 |
| ATOM | 6475 | HA   | ALA | X | 430 | 62.695 | 34.974 | 30.869 | 0.00 | 0.00 |
| ATOM | 6476 | CB   | ALA | X | 430 | 61.913 | 36.534 | 32.113 | 0.00 | 0.00 |
| ATOM | 6477 | HB1  | ALA | X | 430 | 61.749 | 36.778 | 33.163 | 0.00 | 0.00 |
| ATOM | 6478 | HB2  | ALA | X | 430 | 62.438 | 37.275 | 31.511 | 0.00 | 0.00 |
| ATOM | 6479 | HB3  | ALA | X | 430 | 60.935 | 36.422 | 31.645 | 0.00 | 0.00 |
| ATOM | 6480 | C    | ALA | X | 430 | 64.022 | 35.251 | 32.544 | 0.00 | 0.00 |
| ATOM | 6481 | O    | ALA | X | 430 | 64.334 | 34.789 | 33.608 | 0.00 | 0.00 |

|      |      |      |     |   |     |        |        |        |      |      |
|------|------|------|-----|---|-----|--------|--------|--------|------|------|
| ATOM | 6482 | N    | SER | X | 431 | 64.945 | 35.834 | 31.726 | 0.00 | 0.00 |
| ATOM | 6483 | H    | SER | X | 431 | 64.581 | 36.167 | 30.845 | 0.00 | 0.00 |
| ATOM | 6484 | CA   | SER | X | 431 | 66.350 | 36.092 | 32.134 | 0.00 | 0.00 |
| ATOM | 6485 | HA   | SER | X | 431 | 66.912 | 35.173 | 32.304 | 0.00 | 0.00 |
| ATOM | 6486 | CB   | SER | X | 431 | 67.016 | 36.840 | 30.939 | 0.00 | 0.00 |
| ATOM | 6487 | HB2  | SER | X | 431 | 68.056 | 37.063 | 31.178 | 0.00 | 0.00 |
| ATOM | 6488 | HB3  | SER | X | 431 | 67.058 | 36.187 | 30.067 | 0.00 | 0.00 |
| ATOM | 6489 | OG   | SER | X | 431 | 66.515 | 38.099 | 30.511 | 0.00 | 0.00 |
| ATOM | 6490 | HG   | SER | X | 431 | 65.925 | 37.933 | 29.772 | 0.00 | 0.00 |
| ATOM | 6491 | C    | SER | X | 431 | 66.431 | 36.930 | 33.394 | 0.00 | 0.00 |
| ATOM | 6492 | O    | SER | X | 431 | 67.446 | 36.776 | 34.091 | 0.00 | 0.00 |
| ATOM | 6493 | N    | THR | X | 432 | 65.452 | 37.756 | 33.746 | 0.00 | 0.00 |
| ATOM | 6494 | H    | THR | X | 432 | 64.755 | 38.038 | 33.072 | 0.00 | 0.00 |
| ATOM | 6495 | CA   | THR | X | 432 | 65.350 | 38.634 | 34.883 | 0.00 | 0.00 |
| ATOM | 6496 | HA   | THR | X | 432 | 66.295 | 38.974 | 35.307 | 0.00 | 0.00 |
| ATOM | 6497 | CB   | THR | X | 432 | 64.452 | 39.832 | 34.577 | 0.00 | 0.00 |
| ATOM | 6498 | HB   | THR | X | 432 | 63.430 | 39.456 | 34.640 | 0.00 | 0.00 |
| ATOM | 6499 | CG2  | THR | X | 432 | 64.652 | 40.920 | 35.644 | 0.00 | 0.00 |
| ATOM | 6500 | HG21 | THR | X | 432 | 63.798 | 41.597 | 35.669 | 0.00 | 0.00 |
| ATOM | 6501 | HG22 | THR | X | 432 | 64.697 | 40.471 | 36.636 | 0.00 | 0.00 |
| ATOM | 6502 | HG23 | THR | X | 432 | 65.578 | 41.465 | 35.464 | 0.00 | 0.00 |
| ATOM | 6503 | OG1  | THR | X | 432 | 64.808 | 40.368 | 33.347 | 0.00 | 0.00 |
| ATOM | 6504 | HG1  | THR | X | 432 | 64.024 | 40.811 | 33.015 | 0.00 | 0.00 |
| ATOM | 6505 | C    | THR | X | 432 | 64.734 | 37.844 | 36.097 | 0.00 | 0.00 |
| ATOM | 6506 | O    | THR | X | 432 | 64.949 | 38.171 | 37.203 | 0.00 | 0.00 |
| ATOM | 6507 | N    | LEU | X | 433 | 64.050 | 36.760 | 35.888 | 0.00 | 0.00 |
| ATOM | 6508 | H    | LEU | X | 433 | 64.178 | 36.363 | 34.968 | 0.00 | 0.00 |
| ATOM | 6509 | CA   | LEU | X | 433 | 63.203 | 36.041 | 36.908 | 0.00 | 0.00 |
| ATOM | 6510 | HA   | LEU | X | 433 | 62.672 | 36.820 | 37.456 | 0.00 | 0.00 |
| ATOM | 6511 | CB   | LEU | X | 433 | 62.050 | 35.217 | 36.269 | 0.00 | 0.00 |
| ATOM | 6512 | HB2  | LEU | X | 433 | 61.685 | 35.775 | 35.406 | 0.00 | 0.00 |
| ATOM | 6513 | HB3  | LEU | X | 433 | 62.403 | 34.288 | 35.821 | 0.00 | 0.00 |
| ATOM | 6514 | CG   | LEU | X | 433 | 60.782 | 34.984 | 37.135 | 0.00 | 0.00 |
| ATOM | 6515 | HG   | LEU | X | 433 | 60.351 | 35.937 | 37.440 | 0.00 | 0.00 |
| ATOM | 6516 | CD1  | LEU | X | 433 | 59.695 | 34.275 | 36.391 | 0.00 | 0.00 |
| ATOM | 6517 | HD11 | LEU | X | 433 | 58.833 | 33.995 | 36.997 | 0.00 | 0.00 |
| ATOM | 6518 | HD12 | LEU | X | 433 | 59.289 | 34.883 | 35.583 | 0.00 | 0.00 |
| ATOM | 6519 | HD13 | LEU | X | 433 | 60.040 | 33.327 | 35.977 | 0.00 | 0.00 |
| ATOM | 6520 | CD2  | LEU | X | 433 | 61.071 | 34.201 | 38.439 | 0.00 | 0.00 |
| ATOM | 6521 | HD21 | LEU | X | 433 | 60.167 | 33.913 | 38.975 | 0.00 | 0.00 |
| ATOM | 6522 | HD22 | LEU | X | 433 | 61.624 | 33.286 | 38.228 | 0.00 | 0.00 |
| ATOM | 6523 | HD23 | LEU | X | 433 | 61.592 | 34.925 | 39.065 | 0.00 | 0.00 |
| ATOM | 6524 | C    | LEU | X | 433 | 64.061 | 35.199 | 37.897 | 0.00 | 0.00 |
| ATOM | 6525 | O    | LEU | X | 433 | 64.548 | 34.133 | 37.613 | 0.00 | 0.00 |
| ATOM | 6526 | N    | SER | X | 434 | 64.335 | 35.806 | 39.087 | 0.00 | 0.00 |
| ATOM | 6527 | H    | SER | X | 434 | 64.202 | 36.807 | 39.090 | 0.00 | 0.00 |
| ATOM | 6528 | CA   | SER | X | 434 | 65.290 | 35.261 | 40.107 | 0.00 | 0.00 |
| ATOM | 6529 | HA   | SER | X | 434 | 66.194 | 34.969 | 39.572 | 0.00 | 0.00 |
| ATOM | 6530 | CB   | SER | X | 434 | 65.625 | 36.318 | 41.113 | 0.00 | 0.00 |
| ATOM | 6531 | HB2  | SER | X | 434 | 66.272 | 35.881 | 41.873 | 0.00 | 0.00 |
| ATOM | 6532 | HB3  | SER | X | 434 | 66.160 | 37.052 | 40.511 | 0.00 | 0.00 |
| ATOM | 6533 | OG   | SER | X | 434 | 64.440 | 36.810 | 41.649 | 0.00 | 0.00 |
| ATOM | 6534 | HG   | SER | X | 434 | 63.999 | 37.431 | 41.064 | 0.00 | 0.00 |
| ATOM | 6535 | C    | SER | X | 434 | 64.902 | 33.928 | 40.835 | 0.00 | 0.00 |
| ATOM | 6536 | O    | SER | X | 434 | 65.778 | 33.271 | 41.378 | 0.00 | 0.00 |
| ATOM | 6537 | N    | TRP | X | 435 | 63.616 | 33.485 | 40.763 | 0.00 | 0.00 |
| ATOM | 6538 | H    | TRP | X | 435 | 62.893 | 34.138 | 40.499 | 0.00 | 0.00 |
| ATOM | 6539 | CA   | TRP | X | 435 | 63.314 | 32.220 | 41.531 | 0.00 | 0.00 |
| ATOM | 6540 | HA   | TRP | X | 435 | 63.771 | 32.370 | 42.509 | 0.00 | 0.00 |
| ATOM | 6541 | CB   | TRP | X | 435 | 61.792 | 32.067 | 41.798 | 0.00 | 0.00 |
| ATOM | 6542 | HB2  | TRP | X | 435 | 61.217 | 32.017 | 40.873 | 0.00 | 0.00 |
| ATOM | 6543 | HB3  | TRP | X | 435 | 61.631 | 31.084 | 42.240 | 0.00 | 0.00 |
| ATOM | 6544 | CG   | TRP | X | 435 | 61.156 | 33.104 | 42.627 | 0.00 | 0.00 |
| ATOM | 6545 | CD1  | TRP | X | 435 | 60.711 | 34.319 | 42.207 | 0.00 | 0.00 |
| ATOM | 6546 | HD1  | TRP | X | 435 | 60.565 | 34.616 | 41.178 | 0.00 | 0.00 |
| ATOM | 6547 | NE1  | TRP | X | 435 | 60.284 | 35.002 | 43.304 | 0.00 | 0.00 |
| ATOM | 6548 | HE1  | TRP | X | 435 | 59.968 | 35.959 | 43.238 | 0.00 | 0.00 |
| ATOM | 6549 | CE2  | TRP | X | 435 | 60.479 | 34.376 | 44.494 | 0.00 | 0.00 |
| ATOM | 6550 | CZ2  | TRP | X | 435 | 60.152 | 34.652 | 45.823 | 0.00 | 0.00 |
| ATOM | 6551 | HZ2  | TRP | X | 435 | 59.510 | 35.481 | 46.082 | 0.00 | 0.00 |

|      |      |      |     |   |     |        |        |        |      |      |
|------|------|------|-----|---|-----|--------|--------|--------|------|------|
| ATOM | 6552 | CH2  | TRP | X | 435 | 60.373 | 33.641 | 46.810 | 0.00 | 0.00 |
| ATOM | 6553 | HH2  | TRP | X | 435 | 60.053 | 33.847 | 47.820 | 0.00 | 0.00 |
| ATOM | 6554 | CZ3  | TRP | X | 435 | 61.136 | 32.504 | 46.420 | 0.00 | 0.00 |
| ATOM | 6555 | HZ3  | TRP | X | 435 | 61.502 | 31.810 | 47.163 | 0.00 | 0.00 |
| ATOM | 6556 | CE3  | TRP | X | 435 | 61.519 | 32.285 | 45.097 | 0.00 | 0.00 |
| ATOM | 6557 | HE3  | TRP | X | 435 | 61.955 | 31.363 | 44.742 | 0.00 | 0.00 |
| ATOM | 6558 | CD2  | TRP | X | 435 | 61.136 | 33.142 | 44.107 | 0.00 | 0.00 |
| ATOM | 6559 | C    | TRP | X | 435 | 63.958 | 31.047 | 40.737 | 0.00 | 0.00 |
| ATOM | 6560 | O    | TRP | X | 435 | 63.965 | 31.085 | 39.522 | 0.00 | 0.00 |
| ATOM | 6561 | N    | PRO | X | 436 | 64.556 | 30.092 | 41.417 | 0.00 | 0.00 |
| ATOM | 6562 | CD   | PRO | X | 436 | 64.565 | 30.011 | 42.886 | 0.00 | 0.00 |
| ATOM | 6563 | HD2  | PRO | X | 436 | 63.528 | 29.833 | 43.171 | 0.00 | 0.00 |
| ATOM | 6564 | HD3  | PRO | X | 436 | 64.871 | 30.980 | 43.280 | 0.00 | 0.00 |
| ATOM | 6565 | CG   | PRO | X | 436 | 65.486 | 28.848 | 43.272 | 0.00 | 0.00 |
| ATOM | 6566 | HG2  | PRO | X | 436 | 65.240 | 28.358 | 44.214 | 0.00 | 0.00 |
| ATOM | 6567 | HG3  | PRO | X | 436 | 66.486 | 29.282 | 43.287 | 0.00 | 0.00 |
| ATOM | 6568 | CB   | PRO | X | 436 | 65.371 | 27.918 | 42.098 | 0.00 | 0.00 |
| ATOM | 6569 | HB2  | PRO | X | 436 | 64.436 | 27.366 | 42.198 | 0.00 | 0.00 |
| ATOM | 6570 | HB3  | PRO | X | 436 | 66.244 | 27.266 | 42.124 | 0.00 | 0.00 |
| ATOM | 6571 | CA   | PRO | X | 436 | 65.307 | 28.893 | 40.927 | 0.00 | 0.00 |
| ATOM | 6572 | HA   | PRO | X | 436 | 66.301 | 29.215 | 40.617 | 0.00 | 0.00 |
| ATOM | 6573 | C    | PRO | X | 436 | 64.521 | 28.257 | 39.769 | 0.00 | 0.00 |
| ATOM | 6574 | O    | PRO | X | 436 | 63.274 | 28.265 | 39.756 | 0.00 | 0.00 |
| ATOM | 6575 | N    | LEU | X | 437 | 65.246 | 27.820 | 38.657 | 0.00 | 0.00 |
| ATOM | 6576 | H    | LEU | X | 437 | 66.249 | 27.714 | 38.707 | 0.00 | 0.00 |
| ATOM | 6577 | CA   | LEU | X | 437 | 64.783 | 27.179 | 37.419 | 0.00 | 0.00 |
| ATOM | 6578 | HA   | LEU | X | 437 | 64.381 | 27.986 | 36.806 | 0.00 | 0.00 |
| ATOM | 6579 | CB   | LEU | X | 437 | 66.018 | 26.561 | 36.771 | 0.00 | 0.00 |
| ATOM | 6580 | HB2  | LEU | X | 437 | 66.581 | 27.456 | 36.509 | 0.00 | 0.00 |
| ATOM | 6581 | HB3  | LEU | X | 437 | 66.658 | 25.940 | 37.397 | 0.00 | 0.00 |
| ATOM | 6582 | CG   | LEU | X | 437 | 65.843 | 25.659 | 35.480 | 0.00 | 0.00 |
| ATOM | 6583 | HG   | LEU | X | 437 | 65.226 | 24.779 | 35.659 | 0.00 | 0.00 |
| ATOM | 6584 | CD1  | LEU | X | 437 | 65.296 | 26.409 | 34.323 | 0.00 | 0.00 |
| ATOM | 6585 | HD11 | LEU | X | 437 | 64.270 | 26.716 | 34.525 | 0.00 | 0.00 |
| ATOM | 6586 | HD12 | LEU | X | 437 | 65.935 | 27.270 | 34.129 | 0.00 | 0.00 |
| ATOM | 6587 | HD13 | LEU | X | 437 | 65.266 | 25.877 | 33.372 | 0.00 | 0.00 |
| ATOM | 6588 | CD2  | LEU | X | 437 | 67.249 | 25.187 | 35.086 | 0.00 | 0.00 |
| ATOM | 6589 | HD21 | LEU | X | 437 | 67.329 | 24.540 | 34.212 | 0.00 | 0.00 |
| ATOM | 6590 | HD22 | LEU | X | 437 | 68.026 | 25.942 | 34.969 | 0.00 | 0.00 |
| ATOM | 6591 | HD23 | LEU | X | 437 | 67.739 | 24.627 | 35.882 | 0.00 | 0.00 |
| ATOM | 6592 | C    | LEU | X | 437 | 63.659 | 26.113 | 37.628 | 0.00 | 0.00 |
| ATOM | 6593 | O    | LEU | X | 437 | 62.755 | 26.053 | 36.784 | 0.00 | 0.00 |
| ATOM | 6594 | N    | TRP | X | 438 | 63.766 | 25.358 | 38.734 | 0.00 | 0.00 |
| ATOM | 6595 | H    | TRP | X | 438 | 64.578 | 25.480 | 39.323 | 0.00 | 0.00 |
| ATOM | 6596 | CA   | TRP | X | 438 | 62.799 | 24.295 | 39.074 | 0.00 | 0.00 |
| ATOM | 6597 | HA   | TRP | X | 438 | 62.843 | 23.513 | 38.316 | 0.00 | 0.00 |
| ATOM | 6598 | CB   | TRP | X | 438 | 63.247 | 23.556 | 40.321 | 0.00 | 0.00 |
| ATOM | 6599 | HB2  | TRP | X | 438 | 62.723 | 22.602 | 40.273 | 0.00 | 0.00 |
| ATOM | 6600 | HB3  | TRP | X | 438 | 64.320 | 23.385 | 40.234 | 0.00 | 0.00 |
| ATOM | 6601 | CG   | TRP | X | 438 | 62.985 | 24.063 | 41.778 | 0.00 | 0.00 |
| ATOM | 6602 | CD1  | TRP | X | 438 | 63.943 | 24.366 | 42.633 | 0.00 | 0.00 |
| ATOM | 6603 | HD1  | TRP | X | 438 | 64.974 | 24.189 | 42.367 | 0.00 | 0.00 |
| ATOM | 6604 | NE1  | TRP | X | 438 | 63.482 | 24.793 | 43.836 | 0.00 | 0.00 |
| ATOM | 6605 | HE1  | TRP | X | 438 | 64.131 | 25.102 | 44.544 | 0.00 | 0.00 |
| ATOM | 6606 | CE2  | TRP | X | 438 | 62.109 | 24.606 | 43.882 | 0.00 | 0.00 |
| ATOM | 6607 | CZ2  | TRP | X | 438 | 61.118 | 24.808 | 44.858 | 0.00 | 0.00 |
| ATOM | 6608 | HZ2  | TRP | X | 438 | 61.401 | 25.165 | 45.836 | 0.00 | 0.00 |
| ATOM | 6609 | CH2  | TRP | X | 438 | 59.748 | 24.506 | 44.515 | 0.00 | 0.00 |
| ATOM | 6610 | HH2  | TRP | X | 438 | 58.993 | 24.623 | 45.279 | 0.00 | 0.00 |
| ATOM | 6611 | CZ3  | TRP | X | 438 | 59.416 | 23.975 | 43.272 | 0.00 | 0.00 |
| ATOM | 6612 | HZ3  | TRP | X | 438 | 58.403 | 23.652 | 43.080 | 0.00 | 0.00 |
| ATOM | 6613 | CE3  | TRP | X | 438 | 60.370 | 23.842 | 42.311 | 0.00 | 0.00 |
| ATOM | 6614 | HE3  | TRP | X | 438 | 60.085 | 23.322 | 41.408 | 0.00 | 0.00 |
| ATOM | 6615 | CD2  | TRP | X | 438 | 61.741 | 24.222 | 42.563 | 0.00 | 0.00 |
| ATOM | 6616 | C    | TRP | X | 438 | 61.313 | 24.714 | 39.166 | 0.00 | 0.00 |
| ATOM | 6617 | O    | TRP | X | 438 | 60.420 | 23.943 | 38.913 | 0.00 | 0.00 |
| ATOM | 6618 | N    | MET | X | 439 | 61.096 | 25.966 | 39.603 | 0.00 | 0.00 |
| ATOM | 6619 | H    | MET | X | 439 | 61.904 | 26.545 | 39.784 | 0.00 | 0.00 |
| ATOM | 6620 | CA   | MET | X | 439 | 59.808 | 26.387 | 39.992 | 0.00 | 0.00 |
| ATOM | 6621 | HA   | MET | X | 439 | 59.238 | 25.622 | 40.519 | 0.00 | 0.00 |

|      |      |      |     |   |     |        |        |        |      |      |
|------|------|------|-----|---|-----|--------|--------|--------|------|------|
| ATOM | 6622 | CB   | MET | X | 439 | 59.987 | 27.747 | 40.790 | 0.00 | 0.00 |
| ATOM | 6623 | HB2  | MET | X | 439 | 60.898 | 28.253 | 40.470 | 0.00 | 0.00 |
| ATOM | 6624 | HB3  | MET | X | 439 | 59.047 | 28.248 | 40.557 | 0.00 | 0.00 |
| ATOM | 6625 | CG   | MET | X | 439 | 60.255 | 27.399 | 42.228 | 0.00 | 0.00 |
| ATOM | 6626 | HG2  | MET | X | 439 | 59.428 | 26.889 | 42.722 | 0.00 | 0.00 |
| ATOM | 6627 | HG3  | MET | X | 439 | 61.169 | 26.812 | 42.317 | 0.00 | 0.00 |
| ATOM | 6628 | SD   | MET | X | 439 | 60.557 | 28.775 | 43.357 | 0.00 | 0.00 |
| ATOM | 6629 | CE   | MET | X | 439 | 58.871 | 29.374 | 43.485 | 0.00 | 0.00 |
| ATOM | 6630 | HE1  | MET | X | 439 | 58.203 | 28.683 | 44.001 | 0.00 | 0.00 |
| ATOM | 6631 | HE2  | MET | X | 439 | 58.867 | 30.259 | 44.121 | 0.00 | 0.00 |
| ATOM | 6632 | HE3  | MET | X | 439 | 58.561 | 29.541 | 42.453 | 0.00 | 0.00 |
| ATOM | 6633 | C    | MET | X | 439 | 58.939 | 26.584 | 38.725 | 0.00 | 0.00 |
| ATOM | 6634 | O    | MET | X | 439 | 57.745 | 26.638 | 38.829 | 0.00 | 0.00 |
| ATOM | 6635 | N    | GLY | X | 440 | 59.508 | 26.731 | 37.521 | 0.00 | 0.00 |
| ATOM | 6636 | H    | GLY | X | 440 | 60.507 | 26.581 | 37.539 | 0.00 | 0.00 |
| ATOM | 6637 | CA   | GLY | X | 440 | 58.788 | 27.079 | 36.359 | 0.00 | 0.00 |
| ATOM | 6638 | HA2  | GLY | X | 440 | 59.283 | 27.067 | 35.355 | 0.00 | 0.00 |
| ATOM | 6639 | HA3  | GLY | X | 440 | 57.831 | 26.564 | 36.310 | 0.00 | 0.00 |
| ATOM | 6640 | C    | GLY | X | 440 | 58.499 | 28.551 | 36.513 | 0.00 | 0.00 |
| ATOM | 6641 | O    | GLY | X | 440 | 59.377 | 29.406 | 36.477 | 0.00 | 0.00 |
| ATOM | 6642 | N    | VAL | X | 441 | 57.194 | 28.868 | 36.684 | 0.00 | 0.00 |
| ATOM | 6643 | H    | VAL | X | 441 | 56.536 | 28.103 | 36.691 | 0.00 | 0.00 |
| ATOM | 6644 | CA   | VAL | X | 441 | 56.668 | 30.206 | 36.653 | 0.00 | 0.00 |
| ATOM | 6645 | HA   | VAL | X | 441 | 57.514 | 30.888 | 36.580 | 0.00 | 0.00 |
| ATOM | 6646 | CB   | VAL | X | 441 | 55.781 | 30.533 | 35.336 | 0.00 | 0.00 |
| ATOM | 6647 | HB   | VAL | X | 441 | 54.781 | 30.136 | 35.511 | 0.00 | 0.00 |
| ATOM | 6648 | CG1  | VAL | X | 441 | 55.727 | 32.016 | 35.169 | 0.00 | 0.00 |
| ATOM | 6649 | HG11 | VAL | X | 441 | 55.359 | 32.517 | 36.064 | 0.00 | 0.00 |
| ATOM | 6650 | HG12 | VAL | X | 441 | 56.694 | 32.494 | 35.014 | 0.00 | 0.00 |
| ATOM | 6651 | HG13 | VAL | X | 441 | 55.136 | 32.314 | 34.303 | 0.00 | 0.00 |
| ATOM | 6652 | CG2  | VAL | X | 441 | 56.282 | 29.872 | 33.956 | 0.00 | 0.00 |
| ATOM | 6653 | HG21 | VAL | X | 441 | 56.490 | 28.806 | 34.050 | 0.00 | 0.00 |
| ATOM | 6654 | HG22 | VAL | X | 441 | 55.531 | 29.947 | 33.170 | 0.00 | 0.00 |
| ATOM | 6655 | HG23 | VAL | X | 441 | 57.187 | 30.407 | 33.668 | 0.00 | 0.00 |
| ATOM | 6656 | C    | VAL | X | 441 | 55.857 | 30.473 | 37.931 | 0.00 | 0.00 |
| ATOM | 6657 | O    | VAL | X | 441 | 54.732 | 29.961 | 38.059 | 0.00 | 0.00 |
| ATOM | 6658 | N    | PRO | X | 442 | 56.369 | 31.247 | 38.880 | 0.00 | 0.00 |
| ATOM | 6659 | CD   | PRO | X | 442 | 57.701 | 31.804 | 38.871 | 0.00 | 0.00 |
| ATOM | 6660 | HD2  | PRO | X | 442 | 57.722 | 32.457 | 37.998 | 0.00 | 0.00 |
| ATOM | 6661 | HD3  | PRO | X | 442 | 58.432 | 30.996 | 38.845 | 0.00 | 0.00 |
| ATOM | 6662 | CG   | PRO | X | 442 | 57.930 | 32.565 | 40.219 | 0.00 | 0.00 |
| ATOM | 6663 | HG2  | PRO | X | 442 | 57.694 | 33.627 | 40.163 | 0.00 | 0.00 |
| ATOM | 6664 | HG3  | PRO | X | 442 | 58.967 | 32.435 | 40.527 | 0.00 | 0.00 |
| ATOM | 6665 | CB   | PRO | X | 442 | 56.939 | 31.814 | 41.081 | 0.00 | 0.00 |
| ATOM | 6666 | HB2  | PRO | X | 442 | 56.672 | 32.323 | 42.007 | 0.00 | 0.00 |
| ATOM | 6667 | HB3  | PRO | X | 442 | 57.385 | 30.858 | 41.353 | 0.00 | 0.00 |
| ATOM | 6668 | CA   | PRO | X | 442 | 55.810 | 31.508 | 40.184 | 0.00 | 0.00 |
| ATOM | 6669 | HA   | PRO | X | 442 | 55.339 | 30.588 | 40.528 | 0.00 | 0.00 |
| ATOM | 6670 | C    | PRO | X | 442 | 54.665 | 32.585 | 40.105 | 0.00 | 0.00 |
| ATOM | 6671 | O    | PRO | X | 442 | 54.668 | 33.476 | 39.278 | 0.00 | 0.00 |
| ATOM | 6672 | N    | HIP | X | 443 | 53.728 | 32.495 | 41.067 | 0.00 | 0.00 |
| ATOM | 6673 | H    | HIP | X | 443 | 53.772 | 31.710 | 41.700 | 0.00 | 0.00 |
| ATOM | 6674 | CA   | HIP | X | 443 | 52.510 | 33.310 | 41.225 | 0.00 | 0.00 |
| ATOM | 6675 | HA   | HIP | X | 443 | 51.765 | 32.745 | 40.663 | 0.00 | 0.00 |
| ATOM | 6676 | CB   | HIP | X | 443 | 52.229 | 33.295 | 42.736 | 0.00 | 0.00 |
| ATOM | 6677 | HB2  | HIP | X | 443 | 52.100 | 32.281 | 43.114 | 0.00 | 0.00 |
| ATOM | 6678 | HB3  | HIP | X | 443 | 53.075 | 33.738 | 43.261 | 0.00 | 0.00 |
| ATOM | 6679 | CG   | HIP | X | 443 | 51.018 | 34.029 | 43.233 | 0.00 | 0.00 |
| ATOM | 6680 | ND1  | HIP | X | 443 | 49.784 | 33.994 | 42.755 | 0.00 | 0.00 |
| ATOM | 6681 | HD1  | HIP | X | 443 | 49.435 | 33.361 | 42.049 | 0.00 | 0.00 |
| ATOM | 6682 | CE1  | HIP | X | 443 | 48.994 | 34.952 | 43.340 | 0.00 | 0.00 |
| ATOM | 6683 | HE1  | HIP | X | 443 | 47.924 | 35.074 | 43.260 | 0.00 | 0.00 |
| ATOM | 6684 | NE2  | HIP | X | 443 | 49.777 | 35.549 | 44.281 | 0.00 | 0.00 |
| ATOM | 6685 | HE2  | HIP | X | 443 | 49.427 | 36.091 | 45.058 | 0.00 | 0.00 |
| ATOM | 6686 | CD2  | HIP | X | 443 | 51.061 | 34.960 | 44.233 | 0.00 | 0.00 |
| ATOM | 6687 | HD2  | HIP | X | 443 | 52.005 | 35.230 | 44.683 | 0.00 | 0.00 |
| ATOM | 6688 | C    | HIP | X | 443 | 52.639 | 34.726 | 40.588 | 0.00 | 0.00 |
| ATOM | 6689 | O    | HIP | X | 443 | 53.356 | 35.593 | 41.116 | 0.00 | 0.00 |
| ATOM | 6690 | N    | GLY | X | 444 | 51.872 | 34.967 | 39.552 | 0.00 | 0.00 |
| ATOM | 6691 | H    | GLY | X | 444 | 51.324 | 34.250 | 39.099 | 0.00 | 0.00 |

|      |      |      |     |   |     |        |        |        |      |      |
|------|------|------|-----|---|-----|--------|--------|--------|------|------|
| ATOM | 6692 | CA   | GLY | X | 444 | 51.637 | 36.413 | 39.060 | 0.00 | 0.00 |
| ATOM | 6693 | HA2  | GLY | X | 444 | 50.768 | 36.430 | 38.345 | 0.00 | 0.00 |
| ATOM | 6694 | HA3  | GLY | X | 444 | 51.238 | 36.987 | 39.861 | 0.00 | 0.00 |
| ATOM | 6695 | C    | GLY | X | 444 | 52.811 | 37.182 | 38.363 | 0.00 | 0.00 |
| ATOM | 6696 | O    | GLY | X | 444 | 52.820 | 38.401 | 38.465 | 0.00 | 0.00 |
| ATOM | 6697 | N    | TYR | X | 445 | 53.752 | 36.409 | 37.816 | 0.00 | 0.00 |
| ATOM | 6698 | H    | TYR | X | 445 | 53.742 | 35.411 | 37.974 | 0.00 | 0.00 |
| ATOM | 6699 | CA   | TYR | X | 445 | 55.035 | 37.041 | 37.433 | 0.00 | 0.00 |
| ATOM | 6700 | HA   | TYR | X | 445 | 55.274 | 37.869 | 38.100 | 0.00 | 0.00 |
| ATOM | 6701 | CB   | TYR | X | 445 | 56.248 | 36.086 | 37.594 | 0.00 | 0.00 |
| ATOM | 6702 | HB2  | TYR | X | 445 | 55.838 | 35.128 | 37.916 | 0.00 | 0.00 |
| ATOM | 6703 | HB3  | TYR | X | 445 | 56.747 | 36.001 | 36.628 | 0.00 | 0.00 |
| ATOM | 6704 | CG   | TYR | X | 445 | 57.186 | 36.505 | 38.701 | 0.00 | 0.00 |
| ATOM | 6705 | CD1  | TYR | X | 445 | 58.274 | 37.492 | 38.434 | 0.00 | 0.00 |
| ATOM | 6706 | HD1  | TYR | X | 445 | 58.323 | 37.944 | 37.454 | 0.00 | 0.00 |
| ATOM | 6707 | CE1  | TYR | X | 445 | 59.117 | 37.878 | 39.470 | 0.00 | 0.00 |
| ATOM | 6708 | HE1  | TYR | X | 445 | 59.863 | 38.618 | 39.221 | 0.00 | 0.00 |
| ATOM | 6709 | CZ   | TYR | X | 445 | 58.904 | 37.489 | 40.806 | 0.00 | 0.00 |
| ATOM | 6710 | OH   | TYR | X | 445 | 59.818 | 37.816 | 41.826 | 0.00 | 0.00 |
| ATOM | 6711 | HH   | TYR | X | 445 | 60.499 | 38.425 | 41.531 | 0.00 | 0.00 |
| ATOM | 6712 | CE2  | TYR | X | 445 | 57.786 | 36.577 | 41.016 | 0.00 | 0.00 |
| ATOM | 6713 | HE2  | TYR | X | 445 | 57.504 | 36.379 | 42.040 | 0.00 | 0.00 |
| ATOM | 6714 | CD2  | TYR | X | 445 | 56.886 | 36.160 | 40.001 | 0.00 | 0.00 |
| ATOM | 6715 | HD2  | TYR | X | 445 | 56.063 | 35.491 | 40.206 | 0.00 | 0.00 |
| ATOM | 6716 | C    | TYR | X | 445 | 54.904 | 37.610 | 35.985 | 0.00 | 0.00 |
| ATOM | 6717 | O    | TYR | X | 445 | 55.824 | 38.207 | 35.463 | 0.00 | 0.00 |
| ATOM | 6718 | N    | GLU | X | 446 | 53.746 | 37.469 | 35.312 | 0.00 | 0.00 |
| ATOM | 6719 | H    | GLU | X | 446 | 52.975 | 37.063 | 35.823 | 0.00 | 0.00 |
| ATOM | 6720 | CA   | GLU | X | 446 | 53.513 | 37.709 | 33.888 | 0.00 | 0.00 |
| ATOM | 6721 | HA   | GLU | X | 446 | 54.494 | 37.529 | 33.449 | 0.00 | 0.00 |
| ATOM | 6722 | CB   | GLU | X | 446 | 52.480 | 36.685 | 33.371 | 0.00 | 0.00 |
| ATOM | 6723 | HB2  | GLU | X | 446 | 52.632 | 36.567 | 32.298 | 0.00 | 0.00 |
| ATOM | 6724 | HB3  | GLU | X | 446 | 52.569 | 35.756 | 33.934 | 0.00 | 0.00 |
| ATOM | 6725 | CG   | GLU | X | 446 | 50.990 | 37.014 | 33.340 | 0.00 | 0.00 |
| ATOM | 6726 | HG2  | GLU | X | 446 | 50.712 | 37.973 | 32.903 | 0.00 | 0.00 |
| ATOM | 6727 | HG3  | GLU | X | 446 | 50.512 | 36.227 | 32.757 | 0.00 | 0.00 |
| ATOM | 6728 | CD   | GLU | X | 446 | 50.335 | 36.982 | 34.782 | 0.00 | 0.00 |
| ATOM | 6729 | OE1  | GLU | X | 446 | 51.036 | 37.254 | 35.814 | 0.00 | 0.00 |
| ATOM | 6730 | OE2  | GLU | X | 446 | 49.139 | 36.720 | 34.840 | 0.00 | 0.00 |
| ATOM | 6731 | C    | GLU | X | 446 | 53.169 | 39.218 | 33.578 | 0.00 | 0.00 |
| ATOM | 6732 | O    | GLU | X | 446 | 53.537 | 39.759 | 32.505 | 0.00 | 0.00 |
| ATOM | 6733 | N    | ILE | X | 447 | 52.475 | 39.882 | 34.584 | 0.00 | 0.00 |
| ATOM | 6734 | H    | ILE | X | 447 | 52.088 | 39.305 | 35.317 | 0.00 | 0.00 |
| ATOM | 6735 | CA   | ILE | X | 447 | 52.203 | 41.341 | 34.701 | 0.00 | 0.00 |
| ATOM | 6736 | HA   | ILE | X | 447 | 51.464 | 41.574 | 33.934 | 0.00 | 0.00 |
| ATOM | 6737 | CB   | ILE | X | 447 | 51.746 | 41.697 | 36.095 | 0.00 | 0.00 |
| ATOM | 6738 | HB   | ILE | X | 447 | 51.558 | 42.770 | 36.108 | 0.00 | 0.00 |
| ATOM | 6739 | CG2  | ILE | X | 447 | 50.395 | 40.935 | 36.262 | 0.00 | 0.00 |
| ATOM | 6740 | HG21 | ILE | X | 447 | 49.710 | 41.047 | 35.422 | 0.00 | 0.00 |
| ATOM | 6741 | HG22 | ILE | X | 447 | 50.450 | 39.854 | 36.390 | 0.00 | 0.00 |
| ATOM | 6742 | HG23 | ILE | X | 447 | 49.911 | 41.241 | 37.190 | 0.00 | 0.00 |
| ATOM | 6743 | CG1  | ILE | X | 447 | 52.680 | 41.348 | 37.232 | 0.00 | 0.00 |
| ATOM | 6744 | HG12 | ILE | X | 447 | 53.153 | 40.368 | 37.168 | 0.00 | 0.00 |
| ATOM | 6745 | HG13 | ILE | X | 447 | 53.522 | 42.034 | 37.321 | 0.00 | 0.00 |
| ATOM | 6746 | CD1  | ILE | X | 447 | 52.135 | 41.629 | 38.653 | 0.00 | 0.00 |
| ATOM | 6747 | HD11 | ILE | X | 447 | 51.504 | 40.799 | 38.969 | 0.00 | 0.00 |
| ATOM | 6748 | HD12 | ILE | X | 447 | 52.939 | 41.642 | 39.389 | 0.00 | 0.00 |
| ATOM | 6749 | HD13 | ILE | X | 447 | 51.671 | 42.611 | 38.561 | 0.00 | 0.00 |
| ATOM | 6750 | C    | ILE | X | 447 | 53.447 | 42.216 | 34.386 | 0.00 | 0.00 |
| ATOM | 6751 | O    | ILE | X | 447 | 53.302 | 43.282 | 33.769 | 0.00 | 0.00 |
| ATOM | 6752 | N    | GLU | X | 448 | 54.690 | 41.748 | 34.627 | 0.00 | 0.00 |
| ATOM | 6753 | H    | GLU | X | 448 | 54.692 | 40.799 | 34.971 | 0.00 | 0.00 |
| ATOM | 6754 | CA   | GLU | X | 448 | 55.914 | 42.523 | 34.213 | 0.00 | 0.00 |
| ATOM | 6755 | HA   | GLU | X | 448 | 55.927 | 43.519 | 34.657 | 0.00 | 0.00 |
| ATOM | 6756 | CB   | GLU | X | 448 | 57.199 | 41.830 | 34.733 | 0.00 | 0.00 |
| ATOM | 6757 | HB2  | GLU | X | 448 | 57.373 | 40.992 | 34.058 | 0.00 | 0.00 |
| ATOM | 6758 | HB3  | GLU | X | 448 | 58.125 | 42.390 | 34.601 | 0.00 | 0.00 |
| ATOM | 6759 | CG   | GLU | X | 448 | 57.199 | 41.332 | 36.208 | 0.00 | 0.00 |
| ATOM | 6760 | HG2  | GLU | X | 448 | 56.854 | 42.180 | 36.799 | 0.00 | 0.00 |
| ATOM | 6761 | HG3  | GLU | X | 448 | 56.555 | 40.454 | 36.271 | 0.00 | 0.00 |



|      |      |      |     |   |     |        |        |        |      |      |
|------|------|------|-----|---|-----|--------|--------|--------|------|------|
| ATOM | 6762 | CD   | GLU | X | 448 | 58.655 | 40.922 | 36.532 | 0.00 | 0.00 |
| ATOM | 6763 | OE1  | GLU | X | 448 | 59.392 | 41.642 | 37.242 | 0.00 | 0.00 |
| ATOM | 6764 | OE2  | GLU | X | 448 | 59.020 | 39.810 | 36.126 | 0.00 | 0.00 |
| ATOM | 6765 | C    | GLU | X | 448 | 55.955 | 42.771 | 32.721 | 0.00 | 0.00 |
| ATOM | 6766 | O    | GLU | X | 448 | 56.352 | 43.812 | 32.202 | 0.00 | 0.00 |
| ATOM | 6767 | N    | PHE | X | 449 | 55.519 | 41.811 | 31.936 | 0.00 | 0.00 |
| ATOM | 6768 | H    | PHE | X | 449 | 55.035 | 41.017 | 32.330 | 0.00 | 0.00 |
| ATOM | 6769 | CA   | PHE | X | 449 | 55.443 | 41.864 | 30.468 | 0.00 | 0.00 |
| ATOM | 6770 | HA   | PHE | X | 449 | 56.300 | 42.413 | 30.078 | 0.00 | 0.00 |
| ATOM | 6771 | CB   | PHE | X | 449 | 55.437 | 40.467 | 29.835 | 0.00 | 0.00 |
| ATOM | 6772 | HB2  | PHE | X | 449 | 54.707 | 39.772 | 30.251 | 0.00 | 0.00 |
| ATOM | 6773 | HB3  | PHE | X | 449 | 55.265 | 40.620 | 28.770 | 0.00 | 0.00 |
| ATOM | 6774 | CG   | PHE | X | 449 | 56.779 | 39.766 | 29.895 | 0.00 | 0.00 |
| ATOM | 6775 | CD1  | PHE | X | 449 | 57.201 | 39.089 | 31.051 | 0.00 | 0.00 |
| ATOM | 6776 | HD1  | PHE | X | 449 | 56.595 | 38.819 | 31.903 | 0.00 | 0.00 |
| ATOM | 6777 | CE1  | PHE | X | 449 | 58.477 | 38.489 | 31.009 | 0.00 | 0.00 |
| ATOM | 6778 | HE1  | PHE | X | 449 | 58.971 | 38.020 | 31.847 | 0.00 | 0.00 |
| ATOM | 6779 | CZ   | PHE | X | 449 | 59.309 | 38.550 | 29.871 | 0.00 | 0.00 |
| ATOM | 6780 | HZ   | PHE | X | 449 | 60.339 | 38.227 | 29.832 | 0.00 | 0.00 |
| ATOM | 6781 | CE2  | PHE | X | 449 | 58.859 | 39.180 | 28.741 | 0.00 | 0.00 |
| ATOM | 6782 | HE2  | PHE | X | 449 | 59.585 | 39.106 | 27.944 | 0.00 | 0.00 |
| ATOM | 6783 | CD2  | PHE | X | 449 | 57.621 | 39.813 | 28.764 | 0.00 | 0.00 |
| ATOM | 6784 | HD2  | PHE | X | 449 | 57.213 | 40.242 | 27.861 | 0.00 | 0.00 |
| ATOM | 6785 | C    | PHE | X | 449 | 54.165 | 42.658 | 29.991 | 0.00 | 0.00 |
| ATOM | 6786 | O    | PHE | X | 449 | 54.106 | 43.053 | 28.789 | 0.00 | 0.00 |
| ATOM | 6787 | N    | ILE | X | 450 | 53.248 | 43.094 | 30.875 | 0.00 | 0.00 |
| ATOM | 6788 | H    | ILE | X | 450 | 53.519 | 42.821 | 31.808 | 0.00 | 0.00 |
| ATOM | 6789 | CA   | ILE | X | 450 | 51.986 | 43.897 | 30.691 | 0.00 | 0.00 |
| ATOM | 6790 | HA   | ILE | X | 450 | 51.585 | 43.698 | 29.698 | 0.00 | 0.00 |
| ATOM | 6791 | CB   | ILE | X | 450 | 50.853 | 43.385 | 31.591 | 0.00 | 0.00 |
| ATOM | 6792 | HB   | ILE | X | 450 | 51.089 | 43.636 | 32.625 | 0.00 | 0.00 |
| ATOM | 6793 | CG2  | ILE | X | 450 | 49.502 | 44.087 | 31.424 | 0.00 | 0.00 |
| ATOM | 6794 | HG21 | ILE | X | 450 | 48.694 | 43.604 | 31.972 | 0.00 | 0.00 |
| ATOM | 6795 | HG22 | ILE | X | 450 | 49.563 | 45.095 | 31.835 | 0.00 | 0.00 |
| ATOM | 6796 | HG23 | ILE | X | 450 | 49.166 | 44.299 | 30.409 | 0.00 | 0.00 |
| ATOM | 6797 | CG1  | ILE | X | 450 | 50.505 | 41.897 | 31.507 | 0.00 | 0.00 |
| ATOM | 6798 | HG12 | ILE | X | 450 | 51.469 | 41.412 | 31.660 | 0.00 | 0.00 |
| ATOM | 6799 | HG13 | ILE | X | 450 | 49.667 | 41.569 | 32.122 | 0.00 | 0.00 |
| ATOM | 6800 | CD1  | ILE | X | 450 | 50.255 | 41.417 | 30.046 | 0.00 | 0.00 |
| ATOM | 6801 | HD11 | ILE | X | 450 | 51.160 | 41.368 | 29.442 | 0.00 | 0.00 |
| ATOM | 6802 | HD12 | ILE | X | 450 | 49.878 | 40.394 | 30.058 | 0.00 | 0.00 |
| ATOM | 6803 | HD13 | ILE | X | 450 | 49.490 | 42.054 | 29.602 | 0.00 | 0.00 |
| ATOM | 6804 | C    | ILE | X | 450 | 52.378 | 45.269 | 30.865 | 0.00 | 0.00 |
| ATOM | 6805 | O    | ILE | X | 450 | 52.269 | 46.097 | 29.951 | 0.00 | 0.00 |
| ATOM | 6806 | N    | PHE | X | 451 | 53.026 | 45.583 | 31.985 | 0.00 | 0.00 |
| ATOM | 6807 | H    | PHE | X | 451 | 53.220 | 44.870 | 32.673 | 0.00 | 0.00 |
| ATOM | 6808 | CA   | PHE | X | 451 | 53.701 | 46.880 | 32.280 | 0.00 | 0.00 |
| ATOM | 6809 | HA   | PHE | X | 451 | 52.978 | 47.677 | 32.104 | 0.00 | 0.00 |
| ATOM | 6810 | CB   | PHE | X | 451 | 54.023 | 46.831 | 33.759 | 0.00 | 0.00 |
| ATOM | 6811 | HB2  | PHE | X | 451 | 54.515 | 45.906 | 34.061 | 0.00 | 0.00 |
| ATOM | 6812 | HB3  | PHE | X | 451 | 54.703 | 47.672 | 33.898 | 0.00 | 0.00 |
| ATOM | 6813 | CG   | PHE | X | 451 | 52.827 | 47.131 | 34.700 | 0.00 | 0.00 |
| ATOM | 6814 | CD1  | PHE | X | 451 | 52.265 | 46.177 | 35.608 | 0.00 | 0.00 |
| ATOM | 6815 | HD1  | PHE | X | 451 | 52.657 | 45.171 | 35.633 | 0.00 | 0.00 |
| ATOM | 6816 | CE1  | PHE | X | 451 | 51.115 | 46.537 | 36.269 | 0.00 | 0.00 |
| ATOM | 6817 | HE1  | PHE | X | 451 | 50.534 | 45.819 | 36.828 | 0.00 | 0.00 |
| ATOM | 6818 | CZ   | PHE | X | 451 | 50.579 | 47.866 | 36.196 | 0.00 | 0.00 |
| ATOM | 6819 | HZ   | PHE | X | 451 | 49.679 | 48.084 | 36.751 | 0.00 | 0.00 |
| ATOM | 6820 | CE2  | PHE | X | 451 | 51.132 | 48.781 | 35.305 | 0.00 | 0.00 |
| ATOM | 6821 | HE2  | PHE | X | 451 | 50.801 | 49.808 | 35.293 | 0.00 | 0.00 |
| ATOM | 6822 | CD2  | PHE | X | 451 | 52.277 | 48.391 | 34.608 | 0.00 | 0.00 |
| ATOM | 6823 | HD2  | PHE | X | 451 | 52.736 | 49.158 | 34.002 | 0.00 | 0.00 |
| ATOM | 6824 | C    | PHE | X | 451 | 54.936 | 47.099 | 31.397 | 0.00 | 0.00 |
| ATOM | 6825 | O    | PHE | X | 451 | 55.640 | 48.069 | 31.584 | 0.00 | 0.00 |
| ATOM | 6826 | N    | GLY | X | 452 | 55.270 | 46.186 | 30.589 | 0.00 | 0.00 |
| ATOM | 6827 | H    | GLY | X | 452 | 54.620 | 45.450 | 30.351 | 0.00 | 0.00 |
| ATOM | 6828 | CA   | GLY | X | 452 | 56.229 | 46.337 | 29.519 | 0.00 | 0.00 |
| ATOM | 6829 | HA2  | GLY | X | 452 | 56.318 | 45.513 | 28.793 | 0.00 | 0.00 |
| ATOM | 6830 | HA3  | GLY | X | 452 | 55.999 | 47.265 | 28.890 | 0.00 | 0.00 |
| ATOM | 6831 | C    | GLY | X | 452 | 57.701 | 46.555 | 29.978 | 0.00 | 0.00 |

|      |      |      |     |   |     |        |        |        |      |      |
|------|------|------|-----|---|-----|--------|--------|--------|------|------|
| ATOM | 6832 | O    | GLY | X | 452 | 58.424 | 47.210 | 29.257 | 0.00 | 0.00 |
| ATOM | 6833 | N    | ILE | X | 453 | 58.050 | 45.974 | 31.100 | 0.00 | 0.00 |
| ATOM | 6834 | H    | ILE | X | 453 | 57.415 | 45.414 | 31.650 | 0.00 | 0.00 |
| ATOM | 6835 | CA   | ILE | X | 453 | 59.382 | 46.169 | 31.657 | 0.00 | 0.00 |
| ATOM | 6836 | HA   | ILE | X | 453 | 59.537 | 47.244 | 31.745 | 0.00 | 0.00 |
| ATOM | 6837 | CB   | ILE | X | 453 | 59.523 | 45.698 | 33.072 | 0.00 | 0.00 |
| ATOM | 6838 | HB   | ILE | X | 453 | 59.708 | 44.625 | 33.032 | 0.00 | 0.00 |
| ATOM | 6839 | CG2  | ILE | X | 453 | 60.744 | 46.367 | 33.779 | 0.00 | 0.00 |
| ATOM | 6840 | HG21 | ILE | X | 453 | 60.925 | 45.911 | 34.752 | 0.00 | 0.00 |
| ATOM | 6841 | HG22 | ILE | X | 453 | 61.671 | 46.274 | 33.213 | 0.00 | 0.00 |
| ATOM | 6842 | HG23 | ILE | X | 453 | 60.681 | 47.444 | 33.938 | 0.00 | 0.00 |
| ATOM | 6843 | CG1  | ILE | X | 453 | 58.328 | 45.961 | 34.088 | 0.00 | 0.00 |
| ATOM | 6844 | HG12 | ILE | X | 453 | 57.461 | 45.447 | 33.672 | 0.00 | 0.00 |
| ATOM | 6845 | HG13 | ILE | X | 453 | 58.568 | 45.457 | 35.024 | 0.00 | 0.00 |
| ATOM | 6846 | CD1  | ILE | X | 453 | 57.809 | 47.411 | 34.250 | 0.00 | 0.00 |
| ATOM | 6847 | HD11 | ILE | X | 453 | 58.603 | 48.002 | 34.707 | 0.00 | 0.00 |
| ATOM | 6848 | HD12 | ILE | X | 453 | 57.416 | 47.911 | 33.365 | 0.00 | 0.00 |
| ATOM | 6849 | HD13 | ILE | X | 453 | 57.061 | 47.371 | 35.042 | 0.00 | 0.00 |
| ATOM | 6850 | C    | ILE | X | 453 | 60.555 | 45.812 | 30.771 | 0.00 | 0.00 |
| ATOM | 6851 | O    | ILE | X | 453 | 61.521 | 46.538 | 30.677 | 0.00 | 0.00 |
| ATOM | 6852 | N    | PRO | X | 454 | 60.468 | 44.721 | 29.964 | 0.00 | 0.00 |
| ATOM | 6853 | CD   | PRO | X | 454 | 59.564 | 43.573 | 30.220 | 0.00 | 0.00 |
| ATOM | 6854 | HD2  | PRO | X | 454 | 58.574 | 43.780 | 29.814 | 0.00 | 0.00 |
| ATOM | 6855 | HD3  | PRO | X | 454 | 59.574 | 43.384 | 31.294 | 0.00 | 0.00 |
| ATOM | 6856 | CG   | PRO | X | 454 | 60.227 | 42.403 | 29.416 | 0.00 | 0.00 |
| ATOM | 6857 | HG2  | PRO | X | 454 | 59.482 | 41.721 | 29.006 | 0.00 | 0.00 |
| ATOM | 6858 | HG3  | PRO | X | 454 | 60.869 | 41.834 | 30.088 | 0.00 | 0.00 |
| ATOM | 6859 | CB   | PRO | X | 454 | 60.980 | 43.094 | 28.311 | 0.00 | 0.00 |
| ATOM | 6860 | HB2  | PRO | X | 454 | 60.194 | 43.370 | 27.608 | 0.00 | 0.00 |
| ATOM | 6861 | HB3  | PRO | X | 454 | 61.722 | 42.442 | 27.850 | 0.00 | 0.00 |
| ATOM | 6862 | CA   | PRO | X | 454 | 61.489 | 44.390 | 28.914 | 0.00 | 0.00 |
| ATOM | 6863 | HA   | PRO | X | 454 | 62.436 | 44.179 | 29.412 | 0.00 | 0.00 |
| ATOM | 6864 | C    | PRO | X | 454 | 61.566 | 45.477 | 27.767 | 0.00 | 0.00 |
| ATOM | 6865 | O    | PRO | X | 454 | 62.535 | 45.242 | 27.026 | 0.00 | 0.00 |
| ATOM | 6866 | N    | LEU | X | 455 | 60.676 | 46.440 | 27.659 | 0.00 | 0.00 |
| ATOM | 6867 | H    | LEU | X | 455 | 59.888 | 46.443 | 28.291 | 0.00 | 0.00 |
| ATOM | 6868 | CA   | LEU | X | 455 | 60.832 | 47.533 | 26.706 | 0.00 | 0.00 |
| ATOM | 6869 | HA   | LEU | X | 455 | 61.112 | 46.994 | 25.800 | 0.00 | 0.00 |
| ATOM | 6870 | CB   | LEU | X | 455 | 59.562 | 48.451 | 26.506 | 0.00 | 0.00 |
| ATOM | 6871 | HB2  | LEU | X | 455 | 58.704 | 47.804 | 26.685 | 0.00 | 0.00 |
| ATOM | 6872 | HB3  | LEU | X | 455 | 59.474 | 49.194 | 27.298 | 0.00 | 0.00 |
| ATOM | 6873 | CG   | LEU | X | 455 | 59.520 | 49.009 | 25.076 | 0.00 | 0.00 |
| ATOM | 6874 | HG   | LEU | X | 455 | 60.489 | 49.464 | 24.871 | 0.00 | 0.00 |
| ATOM | 6875 | CD1  | LEU | X | 455 | 59.241 | 47.990 | 23.936 | 0.00 | 0.00 |
| ATOM | 6876 | HD11 | LEU | X | 455 | 59.930 | 47.145 | 23.927 | 0.00 | 0.00 |
| ATOM | 6877 | HD12 | LEU | X | 455 | 58.270 | 47.529 | 24.123 | 0.00 | 0.00 |
| ATOM | 6878 | HD13 | LEU | X | 455 | 59.252 | 48.603 | 23.035 | 0.00 | 0.00 |
| ATOM | 6879 | CD2  | LEU | X | 455 | 58.322 | 50.007 | 25.166 | 0.00 | 0.00 |
| ATOM | 6880 | HD21 | LEU | X | 455 | 58.425 | 50.388 | 24.150 | 0.00 | 0.00 |
| ATOM | 6881 | HD22 | LEU | X | 455 | 57.365 | 49.495 | 25.263 | 0.00 | 0.00 |
| ATOM | 6882 | HD23 | LEU | X | 455 | 58.483 | 50.800 | 25.897 | 0.00 | 0.00 |
| ATOM | 6883 | C    | LEU | X | 455 | 62.115 | 48.378 | 26.991 | 0.00 | 0.00 |
| ATOM | 6884 | O    | LEU | X | 455 | 62.634 | 48.905 | 25.979 | 0.00 | 0.00 |
| ATOM | 6885 | N    | ASP | X | 456 | 62.644 | 48.483 | 28.236 | 0.00 | 0.00 |
| ATOM | 6886 | H    | ASP | X | 456 | 62.101 | 48.051 | 28.969 | 0.00 | 0.00 |
| ATOM | 6887 | CA   | ASP | X | 456 | 63.568 | 49.554 | 28.607 | 0.00 | 0.00 |
| ATOM | 6888 | HA   | ASP | X | 456 | 63.362 | 50.426 | 27.987 | 0.00 | 0.00 |
| ATOM | 6889 | CB   | ASP | X | 456 | 63.331 | 49.986 | 30.063 | 0.00 | 0.00 |
| ATOM | 6890 | HB2  | ASP | X | 456 | 62.291 | 50.290 | 30.178 | 0.00 | 0.00 |
| ATOM | 6891 | HB3  | ASP | X | 456 | 63.467 | 49.139 | 30.735 | 0.00 | 0.00 |
| ATOM | 6892 | CG   | ASP | X | 456 | 64.342 | 51.169 | 30.381 | 0.00 | 0.00 |
| ATOM | 6893 | OD1  | ASP | X | 456 | 65.311 | 50.837 | 31.121 | 0.00 | 0.00 |
| ATOM | 6894 | OD2  | ASP | X | 456 | 64.169 | 52.323 | 29.890 | 0.00 | 0.00 |
| ATOM | 6895 | C    | ASP | X | 456 | 65.087 | 49.072 | 28.420 | 0.00 | 0.00 |
| ATOM | 6896 | O    | ASP | X | 456 | 65.394 | 47.973 | 28.916 | 0.00 | 0.00 |
| ATOM | 6897 | N    | PRO | X | 457 | 65.983 | 49.827 | 27.846 | 0.00 | 0.00 |
| ATOM | 6898 | CD   | PRO | X | 457 | 65.704 | 51.078 | 27.161 | 0.00 | 0.00 |
| ATOM | 6899 | HD2  | PRO | X | 457 | 65.680 | 51.833 | 27.948 | 0.00 | 0.00 |
| ATOM | 6900 | HD3  | PRO | X | 457 | 64.772 | 50.928 | 26.617 | 0.00 | 0.00 |
| ATOM | 6901 | CG   | PRO | X | 457 | 66.806 | 51.256 | 26.118 | 0.00 | 0.00 |

|      |      |      |     |   |     |        |        |        |      |      |
|------|------|------|-----|---|-----|--------|--------|--------|------|------|
| ATOM | 6902 | HG2  | PRO | X | 457 | 66.936 | 52.326 | 25.954 | 0.00 | 0.00 |
| ATOM | 6903 | HG3  | PRO | X | 457 | 66.579 | 50.784 | 25.163 | 0.00 | 0.00 |
| ATOM | 6904 | CB   | PRO | X | 457 | 68.014 | 50.621 | 26.781 | 0.00 | 0.00 |
| ATOM | 6905 | HB2  | PRO | X | 457 | 68.401 | 51.347 | 27.495 | 0.00 | 0.00 |
| ATOM | 6906 | HB3  | PRO | X | 457 | 68.814 | 50.260 | 26.135 | 0.00 | 0.00 |
| ATOM | 6907 | CA   | PRO | X | 457 | 67.409 | 49.508 | 27.612 | 0.00 | 0.00 |
| ATOM | 6908 | HA   | PRO | X | 457 | 67.439 | 48.632 | 26.964 | 0.00 | 0.00 |
| ATOM | 6909 | C    | PRO | X | 457 | 68.193 | 49.206 | 28.884 | 0.00 | 0.00 |
| ATOM | 6910 | O    | PRO | X | 457 | 69.123 | 48.418 | 28.781 | 0.00 | 0.00 |
| ATOM | 6911 | N    | SER | X | 458 | 67.920 | 49.808 | 30.079 | 0.00 | 0.00 |
| ATOM | 6912 | H    | SER | X | 458 | 67.055 | 50.328 | 30.112 | 0.00 | 0.00 |
| ATOM | 6913 | CA   | SER | X | 458 | 68.689 | 49.534 | 31.358 | 0.00 | 0.00 |
| ATOM | 6914 | HA   | SER | X | 458 | 69.766 | 49.452 | 31.210 | 0.00 | 0.00 |
| ATOM | 6915 | CB   | SER | X | 458 | 68.537 | 50.790 | 32.343 | 0.00 | 0.00 |
| ATOM | 6916 | HB2  | SER | X | 458 | 69.279 | 50.742 | 33.139 | 0.00 | 0.00 |
| ATOM | 6917 | HB3  | SER | X | 458 | 68.600 | 51.790 | 31.913 | 0.00 | 0.00 |
| ATOM | 6918 | OG   | SER | X | 458 | 67.188 | 50.694 | 32.920 | 0.00 | 0.00 |
| ATOM | 6919 | HG   | SER | X | 458 | 66.632 | 50.750 | 32.139 | 0.00 | 0.00 |
| ATOM | 6920 | C    | SER | X | 458 | 68.274 | 48.161 | 31.997 | 0.00 | 0.00 |
| ATOM | 6921 | O    | SER | X | 458 | 69.026 | 47.755 | 32.836 | 0.00 | 0.00 |
| ATOM | 6922 | N    | ARG | X | 459 | 67.265 | 47.450 | 31.535 | 0.00 | 0.00 |
| ATOM | 6923 | H    | ARG | X | 459 | 66.795 | 47.775 | 30.703 | 0.00 | 0.00 |
| ATOM | 6924 | CA   | ARG | X | 459 | 66.768 | 46.257 | 32.115 | 0.00 | 0.00 |
| ATOM | 6925 | HA   | ARG | X | 459 | 66.974 | 46.308 | 33.184 | 0.00 | 0.00 |
| ATOM | 6926 | CB   | ARG | X | 459 | 65.312 | 46.166 | 31.879 | 0.00 | 0.00 |
| ATOM | 6927 | HB2  | ARG | X | 459 | 65.066 | 46.152 | 30.818 | 0.00 | 0.00 |
| ATOM | 6928 | HB3  | ARG | X | 459 | 64.884 | 45.180 | 32.061 | 0.00 | 0.00 |
| ATOM | 6929 | CG   | ARG | X | 459 | 64.567 | 47.305 | 32.586 | 0.00 | 0.00 |
| ATOM | 6930 | HG2  | ARG | X | 459 | 65.169 | 48.213 | 32.613 | 0.00 | 0.00 |
| ATOM | 6931 | HG3  | ARG | X | 459 | 63.625 | 47.574 | 32.108 | 0.00 | 0.00 |
| ATOM | 6932 | CD   | ARG | X | 459 | 64.287 | 47.042 | 34.033 | 0.00 | 0.00 |
| ATOM | 6933 | HD2  | ARG | X | 459 | 63.645 | 46.161 | 34.060 | 0.00 | 0.00 |
| ATOM | 6934 | HD3  | ARG | X | 459 | 65.172 | 46.689 | 34.562 | 0.00 | 0.00 |
| ATOM | 6935 | NE   | ARG | X | 459 | 63.655 | 48.177 | 34.636 | 0.00 | 0.00 |
| ATOM | 6936 | HE   | ARG | X | 459 | 63.596 | 48.988 | 34.037 | 0.00 | 0.00 |
| ATOM | 6937 | CZ   | ARG | X | 459 | 63.007 | 48.154 | 35.800 | 0.00 | 0.00 |
| ATOM | 6938 | NH1  | ARG | X | 459 | 62.853 | 47.078 | 36.569 | 0.00 | 0.00 |
| ATOM | 6939 | HH11 | ARG | X | 459 | 63.427 | 46.258 | 36.433 | 0.00 | 0.00 |
| ATOM | 6940 | HH12 | ARG | X | 459 | 62.017 | 46.976 | 37.126 | 0.00 | 0.00 |
| ATOM | 6941 | NH2  | ARG | X | 459 | 62.489 | 49.360 | 36.077 | 0.00 | 0.00 |
| ATOM | 6942 | HH21 | ARG | X | 459 | 62.730 | 50.170 | 35.525 | 0.00 | 0.00 |
| ATOM | 6943 | HH22 | ARG | X | 459 | 61.944 | 49.457 | 36.922 | 0.00 | 0.00 |
| ATOM | 6944 | C    | ARG | X | 459 | 67.591 | 45.149 | 31.505 | 0.00 | 0.00 |
| ATOM | 6945 | O    | ARG | X | 459 | 68.180 | 45.259 | 30.426 | 0.00 | 0.00 |
| ATOM | 6946 | N    | ASN | X | 460 | 67.598 | 44.007 | 32.251 | 0.00 | 0.00 |
| ATOM | 6947 | H    | ASN | X | 460 | 67.003 | 44.015 | 33.067 | 0.00 | 0.00 |
| ATOM | 6948 | CA   | ASN | X | 460 | 68.393 | 42.807 | 32.081 | 0.00 | 0.00 |
| ATOM | 6949 | HA   | ASN | X | 460 | 69.451 | 43.017 | 31.924 | 0.00 | 0.00 |
| ATOM | 6950 | CB   | ASN | X | 460 | 68.360 | 41.965 | 33.388 | 0.00 | 0.00 |
| ATOM | 6951 | HB2  | ASN | X | 460 | 68.895 | 42.512 | 34.165 | 0.00 | 0.00 |
| ATOM | 6952 | HB3  | ASN | X | 460 | 67.333 | 41.987 | 33.753 | 0.00 | 0.00 |
| ATOM | 6953 | CG   | ASN | X | 460 | 68.946 | 40.619 | 33.273 | 0.00 | 0.00 |
| ATOM | 6954 | OD1  | ASN | X | 460 | 70.131 | 40.487 | 33.356 | 0.00 | 0.00 |
| ATOM | 6955 | ND2  | ASN | X | 460 | 68.317 | 39.617 | 32.936 | 0.00 | 0.00 |
| ATOM | 6956 | HD21 | ASN | X | 460 | 68.711 | 38.707 | 33.126 | 0.00 | 0.00 |
| ATOM | 6957 | HD22 | ASN | X | 460 | 67.337 | 39.710 | 32.712 | 0.00 | 0.00 |
| ATOM | 6958 | C    | ASN | X | 460 | 67.914 | 41.989 | 30.842 | 0.00 | 0.00 |
| ATOM | 6959 | O    | ASN | X | 460 | 68.725 | 41.279 | 30.207 | 0.00 | 0.00 |
| ATOM | 6960 | N    | TYR | X | 461 | 66.612 | 42.130 | 30.594 | 0.00 | 0.00 |
| ATOM | 6961 | H    | TYR | X | 461 | 66.035 | 42.698 | 31.197 | 0.00 | 0.00 |
| ATOM | 6962 | CA   | TYR | X | 461 | 65.805 | 41.377 | 29.520 | 0.00 | 0.00 |
| ATOM | 6963 | HA   | TYR | X | 461 | 65.729 | 40.331 | 29.818 | 0.00 | 0.00 |
| ATOM | 6964 | CB   | TYR | X | 461 | 64.376 | 41.821 | 29.475 | 0.00 | 0.00 |
| ATOM | 6965 | HB2  | TYR | X | 461 | 64.352 | 42.897 | 29.298 | 0.00 | 0.00 |
| ATOM | 6966 | HB3  | TYR | X | 461 | 63.874 | 41.252 | 28.693 | 0.00 | 0.00 |
| ATOM | 6967 | CG   | TYR | X | 461 | 63.536 | 41.637 | 30.763 | 0.00 | 0.00 |
| ATOM | 6968 | CD1  | TYR | X | 461 | 63.220 | 42.724 | 31.618 | 0.00 | 0.00 |
| ATOM | 6969 | HD1  | TYR | X | 461 | 63.659 | 43.692 | 31.425 | 0.00 | 0.00 |
| ATOM | 6970 | CE1  | TYR | X | 461 | 62.239 | 42.568 | 32.624 | 0.00 | 0.00 |
| ATOM | 6971 | HE1  | TYR | X | 461 | 62.056 | 43.342 | 33.356 | 0.00 | 0.00 |

|      |      |      |     |   |     |        |        |        |      |      |
|------|------|------|-----|---|-----|--------|--------|--------|------|------|
| ATOM | 6972 | CZ   | TYR | X | 461 | 61.565 | 41.369 | 32.855 | 0.00 | 0.00 |
| ATOM | 6973 | OH   | TYR | X | 461 | 60.787 | 41.158 | 33.910 | 0.00 | 0.00 |
| ATOM | 6974 | HH   | TYR | X | 461 | 60.651 | 40.215 | 34.034 | 0.00 | 0.00 |
| ATOM | 6975 | CE2  | TYR | X | 461 | 61.870 | 40.264 | 31.972 | 0.00 | 0.00 |
| ATOM | 6976 | HE2  | TYR | X | 461 | 61.382 | 39.306 | 32.076 | 0.00 | 0.00 |
| ATOM | 6977 | CD2  | TYR | X | 461 | 62.849 | 40.402 | 30.949 | 0.00 | 0.00 |
| ATOM | 6978 | HD2  | TYR | X | 461 | 63.171 | 39.547 | 30.373 | 0.00 | 0.00 |
| ATOM | 6979 | C    | TYR | X | 461 | 66.386 | 41.382 | 28.120 | 0.00 | 0.00 |
| ATOM | 6980 | O    | TYR | X | 461 | 66.934 | 42.410 | 27.709 | 0.00 | 0.00 |
| ATOM | 6981 | N    | THR | X | 462 | 66.317 | 40.277 | 27.424 | 0.00 | 0.00 |
| ATOM | 6982 | H    | THR | X | 462 | 65.943 | 39.463 | 27.891 | 0.00 | 0.00 |
| ATOM | 6983 | CA   | THR | X | 462 | 66.878 | 40.018 | 26.052 | 0.00 | 0.00 |
| ATOM | 6984 | HA   | THR | X | 462 | 67.811 | 40.572 | 25.947 | 0.00 | 0.00 |
| ATOM | 6985 | CB   | THR | X | 462 | 67.357 | 38.613 | 25.882 | 0.00 | 0.00 |
| ATOM | 6986 | HB   | THR | X | 462 | 67.809 | 38.520 | 24.895 | 0.00 | 0.00 |
| ATOM | 6987 | CG2  | THR | X | 462 | 68.466 | 38.114 | 26.781 | 0.00 | 0.00 |
| ATOM | 6988 | HG21 | THR | X | 462 | 69.380 | 38.706 | 26.721 | 0.00 | 0.00 |
| ATOM | 6989 | HG22 | THR | X | 462 | 68.068 | 38.057 | 27.794 | 0.00 | 0.00 |
| ATOM | 6990 | HG23 | THR | X | 462 | 68.711 | 37.110 | 26.436 | 0.00 | 0.00 |
| ATOM | 6991 | OG1  | THR | X | 462 | 66.341 | 37.755 | 25.907 | 0.00 | 0.00 |
| ATOM | 6992 | HG1  | THR | X | 462 | 66.076 | 37.672 | 26.825 | 0.00 | 0.00 |
| ATOM | 6993 | C    | THR | X | 462 | 65.916 | 40.504 | 25.001 | 0.00 | 0.00 |
| ATOM | 6994 | O    | THR | X | 462 | 64.708 | 40.657 | 25.265 | 0.00 | 0.00 |
| ATOM | 6995 | N    | ALA | X | 463 | 66.421 | 40.780 | 23.811 | 0.00 | 0.00 |
| ATOM | 6996 | H    | ALA | X | 463 | 67.398 | 40.539 | 23.723 | 0.00 | 0.00 |
| ATOM | 6997 | CA   | ALA | X | 463 | 65.742 | 41.310 | 22.638 | 0.00 | 0.00 |
| ATOM | 6998 | HA   | ALA | X | 463 | 65.444 | 42.341 | 22.828 | 0.00 | 0.00 |
| ATOM | 6999 | CB   | ALA | X | 463 | 66.702 | 41.434 | 21.423 | 0.00 | 0.00 |
| ATOM | 7000 | HB1  | ALA | X | 463 | 66.300 | 42.062 | 20.628 | 0.00 | 0.00 |
| ATOM | 7001 | HB2  | ALA | X | 463 | 67.638 | 41.847 | 21.798 | 0.00 | 0.00 |
| ATOM | 7002 | HB3  | ALA | X | 463 | 66.895 | 40.412 | 21.097 | 0.00 | 0.00 |
| ATOM | 7003 | C    | ALA | X | 463 | 64.419 | 40.459 | 22.345 | 0.00 | 0.00 |
| ATOM | 7004 | O    | ALA | X | 463 | 63.395 | 41.040 | 21.946 | 0.00 | 0.00 |
| ATOM | 7005 | N    | GLU | X | 464 | 64.525 | 39.129 | 22.572 | 0.00 | 0.00 |
| ATOM | 7006 | H    | GLU | X | 464 | 65.429 | 38.767 | 22.838 | 0.00 | 0.00 |
| ATOM | 7007 | CA   | GLU | X | 464 | 63.415 | 38.183 | 22.392 | 0.00 | 0.00 |
| ATOM | 7008 | HA   | GLU | X | 464 | 62.888 | 38.408 | 21.465 | 0.00 | 0.00 |
| ATOM | 7009 | CB   | GLU | X | 464 | 63.969 | 36.709 | 22.260 | 0.00 | 0.00 |
| ATOM | 7010 | HB2  | GLU | X | 464 | 63.072 | 36.101 | 22.138 | 0.00 | 0.00 |
| ATOM | 7011 | HB3  | GLU | X | 464 | 64.607 | 36.683 | 21.377 | 0.00 | 0.00 |
| ATOM | 7012 | CG   | GLU | X | 464 | 64.873 | 36.174 | 23.436 | 0.00 | 0.00 |
| ATOM | 7013 | HG2  | GLU | X | 464 | 65.787 | 36.762 | 23.360 | 0.00 | 0.00 |
| ATOM | 7014 | HG3  | GLU | X | 464 | 64.286 | 36.325 | 24.342 | 0.00 | 0.00 |
| ATOM | 7015 | CD   | GLU | X | 464 | 65.290 | 34.728 | 23.203 | 0.00 | 0.00 |
| ATOM | 7016 | OE1  | GLU | X | 464 | 66.259 | 34.249 | 23.809 | 0.00 | 0.00 |
| ATOM | 7017 | OE2  | GLU | X | 464 | 64.511 | 34.007 | 22.589 | 0.00 | 0.00 |
| ATOM | 7018 | C    | GLU | X | 464 | 62.289 | 38.276 | 23.402 | 0.00 | 0.00 |
| ATOM | 7019 | O    | GLU | X | 464 | 61.088 | 38.146 | 23.080 | 0.00 | 0.00 |
| ATOM | 7020 | N    | GLU | X | 465 | 62.736 | 38.614 | 24.631 | 0.00 | 0.00 |
| ATOM | 7021 | H    | GLU | X | 465 | 63.664 | 39.009 | 24.687 | 0.00 | 0.00 |
| ATOM | 7022 | CA   | GLU | X | 465 | 61.822 | 38.870 | 25.750 | 0.00 | 0.00 |
| ATOM | 7023 | HA   | GLU | X | 465 | 60.992 | 38.165 | 25.800 | 0.00 | 0.00 |
| ATOM | 7024 | CB   | GLU | X | 465 | 62.563 | 38.823 | 27.077 | 0.00 | 0.00 |
| ATOM | 7025 | HB2  | GLU | X | 465 | 63.281 | 39.641 | 27.145 | 0.00 | 0.00 |
| ATOM | 7026 | HB3  | GLU | X | 465 | 61.779 | 38.825 | 27.834 | 0.00 | 0.00 |
| ATOM | 7027 | CG   | GLU | X | 465 | 63.144 | 37.359 | 27.225 | 0.00 | 0.00 |
| ATOM | 7028 | HG2  | GLU | X | 465 | 62.389 | 36.613 | 27.475 | 0.00 | 0.00 |
| ATOM | 7029 | HG3  | GLU | X | 465 | 63.560 | 37.023 | 26.275 | 0.00 | 0.00 |
| ATOM | 7030 | CD   | GLU | X | 465 | 64.112 | 37.197 | 28.376 | 0.00 | 0.00 |
| ATOM | 7031 | OE1  | GLU | X | 465 | 65.209 | 37.740 | 28.278 | 0.00 | 0.00 |
| ATOM | 7032 | OE2  | GLU | X | 465 | 63.714 | 36.504 | 29.341 | 0.00 | 0.00 |
| ATOM | 7033 | C    | GLU | X | 465 | 61.248 | 40.274 | 25.635 | 0.00 | 0.00 |
| ATOM | 7034 | O    | GLU | X | 465 | 60.098 | 40.444 | 25.897 | 0.00 | 0.00 |
| ATOM | 7035 | N    | LYS | X | 466 | 62.047 | 41.190 | 25.104 | 0.00 | 0.00 |
| ATOM | 7036 | H    | LYS | X | 466 | 62.979 | 40.880 | 24.869 | 0.00 | 0.00 |
| ATOM | 7037 | CA   | LYS | X | 466 | 61.602 | 42.531 | 24.645 | 0.00 | 0.00 |
| ATOM | 7038 | HA   | LYS | X | 466 | 61.168 | 43.021 | 25.517 | 0.00 | 0.00 |
| ATOM | 7039 | CB   | LYS | X | 466 | 62.793 | 43.510 | 24.183 | 0.00 | 0.00 |
| ATOM | 7040 | HB2  | LYS | X | 466 | 63.570 | 43.649 | 24.935 | 0.00 | 0.00 |
| ATOM | 7041 | HB3  | LYS | X | 466 | 63.261 | 43.087 | 23.295 | 0.00 | 0.00 |

|      |      |      |     |   |     |        |        |        |      |      |
|------|------|------|-----|---|-----|--------|--------|--------|------|------|
| ATOM | 7042 | CG   | LYS | X | 466 | 62.193 | 44.810 | 23.657 | 0.00 | 0.00 |
| ATOM | 7043 | HG2  | LYS | X | 466 | 61.864 | 44.664 | 22.629 | 0.00 | 0.00 |
| ATOM | 7044 | HG3  | LYS | X | 466 | 61.369 | 45.077 | 24.319 | 0.00 | 0.00 |
| ATOM | 7045 | CD   | LYS | X | 466 | 63.202 | 45.840 | 23.362 | 0.00 | 0.00 |
| ATOM | 7046 | HD2  | LYS | X | 466 | 63.695 | 46.123 | 24.293 | 0.00 | 0.00 |
| ATOM | 7047 | HD3  | LYS | X | 466 | 63.972 | 45.536 | 22.653 | 0.00 | 0.00 |
| ATOM | 7048 | CE   | LYS | X | 466 | 62.503 | 47.074 | 22.851 | 0.00 | 0.00 |
| ATOM | 7049 | HE2  | LYS | X | 466 | 61.711 | 47.260 | 23.576 | 0.00 | 0.00 |
| ATOM | 7050 | HE3  | LYS | X | 466 | 63.148 | 47.951 | 22.895 | 0.00 | 0.00 |
| ATOM | 7051 | NZ   | LYS | X | 466 | 62.063 | 46.918 | 21.476 | 0.00 | 0.00 |
| ATOM | 7052 | HZ1  | LYS | X | 466 | 62.650 | 46.305 | 20.928 | 0.00 | 0.00 |
| ATOM | 7053 | HZ2  | LYS | X | 466 | 61.104 | 46.602 | 21.436 | 0.00 | 0.00 |
| ATOM | 7054 | HZ3  | LYS | X | 466 | 62.134 | 47.777 | 20.950 | 0.00 | 0.00 |
| ATOM | 7055 | C    | LYS | X | 466 | 60.449 | 42.317 | 23.566 | 0.00 | 0.00 |
| ATOM | 7056 | O    | LYS | X | 466 | 59.486 | 43.076 | 23.654 | 0.00 | 0.00 |
| ATOM | 7057 | N    | ILE | X | 467 | 60.606 | 41.502 | 22.583 | 0.00 | 0.00 |
| ATOM | 7058 | H    | ILE | X | 467 | 61.388 | 40.864 | 22.637 | 0.00 | 0.00 |
| ATOM | 7059 | CA   | ILE | X | 467 | 59.684 | 41.307 | 21.452 | 0.00 | 0.00 |
| ATOM | 7060 | HA   | ILE | X | 467 | 59.344 | 42.284 | 21.108 | 0.00 | 0.00 |
| ATOM | 7061 | CB   | ILE | X | 467 | 60.505 | 40.574 | 20.325 | 0.00 | 0.00 |
| ATOM | 7062 | HB   | ILE | X | 467 | 61.368 | 40.118 | 20.809 | 0.00 | 0.00 |
| ATOM | 7063 | CG2  | ILE | X | 467 | 59.794 | 39.459 | 19.520 | 0.00 | 0.00 |
| ATOM | 7064 | HG21 | ILE | X | 467 | 60.426 | 38.927 | 18.808 | 0.00 | 0.00 |
| ATOM | 7065 | HG22 | ILE | X | 467 | 59.563 | 38.665 | 20.230 | 0.00 | 0.00 |
| ATOM | 7066 | HG23 | ILE | X | 467 | 58.813 | 39.786 | 19.176 | 0.00 | 0.00 |
| ATOM | 7067 | CG1  | ILE | X | 467 | 60.979 | 41.677 | 19.378 | 0.00 | 0.00 |
| ATOM | 7068 | HG12 | ILE | X | 467 | 60.128 | 42.065 | 18.819 | 0.00 | 0.00 |
| ATOM | 7069 | HG13 | ILE | X | 467 | 61.503 | 42.418 | 19.982 | 0.00 | 0.00 |
| ATOM | 7070 | CD1  | ILE | X | 467 | 62.170 | 41.170 | 18.485 | 0.00 | 0.00 |
| ATOM | 7071 | HD11 | ILE | X | 467 | 61.750 | 40.492 | 17.742 | 0.00 | 0.00 |
| ATOM | 7072 | HD12 | ILE | X | 467 | 62.727 | 41.974 | 18.004 | 0.00 | 0.00 |
| ATOM | 7073 | HD13 | ILE | X | 467 | 62.807 | 40.623 | 19.181 | 0.00 | 0.00 |
| ATOM | 7074 | C    | ILE | X | 467 | 58.449 | 40.577 | 21.926 | 0.00 | 0.00 |
| ATOM | 7075 | O    | ILE | X | 467 | 57.389 | 41.129 | 21.513 | 0.00 | 0.00 |
| ATOM | 7076 | N    | PHE | X | 468 | 58.548 | 39.633 | 22.853 | 0.00 | 0.00 |
| ATOM | 7077 | H    | PHE | X | 468 | 59.430 | 39.197 | 23.081 | 0.00 | 0.00 |
| ATOM | 7078 | CA   | PHE | X | 468 | 57.379 | 39.074 | 23.494 | 0.00 | 0.00 |
| ATOM | 7079 | HA   | PHE | X | 468 | 56.659 | 38.628 | 22.808 | 0.00 | 0.00 |
| ATOM | 7080 | CB   | PHE | X | 468 | 57.858 | 37.897 | 24.306 | 0.00 | 0.00 |
| ATOM | 7081 | HB2  | PHE | X | 468 | 58.266 | 37.150 | 23.625 | 0.00 | 0.00 |
| ATOM | 7082 | HB3  | PHE | X | 468 | 58.653 | 38.245 | 24.966 | 0.00 | 0.00 |
| ATOM | 7083 | CG   | PHE | X | 468 | 56.733 | 37.123 | 25.068 | 0.00 | 0.00 |
| ATOM | 7084 | CD1  | PHE | X | 468 | 55.452 | 36.749 | 24.608 | 0.00 | 0.00 |
| ATOM | 7085 | HD1  | PHE | X | 468 | 55.187 | 37.056 | 23.607 | 0.00 | 0.00 |
| ATOM | 7086 | CE1  | PHE | X | 468 | 54.595 | 35.985 | 25.458 | 0.00 | 0.00 |
| ATOM | 7087 | HE1  | PHE | X | 468 | 53.607 | 35.848 | 25.043 | 0.00 | 0.00 |
| ATOM | 7088 | CZ   | PHE | X | 468 | 55.066 | 35.505 | 26.669 | 0.00 | 0.00 |
| ATOM | 7089 | HZ   | PHE | X | 468 | 54.444 | 34.887 | 27.299 | 0.00 | 0.00 |
| ATOM | 7090 | CE2  | PHE | X | 468 | 56.374 | 35.781 | 27.092 | 0.00 | 0.00 |
| ATOM | 7091 | HE2  | PHE | X | 468 | 56.781 | 35.253 | 27.942 | 0.00 | 0.00 |
| ATOM | 7092 | CD2  | PHE | X | 468 | 57.144 | 36.610 | 26.272 | 0.00 | 0.00 |
| ATOM | 7093 | HD2  | PHE | X | 468 | 58.144 | 36.798 | 26.633 | 0.00 | 0.00 |
| ATOM | 7094 | C    | PHE | X | 468 | 56.651 | 40.122 | 24.380 | 0.00 | 0.00 |
| ATOM | 7095 | O    | PHE | X | 468 | 55.394 | 40.142 | 24.317 | 0.00 | 0.00 |
| ATOM | 7096 | N    | ALA | X | 469 | 57.340 | 40.903 | 25.187 | 0.00 | 0.00 |
| ATOM | 7097 | H    | ALA | X | 469 | 58.337 | 40.752 | 25.236 | 0.00 | 0.00 |
| ATOM | 7098 | CA   | ALA | X | 469 | 56.638 | 42.031 | 25.944 | 0.00 | 0.00 |
| ATOM | 7099 | HA   | ALA | X | 469 | 56.061 | 41.365 | 26.585 | 0.00 | 0.00 |
| ATOM | 7100 | CB   | ALA | X | 469 | 57.583 | 42.954 | 26.740 | 0.00 | 0.00 |
| ATOM | 7101 | HB1  | ALA | X | 469 | 57.085 | 43.894 | 26.977 | 0.00 | 0.00 |
| ATOM | 7102 | HB2  | ALA | X | 469 | 58.074 | 42.467 | 27.582 | 0.00 | 0.00 |
| ATOM | 7103 | HB3  | ALA | X | 469 | 58.351 | 43.270 | 26.033 | 0.00 | 0.00 |
| ATOM | 7104 | C    | ALA | X | 469 | 55.745 | 42.885 | 25.048 | 0.00 | 0.00 |
| ATOM | 7105 | O    | ALA | X | 469 | 54.543 | 43.070 | 25.407 | 0.00 | 0.00 |
| ATOM | 7106 | N    | GLN | X | 470 | 56.178 | 43.348 | 23.919 | 0.00 | 0.00 |
| ATOM | 7107 | H    | GLN | X | 470 | 57.161 | 43.340 | 23.687 | 0.00 | 0.00 |
| ATOM | 7108 | CA   | GLN | X | 470 | 55.307 | 44.114 | 22.978 | 0.00 | 0.00 |
| ATOM | 7109 | HA   | GLN | X | 470 | 54.890 | 44.950 | 23.539 | 0.00 | 0.00 |
| ATOM | 7110 | CB   | GLN | X | 470 | 56.207 | 44.608 | 21.841 | 0.00 | 0.00 |
| ATOM | 7111 | HB2  | GLN | X | 470 | 56.672 | 43.809 | 21.263 | 0.00 | 0.00 |

|      |      |      |     |   |     |        |        |        |      |      |
|------|------|------|-----|---|-----|--------|--------|--------|------|------|
| ATOM | 7112 | HB3  | GLN | X | 470 | 55.610 | 45.182 | 21.133 | 0.00 | 0.00 |
| ATOM | 7113 | CG   | GLN | X | 470 | 57.301 | 45.546 | 22.342 | 0.00 | 0.00 |
| ATOM | 7114 | HG2  | GLN | X | 470 | 56.813 | 46.445 | 22.717 | 0.00 | 0.00 |
| ATOM | 7115 | HG3  | GLN | X | 470 | 57.866 | 45.124 | 23.173 | 0.00 | 0.00 |
| ATOM | 7116 | CD   | GLN | X | 470 | 58.381 | 45.996 | 21.306 | 0.00 | 0.00 |
| ATOM | 7117 | OE1  | GLN | X | 470 | 59.457 | 45.417 | 21.307 | 0.00 | 0.00 |
| ATOM | 7118 | NE2  | GLN | X | 470 | 58.091 | 46.977 | 20.449 | 0.00 | 0.00 |
| ATOM | 7119 | HE21 | GLN | X | 470 | 58.729 | 47.040 | 19.669 | 0.00 | 0.00 |
| ATOM | 7120 | HE22 | GLN | X | 470 | 57.134 | 47.278 | 20.331 | 0.00 | 0.00 |
| ATOM | 7121 | C    | GLN | X | 470 | 54.103 | 43.372 | 22.454 | 0.00 | 0.00 |
| ATOM | 7122 | O    | GLN | X | 470 | 53.153 | 44.000 | 21.981 | 0.00 | 0.00 |
| ATOM | 7123 | N    | ARG | X | 471 | 54.098 | 42.030 | 22.392 | 0.00 | 0.00 |
| ATOM | 7124 | H    | ARG | X | 471 | 54.997 | 41.571 | 22.416 | 0.00 | 0.00 |
| ATOM | 7125 | CA   | ARG | X | 471 | 52.931 | 41.233 | 22.258 | 0.00 | 0.00 |
| ATOM | 7126 | HA   | ARG | X | 471 | 52.376 | 41.597 | 21.393 | 0.00 | 0.00 |
| ATOM | 7127 | CB   | ARG | X | 471 | 53.279 | 39.751 | 21.983 | 0.00 | 0.00 |
| ATOM | 7128 | HB2  | ARG | X | 471 | 54.195 | 39.498 | 22.518 | 0.00 | 0.00 |
| ATOM | 7129 | HB3  | ARG | X | 471 | 52.464 | 39.200 | 22.451 | 0.00 | 0.00 |
| ATOM | 7130 | CG   | ARG | X | 471 | 53.498 | 39.489 | 20.498 | 0.00 | 0.00 |
| ATOM | 7131 | HG2  | ARG | X | 471 | 52.524 | 39.582 | 20.018 | 0.00 | 0.00 |
| ATOM | 7132 | HG3  | ARG | X | 471 | 54.188 | 40.240 | 20.114 | 0.00 | 0.00 |
| ATOM | 7133 | CD   | ARG | X | 471 | 54.111 | 38.106 | 20.256 | 0.00 | 0.00 |
| ATOM | 7134 | HD2  | ARG | X | 471 | 54.538 | 37.969 | 19.263 | 0.00 | 0.00 |
| ATOM | 7135 | HD3  | ARG | X | 471 | 54.806 | 38.078 | 21.095 | 0.00 | 0.00 |
| ATOM | 7136 | NE   | ARG | X | 471 | 53.134 | 37.088 | 20.456 | 0.00 | 0.00 |
| ATOM | 7137 | HE   | ARG | X | 471 | 52.267 | 37.261 | 19.968 | 0.00 | 0.00 |
| ATOM | 7138 | CZ   | ARG | X | 471 | 53.262 | 35.964 | 21.113 | 0.00 | 0.00 |
| ATOM | 7139 | NH1  | ARG | X | 471 | 54.425 | 35.521 | 21.515 | 0.00 | 0.00 |
| ATOM | 7140 | HH11 | ARG | X | 471 | 55.200 | 36.080 | 21.187 | 0.00 | 0.00 |
| ATOM | 7141 | HH12 | ARG | X | 471 | 54.673 | 34.606 | 21.862 | 0.00 | 0.00 |
| ATOM | 7142 | NH2  | ARG | X | 471 | 52.233 | 35.231 | 21.299 | 0.00 | 0.00 |
| ATOM | 7143 | HH21 | ARG | X | 471 | 51.307 | 35.507 | 21.008 | 0.00 | 0.00 |
| ATOM | 7144 | HH22 | ARG | X | 471 | 52.305 | 34.291 | 21.662 | 0.00 | 0.00 |
| ATOM | 7145 | C    | ARG | X | 471 | 52.017 | 41.426 | 23.443 | 0.00 | 0.00 |
| ATOM | 7146 | O    | ARG | X | 471 | 50.875 | 41.886 | 23.246 | 0.00 | 0.00 |
| ATOM | 7147 | N    | LEU | X | 472 | 52.392 | 41.045 | 24.640 | 0.00 | 0.00 |
| ATOM | 7148 | H    | LEU | X | 472 | 53.314 | 40.655 | 24.775 | 0.00 | 0.00 |
| ATOM | 7149 | CA   | LEU | X | 472 | 51.425 | 41.029 | 25.779 | 0.00 | 0.00 |
| ATOM | 7150 | HA   | LEU | X | 472 | 50.566 | 40.404 | 25.534 | 0.00 | 0.00 |
| ATOM | 7151 | CB   | LEU | X | 472 | 51.948 | 40.265 | 26.978 | 0.00 | 0.00 |
| ATOM | 7152 | HB2  | LEU | X | 472 | 52.590 | 40.925 | 27.561 | 0.00 | 0.00 |
| ATOM | 7153 | HB3  | LEU | X | 472 | 51.069 | 40.162 | 27.615 | 0.00 | 0.00 |
| ATOM | 7154 | CG   | LEU | X | 472 | 52.516 | 38.852 | 26.743 | 0.00 | 0.00 |
| ATOM | 7155 | HG   | LEU | X | 472 | 53.401 | 39.071 | 26.144 | 0.00 | 0.00 |
| ATOM | 7156 | CD1  | LEU | X | 472 | 53.003 | 38.186 | 28.052 | 0.00 | 0.00 |
| ATOM | 7157 | HD11 | LEU | X | 472 | 53.811 | 38.830 | 28.401 | 0.00 | 0.00 |
| ATOM | 7158 | HD12 | LEU | X | 472 | 52.214 | 38.180 | 28.804 | 0.00 | 0.00 |
| ATOM | 7159 | HD13 | LEU | X | 472 | 53.357 | 37.182 | 27.822 | 0.00 | 0.00 |
| ATOM | 7160 | CD2  | LEU | X | 472 | 51.695 | 37.935 | 25.856 | 0.00 | 0.00 |
| ATOM | 7161 | HD21 | LEU | X | 472 | 50.657 | 37.834 | 26.174 | 0.00 | 0.00 |
| ATOM | 7162 | HD22 | LEU | X | 472 | 51.750 | 38.322 | 24.839 | 0.00 | 0.00 |
| ATOM | 7163 | HD23 | LEU | X | 472 | 52.112 | 36.937 | 25.988 | 0.00 | 0.00 |
| ATOM | 7164 | C    | LEU | X | 472 | 50.907 | 42.384 | 26.146 | 0.00 | 0.00 |
| ATOM | 7165 | O    | LEU | X | 472 | 49.728 | 42.499 | 26.399 | 0.00 | 0.00 |
| ATOM | 7166 | N    | MET | X | 473 | 51.654 | 43.453 | 26.034 | 0.00 | 0.00 |
| ATOM | 7167 | H    | MET | X | 473 | 52.625 | 43.204 | 25.909 | 0.00 | 0.00 |
| ATOM | 7168 | CA   | MET | X | 473 | 51.269 | 44.834 | 25.800 | 0.00 | 0.00 |
| ATOM | 7169 | HA   | MET | X | 473 | 50.872 | 45.207 | 26.744 | 0.00 | 0.00 |
| ATOM | 7170 | CB   | MET | X | 473 | 52.508 | 45.668 | 25.392 | 0.00 | 0.00 |
| ATOM | 7171 | HB2  | MET | X | 473 | 52.908 | 45.291 | 24.450 | 0.00 | 0.00 |
| ATOM | 7172 | HB3  | MET | X | 473 | 52.136 | 46.679 | 25.225 | 0.00 | 0.00 |
| ATOM | 7173 | CG   | MET | X | 473 | 53.626 | 45.814 | 26.369 | 0.00 | 0.00 |
| ATOM | 7174 | HG2  | MET | X | 473 | 53.139 | 46.285 | 27.222 | 0.00 | 0.00 |
| ATOM | 7175 | HG3  | MET | X | 473 | 53.812 | 44.818 | 26.770 | 0.00 | 0.00 |
| ATOM | 7176 | SD   | MET | X | 473 | 55.124 | 46.741 | 25.938 | 0.00 | 0.00 |
| ATOM | 7177 | CE   | MET | X | 473 | 54.574 | 48.353 | 26.410 | 0.00 | 0.00 |
| ATOM | 7178 | HE1  | MET | X | 473 | 55.414 | 48.979 | 26.108 | 0.00 | 0.00 |
| ATOM | 7179 | HE2  | MET | X | 473 | 53.668 | 48.652 | 25.883 | 0.00 | 0.00 |
| ATOM | 7180 | HE3  | MET | X | 473 | 54.355 | 48.350 | 27.478 | 0.00 | 0.00 |
| ATOM | 7181 | C    | MET | X | 473 | 50.153 | 45.010 | 24.757 | 0.00 | 0.00 |

|      |      |      |     |   |     |        |        |        |      |      |
|------|------|------|-----|---|-----|--------|--------|--------|------|------|
| ATOM | 7182 | O    | MET | X | 473 | 49.104 | 45.481 | 25.101 | 0.00 | 0.00 |
| ATOM | 7183 | N    | ARG | X | 474 | 50.367 | 44.569 | 23.503 | 0.00 | 0.00 |
| ATOM | 7184 | H    | ARG | X | 474 | 51.270 | 44.212 | 23.225 | 0.00 | 0.00 |
| ATOM | 7185 | CA   | ARG | X | 474 | 49.389 | 44.681 | 22.388 | 0.00 | 0.00 |
| ATOM | 7186 | HA   | ARG | X | 474 | 49.200 | 45.754 | 22.356 | 0.00 | 0.00 |
| ATOM | 7187 | CB   | ARG | X | 474 | 50.105 | 44.278 | 21.058 | 0.00 | 0.00 |
| ATOM | 7188 | HB2  | ARG | X | 474 | 51.015 | 44.849 | 20.875 | 0.00 | 0.00 |
| ATOM | 7189 | HB3  | ARG | X | 474 | 50.359 | 43.218 | 21.084 | 0.00 | 0.00 |
| ATOM | 7190 | CG   | ARG | X | 474 | 49.178 | 44.498 | 19.853 | 0.00 | 0.00 |
| ATOM | 7191 | HG2  | ARG | X | 474 | 49.835 | 44.285 | 19.010 | 0.00 | 0.00 |
| ATOM | 7192 | HG3  | ARG | X | 474 | 48.434 | 43.701 | 19.860 | 0.00 | 0.00 |
| ATOM | 7193 | CD   | ARG | X | 474 | 48.636 | 45.926 | 19.672 | 0.00 | 0.00 |
| ATOM | 7194 | HD2  | ARG | X | 474 | 47.889 | 46.063 | 20.454 | 0.00 | 0.00 |
| ATOM | 7195 | HD3  | ARG | X | 474 | 49.524 | 46.549 | 19.775 | 0.00 | 0.00 |
| ATOM | 7196 | NE   | ARG | X | 474 | 47.970 | 46.192 | 18.380 | 0.00 | 0.00 |
| ATOM | 7197 | HE   | ARG | X | 474 | 47.605 | 45.342 | 17.975 | 0.00 | 0.00 |
| ATOM | 7198 | CZ   | ARG | X | 474 | 47.969 | 47.271 | 17.671 | 0.00 | 0.00 |
| ATOM | 7199 | NH1  | ARG | X | 474 | 48.476 | 48.334 | 18.185 | 0.00 | 0.00 |
| ATOM | 7200 | HH11 | ARG | X | 474 | 48.960 | 48.325 | 19.072 | 0.00 | 0.00 |
| ATOM | 7201 | HH12 | ARG | X | 474 | 48.396 | 49.212 | 17.692 | 0.00 | 0.00 |
| ATOM | 7202 | NH2  | ARG | X | 474 | 47.483 | 47.308 | 16.517 | 0.00 | 0.00 |
| ATOM | 7203 | HH21 | ARG | X | 474 | 47.277 | 46.409 | 16.105 | 0.00 | 0.00 |
| ATOM | 7204 | HH22 | ARG | X | 474 | 47.289 | 48.175 | 16.037 | 0.00 | 0.00 |
| ATOM | 7205 | C    | ARG | X | 474 | 48.158 | 43.951 | 22.709 | 0.00 | 0.00 |
| ATOM | 7206 | O    | ARG | X | 474 | 47.076 | 44.380 | 22.256 | 0.00 | 0.00 |
| ATOM | 7207 | N    | TYR | X | 475 | 48.168 | 42.749 | 23.314 | 0.00 | 0.00 |
| ATOM | 7208 | H    | TYR | X | 475 | 49.046 | 42.337 | 23.596 | 0.00 | 0.00 |
| ATOM | 7209 | CA   | TYR | X | 475 | 46.946 | 42.001 | 23.677 | 0.00 | 0.00 |
| ATOM | 7210 | HA   | TYR | X | 475 | 46.341 | 42.024 | 22.771 | 0.00 | 0.00 |
| ATOM | 7211 | CB   | TYR | X | 475 | 47.304 | 40.515 | 23.961 | 0.00 | 0.00 |
| ATOM | 7212 | HB2  | TYR | X | 475 | 47.826 | 40.343 | 24.902 | 0.00 | 0.00 |
| ATOM | 7213 | HB3  | TYR | X | 475 | 46.307 | 40.107 | 24.129 | 0.00 | 0.00 |
| ATOM | 7214 | CG   | TYR | X | 475 | 48.124 | 39.689 | 22.969 | 0.00 | 0.00 |
| ATOM | 7215 | CD1  | TYR | X | 475 | 47.934 | 39.885 | 21.567 | 0.00 | 0.00 |
| ATOM | 7216 | HD1  | TYR | X | 475 | 47.318 | 40.685 | 21.184 | 0.00 | 0.00 |
| ATOM | 7217 | CE1  | TYR | X | 475 | 48.559 | 39.116 | 20.632 | 0.00 | 0.00 |
| ATOM | 7218 | HE1  | TYR | X | 475 | 48.345 | 39.354 | 19.601 | 0.00 | 0.00 |
| ATOM | 7219 | CZ   | TYR | X | 475 | 49.548 | 38.190 | 21.009 | 0.00 | 0.00 |
| ATOM | 7220 | OH   | TYR | X | 475 | 50.072 | 37.361 | 20.064 | 0.00 | 0.00 |
| ATOM | 7221 | HH   | TYR | X | 475 | 49.699 | 37.509 | 19.191 | 0.00 | 0.00 |
| ATOM | 7222 | CE2  | TYR | X | 475 | 49.677 | 37.900 | 22.432 | 0.00 | 0.00 |
| ATOM | 7223 | HE2  | TYR | X | 475 | 50.458 | 37.208 | 22.713 | 0.00 | 0.00 |
| ATOM | 7224 | CD2  | TYR | X | 475 | 48.927 | 38.577 | 23.399 | 0.00 | 0.00 |
| ATOM | 7225 | HD2  | TYR | X | 475 | 49.045 | 38.205 | 24.406 | 0.00 | 0.00 |
| ATOM | 7226 | C    | TYR | X | 475 | 46.111 | 42.576 | 24.769 | 0.00 | 0.00 |
| ATOM | 7227 | O    | TYR | X | 475 | 44.905 | 42.543 | 24.681 | 0.00 | 0.00 |
| ATOM | 7228 | N    | TRP | X | 476 | 46.660 | 43.081 | 25.912 | 0.00 | 0.00 |
| ATOM | 7229 | H    | TRP | X | 476 | 47.644 | 42.994 | 26.120 | 0.00 | 0.00 |
| ATOM | 7230 | CA   | TRP | X | 476 | 45.813 | 43.730 | 26.924 | 0.00 | 0.00 |
| ATOM | 7231 | HA   | TRP | X | 476 | 44.945 | 43.100 | 27.117 | 0.00 | 0.00 |
| ATOM | 7232 | CB   | TRP | X | 476 | 46.695 | 43.868 | 28.204 | 0.00 | 0.00 |
| ATOM | 7233 | HB2  | TRP | X | 476 | 47.701 | 44.017 | 27.813 | 0.00 | 0.00 |
| ATOM | 7234 | HB3  | TRP | X | 476 | 46.507 | 44.825 | 28.690 | 0.00 | 0.00 |
| ATOM | 7235 | CG   | TRP | X | 476 | 46.593 | 42.717 | 29.199 | 0.00 | 0.00 |
| ATOM | 7236 | CD1  | TRP | X | 476 | 46.381 | 42.964 | 30.536 | 0.00 | 0.00 |
| ATOM | 7237 | HD1  | TRP | X | 476 | 46.041 | 43.887 | 30.982 | 0.00 | 0.00 |
| ATOM | 7238 | NE1  | TRP | X | 476 | 46.462 | 41.719 | 31.254 | 0.00 | 0.00 |
| ATOM | 7239 | HE1  | TRP | X | 476 | 46.415 | 41.730 | 32.263 | 0.00 | 0.00 |
| ATOM | 7240 | CE2  | TRP | X | 476 | 46.772 | 40.671 | 30.426 | 0.00 | 0.00 |
| ATOM | 7241 | CZ2  | TRP | X | 476 | 46.977 | 39.310 | 30.677 | 0.00 | 0.00 |
| ATOM | 7242 | HZ2  | TRP | X | 476 | 46.834 | 38.842 | 31.640 | 0.00 | 0.00 |
| ATOM | 7243 | CH2  | TRP | X | 476 | 47.415 | 38.491 | 29.663 | 0.00 | 0.00 |
| ATOM | 7244 | HH2  | TRP | X | 476 | 47.584 | 37.456 | 29.922 | 0.00 | 0.00 |
| ATOM | 7245 | CZ3  | TRP | X | 476 | 47.608 | 39.002 | 28.345 | 0.00 | 0.00 |
| ATOM | 7246 | HZ3  | TRP | X | 476 | 47.950 | 38.353 | 27.552 | 0.00 | 0.00 |
| ATOM | 7247 | CE3  | TRP | X | 476 | 47.340 | 40.330 | 28.081 | 0.00 | 0.00 |
| ATOM | 7248 | HE3  | TRP | X | 476 | 47.532 | 40.636 | 27.063 | 0.00 | 0.00 |
| ATOM | 7249 | CD2  | TRP | X | 476 | 46.854 | 41.266 | 29.126 | 0.00 | 0.00 |
| ATOM | 7250 | C    | TRP | X | 476 | 45.457 | 45.173 | 26.448 | 0.00 | 0.00 |
| ATOM | 7251 | O    | TRP | X | 476 | 44.343 | 45.625 | 26.650 | 0.00 | 0.00 |

|      |      |      |     |   |     |        |        |        |      |      |
|------|------|------|-----|---|-----|--------|--------|--------|------|------|
| ATOM | 7252 | N    | ALA | X | 477 | 46.335 | 45.900 | 25.728 | 0.00 | 0.00 |
| ATOM | 7253 | H    | ALA | X | 477 | 47.250 | 45.478 | 25.656 | 0.00 | 0.00 |
| ATOM | 7254 | CA   | ALA | X | 477 | 45.872 | 47.123 | 24.916 | 0.00 | 0.00 |
| ATOM | 7255 | HA   | ALA | X | 477 | 45.471 | 47.805 | 25.667 | 0.00 | 0.00 |
| ATOM | 7256 | CB   | ALA | X | 477 | 46.991 | 47.728 | 24.176 | 0.00 | 0.00 |
| ATOM | 7257 | HB1  | ALA | X | 477 | 46.736 | 48.631 | 23.622 | 0.00 | 0.00 |
| ATOM | 7258 | HB2  | ALA | X | 477 | 47.824 | 47.987 | 24.829 | 0.00 | 0.00 |
| ATOM | 7259 | HB3  | ALA | X | 477 | 47.399 | 47.037 | 23.438 | 0.00 | 0.00 |
| ATOM | 7260 | C    | ALA | X | 477 | 44.710 | 46.884 | 23.982 | 0.00 | 0.00 |
| ATOM | 7261 | O    | ALA | X | 477 | 43.704 | 47.560 | 24.044 | 0.00 | 0.00 |
| ATOM | 7262 | N    | ASN | X | 478 | 44.707 | 45.742 | 23.291 | 0.00 | 0.00 |
| ATOM | 7263 | H    | ASN | X | 478 | 45.568 | 45.216 | 23.239 | 0.00 | 0.00 |
| ATOM | 7264 | CA   | ASN | X | 478 | 43.644 | 45.440 | 22.284 | 0.00 | 0.00 |
| ATOM | 7265 | HA   | ASN | X | 478 | 43.477 | 46.295 | 21.629 | 0.00 | 0.00 |
| ATOM | 7266 | CB   | ASN | X | 478 | 44.021 | 44.275 | 21.307 | 0.00 | 0.00 |
| ATOM | 7267 | HB2  | ASN | X | 478 | 44.564 | 43.467 | 21.798 | 0.00 | 0.00 |
| ATOM | 7268 | HB3  | ASN | X | 478 | 43.115 | 43.883 | 20.845 | 0.00 | 0.00 |
| ATOM | 7269 | CG   | ASN | X | 478 | 44.909 | 44.746 | 20.200 | 0.00 | 0.00 |
| ATOM | 7270 | OD1  | ASN | X | 478 | 45.034 | 45.931 | 19.821 | 0.00 | 0.00 |
| ATOM | 7271 | ND2  | ASN | X | 478 | 45.500 | 43.822 | 19.488 | 0.00 | 0.00 |
| ATOM | 7272 | HD21 | ASN | X | 478 | 46.072 | 44.054 | 18.689 | 0.00 | 0.00 |
| ATOM | 7273 | HD22 | ASN | X | 478 | 45.475 | 42.883 | 19.860 | 0.00 | 0.00 |
| ATOM | 7274 | C    | ASN | X | 478 | 42.344 | 45.161 | 23.030 | 0.00 | 0.00 |
| ATOM | 7275 | O    | ASN | X | 478 | 41.342 | 45.805 | 22.876 | 0.00 | 0.00 |
| ATOM | 7276 | N    | PHE | X | 479 | 42.320 | 44.423 | 24.165 | 0.00 | 0.00 |
| ATOM | 7277 | H    | PHE | X | 479 | 43.125 | 43.842 | 24.352 | 0.00 | 0.00 |
| ATOM | 7278 | CA   | PHE | X | 479 | 41.163 | 44.268 | 25.002 | 0.00 | 0.00 |
| ATOM | 7279 | HA   | PHE | X | 479 | 40.331 | 44.138 | 24.310 | 0.00 | 0.00 |
| ATOM | 7280 | CB   | PHE | X | 479 | 41.495 | 43.120 | 25.958 | 0.00 | 0.00 |
| ATOM | 7281 | HB2  | PHE | X | 479 | 41.615 | 42.205 | 25.378 | 0.00 | 0.00 |
| ATOM | 7282 | HB3  | PHE | X | 479 | 42.475 | 43.342 | 26.381 | 0.00 | 0.00 |
| ATOM | 7283 | CG   | PHE | X | 479 | 40.409 | 42.933 | 27.077 | 0.00 | 0.00 |
| ATOM | 7284 | CD1  | PHE | X | 479 | 39.394 | 42.007 | 26.868 | 0.00 | 0.00 |
| ATOM | 7285 | HD1  | PHE | X | 479 | 39.306 | 41.486 | 25.926 | 0.00 | 0.00 |
| ATOM | 7286 | CE1  | PHE | X | 479 | 38.266 | 42.030 | 27.739 | 0.00 | 0.00 |
| ATOM | 7287 | HE1  | PHE | X | 479 | 37.543 | 41.230 | 27.664 | 0.00 | 0.00 |
| ATOM | 7288 | CZ   | PHE | X | 479 | 38.188 | 42.912 | 28.806 | 0.00 | 0.00 |
| ATOM | 7289 | HZ   | PHE | X | 479 | 37.377 | 42.932 | 29.519 | 0.00 | 0.00 |
| ATOM | 7290 | CE2  | PHE | X | 479 | 39.247 | 43.788 | 29.014 | 0.00 | 0.00 |
| ATOM | 7291 | HE2  | PHE | X | 479 | 39.301 | 44.351 | 29.934 | 0.00 | 0.00 |
| ATOM | 7292 | CD2  | PHE | X | 479 | 40.418 | 43.787 | 28.187 | 0.00 | 0.00 |
| ATOM | 7293 | HD2  | PHE | X | 479 | 41.253 | 44.418 | 28.454 | 0.00 | 0.00 |
| ATOM | 7294 | C    | PHE | X | 479 | 40.871 | 45.624 | 25.668 | 0.00 | 0.00 |
| ATOM | 7295 | O    | PHE | X | 479 | 39.664 | 45.812 | 25.854 | 0.00 | 0.00 |
| ATOM | 7296 | N    | ALA | X | 480 | 41.802 | 46.528 | 25.981 | 0.00 | 0.00 |
| ATOM | 7297 | H    | ALA | X | 480 | 42.774 | 46.325 | 25.798 | 0.00 | 0.00 |
| ATOM | 7298 | CA   | ALA | X | 480 | 41.471 | 47.884 | 26.492 | 0.00 | 0.00 |
| ATOM | 7299 | HA   | ALA | X | 480 | 40.767 | 47.745 | 27.312 | 0.00 | 0.00 |
| ATOM | 7300 | CB   | ALA | X | 480 | 42.671 | 48.567 | 27.097 | 0.00 | 0.00 |
| ATOM | 7301 | HB1  | ALA | X | 480 | 42.473 | 49.476 | 27.664 | 0.00 | 0.00 |
| ATOM | 7302 | HB2  | ALA | X | 480 | 43.105 | 47.873 | 27.816 | 0.00 | 0.00 |
| ATOM | 7303 | HB3  | ALA | X | 480 | 43.426 | 48.638 | 26.314 | 0.00 | 0.00 |
| ATOM | 7304 | C    | ALA | X | 480 | 40.724 | 48.787 | 25.479 | 0.00 | 0.00 |
| ATOM | 7305 | O    | ALA | X | 480 | 39.831 | 49.563 | 25.881 | 0.00 | 0.00 |
| ATOM | 7306 | N    | ARG | X | 481 | 41.003 | 48.596 | 24.170 | 0.00 | 0.00 |
| ATOM | 7307 | H    | ARG | X | 481 | 41.590 | 47.788 | 24.019 | 0.00 | 0.00 |
| ATOM | 7308 | CA   | ARG | X | 481 | 40.366 | 49.193 | 22.966 | 0.00 | 0.00 |
| ATOM | 7309 | HA   | ARG | X | 481 | 40.241 | 50.253 | 23.187 | 0.00 | 0.00 |
| ATOM | 7310 | CB   | ARG | X | 481 | 41.305 | 48.961 | 21.761 | 0.00 | 0.00 |
| ATOM | 7311 | HB2  | ARG | X | 481 | 41.625 | 47.920 | 21.742 | 0.00 | 0.00 |
| ATOM | 7312 | HB3  | ARG | X | 481 | 40.793 | 49.256 | 20.845 | 0.00 | 0.00 |
| ATOM | 7313 | CG   | ARG | X | 481 | 42.549 | 49.827 | 22.015 | 0.00 | 0.00 |
| ATOM | 7314 | HG2  | ARG | X | 481 | 42.383 | 50.871 | 21.751 | 0.00 | 0.00 |
| ATOM | 7315 | HG3  | ARG | X | 481 | 42.830 | 49.874 | 23.067 | 0.00 | 0.00 |
| ATOM | 7316 | CD   | ARG | X | 481 | 43.692 | 49.269 | 21.139 | 0.00 | 0.00 |
| ATOM | 7317 | HD2  | ARG | X | 481 | 44.000 | 48.317 | 21.572 | 0.00 | 0.00 |
| ATOM | 7318 | HD3  | ARG | X | 481 | 43.338 | 48.952 | 20.158 | 0.00 | 0.00 |
| ATOM | 7319 | NE   | ARG | X | 481 | 44.807 | 50.224 | 20.999 | 0.00 | 0.00 |
| ATOM | 7320 | HE   | ARG | X | 481 | 44.618 | 51.183 | 21.254 | 0.00 | 0.00 |
| ATOM | 7321 | CZ   | ARG | X | 481 | 46.067 | 49.924 | 20.611 | 0.00 | 0.00 |



|      |      |      |     |   |     |        |        |        |      |      |
|------|------|------|-----|---|-----|--------|--------|--------|------|------|
| ATOM | 7322 | NH1  | ARG | X | 481 | 46.378 | 48.665 | 20.376 | 0.00 | 0.00 |
| ATOM | 7323 | HH11 | ARG | X | 481 | 45.753 | 47.874 | 20.433 | 0.00 | 0.00 |
| ATOM | 7324 | HH12 | ARG | X | 481 | 47.301 | 48.534 | 19.988 | 0.00 | 0.00 |
| ATOM | 7325 | NH2  | ARG | X | 481 | 47.040 | 50.775 | 20.581 | 0.00 | 0.00 |
| ATOM | 7326 | HH21 | ARG | X | 481 | 46.763 | 51.728 | 20.771 | 0.00 | 0.00 |
| ATOM | 7327 | HH22 | ARG | X | 481 | 47.973 | 50.393 | 20.531 | 0.00 | 0.00 |
| ATOM | 7328 | C    | ARG | X | 481 | 38.965 | 48.647 | 22.691 | 0.00 | 0.00 |
| ATOM | 7329 | O    | ARG | X | 481 | 37.979 | 49.369 | 22.890 | 0.00 | 0.00 |
| ATOM | 7330 | N    | THR | X | 482 | 38.844 | 47.402 | 22.266 | 0.00 | 0.00 |
| ATOM | 7331 | H    | THR | X | 482 | 39.618 | 46.764 | 22.147 | 0.00 | 0.00 |
| ATOM | 7332 | CA   | THR | X | 482 | 37.602 | 46.843 | 21.677 | 0.00 | 0.00 |
| ATOM | 7333 | HA   | THR | X | 482 | 36.915 | 47.658 | 21.449 | 0.00 | 0.00 |
| ATOM | 7334 | CB   | THR | X | 482 | 37.864 | 45.985 | 20.419 | 0.00 | 0.00 |
| ATOM | 7335 | HB   | THR | X | 482 | 36.935 | 45.540 | 20.061 | 0.00 | 0.00 |
| ATOM | 7336 | CG2  | THR | X | 482 | 38.406 | 46.852 | 19.264 | 0.00 | 0.00 |
| ATOM | 7337 | HG21 | THR | X | 482 | 38.541 | 46.310 | 18.328 | 0.00 | 0.00 |
| ATOM | 7338 | HG22 | THR | X | 482 | 37.803 | 47.748 | 19.110 | 0.00 | 0.00 |
| ATOM | 7339 | HG23 | THR | X | 482 | 39.411 | 47.123 | 19.585 | 0.00 | 0.00 |
| ATOM | 7340 | OG1  | THR | X | 482 | 38.751 | 45.035 | 20.845 | 0.00 | 0.00 |
| ATOM | 7341 | HG1  | THR | X | 482 | 38.577 | 44.280 | 20.278 | 0.00 | 0.00 |
| ATOM | 7342 | C    | THR | X | 482 | 36.908 | 45.970 | 22.766 | 0.00 | 0.00 |
| ATOM | 7343 | O    | THR | X | 482 | 35.671 | 45.825 | 22.716 | 0.00 | 0.00 |
| ATOM | 7344 | N    | GLY | X | 483 | 37.584 | 45.441 | 23.771 | 0.00 | 0.00 |
| ATOM | 7345 | H    | GLY | X | 483 | 38.572 | 45.653 | 23.785 | 0.00 | 0.00 |
| ATOM | 7346 | CA   | GLY | X | 483 | 37.014 | 44.294 | 24.579 | 0.00 | 0.00 |
| ATOM | 7347 | HA2  | GLY | X | 483 | 37.374 | 44.460 | 25.646 | 0.00 | 0.00 |
| ATOM | 7348 | HA3  | GLY | X | 483 | 35.893 | 44.303 | 24.657 | 0.00 | 0.00 |
| ATOM | 7349 | C    | GLY | X | 483 | 37.477 | 42.918 | 24.120 | 0.00 | 0.00 |
| ATOM | 7350 | O    | GLY | X | 483 | 36.978 | 41.957 | 24.683 | 0.00 | 0.00 |
| ATOM | 7351 | N    | ASP | X | 484 | 38.347 | 42.736 | 23.094 | 0.00 | 0.00 |
| ATOM | 7352 | H    | ASP | X | 484 | 38.736 | 43.560 | 22.660 | 0.00 | 0.00 |
| ATOM | 7353 | CA   | ASP | X | 484 | 38.777 | 41.471 | 22.490 | 0.00 | 0.00 |
| ATOM | 7354 | HA   | ASP | X | 484 | 38.776 | 40.716 | 23.276 | 0.00 | 0.00 |
| ATOM | 7355 | CB   | ASP | X | 484 | 37.762 | 40.888 | 21.423 | 0.00 | 0.00 |
| ATOM | 7356 | HB2  | ASP | X | 484 | 38.070 | 39.904 | 21.068 | 0.00 | 0.00 |
| ATOM | 7357 | HB3  | ASP | X | 484 | 36.942 | 40.635 | 22.095 | 0.00 | 0.00 |
| ATOM | 7358 | CG   | ASP | X | 484 | 37.206 | 41.915 | 20.374 | 0.00 | 0.00 |
| ATOM | 7359 | OD1  | ASP | X | 484 | 37.959 | 42.400 | 19.451 | 0.00 | 0.00 |
| ATOM | 7360 | OD2  | ASP | X | 484 | 35.994 | 42.249 | 20.612 | 0.00 | 0.00 |
| ATOM | 7361 | C    | ASP | X | 484 | 40.249 | 41.626 | 21.988 | 0.00 | 0.00 |
| ATOM | 7362 | O    | ASP | X | 484 | 40.627 | 42.706 | 21.582 | 0.00 | 0.00 |
| ATOM | 7363 | N    | PRO | X | 485 | 41.086 | 40.601 | 22.110 | 0.00 | 0.00 |
| ATOM | 7364 | CD   | PRO | X | 485 | 40.841 | 39.301 | 22.851 | 0.00 | 0.00 |
| ATOM | 7365 | HD2  | PRO | X | 485 | 40.113 | 38.659 | 22.354 | 0.00 | 0.00 |
| ATOM | 7366 | HD3  | PRO | X | 485 | 40.759 | 39.454 | 23.927 | 0.00 | 0.00 |
| ATOM | 7367 | CG   | PRO | X | 485 | 42.246 | 38.633 | 22.786 | 0.00 | 0.00 |
| ATOM | 7368 | HG2  | PRO | X | 485 | 42.507 | 38.202 | 21.819 | 0.00 | 0.00 |
| ATOM | 7369 | HG3  | PRO | X | 485 | 42.536 | 37.938 | 23.575 | 0.00 | 0.00 |
| ATOM | 7370 | CB   | PRO | X | 485 | 43.188 | 39.764 | 22.928 | 0.00 | 0.00 |
| ATOM | 7371 | HB2  | PRO | X | 485 | 44.206 | 39.579 | 22.586 | 0.00 | 0.00 |
| ATOM | 7372 | HB3  | PRO | X | 485 | 43.232 | 40.048 | 23.979 | 0.00 | 0.00 |
| ATOM | 7373 | CA   | PRO | X | 485 | 42.583 | 40.844 | 22.018 | 0.00 | 0.00 |
| ATOM | 7374 | HA   | PRO | X | 485 | 42.742 | 41.857 | 22.387 | 0.00 | 0.00 |
| ATOM | 7375 | C    | PRO | X | 485 | 43.116 | 40.665 | 20.568 | 0.00 | 0.00 |
| ATOM | 7376 | O    | PRO | X | 485 | 44.301 | 40.953 | 20.463 | 0.00 | 0.00 |
| ATOM | 7377 | N    | ASN | X | 486 | 42.326 | 40.293 | 19.553 | 0.00 | 0.00 |
| ATOM | 7378 | H    | ASN | X | 486 | 41.410 | 40.008 | 19.868 | 0.00 | 0.00 |
| ATOM | 7379 | CA   | ASN | X | 486 | 42.697 | 40.295 | 18.141 | 0.00 | 0.00 |
| ATOM | 7380 | HA   | ASN | X | 486 | 43.575 | 39.664 | 17.999 | 0.00 | 0.00 |
| ATOM | 7381 | CB   | ASN | X | 486 | 41.563 | 39.641 | 17.323 | 0.00 | 0.00 |
| ATOM | 7382 | HB2  | ASN | X | 486 | 41.834 | 39.625 | 16.268 | 0.00 | 0.00 |
| ATOM | 7383 | HB3  | ASN | X | 486 | 41.349 | 38.621 | 17.643 | 0.00 | 0.00 |
| ATOM | 7384 | CG   | ASN | X | 486 | 40.313 | 40.488 | 17.296 | 0.00 | 0.00 |
| ATOM | 7385 | OD1  | ASN | X | 486 | 40.223 | 41.393 | 16.468 | 0.00 | 0.00 |
| ATOM | 7386 | ND2  | ASN | X | 486 | 39.422 | 40.339 | 18.257 | 0.00 | 0.00 |
| ATOM | 7387 | HD21 | ASN | X | 486 | 38.605 | 40.917 | 18.129 | 0.00 | 0.00 |
| ATOM | 7388 | HD22 | ASN | X | 486 | 39.427 | 39.553 | 18.891 | 0.00 | 0.00 |
| ATOM | 7389 | C    | ASN | X | 486 | 43.142 | 41.674 | 17.599 | 0.00 | 0.00 |
| ATOM | 7390 | O    | ASN | X | 486 | 43.059 | 42.694 | 18.248 | 0.00 | 0.00 |
| ATOM | 7391 | N    | GLU | X | 487 | 43.499 | 41.751 | 16.309 | 0.00 | 0.00 |

|      |      |      |     |   |     |        |        |        |      |      |
|------|------|------|-----|---|-----|--------|--------|--------|------|------|
| ATOM | 7392 | H    | GLU | X | 487 | 43.744 | 40.893 | 15.835 | 0.00 | 0.00 |
| ATOM | 7393 | CA   | GLU | X | 487 | 43.542 | 42.879 | 15.370 | 0.00 | 0.00 |
| ATOM | 7394 | HA   | GLU | X | 487 | 43.809 | 43.821 | 15.849 | 0.00 | 0.00 |
| ATOM | 7395 | CB   | GLU | X | 487 | 44.685 | 42.765 | 14.347 | 0.00 | 0.00 |
| ATOM | 7396 | HB2  | GLU | X | 487 | 44.553 | 41.776 | 13.908 | 0.00 | 0.00 |
| ATOM | 7397 | HB3  | GLU | X | 487 | 44.560 | 43.530 | 13.581 | 0.00 | 0.00 |
| ATOM | 7398 | CG   | GLU | X | 487 | 46.118 | 42.870 | 14.996 | 0.00 | 0.00 |
| ATOM | 7399 | HG2  | GLU | X | 487 | 46.223 | 42.048 | 15.705 | 0.00 | 0.00 |
| ATOM | 7400 | HG3  | GLU | X | 487 | 46.923 | 42.848 | 14.261 | 0.00 | 0.00 |
| ATOM | 7401 | CD   | GLU | X | 487 | 46.358 | 44.188 | 15.797 | 0.00 | 0.00 |
| ATOM | 7402 | OE1  | GLU | X | 487 | 46.674 | 44.192 | 16.998 | 0.00 | 0.00 |
| ATOM | 7403 | OE2  | GLU | X | 487 | 46.230 | 45.286 | 15.198 | 0.00 | 0.00 |
| ATOM | 7404 | C    | GLU | X | 487 | 42.204 | 43.043 | 14.647 | 0.00 | 0.00 |
| ATOM | 7405 | O    | GLU | X | 487 | 41.860 | 42.026 | 14.002 | 0.00 | 0.00 |
| ATOM | 7406 | N    | PRO | X | 488 | 41.454 | 44.141 | 14.729 | 0.00 | 0.00 |
| ATOM | 7407 | CD   | PRO | X | 488 | 41.626 | 45.286 | 15.552 | 0.00 | 0.00 |
| ATOM | 7408 | HD2  | PRO | X | 488 | 42.446 | 45.938 | 15.251 | 0.00 | 0.00 |
| ATOM | 7409 | HD3  | PRO | X | 488 | 41.936 | 45.058 | 16.572 | 0.00 | 0.00 |
| ATOM | 7410 | CG   | PRO | X | 488 | 40.317 | 46.070 | 15.577 | 0.00 | 0.00 |
| ATOM | 7411 | HG2  | PRO | X | 488 | 40.498 | 47.144 | 15.533 | 0.00 | 0.00 |
| ATOM | 7412 | HG3  | PRO | X | 488 | 39.715 | 45.817 | 16.449 | 0.00 | 0.00 |
| ATOM | 7413 | CB   | PRO | X | 488 | 39.560 | 45.726 | 14.253 | 0.00 | 0.00 |
| ATOM | 7414 | HB2  | PRO | X | 488 | 40.018 | 46.270 | 13.426 | 0.00 | 0.00 |
| ATOM | 7415 | HB3  | PRO | X | 488 | 38.486 | 45.909 | 14.288 | 0.00 | 0.00 |
| ATOM | 7416 | CA   | PRO | X | 488 | 40.100 | 44.250 | 14.111 | 0.00 | 0.00 |
| ATOM | 7417 | HA   | PRO | X | 488 | 39.509 | 43.543 | 14.694 | 0.00 | 0.00 |
| ATOM | 7418 | C    | PRO | X | 488 | 40.023 | 43.776 | 12.684 | 0.00 | 0.00 |
| ATOM | 7419 | O    | PRO | X | 488 | 39.097 | 42.965 | 12.371 | 0.00 | 0.00 |
| ATOM | 7420 | N    | ARG | X | 489 | 40.905 | 44.242 | 11.805 | 0.00 | 0.00 |
| ATOM | 7421 | H    | ARG | X | 489 | 41.535 | 44.938 | 12.176 | 0.00 | 0.00 |
| ATOM | 7422 | CA   | ARG | X | 489 | 40.928 | 43.949 | 10.302 | 0.00 | 0.00 |
| ATOM | 7423 | HA   | ARG | X | 489 | 40.008 | 44.383 | 9.910  | 0.00 | 0.00 |
| ATOM | 7424 | CB   | ARG | X | 489 | 41.989 | 44.814 | 9.542  | 0.00 | 0.00 |
| ATOM | 7425 | HB2  | ARG | X | 489 | 41.897 | 44.580 | 8.482  | 0.00 | 0.00 |
| ATOM | 7426 | HB3  | ARG | X | 489 | 41.734 | 45.866 | 9.674  | 0.00 | 0.00 |
| ATOM | 7427 | CG   | ARG | X | 489 | 43.461 | 44.505 | 10.026 | 0.00 | 0.00 |
| ATOM | 7428 | HG2  | ARG | X | 489 | 43.424 | 44.362 | 11.106 | 0.00 | 0.00 |
| ATOM | 7429 | HG3  | ARG | X | 489 | 43.911 | 43.633 | 9.550  | 0.00 | 0.00 |
| ATOM | 7430 | CD   | ARG | X | 489 | 44.511 | 45.620 | 9.722  | 0.00 | 0.00 |
| ATOM | 7431 | HD2  | ARG | X | 489 | 44.726 | 45.669 | 8.654  | 0.00 | 0.00 |
| ATOM | 7432 | HD3  | ARG | X | 489 | 43.952 | 46.513 | 10.003 | 0.00 | 0.00 |
| ATOM | 7433 | NE   | ARG | X | 489 | 45.784 | 45.461 | 10.354 | 0.00 | 0.00 |
| ATOM | 7434 | HE   | ARG | X | 489 | 46.534 | 45.361 | 9.686  | 0.00 | 0.00 |
| ATOM | 7435 | CZ   | ARG | X | 489 | 46.172 | 45.581 | 11.602 | 0.00 | 0.00 |
| ATOM | 7436 | NH1  | ARG | X | 489 | 47.464 | 45.480 | 11.850 | 0.00 | 0.00 |
| ATOM | 7437 | HH11 | ARG | X | 489 | 48.146 | 45.411 | 11.108 | 0.00 | 0.00 |
| ATOM | 7438 | HH12 | ARG | X | 489 | 47.847 | 45.558 | 12.782 | 0.00 | 0.00 |
| ATOM | 7439 | NH2  | ARG | X | 489 | 45.272 | 45.665 | 12.591 | 0.00 | 0.00 |
| ATOM | 7440 | HH21 | ARG | X | 489 | 44.321 | 45.873 | 12.320 | 0.00 | 0.00 |
| ATOM | 7441 | HH22 | ARG | X | 489 | 45.608 | 45.566 | 13.538 | 0.00 | 0.00 |
| ATOM | 7442 | C    | ARG | X | 489 | 41.008 | 42.465 | 9.966  | 0.00 | 0.00 |
| ATOM | 7443 | O    | ARG | X | 489 | 40.935 | 42.145 | 8.748  | 0.00 | 0.00 |
| ATOM | 7444 | N    | ASP | X | 490 | 41.395 | 41.586 | 10.813 | 0.00 | 0.00 |
| ATOM | 7445 | H    | ASP | X | 490 | 41.417 | 41.959 | 11.751 | 0.00 | 0.00 |
| ATOM | 7446 | CA   | ASP | X | 490 | 41.397 | 40.111 | 10.600 | 0.00 | 0.00 |
| ATOM | 7447 | HA   | ASP | X | 490 | 41.555 | 39.597 | 11.548 | 0.00 | 0.00 |
| ATOM | 7448 | CB   | ASP | X | 490 | 39.976 | 39.654 | 10.116 | 0.00 | 0.00 |
| ATOM | 7449 | HB2  | ASP | X | 490 | 39.290 | 40.150 | 10.803 | 0.00 | 0.00 |
| ATOM | 7450 | HB3  | ASP | X | 490 | 39.918 | 39.959 | 9.071  | 0.00 | 0.00 |
| ATOM | 7451 | CG   | ASP | X | 490 | 39.877 | 38.099 | 10.080 | 0.00 | 0.00 |
| ATOM | 7452 | OD1  | ASP | X | 490 | 39.142 | 37.677 | 10.986 | 0.00 | 0.00 |
| ATOM | 7453 | OD2  | ASP | X | 490 | 40.378 | 37.420 | 9.145  | 0.00 | 0.00 |
| ATOM | 7454 | C    | ASP | X | 490 | 42.596 | 39.749 | 9.564  | 0.00 | 0.00 |
| ATOM | 7455 | O    | ASP | X | 490 | 42.281 | 39.404 | 8.447  | 0.00 | 0.00 |
| ATOM | 7456 | N    | PRO | X | 491 | 43.847 | 39.863 | 9.980  | 0.00 | 0.00 |
| ATOM | 7457 | CD   | PRO | X | 491 | 44.231 | 40.130 | 11.377 | 0.00 | 0.00 |
| ATOM | 7458 | HD2  | PRO | X | 491 | 43.782 | 39.305 | 11.932 | 0.00 | 0.00 |
| ATOM | 7459 | HD3  | PRO | X | 491 | 43.811 | 41.100 | 11.642 | 0.00 | 0.00 |
| ATOM | 7460 | CG   | PRO | X | 491 | 45.730 | 40.188 | 11.368 | 0.00 | 0.00 |
| ATOM | 7461 | HG2  | PRO | X | 491 | 45.943 | 39.275 | 11.925 | 0.00 | 0.00 |

|      |      |      |     |   |     |        |        |        |      |      |
|------|------|------|-----|---|-----|--------|--------|--------|------|------|
| ATOM | 7462 | HG3  | PRO | X | 491 | 46.174 | 41.022 | 11.912 | 0.00 | 0.00 |
| ATOM | 7463 | CB   | PRO | X | 491 | 46.182 | 40.074 | 9.928  | 0.00 | 0.00 |
| ATOM | 7464 | HB2  | PRO | X | 491 | 47.099 | 39.523 | 9.721  | 0.00 | 0.00 |
| ATOM | 7465 | HB3  | PRO | X | 491 | 46.242 | 41.057 | 9.460  | 0.00 | 0.00 |
| ATOM | 7466 | CA   | PRO | X | 491 | 44.995 | 39.459 | 9.177  | 0.00 | 0.00 |
| ATOM | 7467 | HA   | PRO | X | 491 | 44.931 | 39.887 | 8.177  | 0.00 | 0.00 |
| ATOM | 7468 | C    | PRO | X | 491 | 45.144 | 37.893 | 9.138  | 0.00 | 0.00 |
| ATOM | 7469 | O    | PRO | X | 491 | 44.698 | 37.124 | 10.014 | 0.00 | 0.00 |
| ATOM | 7470 | N    | LYS | X | 492 | 45.823 | 37.417 | 8.108  | 0.00 | 0.00 |
| ATOM | 7471 | H    | LYS | X | 492 | 46.220 | 38.103 | 7.482  | 0.00 | 0.00 |
| ATOM | 7472 | CA   | LYS | X | 492 | 46.133 | 35.977 | 7.967  | 0.00 | 0.00 |
| ATOM | 7473 | HA   | LYS | X | 492 | 45.226 | 35.376 | 8.024  | 0.00 | 0.00 |
| ATOM | 7474 | CB   | LYS | X | 492 | 46.810 | 35.606 | 6.580  | 0.00 | 0.00 |
| ATOM | 7475 | HB2  | LYS | X | 492 | 47.859 | 35.903 | 6.574  | 0.00 | 0.00 |
| ATOM | 7476 | HB3  | LYS | X | 492 | 46.734 | 34.551 | 6.318  | 0.00 | 0.00 |
| ATOM | 7477 | CG   | LYS | X | 492 | 46.259 | 36.355 | 5.376  | 0.00 | 0.00 |
| ATOM | 7478 | HG2  | LYS | X | 492 | 45.185 | 36.167 | 5.400  | 0.00 | 0.00 |
| ATOM | 7479 | HG3  | LYS | X | 492 | 46.386 | 37.421 | 5.563  | 0.00 | 0.00 |
| ATOM | 7480 | CD   | LYS | X | 492 | 46.899 | 35.871 | 4.032  | 0.00 | 0.00 |
| ATOM | 7481 | HD2  | LYS | X | 492 | 47.927 | 36.218 | 3.933  | 0.00 | 0.00 |
| ATOM | 7482 | HD3  | LYS | X | 492 | 46.917 | 34.783 | 4.102  | 0.00 | 0.00 |
| ATOM | 7483 | CE   | LYS | X | 492 | 46.071 | 36.358 | 2.907  | 0.00 | 0.00 |
| ATOM | 7484 | HE2  | LYS | X | 492 | 45.103 | 35.857 | 2.878  | 0.00 | 0.00 |
| ATOM | 7485 | HE3  | LYS | X | 492 | 45.798 | 37.410 | 2.977  | 0.00 | 0.00 |
| ATOM | 7486 | NZ   | LYS | X | 492 | 46.716 | 36.166 | 1.602  | 0.00 | 0.00 |
| ATOM | 7487 | HZ1  | LYS | X | 492 | 46.826 | 35.208 | 1.302  | 0.00 | 0.00 |
| ATOM | 7488 | HZ2  | LYS | X | 492 | 46.274 | 36.561 | 0.784  | 0.00 | 0.00 |
| ATOM | 7489 | HZ3  | LYS | X | 492 | 47.653 | 36.538 | 1.533  | 0.00 | 0.00 |
| ATOM | 7490 | C    | LYS | X | 492 | 46.900 | 35.415 | 9.197  | 0.00 | 0.00 |
| ATOM | 7491 | O    | LYS | X | 492 | 46.779 | 34.254 | 9.559  | 0.00 | 0.00 |
| ATOM | 7492 | N    | ALA | X | 493 | 47.705 | 36.255 | 9.824  | 0.00 | 0.00 |
| ATOM | 7493 | H    | ALA | X | 493 | 47.941 | 37.071 | 9.277  | 0.00 | 0.00 |
| ATOM | 7494 | CA   | ALA | X | 493 | 48.319 | 36.148 | 11.192 | 0.00 | 0.00 |
| ATOM | 7495 | HA   | ALA | X | 493 | 49.186 | 35.535 | 10.945 | 0.00 | 0.00 |
| ATOM | 7496 | CB   | ALA | X | 493 | 48.919 | 37.546 | 11.582 | 0.00 | 0.00 |
| ATOM | 7497 | HB1  | ALA | X | 493 | 48.132 | 38.294 | 11.484 | 0.00 | 0.00 |
| ATOM | 7498 | HB2  | ALA | X | 493 | 49.371 | 37.632 | 12.571 | 0.00 | 0.00 |
| ATOM | 7499 | HB3  | ALA | X | 493 | 49.688 | 37.801 | 10.853 | 0.00 | 0.00 |
| ATOM | 7500 | C    | ALA | X | 493 | 47.443 | 35.575 | 12.341 | 0.00 | 0.00 |
| ATOM | 7501 | O    | ALA | X | 493 | 46.261 | 35.926 | 12.392 | 0.00 | 0.00 |
| ATOM | 7502 | N    | PRO | X | 494 | 47.997 | 34.697 | 13.269 | 0.00 | 0.00 |
| ATOM | 7503 | CD   | PRO | X | 494 | 49.452 | 34.393 | 13.343 | 0.00 | 0.00 |
| ATOM | 7504 | HD2  | PRO | X | 494 | 49.932 | 35.367 | 13.248 | 0.00 | 0.00 |
| ATOM | 7505 | HD3  | PRO | X | 494 | 49.624 | 33.523 | 12.710 | 0.00 | 0.00 |
| ATOM | 7506 | CG   | PRO | X | 494 | 49.578 | 34.009 | 14.853 | 0.00 | 0.00 |
| ATOM | 7507 | HG2  | PRO | X | 494 | 49.702 | 34.893 | 15.478 | 0.00 | 0.00 |
| ATOM | 7508 | HG3  | PRO | X | 494 | 50.398 | 33.294 | 14.932 | 0.00 | 0.00 |
| ATOM | 7509 | CB   | PRO | X | 494 | 48.223 | 33.328 | 15.190 | 0.00 | 0.00 |
| ATOM | 7510 | HB2  | PRO | X | 494 | 48.102 | 33.238 | 16.270 | 0.00 | 0.00 |
| ATOM | 7511 | HB3  | PRO | X | 494 | 48.345 | 32.356 | 14.712 | 0.00 | 0.00 |
| ATOM | 7512 | CA   | PRO | X | 494 | 47.224 | 34.134 | 14.424 | 0.00 | 0.00 |
| ATOM | 7513 | HA   | PRO | X | 494 | 46.569 | 33.383 | 13.983 | 0.00 | 0.00 |
| ATOM | 7514 | C    | PRO | X | 494 | 46.513 | 35.193 | 15.308 | 0.00 | 0.00 |
| ATOM | 7515 | O    | PRO | X | 494 | 47.112 | 36.227 | 15.646 | 0.00 | 0.00 |
| ATOM | 7516 | N    | GLN | X | 495 | 45.252 | 34.871 | 15.617 | 0.00 | 0.00 |
| ATOM | 7517 | H    | GLN | X | 495 | 44.843 | 34.007 | 15.291 | 0.00 | 0.00 |
| ATOM | 7518 | CA   | GLN | X | 495 | 44.515 | 35.683 | 16.602 | 0.00 | 0.00 |
| ATOM | 7519 | HA   | GLN | X | 495 | 45.157 | 36.390 | 17.130 | 0.00 | 0.00 |
| ATOM | 7520 | CB   | GLN | X | 495 | 43.322 | 36.347 | 16.006 | 0.00 | 0.00 |
| ATOM | 7521 | HB2  | GLN | X | 495 | 42.493 | 35.644 | 15.927 | 0.00 | 0.00 |
| ATOM | 7522 | HB3  | GLN | X | 495 | 42.949 | 37.079 | 16.722 | 0.00 | 0.00 |
| ATOM | 7523 | CG   | GLN | X | 495 | 43.618 | 37.067 | 14.673 | 0.00 | 0.00 |
| ATOM | 7524 | HG2  | GLN | X | 495 | 44.109 | 36.394 | 13.970 | 0.00 | 0.00 |
| ATOM | 7525 | HG3  | GLN | X | 495 | 42.700 | 37.518 | 14.296 | 0.00 | 0.00 |
| ATOM | 7526 | CD   | GLN | X | 495 | 44.587 | 38.263 | 14.777 | 0.00 | 0.00 |
| ATOM | 7527 | OE1  | GLN | X | 495 | 44.439 | 39.110 | 15.646 | 0.00 | 0.00 |
| ATOM | 7528 | NE2  | GLN | X | 495 | 45.659 | 38.255 | 13.974 | 0.00 | 0.00 |
| ATOM | 7529 | HE21 | GLN | X | 495 | 46.303 | 39.030 | 14.051 | 0.00 | 0.00 |
| ATOM | 7530 | HE22 | GLN | X | 495 | 45.819 | 37.520 | 13.300 | 0.00 | 0.00 |
| ATOM | 7531 | C    | GLN | X | 495 | 44.127 | 34.761 | 17.757 | 0.00 | 0.00 |

|      |      |     |     |   |     |        |        |        |      |      |
|------|------|-----|-----|---|-----|--------|--------|--------|------|------|
| ATOM | 7532 | O   | GLN | X | 495 | 43.804 | 33.576 | 17.595 | 0.00 | 0.00 |
| ATOM | 7533 | N   | TRP | X | 496 | 44.143 | 35.337 | 18.956 | 0.00 | 0.00 |
| ATOM | 7534 | H   | TRP | X | 496 | 44.253 | 36.341 | 18.950 | 0.00 | 0.00 |
| ATOM | 7535 | CA  | TRP | X | 496 | 43.773 | 34.722 | 20.293 | 0.00 | 0.00 |
| ATOM | 7536 | HA  | TRP | X | 496 | 44.328 | 33.801 | 20.469 | 0.00 | 0.00 |
| ATOM | 7537 | CB  | TRP | X | 496 | 44.320 | 35.553 | 21.473 | 0.00 | 0.00 |
| ATOM | 7538 | HB2 | TRP | X | 496 | 45.409 | 35.535 | 21.429 | 0.00 | 0.00 |
| ATOM | 7539 | HB3 | TRP | X | 496 | 43.977 | 36.583 | 21.377 | 0.00 | 0.00 |
| ATOM | 7540 | CG  | TRP | X | 496 | 44.021 | 35.278 | 22.888 | 0.00 | 0.00 |
| ATOM | 7541 | CD1 | TRP | X | 496 | 43.045 | 34.389 | 23.345 | 0.00 | 0.00 |
| ATOM | 7542 | HD1 | TRP | X | 496 | 42.409 | 33.696 | 22.814 | 0.00 | 0.00 |
| ATOM | 7543 | NE1 | TRP | X | 496 | 43.134 | 34.479 | 24.745 | 0.00 | 0.00 |
| ATOM | 7544 | HE1 | TRP | X | 496 | 42.673 | 33.802 | 25.336 | 0.00 | 0.00 |
| ATOM | 7545 | CE2 | TRP | X | 496 | 43.926 | 35.417 | 25.234 | 0.00 | 0.00 |
| ATOM | 7546 | CZ2 | TRP | X | 496 | 44.169 | 35.937 | 26.512 | 0.00 | 0.00 |
| ATOM | 7547 | HZ2 | TRP | X | 496 | 43.572 | 35.629 | 27.358 | 0.00 | 0.00 |
| ATOM | 7548 | CH2 | TRP | X | 496 | 45.362 | 36.724 | 26.677 | 0.00 | 0.00 |
| ATOM | 7549 | HH2 | TRP | X | 496 | 45.609 | 36.941 | 27.706 | 0.00 | 0.00 |
| ATOM | 7550 | CZ3 | TRP | X | 496 | 46.102 | 37.200 | 25.530 | 0.00 | 0.00 |
| ATOM | 7551 | HZ3 | TRP | X | 496 | 46.913 | 37.884 | 25.736 | 0.00 | 0.00 |
| ATOM | 7552 | CE3 | TRP | X | 496 | 45.650 | 36.776 | 24.259 | 0.00 | 0.00 |
| ATOM | 7553 | HE3 | TRP | X | 496 | 46.104 | 37.226 | 23.388 | 0.00 | 0.00 |
| ATOM | 7554 | CD2 | TRP | X | 496 | 44.613 | 35.900 | 24.053 | 0.00 | 0.00 |
| ATOM | 7555 | C   | TRP | X | 496 | 42.220 | 34.475 | 20.354 | 0.00 | 0.00 |
| ATOM | 7556 | O   | TRP | X | 496 | 41.512 | 35.463 | 20.503 | 0.00 | 0.00 |
| ATOM | 7557 | N   | PRO | X | 497 | 41.754 | 33.212 | 20.311 | 0.00 | 0.00 |
| ATOM | 7558 | CD  | PRO | X | 497 | 42.431 | 31.956 | 20.177 | 0.00 | 0.00 |
| ATOM | 7559 | HD2 | PRO | X | 497 | 42.925 | 31.667 | 21.105 | 0.00 | 0.00 |
| ATOM | 7560 | HD3 | PRO | X | 497 | 43.040 | 32.006 | 19.275 | 0.00 | 0.00 |
| ATOM | 7561 | CG  | PRO | X | 497 | 41.378 | 30.862 | 19.974 | 0.00 | 0.00 |
| ATOM | 7562 | HG2 | PRO | X | 497 | 41.118 | 30.520 | 20.975 | 0.00 | 0.00 |
| ATOM | 7563 | HG3 | PRO | X | 497 | 41.734 | 30.090 | 19.292 | 0.00 | 0.00 |
| ATOM | 7564 | CB  | PRO | X | 497 | 40.187 | 31.681 | 19.513 | 0.00 | 0.00 |
| ATOM | 7565 | HB2 | PRO | X | 497 | 39.266 | 31.115 | 19.654 | 0.00 | 0.00 |
| ATOM | 7566 | HB3 | PRO | X | 497 | 40.339 | 31.788 | 18.439 | 0.00 | 0.00 |
| ATOM | 7567 | CA  | PRO | X | 497 | 40.294 | 32.987 | 20.242 | 0.00 | 0.00 |
| ATOM | 7568 | HA  | PRO | X | 497 | 39.860 | 33.725 | 19.567 | 0.00 | 0.00 |
| ATOM | 7569 | C   | PRO | X | 497 | 39.506 | 32.959 | 21.507 | 0.00 | 0.00 |
| ATOM | 7570 | O   | PRO | X | 497 | 40.067 | 32.820 | 22.590 | 0.00 | 0.00 |
| ATOM | 7571 | N   | PRO | X | 498 | 38.140 | 33.067 | 21.422 | 0.00 | 0.00 |
| ATOM | 7572 | CD  | PRO | X | 498 | 37.383 | 33.240 | 20.220 | 0.00 | 0.00 |
| ATOM | 7573 | HD2 | PRO | X | 498 | 37.335 | 32.341 | 19.605 | 0.00 | 0.00 |
| ATOM | 7574 | HD3 | PRO | X | 498 | 37.767 | 34.052 | 19.602 | 0.00 | 0.00 |
| ATOM | 7575 | CG  | PRO | X | 498 | 35.925 | 33.555 | 20.662 | 0.00 | 0.00 |
| ATOM | 7576 | HG2 | PRO | X | 498 | 35.250 | 32.733 | 20.420 | 0.00 | 0.00 |
| ATOM | 7577 | HG3 | PRO | X | 498 | 35.598 | 34.505 | 20.241 | 0.00 | 0.00 |
| ATOM | 7578 | CB  | PRO | X | 498 | 35.925 | 33.775 | 22.116 | 0.00 | 0.00 |
| ATOM | 7579 | HB2 | PRO | X | 498 | 35.084 | 33.208 | 22.515 | 0.00 | 0.00 |
| ATOM | 7580 | HB3 | PRO | X | 498 | 35.941 | 34.843 | 22.335 | 0.00 | 0.00 |
| ATOM | 7581 | CA  | PRO | X | 498 | 37.258 | 33.268 | 22.605 | 0.00 | 0.00 |
| ATOM | 7582 | HA  | PRO | X | 498 | 37.694 | 33.963 | 23.323 | 0.00 | 0.00 |
| ATOM | 7583 | C   | PRO | X | 498 | 37.066 | 31.980 | 23.486 | 0.00 | 0.00 |
| ATOM | 7584 | O   | PRO | X | 498 | 37.196 | 30.824 | 23.041 | 0.00 | 0.00 |
| ATOM | 7585 | N   | TYR | X | 499 | 36.751 | 32.201 | 24.815 | 0.00 | 0.00 |
| ATOM | 7586 | H   | TYR | X | 499 | 36.772 | 33.187 | 25.035 | 0.00 | 0.00 |
| ATOM | 7587 | CA  | TYR | X | 499 | 36.464 | 31.192 | 25.877 | 0.00 | 0.00 |
| ATOM | 7588 | HA  | TYR | X | 499 | 36.809 | 30.191 | 25.618 | 0.00 | 0.00 |
| ATOM | 7589 | CB  | TYR | X | 499 | 37.156 | 31.542 | 27.187 | 0.00 | 0.00 |
| ATOM | 7590 | HB2 | TYR | X | 499 | 38.202 | 31.759 | 26.973 | 0.00 | 0.00 |
| ATOM | 7591 | HB3 | TYR | X | 499 | 36.743 | 32.466 | 27.591 | 0.00 | 0.00 |
| ATOM | 7592 | CG  | TYR | X | 499 | 37.104 | 30.528 | 28.284 | 0.00 | 0.00 |
| ATOM | 7593 | CD1 | TYR | X | 499 | 36.017 | 30.300 | 29.126 | 0.00 | 0.00 |
| ATOM | 7594 | HD1 | TYR | X | 499 | 35.131 | 30.852 | 28.851 | 0.00 | 0.00 |
| ATOM | 7595 | CE1 | TYR | X | 499 | 36.133 | 29.677 | 30.398 | 0.00 | 0.00 |
| ATOM | 7596 | HE1 | TYR | X | 499 | 35.335 | 29.682 | 31.125 | 0.00 | 0.00 |
| ATOM | 7597 | CZ  | TYR | X | 499 | 37.309 | 28.978 | 30.707 | 0.00 | 0.00 |
| ATOM | 7598 | OH  | TYR | X | 499 | 37.412 | 28.185 | 31.808 | 0.00 | 0.00 |
| ATOM | 7599 | HH  | TYR | X | 499 | 36.556 | 28.079 | 32.228 | 0.00 | 0.00 |
| ATOM | 7600 | CE2 | TYR | X | 499 | 38.293 | 28.903 | 29.705 | 0.00 | 0.00 |
| ATOM | 7601 | HE2 | TYR | X | 499 | 39.161 | 28.265 | 29.793 | 0.00 | 0.00 |

|      |      |      |     |   |     |        |        |        |      |      |
|------|------|------|-----|---|-----|--------|--------|--------|------|------|
| ATOM | 7602 | CD2  | TYR | X | 499 | 38.229 | 29.735 | 28.596 | 0.00 | 0.00 |
| ATOM | 7603 | HD2  | TYR | X | 499 | 39.054 | 29.785 | 27.900 | 0.00 | 0.00 |
| ATOM | 7604 | C    | TYR | X | 499 | 34.978 | 31.149 | 26.113 | 0.00 | 0.00 |
| ATOM | 7605 | O    | TYR | X | 499 | 34.340 | 32.131 | 26.518 | 0.00 | 0.00 |
| ATOM | 7606 | N    | THR | X | 500 | 34.333 | 30.005 | 25.812 | 0.00 | 0.00 |
| ATOM | 7607 | H    | THR | X | 500 | 34.892 | 29.213 | 25.530 | 0.00 | 0.00 |
| ATOM | 7608 | CA   | THR | X | 500 | 32.867 | 29.793 | 26.020 | 0.00 | 0.00 |
| ATOM | 7609 | HA   | THR | X | 500 | 32.472 | 30.769 | 26.302 | 0.00 | 0.00 |
| ATOM | 7610 | CB   | THR | X | 500 | 32.223 | 29.229 | 24.701 | 0.00 | 0.00 |
| ATOM | 7611 | HB   | THR | X | 500 | 31.148 | 29.199 | 24.877 | 0.00 | 0.00 |
| ATOM | 7612 | CG2  | THR | X | 500 | 32.471 | 30.025 | 23.399 | 0.00 | 0.00 |
| ATOM | 7613 | HG21 | THR | X | 500 | 32.058 | 29.383 | 22.621 | 0.00 | 0.00 |
| ATOM | 7614 | HG22 | THR | X | 500 | 31.906 | 30.953 | 23.492 | 0.00 | 0.00 |
| ATOM | 7615 | HG23 | THR | X | 500 | 33.522 | 30.171 | 23.152 | 0.00 | 0.00 |
| ATOM | 7616 | OG1  | THR | X | 500 | 32.686 | 27.910 | 24.605 | 0.00 | 0.00 |
| ATOM | 7617 | HG1  | THR | X | 500 | 32.388 | 27.601 | 23.746 | 0.00 | 0.00 |
| ATOM | 7618 | C    | THR | X | 500 | 32.694 | 28.757 | 27.174 | 0.00 | 0.00 |
| ATOM | 7619 | O    | THR | X | 500 | 33.554 | 27.988 | 27.472 | 0.00 | 0.00 |
| ATOM | 7620 | N    | ALA | X | 501 | 31.555 | 28.876 | 27.865 | 0.00 | 0.00 |
| ATOM | 7621 | H    | ALA | X | 501 | 30.954 | 29.664 | 27.671 | 0.00 | 0.00 |
| ATOM | 7622 | CA   | ALA | X | 501 | 31.277 | 28.061 | 29.097 | 0.00 | 0.00 |
| ATOM | 7623 | HA   | ALA | X | 501 | 32.032 | 28.446 | 29.783 | 0.00 | 0.00 |
| ATOM | 7624 | CB   | ALA | X | 501 | 29.933 | 28.498 | 29.645 | 0.00 | 0.00 |
| ATOM | 7625 | HB1  | ALA | X | 501 | 29.607 | 28.042 | 30.580 | 0.00 | 0.00 |
| ATOM | 7626 | HB2  | ALA | X | 501 | 29.853 | 29.579 | 29.754 | 0.00 | 0.00 |
| ATOM | 7627 | HB3  | ALA | X | 501 | 29.148 | 28.224 | 28.940 | 0.00 | 0.00 |
| ATOM | 7628 | C    | ALA | X | 501 | 31.436 | 26.564 | 28.989 | 0.00 | 0.00 |
| ATOM | 7629 | O    | ALA | X | 501 | 31.946 | 26.007 | 29.928 | 0.00 | 0.00 |
| ATOM | 7630 | N    | GLY | X | 502 | 31.177 | 25.886 | 27.920 | 0.00 | 0.00 |
| ATOM | 7631 | H    | GLY | X | 502 | 30.830 | 26.362 | 27.099 | 0.00 | 0.00 |
| ATOM | 7632 | CA   | GLY | X | 502 | 31.451 | 24.439 | 27.732 | 0.00 | 0.00 |
| ATOM | 7633 | HA2  | GLY | X | 502 | 31.187 | 23.923 | 28.664 | 0.00 | 0.00 |
| ATOM | 7634 | HA3  | GLY | X | 502 | 30.741 | 23.872 | 27.076 | 0.00 | 0.00 |
| ATOM | 7635 | C    | GLY | X | 502 | 32.827 | 24.179 | 27.252 | 0.00 | 0.00 |
| ATOM | 7636 | O    | GLY | X | 502 | 33.538 | 23.435 | 27.908 | 0.00 | 0.00 |
| ATOM | 7637 | N    | ALA | X | 503 | 33.300 | 24.748 | 26.131 | 0.00 | 0.00 |
| ATOM | 7638 | H    | ALA | X | 503 | 32.663 | 25.374 | 25.659 | 0.00 | 0.00 |
| ATOM | 7639 | CA   | ALA | X | 503 | 34.559 | 24.376 | 25.529 | 0.00 | 0.00 |
| ATOM | 7640 | HA   | ALA | X | 503 | 34.633 | 23.289 | 25.498 | 0.00 | 0.00 |
| ATOM | 7641 | CB   | ALA | X | 503 | 34.549 | 24.813 | 24.114 | 0.00 | 0.00 |
| ATOM | 7642 | HB1  | ALA | X | 503 | 35.447 | 24.337 | 23.722 | 0.00 | 0.00 |
| ATOM | 7643 | HB2  | ALA | X | 503 | 33.627 | 24.433 | 23.673 | 0.00 | 0.00 |
| ATOM | 7644 | HB3  | ALA | X | 503 | 34.505 | 25.898 | 24.024 | 0.00 | 0.00 |
| ATOM | 7645 | C    | ALA | X | 503 | 35.817 | 24.976 | 26.214 | 0.00 | 0.00 |
| ATOM | 7646 | O    | ALA | X | 503 | 36.915 | 24.348 | 26.120 | 0.00 | 0.00 |
| ATOM | 7647 | N    | GLN | X | 504 | 35.760 | 26.103 | 26.949 | 0.00 | 0.00 |
| ATOM | 7648 | H    | GLN | X | 504 | 34.864 | 26.569 | 26.921 | 0.00 | 0.00 |
| ATOM | 7649 | CA   | GLN | X | 504 | 36.726 | 26.597 | 27.866 | 0.00 | 0.00 |
| ATOM | 7650 | HA   | GLN | X | 504 | 36.397 | 27.560 | 28.258 | 0.00 | 0.00 |
| ATOM | 7651 | CB   | GLN | X | 504 | 36.713 | 25.763 | 29.188 | 0.00 | 0.00 |
| ATOM | 7652 | HB2  | GLN | X | 504 | 36.994 | 24.743 | 28.927 | 0.00 | 0.00 |
| ATOM | 7653 | HB3  | GLN | X | 504 | 37.513 | 26.137 | 29.827 | 0.00 | 0.00 |
| ATOM | 7654 | CG   | GLN | X | 504 | 35.292 | 25.958 | 29.907 | 0.00 | 0.00 |
| ATOM | 7655 | HG2  | GLN | X | 504 | 35.220 | 26.958 | 30.336 | 0.00 | 0.00 |
| ATOM | 7656 | HG3  | GLN | X | 504 | 34.528 | 25.878 | 29.135 | 0.00 | 0.00 |
| ATOM | 7657 | CD   | GLN | X | 504 | 35.030 | 25.059 | 31.096 | 0.00 | 0.00 |
| ATOM | 7658 | OE1  | GLN | X | 504 | 35.961 | 24.391 | 31.610 | 0.00 | 0.00 |
| ATOM | 7659 | NE2  | GLN | X | 504 | 33.808 | 24.951 | 31.484 | 0.00 | 0.00 |
| ATOM | 7660 | HE21 | GLN | X | 504 | 33.521 | 24.219 | 32.117 | 0.00 | 0.00 |
| ATOM | 7661 | HE22 | GLN | X | 504 | 33.097 | 25.372 | 30.904 | 0.00 | 0.00 |
| ATOM | 7662 | C    | GLN | X | 504 | 38.118 | 26.616 | 27.214 | 0.00 | 0.00 |
| ATOM | 7663 | O    | GLN | X | 504 | 39.138 | 26.090 | 27.682 | 0.00 | 0.00 |
| ATOM | 7664 | N    | GLN | X | 505 | 38.217 | 27.254 | 26.068 | 0.00 | 0.00 |
| ATOM | 7665 | H    | GLN | X | 505 | 37.396 | 27.652 | 25.635 | 0.00 | 0.00 |
| ATOM | 7666 | CA   | GLN | X | 505 | 39.341 | 27.345 | 25.114 | 0.00 | 0.00 |
| ATOM | 7667 | HA   | GLN | X | 505 | 39.867 | 26.395 | 25.021 | 0.00 | 0.00 |
| ATOM | 7668 | CB   | GLN | X | 505 | 38.811 | 27.690 | 23.741 | 0.00 | 0.00 |
| ATOM | 7669 | HB2  | GLN | X | 505 | 38.071 | 26.928 | 23.496 | 0.00 | 0.00 |
| ATOM | 7670 | HB3  | GLN | X | 505 | 38.224 | 28.605 | 23.814 | 0.00 | 0.00 |
| ATOM | 7671 | CG   | GLN | X | 505 | 39.936 | 27.769 | 22.699 | 0.00 | 0.00 |

|      |      |      |     |   |     |        |        |        |      |      |
|------|------|------|-----|---|-----|--------|--------|--------|------|------|
| ATOM | 7672 | HG2  | GLN | X | 505 | 40.528 | 28.653 | 22.937 | 0.00 | 0.00 |
| ATOM | 7673 | HG3  | GLN | X | 505 | 40.615 | 26.920 | 22.624 | 0.00 | 0.00 |
| ATOM | 7674 | CD   | GLN | X | 505 | 39.251 | 27.854 | 21.358 | 0.00 | 0.00 |
| ATOM | 7675 | OE1  | GLN | X | 505 | 39.450 | 27.034 | 20.500 | 0.00 | 0.00 |
| ATOM | 7676 | NE2  | GLN | X | 505 | 38.685 | 28.962 | 21.033 | 0.00 | 0.00 |
| ATOM | 7677 | HE21 | GLN | X | 505 | 38.355 | 29.002 | 20.079 | 0.00 | 0.00 |
| ATOM | 7678 | HE22 | GLN | X | 505 | 38.566 | 29.700 | 21.712 | 0.00 | 0.00 |
| ATOM | 7679 | C    | GLN | X | 505 | 40.281 | 28.432 | 25.626 | 0.00 | 0.00 |
| ATOM | 7680 | O    | GLN | X | 505 | 39.956 | 29.575 | 25.686 | 0.00 | 0.00 |
| ATOM | 7681 | N    | TYR | X | 506 | 41.512 | 28.123 | 25.880 | 0.00 | 0.00 |
| ATOM | 7682 | H    | TYR | X | 506 | 41.821 | 27.168 | 25.774 | 0.00 | 0.00 |
| ATOM | 7683 | CA   | TYR | X | 506 | 42.584 | 28.962 | 26.453 | 0.00 | 0.00 |
| ATOM | 7684 | HA   | TYR | X | 506 | 42.176 | 29.972 | 26.499 | 0.00 | 0.00 |
| ATOM | 7685 | CB   | TYR | X | 506 | 42.886 | 28.453 | 27.847 | 0.00 | 0.00 |
| ATOM | 7686 | HB2  | TYR | X | 506 | 43.443 | 29.245 | 28.348 | 0.00 | 0.00 |
| ATOM | 7687 | HB3  | TYR | X | 506 | 41.995 | 28.283 | 28.452 | 0.00 | 0.00 |
| ATOM | 7688 | CG   | TYR | X | 506 | 43.633 | 27.146 | 27.943 | 0.00 | 0.00 |
| ATOM | 7689 | CD1  | TYR | X | 506 | 42.999 | 25.973 | 27.741 | 0.00 | 0.00 |
| ATOM | 7690 | HD1  | TYR | X | 506 | 41.977 | 25.924 | 27.396 | 0.00 | 0.00 |
| ATOM | 7691 | CE1  | TYR | X | 506 | 43.685 | 24.803 | 28.089 | 0.00 | 0.00 |
| ATOM | 7692 | HE1  | TYR | X | 506 | 43.171 | 23.902 | 27.788 | 0.00 | 0.00 |
| ATOM | 7693 | CZ   | TYR | X | 506 | 44.938 | 24.748 | 28.641 | 0.00 | 0.00 |
| ATOM | 7694 | OH   | TYR | X | 506 | 45.551 | 23.615 | 29.012 | 0.00 | 0.00 |
| ATOM | 7695 | HH   | TYR | X | 506 | 46.445 | 23.789 | 29.316 | 0.00 | 0.00 |
| ATOM | 7696 | CE2  | TYR | X | 506 | 45.576 | 25.967 | 28.847 | 0.00 | 0.00 |
| ATOM | 7697 | HE2  | TYR | X | 506 | 46.570 | 25.931 | 29.267 | 0.00 | 0.00 |
| ATOM | 7698 | CD2  | TYR | X | 506 | 44.924 | 27.168 | 28.576 | 0.00 | 0.00 |
| ATOM | 7699 | HD2  | TYR | X | 506 | 45.460 | 28.095 | 28.716 | 0.00 | 0.00 |
| ATOM | 7700 | C    | TYR | X | 506 | 43.843 | 29.006 | 25.588 | 0.00 | 0.00 |
| ATOM | 7701 | O    | TYR | X | 506 | 44.141 | 27.991 | 25.030 | 0.00 | 0.00 |
| ATOM | 7702 | N    | VAL | X | 507 | 44.597 | 30.116 | 25.498 | 0.00 | 0.00 |
| ATOM | 7703 | H    | VAL | X | 507 | 44.266 | 30.900 | 26.042 | 0.00 | 0.00 |
| ATOM | 7704 | CA   | VAL | X | 507 | 45.894 | 30.114 | 24.790 | 0.00 | 0.00 |
| ATOM | 7705 | HA   | VAL | X | 507 | 45.847 | 29.256 | 24.120 | 0.00 | 0.00 |
| ATOM | 7706 | CB   | VAL | X | 507 | 46.127 | 31.370 | 23.893 | 0.00 | 0.00 |
| ATOM | 7707 | HB   | VAL | X | 507 | 47.129 | 31.314 | 23.468 | 0.00 | 0.00 |
| ATOM | 7708 | CG1  | VAL | X | 507 | 45.011 | 31.454 | 22.815 | 0.00 | 0.00 |
| ATOM | 7709 | HG11 | VAL | X | 507 | 45.220 | 30.658 | 22.101 | 0.00 | 0.00 |
| ATOM | 7710 | HG12 | VAL | X | 507 | 44.047 | 31.223 | 23.269 | 0.00 | 0.00 |
| ATOM | 7711 | HG13 | VAL | X | 507 | 45.002 | 32.401 | 22.275 | 0.00 | 0.00 |
| ATOM | 7712 | CG2  | VAL | X | 507 | 46.005 | 32.678 | 24.705 | 0.00 | 0.00 |
| ATOM | 7713 | HG21 | VAL | X | 507 | 46.815 | 32.624 | 25.431 | 0.00 | 0.00 |
| ATOM | 7714 | HG22 | VAL | X | 507 | 45.906 | 33.588 | 24.113 | 0.00 | 0.00 |
| ATOM | 7715 | HG23 | VAL | X | 507 | 45.042 | 32.630 | 25.212 | 0.00 | 0.00 |
| ATOM | 7716 | C    | VAL | X | 507 | 47.072 | 30.005 | 25.812 | 0.00 | 0.00 |
| ATOM | 7717 | O    | VAL | X | 507 | 46.987 | 30.511 | 26.912 | 0.00 | 0.00 |
| ATOM | 7718 | N    | SER | X | 508 | 48.173 | 29.321 | 25.390 | 0.00 | 0.00 |
| ATOM | 7719 | H    | SER | X | 508 | 47.996 | 29.097 | 24.421 | 0.00 | 0.00 |
| ATOM | 7720 | CA   | SER | X | 508 | 49.500 | 29.545 | 25.931 | 0.00 | 0.00 |
| ATOM | 7721 | HA   | SER | X | 508 | 49.494 | 29.826 | 26.984 | 0.00 | 0.00 |
| ATOM | 7722 | CB   | SER | X | 508 | 50.510 | 28.357 | 25.780 | 0.00 | 0.00 |
| ATOM | 7723 | HB2  | SER | X | 508 | 50.068 | 27.436 | 26.162 | 0.00 | 0.00 |
| ATOM | 7724 | HB3  | SER | X | 508 | 50.782 | 28.179 | 24.739 | 0.00 | 0.00 |
| ATOM | 7725 | OG   | SER | X | 508 | 51.705 | 28.649 | 26.466 | 0.00 | 0.00 |
| ATOM | 7726 | HG   | SER | X | 508 | 52.202 | 27.856 | 26.678 | 0.00 | 0.00 |
| ATOM | 7727 | C    | SER | X | 508 | 50.122 | 30.862 | 25.381 | 0.00 | 0.00 |
| ATOM | 7728 | O    | SER | X | 508 | 50.187 | 31.151 | 24.168 | 0.00 | 0.00 |
| ATOM | 7729 | N    | LEU | X | 509 | 50.624 | 31.697 | 26.283 | 0.00 | 0.00 |
| ATOM | 7730 | H    | LEU | X | 509 | 50.583 | 31.312 | 27.216 | 0.00 | 0.00 |
| ATOM | 7731 | CA   | LEU | X | 509 | 51.598 | 32.695 | 26.101 | 0.00 | 0.00 |
| ATOM | 7732 | HA   | LEU | X | 509 | 51.645 | 33.060 | 25.075 | 0.00 | 0.00 |
| ATOM | 7733 | CB   | LEU | X | 509 | 51.142 | 33.890 | 26.930 | 0.00 | 0.00 |
| ATOM | 7734 | HB2  | LEU | X | 509 | 51.166 | 33.476 | 27.938 | 0.00 | 0.00 |
| ATOM | 7735 | HB3  | LEU | X | 509 | 51.882 | 34.688 | 26.886 | 0.00 | 0.00 |
| ATOM | 7736 | CG   | LEU | X | 509 | 49.661 | 34.375 | 26.561 | 0.00 | 0.00 |
| ATOM | 7737 | HG   | LEU | X | 509 | 48.916 | 33.583 | 26.635 | 0.00 | 0.00 |
| ATOM | 7738 | CD1  | LEU | X | 509 | 49.196 | 35.418 | 27.598 | 0.00 | 0.00 |
| ATOM | 7739 | HD11 | LEU | X | 509 | 49.865 | 36.251 | 27.814 | 0.00 | 0.00 |
| ATOM | 7740 | HD12 | LEU | X | 509 | 48.276 | 35.888 | 27.250 | 0.00 | 0.00 |
| ATOM | 7741 | HD13 | LEU | X | 509 | 49.045 | 34.797 | 28.481 | 0.00 | 0.00 |

|      |      |      |     |   |     |        |        |        |      |      |
|------|------|------|-----|---|-----|--------|--------|--------|------|------|
| ATOM | 7742 | CD2  | LEU | X | 509 | 49.547 | 34.932 | 25.111 | 0.00 | 0.00 |
| ATOM | 7743 | HD21 | LEU | X | 509 | 50.259 | 35.749 | 25.000 | 0.00 | 0.00 |
| ATOM | 7744 | HD22 | LEU | X | 509 | 49.819 | 34.164 | 24.387 | 0.00 | 0.00 |
| ATOM | 7745 | HD23 | LEU | X | 509 | 48.510 | 35.228 | 24.951 | 0.00 | 0.00 |
| ATOM | 7746 | C    | LEU | X | 509 | 52.964 | 32.223 | 26.510 | 0.00 | 0.00 |
| ATOM | 7747 | O    | LEU | X | 509 | 53.241 | 31.814 | 27.637 | 0.00 | 0.00 |
| ATOM | 7748 | N    | ASP | X | 510 | 53.854 | 32.489 | 25.568 | 0.00 | 0.00 |
| ATOM | 7749 | H    | ASP | X | 510 | 53.495 | 32.883 | 24.710 | 0.00 | 0.00 |
| ATOM | 7750 | CA   | ASP | X | 510 | 55.198 | 32.122 | 25.607 | 0.00 | 0.00 |
| ATOM | 7751 | HA   | ASP | X | 510 | 55.601 | 32.521 | 26.538 | 0.00 | 0.00 |
| ATOM | 7752 | CB   | ASP | X | 510 | 55.347 | 30.479 | 25.552 | 0.00 | 0.00 |
| ATOM | 7753 | HB2  | ASP | X | 510 | 54.709 | 30.152 | 26.374 | 0.00 | 0.00 |
| ATOM | 7754 | HB3  | ASP | X | 510 | 54.898 | 30.091 | 24.638 | 0.00 | 0.00 |
| ATOM | 7755 | CG   | ASP | X | 510 | 56.758 | 29.925 | 25.530 | 0.00 | 0.00 |
| ATOM | 7756 | OD1  | ASP | X | 510 | 57.570 | 30.234 | 26.443 | 0.00 | 0.00 |
| ATOM | 7757 | OD2  | ASP | X | 510 | 57.100 | 29.212 | 24.634 | 0.00 | 0.00 |
| ATOM | 7758 | C    | ASP | X | 510 | 55.943 | 32.887 | 24.431 | 0.00 | 0.00 |
| ATOM | 7759 | O    | ASP | X | 510 | 55.311 | 33.609 | 23.625 | 0.00 | 0.00 |
| ATOM | 7760 | N    | LEU | X | 511 | 57.250 | 32.781 | 24.405 | 0.00 | 0.00 |
| ATOM | 7761 | H    | LEU | X | 511 | 57.690 | 32.382 | 25.222 | 0.00 | 0.00 |
| ATOM | 7762 | CA   | LEU | X | 511 | 58.086 | 33.364 | 23.283 | 0.00 | 0.00 |
| ATOM | 7763 | HA   | LEU | X | 511 | 57.905 | 34.438 | 23.256 | 0.00 | 0.00 |
| ATOM | 7764 | CB   | LEU | X | 511 | 59.571 | 32.925 | 23.484 | 0.00 | 0.00 |
| ATOM | 7765 | HB2  | LEU | X | 511 | 59.496 | 31.844 | 23.607 | 0.00 | 0.00 |
| ATOM | 7766 | HB3  | LEU | X | 511 | 60.111 | 33.159 | 22.567 | 0.00 | 0.00 |
| ATOM | 7767 | CG   | LEU | X | 511 | 60.366 | 33.565 | 24.616 | 0.00 | 0.00 |
| ATOM | 7768 | HG   | LEU | X | 511 | 59.828 | 33.215 | 25.498 | 0.00 | 0.00 |
| ATOM | 7769 | CD1  | LEU | X | 511 | 61.745 | 32.970 | 24.746 | 0.00 | 0.00 |
| ATOM | 7770 | HD11 | LEU | X | 511 | 62.182 | 33.567 | 25.546 | 0.00 | 0.00 |
| ATOM | 7771 | HD12 | LEU | X | 511 | 61.683 | 31.910 | 24.990 | 0.00 | 0.00 |
| ATOM | 7772 | HD13 | LEU | X | 511 | 62.331 | 33.133 | 23.841 | 0.00 | 0.00 |
| ATOM | 7773 | CD2  | LEU | X | 511 | 60.335 | 35.091 | 24.548 | 0.00 | 0.00 |
| ATOM | 7774 | HD21 | LEU | X | 511 | 60.973 | 35.545 | 25.307 | 0.00 | 0.00 |
| ATOM | 7775 | HD22 | LEU | X | 511 | 60.786 | 35.428 | 23.615 | 0.00 | 0.00 |
| ATOM | 7776 | HD23 | LEU | X | 511 | 59.385 | 35.572 | 24.780 | 0.00 | 0.00 |
| ATOM | 7777 | C    | LEU | X | 511 | 57.531 | 32.918 | 21.987 | 0.00 | 0.00 |
| ATOM | 7778 | O    | LEU | X | 511 | 57.677 | 33.546 | 20.896 | 0.00 | 0.00 |
| ATOM | 7779 | N    | ARG | X | 512 | 57.044 | 31.713 | 21.925 | 0.00 | 0.00 |
| ATOM | 7780 | H    | ARG | X | 512 | 56.757 | 31.381 | 22.835 | 0.00 | 0.00 |
| ATOM | 7781 | CA   | ARG | X | 512 | 56.498 | 31.110 | 20.736 | 0.00 | 0.00 |
| ATOM | 7782 | HA   | ARG | X | 512 | 57.310 | 30.990 | 20.019 | 0.00 | 0.00 |
| ATOM | 7783 | CB   | ARG | X | 512 | 56.233 | 29.583 | 21.060 | 0.00 | 0.00 |
| ATOM | 7784 | HB2  | ARG | X | 512 | 55.523 | 29.481 | 21.880 | 0.00 | 0.00 |
| ATOM | 7785 | HB3  | ARG | X | 512 | 55.725 | 29.253 | 20.154 | 0.00 | 0.00 |
| ATOM | 7786 | CG   | ARG | X | 512 | 57.494 | 28.724 | 21.324 | 0.00 | 0.00 |
| ATOM | 7787 | HG2  | ARG | X | 512 | 58.018 | 28.626 | 20.374 | 0.00 | 0.00 |
| ATOM | 7788 | HG3  | ARG | X | 512 | 58.219 | 29.165 | 22.009 | 0.00 | 0.00 |
| ATOM | 7789 | CD   | ARG | X | 512 | 57.008 | 27.283 | 21.648 | 0.00 | 0.00 |
| ATOM | 7790 | HD2  | ARG | X | 512 | 56.369 | 27.411 | 22.522 | 0.00 | 0.00 |
| ATOM | 7791 | HD3  | ARG | X | 512 | 56.385 | 26.855 | 20.863 | 0.00 | 0.00 |
| ATOM | 7792 | NE   | ARG | X | 512 | 58.095 | 26.360 | 22.005 | 0.00 | 0.00 |
| ATOM | 7793 | HE   | ARG | X | 512 | 58.438 | 25.860 | 21.198 | 0.00 | 0.00 |
| ATOM | 7794 | CZ   | ARG | X | 512 | 58.536 | 26.107 | 23.206 | 0.00 | 0.00 |
| ATOM | 7795 | NH1  | ARG | X | 512 | 58.040 | 26.673 | 24.328 | 0.00 | 0.00 |
| ATOM | 7796 | HH11 | ARG | X | 512 | 57.499 | 27.523 | 24.261 | 0.00 | 0.00 |
| ATOM | 7797 | HH12 | ARG | X | 512 | 58.346 | 26.307 | 25.218 | 0.00 | 0.00 |
| ATOM | 7798 | NH2  | ARG | X | 512 | 59.429 | 25.165 | 23.350 | 0.00 | 0.00 |
| ATOM | 7799 | HH21 | ARG | X | 512 | 59.812 | 24.752 | 22.512 | 0.00 | 0.00 |
| ATOM | 7800 | HH22 | ARG | X | 512 | 59.919 | 24.954 | 24.208 | 0.00 | 0.00 |
| ATOM | 7801 | C    | ARG | X | 512 | 55.260 | 31.900 | 20.328 | 0.00 | 0.00 |
| ATOM | 7802 | O    | ARG | X | 512 | 54.646 | 32.650 | 21.085 | 0.00 | 0.00 |
| ATOM | 7803 | N    | PRO | X | 513 | 54.674 | 31.653 | 19.137 | 0.00 | 0.00 |
| ATOM | 7804 | CD   | PRO | X | 513 | 55.327 | 30.975 | 18.006 | 0.00 | 0.00 |
| ATOM | 7805 | HD2  | PRO | X | 513 | 55.811 | 30.049 | 18.316 | 0.00 | 0.00 |
| ATOM | 7806 | HD3  | PRO | X | 513 | 56.141 | 31.486 | 17.491 | 0.00 | 0.00 |
| ATOM | 7807 | CG   | PRO | X | 513 | 54.262 | 30.769 | 16.906 | 0.00 | 0.00 |
| ATOM | 7808 | HG2  | PRO | X | 513 | 53.692 | 29.864 | 17.119 | 0.00 | 0.00 |
| ATOM | 7809 | HG3  | PRO | X | 513 | 54.682 | 30.722 | 15.901 | 0.00 | 0.00 |
| ATOM | 7810 | CB   | PRO | X | 513 | 53.345 | 31.949 | 17.106 | 0.00 | 0.00 |
| ATOM | 7811 | HB2  | PRO | X | 513 | 52.372 | 31.734 | 16.665 | 0.00 | 0.00 |

|      |      |      |     |   |     |        |        |        |      |      |
|------|------|------|-----|---|-----|--------|--------|--------|------|------|
| ATOM | 7812 | HB3  | PRO | X | 513 | 53.727 | 32.870 | 16.666 | 0.00 | 0.00 |
| ATOM | 7813 | CA   | PRO | X | 513 | 53.354 | 32.183 | 18.620 | 0.00 | 0.00 |
| ATOM | 7814 | HA   | PRO | X | 513 | 53.176 | 33.234 | 18.851 | 0.00 | 0.00 |
| ATOM | 7815 | C    | PRO | X | 513 | 52.180 | 31.408 | 19.317 | 0.00 | 0.00 |
| ATOM | 7816 | O    | PRO | X | 513 | 52.224 | 30.307 | 19.935 | 0.00 | 0.00 |
| ATOM | 7817 | N    | LEU | X | 514 | 51.005 | 32.052 | 19.318 | 0.00 | 0.00 |
| ATOM | 7818 | H    | LEU | X | 514 | 51.037 | 33.004 | 18.982 | 0.00 | 0.00 |
| ATOM | 7819 | CA   | LEU | X | 514 | 49.770 | 31.658 | 20.070 | 0.00 | 0.00 |
| ATOM | 7820 | HA   | LEU | X | 514 | 50.005 | 31.767 | 21.129 | 0.00 | 0.00 |
| ATOM | 7821 | CB   | LEU | X | 514 | 48.641 | 32.613 | 19.612 | 0.00 | 0.00 |
| ATOM | 7822 | HB2  | LEU | X | 514 | 48.430 | 32.500 | 18.549 | 0.00 | 0.00 |
| ATOM | 7823 | HB3  | LEU | X | 514 | 47.752 | 32.222 | 20.107 | 0.00 | 0.00 |
| ATOM | 7824 | CG   | LEU | X | 514 | 48.724 | 34.080 | 20.107 | 0.00 | 0.00 |
| ATOM | 7825 | HG   | LEU | X | 514 | 49.630 | 34.476 | 19.649 | 0.00 | 0.00 |
| ATOM | 7826 | CD1  | LEU | X | 514 | 47.607 | 34.944 | 19.546 | 0.00 | 0.00 |
| ATOM | 7827 | HD11 | LEU | X | 514 | 47.432 | 34.987 | 18.471 | 0.00 | 0.00 |
| ATOM | 7828 | HD12 | LEU | X | 514 | 46.663 | 34.676 | 20.019 | 0.00 | 0.00 |
| ATOM | 7829 | HD13 | LEU | X | 514 | 47.747 | 35.999 | 19.784 | 0.00 | 0.00 |
| ATOM | 7830 | CD2  | LEU | X | 514 | 48.811 | 34.332 | 21.578 | 0.00 | 0.00 |
| ATOM | 7831 | HD21 | LEU | X | 514 | 48.359 | 35.282 | 21.864 | 0.00 | 0.00 |
| ATOM | 7832 | HD22 | LEU | X | 514 | 48.349 | 33.482 | 22.081 | 0.00 | 0.00 |
| ATOM | 7833 | HD23 | LEU | X | 514 | 49.859 | 34.411 | 21.865 | 0.00 | 0.00 |
| ATOM | 7834 | C    | LEU | X | 514 | 49.464 | 30.222 | 19.766 | 0.00 | 0.00 |
| ATOM | 7835 | O    | LEU | X | 514 | 49.314 | 29.811 | 18.602 | 0.00 | 0.00 |
| ATOM | 7836 | N    | GLU | X | 515 | 49.478 | 29.384 | 20.814 | 0.00 | 0.00 |
| ATOM | 7837 | H    | GLU | X | 515 | 49.807 | 29.797 | 21.676 | 0.00 | 0.00 |
| ATOM | 7838 | CA   | GLU | X | 515 | 49.077 | 27.971 | 20.833 | 0.00 | 0.00 |
| ATOM | 7839 | HA   | GLU | X | 515 | 49.112 | 27.620 | 19.802 | 0.00 | 0.00 |
| ATOM | 7840 | CB   | GLU | X | 515 | 50.195 | 27.082 | 21.591 | 0.00 | 0.00 |
| ATOM | 7841 | HB2  | GLU | X | 515 | 51.126 | 27.108 | 21.025 | 0.00 | 0.00 |
| ATOM | 7842 | HB3  | GLU | X | 515 | 50.319 | 27.349 | 22.640 | 0.00 | 0.00 |
| ATOM | 7843 | CG   | GLU | X | 515 | 49.774 | 25.626 | 21.538 | 0.00 | 0.00 |
| ATOM | 7844 | HG2  | GLU | X | 515 | 48.754 | 25.486 | 21.896 | 0.00 | 0.00 |
| ATOM | 7845 | HG3  | GLU | X | 515 | 49.799 | 25.261 | 20.512 | 0.00 | 0.00 |
| ATOM | 7846 | CD   | GLU | X | 515 | 50.654 | 24.700 | 22.384 | 0.00 | 0.00 |
| ATOM | 7847 | OE1  | GLU | X | 515 | 50.204 | 23.822 | 23.192 | 0.00 | 0.00 |
| ATOM | 7848 | OE2  | GLU | X | 515 | 51.876 | 24.875 | 22.226 | 0.00 | 0.00 |
| ATOM | 7849 | C    | GLU | X | 515 | 47.684 | 27.915 | 21.534 | 0.00 | 0.00 |
| ATOM | 7850 | O    | GLU | X | 515 | 47.547 | 28.498 | 22.616 | 0.00 | 0.00 |
| ATOM | 7851 | N    | VAL | X | 516 | 46.733 | 27.180 | 21.021 | 0.00 | 0.00 |
| ATOM | 7852 | H    | VAL | X | 516 | 46.774 | 26.976 | 20.032 | 0.00 | 0.00 |
| ATOM | 7853 | CA   | VAL | X | 516 | 45.396 | 27.147 | 21.569 | 0.00 | 0.00 |
| ATOM | 7854 | HA   | VAL | X | 516 | 45.215 | 27.927 | 22.309 | 0.00 | 0.00 |
| ATOM | 7855 | CB   | VAL | X | 516 | 44.260 | 27.432 | 20.511 | 0.00 | 0.00 |
| ATOM | 7856 | HB   | VAL | X | 516 | 44.380 | 26.787 | 19.640 | 0.00 | 0.00 |
| ATOM | 7857 | CG1  | VAL | X | 516 | 42.852 | 27.074 | 21.016 | 0.00 | 0.00 |
| ATOM | 7858 | HG11 | VAL | X | 516 | 42.094 | 27.289 | 20.263 | 0.00 | 0.00 |
| ATOM | 7859 | HG12 | VAL | X | 516 | 42.912 | 26.012 | 21.255 | 0.00 | 0.00 |
| ATOM | 7860 | HG13 | VAL | X | 516 | 42.584 | 27.630 | 21.914 | 0.00 | 0.00 |
| ATOM | 7861 | CG2  | VAL | X | 516 | 44.206 | 28.918 | 20.082 | 0.00 | 0.00 |
| ATOM | 7862 | HG21 | VAL | X | 516 | 43.750 | 29.535 | 20.857 | 0.00 | 0.00 |
| ATOM | 7863 | HG22 | VAL | X | 516 | 45.243 | 29.216 | 19.932 | 0.00 | 0.00 |
| ATOM | 7864 | HG23 | VAL | X | 516 | 43.492 | 28.869 | 19.260 | 0.00 | 0.00 |
| ATOM | 7865 | C    | VAL | X | 516 | 45.255 | 25.697 | 22.175 | 0.00 | 0.00 |
| ATOM | 7866 | O    | VAL | X | 516 | 45.465 | 24.648 | 21.549 | 0.00 | 0.00 |
| ATOM | 7867 | N    | ARG | X | 517 | 44.741 | 25.628 | 23.437 | 0.00 | 0.00 |
| ATOM | 7868 | H    | ARG | X | 517 | 44.397 | 26.478 | 23.860 | 0.00 | 0.00 |
| ATOM | 7869 | CA   | ARG | X | 517 | 44.444 | 24.442 | 24.126 | 0.00 | 0.00 |
| ATOM | 7870 | HA   | ARG | X | 517 | 44.532 | 23.476 | 23.629 | 0.00 | 0.00 |
| ATOM | 7871 | CB   | ARG | X | 517 | 45.452 | 24.328 | 25.309 | 0.00 | 0.00 |
| ATOM | 7872 | HB2  | ARG | X | 517 | 45.290 | 25.171 | 25.980 | 0.00 | 0.00 |
| ATOM | 7873 | HB3  | ARG | X | 517 | 45.190 | 23.462 | 25.916 | 0.00 | 0.00 |
| ATOM | 7874 | CG   | ARG | X | 517 | 46.959 | 24.338 | 24.892 | 0.00 | 0.00 |
| ATOM | 7875 | HG2  | ARG | X | 517 | 47.070 | 23.466 | 24.248 | 0.00 | 0.00 |
| ATOM | 7876 | HG3  | ARG | X | 517 | 47.266 | 25.246 | 24.373 | 0.00 | 0.00 |
| ATOM | 7877 | CD   | ARG | X | 517 | 47.878 | 24.249 | 26.052 | 0.00 | 0.00 |
| ATOM | 7878 | HD2  | ARG | X | 517 | 47.579 | 24.975 | 26.809 | 0.00 | 0.00 |
| ATOM | 7879 | HD3  | ARG | X | 517 | 47.800 | 23.251 | 26.483 | 0.00 | 0.00 |
| ATOM | 7880 | NE   | ARG | X | 517 | 49.261 | 24.469 | 25.619 | 0.00 | 0.00 |
| ATOM | 7881 | HE   | ARG | X | 517 | 49.448 | 24.160 | 24.676 | 0.00 | 0.00 |



|      |      |      |     |   |     |        |        |        |      |      |
|------|------|------|-----|---|-----|--------|--------|--------|------|------|
| ATOM | 7882 | CZ   | ARG | X | 517 | 50.358 | 24.727 | 26.278 | 0.00 | 0.00 |
| ATOM | 7883 | NH1  | ARG | X | 517 | 50.376 | 24.989 | 27.571 | 0.00 | 0.00 |
| ATOM | 7884 | HH11 | ARG | X | 517 | 49.549 | 25.091 | 28.141 | 0.00 | 0.00 |
| ATOM | 7885 | HH12 | ARG | X | 517 | 51.296 | 25.038 | 27.986 | 0.00 | 0.00 |
| ATOM | 7886 | NH2  | ARG | X | 517 | 51.528 | 24.734 | 25.629 | 0.00 | 0.00 |
| ATOM | 7887 | HH21 | ARG | X | 517 | 51.490 | 24.564 | 24.634 | 0.00 | 0.00 |
| ATOM | 7888 | HH22 | ARG | X | 517 | 52.368 | 25.179 | 25.969 | 0.00 | 0.00 |
| ATOM | 7889 | C    | ARG | X | 517 | 42.972 | 24.521 | 24.617 | 0.00 | 0.00 |
| ATOM | 7890 | O    | ARG | X | 517 | 42.392 | 25.568 | 24.522 | 0.00 | 0.00 |
| ATOM | 7891 | N    | ARG | X | 518 | 42.390 | 23.416 | 25.151 | 0.00 | 0.00 |
| ATOM | 7892 | H    | ARG | X | 518 | 42.962 | 22.619 | 25.389 | 0.00 | 0.00 |
| ATOM | 7893 | CA   | ARG | X | 518 | 40.955 | 23.373 | 25.489 | 0.00 | 0.00 |
| ATOM | 7894 | HA   | ARG | X | 518 | 40.695 | 24.394 | 25.768 | 0.00 | 0.00 |
| ATOM | 7895 | CB   | ARG | X | 518 | 40.095 | 22.824 | 24.373 | 0.00 | 0.00 |
| ATOM | 7896 | HB2  | ARG | X | 518 | 40.262 | 21.766 | 24.167 | 0.00 | 0.00 |
| ATOM | 7897 | HB3  | ARG | X | 518 | 39.059 | 22.937 | 24.691 | 0.00 | 0.00 |
| ATOM | 7898 | CG   | ARG | X | 518 | 40.348 | 23.553 | 23.110 | 0.00 | 0.00 |
| ATOM | 7899 | HG2  | ARG | X | 518 | 40.225 | 24.632 | 23.202 | 0.00 | 0.00 |
| ATOM | 7900 | HG3  | ARG | X | 518 | 41.388 | 23.451 | 22.799 | 0.00 | 0.00 |
| ATOM | 7901 | CD   | ARG | X | 518 | 39.501 | 23.056 | 21.923 | 0.00 | 0.00 |
| ATOM | 7902 | HD2  | ARG | X | 518 | 40.032 | 22.227 | 21.455 | 0.00 | 0.00 |
| ATOM | 7903 | HD3  | ARG | X | 518 | 38.548 | 22.682 | 22.298 | 0.00 | 0.00 |
| ATOM | 7904 | NE   | ARG | X | 518 | 39.392 | 23.991 | 20.833 | 0.00 | 0.00 |
| ATOM | 7905 | HE   | ARG | X | 518 | 39.529 | 24.984 | 20.954 | 0.00 | 0.00 |
| ATOM | 7906 | CZ   | ARG | X | 518 | 38.826 | 23.731 | 19.665 | 0.00 | 0.00 |
| ATOM | 7907 | NH1  | ARG | X | 518 | 38.395 | 22.509 | 19.399 | 0.00 | 0.00 |
| ATOM | 7908 | HH11 | ARG | X | 518 | 38.516 | 21.769 | 20.076 | 0.00 | 0.00 |
| ATOM | 7909 | HH12 | ARG | X | 518 | 38.347 | 22.256 | 18.422 | 0.00 | 0.00 |
| ATOM | 7910 | NH2  | ARG | X | 518 | 38.732 | 24.674 | 18.802 | 0.00 | 0.00 |
| ATOM | 7911 | HH21 | ARG | X | 518 | 39.108 | 25.583 | 19.029 | 0.00 | 0.00 |
| ATOM | 7912 | HH22 | ARG | X | 518 | 38.205 | 24.495 | 17.959 | 0.00 | 0.00 |
| ATOM | 7913 | C    | ARG | X | 518 | 40.743 | 22.573 | 26.839 | 0.00 | 0.00 |
| ATOM | 7914 | O    | ARG | X | 518 | 41.454 | 21.679 | 27.171 | 0.00 | 0.00 |
| ATOM | 7915 | N    | GLY | X | 519 | 39.739 | 23.131 | 27.549 | 0.00 | 0.00 |
| ATOM | 7916 | H    | GLY | X | 519 | 39.293 | 23.989 | 27.255 | 0.00 | 0.00 |
| ATOM | 7917 | CA   | GLY | X | 519 | 39.303 | 22.610 | 28.843 | 0.00 | 0.00 |
| ATOM | 7918 | HA2  | GLY | X | 519 | 38.261 | 22.777 | 29.029 | 0.00 | 0.00 |
| ATOM | 7919 | HA3  | GLY | X | 519 | 39.460 | 21.514 | 28.633 | 0.00 | 0.00 |
| ATOM | 7920 | C    | GLY | X | 519 | 40.269 | 22.913 | 29.932 | 0.00 | 0.00 |
| ATOM | 7921 | O    | GLY | X | 519 | 40.517 | 22.080 | 30.787 | 0.00 | 0.00 |
| ATOM | 7922 | N    | LEU | X | 520 | 40.599 | 24.190 | 30.139 | 0.00 | 0.00 |
| ATOM | 7923 | H    | LEU | X | 520 | 40.224 | 24.824 | 29.448 | 0.00 | 0.00 |
| ATOM | 7924 | CA   | LEU | X | 520 | 41.567 | 24.770 | 31.050 | 0.00 | 0.00 |
| ATOM | 7925 | HA   | LEU | X | 520 | 42.526 | 24.646 | 30.547 | 0.00 | 0.00 |
| ATOM | 7926 | CB   | LEU | X | 520 | 41.238 | 26.351 | 30.973 | 0.00 | 0.00 |
| ATOM | 7927 | HB2  | LEU | X | 520 | 41.545 | 26.759 | 30.010 | 0.00 | 0.00 |
| ATOM | 7928 | HB3  | LEU | X | 520 | 40.169 | 26.481 | 31.144 | 0.00 | 0.00 |
| ATOM | 7929 | CG   | LEU | X | 520 | 41.888 | 27.292 | 32.046 | 0.00 | 0.00 |
| ATOM | 7930 | HG   | LEU | X | 520 | 41.639 | 26.910 | 33.036 | 0.00 | 0.00 |
| ATOM | 7931 | CD1  | LEU | X | 520 | 43.396 | 27.300 | 32.091 | 0.00 | 0.00 |
| ATOM | 7932 | HD11 | LEU | X | 520 | 43.747 | 26.304 | 32.362 | 0.00 | 0.00 |
| ATOM | 7933 | HD12 | LEU | X | 520 | 43.799 | 27.669 | 31.148 | 0.00 | 0.00 |
| ATOM | 7934 | HD13 | LEU | X | 520 | 43.805 | 28.065 | 32.751 | 0.00 | 0.00 |
| ATOM | 7935 | CD2  | LEU | X | 520 | 41.320 | 28.668 | 31.864 | 0.00 | 0.00 |
| ATOM | 7936 | HD21 | LEU | X | 520 | 41.729 | 29.404 | 32.557 | 0.00 | 0.00 |
| ATOM | 7937 | HD22 | LEU | X | 520 | 41.591 | 29.005 | 30.863 | 0.00 | 0.00 |
| ATOM | 7938 | HD23 | LEU | X | 520 | 40.236 | 28.648 | 31.975 | 0.00 | 0.00 |
| ATOM | 7939 | C    | LEU | X | 520 | 41.483 | 24.152 | 32.521 | 0.00 | 0.00 |
| ATOM | 7940 | O    | LEU | X | 520 | 40.609 | 24.512 | 33.316 | 0.00 | 0.00 |
| ATOM | 7941 | N    | ARG | X | 521 | 42.405 | 23.198 | 32.769 | 0.00 | 0.00 |
| ATOM | 7942 | H    | ARG | X | 521 | 43.146 | 23.125 | 32.088 | 0.00 | 0.00 |
| ATOM | 7943 | CA   | ARG | X | 521 | 42.583 | 22.571 | 34.097 | 0.00 | 0.00 |
| ATOM | 7944 | HA   | ARG | X | 521 | 43.310 | 21.805 | 33.826 | 0.00 | 0.00 |
| ATOM | 7945 | CB   | ARG | X | 521 | 43.196 | 23.491 | 35.123 | 0.00 | 0.00 |
| ATOM | 7946 | HB2  | ARG | X | 521 | 43.770 | 24.304 | 34.680 | 0.00 | 0.00 |
| ATOM | 7947 | HB3  | ARG | X | 521 | 42.443 | 24.125 | 35.591 | 0.00 | 0.00 |
| ATOM | 7948 | CG   | ARG | X | 521 | 43.889 | 22.894 | 36.280 | 0.00 | 0.00 |
| ATOM | 7949 | HG2  | ARG | X | 521 | 44.540 | 23.661 | 36.700 | 0.00 | 0.00 |
| ATOM | 7950 | HG3  | ARG | X | 521 | 43.141 | 22.753 | 37.060 | 0.00 | 0.00 |
| ATOM | 7951 | CD   | ARG | X | 521 | 44.643 | 21.588 | 36.010 | 0.00 | 0.00 |

|      |      |      |     |   |     |        |        |        |      |      |
|------|------|------|-----|---|-----|--------|--------|--------|------|------|
| ATOM | 7952 | HD2  | ARG | X | 521 | 43.951 | 20.809 | 35.691 | 0.00 | 0.00 |
| ATOM | 7953 | HD3  | ARG | X | 521 | 45.330 | 21.853 | 35.206 | 0.00 | 0.00 |
| ATOM | 7954 | NE   | ARG | X | 521 | 45.432 | 21.086 | 37.173 | 0.00 | 0.00 |
| ATOM | 7955 | HE   | ARG | X | 521 | 45.195 | 21.619 | 37.997 | 0.00 | 0.00 |
| ATOM | 7956 | CZ   | ARG | X | 521 | 46.337 | 20.120 | 37.354 | 0.00 | 0.00 |
| ATOM | 7957 | NH1  | ARG | X | 521 | 46.557 | 19.329 | 36.326 | 0.00 | 0.00 |
| ATOM | 7958 | HH11 | ARG | X | 521 | 46.030 | 19.323 | 35.464 | 0.00 | 0.00 |
| ATOM | 7959 | HH12 | ARG | X | 521 | 47.410 | 18.788 | 36.303 | 0.00 | 0.00 |
| ATOM | 7960 | NH2  | ARG | X | 521 | 46.951 | 19.887 | 38.527 | 0.00 | 0.00 |
| ATOM | 7961 | HH21 | ARG | X | 521 | 46.580 | 20.454 | 39.276 | 0.00 | 0.00 |
| ATOM | 7962 | HH22 | ARG | X | 521 | 47.758 | 19.281 | 38.487 | 0.00 | 0.00 |
| ATOM | 7963 | C    | ARG | X | 521 | 41.363 | 21.690 | 34.578 | 0.00 | 0.00 |
| ATOM | 7964 | O    | ARG | X | 521 | 41.398 | 21.103 | 35.661 | 0.00 | 0.00 |
| ATOM | 7965 | N    | ALA | X | 522 | 40.291 | 21.601 | 33.766 | 0.00 | 0.00 |
| ATOM | 7966 | H    | ALA | X | 522 | 40.428 | 22.250 | 33.005 | 0.00 | 0.00 |
| ATOM | 7967 | CA   | ALA | X | 522 | 39.013 | 20.983 | 34.009 | 0.00 | 0.00 |
| ATOM | 7968 | HA   | ALA | X | 522 | 38.611 | 21.569 | 34.835 | 0.00 | 0.00 |
| ATOM | 7969 | CB   | ALA | X | 522 | 38.114 | 21.117 | 32.770 | 0.00 | 0.00 |
| ATOM | 7970 | HB1  | ALA | X | 522 | 37.952 | 22.138 | 32.425 | 0.00 | 0.00 |
| ATOM | 7971 | HB2  | ALA | X | 522 | 38.447 | 20.461 | 31.965 | 0.00 | 0.00 |
| ATOM | 7972 | HB3  | ALA | X | 522 | 37.094 | 20.828 | 33.021 | 0.00 | 0.00 |
| ATOM | 7973 | C    | ALA | X | 522 | 39.099 | 19.494 | 34.480 | 0.00 | 0.00 |
| ATOM | 7974 | O    | ALA | X | 522 | 38.176 | 18.979 | 35.123 | 0.00 | 0.00 |
| ATOM | 7975 | N    | GLN | X | 523 | 40.151 | 18.759 | 34.131 | 0.00 | 0.00 |
| ATOM | 7976 | H    | GLN | X | 523 | 40.873 | 19.168 | 33.555 | 0.00 | 0.00 |
| ATOM | 7977 | CA   | GLN | X | 523 | 40.385 | 17.370 | 34.543 | 0.00 | 0.00 |
| ATOM | 7978 | HA   | GLN | X | 523 | 39.527 | 16.747 | 34.291 | 0.00 | 0.00 |
| ATOM | 7979 | CB   | GLN | X | 523 | 41.543 | 16.683 | 33.744 | 0.00 | 0.00 |
| ATOM | 7980 | HB2  | GLN | X | 523 | 41.449 | 16.907 | 32.681 | 0.00 | 0.00 |
| ATOM | 7981 | HB3  | GLN | X | 523 | 42.429 | 17.151 | 34.174 | 0.00 | 0.00 |
| ATOM | 7982 | CG   | GLN | X | 523 | 41.615 | 15.128 | 33.930 | 0.00 | 0.00 |
| ATOM | 7983 | HG2  | GLN | X | 523 | 41.850 | 14.966 | 34.982 | 0.00 | 0.00 |
| ATOM | 7984 | HG3  | GLN | X | 523 | 40.644 | 14.706 | 33.672 | 0.00 | 0.00 |
| ATOM | 7985 | CD   | GLN | X | 523 | 42.691 | 14.488 | 33.107 | 0.00 | 0.00 |
| ATOM | 7986 | OE1  | GLN | X | 523 | 42.636 | 14.157 | 31.894 | 0.00 | 0.00 |
| ATOM | 7987 | NE2  | GLN | X | 523 | 43.851 | 14.226 | 33.762 | 0.00 | 0.00 |
| ATOM | 7988 | HE21 | GLN | X | 523 | 44.510 | 13.882 | 33.077 | 0.00 | 0.00 |
| ATOM | 7989 | HE22 | GLN | X | 523 | 44.044 | 14.450 | 34.727 | 0.00 | 0.00 |
| ATOM | 7990 | C    | GLN | X | 523 | 40.660 | 17.316 | 36.119 | 0.00 | 0.00 |
| ATOM | 7991 | O    | GLN | X | 523 | 40.358 | 16.304 | 36.735 | 0.00 | 0.00 |
| ATOM | 7992 | N    | ALA | X | 524 | 41.168 | 18.410 | 36.660 | 0.00 | 0.00 |
| ATOM | 7993 | H    | ALA | X | 524 | 41.397 | 19.105 | 35.964 | 0.00 | 0.00 |
| ATOM | 7994 | CA   | ALA | X | 524 | 41.250 | 18.719 | 38.112 | 0.00 | 0.00 |
| ATOM | 7995 | HA   | ALA | X | 524 | 41.333 | 17.789 | 38.675 | 0.00 | 0.00 |
| ATOM | 7996 | CB   | ALA | X | 524 | 42.491 | 19.475 | 38.488 | 0.00 | 0.00 |
| ATOM | 7997 | HB1  | ALA | X | 524 | 43.372 | 18.881 | 38.244 | 0.00 | 0.00 |
| ATOM | 7998 | HB2  | ALA | X | 524 | 42.460 | 20.382 | 37.884 | 0.00 | 0.00 |
| ATOM | 7999 | HB3  | ALA | X | 524 | 42.651 | 19.636 | 39.554 | 0.00 | 0.00 |
| ATOM | 8000 | C    | ALA | X | 524 | 40.000 | 19.422 | 38.563 | 0.00 | 0.00 |
| ATOM | 8001 | O    | ALA | X | 524 | 39.447 | 19.025 | 39.633 | 0.00 | 0.00 |
| ATOM | 8002 | N    | CYX | X | 525 | 39.572 | 20.482 | 37.933 | 0.00 | 0.00 |
| ATOM | 8003 | H    | CYX | X | 525 | 39.918 | 20.617 | 36.994 | 0.00 | 0.00 |
| ATOM | 8004 | CA   | CYX | X | 525 | 38.631 | 21.489 | 38.547 | 0.00 | 0.00 |
| ATOM | 8005 | HA   | CYX | X | 525 | 39.069 | 21.839 | 39.482 | 0.00 | 0.00 |
| ATOM | 8006 | CB   | CYX | X | 525 | 38.549 | 22.751 | 37.678 | 0.00 | 0.00 |
| ATOM | 8007 | HB2  | CYX | X | 525 | 38.194 | 22.420 | 36.702 | 0.00 | 0.00 |
| ATOM | 8008 | HB3  | CYX | X | 525 | 37.863 | 23.457 | 38.148 | 0.00 | 0.00 |
| ATOM | 8009 | SG   | CYX | X | 525 | 40.090 | 23.580 | 37.439 | 0.00 | 0.00 |
| ATOM | 8010 | C    | CYX | X | 525 | 37.295 | 20.890 | 38.916 | 0.00 | 0.00 |
| ATOM | 8011 | O    | CYX | X | 525 | 36.785 | 21.261 | 39.974 | 0.00 | 0.00 |
| ATOM | 8012 | N    | ALA | X | 526 | 36.756 | 19.869 | 38.226 | 0.00 | 0.00 |
| ATOM | 8013 | H    | ALA | X | 526 | 37.246 | 19.659 | 37.368 | 0.00 | 0.00 |
| ATOM | 8014 | CA   | ALA | X | 526 | 35.533 | 19.134 | 38.589 | 0.00 | 0.00 |
| ATOM | 8015 | HA   | ALA | X | 526 | 34.723 | 19.856 | 38.687 | 0.00 | 0.00 |
| ATOM | 8016 | CB   | ALA | X | 526 | 35.108 | 18.313 | 37.378 | 0.00 | 0.00 |
| ATOM | 8017 | HB1  | ALA | X | 526 | 35.039 | 18.879 | 36.449 | 0.00 | 0.00 |
| ATOM | 8018 | HB2  | ALA | X | 526 | 35.799 | 17.470 | 37.361 | 0.00 | 0.00 |
| ATOM | 8019 | HB3  | ALA | X | 526 | 34.188 | 17.803 | 37.663 | 0.00 | 0.00 |
| ATOM | 8020 | C    | ALA | X | 526 | 35.458 | 18.361 | 39.883 | 0.00 | 0.00 |
| ATOM | 8021 | O    | ALA | X | 526 | 34.443 | 18.250 | 40.546 | 0.00 | 0.00 |

|      |      |      |     |   |     |        |        |        |      |      |
|------|------|------|-----|---|-----|--------|--------|--------|------|------|
| ATOM | 8022 | N    | PHE | X | 527 | 36.687 | 17.827 | 40.181 | 0.00 | 0.00 |
| ATOM | 8023 | H    | PHE | X | 527 | 37.482 | 17.973 | 39.576 | 0.00 | 0.00 |
| ATOM | 8024 | CA   | PHE | X | 527 | 36.846 | 17.087 | 41.444 | 0.00 | 0.00 |
| ATOM | 8025 | HA   | PHE | X | 527 | 36.066 | 16.328 | 41.491 | 0.00 | 0.00 |
| ATOM | 8026 | CB   | PHE | X | 527 | 38.196 | 16.322 | 41.364 | 0.00 | 0.00 |
| ATOM | 8027 | HB2  | PHE | X | 527 | 37.986 | 15.449 | 40.746 | 0.00 | 0.00 |
| ATOM | 8028 | HB3  | PHE | X | 527 | 38.992 | 16.895 | 40.889 | 0.00 | 0.00 |
| ATOM | 8029 | CG   | PHE | X | 527 | 38.828 | 15.792 | 42.666 | 0.00 | 0.00 |
| ATOM | 8030 | CD1  | PHE | X | 527 | 38.610 | 14.482 | 43.045 | 0.00 | 0.00 |
| ATOM | 8031 | HD1  | PHE | X | 527 | 37.896 | 13.920 | 42.461 | 0.00 | 0.00 |
| ATOM | 8032 | CE1  | PHE | X | 527 | 39.272 | 13.888 | 44.154 | 0.00 | 0.00 |
| ATOM | 8033 | HE1  | PHE | X | 527 | 39.038 | 12.849 | 44.334 | 0.00 | 0.00 |
| ATOM | 8034 | CZ   | PHE | X | 527 | 40.103 | 14.691 | 45.042 | 0.00 | 0.00 |
| ATOM | 8035 | HZ   | PHE | X | 527 | 40.503 | 14.191 | 45.912 | 0.00 | 0.00 |
| ATOM | 8036 | CE2  | PHE | X | 527 | 40.243 | 16.028 | 44.666 | 0.00 | 0.00 |
| ATOM | 8037 | HE2  | PHE | X | 527 | 40.907 | 16.687 | 45.206 | 0.00 | 0.00 |
| ATOM | 8038 | CD2  | PHE | X | 527 | 39.647 | 16.584 | 43.476 | 0.00 | 0.00 |
| ATOM | 8039 | HD2  | PHE | X | 527 | 39.860 | 17.623 | 43.275 | 0.00 | 0.00 |
| ATOM | 8040 | C    | PHE | X | 527 | 36.788 | 18.084 | 42.609 | 0.00 | 0.00 |
| ATOM | 8041 | O    | PHE | X | 527 | 35.922 | 17.879 | 43.484 | 0.00 | 0.00 |
| ATOM | 8042 | N    | TRP | X | 528 | 37.529 | 19.163 | 42.509 | 0.00 | 0.00 |
| ATOM | 8043 | H    | TRP | X | 528 | 38.110 | 19.191 | 41.684 | 0.00 | 0.00 |
| ATOM | 8044 | CA   | TRP | X | 528 | 37.500 | 20.365 | 43.466 | 0.00 | 0.00 |
| ATOM | 8045 | HA   | TRP | X | 528 | 37.759 | 19.907 | 44.420 | 0.00 | 0.00 |
| ATOM | 8046 | CB   | TRP | X | 528 | 38.551 | 21.364 | 43.018 | 0.00 | 0.00 |
| ATOM | 8047 | HB2  | TRP | X | 528 | 38.395 | 21.618 | 41.970 | 0.00 | 0.00 |
| ATOM | 8048 | HB3  | TRP | X | 528 | 38.384 | 22.245 | 43.639 | 0.00 | 0.00 |
| ATOM | 8049 | CG   | TRP | X | 528 | 39.995 | 20.978 | 43.158 | 0.00 | 0.00 |
| ATOM | 8050 | CD1  | TRP | X | 528 | 40.922 | 20.827 | 42.155 | 0.00 | 0.00 |
| ATOM | 8051 | HD1  | TRP | X | 528 | 40.675 | 20.965 | 41.112 | 0.00 | 0.00 |
| ATOM | 8052 | NE1  | TRP | X | 528 | 42.119 | 20.454 | 42.660 | 0.00 | 0.00 |
| ATOM | 8053 | HE1  | TRP | X | 528 | 42.838 | 20.027 | 42.094 | 0.00 | 0.00 |
| ATOM | 8054 | CE2  | TRP | X | 528 | 42.129 | 20.288 | 44.012 | 0.00 | 0.00 |
| ATOM | 8055 | CZ2  | TRP | X | 528 | 43.057 | 19.818 | 44.949 | 0.00 | 0.00 |
| ATOM | 8056 | HZ2  | TRP | X | 528 | 44.027 | 19.488 | 44.607 | 0.00 | 0.00 |
| ATOM | 8057 | CH2  | TRP | X | 528 | 42.769 | 19.894 | 46.276 | 0.00 | 0.00 |
| ATOM | 8058 | HH2  | TRP | X | 528 | 43.405 | 19.411 | 47.003 | 0.00 | 0.00 |
| ATOM | 8059 | CZ3  | TRP | X | 528 | 41.530 | 20.413 | 46.715 | 0.00 | 0.00 |
| ATOM | 8060 | HZ3  | TRP | X | 528 | 41.454 | 20.446 | 47.792 | 0.00 | 0.00 |
| ATOM | 8061 | CE3  | TRP | X | 528 | 40.475 | 20.694 | 45.780 | 0.00 | 0.00 |
| ATOM | 8062 | HE3  | TRP | X | 528 | 39.506 | 21.007 | 46.141 | 0.00 | 0.00 |
| ATOM | 8063 | CD2  | TRP | X | 528 | 40.755 | 20.619 | 44.366 | 0.00 | 0.00 |
| ATOM | 8064 | C    | TRP | X | 528 | 36.108 | 20.883 | 43.650 | 0.00 | 0.00 |
| ATOM | 8065 | O    | TRP | X | 528 | 35.836 | 21.262 | 44.763 | 0.00 | 0.00 |
| ATOM | 8066 | N    | ASN | X | 529 | 35.305 | 21.065 | 42.623 | 0.00 | 0.00 |
| ATOM | 8067 | H    | ASN | X | 529 | 35.759 | 20.980 | 41.725 | 0.00 | 0.00 |
| ATOM | 8068 | CA   | ASN | X | 529 | 33.952 | 21.687 | 42.594 | 0.00 | 0.00 |
| ATOM | 8069 | HA   | ASN | X | 529 | 34.023 | 22.476 | 43.343 | 0.00 | 0.00 |
| ATOM | 8070 | CB   | ASN | X | 529 | 33.758 | 22.446 | 41.309 | 0.00 | 0.00 |
| ATOM | 8071 | HB2  | ASN | X | 529 | 34.116 | 21.931 | 40.418 | 0.00 | 0.00 |
| ATOM | 8072 | HB3  | ASN | X | 529 | 32.679 | 22.518 | 41.171 | 0.00 | 0.00 |
| ATOM | 8073 | CG   | ASN | X | 529 | 34.375 | 23.843 | 41.355 | 0.00 | 0.00 |
| ATOM | 8074 | OD1  | ASN | X | 529 | 35.490 | 24.074 | 40.911 | 0.00 | 0.00 |
| ATOM | 8075 | ND2  | ASN | X | 529 | 33.824 | 24.738 | 42.163 | 0.00 | 0.00 |
| ATOM | 8076 | HD21 | ASN | X | 529 | 34.317 | 25.613 | 42.272 | 0.00 | 0.00 |
| ATOM | 8077 | HD22 | ASN | X | 529 | 32.902 | 24.628 | 42.559 | 0.00 | 0.00 |
| ATOM | 8078 | C    | ASN | X | 529 | 32.799 | 20.797 | 43.064 | 0.00 | 0.00 |
| ATOM | 8079 | O    | ASN | X | 529 | 31.741 | 21.285 | 43.376 | 0.00 | 0.00 |
| ATOM | 8080 | N    | ARG | X | 530 | 33.007 | 19.497 | 43.079 | 0.00 | 0.00 |
| ATOM | 8081 | H    | ARG | X | 530 | 33.888 | 19.180 | 42.700 | 0.00 | 0.00 |
| ATOM | 8082 | CA   | ARG | X | 530 | 31.942 | 18.499 | 43.265 | 0.00 | 0.00 |
| ATOM | 8083 | HA   | ARG | X | 530 | 31.175 | 18.952 | 43.894 | 0.00 | 0.00 |
| ATOM | 8084 | CB   | ARG | X | 530 | 31.375 | 18.137 | 41.869 | 0.00 | 0.00 |
| ATOM | 8085 | HB2  | ARG | X | 530 | 32.181 | 17.872 | 41.185 | 0.00 | 0.00 |
| ATOM | 8086 | HB3  | ARG | X | 530 | 30.809 | 17.206 | 41.859 | 0.00 | 0.00 |
| ATOM | 8087 | CG   | ARG | X | 530 | 30.434 | 19.196 | 41.268 | 0.00 | 0.00 |
| ATOM | 8088 | HG2  | ARG | X | 530 | 29.757 | 19.410 | 42.095 | 0.00 | 0.00 |
| ATOM | 8089 | HG3  | ARG | X | 530 | 30.989 | 20.120 | 41.104 | 0.00 | 0.00 |
| ATOM | 8090 | CD   | ARG | X | 530 | 29.679 | 18.852 | 39.958 | 0.00 | 0.00 |
| ATOM | 8091 | HD2  | ARG | X | 530 | 29.203 | 17.880 | 40.083 | 0.00 | 0.00 |

|      |      |      |     |   |     |        |        |        |      |      |
|------|------|------|-----|---|-----|--------|--------|--------|------|------|
| ATOM | 8092 | HD3  | ARG | X | 530 | 28.928 | 19.622 | 39.779 | 0.00 | 0.00 |
| ATOM | 8093 | NE   | ARG | X | 530 | 30.570 | 18.721 | 38.868 | 0.00 | 0.00 |
| ATOM | 8094 | HE   | ARG | X | 530 | 30.467 | 17.842 | 38.381 | 0.00 | 0.00 |
| ATOM | 8095 | CZ   | ARG | X | 530 | 31.319 | 19.705 | 38.376 | 0.00 | 0.00 |
| ATOM | 8096 | NH1  | ARG | X | 530 | 31.403 | 20.917 | 38.862 | 0.00 | 0.00 |
| ATOM | 8097 | HH11 | ARG | X | 530 | 30.714 | 21.289 | 39.501 | 0.00 | 0.00 |
| ATOM | 8098 | HH12 | ARG | X | 530 | 31.954 | 21.618 | 38.388 | 0.00 | 0.00 |
| ATOM | 8099 | NH2  | ARG | X | 530 | 32.068 | 19.465 | 37.340 | 0.00 | 0.00 |
| ATOM | 8100 | HH21 | ARG | X | 530 | 32.180 | 18.520 | 37.003 | 0.00 | 0.00 |
| ATOM | 8101 | HH22 | ARG | X | 530 | 32.605 | 20.238 | 36.974 | 0.00 | 0.00 |
| ATOM | 8102 | C    | ARG | X | 530 | 32.389 | 17.300 | 44.054 | 0.00 | 0.00 |
| ATOM | 8103 | O    | ARG | X | 530 | 31.898 | 17.082 | 45.136 | 0.00 | 0.00 |
| ATOM | 8104 | N    | PHE | X | 531 | 33.278 | 16.414 | 43.536 | 0.00 | 0.00 |
| ATOM | 8105 | H    | PHE | X | 531 | 33.783 | 16.648 | 42.693 | 0.00 | 0.00 |
| ATOM | 8106 | CA   | PHE | X | 531 | 33.570 | 15.156 | 44.235 | 0.00 | 0.00 |
| ATOM | 8107 | HA   | PHE | X | 531 | 32.651 | 14.574 | 44.301 | 0.00 | 0.00 |
| ATOM | 8108 | CB   | PHE | X | 531 | 34.563 | 14.285 | 43.420 | 0.00 | 0.00 |
| ATOM | 8109 | HB2  | PHE | X | 531 | 34.163 | 14.083 | 42.427 | 0.00 | 0.00 |
| ATOM | 8110 | HB3  | PHE | X | 531 | 35.542 | 14.744 | 43.284 | 0.00 | 0.00 |
| ATOM | 8111 | CG   | PHE | X | 531 | 34.664 | 12.915 | 44.043 | 0.00 | 0.00 |
| ATOM | 8112 | CD1  | PHE | X | 531 | 33.702 | 11.946 | 43.779 | 0.00 | 0.00 |
| ATOM | 8113 | HD1  | PHE | X | 531 | 32.887 | 12.195 | 43.115 | 0.00 | 0.00 |
| ATOM | 8114 | CE1  | PHE | X | 531 | 33.903 | 10.609 | 44.157 | 0.00 | 0.00 |
| ATOM | 8115 | HE1  | PHE | X | 531 | 33.040 | 9.961  | 44.152 | 0.00 | 0.00 |
| ATOM | 8116 | CZ   | PHE | X | 531 | 35.060 | 10.252 | 44.908 | 0.00 | 0.00 |
| ATOM | 8117 | HZ   | PHE | X | 531 | 35.260 | 9.292  | 45.362 | 0.00 | 0.00 |
| ATOM | 8118 | CE2  | PHE | X | 531 | 36.032 | 11.202 | 45.190 | 0.00 | 0.00 |
| ATOM | 8119 | HE2  | PHE | X | 531 | 36.882 | 10.989 | 45.821 | 0.00 | 0.00 |
| ATOM | 8120 | CD2  | PHE | X | 531 | 35.860 | 12.539 | 44.679 | 0.00 | 0.00 |
| ATOM | 8121 | HD2  | PHE | X | 531 | 36.722 | 13.174 | 44.825 | 0.00 | 0.00 |
| ATOM | 8122 | C    | PHE | X | 531 | 34.085 | 15.392 | 45.669 | 0.00 | 0.00 |
| ATOM | 8123 | O    | PHE | X | 531 | 33.775 | 14.791 | 46.656 | 0.00 | 0.00 |
| ATOM | 8124 | N    | LEU | X | 532 | 35.065 | 16.336 | 45.723 | 0.00 | 0.00 |
| ATOM | 8125 | H    | LEU | X | 532 | 35.280 | 16.875 | 44.897 | 0.00 | 0.00 |
| ATOM | 8126 | CA   | LEU | X | 532 | 35.891 | 16.589 | 46.924 | 0.00 | 0.00 |
| ATOM | 8127 | HA   | LEU | X | 532 | 36.234 | 15.641 | 47.339 | 0.00 | 0.00 |
| ATOM | 8128 | CB   | LEU | X | 532 | 37.036 | 17.432 | 46.395 | 0.00 | 0.00 |
| ATOM | 8129 | HB2  | LEU | X | 532 | 37.471 | 16.866 | 45.572 | 0.00 | 0.00 |
| ATOM | 8130 | HB3  | LEU | X | 532 | 36.670 | 18.287 | 45.825 | 0.00 | 0.00 |
| ATOM | 8131 | CG   | LEU | X | 532 | 38.120 | 17.895 | 47.420 | 0.00 | 0.00 |
| ATOM | 8132 | HG   | LEU | X | 532 | 38.964 | 18.161 | 46.783 | 0.00 | 0.00 |
| ATOM | 8133 | CD1  | LEU | X | 532 | 37.717 | 19.219 | 48.034 | 0.00 | 0.00 |
| ATOM | 8134 | HD11 | LEU | X | 532 | 37.077 | 18.990 | 48.886 | 0.00 | 0.00 |
| ATOM | 8135 | HD12 | LEU | X | 532 | 38.583 | 19.770 | 48.402 | 0.00 | 0.00 |
| ATOM | 8136 | HD13 | LEU | X | 532 | 37.263 | 19.926 | 47.340 | 0.00 | 0.00 |
| ATOM | 8137 | CD2  | LEU | X | 532 | 38.485 | 16.721 | 48.285 | 0.00 | 0.00 |
| ATOM | 8138 | HD21 | LEU | X | 532 | 38.665 | 15.828 | 47.686 | 0.00 | 0.00 |
| ATOM | 8139 | HD22 | LEU | X | 532 | 39.324 | 16.975 | 48.933 | 0.00 | 0.00 |
| ATOM | 8140 | HD23 | LEU | X | 532 | 37.672 | 16.464 | 48.964 | 0.00 | 0.00 |
| ATOM | 8141 | C    | LEU | X | 532 | 35.055 | 17.231 | 48.154 | 0.00 | 0.00 |
| ATOM | 8142 | O    | LEU | X | 532 | 35.233 | 16.709 | 49.201 | 0.00 | 0.00 |
| ATOM | 8143 | N    | PRO | X | 533 | 34.196 | 18.234 | 47.960 | 0.00 | 0.00 |
| ATOM | 8144 | CD   | PRO | X | 533 | 34.055 | 19.261 | 46.904 | 0.00 | 0.00 |
| ATOM | 8145 | HD2  | PRO | X | 533 | 34.100 | 18.731 | 45.953 | 0.00 | 0.00 |
| ATOM | 8146 | HD3  | PRO | X | 533 | 34.817 | 20.038 | 46.953 | 0.00 | 0.00 |
| ATOM | 8147 | CG   | PRO | X | 533 | 32.755 | 19.988 | 46.958 | 0.00 | 0.00 |
| ATOM | 8148 | HG2  | PRO | X | 533 | 31.912 | 19.409 | 46.582 | 0.00 | 0.00 |
| ATOM | 8149 | HG3  | PRO | X | 533 | 32.714 | 20.929 | 46.409 | 0.00 | 0.00 |
| ATOM | 8150 | CB   | PRO | X | 533 | 32.671 | 20.045 | 48.518 | 0.00 | 0.00 |
| ATOM | 8151 | HB2  | PRO | X | 533 | 31.658 | 20.193 | 48.892 | 0.00 | 0.00 |
| ATOM | 8152 | HB3  | PRO | X | 533 | 33.385 | 20.783 | 48.884 | 0.00 | 0.00 |
| ATOM | 8153 | CA   | PRO | X | 533 | 33.320 | 18.786 | 48.999 | 0.00 | 0.00 |
| ATOM | 8154 | HA   | PRO | X | 533 | 33.991 | 18.928 | 49.846 | 0.00 | 0.00 |
| ATOM | 8155 | C    | PRO | X | 533 | 32.304 | 17.676 | 49.419 | 0.00 | 0.00 |
| ATOM | 8156 | O    | PRO | X | 533 | 31.995 | 17.526 | 50.592 | 0.00 | 0.00 |
| ATOM | 8157 | N    | LYS | X | 534 | 31.806 | 16.957 | 48.454 | 0.00 | 0.00 |
| ATOM | 8158 | H    | LYS | X | 534 | 31.939 | 17.280 | 47.506 | 0.00 | 0.00 |
| ATOM | 8159 | CA   | LYS | X | 534 | 30.984 | 15.780 | 48.718 | 0.00 | 0.00 |
| ATOM | 8160 | HA   | LYS | X | 534 | 30.163 | 16.056 | 49.380 | 0.00 | 0.00 |
| ATOM | 8161 | CB   | LYS | X | 534 | 30.450 | 15.271 | 47.413 | 0.00 | 0.00 |

|      |      |      |     |   |     |        |        |        |      |      |
|------|------|------|-----|---|-----|--------|--------|--------|------|------|
| ATOM | 8162 | HB2  | LYS | X | 534 | 31.294 | 15.285 | 46.722 | 0.00 | 0.00 |
| ATOM | 8163 | HB3  | LYS | X | 534 | 30.030 | 14.282 | 47.594 | 0.00 | 0.00 |
| ATOM | 8164 | CG   | LYS | X | 534 | 29.395 | 16.222 | 46.923 | 0.00 | 0.00 |
| ATOM | 8165 | HG2  | LYS | X | 534 | 28.570 | 16.287 | 47.631 | 0.00 | 0.00 |
| ATOM | 8166 | HG3  | LYS | X | 534 | 29.745 | 17.253 | 46.888 | 0.00 | 0.00 |
| ATOM | 8167 | CD   | LYS | X | 534 | 28.847 | 15.804 | 45.548 | 0.00 | 0.00 |
| ATOM | 8168 | HD2  | LYS | X | 534 | 29.674 | 15.663 | 44.851 | 0.00 | 0.00 |
| ATOM | 8169 | HD3  | LYS | X | 534 | 28.477 | 14.784 | 45.646 | 0.00 | 0.00 |
| ATOM | 8170 | CE   | LYS | X | 534 | 27.635 | 16.623 | 45.100 | 0.00 | 0.00 |
| ATOM | 8171 | HE2  | LYS | X | 534 | 27.941 | 17.652 | 45.288 | 0.00 | 0.00 |
| ATOM | 8172 | HE3  | LYS | X | 534 | 27.479 | 16.420 | 44.041 | 0.00 | 0.00 |
| ATOM | 8173 | NZ   | LYS | X | 534 | 26.445 | 16.314 | 45.964 | 0.00 | 0.00 |
| ATOM | 8174 | HZ1  | LYS | X | 534 | 25.644 | 15.979 | 45.448 | 0.00 | 0.00 |
| ATOM | 8175 | HZ2  | LYS | X | 534 | 26.837 | 15.567 | 46.520 | 0.00 | 0.00 |
| ATOM | 8176 | HZ3  | LYS | X | 534 | 26.214 | 17.150 | 46.481 | 0.00 | 0.00 |
| ATOM | 8177 | C    | LYS | X | 534 | 31.569 | 14.658 | 49.628 | 0.00 | 0.00 |
| ATOM | 8178 | O    | LYS | X | 534 | 30.874 | 14.077 | 50.523 | 0.00 | 0.00 |
| ATOM | 8179 | N    | LEU | X | 535 | 32.896 | 14.459 | 49.536 | 0.00 | 0.00 |
| ATOM | 8180 | H    | LEU | X | 535 | 33.439 | 15.065 | 48.939 | 0.00 | 0.00 |
| ATOM | 8181 | CA   | LEU | X | 535 | 33.612 | 13.576 | 50.412 | 0.00 | 0.00 |
| ATOM | 8182 | HA   | LEU | X | 535 | 32.997 | 12.706 | 50.641 | 0.00 | 0.00 |
| ATOM | 8183 | CB   | LEU | X | 535 | 34.917 | 13.191 | 49.677 | 0.00 | 0.00 |
| ATOM | 8184 | HB2  | LEU | X | 535 | 35.146 | 13.910 | 48.890 | 0.00 | 0.00 |
| ATOM | 8185 | HB3  | LEU | X | 535 | 35.629 | 13.424 | 50.468 | 0.00 | 0.00 |
| ATOM | 8186 | CG   | LEU | X | 535 | 34.979 | 11.732 | 49.325 | 0.00 | 0.00 |
| ATOM | 8187 | HG   | LEU | X | 535 | 34.917 | 11.047 | 50.170 | 0.00 | 0.00 |
| ATOM | 8188 | CD1  | LEU | X | 535 | 33.960 | 11.244 | 48.320 | 0.00 | 0.00 |
| ATOM | 8189 | HD11 | LEU | X | 535 | 33.963 | 11.818 | 47.393 | 0.00 | 0.00 |
| ATOM | 8190 | HD12 | LEU | X | 535 | 33.958 | 10.182 | 48.076 | 0.00 | 0.00 |
| ATOM | 8191 | HD13 | LEU | X | 535 | 32.982 | 11.463 | 48.747 | 0.00 | 0.00 |
| ATOM | 8192 | CD2  | LEU | X | 535 | 36.458 | 11.603 | 48.849 | 0.00 | 0.00 |
| ATOM | 8193 | HD21 | LEU | X | 535 | 36.632 | 12.280 | 48.013 | 0.00 | 0.00 |
| ATOM | 8194 | HD22 | LEU | X | 535 | 37.171 | 11.943 | 49.600 | 0.00 | 0.00 |
| ATOM | 8195 | HD23 | LEU | X | 535 | 36.533 | 10.582 | 48.474 | 0.00 | 0.00 |
| ATOM | 8196 | C    | LEU | X | 535 | 33.811 | 14.165 | 51.767 | 0.00 | 0.00 |
| ATOM | 8197 | O    | LEU | X | 535 | 33.731 | 13.353 | 52.719 | 0.00 | 0.00 |
| ATOM | 8198 | N    | LEU | X | 536 | 33.898 | 15.461 | 51.904 | 0.00 | 0.00 |
| ATOM | 8199 | H    | LEU | X | 536 | 33.815 | 15.985 | 51.044 | 0.00 | 0.00 |
| ATOM | 8200 | CA   | LEU | X | 536 | 33.896 | 16.126 | 53.151 | 0.00 | 0.00 |
| ATOM | 8201 | HA   | LEU | X | 536 | 34.522 | 15.560 | 53.841 | 0.00 | 0.00 |
| ATOM | 8202 | CB   | LEU | X | 536 | 34.402 | 17.522 | 53.029 | 0.00 | 0.00 |
| ATOM | 8203 | HB2  | LEU | X | 536 | 33.766 | 18.098 | 52.356 | 0.00 | 0.00 |
| ATOM | 8204 | HB3  | LEU | X | 536 | 34.161 | 18.020 | 53.969 | 0.00 | 0.00 |
| ATOM | 8205 | CG   | LEU | X | 536 | 35.893 | 17.654 | 52.748 | 0.00 | 0.00 |
| ATOM | 8206 | HG   | LEU | X | 536 | 36.063 | 17.163 | 51.790 | 0.00 | 0.00 |
| ATOM | 8207 | CD1  | LEU | X | 536 | 36.218 | 19.132 | 52.594 | 0.00 | 0.00 |
| ATOM | 8208 | HD11 | LEU | X | 536 | 37.259 | 19.319 | 52.328 | 0.00 | 0.00 |
| ATOM | 8209 | HD12 | LEU | X | 536 | 35.537 | 19.585 | 51.874 | 0.00 | 0.00 |
| ATOM | 8210 | HD13 | LEU | X | 536 | 36.009 | 19.702 | 53.499 | 0.00 | 0.00 |
| ATOM | 8211 | CD2  | LEU | X | 536 | 36.703 | 17.038 | 53.889 | 0.00 | 0.00 |
| ATOM | 8212 | HD21 | LEU | X | 536 | 37.758 | 17.232 | 53.692 | 0.00 | 0.00 |
| ATOM | 8213 | HD22 | LEU | X | 536 | 36.402 | 17.537 | 54.810 | 0.00 | 0.00 |
| ATOM | 8214 | HD23 | LEU | X | 536 | 36.600 | 15.953 | 53.906 | 0.00 | 0.00 |
| ATOM | 8215 | C    | LEU | X | 536 | 32.519 | 16.090 | 53.803 | 0.00 | 0.00 |
| ATOM | 8216 | O    | LEU | X | 536 | 32.330 | 16.086 | 54.995 | 0.00 | 0.00 |
| ATOM | 8217 | N    | SER | X | 537 | 31.478 | 16.222 | 52.951 | 0.00 | 0.00 |
| ATOM | 8218 | H    | SER | X | 537 | 31.624 | 16.453 | 51.979 | 0.00 | 0.00 |
| ATOM | 8219 | CA   | SER | X | 537 | 30.085 | 16.221 | 53.384 | 0.00 | 0.00 |
| ATOM | 8220 | HA   | SER | X | 537 | 30.029 | 16.994 | 54.150 | 0.00 | 0.00 |
| ATOM | 8221 | CB   | SER | X | 537 | 29.132 | 16.585 | 52.246 | 0.00 | 0.00 |
| ATOM | 8222 | HB2  | SER | X | 537 | 29.186 | 15.865 | 51.430 | 0.00 | 0.00 |
| ATOM | 8223 | HB3  | SER | X | 537 | 28.125 | 16.510 | 52.657 | 0.00 | 0.00 |
| ATOM | 8224 | OG   | SER | X | 537 | 29.233 | 17.837 | 51.696 | 0.00 | 0.00 |
| ATOM | 8225 | HG   | SER | X | 537 | 30.053 | 17.934 | 51.206 | 0.00 | 0.00 |
| ATOM | 8226 | C    | SER | X | 537 | 29.721 | 14.863 | 53.955 | 0.00 | 0.00 |
| ATOM | 8227 | O    | SER | X | 537 | 28.710 | 14.664 | 54.593 | 0.00 | 0.00 |
| ATOM | 8228 | N    | ALA | X | 538 | 30.594 | 13.817 | 53.684 | 0.00 | 0.00 |
| ATOM | 8229 | H    | ALA | X | 538 | 31.357 | 13.933 | 53.032 | 0.00 | 0.00 |
| ATOM | 8230 | CA   | ALA | X | 538 | 30.369 | 12.383 | 54.059 | 0.00 | 0.00 |
| ATOM | 8231 | HA   | ALA | X | 538 | 29.312 | 12.298 | 54.311 | 0.00 | 0.00 |

|      |      |      |     |   |     |        |        |        |      |      |
|------|------|------|-----|---|-----|--------|--------|--------|------|------|
| ATOM | 8232 | CB   | ALA | X | 538 | 30.795 | 11.489 | 52.846 | 0.00 | 0.00 |
| ATOM | 8233 | HB1  | ALA | X | 538 | 30.597 | 10.454 | 53.127 | 0.00 | 0.00 |
| ATOM | 8234 | HB2  | ALA | X | 538 | 30.269 | 11.717 | 51.919 | 0.00 | 0.00 |
| ATOM | 8235 | HB3  | ALA | X | 538 | 31.874 | 11.548 | 52.703 | 0.00 | 0.00 |
| ATOM | 8236 | C    | ALA | X | 538 | 31.107 | 11.943 | 55.344 | 0.00 | 0.00 |
| ATOM | 8237 | O    | ALA | X | 538 | 30.995 | 10.749 | 55.754 | 0.00 | 0.00 |
| ATOM | 8238 | N    | THR | X | 539 | 31.818 | 12.855 | 55.930 | 0.00 | 0.00 |
| ATOM | 8239 | H    | THR | X | 539 | 31.413 | 13.773 | 55.810 | 0.00 | 0.00 |
| ATOM | 8240 | CA   | THR | X | 539 | 32.723 | 12.763 | 57.082 | 0.00 | 0.00 |
| ATOM | 8241 | HA   | THR | X | 539 | 32.606 | 11.811 | 57.600 | 0.00 | 0.00 |
| ATOM | 8242 | CB   | THR | X | 539 | 34.185 | 12.724 | 56.643 | 0.00 | 0.00 |
| ATOM | 8243 | HB   | THR | X | 539 | 34.842 | 12.831 | 57.506 | 0.00 | 0.00 |
| ATOM | 8244 | CG2  | THR | X | 539 | 34.586 | 11.479 | 55.887 | 0.00 | 0.00 |
| ATOM | 8245 | HG21 | THR | X | 539 | 34.106 | 10.626 | 56.366 | 0.00 | 0.00 |
| ATOM | 8246 | HG22 | THR | X | 539 | 34.266 | 11.413 | 54.847 | 0.00 | 0.00 |
| ATOM | 8247 | HG23 | THR | X | 539 | 35.655 | 11.329 | 56.039 | 0.00 | 0.00 |
| ATOM | 8248 | OG1  | THR | X | 539 | 34.535 | 13.734 | 55.759 | 0.00 | 0.00 |
| ATOM | 8249 | HG1  | THR | X | 539 | 34.130 | 13.612 | 54.897 | 0.00 | 0.00 |
| ATOM | 8250 | C    | THR | X | 539 | 32.369 | 13.781 | 58.116 | 0.00 | 0.00 |
| ATOM | 8251 | O    | THR | X | 539 | 33.070 | 13.986 | 59.125 | 0.00 | 0.00 |
| ATOM | 8252 | OXT  | THR | X | 539 | 31.219 | 14.244 | 58.165 | 0.00 | 0.00 |
| ATOM | 8253 | C    | LIG | X | 540 | 52.602 | 41.998 | 46.081 | 0.00 | 0.00 |
| ATOM | 8254 | C1   | LIG | X | 540 | 53.455 | 40.989 | 45.686 | 0.00 | 0.00 |
| ATOM | 8255 | C2   | LIG | X | 540 | 54.153 | 40.324 | 46.691 | 0.00 | 0.00 |
| ATOM | 8256 | C3   | LIG | X | 540 | 54.033 | 40.638 | 48.053 | 0.00 | 0.00 |
| ATOM | 8257 | C4   | LIG | X | 540 | 53.001 | 41.596 | 48.435 | 0.00 | 0.00 |
| ATOM | 8258 | C5   | LIG | X | 540 | 52.380 | 42.308 | 47.407 | 0.00 | 0.00 |
| ATOM | 8259 | C6   | LIG | X | 540 | 53.604 | 40.779 | 44.234 | 0.00 | 0.00 |
| ATOM | 8260 | N    | LIG | X | 540 | 52.694 | 39.799 | 43.551 | 0.00 | 0.00 |
| ATOM | 8261 | H    | LIG | X | 540 | 51.713 | 40.124 | 43.561 | 0.00 | 0.00 |
| ATOM | 8262 | C7   | LIG | X | 540 | 52.996 | 38.457 | 44.144 | 0.00 | 0.00 |
| ATOM | 8263 | C8   | LIG | X | 540 | 54.176 | 37.763 | 43.339 | 0.00 | 0.00 |
| ATOM | 8264 | C9   | LIG | X | 540 | 54.256 | 38.577 | 42.064 | 0.00 | 0.00 |
| ATOM | 8265 | C10  | LIG | X | 540 | 53.190 | 39.604 | 42.130 | 0.00 | 0.00 |
| ATOM | 8266 | O    | LIG | X | 540 | 54.934 | 40.116 | 49.007 | 0.00 | 0.00 |
| ATOM | 8267 | C11  | LIG | X | 540 | 56.362 | 40.383 | 48.904 | 0.00 | 0.00 |
| ATOM | 8268 | O1   | LIG | X | 540 | 52.613 | 41.820 | 49.712 | 0.00 | 0.00 |
| ATOM | 8269 | H1   | LIG | X | 540 | 52.876 | 41.049 | 50.246 | 0.00 | 0.00 |
| ATOM | 8270 | H2   | LIG | X | 540 | 52.084 | 42.491 | 45.262 | 0.00 | 0.00 |
| ATOM | 8271 | H3   | LIG | X | 540 | 54.886 | 39.588 | 46.371 | 0.00 | 0.00 |
| ATOM | 8272 | H4   | LIG | X | 540 | 51.629 | 43.000 | 47.781 | 0.00 | 0.00 |
| ATOM | 8273 | H5   | LIG | X | 540 | 54.589 | 40.336 | 44.084 | 0.00 | 0.00 |
| ATOM | 8274 | H6   | LIG | X | 540 | 53.518 | 41.760 | 43.764 | 0.00 | 0.00 |
| ATOM | 8275 | H7   | LIG | X | 540 | 53.163 | 38.603 | 45.212 | 0.00 | 0.00 |
| ATOM | 8276 | H8   | LIG | X | 540 | 52.166 | 37.787 | 43.913 | 0.00 | 0.00 |
| ATOM | 8277 | H9   | LIG | X | 540 | 53.943 | 36.704 | 43.210 | 0.00 | 0.00 |
| ATOM | 8278 | H10  | LIG | X | 540 | 55.092 | 37.909 | 43.914 | 0.00 | 0.00 |
| ATOM | 8279 | H11  | LIG | X | 540 | 55.226 | 39.050 | 41.904 | 0.00 | 0.00 |
| ATOM | 8280 | H12  | LIG | X | 540 | 54.029 | 37.933 | 41.212 | 0.00 | 0.00 |
| ATOM | 8281 | H13  | LIG | X | 540 | 52.371 | 39.255 | 41.499 | 0.00 | 0.00 |
| ATOM | 8282 | H14  | LIG | X | 540 | 53.394 | 40.598 | 41.728 | 0.00 | 0.00 |
| ATOM | 8283 | H15  | LIG | X | 540 | 56.901 | 40.025 | 49.785 | 0.00 | 0.00 |
| ATOM | 8284 | H16  | LIG | X | 540 | 56.599 | 41.440 | 48.762 | 0.00 | 0.00 |
| ATOM | 8285 | H17  | LIG | X | 540 | 56.578 | 39.724 | 48.059 | 0.00 | 0.00 |
| ATOM | 8286 | Na+  | Na+ | X | 541 | 66.854 | 76.478 | 50.735 | 0.00 | 0.00 |
| ATOM | 8287 | Na+  | Na+ | X | 542 | 57.962 | 31.996 | 60.856 | 0.00 | 0.00 |
| ATOM | 8288 | Na+  | Na+ | X | 543 | 29.010 | 18.595 | 56.711 | 0.00 | 0.00 |
| ATOM | 8289 | Na+  | Na+ | X | 544 | 53.536 | 22.830 | 37.375 | 0.00 | 0.00 |
| ATOM | 8290 | Na+  | Na+ | X | 545 | 51.594 | 0.886  | 51.014 | 0.00 | 0.00 |
| ATOM | 8291 | Na+  | Na+ | X | 546 | 68.707 | 45.872 | 47.661 | 0.00 | 0.00 |

END

### 3-HCl

|        |        |        |        |       |       |        |        |        |      |      |
|--------|--------|--------|--------|-------|-------|--------|--------|--------|------|------|
| CRYST1 | 85.092 | 85.092 | 85.092 | 90.00 | 90.00 | 90.00  | P 1    |        | 1    |      |
| ATOM   | 1      | N      | ASP    | X     | 1     | 41.693 | 76.156 | 30.872 | 0.00 | 0.00 |
| ATOM   | 2      | H1     | ASP    | X     | 1     | 42.622 | 76.551 | 30.896 | 0.00 | 0.00 |
| ATOM   | 3      | H2     | ASP    | X     | 1     | 41.066 | 76.901 | 30.602 | 0.00 | 0.00 |
| ATOM   | 4      | H3     | ASP    | X     | 1     | 41.639 | 75.399 | 30.205 | 0.00 | 0.00 |
| ATOM   | 5      | CA     | ASP    | X     | 1     | 41.426 | 75.669 | 32.260 | 0.00 | 0.00 |
| ATOM   | 6      | HA     | ASP    | X     | 1     | 42.370 | 75.177 | 32.496 | 0.00 | 0.00 |
| ATOM   | 7      | CB     | ASP    | X     | 1     | 41.233 | 76.822 | 33.158 | 0.00 | 0.00 |

|      |    |      |     |   |   |        |        |        |      |      |
|------|----|------|-----|---|---|--------|--------|--------|------|------|
| ATOM | 8  | HB2  | ASP | X | 1 | 41.922 | 77.657 | 33.034 | 0.00 | 0.00 |
| ATOM | 9  | HB3  | ASP | X | 1 | 40.230 | 77.188 | 32.937 | 0.00 | 0.00 |
| ATOM | 10 | CG   | ASP | X | 1 | 41.220 | 76.307 | 34.593 | 0.00 | 0.00 |
| ATOM | 11 | OD1  | ASP | X | 1 | 40.254 | 76.593 | 35.327 | 0.00 | 0.00 |
| ATOM | 12 | OD2  | ASP | X | 1 | 42.258 | 75.655 | 35.009 | 0.00 | 0.00 |
| ATOM | 13 | C    | ASP | X | 1 | 40.332 | 74.547 | 32.371 | 0.00 | 0.00 |
| ATOM | 14 | O    | ASP | X | 1 | 40.557 | 73.465 | 32.870 | 0.00 | 0.00 |
| ATOM | 15 | N    | ALA | X | 2 | 39.158 | 74.945 | 31.933 | 0.00 | 0.00 |
| ATOM | 16 | H    | ALA | X | 2 | 39.087 | 75.885 | 31.571 | 0.00 | 0.00 |
| ATOM | 17 | CA   | ALA | X | 2 | 37.827 | 74.337 | 31.931 | 0.00 | 0.00 |
| ATOM | 18 | HA   | ALA | X | 2 | 37.381 | 74.462 | 32.918 | 0.00 | 0.00 |
| ATOM | 19 | CB   | ALA | X | 2 | 37.014 | 75.162 | 30.920 | 0.00 | 0.00 |
| ATOM | 20 | HB1  | ALA | X | 2 | 37.392 | 74.996 | 29.911 | 0.00 | 0.00 |
| ATOM | 21 | HB2  | ALA | X | 2 | 36.020 | 74.717 | 30.921 | 0.00 | 0.00 |
| ATOM | 22 | HB3  | ALA | X | 2 | 37.022 | 76.249 | 30.998 | 0.00 | 0.00 |
| ATOM | 23 | C    | ALA | X | 2 | 37.775 | 72.840 | 31.534 | 0.00 | 0.00 |
| ATOM | 24 | O    | ALA | X | 2 | 36.841 | 72.154 | 31.938 | 0.00 | 0.00 |
| ATOM | 25 | N    | GLU | X | 3 | 38.631 | 72.405 | 30.679 | 0.00 | 0.00 |
| ATOM | 26 | H    | GLU | X | 3 | 39.325 | 73.004 | 30.256 | 0.00 | 0.00 |
| ATOM | 27 | CA   | GLU | X | 3 | 38.593 | 70.942 | 30.305 | 0.00 | 0.00 |
| ATOM | 28 | HA   | GLU | X | 3 | 37.557 | 70.612 | 30.384 | 0.00 | 0.00 |
| ATOM | 29 | CB   | GLU | X | 3 | 39.035 | 70.752 | 28.859 | 0.00 | 0.00 |
| ATOM | 30 | HB2  | GLU | X | 3 | 39.996 | 71.244 | 28.705 | 0.00 | 0.00 |
| ATOM | 31 | HB3  | GLU | X | 3 | 39.191 | 69.687 | 28.684 | 0.00 | 0.00 |
| ATOM | 32 | CG   | GLU | X | 3 | 37.991 | 71.229 | 27.748 | 0.00 | 0.00 |
| ATOM | 33 | HG2  | GLU | X | 3 | 38.340 | 70.765 | 26.825 | 0.00 | 0.00 |
| ATOM | 34 | HG3  | GLU | X | 3 | 36.986 | 70.892 | 28.004 | 0.00 | 0.00 |
| ATOM | 35 | CD   | GLU | X | 3 | 37.807 | 72.742 | 27.634 | 0.00 | 0.00 |
| ATOM | 36 | OE1  | GLU | X | 3 | 38.798 | 73.484 | 27.482 | 0.00 | 0.00 |
| ATOM | 37 | OE2  | GLU | X | 3 | 36.648 | 73.201 | 27.499 | 0.00 | 0.00 |
| ATOM | 38 | C    | GLU | X | 3 | 39.340 | 70.039 | 31.293 | 0.00 | 0.00 |
| ATOM | 39 | O    | GLU | X | 3 | 38.985 | 68.842 | 31.379 | 0.00 | 0.00 |
| ATOM | 40 | N    | LEU | X | 4 | 40.055 | 70.671 | 32.166 | 0.00 | 0.00 |
| ATOM | 41 | H    | LEU | X | 4 | 40.147 | 71.667 | 32.025 | 0.00 | 0.00 |
| ATOM | 42 | CA   | LEU | X | 4 | 40.744 | 70.034 | 33.336 | 0.00 | 0.00 |
| ATOM | 43 | HA   | LEU | X | 4 | 40.606 | 68.952 | 33.327 | 0.00 | 0.00 |
| ATOM | 44 | CB   | LEU | X | 4 | 42.245 | 70.463 | 33.421 | 0.00 | 0.00 |
| ATOM | 45 | HB2  | LEU | X | 4 | 42.344 | 71.535 | 33.588 | 0.00 | 0.00 |
| ATOM | 46 | HB3  | LEU | X | 4 | 42.746 | 69.947 | 34.240 | 0.00 | 0.00 |
| ATOM | 47 | CG   | LEU | X | 4 | 43.075 | 70.119 | 32.141 | 0.00 | 0.00 |
| ATOM | 48 | HG   | LEU | X | 4 | 42.536 | 70.610 | 31.331 | 0.00 | 0.00 |
| ATOM | 49 | CD1  | LEU | X | 4 | 44.460 | 70.652 | 32.028 | 0.00 | 0.00 |
| ATOM | 50 | HD11 | LEU | X | 4 | 45.002 | 70.231 | 32.875 | 0.00 | 0.00 |
| ATOM | 51 | HD12 | LEU | X | 4 | 44.876 | 70.302 | 31.083 | 0.00 | 0.00 |
| ATOM | 52 | HD13 | LEU | X | 4 | 44.376 | 71.738 | 31.990 | 0.00 | 0.00 |
| ATOM | 53 | CD2  | LEU | X | 4 | 43.045 | 68.621 | 31.864 | 0.00 | 0.00 |
| ATOM | 54 | HD21 | LEU | X | 4 | 43.437 | 68.203 | 32.792 | 0.00 | 0.00 |
| ATOM | 55 | HD22 | LEU | X | 4 | 42.028 | 68.264 | 31.709 | 0.00 | 0.00 |
| ATOM | 56 | HD23 | LEU | X | 4 | 43.645 | 68.361 | 30.992 | 0.00 | 0.00 |
| ATOM | 57 | C    | LEU | X | 4 | 40.007 | 70.341 | 34.610 | 0.00 | 0.00 |
| ATOM | 58 | O    | LEU | X | 4 | 40.155 | 69.620 | 35.593 | 0.00 | 0.00 |
| ATOM | 59 | N    | LEU | X | 5 | 39.288 | 71.430 | 34.663 | 0.00 | 0.00 |
| ATOM | 60 | H    | LEU | X | 5 | 39.143 | 72.021 | 33.856 | 0.00 | 0.00 |
| ATOM | 61 | CA   | LEU | X | 5 | 38.527 | 71.831 | 35.806 | 0.00 | 0.00 |
| ATOM | 62 | HA   | LEU | X | 5 | 39.087 | 71.485 | 36.675 | 0.00 | 0.00 |
| ATOM | 63 | CB   | LEU | X | 5 | 38.520 | 73.369 | 35.827 | 0.00 | 0.00 |
| ATOM | 64 | HB2  | LEU | X | 5 | 39.576 | 73.637 | 35.795 | 0.00 | 0.00 |
| ATOM | 65 | HB3  | LEU | X | 5 | 38.141 | 73.716 | 34.866 | 0.00 | 0.00 |
| ATOM | 66 | CG   | LEU | X | 5 | 37.690 | 74.113 | 36.939 | 0.00 | 0.00 |
| ATOM | 67 | HG   | LEU | X | 5 | 37.932 | 75.152 | 36.714 | 0.00 | 0.00 |
| ATOM | 68 | CD1  | LEU | X | 5 | 36.114 | 73.917 | 36.740 | 0.00 | 0.00 |
| ATOM | 69 | HD11 | LEU | X | 5 | 35.778 | 74.823 | 37.245 | 0.00 | 0.00 |
| ATOM | 70 | HD12 | LEU | X | 5 | 35.943 | 74.001 | 35.666 | 0.00 | 0.00 |
| ATOM | 71 | HD13 | LEU | X | 5 | 35.682 | 73.077 | 37.284 | 0.00 | 0.00 |
| ATOM | 72 | CD2  | LEU | X | 5 | 38.083 | 73.681 | 38.318 | 0.00 | 0.00 |
| ATOM | 73 | HD21 | LEU | X | 5 | 37.764 | 72.674 | 38.588 | 0.00 | 0.00 |
| ATOM | 74 | HD22 | LEU | X | 5 | 39.155 | 73.854 | 38.407 | 0.00 | 0.00 |
| ATOM | 75 | HD23 | LEU | X | 5 | 37.632 | 74.352 | 39.049 | 0.00 | 0.00 |
| ATOM | 76 | C    | LEU | X | 5 | 37.148 | 71.186 | 35.666 | 0.00 | 0.00 |
| ATOM | 77 | O    | LEU | X | 5 | 36.524 | 71.349 | 34.618 | 0.00 | 0.00 |

|      |     |      |     |   |   |        |        |        |      |      |
|------|-----|------|-----|---|---|--------|--------|--------|------|------|
| ATOM | 78  | N    | VAL | X | 6 | 36.619 | 70.598 | 36.699 | 0.00 | 0.00 |
| ATOM | 79  | H    | VAL | X | 6 | 37.110 | 70.635 | 37.581 | 0.00 | 0.00 |
| ATOM | 80  | CA   | VAL | X | 6 | 35.291 | 69.786 | 36.719 | 0.00 | 0.00 |
| ATOM | 81  | HA   | VAL | X | 6 | 34.594 | 70.196 | 35.988 | 0.00 | 0.00 |
| ATOM | 82  | CB   | VAL | X | 6 | 35.615 | 68.331 | 36.274 | 0.00 | 0.00 |
| ATOM | 83  | HB   | VAL | X | 6 | 36.307 | 68.449 | 35.439 | 0.00 | 0.00 |
| ATOM | 84  | CG1  | VAL | X | 6 | 36.293 | 67.426 | 37.338 | 0.00 | 0.00 |
| ATOM | 85  | HG11 | VAL | X | 6 | 37.247 | 67.895 | 37.581 | 0.00 | 0.00 |
| ATOM | 86  | HG12 | VAL | X | 6 | 35.665 | 67.449 | 38.229 | 0.00 | 0.00 |
| ATOM | 87  | HG13 | VAL | X | 6 | 36.456 | 66.416 | 36.964 | 0.00 | 0.00 |
| ATOM | 88  | CG2  | VAL | X | 6 | 34.450 | 67.572 | 35.548 | 0.00 | 0.00 |
| ATOM | 89  | HG21 | VAL | X | 6 | 34.061 | 68.118 | 34.687 | 0.00 | 0.00 |
| ATOM | 90  | HG22 | VAL | X | 6 | 34.900 | 66.676 | 35.121 | 0.00 | 0.00 |
| ATOM | 91  | HG23 | VAL | X | 6 | 33.692 | 67.205 | 36.240 | 0.00 | 0.00 |
| ATOM | 92  | C    | VAL | X | 6 | 34.692 | 69.734 | 38.071 | 0.00 | 0.00 |
| ATOM | 93  | O    | VAL | X | 6 | 35.387 | 70.105 | 39.047 | 0.00 | 0.00 |
| ATOM | 94  | N    | THR | X | 7 | 33.376 | 69.466 | 38.244 | 0.00 | 0.00 |
| ATOM | 95  | H    | THR | X | 7 | 32.936 | 69.076 | 37.423 | 0.00 | 0.00 |
| ATOM | 96  | CA   | THR | X | 7 | 32.666 | 69.446 | 39.588 | 0.00 | 0.00 |
| ATOM | 97  | HA   | THR | X | 7 | 33.445 | 69.495 | 40.348 | 0.00 | 0.00 |
| ATOM | 98  | CB   | THR | X | 7 | 31.687 | 70.550 | 39.773 | 0.00 | 0.00 |
| ATOM | 99  | HB   | THR | X | 7 | 30.878 | 70.276 | 39.096 | 0.00 | 0.00 |
| ATOM | 100 | CG2  | THR | X | 7 | 31.238 | 70.814 | 41.157 | 0.00 | 0.00 |
| ATOM | 101 | HG21 | THR | X | 7 | 30.592 | 71.688 | 41.240 | 0.00 | 0.00 |
| ATOM | 102 | HG22 | THR | X | 7 | 30.762 | 69.899 | 41.509 | 0.00 | 0.00 |
| ATOM | 103 | HG23 | THR | X | 7 | 32.052 | 71.120 | 41.815 | 0.00 | 0.00 |
| ATOM | 104 | OG1  | THR | X | 7 | 32.267 | 71.717 | 39.193 | 0.00 | 0.00 |
| ATOM | 105 | HG1  | THR | X | 7 | 31.549 | 72.107 | 38.689 | 0.00 | 0.00 |
| ATOM | 106 | C    | THR | X | 7 | 32.039 | 68.074 | 39.832 | 0.00 | 0.00 |
| ATOM | 107 | O    | THR | X | 7 | 31.377 | 67.504 | 38.957 | 0.00 | 0.00 |
| ATOM | 108 | N    | VAL | X | 8 | 32.256 | 67.561 | 41.050 | 0.00 | 0.00 |
| ATOM | 109 | H    | VAL | X | 8 | 32.660 | 68.201 | 41.719 | 0.00 | 0.00 |
| ATOM | 110 | CA   | VAL | X | 8 | 31.580 | 66.253 | 41.426 | 0.00 | 0.00 |
| ATOM | 111 | HA   | VAL | X | 8 | 30.905 | 65.892 | 40.651 | 0.00 | 0.00 |
| ATOM | 112 | CB   | VAL | X | 8 | 32.517 | 65.101 | 41.790 | 0.00 | 0.00 |
| ATOM | 113 | HB   | VAL | X | 8 | 32.003 | 64.179 | 42.060 | 0.00 | 0.00 |
| ATOM | 114 | CG1  | VAL | X | 8 | 33.294 | 64.765 | 40.538 | 0.00 | 0.00 |
| ATOM | 115 | HG11 | VAL | X | 8 | 33.812 | 65.695 | 40.302 | 0.00 | 0.00 |
| ATOM | 116 | HG12 | VAL | X | 8 | 34.046 | 64.015 | 40.784 | 0.00 | 0.00 |
| ATOM | 117 | HG13 | VAL | X | 8 | 32.757 | 64.420 | 39.655 | 0.00 | 0.00 |
| ATOM | 118 | CG2  | VAL | X | 8 | 33.521 | 65.534 | 42.808 | 0.00 | 0.00 |
| ATOM | 119 | HG21 | VAL | X | 8 | 34.179 | 64.710 | 43.084 | 0.00 | 0.00 |
| ATOM | 120 | HG22 | VAL | X | 8 | 34.151 | 66.387 | 42.558 | 0.00 | 0.00 |
| ATOM | 121 | HG23 | VAL | X | 8 | 33.174 | 65.838 | 43.795 | 0.00 | 0.00 |
| ATOM | 122 | C    | VAL | X | 8 | 30.692 | 66.625 | 42.629 | 0.00 | 0.00 |
| ATOM | 123 | O    | VAL | X | 8 | 30.692 | 67.793 | 43.051 | 0.00 | 0.00 |
| ATOM | 124 | N    | ARG | X | 9 | 29.925 | 65.651 | 43.130 | 0.00 | 0.00 |
| ATOM | 125 | H    | ARG | X | 9 | 30.117 | 64.732 | 42.756 | 0.00 | 0.00 |
| ATOM | 126 | CA   | ARG | X | 9 | 28.856 | 65.925 | 44.115 | 0.00 | 0.00 |
| ATOM | 127 | HA   | ARG | X | 9 | 28.267 | 66.768 | 43.753 | 0.00 | 0.00 |
| ATOM | 128 | CB   | ARG | X | 9 | 27.921 | 64.728 | 44.360 | 0.00 | 0.00 |
| ATOM | 129 | HB2  | ARG | X | 9 | 27.795 | 64.205 | 43.412 | 0.00 | 0.00 |
| ATOM | 130 | HB3  | ARG | X | 9 | 28.321 | 64.024 | 45.090 | 0.00 | 0.00 |
| ATOM | 131 | CG   | ARG | X | 9 | 26.483 | 65.217 | 44.752 | 0.00 | 0.00 |
| ATOM | 132 | HG2  | ARG | X | 9 | 26.319 | 65.423 | 45.809 | 0.00 | 0.00 |
| ATOM | 133 | HG3  | ARG | X | 9 | 26.125 | 66.034 | 44.125 | 0.00 | 0.00 |
| ATOM | 134 | CD   | ARG | X | 9 | 25.591 | 63.984 | 44.526 | 0.00 | 0.00 |
| ATOM | 135 | HD2  | ARG | X | 9 | 25.586 | 63.691 | 43.476 | 0.00 | 0.00 |
| ATOM | 136 | HD3  | ARG | X | 9 | 25.943 | 63.093 | 45.047 | 0.00 | 0.00 |
| ATOM | 137 | NE   | ARG | X | 9 | 24.232 | 64.199 | 45.070 | 0.00 | 0.00 |
| ATOM | 138 | HE   | ARG | X | 9 | 23.943 | 65.149 | 45.255 | 0.00 | 0.00 |
| ATOM | 139 | CZ   | ARG | X | 9 | 23.338 | 63.448 | 45.655 | 0.00 | 0.00 |
| ATOM | 140 | NH1  | ARG | X | 9 | 23.479 | 62.147 | 45.767 | 0.00 | 0.00 |
| ATOM | 141 | HH11 | ARG | X | 9 | 24.265 | 61.662 | 45.359 | 0.00 | 0.00 |
| ATOM | 142 | HH12 | ARG | X | 9 | 22.900 | 61.604 | 46.392 | 0.00 | 0.00 |
| ATOM | 143 | NH2  | ARG | X | 9 | 22.342 | 64.077 | 46.254 | 0.00 | 0.00 |
| ATOM | 144 | HH21 | ARG | X | 9 | 22.224 | 65.072 | 46.124 | 0.00 | 0.00 |
| ATOM | 145 | HH22 | ARG | X | 9 | 21.589 | 63.590 | 46.718 | 0.00 | 0.00 |
| ATOM | 146 | C    | ARG | X | 9 | 29.397 | 66.409 | 45.472 | 0.00 | 0.00 |
| ATOM | 147 | O    | ARG | X | 9 | 28.647 | 66.908 | 46.270 | 0.00 | 0.00 |



|      |     |      |     |   |    |        |        |        |      |      |
|------|-----|------|-----|---|----|--------|--------|--------|------|------|
| ATOM | 148 | N    | GLY | X | 10 | 30.700 | 66.341 | 45.749 | 0.00 | 0.00 |
| ATOM | 149 | H    | GLY | X | 10 | 31.174 | 65.599 | 45.254 | 0.00 | 0.00 |
| ATOM | 150 | CA   | GLY | X | 10 | 31.353 | 66.965 | 46.894 | 0.00 | 0.00 |
| ATOM | 151 | HA2  | GLY | X | 10 | 30.599 | 66.971 | 47.656 | 0.00 | 0.00 |
| ATOM | 152 | HA3  | GLY | X | 10 | 32.259 | 66.423 | 47.050 | 0.00 | 0.00 |
| ATOM | 153 | C    | GLY | X | 10 | 31.829 | 68.431 | 46.682 | 0.00 | 0.00 |
| ATOM | 154 | O    | GLY | X | 10 | 31.958 | 69.169 | 47.658 | 0.00 | 0.00 |
| ATOM | 155 | N    | GLY | X | 11 | 32.136 | 68.817 | 45.424 | 0.00 | 0.00 |
| ATOM | 156 | H    | GLY | X | 11 | 31.974 | 68.163 | 44.672 | 0.00 | 0.00 |
| ATOM | 157 | CA   | GLY | X | 11 | 32.772 | 70.082 | 44.999 | 0.00 | 0.00 |
| ATOM | 158 | HA2  | GLY | X | 11 | 32.038 | 70.854 | 44.922 | 0.00 | 0.00 |
| ATOM | 159 | HA3  | GLY | X | 11 | 33.385 | 70.352 | 45.702 | 0.00 | 0.00 |
| ATOM | 160 | C    | GLY | X | 11 | 33.551 | 70.092 | 43.707 | 0.00 | 0.00 |
| ATOM | 161 | O    | GLY | X | 11 | 33.581 | 69.208 | 42.899 | 0.00 | 0.00 |
| ATOM | 162 | N    | ARG | X | 12 | 34.456 | 71.106 | 43.658 | 0.00 | 0.00 |
| ATOM | 163 | H    | ARG | X | 12 | 34.372 | 71.801 | 44.387 | 0.00 | 0.00 |
| ATOM | 164 | CA   | ARG | X | 12 | 35.243 | 71.320 | 42.460 | 0.00 | 0.00 |
| ATOM | 165 | HA   | ARG | X | 12 | 34.777 | 70.910 | 41.563 | 0.00 | 0.00 |
| ATOM | 166 | CB   | ARG | X | 12 | 35.473 | 72.739 | 42.154 | 0.00 | 0.00 |
| ATOM | 167 | HB2  | ARG | X | 12 | 36.103 | 73.127 | 42.954 | 0.00 | 0.00 |
| ATOM | 168 | HB3  | ARG | X | 12 | 35.942 | 72.838 | 41.176 | 0.00 | 0.00 |
| ATOM | 169 | CG   | ARG | X | 12 | 34.161 | 73.568 | 42.133 | 0.00 | 0.00 |
| ATOM | 170 | HG2  | ARG | X | 12 | 33.651 | 73.292 | 41.210 | 0.00 | 0.00 |
| ATOM | 171 | HG3  | ARG | X | 12 | 33.554 | 73.386 | 43.020 | 0.00 | 0.00 |
| ATOM | 172 | CD   | ARG | X | 12 | 34.503 | 75.078 | 42.068 | 0.00 | 0.00 |
| ATOM | 173 | HD2  | ARG | X | 12 | 34.925 | 75.422 | 43.012 | 0.00 | 0.00 |
| ATOM | 174 | HD3  | ARG | X | 12 | 35.284 | 75.216 | 41.319 | 0.00 | 0.00 |
| ATOM | 175 | NE   | ARG | X | 12 | 33.233 | 75.795 | 41.769 | 0.00 | 0.00 |
| ATOM | 176 | HE   | ARG | X | 12 | 32.450 | 75.591 | 42.374 | 0.00 | 0.00 |
| ATOM | 177 | CZ   | ARG | X | 12 | 32.998 | 76.683 | 40.784 | 0.00 | 0.00 |
| ATOM | 178 | NH1  | ARG | X | 12 | 33.930 | 77.159 | 39.980 | 0.00 | 0.00 |
| ATOM | 179 | HH11 | ARG | X | 12 | 34.914 | 76.937 | 40.024 | 0.00 | 0.00 |
| ATOM | 180 | HH12 | ARG | X | 12 | 33.605 | 77.831 | 39.300 | 0.00 | 0.00 |
| ATOM | 181 | NH2  | ARG | X | 12 | 31.744 | 77.135 | 40.669 | 0.00 | 0.00 |
| ATOM | 182 | HH21 | ARG | X | 12 | 31.129 | 76.816 | 41.404 | 0.00 | 0.00 |
| ATOM | 183 | HH22 | ARG | X | 12 | 31.396 | 77.764 | 39.959 | 0.00 | 0.00 |
| ATOM | 184 | C    | ARG | X | 12 | 36.597 | 70.604 | 42.557 | 0.00 | 0.00 |
| ATOM | 185 | O    | ARG | X | 12 | 37.183 | 70.602 | 43.636 | 0.00 | 0.00 |
| ATOM | 186 | N    | LEU | X | 13 | 37.016 | 70.056 | 41.452 | 0.00 | 0.00 |
| ATOM | 187 | H    | LEU | X | 13 | 36.498 | 70.338 | 40.632 | 0.00 | 0.00 |
| ATOM | 188 | CA   | LEU | X | 13 | 38.321 | 69.513 | 41.235 | 0.00 | 0.00 |
| ATOM | 189 | HA   | LEU | X | 13 | 39.011 | 69.706 | 42.056 | 0.00 | 0.00 |
| ATOM | 190 | CB   | LEU | X | 13 | 38.172 | 67.995 | 41.074 | 0.00 | 0.00 |
| ATOM | 191 | HB2  | LEU | X | 13 | 37.560 | 67.918 | 40.176 | 0.00 | 0.00 |
| ATOM | 192 | HB3  | LEU | X | 13 | 39.186 | 67.614 | 40.953 | 0.00 | 0.00 |
| ATOM | 193 | CG   | LEU | X | 13 | 37.551 | 67.066 | 42.194 | 0.00 | 0.00 |
| ATOM | 194 | HG   | LEU | X | 13 | 36.599 | 67.472 | 42.537 | 0.00 | 0.00 |
| ATOM | 195 | CD1  | LEU | X | 13 | 37.326 | 65.729 | 41.523 | 0.00 | 0.00 |
| ATOM | 196 | HD11 | LEU | X | 13 | 37.082 | 64.931 | 42.224 | 0.00 | 0.00 |
| ATOM | 197 | HD12 | LEU | X | 13 | 36.635 | 65.818 | 40.685 | 0.00 | 0.00 |
| ATOM | 198 | HD13 | LEU | X | 13 | 38.240 | 65.389 | 41.035 | 0.00 | 0.00 |
| ATOM | 199 | CD2  | LEU | X | 13 | 38.447 | 66.984 | 43.433 | 0.00 | 0.00 |
| ATOM | 200 | HD21 | LEU | X | 13 | 39.277 | 66.302 | 43.247 | 0.00 | 0.00 |
| ATOM | 201 | HD22 | LEU | X | 13 | 38.873 | 67.953 | 43.692 | 0.00 | 0.00 |
| ATOM | 202 | HD23 | LEU | X | 13 | 37.743 | 66.562 | 44.150 | 0.00 | 0.00 |
| ATOM | 203 | C    | LEU | X | 13 | 38.976 | 70.028 | 39.988 | 0.00 | 0.00 |
| ATOM | 204 | O    | LEU | X | 13 | 38.289 | 70.189 | 38.951 | 0.00 | 0.00 |
| ATOM | 205 | N    | ARG | X | 14 | 40.295 | 69.953 | 40.039 | 0.00 | 0.00 |
| ATOM | 206 | H    | ARG | X | 14 | 40.792 | 69.812 | 40.906 | 0.00 | 0.00 |
| ATOM | 207 | CA   | ARG | X | 14 | 41.145 | 70.223 | 38.922 | 0.00 | 0.00 |
| ATOM | 208 | HA   | ARG | X | 14 | 40.539 | 70.106 | 38.023 | 0.00 | 0.00 |
| ATOM | 209 | CB   | ARG | X | 14 | 41.591 | 71.712 | 38.930 | 0.00 | 0.00 |
| ATOM | 210 | HB2  | ARG | X | 14 | 40.751 | 72.405 | 38.889 | 0.00 | 0.00 |
| ATOM | 211 | HB3  | ARG | X | 14 | 42.262 | 71.828 | 39.780 | 0.00 | 0.00 |
| ATOM | 212 | CG   | ARG | X | 14 | 42.328 | 72.081 | 37.646 | 0.00 | 0.00 |
| ATOM | 213 | HG2  | ARG | X | 14 | 43.126 | 71.346 | 37.538 | 0.00 | 0.00 |
| ATOM | 214 | HG3  | ARG | X | 14 | 41.732 | 72.047 | 36.735 | 0.00 | 0.00 |
| ATOM | 215 | CD   | ARG | X | 14 | 43.120 | 73.459 | 37.580 | 0.00 | 0.00 |
| ATOM | 216 | HD2  | ARG | X | 14 | 43.992 | 73.577 | 38.223 | 0.00 | 0.00 |
| ATOM | 217 | HD3  | ARG | X | 14 | 43.596 | 73.489 | 36.600 | 0.00 | 0.00 |

|      |     |      |     |   |    |        |        |        |      |      |
|------|-----|------|-----|---|----|--------|--------|--------|------|------|
| ATOM | 218 | NE   | ARG | X | 14 | 42.155 | 74.629 | 37.510 | 0.00 | 0.00 |
| ATOM | 219 | HE   | ARG | X | 14 | 41.813 | 74.938 | 36.611 | 0.00 | 0.00 |
| ATOM | 220 | CZ   | ARG | X | 14 | 41.770 | 75.414 | 38.493 | 0.00 | 0.00 |
| ATOM | 221 | NH1  | ARG | X | 14 | 42.244 | 75.344 | 39.711 | 0.00 | 0.00 |
| ATOM | 222 | HH11 | ARG | X | 14 | 42.910 | 74.608 | 39.897 | 0.00 | 0.00 |
| ATOM | 223 | HH12 | ARG | X | 14 | 42.047 | 76.051 | 40.404 | 0.00 | 0.00 |
| ATOM | 224 | NH2  | ARG | X | 14 | 40.947 | 76.387 | 38.169 | 0.00 | 0.00 |
| ATOM | 225 | HH21 | ARG | X | 14 | 40.559 | 76.471 | 37.240 | 0.00 | 0.00 |
| ATOM | 226 | HH22 | ARG | X | 14 | 40.626 | 77.070 | 38.839 | 0.00 | 0.00 |
| ATOM | 227 | C    | ARG | X | 14 | 42.263 | 69.222 | 38.728 | 0.00 | 0.00 |
| ATOM | 228 | O    | ARG | X | 14 | 43.106 | 69.089 | 39.596 | 0.00 | 0.00 |
| ATOM | 229 | N    | GLY | X | 15 | 42.290 | 68.749 | 37.487 | 0.00 | 0.00 |
| ATOM | 230 | H    | GLY | X | 15 | 41.610 | 69.140 | 36.852 | 0.00 | 0.00 |
| ATOM | 231 | CA   | GLY | X | 15 | 43.299 | 67.778 | 37.077 | 0.00 | 0.00 |
| ATOM | 232 | HA2  | GLY | X | 15 | 43.783 | 67.398 | 38.027 | 0.00 | 0.00 |
| ATOM | 233 | HA3  | GLY | X | 15 | 42.709 | 67.069 | 36.564 | 0.00 | 0.00 |
| ATOM | 234 | C    | GLY | X | 15 | 44.318 | 68.311 | 36.062 | 0.00 | 0.00 |
| ATOM | 235 | O    | GLY | X | 15 | 44.801 | 69.481 | 35.944 | 0.00 | 0.00 |
| ATOM | 236 | N    | ILE | X | 16 | 44.823 | 67.333 | 35.251 | 0.00 | 0.00 |
| ATOM | 237 | H    | ILE | X | 16 | 44.644 | 66.347 | 35.376 | 0.00 | 0.00 |
| ATOM | 238 | CA   | ILE | X | 16 | 45.941 | 67.530 | 34.350 | 0.00 | 0.00 |
| ATOM | 239 | HA   | ILE | X | 16 | 45.957 | 68.605 | 34.171 | 0.00 | 0.00 |
| ATOM | 240 | CB   | ILE | X | 16 | 47.166 | 67.041 | 35.147 | 0.00 | 0.00 |
| ATOM | 241 | HB   | ILE | X | 16 | 48.041 | 67.152 | 34.507 | 0.00 | 0.00 |
| ATOM | 242 | CG2  | ILE | X | 16 | 47.506 | 68.016 | 36.296 | 0.00 | 0.00 |
| ATOM | 243 | HG21 | ILE | X | 16 | 46.948 | 67.531 | 37.098 | 0.00 | 0.00 |
| ATOM | 244 | HG22 | ILE | X | 16 | 48.560 | 68.072 | 36.566 | 0.00 | 0.00 |
| ATOM | 245 | HG23 | ILE | X | 16 | 47.204 | 69.047 | 36.112 | 0.00 | 0.00 |
| ATOM | 246 | CG1  | ILE | X | 16 | 47.075 | 65.600 | 35.633 | 0.00 | 0.00 |
| ATOM | 247 | HG12 | ILE | X | 16 | 46.264 | 65.354 | 36.319 | 0.00 | 0.00 |
| ATOM | 248 | HG13 | ILE | X | 16 | 46.808 | 64.967 | 34.786 | 0.00 | 0.00 |
| ATOM | 249 | CD1  | ILE | X | 16 | 48.407 | 65.043 | 36.152 | 0.00 | 0.00 |
| ATOM | 250 | HD11 | ILE | X | 16 | 48.768 | 65.699 | 36.944 | 0.00 | 0.00 |
| ATOM | 251 | HD12 | ILE | X | 16 | 48.307 | 64.042 | 36.571 | 0.00 | 0.00 |
| ATOM | 252 | HD13 | ILE | X | 16 | 49.174 | 65.026 | 35.378 | 0.00 | 0.00 |
| ATOM | 253 | C    | ILE | X | 16 | 45.883 | 66.924 | 32.982 | 0.00 | 0.00 |
| ATOM | 254 | O    | ILE | X | 16 | 45.282 | 65.865 | 32.801 | 0.00 | 0.00 |
| ATOM | 255 | N    | ARG | X | 17 | 46.675 | 67.441 | 32.032 | 0.00 | 0.00 |
| ATOM | 256 | H    | ARG | X | 17 | 47.193 | 68.305 | 32.100 | 0.00 | 0.00 |
| ATOM | 257 | CA   | ARG | X | 17 | 46.881 | 66.728 | 30.849 | 0.00 | 0.00 |
| ATOM | 258 | HA   | ARG | X | 17 | 46.073 | 66.034 | 30.620 | 0.00 | 0.00 |
| ATOM | 259 | CB   | ARG | X | 17 | 46.911 | 67.736 | 29.692 | 0.00 | 0.00 |
| ATOM | 260 | HB2  | ARG | X | 17 | 46.000 | 68.328 | 29.779 | 0.00 | 0.00 |
| ATOM | 261 | HB3  | ARG | X | 17 | 47.693 | 68.467 | 29.897 | 0.00 | 0.00 |
| ATOM | 262 | CG   | ARG | X | 17 | 47.011 | 67.119 | 28.286 | 0.00 | 0.00 |
| ATOM | 263 | HG2  | ARG | X | 17 | 47.916 | 66.535 | 28.116 | 0.00 | 0.00 |
| ATOM | 264 | HG3  | ARG | X | 17 | 46.252 | 66.357 | 28.110 | 0.00 | 0.00 |
| ATOM | 265 | CD   | ARG | X | 17 | 46.846 | 68.181 | 27.205 | 0.00 | 0.00 |
| ATOM | 266 | HD2  | ARG | X | 17 | 46.590 | 67.707 | 26.258 | 0.00 | 0.00 |
| ATOM | 267 | HD3  | ARG | X | 17 | 46.088 | 68.911 | 27.489 | 0.00 | 0.00 |
| ATOM | 268 | NE   | ARG | X | 17 | 48.137 | 68.872 | 27.037 | 0.00 | 0.00 |
| ATOM | 269 | HE   | ARG | X | 17 | 48.280 | 69.833 | 27.310 | 0.00 | 0.00 |
| ATOM | 270 | CZ   | ARG | X | 17 | 49.239 | 68.353 | 26.410 | 0.00 | 0.00 |
| ATOM | 271 | NH1  | ARG | X | 17 | 49.300 | 67.092 | 26.035 | 0.00 | 0.00 |
| ATOM | 272 | HH11 | ARG | X | 17 | 48.430 | 66.588 | 25.931 | 0.00 | 0.00 |
| ATOM | 273 | HH12 | ARG | X | 17 | 50.152 | 66.771 | 25.600 | 0.00 | 0.00 |
| ATOM | 274 | NH2  | ARG | X | 17 | 50.264 | 69.115 | 26.088 | 0.00 | 0.00 |
| ATOM | 275 | HH21 | ARG | X | 17 | 50.344 | 70.073 | 26.396 | 0.00 | 0.00 |
| ATOM | 276 | HH22 | ARG | X | 17 | 50.991 | 68.751 | 25.489 | 0.00 | 0.00 |
| ATOM | 277 | C    | ARG | X | 17 | 48.097 | 65.753 | 30.989 | 0.00 | 0.00 |
| ATOM | 278 | O    | ARG | X | 17 | 49.251 | 66.192 | 31.325 | 0.00 | 0.00 |
| ATOM | 279 | N    | LEU | X | 18 | 47.996 | 64.460 | 30.568 | 0.00 | 0.00 |
| ATOM | 280 | H    | LEU | X | 18 | 47.072 | 64.201 | 30.252 | 0.00 | 0.00 |
| ATOM | 281 | CA   | LEU | X | 18 | 49.102 | 63.478 | 30.431 | 0.00 | 0.00 |
| ATOM | 282 | HA   | LEU | X | 18 | 50.040 | 63.828 | 30.863 | 0.00 | 0.00 |
| ATOM | 283 | CB   | LEU | X | 18 | 48.676 | 62.155 | 31.074 | 0.00 | 0.00 |
| ATOM | 284 | HB2  | LEU | X | 18 | 47.729 | 61.863 | 30.620 | 0.00 | 0.00 |
| ATOM | 285 | HB3  | LEU | X | 18 | 49.367 | 61.352 | 30.817 | 0.00 | 0.00 |
| ATOM | 286 | CG   | LEU | X | 18 | 48.417 | 61.993 | 32.547 | 0.00 | 0.00 |
| ATOM | 287 | HG   | LEU | X | 18 | 47.365 | 62.257 | 32.655 | 0.00 | 0.00 |

|      |     |      |     |   |    |        |        |        |      |      |
|------|-----|------|-----|---|----|--------|--------|--------|------|------|
| ATOM | 288 | CD1  | LEU | X | 18 | 48.553 | 60.466 | 32.813 | 0.00 | 0.00 |
| ATOM | 289 | HD11 | LEU | X | 18 | 47.777 | 59.965 | 32.235 | 0.00 | 0.00 |
| ATOM | 290 | HD12 | LEU | X | 18 | 49.485 | 60.031 | 32.453 | 0.00 | 0.00 |
| ATOM | 291 | HD13 | LEU | X | 18 | 48.413 | 60.263 | 33.875 | 0.00 | 0.00 |
| ATOM | 292 | CD2  | LEU | X | 18 | 49.303 | 62.866 | 33.332 | 0.00 | 0.00 |
| ATOM | 293 | HD21 | LEU | X | 18 | 49.144 | 63.935 | 33.192 | 0.00 | 0.00 |
| ATOM | 294 | HD22 | LEU | X | 18 | 48.942 | 62.781 | 34.357 | 0.00 | 0.00 |
| ATOM | 295 | HD23 | LEU | X | 18 | 50.300 | 62.438 | 33.221 | 0.00 | 0.00 |
| ATOM | 296 | C    | LEU | X | 18 | 49.563 | 63.321 | 28.956 | 0.00 | 0.00 |
| ATOM | 297 | O    | LEU | X | 18 | 48.700 | 63.302 | 28.049 | 0.00 | 0.00 |
| ATOM | 298 | N    | LYS | X | 19 | 50.869 | 63.116 | 28.737 | 0.00 | 0.00 |
| ATOM | 299 | H    | LYS | X | 19 | 51.482 | 63.107 | 29.540 | 0.00 | 0.00 |
| ATOM | 300 | CA   | LYS | X | 19 | 51.568 | 62.994 | 27.423 | 0.00 | 0.00 |
| ATOM | 301 | HA   | LYS | X | 19 | 50.865 | 63.252 | 26.630 | 0.00 | 0.00 |
| ATOM | 302 | CB   | LYS | X | 19 | 52.815 | 63.934 | 27.376 | 0.00 | 0.00 |
| ATOM | 303 | HB2  | LYS | X | 19 | 53.544 | 63.775 | 28.171 | 0.00 | 0.00 |
| ATOM | 304 | HB3  | LYS | X | 19 | 53.443 | 63.649 | 26.531 | 0.00 | 0.00 |
| ATOM | 305 | CG   | LYS | X | 19 | 52.612 | 65.456 | 27.231 | 0.00 | 0.00 |
| ATOM | 306 | HG2  | LYS | X | 19 | 53.599 | 65.791 | 26.913 | 0.00 | 0.00 |
| ATOM | 307 | HG3  | LYS | X | 19 | 51.996 | 65.902 | 26.450 | 0.00 | 0.00 |
| ATOM | 308 | CD   | LYS | X | 19 | 52.347 | 66.224 | 28.515 | 0.00 | 0.00 |
| ATOM | 309 | HD2  | LYS | X | 19 | 52.171 | 67.203 | 28.070 | 0.00 | 0.00 |
| ATOM | 310 | HD3  | LYS | X | 19 | 51.461 | 65.813 | 28.998 | 0.00 | 0.00 |
| ATOM | 311 | CE   | LYS | X | 19 | 53.471 | 66.251 | 29.597 | 0.00 | 0.00 |
| ATOM | 312 | HE2  | LYS | X | 19 | 53.659 | 65.258 | 30.004 | 0.00 | 0.00 |
| ATOM | 313 | HE3  | LYS | X | 19 | 54.364 | 66.672 | 29.134 | 0.00 | 0.00 |
| ATOM | 314 | NZ   | LYS | X | 19 | 53.148 | 67.058 | 30.714 | 0.00 | 0.00 |
| ATOM | 315 | HZ1  | LYS | X | 19 | 53.871 | 67.148 | 31.414 | 0.00 | 0.00 |
| ATOM | 316 | HZ2  | LYS | X | 19 | 52.944 | 68.003 | 30.419 | 0.00 | 0.00 |
| ATOM | 317 | HZ3  | LYS | X | 19 | 52.489 | 66.632 | 31.349 | 0.00 | 0.00 |
| ATOM | 318 | C    | LYS | X | 19 | 51.965 | 61.535 | 27.086 | 0.00 | 0.00 |
| ATOM | 319 | O    | LYS | X | 19 | 52.601 | 60.845 | 27.904 | 0.00 | 0.00 |
| ATOM | 320 | N    | THR | X | 20 | 51.584 | 61.007 | 25.937 | 0.00 | 0.00 |
| ATOM | 321 | H    | THR | X | 20 | 50.845 | 61.417 | 25.383 | 0.00 | 0.00 |
| ATOM | 322 | CA   | THR | X | 20 | 51.750 | 59.596 | 25.550 | 0.00 | 0.00 |
| ATOM | 323 | HA   | THR | X | 20 | 52.680 | 59.190 | 25.949 | 0.00 | 0.00 |
| ATOM | 324 | CB   | THR | X | 20 | 50.602 | 58.799 | 26.152 | 0.00 | 0.00 |
| ATOM | 325 | HB   | THR | X | 20 | 50.623 | 57.838 | 25.639 | 0.00 | 0.00 |
| ATOM | 326 | CG2  | THR | X | 20 | 50.667 | 58.534 | 27.734 | 0.00 | 0.00 |
| ATOM | 327 | HG21 | THR | X | 20 | 51.642 | 58.293 | 28.157 | 0.00 | 0.00 |
| ATOM | 328 | HG22 | THR | X | 20 | 50.341 | 59.414 | 28.288 | 0.00 | 0.00 |
| ATOM | 329 | HG23 | THR | X | 20 | 50.019 | 57.674 | 27.904 | 0.00 | 0.00 |
| ATOM | 330 | OG1  | THR | X | 20 | 49.327 | 59.315 | 25.970 | 0.00 | 0.00 |
| ATOM | 331 | HG1  | THR | X | 20 | 48.928 | 58.806 | 25.261 | 0.00 | 0.00 |
| ATOM | 332 | C    | THR | X | 20 | 51.842 | 59.546 | 24.026 | 0.00 | 0.00 |
| ATOM | 333 | O    | THR | X | 20 | 51.282 | 60.450 | 23.428 | 0.00 | 0.00 |
| ATOM | 334 | N    | PRO | X | 21 | 52.526 | 58.589 | 23.385 | 0.00 | 0.00 |
| ATOM | 335 | CD   | PRO | X | 21 | 53.039 | 57.446 | 24.061 | 0.00 | 0.00 |
| ATOM | 336 | HD2  | PRO | X | 21 | 52.211 | 56.874 | 24.479 | 0.00 | 0.00 |
| ATOM | 337 | HD3  | PRO | X | 21 | 53.752 | 57.669 | 24.854 | 0.00 | 0.00 |
| ATOM | 338 | CG   | PRO | X | 21 | 53.690 | 56.587 | 23.038 | 0.00 | 0.00 |
| ATOM | 339 | HG2  | PRO | X | 21 | 53.003 | 55.767 | 22.831 | 0.00 | 0.00 |
| ATOM | 340 | HG3  | PRO | X | 21 | 54.673 | 56.305 | 23.416 | 0.00 | 0.00 |
| ATOM | 341 | CB   | PRO | X | 21 | 53.802 | 57.465 | 21.763 | 0.00 | 0.00 |
| ATOM | 342 | HB2  | PRO | X | 21 | 53.193 | 56.958 | 21.015 | 0.00 | 0.00 |
| ATOM | 343 | HB3  | PRO | X | 21 | 54.832 | 57.540 | 21.415 | 0.00 | 0.00 |
| ATOM | 344 | CA   | PRO | X | 21 | 52.980 | 58.711 | 21.994 | 0.00 | 0.00 |
| ATOM | 345 | HA   | PRO | X | 21 | 53.661 | 59.562 | 21.962 | 0.00 | 0.00 |
| ATOM | 346 | C    | PRO | X | 21 | 51.918 | 58.958 | 20.926 | 0.00 | 0.00 |
| ATOM | 347 | O    | PRO | X | 21 | 52.370 | 59.492 | 19.882 | 0.00 | 0.00 |
| ATOM | 348 | N    | GLY | X | 22 | 50.678 | 58.558 | 21.143 | 0.00 | 0.00 |
| ATOM | 349 | H    | GLY | X | 22 | 50.487 | 58.073 | 22.008 | 0.00 | 0.00 |
| ATOM | 350 | CA   | GLY | X | 22 | 49.689 | 58.439 | 20.096 | 0.00 | 0.00 |
| ATOM | 351 | HA2  | GLY | X | 22 | 50.019 | 58.933 | 19.163 | 0.00 | 0.00 |
| ATOM | 352 | HA3  | GLY | X | 22 | 49.450 | 57.408 | 19.871 | 0.00 | 0.00 |
| ATOM | 353 | C    | GLY | X | 22 | 48.362 | 59.167 | 20.453 | 0.00 | 0.00 |
| ATOM | 354 | O    | GLY | X | 22 | 47.384 | 58.862 | 19.852 | 0.00 | 0.00 |
| ATOM | 355 | N    | GLY | X | 23 | 48.412 | 60.052 | 21.486 | 0.00 | 0.00 |
| ATOM | 356 | H    | GLY | X | 23 | 49.276 | 60.152 | 22.001 | 0.00 | 0.00 |
| ATOM | 357 | CA   | GLY | X | 23 | 47.335 | 60.997 | 21.652 | 0.00 | 0.00 |

|      |     |      |     |   |    |        |        |        |      |      |
|------|-----|------|-----|---|----|--------|--------|--------|------|------|
| ATOM | 358 | HA2  | GLY | X | 23 | 47.554 | 61.920 | 21.115 | 0.00 | 0.00 |
| ATOM | 359 | HA3  | GLY | X | 23 | 46.392 | 60.488 | 21.412 | 0.00 | 0.00 |
| ATOM | 360 | C    | GLY | X | 23 | 47.198 | 61.338 | 23.163 | 0.00 | 0.00 |
| ATOM | 361 | O    | GLY | X | 23 | 47.314 | 60.455 | 23.988 | 0.00 | 0.00 |
| ATOM | 362 | N    | PRO | X | 24 | 46.862 | 62.581 | 23.540 | 0.00 | 0.00 |
| ATOM | 363 | CD   | PRO | X | 24 | 46.403 | 63.664 | 22.640 | 0.00 | 0.00 |
| ATOM | 364 | HD2  | PRO | X | 24 | 45.495 | 63.274 | 22.179 | 0.00 | 0.00 |
| ATOM | 365 | HD3  | PRO | X | 24 | 47.142 | 64.003 | 21.914 | 0.00 | 0.00 |
| ATOM | 366 | CG   | PRO | X | 24 | 45.988 | 64.831 | 23.582 | 0.00 | 0.00 |
| ATOM | 367 | HG2  | PRO | X | 24 | 44.924 | 64.637 | 23.723 | 0.00 | 0.00 |
| ATOM | 368 | HG3  | PRO | X | 24 | 46.164 | 65.825 | 23.170 | 0.00 | 0.00 |
| ATOM | 369 | CB   | PRO | X | 24 | 46.707 | 64.596 | 24.862 | 0.00 | 0.00 |
| ATOM | 370 | HB2  | PRO | X | 24 | 46.131 | 64.902 | 25.736 | 0.00 | 0.00 |
| ATOM | 371 | HB3  | PRO | X | 24 | 47.688 | 65.071 | 24.858 | 0.00 | 0.00 |
| ATOM | 372 | CA   | PRO | X | 24 | 46.862 | 63.017 | 24.902 | 0.00 | 0.00 |
| ATOM | 373 | HA   | PRO | X | 24 | 47.812 | 62.696 | 25.330 | 0.00 | 0.00 |
| ATOM | 374 | C    | PRO | X | 24 | 45.679 | 62.477 | 25.686 | 0.00 | 0.00 |
| ATOM | 375 | O    | PRO | X | 24 | 44.574 | 62.310 | 25.130 | 0.00 | 0.00 |
| ATOM | 376 | N    | VAL | X | 25 | 45.813 | 62.170 | 26.965 | 0.00 | 0.00 |
| ATOM | 377 | H    | VAL | X | 25 | 46.713 | 62.343 | 27.389 | 0.00 | 0.00 |
| ATOM | 378 | CA   | VAL | X | 25 | 44.903 | 61.642 | 27.949 | 0.00 | 0.00 |
| ATOM | 379 | HA   | VAL | X | 25 | 43.891 | 61.504 | 27.568 | 0.00 | 0.00 |
| ATOM | 380 | CB   | VAL | X | 25 | 45.445 | 60.286 | 28.468 | 0.00 | 0.00 |
| ATOM | 381 | HB   | VAL | X | 25 | 46.528 | 60.342 | 28.579 | 0.00 | 0.00 |
| ATOM | 382 | CG1  | VAL | X | 25 | 44.785 | 59.682 | 29.711 | 0.00 | 0.00 |
| ATOM | 383 | HG11 | VAL | X | 25 | 44.886 | 60.463 | 30.464 | 0.00 | 0.00 |
| ATOM | 384 | HG12 | VAL | X | 25 | 43.696 | 59.646 | 29.709 | 0.00 | 0.00 |
| ATOM | 385 | HG13 | VAL | X | 25 | 45.172 | 58.697 | 29.975 | 0.00 | 0.00 |
| ATOM | 386 | CG2  | VAL | X | 25 | 45.234 | 59.348 | 27.334 | 0.00 | 0.00 |
| ATOM | 387 | HG21 | VAL | X | 25 | 45.494 | 58.313 | 27.557 | 0.00 | 0.00 |
| ATOM | 388 | HG22 | VAL | X | 25 | 44.246 | 59.453 | 26.886 | 0.00 | 0.00 |
| ATOM | 389 | HG23 | VAL | X | 25 | 45.921 | 59.476 | 26.498 | 0.00 | 0.00 |
| ATOM | 390 | C    | VAL | X | 25 | 44.812 | 62.688 | 29.092 | 0.00 | 0.00 |
| ATOM | 391 | O    | VAL | X | 25 | 45.681 | 63.499 | 29.342 | 0.00 | 0.00 |
| ATOM | 392 | N    | SER | X | 26 | 43.678 | 62.741 | 29.771 | 0.00 | 0.00 |
| ATOM | 393 | H    | SER | X | 26 | 42.872 | 62.155 | 29.611 | 0.00 | 0.00 |
| ATOM | 394 | CA   | SER | X | 26 | 43.426 | 63.509 | 30.998 | 0.00 | 0.00 |
| ATOM | 395 | HA   | SER | X | 26 | 44.027 | 64.399 | 31.181 | 0.00 | 0.00 |
| ATOM | 396 | CB   | SER | X | 26 | 41.939 | 64.163 | 31.030 | 0.00 | 0.00 |
| ATOM | 397 | HB2  | SER | X | 26 | 41.200 | 63.406 | 31.293 | 0.00 | 0.00 |
| ATOM | 398 | HB3  | SER | X | 26 | 41.793 | 64.810 | 31.895 | 0.00 | 0.00 |
| ATOM | 399 | OG   | SER | X | 26 | 41.498 | 64.718 | 29.825 | 0.00 | 0.00 |
| ATOM | 400 | HG   | SER | X | 26 | 41.438 | 63.955 | 29.245 | 0.00 | 0.00 |
| ATOM | 401 | C    | SER | X | 26 | 43.605 | 62.558 | 32.198 | 0.00 | 0.00 |
| ATOM | 402 | O    | SER | X | 26 | 43.346 | 61.358 | 32.031 | 0.00 | 0.00 |
| ATOM | 403 | N    | ALA | X | 27 | 44.082 | 63.019 | 33.386 | 0.00 | 0.00 |
| ATOM | 404 | H    | ALA | X | 27 | 44.425 | 63.968 | 33.425 | 0.00 | 0.00 |
| ATOM | 405 | CA   | ALA | X | 27 | 44.169 | 62.204 | 34.602 | 0.00 | 0.00 |
| ATOM | 406 | HA   | ALA | X | 27 | 43.379 | 61.465 | 34.467 | 0.00 | 0.00 |
| ATOM | 407 | CB   | ALA | X | 27 | 45.555 | 61.624 | 34.676 | 0.00 | 0.00 |
| ATOM | 408 | HB1  | ALA | X | 27 | 45.792 | 60.920 | 33.878 | 0.00 | 0.00 |
| ATOM | 409 | HB2  | ALA | X | 27 | 46.321 | 62.400 | 34.701 | 0.00 | 0.00 |
| ATOM | 410 | HB3  | ALA | X | 27 | 45.695 | 60.966 | 35.533 | 0.00 | 0.00 |
| ATOM | 411 | C    | ALA | X | 27 | 43.809 | 63.052 | 35.834 | 0.00 | 0.00 |
| ATOM | 412 | O    | ALA | X | 27 | 43.855 | 64.309 | 35.793 | 0.00 | 0.00 |
| ATOM | 413 | N    | PHE | X | 28 | 43.270 | 62.457 | 36.881 | 0.00 | 0.00 |
| ATOM | 414 | H    | PHE | X | 28 | 43.300 | 61.447 | 36.884 | 0.00 | 0.00 |
| ATOM | 415 | CA   | PHE | X | 28 | 42.409 | 62.989 | 37.896 | 0.00 | 0.00 |
| ATOM | 416 | HA   | PHE | X | 28 | 42.730 | 63.986 | 38.196 | 0.00 | 0.00 |
| ATOM | 417 | CB   | PHE | X | 28 | 40.955 | 63.192 | 37.439 | 0.00 | 0.00 |
| ATOM | 418 | HB2  | PHE | X | 28 | 40.651 | 62.247 | 36.988 | 0.00 | 0.00 |
| ATOM | 419 | HB3  | PHE | X | 28 | 40.193 | 63.289 | 38.212 | 0.00 | 0.00 |
| ATOM | 420 | CG   | PHE | X | 28 | 40.594 | 64.315 | 36.499 | 0.00 | 0.00 |
| ATOM | 421 | CD1  | PHE | X | 28 | 40.501 | 63.987 | 35.139 | 0.00 | 0.00 |
| ATOM | 422 | HD1  | PHE | X | 28 | 40.607 | 62.981 | 34.759 | 0.00 | 0.00 |
| ATOM | 423 | CE1  | PHE | X | 28 | 40.091 | 64.968 | 34.217 | 0.00 | 0.00 |
| ATOM | 424 | HE1  | PHE | X | 28 | 39.946 | 64.707 | 33.179 | 0.00 | 0.00 |
| ATOM | 425 | CZ   | PHE | X | 28 | 39.656 | 66.217 | 34.713 | 0.00 | 0.00 |
| ATOM | 426 | HZ   | PHE | X | 28 | 39.289 | 66.846 | 33.915 | 0.00 | 0.00 |
| ATOM | 427 | CE2  | PHE | X | 28 | 39.820 | 66.566 | 36.050 | 0.00 | 0.00 |

|      |     |      |     |   |    |        |        |        |      |      |
|------|-----|------|-----|---|----|--------|--------|--------|------|------|
| ATOM | 428 | HE2  | PHE | X | 28 | 39.435 | 67.530 | 36.347 | 0.00 | 0.00 |
| ATOM | 429 | CD2  | PHE | X | 28 | 40.323 | 65.596 | 36.945 | 0.00 | 0.00 |
| ATOM | 430 | HD2  | PHE | X | 28 | 40.395 | 65.757 | 38.010 | 0.00 | 0.00 |
| ATOM | 431 | C    | PHE | X | 28 | 42.573 | 62.177 | 39.186 | 0.00 | 0.00 |
| ATOM | 432 | O    | PHE | X | 28 | 41.974 | 61.114 | 39.284 | 0.00 | 0.00 |
| ATOM | 433 | N    | LEU | X | 29 | 43.465 | 62.544 | 40.098 | 0.00 | 0.00 |
| ATOM | 434 | H    | LEU | X | 29 | 44.053 | 63.295 | 39.767 | 0.00 | 0.00 |
| ATOM | 435 | CA   | LEU | X | 29 | 44.078 | 61.602 | 41.101 | 0.00 | 0.00 |
| ATOM | 436 | HA   | LEU | X | 29 | 43.675 | 60.589 | 41.071 | 0.00 | 0.00 |
| ATOM | 437 | CB   | LEU | X | 29 | 45.565 | 61.612 | 40.858 | 0.00 | 0.00 |
| ATOM | 438 | HB2  | LEU | X | 29 | 45.922 | 62.638 | 40.945 | 0.00 | 0.00 |
| ATOM | 439 | HB3  | LEU | X | 29 | 46.010 | 60.919 | 41.573 | 0.00 | 0.00 |
| ATOM | 440 | CG   | LEU | X | 29 | 45.985 | 61.240 | 39.423 | 0.00 | 0.00 |
| ATOM | 441 | HG   | LEU | X | 29 | 45.576 | 61.954 | 38.708 | 0.00 | 0.00 |
| ATOM | 442 | CD1  | LEU | X | 29 | 47.496 | 61.474 | 39.353 | 0.00 | 0.00 |
| ATOM | 443 | HD11 | LEU | X | 29 | 47.996 | 60.865 | 40.106 | 0.00 | 0.00 |
| ATOM | 444 | HD12 | LEU | X | 29 | 47.869 | 61.192 | 38.368 | 0.00 | 0.00 |
| ATOM | 445 | HD13 | LEU | X | 29 | 47.659 | 62.548 | 39.447 | 0.00 | 0.00 |
| ATOM | 446 | CD2  | LEU | X | 29 | 45.592 | 59.870 | 38.849 | 0.00 | 0.00 |
| ATOM | 447 | HD21 | LEU | X | 29 | 46.107 | 59.060 | 39.363 | 0.00 | 0.00 |
| ATOM | 448 | HD22 | LEU | X | 29 | 44.506 | 59.793 | 38.913 | 0.00 | 0.00 |
| ATOM | 449 | HD23 | LEU | X | 29 | 45.934 | 59.893 | 37.814 | 0.00 | 0.00 |
| ATOM | 450 | C    | LEU | X | 29 | 43.859 | 62.087 | 42.525 | 0.00 | 0.00 |
| ATOM | 451 | O    | LEU | X | 29 | 43.919 | 63.241 | 42.948 | 0.00 | 0.00 |
| ATOM | 452 | N    | GLY | X | 30 | 43.679 | 61.067 | 43.376 | 0.00 | 0.00 |
| ATOM | 453 | H    | GLY | X | 30 | 43.715 | 60.132 | 42.996 | 0.00 | 0.00 |
| ATOM | 454 | CA   | GLY | X | 30 | 43.526 | 61.281 | 44.811 | 0.00 | 0.00 |
| ATOM | 455 | HA2  | GLY | X | 30 | 43.598 | 60.418 | 45.379 | 0.00 | 0.00 |
| ATOM | 456 | HA3  | GLY | X | 30 | 44.203 | 62.038 | 45.227 | 0.00 | 0.00 |
| ATOM | 457 | C    | GLY | X | 30 | 42.216 | 61.916 | 45.263 | 0.00 | 0.00 |
| ATOM | 458 | O    | GLY | X | 30 | 42.241 | 62.665 | 46.229 | 0.00 | 0.00 |
| ATOM | 459 | N    | ILE | X | 31 | 41.168 | 61.717 | 44.511 | 0.00 | 0.00 |
| ATOM | 460 | H    | ILE | X | 31 | 41.267 | 61.128 | 43.697 | 0.00 | 0.00 |
| ATOM | 461 | CA   | ILE | X | 31 | 39.885 | 62.349 | 44.730 | 0.00 | 0.00 |
| ATOM | 462 | HA   | ILE | X | 31 | 39.990 | 63.424 | 44.580 | 0.00 | 0.00 |
| ATOM | 463 | CB   | ILE | X | 31 | 38.916 | 61.922 | 43.566 | 0.00 | 0.00 |
| ATOM | 464 | HB   | ILE | X | 31 | 38.929 | 60.832 | 43.559 | 0.00 | 0.00 |
| ATOM | 465 | CG2  | ILE | X | 31 | 37.488 | 62.356 | 43.991 | 0.00 | 0.00 |
| ATOM | 466 | HG21 | ILE | X | 31 | 37.126 | 61.921 | 44.923 | 0.00 | 0.00 |
| ATOM | 467 | HG22 | ILE | X | 31 | 37.386 | 63.440 | 43.948 | 0.00 | 0.00 |
| ATOM | 468 | HG23 | ILE | X | 31 | 36.761 | 62.033 | 43.247 | 0.00 | 0.00 |
| ATOM | 469 | CG1  | ILE | X | 31 | 39.506 | 62.537 | 42.198 | 0.00 | 0.00 |
| ATOM | 470 | HG12 | ILE | X | 31 | 39.392 | 63.621 | 42.172 | 0.00 | 0.00 |
| ATOM | 471 | HG13 | ILE | X | 31 | 40.492 | 62.089 | 42.077 | 0.00 | 0.00 |
| ATOM | 472 | CD1  | ILE | X | 31 | 38.710 | 62.076 | 40.955 | 0.00 | 0.00 |
| ATOM | 473 | HD11 | ILE | X | 31 | 38.869 | 62.780 | 40.138 | 0.00 | 0.00 |
| ATOM | 474 | HD12 | ILE | X | 31 | 39.174 | 61.135 | 40.660 | 0.00 | 0.00 |
| ATOM | 475 | HD13 | ILE | X | 31 | 37.626 | 62.084 | 41.066 | 0.00 | 0.00 |
| ATOM | 476 | C    | ILE | X | 31 | 39.356 | 61.908 | 46.156 | 0.00 | 0.00 |
| ATOM | 477 | O    | ILE | X | 31 | 39.292 | 60.691 | 46.331 | 0.00 | 0.00 |
| ATOM | 478 | N    | PRO | X | 32 | 39.114 | 62.760 | 47.153 | 0.00 | 0.00 |
| ATOM | 479 | CD   | PRO | X | 32 | 39.050 | 64.208 | 47.004 | 0.00 | 0.00 |
| ATOM | 480 | HD2  | PRO | X | 32 | 38.555 | 64.535 | 46.089 | 0.00 | 0.00 |
| ATOM | 481 | HD3  | PRO | X | 32 | 40.080 | 64.564 | 47.010 | 0.00 | 0.00 |
| ATOM | 482 | CG   | PRO | X | 32 | 38.375 | 64.665 | 48.308 | 0.00 | 0.00 |
| ATOM | 483 | HG2  | PRO | X | 32 | 37.311 | 64.778 | 48.100 | 0.00 | 0.00 |
| ATOM | 484 | HG3  | PRO | X | 32 | 38.809 | 65.621 | 48.602 | 0.00 | 0.00 |
| ATOM | 485 | CB   | PRO | X | 32 | 38.748 | 63.508 | 49.239 | 0.00 | 0.00 |
| ATOM | 486 | HB2  | PRO | X | 32 | 38.094 | 63.463 | 50.109 | 0.00 | 0.00 |
| ATOM | 487 | HB3  | PRO | X | 32 | 39.781 | 63.593 | 49.576 | 0.00 | 0.00 |
| ATOM | 488 | CA   | PRO | X | 32 | 38.560 | 62.294 | 48.451 | 0.00 | 0.00 |
| ATOM | 489 | HA   | PRO | X | 32 | 39.193 | 61.475 | 48.791 | 0.00 | 0.00 |
| ATOM | 490 | C    | PRO | X | 32 | 37.114 | 61.785 | 48.389 | 0.00 | 0.00 |
| ATOM | 491 | O    | PRO | X | 32 | 36.162 | 62.440 | 47.890 | 0.00 | 0.00 |
| ATOM | 492 | N    | PHE | X | 33 | 36.786 | 60.682 | 48.990 | 0.00 | 0.00 |
| ATOM | 493 | H    | PHE | X | 33 | 37.463 | 60.058 | 49.405 | 0.00 | 0.00 |
| ATOM | 494 | CA   | PHE | X | 33 | 35.511 | 60.022 | 48.650 | 0.00 | 0.00 |
| ATOM | 495 | HA   | PHE | X | 33 | 34.867 | 60.834 | 48.314 | 0.00 | 0.00 |
| ATOM | 496 | CB   | PHE | X | 33 | 35.717 | 58.990 | 47.514 | 0.00 | 0.00 |
| ATOM | 497 | HB2  | PHE | X | 33 | 34.774 | 58.926 | 46.971 | 0.00 | 0.00 |

|      |     |     |     |   |    |        |        |        |      |      |
|------|-----|-----|-----|---|----|--------|--------|--------|------|------|
| ATOM | 498 | HB3 | PHE | X | 33 | 36.436 | 59.375 | 46.791 | 0.00 | 0.00 |
| ATOM | 499 | CG  | PHE | X | 33 | 36.194 | 57.581 | 48.016 | 0.00 | 0.00 |
| ATOM | 500 | CD1 | PHE | X | 33 | 35.229 | 56.598 | 48.311 | 0.00 | 0.00 |
| ATOM | 501 | HD1 | PHE | X | 33 | 34.184 | 56.866 | 48.259 | 0.00 | 0.00 |
| ATOM | 502 | CE1 | PHE | X | 33 | 35.691 | 55.280 | 48.530 | 0.00 | 0.00 |
| ATOM | 503 | HE1 | PHE | X | 33 | 34.938 | 54.536 | 48.745 | 0.00 | 0.00 |
| ATOM | 504 | CZ  | PHE | X | 33 | 37.066 | 54.915 | 48.483 | 0.00 | 0.00 |
| ATOM | 505 | HZ  | PHE | X | 33 | 37.353 | 53.899 | 48.712 | 0.00 | 0.00 |
| ATOM | 506 | CE2 | PHE | X | 33 | 38.021 | 55.896 | 48.171 | 0.00 | 0.00 |
| ATOM | 507 | HE2 | PHE | X | 33 | 39.064 | 55.632 | 48.266 | 0.00 | 0.00 |
| ATOM | 508 | CD2 | PHE | X | 33 | 37.583 | 57.202 | 47.909 | 0.00 | 0.00 |
| ATOM | 509 | HD2 | PHE | X | 33 | 38.347 | 57.945 | 47.732 | 0.00 | 0.00 |
| ATOM | 510 | C   | PHE | X | 33 | 34.800 | 59.395 | 49.811 | 0.00 | 0.00 |
| ATOM | 511 | O   | PHE | X | 33 | 33.538 | 59.541 | 49.826 | 0.00 | 0.00 |
| ATOM | 512 | N   | ALA | X | 34 | 35.532 | 58.884 | 50.786 | 0.00 | 0.00 |
| ATOM | 513 | H   | ALA | X | 34 | 36.538 | 58.870 | 50.697 | 0.00 | 0.00 |
| ATOM | 514 | CA  | ALA | X | 34 | 35.037 | 58.761 | 52.132 | 0.00 | 0.00 |
| ATOM | 515 | HA  | ALA | X | 34 | 33.954 | 58.864 | 52.073 | 0.00 | 0.00 |
| ATOM | 516 | CB  | ALA | X | 34 | 35.266 | 57.288 | 52.657 | 0.00 | 0.00 |
| ATOM | 517 | HB1 | ALA | X | 34 | 36.329 | 57.061 | 52.734 | 0.00 | 0.00 |
| ATOM | 518 | HB2 | ALA | X | 34 | 34.815 | 57.247 | 53.649 | 0.00 | 0.00 |
| ATOM | 519 | HB3 | ALA | X | 34 | 34.842 | 56.652 | 51.879 | 0.00 | 0.00 |
| ATOM | 520 | C   | ALA | X | 34 | 35.553 | 59.902 | 53.086 | 0.00 | 0.00 |
| ATOM | 521 | O   | ALA | X | 34 | 36.468 | 60.622 | 52.796 | 0.00 | 0.00 |
| ATOM | 522 | N   | GLU | X | 35 | 34.984 | 59.992 | 54.254 | 0.00 | 0.00 |
| ATOM | 523 | H   | GLU | X | 35 | 34.132 | 59.469 | 54.392 | 0.00 | 0.00 |
| ATOM | 524 | CA  | GLU | X | 35 | 35.597 | 60.682 | 55.378 | 0.00 | 0.00 |
| ATOM | 525 | HA  | GLU | X | 35 | 35.880 | 61.696 | 55.095 | 0.00 | 0.00 |
| ATOM | 526 | CB  | GLU | X | 35 | 34.651 | 60.792 | 56.539 | 0.00 | 0.00 |
| ATOM | 527 | HB2 | GLU | X | 35 | 34.330 | 59.768 | 56.733 | 0.00 | 0.00 |
| ATOM | 528 | HB3 | GLU | X | 35 | 35.185 | 61.224 | 57.385 | 0.00 | 0.00 |
| ATOM | 529 | CG  | GLU | X | 35 | 33.419 | 61.691 | 56.248 | 0.00 | 0.00 |
| ATOM | 530 | HG2 | GLU | X | 35 | 33.020 | 61.402 | 55.276 | 0.00 | 0.00 |
| ATOM | 531 | HG3 | GLU | X | 35 | 32.676 | 61.510 | 57.025 | 0.00 | 0.00 |
| ATOM | 532 | CD  | GLU | X | 35 | 33.821 | 63.179 | 56.316 | 0.00 | 0.00 |
| ATOM | 533 | OE1 | GLU | X | 35 | 34.088 | 63.794 | 55.266 | 0.00 | 0.00 |
| ATOM | 534 | OE2 | GLU | X | 35 | 34.011 | 63.703 | 57.434 | 0.00 | 0.00 |
| ATOM | 535 | C   | GLU | X | 35 | 36.813 | 59.878 | 55.831 | 0.00 | 0.00 |
| ATOM | 536 | O   | GLU | X | 35 | 36.816 | 58.636 | 55.713 | 0.00 | 0.00 |
| ATOM | 537 | N   | PRO | X | 36 | 37.868 | 60.490 | 56.358 | 0.00 | 0.00 |
| ATOM | 538 | CD  | PRO | X | 36 | 38.069 | 61.898 | 56.641 | 0.00 | 0.00 |
| ATOM | 539 | HD2 | PRO | X | 36 | 37.351 | 62.228 | 57.392 | 0.00 | 0.00 |
| ATOM | 540 | HD3 | PRO | X | 36 | 38.141 | 62.516 | 55.747 | 0.00 | 0.00 |
| ATOM | 541 | CG  | PRO | X | 36 | 39.416 | 62.124 | 57.361 | 0.00 | 0.00 |
| ATOM | 542 | HG2 | PRO | X | 36 | 39.396 | 62.928 | 58.097 | 0.00 | 0.00 |
| ATOM | 543 | HG3 | PRO | X | 36 | 40.227 | 62.358 | 56.670 | 0.00 | 0.00 |
| ATOM | 544 | CB  | PRO | X | 36 | 39.699 | 60.757 | 57.945 | 0.00 | 0.00 |
| ATOM | 545 | HB2 | PRO | X | 36 | 39.278 | 60.756 | 58.951 | 0.00 | 0.00 |
| ATOM | 546 | HB3 | PRO | X | 36 | 40.740 | 60.439 | 58.013 | 0.00 | 0.00 |
| ATOM | 547 | CA  | PRO | X | 36 | 38.935 | 59.703 | 57.112 | 0.00 | 0.00 |
| ATOM | 548 | HA  | PRO | X | 36 | 39.560 | 59.254 | 56.340 | 0.00 | 0.00 |
| ATOM | 549 | C   | PRO | X | 36 | 38.412 | 58.551 | 57.935 | 0.00 | 0.00 |
| ATOM | 550 | O   | PRO | X | 36 | 37.587 | 58.802 | 58.865 | 0.00 | 0.00 |
| ATOM | 551 | N   | PRO | X | 37 | 38.736 | 57.265 | 57.604 | 0.00 | 0.00 |
| ATOM | 552 | CD  | PRO | X | 37 | 39.580 | 56.793 | 56.597 | 0.00 | 0.00 |
| ATOM | 553 | HD2 | PRO | X | 37 | 40.569 | 57.245 | 56.674 | 0.00 | 0.00 |
| ATOM | 554 | HD3 | PRO | X | 37 | 39.222 | 57.036 | 55.597 | 0.00 | 0.00 |
| ATOM | 555 | CG  | PRO | X | 37 | 39.732 | 55.308 | 56.677 | 0.00 | 0.00 |
| ATOM | 556 | HG2 | PRO | X | 37 | 40.636 | 55.039 | 57.223 | 0.00 | 0.00 |
| ATOM | 557 | HG3 | PRO | X | 37 | 39.759 | 54.727 | 55.754 | 0.00 | 0.00 |
| ATOM | 558 | CB  | PRO | X | 37 | 38.437 | 54.870 | 57.457 | 0.00 | 0.00 |
| ATOM | 559 | HB2 | PRO | X | 37 | 38.555 | 53.856 | 57.840 | 0.00 | 0.00 |
| ATOM | 560 | HB3 | PRO | X | 37 | 37.547 | 54.895 | 56.829 | 0.00 | 0.00 |
| ATOM | 561 | CA  | PRO | X | 37 | 38.395 | 56.076 | 58.436 | 0.00 | 0.00 |
| ATOM | 562 | HA  | PRO | X | 37 | 37.364 | 56.112 | 58.790 | 0.00 | 0.00 |
| ATOM | 563 | C   | PRO | X | 37 | 39.390 | 55.846 | 59.634 | 0.00 | 0.00 |
| ATOM | 564 | O   | PRO | X | 37 | 39.634 | 54.712 | 60.078 | 0.00 | 0.00 |
| ATOM | 565 | N   | MET | X | 38 | 40.035 | 56.918 | 60.114 | 0.00 | 0.00 |
| ATOM | 566 | H   | MET | X | 38 | 39.611 | 57.805 | 59.884 | 0.00 | 0.00 |
| ATOM | 567 | CA  | MET | X | 38 | 41.021 | 56.942 | 61.194 | 0.00 | 0.00 |

|      |     |      |     |   |    |        |        |        |      |      |
|------|-----|------|-----|---|----|--------|--------|--------|------|------|
| ATOM | 568 | HA   | MET | X | 38 | 41.516 | 55.971 | 61.162 | 0.00 | 0.00 |
| ATOM | 569 | CB   | MET | X | 38 | 41.973 | 58.115 | 60.909 | 0.00 | 0.00 |
| ATOM | 570 | HB2  | MET | X | 38 | 42.835 | 58.022 | 61.570 | 0.00 | 0.00 |
| ATOM | 571 | HB3  | MET | X | 38 | 42.421 | 57.999 | 59.922 | 0.00 | 0.00 |
| ATOM | 572 | CG   | MET | X | 38 | 41.335 | 59.534 | 61.303 | 0.00 | 0.00 |
| ATOM | 573 | HG2  | MET | X | 38 | 40.320 | 59.505 | 60.907 | 0.00 | 0.00 |
| ATOM | 574 | HG3  | MET | X | 38 | 41.373 | 59.654 | 62.386 | 0.00 | 0.00 |
| ATOM | 575 | SD   | MET | X | 38 | 42.315 | 60.888 | 60.577 | 0.00 | 0.00 |
| ATOM | 576 | CE   | MET | X | 38 | 41.597 | 62.207 | 61.646 | 0.00 | 0.00 |
| ATOM | 577 | HE1  | MET | X | 38 | 41.824 | 63.249 | 61.419 | 0.00 | 0.00 |
| ATOM | 578 | HE2  | MET | X | 38 | 40.530 | 62.147 | 61.434 | 0.00 | 0.00 |
| ATOM | 579 | HE3  | MET | X | 38 | 41.704 | 62.140 | 62.729 | 0.00 | 0.00 |
| ATOM | 580 | C    | MET | X | 38 | 40.364 | 57.057 | 62.567 | 0.00 | 0.00 |
| ATOM | 581 | O    | MET | X | 38 | 39.283 | 57.617 | 62.727 | 0.00 | 0.00 |
| ATOM | 582 | N    | GLY | X | 39 | 41.128 | 56.579 | 63.584 | 0.00 | 0.00 |
| ATOM | 583 | H    | GLY | X | 39 | 41.945 | 56.064 | 63.289 | 0.00 | 0.00 |
| ATOM | 584 | CA   | GLY | X | 39 | 40.864 | 56.623 | 65.069 | 0.00 | 0.00 |
| ATOM | 585 | HA2  | GLY | X | 39 | 41.485 | 55.904 | 65.498 | 0.00 | 0.00 |
| ATOM | 586 | HA3  | GLY | X | 39 | 40.962 | 57.591 | 65.511 | 0.00 | 0.00 |
| ATOM | 587 | C    | GLY | X | 39 | 39.497 | 56.076 | 65.506 | 0.00 | 0.00 |
| ATOM | 588 | O    | GLY | X | 39 | 39.286 | 54.834 | 65.333 | 0.00 | 0.00 |
| ATOM | 589 | N    | PRO | X | 40 | 38.517 | 56.859 | 65.959 | 0.00 | 0.00 |
| ATOM | 590 | CD   | PRO | X | 40 | 38.779 | 58.136 | 66.361 | 0.00 | 0.00 |
| ATOM | 591 | HD2  | PRO | X | 40 | 38.959 | 58.768 | 65.492 | 0.00 | 0.00 |
| ATOM | 592 | HD3  | PRO | X | 40 | 39.641 | 58.289 | 67.010 | 0.00 | 0.00 |
| ATOM | 593 | CG   | PRO | X | 40 | 37.590 | 58.595 | 67.173 | 0.00 | 0.00 |
| ATOM | 594 | HG2  | PRO | X | 40 | 37.335 | 59.631 | 66.950 | 0.00 | 0.00 |
| ATOM | 595 | HG3  | PRO | X | 40 | 37.799 | 58.464 | 68.235 | 0.00 | 0.00 |
| ATOM | 596 | CB   | PRO | X | 40 | 36.472 | 57.711 | 66.699 | 0.00 | 0.00 |
| ATOM | 597 | HB2  | PRO | X | 40 | 35.855 | 58.187 | 65.936 | 0.00 | 0.00 |
| ATOM | 598 | HB3  | PRO | X | 40 | 35.795 | 57.438 | 67.508 | 0.00 | 0.00 |
| ATOM | 599 | CA   | PRO | X | 40 | 37.124 | 56.480 | 66.191 | 0.00 | 0.00 |
| ATOM | 600 | HA   | PRO | X | 40 | 37.147 | 55.744 | 66.994 | 0.00 | 0.00 |
| ATOM | 601 | C    | PRO | X | 40 | 36.402 | 55.794 | 64.975 | 0.00 | 0.00 |
| ATOM | 602 | O    | PRO | X | 40 | 35.333 | 55.156 | 65.121 | 0.00 | 0.00 |
| ATOM | 603 | N    | ARG | X | 41 | 36.993 | 55.863 | 63.803 | 0.00 | 0.00 |
| ATOM | 604 | H    | ARG | X | 41 | 37.874 | 56.356 | 63.785 | 0.00 | 0.00 |
| ATOM | 605 | CA   | ARG | X | 41 | 36.516 | 55.217 | 62.590 | 0.00 | 0.00 |
| ATOM | 606 | HA   | ARG | X | 41 | 35.550 | 54.752 | 62.787 | 0.00 | 0.00 |
| ATOM | 607 | CB   | ARG | X | 41 | 36.149 | 56.358 | 61.601 | 0.00 | 0.00 |
| ATOM | 608 | HB2  | ARG | X | 41 | 35.480 | 57.075 | 62.075 | 0.00 | 0.00 |
| ATOM | 609 | HB3  | ARG | X | 41 | 37.099 | 56.759 | 61.247 | 0.00 | 0.00 |
| ATOM | 610 | CG   | ARG | X | 41 | 35.276 | 55.821 | 60.450 | 0.00 | 0.00 |
| ATOM | 611 | HG2  | ARG | X | 41 | 35.917 | 55.073 | 59.985 | 0.00 | 0.00 |
| ATOM | 612 | HG3  | ARG | X | 41 | 34.406 | 55.336 | 60.892 | 0.00 | 0.00 |
| ATOM | 613 | CD   | ARG | X | 41 | 34.919 | 56.813 | 59.336 | 0.00 | 0.00 |
| ATOM | 614 | HD2  | ARG | X | 41 | 35.806 | 57.388 | 59.070 | 0.00 | 0.00 |
| ATOM | 615 | HD3  | ARG | X | 41 | 34.626 | 56.437 | 58.355 | 0.00 | 0.00 |
| ATOM | 616 | NE   | ARG | X | 41 | 33.861 | 57.730 | 59.783 | 0.00 | 0.00 |
| ATOM | 617 | HE   | ARG | X | 41 | 32.890 | 57.451 | 59.748 | 0.00 | 0.00 |
| ATOM | 618 | CZ   | ARG | X | 41 | 34.046 | 58.962 | 60.095 | 0.00 | 0.00 |
| ATOM | 619 | NH1  | ARG | X | 41 | 35.235 | 59.522 | 60.180 | 0.00 | 0.00 |
| ATOM | 620 | HH11 | ARG | X | 41 | 35.970 | 59.051 | 59.671 | 0.00 | 0.00 |
| ATOM | 621 | HH12 | ARG | X | 41 | 35.299 | 60.516 | 60.346 | 0.00 | 0.00 |
| ATOM | 622 | NH2  | ARG | X | 41 | 33.018 | 59.600 | 60.409 | 0.00 | 0.00 |
| ATOM | 623 | HH21 | ARG | X | 41 | 32.143 | 59.135 | 60.605 | 0.00 | 0.00 |
| ATOM | 624 | HH22 | ARG | X | 41 | 33.179 | 60.594 | 60.485 | 0.00 | 0.00 |
| ATOM | 625 | C    | ARG | X | 41 | 37.284 | 53.934 | 62.120 | 0.00 | 0.00 |
| ATOM | 626 | O    | ARG | X | 41 | 36.944 | 53.291 | 61.149 | 0.00 | 0.00 |
| ATOM | 627 | N    | ARG | X | 42 | 38.407 | 53.649 | 62.748 | 0.00 | 0.00 |
| ATOM | 628 | H    | ARG | X | 42 | 38.684 | 54.200 | 63.547 | 0.00 | 0.00 |
| ATOM | 629 | CA   | ARG | X | 42 | 39.242 | 52.486 | 62.465 | 0.00 | 0.00 |
| ATOM | 630 | HA   | ARG | X | 42 | 39.727 | 52.616 | 61.497 | 0.00 | 0.00 |
| ATOM | 631 | CB   | ARG | X | 42 | 40.521 | 52.607 | 63.324 | 0.00 | 0.00 |
| ATOM | 632 | HB2  | ARG | X | 42 | 40.885 | 53.627 | 63.192 | 0.00 | 0.00 |
| ATOM | 633 | HB3  | ARG | X | 42 | 40.232 | 52.451 | 64.363 | 0.00 | 0.00 |
| ATOM | 634 | CG   | ARG | X | 42 | 41.636 | 51.648 | 62.906 | 0.00 | 0.00 |
| ATOM | 635 | HG2  | ARG | X | 42 | 41.196 | 50.655 | 62.820 | 0.00 | 0.00 |
| ATOM | 636 | HG3  | ARG | X | 42 | 42.068 | 51.938 | 61.948 | 0.00 | 0.00 |
| ATOM | 637 | CD   | ARG | X | 42 | 42.780 | 51.409 | 63.925 | 0.00 | 0.00 |

|      |     |      |     |   |    |        |        |        |      |      |
|------|-----|------|-----|---|----|--------|--------|--------|------|------|
| ATOM | 638 | HD2  | ARG | X | 42 | 42.359 | 51.273 | 64.921 | 0.00 | 0.00 |
| ATOM | 639 | HD3  | ARG | X | 42 | 43.353 | 50.523 | 63.653 | 0.00 | 0.00 |
| ATOM | 640 | NE   | ARG | X | 42 | 43.671 | 52.608 | 63.927 | 0.00 | 0.00 |
| ATOM | 641 | HE   | ARG | X | 42 | 43.388 | 53.328 | 63.277 | 0.00 | 0.00 |
| ATOM | 642 | CZ   | ARG | X | 42 | 44.471 | 53.080 | 64.811 | 0.00 | 0.00 |
| ATOM | 643 | NH1  | ARG | X | 42 | 44.884 | 52.302 | 65.780 | 0.00 | 0.00 |
| ATOM | 644 | HH11 | ARG | X | 42 | 44.538 | 51.369 | 65.955 | 0.00 | 0.00 |
| ATOM | 645 | HH12 | ARG | X | 42 | 45.452 | 52.669 | 66.530 | 0.00 | 0.00 |
| ATOM | 646 | NH2  | ARG | X | 42 | 44.818 | 54.307 | 64.666 | 0.00 | 0.00 |
| ATOM | 647 | HH21 | ARG | X | 42 | 44.647 | 54.819 | 63.812 | 0.00 | 0.00 |
| ATOM | 648 | HH22 | ARG | X | 42 | 45.175 | 54.742 | 65.504 | 0.00 | 0.00 |
| ATOM | 649 | C    | ARG | X | 42 | 38.402 | 51.205 | 62.514 | 0.00 | 0.00 |
| ATOM | 650 | O    | ARG | X | 42 | 37.622 | 51.170 | 63.474 | 0.00 | 0.00 |
| ATOM | 651 | N    | PHE | X | 43 | 38.522 | 50.191 | 61.643 | 0.00 | 0.00 |
| ATOM | 652 | H    | PHE | X | 43 | 39.177 | 50.343 | 60.890 | 0.00 | 0.00 |
| ATOM | 653 | CA   | PHE | X | 43 | 37.717 | 48.991 | 61.567 | 0.00 | 0.00 |
| ATOM | 654 | HA   | PHE | X | 43 | 38.052 | 48.539 | 60.633 | 0.00 | 0.00 |
| ATOM | 655 | CB   | PHE | X | 43 | 38.090 | 48.021 | 62.762 | 0.00 | 0.00 |
| ATOM | 656 | HB2  | PHE | X | 43 | 37.411 | 48.183 | 63.600 | 0.00 | 0.00 |
| ATOM | 657 | HB3  | PHE | X | 43 | 37.907 | 47.009 | 62.401 | 0.00 | 0.00 |
| ATOM | 658 | CG   | PHE | X | 43 | 39.519 | 48.066 | 63.249 | 0.00 | 0.00 |
| ATOM | 659 | CD1  | PHE | X | 43 | 40.569 | 47.724 | 62.397 | 0.00 | 0.00 |
| ATOM | 660 | HD1  | PHE | X | 43 | 40.352 | 47.396 | 61.391 | 0.00 | 0.00 |
| ATOM | 661 | CE1  | PHE | X | 43 | 41.935 | 47.647 | 62.890 | 0.00 | 0.00 |
| ATOM | 662 | HE1  | PHE | X | 43 | 42.729 | 47.379 | 62.208 | 0.00 | 0.00 |
| ATOM | 663 | CZ   | PHE | X | 43 | 42.181 | 47.950 | 64.227 | 0.00 | 0.00 |
| ATOM | 664 | HZ   | PHE | X | 43 | 43.156 | 47.812 | 64.672 | 0.00 | 0.00 |
| ATOM | 665 | CE2  | PHE | X | 43 | 41.162 | 48.286 | 65.083 | 0.00 | 0.00 |
| ATOM | 666 | HE2  | PHE | X | 43 | 41.369 | 48.536 | 66.113 | 0.00 | 0.00 |
| ATOM | 667 | CD2  | PHE | X | 43 | 39.866 | 48.429 | 64.595 | 0.00 | 0.00 |
| ATOM | 668 | HD2  | PHE | X | 43 | 39.108 | 48.733 | 65.302 | 0.00 | 0.00 |
| ATOM | 669 | C    | PHE | X | 43 | 36.162 | 49.142 | 61.420 | 0.00 | 0.00 |
| ATOM | 670 | O    | PHE | X | 43 | 35.534 | 48.107 | 61.170 | 0.00 | 0.00 |
| ATOM | 671 | N    | LEU | X | 44 | 35.558 | 50.340 | 61.406 | 0.00 | 0.00 |
| ATOM | 672 | H    | LEU | X | 44 | 36.083 | 51.165 | 61.660 | 0.00 | 0.00 |
| ATOM | 673 | CA   | LEU | X | 44 | 34.069 | 50.521 | 61.221 | 0.00 | 0.00 |
| ATOM | 674 | HA   | LEU | X | 44 | 33.479 | 49.676 | 61.576 | 0.00 | 0.00 |
| ATOM | 675 | CB   | LEU | X | 44 | 33.684 | 51.849 | 62.031 | 0.00 | 0.00 |
| ATOM | 676 | HB2  | LEU | X | 44 | 34.470 | 52.600 | 61.952 | 0.00 | 0.00 |
| ATOM | 677 | HB3  | LEU | X | 44 | 32.833 | 52.394 | 61.622 | 0.00 | 0.00 |
| ATOM | 678 | CG   | LEU | X | 44 | 33.500 | 51.364 | 63.512 | 0.00 | 0.00 |
| ATOM | 679 | HG   | LEU | X | 44 | 34.244 | 50.609 | 63.765 | 0.00 | 0.00 |
| ATOM | 680 | CD1  | LEU | X | 44 | 33.704 | 52.501 | 64.435 | 0.00 | 0.00 |
| ATOM | 681 | HD11 | LEU | X | 44 | 33.507 | 52.243 | 65.476 | 0.00 | 0.00 |
| ATOM | 682 | HD12 | LEU | X | 44 | 34.729 | 52.843 | 64.293 | 0.00 | 0.00 |
| ATOM | 683 | HD13 | LEU | X | 44 | 33.017 | 53.303 | 64.165 | 0.00 | 0.00 |
| ATOM | 684 | CD2  | LEU | X | 44 | 32.168 | 50.596 | 63.785 | 0.00 | 0.00 |
| ATOM | 685 | HD21 | LEU | X | 44 | 32.080 | 49.726 | 63.135 | 0.00 | 0.00 |
| ATOM | 686 | HD22 | LEU | X | 44 | 32.053 | 50.422 | 64.855 | 0.00 | 0.00 |
| ATOM | 687 | HD23 | LEU | X | 44 | 31.435 | 51.358 | 63.521 | 0.00 | 0.00 |
| ATOM | 688 | C    | LEU | X | 44 | 33.814 | 50.704 | 59.646 | 0.00 | 0.00 |
| ATOM | 689 | O    | LEU | X | 44 | 34.783 | 50.966 | 58.993 | 0.00 | 0.00 |
| ATOM | 690 | N    | PRO | X | 45 | 32.541 | 50.649 | 59.226 | 0.00 | 0.00 |
| ATOM | 691 | CD   | PRO | X | 45 | 31.401 | 49.996 | 59.884 | 0.00 | 0.00 |
| ATOM | 692 | HD2  | PRO | X | 45 | 30.926 | 50.528 | 60.708 | 0.00 | 0.00 |
| ATOM | 693 | HD3  | PRO | X | 45 | 31.567 | 48.951 | 60.147 | 0.00 | 0.00 |
| ATOM | 694 | CG   | PRO | X | 45 | 30.310 | 49.962 | 58.784 | 0.00 | 0.00 |
| ATOM | 695 | HG2  | PRO | X | 45 | 29.298 | 50.073 | 59.172 | 0.00 | 0.00 |
| ATOM | 696 | HG3  | PRO | X | 45 | 30.409 | 48.971 | 58.342 | 0.00 | 0.00 |
| ATOM | 697 | CB   | PRO | X | 45 | 30.630 | 50.993 | 57.735 | 0.00 | 0.00 |
| ATOM | 698 | HB2  | PRO | X | 45 | 30.194 | 51.951 | 58.019 | 0.00 | 0.00 |
| ATOM | 699 | HB3  | PRO | X | 45 | 30.263 | 50.664 | 56.763 | 0.00 | 0.00 |
| ATOM | 700 | CA   | PRO | X | 45 | 32.159 | 51.066 | 57.888 | 0.00 | 0.00 |
| ATOM | 701 | HA   | PRO | X | 45 | 32.544 | 50.390 | 57.124 | 0.00 | 0.00 |
| ATOM | 702 | C    | PRO | X | 45 | 32.528 | 52.585 | 57.580 | 0.00 | 0.00 |
| ATOM | 703 | O    | PRO | X | 45 | 32.600 | 53.382 | 58.517 | 0.00 | 0.00 |
| ATOM | 704 | N    | PRO | X | 46 | 32.729 | 52.913 | 56.264 | 0.00 | 0.00 |
| ATOM | 705 | CD   | PRO | X | 46 | 32.851 | 51.982 | 55.145 | 0.00 | 0.00 |
| ATOM | 706 | HD2  | PRO | X | 46 | 31.890 | 51.498 | 54.969 | 0.00 | 0.00 |
| ATOM | 707 | HD3  | PRO | X | 46 | 33.624 | 51.263 | 55.414 | 0.00 | 0.00 |



|      |     |     |     |   |    |        |        |        |      |      |
|------|-----|-----|-----|---|----|--------|--------|--------|------|------|
| ATOM | 708 | CG  | PRO | X | 46 | 33.190 | 52.785 | 53.881 | 0.00 | 0.00 |
| ATOM | 709 | HG2 | PRO | X | 46 | 32.291 | 53.058 | 53.328 | 0.00 | 0.00 |
| ATOM | 710 | HG3 | PRO | X | 46 | 33.884 | 52.163 | 53.316 | 0.00 | 0.00 |
| ATOM | 711 | CB  | PRO | X | 46 | 33.823 | 54.004 | 54.488 | 0.00 | 0.00 |
| ATOM | 712 | HB2 | PRO | X | 46 | 33.646 | 54.836 | 53.807 | 0.00 | 0.00 |
| ATOM | 713 | HB3 | PRO | X | 46 | 34.836 | 53.828 | 54.852 | 0.00 | 0.00 |
| ATOM | 714 | CA  | PRO | X | 46 | 33.037 | 54.235 | 55.798 | 0.00 | 0.00 |
| ATOM | 715 | HA  | PRO | X | 46 | 33.718 | 54.752 | 56.474 | 0.00 | 0.00 |
| ATOM | 716 | C   | PRO | X | 46 | 31.825 | 55.088 | 55.558 | 0.00 | 0.00 |
| ATOM | 717 | O   | PRO | X | 46 | 30.675 | 54.633 | 55.389 | 0.00 | 0.00 |
| ATOM | 718 | N   | GLU | X | 47 | 32.081 | 56.374 | 55.553 | 0.00 | 0.00 |
| ATOM | 719 | H   | GLU | X | 47 | 33.019 | 56.748 | 55.570 | 0.00 | 0.00 |
| ATOM | 720 | CA  | GLU | X | 47 | 30.985 | 57.308 | 55.311 | 0.00 | 0.00 |
| ATOM | 721 | HA  | GLU | X | 47 | 30.102 | 56.746 | 55.008 | 0.00 | 0.00 |
| ATOM | 722 | CB  | GLU | X | 47 | 30.835 | 57.997 | 56.646 | 0.00 | 0.00 |
| ATOM | 723 | HB2 | GLU | X | 47 | 31.761 | 58.506 | 56.915 | 0.00 | 0.00 |
| ATOM | 724 | HB3 | GLU | X | 47 | 30.055 | 58.729 | 56.435 | 0.00 | 0.00 |
| ATOM | 725 | CG  | GLU | X | 47 | 30.395 | 57.061 | 57.788 | 0.00 | 0.00 |
| ATOM | 726 | HG2 | GLU | X | 47 | 29.489 | 56.502 | 57.552 | 0.00 | 0.00 |
| ATOM | 727 | HG3 | GLU | X | 47 | 31.136 | 56.272 | 57.917 | 0.00 | 0.00 |
| ATOM | 728 | CD  | GLU | X | 47 | 30.309 | 57.695 | 59.114 | 0.00 | 0.00 |
| ATOM | 729 | OE1 | GLU | X | 47 | 29.580 | 58.658 | 59.310 | 0.00 | 0.00 |
| ATOM | 730 | OE2 | GLU | X | 47 | 30.928 | 57.229 | 60.087 | 0.00 | 0.00 |
| ATOM | 731 | C   | GLU | X | 47 | 31.310 | 58.395 | 54.205 | 0.00 | 0.00 |
| ATOM | 732 | O   | GLU | X | 47 | 32.463 | 58.807 | 54.097 | 0.00 | 0.00 |
| ATOM | 733 | N   | PRO | X | 48 | 30.269 | 58.821 | 53.461 | 0.00 | 0.00 |
| ATOM | 734 | CD  | PRO | X | 48 | 28.917 | 58.441 | 53.631 | 0.00 | 0.00 |
| ATOM | 735 | HD2 | PRO | X | 48 | 28.614 | 58.763 | 54.628 | 0.00 | 0.00 |
| ATOM | 736 | HD3 | PRO | X | 48 | 28.736 | 57.383 | 53.441 | 0.00 | 0.00 |
| ATOM | 737 | CG  | PRO | X | 48 | 28.106 | 59.374 | 52.720 | 0.00 | 0.00 |
| ATOM | 738 | HG2 | PRO | X | 48 | 27.918 | 60.329 | 53.211 | 0.00 | 0.00 |
| ATOM | 739 | HG3 | PRO | X | 48 | 27.150 | 58.960 | 52.399 | 0.00 | 0.00 |
| ATOM | 740 | CB  | PRO | X | 48 | 29.042 | 59.652 | 51.571 | 0.00 | 0.00 |
| ATOM | 741 | HB2 | PRO | X | 48 | 28.889 | 60.636 | 51.127 | 0.00 | 0.00 |
| ATOM | 742 | HB3 | PRO | X | 48 | 28.947 | 58.898 | 50.790 | 0.00 | 0.00 |
| ATOM | 743 | CA  | PRO | X | 48 | 30.440 | 59.592 | 52.270 | 0.00 | 0.00 |
| ATOM | 744 | HA  | PRO | X | 48 | 31.125 | 59.055 | 51.615 | 0.00 | 0.00 |
| ATOM | 745 | C   | PRO | X | 48 | 31.165 | 60.883 | 52.612 | 0.00 | 0.00 |
| ATOM | 746 | O   | PRO | X | 48 | 30.894 | 61.514 | 53.631 | 0.00 | 0.00 |
| ATOM | 747 | N   | LYS | X | 49 | 32.061 | 61.332 | 51.775 | 0.00 | 0.00 |
| ATOM | 748 | H   | LYS | X | 49 | 32.396 | 60.802 | 50.983 | 0.00 | 0.00 |
| ATOM | 749 | CA  | LYS | X | 49 | 32.983 | 62.478 | 52.048 | 0.00 | 0.00 |
| ATOM | 750 | HA  | LYS | X | 49 | 33.496 | 62.278 | 52.989 | 0.00 | 0.00 |
| ATOM | 751 | CB  | LYS | X | 49 | 34.052 | 62.568 | 50.935 | 0.00 | 0.00 |
| ATOM | 752 | HB2 | LYS | X | 49 | 34.861 | 61.861 | 51.115 | 0.00 | 0.00 |
| ATOM | 753 | HB3 | LYS | X | 49 | 33.514 | 62.399 | 50.002 | 0.00 | 0.00 |
| ATOM | 754 | CG  | LYS | X | 49 | 34.722 | 63.879 | 50.746 | 0.00 | 0.00 |
| ATOM | 755 | HG2 | LYS | X | 49 | 35.382 | 63.884 | 49.879 | 0.00 | 0.00 |
| ATOM | 756 | HG3 | LYS | X | 49 | 33.985 | 64.642 | 50.497 | 0.00 | 0.00 |
| ATOM | 757 | CD  | LYS | X | 49 | 35.645 | 64.267 | 51.909 | 0.00 | 0.00 |
| ATOM | 758 | HD2 | LYS | X | 49 | 35.015 | 64.484 | 52.772 | 0.00 | 0.00 |
| ATOM | 759 | HD3 | LYS | X | 49 | 36.342 | 63.461 | 52.140 | 0.00 | 0.00 |
| ATOM | 760 | CE  | LYS | X | 49 | 36.373 | 65.489 | 51.529 | 0.00 | 0.00 |
| ATOM | 761 | HE2 | LYS | X | 49 | 37.029 | 65.367 | 50.667 | 0.00 | 0.00 |
| ATOM | 762 | HE3 | LYS | X | 49 | 35.553 | 66.169 | 51.299 | 0.00 | 0.00 |
| ATOM | 763 | NZ  | LYS | X | 49 | 37.217 | 65.958 | 52.646 | 0.00 | 0.00 |
| ATOM | 764 | HZ1 | LYS | X | 49 | 38.107 | 65.485 | 52.702 | 0.00 | 0.00 |
| ATOM | 765 | HZ2 | LYS | X | 49 | 37.460 | 66.922 | 52.465 | 0.00 | 0.00 |
| ATOM | 766 | HZ3 | LYS | X | 49 | 36.806 | 65.967 | 53.568 | 0.00 | 0.00 |
| ATOM | 767 | C   | LYS | X | 49 | 32.191 | 63.731 | 52.201 | 0.00 | 0.00 |
| ATOM | 768 | O   | LYS | X | 49 | 31.454 | 64.142 | 51.252 | 0.00 | 0.00 |
| ATOM | 769 | N   | GLN | X | 50 | 32.355 | 64.478 | 53.294 | 0.00 | 0.00 |
| ATOM | 770 | H   | GLN | X | 50 | 32.972 | 64.124 | 54.011 | 0.00 | 0.00 |
| ATOM | 771 | CA  | GLN | X | 50 | 31.645 | 65.790 | 53.470 | 0.00 | 0.00 |
| ATOM | 772 | HA  | GLN | X | 50 | 30.589 | 65.650 | 53.237 | 0.00 | 0.00 |
| ATOM | 773 | CB  | GLN | X | 50 | 31.545 | 66.157 | 54.927 | 0.00 | 0.00 |
| ATOM | 774 | HB2 | GLN | X | 50 | 32.545 | 66.256 | 55.348 | 0.00 | 0.00 |
| ATOM | 775 | HB3 | GLN | X | 50 | 31.004 | 67.102 | 54.957 | 0.00 | 0.00 |
| ATOM | 776 | CG  | GLN | X | 50 | 30.868 | 65.182 | 55.868 | 0.00 | 0.00 |
| ATOM | 777 | HG2 | GLN | X | 50 | 29.836 | 65.181 | 55.515 | 0.00 | 0.00 |

|      |     |      |     |   |    |        |        |        |      |      |
|------|-----|------|-----|---|----|--------|--------|--------|------|------|
| ATOM | 778 | HG3  | GLN | X | 50 | 31.274 | 64.171 | 55.860 | 0.00 | 0.00 |
| ATOM | 779 | CD   | GLN | X | 50 | 30.923 | 65.720 | 57.298 | 0.00 | 0.00 |
| ATOM | 780 | OE1  | GLN | X | 50 | 29.959 | 66.332 | 57.761 | 0.00 | 0.00 |
| ATOM | 781 | NE2  | GLN | X | 50 | 32.037 | 65.607 | 58.064 | 0.00 | 0.00 |
| ATOM | 782 | HE21 | GLN | X | 50 | 32.021 | 66.035 | 58.980 | 0.00 | 0.00 |
| ATOM | 783 | HE22 | GLN | X | 50 | 32.843 | 65.102 | 57.725 | 0.00 | 0.00 |
| ATOM | 784 | C    | GLN | X | 50 | 32.188 | 66.804 | 52.461 | 0.00 | 0.00 |
| ATOM | 785 | O    | GLN | X | 50 | 33.397 | 66.823 | 52.087 | 0.00 | 0.00 |
| ATOM | 786 | N    | PRO | X | 51 | 31.345 | 67.728 | 52.012 | 0.00 | 0.00 |
| ATOM | 787 | CD   | PRO | X | 51 | 29.830 | 67.715 | 52.166 | 0.00 | 0.00 |
| ATOM | 788 | HD2  | PRO | X | 51 | 29.630 | 67.817 | 53.233 | 0.00 | 0.00 |
| ATOM | 789 | HD3  | PRO | X | 51 | 29.510 | 66.765 | 51.738 | 0.00 | 0.00 |
| ATOM | 790 | CG   | PRO | X | 51 | 29.330 | 68.877 | 51.364 | 0.00 | 0.00 |
| ATOM | 791 | HG2  | PRO | X | 51 | 29.337 | 69.800 | 51.944 | 0.00 | 0.00 |
| ATOM | 792 | HG3  | PRO | X | 51 | 28.301 | 68.774 | 51.022 | 0.00 | 0.00 |
| ATOM | 793 | CB   | PRO | X | 51 | 30.265 | 68.914 | 50.194 | 0.00 | 0.00 |
| ATOM | 794 | HB2  | PRO | X | 51 | 30.213 | 69.870 | 49.672 | 0.00 | 0.00 |
| ATOM | 795 | HB3  | PRO | X | 51 | 29.867 | 68.122 | 49.559 | 0.00 | 0.00 |
| ATOM | 796 | CA   | PRO | X | 51 | 31.665 | 68.496 | 50.820 | 0.00 | 0.00 |
| ATOM | 797 | HA   | PRO | X | 51 | 32.208 | 67.904 | 50.083 | 0.00 | 0.00 |
| ATOM | 798 | C    | PRO | X | 51 | 32.478 | 69.843 | 51.195 | 0.00 | 0.00 |
| ATOM | 799 | O    | PRO | X | 51 | 32.473 | 70.295 | 52.338 | 0.00 | 0.00 |
| ATOM | 800 | N    | TRP | X | 52 | 33.064 | 70.466 | 50.208 | 0.00 | 0.00 |
| ATOM | 801 | H    | TRP | X | 52 | 32.866 | 70.203 | 49.253 | 0.00 | 0.00 |
| ATOM | 802 | CA   | TRP | X | 52 | 34.144 | 71.522 | 50.412 | 0.00 | 0.00 |
| ATOM | 803 | HA   | TRP | X | 52 | 34.196 | 71.829 | 51.457 | 0.00 | 0.00 |
| ATOM | 804 | CB   | TRP | X | 52 | 35.535 | 70.928 | 49.962 | 0.00 | 0.00 |
| ATOM | 805 | HB2  | TRP | X | 52 | 36.361 | 71.604 | 50.179 | 0.00 | 0.00 |
| ATOM | 806 | HB3  | TRP | X | 52 | 35.506 | 70.050 | 50.607 | 0.00 | 0.00 |
| ATOM | 807 | CG   | TRP | X | 52 | 35.666 | 70.465 | 48.587 | 0.00 | 0.00 |
| ATOM | 808 | CD1  | TRP | X | 52 | 35.932 | 71.277 | 47.502 | 0.00 | 0.00 |
| ATOM | 809 | HD1  | TRP | X | 52 | 36.146 | 72.335 | 47.521 | 0.00 | 0.00 |
| ATOM | 810 | NE1  | TRP | X | 52 | 36.017 | 70.500 | 46.347 | 0.00 | 0.00 |
| ATOM | 811 | HE1  | TRP | X | 52 | 36.343 | 70.849 | 45.457 | 0.00 | 0.00 |
| ATOM | 812 | CE2  | TRP | X | 52 | 35.634 | 69.182 | 46.616 | 0.00 | 0.00 |
| ATOM | 813 | CZ2  | TRP | X | 52 | 35.487 | 68.019 | 45.837 | 0.00 | 0.00 |
| ATOM | 814 | HZ2  | TRP | X | 52 | 35.693 | 68.197 | 44.792 | 0.00 | 0.00 |
| ATOM | 815 | CH2  | TRP | X | 52 | 35.022 | 66.846 | 46.377 | 0.00 | 0.00 |
| ATOM | 816 | HH2  | TRP | X | 52 | 34.783 | 65.975 | 45.783 | 0.00 | 0.00 |
| ATOM | 817 | CZ3  | TRP | X | 52 | 34.923 | 66.756 | 47.760 | 0.00 | 0.00 |
| ATOM | 818 | HZ3  | TRP | X | 52 | 34.412 | 65.885 | 48.144 | 0.00 | 0.00 |
| ATOM | 819 | CE3  | TRP | X | 52 | 35.059 | 67.841 | 48.622 | 0.00 | 0.00 |
| ATOM | 820 | HE3  | TRP | X | 52 | 34.844 | 67.837 | 49.681 | 0.00 | 0.00 |
| ATOM | 821 | CD2  | TRP | X | 52 | 35.432 | 69.135 | 48.065 | 0.00 | 0.00 |
| ATOM | 822 | C    | TRP | X | 52 | 33.799 | 72.826 | 49.600 | 0.00 | 0.00 |
| ATOM | 823 | O    | TRP | X | 52 | 33.229 | 72.806 | 48.476 | 0.00 | 0.00 |
| ATOM | 824 | N    | SER | X | 53 | 34.178 | 73.974 | 50.131 | 0.00 | 0.00 |
| ATOM | 825 | H    | SER | X | 53 | 34.596 | 73.982 | 51.050 | 0.00 | 0.00 |
| ATOM | 826 | CA   | SER | X | 53 | 34.246 | 75.219 | 49.330 | 0.00 | 0.00 |
| ATOM | 827 | HA   | SER | X | 53 | 33.381 | 75.224 | 48.666 | 0.00 | 0.00 |
| ATOM | 828 | CB   | SER | X | 53 | 34.224 | 76.452 | 50.235 | 0.00 | 0.00 |
| ATOM | 829 | HB2  | SER | X | 53 | 35.178 | 76.280 | 50.733 | 0.00 | 0.00 |
| ATOM | 830 | HB3  | SER | X | 53 | 34.409 | 77.316 | 49.597 | 0.00 | 0.00 |
| ATOM | 831 | OG   | SER | X | 53 | 33.184 | 76.796 | 51.186 | 0.00 | 0.00 |
| ATOM | 832 | HG   | SER | X | 53 | 33.354 | 76.279 | 51.977 | 0.00 | 0.00 |
| ATOM | 833 | C    | SER | X | 53 | 35.455 | 75.180 | 48.423 | 0.00 | 0.00 |
| ATOM | 834 | O    | SER | X | 53 | 36.513 | 74.555 | 48.739 | 0.00 | 0.00 |
| ATOM | 835 | N    | GLY | X | 54 | 35.359 | 75.865 | 47.241 | 0.00 | 0.00 |
| ATOM | 836 | H    | GLY | X | 54 | 34.484 | 76.319 | 47.020 | 0.00 | 0.00 |
| ATOM | 837 | CA   | GLY | X | 54 | 36.468 | 76.089 | 46.285 | 0.00 | 0.00 |
| ATOM | 838 | HA2  | GLY | X | 54 | 36.183 | 76.782 | 45.543 | 0.00 | 0.00 |
| ATOM | 839 | HA3  | GLY | X | 54 | 37.356 | 76.484 | 46.795 | 0.00 | 0.00 |
| ATOM | 840 | C    | GLY | X | 54 | 37.016 | 74.862 | 45.592 | 0.00 | 0.00 |
| ATOM | 841 | O    | GLY | X | 54 | 36.154 | 74.009 | 45.354 | 0.00 | 0.00 |
| ATOM | 842 | N    | VAL | X | 55 | 38.322 | 74.860 | 45.271 | 0.00 | 0.00 |
| ATOM | 843 | H    | VAL | X | 55 | 38.851 | 75.701 | 45.452 | 0.00 | 0.00 |
| ATOM | 844 | CA   | VAL | X | 55 | 38.897 | 73.867 | 44.363 | 0.00 | 0.00 |
| ATOM | 845 | HA   | VAL | X | 55 | 38.052 | 73.270 | 44.021 | 0.00 | 0.00 |
| ATOM | 846 | CB   | VAL | X | 55 | 39.331 | 74.534 | 42.929 | 0.00 | 0.00 |
| ATOM | 847 | HB   | VAL | X | 55 | 40.296 | 75.042 | 42.929 | 0.00 | 0.00 |

|      |     |      |     |   |    |        |        |        |      |      |
|------|-----|------|-----|---|----|--------|--------|--------|------|------|
| ATOM | 848 | CG1  | VAL | X | 55 | 39.801 | 73.489 | 41.817 | 0.00 | 0.00 |
| ATOM | 849 | HG11 | VAL | X | 55 | 38.895 | 72.931 | 41.581 | 0.00 | 0.00 |
| ATOM | 850 | HG12 | VAL | X | 55 | 40.176 | 74.010 | 40.936 | 0.00 | 0.00 |
| ATOM | 851 | HG13 | VAL | X | 55 | 40.570 | 72.852 | 42.253 | 0.00 | 0.00 |
| ATOM | 852 | CG2  | VAL | X | 55 | 38.316 | 75.506 | 42.318 | 0.00 | 0.00 |
| ATOM | 853 | HG21 | VAL | X | 55 | 38.008 | 76.279 | 43.022 | 0.00 | 0.00 |
| ATOM | 854 | HG22 | VAL | X | 55 | 38.724 | 75.942 | 41.407 | 0.00 | 0.00 |
| ATOM | 855 | HG23 | VAL | X | 55 | 37.427 | 74.923 | 42.077 | 0.00 | 0.00 |
| ATOM | 856 | C    | VAL | X | 55 | 39.943 | 72.977 | 44.940 | 0.00 | 0.00 |
| ATOM | 857 | O    | VAL | X | 55 | 40.924 | 73.554 | 45.393 | 0.00 | 0.00 |
| ATOM | 858 | N    | VAL | X | 56 | 39.708 | 71.676 | 44.808 | 0.00 | 0.00 |
| ATOM | 859 | H    | VAL | X | 56 | 38.821 | 71.405 | 44.408 | 0.00 | 0.00 |
| ATOM | 860 | CA   | VAL | X | 56 | 40.629 | 70.684 | 45.466 | 0.00 | 0.00 |
| ATOM | 861 | HA   | VAL | X | 56 | 41.329 | 71.240 | 46.089 | 0.00 | 0.00 |
| ATOM | 862 | CB   | VAL | X | 56 | 39.825 | 69.844 | 46.499 | 0.00 | 0.00 |
| ATOM | 863 | HB   | VAL | X | 56 | 38.894 | 69.540 | 46.022 | 0.00 | 0.00 |
| ATOM | 864 | CG1  | VAL | X | 56 | 40.472 | 68.510 | 46.872 | 0.00 | 0.00 |
| ATOM | 865 | HG11 | VAL | X | 56 | 41.320 | 68.663 | 47.539 | 0.00 | 0.00 |
| ATOM | 866 | HG12 | VAL | X | 56 | 39.713 | 67.877 | 47.332 | 0.00 | 0.00 |
| ATOM | 867 | HG13 | VAL | X | 56 | 40.881 | 68.029 | 45.983 | 0.00 | 0.00 |
| ATOM | 868 | CG2  | VAL | X | 56 | 39.474 | 70.615 | 47.752 | 0.00 | 0.00 |
| ATOM | 869 | HG21 | VAL | X | 56 | 40.273 | 71.270 | 48.100 | 0.00 | 0.00 |
| ATOM | 870 | HG22 | VAL | X | 56 | 38.753 | 71.404 | 47.536 | 0.00 | 0.00 |
| ATOM | 871 | HG23 | VAL | X | 56 | 38.877 | 70.043 | 48.463 | 0.00 | 0.00 |
| ATOM | 872 | C    | VAL | X | 56 | 41.373 | 69.903 | 44.379 | 0.00 | 0.00 |
| ATOM | 873 | O    | VAL | X | 56 | 40.838 | 69.499 | 43.353 | 0.00 | 0.00 |
| ATOM | 874 | N    | ASP | X | 57 | 42.654 | 69.780 | 44.580 | 0.00 | 0.00 |
| ATOM | 875 | H    | ASP | X | 57 | 42.971 | 70.100 | 45.484 | 0.00 | 0.00 |
| ATOM | 876 | CA   | ASP | X | 57 | 43.734 | 69.337 | 43.678 | 0.00 | 0.00 |
| ATOM | 877 | HA   | ASP | X | 57 | 43.622 | 69.962 | 42.792 | 0.00 | 0.00 |
| ATOM | 878 | CB   | ASP | X | 57 | 44.949 | 69.658 | 44.428 | 0.00 | 0.00 |
| ATOM | 879 | HB2  | ASP | X | 57 | 45.047 | 70.679 | 44.798 | 0.00 | 0.00 |
| ATOM | 880 | HB3  | ASP | X | 57 | 44.990 | 69.123 | 45.377 | 0.00 | 0.00 |
| ATOM | 881 | CG   | ASP | X | 57 | 46.262 | 69.426 | 43.682 | 0.00 | 0.00 |
| ATOM | 882 | OD1  | ASP | X | 57 | 46.664 | 68.281 | 43.380 | 0.00 | 0.00 |
| ATOM | 883 | OD2  | ASP | X | 57 | 46.935 | 70.404 | 43.287 | 0.00 | 0.00 |
| ATOM | 884 | C    | ASP | X | 57 | 43.594 | 67.823 | 43.401 | 0.00 | 0.00 |
| ATOM | 885 | O    | ASP | X | 57 | 43.541 | 66.986 | 44.350 | 0.00 | 0.00 |
| ATOM | 886 | N    | ALA | X | 58 | 43.371 | 67.575 | 42.094 | 0.00 | 0.00 |
| ATOM | 887 | H    | ALA | X | 58 | 43.458 | 68.354 | 41.457 | 0.00 | 0.00 |
| ATOM | 888 | CA   | ALA | X | 58 | 43.367 | 66.224 | 41.541 | 0.00 | 0.00 |
| ATOM | 889 | HA   | ALA | X | 58 | 43.522 | 65.545 | 42.380 | 0.00 | 0.00 |
| ATOM | 890 | CB   | ALA | X | 58 | 41.969 | 65.988 | 40.891 | 0.00 | 0.00 |
| ATOM | 891 | HB1  | ALA | X | 58 | 41.943 | 64.957 | 40.537 | 0.00 | 0.00 |
| ATOM | 892 | HB2  | ALA | X | 58 | 41.239 | 65.960 | 41.700 | 0.00 | 0.00 |
| ATOM | 893 | HB3  | ALA | X | 58 | 41.772 | 66.763 | 40.151 | 0.00 | 0.00 |
| ATOM | 894 | C    | ALA | X | 58 | 44.582 | 65.870 | 40.683 | 0.00 | 0.00 |
| ATOM | 895 | O    | ALA | X | 58 | 44.465 | 65.060 | 39.831 | 0.00 | 0.00 |
| ATOM | 896 | N    | THR | X | 59 | 45.663 | 66.623 | 40.911 | 0.00 | 0.00 |
| ATOM | 897 | H    | THR | X | 59 | 45.711 | 67.229 | 41.718 | 0.00 | 0.00 |
| ATOM | 898 | CA   | THR | X | 59 | 46.866 | 66.532 | 40.142 | 0.00 | 0.00 |
| ATOM | 899 | HA   | THR | X | 59 | 46.638 | 66.322 | 39.097 | 0.00 | 0.00 |
| ATOM | 900 | CB   | THR | X | 59 | 47.650 | 67.819 | 40.112 | 0.00 | 0.00 |
| ATOM | 901 | HB   | THR | X | 59 | 48.497 | 67.684 | 39.439 | 0.00 | 0.00 |
| ATOM | 902 | CG2  | THR | X | 59 | 46.738 | 69.006 | 39.617 | 0.00 | 0.00 |
| ATOM | 903 | HG21 | THR | X | 59 | 45.903 | 69.114 | 40.309 | 0.00 | 0.00 |
| ATOM | 904 | HG22 | THR | X | 59 | 47.340 | 69.914 | 39.611 | 0.00 | 0.00 |
| ATOM | 905 | HG23 | THR | X | 59 | 46.194 | 68.811 | 38.693 | 0.00 | 0.00 |
| ATOM | 906 | OG1  | THR | X | 59 | 48.323 | 68.100 | 41.311 | 0.00 | 0.00 |
| ATOM | 907 | HG1  | THR | X | 59 | 47.725 | 68.317 | 42.030 | 0.00 | 0.00 |
| ATOM | 908 | C    | THR | X | 59 | 47.795 | 65.405 | 40.534 | 0.00 | 0.00 |
| ATOM | 909 | O    | THR | X | 59 | 48.756 | 65.192 | 39.819 | 0.00 | 0.00 |
| ATOM | 910 | N    | THR | X | 60 | 47.733 | 64.834 | 41.738 | 0.00 | 0.00 |
| ATOM | 911 | H    | THR | X | 60 | 47.023 | 65.143 | 42.387 | 0.00 | 0.00 |
| ATOM | 912 | CA   | THR | X | 60 | 48.644 | 63.858 | 42.270 | 0.00 | 0.00 |
| ATOM | 913 | HA   | THR | X | 60 | 49.072 | 63.242 | 41.479 | 0.00 | 0.00 |
| ATOM | 914 | CB   | THR | X | 60 | 49.980 | 64.517 | 42.722 | 0.00 | 0.00 |
| ATOM | 915 | HB   | THR | X | 60 | 50.374 | 65.198 | 41.967 | 0.00 | 0.00 |
| ATOM | 916 | CG2  | THR | X | 60 | 49.926 | 65.341 | 43.987 | 0.00 | 0.00 |
| ATOM | 917 | HG21 | THR | X | 60 | 49.290 | 64.886 | 44.747 | 0.00 | 0.00 |

|      |     |      |     |   |    |        |        |        |      |      |
|------|-----|------|-----|---|----|--------|--------|--------|------|------|
| ATOM | 918 | HG22 | THR | X | 60 | 50.931 | 65.525 | 44.366 | 0.00 | 0.00 |
| ATOM | 919 | HG23 | THR | X | 60 | 49.403 | 66.289 | 43.864 | 0.00 | 0.00 |
| ATOM | 920 | OG1  | THR | X | 60 | 50.883 | 63.524 | 42.921 | 0.00 | 0.00 |
| ATOM | 921 | HG1  | THR | X | 60 | 51.653 | 64.038 | 43.176 | 0.00 | 0.00 |
| ATOM | 922 | C    | THR | X | 60 | 47.956 | 62.948 | 43.286 | 0.00 | 0.00 |
| ATOM | 923 | O    | THR | X | 60 | 46.776 | 63.127 | 43.603 | 0.00 | 0.00 |
| ATOM | 924 | N    | PHE | X | 61 | 48.636 | 61.916 | 43.755 | 0.00 | 0.00 |
| ATOM | 925 | H    | PHE | X | 61 | 49.594 | 61.802 | 43.455 | 0.00 | 0.00 |
| ATOM | 926 | CA   | PHE | X | 61 | 48.080 | 61.000 | 44.743 | 0.00 | 0.00 |
| ATOM | 927 | HA   | PHE | X | 61 | 47.100 | 60.588 | 44.499 | 0.00 | 0.00 |
| ATOM | 928 | CB   | PHE | X | 61 | 48.956 | 59.760 | 44.788 | 0.00 | 0.00 |
| ATOM | 929 | HB2  | PHE | X | 61 | 50.003 | 60.039 | 44.674 | 0.00 | 0.00 |
| ATOM | 930 | HB3  | PHE | X | 61 | 48.960 | 59.290 | 45.772 | 0.00 | 0.00 |
| ATOM | 931 | CG   | PHE | X | 61 | 48.619 | 58.794 | 43.696 | 0.00 | 0.00 |
| ATOM | 932 | CD1  | PHE | X | 61 | 47.531 | 57.932 | 43.735 | 0.00 | 0.00 |
| ATOM | 933 | HD1  | PHE | X | 61 | 46.832 | 57.835 | 44.552 | 0.00 | 0.00 |
| ATOM | 934 | CE1  | PHE | X | 61 | 47.253 | 57.069 | 42.701 | 0.00 | 0.00 |
| ATOM | 935 | HE1  | PHE | X | 61 | 46.526 | 56.275 | 42.786 | 0.00 | 0.00 |
| ATOM | 936 | CZ   | PHE | X | 61 | 47.951 | 57.111 | 41.518 | 0.00 | 0.00 |
| ATOM | 937 | HZ   | PHE | X | 61 | 47.723 | 56.358 | 40.779 | 0.00 | 0.00 |
| ATOM | 938 | CE2  | PHE | X | 61 | 49.069 | 57.935 | 41.421 | 0.00 | 0.00 |
| ATOM | 939 | HE2  | PHE | X | 61 | 49.646 | 57.985 | 40.509 | 0.00 | 0.00 |
| ATOM | 940 | CD2  | PHE | X | 61 | 49.387 | 58.780 | 42.486 | 0.00 | 0.00 |
| ATOM | 941 | HD2  | PHE | X | 61 | 50.224 | 59.440 | 42.311 | 0.00 | 0.00 |
| ATOM | 942 | C    | PHE | X | 61 | 48.033 | 61.770 | 46.101 | 0.00 | 0.00 |
| ATOM | 943 | O    | PHE | X | 61 | 48.723 | 62.785 | 46.287 | 0.00 | 0.00 |
| ATOM | 944 | N    | GLN | X | 62 | 47.400 | 61.282 | 47.186 | 0.00 | 0.00 |
| ATOM | 945 | H    | GLN | X | 62 | 46.743 | 60.528 | 47.044 | 0.00 | 0.00 |
| ATOM | 946 | CA   | GLN | X | 62 | 47.617 | 61.731 | 48.639 | 0.00 | 0.00 |
| ATOM | 947 | HA   | GLN | X | 62 | 48.357 | 62.528 | 48.725 | 0.00 | 0.00 |
| ATOM | 948 | CB   | GLN | X | 62 | 46.263 | 62.237 | 49.102 | 0.00 | 0.00 |
| ATOM | 949 | HB2  | GLN | X | 62 | 45.600 | 61.468 | 48.706 | 0.00 | 0.00 |
| ATOM | 950 | HB3  | GLN | X | 62 | 46.107 | 62.164 | 50.178 | 0.00 | 0.00 |
| ATOM | 951 | CG   | GLN | X | 62 | 45.866 | 63.670 | 48.659 | 0.00 | 0.00 |
| ATOM | 952 | HG2  | GLN | X | 62 | 45.998 | 63.700 | 47.577 | 0.00 | 0.00 |
| ATOM | 953 | HG3  | GLN | X | 62 | 44.816 | 63.767 | 48.936 | 0.00 | 0.00 |
| ATOM | 954 | CD   | GLN | X | 62 | 46.652 | 64.688 | 49.350 | 0.00 | 0.00 |
| ATOM | 955 | OE1  | GLN | X | 62 | 47.663 | 64.458 | 50.012 | 0.00 | 0.00 |
| ATOM | 956 | NE2  | GLN | X | 62 | 46.341 | 65.928 | 49.109 | 0.00 | 0.00 |
| ATOM | 957 | HE21 | GLN | X | 62 | 46.761 | 66.530 | 49.803 | 0.00 | 0.00 |
| ATOM | 958 | HE22 | GLN | X | 62 | 45.553 | 66.084 | 48.498 | 0.00 | 0.00 |
| ATOM | 959 | C    | GLN | X | 62 | 48.276 | 60.533 | 49.378 | 0.00 | 0.00 |
| ATOM | 960 | O    | GLN | X | 62 | 49.064 | 59.823 | 48.726 | 0.00 | 0.00 |
| ATOM | 961 | N    | SER | X | 63 | 47.920 | 60.226 | 50.643 | 0.00 | 0.00 |
| ATOM | 962 | H    | SER | X | 63 | 47.195 | 60.712 | 51.152 | 0.00 | 0.00 |
| ATOM | 963 | CA   | SER | X | 63 | 48.442 | 59.058 | 51.255 | 0.00 | 0.00 |
| ATOM | 964 | HA   | SER | X | 63 | 49.496 | 58.874 | 51.042 | 0.00 | 0.00 |
| ATOM | 965 | CB   | SER | X | 63 | 48.227 | 58.986 | 52.788 | 0.00 | 0.00 |
| ATOM | 966 | HB2  | SER | X | 63 | 47.160 | 58.880 | 52.985 | 0.00 | 0.00 |
| ATOM | 967 | HB3  | SER | X | 63 | 48.852 | 58.150 | 53.103 | 0.00 | 0.00 |
| ATOM | 968 | OG   | SER | X | 63 | 48.692 | 60.094 | 53.569 | 0.00 | 0.00 |
| ATOM | 969 | HG   | SER | X | 63 | 48.820 | 59.701 | 54.436 | 0.00 | 0.00 |
| ATOM | 970 | C    | SER | X | 63 | 47.759 | 57.734 | 50.692 | 0.00 | 0.00 |
| ATOM | 971 | O    | SER | X | 63 | 46.707 | 57.725 | 50.097 | 0.00 | 0.00 |
| ATOM | 972 | N    | VAL | X | 64 | 48.287 | 56.537 | 51.040 | 0.00 | 0.00 |
| ATOM | 973 | H    | VAL | X | 64 | 49.157 | 56.521 | 51.552 | 0.00 | 0.00 |
| ATOM | 974 | CA   | VAL | X | 64 | 47.642 | 55.222 | 50.754 | 0.00 | 0.00 |
| ATOM | 975 | HA   | VAL | X | 64 | 46.660 | 55.438 | 50.331 | 0.00 | 0.00 |
| ATOM | 976 | CB   | VAL | X | 64 | 48.414 | 54.433 | 49.656 | 0.00 | 0.00 |
| ATOM | 977 | HB   | VAL | X | 64 | 47.717 | 53.663 | 49.325 | 0.00 | 0.00 |
| ATOM | 978 | CG1  | VAL | X | 64 | 48.946 | 55.407 | 48.511 | 0.00 | 0.00 |
| ATOM | 979 | HG11 | VAL | X | 64 | 48.111 | 55.898 | 48.011 | 0.00 | 0.00 |
| ATOM | 980 | HG12 | VAL | X | 64 | 49.519 | 56.197 | 48.995 | 0.00 | 0.00 |
| ATOM | 981 | HG13 | VAL | X | 64 | 49.586 | 54.876 | 47.807 | 0.00 | 0.00 |
| ATOM | 982 | CG2  | VAL | X | 64 | 49.640 | 53.695 | 50.206 | 0.00 | 0.00 |
| ATOM | 983 | HG21 | VAL | X | 64 | 49.148 | 52.972 | 50.856 | 0.00 | 0.00 |
| ATOM | 984 | HG22 | VAL | X | 64 | 50.093 | 53.085 | 49.425 | 0.00 | 0.00 |
| ATOM | 985 | HG23 | VAL | X | 64 | 50.413 | 54.398 | 50.517 | 0.00 | 0.00 |
| ATOM | 986 | C    | VAL | X | 64 | 47.467 | 54.534 | 52.030 | 0.00 | 0.00 |
| ATOM | 987 | O    | VAL | X | 64 | 47.963 | 54.981 | 53.072 | 0.00 | 0.00 |

|      |      |      |     |   |    |        |        |        |      |      |
|------|------|------|-----|---|----|--------|--------|--------|------|------|
| ATOM | 988  | N    | CYX | X | 65 | 46.673 | 53.546 | 52.021 | 0.00 | 0.00 |
| ATOM | 989  | H    | CYX | X | 65 | 46.215 | 53.338 | 51.146 | 0.00 | 0.00 |
| ATOM | 990  | CA   | CYX | X | 65 | 46.207 | 52.949 | 53.301 | 0.00 | 0.00 |
| ATOM | 991  | HA   | CYX | X | 65 | 46.008 | 53.750 | 54.012 | 0.00 | 0.00 |
| ATOM | 992  | CB   | CYX | X | 65 | 44.956 | 52.074 | 53.058 | 0.00 | 0.00 |
| ATOM | 993  | HB2  | CYX | X | 65 | 45.102 | 51.217 | 52.400 | 0.00 | 0.00 |
| ATOM | 994  | HB3  | CYX | X | 65 | 44.666 | 51.682 | 54.033 | 0.00 | 0.00 |
| ATOM | 995  | SG   | CYX | X | 65 | 43.513 | 53.012 | 52.518 | 0.00 | 0.00 |
| ATOM | 996  | C    | CYX | X | 65 | 47.253 | 52.052 | 54.078 | 0.00 | 0.00 |
| ATOM | 997  | O    | CYX | X | 65 | 48.128 | 51.390 | 53.480 | 0.00 | 0.00 |
| ATOM | 998  | N    | TYR | X | 66 | 47.154 | 52.037 | 55.379 | 0.00 | 0.00 |
| ATOM | 999  | H    | TYR | X | 66 | 46.489 | 52.605 | 55.885 | 0.00 | 0.00 |
| ATOM | 1000 | CA   | TYR | X | 66 | 48.171 | 51.316 | 56.123 | 0.00 | 0.00 |
| ATOM | 1001 | HA   | TYR | X | 66 | 49.175 | 51.680 | 55.901 | 0.00 | 0.00 |
| ATOM | 1002 | CB   | TYR | X | 66 | 47.884 | 51.397 | 57.641 | 0.00 | 0.00 |
| ATOM | 1003 | HB2  | TYR | X | 66 | 46.823 | 51.499 | 57.867 | 0.00 | 0.00 |
| ATOM | 1004 | HB3  | TYR | X | 66 | 48.099 | 50.435 | 58.106 | 0.00 | 0.00 |
| ATOM | 1005 | CG   | TYR | X | 66 | 48.635 | 52.500 | 58.400 | 0.00 | 0.00 |
| ATOM | 1006 | CD1  | TYR | X | 66 | 48.002 | 53.538 | 59.117 | 0.00 | 0.00 |
| ATOM | 1007 | HD1  | TYR | X | 66 | 46.933 | 53.652 | 59.224 | 0.00 | 0.00 |
| ATOM | 1008 | CE1  | TYR | X | 66 | 48.791 | 54.571 | 59.599 | 0.00 | 0.00 |
| ATOM | 1009 | HE1  | TYR | X | 66 | 48.385 | 55.428 | 60.115 | 0.00 | 0.00 |
| ATOM | 1010 | CZ   | TYR | X | 66 | 50.138 | 54.603 | 59.361 | 0.00 | 0.00 |
| ATOM | 1011 | OH   | TYR | X | 66 | 50.892 | 55.638 | 59.720 | 0.00 | 0.00 |
| ATOM | 1012 | HH   | TYR | X | 66 | 50.441 | 56.306 | 60.242 | 0.00 | 0.00 |
| ATOM | 1013 | CE2  | TYR | X | 66 | 50.788 | 53.557 | 58.771 | 0.00 | 0.00 |
| ATOM | 1014 | HE2  | TYR | X | 66 | 51.839 | 53.653 | 58.539 | 0.00 | 0.00 |
| ATOM | 1015 | CD2  | TYR | X | 66 | 50.016 | 52.522 | 58.234 | 0.00 | 0.00 |
| ATOM | 1016 | HD2  | TYR | X | 66 | 50.606 | 51.770 | 57.730 | 0.00 | 0.00 |
| ATOM | 1017 | C    | TYR | X | 66 | 48.266 | 49.795 | 55.772 | 0.00 | 0.00 |
| ATOM | 1018 | O    | TYR | X | 66 | 47.256 | 49.085 | 55.584 | 0.00 | 0.00 |
| ATOM | 1019 | N    | GLN | X | 67 | 49.463 | 49.180 | 55.800 | 0.00 | 0.00 |
| ATOM | 1020 | H    | GLN | X | 67 | 50.269 | 49.750 | 56.015 | 0.00 | 0.00 |
| ATOM | 1021 | CA   | GLN | X | 67 | 49.773 | 47.875 | 55.201 | 0.00 | 0.00 |
| ATOM | 1022 | HA   | GLN | X | 67 | 49.086 | 47.068 | 55.458 | 0.00 | 0.00 |
| ATOM | 1023 | CB   | GLN | X | 67 | 49.759 | 48.004 | 53.668 | 0.00 | 0.00 |
| ATOM | 1024 | HB2  | GLN | X | 67 | 49.996 | 47.059 | 53.179 | 0.00 | 0.00 |
| ATOM | 1025 | HB3  | GLN | X | 67 | 48.731 | 48.211 | 53.372 | 0.00 | 0.00 |
| ATOM | 1026 | CG   | GLN | X | 67 | 50.612 | 49.033 | 52.992 | 0.00 | 0.00 |
| ATOM | 1027 | HG2  | GLN | X | 67 | 50.444 | 50.021 | 53.421 | 0.00 | 0.00 |
| ATOM | 1028 | HG3  | GLN | X | 67 | 51.628 | 48.721 | 53.233 | 0.00 | 0.00 |
| ATOM | 1029 | CD   | GLN | X | 67 | 50.352 | 49.035 | 51.543 | 0.00 | 0.00 |
| ATOM | 1030 | OE1  | GLN | X | 67 | 50.949 | 48.352 | 50.716 | 0.00 | 0.00 |
| ATOM | 1031 | NE2  | GLN | X | 67 | 49.328 | 49.791 | 51.220 | 0.00 | 0.00 |
| ATOM | 1032 | HE21 | GLN | X | 67 | 49.177 | 49.652 | 50.231 | 0.00 | 0.00 |
| ATOM | 1033 | HE22 | GLN | X | 67 | 48.765 | 50.320 | 51.870 | 0.00 | 0.00 |
| ATOM | 1034 | C    | GLN | X | 67 | 51.189 | 47.460 | 55.587 | 0.00 | 0.00 |
| ATOM | 1035 | O    | GLN | X | 67 | 51.984 | 48.317 | 55.958 | 0.00 | 0.00 |
| ATOM | 1036 | N    | TYR | X | 68 | 51.562 | 46.174 | 55.511 | 0.00 | 0.00 |
| ATOM | 1037 | H    | TYR | X | 68 | 50.901 | 45.522 | 55.112 | 0.00 | 0.00 |
| ATOM | 1038 | CA   | TYR | X | 68 | 52.962 | 45.771 | 55.817 | 0.00 | 0.00 |
| ATOM | 1039 | HA   | TYR | X | 68 | 53.406 | 46.554 | 56.432 | 0.00 | 0.00 |
| ATOM | 1040 | CB   | TYR | X | 68 | 52.955 | 44.450 | 56.628 | 0.00 | 0.00 |
| ATOM | 1041 | HB2  | TYR | X | 68 | 52.330 | 44.676 | 57.492 | 0.00 | 0.00 |
| ATOM | 1042 | HB3  | TYR | X | 68 | 52.446 | 43.671 | 56.060 | 0.00 | 0.00 |
| ATOM | 1043 | CG   | TYR | X | 68 | 54.313 | 43.930 | 57.149 | 0.00 | 0.00 |
| ATOM | 1044 | CD1  | TYR | X | 68 | 54.720 | 44.114 | 58.524 | 0.00 | 0.00 |
| ATOM | 1045 | HD1  | TYR | X | 68 | 54.046 | 44.614 | 59.203 | 0.00 | 0.00 |
| ATOM | 1046 | CE1  | TYR | X | 68 | 55.942 | 43.628 | 58.996 | 0.00 | 0.00 |
| ATOM | 1047 | HE1  | TYR | X | 68 | 56.092 | 43.530 | 60.061 | 0.00 | 0.00 |
| ATOM | 1048 | CZ   | TYR | X | 68 | 56.726 | 42.921 | 58.090 | 0.00 | 0.00 |
| ATOM | 1049 | OH   | TYR | X | 68 | 57.945 | 42.362 | 58.393 | 0.00 | 0.00 |
| ATOM | 1050 | HH   | TYR | X | 68 | 58.117 | 42.129 | 59.308 | 0.00 | 0.00 |
| ATOM | 1051 | CE2  | TYR | X | 68 | 56.377 | 42.905 | 56.748 | 0.00 | 0.00 |
| ATOM | 1052 | HE2  | TYR | X | 68 | 57.056 | 42.448 | 56.044 | 0.00 | 0.00 |
| ATOM | 1053 | CD2  | TYR | X | 68 | 55.182 | 43.416 | 56.247 | 0.00 | 0.00 |
| ATOM | 1054 | HD2  | TYR | X | 68 | 54.867 | 43.204 | 55.236 | 0.00 | 0.00 |
| ATOM | 1055 | C    | TYR | X | 68 | 53.751 | 45.860 | 54.533 | 0.00 | 0.00 |
| ATOM | 1056 | O    | TYR | X | 68 | 53.226 | 45.391 | 53.489 | 0.00 | 0.00 |
| ATOM | 1057 | N    | VAL | X | 69 | 55.009 | 46.290 | 54.520 | 0.00 | 0.00 |

|      |      |      |     |   |    |        |        |        |      |      |
|------|------|------|-----|---|----|--------|--------|--------|------|------|
| ATOM | 1058 | H    | VAL | X | 69 | 55.407 | 46.500 | 55.424 | 0.00 | 0.00 |
| ATOM | 1059 | CA   | VAL | X | 69 | 55.850 | 46.172 | 53.338 | 0.00 | 0.00 |
| ATOM | 1060 | HA   | VAL | X | 69 | 55.256 | 46.118 | 52.425 | 0.00 | 0.00 |
| ATOM | 1061 | CB   | VAL | X | 69 | 56.857 | 47.384 | 53.128 | 0.00 | 0.00 |
| ATOM | 1062 | HB   | VAL | X | 69 | 57.601 | 47.391 | 53.924 | 0.00 | 0.00 |
| ATOM | 1063 | CG1  | VAL | X | 69 | 57.461 | 47.318 | 51.733 | 0.00 | 0.00 |
| ATOM | 1064 | HG11 | VAL | X | 69 | 56.674 | 47.225 | 50.985 | 0.00 | 0.00 |
| ATOM | 1065 | HG12 | VAL | X | 69 | 57.940 | 48.242 | 51.409 | 0.00 | 0.00 |
| ATOM | 1066 | HG13 | VAL | X | 69 | 58.270 | 46.594 | 51.831 | 0.00 | 0.00 |
| ATOM | 1067 | CG2  | VAL | X | 69 | 56.231 | 48.826 | 53.213 | 0.00 | 0.00 |
| ATOM | 1068 | HG21 | VAL | X | 69 | 56.910 | 49.678 | 53.222 | 0.00 | 0.00 |
| ATOM | 1069 | HG22 | VAL | X | 69 | 55.613 | 49.045 | 52.342 | 0.00 | 0.00 |
| ATOM | 1070 | HG23 | VAL | X | 69 | 55.641 | 48.944 | 54.122 | 0.00 | 0.00 |
| ATOM | 1071 | C    | VAL | X | 69 | 56.656 | 44.844 | 53.449 | 0.00 | 0.00 |
| ATOM | 1072 | O    | VAL | X | 69 | 57.464 | 44.769 | 54.370 | 0.00 | 0.00 |
| ATOM | 1073 | N    | ASP | X | 70 | 56.316 | 43.874 | 52.626 | 0.00 | 0.00 |
| ATOM | 1074 | H    | ASP | X | 70 | 55.672 | 44.196 | 51.918 | 0.00 | 0.00 |
| ATOM | 1075 | CA   | ASP | X | 70 | 56.958 | 42.626 | 52.404 | 0.00 | 0.00 |
| ATOM | 1076 | HA   | ASP | X | 70 | 56.696 | 41.923 | 53.195 | 0.00 | 0.00 |
| ATOM | 1077 | CB   | ASP | X | 70 | 56.334 | 42.247 | 51.049 | 0.00 | 0.00 |
| ATOM | 1078 | HB2  | ASP | X | 70 | 55.254 | 42.179 | 51.177 | 0.00 | 0.00 |
| ATOM | 1079 | HB3  | ASP | X | 70 | 56.641 | 42.936 | 50.262 | 0.00 | 0.00 |
| ATOM | 1080 | CG   | ASP | X | 70 | 56.726 | 40.832 | 50.562 | 0.00 | 0.00 |
| ATOM | 1081 | OD1  | ASP | X | 70 | 57.864 | 40.323 | 50.802 | 0.00 | 0.00 |
| ATOM | 1082 | OD2  | ASP | X | 70 | 55.850 | 40.248 | 49.955 | 0.00 | 0.00 |
| ATOM | 1083 | C    | ASP | X | 70 | 58.508 | 42.823 | 52.422 | 0.00 | 0.00 |
| ATOM | 1084 | O    | ASP | X | 70 | 59.081 | 43.565 | 51.580 | 0.00 | 0.00 |
| ATOM | 1085 | N    | THR | X | 71 | 59.187 | 42.091 | 53.291 | 0.00 | 0.00 |
| ATOM | 1086 | H    | THR | X | 71 | 58.588 | 41.502 | 53.852 | 0.00 | 0.00 |
| ATOM | 1087 | CA   | THR | X | 71 | 60.613 | 42.119 | 53.533 | 0.00 | 0.00 |
| ATOM | 1088 | HA   | THR | X | 71 | 61.026 | 42.711 | 52.716 | 0.00 | 0.00 |
| ATOM | 1089 | CB   | THR | X | 71 | 60.892 | 42.696 | 54.966 | 0.00 | 0.00 |
| ATOM | 1090 | HB   | THR | X | 71 | 61.830 | 42.437 | 55.457 | 0.00 | 0.00 |
| ATOM | 1091 | CG2  | THR | X | 71 | 61.008 | 44.242 | 54.893 | 0.00 | 0.00 |
| ATOM | 1092 | HG21 | THR | X | 71 | 61.188 | 44.651 | 55.888 | 0.00 | 0.00 |
| ATOM | 1093 | HG22 | THR | X | 71 | 61.885 | 44.367 | 54.257 | 0.00 | 0.00 |
| ATOM | 1094 | HG23 | THR | X | 71 | 60.138 | 44.671 | 54.397 | 0.00 | 0.00 |
| ATOM | 1095 | OG1  | THR | X | 71 | 59.825 | 42.470 | 55.836 | 0.00 | 0.00 |
| ATOM | 1096 | HG1  | THR | X | 71 | 59.444 | 43.334 | 56.008 | 0.00 | 0.00 |
| ATOM | 1097 | C    | THR | X | 71 | 61.428 | 40.839 | 53.310 | 0.00 | 0.00 |
| ATOM | 1098 | O    | THR | X | 71 | 62.632 | 40.857 | 53.533 | 0.00 | 0.00 |
| ATOM | 1099 | N    | LEU | X | 72 | 60.861 | 39.734 | 52.842 | 0.00 | 0.00 |
| ATOM | 1100 | H    | LEU | X | 72 | 59.922 | 39.813 | 52.477 | 0.00 | 0.00 |
| ATOM | 1101 | CA   | LEU | X | 72 | 61.594 | 38.452 | 52.637 | 0.00 | 0.00 |
| ATOM | 1102 | HA   | LEU | X | 72 | 62.082 | 38.378 | 53.609 | 0.00 | 0.00 |
| ATOM | 1103 | CB   | LEU | X | 72 | 60.557 | 37.321 | 52.415 | 0.00 | 0.00 |
| ATOM | 1104 | HB2  | LEU | X | 72 | 59.742 | 37.414 | 53.132 | 0.00 | 0.00 |
| ATOM | 1105 | HB3  | LEU | X | 72 | 60.091 | 37.652 | 51.486 | 0.00 | 0.00 |
| ATOM | 1106 | CG   | LEU | X | 72 | 61.009 | 35.911 | 52.262 | 0.00 | 0.00 |
| ATOM | 1107 | HG   | LEU | X | 72 | 61.767 | 35.993 | 51.483 | 0.00 | 0.00 |
| ATOM | 1108 | CD1  | LEU | X | 72 | 61.691 | 35.453 | 53.577 | 0.00 | 0.00 |
| ATOM | 1109 | HD11 | LEU | X | 72 | 62.536 | 36.122 | 53.743 | 0.00 | 0.00 |
| ATOM | 1110 | HD12 | LEU | X | 72 | 61.011 | 35.505 | 54.427 | 0.00 | 0.00 |
| ATOM | 1111 | HD13 | LEU | X | 72 | 61.949 | 34.397 | 53.497 | 0.00 | 0.00 |
| ATOM | 1112 | CD2  | LEU | X | 72 | 59.920 | 34.889 | 51.849 | 0.00 | 0.00 |
| ATOM | 1113 | HD21 | LEU | X | 72 | 60.434 | 33.985 | 51.523 | 0.00 | 0.00 |
| ATOM | 1114 | HD22 | LEU | X | 72 | 59.262 | 34.607 | 52.671 | 0.00 | 0.00 |
| ATOM | 1115 | HD23 | LEU | X | 72 | 59.418 | 35.376 | 51.013 | 0.00 | 0.00 |
| ATOM | 1116 | C    | LEU | X | 72 | 62.626 | 38.496 | 51.501 | 0.00 | 0.00 |
| ATOM | 1117 | O    | LEU | X | 72 | 63.730 | 38.176 | 51.744 | 0.00 | 0.00 |
| ATOM | 1118 | N    | TYR | X | 73 | 62.257 | 38.997 | 50.304 | 0.00 | 0.00 |
| ATOM | 1119 | H    | TYR | X | 73 | 61.284 | 39.042 | 50.036 | 0.00 | 0.00 |
| ATOM | 1120 | CA   | TYR | X | 73 | 63.223 | 39.307 | 49.140 | 0.00 | 0.00 |
| ATOM | 1121 | HA   | TYR | X | 73 | 64.268 | 39.117 | 49.385 | 0.00 | 0.00 |
| ATOM | 1122 | CB   | TYR | X | 73 | 62.867 | 38.442 | 47.941 | 0.00 | 0.00 |
| ATOM | 1123 | HB2  | TYR | X | 73 | 61.848 | 38.695 | 47.648 | 0.00 | 0.00 |
| ATOM | 1124 | HB3  | TYR | X | 73 | 63.629 | 38.609 | 47.180 | 0.00 | 0.00 |
| ATOM | 1125 | CG   | TYR | X | 73 | 62.761 | 36.940 | 48.169 | 0.00 | 0.00 |
| ATOM | 1126 | CD1  | TYR | X | 73 | 63.894 | 36.219 | 48.647 | 0.00 | 0.00 |
| ATOM | 1127 | HD1  | TYR | X | 73 | 64.839 | 36.706 | 48.833 | 0.00 | 0.00 |

|      |      |     |     |   |    |        |        |        |      |      |
|------|------|-----|-----|---|----|--------|--------|--------|------|------|
| ATOM | 1128 | CE1 | TYR | X | 73 | 63.838 | 34.878 | 48.938 | 0.00 | 0.00 |
| ATOM | 1129 | HE1 | TYR | X | 73 | 64.743 | 34.427 | 49.320 | 0.00 | 0.00 |
| ATOM | 1130 | CZ  | TYR | X | 73 | 62.581 | 34.210 | 48.915 | 0.00 | 0.00 |
| ATOM | 1131 | OH  | TYR | X | 73 | 62.541 | 32.873 | 49.189 | 0.00 | 0.00 |
| ATOM | 1132 | HH  | TYR | X | 73 | 61.676 | 32.561 | 49.466 | 0.00 | 0.00 |
| ATOM | 1133 | CE2 | TYR | X | 73 | 61.429 | 34.874 | 48.374 | 0.00 | 0.00 |
| ATOM | 1134 | HE2 | TYR | X | 73 | 60.478 | 34.364 | 48.422 | 0.00 | 0.00 |
| ATOM | 1135 | CD2 | TYR | X | 73 | 61.552 | 36.245 | 47.980 | 0.00 | 0.00 |
| ATOM | 1136 | HD2 | TYR | X | 73 | 60.695 | 36.757 | 47.568 | 0.00 | 0.00 |
| ATOM | 1137 | C   | TYR | X | 73 | 63.233 | 40.761 | 48.724 | 0.00 | 0.00 |
| ATOM | 1138 | O   | TYR | X | 73 | 62.707 | 41.092 | 47.678 | 0.00 | 0.00 |
| ATOM | 1139 | N   | PRO | X | 74 | 63.843 | 41.618 | 49.560 | 0.00 | 0.00 |
| ATOM | 1140 | CD  | PRO | X | 74 | 64.482 | 41.350 | 50.846 | 0.00 | 0.00 |
| ATOM | 1141 | HD2 | PRO | X | 74 | 65.441 | 40.890 | 50.606 | 0.00 | 0.00 |
| ATOM | 1142 | HD3 | PRO | X | 74 | 63.906 | 40.704 | 51.509 | 0.00 | 0.00 |
| ATOM | 1143 | CG  | PRO | X | 74 | 64.630 | 42.720 | 51.502 | 0.00 | 0.00 |
| ATOM | 1144 | HG2 | PRO | X | 74 | 65.620 | 43.129 | 51.300 | 0.00 | 0.00 |
| ATOM | 1145 | HG3 | PRO | X | 74 | 64.441 | 42.597 | 52.569 | 0.00 | 0.00 |
| ATOM | 1146 | CB  | PRO | X | 74 | 63.709 | 43.676 | 50.754 | 0.00 | 0.00 |
| ATOM | 1147 | HB2 | PRO | X | 74 | 63.985 | 44.728 | 50.837 | 0.00 | 0.00 |
| ATOM | 1148 | HB3 | PRO | X | 74 | 62.692 | 43.516 | 51.111 | 0.00 | 0.00 |
| ATOM | 1149 | CA  | PRO | X | 74 | 63.647 | 43.029 | 49.365 | 0.00 | 0.00 |
| ATOM | 1150 | HA  | PRO | X | 74 | 62.620 | 43.134 | 49.015 | 0.00 | 0.00 |
| ATOM | 1151 | C   | PRO | X | 74 | 64.690 | 43.723 | 48.451 | 0.00 | 0.00 |
| ATOM | 1152 | O   | PRO | X | 74 | 65.807 | 43.203 | 48.350 | 0.00 | 0.00 |
| ATOM | 1153 | N   | GLY | X | 75 | 64.355 | 44.890 | 47.840 | 0.00 | 0.00 |
| ATOM | 1154 | H   | GLY | X | 75 | 63.468 | 45.312 | 48.074 | 0.00 | 0.00 |
| ATOM | 1155 | CA  | GLY | X | 75 | 65.239 | 45.746 | 46.932 | 0.00 | 0.00 |
| ATOM | 1156 | HA2 | GLY | X | 75 | 64.810 | 46.808 | 46.959 | 0.00 | 0.00 |
| ATOM | 1157 | HA3 | GLY | X | 75 | 66.232 | 45.704 | 47.345 | 0.00 | 0.00 |
| ATOM | 1158 | C   | GLY | X | 75 | 65.336 | 45.148 | 45.534 | 0.00 | 0.00 |
| ATOM | 1159 | O   | GLY | X | 75 | 65.834 | 45.809 | 44.662 | 0.00 | 0.00 |
| ATOM | 1160 | N   | PHE | X | 76 | 64.918 | 43.917 | 45.355 | 0.00 | 0.00 |
| ATOM | 1161 | H   | PHE | X | 76 | 64.580 | 43.462 | 46.191 | 0.00 | 0.00 |
| ATOM | 1162 | CA  | PHE | X | 76 | 64.834 | 43.095 | 44.074 | 0.00 | 0.00 |
| ATOM | 1163 | HA  | PHE | X | 76 | 65.818 | 43.199 | 43.616 | 0.00 | 0.00 |
| ATOM | 1164 | CB  | PHE | X | 76 | 64.458 | 41.599 | 44.423 | 0.00 | 0.00 |
| ATOM | 1165 | HB2 | PHE | X | 76 | 65.247 | 41.192 | 45.056 | 0.00 | 0.00 |
| ATOM | 1166 | HB3 | PHE | X | 76 | 63.519 | 41.602 | 44.976 | 0.00 | 0.00 |
| ATOM | 1167 | CG  | PHE | X | 76 | 64.397 | 40.629 | 43.286 | 0.00 | 0.00 |
| ATOM | 1168 | CD1 | PHE | X | 76 | 65.549 | 40.386 | 42.488 | 0.00 | 0.00 |
| ATOM | 1169 | HD1 | PHE | X | 76 | 66.476 | 40.915 | 42.654 | 0.00 | 0.00 |
| ATOM | 1170 | CE1 | PHE | X | 76 | 65.394 | 39.599 | 41.344 | 0.00 | 0.00 |
| ATOM | 1171 | HE1 | PHE | X | 76 | 66.214 | 39.636 | 40.642 | 0.00 | 0.00 |
| ATOM | 1172 | CZ  | PHE | X | 76 | 64.255 | 38.839 | 41.183 | 0.00 | 0.00 |
| ATOM | 1173 | HZ  | PHE | X | 76 | 64.170 | 38.199 | 40.317 | 0.00 | 0.00 |
| ATOM | 1174 | CE2 | PHE | X | 76 | 63.149 | 38.998 | 41.989 | 0.00 | 0.00 |
| ATOM | 1175 | HE2 | PHE | X | 76 | 62.181 | 38.539 | 41.856 | 0.00 | 0.00 |
| ATOM | 1176 | CD2 | PHE | X | 76 | 63.151 | 39.926 | 42.993 | 0.00 | 0.00 |
| ATOM | 1177 | HD2 | PHE | X | 76 | 62.294 | 40.205 | 43.589 | 0.00 | 0.00 |
| ATOM | 1178 | C   | PHE | X | 76 | 64.017 | 43.671 | 42.950 | 0.00 | 0.00 |
| ATOM | 1179 | O   | PHE | X | 76 | 62.904 | 44.158 | 43.155 | 0.00 | 0.00 |
| ATOM | 1180 | N   | GLU | X | 77 | 64.470 | 43.514 | 41.696 | 0.00 | 0.00 |
| ATOM | 1181 | H   | GLU | X | 77 | 65.370 | 43.079 | 41.547 | 0.00 | 0.00 |
| ATOM | 1182 | CA  | GLU | X | 77 | 63.752 | 43.821 | 40.454 | 0.00 | 0.00 |
| ATOM | 1183 | HA  | GLU | X | 77 | 63.497 | 44.881 | 40.438 | 0.00 | 0.00 |
| ATOM | 1184 | CB  | GLU | X | 77 | 64.690 | 43.568 | 39.288 | 0.00 | 0.00 |
| ATOM | 1185 | HB2 | GLU | X | 77 | 65.276 | 42.658 | 39.417 | 0.00 | 0.00 |
| ATOM | 1186 | HB3 | GLU | X | 77 | 64.164 | 43.265 | 38.383 | 0.00 | 0.00 |
| ATOM | 1187 | CG  | GLU | X | 77 | 65.656 | 44.723 | 38.971 | 0.00 | 0.00 |
| ATOM | 1188 | HG2 | GLU | X | 77 | 64.976 | 45.522 | 38.673 | 0.00 | 0.00 |
| ATOM | 1189 | HG3 | GLU | X | 77 | 66.309 | 44.941 | 39.816 | 0.00 | 0.00 |
| ATOM | 1190 | CD  | GLU | X | 77 | 66.499 | 44.341 | 37.815 | 0.00 | 0.00 |
| ATOM | 1191 | OE1 | GLU | X | 77 | 67.043 | 43.206 | 37.748 | 0.00 | 0.00 |
| ATOM | 1192 | OE2 | GLU | X | 77 | 66.663 | 45.190 | 36.861 | 0.00 | 0.00 |
| ATOM | 1193 | C   | GLU | X | 77 | 62.394 | 43.099 | 40.284 | 0.00 | 0.00 |
| ATOM | 1194 | O   | GLU | X | 77 | 61.477 | 43.556 | 39.628 | 0.00 | 0.00 |
| ATOM | 1195 | N   | GLY | X | 78 | 62.183 | 41.915 | 40.898 | 0.00 | 0.00 |
| ATOM | 1196 | H   | GLY | X | 78 | 62.920 | 41.611 | 41.518 | 0.00 | 0.00 |
| ATOM | 1197 | CA  | GLY | X | 78 | 60.813 | 41.352 | 41.059 | 0.00 | 0.00 |

|      |      |      |     |   |    |        |        |        |      |      |
|------|------|------|-----|---|----|--------|--------|--------|------|------|
| ATOM | 1198 | HA2  | GLY | X | 78 | 60.247 | 41.731 | 40.181 | 0.00 | 0.00 |
| ATOM | 1199 | HA3  | GLY | X | 78 | 60.833 | 40.247 | 41.127 | 0.00 | 0.00 |
| ATOM | 1200 | C    | GLY | X | 78 | 59.996 | 41.884 | 42.219 | 0.00 | 0.00 |
| ATOM | 1201 | O    | GLY | X | 78 | 58.831 | 41.507 | 42.337 | 0.00 | 0.00 |
| ATOM | 1202 | N    | THR | X | 79 | 60.392 | 42.775 | 43.072 | 0.00 | 0.00 |
| ATOM | 1203 | H    | THR | X | 79 | 61.360 | 43.043 | 42.968 | 0.00 | 0.00 |
| ATOM | 1204 | CA   | THR | X | 79 | 59.563 | 43.200 | 44.255 | 0.00 | 0.00 |
| ATOM | 1205 | HA   | THR | X | 79 | 58.526 | 42.988 | 43.996 | 0.00 | 0.00 |
| ATOM | 1206 | CB   | THR | X | 79 | 60.004 | 42.433 | 45.523 | 0.00 | 0.00 |
| ATOM | 1207 | HB   | THR | X | 79 | 59.561 | 43.005 | 46.338 | 0.00 | 0.00 |
| ATOM | 1208 | CG2  | THR | X | 79 | 59.664 | 40.902 | 45.591 | 0.00 | 0.00 |
| ATOM | 1209 | HG21 | THR | X | 79 | 60.019 | 40.521 | 46.549 | 0.00 | 0.00 |
| ATOM | 1210 | HG22 | THR | X | 79 | 58.591 | 40.848 | 45.408 | 0.00 | 0.00 |
| ATOM | 1211 | HG23 | THR | X | 79 | 60.187 | 40.479 | 44.734 | 0.00 | 0.00 |
| ATOM | 1212 | OG1  | THR | X | 79 | 61.403 | 42.698 | 45.607 | 0.00 | 0.00 |
| ATOM | 1213 | HG1  | THR | X | 79 | 61.771 | 41.956 | 46.091 | 0.00 | 0.00 |
| ATOM | 1214 | C    | THR | X | 79 | 59.404 | 44.654 | 44.533 | 0.00 | 0.00 |
| ATOM | 1215 | O    | THR | X | 79 | 58.410 | 45.059 | 45.174 | 0.00 | 0.00 |
| ATOM | 1216 | N    | GLU | X | 80 | 60.251 | 45.514 | 44.027 | 0.00 | 0.00 |
| ATOM | 1217 | H    | GLU | X | 80 | 61.094 | 45.138 | 43.615 | 0.00 | 0.00 |
| ATOM | 1218 | CA   | GLU | X | 80 | 60.136 | 46.967 | 44.341 | 0.00 | 0.00 |
| ATOM | 1219 | HA   | GLU | X | 80 | 60.079 | 46.956 | 45.430 | 0.00 | 0.00 |
| ATOM | 1220 | CB   | GLU | X | 80 | 61.396 | 47.790 | 43.946 | 0.00 | 0.00 |
| ATOM | 1221 | HB2  | GLU | X | 80 | 61.610 | 47.744 | 42.878 | 0.00 | 0.00 |
| ATOM | 1222 | HB3  | GLU | X | 80 | 61.082 | 48.803 | 44.200 | 0.00 | 0.00 |
| ATOM | 1223 | CG   | GLU | X | 80 | 62.609 | 47.483 | 44.873 | 0.00 | 0.00 |
| ATOM | 1224 | HG2  | GLU | X | 80 | 62.154 | 47.285 | 45.844 | 0.00 | 0.00 |
| ATOM | 1225 | HG3  | GLU | X | 80 | 63.093 | 46.549 | 44.587 | 0.00 | 0.00 |
| ATOM | 1226 | CD   | GLU | X | 80 | 63.644 | 48.642 | 44.892 | 0.00 | 0.00 |
| ATOM | 1227 | OE1  | GLU | X | 80 | 64.171 | 48.824 | 43.785 | 0.00 | 0.00 |
| ATOM | 1228 | OE2  | GLU | X | 80 | 63.983 | 49.258 | 45.937 | 0.00 | 0.00 |
| ATOM | 1229 | C    | GLU | X | 80 | 58.934 | 47.653 | 43.838 | 0.00 | 0.00 |
| ATOM | 1230 | O    | GLU | X | 80 | 58.485 | 48.640 | 44.339 | 0.00 | 0.00 |
| ATOM | 1231 | N    | MET | X | 81 | 58.399 | 47.137 | 42.698 | 0.00 | 0.00 |
| ATOM | 1232 | H    | MET | X | 81 | 58.814 | 46.380 | 42.175 | 0.00 | 0.00 |
| ATOM | 1233 | CA   | MET | X | 81 | 57.251 | 47.710 | 41.916 | 0.00 | 0.00 |
| ATOM | 1234 | HA   | MET | X | 81 | 57.363 | 48.722 | 41.528 | 0.00 | 0.00 |
| ATOM | 1235 | CB   | MET | X | 81 | 57.130 | 46.969 | 40.527 | 0.00 | 0.00 |
| ATOM | 1236 | HB2  | MET | X | 81 | 56.419 | 47.353 | 39.796 | 0.00 | 0.00 |
| ATOM | 1237 | HB3  | MET | X | 81 | 58.104 | 47.138 | 40.067 | 0.00 | 0.00 |
| ATOM | 1238 | CG   | MET | X | 81 | 56.970 | 45.418 | 40.706 | 0.00 | 0.00 |
| ATOM | 1239 | HG2  | MET | X | 81 | 57.904 | 44.922 | 40.968 | 0.00 | 0.00 |
| ATOM | 1240 | HG3  | MET | X | 81 | 56.159 | 45.104 | 41.364 | 0.00 | 0.00 |
| ATOM | 1241 | SD   | MET | X | 81 | 56.462 | 44.656 | 39.145 | 0.00 | 0.00 |
| ATOM | 1242 | CE   | MET | X | 81 | 54.634 | 44.801 | 39.122 | 0.00 | 0.00 |
| ATOM | 1243 | HE1  | MET | X | 81 | 54.355 | 45.827 | 39.361 | 0.00 | 0.00 |
| ATOM | 1244 | HE2  | MET | X | 81 | 54.344 | 44.395 | 38.153 | 0.00 | 0.00 |
| ATOM | 1245 | HE3  | MET | X | 81 | 54.249 | 44.157 | 39.913 | 0.00 | 0.00 |
| ATOM | 1246 | C    | MET | X | 81 | 55.923 | 47.573 | 42.666 | 0.00 | 0.00 |
| ATOM | 1247 | O    | MET | X | 81 | 54.958 | 48.177 | 42.358 | 0.00 | 0.00 |
| ATOM | 1248 | N    | TRP | X | 82 | 55.874 | 46.799 | 43.827 | 0.00 | 0.00 |
| ATOM | 1249 | H    | TRP | X | 82 | 56.760 | 46.353 | 44.020 | 0.00 | 0.00 |
| ATOM | 1250 | CA   | TRP | X | 82 | 54.752 | 46.530 | 44.771 | 0.00 | 0.00 |
| ATOM | 1251 | HA   | TRP | X | 82 | 53.749 | 46.796 | 44.438 | 0.00 | 0.00 |
| ATOM | 1252 | CB   | TRP | X | 82 | 54.725 | 45.022 | 45.043 | 0.00 | 0.00 |
| ATOM | 1253 | HB2  | TRP | X | 82 | 55.679 | 44.678 | 45.440 | 0.00 | 0.00 |
| ATOM | 1254 | HB3  | TRP | X | 82 | 54.002 | 44.953 | 45.855 | 0.00 | 0.00 |
| ATOM | 1255 | CG   | TRP | X | 82 | 54.378 | 44.035 | 43.936 | 0.00 | 0.00 |
| ATOM | 1256 | CD1  | TRP | X | 82 | 55.231 | 43.367 | 43.231 | 0.00 | 0.00 |
| ATOM | 1257 | HD1  | TRP | X | 82 | 56.305 | 43.454 | 43.304 | 0.00 | 0.00 |
| ATOM | 1258 | NE1  | TRP | X | 82 | 54.525 | 42.537 | 42.381 | 0.00 | 0.00 |
| ATOM | 1259 | HE1  | TRP | X | 82 | 55.031 | 41.999 | 41.692 | 0.00 | 0.00 |
| ATOM | 1260 | CE2  | TRP | X | 82 | 53.184 | 42.528 | 42.635 | 0.00 | 0.00 |
| ATOM | 1261 | CZ2  | TRP | X | 82 | 52.124 | 41.885 | 42.045 | 0.00 | 0.00 |
| ATOM | 1262 | HZ2  | TRP | X | 82 | 52.218 | 41.033 | 41.388 | 0.00 | 0.00 |
| ATOM | 1263 | CH2  | TRP | X | 82 | 50.826 | 42.255 | 42.475 | 0.00 | 0.00 |
| ATOM | 1264 | HH2  | TRP | X | 82 | 49.871 | 41.782 | 42.295 | 0.00 | 0.00 |
| ATOM | 1265 | CZ3  | TRP | X | 82 | 50.656 | 43.307 | 43.388 | 0.00 | 0.00 |
| ATOM | 1266 | HZ3  | TRP | X | 82 | 49.693 | 43.602 | 43.777 | 0.00 | 0.00 |
| ATOM | 1267 | CE3  | TRP | X | 82 | 51.756 | 43.940 | 44.022 | 0.00 | 0.00 |



|      |      |      |     |   |    |        |        |        |      |      |
|------|------|------|-----|---|----|--------|--------|--------|------|------|
| ATOM | 1268 | HE3  | TRP | X | 82 | 51.761 | 44.640 | 44.844 | 0.00 | 0.00 |
| ATOM | 1269 | CD2  | TRP | X | 82 | 53.022 | 43.577 | 43.581 | 0.00 | 0.00 |
| ATOM | 1270 | C    | TRP | X | 82 | 55.017 | 47.242 | 46.057 | 0.00 | 0.00 |
| ATOM | 1271 | O    | TRP | X | 82 | 54.017 | 47.560 | 46.690 | 0.00 | 0.00 |
| ATOM | 1272 | N    | ASN | X | 83 | 56.285 | 47.689 | 46.391 | 0.00 | 0.00 |
| ATOM | 1273 | H    | ASN | X | 83 | 56.992 | 47.645 | 45.671 | 0.00 | 0.00 |
| ATOM | 1274 | CA   | ASN | X | 83 | 56.521 | 48.597 | 47.468 | 0.00 | 0.00 |
| ATOM | 1275 | HA   | ASN | X | 83 | 56.191 | 48.097 | 48.378 | 0.00 | 0.00 |
| ATOM | 1276 | CB   | ASN | X | 83 | 57.978 | 48.947 | 47.681 | 0.00 | 0.00 |
| ATOM | 1277 | HB2  | ASN | X | 83 | 58.411 | 49.234 | 46.722 | 0.00 | 0.00 |
| ATOM | 1278 | HB3  | ASN | X | 83 | 58.119 | 49.806 | 48.336 | 0.00 | 0.00 |
| ATOM | 1279 | CG   | ASN | X | 83 | 58.816 | 47.828 | 48.313 | 0.00 | 0.00 |
| ATOM | 1280 | OD1  | ASN | X | 83 | 59.768 | 48.013 | 49.140 | 0.00 | 0.00 |
| ATOM | 1281 | ND2  | ASN | X | 83 | 58.716 | 46.608 | 47.835 | 0.00 | 0.00 |
| ATOM | 1282 | HD21 | ASN | X | 83 | 59.313 | 45.858 | 48.153 | 0.00 | 0.00 |
| ATOM | 1283 | HD22 | ASN | X | 83 | 57.972 | 46.378 | 47.191 | 0.00 | 0.00 |
| ATOM | 1284 | C    | ASN | X | 83 | 55.678 | 49.875 | 47.296 | 0.00 | 0.00 |
| ATOM | 1285 | O    | ASN | X | 83 | 55.677 | 50.379 | 46.196 | 0.00 | 0.00 |
| ATOM | 1286 | N    | PRO | X | 84 | 55.042 | 50.451 | 48.373 | 0.00 | 0.00 |
| ATOM | 1287 | CD   | PRO | X | 84 | 54.815 | 49.855 | 49.745 | 0.00 | 0.00 |
| ATOM | 1288 | HD2  | PRO | X | 84 | 55.735 | 49.460 | 50.176 | 0.00 | 0.00 |
| ATOM | 1289 | HD3  | PRO | X | 84 | 54.109 | 49.030 | 49.655 | 0.00 | 0.00 |
| ATOM | 1290 | CG   | PRO | X | 84 | 54.156 | 50.924 | 50.611 | 0.00 | 0.00 |
| ATOM | 1291 | HG2  | PRO | X | 84 | 54.836 | 51.488 | 51.250 | 0.00 | 0.00 |
| ATOM | 1292 | HG3  | PRO | X | 84 | 53.480 | 50.373 | 51.265 | 0.00 | 0.00 |
| ATOM | 1293 | CB   | PRO | X | 84 | 53.488 | 51.773 | 49.533 | 0.00 | 0.00 |
| ATOM | 1294 | HB2  | PRO | X | 84 | 53.559 | 52.829 | 49.797 | 0.00 | 0.00 |
| ATOM | 1295 | HB3  | PRO | X | 84 | 52.460 | 51.425 | 49.437 | 0.00 | 0.00 |
| ATOM | 1296 | CA   | PRO | X | 84 | 54.262 | 51.638 | 48.262 | 0.00 | 0.00 |
| ATOM | 1297 | HA   | PRO | X | 84 | 53.604 | 51.338 | 47.447 | 0.00 | 0.00 |
| ATOM | 1298 | C    | PRO | X | 84 | 55.068 | 52.808 | 47.943 | 0.00 | 0.00 |
| ATOM | 1299 | O    | PRO | X | 84 | 55.936 | 53.179 | 48.746 | 0.00 | 0.00 |
| ATOM | 1300 | N    | ASN | X | 85 | 54.886 | 53.458 | 46.762 | 0.00 | 0.00 |
| ATOM | 1301 | H    | ASN | X | 85 | 54.200 | 53.124 | 46.100 | 0.00 | 0.00 |
| ATOM | 1302 | CA   | ASN | X | 85 | 55.610 | 54.636 | 46.370 | 0.00 | 0.00 |
| ATOM | 1303 | HA   | ASN | X | 85 | 56.600 | 54.615 | 46.824 | 0.00 | 0.00 |
| ATOM | 1304 | CB   | ASN | X | 85 | 55.811 | 54.677 | 44.836 | 0.00 | 0.00 |
| ATOM | 1305 | HB2  | ASN | X | 85 | 56.366 | 55.574 | 44.563 | 0.00 | 0.00 |
| ATOM | 1306 | HB3  | ASN | X | 85 | 56.439 | 53.851 | 44.501 | 0.00 | 0.00 |
| ATOM | 1307 | CG   | ASN | X | 85 | 54.594 | 54.763 | 43.965 | 0.00 | 0.00 |
| ATOM | 1308 | OD1  | ASN | X | 85 | 53.470 | 54.741 | 44.438 | 0.00 | 0.00 |
| ATOM | 1309 | ND2  | ASN | X | 85 | 54.763 | 54.858 | 42.689 | 0.00 | 0.00 |
| ATOM | 1310 | HD21 | ASN | X | 85 | 53.908 | 54.950 | 42.160 | 0.00 | 0.00 |
| ATOM | 1311 | HD22 | ASN | X | 85 | 55.728 | 54.857 | 42.388 | 0.00 | 0.00 |
| ATOM | 1312 | C    | ASN | X | 85 | 54.933 | 55.922 | 46.842 | 0.00 | 0.00 |
| ATOM | 1313 | O    | ASN | X | 85 | 54.967 | 56.982 | 46.242 | 0.00 | 0.00 |
| ATOM | 1314 | N    | ARG | X | 86 | 54.389 | 55.880 | 48.050 | 0.00 | 0.00 |
| ATOM | 1315 | H    | ARG | X | 86 | 54.475 | 54.970 | 48.479 | 0.00 | 0.00 |
| ATOM | 1316 | CA   | ARG | X | 86 | 53.662 | 56.907 | 48.728 | 0.00 | 0.00 |
| ATOM | 1317 | HA   | ARG | X | 86 | 54.073 | 57.883 | 48.471 | 0.00 | 0.00 |
| ATOM | 1318 | CB   | ARG | X | 86 | 52.136 | 56.793 | 48.387 | 0.00 | 0.00 |
| ATOM | 1319 | HB2  | ARG | X | 86 | 51.863 | 55.740 | 48.446 | 0.00 | 0.00 |
| ATOM | 1320 | HB3  | ARG | X | 86 | 51.552 | 57.455 | 49.027 | 0.00 | 0.00 |
| ATOM | 1321 | CG   | ARG | X | 86 | 51.813 | 57.313 | 47.025 | 0.00 | 0.00 |
| ATOM | 1322 | HG2  | ARG | X | 86 | 52.285 | 56.654 | 46.296 | 0.00 | 0.00 |
| ATOM | 1323 | HG3  | ARG | X | 86 | 50.729 | 57.287 | 46.919 | 0.00 | 0.00 |
| ATOM | 1324 | CD   | ARG | X | 86 | 52.359 | 58.765 | 46.611 | 0.00 | 0.00 |
| ATOM | 1325 | HD2  | ARG | X | 86 | 53.443 | 58.855 | 46.680 | 0.00 | 0.00 |
| ATOM | 1326 | HD3  | ARG | X | 86 | 52.115 | 58.874 | 45.554 | 0.00 | 0.00 |
| ATOM | 1327 | NE   | ARG | X | 86 | 51.879 | 59.935 | 47.455 | 0.00 | 0.00 |
| ATOM | 1328 | HE   | ARG | X | 86 | 51.646 | 59.797 | 48.428 | 0.00 | 0.00 |
| ATOM | 1329 | CZ   | ARG | X | 86 | 51.663 | 61.167 | 47.055 | 0.00 | 0.00 |
| ATOM | 1330 | NH1  | ARG | X | 86 | 51.763 | 61.552 | 45.755 | 0.00 | 0.00 |
| ATOM | 1331 | HH11 | ARG | X | 86 | 51.974 | 60.903 | 45.011 | 0.00 | 0.00 |
| ATOM | 1332 | HH12 | ARG | X | 86 | 51.720 | 62.540 | 45.551 | 0.00 | 0.00 |
| ATOM | 1333 | NH2  | ARG | X | 86 | 51.364 | 62.030 | 48.007 | 0.00 | 0.00 |
| ATOM | 1334 | HH21 | ARG | X | 86 | 51.354 | 61.680 | 48.955 | 0.00 | 0.00 |
| ATOM | 1335 | HH22 | ARG | X | 86 | 51.134 | 63.013 | 47.965 | 0.00 | 0.00 |
| ATOM | 1336 | C    | ARG | X | 86 | 53.836 | 56.759 | 50.248 | 0.00 | 0.00 |
| ATOM | 1337 | O    | ARG | X | 86 | 54.472 | 55.792 | 50.704 | 0.00 | 0.00 |

|      |      |      |     |   |    |        |        |        |      |      |
|------|------|------|-----|---|----|--------|--------|--------|------|------|
| ATOM | 1338 | N    | GLU | X | 87 | 53.326 | 57.750 | 51.037 | 0.00 | 0.00 |
| ATOM | 1339 | H    | GLU | X | 87 | 52.854 | 58.526 | 50.593 | 0.00 | 0.00 |
| ATOM | 1340 | CA   | GLU | X | 87 | 53.076 | 57.703 | 52.480 | 0.00 | 0.00 |
| ATOM | 1341 | HA   | GLU | X | 87 | 53.954 | 57.283 | 52.971 | 0.00 | 0.00 |
| ATOM | 1342 | CB   | GLU | X | 87 | 52.949 | 59.103 | 53.074 | 0.00 | 0.00 |
| ATOM | 1343 | HB2  | GLU | X | 87 | 52.865 | 59.021 | 54.158 | 0.00 | 0.00 |
| ATOM | 1344 | HB3  | GLU | X | 87 | 53.851 | 59.508 | 52.616 | 0.00 | 0.00 |
| ATOM | 1345 | CG   | GLU | X | 87 | 51.725 | 60.053 | 52.591 | 0.00 | 0.00 |
| ATOM | 1346 | HG2  | GLU | X | 87 | 50.851 | 59.417 | 52.733 | 0.00 | 0.00 |
| ATOM | 1347 | HG3  | GLU | X | 87 | 51.659 | 60.856 | 53.326 | 0.00 | 0.00 |
| ATOM | 1348 | CD   | GLU | X | 87 | 51.727 | 60.657 | 51.176 | 0.00 | 0.00 |
| ATOM | 1349 | OE1  | GLU | X | 87 | 51.393 | 61.865 | 51.100 | 0.00 | 0.00 |
| ATOM | 1350 | OE2  | GLU | X | 87 | 52.192 | 59.998 | 50.228 | 0.00 | 0.00 |
| ATOM | 1351 | C    | GLU | X | 87 | 51.931 | 56.795 | 52.976 | 0.00 | 0.00 |
| ATOM | 1352 | O    | GLU | X | 87 | 50.794 | 56.879 | 52.438 | 0.00 | 0.00 |
| ATOM | 1353 | N    | LEU | X | 88 | 52.208 | 56.073 | 54.096 | 0.00 | 0.00 |
| ATOM | 1354 | H    | LEU | X | 88 | 53.091 | 56.079 | 54.587 | 0.00 | 0.00 |
| ATOM | 1355 | CA   | LEU | X | 88 | 51.201 | 55.283 | 54.757 | 0.00 | 0.00 |
| ATOM | 1356 | HA   | LEU | X | 88 | 50.464 | 55.006 | 54.004 | 0.00 | 0.00 |
| ATOM | 1357 | CB   | LEU | X | 88 | 51.831 | 53.991 | 55.295 | 0.00 | 0.00 |
| ATOM | 1358 | HB2  | LEU | X | 88 | 52.536 | 54.391 | 56.023 | 0.00 | 0.00 |
| ATOM | 1359 | HB3  | LEU | X | 88 | 51.094 | 53.498 | 55.929 | 0.00 | 0.00 |
| ATOM | 1360 | CG   | LEU | X | 88 | 52.556 | 53.029 | 54.274 | 0.00 | 0.00 |
| ATOM | 1361 | HG   | LEU | X | 88 | 53.494 | 53.477 | 53.946 | 0.00 | 0.00 |
| ATOM | 1362 | CD1  | LEU | X | 88 | 52.699 | 51.645 | 55.026 | 0.00 | 0.00 |
| ATOM | 1363 | HD11 | LEU | X | 88 | 52.704 | 50.735 | 54.427 | 0.00 | 0.00 |
| ATOM | 1364 | HD12 | LEU | X | 88 | 53.622 | 51.810 | 55.583 | 0.00 | 0.00 |
| ATOM | 1365 | HD13 | LEU | X | 88 | 51.871 | 51.578 | 55.731 | 0.00 | 0.00 |
| ATOM | 1366 | CD2  | LEU | X | 88 | 51.594 | 52.781 | 53.079 | 0.00 | 0.00 |
| ATOM | 1367 | HD21 | LEU | X | 88 | 52.060 | 52.057 | 52.410 | 0.00 | 0.00 |
| ATOM | 1368 | HD22 | LEU | X | 88 | 50.650 | 52.395 | 53.463 | 0.00 | 0.00 |
| ATOM | 1369 | HD23 | LEU | X | 88 | 51.392 | 53.651 | 52.453 | 0.00 | 0.00 |
| ATOM | 1370 | C    | LEU | X | 88 | 50.420 | 56.056 | 55.840 | 0.00 | 0.00 |
| ATOM | 1371 | O    | LEU | X | 88 | 50.991 | 56.837 | 56.514 | 0.00 | 0.00 |
| ATOM | 1372 | N    | SER | X | 89 | 49.085 | 55.967 | 55.773 | 0.00 | 0.00 |
| ATOM | 1373 | H    | SER | X | 89 | 48.684 | 55.226 | 55.215 | 0.00 | 0.00 |
| ATOM | 1374 | CA   | SER | X | 89 | 48.172 | 56.668 | 56.657 | 0.00 | 0.00 |
| ATOM | 1375 | HA   | SER | X | 89 | 48.668 | 56.740 | 57.625 | 0.00 | 0.00 |
| ATOM | 1376 | CB   | SER | X | 89 | 47.929 | 58.105 | 56.179 | 0.00 | 0.00 |
| ATOM | 1377 | HB2  | SER | X | 89 | 47.270 | 58.221 | 55.318 | 0.00 | 0.00 |
| ATOM | 1378 | HB3  | SER | X | 89 | 47.411 | 58.594 | 57.005 | 0.00 | 0.00 |
| ATOM | 1379 | OG   | SER | X | 89 | 49.171 | 58.821 | 56.128 | 0.00 | 0.00 |
| ATOM | 1380 | HG   | SER | X | 89 | 49.835 | 58.128 | 56.106 | 0.00 | 0.00 |
| ATOM | 1381 | C    | SER | X | 89 | 46.893 | 55.902 | 56.847 | 0.00 | 0.00 |
| ATOM | 1382 | O    | SER | X | 89 | 46.438 | 55.121 | 55.980 | 0.00 | 0.00 |
| ATOM | 1383 | N    | GLU | X | 90 | 46.157 | 56.164 | 57.924 | 0.00 | 0.00 |
| ATOM | 1384 | H    | GLU | X | 90 | 46.395 | 56.938 | 58.528 | 0.00 | 0.00 |
| ATOM | 1385 | CA   | GLU | X | 90 | 44.760 | 55.728 | 58.088 | 0.00 | 0.00 |
| ATOM | 1386 | HA   | GLU | X | 90 | 44.577 | 54.716 | 57.725 | 0.00 | 0.00 |
| ATOM | 1387 | CB   | GLU | X | 90 | 44.154 | 55.961 | 59.442 | 0.00 | 0.00 |
| ATOM | 1388 | HB2  | GLU | X | 90 | 44.206 | 57.014 | 59.719 | 0.00 | 0.00 |
| ATOM | 1389 | HB3  | GLU | X | 90 | 43.090 | 55.729 | 59.382 | 0.00 | 0.00 |
| ATOM | 1390 | CG   | GLU | X | 90 | 44.865 | 55.142 | 60.506 | 0.00 | 0.00 |
| ATOM | 1391 | HG2  | GLU | X | 90 | 44.618 | 54.086 | 60.400 | 0.00 | 0.00 |
| ATOM | 1392 | HG3  | GLU | X | 90 | 45.949 | 55.205 | 60.403 | 0.00 | 0.00 |
| ATOM | 1393 | CD   | GLU | X | 90 | 44.457 | 55.630 | 61.873 | 0.00 | 0.00 |
| ATOM | 1394 | OE1  | GLU | X | 90 | 43.396 | 55.156 | 62.342 | 0.00 | 0.00 |
| ATOM | 1395 | OE2  | GLU | X | 90 | 45.212 | 56.315 | 62.598 | 0.00 | 0.00 |
| ATOM | 1396 | C    | GLU | X | 90 | 43.878 | 56.628 | 57.104 | 0.00 | 0.00 |
| ATOM | 1397 | O    | GLU | X | 90 | 42.931 | 56.178 | 56.446 | 0.00 | 0.00 |
| ATOM | 1398 | N    | ASP | X | 91 | 44.162 | 57.951 | 57.134 | 0.00 | 0.00 |
| ATOM | 1399 | H    | ASP | X | 91 | 44.849 | 58.265 | 57.804 | 0.00 | 0.00 |
| ATOM | 1400 | CA   | ASP | X | 91 | 43.445 | 58.881 | 56.244 | 0.00 | 0.00 |
| ATOM | 1401 | HA   | ASP | X | 91 | 42.415 | 58.529 | 56.185 | 0.00 | 0.00 |
| ATOM | 1402 | CB   | ASP | X | 91 | 43.543 | 60.261 | 56.882 | 0.00 | 0.00 |
| ATOM | 1403 | HB2  | ASP | X | 91 | 43.114 | 60.140 | 57.877 | 0.00 | 0.00 |
| ATOM | 1404 | HB3  | ASP | X | 91 | 44.564 | 60.553 | 57.127 | 0.00 | 0.00 |
| ATOM | 1405 | CG   | ASP | X | 91 | 42.863 | 61.397 | 56.118 | 0.00 | 0.00 |
| ATOM | 1406 | OD1  | ASP | X | 91 | 41.939 | 61.046 | 55.315 | 0.00 | 0.00 |
| ATOM | 1407 | OD2  | ASP | X | 91 | 43.104 | 62.582 | 56.262 | 0.00 | 0.00 |

|      |      |      |     |   |    |        |        |        |      |      |
|------|------|------|-----|---|----|--------|--------|--------|------|------|
| ATOM | 1408 | C    | ASP | X | 91 | 43.993 | 58.632 | 54.764 | 0.00 | 0.00 |
| ATOM | 1409 | O    | ASP | X | 91 | 45.164 | 58.901 | 54.443 | 0.00 | 0.00 |
| ATOM | 1410 | N    | CYX | X | 92 | 43.158 | 57.908 | 53.969 | 0.00 | 0.00 |
| ATOM | 1411 | H    | CYX | X | 92 | 42.235 | 57.730 | 54.338 | 0.00 | 0.00 |
| ATOM | 1412 | CA   | CYX | X | 92 | 43.688 | 57.091 | 52.817 | 0.00 | 0.00 |
| ATOM | 1413 | HA   | CYX | X | 92 | 44.364 | 57.708 | 52.225 | 0.00 | 0.00 |
| ATOM | 1414 | CB   | CYX | X | 92 | 44.385 | 55.838 | 53.296 | 0.00 | 0.00 |
| ATOM | 1415 | HB2  | CYX | X | 92 | 44.821 | 55.439 | 52.381 | 0.00 | 0.00 |
| ATOM | 1416 | HB3  | CYX | X | 92 | 45.218 | 56.036 | 53.970 | 0.00 | 0.00 |
| ATOM | 1417 | SG   | CYX | X | 92 | 43.345 | 54.492 | 53.908 | 0.00 | 0.00 |
| ATOM | 1418 | C    | CYX | X | 92 | 42.640 | 56.816 | 51.725 | 0.00 | 0.00 |
| ATOM | 1419 | O    | CYX | X | 92 | 42.985 | 56.192 | 50.721 | 0.00 | 0.00 |
| ATOM | 1420 | N    | LEU | X | 93 | 41.317 | 57.066 | 52.014 | 0.00 | 0.00 |
| ATOM | 1421 | H    | LEU | X | 93 | 41.153 | 57.565 | 52.877 | 0.00 | 0.00 |
| ATOM | 1422 | CA   | LEU | X | 93 | 40.134 | 56.756 | 51.156 | 0.00 | 0.00 |
| ATOM | 1423 | HA   | LEU | X | 93 | 40.281 | 55.874 | 50.531 | 0.00 | 0.00 |
| ATOM | 1424 | CB   | LEU | X | 93 | 38.862 | 56.521 | 52.074 | 0.00 | 0.00 |
| ATOM | 1425 | HB2  | LEU | X | 93 | 38.891 | 57.378 | 52.747 | 0.00 | 0.00 |
| ATOM | 1426 | HB3  | LEU | X | 93 | 38.007 | 56.595 | 51.402 | 0.00 | 0.00 |
| ATOM | 1427 | CG   | LEU | X | 93 | 38.830 | 55.137 | 52.770 | 0.00 | 0.00 |
| ATOM | 1428 | HG   | LEU | X | 93 | 39.751 | 55.138 | 53.354 | 0.00 | 0.00 |
| ATOM | 1429 | CD1  | LEU | X | 93 | 37.584 | 54.903 | 53.718 | 0.00 | 0.00 |
| ATOM | 1430 | HD11 | LEU | X | 93 | 37.492 | 55.734 | 54.417 | 0.00 | 0.00 |
| ATOM | 1431 | HD12 | LEU | X | 93 | 36.685 | 54.870 | 53.102 | 0.00 | 0.00 |
| ATOM | 1432 | HD13 | LEU | X | 93 | 37.631 | 53.930 | 54.207 | 0.00 | 0.00 |
| ATOM | 1433 | CD2  | LEU | X | 93 | 38.862 | 53.940 | 51.796 | 0.00 | 0.00 |
| ATOM | 1434 | HD21 | LEU | X | 93 | 37.921 | 53.674 | 51.314 | 0.00 | 0.00 |
| ATOM | 1435 | HD22 | LEU | X | 93 | 39.681 | 54.083 | 51.090 | 0.00 | 0.00 |
| ATOM | 1436 | HD23 | LEU | X | 93 | 39.153 | 53.096 | 52.421 | 0.00 | 0.00 |
| ATOM | 1437 | C    | LEU | X | 93 | 40.051 | 57.905 | 50.081 | 0.00 | 0.00 |
| ATOM | 1438 | O    | LEU | X | 93 | 39.167 | 58.807 | 50.087 | 0.00 | 0.00 |
| ATOM | 1439 | N    | TYR | X | 94 | 40.944 | 57.737 | 49.102 | 0.00 | 0.00 |
| ATOM | 1440 | H    | TYR | X | 94 | 41.554 | 56.939 | 49.210 | 0.00 | 0.00 |
| ATOM | 1441 | CA   | TYR | X | 94 | 41.232 | 58.553 | 47.920 | 0.00 | 0.00 |
| ATOM | 1442 | HA   | TYR | X | 94 | 40.417 | 59.277 | 47.918 | 0.00 | 0.00 |
| ATOM | 1443 | CB   | TYR | X | 94 | 42.546 | 59.288 | 47.986 | 0.00 | 0.00 |
| ATOM | 1444 | HB2  | TYR | X | 94 | 43.437 | 58.661 | 47.940 | 0.00 | 0.00 |
| ATOM | 1445 | HB3  | TYR | X | 94 | 42.507 | 59.955 | 47.124 | 0.00 | 0.00 |
| ATOM | 1446 | CG   | TYR | X | 94 | 42.718 | 60.108 | 49.270 | 0.00 | 0.00 |
| ATOM | 1447 | CD1  | TYR | X | 94 | 42.098 | 61.401 | 49.386 | 0.00 | 0.00 |
| ATOM | 1448 | HD1  | TYR | X | 94 | 41.568 | 61.874 | 48.573 | 0.00 | 0.00 |
| ATOM | 1449 | CE1  | TYR | X | 94 | 42.333 | 62.164 | 50.589 | 0.00 | 0.00 |
| ATOM | 1450 | HE1  | TYR | X | 94 | 41.854 | 63.132 | 50.619 | 0.00 | 0.00 |
| ATOM | 1451 | CZ   | TYR | X | 94 | 43.192 | 61.685 | 51.593 | 0.00 | 0.00 |
| ATOM | 1452 | OH   | TYR | X | 94 | 43.389 | 62.420 | 52.734 | 0.00 | 0.00 |
| ATOM | 1453 | HH   | TYR | X | 94 | 43.915 | 61.907 | 53.351 | 0.00 | 0.00 |
| ATOM | 1454 | CE2  | TYR | X | 94 | 43.791 | 60.401 | 51.471 | 0.00 | 0.00 |
| ATOM | 1455 | HE2  | TYR | X | 94 | 44.407 | 60.227 | 52.341 | 0.00 | 0.00 |
| ATOM | 1456 | CD2  | TYR | X | 94 | 43.544 | 59.646 | 50.290 | 0.00 | 0.00 |
| ATOM | 1457 | HD2  | TYR | X | 94 | 44.043 | 58.696 | 50.166 | 0.00 | 0.00 |
| ATOM | 1458 | C    | TYR | X | 94 | 41.058 | 57.812 | 46.590 | 0.00 | 0.00 |
| ATOM | 1459 | O    | TYR | X | 94 | 41.330 | 56.614 | 46.497 | 0.00 | 0.00 |
| ATOM | 1460 | N    | LEU | X | 95 | 40.508 | 58.429 | 45.526 | 0.00 | 0.00 |
| ATOM | 1461 | H    | LEU | X | 95 | 40.151 | 59.370 | 45.609 | 0.00 | 0.00 |
| ATOM | 1462 | CA   | LEU | X | 95 | 40.251 | 57.689 | 44.277 | 0.00 | 0.00 |
| ATOM | 1463 | HA   | LEU | X | 95 | 40.924 | 56.832 | 44.267 | 0.00 | 0.00 |
| ATOM | 1464 | CB   | LEU | X | 95 | 38.771 | 57.083 | 44.173 | 0.00 | 0.00 |
| ATOM | 1465 | HB2  | LEU | X | 95 | 38.778 | 56.289 | 43.426 | 0.00 | 0.00 |
| ATOM | 1466 | HB3  | LEU | X | 95 | 38.636 | 56.557 | 45.118 | 0.00 | 0.00 |
| ATOM | 1467 | CG   | LEU | X | 95 | 37.580 | 57.963 | 43.935 | 0.00 | 0.00 |
| ATOM | 1468 | HG   | LEU | X | 95 | 37.706 | 58.802 | 44.619 | 0.00 | 0.00 |
| ATOM | 1469 | CD1  | LEU | X | 95 | 37.502 | 58.604 | 42.555 | 0.00 | 0.00 |
| ATOM | 1470 | HD11 | LEU | X | 95 | 36.761 | 59.399 | 42.647 | 0.00 | 0.00 |
| ATOM | 1471 | HD12 | LEU | X | 95 | 38.489 | 58.964 | 42.266 | 0.00 | 0.00 |
| ATOM | 1472 | HD13 | LEU | X | 95 | 37.130 | 57.884 | 41.826 | 0.00 | 0.00 |
| ATOM | 1473 | CD2  | LEU | X | 95 | 36.279 | 57.136 | 44.299 | 0.00 | 0.00 |
| ATOM | 1474 | HD21 | LEU | X | 95 | 36.344 | 56.582 | 45.236 | 0.00 | 0.00 |
| ATOM | 1475 | HD22 | LEU | X | 95 | 35.498 | 57.885 | 44.426 | 0.00 | 0.00 |
| ATOM | 1476 | HD23 | LEU | X | 95 | 36.086 | 56.383 | 43.534 | 0.00 | 0.00 |
| ATOM | 1477 | C    | LEU | X | 95 | 40.845 | 58.240 | 42.933 | 0.00 | 0.00 |

|      |      |      |     |   |     |        |        |        |      |      |
|------|------|------|-----|---|-----|--------|--------|--------|------|------|
| ATOM | 1478 | O    | LEU | X | 95  | 41.306 | 59.345 | 43.032 | 0.00 | 0.00 |
| ATOM | 1479 | N    | ASN | X | 96  | 40.747 | 57.640 | 41.750 | 0.00 | 0.00 |
| ATOM | 1480 | H    | ASN | X | 96  | 40.456 | 56.679 | 41.856 | 0.00 | 0.00 |
| ATOM | 1481 | CA   | ASN | X | 96  | 41.463 | 58.061 | 40.568 | 0.00 | 0.00 |
| ATOM | 1482 | HA   | ASN | X | 96  | 41.725 | 59.120 | 40.555 | 0.00 | 0.00 |
| ATOM | 1483 | CB   | ASN | X | 96  | 42.798 | 57.444 | 40.529 | 0.00 | 0.00 |
| ATOM | 1484 | HB2  | ASN | X | 96  | 42.710 | 56.369 | 40.367 | 0.00 | 0.00 |
| ATOM | 1485 | HB3  | ASN | X | 96  | 43.470 | 57.834 | 39.764 | 0.00 | 0.00 |
| ATOM | 1486 | CG   | ASN | X | 96  | 43.569 | 57.490 | 41.828 | 0.00 | 0.00 |
| ATOM | 1487 | OD1  | ASN | X | 96  | 44.342 | 58.399 | 42.027 | 0.00 | 0.00 |
| ATOM | 1488 | ND2  | ASN | X | 96  | 43.447 | 56.517 | 42.715 | 0.00 | 0.00 |
| ATOM | 1489 | HD21 | ASN | X | 96  | 44.241 | 56.355 | 43.317 | 0.00 | 0.00 |
| ATOM | 1490 | HD22 | ASN | X | 96  | 42.731 | 55.846 | 42.478 | 0.00 | 0.00 |
| ATOM | 1491 | C    | ASN | X | 96  | 40.734 | 57.747 | 39.232 | 0.00 | 0.00 |
| ATOM | 1492 | O    | ASN | X | 96  | 40.175 | 56.706 | 39.108 | 0.00 | 0.00 |
| ATOM | 1493 | N    | VAL | X | 97  | 40.756 | 58.714 | 38.301 | 0.00 | 0.00 |
| ATOM | 1494 | H    | VAL | X | 97  | 41.295 | 59.538 | 38.523 | 0.00 | 0.00 |
| ATOM | 1495 | CA   | VAL | X | 97  | 40.101 | 58.660 | 36.989 | 0.00 | 0.00 |
| ATOM | 1496 | HA   | VAL | X | 97  | 39.614 | 57.687 | 36.917 | 0.00 | 0.00 |
| ATOM | 1497 | CB   | VAL | X | 97  | 38.962 | 59.635 | 37.000 | 0.00 | 0.00 |
| ATOM | 1498 | HB   | VAL | X | 97  | 39.389 | 60.597 | 37.283 | 0.00 | 0.00 |
| ATOM | 1499 | CG1  | VAL | X | 97  | 38.321 | 59.707 | 35.618 | 0.00 | 0.00 |
| ATOM | 1500 | HG11 | VAL | X | 97  | 39.055 | 59.913 | 34.838 | 0.00 | 0.00 |
| ATOM | 1501 | HG12 | VAL | X | 97  | 37.724 | 58.805 | 35.484 | 0.00 | 0.00 |
| ATOM | 1502 | HG13 | VAL | X | 97  | 37.661 | 60.571 | 35.549 | 0.00 | 0.00 |
| ATOM | 1503 | CG2  | VAL | X | 97  | 37.829 | 59.277 | 38.029 | 0.00 | 0.00 |
| ATOM | 1504 | HG21 | VAL | X | 97  | 36.956 | 59.929 | 38.048 | 0.00 | 0.00 |
| ATOM | 1505 | HG22 | VAL | X | 97  | 37.580 | 58.226 | 37.882 | 0.00 | 0.00 |
| ATOM | 1506 | HG23 | VAL | X | 97  | 38.206 | 59.336 | 39.050 | 0.00 | 0.00 |
| ATOM | 1507 | C    | VAL | X | 97  | 41.233 | 58.908 | 35.926 | 0.00 | 0.00 |
| ATOM | 1508 | O    | VAL | X | 97  | 42.195 | 59.637 | 36.279 | 0.00 | 0.00 |
| ATOM | 1509 | N    | TRP | X | 98  | 41.123 | 58.178 | 34.848 | 0.00 | 0.00 |
| ATOM | 1510 | H    | TRP | X | 98  | 40.331 | 57.566 | 34.715 | 0.00 | 0.00 |
| ATOM | 1511 | CA   | TRP | X | 98  | 41.893 | 58.530 | 33.646 | 0.00 | 0.00 |
| ATOM | 1512 | HA   | TRP | X | 98  | 42.341 | 59.491 | 33.897 | 0.00 | 0.00 |
| ATOM | 1513 | CB   | TRP | X | 98  | 43.026 | 57.464 | 33.292 | 0.00 | 0.00 |
| ATOM | 1514 | HB2  | TRP | X | 98  | 42.674 | 56.433 | 33.248 | 0.00 | 0.00 |
| ATOM | 1515 | HB3  | TRP | X | 98  | 43.461 | 57.756 | 32.336 | 0.00 | 0.00 |
| ATOM | 1516 | CG   | TRP | X | 98  | 44.311 | 57.386 | 34.273 | 0.00 | 0.00 |
| ATOM | 1517 | CD1  | TRP | X | 98  | 45.605 | 57.445 | 33.955 | 0.00 | 0.00 |
| ATOM | 1518 | HD1  | TRP | X | 98  | 46.017 | 57.724 | 32.997 | 0.00 | 0.00 |
| ATOM | 1519 | NE1  | TRP | X | 98  | 46.416 | 57.149 | 35.018 | 0.00 | 0.00 |
| ATOM | 1520 | HE1  | TRP | X | 98  | 47.405 | 57.338 | 34.942 | 0.00 | 0.00 |
| ATOM | 1521 | CE2  | TRP | X | 98  | 45.670 | 56.844 | 36.167 | 0.00 | 0.00 |
| ATOM | 1522 | CZ2  | TRP | X | 98  | 46.020 | 56.555 | 37.547 | 0.00 | 0.00 |
| ATOM | 1523 | HZ2  | TRP | X | 98  | 47.032 | 56.646 | 37.912 | 0.00 | 0.00 |
| ATOM | 1524 | CH2  | TRP | X | 98  | 45.064 | 55.842 | 38.307 | 0.00 | 0.00 |
| ATOM | 1525 | HH2  | TRP | X | 98  | 45.221 | 55.491 | 39.316 | 0.00 | 0.00 |
| ATOM | 1526 | CZ3  | TRP | X | 98  | 43.794 | 55.846 | 37.773 | 0.00 | 0.00 |
| ATOM | 1527 | HZ3  | TRP | X | 98  | 43.023 | 55.316 | 38.312 | 0.00 | 0.00 |
| ATOM | 1528 | CE3  | TRP | X | 98  | 43.398 | 56.514 | 36.561 | 0.00 | 0.00 |
| ATOM | 1529 | HE3  | TRP | X | 98  | 42.371 | 56.470 | 36.230 | 0.00 | 0.00 |
| ATOM | 1530 | CD2  | TRP | X | 98  | 44.353 | 56.868 | 35.605 | 0.00 | 0.00 |
| ATOM | 1531 | C    | TRP | X | 98  | 40.925 | 58.539 | 32.403 | 0.00 | 0.00 |
| ATOM | 1532 | O    | TRP | X | 98  | 40.203 | 57.576 | 32.195 | 0.00 | 0.00 |
| ATOM | 1533 | N    | THR | X | 99  | 40.936 | 59.543 | 31.564 | 0.00 | 0.00 |
| ATOM | 1534 | H    | THR | X | 99  | 41.575 | 60.320 | 31.656 | 0.00 | 0.00 |
| ATOM | 1535 | CA   | THR | X | 99  | 39.871 | 59.838 | 30.532 | 0.00 | 0.00 |
| ATOM | 1536 | HA   | THR | X | 99  | 39.514 | 58.888 | 30.133 | 0.00 | 0.00 |
| ATOM | 1537 | CB   | THR | X | 99  | 38.559 | 60.464 | 31.117 | 0.00 | 0.00 |
| ATOM | 1538 | HB   | THR | X | 99  | 38.079 | 59.781 | 31.819 | 0.00 | 0.00 |
| ATOM | 1539 | CG2  | THR | X | 99  | 38.749 | 61.781 | 31.794 | 0.00 | 0.00 |
| ATOM | 1540 | HG21 | THR | X | 99  | 37.822 | 61.981 | 32.332 | 0.00 | 0.00 |
| ATOM | 1541 | HG22 | THR | X | 99  | 39.558 | 61.784 | 32.525 | 0.00 | 0.00 |
| ATOM | 1542 | HG23 | THR | X | 99  | 38.943 | 62.513 | 31.010 | 0.00 | 0.00 |
| ATOM | 1543 | OG1  | THR | X | 99  | 37.701 | 60.684 | 30.110 | 0.00 | 0.00 |
| ATOM | 1544 | HG1  | THR | X | 99  | 37.000 | 61.308 | 30.312 | 0.00 | 0.00 |
| ATOM | 1545 | C    | THR | X | 99  | 40.426 | 60.713 | 29.407 | 0.00 | 0.00 |
| ATOM | 1546 | O    | THR | X | 99  | 41.224 | 61.548 | 29.727 | 0.00 | 0.00 |
| ATOM | 1547 | N    | PRO | X | 100 | 40.228 | 60.437 | 28.077 | 0.00 | 0.00 |

|      |      |      |     |   |     |        |        |        |      |      |
|------|------|------|-----|---|-----|--------|--------|--------|------|------|
| ATOM | 1548 | CD   | PRO | X | 100 | 39.372 | 59.468 | 27.534 | 0.00 | 0.00 |
| ATOM | 1549 | HD2  | PRO | X | 100 | 38.368 | 59.477 | 27.958 | 0.00 | 0.00 |
| ATOM | 1550 | HD3  | PRO | X | 100 | 39.815 | 58.473 | 27.498 | 0.00 | 0.00 |
| ATOM | 1551 | CG   | PRO | X | 100 | 39.186 | 59.987 | 26.085 | 0.00 | 0.00 |
| ATOM | 1552 | HG2  | PRO | X | 100 | 38.497 | 60.831 | 26.046 | 0.00 | 0.00 |
| ATOM | 1553 | HG3  | PRO | X | 100 | 38.774 | 59.153 | 25.517 | 0.00 | 0.00 |
| ATOM | 1554 | CB   | PRO | X | 100 | 40.563 | 60.311 | 25.703 | 0.00 | 0.00 |
| ATOM | 1555 | HB2  | PRO | X | 100 | 40.573 | 60.948 | 24.818 | 0.00 | 0.00 |
| ATOM | 1556 | HB3  | PRO | X | 100 | 41.152 | 59.424 | 25.466 | 0.00 | 0.00 |
| ATOM | 1557 | CA   | PRO | X | 100 | 40.960 | 61.085 | 27.036 | 0.00 | 0.00 |
| ATOM | 1558 | HA   | PRO | X | 100 | 42.020 | 60.849 | 27.134 | 0.00 | 0.00 |
| ATOM | 1559 | C    | PRO | X | 100 | 40.896 | 62.633 | 26.956 | 0.00 | 0.00 |
| ATOM | 1560 | O    | PRO | X | 100 | 40.031 | 63.207 | 27.512 | 0.00 | 0.00 |
| ATOM | 1561 | N    | TYR | X | 101 | 41.857 | 63.231 | 26.369 | 0.00 | 0.00 |
| ATOM | 1562 | H    | TYR | X | 101 | 42.584 | 62.784 | 25.828 | 0.00 | 0.00 |
| ATOM | 1563 | CA   | TYR | X | 101 | 41.928 | 64.756 | 26.272 | 0.00 | 0.00 |
| ATOM | 1564 | HA   | TYR | X | 101 | 41.157 | 65.149 | 26.935 | 0.00 | 0.00 |
| ATOM | 1565 | CB   | TYR | X | 101 | 43.334 | 65.164 | 26.746 | 0.00 | 0.00 |
| ATOM | 1566 | HB2  | TYR | X | 101 | 43.489 | 64.852 | 27.779 | 0.00 | 0.00 |
| ATOM | 1567 | HB3  | TYR | X | 101 | 44.121 | 64.779 | 26.097 | 0.00 | 0.00 |
| ATOM | 1568 | CG   | TYR | X | 101 | 43.476 | 66.625 | 26.819 | 0.00 | 0.00 |
| ATOM | 1569 | CD1  | TYR | X | 101 | 43.994 | 67.343 | 25.774 | 0.00 | 0.00 |
| ATOM | 1570 | HD1  | TYR | X | 101 | 43.994 | 66.925 | 24.778 | 0.00 | 0.00 |
| ATOM | 1571 | CE1  | TYR | X | 101 | 43.907 | 68.772 | 25.793 | 0.00 | 0.00 |
| ATOM | 1572 | HE1  | TYR | X | 101 | 44.171 | 69.374 | 24.936 | 0.00 | 0.00 |
| ATOM | 1573 | CZ   | TYR | X | 101 | 43.481 | 69.451 | 27.002 | 0.00 | 0.00 |
| ATOM | 1574 | OH   | TYR | X | 101 | 43.572 | 70.779 | 27.063 | 0.00 | 0.00 |
| ATOM | 1575 | HH   | TYR | X | 101 | 43.450 | 71.129 | 26.177 | 0.00 | 0.00 |
| ATOM | 1576 | CE2  | TYR | X | 101 | 43.176 | 68.687 | 28.154 | 0.00 | 0.00 |
| ATOM | 1577 | HE2  | TYR | X | 101 | 42.866 | 69.157 | 29.075 | 0.00 | 0.00 |
| ATOM | 1578 | CD2  | TYR | X | 101 | 43.080 | 67.286 | 28.019 | 0.00 | 0.00 |
| ATOM | 1579 | HD2  | TYR | X | 101 | 42.753 | 66.768 | 28.909 | 0.00 | 0.00 |
| ATOM | 1580 | C    | TYR | X | 101 | 41.623 | 65.379 | 24.875 | 0.00 | 0.00 |
| ATOM | 1581 | O    | TYR | X | 101 | 42.221 | 64.887 | 23.921 | 0.00 | 0.00 |
| ATOM | 1582 | N    | PRO | X | 102 | 41.036 | 66.579 | 24.738 | 0.00 | 0.00 |
| ATOM | 1583 | CD   | PRO | X | 102 | 40.876 | 67.305 | 23.502 | 0.00 | 0.00 |
| ATOM | 1584 | HD2  | PRO | X | 102 | 40.090 | 66.745 | 22.995 | 0.00 | 0.00 |
| ATOM | 1585 | HD3  | PRO | X | 102 | 41.766 | 67.342 | 22.875 | 0.00 | 0.00 |
| ATOM | 1586 | CG   | PRO | X | 102 | 40.501 | 68.704 | 23.971 | 0.00 | 0.00 |
| ATOM | 1587 | HG2  | PRO | X | 102 | 40.048 | 69.344 | 23.214 | 0.00 | 0.00 |
| ATOM | 1588 | HG3  | PRO | X | 102 | 41.369 | 69.282 | 24.289 | 0.00 | 0.00 |
| ATOM | 1589 | CB   | PRO | X | 102 | 39.635 | 68.434 | 25.177 | 0.00 | 0.00 |
| ATOM | 1590 | HB2  | PRO | X | 102 | 38.581 | 68.347 | 24.912 | 0.00 | 0.00 |
| ATOM | 1591 | HB3  | PRO | X | 102 | 39.665 | 69.110 | 26.032 | 0.00 | 0.00 |
| ATOM | 1592 | CA   | PRO | X | 102 | 40.162 | 67.139 | 25.736 | 0.00 | 0.00 |
| ATOM | 1593 | HA   | PRO | X | 102 | 40.829 | 67.418 | 26.552 | 0.00 | 0.00 |
| ATOM | 1594 | C    | PRO | X | 102 | 39.042 | 66.203 | 26.183 | 0.00 | 0.00 |
| ATOM | 1595 | O    | PRO | X | 102 | 38.639 | 65.207 | 25.557 | 0.00 | 0.00 |
| ATOM | 1596 | N    | ARG | X | 103 | 38.482 | 66.481 | 27.394 | 0.00 | 0.00 |
| ATOM | 1597 | H    | ARG | X | 103 | 38.986 | 67.194 | 27.903 | 0.00 | 0.00 |
| ATOM | 1598 | CA   | ARG | X | 103 | 37.712 | 65.611 | 28.243 | 0.00 | 0.00 |
| ATOM | 1599 | HA   | ARG | X | 103 | 38.241 | 64.658 | 28.276 | 0.00 | 0.00 |
| ATOM | 1600 | CB   | ARG | X | 103 | 37.784 | 66.219 | 29.691 | 0.00 | 0.00 |
| ATOM | 1601 | HB2  | ARG | X | 103 | 38.825 | 66.521 | 29.811 | 0.00 | 0.00 |
| ATOM | 1602 | HB3  | ARG | X | 103 | 37.125 | 67.084 | 29.631 | 0.00 | 0.00 |
| ATOM | 1603 | CG   | ARG | X | 103 | 37.256 | 65.340 | 30.797 | 0.00 | 0.00 |
| ATOM | 1604 | HG2  | ARG | X | 103 | 36.412 | 64.745 | 30.448 | 0.00 | 0.00 |
| ATOM | 1605 | HG3  | ARG | X | 103 | 38.010 | 64.592 | 31.042 | 0.00 | 0.00 |
| ATOM | 1606 | CD   | ARG | X | 103 | 36.889 | 66.073 | 32.107 | 0.00 | 0.00 |
| ATOM | 1607 | HD2  | ARG | X | 103 | 36.799 | 65.296 | 32.866 | 0.00 | 0.00 |
| ATOM | 1608 | HD3  | ARG | X | 103 | 37.728 | 66.658 | 32.483 | 0.00 | 0.00 |
| ATOM | 1609 | NE   | ARG | X | 103 | 35.697 | 66.919 | 31.996 | 0.00 | 0.00 |
| ATOM | 1610 | HE   | ARG | X | 103 | 34.903 | 66.488 | 31.543 | 0.00 | 0.00 |
| ATOM | 1611 | CZ   | ARG | X | 103 | 35.564 | 68.223 | 32.331 | 0.00 | 0.00 |
| ATOM | 1612 | NH1  | ARG | X | 103 | 36.549 | 68.995 | 32.718 | 0.00 | 0.00 |
| ATOM | 1613 | HH11 | ARG | X | 103 | 37.484 | 68.783 | 32.398 | 0.00 | 0.00 |
| ATOM | 1614 | HH12 | ARG | X | 103 | 36.298 | 69.886 | 33.122 | 0.00 | 0.00 |
| ATOM | 1615 | NH2  | ARG | X | 103 | 34.285 | 68.674 | 32.224 | 0.00 | 0.00 |
| ATOM | 1616 | HH21 | ARG | X | 103 | 33.581 | 68.064 | 31.834 | 0.00 | 0.00 |
| ATOM | 1617 | HH22 | ARG | X | 103 | 34.147 | 69.672 | 32.142 | 0.00 | 0.00 |

|      |      |      |     |   |     |        |        |        |      |      |
|------|------|------|-----|---|-----|--------|--------|--------|------|------|
| ATOM | 1618 | C    | ARG | X | 103 | 36.272 | 65.464 | 27.725 | 0.00 | 0.00 |
| ATOM | 1619 | O    | ARG | X | 103 | 35.567 | 66.451 | 27.741 | 0.00 | 0.00 |
| ATOM | 1620 | N    | PRO | X | 104 | 35.761 | 64.262 | 27.251 | 0.00 | 0.00 |
| ATOM | 1621 | CD   | PRO | X | 104 | 36.536 | 63.076 | 27.057 | 0.00 | 0.00 |
| ATOM | 1622 | HD2  | PRO | X | 104 | 36.832 | 62.676 | 28.027 | 0.00 | 0.00 |
| ATOM | 1623 | HD3  | PRO | X | 104 | 37.421 | 63.145 | 26.424 | 0.00 | 0.00 |
| ATOM | 1624 | CG   | PRO | X | 104 | 35.522 | 62.067 | 26.559 | 0.00 | 0.00 |
| ATOM | 1625 | HG2  | PRO | X | 104 | 35.151 | 61.678 | 27.507 | 0.00 | 0.00 |
| ATOM | 1626 | HG3  | PRO | X | 104 | 35.968 | 61.360 | 25.859 | 0.00 | 0.00 |
| ATOM | 1627 | CB   | PRO | X | 104 | 34.347 | 62.853 | 25.897 | 0.00 | 0.00 |
| ATOM | 1628 | HB2  | PRO | X | 104 | 33.400 | 62.398 | 26.186 | 0.00 | 0.00 |
| ATOM | 1629 | HB3  | PRO | X | 104 | 34.470 | 62.879 | 24.814 | 0.00 | 0.00 |
| ATOM | 1630 | CA   | PRO | X | 104 | 34.474 | 64.235 | 26.570 | 0.00 | 0.00 |
| ATOM | 1631 | HA   | PRO | X | 104 | 34.566 | 65.039 | 25.839 | 0.00 | 0.00 |
| ATOM | 1632 | C    | PRO | X | 104 | 33.340 | 64.489 | 27.625 | 0.00 | 0.00 |
| ATOM | 1633 | O    | PRO | X | 104 | 33.504 | 64.124 | 28.733 | 0.00 | 0.00 |
| ATOM | 1634 | N    | THR | X | 105 | 32.216 | 65.064 | 27.130 | 0.00 | 0.00 |
| ATOM | 1635 | H    | THR | X | 105 | 32.285 | 65.151 | 26.126 | 0.00 | 0.00 |
| ATOM | 1636 | CA   | THR | X | 105 | 30.947 | 65.242 | 27.868 | 0.00 | 0.00 |
| ATOM | 1637 | HA   | THR | X | 105 | 31.281 | 65.183 | 28.904 | 0.00 | 0.00 |
| ATOM | 1638 | CB   | THR | X | 105 | 30.349 | 66.614 | 27.591 | 0.00 | 0.00 |
| ATOM | 1639 | HB   | THR | X | 105 | 29.313 | 66.568 | 27.925 | 0.00 | 0.00 |
| ATOM | 1640 | CG2  | THR | X | 105 | 31.057 | 67.645 | 28.325 | 0.00 | 0.00 |
| ATOM | 1641 | HG21 | THR | X | 105 | 30.847 | 67.619 | 29.395 | 0.00 | 0.00 |
| ATOM | 1642 | HG22 | THR | X | 105 | 32.146 | 67.632 | 28.297 | 0.00 | 0.00 |
| ATOM | 1643 | HG23 | THR | X | 105 | 30.734 | 68.598 | 27.906 | 0.00 | 0.00 |
| ATOM | 1644 | OG1  | THR | X | 105 | 30.398 | 66.860 | 26.205 | 0.00 | 0.00 |
| ATOM | 1645 | HG1  | THR | X | 105 | 29.972 | 67.694 | 25.995 | 0.00 | 0.00 |
| ATOM | 1646 | C    | THR | X | 105 | 29.937 | 64.068 | 27.510 | 0.00 | 0.00 |
| ATOM | 1647 | O    | THR | X | 105 | 29.090 | 63.694 | 28.291 | 0.00 | 0.00 |
| ATOM | 1648 | N    | SER | X | 106 | 30.061 | 63.559 | 26.298 | 0.00 | 0.00 |
| ATOM | 1649 | H    | SER | X | 106 | 30.667 | 64.126 | 25.722 | 0.00 | 0.00 |
| ATOM | 1650 | CA   | SER | X | 106 | 29.477 | 62.321 | 25.807 | 0.00 | 0.00 |
| ATOM | 1651 | HA   | SER | X | 106 | 28.391 | 62.306 | 25.892 | 0.00 | 0.00 |
| ATOM | 1652 | CB   | SER | X | 106 | 29.740 | 62.286 | 24.230 | 0.00 | 0.00 |
| ATOM | 1653 | HB2  | SER | X | 106 | 29.259 | 63.175 | 23.822 | 0.00 | 0.00 |
| ATOM | 1654 | HB3  | SER | X | 106 | 30.806 | 62.271 | 24.003 | 0.00 | 0.00 |
| ATOM | 1655 | OG   | SER | X | 106 | 29.075 | 61.123 | 23.600 | 0.00 | 0.00 |
| ATOM | 1656 | HG   | SER | X | 106 | 28.261 | 61.460 | 23.219 | 0.00 | 0.00 |
| ATOM | 1657 | C    | SER | X | 106 | 29.994 | 61.127 | 26.519 | 0.00 | 0.00 |
| ATOM | 1658 | O    | SER | X | 106 | 31.214 | 60.878 | 26.384 | 0.00 | 0.00 |
| ATOM | 1659 | N    | PRO | X | 107 | 29.233 | 60.377 | 27.310 | 0.00 | 0.00 |
| ATOM | 1660 | CD   | PRO | X | 107 | 27.758 | 60.617 | 27.537 | 0.00 | 0.00 |
| ATOM | 1661 | HD2  | PRO | X | 107 | 27.078 | 60.349 | 26.728 | 0.00 | 0.00 |
| ATOM | 1662 | HD3  | PRO | X | 107 | 27.574 | 61.637 | 27.875 | 0.00 | 0.00 |
| ATOM | 1663 | CG   | PRO | X | 107 | 27.355 | 59.807 | 28.741 | 0.00 | 0.00 |
| ATOM | 1664 | HG2  | PRO | X | 107 | 26.301 | 59.537 | 28.801 | 0.00 | 0.00 |
| ATOM | 1665 | HG3  | PRO | X | 107 | 27.680 | 60.340 | 29.635 | 0.00 | 0.00 |
| ATOM | 1666 | CB   | PRO | X | 107 | 28.235 | 58.566 | 28.587 | 0.00 | 0.00 |
| ATOM | 1667 | HB2  | PRO | X | 107 | 27.698 | 58.050 | 27.791 | 0.00 | 0.00 |
| ATOM | 1668 | HB3  | PRO | X | 107 | 28.379 | 57.883 | 29.424 | 0.00 | 0.00 |
| ATOM | 1669 | CA   | PRO | X | 107 | 29.583 | 59.149 | 28.052 | 0.00 | 0.00 |
| ATOM | 1670 | HA   | PRO | X | 107 | 30.074 | 59.454 | 28.976 | 0.00 | 0.00 |
| ATOM | 1671 | C    | PRO | X | 107 | 30.318 | 57.988 | 27.373 | 0.00 | 0.00 |
| ATOM | 1672 | O    | PRO | X | 107 | 30.040 | 57.704 | 26.183 | 0.00 | 0.00 |
| ATOM | 1673 | N    | THR | X | 108 | 31.316 | 57.385 | 28.059 | 0.00 | 0.00 |
| ATOM | 1674 | H    | THR | X | 108 | 31.477 | 57.592 | 29.034 | 0.00 | 0.00 |
| ATOM | 1675 | CA   | THR | X | 108 | 32.199 | 56.311 | 27.551 | 0.00 | 0.00 |
| ATOM | 1676 | HA   | THR | X | 108 | 31.746 | 55.984 | 26.615 | 0.00 | 0.00 |
| ATOM | 1677 | CB   | THR | X | 108 | 33.647 | 56.809 | 27.337 | 0.00 | 0.00 |
| ATOM | 1678 | HB   | THR | X | 108 | 34.310 | 56.578 | 28.170 | 0.00 | 0.00 |
| ATOM | 1679 | CG2  | THR | X | 108 | 34.247 | 56.115 | 26.139 | 0.00 | 0.00 |
| ATOM | 1680 | HG21 | THR | X | 108 | 35.285 | 56.362 | 25.914 | 0.00 | 0.00 |
| ATOM | 1681 | HG22 | THR | X | 108 | 34.370 | 55.091 | 26.492 | 0.00 | 0.00 |
| ATOM | 1682 | HG23 | THR | X | 108 | 33.608 | 56.257 | 25.267 | 0.00 | 0.00 |
| ATOM | 1683 | OG1  | THR | X | 108 | 33.795 | 58.203 | 27.087 | 0.00 | 0.00 |
| ATOM | 1684 | HG1  | THR | X | 108 | 33.124 | 58.590 | 27.654 | 0.00 | 0.00 |
| ATOM | 1685 | C    | THR | X | 108 | 32.275 | 55.186 | 28.606 | 0.00 | 0.00 |
| ATOM | 1686 | O    | THR | X | 108 | 32.410 | 55.444 | 29.793 | 0.00 | 0.00 |
| ATOM | 1687 | N    | PRO | X | 109 | 32.310 | 53.897 | 28.168 | 0.00 | 0.00 |

|      |      |      |     |   |     |        |        |        |      |      |
|------|------|------|-----|---|-----|--------|--------|--------|------|------|
| ATOM | 1688 | CD   | PRO | X | 109 | 32.245 | 53.360 | 26.837 | 0.00 | 0.00 |
| ATOM | 1689 | HD2  | PRO | X | 109 | 33.224 | 53.333 | 26.358 | 0.00 | 0.00 |
| ATOM | 1690 | HD3  | PRO | X | 109 | 31.561 | 53.859 | 26.151 | 0.00 | 0.00 |
| ATOM | 1691 | CG   | PRO | X | 109 | 31.714 | 51.956 | 26.983 | 0.00 | 0.00 |
| ATOM | 1692 | HG2  | PRO | X | 109 | 31.902 | 51.255 | 26.169 | 0.00 | 0.00 |
| ATOM | 1693 | HG3  | PRO | X | 109 | 30.664 | 52.077 | 27.250 | 0.00 | 0.00 |
| ATOM | 1694 | CB   | PRO | X | 109 | 32.291 | 51.433 | 28.301 | 0.00 | 0.00 |
| ATOM | 1695 | HB2  | PRO | X | 109 | 33.280 | 50.984 | 28.211 | 0.00 | 0.00 |
| ATOM | 1696 | HB3  | PRO | X | 109 | 31.522 | 50.710 | 28.572 | 0.00 | 0.00 |
| ATOM | 1697 | CA   | PRO | X | 109 | 32.258 | 52.729 | 29.094 | 0.00 | 0.00 |
| ATOM | 1698 | HA   | PRO | X | 109 | 31.406 | 52.904 | 29.752 | 0.00 | 0.00 |
| ATOM | 1699 | C    | PRO | X | 109 | 33.402 | 52.743 | 30.093 | 0.00 | 0.00 |
| ATOM | 1700 | O    | PRO | X | 109 | 34.431 | 53.323 | 29.788 | 0.00 | 0.00 |
| ATOM | 1701 | N    | VAL | X | 110 | 33.302 | 52.004 | 31.225 | 0.00 | 0.00 |
| ATOM | 1702 | H    | VAL | X | 110 | 32.369 | 51.656 | 31.391 | 0.00 | 0.00 |
| ATOM | 1703 | CA   | VAL | X | 110 | 34.148 | 52.174 | 32.434 | 0.00 | 0.00 |
| ATOM | 1704 | HA   | VAL | X | 110 | 34.890 | 52.912 | 32.131 | 0.00 | 0.00 |
| ATOM | 1705 | CB   | VAL | X | 110 | 33.332 | 52.917 | 33.606 | 0.00 | 0.00 |
| ATOM | 1706 | HB   | VAL | X | 110 | 32.547 | 52.251 | 33.966 | 0.00 | 0.00 |
| ATOM | 1707 | CG1  | VAL | X | 110 | 34.150 | 53.348 | 34.800 | 0.00 | 0.00 |
| ATOM | 1708 | HG11 | VAL | X | 110 | 34.970 | 53.998 | 34.492 | 0.00 | 0.00 |
| ATOM | 1709 | HG12 | VAL | X | 110 | 33.439 | 53.777 | 35.506 | 0.00 | 0.00 |
| ATOM | 1710 | HG13 | VAL | X | 110 | 34.568 | 52.448 | 35.250 | 0.00 | 0.00 |
| ATOM | 1711 | CG2  | VAL | X | 110 | 32.511 | 54.080 | 33.043 | 0.00 | 0.00 |
| ATOM | 1712 | HG21 | VAL | X | 110 | 33.165 | 54.809 | 32.564 | 0.00 | 0.00 |
| ATOM | 1713 | HG22 | VAL | X | 110 | 31.714 | 53.746 | 32.379 | 0.00 | 0.00 |
| ATOM | 1714 | HG23 | VAL | X | 110 | 32.029 | 54.623 | 33.856 | 0.00 | 0.00 |
| ATOM | 1715 | C    | VAL | X | 110 | 34.770 | 50.812 | 32.800 | 0.00 | 0.00 |
| ATOM | 1716 | O    | VAL | X | 110 | 34.324 | 49.748 | 32.425 | 0.00 | 0.00 |
| ATOM | 1717 | N    | LEU | X | 111 | 35.964 | 50.871 | 33.331 | 0.00 | 0.00 |
| ATOM | 1718 | H    | LEU | X | 111 | 36.326 | 51.812 | 33.404 | 0.00 | 0.00 |
| ATOM | 1719 | CA   | LEU | X | 111 | 36.947 | 49.793 | 33.612 | 0.00 | 0.00 |
| ATOM | 1720 | HA   | LEU | X | 111 | 36.308 | 48.912 | 33.674 | 0.00 | 0.00 |
| ATOM | 1721 | CB   | LEU | X | 111 | 37.997 | 49.709 | 32.457 | 0.00 | 0.00 |
| ATOM | 1722 | HB2  | LEU | X | 111 | 38.167 | 50.721 | 32.089 | 0.00 | 0.00 |
| ATOM | 1723 | HB3  | LEU | X | 111 | 38.929 | 49.291 | 32.840 | 0.00 | 0.00 |
| ATOM | 1724 | CG   | LEU | X | 111 | 37.672 | 48.756 | 31.182 | 0.00 | 0.00 |
| ATOM | 1725 | HG   | LEU | X | 111 | 36.837 | 49.312 | 30.755 | 0.00 | 0.00 |
| ATOM | 1726 | CD1  | LEU | X | 111 | 38.767 | 48.757 | 30.096 | 0.00 | 0.00 |
| ATOM | 1727 | HD11 | LEU | X | 111 | 39.680 | 48.607 | 30.674 | 0.00 | 0.00 |
| ATOM | 1728 | HD12 | LEU | X | 111 | 38.550 | 48.033 | 29.311 | 0.00 | 0.00 |
| ATOM | 1729 | HD13 | LEU | X | 111 | 38.710 | 49.776 | 29.713 | 0.00 | 0.00 |
| ATOM | 1730 | CD2  | LEU | X | 111 | 37.310 | 47.309 | 31.692 | 0.00 | 0.00 |
| ATOM | 1731 | HD21 | LEU | X | 111 | 36.408 | 47.320 | 32.304 | 0.00 | 0.00 |
| ATOM | 1732 | HD22 | LEU | X | 111 | 37.294 | 46.572 | 30.889 | 0.00 | 0.00 |
| ATOM | 1733 | HD23 | LEU | X | 111 | 38.170 | 47.034 | 32.302 | 0.00 | 0.00 |
| ATOM | 1734 | C    | LEU | X | 111 | 37.589 | 49.993 | 34.976 | 0.00 | 0.00 |
| ATOM | 1735 | O    | LEU | X | 111 | 38.424 | 50.887 | 35.074 | 0.00 | 0.00 |
| ATOM | 1736 | N    | VAL | X | 112 | 37.050 | 49.357 | 36.004 | 0.00 | 0.00 |
| ATOM | 1737 | H    | VAL | X | 112 | 36.383 | 48.625 | 35.809 | 0.00 | 0.00 |
| ATOM | 1738 | CA   | VAL | X | 112 | 37.390 | 49.534 | 37.409 | 0.00 | 0.00 |
| ATOM | 1739 | HA   | VAL | X | 112 | 37.940 | 50.461 | 37.571 | 0.00 | 0.00 |
| ATOM | 1740 | CB   | VAL | X | 112 | 36.098 | 49.621 | 38.160 | 0.00 | 0.00 |
| ATOM | 1741 | HB   | VAL | X | 112 | 35.602 | 48.653 | 38.087 | 0.00 | 0.00 |
| ATOM | 1742 | CG1  | VAL | X | 112 | 36.335 | 50.311 | 39.557 | 0.00 | 0.00 |
| ATOM | 1743 | HG11 | VAL | X | 112 | 37.090 | 49.806 | 40.160 | 0.00 | 0.00 |
| ATOM | 1744 | HG12 | VAL | X | 112 | 36.641 | 51.351 | 39.445 | 0.00 | 0.00 |
| ATOM | 1745 | HG13 | VAL | X | 112 | 35.386 | 50.366 | 40.090 | 0.00 | 0.00 |
| ATOM | 1746 | CG2  | VAL | X | 112 | 35.027 | 50.574 | 37.535 | 0.00 | 0.00 |
| ATOM | 1747 | HG21 | VAL | X | 112 | 34.264 | 50.769 | 38.289 | 0.00 | 0.00 |
| ATOM | 1748 | HG22 | VAL | X | 112 | 35.525 | 51.483 | 37.199 | 0.00 | 0.00 |
| ATOM | 1749 | HG23 | VAL | X | 112 | 34.492 | 50.225 | 36.651 | 0.00 | 0.00 |
| ATOM | 1750 | C    | VAL | X | 112 | 38.257 | 48.436 | 37.980 | 0.00 | 0.00 |
| ATOM | 1751 | O    | VAL | X | 112 | 37.858 | 47.336 | 38.007 | 0.00 | 0.00 |
| ATOM | 1752 | N    | TRP | X | 113 | 39.401 | 48.883 | 38.460 | 0.00 | 0.00 |
| ATOM | 1753 | H    | TRP | X | 113 | 39.562 | 49.866 | 38.289 | 0.00 | 0.00 |
| ATOM | 1754 | CA   | TRP | X | 113 | 40.507 | 47.927 | 38.841 | 0.00 | 0.00 |
| ATOM | 1755 | HA   | TRP | X | 113 | 40.540 | 46.982 | 38.299 | 0.00 | 0.00 |
| ATOM | 1756 | CB   | TRP | X | 113 | 41.760 | 48.698 | 38.366 | 0.00 | 0.00 |
| ATOM | 1757 | HB2  | TRP | X | 113 | 41.740 | 48.815 | 37.283 | 0.00 | 0.00 |

|      |      |      |     |   |     |        |        |        |      |      |
|------|------|------|-----|---|-----|--------|--------|--------|------|------|
| ATOM | 1758 | HB3  | TRP | X | 113 | 41.762 | 49.694 | 38.808 | 0.00 | 0.00 |
| ATOM | 1759 | CG   | TRP | X | 113 | 43.018 | 47.954 | 38.766 | 0.00 | 0.00 |
| ATOM | 1760 | CD1  | TRP | X | 113 | 43.921 | 48.439 | 39.712 | 0.00 | 0.00 |
| ATOM | 1761 | HD1  | TRP | X | 113 | 43.749 | 49.390 | 40.194 | 0.00 | 0.00 |
| ATOM | 1762 | NE1  | TRP | X | 113 | 44.950 | 47.518 | 39.749 | 0.00 | 0.00 |
| ATOM | 1763 | HE1  | TRP | X | 113 | 45.683 | 47.425 | 40.437 | 0.00 | 0.00 |
| ATOM | 1764 | CE2  | TRP | X | 113 | 44.674 | 46.411 | 39.007 | 0.00 | 0.00 |
| ATOM | 1765 | CZ2  | TRP | X | 113 | 45.345 | 45.185 | 38.790 | 0.00 | 0.00 |
| ATOM | 1766 | HZ2  | TRP | X | 113 | 46.305 | 45.039 | 39.264 | 0.00 | 0.00 |
| ATOM | 1767 | CH2  | TRP | X | 113 | 44.872 | 44.261 | 37.826 | 0.00 | 0.00 |
| ATOM | 1768 | HH2  | TRP | X | 113 | 45.437 | 43.349 | 37.703 | 0.00 | 0.00 |
| ATOM | 1769 | CZ3  | TRP | X | 113 | 43.684 | 44.518 | 37.137 | 0.00 | 0.00 |
| ATOM | 1770 | HZ3  | TRP | X | 113 | 43.166 | 43.818 | 36.499 | 0.00 | 0.00 |
| ATOM | 1771 | CE3  | TRP | X | 113 | 43.013 | 45.704 | 37.351 | 0.00 | 0.00 |
| ATOM | 1772 | HE3  | TRP | X | 113 | 42.147 | 45.825 | 36.716 | 0.00 | 0.00 |
| ATOM | 1773 | CD2  | TRP | X | 113 | 43.451 | 46.666 | 38.308 | 0.00 | 0.00 |
| ATOM | 1774 | C    | TRP | X | 113 | 40.512 | 47.654 | 40.367 | 0.00 | 0.00 |
| ATOM | 1775 | O    | TRP | X | 113 | 40.373 | 48.628 | 41.145 | 0.00 | 0.00 |
| ATOM | 1776 | N    | ILE | X | 114 | 40.563 | 46.332 | 40.693 | 0.00 | 0.00 |
| ATOM | 1777 | H    | ILE | X | 114 | 40.481 | 45.672 | 39.933 | 0.00 | 0.00 |
| ATOM | 1778 | CA   | ILE | X | 114 | 40.737 | 45.912 | 42.076 | 0.00 | 0.00 |
| ATOM | 1779 | HA   | ILE | X | 114 | 40.897 | 46.797 | 42.692 | 0.00 | 0.00 |
| ATOM | 1780 | CB   | ILE | X | 114 | 39.479 | 45.160 | 42.662 | 0.00 | 0.00 |
| ATOM | 1781 | HB   | ILE | X | 114 | 39.285 | 44.179 | 42.227 | 0.00 | 0.00 |
| ATOM | 1782 | CG2  | ILE | X | 114 | 39.670 | 44.996 | 44.181 | 0.00 | 0.00 |
| ATOM | 1783 | HG21 | ILE | X | 114 | 38.917 | 44.323 | 44.593 | 0.00 | 0.00 |
| ATOM | 1784 | HG22 | ILE | X | 114 | 40.668 | 44.566 | 44.262 | 0.00 | 0.00 |
| ATOM | 1785 | HG23 | ILE | X | 114 | 39.782 | 45.923 | 44.742 | 0.00 | 0.00 |
| ATOM | 1786 | CG1  | ILE | X | 114 | 38.168 | 46.010 | 42.453 | 0.00 | 0.00 |
| ATOM | 1787 | HG12 | ILE | X | 114 | 38.259 | 47.028 | 42.830 | 0.00 | 0.00 |
| ATOM | 1788 | HG13 | ILE | X | 114 | 37.942 | 46.225 | 41.408 | 0.00 | 0.00 |
| ATOM | 1789 | CD1  | ILE | X | 114 | 36.823 | 45.500 | 42.966 | 0.00 | 0.00 |
| ATOM | 1790 | HD11 | ILE | X | 114 | 36.007 | 46.150 | 42.651 | 0.00 | 0.00 |
| ATOM | 1791 | HD12 | ILE | X | 114 | 36.640 | 44.508 | 42.553 | 0.00 | 0.00 |
| ATOM | 1792 | HD13 | ILE | X | 114 | 36.782 | 45.387 | 44.049 | 0.00 | 0.00 |
| ATOM | 1793 | C    | ILE | X | 114 | 42.103 | 45.118 | 42.188 | 0.00 | 0.00 |
| ATOM | 1794 | O    | ILE | X | 114 | 42.216 | 43.989 | 41.676 | 0.00 | 0.00 |
| ATOM | 1795 | N    | TYR | X | 115 | 43.125 | 45.698 | 42.905 | 0.00 | 0.00 |
| ATOM | 1796 | H    | TYR | X | 115 | 42.915 | 46.533 | 43.433 | 0.00 | 0.00 |
| ATOM | 1797 | CA   | TYR | X | 115 | 44.559 | 45.192 | 42.979 | 0.00 | 0.00 |
| ATOM | 1798 | HA   | TYR | X | 115 | 44.847 | 44.819 | 41.997 | 0.00 | 0.00 |
| ATOM | 1799 | CB   | TYR | X | 115 | 45.589 | 46.381 | 43.151 | 0.00 | 0.00 |
| ATOM | 1800 | HB2  | TYR | X | 115 | 46.496 | 45.932 | 43.557 | 0.00 | 0.00 |
| ATOM | 1801 | HB3  | TYR | X | 115 | 45.805 | 46.875 | 42.204 | 0.00 | 0.00 |
| ATOM | 1802 | CG   | TYR | X | 115 | 45.211 | 47.501 | 44.078 | 0.00 | 0.00 |
| ATOM | 1803 | CD1  | TYR | X | 115 | 45.513 | 47.350 | 45.467 | 0.00 | 0.00 |
| ATOM | 1804 | HD1  | TYR | X | 115 | 46.152 | 46.546 | 45.801 | 0.00 | 0.00 |
| ATOM | 1805 | CE1  | TYR | X | 115 | 45.166 | 48.431 | 46.376 | 0.00 | 0.00 |
| ATOM | 1806 | HE1  | TYR | X | 115 | 45.342 | 48.304 | 47.434 | 0.00 | 0.00 |
| ATOM | 1807 | CZ   | TYR | X | 115 | 44.340 | 49.523 | 45.907 | 0.00 | 0.00 |
| ATOM | 1808 | OH   | TYR | X | 115 | 43.776 | 50.363 | 46.825 | 0.00 | 0.00 |
| ATOM | 1809 | HH   | TYR | X | 115 | 43.225 | 51.004 | 46.369 | 0.00 | 0.00 |
| ATOM | 1810 | CE2  | TYR | X | 115 | 44.176 | 49.663 | 44.547 | 0.00 | 0.00 |
| ATOM | 1811 | HE2  | TYR | X | 115 | 43.511 | 50.413 | 44.146 | 0.00 | 0.00 |
| ATOM | 1812 | CD2  | TYR | X | 115 | 44.690 | 48.712 | 43.659 | 0.00 | 0.00 |
| ATOM | 1813 | HD2  | TYR | X | 115 | 44.490 | 48.800 | 42.601 | 0.00 | 0.00 |
| ATOM | 1814 | C    | TYR | X | 115 | 44.757 | 44.054 | 43.937 | 0.00 | 0.00 |
| ATOM | 1815 | O    | TYR | X | 115 | 44.291 | 44.096 | 45.126 | 0.00 | 0.00 |
| ATOM | 1816 | N    | GLY | X | 116 | 45.616 | 43.079 | 43.541 | 0.00 | 0.00 |
| ATOM | 1817 | H    | GLY | X | 116 | 45.970 | 42.972 | 42.601 | 0.00 | 0.00 |
| ATOM | 1818 | CA   | GLY | X | 116 | 46.257 | 42.184 | 44.505 | 0.00 | 0.00 |
| ATOM | 1819 | HA2  | GLY | X | 116 | 45.492 | 41.738 | 45.228 | 0.00 | 0.00 |
| ATOM | 1820 | HA3  | GLY | X | 116 | 46.636 | 41.293 | 44.012 | 0.00 | 0.00 |
| ATOM | 1821 | C    | GLY | X | 116 | 47.469 | 42.730 | 45.279 | 0.00 | 0.00 |
| ATOM | 1822 | O    | GLY | X | 116 | 47.804 | 43.918 | 45.345 | 0.00 | 0.00 |
| ATOM | 1823 | N    | GLY | X | 117 | 48.053 | 41.819 | 45.979 | 0.00 | 0.00 |
| ATOM | 1824 | H    | GLY | X | 117 | 47.713 | 40.879 | 45.835 | 0.00 | 0.00 |
| ATOM | 1825 | CA   | GLY | X | 117 | 48.965 | 41.974 | 47.060 | 0.00 | 0.00 |
| ATOM | 1826 | HA2  | GLY | X | 117 | 49.871 | 41.605 | 46.739 | 0.00 | 0.00 |
| ATOM | 1827 | HA3  | GLY | X | 117 | 49.030 | 43.055 | 47.187 | 0.00 | 0.00 |



|      |      |     |     |   |     |        |        |        |      |      |
|------|------|-----|-----|---|-----|--------|--------|--------|------|------|
| ATOM | 1828 | C   | GLY | X | 117 | 48.631 | 41.165 | 48.301 | 0.00 | 0.00 |
| ATOM | 1829 | O   | GLY | X | 117 | 49.175 | 41.373 | 49.369 | 0.00 | 0.00 |
| ATOM | 1830 | N   | GLY | X | 118 | 47.619 | 40.245 | 48.244 | 0.00 | 0.00 |
| ATOM | 1831 | H   | GLY | X | 118 | 47.089 | 40.153 | 47.389 | 0.00 | 0.00 |
| ATOM | 1832 | CA  | GLY | X | 118 | 47.192 | 39.337 | 49.322 | 0.00 | 0.00 |
| ATOM | 1833 | HA2 | GLY | X | 118 | 46.646 | 38.543 | 48.808 | 0.00 | 0.00 |
| ATOM | 1834 | HA3 | GLY | X | 118 | 48.113 | 38.951 | 49.823 | 0.00 | 0.00 |
| ATOM | 1835 | C   | GLY | X | 118 | 46.273 | 39.790 | 50.419 | 0.00 | 0.00 |
| ATOM | 1836 | O   | GLY | X | 118 | 46.221 | 39.287 | 51.527 | 0.00 | 0.00 |
| ATOM | 1837 | N   | PHE | X | 119 | 45.596 | 40.909 | 50.239 | 0.00 | 0.00 |
| ATOM | 1838 | H   | PHE | X | 119 | 45.797 | 41.426 | 49.395 | 0.00 | 0.00 |
| ATOM | 1839 | CA  | PHE | X | 119 | 44.684 | 41.540 | 51.203 | 0.00 | 0.00 |
| ATOM | 1840 | HA  | PHE | X | 119 | 44.117 | 42.279 | 50.637 | 0.00 | 0.00 |
| ATOM | 1841 | CB  | PHE | X | 119 | 43.583 | 40.545 | 51.847 | 0.00 | 0.00 |
| ATOM | 1842 | HB2 | PHE | X | 119 | 44.086 | 39.860 | 52.530 | 0.00 | 0.00 |
| ATOM | 1843 | HB3 | PHE | X | 119 | 42.926 | 41.151 | 52.471 | 0.00 | 0.00 |
| ATOM | 1844 | CG  | PHE | X | 119 | 42.675 | 39.757 | 50.896 | 0.00 | 0.00 |
| ATOM | 1845 | CD1 | PHE | X | 119 | 41.647 | 40.389 | 50.153 | 0.00 | 0.00 |
| ATOM | 1846 | HD1 | PHE | X | 119 | 41.476 | 41.453 | 50.225 | 0.00 | 0.00 |
| ATOM | 1847 | CE1 | PHE | X | 119 | 40.894 | 39.626 | 49.247 | 0.00 | 0.00 |
| ATOM | 1848 | HE1 | PHE | X | 119 | 40.177 | 40.189 | 48.668 | 0.00 | 0.00 |
| ATOM | 1849 | CZ  | PHE | X | 119 | 41.042 | 38.240 | 49.212 | 0.00 | 0.00 |
| ATOM | 1850 | HZ  | PHE | X | 119 | 40.334 | 37.661 | 48.636 | 0.00 | 0.00 |
| ATOM | 1851 | CE2 | PHE | X | 119 | 41.947 | 37.597 | 50.006 | 0.00 | 0.00 |
| ATOM | 1852 | HE2 | PHE | X | 119 | 42.072 | 36.524 | 50.006 | 0.00 | 0.00 |
| ATOM | 1853 | CD2 | PHE | X | 119 | 42.802 | 38.370 | 50.807 | 0.00 | 0.00 |
| ATOM | 1854 | HD2 | PHE | X | 119 | 43.611 | 37.918 | 51.362 | 0.00 | 0.00 |
| ATOM | 1855 | C   | PHE | X | 119 | 45.389 | 42.397 | 52.281 | 0.00 | 0.00 |
| ATOM | 1856 | O   | PHE | X | 119 | 44.672 | 42.989 | 53.076 | 0.00 | 0.00 |
| ATOM | 1857 | N   | TYR | X | 120 | 46.737 | 42.304 | 52.399 | 0.00 | 0.00 |
| ATOM | 1858 | H   | TYR | X | 120 | 47.252 | 41.663 | 51.812 | 0.00 | 0.00 |
| ATOM | 1859 | CA  | TYR | X | 120 | 47.519 | 42.944 | 53.496 | 0.00 | 0.00 |
| ATOM | 1860 | HA  | TYR | X | 120 | 46.811 | 43.477 | 54.130 | 0.00 | 0.00 |
| ATOM | 1861 | CB  | TYR | X | 120 | 48.304 | 41.865 | 54.327 | 0.00 | 0.00 |
| ATOM | 1862 | HB2 | TYR | X | 120 | 48.552 | 42.319 | 55.287 | 0.00 | 0.00 |
| ATOM | 1863 | HB3 | TYR | X | 120 | 47.693 | 40.967 | 54.417 | 0.00 | 0.00 |
| ATOM | 1864 | CG  | TYR | X | 120 | 49.574 | 41.404 | 53.600 | 0.00 | 0.00 |
| ATOM | 1865 | CD1 | TYR | X | 120 | 50.735 | 42.108 | 53.782 | 0.00 | 0.00 |
| ATOM | 1866 | HD1 | TYR | X | 120 | 50.701 | 42.817 | 54.596 | 0.00 | 0.00 |
| ATOM | 1867 | CE1 | TYR | X | 120 | 51.873 | 41.834 | 52.994 | 0.00 | 0.00 |
| ATOM | 1868 | HE1 | TYR | X | 120 | 52.759 | 42.435 | 53.129 | 0.00 | 0.00 |
| ATOM | 1869 | CZ  | TYR | X | 120 | 51.763 | 40.815 | 52.041 | 0.00 | 0.00 |
| ATOM | 1870 | OH  | TYR | X | 120 | 52.804 | 40.734 | 51.215 | 0.00 | 0.00 |
| ATOM | 1871 | HH  | TYR | X | 120 | 53.367 | 41.492 | 51.393 | 0.00 | 0.00 |
| ATOM | 1872 | CE2 | TYR | X | 120 | 50.599 | 40.005 | 51.933 | 0.00 | 0.00 |
| ATOM | 1873 | HE2 | TYR | X | 120 | 50.561 | 39.230 | 51.182 | 0.00 | 0.00 |
| ATOM | 1874 | CD2 | TYR | X | 120 | 49.472 | 40.336 | 52.673 | 0.00 | 0.00 |
| ATOM | 1875 | HD2 | TYR | X | 120 | 48.525 | 39.826 | 52.569 | 0.00 | 0.00 |
| ATOM | 1876 | C   | TYR | X | 120 | 48.547 | 43.957 | 52.891 | 0.00 | 0.00 |
| ATOM | 1877 | O   | TYR | X | 120 | 49.310 | 44.597 | 53.564 | 0.00 | 0.00 |
| ATOM | 1878 | N   | SER | X | 121 | 48.524 | 44.188 | 51.616 | 0.00 | 0.00 |
| ATOM | 1879 | H   | SER | X | 121 | 47.881 | 43.686 | 51.021 | 0.00 | 0.00 |
| ATOM | 1880 | CA  | SER | X | 121 | 49.313 | 45.206 | 50.869 | 0.00 | 0.00 |
| ATOM | 1881 | HA  | SER | X | 121 | 49.181 | 46.146 | 51.404 | 0.00 | 0.00 |
| ATOM | 1882 | CB  | SER | X | 121 | 50.816 | 44.859 | 50.895 | 0.00 | 0.00 |
| ATOM | 1883 | HB2 | SER | X | 121 | 51.410 | 45.647 | 50.433 | 0.00 | 0.00 |
| ATOM | 1884 | HB3 | SER | X | 121 | 51.161 | 44.690 | 51.916 | 0.00 | 0.00 |
| ATOM | 1885 | OG  | SER | X | 121 | 51.144 | 43.628 | 50.187 | 0.00 | 0.00 |
| ATOM | 1886 | HG  | SER | X | 121 | 50.508 | 42.916 | 50.286 | 0.00 | 0.00 |
| ATOM | 1887 | C   | SER | X | 121 | 48.803 | 45.519 | 49.465 | 0.00 | 0.00 |
| ATOM | 1888 | O   | SER | X | 121 | 47.814 | 44.894 | 49.145 | 0.00 | 0.00 |
| ATOM | 1889 | N   | GLY | X | 122 | 49.453 | 46.446 | 48.692 | 0.00 | 0.00 |
| ATOM | 1890 | H   | GLY | X | 122 | 50.303 | 46.848 | 49.060 | 0.00 | 0.00 |
| ATOM | 1891 | CA  | GLY | X | 122 | 49.017 | 46.903 | 47.400 | 0.00 | 0.00 |
| ATOM | 1892 | HA2 | GLY | X | 122 | 49.849 | 47.001 | 46.666 | 0.00 | 0.00 |
| ATOM | 1893 | HA3 | GLY | X | 122 | 48.259 | 46.258 | 47.066 | 0.00 | 0.00 |
| ATOM | 1894 | C   | GLY | X | 122 | 48.355 | 48.317 | 47.518 | 0.00 | 0.00 |
| ATOM | 1895 | O   | GLY | X | 122 | 47.931 | 48.689 | 48.594 | 0.00 | 0.00 |
| ATOM | 1896 | N   | ALA | X | 123 | 48.297 | 49.101 | 46.451 | 0.00 | 0.00 |
| ATOM | 1897 | H   | ALA | X | 123 | 48.524 | 48.727 | 45.540 | 0.00 | 0.00 |

|      |      |      |     |   |     |        |        |        |      |      |
|------|------|------|-----|---|-----|--------|--------|--------|------|------|
| ATOM | 1898 | CA   | ALA | X | 123 | 47.855 | 50.512 | 46.430 | 0.00 | 0.00 |
| ATOM | 1899 | HA   | ALA | X | 123 | 47.039 | 50.801 | 47.092 | 0.00 | 0.00 |
| ATOM | 1900 | CB   | ALA | X | 123 | 49.000 | 51.412 | 47.046 | 0.00 | 0.00 |
| ATOM | 1901 | HB1  | ALA | X | 123 | 48.799 | 52.480 | 47.122 | 0.00 | 0.00 |
| ATOM | 1902 | HB2  | ALA | X | 123 | 49.437 | 51.198 | 48.022 | 0.00 | 0.00 |
| ATOM | 1903 | HB3  | ALA | X | 123 | 49.744 | 51.160 | 46.291 | 0.00 | 0.00 |
| ATOM | 1904 | C    | ALA | X | 123 | 47.562 | 51.027 | 44.945 | 0.00 | 0.00 |
| ATOM | 1905 | O    | ALA | X | 123 | 48.108 | 50.505 | 43.989 | 0.00 | 0.00 |
| ATOM | 1906 | N    | SER | X | 124 | 46.607 | 52.037 | 44.846 | 0.00 | 0.00 |
| ATOM | 1907 | H    | SER | X | 124 | 46.244 | 52.434 | 45.701 | 0.00 | 0.00 |
| ATOM | 1908 | CA   | SER | X | 124 | 46.301 | 52.610 | 43.477 | 0.00 | 0.00 |
| ATOM | 1909 | HA   | SER | X | 124 | 46.194 | 51.681 | 42.915 | 0.00 | 0.00 |
| ATOM | 1910 | CB   | SER | X | 124 | 45.020 | 53.460 | 43.561 | 0.00 | 0.00 |
| ATOM | 1911 | HB2  | SER | X | 124 | 44.657 | 53.691 | 42.560 | 0.00 | 0.00 |
| ATOM | 1912 | HB3  | SER | X | 124 | 44.238 | 52.813 | 43.960 | 0.00 | 0.00 |
| ATOM | 1913 | OG   | SER | X | 124 | 45.221 | 54.685 | 44.266 | 0.00 | 0.00 |
| ATOM | 1914 | HG   | SER | X | 124 | 45.018 | 54.550 | 45.195 | 0.00 | 0.00 |
| ATOM | 1915 | C    | SER | X | 124 | 47.506 | 53.301 | 42.786 | 0.00 | 0.00 |
| ATOM | 1916 | O    | SER | X | 124 | 47.601 | 53.455 | 41.577 | 0.00 | 0.00 |
| ATOM | 1917 | N    | SER | X | 125 | 48.424 | 53.884 | 43.566 | 0.00 | 0.00 |
| ATOM | 1918 | H    | SER | X | 125 | 48.373 | 53.680 | 44.554 | 0.00 | 0.00 |
| ATOM | 1919 | CA   | SER | X | 125 | 49.552 | 54.686 | 43.033 | 0.00 | 0.00 |
| ATOM | 1920 | HA   | SER | X | 125 | 49.183 | 55.169 | 42.129 | 0.00 | 0.00 |
| ATOM | 1921 | CB   | SER | X | 125 | 50.091 | 55.670 | 44.123 | 0.00 | 0.00 |
| ATOM | 1922 | HB2  | SER | X | 125 | 50.805 | 56.361 | 43.673 | 0.00 | 0.00 |
| ATOM | 1923 | HB3  | SER | X | 125 | 49.365 | 56.367 | 44.543 | 0.00 | 0.00 |
| ATOM | 1924 | OG   | SER | X | 125 | 50.687 | 54.869 | 45.151 | 0.00 | 0.00 |
| ATOM | 1925 | HG   | SER | X | 125 | 51.629 | 54.825 | 44.973 | 0.00 | 0.00 |
| ATOM | 1926 | C    | SER | X | 125 | 50.722 | 53.906 | 42.524 | 0.00 | 0.00 |
| ATOM | 1927 | O    | SER | X | 125 | 51.695 | 54.499 | 42.037 | 0.00 | 0.00 |
| ATOM | 1928 | N    | LEU | X | 126 | 50.777 | 52.593 | 42.574 | 0.00 | 0.00 |
| ATOM | 1929 | H    | LEU | X | 126 | 50.109 | 52.078 | 43.129 | 0.00 | 0.00 |
| ATOM | 1930 | CA   | LEU | X | 126 | 51.844 | 51.846 | 41.913 | 0.00 | 0.00 |
| ATOM | 1931 | HA   | LEU | X | 126 | 52.714 | 52.236 | 42.441 | 0.00 | 0.00 |
| ATOM | 1932 | CB   | LEU | X | 126 | 51.693 | 50.333 | 42.186 | 0.00 | 0.00 |
| ATOM | 1933 | HB2  | LEU | X | 126 | 50.737 | 50.095 | 41.719 | 0.00 | 0.00 |
| ATOM | 1934 | HB3  | LEU | X | 126 | 52.506 | 49.739 | 41.767 | 0.00 | 0.00 |
| ATOM | 1935 | CG   | LEU | X | 126 | 51.629 | 49.976 | 43.717 | 0.00 | 0.00 |
| ATOM | 1936 | HG   | LEU | X | 126 | 50.760 | 50.430 | 44.194 | 0.00 | 0.00 |
| ATOM | 1937 | CD1  | LEU | X | 126 | 51.295 | 48.417 | 43.859 | 0.00 | 0.00 |
| ATOM | 1938 | HD11 | LEU | X | 126 | 52.139 | 47.870 | 43.439 | 0.00 | 0.00 |
| ATOM | 1939 | HD12 | LEU | X | 126 | 51.251 | 48.082 | 44.896 | 0.00 | 0.00 |
| ATOM | 1940 | HD13 | LEU | X | 126 | 50.309 | 48.265 | 43.421 | 0.00 | 0.00 |
| ATOM | 1941 | CD2  | LEU | X | 126 | 52.798 | 50.314 | 44.578 | 0.00 | 0.00 |
| ATOM | 1942 | HD21 | LEU | X | 126 | 52.737 | 50.088 | 45.643 | 0.00 | 0.00 |
| ATOM | 1943 | HD22 | LEU | X | 126 | 53.613 | 49.751 | 44.124 | 0.00 | 0.00 |
| ATOM | 1944 | HD23 | LEU | X | 126 | 53.090 | 51.346 | 44.383 | 0.00 | 0.00 |
| ATOM | 1945 | C    | LEU | X | 126 | 51.882 | 52.095 | 40.411 | 0.00 | 0.00 |
| ATOM | 1946 | O    | LEU | X | 126 | 50.808 | 52.138 | 39.828 | 0.00 | 0.00 |
| ATOM | 1947 | N    | ASP | X | 127 | 53.034 | 52.394 | 39.893 | 0.00 | 0.00 |
| ATOM | 1948 | H    | ASP | X | 127 | 53.840 | 52.405 | 40.502 | 0.00 | 0.00 |
| ATOM | 1949 | CA   | ASP | X | 127 | 53.141 | 53.026 | 38.548 | 0.00 | 0.00 |
| ATOM | 1950 | HA   | ASP | X | 127 | 52.522 | 53.924 | 38.566 | 0.00 | 0.00 |
| ATOM | 1951 | CB   | ASP | X | 127 | 54.566 | 53.576 | 38.498 | 0.00 | 0.00 |
| ATOM | 1952 | HB2  | ASP | X | 127 | 54.750 | 54.298 | 39.293 | 0.00 | 0.00 |
| ATOM | 1953 | HB3  | ASP | X | 127 | 55.266 | 52.763 | 38.692 | 0.00 | 0.00 |
| ATOM | 1954 | CG   | ASP | X | 127 | 54.846 | 54.344 | 37.264 | 0.00 | 0.00 |
| ATOM | 1955 | OD1  | ASP | X | 127 | 54.499 | 55.523 | 37.278 | 0.00 | 0.00 |
| ATOM | 1956 | OD2  | ASP | X | 127 | 55.259 | 53.737 | 36.286 | 0.00 | 0.00 |
| ATOM | 1957 | C    | ASP | X | 127 | 52.862 | 52.085 | 37.345 | 0.00 | 0.00 |
| ATOM | 1958 | O    | ASP | X | 127 | 52.722 | 52.441 | 36.182 | 0.00 | 0.00 |
| ATOM | 1959 | N    | VAL | X | 128 | 52.768 | 50.814 | 37.607 | 0.00 | 0.00 |
| ATOM | 1960 | H    | VAL | X | 128 | 53.174 | 50.567 | 38.498 | 0.00 | 0.00 |
| ATOM | 1961 | CA   | VAL | X | 128 | 52.220 | 49.695 | 36.778 | 0.00 | 0.00 |
| ATOM | 1962 | HA   | VAL | X | 128 | 52.628 | 49.920 | 35.792 | 0.00 | 0.00 |
| ATOM | 1963 | CB   | VAL | X | 128 | 52.777 | 48.312 | 37.286 | 0.00 | 0.00 |
| ATOM | 1964 | HB   | VAL | X | 128 | 53.846 | 48.432 | 37.460 | 0.00 | 0.00 |
| ATOM | 1965 | CG1  | VAL | X | 128 | 52.205 | 48.007 | 38.749 | 0.00 | 0.00 |
| ATOM | 1966 | HG11 | VAL | X | 128 | 52.745 | 47.141 | 39.133 | 0.00 | 0.00 |
| ATOM | 1967 | HG12 | VAL | X | 128 | 52.282 | 48.821 | 39.470 | 0.00 | 0.00 |

|      |      |      |     |   |     |        |        |        |      |      |
|------|------|------|-----|---|-----|--------|--------|--------|------|------|
| ATOM | 1968 | HG13 | VAL | X | 128 | 51.186 | 47.620 | 38.749 | 0.00 | 0.00 |
| ATOM | 1969 | CG2  | VAL | X | 128 | 52.518 | 47.061 | 36.349 | 0.00 | 0.00 |
| ATOM | 1970 | HG21 | VAL | X | 128 | 51.471 | 46.784 | 36.220 | 0.00 | 0.00 |
| ATOM | 1971 | HG22 | VAL | X | 128 | 52.867 | 47.137 | 35.320 | 0.00 | 0.00 |
| ATOM | 1972 | HG23 | VAL | X | 128 | 52.992 | 46.174 | 36.769 | 0.00 | 0.00 |
| ATOM | 1973 | C    | VAL | X | 128 | 50.725 | 49.668 | 36.600 | 0.00 | 0.00 |
| ATOM | 1974 | O    | VAL | X | 128 | 50.182 | 49.289 | 35.564 | 0.00 | 0.00 |
| ATOM | 1975 | N    | TYR | X | 129 | 50.031 | 50.180 | 37.620 | 0.00 | 0.00 |
| ATOM | 1976 | H    | TYR | X | 129 | 50.506 | 50.348 | 38.496 | 0.00 | 0.00 |
| ATOM | 1977 | CA   | TYR | X | 129 | 48.559 | 50.190 | 37.607 | 0.00 | 0.00 |
| ATOM | 1978 | HA   | TYR | X | 129 | 48.130 | 49.477 | 36.905 | 0.00 | 0.00 |
| ATOM | 1979 | CB   | TYR | X | 129 | 47.950 | 49.832 | 39.047 | 0.00 | 0.00 |
| ATOM | 1980 | HB2  | TYR | X | 129 | 48.185 | 50.660 | 39.715 | 0.00 | 0.00 |
| ATOM | 1981 | HB3  | TYR | X | 129 | 46.867 | 49.740 | 38.970 | 0.00 | 0.00 |
| ATOM | 1982 | CG   | TYR | X | 129 | 48.373 | 48.516 | 39.660 | 0.00 | 0.00 |
| ATOM | 1983 | CD1  | TYR | X | 129 | 48.446 | 47.348 | 38.768 | 0.00 | 0.00 |
| ATOM | 1984 | HD1  | TYR | X | 129 | 48.385 | 47.413 | 37.692 | 0.00 | 0.00 |
| ATOM | 1985 | CE1  | TYR | X | 129 | 48.559 | 46.083 | 39.321 | 0.00 | 0.00 |
| ATOM | 1986 | HE1  | TYR | X | 129 | 48.628 | 45.188 | 38.721 | 0.00 | 0.00 |
| ATOM | 1987 | CZ   | TYR | X | 129 | 48.601 | 45.876 | 40.736 | 0.00 | 0.00 |
| ATOM | 1988 | OH   | TYR | X | 129 | 48.506 | 44.649 | 41.280 | 0.00 | 0.00 |
| ATOM | 1989 | HH   | TYR | X | 129 | 48.332 | 43.927 | 40.672 | 0.00 | 0.00 |
| ATOM | 1990 | CE2  | TYR | X | 129 | 48.535 | 46.979 | 41.597 | 0.00 | 0.00 |
| ATOM | 1991 | HE2  | TYR | X | 129 | 48.471 | 46.774 | 42.655 | 0.00 | 0.00 |
| ATOM | 1992 | CD2  | TYR | X | 129 | 48.423 | 48.319 | 41.081 | 0.00 | 0.00 |
| ATOM | 1993 | HD2  | TYR | X | 129 | 48.293 | 49.106 | 41.810 | 0.00 | 0.00 |
| ATOM | 1994 | C    | TYR | X | 129 | 47.969 | 51.448 | 36.903 | 0.00 | 0.00 |
| ATOM | 1995 | O    | TYR | X | 129 | 46.764 | 51.709 | 37.090 | 0.00 | 0.00 |
| ATOM | 1996 | N    | ASP | X | 130 | 48.743 | 52.286 | 36.298 | 0.00 | 0.00 |
| ATOM | 1997 | H    | ASP | X | 130 | 49.694 | 51.946 | 36.308 | 0.00 | 0.00 |
| ATOM | 1998 | CA   | ASP | X | 130 | 48.477 | 53.589 | 35.657 | 0.00 | 0.00 |
| ATOM | 1999 | HA   | ASP | X | 130 | 47.731 | 54.107 | 36.261 | 0.00 | 0.00 |
| ATOM | 2000 | CB   | ASP | X | 130 | 49.750 | 54.414 | 35.787 | 0.00 | 0.00 |
| ATOM | 2001 | HB2  | ASP | X | 130 | 50.147 | 54.353 | 36.801 | 0.00 | 0.00 |
| ATOM | 2002 | HB3  | ASP | X | 130 | 50.562 | 54.033 | 35.167 | 0.00 | 0.00 |
| ATOM | 2003 | CG   | ASP | X | 130 | 49.528 | 55.943 | 35.456 | 0.00 | 0.00 |
| ATOM | 2004 | OD1  | ASP | X | 130 | 50.052 | 56.807 | 36.215 | 0.00 | 0.00 |
| ATOM | 2005 | OD2  | ASP | X | 130 | 48.927 | 56.275 | 34.395 | 0.00 | 0.00 |
| ATOM | 2006 | C    | ASP | X | 130 | 48.026 | 53.335 | 34.261 | 0.00 | 0.00 |
| ATOM | 2007 | O    | ASP | X | 130 | 48.733 | 52.953 | 33.318 | 0.00 | 0.00 |
| ATOM | 2008 | N    | GLY | X | 131 | 46.683 | 53.458 | 34.077 | 0.00 | 0.00 |
| ATOM | 2009 | H    | GLY | X | 131 | 46.183 | 53.680 | 34.926 | 0.00 | 0.00 |
| ATOM | 2010 | CA   | GLY | X | 131 | 45.942 | 53.316 | 32.863 | 0.00 | 0.00 |
| ATOM | 2011 | HA2  | GLY | X | 131 | 46.233 | 52.289 | 32.534 | 0.00 | 0.00 |
| ATOM | 2012 | HA3  | GLY | X | 131 | 44.919 | 53.333 | 33.101 | 0.00 | 0.00 |
| ATOM | 2013 | C    | GLY | X | 131 | 46.221 | 54.252 | 31.605 | 0.00 | 0.00 |
| ATOM | 2014 | O    | GLY | X | 131 | 45.392 | 54.136 | 30.693 | 0.00 | 0.00 |
| ATOM | 2015 | N    | ARG | X | 132 | 47.214 | 55.170 | 31.582 | 0.00 | 0.00 |
| ATOM | 2016 | H    | ARG | X | 132 | 47.881 | 55.281 | 32.332 | 0.00 | 0.00 |
| ATOM | 2017 | CA   | ARG | X | 132 | 47.392 | 56.286 | 30.611 | 0.00 | 0.00 |
| ATOM | 2018 | HA   | ARG | X | 132 | 46.480 | 56.875 | 30.704 | 0.00 | 0.00 |
| ATOM | 2019 | CB   | ARG | X | 132 | 48.614 | 57.137 | 30.997 | 0.00 | 0.00 |
| ATOM | 2020 | HB2  | ARG | X | 132 | 48.681 | 57.969 | 30.295 | 0.00 | 0.00 |
| ATOM | 2021 | HB3  | ARG | X | 132 | 48.387 | 57.485 | 32.005 | 0.00 | 0.00 |
| ATOM | 2022 | CG   | ARG | X | 132 | 49.960 | 56.392 | 31.037 | 0.00 | 0.00 |
| ATOM | 2023 | HG2  | ARG | X | 132 | 49.831 | 55.530 | 31.691 | 0.00 | 0.00 |
| ATOM | 2024 | HG3  | ARG | X | 132 | 50.236 | 56.104 | 30.023 | 0.00 | 0.00 |
| ATOM | 2025 | CD   | ARG | X | 132 | 51.059 | 57.325 | 31.571 | 0.00 | 0.00 |
| ATOM | 2026 | HD2  | ARG | X | 132 | 51.988 | 56.755 | 31.550 | 0.00 | 0.00 |
| ATOM | 2027 | HD3  | ARG | X | 132 | 51.151 | 58.208 | 30.939 | 0.00 | 0.00 |
| ATOM | 2028 | NE   | ARG | X | 132 | 50.850 | 57.691 | 33.008 | 0.00 | 0.00 |
| ATOM | 2029 | HE   | ARG | X | 132 | 50.053 | 57.212 | 33.402 | 0.00 | 0.00 |
| ATOM | 2030 | CZ   | ARG | X | 132 | 51.504 | 58.616 | 33.749 | 0.00 | 0.00 |
| ATOM | 2031 | NH1  | ARG | X | 132 | 52.534 | 59.304 | 33.313 | 0.00 | 0.00 |
| ATOM | 2032 | HH11 | ARG | X | 132 | 52.914 | 59.052 | 32.412 | 0.00 | 0.00 |
| ATOM | 2033 | HH12 | ARG | X | 132 | 53.237 | 59.679 | 33.934 | 0.00 | 0.00 |
| ATOM | 2034 | NH2  | ARG | X | 132 | 51.255 | 58.894 | 35.024 | 0.00 | 0.00 |
| ATOM | 2035 | HH21 | ARG | X | 132 | 50.497 | 58.420 | 35.494 | 0.00 | 0.00 |
| ATOM | 2036 | HH22 | ARG | X | 132 | 51.848 | 59.548 | 35.514 | 0.00 | 0.00 |
| ATOM | 2037 | C    | ARG | X | 132 | 47.438 | 55.760 | 29.210 | 0.00 | 0.00 |

|      |      |      |     |   |     |        |        |        |      |      |
|------|------|------|-----|---|-----|--------|--------|--------|------|------|
| ATOM | 2038 | O    | ARG | X | 132 | 46.825 | 56.349 | 28.327 | 0.00 | 0.00 |
| ATOM | 2039 | N    | PHE | X | 133 | 48.088 | 54.625 | 28.963 | 0.00 | 0.00 |
| ATOM | 2040 | H    | PHE | X | 133 | 48.322 | 54.050 | 29.759 | 0.00 | 0.00 |
| ATOM | 2041 | CA   | PHE | X | 133 | 48.411 | 54.082 | 27.644 | 0.00 | 0.00 |
| ATOM | 2042 | HA   | PHE | X | 133 | 48.581 | 54.916 | 26.964 | 0.00 | 0.00 |
| ATOM | 2043 | CB   | PHE | X | 133 | 49.748 | 53.222 | 27.773 | 0.00 | 0.00 |
| ATOM | 2044 | HB2  | PHE | X | 133 | 49.643 | 52.326 | 28.384 | 0.00 | 0.00 |
| ATOM | 2045 | HB3  | PHE | X | 133 | 49.937 | 52.664 | 26.856 | 0.00 | 0.00 |
| ATOM | 2046 | CG   | PHE | X | 133 | 50.970 | 53.976 | 28.276 | 0.00 | 0.00 |
| ATOM | 2047 | CD1  | PHE | X | 133 | 51.488 | 53.845 | 29.571 | 0.00 | 0.00 |
| ATOM | 2048 | HD1  | PHE | X | 133 | 50.916 | 53.232 | 30.250 | 0.00 | 0.00 |
| ATOM | 2049 | CE1  | PHE | X | 133 | 52.703 | 54.436 | 29.975 | 0.00 | 0.00 |
| ATOM | 2050 | HE1  | PHE | X | 133 | 53.069 | 54.090 | 30.930 | 0.00 | 0.00 |
| ATOM | 2051 | CZ   | PHE | X | 133 | 53.412 | 55.264 | 29.067 | 0.00 | 0.00 |
| ATOM | 2052 | HZ   | PHE | X | 133 | 54.277 | 55.806 | 29.421 | 0.00 | 0.00 |
| ATOM | 2053 | CE2  | PHE | X | 133 | 52.813 | 55.480 | 27.748 | 0.00 | 0.00 |
| ATOM | 2054 | HE2  | PHE | X | 133 | 53.325 | 56.087 | 27.016 | 0.00 | 0.00 |
| ATOM | 2055 | CD2  | PHE | X | 133 | 51.741 | 54.731 | 27.323 | 0.00 | 0.00 |
| ATOM | 2056 | HD2  | PHE | X | 133 | 51.205 | 54.911 | 26.403 | 0.00 | 0.00 |
| ATOM | 2057 | C    | PHE | X | 133 | 47.174 | 53.355 | 27.177 | 0.00 | 0.00 |
| ATOM | 2058 | O    | PHE | X | 133 | 46.761 | 53.455 | 26.074 | 0.00 | 0.00 |
| ATOM | 2059 | N    | LEU | X | 134 | 46.470 | 52.636 | 28.086 | 0.00 | 0.00 |
| ATOM | 2060 | H    | LEU | X | 134 | 46.931 | 52.589 | 28.983 | 0.00 | 0.00 |
| ATOM | 2061 | CA   | LEU | X | 134 | 45.182 | 51.975 | 27.800 | 0.00 | 0.00 |
| ATOM | 2062 | HA   | LEU | X | 134 | 45.330 | 51.353 | 26.917 | 0.00 | 0.00 |
| ATOM | 2063 | CB   | LEU | X | 134 | 44.733 | 51.194 | 29.041 | 0.00 | 0.00 |
| ATOM | 2064 | HB2  | LEU | X | 134 | 45.401 | 50.350 | 29.210 | 0.00 | 0.00 |
| ATOM | 2065 | HB3  | LEU | X | 134 | 44.928 | 51.768 | 29.948 | 0.00 | 0.00 |
| ATOM | 2066 | CG   | LEU | X | 134 | 43.238 | 50.676 | 29.070 | 0.00 | 0.00 |
| ATOM | 2067 | HG   | LEU | X | 134 | 42.573 | 51.528 | 28.930 | 0.00 | 0.00 |
| ATOM | 2068 | CD1  | LEU | X | 134 | 42.990 | 49.753 | 27.923 | 0.00 | 0.00 |
| ATOM | 2069 | HD11 | LEU | X | 134 | 43.199 | 50.189 | 26.946 | 0.00 | 0.00 |
| ATOM | 2070 | HD12 | LEU | X | 134 | 43.596 | 48.866 | 28.113 | 0.00 | 0.00 |
| ATOM | 2071 | HD13 | LEU | X | 134 | 41.993 | 49.332 | 28.051 | 0.00 | 0.00 |
| ATOM | 2072 | CD2  | LEU | X | 134 | 42.850 | 49.963 | 30.338 | 0.00 | 0.00 |
| ATOM | 2073 | HD21 | LEU | X | 134 | 43.123 | 50.636 | 31.151 | 0.00 | 0.00 |
| ATOM | 2074 | HD22 | LEU | X | 134 | 41.805 | 49.741 | 30.554 | 0.00 | 0.00 |
| ATOM | 2075 | HD23 | LEU | X | 134 | 43.429 | 49.052 | 30.483 | 0.00 | 0.00 |
| ATOM | 2076 | C    | LEU | X | 134 | 44.192 | 53.021 | 27.353 | 0.00 | 0.00 |
| ATOM | 2077 | O    | LEU | X | 134 | 43.593 | 52.938 | 26.242 | 0.00 | 0.00 |
| ATOM | 2078 | N    | VAL | X | 135 | 43.956 | 54.045 | 28.105 | 0.00 | 0.00 |
| ATOM | 2079 | H    | VAL | X | 135 | 44.392 | 54.112 | 29.013 | 0.00 | 0.00 |
| ATOM | 2080 | CA   | VAL | X | 135 | 43.006 | 55.086 | 27.784 | 0.00 | 0.00 |
| ATOM | 2081 | HA   | VAL | X | 135 | 42.034 | 54.655 | 27.546 | 0.00 | 0.00 |
| ATOM | 2082 | CB   | VAL | X | 135 | 42.835 | 55.915 | 29.137 | 0.00 | 0.00 |
| ATOM | 2083 | HB   | VAL | X | 135 | 43.856 | 56.230 | 29.353 | 0.00 | 0.00 |
| ATOM | 2084 | CG1  | VAL | X | 135 | 41.933 | 57.094 | 29.013 | 0.00 | 0.00 |
| ATOM | 2085 | HG11 | VAL | X | 135 | 40.902 | 56.806 | 28.808 | 0.00 | 0.00 |
| ATOM | 2086 | HG12 | VAL | X | 135 | 41.988 | 57.750 | 29.883 | 0.00 | 0.00 |
| ATOM | 2087 | HG13 | VAL | X | 135 | 42.314 | 57.600 | 28.126 | 0.00 | 0.00 |
| ATOM | 2088 | CG2  | VAL | X | 135 | 42.304 | 55.041 | 30.329 | 0.00 | 0.00 |
| ATOM | 2089 | HG21 | VAL | X | 135 | 41.284 | 55.396 | 30.483 | 0.00 | 0.00 |
| ATOM | 2090 | HG22 | VAL | X | 135 | 42.504 | 54.003 | 30.067 | 0.00 | 0.00 |
| ATOM | 2091 | HG23 | VAL | X | 135 | 42.877 | 55.283 | 31.224 | 0.00 | 0.00 |
| ATOM | 2092 | C    | VAL | X | 135 | 43.408 | 55.979 | 26.560 | 0.00 | 0.00 |
| ATOM | 2093 | O    | VAL | X | 135 | 42.640 | 56.640 | 25.947 | 0.00 | 0.00 |
| ATOM | 2094 | N    | GLN | X | 136 | 44.662 | 56.094 | 26.158 | 0.00 | 0.00 |
| ATOM | 2095 | H    | GLN | X | 136 | 45.408 | 55.635 | 26.660 | 0.00 | 0.00 |
| ATOM | 2096 | CA   | GLN | X | 136 | 45.037 | 56.670 | 24.823 | 0.00 | 0.00 |
| ATOM | 2097 | HA   | GLN | X | 136 | 44.608 | 57.646 | 24.595 | 0.00 | 0.00 |
| ATOM | 2098 | CB   | GLN | X | 136 | 46.585 | 56.826 | 24.705 | 0.00 | 0.00 |
| ATOM | 2099 | HB2  | GLN | X | 136 | 46.946 | 57.759 | 25.136 | 0.00 | 0.00 |
| ATOM | 2100 | HB3  | GLN | X | 136 | 47.110 | 56.120 | 25.349 | 0.00 | 0.00 |
| ATOM | 2101 | CG   | GLN | X | 136 | 47.143 | 56.808 | 23.193 | 0.00 | 0.00 |
| ATOM | 2102 | HG2  | GLN | X | 136 | 46.751 | 55.956 | 22.637 | 0.00 | 0.00 |
| ATOM | 2103 | HG3  | GLN | X | 136 | 46.751 | 57.698 | 22.701 | 0.00 | 0.00 |
| ATOM | 2104 | CD   | GLN | X | 136 | 48.635 | 56.613 | 23.111 | 0.00 | 0.00 |
| ATOM | 2105 | OE1  | GLN | X | 136 | 49.415 | 57.487 | 23.575 | 0.00 | 0.00 |
| ATOM | 2106 | NE2  | GLN | X | 136 | 49.096 | 55.540 | 22.597 | 0.00 | 0.00 |
| ATOM | 2107 | HE21 | GLN | X | 136 | 50.095 | 55.465 | 22.467 | 0.00 | 0.00 |

|      |      |      |     |   |     |        |        |        |      |      |
|------|------|------|-----|---|-----|--------|--------|--------|------|------|
| ATOM | 2108 | HE22 | GLN | X | 136 | 48.502 | 54.945 | 22.039 | 0.00 | 0.00 |
| ATOM | 2109 | C    | GLN | X | 136 | 44.554 | 55.660 | 23.757 | 0.00 | 0.00 |
| ATOM | 2110 | O    | GLN | X | 136 | 43.936 | 56.071 | 22.779 | 0.00 | 0.00 |
| ATOM | 2111 | N    | ALA | X | 137 | 44.764 | 54.360 | 23.895 | 0.00 | 0.00 |
| ATOM | 2112 | H    | ALA | X | 137 | 45.298 | 54.041 | 24.692 | 0.00 | 0.00 |
| ATOM | 2113 | CA   | ALA | X | 137 | 44.433 | 53.333 | 22.854 | 0.00 | 0.00 |
| ATOM | 2114 | HA   | ALA | X | 137 | 44.820 | 53.676 | 21.895 | 0.00 | 0.00 |
| ATOM | 2115 | CB   | ALA | X | 137 | 45.225 | 52.073 | 23.234 | 0.00 | 0.00 |
| ATOM | 2116 | HB1  | ALA | X | 137 | 46.307 | 52.205 | 23.245 | 0.00 | 0.00 |
| ATOM | 2117 | HB2  | ALA | X | 137 | 44.941 | 51.657 | 24.201 | 0.00 | 0.00 |
| ATOM | 2118 | HB3  | ALA | X | 137 | 44.986 | 51.297 | 22.507 | 0.00 | 0.00 |
| ATOM | 2119 | C    | ALA | X | 137 | 42.985 | 52.957 | 22.680 | 0.00 | 0.00 |
| ATOM | 2120 | O    | ALA | X | 137 | 42.562 | 52.631 | 21.554 | 0.00 | 0.00 |
| ATOM | 2121 | N    | GLU | X | 138 | 42.160 | 52.912 | 23.735 | 0.00 | 0.00 |
| ATOM | 2122 | H    | GLU | X | 138 | 42.631 | 53.148 | 24.596 | 0.00 | 0.00 |
| ATOM | 2123 | CA   | GLU | X | 138 | 40.758 | 52.458 | 23.829 | 0.00 | 0.00 |
| ATOM | 2124 | HA   | GLU | X | 138 | 40.417 | 52.322 | 22.802 | 0.00 | 0.00 |
| ATOM | 2125 | CB   | GLU | X | 138 | 40.478 | 51.102 | 24.465 | 0.00 | 0.00 |
| ATOM | 2126 | HB2  | GLU | X | 138 | 40.960 | 51.166 | 25.440 | 0.00 | 0.00 |
| ATOM | 2127 | HB3  | GLU | X | 138 | 39.429 | 50.827 | 24.574 | 0.00 | 0.00 |
| ATOM | 2128 | CG   | GLU | X | 138 | 41.233 | 49.913 | 23.772 | 0.00 | 0.00 |
| ATOM | 2129 | HG2  | GLU | X | 138 | 42.303 | 50.116 | 23.747 | 0.00 | 0.00 |
| ATOM | 2130 | HG3  | GLU | X | 138 | 41.021 | 48.991 | 24.313 | 0.00 | 0.00 |
| ATOM | 2131 | CD   | GLU | X | 138 | 40.748 | 49.655 | 22.316 | 0.00 | 0.00 |
| ATOM | 2132 | OE1  | GLU | X | 138 | 39.502 | 49.485 | 22.057 | 0.00 | 0.00 |
| ATOM | 2133 | OE2  | GLU | X | 138 | 41.690 | 49.711 | 21.458 | 0.00 | 0.00 |
| ATOM | 2134 | C    | GLU | X | 138 | 39.754 | 53.489 | 24.455 | 0.00 | 0.00 |
| ATOM | 2135 | O    | GLU | X | 138 | 38.542 | 53.275 | 24.311 | 0.00 | 0.00 |
| ATOM | 2136 | N    | ARG | X | 139 | 40.247 | 54.518 | 25.137 | 0.00 | 0.00 |
| ATOM | 2137 | H    | ARG | X | 139 | 41.252 | 54.585 | 25.210 | 0.00 | 0.00 |
| ATOM | 2138 | CA   | ARG | X | 139 | 39.471 | 55.676 | 25.568 | 0.00 | 0.00 |
| ATOM | 2139 | HA   | ARG | X | 139 | 40.105 | 56.409 | 26.065 | 0.00 | 0.00 |
| ATOM | 2140 | CB   | ARG | X | 139 | 38.888 | 56.413 | 24.302 | 0.00 | 0.00 |
| ATOM | 2141 | HB2  | ARG | X | 139 | 38.096 | 55.759 | 23.937 | 0.00 | 0.00 |
| ATOM | 2142 | HB3  | ARG | X | 139 | 38.364 | 57.224 | 24.807 | 0.00 | 0.00 |
| ATOM | 2143 | CG   | ARG | X | 139 | 39.887 | 56.875 | 23.266 | 0.00 | 0.00 |
| ATOM | 2144 | HG2  | ARG | X | 139 | 40.577 | 57.587 | 23.718 | 0.00 | 0.00 |
| ATOM | 2145 | HG3  | ARG | X | 139 | 40.551 | 56.060 | 22.976 | 0.00 | 0.00 |
| ATOM | 2146 | CD   | ARG | X | 139 | 39.284 | 57.361 | 21.970 | 0.00 | 0.00 |
| ATOM | 2147 | HD2  | ARG | X | 139 | 40.128 | 57.585 | 21.319 | 0.00 | 0.00 |
| ATOM | 2148 | HD3  | ARG | X | 139 | 38.604 | 56.657 | 21.488 | 0.00 | 0.00 |
| ATOM | 2149 | NE   | ARG | X | 139 | 38.496 | 58.636 | 22.120 | 0.00 | 0.00 |
| ATOM | 2150 | HE   | ARG | X | 139 | 37.493 | 58.537 | 22.184 | 0.00 | 0.00 |
| ATOM | 2151 | CZ   | ARG | X | 139 | 38.964 | 59.928 | 22.281 | 0.00 | 0.00 |
| ATOM | 2152 | NH1  | ARG | X | 139 | 40.290 | 60.262 | 22.285 | 0.00 | 0.00 |
| ATOM | 2153 | HH11 | ARG | X | 139 | 40.997 | 59.548 | 22.179 | 0.00 | 0.00 |
| ATOM | 2154 | HH12 | ARG | X | 139 | 40.561 | 61.182 | 22.601 | 0.00 | 0.00 |
| ATOM | 2155 | NH2  | ARG | X | 139 | 38.164 | 60.898 | 22.589 | 0.00 | 0.00 |
| ATOM | 2156 | HH21 | ARG | X | 139 | 37.164 | 60.885 | 22.444 | 0.00 | 0.00 |
| ATOM | 2157 | HH22 | ARG | X | 139 | 38.554 | 61.812 | 22.773 | 0.00 | 0.00 |
| ATOM | 2158 | C    | ARG | X | 139 | 38.410 | 55.444 | 26.614 | 0.00 | 0.00 |
| ATOM | 2159 | O    | ARG | X | 139 | 38.029 | 56.442 | 27.213 | 0.00 | 0.00 |
| ATOM | 2160 | N    | THR | X | 140 | 37.946 | 54.232 | 26.864 | 0.00 | 0.00 |
| ATOM | 2161 | H    | THR | X | 140 | 38.271 | 53.489 | 26.262 | 0.00 | 0.00 |
| ATOM | 2162 | CA   | THR | X | 140 | 37.163 | 53.668 | 27.956 | 0.00 | 0.00 |
| ATOM | 2163 | HA   | THR | X | 140 | 36.151 | 54.036 | 27.783 | 0.00 | 0.00 |
| ATOM | 2164 | CB   | THR | X | 140 | 37.172 | 52.165 | 28.031 | 0.00 | 0.00 |
| ATOM | 2165 | HB   | THR | X | 140 | 36.847 | 51.821 | 29.013 | 0.00 | 0.00 |
| ATOM | 2166 | CG2  | THR | X | 140 | 36.127 | 51.635 | 27.021 | 0.00 | 0.00 |
| ATOM | 2167 | HG21 | THR | X | 140 | 36.336 | 51.855 | 25.974 | 0.00 | 0.00 |
| ATOM | 2168 | HG22 | THR | X | 140 | 36.106 | 50.548 | 27.092 | 0.00 | 0.00 |
| ATOM | 2169 | HG23 | THR | X | 140 | 35.151 | 52.061 | 27.256 | 0.00 | 0.00 |
| ATOM | 2170 | OG1  | THR | X | 140 | 38.468 | 51.723 | 27.719 | 0.00 | 0.00 |
| ATOM | 2171 | HG1  | THR | X | 140 | 39.053 | 52.089 | 28.386 | 0.00 | 0.00 |
| ATOM | 2172 | C    | THR | X | 140 | 37.785 | 54.219 | 29.214 | 0.00 | 0.00 |
| ATOM | 2173 | O    | THR | X | 140 | 39.012 | 54.170 | 29.367 | 0.00 | 0.00 |
| ATOM | 2174 | N    | VAL | X | 141 | 36.955 | 54.724 | 30.113 | 0.00 | 0.00 |
| ATOM | 2175 | H    | VAL | X | 141 | 35.970 | 54.558 | 29.958 | 0.00 | 0.00 |
| ATOM | 2176 | CA   | VAL | X | 141 | 37.444 | 55.312 | 31.411 | 0.00 | 0.00 |
| ATOM | 2177 | HA   | VAL | X | 141 | 38.197 | 56.024 | 31.073 | 0.00 | 0.00 |

|      |      |      |     |   |     |        |        |        |      |      |
|------|------|------|-----|---|-----|--------|--------|--------|------|------|
| ATOM | 2178 | CB   | VAL | X | 141 | 36.314 | 56.115 | 32.078 | 0.00 | 0.00 |
| ATOM | 2179 | HB   | VAL | X | 141 | 35.452 | 55.453 | 32.150 | 0.00 | 0.00 |
| ATOM | 2180 | CG1  | VAL | X | 141 | 36.741 | 56.776 | 33.401 | 0.00 | 0.00 |
| ATOM | 2181 | HG11 | VAL | X | 141 | 37.036 | 56.095 | 34.199 | 0.00 | 0.00 |
| ATOM | 2182 | HG12 | VAL | X | 141 | 37.652 | 57.350 | 33.234 | 0.00 | 0.00 |
| ATOM | 2183 | HG13 | VAL | X | 141 | 35.844 | 57.321 | 33.694 | 0.00 | 0.00 |
| ATOM | 2184 | CG2  | VAL | X | 141 | 35.928 | 57.303 | 31.084 | 0.00 | 0.00 |
| ATOM | 2185 | HG21 | VAL | X | 141 | 36.764 | 57.997 | 30.994 | 0.00 | 0.00 |
| ATOM | 2186 | HG22 | VAL | X | 141 | 35.679 | 56.891 | 30.106 | 0.00 | 0.00 |
| ATOM | 2187 | HG23 | VAL | X | 141 | 35.083 | 57.905 | 31.418 | 0.00 | 0.00 |
| ATOM | 2188 | C    | VAL | X | 141 | 38.042 | 54.253 | 32.212 | 0.00 | 0.00 |
| ATOM | 2189 | O    | VAL | X | 141 | 37.457 | 53.208 | 32.402 | 0.00 | 0.00 |
| ATOM | 2190 | N    | LEU | X | 142 | 39.292 | 54.402 | 32.736 | 0.00 | 0.00 |
| ATOM | 2191 | H    | LEU | X | 142 | 39.839 | 55.155 | 32.343 | 0.00 | 0.00 |
| ATOM | 2192 | CA   | LEU | X | 142 | 40.001 | 53.484 | 33.681 | 0.00 | 0.00 |
| ATOM | 2193 | HA   | LEU | X | 142 | 39.479 | 52.530 | 33.754 | 0.00 | 0.00 |
| ATOM | 2194 | CB   | LEU | X | 142 | 41.420 | 53.275 | 33.125 | 0.00 | 0.00 |
| ATOM | 2195 | HB2  | LEU | X | 142 | 41.285 | 52.685 | 32.219 | 0.00 | 0.00 |
| ATOM | 2196 | HB3  | LEU | X | 142 | 41.917 | 54.217 | 32.895 | 0.00 | 0.00 |
| ATOM | 2197 | CG   | LEU | X | 142 | 42.339 | 52.403 | 34.018 | 0.00 | 0.00 |
| ATOM | 2198 | HG   | LEU | X | 142 | 43.194 | 52.043 | 33.444 | 0.00 | 0.00 |
| ATOM | 2199 | CD1  | LEU | X | 142 | 42.957 | 53.261 | 35.167 | 0.00 | 0.00 |
| ATOM | 2200 | HD11 | LEU | X | 142 | 43.140 | 54.300 | 34.894 | 0.00 | 0.00 |
| ATOM | 2201 | HD12 | LEU | X | 142 | 42.228 | 53.239 | 35.977 | 0.00 | 0.00 |
| ATOM | 2202 | HD13 | LEU | X | 142 | 43.902 | 52.804 | 35.458 | 0.00 | 0.00 |
| ATOM | 2203 | CD2  | LEU | X | 142 | 41.675 | 51.083 | 34.480 | 0.00 | 0.00 |
| ATOM | 2204 | HD21 | LEU | X | 142 | 42.471 | 50.657 | 35.090 | 0.00 | 0.00 |
| ATOM | 2205 | HD22 | LEU | X | 142 | 40.809 | 51.242 | 35.122 | 0.00 | 0.00 |
| ATOM | 2206 | HD23 | LEU | X | 142 | 41.362 | 50.503 | 33.612 | 0.00 | 0.00 |
| ATOM | 2207 | C    | LEU | X | 142 | 39.895 | 54.186 | 35.022 | 0.00 | 0.00 |
| ATOM | 2208 | O    | LEU | X | 142 | 40.135 | 55.346 | 35.232 | 0.00 | 0.00 |
| ATOM | 2209 | N    | VAL | X | 143 | 39.461 | 53.445 | 36.049 | 0.00 | 0.00 |
| ATOM | 2210 | H    | VAL | X | 143 | 39.112 | 52.528 | 35.806 | 0.00 | 0.00 |
| ATOM | 2211 | CA   | VAL | X | 143 | 39.187 | 53.940 | 37.423 | 0.00 | 0.00 |
| ATOM | 2212 | HA   | VAL | X | 143 | 39.590 | 54.935 | 37.612 | 0.00 | 0.00 |
| ATOM | 2213 | CB   | VAL | X | 143 | 37.687 | 54.018 | 37.745 | 0.00 | 0.00 |
| ATOM | 2214 | HB   | VAL | X | 143 | 37.281 | 53.038 | 37.998 | 0.00 | 0.00 |
| ATOM | 2215 | CG1  | VAL | X | 143 | 37.509 | 54.907 | 39.013 | 0.00 | 0.00 |
| ATOM | 2216 | HG11 | VAL | X | 143 | 37.956 | 54.274 | 39.780 | 0.00 | 0.00 |
| ATOM | 2217 | HG12 | VAL | X | 143 | 37.999 | 55.876 | 38.920 | 0.00 | 0.00 |
| ATOM | 2218 | HG13 | VAL | X | 143 | 36.452 | 55.046 | 39.241 | 0.00 | 0.00 |
| ATOM | 2219 | CG2  | VAL | X | 143 | 36.868 | 54.830 | 36.763 | 0.00 | 0.00 |
| ATOM | 2220 | HG21 | VAL | X | 143 | 37.080 | 54.369 | 35.798 | 0.00 | 0.00 |
| ATOM | 2221 | HG22 | VAL | X | 143 | 35.836 | 54.898 | 37.105 | 0.00 | 0.00 |
| ATOM | 2222 | HG23 | VAL | X | 143 | 37.296 | 55.831 | 36.723 | 0.00 | 0.00 |
| ATOM | 2223 | C    | VAL | X | 143 | 39.961 | 53.009 | 38.347 | 0.00 | 0.00 |
| ATOM | 2224 | O    | VAL | X | 143 | 40.171 | 51.816 | 38.125 | 0.00 | 0.00 |
| ATOM | 2225 | N    | SER | X | 144 | 40.428 | 53.578 | 39.426 | 0.00 | 0.00 |
| ATOM | 2226 | H    | SER | X | 144 | 40.433 | 54.571 | 39.609 | 0.00 | 0.00 |
| ATOM | 2227 | CA   | SER | X | 144 | 41.181 | 52.840 | 40.452 | 0.00 | 0.00 |
| ATOM | 2228 | HA   | SER | X | 144 | 40.743 | 51.846 | 40.540 | 0.00 | 0.00 |
| ATOM | 2229 | CB   | SER | X | 144 | 42.708 | 52.841 | 40.089 | 0.00 | 0.00 |
| ATOM | 2230 | HB2  | SER | X | 144 | 42.845 | 52.929 | 39.011 | 0.00 | 0.00 |
| ATOM | 2231 | HB3  | SER | X | 144 | 43.117 | 53.785 | 40.447 | 0.00 | 0.00 |
| ATOM | 2232 | OG   | SER | X | 144 | 43.436 | 51.671 | 40.556 | 0.00 | 0.00 |
| ATOM | 2233 | HG   | SER | X | 144 | 44.371 | 51.745 | 40.351 | 0.00 | 0.00 |
| ATOM | 2234 | C    | SER | X | 144 | 40.986 | 53.483 | 41.857 | 0.00 | 0.00 |
| ATOM | 2235 | O    | SER | X | 144 | 41.075 | 54.710 | 41.940 | 0.00 | 0.00 |
| ATOM | 2236 | N    | MET | X | 145 | 40.782 | 52.750 | 42.982 | 0.00 | 0.00 |
| ATOM | 2237 | H    | MET | X | 145 | 40.694 | 51.744 | 43.023 | 0.00 | 0.00 |
| ATOM | 2238 | CA   | MET | X | 145 | 40.674 | 53.435 | 44.271 | 0.00 | 0.00 |
| ATOM | 2239 | HA   | MET | X | 145 | 41.012 | 54.471 | 44.241 | 0.00 | 0.00 |
| ATOM | 2240 | CB   | MET | X | 145 | 39.210 | 53.407 | 44.750 | 0.00 | 0.00 |
| ATOM | 2241 | HB2  | MET | X | 145 | 39.068 | 53.782 | 45.764 | 0.00 | 0.00 |
| ATOM | 2242 | HB3  | MET | X | 145 | 38.595 | 54.046 | 44.116 | 0.00 | 0.00 |
| ATOM | 2243 | CG   | MET | X | 145 | 38.580 | 52.003 | 44.754 | 0.00 | 0.00 |
| ATOM | 2244 | HG2  | MET | X | 145 | 39.356 | 51.257 | 44.924 | 0.00 | 0.00 |
| ATOM | 2245 | HG3  | MET | X | 145 | 37.942 | 51.933 | 45.635 | 0.00 | 0.00 |
| ATOM | 2246 | SD   | MET | X | 145 | 37.742 | 51.397 | 43.258 | 0.00 | 0.00 |
| ATOM | 2247 | CE   | MET | X | 145 | 37.360 | 49.677 | 43.674 | 0.00 | 0.00 |

|      |      |      |     |   |     |        |        |        |      |      |
|------|------|------|-----|---|-----|--------|--------|--------|------|------|
| ATOM | 2248 | HE1  | MET | X | 145 | 38.304 | 49.416 | 44.154 | 0.00 | 0.00 |
| ATOM | 2249 | HE2  | MET | X | 145 | 36.560 | 49.613 | 44.412 | 0.00 | 0.00 |
| ATOM | 2250 | HE3  | MET | X | 145 | 37.292 | 49.042 | 42.791 | 0.00 | 0.00 |
| ATOM | 2251 | C    | MET | X | 145 | 41.476 | 52.803 | 45.395 | 0.00 | 0.00 |
| ATOM | 2252 | O    | MET | X | 145 | 41.805 | 51.610 | 45.400 | 0.00 | 0.00 |
| ATOM | 2253 | N    | ASN | X | 146 | 41.910 | 53.711 | 46.288 | 0.00 | 0.00 |
| ATOM | 2254 | H    | ASN | X | 146 | 41.825 | 54.703 | 46.117 | 0.00 | 0.00 |
| ATOM | 2255 | CA   | ASN | X | 146 | 42.380 | 53.166 | 47.591 | 0.00 | 0.00 |
| ATOM | 2256 | HA   | ASN | X | 146 | 43.226 | 52.509 | 47.391 | 0.00 | 0.00 |
| ATOM | 2257 | CB   | ASN | X | 146 | 43.064 | 54.301 | 48.383 | 0.00 | 0.00 |
| ATOM | 2258 | HB2  | ASN | X | 146 | 42.445 | 55.199 | 48.374 | 0.00 | 0.00 |
| ATOM | 2259 | HB3  | ASN | X | 146 | 43.182 | 54.024 | 49.431 | 0.00 | 0.00 |
| ATOM | 2260 | CG   | ASN | X | 146 | 44.433 | 54.727 | 47.815 | 0.00 | 0.00 |
| ATOM | 2261 | OD1  | ASN | X | 146 | 44.983 | 54.056 | 46.939 | 0.00 | 0.00 |
| ATOM | 2262 | ND2  | ASN | X | 146 | 45.043 | 55.640 | 48.496 | 0.00 | 0.00 |
| ATOM | 2263 | HD21 | ASN | X | 146 | 46.038 | 55.758 | 48.368 | 0.00 | 0.00 |
| ATOM | 2264 | HD22 | ASN | X | 146 | 44.548 | 56.042 | 49.279 | 0.00 | 0.00 |
| ATOM | 2265 | C    | ASN | X | 146 | 41.260 | 52.454 | 48.353 | 0.00 | 0.00 |
| ATOM | 2266 | O    | ASN | X | 146 | 40.047 | 52.774 | 48.191 | 0.00 | 0.00 |
| ATOM | 2267 | N    | TYR | X | 147 | 41.742 | 51.611 | 49.286 | 0.00 | 0.00 |
| ATOM | 2268 | H    | TYR | X | 147 | 42.734 | 51.480 | 49.428 | 0.00 | 0.00 |
| ATOM | 2269 | CA   | TYR | X | 147 | 40.938 | 50.973 | 50.316 | 0.00 | 0.00 |
| ATOM | 2270 | HA   | TYR | X | 147 | 40.316 | 51.659 | 50.891 | 0.00 | 0.00 |
| ATOM | 2271 | CB   | TYR | X | 147 | 39.952 | 49.920 | 49.789 | 0.00 | 0.00 |
| ATOM | 2272 | HB2  | TYR | X | 147 | 39.346 | 49.530 | 50.606 | 0.00 | 0.00 |
| ATOM | 2273 | HB3  | TYR | X | 147 | 39.288 | 50.597 | 49.251 | 0.00 | 0.00 |
| ATOM | 2274 | CG   | TYR | X | 147 | 40.496 | 48.962 | 48.763 | 0.00 | 0.00 |
| ATOM | 2275 | CD1  | TYR | X | 147 | 40.376 | 49.267 | 47.402 | 0.00 | 0.00 |
| ATOM | 2276 | HD1  | TYR | X | 147 | 39.797 | 50.144 | 47.152 | 0.00 | 0.00 |
| ATOM | 2277 | CE1  | TYR | X | 147 | 40.997 | 48.378 | 46.457 | 0.00 | 0.00 |
| ATOM | 2278 | HE1  | TYR | X | 147 | 40.985 | 48.550 | 45.391 | 0.00 | 0.00 |
| ATOM | 2279 | CZ   | TYR | X | 147 | 41.750 | 47.256 | 46.868 | 0.00 | 0.00 |
| ATOM | 2280 | OH   | TYR | X | 147 | 42.443 | 46.481 | 45.969 | 0.00 | 0.00 |
| ATOM | 2281 | HH   | TYR | X | 147 | 43.071 | 45.877 | 46.371 | 0.00 | 0.00 |
| ATOM | 2282 | CE2  | TYR | X | 147 | 41.841 | 46.985 | 48.288 | 0.00 | 0.00 |
| ATOM | 2283 | HE2  | TYR | X | 147 | 42.510 | 46.210 | 48.631 | 0.00 | 0.00 |
| ATOM | 2284 | CD2  | TYR | X | 147 | 41.142 | 47.793 | 49.219 | 0.00 | 0.00 |
| ATOM | 2285 | HD2  | TYR | X | 147 | 41.278 | 47.736 | 50.289 | 0.00 | 0.00 |
| ATOM | 2286 | C    | TYR | X | 147 | 41.818 | 50.322 | 51.444 | 0.00 | 0.00 |
| ATOM | 2287 | O    | TYR | X | 147 | 42.964 | 49.901 | 51.127 | 0.00 | 0.00 |
| ATOM | 2288 | N    | ARG | X | 148 | 41.292 | 50.110 | 52.635 | 0.00 | 0.00 |
| ATOM | 2289 | H    | ARG | X | 148 | 40.328 | 50.399 | 52.720 | 0.00 | 0.00 |
| ATOM | 2290 | CA   | ARG | X | 148 | 41.936 | 49.497 | 53.768 | 0.00 | 0.00 |
| ATOM | 2291 | HA   | ARG | X | 148 | 42.858 | 50.069 | 53.873 | 0.00 | 0.00 |
| ATOM | 2292 | CB   | ARG | X | 148 | 41.017 | 49.773 | 55.019 | 0.00 | 0.00 |
| ATOM | 2293 | HB2  | ARG | X | 148 | 40.041 | 49.349 | 54.782 | 0.00 | 0.00 |
| ATOM | 2294 | HB3  | ARG | X | 148 | 41.223 | 49.141 | 55.883 | 0.00 | 0.00 |
| ATOM | 2295 | CG   | ARG | X | 148 | 40.920 | 51.246 | 55.487 | 0.00 | 0.00 |
| ATOM | 2296 | HG2  | ARG | X | 148 | 41.951 | 51.484 | 55.745 | 0.00 | 0.00 |
| ATOM | 2297 | HG3  | ARG | X | 148 | 40.569 | 51.865 | 54.661 | 0.00 | 0.00 |
| ATOM | 2298 | CD   | ARG | X | 148 | 39.904 | 51.435 | 56.613 | 0.00 | 0.00 |
| ATOM | 2299 | HD2  | ARG | X | 148 | 40.168 | 50.771 | 57.436 | 0.00 | 0.00 |
| ATOM | 2300 | HD3  | ARG | X | 148 | 39.872 | 52.495 | 56.864 | 0.00 | 0.00 |
| ATOM | 2301 | NE   | ARG | X | 148 | 38.576 | 51.239 | 56.141 | 0.00 | 0.00 |
| ATOM | 2302 | HE   | ARG | X | 148 | 38.256 | 51.364 | 55.191 | 0.00 | 0.00 |
| ATOM | 2303 | CZ   | ARG | X | 148 | 37.525 | 51.279 | 56.934 | 0.00 | 0.00 |
| ATOM | 2304 | NH1  | ARG | X | 148 | 37.585 | 51.235 | 58.232 | 0.00 | 0.00 |
| ATOM | 2305 | HH11 | ARG | X | 148 | 38.493 | 51.260 | 58.675 | 0.00 | 0.00 |
| ATOM | 2306 | HH12 | ARG | X | 148 | 36.752 | 51.296 | 58.799 | 0.00 | 0.00 |
| ATOM | 2307 | NH2  | ARG | X | 148 | 36.324 | 51.204 | 56.488 | 0.00 | 0.00 |
| ATOM | 2308 | HH21 | ARG | X | 148 | 36.293 | 51.226 | 55.479 | 0.00 | 0.00 |
| ATOM | 2309 | HH22 | ARG | X | 148 | 35.633 | 51.043 | 57.207 | 0.00 | 0.00 |
| ATOM | 2310 | C    | ARG | X | 148 | 42.250 | 48.022 | 53.540 | 0.00 | 0.00 |
| ATOM | 2311 | O    | ARG | X | 148 | 41.441 | 47.308 | 53.014 | 0.00 | 0.00 |
| ATOM | 2312 | N    | VAL | X | 149 | 43.398 | 47.575 | 54.008 | 0.00 | 0.00 |
| ATOM | 2313 | H    | VAL | X | 149 | 43.928 | 48.246 | 54.546 | 0.00 | 0.00 |
| ATOM | 2314 | CA   | VAL | X | 149 | 43.943 | 46.215 | 53.860 | 0.00 | 0.00 |
| ATOM | 2315 | HA   | VAL | X | 149 | 43.158 | 45.476 | 53.694 | 0.00 | 0.00 |
| ATOM | 2316 | CB   | VAL | X | 149 | 44.886 | 46.107 | 52.663 | 0.00 | 0.00 |
| ATOM | 2317 | HB   | VAL | X | 149 | 45.480 | 45.197 | 52.742 | 0.00 | 0.00 |

|      |      |      |     |   |     |        |        |        |      |      |
|------|------|------|-----|---|-----|--------|--------|--------|------|------|
| ATOM | 2318 | CG1  | VAL | X | 149 | 44.160 | 46.171 | 51.315 | 0.00 | 0.00 |
| ATOM | 2319 | HG11 | VAL | X | 149 | 43.868 | 47.200 | 51.101 | 0.00 | 0.00 |
| ATOM | 2320 | HG12 | VAL | X | 149 | 44.944 | 45.820 | 50.644 | 0.00 | 0.00 |
| ATOM | 2321 | HG13 | VAL | X | 149 | 43.262 | 45.556 | 51.254 | 0.00 | 0.00 |
| ATOM | 2322 | CG2  | VAL | X | 149 | 45.877 | 47.241 | 52.536 | 0.00 | 0.00 |
| ATOM | 2323 | HG21 | VAL | X | 149 | 46.523 | 47.266 | 53.413 | 0.00 | 0.00 |
| ATOM | 2324 | HG22 | VAL | X | 149 | 46.525 | 47.051 | 51.680 | 0.00 | 0.00 |
| ATOM | 2325 | HG23 | VAL | X | 149 | 45.430 | 48.235 | 52.519 | 0.00 | 0.00 |
| ATOM | 2326 | C    | VAL | X | 149 | 44.602 | 45.898 | 55.172 | 0.00 | 0.00 |
| ATOM | 2327 | O    | VAL | X | 149 | 44.804 | 46.795 | 56.020 | 0.00 | 0.00 |
| ATOM | 2328 | N    | GLY | X | 150 | 44.979 | 44.613 | 55.382 | 0.00 | 0.00 |
| ATOM | 2329 | H    | GLY | X | 150 | 44.715 | 43.928 | 54.688 | 0.00 | 0.00 |
| ATOM | 2330 | CA   | GLY | X | 150 | 45.484 | 44.178 | 56.675 | 0.00 | 0.00 |
| ATOM | 2331 | HA2  | GLY | X | 150 | 45.717 | 43.147 | 56.614 | 0.00 | 0.00 |
| ATOM | 2332 | HA3  | GLY | X | 150 | 46.224 | 44.738 | 57.118 | 0.00 | 0.00 |
| ATOM | 2333 | C    | GLY | X | 150 | 44.323 | 44.019 | 57.733 | 0.00 | 0.00 |
| ATOM | 2334 | O    | GLY | X | 150 | 43.189 | 44.165 | 57.334 | 0.00 | 0.00 |
| ATOM | 2335 | N    | ALA | X | 151 | 44.616 | 43.940 | 59.026 | 0.00 | 0.00 |
| ATOM | 2336 | H    | ALA | X | 151 | 45.573 | 43.843 | 59.332 | 0.00 | 0.00 |
| ATOM | 2337 | CA   | ALA | X | 151 | 43.580 | 44.191 | 60.037 | 0.00 | 0.00 |
| ATOM | 2338 | HA   | ALA | X | 151 | 42.853 | 43.383 | 60.118 | 0.00 | 0.00 |
| ATOM | 2339 | CB   | ALA | X | 151 | 44.449 | 44.298 | 61.390 | 0.00 | 0.00 |
| ATOM | 2340 | HB1  | ALA | X | 151 | 43.904 | 44.301 | 62.334 | 0.00 | 0.00 |
| ATOM | 2341 | HB2  | ALA | X | 151 | 45.137 | 43.453 | 61.423 | 0.00 | 0.00 |
| ATOM | 2342 | HB3  | ALA | X | 151 | 45.063 | 45.191 | 61.506 | 0.00 | 0.00 |
| ATOM | 2343 | C    | ALA | X | 151 | 42.772 | 45.489 | 59.845 | 0.00 | 0.00 |
| ATOM | 2344 | O    | ALA | X | 151 | 41.605 | 45.447 | 60.306 | 0.00 | 0.00 |
| ATOM | 2345 | N    | PHE | X | 152 | 43.217 | 46.576 | 59.173 | 0.00 | 0.00 |
| ATOM | 2346 | H    | PHE | X | 152 | 44.109 | 46.424 | 58.725 | 0.00 | 0.00 |
| ATOM | 2347 | CA   | PHE | X | 152 | 42.505 | 47.797 | 58.970 | 0.00 | 0.00 |
| ATOM | 2348 | HA   | PHE | X | 152 | 42.227 | 48.191 | 59.947 | 0.00 | 0.00 |
| ATOM | 2349 | CB   | PHE | X | 152 | 43.414 | 48.859 | 58.436 | 0.00 | 0.00 |
| ATOM | 2350 | HB2  | PHE | X | 152 | 43.623 | 48.539 | 57.415 | 0.00 | 0.00 |
| ATOM | 2351 | HB3  | PHE | X | 152 | 42.815 | 49.768 | 58.399 | 0.00 | 0.00 |
| ATOM | 2352 | CG   | PHE | X | 152 | 44.646 | 49.198 | 59.169 | 0.00 | 0.00 |
| ATOM | 2353 | CD1  | PHE | X | 152 | 45.751 | 48.260 | 59.156 | 0.00 | 0.00 |
| ATOM | 2354 | HD1  | PHE | X | 152 | 45.739 | 47.610 | 58.294 | 0.00 | 0.00 |
| ATOM | 2355 | CE1  | PHE | X | 152 | 46.775 | 48.356 | 60.082 | 0.00 | 0.00 |
| ATOM | 2356 | HE1  | PHE | X | 152 | 47.604 | 47.673 | 59.963 | 0.00 | 0.00 |
| ATOM | 2357 | CZ   | PHE | X | 152 | 46.771 | 49.431 | 61.022 | 0.00 | 0.00 |
| ATOM | 2358 | HZ   | PHE | X | 152 | 47.536 | 49.515 | 61.780 | 0.00 | 0.00 |
| ATOM | 2359 | CE2  | PHE | X | 152 | 45.809 | 50.432 | 61.034 | 0.00 | 0.00 |
| ATOM | 2360 | HE2  | PHE | X | 152 | 45.787 | 51.250 | 61.739 | 0.00 | 0.00 |
| ATOM | 2361 | CD2  | PHE | X | 152 | 44.706 | 50.234 | 60.124 | 0.00 | 0.00 |
| ATOM | 2362 | HD2  | PHE | X | 152 | 43.793 | 50.795 | 60.252 | 0.00 | 0.00 |
| ATOM | 2363 | C    | PHE | X | 152 | 41.175 | 47.657 | 58.233 | 0.00 | 0.00 |
| ATOM | 2364 | O    | PHE | X | 152 | 40.185 | 48.330 | 58.548 | 0.00 | 0.00 |
| ATOM | 2365 | N    | GLY | X | 153 | 41.209 | 46.664 | 57.317 | 0.00 | 0.00 |
| ATOM | 2366 | H    | GLY | X | 153 | 42.106 | 46.225 | 57.168 | 0.00 | 0.00 |
| ATOM | 2367 | CA   | GLY | X | 153 | 40.016 | 46.294 | 56.483 | 0.00 | 0.00 |
| ATOM | 2368 | HA2  | GLY | X | 153 | 39.300 | 47.148 | 56.389 | 0.00 | 0.00 |
| ATOM | 2369 | HA3  | GLY | X | 153 | 40.232 | 46.255 | 55.438 | 0.00 | 0.00 |
| ATOM | 2370 | C    | GLY | X | 153 | 39.292 | 45.022 | 56.835 | 0.00 | 0.00 |
| ATOM | 2371 | O    | GLY | X | 153 | 38.155 | 44.791 | 56.410 | 0.00 | 0.00 |
| ATOM | 2372 | N    | PHE | X | 154 | 39.803 | 44.170 | 57.771 | 0.00 | 0.00 |
| ATOM | 2373 | H    | PHE | X | 154 | 40.653 | 44.345 | 58.289 | 0.00 | 0.00 |
| ATOM | 2374 | CA   | PHE | X | 154 | 39.479 | 42.745 | 57.770 | 0.00 | 0.00 |
| ATOM | 2375 | HA   | PHE | X | 154 | 38.471 | 42.525 | 57.420 | 0.00 | 0.00 |
| ATOM | 2376 | CB   | PHE | X | 154 | 40.458 | 42.050 | 56.825 | 0.00 | 0.00 |
| ATOM | 2377 | HB2  | PHE | X | 154 | 41.509 | 42.323 | 56.919 | 0.00 | 0.00 |
| ATOM | 2378 | HB3  | PHE | X | 154 | 40.278 | 40.994 | 57.026 | 0.00 | 0.00 |
| ATOM | 2379 | CG   | PHE | X | 154 | 40.047 | 42.171 | 55.409 | 0.00 | 0.00 |
| ATOM | 2380 | CD1  | PHE | X | 154 | 40.805 | 42.901 | 54.463 | 0.00 | 0.00 |
| ATOM | 2381 | HD1  | PHE | X | 154 | 41.690 | 43.388 | 54.844 | 0.00 | 0.00 |
| ATOM | 2382 | CE1  | PHE | X | 154 | 40.393 | 42.973 | 53.114 | 0.00 | 0.00 |
| ATOM | 2383 | HE1  | PHE | X | 154 | 41.056 | 43.477 | 52.426 | 0.00 | 0.00 |
| ATOM | 2384 | CZ   | PHE | X | 154 | 39.178 | 42.499 | 52.686 | 0.00 | 0.00 |
| ATOM | 2385 | HZ   | PHE | X | 154 | 38.750 | 42.714 | 51.718 | 0.00 | 0.00 |
| ATOM | 2386 | CE2  | PHE | X | 154 | 38.367 | 41.878 | 53.681 | 0.00 | 0.00 |
| ATOM | 2387 | HE2  | PHE | X | 154 | 37.387 | 41.534 | 53.386 | 0.00 | 0.00 |



|      |      |      |     |   |     |        |        |        |      |      |
|------|------|------|-----|---|-----|--------|--------|--------|------|------|
| ATOM | 2388 | CD2  | PHE | X | 154 | 38.853 | 41.546 | 54.942 | 0.00 | 0.00 |
| ATOM | 2389 | HD2  | PHE | X | 154 | 38.207 | 41.038 | 55.642 | 0.00 | 0.00 |
| ATOM | 2390 | C    | PHE | X | 154 | 39.355 | 42.112 | 59.248 | 0.00 | 0.00 |
| ATOM | 2391 | O    | PHE | X | 154 | 39.089 | 40.903 | 59.374 | 0.00 | 0.00 |
| ATOM | 2392 | N    | LEU | X | 155 | 39.534 | 42.965 | 60.300 | 0.00 | 0.00 |
| ATOM | 2393 | H    | LEU | X | 155 | 39.800 | 43.921 | 60.110 | 0.00 | 0.00 |
| ATOM | 2394 | CA   | LEU | X | 155 | 39.402 | 42.639 | 61.785 | 0.00 | 0.00 |
| ATOM | 2395 | HA   | LEU | X | 155 | 39.978 | 41.715 | 61.828 | 0.00 | 0.00 |
| ATOM | 2396 | CB   | LEU | X | 155 | 40.188 | 43.667 | 62.572 | 0.00 | 0.00 |
| ATOM | 2397 | HB2  | LEU | X | 155 | 41.200 | 43.771 | 62.181 | 0.00 | 0.00 |
| ATOM | 2398 | HB3  | LEU | X | 155 | 39.605 | 44.587 | 62.578 | 0.00 | 0.00 |
| ATOM | 2399 | CG   | LEU | X | 155 | 40.365 | 43.374 | 64.042 | 0.00 | 0.00 |
| ATOM | 2400 | HG   | LEU | X | 155 | 40.045 | 42.333 | 64.104 | 0.00 | 0.00 |
| ATOM | 2401 | CD1  | LEU | X | 155 | 41.906 | 43.441 | 64.478 | 0.00 | 0.00 |
| ATOM | 2402 | HD11 | LEU | X | 155 | 42.475 | 42.756 | 63.850 | 0.00 | 0.00 |
| ATOM | 2403 | HD12 | LEU | X | 155 | 42.204 | 44.486 | 64.383 | 0.00 | 0.00 |
| ATOM | 2404 | HD13 | LEU | X | 155 | 42.106 | 43.161 | 65.512 | 0.00 | 0.00 |
| ATOM | 2405 | CD2  | LEU | X | 155 | 39.693 | 44.208 | 65.051 | 0.00 | 0.00 |
| ATOM | 2406 | HD21 | LEU | X | 155 | 40.127 | 44.074 | 66.042 | 0.00 | 0.00 |
| ATOM | 2407 | HD22 | LEU | X | 155 | 39.867 | 45.251 | 64.787 | 0.00 | 0.00 |
| ATOM | 2408 | HD23 | LEU | X | 155 | 38.610 | 44.089 | 65.090 | 0.00 | 0.00 |
| ATOM | 2409 | C    | LEU | X | 155 | 37.935 | 42.448 | 62.110 | 0.00 | 0.00 |
| ATOM | 2410 | O    | LEU | X | 155 | 37.137 | 43.362 | 61.866 | 0.00 | 0.00 |
| ATOM | 2411 | N    | ALA | X | 156 | 37.575 | 41.288 | 62.554 | 0.00 | 0.00 |
| ATOM | 2412 | H    | ALA | X | 156 | 38.235 | 40.537 | 62.698 | 0.00 | 0.00 |
| ATOM | 2413 | CA   | ALA | X | 156 | 36.200 | 40.932 | 62.820 | 0.00 | 0.00 |
| ATOM | 2414 | HA   | ALA | X | 156 | 35.609 | 41.848 | 62.827 | 0.00 | 0.00 |
| ATOM | 2415 | CB   | ALA | X | 156 | 35.736 | 39.967 | 61.710 | 0.00 | 0.00 |
| ATOM | 2416 | HB1  | ALA | X | 156 | 36.259 | 39.018 | 61.821 | 0.00 | 0.00 |
| ATOM | 2417 | HB2  | ALA | X | 156 | 34.646 | 39.953 | 61.702 | 0.00 | 0.00 |
| ATOM | 2418 | HB3  | ALA | X | 156 | 35.974 | 40.332 | 60.711 | 0.00 | 0.00 |
| ATOM | 2419 | C    | ALA | X | 156 | 36.040 | 40.378 | 64.299 | 0.00 | 0.00 |
| ATOM | 2420 | O    | ALA | X | 156 | 36.833 | 39.468 | 64.634 | 0.00 | 0.00 |
| ATOM | 2421 | N    | LEU | X | 157 | 35.079 | 40.919 | 65.005 | 0.00 | 0.00 |
| ATOM | 2422 | H    | LEU | X | 157 | 34.546 | 41.736 | 64.742 | 0.00 | 0.00 |
| ATOM | 2423 | CA   | LEU | X | 157 | 34.741 | 40.298 | 66.259 | 0.00 | 0.00 |
| ATOM | 2424 | HA   | LEU | X | 157 | 35.495 | 39.553 | 66.511 | 0.00 | 0.00 |
| ATOM | 2425 | CB   | LEU | X | 157 | 34.838 | 41.271 | 67.513 | 0.00 | 0.00 |
| ATOM | 2426 | HB2  | LEU | X | 157 | 34.087 | 42.042 | 67.343 | 0.00 | 0.00 |
| ATOM | 2427 | HB3  | LEU | X | 157 | 34.571 | 40.758 | 68.437 | 0.00 | 0.00 |
| ATOM | 2428 | CG   | LEU | X | 157 | 36.245 | 41.905 | 67.743 | 0.00 | 0.00 |
| ATOM | 2429 | HG   | LEU | X | 157 | 36.512 | 42.327 | 66.774 | 0.00 | 0.00 |
| ATOM | 2430 | CD1  | LEU | X | 157 | 36.276 | 43.036 | 68.798 | 0.00 | 0.00 |
| ATOM | 2431 | HD11 | LEU | X | 157 | 35.461 | 43.735 | 68.608 | 0.00 | 0.00 |
| ATOM | 2432 | HD12 | LEU | X | 157 | 36.420 | 42.635 | 69.801 | 0.00 | 0.00 |
| ATOM | 2433 | HD13 | LEU | X | 157 | 37.152 | 43.671 | 68.668 | 0.00 | 0.00 |
| ATOM | 2434 | CD2  | LEU | X | 157 | 37.262 | 40.851 | 68.151 | 0.00 | 0.00 |
| ATOM | 2435 | HD21 | LEU | X | 157 | 37.457 | 40.110 | 67.376 | 0.00 | 0.00 |
| ATOM | 2436 | HD22 | LEU | X | 157 | 38.201 | 41.371 | 68.340 | 0.00 | 0.00 |
| ATOM | 2437 | HD23 | LEU | X | 157 | 36.924 | 40.217 | 68.971 | 0.00 | 0.00 |
| ATOM | 2438 | C    | LEU | X | 157 | 33.277 | 39.811 | 65.947 | 0.00 | 0.00 |
| ATOM | 2439 | O    | LEU | X | 157 | 32.517 | 40.681 | 65.576 | 0.00 | 0.00 |
| ATOM | 2440 | N    | PRO | X | 158 | 32.895 | 38.496 | 66.052 | 0.00 | 0.00 |
| ATOM | 2441 | CD   | PRO | X | 158 | 33.778 | 37.407 | 66.623 | 0.00 | 0.00 |
| ATOM | 2442 | HD2  | PRO | X | 158 | 33.920 | 37.611 | 67.684 | 0.00 | 0.00 |
| ATOM | 2443 | HD3  | PRO | X | 158 | 34.693 | 37.387 | 66.031 | 0.00 | 0.00 |
| ATOM | 2444 | CG   | PRO | X | 158 | 33.179 | 36.045 | 66.366 | 0.00 | 0.00 |
| ATOM | 2445 | HG2  | PRO | X | 158 | 33.310 | 35.381 | 67.219 | 0.00 | 0.00 |
| ATOM | 2446 | HG3  | PRO | X | 158 | 33.582 | 35.544 | 65.486 | 0.00 | 0.00 |
| ATOM | 2447 | CB   | PRO | X | 158 | 31.684 | 36.411 | 66.189 | 0.00 | 0.00 |
| ATOM | 2448 | HB2  | PRO | X | 158 | 31.292 | 36.382 | 67.206 | 0.00 | 0.00 |
| ATOM | 2449 | HB3  | PRO | X | 158 | 31.161 | 35.675 | 65.579 | 0.00 | 0.00 |
| ATOM | 2450 | CA   | PRO | X | 158 | 31.595 | 37.857 | 65.746 | 0.00 | 0.00 |
| ATOM | 2451 | HA   | PRO | X | 158 | 31.516 | 37.917 | 64.661 | 0.00 | 0.00 |
| ATOM | 2452 | C    | PRO | X | 158 | 30.432 | 38.702 | 66.262 | 0.00 | 0.00 |
| ATOM | 2453 | O    | PRO | X | 158 | 30.230 | 38.857 | 67.491 | 0.00 | 0.00 |
| ATOM | 2454 | N    | GLY | X | 159 | 29.797 | 39.341 | 65.309 | 0.00 | 0.00 |
| ATOM | 2455 | H    | GLY | X | 159 | 29.993 | 38.933 | 64.406 | 0.00 | 0.00 |
| ATOM | 2456 | CA   | GLY | X | 159 | 28.564 | 40.104 | 65.569 | 0.00 | 0.00 |
| ATOM | 2457 | HA2  | GLY | X | 159 | 28.180 | 40.420 | 64.523 | 0.00 | 0.00 |

|      |      |      |     |   |     |        |        |        |      |      |
|------|------|------|-----|---|-----|--------|--------|--------|------|------|
| ATOM | 2458 | HA3  | GLY | X | 159 | 27.777 | 39.405 | 65.938 | 0.00 | 0.00 |
| ATOM | 2459 | C    | GLY | X | 159 | 28.536 | 41.326 | 66.479 | 0.00 | 0.00 |
| ATOM | 2460 | O    | GLY | X | 159 | 27.435 | 41.621 | 67.012 | 0.00 | 0.00 |
| ATOM | 2461 | N    | SER | X | 160 | 29.676 | 41.989 | 66.585 | 0.00 | 0.00 |
| ATOM | 2462 | H    | SER | X | 160 | 30.367 | 41.696 | 65.909 | 0.00 | 0.00 |
| ATOM | 2463 | CA   | SER | X | 160 | 29.926 | 43.223 | 67.360 | 0.00 | 0.00 |
| ATOM | 2464 | HA   | SER | X | 160 | 29.123 | 43.321 | 68.090 | 0.00 | 0.00 |
| ATOM | 2465 | CB   | SER | X | 160 | 31.308 | 43.013 | 68.053 | 0.00 | 0.00 |
| ATOM | 2466 | HB2  | SER | X | 160 | 31.556 | 41.962 | 68.201 | 0.00 | 0.00 |
| ATOM | 2467 | HB3  | SER | X | 160 | 32.091 | 43.401 | 67.402 | 0.00 | 0.00 |
| ATOM | 2468 | OG   | SER | X | 160 | 31.427 | 43.763 | 69.258 | 0.00 | 0.00 |
| ATOM | 2469 | HG   | SER | X | 160 | 31.210 | 44.689 | 69.123 | 0.00 | 0.00 |
| ATOM | 2470 | C    | SER | X | 160 | 29.968 | 44.453 | 66.443 | 0.00 | 0.00 |
| ATOM | 2471 | O    | SER | X | 160 | 30.907 | 44.733 | 65.648 | 0.00 | 0.00 |
| ATOM | 2472 | N    | ARG | X | 161 | 28.891 | 45.266 | 66.447 | 0.00 | 0.00 |
| ATOM | 2473 | H    | ARG | X | 161 | 28.244 | 44.955 | 67.158 | 0.00 | 0.00 |
| ATOM | 2474 | CA   | ARG | X | 161 | 28.712 | 46.553 | 65.789 | 0.00 | 0.00 |
| ATOM | 2475 | HA   | ARG | X | 161 | 28.652 | 46.309 | 64.728 | 0.00 | 0.00 |
| ATOM | 2476 | CB   | ARG | X | 161 | 27.491 | 47.222 | 66.304 | 0.00 | 0.00 |
| ATOM | 2477 | HB2  | ARG | X | 161 | 27.433 | 46.993 | 67.368 | 0.00 | 0.00 |
| ATOM | 2478 | HB3  | ARG | X | 161 | 27.608 | 48.292 | 66.135 | 0.00 | 0.00 |
| ATOM | 2479 | CG   | ARG | X | 161 | 26.178 | 46.762 | 65.665 | 0.00 | 0.00 |
| ATOM | 2480 | HG2  | ARG | X | 161 | 26.171 | 46.940 | 64.589 | 0.00 | 0.00 |
| ATOM | 2481 | HG3  | ARG | X | 161 | 25.992 | 45.701 | 65.834 | 0.00 | 0.00 |
| ATOM | 2482 | CD   | ARG | X | 161 | 24.974 | 47.597 | 66.150 | 0.00 | 0.00 |
| ATOM | 2483 | HD2  | ARG | X | 161 | 24.935 | 47.399 | 67.221 | 0.00 | 0.00 |
| ATOM | 2484 | HD3  | ARG | X | 161 | 25.181 | 48.632 | 65.878 | 0.00 | 0.00 |
| ATOM | 2485 | NE   | ARG | X | 161 | 23.690 | 47.102 | 65.548 | 0.00 | 0.00 |
| ATOM | 2486 | HE   | ARG | X | 161 | 23.810 | 46.240 | 65.036 | 0.00 | 0.00 |
| ATOM | 2487 | CZ   | ARG | X | 161 | 22.501 | 47.630 | 65.528 | 0.00 | 0.00 |
| ATOM | 2488 | NH1  | ARG | X | 161 | 22.143 | 48.687 | 66.165 | 0.00 | 0.00 |
| ATOM | 2489 | HH11 | ARG | X | 161 | 22.796 | 49.306 | 66.623 | 0.00 | 0.00 |
| ATOM | 2490 | HH12 | ARG | X | 161 | 21.168 | 48.950 | 66.130 | 0.00 | 0.00 |
| ATOM | 2491 | NH2  | ARG | X | 161 | 21.449 | 46.996 | 65.121 | 0.00 | 0.00 |
| ATOM | 2492 | HH21 | ARG | X | 161 | 21.608 | 46.028 | 64.879 | 0.00 | 0.00 |
| ATOM | 2493 | HH22 | ARG | X | 161 | 20.542 | 47.425 | 65.230 | 0.00 | 0.00 |
| ATOM | 2494 | C    | ARG | X | 161 | 29.977 | 47.501 | 65.721 | 0.00 | 0.00 |
| ATOM | 2495 | O    | ARG | X | 161 | 29.986 | 48.384 | 64.834 | 0.00 | 0.00 |
| ATOM | 2496 | N    | GLU | X | 162 | 31.033 | 47.297 | 66.527 | 0.00 | 0.00 |
| ATOM | 2497 | H    | GLU | X | 162 | 30.906 | 46.576 | 67.223 | 0.00 | 0.00 |
| ATOM | 2498 | CA   | GLU | X | 162 | 32.154 | 48.193 | 66.820 | 0.00 | 0.00 |
| ATOM | 2499 | HA   | GLU | X | 162 | 31.866 | 49.239 | 66.716 | 0.00 | 0.00 |
| ATOM | 2500 | CB   | GLU | X | 162 | 32.740 | 47.818 | 68.216 | 0.00 | 0.00 |
| ATOM | 2501 | HB2  | GLU | X | 162 | 33.138 | 46.815 | 68.372 | 0.00 | 0.00 |
| ATOM | 2502 | HB3  | GLU | X | 162 | 33.571 | 48.503 | 68.382 | 0.00 | 0.00 |
| ATOM | 2503 | CG   | GLU | X | 162 | 31.886 | 48.211 | 69.388 | 0.00 | 0.00 |
| ATOM | 2504 | HG2  | GLU | X | 162 | 32.510 | 48.126 | 70.277 | 0.00 | 0.00 |
| ATOM | 2505 | HG3  | GLU | X | 162 | 31.540 | 49.216 | 69.142 | 0.00 | 0.00 |
| ATOM | 2506 | CD   | GLU | X | 162 | 30.665 | 47.357 | 69.469 | 0.00 | 0.00 |
| ATOM | 2507 | OE1  | GLU | X | 162 | 30.744 | 46.133 | 69.153 | 0.00 | 0.00 |
| ATOM | 2508 | OE2  | GLU | X | 162 | 29.540 | 47.778 | 69.747 | 0.00 | 0.00 |
| ATOM | 2509 | C    | GLU | X | 162 | 33.347 | 47.903 | 65.902 | 0.00 | 0.00 |
| ATOM | 2510 | O    | GLU | X | 162 | 34.247 | 48.705 | 65.794 | 0.00 | 0.00 |
| ATOM | 2511 | N    | ALA | X | 163 | 33.325 | 46.692 | 65.278 | 0.00 | 0.00 |
| ATOM | 2512 | H    | ALA | X | 163 | 32.550 | 46.071 | 65.462 | 0.00 | 0.00 |
| ATOM | 2513 | CA   | ALA | X | 163 | 34.308 | 46.111 | 64.393 | 0.00 | 0.00 |
| ATOM | 2514 | HA   | ALA | X | 163 | 34.486 | 46.881 | 63.642 | 0.00 | 0.00 |
| ATOM | 2515 | CB   | ALA | X | 163 | 35.701 | 45.924 | 65.015 | 0.00 | 0.00 |
| ATOM | 2516 | HB1  | ALA | X | 163 | 36.384 | 45.542 | 64.256 | 0.00 | 0.00 |
| ATOM | 2517 | HB2  | ALA | X | 163 | 36.045 | 46.879 | 65.412 | 0.00 | 0.00 |
| ATOM | 2518 | HB3  | ALA | X | 163 | 35.723 | 45.273 | 65.889 | 0.00 | 0.00 |
| ATOM | 2519 | C    | ALA | X | 163 | 33.819 | 44.881 | 63.640 | 0.00 | 0.00 |
| ATOM | 2520 | O    | ALA | X | 163 | 34.286 | 43.779 | 63.912 | 0.00 | 0.00 |
| ATOM | 2521 | N    | PRO | X | 164 | 32.897 | 44.982 | 62.661 | 0.00 | 0.00 |
| ATOM | 2522 | CD   | PRO | X | 164 | 32.472 | 46.224 | 62.002 | 0.00 | 0.00 |
| ATOM | 2523 | HD2  | PRO | X | 164 | 33.323 | 46.548 | 61.403 | 0.00 | 0.00 |
| ATOM | 2524 | HD3  | PRO | X | 164 | 31.956 | 46.870 | 62.713 | 0.00 | 0.00 |
| ATOM | 2525 | CG   | PRO | X | 164 | 31.383 | 45.814 | 61.058 | 0.00 | 0.00 |
| ATOM | 2526 | HG2  | PRO | X | 164 | 31.668 | 45.725 | 60.010 | 0.00 | 0.00 |
| ATOM | 2527 | HG3  | PRO | X | 164 | 30.588 | 46.558 | 61.109 | 0.00 | 0.00 |

|      |      |      |     |   |     |        |        |        |      |      |
|------|------|------|-----|---|-----|--------|--------|--------|------|------|
| ATOM | 2528 | CB   | PRO | X | 164 | 30.808 | 44.481 | 61.497 | 0.00 | 0.00 |
| ATOM | 2529 | HB2  | PRO | X | 164 | 30.438 | 43.867 | 60.676 | 0.00 | 0.00 |
| ATOM | 2530 | HB3  | PRO | X | 164 | 29.946 | 44.671 | 62.136 | 0.00 | 0.00 |
| ATOM | 2531 | CA   | PRO | X | 164 | 32.088 | 43.889 | 62.153 | 0.00 | 0.00 |
| ATOM | 2532 | HA   | PRO | X | 164 | 31.782 | 43.279 | 63.003 | 0.00 | 0.00 |
| ATOM | 2533 | C    | PRO | X | 164 | 32.808 | 42.968 | 61.144 | 0.00 | 0.00 |
| ATOM | 2534 | O    | PRO | X | 164 | 32.223 | 41.997 | 60.780 | 0.00 | 0.00 |
| ATOM | 2535 | N    | GLY | X | 165 | 34.047 | 43.309 | 60.671 | 0.00 | 0.00 |
| ATOM | 2536 | H    | GLY | X | 165 | 34.504 | 44.179 | 60.907 | 0.00 | 0.00 |
| ATOM | 2537 | CA   | GLY | X | 165 | 34.731 | 42.437 | 59.607 | 0.00 | 0.00 |
| ATOM | 2538 | HA2  | GLY | X | 165 | 35.764 | 42.716 | 59.739 | 0.00 | 0.00 |
| ATOM | 2539 | HA3  | GLY | X | 165 | 34.382 | 41.349 | 59.747 | 0.00 | 0.00 |
| ATOM | 2540 | C    | GLY | X | 165 | 34.441 | 42.986 | 58.197 | 0.00 | 0.00 |
| ATOM | 2541 | O    | GLY | X | 165 | 33.690 | 44.001 | 58.013 | 0.00 | 0.00 |
| ATOM | 2542 | N    | ASN | X | 166 | 35.320 | 42.654 | 57.255 | 0.00 | 0.00 |
| ATOM | 2543 | H    | ASN | X | 166 | 36.067 | 42.034 | 57.534 | 0.00 | 0.00 |
| ATOM | 2544 | CA   | ASN | X | 166 | 35.248 | 42.931 | 55.794 | 0.00 | 0.00 |
| ATOM | 2545 | HA   | ASN | X | 166 | 35.976 | 42.299 | 55.285 | 0.00 | 0.00 |
| ATOM | 2546 | CB   | ASN | X | 166 | 33.936 | 42.297 | 55.226 | 0.00 | 0.00 |
| ATOM | 2547 | HB2  | ASN | X | 166 | 33.083 | 42.771 | 55.710 | 0.00 | 0.00 |
| ATOM | 2548 | HB3  | ASN | X | 166 | 33.840 | 42.499 | 54.160 | 0.00 | 0.00 |
| ATOM | 2549 | CG   | ASN | X | 166 | 33.789 | 40.776 | 55.348 | 0.00 | 0.00 |
| ATOM | 2550 | OD1  | ASN | X | 166 | 34.451 | 40.033 | 54.625 | 0.00 | 0.00 |
| ATOM | 2551 | ND2  | ASN | X | 166 | 32.866 | 40.317 | 56.176 | 0.00 | 0.00 |
| ATOM | 2552 | HD21 | ASN | X | 166 | 32.711 | 39.319 | 56.156 | 0.00 | 0.00 |
| ATOM | 2553 | HD22 | ASN | X | 166 | 32.260 | 40.935 | 56.696 | 0.00 | 0.00 |
| ATOM | 2554 | C    | ASN | X | 166 | 35.246 | 44.378 | 55.303 | 0.00 | 0.00 |
| ATOM | 2555 | O    | ASN | X | 166 | 35.072 | 44.636 | 54.109 | 0.00 | 0.00 |
| ATOM | 2556 | N    | VAL | X | 167 | 35.312 | 45.346 | 56.197 | 0.00 | 0.00 |
| ATOM | 2557 | H    | VAL | X | 167 | 35.284 | 45.136 | 57.185 | 0.00 | 0.00 |
| ATOM | 2558 | CA   | VAL | X | 167 | 35.078 | 46.767 | 55.870 | 0.00 | 0.00 |
| ATOM | 2559 | HA   | VAL | X | 167 | 34.084 | 46.692 | 55.428 | 0.00 | 0.00 |
| ATOM | 2560 | CB   | VAL | X | 167 | 35.108 | 47.666 | 57.147 | 0.00 | 0.00 |
| ATOM | 2561 | HB   | VAL | X | 167 | 34.727 | 48.655 | 56.891 | 0.00 | 0.00 |
| ATOM | 2562 | CG1  | VAL | X | 167 | 33.965 | 47.299 | 58.056 | 0.00 | 0.00 |
| ATOM | 2563 | HG11 | VAL | X | 167 | 33.071 | 47.021 | 57.497 | 0.00 | 0.00 |
| ATOM | 2564 | HG12 | VAL | X | 167 | 34.313 | 46.595 | 58.812 | 0.00 | 0.00 |
| ATOM | 2565 | HG13 | VAL | X | 167 | 33.804 | 48.216 | 58.622 | 0.00 | 0.00 |
| ATOM | 2566 | CG2  | VAL | X | 167 | 36.572 | 47.814 | 57.842 | 0.00 | 0.00 |
| ATOM | 2567 | HG21 | VAL | X | 167 | 37.203 | 48.252 | 57.068 | 0.00 | 0.00 |
| ATOM | 2568 | HG22 | VAL | X | 167 | 36.476 | 48.516 | 58.670 | 0.00 | 0.00 |
| ATOM | 2569 | HG23 | VAL | X | 167 | 37.057 | 46.856 | 58.029 | 0.00 | 0.00 |
| ATOM | 2570 | C    | VAL | X | 167 | 36.004 | 47.403 | 54.817 | 0.00 | 0.00 |
| ATOM | 2571 | O    | VAL | X | 167 | 35.726 | 48.521 | 54.352 | 0.00 | 0.00 |
| ATOM | 2572 | N    | GLY | X | 168 | 37.074 | 46.686 | 54.389 | 0.00 | 0.00 |
| ATOM | 2573 | H    | GLY | X | 168 | 37.110 | 45.713 | 54.658 | 0.00 | 0.00 |
| ATOM | 2574 | CA   | GLY | X | 168 | 37.919 | 47.209 | 53.302 | 0.00 | 0.00 |
| ATOM | 2575 | HA2  | GLY | X | 168 | 37.899 | 48.241 | 53.542 | 0.00 | 0.00 |
| ATOM | 2576 | HA3  | GLY | X | 168 | 38.935 | 46.810 | 53.278 | 0.00 | 0.00 |
| ATOM | 2577 | C    | GLY | X | 168 | 37.278 | 46.980 | 51.886 | 0.00 | 0.00 |
| ATOM | 2578 | O    | GLY | X | 168 | 37.571 | 47.638 | 50.861 | 0.00 | 0.00 |
| ATOM | 2579 | N    | LEU | X | 169 | 36.308 | 46.061 | 51.803 | 0.00 | 0.00 |
| ATOM | 2580 | H    | LEU | X | 169 | 36.101 | 45.472 | 52.598 | 0.00 | 0.00 |
| ATOM | 2581 | CA   | LEU | X | 169 | 35.319 | 45.825 | 50.714 | 0.00 | 0.00 |
| ATOM | 2582 | HA   | LEU | X | 169 | 35.776 | 45.857 | 49.725 | 0.00 | 0.00 |
| ATOM | 2583 | CB   | LEU | X | 169 | 34.730 | 44.399 | 50.851 | 0.00 | 0.00 |
| ATOM | 2584 | HB2  | LEU | X | 169 | 34.049 | 44.367 | 51.702 | 0.00 | 0.00 |
| ATOM | 2585 | HB3  | LEU | X | 169 | 34.111 | 44.192 | 49.978 | 0.00 | 0.00 |
| ATOM | 2586 | CG   | LEU | X | 169 | 35.827 | 43.304 | 50.890 | 0.00 | 0.00 |
| ATOM | 2587 | HG   | LEU | X | 169 | 36.384 | 43.358 | 51.826 | 0.00 | 0.00 |
| ATOM | 2588 | CD1  | LEU | X | 169 | 35.197 | 41.865 | 51.077 | 0.00 | 0.00 |
| ATOM | 2589 | HD11 | LEU | X | 169 | 34.586 | 41.545 | 50.233 | 0.00 | 0.00 |
| ATOM | 2590 | HD12 | LEU | X | 169 | 36.039 | 41.184 | 51.206 | 0.00 | 0.00 |
| ATOM | 2591 | HD13 | LEU | X | 169 | 34.604 | 41.951 | 51.988 | 0.00 | 0.00 |
| ATOM | 2592 | CD2  | LEU | X | 169 | 36.827 | 43.394 | 49.747 | 0.00 | 0.00 |
| ATOM | 2593 | HD21 | LEU | X | 169 | 36.356 | 43.376 | 48.764 | 0.00 | 0.00 |
| ATOM | 2594 | HD22 | LEU | X | 169 | 37.431 | 44.297 | 49.837 | 0.00 | 0.00 |
| ATOM | 2595 | HD23 | LEU | X | 169 | 37.568 | 42.606 | 49.885 | 0.00 | 0.00 |
| ATOM | 2596 | C    | LEU | X | 169 | 34.164 | 46.860 | 50.689 | 0.00 | 0.00 |
| ATOM | 2597 | O    | LEU | X | 169 | 33.610 | 47.086 | 49.621 | 0.00 | 0.00 |

|      |      |      |     |   |     |        |        |        |      |      |
|------|------|------|-----|---|-----|--------|--------|--------|------|------|
| ATOM | 2598 | N    | LEU | X | 170 | 33.795 | 47.432 | 51.883 | 0.00 | 0.00 |
| ATOM | 2599 | H    | LEU | X | 170 | 34.074 | 46.904 | 52.698 | 0.00 | 0.00 |
| ATOM | 2600 | CA   | LEU | X | 170 | 32.758 | 48.493 | 52.037 | 0.00 | 0.00 |
| ATOM | 2601 | HA   | LEU | X | 170 | 31.934 | 48.354 | 51.337 | 0.00 | 0.00 |
| ATOM | 2602 | CB   | LEU | X | 170 | 32.127 | 48.570 | 53.482 | 0.00 | 0.00 |
| ATOM | 2603 | HB2  | LEU | X | 170 | 32.950 | 48.696 | 54.186 | 0.00 | 0.00 |
| ATOM | 2604 | HB3  | LEU | X | 170 | 31.537 | 49.484 | 53.548 | 0.00 | 0.00 |
| ATOM | 2605 | CG   | LEU | X | 170 | 31.269 | 47.418 | 53.801 | 0.00 | 0.00 |
| ATOM | 2606 | HG   | LEU | X | 170 | 31.828 | 46.494 | 53.650 | 0.00 | 0.00 |
| ATOM | 2607 | CD1  | LEU | X | 170 | 30.782 | 47.523 | 55.314 | 0.00 | 0.00 |
| ATOM | 2608 | HD11 | LEU | X | 170 | 31.693 | 47.597 | 55.909 | 0.00 | 0.00 |
| ATOM | 2609 | HD12 | LEU | X | 170 | 30.113 | 48.377 | 55.422 | 0.00 | 0.00 |
| ATOM | 2610 | HD13 | LEU | X | 170 | 30.401 | 46.581 | 55.708 | 0.00 | 0.00 |
| ATOM | 2611 | CD2  | LEU | X | 170 | 30.073 | 47.269 | 52.832 | 0.00 | 0.00 |
| ATOM | 2612 | HD21 | LEU | X | 170 | 30.434 | 46.852 | 51.891 | 0.00 | 0.00 |
| ATOM | 2613 | HD22 | LEU | X | 170 | 29.455 | 46.503 | 53.300 | 0.00 | 0.00 |
| ATOM | 2614 | HD23 | LEU | X | 170 | 29.497 | 48.189 | 52.733 | 0.00 | 0.00 |
| ATOM | 2615 | C    | LEU | X | 170 | 33.302 | 49.839 | 51.637 | 0.00 | 0.00 |
| ATOM | 2616 | O    | LEU | X | 170 | 32.580 | 50.661 | 51.060 | 0.00 | 0.00 |
| ATOM | 2617 | N    | ASP | X | 171 | 34.631 | 49.955 | 51.620 | 0.00 | 0.00 |
| ATOM | 2618 | H    | ASP | X | 171 | 35.204 | 49.265 | 52.085 | 0.00 | 0.00 |
| ATOM | 2619 | CA   | ASP | X | 171 | 35.425 | 51.073 | 51.094 | 0.00 | 0.00 |
| ATOM | 2620 | HA   | ASP | X | 171 | 35.069 | 52.059 | 51.396 | 0.00 | 0.00 |
| ATOM | 2621 | CB   | ASP | X | 171 | 36.869 | 50.928 | 51.520 | 0.00 | 0.00 |
| ATOM | 2622 | HB2  | ASP | X | 171 | 37.098 | 49.888 | 51.284 | 0.00 | 0.00 |
| ATOM | 2623 | HB3  | ASP | X | 171 | 37.586 | 51.529 | 50.962 | 0.00 | 0.00 |
| ATOM | 2624 | CG   | ASP | X | 171 | 37.140 | 51.126 | 52.999 | 0.00 | 0.00 |
| ATOM | 2625 | OD1  | ASP | X | 171 | 36.339 | 51.683 | 53.777 | 0.00 | 0.00 |
| ATOM | 2626 | OD2  | ASP | X | 171 | 38.252 | 50.733 | 53.340 | 0.00 | 0.00 |
| ATOM | 2627 | C    | ASP | X | 171 | 35.349 | 50.943 | 49.561 | 0.00 | 0.00 |
| ATOM | 2628 | O    | ASP | X | 171 | 34.999 | 51.864 | 48.812 | 0.00 | 0.00 |
| ATOM | 2629 | N    | GLN | X | 172 | 35.609 | 49.792 | 48.960 | 0.00 | 0.00 |
| ATOM | 2630 | H    | GLN | X | 172 | 35.801 | 48.990 | 49.543 | 0.00 | 0.00 |
| ATOM | 2631 | CA   | GLN | X | 172 | 35.408 | 49.509 | 47.515 | 0.00 | 0.00 |
| ATOM | 2632 | HA   | GLN | X | 172 | 36.020 | 50.095 | 46.830 | 0.00 | 0.00 |
| ATOM | 2633 | CB   | GLN | X | 172 | 35.774 | 48.028 | 47.189 | 0.00 | 0.00 |
| ATOM | 2634 | HB2  | GLN | X | 172 | 35.371 | 47.363 | 47.954 | 0.00 | 0.00 |
| ATOM | 2635 | HB3  | GLN | X | 172 | 35.372 | 47.706 | 46.228 | 0.00 | 0.00 |
| ATOM | 2636 | CG   | GLN | X | 172 | 37.324 | 47.791 | 47.276 | 0.00 | 0.00 |
| ATOM | 2637 | HG2  | GLN | X | 172 | 37.707 | 48.287 | 46.384 | 0.00 | 0.00 |
| ATOM | 2638 | HG3  | GLN | X | 172 | 37.671 | 48.238 | 48.207 | 0.00 | 0.00 |
| ATOM | 2639 | CD   | GLN | X | 172 | 37.754 | 46.310 | 47.198 | 0.00 | 0.00 |
| ATOM | 2640 | OE1  | GLN | X | 172 | 36.883 | 45.442 | 47.100 | 0.00 | 0.00 |
| ATOM | 2641 | NE2  | GLN | X | 172 | 38.990 | 45.954 | 47.311 | 0.00 | 0.00 |
| ATOM | 2642 | HE21 | GLN | X | 172 | 39.257 | 44.985 | 47.217 | 0.00 | 0.00 |
| ATOM | 2643 | HE22 | GLN | X | 172 | 39.607 | 46.684 | 47.636 | 0.00 | 0.00 |
| ATOM | 2644 | C    | GLN | X | 172 | 33.962 | 49.747 | 47.157 | 0.00 | 0.00 |
| ATOM | 2645 | O    | GLN | X | 172 | 33.646 | 50.488 | 46.236 | 0.00 | 0.00 |
| ATOM | 2646 | N    | ARG | X | 173 | 33.083 | 49.102 | 47.880 | 0.00 | 0.00 |
| ATOM | 2647 | H    | ARG | X | 173 | 33.370 | 48.532 | 48.662 | 0.00 | 0.00 |
| ATOM | 2648 | CA   | ARG | X | 173 | 31.680 | 49.340 | 47.584 | 0.00 | 0.00 |
| ATOM | 2649 | HA   | ARG | X | 173 | 31.561 | 49.027 | 46.547 | 0.00 | 0.00 |
| ATOM | 2650 | CB   | ARG | X | 173 | 30.735 | 48.455 | 48.500 | 0.00 | 0.00 |
| ATOM | 2651 | HB2  | ARG | X | 173 | 31.027 | 47.416 | 48.651 | 0.00 | 0.00 |
| ATOM | 2652 | HB3  | ARG | X | 173 | 30.846 | 48.978 | 49.450 | 0.00 | 0.00 |
| ATOM | 2653 | CG   | ARG | X | 173 | 29.228 | 48.473 | 48.220 | 0.00 | 0.00 |
| ATOM | 2654 | HG2  | ARG | X | 173 | 28.939 | 49.523 | 48.168 | 0.00 | 0.00 |
| ATOM | 2655 | HG3  | ARG | X | 173 | 29.062 | 48.044 | 47.232 | 0.00 | 0.00 |
| ATOM | 2656 | CD   | ARG | X | 173 | 28.406 | 47.818 | 49.334 | 0.00 | 0.00 |
| ATOM | 2657 | HD2  | ARG | X | 173 | 28.917 | 48.012 | 50.277 | 0.00 | 0.00 |
| ATOM | 2658 | HD3  | ARG | X | 173 | 27.404 | 48.246 | 49.311 | 0.00 | 0.00 |
| ATOM | 2659 | NE   | ARG | X | 173 | 28.256 | 46.382 | 49.045 | 0.00 | 0.00 |
| ATOM | 2660 | HE   | ARG | X | 173 | 28.574 | 46.066 | 48.140 | 0.00 | 0.00 |
| ATOM | 2661 | CZ   | ARG | X | 173 | 28.073 | 45.498 | 49.929 | 0.00 | 0.00 |
| ATOM | 2662 | NH1  | ARG | X | 173 | 27.671 | 45.775 | 51.160 | 0.00 | 0.00 |
| ATOM | 2663 | HH11 | ARG | X | 173 | 27.364 | 46.686 | 51.469 | 0.00 | 0.00 |
| ATOM | 2664 | HH12 | ARG | X | 173 | 27.733 | 44.991 | 51.794 | 0.00 | 0.00 |
| ATOM | 2665 | NH2  | ARG | X | 173 | 28.365 | 44.233 | 49.602 | 0.00 | 0.00 |
| ATOM | 2666 | HH21 | ARG | X | 173 | 28.729 | 44.001 | 48.688 | 0.00 | 0.00 |
| ATOM | 2667 | HH22 | ARG | X | 173 | 28.263 | 43.495 | 50.283 | 0.00 | 0.00 |

|      |      |      |     |   |     |        |        |        |      |      |
|------|------|------|-----|---|-----|--------|--------|--------|------|------|
| ATOM | 2668 | C    | ARG | X | 173 | 31.273 | 50.840 | 47.588 | 0.00 | 0.00 |
| ATOM | 2669 | O    | ARG | X | 173 | 30.573 | 51.307 | 46.636 | 0.00 | 0.00 |
| ATOM | 2670 | N    | LEU | X | 174 | 31.714 | 51.694 | 48.517 | 0.00 | 0.00 |
| ATOM | 2671 | H    | LEU | X | 174 | 32.216 | 51.222 | 49.256 | 0.00 | 0.00 |
| ATOM | 2672 | CA   | LEU | X | 174 | 31.383 | 53.103 | 48.520 | 0.00 | 0.00 |
| ATOM | 2673 | HA   | LEU | X | 174 | 30.313 | 53.276 | 48.403 | 0.00 | 0.00 |
| ATOM | 2674 | CB   | LEU | X | 174 | 31.765 | 53.829 | 49.808 | 0.00 | 0.00 |
| ATOM | 2675 | HB2  | LEU | X | 174 | 31.385 | 53.158 | 50.579 | 0.00 | 0.00 |
| ATOM | 2676 | HB3  | LEU | X | 174 | 32.840 | 53.960 | 49.937 | 0.00 | 0.00 |
| ATOM | 2677 | CG   | LEU | X | 174 | 31.187 | 55.251 | 49.948 | 0.00 | 0.00 |
| ATOM | 2678 | HG   | LEU | X | 174 | 31.431 | 55.835 | 49.061 | 0.00 | 0.00 |
| ATOM | 2679 | CD1  | LEU | X | 174 | 29.650 | 55.256 | 50.087 | 0.00 | 0.00 |
| ATOM | 2680 | HD11 | LEU | X | 174 | 29.123 | 54.874 | 49.213 | 0.00 | 0.00 |
| ATOM | 2681 | HD12 | LEU | X | 174 | 29.283 | 54.614 | 50.888 | 0.00 | 0.00 |
| ATOM | 2682 | HD13 | LEU | X | 174 | 29.317 | 56.280 | 50.252 | 0.00 | 0.00 |
| ATOM | 2683 | CD2  | LEU | X | 174 | 31.771 | 55.967 | 51.184 | 0.00 | 0.00 |
| ATOM | 2684 | HD21 | LEU | X | 174 | 31.286 | 56.938 | 51.283 | 0.00 | 0.00 |
| ATOM | 2685 | HD22 | LEU | X | 174 | 31.598 | 55.391 | 52.093 | 0.00 | 0.00 |
| ATOM | 2686 | HD23 | LEU | X | 174 | 32.854 | 56.093 | 51.169 | 0.00 | 0.00 |
| ATOM | 2687 | C    | LEU | X | 174 | 32.015 | 53.744 | 47.249 | 0.00 | 0.00 |
| ATOM | 2688 | O    | LEU | X | 174 | 31.511 | 54.715 | 46.682 | 0.00 | 0.00 |
| ATOM | 2689 | N    | ALA | X | 175 | 33.248 | 53.385 | 46.842 | 0.00 | 0.00 |
| ATOM | 2690 | H    | ALA | X | 175 | 33.719 | 52.687 | 47.401 | 0.00 | 0.00 |
| ATOM | 2691 | CA   | ALA | X | 175 | 33.954 | 53.853 | 45.627 | 0.00 | 0.00 |
| ATOM | 2692 | HA   | ALA | X | 175 | 34.089 | 54.932 | 45.712 | 0.00 | 0.00 |
| ATOM | 2693 | CB   | ALA | X | 175 | 35.359 | 53.324 | 45.530 | 0.00 | 0.00 |
| ATOM | 2694 | HB1  | ALA | X | 175 | 35.814 | 53.641 | 44.592 | 0.00 | 0.00 |
| ATOM | 2695 | HB2  | ALA | X | 175 | 36.082 | 53.664 | 46.272 | 0.00 | 0.00 |
| ATOM | 2696 | HB3  | ALA | X | 175 | 35.306 | 52.236 | 45.496 | 0.00 | 0.00 |
| ATOM | 2697 | C    | ALA | X | 175 | 33.134 | 53.531 | 44.380 | 0.00 | 0.00 |
| ATOM | 2698 | O    | ALA | X | 175 | 32.934 | 54.374 | 43.483 | 0.00 | 0.00 |
| ATOM | 2699 | N    | LEU | X | 176 | 32.543 | 52.344 | 44.296 | 0.00 | 0.00 |
| ATOM | 2700 | H    | LEU | X | 176 | 32.471 | 51.696 | 45.067 | 0.00 | 0.00 |
| ATOM | 2701 | CA   | LEU | X | 176 | 31.659 | 52.049 | 43.104 | 0.00 | 0.00 |
| ATOM | 2702 | HA   | LEU | X | 176 | 32.255 | 52.263 | 42.217 | 0.00 | 0.00 |
| ATOM | 2703 | CB   | LEU | X | 176 | 31.399 | 50.551 | 43.125 | 0.00 | 0.00 |
| ATOM | 2704 | HB2  | LEU | X | 176 | 30.985 | 50.263 | 44.092 | 0.00 | 0.00 |
| ATOM | 2705 | HB3  | LEU | X | 176 | 30.678 | 50.326 | 42.339 | 0.00 | 0.00 |
| ATOM | 2706 | CG   | LEU | X | 176 | 32.528 | 49.545 | 42.884 | 0.00 | 0.00 |
| ATOM | 2707 | HG   | LEU | X | 176 | 33.317 | 49.851 | 43.570 | 0.00 | 0.00 |
| ATOM | 2708 | CD1  | LEU | X | 176 | 32.156 | 48.074 | 43.237 | 0.00 | 0.00 |
| ATOM | 2709 | HD11 | LEU | X | 176 | 33.063 | 47.519 | 43.476 | 0.00 | 0.00 |
| ATOM | 2710 | HD12 | LEU | X | 176 | 31.459 | 48.095 | 44.074 | 0.00 | 0.00 |
| ATOM | 2711 | HD13 | LEU | X | 176 | 31.668 | 47.647 | 42.361 | 0.00 | 0.00 |
| ATOM | 2712 | CD2  | LEU | X | 176 | 33.146 | 49.742 | 41.434 | 0.00 | 0.00 |
| ATOM | 2713 | HD21 | LEU | X | 176 | 33.494 | 50.774 | 41.480 | 0.00 | 0.00 |
| ATOM | 2714 | HD22 | LEU | X | 176 | 33.870 | 48.976 | 41.155 | 0.00 | 0.00 |
| ATOM | 2715 | HD23 | LEU | X | 176 | 32.263 | 49.526 | 40.832 | 0.00 | 0.00 |
| ATOM | 2716 | C    | LEU | X | 176 | 30.394 | 52.912 | 43.097 | 0.00 | 0.00 |
| ATOM | 2717 | O    | LEU | X | 176 | 29.787 | 53.264 | 42.091 | 0.00 | 0.00 |
| ATOM | 2718 | N    | GLN | X | 177 | 29.846 | 53.135 | 44.326 | 0.00 | 0.00 |
| ATOM | 2719 | H    | GLN | X | 177 | 30.247 | 52.676 | 45.132 | 0.00 | 0.00 |
| ATOM | 2720 | CA   | GLN | X | 177 | 28.724 | 54.088 | 44.508 | 0.00 | 0.00 |
| ATOM | 2721 | HA   | GLN | X | 177 | 27.861 | 53.615 | 44.041 | 0.00 | 0.00 |
| ATOM | 2722 | CB   | GLN | X | 177 | 28.225 | 54.099 | 45.939 | 0.00 | 0.00 |
| ATOM | 2723 | HB2  | GLN | X | 177 | 28.144 | 53.112 | 46.395 | 0.00 | 0.00 |
| ATOM | 2724 | HB3  | GLN | X | 177 | 29.023 | 54.574 | 46.509 | 0.00 | 0.00 |
| ATOM | 2725 | CG   | GLN | X | 177 | 26.846 | 54.799 | 46.161 | 0.00 | 0.00 |
| ATOM | 2726 | HG2  | GLN | X | 177 | 26.930 | 55.829 | 45.812 | 0.00 | 0.00 |
| ATOM | 2727 | HG3  | GLN | X | 177 | 26.139 | 54.265 | 45.526 | 0.00 | 0.00 |
| ATOM | 2728 | CD   | GLN | X | 177 | 26.302 | 54.666 | 47.536 | 0.00 | 0.00 |
| ATOM | 2729 | OE1  | GLN | X | 177 | 25.878 | 53.578 | 47.934 | 0.00 | 0.00 |
| ATOM | 2730 | NE2  | GLN | X | 177 | 26.411 | 55.670 | 48.307 | 0.00 | 0.00 |
| ATOM | 2731 | HE21 | GLN | X | 177 | 25.950 | 55.684 | 49.205 | 0.00 | 0.00 |
| ATOM | 2732 | HE22 | GLN | X | 177 | 26.735 | 56.531 | 47.888 | 0.00 | 0.00 |
| ATOM | 2733 | C    | GLN | X | 177 | 29.065 | 55.446 | 43.871 | 0.00 | 0.00 |
| ATOM | 2734 | O    | GLN | X | 177 | 28.282 | 55.963 | 43.042 | 0.00 | 0.00 |
| ATOM | 2735 | N    | TRP | X | 178 | 30.205 | 55.995 | 44.258 | 0.00 | 0.00 |
| ATOM | 2736 | H    | TRP | X | 178 | 30.675 | 55.476 | 44.986 | 0.00 | 0.00 |
| ATOM | 2737 | CA   | TRP | X | 178 | 30.747 | 57.222 | 43.698 | 0.00 | 0.00 |

|      |      |      |     |   |     |        |        |        |      |      |
|------|------|------|-----|---|-----|--------|--------|--------|------|------|
| ATOM | 2738 | HA   | TRP | X | 178 | 30.018 | 57.986 | 43.967 | 0.00 | 0.00 |
| ATOM | 2739 | CB   | TRP | X | 178 | 32.080 | 57.505 | 44.414 | 0.00 | 0.00 |
| ATOM | 2740 | HB2  | TRP | X | 178 | 32.024 | 57.505 | 45.503 | 0.00 | 0.00 |
| ATOM | 2741 | HB3  | TRP | X | 178 | 32.854 | 56.765 | 44.211 | 0.00 | 0.00 |
| ATOM | 2742 | CG   | TRP | X | 178 | 32.742 | 58.845 | 44.010 | 0.00 | 0.00 |
| ATOM | 2743 | CD1  | TRP | X | 178 | 32.643 | 59.991 | 44.676 | 0.00 | 0.00 |
| ATOM | 2744 | HD1  | TRP | X | 178 | 32.263 | 60.081 | 45.683 | 0.00 | 0.00 |
| ATOM | 2745 | NE1  | TRP | X | 178 | 33.189 | 61.018 | 43.937 | 0.00 | 0.00 |
| ATOM | 2746 | HE1  | TRP | X | 178 | 33.247 | 61.968 | 44.278 | 0.00 | 0.00 |
| ATOM | 2747 | CE2  | TRP | X | 178 | 33.745 | 60.613 | 42.757 | 0.00 | 0.00 |
| ATOM | 2748 | CZ2  | TRP | X | 178 | 34.516 | 61.271 | 41.770 | 0.00 | 0.00 |
| ATOM | 2749 | HZ2  | TRP | X | 178 | 34.695 | 62.336 | 41.770 | 0.00 | 0.00 |
| ATOM | 2750 | CH2  | TRP | X | 178 | 35.036 | 60.423 | 40.774 | 0.00 | 0.00 |
| ATOM | 2751 | HH2  | TRP | X | 178 | 35.731 | 60.778 | 40.027 | 0.00 | 0.00 |
| ATOM | 2752 | CZ3  | TRP | X | 178 | 34.594 | 59.066 | 40.653 | 0.00 | 0.00 |
| ATOM | 2753 | HZ3  | TRP | X | 178 | 35.006 | 58.420 | 39.891 | 0.00 | 0.00 |
| ATOM | 2754 | CE3  | TRP | X | 178 | 33.875 | 58.413 | 41.676 | 0.00 | 0.00 |
| ATOM | 2755 | HE3  | TRP | X | 178 | 33.866 | 57.334 | 41.716 | 0.00 | 0.00 |
| ATOM | 2756 | CD2  | TRP | X | 178 | 33.437 | 59.208 | 42.780 | 0.00 | 0.00 |
| ATOM | 2757 | C    | TRP | X | 178 | 30.900 | 57.166 | 42.140 | 0.00 | 0.00 |
| ATOM | 2758 | O    | TRP | X | 178 | 30.575 | 58.248 | 41.553 | 0.00 | 0.00 |
| ATOM | 2759 | N    | VAL | X | 179 | 31.391 | 56.075 | 41.569 | 0.00 | 0.00 |
| ATOM | 2760 | H    | VAL | X | 179 | 31.768 | 55.342 | 42.154 | 0.00 | 0.00 |
| ATOM | 2761 | CA   | VAL | X | 179 | 31.424 | 55.939 | 40.112 | 0.00 | 0.00 |
| ATOM | 2762 | HA   | VAL | X | 179 | 32.109 | 56.661 | 39.668 | 0.00 | 0.00 |
| ATOM | 2763 | CB   | VAL | X | 179 | 32.135 | 54.601 | 39.798 | 0.00 | 0.00 |
| ATOM | 2764 | HB   | VAL | X | 179 | 31.655 | 53.879 | 40.459 | 0.00 | 0.00 |
| ATOM | 2765 | CG1  | VAL | X | 179 | 32.028 | 54.192 | 38.313 | 0.00 | 0.00 |
| ATOM | 2766 | HG11 | VAL | X | 179 | 32.551 | 53.251 | 38.145 | 0.00 | 0.00 |
| ATOM | 2767 | HG12 | VAL | X | 179 | 30.995 | 54.129 | 37.974 | 0.00 | 0.00 |
| ATOM | 2768 | HG13 | VAL | X | 179 | 32.549 | 54.908 | 37.677 | 0.00 | 0.00 |
| ATOM | 2769 | CG2  | VAL | X | 179 | 33.613 | 54.606 | 40.304 | 0.00 | 0.00 |
| ATOM | 2770 | HG21 | VAL | X | 179 | 34.122 | 53.827 | 39.737 | 0.00 | 0.00 |
| ATOM | 2771 | HG22 | VAL | X | 179 | 34.035 | 55.601 | 40.161 | 0.00 | 0.00 |
| ATOM | 2772 | HG23 | VAL | X | 179 | 33.633 | 54.311 | 41.353 | 0.00 | 0.00 |
| ATOM | 2773 | C    | VAL | X | 179 | 30.020 | 56.078 | 39.482 | 0.00 | 0.00 |
| ATOM | 2774 | O    | VAL | X | 179 | 29.818 | 56.844 | 38.558 | 0.00 | 0.00 |
| ATOM | 2775 | N    | GLN | X | 180 | 28.984 | 55.384 | 40.099 | 0.00 | 0.00 |
| ATOM | 2776 | H    | GLN | X | 180 | 29.116 | 54.730 | 40.857 | 0.00 | 0.00 |
| ATOM | 2777 | CA   | GLN | X | 180 | 27.612 | 55.492 | 39.648 | 0.00 | 0.00 |
| ATOM | 2778 | HA   | GLN | X | 180 | 27.500 | 55.018 | 38.673 | 0.00 | 0.00 |
| ATOM | 2779 | CB   | GLN | X | 180 | 26.688 | 54.666 | 40.618 | 0.00 | 0.00 |
| ATOM | 2780 | HB2  | GLN | X | 180 | 26.967 | 54.771 | 41.666 | 0.00 | 0.00 |
| ATOM | 2781 | HB3  | GLN | X | 180 | 25.627 | 54.861 | 40.461 | 0.00 | 0.00 |
| ATOM | 2782 | CG   | GLN | X | 180 | 26.528 | 53.164 | 40.396 | 0.00 | 0.00 |
| ATOM | 2783 | HG2  | GLN | X | 180 | 27.442 | 52.677 | 40.737 | 0.00 | 0.00 |
| ATOM | 2784 | HG3  | GLN | X | 180 | 25.752 | 52.897 | 41.113 | 0.00 | 0.00 |
| ATOM | 2785 | CD   | GLN | X | 180 | 26.111 | 52.794 | 38.922 | 0.00 | 0.00 |
| ATOM | 2786 | OE1  | GLN | X | 180 | 24.935 | 52.900 | 38.465 | 0.00 | 0.00 |
| ATOM | 2787 | NE2  | GLN | X | 180 | 26.910 | 52.232 | 38.136 | 0.00 | 0.00 |
| ATOM | 2788 | HE21 | GLN | X | 180 | 26.592 | 52.214 | 37.177 | 0.00 | 0.00 |
| ATOM | 2789 | HE22 | GLN | X | 180 | 27.913 | 52.309 | 38.226 | 0.00 | 0.00 |
| ATOM | 2790 | C    | GLN | X | 180 | 27.130 | 56.998 | 39.605 | 0.00 | 0.00 |
| ATOM | 2791 | O    | GLN | X | 180 | 26.334 | 57.406 | 38.748 | 0.00 | 0.00 |
| ATOM | 2792 | N    | GLU | X | 181 | 27.640 | 57.815 | 40.564 | 0.00 | 0.00 |
| ATOM | 2793 | H    | GLU | X | 181 | 28.030 | 57.341 | 41.366 | 0.00 | 0.00 |
| ATOM | 2794 | CA   | GLU | X | 181 | 27.084 | 59.132 | 40.793 | 0.00 | 0.00 |
| ATOM | 2795 | HA   | GLU | X | 181 | 26.039 | 59.206 | 40.491 | 0.00 | 0.00 |
| ATOM | 2796 | CB   | GLU | X | 181 | 27.061 | 59.309 | 42.355 | 0.00 | 0.00 |
| ATOM | 2797 | HB2  | GLU | X | 181 | 26.586 | 58.465 | 42.856 | 0.00 | 0.00 |
| ATOM | 2798 | HB3  | GLU | X | 181 | 28.059 | 59.330 | 42.792 | 0.00 | 0.00 |
| ATOM | 2799 | CG   | GLU | X | 181 | 26.274 | 60.456 | 42.887 | 0.00 | 0.00 |
| ATOM | 2800 | HG2  | GLU | X | 181 | 26.519 | 61.413 | 42.426 | 0.00 | 0.00 |
| ATOM | 2801 | HG3  | GLU | X | 181 | 25.207 | 60.278 | 42.758 | 0.00 | 0.00 |
| ATOM | 2802 | CD   | GLU | X | 181 | 26.534 | 60.741 | 44.422 | 0.00 | 0.00 |
| ATOM | 2803 | OE1  | GLU | X | 181 | 27.633 | 61.169 | 44.921 | 0.00 | 0.00 |
| ATOM | 2804 | OE2  | GLU | X | 181 | 25.584 | 60.489 | 45.138 | 0.00 | 0.00 |
| ATOM | 2805 | C    | GLU | X | 181 | 27.900 | 60.268 | 40.192 | 0.00 | 0.00 |
| ATOM | 2806 | O    | GLU | X | 181 | 27.387 | 61.367 | 40.077 | 0.00 | 0.00 |
| ATOM | 2807 | N    | ASN | X | 182 | 29.049 | 59.907 | 39.636 | 0.00 | 0.00 |

|      |      |      |     |   |     |        |        |        |      |      |
|------|------|------|-----|---|-----|--------|--------|--------|------|------|
| ATOM | 2808 | H    | ASN | X | 182 | 29.480 | 59.027 | 39.880 | 0.00 | 0.00 |
| ATOM | 2809 | CA   | ASN | X | 182 | 30.044 | 60.951 | 39.376 | 0.00 | 0.00 |
| ATOM | 2810 | HA   | ASN | X | 182 | 29.503 | 61.889 | 39.255 | 0.00 | 0.00 |
| ATOM | 2811 | CB   | ASN | X | 182 | 31.035 | 61.180 | 40.595 | 0.00 | 0.00 |
| ATOM | 2812 | HB2  | ASN | X | 182 | 31.597 | 60.270 | 40.803 | 0.00 | 0.00 |
| ATOM | 2813 | HB3  | ASN | X | 182 | 31.810 | 61.918 | 40.390 | 0.00 | 0.00 |
| ATOM | 2814 | CG   | ASN | X | 182 | 30.247 | 61.651 | 41.807 | 0.00 | 0.00 |
| ATOM | 2815 | OD1  | ASN | X | 182 | 29.649 | 62.699 | 41.816 | 0.00 | 0.00 |
| ATOM | 2816 | ND2  | ASN | X | 182 | 30.235 | 60.862 | 42.899 | 0.00 | 0.00 |
| ATOM | 2817 | HD21 | ASN | X | 182 | 29.613 | 61.084 | 43.662 | 0.00 | 0.00 |
| ATOM | 2818 | HD22 | ASN | X | 182 | 30.696 | 59.963 | 42.890 | 0.00 | 0.00 |
| ATOM | 2819 | C    | ASN | X | 182 | 30.871 | 60.712 | 38.080 | 0.00 | 0.00 |
| ATOM | 2820 | O    | ASN | X | 182 | 31.237 | 61.663 | 37.506 | 0.00 | 0.00 |
| ATOM | 2821 | N    | VAL | X | 183 | 30.977 | 59.485 | 37.621 | 0.00 | 0.00 |
| ATOM | 2822 | H    | VAL | X | 183 | 30.601 | 58.770 | 38.227 | 0.00 | 0.00 |
| ATOM | 2823 | CA   | VAL | X | 183 | 31.870 | 59.034 | 36.542 | 0.00 | 0.00 |
| ATOM | 2824 | HA   | VAL | X | 183 | 32.896 | 59.334 | 36.753 | 0.00 | 0.00 |
| ATOM | 2825 | CB   | VAL | X | 183 | 32.112 | 57.496 | 36.446 | 0.00 | 0.00 |
| ATOM | 2826 | HB   | VAL | X | 183 | 32.151 | 57.208 | 37.497 | 0.00 | 0.00 |
| ATOM | 2827 | CG1  | VAL | X | 183 | 30.987 | 56.681 | 35.779 | 0.00 | 0.00 |
| ATOM | 2828 | HG11 | VAL | X | 183 | 30.004 | 56.952 | 36.163 | 0.00 | 0.00 |
| ATOM | 2829 | HG12 | VAL | X | 183 | 31.090 | 56.860 | 34.708 | 0.00 | 0.00 |
| ATOM | 2830 | HG13 | VAL | X | 183 | 31.175 | 55.637 | 36.029 | 0.00 | 0.00 |
| ATOM | 2831 | CG2  | VAL | X | 183 | 33.513 | 57.229 | 35.864 | 0.00 | 0.00 |
| ATOM | 2832 | HG21 | VAL | X | 183 | 33.783 | 56.184 | 36.019 | 0.00 | 0.00 |
| ATOM | 2833 | HG22 | VAL | X | 183 | 33.458 | 57.424 | 34.793 | 0.00 | 0.00 |
| ATOM | 2834 | HG23 | VAL | X | 183 | 34.247 | 57.904 | 36.303 | 0.00 | 0.00 |
| ATOM | 2835 | C    | VAL | X | 183 | 31.549 | 59.746 | 35.222 | 0.00 | 0.00 |
| ATOM | 2836 | O    | VAL | X | 183 | 32.506 | 60.107 | 34.551 | 0.00 | 0.00 |
| ATOM | 2837 | N    | ALA | X | 184 | 30.253 | 60.089 | 34.946 | 0.00 | 0.00 |
| ATOM | 2838 | H    | ALA | X | 184 | 29.562 | 59.788 | 35.618 | 0.00 | 0.00 |
| ATOM | 2839 | CA   | ALA | X | 184 | 29.815 | 60.918 | 33.730 | 0.00 | 0.00 |
| ATOM | 2840 | HA   | ALA | X | 184 | 30.135 | 60.493 | 32.779 | 0.00 | 0.00 |
| ATOM | 2841 | CB   | ALA | X | 184 | 28.319 | 60.929 | 33.790 | 0.00 | 0.00 |
| ATOM | 2842 | HB1  | ALA | X | 184 | 27.867 | 59.941 | 33.875 | 0.00 | 0.00 |
| ATOM | 2843 | HB2  | ALA | X | 184 | 28.047 | 61.443 | 34.711 | 0.00 | 0.00 |
| ATOM | 2844 | HB3  | ALA | X | 184 | 27.980 | 61.393 | 32.863 | 0.00 | 0.00 |
| ATOM | 2845 | C    | ALA | X | 184 | 30.357 | 62.419 | 33.790 | 0.00 | 0.00 |
| ATOM | 2846 | O    | ALA | X | 184 | 30.535 | 63.005 | 32.770 | 0.00 | 0.00 |
| ATOM | 2847 | N    | ALA | X | 185 | 30.772 | 62.981 | 34.945 | 0.00 | 0.00 |
| ATOM | 2848 | H    | ALA | X | 185 | 30.651 | 62.396 | 35.759 | 0.00 | 0.00 |
| ATOM | 2849 | CA   | ALA | X | 185 | 31.326 | 64.288 | 35.055 | 0.00 | 0.00 |
| ATOM | 2850 | HA   | ALA | X | 185 | 30.603 | 65.045 | 34.750 | 0.00 | 0.00 |
| ATOM | 2851 | CB   | ALA | X | 185 | 31.849 | 64.523 | 36.518 | 0.00 | 0.00 |
| ATOM | 2852 | HB1  | ALA | X | 185 | 32.348 | 65.487 | 36.620 | 0.00 | 0.00 |
| ATOM | 2853 | HB2  | ALA | X | 185 | 31.005 | 64.528 | 37.207 | 0.00 | 0.00 |
| ATOM | 2854 | HB3  | ALA | X | 185 | 32.612 | 63.789 | 36.778 | 0.00 | 0.00 |
| ATOM | 2855 | C    | ALA | X | 185 | 32.649 | 64.291 | 34.207 | 0.00 | 0.00 |
| ATOM | 2856 | O    | ALA | X | 185 | 32.860 | 65.237 | 33.469 | 0.00 | 0.00 |
| ATOM | 2857 | N    | PHE | X | 186 | 33.343 | 63.141 | 34.139 | 0.00 | 0.00 |
| ATOM | 2858 | H    | PHE | X | 186 | 33.006 | 62.385 | 34.718 | 0.00 | 0.00 |
| ATOM | 2859 | CA   | PHE | X | 186 | 34.618 | 62.859 | 33.504 | 0.00 | 0.00 |
| ATOM | 2860 | HA   | PHE | X | 186 | 35.093 | 63.839 | 33.456 | 0.00 | 0.00 |
| ATOM | 2861 | CB   | PHE | X | 186 | 35.469 | 61.899 | 34.361 | 0.00 | 0.00 |
| ATOM | 2862 | HB2  | PHE | X | 186 | 34.940 | 60.952 | 34.465 | 0.00 | 0.00 |
| ATOM | 2863 | HB3  | PHE | X | 186 | 36.387 | 61.742 | 33.795 | 0.00 | 0.00 |
| ATOM | 2864 | CG   | PHE | X | 186 | 35.807 | 62.448 | 35.700 | 0.00 | 0.00 |
| ATOM | 2865 | CD1  | PHE | X | 186 | 34.897 | 62.128 | 36.738 | 0.00 | 0.00 |
| ATOM | 2866 | HD1  | PHE | X | 186 | 34.048 | 61.497 | 36.523 | 0.00 | 0.00 |
| ATOM | 2867 | CE1  | PHE | X | 186 | 35.194 | 62.613 | 38.048 | 0.00 | 0.00 |
| ATOM | 2868 | HE1  | PHE | X | 186 | 34.501 | 62.244 | 38.789 | 0.00 | 0.00 |
| ATOM | 2869 | CZ   | PHE | X | 186 | 36.311 | 63.457 | 38.380 | 0.00 | 0.00 |
| ATOM | 2870 | HZ   | PHE | X | 186 | 36.452 | 63.863 | 39.371 | 0.00 | 0.00 |
| ATOM | 2871 | CE2  | PHE | X | 186 | 37.133 | 63.812 | 37.314 | 0.00 | 0.00 |
| ATOM | 2872 | HE2  | PHE | X | 186 | 38.045 | 64.359 | 37.502 | 0.00 | 0.00 |
| ATOM | 2873 | CD2  | PHE | X | 186 | 36.877 | 63.350 | 35.995 | 0.00 | 0.00 |
| ATOM | 2874 | HD2  | PHE | X | 186 | 37.492 | 63.611 | 35.146 | 0.00 | 0.00 |
| ATOM | 2875 | C    | PHE | X | 186 | 34.445 | 62.320 | 32.021 | 0.00 | 0.00 |
| ATOM | 2876 | O    | PHE | X | 186 | 35.479 | 62.082 | 31.396 | 0.00 | 0.00 |
| ATOM | 2877 | N    | GLY | X | 187 | 33.266 | 62.269 | 31.479 | 0.00 | 0.00 |

|      |      |      |     |   |     |        |        |        |      |      |
|------|------|------|-----|---|-----|--------|--------|--------|------|------|
| ATOM | 2878 | H    | GLY | X | 187 | 32.481 | 62.752 | 31.893 | 0.00 | 0.00 |
| ATOM | 2879 | CA   | GLY | X | 187 | 33.057 | 61.589 | 30.221 | 0.00 | 0.00 |
| ATOM | 2880 | HA2  | GLY | X | 187 | 32.227 | 62.082 | 29.819 | 0.00 | 0.00 |
| ATOM | 2881 | HA3  | GLY | X | 187 | 33.908 | 61.629 | 29.583 | 0.00 | 0.00 |
| ATOM | 2882 | C    | GLY | X | 187 | 32.745 | 60.168 | 30.334 | 0.00 | 0.00 |
| ATOM | 2883 | O    | GLY | X | 187 | 32.596 | 59.538 | 29.270 | 0.00 | 0.00 |
| ATOM | 2884 | N    | GLY | X | 188 | 32.631 | 59.616 | 31.540 | 0.00 | 0.00 |
| ATOM | 2885 | H    | GLY | X | 188 | 32.582 | 60.250 | 32.325 | 0.00 | 0.00 |
| ATOM | 2886 | CA   | GLY | X | 188 | 32.435 | 58.144 | 31.671 | 0.00 | 0.00 |
| ATOM | 2887 | HA2  | GLY | X | 188 | 33.041 | 57.633 | 30.921 | 0.00 | 0.00 |
| ATOM | 2888 | HA3  | GLY | X | 188 | 32.740 | 57.842 | 32.662 | 0.00 | 0.00 |
| ATOM | 2889 | C    | GLY | X | 188 | 31.015 | 57.698 | 31.534 | 0.00 | 0.00 |
| ATOM | 2890 | O    | GLY | X | 188 | 30.176 | 58.579 | 31.196 | 0.00 | 0.00 |
| ATOM | 2891 | N    | ASP | X | 189 | 30.645 | 56.459 | 31.742 | 0.00 | 0.00 |
| ATOM | 2892 | H    | ASP | X | 189 | 31.338 | 55.726 | 31.792 | 0.00 | 0.00 |
| ATOM | 2893 | CA   | ASP | X | 189 | 29.278 | 55.888 | 31.692 | 0.00 | 0.00 |
| ATOM | 2894 | HA   | ASP | X | 189 | 28.559 | 56.706 | 31.716 | 0.00 | 0.00 |
| ATOM | 2895 | CB   | ASP | X | 189 | 29.153 | 55.112 | 30.436 | 0.00 | 0.00 |
| ATOM | 2896 | HB2  | ASP | X | 189 | 29.604 | 55.705 | 29.641 | 0.00 | 0.00 |
| ATOM | 2897 | HB3  | ASP | X | 189 | 29.762 | 54.209 | 30.422 | 0.00 | 0.00 |
| ATOM | 2898 | CG   | ASP | X | 189 | 27.701 | 54.702 | 30.003 | 0.00 | 0.00 |
| ATOM | 2899 | OD1  | ASP | X | 189 | 27.393 | 54.254 | 28.894 | 0.00 | 0.00 |
| ATOM | 2900 | OD2  | ASP | X | 189 | 26.888 | 54.723 | 30.954 | 0.00 | 0.00 |
| ATOM | 2901 | C    | ASP | X | 189 | 28.935 | 55.022 | 32.907 | 0.00 | 0.00 |
| ATOM | 2902 | O    | ASP | X | 189 | 29.483 | 53.961 | 33.075 | 0.00 | 0.00 |
| ATOM | 2903 | N    | PRO | X | 190 | 28.093 | 55.401 | 33.860 | 0.00 | 0.00 |
| ATOM | 2904 | CD   | PRO | X | 190 | 27.337 | 56.632 | 33.869 | 0.00 | 0.00 |
| ATOM | 2905 | HD2  | PRO | X | 190 | 26.786 | 56.843 | 32.952 | 0.00 | 0.00 |
| ATOM | 2906 | HD3  | PRO | X | 190 | 28.010 | 57.467 | 34.066 | 0.00 | 0.00 |
| ATOM | 2907 | CG   | PRO | X | 190 | 26.340 | 56.593 | 34.991 | 0.00 | 0.00 |
| ATOM | 2908 | HG2  | PRO | X | 190 | 25.378 | 56.183 | 34.682 | 0.00 | 0.00 |
| ATOM | 2909 | HG3  | PRO | X | 190 | 26.171 | 57.562 | 35.462 | 0.00 | 0.00 |
| ATOM | 2910 | CB   | PRO | X | 190 | 27.059 | 55.613 | 35.915 | 0.00 | 0.00 |
| ATOM | 2911 | HB2  | PRO | X | 190 | 26.385 | 55.210 | 36.671 | 0.00 | 0.00 |
| ATOM | 2912 | HB3  | PRO | X | 190 | 27.774 | 56.264 | 36.419 | 0.00 | 0.00 |
| ATOM | 2913 | CA   | PRO | X | 190 | 27.721 | 54.670 | 35.016 | 0.00 | 0.00 |
| ATOM | 2914 | HA   | PRO | X | 190 | 28.552 | 54.178 | 35.523 | 0.00 | 0.00 |
| ATOM | 2915 | C    | PRO | X | 190 | 26.638 | 53.577 | 34.714 | 0.00 | 0.00 |
| ATOM | 2916 | O    | PRO | X | 190 | 26.322 | 52.764 | 35.568 | 0.00 | 0.00 |
| ATOM | 2917 | N    | THR | X | 191 | 26.095 | 53.507 | 33.506 | 0.00 | 0.00 |
| ATOM | 2918 | H    | THR | X | 191 | 26.397 | 54.148 | 32.785 | 0.00 | 0.00 |
| ATOM | 2919 | CA   | THR | X | 191 | 25.346 | 52.402 | 32.924 | 0.00 | 0.00 |
| ATOM | 2920 | HA   | THR | X | 191 | 24.794 | 51.918 | 33.729 | 0.00 | 0.00 |
| ATOM | 2921 | CB   | THR | X | 191 | 24.211 | 52.785 | 31.941 | 0.00 | 0.00 |
| ATOM | 2922 | HB   | THR | X | 191 | 23.566 | 51.917 | 31.809 | 0.00 | 0.00 |
| ATOM | 2923 | CG2  | THR | X | 191 | 23.353 | 53.930 | 32.488 | 0.00 | 0.00 |
| ATOM | 2924 | HG21 | THR | X | 191 | 22.375 | 54.012 | 32.015 | 0.00 | 0.00 |
| ATOM | 2925 | HG22 | THR | X | 191 | 23.276 | 53.877 | 33.574 | 0.00 | 0.00 |
| ATOM | 2926 | HG23 | THR | X | 191 | 23.855 | 54.878 | 32.294 | 0.00 | 0.00 |
| ATOM | 2927 | OG1  | THR | X | 191 | 24.629 | 53.290 | 30.708 | 0.00 | 0.00 |
| ATOM | 2928 | HG1  | THR | X | 191 | 25.400 | 53.840 | 30.862 | 0.00 | 0.00 |
| ATOM | 2929 | C    | THR | X | 191 | 26.197 | 51.388 | 32.183 | 0.00 | 0.00 |
| ATOM | 2930 | O    | THR | X | 191 | 25.621 | 50.431 | 31.629 | 0.00 | 0.00 |
| ATOM | 2931 | N    | SER | X | 192 | 27.522 | 51.558 | 31.995 | 0.00 | 0.00 |
| ATOM | 2932 | H    | SER | X | 192 | 27.843 | 52.459 | 32.319 | 0.00 | 0.00 |
| ATOM | 2933 | CA   | SER | X | 192 | 28.335 | 50.688 | 31.095 | 0.00 | 0.00 |
| ATOM | 2934 | HA   | SER | X | 192 | 27.895 | 49.701 | 30.954 | 0.00 | 0.00 |
| ATOM | 2935 | CB   | SER | X | 192 | 28.522 | 51.298 | 29.676 | 0.00 | 0.00 |
| ATOM | 2936 | HB2  | SER | X | 192 | 29.121 | 52.205 | 29.759 | 0.00 | 0.00 |
| ATOM | 2937 | HB3  | SER | X | 192 | 29.101 | 50.587 | 29.086 | 0.00 | 0.00 |
| ATOM | 2938 | OG   | SER | X | 192 | 27.362 | 51.641 | 28.998 | 0.00 | 0.00 |
| ATOM | 2939 | HG   | SER | X | 192 | 27.238 | 52.592 | 29.027 | 0.00 | 0.00 |
| ATOM | 2940 | C    | SER | X | 192 | 29.683 | 50.379 | 31.701 | 0.00 | 0.00 |
| ATOM | 2941 | O    | SER | X | 192 | 30.700 | 50.590 | 31.127 | 0.00 | 0.00 |
| ATOM | 2942 | N    | VAL | X | 193 | 29.654 | 49.897 | 33.021 | 0.00 | 0.00 |
| ATOM | 2943 | H    | VAL | X | 193 | 28.735 | 49.955 | 33.435 | 0.00 | 0.00 |
| ATOM | 2944 | CA   | VAL | X | 193 | 30.757 | 49.747 | 33.969 | 0.00 | 0.00 |
| ATOM | 2945 | HA   | VAL | X | 193 | 31.627 | 50.319 | 33.646 | 0.00 | 0.00 |
| ATOM | 2946 | CB   | VAL | X | 193 | 30.424 | 50.280 | 35.486 | 0.00 | 0.00 |
| ATOM | 2947 | HB   | VAL | X | 193 | 29.568 | 49.680 | 35.793 | 0.00 | 0.00 |



|      |      |      |     |   |     |        |        |        |      |      |
|------|------|------|-----|---|-----|--------|--------|--------|------|------|
| ATOM | 2948 | CG1  | VAL | X | 193 | 31.548 | 50.081 | 36.494 | 0.00 | 0.00 |
| ATOM | 2949 | HG11 | VAL | X | 193 | 31.407 | 50.636 | 37.421 | 0.00 | 0.00 |
| ATOM | 2950 | HG12 | VAL | X | 193 | 31.783 | 49.048 | 36.749 | 0.00 | 0.00 |
| ATOM | 2951 | HG13 | VAL | X | 193 | 32.488 | 50.397 | 36.041 | 0.00 | 0.00 |
| ATOM | 2952 | CG2  | VAL | X | 193 | 29.888 | 51.780 | 35.474 | 0.00 | 0.00 |
| ATOM | 2953 | HG21 | VAL | X | 193 | 29.224 | 51.862 | 34.613 | 0.00 | 0.00 |
| ATOM | 2954 | HG22 | VAL | X | 193 | 29.395 | 52.071 | 36.402 | 0.00 | 0.00 |
| ATOM | 2955 | HG23 | VAL | X | 193 | 30.731 | 52.421 | 35.220 | 0.00 | 0.00 |
| ATOM | 2956 | C    | VAL | X | 193 | 31.110 | 48.236 | 34.065 | 0.00 | 0.00 |
| ATOM | 2957 | O    | VAL | X | 193 | 30.262 | 47.381 | 34.180 | 0.00 | 0.00 |
| ATOM | 2958 | N    | THR | X | 194 | 32.421 | 47.884 | 34.093 | 0.00 | 0.00 |
| ATOM | 2959 | H    | THR | X | 194 | 33.087 | 48.644 | 34.091 | 0.00 | 0.00 |
| ATOM | 2960 | CA   | THR | X | 194 | 33.043 | 46.561 | 34.151 | 0.00 | 0.00 |
| ATOM | 2961 | HA   | THR | X | 194 | 32.316 | 45.798 | 34.430 | 0.00 | 0.00 |
| ATOM | 2962 | CB   | THR | X | 194 | 33.770 | 46.217 | 32.859 | 0.00 | 0.00 |
| ATOM | 2963 | HB   | THR | X | 194 | 34.261 | 47.103 | 32.454 | 0.00 | 0.00 |
| ATOM | 2964 | CG2  | THR | X | 194 | 34.783 | 45.082 | 32.912 | 0.00 | 0.00 |
| ATOM | 2965 | HG21 | THR | X | 194 | 35.652 | 45.267 | 33.544 | 0.00 | 0.00 |
| ATOM | 2966 | HG22 | THR | X | 194 | 34.384 | 44.212 | 33.433 | 0.00 | 0.00 |
| ATOM | 2967 | HG23 | THR | X | 194 | 35.057 | 44.724 | 31.920 | 0.00 | 0.00 |
| ATOM | 2968 | OG1  | THR | X | 194 | 32.907 | 45.680 | 31.915 | 0.00 | 0.00 |
| ATOM | 2969 | HG1  | THR | X | 194 | 32.525 | 46.396 | 31.401 | 0.00 | 0.00 |
| ATOM | 2970 | C    | THR | X | 194 | 34.111 | 46.697 | 35.309 | 0.00 | 0.00 |
| ATOM | 2971 | O    | THR | X | 194 | 34.900 | 47.670 | 35.338 | 0.00 | 0.00 |
| ATOM | 2972 | N    | LEU | X | 195 | 34.098 | 45.644 | 36.132 | 0.00 | 0.00 |
| ATOM | 2973 | H    | LEU | X | 195 | 33.337 | 45.012 | 35.929 | 0.00 | 0.00 |
| ATOM | 2974 | CA   | LEU | X | 195 | 35.041 | 45.318 | 37.164 | 0.00 | 0.00 |
| ATOM | 2975 | HA   | LEU | X | 195 | 35.400 | 46.226 | 37.649 | 0.00 | 0.00 |
| ATOM | 2976 | CB   | LEU | X | 195 | 34.390 | 44.497 | 38.287 | 0.00 | 0.00 |
| ATOM | 2977 | HB2  | LEU | X | 195 | 33.873 | 43.603 | 37.938 | 0.00 | 0.00 |
| ATOM | 2978 | HB3  | LEU | X | 195 | 35.203 | 44.125 | 38.909 | 0.00 | 0.00 |
| ATOM | 2979 | CG   | LEU | X | 195 | 33.437 | 45.368 | 39.156 | 0.00 | 0.00 |
| ATOM | 2980 | HG   | LEU | X | 195 | 32.629 | 45.697 | 38.502 | 0.00 | 0.00 |
| ATOM | 2981 | CD1  | LEU | X | 195 | 32.807 | 44.522 | 40.281 | 0.00 | 0.00 |
| ATOM | 2982 | HD11 | LEU | X | 195 | 32.000 | 45.124 | 40.700 | 0.00 | 0.00 |
| ATOM | 2983 | HD12 | LEU | X | 195 | 32.470 | 43.531 | 39.976 | 0.00 | 0.00 |
| ATOM | 2984 | HD13 | LEU | X | 195 | 33.520 | 44.332 | 41.083 | 0.00 | 0.00 |
| ATOM | 2985 | CD2  | LEU | X | 195 | 34.061 | 46.519 | 39.856 | 0.00 | 0.00 |
| ATOM | 2986 | HD21 | LEU | X | 195 | 34.298 | 47.336 | 39.175 | 0.00 | 0.00 |
| ATOM | 2987 | HD22 | LEU | X | 195 | 33.494 | 46.839 | 40.730 | 0.00 | 0.00 |
| ATOM | 2988 | HD23 | LEU | X | 195 | 35.024 | 46.119 | 40.175 | 0.00 | 0.00 |
| ATOM | 2989 | C    | LEU | X | 195 | 36.211 | 44.449 | 36.572 | 0.00 | 0.00 |
| ATOM | 2990 | O    | LEU | X | 195 | 35.977 | 43.452 | 35.890 | 0.00 | 0.00 |
| ATOM | 2991 | N    | PHE | X | 196 | 37.407 | 44.787 | 36.901 | 0.00 | 0.00 |
| ATOM | 2992 | H    | PHE | X | 196 | 37.505 | 45.706 | 37.309 | 0.00 | 0.00 |
| ATOM | 2993 | CA   | PHE | X | 196 | 38.541 | 43.873 | 36.619 | 0.00 | 0.00 |
| ATOM | 2994 | HA   | PHE | X | 196 | 38.272 | 42.822 | 36.516 | 0.00 | 0.00 |
| ATOM | 2995 | CB   | PHE | X | 196 | 39.225 | 44.102 | 35.207 | 0.00 | 0.00 |
| ATOM | 2996 | HB2  | PHE | X | 196 | 39.622 | 43.158 | 34.832 | 0.00 | 0.00 |
| ATOM | 2997 | HB3  | PHE | X | 196 | 38.302 | 44.180 | 34.632 | 0.00 | 0.00 |
| ATOM | 2998 | CG   | PHE | X | 196 | 40.166 | 45.315 | 34.977 | 0.00 | 0.00 |
| ATOM | 2999 | CD1  | PHE | X | 196 | 39.790 | 46.604 | 35.356 | 0.00 | 0.00 |
| ATOM | 3000 | HD1  | PHE | X | 196 | 38.776 | 46.732 | 35.704 | 0.00 | 0.00 |
| ATOM | 3001 | CE1  | PHE | X | 196 | 40.678 | 47.637 | 35.202 | 0.00 | 0.00 |
| ATOM | 3002 | HE1  | PHE | X | 196 | 40.309 | 48.627 | 35.424 | 0.00 | 0.00 |
| ATOM | 3003 | CZ   | PHE | X | 196 | 41.974 | 47.459 | 34.657 | 0.00 | 0.00 |
| ATOM | 3004 | HZ   | PHE | X | 196 | 42.639 | 48.303 | 34.556 | 0.00 | 0.00 |
| ATOM | 3005 | CE2  | PHE | X | 196 | 42.381 | 46.175 | 34.239 | 0.00 | 0.00 |
| ATOM | 3006 | HE2  | PHE | X | 196 | 43.361 | 46.031 | 33.809 | 0.00 | 0.00 |
| ATOM | 3007 | CD2  | PHE | X | 196 | 41.504 | 45.074 | 34.402 | 0.00 | 0.00 |
| ATOM | 3008 | HD2  | PHE | X | 196 | 41.817 | 44.076 | 34.135 | 0.00 | 0.00 |
| ATOM | 3009 | C    | PHE | X | 196 | 39.589 | 43.895 | 37.764 | 0.00 | 0.00 |
| ATOM | 3010 | O    | PHE | X | 196 | 39.474 | 44.727 | 38.619 | 0.00 | 0.00 |
| ATOM | 3011 | N    | GLY | X | 197 | 40.471 | 42.921 | 37.861 | 0.00 | 0.00 |
| ATOM | 3012 | H    | GLY | X | 197 | 40.392 | 42.222 | 37.136 | 0.00 | 0.00 |
| ATOM | 3013 | CA   | GLY | X | 197 | 41.452 | 42.812 | 38.919 | 0.00 | 0.00 |
| ATOM | 3014 | HA2  | GLY | X | 197 | 42.058 | 43.607 | 38.742 | 0.00 | 0.00 |
| ATOM | 3015 | HA3  | GLY | X | 197 | 40.982 | 42.965 | 39.915 | 0.00 | 0.00 |
| ATOM | 3016 | C    | GLY | X | 197 | 42.230 | 41.481 | 38.877 | 0.00 | 0.00 |
| ATOM | 3017 | O    | GLY | X | 197 | 41.856 | 40.498 | 38.277 | 0.00 | 0.00 |

|      |      |     |     |   |     |        |        |        |      |      |
|------|------|-----|-----|---|-----|--------|--------|--------|------|------|
| ATOM | 3018 | N   | GLU | X | 198 | 43.245 | 41.333 | 39.744 | 0.00 | 0.00 |
| ATOM | 3019 | H   | GLU | X | 198 | 43.233 | 42.120 | 40.378 | 0.00 | 0.00 |
| ATOM | 3020 | CA  | GLU | X | 198 | 44.194 | 40.211 | 39.858 | 0.00 | 0.00 |
| ATOM | 3021 | HA  | GLU | X | 198 | 43.919 | 39.376 | 39.214 | 0.00 | 0.00 |
| ATOM | 3022 | CB  | GLU | X | 198 | 45.646 | 40.461 | 39.555 | 0.00 | 0.00 |
| ATOM | 3023 | HB2 | GLU | X | 198 | 46.158 | 39.516 | 39.739 | 0.00 | 0.00 |
| ATOM | 3024 | HB3 | GLU | X | 198 | 45.687 | 40.813 | 38.524 | 0.00 | 0.00 |
| ATOM | 3025 | CG  | GLU | X | 198 | 46.371 | 41.563 | 40.371 | 0.00 | 0.00 |
| ATOM | 3026 | HG2 | GLU | X | 198 | 45.919 | 42.549 | 40.264 | 0.00 | 0.00 |
| ATOM | 3027 | HG3 | GLU | X | 198 | 46.261 | 41.247 | 41.408 | 0.00 | 0.00 |
| ATOM | 3028 | CD  | GLU | X | 198 | 47.860 | 41.522 | 39.832 | 0.00 | 0.00 |
| ATOM | 3029 | OE1 | GLU | X | 198 | 48.429 | 42.555 | 39.425 | 0.00 | 0.00 |
| ATOM | 3030 | OE2 | GLU | X | 198 | 48.563 | 40.493 | 40.001 | 0.00 | 0.00 |
| ATOM | 3031 | C   | GLU | X | 198 | 43.969 | 39.571 | 41.239 | 0.00 | 0.00 |
| ATOM | 3032 | O   | GLU | X | 198 | 43.903 | 40.317 | 42.216 | 0.00 | 0.00 |
| ATOM | 3033 | N   | XA1 | X | 199 | 43.890 | 38.218 | 41.420 | 0.00 | 0.00 |
| ATOM | 3034 | CA  | XA1 | X | 199 | 44.397 | 37.612 | 42.683 | 0.00 | 0.00 |
| ATOM | 3035 | C   | XA1 | X | 199 | 43.415 | 37.724 | 43.883 | 0.00 | 0.00 |
| ATOM | 3036 | O   | XA1 | X | 199 | 42.280 | 37.340 | 43.750 | 0.00 | 0.00 |
| ATOM | 3037 | CB  | XA1 | X | 199 | 45.789 | 38.236 | 43.100 | 0.00 | 0.00 |
| ATOM | 3038 | OG  | XA1 | X | 199 | 46.529 | 37.442 | 44.086 | 0.00 | 0.00 |
| ATOM | 3039 | P1  | XA1 | X | 199 | 47.526 | 38.162 | 45.106 | 0.00 | 0.00 |
| ATOM | 3040 | O1  | XA1 | X | 199 | 46.699 | 39.174 | 45.798 | 0.00 | 0.00 |
| ATOM | 3041 | O2  | XA1 | X | 199 | 48.826 | 38.595 | 44.527 | 0.00 | 0.00 |
| ATOM | 3042 | C1  | XA1 | X | 199 | 47.879 | 36.921 | 46.292 | 0.00 | 0.00 |
| ATOM | 3043 | H   | XA1 | X | 199 | 43.854 | 37.684 | 40.563 | 0.00 | 0.00 |
| ATOM | 3044 | HA  | XA1 | X | 199 | 44.571 | 36.546 | 42.537 | 0.00 | 0.00 |
| ATOM | 3045 | HB2 | XA1 | X | 199 | 46.430 | 38.238 | 42.215 | 0.00 | 0.00 |
| ATOM | 3046 | HB3 | XA1 | X | 199 | 45.712 | 39.285 | 43.398 | 0.00 | 0.00 |
| ATOM | 3047 | H11 | XA1 | X | 199 | 48.888 | 36.507 | 46.225 | 0.00 | 0.00 |
| ATOM | 3048 | H12 | XA1 | X | 199 | 47.758 | 37.325 | 47.299 | 0.00 | 0.00 |
| ATOM | 3049 | H13 | XA1 | X | 199 | 47.196 | 36.091 | 46.099 | 0.00 | 0.00 |
| ATOM | 3050 | N   | ALA | X | 200 | 43.802 | 38.276 | 45.048 | 0.00 | 0.00 |
| ATOM | 3051 | H   | ALA | X | 200 | 44.772 | 38.494 | 45.229 | 0.00 | 0.00 |
| ATOM | 3052 | CA  | ALA | X | 200 | 42.921 | 38.727 | 46.078 | 0.00 | 0.00 |
| ATOM | 3053 | HA  | ALA | X | 200 | 42.471 | 37.837 | 46.519 | 0.00 | 0.00 |
| ATOM | 3054 | CB  | ALA | X | 200 | 43.837 | 39.288 | 47.221 | 0.00 | 0.00 |
| ATOM | 3055 | HB1 | ALA | X | 200 | 44.735 | 38.698 | 47.401 | 0.00 | 0.00 |
| ATOM | 3056 | HB2 | ALA | X | 200 | 44.290 | 40.249 | 46.979 | 0.00 | 0.00 |
| ATOM | 3057 | HB3 | ALA | X | 200 | 43.328 | 39.383 | 48.181 | 0.00 | 0.00 |
| ATOM | 3058 | C   | ALA | X | 200 | 41.854 | 39.727 | 45.592 | 0.00 | 0.00 |
| ATOM | 3059 | O   | ALA | X | 200 | 40.715 | 39.811 | 46.046 | 0.00 | 0.00 |
| ATOM | 3060 | N   | GLY | X | 201 | 42.243 | 40.614 | 44.688 | 0.00 | 0.00 |
| ATOM | 3061 | H   | GLY | X | 201 | 43.237 | 40.651 | 44.509 | 0.00 | 0.00 |
| ATOM | 3062 | CA  | GLY | X | 201 | 41.408 | 41.656 | 44.078 | 0.00 | 0.00 |
| ATOM | 3063 | HA2 | GLY | X | 201 | 40.731 | 42.098 | 44.891 | 0.00 | 0.00 |
| ATOM | 3064 | HA3 | GLY | X | 201 | 41.982 | 42.399 | 43.645 | 0.00 | 0.00 |
| ATOM | 3065 | C   | GLY | X | 201 | 40.491 | 41.102 | 42.988 | 0.00 | 0.00 |
| ATOM | 3066 | O   | GLY | X | 201 | 39.341 | 41.479 | 42.989 | 0.00 | 0.00 |
| ATOM | 3067 | N   | ALA | X | 202 | 40.910 | 40.048 | 42.239 | 0.00 | 0.00 |
| ATOM | 3068 | H   | ALA | X | 202 | 41.858 | 39.726 | 42.374 | 0.00 | 0.00 |
| ATOM | 3069 | CA  | ALA | X | 202 | 39.998 | 39.288 | 41.380 | 0.00 | 0.00 |
| ATOM | 3070 | HA  | ALA | X | 202 | 39.427 | 39.903 | 40.684 | 0.00 | 0.00 |
| ATOM | 3071 | CB  | ALA | X | 202 | 40.816 | 38.156 | 40.631 | 0.00 | 0.00 |
| ATOM | 3072 | HB1 | ALA | X | 202 | 40.163 | 37.392 | 40.211 | 0.00 | 0.00 |
| ATOM | 3073 | HB2 | ALA | X | 202 | 41.504 | 38.548 | 39.881 | 0.00 | 0.00 |
| ATOM | 3074 | HB3 | ALA | X | 202 | 41.315 | 37.584 | 41.413 | 0.00 | 0.00 |
| ATOM | 3075 | C   | ALA | X | 202 | 38.999 | 38.608 | 42.309 | 0.00 | 0.00 |
| ATOM | 3076 | O   | ALA | X | 202 | 37.780 | 38.826 | 42.127 | 0.00 | 0.00 |
| ATOM | 3077 | N   | ALA | X | 203 | 39.470 | 37.925 | 43.414 | 0.00 | 0.00 |
| ATOM | 3078 | H   | ALA | X | 203 | 40.450 | 37.684 | 43.415 | 0.00 | 0.00 |
| ATOM | 3079 | CA  | ALA | X | 203 | 38.498 | 37.299 | 44.319 | 0.00 | 0.00 |
| ATOM | 3080 | HA  | ALA | X | 203 | 37.878 | 36.626 | 43.728 | 0.00 | 0.00 |
| ATOM | 3081 | CB  | ALA | X | 203 | 39.405 | 36.596 | 45.325 | 0.00 | 0.00 |
| ATOM | 3082 | HB1 | ALA | X | 203 | 39.897 | 35.749 | 44.848 | 0.00 | 0.00 |
| ATOM | 3083 | HB2 | ALA | X | 203 | 40.230 | 37.253 | 45.601 | 0.00 | 0.00 |
| ATOM | 3084 | HB3 | ALA | X | 203 | 38.902 | 36.256 | 46.230 | 0.00 | 0.00 |
| ATOM | 3085 | C   | ALA | X | 203 | 37.569 | 38.274 | 45.079 | 0.00 | 0.00 |
| ATOM | 3086 | O   | ALA | X | 203 | 36.407 | 37.986 | 45.469 | 0.00 | 0.00 |
| ATOM | 3087 | N   | SER | X | 204 | 38.060 | 39.511 | 45.315 | 0.00 | 0.00 |

|      |      |      |     |   |     |        |        |        |      |      |
|------|------|------|-----|---|-----|--------|--------|--------|------|------|
| ATOM | 3088 | H    | SER | X | 204 | 39.017 | 39.536 | 44.992 | 0.00 | 0.00 |
| ATOM | 3089 | CA   | SER | X | 204 | 37.227 | 40.567 | 45.716 | 0.00 | 0.00 |
| ATOM | 3090 | HA   | SER | X | 204 | 36.742 | 40.278 | 46.648 | 0.00 | 0.00 |
| ATOM | 3091 | CB   | SER | X | 204 | 38.020 | 41.807 | 46.029 | 0.00 | 0.00 |
| ATOM | 3092 | HB2  | SER | X | 204 | 38.585 | 42.239 | 45.202 | 0.00 | 0.00 |
| ATOM | 3093 | HB3  | SER | X | 204 | 37.356 | 42.622 | 46.318 | 0.00 | 0.00 |
| ATOM | 3094 | OG   | SER | X | 204 | 38.941 | 41.485 | 47.055 | 0.00 | 0.00 |
| ATOM | 3095 | HG   | SER | X | 204 | 39.497 | 40.795 | 46.686 | 0.00 | 0.00 |
| ATOM | 3096 | C    | SER | X | 204 | 36.145 | 41.013 | 44.669 | 0.00 | 0.00 |
| ATOM | 3097 | O    | SER | X | 204 | 35.076 | 41.284 | 45.162 | 0.00 | 0.00 |
| ATOM | 3098 | N    | VAL | X | 205 | 36.339 | 40.958 | 43.343 | 0.00 | 0.00 |
| ATOM | 3099 | H    | VAL | X | 205 | 37.262 | 40.623 | 43.104 | 0.00 | 0.00 |
| ATOM | 3100 | CA   | VAL | X | 205 | 35.318 | 41.218 | 42.284 | 0.00 | 0.00 |
| ATOM | 3101 | HA   | VAL | X | 205 | 34.894 | 42.196 | 42.510 | 0.00 | 0.00 |
| ATOM | 3102 | CB   | VAL | X | 205 | 35.901 | 41.252 | 40.840 | 0.00 | 0.00 |
| ATOM | 3103 | HB   | VAL | X | 205 | 36.532 | 40.384 | 40.651 | 0.00 | 0.00 |
| ATOM | 3104 | CG1  | VAL | X | 205 | 34.831 | 41.270 | 39.788 | 0.00 | 0.00 |
| ATOM | 3105 | HG11 | VAL | X | 205 | 34.197 | 40.384 | 39.788 | 0.00 | 0.00 |
| ATOM | 3106 | HG12 | VAL | X | 205 | 34.053 | 42.030 | 39.863 | 0.00 | 0.00 |
| ATOM | 3107 | HG13 | VAL | X | 205 | 35.388 | 41.458 | 38.870 | 0.00 | 0.00 |
| ATOM | 3108 | CG2  | VAL | X | 205 | 36.816 | 42.462 | 40.611 | 0.00 | 0.00 |
| ATOM | 3109 | HG21 | VAL | X | 205 | 37.547 | 42.536 | 41.417 | 0.00 | 0.00 |
| ATOM | 3110 | HG22 | VAL | X | 205 | 37.365 | 42.481 | 39.669 | 0.00 | 0.00 |
| ATOM | 3111 | HG23 | VAL | X | 205 | 36.212 | 43.368 | 40.641 | 0.00 | 0.00 |
| ATOM | 3112 | C    | VAL | X | 205 | 34.221 | 40.131 | 42.382 | 0.00 | 0.00 |
| ATOM | 3113 | O    | VAL | X | 205 | 33.038 | 40.469 | 42.287 | 0.00 | 0.00 |
| ATOM | 3114 | N    | GLY | X | 206 | 34.639 | 38.888 | 42.860 | 0.00 | 0.00 |
| ATOM | 3115 | H    | GLY | X | 206 | 35.619 | 38.654 | 42.793 | 0.00 | 0.00 |
| ATOM | 3116 | CA   | GLY | X | 206 | 33.707 | 37.822 | 43.203 | 0.00 | 0.00 |
| ATOM | 3117 | HA2  | GLY | X | 206 | 32.880 | 37.826 | 42.456 | 0.00 | 0.00 |
| ATOM | 3118 | HA3  | GLY | X | 206 | 34.321 | 36.900 | 43.220 | 0.00 | 0.00 |
| ATOM | 3119 | C    | GLY | X | 206 | 33.002 | 38.091 | 44.531 | 0.00 | 0.00 |
| ATOM | 3120 | O    | GLY | X | 206 | 31.846 | 37.729 | 44.624 | 0.00 | 0.00 |
| ATOM | 3121 | N    | MET | X | 207 | 33.581 | 38.753 | 45.491 | 0.00 | 0.00 |
| ATOM | 3122 | H    | MET | X | 207 | 34.545 | 39.036 | 45.383 | 0.00 | 0.00 |
| ATOM | 3123 | CA   | MET | X | 207 | 32.820 | 39.216 | 46.634 | 0.00 | 0.00 |
| ATOM | 3124 | HA   | MET | X | 207 | 32.127 | 38.430 | 46.934 | 0.00 | 0.00 |
| ATOM | 3125 | CB   | MET | X | 207 | 33.670 | 39.659 | 47.784 | 0.00 | 0.00 |
| ATOM | 3126 | HB2  | MET | X | 207 | 33.969 | 40.691 | 47.597 | 0.00 | 0.00 |
| ATOM | 3127 | HB3  | MET | X | 207 | 33.060 | 39.675 | 48.687 | 0.00 | 0.00 |
| ATOM | 3128 | CG   | MET | X | 207 | 34.827 | 38.680 | 48.182 | 0.00 | 0.00 |
| ATOM | 3129 | HG2  | MET | X | 207 | 35.519 | 38.725 | 47.341 | 0.00 | 0.00 |
| ATOM | 3130 | HG3  | MET | X | 207 | 35.319 | 38.955 | 49.115 | 0.00 | 0.00 |
| ATOM | 3131 | SD   | MET | X | 207 | 34.298 | 36.884 | 48.266 | 0.00 | 0.00 |
| ATOM | 3132 | CE   | MET | X | 207 | 35.874 | 35.974 | 48.283 | 0.00 | 0.00 |
| ATOM | 3133 | HE1  | MET | X | 207 | 36.605 | 36.544 | 47.711 | 0.00 | 0.00 |
| ATOM | 3134 | HE2  | MET | X | 207 | 36.269 | 35.893 | 49.296 | 0.00 | 0.00 |
| ATOM | 3135 | HE3  | MET | X | 207 | 35.785 | 34.968 | 47.873 | 0.00 | 0.00 |
| ATOM | 3136 | C    | MET | X | 207 | 31.807 | 40.369 | 46.137 | 0.00 | 0.00 |
| ATOM | 3137 | O    | MET | X | 207 | 30.661 | 40.568 | 46.552 | 0.00 | 0.00 |
| ATOM | 3138 | N    | HIE | X | 208 | 32.243 | 41.182 | 45.099 | 0.00 | 0.00 |
| ATOM | 3139 | H    | HIE | X | 208 | 33.231 | 41.184 | 44.887 | 0.00 | 0.00 |
| ATOM | 3140 | CA   | HIE | X | 208 | 31.280 | 42.141 | 44.514 | 0.00 | 0.00 |
| ATOM | 3141 | HA   | HIE | X | 208 | 30.725 | 42.651 | 45.302 | 0.00 | 0.00 |
| ATOM | 3142 | CB   | HIE | X | 208 | 32.049 | 43.298 | 43.846 | 0.00 | 0.00 |
| ATOM | 3143 | HB2  | HIE | X | 208 | 32.651 | 42.962 | 43.002 | 0.00 | 0.00 |
| ATOM | 3144 | HB3  | HIE | X | 208 | 31.300 | 43.924 | 43.362 | 0.00 | 0.00 |
| ATOM | 3145 | CG   | HIE | X | 208 | 32.698 | 44.197 | 44.796 | 0.00 | 0.00 |
| ATOM | 3146 | ND1  | HIE | X | 208 | 32.032 | 45.067 | 45.636 | 0.00 | 0.00 |
| ATOM | 3147 | CE1  | HIE | X | 208 | 32.971 | 45.543 | 46.457 | 0.00 | 0.00 |
| ATOM | 3148 | HE1  | HIE | X | 208 | 32.753 | 46.345 | 47.146 | 0.00 | 0.00 |
| ATOM | 3149 | NE2  | HIE | X | 208 | 34.200 | 45.177 | 46.061 | 0.00 | 0.00 |
| ATOM | 3150 | HE2  | HIE | X | 208 | 35.087 | 45.292 | 46.529 | 0.00 | 0.00 |
| ATOM | 3151 | CD2  | HIE | X | 208 | 34.050 | 44.268 | 45.070 | 0.00 | 0.00 |
| ATOM | 3152 | HD2  | HIE | X | 208 | 34.806 | 43.705 | 44.543 | 0.00 | 0.00 |
| ATOM | 3153 | C    | HIE | X | 208 | 30.207 | 41.554 | 43.667 | 0.00 | 0.00 |
| ATOM | 3154 | O    | HIE | X | 208 | 29.177 | 42.191 | 43.618 | 0.00 | 0.00 |
| ATOM | 3155 | N    | LEU | X | 209 | 30.363 | 40.366 | 43.039 | 0.00 | 0.00 |
| ATOM | 3156 | H    | LEU | X | 209 | 31.317 | 40.043 | 43.109 | 0.00 | 0.00 |
| ATOM | 3157 | CA   | LEU | X | 209 | 29.222 | 39.614 | 42.456 | 0.00 | 0.00 |

|      |      |      |     |   |     |        |        |        |      |      |
|------|------|------|-----|---|-----|--------|--------|--------|------|------|
| ATOM | 3158 | HA   | LEU | X | 209 | 28.476 | 40.259 | 41.993 | 0.00 | 0.00 |
| ATOM | 3159 | CB   | LEU | X | 209 | 29.723 | 38.429 | 41.545 | 0.00 | 0.00 |
| ATOM | 3160 | HB2  | LEU | X | 209 | 30.421 | 37.823 | 42.122 | 0.00 | 0.00 |
| ATOM | 3161 | HB3  | LEU | X | 209 | 28.878 | 37.783 | 41.310 | 0.00 | 0.00 |
| ATOM | 3162 | CG   | LEU | X | 209 | 30.470 | 38.841 | 40.174 | 0.00 | 0.00 |
| ATOM | 3163 | HG   | LEU | X | 209 | 31.267 | 39.532 | 40.448 | 0.00 | 0.00 |
| ATOM | 3164 | CD1  | LEU | X | 209 | 31.015 | 37.509 | 39.686 | 0.00 | 0.00 |
| ATOM | 3165 | HD11 | LEU | X | 209 | 30.259 | 36.725 | 39.657 | 0.00 | 0.00 |
| ATOM | 3166 | HD12 | LEU | X | 209 | 31.568 | 37.607 | 38.751 | 0.00 | 0.00 |
| ATOM | 3167 | HD13 | LEU | X | 209 | 31.723 | 37.132 | 40.424 | 0.00 | 0.00 |
| ATOM | 3168 | CD2  | LEU | X | 209 | 29.410 | 39.407 | 39.263 | 0.00 | 0.00 |
| ATOM | 3169 | HD21 | LEU | X | 209 | 28.610 | 38.692 | 39.071 | 0.00 | 0.00 |
| ATOM | 3170 | HD22 | LEU | X | 209 | 29.030 | 40.348 | 39.662 | 0.00 | 0.00 |
| ATOM | 3171 | HD23 | LEU | X | 209 | 29.812 | 39.598 | 38.269 | 0.00 | 0.00 |
| ATOM | 3172 | C    | LEU | X | 209 | 28.425 | 38.897 | 43.616 | 0.00 | 0.00 |
| ATOM | 3173 | O    | LEU | X | 209 | 27.243 | 38.769 | 43.428 | 0.00 | 0.00 |
| ATOM | 3174 | N    | LEU | X | 210 | 29.039 | 38.506 | 44.777 | 0.00 | 0.00 |
| ATOM | 3175 | H    | LEU | X | 210 | 30.045 | 38.591 | 44.746 | 0.00 | 0.00 |
| ATOM | 3176 | CA   | LEU | X | 210 | 28.431 | 37.590 | 45.753 | 0.00 | 0.00 |
| ATOM | 3177 | HA   | LEU | X | 210 | 27.868 | 36.836 | 45.203 | 0.00 | 0.00 |
| ATOM | 3178 | CB   | LEU | X | 210 | 29.488 | 36.755 | 46.420 | 0.00 | 0.00 |
| ATOM | 3179 | HB2  | LEU | X | 210 | 30.405 | 37.287 | 46.673 | 0.00 | 0.00 |
| ATOM | 3180 | HB3  | LEU | X | 210 | 29.067 | 36.258 | 47.294 | 0.00 | 0.00 |
| ATOM | 3181 | CG   | LEU | X | 210 | 29.877 | 35.562 | 45.507 | 0.00 | 0.00 |
| ATOM | 3182 | HG   | LEU | X | 210 | 30.032 | 35.905 | 44.485 | 0.00 | 0.00 |
| ATOM | 3183 | CD1  | LEU | X | 210 | 31.153 | 34.917 | 45.990 | 0.00 | 0.00 |
| ATOM | 3184 | HD11 | LEU | X | 210 | 30.991 | 34.538 | 46.999 | 0.00 | 0.00 |
| ATOM | 3185 | HD12 | LEU | X | 210 | 31.564 | 34.101 | 45.397 | 0.00 | 0.00 |
| ATOM | 3186 | HD13 | LEU | X | 210 | 31.966 | 35.643 | 45.966 | 0.00 | 0.00 |
| ATOM | 3187 | CD2  | LEU | X | 210 | 28.847 | 34.435 | 45.414 | 0.00 | 0.00 |
| ATOM | 3188 | HD21 | LEU | X | 210 | 28.009 | 34.781 | 44.810 | 0.00 | 0.00 |
| ATOM | 3189 | HD22 | LEU | X | 210 | 29.303 | 33.548 | 44.975 | 0.00 | 0.00 |
| ATOM | 3190 | HD23 | LEU | X | 210 | 28.406 | 34.233 | 46.391 | 0.00 | 0.00 |
| ATOM | 3191 | C    | LEU | X | 210 | 27.527 | 38.286 | 46.712 | 0.00 | 0.00 |
| ATOM | 3192 | O    | LEU | X | 210 | 26.369 | 37.908 | 46.968 | 0.00 | 0.00 |
| ATOM | 3193 | N    | SER | X | 211 | 28.028 | 39.356 | 47.327 | 0.00 | 0.00 |
| ATOM | 3194 | H    | SER | X | 211 | 28.893 | 39.703 | 46.937 | 0.00 | 0.00 |
| ATOM | 3195 | CA   | SER | X | 211 | 27.386 | 40.173 | 48.347 | 0.00 | 0.00 |
| ATOM | 3196 | HA   | SER | X | 211 | 26.960 | 39.547 | 49.131 | 0.00 | 0.00 |
| ATOM | 3197 | CB   | SER | X | 211 | 28.491 | 40.862 | 49.205 | 0.00 | 0.00 |
| ATOM | 3198 | HB2  | SER | X | 211 | 29.306 | 40.157 | 49.366 | 0.00 | 0.00 |
| ATOM | 3199 | HB3  | SER | X | 211 | 28.913 | 41.646 | 48.576 | 0.00 | 0.00 |
| ATOM | 3200 | OG   | SER | X | 211 | 27.994 | 41.421 | 50.439 | 0.00 | 0.00 |
| ATOM | 3201 | HG   | SER | X | 211 | 28.314 | 40.825 | 51.120 | 0.00 | 0.00 |
| ATOM | 3202 | C    | SER | X | 211 | 26.405 | 41.205 | 47.714 | 0.00 | 0.00 |
| ATOM | 3203 | O    | SER | X | 211 | 26.935 | 42.146 | 47.076 | 0.00 | 0.00 |
| ATOM | 3204 | N    | PRO | X | 212 | 25.071 | 41.077 | 47.922 | 0.00 | 0.00 |
| ATOM | 3205 | CD   | PRO | X | 212 | 24.502 | 40.074 | 48.797 | 0.00 | 0.00 |
| ATOM | 3206 | HD2  | PRO | X | 212 | 24.574 | 40.384 | 49.840 | 0.00 | 0.00 |
| ATOM | 3207 | HD3  | PRO | X | 212 | 25.000 | 39.107 | 48.727 | 0.00 | 0.00 |
| ATOM | 3208 | CG   | PRO | X | 212 | 23.023 | 40.019 | 48.265 | 0.00 | 0.00 |
| ATOM | 3209 | HG2  | PRO | X | 212 | 22.321 | 39.600 | 48.984 | 0.00 | 0.00 |
| ATOM | 3210 | HG3  | PRO | X | 212 | 22.981 | 39.414 | 47.359 | 0.00 | 0.00 |
| ATOM | 3211 | CB   | PRO | X | 212 | 22.695 | 41.538 | 47.947 | 0.00 | 0.00 |
| ATOM | 3212 | HB2  | PRO | X | 212 | 22.361 | 42.111 | 48.812 | 0.00 | 0.00 |
| ATOM | 3213 | HB3  | PRO | X | 212 | 21.923 | 41.599 | 47.180 | 0.00 | 0.00 |
| ATOM | 3214 | CA   | PRO | X | 212 | 24.042 | 41.906 | 47.294 | 0.00 | 0.00 |
| ATOM | 3215 | HA   | PRO | X | 212 | 24.106 | 41.437 | 46.312 | 0.00 | 0.00 |
| ATOM | 3216 | C    | PRO | X | 212 | 24.149 | 43.425 | 47.093 | 0.00 | 0.00 |
| ATOM | 3217 | O    | PRO | X | 212 | 23.947 | 43.777 | 45.900 | 0.00 | 0.00 |
| ATOM | 3218 | N    | PRO | X | 213 | 24.423 | 44.256 | 48.088 | 0.00 | 0.00 |
| ATOM | 3219 | CD   | PRO | X | 213 | 24.611 | 43.800 | 49.470 | 0.00 | 0.00 |
| ATOM | 3220 | HD2  | PRO | X | 213 | 25.634 | 43.472 | 49.659 | 0.00 | 0.00 |
| ATOM | 3221 | HD3  | PRO | X | 213 | 23.987 | 42.942 | 49.720 | 0.00 | 0.00 |
| ATOM | 3222 | CG   | PRO | X | 213 | 24.258 | 45.036 | 50.334 | 0.00 | 0.00 |
| ATOM | 3223 | HG2  | PRO | X | 213 | 24.871 | 45.112 | 51.232 | 0.00 | 0.00 |
| ATOM | 3224 | HG3  | PRO | X | 213 | 23.197 | 45.121 | 50.566 | 0.00 | 0.00 |
| ATOM | 3225 | CB   | PRO | X | 213 | 24.579 | 46.239 | 49.464 | 0.00 | 0.00 |
| ATOM | 3226 | HB2  | PRO | X | 213 | 25.574 | 46.605 | 49.715 | 0.00 | 0.00 |
| ATOM | 3227 | HB3  | PRO | X | 213 | 23.831 | 46.977 | 49.753 | 0.00 | 0.00 |

|      |      |      |     |   |     |        |        |        |      |      |
|------|------|------|-----|---|-----|--------|--------|--------|------|------|
| ATOM | 3228 | CA   | PRO | X | 213 | 24.538 | 45.705 | 47.999 | 0.00 | 0.00 |
| ATOM | 3229 | HA   | PRO | X | 213 | 23.615 | 46.024 | 47.514 | 0.00 | 0.00 |
| ATOM | 3230 | C    | PRO | X | 213 | 25.676 | 46.170 | 47.170 | 0.00 | 0.00 |
| ATOM | 3231 | O    | PRO | X | 213 | 25.779 | 47.359 | 46.999 | 0.00 | 0.00 |
| ATOM | 3232 | N    | SER | X | 214 | 26.435 | 45.358 | 46.544 | 0.00 | 0.00 |
| ATOM | 3233 | H    | SER | X | 214 | 26.343 | 44.357 | 46.642 | 0.00 | 0.00 |
| ATOM | 3234 | CA   | SER | X | 214 | 27.520 | 45.717 | 45.543 | 0.00 | 0.00 |
| ATOM | 3235 | HA   | SER | X | 214 | 27.805 | 46.759 | 45.689 | 0.00 | 0.00 |
| ATOM | 3236 | CB   | SER | X | 214 | 28.775 | 44.824 | 45.748 | 0.00 | 0.00 |
| ATOM | 3237 | HB2  | SER | X | 214 | 28.517 | 43.771 | 45.632 | 0.00 | 0.00 |
| ATOM | 3238 | HB3  | SER | X | 214 | 29.337 | 45.073 | 44.848 | 0.00 | 0.00 |
| ATOM | 3239 | OG   | SER | X | 214 | 29.515 | 45.162 | 46.853 | 0.00 | 0.00 |
| ATOM | 3240 | HG   | SER | X | 214 | 30.387 | 45.083 | 46.460 | 0.00 | 0.00 |
| ATOM | 3241 | C    | SER | X | 214 | 27.033 | 45.546 | 44.111 | 0.00 | 0.00 |
| ATOM | 3242 | O    | SER | X | 214 | 27.695 | 46.151 | 43.223 | 0.00 | 0.00 |
| ATOM | 3243 | N    | ARG | X | 215 | 25.947 | 44.826 | 43.802 | 0.00 | 0.00 |
| ATOM | 3244 | H    | ARG | X | 215 | 25.435 | 44.484 | 44.602 | 0.00 | 0.00 |
| ATOM | 3245 | CA   | ARG | X | 215 | 25.645 | 44.268 | 42.472 | 0.00 | 0.00 |
| ATOM | 3246 | HA   | ARG | X | 215 | 26.596 | 43.865 | 42.123 | 0.00 | 0.00 |
| ATOM | 3247 | CB   | ARG | X | 215 | 24.702 | 43.092 | 42.567 | 0.00 | 0.00 |
| ATOM | 3248 | HB2  | ARG | X | 215 | 23.774 | 43.388 | 43.056 | 0.00 | 0.00 |
| ATOM | 3249 | HB3  | ARG | X | 215 | 24.495 | 42.891 | 41.516 | 0.00 | 0.00 |
| ATOM | 3250 | CG   | ARG | X | 215 | 25.232 | 41.837 | 43.391 | 0.00 | 0.00 |
| ATOM | 3251 | HG2  | ARG | X | 215 | 26.163 | 41.406 | 43.023 | 0.00 | 0.00 |
| ATOM | 3252 | HG3  | ARG | X | 215 | 25.383 | 42.116 | 44.434 | 0.00 | 0.00 |
| ATOM | 3253 | CD   | ARG | X | 215 | 24.049 | 40.800 | 43.383 | 0.00 | 0.00 |
| ATOM | 3254 | HD2  | ARG | X | 215 | 23.149 | 41.251 | 43.800 | 0.00 | 0.00 |
| ATOM | 3255 | HD3  | ARG | X | 215 | 23.831 | 40.572 | 42.339 | 0.00 | 0.00 |
| ATOM | 3256 | NE   | ARG | X | 215 | 24.465 | 39.561 | 43.996 | 0.00 | 0.00 |
| ATOM | 3257 | HE   | ARG | X | 215 | 25.440 | 39.356 | 44.164 | 0.00 | 0.00 |
| ATOM | 3258 | CZ   | ARG | X | 215 | 23.572 | 38.700 | 44.508 | 0.00 | 0.00 |
| ATOM | 3259 | NH1  | ARG | X | 215 | 22.264 | 38.832 | 44.452 | 0.00 | 0.00 |
| ATOM | 3260 | HH11 | ARG | X | 215 | 21.904 | 39.583 | 43.881 | 0.00 | 0.00 |
| ATOM | 3261 | HH12 | ARG | X | 215 | 21.561 | 38.193 | 44.795 | 0.00 | 0.00 |
| ATOM | 3262 | NH2  | ARG | X | 215 | 24.051 | 37.648 | 45.203 | 0.00 | 0.00 |
| ATOM | 3263 | HH21 | ARG | X | 215 | 25.014 | 37.544 | 45.488 | 0.00 | 0.00 |
| ATOM | 3264 | HH22 | ARG | X | 215 | 23.359 | 36.970 | 45.489 | 0.00 | 0.00 |
| ATOM | 3265 | C    | ARG | X | 215 | 25.134 | 45.272 | 41.485 | 0.00 | 0.00 |
| ATOM | 3266 | O    | ARG | X | 215 | 25.503 | 45.094 | 40.354 | 0.00 | 0.00 |
| ATOM | 3267 | N    | GLY | X | 216 | 24.359 | 46.250 | 41.903 | 0.00 | 0.00 |
| ATOM | 3268 | H    | GLY | X | 216 | 24.195 | 46.205 | 42.898 | 0.00 | 0.00 |
| ATOM | 3269 | CA   | GLY | X | 216 | 23.691 | 47.266 | 41.117 | 0.00 | 0.00 |
| ATOM | 3270 | HA2  | GLY | X | 216 | 23.444 | 46.894 | 40.094 | 0.00 | 0.00 |
| ATOM | 3271 | HA3  | GLY | X | 216 | 22.806 | 47.721 | 41.639 | 0.00 | 0.00 |
| ATOM | 3272 | C    | GLY | X | 216 | 24.686 | 48.378 | 40.850 | 0.00 | 0.00 |
| ATOM | 3273 | O    | GLY | X | 216 | 24.230 | 49.356 | 40.209 | 0.00 | 0.00 |
| ATOM | 3274 | N    | LEU | X | 217 | 25.935 | 48.312 | 41.280 | 0.00 | 0.00 |
| ATOM | 3275 | H    | LEU | X | 217 | 26.111 | 47.619 | 41.994 | 0.00 | 0.00 |
| ATOM | 3276 | CA   | LEU | X | 217 | 26.938 | 49.290 | 41.020 | 0.00 | 0.00 |
| ATOM | 3277 | HA   | LEU | X | 217 | 26.461 | 50.214 | 40.694 | 0.00 | 0.00 |
| ATOM | 3278 | CB   | LEU | X | 217 | 27.752 | 49.464 | 42.347 | 0.00 | 0.00 |
| ATOM | 3279 | HB2  | LEU | X | 217 | 28.511 | 48.682 | 42.369 | 0.00 | 0.00 |
| ATOM | 3280 | HB3  | LEU | X | 217 | 28.490 | 50.263 | 42.289 | 0.00 | 0.00 |
| ATOM | 3281 | CG   | LEU | X | 217 | 26.967 | 49.640 | 43.706 | 0.00 | 0.00 |
| ATOM | 3282 | HG   | LEU | X | 217 | 26.287 | 48.801 | 43.850 | 0.00 | 0.00 |
| ATOM | 3283 | CD1  | LEU | X | 217 | 27.852 | 49.670 | 44.915 | 0.00 | 0.00 |
| ATOM | 3284 | HD11 | LEU | X | 217 | 27.184 | 49.724 | 45.774 | 0.00 | 0.00 |
| ATOM | 3285 | HD12 | LEU | X | 217 | 28.437 | 48.755 | 45.009 | 0.00 | 0.00 |
| ATOM | 3286 | HD13 | LEU | X | 217 | 28.413 | 50.604 | 44.877 | 0.00 | 0.00 |
| ATOM | 3287 | CD2  | LEU | X | 217 | 26.125 | 50.976 | 43.633 | 0.00 | 0.00 |
| ATOM | 3288 | HD21 | LEU | X | 217 | 25.345 | 50.869 | 42.879 | 0.00 | 0.00 |
| ATOM | 3289 | HD22 | LEU | X | 217 | 25.662 | 51.174 | 44.600 | 0.00 | 0.00 |
| ATOM | 3290 | HD23 | LEU | X | 217 | 26.788 | 51.785 | 43.326 | 0.00 | 0.00 |
| ATOM | 3291 | C    | LEU | X | 217 | 27.808 | 48.961 | 39.815 | 0.00 | 0.00 |
| ATOM | 3292 | O    | LEU | X | 217 | 28.809 | 49.668 | 39.633 | 0.00 | 0.00 |
| ATOM | 3293 | N    | PHE | X | 218 | 27.628 | 47.908 | 39.067 | 0.00 | 0.00 |
| ATOM | 3294 | H    | PHE | X | 218 | 26.838 | 47.284 | 39.143 | 0.00 | 0.00 |
| ATOM | 3295 | CA   | PHE | X | 218 | 28.413 | 47.554 | 37.917 | 0.00 | 0.00 |
| ATOM | 3296 | HA   | PHE | X | 218 | 28.426 | 48.455 | 37.304 | 0.00 | 0.00 |
| ATOM | 3297 | CB   | PHE | X | 218 | 29.764 | 46.899 | 38.195 | 0.00 | 0.00 |

|      |      |      |     |   |     |        |        |        |      |      |
|------|------|------|-----|---|-----|--------|--------|--------|------|------|
| ATOM | 3298 | HB2  | PHE | X | 218 | 30.277 | 46.862 | 37.234 | 0.00 | 0.00 |
| ATOM | 3299 | HB3  | PHE | X | 218 | 30.277 | 47.551 | 38.902 | 0.00 | 0.00 |
| ATOM | 3300 | CG   | PHE | X | 218 | 29.674 | 45.536 | 38.940 | 0.00 | 0.00 |
| ATOM | 3301 | CD1  | PHE | X | 218 | 29.419 | 45.535 | 40.308 | 0.00 | 0.00 |
| ATOM | 3302 | HD1  | PHE | X | 218 | 29.260 | 46.421 | 40.905 | 0.00 | 0.00 |
| ATOM | 3303 | CE1  | PHE | X | 218 | 29.431 | 44.308 | 40.930 | 0.00 | 0.00 |
| ATOM | 3304 | HE1  | PHE | X | 218 | 29.156 | 44.265 | 41.974 | 0.00 | 0.00 |
| ATOM | 3305 | CZ   | PHE | X | 218 | 29.764 | 43.112 | 40.239 | 0.00 | 0.00 |
| ATOM | 3306 | HZ   | PHE | X | 218 | 29.891 | 42.167 | 40.745 | 0.00 | 0.00 |
| ATOM | 3307 | CE2  | PHE | X | 218 | 30.064 | 43.135 | 38.871 | 0.00 | 0.00 |
| ATOM | 3308 | HE2  | PHE | X | 218 | 30.405 | 42.228 | 38.393 | 0.00 | 0.00 |
| ATOM | 3309 | CD2  | PHE | X | 218 | 30.057 | 44.386 | 38.223 | 0.00 | 0.00 |
| ATOM | 3310 | HD2  | PHE | X | 218 | 30.297 | 44.521 | 37.179 | 0.00 | 0.00 |
| ATOM | 3311 | C    | PHE | X | 218 | 27.574 | 46.573 | 37.053 | 0.00 | 0.00 |
| ATOM | 3312 | O    | PHE | X | 218 | 26.580 | 45.967 | 37.475 | 0.00 | 0.00 |
| ATOM | 3313 | N    | HIE | X | 219 | 28.000 | 46.312 | 35.823 | 0.00 | 0.00 |
| ATOM | 3314 | H    | HIE | X | 219 | 28.841 | 46.704 | 35.425 | 0.00 | 0.00 |
| ATOM | 3315 | CA   | HIE | X | 219 | 27.238 | 45.486 | 34.811 | 0.00 | 0.00 |
| ATOM | 3316 | HA   | HIE | X | 219 | 26.259 | 45.286 | 35.246 | 0.00 | 0.00 |
| ATOM | 3317 | CB   | HIE | X | 219 | 26.962 | 46.407 | 33.592 | 0.00 | 0.00 |
| ATOM | 3318 | HB2  | HIE | X | 219 | 27.899 | 46.677 | 33.105 | 0.00 | 0.00 |
| ATOM | 3319 | HB3  | HIE | X | 219 | 26.287 | 45.948 | 32.869 | 0.00 | 0.00 |
| ATOM | 3320 | CG   | HIE | X | 219 | 26.399 | 47.686 | 34.085 | 0.00 | 0.00 |
| ATOM | 3321 | ND1  | HIE | X | 219 | 27.152 | 48.735 | 34.525 | 0.00 | 0.00 |
| ATOM | 3322 | CE1  | HIE | X | 219 | 26.252 | 49.590 | 34.990 | 0.00 | 0.00 |
| ATOM | 3323 | HE1  | HIE | X | 219 | 26.424 | 50.513 | 35.523 | 0.00 | 0.00 |
| ATOM | 3324 | NE2  | HIE | X | 219 | 25.002 | 49.202 | 34.816 | 0.00 | 0.00 |
| ATOM | 3325 | HE2  | HIE | X | 219 | 24.134 | 49.654 | 35.067 | 0.00 | 0.00 |
| ATOM | 3326 | CD2  | HIE | X | 219 | 25.062 | 48.024 | 34.204 | 0.00 | 0.00 |
| ATOM | 3327 | HD2  | HIE | X | 219 | 24.201 | 47.467 | 33.865 | 0.00 | 0.00 |
| ATOM | 3328 | C    | HIE | X | 219 | 27.986 | 44.160 | 34.459 | 0.00 | 0.00 |
| ATOM | 3329 | O    | HIE | X | 219 | 27.368 | 43.152 | 34.272 | 0.00 | 0.00 |
| ATOM | 3330 | N    | ARG | X | 220 | 29.312 | 44.096 | 34.470 | 0.00 | 0.00 |
| ATOM | 3331 | H    | ARG | X | 220 | 29.827 | 44.963 | 34.412 | 0.00 | 0.00 |
| ATOM | 3332 | CA   | ARG | X | 220 | 30.078 | 42.854 | 34.048 | 0.00 | 0.00 |
| ATOM | 3333 | HA   | ARG | X | 220 | 29.471 | 41.977 | 34.274 | 0.00 | 0.00 |
| ATOM | 3334 | CB   | ARG | X | 220 | 30.377 | 42.918 | 32.567 | 0.00 | 0.00 |
| ATOM | 3335 | HB2  | ARG | X | 220 | 31.076 | 43.739 | 32.408 | 0.00 | 0.00 |
| ATOM | 3336 | HB3  | ARG | X | 220 | 30.669 | 41.925 | 32.224 | 0.00 | 0.00 |
| ATOM | 3337 | CG   | ARG | X | 220 | 29.178 | 43.292 | 31.634 | 0.00 | 0.00 |
| ATOM | 3338 | HG2  | ARG | X | 220 | 28.290 | 42.683 | 31.806 | 0.00 | 0.00 |
| ATOM | 3339 | HG3  | ARG | X | 220 | 28.918 | 44.346 | 31.732 | 0.00 | 0.00 |
| ATOM | 3340 | CD   | ARG | X | 220 | 29.575 | 43.168 | 30.152 | 0.00 | 0.00 |
| ATOM | 3341 | HD2  | ARG | X | 220 | 30.449 | 43.708 | 29.786 | 0.00 | 0.00 |
| ATOM | 3342 | HD3  | ARG | X | 220 | 29.749 | 42.100 | 30.019 | 0.00 | 0.00 |
| ATOM | 3343 | NE   | ARG | X | 220 | 28.487 | 43.608 | 29.291 | 0.00 | 0.00 |
| ATOM | 3344 | HE   | ARG | X | 220 | 27.917 | 42.856 | 28.930 | 0.00 | 0.00 |
| ATOM | 3345 | CZ   | ARG | X | 220 | 28.225 | 44.873 | 28.968 | 0.00 | 0.00 |
| ATOM | 3346 | NH1  | ARG | X | 220 | 28.846 | 45.936 | 29.545 | 0.00 | 0.00 |
| ATOM | 3347 | HH11 | ARG | X | 220 | 29.689 | 45.777 | 30.079 | 0.00 | 0.00 |
| ATOM | 3348 | HH12 | ARG | X | 220 | 28.498 | 46.856 | 29.317 | 0.00 | 0.00 |
| ATOM | 3349 | NH2  | ARG | X | 220 | 27.330 | 45.069 | 28.089 | 0.00 | 0.00 |
| ATOM | 3350 | HH21 | ARG | X | 220 | 26.983 | 44.267 | 27.583 | 0.00 | 0.00 |
| ATOM | 3351 | HH22 | ARG | X | 220 | 26.977 | 46.000 | 27.918 | 0.00 | 0.00 |
| ATOM | 3352 | C    | ARG | X | 220 | 31.446 | 42.777 | 34.713 | 0.00 | 0.00 |
| ATOM | 3353 | O    | ARG | X | 220 | 31.942 | 43.733 | 35.360 | 0.00 | 0.00 |
| ATOM | 3354 | N    | ALA | X | 221 | 32.088 | 41.619 | 34.676 | 0.00 | 0.00 |
| ATOM | 3355 | H    | ALA | X | 221 | 31.674 | 40.860 | 34.153 | 0.00 | 0.00 |
| ATOM | 3356 | CA   | ALA | X | 221 | 33.281 | 41.299 | 35.495 | 0.00 | 0.00 |
| ATOM | 3357 | HA   | ALA | X | 221 | 33.776 | 42.175 | 35.914 | 0.00 | 0.00 |
| ATOM | 3358 | CB   | ALA | X | 221 | 32.642 | 40.381 | 36.572 | 0.00 | 0.00 |
| ATOM | 3359 | HB1  | ALA | X | 221 | 31.887 | 41.039 | 37.003 | 0.00 | 0.00 |
| ATOM | 3360 | HB2  | ALA | X | 221 | 32.129 | 39.464 | 36.280 | 0.00 | 0.00 |
| ATOM | 3361 | HB3  | ALA | X | 221 | 33.298 | 40.028 | 37.368 | 0.00 | 0.00 |
| ATOM | 3362 | C    | ALA | X | 221 | 34.461 | 40.528 | 34.852 | 0.00 | 0.00 |
| ATOM | 3363 | O    | ALA | X | 221 | 34.231 | 39.790 | 33.921 | 0.00 | 0.00 |
| ATOM | 3364 | N    | VAL | X | 222 | 35.648 | 40.794 | 35.317 | 0.00 | 0.00 |
| ATOM | 3365 | H    | VAL | X | 222 | 35.835 | 41.608 | 35.885 | 0.00 | 0.00 |
| ATOM | 3366 | CA   | VAL | X | 222 | 36.817 | 40.034 | 35.004 | 0.00 | 0.00 |
| ATOM | 3367 | HA   | VAL | X | 222 | 36.604 | 39.070 | 34.540 | 0.00 | 0.00 |

|      |      |      |     |   |     |        |        |        |      |      |
|------|------|------|-----|---|-----|--------|--------|--------|------|------|
| ATOM | 3368 | CB   | VAL | X | 222 | 37.691 | 40.830 | 33.968 | 0.00 | 0.00 |
| ATOM | 3369 | HB   | VAL | X | 222 | 38.096 | 41.708 | 34.473 | 0.00 | 0.00 |
| ATOM | 3370 | CG1  | VAL | X | 222 | 38.908 | 40.132 | 33.421 | 0.00 | 0.00 |
| ATOM | 3371 | HG11 | VAL | X | 222 | 39.604 | 40.019 | 34.252 | 0.00 | 0.00 |
| ATOM | 3372 | HG12 | VAL | X | 222 | 38.682 | 39.190 | 32.922 | 0.00 | 0.00 |
| ATOM | 3373 | HG13 | VAL | X | 222 | 39.524 | 40.751 | 32.769 | 0.00 | 0.00 |
| ATOM | 3374 | CG2  | VAL | X | 222 | 36.919 | 41.434 | 32.802 | 0.00 | 0.00 |
| ATOM | 3375 | HG21 | VAL | X | 222 | 37.467 | 42.244 | 32.320 | 0.00 | 0.00 |
| ATOM | 3376 | HG22 | VAL | X | 222 | 36.850 | 40.634 | 32.066 | 0.00 | 0.00 |
| ATOM | 3377 | HG23 | VAL | X | 222 | 35.952 | 41.832 | 33.111 | 0.00 | 0.00 |
| ATOM | 3378 | C    | VAL | X | 222 | 37.642 | 39.628 | 36.263 | 0.00 | 0.00 |
| ATOM | 3379 | O    | VAL | X | 222 | 37.783 | 40.323 | 37.254 | 0.00 | 0.00 |
| ATOM | 3380 | N    | LEU | X | 223 | 38.175 | 38.378 | 36.173 | 0.00 | 0.00 |
| ATOM | 3381 | H    | LEU | X | 223 | 37.954 | 37.741 | 35.421 | 0.00 | 0.00 |
| ATOM | 3382 | CA   | LEU | X | 223 | 38.868 | 37.766 | 37.360 | 0.00 | 0.00 |
| ATOM | 3383 | HA   | LEU | X | 223 | 39.129 | 38.584 | 38.033 | 0.00 | 0.00 |
| ATOM | 3384 | CB   | LEU | X | 223 | 37.903 | 36.684 | 37.999 | 0.00 | 0.00 |
| ATOM | 3385 | HB2  | LEU | X | 223 | 37.290 | 36.361 | 37.158 | 0.00 | 0.00 |
| ATOM | 3386 | HB3  | LEU | X | 223 | 38.263 | 35.724 | 38.370 | 0.00 | 0.00 |
| ATOM | 3387 | CG   | LEU | X | 223 | 36.971 | 37.283 | 39.112 | 0.00 | 0.00 |
| ATOM | 3388 | HG   | LEU | X | 223 | 37.413 | 38.249 | 39.353 | 0.00 | 0.00 |
| ATOM | 3389 | CD1  | LEU | X | 223 | 35.514 | 37.419 | 38.546 | 0.00 | 0.00 |
| ATOM | 3390 | HD11 | LEU | X | 223 | 34.852 | 37.783 | 39.332 | 0.00 | 0.00 |
| ATOM | 3391 | HD12 | LEU | X | 223 | 35.416 | 38.016 | 37.639 | 0.00 | 0.00 |
| ATOM | 3392 | HD13 | LEU | X | 223 | 35.171 | 36.424 | 38.260 | 0.00 | 0.00 |
| ATOM | 3393 | CD2  | LEU | X | 223 | 36.867 | 36.377 | 40.376 | 0.00 | 0.00 |
| ATOM | 3394 | HD21 | LEU | X | 223 | 36.349 | 36.959 | 41.138 | 0.00 | 0.00 |
| ATOM | 3395 | HD22 | LEU | X | 223 | 36.375 | 35.446 | 40.093 | 0.00 | 0.00 |
| ATOM | 3396 | HD23 | LEU | X | 223 | 37.863 | 36.161 | 40.763 | 0.00 | 0.00 |
| ATOM | 3397 | C    | LEU | X | 223 | 40.114 | 37.085 | 36.891 | 0.00 | 0.00 |
| ATOM | 3398 | O    | LEU | X | 223 | 40.024 | 35.967 | 36.360 | 0.00 | 0.00 |
| ATOM | 3399 | N    | GLN | X | 224 | 41.309 | 37.575 | 37.277 | 0.00 | 0.00 |
| ATOM | 3400 | H    | GLN | X | 224 | 41.420 | 38.349 | 37.917 | 0.00 | 0.00 |
| ATOM | 3401 | CA   | GLN | X | 224 | 42.599 | 37.245 | 36.641 | 0.00 | 0.00 |
| ATOM | 3402 | HA   | GLN | X | 224 | 42.348 | 36.609 | 35.792 | 0.00 | 0.00 |
| ATOM | 3403 | CB   | GLN | X | 224 | 43.256 | 38.560 | 36.082 | 0.00 | 0.00 |
| ATOM | 3404 | HB2  | GLN | X | 224 | 43.534 | 39.276 | 36.855 | 0.00 | 0.00 |
| ATOM | 3405 | HB3  | GLN | X | 224 | 44.191 | 38.324 | 35.573 | 0.00 | 0.00 |
| ATOM | 3406 | CG   | GLN | X | 224 | 42.356 | 39.313 | 35.093 | 0.00 | 0.00 |
| ATOM | 3407 | HG2  | GLN | X | 224 | 41.954 | 38.630 | 34.345 | 0.00 | 0.00 |
| ATOM | 3408 | HG3  | GLN | X | 224 | 41.478 | 39.761 | 35.558 | 0.00 | 0.00 |
| ATOM | 3409 | CD   | GLN | X | 224 | 43.110 | 40.403 | 34.324 | 0.00 | 0.00 |
| ATOM | 3410 | OE1  | GLN | X | 224 | 42.496 | 41.508 | 34.166 | 0.00 | 0.00 |
| ATOM | 3411 | NE2  | GLN | X | 224 | 44.280 | 40.180 | 33.794 | 0.00 | 0.00 |
| ATOM | 3412 | HE21 | GLN | X | 224 | 44.778 | 40.997 | 33.468 | 0.00 | 0.00 |
| ATOM | 3413 | HE22 | GLN | X | 224 | 44.763 | 39.304 | 33.933 | 0.00 | 0.00 |
| ATOM | 3414 | C    | GLN | X | 224 | 43.492 | 36.546 | 37.647 | 0.00 | 0.00 |
| ATOM | 3415 | O    | GLN | X | 224 | 43.889 | 37.293 | 38.614 | 0.00 | 0.00 |
| ATOM | 3416 | N    | SER | X | 225 | 43.832 | 35.313 | 37.492 | 0.00 | 0.00 |
| ATOM | 3417 | H    | SER | X | 225 | 43.404 | 34.760 | 36.763 | 0.00 | 0.00 |
| ATOM | 3418 | CA   | SER | X | 225 | 44.796 | 34.598 | 38.444 | 0.00 | 0.00 |
| ATOM | 3419 | HA   | SER | X | 225 | 44.835 | 33.562 | 38.106 | 0.00 | 0.00 |
| ATOM | 3420 | CB   | SER | X | 225 | 46.192 | 35.097 | 38.545 | 0.00 | 0.00 |
| ATOM | 3421 | HB2  | SER | X | 225 | 46.197 | 36.161 | 38.780 | 0.00 | 0.00 |
| ATOM | 3422 | HB3  | SER | X | 225 | 46.692 | 34.532 | 39.331 | 0.00 | 0.00 |
| ATOM | 3423 | OG   | SER | X | 225 | 47.014 | 34.870 | 37.437 | 0.00 | 0.00 |
| ATOM | 3424 | HG   | SER | X | 225 | 47.286 | 33.950 | 37.484 | 0.00 | 0.00 |
| ATOM | 3425 | C    | SER | X | 225 | 44.223 | 34.524 | 39.892 | 0.00 | 0.00 |
| ATOM | 3426 | O    | SER | X | 225 | 44.873 | 34.537 | 40.938 | 0.00 | 0.00 |
| ATOM | 3427 | N    | GLY | X | 226 | 42.891 | 34.424 | 39.964 | 0.00 | 0.00 |
| ATOM | 3428 | H    | GLY | X | 226 | 42.390 | 34.532 | 39.093 | 0.00 | 0.00 |
| ATOM | 3429 | CA   | GLY | X | 226 | 42.123 | 34.051 | 41.174 | 0.00 | 0.00 |
| ATOM | 3430 | HA2  | GLY | X | 226 | 42.373 | 33.110 | 41.671 | 0.00 | 0.00 |
| ATOM | 3431 | HA3  | GLY | X | 226 | 42.388 | 34.745 | 41.882 | 0.00 | 0.00 |
| ATOM | 3432 | C    | GLY | X | 226 | 40.626 | 33.949 | 41.146 | 0.00 | 0.00 |
| ATOM | 3433 | O    | GLY | X | 226 | 40.016 | 34.377 | 40.140 | 0.00 | 0.00 |
| ATOM | 3434 | N    | ALA | X | 227 | 40.008 | 33.544 | 42.193 | 0.00 | 0.00 |
| ATOM | 3435 | H    | ALA | X | 227 | 40.612 | 33.236 | 42.942 | 0.00 | 0.00 |
| ATOM | 3436 | CA   | ALA | X | 227 | 38.526 | 33.311 | 42.280 | 0.00 | 0.00 |
| ATOM | 3437 | HA   | ALA | X | 227 | 37.891 | 33.948 | 41.664 | 0.00 | 0.00 |

|      |      |      |     |   |     |        |        |        |      |      |
|------|------|------|-----|---|-----|--------|--------|--------|------|------|
| ATOM | 3438 | CB   | ALA | X | 227 | 38.276 | 31.886 | 41.864 | 0.00 | 0.00 |
| ATOM | 3439 | HB1  | ALA | X | 227 | 38.885 | 31.781 | 40.966 | 0.00 | 0.00 |
| ATOM | 3440 | HB2  | ALA | X | 227 | 38.663 | 31.138 | 42.556 | 0.00 | 0.00 |
| ATOM | 3441 | HB3  | ALA | X | 227 | 37.205 | 31.818 | 41.678 | 0.00 | 0.00 |
| ATOM | 3442 | C    | ALA | X | 227 | 38.076 | 33.597 | 43.749 | 0.00 | 0.00 |
| ATOM | 3443 | O    | ALA | X | 227 | 38.866 | 33.455 | 44.696 | 0.00 | 0.00 |
| ATOM | 3444 | N    | PRO | X | 228 | 36.763 | 33.797 | 43.979 | 0.00 | 0.00 |
| ATOM | 3445 | CD   | PRO | X | 228 | 35.727 | 33.949 | 42.946 | 0.00 | 0.00 |
| ATOM | 3446 | HD2  | PRO | X | 228 | 35.827 | 33.337 | 42.049 | 0.00 | 0.00 |
| ATOM | 3447 | HD3  | PRO | X | 228 | 35.727 | 34.922 | 42.456 | 0.00 | 0.00 |
| ATOM | 3448 | CG   | PRO | X | 228 | 34.357 | 33.898 | 43.697 | 0.00 | 0.00 |
| ATOM | 3449 | HG2  | PRO | X | 228 | 33.979 | 32.883 | 43.811 | 0.00 | 0.00 |
| ATOM | 3450 | HG3  | PRO | X | 228 | 33.769 | 34.589 | 43.093 | 0.00 | 0.00 |
| ATOM | 3451 | CB   | PRO | X | 228 | 34.784 | 34.493 | 45.045 | 0.00 | 0.00 |
| ATOM | 3452 | HB2  | PRO | X | 228 | 34.034 | 34.239 | 45.794 | 0.00 | 0.00 |
| ATOM | 3453 | HB3  | PRO | X | 228 | 34.804 | 35.577 | 45.152 | 0.00 | 0.00 |
| ATOM | 3454 | CA   | PRO | X | 228 | 36.189 | 33.976 | 45.295 | 0.00 | 0.00 |
| ATOM | 3455 | HA   | PRO | X | 228 | 36.743 | 34.689 | 45.904 | 0.00 | 0.00 |
| ATOM | 3456 | C    | PRO | X | 228 | 36.166 | 32.637 | 46.071 | 0.00 | 0.00 |
| ATOM | 3457 | O    | PRO | X | 228 | 36.445 | 32.642 | 47.270 | 0.00 | 0.00 |
| ATOM | 3458 | N    | ASN | X | 229 | 35.935 | 31.520 | 45.404 | 0.00 | 0.00 |
| ATOM | 3459 | H    | ASN | X | 229 | 35.679 | 31.594 | 44.429 | 0.00 | 0.00 |
| ATOM | 3460 | CA   | ASN | X | 229 | 35.963 | 30.204 | 45.931 | 0.00 | 0.00 |
| ATOM | 3461 | HA   | ASN | X | 229 | 35.639 | 30.201 | 46.972 | 0.00 | 0.00 |
| ATOM | 3462 | CB   | ASN | X | 229 | 34.944 | 29.336 | 45.206 | 0.00 | 0.00 |
| ATOM | 3463 | HB2  | ASN | X | 229 | 34.940 | 28.334 | 45.633 | 0.00 | 0.00 |
| ATOM | 3464 | HB3  | ASN | X | 229 | 33.936 | 29.726 | 45.352 | 0.00 | 0.00 |
| ATOM | 3465 | CG   | ASN | X | 229 | 35.138 | 29.298 | 43.728 | 0.00 | 0.00 |
| ATOM | 3466 | OD1  | ASN | X | 229 | 34.660 | 30.142 | 43.003 | 0.00 | 0.00 |
| ATOM | 3467 | ND2  | ASN | X | 229 | 35.703 | 28.285 | 43.188 | 0.00 | 0.00 |
| ATOM | 3468 | HD21 | ASN | X | 229 | 35.740 | 28.157 | 42.187 | 0.00 | 0.00 |
| ATOM | 3469 | HD22 | ASN | X | 229 | 36.144 | 27.585 | 43.768 | 0.00 | 0.00 |
| ATOM | 3470 | C    | ASN | X | 229 | 37.358 | 29.536 | 46.025 | 0.00 | 0.00 |
| ATOM | 3471 | O    | ASN | X | 229 | 37.488 | 28.365 | 45.807 | 0.00 | 0.00 |
| ATOM | 3472 | N    | GLY | X | 230 | 38.393 | 30.372 | 46.224 | 0.00 | 0.00 |
| ATOM | 3473 | H    | GLY | X | 230 | 38.144 | 31.343 | 46.348 | 0.00 | 0.00 |
| ATOM | 3474 | CA   | GLY | X | 230 | 39.848 | 30.037 | 46.484 | 0.00 | 0.00 |
| ATOM | 3475 | HA2  | GLY | X | 230 | 39.998 | 29.118 | 45.829 | 0.00 | 0.00 |
| ATOM | 3476 | HA3  | GLY | X | 230 | 40.455 | 30.969 | 46.264 | 0.00 | 0.00 |
| ATOM | 3477 | C    | GLY | X | 230 | 39.958 | 29.625 | 47.965 | 0.00 | 0.00 |
| ATOM | 3478 | O    | GLY | X | 230 | 39.418 | 30.275 | 48.862 | 0.00 | 0.00 |
| ATOM | 3479 | N    | PRO | X | 231 | 40.644 | 28.472 | 48.248 | 0.00 | 0.00 |
| ATOM | 3480 | CD   | PRO | X | 231 | 41.617 | 27.794 | 47.432 | 0.00 | 0.00 |
| ATOM | 3481 | HD2  | PRO | X | 231 | 42.227 | 28.528 | 46.905 | 0.00 | 0.00 |
| ATOM | 3482 | HD3  | PRO | X | 231 | 41.304 | 27.131 | 46.626 | 0.00 | 0.00 |
| ATOM | 3483 | CG   | PRO | X | 231 | 42.506 | 27.019 | 48.502 | 0.00 | 0.00 |
| ATOM | 3484 | HG2  | PRO | X | 231 | 43.325 | 27.684 | 48.776 | 0.00 | 0.00 |
| ATOM | 3485 | HG3  | PRO | X | 231 | 42.960 | 26.120 | 48.087 | 0.00 | 0.00 |
| ATOM | 3486 | CB   | PRO | X | 231 | 41.661 | 26.769 | 49.791 | 0.00 | 0.00 |
| ATOM | 3487 | HB2  | PRO | X | 231 | 42.327 | 26.786 | 50.653 | 0.00 | 0.00 |
| ATOM | 3488 | HB3  | PRO | X | 231 | 41.067 | 25.863 | 49.666 | 0.00 | 0.00 |
| ATOM | 3489 | CA   | PRO | X | 231 | 40.730 | 27.980 | 49.675 | 0.00 | 0.00 |
| ATOM | 3490 | HA   | PRO | X | 231 | 39.769 | 27.606 | 50.028 | 0.00 | 0.00 |
| ATOM | 3491 | C    | PRO | X | 231 | 41.258 | 29.157 | 50.599 | 0.00 | 0.00 |
| ATOM | 3492 | O    | PRO | X | 231 | 40.514 | 29.567 | 51.468 | 0.00 | 0.00 |
| ATOM | 3493 | N    | TRP | X | 232 | 42.318 | 29.854 | 50.272 | 0.00 | 0.00 |
| ATOM | 3494 | H    | TRP | X | 232 | 42.809 | 29.517 | 49.456 | 0.00 | 0.00 |
| ATOM | 3495 | CA   | TRP | X | 232 | 42.847 | 30.982 | 50.966 | 0.00 | 0.00 |
| ATOM | 3496 | HA   | TRP | X | 232 | 42.950 | 30.676 | 52.007 | 0.00 | 0.00 |
| ATOM | 3497 | CB   | TRP | X | 232 | 44.219 | 31.300 | 50.334 | 0.00 | 0.00 |
| ATOM | 3498 | HB2  | TRP | X | 232 | 44.575 | 32.188 | 50.857 | 0.00 | 0.00 |
| ATOM | 3499 | HB3  | TRP | X | 232 | 44.891 | 30.448 | 50.433 | 0.00 | 0.00 |
| ATOM | 3500 | CG   | TRP | X | 232 | 43.993 | 31.558 | 48.860 | 0.00 | 0.00 |
| ATOM | 3501 | CD1  | TRP | X | 232 | 44.135 | 30.614 | 47.914 | 0.00 | 0.00 |
| ATOM | 3502 | HD1  | TRP | X | 232 | 44.459 | 29.601 | 48.105 | 0.00 | 0.00 |
| ATOM | 3503 | NE1  | TRP | X | 232 | 43.903 | 31.217 | 46.711 | 0.00 | 0.00 |
| ATOM | 3504 | HE1  | TRP | X | 232 | 44.180 | 30.762 | 45.852 | 0.00 | 0.00 |
| ATOM | 3505 | CE2  | TRP | X | 232 | 43.561 | 32.535 | 46.721 | 0.00 | 0.00 |
| ATOM | 3506 | CZ2  | TRP | X | 232 | 43.192 | 33.486 | 45.780 | 0.00 | 0.00 |
| ATOM | 3507 | HZ2  | TRP | X | 232 | 43.191 | 33.301 | 44.716 | 0.00 | 0.00 |



|      |      |      |     |   |     |        |        |        |      |      |
|------|------|------|-----|---|-----|--------|--------|--------|------|------|
| ATOM | 3508 | CH2  | TRP | X | 232 | 42.910 | 34.784 | 46.265 | 0.00 | 0.00 |
| ATOM | 3509 | HH2  | TRP | X | 232 | 42.789 | 35.567 | 45.532 | 0.00 | 0.00 |
| ATOM | 3510 | CZ3  | TRP | X | 232 | 43.106 | 35.096 | 47.596 | 0.00 | 0.00 |
| ATOM | 3511 | HZ3  | TRP | X | 232 | 42.907 | 36.098 | 47.946 | 0.00 | 0.00 |
| ATOM | 3512 | CE3  | TRP | X | 232 | 43.478 | 34.124 | 48.533 | 0.00 | 0.00 |
| ATOM | 3513 | HE3  | TRP | X | 232 | 43.501 | 34.378 | 49.582 | 0.00 | 0.00 |
| ATOM | 3514 | CD2  | TRP | X | 232 | 43.619 | 32.813 | 48.155 | 0.00 | 0.00 |
| ATOM | 3515 | C    | TRP | X | 232 | 41.968 | 32.295 | 50.968 | 0.00 | 0.00 |
| ATOM | 3516 | O    | TRP | X | 232 | 42.162 | 33.211 | 51.783 | 0.00 | 0.00 |
| ATOM | 3517 | N    | ALA | X | 233 | 40.960 | 32.387 | 50.126 | 0.00 | 0.00 |
| ATOM | 3518 | H    | ALA | X | 233 | 40.773 | 31.599 | 49.523 | 0.00 | 0.00 |
| ATOM | 3519 | CA   | ALA | X | 233 | 40.282 | 33.720 | 49.775 | 0.00 | 0.00 |
| ATOM | 3520 | HA   | ALA | X | 233 | 40.982 | 34.555 | 49.767 | 0.00 | 0.00 |
| ATOM | 3521 | CB   | ALA | X | 233 | 39.757 | 33.533 | 48.416 | 0.00 | 0.00 |
| ATOM | 3522 | HB1  | ALA | X | 233 | 39.203 | 32.607 | 48.261 | 0.00 | 0.00 |
| ATOM | 3523 | HB2  | ALA | X | 233 | 39.252 | 34.433 | 48.064 | 0.00 | 0.00 |
| ATOM | 3524 | HB3  | ALA | X | 233 | 40.607 | 33.484 | 47.737 | 0.00 | 0.00 |
| ATOM | 3525 | C    | ALA | X | 233 | 39.293 | 34.127 | 50.873 | 0.00 | 0.00 |
| ATOM | 3526 | O    | ALA | X | 233 | 38.448 | 34.997 | 50.672 | 0.00 | 0.00 |
| ATOM | 3527 | N    | THR | X | 234 | 39.347 | 33.543 | 52.075 | 0.00 | 0.00 |
| ATOM | 3528 | H    | THR | X | 234 | 40.074 | 32.855 | 52.213 | 0.00 | 0.00 |
| ATOM | 3529 | CA   | THR | X | 234 | 38.250 | 33.646 | 53.162 | 0.00 | 0.00 |
| ATOM | 3530 | HA   | THR | X | 234 | 37.955 | 34.674 | 53.373 | 0.00 | 0.00 |
| ATOM | 3531 | CB   | THR | X | 234 | 37.016 | 32.869 | 52.558 | 0.00 | 0.00 |
| ATOM | 3532 | HB   | THR | X | 234 | 37.442 | 32.055 | 51.971 | 0.00 | 0.00 |
| ATOM | 3533 | CG2  | THR | X | 234 | 36.072 | 32.314 | 53.568 | 0.00 | 0.00 |
| ATOM | 3534 | HG21 | THR | X | 234 | 36.533 | 31.536 | 54.177 | 0.00 | 0.00 |
| ATOM | 3535 | HG22 | THR | X | 234 | 35.757 | 33.100 | 54.254 | 0.00 | 0.00 |
| ATOM | 3536 | HG23 | THR | X | 234 | 35.185 | 31.897 | 53.091 | 0.00 | 0.00 |
| ATOM | 3537 | OG1  | THR | X | 234 | 36.312 | 33.777 | 51.712 | 0.00 | 0.00 |
| ATOM | 3538 | HG1  | THR | X | 234 | 36.932 | 34.231 | 51.137 | 0.00 | 0.00 |
| ATOM | 3539 | C    | THR | X | 234 | 38.805 | 32.944 | 54.402 | 0.00 | 0.00 |
| ATOM | 3540 | O    | THR | X | 234 | 39.668 | 32.109 | 54.369 | 0.00 | 0.00 |
| ATOM | 3541 | N    | VAL | X | 235 | 38.227 | 33.312 | 55.570 | 0.00 | 0.00 |
| ATOM | 3542 | H    | VAL | X | 235 | 37.696 | 34.166 | 55.477 | 0.00 | 0.00 |
| ATOM | 3543 | CA   | VAL | X | 235 | 38.266 | 32.681 | 56.887 | 0.00 | 0.00 |
| ATOM | 3544 | HA   | VAL | X | 235 | 38.312 | 31.617 | 56.654 | 0.00 | 0.00 |
| ATOM | 3545 | CB   | VAL | X | 235 | 39.554 | 33.188 | 57.621 | 0.00 | 0.00 |
| ATOM | 3546 | HB   | VAL | X | 235 | 40.350 | 33.135 | 56.878 | 0.00 | 0.00 |
| ATOM | 3547 | CG1  | VAL | X | 235 | 39.402 | 34.583 | 58.221 | 0.00 | 0.00 |
| ATOM | 3548 | HG11 | VAL | X | 235 | 39.149 | 35.297 | 57.436 | 0.00 | 0.00 |
| ATOM | 3549 | HG12 | VAL | X | 235 | 38.550 | 34.579 | 58.900 | 0.00 | 0.00 |
| ATOM | 3550 | HG13 | VAL | X | 235 | 40.284 | 34.752 | 58.839 | 0.00 | 0.00 |
| ATOM | 3551 | CG2  | VAL | X | 235 | 39.997 | 32.213 | 58.714 | 0.00 | 0.00 |
| ATOM | 3552 | HG21 | VAL | X | 235 | 41.064 | 32.367 | 58.873 | 0.00 | 0.00 |
| ATOM | 3553 | HG22 | VAL | X | 235 | 39.585 | 32.504 | 59.680 | 0.00 | 0.00 |
| ATOM | 3554 | HG23 | VAL | X | 235 | 39.847 | 31.171 | 58.432 | 0.00 | 0.00 |
| ATOM | 3555 | C    | VAL | X | 235 | 36.943 | 32.918 | 57.584 | 0.00 | 0.00 |
| ATOM | 3556 | O    | VAL | X | 235 | 36.173 | 33.781 | 57.223 | 0.00 | 0.00 |
| ATOM | 3557 | N    | GLY | X | 236 | 36.678 | 32.278 | 58.660 | 0.00 | 0.00 |
| ATOM | 3558 | H    | GLY | X | 236 | 37.337 | 31.590 | 58.993 | 0.00 | 0.00 |
| ATOM | 3559 | CA   | GLY | X | 236 | 35.518 | 32.662 | 59.485 | 0.00 | 0.00 |
| ATOM | 3560 | HA2  | GLY | X | 236 | 34.679 | 33.055 | 58.870 | 0.00 | 0.00 |
| ATOM | 3561 | HA3  | GLY | X | 236 | 35.103 | 31.794 | 59.968 | 0.00 | 0.00 |
| ATOM | 3562 | C    | GLY | X | 236 | 35.895 | 33.584 | 60.644 | 0.00 | 0.00 |
| ATOM | 3563 | O    | GLY | X | 236 | 37.058 | 33.931 | 60.943 | 0.00 | 0.00 |
| ATOM | 3564 | N    | MET | X | 237 | 34.798 | 34.139 | 61.270 | 0.00 | 0.00 |
| ATOM | 3565 | H    | MET | X | 237 | 33.926 | 33.639 | 61.166 | 0.00 | 0.00 |
| ATOM | 3566 | CA   | MET | X | 237 | 34.862 | 35.099 | 62.389 | 0.00 | 0.00 |
| ATOM | 3567 | HA   | MET | X | 237 | 35.551 | 35.846 | 61.997 | 0.00 | 0.00 |
| ATOM | 3568 | CB   | MET | X | 237 | 33.485 | 35.781 | 62.554 | 0.00 | 0.00 |
| ATOM | 3569 | HB2  | MET | X | 237 | 33.463 | 36.573 | 63.303 | 0.00 | 0.00 |
| ATOM | 3570 | HB3  | MET | X | 237 | 33.267 | 36.333 | 61.639 | 0.00 | 0.00 |
| ATOM | 3571 | CG   | MET | X | 237 | 32.361 | 34.799 | 62.679 | 0.00 | 0.00 |
| ATOM | 3572 | HG2  | MET | X | 237 | 32.390 | 34.117 | 61.829 | 0.00 | 0.00 |
| ATOM | 3573 | HG3  | MET | X | 237 | 32.549 | 34.097 | 63.492 | 0.00 | 0.00 |
| ATOM | 3574 | SD   | MET | X | 237 | 30.720 | 35.518 | 62.811 | 0.00 | 0.00 |
| ATOM | 3575 | CE   | MET | X | 237 | 29.797 | 34.093 | 63.501 | 0.00 | 0.00 |
| ATOM | 3576 | HE1  | MET | X | 237 | 28.746 | 34.321 | 63.677 | 0.00 | 0.00 |
| ATOM | 3577 | HE2  | MET | X | 237 | 29.789 | 33.241 | 62.821 | 0.00 | 0.00 |

|      |      |      |     |   |     |        |        |        |      |      |
|------|------|------|-----|---|-----|--------|--------|--------|------|------|
| ATOM | 3578 | HE3  | MET | X | 237 | 30.208 | 33.711 | 64.436 | 0.00 | 0.00 |
| ATOM | 3579 | C    | MET | X | 237 | 35.463 | 34.663 | 63.715 | 0.00 | 0.00 |
| ATOM | 3580 | O    | MET | X | 237 | 36.112 | 35.500 | 64.341 | 0.00 | 0.00 |
| ATOM | 3581 | N    | GLY | X | 238 | 35.526 | 33.364 | 63.979 | 0.00 | 0.00 |
| ATOM | 3582 | H    | GLY | X | 238 | 35.252 | 32.631 | 63.341 | 0.00 | 0.00 |
| ATOM | 3583 | CA   | GLY | X | 238 | 36.125 | 33.020 | 65.289 | 0.00 | 0.00 |
| ATOM | 3584 | HA2  | GLY | X | 238 | 35.896 | 33.784 | 65.962 | 0.00 | 0.00 |
| ATOM | 3585 | HA3  | GLY | X | 238 | 35.677 | 32.200 | 65.755 | 0.00 | 0.00 |
| ATOM | 3586 | C    | GLY | X | 238 | 37.616 | 32.907 | 65.191 | 0.00 | 0.00 |
| ATOM | 3587 | O    | GLY | X | 238 | 38.249 | 33.232 | 66.108 | 0.00 | 0.00 |
| ATOM | 3588 | N    | GLU | X | 239 | 38.129 | 32.445 | 64.024 | 0.00 | 0.00 |
| ATOM | 3589 | H    | GLU | X | 239 | 37.470 | 32.101 | 63.340 | 0.00 | 0.00 |
| ATOM | 3590 | CA   | GLU | X | 239 | 39.561 | 32.482 | 63.764 | 0.00 | 0.00 |
| ATOM | 3591 | HA   | GLU | X | 239 | 40.092 | 32.042 | 64.609 | 0.00 | 0.00 |
| ATOM | 3592 | CB   | GLU | X | 239 | 39.905 | 31.550 | 62.626 | 0.00 | 0.00 |
| ATOM | 3593 | HB2  | GLU | X | 239 | 39.172 | 31.612 | 61.821 | 0.00 | 0.00 |
| ATOM | 3594 | HB3  | GLU | X | 239 | 40.832 | 31.932 | 62.198 | 0.00 | 0.00 |
| ATOM | 3595 | CG   | GLU | X | 239 | 40.131 | 30.131 | 63.028 | 0.00 | 0.00 |
| ATOM | 3596 | HG2  | GLU | X | 239 | 39.284 | 29.846 | 63.652 | 0.00 | 0.00 |
| ATOM | 3597 | HG3  | GLU | X | 239 | 40.426 | 29.490 | 62.197 | 0.00 | 0.00 |
| ATOM | 3598 | CD   | GLU | X | 239 | 41.416 | 29.914 | 63.840 | 0.00 | 0.00 |
| ATOM | 3599 | OE1  | GLU | X | 239 | 42.478 | 29.897 | 63.204 | 0.00 | 0.00 |
| ATOM | 3600 | OE2  | GLU | X | 239 | 41.375 | 29.421 | 64.990 | 0.00 | 0.00 |
| ATOM | 3601 | C    | GLU | X | 239 | 40.090 | 33.905 | 63.564 | 0.00 | 0.00 |
| ATOM | 3602 | O    | GLU | X | 239 | 41.152 | 34.206 | 64.082 | 0.00 | 0.00 |
| ATOM | 3603 | N    | ALA | X | 240 | 39.330 | 34.797 | 62.836 | 0.00 | 0.00 |
| ATOM | 3604 | H    | ALA | X | 240 | 38.459 | 34.572 | 62.378 | 0.00 | 0.00 |
| ATOM | 3605 | CA   | ALA | X | 240 | 39.637 | 36.253 | 62.796 | 0.00 | 0.00 |
| ATOM | 3606 | HA   | ALA | X | 240 | 40.563 | 36.381 | 62.236 | 0.00 | 0.00 |
| ATOM | 3607 | CB   | ALA | X | 240 | 38.463 | 36.909 | 62.015 | 0.00 | 0.00 |
| ATOM | 3608 | HB1  | ALA | X | 240 | 38.304 | 36.299 | 61.126 | 0.00 | 0.00 |
| ATOM | 3609 | HB2  | ALA | X | 240 | 37.518 | 36.796 | 62.547 | 0.00 | 0.00 |
| ATOM | 3610 | HB3  | ALA | X | 240 | 38.713 | 37.934 | 61.744 | 0.00 | 0.00 |
| ATOM | 3611 | C    | ALA | X | 240 | 39.622 | 36.852 | 64.167 | 0.00 | 0.00 |
| ATOM | 3612 | O    | ALA | X | 240 | 40.567 | 37.522 | 64.539 | 0.00 | 0.00 |
| ATOM | 3613 | N    | ARG | X | 241 | 38.646 | 36.500 | 65.068 | 0.00 | 0.00 |
| ATOM | 3614 | H    | ARG | X | 241 | 37.782 | 36.068 | 64.775 | 0.00 | 0.00 |
| ATOM | 3615 | CA   | ARG | X | 241 | 38.755 | 36.907 | 66.502 | 0.00 | 0.00 |
| ATOM | 3616 | HA   | ARG | X | 241 | 38.698 | 37.993 | 66.572 | 0.00 | 0.00 |
| ATOM | 3617 | CB   | ARG | X | 241 | 37.623 | 36.358 | 67.410 | 0.00 | 0.00 |
| ATOM | 3618 | HB2  | ARG | X | 241 | 36.767 | 36.270 | 66.741 | 0.00 | 0.00 |
| ATOM | 3619 | HB3  | ARG | X | 241 | 37.888 | 35.384 | 67.820 | 0.00 | 0.00 |
| ATOM | 3620 | CG   | ARG | X | 241 | 37.180 | 37.216 | 68.548 | 0.00 | 0.00 |
| ATOM | 3621 | HG2  | ARG | X | 241 | 36.950 | 38.177 | 68.086 | 0.00 | 0.00 |
| ATOM | 3622 | HG3  | ARG | X | 241 | 36.213 | 36.905 | 68.943 | 0.00 | 0.00 |
| ATOM | 3623 | CD   | ARG | X | 241 | 38.123 | 37.401 | 69.774 | 0.00 | 0.00 |
| ATOM | 3624 | HD2  | ARG | X | 241 | 38.274 | 36.423 | 70.232 | 0.00 | 0.00 |
| ATOM | 3625 | HD3  | ARG | X | 241 | 39.042 | 37.923 | 69.506 | 0.00 | 0.00 |
| ATOM | 3626 | NE   | ARG | X | 241 | 37.566 | 38.193 | 70.888 | 0.00 | 0.00 |
| ATOM | 3627 | HE   | ARG | X | 241 | 36.731 | 38.719 | 70.676 | 0.00 | 0.00 |
| ATOM | 3628 | CZ   | ARG | X | 241 | 37.896 | 38.074 | 72.165 | 0.00 | 0.00 |
| ATOM | 3629 | NH1  | ARG | X | 241 | 38.919 | 37.319 | 72.630 | 0.00 | 0.00 |
| ATOM | 3630 | HH11 | ARG | X | 241 | 39.336 | 36.701 | 71.949 | 0.00 | 0.00 |
| ATOM | 3631 | HH12 | ARG | X | 241 | 39.358 | 37.511 | 73.519 | 0.00 | 0.00 |
| ATOM | 3632 | NH2  | ARG | X | 241 | 37.248 | 38.808 | 73.033 | 0.00 | 0.00 |
| ATOM | 3633 | HH21 | ARG | X | 241 | 36.428 | 39.320 | 72.742 | 0.00 | 0.00 |
| ATOM | 3634 | HH22 | ARG | X | 241 | 37.466 | 38.646 | 74.005 | 0.00 | 0.00 |
| ATOM | 3635 | C    | ARG | X | 241 | 40.075 | 36.494 | 67.146 | 0.00 | 0.00 |
| ATOM | 3636 | O    | ARG | X | 241 | 40.717 | 37.297 | 67.833 | 0.00 | 0.00 |
| ATOM | 3637 | N    | ARG | X | 242 | 40.450 | 35.255 | 66.912 | 0.00 | 0.00 |
| ATOM | 3638 | H    | ARG | X | 242 | 39.895 | 34.620 | 66.356 | 0.00 | 0.00 |
| ATOM | 3639 | CA   | ARG | X | 242 | 41.710 | 34.766 | 67.499 | 0.00 | 0.00 |
| ATOM | 3640 | HA   | ARG | X | 242 | 41.511 | 34.955 | 68.554 | 0.00 | 0.00 |
| ATOM | 3641 | CB   | ARG | X | 242 | 41.862 | 33.288 | 67.259 | 0.00 | 0.00 |
| ATOM | 3642 | HB2  | ARG | X | 242 | 40.927 | 32.839 | 67.593 | 0.00 | 0.00 |
| ATOM | 3643 | HB3  | ARG | X | 242 | 42.022 | 33.154 | 66.189 | 0.00 | 0.00 |
| ATOM | 3644 | CG   | ARG | X | 242 | 43.015 | 32.649 | 68.016 | 0.00 | 0.00 |
| ATOM | 3645 | HG2  | ARG | X | 242 | 43.966 | 32.918 | 67.556 | 0.00 | 0.00 |
| ATOM | 3646 | HG3  | ARG | X | 242 | 43.052 | 33.067 | 69.022 | 0.00 | 0.00 |
| ATOM | 3647 | CD   | ARG | X | 242 | 42.770 | 31.118 | 68.137 | 0.00 | 0.00 |

|      |      |      |     |   |     |        |        |        |      |      |
|------|------|------|-----|---|-----|--------|--------|--------|------|------|
| ATOM | 3648 | HD2  | ARG | X | 242 | 43.440 | 30.659 | 68.864 | 0.00 | 0.00 |
| ATOM | 3649 | HD3  | ARG | X | 242 | 41.714 | 30.941 | 68.339 | 0.00 | 0.00 |
| ATOM | 3650 | NE   | ARG | X | 242 | 43.116 | 30.476 | 66.940 | 0.00 | 0.00 |
| ATOM | 3651 | HE   | ARG | X | 242 | 42.483 | 29.768 | 66.597 | 0.00 | 0.00 |
| ATOM | 3652 | CZ   | ARG | X | 242 | 44.302 | 30.257 | 66.410 | 0.00 | 0.00 |
| ATOM | 3653 | NH1  | ARG | X | 242 | 45.430 | 30.820 | 66.838 | 0.00 | 0.00 |
| ATOM | 3654 | HH11 | ARG | X | 242 | 45.368 | 31.568 | 67.515 | 0.00 | 0.00 |
| ATOM | 3655 | HH12 | ARG | X | 242 | 46.320 | 30.517 | 66.469 | 0.00 | 0.00 |
| ATOM | 3656 | NH2  | ARG | X | 242 | 44.323 | 29.528 | 65.328 | 0.00 | 0.00 |
| ATOM | 3657 | HH21 | ARG | X | 242 | 43.421 | 29.327 | 64.919 | 0.00 | 0.00 |
| ATOM | 3658 | HH22 | ARG | X | 242 | 45.127 | 29.225 | 64.798 | 0.00 | 0.00 |
| ATOM | 3659 | C    | ARG | X | 242 | 42.874 | 35.594 | 67.125 | 0.00 | 0.00 |
| ATOM | 3660 | O    | ARG | X | 242 | 43.639 | 36.024 | 67.944 | 0.00 | 0.00 |
| ATOM | 3661 | N    | ARG | X | 243 | 43.028 | 35.822 | 65.818 | 0.00 | 0.00 |
| ATOM | 3662 | H    | ARG | X | 243 | 42.328 | 35.522 | 65.156 | 0.00 | 0.00 |
| ATOM | 3663 | CA   | ARG | X | 243 | 44.019 | 36.824 | 65.330 | 0.00 | 0.00 |
| ATOM | 3664 | HA   | ARG | X | 243 | 44.912 | 36.327 | 65.707 | 0.00 | 0.00 |
| ATOM | 3665 | CB   | ARG | X | 243 | 43.966 | 36.757 | 63.819 | 0.00 | 0.00 |
| ATOM | 3666 | HB2  | ARG | X | 243 | 42.950 | 36.960 | 63.480 | 0.00 | 0.00 |
| ATOM | 3667 | HB3  | ARG | X | 243 | 44.645 | 37.509 | 63.417 | 0.00 | 0.00 |
| ATOM | 3668 | CG   | ARG | X | 243 | 44.437 | 35.382 | 63.266 | 0.00 | 0.00 |
| ATOM | 3669 | HG2  | ARG | X | 243 | 45.370 | 35.162 | 63.785 | 0.00 | 0.00 |
| ATOM | 3670 | HG3  | ARG | X | 243 | 43.679 | 34.624 | 63.461 | 0.00 | 0.00 |
| ATOM | 3671 | CD   | ARG | X | 243 | 44.698 | 35.441 | 61.811 | 0.00 | 0.00 |
| ATOM | 3672 | HD2  | ARG | X | 243 | 44.037 | 36.103 | 61.251 | 0.00 | 0.00 |
| ATOM | 3673 | HD3  | ARG | X | 243 | 45.653 | 35.938 | 61.641 | 0.00 | 0.00 |
| ATOM | 3674 | NE   | ARG | X | 243 | 44.591 | 34.122 | 61.163 | 0.00 | 0.00 |
| ATOM | 3675 | HE   | ARG | X | 243 | 44.253 | 33.326 | 61.686 | 0.00 | 0.00 |
| ATOM | 3676 | CZ   | ARG | X | 243 | 44.872 | 33.827 | 59.926 | 0.00 | 0.00 |
| ATOM | 3677 | NH1  | ARG | X | 243 | 45.367 | 34.686 | 59.082 | 0.00 | 0.00 |
| ATOM | 3678 | HH11 | ARG | X | 243 | 45.260 | 35.661 | 59.320 | 0.00 | 0.00 |
| ATOM | 3679 | HH12 | ARG | X | 243 | 45.672 | 34.441 | 58.150 | 0.00 | 0.00 |
| ATOM | 3680 | NH2  | ARG | X | 243 | 44.677 | 32.632 | 59.531 | 0.00 | 0.00 |
| ATOM | 3681 | HH21 | ARG | X | 243 | 44.237 | 31.945 | 60.127 | 0.00 | 0.00 |
| ATOM | 3682 | HH22 | ARG | X | 243 | 45.072 | 32.369 | 58.639 | 0.00 | 0.00 |
| ATOM | 3683 | C    | ARG | X | 243 | 43.874 | 38.263 | 66.001 | 0.00 | 0.00 |
| ATOM | 3684 | O    | ARG | X | 243 | 44.868 | 38.893 | 66.314 | 0.00 | 0.00 |
| ATOM | 3685 | N    | ALA | X | 244 | 42.693 | 38.735 | 66.322 | 0.00 | 0.00 |
| ATOM | 3686 | H    | ALA | X | 244 | 41.858 | 38.200 | 66.130 | 0.00 | 0.00 |
| ATOM | 3687 | CA   | ALA | X | 244 | 42.485 | 39.982 | 67.087 | 0.00 | 0.00 |
| ATOM | 3688 | HA   | ALA | X | 244 | 43.154 | 40.752 | 66.703 | 0.00 | 0.00 |
| ATOM | 3689 | CB   | ALA | X | 244 | 41.047 | 40.453 | 66.903 | 0.00 | 0.00 |
| ATOM | 3690 | HB1  | ALA | X | 244 | 40.797 | 40.528 | 65.844 | 0.00 | 0.00 |
| ATOM | 3691 | HB2  | ALA | X | 244 | 40.321 | 39.812 | 67.403 | 0.00 | 0.00 |
| ATOM | 3692 | HB3  | ALA | X | 244 | 41.055 | 41.433 | 67.379 | 0.00 | 0.00 |
| ATOM | 3693 | C    | ALA | X | 244 | 42.936 | 39.783 | 68.541 | 0.00 | 0.00 |
| ATOM | 3694 | O    | ALA | X | 244 | 43.445 | 40.786 | 69.089 | 0.00 | 0.00 |
| ATOM | 3695 | N    | THR | X | 245 | 42.717 | 38.638 | 69.183 | 0.00 | 0.00 |
| ATOM | 3696 | H    | THR | X | 245 | 42.153 | 37.967 | 68.681 | 0.00 | 0.00 |
| ATOM | 3697 | CA   | THR | X | 245 | 43.257 | 38.279 | 70.511 | 0.00 | 0.00 |
| ATOM | 3698 | HA   | THR | X | 245 | 42.938 | 39.049 | 71.215 | 0.00 | 0.00 |
| ATOM | 3699 | CB   | THR | X | 245 | 42.761 | 36.887 | 70.992 | 0.00 | 0.00 |
| ATOM | 3700 | HB   | THR | X | 245 | 43.067 | 36.045 | 70.372 | 0.00 | 0.00 |
| ATOM | 3701 | CG2  | THR | X | 245 | 43.186 | 36.596 | 72.375 | 0.00 | 0.00 |
| ATOM | 3702 | HG21 | THR | X | 245 | 42.782 | 37.249 | 73.148 | 0.00 | 0.00 |
| ATOM | 3703 | HG22 | THR | X | 245 | 42.852 | 35.580 | 72.587 | 0.00 | 0.00 |
| ATOM | 3704 | HG23 | THR | X | 245 | 44.274 | 36.656 | 72.339 | 0.00 | 0.00 |
| ATOM | 3705 | OG1  | THR | X | 245 | 41.362 | 36.931 | 70.769 | 0.00 | 0.00 |
| ATOM | 3706 | HG1  | THR | X | 245 | 41.063 | 36.051 | 70.531 | 0.00 | 0.00 |
| ATOM | 3707 | C    | THR | X | 245 | 44.824 | 38.392 | 70.413 | 0.00 | 0.00 |
| ATOM | 3708 | O    | THR | X | 245 | 45.459 | 39.050 | 71.242 | 0.00 | 0.00 |
| ATOM | 3709 | N    | GLN | X | 246 | 45.422 | 37.847 | 69.349 | 0.00 | 0.00 |
| ATOM | 3710 | H    | GLN | X | 246 | 44.883 | 37.155 | 68.848 | 0.00 | 0.00 |
| ATOM | 3711 | CA   | GLN | X | 246 | 46.836 | 37.798 | 69.170 | 0.00 | 0.00 |
| ATOM | 3712 | HA   | GLN | X | 246 | 47.297 | 37.498 | 70.111 | 0.00 | 0.00 |
| ATOM | 3713 | CB   | GLN | X | 246 | 47.269 | 36.840 | 67.980 | 0.00 | 0.00 |
| ATOM | 3714 | HB2  | GLN | X | 246 | 46.775 | 37.107 | 67.046 | 0.00 | 0.00 |
| ATOM | 3715 | HB3  | GLN | X | 246 | 48.334 | 36.994 | 67.804 | 0.00 | 0.00 |
| ATOM | 3716 | CG   | GLN | X | 246 | 46.914 | 35.352 | 68.225 | 0.00 | 0.00 |
| ATOM | 3717 | HG2  | GLN | X | 246 | 47.657 | 35.024 | 68.952 | 0.00 | 0.00 |

|      |      |      |     |   |     |        |        |        |      |      |
|------|------|------|-----|---|-----|--------|--------|--------|------|------|
| ATOM | 3718 | HG3  | GLN | X | 246 | 45.909 | 35.100 | 68.562 | 0.00 | 0.00 |
| ATOM | 3719 | CD   | GLN | X | 246 | 47.145 | 34.482 | 66.950 | 0.00 | 0.00 |
| ATOM | 3720 | OE1  | GLN | X | 246 | 46.278 | 33.993 | 66.207 | 0.00 | 0.00 |
| ATOM | 3721 | NE2  | GLN | X | 246 | 48.416 | 34.143 | 66.632 | 0.00 | 0.00 |
| ATOM | 3722 | HE21 | GLN | X | 246 | 48.612 | 33.668 | 65.763 | 0.00 | 0.00 |
| ATOM | 3723 | HE22 | GLN | X | 246 | 49.171 | 34.490 | 67.206 | 0.00 | 0.00 |
| ATOM | 3724 | C    | GLN | X | 246 | 47.449 | 39.186 | 68.926 | 0.00 | 0.00 |
| ATOM | 3725 | O    | GLN | X | 246 | 48.445 | 39.496 | 69.585 | 0.00 | 0.00 |
| ATOM | 3726 | N    | LEU | X | 247 | 46.839 | 39.989 | 68.111 | 0.00 | 0.00 |
| ATOM | 3727 | H    | LEU | X | 247 | 46.071 | 39.639 | 67.555 | 0.00 | 0.00 |
| ATOM | 3728 | CA   | LEU | X | 247 | 47.297 | 41.330 | 67.767 | 0.00 | 0.00 |
| ATOM | 3729 | HA   | LEU | X | 247 | 48.368 | 41.373 | 67.567 | 0.00 | 0.00 |
| ATOM | 3730 | CB   | LEU | X | 247 | 46.319 | 41.781 | 66.651 | 0.00 | 0.00 |
| ATOM | 3731 | HB2  | LEU | X | 247 | 46.253 | 41.093 | 65.808 | 0.00 | 0.00 |
| ATOM | 3732 | HB3  | LEU | X | 247 | 45.363 | 42.023 | 67.114 | 0.00 | 0.00 |
| ATOM | 3733 | CG   | LEU | X | 247 | 46.750 | 43.182 | 66.142 | 0.00 | 0.00 |
| ATOM | 3734 | HG   | LEU | X | 247 | 46.340 | 43.868 | 66.884 | 0.00 | 0.00 |
| ATOM | 3735 | CD1  | LEU | X | 247 | 48.268 | 43.416 | 65.851 | 0.00 | 0.00 |
| ATOM | 3736 | HD11 | LEU | X | 247 | 48.921 | 43.362 | 66.721 | 0.00 | 0.00 |
| ATOM | 3737 | HD12 | LEU | X | 247 | 48.596 | 42.649 | 65.148 | 0.00 | 0.00 |
| ATOM | 3738 | HD13 | LEU | X | 247 | 48.414 | 44.408 | 65.425 | 0.00 | 0.00 |
| ATOM | 3739 | CD2  | LEU | X | 247 | 45.844 | 43.439 | 64.858 | 0.00 | 0.00 |
| ATOM | 3740 | HD21 | LEU | X | 247 | 44.795 | 43.434 | 65.153 | 0.00 | 0.00 |
| ATOM | 3741 | HD22 | LEU | X | 247 | 46.049 | 44.463 | 64.545 | 0.00 | 0.00 |
| ATOM | 3742 | HD23 | LEU | X | 247 | 46.000 | 42.699 | 64.073 | 0.00 | 0.00 |
| ATOM | 3743 | C    | LEU | X | 247 | 47.184 | 42.095 | 69.055 | 0.00 | 0.00 |
| ATOM | 3744 | O    | LEU | X | 247 | 48.078 | 42.810 | 69.392 | 0.00 | 0.00 |
| ATOM | 3745 | N    | ALA | X | 248 | 46.064 | 42.051 | 69.831 | 0.00 | 0.00 |
| ATOM | 3746 | H    | ALA | X | 248 | 45.291 | 41.476 | 69.530 | 0.00 | 0.00 |
| ATOM | 3747 | CA   | ALA | X | 248 | 45.939 | 42.779 | 71.088 | 0.00 | 0.00 |
| ATOM | 3748 | HA   | ALA | X | 248 | 46.084 | 43.841 | 70.887 | 0.00 | 0.00 |
| ATOM | 3749 | CB   | ALA | X | 248 | 44.506 | 42.573 | 71.606 | 0.00 | 0.00 |
| ATOM | 3750 | HB1  | ALA | X | 248 | 44.514 | 41.564 | 72.018 | 0.00 | 0.00 |
| ATOM | 3751 | HB2  | ALA | X | 248 | 44.361 | 43.218 | 72.473 | 0.00 | 0.00 |
| ATOM | 3752 | HB3  | ALA | X | 248 | 43.695 | 42.678 | 70.885 | 0.00 | 0.00 |
| ATOM | 3753 | C    | ALA | X | 248 | 47.025 | 42.484 | 72.120 | 0.00 | 0.00 |
| ATOM | 3754 | O    | ALA | X | 248 | 47.399 | 43.355 | 72.836 | 0.00 | 0.00 |
| ATOM | 3755 | N    | HIE | X | 249 | 47.578 | 41.243 | 72.062 | 0.00 | 0.00 |
| ATOM | 3756 | H    | HIE | X | 249 | 47.288 | 40.692 | 71.266 | 0.00 | 0.00 |
| ATOM | 3757 | CA   | HIE | X | 249 | 48.639 | 40.800 | 72.923 | 0.00 | 0.00 |
| ATOM | 3758 | HA   | HIE | X | 249 | 48.354 | 41.092 | 73.933 | 0.00 | 0.00 |
| ATOM | 3759 | CB   | HIE | X | 249 | 48.605 | 39.271 | 72.911 | 0.00 | 0.00 |
| ATOM | 3760 | HB2  | HIE | X | 249 | 47.593 | 38.971 | 73.185 | 0.00 | 0.00 |
| ATOM | 3761 | HB3  | HIE | X | 249 | 48.860 | 38.846 | 71.940 | 0.00 | 0.00 |
| ATOM | 3762 | CG   | HIE | X | 249 | 49.589 | 38.710 | 73.818 | 0.00 | 0.00 |
| ATOM | 3763 | ND1  | HIE | X | 249 | 49.499 | 38.803 | 75.230 | 0.00 | 0.00 |
| ATOM | 3764 | CE1  | HIE | X | 249 | 50.744 | 38.549 | 75.659 | 0.00 | 0.00 |
| ATOM | 3765 | HE1  | HIE | X | 249 | 51.051 | 38.734 | 76.678 | 0.00 | 0.00 |
| ATOM | 3766 | NE2  | HIE | X | 249 | 51.566 | 38.189 | 74.653 | 0.00 | 0.00 |
| ATOM | 3767 | HE2  | HIE | X | 249 | 52.499 | 37.812 | 74.739 | 0.00 | 0.00 |
| ATOM | 3768 | CD2  | HIE | X | 249 | 50.872 | 38.382 | 73.537 | 0.00 | 0.00 |
| ATOM | 3769 | HD2  | HIE | X | 249 | 51.244 | 38.374 | 72.523 | 0.00 | 0.00 |
| ATOM | 3770 | C    | HIE | X | 249 | 49.957 | 41.449 | 72.591 | 0.00 | 0.00 |
| ATOM | 3771 | O    | HIE | X | 249 | 50.592 | 42.004 | 73.527 | 0.00 | 0.00 |
| ATOM | 3772 | N    | LEU | X | 250 | 50.379 | 41.390 | 71.329 | 0.00 | 0.00 |
| ATOM | 3773 | H    | LEU | X | 250 | 49.775 | 40.797 | 70.777 | 0.00 | 0.00 |
| ATOM | 3774 | CA   | LEU | X | 250 | 51.583 | 42.046 | 70.821 | 0.00 | 0.00 |
| ATOM | 3775 | HA   | LEU | X | 250 | 52.436 | 41.735 | 71.423 | 0.00 | 0.00 |
| ATOM | 3776 | CB   | LEU | X | 250 | 51.799 | 41.584 | 69.330 | 0.00 | 0.00 |
| ATOM | 3777 | HB2  | LEU | X | 250 | 50.975 | 41.978 | 68.736 | 0.00 | 0.00 |
| ATOM | 3778 | HB3  | LEU | X | 250 | 52.720 | 42.055 | 68.984 | 0.00 | 0.00 |
| ATOM | 3779 | CG   | LEU | X | 250 | 51.941 | 40.052 | 69.090 | 0.00 | 0.00 |
| ATOM | 3780 | HG   | LEU | X | 250 | 51.097 | 39.610 | 69.619 | 0.00 | 0.00 |
| ATOM | 3781 | CD1  | LEU | X | 250 | 51.932 | 39.686 | 67.638 | 0.00 | 0.00 |
| ATOM | 3782 | HD11 | LEU | X | 250 | 51.158 | 40.242 | 67.109 | 0.00 | 0.00 |
| ATOM | 3783 | HD12 | LEU | X | 250 | 52.897 | 39.953 | 67.207 | 0.00 | 0.00 |
| ATOM | 3784 | HD13 | LEU | X | 250 | 51.774 | 38.612 | 67.736 | 0.00 | 0.00 |
| ATOM | 3785 | CD2  | LEU | X | 250 | 53.229 | 39.513 | 69.672 | 0.00 | 0.00 |
| ATOM | 3786 | HD21 | LEU | X | 250 | 54.052 | 40.097 | 69.260 | 0.00 | 0.00 |
| ATOM | 3787 | HD22 | LEU | X | 250 | 53.092 | 39.506 | 70.753 | 0.00 | 0.00 |

|      |      |      |     |   |     |        |        |        |      |      |
|------|------|------|-----|---|-----|--------|--------|--------|------|------|
| ATOM | 3788 | HD23 | LEU | X | 250 | 53.348 | 38.475 | 69.361 | 0.00 | 0.00 |
| ATOM | 3789 | C    | LEU | X | 250 | 51.535 | 43.591 | 70.915 | 0.00 | 0.00 |
| ATOM | 3790 | O    | LEU | X | 250 | 52.473 | 44.261 | 71.307 | 0.00 | 0.00 |
| ATOM | 3791 | N    | VAL | X | 251 | 50.342 | 44.165 | 70.640 | 0.00 | 0.00 |
| ATOM | 3792 | H    | VAL | X | 251 | 49.585 | 43.542 | 70.397 | 0.00 | 0.00 |
| ATOM | 3793 | CA   | VAL | X | 251 | 50.021 | 45.631 | 70.813 | 0.00 | 0.00 |
| ATOM | 3794 | HA   | VAL | X | 251 | 50.759 | 46.154 | 70.205 | 0.00 | 0.00 |
| ATOM | 3795 | CB   | VAL | X | 251 | 48.600 | 45.935 | 70.240 | 0.00 | 0.00 |
| ATOM | 3796 | HB   | VAL | X | 251 | 47.819 | 45.242 | 70.552 | 0.00 | 0.00 |
| ATOM | 3797 | CG1  | VAL | X | 251 | 47.994 | 47.279 | 70.568 | 0.00 | 0.00 |
| ATOM | 3798 | HG11 | VAL | X | 251 | 47.960 | 47.469 | 71.641 | 0.00 | 0.00 |
| ATOM | 3799 | HG12 | VAL | X | 251 | 48.740 | 48.010 | 70.256 | 0.00 | 0.00 |
| ATOM | 3800 | HG13 | VAL | X | 251 | 47.066 | 47.525 | 70.051 | 0.00 | 0.00 |
| ATOM | 3801 | CG2  | VAL | X | 251 | 48.743 | 45.754 | 68.657 | 0.00 | 0.00 |
| ATOM | 3802 | HG21 | VAL | X | 251 | 47.767 | 45.359 | 68.374 | 0.00 | 0.00 |
| ATOM | 3803 | HG22 | VAL | X | 251 | 49.033 | 46.723 | 68.250 | 0.00 | 0.00 |
| ATOM | 3804 | HG23 | VAL | X | 251 | 49.367 | 44.904 | 68.382 | 0.00 | 0.00 |
| ATOM | 3805 | C    | VAL | X | 251 | 50.148 | 46.118 | 72.266 | 0.00 | 0.00 |
| ATOM | 3806 | O    | VAL | X | 251 | 50.675 | 47.218 | 72.469 | 0.00 | 0.00 |
| ATOM | 3807 | N    | GLY | X | 252 | 49.612 | 45.339 | 73.237 | 0.00 | 0.00 |
| ATOM | 3808 | H    | GLY | X | 252 | 49.164 | 44.497 | 72.907 | 0.00 | 0.00 |
| ATOM | 3809 | CA   | GLY | X | 252 | 49.823 | 45.529 | 74.650 | 0.00 | 0.00 |
| ATOM | 3810 | HA2  | GLY | X | 252 | 49.947 | 44.539 | 75.289 | 0.00 | 0.00 |
| ATOM | 3811 | HA3  | GLY | X | 252 | 50.710 | 46.112 | 74.738 | 0.00 | 0.00 |
| ATOM | 3812 | C    | GLY | X | 252 | 48.566 | 46.178 | 75.308 | 0.00 | 0.00 |
| ATOM | 3813 | O    | GLY | X | 252 | 48.614 | 47.189 | 75.953 | 0.00 | 0.00 |
| ATOM | 3814 | N    | CYX | X | 253 | 47.443 | 45.497 | 75.015 | 0.00 | 0.00 |
| ATOM | 3815 | H    | CYX | X | 253 | 47.589 | 44.729 | 74.376 | 0.00 | 0.00 |
| ATOM | 3816 | CA   | CYX | X | 253 | 46.028 | 45.928 | 75.377 | 0.00 | 0.00 |
| ATOM | 3817 | HA   | CYX | X | 253 | 45.976 | 46.899 | 75.871 | 0.00 | 0.00 |
| ATOM | 3818 | CB   | CYX | X | 253 | 45.204 | 46.075 | 74.059 | 0.00 | 0.00 |
| ATOM | 3819 | HB2  | CYX | X | 253 | 45.403 | 45.134 | 73.546 | 0.00 | 0.00 |
| ATOM | 3820 | HB3  | CYX | X | 253 | 44.125 | 46.063 | 74.211 | 0.00 | 0.00 |
| ATOM | 3821 | SG   | CYX | X | 253 | 45.436 | 47.514 | 73.033 | 0.00 | 0.00 |
| ATOM | 3822 | C    | CYX | X | 253 | 45.130 | 44.975 | 76.285 | 0.00 | 0.00 |
| ATOM | 3823 | O    | CYX | X | 253 | 44.723 | 43.880 | 75.837 | 0.00 | 0.00 |
| ATOM | 3824 | N    | PRO | X | 254 | 44.748 | 45.447 | 77.546 | 0.00 | 0.00 |
| ATOM | 3825 | CD   | PRO | X | 254 | 43.786 | 44.728 | 78.322 | 0.00 | 0.00 |
| ATOM | 3826 | HD2  | PRO | X | 254 | 44.093 | 43.683 | 78.367 | 0.00 | 0.00 |
| ATOM | 3827 | HD3  | PRO | X | 254 | 42.745 | 44.828 | 78.014 | 0.00 | 0.00 |
| ATOM | 3828 | CG   | PRO | X | 254 | 43.979 | 45.182 | 79.738 | 0.00 | 0.00 |
| ATOM | 3829 | HG2  | PRO | X | 254 | 44.863 | 44.725 | 80.183 | 0.00 | 0.00 |
| ATOM | 3830 | HG3  | PRO | X | 254 | 43.135 | 45.007 | 80.405 | 0.00 | 0.00 |
| ATOM | 3831 | CB   | PRO | X | 254 | 44.355 | 46.659 | 79.540 | 0.00 | 0.00 |
| ATOM | 3832 | HB2  | PRO | X | 254 | 44.863 | 47.134 | 80.379 | 0.00 | 0.00 |
| ATOM | 3833 | HB3  | PRO | X | 254 | 43.472 | 47.223 | 79.238 | 0.00 | 0.00 |
| ATOM | 3834 | CA   | PRO | X | 254 | 45.191 | 46.610 | 78.235 | 0.00 | 0.00 |
| ATOM | 3835 | HA   | PRO | X | 254 | 44.981 | 47.546 | 77.717 | 0.00 | 0.00 |
| ATOM | 3836 | C    | PRO | X | 254 | 46.684 | 46.626 | 78.532 | 0.00 | 0.00 |
| ATOM | 3837 | O    | PRO | X | 254 | 47.312 | 45.604 | 78.448 | 0.00 | 0.00 |
| ATOM | 3838 | N    | PRO | X | 255 | 47.273 | 47.789 | 78.862 | 0.00 | 0.00 |
| ATOM | 3839 | CD   | PRO | X | 255 | 46.684 | 49.136 | 78.839 | 0.00 | 0.00 |
| ATOM | 3840 | HD2  | PRO | X | 255 | 45.654 | 49.124 | 79.194 | 0.00 | 0.00 |
| ATOM | 3841 | HD3  | PRO | X | 255 | 46.848 | 49.591 | 77.862 | 0.00 | 0.00 |
| ATOM | 3842 | CG   | PRO | X | 255 | 47.405 | 49.991 | 79.836 | 0.00 | 0.00 |
| ATOM | 3843 | HG2  | PRO | X | 255 | 46.811 | 49.930 | 80.748 | 0.00 | 0.00 |
| ATOM | 3844 | HG3  | PRO | X | 255 | 47.369 | 50.960 | 79.339 | 0.00 | 0.00 |
| ATOM | 3845 | CB   | PRO | X | 255 | 48.811 | 49.457 | 79.918 | 0.00 | 0.00 |
| ATOM | 3846 | HB2  | PRO | X | 255 | 49.215 | 49.556 | 80.926 | 0.00 | 0.00 |
| ATOM | 3847 | HB3  | PRO | X | 255 | 49.471 | 50.001 | 79.243 | 0.00 | 0.00 |
| ATOM | 3848 | CA   | PRO | X | 255 | 48.562 | 47.957 | 79.522 | 0.00 | 0.00 |
| ATOM | 3849 | HA   | PRO | X | 255 | 49.351 | 47.616 | 78.851 | 0.00 | 0.00 |
| ATOM | 3850 | C    | PRO | X | 255 | 48.581 | 47.123 | 80.827 | 0.00 | 0.00 |
| ATOM | 3851 | O    | PRO | X | 255 | 47.722 | 47.298 | 81.740 | 0.00 | 0.00 |
| ATOM | 3852 | N    | GLY | X | 256 | 49.394 | 46.057 | 80.829 | 0.00 | 0.00 |
| ATOM | 3853 | H    | GLY | X | 256 | 49.951 | 45.871 | 80.008 | 0.00 | 0.00 |
| ATOM | 3854 | CA   | GLY | X | 256 | 49.604 | 45.276 | 82.100 | 0.00 | 0.00 |
| ATOM | 3855 | HA2  | GLY | X | 256 | 50.633 | 44.829 | 82.127 | 0.00 | 0.00 |
| ATOM | 3856 | HA3  | GLY | X | 256 | 49.485 | 45.837 | 82.948 | 0.00 | 0.00 |
| ATOM | 3857 | C    | GLY | X | 256 | 48.609 | 44.153 | 82.247 | 0.00 | 0.00 |

|      |      |      |     |   |     |        |        |        |      |      |
|------|------|------|-----|---|-----|--------|--------|--------|------|------|
| ATOM | 3858 | O    | GLY | X | 256 | 48.517 | 43.664 | 83.363 | 0.00 | 0.00 |
| ATOM | 3859 | N    | GLY | X | 257 | 47.907 | 43.742 | 81.156 | 0.00 | 0.00 |
| ATOM | 3860 | H    | GLY | X | 257 | 47.849 | 44.346 | 80.349 | 0.00 | 0.00 |
| ATOM | 3861 | CA   | GLY | X | 257 | 46.826 | 42.698 | 81.123 | 0.00 | 0.00 |
| ATOM | 3862 | HA2  | GLY | X | 257 | 47.072 | 41.879 | 81.875 | 0.00 | 0.00 |
| ATOM | 3863 | HA3  | GLY | X | 257 | 45.916 | 43.210 | 81.469 | 0.00 | 0.00 |
| ATOM | 3864 | C    | GLY | X | 257 | 46.616 | 41.962 | 79.787 | 0.00 | 0.00 |
| ATOM | 3865 | O    | GLY | X | 257 | 47.481 | 42.082 | 78.946 | 0.00 | 0.00 |
| ATOM | 3866 | N    | THR | X | 258 | 45.518 | 41.280 | 79.564 | 0.00 | 0.00 |
| ATOM | 3867 | H    | THR | X | 258 | 44.813 | 41.378 | 80.280 | 0.00 | 0.00 |
| ATOM | 3868 | CA   | THR | X | 258 | 45.080 | 40.748 | 78.202 | 0.00 | 0.00 |
| ATOM | 3869 | HA   | THR | X | 258 | 45.610 | 41.314 | 77.436 | 0.00 | 0.00 |
| ATOM | 3870 | CB   | THR | X | 258 | 45.467 | 39.300 | 78.019 | 0.00 | 0.00 |
| ATOM | 3871 | HB   | THR | X | 258 | 45.028 | 38.932 | 77.092 | 0.00 | 0.00 |
| ATOM | 3872 | CG2  | THR | X | 258 | 46.978 | 39.088 | 77.846 | 0.00 | 0.00 |
| ATOM | 3873 | HG21 | THR | X | 258 | 47.506 | 39.222 | 78.790 | 0.00 | 0.00 |
| ATOM | 3874 | HG22 | THR | X | 258 | 47.183 | 38.088 | 77.465 | 0.00 | 0.00 |
| ATOM | 3875 | HG23 | THR | X | 258 | 47.412 | 39.829 | 77.174 | 0.00 | 0.00 |
| ATOM | 3876 | OG1  | THR | X | 258 | 44.910 | 38.539 | 79.026 | 0.00 | 0.00 |
| ATOM | 3877 | HG1  | THR | X | 258 | 45.167 | 37.614 | 79.016 | 0.00 | 0.00 |
| ATOM | 3878 | C    | THR | X | 258 | 43.641 | 40.909 | 78.062 | 0.00 | 0.00 |
| ATOM | 3879 | O    | THR | X | 258 | 42.943 | 40.994 | 79.068 | 0.00 | 0.00 |
| ATOM | 3880 | N    | GLY | X | 259 | 43.256 | 41.029 | 76.762 | 0.00 | 0.00 |
| ATOM | 3881 | H    | GLY | X | 259 | 43.971 | 41.132 | 76.056 | 0.00 | 0.00 |
| ATOM | 3882 | CA   | GLY | X | 259 | 41.920 | 41.272 | 76.267 | 0.00 | 0.00 |
| ATOM | 3883 | HA2  | GLY | X | 259 | 41.611 | 42.260 | 76.643 | 0.00 | 0.00 |
| ATOM | 3884 | HA3  | GLY | X | 259 | 41.795 | 41.060 | 75.144 | 0.00 | 0.00 |
| ATOM | 3885 | C    | GLY | X | 259 | 40.891 | 40.264 | 76.780 | 0.00 | 0.00 |
| ATOM | 3886 | O    | GLY | X | 259 | 40.951 | 39.095 | 76.384 | 0.00 | 0.00 |
| ATOM | 3887 | N    | GLY | X | 260 | 39.853 | 40.723 | 77.495 | 0.00 | 0.00 |
| ATOM | 3888 | H    | GLY | X | 260 | 40.031 | 41.716 | 77.550 | 0.00 | 0.00 |
| ATOM | 3889 | CA   | GLY | X | 260 | 38.555 | 40.063 | 77.798 | 0.00 | 0.00 |
| ATOM | 3890 | HA2  | GLY | X | 260 | 38.598 | 39.016 | 77.753 | 0.00 | 0.00 |
| ATOM | 3891 | HA3  | GLY | X | 260 | 38.297 | 40.329 | 78.804 | 0.00 | 0.00 |
| ATOM | 3892 | C    | GLY | X | 260 | 37.431 | 40.372 | 76.812 | 0.00 | 0.00 |
| ATOM | 3893 | O    | GLY | X | 260 | 37.326 | 39.769 | 75.754 | 0.00 | 0.00 |
| ATOM | 3894 | N    | ASN | X | 261 | 36.582 | 41.307 | 77.202 | 0.00 | 0.00 |
| ATOM | 3895 | H    | ASN | X | 261 | 36.755 | 41.775 | 78.080 | 0.00 | 0.00 |
| ATOM | 3896 | CA   | ASN | X | 261 | 35.526 | 41.822 | 76.440 | 0.00 | 0.00 |
| ATOM | 3897 | HA   | ASN | X | 261 | 34.840 | 41.000 | 76.236 | 0.00 | 0.00 |
| ATOM | 3898 | CB   | ASN | X | 261 | 34.747 | 42.896 | 77.315 | 0.00 | 0.00 |
| ATOM | 3899 | HB2  | ASN | X | 261 | 34.318 | 42.452 | 78.214 | 0.00 | 0.00 |
| ATOM | 3900 | HB3  | ASN | X | 261 | 35.435 | 43.702 | 77.568 | 0.00 | 0.00 |
| ATOM | 3901 | CG   | ASN | X | 261 | 33.539 | 43.541 | 76.595 | 0.00 | 0.00 |
| ATOM | 3902 | OD1  | ASN | X | 261 | 33.649 | 44.557 | 75.913 | 0.00 | 0.00 |
| ATOM | 3903 | ND2  | ASN | X | 261 | 32.482 | 42.854 | 76.451 | 0.00 | 0.00 |
| ATOM | 3904 | HD21 | ASN | X | 261 | 31.636 | 43.272 | 76.093 | 0.00 | 0.00 |
| ATOM | 3905 | HD22 | ASN | X | 261 | 32.379 | 41.953 | 76.897 | 0.00 | 0.00 |
| ATOM | 3906 | C    | ASN | X | 261 | 35.949 | 42.417 | 75.050 | 0.00 | 0.00 |
| ATOM | 3907 | O    | ASN | X | 261 | 36.776 | 43.358 | 75.081 | 0.00 | 0.00 |
| ATOM | 3908 | N    | ASP | X | 262 | 35.334 | 42.057 | 73.970 | 0.00 | 0.00 |
| ATOM | 3909 | H    | ASP | X | 262 | 34.760 | 41.243 | 74.139 | 0.00 | 0.00 |
| ATOM | 3910 | CA   | ASP | X | 262 | 35.479 | 42.543 | 72.633 | 0.00 | 0.00 |
| ATOM | 3911 | HA   | ASP | X | 262 | 36.415 | 42.161 | 72.226 | 0.00 | 0.00 |
| ATOM | 3912 | CB   | ASP | X | 262 | 34.364 | 41.864 | 71.747 | 0.00 | 0.00 |
| ATOM | 3913 | HB2  | ASP | X | 262 | 33.338 | 42.101 | 72.032 | 0.00 | 0.00 |
| ATOM | 3914 | HB3  | ASP | X | 262 | 34.428 | 42.151 | 70.698 | 0.00 | 0.00 |
| ATOM | 3915 | CG   | ASP | X | 262 | 34.487 | 40.325 | 71.958 | 0.00 | 0.00 |
| ATOM | 3916 | OD1  | ASP | X | 262 | 34.066 | 39.689 | 72.938 | 0.00 | 0.00 |
| ATOM | 3917 | OD2  | ASP | X | 262 | 35.116 | 39.655 | 71.162 | 0.00 | 0.00 |
| ATOM | 3918 | C    | ASP | X | 262 | 35.460 | 44.039 | 72.407 | 0.00 | 0.00 |
| ATOM | 3919 | O    | ASP | X | 262 | 36.222 | 44.553 | 71.611 | 0.00 | 0.00 |
| ATOM | 3920 | N    | THR | X | 263 | 34.566 | 44.737 | 73.058 | 0.00 | 0.00 |
| ATOM | 3921 | H    | THR | X | 263 | 33.969 | 44.240 | 73.703 | 0.00 | 0.00 |
| ATOM | 3922 | CA   | THR | X | 263 | 34.395 | 46.252 | 72.980 | 0.00 | 0.00 |
| ATOM | 3923 | HA   | THR | X | 263 | 34.478 | 46.470 | 71.915 | 0.00 | 0.00 |
| ATOM | 3924 | CB   | THR | X | 263 | 33.088 | 46.844 | 73.472 | 0.00 | 0.00 |
| ATOM | 3925 | HB   | THR | X | 263 | 32.938 | 47.804 | 72.978 | 0.00 | 0.00 |
| ATOM | 3926 | CG2  | THR | X | 263 | 31.771 | 46.037 | 73.177 | 0.00 | 0.00 |
| ATOM | 3927 | HG21 | THR | X | 263 | 31.562 | 45.836 | 72.126 | 0.00 | 0.00 |

|      |      |      |     |   |     |        |        |        |      |      |
|------|------|------|-----|---|-----|--------|--------|--------|------|------|
| ATOM | 3928 | HG22 | THR | X | 263 | 31.861 | 45.019 | 73.556 | 0.00 | 0.00 |
| ATOM | 3929 | HG23 | THR | X | 263 | 30.896 | 46.490 | 73.642 | 0.00 | 0.00 |
| ATOM | 3930 | OG1  | THR | X | 263 | 33.202 | 47.132 | 74.877 | 0.00 | 0.00 |
| ATOM | 3931 | HG1  | THR | X | 263 | 33.181 | 46.286 | 75.330 | 0.00 | 0.00 |
| ATOM | 3932 | C    | THR | X | 263 | 35.519 | 47.052 | 73.638 | 0.00 | 0.00 |
| ATOM | 3933 | O    | THR | X | 263 | 35.941 | 48.084 | 73.171 | 0.00 | 0.00 |
| ATOM | 3934 | N    | GLU | X | 264 | 36.034 | 46.385 | 74.664 | 0.00 | 0.00 |
| ATOM | 3935 | H    | GLU | X | 264 | 35.608 | 45.530 | 74.991 | 0.00 | 0.00 |
| ATOM | 3936 | CA   | GLU | X | 264 | 37.244 | 46.910 | 75.369 | 0.00 | 0.00 |
| ATOM | 3937 | HA   | GLU | X | 264 | 37.068 | 47.984 | 75.297 | 0.00 | 0.00 |
| ATOM | 3938 | CB   | GLU | X | 264 | 37.295 | 46.317 | 76.791 | 0.00 | 0.00 |
| ATOM | 3939 | HB2  | GLU | X | 264 | 37.362 | 45.231 | 76.734 | 0.00 | 0.00 |
| ATOM | 3940 | HB3  | GLU | X | 264 | 38.274 | 46.558 | 77.206 | 0.00 | 0.00 |
| ATOM | 3941 | CG   | GLU | X | 264 | 36.133 | 46.745 | 77.804 | 0.00 | 0.00 |
| ATOM | 3942 | HG2  | GLU | X | 264 | 35.151 | 46.554 | 77.370 | 0.00 | 0.00 |
| ATOM | 3943 | HG3  | GLU | X | 264 | 36.124 | 46.131 | 78.705 | 0.00 | 0.00 |
| ATOM | 3944 | CD   | GLU | X | 264 | 36.300 | 48.146 | 78.292 | 0.00 | 0.00 |
| ATOM | 3945 | OE1  | GLU | X | 264 | 36.724 | 48.408 | 79.402 | 0.00 | 0.00 |
| ATOM | 3946 | OE2  | GLU | X | 264 | 36.147 | 48.975 | 77.458 | 0.00 | 0.00 |
| ATOM | 3947 | C    | GLU | X | 264 | 38.535 | 46.611 | 74.571 | 0.00 | 0.00 |
| ATOM | 3948 | O    | GLU | X | 264 | 39.275 | 47.558 | 74.286 | 0.00 | 0.00 |
| ATOM | 3949 | N    | LEU | X | 265 | 38.702 | 45.417 | 73.982 | 0.00 | 0.00 |
| ATOM | 3950 | H    | LEU | X | 265 | 38.104 | 44.657 | 74.274 | 0.00 | 0.00 |
| ATOM | 3951 | CA   | LEU | X | 265 | 39.838 | 45.090 | 73.095 | 0.00 | 0.00 |
| ATOM | 3952 | HA   | LEU | X | 265 | 40.709 | 45.236 | 73.733 | 0.00 | 0.00 |
| ATOM | 3953 | CB   | LEU | X | 265 | 39.666 | 43.642 | 72.618 | 0.00 | 0.00 |
| ATOM | 3954 | HB2  | LEU | X | 265 | 39.715 | 43.049 | 73.532 | 0.00 | 0.00 |
| ATOM | 3955 | HB3  | LEU | X | 265 | 38.719 | 43.400 | 72.136 | 0.00 | 0.00 |
| ATOM | 3956 | CG   | LEU | X | 265 | 40.686 | 43.023 | 71.644 | 0.00 | 0.00 |
| ATOM | 3957 | HG   | LEU | X | 265 | 41.639 | 43.443 | 71.966 | 0.00 | 0.00 |
| ATOM | 3958 | CD1  | LEU | X | 265 | 40.592 | 41.508 | 71.798 | 0.00 | 0.00 |
| ATOM | 3959 | HD11 | LEU | X | 265 | 41.146 | 40.894 | 71.087 | 0.00 | 0.00 |
| ATOM | 3960 | HD12 | LEU | X | 265 | 40.840 | 41.276 | 72.834 | 0.00 | 0.00 |
| ATOM | 3961 | HD13 | LEU | X | 265 | 39.549 | 41.246 | 71.622 | 0.00 | 0.00 |
| ATOM | 3962 | CD2  | LEU | X | 265 | 40.375 | 43.351 | 70.077 | 0.00 | 0.00 |
| ATOM | 3963 | HD21 | LEU | X | 265 | 41.071 | 42.770 | 69.472 | 0.00 | 0.00 |
| ATOM | 3964 | HD22 | LEU | X | 265 | 39.349 | 43.043 | 69.876 | 0.00 | 0.00 |
| ATOM | 3965 | HD23 | LEU | X | 265 | 40.531 | 44.429 | 70.023 | 0.00 | 0.00 |
| ATOM | 3966 | C    | LEU | X | 265 | 39.992 | 46.031 | 71.918 | 0.00 | 0.00 |
| ATOM | 3967 | O    | LEU | X | 265 | 41.070 | 46.600 | 71.637 | 0.00 | 0.00 |
| ATOM | 3968 | N    | VAL | X | 266 | 38.927 | 46.254 | 71.140 | 0.00 | 0.00 |
| ATOM | 3969 | H    | VAL | X | 266 | 38.097 | 45.711 | 71.330 | 0.00 | 0.00 |
| ATOM | 3970 | CA   | VAL | X | 266 | 39.001 | 47.111 | 69.960 | 0.00 | 0.00 |
| ATOM | 3971 | HA   | VAL | X | 266 | 39.811 | 46.727 | 69.340 | 0.00 | 0.00 |
| ATOM | 3972 | CB   | VAL | X | 266 | 37.659 | 46.910 | 69.084 | 0.00 | 0.00 |
| ATOM | 3973 | HB   | VAL | X | 266 | 37.519 | 45.831 | 69.021 | 0.00 | 0.00 |
| ATOM | 3974 | CG1  | VAL | X | 266 | 36.395 | 47.458 | 69.735 | 0.00 | 0.00 |
| ATOM | 3975 | HG11 | VAL | X | 266 | 36.495 | 48.543 | 69.763 | 0.00 | 0.00 |
| ATOM | 3976 | HG12 | VAL | X | 266 | 35.531 | 47.083 | 69.187 | 0.00 | 0.00 |
| ATOM | 3977 | HG13 | VAL | X | 266 | 36.328 | 47.009 | 70.726 | 0.00 | 0.00 |
| ATOM | 3978 | CG2  | VAL | X | 266 | 37.747 | 47.626 | 67.684 | 0.00 | 0.00 |
| ATOM | 3979 | HG21 | VAL | X | 266 | 38.553 | 47.183 | 67.098 | 0.00 | 0.00 |
| ATOM | 3980 | HG22 | VAL | X | 266 | 36.842 | 47.373 | 67.132 | 0.00 | 0.00 |
| ATOM | 3981 | HG23 | VAL | X | 266 | 37.669 | 48.710 | 67.768 | 0.00 | 0.00 |
| ATOM | 3982 | C    | VAL | X | 266 | 39.270 | 48.543 | 70.232 | 0.00 | 0.00 |
| ATOM | 3983 | O    | VAL | X | 266 | 39.879 | 49.265 | 69.417 | 0.00 | 0.00 |
| ATOM | 3984 | N    | ALA | X | 267 | 38.917 | 48.984 | 71.397 | 0.00 | 0.00 |
| ATOM | 3985 | H    | ALA | X | 267 | 38.477 | 48.357 | 72.055 | 0.00 | 0.00 |
| ATOM | 3986 | CA   | ALA | X | 267 | 39.007 | 50.378 | 71.791 | 0.00 | 0.00 |
| ATOM | 3987 | HA   | ALA | X | 267 | 38.727 | 50.882 | 70.866 | 0.00 | 0.00 |
| ATOM | 3988 | CB   | ALA | X | 267 | 37.980 | 50.725 | 72.885 | 0.00 | 0.00 |
| ATOM | 3989 | HB1  | ALA | X | 267 | 38.068 | 51.772 | 73.175 | 0.00 | 0.00 |
| ATOM | 3990 | HB2  | ALA | X | 267 | 36.992 | 50.523 | 72.472 | 0.00 | 0.00 |
| ATOM | 3991 | HB3  | ALA | X | 267 | 38.114 | 50.159 | 73.808 | 0.00 | 0.00 |
| ATOM | 3992 | C    | ALA | X | 267 | 40.476 | 50.746 | 72.118 | 0.00 | 0.00 |
| ATOM | 3993 | O    | ALA | X | 267 | 40.956 | 51.709 | 71.683 | 0.00 | 0.00 |
| ATOM | 3994 | N    | CYX | X | 268 | 41.202 | 49.818 | 72.792 | 0.00 | 0.00 |
| ATOM | 3995 | H    | CYX | X | 268 | 40.726 | 48.977 | 73.087 | 0.00 | 0.00 |
| ATOM | 3996 | CA   | CYX | X | 268 | 42.648 | 49.894 | 72.945 | 0.00 | 0.00 |
| ATOM | 3997 | HA   | CYX | X | 268 | 42.870 | 50.871 | 73.374 | 0.00 | 0.00 |

|      |      |      |     |   |     |        |        |        |      |      |
|------|------|------|-----|---|-----|--------|--------|--------|------|------|
| ATOM | 3998 | CB   | CYX | X | 268 | 43.133 | 48.892 | 73.945 | 0.00 | 0.00 |
| ATOM | 3999 | HB2  | CYX | X | 268 | 42.681 | 49.097 | 74.915 | 0.00 | 0.00 |
| ATOM | 4000 | HB3  | CYX | X | 268 | 42.927 | 47.884 | 73.584 | 0.00 | 0.00 |
| ATOM | 4001 | SG   | CYX | X | 268 | 44.878 | 48.931 | 74.269 | 0.00 | 0.00 |
| ATOM | 4002 | C    | CYX | X | 268 | 43.364 | 49.878 | 71.552 | 0.00 | 0.00 |
| ATOM | 4003 | O    | CYX | X | 268 | 44.153 | 50.732 | 71.276 | 0.00 | 0.00 |
| ATOM | 4004 | N    | LEU | X | 269 | 42.960 | 48.913 | 70.669 | 0.00 | 0.00 |
| ATOM | 4005 | H    | LEU | X | 269 | 42.527 | 48.081 | 71.044 | 0.00 | 0.00 |
| ATOM | 4006 | CA   | LEU | X | 269 | 43.391 | 48.989 | 69.201 | 0.00 | 0.00 |
| ATOM | 4007 | HA   | LEU | X | 269 | 44.480 | 48.972 | 69.169 | 0.00 | 0.00 |
| ATOM | 4008 | CB   | LEU | X | 269 | 42.941 | 47.710 | 68.502 | 0.00 | 0.00 |
| ATOM | 4009 | HB2  | LEU | X | 269 | 41.907 | 47.459 | 68.742 | 0.00 | 0.00 |
| ATOM | 4010 | HB3  | LEU | X | 269 | 42.996 | 47.797 | 67.417 | 0.00 | 0.00 |
| ATOM | 4011 | CG   | LEU | X | 269 | 43.872 | 46.521 | 68.839 | 0.00 | 0.00 |
| ATOM | 4012 | HG   | LEU | X | 269 | 44.876 | 46.944 | 68.791 | 0.00 | 0.00 |
| ATOM | 4013 | CD1  | LEU | X | 269 | 43.672 | 45.885 | 70.236 | 0.00 | 0.00 |
| ATOM | 4014 | HD11 | LEU | X | 269 | 43.629 | 46.600 | 71.058 | 0.00 | 0.00 |
| ATOM | 4015 | HD12 | LEU | X | 269 | 42.827 | 45.197 | 70.193 | 0.00 | 0.00 |
| ATOM | 4016 | HD13 | LEU | X | 269 | 44.513 | 45.228 | 70.457 | 0.00 | 0.00 |
| ATOM | 4017 | CD2  | LEU | X | 269 | 43.711 | 45.423 | 67.792 | 0.00 | 0.00 |
| ATOM | 4018 | HD21 | LEU | X | 269 | 42.719 | 44.971 | 67.774 | 0.00 | 0.00 |
| ATOM | 4019 | HD22 | LEU | X | 269 | 43.994 | 45.778 | 66.801 | 0.00 | 0.00 |
| ATOM | 4020 | HD23 | LEU | X | 269 | 44.428 | 44.648 | 68.061 | 0.00 | 0.00 |
| ATOM | 4021 | C    | LEU | X | 269 | 43.027 | 50.265 | 68.488 | 0.00 | 0.00 |
| ATOM | 4022 | O    | LEU | X | 269 | 43.609 | 50.451 | 67.389 | 0.00 | 0.00 |
| ATOM | 4023 | N    | ARG | X | 270 | 42.208 | 51.146 | 68.996 | 0.00 | 0.00 |
| ATOM | 4024 | H    | ARG | X | 270 | 41.671 | 50.740 | 69.749 | 0.00 | 0.00 |
| ATOM | 4025 | CA   | ARG | X | 270 | 41.867 | 52.491 | 68.506 | 0.00 | 0.00 |
| ATOM | 4026 | HA   | ARG | X | 270 | 42.157 | 52.441 | 67.456 | 0.00 | 0.00 |
| ATOM | 4027 | CB   | ARG | X | 270 | 40.334 | 52.872 | 68.584 | 0.00 | 0.00 |
| ATOM | 4028 | HB2  | ARG | X | 270 | 40.023 | 52.657 | 69.607 | 0.00 | 0.00 |
| ATOM | 4029 | HB3  | ARG | X | 270 | 40.164 | 53.943 | 68.474 | 0.00 | 0.00 |
| ATOM | 4030 | CG   | ARG | X | 270 | 39.544 | 52.153 | 67.407 | 0.00 | 0.00 |
| ATOM | 4031 | HG2  | ARG | X | 270 | 40.110 | 52.476 | 66.533 | 0.00 | 0.00 |
| ATOM | 4032 | HG3  | ARG | X | 270 | 39.529 | 51.063 | 67.411 | 0.00 | 0.00 |
| ATOM | 4033 | CD   | ARG | X | 270 | 38.112 | 52.831 | 67.341 | 0.00 | 0.00 |
| ATOM | 4034 | HD2  | ARG | X | 270 | 38.189 | 53.813 | 67.809 | 0.00 | 0.00 |
| ATOM | 4035 | HD3  | ARG | X | 270 | 37.847 | 52.980 | 66.294 | 0.00 | 0.00 |
| ATOM | 4036 | NE   | ARG | X | 270 | 37.089 | 52.002 | 67.895 | 0.00 | 0.00 |
| ATOM | 4037 | HE   | ARG | X | 270 | 36.930 | 52.224 | 68.868 | 0.00 | 0.00 |
| ATOM | 4038 | CZ   | ARG | X | 270 | 36.264 | 51.099 | 67.321 | 0.00 | 0.00 |
| ATOM | 4039 | NH1  | ARG | X | 270 | 36.272 | 50.824 | 66.032 | 0.00 | 0.00 |
| ATOM | 4040 | HH11 | ARG | X | 270 | 36.986 | 51.300 | 65.499 | 0.00 | 0.00 |
| ATOM | 4041 | HH12 | ARG | X | 270 | 35.515 | 50.248 | 65.692 | 0.00 | 0.00 |
| ATOM | 4042 | NH2  | ARG | X | 270 | 35.311 | 50.502 | 68.054 | 0.00 | 0.00 |
| ATOM | 4043 | HH21 | ARG | X | 270 | 35.145 | 50.675 | 69.036 | 0.00 | 0.00 |
| ATOM | 4044 | HH22 | ARG | X | 270 | 34.574 | 50.003 | 67.577 | 0.00 | 0.00 |
| ATOM | 4045 | C    | ARG | X | 270 | 42.789 | 53.492 | 69.234 | 0.00 | 0.00 |
| ATOM | 4046 | O    | ARG | X | 270 | 43.241 | 54.436 | 68.551 | 0.00 | 0.00 |
| ATOM | 4047 | N    | THR | X | 271 | 43.063 | 53.319 | 70.545 | 0.00 | 0.00 |
| ATOM | 4048 | H    | THR | X | 271 | 42.588 | 52.562 | 71.017 | 0.00 | 0.00 |
| ATOM | 4049 | CA   | THR | X | 271 | 43.980 | 54.094 | 71.427 | 0.00 | 0.00 |
| ATOM | 4050 | HA   | THR | X | 271 | 43.759 | 55.161 | 71.455 | 0.00 | 0.00 |
| ATOM | 4051 | CB   | THR | X | 271 | 43.906 | 53.674 | 72.882 | 0.00 | 0.00 |
| ATOM | 4052 | HB   | THR | X | 271 | 44.218 | 52.631 | 72.947 | 0.00 | 0.00 |
| ATOM | 4053 | CG2  | THR | X | 271 | 44.964 | 54.487 | 73.686 | 0.00 | 0.00 |
| ATOM | 4054 | HG21 | THR | X | 271 | 44.648 | 54.278 | 74.708 | 0.00 | 0.00 |
| ATOM | 4055 | HG22 | THR | X | 271 | 45.921 | 53.969 | 73.749 | 0.00 | 0.00 |
| ATOM | 4056 | HG23 | THR | X | 271 | 45.235 | 55.502 | 73.398 | 0.00 | 0.00 |
| ATOM | 4057 | OG1  | THR | X | 271 | 42.540 | 53.812 | 73.282 | 0.00 | 0.00 |
| ATOM | 4058 | HG1  | THR | X | 271 | 42.361 | 53.375 | 74.117 | 0.00 | 0.00 |
| ATOM | 4059 | C    | THR | X | 271 | 45.425 | 54.100 | 70.879 | 0.00 | 0.00 |
| ATOM | 4060 | O    | THR | X | 271 | 45.927 | 55.170 | 70.493 | 0.00 | 0.00 |
| ATOM | 4061 | N    | ARG | X | 272 | 46.130 | 52.952 | 70.758 | 0.00 | 0.00 |
| ATOM | 4062 | H    | ARG | X | 272 | 45.662 | 52.110 | 71.060 | 0.00 | 0.00 |
| ATOM | 4063 | CA   | ARG | X | 272 | 47.508 | 52.841 | 70.332 | 0.00 | 0.00 |
| ATOM | 4064 | HA   | ARG | X | 272 | 47.986 | 53.576 | 70.979 | 0.00 | 0.00 |
| ATOM | 4065 | CB   | ARG | X | 272 | 48.154 | 51.401 | 70.742 | 0.00 | 0.00 |
| ATOM | 4066 | HB2  | ARG | X | 272 | 47.966 | 50.693 | 69.934 | 0.00 | 0.00 |
| ATOM | 4067 | HB3  | ARG | X | 272 | 49.223 | 51.591 | 70.647 | 0.00 | 0.00 |



|      |      |      |     |   |     |        |        |        |      |      |
|------|------|------|-----|---|-----|--------|--------|--------|------|------|
| ATOM | 4068 | CG   | ARG | X | 272 | 47.825 | 50.779 | 72.079 | 0.00 | 0.00 |
| ATOM | 4069 | HG2  | ARG | X | 272 | 46.773 | 50.497 | 72.093 | 0.00 | 0.00 |
| ATOM | 4070 | HG3  | ARG | X | 272 | 48.396 | 49.865 | 72.246 | 0.00 | 0.00 |
| ATOM | 4071 | CD   | ARG | X | 272 | 48.396 | 51.712 | 73.188 | 0.00 | 0.00 |
| ATOM | 4072 | HD2  | ARG | X | 272 | 49.362 | 52.097 | 72.863 | 0.00 | 0.00 |
| ATOM | 4073 | HD3  | ARG | X | 272 | 47.741 | 52.580 | 73.263 | 0.00 | 0.00 |
| ATOM | 4074 | NE   | ARG | X | 272 | 48.441 | 51.106 | 74.532 | 0.00 | 0.00 |
| ATOM | 4075 | HE   | ARG | X | 272 | 47.598 | 51.182 | 75.085 | 0.00 | 0.00 |
| ATOM | 4076 | CZ   | ARG | X | 272 | 49.577 | 50.625 | 75.106 | 0.00 | 0.00 |
| ATOM | 4077 | NH1  | ARG | X | 272 | 50.608 | 50.157 | 74.468 | 0.00 | 0.00 |
| ATOM | 4078 | HH11 | ARG | X | 272 | 50.656 | 50.193 | 73.460 | 0.00 | 0.00 |
| ATOM | 4079 | HH12 | ARG | X | 272 | 51.481 | 49.898 | 74.905 | 0.00 | 0.00 |
| ATOM | 4080 | NH2  | ARG | X | 272 | 49.609 | 50.543 | 76.388 | 0.00 | 0.00 |
| ATOM | 4081 | HH21 | ARG | X | 272 | 48.791 | 50.735 | 76.948 | 0.00 | 0.00 |
| ATOM | 4082 | HH22 | ARG | X | 272 | 50.253 | 49.924 | 76.860 | 0.00 | 0.00 |
| ATOM | 4083 | C    | ARG | X | 272 | 47.752 | 53.128 | 68.795 | 0.00 | 0.00 |
| ATOM | 4084 | O    | ARG | X | 272 | 46.943 | 52.640 | 68.069 | 0.00 | 0.00 |
| ATOM | 4085 | N    | PRO | X | 273 | 48.849 | 53.825 | 68.461 | 0.00 | 0.00 |
| ATOM | 4086 | CD   | PRO | X | 273 | 49.944 | 54.159 | 69.314 | 0.00 | 0.00 |
| ATOM | 4087 | HD2  | PRO | X | 273 | 50.611 | 53.311 | 69.471 | 0.00 | 0.00 |
| ATOM | 4088 | HD3  | PRO | X | 273 | 49.586 | 54.535 | 70.272 | 0.00 | 0.00 |
| ATOM | 4089 | CG   | PRO | X | 273 | 50.713 | 55.236 | 68.531 | 0.00 | 0.00 |
| ATOM | 4090 | HG2  | PRO | X | 273 | 51.781 | 55.234 | 68.749 | 0.00 | 0.00 |
| ATOM | 4091 | HG3  | PRO | X | 273 | 50.249 | 56.191 | 68.778 | 0.00 | 0.00 |
| ATOM | 4092 | CB   | PRO | X | 273 | 50.344 | 54.955 | 67.057 | 0.00 | 0.00 |
| ATOM | 4093 | HB2  | PRO | X | 273 | 51.104 | 54.387 | 66.521 | 0.00 | 0.00 |
| ATOM | 4094 | HB3  | PRO | X | 273 | 50.114 | 55.840 | 66.463 | 0.00 | 0.00 |
| ATOM | 4095 | CA   | PRO | X | 273 | 49.087 | 54.141 | 67.079 | 0.00 | 0.00 |
| ATOM | 4096 | HA   | PRO | X | 273 | 48.171 | 54.663 | 66.801 | 0.00 | 0.00 |
| ATOM | 4097 | C    | PRO | X | 273 | 49.205 | 53.011 | 66.085 | 0.00 | 0.00 |
| ATOM | 4098 | O    | PRO | X | 273 | 49.758 | 52.001 | 66.349 | 0.00 | 0.00 |
| ATOM | 4099 | N    | ALA | X | 274 | 48.506 | 53.104 | 64.940 | 0.00 | 0.00 |
| ATOM | 4100 | H    | ALA | X | 274 | 48.031 | 53.993 | 64.869 | 0.00 | 0.00 |
| ATOM | 4101 | CA   | ALA | X | 274 | 48.503 | 52.215 | 63.823 | 0.00 | 0.00 |
| ATOM | 4102 | HA   | ALA | X | 274 | 47.809 | 51.394 | 64.004 | 0.00 | 0.00 |
| ATOM | 4103 | CB   | ALA | X | 274 | 47.971 | 53.130 | 62.654 | 0.00 | 0.00 |
| ATOM | 4104 | HB1  | ALA | X | 274 | 48.009 | 52.627 | 61.687 | 0.00 | 0.00 |
| ATOM | 4105 | HB2  | ALA | X | 274 | 46.954 | 53.372 | 62.963 | 0.00 | 0.00 |
| ATOM | 4106 | HB3  | ALA | X | 274 | 48.533 | 54.045 | 62.470 | 0.00 | 0.00 |
| ATOM | 4107 | C    | ALA | X | 274 | 49.871 | 51.570 | 63.424 | 0.00 | 0.00 |
| ATOM | 4108 | O    | ALA | X | 274 | 49.932 | 50.377 | 63.162 | 0.00 | 0.00 |
| ATOM | 4109 | N    | GLN | X | 275 | 50.960 | 52.312 | 63.603 | 0.00 | 0.00 |
| ATOM | 4110 | H    | GLN | X | 275 | 50.852 | 53.300 | 63.782 | 0.00 | 0.00 |
| ATOM | 4111 | CA   | GLN | X | 275 | 52.359 | 51.803 | 63.287 | 0.00 | 0.00 |
| ATOM | 4112 | HA   | GLN | X | 275 | 52.380 | 51.461 | 62.252 | 0.00 | 0.00 |
| ATOM | 4113 | CB   | GLN | X | 275 | 53.317 | 52.983 | 63.391 | 0.00 | 0.00 |
| ATOM | 4114 | HB2  | GLN | X | 275 | 52.956 | 53.552 | 64.247 | 0.00 | 0.00 |
| ATOM | 4115 | HB3  | GLN | X | 275 | 54.316 | 52.547 | 63.355 | 0.00 | 0.00 |
| ATOM | 4116 | CG   | GLN | X | 275 | 53.230 | 53.988 | 62.203 | 0.00 | 0.00 |
| ATOM | 4117 | HG2  | GLN | X | 275 | 52.223 | 53.973 | 61.785 | 0.00 | 0.00 |
| ATOM | 4118 | HG3  | GLN | X | 275 | 53.410 | 55.025 | 62.489 | 0.00 | 0.00 |
| ATOM | 4119 | CD   | GLN | X | 275 | 54.072 | 53.573 | 60.992 | 0.00 | 0.00 |
| ATOM | 4120 | OE1  | GLN | X | 275 | 54.451 | 52.419 | 60.840 | 0.00 | 0.00 |
| ATOM | 4121 | NE2  | GLN | X | 275 | 54.373 | 54.477 | 60.067 | 0.00 | 0.00 |
| ATOM | 4122 | HE21 | GLN | X | 275 | 54.931 | 54.190 | 59.275 | 0.00 | 0.00 |
| ATOM | 4123 | HE22 | GLN | X | 275 | 54.152 | 55.434 | 60.302 | 0.00 | 0.00 |
| ATOM | 4124 | C    | GLN | X | 275 | 52.784 | 50.591 | 64.175 | 0.00 | 0.00 |
| ATOM | 4125 | O    | GLN | X | 275 | 53.596 | 49.792 | 63.768 | 0.00 | 0.00 |
| ATOM | 4126 | N    | VAL | X | 276 | 52.157 | 50.491 | 65.390 | 0.00 | 0.00 |
| ATOM | 4127 | H    | VAL | X | 276 | 51.582 | 51.262 | 65.698 | 0.00 | 0.00 |
| ATOM | 4128 | CA   | VAL | X | 276 | 52.439 | 49.409 | 66.380 | 0.00 | 0.00 |
| ATOM | 4129 | HA   | VAL | X | 276 | 53.480 | 49.166 | 66.589 | 0.00 | 0.00 |
| ATOM | 4130 | CB   | VAL | X | 276 | 51.756 | 49.779 | 67.763 | 0.00 | 0.00 |
| ATOM | 4131 | HB   | VAL | X | 276 | 50.681 | 49.902 | 67.632 | 0.00 | 0.00 |
| ATOM | 4132 | CG1  | VAL | X | 276 | 51.998 | 48.682 | 68.806 | 0.00 | 0.00 |
| ATOM | 4133 | HG11 | VAL | X | 276 | 51.461 | 48.958 | 69.714 | 0.00 | 0.00 |
| ATOM | 4134 | HG12 | VAL | X | 276 | 51.576 | 47.728 | 68.491 | 0.00 | 0.00 |
| ATOM | 4135 | HG13 | VAL | X | 276 | 53.046 | 48.530 | 69.063 | 0.00 | 0.00 |
| ATOM | 4136 | CG2  | VAL | X | 276 | 52.202 | 51.052 | 68.337 | 0.00 | 0.00 |
| ATOM | 4137 | HG21 | VAL | X | 276 | 52.251 | 51.809 | 67.554 | 0.00 | 0.00 |

|      |      |      |     |   |     |        |        |        |      |      |
|------|------|------|-----|---|-----|--------|--------|--------|------|------|
| ATOM | 4138 | HG22 | VAL | X | 276 | 51.466 | 51.451 | 69.035 | 0.00 | 0.00 |
| ATOM | 4139 | HG23 | VAL | X | 276 | 53.163 | 50.882 | 68.821 | 0.00 | 0.00 |
| ATOM | 4140 | C    | VAL | X | 276 | 51.668 | 48.227 | 65.828 | 0.00 | 0.00 |
| ATOM | 4141 | O    | VAL | X | 276 | 52.323 | 47.198 | 65.632 | 0.00 | 0.00 |
| ATOM | 4142 | N    | LEU | X | 277 | 50.373 | 48.285 | 65.436 | 0.00 | 0.00 |
| ATOM | 4143 | H    | LEU | X | 277 | 49.873 | 49.152 | 65.568 | 0.00 | 0.00 |
| ATOM | 4144 | CA   | LEU | X | 277 | 49.537 | 47.204 | 64.907 | 0.00 | 0.00 |
| ATOM | 4145 | HA   | LEU | X | 277 | 49.513 | 46.374 | 65.613 | 0.00 | 0.00 |
| ATOM | 4146 | CB   | LEU | X | 277 | 48.133 | 47.683 | 64.620 | 0.00 | 0.00 |
| ATOM | 4147 | HB2  | LEU | X | 277 | 48.199 | 48.661 | 64.143 | 0.00 | 0.00 |
| ATOM | 4148 | HB3  | LEU | X | 277 | 47.697 | 46.883 | 64.022 | 0.00 | 0.00 |
| ATOM | 4149 | CG   | LEU | X | 277 | 47.162 | 47.896 | 65.830 | 0.00 | 0.00 |
| ATOM | 4150 | HG   | LEU | X | 277 | 47.040 | 46.914 | 66.286 | 0.00 | 0.00 |
| ATOM | 4151 | CD1  | LEU | X | 277 | 47.494 | 49.055 | 66.773 | 0.00 | 0.00 |
| ATOM | 4152 | HD11 | LEU | X | 277 | 48.306 | 48.811 | 67.457 | 0.00 | 0.00 |
| ATOM | 4153 | HD12 | LEU | X | 277 | 47.778 | 49.950 | 66.219 | 0.00 | 0.00 |
| ATOM | 4154 | HD13 | LEU | X | 277 | 46.665 | 49.250 | 67.454 | 0.00 | 0.00 |
| ATOM | 4155 | CD2  | LEU | X | 277 | 45.825 | 48.201 | 65.222 | 0.00 | 0.00 |
| ATOM | 4156 | HD21 | LEU | X | 277 | 46.028 | 49.005 | 64.515 | 0.00 | 0.00 |
| ATOM | 4157 | HD22 | LEU | X | 277 | 45.461 | 47.355 | 64.640 | 0.00 | 0.00 |
| ATOM | 4158 | HD23 | LEU | X | 277 | 45.093 | 48.418 | 66.000 | 0.00 | 0.00 |
| ATOM | 4159 | C    | LEU | X | 277 | 50.156 | 46.642 | 63.548 | 0.00 | 0.00 |
| ATOM | 4160 | O    | LEU | X | 277 | 50.262 | 45.459 | 63.323 | 0.00 | 0.00 |
| ATOM | 4161 | N    | VAL | X | 278 | 50.437 | 47.575 | 62.614 | 0.00 | 0.00 |
| ATOM | 4162 | H    | VAL | X | 278 | 50.282 | 48.546 | 62.847 | 0.00 | 0.00 |
| ATOM | 4163 | CA   | VAL | X | 278 | 50.709 | 47.148 | 61.234 | 0.00 | 0.00 |
| ATOM | 4164 | HA   | VAL | X | 278 | 49.903 | 46.499 | 60.890 | 0.00 | 0.00 |
| ATOM | 4165 | CB   | VAL | X | 278 | 50.724 | 48.354 | 60.315 | 0.00 | 0.00 |
| ATOM | 4166 | HB   | VAL | X | 278 | 49.829 | 48.919 | 60.577 | 0.00 | 0.00 |
| ATOM | 4167 | CG1  | VAL | X | 278 | 51.992 | 49.263 | 60.498 | 0.00 | 0.00 |
| ATOM | 4168 | HG11 | VAL | X | 278 | 51.950 | 50.148 | 59.863 | 0.00 | 0.00 |
| ATOM | 4169 | HG12 | VAL | X | 278 | 52.095 | 49.502 | 61.557 | 0.00 | 0.00 |
| ATOM | 4170 | HG13 | VAL | X | 278 | 52.931 | 48.733 | 60.339 | 0.00 | 0.00 |
| ATOM | 4171 | CG2  | VAL | X | 278 | 50.626 | 47.986 | 58.880 | 0.00 | 0.00 |
| ATOM | 4172 | HG21 | VAL | X | 278 | 49.950 | 47.146 | 58.718 | 0.00 | 0.00 |
| ATOM | 4173 | HG22 | VAL | X | 278 | 50.240 | 48.902 | 58.434 | 0.00 | 0.00 |
| ATOM | 4174 | HG23 | VAL | X | 278 | 51.608 | 47.781 | 58.453 | 0.00 | 0.00 |
| ATOM | 4175 | C    | VAL | X | 278 | 51.949 | 46.300 | 61.108 | 0.00 | 0.00 |
| ATOM | 4176 | O    | VAL | X | 278 | 52.094 | 45.546 | 60.168 | 0.00 | 0.00 |
| ATOM | 4177 | N    | ASN | X | 279 | 52.939 | 46.403 | 62.079 | 0.00 | 0.00 |
| ATOM | 4178 | H    | ASN | X | 279 | 52.742 | 46.947 | 62.907 | 0.00 | 0.00 |
| ATOM | 4179 | CA   | ASN | X | 279 | 54.101 | 45.455 | 61.992 | 0.00 | 0.00 |
| ATOM | 4180 | HA   | ASN | X | 279 | 54.551 | 45.534 | 61.002 | 0.00 | 0.00 |
| ATOM | 4181 | CB   | ASN | X | 279 | 55.088 | 45.902 | 63.070 | 0.00 | 0.00 |
| ATOM | 4182 | HB2  | ASN | X | 279 | 55.203 | 46.956 | 62.817 | 0.00 | 0.00 |
| ATOM | 4183 | HB3  | ASN | X | 279 | 54.628 | 45.923 | 64.058 | 0.00 | 0.00 |
| ATOM | 4184 | CG   | ASN | X | 279 | 56.379 | 45.134 | 62.990 | 0.00 | 0.00 |
| ATOM | 4185 | OD1  | ASN | X | 279 | 56.460 | 43.974 | 63.318 | 0.00 | 0.00 |
| ATOM | 4186 | ND2  | ASN | X | 279 | 57.480 | 45.776 | 62.605 | 0.00 | 0.00 |
| ATOM | 4187 | HD21 | ASN | X | 279 | 58.362 | 45.285 | 62.558 | 0.00 | 0.00 |
| ATOM | 4188 | HD22 | ASN | X | 279 | 57.391 | 46.776 | 62.490 | 0.00 | 0.00 |
| ATOM | 4189 | C    | ASN | X | 279 | 53.564 | 44.026 | 62.199 | 0.00 | 0.00 |
| ATOM | 4190 | O    | ASN | X | 279 | 53.872 | 43.075 | 61.460 | 0.00 | 0.00 |
| ATOM | 4191 | N    | HIE | X | 280 | 52.589 | 43.860 | 63.151 | 0.00 | 0.00 |
| ATOM | 4192 | H    | HIE | X | 280 | 52.204 | 44.720 | 63.513 | 0.00 | 0.00 |
| ATOM | 4193 | CA   | HIE | X | 280 | 52.202 | 42.632 | 63.755 | 0.00 | 0.00 |
| ATOM | 4194 | HA   | HIE | X | 280 | 53.069 | 41.994 | 63.928 | 0.00 | 0.00 |
| ATOM | 4195 | CB   | HIE | X | 280 | 51.574 | 42.871 | 65.119 | 0.00 | 0.00 |
| ATOM | 4196 | HB2  | HIE | X | 280 | 50.792 | 43.620 | 64.998 | 0.00 | 0.00 |
| ATOM | 4197 | HB3  | HIE | X | 280 | 51.061 | 41.955 | 65.412 | 0.00 | 0.00 |
| ATOM | 4198 | CG   | HIE | X | 280 | 52.516 | 43.297 | 66.214 | 0.00 | 0.00 |
| ATOM | 4199 | ND1  | HIE | X | 280 | 53.743 | 42.764 | 66.405 | 0.00 | 0.00 |
| ATOM | 4200 | CE1  | HIE | X | 280 | 54.240 | 43.450 | 67.470 | 0.00 | 0.00 |
| ATOM | 4201 | HE1  | HIE | X | 280 | 55.238 | 43.343 | 67.867 | 0.00 | 0.00 |
| ATOM | 4202 | NE2  | HIE | X | 280 | 53.422 | 44.406 | 67.887 | 0.00 | 0.00 |
| ATOM | 4203 | HE2  | HIE | X | 280 | 53.525 | 44.950 | 68.732 | 0.00 | 0.00 |
| ATOM | 4204 | CD2  | HIE | X | 280 | 52.284 | 44.314 | 67.083 | 0.00 | 0.00 |
| ATOM | 4205 | HD2  | HIE | X | 280 | 51.438 | 44.985 | 67.110 | 0.00 | 0.00 |
| ATOM | 4206 | C    | HIE | X | 280 | 51.252 | 41.823 | 62.842 | 0.00 | 0.00 |
| ATOM | 4207 | O    | HIE | X | 280 | 50.980 | 40.624 | 63.144 | 0.00 | 0.00 |

|      |      |      |     |   |     |        |        |        |      |      |
|------|------|------|-----|---|-----|--------|--------|--------|------|------|
| ATOM | 4208 | N    | GLU | X | 281 | 50.893 | 42.386 | 61.753 | 0.00 | 0.00 |
| ATOM | 4209 | H    | GLU | X | 281 | 51.195 | 43.349 | 61.731 | 0.00 | 0.00 |
| ATOM | 4210 | CA   | GLU | X | 281 | 50.347 | 41.737 | 60.568 | 0.00 | 0.00 |
| ATOM | 4211 | HA   | GLU | X | 281 | 49.329 | 41.451 | 60.831 | 0.00 | 0.00 |
| ATOM | 4212 | CB   | GLU | X | 281 | 50.473 | 42.668 | 59.294 | 0.00 | 0.00 |
| ATOM | 4213 | HB2  | GLU | X | 281 | 51.490 | 43.000 | 59.502 | 0.00 | 0.00 |
| ATOM | 4214 | HB3  | GLU | X | 281 | 50.415 | 42.043 | 58.402 | 0.00 | 0.00 |
| ATOM | 4215 | CG   | GLU | X | 281 | 49.509 | 43.921 | 59.306 | 0.00 | 0.00 |
| ATOM | 4216 | HG2  | GLU | X | 281 | 49.709 | 44.433 | 60.247 | 0.00 | 0.00 |
| ATOM | 4217 | HG3  | GLU | X | 281 | 49.780 | 44.570 | 58.473 | 0.00 | 0.00 |
| ATOM | 4218 | CD   | GLU | X | 281 | 48.034 | 43.681 | 59.196 | 0.00 | 0.00 |
| ATOM | 4219 | OE1  | GLU | X | 281 | 47.275 | 44.597 | 59.648 | 0.00 | 0.00 |
| ATOM | 4220 | OE2  | GLU | X | 281 | 47.705 | 42.636 | 58.697 | 0.00 | 0.00 |
| ATOM | 4221 | C    | GLU | X | 281 | 51.128 | 40.422 | 60.322 | 0.00 | 0.00 |
| ATOM | 4222 | O    | GLU | X | 281 | 50.580 | 39.270 | 60.341 | 0.00 | 0.00 |
| ATOM | 4223 | N    | TRP | X | 282 | 52.420 | 40.460 | 60.017 | 0.00 | 0.00 |
| ATOM | 4224 | H    | TRP | X | 282 | 52.863 | 41.363 | 59.922 | 0.00 | 0.00 |
| ATOM | 4225 | CA   | TRP | X | 282 | 53.316 | 39.379 | 59.522 | 0.00 | 0.00 |
| ATOM | 4226 | HA   | TRP | X | 282 | 52.670 | 38.770 | 58.890 | 0.00 | 0.00 |
| ATOM | 4227 | CB   | TRP | X | 282 | 54.487 | 39.805 | 58.650 | 0.00 | 0.00 |
| ATOM | 4228 | HB2  | TRP | X | 282 | 54.888 | 40.768 | 58.965 | 0.00 | 0.00 |
| ATOM | 4229 | HB3  | TRP | X | 282 | 55.275 | 39.052 | 58.657 | 0.00 | 0.00 |
| ATOM | 4230 | CG   | TRP | X | 282 | 54.180 | 39.986 | 57.219 | 0.00 | 0.00 |
| ATOM | 4231 | CD1  | TRP | X | 282 | 53.100 | 40.572 | 56.661 | 0.00 | 0.00 |
| ATOM | 4232 | HD1  | TRP | X | 282 | 52.362 | 41.009 | 57.317 | 0.00 | 0.00 |
| ATOM | 4233 | NE1  | TRP | X | 282 | 53.169 | 40.572 | 55.307 | 0.00 | 0.00 |
| ATOM | 4234 | HE1  | TRP | X | 282 | 52.480 | 41.001 | 54.706 | 0.00 | 0.00 |
| ATOM | 4235 | CE2  | TRP | X | 282 | 54.347 | 39.964 | 54.874 | 0.00 | 0.00 |
| ATOM | 4236 | CZ2  | TRP | X | 282 | 54.901 | 39.691 | 53.648 | 0.00 | 0.00 |
| ATOM | 4237 | HZ2  | TRP | X | 282 | 54.427 | 39.986 | 52.723 | 0.00 | 0.00 |
| ATOM | 4238 | CH2  | TRP | X | 282 | 56.150 | 38.995 | 53.593 | 0.00 | 0.00 |
| ATOM | 4239 | HH2  | TRP | X | 282 | 56.634 | 38.716 | 52.669 | 0.00 | 0.00 |
| ATOM | 4240 | CZ3  | TRP | X | 282 | 56.734 | 38.481 | 54.813 | 0.00 | 0.00 |
| ATOM | 4241 | HZ3  | TRP | X | 282 | 57.536 | 37.758 | 54.806 | 0.00 | 0.00 |
| ATOM | 4242 | CE3  | TRP | X | 282 | 56.133 | 38.814 | 56.008 | 0.00 | 0.00 |
| ATOM | 4243 | HE3  | TRP | X | 282 | 56.520 | 38.490 | 56.963 | 0.00 | 0.00 |
| ATOM | 4244 | CD2  | TRP | X | 282 | 54.963 | 39.576 | 56.075 | 0.00 | 0.00 |
| ATOM | 4245 | C    | TRP | X | 282 | 53.705 | 38.356 | 60.545 | 0.00 | 0.00 |
| ATOM | 4246 | O    | TRP | X | 282 | 54.155 | 37.196 | 60.271 | 0.00 | 0.00 |
| ATOM | 4247 | N    | HIE | X | 283 | 53.407 | 38.720 | 61.776 | 0.00 | 0.00 |
| ATOM | 4248 | H    | HIE | X | 283 | 53.083 | 39.676 | 61.815 | 0.00 | 0.00 |
| ATOM | 4249 | CA   | HIE | X | 283 | 53.435 | 37.916 | 62.996 | 0.00 | 0.00 |
| ATOM | 4250 | HA   | HIE | X | 283 | 54.216 | 37.178 | 62.810 | 0.00 | 0.00 |
| ATOM | 4251 | CB   | HIE | X | 283 | 53.843 | 38.825 | 64.164 | 0.00 | 0.00 |
| ATOM | 4252 | HB2  | HIE | X | 283 | 54.833 | 39.269 | 64.062 | 0.00 | 0.00 |
| ATOM | 4253 | HB3  | HIE | X | 283 | 52.983 | 39.474 | 64.329 | 0.00 | 0.00 |
| ATOM | 4254 | CG   | HIE | X | 283 | 54.088 | 37.965 | 65.356 | 0.00 | 0.00 |
| ATOM | 4255 | ND1  | HIE | X | 283 | 53.109 | 37.330 | 66.119 | 0.00 | 0.00 |
| ATOM | 4256 | CE1  | HIE | X | 283 | 53.792 | 36.910 | 67.198 | 0.00 | 0.00 |
| ATOM | 4257 | HE1  | HIE | X | 283 | 53.435 | 36.485 | 68.124 | 0.00 | 0.00 |
| ATOM | 4258 | NE2  | HIE | X | 283 | 55.144 | 37.176 | 67.132 | 0.00 | 0.00 |
| ATOM | 4259 | HE2  | HIE | X | 283 | 55.865 | 36.987 | 67.813 | 0.00 | 0.00 |
| ATOM | 4260 | CD2  | HIE | X | 283 | 55.284 | 37.819 | 65.939 | 0.00 | 0.00 |
| ATOM | 4261 | HD2  | HIE | X | 283 | 56.159 | 38.393 | 65.671 | 0.00 | 0.00 |
| ATOM | 4262 | C    | HIE | X | 283 | 52.118 | 37.154 | 63.325 | 0.00 | 0.00 |
| ATOM | 4263 | O    | HIE | X | 283 | 52.089 | 35.908 | 63.487 | 0.00 | 0.00 |
| ATOM | 4264 | N    | VAL | X | 284 | 50.969 | 37.824 | 63.192 | 0.00 | 0.00 |
| ATOM | 4265 | H    | VAL | X | 284 | 50.968 | 38.832 | 63.131 | 0.00 | 0.00 |
| ATOM | 4266 | CA   | VAL | X | 284 | 49.625 | 37.130 | 63.253 | 0.00 | 0.00 |
| ATOM | 4267 | HA   | VAL | X | 284 | 49.648 | 36.499 | 64.141 | 0.00 | 0.00 |
| ATOM | 4268 | CB   | VAL | X | 284 | 48.374 | 37.955 | 63.607 | 0.00 | 0.00 |
| ATOM | 4269 | HB   | VAL | X | 284 | 47.584 | 37.212 | 63.724 | 0.00 | 0.00 |
| ATOM | 4270 | CG1  | VAL | X | 284 | 48.547 | 38.634 | 65.020 | 0.00 | 0.00 |
| ATOM | 4271 | HG11 | VAL | X | 284 | 49.355 | 39.366 | 65.020 | 0.00 | 0.00 |
| ATOM | 4272 | HG12 | VAL | X | 284 | 47.598 | 39.118 | 65.250 | 0.00 | 0.00 |
| ATOM | 4273 | HG13 | VAL | X | 284 | 48.763 | 37.800 | 65.689 | 0.00 | 0.00 |
| ATOM | 4274 | CG2  | VAL | X | 284 | 47.859 | 39.055 | 62.603 | 0.00 | 0.00 |
| ATOM | 4275 | HG21 | VAL | X | 284 | 48.673 | 39.757 | 62.424 | 0.00 | 0.00 |
| ATOM | 4276 | HG22 | VAL | X | 284 | 47.602 | 38.732 | 61.595 | 0.00 | 0.00 |
| ATOM | 4277 | HG23 | VAL | X | 284 | 46.998 | 39.594 | 62.998 | 0.00 | 0.00 |

|      |      |      |     |   |     |        |        |        |      |      |
|------|------|------|-----|---|-----|--------|--------|--------|------|------|
| ATOM | 4278 | C    | VAL | X | 284 | 49.352 | 36.210 | 62.066 | 0.00 | 0.00 |
| ATOM | 4279 | O    | VAL | X | 284 | 48.604 | 35.233 | 62.203 | 0.00 | 0.00 |
| ATOM | 4280 | N    | LEU | X | 285 | 49.981 | 36.433 | 60.899 | 0.00 | 0.00 |
| ATOM | 4281 | H    | LEU | X | 285 | 50.509 | 37.292 | 60.831 | 0.00 | 0.00 |
| ATOM | 4282 | CA   | LEU | X | 285 | 50.252 | 35.442 | 59.826 | 0.00 | 0.00 |
| ATOM | 4283 | HA   | LEU | X | 285 | 49.380 | 35.253 | 59.199 | 0.00 | 0.00 |
| ATOM | 4284 | CB   | LEU | X | 285 | 51.396 | 35.957 | 58.965 | 0.00 | 0.00 |
| ATOM | 4285 | HB2  | LEU | X | 285 | 51.268 | 36.973 | 58.592 | 0.00 | 0.00 |
| ATOM | 4286 | HB3  | LEU | X | 285 | 52.200 | 36.149 | 59.676 | 0.00 | 0.00 |
| ATOM | 4287 | CG   | LEU | X | 285 | 51.955 | 35.053 | 57.833 | 0.00 | 0.00 |
| ATOM | 4288 | HG   | LEU | X | 285 | 52.141 | 34.040 | 58.191 | 0.00 | 0.00 |
| ATOM | 4289 | CD1  | LEU | X | 285 | 50.900 | 34.854 | 56.731 | 0.00 | 0.00 |
| ATOM | 4290 | HD11 | LEU | X | 285 | 49.916 | 34.635 | 57.145 | 0.00 | 0.00 |
| ATOM | 4291 | HD12 | LEU | X | 285 | 50.784 | 35.815 | 56.229 | 0.00 | 0.00 |
| ATOM | 4292 | HD13 | LEU | X | 285 | 51.341 | 34.108 | 56.070 | 0.00 | 0.00 |
| ATOM | 4293 | CD2  | LEU | X | 285 | 53.209 | 35.663 | 57.231 | 0.00 | 0.00 |
| ATOM | 4294 | HD21 | LEU | X | 285 | 54.003 | 35.518 | 57.964 | 0.00 | 0.00 |
| ATOM | 4295 | HD22 | LEU | X | 285 | 53.551 | 35.090 | 56.369 | 0.00 | 0.00 |
| ATOM | 4296 | HD23 | LEU | X | 285 | 52.985 | 36.674 | 56.889 | 0.00 | 0.00 |
| ATOM | 4297 | C    | LEU | X | 285 | 50.613 | 34.097 | 60.402 | 0.00 | 0.00 |
| ATOM | 4298 | O    | LEU | X | 285 | 51.477 | 34.020 | 61.294 | 0.00 | 0.00 |
| ATOM | 4299 | N    | PRO | X | 286 | 49.880 | 33.012 | 59.960 | 0.00 | 0.00 |
| ATOM | 4300 | CD   | PRO | X | 286 | 48.590 | 33.066 | 59.254 | 0.00 | 0.00 |
| ATOM | 4301 | HD2  | PRO | X | 286 | 48.794 | 33.016 | 58.185 | 0.00 | 0.00 |
| ATOM | 4302 | HD3  | PRO | X | 286 | 47.856 | 33.861 | 59.387 | 0.00 | 0.00 |
| ATOM | 4303 | CG   | PRO | X | 286 | 47.916 | 31.774 | 59.586 | 0.00 | 0.00 |
| ATOM | 4304 | HG2  | PRO | X | 286 | 47.247 | 31.466 | 58.783 | 0.00 | 0.00 |
| ATOM | 4305 | HG3  | PRO | X | 286 | 47.362 | 31.801 | 60.524 | 0.00 | 0.00 |
| ATOM | 4306 | CB   | PRO | X | 286 | 49.107 | 30.731 | 59.778 | 0.00 | 0.00 |
| ATOM | 4307 | HB2  | PRO | X | 286 | 49.399 | 30.286 | 58.827 | 0.00 | 0.00 |
| ATOM | 4308 | HB3  | PRO | X | 286 | 48.859 | 29.962 | 60.510 | 0.00 | 0.00 |
| ATOM | 4309 | CA   | PRO | X | 286 | 50.231 | 31.570 | 60.300 | 0.00 | 0.00 |
| ATOM | 4310 | HA   | PRO | X | 286 | 50.226 | 31.387 | 61.374 | 0.00 | 0.00 |
| ATOM | 4311 | C    | PRO | X | 286 | 51.600 | 31.114 | 59.793 | 0.00 | 0.00 |
| ATOM | 4312 | O    | PRO | X | 286 | 52.248 | 31.791 | 58.993 | 0.00 | 0.00 |
| ATOM | 4313 | N    | GLN | X | 287 | 52.046 | 29.935 | 60.259 | 0.00 | 0.00 |
| ATOM | 4314 | H    | GLN | X | 287 | 51.357 | 29.374 | 60.739 | 0.00 | 0.00 |
| ATOM | 4315 | CA   | GLN | X | 287 | 53.323 | 29.292 | 59.768 | 0.00 | 0.00 |
| ATOM | 4316 | HA   | GLN | X | 287 | 53.756 | 29.865 | 58.949 | 0.00 | 0.00 |
| ATOM | 4317 | CB   | GLN | X | 287 | 54.294 | 29.375 | 60.957 | 0.00 | 0.00 |
| ATOM | 4318 | HB2  | GLN | X | 287 | 53.832 | 28.940 | 61.844 | 0.00 | 0.00 |
| ATOM | 4319 | HB3  | GLN | X | 287 | 55.245 | 28.906 | 60.706 | 0.00 | 0.00 |
| ATOM | 4320 | CG   | GLN | X | 287 | 54.612 | 30.817 | 61.286 | 0.00 | 0.00 |
| ATOM | 4321 | HG2  | GLN | X | 287 | 53.772 | 31.479 | 61.495 | 0.00 | 0.00 |
| ATOM | 4322 | HG3  | GLN | X | 287 | 55.109 | 31.077 | 62.220 | 0.00 | 0.00 |
| ATOM | 4323 | CD   | GLN | X | 287 | 55.479 | 31.448 | 60.306 | 0.00 | 0.00 |
| ATOM | 4324 | OE1  | GLN | X | 287 | 55.988 | 30.903 | 59.320 | 0.00 | 0.00 |
| ATOM | 4325 | NE2  | GLN | X | 287 | 55.759 | 32.674 | 60.515 | 0.00 | 0.00 |
| ATOM | 4326 | HE21 | GLN | X | 287 | 56.218 | 33.123 | 59.735 | 0.00 | 0.00 |
| ATOM | 4327 | HE22 | GLN | X | 287 | 55.206 | 33.240 | 61.142 | 0.00 | 0.00 |
| ATOM | 4328 | C    | GLN | X | 287 | 53.013 | 27.820 | 59.288 | 0.00 | 0.00 |
| ATOM | 4329 | O    | GLN | X | 287 | 51.849 | 27.501 | 59.021 | 0.00 | 0.00 |
| ATOM | 4330 | N    | GLU | X | 288 | 54.007 | 27.030 | 58.909 | 0.00 | 0.00 |
| ATOM | 4331 | H    | GLU | X | 288 | 54.902 | 27.497 | 58.937 | 0.00 | 0.00 |
| ATOM | 4332 | CA   | GLU | X | 288 | 53.872 | 25.564 | 58.612 | 0.00 | 0.00 |
| ATOM | 4333 | HA   | GLU | X | 288 | 54.894 | 25.220 | 58.453 | 0.00 | 0.00 |
| ATOM | 4334 | CB   | GLU | X | 288 | 53.250 | 24.744 | 59.788 | 0.00 | 0.00 |
| ATOM | 4335 | HB2  | GLU | X | 288 | 52.174 | 24.876 | 59.673 | 0.00 | 0.00 |
| ATOM | 4336 | HB3  | GLU | X | 288 | 53.493 | 23.682 | 59.756 | 0.00 | 0.00 |
| ATOM | 4337 | CG   | GLU | X | 288 | 53.696 | 24.995 | 61.208 | 0.00 | 0.00 |
| ATOM | 4338 | HG2  | GLU | X | 288 | 54.777 | 24.981 | 61.344 | 0.00 | 0.00 |
| ATOM | 4339 | HG3  | GLU | X | 288 | 53.530 | 26.044 | 61.451 | 0.00 | 0.00 |
| ATOM | 4340 | CD   | GLU | X | 288 | 53.059 | 24.000 | 62.182 | 0.00 | 0.00 |
| ATOM | 4341 | OE1  | GLU | X | 288 | 52.079 | 24.504 | 62.778 | 0.00 | 0.00 |
| ATOM | 4342 | OE2  | GLU | X | 288 | 53.609 | 22.883 | 62.387 | 0.00 | 0.00 |
| ATOM | 4343 | C    | GLU | X | 288 | 53.228 | 25.271 | 57.288 | 0.00 | 0.00 |
| ATOM | 4344 | O    | GLU | X | 288 | 52.902 | 24.162 | 57.018 | 0.00 | 0.00 |
| ATOM | 4345 | N    | SER | X | 289 | 52.950 | 26.262 | 56.495 | 0.00 | 0.00 |
| ATOM | 4346 | H    | SER | X | 289 | 53.023 | 27.166 | 56.939 | 0.00 | 0.00 |
| ATOM | 4347 | CA   | SER | X | 289 | 52.055 | 26.099 | 55.388 | 0.00 | 0.00 |

|      |      |      |     |   |     |        |        |        |      |      |
|------|------|------|-----|---|-----|--------|--------|--------|------|------|
| ATOM | 4348 | HA   | SER | X | 289 | 52.302 | 25.178 | 54.861 | 0.00 | 0.00 |
| ATOM | 4349 | CB   | SER | X | 289 | 50.632 | 25.881 | 56.143 | 0.00 | 0.00 |
| ATOM | 4350 | HB2  | SER | X | 289 | 50.722 | 25.023 | 56.810 | 0.00 | 0.00 |
| ATOM | 4351 | HB3  | SER | X | 289 | 50.459 | 26.851 | 56.609 | 0.00 | 0.00 |
| ATOM | 4352 | OG   | SER | X | 289 | 49.458 | 25.688 | 55.344 | 0.00 | 0.00 |
| ATOM | 4353 | HG   | SER | X | 289 | 49.040 | 24.909 | 55.717 | 0.00 | 0.00 |
| ATOM | 4354 | C    | SER | X | 289 | 52.041 | 27.293 | 54.367 | 0.00 | 0.00 |
| ATOM | 4355 | O    | SER | X | 289 | 52.503 | 28.392 | 54.642 | 0.00 | 0.00 |
| ATOM | 4356 | N    | VAL | X | 290 | 51.630 | 26.943 | 53.129 | 0.00 | 0.00 |
| ATOM | 4357 | H    | VAL | X | 290 | 51.084 | 26.107 | 52.976 | 0.00 | 0.00 |
| ATOM | 4358 | CA   | VAL | X | 290 | 51.822 | 27.821 | 51.963 | 0.00 | 0.00 |
| ATOM | 4359 | HA   | VAL | X | 290 | 52.633 | 28.524 | 52.154 | 0.00 | 0.00 |
| ATOM | 4360 | CB   | VAL | X | 290 | 52.227 | 27.038 | 50.702 | 0.00 | 0.00 |
| ATOM | 4361 | HB   | VAL | X | 290 | 51.400 | 26.382 | 50.431 | 0.00 | 0.00 |
| ATOM | 4362 | CG1  | VAL | X | 290 | 52.526 | 27.919 | 49.483 | 0.00 | 0.00 |
| ATOM | 4363 | HG11 | VAL | X | 290 | 51.570 | 28.345 | 49.178 | 0.00 | 0.00 |
| ATOM | 4364 | HG12 | VAL | X | 290 | 53.115 | 28.792 | 49.764 | 0.00 | 0.00 |
| ATOM | 4365 | HG13 | VAL | X | 290 | 53.129 | 27.385 | 48.749 | 0.00 | 0.00 |
| ATOM | 4366 | CG2  | VAL | X | 290 | 53.421 | 26.118 | 50.897 | 0.00 | 0.00 |
| ATOM | 4367 | HG21 | VAL | X | 290 | 53.375 | 25.782 | 51.933 | 0.00 | 0.00 |
| ATOM | 4368 | HG22 | VAL | X | 290 | 53.383 | 25.253 | 50.234 | 0.00 | 0.00 |
| ATOM | 4369 | HG23 | VAL | X | 290 | 54.245 | 26.832 | 50.901 | 0.00 | 0.00 |
| ATOM | 4370 | C    | VAL | X | 290 | 50.460 | 28.558 | 51.718 | 0.00 | 0.00 |
| ATOM | 4371 | O    | VAL | X | 290 | 49.407 | 28.053 | 52.203 | 0.00 | 0.00 |
| ATOM | 4372 | N    | PHE | X | 291 | 50.487 | 29.753 | 51.103 | 0.00 | 0.00 |
| ATOM | 4373 | H    | PHE | X | 291 | 51.380 | 30.068 | 50.750 | 0.00 | 0.00 |
| ATOM | 4374 | CA   | PHE | X | 291 | 49.351 | 30.533 | 50.658 | 0.00 | 0.00 |
| ATOM | 4375 | HA   | PHE | X | 291 | 49.788 | 31.301 | 50.020 | 0.00 | 0.00 |
| ATOM | 4376 | CB   | PHE | X | 291 | 48.458 | 29.648 | 49.732 | 0.00 | 0.00 |
| ATOM | 4377 | HB2  | PHE | X | 291 | 49.052 | 28.782 | 49.441 | 0.00 | 0.00 |
| ATOM | 4378 | HB3  | PHE | X | 291 | 47.545 | 29.495 | 50.308 | 0.00 | 0.00 |
| ATOM | 4379 | CG   | PHE | X | 291 | 48.028 | 30.298 | 48.510 | 0.00 | 0.00 |
| ATOM | 4380 | CD1  | PHE | X | 291 | 47.538 | 31.613 | 48.507 | 0.00 | 0.00 |
| ATOM | 4381 | HD1  | PHE | X | 291 | 47.650 | 32.191 | 49.413 | 0.00 | 0.00 |
| ATOM | 4382 | CE1  | PHE | X | 291 | 47.101 | 32.288 | 47.367 | 0.00 | 0.00 |
| ATOM | 4383 | HE1  | PHE | X | 291 | 46.756 | 33.311 | 47.416 | 0.00 | 0.00 |
| ATOM | 4384 | CZ   | PHE | X | 291 | 47.180 | 31.640 | 46.088 | 0.00 | 0.00 |
| ATOM | 4385 | HZ   | PHE | X | 291 | 46.891 | 32.103 | 45.156 | 0.00 | 0.00 |
| ATOM | 4386 | CE2  | PHE | X | 291 | 47.696 | 30.318 | 46.076 | 0.00 | 0.00 |
| ATOM | 4387 | HE2  | PHE | X | 291 | 47.895 | 29.689 | 45.220 | 0.00 | 0.00 |
| ATOM | 4388 | CD2  | PHE | X | 291 | 48.042 | 29.576 | 47.255 | 0.00 | 0.00 |
| ATOM | 4389 | HD2  | PHE | X | 291 | 48.473 | 28.587 | 47.211 | 0.00 | 0.00 |
| ATOM | 4390 | C    | PHE | X | 291 | 48.660 | 31.251 | 51.818 | 0.00 | 0.00 |
| ATOM | 4391 | O    | PHE | X | 291 | 47.484 | 31.452 | 51.858 | 0.00 | 0.00 |
| ATOM | 4392 | N    | ARG | X | 292 | 49.368 | 31.559 | 52.939 | 0.00 | 0.00 |
| ATOM | 4393 | H    | ARG | X | 292 | 50.378 | 31.534 | 52.929 | 0.00 | 0.00 |
| ATOM | 4394 | CA   | ARG | X | 292 | 48.834 | 32.226 | 54.196 | 0.00 | 0.00 |
| ATOM | 4395 | HA   | ARG | X | 292 | 47.793 | 31.958 | 54.379 | 0.00 | 0.00 |
| ATOM | 4396 | CB   | ARG | X | 292 | 49.589 | 31.692 | 55.408 | 0.00 | 0.00 |
| ATOM | 4397 | HB2  | ARG | X | 292 | 50.572 | 32.130 | 55.584 | 0.00 | 0.00 |
| ATOM | 4398 | HB3  | ARG | X | 292 | 49.030 | 31.949 | 56.307 | 0.00 | 0.00 |
| ATOM | 4399 | CG   | ARG | X | 292 | 49.792 | 30.162 | 55.468 | 0.00 | 0.00 |
| ATOM | 4400 | HG2  | ARG | X | 292 | 50.301 | 29.768 | 54.588 | 0.00 | 0.00 |
| ATOM | 4401 | HG3  | ARG | X | 292 | 50.500 | 29.863 | 56.241 | 0.00 | 0.00 |
| ATOM | 4402 | CD   | ARG | X | 292 | 48.507 | 29.385 | 55.814 | 0.00 | 0.00 |
| ATOM | 4403 | HD2  | ARG | X | 292 | 48.749 | 28.409 | 56.234 | 0.00 | 0.00 |
| ATOM | 4404 | HD3  | ARG | X | 292 | 47.955 | 29.952 | 56.564 | 0.00 | 0.00 |
| ATOM | 4405 | NE   | ARG | X | 292 | 47.629 | 29.130 | 54.618 | 0.00 | 0.00 |
| ATOM | 4406 | HE   | ARG | X | 292 | 48.156 | 28.810 | 53.818 | 0.00 | 0.00 |
| ATOM | 4407 | CZ   | ARG | X | 292 | 46.325 | 28.895 | 54.518 | 0.00 | 0.00 |
| ATOM | 4408 | NH1  | ARG | X | 292 | 45.433 | 29.066 | 55.487 | 0.00 | 0.00 |
| ATOM | 4409 | HH11 | ARG | X | 292 | 45.674 | 29.373 | 56.419 | 0.00 | 0.00 |
| ATOM | 4410 | HH12 | ARG | X | 292 | 44.497 | 28.704 | 55.368 | 0.00 | 0.00 |
| ATOM | 4411 | NH2  | ARG | X | 292 | 45.783 | 28.515 | 53.368 | 0.00 | 0.00 |
| ATOM | 4412 | HH21 | ARG | X | 292 | 46.308 | 28.238 | 52.550 | 0.00 | 0.00 |
| ATOM | 4413 | HH22 | ARG | X | 292 | 44.806 | 28.261 | 53.323 | 0.00 | 0.00 |
| ATOM | 4414 | C    | ARG | X | 292 | 49.046 | 33.733 | 54.156 | 0.00 | 0.00 |
| ATOM | 4415 | O    | ARG | X | 292 | 49.991 | 34.235 | 53.605 | 0.00 | 0.00 |
| ATOM | 4416 | N    | PHE | X | 293 | 48.051 | 34.459 | 54.716 | 0.00 | 0.00 |
| ATOM | 4417 | H    | PHE | X | 293 | 47.227 | 33.945 | 54.994 | 0.00 | 0.00 |

|      |      |      |     |   |     |        |        |        |      |      |
|------|------|------|-----|---|-----|--------|--------|--------|------|------|
| ATOM | 4418 | CA   | PHE | X | 293 | 47.996 | 35.921 | 54.993 | 0.00 | 0.00 |
| ATOM | 4419 | HA   | PHE | X | 293 | 49.023 | 36.285 | 55.017 | 0.00 | 0.00 |
| ATOM | 4420 | CB   | PHE | X | 293 | 47.185 | 36.718 | 53.994 | 0.00 | 0.00 |
| ATOM | 4421 | HB2  | PHE | X | 293 | 46.129 | 36.506 | 54.163 | 0.00 | 0.00 |
| ATOM | 4422 | HB3  | PHE | X | 293 | 47.401 | 37.787 | 53.999 | 0.00 | 0.00 |
| ATOM | 4423 | CG   | PHE | X | 293 | 47.510 | 36.352 | 52.540 | 0.00 | 0.00 |
| ATOM | 4424 | CD1  | PHE | X | 293 | 48.812 | 36.321 | 52.095 | 0.00 | 0.00 |
| ATOM | 4425 | HD1  | PHE | X | 293 | 49.593 | 36.579 | 52.795 | 0.00 | 0.00 |
| ATOM | 4426 | CE1  | PHE | X | 293 | 49.066 | 35.895 | 50.770 | 0.00 | 0.00 |
| ATOM | 4427 | HE1  | PHE | X | 293 | 50.109 | 35.725 | 50.548 | 0.00 | 0.00 |
| ATOM | 4428 | CZ   | PHE | X | 293 | 48.045 | 35.583 | 49.882 | 0.00 | 0.00 |
| ATOM | 4429 | HZ   | PHE | X | 293 | 48.218 | 35.155 | 48.906 | 0.00 | 0.00 |
| ATOM | 4430 | CE2  | PHE | X | 293 | 46.717 | 35.702 | 50.362 | 0.00 | 0.00 |
| ATOM | 4431 | HE2  | PHE | X | 293 | 45.893 | 35.437 | 49.716 | 0.00 | 0.00 |
| ATOM | 4432 | CD2  | PHE | X | 293 | 46.467 | 36.077 | 51.676 | 0.00 | 0.00 |
| ATOM | 4433 | HD2  | PHE | X | 293 | 45.451 | 36.271 | 51.988 | 0.00 | 0.00 |
| ATOM | 4434 | C    | PHE | X | 293 | 47.618 | 36.304 | 56.370 | 0.00 | 0.00 |
| ATOM | 4435 | O    | PHE | X | 293 | 47.172 | 35.504 | 57.177 | 0.00 | 0.00 |
| ATOM | 4436 | N    | SER | X | 294 | 47.751 | 37.573 | 56.750 | 0.00 | 0.00 |
| ATOM | 4437 | H    | SER | X | 294 | 48.028 | 38.308 | 56.116 | 0.00 | 0.00 |
| ATOM | 4438 | CA   | SER | X | 294 | 47.417 | 38.123 | 58.131 | 0.00 | 0.00 |
| ATOM | 4439 | HA   | SER | X | 294 | 47.822 | 37.445 | 58.882 | 0.00 | 0.00 |
| ATOM | 4440 | CB   | SER | X | 294 | 48.060 | 39.501 | 58.400 | 0.00 | 0.00 |
| ATOM | 4441 | HB2  | SER | X | 294 | 47.851 | 39.737 | 59.444 | 0.00 | 0.00 |
| ATOM | 4442 | HB3  | SER | X | 294 | 49.138 | 39.375 | 58.304 | 0.00 | 0.00 |
| ATOM | 4443 | OG   | SER | X | 294 | 47.668 | 40.460 | 57.394 | 0.00 | 0.00 |
| ATOM | 4444 | HG   | SER | X | 294 | 47.615 | 41.302 | 57.853 | 0.00 | 0.00 |
| ATOM | 4445 | C    | SER | X | 294 | 45.903 | 38.196 | 58.410 | 0.00 | 0.00 |
| ATOM | 4446 | O    | SER | X | 294 | 45.469 | 37.548 | 59.349 | 0.00 | 0.00 |
| ATOM | 4447 | N    | PHE | X | 295 | 45.147 | 38.867 | 57.543 | 0.00 | 0.00 |
| ATOM | 4448 | H    | PHE | X | 295 | 45.619 | 39.428 | 56.849 | 0.00 | 0.00 |
| ATOM | 4449 | CA   | PHE | X | 295 | 43.674 | 38.977 | 57.632 | 0.00 | 0.00 |
| ATOM | 4450 | HA   | PHE | X | 295 | 43.181 | 38.195 | 58.210 | 0.00 | 0.00 |
| ATOM | 4451 | CB   | PHE | X | 295 | 43.206 | 40.295 | 58.244 | 0.00 | 0.00 |
| ATOM | 4452 | HB2  | PHE | X | 295 | 43.672 | 41.139 | 57.735 | 0.00 | 0.00 |
| ATOM | 4453 | HB3  | PHE | X | 295 | 42.135 | 40.479 | 58.151 | 0.00 | 0.00 |
| ATOM | 4454 | CG   | PHE | X | 295 | 43.417 | 40.522 | 59.746 | 0.00 | 0.00 |
| ATOM | 4455 | CD1  | PHE | X | 295 | 42.484 | 40.198 | 60.679 | 0.00 | 0.00 |
| ATOM | 4456 | HD1  | PHE | X | 295 | 41.474 | 39.935 | 60.399 | 0.00 | 0.00 |
| ATOM | 4457 | CE1  | PHE | X | 295 | 42.861 | 40.112 | 62.050 | 0.00 | 0.00 |
| ATOM | 4458 | HE1  | PHE | X | 295 | 42.201 | 39.781 | 62.839 | 0.00 | 0.00 |
| ATOM | 4459 | CZ   | PHE | X | 295 | 44.170 | 40.503 | 62.421 | 0.00 | 0.00 |
| ATOM | 4460 | HZ   | PHE | X | 295 | 44.372 | 40.336 | 63.469 | 0.00 | 0.00 |
| ATOM | 4461 | CE2  | PHE | X | 295 | 45.100 | 40.884 | 61.468 | 0.00 | 0.00 |
| ATOM | 4462 | HE2  | PHE | X | 295 | 46.094 | 41.107 | 61.828 | 0.00 | 0.00 |
| ATOM | 4463 | CD2  | PHE | X | 295 | 44.707 | 40.927 | 60.114 | 0.00 | 0.00 |
| ATOM | 4464 | HD2  | PHE | X | 295 | 45.361 | 41.167 | 59.289 | 0.00 | 0.00 |
| ATOM | 4465 | C    | PHE | X | 295 | 43.200 | 38.923 | 56.127 | 0.00 | 0.00 |
| ATOM | 4466 | O    | PHE | X | 295 | 43.956 | 39.241 | 55.228 | 0.00 | 0.00 |
| ATOM | 4467 | N    | VAL | X | 296 | 41.980 | 38.338 | 55.955 | 0.00 | 0.00 |
| ATOM | 4468 | H    | VAL | X | 296 | 41.516 | 38.262 | 56.849 | 0.00 | 0.00 |
| ATOM | 4469 | CA   | VAL | X | 296 | 41.293 | 38.033 | 54.607 | 0.00 | 0.00 |
| ATOM | 4470 | HA   | VAL | X | 296 | 41.662 | 38.836 | 53.969 | 0.00 | 0.00 |
| ATOM | 4471 | CB   | VAL | X | 296 | 41.672 | 36.553 | 54.091 | 0.00 | 0.00 |
| ATOM | 4472 | HB   | VAL | X | 296 | 41.149 | 36.312 | 53.165 | 0.00 | 0.00 |
| ATOM | 4473 | CG1  | VAL | X | 296 | 43.154 | 36.452 | 53.822 | 0.00 | 0.00 |
| ATOM | 4474 | HG11 | VAL | X | 296 | 43.693 | 37.357 | 53.541 | 0.00 | 0.00 |
| ATOM | 4475 | HG12 | VAL | X | 296 | 43.706 | 36.158 | 54.715 | 0.00 | 0.00 |
| ATOM | 4476 | HG13 | VAL | X | 296 | 43.378 | 35.755 | 53.014 | 0.00 | 0.00 |
| ATOM | 4477 | CG2  | VAL | X | 296 | 41.100 | 35.470 | 55.016 | 0.00 | 0.00 |
| ATOM | 4478 | HG21 | VAL | X | 296 | 41.254 | 34.455 | 54.648 | 0.00 | 0.00 |
| ATOM | 4479 | HG22 | VAL | X | 296 | 41.545 | 35.605 | 56.001 | 0.00 | 0.00 |
| ATOM | 4480 | HG23 | VAL | X | 296 | 40.015 | 35.573 | 55.013 | 0.00 | 0.00 |
| ATOM | 4481 | C    | VAL | X | 296 | 39.763 | 38.171 | 54.806 | 0.00 | 0.00 |
| ATOM | 4482 | O    | VAL | X | 296 | 39.333 | 38.207 | 55.973 | 0.00 | 0.00 |
| ATOM | 4483 | N    | PRO | X | 297 | 38.938 | 38.220 | 53.672 | 0.00 | 0.00 |
| ATOM | 4484 | CD   | PRO | X | 297 | 39.389 | 38.224 | 52.296 | 0.00 | 0.00 |
| ATOM | 4485 | HD2  | PRO | X | 297 | 39.739 | 37.229 | 52.020 | 0.00 | 0.00 |
| ATOM | 4486 | HD3  | PRO | X | 297 | 40.144 | 38.976 | 52.066 | 0.00 | 0.00 |
| ATOM | 4487 | CG   | PRO | X | 297 | 38.177 | 38.398 | 51.394 | 0.00 | 0.00 |

|      |      |      |     |   |     |        |        |        |      |      |
|------|------|------|-----|---|-----|--------|--------|--------|------|------|
| ATOM | 4488 | HG2  | PRO | X | 297 | 38.128 | 37.881 | 50.436 | 0.00 | 0.00 |
| ATOM | 4489 | HG3  | PRO | X | 297 | 38.206 | 39.473 | 51.215 | 0.00 | 0.00 |
| ATOM | 4490 | CB   | PRO | X | 297 | 37.009 | 37.995 | 52.281 | 0.00 | 0.00 |
| ATOM | 4491 | HB2  | PRO | X | 297 | 36.881 | 36.917 | 52.184 | 0.00 | 0.00 |
| ATOM | 4492 | HB3  | PRO | X | 297 | 36.115 | 38.597 | 52.120 | 0.00 | 0.00 |
| ATOM | 4493 | CA   | PRO | X | 297 | 37.501 | 38.196 | 53.733 | 0.00 | 0.00 |
| ATOM | 4494 | HA   | PRO | X | 297 | 37.289 | 39.235 | 53.987 | 0.00 | 0.00 |
| ATOM | 4495 | C    | PRO | X | 297 | 36.858 | 37.204 | 54.760 | 0.00 | 0.00 |
| ATOM | 4496 | O    | PRO | X | 297 | 37.364 | 36.092 | 55.013 | 0.00 | 0.00 |
| ATOM | 4497 | N    | VAL | X | 298 | 35.723 | 37.587 | 55.284 | 0.00 | 0.00 |
| ATOM | 4498 | H    | VAL | X | 298 | 35.232 | 38.420 | 54.992 | 0.00 | 0.00 |
| ATOM | 4499 | CA   | VAL | X | 298 | 35.203 | 36.909 | 56.451 | 0.00 | 0.00 |
| ATOM | 4500 | HA   | VAL | X | 298 | 35.808 | 36.015 | 56.600 | 0.00 | 0.00 |
| ATOM | 4501 | CB   | VAL | X | 298 | 35.291 | 37.785 | 57.695 | 0.00 | 0.00 |
| ATOM | 4502 | HB   | VAL | X | 298 | 34.667 | 38.675 | 57.626 | 0.00 | 0.00 |
| ATOM | 4503 | CG1  | VAL | X | 298 | 34.763 | 37.044 | 58.939 | 0.00 | 0.00 |
| ATOM | 4504 | HG11 | VAL | X | 298 | 33.682 | 37.173 | 58.992 | 0.00 | 0.00 |
| ATOM | 4505 | HG12 | VAL | X | 298 | 35.117 | 36.017 | 58.850 | 0.00 | 0.00 |
| ATOM | 4506 | HG13 | VAL | X | 298 | 35.159 | 37.488 | 59.852 | 0.00 | 0.00 |
| ATOM | 4507 | CG2  | VAL | X | 298 | 36.704 | 38.147 | 58.008 | 0.00 | 0.00 |
| ATOM | 4508 | HG21 | VAL | X | 298 | 37.123 | 38.699 | 57.167 | 0.00 | 0.00 |
| ATOM | 4509 | HG22 | VAL | X | 298 | 36.679 | 38.890 | 58.805 | 0.00 | 0.00 |
| ATOM | 4510 | HG23 | VAL | X | 298 | 37.218 | 37.200 | 58.170 | 0.00 | 0.00 |
| ATOM | 4511 | C    | VAL | X | 298 | 33.783 | 36.377 | 56.198 | 0.00 | 0.00 |
| ATOM | 4512 | O    | VAL | X | 298 | 32.928 | 37.177 | 55.828 | 0.00 | 0.00 |
| ATOM | 4513 | N    | VAL | X | 299 | 33.618 | 35.037 | 56.484 | 0.00 | 0.00 |
| ATOM | 4514 | H    | VAL | X | 299 | 34.446 | 34.511 | 56.725 | 0.00 | 0.00 |
| ATOM | 4515 | CA   | VAL | X | 299 | 32.252 | 34.404 | 56.631 | 0.00 | 0.00 |
| ATOM | 4516 | HA   | VAL | X | 299 | 31.553 | 34.707 | 55.851 | 0.00 | 0.00 |
| ATOM | 4517 | CB   | VAL | X | 299 | 32.240 | 32.929 | 56.669 | 0.00 | 0.00 |
| ATOM | 4518 | HB   | VAL | X | 299 | 32.859 | 32.652 | 57.522 | 0.00 | 0.00 |
| ATOM | 4519 | CG1  | VAL | X | 299 | 30.796 | 32.516 | 56.985 | 0.00 | 0.00 |
| ATOM | 4520 | HG11 | VAL | X | 299 | 30.129 | 32.961 | 56.247 | 0.00 | 0.00 |
| ATOM | 4521 | HG12 | VAL | X | 299 | 30.816 | 31.438 | 57.148 | 0.00 | 0.00 |
| ATOM | 4522 | HG13 | VAL | X | 299 | 30.499 | 32.970 | 57.930 | 0.00 | 0.00 |
| ATOM | 4523 | CG2  | VAL | X | 299 | 32.793 | 32.254 | 55.461 | 0.00 | 0.00 |
| ATOM | 4524 | HG21 | VAL | X | 299 | 33.823 | 32.608 | 55.441 | 0.00 | 0.00 |
| ATOM | 4525 | HG22 | VAL | X | 299 | 32.710 | 31.185 | 55.659 | 0.00 | 0.00 |
| ATOM | 4526 | HG23 | VAL | X | 299 | 32.273 | 32.504 | 54.536 | 0.00 | 0.00 |
| ATOM | 4527 | C    | VAL | X | 299 | 31.730 | 34.982 | 57.978 | 0.00 | 0.00 |
| ATOM | 4528 | O    | VAL | X | 299 | 32.082 | 34.484 | 59.006 | 0.00 | 0.00 |
| ATOM | 4529 | N    | ASP | X | 300 | 30.831 | 35.986 | 57.920 | 0.00 | 0.00 |
| ATOM | 4530 | H    | ASP | X | 300 | 30.564 | 36.283 | 56.993 | 0.00 | 0.00 |
| ATOM | 4531 | CA   | ASP | X | 300 | 30.292 | 36.766 | 59.084 | 0.00 | 0.00 |
| ATOM | 4532 | HA   | ASP | X | 300 | 30.796 | 36.300 | 59.930 | 0.00 | 0.00 |
| ATOM | 4533 | CB   | ASP | X | 300 | 30.647 | 38.236 | 58.820 | 0.00 | 0.00 |
| ATOM | 4534 | HB2  | ASP | X | 300 | 30.619 | 38.788 | 59.759 | 0.00 | 0.00 |
| ATOM | 4535 | HB3  | ASP | X | 300 | 31.613 | 38.399 | 58.342 | 0.00 | 0.00 |
| ATOM | 4536 | CG   | ASP | X | 300 | 29.658 | 38.957 | 57.858 | 0.00 | 0.00 |
| ATOM | 4537 | OD1  | ASP | X | 300 | 29.450 | 38.483 | 56.696 | 0.00 | 0.00 |
| ATOM | 4538 | OD2  | ASP | X | 300 | 29.133 | 40.069 | 58.230 | 0.00 | 0.00 |
| ATOM | 4539 | C    | ASP | X | 300 | 28.793 | 36.533 | 59.345 | 0.00 | 0.00 |
| ATOM | 4540 | O    | ASP | X | 300 | 28.363 | 36.662 | 60.484 | 0.00 | 0.00 |
| ATOM | 4541 | N    | GLY | X | 301 | 28.044 | 35.995 | 58.347 | 0.00 | 0.00 |
| ATOM | 4542 | H    | GLY | X | 301 | 28.392 | 35.841 | 57.411 | 0.00 | 0.00 |
| ATOM | 4543 | CA   | GLY | X | 301 | 26.654 | 35.739 | 58.406 | 0.00 | 0.00 |
| ATOM | 4544 | HA2  | GLY | X | 301 | 26.425 | 34.710 | 58.092 | 0.00 | 0.00 |
| ATOM | 4545 | HA3  | GLY | X | 301 | 26.275 | 35.643 | 59.435 | 0.00 | 0.00 |
| ATOM | 4546 | C    | GLY | X | 301 | 25.824 | 36.686 | 57.568 | 0.00 | 0.00 |
| ATOM | 4547 | O    | GLY | X | 301 | 24.618 | 36.465 | 57.364 | 0.00 | 0.00 |
| ATOM | 4548 | N    | ASP | X | 302 | 26.445 | 37.767 | 57.050 | 0.00 | 0.00 |
| ATOM | 4549 | H    | ASP | X | 302 | 27.431 | 37.952 | 57.166 | 0.00 | 0.00 |
| ATOM | 4550 | CA   | ASP | X | 302 | 25.639 | 38.629 | 56.157 | 0.00 | 0.00 |
| ATOM | 4551 | HA   | ASP | X | 302 | 24.943 | 37.980 | 55.625 | 0.00 | 0.00 |
| ATOM | 4552 | CB   | ASP | X | 302 | 24.815 | 39.580 | 57.009 | 0.00 | 0.00 |
| ATOM | 4553 | HB2  | ASP | X | 302 | 24.303 | 39.078 | 57.830 | 0.00 | 0.00 |
| ATOM | 4554 | HB3  | ASP | X | 302 | 25.538 | 40.244 | 57.484 | 0.00 | 0.00 |
| ATOM | 4555 | CG   | ASP | X | 302 | 23.798 | 40.402 | 56.297 | 0.00 | 0.00 |
| ATOM | 4556 | OD1  | ASP | X | 302 | 24.174 | 41.575 | 55.953 | 0.00 | 0.00 |
| ATOM | 4557 | OD2  | ASP | X | 302 | 22.611 | 39.921 | 56.110 | 0.00 | 0.00 |

|      |      |      |     |   |     |        |        |        |      |      |
|------|------|------|-----|---|-----|--------|--------|--------|------|------|
| ATOM | 4558 | C    | ASP | X | 302 | 26.395 | 39.363 | 54.998 | 0.00 | 0.00 |
| ATOM | 4559 | O    | ASP | X | 302 | 25.971 | 39.323 | 53.898 | 0.00 | 0.00 |
| ATOM | 4560 | N    | PHE | X | 303 | 27.633 | 39.930 | 55.280 | 0.00 | 0.00 |
| ATOM | 4561 | H    | PHE | X | 303 | 28.106 | 39.935 | 56.172 | 0.00 | 0.00 |
| ATOM | 4562 | CA   | PHE | X | 303 | 28.535 | 40.332 | 54.125 | 0.00 | 0.00 |
| ATOM | 4563 | HA   | PHE | X | 303 | 27.931 | 40.911 | 53.427 | 0.00 | 0.00 |
| ATOM | 4564 | CB   | PHE | X | 303 | 29.629 | 41.320 | 54.590 | 0.00 | 0.00 |
| ATOM | 4565 | HB2  | PHE | X | 303 | 29.100 | 42.106 | 55.129 | 0.00 | 0.00 |
| ATOM | 4566 | HB3  | PHE | X | 303 | 30.228 | 40.777 | 55.321 | 0.00 | 0.00 |
| ATOM | 4567 | CG   | PHE | X | 303 | 30.389 | 41.800 | 53.424 | 0.00 | 0.00 |
| ATOM | 4568 | CD1  | PHE | X | 303 | 31.319 | 40.872 | 52.863 | 0.00 | 0.00 |
| ATOM | 4569 | HD1  | PHE | X | 303 | 31.361 | 39.848 | 53.203 | 0.00 | 0.00 |
| ATOM | 4570 | CE1  | PHE | X | 303 | 31.975 | 41.213 | 51.668 | 0.00 | 0.00 |
| ATOM | 4571 | HE1  | PHE | X | 303 | 32.601 | 40.493 | 51.161 | 0.00 | 0.00 |
| ATOM | 4572 | CZ   | PHE | X | 303 | 31.787 | 42.510 | 51.150 | 0.00 | 0.00 |
| ATOM | 4573 | HZ   | PHE | X | 303 | 32.299 | 42.779 | 50.238 | 0.00 | 0.00 |
| ATOM | 4574 | CE2  | PHE | X | 303 | 30.844 | 43.427 | 51.641 | 0.00 | 0.00 |
| ATOM | 4575 | HE2  | PHE | X | 303 | 30.555 | 44.371 | 51.203 | 0.00 | 0.00 |
| ATOM | 4576 | CD2  | PHE | X | 303 | 30.150 | 43.017 | 52.802 | 0.00 | 0.00 |
| ATOM | 4577 | HD2  | PHE | X | 303 | 29.572 | 43.772 | 53.314 | 0.00 | 0.00 |
| ATOM | 4578 | C    | PHE | X | 303 | 28.868 | 39.132 | 53.300 | 0.00 | 0.00 |
| ATOM | 4579 | O    | PHE | X | 303 | 28.783 | 39.212 | 52.100 | 0.00 | 0.00 |
| ATOM | 4580 | N    | LEU | X | 304 | 29.326 | 38.001 | 53.896 | 0.00 | 0.00 |
| ATOM | 4581 | H    | LEU | X | 304 | 29.458 | 38.096 | 54.893 | 0.00 | 0.00 |
| ATOM | 4582 | CA   | LEU | X | 304 | 29.422 | 36.641 | 53.358 | 0.00 | 0.00 |
| ATOM | 4583 | HA   | LEU | X | 304 | 28.933 | 36.586 | 52.385 | 0.00 | 0.00 |
| ATOM | 4584 | CB   | LEU | X | 304 | 30.790 | 36.269 | 52.973 | 0.00 | 0.00 |
| ATOM | 4585 | HB2  | LEU | X | 304 | 31.245 | 36.422 | 53.952 | 0.00 | 0.00 |
| ATOM | 4586 | HB3  | LEU | X | 304 | 30.893 | 35.210 | 52.737 | 0.00 | 0.00 |
| ATOM | 4587 | CG   | LEU | X | 304 | 31.550 | 37.084 | 51.910 | 0.00 | 0.00 |
| ATOM | 4588 | HG   | LEU | X | 304 | 31.648 | 38.130 | 52.202 | 0.00 | 0.00 |
| ATOM | 4589 | CD1  | LEU | X | 304 | 33.001 | 36.617 | 51.733 | 0.00 | 0.00 |
| ATOM | 4590 | HD11 | LEU | X | 304 | 33.357 | 36.323 | 52.720 | 0.00 | 0.00 |
| ATOM | 4591 | HD12 | LEU | X | 304 | 32.966 | 35.633 | 51.265 | 0.00 | 0.00 |
| ATOM | 4592 | HD13 | LEU | X | 304 | 33.573 | 37.437 | 51.301 | 0.00 | 0.00 |
| ATOM | 4593 | CD2  | LEU | X | 304 | 30.964 | 36.913 | 50.510 | 0.00 | 0.00 |
| ATOM | 4594 | HD21 | LEU | X | 304 | 29.911 | 37.181 | 50.417 | 0.00 | 0.00 |
| ATOM | 4595 | HD22 | LEU | X | 304 | 31.607 | 37.392 | 49.771 | 0.00 | 0.00 |
| ATOM | 4596 | HD23 | LEU | X | 304 | 30.868 | 35.843 | 50.325 | 0.00 | 0.00 |
| ATOM | 4597 | C    | LEU | X | 304 | 28.686 | 35.690 | 54.335 | 0.00 | 0.00 |
| ATOM | 4598 | O    | LEU | X | 304 | 29.138 | 35.313 | 55.428 | 0.00 | 0.00 |
| ATOM | 4599 | N    | SER | X | 305 | 27.481 | 35.281 | 53.917 | 0.00 | 0.00 |
| ATOM | 4600 | H    | SER | X | 305 | 27.191 | 35.753 | 53.073 | 0.00 | 0.00 |
| ATOM | 4601 | CA   | SER | X | 305 | 26.634 | 34.414 | 54.657 | 0.00 | 0.00 |
| ATOM | 4602 | HA   | SER | X | 305 | 26.474 | 34.705 | 55.696 | 0.00 | 0.00 |
| ATOM | 4603 | CB   | SER | X | 305 | 25.201 | 34.406 | 54.047 | 0.00 | 0.00 |
| ATOM | 4604 | HB2  | SER | X | 305 | 24.552 | 33.898 | 54.760 | 0.00 | 0.00 |
| ATOM | 4605 | HB3  | SER | X | 305 | 24.870 | 35.444 | 54.010 | 0.00 | 0.00 |
| ATOM | 4606 | OG   | SER | X | 305 | 25.157 | 33.731 | 52.827 | 0.00 | 0.00 |
| ATOM | 4607 | HG   | SER | X | 305 | 25.569 | 34.284 | 52.159 | 0.00 | 0.00 |
| ATOM | 4608 | C    | SER | X | 305 | 27.033 | 32.931 | 54.710 | 0.00 | 0.00 |
| ATOM | 4609 | O    | SER | X | 305 | 26.421 | 32.075 | 55.413 | 0.00 | 0.00 |
| ATOM | 4610 | N    | ASP | X | 306 | 28.191 | 32.616 | 54.006 | 0.00 | 0.00 |
| ATOM | 4611 | H    | ASP | X | 306 | 28.815 | 33.352 | 53.707 | 0.00 | 0.00 |
| ATOM | 4612 | CA   | ASP | X | 306 | 28.724 | 31.342 | 54.010 | 0.00 | 0.00 |
| ATOM | 4613 | HA   | ASP | X | 306 | 28.785 | 31.047 | 55.058 | 0.00 | 0.00 |
| ATOM | 4614 | CB   | ASP | X | 306 | 27.769 | 30.306 | 53.299 | 0.00 | 0.00 |
| ATOM | 4615 | HB2  | ASP | X | 306 | 26.724 | 30.606 | 53.369 | 0.00 | 0.00 |
| ATOM | 4616 | HB3  | ASP | X | 306 | 27.857 | 30.327 | 52.213 | 0.00 | 0.00 |
| ATOM | 4617 | CG   | ASP | X | 306 | 27.841 | 28.962 | 53.930 | 0.00 | 0.00 |
| ATOM | 4618 | OD1  | ASP | X | 306 | 28.922 | 28.386 | 54.240 | 0.00 | 0.00 |
| ATOM | 4619 | OD2  | ASP | X | 306 | 26.682 | 28.498 | 54.130 | 0.00 | 0.00 |
| ATOM | 4620 | C    | ASP | X | 306 | 30.144 | 31.394 | 53.300 | 0.00 | 0.00 |
| ATOM | 4621 | O    | ASP | X | 306 | 30.567 | 32.421 | 52.763 | 0.00 | 0.00 |
| ATOM | 4622 | N    | THR | X | 307 | 30.843 | 30.239 | 53.165 | 0.00 | 0.00 |
| ATOM | 4623 | H    | THR | X | 307 | 30.391 | 29.376 | 53.429 | 0.00 | 0.00 |
| ATOM | 4624 | CA   | THR | X | 307 | 31.958 | 30.085 | 52.232 | 0.00 | 0.00 |
| ATOM | 4625 | HA   | THR | X | 307 | 32.734 | 30.794 | 52.524 | 0.00 | 0.00 |
| ATOM | 4626 | CB   | THR | X | 307 | 32.535 | 28.660 | 52.324 | 0.00 | 0.00 |
| ATOM | 4627 | HB   | THR | X | 307 | 33.165 | 28.431 | 51.465 | 0.00 | 0.00 |



|      |      |      |     |   |     |        |        |        |      |      |
|------|------|------|-----|---|-----|--------|--------|--------|------|------|
| ATOM | 4628 | CG2  | THR | X | 307 | 33.300 | 28.472 | 53.580 | 0.00 | 0.00 |
| ATOM | 4629 | HG21 | THR | X | 307 | 34.153 | 29.149 | 53.536 | 0.00 | 0.00 |
| ATOM | 4630 | HG22 | THR | X | 307 | 32.622 | 28.630 | 54.419 | 0.00 | 0.00 |
| ATOM | 4631 | HG23 | THR | X | 307 | 33.641 | 27.443 | 53.693 | 0.00 | 0.00 |
| ATOM | 4632 | OG1  | THR | X | 307 | 31.473 | 27.781 | 52.170 | 0.00 | 0.00 |
| ATOM | 4633 | HG1  | THR | X | 307 | 30.855 | 28.198 | 51.565 | 0.00 | 0.00 |
| ATOM | 4634 | C    | THR | X | 307 | 31.466 | 30.346 | 50.801 | 0.00 | 0.00 |
| ATOM | 4635 | O    | THR | X | 307 | 30.556 | 29.569 | 50.387 | 0.00 | 0.00 |
| ATOM | 4636 | N    | PRO | X | 308 | 32.088 | 31.263 | 50.073 | 0.00 | 0.00 |
| ATOM | 4637 | CD   | PRO | X | 308 | 33.149 | 32.214 | 50.480 | 0.00 | 0.00 |
| ATOM | 4638 | HD2  | PRO | X | 308 | 34.006 | 31.599 | 50.756 | 0.00 | 0.00 |
| ATOM | 4639 | HD3  | PRO | X | 308 | 32.899 | 32.818 | 51.352 | 0.00 | 0.00 |
| ATOM | 4640 | CG   | PRO | X | 308 | 33.522 | 33.048 | 49.313 | 0.00 | 0.00 |
| ATOM | 4641 | HG2  | PRO | X | 308 | 34.505 | 33.512 | 49.397 | 0.00 | 0.00 |
| ATOM | 4642 | HG3  | PRO | X | 308 | 32.799 | 33.830 | 49.082 | 0.00 | 0.00 |
| ATOM | 4643 | CB   | PRO | X | 308 | 33.319 | 32.054 | 48.123 | 0.00 | 0.00 |
| ATOM | 4644 | HB2  | PRO | X | 308 | 34.183 | 31.398 | 48.018 | 0.00 | 0.00 |
| ATOM | 4645 | HB3  | PRO | X | 308 | 33.214 | 32.569 | 47.168 | 0.00 | 0.00 |
| ATOM | 4646 | CA   | PRO | X | 308 | 32.044 | 31.418 | 48.621 | 0.00 | 0.00 |
| ATOM | 4647 | HA   | PRO | X | 308 | 31.211 | 32.106 | 48.472 | 0.00 | 0.00 |
| ATOM | 4648 | C    | PRO | X | 308 | 31.708 | 30.060 | 47.784 | 0.00 | 0.00 |
| ATOM | 4649 | O    | PRO | X | 308 | 30.886 | 30.072 | 46.876 | 0.00 | 0.00 |
| ATOM | 4650 | N    | GLU | X | 309 | 32.389 | 28.962 | 48.165 | 0.00 | 0.00 |
| ATOM | 4651 | H    | GLU | X | 309 | 32.990 | 28.970 | 48.977 | 0.00 | 0.00 |
| ATOM | 4652 | CA   | GLU | X | 309 | 32.265 | 27.645 | 47.457 | 0.00 | 0.00 |
| ATOM | 4653 | HA   | GLU | X | 309 | 32.339 | 27.917 | 46.404 | 0.00 | 0.00 |
| ATOM | 4654 | CB   | GLU | X | 309 | 33.387 | 26.665 | 47.865 | 0.00 | 0.00 |
| ATOM | 4655 | HB2  | GLU | X | 309 | 34.327 | 27.204 | 47.749 | 0.00 | 0.00 |
| ATOM | 4656 | HB3  | GLU | X | 309 | 33.129 | 26.299 | 48.859 | 0.00 | 0.00 |
| ATOM | 4657 | CG   | GLU | X | 309 | 33.450 | 25.428 | 47.004 | 0.00 | 0.00 |
| ATOM | 4658 | HG2  | GLU | X | 309 | 32.465 | 24.960 | 47.029 | 0.00 | 0.00 |
| ATOM | 4659 | HG3  | GLU | X | 309 | 33.734 | 25.748 | 46.002 | 0.00 | 0.00 |
| ATOM | 4660 | CD   | GLU | X | 309 | 34.560 | 24.518 | 47.586 | 0.00 | 0.00 |
| ATOM | 4661 | OE1  | GLU | X | 309 | 35.642 | 24.408 | 46.994 | 0.00 | 0.00 |
| ATOM | 4662 | OE2  | GLU | X | 309 | 34.377 | 23.836 | 48.650 | 0.00 | 0.00 |
| ATOM | 4663 | C    | GLU | X | 309 | 30.841 | 27.009 | 47.631 | 0.00 | 0.00 |
| ATOM | 4664 | O    | GLU | X | 309 | 30.413 | 26.231 | 46.702 | 0.00 | 0.00 |
| ATOM | 4665 | N    | ALA | X | 310 | 30.122 | 27.294 | 48.642 | 0.00 | 0.00 |
| ATOM | 4666 | H    | ALA | X | 310 | 30.396 | 28.052 | 49.250 | 0.00 | 0.00 |
| ATOM | 4667 | CA   | ALA | X | 310 | 28.689 | 27.155 | 48.640 | 0.00 | 0.00 |
| ATOM | 4668 | HA   | ALA | X | 310 | 28.362 | 26.229 | 48.165 | 0.00 | 0.00 |
| ATOM | 4669 | CB   | ALA | X | 310 | 28.238 | 27.028 | 50.048 | 0.00 | 0.00 |
| ATOM | 4670 | HB1  | ALA | X | 310 | 27.225 | 26.629 | 50.099 | 0.00 | 0.00 |
| ATOM | 4671 | HB2  | ALA | X | 310 | 28.858 | 26.312 | 50.589 | 0.00 | 0.00 |
| ATOM | 4672 | HB3  | ALA | X | 310 | 28.302 | 27.968 | 50.595 | 0.00 | 0.00 |
| ATOM | 4673 | C    | ALA | X | 310 | 27.839 | 28.247 | 47.972 | 0.00 | 0.00 |
| ATOM | 4674 | O    | ALA | X | 310 | 26.855 | 27.875 | 47.390 | 0.00 | 0.00 |
| ATOM | 4675 | N    | LEU | X | 311 | 28.105 | 29.540 | 48.122 | 0.00 | 0.00 |
| ATOM | 4676 | H    | LEU | X | 311 | 28.919 | 29.744 | 48.684 | 0.00 | 0.00 |
| ATOM | 4677 | CA   | LEU | X | 311 | 27.273 | 30.626 | 47.797 | 0.00 | 0.00 |
| ATOM | 4678 | HA   | LEU | X | 311 | 26.237 | 30.565 | 48.131 | 0.00 | 0.00 |
| ATOM | 4679 | CB   | LEU | X | 311 | 27.949 | 31.960 | 48.293 | 0.00 | 0.00 |
| ATOM | 4680 | HB2  | LEU | X | 311 | 28.937 | 31.980 | 47.832 | 0.00 | 0.00 |
| ATOM | 4681 | HB3  | LEU | X | 311 | 27.362 | 32.816 | 47.961 | 0.00 | 0.00 |
| ATOM | 4682 | CG   | LEU | X | 311 | 28.116 | 32.123 | 49.834 | 0.00 | 0.00 |
| ATOM | 4683 | HG   | LEU | X | 311 | 28.624 | 31.228 | 50.193 | 0.00 | 0.00 |
| ATOM | 4684 | CD1  | LEU | X | 311 | 28.949 | 33.417 | 50.048 | 0.00 | 0.00 |
| ATOM | 4685 | HD11 | LEU | X | 311 | 30.011 | 33.219 | 50.188 | 0.00 | 0.00 |
| ATOM | 4686 | HD12 | LEU | X | 311 | 28.872 | 33.950 | 49.100 | 0.00 | 0.00 |
| ATOM | 4687 | HD13 | LEU | X | 311 | 28.690 | 33.909 | 50.986 | 0.00 | 0.00 |
| ATOM | 4688 | CD2  | LEU | X | 311 | 26.625 | 32.177 | 50.370 | 0.00 | 0.00 |
| ATOM | 4689 | HD21 | LEU | X | 311 | 26.100 | 33.063 | 50.012 | 0.00 | 0.00 |
| ATOM | 4690 | HD22 | LEU | X | 311 | 26.047 | 31.294 | 50.094 | 0.00 | 0.00 |
| ATOM | 4691 | HD23 | LEU | X | 311 | 26.568 | 31.998 | 51.444 | 0.00 | 0.00 |
| ATOM | 4692 | C    | LEU | X | 311 | 27.175 | 30.656 | 46.265 | 0.00 | 0.00 |
| ATOM | 4693 | O    | LEU | X | 311 | 26.116 | 30.826 | 45.728 | 0.00 | 0.00 |
| ATOM | 4694 | N    | ILE | X | 312 | 28.244 | 30.336 | 45.585 | 0.00 | 0.00 |
| ATOM | 4695 | H    | ILE | X | 312 | 29.069 | 30.242 | 46.161 | 0.00 | 0.00 |
| ATOM | 4696 | CA   | ILE | X | 312 | 28.380 | 30.142 | 44.109 | 0.00 | 0.00 |
| ATOM | 4697 | HA   | ILE | X | 312 | 27.891 | 31.013 | 43.673 | 0.00 | 0.00 |

|      |      |      |     |   |     |        |        |        |      |      |
|------|------|------|-----|---|-----|--------|--------|--------|------|------|
| ATOM | 4698 | CB   | ILE | X | 312 | 29.864 | 30.095 | 43.659 | 0.00 | 0.00 |
| ATOM | 4699 | HB   | ILE | X | 312 | 30.424 | 30.814 | 44.257 | 0.00 | 0.00 |
| ATOM | 4700 | CG2  | ILE | X | 312 | 30.523 | 28.704 | 43.743 | 0.00 | 0.00 |
| ATOM | 4701 | HG21 | ILE | X | 312 | 30.393 | 28.172 | 44.686 | 0.00 | 0.00 |
| ATOM | 4702 | HG22 | ILE | X | 312 | 30.084 | 28.077 | 42.967 | 0.00 | 0.00 |
| ATOM | 4703 | HG23 | ILE | X | 312 | 31.584 | 28.774 | 43.504 | 0.00 | 0.00 |
| ATOM | 4704 | CG1  | ILE | X | 312 | 30.138 | 30.664 | 42.253 | 0.00 | 0.00 |
| ATOM | 4705 | HG12 | ILE | X | 312 | 31.192 | 30.454 | 42.073 | 0.00 | 0.00 |
| ATOM | 4706 | HG13 | ILE | X | 312 | 29.546 | 30.061 | 41.565 | 0.00 | 0.00 |
| ATOM | 4707 | CD1  | ILE | X | 312 | 29.969 | 32.086 | 41.883 | 0.00 | 0.00 |
| ATOM | 4708 | HD11 | ILE | X | 312 | 29.071 | 32.506 | 42.337 | 0.00 | 0.00 |
| ATOM | 4709 | HD12 | ILE | X | 312 | 30.810 | 32.776 | 41.950 | 0.00 | 0.00 |
| ATOM | 4710 | HD13 | ILE | X | 312 | 29.651 | 31.899 | 40.858 | 0.00 | 0.00 |
| ATOM | 4711 | C    | ILE | X | 312 | 27.585 | 28.972 | 43.651 | 0.00 | 0.00 |
| ATOM | 4712 | O    | ILE | X | 312 | 27.143 | 29.003 | 42.480 | 0.00 | 0.00 |
| ATOM | 4713 | N    | ASN | X | 313 | 27.263 | 27.943 | 44.397 | 0.00 | 0.00 |
| ATOM | 4714 | H    | ASN | X | 313 | 27.456 | 28.038 | 45.384 | 0.00 | 0.00 |
| ATOM | 4715 | CA   | ASN | X | 313 | 26.625 | 26.676 | 43.928 | 0.00 | 0.00 |
| ATOM | 4716 | HA   | ASN | X | 313 | 26.846 | 26.580 | 42.865 | 0.00 | 0.00 |
| ATOM | 4717 | CB   | ASN | X | 313 | 27.320 | 25.501 | 44.588 | 0.00 | 0.00 |
| ATOM | 4718 | HB2  | ASN | X | 313 | 28.389 | 25.611 | 44.404 | 0.00 | 0.00 |
| ATOM | 4719 | HB3  | ASN | X | 313 | 27.164 | 25.559 | 45.665 | 0.00 | 0.00 |
| ATOM | 4720 | CG   | ASN | X | 313 | 26.990 | 24.056 | 44.160 | 0.00 | 0.00 |
| ATOM | 4721 | OD1  | ASN | X | 313 | 27.256 | 23.172 | 44.939 | 0.00 | 0.00 |
| ATOM | 4722 | ND2  | ASN | X | 313 | 26.465 | 23.841 | 43.005 | 0.00 | 0.00 |
| ATOM | 4723 | HD21 | ASN | X | 313 | 26.055 | 22.930 | 42.858 | 0.00 | 0.00 |
| ATOM | 4724 | HD22 | ASN | X | 313 | 26.167 | 24.564 | 42.366 | 0.00 | 0.00 |
| ATOM | 4725 | C    | ASN | X | 313 | 25.106 | 26.591 | 44.087 | 0.00 | 0.00 |
| ATOM | 4726 | O    | ASN | X | 313 | 24.383 | 25.880 | 43.375 | 0.00 | 0.00 |
| ATOM | 4727 | N    | ALA | X | 314 | 24.585 | 27.404 | 44.974 | 0.00 | 0.00 |
| ATOM | 4728 | H    | ALA | X | 314 | 25.232 | 27.797 | 45.643 | 0.00 | 0.00 |
| ATOM | 4729 | CA   | ALA | X | 314 | 23.123 | 27.612 | 45.202 | 0.00 | 0.00 |
| ATOM | 4730 | HA   | ALA | X | 314 | 22.656 | 26.791 | 44.657 | 0.00 | 0.00 |
| ATOM | 4731 | CB   | ALA | X | 314 | 22.833 | 27.510 | 46.710 | 0.00 | 0.00 |
| ATOM | 4732 | HB1  | ALA | X | 314 | 23.459 | 26.744 | 47.169 | 0.00 | 0.00 |
| ATOM | 4733 | HB2  | ALA | X | 314 | 23.113 | 28.434 | 47.216 | 0.00 | 0.00 |
| ATOM | 4734 | HB3  | ALA | X | 314 | 21.782 | 27.344 | 46.946 | 0.00 | 0.00 |
| ATOM | 4735 | C    | ALA | X | 314 | 22.608 | 28.954 | 44.545 | 0.00 | 0.00 |
| ATOM | 4736 | O    | ALA | X | 314 | 21.431 | 29.152 | 44.395 | 0.00 | 0.00 |
| ATOM | 4737 | N    | GLY | X | 315 | 23.464 | 29.845 | 44.028 | 0.00 | 0.00 |
| ATOM | 4738 | H    | GLY | X | 315 | 24.429 | 29.557 | 43.951 | 0.00 | 0.00 |
| ATOM | 4739 | CA   | GLY | X | 315 | 23.162 | 31.194 | 43.576 | 0.00 | 0.00 |
| ATOM | 4740 | HA2  | GLY | X | 315 | 22.395 | 31.521 | 44.213 | 0.00 | 0.00 |
| ATOM | 4741 | HA3  | GLY | X | 315 | 24.002 | 31.811 | 43.655 | 0.00 | 0.00 |
| ATOM | 4742 | C    | GLY | X | 315 | 22.436 | 31.224 | 42.206 | 0.00 | 0.00 |
| ATOM | 4743 | O    | GLY | X | 315 | 22.720 | 30.320 | 41.391 | 0.00 | 0.00 |
| ATOM | 4744 | N    | ASP | X | 316 | 21.692 | 32.298 | 41.827 | 0.00 | 0.00 |
| ATOM | 4745 | H    | ASP | X | 316 | 21.551 | 33.031 | 42.507 | 0.00 | 0.00 |
| ATOM | 4746 | CA   | ASP | X | 316 | 21.283 | 32.566 | 40.463 | 0.00 | 0.00 |
| ATOM | 4747 | HA   | ASP | X | 316 | 21.424 | 31.594 | 39.990 | 0.00 | 0.00 |
| ATOM | 4748 | CB   | ASP | X | 316 | 19.796 | 33.045 | 40.502 | 0.00 | 0.00 |
| ATOM | 4749 | HB2  | ASP | X | 316 | 19.121 | 32.291 | 40.906 | 0.00 | 0.00 |
| ATOM | 4750 | HB3  | ASP | X | 316 | 19.728 | 33.787 | 41.298 | 0.00 | 0.00 |
| ATOM | 4751 | CG   | ASP | X | 316 | 19.346 | 33.664 | 39.205 | 0.00 | 0.00 |
| ATOM | 4752 | OD1  | ASP | X | 316 | 18.655 | 34.672 | 39.243 | 0.00 | 0.00 |
| ATOM | 4753 | OD2  | ASP | X | 316 | 19.528 | 33.135 | 38.087 | 0.00 | 0.00 |
| ATOM | 4754 | C    | ASP | X | 316 | 22.196 | 33.603 | 39.864 | 0.00 | 0.00 |
| ATOM | 4755 | O    | ASP | X | 316 | 22.526 | 34.563 | 40.500 | 0.00 | 0.00 |
| ATOM | 4756 | N    | PHE | X | 317 | 22.561 | 33.380 | 38.573 | 0.00 | 0.00 |
| ATOM | 4757 | H    | PHE | X | 317 | 22.074 | 32.631 | 38.103 | 0.00 | 0.00 |
| ATOM | 4758 | CA   | PHE | X | 317 | 23.404 | 34.209 | 37.878 | 0.00 | 0.00 |
| ATOM | 4759 | HA   | PHE | X | 317 | 23.449 | 35.181 | 38.369 | 0.00 | 0.00 |
| ATOM | 4760 | CB   | PHE | X | 317 | 24.862 | 33.693 | 37.825 | 0.00 | 0.00 |
| ATOM | 4761 | HB2  | PHE | X | 317 | 24.853 | 32.748 | 37.282 | 0.00 | 0.00 |
| ATOM | 4762 | HB3  | PHE | X | 317 | 25.432 | 34.258 | 37.088 | 0.00 | 0.00 |
| ATOM | 4763 | CG   | PHE | X | 317 | 25.628 | 33.677 | 39.110 | 0.00 | 0.00 |
| ATOM | 4764 | CD1  | PHE | X | 317 | 26.193 | 34.850 | 39.749 | 0.00 | 0.00 |
| ATOM | 4765 | HD1  | PHE | X | 317 | 26.125 | 35.821 | 39.282 | 0.00 | 0.00 |
| ATOM | 4766 | CE1  | PHE | X | 317 | 26.633 | 34.811 | 41.068 | 0.00 | 0.00 |
| ATOM | 4767 | HE1  | PHE | X | 317 | 27.057 | 35.668 | 41.570 | 0.00 | 0.00 |

|      |      |      |     |   |     |        |        |        |      |      |
|------|------|------|-----|---|-----|--------|--------|--------|------|------|
| ATOM | 4768 | CZ   | PHE | X | 317 | 26.601 | 33.576 | 41.764 | 0.00 | 0.00 |
| ATOM | 4769 | HZ   | PHE | X | 317 | 26.909 | 33.531 | 42.798 | 0.00 | 0.00 |
| ATOM | 4770 | CE2  | PHE | X | 317 | 26.190 | 32.405 | 41.123 | 0.00 | 0.00 |
| ATOM | 4771 | HE2  | PHE | X | 317 | 26.227 | 31.422 | 41.569 | 0.00 | 0.00 |
| ATOM | 4772 | CD2  | PHE | X | 317 | 25.582 | 32.518 | 39.877 | 0.00 | 0.00 |
| ATOM | 4773 | HD2  | PHE | X | 317 | 25.048 | 31.655 | 39.506 | 0.00 | 0.00 |
| ATOM | 4774 | C    | PHE | X | 317 | 22.914 | 34.535 | 36.482 | 0.00 | 0.00 |
| ATOM | 4775 | O    | PHE | X | 317 | 23.735 | 34.995 | 35.649 | 0.00 | 0.00 |
| ATOM | 4776 | N    | HIE | X | 318 | 21.647 | 34.185 | 36.064 | 0.00 | 0.00 |
| ATOM | 4777 | H    | HIE | X | 318 | 20.983 | 33.812 | 36.727 | 0.00 | 0.00 |
| ATOM | 4778 | CA   | HIE | X | 318 | 21.074 | 34.357 | 34.676 | 0.00 | 0.00 |
| ATOM | 4779 | HA   | HIE | X | 318 | 21.569 | 33.616 | 34.048 | 0.00 | 0.00 |
| ATOM | 4780 | CB   | HIE | X | 318 | 19.565 | 34.049 | 34.688 | 0.00 | 0.00 |
| ATOM | 4781 | HB2  | HIE | X | 318 | 19.362 | 33.183 | 35.318 | 0.00 | 0.00 |
| ATOM | 4782 | HB3  | HIE | X | 318 | 19.006 | 34.849 | 35.174 | 0.00 | 0.00 |
| ATOM | 4783 | CG   | HIE | X | 318 | 18.977 | 33.766 | 33.321 | 0.00 | 0.00 |
| ATOM | 4784 | ND1  | HIE | X | 318 | 18.068 | 34.528 | 32.610 | 0.00 | 0.00 |
| ATOM | 4785 | CE1  | HIE | X | 318 | 17.876 | 33.918 | 31.410 | 0.00 | 0.00 |
| ATOM | 4786 | HE1  | HIE | X | 318 | 17.213 | 34.245 | 30.623 | 0.00 | 0.00 |
| ATOM | 4787 | NE2  | HIE | X | 318 | 18.549 | 32.752 | 31.396 | 0.00 | 0.00 |
| ATOM | 4788 | HE2  | HIE | X | 318 | 18.407 | 32.122 | 30.620 | 0.00 | 0.00 |
| ATOM | 4789 | CD2  | HIE | X | 318 | 19.206 | 32.591 | 32.595 | 0.00 | 0.00 |
| ATOM | 4790 | HD2  | HIE | X | 318 | 19.813 | 31.728 | 32.828 | 0.00 | 0.00 |
| ATOM | 4791 | C    | HIE | X | 318 | 21.376 | 35.769 | 34.121 | 0.00 | 0.00 |
| ATOM | 4792 | O    | HIE | X | 318 | 21.452 | 36.749 | 34.909 | 0.00 | 0.00 |
| ATOM | 4793 | N    | GLY | X | 319 | 21.749 | 35.799 | 32.838 | 0.00 | 0.00 |
| ATOM | 4794 | H    | GLY | X | 319 | 21.560 | 34.945 | 32.333 | 0.00 | 0.00 |
| ATOM | 4795 | CA   | GLY | X | 319 | 22.123 | 36.936 | 31.908 | 0.00 | 0.00 |
| ATOM | 4796 | HA2  | GLY | X | 319 | 22.350 | 36.370 | 31.031 | 0.00 | 0.00 |
| ATOM | 4797 | HA3  | GLY | X | 319 | 21.273 | 37.531 | 31.674 | 0.00 | 0.00 |
| ATOM | 4798 | C    | GLY | X | 319 | 23.496 | 37.604 | 32.129 | 0.00 | 0.00 |
| ATOM | 4799 | O    | GLY | X | 319 | 23.898 | 38.550 | 31.411 | 0.00 | 0.00 |
| ATOM | 4800 | N    | LEU | X | 320 | 24.245 | 37.227 | 33.187 | 0.00 | 0.00 |
| ATOM | 4801 | H    | LEU | X | 320 | 23.910 | 36.435 | 33.717 | 0.00 | 0.00 |
| ATOM | 4802 | CA   | LEU | X | 320 | 25.467 | 37.823 | 33.719 | 0.00 | 0.00 |
| ATOM | 4803 | HA   | LEU | X | 320 | 25.278 | 38.890 | 33.829 | 0.00 | 0.00 |
| ATOM | 4804 | CB   | LEU | X | 320 | 25.799 | 37.179 | 35.073 | 0.00 | 0.00 |
| ATOM | 4805 | HB2  | LEU | X | 320 | 25.094 | 37.478 | 35.849 | 0.00 | 0.00 |
| ATOM | 4806 | HB3  | LEU | X | 320 | 25.828 | 36.089 | 35.078 | 0.00 | 0.00 |
| ATOM | 4807 | CG   | LEU | X | 320 | 27.169 | 37.579 | 35.630 | 0.00 | 0.00 |
| ATOM | 4808 | HG   | LEU | X | 320 | 27.906 | 37.081 | 35.001 | 0.00 | 0.00 |
| ATOM | 4809 | CD1  | LEU | X | 320 | 27.327 | 39.073 | 35.731 | 0.00 | 0.00 |
| ATOM | 4810 | HD11 | LEU | X | 320 | 27.296 | 39.443 | 34.706 | 0.00 | 0.00 |
| ATOM | 4811 | HD12 | LEU | X | 320 | 26.656 | 39.510 | 36.470 | 0.00 | 0.00 |
| ATOM | 4812 | HD13 | LEU | X | 320 | 28.324 | 39.304 | 36.107 | 0.00 | 0.00 |
| ATOM | 4813 | CD2  | LEU | X | 320 | 27.380 | 36.892 | 36.973 | 0.00 | 0.00 |
| ATOM | 4814 | HD21 | LEU | X | 320 | 26.563 | 37.084 | 37.669 | 0.00 | 0.00 |
| ATOM | 4815 | HD22 | LEU | X | 320 | 27.473 | 35.816 | 36.825 | 0.00 | 0.00 |
| ATOM | 4816 | HD23 | LEU | X | 320 | 28.272 | 37.276 | 37.467 | 0.00 | 0.00 |
| ATOM | 4817 | C    | LEU | X | 320 | 26.593 | 37.519 | 32.689 | 0.00 | 0.00 |
| ATOM | 4818 | O    | LEU | X | 320 | 26.794 | 36.391 | 32.239 | 0.00 | 0.00 |
| ATOM | 4819 | N    | GLN | X | 321 | 27.385 | 38.479 | 32.330 | 0.00 | 0.00 |
| ATOM | 4820 | H    | GLN | X | 321 | 27.238 | 39.434 | 32.624 | 0.00 | 0.00 |
| ATOM | 4821 | CA   | GLN | X | 321 | 28.591 | 38.269 | 31.502 | 0.00 | 0.00 |
| ATOM | 4822 | HA   | GLN | X | 321 | 28.569 | 37.299 | 31.005 | 0.00 | 0.00 |
| ATOM | 4823 | CB   | GLN | X | 321 | 28.531 | 39.386 | 30.444 | 0.00 | 0.00 |
| ATOM | 4824 | HB2  | GLN | X | 321 | 28.524 | 40.398 | 30.850 | 0.00 | 0.00 |
| ATOM | 4825 | HB3  | GLN | X | 321 | 29.463 | 39.380 | 29.878 | 0.00 | 0.00 |
| ATOM | 4826 | CG   | GLN | X | 321 | 27.449 | 39.156 | 29.429 | 0.00 | 0.00 |
| ATOM | 4827 | HG2  | GLN | X | 321 | 27.616 | 38.266 | 28.824 | 0.00 | 0.00 |
| ATOM | 4828 | HG3  | GLN | X | 321 | 26.475 | 39.023 | 29.901 | 0.00 | 0.00 |
| ATOM | 4829 | CD   | GLN | X | 321 | 27.148 | 40.290 | 28.492 | 0.00 | 0.00 |
| ATOM | 4830 | OE1  | GLN | X | 321 | 26.633 | 41.328 | 28.877 | 0.00 | 0.00 |
| ATOM | 4831 | NE2  | GLN | X | 321 | 27.671 | 40.355 | 27.330 | 0.00 | 0.00 |
| ATOM | 4832 | HE21 | GLN | X | 321 | 27.532 | 41.257 | 26.897 | 0.00 | 0.00 |
| ATOM | 4833 | HE22 | GLN | X | 321 | 27.884 | 39.516 | 26.809 | 0.00 | 0.00 |
| ATOM | 4834 | C    | GLN | X | 321 | 29.934 | 38.401 | 32.320 | 0.00 | 0.00 |
| ATOM | 4835 | O    | GLN | X | 321 | 30.152 | 39.431 | 32.945 | 0.00 | 0.00 |
| ATOM | 4836 | N    | VAL | X | 322 | 30.803 | 37.401 | 32.325 | 0.00 | 0.00 |
| ATOM | 4837 | H    | VAL | X | 322 | 30.569 | 36.517 | 31.896 | 0.00 | 0.00 |

|      |      |      |     |   |     |        |        |        |      |      |
|------|------|------|-----|---|-----|--------|--------|--------|------|------|
| ATOM | 4838 | CA   | VAL | X | 322 | 32.097 | 37.377 | 33.011 | 0.00 | 0.00 |
| ATOM | 4839 | HA   | VAL | X | 322 | 32.393 | 38.415 | 33.159 | 0.00 | 0.00 |
| ATOM | 4840 | CB   | VAL | X | 322 | 31.938 | 36.603 | 34.376 | 0.00 | 0.00 |
| ATOM | 4841 | HB   | VAL | X | 322 | 32.038 | 35.553 | 34.100 | 0.00 | 0.00 |
| ATOM | 4842 | CG1  | VAL | X | 322 | 33.106 | 36.903 | 35.276 | 0.00 | 0.00 |
| ATOM | 4843 | HG11 | VAL | X | 322 | 32.950 | 36.650 | 36.325 | 0.00 | 0.00 |
| ATOM | 4844 | HG12 | VAL | X | 322 | 33.993 | 36.325 | 35.019 | 0.00 | 0.00 |
| ATOM | 4845 | HG13 | VAL | X | 322 | 33.313 | 37.967 | 35.154 | 0.00 | 0.00 |
| ATOM | 4846 | CG2  | VAL | X | 322 | 30.617 | 36.658 | 35.153 | 0.00 | 0.00 |
| ATOM | 4847 | HG21 | VAL | X | 322 | 30.087 | 37.599 | 35.006 | 0.00 | 0.00 |
| ATOM | 4848 | HG22 | VAL | X | 322 | 29.921 | 35.905 | 34.785 | 0.00 | 0.00 |
| ATOM | 4849 | HG23 | VAL | X | 322 | 30.756 | 36.622 | 36.234 | 0.00 | 0.00 |
| ATOM | 4850 | C    | VAL | X | 322 | 33.286 | 36.720 | 32.250 | 0.00 | 0.00 |
| ATOM | 4851 | O    | VAL | X | 322 | 33.078 | 35.624 | 31.735 | 0.00 | 0.00 |
| ATOM | 4852 | N    | LEU | X | 323 | 34.521 | 37.381 | 32.206 | 0.00 | 0.00 |
| ATOM | 4853 | H    | LEU | X | 323 | 34.520 | 38.224 | 32.762 | 0.00 | 0.00 |
| ATOM | 4854 | CA   | LEU | X | 323 | 35.765 | 36.799 | 31.649 | 0.00 | 0.00 |
| ATOM | 4855 | HA   | LEU | X | 323 | 35.495 | 35.973 | 30.992 | 0.00 | 0.00 |
| ATOM | 4856 | CB   | LEU | X | 323 | 36.302 | 37.908 | 30.783 | 0.00 | 0.00 |
| ATOM | 4857 | HB2  | LEU | X | 323 | 35.491 | 38.430 | 30.275 | 0.00 | 0.00 |
| ATOM | 4858 | HB3  | LEU | X | 323 | 36.667 | 38.568 | 31.570 | 0.00 | 0.00 |
| ATOM | 4859 | CG   | LEU | X | 323 | 37.379 | 37.637 | 29.711 | 0.00 | 0.00 |
| ATOM | 4860 | HG   | LEU | X | 323 | 37.006 | 36.842 | 29.066 | 0.00 | 0.00 |
| ATOM | 4861 | CD1  | LEU | X | 323 | 37.552 | 38.958 | 28.895 | 0.00 | 0.00 |
| ATOM | 4862 | HD11 | LEU | X | 323 | 37.519 | 39.851 | 29.519 | 0.00 | 0.00 |
| ATOM | 4863 | HD12 | LEU | X | 323 | 38.480 | 39.129 | 28.349 | 0.00 | 0.00 |
| ATOM | 4864 | HD13 | LEU | X | 323 | 36.646 | 39.066 | 28.298 | 0.00 | 0.00 |
| ATOM | 4865 | CD2  | LEU | X | 323 | 38.665 | 37.333 | 30.409 | 0.00 | 0.00 |
| ATOM | 4866 | HD21 | LEU | X | 323 | 38.957 | 38.169 | 31.045 | 0.00 | 0.00 |
| ATOM | 4867 | HD22 | LEU | X | 323 | 38.753 | 36.389 | 30.946 | 0.00 | 0.00 |
| ATOM | 4868 | HD23 | LEU | X | 323 | 39.395 | 37.274 | 29.601 | 0.00 | 0.00 |
| ATOM | 4869 | C    | LEU | X | 323 | 36.567 | 36.289 | 32.879 | 0.00 | 0.00 |
| ATOM | 4870 | O    | LEU | X | 323 | 36.712 | 37.059 | 33.827 | 0.00 | 0.00 |
| ATOM | 4871 | N    | VAL | X | 324 | 37.159 | 35.055 | 32.785 | 0.00 | 0.00 |
| ATOM | 4872 | H    | VAL | X | 324 | 37.172 | 34.524 | 31.927 | 0.00 | 0.00 |
| ATOM | 4873 | CA   | VAL | X | 324 | 37.898 | 34.417 | 33.952 | 0.00 | 0.00 |
| ATOM | 4874 | HA   | VAL | X | 324 | 38.193 | 35.101 | 34.747 | 0.00 | 0.00 |
| ATOM | 4875 | CB   | VAL | X | 324 | 37.002 | 33.383 | 34.617 | 0.00 | 0.00 |
| ATOM | 4876 | HB   | VAL | X | 324 | 37.639 | 32.942 | 35.384 | 0.00 | 0.00 |
| ATOM | 4877 | CG1  | VAL | X | 324 | 35.776 | 34.098 | 35.170 | 0.00 | 0.00 |
| ATOM | 4878 | HG11 | VAL | X | 324 | 36.076 | 35.023 | 35.662 | 0.00 | 0.00 |
| ATOM | 4879 | HG12 | VAL | X | 324 | 35.018 | 34.223 | 34.397 | 0.00 | 0.00 |
| ATOM | 4880 | HG13 | VAL | X | 324 | 35.511 | 33.435 | 35.994 | 0.00 | 0.00 |
| ATOM | 4881 | CG2  | VAL | X | 324 | 36.431 | 32.239 | 33.734 | 0.00 | 0.00 |
| ATOM | 4882 | HG21 | VAL | X | 324 | 35.897 | 31.480 | 34.306 | 0.00 | 0.00 |
| ATOM | 4883 | HG22 | VAL | X | 324 | 35.897 | 32.644 | 32.875 | 0.00 | 0.00 |
| ATOM | 4884 | HG23 | VAL | X | 324 | 37.228 | 31.632 | 33.304 | 0.00 | 0.00 |
| ATOM | 4885 | C    | VAL | X | 324 | 39.197 | 33.729 | 33.462 | 0.00 | 0.00 |
| ATOM | 4886 | O    | VAL | X | 324 | 39.239 | 33.459 | 32.221 | 0.00 | 0.00 |
| ATOM | 4887 | N    | GLY | X | 325 | 40.160 | 33.387 | 34.368 | 0.00 | 0.00 |
| ATOM | 4888 | H    | GLY | X | 325 | 40.052 | 33.642 | 35.340 | 0.00 | 0.00 |
| ATOM | 4889 | CA   | GLY | X | 325 | 41.391 | 32.719 | 33.845 | 0.00 | 0.00 |
| ATOM | 4890 | HA2  | GLY | X | 325 | 41.122 | 31.666 | 33.776 | 0.00 | 0.00 |
| ATOM | 4891 | HA3  | GLY | X | 325 | 41.688 | 33.066 | 32.863 | 0.00 | 0.00 |
| ATOM | 4892 | C    | GLY | X | 325 | 42.635 | 32.752 | 34.742 | 0.00 | 0.00 |
| ATOM | 4893 | O    | GLY | X | 325 | 42.528 | 33.236 | 35.868 | 0.00 | 0.00 |
| ATOM | 4894 | N    | VAL | X | 326 | 43.675 | 32.167 | 34.366 | 0.00 | 0.00 |
| ATOM | 4895 | H    | VAL | X | 326 | 43.616 | 31.734 | 33.455 | 0.00 | 0.00 |
| ATOM | 4896 | CA   | VAL | X | 326 | 44.976 | 31.981 | 35.049 | 0.00 | 0.00 |
| ATOM | 4897 | HA   | VAL | X | 326 | 45.052 | 32.523 | 35.992 | 0.00 | 0.00 |
| ATOM | 4898 | CB   | VAL | X | 326 | 45.179 | 30.507 | 35.511 | 0.00 | 0.00 |
| ATOM | 4899 | HB   | VAL | X | 326 | 46.187 | 30.449 | 35.922 | 0.00 | 0.00 |
| ATOM | 4900 | CG1  | VAL | X | 326 | 44.119 | 30.132 | 36.525 | 0.00 | 0.00 |
| ATOM | 4901 | HG11 | VAL | X | 326 | 44.349 | 29.362 | 37.261 | 0.00 | 0.00 |
| ATOM | 4902 | HG12 | VAL | X | 326 | 43.839 | 31.035 | 37.067 | 0.00 | 0.00 |
| ATOM | 4903 | HG13 | VAL | X | 326 | 43.209 | 29.734 | 36.075 | 0.00 | 0.00 |
| ATOM | 4904 | CG2  | VAL | X | 326 | 45.149 | 29.473 | 34.302 | 0.00 | 0.00 |
| ATOM | 4905 | HG21 | VAL | X | 326 | 45.971 | 29.614 | 33.600 | 0.00 | 0.00 |
| ATOM | 4906 | HG22 | VAL | X | 326 | 45.377 | 28.467 | 34.654 | 0.00 | 0.00 |
| ATOM | 4907 | HG23 | VAL | X | 326 | 44.174 | 29.441 | 33.817 | 0.00 | 0.00 |

|      |      |      |     |   |     |        |        |        |      |      |
|------|------|------|-----|---|-----|--------|--------|--------|------|------|
| ATOM | 4908 | C    | VAL | X | 326 | 46.104 | 32.413 | 34.086 | 0.00 | 0.00 |
| ATOM | 4909 | O    | VAL | X | 326 | 45.947 | 32.424 | 32.861 | 0.00 | 0.00 |
| ATOM | 4910 | N    | VAL | X | 327 | 47.360 | 32.597 | 34.579 | 0.00 | 0.00 |
| ATOM | 4911 | H    | VAL | X | 327 | 47.483 | 32.560 | 35.581 | 0.00 | 0.00 |
| ATOM | 4912 | CA   | VAL | X | 327 | 48.661 | 32.556 | 33.798 | 0.00 | 0.00 |
| ATOM | 4913 | HA   | VAL | X | 327 | 48.455 | 32.610 | 32.730 | 0.00 | 0.00 |
| ATOM | 4914 | CB   | VAL | X | 327 | 49.554 | 33.731 | 34.130 | 0.00 | 0.00 |
| ATOM | 4915 | HB   | VAL | X | 327 | 50.258 | 33.598 | 33.309 | 0.00 | 0.00 |
| ATOM | 4916 | CG1  | VAL | X | 327 | 48.723 | 34.991 | 33.931 | 0.00 | 0.00 |
| ATOM | 4917 | HG11 | VAL | X | 327 | 48.182 | 34.978 | 32.985 | 0.00 | 0.00 |
| ATOM | 4918 | HG12 | VAL | X | 327 | 48.106 | 35.124 | 34.820 | 0.00 | 0.00 |
| ATOM | 4919 | HG13 | VAL | X | 327 | 49.264 | 35.936 | 33.976 | 0.00 | 0.00 |
| ATOM | 4920 | CG2  | VAL | X | 327 | 50.216 | 33.630 | 35.528 | 0.00 | 0.00 |
| ATOM | 4921 | HG21 | VAL | X | 327 | 50.805 | 32.719 | 35.631 | 0.00 | 0.00 |
| ATOM | 4922 | HG22 | VAL | X | 327 | 50.866 | 34.502 | 35.613 | 0.00 | 0.00 |
| ATOM | 4923 | HG23 | VAL | X | 327 | 49.390 | 33.668 | 36.238 | 0.00 | 0.00 |
| ATOM | 4924 | C    | VAL | X | 327 | 49.301 | 31.180 | 34.010 | 0.00 | 0.00 |
| ATOM | 4925 | O    | VAL | X | 327 | 48.749 | 30.437 | 34.798 | 0.00 | 0.00 |
| ATOM | 4926 | N    | LYS | X | 328 | 50.451 | 30.945 | 33.329 | 0.00 | 0.00 |
| ATOM | 4927 | H    | LYS | X | 328 | 50.878 | 31.742 | 32.878 | 0.00 | 0.00 |
| ATOM | 4928 | CA   | LYS | X | 328 | 51.216 | 29.769 | 33.343 | 0.00 | 0.00 |
| ATOM | 4929 | HA   | LYS | X | 328 | 50.531 | 29.061 | 32.877 | 0.00 | 0.00 |
| ATOM | 4930 | CB   | LYS | X | 328 | 52.366 | 29.780 | 32.327 | 0.00 | 0.00 |
| ATOM | 4931 | HB2  | LYS | X | 328 | 51.930 | 30.094 | 31.378 | 0.00 | 0.00 |
| ATOM | 4932 | HB3  | LYS | X | 328 | 53.071 | 30.564 | 32.603 | 0.00 | 0.00 |
| ATOM | 4933 | CG   | LYS | X | 328 | 53.074 | 28.426 | 32.247 | 0.00 | 0.00 |
| ATOM | 4934 | HG2  | LYS | X | 328 | 53.706 | 28.327 | 33.129 | 0.00 | 0.00 |
| ATOM | 4935 | HG3  | LYS | X | 328 | 52.372 | 27.604 | 32.108 | 0.00 | 0.00 |
| ATOM | 4936 | CD   | LYS | X | 328 | 54.035 | 28.324 | 31.080 | 0.00 | 0.00 |
| ATOM | 4937 | HD2  | LYS | X | 328 | 53.533 | 28.103 | 30.138 | 0.00 | 0.00 |
| ATOM | 4938 | HD3  | LYS | X | 328 | 54.592 | 29.253 | 30.954 | 0.00 | 0.00 |
| ATOM | 4939 | CE   | LYS | X | 328 | 55.011 | 27.113 | 31.246 | 0.00 | 0.00 |
| ATOM | 4940 | HE2  | LYS | X | 328 | 54.397 | 26.247 | 31.490 | 0.00 | 0.00 |
| ATOM | 4941 | HE3  | LYS | X | 328 | 55.451 | 26.821 | 30.292 | 0.00 | 0.00 |
| ATOM | 4942 | NZ   | LYS | X | 328 | 56.129 | 27.444 | 32.222 | 0.00 | 0.00 |
| ATOM | 4943 | HZ1  | LYS | X | 328 | 56.779 | 26.679 | 32.336 | 0.00 | 0.00 |
| ATOM | 4944 | HZ2  | LYS | X | 328 | 56.560 | 28.329 | 31.998 | 0.00 | 0.00 |
| ATOM | 4945 | HZ3  | LYS | X | 328 | 55.795 | 27.663 | 33.149 | 0.00 | 0.00 |
| ATOM | 4946 | C    | LYS | X | 328 | 51.488 | 29.129 | 34.739 | 0.00 | 0.00 |
| ATOM | 4947 | O    | LYS | X | 328 | 51.070 | 28.037 | 34.974 | 0.00 | 0.00 |
| ATOM | 4948 | N    | ASP | X | 329 | 52.428 | 29.698 | 35.464 | 0.00 | 0.00 |
| ATOM | 4949 | H    | ASP | X | 329 | 52.767 | 30.624 | 35.245 | 0.00 | 0.00 |
| ATOM | 4950 | CA   | ASP | X | 329 | 53.148 | 29.103 | 36.616 | 0.00 | 0.00 |
| ATOM | 4951 | HA   | ASP | X | 329 | 52.843 | 28.057 | 36.638 | 0.00 | 0.00 |
| ATOM | 4952 | CB   | ASP | X | 329 | 54.714 | 29.153 | 36.570 | 0.00 | 0.00 |
| ATOM | 4953 | HB2  | ASP | X | 329 | 55.108 | 30.109 | 36.916 | 0.00 | 0.00 |
| ATOM | 4954 | HB3  | ASP | X | 329 | 55.136 | 28.491 | 37.326 | 0.00 | 0.00 |
| ATOM | 4955 | CG   | ASP | X | 329 | 55.400 | 28.646 | 35.277 | 0.00 | 0.00 |
| ATOM | 4956 | OD1  | ASP | X | 329 | 55.719 | 27.434 | 35.088 | 0.00 | 0.00 |
| ATOM | 4957 | OD2  | ASP | X | 329 | 55.528 | 29.357 | 34.227 | 0.00 | 0.00 |
| ATOM | 4958 | C    | ASP | X | 329 | 52.611 | 29.718 | 37.959 | 0.00 | 0.00 |
| ATOM | 4959 | O    | ASP | X | 329 | 53.288 | 30.369 | 38.676 | 0.00 | 0.00 |
| ATOM | 4960 | N    | GLU | X | 330 | 51.371 | 29.446 | 38.302 | 0.00 | 0.00 |
| ATOM | 4961 | H    | GLU | X | 330 | 50.987 | 28.699 | 37.741 | 0.00 | 0.00 |
| ATOM | 4962 | CA   | GLU | X | 330 | 50.553 | 30.048 | 39.369 | 0.00 | 0.00 |
| ATOM | 4963 | HA   | GLU | X | 330 | 50.645 | 31.119 | 39.188 | 0.00 | 0.00 |
| ATOM | 4964 | CB   | GLU | X | 330 | 49.042 | 29.575 | 39.288 | 0.00 | 0.00 |
| ATOM | 4965 | HB2  | GLU | X | 330 | 49.065 | 28.517 | 39.027 | 0.00 | 0.00 |
| ATOM | 4966 | HB3  | GLU | X | 330 | 48.462 | 29.645 | 40.209 | 0.00 | 0.00 |
| ATOM | 4967 | CG   | GLU | X | 330 | 48.307 | 30.264 | 38.173 | 0.00 | 0.00 |
| ATOM | 4968 | HG2  | GLU | X | 330 | 48.853 | 29.984 | 37.272 | 0.00 | 0.00 |
| ATOM | 4969 | HG3  | GLU | X | 330 | 47.350 | 29.768 | 38.016 | 0.00 | 0.00 |
| ATOM | 4970 | CD   | GLU | X | 330 | 47.963 | 31.725 | 38.411 | 0.00 | 0.00 |
| ATOM | 4971 | OE1  | GLU | X | 330 | 47.950 | 32.233 | 39.532 | 0.00 | 0.00 |
| ATOM | 4972 | OE2  | GLU | X | 330 | 47.778 | 32.481 | 37.391 | 0.00 | 0.00 |
| ATOM | 4973 | C    | GLU | X | 330 | 51.193 | 29.807 | 40.784 | 0.00 | 0.00 |
| ATOM | 4974 | O    | GLU | X | 330 | 51.327 | 30.728 | 41.594 | 0.00 | 0.00 |
| ATOM | 4975 | N    | GLY | X | 331 | 51.580 | 28.516 | 41.025 | 0.00 | 0.00 |
| ATOM | 4976 | H    | GLY | X | 331 | 51.450 | 27.742 | 40.389 | 0.00 | 0.00 |
| ATOM | 4977 | CA   | GLY | X | 331 | 51.910 | 28.090 | 42.473 | 0.00 | 0.00 |

|      |      |      |     |   |     |        |        |        |      |      |
|------|------|------|-----|---|-----|--------|--------|--------|------|------|
| ATOM | 4978 | HA2  | GLY | X | 331 | 51.109 | 28.430 | 43.167 | 0.00 | 0.00 |
| ATOM | 4979 | HA3  | GLY | X | 331 | 51.934 | 27.007 | 42.501 | 0.00 | 0.00 |
| ATOM | 4980 | C    | GLY | X | 331 | 53.282 | 28.573 | 42.952 | 0.00 | 0.00 |
| ATOM | 4981 | O    | GLY | X | 331 | 53.585 | 28.532 | 44.173 | 0.00 | 0.00 |
| ATOM | 4982 | N    | SER | X | 332 | 54.134 | 29.119 | 42.066 | 0.00 | 0.00 |
| ATOM | 4983 | H    | SER | X | 332 | 53.809 | 29.158 | 41.111 | 0.00 | 0.00 |
| ATOM | 4984 | CA   | SER | X | 332 | 55.518 | 29.396 | 42.337 | 0.00 | 0.00 |
| ATOM | 4985 | HA   | SER | X | 332 | 55.938 | 28.509 | 42.810 | 0.00 | 0.00 |
| ATOM | 4986 | CB   | SER | X | 332 | 56.219 | 29.422 | 40.982 | 0.00 | 0.00 |
| ATOM | 4987 | HB2  | SER | X | 332 | 57.287 | 29.630 | 41.055 | 0.00 | 0.00 |
| ATOM | 4988 | HB3  | SER | X | 332 | 56.240 | 28.427 | 40.537 | 0.00 | 0.00 |
| ATOM | 4989 | OG   | SER | X | 332 | 55.553 | 30.313 | 40.144 | 0.00 | 0.00 |
| ATOM | 4990 | HG   | SER | X | 332 | 54.719 | 30.044 | 39.753 | 0.00 | 0.00 |
| ATOM | 4991 | C    | SER | X | 332 | 55.672 | 30.541 | 43.331 | 0.00 | 0.00 |
| ATOM | 4992 | O    | SER | X | 332 | 56.452 | 30.575 | 44.262 | 0.00 | 0.00 |
| ATOM | 4993 | N    | TYR | X | 333 | 54.943 | 31.568 | 43.114 | 0.00 | 0.00 |
| ATOM | 4994 | H    | TYR | X | 333 | 54.295 | 31.403 | 42.356 | 0.00 | 0.00 |
| ATOM | 4995 | CA   | TYR | X | 333 | 54.862 | 32.857 | 43.800 | 0.00 | 0.00 |
| ATOM | 4996 | HA   | TYR | X | 333 | 55.829 | 33.352 | 43.882 | 0.00 | 0.00 |
| ATOM | 4997 | CB   | TYR | X | 333 | 53.843 | 33.628 | 42.926 | 0.00 | 0.00 |
| ATOM | 4998 | HB2  | TYR | X | 333 | 53.993 | 33.324 | 41.890 | 0.00 | 0.00 |
| ATOM | 4999 | HB3  | TYR | X | 333 | 52.879 | 33.172 | 43.150 | 0.00 | 0.00 |
| ATOM | 5000 | CG   | TYR | X | 333 | 53.713 | 35.131 | 43.121 | 0.00 | 0.00 |
| ATOM | 5001 | CD1  | TYR | X | 333 | 54.820 | 35.952 | 42.797 | 0.00 | 0.00 |
| ATOM | 5002 | HD1  | TYR | X | 333 | 55.849 | 35.629 | 42.728 | 0.00 | 0.00 |
| ATOM | 5003 | CE1  | TYR | X | 333 | 54.731 | 37.353 | 42.947 | 0.00 | 0.00 |
| ATOM | 5004 | HE1  | TYR | X | 333 | 55.535 | 38.022 | 42.677 | 0.00 | 0.00 |
| ATOM | 5005 | CZ   | TYR | X | 333 | 53.471 | 37.963 | 43.318 | 0.00 | 0.00 |
| ATOM | 5006 | OH   | TYR | X | 333 | 53.230 | 39.309 | 43.345 | 0.00 | 0.00 |
| ATOM | 5007 | HH   | TYR | X | 333 | 52.344 | 39.631 | 43.524 | 0.00 | 0.00 |
| ATOM | 5008 | CE2  | TYR | X | 333 | 52.318 | 37.134 | 43.591 | 0.00 | 0.00 |
| ATOM | 5009 | HE2  | TYR | X | 333 | 51.348 | 37.537 | 43.842 | 0.00 | 0.00 |
| ATOM | 5010 | CD2  | TYR | X | 333 | 52.528 | 35.717 | 43.575 | 0.00 | 0.00 |
| ATOM | 5011 | HD2  | TYR | X | 333 | 51.679 | 35.068 | 43.731 | 0.00 | 0.00 |
| ATOM | 5012 | C    | TYR | X | 333 | 54.340 | 32.789 | 45.268 | 0.00 | 0.00 |
| ATOM | 5013 | O    | TYR | X | 333 | 54.519 | 33.691 | 46.079 | 0.00 | 0.00 |
| ATOM | 5014 | N    | PHE | X | 334 | 53.872 | 31.566 | 45.694 | 0.00 | 0.00 |
| ATOM | 5015 | H    | PHE | X | 334 | 53.842 | 30.804 | 45.031 | 0.00 | 0.00 |
| ATOM | 5016 | CA   | PHE | X | 334 | 53.613 | 31.040 | 47.030 | 0.00 | 0.00 |
| ATOM | 5017 | HA   | PHE | X | 334 | 53.650 | 31.957 | 47.618 | 0.00 | 0.00 |
| ATOM | 5018 | CB   | PHE | X | 334 | 52.125 | 30.538 | 47.036 | 0.00 | 0.00 |
| ATOM | 5019 | HB2  | PHE | X | 334 | 52.011 | 29.572 | 46.544 | 0.00 | 0.00 |
| ATOM | 5020 | HB3  | PHE | X | 334 | 51.920 | 30.328 | 48.085 | 0.00 | 0.00 |
| ATOM | 5021 | CG   | PHE | X | 334 | 51.136 | 31.480 | 46.455 | 0.00 | 0.00 |
| ATOM | 5022 | CD1  | PHE | X | 334 | 50.935 | 31.476 | 45.073 | 0.00 | 0.00 |
| ATOM | 5023 | HD1  | PHE | X | 334 | 51.222 | 30.672 | 44.411 | 0.00 | 0.00 |
| ATOM | 5024 | CE1  | PHE | X | 334 | 50.200 | 32.496 | 44.462 | 0.00 | 0.00 |
| ATOM | 5025 | HE1  | PHE | X | 334 | 50.040 | 32.381 | 43.400 | 0.00 | 0.00 |
| ATOM | 5026 | CZ   | PHE | X | 334 | 49.838 | 33.644 | 45.216 | 0.00 | 0.00 |
| ATOM | 5027 | HZ   | PHE | X | 334 | 49.323 | 34.457 | 44.727 | 0.00 | 0.00 |
| ATOM | 5028 | CE2  | PHE | X | 334 | 49.971 | 33.592 | 46.636 | 0.00 | 0.00 |
| ATOM | 5029 | HE2  | PHE | X | 334 | 49.635 | 34.454 | 47.193 | 0.00 | 0.00 |
| ATOM | 5030 | CD2  | PHE | X | 334 | 50.676 | 32.549 | 47.223 | 0.00 | 0.00 |
| ATOM | 5031 | HD2  | PHE | X | 334 | 50.826 | 32.537 | 48.292 | 0.00 | 0.00 |
| ATOM | 5032 | C    | PHE | X | 334 | 54.606 | 30.139 | 47.657 | 0.00 | 0.00 |
| ATOM | 5033 | O    | PHE | X | 334 | 54.970 | 30.256 | 48.842 | 0.00 | 0.00 |
| ATOM | 5034 | N    | LEU | X | 335 | 55.060 | 29.110 | 46.882 | 0.00 | 0.00 |
| ATOM | 5035 | H    | LEU | X | 335 | 54.760 | 29.138 | 45.918 | 0.00 | 0.00 |
| ATOM | 5036 | CA   | LEU | X | 335 | 56.077 | 28.243 | 47.258 | 0.00 | 0.00 |
| ATOM | 5037 | HA   | LEU | X | 335 | 55.703 | 27.734 | 48.147 | 0.00 | 0.00 |
| ATOM | 5038 | CB   | LEU | X | 335 | 56.440 | 27.267 | 46.127 | 0.00 | 0.00 |
| ATOM | 5039 | HB2  | LEU | X | 335 | 56.435 | 27.891 | 45.233 | 0.00 | 0.00 |
| ATOM | 5040 | HB3  | LEU | X | 335 | 57.405 | 26.817 | 46.361 | 0.00 | 0.00 |
| ATOM | 5041 | CG   | LEU | X | 335 | 55.430 | 26.122 | 46.006 | 0.00 | 0.00 |
| ATOM | 5042 | HG   | LEU | X | 335 | 54.443 | 26.574 | 45.911 | 0.00 | 0.00 |
| ATOM | 5043 | CD1  | LEU | X | 335 | 55.639 | 25.325 | 44.721 | 0.00 | 0.00 |
| ATOM | 5044 | HD11 | LEU | X | 335 | 55.644 | 25.999 | 43.864 | 0.00 | 0.00 |
| ATOM | 5045 | HD12 | LEU | X | 335 | 56.619 | 24.847 | 44.747 | 0.00 | 0.00 |
| ATOM | 5046 | HD13 | LEU | X | 335 | 54.936 | 24.492 | 44.738 | 0.00 | 0.00 |
| ATOM | 5047 | CD2  | LEU | X | 335 | 55.274 | 25.233 | 47.243 | 0.00 | 0.00 |

|      |      |      |     |   |     |        |        |        |      |      |
|------|------|------|-----|---|-----|--------|--------|--------|------|------|
| ATOM | 5048 | HD21 | LEU | X | 335 | 54.985 | 25.785 | 48.137 | 0.00 | 0.00 |
| ATOM | 5049 | HD22 | LEU | X | 335 | 54.582 | 24.399 | 47.127 | 0.00 | 0.00 |
| ATOM | 5050 | HD23 | LEU | X | 335 | 56.299 | 24.902 | 47.411 | 0.00 | 0.00 |
| ATOM | 5051 | C    | LEU | X | 335 | 57.320 | 29.071 | 47.836 | 0.00 | 0.00 |
| ATOM | 5052 | O    | LEU | X | 335 | 57.828 | 28.695 | 48.873 | 0.00 | 0.00 |
| ATOM | 5053 | N    | VAL | X | 336 | 57.676 | 30.178 | 47.118 | 0.00 | 0.00 |
| ATOM | 5054 | H    | VAL | X | 336 | 57.295 | 30.321 | 46.194 | 0.00 | 0.00 |
| ATOM | 5055 | CA   | VAL | X | 336 | 58.736 | 31.071 | 47.517 | 0.00 | 0.00 |
| ATOM | 5056 | HA   | VAL | X | 336 | 59.639 | 30.494 | 47.717 | 0.00 | 0.00 |
| ATOM | 5057 | CB   | VAL | X | 336 | 59.160 | 32.119 | 46.459 | 0.00 | 0.00 |
| ATOM | 5058 | HB   | VAL | X | 336 | 59.970 | 32.696 | 46.906 | 0.00 | 0.00 |
| ATOM | 5059 | CG1  | VAL | X | 336 | 59.682 | 31.569 | 45.112 | 0.00 | 0.00 |
| ATOM | 5060 | HG11 | VAL | X | 336 | 60.716 | 31.241 | 45.220 | 0.00 | 0.00 |
| ATOM | 5061 | HG12 | VAL | X | 336 | 59.137 | 30.755 | 44.635 | 0.00 | 0.00 |
| ATOM | 5062 | HG13 | VAL | X | 336 | 59.746 | 32.414 | 44.427 | 0.00 | 0.00 |
| ATOM | 5063 | CG2  | VAL | X | 336 | 58.131 | 33.258 | 46.236 | 0.00 | 0.00 |
| ATOM | 5064 | HG21 | VAL | X | 336 | 57.925 | 33.743 | 47.190 | 0.00 | 0.00 |
| ATOM | 5065 | HG22 | VAL | X | 336 | 58.556 | 33.902 | 45.466 | 0.00 | 0.00 |
| ATOM | 5066 | HG23 | VAL | X | 336 | 57.207 | 32.771 | 45.923 | 0.00 | 0.00 |
| ATOM | 5067 | C    | VAL | X | 336 | 58.484 | 31.757 | 48.834 | 0.00 | 0.00 |
| ATOM | 5068 | O    | VAL | X | 336 | 59.450 | 32.427 | 49.339 | 0.00 | 0.00 |
| ATOM | 5069 | N    | TYR | X | 337 | 57.393 | 31.651 | 49.540 | 0.00 | 0.00 |
| ATOM | 5070 | H    | TYR | X | 337 | 56.616 | 31.215 | 49.065 | 0.00 | 0.00 |
| ATOM | 5071 | CA   | TYR | X | 337 | 57.156 | 32.155 | 50.871 | 0.00 | 0.00 |
| ATOM | 5072 | HA   | TYR | X | 337 | 57.965 | 32.787 | 51.238 | 0.00 | 0.00 |
| ATOM | 5073 | CB   | TYR | X | 337 | 55.862 | 32.917 | 50.854 | 0.00 | 0.00 |
| ATOM | 5074 | HB2  | TYR | X | 337 | 55.128 | 32.386 | 50.249 | 0.00 | 0.00 |
| ATOM | 5075 | HB3  | TYR | X | 337 | 55.517 | 32.995 | 51.885 | 0.00 | 0.00 |
| ATOM | 5076 | CG   | TYR | X | 337 | 55.999 | 34.329 | 50.320 | 0.00 | 0.00 |
| ATOM | 5077 | CD1  | TYR | X | 337 | 56.481 | 35.392 | 51.149 | 0.00 | 0.00 |
| ATOM | 5078 | HD1  | TYR | X | 337 | 56.606 | 35.278 | 52.216 | 0.00 | 0.00 |
| ATOM | 5079 | CE1  | TYR | X | 337 | 56.570 | 36.654 | 50.536 | 0.00 | 0.00 |
| ATOM | 5080 | HE1  | TYR | X | 337 | 56.986 | 37.416 | 51.179 | 0.00 | 0.00 |
| ATOM | 5081 | CZ   | TYR | X | 337 | 56.401 | 36.887 | 49.134 | 0.00 | 0.00 |
| ATOM | 5082 | OH   | TYR | X | 337 | 56.584 | 38.134 | 48.652 | 0.00 | 0.00 |
| ATOM | 5083 | HH   | TYR | X | 337 | 56.361 | 38.785 | 49.321 | 0.00 | 0.00 |
| ATOM | 5084 | CE2  | TYR | X | 337 | 56.129 | 35.791 | 48.316 | 0.00 | 0.00 |
| ATOM | 5085 | HE2  | TYR | X | 337 | 56.175 | 35.865 | 47.239 | 0.00 | 0.00 |
| ATOM | 5086 | CD2  | TYR | X | 337 | 55.816 | 34.549 | 48.893 | 0.00 | 0.00 |
| ATOM | 5087 | HD2  | TYR | X | 337 | 55.545 | 33.702 | 48.280 | 0.00 | 0.00 |
| ATOM | 5088 | C    | TYR | X | 337 | 57.070 | 30.998 | 51.817 | 0.00 | 0.00 |
| ATOM | 5089 | O    | TYR | X | 337 | 57.658 | 31.074 | 52.864 | 0.00 | 0.00 |
| ATOM | 5090 | N    | GLY | X | 338 | 56.276 | 29.970 | 51.553 | 0.00 | 0.00 |
| ATOM | 5091 | H    | GLY | X | 338 | 55.761 | 29.948 | 50.685 | 0.00 | 0.00 |
| ATOM | 5092 | CA   | GLY | X | 338 | 55.824 | 29.017 | 52.574 | 0.00 | 0.00 |
| ATOM | 5093 | HA2  | GLY | X | 338 | 55.939 | 29.488 | 53.498 | 0.00 | 0.00 |
| ATOM | 5094 | HA3  | GLY | X | 338 | 54.761 | 28.939 | 52.378 | 0.00 | 0.00 |
| ATOM | 5095 | C    | GLY | X | 338 | 56.388 | 27.592 | 52.543 | 0.00 | 0.00 |
| ATOM | 5096 | O    | GLY | X | 338 | 56.076 | 26.850 | 53.504 | 0.00 | 0.00 |
| ATOM | 5097 | N    | ALA | X | 339 | 57.110 | 27.204 | 51.407 | 0.00 | 0.00 |
| ATOM | 5098 | H    | ALA | X | 339 | 57.500 | 27.898 | 50.785 | 0.00 | 0.00 |
| ATOM | 5099 | CA   | ALA | X | 339 | 57.687 | 25.890 | 51.280 | 0.00 | 0.00 |
| ATOM | 5100 | HA   | ALA | X | 339 | 57.335 | 25.306 | 52.131 | 0.00 | 0.00 |
| ATOM | 5101 | CB   | ALA | X | 339 | 57.275 | 25.238 | 49.932 | 0.00 | 0.00 |
| ATOM | 5102 | HB1  | ALA | X | 339 | 57.710 | 24.239 | 49.938 | 0.00 | 0.00 |
| ATOM | 5103 | HB2  | ALA | X | 339 | 56.205 | 25.045 | 49.852 | 0.00 | 0.00 |
| ATOM | 5104 | HB3  | ALA | X | 339 | 57.538 | 25.792 | 49.031 | 0.00 | 0.00 |
| ATOM | 5105 | C    | ALA | X | 339 | 59.224 | 26.035 | 51.360 | 0.00 | 0.00 |
| ATOM | 5106 | O    | ALA | X | 339 | 59.724 | 27.054 | 50.849 | 0.00 | 0.00 |
| ATOM | 5107 | N    | PRO | X | 340 | 60.007 | 25.131 | 51.928 | 0.00 | 0.00 |
| ATOM | 5108 | CD   | PRO | X | 340 | 59.556 | 23.866 | 52.570 | 0.00 | 0.00 |
| ATOM | 5109 | HD2  | PRO | X | 340 | 59.115 | 23.218 | 51.813 | 0.00 | 0.00 |
| ATOM | 5110 | HD3  | PRO | X | 340 | 58.920 | 24.195 | 53.392 | 0.00 | 0.00 |
| ATOM | 5111 | CG   | PRO | X | 340 | 60.878 | 23.240 | 53.031 | 0.00 | 0.00 |
| ATOM | 5112 | HG2  | PRO | X | 340 | 61.328 | 22.642 | 52.239 | 0.00 | 0.00 |
| ATOM | 5113 | HG3  | PRO | X | 340 | 60.814 | 22.669 | 53.957 | 0.00 | 0.00 |
| ATOM | 5114 | CB   | PRO | X | 340 | 61.871 | 24.390 | 53.173 | 0.00 | 0.00 |
| ATOM | 5115 | HB2  | PRO | X | 340 | 62.856 | 23.988 | 52.933 | 0.00 | 0.00 |
| ATOM | 5116 | HB3  | PRO | X | 340 | 61.885 | 24.791 | 54.186 | 0.00 | 0.00 |
| ATOM | 5117 | CA   | PRO | X | 340 | 61.391 | 25.425 | 52.239 | 0.00 | 0.00 |

|      |      |     |     |   |     |        |        |        |      |      |
|------|------|-----|-----|---|-----|--------|--------|--------|------|------|
| ATOM | 5118 | HA  | PRO | X | 340 | 61.367 | 26.360 | 52.799 | 0.00 | 0.00 |
| ATOM | 5119 | C   | PRO | X | 340 | 62.226 | 25.473 | 50.985 | 0.00 | 0.00 |
| ATOM | 5120 | O   | PRO | X | 340 | 61.980 | 24.794 | 50.000 | 0.00 | 0.00 |
| ATOM | 5121 | N   | GLY | X | 341 | 63.364 | 26.139 | 51.073 | 0.00 | 0.00 |
| ATOM | 5122 | H   | GLY | X | 341 | 63.447 | 26.802 | 51.831 | 0.00 | 0.00 |
| ATOM | 5123 | CA  | GLY | X | 341 | 64.527 | 26.188 | 50.100 | 0.00 | 0.00 |
| ATOM | 5124 | HA2 | GLY | X | 341 | 65.344 | 26.487 | 50.659 | 0.00 | 0.00 |
| ATOM | 5125 | HA3 | GLY | X | 341 | 64.557 | 25.205 | 49.685 | 0.00 | 0.00 |
| ATOM | 5126 | C   | GLY | X | 341 | 64.149 | 27.034 | 48.867 | 0.00 | 0.00 |
| ATOM | 5127 | O   | GLY | X | 341 | 64.997 | 27.804 | 48.467 | 0.00 | 0.00 |
| ATOM | 5128 | N   | PHE | X | 342 | 62.857 | 27.017 | 48.469 | 0.00 | 0.00 |
| ATOM | 5129 | H   | PHE | X | 342 | 62.202 | 26.441 | 48.978 | 0.00 | 0.00 |
| ATOM | 5130 | CA  | PHE | X | 342 | 62.299 | 27.788 | 47.320 | 0.00 | 0.00 |
| ATOM | 5131 | HA  | PHE | X | 342 | 62.616 | 27.380 | 46.360 | 0.00 | 0.00 |
| ATOM | 5132 | CB  | PHE | X | 342 | 60.733 | 27.673 | 47.309 | 0.00 | 0.00 |
| ATOM | 5133 | HB2 | PHE | X | 342 | 60.395 | 27.711 | 48.345 | 0.00 | 0.00 |
| ATOM | 5134 | HB3 | PHE | X | 342 | 60.328 | 28.493 | 46.716 | 0.00 | 0.00 |
| ATOM | 5135 | CG  | PHE | X | 342 | 60.133 | 26.471 | 46.691 | 0.00 | 0.00 |
| ATOM | 5136 | CD1 | PHE | X | 342 | 59.926 | 26.376 | 45.343 | 0.00 | 0.00 |
| ATOM | 5137 | HD1 | PHE | X | 342 | 60.202 | 27.111 | 44.601 | 0.00 | 0.00 |
| ATOM | 5138 | CE1 | PHE | X | 342 | 59.452 | 25.212 | 44.776 | 0.00 | 0.00 |
| ATOM | 5139 | HE1 | PHE | X | 342 | 59.380 | 25.130 | 43.702 | 0.00 | 0.00 |
| ATOM | 5140 | CZ  | PHE | X | 342 | 59.095 | 24.094 | 45.590 | 0.00 | 0.00 |
| ATOM | 5141 | HZ  | PHE | X | 342 | 58.845 | 23.164 | 45.102 | 0.00 | 0.00 |
| ATOM | 5142 | CE2 | PHE | X | 342 | 59.333 | 24.179 | 46.947 | 0.00 | 0.00 |
| ATOM | 5143 | HE2 | PHE | X | 342 | 59.175 | 23.317 | 47.578 | 0.00 | 0.00 |
| ATOM | 5144 | CD2 | PHE | X | 342 | 59.803 | 25.388 | 47.502 | 0.00 | 0.00 |
| ATOM | 5145 | HD2 | PHE | X | 342 | 60.030 | 25.478 | 48.554 | 0.00 | 0.00 |
| ATOM | 5146 | C   | PHE | X | 342 | 62.654 | 29.319 | 47.395 | 0.00 | 0.00 |
| ATOM | 5147 | O   | PHE | X | 342 | 62.396 | 29.904 | 48.474 | 0.00 | 0.00 |
| ATOM | 5148 | N   | SER | X | 343 | 63.069 | 29.940 | 46.313 | 0.00 | 0.00 |
| ATOM | 5149 | H   | SER | X | 343 | 63.199 | 29.344 | 45.508 | 0.00 | 0.00 |
| ATOM | 5150 | CA  | SER | X | 343 | 63.553 | 31.304 | 46.202 | 0.00 | 0.00 |
| ATOM | 5151 | HA  | SER | X | 343 | 62.745 | 31.788 | 46.749 | 0.00 | 0.00 |
| ATOM | 5152 | CB  | SER | X | 343 | 64.723 | 31.511 | 47.143 | 0.00 | 0.00 |
| ATOM | 5153 | HB2 | SER | X | 343 | 64.520 | 32.065 | 48.059 | 0.00 | 0.00 |
| ATOM | 5154 | HB3 | SER | X | 343 | 64.986 | 30.564 | 47.614 | 0.00 | 0.00 |
| ATOM | 5155 | OG  | SER | X | 343 | 65.900 | 32.082 | 46.527 | 0.00 | 0.00 |
| ATOM | 5156 | HG  | SER | X | 343 | 66.475 | 32.389 | 47.231 | 0.00 | 0.00 |
| ATOM | 5157 | C   | SER | X | 343 | 63.611 | 31.908 | 44.832 | 0.00 | 0.00 |
| ATOM | 5158 | O   | SER | X | 343 | 63.669 | 31.223 | 43.801 | 0.00 | 0.00 |
| ATOM | 5159 | N   | LYS | X | 344 | 63.564 | 33.267 | 44.847 | 0.00 | 0.00 |
| ATOM | 5160 | H   | LYS | X | 344 | 63.674 | 33.712 | 45.747 | 0.00 | 0.00 |
| ATOM | 5161 | CA  | LYS | X | 344 | 63.862 | 34.047 | 43.634 | 0.00 | 0.00 |
| ATOM | 5162 | HA  | LYS | X | 344 | 63.205 | 33.631 | 42.870 | 0.00 | 0.00 |
| ATOM | 5163 | CB  | LYS | X | 344 | 63.454 | 35.534 | 43.908 | 0.00 | 0.00 |
| ATOM | 5164 | HB2 | LYS | X | 344 | 63.338 | 36.059 | 42.960 | 0.00 | 0.00 |
| ATOM | 5165 | HB3 | LYS | X | 344 | 62.498 | 35.578 | 44.430 | 0.00 | 0.00 |
| ATOM | 5166 | CG  | LYS | X | 344 | 64.229 | 36.484 | 44.947 | 0.00 | 0.00 |
| ATOM | 5167 | HG2 | LYS | X | 344 | 63.551 | 37.304 | 45.185 | 0.00 | 0.00 |
| ATOM | 5168 | HG3 | LYS | X | 344 | 64.371 | 35.964 | 45.894 | 0.00 | 0.00 |
| ATOM | 5169 | CD  | LYS | X | 344 | 65.538 | 36.973 | 44.326 | 0.00 | 0.00 |
| ATOM | 5170 | HD2 | LYS | X | 344 | 66.325 | 36.220 | 44.302 | 0.00 | 0.00 |
| ATOM | 5171 | HD3 | LYS | X | 344 | 65.289 | 37.478 | 43.393 | 0.00 | 0.00 |
| ATOM | 5172 | CE  | LYS | X | 344 | 66.073 | 37.960 | 45.365 | 0.00 | 0.00 |
| ATOM | 5173 | HE2 | LYS | X | 344 | 65.226 | 38.636 | 45.480 | 0.00 | 0.00 |
| ATOM | 5174 | HE3 | LYS | X | 344 | 66.242 | 37.448 | 46.312 | 0.00 | 0.00 |
| ATOM | 5175 | NZ  | LYS | X | 344 | 67.297 | 38.658 | 44.946 | 0.00 | 0.00 |
| ATOM | 5176 | HZ1 | LYS | X | 344 | 67.385 | 38.887 | 43.966 | 0.00 | 0.00 |
| ATOM | 5177 | HZ2 | LYS | X | 344 | 67.415 | 39.539 | 45.426 | 0.00 | 0.00 |
| ATOM | 5178 | HZ3 | LYS | X | 344 | 68.080 | 38.054 | 45.155 | 0.00 | 0.00 |
| ATOM | 5179 | C   | LYS | X | 344 | 65.248 | 33.980 | 42.994 | 0.00 | 0.00 |
| ATOM | 5180 | O   | LYS | X | 344 | 65.490 | 34.570 | 41.957 | 0.00 | 0.00 |
| ATOM | 5181 | N   | ASP | X | 345 | 66.157 | 33.276 | 43.704 | 0.00 | 0.00 |
| ATOM | 5182 | H   | ASP | X | 345 | 65.776 | 32.629 | 44.380 | 0.00 | 0.00 |
| ATOM | 5183 | CA  | ASP | X | 345 | 67.575 | 33.145 | 43.324 | 0.00 | 0.00 |
| ATOM | 5184 | HA  | ASP | X | 345 | 67.534 | 33.397 | 42.265 | 0.00 | 0.00 |
| ATOM | 5185 | CB  | ASP | X | 345 | 68.429 | 34.082 | 44.173 | 0.00 | 0.00 |
| ATOM | 5186 | HB2 | ASP | X | 345 | 68.063 | 35.066 | 43.882 | 0.00 | 0.00 |
| ATOM | 5187 | HB3 | ASP | X | 345 | 68.205 | 33.956 | 45.232 | 0.00 | 0.00 |



|      |      |      |     |   |     |        |        |        |      |      |
|------|------|------|-----|---|-----|--------|--------|--------|------|------|
| ATOM | 5188 | CG   | ASP | X | 345 | 69.934 | 34.018 | 44.055 | 0.00 | 0.00 |
| ATOM | 5189 | OD1  | ASP | X | 345 | 70.609 | 33.881 | 45.131 | 0.00 | 0.00 |
| ATOM | 5190 | OD2  | ASP | X | 345 | 70.509 | 34.192 | 42.956 | 0.00 | 0.00 |
| ATOM | 5191 | C    | ASP | X | 345 | 68.004 | 31.666 | 43.470 | 0.00 | 0.00 |
| ATOM | 5192 | O    | ASP | X | 345 | 68.733 | 31.194 | 42.578 | 0.00 | 0.00 |
| ATOM | 5193 | N    | ASN | X | 346 | 67.460 | 30.903 | 44.387 | 0.00 | 0.00 |
| ATOM | 5194 | H    | ASN | X | 346 | 66.704 | 31.330 | 44.903 | 0.00 | 0.00 |
| ATOM | 5195 | CA   | ASN | X | 346 | 67.730 | 29.440 | 44.652 | 0.00 | 0.00 |
| ATOM | 5196 | HA   | ASN | X | 346 | 68.803 | 29.285 | 44.534 | 0.00 | 0.00 |
| ATOM | 5197 | CB   | ASN | X | 346 | 67.299 | 29.087 | 46.060 | 0.00 | 0.00 |
| ATOM | 5198 | HB2  | ASN | X | 346 | 67.822 | 29.781 | 46.717 | 0.00 | 0.00 |
| ATOM | 5199 | HB3  | ASN | X | 346 | 66.217 | 29.210 | 46.122 | 0.00 | 0.00 |
| ATOM | 5200 | CG   | ASN | X | 346 | 67.654 | 27.652 | 46.431 | 0.00 | 0.00 |
| ATOM | 5201 | OD1  | ASN | X | 346 | 67.035 | 26.651 | 46.117 | 0.00 | 0.00 |
| ATOM | 5202 | ND2  | ASN | X | 346 | 68.758 | 27.424 | 47.113 | 0.00 | 0.00 |
| ATOM | 5203 | HD21 | ASN | X | 346 | 69.018 | 26.449 | 47.166 | 0.00 | 0.00 |
| ATOM | 5204 | HD22 | ASN | X | 346 | 69.412 | 28.160 | 47.338 | 0.00 | 0.00 |
| ATOM | 5205 | C    | ASN | X | 346 | 66.982 | 28.551 | 43.600 | 0.00 | 0.00 |
| ATOM | 5206 | O    | ASN | X | 346 | 65.777 | 28.755 | 43.392 | 0.00 | 0.00 |
| ATOM | 5207 | N    | GLU | X | 347 | 67.609 | 27.494 | 42.972 | 0.00 | 0.00 |
| ATOM | 5208 | H    | GLU | X | 347 | 68.602 | 27.394 | 43.125 | 0.00 | 0.00 |
| ATOM | 5209 | CA   | GLU | X | 347 | 67.033 | 26.651 | 41.888 | 0.00 | 0.00 |
| ATOM | 5210 | HA   | GLU | X | 347 | 66.439 | 27.298 | 41.242 | 0.00 | 0.00 |
| ATOM | 5211 | CB   | GLU | X | 347 | 68.126 | 25.903 | 41.056 | 0.00 | 0.00 |
| ATOM | 5212 | HB2  | GLU | X | 347 | 68.614 | 25.197 | 41.728 | 0.00 | 0.00 |
| ATOM | 5213 | HB3  | GLU | X | 347 | 67.637 | 25.259 | 40.325 | 0.00 | 0.00 |
| ATOM | 5214 | CG   | GLU | X | 347 | 69.188 | 26.764 | 40.492 | 0.00 | 0.00 |
| ATOM | 5215 | HG2  | GLU | X | 347 | 68.734 | 27.442 | 39.769 | 0.00 | 0.00 |
| ATOM | 5216 | HG3  | GLU | X | 347 | 69.646 | 27.235 | 41.362 | 0.00 | 0.00 |
| ATOM | 5217 | CD   | GLU | X | 347 | 70.313 | 26.064 | 39.749 | 0.00 | 0.00 |
| ATOM | 5218 | OE1  | GLU | X | 347 | 70.042 | 24.999 | 39.173 | 0.00 | 0.00 |
| ATOM | 5219 | OE2  | GLU | X | 347 | 71.438 | 26.674 | 39.617 | 0.00 | 0.00 |
| ATOM | 5220 | C    | GLU | X | 347 | 65.847 | 25.754 | 42.385 | 0.00 | 0.00 |
| ATOM | 5221 | O    | GLU | X | 347 | 65.203 | 25.168 | 41.502 | 0.00 | 0.00 |
| ATOM | 5222 | N    | SER | X | 348 | 65.582 | 25.719 | 43.678 | 0.00 | 0.00 |
| ATOM | 5223 | H    | SER | X | 348 | 66.233 | 26.164 | 44.308 | 0.00 | 0.00 |
| ATOM | 5224 | CA   | SER | X | 348 | 64.387 | 25.150 | 44.255 | 0.00 | 0.00 |
| ATOM | 5225 | HA   | SER | X | 348 | 64.398 | 25.153 | 45.345 | 0.00 | 0.00 |
| ATOM | 5226 | CB   | SER | X | 348 | 63.098 | 25.983 | 43.874 | 0.00 | 0.00 |
| ATOM | 5227 | HB2  | SER | X | 348 | 62.886 | 25.841 | 42.815 | 0.00 | 0.00 |
| ATOM | 5228 | HB3  | SER | X | 348 | 62.276 | 25.590 | 44.473 | 0.00 | 0.00 |
| ATOM | 5229 | OG   | SER | X | 348 | 63.405 | 27.351 | 44.182 | 0.00 | 0.00 |
| ATOM | 5230 | HG   | SER | X | 348 | 64.073 | 27.657 | 43.565 | 0.00 | 0.00 |
| ATOM | 5231 | C    | SER | X | 348 | 64.158 | 23.649 | 43.973 | 0.00 | 0.00 |
| ATOM | 5232 | O    | SER | X | 348 | 62.997 | 23.201 | 43.917 | 0.00 | 0.00 |
| ATOM | 5233 | N    | LEU | X | 349 | 65.182 | 22.818 | 43.601 | 0.00 | 0.00 |
| ATOM | 5234 | H    | LEU | X | 349 | 65.993 | 23.372 | 43.366 | 0.00 | 0.00 |
| ATOM | 5235 | CA   | LEU | X | 349 | 65.199 | 21.354 | 43.334 | 0.00 | 0.00 |
| ATOM | 5236 | HA   | LEU | X | 349 | 64.325 | 20.977 | 42.804 | 0.00 | 0.00 |
| ATOM | 5237 | CB   | LEU | X | 349 | 66.511 | 21.048 | 42.673 | 0.00 | 0.00 |
| ATOM | 5238 | HB2  | LEU | X | 349 | 67.274 | 21.305 | 43.408 | 0.00 | 0.00 |
| ATOM | 5239 | HB3  | LEU | X | 349 | 66.519 | 19.963 | 42.569 | 0.00 | 0.00 |
| ATOM | 5240 | CG   | LEU | X | 349 | 66.663 | 21.819 | 41.344 | 0.00 | 0.00 |
| ATOM | 5241 | HG   | LEU | X | 349 | 66.583 | 22.883 | 41.566 | 0.00 | 0.00 |
| ATOM | 5242 | CD1  | LEU | X | 349 | 68.091 | 21.675 | 40.869 | 0.00 | 0.00 |
| ATOM | 5243 | HD11 | LEU | X | 349 | 68.203 | 22.423 | 40.083 | 0.00 | 0.00 |
| ATOM | 5244 | HD12 | LEU | X | 349 | 68.745 | 21.803 | 41.732 | 0.00 | 0.00 |
| ATOM | 5245 | HD13 | LEU | X | 349 | 68.322 | 20.712 | 40.413 | 0.00 | 0.00 |
| ATOM | 5246 | CD2  | LEU | X | 349 | 65.544 | 21.322 | 40.382 | 0.00 | 0.00 |
| ATOM | 5247 | HD21 | LEU | X | 349 | 65.616 | 20.247 | 40.213 | 0.00 | 0.00 |
| ATOM | 5248 | HD22 | LEU | X | 349 | 64.558 | 21.421 | 40.835 | 0.00 | 0.00 |
| ATOM | 5249 | HD23 | LEU | X | 349 | 65.742 | 21.834 | 39.441 | 0.00 | 0.00 |
| ATOM | 5250 | C    | LEU | X | 349 | 65.113 | 20.512 | 44.615 | 0.00 | 0.00 |
| ATOM | 5251 | O    | LEU | X | 349 | 65.630 | 20.820 | 45.671 | 0.00 | 0.00 |
| ATOM | 5252 | N    | ILE | X | 350 | 64.310 | 19.418 | 44.498 | 0.00 | 0.00 |
| ATOM | 5253 | H    | ILE | X | 350 | 63.985 | 19.267 | 43.554 | 0.00 | 0.00 |
| ATOM | 5254 | CA   | ILE | X | 350 | 63.776 | 18.614 | 45.654 | 0.00 | 0.00 |
| ATOM | 5255 | HA   | ILE | X | 350 | 64.391 | 18.866 | 46.518 | 0.00 | 0.00 |
| ATOM | 5256 | CB   | ILE | X | 350 | 62.296 | 18.984 | 45.963 | 0.00 | 0.00 |
| ATOM | 5257 | HB   | ILE | X | 350 | 62.003 | 18.310 | 46.768 | 0.00 | 0.00 |

|      |      |      |     |   |     |        |        |        |      |      |
|------|------|------|-----|---|-----|--------|--------|--------|------|------|
| ATOM | 5258 | CG2  | ILE | X | 350 | 62.286 | 20.346 | 46.683 | 0.00 | 0.00 |
| ATOM | 5259 | HG21 | ILE | X | 350 | 62.516 | 21.129 | 45.960 | 0.00 | 0.00 |
| ATOM | 5260 | HG22 | ILE | X | 350 | 61.339 | 20.482 | 47.205 | 0.00 | 0.00 |
| ATOM | 5261 | HG23 | ILE | X | 350 | 63.072 | 20.306 | 47.437 | 0.00 | 0.00 |
| ATOM | 5262 | CG1  | ILE | X | 350 | 61.261 | 18.811 | 44.857 | 0.00 | 0.00 |
| ATOM | 5263 | HG12 | ILE | X | 350 | 61.419 | 19.511 | 44.036 | 0.00 | 0.00 |
| ATOM | 5264 | HG13 | ILE | X | 350 | 61.376 | 17.784 | 44.508 | 0.00 | 0.00 |
| ATOM | 5265 | CD1  | ILE | X | 350 | 59.860 | 19.040 | 45.399 | 0.00 | 0.00 |
| ATOM | 5266 | HD11 | ILE | X | 350 | 59.102 | 19.118 | 44.620 | 0.00 | 0.00 |
| ATOM | 5267 | HD12 | ILE | X | 350 | 59.725 | 18.263 | 46.152 | 0.00 | 0.00 |
| ATOM | 5268 | HD13 | ILE | X | 350 | 59.842 | 19.991 | 45.933 | 0.00 | 0.00 |
| ATOM | 5269 | C    | ILE | X | 350 | 63.854 | 17.093 | 45.445 | 0.00 | 0.00 |
| ATOM | 5270 | O    | ILE | X | 350 | 63.587 | 16.623 | 44.374 | 0.00 | 0.00 |
| ATOM | 5271 | N    | SER | X | 351 | 64.244 | 16.307 | 46.506 | 0.00 | 0.00 |
| ATOM | 5272 | H    | SER | X | 351 | 64.593 | 16.690 | 47.372 | 0.00 | 0.00 |
| ATOM | 5273 | CA   | SER | X | 351 | 64.049 | 14.871 | 46.516 | 0.00 | 0.00 |
| ATOM | 5274 | HA   | SER | X | 351 | 64.481 | 14.506 | 45.585 | 0.00 | 0.00 |
| ATOM | 5275 | CB   | SER | X | 351 | 64.764 | 14.196 | 47.688 | 0.00 | 0.00 |
| ATOM | 5276 | HB2  | SER | X | 351 | 64.697 | 13.112 | 47.602 | 0.00 | 0.00 |
| ATOM | 5277 | HB3  | SER | X | 351 | 65.800 | 14.534 | 47.735 | 0.00 | 0.00 |
| ATOM | 5278 | OG   | SER | X | 351 | 64.208 | 14.661 | 48.911 | 0.00 | 0.00 |
| ATOM | 5279 | HG   | SER | X | 351 | 64.593 | 15.538 | 48.977 | 0.00 | 0.00 |
| ATOM | 5280 | C    | SER | X | 351 | 62.527 | 14.485 | 46.452 | 0.00 | 0.00 |
| ATOM | 5281 | O    | SER | X | 351 | 61.655 | 15.315 | 46.635 | 0.00 | 0.00 |
| ATOM | 5282 | N    | ARG | X | 352 | 62.165 | 13.213 | 46.219 | 0.00 | 0.00 |
| ATOM | 5283 | H    | ARG | X | 352 | 62.816 | 12.448 | 46.113 | 0.00 | 0.00 |
| ATOM | 5284 | CA   | ARG | X | 352 | 60.763 | 12.713 | 46.198 | 0.00 | 0.00 |
| ATOM | 5285 | HA   | ARG | X | 352 | 60.163 | 13.429 | 45.638 | 0.00 | 0.00 |
| ATOM | 5286 | CB   | ARG | X | 352 | 60.649 | 11.382 | 45.440 | 0.00 | 0.00 |
| ATOM | 5287 | HB2  | ARG | X | 352 | 61.251 | 11.502 | 44.539 | 0.00 | 0.00 |
| ATOM | 5288 | HB3  | ARG | X | 352 | 61.039 | 10.557 | 46.036 | 0.00 | 0.00 |
| ATOM | 5289 | CG   | ARG | X | 352 | 59.259 | 11.040 | 45.002 | 0.00 | 0.00 |
| ATOM | 5290 | HG2  | ARG | X | 352 | 58.632 | 11.004 | 45.893 | 0.00 | 0.00 |
| ATOM | 5291 | HG3  | ARG | X | 352 | 58.822 | 11.759 | 44.309 | 0.00 | 0.00 |
| ATOM | 5292 | CD   | ARG | X | 352 | 59.206 | 9.643  | 44.331 | 0.00 | 0.00 |
| ATOM | 5293 | HD2  | ARG | X | 352 | 59.671 | 9.660  | 43.345 | 0.00 | 0.00 |
| ATOM | 5294 | HD3  | ARG | X | 352 | 59.782 | 8.920  | 44.907 | 0.00 | 0.00 |
| ATOM | 5295 | NE   | ARG | X | 352 | 57.821 | 9.170  | 44.209 | 0.00 | 0.00 |
| ATOM | 5296 | HE   | ARG | X | 352 | 57.519 | 8.404  | 44.794 | 0.00 | 0.00 |
| ATOM | 5297 | CZ   | ARG | X | 352 | 56.939 | 9.618  | 43.385 | 0.00 | 0.00 |
| ATOM | 5298 | NH1  | ARG | X | 352 | 57.117 | 10.536 | 42.528 | 0.00 | 0.00 |
| ATOM | 5299 | HH11 | ARG | X | 352 | 57.966 | 11.062 | 42.380 | 0.00 | 0.00 |
| ATOM | 5300 | HH12 | ARG | X | 352 | 56.375 | 10.586 | 41.844 | 0.00 | 0.00 |
| ATOM | 5301 | NH2  | ARG | X | 352 | 55.750 | 8.987  | 43.385 | 0.00 | 0.00 |
| ATOM | 5302 | HH21 | ARG | X | 352 | 55.653 | 8.125  | 43.903 | 0.00 | 0.00 |
| ATOM | 5303 | HH22 | ARG | X | 352 | 55.043 | 9.306  | 42.739 | 0.00 | 0.00 |
| ATOM | 5304 | C    | ARG | X | 352 | 60.069 | 12.754 | 47.587 | 0.00 | 0.00 |
| ATOM | 5305 | O    | ARG | X | 352 | 58.822 | 12.869 | 47.705 | 0.00 | 0.00 |
| ATOM | 5306 | N    | ALA | X | 353 | 60.809 | 12.707 | 48.701 | 0.00 | 0.00 |
| ATOM | 5307 | H    | ALA | X | 353 | 61.771 | 12.439 | 48.557 | 0.00 | 0.00 |
| ATOM | 5308 | CA   | ALA | X | 353 | 60.327 | 12.825 | 50.041 | 0.00 | 0.00 |
| ATOM | 5309 | HA   | ALA | X | 353 | 59.281 | 12.541 | 50.150 | 0.00 | 0.00 |
| ATOM | 5310 | CB   | ALA | X | 353 | 61.178 | 11.903 | 50.965 | 0.00 | 0.00 |
| ATOM | 5311 | HB1  | ALA | X | 353 | 62.231 | 12.175 | 50.893 | 0.00 | 0.00 |
| ATOM | 5312 | HB2  | ALA | X | 353 | 60.775 | 11.997 | 51.973 | 0.00 | 0.00 |
| ATOM | 5313 | HB3  | ALA | X | 353 | 60.964 | 10.851 | 50.779 | 0.00 | 0.00 |
| ATOM | 5314 | C    | ALA | X | 353 | 60.189 | 14.296 | 50.483 | 0.00 | 0.00 |
| ATOM | 5315 | O    | ALA | X | 353 | 59.178 | 14.638 | 51.069 | 0.00 | 0.00 |
| ATOM | 5316 | N    | GLU | X | 354 | 61.003 | 15.195 | 49.980 | 0.00 | 0.00 |
| ATOM | 5317 | H    | GLU | X | 354 | 61.757 | 14.973 | 49.345 | 0.00 | 0.00 |
| ATOM | 5318 | CA   | GLU | X | 354 | 60.707 | 16.620 | 50.158 | 0.00 | 0.00 |
| ATOM | 5319 | HA   | GLU | X | 354 | 60.463 | 16.852 | 51.194 | 0.00 | 0.00 |
| ATOM | 5320 | CB   | GLU | X | 354 | 62.010 | 17.397 | 49.765 | 0.00 | 0.00 |
| ATOM | 5321 | HB2  | GLU | X | 354 | 62.389 | 17.118 | 48.782 | 0.00 | 0.00 |
| ATOM | 5322 | HB3  | GLU | X | 354 | 61.776 | 18.461 | 49.785 | 0.00 | 0.00 |
| ATOM | 5323 | CG   | GLU | X | 354 | 63.211 | 17.301 | 50.802 | 0.00 | 0.00 |
| ATOM | 5324 | HG2  | GLU | X | 354 | 63.082 | 17.890 | 51.710 | 0.00 | 0.00 |
| ATOM | 5325 | HG3  | GLU | X | 354 | 63.360 | 16.253 | 51.064 | 0.00 | 0.00 |
| ATOM | 5326 | CD   | GLU | X | 354 | 64.514 | 17.789 | 50.103 | 0.00 | 0.00 |
| ATOM | 5327 | OE1  | GLU | X | 354 | 64.902 | 18.986 | 50.193 | 0.00 | 0.00 |

|      |      |      |     |   |     |        |        |        |      |      |
|------|------|------|-----|---|-----|--------|--------|--------|------|------|
| ATOM | 5328 | OE2  | GLU | X | 354 | 65.062 | 17.015 | 49.257 | 0.00 | 0.00 |
| ATOM | 5329 | C    | GLU | X | 354 | 59.530 | 17.142 | 49.250 | 0.00 | 0.00 |
| ATOM | 5330 | O    | GLU | X | 354 | 58.777 | 18.018 | 49.682 | 0.00 | 0.00 |
| ATOM | 5331 | N    | PHE | X | 355 | 59.175 | 16.510 | 48.115 | 0.00 | 0.00 |
| ATOM | 5332 | H    | PHE | X | 355 | 59.835 | 15.870 | 47.697 | 0.00 | 0.00 |
| ATOM | 5333 | CA   | PHE | X | 355 | 57.910 | 16.620 | 47.436 | 0.00 | 0.00 |
| ATOM | 5334 | HA   | PHE | X | 355 | 57.808 | 17.697 | 47.306 | 0.00 | 0.00 |
| ATOM | 5335 | CB   | PHE | X | 355 | 58.026 | 15.806 | 46.119 | 0.00 | 0.00 |
| ATOM | 5336 | HB2  | PHE | X | 355 | 58.764 | 16.347 | 45.527 | 0.00 | 0.00 |
| ATOM | 5337 | HB3  | PHE | X | 355 | 58.376 | 14.804 | 46.369 | 0.00 | 0.00 |
| ATOM | 5338 | CG   | PHE | X | 355 | 56.840 | 15.761 | 45.216 | 0.00 | 0.00 |
| ATOM | 5339 | CD1  | PHE | X | 355 | 56.038 | 16.897 | 45.048 | 0.00 | 0.00 |
| ATOM | 5340 | HD1  | PHE | X | 355 | 56.243 | 17.801 | 45.602 | 0.00 | 0.00 |
| ATOM | 5341 | CE1  | PHE | X | 355 | 55.001 | 16.839 | 44.085 | 0.00 | 0.00 |
| ATOM | 5342 | HE1  | PHE | X | 355 | 54.320 | 17.634 | 43.823 | 0.00 | 0.00 |
| ATOM | 5343 | CZ   | PHE | X | 355 | 54.729 | 15.664 | 43.378 | 0.00 | 0.00 |
| ATOM | 5344 | HZ   | PHE | X | 355 | 53.893 | 15.660 | 42.695 | 0.00 | 0.00 |
| ATOM | 5345 | CE2  | PHE | X | 355 | 55.516 | 14.521 | 43.565 | 0.00 | 0.00 |
| ATOM | 5346 | HE2  | PHE | X | 355 | 55.243 | 13.586 | 43.098 | 0.00 | 0.00 |
| ATOM | 5347 | CD2  | PHE | X | 355 | 56.530 | 14.622 | 44.497 | 0.00 | 0.00 |
| ATOM | 5348 | HD2  | PHE | X | 355 | 57.054 | 13.698 | 44.690 | 0.00 | 0.00 |
| ATOM | 5349 | C    | PHE | X | 355 | 56.733 | 16.153 | 48.294 | 0.00 | 0.00 |
| ATOM | 5350 | O    | PHE | X | 355 | 55.857 | 17.007 | 48.349 | 0.00 | 0.00 |
| ATOM | 5351 | N    | LEU | X | 356 | 56.769 | 15.016 | 49.031 | 0.00 | 0.00 |
| ATOM | 5352 | H    | LEU | X | 356 | 57.543 | 14.378 | 48.915 | 0.00 | 0.00 |
| ATOM | 5353 | CA   | LEU | X | 356 | 55.697 | 14.571 | 49.937 | 0.00 | 0.00 |
| ATOM | 5354 | HA   | LEU | X | 356 | 54.704 | 14.502 | 49.493 | 0.00 | 0.00 |
| ATOM | 5355 | CB   | LEU | X | 356 | 56.069 | 13.156 | 50.515 | 0.00 | 0.00 |
| ATOM | 5356 | HB2  | LEU | X | 356 | 56.135 | 12.468 | 49.672 | 0.00 | 0.00 |
| ATOM | 5357 | HB3  | LEU | X | 356 | 57.076 | 13.209 | 50.928 | 0.00 | 0.00 |
| ATOM | 5358 | CG   | LEU | X | 356 | 55.068 | 12.551 | 51.537 | 0.00 | 0.00 |
| ATOM | 5359 | HG   | LEU | X | 356 | 55.061 | 13.314 | 52.314 | 0.00 | 0.00 |
| ATOM | 5360 | CD1  | LEU | X | 356 | 53.662 | 12.376 | 50.934 | 0.00 | 0.00 |
| ATOM | 5361 | HD11 | LEU | X | 356 | 52.970 | 11.819 | 51.566 | 0.00 | 0.00 |
| ATOM | 5362 | HD12 | LEU | X | 356 | 53.260 | 13.366 | 50.718 | 0.00 | 0.00 |
| ATOM | 5363 | HD13 | LEU | X | 356 | 53.823 | 11.808 | 50.018 | 0.00 | 0.00 |
| ATOM | 5364 | CD2  | LEU | X | 356 | 55.625 | 11.203 | 52.024 | 0.00 | 0.00 |
| ATOM | 5365 | HD21 | LEU | X | 356 | 55.679 | 10.523 | 51.174 | 0.00 | 0.00 |
| ATOM | 5366 | HD22 | LEU | X | 356 | 56.621 | 11.260 | 52.463 | 0.00 | 0.00 |
| ATOM | 5367 | HD23 | LEU | X | 356 | 54.869 | 10.907 | 52.751 | 0.00 | 0.00 |
| ATOM | 5368 | C    | LEU | X | 356 | 55.502 | 15.633 | 51.062 | 0.00 | 0.00 |
| ATOM | 5369 | O    | LEU | X | 356 | 54.405 | 16.150 | 51.221 | 0.00 | 0.00 |
| ATOM | 5370 | N    | ALA | X | 357 | 56.589 | 16.095 | 51.702 | 0.00 | 0.00 |
| ATOM | 5371 | H    | ALA | X | 357 | 57.529 | 15.880 | 51.400 | 0.00 | 0.00 |
| ATOM | 5372 | CA   | ALA | X | 357 | 56.536 | 17.129 | 52.715 | 0.00 | 0.00 |
| ATOM | 5373 | HA   | ALA | X | 357 | 55.731 | 16.847 | 53.393 | 0.00 | 0.00 |
| ATOM | 5374 | CB   | ALA | X | 357 | 57.900 | 17.128 | 53.405 | 0.00 | 0.00 |
| ATOM | 5375 | HB1  | ALA | X | 357 | 58.718 | 17.212 | 52.690 | 0.00 | 0.00 |
| ATOM | 5376 | HB2  | ALA | X | 357 | 57.940 | 18.067 | 53.957 | 0.00 | 0.00 |
| ATOM | 5377 | HB3  | ALA | X | 357 | 57.914 | 16.273 | 54.082 | 0.00 | 0.00 |
| ATOM | 5378 | C    | ALA | X | 357 | 56.026 | 18.459 | 52.167 | 0.00 | 0.00 |
| ATOM | 5379 | O    | ALA | X | 357 | 55.312 | 19.245 | 52.721 | 0.00 | 0.00 |
| ATOM | 5380 | N    | GLY | X | 358 | 56.404 | 18.729 | 50.936 | 0.00 | 0.00 |
| ATOM | 5381 | H    | GLY | X | 358 | 57.074 | 18.062 | 50.582 | 0.00 | 0.00 |
| ATOM | 5382 | CA   | GLY | X | 358 | 55.951 | 19.857 | 50.146 | 0.00 | 0.00 |
| ATOM | 5383 | HA2  | GLY | X | 358 | 56.330 | 20.750 | 50.656 | 0.00 | 0.00 |
| ATOM | 5384 | HA3  | GLY | X | 358 | 56.480 | 19.784 | 49.145 | 0.00 | 0.00 |
| ATOM | 5385 | C    | GLY | X | 358 | 54.472 | 19.903 | 49.849 | 0.00 | 0.00 |
| ATOM | 5386 | O    | GLY | X | 358 | 53.731 | 20.841 | 50.065 | 0.00 | 0.00 |
| ATOM | 5387 | N    | VAL | X | 359 | 53.966 | 18.811 | 49.338 | 0.00 | 0.00 |
| ATOM | 5388 | H    | VAL | X | 359 | 54.622 | 18.082 | 49.093 | 0.00 | 0.00 |
| ATOM | 5389 | CA   | VAL | X | 359 | 52.568 | 18.523 | 49.172 | 0.00 | 0.00 |
| ATOM | 5390 | HA   | VAL | X | 359 | 52.046 | 19.199 | 48.495 | 0.00 | 0.00 |
| ATOM | 5391 | CB   | VAL | X | 359 | 52.247 | 17.103 | 48.607 | 0.00 | 0.00 |
| ATOM | 5392 | HB   | VAL | X | 359 | 52.845 | 16.367 | 49.144 | 0.00 | 0.00 |
| ATOM | 5393 | CG1  | VAL | X | 359 | 50.799 | 16.611 | 48.743 | 0.00 | 0.00 |
| ATOM | 5394 | HG11 | VAL | X | 359 | 50.682 | 15.600 | 48.353 | 0.00 | 0.00 |
| ATOM | 5395 | HG12 | VAL | X | 359 | 50.574 | 16.551 | 49.808 | 0.00 | 0.00 |
| ATOM | 5396 | HG13 | VAL | X | 359 | 50.089 | 17.258 | 48.228 | 0.00 | 0.00 |
| ATOM | 5397 | CG2  | VAL | X | 359 | 52.669 | 17.085 | 47.124 | 0.00 | 0.00 |

|      |      |      |     |   |     |        |        |        |      |      |
|------|------|------|-----|---|-----|--------|--------|--------|------|------|
| ATOM | 5398 | HG21 | VAL | X | 359 | 52.325 | 16.144 | 46.694 | 0.00 | 0.00 |
| ATOM | 5399 | HG22 | VAL | X | 359 | 52.228 | 17.951 | 46.630 | 0.00 | 0.00 |
| ATOM | 5400 | HG23 | VAL | X | 359 | 53.738 | 17.246 | 46.983 | 0.00 | 0.00 |
| ATOM | 5401 | C    | VAL | X | 359 | 51.852 | 18.831 | 50.526 | 0.00 | 0.00 |
| ATOM | 5402 | O    | VAL | X | 359 | 50.756 | 19.490 | 50.541 | 0.00 | 0.00 |
| ATOM | 5403 | N    | ARG | X | 360 | 52.491 | 18.337 | 51.603 | 0.00 | 0.00 |
| ATOM | 5404 | H    | ARG | X | 360 | 53.306 | 17.751 | 51.484 | 0.00 | 0.00 |
| ATOM | 5405 | CA   | ARG | X | 360 | 51.958 | 18.446 | 52.976 | 0.00 | 0.00 |
| ATOM | 5406 | HA   | ARG | X | 360 | 50.934 | 18.107 | 52.823 | 0.00 | 0.00 |
| ATOM | 5407 | CB   | ARG | X | 360 | 52.613 | 17.485 | 53.962 | 0.00 | 0.00 |
| ATOM | 5408 | HB2  | ARG | X | 360 | 53.659 | 17.587 | 53.675 | 0.00 | 0.00 |
| ATOM | 5409 | HB3  | ARG | X | 360 | 52.446 | 17.805 | 54.991 | 0.00 | 0.00 |
| ATOM | 5410 | CG   | ARG | X | 360 | 52.274 | 15.937 | 53.902 | 0.00 | 0.00 |
| ATOM | 5411 | HG2  | ARG | X | 360 | 52.392 | 15.536 | 52.895 | 0.00 | 0.00 |
| ATOM | 5412 | HG3  | ARG | X | 360 | 53.052 | 15.449 | 54.489 | 0.00 | 0.00 |
| ATOM | 5413 | CD   | ARG | X | 360 | 50.850 | 15.687 | 54.382 | 0.00 | 0.00 |
| ATOM | 5414 | HD2  | ARG | X | 360 | 50.159 | 16.116 | 53.656 | 0.00 | 0.00 |
| ATOM | 5415 | HD3  | ARG | X | 360 | 50.715 | 14.606 | 54.422 | 0.00 | 0.00 |
| ATOM | 5416 | NE   | ARG | X | 360 | 50.498 | 16.235 | 55.714 | 0.00 | 0.00 |
| ATOM | 5417 | HE   | ARG | X | 360 | 49.996 | 17.105 | 55.822 | 0.00 | 0.00 |
| ATOM | 5418 | CZ   | ARG | X | 360 | 50.222 | 15.439 | 56.785 | 0.00 | 0.00 |
| ATOM | 5419 | NH1  | ARG | X | 360 | 50.499 | 14.129 | 56.916 | 0.00 | 0.00 |
| ATOM | 5420 | HH11 | ARG | X | 360 | 50.981 | 13.661 | 56.162 | 0.00 | 0.00 |
| ATOM | 5421 | HH12 | ARG | X | 360 | 50.201 | 13.511 | 57.658 | 0.00 | 0.00 |
| ATOM | 5422 | NH2  | ARG | X | 360 | 49.638 | 16.040 | 57.790 | 0.00 | 0.00 |
| ATOM | 5423 | HH21 | ARG | X | 360 | 49.514 | 17.031 | 57.637 | 0.00 | 0.00 |
| ATOM | 5424 | HH22 | ARG | X | 360 | 49.651 | 15.725 | 58.749 | 0.00 | 0.00 |
| ATOM | 5425 | C    | ARG | X | 360 | 51.911 | 19.878 | 53.648 | 0.00 | 0.00 |
| ATOM | 5426 | O    | ARG | X | 360 | 51.055 | 20.170 | 54.426 | 0.00 | 0.00 |
| ATOM | 5427 | N    | VAL | X | 361 | 52.862 | 20.829 | 53.257 | 0.00 | 0.00 |
| ATOM | 5428 | H    | VAL | X | 361 | 53.659 | 20.456 | 52.760 | 0.00 | 0.00 |
| ATOM | 5429 | CA   | VAL | X | 361 | 52.693 | 22.297 | 53.530 | 0.00 | 0.00 |
| ATOM | 5430 | HA   | VAL | X | 361 | 52.351 | 22.462 | 54.551 | 0.00 | 0.00 |
| ATOM | 5431 | CB   | VAL | X | 361 | 54.035 | 23.042 | 53.541 | 0.00 | 0.00 |
| ATOM | 5432 | HB   | VAL | X | 361 | 53.768 | 24.099 | 53.520 | 0.00 | 0.00 |
| ATOM | 5433 | CG1  | VAL | X | 361 | 54.750 | 22.672 | 54.828 | 0.00 | 0.00 |
| ATOM | 5434 | HG11 | VAL | X | 361 | 54.184 | 22.245 | 55.655 | 0.00 | 0.00 |
| ATOM | 5435 | HG12 | VAL | X | 361 | 55.373 | 21.824 | 54.543 | 0.00 | 0.00 |
| ATOM | 5436 | HG13 | VAL | X | 361 | 55.303 | 23.534 | 55.202 | 0.00 | 0.00 |
| ATOM | 5437 | CG2  | VAL | X | 361 | 54.893 | 22.837 | 52.263 | 0.00 | 0.00 |
| ATOM | 5438 | HG21 | VAL | X | 361 | 55.141 | 21.800 | 52.037 | 0.00 | 0.00 |
| ATOM | 5439 | HG22 | VAL | X | 361 | 54.454 | 23.278 | 51.367 | 0.00 | 0.00 |
| ATOM | 5440 | HG23 | VAL | X | 361 | 55.826 | 23.378 | 52.425 | 0.00 | 0.00 |
| ATOM | 5441 | C    | VAL | X | 361 | 51.788 | 23.006 | 52.444 | 0.00 | 0.00 |
| ATOM | 5442 | O    | VAL | X | 361 | 51.132 | 24.026 | 52.783 | 0.00 | 0.00 |
| ATOM | 5443 | N    | GLY | X | 362 | 51.683 | 22.473 | 51.183 | 0.00 | 0.00 |
| ATOM | 5444 | H    | GLY | X | 362 | 52.343 | 21.750 | 50.931 | 0.00 | 0.00 |
| ATOM | 5445 | CA   | GLY | X | 362 | 50.982 | 23.237 | 50.083 | 0.00 | 0.00 |
| ATOM | 5446 | HA2  | GLY | X | 362 | 51.137 | 24.305 | 50.215 | 0.00 | 0.00 |
| ATOM | 5447 | HA3  | GLY | X | 362 | 51.363 | 22.786 | 49.144 | 0.00 | 0.00 |
| ATOM | 5448 | C    | GLY | X | 362 | 49.485 | 23.093 | 49.945 | 0.00 | 0.00 |
| ATOM | 5449 | O    | GLY | X | 362 | 48.742 | 23.929 | 49.536 | 0.00 | 0.00 |
| ATOM | 5450 | N    | VAL | X | 363 | 49.059 | 21.909 | 50.281 | 0.00 | 0.00 |
| ATOM | 5451 | H    | VAL | X | 363 | 49.802 | 21.269 | 50.524 | 0.00 | 0.00 |
| ATOM | 5452 | CA   | VAL | X | 363 | 47.661 | 21.426 | 50.157 | 0.00 | 0.00 |
| ATOM | 5453 | HA   | VAL | X | 363 | 47.234 | 22.149 | 49.461 | 0.00 | 0.00 |
| ATOM | 5454 | CB   | VAL | X | 363 | 47.473 | 20.008 | 49.597 | 0.00 | 0.00 |
| ATOM | 5455 | HB   | VAL | X | 363 | 47.726 | 19.309 | 50.394 | 0.00 | 0.00 |
| ATOM | 5456 | CG1  | VAL | X | 363 | 45.974 | 19.888 | 49.369 | 0.00 | 0.00 |
| ATOM | 5457 | HG11 | VAL | X | 363 | 45.573 | 20.025 | 50.373 | 0.00 | 0.00 |
| ATOM | 5458 | HG12 | VAL | X | 363 | 45.601 | 20.657 | 48.693 | 0.00 | 0.00 |
| ATOM | 5459 | HG13 | VAL | X | 363 | 45.626 | 18.942 | 48.953 | 0.00 | 0.00 |
| ATOM | 5460 | CG2  | VAL | X | 363 | 48.341 | 19.664 | 48.342 | 0.00 | 0.00 |
| ATOM | 5461 | HG21 | VAL | X | 363 | 48.026 | 18.742 | 47.854 | 0.00 | 0.00 |
| ATOM | 5462 | HG22 | VAL | X | 363 | 48.261 | 20.429 | 47.570 | 0.00 | 0.00 |
| ATOM | 5463 | HG23 | VAL | X | 363 | 49.416 | 19.605 | 48.512 | 0.00 | 0.00 |
| ATOM | 5464 | C    | VAL | X | 363 | 47.094 | 21.629 | 51.592 | 0.00 | 0.00 |
| ATOM | 5465 | O    | VAL | X | 363 | 47.704 | 21.164 | 52.519 | 0.00 | 0.00 |
| ATOM | 5466 | N    | PRO | X | 364 | 46.026 | 22.440 | 51.705 | 0.00 | 0.00 |
| ATOM | 5467 | CD   | PRO | X | 364 | 45.376 | 23.251 | 50.640 | 0.00 | 0.00 |

|      |      |      |     |   |     |        |        |        |      |      |
|------|------|------|-----|---|-----|--------|--------|--------|------|------|
| ATOM | 5468 | HD2  | PRO | X | 364 | 45.137 | 22.655 | 49.759 | 0.00 | 0.00 |
| ATOM | 5469 | HD3  | PRO | X | 364 | 45.993 | 24.122 | 50.419 | 0.00 | 0.00 |
| ATOM | 5470 | CG   | PRO | X | 364 | 44.177 | 23.874 | 51.310 | 0.00 | 0.00 |
| ATOM | 5471 | HG2  | PRO | X | 364 | 43.329 | 23.190 | 51.262 | 0.00 | 0.00 |
| ATOM | 5472 | HG3  | PRO | X | 364 | 43.732 | 24.812 | 50.979 | 0.00 | 0.00 |
| ATOM | 5473 | CB   | PRO | X | 364 | 44.545 | 23.982 | 52.771 | 0.00 | 0.00 |
| ATOM | 5474 | HB2  | PRO | X | 364 | 43.658 | 23.922 | 53.402 | 0.00 | 0.00 |
| ATOM | 5475 | HB3  | PRO | X | 364 | 45.022 | 24.938 | 52.985 | 0.00 | 0.00 |
| ATOM | 5476 | CA   | PRO | X | 364 | 45.419 | 22.724 | 52.984 | 0.00 | 0.00 |
| ATOM | 5477 | HA   | PRO | X | 364 | 46.210 | 23.094 | 53.636 | 0.00 | 0.00 |
| ATOM | 5478 | C    | PRO | X | 364 | 44.562 | 21.548 | 53.525 | 0.00 | 0.00 |
| ATOM | 5479 | O    | PRO | X | 364 | 44.063 | 20.715 | 52.741 | 0.00 | 0.00 |
| ATOM | 5480 | N    | GLN | X | 365 | 44.360 | 21.382 | 54.826 | 0.00 | 0.00 |
| ATOM | 5481 | H    | GLN | X | 365 | 44.886 | 21.998 | 55.429 | 0.00 | 0.00 |
| ATOM | 5482 | CA   | GLN | X | 365 | 43.507 | 20.373 | 55.455 | 0.00 | 0.00 |
| ATOM | 5483 | HA   | GLN | X | 365 | 43.503 | 20.537 | 56.532 | 0.00 | 0.00 |
| ATOM | 5484 | CB   | GLN | X | 365 | 42.053 | 20.523 | 55.002 | 0.00 | 0.00 |
| ATOM | 5485 | HB2  | GLN | X | 365 | 41.905 | 20.213 | 53.968 | 0.00 | 0.00 |
| ATOM | 5486 | HB3  | GLN | X | 365 | 41.463 | 19.770 | 55.526 | 0.00 | 0.00 |
| ATOM | 5487 | CG   | GLN | X | 365 | 41.493 | 21.868 | 55.407 | 0.00 | 0.00 |
| ATOM | 5488 | HG2  | GLN | X | 365 | 41.854 | 22.015 | 56.425 | 0.00 | 0.00 |
| ATOM | 5489 | HG3  | GLN | X | 365 | 42.047 | 22.672 | 54.923 | 0.00 | 0.00 |
| ATOM | 5490 | CD   | GLN | X | 365 | 39.970 | 21.976 | 55.286 | 0.00 | 0.00 |
| ATOM | 5491 | OE1  | GLN | X | 365 | 39.410 | 21.954 | 54.207 | 0.00 | 0.00 |
| ATOM | 5492 | NE2  | GLN | X | 365 | 39.189 | 22.077 | 56.303 | 0.00 | 0.00 |
| ATOM | 5493 | HE21 | GLN | X | 365 | 38.260 | 22.357 | 56.023 | 0.00 | 0.00 |
| ATOM | 5494 | HE22 | GLN | X | 365 | 39.536 | 21.932 | 57.240 | 0.00 | 0.00 |
| ATOM | 5495 | C    | GLN | X | 365 | 44.105 | 18.973 | 55.240 | 0.00 | 0.00 |
| ATOM | 5496 | O    | GLN | X | 365 | 43.348 | 18.010 | 55.364 | 0.00 | 0.00 |
| ATOM | 5497 | N    | VAL | X | 366 | 45.369 | 18.843 | 54.773 | 0.00 | 0.00 |
| ATOM | 5498 | H    | VAL | X | 366 | 45.826 | 19.741 | 54.717 | 0.00 | 0.00 |
| ATOM | 5499 | CA   | VAL | X | 366 | 45.783 | 17.588 | 54.111 | 0.00 | 0.00 |
| ATOM | 5500 | HA   | VAL | X | 366 | 44.921 | 17.356 | 53.485 | 0.00 | 0.00 |
| ATOM | 5501 | CB   | VAL | X | 366 | 46.935 | 17.850 | 53.130 | 0.00 | 0.00 |
| ATOM | 5502 | HB   | VAL | X | 366 | 46.702 | 18.694 | 52.481 | 0.00 | 0.00 |
| ATOM | 5503 | CG1  | VAL | X | 366 | 48.194 | 18.436 | 53.845 | 0.00 | 0.00 |
| ATOM | 5504 | HG11 | VAL | X | 366 | 48.948 | 18.646 | 53.087 | 0.00 | 0.00 |
| ATOM | 5505 | HG12 | VAL | X | 366 | 47.859 | 19.358 | 54.321 | 0.00 | 0.00 |
| ATOM | 5506 | HG13 | VAL | X | 366 | 48.625 | 17.705 | 54.529 | 0.00 | 0.00 |
| ATOM | 5507 | CG2  | VAL | X | 366 | 47.531 | 16.677 | 52.284 | 0.00 | 0.00 |
| ATOM | 5508 | HG21 | VAL | X | 366 | 48.108 | 17.139 | 51.482 | 0.00 | 0.00 |
| ATOM | 5509 | HG22 | VAL | X | 366 | 48.233 | 16.117 | 52.902 | 0.00 | 0.00 |
| ATOM | 5510 | HG23 | VAL | X | 366 | 46.816 | 15.897 | 52.023 | 0.00 | 0.00 |
| ATOM | 5511 | C    | VAL | X | 366 | 46.063 | 16.563 | 55.170 | 0.00 | 0.00 |
| ATOM | 5512 | O    | VAL | X | 366 | 46.313 | 16.910 | 56.319 | 0.00 | 0.00 |
| ATOM | 5513 | N    | SER | X | 367 | 46.140 | 15.340 | 54.750 | 0.00 | 0.00 |
| ATOM | 5514 | H    | SER | X | 367 | 45.820 | 15.151 | 53.811 | 0.00 | 0.00 |
| ATOM | 5515 | CA   | SER | X | 367 | 46.458 | 14.140 | 55.507 | 0.00 | 0.00 |
| ATOM | 5516 | HA   | SER | X | 367 | 46.834 | 14.424 | 56.490 | 0.00 | 0.00 |
| ATOM | 5517 | CB   | SER | X | 367 | 45.161 | 13.355 | 55.812 | 0.00 | 0.00 |
| ATOM | 5518 | HB2  | SER | X | 367 | 45.312 | 12.610 | 56.592 | 0.00 | 0.00 |
| ATOM | 5519 | HB3  | SER | X | 367 | 44.434 | 14.131 | 56.050 | 0.00 | 0.00 |
| ATOM | 5520 | OG   | SER | X | 367 | 44.713 | 12.617 | 54.653 | 0.00 | 0.00 |
| ATOM | 5521 | HG   | SER | X | 367 | 43.886 | 12.172 | 54.852 | 0.00 | 0.00 |
| ATOM | 5522 | C    | SER | X | 367 | 47.572 | 13.345 | 54.833 | 0.00 | 0.00 |
| ATOM | 5523 | O    | SER | X | 367 | 47.963 | 13.539 | 53.682 | 0.00 | 0.00 |
| ATOM | 5524 | N    | ASP | X | 368 | 48.038 | 12.326 | 55.551 | 0.00 | 0.00 |
| ATOM | 5525 | H    | ASP | X | 368 | 47.564 | 12.057 | 56.402 | 0.00 | 0.00 |
| ATOM | 5526 | CA   | ASP | X | 368 | 49.115 | 11.426 | 55.028 | 0.00 | 0.00 |
| ATOM | 5527 | HA   | ASP | X | 368 | 49.995 | 12.062 | 54.926 | 0.00 | 0.00 |
| ATOM | 5528 | CB   | ASP | X | 368 | 49.510 | 10.308 | 56.022 | 0.00 | 0.00 |
| ATOM | 5529 | HB2  | ASP | X | 368 | 49.641 | 10.782 | 56.995 | 0.00 | 0.00 |
| ATOM | 5530 | HB3  | ASP | X | 368 | 48.721 | 9.573  | 56.179 | 0.00 | 0.00 |
| ATOM | 5531 | CG   | ASP | X | 368 | 50.875 | 9.642  | 55.697 | 0.00 | 0.00 |
| ATOM | 5532 | OD1  | ASP | X | 368 | 51.965 | 10.250 | 56.055 | 0.00 | 0.00 |
| ATOM | 5533 | OD2  | ASP | X | 368 | 50.857 | 8.443  | 55.323 | 0.00 | 0.00 |
| ATOM | 5534 | C    | ASP | X | 368 | 48.633 | 10.793 | 53.725 | 0.00 | 0.00 |
| ATOM | 5535 | O    | ASP | X | 368 | 49.341 | 10.833 | 52.702 | 0.00 | 0.00 |
| ATOM | 5536 | N    | LEU | X | 369 | 47.369 | 10.285 | 53.737 | 0.00 | 0.00 |
| ATOM | 5537 | H    | LEU | X | 369 | 46.997 | 10.181 | 54.670 | 0.00 | 0.00 |

|      |      |      |     |   |     |        |        |        |      |      |
|------|------|------|-----|---|-----|--------|--------|--------|------|------|
| ATOM | 5538 | CA   | LEU | X | 369 | 46.780 | 9.475  | 52.723 | 0.00 | 0.00 |
| ATOM | 5539 | HA   | LEU | X | 369 | 47.519 | 8.886  | 52.179 | 0.00 | 0.00 |
| ATOM | 5540 | CB   | LEU | X | 369 | 45.844 | 8.487  | 53.353 | 0.00 | 0.00 |
| ATOM | 5541 | HB2  | LEU | X | 369 | 46.284 | 8.136  | 54.287 | 0.00 | 0.00 |
| ATOM | 5542 | HB3  | LEU | X | 369 | 44.868 | 8.897  | 53.608 | 0.00 | 0.00 |
| ATOM | 5543 | CG   | LEU | X | 369 | 45.558 | 7.186  | 52.543 | 0.00 | 0.00 |
| ATOM | 5544 | HG   | LEU | X | 369 | 45.009 | 7.380  | 51.621 | 0.00 | 0.00 |
| ATOM | 5545 | CD1  | LEU | X | 369 | 46.792 | 6.293  | 52.098 | 0.00 | 0.00 |
| ATOM | 5546 | HD11 | LEU | X | 369 | 47.533 | 6.274  | 52.897 | 0.00 | 0.00 |
| ATOM | 5547 | HD12 | LEU | X | 369 | 46.576 | 5.311  | 51.678 | 0.00 | 0.00 |
| ATOM | 5548 | HD13 | LEU | X | 369 | 47.349 | 6.792  | 51.305 | 0.00 | 0.00 |
| ATOM | 5549 | CD2  | LEU | X | 369 | 44.633 | 6.287  | 53.373 | 0.00 | 0.00 |
| ATOM | 5550 | HD21 | LEU | X | 369 | 44.246 | 5.498  | 52.728 | 0.00 | 0.00 |
| ATOM | 5551 | HD22 | LEU | X | 369 | 45.225 | 5.793  | 54.143 | 0.00 | 0.00 |
| ATOM | 5552 | HD23 | LEU | X | 369 | 43.890 | 6.879  | 53.909 | 0.00 | 0.00 |
| ATOM | 5553 | C    | LEU | X | 369 | 46.254 | 10.298 | 51.562 | 0.00 | 0.00 |
| ATOM | 5554 | O    | LEU | X | 369 | 46.175 | 9.750  | 50.466 | 0.00 | 0.00 |
| ATOM | 5555 | N    | ALA | X | 370 | 45.881 | 11.559 | 51.810 | 0.00 | 0.00 |
| ATOM | 5556 | H    | ALA | X | 370 | 45.992 | 12.030 | 52.697 | 0.00 | 0.00 |
| ATOM | 5557 | CA   | ALA | X | 370 | 45.715 | 12.490 | 50.690 | 0.00 | 0.00 |
| ATOM | 5558 | HA   | ALA | X | 370 | 45.218 | 12.048 | 49.826 | 0.00 | 0.00 |
| ATOM | 5559 | CB   | ALA | X | 370 | 44.859 | 13.750 | 51.048 | 0.00 | 0.00 |
| ATOM | 5560 | HB1  | ALA | X | 370 | 44.897 | 14.470 | 50.231 | 0.00 | 0.00 |
| ATOM | 5561 | HB2  | ALA | X | 370 | 43.838 | 13.383 | 51.153 | 0.00 | 0.00 |
| ATOM | 5562 | HB3  | ALA | X | 370 | 45.184 | 14.290 | 51.937 | 0.00 | 0.00 |
| ATOM | 5563 | C    | ALA | X | 370 | 47.082 | 12.892 | 50.135 | 0.00 | 0.00 |
| ATOM | 5564 | O    | ALA | X | 370 | 47.274 | 12.689 | 48.921 | 0.00 | 0.00 |
| ATOM | 5565 | N    | ALA | X | 371 | 48.120 | 13.242 | 50.921 | 0.00 | 0.00 |
| ATOM | 5566 | H    | ALA | X | 371 | 48.004 | 13.457 | 51.901 | 0.00 | 0.00 |
| ATOM | 5567 | CA   | ALA | X | 371 | 49.358 | 13.658 | 50.310 | 0.00 | 0.00 |
| ATOM | 5568 | HA   | ALA | X | 371 | 49.036 | 14.474 | 49.663 | 0.00 | 0.00 |
| ATOM | 5569 | CB   | ALA | X | 371 | 50.436 | 14.169 | 51.280 | 0.00 | 0.00 |
| ATOM | 5570 | HB1  | ALA | X | 371 | 50.685 | 13.406 | 52.018 | 0.00 | 0.00 |
| ATOM | 5571 | HB2  | ALA | X | 371 | 51.302 | 14.558 | 50.745 | 0.00 | 0.00 |
| ATOM | 5572 | HB3  | ALA | X | 371 | 50.064 | 15.037 | 51.823 | 0.00 | 0.00 |
| ATOM | 5573 | C    | ALA | X | 371 | 50.031 | 12.596 | 49.417 | 0.00 | 0.00 |
| ATOM | 5574 | O    | ALA | X | 371 | 50.383 | 12.907 | 48.295 | 0.00 | 0.00 |
| ATOM | 5575 | N    | GLU | X | 372 | 50.027 | 11.327 | 49.709 | 0.00 | 0.00 |
| ATOM | 5576 | H    | GLU | X | 372 | 49.665 | 11.046 | 50.609 | 0.00 | 0.00 |
| ATOM | 5577 | CA   | GLU | X | 372 | 50.240 | 10.144 | 48.841 | 0.00 | 0.00 |
| ATOM | 5578 | HA   | GLU | X | 372 | 51.262 | 9.964  | 48.509 | 0.00 | 0.00 |
| ATOM | 5579 | CB   | GLU | X | 372 | 49.765 | 8.943  | 49.756 | 0.00 | 0.00 |
| ATOM | 5580 | HB2  | GLU | X | 372 | 50.490 | 8.842  | 50.564 | 0.00 | 0.00 |
| ATOM | 5581 | HB3  | GLU | X | 372 | 48.784 | 9.177  | 50.169 | 0.00 | 0.00 |
| ATOM | 5582 | CG   | GLU | X | 372 | 49.749 | 7.569  | 49.031 | 0.00 | 0.00 |
| ATOM | 5583 | HG2  | GLU | X | 372 | 49.018 | 6.933  | 49.530 | 0.00 | 0.00 |
| ATOM | 5584 | HG3  | GLU | X | 372 | 49.262 | 7.603  | 48.056 | 0.00 | 0.00 |
| ATOM | 5585 | CD   | GLU | X | 372 | 51.100 | 6.907  | 48.787 | 0.00 | 0.00 |
| ATOM | 5586 | OE1  | GLU | X | 372 | 51.229 | 5.702  | 48.587 | 0.00 | 0.00 |
| ATOM | 5587 | OE2  | GLU | X | 372 | 52.094 | 7.629  | 48.523 | 0.00 | 0.00 |
| ATOM | 5588 | C    | GLU | X | 372 | 49.392 | 10.114 | 47.506 | 0.00 | 0.00 |
| ATOM | 5589 | O    | GLU | X | 372 | 49.972 | 10.004 | 46.422 | 0.00 | 0.00 |
| ATOM | 5590 | N    | ALA | X | 373 | 48.055 | 10.215 | 47.593 | 0.00 | 0.00 |
| ATOM | 5591 | H    | ALA | X | 373 | 47.630 | 10.353 | 48.499 | 0.00 | 0.00 |
| ATOM | 5592 | CA   | ALA | X | 373 | 47.240 | 10.358 | 46.441 | 0.00 | 0.00 |
| ATOM | 5593 | HA   | ALA | X | 373 | 47.337 | 9.443  | 45.856 | 0.00 | 0.00 |
| ATOM | 5594 | CB   | ALA | X | 373 | 45.762 | 10.426 | 46.822 | 0.00 | 0.00 |
| ATOM | 5595 | HB1  | ALA | X | 373 | 45.566 | 11.253 | 47.504 | 0.00 | 0.00 |
| ATOM | 5596 | HB2  | ALA | X | 373 | 45.156 | 10.376 | 45.917 | 0.00 | 0.00 |
| ATOM | 5597 | HB3  | ALA | X | 373 | 45.535 | 9.521  | 47.385 | 0.00 | 0.00 |
| ATOM | 5598 | C    | ALA | X | 373 | 47.677 | 11.604 | 45.593 | 0.00 | 0.00 |
| ATOM | 5599 | O    | ALA | X | 373 | 47.678 | 11.470 | 44.396 | 0.00 | 0.00 |
| ATOM | 5600 | N    | VAL | X | 374 | 48.103 | 12.670 | 46.242 | 0.00 | 0.00 |
| ATOM | 5601 | H    | VAL | X | 374 | 48.059 | 12.703 | 47.250 | 0.00 | 0.00 |
| ATOM | 5602 | CA   | VAL | X | 374 | 48.434 | 13.898 | 45.500 | 0.00 | 0.00 |
| ATOM | 5603 | HA   | VAL | X | 374 | 47.715 | 14.051 | 44.696 | 0.00 | 0.00 |
| ATOM | 5604 | CB   | VAL | X | 374 | 48.476 | 15.178 | 46.398 | 0.00 | 0.00 |
| ATOM | 5605 | HB   | VAL | X | 374 | 49.142 | 15.034 | 47.249 | 0.00 | 0.00 |
| ATOM | 5606 | CG1  | VAL | X | 374 | 49.047 | 16.465 | 45.697 | 0.00 | 0.00 |
| ATOM | 5607 | HG11 | VAL | X | 374 | 48.448 | 16.604 | 44.796 | 0.00 | 0.00 |

|      |      |      |     |   |     |        |        |        |      |      |
|------|------|------|-----|---|-----|--------|--------|--------|------|------|
| ATOM | 5608 | HG12 | VAL | X | 374 | 48.982 | 17.342 | 46.340 | 0.00 | 0.00 |
| ATOM | 5609 | HG13 | VAL | X | 374 | 50.091 | 16.391 | 45.393 | 0.00 | 0.00 |
| ATOM | 5610 | CG2  | VAL | X | 374 | 47.176 | 15.587 | 47.131 | 0.00 | 0.00 |
| ATOM | 5611 | HG21 | VAL | X | 374 | 46.349 | 15.905 | 46.496 | 0.00 | 0.00 |
| ATOM | 5612 | HG22 | VAL | X | 374 | 46.718 | 14.698 | 47.566 | 0.00 | 0.00 |
| ATOM | 5613 | HG23 | VAL | X | 374 | 47.228 | 16.421 | 47.831 | 0.00 | 0.00 |
| ATOM | 5614 | C    | VAL | X | 374 | 49.746 | 13.638 | 44.853 | 0.00 | 0.00 |
| ATOM | 5615 | O    | VAL | X | 374 | 49.856 | 13.843 | 43.661 | 0.00 | 0.00 |
| ATOM | 5616 | N    | VAL | X | 375 | 50.844 | 13.232 | 45.575 | 0.00 | 0.00 |
| ATOM | 5617 | H    | VAL | X | 375 | 50.808 | 13.158 | 46.582 | 0.00 | 0.00 |
| ATOM | 5618 | CA   | VAL | X | 375 | 52.079 | 12.858 | 44.946 | 0.00 | 0.00 |
| ATOM | 5619 | HA   | VAL | X | 375 | 52.510 | 13.754 | 44.499 | 0.00 | 0.00 |
| ATOM | 5620 | CB   | VAL | X | 375 | 53.102 | 12.261 | 46.041 | 0.00 | 0.00 |
| ATOM | 5621 | HB   | VAL | X | 375 | 52.570 | 11.560 | 46.683 | 0.00 | 0.00 |
| ATOM | 5622 | CG1  | VAL | X | 375 | 54.390 | 11.636 | 45.581 | 0.00 | 0.00 |
| ATOM | 5623 | HG11 | VAL | X | 375 | 54.132 | 10.877 | 44.843 | 0.00 | 0.00 |
| ATOM | 5624 | HG12 | VAL | X | 375 | 55.037 | 12.413 | 45.173 | 0.00 | 0.00 |
| ATOM | 5625 | HG13 | VAL | X | 375 | 54.914 | 11.211 | 46.437 | 0.00 | 0.00 |
| ATOM | 5626 | CG2  | VAL | X | 375 | 53.441 | 13.363 | 47.046 | 0.00 | 0.00 |
| ATOM | 5627 | HG21 | VAL | X | 375 | 54.139 | 13.042 | 47.820 | 0.00 | 0.00 |
| ATOM | 5628 | HG22 | VAL | X | 375 | 53.976 | 14.070 | 46.412 | 0.00 | 0.00 |
| ATOM | 5629 | HG23 | VAL | X | 375 | 52.561 | 13.942 | 47.327 | 0.00 | 0.00 |
| ATOM | 5630 | C    | VAL | X | 375 | 51.849 | 11.866 | 43.847 | 0.00 | 0.00 |
| ATOM | 5631 | O    | VAL | X | 375 | 52.558 | 11.818 | 42.912 | 0.00 | 0.00 |
| ATOM | 5632 | N    | LEU | X | 376 | 50.947 | 10.959 | 43.950 | 0.00 | 0.00 |
| ATOM | 5633 | H    | LEU | X | 376 | 50.313 | 11.000 | 44.735 | 0.00 | 0.00 |
| ATOM | 5634 | CA   | LEU | X | 376 | 50.706 | 9.850  | 42.880 | 0.00 | 0.00 |
| ATOM | 5635 | HA   | LEU | X | 376 | 51.676 | 9.516  | 42.514 | 0.00 | 0.00 |
| ATOM | 5636 | CB   | LEU | X | 376 | 49.874 | 8.649  | 43.367 | 0.00 | 0.00 |
| ATOM | 5637 | HB2  | LEU | X | 376 | 50.288 | 8.410  | 44.346 | 0.00 | 0.00 |
| ATOM | 5638 | HB3  | LEU | X | 376 | 48.897 | 9.057  | 43.626 | 0.00 | 0.00 |
| ATOM | 5639 | CG   | LEU | X | 376 | 49.685 | 7.430  | 42.436 | 0.00 | 0.00 |
| ATOM | 5640 | HG   | LEU | X | 376 | 49.139 | 7.690  | 41.529 | 0.00 | 0.00 |
| ATOM | 5641 | CD1  | LEU | X | 376 | 51.052 | 6.760  | 42.230 | 0.00 | 0.00 |
| ATOM | 5642 | HD11 | LEU | X | 376 | 50.931 | 6.012  | 41.446 | 0.00 | 0.00 |
| ATOM | 5643 | HD12 | LEU | X | 376 | 51.761 | 7.497  | 41.853 | 0.00 | 0.00 |
| ATOM | 5644 | HD13 | LEU | X | 376 | 51.465 | 6.328  | 43.142 | 0.00 | 0.00 |
| ATOM | 5645 | CD2  | LEU | X | 376 | 48.806 | 6.508  | 43.174 | 0.00 | 0.00 |
| ATOM | 5646 | HD21 | LEU | X | 376 | 47.829 | 6.985  | 43.247 | 0.00 | 0.00 |
| ATOM | 5647 | HD22 | LEU | X | 376 | 48.546 | 5.556  | 42.710 | 0.00 | 0.00 |
| ATOM | 5648 | HD23 | LEU | X | 376 | 49.243 | 6.215  | 44.128 | 0.00 | 0.00 |
| ATOM | 5649 | C    | LEU | X | 376 | 49.997 | 10.449 | 41.597 | 0.00 | 0.00 |
| ATOM | 5650 | O    | LEU | X | 376 | 50.465 | 10.238 | 40.531 | 0.00 | 0.00 |
| ATOM | 5651 | N    | HIE | X | 377 | 49.040 | 11.389 | 41.740 | 0.00 | 0.00 |
| ATOM | 5652 | H    | HIE | X | 377 | 48.595 | 11.659 | 42.606 | 0.00 | 0.00 |
| ATOM | 5653 | CA   | HIE | X | 377 | 48.349 | 12.073 | 40.646 | 0.00 | 0.00 |
| ATOM | 5654 | HA   | HIE | X | 377 | 47.980 | 11.358 | 39.911 | 0.00 | 0.00 |
| ATOM | 5655 | CB   | HIE | X | 377 | 47.220 | 12.856 | 41.326 | 0.00 | 0.00 |
| ATOM | 5656 | HB2  | HIE | X | 377 | 46.533 | 12.114 | 41.732 | 0.00 | 0.00 |
| ATOM | 5657 | HB3  | HIE | X | 377 | 47.644 | 13.518 | 42.082 | 0.00 | 0.00 |
| ATOM | 5658 | CG   | HIE | X | 377 | 46.408 | 13.717 | 40.327 | 0.00 | 0.00 |
| ATOM | 5659 | ND1  | HIE | X | 377 | 45.415 | 13.149 | 39.460 | 0.00 | 0.00 |
| ATOM | 5660 | CE1  | HIE | X | 377 | 45.056 | 14.156 | 38.628 | 0.00 | 0.00 |
| ATOM | 5661 | HE1  | HIE | X | 377 | 44.112 | 14.278 | 38.117 | 0.00 | 0.00 |
| ATOM | 5662 | NE2  | HIE | X | 377 | 45.800 | 15.264 | 38.967 | 0.00 | 0.00 |
| ATOM | 5663 | HE2  | HIE | X | 377 | 45.825 | 16.139 | 38.463 | 0.00 | 0.00 |
| ATOM | 5664 | CD2  | HIE | X | 377 | 46.697 | 14.974 | 39.967 | 0.00 | 0.00 |
| ATOM | 5665 | HD2  | HIE | X | 377 | 47.441 | 15.589 | 40.450 | 0.00 | 0.00 |
| ATOM | 5666 | C    | HIE | X | 377 | 49.324 | 13.022 | 39.859 | 0.00 | 0.00 |
| ATOM | 5667 | O    | HIE | X | 377 | 49.215 | 13.200 | 38.603 | 0.00 | 0.00 |
| ATOM | 5668 | N    | TYR | X | 378 | 50.272 | 13.614 | 40.516 | 0.00 | 0.00 |
| ATOM | 5669 | H    | TYR | X | 378 | 50.294 | 13.570 | 41.525 | 0.00 | 0.00 |
| ATOM | 5670 | CA   | TYR | X | 378 | 51.262 | 14.517 | 39.848 | 0.00 | 0.00 |
| ATOM | 5671 | HA   | TYR | X | 378 | 50.791 | 14.959 | 38.970 | 0.00 | 0.00 |
| ATOM | 5672 | CB   | TYR | X | 378 | 51.471 | 15.686 | 40.866 | 0.00 | 0.00 |
| ATOM | 5673 | HB2  | TYR | X | 378 | 51.470 | 15.247 | 41.864 | 0.00 | 0.00 |
| ATOM | 5674 | HB3  | TYR | X | 378 | 52.335 | 16.329 | 40.700 | 0.00 | 0.00 |
| ATOM | 5675 | CG   | TYR | X | 378 | 50.377 | 16.711 | 40.853 | 0.00 | 0.00 |
| ATOM | 5676 | CD1  | TYR | X | 378 | 50.325 | 17.753 | 39.924 | 0.00 | 0.00 |
| ATOM | 5677 | HD1  | TYR | X | 378 | 51.149 | 17.768 | 39.226 | 0.00 | 0.00 |

|      |      |      |     |   |     |        |        |        |      |      |
|------|------|------|-----|---|-----|--------|--------|--------|------|------|
| ATOM | 5678 | CE1  | TYR | X | 378 | 49.345 | 18.818 | 40.104 | 0.00 | 0.00 |
| ATOM | 5679 | HE1  | TYR | X | 378 | 49.331 | 19.754 | 39.565 | 0.00 | 0.00 |
| ATOM | 5680 | CZ   | TYR | X | 378 | 48.282 | 18.568 | 40.969 | 0.00 | 0.00 |
| ATOM | 5681 | OH   | TYR | X | 378 | 47.242 | 19.493 | 41.072 | 0.00 | 0.00 |
| ATOM | 5682 | HH   | TYR | X | 378 | 47.408 | 20.246 | 40.500 | 0.00 | 0.00 |
| ATOM | 5683 | CE2  | TYR | X | 378 | 48.156 | 17.430 | 41.753 | 0.00 | 0.00 |
| ATOM | 5684 | HE2  | TYR | X | 378 | 47.432 | 17.309 | 42.545 | 0.00 | 0.00 |
| ATOM | 5685 | CD2  | TYR | X | 378 | 49.253 | 16.568 | 41.731 | 0.00 | 0.00 |
| ATOM | 5686 | HD2  | TYR | X | 378 | 49.183 | 15.693 | 42.360 | 0.00 | 0.00 |
| ATOM | 5687 | C    | TYR | X | 378 | 52.583 | 13.842 | 39.337 | 0.00 | 0.00 |
| ATOM | 5688 | O    | TYR | X | 378 | 53.388 | 14.601 | 38.766 | 0.00 | 0.00 |
| ATOM | 5689 | N    | THR | X | 379 | 52.792 | 12.529 | 39.578 | 0.00 | 0.00 |
| ATOM | 5690 | H    | THR | X | 379 | 52.039 | 12.014 | 40.014 | 0.00 | 0.00 |
| ATOM | 5691 | CA   | THR | X | 379 | 54.067 | 11.815 | 39.301 | 0.00 | 0.00 |
| ATOM | 5692 | HA   | THR | X | 379 | 54.969 | 12.220 | 39.759 | 0.00 | 0.00 |
| ATOM | 5693 | CB   | THR | X | 379 | 53.825 | 10.429 | 39.907 | 0.00 | 0.00 |
| ATOM | 5694 | HB   | THR | X | 379 | 52.783 | 10.144 | 39.762 | 0.00 | 0.00 |
| ATOM | 5695 | CG2  | THR | X | 379 | 54.694 | 9.321  | 39.451 | 0.00 | 0.00 |
| ATOM | 5696 | HG21 | THR | X | 379 | 55.711 | 9.619  | 39.196 | 0.00 | 0.00 |
| ATOM | 5697 | HG22 | THR | X | 379 | 54.710 | 8.518  | 40.188 | 0.00 | 0.00 |
| ATOM | 5698 | HG23 | THR | X | 379 | 54.244 | 8.907  | 38.549 | 0.00 | 0.00 |
| ATOM | 5699 | OG1  | THR | X | 379 | 54.202 | 10.518 | 41.269 | 0.00 | 0.00 |
| ATOM | 5700 | HG1  | THR | X | 379 | 53.766 | 11.285 | 41.647 | 0.00 | 0.00 |
| ATOM | 5701 | C    | THR | X | 379 | 54.341 | 11.614 | 37.764 | 0.00 | 0.00 |
| ATOM | 5702 | O    | THR | X | 379 | 53.415 | 11.335 | 37.024 | 0.00 | 0.00 |
| ATOM | 5703 | N    | ASP | X | 380 | 55.492 | 11.983 | 37.374 | 0.00 | 0.00 |
| ATOM | 5704 | H    | ASP | X | 380 | 56.144 | 12.261 | 38.094 | 0.00 | 0.00 |
| ATOM | 5705 | CA   | ASP | X | 380 | 56.108 | 11.792 | 36.031 | 0.00 | 0.00 |
| ATOM | 5706 | HA   | ASP | X | 380 | 55.337 | 11.927 | 35.273 | 0.00 | 0.00 |
| ATOM | 5707 | CB   | ASP | X | 380 | 57.241 | 12.800 | 35.815 | 0.00 | 0.00 |
| ATOM | 5708 | HB2  | ASP | X | 380 | 56.847 | 13.810 | 35.923 | 0.00 | 0.00 |
| ATOM | 5709 | HB3  | ASP | X | 380 | 58.111 | 12.560 | 36.427 | 0.00 | 0.00 |
| ATOM | 5710 | CG   | ASP | X | 380 | 57.636 | 12.683 | 34.287 | 0.00 | 0.00 |
| ATOM | 5711 | OD1  | ASP | X | 380 | 56.946 | 13.247 | 33.423 | 0.00 | 0.00 |
| ATOM | 5712 | OD2  | ASP | X | 380 | 58.683 | 12.054 | 34.046 | 0.00 | 0.00 |
| ATOM | 5713 | C    | ASP | X | 380 | 56.527 | 10.268 | 35.843 | 0.00 | 0.00 |
| ATOM | 5714 | O    | ASP | X | 380 | 57.376 | 9.711  | 36.488 | 0.00 | 0.00 |
| ATOM | 5715 | N    | TRP | X | 381 | 55.907 | 9.636  | 34.809 | 0.00 | 0.00 |
| ATOM | 5716 | H    | TRP | X | 381 | 55.434 | 10.220 | 34.134 | 0.00 | 0.00 |
| ATOM | 5717 | CA   | TRP | X | 381 | 56.085 | 8.237  | 34.536 | 0.00 | 0.00 |
| ATOM | 5718 | HA   | TRP | X | 381 | 56.163 | 7.708  | 35.485 | 0.00 | 0.00 |
| ATOM | 5719 | CB   | TRP | X | 381 | 54.825 | 7.712  | 33.691 | 0.00 | 0.00 |
| ATOM | 5720 | HB2  | TRP | X | 381 | 54.687 | 8.263  | 32.761 | 0.00 | 0.00 |
| ATOM | 5721 | HB3  | TRP | X | 381 | 54.958 | 6.682  | 33.359 | 0.00 | 0.00 |
| ATOM | 5722 | CG   | TRP | X | 381 | 53.572 | 7.781  | 34.371 | 0.00 | 0.00 |
| ATOM | 5723 | CD1  | TRP | X | 381 | 53.371 | 7.934  | 35.653 | 0.00 | 0.00 |
| ATOM | 5724 | HD1  | TRP | X | 381 | 54.167 | 8.163  | 36.347 | 0.00 | 0.00 |
| ATOM | 5725 | NE1  | TRP | X | 381 | 52.023 | 7.814  | 35.973 | 0.00 | 0.00 |
| ATOM | 5726 | HE1  | TRP | X | 381 | 51.605 | 8.134  | 36.835 | 0.00 | 0.00 |
| ATOM | 5727 | CE2  | TRP | X | 381 | 51.315 | 7.497  | 34.855 | 0.00 | 0.00 |
| ATOM | 5728 | CZ2  | TRP | X | 381 | 49.971 | 7.201  | 34.644 | 0.00 | 0.00 |
| ATOM | 5729 | HZ2  | TRP | X | 381 | 49.346 | 7.097  | 35.519 | 0.00 | 0.00 |
| ATOM | 5730 | CH2  | TRP | X | 381 | 49.511 | 6.921  | 33.312 | 0.00 | 0.00 |
| ATOM | 5731 | HH2  | TRP | X | 381 | 48.484 | 6.613  | 33.175 | 0.00 | 0.00 |
| ATOM | 5732 | CZ3  | TRP | X | 381 | 50.395 | 7.174  | 32.229 | 0.00 | 0.00 |
| ATOM | 5733 | HZ3  | TRP | X | 381 | 50.075 | 7.090  | 31.201 | 0.00 | 0.00 |
| ATOM | 5734 | CE3  | TRP | X | 381 | 51.767 | 7.450  | 32.473 | 0.00 | 0.00 |
| ATOM | 5735 | HE3  | TRP | X | 381 | 52.410 | 7.496  | 31.607 | 0.00 | 0.00 |
| ATOM | 5736 | CD2  | TRP | X | 381 | 52.248 | 7.553  | 33.773 | 0.00 | 0.00 |
| ATOM | 5737 | C    | TRP | X | 381 | 57.395 | 7.984  | 33.788 | 0.00 | 0.00 |
| ATOM | 5738 | O    | TRP | X | 381 | 57.769 | 6.845  | 33.538 | 0.00 | 0.00 |
| ATOM | 5739 | N    | LEU | X | 382 | 58.051 | 9.012  | 33.330 | 0.00 | 0.00 |
| ATOM | 5740 | H    | LEU | X | 382 | 57.667 | 9.938  | 33.454 | 0.00 | 0.00 |
| ATOM | 5741 | CA   | LEU | X | 382 | 59.212 | 9.052  | 32.442 | 0.00 | 0.00 |
| ATOM | 5742 | HA   | LEU | X | 382 | 59.278 | 8.067  | 31.981 | 0.00 | 0.00 |
| ATOM | 5743 | CB   | LEU | X | 382 | 58.995 | 10.086 | 31.297 | 0.00 | 0.00 |
| ATOM | 5744 | HB2  | LEU | X | 382 | 58.463 | 10.970 | 31.647 | 0.00 | 0.00 |
| ATOM | 5745 | HB3  | LEU | X | 382 | 60.003 | 10.344 | 30.972 | 0.00 | 0.00 |
| ATOM | 5746 | CG   | LEU | X | 382 | 58.434 | 9.473  | 30.016 | 0.00 | 0.00 |
| ATOM | 5747 | HG   | LEU | X | 382 | 59.112 | 8.817  | 29.470 | 0.00 | 0.00 |



|      |      |      |     |   |     |        |        |        |      |      |
|------|------|------|-----|---|-----|--------|--------|--------|------|------|
| ATOM | 5748 | CD1  | LEU | X | 382 | 57.083 | 8.771  | 30.266 | 0.00 | 0.00 |
| ATOM | 5749 | HD11 | LEU | X | 382 | 56.294 | 9.518  | 30.351 | 0.00 | 0.00 |
| ATOM | 5750 | HD12 | LEU | X | 382 | 56.866 | 8.200  | 29.363 | 0.00 | 0.00 |
| ATOM | 5751 | HD13 | LEU | X | 382 | 57.137 | 8.197  | 31.191 | 0.00 | 0.00 |
| ATOM | 5752 | CD2  | LEU | X | 382 | 58.201 | 10.632 | 29.041 | 0.00 | 0.00 |
| ATOM | 5753 | HD21 | LEU | X | 382 | 57.858 | 10.297 | 28.061 | 0.00 | 0.00 |
| ATOM | 5754 | HD22 | LEU | X | 382 | 57.536 | 11.387 | 29.460 | 0.00 | 0.00 |
| ATOM | 5755 | HD23 | LEU | X | 382 | 59.189 | 11.066 | 28.888 | 0.00 | 0.00 |
| ATOM | 5756 | C    | LEU | X | 382 | 60.514 | 9.165  | 33.296 | 0.00 | 0.00 |
| ATOM | 5757 | O    | LEU | X | 382 | 61.488 | 8.546  | 32.912 | 0.00 | 0.00 |
| ATOM | 5758 | N    | HIE | X | 383 | 60.576 | 10.035 | 34.307 | 0.00 | 0.00 |
| ATOM | 5759 | H    | HIE | X | 383 | 59.882 | 10.768 | 34.330 | 0.00 | 0.00 |
| ATOM | 5760 | CA   | HIE | X | 383 | 61.496 | 10.007 | 35.487 | 0.00 | 0.00 |
| ATOM | 5761 | HA   | HIE | X | 383 | 61.661 | 8.933  | 35.580 | 0.00 | 0.00 |
| ATOM | 5762 | CB   | HIE | X | 383 | 62.800 | 10.701 | 35.162 | 0.00 | 0.00 |
| ATOM | 5763 | HB2  | HIE | X | 383 | 63.127 | 10.149 | 34.281 | 0.00 | 0.00 |
| ATOM | 5764 | HB3  | HIE | X | 383 | 62.595 | 11.752 | 34.957 | 0.00 | 0.00 |
| ATOM | 5765 | CG   | HIE | X | 383 | 63.906 | 10.573 | 36.191 | 0.00 | 0.00 |
| ATOM | 5766 | ND1  | HIE | X | 383 | 63.704 | 10.085 | 37.502 | 0.00 | 0.00 |
| ATOM | 5767 | CE1  | HIE | X | 383 | 64.900 | 10.412 | 38.032 | 0.00 | 0.00 |
| ATOM | 5768 | HE1  | HIE | X | 383 | 65.079 | 10.233 | 39.082 | 0.00 | 0.00 |
| ATOM | 5769 | NE2  | HIE | X | 383 | 65.716 | 10.992 | 37.141 | 0.00 | 0.00 |
| ATOM | 5770 | HE2  | HIE | X | 383 | 66.518 | 11.544 | 37.407 | 0.00 | 0.00 |
| ATOM | 5771 | CD2  | HIE | X | 383 | 65.051 | 11.165 | 36.018 | 0.00 | 0.00 |
| ATOM | 5772 | HD2  | HIE | X | 383 | 65.304 | 11.649 | 35.087 | 0.00 | 0.00 |
| ATOM | 5773 | C    | HIE | X | 383 | 60.796 | 10.416 | 36.815 | 0.00 | 0.00 |
| ATOM | 5774 | O    | HIE | X | 383 | 60.675 | 11.654 | 37.026 | 0.00 | 0.00 |
| ATOM | 5775 | N    | PRO | X | 384 | 60.247 | 9.544  | 37.685 | 0.00 | 0.00 |
| ATOM | 5776 | CD   | PRO | X | 384 | 60.027 | 8.190  | 37.434 | 0.00 | 0.00 |
| ATOM | 5777 | HD2  | PRO | X | 384 | 60.920 | 7.603  | 37.649 | 0.00 | 0.00 |
| ATOM | 5778 | HD3  | PRO | X | 384 | 59.692 | 7.949  | 36.425 | 0.00 | 0.00 |
| ATOM | 5779 | CG   | PRO | X | 384 | 59.007 | 7.668  | 38.451 | 0.00 | 0.00 |
| ATOM | 5780 | HG2  | PRO | X | 384 | 59.466 | 6.769  | 38.863 | 0.00 | 0.00 |
| ATOM | 5781 | HG3  | PRO | X | 384 | 58.004 | 7.566  | 38.037 | 0.00 | 0.00 |
| ATOM | 5782 | CB   | PRO | X | 384 | 58.878 | 8.821  | 39.494 | 0.00 | 0.00 |
| ATOM | 5783 | HB2  | PRO | X | 384 | 59.400 | 8.533  | 40.406 | 0.00 | 0.00 |
| ATOM | 5784 | HB3  | PRO | X | 384 | 57.865 | 9.045  | 39.828 | 0.00 | 0.00 |
| ATOM | 5785 | CA   | PRO | X | 384 | 59.504 | 10.058 | 38.894 | 0.00 | 0.00 |
| ATOM | 5786 | HA   | PRO | X | 384 | 58.857 | 10.818 | 38.454 | 0.00 | 0.00 |
| ATOM | 5787 | C    | PRO | X | 384 | 60.445 | 10.746 | 39.991 | 0.00 | 0.00 |
| ATOM | 5788 | O    | PRO | X | 384 | 59.870 | 11.358 | 40.841 | 0.00 | 0.00 |
| ATOM | 5789 | N    | GLU | X | 385 | 61.748 | 10.687 | 39.923 | 0.00 | 0.00 |
| ATOM | 5790 | H    | GLU | X | 385 | 62.202 | 10.109 | 39.230 | 0.00 | 0.00 |
| ATOM | 5791 | CA   | GLU | X | 385 | 62.697 | 11.307 | 40.818 | 0.00 | 0.00 |
| ATOM | 5792 | HA   | GLU | X | 385 | 62.139 | 11.711 | 41.662 | 0.00 | 0.00 |
| ATOM | 5793 | CB   | GLU | X | 385 | 63.549 | 10.199 | 41.573 | 0.00 | 0.00 |
| ATOM | 5794 | HB2  | GLU | X | 385 | 64.114 | 9.553  | 40.901 | 0.00 | 0.00 |
| ATOM | 5795 | HB3  | GLU | X | 385 | 64.282 | 10.661 | 42.235 | 0.00 | 0.00 |
| ATOM | 5796 | CG   | GLU | X | 385 | 62.674 | 9.254  | 42.406 | 0.00 | 0.00 |
| ATOM | 5797 | HG2  | GLU | X | 385 | 62.096 | 9.875  | 43.091 | 0.00 | 0.00 |
| ATOM | 5798 | HG3  | GLU | X | 385 | 61.944 | 8.692  | 41.824 | 0.00 | 0.00 |
| ATOM | 5799 | CD   | GLU | X | 385 | 63.624 | 8.285  | 43.214 | 0.00 | 0.00 |
| ATOM | 5800 | OE1  | GLU | X | 385 | 63.612 | 7.079  | 42.907 | 0.00 | 0.00 |
| ATOM | 5801 | OE2  | GLU | X | 385 | 64.296 | 8.732  | 44.188 | 0.00 | 0.00 |
| ATOM | 5802 | C    | GLU | X | 385 | 63.538 | 12.377 | 40.112 | 0.00 | 0.00 |
| ATOM | 5803 | O    | GLU | X | 385 | 64.479 | 12.860 | 40.716 | 0.00 | 0.00 |
| ATOM | 5804 | N    | ASP | X | 386 | 63.078 | 12.859 | 38.958 | 0.00 | 0.00 |
| ATOM | 5805 | H    | ASP | X | 386 | 62.325 | 12.462 | 38.416 | 0.00 | 0.00 |
| ATOM | 5806 | CA   | ASP | X | 386 | 63.730 | 13.997 | 38.364 | 0.00 | 0.00 |
| ATOM | 5807 | HA   | ASP | X | 386 | 64.767 | 13.677 | 38.265 | 0.00 | 0.00 |
| ATOM | 5808 | CB   | ASP | X | 386 | 63.120 | 14.170 | 36.939 | 0.00 | 0.00 |
| ATOM | 5809 | HB2  | ASP | X | 386 | 63.274 | 13.263 | 36.353 | 0.00 | 0.00 |
| ATOM | 5810 | HB3  | ASP | X | 386 | 62.086 | 14.513 | 36.961 | 0.00 | 0.00 |
| ATOM | 5811 | CG   | ASP | X | 386 | 63.997 | 15.200 | 36.171 | 0.00 | 0.00 |
| ATOM | 5812 | OD1  | ASP | X | 386 | 64.864 | 14.743 | 35.369 | 0.00 | 0.00 |
| ATOM | 5813 | OD2  | ASP | X | 386 | 63.848 | 16.453 | 36.482 | 0.00 | 0.00 |
| ATOM | 5814 | C    | ASP | X | 386 | 63.462 | 15.288 | 39.179 | 0.00 | 0.00 |
| ATOM | 5815 | O    | ASP | X | 386 | 62.279 | 15.675 | 39.304 | 0.00 | 0.00 |
| ATOM | 5816 | N    | PRO | X | 387 | 64.510 | 15.896 | 39.801 | 0.00 | 0.00 |
| ATOM | 5817 | CD   | PRO | X | 387 | 65.876 | 15.505 | 39.559 | 0.00 | 0.00 |

|      |      |      |     |   |     |        |        |        |      |      |
|------|------|------|-----|---|-----|--------|--------|--------|------|------|
| ATOM | 5818 | HD2  | PRO | X | 387 | 66.141 | 15.483 | 38.502 | 0.00 | 0.00 |
| ATOM | 5819 | HD3  | PRO | X | 387 | 66.109 | 14.533 | 39.993 | 0.00 | 0.00 |
| ATOM | 5820 | CG   | PRO | X | 387 | 66.684 | 16.656 | 40.277 | 0.00 | 0.00 |
| ATOM | 5821 | HG2  | PRO | X | 387 | 66.789 | 17.469 | 39.558 | 0.00 | 0.00 |
| ATOM | 5822 | HG3  | PRO | X | 387 | 67.678 | 16.328 | 40.577 | 0.00 | 0.00 |
| ATOM | 5823 | CB   | PRO | X | 387 | 65.755 | 17.067 | 41.416 | 0.00 | 0.00 |
| ATOM | 5824 | HB2  | PRO | X | 387 | 65.980 | 18.123 | 41.561 | 0.00 | 0.00 |
| ATOM | 5825 | HB3  | PRO | X | 387 | 65.934 | 16.330 | 42.199 | 0.00 | 0.00 |
| ATOM | 5826 | CA   | PRO | X | 387 | 64.366 | 16.873 | 40.814 | 0.00 | 0.00 |
| ATOM | 5827 | HA   | PRO | X | 387 | 63.823 | 16.493 | 41.680 | 0.00 | 0.00 |
| ATOM | 5828 | C    | PRO | X | 387 | 63.739 | 18.187 | 40.396 | 0.00 | 0.00 |
| ATOM | 5829 | O    | PRO | X | 387 | 63.190 | 18.932 | 41.175 | 0.00 | 0.00 |
| ATOM | 5830 | N    | ALA | X | 388 | 63.885 | 18.494 | 39.134 | 0.00 | 0.00 |
| ATOM | 5831 | H    | ALA | X | 388 | 64.439 | 17.852 | 38.585 | 0.00 | 0.00 |
| ATOM | 5832 | CA   | ALA | X | 388 | 63.270 | 19.680 | 38.534 | 0.00 | 0.00 |
| ATOM | 5833 | HA   | ALA | X | 388 | 63.342 | 20.521 | 39.223 | 0.00 | 0.00 |
| ATOM | 5834 | CB   | ALA | X | 388 | 64.080 | 19.920 | 37.291 | 0.00 | 0.00 |
| ATOM | 5835 | HB1  | ALA | X | 388 | 64.139 | 18.989 | 36.727 | 0.00 | 0.00 |
| ATOM | 5836 | HB2  | ALA | X | 388 | 63.559 | 20.591 | 36.609 | 0.00 | 0.00 |
| ATOM | 5837 | HB3  | ALA | X | 388 | 65.085 | 20.274 | 37.523 | 0.00 | 0.00 |
| ATOM | 5838 | C    | ALA | X | 388 | 61.796 | 19.364 | 38.315 | 0.00 | 0.00 |
| ATOM | 5839 | O    | ALA | X | 388 | 60.915 | 20.189 | 38.560 | 0.00 | 0.00 |
| ATOM | 5840 | N    | ARG | X | 389 | 61.452 | 18.219 | 37.774 | 0.00 | 0.00 |
| ATOM | 5841 | H    | ARG | X | 389 | 62.205 | 17.598 | 37.513 | 0.00 | 0.00 |
| ATOM | 5842 | CA   | ARG | X | 389 | 60.030 | 17.801 | 37.466 | 0.00 | 0.00 |
| ATOM | 5843 | HA   | ARG | X | 389 | 59.577 | 18.485 | 36.748 | 0.00 | 0.00 |
| ATOM | 5844 | CB   | ARG | X | 389 | 59.976 | 16.461 | 36.796 | 0.00 | 0.00 |
| ATOM | 5845 | HB2  | ARG | X | 389 | 60.621 | 15.819 | 37.396 | 0.00 | 0.00 |
| ATOM | 5846 | HB3  | ARG | X | 389 | 58.967 | 16.079 | 36.640 | 0.00 | 0.00 |
| ATOM | 5847 | CG   | ARG | X | 389 | 60.622 | 16.581 | 35.383 | 0.00 | 0.00 |
| ATOM | 5848 | HG2  | ARG | X | 389 | 60.059 | 17.323 | 34.816 | 0.00 | 0.00 |
| ATOM | 5849 | HG3  | ARG | X | 389 | 61.636 | 16.966 | 35.496 | 0.00 | 0.00 |
| ATOM | 5850 | CD   | ARG | X | 389 | 60.522 | 15.201 | 34.659 | 0.00 | 0.00 |
| ATOM | 5851 | HD2  | ARG | X | 389 | 60.731 | 14.385 | 35.351 | 0.00 | 0.00 |
| ATOM | 5852 | HD3  | ARG | X | 389 | 59.483 | 15.242 | 34.332 | 0.00 | 0.00 |
| ATOM | 5853 | NE   | ARG | X | 389 | 61.547 | 15.219 | 33.587 | 0.00 | 0.00 |
| ATOM | 5854 | HE   | ARG | X | 389 | 62.098 | 16.061 | 33.499 | 0.00 | 0.00 |
| ATOM | 5855 | CZ   | ARG | X | 389 | 61.667 | 14.281 | 32.693 | 0.00 | 0.00 |
| ATOM | 5856 | NH1  | ARG | X | 389 | 61.025 | 13.136 | 32.741 | 0.00 | 0.00 |
| ATOM | 5857 | HH11 | ARG | X | 389 | 60.328 | 12.945 | 33.447 | 0.00 | 0.00 |
| ATOM | 5858 | HH12 | ARG | X | 389 | 61.207 | 12.419 | 32.053 | 0.00 | 0.00 |
| ATOM | 5859 | NH2  | ARG | X | 389 | 62.559 | 14.382 | 31.771 | 0.00 | 0.00 |
| ATOM | 5860 | HH21 | ARG | X | 389 | 63.174 | 15.183 | 31.736 | 0.00 | 0.00 |
| ATOM | 5861 | HH22 | ARG | X | 389 | 62.756 | 13.569 | 31.204 | 0.00 | 0.00 |
| ATOM | 5862 | C    | ARG | X | 389 | 59.194 | 17.783 | 38.763 | 0.00 | 0.00 |
| ATOM | 5863 | O    | ARG | X | 389 | 58.137 | 18.342 | 38.849 | 0.00 | 0.00 |
| ATOM | 5864 | N    | LEU | X | 390 | 59.746 | 17.152 | 39.852 | 0.00 | 0.00 |
| ATOM | 5865 | H    | LEU | X | 390 | 60.643 | 16.720 | 39.680 | 0.00 | 0.00 |
| ATOM | 5866 | CA   | LEU | X | 390 | 59.336 | 17.056 | 41.301 | 0.00 | 0.00 |
| ATOM | 5867 | HA   | LEU | X | 390 | 58.454 | 16.432 | 41.447 | 0.00 | 0.00 |
| ATOM | 5868 | CB   | LEU | X | 390 | 60.416 | 16.382 | 42.129 | 0.00 | 0.00 |
| ATOM | 5869 | HB2  | LEU | X | 390 | 61.365 | 16.825 | 41.828 | 0.00 | 0.00 |
| ATOM | 5870 | HB3  | LEU | X | 390 | 60.160 | 16.597 | 43.167 | 0.00 | 0.00 |
| ATOM | 5871 | CG   | LEU | X | 390 | 60.563 | 14.889 | 41.923 | 0.00 | 0.00 |
| ATOM | 5872 | HG   | LEU | X | 390 | 60.734 | 14.567 | 40.895 | 0.00 | 0.00 |
| ATOM | 5873 | CD1  | LEU | X | 390 | 61.810 | 14.555 | 42.762 | 0.00 | 0.00 |
| ATOM | 5874 | HD11 | LEU | X | 390 | 62.712 | 14.974 | 42.316 | 0.00 | 0.00 |
| ATOM | 5875 | HD12 | LEU | X | 390 | 61.608 | 14.809 | 43.803 | 0.00 | 0.00 |
| ATOM | 5876 | HD13 | LEU | X | 390 | 61.970 | 13.484 | 42.884 | 0.00 | 0.00 |
| ATOM | 5877 | CD2  | LEU | X | 390 | 59.403 | 14.145 | 42.488 | 0.00 | 0.00 |
| ATOM | 5878 | HD21 | LEU | X | 390 | 59.675 | 13.102 | 42.652 | 0.00 | 0.00 |
| ATOM | 5879 | HD22 | LEU | X | 390 | 58.981 | 14.561 | 43.402 | 0.00 | 0.00 |
| ATOM | 5880 | HD23 | LEU | X | 390 | 58.570 | 14.205 | 41.787 | 0.00 | 0.00 |
| ATOM | 5881 | C    | LEU | X | 390 | 59.006 | 18.547 | 41.773 | 0.00 | 0.00 |
| ATOM | 5882 | O    | LEU | X | 390 | 57.921 | 18.766 | 42.296 | 0.00 | 0.00 |
| ATOM | 5883 | N    | ARG | X | 391 | 59.911 | 19.485 | 41.690 | 0.00 | 0.00 |
| ATOM | 5884 | H    | ARG | X | 391 | 60.862 | 19.254 | 41.440 | 0.00 | 0.00 |
| ATOM | 5885 | CA   | ARG | X | 391 | 59.756 | 20.916 | 41.921 | 0.00 | 0.00 |
| ATOM | 5886 | HA   | ARG | X | 391 | 59.473 | 21.147 | 42.948 | 0.00 | 0.00 |
| ATOM | 5887 | CB   | ARG | X | 391 | 61.109 | 21.681 | 41.567 | 0.00 | 0.00 |

|      |      |      |     |   |     |        |        |        |      |      |
|------|------|------|-----|---|-----|--------|--------|--------|------|------|
| ATOM | 5888 | HB2  | ARG | X | 391 | 61.834 | 21.352 | 42.311 | 0.00 | 0.00 |
| ATOM | 5889 | HB3  | ARG | X | 391 | 61.406 | 21.346 | 40.573 | 0.00 | 0.00 |
| ATOM | 5890 | CG   | ARG | X | 391 | 60.985 | 23.171 | 41.634 | 0.00 | 0.00 |
| ATOM | 5891 | HG2  | ARG | X | 391 | 60.038 | 23.561 | 41.259 | 0.00 | 0.00 |
| ATOM | 5892 | HG3  | ARG | X | 391 | 60.910 | 23.491 | 42.673 | 0.00 | 0.00 |
| ATOM | 5893 | CD   | ARG | X | 391 | 62.148 | 23.995 | 40.961 | 0.00 | 0.00 |
| ATOM | 5894 | HD2  | ARG | X | 391 | 61.967 | 25.055 | 41.142 | 0.00 | 0.00 |
| ATOM | 5895 | HD3  | ARG | X | 391 | 63.102 | 23.715 | 41.409 | 0.00 | 0.00 |
| ATOM | 5896 | NE   | ARG | X | 391 | 62.339 | 23.840 | 39.527 | 0.00 | 0.00 |
| ATOM | 5897 | HE   | ARG | X | 391 | 63.292 | 23.721 | 39.216 | 0.00 | 0.00 |
| ATOM | 5898 | CZ   | ARG | X | 391 | 61.469 | 23.727 | 38.449 | 0.00 | 0.00 |
| ATOM | 5899 | NH1  | ARG | X | 391 | 60.196 | 24.027 | 38.536 | 0.00 | 0.00 |
| ATOM | 5900 | HH11 | ARG | X | 391 | 59.791 | 24.364 | 39.397 | 0.00 | 0.00 |
| ATOM | 5901 | HH12 | ARG | X | 391 | 59.694 | 24.018 | 37.659 | 0.00 | 0.00 |
| ATOM | 5902 | NH2  | ARG | X | 391 | 61.833 | 23.423 | 37.326 | 0.00 | 0.00 |
| ATOM | 5903 | HH21 | ARG | X | 391 | 62.767 | 23.068 | 37.178 | 0.00 | 0.00 |
| ATOM | 5904 | HH22 | ARG | X | 391 | 61.194 | 23.504 | 36.548 | 0.00 | 0.00 |
| ATOM | 5905 | C    | ARG | X | 391 | 58.602 | 21.504 | 41.099 | 0.00 | 0.00 |
| ATOM | 5906 | O    | ARG | X | 391 | 57.711 | 21.975 | 41.755 | 0.00 | 0.00 |
| ATOM | 5907 | N    | GLU | X | 392 | 58.568 | 21.288 | 39.771 | 0.00 | 0.00 |
| ATOM | 5908 | H    | GLU | X | 392 | 59.270 | 20.738 | 39.297 | 0.00 | 0.00 |
| ATOM | 5909 | CA   | GLU | X | 392 | 57.482 | 21.952 | 39.004 | 0.00 | 0.00 |
| ATOM | 5910 | HA   | GLU | X | 392 | 57.410 | 23.020 | 39.207 | 0.00 | 0.00 |
| ATOM | 5911 | CB   | GLU | X | 392 | 57.689 | 21.643 | 37.547 | 0.00 | 0.00 |
| ATOM | 5912 | HB2  | GLU | X | 392 | 58.735 | 21.551 | 37.255 | 0.00 | 0.00 |
| ATOM | 5913 | HB3  | GLU | X | 392 | 57.346 | 20.611 | 37.476 | 0.00 | 0.00 |
| ATOM | 5914 | CG   | GLU | X | 392 | 56.990 | 22.491 | 36.442 | 0.00 | 0.00 |
| ATOM | 5915 | HG2  | GLU | X | 392 | 57.164 | 22.107 | 35.437 | 0.00 | 0.00 |
| ATOM | 5916 | HG3  | GLU | X | 392 | 55.945 | 22.448 | 36.749 | 0.00 | 0.00 |
| ATOM | 5917 | CD   | GLU | X | 392 | 57.486 | 23.932 | 36.598 | 0.00 | 0.00 |
| ATOM | 5918 | OE1  | GLU | X | 392 | 56.682 | 24.803 | 36.950 | 0.00 | 0.00 |
| ATOM | 5919 | OE2  | GLU | X | 392 | 58.637 | 24.165 | 36.261 | 0.00 | 0.00 |
| ATOM | 5920 | C    | GLU | X | 392 | 56.065 | 21.366 | 39.397 | 0.00 | 0.00 |
| ATOM | 5921 | O    | GLU | X | 392 | 54.999 | 22.022 | 39.300 | 0.00 | 0.00 |
| ATOM | 5922 | N    | ALA | X | 393 | 56.094 | 20.107 | 39.726 | 0.00 | 0.00 |
| ATOM | 5923 | H    | ALA | X | 393 | 57.002 | 19.665 | 39.708 | 0.00 | 0.00 |
| ATOM | 5924 | CA   | ALA | X | 393 | 54.911 | 19.310 | 40.162 | 0.00 | 0.00 |
| ATOM | 5925 | HA   | ALA | X | 393 | 54.189 | 19.402 | 39.350 | 0.00 | 0.00 |
| ATOM | 5926 | CB   | ALA | X | 393 | 55.279 | 17.852 | 40.353 | 0.00 | 0.00 |
| ATOM | 5927 | HB1  | ALA | X | 393 | 55.852 | 17.790 | 41.278 | 0.00 | 0.00 |
| ATOM | 5928 | HB2  | ALA | X | 393 | 54.598 | 17.041 | 40.607 | 0.00 | 0.00 |
| ATOM | 5929 | HB3  | ALA | X | 393 | 55.848 | 17.517 | 39.485 | 0.00 | 0.00 |
| ATOM | 5930 | C    | ALA | X | 393 | 54.255 | 19.849 | 41.467 | 0.00 | 0.00 |
| ATOM | 5931 | O    | ALA | X | 393 | 53.026 | 19.926 | 41.461 | 0.00 | 0.00 |
| ATOM | 5932 | N    | LEU | X | 394 | 55.033 | 20.348 | 42.353 | 0.00 | 0.00 |
| ATOM | 5933 | H    | LEU | X | 394 | 56.033 | 20.205 | 42.362 | 0.00 | 0.00 |
| ATOM | 5934 | CA   | LEU | X | 394 | 54.531 | 20.958 | 43.548 | 0.00 | 0.00 |
| ATOM | 5935 | HA   | LEU | X | 394 | 53.722 | 20.355 | 43.959 | 0.00 | 0.00 |
| ATOM | 5936 | CB   | LEU | X | 394 | 55.683 | 20.854 | 44.644 | 0.00 | 0.00 |
| ATOM | 5937 | HB2  | LEU | X | 394 | 55.938 | 19.815 | 44.856 | 0.00 | 0.00 |
| ATOM | 5938 | HB3  | LEU | X | 394 | 56.558 | 21.362 | 44.240 | 0.00 | 0.00 |
| ATOM | 5939 | CG   | LEU | X | 394 | 55.249 | 21.543 | 45.984 | 0.00 | 0.00 |
| ATOM | 5940 | HG   | LEU | X | 394 | 54.973 | 22.572 | 45.754 | 0.00 | 0.00 |
| ATOM | 5941 | CD1  | LEU | X | 394 | 53.984 | 20.917 | 46.540 | 0.00 | 0.00 |
| ATOM | 5942 | HD11 | LEU | X | 394 | 53.129 | 21.106 | 45.892 | 0.00 | 0.00 |
| ATOM | 5943 | HD12 | LEU | X | 394 | 54.003 | 19.865 | 46.825 | 0.00 | 0.00 |
| ATOM | 5944 | HD13 | LEU | X | 394 | 53.659 | 21.436 | 47.442 | 0.00 | 0.00 |
| ATOM | 5945 | CD2  | LEU | X | 394 | 56.437 | 21.572 | 46.937 | 0.00 | 0.00 |
| ATOM | 5946 | HD21 | LEU | X | 394 | 56.799 | 20.545 | 46.993 | 0.00 | 0.00 |
| ATOM | 5947 | HD22 | LEU | X | 394 | 57.204 | 22.283 | 46.633 | 0.00 | 0.00 |
| ATOM | 5948 | HD23 | LEU | X | 394 | 56.009 | 21.782 | 47.917 | 0.00 | 0.00 |
| ATOM | 5949 | C    | LEU | X | 394 | 54.023 | 22.341 | 43.156 | 0.00 | 0.00 |
| ATOM | 5950 | O    | LEU | X | 394 | 52.937 | 22.678 | 43.640 | 0.00 | 0.00 |
| ATOM | 5951 | N    | SER | X | 395 | 54.694 | 23.148 | 42.344 | 0.00 | 0.00 |
| ATOM | 5952 | H    | SER | X | 395 | 55.678 | 22.952 | 42.233 | 0.00 | 0.00 |
| ATOM | 5953 | CA   | SER | X | 395 | 53.993 | 24.330 | 41.865 | 0.00 | 0.00 |
| ATOM | 5954 | HA   | SER | X | 395 | 53.622 | 24.933 | 42.694 | 0.00 | 0.00 |
| ATOM | 5955 | CB   | SER | X | 395 | 54.896 | 25.135 | 40.934 | 0.00 | 0.00 |
| ATOM | 5956 | HB2  | SER | X | 395 | 55.207 | 24.578 | 40.050 | 0.00 | 0.00 |
| ATOM | 5957 | HB3  | SER | X | 395 | 54.374 | 26.047 | 40.644 | 0.00 | 0.00 |

|      |      |      |     |   |     |        |        |        |      |      |
|------|------|------|-----|---|-----|--------|--------|--------|------|------|
| ATOM | 5958 | OG   | SER | X | 395 | 56.065 | 25.426 | 41.548 | 0.00 | 0.00 |
| ATOM | 5959 | HG   | SER | X | 395 | 56.698 | 25.340 | 40.832 | 0.00 | 0.00 |
| ATOM | 5960 | C    | SER | X | 395 | 52.726 | 24.066 | 41.188 | 0.00 | 0.00 |
| ATOM | 5961 | O    | SER | X | 395 | 51.780 | 24.792 | 41.371 | 0.00 | 0.00 |
| ATOM | 5962 | N    | ASP | X | 396 | 52.614 | 22.977 | 40.358 | 0.00 | 0.00 |
| ATOM | 5963 | H    | ASP | X | 396 | 53.478 | 22.482 | 40.191 | 0.00 | 0.00 |
| ATOM | 5964 | CA   | ASP | X | 396 | 51.313 | 22.508 | 39.736 | 0.00 | 0.00 |
| ATOM | 5965 | HA   | ASP | X | 396 | 50.884 | 23.421 | 39.323 | 0.00 | 0.00 |
| ATOM | 5966 | CB   | ASP | X | 396 | 51.706 | 21.492 | 38.549 | 0.00 | 0.00 |
| ATOM | 5967 | HB2  | ASP | X | 396 | 52.794 | 21.508 | 38.481 | 0.00 | 0.00 |
| ATOM | 5968 | HB3  | ASP | X | 396 | 51.498 | 20.484 | 38.908 | 0.00 | 0.00 |
| ATOM | 5969 | CG   | ASP | X | 396 | 51.152 | 21.685 | 37.207 | 0.00 | 0.00 |
| ATOM | 5970 | OD1  | ASP | X | 396 | 50.766 | 20.681 | 36.614 | 0.00 | 0.00 |
| ATOM | 5971 | OD2  | ASP | X | 396 | 51.469 | 22.797 | 36.590 | 0.00 | 0.00 |
| ATOM | 5972 | C    | ASP | X | 396 | 50.265 | 21.976 | 40.733 | 0.00 | 0.00 |
| ATOM | 5973 | O    | ASP | X | 396 | 49.110 | 22.245 | 40.421 | 0.00 | 0.00 |
| ATOM | 5974 | N    | VAL | X | 397 | 50.629 | 21.331 | 41.837 | 0.00 | 0.00 |
| ATOM | 5975 | H    | VAL | X | 397 | 51.583 | 21.015 | 41.944 | 0.00 | 0.00 |
| ATOM | 5976 | CA   | VAL | X | 397 | 49.827 | 21.080 | 43.116 | 0.00 | 0.00 |
| ATOM | 5977 | HA   | VAL | X | 397 | 48.981 | 20.462 | 42.815 | 0.00 | 0.00 |
| ATOM | 5978 | CB   | VAL | X | 397 | 50.719 | 20.167 | 43.989 | 0.00 | 0.00 |
| ATOM | 5979 | HB   | VAL | X | 397 | 51.708 | 20.623 | 43.935 | 0.00 | 0.00 |
| ATOM | 5980 | CG1  | VAL | X | 397 | 50.358 | 20.131 | 45.477 | 0.00 | 0.00 |
| ATOM | 5981 | HG11 | VAL | X | 397 | 49.448 | 19.569 | 45.692 | 0.00 | 0.00 |
| ATOM | 5982 | HG12 | VAL | X | 397 | 51.184 | 19.611 | 45.962 | 0.00 | 0.00 |
| ATOM | 5983 | HG13 | VAL | X | 397 | 50.203 | 21.113 | 45.924 | 0.00 | 0.00 |
| ATOM | 5984 | CG2  | VAL | X | 397 | 50.762 | 18.705 | 43.613 | 0.00 | 0.00 |
| ATOM | 5985 | HG21 | VAL | X | 397 | 51.401 | 18.125 | 44.279 | 0.00 | 0.00 |
| ATOM | 5986 | HG22 | VAL | X | 397 | 49.713 | 18.444 | 43.751 | 0.00 | 0.00 |
| ATOM | 5987 | HG23 | VAL | X | 397 | 51.149 | 18.498 | 42.616 | 0.00 | 0.00 |
| ATOM | 5988 | C    | VAL | X | 397 | 49.330 | 22.321 | 43.803 | 0.00 | 0.00 |
| ATOM | 5989 | O    | VAL | X | 397 | 48.176 | 22.378 | 44.171 | 0.00 | 0.00 |
| ATOM | 5990 | N    | VAL | X | 398 | 50.186 | 23.329 | 44.051 | 0.00 | 0.00 |
| ATOM | 5991 | H    | VAL | X | 398 | 51.155 | 23.259 | 43.774 | 0.00 | 0.00 |
| ATOM | 5992 | CA   | VAL | X | 398 | 49.766 | 24.559 | 44.842 | 0.00 | 0.00 |
| ATOM | 5993 | HA   | VAL | X | 398 | 49.235 | 24.120 | 45.687 | 0.00 | 0.00 |
| ATOM | 5994 | CB   | VAL | X | 398 | 50.959 | 25.386 | 45.422 | 0.00 | 0.00 |
| ATOM | 5995 | HB   | VAL | X | 398 | 51.597 | 25.428 | 44.539 | 0.00 | 0.00 |
| ATOM | 5996 | CG1  | VAL | X | 398 | 50.551 | 26.856 | 45.794 | 0.00 | 0.00 |
| ATOM | 5997 | HG11 | VAL | X | 398 | 51.450 | 27.430 | 46.020 | 0.00 | 0.00 |
| ATOM | 5998 | HG12 | VAL | X | 398 | 49.958 | 27.310 | 45.000 | 0.00 | 0.00 |
| ATOM | 5999 | HG13 | VAL | X | 398 | 49.928 | 26.901 | 46.688 | 0.00 | 0.00 |
| ATOM | 6000 | CG2  | VAL | X | 398 | 51.679 | 24.674 | 46.601 | 0.00 | 0.00 |
| ATOM | 6001 | HG21 | VAL | X | 398 | 52.527 | 25.316 | 46.839 | 0.00 | 0.00 |
| ATOM | 6002 | HG22 | VAL | X | 398 | 50.930 | 24.713 | 47.392 | 0.00 | 0.00 |
| ATOM | 6003 | HG23 | VAL | X | 398 | 52.032 | 23.704 | 46.251 | 0.00 | 0.00 |
| ATOM | 6004 | C    | VAL | X | 398 | 48.834 | 25.376 | 43.967 | 0.00 | 0.00 |
| ATOM | 6005 | O    | VAL | X | 398 | 47.688 | 25.685 | 44.339 | 0.00 | 0.00 |
| ATOM | 6006 | N    | GLY | X | 399 | 49.303 | 25.580 | 42.733 | 0.00 | 0.00 |
| ATOM | 6007 | H    | GLY | X | 399 | 50.104 | 25.015 | 42.491 | 0.00 | 0.00 |
| ATOM | 6008 | CA   | GLY | X | 399 | 48.723 | 26.435 | 41.676 | 0.00 | 0.00 |
| ATOM | 6009 | HA2  | GLY | X | 399 | 48.655 | 27.519 | 41.875 | 0.00 | 0.00 |
| ATOM | 6010 | HA3  | GLY | X | 399 | 49.272 | 26.343 | 40.811 | 0.00 | 0.00 |
| ATOM | 6011 | C    | GLY | X | 399 | 47.302 | 25.966 | 41.391 | 0.00 | 0.00 |
| ATOM | 6012 | O    | GLY | X | 399 | 46.400 | 26.852 | 41.183 | 0.00 | 0.00 |
| ATOM | 6013 | N    | ASP | X | 400 | 46.944 | 24.693 | 41.331 | 0.00 | 0.00 |
| ATOM | 6014 | H    | ASP | X | 400 | 47.670 | 24.010 | 41.494 | 0.00 | 0.00 |
| ATOM | 6015 | CA   | ASP | X | 400 | 45.609 | 24.097 | 41.026 | 0.00 | 0.00 |
| ATOM | 6016 | HA   | ASP | X | 400 | 45.115 | 24.519 | 40.151 | 0.00 | 0.00 |
| ATOM | 6017 | CB   | ASP | X | 400 | 45.842 | 22.617 | 40.688 | 0.00 | 0.00 |
| ATOM | 6018 | HB2  | ASP | X | 400 | 46.476 | 22.117 | 41.420 | 0.00 | 0.00 |
| ATOM | 6019 | HB3  | ASP | X | 400 | 44.888 | 22.090 | 40.705 | 0.00 | 0.00 |
| ATOM | 6020 | CG   | ASP | X | 400 | 46.291 | 22.305 | 39.247 | 0.00 | 0.00 |
| ATOM | 6021 | OD1  | ASP | X | 400 | 46.332 | 23.183 | 38.360 | 0.00 | 0.00 |
| ATOM | 6022 | OD2  | ASP | X | 400 | 46.632 | 21.132 | 38.932 | 0.00 | 0.00 |
| ATOM | 6023 | C    | ASP | X | 400 | 44.596 | 24.309 | 42.152 | 0.00 | 0.00 |
| ATOM | 6024 | O    | ASP | X | 400 | 43.851 | 25.286 | 42.102 | 0.00 | 0.00 |
| ATOM | 6025 | N    | HIE | X | 401 | 44.668 | 23.433 | 43.227 | 0.00 | 0.00 |
| ATOM | 6026 | H    | HIE | X | 401 | 45.356 | 22.694 | 43.180 | 0.00 | 0.00 |
| ATOM | 6027 | CA   | HIE | X | 401 | 43.788 | 23.526 | 44.386 | 0.00 | 0.00 |

|      |      |      |     |   |     |        |        |        |      |      |
|------|------|------|-----|---|-----|--------|--------|--------|------|------|
| ATOM | 6028 | HA   | HIE | X | 401 | 42.812 | 23.222 | 44.008 | 0.00 | 0.00 |
| ATOM | 6029 | CB   | HIE | X | 401 | 44.243 | 22.567 | 45.498 | 0.00 | 0.00 |
| ATOM | 6030 | HB2  | HIE | X | 401 | 44.475 | 21.632 | 44.987 | 0.00 | 0.00 |
| ATOM | 6031 | HB3  | HIE | X | 401 | 45.207 | 22.816 | 45.942 | 0.00 | 0.00 |
| ATOM | 6032 | CG   | HIE | X | 401 | 43.299 | 22.335 | 46.662 | 0.00 | 0.00 |
| ATOM | 6033 | ND1  | HIE | X | 401 | 43.038 | 23.270 | 47.586 | 0.00 | 0.00 |
| ATOM | 6034 | CE1  | HIE | X | 401 | 42.309 | 22.691 | 48.518 | 0.00 | 0.00 |
| ATOM | 6035 | HE1  | HIE | X | 401 | 41.808 | 23.161 | 49.351 | 0.00 | 0.00 |
| ATOM | 6036 | NE2  | HIE | X | 401 | 42.036 | 21.454 | 48.179 | 0.00 | 0.00 |
| ATOM | 6037 | HE2  | HIE | X | 401 | 41.554 | 20.760 | 48.733 | 0.00 | 0.00 |
| ATOM | 6038 | CD2  | HIE | X | 401 | 42.712 | 21.199 | 47.059 | 0.00 | 0.00 |
| ATOM | 6039 | HD2  | HIE | X | 401 | 42.742 | 20.262 | 46.522 | 0.00 | 0.00 |
| ATOM | 6040 | C    | HIE | X | 401 | 43.563 | 24.935 | 44.945 | 0.00 | 0.00 |
| ATOM | 6041 | O    | HIE | X | 401 | 42.395 | 25.316 | 45.302 | 0.00 | 0.00 |
| ATOM | 6042 | N    | ASN | X | 402 | 44.642 | 25.708 | 44.947 | 0.00 | 0.00 |
| ATOM | 6043 | H    | ASN | X | 402 | 45.555 | 25.376 | 44.671 | 0.00 | 0.00 |
| ATOM | 6044 | CA   | ASN | X | 402 | 44.627 | 27.039 | 45.524 | 0.00 | 0.00 |
| ATOM | 6045 | HA   | ASN | X | 402 | 43.853 | 27.135 | 46.285 | 0.00 | 0.00 |
| ATOM | 6046 | CB   | ASN | X | 402 | 45.834 | 27.381 | 46.253 | 0.00 | 0.00 |
| ATOM | 6047 | HB2  | ASN | X | 402 | 46.703 | 27.682 | 45.668 | 0.00 | 0.00 |
| ATOM | 6048 | HB3  | ASN | X | 402 | 45.566 | 28.294 | 46.786 | 0.00 | 0.00 |
| ATOM | 6049 | CG   | ASN | X | 402 | 46.239 | 26.428 | 47.261 | 0.00 | 0.00 |
| ATOM | 6050 | OD1  | ASN | X | 402 | 45.923 | 26.689 | 48.400 | 0.00 | 0.00 |
| ATOM | 6051 | ND2  | ASN | X | 402 | 47.130 | 25.463 | 47.110 | 0.00 | 0.00 |
| ATOM | 6052 | HD21 | ASN | X | 402 | 47.253 | 24.846 | 47.900 | 0.00 | 0.00 |
| ATOM | 6053 | HD22 | ASN | X | 402 | 47.502 | 25.215 | 46.205 | 0.00 | 0.00 |
| ATOM | 6054 | C    | ASN | X | 402 | 44.338 | 28.107 | 44.473 | 0.00 | 0.00 |
| ATOM | 6055 | O    | ASN | X | 402 | 44.160 | 29.253 | 44.847 | 0.00 | 0.00 |
| ATOM | 6056 | N    | VAL | X | 403 | 44.448 | 27.794 | 43.174 | 0.00 | 0.00 |
| ATOM | 6057 | H    | VAL | X | 403 | 44.712 | 26.912 | 42.760 | 0.00 | 0.00 |
| ATOM | 6058 | CA   | VAL | X | 403 | 44.148 | 28.782 | 42.142 | 0.00 | 0.00 |
| ATOM | 6059 | HA   | VAL | X | 403 | 43.428 | 29.499 | 42.538 | 0.00 | 0.00 |
| ATOM | 6060 | CB   | VAL | X | 403 | 45.305 | 29.717 | 41.715 | 0.00 | 0.00 |
| ATOM | 6061 | HB   | VAL | X | 403 | 45.823 | 29.248 | 40.878 | 0.00 | 0.00 |
| ATOM | 6062 | CG1  | VAL | X | 403 | 44.844 | 31.134 | 41.315 | 0.00 | 0.00 |
| ATOM | 6063 | HG11 | VAL | X | 403 | 45.716 | 31.678 | 40.950 | 0.00 | 0.00 |
| ATOM | 6064 | HG12 | VAL | X | 403 | 44.171 | 30.934 | 40.482 | 0.00 | 0.00 |
| ATOM | 6065 | HG13 | VAL | X | 403 | 44.411 | 31.673 | 42.158 | 0.00 | 0.00 |
| ATOM | 6066 | CG2  | VAL | X | 403 | 46.344 | 29.908 | 42.838 | 0.00 | 0.00 |
| ATOM | 6067 | HG21 | VAL | X | 403 | 45.890 | 30.512 | 43.625 | 0.00 | 0.00 |
| ATOM | 6068 | HG22 | VAL | X | 403 | 46.794 | 29.015 | 43.272 | 0.00 | 0.00 |
| ATOM | 6069 | HG23 | VAL | X | 403 | 47.169 | 30.527 | 42.485 | 0.00 | 0.00 |
| ATOM | 6070 | C    | VAL | X | 403 | 43.398 | 28.260 | 40.917 | 0.00 | 0.00 |
| ATOM | 6071 | O    | VAL | X | 403 | 42.274 | 28.756 | 40.673 | 0.00 | 0.00 |
| ATOM | 6072 | N    | VAL | X | 404 | 43.918 | 27.357 | 40.101 | 0.00 | 0.00 |
| ATOM | 6073 | H    | VAL | X | 404 | 44.873 | 27.071 | 40.264 | 0.00 | 0.00 |
| ATOM | 6074 | CA   | VAL | X | 404 | 43.273 | 27.070 | 38.784 | 0.00 | 0.00 |
| ATOM | 6075 | HA   | VAL | X | 404 | 42.997 | 27.995 | 38.278 | 0.00 | 0.00 |
| ATOM | 6076 | CB   | VAL | X | 404 | 44.225 | 26.286 | 37.859 | 0.00 | 0.00 |
| ATOM | 6077 | HB   | VAL | X | 404 | 44.257 | 25.267 | 38.244 | 0.00 | 0.00 |
| ATOM | 6078 | CG1  | VAL | X | 404 | 43.801 | 26.084 | 36.398 | 0.00 | 0.00 |
| ATOM | 6079 | HG11 | VAL | X | 404 | 42.941 | 25.416 | 36.345 | 0.00 | 0.00 |
| ATOM | 6080 | HG12 | VAL | X | 404 | 43.758 | 27.067 | 35.930 | 0.00 | 0.00 |
| ATOM | 6081 | HG13 | VAL | X | 404 | 44.533 | 25.490 | 35.852 | 0.00 | 0.00 |
| ATOM | 6082 | CG2  | VAL | X | 404 | 45.646 | 26.852 | 37.765 | 0.00 | 0.00 |
| ATOM | 6083 | HG21 | VAL | X | 404 | 46.371 | 26.147 | 37.358 | 0.00 | 0.00 |
| ATOM | 6084 | HG22 | VAL | X | 404 | 45.568 | 27.722 | 37.113 | 0.00 | 0.00 |
| ATOM | 6085 | HG23 | VAL | X | 404 | 46.063 | 27.208 | 38.707 | 0.00 | 0.00 |
| ATOM | 6086 | C    | VAL | X | 404 | 41.963 | 26.238 | 38.896 | 0.00 | 0.00 |
| ATOM | 6087 | O    | VAL | X | 404 | 41.101 | 26.408 | 38.117 | 0.00 | 0.00 |
| ATOM | 6088 | N    | CYX | X | 405 | 41.756 | 25.372 | 39.943 | 0.00 | 0.00 |
| ATOM | 6089 | H    | CYX | X | 405 | 42.508 | 25.206 | 40.596 | 0.00 | 0.00 |
| ATOM | 6090 | CA   | CYX | X | 405 | 40.540 | 24.563 | 40.209 | 0.00 | 0.00 |
| ATOM | 6091 | HA   | CYX | X | 405 | 40.010 | 24.231 | 39.316 | 0.00 | 0.00 |
| ATOM | 6092 | CB   | CYX | X | 405 | 40.849 | 23.337 | 41.007 | 0.00 | 0.00 |
| ATOM | 6093 | HB2  | CYX | X | 405 | 41.289 | 23.644 | 41.956 | 0.00 | 0.00 |
| ATOM | 6094 | HB3  | CYX | X | 405 | 39.904 | 22.817 | 41.164 | 0.00 | 0.00 |
| ATOM | 6095 | SG   | CYX | X | 405 | 42.090 | 22.320 | 40.019 | 0.00 | 0.00 |
| ATOM | 6096 | C    | CYX | X | 405 | 39.395 | 25.490 | 40.792 | 0.00 | 0.00 |
| ATOM | 6097 | O    | CYX | X | 405 | 38.355 | 25.454 | 40.269 | 0.00 | 0.00 |

|      |      |      |     |   |     |        |        |        |      |      |
|------|------|------|-----|---|-----|--------|--------|--------|------|------|
| ATOM | 6098 | N    | PRO | X | 406 | 39.656 | 26.414 | 41.785 | 0.00 | 0.00 |
| ATOM | 6099 | CD   | PRO | X | 406 | 40.627 | 26.232 | 42.921 | 0.00 | 0.00 |
| ATOM | 6100 | HD2  | PRO | X | 406 | 41.612 | 26.337 | 42.469 | 0.00 | 0.00 |
| ATOM | 6101 | HD3  | PRO | X | 406 | 40.548 | 25.309 | 43.496 | 0.00 | 0.00 |
| ATOM | 6102 | CG   | PRO | X | 406 | 40.444 | 27.410 | 43.880 | 0.00 | 0.00 |
| ATOM | 6103 | HG2  | PRO | X | 406 | 41.385 | 27.887 | 44.153 | 0.00 | 0.00 |
| ATOM | 6104 | HG3  | PRO | X | 406 | 39.869 | 27.013 | 44.717 | 0.00 | 0.00 |
| ATOM | 6105 | CB   | PRO | X | 406 | 39.636 | 28.404 | 43.091 | 0.00 | 0.00 |
| ATOM | 6106 | HB2  | PRO | X | 406 | 40.372 | 29.045 | 42.607 | 0.00 | 0.00 |
| ATOM | 6107 | HB3  | PRO | X | 406 | 38.990 | 29.053 | 43.682 | 0.00 | 0.00 |
| ATOM | 6108 | CA   | PRO | X | 406 | 38.790 | 27.582 | 42.084 | 0.00 | 0.00 |
| ATOM | 6109 | HA   | PRO | X | 406 | 37.971 | 27.051 | 42.570 | 0.00 | 0.00 |
| ATOM | 6110 | C    | PRO | X | 406 | 38.209 | 28.376 | 40.884 | 0.00 | 0.00 |
| ATOM | 6111 | O    | PRO | X | 406 | 37.026 | 28.613 | 40.712 | 0.00 | 0.00 |
| ATOM | 6112 | N    | VAL | X | 407 | 39.137 | 28.772 | 40.037 | 0.00 | 0.00 |
| ATOM | 6113 | H    | VAL | X | 407 | 40.131 | 28.719 | 40.206 | 0.00 | 0.00 |
| ATOM | 6114 | CA   | VAL | X | 407 | 38.824 | 29.422 | 38.688 | 0.00 | 0.00 |
| ATOM | 6115 | HA   | VAL | X | 407 | 38.388 | 30.418 | 38.761 | 0.00 | 0.00 |
| ATOM | 6116 | CB   | VAL | X | 407 | 40.163 | 29.888 | 38.069 | 0.00 | 0.00 |
| ATOM | 6117 | HB   | VAL | X | 407 | 40.855 | 29.048 | 38.135 | 0.00 | 0.00 |
| ATOM | 6118 | CG1  | VAL | X | 407 | 40.081 | 30.323 | 36.566 | 0.00 | 0.00 |
| ATOM | 6119 | HG11 | VAL | X | 407 | 39.645 | 29.566 | 35.914 | 0.00 | 0.00 |
| ATOM | 6120 | HG12 | VAL | X | 407 | 39.411 | 31.182 | 36.519 | 0.00 | 0.00 |
| ATOM | 6121 | HG13 | VAL | X | 407 | 41.066 | 30.623 | 36.208 | 0.00 | 0.00 |
| ATOM | 6122 | CG2  | VAL | X | 407 | 40.775 | 31.139 | 38.676 | 0.00 | 0.00 |
| ATOM | 6123 | HG21 | VAL | X | 407 | 41.775 | 31.332 | 38.288 | 0.00 | 0.00 |
| ATOM | 6124 | HG22 | VAL | X | 407 | 40.178 | 32.045 | 38.568 | 0.00 | 0.00 |
| ATOM | 6125 | HG23 | VAL | X | 407 | 40.971 | 31.031 | 39.743 | 0.00 | 0.00 |
| ATOM | 6126 | C    | VAL | X | 407 | 38.050 | 28.512 | 37.720 | 0.00 | 0.00 |
| ATOM | 6127 | O    | VAL | X | 407 | 37.046 | 28.908 | 37.116 | 0.00 | 0.00 |
| ATOM | 6128 | N    | ALA | X | 408 | 38.394 | 27.163 | 37.658 | 0.00 | 0.00 |
| ATOM | 6129 | H    | ALA | X | 408 | 39.211 | 26.790 | 38.119 | 0.00 | 0.00 |
| ATOM | 6130 | CA   | ALA | X | 408 | 37.593 | 26.190 | 36.840 | 0.00 | 0.00 |
| ATOM | 6131 | HA   | ALA | X | 408 | 37.342 | 26.554 | 35.843 | 0.00 | 0.00 |
| ATOM | 6132 | CB   | ALA | X | 408 | 38.372 | 24.948 | 36.565 | 0.00 | 0.00 |
| ATOM | 6133 | HB1  | ALA | X | 408 | 38.341 | 24.299 | 37.441 | 0.00 | 0.00 |
| ATOM | 6134 | HB2  | ALA | X | 408 | 38.005 | 24.397 | 35.699 | 0.00 | 0.00 |
| ATOM | 6135 | HB3  | ALA | X | 408 | 39.417 | 25.115 | 36.303 | 0.00 | 0.00 |
| ATOM | 6136 | C    | ALA | X | 408 | 36.174 | 25.855 | 37.455 | 0.00 | 0.00 |
| ATOM | 6137 | O    | ALA | X | 408 | 35.192 | 25.585 | 36.780 | 0.00 | 0.00 |
| ATOM | 6138 | N    | GLN | X | 409 | 36.013 | 25.951 | 38.809 | 0.00 | 0.00 |
| ATOM | 6139 | H    | GLN | X | 409 | 36.742 | 26.126 | 39.486 | 0.00 | 0.00 |
| ATOM | 6140 | CA   | GLN | X | 409 | 34.717 | 25.635 | 39.483 | 0.00 | 0.00 |
| ATOM | 6141 | HA   | GLN | X | 409 | 34.189 | 24.925 | 38.847 | 0.00 | 0.00 |
| ATOM | 6142 | CB   | GLN | X | 409 | 35.112 | 25.109 | 40.946 | 0.00 | 0.00 |
| ATOM | 6143 | HB2  | GLN | X | 409 | 35.760 | 24.237 | 40.850 | 0.00 | 0.00 |
| ATOM | 6144 | HB3  | GLN | X | 409 | 35.577 | 25.870 | 41.572 | 0.00 | 0.00 |
| ATOM | 6145 | CG   | GLN | X | 409 | 33.881 | 24.582 | 41.591 | 0.00 | 0.00 |
| ATOM | 6146 | HG2  | GLN | X | 409 | 33.392 | 25.479 | 41.972 | 0.00 | 0.00 |
| ATOM | 6147 | HG3  | GLN | X | 409 | 33.189 | 24.112 | 40.892 | 0.00 | 0.00 |
| ATOM | 6148 | CD   | GLN | X | 409 | 34.156 | 23.542 | 42.658 | 0.00 | 0.00 |
| ATOM | 6149 | OE1  | GLN | X | 409 | 34.092 | 22.335 | 42.415 | 0.00 | 0.00 |
| ATOM | 6150 | NE2  | GLN | X | 409 | 34.444 | 23.807 | 43.946 | 0.00 | 0.00 |
| ATOM | 6151 | HE21 | GLN | X | 409 | 34.593 | 23.060 | 44.609 | 0.00 | 0.00 |
| ATOM | 6152 | HE22 | GLN | X | 409 | 34.508 | 24.749 | 44.305 | 0.00 | 0.00 |
| ATOM | 6153 | C    | GLN | X | 409 | 33.760 | 26.850 | 39.420 | 0.00 | 0.00 |
| ATOM | 6154 | O    | GLN | X | 409 | 32.611 | 26.634 | 39.147 | 0.00 | 0.00 |
| ATOM | 6155 | N    | LEU | X | 410 | 34.243 | 28.072 | 39.715 | 0.00 | 0.00 |
| ATOM | 6156 | H    | LEU | X | 410 | 35.204 | 28.140 | 40.018 | 0.00 | 0.00 |
| ATOM | 6157 | CA   | LEU | X | 410 | 33.544 | 29.267 | 39.351 | 0.00 | 0.00 |
| ATOM | 6158 | HA   | LEU | X | 410 | 32.775 | 29.514 | 40.083 | 0.00 | 0.00 |
| ATOM | 6159 | CB   | LEU | X | 410 | 34.667 | 30.397 | 39.492 | 0.00 | 0.00 |
| ATOM | 6160 | HB2  | LEU | X | 410 | 35.109 | 30.444 | 40.487 | 0.00 | 0.00 |
| ATOM | 6161 | HB3  | LEU | X | 410 | 35.486 | 30.177 | 38.808 | 0.00 | 0.00 |
| ATOM | 6162 | CG   | LEU | X | 410 | 34.183 | 31.783 | 39.060 | 0.00 | 0.00 |
| ATOM | 6163 | HG   | LEU | X | 410 | 33.697 | 31.764 | 38.084 | 0.00 | 0.00 |
| ATOM | 6164 | CD1  | LEU | X | 410 | 33.173 | 32.382 | 40.103 | 0.00 | 0.00 |
| ATOM | 6165 | HD11 | LEU | X | 410 | 32.902 | 33.401 | 39.828 | 0.00 | 0.00 |
| ATOM | 6166 | HD12 | LEU | X | 410 | 32.278 | 31.761 | 40.064 | 0.00 | 0.00 |
| ATOM | 6167 | HD13 | LEU | X | 410 | 33.711 | 32.310 | 41.049 | 0.00 | 0.00 |

|      |      |      |     |   |     |        |        |        |      |      |
|------|------|------|-----|---|-----|--------|--------|--------|------|------|
| ATOM | 6168 | CD2  | LEU | X | 410 | 35.400 | 32.791 | 38.919 | 0.00 | 0.00 |
| ATOM | 6169 | HD21 | LEU | X | 410 | 35.816 | 32.903 | 39.920 | 0.00 | 0.00 |
| ATOM | 6170 | HD22 | LEU | X | 410 | 36.104 | 32.320 | 38.234 | 0.00 | 0.00 |
| ATOM | 6171 | HD23 | LEU | X | 410 | 35.144 | 33.777 | 38.531 | 0.00 | 0.00 |
| ATOM | 6172 | C    | LEU | X | 410 | 32.973 | 29.274 | 37.947 | 0.00 | 0.00 |
| ATOM | 6173 | O    | LEU | X | 410 | 31.779 | 29.471 | 37.794 | 0.00 | 0.00 |
| ATOM | 6174 | N    | ALA | X | 411 | 33.899 | 29.108 | 37.000 | 0.00 | 0.00 |
| ATOM | 6175 | H    | ALA | X | 411 | 34.866 | 29.018 | 37.279 | 0.00 | 0.00 |
| ATOM | 6176 | CA   | ALA | X | 411 | 33.576 | 28.974 | 35.596 | 0.00 | 0.00 |
| ATOM | 6177 | HA   | ALA | X | 411 | 33.047 | 29.849 | 35.220 | 0.00 | 0.00 |
| ATOM | 6178 | CB   | ALA | X | 411 | 34.864 | 28.858 | 34.682 | 0.00 | 0.00 |
| ATOM | 6179 | HB1  | ALA | X | 411 | 35.626 | 29.582 | 34.971 | 0.00 | 0.00 |
| ATOM | 6180 | HB2  | ALA | X | 411 | 35.394 | 27.909 | 34.748 | 0.00 | 0.00 |
| ATOM | 6181 | HB3  | ALA | X | 411 | 34.631 | 29.011 | 33.628 | 0.00 | 0.00 |
| ATOM | 6182 | C    | ALA | X | 411 | 32.448 | 27.967 | 35.309 | 0.00 | 0.00 |
| ATOM | 6183 | O    | ALA | X | 411 | 31.442 | 28.340 | 34.570 | 0.00 | 0.00 |
| ATOM | 6184 | N    | GLY | X | 412 | 32.570 | 26.757 | 35.862 | 0.00 | 0.00 |
| ATOM | 6185 | H    | GLY | X | 412 | 33.169 | 26.722 | 36.674 | 0.00 | 0.00 |
| ATOM | 6186 | CA   | GLY | X | 412 | 31.542 | 25.697 | 35.725 | 0.00 | 0.00 |
| ATOM | 6187 | HA2  | GLY | X | 412 | 31.357 | 25.470 | 34.653 | 0.00 | 0.00 |
| ATOM | 6188 | HA3  | GLY | X | 412 | 31.793 | 24.756 | 36.222 | 0.00 | 0.00 |
| ATOM | 6189 | C    | GLY | X | 412 | 30.214 | 26.157 | 36.377 | 0.00 | 0.00 |
| ATOM | 6190 | O    | GLY | X | 412 | 29.222 | 26.115 | 35.721 | 0.00 | 0.00 |
| ATOM | 6191 | N    | ARG | X | 413 | 30.246 | 26.670 | 37.683 | 0.00 | 0.00 |
| ATOM | 6192 | H    | ARG | X | 413 | 31.109 | 26.769 | 38.199 | 0.00 | 0.00 |
| ATOM | 6193 | CA   | ARG | X | 413 | 28.980 | 27.030 | 38.414 | 0.00 | 0.00 |
| ATOM | 6194 | HA   | ARG | X | 413 | 28.228 | 26.261 | 38.238 | 0.00 | 0.00 |
| ATOM | 6195 | CB   | ARG | X | 413 | 29.277 | 27.387 | 39.926 | 0.00 | 0.00 |
| ATOM | 6196 | HB2  | ARG | X | 413 | 30.258 | 27.859 | 39.988 | 0.00 | 0.00 |
| ATOM | 6197 | HB3  | ARG | X | 413 | 28.670 | 28.186 | 40.353 | 0.00 | 0.00 |
| ATOM | 6198 | CG   | ARG | X | 413 | 29.165 | 26.194 | 40.843 | 0.00 | 0.00 |
| ATOM | 6199 | HG2  | ARG | X | 413 | 29.237 | 26.577 | 41.861 | 0.00 | 0.00 |
| ATOM | 6200 | HG3  | ARG | X | 413 | 28.159 | 25.776 | 40.790 | 0.00 | 0.00 |
| ATOM | 6201 | CD   | ARG | X | 413 | 30.210 | 24.998 | 40.602 | 0.00 | 0.00 |
| ATOM | 6202 | HD2  | ARG | X | 413 | 30.237 | 24.524 | 39.621 | 0.00 | 0.00 |
| ATOM | 6203 | HD3  | ARG | X | 413 | 31.130 | 25.563 | 40.747 | 0.00 | 0.00 |
| ATOM | 6204 | NE   | ARG | X | 413 | 30.163 | 24.076 | 41.698 | 0.00 | 0.00 |
| ATOM | 6205 | HE   | ARG | X | 413 | 30.667 | 24.334 | 42.534 | 0.00 | 0.00 |
| ATOM | 6206 | CZ   | ARG | X | 413 | 29.528 | 22.869 | 41.761 | 0.00 | 0.00 |
| ATOM | 6207 | NH1  | ARG | X | 413 | 29.039 | 22.316 | 40.719 | 0.00 | 0.00 |
| ATOM | 6208 | HH11 | ARG | X | 413 | 28.969 | 22.810 | 39.840 | 0.00 | 0.00 |
| ATOM | 6209 | HH12 | ARG | X | 413 | 28.998 | 21.307 | 40.700 | 0.00 | 0.00 |
| ATOM | 6210 | NH2  | ARG | X | 413 | 29.691 | 22.184 | 42.837 | 0.00 | 0.00 |
| ATOM | 6211 | HH21 | ARG | X | 413 | 30.185 | 22.547 | 43.640 | 0.00 | 0.00 |
| ATOM | 6212 | HH22 | ARG | X | 413 | 29.076 | 21.396 | 42.980 | 0.00 | 0.00 |
| ATOM | 6213 | C    | ARG | X | 413 | 28.183 | 28.098 | 37.765 | 0.00 | 0.00 |
| ATOM | 6214 | O    | ARG | X | 413 | 27.014 | 27.955 | 37.365 | 0.00 | 0.00 |
| ATOM | 6215 | N    | LEU | X | 414 | 28.895 | 29.141 | 37.366 | 0.00 | 0.00 |
| ATOM | 6216 | H    | LEU | X | 414 | 29.840 | 29.132 | 37.723 | 0.00 | 0.00 |
| ATOM | 6217 | CA   | LEU | X | 414 | 28.408 | 30.265 | 36.567 | 0.00 | 0.00 |
| ATOM | 6218 | HA   | LEU | X | 414 | 27.640 | 30.784 | 37.141 | 0.00 | 0.00 |
| ATOM | 6219 | CB   | LEU | X | 414 | 29.553 | 31.287 | 36.275 | 0.00 | 0.00 |
| ATOM | 6220 | HB2  | LEU | X | 414 | 30.441 | 30.735 | 35.969 | 0.00 | 0.00 |
| ATOM | 6221 | HB3  | LEU | X | 414 | 29.306 | 32.001 | 35.489 | 0.00 | 0.00 |
| ATOM | 6222 | CG   | LEU | X | 414 | 30.129 | 32.166 | 37.414 | 0.00 | 0.00 |
| ATOM | 6223 | HG   | LEU | X | 414 | 30.570 | 31.590 | 38.227 | 0.00 | 0.00 |
| ATOM | 6224 | CD1  | LEU | X | 414 | 31.285 | 33.021 | 36.906 | 0.00 | 0.00 |
| ATOM | 6225 | HD11 | LEU | X | 414 | 31.015 | 33.879 | 36.292 | 0.00 | 0.00 |
| ATOM | 6226 | HD12 | LEU | X | 414 | 31.947 | 33.429 | 37.669 | 0.00 | 0.00 |
| ATOM | 6227 | HD13 | LEU | X | 414 | 32.029 | 32.416 | 36.387 | 0.00 | 0.00 |
| ATOM | 6228 | CD2  | LEU | X | 414 | 29.048 | 33.062 | 38.023 | 0.00 | 0.00 |
| ATOM | 6229 | HD21 | LEU | X | 414 | 28.453 | 33.609 | 37.292 | 0.00 | 0.00 |
| ATOM | 6230 | HD22 | LEU | X | 414 | 28.145 | 32.644 | 38.467 | 0.00 | 0.00 |
| ATOM | 6231 | HD23 | LEU | X | 414 | 29.385 | 33.826 | 38.724 | 0.00 | 0.00 |
| ATOM | 6232 | C    | LEU | X | 414 | 27.778 | 29.859 | 35.227 | 0.00 | 0.00 |
| ATOM | 6233 | O    | LEU | X | 414 | 26.618 | 30.151 | 34.938 | 0.00 | 0.00 |
| ATOM | 6234 | N    | ALA | X | 415 | 28.496 | 29.094 | 34.386 | 0.00 | 0.00 |
| ATOM | 6235 | H    | ALA | X | 415 | 29.401 | 28.806 | 34.732 | 0.00 | 0.00 |
| ATOM | 6236 | CA   | ALA | X | 415 | 28.009 | 28.734 | 33.046 | 0.00 | 0.00 |
| ATOM | 6237 | HA   | ALA | X | 415 | 27.613 | 29.632 | 32.572 | 0.00 | 0.00 |

|      |      |      |     |   |     |        |        |        |      |      |
|------|------|------|-----|---|-----|--------|--------|--------|------|------|
| ATOM | 6238 | CB   | ALA | X | 415 | 29.222 | 28.264 | 32.192 | 0.00 | 0.00 |
| ATOM | 6239 | HB1  | ALA | X | 415 | 29.776 | 27.450 | 32.660 | 0.00 | 0.00 |
| ATOM | 6240 | HB2  | ALA | X | 415 | 28.911 | 27.968 | 31.190 | 0.00 | 0.00 |
| ATOM | 6241 | HB3  | ALA | X | 415 | 29.958 | 29.068 | 32.170 | 0.00 | 0.00 |
| ATOM | 6242 | C    | ALA | X | 415 | 26.768 | 27.878 | 33.062 | 0.00 | 0.00 |
| ATOM | 6243 | O    | ALA | X | 415 | 26.048 | 27.711 | 32.084 | 0.00 | 0.00 |
| ATOM | 6244 | N    | ALA | X | 416 | 26.527 | 27.233 | 34.220 | 0.00 | 0.00 |
| ATOM | 6245 | H    | ALA | X | 416 | 27.079 | 27.503 | 35.022 | 0.00 | 0.00 |
| ATOM | 6246 | CA   | ALA | X | 416 | 25.405 | 26.308 | 34.347 | 0.00 | 0.00 |
| ATOM | 6247 | HA   | ALA | X | 416 | 25.187 | 25.775 | 33.422 | 0.00 | 0.00 |
| ATOM | 6248 | CB   | ALA | X | 416 | 25.913 | 25.155 | 35.329 | 0.00 | 0.00 |
| ATOM | 6249 | HB1  | ALA | X | 416 | 25.114 | 24.426 | 35.469 | 0.00 | 0.00 |
| ATOM | 6250 | HB2  | ALA | X | 416 | 26.773 | 24.569 | 35.007 | 0.00 | 0.00 |
| ATOM | 6251 | HB3  | ALA | X | 416 | 26.183 | 25.494 | 36.329 | 0.00 | 0.00 |
| ATOM | 6252 | C    | ALA | X | 416 | 24.181 | 26.997 | 35.004 | 0.00 | 0.00 |
| ATOM | 6253 | O    | ALA | X | 416 | 23.138 | 26.474 | 34.699 | 0.00 | 0.00 |
| ATOM | 6254 | N    | GLN | X | 417 | 24.399 | 27.930 | 35.918 | 0.00 | 0.00 |
| ATOM | 6255 | H    | GLN | X | 417 | 25.361 | 28.152 | 36.130 | 0.00 | 0.00 |
| ATOM | 6256 | CA   | GLN | X | 417 | 23.362 | 28.674 | 36.622 | 0.00 | 0.00 |
| ATOM | 6257 | HA   | GLN | X | 417 | 22.472 | 28.056 | 36.740 | 0.00 | 0.00 |
| ATOM | 6258 | CB   | GLN | X | 417 | 23.879 | 28.868 | 38.040 | 0.00 | 0.00 |
| ATOM | 6259 | HB2  | GLN | X | 417 | 24.929 | 29.123 | 37.901 | 0.00 | 0.00 |
| ATOM | 6260 | HB3  | GLN | X | 417 | 23.453 | 29.728 | 38.558 | 0.00 | 0.00 |
| ATOM | 6261 | CG   | GLN | X | 417 | 23.749 | 27.571 | 38.905 | 0.00 | 0.00 |
| ATOM | 6262 | HG2  | GLN | X | 417 | 22.783 | 27.571 | 39.410 | 0.00 | 0.00 |
| ATOM | 6263 | HG3  | GLN | X | 417 | 24.043 | 26.696 | 38.327 | 0.00 | 0.00 |
| ATOM | 6264 | CD   | GLN | X | 417 | 24.851 | 27.549 | 39.972 | 0.00 | 0.00 |
| ATOM | 6265 | OE1  | GLN | X | 417 | 25.799 | 26.821 | 39.852 | 0.00 | 0.00 |
| ATOM | 6266 | NE2  | GLN | X | 417 | 24.830 | 28.369 | 40.958 | 0.00 | 0.00 |
| ATOM | 6267 | HE21 | GLN | X | 417 | 25.638 | 28.360 | 41.563 | 0.00 | 0.00 |
| ATOM | 6268 | HE22 | GLN | X | 417 | 23.940 | 28.818 | 41.119 | 0.00 | 0.00 |
| ATOM | 6269 | C    | GLN | X | 417 | 22.880 | 29.917 | 35.901 | 0.00 | 0.00 |
| ATOM | 6270 | O    | GLN | X | 417 | 22.019 | 30.620 | 36.404 | 0.00 | 0.00 |
| ATOM | 6271 | N    | GLY | X | 418 | 23.405 | 30.181 | 34.693 | 0.00 | 0.00 |
| ATOM | 6272 | H    | GLY | X | 418 | 24.202 | 29.602 | 34.469 | 0.00 | 0.00 |
| ATOM | 6273 | CA   | GLY | X | 418 | 22.845 | 31.051 | 33.713 | 0.00 | 0.00 |
| ATOM | 6274 | HA2  | GLY | X | 418 | 22.481 | 30.439 | 32.890 | 0.00 | 0.00 |
| ATOM | 6275 | HA3  | GLY | X | 418 | 21.983 | 31.500 | 34.200 | 0.00 | 0.00 |
| ATOM | 6276 | C    | GLY | X | 418 | 23.770 | 32.113 | 33.032 | 0.00 | 0.00 |
| ATOM | 6277 | O    | GLY | X | 418 | 23.259 | 32.907 | 32.232 | 0.00 | 0.00 |
| ATOM | 6278 | N    | ALA | X | 419 | 25.048 | 32.248 | 33.403 | 0.00 | 0.00 |
| ATOM | 6279 | H    | ALA | X | 419 | 25.558 | 31.657 | 34.044 | 0.00 | 0.00 |
| ATOM | 6280 | CA   | ALA | X | 419 | 25.946 | 33.320 | 32.860 | 0.00 | 0.00 |
| ATOM | 6281 | HA   | ALA | X | 419 | 25.355 | 34.215 | 32.662 | 0.00 | 0.00 |
| ATOM | 6282 | CB   | ALA | X | 419 | 26.937 | 33.612 | 34.038 | 0.00 | 0.00 |
| ATOM | 6283 | HB1  | ALA | X | 419 | 27.710 | 34.313 | 33.725 | 0.00 | 0.00 |
| ATOM | 6284 | HB2  | ALA | X | 419 | 26.410 | 34.067 | 34.877 | 0.00 | 0.00 |
| ATOM | 6285 | HB3  | ALA | X | 419 | 27.449 | 32.687 | 34.302 | 0.00 | 0.00 |
| ATOM | 6286 | C    | ALA | X | 419 | 26.637 | 32.898 | 31.582 | 0.00 | 0.00 |
| ATOM | 6287 | O    | ALA | X | 419 | 26.750 | 31.679 | 31.221 | 0.00 | 0.00 |
| ATOM | 6288 | N    | ARG | X | 420 | 27.071 | 33.925 | 30.797 | 0.00 | 0.00 |
| ATOM | 6289 | H    | ARG | X | 420 | 27.110 | 34.835 | 31.234 | 0.00 | 0.00 |
| ATOM | 6290 | CA   | ARG | X | 420 | 28.003 | 33.655 | 29.761 | 0.00 | 0.00 |
| ATOM | 6291 | HA   | ARG | X | 420 | 27.867 | 32.633 | 29.407 | 0.00 | 0.00 |
| ATOM | 6292 | CB   | ARG | X | 420 | 27.674 | 34.584 | 28.573 | 0.00 | 0.00 |
| ATOM | 6293 | HB2  | ARG | X | 420 | 26.603 | 34.424 | 28.446 | 0.00 | 0.00 |
| ATOM | 6294 | HB3  | ARG | X | 420 | 27.906 | 35.630 | 28.773 | 0.00 | 0.00 |
| ATOM | 6295 | CG   | ARG | X | 420 | 28.309 | 34.098 | 27.310 | 0.00 | 0.00 |
| ATOM | 6296 | HG2  | ARG | X | 420 | 29.379 | 34.297 | 27.375 | 0.00 | 0.00 |
| ATOM | 6297 | HG3  | ARG | X | 420 | 28.148 | 33.032 | 27.148 | 0.00 | 0.00 |
| ATOM | 6298 | CD   | ARG | X | 420 | 27.760 | 34.798 | 26.082 | 0.00 | 0.00 |
| ATOM | 6299 | HD2  | ARG | X | 420 | 27.971 | 35.857 | 26.233 | 0.00 | 0.00 |
| ATOM | 6300 | HD3  | ARG | X | 420 | 28.387 | 34.503 | 25.241 | 0.00 | 0.00 |
| ATOM | 6301 | NE   | ARG | X | 420 | 26.361 | 34.421 | 25.967 | 0.00 | 0.00 |
| ATOM | 6302 | HE   | ARG | X | 420 | 26.082 | 33.623 | 26.520 | 0.00 | 0.00 |
| ATOM | 6303 | CZ   | ARG | X | 420 | 25.502 | 35.089 | 25.183 | 0.00 | 0.00 |
| ATOM | 6304 | NH1  | ARG | X | 420 | 25.791 | 36.121 | 24.432 | 0.00 | 0.00 |
| ATOM | 6305 | HH11 | ARG | X | 420 | 26.752 | 36.430 | 24.408 | 0.00 | 0.00 |
| ATOM | 6306 | HH12 | ARG | X | 420 | 25.008 | 36.576 | 23.986 | 0.00 | 0.00 |
| ATOM | 6307 | NH2  | ARG | X | 420 | 24.254 | 34.729 | 25.203 | 0.00 | 0.00 |



|      |      |      |     |   |     |        |        |        |      |      |
|------|------|------|-----|---|-----|--------|--------|--------|------|------|
| ATOM | 6308 | HH21 | ARG | X | 420 | 23.929 | 33.952 | 25.762 | 0.00 | 0.00 |
| ATOM | 6309 | HH22 | ARG | X | 420 | 23.625 | 35.175 | 24.550 | 0.00 | 0.00 |
| ATOM | 6310 | C    | ARG | X | 420 | 29.467 | 33.899 | 30.160 | 0.00 | 0.00 |
| ATOM | 6311 | O    | ARG | X | 420 | 29.793 | 34.989 | 30.677 | 0.00 | 0.00 |
| ATOM | 6312 | N    | VAL | X | 421 | 30.222 | 32.825 | 30.009 | 0.00 | 0.00 |
| ATOM | 6313 | H    | VAL | X | 421 | 29.851 | 31.965 | 29.630 | 0.00 | 0.00 |
| ATOM | 6314 | CA   | VAL | X | 421 | 31.596 | 32.736 | 30.539 | 0.00 | 0.00 |
| ATOM | 6315 | HA   | VAL | X | 421 | 31.847 | 33.548 | 31.222 | 0.00 | 0.00 |
| ATOM | 6316 | CB   | VAL | X | 421 | 31.674 | 31.581 | 31.502 | 0.00 | 0.00 |
| ATOM | 6317 | HB   | VAL | X | 421 | 31.364 | 30.642 | 31.044 | 0.00 | 0.00 |
| ATOM | 6318 | CG1  | VAL | X | 421 | 33.059 | 31.377 | 32.124 | 0.00 | 0.00 |
| ATOM | 6319 | HG11 | VAL | X | 421 | 33.692 | 30.974 | 31.335 | 0.00 | 0.00 |
| ATOM | 6320 | HG12 | VAL | X | 421 | 33.380 | 32.389 | 32.373 | 0.00 | 0.00 |
| ATOM | 6321 | HG13 | VAL | X | 421 | 33.163 | 30.632 | 32.913 | 0.00 | 0.00 |
| ATOM | 6322 | CG2  | VAL | X | 421 | 30.749 | 31.813 | 32.705 | 0.00 | 0.00 |
| ATOM | 6323 | HG21 | VAL | X | 421 | 30.480 | 30.931 | 33.286 | 0.00 | 0.00 |
| ATOM | 6324 | HG22 | VAL | X | 421 | 31.159 | 32.543 | 33.402 | 0.00 | 0.00 |
| ATOM | 6325 | HG23 | VAL | X | 421 | 29.846 | 32.391 | 32.509 | 0.00 | 0.00 |
| ATOM | 6326 | C    | VAL | X | 421 | 32.658 | 32.709 | 29.463 | 0.00 | 0.00 |
| ATOM | 6327 | O    | VAL | X | 421 | 32.465 | 32.239 | 28.406 | 0.00 | 0.00 |
| ATOM | 6328 | N    | TYR | X | 422 | 33.882 | 33.170 | 29.839 | 0.00 | 0.00 |
| ATOM | 6329 | H    | TYR | X | 422 | 34.016 | 33.474 | 30.793 | 0.00 | 0.00 |
| ATOM | 6330 | CA   | TYR | X | 422 | 35.080 | 33.155 | 29.005 | 0.00 | 0.00 |
| ATOM | 6331 | HA   | TYR | X | 422 | 35.014 | 32.393 | 28.228 | 0.00 | 0.00 |
| ATOM | 6332 | CB   | TYR | X | 422 | 35.140 | 34.505 | 28.310 | 0.00 | 0.00 |
| ATOM | 6333 | HB2  | TYR | X | 422 | 35.193 | 35.330 | 29.020 | 0.00 | 0.00 |
| ATOM | 6334 | HB3  | TYR | X | 422 | 36.031 | 34.398 | 27.690 | 0.00 | 0.00 |
| ATOM | 6335 | CG   | TYR | X | 422 | 34.046 | 34.893 | 27.348 | 0.00 | 0.00 |
| ATOM | 6336 | CD1  | TYR | X | 422 | 34.070 | 34.528 | 25.994 | 0.00 | 0.00 |
| ATOM | 6337 | HD1  | TYR | X | 422 | 34.863 | 33.872 | 25.666 | 0.00 | 0.00 |
| ATOM | 6338 | CE1  | TYR | X | 422 | 33.127 | 34.991 | 25.080 | 0.00 | 0.00 |
| ATOM | 6339 | HE1  | TYR | X | 422 | 33.254 | 34.840 | 24.019 | 0.00 | 0.00 |
| ATOM | 6340 | CZ   | TYR | X | 422 | 32.166 | 35.905 | 25.454 | 0.00 | 0.00 |
| ATOM | 6341 | OH   | TYR | X | 422 | 31.199 | 36.343 | 24.556 | 0.00 | 0.00 |
| ATOM | 6342 | HH   | TYR | X | 422 | 31.396 | 35.931 | 23.712 | 0.00 | 0.00 |
| ATOM | 6343 | CE2  | TYR | X | 422 | 32.061 | 36.245 | 26.794 | 0.00 | 0.00 |
| ATOM | 6344 | HE2  | TYR | X | 422 | 31.371 | 37.001 | 27.139 | 0.00 | 0.00 |
| ATOM | 6345 | CD2  | TYR | X | 422 | 32.999 | 35.792 | 27.727 | 0.00 | 0.00 |
| ATOM | 6346 | HD2  | TYR | X | 422 | 32.987 | 36.119 | 28.756 | 0.00 | 0.00 |
| ATOM | 6347 | C    | TYR | X | 422 | 36.319 | 32.877 | 29.707 | 0.00 | 0.00 |
| ATOM | 6348 | O    | TYR | X | 422 | 36.888 | 33.708 | 30.484 | 0.00 | 0.00 |
| ATOM | 6349 | N    | ALA | X | 423 | 36.912 | 31.685 | 29.483 | 0.00 | 0.00 |
| ATOM | 6350 | H    | ALA | X | 423 | 36.484 | 31.104 | 28.777 | 0.00 | 0.00 |
| ATOM | 6351 | CA   | ALA | X | 423 | 38.170 | 31.291 | 30.156 | 0.00 | 0.00 |
| ATOM | 6352 | HA   | ALA | X | 423 | 38.422 | 31.857 | 31.053 | 0.00 | 0.00 |
| ATOM | 6353 | CB   | ALA | X | 423 | 37.979 | 29.850 | 30.668 | 0.00 | 0.00 |
| ATOM | 6354 | HB1  | ALA | X | 423 | 38.970 | 29.555 | 31.013 | 0.00 | 0.00 |
| ATOM | 6355 | HB2  | ALA | X | 423 | 37.220 | 29.770 | 31.446 | 0.00 | 0.00 |
| ATOM | 6356 | HB3  | ALA | X | 423 | 37.704 | 29.181 | 29.853 | 0.00 | 0.00 |
| ATOM | 6357 | C    | ALA | X | 423 | 39.366 | 31.506 | 29.232 | 0.00 | 0.00 |
| ATOM | 6358 | O    | ALA | X | 423 | 39.283 | 31.498 | 28.041 | 0.00 | 0.00 |
| ATOM | 6359 | N    | TYR | X | 424 | 40.474 | 31.812 | 29.874 | 0.00 | 0.00 |
| ATOM | 6360 | H    | TYR | X | 424 | 40.426 | 32.073 | 30.849 | 0.00 | 0.00 |
| ATOM | 6361 | CA   | TYR | X | 424 | 41.874 | 31.866 | 29.368 | 0.00 | 0.00 |
| ATOM | 6362 | HA   | TYR | X | 424 | 41.761 | 31.343 | 28.419 | 0.00 | 0.00 |
| ATOM | 6363 | CB   | TYR | X | 424 | 42.359 | 33.282 | 29.011 | 0.00 | 0.00 |
| ATOM | 6364 | HB2  | TYR | X | 424 | 43.336 | 33.058 | 28.583 | 0.00 | 0.00 |
| ATOM | 6365 | HB3  | TYR | X | 424 | 41.683 | 33.789 | 28.322 | 0.00 | 0.00 |
| ATOM | 6366 | CG   | TYR | X | 424 | 42.774 | 34.127 | 30.194 | 0.00 | 0.00 |
| ATOM | 6367 | CD1  | TYR | X | 424 | 44.124 | 34.137 | 30.535 | 0.00 | 0.00 |
| ATOM | 6368 | HD1  | TYR | X | 424 | 44.879 | 33.622 | 29.961 | 0.00 | 0.00 |
| ATOM | 6369 | CE1  | TYR | X | 424 | 44.531 | 34.944 | 31.615 | 0.00 | 0.00 |
| ATOM | 6370 | HE1  | TYR | X | 424 | 45.559 | 35.015 | 31.938 | 0.00 | 0.00 |
| ATOM | 6371 | CZ   | TYR | X | 424 | 43.563 | 35.679 | 32.392 | 0.00 | 0.00 |
| ATOM | 6372 | OH   | TYR | X | 424 | 43.998 | 36.403 | 33.378 | 0.00 | 0.00 |
| ATOM | 6373 | HH   | TYR | X | 424 | 44.892 | 36.750 | 33.429 | 0.00 | 0.00 |
| ATOM | 6374 | CE2  | TYR | X | 424 | 42.174 | 35.612 | 32.034 | 0.00 | 0.00 |
| ATOM | 6375 | HE2  | TYR | X | 424 | 41.472 | 36.166 | 32.639 | 0.00 | 0.00 |
| ATOM | 6376 | CD2  | TYR | X | 424 | 41.818 | 34.840 | 30.941 | 0.00 | 0.00 |
| ATOM | 6377 | HD2  | TYR | X | 424 | 40.815 | 34.966 | 30.561 | 0.00 | 0.00 |

|      |      |      |     |   |     |        |        |        |      |      |
|------|------|------|-----|---|-----|--------|--------|--------|------|------|
| ATOM | 6378 | C    | TYR | X | 424 | 42.882 | 31.179 | 30.318 | 0.00 | 0.00 |
| ATOM | 6379 | O    | TYR | X | 424 | 42.738 | 31.193 | 31.507 | 0.00 | 0.00 |
| ATOM | 6380 | N    | VAL | X | 425 | 43.951 | 30.622 | 29.679 | 0.00 | 0.00 |
| ATOM | 6381 | H    | VAL | X | 425 | 43.943 | 30.570 | 28.671 | 0.00 | 0.00 |
| ATOM | 6382 | CA   | VAL | X | 425 | 45.283 | 30.428 | 30.234 | 0.00 | 0.00 |
| ATOM | 6383 | HA   | VAL | X | 425 | 45.247 | 30.861 | 31.234 | 0.00 | 0.00 |
| ATOM | 6384 | CB   | VAL | X | 425 | 45.775 | 28.971 | 30.252 | 0.00 | 0.00 |
| ATOM | 6385 | HB   | VAL | X | 425 | 45.801 | 28.593 | 29.230 | 0.00 | 0.00 |
| ATOM | 6386 | CG1  | VAL | X | 425 | 47.220 | 28.942 | 30.827 | 0.00 | 0.00 |
| ATOM | 6387 | HG11 | VAL | X | 425 | 47.435 | 27.956 | 31.241 | 0.00 | 0.00 |
| ATOM | 6388 | HG12 | VAL | X | 425 | 47.907 | 29.171 | 30.013 | 0.00 | 0.00 |
| ATOM | 6389 | HG13 | VAL | X | 425 | 47.326 | 29.579 | 31.705 | 0.00 | 0.00 |
| ATOM | 6390 | CG2  | VAL | X | 425 | 44.810 | 28.023 | 31.063 | 0.00 | 0.00 |
| ATOM | 6391 | HG21 | VAL | X | 425 | 44.926 | 28.082 | 32.145 | 0.00 | 0.00 |
| ATOM | 6392 | HG22 | VAL | X | 425 | 43.777 | 28.327 | 30.891 | 0.00 | 0.00 |
| ATOM | 6393 | HG23 | VAL | X | 425 | 45.000 | 26.979 | 30.816 | 0.00 | 0.00 |
| ATOM | 6394 | C    | VAL | X | 425 | 46.180 | 31.271 | 29.274 | 0.00 | 0.00 |
| ATOM | 6395 | O    | VAL | X | 425 | 46.049 | 31.178 | 28.071 | 0.00 | 0.00 |
| ATOM | 6396 | N    | PHE | X | 426 | 47.077 | 32.066 | 29.913 | 0.00 | 0.00 |
| ATOM | 6397 | H    | PHE | X | 426 | 46.980 | 32.092 | 30.917 | 0.00 | 0.00 |
| ATOM | 6398 | CA   | PHE | X | 426 | 48.153 | 32.889 | 29.319 | 0.00 | 0.00 |
| ATOM | 6399 | HA   | PHE | X | 426 | 47.909 | 33.156 | 28.290 | 0.00 | 0.00 |
| ATOM | 6400 | CB   | PHE | X | 426 | 48.209 | 34.243 | 30.091 | 0.00 | 0.00 |
| ATOM | 6401 | HB2  | PHE | X | 426 | 47.265 | 34.788 | 30.076 | 0.00 | 0.00 |
| ATOM | 6402 | HB3  | PHE | X | 426 | 48.494 | 33.955 | 31.102 | 0.00 | 0.00 |
| ATOM | 6403 | CG   | PHE | X | 426 | 49.217 | 35.286 | 29.669 | 0.00 | 0.00 |
| ATOM | 6404 | CD1  | PHE | X | 426 | 48.949 | 36.137 | 28.620 | 0.00 | 0.00 |
| ATOM | 6405 | HD1  | PHE | X | 426 | 47.980 | 36.087 | 28.146 | 0.00 | 0.00 |
| ATOM | 6406 | CE1  | PHE | X | 426 | 49.710 | 37.206 | 28.251 | 0.00 | 0.00 |
| ATOM | 6407 | HE1  | PHE | X | 426 | 49.473 | 37.855 | 27.421 | 0.00 | 0.00 |
| ATOM | 6408 | CZ   | PHE | X | 426 | 51.043 | 37.224 | 28.803 | 0.00 | 0.00 |
| ATOM | 6409 | HZ   | PHE | X | 426 | 51.779 | 37.945 | 28.478 | 0.00 | 0.00 |
| ATOM | 6410 | CE2  | PHE | X | 426 | 51.441 | 36.274 | 29.751 | 0.00 | 0.00 |
| ATOM | 6411 | HE2  | PHE | X | 426 | 52.420 | 36.274 | 30.205 | 0.00 | 0.00 |
| ATOM | 6412 | CD2  | PHE | X | 426 | 50.510 | 35.297 | 30.180 | 0.00 | 0.00 |
| ATOM | 6413 | HD2  | PHE | X | 426 | 50.905 | 34.591 | 30.895 | 0.00 | 0.00 |
| ATOM | 6414 | C    | PHE | X | 426 | 49.492 | 32.219 | 29.375 | 0.00 | 0.00 |
| ATOM | 6415 | O    | PHE | X | 426 | 49.829 | 31.595 | 30.390 | 0.00 | 0.00 |
| ATOM | 6416 | N    | GLU | X | 427 | 50.303 | 32.395 | 28.349 | 0.00 | 0.00 |
| ATOM | 6417 | H    | GLU | X | 427 | 49.864 | 32.774 | 27.522 | 0.00 | 0.00 |
| ATOM | 6418 | CA   | GLU | X | 427 | 51.592 | 31.652 | 28.254 | 0.00 | 0.00 |
| ATOM | 6419 | HA   | GLU | X | 427 | 51.956 | 31.570 | 29.278 | 0.00 | 0.00 |
| ATOM | 6420 | CB   | GLU | X | 427 | 51.295 | 30.248 | 27.742 | 0.00 | 0.00 |
| ATOM | 6421 | HB2  | GLU | X | 427 | 52.147 | 29.578 | 27.851 | 0.00 | 0.00 |
| ATOM | 6422 | HB3  | GLU | X | 427 | 50.459 | 29.852 | 28.318 | 0.00 | 0.00 |
| ATOM | 6423 | CG   | GLU | X | 427 | 50.894 | 30.187 | 26.319 | 0.00 | 0.00 |
| ATOM | 6424 | HG2  | GLU | X | 427 | 49.984 | 30.774 | 26.191 | 0.00 | 0.00 |
| ATOM | 6425 | HG3  | GLU | X | 427 | 51.744 | 30.514 | 25.721 | 0.00 | 0.00 |
| ATOM | 6426 | CD   | GLU | X | 427 | 50.371 | 28.793 | 25.817 | 0.00 | 0.00 |
| ATOM | 6427 | OE1  | GLU | X | 427 | 49.550 | 28.806 | 24.851 | 0.00 | 0.00 |
| ATOM | 6428 | OE2  | GLU | X | 427 | 50.798 | 27.753 | 26.285 | 0.00 | 0.00 |
| ATOM | 6429 | C    | GLU | X | 427 | 52.718 | 32.420 | 27.514 | 0.00 | 0.00 |
| ATOM | 6430 | O    | GLU | X | 427 | 53.807 | 31.914 | 27.400 | 0.00 | 0.00 |
| ATOM | 6431 | N    | HIE | X | 428 | 52.497 | 33.687 | 27.130 | 0.00 | 0.00 |
| ATOM | 6432 | H    | HIE | X | 428 | 51.585 | 34.090 | 27.291 | 0.00 | 0.00 |
| ATOM | 6433 | CA   | HIE | X | 428 | 53.664 | 34.472 | 26.651 | 0.00 | 0.00 |
| ATOM | 6434 | HA   | HIE | X | 428 | 54.188 | 33.896 | 25.888 | 0.00 | 0.00 |
| ATOM | 6435 | CB   | HIE | X | 428 | 53.241 | 35.723 | 25.923 | 0.00 | 0.00 |
| ATOM | 6436 | HB2  | HIE | X | 428 | 52.558 | 35.464 | 25.114 | 0.00 | 0.00 |
| ATOM | 6437 | HB3  | HIE | X | 428 | 52.663 | 36.430 | 26.519 | 0.00 | 0.00 |
| ATOM | 6438 | CG   | HIE | X | 428 | 54.343 | 36.488 | 25.161 | 0.00 | 0.00 |
| ATOM | 6439 | ND1  | HIE | X | 428 | 55.311 | 35.898 | 24.307 | 0.00 | 0.00 |
| ATOM | 6440 | CE1  | HIE | X | 428 | 56.347 | 36.749 | 24.060 | 0.00 | 0.00 |
| ATOM | 6441 | HE1  | HIE | X | 428 | 57.190 | 36.652 | 23.391 | 0.00 | 0.00 |
| ATOM | 6442 | NE2  | HIE | X | 428 | 56.068 | 37.878 | 24.761 | 0.00 | 0.00 |
| ATOM | 6443 | HE2  | HIE | X | 428 | 56.599 | 38.736 | 24.802 | 0.00 | 0.00 |
| ATOM | 6444 | CD2  | HIE | X | 428 | 54.852 | 37.741 | 25.441 | 0.00 | 0.00 |
| ATOM | 6445 | HD2  | HIE | X | 428 | 54.403 | 38.527 | 26.031 | 0.00 | 0.00 |
| ATOM | 6446 | C    | HIE | X | 428 | 54.569 | 34.934 | 27.764 | 0.00 | 0.00 |
| ATOM | 6447 | O    | HIE | X | 428 | 54.264 | 35.644 | 28.682 | 0.00 | 0.00 |

|      |      |      |     |   |     |        |        |        |      |      |
|------|------|------|-----|---|-----|--------|--------|--------|------|------|
| ATOM | 6448 | N    | ARG | X | 429 | 55.845 | 34.451 | 27.701 | 0.00 | 0.00 |
| ATOM | 6449 | H    | ARG | X | 429 | 56.046 | 33.764 | 26.989 | 0.00 | 0.00 |
| ATOM | 6450 | CA   | ARG | X | 429 | 56.970 | 34.971 | 28.472 | 0.00 | 0.00 |
| ATOM | 6451 | HA   | ARG | X | 429 | 56.534 | 35.281 | 29.422 | 0.00 | 0.00 |
| ATOM | 6452 | CB   | ARG | X | 429 | 58.006 | 33.876 | 28.790 | 0.00 | 0.00 |
| ATOM | 6453 | HB2  | ARG | X | 429 | 57.388 | 33.005 | 29.006 | 0.00 | 0.00 |
| ATOM | 6454 | HB3  | ARG | X | 429 | 58.596 | 33.594 | 27.917 | 0.00 | 0.00 |
| ATOM | 6455 | CG   | ARG | X | 429 | 58.823 | 34.357 | 29.929 | 0.00 | 0.00 |
| ATOM | 6456 | HG2  | ARG | X | 429 | 59.244 | 35.334 | 29.693 | 0.00 | 0.00 |
| ATOM | 6457 | HG3  | ARG | X | 429 | 58.149 | 34.498 | 30.774 | 0.00 | 0.00 |
| ATOM | 6458 | CD   | ARG | X | 429 | 59.877 | 33.258 | 30.173 | 0.00 | 0.00 |
| ATOM | 6459 | HD2  | ARG | X | 429 | 59.416 | 32.288 | 29.988 | 0.00 | 0.00 |
| ATOM | 6460 | HD3  | ARG | X | 429 | 60.700 | 33.334 | 29.462 | 0.00 | 0.00 |
| ATOM | 6461 | NE   | ARG | X | 429 | 60.285 | 33.420 | 31.620 | 0.00 | 0.00 |
| ATOM | 6462 | HE   | ARG | X | 429 | 59.543 | 33.045 | 32.194 | 0.00 | 0.00 |
| ATOM | 6463 | CZ   | ARG | X | 429 | 61.421 | 33.757 | 32.297 | 0.00 | 0.00 |
| ATOM | 6464 | NH1  | ARG | X | 429 | 62.515 | 34.075 | 31.642 | 0.00 | 0.00 |
| ATOM | 6465 | HH11 | ARG | X | 429 | 62.518 | 34.015 | 30.634 | 0.00 | 0.00 |
| ATOM | 6466 | HH12 | ARG | X | 429 | 63.334 | 34.284 | 32.195 | 0.00 | 0.00 |
| ATOM | 6467 | NH2  | ARG | X | 429 | 61.399 | 33.733 | 33.600 | 0.00 | 0.00 |
| ATOM | 6468 | HH21 | ARG | X | 429 | 60.500 | 33.604 | 34.041 | 0.00 | 0.00 |
| ATOM | 6469 | HH22 | ARG | X | 429 | 62.233 | 34.049 | 34.074 | 0.00 | 0.00 |
| ATOM | 6470 | C    | ARG | X | 429 | 57.553 | 36.235 | 27.795 | 0.00 | 0.00 |
| ATOM | 6471 | O    | ARG | X | 429 | 58.231 | 36.011 | 26.781 | 0.00 | 0.00 |
| ATOM | 6472 | N    | ALA | X | 430 | 57.380 | 37.466 | 28.273 | 0.00 | 0.00 |
| ATOM | 6473 | H    | ALA | X | 430 | 56.707 | 37.574 | 29.018 | 0.00 | 0.00 |
| ATOM | 6474 | CA   | ALA | X | 430 | 57.923 | 38.732 | 27.756 | 0.00 | 0.00 |
| ATOM | 6475 | HA   | ALA | X | 430 | 57.537 | 38.846 | 26.743 | 0.00 | 0.00 |
| ATOM | 6476 | CB   | ALA | X | 430 | 57.357 | 39.944 | 28.498 | 0.00 | 0.00 |
| ATOM | 6477 | HB1  | ALA | X | 430 | 57.720 | 39.817 | 29.518 | 0.00 | 0.00 |
| ATOM | 6478 | HB2  | ALA | X | 430 | 57.889 | 40.795 | 28.072 | 0.00 | 0.00 |
| ATOM | 6479 | HB3  | ALA | X | 430 | 56.275 | 40.027 | 28.391 | 0.00 | 0.00 |
| ATOM | 6480 | C    | ALA | X | 430 | 59.422 | 38.839 | 27.665 | 0.00 | 0.00 |
| ATOM | 6481 | O    | ALA | X | 430 | 60.139 | 38.240 | 28.432 | 0.00 | 0.00 |
| ATOM | 6482 | N    | SER | X | 431 | 59.905 | 39.623 | 26.696 | 0.00 | 0.00 |
| ATOM | 6483 | H    | SER | X | 431 | 59.240 | 39.942 | 26.005 | 0.00 | 0.00 |
| ATOM | 6484 | CA   | SER | X | 431 | 61.328 | 40.003 | 26.590 | 0.00 | 0.00 |
| ATOM | 6485 | HA   | SER | X | 431 | 61.930 | 39.094 | 26.576 | 0.00 | 0.00 |
| ATOM | 6486 | CB   | SER | X | 431 | 61.515 | 40.654 | 25.272 | 0.00 | 0.00 |
| ATOM | 6487 | HB2  | SER | X | 431 | 62.532 | 41.004 | 25.094 | 0.00 | 0.00 |
| ATOM | 6488 | HB3  | SER | X | 431 | 61.224 | 39.974 | 24.472 | 0.00 | 0.00 |
| ATOM | 6489 | OG   | SER | X | 431 | 60.779 | 41.926 | 25.235 | 0.00 | 0.00 |
| ATOM | 6490 | HG   | SER | X | 431 | 60.125 | 41.833 | 24.538 | 0.00 | 0.00 |
| ATOM | 6491 | C    | SER | X | 431 | 61.945 | 40.828 | 27.753 | 0.00 | 0.00 |
| ATOM | 6492 | O    | SER | X | 431 | 63.118 | 41.214 | 27.767 | 0.00 | 0.00 |
| ATOM | 6493 | N    | THR | X | 432 | 61.151 | 41.057 | 28.815 | 0.00 | 0.00 |
| ATOM | 6494 | H    | THR | X | 432 | 60.241 | 40.628 | 28.903 | 0.00 | 0.00 |
| ATOM | 6495 | CA   | THR | X | 432 | 61.694 | 41.588 | 30.111 | 0.00 | 0.00 |
| ATOM | 6496 | HA   | THR | X | 432 | 62.716 | 41.252 | 30.285 | 0.00 | 0.00 |
| ATOM | 6497 | CB   | THR | X | 432 | 61.528 | 43.096 | 30.254 | 0.00 | 0.00 |
| ATOM | 6498 | HB   | THR | X | 432 | 60.514 | 43.424 | 30.027 | 0.00 | 0.00 |
| ATOM | 6499 | CG2  | THR | X | 432 | 61.897 | 43.625 | 31.643 | 0.00 | 0.00 |
| ATOM | 6500 | HG21 | THR | X | 432 | 62.013 | 44.708 | 31.661 | 0.00 | 0.00 |
| ATOM | 6501 | HG22 | THR | X | 432 | 61.138 | 43.281 | 32.345 | 0.00 | 0.00 |
| ATOM | 6502 | HG23 | THR | X | 432 | 62.902 | 43.269 | 31.867 | 0.00 | 0.00 |
| ATOM | 6503 | OG1  | THR | X | 432 | 62.537 | 43.694 | 29.517 | 0.00 | 0.00 |
| ATOM | 6504 | HG1  | THR | X | 432 | 62.358 | 43.411 | 28.617 | 0.00 | 0.00 |
| ATOM | 6505 | C    | THR | X | 432 | 60.784 | 41.056 | 31.244 | 0.00 | 0.00 |
| ATOM | 6506 | O    | THR | X | 432 | 59.566 | 41.365 | 31.244 | 0.00 | 0.00 |
| ATOM | 6507 | N    | LEU | X | 433 | 61.304 | 40.185 | 32.169 | 0.00 | 0.00 |
| ATOM | 6508 | H    | LEU | X | 433 | 62.216 | 39.810 | 31.947 | 0.00 | 0.00 |
| ATOM | 6509 | CA   | LEU | X | 433 | 60.566 | 39.485 | 33.186 | 0.00 | 0.00 |
| ATOM | 6510 | HA   | LEU | X | 433 | 59.935 | 40.260 | 33.621 | 0.00 | 0.00 |
| ATOM | 6511 | CB   | LEU | X | 433 | 59.905 | 38.234 | 32.562 | 0.00 | 0.00 |
| ATOM | 6512 | HB2  | LEU | X | 433 | 59.164 | 38.613 | 31.857 | 0.00 | 0.00 |
| ATOM | 6513 | HB3  | LEU | X | 433 | 60.577 | 37.598 | 31.986 | 0.00 | 0.00 |
| ATOM | 6514 | CG   | LEU | X | 433 | 59.377 | 37.270 | 33.680 | 0.00 | 0.00 |
| ATOM | 6515 | HG   | LEU | X | 433 | 60.217 | 36.819 | 34.209 | 0.00 | 0.00 |
| ATOM | 6516 | CD1  | LEU | X | 433 | 58.551 | 37.882 | 34.793 | 0.00 | 0.00 |
| ATOM | 6517 | HD11 | LEU | X | 433 | 58.074 | 37.110 | 35.397 | 0.00 | 0.00 |

|      |      |      |     |   |     |        |        |        |      |      |
|------|------|------|-----|---|-----|--------|--------|--------|------|------|
| ATOM | 6518 | HD12 | LEU | X | 433 | 59.142 | 38.532 | 35.438 | 0.00 | 0.00 |
| ATOM | 6519 | HD13 | LEU | X | 433 | 57.716 | 38.449 | 34.381 | 0.00 | 0.00 |
| ATOM | 6520 | CD2  | LEU | X | 433 | 58.638 | 36.126 | 32.920 | 0.00 | 0.00 |
| ATOM | 6521 | HD21 | LEU | X | 433 | 58.182 | 35.447 | 33.641 | 0.00 | 0.00 |
| ATOM | 6522 | HD22 | LEU | X | 433 | 57.851 | 36.573 | 32.312 | 0.00 | 0.00 |
| ATOM | 6523 | HD23 | LEU | X | 433 | 59.402 | 35.523 | 32.430 | 0.00 | 0.00 |
| ATOM | 6524 | C    | LEU | X | 433 | 61.603 | 39.240 | 34.313 | 0.00 | 0.00 |
| ATOM | 6525 | O    | LEU | X | 433 | 62.564 | 38.530 | 34.135 | 0.00 | 0.00 |
| ATOM | 6526 | N    | SER | X | 434 | 61.497 | 39.886 | 35.475 | 0.00 | 0.00 |
| ATOM | 6527 | H    | SER | X | 434 | 60.630 | 40.373 | 35.649 | 0.00 | 0.00 |
| ATOM | 6528 | CA   | SER | X | 434 | 62.610 | 39.780 | 36.511 | 0.00 | 0.00 |
| ATOM | 6529 | HA   | SER | X | 434 | 63.549 | 40.096 | 36.056 | 0.00 | 0.00 |
| ATOM | 6530 | CB   | SER | X | 434 | 62.359 | 40.739 | 37.775 | 0.00 | 0.00 |
| ATOM | 6531 | HB2  | SER | X | 434 | 61.353 | 40.401 | 38.026 | 0.00 | 0.00 |
| ATOM | 6532 | HB3  | SER | X | 434 | 63.078 | 40.590 | 38.580 | 0.00 | 0.00 |
| ATOM | 6533 | OG   | SER | X | 434 | 62.109 | 42.062 | 37.447 | 0.00 | 0.00 |
| ATOM | 6534 | HG   | SER | X | 434 | 61.765 | 42.559 | 38.192 | 0.00 | 0.00 |
| ATOM | 6535 | C    | SER | X | 434 | 62.852 | 38.388 | 37.026 | 0.00 | 0.00 |
| ATOM | 6536 | O    | SER | X | 434 | 63.908 | 38.011 | 37.446 | 0.00 | 0.00 |
| ATOM | 6537 | N    | TRP | X | 435 | 61.818 | 37.650 | 37.230 | 0.00 | 0.00 |
| ATOM | 6538 | H    | TRP | X | 435 | 60.972 | 37.980 | 36.786 | 0.00 | 0.00 |
| ATOM | 6539 | CA   | TRP | X | 435 | 61.810 | 36.404 | 38.114 | 0.00 | 0.00 |
| ATOM | 6540 | HA   | TRP | X | 435 | 62.315 | 36.745 | 39.018 | 0.00 | 0.00 |
| ATOM | 6541 | CB   | TRP | X | 435 | 60.428 | 36.037 | 38.589 | 0.00 | 0.00 |
| ATOM | 6542 | HB2  | TRP | X | 435 | 59.813 | 35.929 | 37.695 | 0.00 | 0.00 |
| ATOM | 6543 | HB3  | TRP | X | 435 | 60.429 | 35.071 | 39.094 | 0.00 | 0.00 |
| ATOM | 6544 | CG   | TRP | X | 435 | 59.818 | 37.057 | 39.532 | 0.00 | 0.00 |
| ATOM | 6545 | CD1  | TRP | X | 435 | 59.165 | 38.205 | 39.135 | 0.00 | 0.00 |
| ATOM | 6546 | HD1  | TRP | X | 435 | 59.102 | 38.555 | 38.115 | 0.00 | 0.00 |
| ATOM | 6547 | NE1  | TRP | X | 435 | 58.566 | 38.835 | 40.234 | 0.00 | 0.00 |
| ATOM | 6548 | HE1  | TRP | X | 435 | 57.945 | 39.629 | 40.174 | 0.00 | 0.00 |
| ATOM | 6549 | CE2  | TRP | X | 435 | 58.834 | 38.180 | 41.417 | 0.00 | 0.00 |
| ATOM | 6550 | CZ2  | TRP | X | 435 | 58.369 | 38.390 | 42.696 | 0.00 | 0.00 |
| ATOM | 6551 | HZ2  | TRP | X | 435 | 57.678 | 39.200 | 42.877 | 0.00 | 0.00 |
| ATOM | 6552 | CH2  | TRP | X | 435 | 58.901 | 37.555 | 43.731 | 0.00 | 0.00 |
| ATOM | 6553 | HH2  | TRP | X | 435 | 58.641 | 37.773 | 44.757 | 0.00 | 0.00 |
| ATOM | 6554 | CZ3  | TRP | X | 435 | 59.664 | 36.445 | 43.390 | 0.00 | 0.00 |
| ATOM | 6555 | HZ3  | TRP | X | 435 | 60.010 | 35.824 | 44.204 | 0.00 | 0.00 |
| ATOM | 6556 | CE3  | TRP | X | 435 | 60.022 | 36.198 | 42.019 | 0.00 | 0.00 |
| ATOM | 6557 | HE3  | TRP | X | 435 | 60.607 | 35.338 | 41.727 | 0.00 | 0.00 |
| ATOM | 6558 | CD2  | TRP | X | 435 | 59.571 | 37.031 | 40.975 | 0.00 | 0.00 |
| ATOM | 6559 | C    | TRP | X | 435 | 62.526 | 35.226 | 37.411 | 0.00 | 0.00 |
| ATOM | 6560 | O    | TRP | X | 435 | 62.316 | 35.050 | 36.170 | 0.00 | 0.00 |
| ATOM | 6561 | N    | PRO | X | 436 | 63.093 | 34.263 | 38.200 | 0.00 | 0.00 |
| ATOM | 6562 | CD   | PRO | X | 436 | 63.133 | 34.075 | 39.680 | 0.00 | 0.00 |
| ATOM | 6563 | HD2  | PRO | X | 436 | 62.120 | 34.279 | 40.024 | 0.00 | 0.00 |
| ATOM | 6564 | HD3  | PRO | X | 436 | 63.757 | 34.813 | 40.184 | 0.00 | 0.00 |
| ATOM | 6565 | CG   | PRO | X | 436 | 63.500 | 32.642 | 39.880 | 0.00 | 0.00 |
| ATOM | 6566 | HG2  | PRO | X | 436 | 62.648 | 32.011 | 39.627 | 0.00 | 0.00 |
| ATOM | 6567 | HG3  | PRO | X | 436 | 63.955 | 32.346 | 40.825 | 0.00 | 0.00 |
| ATOM | 6568 | CB   | PRO | X | 436 | 64.571 | 32.478 | 38.801 | 0.00 | 0.00 |
| ATOM | 6569 | HB2  | PRO | X | 436 | 64.773 | 31.432 | 38.570 | 0.00 | 0.00 |
| ATOM | 6570 | HB3  | PRO | X | 436 | 65.499 | 32.910 | 39.176 | 0.00 | 0.00 |
| ATOM | 6571 | CA   | PRO | X | 436 | 63.950 | 33.210 | 37.624 | 0.00 | 0.00 |
| ATOM | 6572 | HA   | PRO | X | 436 | 64.725 | 33.729 | 37.059 | 0.00 | 0.00 |
| ATOM | 6573 | C    | PRO | X | 436 | 63.138 | 32.243 | 36.753 | 0.00 | 0.00 |
| ATOM | 6574 | O    | PRO | X | 436 | 61.940 | 31.944 | 36.900 | 0.00 | 0.00 |
| ATOM | 6575 | N    | LEU | X | 437 | 63.901 | 31.542 | 35.885 | 0.00 | 0.00 |
| ATOM | 6576 | H    | LEU | X | 437 | 64.903 | 31.664 | 35.907 | 0.00 | 0.00 |
| ATOM | 6577 | CA   | LEU | X | 437 | 63.473 | 30.513 | 34.901 | 0.00 | 0.00 |
| ATOM | 6578 | HA   | LEU | X | 437 | 62.845 | 30.995 | 34.152 | 0.00 | 0.00 |
| ATOM | 6579 | CB   | LEU | X | 437 | 64.831 | 30.179 | 34.150 | 0.00 | 0.00 |
| ATOM | 6580 | HB2  | LEU | X | 437 | 65.477 | 31.030 | 33.934 | 0.00 | 0.00 |
| ATOM | 6581 | HB3  | LEU | X | 437 | 65.400 | 29.558 | 34.842 | 0.00 | 0.00 |
| ATOM | 6582 | CG   | LEU | X | 437 | 64.731 | 29.458 | 32.790 | 0.00 | 0.00 |
| ATOM | 6583 | HG   | LEU | X | 437 | 64.292 | 28.473 | 32.950 | 0.00 | 0.00 |
| ATOM | 6584 | CD1  | LEU | X | 437 | 63.796 | 30.288 | 31.878 | 0.00 | 0.00 |
| ATOM | 6585 | HD11 | LEU | X | 437 | 62.757 | 30.172 | 32.187 | 0.00 | 0.00 |
| ATOM | 6586 | HD12 | LEU | X | 437 | 64.044 | 31.336 | 32.049 | 0.00 | 0.00 |
| ATOM | 6587 | HD13 | LEU | X | 437 | 64.006 | 30.056 | 30.834 | 0.00 | 0.00 |

|      |      |      |     |   |     |        |        |        |      |      |
|------|------|------|-----|---|-----|--------|--------|--------|------|------|
| ATOM | 6588 | CD2  | LEU | X | 437 | 66.163 | 29.288 | 32.193 | 0.00 | 0.00 |
| ATOM | 6589 | HD21 | LEU | X | 437 | 66.774 | 28.683 | 32.863 | 0.00 | 0.00 |
| ATOM | 6590 | HD22 | LEU | X | 437 | 66.061 | 28.765 | 31.242 | 0.00 | 0.00 |
| ATOM | 6591 | HD23 | LEU | X | 437 | 66.661 | 30.248 | 32.059 | 0.00 | 0.00 |
| ATOM | 6592 | C    | LEU | X | 437 | 62.801 | 29.285 | 35.456 | 0.00 | 0.00 |
| ATOM | 6593 | O    | LEU | X | 437 | 61.868 | 28.806 | 34.774 | 0.00 | 0.00 |
| ATOM | 6594 | N    | TRP | X | 438 | 63.080 | 28.848 | 36.666 | 0.00 | 0.00 |
| ATOM | 6595 | H    | TRP | X | 438 | 63.723 | 29.404 | 37.211 | 0.00 | 0.00 |
| ATOM | 6596 | CA   | TRP | X | 438 | 62.249 | 27.832 | 37.333 | 0.00 | 0.00 |
| ATOM | 6597 | HA   | TRP | X | 438 | 62.179 | 27.053 | 36.574 | 0.00 | 0.00 |
| ATOM | 6598 | CB   | TRP | X | 438 | 62.982 | 27.254 | 38.646 | 0.00 | 0.00 |
| ATOM | 6599 | HB2  | TRP | X | 438 | 62.826 | 26.202 | 38.888 | 0.00 | 0.00 |
| ATOM | 6600 | HB3  | TRP | X | 438 | 64.052 | 27.244 | 38.437 | 0.00 | 0.00 |
| ATOM | 6601 | CG   | TRP | X | 438 | 62.753 | 27.989 | 39.925 | 0.00 | 0.00 |
| ATOM | 6602 | CD1  | TRP | X | 438 | 63.631 | 28.812 | 40.560 | 0.00 | 0.00 |
| ATOM | 6603 | HD1  | TRP | X | 438 | 64.653 | 29.013 | 40.276 | 0.00 | 0.00 |
| ATOM | 6604 | NE1  | TRP | X | 438 | 63.091 | 29.222 | 41.752 | 0.00 | 0.00 |
| ATOM | 6605 | HE1  | TRP | X | 438 | 63.490 | 29.782 | 42.492 | 0.00 | 0.00 |
| ATOM | 6606 | CE2  | TRP | X | 438 | 61.766 | 28.809 | 41.881 | 0.00 | 0.00 |
| ATOM | 6607 | CZ2  | TRP | X | 438 | 60.744 | 29.113 | 42.806 | 0.00 | 0.00 |
| ATOM | 6608 | HZ2  | TRP | X | 438 | 60.955 | 29.687 | 43.696 | 0.00 | 0.00 |
| ATOM | 6609 | CH2  | TRP | X | 438 | 59.492 | 28.521 | 42.692 | 0.00 | 0.00 |
| ATOM | 6610 | HH2  | TRP | X | 438 | 58.749 | 28.916 | 43.369 | 0.00 | 0.00 |
| ATOM | 6611 | CZ3  | TRP | X | 438 | 59.261 | 27.643 | 41.595 | 0.00 | 0.00 |
| ATOM | 6612 | HZ3  | TRP | X | 438 | 58.326 | 27.105 | 41.542 | 0.00 | 0.00 |
| ATOM | 6613 | CE3  | TRP | X | 438 | 60.319 | 27.267 | 40.781 | 0.00 | 0.00 |
| ATOM | 6614 | HE3  | TRP | X | 438 | 60.194 | 26.500 | 40.032 | 0.00 | 0.00 |
| ATOM | 6615 | CD2  | TRP | X | 438 | 61.570 | 27.967 | 40.736 | 0.00 | 0.00 |
| ATOM | 6616 | C    | TRP | X | 438 | 60.706 | 28.213 | 37.645 | 0.00 | 0.00 |
| ATOM | 6617 | O    | TRP | X | 438 | 59.909 | 27.317 | 37.760 | 0.00 | 0.00 |
| ATOM | 6618 | N    | MET | X | 439 | 60.446 | 29.531 | 37.638 | 0.00 | 0.00 |
| ATOM | 6619 | H    | MET | X | 439 | 61.221 | 30.170 | 37.531 | 0.00 | 0.00 |
| ATOM | 6620 | CA   | MET | X | 439 | 59.118 | 30.120 | 37.736 | 0.00 | 0.00 |
| ATOM | 6621 | HA   | MET | X | 439 | 58.441 | 29.377 | 38.156 | 0.00 | 0.00 |
| ATOM | 6622 | CB   | MET | X | 439 | 59.110 | 31.323 | 38.585 | 0.00 | 0.00 |
| ATOM | 6623 | HB2  | MET | X | 439 | 59.533 | 32.164 | 38.035 | 0.00 | 0.00 |
| ATOM | 6624 | HB3  | MET | X | 439 | 58.086 | 31.528 | 38.896 | 0.00 | 0.00 |
| ATOM | 6625 | CG   | MET | X | 439 | 59.797 | 31.099 | 39.927 | 0.00 | 0.00 |
| ATOM | 6626 | HG2  | MET | X | 439 | 59.426 | 30.181 | 40.383 | 0.00 | 0.00 |
| ATOM | 6627 | HG3  | MET | X | 439 | 60.835 | 30.884 | 39.670 | 0.00 | 0.00 |
| ATOM | 6628 | SD   | MET | X | 439 | 59.831 | 32.499 | 41.056 | 0.00 | 0.00 |
| ATOM | 6629 | CE   | MET | X | 439 | 58.128 | 32.716 | 41.671 | 0.00 | 0.00 |
| ATOM | 6630 | HE1  | MET | X | 439 | 57.522 | 32.362 | 40.837 | 0.00 | 0.00 |
| ATOM | 6631 | HE2  | MET | X | 439 | 58.013 | 32.065 | 42.538 | 0.00 | 0.00 |
| ATOM | 6632 | HE3  | MET | X | 439 | 57.773 | 33.729 | 41.860 | 0.00 | 0.00 |
| ATOM | 6633 | C    | MET | X | 439 | 58.546 | 30.594 | 36.421 | 0.00 | 0.00 |
| ATOM | 6634 | O    | MET | X | 439 | 57.464 | 31.084 | 36.384 | 0.00 | 0.00 |
| ATOM | 6635 | N    | GLY | X | 440 | 59.157 | 30.332 | 35.261 | 0.00 | 0.00 |
| ATOM | 6636 | H    | GLY | X | 440 | 60.073 | 29.906 | 35.265 | 0.00 | 0.00 |
| ATOM | 6637 | CA   | GLY | X | 440 | 58.587 | 30.764 | 33.938 | 0.00 | 0.00 |
| ATOM | 6638 | HA2  | GLY | X | 440 | 59.356 | 30.808 | 33.210 | 0.00 | 0.00 |
| ATOM | 6639 | HA3  | GLY | X | 440 | 57.950 | 29.915 | 33.697 | 0.00 | 0.00 |
| ATOM | 6640 | C    | GLY | X | 440 | 57.801 | 32.024 | 33.911 | 0.00 | 0.00 |
| ATOM | 6641 | O    | GLY | X | 440 | 58.447 | 33.041 | 33.838 | 0.00 | 0.00 |
| ATOM | 6642 | N    | VAL | X | 441 | 56.491 | 31.949 | 33.836 | 0.00 | 0.00 |
| ATOM | 6643 | H    | VAL | X | 441 | 55.999 | 31.070 | 33.906 | 0.00 | 0.00 |
| ATOM | 6644 | CA   | VAL | X | 441 | 55.631 | 33.154 | 33.953 | 0.00 | 0.00 |
| ATOM | 6645 | HA   | VAL | X | 441 | 56.217 | 34.069 | 34.036 | 0.00 | 0.00 |
| ATOM | 6646 | CB   | VAL | X | 441 | 54.588 | 33.239 | 32.800 | 0.00 | 0.00 |
| ATOM | 6647 | HB   | VAL | X | 441 | 53.983 | 32.332 | 32.784 | 0.00 | 0.00 |
| ATOM | 6648 | CG1  | VAL | X | 441 | 53.720 | 34.558 | 32.934 | 0.00 | 0.00 |
| ATOM | 6649 | HG11 | VAL | X | 441 | 52.961 | 34.353 | 33.690 | 0.00 | 0.00 |
| ATOM | 6650 | HG12 | VAL | X | 441 | 54.375 | 35.403 | 33.148 | 0.00 | 0.00 |
| ATOM | 6651 | HG13 | VAL | X | 441 | 53.123 | 34.614 | 32.024 | 0.00 | 0.00 |
| ATOM | 6652 | CG2  | VAL | X | 441 | 55.391 | 33.375 | 31.490 | 0.00 | 0.00 |
| ATOM | 6653 | HG21 | VAL | X | 441 | 55.904 | 34.321 | 31.316 | 0.00 | 0.00 |
| ATOM | 6654 | HG22 | VAL | X | 441 | 56.119 | 32.590 | 31.290 | 0.00 | 0.00 |
| ATOM | 6655 | HG23 | VAL | X | 441 | 54.696 | 33.444 | 30.653 | 0.00 | 0.00 |
| ATOM | 6656 | C    | VAL | X | 441 | 54.847 | 33.008 | 35.245 | 0.00 | 0.00 |
| ATOM | 6657 | O    | VAL | X | 441 | 53.860 | 32.226 | 35.327 | 0.00 | 0.00 |

|      |      |     |     |   |     |        |        |        |      |      |
|------|------|-----|-----|---|-----|--------|--------|--------|------|------|
| ATOM | 6658 | N   | PRO | X | 442 | 55.202 | 33.773 | 36.284 | 0.00 | 0.00 |
| ATOM | 6659 | CD  | PRO | X | 442 | 56.336 | 34.719 | 36.434 | 0.00 | 0.00 |
| ATOM | 6660 | HD2 | PRO | X | 442 | 56.291 | 35.444 | 35.621 | 0.00 | 0.00 |
| ATOM | 6661 | HD3 | PRO | X | 442 | 57.286 | 34.185 | 36.399 | 0.00 | 0.00 |
| ATOM | 6662 | CG  | PRO | X | 442 | 56.094 | 35.391 | 37.773 | 0.00 | 0.00 |
| ATOM | 6663 | HG2 | PRO | X | 442 | 55.344 | 36.174 | 37.667 | 0.00 | 0.00 |
| ATOM | 6664 | HG3 | PRO | X | 442 | 57.023 | 35.714 | 38.242 | 0.00 | 0.00 |
| ATOM | 6665 | CB  | PRO | X | 442 | 55.479 | 34.276 | 38.606 | 0.00 | 0.00 |
| ATOM | 6666 | HB2 | PRO | X | 442 | 54.944 | 34.642 | 39.483 | 0.00 | 0.00 |
| ATOM | 6667 | HB3 | PRO | X | 442 | 56.256 | 33.568 | 38.894 | 0.00 | 0.00 |
| ATOM | 6668 | CA  | PRO | X | 442 | 54.582 | 33.612 | 37.577 | 0.00 | 0.00 |
| ATOM | 6669 | HA  | PRO | X | 442 | 54.410 | 32.577 | 37.872 | 0.00 | 0.00 |
| ATOM | 6670 | C   | PRO | X | 442 | 53.182 | 34.280 | 37.687 | 0.00 | 0.00 |
| ATOM | 6671 | O   | PRO | X | 442 | 52.937 | 35.212 | 36.920 | 0.00 | 0.00 |
| ATOM | 6672 | N   | HIP | X | 443 | 52.251 | 33.829 | 38.530 | 0.00 | 0.00 |
| ATOM | 6673 | H   | HIP | X | 443 | 52.583 | 33.037 | 39.062 | 0.00 | 0.00 |
| ATOM | 6674 | CA  | HIP | X | 443 | 50.857 | 34.318 | 38.787 | 0.00 | 0.00 |
| ATOM | 6675 | HA  | HIP | X | 443 | 50.164 | 33.840 | 38.094 | 0.00 | 0.00 |
| ATOM | 6676 | CB  | HIP | X | 443 | 50.517 | 33.812 | 40.207 | 0.00 | 0.00 |
| ATOM | 6677 | HB2 | HIP | X | 443 | 50.245 | 32.757 | 40.241 | 0.00 | 0.00 |
| ATOM | 6678 | HB3 | HIP | X | 443 | 51.455 | 33.816 | 40.762 | 0.00 | 0.00 |
| ATOM | 6679 | CG  | HIP | X | 443 | 49.468 | 34.600 | 40.980 | 0.00 | 0.00 |
| ATOM | 6680 | ND1 | HIP | X | 443 | 48.170 | 34.236 | 41.250 | 0.00 | 0.00 |
| ATOM | 6681 | HD1 | HIP | X | 443 | 47.760 | 33.378 | 40.909 | 0.00 | 0.00 |
| ATOM | 6682 | CE1 | HIP | X | 443 | 47.558 | 35.162 | 41.980 | 0.00 | 0.00 |
| ATOM | 6683 | HE1 | HIP | X | 443 | 46.566 | 35.245 | 42.401 | 0.00 | 0.00 |
| ATOM | 6684 | NE2 | HIP | X | 443 | 48.417 | 36.174 | 42.193 | 0.00 | 0.00 |
| ATOM | 6685 | HE2 | HIP | X | 443 | 48.274 | 37.046 | 42.681 | 0.00 | 0.00 |
| ATOM | 6686 | CD2 | HIP | X | 443 | 49.663 | 35.786 | 41.622 | 0.00 | 0.00 |
| ATOM | 6687 | HD2 | HIP | X | 443 | 50.590 | 36.342 | 41.620 | 0.00 | 0.00 |
| ATOM | 6688 | C   | HIP | X | 443 | 50.655 | 35.881 | 38.592 | 0.00 | 0.00 |
| ATOM | 6689 | O   | HIP | X | 443 | 51.505 | 36.606 | 39.194 | 0.00 | 0.00 |
| ATOM | 6690 | N   | GLY | X | 444 | 49.701 | 36.335 | 37.776 | 0.00 | 0.00 |
| ATOM | 6691 | H   | GLY | X | 444 | 49.137 | 35.618 | 37.342 | 0.00 | 0.00 |
| ATOM | 6692 | CA  | GLY | X | 444 | 49.333 | 37.759 | 37.599 | 0.00 | 0.00 |
| ATOM | 6693 | HA2 | GLY | X | 444 | 48.356 | 37.693 | 37.050 | 0.00 | 0.00 |
| ATOM | 6694 | HA3 | GLY | X | 444 | 49.231 | 38.126 | 38.616 | 0.00 | 0.00 |
| ATOM | 6695 | C   | GLY | X | 444 | 50.250 | 38.691 | 36.797 | 0.00 | 0.00 |
| ATOM | 6696 | O   | GLY | X | 444 | 49.929 | 39.855 | 36.602 | 0.00 | 0.00 |
| ATOM | 6697 | N   | TYR | X | 445 | 51.375 | 38.179 | 36.342 | 0.00 | 0.00 |
| ATOM | 6698 | H   | TYR | X | 445 | 51.478 | 37.177 | 36.421 | 0.00 | 0.00 |
| ATOM | 6699 | CA  | TYR | X | 445 | 52.439 | 39.009 | 35.730 | 0.00 | 0.00 |
| ATOM | 6700 | HA  | TYR | X | 445 | 52.320 | 39.936 | 36.292 | 0.00 | 0.00 |
| ATOM | 6701 | CB  | TYR | X | 445 | 53.874 | 38.533 | 35.938 | 0.00 | 0.00 |
| ATOM | 6702 | HB2 | TYR | X | 445 | 53.999 | 37.451 | 35.966 | 0.00 | 0.00 |
| ATOM | 6703 | HB3 | TYR | X | 445 | 54.435 | 38.848 | 35.058 | 0.00 | 0.00 |
| ATOM | 6704 | CG  | TYR | X | 445 | 54.623 | 39.120 | 37.112 | 0.00 | 0.00 |
| ATOM | 6705 | CD1 | TYR | X | 445 | 55.370 | 40.265 | 36.928 | 0.00 | 0.00 |
| ATOM | 6706 | HD1 | TYR | X | 445 | 55.738 | 40.669 | 35.996 | 0.00 | 0.00 |
| ATOM | 6707 | CE1 | TYR | X | 445 | 55.915 | 40.876 | 38.028 | 0.00 | 0.00 |
| ATOM | 6708 | HE1 | TYR | X | 445 | 56.589 | 41.701 | 37.850 | 0.00 | 0.00 |
| ATOM | 6709 | CZ  | TYR | X | 445 | 55.603 | 40.498 | 39.360 | 0.00 | 0.00 |
| ATOM | 6710 | OH  | TYR | X | 445 | 56.233 | 41.117 | 40.387 | 0.00 | 0.00 |
| ATOM | 6711 | HH  | TYR | X | 445 | 56.736 | 41.855 | 40.037 | 0.00 | 0.00 |
| ATOM | 6712 | CE2 | TYR | X | 445 | 54.837 | 39.315 | 39.533 | 0.00 | 0.00 |
| ATOM | 6713 | HE2 | TYR | X | 445 | 54.845 | 38.945 | 40.548 | 0.00 | 0.00 |
| ATOM | 6714 | CD2 | TYR | X | 445 | 54.414 | 38.578 | 38.372 | 0.00 | 0.00 |
| ATOM | 6715 | HD2 | TYR | X | 445 | 53.951 | 37.609 | 38.483 | 0.00 | 0.00 |
| ATOM | 6716 | C   | TYR | X | 445 | 52.056 | 39.339 | 34.234 | 0.00 | 0.00 |
| ATOM | 6717 | O   | TYR | X | 445 | 52.656 | 40.163 | 33.595 | 0.00 | 0.00 |
| ATOM | 6718 | N   | GLU | X | 446 | 50.920 | 38.785 | 33.716 | 0.00 | 0.00 |
| ATOM | 6719 | H   | GLU | X | 446 | 50.497 | 38.004 | 34.197 | 0.00 | 0.00 |
| ATOM | 6720 | CA  | GLU | X | 446 | 50.365 | 39.179 | 32.398 | 0.00 | 0.00 |
| ATOM | 6721 | HA  | GLU | X | 446 | 51.216 | 39.188 | 31.717 | 0.00 | 0.00 |
| ATOM | 6722 | CB  | GLU | X | 446 | 49.384 | 38.099 | 31.855 | 0.00 | 0.00 |
| ATOM | 6723 | HB2 | GLU | X | 446 | 49.551 | 38.121 | 30.778 | 0.00 | 0.00 |
| ATOM | 6724 | HB3 | GLU | X | 446 | 49.721 | 37.141 | 32.249 | 0.00 | 0.00 |
| ATOM | 6725 | CG  | GLU | X | 446 | 47.840 | 38.207 | 31.995 | 0.00 | 0.00 |
| ATOM | 6726 | HG2 | GLU | X | 446 | 47.431 | 39.058 | 31.450 | 0.00 | 0.00 |
| ATOM | 6727 | HG3 | GLU | X | 446 | 47.590 | 37.291 | 31.459 | 0.00 | 0.00 |

|      |      |      |     |   |     |        |        |        |      |      |
|------|------|------|-----|---|-----|--------|--------|--------|------|------|
| ATOM | 6728 | CD   | GLU | X | 446 | 47.355 | 38.242 | 33.484 | 0.00 | 0.00 |
| ATOM | 6729 | OE1  | GLU | X | 446 | 48.173 | 38.576 | 34.371 | 0.00 | 0.00 |
| ATOM | 6730 | OE2  | GLU | X | 446 | 46.135 | 38.064 | 33.726 | 0.00 | 0.00 |
| ATOM | 6731 | C    | GLU | X | 446 | 49.716 | 40.559 | 32.491 | 0.00 | 0.00 |
| ATOM | 6732 | O    | GLU | X | 446 | 49.439 | 41.086 | 31.448 | 0.00 | 0.00 |
| ATOM | 6733 | N    | ILE | X | 447 | 49.284 | 41.153 | 33.640 | 0.00 | 0.00 |
| ATOM | 6734 | H    | ILE | X | 447 | 49.116 | 40.543 | 34.427 | 0.00 | 0.00 |
| ATOM | 6735 | CA   | ILE | X | 447 | 48.500 | 42.419 | 33.665 | 0.00 | 0.00 |
| ATOM | 6736 | HA   | ILE | X | 447 | 47.687 | 42.199 | 32.972 | 0.00 | 0.00 |
| ATOM | 6737 | CB   | ILE | X | 447 | 47.948 | 42.812 | 35.004 | 0.00 | 0.00 |
| ATOM | 6738 | HB   | ILE | X | 447 | 47.305 | 43.685 | 34.895 | 0.00 | 0.00 |
| ATOM | 6739 | CG2  | ILE | X | 447 | 47.143 | 41.648 | 35.598 | 0.00 | 0.00 |
| ATOM | 6740 | HG21 | ILE | X | 447 | 46.578 | 41.191 | 34.786 | 0.00 | 0.00 |
| ATOM | 6741 | HG22 | ILE | X | 447 | 47.741 | 40.819 | 35.977 | 0.00 | 0.00 |
| ATOM | 6742 | HG23 | ILE | X | 447 | 46.491 | 41.984 | 36.405 | 0.00 | 0.00 |
| ATOM | 6743 | CG1  | ILE | X | 447 | 49.026 | 42.985 | 36.080 | 0.00 | 0.00 |
| ATOM | 6744 | HG12 | ILE | X | 447 | 48.608 | 42.889 | 37.082 | 0.00 | 0.00 |
| ATOM | 6745 | HG13 | ILE | X | 447 | 49.831 | 42.274 | 35.893 | 0.00 | 0.00 |
| ATOM | 6746 | CD1  | ILE | X | 447 | 49.768 | 44.302 | 36.099 | 0.00 | 0.00 |
| ATOM | 6747 | HD11 | ILE | X | 447 | 50.412 | 44.207 | 36.973 | 0.00 | 0.00 |
| ATOM | 6748 | HD12 | ILE | X | 447 | 50.505 | 44.443 | 35.308 | 0.00 | 0.00 |
| ATOM | 6749 | HD13 | ILE | X | 447 | 49.025 | 45.072 | 36.306 | 0.00 | 0.00 |
| ATOM | 6750 | C    | ILE | X | 447 | 49.215 | 43.623 | 32.986 | 0.00 | 0.00 |
| ATOM | 6751 | O    | ILE | X | 447 | 48.510 | 44.459 | 32.422 | 0.00 | 0.00 |
| ATOM | 6752 | N    | GLU | X | 448 | 50.554 | 43.618 | 32.896 | 0.00 | 0.00 |
| ATOM | 6753 | H    | GLU | X | 448 | 51.033 | 42.768 | 33.157 | 0.00 | 0.00 |
| ATOM | 6754 | CA   | GLU | X | 448 | 51.269 | 44.674 | 32.175 | 0.00 | 0.00 |
| ATOM | 6755 | HA   | GLU | X | 448 | 50.868 | 45.665 | 32.388 | 0.00 | 0.00 |
| ATOM | 6756 | CB   | GLU | X | 448 | 52.767 | 44.671 | 32.498 | 0.00 | 0.00 |
| ATOM | 6757 | HB2  | GLU | X | 448 | 53.274 | 45.596 | 32.224 | 0.00 | 0.00 |
| ATOM | 6758 | HB3  | GLU | X | 448 | 52.911 | 44.447 | 33.555 | 0.00 | 0.00 |
| ATOM | 6759 | CG   | GLU | X | 448 | 53.520 | 43.557 | 31.767 | 0.00 | 0.00 |
| ATOM | 6760 | HG2  | GLU | X | 448 | 52.933 | 42.651 | 31.913 | 0.00 | 0.00 |
| ATOM | 6761 | HG3  | GLU | X | 448 | 53.606 | 43.784 | 30.704 | 0.00 | 0.00 |
| ATOM | 6762 | CD   | GLU | X | 448 | 54.865 | 43.287 | 32.310 | 0.00 | 0.00 |
| ATOM | 6763 | OE1  | GLU | X | 448 | 55.733 | 42.929 | 31.473 | 0.00 | 0.00 |
| ATOM | 6764 | OE2  | GLU | X | 448 | 55.064 | 43.382 | 33.525 | 0.00 | 0.00 |
| ATOM | 6765 | C    | GLU | X | 448 | 51.016 | 44.688 | 30.677 | 0.00 | 0.00 |
| ATOM | 6766 | O    | GLU | X | 448 | 51.318 | 45.654 | 30.041 | 0.00 | 0.00 |
| ATOM | 6767 | N    | PHE | X | 449 | 50.479 | 43.614 | 30.094 | 0.00 | 0.00 |
| ATOM | 6768 | H    | PHE | X | 449 | 50.057 | 42.903 | 30.673 | 0.00 | 0.00 |
| ATOM | 6769 | CA   | PHE | X | 449 | 49.953 | 43.621 | 28.651 | 0.00 | 0.00 |
| ATOM | 6770 | HA   | PHE | X | 449 | 50.448 | 44.375 | 28.039 | 0.00 | 0.00 |
| ATOM | 6771 | CB   | PHE | X | 449 | 50.265 | 42.219 | 28.027 | 0.00 | 0.00 |
| ATOM | 6772 | HB2  | PHE | X | 449 | 49.943 | 41.472 | 28.753 | 0.00 | 0.00 |
| ATOM | 6773 | HB3  | PHE | X | 449 | 49.575 | 42.115 | 27.190 | 0.00 | 0.00 |
| ATOM | 6774 | CG   | PHE | X | 449 | 51.726 | 42.005 | 27.603 | 0.00 | 0.00 |
| ATOM | 6775 | CD1  | PHE | X | 449 | 52.679 | 41.858 | 28.607 | 0.00 | 0.00 |
| ATOM | 6776 | HD1  | PHE | X | 449 | 52.426 | 41.703 | 29.645 | 0.00 | 0.00 |
| ATOM | 6777 | CE1  | PHE | X | 449 | 54.112 | 41.848 | 28.233 | 0.00 | 0.00 |
| ATOM | 6778 | HE1  | PHE | X | 449 | 54.944 | 41.653 | 28.894 | 0.00 | 0.00 |
| ATOM | 6779 | CZ   | PHE | X | 449 | 54.416 | 41.896 | 26.823 | 0.00 | 0.00 |
| ATOM | 6780 | HZ   | PHE | X | 449 | 55.452 | 41.932 | 26.521 | 0.00 | 0.00 |
| ATOM | 6781 | CE2  | PHE | X | 449 | 53.419 | 41.930 | 25.883 | 0.00 | 0.00 |
| ATOM | 6782 | HE2  | PHE | X | 449 | 53.665 | 41.956 | 24.832 | 0.00 | 0.00 |
| ATOM | 6783 | CD2  | PHE | X | 449 | 52.076 | 41.966 | 26.288 | 0.00 | 0.00 |
| ATOM | 6784 | HD2  | PHE | X | 449 | 51.278 | 42.058 | 25.567 | 0.00 | 0.00 |
| ATOM | 6785 | C    | PHE | X | 449 | 48.429 | 43.929 | 28.634 | 0.00 | 0.00 |
| ATOM | 6786 | O    | PHE | X | 449 | 47.969 | 44.189 | 27.557 | 0.00 | 0.00 |
| ATOM | 6787 | N    | ILE | X | 450 | 47.732 | 43.994 | 29.772 | 0.00 | 0.00 |
| ATOM | 6788 | H    | ILE | X | 450 | 48.210 | 43.777 | 30.635 | 0.00 | 0.00 |
| ATOM | 6789 | CA   | ILE | X | 450 | 46.336 | 44.612 | 29.813 | 0.00 | 0.00 |
| ATOM | 6790 | HA   | ILE | X | 450 | 45.872 | 44.499 | 28.833 | 0.00 | 0.00 |
| ATOM | 6791 | CB   | ILE | X | 450 | 45.536 | 43.895 | 30.905 | 0.00 | 0.00 |
| ATOM | 6792 | HB   | ILE | X | 450 | 45.955 | 44.266 | 31.840 | 0.00 | 0.00 |
| ATOM | 6793 | CG2  | ILE | X | 450 | 44.024 | 44.282 | 30.763 | 0.00 | 0.00 |
| ATOM | 6794 | HG21 | ILE | X | 450 | 43.470 | 43.570 | 31.375 | 0.00 | 0.00 |
| ATOM | 6795 | HG22 | ILE | X | 450 | 43.726 | 45.240 | 31.190 | 0.00 | 0.00 |
| ATOM | 6796 | HG23 | ILE | X | 450 | 43.698 | 44.254 | 29.723 | 0.00 | 0.00 |
| ATOM | 6797 | CG1  | ILE | X | 450 | 45.626 | 42.383 | 30.746 | 0.00 | 0.00 |

|      |      |      |     |   |     |        |        |        |      |      |
|------|------|------|-----|---|-----|--------|--------|--------|------|------|
| ATOM | 6798 | HG12 | ILE | X | 450 | 46.604 | 42.069 | 31.112 | 0.00 | 0.00 |
| ATOM | 6799 | HG13 | ILE | X | 450 | 44.991 | 42.003 | 31.546 | 0.00 | 0.00 |
| ATOM | 6800 | CD1  | ILE | X | 450 | 45.369 | 41.751 | 29.389 | 0.00 | 0.00 |
| ATOM | 6801 | HD11 | ILE | X | 450 | 44.329 | 41.863 | 29.081 | 0.00 | 0.00 |
| ATOM | 6802 | HD12 | ILE | X | 450 | 45.872 | 42.330 | 28.615 | 0.00 | 0.00 |
| ATOM | 6803 | HD13 | ILE | X | 450 | 45.742 | 40.728 | 29.350 | 0.00 | 0.00 |
| ATOM | 6804 | C    | ILE | X | 450 | 46.357 | 46.166 | 30.032 | 0.00 | 0.00 |
| ATOM | 6805 | O    | ILE | X | 450 | 45.642 | 46.978 | 29.443 | 0.00 | 0.00 |
| ATOM | 6806 | N    | PHE | X | 451 | 47.347 | 46.625 | 30.874 | 0.00 | 0.00 |
| ATOM | 6807 | H    | PHE | X | 451 | 47.781 | 45.961 | 31.499 | 0.00 | 0.00 |
| ATOM | 6808 | CA   | PHE | X | 451 | 47.812 | 48.056 | 31.091 | 0.00 | 0.00 |
| ATOM | 6809 | HA   | PHE | X | 451 | 46.882 | 48.625 | 31.066 | 0.00 | 0.00 |
| ATOM | 6810 | CB   | PHE | X | 451 | 48.536 | 48.284 | 32.464 | 0.00 | 0.00 |
| ATOM | 6811 | HB2  | PHE | X | 451 | 49.319 | 47.526 | 32.507 | 0.00 | 0.00 |
| ATOM | 6812 | HB3  | PHE | X | 451 | 49.177 | 49.152 | 32.619 | 0.00 | 0.00 |
| ATOM | 6813 | CG   | PHE | X | 451 | 47.554 | 48.198 | 33.558 | 0.00 | 0.00 |
| ATOM | 6814 | CD1  | PHE | X | 451 | 47.276 | 46.940 | 34.187 | 0.00 | 0.00 |
| ATOM | 6815 | HD1  | PHE | X | 451 | 47.784 | 46.038 | 33.878 | 0.00 | 0.00 |
| ATOM | 6816 | CE1  | PHE | X | 451 | 46.463 | 46.878 | 35.328 | 0.00 | 0.00 |
| ATOM | 6817 | HE1  | PHE | X | 451 | 46.352 | 45.897 | 35.766 | 0.00 | 0.00 |
| ATOM | 6818 | CZ   | PHE | X | 451 | 45.767 | 48.021 | 35.831 | 0.00 | 0.00 |
| ATOM | 6819 | HZ   | PHE | X | 451 | 45.100 | 48.009 | 36.680 | 0.00 | 0.00 |
| ATOM | 6820 | CE2  | PHE | X | 451 | 45.981 | 49.256 | 35.189 | 0.00 | 0.00 |
| ATOM | 6821 | HE2  | PHE | X | 451 | 45.458 | 50.134 | 35.537 | 0.00 | 0.00 |
| ATOM | 6822 | CD2  | PHE | X | 451 | 46.926 | 49.333 | 34.113 | 0.00 | 0.00 |
| ATOM | 6823 | HD2  | PHE | X | 451 | 47.114 | 50.307 | 33.687 | 0.00 | 0.00 |
| ATOM | 6824 | C    | PHE | X | 451 | 48.588 | 48.651 | 29.915 | 0.00 | 0.00 |
| ATOM | 6825 | O    | PHE | X | 451 | 48.740 | 49.809 | 29.840 | 0.00 | 0.00 |
| ATOM | 6826 | N    | GLY | X | 452 | 49.011 | 47.791 | 28.971 | 0.00 | 0.00 |
| ATOM | 6827 | H    | GLY | X | 452 | 48.919 | 46.804 | 29.165 | 0.00 | 0.00 |
| ATOM | 6828 | CA   | GLY | X | 452 | 49.726 | 48.088 | 27.688 | 0.00 | 0.00 |
| ATOM | 6829 | HA2  | GLY | X | 452 | 50.000 | 47.177 | 27.169 | 0.00 | 0.00 |
| ATOM | 6830 | HA3  | GLY | X | 452 | 49.092 | 48.855 | 27.169 | 0.00 | 0.00 |
| ATOM | 6831 | C    | GLY | X | 452 | 51.030 | 48.746 | 27.970 | 0.00 | 0.00 |
| ATOM | 6832 | O    | GLY | X | 452 | 51.314 | 49.754 | 27.280 | 0.00 | 0.00 |
| ATOM | 6833 | N    | ILE | X | 453 | 51.770 | 48.362 | 29.018 | 0.00 | 0.00 |
| ATOM | 6834 | H    | ILE | X | 453 | 51.415 | 47.660 | 29.651 | 0.00 | 0.00 |
| ATOM | 6835 | CA   | ILE | X | 453 | 53.117 | 48.883 | 29.416 | 0.00 | 0.00 |
| ATOM | 6836 | HA   | ILE | X | 453 | 53.130 | 49.958 | 29.599 | 0.00 | 0.00 |
| ATOM | 6837 | CB   | ILE | X | 453 | 53.742 | 48.174 | 30.671 | 0.00 | 0.00 |
| ATOM | 6838 | HB   | ILE | X | 453 | 53.743 | 47.098 | 30.498 | 0.00 | 0.00 |
| ATOM | 6839 | CG2  | ILE | X | 453 | 55.155 | 48.626 | 30.954 | 0.00 | 0.00 |
| ATOM | 6840 | HG21 | ILE | X | 453 | 55.300 | 49.690 | 30.770 | 0.00 | 0.00 |
| ATOM | 6841 | HG22 | ILE | X | 453 | 55.510 | 48.355 | 31.948 | 0.00 | 0.00 |
| ATOM | 6842 | HG23 | ILE | X | 453 | 55.819 | 47.914 | 30.464 | 0.00 | 0.00 |
| ATOM | 6843 | CG1  | ILE | X | 453 | 52.932 | 48.394 | 31.925 | 0.00 | 0.00 |
| ATOM | 6844 | HG12 | ILE | X | 453 | 51.996 | 47.859 | 31.762 | 0.00 | 0.00 |
| ATOM | 6845 | HG13 | ILE | X | 453 | 53.432 | 48.008 | 32.813 | 0.00 | 0.00 |
| ATOM | 6846 | CD1  | ILE | X | 453 | 52.768 | 49.921 | 32.239 | 0.00 | 0.00 |
| ATOM | 6847 | HD11 | ILE | X | 453 | 53.670 | 50.515 | 32.093 | 0.00 | 0.00 |
| ATOM | 6848 | HD12 | ILE | X | 453 | 52.002 | 50.443 | 31.666 | 0.00 | 0.00 |
| ATOM | 6849 | HD13 | ILE | X | 453 | 52.312 | 49.938 | 33.229 | 0.00 | 0.00 |
| ATOM | 6850 | C    | ILE | X | 453 | 54.021 | 48.774 | 28.212 | 0.00 | 0.00 |
| ATOM | 6851 | O    | ILE | X | 453 | 54.845 | 49.679 | 28.013 | 0.00 | 0.00 |
| ATOM | 6852 | N    | PRO | X | 454 | 53.832 | 47.749 | 27.242 | 0.00 | 0.00 |
| ATOM | 6853 | CD   | PRO | X | 454 | 53.367 | 46.386 | 27.594 | 0.00 | 0.00 |
| ATOM | 6854 | HD2  | PRO | X | 454 | 52.284 | 46.330 | 27.702 | 0.00 | 0.00 |
| ATOM | 6855 | HD3  | PRO | X | 454 | 53.754 | 45.997 | 28.536 | 0.00 | 0.00 |
| ATOM | 6856 | CG   | PRO | X | 454 | 53.955 | 45.557 | 26.470 | 0.00 | 0.00 |
| ATOM | 6857 | HG2  | PRO | X | 454 | 53.390 | 44.658 | 26.221 | 0.00 | 0.00 |
| ATOM | 6858 | HG3  | PRO | X | 454 | 54.910 | 45.209 | 26.863 | 0.00 | 0.00 |
| ATOM | 6859 | CB   | PRO | X | 454 | 54.123 | 46.465 | 25.240 | 0.00 | 0.00 |
| ATOM | 6860 | HB2  | PRO | X | 454 | 53.162 | 46.647 | 24.760 | 0.00 | 0.00 |
| ATOM | 6861 | HB3  | PRO | X | 454 | 54.867 | 45.998 | 24.593 | 0.00 | 0.00 |
| ATOM | 6862 | CA   | PRO | X | 454 | 54.553 | 47.759 | 25.953 | 0.00 | 0.00 |
| ATOM | 6863 | HA   | PRO | X | 454 | 55.625 | 47.799 | 26.148 | 0.00 | 0.00 |
| ATOM | 6864 | C    | PRO | X | 454 | 54.315 | 48.920 | 24.924 | 0.00 | 0.00 |
| ATOM | 6865 | O    | PRO | X | 454 | 55.047 | 48.915 | 23.901 | 0.00 | 0.00 |
| ATOM | 6866 | N    | LEU | X | 455 | 53.413 | 49.920 | 25.161 | 0.00 | 0.00 |
| ATOM | 6867 | H    | LEU | X | 455 | 52.873 | 49.716 | 25.990 | 0.00 | 0.00 |



|      |      |      |     |   |     |        |        |        |      |      |
|------|------|------|-----|---|-----|--------|--------|--------|------|------|
| ATOM | 6868 | CA   | LEU | X | 455 | 53.419 | 51.288 | 24.656 | 0.00 | 0.00 |
| ATOM | 6869 | HA   | LEU | X | 455 | 53.647 | 51.313 | 23.590 | 0.00 | 0.00 |
| ATOM | 6870 | CB   | LEU | X | 455 | 52.016 | 51.773 | 24.763 | 0.00 | 0.00 |
| ATOM | 6871 | HB2  | LEU | X | 455 | 51.640 | 51.647 | 25.778 | 0.00 | 0.00 |
| ATOM | 6872 | HB3  | LEU | X | 455 | 51.994 | 52.859 | 24.671 | 0.00 | 0.00 |
| ATOM | 6873 | CG   | LEU | X | 455 | 51.015 | 51.119 | 23.724 | 0.00 | 0.00 |
| ATOM | 6874 | HG   | LEU | X | 455 | 51.291 | 51.322 | 22.689 | 0.00 | 0.00 |
| ATOM | 6875 | CD1  | LEU | X | 455 | 50.715 | 49.602 | 24.021 | 0.00 | 0.00 |
| ATOM | 6876 | HD11 | LEU | X | 455 | 49.831 | 49.300 | 23.459 | 0.00 | 0.00 |
| ATOM | 6877 | HD12 | LEU | X | 455 | 51.588 | 48.981 | 23.824 | 0.00 | 0.00 |
| ATOM | 6878 | HD13 | LEU | X | 455 | 50.380 | 49.553 | 25.057 | 0.00 | 0.00 |
| ATOM | 6879 | CD2  | LEU | X | 455 | 49.669 | 51.922 | 23.754 | 0.00 | 0.00 |
| ATOM | 6880 | HD21 | LEU | X | 455 | 49.206 | 51.906 | 24.741 | 0.00 | 0.00 |
| ATOM | 6881 | HD22 | LEU | X | 455 | 49.896 | 52.936 | 23.426 | 0.00 | 0.00 |
| ATOM | 6882 | HD23 | LEU | X | 455 | 49.062 | 51.562 | 22.924 | 0.00 | 0.00 |
| ATOM | 6883 | C    | LEU | X | 455 | 54.457 | 52.279 | 25.174 | 0.00 | 0.00 |
| ATOM | 6884 | O    | LEU | X | 455 | 54.712 | 53.234 | 24.453 | 0.00 | 0.00 |
| ATOM | 6885 | N    | ASP | X | 456 | 55.079 | 52.040 | 26.310 | 0.00 | 0.00 |
| ATOM | 6886 | H    | ASP | X | 456 | 54.740 | 51.275 | 26.875 | 0.00 | 0.00 |
| ATOM | 6887 | CA   | ASP | X | 456 | 55.958 | 52.994 | 27.001 | 0.00 | 0.00 |
| ATOM | 6888 | HA   | ASP | X | 456 | 55.346 | 53.893 | 27.072 | 0.00 | 0.00 |
| ATOM | 6889 | CB   | ASP | X | 456 | 56.102 | 52.649 | 28.515 | 0.00 | 0.00 |
| ATOM | 6890 | HB2  | ASP | X | 456 | 55.140 | 52.532 | 29.014 | 0.00 | 0.00 |
| ATOM | 6891 | HB3  | ASP | X | 456 | 56.601 | 51.684 | 28.606 | 0.00 | 0.00 |
| ATOM | 6892 | CG   | ASP | X | 456 | 56.877 | 53.775 | 29.124 | 0.00 | 0.00 |
| ATOM | 6893 | OD1  | ASP | X | 456 | 57.557 | 53.487 | 30.103 | 0.00 | 0.00 |
| ATOM | 6894 | OD2  | ASP | X | 456 | 56.770 | 54.937 | 28.625 | 0.00 | 0.00 |
| ATOM | 6895 | C    | ASP | X | 456 | 57.299 | 53.288 | 26.303 | 0.00 | 0.00 |
| ATOM | 6896 | O    | ASP | X | 456 | 58.110 | 52.368 | 26.304 | 0.00 | 0.00 |
| ATOM | 6897 | N    | PRO | X | 457 | 57.581 | 54.548 | 25.857 | 0.00 | 0.00 |
| ATOM | 6898 | CD   | PRO | X | 457 | 56.713 | 55.667 | 25.543 | 0.00 | 0.00 |
| ATOM | 6899 | HD2  | PRO | X | 457 | 56.067 | 55.958 | 26.372 | 0.00 | 0.00 |
| ATOM | 6900 | HD3  | PRO | X | 457 | 56.049 | 55.449 | 24.707 | 0.00 | 0.00 |
| ATOM | 6901 | CG   | PRO | X | 457 | 57.586 | 56.907 | 25.276 | 0.00 | 0.00 |
| ATOM | 6902 | HG2  | PRO | X | 457 | 57.889 | 57.231 | 26.272 | 0.00 | 0.00 |
| ATOM | 6903 | HG3  | PRO | X | 457 | 57.103 | 57.606 | 24.593 | 0.00 | 0.00 |
| ATOM | 6904 | CB   | PRO | X | 457 | 58.763 | 56.291 | 24.529 | 0.00 | 0.00 |
| ATOM | 6905 | HB2  | PRO | X | 457 | 59.561 | 57.033 | 24.536 | 0.00 | 0.00 |
| ATOM | 6906 | HB3  | PRO | X | 457 | 58.564 | 55.991 | 23.500 | 0.00 | 0.00 |
| ATOM | 6907 | CA   | PRO | X | 457 | 58.895 | 54.918 | 25.309 | 0.00 | 0.00 |
| ATOM | 6908 | HA   | PRO | X | 457 | 59.315 | 54.199 | 24.606 | 0.00 | 0.00 |
| ATOM | 6909 | C    | PRO | X | 457 | 59.910 | 55.036 | 26.395 | 0.00 | 0.00 |
| ATOM | 6910 | O    | PRO | X | 457 | 61.073 | 55.160 | 25.981 | 0.00 | 0.00 |
| ATOM | 6911 | N    | SER | X | 458 | 59.669 | 54.875 | 27.718 | 0.00 | 0.00 |
| ATOM | 6912 | H    | SER | X | 458 | 58.688 | 54.892 | 27.956 | 0.00 | 0.00 |
| ATOM | 6913 | CA   | SER | X | 458 | 60.775 | 54.909 | 28.780 | 0.00 | 0.00 |
| ATOM | 6914 | HA   | SER | X | 458 | 61.586 | 55.470 | 28.315 | 0.00 | 0.00 |
| ATOM | 6915 | CB   | SER | X | 458 | 60.269 | 55.545 | 30.071 | 0.00 | 0.00 |
| ATOM | 6916 | HB2  | SER | X | 458 | 59.351 | 55.047 | 30.381 | 0.00 | 0.00 |
| ATOM | 6917 | HB3  | SER | X | 458 | 60.971 | 55.379 | 30.888 | 0.00 | 0.00 |
| ATOM | 6918 | OG   | SER | X | 458 | 60.159 | 56.952 | 29.776 | 0.00 | 0.00 |
| ATOM | 6919 | HG   | SER | X | 458 | 59.252 | 57.025 | 29.468 | 0.00 | 0.00 |
| ATOM | 6920 | C    | SER | X | 458 | 61.350 | 53.534 | 29.006 | 0.00 | 0.00 |
| ATOM | 6921 | O    | SER | X | 458 | 62.492 | 53.486 | 29.405 | 0.00 | 0.00 |
| ATOM | 6922 | N    | ARG | X | 459 | 60.658 | 52.412 | 28.622 | 0.00 | 0.00 |
| ATOM | 6923 | H    | ARG | X | 459 | 59.667 | 52.566 | 28.507 | 0.00 | 0.00 |
| ATOM | 6924 | CA   | ARG | X | 459 | 61.143 | 51.013 | 28.611 | 0.00 | 0.00 |
| ATOM | 6925 | HA   | ARG | X | 459 | 62.168 | 50.997 | 28.982 | 0.00 | 0.00 |
| ATOM | 6926 | CB   | ARG | X | 459 | 60.208 | 50.120 | 29.517 | 0.00 | 0.00 |
| ATOM | 6927 | HB2  | ARG | X | 459 | 59.155 | 50.366 | 29.386 | 0.00 | 0.00 |
| ATOM | 6928 | HB3  | ARG | X | 459 | 60.337 | 49.055 | 29.321 | 0.00 | 0.00 |
| ATOM | 6929 | CG   | ARG | X | 459 | 60.543 | 50.399 | 30.937 | 0.00 | 0.00 |
| ATOM | 6930 | HG2  | ARG | X | 459 | 61.592 | 50.130 | 31.061 | 0.00 | 0.00 |
| ATOM | 6931 | HG3  | ARG | X | 459 | 60.397 | 51.446 | 31.205 | 0.00 | 0.00 |
| ATOM | 6932 | CD   | ARG | X | 459 | 59.670 | 49.597 | 31.869 | 0.00 | 0.00 |
| ATOM | 6933 | HD2  | ARG | X | 459 | 59.941 | 49.841 | 32.896 | 0.00 | 0.00 |
| ATOM | 6934 | HD3  | ARG | X | 459 | 58.634 | 49.907 | 31.727 | 0.00 | 0.00 |
| ATOM | 6935 | NE   | ARG | X | 459 | 59.732 | 48.186 | 31.522 | 0.00 | 0.00 |
| ATOM | 6936 | HE   | ARG | X | 459 | 60.322 | 47.917 | 30.748 | 0.00 | 0.00 |
| ATOM | 6937 | CZ   | ARG | X | 459 | 58.968 | 47.272 | 31.986 | 0.00 | 0.00 |

|      |      |      |     |   |     |        |        |        |      |      |
|------|------|------|-----|---|-----|--------|--------|--------|------|------|
| ATOM | 6938 | NH1  | ARG | X | 459 | 57.937 | 47.597 | 32.782 | 0.00 | 0.00 |
| ATOM | 6939 | HH11 | ARG | X | 459 | 57.738 | 48.548 | 33.057 | 0.00 | 0.00 |
| ATOM | 6940 | HH12 | ARG | X | 459 | 57.147 | 47.012 | 33.014 | 0.00 | 0.00 |
| ATOM | 6941 | NH2  | ARG | X | 459 | 59.069 | 46.025 | 31.561 | 0.00 | 0.00 |
| ATOM | 6942 | HH21 | ARG | X | 459 | 59.753 | 45.844 | 30.841 | 0.00 | 0.00 |
| ATOM | 6943 | HH22 | ARG | X | 459 | 58.479 | 45.242 | 31.805 | 0.00 | 0.00 |
| ATOM | 6944 | C    | ARG | X | 459 | 61.157 | 50.514 | 27.195 | 0.00 | 0.00 |
| ATOM | 6945 | O    | ARG | X | 459 | 61.206 | 51.374 | 26.281 | 0.00 | 0.00 |
| ATOM | 6946 | N    | ASN | X | 460 | 61.171 | 49.218 | 26.899 | 0.00 | 0.00 |
| ATOM | 6947 | H    | ASN | X | 460 | 61.225 | 48.567 | 27.669 | 0.00 | 0.00 |
| ATOM | 6948 | CA   | ASN | X | 460 | 61.265 | 48.738 | 25.566 | 0.00 | 0.00 |
| ATOM | 6949 | HA   | ASN | X | 460 | 60.530 | 49.258 | 24.952 | 0.00 | 0.00 |
| ATOM | 6950 | CB   | ASN | X | 460 | 62.676 | 49.024 | 25.043 | 0.00 | 0.00 |
| ATOM | 6951 | HB2  | ASN | X | 460 | 63.042 | 50.046 | 25.139 | 0.00 | 0.00 |
| ATOM | 6952 | HB3  | ASN | X | 460 | 63.317 | 48.549 | 25.786 | 0.00 | 0.00 |
| ATOM | 6953 | CG   | ASN | X | 460 | 62.929 | 48.763 | 23.540 | 0.00 | 0.00 |
| ATOM | 6954 | OD1  | ASN | X | 460 | 62.409 | 49.494 | 22.671 | 0.00 | 0.00 |
| ATOM | 6955 | ND2  | ASN | X | 460 | 63.781 | 47.808 | 23.267 | 0.00 | 0.00 |
| ATOM | 6956 | HD21 | ASN | X | 460 | 63.910 | 47.492 | 22.317 | 0.00 | 0.00 |
| ATOM | 6957 | HD22 | ASN | X | 460 | 63.908 | 47.181 | 24.048 | 0.00 | 0.00 |
| ATOM | 6958 | C    | ASN | X | 460 | 60.866 | 47.262 | 25.447 | 0.00 | 0.00 |
| ATOM | 6959 | O    | ASN | X | 460 | 61.347 | 46.452 | 26.249 | 0.00 | 0.00 |
| ATOM | 6960 | N    | TYR | X | 461 | 59.854 | 46.915 | 24.613 | 0.00 | 0.00 |
| ATOM | 6961 | H    | TYR | X | 461 | 59.579 | 47.627 | 23.952 | 0.00 | 0.00 |
| ATOM | 6962 | CA   | TYR | X | 461 | 59.615 | 45.459 | 24.263 | 0.00 | 0.00 |
| ATOM | 6963 | HA   | TYR | X | 461 | 60.287 | 44.768 | 24.774 | 0.00 | 0.00 |
| ATOM | 6964 | CB   | TYR | X | 461 | 58.193 | 45.227 | 24.746 | 0.00 | 0.00 |
| ATOM | 6965 | HB2  | TYR | X | 461 | 57.552 | 45.982 | 24.290 | 0.00 | 0.00 |
| ATOM | 6966 | HB3  | TYR | X | 461 | 57.957 | 44.244 | 24.340 | 0.00 | 0.00 |
| ATOM | 6967 | CG   | TYR | X | 461 | 57.935 | 45.164 | 26.261 | 0.00 | 0.00 |
| ATOM | 6968 | CD1  | TYR | X | 461 | 57.713 | 46.378 | 27.023 | 0.00 | 0.00 |
| ATOM | 6969 | HD1  | TYR | X | 461 | 57.764 | 47.331 | 26.516 | 0.00 | 0.00 |
| ATOM | 6970 | CE1  | TYR | X | 461 | 57.324 | 46.320 | 28.375 | 0.00 | 0.00 |
| ATOM | 6971 | HE1  | TYR | X | 461 | 57.278 | 47.228 | 28.958 | 0.00 | 0.00 |
| ATOM | 6972 | CZ   | TYR | X | 461 | 56.951 | 45.143 | 28.938 | 0.00 | 0.00 |
| ATOM | 6973 | OH   | TYR | X | 461 | 56.436 | 45.209 | 30.205 | 0.00 | 0.00 |
| ATOM | 6974 | HH   | TYR | X | 461 | 56.305 | 44.300 | 30.487 | 0.00 | 0.00 |
| ATOM | 6975 | CE2  | TYR | X | 461 | 57.038 | 43.952 | 28.162 | 0.00 | 0.00 |
| ATOM | 6976 | HE2  | TYR | X | 461 | 56.887 | 42.986 | 28.622 | 0.00 | 0.00 |
| ATOM | 6977 | CD2  | TYR | X | 461 | 57.650 | 43.948 | 26.862 | 0.00 | 0.00 |
| ATOM | 6978 | HD2  | TYR | X | 461 | 57.690 | 43.027 | 26.300 | 0.00 | 0.00 |
| ATOM | 6979 | C    | TYR | X | 461 | 59.825 | 45.187 | 22.762 | 0.00 | 0.00 |
| ATOM | 6980 | O    | TYR | X | 461 | 60.222 | 46.078 | 22.020 | 0.00 | 0.00 |
| ATOM | 6981 | N    | THR | X | 462 | 59.488 | 44.001 | 22.260 | 0.00 | 0.00 |
| ATOM | 6982 | H    | THR | X | 462 | 59.161 | 43.340 | 22.950 | 0.00 | 0.00 |
| ATOM | 6983 | CA   | THR | X | 462 | 59.463 | 43.801 | 20.799 | 0.00 | 0.00 |
| ATOM | 6984 | HA   | THR | X | 462 | 60.351 | 44.205 | 20.313 | 0.00 | 0.00 |
| ATOM | 6985 | CB   | THR | X | 462 | 59.428 | 42.303 | 20.376 | 0.00 | 0.00 |
| ATOM | 6986 | HB   | THR | X | 462 | 59.323 | 42.281 | 19.291 | 0.00 | 0.00 |
| ATOM | 6987 | CG2  | THR | X | 462 | 60.714 | 41.596 | 20.957 | 0.00 | 0.00 |
| ATOM | 6988 | HG21 | THR | X | 462 | 60.761 | 41.332 | 22.014 | 0.00 | 0.00 |
| ATOM | 6989 | HG22 | THR | X | 462 | 60.783 | 40.659 | 20.403 | 0.00 | 0.00 |
| ATOM | 6990 | HG23 | THR | X | 462 | 61.594 | 42.218 | 20.791 | 0.00 | 0.00 |
| ATOM | 6991 | OG1  | THR | X | 462 | 58.297 | 41.648 | 20.892 | 0.00 | 0.00 |
| ATOM | 6992 | HG1  | THR | X | 462 | 58.350 | 41.701 | 21.849 | 0.00 | 0.00 |
| ATOM | 6993 | C    | THR | X | 462 | 58.242 | 44.469 | 20.228 | 0.00 | 0.00 |
| ATOM | 6994 | O    | THR | X | 462 | 57.375 | 44.836 | 20.979 | 0.00 | 0.00 |
| ATOM | 6995 | N    | ALA | X | 463 | 58.304 | 44.720 | 18.927 | 0.00 | 0.00 |
| ATOM | 6996 | H    | ALA | X | 463 | 59.122 | 44.328 | 18.483 | 0.00 | 0.00 |
| ATOM | 6997 | CA   | ALA | X | 463 | 57.278 | 45.264 | 18.089 | 0.00 | 0.00 |
| ATOM | 6998 | HA   | ALA | X | 463 | 56.996 | 46.211 | 18.550 | 0.00 | 0.00 |
| ATOM | 6999 | CB   | ALA | X | 463 | 57.818 | 45.479 | 16.637 | 0.00 | 0.00 |
| ATOM | 7000 | HB1  | ALA | X | 463 | 57.139 | 45.961 | 15.932 | 0.00 | 0.00 |
| ATOM | 7001 | HB2  | ALA | X | 463 | 58.733 | 46.062 | 16.740 | 0.00 | 0.00 |
| ATOM | 7002 | HB3  | ALA | X | 463 | 58.204 | 44.557 | 16.204 | 0.00 | 0.00 |
| ATOM | 7003 | C    | ALA | X | 463 | 55.995 | 44.375 | 18.128 | 0.00 | 0.00 |
| ATOM | 7004 | O    | ALA | X | 463 | 54.911 | 44.920 | 18.291 | 0.00 | 0.00 |
| ATOM | 7005 | N    | GLU | X | 464 | 56.178 | 43.069 | 18.014 | 0.00 | 0.00 |
| ATOM | 7006 | H    | GLU | X | 464 | 57.049 | 42.683 | 17.679 | 0.00 | 0.00 |
| ATOM | 7007 | CA   | GLU | X | 464 | 55.073 | 42.214 | 18.097 | 0.00 | 0.00 |

|      |      |      |     |   |     |        |        |        |      |      |
|------|------|------|-----|---|-----|--------|--------|--------|------|------|
| ATOM | 7008 | HA   | GLU | X | 464 | 54.326 | 42.690 | 17.462 | 0.00 | 0.00 |
| ATOM | 7009 | CB   | GLU | X | 464 | 55.298 | 40.945 | 17.376 | 0.00 | 0.00 |
| ATOM | 7010 | HB2  | GLU | X | 464 | 54.344 | 40.449 | 17.195 | 0.00 | 0.00 |
| ATOM | 7011 | HB3  | GLU | X | 464 | 55.867 | 41.004 | 16.449 | 0.00 | 0.00 |
| ATOM | 7012 | CG   | GLU | X | 464 | 56.201 | 40.047 | 18.198 | 0.00 | 0.00 |
| ATOM | 7013 | HG2  | GLU | X | 464 | 57.134 | 40.589 | 18.350 | 0.00 | 0.00 |
| ATOM | 7014 | HG3  | GLU | X | 464 | 55.742 | 39.755 | 19.143 | 0.00 | 0.00 |
| ATOM | 7015 | CD   | GLU | X | 464 | 56.501 | 38.712 | 17.539 | 0.00 | 0.00 |
| ATOM | 7016 | OE1  | GLU | X | 464 | 57.613 | 38.278 | 17.938 | 0.00 | 0.00 |
| ATOM | 7017 | OE2  | GLU | X | 464 | 55.738 | 38.196 | 16.647 | 0.00 | 0.00 |
| ATOM | 7018 | C    | GLU | X | 464 | 54.457 | 42.104 | 19.490 | 0.00 | 0.00 |
| ATOM | 7019 | O    | GLU | X | 464 | 53.312 | 41.635 | 19.639 | 0.00 | 0.00 |
| ATOM | 7020 | N    | GLU | X | 465 | 55.211 | 42.412 | 20.566 | 0.00 | 0.00 |
| ATOM | 7021 | H    | GLU | X | 465 | 56.178 | 42.628 | 20.370 | 0.00 | 0.00 |
| ATOM | 7022 | CA   | GLU | X | 465 | 54.695 | 42.649 | 21.961 | 0.00 | 0.00 |
| ATOM | 7023 | HA   | GLU | X | 465 | 54.113 | 41.755 | 22.187 | 0.00 | 0.00 |
| ATOM | 7024 | CB   | GLU | X | 465 | 55.869 | 42.726 | 23.002 | 0.00 | 0.00 |
| ATOM | 7025 | HB2  | GLU | X | 465 | 56.638 | 43.287 | 22.470 | 0.00 | 0.00 |
| ATOM | 7026 | HB3  | GLU | X | 465 | 55.495 | 43.130 | 23.943 | 0.00 | 0.00 |
| ATOM | 7027 | CG   | GLU | X | 465 | 56.313 | 41.276 | 23.409 | 0.00 | 0.00 |
| ATOM | 7028 | HG2  | GLU | X | 465 | 55.635 | 40.873 | 24.162 | 0.00 | 0.00 |
| ATOM | 7029 | HG3  | GLU | X | 465 | 56.229 | 40.610 | 22.550 | 0.00 | 0.00 |
| ATOM | 7030 | CD   | GLU | X | 465 | 57.710 | 41.130 | 23.990 | 0.00 | 0.00 |
| ATOM | 7031 | OE1  | GLU | X | 465 | 58.658 | 41.794 | 23.588 | 0.00 | 0.00 |
| ATOM | 7032 | OE2  | GLU | X | 465 | 58.003 | 40.242 | 24.738 | 0.00 | 0.00 |
| ATOM | 7033 | C    | GLU | X | 465 | 53.839 | 43.908 | 22.121 | 0.00 | 0.00 |
| ATOM | 7034 | O    | GLU | X | 465 | 52.845 | 43.841 | 22.826 | 0.00 | 0.00 |
| ATOM | 7035 | N    | LYS | X | 466 | 54.145 | 45.028 | 21.501 | 0.00 | 0.00 |
| ATOM | 7036 | H    | LYS | X | 466 | 54.888 | 45.091 | 20.820 | 0.00 | 0.00 |
| ATOM | 7037 | CA   | LYS | X | 466 | 53.221 | 46.187 | 21.604 | 0.00 | 0.00 |
| ATOM | 7038 | HA   | LYS | X | 466 | 52.872 | 46.256 | 22.635 | 0.00 | 0.00 |
| ATOM | 7039 | CB   | LYS | X | 466 | 53.996 | 47.382 | 21.101 | 0.00 | 0.00 |
| ATOM | 7040 | HB2  | LYS | X | 466 | 54.934 | 47.463 | 21.649 | 0.00 | 0.00 |
| ATOM | 7041 | HB3  | LYS | X | 466 | 54.170 | 47.143 | 20.052 | 0.00 | 0.00 |
| ATOM | 7042 | CG   | LYS | X | 466 | 53.160 | 48.650 | 21.133 | 0.00 | 0.00 |
| ATOM | 7043 | HG2  | LYS | X | 466 | 52.473 | 48.474 | 20.305 | 0.00 | 0.00 |
| ATOM | 7044 | HG3  | LYS | X | 466 | 52.539 | 48.677 | 22.028 | 0.00 | 0.00 |
| ATOM | 7045 | CD   | LYS | X | 466 | 54.003 | 49.888 | 20.987 | 0.00 | 0.00 |
| ATOM | 7046 | HD2  | LYS | X | 466 | 53.393 | 50.753 | 21.247 | 0.00 | 0.00 |
| ATOM | 7047 | HD3  | LYS | X | 466 | 54.837 | 49.799 | 21.683 | 0.00 | 0.00 |
| ATOM | 7048 | CE   | LYS | X | 466 | 54.636 | 50.013 | 19.616 | 0.00 | 0.00 |
| ATOM | 7049 | HE2  | LYS | X | 466 | 55.296 | 49.146 | 19.653 | 0.00 | 0.00 |
| ATOM | 7050 | HE3  | LYS | X | 466 | 53.893 | 50.094 | 18.822 | 0.00 | 0.00 |
| ATOM | 7051 | NZ   | LYS | X | 466 | 55.432 | 51.254 | 19.660 | 0.00 | 0.00 |
| ATOM | 7052 | HZ1  | LYS | X | 466 | 54.862 | 52.084 | 19.737 | 0.00 | 0.00 |
| ATOM | 7053 | HZ2  | LYS | X | 466 | 56.082 | 51.340 | 20.428 | 0.00 | 0.00 |
| ATOM | 7054 | HZ3  | LYS | X | 466 | 56.087 | 51.344 | 18.896 | 0.00 | 0.00 |
| ATOM | 7055 | C    | LYS | X | 466 | 51.980 | 45.921 | 20.767 | 0.00 | 0.00 |
| ATOM | 7056 | O    | LYS | X | 466 | 50.892 | 46.317 | 21.154 | 0.00 | 0.00 |
| ATOM | 7057 | N    | ILE | X | 467 | 52.017 | 45.150 | 19.683 | 0.00 | 0.00 |
| ATOM | 7058 | H    | ILE | X | 467 | 52.920 | 44.871 | 19.326 | 0.00 | 0.00 |
| ATOM | 7059 | CA   | ILE | X | 467 | 50.799 | 44.662 | 19.051 | 0.00 | 0.00 |
| ATOM | 7060 | HA   | ILE | X | 467 | 50.170 | 45.530 | 18.853 | 0.00 | 0.00 |
| ATOM | 7061 | CB   | ILE | X | 467 | 51.188 | 43.894 | 17.663 | 0.00 | 0.00 |
| ATOM | 7062 | HB   | ILE | X | 467 | 51.914 | 43.085 | 17.755 | 0.00 | 0.00 |
| ATOM | 7063 | CG2  | ILE | X | 467 | 49.884 | 43.437 | 16.943 | 0.00 | 0.00 |
| ATOM | 7064 | HG21 | ILE | X | 467 | 49.249 | 44.218 | 16.525 | 0.00 | 0.00 |
| ATOM | 7065 | HG22 | ILE | X | 467 | 50.238 | 43.055 | 15.985 | 0.00 | 0.00 |
| ATOM | 7066 | HG23 | ILE | X | 467 | 49.270 | 42.662 | 17.402 | 0.00 | 0.00 |
| ATOM | 7067 | CG1  | ILE | X | 467 | 51.836 | 44.891 | 16.687 | 0.00 | 0.00 |
| ATOM | 7068 | HG12 | ILE | X | 467 | 52.715 | 45.293 | 17.191 | 0.00 | 0.00 |
| ATOM | 7069 | HG13 | ILE | X | 467 | 52.297 | 44.284 | 15.908 | 0.00 | 0.00 |
| ATOM | 7070 | CD1  | ILE | X | 467 | 51.117 | 46.212 | 16.237 | 0.00 | 0.00 |
| ATOM | 7071 | HD11 | ILE | X | 467 | 51.733 | 46.903 | 15.662 | 0.00 | 0.00 |
| ATOM | 7072 | HD12 | ILE | X | 467 | 50.315 | 45.894 | 15.570 | 0.00 | 0.00 |
| ATOM | 7073 | HD13 | ILE | X | 467 | 50.497 | 46.605 | 17.043 | 0.00 | 0.00 |
| ATOM | 7074 | C    | ILE | X | 467 | 49.985 | 43.729 | 19.956 | 0.00 | 0.00 |
| ATOM | 7075 | O    | ILE | X | 467 | 48.784 | 43.748 | 19.870 | 0.00 | 0.00 |
| ATOM | 7076 | N    | PHE | X | 468 | 50.639 | 42.803 | 20.679 | 0.00 | 0.00 |
| ATOM | 7077 | H    | PHE | X | 468 | 51.634 | 42.736 | 20.516 | 0.00 | 0.00 |

|      |      |      |     |   |     |        |        |        |      |      |
|------|------|------|-----|---|-----|--------|--------|--------|------|------|
| ATOM | 7078 | CA   | PHE | X | 468 | 50.009 | 41.830 | 21.457 | 0.00 | 0.00 |
| ATOM | 7079 | HA   | PHE | X | 468 | 49.215 | 41.322 | 20.911 | 0.00 | 0.00 |
| ATOM | 7080 | CB   | PHE | X | 468 | 50.933 | 40.741 | 21.883 | 0.00 | 0.00 |
| ATOM | 7081 | HB2  | PHE | X | 468 | 51.259 | 40.216 | 20.985 | 0.00 | 0.00 |
| ATOM | 7082 | HB3  | PHE | X | 468 | 51.757 | 41.279 | 22.351 | 0.00 | 0.00 |
| ATOM | 7083 | CG   | PHE | X | 468 | 50.381 | 39.715 | 22.858 | 0.00 | 0.00 |
| ATOM | 7084 | CD1  | PHE | X | 468 | 49.097 | 39.133 | 22.653 | 0.00 | 0.00 |
| ATOM | 7085 | HD1  | PHE | X | 468 | 48.420 | 39.436 | 21.868 | 0.00 | 0.00 |
| ATOM | 7086 | CE1  | PHE | X | 468 | 48.688 | 37.988 | 23.372 | 0.00 | 0.00 |
| ATOM | 7087 | HE1  | PHE | X | 468 | 47.734 | 37.513 | 23.197 | 0.00 | 0.00 |
| ATOM | 7088 | CZ   | PHE | X | 468 | 49.513 | 37.558 | 24.440 | 0.00 | 0.00 |
| ATOM | 7089 | HZ   | PHE | X | 468 | 49.146 | 36.802 | 25.117 | 0.00 | 0.00 |
| ATOM | 7090 | CE2  | PHE | X | 468 | 50.812 | 38.140 | 24.705 | 0.00 | 0.00 |
| ATOM | 7091 | HE2  | PHE | X | 468 | 51.582 | 37.706 | 25.326 | 0.00 | 0.00 |
| ATOM | 7092 | CD2  | PHE | X | 468 | 51.208 | 39.226 | 23.861 | 0.00 | 0.00 |
| ATOM | 7093 | HD2  | PHE | X | 468 | 52.189 | 39.667 | 23.965 | 0.00 | 0.00 |
| ATOM | 7094 | C    | PHE | X | 468 | 49.317 | 42.479 | 22.649 | 0.00 | 0.00 |
| ATOM | 7095 | O    | PHE | X | 468 | 48.202 | 42.206 | 22.863 | 0.00 | 0.00 |
| ATOM | 7096 | N    | ALA | X | 469 | 49.957 | 43.451 | 23.364 | 0.00 | 0.00 |
| ATOM | 7097 | H    | ALA | X | 469 | 50.952 | 43.557 | 23.226 | 0.00 | 0.00 |
| ATOM | 7098 | CA   | ALA | X | 469 | 49.332 | 44.275 | 24.333 | 0.00 | 0.00 |
| ATOM | 7099 | HA   | ALA | X | 469 | 49.204 | 43.605 | 25.184 | 0.00 | 0.00 |
| ATOM | 7100 | CB   | ALA | X | 469 | 50.432 | 45.274 | 24.759 | 0.00 | 0.00 |
| ATOM | 7101 | HB1  | ALA | X | 469 | 51.125 | 44.700 | 25.373 | 0.00 | 0.00 |
| ATOM | 7102 | HB2  | ALA | X | 469 | 50.998 | 45.663 | 23.912 | 0.00 | 0.00 |
| ATOM | 7103 | HB3  | ALA | X | 469 | 50.055 | 46.138 | 25.305 | 0.00 | 0.00 |
| ATOM | 7104 | C    | ALA | X | 469 | 48.115 | 44.952 | 23.731 | 0.00 | 0.00 |
| ATOM | 7105 | O    | ALA | X | 469 | 47.067 | 45.009 | 24.345 | 0.00 | 0.00 |
| ATOM | 7106 | N    | GLN | X | 470 | 48.230 | 45.513 | 22.505 | 0.00 | 0.00 |
| ATOM | 7107 | H    | GLN | X | 470 | 49.124 | 45.707 | 22.077 | 0.00 | 0.00 |
| ATOM | 7108 | CA   | GLN | X | 470 | 47.079 | 46.199 | 21.865 | 0.00 | 0.00 |
| ATOM | 7109 | HA   | GLN | X | 470 | 46.641 | 46.986 | 22.479 | 0.00 | 0.00 |
| ATOM | 7110 | CB   | GLN | X | 470 | 47.660 | 47.019 | 20.684 | 0.00 | 0.00 |
| ATOM | 7111 | HB2  | GLN | X | 470 | 48.232 | 46.384 | 20.009 | 0.00 | 0.00 |
| ATOM | 7112 | HB3  | GLN | X | 470 | 46.857 | 47.267 | 19.990 | 0.00 | 0.00 |
| ATOM | 7113 | CG   | GLN | X | 470 | 48.470 | 48.321 | 21.050 | 0.00 | 0.00 |
| ATOM | 7114 | HG2  | GLN | X | 470 | 47.803 | 49.079 | 21.459 | 0.00 | 0.00 |
| ATOM | 7115 | HG3  | GLN | X | 470 | 49.298 | 48.092 | 21.722 | 0.00 | 0.00 |
| ATOM | 7116 | CD   | GLN | X | 470 | 49.178 | 48.958 | 19.874 | 0.00 | 0.00 |
| ATOM | 7117 | OE1  | GLN | X | 470 | 50.177 | 48.561 | 19.313 | 0.00 | 0.00 |
| ATOM | 7118 | NE2  | GLN | X | 470 | 48.534 | 50.001 | 19.350 | 0.00 | 0.00 |
| ATOM | 7119 | HE21 | GLN | X | 470 | 48.896 | 50.345 | 18.471 | 0.00 | 0.00 |
| ATOM | 7120 | HE22 | GLN | X | 470 | 47.622 | 50.259 | 19.699 | 0.00 | 0.00 |
| ATOM | 7121 | C    | GLN | X | 470 | 45.953 | 45.257 | 21.448 | 0.00 | 0.00 |
| ATOM | 7122 | O    | GLN | X | 470 | 44.793 | 45.666 | 21.675 | 0.00 | 0.00 |
| ATOM | 7123 | N    | ARG | X | 471 | 46.241 | 43.986 | 21.110 | 0.00 | 0.00 |
| ATOM | 7124 | H    | ARG | X | 471 | 47.203 | 43.729 | 20.943 | 0.00 | 0.00 |
| ATOM | 7125 | CA   | ARG | X | 471 | 45.237 | 42.947 | 21.007 | 0.00 | 0.00 |
| ATOM | 7126 | HA   | ARG | X | 471 | 44.503 | 43.318 | 20.293 | 0.00 | 0.00 |
| ATOM | 7127 | CB   | ARG | X | 471 | 45.971 | 41.780 | 20.367 | 0.00 | 0.00 |
| ATOM | 7128 | HB2  | ARG | X | 471 | 46.202 | 42.085 | 19.346 | 0.00 | 0.00 |
| ATOM | 7129 | HB3  | ARG | X | 471 | 46.807 | 41.493 | 21.005 | 0.00 | 0.00 |
| ATOM | 7130 | CG   | ARG | X | 471 | 45.012 | 40.559 | 20.303 | 0.00 | 0.00 |
| ATOM | 7131 | HG2  | ARG | X | 471 | 44.804 | 40.251 | 21.328 | 0.00 | 0.00 |
| ATOM | 7132 | HG3  | ARG | X | 471 | 44.029 | 40.723 | 19.862 | 0.00 | 0.00 |
| ATOM | 7133 | CD   | ARG | X | 471 | 45.823 | 39.475 | 19.481 | 0.00 | 0.00 |
| ATOM | 7134 | HD2  | ARG | X | 471 | 45.927 | 39.835 | 18.458 | 0.00 | 0.00 |
| ATOM | 7135 | HD3  | ARG | X | 471 | 46.799 | 39.402 | 19.961 | 0.00 | 0.00 |
| ATOM | 7136 | NE   | ARG | X | 471 | 45.151 | 38.209 | 19.346 | 0.00 | 0.00 |
| ATOM | 7137 | HE   | ARG | X | 471 | 44.157 | 38.317 | 19.202 | 0.00 | 0.00 |
| ATOM | 7138 | CZ   | ARG | X | 471 | 45.658 | 37.076 | 19.749 | 0.00 | 0.00 |
| ATOM | 7139 | NH1  | ARG | X | 471 | 46.918 | 36.880 | 19.932 | 0.00 | 0.00 |
| ATOM | 7140 | HH11 | ARG | X | 471 | 47.606 | 37.620 | 19.923 | 0.00 | 0.00 |
| ATOM | 7141 | HH12 | ARG | X | 471 | 47.262 | 35.931 | 19.889 | 0.00 | 0.00 |
| ATOM | 7142 | NH2  | ARG | X | 471 | 44.914 | 36.074 | 19.885 | 0.00 | 0.00 |
| ATOM | 7143 | HH21 | ARG | X | 471 | 43.936 | 36.121 | 19.639 | 0.00 | 0.00 |
| ATOM | 7144 | HH22 | ARG | X | 471 | 45.253 | 35.263 | 20.383 | 0.00 | 0.00 |
| ATOM | 7145 | C    | ARG | X | 471 | 44.459 | 42.650 | 22.265 | 0.00 | 0.00 |
| ATOM | 7146 | O    | ARG | X | 471 | 43.256 | 42.573 | 22.211 | 0.00 | 0.00 |
| ATOM | 7147 | N    | LEU | X | 472 | 45.180 | 42.529 | 23.399 | 0.00 | 0.00 |

|      |      |      |     |   |     |        |        |        |      |      |
|------|------|------|-----|---|-----|--------|--------|--------|------|------|
| ATOM | 7148 | H    | LEU | X | 472 | 46.188 | 42.583 | 23.360 | 0.00 | 0.00 |
| ATOM | 7149 | CA   | LEU | X | 472 | 44.561 | 42.146 | 24.676 | 0.00 | 0.00 |
| ATOM | 7150 | HA   | LEU | X | 472 | 43.825 | 41.345 | 24.605 | 0.00 | 0.00 |
| ATOM | 7151 | CB   | LEU | X | 472 | 45.685 | 41.675 | 25.643 | 0.00 | 0.00 |
| ATOM | 7152 | HB2  | LEU | X | 472 | 46.425 | 42.473 | 25.694 | 0.00 | 0.00 |
| ATOM | 7153 | HB3  | LEU | X | 472 | 45.256 | 41.499 | 26.630 | 0.00 | 0.00 |
| ATOM | 7154 | CG   | LEU | X | 472 | 46.426 | 40.383 | 25.297 | 0.00 | 0.00 |
| ATOM | 7155 | HG   | LEU | X | 472 | 47.166 | 40.656 | 24.545 | 0.00 | 0.00 |
| ATOM | 7156 | CD1  | LEU | X | 472 | 47.192 | 39.813 | 26.559 | 0.00 | 0.00 |
| ATOM | 7157 | HD11 | LEU | X | 472 | 46.445 | 39.786 | 27.353 | 0.00 | 0.00 |
| ATOM | 7158 | HD12 | LEU | X | 472 | 47.707 | 38.881 | 26.327 | 0.00 | 0.00 |
| ATOM | 7159 | HD13 | LEU | X | 472 | 47.871 | 40.548 | 26.991 | 0.00 | 0.00 |
| ATOM | 7160 | CD2  | LEU | X | 472 | 45.535 | 39.288 | 24.686 | 0.00 | 0.00 |
| ATOM | 7161 | HD21 | LEU | X | 472 | 44.656 | 39.053 | 25.287 | 0.00 | 0.00 |
| ATOM | 7162 | HD22 | LEU | X | 472 | 45.124 | 39.655 | 23.746 | 0.00 | 0.00 |
| ATOM | 7163 | HD23 | LEU | X | 472 | 46.126 | 38.458 | 24.299 | 0.00 | 0.00 |
| ATOM | 7164 | C    | LEU | X | 472 | 43.814 | 43.267 | 25.307 | 0.00 | 0.00 |
| ATOM | 7165 | O    | LEU | X | 472 | 42.666 | 43.102 | 25.715 | 0.00 | 0.00 |
| ATOM | 7166 | N    | MET | X | 473 | 44.305 | 44.537 | 25.253 | 0.00 | 0.00 |
| ATOM | 7167 | H    | MET | X | 473 | 45.265 | 44.632 | 24.953 | 0.00 | 0.00 |
| ATOM | 7168 | CA   | MET | X | 473 | 43.671 | 45.715 | 25.551 | 0.00 | 0.00 |
| ATOM | 7169 | HA   | MET | X | 473 | 43.463 | 45.795 | 26.617 | 0.00 | 0.00 |
| ATOM | 7170 | CB   | MET | X | 473 | 44.565 | 46.907 | 25.180 | 0.00 | 0.00 |
| ATOM | 7171 | HB2  | MET | X | 473 | 44.929 | 46.790 | 24.159 | 0.00 | 0.00 |
| ATOM | 7172 | HB3  | MET | X | 473 | 43.879 | 47.748 | 25.076 | 0.00 | 0.00 |
| ATOM | 7173 | CG   | MET | X | 473 | 45.565 | 47.235 | 26.264 | 0.00 | 0.00 |
| ATOM | 7174 | HG2  | MET | X | 473 | 45.004 | 47.197 | 27.197 | 0.00 | 0.00 |
| ATOM | 7175 | HG3  | MET | X | 473 | 46.295 | 46.430 | 26.353 | 0.00 | 0.00 |
| ATOM | 7176 | SD   | MET | X | 473 | 46.409 | 48.824 | 26.222 | 0.00 | 0.00 |
| ATOM | 7177 | CE   | MET | X | 473 | 46.875 | 49.079 | 24.487 | 0.00 | 0.00 |
| ATOM | 7178 | HE1  | MET | X | 473 | 47.205 | 48.145 | 24.033 | 0.00 | 0.00 |
| ATOM | 7179 | HE2  | MET | X | 473 | 46.056 | 49.526 | 23.923 | 0.00 | 0.00 |
| ATOM | 7180 | HE3  | MET | X | 473 | 47.691 | 49.799 | 24.548 | 0.00 | 0.00 |
| ATOM | 7181 | C    | MET | X | 473 | 42.373 | 45.912 | 24.759 | 0.00 | 0.00 |
| ATOM | 7182 | O    | MET | X | 473 | 41.378 | 46.353 | 25.369 | 0.00 | 0.00 |
| ATOM | 7183 | N    | ARG | X | 474 | 42.310 | 45.660 | 23.459 | 0.00 | 0.00 |
| ATOM | 7184 | H    | ARG | X | 474 | 43.157 | 45.306 | 23.039 | 0.00 | 0.00 |
| ATOM | 7185 | CA   | ARG | X | 474 | 41.045 | 45.780 | 22.708 | 0.00 | 0.00 |
| ATOM | 7186 | HA   | ARG | X | 474 | 40.610 | 46.727 | 23.026 | 0.00 | 0.00 |
| ATOM | 7187 | CB   | ARG | X | 474 | 41.347 | 45.693 | 21.160 | 0.00 | 0.00 |
| ATOM | 7188 | HB2  | ARG | X | 474 | 41.961 | 46.561 | 20.917 | 0.00 | 0.00 |
| ATOM | 7189 | HB3  | ARG | X | 474 | 41.819 | 44.724 | 20.997 | 0.00 | 0.00 |
| ATOM | 7190 | CG   | ARG | X | 474 | 40.147 | 45.669 | 20.176 | 0.00 | 0.00 |
| ATOM | 7191 | HG2  | ARG | X | 474 | 40.514 | 45.431 | 19.178 | 0.00 | 0.00 |
| ATOM | 7192 | HG3  | ARG | X | 474 | 39.407 | 44.901 | 20.400 | 0.00 | 0.00 |
| ATOM | 7193 | CD   | ARG | X | 474 | 39.430 | 47.058 | 20.195 | 0.00 | 0.00 |
| ATOM | 7194 | HD2  | ARG | X | 474 | 38.881 | 47.081 | 21.136 | 0.00 | 0.00 |
| ATOM | 7195 | HD3  | ARG | X | 474 | 40.152 | 47.868 | 20.295 | 0.00 | 0.00 |
| ATOM | 7196 | NE   | ARG | X | 474 | 38.530 | 47.362 | 19.108 | 0.00 | 0.00 |
| ATOM | 7197 | HE   | ARG | X | 474 | 38.161 | 46.563 | 18.614 | 0.00 | 0.00 |
| ATOM | 7198 | CZ   | ARG | X | 474 | 38.048 | 48.534 | 18.727 | 0.00 | 0.00 |
| ATOM | 7199 | NH1  | ARG | X | 474 | 38.291 | 49.689 | 19.408 | 0.00 | 0.00 |
| ATOM | 7200 | HH11 | ARG | X | 474 | 38.787 | 49.632 | 20.286 | 0.00 | 0.00 |
| ATOM | 7201 | HH12 | ARG | X | 474 | 37.933 | 50.569 | 19.067 | 0.00 | 0.00 |
| ATOM | 7202 | NH2  | ARG | X | 474 | 37.300 | 48.631 | 17.686 | 0.00 | 0.00 |
| ATOM | 7203 | HH21 | ARG | X | 474 | 37.093 | 47.813 | 17.132 | 0.00 | 0.00 |
| ATOM | 7204 | HH22 | ARG | X | 474 | 36.870 | 49.474 | 17.335 | 0.00 | 0.00 |
| ATOM | 7205 | C    | ARG | X | 474 | 40.091 | 44.603 | 23.145 | 0.00 | 0.00 |
| ATOM | 7206 | O    | ARG | X | 474 | 38.863 | 44.852 | 23.180 | 0.00 | 0.00 |
| ATOM | 7207 | N    | TYR | X | 475 | 40.512 | 43.416 | 23.591 | 0.00 | 0.00 |
| ATOM | 7208 | H    | TYR | X | 475 | 41.464 | 43.147 | 23.390 | 0.00 | 0.00 |
| ATOM | 7209 | CA   | TYR | X | 475 | 39.685 | 42.430 | 24.191 | 0.00 | 0.00 |
| ATOM | 7210 | HA   | TYR | X | 475 | 38.889 | 42.143 | 23.504 | 0.00 | 0.00 |
| ATOM | 7211 | CB   | TYR | X | 475 | 40.470 | 41.124 | 24.395 | 0.00 | 0.00 |
| ATOM | 7212 | HB2  | TYR | X | 475 | 41.332 | 41.394 | 25.005 | 0.00 | 0.00 |
| ATOM | 7213 | HB3  | TYR | X | 475 | 39.763 | 40.519 | 24.961 | 0.00 | 0.00 |
| ATOM | 7214 | CG   | TYR | X | 475 | 40.997 | 40.298 | 23.176 | 0.00 | 0.00 |
| ATOM | 7215 | CD1  | TYR | X | 475 | 40.387 | 40.384 | 21.912 | 0.00 | 0.00 |
| ATOM | 7216 | HD1  | TYR | X | 475 | 39.425 | 40.863 | 21.800 | 0.00 | 0.00 |
| ATOM | 7217 | CE1  | TYR | X | 475 | 40.887 | 39.643 | 20.802 | 0.00 | 0.00 |

|      |      |      |     |   |     |        |        |        |      |      |
|------|------|------|-----|---|-----|--------|--------|--------|------|------|
| ATOM | 7218 | HE1  | TYR | X | 475 | 40.302 | 39.705 | 19.896 | 0.00 | 0.00 |
| ATOM | 7219 | CZ   | TYR | X | 475 | 42.047 | 38.832 | 20.938 | 0.00 | 0.00 |
| ATOM | 7220 | OH   | TYR | X | 475 | 42.293 | 37.917 | 19.995 | 0.00 | 0.00 |
| ATOM | 7221 | HH   | TYR | X | 475 | 41.849 | 38.218 | 19.198 | 0.00 | 0.00 |
| ATOM | 7222 | CE2  | TYR | X | 475 | 42.563 | 38.602 | 22.222 | 0.00 | 0.00 |
| ATOM | 7223 | HE2  | TYR | X | 475 | 43.239 | 37.784 | 22.424 | 0.00 | 0.00 |
| ATOM | 7224 | CD2  | TYR | X | 475 | 42.118 | 39.414 | 23.269 | 0.00 | 0.00 |
| ATOM | 7225 | HD2  | TYR | X | 475 | 42.511 | 39.263 | 24.264 | 0.00 | 0.00 |
| ATOM | 7226 | C    | TYR | X | 475 | 39.024 | 42.986 | 25.448 | 0.00 | 0.00 |
| ATOM | 7227 | O    | TYR | X | 475 | 37.785 | 42.942 | 25.601 | 0.00 | 0.00 |
| ATOM | 7228 | N    | TRP | X | 476 | 39.741 | 43.343 | 26.521 | 0.00 | 0.00 |
| ATOM | 7229 | H    | TRP | X | 476 | 40.731 | 43.414 | 26.333 | 0.00 | 0.00 |
| ATOM | 7230 | CA   | TRP | X | 476 | 39.213 | 43.917 | 27.786 | 0.00 | 0.00 |
| ATOM | 7231 | HA   | TRP | X | 476 | 38.579 | 43.208 | 28.318 | 0.00 | 0.00 |
| ATOM | 7232 | CB   | TRP | X | 476 | 40.386 | 44.096 | 28.699 | 0.00 | 0.00 |
| ATOM | 7233 | HB2  | TRP | X | 476 | 41.188 | 44.540 | 28.109 | 0.00 | 0.00 |
| ATOM | 7234 | HB3  | TRP | X | 476 | 39.995 | 44.898 | 29.326 | 0.00 | 0.00 |
| ATOM | 7235 | CG   | TRP | X | 476 | 40.904 | 42.974 | 29.605 | 0.00 | 0.00 |
| ATOM | 7236 | CD1  | TRP | X | 476 | 40.878 | 43.012 | 30.978 | 0.00 | 0.00 |
| ATOM | 7237 | HD1  | TRP | X | 476 | 40.461 | 43.873 | 31.477 | 0.00 | 0.00 |
| ATOM | 7238 | NE1  | TRP | X | 476 | 41.412 | 41.879 | 31.489 | 0.00 | 0.00 |
| ATOM | 7239 | HE1  | TRP | X | 476 | 41.540 | 41.807 | 32.488 | 0.00 | 0.00 |
| ATOM | 7240 | CE2  | TRP | X | 476 | 41.820 | 40.940 | 30.543 | 0.00 | 0.00 |
| ATOM | 7241 | CZ2  | TRP | X | 476 | 42.411 | 39.630 | 30.643 | 0.00 | 0.00 |
| ATOM | 7242 | HZ2  | TRP | X | 476 | 42.663 | 39.080 | 31.537 | 0.00 | 0.00 |
| ATOM | 7243 | CH2  | TRP | X | 476 | 42.735 | 38.996 | 29.400 | 0.00 | 0.00 |
| ATOM | 7244 | HH2  | TRP | X | 476 | 43.193 | 38.020 | 29.455 | 0.00 | 0.00 |
| ATOM | 7245 | CZ3  | TRP | X | 476 | 42.542 | 39.663 | 28.183 | 0.00 | 0.00 |
| ATOM | 7246 | HZ3  | TRP | X | 476 | 42.699 | 39.085 | 27.284 | 0.00 | 0.00 |
| ATOM | 7247 | CE3  | TRP | X | 476 | 41.827 | 40.906 | 28.170 | 0.00 | 0.00 |
| ATOM | 7248 | HE3  | TRP | X | 476 | 41.357 | 41.231 | 27.254 | 0.00 | 0.00 |
| ATOM | 7249 | CD2  | TRP | X | 476 | 41.519 | 41.650 | 29.302 | 0.00 | 0.00 |
| ATOM | 7250 | C    | TRP | X | 476 | 38.335 | 45.144 | 27.555 | 0.00 | 0.00 |
| ATOM | 7251 | O    | TRP | X | 476 | 37.326 | 45.283 | 28.278 | 0.00 | 0.00 |
| ATOM | 7252 | N    | ALA | X | 477 | 38.592 | 46.135 | 26.661 | 0.00 | 0.00 |
| ATOM | 7253 | H    | ALA | X | 477 | 39.516 | 46.217 | 26.261 | 0.00 | 0.00 |
| ATOM | 7254 | CA   | ALA | X | 477 | 37.632 | 47.163 | 26.269 | 0.00 | 0.00 |
| ATOM | 7255 | HA   | ALA | X | 477 | 37.165 | 47.612 | 27.146 | 0.00 | 0.00 |
| ATOM | 7256 | CB   | ALA | X | 477 | 38.416 | 48.395 | 25.671 | 0.00 | 0.00 |
| ATOM | 7257 | HB1  | ALA | X | 477 | 38.687 | 48.113 | 24.654 | 0.00 | 0.00 |
| ATOM | 7258 | HB2  | ALA | X | 477 | 37.825 | 49.311 | 25.678 | 0.00 | 0.00 |
| ATOM | 7259 | HB3  | ALA | X | 477 | 39.340 | 48.548 | 26.228 | 0.00 | 0.00 |
| ATOM | 7260 | C    | ALA | X | 477 | 36.430 | 46.688 | 25.430 | 0.00 | 0.00 |
| ATOM | 7261 | O    | ALA | X | 477 | 35.303 | 47.129 | 25.722 | 0.00 | 0.00 |
| ATOM | 7262 | N    | ASN | X | 478 | 36.540 | 45.831 | 24.449 | 0.00 | 0.00 |
| ATOM | 7263 | H    | ASN | X | 478 | 37.458 | 45.598 | 24.099 | 0.00 | 0.00 |
| ATOM | 7264 | CA   | ASN | X | 478 | 35.366 | 45.193 | 23.711 | 0.00 | 0.00 |
| ATOM | 7265 | HA   | ASN | X | 478 | 34.715 | 45.882 | 23.172 | 0.00 | 0.00 |
| ATOM | 7266 | CB   | ASN | X | 478 | 35.932 | 44.204 | 22.656 | 0.00 | 0.00 |
| ATOM | 7267 | HB2  | ASN | X | 478 | 36.716 | 43.595 | 23.107 | 0.00 | 0.00 |
| ATOM | 7268 | HB3  | ASN | X | 478 | 35.237 | 43.381 | 22.491 | 0.00 | 0.00 |
| ATOM | 7269 | CG   | ASN | X | 478 | 36.348 | 44.836 | 21.367 | 0.00 | 0.00 |
| ATOM | 7270 | OD1  | ASN | X | 478 | 36.021 | 45.958 | 21.037 | 0.00 | 0.00 |
| ATOM | 7271 | ND2  | ASN | X | 478 | 36.940 | 43.972 | 20.514 | 0.00 | 0.00 |
| ATOM | 7272 | HD21 | ASN | X | 478 | 37.000 | 44.219 | 19.536 | 0.00 | 0.00 |
| ATOM | 7273 | HD22 | ASN | X | 478 | 37.165 | 43.010 | 20.723 | 0.00 | 0.00 |
| ATOM | 7274 | C    | ASN | X | 478 | 34.480 | 44.449 | 24.737 | 0.00 | 0.00 |
| ATOM | 7275 | O    | ASN | X | 478 | 33.236 | 44.598 | 24.707 | 0.00 | 0.00 |
| ATOM | 7276 | N    | PHE | X | 479 | 35.052 | 44.025 | 25.917 | 0.00 | 0.00 |
| ATOM | 7277 | H    | PHE | X | 479 | 36.058 | 44.052 | 26.000 | 0.00 | 0.00 |
| ATOM | 7278 | CA   | PHE | X | 479 | 34.257 | 43.579 | 27.044 | 0.00 | 0.00 |
| ATOM | 7279 | HA   | PHE | X | 479 | 33.450 | 42.920 | 26.722 | 0.00 | 0.00 |
| ATOM | 7280 | CB   | PHE | X | 479 | 35.180 | 42.731 | 27.941 | 0.00 | 0.00 |
| ATOM | 7281 | HB2  | PHE | X | 479 | 35.875 | 42.360 | 27.188 | 0.00 | 0.00 |
| ATOM | 7282 | HB3  | PHE | X | 479 | 35.761 | 43.406 | 28.569 | 0.00 | 0.00 |
| ATOM | 7283 | CG   | PHE | X | 479 | 34.524 | 41.662 | 28.746 | 0.00 | 0.00 |
| ATOM | 7284 | CD1  | PHE | X | 479 | 34.110 | 40.438 | 28.260 | 0.00 | 0.00 |
| ATOM | 7285 | HD1  | PHE | X | 479 | 34.395 | 40.308 | 27.226 | 0.00 | 0.00 |
| ATOM | 7286 | CE1  | PHE | X | 479 | 33.269 | 39.637 | 28.947 | 0.00 | 0.00 |
| ATOM | 7287 | HE1  | PHE | X | 479 | 33.011 | 38.660 | 28.568 | 0.00 | 0.00 |

|      |      |      |     |   |     |        |        |        |      |      |
|------|------|------|-----|---|-----|--------|--------|--------|------|------|
| ATOM | 7288 | CZ   | PHE | X | 479 | 32.837 | 39.990 | 30.259 | 0.00 | 0.00 |
| ATOM | 7289 | HZ   | PHE | X | 479 | 32.058 | 39.441 | 30.767 | 0.00 | 0.00 |
| ATOM | 7290 | CE2  | PHE | X | 479 | 33.395 | 41.060 | 30.823 | 0.00 | 0.00 |
| ATOM | 7291 | HE2  | PHE | X | 479 | 33.102 | 41.348 | 31.821 | 0.00 | 0.00 |
| ATOM | 7292 | CD2  | PHE | X | 479 | 34.159 | 41.968 | 30.109 | 0.00 | 0.00 |
| ATOM | 7293 | HD2  | PHE | X | 479 | 34.448 | 42.929 | 30.508 | 0.00 | 0.00 |
| ATOM | 7294 | C    | PHE | X | 479 | 33.538 | 44.672 | 27.811 | 0.00 | 0.00 |
| ATOM | 7295 | O    | PHE | X | 479 | 32.387 | 44.543 | 28.197 | 0.00 | 0.00 |
| ATOM | 7296 | N    | ALA | X | 480 | 34.260 | 45.823 | 28.012 | 0.00 | 0.00 |
| ATOM | 7297 | H    | ALA | X | 480 | 35.227 | 45.917 | 27.733 | 0.00 | 0.00 |
| ATOM | 7298 | CA   | ALA | X | 480 | 33.651 | 47.030 | 28.519 | 0.00 | 0.00 |
| ATOM | 7299 | HA   | ALA | X | 480 | 33.274 | 46.778 | 29.510 | 0.00 | 0.00 |
| ATOM | 7300 | CB   | ALA | X | 480 | 34.756 | 48.133 | 28.603 | 0.00 | 0.00 |
| ATOM | 7301 | HB1  | ALA | X | 480 | 35.760 | 47.711 | 28.653 | 0.00 | 0.00 |
| ATOM | 7302 | HB2  | ALA | X | 480 | 34.808 | 48.735 | 27.696 | 0.00 | 0.00 |
| ATOM | 7303 | HB3  | ALA | X | 480 | 34.604 | 48.745 | 29.492 | 0.00 | 0.00 |
| ATOM | 7304 | C    | ALA | X | 480 | 32.488 | 47.557 | 27.698 | 0.00 | 0.00 |
| ATOM | 7305 | O    | ALA | X | 480 | 31.537 | 48.092 | 28.210 | 0.00 | 0.00 |
| ATOM | 7306 | N    | ARG | X | 481 | 32.523 | 47.390 | 26.335 | 0.00 | 0.00 |
| ATOM | 7307 | H    | ARG | X | 481 | 33.417 | 47.053 | 26.007 | 0.00 | 0.00 |
| ATOM | 7308 | CA   | ARG | X | 481 | 31.503 | 47.852 | 25.397 | 0.00 | 0.00 |
| ATOM | 7309 | HA   | ARG | X | 481 | 31.221 | 48.847 | 25.740 | 0.00 | 0.00 |
| ATOM | 7310 | CB   | ARG | X | 481 | 32.044 | 47.987 | 24.029 | 0.00 | 0.00 |
| ATOM | 7311 | HB2  | ARG | X | 481 | 32.526 | 47.056 | 23.730 | 0.00 | 0.00 |
| ATOM | 7312 | HB3  | ARG | X | 481 | 31.164 | 48.137 | 23.403 | 0.00 | 0.00 |
| ATOM | 7313 | CG   | ARG | X | 481 | 33.152 | 49.071 | 23.914 | 0.00 | 0.00 |
| ATOM | 7314 | HG2  | ARG | X | 481 | 32.703 | 50.054 | 24.058 | 0.00 | 0.00 |
| ATOM | 7315 | HG3  | ARG | X | 481 | 33.805 | 48.987 | 24.783 | 0.00 | 0.00 |
| ATOM | 7316 | CD   | ARG | X | 481 | 34.031 | 49.066 | 22.663 | 0.00 | 0.00 |
| ATOM | 7317 | HD2  | ARG | X | 481 | 34.424 | 48.066 | 22.478 | 0.00 | 0.00 |
| ATOM | 7318 | HD3  | ARG | X | 481 | 33.411 | 49.368 | 21.819 | 0.00 | 0.00 |
| ATOM | 7319 | NE   | ARG | X | 481 | 35.106 | 50.020 | 22.692 | 0.00 | 0.00 |
| ATOM | 7320 | HE   | ARG | X | 481 | 34.812 | 50.986 | 22.725 | 0.00 | 0.00 |
| ATOM | 7321 | CZ   | ARG | X | 481 | 36.426 | 49.828 | 22.655 | 0.00 | 0.00 |
| ATOM | 7322 | NH1  | ARG | X | 481 | 36.940 | 48.662 | 22.289 | 0.00 | 0.00 |
| ATOM | 7323 | HH11 | ARG | X | 481 | 36.352 | 47.841 | 22.282 | 0.00 | 0.00 |
| ATOM | 7324 | HH12 | ARG | X | 481 | 37.939 | 48.653 | 22.142 | 0.00 | 0.00 |
| ATOM | 7325 | NH2  | ARG | X | 481 | 37.278 | 50.809 | 22.758 | 0.00 | 0.00 |
| ATOM | 7326 | HH21 | ARG | X | 481 | 37.085 | 51.772 | 22.991 | 0.00 | 0.00 |
| ATOM | 7327 | HH22 | ARG | X | 481 | 38.243 | 50.518 | 22.697 | 0.00 | 0.00 |
| ATOM | 7328 | C    | ARG | X | 481 | 30.242 | 47.001 | 25.510 | 0.00 | 0.00 |
| ATOM | 7329 | O    | ARG | X | 481 | 29.118 | 47.554 | 25.722 | 0.00 | 0.00 |
| ATOM | 7330 | N    | THR | X | 482 | 30.414 | 45.675 | 25.287 | 0.00 | 0.00 |
| ATOM | 7331 | H    | THR | X | 482 | 31.304 | 45.312 | 24.977 | 0.00 | 0.00 |
| ATOM | 7332 | CA   | THR | X | 482 | 29.264 | 44.735 | 25.081 | 0.00 | 0.00 |
| ATOM | 7333 | HA   | THR | X | 482 | 28.307 | 45.224 | 25.265 | 0.00 | 0.00 |
| ATOM | 7334 | CB   | THR | X | 482 | 29.229 | 44.335 | 23.535 | 0.00 | 0.00 |
| ATOM | 7335 | HB   | THR | X | 482 | 28.412 | 43.646 | 23.322 | 0.00 | 0.00 |
| ATOM | 7336 | CG2  | THR | X | 482 | 29.138 | 45.479 | 22.561 | 0.00 | 0.00 |
| ATOM | 7337 | HG21 | THR | X | 482 | 29.036 | 45.125 | 21.535 | 0.00 | 0.00 |
| ATOM | 7338 | HG22 | THR | X | 482 | 28.312 | 46.131 | 22.845 | 0.00 | 0.00 |
| ATOM | 7339 | HG23 | THR | X | 482 | 30.041 | 46.068 | 22.724 | 0.00 | 0.00 |
| ATOM | 7340 | OG1  | THR | X | 482 | 30.528 | 43.741 | 23.422 | 0.00 | 0.00 |
| ATOM | 7341 | HG1  | THR | X | 482 | 30.671 | 43.716 | 22.473 | 0.00 | 0.00 |
| ATOM | 7342 | C    | THR | X | 482 | 29.420 | 43.494 | 25.903 | 0.00 | 0.00 |
| ATOM | 7343 | O    | THR | X | 482 | 28.438 | 42.775 | 26.034 | 0.00 | 0.00 |
| ATOM | 7344 | N    | GLY | X | 483 | 30.617 | 43.196 | 26.525 | 0.00 | 0.00 |
| ATOM | 7345 | H    | GLY | X | 483 | 31.412 | 43.801 | 26.382 | 0.00 | 0.00 |
| ATOM | 7346 | CA   | GLY | X | 483 | 30.897 | 41.852 | 27.184 | 0.00 | 0.00 |
| ATOM | 7347 | HA2  | GLY | X | 483 | 31.820 | 41.983 | 27.712 | 0.00 | 0.00 |
| ATOM | 7348 | HA3  | GLY | X | 483 | 30.089 | 41.502 | 27.783 | 0.00 | 0.00 |
| ATOM | 7349 | C    | GLY | X | 483 | 31.052 | 40.719 | 26.126 | 0.00 | 0.00 |
| ATOM | 7350 | O    | GLY | X | 483 | 31.163 | 39.571 | 26.563 | 0.00 | 0.00 |
| ATOM | 7351 | N    | ASP | X | 484 | 31.221 | 40.968 | 24.822 | 0.00 | 0.00 |
| ATOM | 7352 | H    | ASP | X | 484 | 31.281 | 41.945 | 24.572 | 0.00 | 0.00 |
| ATOM | 7353 | CA   | ASP | X | 484 | 31.938 | 40.079 | 23.815 | 0.00 | 0.00 |
| ATOM | 7354 | HA   | ASP | X | 484 | 31.903 | 39.018 | 24.064 | 0.00 | 0.00 |
| ATOM | 7355 | CB   | ASP | X | 484 | 31.480 | 40.407 | 22.365 | 0.00 | 0.00 |
| ATOM | 7356 | HB2  | ASP | X | 484 | 31.595 | 41.449 | 22.066 | 0.00 | 0.00 |
| ATOM | 7357 | HB3  | ASP | X | 484 | 32.037 | 39.799 | 21.652 | 0.00 | 0.00 |

|      |      |      |     |   |     |        |        |        |      |      |
|------|------|------|-----|---|-----|--------|--------|--------|------|------|
| ATOM | 7358 | CG   | ASP | X | 484 | 29.960 | 40.105 | 22.048 | 0.00 | 0.00 |
| ATOM | 7359 | OD1  | ASP | X | 484 | 29.298 | 39.295 | 22.687 | 0.00 | 0.00 |
| ATOM | 7360 | OD2  | ASP | X | 484 | 29.494 | 40.704 | 21.076 | 0.00 | 0.00 |
| ATOM | 7361 | C    | ASP | X | 484 | 33.413 | 40.422 | 23.822 | 0.00 | 0.00 |
| ATOM | 7362 | O    | ASP | X | 484 | 33.744 | 41.628 | 23.651 | 0.00 | 0.00 |
| ATOM | 7363 | N    | PRO | X | 485 | 34.395 | 39.477 | 23.843 | 0.00 | 0.00 |
| ATOM | 7364 | CD   | PRO | X | 485 | 34.390 | 38.116 | 24.331 | 0.00 | 0.00 |
| ATOM | 7365 | HD2  | PRO | X | 485 | 33.978 | 37.438 | 23.583 | 0.00 | 0.00 |
| ATOM | 7366 | HD3  | PRO | X | 485 | 33.583 | 38.095 | 25.064 | 0.00 | 0.00 |
| ATOM | 7367 | CG   | PRO | X | 485 | 35.726 | 37.765 | 24.976 | 0.00 | 0.00 |
| ATOM | 7368 | HG2  | PRO | X | 485 | 35.996 | 36.709 | 24.971 | 0.00 | 0.00 |
| ATOM | 7369 | HG3  | PRO | X | 485 | 35.839 | 38.332 | 25.900 | 0.00 | 0.00 |
| ATOM | 7370 | CB   | PRO | X | 485 | 36.569 | 38.497 | 23.955 | 0.00 | 0.00 |
| ATOM | 7371 | HB2  | PRO | X | 485 | 36.674 | 37.857 | 23.079 | 0.00 | 0.00 |
| ATOM | 7372 | HB3  | PRO | X | 485 | 37.554 | 38.730 | 24.359 | 0.00 | 0.00 |
| ATOM | 7373 | CA   | PRO | X | 485 | 35.839 | 39.789 | 23.716 | 0.00 | 0.00 |
| ATOM | 7374 | HA   | PRO | X | 485 | 36.194 | 40.401 | 24.545 | 0.00 | 0.00 |
| ATOM | 7375 | C    | PRO | X | 485 | 36.164 | 40.270 | 22.251 | 0.00 | 0.00 |
| ATOM | 7376 | O    | PRO | X | 485 | 37.145 | 41.059 | 22.008 | 0.00 | 0.00 |
| ATOM | 7377 | N    | ASN | X | 486 | 35.500 | 39.790 | 21.207 | 0.00 | 0.00 |
| ATOM | 7378 | H    | ASN | X | 486 | 34.817 | 39.069 | 21.390 | 0.00 | 0.00 |
| ATOM | 7379 | CA   | ASN | X | 486 | 35.737 | 40.152 | 19.813 | 0.00 | 0.00 |
| ATOM | 7380 | HA   | ASN | X | 486 | 36.807 | 40.332 | 19.712 | 0.00 | 0.00 |
| ATOM | 7381 | CB   | ASN | X | 486 | 35.125 | 38.977 | 19.001 | 0.00 | 0.00 |
| ATOM | 7382 | HB2  | ASN | X | 486 | 35.041 | 39.254 | 17.950 | 0.00 | 0.00 |
| ATOM | 7383 | HB3  | ASN | X | 486 | 35.877 | 38.188 | 18.978 | 0.00 | 0.00 |
| ATOM | 7384 | CG   | ASN | X | 486 | 33.817 | 38.435 | 19.515 | 0.00 | 0.00 |
| ATOM | 7385 | OD1  | ASN | X | 486 | 33.787 | 37.664 | 20.445 | 0.00 | 0.00 |
| ATOM | 7386 | ND2  | ASN | X | 486 | 32.706 | 38.887 | 18.954 | 0.00 | 0.00 |
| ATOM | 7387 | HD21 | ASN | X | 486 | 31.827 | 38.550 | 19.321 | 0.00 | 0.00 |
| ATOM | 7388 | HD22 | ASN | X | 486 | 32.746 | 39.673 | 18.321 | 0.00 | 0.00 |
| ATOM | 7389 | C    | ASN | X | 486 | 35.099 | 41.487 | 19.528 | 0.00 | 0.00 |
| ATOM | 7390 | O    | ASN | X | 486 | 34.230 | 41.999 | 20.234 | 0.00 | 0.00 |
| ATOM | 7391 | N    | GLU | X | 487 | 35.353 | 41.996 | 18.347 | 0.00 | 0.00 |
| ATOM | 7392 | H    | GLU | X | 487 | 36.126 | 41.570 | 17.857 | 0.00 | 0.00 |
| ATOM | 7393 | CA   | GLU | X | 487 | 34.454 | 42.968 | 17.655 | 0.00 | 0.00 |
| ATOM | 7394 | HA   | GLU | X | 487 | 34.461 | 43.879 | 18.253 | 0.00 | 0.00 |
| ATOM | 7395 | CB   | GLU | X | 487 | 35.021 | 43.257 | 16.257 | 0.00 | 0.00 |
| ATOM | 7396 | HB2  | GLU | X | 487 | 35.174 | 42.265 | 15.831 | 0.00 | 0.00 |
| ATOM | 7397 | HB3  | GLU | X | 487 | 34.283 | 43.784 | 15.653 | 0.00 | 0.00 |
| ATOM | 7398 | CG   | GLU | X | 487 | 36.302 | 44.034 | 16.134 | 0.00 | 0.00 |
| ATOM | 7399 | HG2  | GLU | X | 487 | 37.130 | 43.467 | 16.561 | 0.00 | 0.00 |
| ATOM | 7400 | HG3  | GLU | X | 487 | 36.538 | 44.109 | 15.073 | 0.00 | 0.00 |
| ATOM | 7401 | CD   | GLU | X | 487 | 36.384 | 45.387 | 16.797 | 0.00 | 0.00 |
| ATOM | 7402 | OE1  | GLU | X | 487 | 37.521 | 45.832 | 17.085 | 0.00 | 0.00 |
| ATOM | 7403 | OE2  | GLU | X | 487 | 35.371 | 46.043 | 17.121 | 0.00 | 0.00 |
| ATOM | 7404 | C    | GLU | X | 487 | 33.031 | 42.468 | 17.564 | 0.00 | 0.00 |
| ATOM | 7405 | O    | GLU | X | 487 | 32.825 | 41.296 | 17.359 | 0.00 | 0.00 |
| ATOM | 7406 | N    | PRO | X | 488 | 32.028 | 43.414 | 17.547 | 0.00 | 0.00 |
| ATOM | 7407 | CD   | PRO | X | 488 | 32.023 | 44.767 | 18.156 | 0.00 | 0.00 |
| ATOM | 7408 | HD2  | PRO | X | 488 | 32.597 | 45.340 | 17.428 | 0.00 | 0.00 |
| ATOM | 7409 | HD3  | PRO | X | 488 | 32.518 | 44.909 | 19.117 | 0.00 | 0.00 |
| ATOM | 7410 | CG   | PRO | X | 488 | 30.519 | 45.207 | 18.279 | 0.00 | 0.00 |
| ATOM | 7411 | HG2  | PRO | X | 488 | 30.408 | 46.288 | 18.184 | 0.00 | 0.00 |
| ATOM | 7412 | HG3  | PRO | X | 488 | 30.159 | 44.816 | 19.231 | 0.00 | 0.00 |
| ATOM | 7413 | CB   | PRO | X | 488 | 29.846 | 44.280 | 17.260 | 0.00 | 0.00 |
| ATOM | 7414 | HB2  | PRO | X | 488 | 29.843 | 44.800 | 16.302 | 0.00 | 0.00 |
| ATOM | 7415 | HB3  | PRO | X | 488 | 28.833 | 43.963 | 17.507 | 0.00 | 0.00 |
| ATOM | 7416 | CA   | PRO | X | 488 | 30.709 | 42.999 | 17.167 | 0.00 | 0.00 |
| ATOM | 7417 | HA   | PRO | X | 488 | 30.402 | 42.192 | 17.832 | 0.00 | 0.00 |
| ATOM | 7418 | C    | PRO | X | 488 | 30.687 | 42.526 | 15.692 | 0.00 | 0.00 |
| ATOM | 7419 | O    | PRO | X | 488 | 30.194 | 41.458 | 15.324 | 0.00 | 0.00 |
| ATOM | 7420 | N    | ARG | X | 489 | 31.323 | 43.304 | 14.836 | 0.00 | 0.00 |
| ATOM | 7421 | H    | ARG | X | 489 | 31.673 | 44.227 | 15.052 | 0.00 | 0.00 |
| ATOM | 7422 | CA   | ARG | X | 489 | 31.287 | 43.017 | 13.355 | 0.00 | 0.00 |
| ATOM | 7423 | HA   | ARG | X | 489 | 30.329 | 42.523 | 13.193 | 0.00 | 0.00 |
| ATOM | 7424 | CB   | ARG | X | 489 | 31.281 | 44.274 | 12.445 | 0.00 | 0.00 |
| ATOM | 7425 | HB2  | ARG | X | 489 | 30.444 | 44.908 | 12.738 | 0.00 | 0.00 |
| ATOM | 7426 | HB3  | ARG | X | 489 | 32.255 | 44.761 | 12.489 | 0.00 | 0.00 |
| ATOM | 7427 | CG   | ARG | X | 489 | 30.960 | 43.866 | 11.061 | 0.00 | 0.00 |



|      |      |      |     |   |     |        |        |        |      |      |
|------|------|------|-----|---|-----|--------|--------|--------|------|------|
| ATOM | 7428 | HG2  | ARG | X | 489 | 31.651 | 43.077 | 10.762 | 0.00 | 0.00 |
| ATOM | 7429 | HG3  | ARG | X | 489 | 29.984 | 43.406 | 10.902 | 0.00 | 0.00 |
| ATOM | 7430 | CD   | ARG | X | 489 | 31.047 | 45.065 | 10.132 | 0.00 | 0.00 |
| ATOM | 7431 | HD2  | ARG | X | 489 | 30.582 | 44.800 | 9.183  | 0.00 | 0.00 |
| ATOM | 7432 | HD3  | ARG | X | 489 | 30.517 | 45.934 | 10.521 | 0.00 | 0.00 |
| ATOM | 7433 | NE   | ARG | X | 489 | 32.462 | 45.502 | 9.900  | 0.00 | 0.00 |
| ATOM | 7434 | HE   | ARG | X | 489 | 32.837 | 46.196 | 10.531 | 0.00 | 0.00 |
| ATOM | 7435 | CZ   | ARG | X | 489 | 33.387 | 44.917 | 9.164  | 0.00 | 0.00 |
| ATOM | 7436 | NH1  | ARG | X | 489 | 34.471 | 45.665 | 9.026  | 0.00 | 0.00 |
| ATOM | 7437 | HH11 | ARG | X | 489 | 34.601 | 46.553 | 9.490  | 0.00 | 0.00 |
| ATOM | 7438 | HH12 | ARG | X | 489 | 35.220 | 45.318 | 8.443  | 0.00 | 0.00 |
| ATOM | 7439 | NH2  | ARG | X | 489 | 33.278 | 43.769 | 8.506  | 0.00 | 0.00 |
| ATOM | 7440 | HH21 | ARG | X | 489 | 32.458 | 43.183 | 8.574  | 0.00 | 0.00 |
| ATOM | 7441 | HH22 | ARG | X | 489 | 33.894 | 43.599 | 7.725  | 0.00 | 0.00 |
| ATOM | 7442 | C    | ARG | X | 489 | 32.541 | 42.073 | 13.209 | 0.00 | 0.00 |
| ATOM | 7443 | O    | ARG | X | 489 | 33.608 | 42.411 | 12.640 | 0.00 | 0.00 |
| ATOM | 7444 | N    | ASP | X | 490 | 32.466 | 40.828 | 13.720 | 0.00 | 0.00 |
| ATOM | 7445 | H    | ASP | X | 490 | 31.562 | 40.463 | 13.982 | 0.00 | 0.00 |
| ATOM | 7446 | CA   | ASP | X | 490 | 33.548 | 39.833 | 13.876 | 0.00 | 0.00 |
| ATOM | 7447 | HA   | ASP | X | 490 | 34.269 | 40.168 | 14.622 | 0.00 | 0.00 |
| ATOM | 7448 | CB   | ASP | X | 490 | 32.949 | 38.496 | 14.471 | 0.00 | 0.00 |
| ATOM | 7449 | HB2  | ASP | X | 490 | 33.762 | 37.794 | 14.660 | 0.00 | 0.00 |
| ATOM | 7450 | HB3  | ASP | X | 490 | 32.409 | 38.801 | 15.367 | 0.00 | 0.00 |
| ATOM | 7451 | CG   | ASP | X | 490 | 31.878 | 37.814 | 13.642 | 0.00 | 0.00 |
| ATOM | 7452 | OD1  | ASP | X | 490 | 30.784 | 38.415 | 13.478 | 0.00 | 0.00 |
| ATOM | 7453 | OD2  | ASP | X | 490 | 32.056 | 36.595 | 13.432 | 0.00 | 0.00 |
| ATOM | 7454 | C    | ASP | X | 490 | 34.276 | 39.470 | 12.527 | 0.00 | 0.00 |
| ATOM | 7455 | O    | ASP | X | 490 | 33.620 | 38.973 | 11.597 | 0.00 | 0.00 |
| ATOM | 7456 | N    | PRO | X | 491 | 35.577 | 39.726 | 12.413 | 0.00 | 0.00 |
| ATOM | 7457 | CD   | PRO | X | 491 | 36.314 | 40.540 | 13.373 | 0.00 | 0.00 |
| ATOM | 7458 | HD2  | PRO | X | 491 | 36.483 | 39.998 | 14.303 | 0.00 | 0.00 |
| ATOM | 7459 | HD3  | PRO | X | 491 | 35.678 | 41.390 | 13.621 | 0.00 | 0.00 |
| ATOM | 7460 | CG   | PRO | X | 491 | 37.669 | 40.906 | 12.751 | 0.00 | 0.00 |
| ATOM | 7461 | HG2  | PRO | X | 491 | 38.489 | 40.855 | 13.469 | 0.00 | 0.00 |
| ATOM | 7462 | HG3  | PRO | X | 491 | 37.528 | 41.886 | 12.297 | 0.00 | 0.00 |
| ATOM | 7463 | CB   | PRO | X | 491 | 37.924 | 39.825 | 11.739 | 0.00 | 0.00 |
| ATOM | 7464 | HB2  | PRO | X | 491 | 38.529 | 38.991 | 12.094 | 0.00 | 0.00 |
| ATOM | 7465 | HB3  | PRO | X | 491 | 38.443 | 40.094 | 10.819 | 0.00 | 0.00 |
| ATOM | 7466 | CA   | PRO | X | 491 | 36.553 | 39.391 | 11.316 | 0.00 | 0.00 |
| ATOM | 7467 | HA   | PRO | X | 491 | 36.235 | 39.900 | 10.406 | 0.00 | 0.00 |
| ATOM | 7468 | C    | PRO | X | 491 | 36.544 | 37.868 | 11.117 | 0.00 | 0.00 |
| ATOM | 7469 | O    | PRO | X | 491 | 36.508 | 37.120 | 12.118 | 0.00 | 0.00 |
| ATOM | 7470 | N    | LYS | X | 492 | 36.747 | 37.476 | 9.840  | 0.00 | 0.00 |
| ATOM | 7471 | H    | LYS | X | 492 | 36.886 | 37.992 | 8.983  | 0.00 | 0.00 |
| ATOM | 7472 | CA   | LYS | X | 492 | 36.883 | 36.052 | 9.619  | 0.00 | 0.00 |
| ATOM | 7473 | HA   | LYS | X | 492 | 36.017 | 35.640 | 10.137 | 0.00 | 0.00 |
| ATOM | 7474 | CB   | LYS | X | 492 | 36.740 | 35.719 | 8.065  | 0.00 | 0.00 |
| ATOM | 7475 | HB2  | LYS | X | 492 | 35.777 | 36.102 | 7.728  | 0.00 | 0.00 |
| ATOM | 7476 | HB3  | LYS | X | 492 | 37.525 | 36.241 | 7.516  | 0.00 | 0.00 |
| ATOM | 7477 | CG   | LYS | X | 492 | 36.689 | 34.206 | 7.918  | 0.00 | 0.00 |
| ATOM | 7478 | HG2  | LYS | X | 492 | 37.735 | 33.900 | 7.962  | 0.00 | 0.00 |
| ATOM | 7479 | HG3  | LYS | X | 492 | 36.238 | 33.750 | 8.800  | 0.00 | 0.00 |
| ATOM | 7480 | CD   | LYS | X | 492 | 35.950 | 33.639 | 6.721  | 0.00 | 0.00 |
| ATOM | 7481 | HD2  | LYS | X | 492 | 34.954 | 34.070 | 6.627  | 0.00 | 0.00 |
| ATOM | 7482 | HD3  | LYS | X | 492 | 36.441 | 33.946 | 5.797  | 0.00 | 0.00 |
| ATOM | 7483 | CE   | LYS | X | 492 | 35.827 | 32.118 | 6.796  | 0.00 | 0.00 |
| ATOM | 7484 | HE2  | LYS | X | 492 | 36.794 | 31.696 | 6.524  | 0.00 | 0.00 |
| ATOM | 7485 | HE3  | LYS | X | 492 | 35.449 | 31.779 | 7.761  | 0.00 | 0.00 |
| ATOM | 7486 | NZ   | LYS | X | 492 | 34.783 | 31.616 | 5.879  | 0.00 | 0.00 |
| ATOM | 7487 | HZ1  | LYS | X | 492 | 33.889 | 32.034 | 6.094  | 0.00 | 0.00 |
| ATOM | 7488 | HZ2  | LYS | X | 492 | 34.971 | 31.752 | 4.896  | 0.00 | 0.00 |
| ATOM | 7489 | HZ3  | LYS | X | 492 | 34.729 | 30.609 | 5.943  | 0.00 | 0.00 |
| ATOM | 7490 | C    | LYS | X | 492 | 38.083 | 35.299 | 10.345 | 0.00 | 0.00 |
| ATOM | 7491 | O    | LYS | X | 492 | 37.994 | 34.107 | 10.574 | 0.00 | 0.00 |
| ATOM | 7492 | N    | ALA | X | 493 | 39.162 | 36.015 | 10.771 | 0.00 | 0.00 |
| ATOM | 7493 | H    | ALA | X | 493 | 39.078 | 37.021 | 10.771 | 0.00 | 0.00 |
| ATOM | 7494 | CA   | ALA | X | 493 | 40.148 | 35.531 | 11.705 | 0.00 | 0.00 |
| ATOM | 7495 | HA   | ALA | X | 493 | 40.766 | 34.797 | 11.187 | 0.00 | 0.00 |
| ATOM | 7496 | CB   | ALA | X | 493 | 40.900 | 36.767 | 12.313 | 0.00 | 0.00 |
| ATOM | 7497 | HB1  | ALA | X | 493 | 41.644 | 36.521 | 13.071 | 0.00 | 0.00 |

|      |      |      |     |   |     |        |        |        |      |      |
|------|------|------|-----|---|-----|--------|--------|--------|------|------|
| ATOM | 7498 | HB2  | ALA | X | 493 | 41.256 | 37.330 | 11.450 | 0.00 | 0.00 |
| ATOM | 7499 | HB3  | ALA | X | 493 | 40.186 | 37.442 | 12.786 | 0.00 | 0.00 |
| ATOM | 7500 | C    | ALA | X | 493 | 39.551 | 34.779 | 12.982 | 0.00 | 0.00 |
| ATOM | 7501 | O    | ALA | X | 493 | 38.402 | 35.082 | 13.403 | 0.00 | 0.00 |
| ATOM | 7502 | N    | PRO | X | 494 | 40.278 | 33.905 | 13.616 | 0.00 | 0.00 |
| ATOM | 7503 | CD   | PRO | X | 494 | 41.611 | 33.487 | 13.250 | 0.00 | 0.00 |
| ATOM | 7504 | HD2  | PRO | X | 494 | 42.271 | 34.281 | 12.901 | 0.00 | 0.00 |
| ATOM | 7505 | HD3  | PRO | X | 494 | 41.642 | 32.771 | 12.429 | 0.00 | 0.00 |
| ATOM | 7506 | CG   | PRO | X | 494 | 42.137 | 32.864 | 14.586 | 0.00 | 0.00 |
| ATOM | 7507 | HG2  | PRO | X | 494 | 42.469 | 33.596 | 15.322 | 0.00 | 0.00 |
| ATOM | 7508 | HG3  | PRO | X | 494 | 42.900 | 32.108 | 14.402 | 0.00 | 0.00 |
| ATOM | 7509 | CB   | PRO | X | 494 | 40.964 | 32.239 | 15.318 | 0.00 | 0.00 |
| ATOM | 7510 | HB2  | PRO | X | 494 | 41.249 | 32.253 | 16.370 | 0.00 | 0.00 |
| ATOM | 7511 | HB3  | PRO | X | 494 | 40.704 | 31.315 | 14.801 | 0.00 | 0.00 |
| ATOM | 7512 | CA   | PRO | X | 494 | 39.816 | 33.193 | 14.857 | 0.00 | 0.00 |
| ATOM | 7513 | HA   | PRO | X | 494 | 39.005 | 32.532 | 14.551 | 0.00 | 0.00 |
| ATOM | 7514 | C    | PRO | X | 494 | 39.350 | 34.131 | 15.996 | 0.00 | 0.00 |
| ATOM | 7515 | O    | PRO | X | 494 | 39.990 | 35.097 | 16.360 | 0.00 | 0.00 |
| ATOM | 7516 | N    | GLN | X | 495 | 38.272 | 33.785 | 16.692 | 0.00 | 0.00 |
| ATOM | 7517 | H    | GLN | X | 495 | 37.877 | 32.872 | 16.520 | 0.00 | 0.00 |
| ATOM | 7518 | CA   | GLN | X | 495 | 37.735 | 34.564 | 17.819 | 0.00 | 0.00 |
| ATOM | 7519 | HA   | GLN | X | 495 | 38.471 | 35.294 | 18.155 | 0.00 | 0.00 |
| ATOM | 7520 | CB   | GLN | X | 495 | 36.491 | 35.244 | 17.340 | 0.00 | 0.00 |
| ATOM | 7521 | HB2  | GLN | X | 495 | 35.769 | 34.446 | 17.165 | 0.00 | 0.00 |
| ATOM | 7522 | HB3  | GLN | X | 495 | 36.177 | 35.875 | 18.171 | 0.00 | 0.00 |
| ATOM | 7523 | CG   | GLN | X | 495 | 36.482 | 36.130 | 16.172 | 0.00 | 0.00 |
| ATOM | 7524 | HG2  | GLN | X | 495 | 36.672 | 35.490 | 15.310 | 0.00 | 0.00 |
| ATOM | 7525 | HG3  | GLN | X | 495 | 35.437 | 36.398 | 16.011 | 0.00 | 0.00 |
| ATOM | 7526 | CD   | GLN | X | 495 | 37.353 | 37.324 | 16.170 | 0.00 | 0.00 |
| ATOM | 7527 | OE1  | GLN | X | 495 | 37.481 | 37.998 | 17.202 | 0.00 | 0.00 |
| ATOM | 7528 | NE2  | GLN | X | 495 | 38.119 | 37.521 | 15.163 | 0.00 | 0.00 |
| ATOM | 7529 | HE21 | GLN | X | 495 | 38.703 | 38.344 | 15.211 | 0.00 | 0.00 |
| ATOM | 7530 | HE22 | GLN | X | 495 | 38.052 | 36.882 | 14.384 | 0.00 | 0.00 |
| ATOM | 7531 | C    | GLN | X | 495 | 37.402 | 33.739 | 19.088 | 0.00 | 0.00 |
| ATOM | 7532 | O    | GLN | X | 495 | 36.960 | 32.540 | 18.948 | 0.00 | 0.00 |
| ATOM | 7533 | N    | TRP | X | 496 | 37.543 | 34.291 | 20.324 | 0.00 | 0.00 |
| ATOM | 7534 | H    | TRP | X | 496 | 37.731 | 35.282 | 20.369 | 0.00 | 0.00 |
| ATOM | 7535 | CA   | TRP | X | 496 | 37.252 | 33.677 | 21.625 | 0.00 | 0.00 |
| ATOM | 7536 | HA   | TRP | X | 496 | 37.994 | 32.889 | 21.757 | 0.00 | 0.00 |
| ATOM | 7537 | CB   | TRP | X | 496 | 37.550 | 34.753 | 22.705 | 0.00 | 0.00 |
| ATOM | 7538 | HB2  | TRP | X | 496 | 38.503 | 35.154 | 22.360 | 0.00 | 0.00 |
| ATOM | 7539 | HB3  | TRP | X | 496 | 36.841 | 35.579 | 22.764 | 0.00 | 0.00 |
| ATOM | 7540 | CG   | TRP | X | 496 | 37.831 | 34.456 | 24.110 | 0.00 | 0.00 |
| ATOM | 7541 | CD1  | TRP | X | 496 | 37.524 | 33.358 | 24.845 | 0.00 | 0.00 |
| ATOM | 7542 | HD1  | TRP | X | 496 | 36.884 | 32.561 | 24.495 | 0.00 | 0.00 |
| ATOM | 7543 | NE1  | TRP | X | 496 | 38.148 | 33.429 | 26.027 | 0.00 | 0.00 |
| ATOM | 7544 | HE1  | TRP | X | 496 | 38.202 | 32.669 | 26.690 | 0.00 | 0.00 |
| ATOM | 7545 | CE2  | TRP | X | 496 | 38.914 | 34.548 | 26.156 | 0.00 | 0.00 |
| ATOM | 7546 | CZ2  | TRP | X | 496 | 39.586 | 35.080 | 27.275 | 0.00 | 0.00 |
| ATOM | 7547 | HZ2  | TRP | X | 496 | 39.673 | 34.514 | 28.190 | 0.00 | 0.00 |
| ATOM | 7548 | CH2  | TRP | X | 496 | 40.362 | 36.280 | 27.184 | 0.00 | 0.00 |
| ATOM | 7549 | HH2  | TRP | X | 496 | 41.008 | 36.591 | 27.992 | 0.00 | 0.00 |
| ATOM | 7550 | CZ3  | TRP | X | 496 | 40.202 | 37.010 | 25.943 | 0.00 | 0.00 |
| ATOM | 7551 | HZ3  | TRP | X | 496 | 40.710 | 37.953 | 25.806 | 0.00 | 0.00 |
| ATOM | 7552 | CE3  | TRP | X | 496 | 39.490 | 36.441 | 24.818 | 0.00 | 0.00 |
| ATOM | 7553 | HE3  | TRP | X | 496 | 39.500 | 37.079 | 23.947 | 0.00 | 0.00 |
| ATOM | 7554 | CD2  | TRP | X | 496 | 38.824 | 35.227 | 24.938 | 0.00 | 0.00 |
| ATOM | 7555 | C    | TRP | X | 496 | 35.859 | 33.038 | 21.724 | 0.00 | 0.00 |
| ATOM | 7556 | O    | TRP | X | 496 | 34.908 | 33.847 | 21.774 | 0.00 | 0.00 |
| ATOM | 7557 | N    | PRO | X | 497 | 35.644 | 31.717 | 21.743 | 0.00 | 0.00 |
| ATOM | 7558 | CD   | PRO | X | 497 | 36.613 | 30.682 | 21.480 | 0.00 | 0.00 |
| ATOM | 7559 | HD2  | PRO | X | 497 | 37.504 | 30.842 | 22.087 | 0.00 | 0.00 |
| ATOM | 7560 | HD3  | PRO | X | 497 | 36.778 | 30.715 | 20.403 | 0.00 | 0.00 |
| ATOM | 7561 | CG   | PRO | X | 497 | 35.920 | 29.381 | 21.806 | 0.00 | 0.00 |
| ATOM | 7562 | HG2  | PRO | X | 497 | 36.203 | 29.037 | 22.801 | 0.00 | 0.00 |
| ATOM | 7563 | HG3  | PRO | X | 497 | 36.154 | 28.704 | 20.985 | 0.00 | 0.00 |
| ATOM | 7564 | CB   | PRO | X | 497 | 34.442 | 29.690 | 21.722 | 0.00 | 0.00 |
| ATOM | 7565 | HB2  | PRO | X | 497 | 33.948 | 29.006 | 22.412 | 0.00 | 0.00 |
| ATOM | 7566 | HB3  | PRO | X | 497 | 33.980 | 29.529 | 20.748 | 0.00 | 0.00 |
| ATOM | 7567 | CA   | PRO | X | 497 | 34.335 | 31.208 | 22.079 | 0.00 | 0.00 |

|      |      |      |     |   |     |        |        |        |      |      |
|------|------|------|-----|---|-----|--------|--------|--------|------|------|
| ATOM | 7568 | HA   | PRO | X | 497 | 33.569 | 31.725 | 21.501 | 0.00 | 0.00 |
| ATOM | 7569 | C    | PRO | X | 497 | 33.920 | 31.299 | 23.542 | 0.00 | 0.00 |
| ATOM | 7570 | O    | PRO | X | 497 | 34.727 | 31.072 | 24.428 | 0.00 | 0.00 |
| ATOM | 7571 | N    | PRO | X | 498 | 32.599 | 31.341 | 23.850 | 0.00 | 0.00 |
| ATOM | 7572 | CD   | PRO | X | 498 | 31.429 | 31.511 | 23.000 | 0.00 | 0.00 |
| ATOM | 7573 | HD2  | PRO | X | 498 | 31.088 | 30.517 | 22.711 | 0.00 | 0.00 |
| ATOM | 7574 | HD3  | PRO | X | 498 | 31.663 | 32.120 | 22.126 | 0.00 | 0.00 |
| ATOM | 7575 | CG   | PRO | X | 498 | 30.486 | 32.202 | 23.943 | 0.00 | 0.00 |
| ATOM | 7576 | HG2  | PRO | X | 498 | 29.474 | 32.213 | 23.538 | 0.00 | 0.00 |
| ATOM | 7577 | HG3  | PRO | X | 498 | 30.757 | 33.255 | 24.013 | 0.00 | 0.00 |
| ATOM | 7578 | CB   | PRO | X | 498 | 30.694 | 31.480 | 25.319 | 0.00 | 0.00 |
| ATOM | 7579 | HB2  | PRO | X | 498 | 30.005 | 30.644 | 25.444 | 0.00 | 0.00 |
| ATOM | 7580 | HB3  | PRO | X | 498 | 30.587 | 32.321 | 26.004 | 0.00 | 0.00 |
| ATOM | 7581 | CA   | PRO | X | 498 | 32.180 | 31.069 | 25.217 | 0.00 | 0.00 |
| ATOM | 7582 | HA   | PRO | X | 498 | 32.780 | 31.768 | 25.800 | 0.00 | 0.00 |
| ATOM | 7583 | C    | PRO | X | 498 | 32.443 | 29.663 | 25.823 | 0.00 | 0.00 |
| ATOM | 7584 | O    | PRO | X | 498 | 32.146 | 28.593 | 25.154 | 0.00 | 0.00 |
| ATOM | 7585 | N    | TYR | X | 499 | 32.741 | 29.688 | 27.138 | 0.00 | 0.00 |
| ATOM | 7586 | H    | TYR | X | 499 | 32.563 | 30.595 | 27.546 | 0.00 | 0.00 |
| ATOM | 7587 | CA   | TYR | X | 499 | 32.833 | 28.476 | 28.022 | 0.00 | 0.00 |
| ATOM | 7588 | HA   | TYR | X | 499 | 33.354 | 27.620 | 27.594 | 0.00 | 0.00 |
| ATOM | 7589 | CB   | TYR | X | 499 | 33.658 | 29.001 | 29.278 | 0.00 | 0.00 |
| ATOM | 7590 | HB2  | TYR | X | 499 | 34.577 | 29.473 | 28.931 | 0.00 | 0.00 |
| ATOM | 7591 | HB3  | TYR | X | 499 | 33.043 | 29.772 | 29.742 | 0.00 | 0.00 |
| ATOM | 7592 | CG   | TYR | X | 499 | 34.026 | 27.929 | 30.332 | 0.00 | 0.00 |
| ATOM | 7593 | CD1  | TYR | X | 499 | 33.113 | 27.426 | 31.259 | 0.00 | 0.00 |
| ATOM | 7594 | HD1  | TYR | X | 499 | 32.061 | 27.671 | 31.245 | 0.00 | 0.00 |
| ATOM | 7595 | CE1  | TYR | X | 499 | 33.477 | 26.463 | 32.240 | 0.00 | 0.00 |
| ATOM | 7596 | HE1  | TYR | X | 499 | 32.731 | 26.160 | 32.960 | 0.00 | 0.00 |
| ATOM | 7597 | CZ   | TYR | X | 499 | 34.829 | 26.140 | 32.369 | 0.00 | 0.00 |
| ATOM | 7598 | OH   | TYR | X | 499 | 35.197 | 25.453 | 33.447 | 0.00 | 0.00 |
| ATOM | 7599 | HH   | TYR | X | 499 | 34.576 | 25.455 | 34.179 | 0.00 | 0.00 |
| ATOM | 7600 | CE2  | TYR | X | 499 | 35.802 | 26.566 | 31.368 | 0.00 | 0.00 |
| ATOM | 7601 | HE2  | TYR | X | 499 | 36.833 | 26.246 | 31.331 | 0.00 | 0.00 |
| ATOM | 7602 | CD2  | TYR | X | 499 | 35.350 | 27.457 | 30.358 | 0.00 | 0.00 |
| ATOM | 7603 | HD2  | TYR | X | 499 | 36.077 | 27.787 | 29.630 | 0.00 | 0.00 |
| ATOM | 7604 | C    | TYR | X | 499 | 31.366 | 28.070 | 28.352 | 0.00 | 0.00 |
| ATOM | 7605 | O    | TYR | X | 499 | 30.644 | 28.839 | 28.997 | 0.00 | 0.00 |
| ATOM | 7606 | N    | THR | X | 500 | 31.033 | 26.855 | 28.081 | 0.00 | 0.00 |
| ATOM | 7607 | H    | THR | X | 500 | 31.736 | 26.310 | 27.604 | 0.00 | 0.00 |
| ATOM | 7608 | CA   | THR | X | 500 | 29.844 | 26.181 | 28.626 | 0.00 | 0.00 |
| ATOM | 7609 | HA   | THR | X | 500 | 29.112 | 26.889 | 29.015 | 0.00 | 0.00 |
| ATOM | 7610 | CB   | THR | X | 500 | 29.059 | 25.375 | 27.657 | 0.00 | 0.00 |
| ATOM | 7611 | HB   | THR | X | 500 | 28.314 | 24.776 | 28.180 | 0.00 | 0.00 |
| ATOM | 7612 | CG2  | THR | X | 500 | 28.186 | 26.313 | 26.736 | 0.00 | 0.00 |
| ATOM | 7613 | HG21 | THR | X | 500 | 27.568 | 25.774 | 26.017 | 0.00 | 0.00 |
| ATOM | 7614 | HG22 | THR | X | 500 | 27.443 | 26.791 | 27.373 | 0.00 | 0.00 |
| ATOM | 7615 | HG23 | THR | X | 500 | 28.905 | 27.027 | 26.335 | 0.00 | 0.00 |
| ATOM | 7616 | OG1  | THR | X | 500 | 29.778 | 24.549 | 26.774 | 0.00 | 0.00 |
| ATOM | 7617 | HG1  | THR | X | 500 | 29.297 | 23.757 | 26.524 | 0.00 | 0.00 |
| ATOM | 7618 | C    | THR | X | 500 | 30.370 | 25.255 | 29.702 | 0.00 | 0.00 |
| ATOM | 7619 | O    | THR | X | 500 | 31.574 | 24.970 | 29.793 | 0.00 | 0.00 |
| ATOM | 7620 | N    | ALA | X | 501 | 29.571 | 24.795 | 30.664 | 0.00 | 0.00 |
| ATOM | 7621 | H    | ALA | X | 501 | 28.630 | 25.157 | 30.619 | 0.00 | 0.00 |
| ATOM | 7622 | CA   | ALA | X | 501 | 29.797 | 23.930 | 31.780 | 0.00 | 0.00 |
| ATOM | 7623 | HA   | ALA | X | 501 | 30.582 | 24.393 | 32.378 | 0.00 | 0.00 |
| ATOM | 7624 | CB   | ALA | X | 501 | 28.594 | 24.136 | 32.683 | 0.00 | 0.00 |
| ATOM | 7625 | HB1  | ALA | X | 501 | 28.324 | 25.180 | 32.844 | 0.00 | 0.00 |
| ATOM | 7626 | HB2  | ALA | X | 501 | 27.698 | 23.754 | 32.195 | 0.00 | 0.00 |
| ATOM | 7627 | HB3  | ALA | X | 501 | 28.606 | 23.651 | 33.659 | 0.00 | 0.00 |
| ATOM | 7628 | C    | ALA | X | 501 | 30.069 | 22.453 | 31.415 | 0.00 | 0.00 |
| ATOM | 7629 | O    | ALA | X | 501 | 30.618 | 21.724 | 32.206 | 0.00 | 0.00 |
| ATOM | 7630 | N    | GLY | X | 502 | 29.640 | 22.083 | 30.195 | 0.00 | 0.00 |
| ATOM | 7631 | H    | GLY | X | 502 | 29.100 | 22.732 | 29.642 | 0.00 | 0.00 |
| ATOM | 7632 | CA   | GLY | X | 502 | 29.929 | 20.751 | 29.636 | 0.00 | 0.00 |
| ATOM | 7633 | HA2  | GLY | X | 502 | 29.956 | 20.014 | 30.433 | 0.00 | 0.00 |
| ATOM | 7634 | HA3  | GLY | X | 502 | 29.110 | 20.628 | 28.925 | 0.00 | 0.00 |
| ATOM | 7635 | C    | GLY | X | 502 | 31.132 | 20.682 | 28.658 | 0.00 | 0.00 |
| ATOM | 7636 | O    | GLY | X | 502 | 31.971 | 19.779 | 28.806 | 0.00 | 0.00 |
| ATOM | 7637 | N    | ALA | X | 503 | 31.300 | 21.677 | 27.763 | 0.00 | 0.00 |

|      |      |      |     |   |     |        |        |        |      |      |
|------|------|------|-----|---|-----|--------|--------|--------|------|------|
| ATOM | 7638 | H    | ALA | X | 503 | 30.583 | 22.378 | 27.641 | 0.00 | 0.00 |
| ATOM | 7639 | CA   | ALA | X | 503 | 32.481 | 21.684 | 26.874 | 0.00 | 0.00 |
| ATOM | 7640 | HA   | ALA | X | 503 | 32.740 | 20.645 | 26.667 | 0.00 | 0.00 |
| ATOM | 7641 | CB   | ALA | X | 503 | 32.017 | 22.287 | 25.547 | 0.00 | 0.00 |
| ATOM | 7642 | HB1  | ALA | X | 503 | 31.128 | 21.803 | 25.143 | 0.00 | 0.00 |
| ATOM | 7643 | HB2  | ALA | X | 503 | 31.784 | 23.338 | 25.717 | 0.00 | 0.00 |
| ATOM | 7644 | HB3  | ALA | X | 503 | 32.896 | 22.256 | 24.903 | 0.00 | 0.00 |
| ATOM | 7645 | C    | ALA | X | 503 | 33.814 | 22.352 | 27.413 | 0.00 | 0.00 |
| ATOM | 7646 | O    | ALA | X | 503 | 34.887 | 21.985 | 26.998 | 0.00 | 0.00 |
| ATOM | 7647 | N    | GLN | X | 504 | 33.522 | 23.313 | 28.320 | 0.00 | 0.00 |
| ATOM | 7648 | H    | GLN | X | 504 | 32.557 | 23.484 | 28.563 | 0.00 | 0.00 |
| ATOM | 7649 | CA   | GLN | X | 504 | 34.483 | 23.929 | 29.172 | 0.00 | 0.00 |
| ATOM | 7650 | HA   | GLN | X | 504 | 33.992 | 24.806 | 29.594 | 0.00 | 0.00 |
| ATOM | 7651 | CB   | GLN | X | 504 | 35.017 | 22.911 | 30.211 | 0.00 | 0.00 |
| ATOM | 7652 | HB2  | GLN | X | 504 | 35.460 | 22.038 | 29.732 | 0.00 | 0.00 |
| ATOM | 7653 | HB3  | GLN | X | 504 | 35.794 | 23.348 | 30.838 | 0.00 | 0.00 |
| ATOM | 7654 | CG   | GLN | X | 504 | 33.856 | 22.541 | 31.168 | 0.00 | 0.00 |
| ATOM | 7655 | HG2  | GLN | X | 504 | 33.510 | 23.450 | 31.659 | 0.00 | 0.00 |
| ATOM | 7656 | HG3  | GLN | X | 504 | 33.044 | 22.177 | 30.538 | 0.00 | 0.00 |
| ATOM | 7657 | CD   | GLN | X | 504 | 34.302 | 21.454 | 32.125 | 0.00 | 0.00 |
| ATOM | 7658 | OE1  | GLN | X | 504 | 35.475 | 21.125 | 32.428 | 0.00 | 0.00 |
| ATOM | 7659 | NE2  | GLN | X | 504 | 33.352 | 20.958 | 32.834 | 0.00 | 0.00 |
| ATOM | 7660 | HE21 | GLN | X | 504 | 33.622 | 20.471 | 33.676 | 0.00 | 0.00 |
| ATOM | 7661 | HE22 | GLN | X | 504 | 32.407 | 21.204 | 32.575 | 0.00 | 0.00 |
| ATOM | 7662 | C    | GLN | X | 504 | 35.619 | 24.523 | 28.336 | 0.00 | 0.00 |
| ATOM | 7663 | O    | GLN | X | 504 | 36.771 | 24.167 | 28.627 | 0.00 | 0.00 |
| ATOM | 7664 | N    | GLN | X | 505 | 35.333 | 25.474 | 27.396 | 0.00 | 0.00 |
| ATOM | 7665 | H    | GLN | X | 505 | 34.374 | 25.663 | 27.142 | 0.00 | 0.00 |
| ATOM | 7666 | CA   | GLN | X | 505 | 36.409 | 25.894 | 26.483 | 0.00 | 0.00 |
| ATOM | 7667 | HA   | GLN | X | 505 | 37.062 | 25.024 | 26.553 | 0.00 | 0.00 |
| ATOM | 7668 | CB   | GLN | X | 505 | 35.848 | 25.982 | 25.040 | 0.00 | 0.00 |
| ATOM | 7669 | HB2  | GLN | X | 505 | 35.157 | 26.825 | 25.025 | 0.00 | 0.00 |
| ATOM | 7670 | HB3  | GLN | X | 505 | 36.618 | 26.325 | 24.349 | 0.00 | 0.00 |
| ATOM | 7671 | CG   | GLN | X | 505 | 35.386 | 24.619 | 24.568 | 0.00 | 0.00 |
| ATOM | 7672 | HG2  | GLN | X | 505 | 36.244 | 23.990 | 24.335 | 0.00 | 0.00 |
| ATOM | 7673 | HG3  | GLN | X | 505 | 34.622 | 24.312 | 25.283 | 0.00 | 0.00 |
| ATOM | 7674 | CD   | GLN | X | 505 | 34.620 | 24.721 | 23.279 | 0.00 | 0.00 |
| ATOM | 7675 | OE1  | GLN | X | 505 | 33.444 | 24.999 | 23.210 | 0.00 | 0.00 |
| ATOM | 7676 | NE2  | GLN | X | 505 | 35.314 | 24.414 | 22.190 | 0.00 | 0.00 |
| ATOM | 7677 | HE21 | GLN | X | 505 | 34.931 | 24.474 | 21.258 | 0.00 | 0.00 |
| ATOM | 7678 | HE22 | GLN | X | 505 | 36.231 | 23.993 | 22.230 | 0.00 | 0.00 |
| ATOM | 7679 | C    | GLN | X | 505 | 37.077 | 27.197 | 26.929 | 0.00 | 0.00 |
| ATOM | 7680 | O    | GLN | X | 505 | 36.407 | 28.198 | 27.269 | 0.00 | 0.00 |
| ATOM | 7681 | N    | TYR | X | 506 | 38.401 | 27.144 | 26.947 | 0.00 | 0.00 |
| ATOM | 7682 | H    | TYR | X | 506 | 38.880 | 26.354 | 26.538 | 0.00 | 0.00 |
| ATOM | 7683 | CA   | TYR | X | 506 | 39.291 | 28.239 | 27.211 | 0.00 | 0.00 |
| ATOM | 7684 | HA   | TYR | X | 506 | 38.709 | 29.147 | 27.370 | 0.00 | 0.00 |
| ATOM | 7685 | CB   | TYR | X | 506 | 40.255 | 27.953 | 28.417 | 0.00 | 0.00 |
| ATOM | 7686 | HB2  | TYR | X | 506 | 40.797 | 28.867 | 28.658 | 0.00 | 0.00 |
| ATOM | 7687 | HB3  | TYR | X | 506 | 39.640 | 27.734 | 29.290 | 0.00 | 0.00 |
| ATOM | 7688 | CG   | TYR | X | 506 | 41.298 | 26.880 | 28.359 | 0.00 | 0.00 |
| ATOM | 7689 | CD1  | TYR | X | 506 | 40.910 | 25.536 | 28.481 | 0.00 | 0.00 |
| ATOM | 7690 | HD1  | TYR | X | 506 | 39.848 | 25.394 | 28.617 | 0.00 | 0.00 |
| ATOM | 7691 | CE1  | TYR | X | 506 | 41.779 | 24.469 | 28.469 | 0.00 | 0.00 |
| ATOM | 7692 | HE1  | TYR | X | 506 | 41.398 | 23.459 | 28.505 | 0.00 | 0.00 |
| ATOM | 7693 | CZ   | TYR | X | 506 | 43.142 | 24.747 | 28.229 | 0.00 | 0.00 |
| ATOM | 7694 | OH   | TYR | X | 506 | 44.165 | 23.848 | 28.193 | 0.00 | 0.00 |
| ATOM | 7695 | HH   | TYR | X | 506 | 43.895 | 22.944 | 28.370 | 0.00 | 0.00 |
| ATOM | 7696 | CE2  | TYR | X | 506 | 43.510 | 26.094 | 28.076 | 0.00 | 0.00 |
| ATOM | 7697 | HE2  | TYR | X | 506 | 44.575 | 26.211 | 27.941 | 0.00 | 0.00 |
| ATOM | 7698 | CD2  | TYR | X | 506 | 42.635 | 27.208 | 28.191 | 0.00 | 0.00 |
| ATOM | 7699 | HD2  | TYR | X | 506 | 42.916 | 28.227 | 27.966 | 0.00 | 0.00 |
| ATOM | 7700 | C    | TYR | X | 506 | 40.216 | 28.523 | 26.004 | 0.00 | 0.00 |
| ATOM | 7701 | O    | TYR | X | 506 | 40.345 | 27.683 | 25.139 | 0.00 | 0.00 |
| ATOM | 7702 | N    | VAL | X | 507 | 40.759 | 29.715 | 26.031 | 0.00 | 0.00 |
| ATOM | 7703 | H    | VAL | X | 507 | 40.443 | 30.336 | 26.762 | 0.00 | 0.00 |
| ATOM | 7704 | CA   | VAL | X | 507 | 41.781 | 30.157 | 25.073 | 0.00 | 0.00 |
| ATOM | 7705 | HA   | VAL | X | 507 | 41.691 | 29.358 | 24.337 | 0.00 | 0.00 |
| ATOM | 7706 | CB   | VAL | X | 507 | 41.493 | 31.552 | 24.370 | 0.00 | 0.00 |
| ATOM | 7707 | HB   | VAL | X | 507 | 42.244 | 31.641 | 23.586 | 0.00 | 0.00 |

|      |      |      |     |   |     |        |        |        |      |      |
|------|------|------|-----|---|-----|--------|--------|--------|------|------|
| ATOM | 7708 | CG1  | VAL | X | 507 | 40.143 | 31.493 | 23.606 | 0.00 | 0.00 |
| ATOM | 7709 | HG11 | VAL | X | 507 | 39.383 | 31.393 | 24.380 | 0.00 | 0.00 |
| ATOM | 7710 | HG12 | VAL | X | 507 | 39.916 | 32.483 | 23.211 | 0.00 | 0.00 |
| ATOM | 7711 | HG13 | VAL | X | 507 | 40.132 | 30.681 | 22.879 | 0.00 | 0.00 |
| ATOM | 7712 | CG2  | VAL | X | 507 | 41.611 | 32.695 | 25.379 | 0.00 | 0.00 |
| ATOM | 7713 | HG21 | VAL | X | 507 | 42.661 | 32.740 | 25.668 | 0.00 | 0.00 |
| ATOM | 7714 | HG22 | VAL | X | 507 | 41.231 | 33.629 | 24.964 | 0.00 | 0.00 |
| ATOM | 7715 | HG23 | VAL | X | 507 | 41.099 | 32.538 | 26.329 | 0.00 | 0.00 |
| ATOM | 7716 | C    | VAL | X | 507 | 43.266 | 30.136 | 25.592 | 0.00 | 0.00 |
| ATOM | 7717 | O    | VAL | X | 507 | 43.537 | 30.455 | 26.747 | 0.00 | 0.00 |
| ATOM | 7718 | N    | SER | X | 508 | 44.189 | 29.878 | 24.746 | 0.00 | 0.00 |
| ATOM | 7719 | H    | SER | X | 508 | 43.912 | 29.682 | 23.795 | 0.00 | 0.00 |
| ATOM | 7720 | CA   | SER | X | 508 | 45.584 | 30.207 | 24.830 | 0.00 | 0.00 |
| ATOM | 7721 | HA   | SER | X | 508 | 45.897 | 30.166 | 25.873 | 0.00 | 0.00 |
| ATOM | 7722 | CB   | SER | X | 508 | 46.298 | 29.195 | 23.929 | 0.00 | 0.00 |
| ATOM | 7723 | HB2  | SER | X | 508 | 46.466 | 28.176 | 24.277 | 0.00 | 0.00 |
| ATOM | 7724 | HB3  | SER | X | 508 | 45.733 | 29.103 | 23.002 | 0.00 | 0.00 |
| ATOM | 7725 | OG   | SER | X | 508 | 47.589 | 29.667 | 23.506 | 0.00 | 0.00 |
| ATOM | 7726 | HG   | SER | X | 508 | 48.241 | 29.309 | 24.112 | 0.00 | 0.00 |
| ATOM | 7727 | C    | SER | X | 508 | 45.878 | 31.677 | 24.428 | 0.00 | 0.00 |
| ATOM | 7728 | O    | SER | X | 508 | 45.785 | 32.056 | 23.309 | 0.00 | 0.00 |
| ATOM | 7729 | N    | LEU | X | 509 | 46.263 | 32.505 | 25.360 | 0.00 | 0.00 |
| ATOM | 7730 | H    | LEU | X | 509 | 46.268 | 32.260 | 26.339 | 0.00 | 0.00 |
| ATOM | 7731 | CA   | LEU | X | 509 | 46.697 | 33.863 | 24.999 | 0.00 | 0.00 |
| ATOM | 7732 | HA   | LEU | X | 509 | 46.353 | 34.178 | 24.014 | 0.00 | 0.00 |
| ATOM | 7733 | CB   | LEU | X | 509 | 46.241 | 34.936 | 26.055 | 0.00 | 0.00 |
| ATOM | 7734 | HB2  | LEU | X | 509 | 46.698 | 34.672 | 27.009 | 0.00 | 0.00 |
| ATOM | 7735 | HB3  | LEU | X | 509 | 46.662 | 35.897 | 25.761 | 0.00 | 0.00 |
| ATOM | 7736 | CG   | LEU | X | 509 | 44.700 | 35.010 | 26.165 | 0.00 | 0.00 |
| ATOM | 7737 | HG   | LEU | X | 509 | 44.396 | 33.965 | 26.237 | 0.00 | 0.00 |
| ATOM | 7738 | CD1  | LEU | X | 509 | 44.348 | 35.831 | 27.450 | 0.00 | 0.00 |
| ATOM | 7739 | HD11 | LEU | X | 509 | 44.846 | 36.780 | 27.253 | 0.00 | 0.00 |
| ATOM | 7740 | HD12 | LEU | X | 509 | 43.277 | 35.944 | 27.622 | 0.00 | 0.00 |
| ATOM | 7741 | HD13 | LEU | X | 509 | 44.858 | 35.456 | 28.337 | 0.00 | 0.00 |
| ATOM | 7742 | CD2  | LEU | X | 509 | 44.017 | 35.676 | 24.936 | 0.00 | 0.00 |
| ATOM | 7743 | HD21 | LEU | X | 509 | 44.475 | 36.621 | 24.643 | 0.00 | 0.00 |
| ATOM | 7744 | HD22 | LEU | X | 509 | 44.177 | 35.205 | 23.966 | 0.00 | 0.00 |
| ATOM | 7745 | HD23 | LEU | X | 509 | 42.968 | 35.903 | 25.129 | 0.00 | 0.00 |
| ATOM | 7746 | C    | LEU | X | 509 | 48.228 | 33.892 | 24.951 | 0.00 | 0.00 |
| ATOM | 7747 | O    | LEU | X | 509 | 48.885 | 33.455 | 25.844 | 0.00 | 0.00 |
| ATOM | 7748 | N    | ASP | X | 510 | 48.779 | 34.353 | 23.810 | 0.00 | 0.00 |
| ATOM | 7749 | H    | ASP | X | 510 | 48.140 | 34.672 | 23.095 | 0.00 | 0.00 |
| ATOM | 7750 | CA   | ASP | X | 510 | 50.139 | 34.279 | 23.305 | 0.00 | 0.00 |
| ATOM | 7751 | HA   | ASP | X | 510 | 50.854 | 34.593 | 24.065 | 0.00 | 0.00 |
| ATOM | 7752 | CB   | ASP | X | 510 | 50.383 | 32.759 | 23.036 | 0.00 | 0.00 |
| ATOM | 7753 | HB2  | ASP | X | 510 | 50.426 | 32.254 | 24.002 | 0.00 | 0.00 |
| ATOM | 7754 | HB3  | ASP | X | 510 | 49.508 | 32.375 | 22.513 | 0.00 | 0.00 |
| ATOM | 7755 | CG   | ASP | X | 510 | 51.599 | 32.412 | 22.185 | 0.00 | 0.00 |
| ATOM | 7756 | OD1  | ASP | X | 510 | 52.709 | 32.714 | 22.667 | 0.00 | 0.00 |
| ATOM | 7757 | OD2  | ASP | X | 510 | 51.378 | 31.890 | 21.033 | 0.00 | 0.00 |
| ATOM | 7758 | C    | ASP | X | 510 | 50.168 | 35.226 | 22.066 | 0.00 | 0.00 |
| ATOM | 7759 | O    | ASP | X | 510 | 49.097 | 35.584 | 21.569 | 0.00 | 0.00 |
| ATOM | 7760 | N    | LEU | X | 511 | 51.337 | 35.542 | 21.584 | 0.00 | 0.00 |
| ATOM | 7761 | H    | LEU | X | 511 | 52.046 | 35.169 | 22.199 | 0.00 | 0.00 |
| ATOM | 7762 | CA   | LEU | X | 511 | 51.539 | 36.411 | 20.476 | 0.00 | 0.00 |
| ATOM | 7763 | HA   | LEU | X | 511 | 51.060 | 37.353 | 20.743 | 0.00 | 0.00 |
| ATOM | 7764 | CB   | LEU | X | 511 | 53.047 | 36.456 | 20.122 | 0.00 | 0.00 |
| ATOM | 7765 | HB2  | LEU | X | 511 | 53.381 | 35.464 | 19.818 | 0.00 | 0.00 |
| ATOM | 7766 | HB3  | LEU | X | 511 | 53.181 | 37.083 | 19.240 | 0.00 | 0.00 |
| ATOM | 7767 | CG   | LEU | X | 511 | 54.047 | 37.047 | 21.206 | 0.00 | 0.00 |
| ATOM | 7768 | HG   | LEU | X | 511 | 53.901 | 36.549 | 22.164 | 0.00 | 0.00 |
| ATOM | 7769 | CD1  | LEU | X | 511 | 55.396 | 37.014 | 20.598 | 0.00 | 0.00 |
| ATOM | 7770 | HD11 | LEU | X | 511 | 55.360 | 37.594 | 19.676 | 0.00 | 0.00 |
| ATOM | 7771 | HD12 | LEU | X | 511 | 56.184 | 37.439 | 21.220 | 0.00 | 0.00 |
| ATOM | 7772 | HD13 | LEU | X | 511 | 55.667 | 35.974 | 20.411 | 0.00 | 0.00 |
| ATOM | 7773 | CD2  | LEU | X | 511 | 53.627 | 38.498 | 21.473 | 0.00 | 0.00 |
| ATOM | 7774 | HD21 | LEU | X | 511 | 52.582 | 38.488 | 21.783 | 0.00 | 0.00 |
| ATOM | 7775 | HD22 | LEU | X | 511 | 54.288 | 38.899 | 22.241 | 0.00 | 0.00 |
| ATOM | 7776 | HD23 | LEU | X | 511 | 53.827 | 39.104 | 20.589 | 0.00 | 0.00 |
| ATOM | 7777 | C    | LEU | X | 511 | 50.771 | 35.945 | 19.190 | 0.00 | 0.00 |

|      |      |      |     |   |     |        |        |        |      |      |
|------|------|------|-----|---|-----|--------|--------|--------|------|------|
| ATOM | 7778 | O    | LEU | X | 511 | 50.455 | 36.743 | 18.299 | 0.00 | 0.00 |
| ATOM | 7779 | N    | ARG | X | 512 | 50.572 | 34.620 | 19.042 | 0.00 | 0.00 |
| ATOM | 7780 | H    | ARG | X | 512 | 50.831 | 34.089 | 19.861 | 0.00 | 0.00 |
| ATOM | 7781 | CA   | ARG | X | 512 | 50.047 | 33.980 | 17.823 | 0.00 | 0.00 |
| ATOM | 7782 | HA   | ARG | X | 512 | 50.459 | 34.533 | 16.978 | 0.00 | 0.00 |
| ATOM | 7783 | CB   | ARG | X | 512 | 50.222 | 32.394 | 17.753 | 0.00 | 0.00 |
| ATOM | 7784 | HB2  | ARG | X | 512 | 49.683 | 31.864 | 18.538 | 0.00 | 0.00 |
| ATOM | 7785 | HB3  | ARG | X | 512 | 49.936 | 32.023 | 16.768 | 0.00 | 0.00 |
| ATOM | 7786 | CG   | ARG | X | 512 | 51.681 | 32.081 | 17.881 | 0.00 | 0.00 |
| ATOM | 7787 | HG2  | ARG | X | 512 | 52.255 | 32.408 | 17.013 | 0.00 | 0.00 |
| ATOM | 7788 | HG3  | ARG | X | 512 | 52.060 | 32.555 | 18.786 | 0.00 | 0.00 |
| ATOM | 7789 | CD   | ARG | X | 512 | 51.912 | 30.520 | 18.067 | 0.00 | 0.00 |
| ATOM | 7790 | HD2  | ARG | X | 512 | 51.481 | 30.180 | 19.009 | 0.00 | 0.00 |
| ATOM | 7791 | HD3  | ARG | X | 512 | 51.398 | 29.954 | 17.291 | 0.00 | 0.00 |
| ATOM | 7792 | NE   | ARG | X | 512 | 53.336 | 30.076 | 18.204 | 0.00 | 0.00 |
| ATOM | 7793 | HE   | ARG | X | 512 | 53.676 | 29.519 | 17.433 | 0.00 | 0.00 |
| ATOM | 7794 | CZ   | ARG | X | 512 | 54.178 | 30.212 | 19.210 | 0.00 | 0.00 |
| ATOM | 7795 | NH1  | ARG | X | 512 | 53.823 | 30.735 | 20.325 | 0.00 | 0.00 |
| ATOM | 7796 | HH11 | ARG | X | 512 | 52.881 | 31.087 | 20.413 | 0.00 | 0.00 |
| ATOM | 7797 | HH12 | ARG | X | 512 | 54.477 | 30.848 | 21.086 | 0.00 | 0.00 |
| ATOM | 7798 | NH2  | ARG | X | 512 | 55.427 | 29.836 | 19.095 | 0.00 | 0.00 |
| ATOM | 7799 | HH21 | ARG | X | 512 | 55.688 | 29.233 | 18.328 | 0.00 | 0.00 |
| ATOM | 7800 | HH22 | ARG | X | 512 | 56.125 | 30.168 | 19.745 | 0.00 | 0.00 |
| ATOM | 7801 | C    | ARG | X | 512 | 48.499 | 34.252 | 17.823 | 0.00 | 0.00 |
| ATOM | 7802 | O    | ARG | X | 512 | 47.929 | 34.495 | 18.890 | 0.00 | 0.00 |
| ATOM | 7803 | N    | PRO | X | 513 | 47.824 | 34.100 | 16.673 | 0.00 | 0.00 |
| ATOM | 7804 | CD   | PRO | X | 513 | 48.303 | 34.065 | 15.301 | 0.00 | 0.00 |
| ATOM | 7805 | HD2  | PRO | X | 513 | 49.048 | 33.273 | 15.228 | 0.00 | 0.00 |
| ATOM | 7806 | HD3  | PRO | X | 513 | 48.774 | 35.004 | 15.009 | 0.00 | 0.00 |
| ATOM | 7807 | CG   | PRO | X | 513 | 47.091 | 33.817 | 14.430 | 0.00 | 0.00 |
| ATOM | 7808 | HG2  | PRO | X | 513 | 46.928 | 32.749 | 14.281 | 0.00 | 0.00 |
| ATOM | 7809 | HG3  | PRO | X | 513 | 47.041 | 34.343 | 13.477 | 0.00 | 0.00 |
| ATOM | 7810 | CB   | PRO | X | 513 | 45.983 | 34.287 | 15.332 | 0.00 | 0.00 |
| ATOM | 7811 | HB2  | PRO | X | 513 | 45.107 | 33.686 | 15.090 | 0.00 | 0.00 |
| ATOM | 7812 | HB3  | PRO | X | 513 | 45.683 | 35.313 | 15.119 | 0.00 | 0.00 |
| ATOM | 7813 | CA   | PRO | X | 513 | 46.354 | 34.175 | 16.782 | 0.00 | 0.00 |
| ATOM | 7814 | HA   | PRO | X | 513 | 46.122 | 35.116 | 17.280 | 0.00 | 0.00 |
| ATOM | 7815 | C    | PRO | X | 513 | 45.735 | 32.995 | 17.599 | 0.00 | 0.00 |
| ATOM | 7816 | O    | PRO | X | 513 | 46.401 | 31.942 | 17.679 | 0.00 | 0.00 |
| ATOM | 7817 | N    | LEU | X | 514 | 44.466 | 33.189 | 18.035 | 0.00 | 0.00 |
| ATOM | 7818 | H    | LEU | X | 514 | 44.048 | 34.104 | 17.946 | 0.00 | 0.00 |
| ATOM | 7819 | CA   | LEU | X | 514 | 43.837 | 32.252 | 19.010 | 0.00 | 0.00 |
| ATOM | 7820 | HA   | LEU | X | 514 | 44.497 | 32.287 | 19.876 | 0.00 | 0.00 |
| ATOM | 7821 | CB   | LEU | X | 514 | 42.360 | 32.628 | 19.522 | 0.00 | 0.00 |
| ATOM | 7822 | HB2  | LEU | X | 514 | 41.733 | 32.629 | 18.630 | 0.00 | 0.00 |
| ATOM | 7823 | HB3  | LEU | X | 514 | 42.048 | 31.918 | 20.289 | 0.00 | 0.00 |
| ATOM | 7824 | CG   | LEU | X | 514 | 42.168 | 34.064 | 20.138 | 0.00 | 0.00 |
| ATOM | 7825 | HG   | LEU | X | 514 | 42.779 | 34.777 | 19.584 | 0.00 | 0.00 |
| ATOM | 7826 | CD1  | LEU | X | 514 | 40.756 | 34.564 | 19.947 | 0.00 | 0.00 |
| ATOM | 7827 | HD11 | LEU | X | 514 | 40.646 | 35.323 | 20.722 | 0.00 | 0.00 |
| ATOM | 7828 | HD12 | LEU | X | 514 | 40.752 | 35.075 | 18.984 | 0.00 | 0.00 |
| ATOM | 7829 | HD13 | LEU | X | 514 | 39.996 | 33.794 | 20.085 | 0.00 | 0.00 |
| ATOM | 7830 | CD2  | LEU | X | 514 | 42.547 | 34.281 | 21.654 | 0.00 | 0.00 |
| ATOM | 7831 | HD21 | LEU | X | 514 | 43.504 | 33.782 | 21.808 | 0.00 | 0.00 |
| ATOM | 7832 | HD22 | LEU | X | 514 | 42.684 | 35.336 | 21.893 | 0.00 | 0.00 |
| ATOM | 7833 | HD23 | LEU | X | 514 | 41.757 | 33.862 | 22.278 | 0.00 | 0.00 |
| ATOM | 7834 | C    | LEU | X | 514 | 43.854 | 30.820 | 18.596 | 0.00 | 0.00 |
| ATOM | 7835 | O    | LEU | X | 514 | 43.528 | 30.467 | 17.433 | 0.00 | 0.00 |
| ATOM | 7836 | N    | GLU | X | 515 | 44.110 | 29.970 | 19.567 | 0.00 | 0.00 |
| ATOM | 7837 | H    | GLU | X | 515 | 44.499 | 30.276 | 20.447 | 0.00 | 0.00 |
| ATOM | 7838 | CA   | GLU | X | 515 | 43.882 | 28.534 | 19.522 | 0.00 | 0.00 |
| ATOM | 7839 | HA   | GLU | X | 515 | 43.222 | 28.271 | 18.695 | 0.00 | 0.00 |
| ATOM | 7840 | CB   | GLU | X | 515 | 45.244 | 27.804 | 19.375 | 0.00 | 0.00 |
| ATOM | 7841 | HB2  | GLU | X | 515 | 45.664 | 28.067 | 18.404 | 0.00 | 0.00 |
| ATOM | 7842 | HB3  | GLU | X | 515 | 45.820 | 28.112 | 20.247 | 0.00 | 0.00 |
| ATOM | 7843 | CG   | GLU | X | 515 | 45.179 | 26.291 | 19.405 | 0.00 | 0.00 |
| ATOM | 7844 | HG2  | GLU | X | 515 | 46.148 | 25.854 | 19.161 | 0.00 | 0.00 |
| ATOM | 7845 | HG3  | GLU | X | 515 | 45.078 | 25.927 | 20.428 | 0.00 | 0.00 |
| ATOM | 7846 | CD   | GLU | X | 515 | 44.209 | 25.750 | 18.304 | 0.00 | 0.00 |
| ATOM | 7847 | OE1  | GLU | X | 515 | 42.932 | 25.682 | 18.519 | 0.00 | 0.00 |

|      |      |      |     |   |     |        |        |        |      |      |
|------|------|------|-----|---|-----|--------|--------|--------|------|------|
| ATOM | 7848 | OE2  | GLU | X | 515 | 44.665 | 25.410 | 17.212 | 0.00 | 0.00 |
| ATOM | 7849 | C    | GLU | X | 515 | 43.066 | 28.209 | 20.754 | 0.00 | 0.00 |
| ATOM | 7850 | O    | GLU | X | 515 | 43.306 | 28.864 | 21.816 | 0.00 | 0.00 |
| ATOM | 7851 | N    | VAL | X | 516 | 42.140 | 27.360 | 20.648 | 0.00 | 0.00 |
| ATOM | 7852 | H    | VAL | X | 516 | 42.189 | 26.772 | 19.828 | 0.00 | 0.00 |
| ATOM | 7853 | CA   | VAL | X | 516 | 41.082 | 27.112 | 21.620 | 0.00 | 0.00 |
| ATOM | 7854 | HA   | VAL | X | 516 | 41.187 | 27.792 | 22.466 | 0.00 | 0.00 |
| ATOM | 7855 | CB   | VAL | X | 516 | 39.687 | 27.254 | 21.023 | 0.00 | 0.00 |
| ATOM | 7856 | HB   | VAL | X | 516 | 39.589 | 26.471 | 20.271 | 0.00 | 0.00 |
| ATOM | 7857 | CG1  | VAL | X | 516 | 38.542 | 27.010 | 21.987 | 0.00 | 0.00 |
| ATOM | 7858 | HG11 | VAL | X | 516 | 38.773 | 26.109 | 22.555 | 0.00 | 0.00 |
| ATOM | 7859 | HG12 | VAL | X | 516 | 38.598 | 27.780 | 22.757 | 0.00 | 0.00 |
| ATOM | 7860 | HG13 | VAL | X | 516 | 37.585 | 27.104 | 21.472 | 0.00 | 0.00 |
| ATOM | 7861 | CG2  | VAL | X | 516 | 39.518 | 28.616 | 20.433 | 0.00 | 0.00 |
| ATOM | 7862 | HG21 | VAL | X | 516 | 38.560 | 28.680 | 19.918 | 0.00 | 0.00 |
| ATOM | 7863 | HG22 | VAL | X | 516 | 39.458 | 29.348 | 21.238 | 0.00 | 0.00 |
| ATOM | 7864 | HG23 | VAL | X | 516 | 40.351 | 28.890 | 19.785 | 0.00 | 0.00 |
| ATOM | 7865 | C    | VAL | X | 516 | 41.270 | 25.728 | 22.132 | 0.00 | 0.00 |
| ATOM | 7866 | O    | VAL | X | 516 | 41.481 | 24.765 | 21.270 | 0.00 | 0.00 |
| ATOM | 7867 | N    | ARG | X | 517 | 41.339 | 25.557 | 23.397 | 0.00 | 0.00 |
| ATOM | 7868 | H    | ARG | X | 517 | 41.196 | 26.423 | 23.896 | 0.00 | 0.00 |
| ATOM | 7869 | CA   | ARG | X | 517 | 41.499 | 24.241 | 24.056 | 0.00 | 0.00 |
| ATOM | 7870 | HA   | ARG | X | 517 | 41.691 | 23.401 | 23.388 | 0.00 | 0.00 |
| ATOM | 7871 | CB   | ARG | X | 517 | 42.797 | 24.386 | 24.922 | 0.00 | 0.00 |
| ATOM | 7872 | HB2  | ARG | X | 517 | 42.672 | 25.225 | 25.607 | 0.00 | 0.00 |
| ATOM | 7873 | HB3  | ARG | X | 517 | 42.870 | 23.456 | 25.486 | 0.00 | 0.00 |
| ATOM | 7874 | CG   | ARG | X | 517 | 44.075 | 24.654 | 24.136 | 0.00 | 0.00 |
| ATOM | 7875 | HG2  | ARG | X | 517 | 44.128 | 23.898 | 23.353 | 0.00 | 0.00 |
| ATOM | 7876 | HG3  | ARG | X | 517 | 43.943 | 25.654 | 23.723 | 0.00 | 0.00 |
| ATOM | 7877 | CD   | ARG | X | 517 | 45.390 | 24.650 | 24.916 | 0.00 | 0.00 |
| ATOM | 7878 | HD2  | ARG | X | 517 | 45.328 | 25.308 | 25.783 | 0.00 | 0.00 |
| ATOM | 7879 | HD3  | ARG | X | 517 | 45.435 | 23.675 | 25.401 | 0.00 | 0.00 |
| ATOM | 7880 | NE   | ARG | X | 517 | 46.529 | 25.067 | 24.094 | 0.00 | 0.00 |
| ATOM | 7881 | HE   | ARG | X | 517 | 46.525 | 24.684 | 23.160 | 0.00 | 0.00 |
| ATOM | 7882 | CZ   | ARG | X | 517 | 47.568 | 25.718 | 24.488 | 0.00 | 0.00 |
| ATOM | 7883 | NH1  | ARG | X | 517 | 47.839 | 26.126 | 25.686 | 0.00 | 0.00 |
| ATOM | 7884 | HH11 | ARG | X | 517 | 47.263 | 25.937 | 26.495 | 0.00 | 0.00 |
| ATOM | 7885 | HH12 | ARG | X | 517 | 48.546 | 26.812 | 25.908 | 0.00 | 0.00 |
| ATOM | 7886 | NH2  | ARG | X | 517 | 48.474 | 25.921 | 23.576 | 0.00 | 0.00 |
| ATOM | 7887 | HH21 | ARG | X | 517 | 48.290 | 25.612 | 22.632 | 0.00 | 0.00 |
| ATOM | 7888 | HH22 | ARG | X | 517 | 49.342 | 26.361 | 23.846 | 0.00 | 0.00 |
| ATOM | 7889 | C    | ARG | X | 517 | 40.177 | 23.972 | 24.784 | 0.00 | 0.00 |
| ATOM | 7890 | O    | ARG | X | 517 | 39.619 | 24.905 | 25.336 | 0.00 | 0.00 |
| ATOM | 7891 | N    | ARG | X | 518 | 39.676 | 22.692 | 24.812 | 0.00 | 0.00 |
| ATOM | 7892 | H    | ARG | X | 518 | 40.210 | 21.916 | 24.447 | 0.00 | 0.00 |
| ATOM | 7893 | CA   | ARG | X | 518 | 38.552 | 22.265 | 25.593 | 0.00 | 0.00 |
| ATOM | 7894 | HA   | ARG | X | 518 | 38.091 | 23.194 | 25.929 | 0.00 | 0.00 |
| ATOM | 7895 | CB   | ARG | X | 518 | 37.569 | 21.359 | 24.792 | 0.00 | 0.00 |
| ATOM | 7896 | HB2  | ARG | X | 518 | 36.597 | 21.331 | 25.284 | 0.00 | 0.00 |
| ATOM | 7897 | HB3  | ARG | X | 518 | 37.455 | 21.932 | 23.871 | 0.00 | 0.00 |
| ATOM | 7898 | CG   | ARG | X | 518 | 38.027 | 19.906 | 24.507 | 0.00 | 0.00 |
| ATOM | 7899 | HG2  | ARG | X | 518 | 39.041 | 19.921 | 24.110 | 0.00 | 0.00 |
| ATOM | 7900 | HG3  | ARG | X | 518 | 38.161 | 19.443 | 25.485 | 0.00 | 0.00 |
| ATOM | 7901 | CD   | ARG | X | 518 | 37.179 | 19.113 | 23.576 | 0.00 | 0.00 |
| ATOM | 7902 | HD2  | ARG | X | 518 | 36.263 | 18.847 | 24.104 | 0.00 | 0.00 |
| ATOM | 7903 | HD3  | ARG | X | 518 | 36.937 | 19.737 | 22.716 | 0.00 | 0.00 |
| ATOM | 7904 | NE   | ARG | X | 518 | 37.969 | 17.994 | 23.066 | 0.00 | 0.00 |
| ATOM | 7905 | HE   | ARG | X | 518 | 38.815 | 18.340 | 22.636 | 0.00 | 0.00 |
| ATOM | 7906 | CZ   | ARG | X | 518 | 37.790 | 16.658 | 23.158 | 0.00 | 0.00 |
| ATOM | 7907 | NH1  | ARG | X | 518 | 36.795 | 16.103 | 23.909 | 0.00 | 0.00 |
| ATOM | 7908 | HH11 | ARG | X | 518 | 36.099 | 16.676 | 24.364 | 0.00 | 0.00 |
| ATOM | 7909 | HH12 | ARG | X | 518 | 36.621 | 15.110 | 23.974 | 0.00 | 0.00 |
| ATOM | 7910 | NH2  | ARG | X | 518 | 38.625 | 15.867 | 22.473 | 0.00 | 0.00 |
| ATOM | 7911 | HH21 | ARG | X | 518 | 39.477 | 16.188 | 22.037 | 0.00 | 0.00 |
| ATOM | 7912 | HH22 | ARG | X | 518 | 38.393 | 14.885 | 22.527 | 0.00 | 0.00 |
| ATOM | 7913 | C    | ARG | X | 518 | 38.864 | 21.458 | 26.898 | 0.00 | 0.00 |
| ATOM | 7914 | O    | ARG | X | 518 | 39.926 | 20.815 | 27.049 | 0.00 | 0.00 |
| ATOM | 7915 | N    | GLY | X | 519 | 37.956 | 21.521 | 27.849 | 0.00 | 0.00 |
| ATOM | 7916 | H    | GLY | X | 519 | 37.116 | 22.072 | 27.745 | 0.00 | 0.00 |
| ATOM | 7917 | CA   | GLY | X | 519 | 38.081 | 20.727 | 29.054 | 0.00 | 0.00 |

|      |      |      |     |   |     |        |        |        |      |      |
|------|------|------|-----|---|-----|--------|--------|--------|------|------|
| ATOM | 7918 | HA2  | GLY | X | 519 | 37.150 | 20.719 | 29.547 | 0.00 | 0.00 |
| ATOM | 7919 | HA3  | GLY | X | 519 | 38.429 | 19.813 | 28.726 | 0.00 | 0.00 |
| ATOM | 7920 | C    | GLY | X | 519 | 39.021 | 21.350 | 30.069 | 0.00 | 0.00 |
| ATOM | 7921 | O    | GLY | X | 519 | 40.021 | 20.670 | 30.437 | 0.00 | 0.00 |
| ATOM | 7922 | N    | LEU | X | 520 | 38.782 | 22.624 | 30.501 | 0.00 | 0.00 |
| ATOM | 7923 | H    | LEU | X | 520 | 37.915 | 23.023 | 30.170 | 0.00 | 0.00 |
| ATOM | 7924 | CA   | LEU | X | 520 | 39.616 | 23.417 | 31.404 | 0.00 | 0.00 |
| ATOM | 7925 | HA   | LEU | X | 520 | 40.526 | 23.639 | 30.847 | 0.00 | 0.00 |
| ATOM | 7926 | CB   | LEU | X | 520 | 38.987 | 24.794 | 31.821 | 0.00 | 0.00 |
| ATOM | 7927 | HB2  | LEU | X | 520 | 38.679 | 25.348 | 30.934 | 0.00 | 0.00 |
| ATOM | 7928 | HB3  | LEU | X | 520 | 38.070 | 24.663 | 32.397 | 0.00 | 0.00 |
| ATOM | 7929 | CG   | LEU | X | 520 | 39.861 | 25.613 | 32.805 | 0.00 | 0.00 |
| ATOM | 7930 | HG   | LEU | X | 520 | 40.132 | 25.087 | 33.721 | 0.00 | 0.00 |
| ATOM | 7931 | CD1  | LEU | X | 520 | 41.111 | 25.989 | 32.118 | 0.00 | 0.00 |
| ATOM | 7932 | HD11 | LEU | X | 520 | 41.001 | 26.607 | 31.227 | 0.00 | 0.00 |
| ATOM | 7933 | HD12 | LEU | X | 520 | 41.744 | 26.569 | 32.790 | 0.00 | 0.00 |
| ATOM | 7934 | HD13 | LEU | X | 520 | 41.680 | 25.104 | 31.834 | 0.00 | 0.00 |
| ATOM | 7935 | CD2  | LEU | X | 520 | 39.148 | 26.867 | 33.190 | 0.00 | 0.00 |
| ATOM | 7936 | HD21 | LEU | X | 520 | 39.768 | 27.368 | 33.933 | 0.00 | 0.00 |
| ATOM | 7937 | HD22 | LEU | X | 520 | 39.081 | 27.574 | 32.363 | 0.00 | 0.00 |
| ATOM | 7938 | HD23 | LEU | X | 520 | 38.133 | 26.724 | 33.560 | 0.00 | 0.00 |
| ATOM | 7939 | C    | LEU | X | 520 | 40.131 | 22.660 | 32.651 | 0.00 | 0.00 |
| ATOM | 7940 | O    | LEU | X | 520 | 39.347 | 22.454 | 33.564 | 0.00 | 0.00 |
| ATOM | 7941 | N    | ARG | X | 521 | 41.382 | 22.235 | 32.642 | 0.00 | 0.00 |
| ATOM | 7942 | H    | ARG | X | 521 | 41.945 | 22.366 | 31.814 | 0.00 | 0.00 |
| ATOM | 7943 | CA   | ARG | X | 521 | 42.026 | 21.626 | 33.776 | 0.00 | 0.00 |
| ATOM | 7944 | HA   | ARG | X | 521 | 42.974 | 21.187 | 33.464 | 0.00 | 0.00 |
| ATOM | 7945 | CB   | ARG | X | 521 | 42.444 | 22.760 | 34.726 | 0.00 | 0.00 |
| ATOM | 7946 | HB2  | ARG | X | 521 | 42.518 | 23.757 | 34.291 | 0.00 | 0.00 |
| ATOM | 7947 | HB3  | ARG | X | 521 | 41.693 | 22.798 | 35.515 | 0.00 | 0.00 |
| ATOM | 7948 | CG   | ARG | X | 521 | 43.816 | 22.385 | 35.388 | 0.00 | 0.00 |
| ATOM | 7949 | HG2  | ARG | X | 521 | 43.741 | 22.855 | 36.368 | 0.00 | 0.00 |
| ATOM | 7950 | HG3  | ARG | X | 521 | 43.822 | 21.296 | 35.427 | 0.00 | 0.00 |
| ATOM | 7951 | CD   | ARG | X | 521 | 45.167 | 22.851 | 34.721 | 0.00 | 0.00 |
| ATOM | 7952 | HD2  | ARG | X | 521 | 45.259 | 22.381 | 33.742 | 0.00 | 0.00 |
| ATOM | 7953 | HD3  | ARG | X | 521 | 45.229 | 23.927 | 34.556 | 0.00 | 0.00 |
| ATOM | 7954 | NE   | ARG | X | 521 | 46.242 | 22.517 | 35.704 | 0.00 | 0.00 |
| ATOM | 7955 | HE   | ARG | X | 521 | 46.058 | 22.653 | 36.688 | 0.00 | 0.00 |
| ATOM | 7956 | CZ   | ARG | X | 521 | 47.362 | 21.809 | 35.409 | 0.00 | 0.00 |
| ATOM | 7957 | NH1  | ARG | X | 521 | 47.836 | 21.703 | 34.194 | 0.00 | 0.00 |
| ATOM | 7958 | HH11 | ARG | X | 521 | 47.389 | 22.237 | 33.462 | 0.00 | 0.00 |
| ATOM | 7959 | HH12 | ARG | X | 521 | 48.718 | 21.265 | 33.968 | 0.00 | 0.00 |
| ATOM | 7960 | NH2  | ARG | X | 521 | 48.012 | 21.256 | 36.467 | 0.00 | 0.00 |
| ATOM | 7961 | HH21 | ARG | X | 521 | 47.839 | 21.581 | 37.407 | 0.00 | 0.00 |
| ATOM | 7962 | HH22 | ARG | X | 521 | 48.809 | 20.645 | 36.350 | 0.00 | 0.00 |
| ATOM | 7963 | C    | ARG | X | 521 | 41.270 | 20.434 | 34.391 | 0.00 | 0.00 |
| ATOM | 7964 | O    | ARG | X | 521 | 41.302 | 20.192 | 35.594 | 0.00 | 0.00 |
| ATOM | 7965 | N    | ALA | X | 522 | 40.592 | 19.670 | 33.517 | 0.00 | 0.00 |
| ATOM | 7966 | H    | ALA | X | 522 | 40.771 | 19.768 | 32.528 | 0.00 | 0.00 |
| ATOM | 7967 | CA   | ALA | X | 522 | 39.321 | 18.878 | 33.853 | 0.00 | 0.00 |
| ATOM | 7968 | HA   | ALA | X | 522 | 38.824 | 19.357 | 34.697 | 0.00 | 0.00 |
| ATOM | 7969 | CB   | ALA | X | 522 | 38.363 | 18.984 | 32.692 | 0.00 | 0.00 |
| ATOM | 7970 | HB1  | ALA | X | 522 | 38.852 | 18.413 | 31.903 | 0.00 | 0.00 |
| ATOM | 7971 | HB2  | ALA | X | 522 | 37.401 | 18.574 | 33.000 | 0.00 | 0.00 |
| ATOM | 7972 | HB3  | ALA | X | 522 | 38.159 | 19.996 | 32.342 | 0.00 | 0.00 |
| ATOM | 7973 | C    | ALA | X | 522 | 39.571 | 17.470 | 34.378 | 0.00 | 0.00 |
| ATOM | 7974 | O    | ALA | X | 522 | 38.611 | 16.884 | 34.885 | 0.00 | 0.00 |
| ATOM | 7975 | N    | GLN | X | 523 | 40.808 | 17.023 | 34.261 | 0.00 | 0.00 |
| ATOM | 7976 | H    | GLN | X | 523 | 41.620 | 17.580 | 34.037 | 0.00 | 0.00 |
| ATOM | 7977 | CA   | GLN | X | 523 | 41.193 | 15.769 | 34.823 | 0.00 | 0.00 |
| ATOM | 7978 | HA   | GLN | X | 523 | 40.254 | 15.222 | 34.911 | 0.00 | 0.00 |
| ATOM | 7979 | CB   | GLN | X | 523 | 42.067 | 14.889 | 33.928 | 0.00 | 0.00 |
| ATOM | 7980 | HB2  | GLN | X | 523 | 42.982 | 15.433 | 33.692 | 0.00 | 0.00 |
| ATOM | 7981 | HB3  | GLN | X | 523 | 42.283 | 13.990 | 34.506 | 0.00 | 0.00 |
| ATOM | 7982 | CG   | GLN | X | 523 | 41.424 | 14.620 | 32.520 | 0.00 | 0.00 |
| ATOM | 7983 | HG2  | GLN | X | 523 | 42.067 | 13.939 | 31.962 | 0.00 | 0.00 |
| ATOM | 7984 | HG3  | GLN | X | 523 | 40.464 | 14.109 | 32.595 | 0.00 | 0.00 |
| ATOM | 7985 | CD   | GLN | X | 523 | 41.306 | 15.806 | 31.614 | 0.00 | 0.00 |
| ATOM | 7986 | OE1  | GLN | X | 523 | 42.170 | 16.646 | 31.640 | 0.00 | 0.00 |
| ATOM | 7987 | NE2  | GLN | X | 523 | 40.365 | 15.918 | 30.789 | 0.00 | 0.00 |



|      |      |      |     |   |     |        |        |        |      |      |
|------|------|------|-----|---|-----|--------|--------|--------|------|------|
| ATOM | 7988 | HE21 | GLN | X | 523 | 40.422 | 16.581 | 30.030 | 0.00 | 0.00 |
| ATOM | 7989 | HE22 | GLN | X | 523 | 39.451 | 15.502 | 30.893 | 0.00 | 0.00 |
| ATOM | 7990 | C    | GLN | X | 523 | 41.737 | 15.957 | 36.240 | 0.00 | 0.00 |
| ATOM | 7991 | O    | GLN | X | 523 | 41.226 | 15.398 | 37.205 | 0.00 | 0.00 |
| ATOM | 7992 | N    | ALA | X | 524 | 42.592 | 16.976 | 36.424 | 0.00 | 0.00 |
| ATOM | 7993 | H    | ALA | X | 524 | 42.881 | 17.404 | 35.557 | 0.00 | 0.00 |
| ATOM | 7994 | CA   | ALA | X | 524 | 43.089 | 17.454 | 37.715 | 0.00 | 0.00 |
| ATOM | 7995 | HA   | ALA | X | 524 | 43.514 | 16.653 | 38.321 | 0.00 | 0.00 |
| ATOM | 7996 | CB   | ALA | X | 524 | 44.270 | 18.320 | 37.385 | 0.00 | 0.00 |
| ATOM | 7997 | HB1  | ALA | X | 524 | 44.780 | 18.650 | 38.290 | 0.00 | 0.00 |
| ATOM | 7998 | HB2  | ALA | X | 524 | 44.914 | 17.784 | 36.687 | 0.00 | 0.00 |
| ATOM | 7999 | HB3  | ALA | X | 524 | 43.898 | 19.193 | 36.850 | 0.00 | 0.00 |
| ATOM | 8000 | C    | ALA | X | 524 | 42.029 | 18.092 | 38.638 | 0.00 | 0.00 |
| ATOM | 8001 | O    | ALA | X | 524 | 41.868 | 17.639 | 39.791 | 0.00 | 0.00 |
| ATOM | 8002 | N    | CYX | X | 525 | 41.214 | 19.060 | 38.173 | 0.00 | 0.00 |
| ATOM | 8003 | H    | CYX | X | 525 | 41.428 | 19.336 | 37.225 | 0.00 | 0.00 |
| ATOM | 8004 | CA   | CYX | X | 525 | 40.139 | 19.605 | 38.962 | 0.00 | 0.00 |
| ATOM | 8005 | HA   | CYX | X | 525 | 40.638 | 19.872 | 39.893 | 0.00 | 0.00 |
| ATOM | 8006 | CB   | CYX | X | 525 | 39.732 | 21.005 | 38.436 | 0.00 | 0.00 |
| ATOM | 8007 | HB2  | CYX | X | 525 | 39.307 | 20.900 | 37.438 | 0.00 | 0.00 |
| ATOM | 8008 | HB3  | CYX | X | 525 | 38.979 | 21.437 | 39.096 | 0.00 | 0.00 |
| ATOM | 8009 | SG   | CYX | X | 525 | 41.206 | 22.005 | 38.199 | 0.00 | 0.00 |
| ATOM | 8010 | C    | CYX | X | 525 | 39.004 | 18.618 | 39.223 | 0.00 | 0.00 |
| ATOM | 8011 | O    | CYX | X | 525 | 38.400 | 18.781 | 40.276 | 0.00 | 0.00 |
| ATOM | 8012 | N    | ALA | X | 526 | 38.767 | 17.507 | 38.441 | 0.00 | 0.00 |
| ATOM | 8013 | H    | ALA | X | 526 | 39.337 | 17.212 | 37.661 | 0.00 | 0.00 |
| ATOM | 8014 | CA   | ALA | X | 526 | 37.838 | 16.460 | 38.969 | 0.00 | 0.00 |
| ATOM | 8015 | HA   | ALA | X | 526 | 36.901 | 16.837 | 39.378 | 0.00 | 0.00 |
| ATOM | 8016 | CB   | ALA | X | 526 | 37.390 | 15.676 | 37.765 | 0.00 | 0.00 |
| ATOM | 8017 | HB1  | ALA | X | 526 | 38.267 | 15.340 | 37.212 | 0.00 | 0.00 |
| ATOM | 8018 | HB2  | ALA | X | 526 | 36.703 | 14.846 | 37.931 | 0.00 | 0.00 |
| ATOM | 8019 | HB3  | ALA | X | 526 | 36.942 | 16.326 | 37.013 | 0.00 | 0.00 |
| ATOM | 8020 | C    | ALA | X | 526 | 38.432 | 15.545 | 40.040 | 0.00 | 0.00 |
| ATOM | 8021 | O    | ALA | X | 526 | 37.697 | 15.050 | 40.820 | 0.00 | 0.00 |
| ATOM | 8022 | N    | PHE | X | 527 | 39.777 | 15.528 | 40.017 | 0.00 | 0.00 |
| ATOM | 8023 | H    | PHE | X | 527 | 40.276 | 15.854 | 39.202 | 0.00 | 0.00 |
| ATOM | 8024 | CA   | PHE | X | 527 | 40.455 | 14.870 | 41.100 | 0.00 | 0.00 |
| ATOM | 8025 | HA   | PHE | X | 527 | 40.064 | 13.862 | 41.245 | 0.00 | 0.00 |
| ATOM | 8026 | CB   | PHE | X | 527 | 41.971 | 14.760 | 40.841 | 0.00 | 0.00 |
| ATOM | 8027 | HB2  | PHE | X | 527 | 42.063 | 14.086 | 39.990 | 0.00 | 0.00 |
| ATOM | 8028 | HB3  | PHE | X | 527 | 42.557 | 15.633 | 40.555 | 0.00 | 0.00 |
| ATOM | 8029 | CG   | PHE | X | 527 | 42.804 | 14.120 | 41.956 | 0.00 | 0.00 |
| ATOM | 8030 | CD1  | PHE | X | 527 | 42.677 | 12.803 | 42.319 | 0.00 | 0.00 |
| ATOM | 8031 | HD1  | PHE | X | 527 | 42.085 | 12.129 | 41.718 | 0.00 | 0.00 |
| ATOM | 8032 | CE1  | PHE | X | 527 | 43.512 | 12.296 | 43.425 | 0.00 | 0.00 |
| ATOM | 8033 | HE1  | PHE | X | 527 | 43.401 | 11.266 | 43.728 | 0.00 | 0.00 |
| ATOM | 8034 | CZ   | PHE | X | 527 | 44.415 | 13.143 | 44.094 | 0.00 | 0.00 |
| ATOM | 8035 | HZ   | PHE | X | 527 | 45.204 | 12.723 | 44.702 | 0.00 | 0.00 |
| ATOM | 8036 | CE2  | PHE | X | 527 | 44.480 | 14.473 | 43.663 | 0.00 | 0.00 |
| ATOM | 8037 | HE2  | PHE | X | 527 | 45.228 | 15.092 | 44.137 | 0.00 | 0.00 |
| ATOM | 8038 | CD2  | PHE | X | 527 | 43.676 | 14.949 | 42.622 | 0.00 | 0.00 |
| ATOM | 8039 | HD2  | PHE | X | 527 | 43.798 | 15.972 | 42.300 | 0.00 | 0.00 |
| ATOM | 8040 | C    | PHE | X | 527 | 40.217 | 15.649 | 42.402 | 0.00 | 0.00 |
| ATOM | 8041 | O    | PHE | X | 527 | 39.792 | 15.070 | 43.425 | 0.00 | 0.00 |
| ATOM | 8042 | N    | TRP | X | 528 | 40.506 | 16.902 | 42.343 | 0.00 | 0.00 |
| ATOM | 8043 | H    | TRP | X | 528 | 40.852 | 17.305 | 41.484 | 0.00 | 0.00 |
| ATOM | 8044 | CA   | TRP | X | 528 | 40.415 | 17.757 | 43.502 | 0.00 | 0.00 |
| ATOM | 8045 | HA   | TRP | X | 528 | 41.035 | 17.375 | 44.313 | 0.00 | 0.00 |
| ATOM | 8046 | CB   | TRP | X | 528 | 41.076 | 19.119 | 43.121 | 0.00 | 0.00 |
| ATOM | 8047 | HB2  | TRP | X | 528 | 40.555 | 19.339 | 42.190 | 0.00 | 0.00 |
| ATOM | 8048 | HB3  | TRP | X | 528 | 40.872 | 19.920 | 43.831 | 0.00 | 0.00 |
| ATOM | 8049 | CG   | TRP | X | 528 | 42.579 | 19.039 | 42.951 | 0.00 | 0.00 |
| ATOM | 8050 | CD1  | TRP | X | 528 | 43.338 | 19.520 | 41.947 | 0.00 | 0.00 |
| ATOM | 8051 | HD1  | TRP | X | 528 | 42.933 | 19.849 | 41.001 | 0.00 | 0.00 |
| ATOM | 8052 | NE1  | TRP | X | 528 | 44.719 | 19.471 | 42.196 | 0.00 | 0.00 |
| ATOM | 8053 | HE1  | TRP | X | 528 | 45.524 | 19.481 | 41.587 | 0.00 | 0.00 |
| ATOM | 8054 | CE2  | TRP | X | 528 | 44.851 | 19.011 | 43.484 | 0.00 | 0.00 |
| ATOM | 8055 | CZ2  | TRP | X | 528 | 46.036 | 18.904 | 44.275 | 0.00 | 0.00 |
| ATOM | 8056 | HZ2  | TRP | X | 528 | 46.956 | 19.222 | 43.806 | 0.00 | 0.00 |
| ATOM | 8057 | CH2  | TRP | X | 528 | 45.833 | 18.359 | 45.585 | 0.00 | 0.00 |

|      |      |      |     |   |     |        |        |        |      |      |
|------|------|------|-----|---|-----|--------|--------|--------|------|------|
| ATOM | 8058 | HH2  | TRP | X | 528 | 46.718 | 18.129 | 46.160 | 0.00 | 0.00 |
| ATOM | 8059 | CZ3  | TRP | X | 528 | 44.626 | 17.973 | 46.061 | 0.00 | 0.00 |
| ATOM | 8060 | HZ3  | TRP | X | 528 | 44.573 | 17.492 | 47.026 | 0.00 | 0.00 |
| ATOM | 8061 | CE3  | TRP | X | 528 | 43.475 | 18.115 | 45.263 | 0.00 | 0.00 |
| ATOM | 8062 | HE3  | TRP | X | 528 | 42.559 | 17.739 | 45.695 | 0.00 | 0.00 |
| ATOM | 8063 | CD2  | TRP | X | 528 | 43.535 | 18.651 | 43.944 | 0.00 | 0.00 |
| ATOM | 8064 | C    | TRP | X | 528 | 39.014 | 17.999 | 44.011 | 0.00 | 0.00 |
| ATOM | 8065 | O    | TRP | X | 528 | 38.816 | 18.141 | 45.195 | 0.00 | 0.00 |
| ATOM | 8066 | N    | ASN | X | 529 | 38.051 | 18.139 | 43.098 | 0.00 | 0.00 |
| ATOM | 8067 | H    | ASN | X | 529 | 38.421 | 18.155 | 42.158 | 0.00 | 0.00 |
| ATOM | 8068 | CA   | ASN | X | 529 | 36.667 | 18.492 | 43.421 | 0.00 | 0.00 |
| ATOM | 8069 | HA   | ASN | X | 529 | 36.641 | 19.055 | 44.355 | 0.00 | 0.00 |
| ATOM | 8070 | CB   | ASN | X | 529 | 36.080 | 19.391 | 42.292 | 0.00 | 0.00 |
| ATOM | 8071 | HB2  | ASN | X | 529 | 35.854 | 18.899 | 41.346 | 0.00 | 0.00 |
| ATOM | 8072 | HB3  | ASN | X | 529 | 35.164 | 19.798 | 42.722 | 0.00 | 0.00 |
| ATOM | 8073 | CG   | ASN | X | 529 | 36.751 | 20.673 | 41.948 | 0.00 | 0.00 |
| ATOM | 8074 | OD1  | ASN | X | 529 | 36.589 | 21.172 | 40.823 | 0.00 | 0.00 |
| ATOM | 8075 | ND2  | ASN | X | 529 | 37.435 | 21.299 | 42.863 | 0.00 | 0.00 |
| ATOM | 8076 | HD21 | ASN | X | 529 | 38.083 | 22.036 | 42.624 | 0.00 | 0.00 |
| ATOM | 8077 | HD22 | ASN | X | 529 | 37.474 | 20.840 | 43.762 | 0.00 | 0.00 |
| ATOM | 8078 | C    | ASN | X | 529 | 35.730 | 17.320 | 43.726 | 0.00 | 0.00 |
| ATOM | 8079 | O    | ASN | X | 529 | 34.664 | 17.559 | 44.315 | 0.00 | 0.00 |
| ATOM | 8080 | N    | ARG | X | 530 | 36.147 | 16.099 | 43.348 | 0.00 | 0.00 |
| ATOM | 8081 | H    | ARG | X | 530 | 36.969 | 16.033 | 42.764 | 0.00 | 0.00 |
| ATOM | 8082 | CA   | ARG | X | 530 | 35.287 | 14.916 | 43.617 | 0.00 | 0.00 |
| ATOM | 8083 | HA   | ARG | X | 530 | 34.514 | 15.198 | 44.332 | 0.00 | 0.00 |
| ATOM | 8084 | CB   | ARG | X | 530 | 34.487 | 14.385 | 42.368 | 0.00 | 0.00 |
| ATOM | 8085 | HB2  | ARG | X | 530 | 35.201 | 13.884 | 41.713 | 0.00 | 0.00 |
| ATOM | 8086 | HB3  | ARG | X | 530 | 33.729 | 13.732 | 42.800 | 0.00 | 0.00 |
| ATOM | 8087 | CG   | ARG | X | 530 | 33.699 | 15.369 | 41.508 | 0.00 | 0.00 |
| ATOM | 8088 | HG2  | ARG | X | 530 | 32.987 | 15.933 | 42.111 | 0.00 | 0.00 |
| ATOM | 8089 | HG3  | ARG | X | 530 | 34.433 | 16.056 | 41.086 | 0.00 | 0.00 |
| ATOM | 8090 | CD   | ARG | X | 530 | 32.906 | 14.713 | 40.404 | 0.00 | 0.00 |
| ATOM | 8091 | HD2  | ARG | X | 530 | 32.766 | 15.443 | 39.606 | 0.00 | 0.00 |
| ATOM | 8092 | HD3  | ARG | X | 530 | 33.486 | 13.882 | 40.003 | 0.00 | 0.00 |
| ATOM | 8093 | NE   | ARG | X | 530 | 31.671 | 14.052 | 40.838 | 0.00 | 0.00 |
| ATOM | 8094 | HE   | ARG | X | 530 | 31.348 | 14.363 | 41.743 | 0.00 | 0.00 |
| ATOM | 8095 | CZ   | ARG | X | 530 | 31.024 | 13.057 | 40.324 | 0.00 | 0.00 |
| ATOM | 8096 | NH1  | ARG | X | 530 | 31.429 | 12.427 | 39.269 | 0.00 | 0.00 |
| ATOM | 8097 | HH11 | ARG | X | 530 | 32.212 | 12.723 | 38.703 | 0.00 | 0.00 |
| ATOM | 8098 | HH12 | ARG | X | 530 | 30.841 | 11.720 | 38.850 | 0.00 | 0.00 |
| ATOM | 8099 | NH2  | ARG | X | 530 | 29.927 | 12.720 | 40.893 | 0.00 | 0.00 |
| ATOM | 8100 | HH21 | ARG | X | 530 | 29.447 | 13.193 | 41.644 | 0.00 | 0.00 |
| ATOM | 8101 | HH22 | ARG | X | 530 | 29.326 | 11.994 | 40.529 | 0.00 | 0.00 |
| ATOM | 8102 | C    | ARG | X | 530 | 35.986 | 13.778 | 44.335 | 0.00 | 0.00 |
| ATOM | 8103 | O    | ARG | X | 530 | 35.556 | 13.343 | 45.419 | 0.00 | 0.00 |
| ATOM | 8104 | N    | PHE | X | 531 | 37.106 | 13.240 | 43.776 | 0.00 | 0.00 |
| ATOM | 8105 | H    | PHE | X | 531 | 37.454 | 13.619 | 42.906 | 0.00 | 0.00 |
| ATOM | 8106 | CA   | PHE | X | 531 | 37.834 | 12.086 | 44.323 | 0.00 | 0.00 |
| ATOM | 8107 | HA   | PHE | X | 531 | 37.088 | 11.295 | 44.398 | 0.00 | 0.00 |
| ATOM | 8108 | CB   | PHE | X | 531 | 38.903 | 11.579 | 43.403 | 0.00 | 0.00 |
| ATOM | 8109 | HB2  | PHE | X | 531 | 38.560 | 11.541 | 42.369 | 0.00 | 0.00 |
| ATOM | 8110 | HB3  | PHE | X | 531 | 39.747 | 12.251 | 43.248 | 0.00 | 0.00 |
| ATOM | 8111 | CG   | PHE | X | 531 | 39.467 | 10.259 | 43.794 | 0.00 | 0.00 |
| ATOM | 8112 | CD1  | PHE | X | 531 | 40.693 | 10.123 | 44.487 | 0.00 | 0.00 |
| ATOM | 8113 | HD1  | PHE | X | 531 | 41.251 | 10.965 | 44.868 | 0.00 | 0.00 |
| ATOM | 8114 | CE1  | PHE | X | 531 | 41.044 | 8.869  | 44.929 | 0.00 | 0.00 |
| ATOM | 8115 | HE1  | PHE | X | 531 | 41.933 | 8.801  | 45.539 | 0.00 | 0.00 |
| ATOM | 8116 | CZ   | PHE | X | 531 | 40.312 | 7.712  | 44.571 | 0.00 | 0.00 |
| ATOM | 8117 | HZ   | PHE | X | 531 | 40.688 | 6.786  | 44.981 | 0.00 | 0.00 |
| ATOM | 8118 | CE2  | PHE | X | 531 | 39.205 | 7.820  | 43.847 | 0.00 | 0.00 |
| ATOM | 8119 | HE2  | PHE | X | 531 | 38.659 | 6.919  | 43.610 | 0.00 | 0.00 |
| ATOM | 8120 | CD2  | PHE | X | 531 | 38.752 | 9.094  | 43.452 | 0.00 | 0.00 |
| ATOM | 8121 | HD2  | PHE | X | 531 | 37.750 | 9.263  | 43.085 | 0.00 | 0.00 |
| ATOM | 8122 | C    | PHE | X | 531 | 38.464 | 12.394 | 45.667 | 0.00 | 0.00 |
| ATOM | 8123 | O    | PHE | X | 531 | 38.442 | 11.607 | 46.582 | 0.00 | 0.00 |
| ATOM | 8124 | N    | LEU | X | 532 | 39.175 | 13.524 | 45.775 | 0.00 | 0.00 |
| ATOM | 8125 | H    | LEU | X | 532 | 39.338 | 14.087 | 44.953 | 0.00 | 0.00 |
| ATOM | 8126 | CA   | LEU | X | 532 | 39.912 | 13.939 | 46.983 | 0.00 | 0.00 |
| ATOM | 8127 | HA   | LEU | X | 532 | 40.549 | 13.075 | 47.174 | 0.00 | 0.00 |

|      |      |      |     |   |     |        |        |        |      |      |
|------|------|------|-----|---|-----|--------|--------|--------|------|------|
| ATOM | 8128 | CB   | LEU | X | 532 | 41.003 | 14.998 | 46.560 | 0.00 | 0.00 |
| ATOM | 8129 | HB2  | LEU | X | 532 | 41.376 | 14.855 | 45.545 | 0.00 | 0.00 |
| ATOM | 8130 | HB3  | LEU | X | 532 | 40.363 | 15.879 | 46.563 | 0.00 | 0.00 |
| ATOM | 8131 | CG   | LEU | X | 532 | 42.172 | 15.230 | 47.567 | 0.00 | 0.00 |
| ATOM | 8132 | HG   | LEU | X | 532 | 42.790 | 15.918 | 46.990 | 0.00 | 0.00 |
| ATOM | 8133 | CD1  | LEU | X | 532 | 41.847 | 15.910 | 48.830 | 0.00 | 0.00 |
| ATOM | 8134 | HD11 | LEU | X | 532 | 41.071 | 15.440 | 49.434 | 0.00 | 0.00 |
| ATOM | 8135 | HD12 | LEU | X | 532 | 42.701 | 16.011 | 49.500 | 0.00 | 0.00 |
| ATOM | 8136 | HD13 | LEU | X | 532 | 41.470 | 16.878 | 48.499 | 0.00 | 0.00 |
| ATOM | 8137 | CD2  | LEU | X | 532 | 42.956 | 13.959 | 47.873 | 0.00 | 0.00 |
| ATOM | 8138 | HD21 | LEU | X | 532 | 43.954 | 14.206 | 48.233 | 0.00 | 0.00 |
| ATOM | 8139 | HD22 | LEU | X | 532 | 42.459 | 13.435 | 48.690 | 0.00 | 0.00 |
| ATOM | 8140 | HD23 | LEU | X | 532 | 42.940 | 13.255 | 47.041 | 0.00 | 0.00 |
| ATOM | 8141 | C    | LEU | X | 532 | 39.087 | 14.255 | 48.317 | 0.00 | 0.00 |
| ATOM | 8142 | O    | LEU | X | 532 | 39.232 | 13.571 | 49.294 | 0.00 | 0.00 |
| ATOM | 8143 | N    | PRO | X | 533 | 37.998 | 15.141 | 48.240 | 0.00 | 0.00 |
| ATOM | 8144 | CD   | PRO | X | 533 | 37.549 | 15.784 | 47.001 | 0.00 | 0.00 |
| ATOM | 8145 | HD2  | PRO | X | 533 | 37.578 | 15.119 | 46.138 | 0.00 | 0.00 |
| ATOM | 8146 | HD3  | PRO | X | 533 | 38.135 | 16.685 | 46.819 | 0.00 | 0.00 |
| ATOM | 8147 | CG   | PRO | X | 533 | 36.060 | 16.097 | 47.446 | 0.00 | 0.00 |
| ATOM | 8148 | HG2  | PRO | X | 533 | 35.491 | 15.205 | 47.185 | 0.00 | 0.00 |
| ATOM | 8149 | HG3  | PRO | X | 533 | 35.749 | 17.017 | 46.950 | 0.00 | 0.00 |
| ATOM | 8150 | CB   | PRO | X | 533 | 35.948 | 16.283 | 48.936 | 0.00 | 0.00 |
| ATOM | 8151 | HB2  | PRO | X | 533 | 34.992 | 15.977 | 49.360 | 0.00 | 0.00 |
| ATOM | 8152 | HB3  | PRO | X | 533 | 36.248 | 17.234 | 49.377 | 0.00 | 0.00 |
| ATOM | 8153 | CA   | PRO | X | 533 | 37.080 | 15.320 | 49.388 | 0.00 | 0.00 |
| ATOM | 8154 | HA   | PRO | X | 533 | 37.680 | 15.594 | 50.257 | 0.00 | 0.00 |
| ATOM | 8155 | C    | PRO | X | 533 | 36.508 | 13.915 | 49.752 | 0.00 | 0.00 |
| ATOM | 8156 | O    | PRO | X | 533 | 36.282 | 13.703 | 50.923 | 0.00 | 0.00 |
| ATOM | 8157 | N    | LYS | X | 534 | 36.226 | 13.011 | 48.806 | 0.00 | 0.00 |
| ATOM | 8158 | H    | LYS | X | 534 | 36.278 | 13.278 | 47.834 | 0.00 | 0.00 |
| ATOM | 8159 | CA   | LYS | X | 534 | 35.672 | 11.650 | 49.127 | 0.00 | 0.00 |
| ATOM | 8160 | HA   | LYS | X | 534 | 35.047 | 11.671 | 50.019 | 0.00 | 0.00 |
| ATOM | 8161 | CB   | LYS | X | 534 | 34.810 | 11.171 | 47.906 | 0.00 | 0.00 |
| ATOM | 8162 | HB2  | LYS | X | 534 | 34.167 | 11.954 | 47.504 | 0.00 | 0.00 |
| ATOM | 8163 | HB3  | LYS | X | 534 | 35.548 | 11.223 | 47.106 | 0.00 | 0.00 |
| ATOM | 8164 | CG   | LYS | X | 534 | 34.191 | 9.783  | 47.846 | 0.00 | 0.00 |
| ATOM | 8165 | HG2  | LYS | X | 534 | 33.687 | 9.704  | 46.883 | 0.00 | 0.00 |
| ATOM | 8166 | HG3  | LYS | X | 534 | 34.914 | 8.972  | 47.942 | 0.00 | 0.00 |
| ATOM | 8167 | CD   | LYS | X | 534 | 33.172 | 9.680  | 48.947 | 0.00 | 0.00 |
| ATOM | 8168 | HD2  | LYS | X | 534 | 32.591 | 8.768  | 48.806 | 0.00 | 0.00 |
| ATOM | 8169 | HD3  | LYS | X | 534 | 33.588 | 9.628  | 49.953 | 0.00 | 0.00 |
| ATOM | 8170 | CE   | LYS | X | 534 | 32.104 | 10.815 | 48.948 | 0.00 | 0.00 |
| ATOM | 8171 | HE2  | LYS | X | 534 | 32.553 | 11.807 | 49.006 | 0.00 | 0.00 |
| ATOM | 8172 | HE3  | LYS | X | 534 | 31.492 | 10.824 | 48.046 | 0.00 | 0.00 |
| ATOM | 8173 | NZ   | LYS | X | 534 | 31.118 | 10.577 | 50.014 | 0.00 | 0.00 |
| ATOM | 8174 | HZ1  | LYS | X | 534 | 30.531 | 9.787  | 49.785 | 0.00 | 0.00 |
| ATOM | 8175 | HZ2  | LYS | X | 534 | 31.489 | 10.262 | 50.899 | 0.00 | 0.00 |
| ATOM | 8176 | HZ3  | LYS | X | 534 | 30.619 | 11.423 | 50.247 | 0.00 | 0.00 |
| ATOM | 8177 | C    | LYS | X | 534 | 36.720 | 10.592 | 49.479 | 0.00 | 0.00 |
| ATOM | 8178 | O    | LYS | X | 534 | 36.338 | 9.533  | 50.095 | 0.00 | 0.00 |
| ATOM | 8179 | N    | LEU | X | 535 | 37.937 | 10.876 | 49.256 | 0.00 | 0.00 |
| ATOM | 8180 | H    | LEU | X | 535 | 38.167 | 11.683 | 48.694 | 0.00 | 0.00 |
| ATOM | 8181 | CA   | LEU | X | 535 | 39.078 | 10.126 | 49.957 | 0.00 | 0.00 |
| ATOM | 8182 | HA   | LEU | X | 535 | 38.766 | 9.082  | 49.954 | 0.00 | 0.00 |
| ATOM | 8183 | CB   | LEU | X | 535 | 40.411 | 10.358 | 49.205 | 0.00 | 0.00 |
| ATOM | 8184 | HB2  | LEU | X | 535 | 40.237 | 10.309 | 48.130 | 0.00 | 0.00 |
| ATOM | 8185 | HB3  | LEU | X | 535 | 40.783 | 11.348 | 49.467 | 0.00 | 0.00 |
| ATOM | 8186 | CG   | LEU | X | 535 | 41.560 | 9.329  | 49.492 | 0.00 | 0.00 |
| ATOM | 8187 | HG   | LEU | X | 535 | 41.651 | 9.356  | 50.578 | 0.00 | 0.00 |
| ATOM | 8188 | CD1  | LEU | X | 535 | 41.180 | 7.903  | 49.127 | 0.00 | 0.00 |
| ATOM | 8189 | HD11 | LEU | X | 535 | 40.774 | 7.801  | 48.121 | 0.00 | 0.00 |
| ATOM | 8190 | HD12 | LEU | X | 535 | 42.079 | 7.286  | 49.150 | 0.00 | 0.00 |
| ATOM | 8191 | HD13 | LEU | X | 535 | 40.456 | 7.512  | 49.842 | 0.00 | 0.00 |
| ATOM | 8192 | CD2  | LEU | X | 535 | 42.769 | 9.893  | 48.806 | 0.00 | 0.00 |
| ATOM | 8193 | HD21 | LEU | X | 535 | 42.506 | 10.101 | 47.769 | 0.00 | 0.00 |
| ATOM | 8194 | HD22 | LEU | X | 535 | 43.104 | 10.837 | 49.237 | 0.00 | 0.00 |
| ATOM | 8195 | HD23 | LEU | X | 535 | 43.529 | 9.123  | 48.942 | 0.00 | 0.00 |
| ATOM | 8196 | C    | LEU | X | 535 | 39.154 | 10.597 | 51.428 | 0.00 | 0.00 |
| ATOM | 8197 | O    | LEU | X | 535 | 39.240 | 9.738  | 52.329 | 0.00 | 0.00 |

|      |      |      |     |   |     |        |        |        |      |      |
|------|------|------|-----|---|-----|--------|--------|--------|------|------|
| ATOM | 8198 | N    | LEU | X | 536 | 39.174 | 11.907 | 51.669 | 0.00 | 0.00 |
| ATOM | 8199 | H    | LEU | X | 536 | 39.274 | 12.580 | 50.923 | 0.00 | 0.00 |
| ATOM | 8200 | CA   | LEU | X | 536 | 39.225 | 12.418 | 53.092 | 0.00 | 0.00 |
| ATOM | 8201 | HA   | LEU | X | 536 | 40.144 | 12.063 | 53.559 | 0.00 | 0.00 |
| ATOM | 8202 | CB   | LEU | X | 536 | 39.184 | 13.987 | 53.040 | 0.00 | 0.00 |
| ATOM | 8203 | HB2  | LEU | X | 536 | 38.304 | 14.277 | 52.465 | 0.00 | 0.00 |
| ATOM | 8204 | HB3  | LEU | X | 536 | 38.970 | 14.261 | 54.073 | 0.00 | 0.00 |
| ATOM | 8205 | CG   | LEU | X | 536 | 40.454 | 14.679 | 52.546 | 0.00 | 0.00 |
| ATOM | 8206 | HG   | LEU | X | 536 | 40.578 | 14.490 | 51.480 | 0.00 | 0.00 |
| ATOM | 8207 | CD1  | LEU | X | 536 | 40.358 | 16.173 | 52.597 | 0.00 | 0.00 |
| ATOM | 8208 | HD11 | LEU | X | 536 | 39.533 | 16.524 | 51.976 | 0.00 | 0.00 |
| ATOM | 8209 | HD12 | LEU | X | 536 | 40.268 | 16.396 | 53.660 | 0.00 | 0.00 |
| ATOM | 8210 | HD13 | LEU | X | 536 | 41.249 | 16.626 | 52.164 | 0.00 | 0.00 |
| ATOM | 8211 | CD2  | LEU | X | 536 | 41.734 | 14.145 | 53.244 | 0.00 | 0.00 |
| ATOM | 8212 | HD21 | LEU | X | 536 | 42.512 | 14.899 | 53.366 | 0.00 | 0.00 |
| ATOM | 8213 | HD22 | LEU | X | 536 | 41.601 | 13.751 | 54.252 | 0.00 | 0.00 |
| ATOM | 8214 | HD23 | LEU | X | 536 | 42.106 | 13.302 | 52.663 | 0.00 | 0.00 |
| ATOM | 8215 | C    | LEU | X | 536 | 38.117 | 11.871 | 53.886 | 0.00 | 0.00 |
| ATOM | 8216 | O    | LEU | X | 536 | 38.446 | 11.340 | 54.970 | 0.00 | 0.00 |
| ATOM | 8217 | N    | SER | X | 537 | 36.888 | 12.051 | 53.462 | 0.00 | 0.00 |
| ATOM | 8218 | H    | SER | X | 537 | 36.763 | 12.742 | 52.736 | 0.00 | 0.00 |
| ATOM | 8219 | CA   | SER | X | 537 | 35.671 | 11.580 | 54.244 | 0.00 | 0.00 |
| ATOM | 8220 | HA   | SER | X | 537 | 35.613 | 12.196 | 55.141 | 0.00 | 0.00 |
| ATOM | 8221 | CB   | SER | X | 537 | 34.459 | 11.826 | 53.335 | 0.00 | 0.00 |
| ATOM | 8222 | HB2  | SER | X | 537 | 34.562 | 11.403 | 52.336 | 0.00 | 0.00 |
| ATOM | 8223 | HB3  | SER | X | 537 | 33.629 | 11.408 | 53.905 | 0.00 | 0.00 |
| ATOM | 8224 | OG   | SER | X | 537 | 34.352 | 13.285 | 53.293 | 0.00 | 0.00 |
| ATOM | 8225 | HG   | SER | X | 537 | 33.535 | 13.619 | 52.915 | 0.00 | 0.00 |
| ATOM | 8226 | C    | SER | X | 537 | 35.708 | 10.123 | 54.664 | 0.00 | 0.00 |
| ATOM | 8227 | O    | SER | X | 537 | 35.088 | 9.741  | 55.679 | 0.00 | 0.00 |
| ATOM | 8228 | N    | ALA | X | 538 | 36.374 | 9.298  | 53.939 | 0.00 | 0.00 |
| ATOM | 8229 | H    | ALA | X | 538 | 36.882 | 9.731  | 53.181 | 0.00 | 0.00 |
| ATOM | 8230 | CA   | ALA | X | 538 | 36.278 | 7.878  | 54.058 | 0.00 | 0.00 |
| ATOM | 8231 | HA   | ALA | X | 538 | 35.476 | 7.525  | 54.706 | 0.00 | 0.00 |
| ATOM | 8232 | CB   | ALA | X | 538 | 35.810 | 7.458  | 52.661 | 0.00 | 0.00 |
| ATOM | 8233 | HB1  | ALA | X | 538 | 34.808 | 7.842  | 52.469 | 0.00 | 0.00 |
| ATOM | 8234 | HB2  | ALA | X | 538 | 36.463 | 7.951  | 51.940 | 0.00 | 0.00 |
| ATOM | 8235 | HB3  | ALA | X | 538 | 35.746 | 6.375  | 52.564 | 0.00 | 0.00 |
| ATOM | 8236 | C    | ALA | X | 538 | 37.549 | 7.159  | 54.518 | 0.00 | 0.00 |
| ATOM | 8237 | O    | ALA | X | 538 | 37.550 | 5.909  | 54.644 | 0.00 | 0.00 |
| ATOM | 8238 | N    | THR | X | 539 | 38.636 | 7.922  | 54.761 | 0.00 | 0.00 |
| ATOM | 8239 | H    | THR | X | 539 | 38.510 | 8.919  | 54.660 | 0.00 | 0.00 |
| ATOM | 8240 | CA   | THR | X | 539 | 39.979 | 7.338  | 55.138 | 0.00 | 0.00 |
| ATOM | 8241 | HA   | THR | X | 539 | 40.030 | 6.272  | 54.913 | 0.00 | 0.00 |
| ATOM | 8242 | CB   | THR | X | 539 | 41.186 | 7.992  | 54.344 | 0.00 | 0.00 |
| ATOM | 8243 | HB   | THR | X | 539 | 42.114 | 7.903  | 54.908 | 0.00 | 0.00 |
| ATOM | 8244 | CG2  | THR | X | 539 | 41.266 | 7.300  | 53.006 | 0.00 | 0.00 |
| ATOM | 8245 | HG21 | THR | X | 539 | 41.932 | 7.889  | 52.376 | 0.00 | 0.00 |
| ATOM | 8246 | HG22 | THR | X | 539 | 41.589 | 6.258  | 53.013 | 0.00 | 0.00 |
| ATOM | 8247 | HG23 | THR | X | 539 | 40.246 | 7.251  | 52.626 | 0.00 | 0.00 |
| ATOM | 8248 | OG1  | THR | X | 539 | 40.905 | 9.374  | 54.338 | 0.00 | 0.00 |
| ATOM | 8249 | HG1  | THR | X | 539 | 40.264 | 9.520  | 53.639 | 0.00 | 0.00 |
| ATOM | 8250 | C    | THR | X | 539 | 40.209 | 7.426  | 56.621 | 0.00 | 0.00 |
| ATOM | 8251 | O    | THR | X | 539 | 41.222 | 6.890  | 57.091 | 0.00 | 0.00 |
| ATOM | 8252 | OXT  | THR | X | 539 | 39.351 | 7.900  | 57.397 | 0.00 | 0.00 |
| ATOM | 8253 | C    | LIG | X | 540 | 52.324 | 37.952 | 48.761 | 0.00 | 0.00 |
| ATOM | 8254 | C1   | LIG | X | 540 | 52.700 | 37.475 | 50.039 | 0.00 | 0.00 |
| ATOM | 8255 | C2   | LIG | X | 540 | 52.695 | 36.100 | 50.336 | 0.00 | 0.00 |
| ATOM | 8256 | C3   | LIG | X | 540 | 52.615 | 35.197 | 49.353 | 0.00 | 0.00 |
| ATOM | 8257 | C4   | LIG | X | 540 | 52.351 | 35.622 | 48.059 | 0.00 | 0.00 |
| ATOM | 8258 | C5   | LIG | X | 540 | 52.088 | 36.968 | 47.799 | 0.00 | 0.00 |
| ATOM | 8259 | C6   | LIG | X | 540 | 52.329 | 39.430 | 48.369 | 0.00 | 0.00 |
| ATOM | 8260 | N    | LIG | X | 540 | 53.707 | 40.061 | 48.027 | 0.00 | 0.00 |
| ATOM | 8261 | H    | LIG | X | 540 | 54.345 | 39.929 | 48.829 | 0.00 | 0.00 |
| ATOM | 8262 | C7   | LIG | X | 540 | 53.520 | 41.514 | 47.836 | 0.00 | 0.00 |
| ATOM | 8263 | C8   | LIG | X | 540 | 54.847 | 42.284 | 47.462 | 0.00 | 0.00 |
| ATOM | 8264 | C9   | LIG | X | 540 | 55.302 | 41.580 | 46.138 | 0.00 | 0.00 |
| ATOM | 8265 | C10  | LIG | X | 540 | 55.632 | 40.106 | 46.272 | 0.00 | 0.00 |
| ATOM | 8266 | C11  | LIG | X | 540 | 54.280 | 39.470 | 46.782 | 0.00 | 0.00 |
| ATOM | 8267 | O    | LIG | X | 540 | 52.866 | 35.653 | 51.697 | 0.00 | 0.00 |

|      |      |     |     |   |     |        |        |        |      |      |
|------|------|-----|-----|---|-----|--------|--------|--------|------|------|
| ATOM | 8268 | C12 | LIG | X | 540 | 53.274 | 36.511 | 52.745 | 0.00 | 0.00 |
| ATOM | 8269 | O1  | LIG | X | 540 | 52.634 | 33.835 | 49.583 | 0.00 | 0.00 |
| ATOM | 8270 | H1  | LIG | X | 540 | 52.692 | 33.523 | 50.504 | 0.00 | 0.00 |
| ATOM | 8271 | H2  | LIG | X | 540 | 52.845 | 38.175 | 50.858 | 0.00 | 0.00 |
| ATOM | 8272 | H3  | LIG | X | 540 | 52.351 | 34.934 | 47.217 | 0.00 | 0.00 |
| ATOM | 8273 | H4  | LIG | X | 540 | 52.103 | 37.275 | 46.756 | 0.00 | 0.00 |
| ATOM | 8274 | H5  | LIG | X | 540 | 51.718 | 39.449 | 47.465 | 0.00 | 0.00 |
| ATOM | 8275 | H6  | LIG | X | 540 | 51.847 | 39.976 | 49.182 | 0.00 | 0.00 |
| ATOM | 8276 | H7  | LIG | X | 540 | 53.096 | 41.915 | 48.757 | 0.00 | 0.00 |
| ATOM | 8277 | H8  | LIG | X | 540 | 52.743 | 41.603 | 47.075 | 0.00 | 0.00 |
| ATOM | 8278 | H9  | LIG | X | 540 | 54.601 | 43.321 | 47.223 | 0.00 | 0.00 |
| ATOM | 8279 | H10 | LIG | X | 540 | 55.744 | 42.271 | 48.085 | 0.00 | 0.00 |
| ATOM | 8280 | H11 | LIG | X | 540 | 54.546 | 41.621 | 45.352 | 0.00 | 0.00 |
| ATOM | 8281 | H12 | LIG | X | 540 | 56.152 | 42.202 | 45.850 | 0.00 | 0.00 |
| ATOM | 8282 | H13 | LIG | X | 540 | 55.984 | 39.751 | 45.301 | 0.00 | 0.00 |
| ATOM | 8283 | H14 | LIG | X | 540 | 56.413 | 39.965 | 47.022 | 0.00 | 0.00 |
| ATOM | 8284 | H15 | LIG | X | 540 | 54.407 | 38.413 | 47.022 | 0.00 | 0.00 |
| ATOM | 8285 | H16 | LIG | X | 540 | 53.480 | 39.715 | 46.082 | 0.00 | 0.00 |
| ATOM | 8286 | H17 | LIG | X | 540 | 54.349 | 36.693 | 52.669 | 0.00 | 0.00 |
| ATOM | 8287 | H18 | LIG | X | 540 | 53.181 | 35.963 | 53.686 | 0.00 | 0.00 |
| ATOM | 8288 | H19 | LIG | X | 540 | 52.654 | 37.408 | 52.820 | 0.00 | 0.00 |
| ATOM | 8289 | Na+ | Na+ | X | 541 | 50.215 | 40.935 | 38.599 | 0.00 | 0.00 |
| ATOM | 8290 | Na+ | Na+ | X | 542 | 83.028 | 33.903 | 29.411 | 0.00 | 0.00 |
| ATOM | 8291 | Na+ | Na+ | X | 543 | 28.258 | 18.128 | 59.192 | 0.00 | 0.00 |
| ATOM | 8292 | Na+ | Na+ | X | 544 | 52.351 | -7.757 | 60.766 | 0.00 | 0.00 |
| ATOM | 8293 | Na+ | Na+ | X | 545 | 54.705 | 25.317 | 35.918 | 0.00 | 0.00 |
| ATOM | 8294 | Na+ | Na+ | X | 546 | 17.741 | 38.001 | 26.119 | 0.00 | 0.00 |
| ATOM | 8295 | Na+ | Na+ | X | 547 | 71.311 | 50.690 | 40.351 | 0.00 | 0.00 |

END

#### 4-HCl

|        |        |        |        |       |       |        |        |        |      |      |
|--------|--------|--------|--------|-------|-------|--------|--------|--------|------|------|
| CRYST1 | 85.134 | 85.134 | 85.134 | 90.00 | 90.00 | 90.00  | P 1    |        | 1    |      |
| ATOM   | 1      | N      | ASP    | X     | 1     | 40.982 | 78.565 | 29.656 | 0.00 | 0.00 |
| ATOM   | 2      | H1     | ASP    | X     | 1     | 41.987 | 78.571 | 29.761 | 0.00 | 0.00 |
| ATOM   | 3      | H2     | ASP    | X     | 1     | 40.588 | 78.866 | 28.776 | 0.00 | 0.00 |
| ATOM   | 4      | H3     | ASP    | X     | 1     | 40.582 | 77.657 | 29.845 | 0.00 | 0.00 |
| ATOM   | 5      | CA     | ASP    | X     | 1     | 40.366 | 79.439 | 30.598 | 0.00 | 0.00 |
| ATOM   | 6      | HA     | ASP    | X     | 1     | 40.742 | 80.462 | 30.579 | 0.00 | 0.00 |
| ATOM   | 7      | CB     | ASP    | X     | 1     | 38.894 | 79.650 | 30.091 | 0.00 | 0.00 |
| ATOM   | 8      | HB2    | ASP    | X     | 1     | 39.003 | 79.878 | 29.031 | 0.00 | 0.00 |
| ATOM   | 9      | HB3    | ASP    | X     | 1     | 38.322 | 78.746 | 30.300 | 0.00 | 0.00 |
| ATOM   | 10     | CG     | ASP    | X     | 1     | 38.248 | 80.849 | 30.736 | 0.00 | 0.00 |
| ATOM   | 11     | OD1    | ASP    | X     | 1     | 37.362 | 80.675 | 31.612 | 0.00 | 0.00 |
| ATOM   | 12     | OD2    | ASP    | X     | 1     | 38.462 | 81.978 | 30.282 | 0.00 | 0.00 |
| ATOM   | 13     | C      | ASP    | X     | 1     | 40.547 | 78.979 | 32.077 | 0.00 | 0.00 |
| ATOM   | 14     | O      | ASP    | X     | 1     | 41.260 | 79.597 | 32.875 | 0.00 | 0.00 |
| ATOM   | 15     | N      | ALA    | X     | 2     | 39.750 | 78.038 | 32.556 | 0.00 | 0.00 |
| ATOM   | 16     | H      | ALA    | X     | 2     | 39.319 | 77.369 | 31.934 | 0.00 | 0.00 |
| ATOM   | 17     | CA     | ALA    | X     | 2     | 39.619 | 77.703 | 33.970 | 0.00 | 0.00 |
| ATOM   | 18     | HA     | ALA    | X     | 2     | 40.578 | 77.755 | 34.486 | 0.00 | 0.00 |
| ATOM   | 19     | CB     | ALA    | X     | 2     | 38.688 | 78.751 | 34.583 | 0.00 | 0.00 |
| ATOM   | 20     | HB1    | ALA    | X     | 2     | 39.067 | 79.746 | 34.349 | 0.00 | 0.00 |
| ATOM   | 21     | HB2    | ALA    | X     | 2     | 37.708 | 78.604 | 34.129 | 0.00 | 0.00 |
| ATOM   | 22     | HB3    | ALA    | X     | 2     | 38.610 | 78.713 | 35.669 | 0.00 | 0.00 |
| ATOM   | 23     | C      | ALA    | X     | 2     | 39.114 | 76.233 | 34.123 | 0.00 | 0.00 |
| ATOM   | 24     | O      | ALA    | X     | 2     | 38.141 | 75.989 | 34.819 | 0.00 | 0.00 |
| ATOM   | 25     | N      | GLU    | X     | 3     | 39.625 | 75.283 | 33.246 | 0.00 | 0.00 |
| ATOM   | 26     | H      | GLU    | X     | 3     | 40.478 | 75.545 | 32.773 | 0.00 | 0.00 |
| ATOM   | 27     | CA     | GLU    | X     | 3     | 39.146 | 73.906 | 33.106 | 0.00 | 0.00 |
| ATOM   | 28     | HA     | GLU    | X     | 3     | 38.059 | 73.887 | 33.176 | 0.00 | 0.00 |
| ATOM   | 29     | CB     | GLU    | X     | 3     | 39.480 | 73.369 | 31.684 | 0.00 | 0.00 |
| ATOM   | 30     | HB2    | GLU    | X     | 3     | 40.550 | 73.183 | 31.587 | 0.00 | 0.00 |
| ATOM   | 31     | HB3    | GLU    | X     | 3     | 38.926 | 72.438 | 31.559 | 0.00 | 0.00 |
| ATOM   | 32     | CG     | GLU    | X     | 3     | 39.077 | 74.159 | 30.443 | 0.00 | 0.00 |
| ATOM   | 33     | HG2    | GLU    | X     | 3     | 39.286 | 73.511 | 29.592 | 0.00 | 0.00 |
| ATOM   | 34     | HG3    | GLU    | X     | 3     | 37.997 | 74.305 | 30.476 | 0.00 | 0.00 |
| ATOM   | 35     | CD     | GLU    | X     | 3     | 39.680 | 75.547 | 30.312 | 0.00 | 0.00 |
| ATOM   | 36     | OE1    | GLU    | X     | 3     | 39.002 | 76.526 | 30.567 | 0.00 | 0.00 |
| ATOM   | 37     | OE2    | GLU    | X     | 3     | 40.883 | 75.760 | 30.008 | 0.00 | 0.00 |
| ATOM   | 38     | C      | GLU    | X     | 3     | 39.665 | 72.875 | 34.112 | 0.00 | 0.00 |
| ATOM   | 39     | O      | GLU    | X     | 3     | 38.952 | 71.932 | 34.380 | 0.00 | 0.00 |

|      |     |      |     |   |   |        |        |        |      |      |
|------|-----|------|-----|---|---|--------|--------|--------|------|------|
| ATOM | 40  | N    | LEU | X | 4 | 40.782 | 73.099 | 34.810 | 0.00 | 0.00 |
| ATOM | 41  | H    | LEU | X | 4 | 41.269 | 73.983 | 34.848 | 0.00 | 0.00 |
| ATOM | 42  | CA   | LEU | X | 4 | 41.256 | 72.207 | 35.945 | 0.00 | 0.00 |
| ATOM | 43  | HA   | LEU | X | 4 | 41.062 | 71.177 | 35.648 | 0.00 | 0.00 |
| ATOM | 44  | CB   | LEU | X | 4 | 42.755 | 72.438 | 36.140 | 0.00 | 0.00 |
| ATOM | 45  | HB2  | LEU | X | 4 | 42.938 | 73.502 | 36.291 | 0.00 | 0.00 |
| ATOM | 46  | HB3  | LEU | X | 4 | 43.173 | 71.955 | 37.023 | 0.00 | 0.00 |
| ATOM | 47  | CG   | LEU | X | 4 | 43.598 | 72.053 | 34.972 | 0.00 | 0.00 |
| ATOM | 48  | HG   | LEU | X | 4 | 43.207 | 72.589 | 34.107 | 0.00 | 0.00 |
| ATOM | 49  | CD1  | LEU | X | 4 | 45.107 | 72.194 | 35.337 | 0.00 | 0.00 |
| ATOM | 50  | HD11 | LEU | X | 4 | 45.618 | 71.921 | 34.414 | 0.00 | 0.00 |
| ATOM | 51  | HD12 | LEU | X | 4 | 45.222 | 73.271 | 35.463 | 0.00 | 0.00 |
| ATOM | 52  | HD13 | LEU | X | 4 | 45.443 | 71.612 | 36.196 | 0.00 | 0.00 |
| ATOM | 53  | CD2  | LEU | X | 4 | 43.432 | 70.618 | 34.683 | 0.00 | 0.00 |
| ATOM | 54  | HD21 | LEU | X | 4 | 42.455 | 70.481 | 34.220 | 0.00 | 0.00 |
| ATOM | 55  | HD22 | LEU | X | 4 | 44.157 | 70.199 | 33.984 | 0.00 | 0.00 |
| ATOM | 56  | HD23 | LEU | X | 4 | 43.493 | 70.003 | 35.581 | 0.00 | 0.00 |
| ATOM | 57  | C    | LEU | X | 4 | 40.527 | 72.456 | 37.268 | 0.00 | 0.00 |
| ATOM | 58  | O    | LEU | X | 4 | 40.816 | 71.870 | 38.271 | 0.00 | 0.00 |
| ATOM | 59  | N    | LEU | X | 5 | 39.710 | 73.487 | 37.318 | 0.00 | 0.00 |
| ATOM | 60  | H    | LEU | X | 5 | 39.379 | 73.882 | 36.449 | 0.00 | 0.00 |
| ATOM | 61  | CA   | LEU | X | 5 | 38.978 | 73.837 | 38.487 | 0.00 | 0.00 |
| ATOM | 62  | HA   | LEU | X | 5 | 39.358 | 73.401 | 39.411 | 0.00 | 0.00 |
| ATOM | 63  | CB   | LEU | X | 5 | 38.993 | 75.346 | 38.627 | 0.00 | 0.00 |
| ATOM | 64  | HB2  | LEU | X | 5 | 38.663 | 75.762 | 37.675 | 0.00 | 0.00 |
| ATOM | 65  | HB3  | LEU | X | 5 | 38.361 | 75.681 | 39.449 | 0.00 | 0.00 |
| ATOM | 66  | CG   | LEU | X | 5 | 40.379 | 75.984 | 38.878 | 0.00 | 0.00 |
| ATOM | 67  | HG   | LEU | X | 5 | 40.998 | 75.759 | 38.009 | 0.00 | 0.00 |
| ATOM | 68  | CD1  | LEU | X | 5 | 40.296 | 77.494 | 38.877 | 0.00 | 0.00 |
| ATOM | 69  | HD11 | LEU | X | 5 | 41.316 | 77.845 | 39.037 | 0.00 | 0.00 |
| ATOM | 70  | HD12 | LEU | X | 5 | 39.909 | 77.995 | 37.990 | 0.00 | 0.00 |
| ATOM | 71  | HD13 | LEU | X | 5 | 39.826 | 77.703 | 39.838 | 0.00 | 0.00 |
| ATOM | 72  | CD2  | LEU | X | 5 | 41.074 | 75.344 | 40.076 | 0.00 | 0.00 |
| ATOM | 73  | HD21 | LEU | X | 5 | 41.310 | 74.307 | 39.837 | 0.00 | 0.00 |
| ATOM | 74  | HD22 | LEU | X | 5 | 41.927 | 75.982 | 40.307 | 0.00 | 0.00 |
| ATOM | 75  | HD23 | LEU | X | 5 | 40.287 | 75.449 | 40.822 | 0.00 | 0.00 |
| ATOM | 76  | C    | LEU | X | 5 | 37.526 | 73.272 | 38.349 | 0.00 | 0.00 |
| ATOM | 77  | O    | LEU | X | 5 | 36.902 | 73.343 | 37.274 | 0.00 | 0.00 |
| ATOM | 78  | N    | VAL | X | 6 | 36.955 | 72.753 | 39.432 | 0.00 | 0.00 |
| ATOM | 79  | H    | VAL | X | 6 | 37.507 | 72.830 | 40.274 | 0.00 | 0.00 |
| ATOM | 80  | CA   | VAL | X | 6 | 35.491 | 72.452 | 39.400 | 0.00 | 0.00 |
| ATOM | 81  | HA   | VAL | X | 6 | 35.020 | 73.263 | 38.844 | 0.00 | 0.00 |
| ATOM | 82  | CB   | VAL | X | 6 | 35.288 | 71.094 | 38.574 | 0.00 | 0.00 |
| ATOM | 83  | HB   | VAL | X | 6 | 35.952 | 71.126 | 37.710 | 0.00 | 0.00 |
| ATOM | 84  | CG1  | VAL | X | 6 | 35.483 | 69.815 | 39.333 | 0.00 | 0.00 |
| ATOM | 85  | HG11 | VAL | X | 6 | 36.411 | 69.968 | 39.884 | 0.00 | 0.00 |
| ATOM | 86  | HG12 | VAL | X | 6 | 34.777 | 69.673 | 40.152 | 0.00 | 0.00 |
| ATOM | 87  | HG13 | VAL | X | 6 | 35.251 | 68.948 | 38.714 | 0.00 | 0.00 |
| ATOM | 88  | CG2  | VAL | X | 6 | 33.840 | 71.075 | 38.015 | 0.00 | 0.00 |
| ATOM | 89  | HG21 | VAL | X | 6 | 33.605 | 71.919 | 37.366 | 0.00 | 0.00 |
| ATOM | 90  | HG22 | VAL | X | 6 | 33.681 | 70.205 | 37.377 | 0.00 | 0.00 |
| ATOM | 91  | HG23 | VAL | X | 6 | 33.120 | 70.836 | 38.797 | 0.00 | 0.00 |
| ATOM | 92  | C    | VAL | X | 6 | 34.854 | 72.428 | 40.803 | 0.00 | 0.00 |
| ATOM | 93  | O    | VAL | X | 6 | 35.421 | 72.024 | 41.782 | 0.00 | 0.00 |
| ATOM | 94  | N    | THR | X | 7 | 33.524 | 72.746 | 40.778 | 0.00 | 0.00 |
| ATOM | 95  | H    | THR | X | 7 | 33.236 | 73.261 | 39.958 | 0.00 | 0.00 |
| ATOM | 96  | CA   | THR | X | 7 | 32.713 | 72.673 | 41.927 | 0.00 | 0.00 |
| ATOM | 97  | HA   | THR | X | 7 | 33.418 | 72.817 | 42.746 | 0.00 | 0.00 |
| ATOM | 98  | CB   | THR | X | 7 | 31.828 | 73.991 | 41.996 | 0.00 | 0.00 |
| ATOM | 99  | HB   | THR | X | 7 | 31.130 | 74.079 | 41.163 | 0.00 | 0.00 |
| ATOM | 100 | CG2  | THR | X | 7 | 31.152 | 74.046 | 43.323 | 0.00 | 0.00 |
| ATOM | 101 | HG21 | THR | X | 7 | 30.529 | 74.931 | 43.190 | 0.00 | 0.00 |
| ATOM | 102 | HG22 | THR | X | 7 | 30.701 | 73.086 | 43.577 | 0.00 | 0.00 |
| ATOM | 103 | HG23 | THR | X | 7 | 31.896 | 74.119 | 44.116 | 0.00 | 0.00 |
| ATOM | 104 | OG1  | THR | X | 7 | 32.663 | 75.106 | 41.885 | 0.00 | 0.00 |
| ATOM | 105 | HG1  | THR | X | 7 | 32.172 | 75.781 | 42.359 | 0.00 | 0.00 |
| ATOM | 106 | C    | THR | X | 7 | 31.981 | 71.346 | 42.127 | 0.00 | 0.00 |
| ATOM | 107 | O    | THR | X | 7 | 31.329 | 70.857 | 41.223 | 0.00 | 0.00 |
| ATOM | 108 | N    | VAL | X | 8 | 32.072 | 70.789 | 43.345 | 0.00 | 0.00 |
| ATOM | 109 | H    | VAL | X | 8 | 32.756 | 71.130 | 44.006 | 0.00 | 0.00 |

|      |     |      |     |   |    |        |        |        |      |      |
|------|-----|------|-----|---|----|--------|--------|--------|------|------|
| ATOM | 110 | CA   | VAL | X | 8  | 31.122 | 69.741 | 43.856 | 0.00 | 0.00 |
| ATOM | 111 | HA   | VAL | X | 8  | 30.447 | 69.543 | 43.023 | 0.00 | 0.00 |
| ATOM | 112 | CB   | VAL | X | 8  | 31.904 | 68.414 | 44.130 | 0.00 | 0.00 |
| ATOM | 113 | HB   | VAL | X | 8  | 31.230 | 67.625 | 44.465 | 0.00 | 0.00 |
| ATOM | 114 | CG1  | VAL | X | 8  | 32.487 | 67.889 | 42.791 | 0.00 | 0.00 |
| ATOM | 115 | HG11 | VAL | X | 8  | 33.000 | 68.689 | 42.257 | 0.00 | 0.00 |
| ATOM | 116 | HG12 | VAL | X | 8  | 33.072 | 67.002 | 43.035 | 0.00 | 0.00 |
| ATOM | 117 | HG13 | VAL | X | 8  | 31.683 | 67.589 | 42.119 | 0.00 | 0.00 |
| ATOM | 118 | CG2  | VAL | X | 8  | 32.959 | 68.463 | 45.242 | 0.00 | 0.00 |
| ATOM | 119 | HG21 | VAL | X | 8  | 32.463 | 69.059 | 46.008 | 0.00 | 0.00 |
| ATOM | 120 | HG22 | VAL | X | 8  | 32.964 | 67.593 | 45.899 | 0.00 | 0.00 |
| ATOM | 121 | HG23 | VAL | X | 8  | 33.934 | 68.824 | 44.914 | 0.00 | 0.00 |
| ATOM | 122 | C    | VAL | X | 8  | 30.239 | 70.227 | 45.004 | 0.00 | 0.00 |
| ATOM | 123 | O    | VAL | X | 8  | 30.305 | 71.389 | 45.343 | 0.00 | 0.00 |
| ATOM | 124 | N    | ARG | X | 9  | 29.325 | 69.405 | 45.522 | 0.00 | 0.00 |
| ATOM | 125 | H    | ARG | X | 9  | 29.198 | 68.487 | 45.122 | 0.00 | 0.00 |
| ATOM | 126 | CA   | ARG | X | 9  | 28.385 | 69.748 | 46.608 | 0.00 | 0.00 |
| ATOM | 127 | HA   | ARG | X | 9  | 27.762 | 70.557 | 46.228 | 0.00 | 0.00 |
| ATOM | 128 | CB   | ARG | X | 9  | 27.543 | 68.470 | 46.900 | 0.00 | 0.00 |
| ATOM | 129 | HB2  | ARG | X | 9  | 27.599 | 67.850 | 46.004 | 0.00 | 0.00 |
| ATOM | 130 | HB3  | ARG | X | 9  | 28.073 | 67.994 | 47.725 | 0.00 | 0.00 |
| ATOM | 131 | CG   | ARG | X | 9  | 26.222 | 68.955 | 47.349 | 0.00 | 0.00 |
| ATOM | 132 | HG2  | ARG | X | 9  | 26.402 | 69.633 | 48.184 | 0.00 | 0.00 |
| ATOM | 133 | HG3  | ARG | X | 9  | 25.747 | 69.594 | 46.604 | 0.00 | 0.00 |
| ATOM | 134 | CD   | ARG | X | 9  | 25.307 | 67.860 | 47.828 | 0.00 | 0.00 |
| ATOM | 135 | HD2  | ARG | X | 9  | 24.760 | 67.336 | 47.044 | 0.00 | 0.00 |
| ATOM | 136 | HD3  | ARG | X | 9  | 25.855 | 67.151 | 48.448 | 0.00 | 0.00 |
| ATOM | 137 | NE   | ARG | X | 9  | 24.320 | 68.469 | 48.733 | 0.00 | 0.00 |
| ATOM | 138 | HE   | ARG | X | 9  | 24.281 | 69.478 | 48.735 | 0.00 | 0.00 |
| ATOM | 139 | CZ   | ARG | X | 9  | 23.441 | 67.896 | 49.490 | 0.00 | 0.00 |
| ATOM | 140 | NH1  | ARG | X | 9  | 23.157 | 66.612 | 49.433 | 0.00 | 0.00 |
| ATOM | 141 | HH11 | ARG | X | 9  | 23.557 | 66.093 | 48.664 | 0.00 | 0.00 |
| ATOM | 142 | HH12 | ARG | X | 9  | 22.497 | 66.151 | 50.042 | 0.00 | 0.00 |
| ATOM | 143 | NH2  | ARG | X | 9  | 22.825 | 68.660 | 50.386 | 0.00 | 0.00 |
| ATOM | 144 | HH21 | ARG | X | 9  | 23.104 | 69.629 | 50.443 | 0.00 | 0.00 |
| ATOM | 145 | HH22 | ARG | X | 9  | 22.033 | 68.356 | 50.934 | 0.00 | 0.00 |
| ATOM | 146 | C    | ARG | X | 9  | 29.045 | 70.222 | 47.863 | 0.00 | 0.00 |
| ATOM | 147 | O    | ARG | X | 9  | 28.549 | 71.071 | 48.539 | 0.00 | 0.00 |
| ATOM | 148 | N    | GLY | X | 10 | 30.191 | 69.644 | 48.105 | 0.00 | 0.00 |
| ATOM | 149 | H    | GLY | X | 10 | 30.449 | 68.896 | 47.479 | 0.00 | 0.00 |
| ATOM | 150 | CA   | GLY | X | 10 | 31.130 | 69.976 | 49.241 | 0.00 | 0.00 |
| ATOM | 151 | HA2  | GLY | X | 10 | 30.437 | 70.228 | 50.064 | 0.00 | 0.00 |
| ATOM | 152 | HA3  | GLY | X | 10 | 31.868 | 69.247 | 49.446 | 0.00 | 0.00 |
| ATOM | 153 | C    | GLY | X | 10 | 31.999 | 71.205 | 48.971 | 0.00 | 0.00 |
| ATOM | 154 | O    | GLY | X | 10 | 32.526 | 71.752 | 49.946 | 0.00 | 0.00 |
| ATOM | 155 | N    | GLY | X | 11 | 32.120 | 71.581 | 47.674 | 0.00 | 0.00 |
| ATOM | 156 | H    | GLY | X | 11 | 31.613 | 71.172 | 46.903 | 0.00 | 0.00 |
| ATOM | 157 | CA   | GLY | X | 11 | 32.918 | 72.758 | 47.299 | 0.00 | 0.00 |
| ATOM | 158 | HA2  | GLY | X | 11 | 32.183 | 73.443 | 46.804 | 0.00 | 0.00 |
| ATOM | 159 | HA3  | GLY | X | 11 | 33.393 | 73.231 | 48.151 | 0.00 | 0.00 |
| ATOM | 160 | C    | GLY | X | 11 | 33.947 | 72.661 | 46.249 | 0.00 | 0.00 |
| ATOM | 161 | O    | GLY | X | 11 | 33.864 | 71.801 | 45.342 | 0.00 | 0.00 |
| ATOM | 162 | N    | ARG | X | 12 | 34.728 | 73.745 | 46.172 | 0.00 | 0.00 |
| ATOM | 163 | H    | ARG | X | 12 | 34.825 | 74.511 | 46.823 | 0.00 | 0.00 |
| ATOM | 164 | CA   | ARG | X | 12 | 35.665 | 73.845 | 45.040 | 0.00 | 0.00 |
| ATOM | 165 | HA   | ARG | X | 12 | 35.092 | 73.507 | 44.177 | 0.00 | 0.00 |
| ATOM | 166 | CB   | ARG | X | 12 | 36.087 | 75.347 | 44.867 | 0.00 | 0.00 |
| ATOM | 167 | HB2  | ARG | X | 12 | 35.192 | 75.900 | 45.154 | 0.00 | 0.00 |
| ATOM | 168 | HB3  | ARG | X | 12 | 36.954 | 75.676 | 45.441 | 0.00 | 0.00 |
| ATOM | 169 | CG   | ARG | X | 12 | 36.429 | 75.665 | 43.388 | 0.00 | 0.00 |
| ATOM | 170 | HG2  | ARG | X | 12 | 37.427 | 75.276 | 43.183 | 0.00 | 0.00 |
| ATOM | 171 | HG3  | ARG | X | 12 | 35.716 | 75.063 | 42.826 | 0.00 | 0.00 |
| ATOM | 172 | CD   | ARG | X | 12 | 36.389 | 77.157 | 43.006 | 0.00 | 0.00 |
| ATOM | 173 | HD2  | ARG | X | 12 | 35.386 | 77.512 | 43.243 | 0.00 | 0.00 |
| ATOM | 174 | HD3  | ARG | X | 12 | 37.137 | 77.747 | 43.536 | 0.00 | 0.00 |
| ATOM | 175 | NE   | ARG | X | 12 | 36.396 | 77.234 | 41.526 | 0.00 | 0.00 |
| ATOM | 176 | HE   | ARG | X | 12 | 35.782 | 76.601 | 41.032 | 0.00 | 0.00 |
| ATOM | 177 | CZ   | ARG | X | 12 | 36.923 | 78.131 | 40.771 | 0.00 | 0.00 |
| ATOM | 178 | NH1  | ARG | X | 12 | 37.888 | 78.957 | 41.171 | 0.00 | 0.00 |
| ATOM | 179 | HH11 | ARG | X | 12 | 38.140 | 79.020 | 42.147 | 0.00 | 0.00 |

|      |     |      |     |   |    |        |        |        |      |      |
|------|-----|------|-----|---|----|--------|--------|--------|------|------|
| ATOM | 180 | HH12 | ARG | X | 12 | 38.228 | 79.710 | 40.591 | 0.00 | 0.00 |
| ATOM | 181 | NH2  | ARG | X | 12 | 36.564 | 78.140 | 39.503 | 0.00 | 0.00 |
| ATOM | 182 | HH21 | ARG | X | 12 | 35.819 | 77.544 | 39.172 | 0.00 | 0.00 |
| ATOM | 183 | HH22 | ARG | X | 12 | 36.986 | 78.768 | 38.834 | 0.00 | 0.00 |
| ATOM | 184 | C    | ARG | X | 12 | 36.819 | 72.903 | 45.090 | 0.00 | 0.00 |
| ATOM | 185 | O    | ARG | X | 12 | 37.438 | 72.786 | 46.145 | 0.00 | 0.00 |
| ATOM | 186 | N    | LEU | X | 13 | 37.257 | 72.340 | 43.975 | 0.00 | 0.00 |
| ATOM | 187 | H    | LEU | X | 13 | 36.798 | 72.645 | 43.129 | 0.00 | 0.00 |
| ATOM | 188 | CA   | LEU | X | 13 | 38.419 | 71.472 | 43.837 | 0.00 | 0.00 |
| ATOM | 189 | HA   | LEU | X | 13 | 38.953 | 71.508 | 44.786 | 0.00 | 0.00 |
| ATOM | 190 | CB   | LEU | X | 13 | 37.964 | 70.043 | 43.536 | 0.00 | 0.00 |
| ATOM | 191 | HB2  | LEU | X | 13 | 37.538 | 70.083 | 42.534 | 0.00 | 0.00 |
| ATOM | 192 | HB3  | LEU | X | 13 | 38.843 | 69.445 | 43.296 | 0.00 | 0.00 |
| ATOM | 193 | CG   | LEU | X | 13 | 37.070 | 69.223 | 44.471 | 0.00 | 0.00 |
| ATOM | 194 | HG   | LEU | X | 13 | 36.238 | 69.867 | 44.757 | 0.00 | 0.00 |
| ATOM | 195 | CD1  | LEU | X | 13 | 36.490 | 68.030 | 43.806 | 0.00 | 0.00 |
| ATOM | 196 | HD11 | LEU | X | 13 | 35.910 | 67.445 | 44.520 | 0.00 | 0.00 |
| ATOM | 197 | HD12 | LEU | X | 13 | 35.782 | 68.304 | 43.024 | 0.00 | 0.00 |
| ATOM | 198 | HD13 | LEU | X | 13 | 37.317 | 67.439 | 43.414 | 0.00 | 0.00 |
| ATOM | 199 | CD2  | LEU | X | 13 | 37.862 | 68.767 | 45.647 | 0.00 | 0.00 |
| ATOM | 200 | HD21 | LEU | X | 13 | 38.348 | 69.634 | 46.094 | 0.00 | 0.00 |
| ATOM | 201 | HD22 | LEU | X | 13 | 37.146 | 68.419 | 46.392 | 0.00 | 0.00 |
| ATOM | 202 | HD23 | LEU | X | 13 | 38.437 | 67.884 | 45.368 | 0.00 | 0.00 |
| ATOM | 203 | C    | LEU | X | 13 | 39.287 | 72.060 | 42.800 | 0.00 | 0.00 |
| ATOM | 204 | O    | LEU | X | 13 | 38.826 | 72.742 | 41.879 | 0.00 | 0.00 |
| ATOM | 205 | N    | ARG | X | 14 | 40.514 | 71.629 | 42.851 | 0.00 | 0.00 |
| ATOM | 206 | H    | ARG | X | 14 | 40.798 | 71.146 | 43.691 | 0.00 | 0.00 |
| ATOM | 207 | CA   | ARG | X | 14 | 41.549 | 71.824 | 41.833 | 0.00 | 0.00 |
| ATOM | 208 | HA   | ARG | X | 14 | 41.062 | 72.238 | 40.950 | 0.00 | 0.00 |
| ATOM | 209 | CB   | ARG | X | 14 | 42.554 | 72.870 | 42.336 | 0.00 | 0.00 |
| ATOM | 210 | HB2  | ARG | X | 14 | 42.157 | 73.881 | 42.247 | 0.00 | 0.00 |
| ATOM | 211 | HB3  | ARG | X | 14 | 42.906 | 72.691 | 43.352 | 0.00 | 0.00 |
| ATOM | 212 | CG   | ARG | X | 14 | 43.847 | 72.971 | 41.526 | 0.00 | 0.00 |
| ATOM | 213 | HG2  | ARG | X | 14 | 44.365 | 72.018 | 41.638 | 0.00 | 0.00 |
| ATOM | 214 | HG3  | ARG | X | 14 | 43.565 | 73.037 | 40.475 | 0.00 | 0.00 |
| ATOM | 215 | CD   | ARG | X | 14 | 44.610 | 74.233 | 41.891 | 0.00 | 0.00 |
| ATOM | 216 | HD2  | ARG | X | 14 | 45.467 | 74.383 | 41.234 | 0.00 | 0.00 |
| ATOM | 217 | HD3  | ARG | X | 14 | 44.011 | 75.124 | 41.698 | 0.00 | 0.00 |
| ATOM | 218 | NE   | ARG | X | 14 | 45.068 | 74.070 | 43.297 | 0.00 | 0.00 |
| ATOM | 219 | HE   | ARG | X | 14 | 45.379 | 73.145 | 43.559 | 0.00 | 0.00 |
| ATOM | 220 | CZ   | ARG | X | 14 | 44.982 | 74.960 | 44.249 | 0.00 | 0.00 |
| ATOM | 221 | NH1  | ARG | X | 14 | 44.318 | 76.076 | 44.145 | 0.00 | 0.00 |
| ATOM | 222 | HH11 | ARG | X | 14 | 43.898 | 76.390 | 43.282 | 0.00 | 0.00 |
| ATOM | 223 | HH12 | ARG | X | 14 | 44.323 | 76.707 | 44.934 | 0.00 | 0.00 |
| ATOM | 224 | NH2  | ARG | X | 14 | 45.594 | 74.633 | 45.385 | 0.00 | 0.00 |
| ATOM | 225 | HH21 | ARG | X | 14 | 46.038 | 73.728 | 45.442 | 0.00 | 0.00 |
| ATOM | 226 | HH22 | ARG | X | 14 | 45.594 | 75.272 | 46.166 | 0.00 | 0.00 |
| ATOM | 227 | C    | ARG | X | 14 | 42.210 | 70.487 | 41.427 | 0.00 | 0.00 |
| ATOM | 228 | O    | ARG | X | 14 | 42.730 | 69.836 | 42.345 | 0.00 | 0.00 |
| ATOM | 229 | N    | GLY | X | 15 | 42.229 | 70.156 | 40.112 | 0.00 | 0.00 |
| ATOM | 230 | H    | GLY | X | 15 | 41.820 | 70.825 | 39.476 | 0.00 | 0.00 |
| ATOM | 231 | CA   | GLY | X | 15 | 42.949 | 68.969 | 39.597 | 0.00 | 0.00 |
| ATOM | 232 | HA2  | GLY | X | 15 | 43.160 | 68.281 | 40.366 | 0.00 | 0.00 |
| ATOM | 233 | HA3  | GLY | X | 15 | 42.243 | 68.434 | 38.886 | 0.00 | 0.00 |
| ATOM | 234 | C    | GLY | X | 15 | 44.265 | 69.203 | 38.846 | 0.00 | 0.00 |
| ATOM | 235 | O    | GLY | X | 15 | 44.733 | 70.336 | 38.801 | 0.00 | 0.00 |
| ATOM | 236 | N    | ILE | X | 16 | 44.722 | 68.199 | 38.058 | 0.00 | 0.00 |
| ATOM | 237 | H    | ILE | X | 16 | 44.134 | 67.381 | 37.992 | 0.00 | 0.00 |
| ATOM | 238 | CA   | ILE | X | 16 | 45.903 | 68.300 | 37.185 | 0.00 | 0.00 |
| ATOM | 239 | HA   | ILE | X | 16 | 46.319 | 69.306 | 37.243 | 0.00 | 0.00 |
| ATOM | 240 | CB   | ILE | X | 16 | 47.070 | 67.347 | 37.874 | 0.00 | 0.00 |
| ATOM | 241 | HB   | ILE | X | 16 | 48.006 | 67.424 | 37.320 | 0.00 | 0.00 |
| ATOM | 242 | CG2  | ILE | X | 16 | 47.460 | 68.067 | 39.244 | 0.00 | 0.00 |
| ATOM | 243 | HG21 | ILE | X | 16 | 47.760 | 69.110 | 39.137 | 0.00 | 0.00 |
| ATOM | 244 | HG22 | ILE | X | 16 | 46.696 | 68.092 | 40.021 | 0.00 | 0.00 |
| ATOM | 245 | HG23 | ILE | X | 16 | 48.332 | 67.643 | 39.742 | 0.00 | 0.00 |
| ATOM | 246 | CG1  | ILE | X | 16 | 46.789 | 65.794 | 37.964 | 0.00 | 0.00 |
| ATOM | 247 | HG12 | ILE | X | 16 | 45.920 | 65.640 | 38.603 | 0.00 | 0.00 |
| ATOM | 248 | HG13 | ILE | X | 16 | 46.668 | 65.359 | 36.972 | 0.00 | 0.00 |
| ATOM | 249 | CD1  | ILE | X | 16 | 47.978 | 65.080 | 38.553 | 0.00 | 0.00 |



|      |     |      |     |   |    |        |        |        |      |      |
|------|-----|------|-----|---|----|--------|--------|--------|------|------|
| ATOM | 250 | HD11 | ILE | X | 16 | 48.309 | 65.322 | 39.563 | 0.00 | 0.00 |
| ATOM | 251 | HD12 | ILE | X | 16 | 47.709 | 64.028 | 38.452 | 0.00 | 0.00 |
| ATOM | 252 | HD13 | ILE | X | 16 | 48.862 | 65.246 | 37.937 | 0.00 | 0.00 |
| ATOM | 253 | C    | ILE | X | 16 | 45.682 | 67.796 | 35.767 | 0.00 | 0.00 |
| ATOM | 254 | O    | ILE | X | 16 | 44.810 | 66.948 | 35.563 | 0.00 | 0.00 |
| ATOM | 255 | N    | ARG | X | 17 | 46.461 | 68.281 | 34.784 | 0.00 | 0.00 |
| ATOM | 256 | H    | ARG | X | 17 | 47.133 | 69.015 | 34.957 | 0.00 | 0.00 |
| ATOM | 257 | CA   | ARG | X | 17 | 46.486 | 67.780 | 33.420 | 0.00 | 0.00 |
| ATOM | 258 | HA   | ARG | X | 17 | 45.477 | 67.448 | 33.176 | 0.00 | 0.00 |
| ATOM | 259 | CB   | ARG | X | 17 | 46.729 | 68.979 | 32.522 | 0.00 | 0.00 |
| ATOM | 260 | HB2  | ARG | X | 17 | 46.107 | 69.802 | 32.874 | 0.00 | 0.00 |
| ATOM | 261 | HB3  | ARG | X | 17 | 47.709 | 69.400 | 32.745 | 0.00 | 0.00 |
| ATOM | 262 | CG   | ARG | X | 17 | 46.506 | 68.690 | 31.059 | 0.00 | 0.00 |
| ATOM | 263 | HG2  | ARG | X | 17 | 47.152 | 67.921 | 30.636 | 0.00 | 0.00 |
| ATOM | 264 | HG3  | ARG | X | 17 | 45.478 | 68.387 | 30.855 | 0.00 | 0.00 |
| ATOM | 265 | CD   | ARG | X | 17 | 46.546 | 69.995 | 30.156 | 0.00 | 0.00 |
| ATOM | 266 | HD2  | ARG | X | 17 | 45.599 | 70.438 | 29.849 | 0.00 | 0.00 |
| ATOM | 267 | HD3  | ARG | X | 17 | 47.038 | 70.773 | 30.741 | 0.00 | 0.00 |
| ATOM | 268 | NE   | ARG | X | 17 | 47.334 | 69.611 | 28.906 | 0.00 | 0.00 |
| ATOM | 269 | HE   | ARG | X | 17 | 47.981 | 68.840 | 28.992 | 0.00 | 0.00 |
| ATOM | 270 | CZ   | ARG | X | 17 | 47.415 | 70.282 | 27.778 | 0.00 | 0.00 |
| ATOM | 271 | NH1  | ARG | X | 17 | 46.713 | 71.365 | 27.657 | 0.00 | 0.00 |
| ATOM | 272 | HH11 | ARG | X | 17 | 46.346 | 71.818 | 28.481 | 0.00 | 0.00 |
| ATOM | 273 | HH12 | ARG | X | 17 | 46.798 | 71.912 | 26.812 | 0.00 | 0.00 |
| ATOM | 274 | NH2  | ARG | X | 17 | 48.143 | 69.943 | 26.791 | 0.00 | 0.00 |
| ATOM | 275 | HH21 | ARG | X | 17 | 48.631 | 69.059 | 26.778 | 0.00 | 0.00 |
| ATOM | 276 | HH22 | ARG | X | 17 | 48.110 | 70.519 | 25.962 | 0.00 | 0.00 |
| ATOM | 277 | C    | ARG | X | 17 | 47.532 | 66.679 | 33.306 | 0.00 | 0.00 |
| ATOM | 278 | O    | ARG | X | 17 | 48.530 | 66.811 | 34.058 | 0.00 | 0.00 |
| ATOM | 279 | N    | LEU | X | 18 | 47.296 | 65.667 | 32.472 | 0.00 | 0.00 |
| ATOM | 280 | H    | LEU | X | 18 | 46.594 | 65.771 | 31.753 | 0.00 | 0.00 |
| ATOM | 281 | CA   | LEU | X | 18 | 48.210 | 64.506 | 32.182 | 0.00 | 0.00 |
| ATOM | 282 | HA   | LEU | X | 18 | 49.180 | 64.637 | 32.662 | 0.00 | 0.00 |
| ATOM | 283 | CB   | LEU | X | 18 | 47.489 | 63.214 | 32.661 | 0.00 | 0.00 |
| ATOM | 284 | HB2  | LEU | X | 18 | 46.606 | 63.291 | 32.026 | 0.00 | 0.00 |
| ATOM | 285 | HB3  | LEU | X | 18 | 48.024 | 62.318 | 32.349 | 0.00 | 0.00 |
| ATOM | 286 | CG   | LEU | X | 18 | 47.090 | 63.146 | 34.144 | 0.00 | 0.00 |
| ATOM | 287 | HG   | LEU | X | 18 | 46.362 | 63.934 | 34.339 | 0.00 | 0.00 |
| ATOM | 288 | CD1  | LEU | X | 18 | 46.457 | 61.735 | 34.506 | 0.00 | 0.00 |
| ATOM | 289 | HD11 | LEU | X | 18 | 45.580 | 61.460 | 33.920 | 0.00 | 0.00 |
| ATOM | 290 | HD12 | LEU | X | 18 | 47.133 | 60.887 | 34.394 | 0.00 | 0.00 |
| ATOM | 291 | HD13 | LEU | X | 18 | 46.226 | 61.811 | 35.569 | 0.00 | 0.00 |
| ATOM | 292 | CD2  | LEU | X | 18 | 48.275 | 63.422 | 35.081 | 0.00 | 0.00 |
| ATOM | 293 | HD21 | LEU | X | 18 | 49.014 | 62.626 | 34.985 | 0.00 | 0.00 |
| ATOM | 294 | HD22 | LEU | X | 18 | 48.833 | 64.331 | 34.858 | 0.00 | 0.00 |
| ATOM | 295 | HD23 | LEU | X | 18 | 47.896 | 63.519 | 36.098 | 0.00 | 0.00 |
| ATOM | 296 | C    | LEU | X | 18 | 48.460 | 64.427 | 30.737 | 0.00 | 0.00 |
| ATOM | 297 | O    | LEU | X | 18 | 47.510 | 64.494 | 30.009 | 0.00 | 0.00 |
| ATOM | 298 | N    | LYS | X | 19 | 49.699 | 64.281 | 30.313 | 0.00 | 0.00 |
| ATOM | 299 | H    | LYS | X | 19 | 50.441 | 64.165 | 30.988 | 0.00 | 0.00 |
| ATOM | 300 | CA   | LYS | X | 19 | 50.005 | 64.105 | 28.915 | 0.00 | 0.00 |
| ATOM | 301 | HA   | LYS | X | 19 | 49.282 | 64.661 | 28.318 | 0.00 | 0.00 |
| ATOM | 302 | CB   | LYS | X | 19 | 51.385 | 64.739 | 28.577 | 0.00 | 0.00 |
| ATOM | 303 | HB2  | LYS | X | 19 | 51.455 | 64.798 | 27.491 | 0.00 | 0.00 |
| ATOM | 304 | HB3  | LYS | X | 19 | 51.388 | 65.746 | 28.995 | 0.00 | 0.00 |
| ATOM | 305 | CG   | LYS | X | 19 | 52.710 | 64.014 | 29.055 | 0.00 | 0.00 |
| ATOM | 306 | HG2  | LYS | X | 19 | 52.481 | 63.812 | 30.102 | 0.00 | 0.00 |
| ATOM | 307 | HG3  | LYS | X | 19 | 52.821 | 63.129 | 28.429 | 0.00 | 0.00 |
| ATOM | 308 | CD   | LYS | X | 19 | 53.976 | 64.903 | 28.977 | 0.00 | 0.00 |
| ATOM | 309 | HD2  | LYS | X | 19 | 53.994 | 65.524 | 29.872 | 0.00 | 0.00 |
| ATOM | 310 | HD3  | LYS | X | 19 | 54.822 | 64.270 | 29.245 | 0.00 | 0.00 |
| ATOM | 311 | CE   | LYS | X | 19 | 54.020 | 65.648 | 27.616 | 0.00 | 0.00 |
| ATOM | 312 | HE2  | LYS | X | 19 | 54.368 | 64.922 | 26.881 | 0.00 | 0.00 |
| ATOM | 313 | HE3  | LYS | X | 19 | 53.019 | 66.030 | 27.414 | 0.00 | 0.00 |
| ATOM | 314 | NZ   | LYS | X | 19 | 54.939 | 66.783 | 27.625 | 0.00 | 0.00 |
| ATOM | 315 | HZ1  | LYS | X | 19 | 55.008 | 67.170 | 26.695 | 0.00 | 0.00 |
| ATOM | 316 | HZ2  | LYS | X | 19 | 54.719 | 67.433 | 28.366 | 0.00 | 0.00 |
| ATOM | 317 | HZ3  | LYS | X | 19 | 55.856 | 66.436 | 27.865 | 0.00 | 0.00 |
| ATOM | 318 | C    | LYS | X | 19 | 49.890 | 62.675 | 28.511 | 0.00 | 0.00 |
| ATOM | 319 | O    | LYS | X | 19 | 50.496 | 61.771 | 29.090 | 0.00 | 0.00 |

|      |     |      |     |   |    |        |        |        |      |      |
|------|-----|------|-----|---|----|--------|--------|--------|------|------|
| ATOM | 320 | N    | THR | X | 20 | 49.225 | 62.341 | 27.396 | 0.00 | 0.00 |
| ATOM | 321 | H    | THR | X | 20 | 48.893 | 63.101 | 26.819 | 0.00 | 0.00 |
| ATOM | 322 | CA   | THR | X | 20 | 48.823 | 60.959 | 27.050 | 0.00 | 0.00 |
| ATOM | 323 | HA   | THR | X | 20 | 49.582 | 60.317 | 27.498 | 0.00 | 0.00 |
| ATOM | 324 | CB   | THR | X | 20 | 47.465 | 60.454 | 27.611 | 0.00 | 0.00 |
| ATOM | 325 | HB   | THR | X | 20 | 47.024 | 59.657 | 27.013 | 0.00 | 0.00 |
| ATOM | 326 | CG2  | THR | X | 20 | 47.605 | 59.760 | 29.001 | 0.00 | 0.00 |
| ATOM | 327 | HG21 | THR | X | 20 | 48.422 | 59.054 | 28.851 | 0.00 | 0.00 |
| ATOM | 328 | HG22 | THR | X | 20 | 47.822 | 60.440 | 29.825 | 0.00 | 0.00 |
| ATOM | 329 | HG23 | THR | X | 20 | 46.750 | 59.097 | 29.133 | 0.00 | 0.00 |
| ATOM | 330 | OG1  | THR | X | 20 | 46.480 | 61.465 | 27.803 | 0.00 | 0.00 |
| ATOM | 331 | HG1  | THR | X | 20 | 46.319 | 61.954 | 26.993 | 0.00 | 0.00 |
| ATOM | 332 | C    | THR | X | 20 | 48.856 | 60.869 | 25.549 | 0.00 | 0.00 |
| ATOM | 333 | O    | THR | X | 20 | 48.639 | 61.921 | 24.887 | 0.00 | 0.00 |
| ATOM | 334 | N    | PRO | X | 21 | 49.142 | 59.691 | 24.882 | 0.00 | 0.00 |
| ATOM | 335 | CD   | PRO | X | 21 | 49.630 | 58.465 | 25.540 | 0.00 | 0.00 |
| ATOM | 336 | HD2  | PRO | X | 21 | 48.710 | 57.939 | 25.795 | 0.00 | 0.00 |
| ATOM | 337 | HD3  | PRO | X | 21 | 50.228 | 58.694 | 26.421 | 0.00 | 0.00 |
| ATOM | 338 | CG   | PRO | X | 21 | 50.423 | 57.766 | 24.461 | 0.00 | 0.00 |
| ATOM | 339 | HG2  | PRO | X | 21 | 50.354 | 56.686 | 24.592 | 0.00 | 0.00 |
| ATOM | 340 | HG3  | PRO | X | 21 | 51.443 | 58.147 | 24.407 | 0.00 | 0.00 |
| ATOM | 341 | CB   | PRO | X | 21 | 49.708 | 58.189 | 23.241 | 0.00 | 0.00 |
| ATOM | 342 | HB2  | PRO | X | 21 | 48.882 | 57.479 | 23.187 | 0.00 | 0.00 |
| ATOM | 343 | HB3  | PRO | X | 21 | 50.366 | 58.147 | 22.373 | 0.00 | 0.00 |
| ATOM | 344 | CA   | PRO | X | 21 | 49.222 | 59.648 | 23.466 | 0.00 | 0.00 |
| ATOM | 345 | HA   | PRO | X | 21 | 49.961 | 60.376 | 23.132 | 0.00 | 0.00 |
| ATOM | 346 | C    | PRO | X | 21 | 47.869 | 59.891 | 22.840 | 0.00 | 0.00 |
| ATOM | 347 | O    | PRO | X | 21 | 46.765 | 59.609 | 23.361 | 0.00 | 0.00 |
| ATOM | 348 | N    | GLY | X | 22 | 47.913 | 60.491 | 21.631 | 0.00 | 0.00 |
| ATOM | 349 | H    | GLY | X | 22 | 48.794 | 60.803 | 21.247 | 0.00 | 0.00 |
| ATOM | 350 | CA   | GLY | X | 22 | 46.727 | 60.981 | 20.940 | 0.00 | 0.00 |
| ATOM | 351 | HA2  | GLY | X | 22 | 46.907 | 60.993 | 19.832 | 0.00 | 0.00 |
| ATOM | 352 | HA3  | GLY | X | 22 | 45.871 | 60.351 | 21.164 | 0.00 | 0.00 |
| ATOM | 353 | C    | GLY | X | 22 | 46.311 | 62.348 | 21.368 | 0.00 | 0.00 |
| ATOM | 354 | O    | GLY | X | 22 | 46.283 | 63.216 | 20.510 | 0.00 | 0.00 |
| ATOM | 355 | N    | GLY | X | 23 | 45.957 | 62.474 | 22.651 | 0.00 | 0.00 |
| ATOM | 356 | H    | GLY | X | 23 | 46.122 | 61.572 | 23.074 | 0.00 | 0.00 |
| ATOM | 357 | CA   | GLY | X | 23 | 45.664 | 63.723 | 23.360 | 0.00 | 0.00 |
| ATOM | 358 | HA2  | GLY | X | 23 | 46.172 | 64.538 | 23.001 | 0.00 | 0.00 |
| ATOM | 359 | HA3  | GLY | X | 23 | 44.585 | 63.965 | 23.133 | 0.00 | 0.00 |
| ATOM | 360 | C    | GLY | X | 23 | 45.791 | 63.692 | 24.874 | 0.00 | 0.00 |
| ATOM | 361 | O    | GLY | X | 23 | 45.839 | 62.559 | 25.375 | 0.00 | 0.00 |
| ATOM | 362 | N    | PRO | X | 24 | 45.826 | 64.845 | 25.536 | 0.00 | 0.00 |
| ATOM | 363 | CD   | PRO | X | 24 | 45.981 | 66.180 | 24.898 | 0.00 | 0.00 |
| ATOM | 364 | HD2  | PRO | X | 24 | 45.256 | 66.582 | 24.190 | 0.00 | 0.00 |
| ATOM | 365 | HD3  | PRO | X | 24 | 46.963 | 66.231 | 24.429 | 0.00 | 0.00 |
| ATOM | 366 | CG   | PRO | X | 24 | 45.845 | 67.091 | 26.014 | 0.00 | 0.00 |
| ATOM | 367 | HG2  | PRO | X | 24 | 44.837 | 67.421 | 26.266 | 0.00 | 0.00 |
| ATOM | 368 | HG3  | PRO | X | 24 | 46.378 | 68.018 | 25.803 | 0.00 | 0.00 |
| ATOM | 369 | CB   | PRO | X | 24 | 46.302 | 66.298 | 27.250 | 0.00 | 0.00 |
| ATOM | 370 | HB2  | PRO | X | 24 | 45.975 | 66.772 | 28.175 | 0.00 | 0.00 |
| ATOM | 371 | HB3  | PRO | X | 24 | 47.390 | 66.280 | 27.186 | 0.00 | 0.00 |
| ATOM | 372 | CA   | PRO | X | 24 | 45.928 | 64.876 | 26.932 | 0.00 | 0.00 |
| ATOM | 373 | HA   | PRO | X | 24 | 46.776 | 64.276 | 27.260 | 0.00 | 0.00 |
| ATOM | 374 | C    | PRO | X | 24 | 44.674 | 64.436 | 27.706 | 0.00 | 0.00 |
| ATOM | 375 | O    | PRO | X | 24 | 43.551 | 64.507 | 27.162 | 0.00 | 0.00 |
| ATOM | 376 | N    | VAL | X | 25 | 44.832 | 64.193 | 29.006 | 0.00 | 0.00 |
| ATOM | 377 | H    | VAL | X | 25 | 45.733 | 64.136 | 29.457 | 0.00 | 0.00 |
| ATOM | 378 | CA   | VAL | X | 25 | 43.671 | 63.995 | 29.940 | 0.00 | 0.00 |
| ATOM | 379 | HA   | VAL | X | 25 | 42.786 | 64.381 | 29.436 | 0.00 | 0.00 |
| ATOM | 380 | CB   | VAL | X | 25 | 43.431 | 62.473 | 30.218 | 0.00 | 0.00 |
| ATOM | 381 | HB   | VAL | X | 25 | 42.603 | 62.215 | 30.879 | 0.00 | 0.00 |
| ATOM | 382 | CG1  | VAL | X | 25 | 42.941 | 61.782 | 28.895 | 0.00 | 0.00 |
| ATOM | 383 | HG11 | VAL | X | 25 | 42.309 | 62.524 | 28.408 | 0.00 | 0.00 |
| ATOM | 384 | HG12 | VAL | X | 25 | 43.796 | 61.659 | 28.231 | 0.00 | 0.00 |
| ATOM | 385 | HG13 | VAL | X | 25 | 42.423 | 60.832 | 29.032 | 0.00 | 0.00 |
| ATOM | 386 | CG2  | VAL | X | 25 | 44.603 | 61.684 | 30.794 | 0.00 | 0.00 |
| ATOM | 387 | HG21 | VAL | X | 25 | 44.737 | 61.917 | 31.850 | 0.00 | 0.00 |
| ATOM | 388 | HG22 | VAL | X | 25 | 44.395 | 60.615 | 30.752 | 0.00 | 0.00 |
| ATOM | 389 | HG23 | VAL | X | 25 | 45.569 | 61.887 | 30.332 | 0.00 | 0.00 |

|      |     |      |     |   |    |        |        |        |      |      |
|------|-----|------|-----|---|----|--------|--------|--------|------|------|
| ATOM | 390 | C    | VAL | X | 25 | 43.771 | 64.855 | 31.194 | 0.00 | 0.00 |
| ATOM | 391 | O    | VAL | X | 25 | 44.609 | 65.712 | 31.222 | 0.00 | 0.00 |
| ATOM | 392 | N    | SER | X | 26 | 43.024 | 64.508 | 32.244 | 0.00 | 0.00 |
| ATOM | 393 | H    | SER | X | 26 | 42.417 | 63.713 | 32.102 | 0.00 | 0.00 |
| ATOM | 394 | CA   | SER | X | 26 | 43.068 | 65.198 | 33.522 | 0.00 | 0.00 |
| ATOM | 395 | HA   | SER | X | 26 | 44.090 | 65.542 | 33.681 | 0.00 | 0.00 |
| ATOM | 396 | CB   | SER | X | 26 | 42.232 | 66.466 | 33.556 | 0.00 | 0.00 |
| ATOM | 397 | HB2  | SER | X | 26 | 42.362 | 66.902 | 34.546 | 0.00 | 0.00 |
| ATOM | 398 | HB3  | SER | X | 26 | 42.555 | 67.162 | 32.781 | 0.00 | 0.00 |
| ATOM | 399 | OG   | SER | X | 26 | 40.823 | 66.182 | 33.365 | 0.00 | 0.00 |
| ATOM | 400 | HG   | SER | X | 26 | 40.798 | 65.430 | 32.769 | 0.00 | 0.00 |
| ATOM | 401 | C    | SER | X | 26 | 42.792 | 64.220 | 34.690 | 0.00 | 0.00 |
| ATOM | 402 | O    | SER | X | 26 | 42.447 | 63.009 | 34.442 | 0.00 | 0.00 |
| ATOM | 403 | N    | ALA | X | 27 | 43.052 | 64.590 | 35.962 | 0.00 | 0.00 |
| ATOM | 404 | H    | ALA | X | 27 | 43.377 | 65.526 | 36.160 | 0.00 | 0.00 |
| ATOM | 405 | CA   | ALA | X | 27 | 42.691 | 63.738 | 37.147 | 0.00 | 0.00 |
| ATOM | 406 | HA   | ALA | X | 27 | 41.742 | 63.243 | 36.940 | 0.00 | 0.00 |
| ATOM | 407 | CB   | ALA | X | 27 | 43.815 | 62.625 | 37.397 | 0.00 | 0.00 |
| ATOM | 408 | HB1  | ALA | X | 27 | 43.764 | 61.987 | 36.515 | 0.00 | 0.00 |
| ATOM | 409 | HB2  | ALA | X | 27 | 44.755 | 63.147 | 37.579 | 0.00 | 0.00 |
| ATOM | 410 | HB3  | ALA | X | 27 | 43.492 | 62.027 | 38.250 | 0.00 | 0.00 |
| ATOM | 411 | C    | ALA | X | 27 | 42.581 | 64.614 | 38.451 | 0.00 | 0.00 |
| ATOM | 412 | O    | ALA | X | 27 | 43.053 | 65.804 | 38.425 | 0.00 | 0.00 |
| ATOM | 413 | N    | PHE | X | 28 | 41.838 | 64.141 | 39.385 | 0.00 | 0.00 |
| ATOM | 414 | H    | PHE | X | 28 | 41.463 | 63.206 | 39.314 | 0.00 | 0.00 |
| ATOM | 415 | CA   | PHE | X | 28 | 41.551 | 64.826 | 40.629 | 0.00 | 0.00 |
| ATOM | 416 | HA   | PHE | X | 28 | 42.316 | 65.600 | 40.696 | 0.00 | 0.00 |
| ATOM | 417 | CB   | PHE | X | 28 | 40.173 | 65.508 | 40.529 | 0.00 | 0.00 |
| ATOM | 418 | HB2  | PHE | X | 28 | 39.413 | 64.779 | 40.247 | 0.00 | 0.00 |
| ATOM | 419 | HB3  | PHE | X | 28 | 39.972 | 65.865 | 41.539 | 0.00 | 0.00 |
| ATOM | 420 | CG   | PHE | X | 28 | 40.053 | 66.756 | 39.701 | 0.00 | 0.00 |
| ATOM | 421 | CD1  | PHE | X | 28 | 39.841 | 66.647 | 38.258 | 0.00 | 0.00 |
| ATOM | 422 | HD1  | PHE | X | 28 | 39.990 | 65.719 | 37.727 | 0.00 | 0.00 |
| ATOM | 423 | CE1  | PHE | X | 28 | 39.550 | 67.772 | 37.545 | 0.00 | 0.00 |
| ATOM | 424 | HE1  | PHE | X | 28 | 39.594 | 67.623 | 36.476 | 0.00 | 0.00 |
| ATOM | 425 | CZ   | PHE | X | 28 | 39.255 | 69.045 | 38.143 | 0.00 | 0.00 |
| ATOM | 426 | HZ   | PHE | X | 28 | 38.994 | 69.876 | 37.505 | 0.00 | 0.00 |
| ATOM | 427 | CE2  | PHE | X | 28 | 39.358 | 69.143 | 39.502 | 0.00 | 0.00 |
| ATOM | 428 | HE2  | PHE | X | 28 | 39.154 | 70.125 | 39.902 | 0.00 | 0.00 |
| ATOM | 429 | CD2  | PHE | X | 28 | 39.800 | 68.035 | 40.273 | 0.00 | 0.00 |
| ATOM | 430 | HD2  | PHE | X | 28 | 39.859 | 68.184 | 41.341 | 0.00 | 0.00 |
| ATOM | 431 | C    | PHE | X | 28 | 41.572 | 63.702 | 41.664 | 0.00 | 0.00 |
| ATOM | 432 | O    | PHE | X | 28 | 40.877 | 62.703 | 41.566 | 0.00 | 0.00 |
| ATOM | 433 | N    | LEU | X | 29 | 42.575 | 63.771 | 42.529 | 0.00 | 0.00 |
| ATOM | 434 | H    | LEU | X | 29 | 42.923 | 64.709 | 42.669 | 0.00 | 0.00 |
| ATOM | 435 | CA   | LEU | X | 29 | 43.000 | 62.736 | 43.460 | 0.00 | 0.00 |
| ATOM | 436 | HA   | LEU | X | 29 | 42.471 | 61.806 | 43.252 | 0.00 | 0.00 |
| ATOM | 437 | CB   | LEU | X | 29 | 44.572 | 62.424 | 43.152 | 0.00 | 0.00 |
| ATOM | 438 | HB2  | LEU | X | 29 | 45.190 | 63.286 | 43.403 | 0.00 | 0.00 |
| ATOM | 439 | HB3  | LEU | X | 29 | 44.874 | 61.555 | 43.736 | 0.00 | 0.00 |
| ATOM | 440 | CG   | LEU | X | 29 | 45.147 | 62.051 | 41.688 | 0.00 | 0.00 |
| ATOM | 441 | HG   | LEU | X | 29 | 46.189 | 61.812 | 41.901 | 0.00 | 0.00 |
| ATOM | 442 | CD1  | LEU | X | 29 | 44.428 | 60.847 | 41.073 | 0.00 | 0.00 |
| ATOM | 443 | HD11 | LEU | X | 29 | 44.564 | 59.977 | 41.715 | 0.00 | 0.00 |
| ATOM | 444 | HD12 | LEU | X | 29 | 43.383 | 61.079 | 40.866 | 0.00 | 0.00 |
| ATOM | 445 | HD13 | LEU | X | 29 | 44.676 | 60.662 | 40.028 | 0.00 | 0.00 |
| ATOM | 446 | CD2  | LEU | X | 29 | 45.110 | 63.343 | 40.822 | 0.00 | 0.00 |
| ATOM | 447 | HD21 | LEU | X | 29 | 44.068 | 63.556 | 40.583 | 0.00 | 0.00 |
| ATOM | 448 | HD22 | LEU | X | 29 | 45.559 | 64.238 | 41.251 | 0.00 | 0.00 |
| ATOM | 449 | HD23 | LEU | X | 29 | 45.708 | 63.249 | 39.915 | 0.00 | 0.00 |
| ATOM | 450 | C    | LEU | X | 29 | 42.820 | 63.231 | 44.879 | 0.00 | 0.00 |
| ATOM | 451 | O    | LEU | X | 29 | 43.073 | 64.376 | 45.193 | 0.00 | 0.00 |
| ATOM | 452 | N    | GLY | X | 30 | 42.491 | 62.234 | 45.746 | 0.00 | 0.00 |
| ATOM | 453 | H    | GLY | X | 30 | 42.315 | 61.267 | 45.512 | 0.00 | 0.00 |
| ATOM | 454 | CA   | GLY | X | 30 | 42.463 | 62.537 | 47.176 | 0.00 | 0.00 |
| ATOM | 455 | HA2  | GLY | X | 30 | 42.384 | 61.638 | 47.748 | 0.00 | 0.00 |
| ATOM | 456 | HA3  | GLY | X | 30 | 43.340 | 62.979 | 47.502 | 0.00 | 0.00 |
| ATOM | 457 | C    | GLY | X | 30 | 41.334 | 63.558 | 47.559 | 0.00 | 0.00 |
| ATOM | 458 | O    | GLY | X | 30 | 41.378 | 64.461 | 48.344 | 0.00 | 0.00 |
| ATOM | 459 | N    | ILE | X | 31 | 40.130 | 63.304 | 46.986 | 0.00 | 0.00 |

|      |     |      |     |   |    |        |        |        |      |      |
|------|-----|------|-----|---|----|--------|--------|--------|------|------|
| ATOM | 460 | H    | ILE | X | 31 | 40.124 | 62.641 | 46.224 | 0.00 | 0.00 |
| ATOM | 461 | CA   | ILE | X | 31 | 38.897 | 64.072 | 47.167 | 0.00 | 0.00 |
| ATOM | 462 | HA   | ILE | X | 31 | 39.213 | 65.106 | 47.310 | 0.00 | 0.00 |
| ATOM | 463 | CB   | ILE | X | 31 | 38.015 | 64.048 | 45.890 | 0.00 | 0.00 |
| ATOM | 464 | HB   | ILE | X | 31 | 37.502 | 63.087 | 45.945 | 0.00 | 0.00 |
| ATOM | 465 | CG2  | ILE | X | 31 | 36.914 | 65.110 | 46.126 | 0.00 | 0.00 |
| ATOM | 466 | HG21 | ILE | X | 31 | 37.317 | 65.996 | 46.615 | 0.00 | 0.00 |
| ATOM | 467 | HG22 | ILE | X | 31 | 36.423 | 65.362 | 45.186 | 0.00 | 0.00 |
| ATOM | 468 | HG23 | ILE | X | 31 | 35.986 | 64.759 | 46.576 | 0.00 | 0.00 |
| ATOM | 469 | CG1  | ILE | X | 31 | 38.756 | 64.183 | 44.546 | 0.00 | 0.00 |
| ATOM | 470 | HG12 | ILE | X | 31 | 39.369 | 65.081 | 44.461 | 0.00 | 0.00 |
| ATOM | 471 | HG13 | ILE | X | 31 | 39.505 | 63.392 | 44.512 | 0.00 | 0.00 |
| ATOM | 472 | CD1  | ILE | X | 31 | 37.867 | 64.101 | 43.303 | 0.00 | 0.00 |
| ATOM | 473 | HD11 | ILE | X | 31 | 37.127 | 63.304 | 43.375 | 0.00 | 0.00 |
| ATOM | 474 | HD12 | ILE | X | 31 | 37.289 | 65.024 | 43.254 | 0.00 | 0.00 |
| ATOM | 475 | HD13 | ILE | X | 31 | 38.468 | 64.015 | 42.397 | 0.00 | 0.00 |
| ATOM | 476 | C    | ILE | X | 31 | 38.152 | 63.585 | 48.472 | 0.00 | 0.00 |
| ATOM | 477 | O    | ILE | X | 31 | 37.833 | 62.359 | 48.525 | 0.00 | 0.00 |
| ATOM | 478 | N    | PRO | X | 32 | 37.956 | 64.426 | 49.499 | 0.00 | 0.00 |
| ATOM | 479 | CD   | PRO | X | 32 | 38.424 | 65.840 | 49.495 | 0.00 | 0.00 |
| ATOM | 480 | HD2  | PRO | X | 32 | 37.868 | 66.415 | 48.755 | 0.00 | 0.00 |
| ATOM | 481 | HD3  | PRO | X | 32 | 39.506 | 65.950 | 49.428 | 0.00 | 0.00 |
| ATOM | 482 | CG   | PRO | X | 32 | 37.910 | 66.330 | 50.849 | 0.00 | 0.00 |
| ATOM | 483 | HG2  | PRO | X | 32 | 36.906 | 66.676 | 50.604 | 0.00 | 0.00 |
| ATOM | 484 | HG3  | PRO | X | 32 | 38.501 | 67.117 | 51.317 | 0.00 | 0.00 |
| ATOM | 485 | CB   | PRO | X | 32 | 37.762 | 65.167 | 51.781 | 0.00 | 0.00 |
| ATOM | 486 | HB2  | PRO | X | 32 | 36.920 | 65.360 | 52.446 | 0.00 | 0.00 |
| ATOM | 487 | HB3  | PRO | X | 32 | 38.676 | 65.030 | 52.359 | 0.00 | 0.00 |
| ATOM | 488 | CA   | PRO | X | 32 | 37.430 | 64.041 | 50.783 | 0.00 | 0.00 |
| ATOM | 489 | HA   | PRO | X | 32 | 37.922 | 63.107 | 51.053 | 0.00 | 0.00 |
| ATOM | 490 | C    | PRO | X | 32 | 35.936 | 63.780 | 50.707 | 0.00 | 0.00 |
| ATOM | 491 | O    | PRO | X | 32 | 35.152 | 64.666 | 50.508 | 0.00 | 0.00 |
| ATOM | 492 | N    | PHE | X | 33 | 35.555 | 62.502 | 50.807 | 0.00 | 0.00 |
| ATOM | 493 | H    | PHE | X | 33 | 36.227 | 61.763 | 50.957 | 0.00 | 0.00 |
| ATOM | 494 | CA   | PHE | X | 33 | 34.188 | 62.070 | 50.648 | 0.00 | 0.00 |
| ATOM | 495 | HA   | PHE | X | 33 | 33.617 | 62.946 | 50.340 | 0.00 | 0.00 |
| ATOM | 496 | CB   | PHE | X | 33 | 34.078 | 60.960 | 49.654 | 0.00 | 0.00 |
| ATOM | 497 | HB2  | PHE | X | 33 | 33.124 | 61.039 | 49.132 | 0.00 | 0.00 |
| ATOM | 498 | HB3  | PHE | X | 33 | 34.789 | 61.107 | 48.841 | 0.00 | 0.00 |
| ATOM | 499 | CG   | PHE | X | 33 | 34.251 | 59.508 | 50.179 | 0.00 | 0.00 |
| ATOM | 500 | CD1  | PHE | X | 33 | 33.149 | 58.743 | 50.541 | 0.00 | 0.00 |
| ATOM | 501 | HD1  | PHE | X | 33 | 32.163 | 59.174 | 50.446 | 0.00 | 0.00 |
| ATOM | 502 | CE1  | PHE | X | 33 | 33.275 | 57.442 | 50.978 | 0.00 | 0.00 |
| ATOM | 503 | HE1  | PHE | X | 33 | 32.448 | 56.823 | 51.289 | 0.00 | 0.00 |
| ATOM | 504 | CZ   | PHE | X | 33 | 34.582 | 56.908 | 51.021 | 0.00 | 0.00 |
| ATOM | 505 | HZ   | PHE | X | 33 | 34.770 | 55.927 | 51.431 | 0.00 | 0.00 |
| ATOM | 506 | CE2  | PHE | X | 33 | 35.699 | 57.616 | 50.656 | 0.00 | 0.00 |
| ATOM | 507 | HE2  | PHE | X | 33 | 36.659 | 57.126 | 50.592 | 0.00 | 0.00 |
| ATOM | 508 | CD2  | PHE | X | 33 | 35.521 | 58.914 | 50.286 | 0.00 | 0.00 |
| ATOM | 509 | HD2  | PHE | X | 33 | 36.398 | 59.482 | 50.013 | 0.00 | 0.00 |
| ATOM | 510 | C    | PHE | X | 33 | 33.526 | 61.712 | 51.962 | 0.00 | 0.00 |
| ATOM | 511 | O    | PHE | X | 33 | 32.294 | 61.851 | 52.098 | 0.00 | 0.00 |
| ATOM | 512 | N    | ALA | X | 34 | 34.294 | 61.433 | 53.007 | 0.00 | 0.00 |
| ATOM | 513 | H    | ALA | X | 34 | 35.236 | 61.093 | 52.879 | 0.00 | 0.00 |
| ATOM | 514 | CA   | ALA | X | 34 | 33.762 | 60.929 | 54.312 | 0.00 | 0.00 |
| ATOM | 515 | HA   | ALA | X | 34 | 32.781 | 61.377 | 54.470 | 0.00 | 0.00 |
| ATOM | 516 | CB   | ALA | X | 34 | 33.538 | 59.381 | 54.224 | 0.00 | 0.00 |
| ATOM | 517 | HB1  | ALA | X | 34 | 34.428 | 58.812 | 53.958 | 0.00 | 0.00 |
| ATOM | 518 | HB2  | ALA | X | 34 | 33.117 | 59.011 | 55.159 | 0.00 | 0.00 |
| ATOM | 519 | HB3  | ALA | X | 34 | 32.810 | 59.230 | 53.427 | 0.00 | 0.00 |
| ATOM | 520 | C    | ALA | X | 34 | 34.603 | 61.419 | 55.413 | 0.00 | 0.00 |
| ATOM | 521 | O    | ALA | X | 34 | 35.769 | 61.683 | 55.269 | 0.00 | 0.00 |
| ATOM | 522 | N    | GLU | X | 35 | 34.038 | 61.379 | 56.655 | 0.00 | 0.00 |
| ATOM | 523 | H    | GLU | X | 35 | 33.064 | 61.111 | 56.658 | 0.00 | 0.00 |
| ATOM | 524 | CA   | GLU | X | 35 | 34.744 | 61.875 | 57.794 | 0.00 | 0.00 |
| ATOM | 525 | HA   | GLU | X | 35 | 35.382 | 62.704 | 57.486 | 0.00 | 0.00 |
| ATOM | 526 | CB   | GLU | X | 35 | 33.782 | 62.331 | 58.890 | 0.00 | 0.00 |
| ATOM | 527 | HB2  | GLU | X | 35 | 33.060 | 61.516 | 58.928 | 0.00 | 0.00 |
| ATOM | 528 | HB3  | GLU | X | 35 | 34.243 | 62.451 | 59.870 | 0.00 | 0.00 |
| ATOM | 529 | CG   | GLU | X | 35 | 33.099 | 63.717 | 58.623 | 0.00 | 0.00 |

|      |     |     |     |   |    |        |        |        |      |      |
|------|-----|-----|-----|---|----|--------|--------|--------|------|------|
| ATOM | 530 | HG2 | GLU | X | 35 | 32.479 | 63.634 | 57.730 | 0.00 | 0.00 |
| ATOM | 531 | HG3 | GLU | X | 35 | 32.374 | 63.963 | 59.399 | 0.00 | 0.00 |
| ATOM | 532 | CD  | GLU | X | 35 | 34.021 | 64.962 | 58.443 | 0.00 | 0.00 |
| ATOM | 533 | OE1 | GLU | X | 35 | 34.925 | 65.109 | 59.280 | 0.00 | 0.00 |
| ATOM | 534 | OE2 | GLU | X | 35 | 33.737 | 65.755 | 57.542 | 0.00 | 0.00 |
| ATOM | 535 | C   | GLU | X | 35 | 35.673 | 60.788 | 58.293 | 0.00 | 0.00 |
| ATOM | 536 | O   | GLU | X | 35 | 35.286 | 59.603 | 58.263 | 0.00 | 0.00 |
| ATOM | 537 | N   | PRO | X | 36 | 36.955 | 61.088 | 58.700 | 0.00 | 0.00 |
| ATOM | 538 | CD  | PRO | X | 36 | 37.604 | 62.332 | 58.540 | 0.00 | 0.00 |
| ATOM | 539 | HD2 | PRO | X | 36 | 36.929 | 62.981 | 59.098 | 0.00 | 0.00 |
| ATOM | 540 | HD3 | PRO | X | 36 | 37.614 | 62.665 | 57.502 | 0.00 | 0.00 |
| ATOM | 541 | CG  | PRO | X | 36 | 39.052 | 62.163 | 59.066 | 0.00 | 0.00 |
| ATOM | 542 | HG2 | PRO | X | 36 | 39.362 | 62.986 | 59.710 | 0.00 | 0.00 |
| ATOM | 543 | HG3 | PRO | X | 36 | 39.767 | 62.108 | 58.245 | 0.00 | 0.00 |
| ATOM | 544 | CB  | PRO | X | 36 | 39.136 | 60.863 | 59.849 | 0.00 | 0.00 |
| ATOM | 545 | HB2 | PRO | X | 36 | 39.084 | 61.122 | 60.906 | 0.00 | 0.00 |
| ATOM | 546 | HB3 | PRO | X | 36 | 40.036 | 60.271 | 59.680 | 0.00 | 0.00 |
| ATOM | 547 | CA  | PRO | X | 36 | 37.964 | 60.094 | 59.259 | 0.00 | 0.00 |
| ATOM | 548 | HA  | PRO | X | 36 | 38.397 | 59.615 | 58.381 | 0.00 | 0.00 |
| ATOM | 549 | C   | PRO | X | 36 | 37.384 | 59.124 | 60.301 | 0.00 | 0.00 |
| ATOM | 550 | O   | PRO | X | 36 | 36.796 | 59.513 | 61.299 | 0.00 | 0.00 |
| ATOM | 551 | N   | PRO | X | 37 | 37.436 | 57.810 | 59.939 | 0.00 | 0.00 |
| ATOM | 552 | CD  | PRO | X | 37 | 37.800 | 57.288 | 58.629 | 0.00 | 0.00 |
| ATOM | 553 | HD2 | PRO | X | 37 | 38.807 | 57.606 | 58.361 | 0.00 | 0.00 |
| ATOM | 554 | HD3 | PRO | X | 37 | 37.151 | 57.757 | 57.890 | 0.00 | 0.00 |
| ATOM | 555 | CG  | PRO | X | 37 | 37.697 | 55.739 | 58.694 | 0.00 | 0.00 |
| ATOM | 556 | HG2 | PRO | X | 37 | 38.689 | 55.412 | 59.005 | 0.00 | 0.00 |
| ATOM | 557 | HG3 | PRO | X | 37 | 37.454 | 55.226 | 57.763 | 0.00 | 0.00 |
| ATOM | 558 | CB  | PRO | X | 37 | 36.547 | 55.547 | 59.679 | 0.00 | 0.00 |
| ATOM | 559 | HB2 | PRO | X | 37 | 36.599 | 54.586 | 60.191 | 0.00 | 0.00 |
| ATOM | 560 | HB3 | PRO | X | 37 | 35.633 | 55.708 | 59.108 | 0.00 | 0.00 |
| ATOM | 561 | CA  | PRO | X | 37 | 36.832 | 56.729 | 60.744 | 0.00 | 0.00 |
| ATOM | 562 | HA  | PRO | X | 37 | 35.938 | 57.182 | 61.170 | 0.00 | 0.00 |
| ATOM | 563 | C   | PRO | X | 37 | 37.829 | 56.307 | 61.844 | 0.00 | 0.00 |
| ATOM | 564 | O   | PRO | X | 37 | 37.903 | 55.116 | 62.161 | 0.00 | 0.00 |
| ATOM | 565 | N   | MET | X | 38 | 38.593 | 57.268 | 62.350 | 0.00 | 0.00 |
| ATOM | 566 | H   | MET | X | 38 | 38.417 | 58.243 | 62.153 | 0.00 | 0.00 |
| ATOM | 567 | CA  | MET | X | 38 | 39.558 | 57.120 | 63.450 | 0.00 | 0.00 |
| ATOM | 568 | HA  | MET | X | 38 | 40.283 | 56.361 | 63.159 | 0.00 | 0.00 |
| ATOM | 569 | CB  | MET | X | 38 | 40.225 | 58.491 | 63.839 | 0.00 | 0.00 |
| ATOM | 570 | HB2 | MET | X | 38 | 39.623 | 59.377 | 64.042 | 0.00 | 0.00 |
| ATOM | 571 | HB3 | MET | X | 38 | 40.750 | 58.270 | 64.769 | 0.00 | 0.00 |
| ATOM | 572 | CG  | MET | X | 38 | 41.303 | 58.841 | 62.910 | 0.00 | 0.00 |
| ATOM | 573 | HG2 | MET | X | 38 | 42.116 | 58.209 | 63.268 | 0.00 | 0.00 |
| ATOM | 574 | HG3 | MET | X | 38 | 41.047 | 58.525 | 61.899 | 0.00 | 0.00 |
| ATOM | 575 | SD  | MET | X | 38 | 41.801 | 60.516 | 62.836 | 0.00 | 0.00 |
| ATOM | 576 | CE  | MET | X | 38 | 42.595 | 60.631 | 61.281 | 0.00 | 0.00 |
| ATOM | 577 | HE1 | MET | X | 38 | 43.600 | 60.212 | 61.222 | 0.00 | 0.00 |
| ATOM | 578 | HE2 | MET | X | 38 | 41.933 | 60.350 | 60.463 | 0.00 | 0.00 |
| ATOM | 579 | HE3 | MET | X | 38 | 42.801 | 61.665 | 61.004 | 0.00 | 0.00 |
| ATOM | 580 | C   | MET | X | 38 | 38.879 | 56.646 | 64.750 | 0.00 | 0.00 |
| ATOM | 581 | O   | MET | X | 38 | 37.863 | 57.238 | 65.197 | 0.00 | 0.00 |
| ATOM | 582 | N   | GLY | X | 39 | 39.648 | 55.773 | 65.465 | 0.00 | 0.00 |
| ATOM | 583 | H   | GLY | X | 39 | 40.462 | 55.427 | 64.977 | 0.00 | 0.00 |
| ATOM | 584 | CA  | GLY | X | 39 | 39.595 | 55.542 | 66.929 | 0.00 | 0.00 |
| ATOM | 585 | HA2 | GLY | X | 39 | 40.308 | 54.731 | 67.148 | 0.00 | 0.00 |
| ATOM | 586 | HA3 | GLY | X | 39 | 39.888 | 56.410 | 67.483 | 0.00 | 0.00 |
| ATOM | 587 | C   | GLY | X | 39 | 38.230 | 55.123 | 67.367 | 0.00 | 0.00 |
| ATOM | 588 | O   | GLY | X | 39 | 37.897 | 53.998 | 66.950 | 0.00 | 0.00 |
| ATOM | 589 | N   | PRO | X | 40 | 37.332 | 55.946 | 67.936 | 0.00 | 0.00 |
| ATOM | 590 | CD  | PRO | X | 40 | 37.691 | 57.241 | 68.500 | 0.00 | 0.00 |
| ATOM | 591 | HD2 | PRO | X | 40 | 37.816 | 57.941 | 67.675 | 0.00 | 0.00 |
| ATOM | 592 | HD3 | PRO | X | 40 | 38.652 | 57.125 | 69.002 | 0.00 | 0.00 |
| ATOM | 593 | CG  | PRO | X | 40 | 36.510 | 57.660 | 69.383 | 0.00 | 0.00 |
| ATOM | 594 | HG2 | PRO | X | 40 | 36.428 | 58.747 | 69.379 | 0.00 | 0.00 |
| ATOM | 595 | HG3 | PRO | X | 40 | 36.679 | 57.352 | 70.415 | 0.00 | 0.00 |
| ATOM | 596 | CB  | PRO | X | 40 | 35.278 | 56.961 | 68.793 | 0.00 | 0.00 |
| ATOM | 597 | HB2 | PRO | X | 40 | 34.827 | 57.671 | 68.099 | 0.00 | 0.00 |
| ATOM | 598 | HB3 | PRO | X | 40 | 34.503 | 56.758 | 69.532 | 0.00 | 0.00 |
| ATOM | 599 | CA  | PRO | X | 40 | 35.864 | 55.700 | 68.196 | 0.00 | 0.00 |

|      |     |      |     |   |    |        |        |        |      |      |
|------|-----|------|-----|---|----|--------|--------|--------|------|------|
| ATOM | 600 | HA   | PRO | X | 40 | 35.876 | 54.856 | 68.886 | 0.00 | 0.00 |
| ATOM | 601 | C    | PRO | X | 40 | 34.983 | 55.290 | 66.975 | 0.00 | 0.00 |
| ATOM | 602 | O    | PRO | X | 40 | 34.017 | 54.485 | 67.240 | 0.00 | 0.00 |
| ATOM | 603 | N    | ARG | X | 41 | 35.316 | 55.651 | 65.753 | 0.00 | 0.00 |
| ATOM | 604 | H    | ARG | X | 41 | 36.171 | 56.181 | 65.660 | 0.00 | 0.00 |
| ATOM | 605 | CA   | ARG | X | 41 | 34.527 | 55.206 | 64.618 | 0.00 | 0.00 |
| ATOM | 606 | HA   | ARG | X | 41 | 33.481 | 55.145 | 64.915 | 0.00 | 0.00 |
| ATOM | 607 | CB   | ARG | X | 41 | 34.671 | 56.184 | 63.413 | 0.00 | 0.00 |
| ATOM | 608 | HB2  | ARG | X | 41 | 35.656 | 56.649 | 63.385 | 0.00 | 0.00 |
| ATOM | 609 | HB3  | ARG | X | 41 | 34.552 | 55.611 | 62.494 | 0.00 | 0.00 |
| ATOM | 610 | CG   | ARG | X | 41 | 33.486 | 57.192 | 63.422 | 0.00 | 0.00 |
| ATOM | 611 | HG2  | ARG | X | 41 | 32.586 | 56.728 | 63.017 | 0.00 | 0.00 |
| ATOM | 612 | HG3  | ARG | X | 41 | 33.369 | 57.456 | 64.473 | 0.00 | 0.00 |
| ATOM | 613 | CD   | ARG | X | 41 | 33.991 | 58.378 | 62.572 | 0.00 | 0.00 |
| ATOM | 614 | HD2  | ARG | X | 41 | 34.946 | 58.624 | 63.039 | 0.00 | 0.00 |
| ATOM | 615 | HD3  | ARG | X | 41 | 34.000 | 58.123 | 61.513 | 0.00 | 0.00 |
| ATOM | 616 | NE   | ARG | X | 41 | 33.191 | 59.600 | 62.789 | 0.00 | 0.00 |
| ATOM | 617 | HE   | ARG | X | 41 | 32.281 | 59.508 | 63.219 | 0.00 | 0.00 |
| ATOM | 618 | CZ   | ARG | X | 41 | 33.522 | 60.823 | 62.504 | 0.00 | 0.00 |
| ATOM | 619 | NH1  | ARG | X | 41 | 34.664 | 61.155 | 61.956 | 0.00 | 0.00 |
| ATOM | 620 | HH11 | ARG | X | 41 | 35.351 | 60.468 | 61.681 | 0.00 | 0.00 |
| ATOM | 621 | HH12 | ARG | X | 41 | 34.923 | 62.132 | 61.969 | 0.00 | 0.00 |
| ATOM | 622 | NH2  | ARG | X | 41 | 32.658 | 61.750 | 62.767 | 0.00 | 0.00 |
| ATOM | 623 | HH21 | ARG | X | 41 | 31.703 | 61.445 | 62.890 | 0.00 | 0.00 |
| ATOM | 624 | HH22 | ARG | X | 41 | 32.770 | 62.721 | 62.513 | 0.00 | 0.00 |
| ATOM | 625 | C    | ARG | X | 41 | 35.015 | 53.847 | 64.129 | 0.00 | 0.00 |
| ATOM | 626 | O    | ARG | X | 41 | 34.343 | 53.307 | 63.280 | 0.00 | 0.00 |
| ATOM | 627 | N    | ARG | X | 42 | 36.061 | 53.145 | 64.583 | 0.00 | 0.00 |
| ATOM | 628 | H    | ARG | X | 42 | 36.682 | 53.625 | 65.219 | 0.00 | 0.00 |
| ATOM | 629 | CA   | ARG | X | 42 | 36.336 | 51.737 | 64.183 | 0.00 | 0.00 |
| ATOM | 630 | HA   | ARG | X | 42 | 36.525 | 51.832 | 63.114 | 0.00 | 0.00 |
| ATOM | 631 | CB   | ARG | X | 42 | 37.620 | 51.393 | 64.977 | 0.00 | 0.00 |
| ATOM | 632 | HB2  | ARG | X | 42 | 37.385 | 51.474 | 66.039 | 0.00 | 0.00 |
| ATOM | 633 | HB3  | ARG | X | 42 | 37.804 | 50.320 | 64.922 | 0.00 | 0.00 |
| ATOM | 634 | CG   | ARG | X | 42 | 38.946 | 52.162 | 64.564 | 0.00 | 0.00 |
| ATOM | 635 | HG2  | ARG | X | 42 | 39.222 | 51.995 | 63.523 | 0.00 | 0.00 |
| ATOM | 636 | HG3  | ARG | X | 42 | 38.782 | 53.232 | 64.697 | 0.00 | 0.00 |
| ATOM | 637 | CD   | ARG | X | 42 | 40.009 | 51.520 | 65.502 | 0.00 | 0.00 |
| ATOM | 638 | HD2  | ARG | X | 42 | 39.568 | 51.470 | 66.498 | 0.00 | 0.00 |
| ATOM | 639 | HD3  | ARG | X | 42 | 40.184 | 50.483 | 65.215 | 0.00 | 0.00 |
| ATOM | 640 | NE   | ARG | X | 42 | 41.179 | 52.335 | 65.626 | 0.00 | 0.00 |
| ATOM | 641 | HE   | ARG | X | 42 | 41.192 | 53.144 | 65.022 | 0.00 | 0.00 |
| ATOM | 642 | CZ   | ARG | X | 42 | 41.985 | 52.467 | 66.632 | 0.00 | 0.00 |
| ATOM | 643 | NH1  | ARG | X | 42 | 41.970 | 51.628 | 67.670 | 0.00 | 0.00 |
| ATOM | 644 | HH11 | ARG | X | 42 | 41.348 | 50.840 | 67.571 | 0.00 | 0.00 |
| ATOM | 645 | HH12 | ARG | X | 42 | 42.704 | 51.576 | 68.363 | 0.00 | 0.00 |
| ATOM | 646 | NH2  | ARG | X | 42 | 42.908 | 53.370 | 66.617 | 0.00 | 0.00 |
| ATOM | 647 | HH21 | ARG | X | 42 | 43.049 | 53.970 | 65.817 | 0.00 | 0.00 |
| ATOM | 648 | HH22 | ARG | X | 42 | 43.563 | 53.477 | 67.377 | 0.00 | 0.00 |
| ATOM | 649 | C    | ARG | X | 42 | 35.200 | 50.773 | 64.373 | 0.00 | 0.00 |
| ATOM | 650 | O    | ARG | X | 42 | 34.446 | 51.095 | 65.293 | 0.00 | 0.00 |
| ATOM | 651 | N    | PHE | X | 43 | 35.003 | 49.828 | 63.457 | 0.00 | 0.00 |
| ATOM | 652 | H    | PHE | X | 43 | 35.758 | 49.761 | 62.790 | 0.00 | 0.00 |
| ATOM | 653 | CA   | PHE | X | 43 | 33.925 | 48.795 | 63.423 | 0.00 | 0.00 |
| ATOM | 654 | HA   | PHE | X | 43 | 34.127 | 48.097 | 62.611 | 0.00 | 0.00 |
| ATOM | 655 | CB   | PHE | X | 43 | 34.043 | 47.945 | 64.651 | 0.00 | 0.00 |
| ATOM | 656 | HB2  | PHE | X | 43 | 33.421 | 48.477 | 65.371 | 0.00 | 0.00 |
| ATOM | 657 | HB3  | PHE | X | 43 | 33.635 | 46.941 | 64.542 | 0.00 | 0.00 |
| ATOM | 658 | CG   | PHE | X | 43 | 35.408 | 47.766 | 65.364 | 0.00 | 0.00 |
| ATOM | 659 | CD1  | PHE | X | 43 | 36.584 | 47.582 | 64.640 | 0.00 | 0.00 |
| ATOM | 660 | HD1  | PHE | X | 43 | 36.611 | 47.605 | 63.561 | 0.00 | 0.00 |
| ATOM | 661 | CE1  | PHE | X | 43 | 37.866 | 47.504 | 65.359 | 0.00 | 0.00 |
| ATOM | 662 | HE1  | PHE | X | 43 | 38.766 | 47.411 | 64.769 | 0.00 | 0.00 |
| ATOM | 663 | CZ   | PHE | X | 43 | 37.848 | 47.596 | 66.745 | 0.00 | 0.00 |
| ATOM | 664 | HZ   | PHE | X | 43 | 38.829 | 47.650 | 67.194 | 0.00 | 0.00 |
| ATOM | 665 | CE2  | PHE | X | 43 | 36.642 | 47.648 | 67.427 | 0.00 | 0.00 |
| ATOM | 666 | HE2  | PHE | X | 43 | 36.637 | 47.563 | 68.503 | 0.00 | 0.00 |
| ATOM | 667 | CD2  | PHE | X | 43 | 35.419 | 47.647 | 66.792 | 0.00 | 0.00 |
| ATOM | 668 | HD2  | PHE | X | 43 | 34.564 | 47.677 | 67.451 | 0.00 | 0.00 |
| ATOM | 669 | C    | PHE | X | 43 | 32.449 | 49.347 | 63.413 | 0.00 | 0.00 |

|      |     |      |     |   |    |        |        |        |      |      |
|------|-----|------|-----|---|----|--------|--------|--------|------|------|
| ATOM | 670 | O    | PHE | X | 43 | 31.523 | 48.612 | 63.185 | 0.00 | 0.00 |
| ATOM | 671 | N    | LEU | X | 44 | 32.301 | 50.707 | 63.524 | 0.00 | 0.00 |
| ATOM | 672 | H    | LEU | X | 44 | 33.152 | 51.245 | 63.605 | 0.00 | 0.00 |
| ATOM | 673 | CA   | LEU | X | 44 | 31.062 | 51.459 | 63.544 | 0.00 | 0.00 |
| ATOM | 674 | HA   | LEU | X | 44 | 30.314 | 50.668 | 63.493 | 0.00 | 0.00 |
| ATOM | 675 | CB   | LEU | X | 44 | 30.995 | 52.380 | 64.825 | 0.00 | 0.00 |
| ATOM | 676 | HB2  | LEU | X | 44 | 31.980 | 52.758 | 65.100 | 0.00 | 0.00 |
| ATOM | 677 | HB3  | LEU | X | 44 | 30.244 | 53.143 | 64.616 | 0.00 | 0.00 |
| ATOM | 678 | CG   | LEU | X | 44 | 30.497 | 51.701 | 66.140 | 0.00 | 0.00 |
| ATOM | 679 | HG   | LEU | X | 44 | 29.494 | 51.366 | 65.874 | 0.00 | 0.00 |
| ATOM | 680 | CD1  | LEU | X | 44 | 31.381 | 50.557 | 66.616 | 0.00 | 0.00 |
| ATOM | 681 | HD11 | LEU | X | 44 | 31.378 | 49.722 | 65.916 | 0.00 | 0.00 |
| ATOM | 682 | HD12 | LEU | X | 44 | 32.415 | 50.857 | 66.784 | 0.00 | 0.00 |
| ATOM | 683 | HD13 | LEU | X | 44 | 30.859 | 50.150 | 67.483 | 0.00 | 0.00 |
| ATOM | 684 | CD2  | LEU | X | 44 | 30.422 | 52.678 | 67.285 | 0.00 | 0.00 |
| ATOM | 685 | HD21 | LEU | X | 44 | 29.899 | 52.200 | 68.113 | 0.00 | 0.00 |
| ATOM | 686 | HD22 | LEU | X | 44 | 31.472 | 52.773 | 67.562 | 0.00 | 0.00 |
| ATOM | 687 | HD23 | LEU | X | 44 | 29.948 | 53.649 | 67.146 | 0.00 | 0.00 |
| ATOM | 688 | C    | LEU | X | 44 | 30.983 | 52.215 | 62.213 | 0.00 | 0.00 |
| ATOM | 689 | O    | LEU | X | 44 | 32.029 | 52.356 | 61.499 | 0.00 | 0.00 |
| ATOM | 690 | N    | PRO | X | 45 | 29.797 | 52.617 | 61.751 | 0.00 | 0.00 |
| ATOM | 691 | CD   | PRO | X | 45 | 28.552 | 52.446 | 62.439 | 0.00 | 0.00 |
| ATOM | 692 | HD2  | PRO | X | 45 | 28.476 | 52.896 | 63.429 | 0.00 | 0.00 |
| ATOM | 693 | HD3  | PRO | X | 45 | 28.421 | 51.366 | 62.507 | 0.00 | 0.00 |
| ATOM | 694 | CG   | PRO | X | 45 | 27.460 | 53.066 | 61.625 | 0.00 | 0.00 |
| ATOM | 695 | HG2  | PRO | X | 45 | 27.215 | 54.096 | 61.883 | 0.00 | 0.00 |
| ATOM | 696 | HG3  | PRO | X | 45 | 26.541 | 52.481 | 61.659 | 0.00 | 0.00 |
| ATOM | 697 | CB   | PRO | X | 45 | 28.015 | 53.025 | 60.227 | 0.00 | 0.00 |
| ATOM | 698 | HB2  | PRO | X | 45 | 27.552 | 53.831 | 59.658 | 0.00 | 0.00 |
| ATOM | 699 | HB3  | PRO | X | 45 | 27.810 | 52.024 | 59.848 | 0.00 | 0.00 |
| ATOM | 700 | CA   | PRO | X | 45 | 29.462 | 53.106 | 60.386 | 0.00 | 0.00 |
| ATOM | 701 | HA   | PRO | X | 45 | 29.982 | 52.443 | 59.695 | 0.00 | 0.00 |
| ATOM | 702 | C    | PRO | X | 45 | 29.983 | 54.532 | 60.086 | 0.00 | 0.00 |
| ATOM | 703 | O    | PRO | X | 45 | 29.767 | 55.409 | 60.854 | 0.00 | 0.00 |
| ATOM | 704 | N    | PRO | X | 46 | 30.415 | 54.789 | 58.881 | 0.00 | 0.00 |
| ATOM | 705 | CD   | PRO | X | 46 | 30.552 | 53.895 | 57.763 | 0.00 | 0.00 |
| ATOM | 706 | HD2  | PRO | X | 46 | 29.578 | 53.487 | 57.491 | 0.00 | 0.00 |
| ATOM | 707 | HD3  | PRO | X | 46 | 31.261 | 53.068 | 57.793 | 0.00 | 0.00 |
| ATOM | 708 | CG   | PRO | X | 46 | 31.044 | 54.714 | 56.584 | 0.00 | 0.00 |
| ATOM | 709 | HG2  | PRO | X | 46 | 30.235 | 55.214 | 56.051 | 0.00 | 0.00 |
| ATOM | 710 | HG3  | PRO | X | 46 | 31.691 | 54.166 | 55.900 | 0.00 | 0.00 |
| ATOM | 711 | CB   | PRO | X | 46 | 31.868 | 55.716 | 57.354 | 0.00 | 0.00 |
| ATOM | 712 | HB2  | PRO | X | 46 | 32.151 | 56.589 | 56.764 | 0.00 | 0.00 |
| ATOM | 713 | HB3  | PRO | X | 46 | 32.724 | 55.248 | 57.840 | 0.00 | 0.00 |
| ATOM | 714 | CA   | PRO | X | 46 | 30.968 | 56.064 | 58.531 | 0.00 | 0.00 |
| ATOM | 715 | HA   | PRO | X | 46 | 31.619 | 56.464 | 59.308 | 0.00 | 0.00 |
| ATOM | 716 | C    | PRO | X | 46 | 29.876 | 57.098 | 58.171 | 0.00 | 0.00 |
| ATOM | 717 | O    | PRO | X | 46 | 28.696 | 56.797 | 58.018 | 0.00 | 0.00 |
| ATOM | 718 | N    | GLU | X | 47 | 30.246 | 58.348 | 57.912 | 0.00 | 0.00 |
| ATOM | 719 | H    | GLU | X | 47 | 31.233 | 58.558 | 57.949 | 0.00 | 0.00 |
| ATOM | 720 | CA   | GLU | X | 47 | 29.357 | 59.521 | 57.767 | 0.00 | 0.00 |
| ATOM | 721 | HA   | GLU | X | 47 | 28.368 | 59.229 | 57.415 | 0.00 | 0.00 |
| ATOM | 722 | CB   | GLU | X | 47 | 28.917 | 60.093 | 59.181 | 0.00 | 0.00 |
| ATOM | 723 | HB2  | GLU | X | 47 | 28.359 | 60.992 | 58.918 | 0.00 | 0.00 |
| ATOM | 724 | HB3  | GLU | X | 47 | 28.251 | 59.342 | 59.606 | 0.00 | 0.00 |
| ATOM | 725 | CG   | GLU | X | 47 | 30.007 | 60.333 | 60.166 | 0.00 | 0.00 |
| ATOM | 726 | HG2  | GLU | X | 47 | 30.617 | 59.451 | 60.361 | 0.00 | 0.00 |
| ATOM | 727 | HG3  | GLU | X | 47 | 30.759 | 61.026 | 59.789 | 0.00 | 0.00 |
| ATOM | 728 | CD   | GLU | X | 47 | 29.497 | 60.767 | 61.541 | 0.00 | 0.00 |
| ATOM | 729 | OE1  | GLU | X | 47 | 30.231 | 60.529 | 62.529 | 0.00 | 0.00 |
| ATOM | 730 | OE2  | GLU | X | 47 | 28.330 | 61.127 | 61.681 | 0.00 | 0.00 |
| ATOM | 731 | C    | GLU | X | 47 | 29.966 | 60.597 | 56.847 | 0.00 | 0.00 |
| ATOM | 732 | O    | GLU | X | 47 | 31.190 | 60.809 | 56.865 | 0.00 | 0.00 |
| ATOM | 733 | N    | PRO | X | 48 | 29.089 | 61.192 | 55.970 | 0.00 | 0.00 |
| ATOM | 734 | CD   | PRO | X | 48 | 27.696 | 61.037 | 55.754 | 0.00 | 0.00 |
| ATOM | 735 | HD2  | PRO | X | 48 | 27.097 | 61.211 | 56.647 | 0.00 | 0.00 |
| ATOM | 736 | HD3  | PRO | X | 48 | 27.501 | 60.111 | 55.213 | 0.00 | 0.00 |
| ATOM | 737 | CG   | PRO | X | 48 | 27.294 | 62.152 | 54.696 | 0.00 | 0.00 |
| ATOM | 738 | HG2  | PRO | X | 48 | 27.372 | 63.123 | 55.186 | 0.00 | 0.00 |
| ATOM | 739 | HG3  | PRO | X | 48 | 26.351 | 61.936 | 54.194 | 0.00 | 0.00 |

|      |     |      |     |   |    |        |        |        |      |      |
|------|-----|------|-----|---|----|--------|--------|--------|------|------|
| ATOM | 740 | CB   | PRO | X | 48 | 28.519 | 62.052 | 53.787 | 0.00 | 0.00 |
| ATOM | 741 | HB2  | PRO | X | 48 | 28.789 | 62.786 | 53.028 | 0.00 | 0.00 |
| ATOM | 742 | HB3  | PRO | X | 48 | 28.554 | 61.081 | 53.294 | 0.00 | 0.00 |
| ATOM | 743 | CA   | PRO | X | 48 | 29.654 | 61.943 | 54.779 | 0.00 | 0.00 |
| ATOM | 744 | HA   | PRO | X | 48 | 30.344 | 61.283 | 54.252 | 0.00 | 0.00 |
| ATOM | 745 | C    | PRO | X | 48 | 30.333 | 63.298 | 55.086 | 0.00 | 0.00 |
| ATOM | 746 | O    | PRO | X | 48 | 30.065 | 63.847 | 56.173 | 0.00 | 0.00 |
| ATOM | 747 | N    | LYS | X | 49 | 31.339 | 63.712 | 54.330 | 0.00 | 0.00 |
| ATOM | 748 | H    | LYS | X | 49 | 31.601 | 63.259 | 53.466 | 0.00 | 0.00 |
| ATOM | 749 | CA   | LYS | X | 49 | 32.204 | 64.869 | 54.723 | 0.00 | 0.00 |
| ATOM | 750 | HA   | LYS | X | 49 | 32.518 | 64.591 | 55.729 | 0.00 | 0.00 |
| ATOM | 751 | CB   | LYS | X | 49 | 33.394 | 64.922 | 53.744 | 0.00 | 0.00 |
| ATOM | 752 | HB2  | LYS | X | 49 | 33.729 | 63.896 | 53.591 | 0.00 | 0.00 |
| ATOM | 753 | HB3  | LYS | X | 49 | 33.069 | 65.261 | 52.761 | 0.00 | 0.00 |
| ATOM | 754 | CG   | LYS | X | 49 | 34.619 | 65.821 | 54.257 | 0.00 | 0.00 |
| ATOM | 755 | HG2  | LYS | X | 49 | 35.153 | 66.337 | 53.459 | 0.00 | 0.00 |
| ATOM | 756 | HG3  | LYS | X | 49 | 34.340 | 66.639 | 54.921 | 0.00 | 0.00 |
| ATOM | 757 | CD   | LYS | X | 49 | 35.659 | 65.010 | 55.005 | 0.00 | 0.00 |
| ATOM | 758 | HD2  | LYS | X | 49 | 35.222 | 64.467 | 55.843 | 0.00 | 0.00 |
| ATOM | 759 | HD3  | LYS | X | 49 | 36.172 | 64.282 | 54.377 | 0.00 | 0.00 |
| ATOM | 760 | CE   | LYS | X | 49 | 36.843 | 65.757 | 55.598 | 0.00 | 0.00 |
| ATOM | 761 | HE2  | LYS | X | 49 | 37.611 | 65.081 | 55.972 | 0.00 | 0.00 |
| ATOM | 762 | HE3  | LYS | X | 49 | 37.363 | 66.323 | 54.825 | 0.00 | 0.00 |
| ATOM | 763 | NZ   | LYS | X | 49 | 36.430 | 66.753 | 56.577 | 0.00 | 0.00 |
| ATOM | 764 | HZ1  | LYS | X | 49 | 37.168 | 67.274 | 57.029 | 0.00 | 0.00 |
| ATOM | 765 | HZ2  | LYS | X | 49 | 35.820 | 67.463 | 56.198 | 0.00 | 0.00 |
| ATOM | 766 | HZ3  | LYS | X | 49 | 35.992 | 66.297 | 57.365 | 0.00 | 0.00 |
| ATOM | 767 | C    | LYS | X | 49 | 31.498 | 66.222 | 54.814 | 0.00 | 0.00 |
| ATOM | 768 | O    | LYS | X | 49 | 30.636 | 66.492 | 53.983 | 0.00 | 0.00 |
| ATOM | 769 | N    | GLN | X | 50 | 31.823 | 66.994 | 55.806 | 0.00 | 0.00 |
| ATOM | 770 | H    | GLN | X | 50 | 32.418 | 66.601 | 56.521 | 0.00 | 0.00 |
| ATOM | 771 | CA   | GLN | X | 50 | 31.510 | 68.435 | 55.906 | 0.00 | 0.00 |
| ATOM | 772 | HA   | GLN | X | 50 | 30.425 | 68.504 | 55.985 | 0.00 | 0.00 |
| ATOM | 773 | CB   | GLN | X | 50 | 32.111 | 69.068 | 57.231 | 0.00 | 0.00 |
| ATOM | 774 | HB2  | GLN | X | 50 | 33.069 | 68.595 | 57.443 | 0.00 | 0.00 |
| ATOM | 775 | HB3  | GLN | X | 50 | 32.261 | 70.144 | 57.143 | 0.00 | 0.00 |
| ATOM | 776 | CG   | GLN | X | 50 | 31.156 | 68.831 | 58.433 | 0.00 | 0.00 |
| ATOM | 777 | HG2  | GLN | X | 50 | 30.877 | 67.778 | 58.452 | 0.00 | 0.00 |
| ATOM | 778 | HG3  | GLN | X | 50 | 31.786 | 69.014 | 59.303 | 0.00 | 0.00 |
| ATOM | 779 | CD   | GLN | X | 50 | 30.029 | 69.833 | 58.240 | 0.00 | 0.00 |
| ATOM | 780 | OE1  | GLN | X | 50 | 28.992 | 69.478 | 57.628 | 0.00 | 0.00 |
| ATOM | 781 | NE2  | GLN | X | 50 | 30.131 | 71.014 | 58.797 | 0.00 | 0.00 |
| ATOM | 782 | HE21 | GLN | X | 50 | 29.406 | 71.706 | 58.672 | 0.00 | 0.00 |
| ATOM | 783 | HE22 | GLN | X | 50 | 30.940 | 71.333 | 59.312 | 0.00 | 0.00 |
| ATOM | 784 | C    | GLN | X | 50 | 32.097 | 69.209 | 54.721 | 0.00 | 0.00 |
| ATOM | 785 | O    | GLN | X | 50 | 33.029 | 68.740 | 54.026 | 0.00 | 0.00 |
| ATOM | 786 | N    | PRO | X | 51 | 31.493 | 70.367 | 54.302 | 0.00 | 0.00 |
| ATOM | 787 | CD   | PRO | X | 51 | 30.263 | 70.825 | 54.932 | 0.00 | 0.00 |
| ATOM | 788 | HD2  | PRO | X | 51 | 30.368 | 71.135 | 55.971 | 0.00 | 0.00 |
| ATOM | 789 | HD3  | PRO | X | 51 | 29.529 | 70.024 | 54.854 | 0.00 | 0.00 |
| ATOM | 790 | CG   | PRO | X | 51 | 29.764 | 72.081 | 54.218 | 0.00 | 0.00 |
| ATOM | 791 | HG2  | PRO | X | 51 | 30.406 | 72.887 | 54.575 | 0.00 | 0.00 |
| ATOM | 792 | HG3  | PRO | X | 51 | 28.690 | 72.255 | 54.163 | 0.00 | 0.00 |
| ATOM | 793 | CB   | PRO | X | 51 | 30.478 | 71.945 | 52.889 | 0.00 | 0.00 |
| ATOM | 794 | HB2  | PRO | X | 51 | 30.633 | 72.929 | 52.447 | 0.00 | 0.00 |
| ATOM | 795 | HB3  | PRO | X | 51 | 29.865 | 71.222 | 52.352 | 0.00 | 0.00 |
| ATOM | 796 | CA   | PRO | X | 51 | 31.794 | 71.182 | 53.119 | 0.00 | 0.00 |
| ATOM | 797 | HA   | PRO | X | 51 | 32.000 | 70.650 | 52.191 | 0.00 | 0.00 |
| ATOM | 798 | C    | PRO | X | 51 | 32.938 | 72.155 | 53.582 | 0.00 | 0.00 |
| ATOM | 799 | O    | PRO | X | 51 | 33.029 | 72.496 | 54.780 | 0.00 | 0.00 |
| ATOM | 800 | N    | TRP | X | 52 | 33.820 | 72.547 | 52.630 | 0.00 | 0.00 |
| ATOM | 801 | H    | TRP | X | 52 | 33.625 | 72.447 | 51.644 | 0.00 | 0.00 |
| ATOM | 802 | CA   | TRP | X | 52 | 35.042 | 73.307 | 52.932 | 0.00 | 0.00 |
| ATOM | 803 | HA   | TRP | X | 52 | 35.002 | 73.454 | 54.012 | 0.00 | 0.00 |
| ATOM | 804 | CB   | TRP | X | 52 | 36.265 | 72.397 | 52.523 | 0.00 | 0.00 |
| ATOM | 805 | HB2  | TRP | X | 52 | 37.147 | 73.033 | 52.602 | 0.00 | 0.00 |
| ATOM | 806 | HB3  | TRP | X | 52 | 36.347 | 71.598 | 53.259 | 0.00 | 0.00 |
| ATOM | 807 | CG   | TRP | X | 52 | 36.183 | 71.812 | 51.163 | 0.00 | 0.00 |
| ATOM | 808 | CD1  | TRP | X | 52 | 36.531 | 72.561 | 50.039 | 0.00 | 0.00 |
| ATOM | 809 | HD1  | TRP | X | 52 | 36.790 | 73.608 | 49.981 | 0.00 | 0.00 |



|      |     |      |     |   |    |        |        |        |      |      |
|------|-----|------|-----|---|----|--------|--------|--------|------|------|
| ATOM | 810 | NE1  | TRP | X | 52 | 36.351 | 71.698 | 48.957 | 0.00 | 0.00 |
| ATOM | 811 | HE1  | TRP | X | 52 | 36.568 | 72.136 | 48.074 | 0.00 | 0.00 |
| ATOM | 812 | CE2  | TRP | X | 52 | 35.744 | 70.546 | 49.233 | 0.00 | 0.00 |
| ATOM | 813 | CZ2  | TRP | X | 52 | 35.321 | 69.485 | 48.478 | 0.00 | 0.00 |
| ATOM | 814 | HZ2  | TRP | X | 52 | 35.310 | 69.638 | 47.409 | 0.00 | 0.00 |
| ATOM | 815 | CH2  | TRP | X | 52 | 34.781 | 68.301 | 49.058 | 0.00 | 0.00 |
| ATOM | 816 | HH2  | TRP | X | 52 | 34.397 | 67.443 | 48.526 | 0.00 | 0.00 |
| ATOM | 817 | CZ3  | TRP | X | 52 | 34.817 | 68.283 | 50.464 | 0.00 | 0.00 |
| ATOM | 818 | HZ3  | TRP | X | 52 | 34.385 | 67.418 | 50.946 | 0.00 | 0.00 |
| ATOM | 819 | CE3  | TRP | X | 52 | 35.328 | 69.321 | 51.224 | 0.00 | 0.00 |
| ATOM | 820 | HE3  | TRP | X | 52 | 35.310 | 69.208 | 52.298 | 0.00 | 0.00 |
| ATOM | 821 | CD2  | TRP | X | 52 | 35.778 | 70.548 | 50.649 | 0.00 | 0.00 |
| ATOM | 822 | C    | TRP | X | 52 | 35.170 | 74.667 | 52.244 | 0.00 | 0.00 |
| ATOM | 823 | O    | TRP | X | 52 | 34.629 | 74.924 | 51.176 | 0.00 | 0.00 |
| ATOM | 824 | N    | SER | X | 53 | 35.897 | 75.596 | 52.864 | 0.00 | 0.00 |
| ATOM | 825 | H    | SER | X | 53 | 36.300 | 75.382 | 53.765 | 0.00 | 0.00 |
| ATOM | 826 | CA   | SER | X | 53 | 35.964 | 76.968 | 52.403 | 0.00 | 0.00 |
| ATOM | 827 | HA   | SER | X | 53 | 35.070 | 77.203 | 51.826 | 0.00 | 0.00 |
| ATOM | 828 | CB   | SER | X | 53 | 36.162 | 77.949 | 53.550 | 0.00 | 0.00 |
| ATOM | 829 | HB2  | SER | X | 53 | 37.022 | 77.735 | 54.185 | 0.00 | 0.00 |
| ATOM | 830 | HB3  | SER | X | 53 | 36.415 | 78.957 | 53.223 | 0.00 | 0.00 |
| ATOM | 831 | OG   | SER | X | 53 | 35.040 | 77.958 | 54.310 | 0.00 | 0.00 |
| ATOM | 832 | HG   | SER | X | 53 | 35.022 | 78.700 | 54.918 | 0.00 | 0.00 |
| ATOM | 833 | C    | SER | X | 53 | 37.144 | 77.166 | 51.435 | 0.00 | 0.00 |
| ATOM | 834 | O    | SER | X | 53 | 38.239 | 76.843 | 51.800 | 0.00 | 0.00 |
| ATOM | 835 | N    | GLY | X | 54 | 36.963 | 77.924 | 50.341 | 0.00 | 0.00 |
| ATOM | 836 | H    | GLY | X | 54 | 36.121 | 78.436 | 50.119 | 0.00 | 0.00 |
| ATOM | 837 | CA   | GLY | X | 54 | 38.032 | 78.254 | 49.401 | 0.00 | 0.00 |
| ATOM | 838 | HA2  | GLY | X | 54 | 37.842 | 79.030 | 48.599 | 0.00 | 0.00 |
| ATOM | 839 | HA3  | GLY | X | 54 | 38.979 | 78.422 | 49.893 | 0.00 | 0.00 |
| ATOM | 840 | C    | GLY | X | 54 | 38.244 | 77.049 | 48.518 | 0.00 | 0.00 |
| ATOM | 841 | O    | GLY | X | 54 | 37.484 | 76.090 | 48.519 | 0.00 | 0.00 |
| ATOM | 842 | N    | VAL | X | 55 | 39.332 | 77.041 | 47.774 | 0.00 | 0.00 |
| ATOM | 843 | H    | VAL | X | 55 | 39.927 | 77.847 | 47.903 | 0.00 | 0.00 |
| ATOM | 844 | CA   | VAL | X | 55 | 39.807 | 75.957 | 46.955 | 0.00 | 0.00 |
| ATOM | 845 | HA   | VAL | X | 55 | 38.994 | 75.363 | 46.535 | 0.00 | 0.00 |
| ATOM | 846 | CB   | VAL | X | 55 | 40.477 | 76.442 | 45.675 | 0.00 | 0.00 |
| ATOM | 847 | HB   | VAL | X | 55 | 41.322 | 77.061 | 45.979 | 0.00 | 0.00 |
| ATOM | 848 | CG1  | VAL | X | 55 | 41.000 | 75.343 | 44.702 | 0.00 | 0.00 |
| ATOM | 849 | HG11 | VAL | X | 55 | 40.192 | 75.006 | 44.053 | 0.00 | 0.00 |
| ATOM | 850 | HG12 | VAL | X | 55 | 41.791 | 75.755 | 44.074 | 0.00 | 0.00 |
| ATOM | 851 | HG13 | VAL | X | 55 | 41.503 | 74.519 | 45.208 | 0.00 | 0.00 |
| ATOM | 852 | CG2  | VAL | X | 55 | 39.565 | 77.442 | 44.840 | 0.00 | 0.00 |
| ATOM | 853 | HG21 | VAL | X | 55 | 39.946 | 77.666 | 43.843 | 0.00 | 0.00 |
| ATOM | 854 | HG22 | VAL | X | 55 | 38.575 | 77.001 | 44.725 | 0.00 | 0.00 |
| ATOM | 855 | HG23 | VAL | X | 55 | 39.375 | 78.356 | 45.403 | 0.00 | 0.00 |
| ATOM | 856 | C    | VAL | X | 55 | 40.440 | 74.971 | 47.873 | 0.00 | 0.00 |
| ATOM | 857 | O    | VAL | X | 55 | 41.482 | 75.283 | 48.487 | 0.00 | 0.00 |
| ATOM | 858 | N    | VAL | X | 56 | 39.886 | 73.738 | 47.936 | 0.00 | 0.00 |
| ATOM | 859 | H    | VAL | X | 56 | 39.158 | 73.463 | 47.291 | 0.00 | 0.00 |
| ATOM | 860 | CA   | VAL | X | 56 | 40.657 | 72.537 | 48.445 | 0.00 | 0.00 |
| ATOM | 861 | HA   | VAL | X | 56 | 41.393 | 72.791 | 49.208 | 0.00 | 0.00 |
| ATOM | 862 | CB   | VAL | X | 56 | 39.767 | 71.398 | 48.997 | 0.00 | 0.00 |
| ATOM | 863 | HB   | VAL | X | 56 | 38.878 | 71.516 | 48.377 | 0.00 | 0.00 |
| ATOM | 864 | CG1  | VAL | X | 56 | 40.411 | 69.939 | 48.911 | 0.00 | 0.00 |
| ATOM | 865 | HG11 | VAL | X | 56 | 41.391 | 69.979 | 49.386 | 0.00 | 0.00 |
| ATOM | 866 | HG12 | VAL | X | 56 | 39.752 | 69.167 | 49.308 | 0.00 | 0.00 |
| ATOM | 867 | HG13 | VAL | X | 56 | 40.576 | 69.661 | 47.870 | 0.00 | 0.00 |
| ATOM | 868 | CG2  | VAL | X | 56 | 39.544 | 71.785 | 50.440 | 0.00 | 0.00 |
| ATOM | 869 | HG21 | VAL | X | 56 | 38.795 | 71.119 | 50.869 | 0.00 | 0.00 |
| ATOM | 870 | HG22 | VAL | X | 56 | 40.440 | 71.702 | 51.056 | 0.00 | 0.00 |
| ATOM | 871 | HG23 | VAL | X | 56 | 39.228 | 72.826 | 50.513 | 0.00 | 0.00 |
| ATOM | 872 | C    | VAL | X | 56 | 41.410 | 72.055 | 47.249 | 0.00 | 0.00 |
| ATOM | 873 | O    | VAL | X | 56 | 40.816 | 72.045 | 46.134 | 0.00 | 0.00 |
| ATOM | 874 | N    | ASP | X | 57 | 42.606 | 71.578 | 47.406 | 0.00 | 0.00 |
| ATOM | 875 | H    | ASP | X | 57 | 42.904 | 71.588 | 48.371 | 0.00 | 0.00 |
| ATOM | 876 | CA   | ASP | X | 57 | 43.511 | 70.983 | 46.439 | 0.00 | 0.00 |
| ATOM | 877 | HA   | ASP | X | 57 | 43.286 | 71.497 | 45.504 | 0.00 | 0.00 |
| ATOM | 878 | CB   | ASP | X | 57 | 44.930 | 71.371 | 46.884 | 0.00 | 0.00 |
| ATOM | 879 | HB2  | ASP | X | 57 | 44.812 | 72.447 | 47.018 | 0.00 | 0.00 |

|      |     |      |     |   |    |        |        |        |      |      |
|------|-----|------|-----|---|----|--------|--------|--------|------|------|
| ATOM | 880 | HB3  | ASP | X | 57 | 45.300 | 70.938 | 47.813 | 0.00 | 0.00 |
| ATOM | 881 | CG   | ASP | X | 57 | 45.930 | 71.023 | 45.750 | 0.00 | 0.00 |
| ATOM | 882 | OD1  | ASP | X | 57 | 46.628 | 69.931 | 45.794 | 0.00 | 0.00 |
| ATOM | 883 | OD2  | ASP | X | 57 | 46.242 | 71.937 | 44.932 | 0.00 | 0.00 |
| ATOM | 884 | C    | ASP | X | 57 | 43.389 | 69.437 | 46.213 | 0.00 | 0.00 |
| ATOM | 885 | O    | ASP | X | 57 | 43.452 | 68.691 | 47.214 | 0.00 | 0.00 |
| ATOM | 886 | N    | ALA | X | 58 | 43.225 | 68.977 | 44.951 | 0.00 | 0.00 |
| ATOM | 887 | H    | ALA | X | 58 | 43.039 | 69.683 | 44.253 | 0.00 | 0.00 |
| ATOM | 888 | CA   | ALA | X | 58 | 43.045 | 67.582 | 44.617 | 0.00 | 0.00 |
| ATOM | 889 | HA   | ALA | X | 58 | 43.043 | 67.012 | 45.546 | 0.00 | 0.00 |
| ATOM | 890 | CB   | ALA | X | 58 | 41.600 | 67.295 | 44.326 | 0.00 | 0.00 |
| ATOM | 891 | HB1  | ALA | X | 58 | 41.195 | 67.888 | 43.505 | 0.00 | 0.00 |
| ATOM | 892 | HB2  | ALA | X | 58 | 41.393 | 66.229 | 44.239 | 0.00 | 0.00 |
| ATOM | 893 | HB3  | ALA | X | 58 | 41.080 | 67.814 | 45.131 | 0.00 | 0.00 |
| ATOM | 894 | C    | ALA | X | 58 | 44.045 | 67.009 | 43.592 | 0.00 | 0.00 |
| ATOM | 895 | O    | ALA | X | 58 | 43.692 | 66.381 | 42.650 | 0.00 | 0.00 |
| ATOM | 896 | N    | THR | X | 59 | 45.315 | 67.417 | 43.703 | 0.00 | 0.00 |
| ATOM | 897 | H    | THR | X | 59 | 45.632 | 67.941 | 44.507 | 0.00 | 0.00 |
| ATOM | 898 | CA   | THR | X | 59 | 46.451 | 67.216 | 42.800 | 0.00 | 0.00 |
| ATOM | 899 | HA   | THR | X | 59 | 46.133 | 67.068 | 41.768 | 0.00 | 0.00 |
| ATOM | 900 | CB   | THR | X | 59 | 47.364 | 68.488 | 42.835 | 0.00 | 0.00 |
| ATOM | 901 | HB   | THR | X | 59 | 48.100 | 68.336 | 42.046 | 0.00 | 0.00 |
| ATOM | 902 | CG2  | THR | X | 59 | 46.625 | 69.759 | 42.448 | 0.00 | 0.00 |
| ATOM | 903 | HG21 | THR | X | 59 | 46.317 | 69.794 | 41.403 | 0.00 | 0.00 |
| ATOM | 904 | HG22 | THR | X | 59 | 45.676 | 69.734 | 42.985 | 0.00 | 0.00 |
| ATOM | 905 | HG23 | THR | X | 59 | 47.234 | 70.646 | 42.622 | 0.00 | 0.00 |
| ATOM | 906 | OG1  | THR | X | 59 | 47.963 | 68.598 | 44.137 | 0.00 | 0.00 |
| ATOM | 907 | HG1  | THR | X | 59 | 47.406 | 69.073 | 44.758 | 0.00 | 0.00 |
| ATOM | 908 | C    | THR | X | 59 | 47.256 | 65.953 | 43.064 | 0.00 | 0.00 |
| ATOM | 909 | O    | THR | X | 59 | 47.882 | 65.442 | 42.122 | 0.00 | 0.00 |
| ATOM | 910 | N    | THR | X | 60 | 47.339 | 65.493 | 44.292 | 0.00 | 0.00 |
| ATOM | 911 | H    | THR | X | 60 | 46.839 | 65.897 | 45.071 | 0.00 | 0.00 |
| ATOM | 912 | CA   | THR | X | 60 | 48.213 | 64.332 | 44.749 | 0.00 | 0.00 |
| ATOM | 913 | HA   | THR | X | 60 | 48.380 | 63.741 | 43.849 | 0.00 | 0.00 |
| ATOM | 914 | CB   | THR | X | 60 | 49.597 | 64.880 | 45.326 | 0.00 | 0.00 |
| ATOM | 915 | HB   | THR | X | 60 | 49.500 | 65.642 | 46.099 | 0.00 | 0.00 |
| ATOM | 916 | CG2  | THR | X | 60 | 50.437 | 63.754 | 45.899 | 0.00 | 0.00 |
| ATOM | 917 | HG21 | THR | X | 60 | 51.336 | 64.126 | 46.389 | 0.00 | 0.00 |
| ATOM | 918 | HG22 | THR | X | 60 | 49.885 | 63.119 | 46.592 | 0.00 | 0.00 |
| ATOM | 919 | HG23 | THR | X | 60 | 50.800 | 63.123 | 45.087 | 0.00 | 0.00 |
| ATOM | 920 | OG1  | THR | X | 60 | 50.270 | 65.456 | 44.306 | 0.00 | 0.00 |
| ATOM | 921 | HG1  | THR | X | 60 | 51.210 | 65.444 | 44.500 | 0.00 | 0.00 |
| ATOM | 922 | C    | THR | X | 60 | 47.384 | 63.471 | 45.740 | 0.00 | 0.00 |
| ATOM | 923 | O    | THR | X | 60 | 46.496 | 64.054 | 46.412 | 0.00 | 0.00 |
| ATOM | 924 | N    | PHE | X | 61 | 47.649 | 62.181 | 45.805 | 0.00 | 0.00 |
| ATOM | 925 | H    | PHE | X | 61 | 48.405 | 61.658 | 45.387 | 0.00 | 0.00 |
| ATOM | 926 | CA   | PHE | X | 61 | 46.806 | 61.460 | 46.851 | 0.00 | 0.00 |
| ATOM | 927 | HA   | PHE | X | 61 | 45.779 | 61.743 | 46.620 | 0.00 | 0.00 |
| ATOM | 928 | CB   | PHE | X | 61 | 46.949 | 59.942 | 46.573 | 0.00 | 0.00 |
| ATOM | 929 | HB2  | PHE | X | 61 | 46.899 | 59.740 | 45.503 | 0.00 | 0.00 |
| ATOM | 930 | HB3  | PHE | X | 61 | 47.944 | 59.722 | 46.959 | 0.00 | 0.00 |
| ATOM | 931 | CG   | PHE | X | 61 | 45.870 | 59.190 | 47.367 | 0.00 | 0.00 |
| ATOM | 932 | CD1  | PHE | X | 61 | 46.140 | 58.613 | 48.676 | 0.00 | 0.00 |
| ATOM | 933 | HD1  | PHE | X | 61 | 47.134 | 58.633 | 49.099 | 0.00 | 0.00 |
| ATOM | 934 | CE1  | PHE | X | 61 | 45.055 | 58.079 | 49.411 | 0.00 | 0.00 |
| ATOM | 935 | HE1  | PHE | X | 61 | 45.180 | 57.633 | 50.387 | 0.00 | 0.00 |
| ATOM | 936 | CZ   | PHE | X | 61 | 43.803 | 58.003 | 48.816 | 0.00 | 0.00 |
| ATOM | 937 | HZ   | PHE | X | 61 | 43.019 | 57.531 | 49.389 | 0.00 | 0.00 |
| ATOM | 938 | CE2  | PHE | X | 61 | 43.516 | 58.563 | 47.545 | 0.00 | 0.00 |
| ATOM | 939 | HE2  | PHE | X | 61 | 42.560 | 58.470 | 47.051 | 0.00 | 0.00 |
| ATOM | 940 | CD2  | PHE | X | 61 | 44.610 | 59.164 | 46.840 | 0.00 | 0.00 |
| ATOM | 941 | HD2  | PHE | X | 61 | 44.420 | 59.568 | 45.857 | 0.00 | 0.00 |
| ATOM | 942 | C    | PHE | X | 61 | 47.236 | 61.934 | 48.252 | 0.00 | 0.00 |
| ATOM | 943 | O    | PHE | X | 61 | 48.276 | 62.559 | 48.550 | 0.00 | 0.00 |
| ATOM | 944 | N    | GLN | X | 62 | 46.493 | 61.505 | 49.230 | 0.00 | 0.00 |
| ATOM | 945 | H    | GLN | X | 62 | 45.839 | 60.774 | 48.991 | 0.00 | 0.00 |
| ATOM | 946 | CA   | GLN | X | 62 | 46.754 | 61.917 | 50.624 | 0.00 | 0.00 |
| ATOM | 947 | HA   | GLN | X | 62 | 47.522 | 62.691 | 50.619 | 0.00 | 0.00 |
| ATOM | 948 | CB   | GLN | X | 62 | 45.397 | 62.448 | 51.222 | 0.00 | 0.00 |
| ATOM | 949 | HB2  | GLN | X | 62 | 44.600 | 61.715 | 51.095 | 0.00 | 0.00 |

|      |      |      |     |   |    |        |        |        |      |      |
|------|------|------|-----|---|----|--------|--------|--------|------|------|
| ATOM | 950  | HB3  | GLN | X | 62 | 45.533 | 62.497 | 52.302 | 0.00 | 0.00 |
| ATOM | 951  | CG   | GLN | X | 62 | 44.965 | 63.814 | 50.730 | 0.00 | 0.00 |
| ATOM | 952  | HG2  | GLN | X | 62 | 44.858 | 63.642 | 49.659 | 0.00 | 0.00 |
| ATOM | 953  | HG3  | GLN | X | 62 | 43.981 | 63.969 | 51.173 | 0.00 | 0.00 |
| ATOM | 954  | CD   | GLN | X | 62 | 45.945 | 65.077 | 50.913 | 0.00 | 0.00 |
| ATOM | 955  | OE1  | GLN | X | 62 | 46.995 | 64.943 | 51.499 | 0.00 | 0.00 |
| ATOM | 956  | NE2  | GLN | X | 62 | 45.484 | 66.173 | 50.425 | 0.00 | 0.00 |
| ATOM | 957  | HE21 | GLN | X | 62 | 45.932 | 67.054 | 50.634 | 0.00 | 0.00 |
| ATOM | 958  | HE22 | GLN | X | 62 | 44.570 | 66.224 | 49.998 | 0.00 | 0.00 |
| ATOM | 959  | C    | GLN | X | 62 | 47.394 | 60.724 | 51.313 | 0.00 | 0.00 |
| ATOM | 960  | O    | GLN | X | 62 | 48.487 | 60.228 | 50.956 | 0.00 | 0.00 |
| ATOM | 961  | N    | SER | X | 63 | 46.680 | 60.208 | 52.245 | 0.00 | 0.00 |
| ATOM | 962  | H    | SER | X | 63 | 45.801 | 60.679 | 52.407 | 0.00 | 0.00 |
| ATOM | 963  | CA   | SER | X | 63 | 47.158 | 59.132 | 53.105 | 0.00 | 0.00 |
| ATOM | 964  | HA   | SER | X | 63 | 48.068 | 58.709 | 52.679 | 0.00 | 0.00 |
| ATOM | 965  | CB   | SER | X | 63 | 47.302 | 59.680 | 54.539 | 0.00 | 0.00 |
| ATOM | 966  | HB2  | SER | X | 63 | 47.604 | 58.962 | 55.301 | 0.00 | 0.00 |
| ATOM | 967  | HB3  | SER | X | 63 | 48.078 | 60.442 | 54.481 | 0.00 | 0.00 |
| ATOM | 968  | OG   | SER | X | 63 | 46.181 | 60.364 | 55.068 | 0.00 | 0.00 |
| ATOM | 969  | HG   | SER | X | 63 | 45.593 | 59.663 | 55.356 | 0.00 | 0.00 |
| ATOM | 970  | C    | SER | X | 63 | 46.250 | 57.888 | 53.282 | 0.00 | 0.00 |
| ATOM | 971  | O    | SER | X | 63 | 45.055 | 58.062 | 52.865 | 0.00 | 0.00 |
| ATOM | 972  | N    | VAL | X | 64 | 46.769 | 56.759 | 53.694 | 0.00 | 0.00 |
| ATOM | 973  | H    | VAL | X | 64 | 47.697 | 56.763 | 54.093 | 0.00 | 0.00 |
| ATOM | 974  | CA   | VAL | X | 64 | 46.203 | 55.474 | 53.298 | 0.00 | 0.00 |
| ATOM | 975  | HA   | VAL | X | 64 | 45.216 | 55.613 | 52.857 | 0.00 | 0.00 |
| ATOM | 976  | CB   | VAL | X | 64 | 47.251 | 54.705 | 52.380 | 0.00 | 0.00 |
| ATOM | 977  | HB   | VAL | X | 64 | 48.223 | 54.873 | 52.844 | 0.00 | 0.00 |
| ATOM | 978  | CG1  | VAL | X | 64 | 46.906 | 53.159 | 52.134 | 0.00 | 0.00 |
| ATOM | 979  | HG11 | VAL | X | 64 | 45.947 | 53.106 | 51.617 | 0.00 | 0.00 |
| ATOM | 980  | HG12 | VAL | X | 64 | 47.620 | 52.630 | 51.502 | 0.00 | 0.00 |
| ATOM | 981  | HG13 | VAL | X | 64 | 47.044 | 52.596 | 53.057 | 0.00 | 0.00 |
| ATOM | 982  | CG2  | VAL | X | 64 | 47.370 | 55.306 | 50.958 | 0.00 | 0.00 |
| ATOM | 983  | HG21 | VAL | X | 64 | 47.686 | 56.342 | 51.082 | 0.00 | 0.00 |
| ATOM | 984  | HG22 | VAL | X | 64 | 48.161 | 54.786 | 50.417 | 0.00 | 0.00 |
| ATOM | 985  | HG23 | VAL | X | 64 | 46.458 | 55.233 | 50.365 | 0.00 | 0.00 |
| ATOM | 986  | C    | VAL | X | 64 | 45.924 | 54.596 | 54.554 | 0.00 | 0.00 |
| ATOM | 987  | O    | VAL | X | 64 | 46.583 | 54.741 | 55.634 | 0.00 | 0.00 |
| ATOM | 988  | N    | CYX | X | 65 | 44.908 | 53.732 | 54.572 | 0.00 | 0.00 |
| ATOM | 989  | H    | CYX | X | 65 | 44.280 | 53.671 | 53.783 | 0.00 | 0.00 |
| ATOM | 990  | CA   | CYX | X | 65 | 44.445 | 53.052 | 55.844 | 0.00 | 0.00 |
| ATOM | 991  | HA   | CYX | X | 65 | 44.215 | 53.728 | 56.667 | 0.00 | 0.00 |
| ATOM | 992  | CB   | CYX | X | 65 | 43.167 | 52.257 | 55.634 | 0.00 | 0.00 |
| ATOM | 993  | HB2  | CYX | X | 65 | 43.285 | 51.572 | 54.794 | 0.00 | 0.00 |
| ATOM | 994  | HB3  | CYX | X | 65 | 42.960 | 51.620 | 56.493 | 0.00 | 0.00 |
| ATOM | 995  | SG   | CYX | X | 65 | 41.649 | 53.215 | 55.334 | 0.00 | 0.00 |
| ATOM | 996  | C    | CYX | X | 65 | 45.467 | 52.071 | 56.337 | 0.00 | 0.00 |
| ATOM | 997  | O    | CYX | X | 65 | 46.032 | 51.343 | 55.513 | 0.00 | 0.00 |
| ATOM | 998  | N    | TYR | X | 66 | 45.735 | 52.033 | 57.649 | 0.00 | 0.00 |
| ATOM | 999  | H    | TYR | X | 66 | 45.372 | 52.893 | 58.036 | 0.00 | 0.00 |
| ATOM | 1000 | CA   | TYR | X | 66 | 46.806 | 51.307 | 58.303 | 0.00 | 0.00 |
| ATOM | 1001 | HA   | TYR | X | 66 | 47.722 | 51.671 | 57.839 | 0.00 | 0.00 |
| ATOM | 1002 | CB   | TYR | X | 66 | 46.901 | 51.530 | 59.775 | 0.00 | 0.00 |
| ATOM | 1003 | HB2  | TYR | X | 66 | 45.904 | 51.775 | 60.140 | 0.00 | 0.00 |
| ATOM | 1004 | HB3  | TYR | X | 66 | 47.218 | 50.609 | 60.263 | 0.00 | 0.00 |
| ATOM | 1005 | CG   | TYR | X | 66 | 47.827 | 52.582 | 60.247 | 0.00 | 0.00 |
| ATOM | 1006 | CD1  | TYR | X | 66 | 47.223 | 53.742 | 60.761 | 0.00 | 0.00 |
| ATOM | 1007 | HD1  | TYR | X | 66 | 46.147 | 53.736 | 60.675 | 0.00 | 0.00 |
| ATOM | 1008 | CE1  | TYR | X | 66 | 48.047 | 54.671 | 61.356 | 0.00 | 0.00 |
| ATOM | 1009 | HE1  | TYR | X | 66 | 47.628 | 55.575 | 61.773 | 0.00 | 0.00 |
| ATOM | 1010 | CZ   | TYR | X | 66 | 49.474 | 54.552 | 61.357 | 0.00 | 0.00 |
| ATOM | 1011 | OH   | TYR | X | 66 | 50.270 | 55.443 | 62.029 | 0.00 | 0.00 |
| ATOM | 1012 | HH   | TYR | X | 66 | 49.719 | 56.120 | 62.427 | 0.00 | 0.00 |
| ATOM | 1013 | CE2  | TYR | X | 66 | 50.121 | 53.463 | 60.680 | 0.00 | 0.00 |
| ATOM | 1014 | HE2  | TYR | X | 66 | 51.200 | 53.428 | 60.678 | 0.00 | 0.00 |
| ATOM | 1015 | CD2  | TYR | X | 66 | 49.246 | 52.458 | 60.206 | 0.00 | 0.00 |
| ATOM | 1016 | HD2  | TYR | X | 66 | 49.684 | 51.575 | 59.763 | 0.00 | 0.00 |
| ATOM | 1017 | C    | TYR | X | 66 | 46.564 | 49.822 | 57.992 | 0.00 | 0.00 |
| ATOM | 1018 | O    | TYR | X | 66 | 45.430 | 49.288 | 58.028 | 0.00 | 0.00 |
| ATOM | 1019 | N    | GLN | X | 67 | 47.644 | 49.149 | 57.644 | 0.00 | 0.00 |

|      |      |      |     |   |    |        |        |        |      |      |
|------|------|------|-----|---|----|--------|--------|--------|------|------|
| ATOM | 1020 | H    | GLN | X | 67 | 48.541 | 49.563 | 57.852 | 0.00 | 0.00 |
| ATOM | 1021 | CA   | GLN | X | 67 | 47.648 | 47.874 | 57.001 | 0.00 | 0.00 |
| ATOM | 1022 | HA   | GLN | X | 67 | 47.015 | 47.195 | 57.572 | 0.00 | 0.00 |
| ATOM | 1023 | CB   | GLN | X | 67 | 47.079 | 47.951 | 55.572 | 0.00 | 0.00 |
| ATOM | 1024 | HB2  | GLN | X | 67 | 46.830 | 46.958 | 55.200 | 0.00 | 0.00 |
| ATOM | 1025 | HB3  | GLN | X | 67 | 46.062 | 48.321 | 55.704 | 0.00 | 0.00 |
| ATOM | 1026 | CG   | GLN | X | 67 | 48.081 | 48.682 | 54.530 | 0.00 | 0.00 |
| ATOM | 1027 | HG2  | GLN | X | 67 | 48.372 | 49.613 | 55.015 | 0.00 | 0.00 |
| ATOM | 1028 | HG3  | GLN | X | 67 | 48.969 | 48.059 | 54.420 | 0.00 | 0.00 |
| ATOM | 1029 | CD   | GLN | X | 67 | 47.515 | 48.865 | 53.173 | 0.00 | 0.00 |
| ATOM | 1030 | OE1  | GLN | X | 67 | 48.030 | 48.351 | 52.176 | 0.00 | 0.00 |
| ATOM | 1031 | NE2  | GLN | X | 67 | 46.484 | 49.681 | 53.038 | 0.00 | 0.00 |
| ATOM | 1032 | HE21 | GLN | X | 67 | 46.140 | 49.756 | 52.092 | 0.00 | 0.00 |
| ATOM | 1033 | HE22 | GLN | X | 67 | 46.113 | 50.180 | 53.834 | 0.00 | 0.00 |
| ATOM | 1034 | C    | GLN | X | 67 | 49.059 | 47.217 | 56.987 | 0.00 | 0.00 |
| ATOM | 1035 | O    | GLN | X | 67 | 50.065 | 47.842 | 57.224 | 0.00 | 0.00 |
| ATOM | 1036 | N    | TYR | X | 68 | 49.093 | 45.861 | 56.819 | 0.00 | 0.00 |
| ATOM | 1037 | H    | TYR | X | 68 | 48.236 | 45.349 | 56.667 | 0.00 | 0.00 |
| ATOM | 1038 | CA   | TYR | X | 68 | 50.376 | 45.191 | 56.983 | 0.00 | 0.00 |
| ATOM | 1039 | HA   | TYR | X | 68 | 50.973 | 45.798 | 57.664 | 0.00 | 0.00 |
| ATOM | 1040 | CB   | TYR | X | 68 | 50.225 | 43.676 | 57.533 | 0.00 | 0.00 |
| ATOM | 1041 | HB2  | TYR | X | 68 | 49.663 | 43.904 | 58.439 | 0.00 | 0.00 |
| ATOM | 1042 | HB3  | TYR | X | 68 | 49.799 | 43.084 | 56.723 | 0.00 | 0.00 |
| ATOM | 1043 | CG   | TYR | X | 68 | 51.454 | 42.853 | 57.816 | 0.00 | 0.00 |
| ATOM | 1044 | CD1  | TYR | X | 68 | 52.084 | 43.003 | 59.056 | 0.00 | 0.00 |
| ATOM | 1045 | HD1  | TYR | X | 68 | 51.513 | 43.549 | 59.792 | 0.00 | 0.00 |
| ATOM | 1046 | CE1  | TYR | X | 68 | 53.251 | 42.299 | 59.446 | 0.00 | 0.00 |
| ATOM | 1047 | HE1  | TYR | X | 68 | 53.622 | 42.329 | 60.459 | 0.00 | 0.00 |
| ATOM | 1048 | CZ   | TYR | X | 68 | 53.915 | 41.570 | 58.449 | 0.00 | 0.00 |
| ATOM | 1049 | OH   | TYR | X | 68 | 55.066 | 40.886 | 58.669 | 0.00 | 0.00 |
| ATOM | 1050 | HH   | TYR | X | 68 | 55.506 | 41.046 | 59.508 | 0.00 | 0.00 |
| ATOM | 1051 | CE2  | TYR | X | 68 | 53.310 | 41.503 | 57.120 | 0.00 | 0.00 |
| ATOM | 1052 | HE2  | TYR | X | 68 | 53.858 | 41.010 | 56.330 | 0.00 | 0.00 |
| ATOM | 1053 | CD2  | TYR | X | 68 | 52.038 | 42.101 | 56.861 | 0.00 | 0.00 |
| ATOM | 1054 | HD2  | TYR | X | 68 | 51.530 | 42.047 | 55.909 | 0.00 | 0.00 |
| ATOM | 1055 | C    | TYR | X | 68 | 51.156 | 45.187 | 55.731 | 0.00 | 0.00 |
| ATOM | 1056 | O    | TYR | X | 68 | 50.594 | 45.180 | 54.662 | 0.00 | 0.00 |
| ATOM | 1057 | N    | VAL | X | 69 | 52.493 | 45.233 | 55.735 | 0.00 | 0.00 |
| ATOM | 1058 | H    | VAL | X | 69 | 52.930 | 45.318 | 56.641 | 0.00 | 0.00 |
| ATOM | 1059 | CA   | VAL | X | 69 | 53.307 | 45.529 | 54.600 | 0.00 | 0.00 |
| ATOM | 1060 | HA   | VAL | X | 69 | 52.689 | 45.607 | 53.706 | 0.00 | 0.00 |
| ATOM | 1061 | CB   | VAL | X | 69 | 54.015 | 46.900 | 54.815 | 0.00 | 0.00 |
| ATOM | 1062 | HB   | VAL | X | 69 | 54.646 | 46.757 | 55.692 | 0.00 | 0.00 |
| ATOM | 1063 | CG1  | VAL | X | 69 | 54.948 | 47.178 | 53.644 | 0.00 | 0.00 |
| ATOM | 1064 | HG11 | VAL | X | 69 | 55.488 | 48.123 | 53.704 | 0.00 | 0.00 |
| ATOM | 1065 | HG12 | VAL | X | 69 | 55.653 | 46.368 | 53.459 | 0.00 | 0.00 |
| ATOM | 1066 | HG13 | VAL | X | 69 | 54.453 | 47.398 | 52.698 | 0.00 | 0.00 |
| ATOM | 1067 | CG2  | VAL | X | 69 | 53.020 | 48.056 | 55.055 | 0.00 | 0.00 |
| ATOM | 1068 | HG21 | VAL | X | 69 | 52.095 | 47.852 | 54.516 | 0.00 | 0.00 |
| ATOM | 1069 | HG22 | VAL | X | 69 | 52.747 | 48.229 | 56.096 | 0.00 | 0.00 |
| ATOM | 1070 | HG23 | VAL | X | 69 | 53.338 | 48.994 | 54.599 | 0.00 | 0.00 |
| ATOM | 1071 | C    | VAL | X | 69 | 54.268 | 44.343 | 54.411 | 0.00 | 0.00 |
| ATOM | 1072 | O    | VAL | X | 69 | 55.110 | 44.000 | 55.198 | 0.00 | 0.00 |
| ATOM | 1073 | N    | ASP | X | 70 | 53.980 | 43.705 | 53.262 | 0.00 | 0.00 |
| ATOM | 1074 | H    | ASP | X | 70 | 53.255 | 44.043 | 52.645 | 0.00 | 0.00 |
| ATOM | 1075 | CA   | ASP | X | 70 | 54.503 | 42.322 | 52.879 | 0.00 | 0.00 |
| ATOM | 1076 | HA   | ASP | X | 70 | 53.871 | 41.746 | 53.555 | 0.00 | 0.00 |
| ATOM | 1077 | CB   | ASP | X | 70 | 54.191 | 41.920 | 51.448 | 0.00 | 0.00 |
| ATOM | 1078 | HB2  | ASP | X | 70 | 53.169 | 42.292 | 51.372 | 0.00 | 0.00 |
| ATOM | 1079 | HB3  | ASP | X | 70 | 54.883 | 42.383 | 50.744 | 0.00 | 0.00 |
| ATOM | 1080 | CG   | ASP | X | 70 | 54.238 | 40.395 | 51.271 | 0.00 | 0.00 |
| ATOM | 1081 | OD1  | ASP | X | 70 | 53.169 | 39.771 | 51.361 | 0.00 | 0.00 |
| ATOM | 1082 | OD2  | ASP | X | 70 | 55.335 | 39.820 | 51.126 | 0.00 | 0.00 |
| ATOM | 1083 | C    | ASP | X | 70 | 56.055 | 42.061 | 53.087 | 0.00 | 0.00 |
| ATOM | 1084 | O    | ASP | X | 70 | 56.731 | 42.940 | 52.639 | 0.00 | 0.00 |
| ATOM | 1085 | N    | THR | X | 71 | 56.442 | 40.967 | 53.831 | 0.00 | 0.00 |
| ATOM | 1086 | H    | THR | X | 71 | 55.768 | 40.338 | 54.243 | 0.00 | 0.00 |
| ATOM | 1087 | CA   | THR | X | 71 | 57.865 | 40.718 | 54.160 | 0.00 | 0.00 |
| ATOM | 1088 | HA   | THR | X | 71 | 58.395 | 41.624 | 53.868 | 0.00 | 0.00 |
| ATOM | 1089 | CB   | THR | X | 71 | 58.012 | 40.472 | 55.682 | 0.00 | 0.00 |

|      |      |      |     |   |    |        |        |        |      |      |
|------|------|------|-----|---|----|--------|--------|--------|------|------|
| ATOM | 1090 | HB   | THR | X | 71 | 59.058 | 40.267 | 55.908 | 0.00 | 0.00 |
| ATOM | 1091 | CG2  | THR | X | 71 | 57.689 | 41.675 | 56.526 | 0.00 | 0.00 |
| ATOM | 1092 | HG21 | THR | X | 71 | 57.813 | 41.456 | 57.587 | 0.00 | 0.00 |
| ATOM | 1093 | HG22 | THR | X | 71 | 58.429 | 42.447 | 56.320 | 0.00 | 0.00 |
| ATOM | 1094 | HG23 | THR | X | 71 | 56.666 | 41.946 | 56.265 | 0.00 | 0.00 |
| ATOM | 1095 | OG1  | THR | X | 71 | 57.317 | 39.295 | 56.131 | 0.00 | 0.00 |
| ATOM | 1096 | HG1  | THR | X | 71 | 58.024 | 38.753 | 56.489 | 0.00 | 0.00 |
| ATOM | 1097 | C    | THR | X | 71 | 58.557 | 39.623 | 53.411 | 0.00 | 0.00 |
| ATOM | 1098 | O    | THR | X | 71 | 59.748 | 39.514 | 53.596 | 0.00 | 0.00 |
| ATOM | 1099 | N    | LEU | X | 72 | 57.876 | 38.776 | 52.749 | 0.00 | 0.00 |
| ATOM | 1100 | H    | LEU | X | 72 | 56.919 | 39.071 | 52.619 | 0.00 | 0.00 |
| ATOM | 1101 | CA   | LEU | X | 72 | 58.385 | 37.713 | 51.901 | 0.00 | 0.00 |
| ATOM | 1102 | HA   | LEU | X | 72 | 59.151 | 37.235 | 52.512 | 0.00 | 0.00 |
| ATOM | 1103 | CB   | LEU | X | 72 | 57.270 | 36.711 | 51.654 | 0.00 | 0.00 |
| ATOM | 1104 | HB2  | LEU | X | 72 | 56.701 | 36.465 | 52.551 | 0.00 | 0.00 |
| ATOM | 1105 | HB3  | LEU | X | 72 | 56.529 | 37.205 | 51.026 | 0.00 | 0.00 |
| ATOM | 1106 | CG   | LEU | X | 72 | 57.820 | 35.445 | 50.998 | 0.00 | 0.00 |
| ATOM | 1107 | HG   | LEU | X | 72 | 58.449 | 35.581 | 50.119 | 0.00 | 0.00 |
| ATOM | 1108 | CD1  | LEU | X | 72 | 58.703 | 34.629 | 52.003 | 0.00 | 0.00 |
| ATOM | 1109 | HD11 | LEU | X | 72 | 59.596 | 35.229 | 52.172 | 0.00 | 0.00 |
| ATOM | 1110 | HD12 | LEU | X | 72 | 58.084 | 34.461 | 52.884 | 0.00 | 0.00 |
| ATOM | 1111 | HD13 | LEU | X | 72 | 59.093 | 33.693 | 51.602 | 0.00 | 0.00 |
| ATOM | 1112 | CD2  | LEU | X | 72 | 56.620 | 34.520 | 50.662 | 0.00 | 0.00 |
| ATOM | 1113 | HD21 | LEU | X | 72 | 55.903 | 34.523 | 51.483 | 0.00 | 0.00 |
| ATOM | 1114 | HD22 | LEU | X | 72 | 56.060 | 34.924 | 49.819 | 0.00 | 0.00 |
| ATOM | 1115 | HD23 | LEU | X | 72 | 56.922 | 33.510 | 50.386 | 0.00 | 0.00 |
| ATOM | 1116 | C    | LEU | X | 72 | 58.994 | 38.303 | 50.595 | 0.00 | 0.00 |
| ATOM | 1117 | O    | LEU | X | 72 | 60.069 | 37.839 | 50.237 | 0.00 | 0.00 |
| ATOM | 1118 | N    | TYR | X | 73 | 58.314 | 39.248 | 49.911 | 0.00 | 0.00 |
| ATOM | 1119 | H    | TYR | X | 73 | 57.484 | 39.618 | 50.352 | 0.00 | 0.00 |
| ATOM | 1120 | CA   | TYR | X | 73 | 58.779 | 39.915 | 48.706 | 0.00 | 0.00 |
| ATOM | 1121 | HA   | TYR | X | 73 | 59.841 | 39.717 | 48.562 | 0.00 | 0.00 |
| ATOM | 1122 | CB   | TYR | X | 73 | 58.051 | 39.259 | 47.466 | 0.00 | 0.00 |
| ATOM | 1123 | HB2  | TYR | X | 73 | 57.036 | 39.643 | 47.365 | 0.00 | 0.00 |
| ATOM | 1124 | HB3  | TYR | X | 73 | 58.560 | 39.688 | 46.604 | 0.00 | 0.00 |
| ATOM | 1125 | CG   | TYR | X | 73 | 58.121 | 37.733 | 47.378 | 0.00 | 0.00 |
| ATOM | 1126 | CD1  | TYR | X | 73 | 59.425 | 37.162 | 47.402 | 0.00 | 0.00 |
| ATOM | 1127 | HD1  | TYR | X | 73 | 60.305 | 37.725 | 47.130 | 0.00 | 0.00 |
| ATOM | 1128 | CE1  | TYR | X | 73 | 59.648 | 35.757 | 47.449 | 0.00 | 0.00 |
| ATOM | 1129 | HE1  | TYR | X | 73 | 60.683 | 35.450 | 47.463 | 0.00 | 0.00 |
| ATOM | 1130 | CZ   | TYR | X | 73 | 58.552 | 34.920 | 47.475 | 0.00 | 0.00 |
| ATOM | 1131 | OH   | TYR | X | 73 | 58.752 | 33.574 | 47.574 | 0.00 | 0.00 |
| ATOM | 1132 | HH   | TYR | X | 73 | 57.896 | 33.183 | 47.385 | 0.00 | 0.00 |
| ATOM | 1133 | CE2  | TYR | X | 73 | 57.240 | 35.479 | 47.239 | 0.00 | 0.00 |
| ATOM | 1134 | HE2  | TYR | X | 73 | 56.347 | 34.871 | 47.263 | 0.00 | 0.00 |
| ATOM | 1135 | CD2  | TYR | X | 73 | 57.030 | 36.869 | 47.129 | 0.00 | 0.00 |
| ATOM | 1136 | HD2  | TYR | X | 73 | 56.017 | 37.241 | 47.100 | 0.00 | 0.00 |
| ATOM | 1137 | C    | TYR | X | 73 | 58.701 | 41.458 | 48.779 | 0.00 | 0.00 |
| ATOM | 1138 | O    | TYR | X | 73 | 57.808 | 42.036 | 48.139 | 0.00 | 0.00 |
| ATOM | 1139 | N    | PRO | X | 74 | 59.629 | 42.142 | 49.586 | 0.00 | 0.00 |
| ATOM | 1140 | CD   | PRO | X | 74 | 60.685 | 41.521 | 50.352 | 0.00 | 0.00 |
| ATOM | 1141 | HD2  | PRO | X | 74 | 61.600 | 41.337 | 49.789 | 0.00 | 0.00 |
| ATOM | 1142 | HD3  | PRO | X | 74 | 60.378 | 40.581 | 50.809 | 0.00 | 0.00 |
| ATOM | 1143 | CG   | PRO | X | 74 | 60.992 | 42.584 | 51.461 | 0.00 | 0.00 |
| ATOM | 1144 | HG2  | PRO | X | 74 | 62.006 | 42.419 | 51.825 | 0.00 | 0.00 |
| ATOM | 1145 | HG3  | PRO | X | 74 | 60.259 | 42.546 | 52.267 | 0.00 | 0.00 |
| ATOM | 1146 | CB   | PRO | X | 74 | 60.853 | 43.882 | 50.642 | 0.00 | 0.00 |
| ATOM | 1147 | HB2  | PRO | X | 74 | 61.739 | 43.984 | 50.015 | 0.00 | 0.00 |
| ATOM | 1148 | HB3  | PRO | X | 74 | 60.659 | 44.790 | 51.213 | 0.00 | 0.00 |
| ATOM | 1149 | CA   | PRO | X | 74 | 59.721 | 43.628 | 49.741 | 0.00 | 0.00 |
| ATOM | 1150 | HA   | PRO | X | 74 | 58.753 | 43.961 | 50.118 | 0.00 | 0.00 |
| ATOM | 1151 | C    | PRO | X | 74 | 59.978 | 44.371 | 48.453 | 0.00 | 0.00 |
| ATOM | 1152 | O    | PRO | X | 74 | 60.747 | 43.954 | 47.610 | 0.00 | 0.00 |
| ATOM | 1153 | N    | GLY | X | 75 | 59.323 | 45.507 | 48.298 | 0.00 | 0.00 |
| ATOM | 1154 | H    | GLY | X | 75 | 58.650 | 45.751 | 49.010 | 0.00 | 0.00 |
| ATOM | 1155 | CA   | GLY | X | 75 | 59.512 | 46.413 | 47.191 | 0.00 | 0.00 |
| ATOM | 1156 | HA2  | GLY | X | 75 | 59.074 | 47.387 | 47.357 | 0.00 | 0.00 |
| ATOM | 1157 | HA3  | GLY | X | 75 | 60.594 | 46.643 | 47.066 | 0.00 | 0.00 |
| ATOM | 1158 | C    | GLY | X | 75 | 59.057 | 45.820 | 45.845 | 0.00 | 0.00 |
| ATOM | 1159 | O    | GLY | X | 75 | 59.297 | 46.466 | 44.825 | 0.00 | 0.00 |

|      |      |      |     |   |    |        |        |        |      |      |
|------|------|------|-----|---|----|--------|--------|--------|------|------|
| ATOM | 1160 | N    | PHE | X | 76 | 58.577 | 44.576 | 45.756 | 0.00 | 0.00 |
| ATOM | 1161 | H    | PHE | X | 76 | 58.254 | 44.082 | 46.575 | 0.00 | 0.00 |
| ATOM | 1162 | CA   | PHE | X | 76 | 58.726 | 43.700 | 44.596 | 0.00 | 0.00 |
| ATOM | 1163 | HA   | PHE | X | 76 | 59.669 | 44.025 | 44.158 | 0.00 | 0.00 |
| ATOM | 1164 | CB   | PHE | X | 76 | 58.867 | 42.226 | 45.014 | 0.00 | 0.00 |
| ATOM | 1165 | HB2  | PHE | X | 76 | 59.650 | 41.991 | 45.734 | 0.00 | 0.00 |
| ATOM | 1166 | HB3  | PHE | X | 76 | 57.908 | 41.923 | 45.436 | 0.00 | 0.00 |
| ATOM | 1167 | CG   | PHE | X | 76 | 59.039 | 41.355 | 43.771 | 0.00 | 0.00 |
| ATOM | 1168 | CD1  | PHE | X | 76 | 60.214 | 41.532 | 43.048 | 0.00 | 0.00 |
| ATOM | 1169 | HD1  | PHE | X | 76 | 60.829 | 42.405 | 43.210 | 0.00 | 0.00 |
| ATOM | 1170 | CE1  | PHE | X | 76 | 60.399 | 40.829 | 41.874 | 0.00 | 0.00 |
| ATOM | 1171 | HE1  | PHE | X | 76 | 61.076 | 41.176 | 41.107 | 0.00 | 0.00 |
| ATOM | 1172 | CZ   | PHE | X | 76 | 59.463 | 39.858 | 41.499 | 0.00 | 0.00 |
| ATOM | 1173 | HZ   | PHE | X | 76 | 59.619 | 39.454 | 40.509 | 0.00 | 0.00 |
| ATOM | 1174 | CE2  | PHE | X | 76 | 58.356 | 39.581 | 42.283 | 0.00 | 0.00 |
| ATOM | 1175 | HE2  | PHE | X | 76 | 57.684 | 38.800 | 41.957 | 0.00 | 0.00 |
| ATOM | 1176 | CD2  | PHE | X | 76 | 58.129 | 40.321 | 43.469 | 0.00 | 0.00 |
| ATOM | 1177 | HD2  | PHE | X | 76 | 57.411 | 40.057 | 44.231 | 0.00 | 0.00 |
| ATOM | 1178 | C    | PHE | X | 76 | 57.548 | 43.893 | 43.657 | 0.00 | 0.00 |
| ATOM | 1179 | O    | PHE | X | 76 | 56.557 | 44.517 | 43.969 | 0.00 | 0.00 |
| ATOM | 1180 | N    | GLU | X | 77 | 57.640 | 43.447 | 42.371 | 0.00 | 0.00 |
| ATOM | 1181 | H    | GLU | X | 77 | 58.538 | 43.028 | 42.174 | 0.00 | 0.00 |
| ATOM | 1182 | CA   | GLU | X | 77 | 56.705 | 43.418 | 41.283 | 0.00 | 0.00 |
| ATOM | 1183 | HA   | GLU | X | 77 | 56.333 | 44.425 | 41.097 | 0.00 | 0.00 |
| ATOM | 1184 | CB   | GLU | X | 77 | 57.538 | 43.031 | 40.051 | 0.00 | 0.00 |
| ATOM | 1185 | HB2  | GLU | X | 77 | 58.401 | 43.696 | 40.081 | 0.00 | 0.00 |
| ATOM | 1186 | HB3  | GLU | X | 77 | 57.826 | 41.992 | 40.212 | 0.00 | 0.00 |
| ATOM | 1187 | CG   | GLU | X | 77 | 56.834 | 43.149 | 38.712 | 0.00 | 0.00 |
| ATOM | 1188 | HG2  | GLU | X | 77 | 55.939 | 42.528 | 38.687 | 0.00 | 0.00 |
| ATOM | 1189 | HG3  | GLU | X | 77 | 56.537 | 44.192 | 38.607 | 0.00 | 0.00 |
| ATOM | 1190 | CD   | GLU | X | 77 | 57.710 | 42.736 | 37.618 | 0.00 | 0.00 |
| ATOM | 1191 | OE1  | GLU | X | 77 | 58.254 | 43.609 | 36.894 | 0.00 | 0.00 |
| ATOM | 1192 | OE2  | GLU | X | 77 | 57.874 | 41.533 | 37.323 | 0.00 | 0.00 |
| ATOM | 1193 | C    | GLU | X | 77 | 55.482 | 42.482 | 41.606 | 0.00 | 0.00 |
| ATOM | 1194 | O    | GLU | X | 77 | 54.461 | 42.731 | 41.014 | 0.00 | 0.00 |
| ATOM | 1195 | N    | GLY | X | 78 | 55.569 | 41.582 | 42.558 | 0.00 | 0.00 |
| ATOM | 1196 | H    | GLY | X | 78 | 56.470 | 41.334 | 42.940 | 0.00 | 0.00 |
| ATOM | 1197 | CA   | GLY | X | 78 | 54.443 | 40.807 | 43.021 | 0.00 | 0.00 |
| ATOM | 1198 | HA2  | GLY | X | 78 | 53.714 | 40.577 | 42.212 | 0.00 | 0.00 |
| ATOM | 1199 | HA3  | GLY | X | 78 | 54.854 | 39.826 | 43.301 | 0.00 | 0.00 |
| ATOM | 1200 | C    | GLY | X | 78 | 53.712 | 41.479 | 44.188 | 0.00 | 0.00 |
| ATOM | 1201 | O    | GLY | X | 78 | 52.701 | 40.950 | 44.660 | 0.00 | 0.00 |
| ATOM | 1202 | N    | THR | X | 79 | 54.184 | 42.577 | 44.782 | 0.00 | 0.00 |
| ATOM | 1203 | H    | THR | X | 79 | 54.956 | 43.059 | 44.344 | 0.00 | 0.00 |
| ATOM | 1204 | CA   | THR | X | 79 | 53.471 | 43.134 | 45.935 | 0.00 | 0.00 |
| ATOM | 1205 | HA   | THR | X | 79 | 52.575 | 42.565 | 46.186 | 0.00 | 0.00 |
| ATOM | 1206 | CB   | THR | X | 79 | 54.296 | 42.978 | 47.225 | 0.00 | 0.00 |
| ATOM | 1207 | HB   | THR | X | 79 | 53.732 | 43.405 | 48.054 | 0.00 | 0.00 |
| ATOM | 1208 | CG2  | THR | X | 79 | 54.529 | 41.508 | 47.611 | 0.00 | 0.00 |
| ATOM | 1209 | HG21 | THR | X | 79 | 53.581 | 40.986 | 47.483 | 0.00 | 0.00 |
| ATOM | 1210 | HG22 | THR | X | 79 | 55.323 | 41.126 | 46.969 | 0.00 | 0.00 |
| ATOM | 1211 | HG23 | THR | X | 79 | 54.867 | 41.417 | 48.643 | 0.00 | 0.00 |
| ATOM | 1212 | OG1  | THR | X | 79 | 55.586 | 43.632 | 47.219 | 0.00 | 0.00 |
| ATOM | 1213 | HG1  | THR | X | 79 | 56.136 | 43.131 | 47.826 | 0.00 | 0.00 |
| ATOM | 1214 | C    | THR | X | 79 | 53.104 | 44.605 | 45.763 | 0.00 | 0.00 |
| ATOM | 1215 | O    | THR | X | 79 | 52.030 | 44.988 | 46.184 | 0.00 | 0.00 |
| ATOM | 1216 | N    | GLU | X | 80 | 53.862 | 45.398 | 45.043 | 0.00 | 0.00 |
| ATOM | 1217 | H    | GLU | X | 80 | 54.786 | 45.029 | 44.871 | 0.00 | 0.00 |
| ATOM | 1218 | CA   | GLU | X | 80 | 53.774 | 46.897 | 45.054 | 0.00 | 0.00 |
| ATOM | 1219 | HA   | GLU | X | 80 | 53.832 | 47.117 | 46.120 | 0.00 | 0.00 |
| ATOM | 1220 | CB   | GLU | X | 80 | 55.029 | 47.441 | 44.321 | 0.00 | 0.00 |
| ATOM | 1221 | HB2  | GLU | X | 80 | 54.856 | 48.511 | 44.441 | 0.00 | 0.00 |
| ATOM | 1222 | HB3  | GLU | X | 80 | 55.986 | 47.299 | 44.822 | 0.00 | 0.00 |
| ATOM | 1223 | CG   | GLU | X | 80 | 55.219 | 47.084 | 42.840 | 0.00 | 0.00 |
| ATOM | 1224 | HG2  | GLU | X | 80 | 55.431 | 46.017 | 42.760 | 0.00 | 0.00 |
| ATOM | 1225 | HG3  | GLU | X | 80 | 54.373 | 47.426 | 42.244 | 0.00 | 0.00 |
| ATOM | 1226 | CD   | GLU | X | 80 | 56.518 | 47.853 | 42.366 | 0.00 | 0.00 |
| ATOM | 1227 | OE1  | GLU | X | 80 | 57.285 | 47.295 | 41.609 | 0.00 | 0.00 |
| ATOM | 1228 | OE2  | GLU | X | 80 | 56.610 | 49.092 | 42.574 | 0.00 | 0.00 |
| ATOM | 1229 | C    | GLU | X | 80 | 52.420 | 47.514 | 44.524 | 0.00 | 0.00 |

|      |      |      |     |   |    |        |        |        |      |      |
|------|------|------|-----|---|----|--------|--------|--------|------|------|
| ATOM | 1230 | O    | GLU | X | 80 | 51.992 | 48.543 | 44.999 | 0.00 | 0.00 |
| ATOM | 1231 | N    | MET | X | 81 | 51.863 | 46.894 | 43.459 | 0.00 | 0.00 |
| ATOM | 1232 | H    | MET | X | 81 | 52.276 | 46.007 | 43.210 | 0.00 | 0.00 |
| ATOM | 1233 | CA   | MET | X | 81 | 50.529 | 47.131 | 43.000 | 0.00 | 0.00 |
| ATOM | 1234 | HA   | MET | X | 81 | 50.480 | 48.219 | 42.978 | 0.00 | 0.00 |
| ATOM | 1235 | CB   | MET | X | 81 | 50.320 | 46.462 | 41.611 | 0.00 | 0.00 |
| ATOM | 1236 | HB2  | MET | X | 81 | 49.380 | 46.652 | 41.094 | 0.00 | 0.00 |
| ATOM | 1237 | HB3  | MET | X | 81 | 51.117 | 46.748 | 40.925 | 0.00 | 0.00 |
| ATOM | 1238 | CG   | MET | X | 81 | 50.343 | 44.901 | 41.815 | 0.00 | 0.00 |
| ATOM | 1239 | HG2  | MET | X | 81 | 49.496 | 44.631 | 42.446 | 0.00 | 0.00 |
| ATOM | 1240 | HG3  | MET | X | 81 | 50.018 | 44.400 | 40.903 | 0.00 | 0.00 |
| ATOM | 1241 | SD   | MET | X | 81 | 51.804 | 44.035 | 42.280 | 0.00 | 0.00 |
| ATOM | 1242 | CE   | MET | X | 81 | 51.374 | 42.470 | 41.620 | 0.00 | 0.00 |
| ATOM | 1243 | HE1  | MET | X | 81 | 51.675 | 42.455 | 40.573 | 0.00 | 0.00 |
| ATOM | 1244 | HE2  | MET | X | 81 | 51.982 | 41.671 | 42.043 | 0.00 | 0.00 |
| ATOM | 1245 | HE3  | MET | X | 81 | 50.305 | 42.260 | 41.656 | 0.00 | 0.00 |
| ATOM | 1246 | C    | MET | X | 81 | 49.335 | 46.814 | 43.874 | 0.00 | 0.00 |
| ATOM | 1247 | O    | MET | X | 81 | 48.266 | 47.246 | 43.476 | 0.00 | 0.00 |
| ATOM | 1248 | N    | TRP | X | 82 | 49.516 | 46.185 | 44.989 | 0.00 | 0.00 |
| ATOM | 1249 | H    | TRP | X | 82 | 50.357 | 45.635 | 45.089 | 0.00 | 0.00 |
| ATOM | 1250 | CA   | TRP | X | 82 | 48.394 | 45.998 | 45.979 | 0.00 | 0.00 |
| ATOM | 1251 | HA   | TRP | X | 82 | 47.687 | 46.828 | 45.963 | 0.00 | 0.00 |
| ATOM | 1252 | CB   | TRP | X | 82 | 47.412 | 44.930 | 45.569 | 0.00 | 0.00 |
| ATOM | 1253 | HB2  | TRP | X | 82 | 46.762 | 44.625 | 46.389 | 0.00 | 0.00 |
| ATOM | 1254 | HB3  | TRP | X | 82 | 46.761 | 45.364 | 44.809 | 0.00 | 0.00 |
| ATOM | 1255 | CG   | TRP | X | 82 | 47.990 | 43.640 | 45.158 | 0.00 | 0.00 |
| ATOM | 1256 | CD1  | TRP | X | 82 | 49.268 | 43.200 | 45.312 | 0.00 | 0.00 |
| ATOM | 1257 | HD1  | TRP | X | 82 | 50.040 | 43.778 | 45.798 | 0.00 | 0.00 |
| ATOM | 1258 | NE1  | TRP | X | 82 | 49.482 | 42.064 | 44.676 | 0.00 | 0.00 |
| ATOM | 1259 | HE1  | TRP | X | 82 | 50.357 | 41.561 | 44.618 | 0.00 | 0.00 |
| ATOM | 1260 | CE2  | TRP | X | 82 | 48.326 | 41.546 | 44.106 | 0.00 | 0.00 |
| ATOM | 1261 | CZ2  | TRP | X | 82 | 47.964 | 40.352 | 43.441 | 0.00 | 0.00 |
| ATOM | 1262 | HZ2  | TRP | X | 82 | 48.660 | 39.539 | 43.295 | 0.00 | 0.00 |
| ATOM | 1263 | CH2  | TRP | X | 82 | 46.644 | 40.194 | 43.008 | 0.00 | 0.00 |
| ATOM | 1264 | HH2  | TRP | X | 82 | 46.285 | 39.294 | 42.530 | 0.00 | 0.00 |
| ATOM | 1265 | CZ3  | TRP | X | 82 | 45.671 | 41.236 | 43.152 | 0.00 | 0.00 |
| ATOM | 1266 | HZ3  | TRP | X | 82 | 44.665 | 41.053 | 42.804 | 0.00 | 0.00 |
| ATOM | 1267 | CE3  | TRP | X | 82 | 46.014 | 42.397 | 43.802 | 0.00 | 0.00 |
| ATOM | 1268 | HE3  | TRP | X | 82 | 45.210 | 43.076 | 44.043 | 0.00 | 0.00 |
| ATOM | 1269 | CD2  | TRP | X | 82 | 47.353 | 42.617 | 44.332 | 0.00 | 0.00 |
| ATOM | 1270 | C    | TRP | X | 82 | 48.926 | 45.947 | 47.400 | 0.00 | 0.00 |
| ATOM | 1271 | O    | TRP | X | 82 | 48.444 | 45.188 | 48.247 | 0.00 | 0.00 |
| ATOM | 1272 | N    | ASN | X | 83 | 50.018 | 46.544 | 47.692 | 0.00 | 0.00 |
| ATOM | 1273 | H    | ASN | X | 83 | 50.505 | 47.052 | 46.967 | 0.00 | 0.00 |
| ATOM | 1274 | CA   | ASN | X | 83 | 50.586 | 46.647 | 49.082 | 0.00 | 0.00 |
| ATOM | 1275 | HA   | ASN | X | 83 | 49.784 | 46.583 | 49.818 | 0.00 | 0.00 |
| ATOM | 1276 | CB   | ASN | X | 83 | 51.505 | 45.428 | 49.293 | 0.00 | 0.00 |
| ATOM | 1277 | HB2  | ASN | X | 83 | 50.956 | 44.502 | 49.124 | 0.00 | 0.00 |
| ATOM | 1278 | HB3  | ASN | X | 83 | 52.388 | 45.659 | 48.698 | 0.00 | 0.00 |
| ATOM | 1279 | CG   | ASN | X | 83 | 51.922 | 45.347 | 50.742 | 0.00 | 0.00 |
| ATOM | 1280 | OD1  | ASN | X | 83 | 53.097 | 45.477 | 51.138 | 0.00 | 0.00 |
| ATOM | 1281 | ND2  | ASN | X | 83 | 50.972 | 45.041 | 51.636 | 0.00 | 0.00 |
| ATOM | 1282 | HD21 | ASN | X | 83 | 51.119 | 45.137 | 52.630 | 0.00 | 0.00 |
| ATOM | 1283 | HD22 | ASN | X | 83 | 50.068 | 44.898 | 51.210 | 0.00 | 0.00 |
| ATOM | 1284 | C    | ASN | X | 83 | 51.229 | 48.038 | 49.170 | 0.00 | 0.00 |
| ATOM | 1285 | O    | ASN | X | 83 | 51.782 | 48.461 | 48.193 | 0.00 | 0.00 |
| ATOM | 1286 | N    | PRO | X | 84 | 51.127 | 48.900 | 50.266 | 0.00 | 0.00 |
| ATOM | 1287 | CD   | PRO | X | 84 | 51.129 | 48.527 | 51.678 | 0.00 | 0.00 |
| ATOM | 1288 | HD2  | PRO | X | 84 | 51.971 | 47.858 | 51.857 | 0.00 | 0.00 |
| ATOM | 1289 | HD3  | PRO | X | 84 | 50.297 | 47.855 | 51.890 | 0.00 | 0.00 |
| ATOM | 1290 | CG   | PRO | X | 84 | 51.077 | 49.858 | 52.470 | 0.00 | 0.00 |
| ATOM | 1291 | HG2  | PRO | X | 84 | 52.091 | 50.124 | 52.766 | 0.00 | 0.00 |
| ATOM | 1292 | HG3  | PRO | X | 84 | 50.479 | 49.736 | 53.374 | 0.00 | 0.00 |
| ATOM | 1293 | CB   | PRO | X | 84 | 50.511 | 50.892 | 51.498 | 0.00 | 0.00 |
| ATOM | 1294 | HB2  | PRO | X | 84 | 50.766 | 51.919 | 51.760 | 0.00 | 0.00 |
| ATOM | 1295 | HB3  | PRO | X | 84 | 49.426 | 50.799 | 51.546 | 0.00 | 0.00 |
| ATOM | 1296 | CA   | PRO | X | 84 | 51.091 | 50.356 | 50.194 | 0.00 | 0.00 |
| ATOM | 1297 | HA   | PRO | X | 84 | 50.355 | 50.614 | 49.433 | 0.00 | 0.00 |
| ATOM | 1298 | C    | PRO | X | 84 | 52.343 | 51.085 | 49.677 | 0.00 | 0.00 |
| ATOM | 1299 | O    | PRO | X | 84 | 53.449 | 50.480 | 49.679 | 0.00 | 0.00 |

|      |      |      |     |   |    |        |        |        |      |      |
|------|------|------|-----|---|----|--------|--------|--------|------|------|
| ATOM | 1300 | N    | ASN | X | 85 | 52.136 | 52.349 | 49.256 | 0.00 | 0.00 |
| ATOM | 1301 | H    | ASN | X | 85 | 51.179 | 52.659 | 49.169 | 0.00 | 0.00 |
| ATOM | 1302 | CA   | ASN | X | 85 | 53.295 | 53.205 | 48.813 | 0.00 | 0.00 |
| ATOM | 1303 | HA   | ASN | X | 85 | 54.212 | 52.756 | 49.192 | 0.00 | 0.00 |
| ATOM | 1304 | CB   | ASN | X | 85 | 53.319 | 53.286 | 47.260 | 0.00 | 0.00 |
| ATOM | 1305 | HB2  | ASN | X | 85 | 54.266 | 53.628 | 46.842 | 0.00 | 0.00 |
| ATOM | 1306 | HB3  | ASN | X | 85 | 53.113 | 52.254 | 46.977 | 0.00 | 0.00 |
| ATOM | 1307 | CG   | ASN | X | 85 | 52.238 | 54.190 | 46.586 | 0.00 | 0.00 |
| ATOM | 1308 | OD1  | ASN | X | 85 | 51.236 | 54.608 | 47.188 | 0.00 | 0.00 |
| ATOM | 1309 | ND2  | ASN | X | 85 | 52.293 | 54.456 | 45.264 | 0.00 | 0.00 |
| ATOM | 1310 | HD21 | ASN | X | 85 | 51.539 | 54.906 | 44.765 | 0.00 | 0.00 |
| ATOM | 1311 | HD22 | ASN | X | 85 | 53.097 | 54.256 | 44.687 | 0.00 | 0.00 |
| ATOM | 1312 | C    | ASN | X | 85 | 53.341 | 54.579 | 49.559 | 0.00 | 0.00 |
| ATOM | 1313 | O    | ASN | X | 85 | 54.300 | 54.898 | 50.266 | 0.00 | 0.00 |
| ATOM | 1314 | N    | ARG | X | 86 | 52.248 | 55.388 | 49.470 | 0.00 | 0.00 |
| ATOM | 1315 | H    | ARG | X | 86 | 51.535 | 55.056 | 48.836 | 0.00 | 0.00 |
| ATOM | 1316 | CA   | ARG | X | 86 | 51.899 | 56.569 | 50.254 | 0.00 | 0.00 |
| ATOM | 1317 | HA   | ARG | X | 86 | 52.619 | 57.379 | 50.142 | 0.00 | 0.00 |
| ATOM | 1318 | CB   | ARG | X | 86 | 50.667 | 57.215 | 49.624 | 0.00 | 0.00 |
| ATOM | 1319 | HB2  | ARG | X | 86 | 49.869 | 56.475 | 49.564 | 0.00 | 0.00 |
| ATOM | 1320 | HB3  | ARG | X | 86 | 50.249 | 57.916 | 50.346 | 0.00 | 0.00 |
| ATOM | 1321 | CG   | ARG | X | 86 | 50.792 | 57.931 | 48.238 | 0.00 | 0.00 |
| ATOM | 1322 | HG2  | ARG | X | 86 | 51.307 | 57.241 | 47.571 | 0.00 | 0.00 |
| ATOM | 1323 | HG3  | ARG | X | 86 | 49.776 | 58.041 | 47.860 | 0.00 | 0.00 |
| ATOM | 1324 | CD   | ARG | X | 86 | 51.651 | 59.215 | 48.260 | 0.00 | 0.00 |
| ATOM | 1325 | HD2  | ARG | X | 86 | 52.567 | 58.919 | 48.771 | 0.00 | 0.00 |
| ATOM | 1326 | HD3  | ARG | X | 86 | 51.906 | 59.497 | 47.238 | 0.00 | 0.00 |
| ATOM | 1327 | NE   | ARG | X | 86 | 50.985 | 60.321 | 48.940 | 0.00 | 0.00 |
| ATOM | 1328 | HE   | ARG | X | 86 | 50.118 | 60.136 | 49.425 | 0.00 | 0.00 |
| ATOM | 1329 | CZ   | ARG | X | 86 | 51.468 | 61.534 | 49.197 | 0.00 | 0.00 |
| ATOM | 1330 | NH1  | ARG | X | 86 | 52.645 | 61.909 | 48.744 | 0.00 | 0.00 |
| ATOM | 1331 | HH11 | ARG | X | 86 | 53.121 | 61.393 | 48.018 | 0.00 | 0.00 |
| ATOM | 1332 | HH12 | ARG | X | 86 | 53.013 | 62.784 | 49.092 | 0.00 | 0.00 |
| ATOM | 1333 | NH2  | ARG | X | 86 | 50.796 | 62.301 | 50.001 | 0.00 | 0.00 |
| ATOM | 1334 | HH21 | ARG | X | 86 | 49.996 | 61.922 | 50.486 | 0.00 | 0.00 |
| ATOM | 1335 | HH22 | ARG | X | 86 | 51.236 | 63.199 | 50.144 | 0.00 | 0.00 |
| ATOM | 1336 | C    | ARG | X | 86 | 51.705 | 56.242 | 51.706 | 0.00 | 0.00 |
| ATOM | 1337 | O    | ARG | X | 86 | 51.680 | 55.076 | 52.098 | 0.00 | 0.00 |
| ATOM | 1338 | N    | GLU | X | 87 | 51.663 | 57.302 | 52.543 | 0.00 | 0.00 |
| ATOM | 1339 | H    | GLU | X | 87 | 51.823 | 58.230 | 52.179 | 0.00 | 0.00 |
| ATOM | 1340 | CA   | GLU | X | 87 | 51.798 | 57.214 | 53.949 | 0.00 | 0.00 |
| ATOM | 1341 | HA   | GLU | X | 87 | 52.539 | 56.434 | 54.128 | 0.00 | 0.00 |
| ATOM | 1342 | CB   | GLU | X | 87 | 52.401 | 58.495 | 54.572 | 0.00 | 0.00 |
| ATOM | 1343 | HB2  | GLU | X | 87 | 53.077 | 58.259 | 55.393 | 0.00 | 0.00 |
| ATOM | 1344 | HB3  | GLU | X | 87 | 53.010 | 59.006 | 53.826 | 0.00 | 0.00 |
| ATOM | 1345 | CG   | GLU | X | 87 | 51.358 | 59.621 | 54.887 | 0.00 | 0.00 |
| ATOM | 1346 | HG2  | GLU | X | 87 | 50.812 | 59.854 | 53.972 | 0.00 | 0.00 |
| ATOM | 1347 | HG3  | GLU | X | 87 | 50.699 | 59.385 | 55.723 | 0.00 | 0.00 |
| ATOM | 1348 | CD   | GLU | X | 87 | 52.021 | 60.890 | 55.237 | 0.00 | 0.00 |
| ATOM | 1349 | OE1  | GLU | X | 87 | 52.393 | 61.608 | 54.282 | 0.00 | 0.00 |
| ATOM | 1350 | OE2  | GLU | X | 87 | 52.140 | 61.165 | 56.487 | 0.00 | 0.00 |
| ATOM | 1351 | C    | GLU | X | 87 | 50.454 | 56.736 | 54.666 | 0.00 | 0.00 |
| ATOM | 1352 | O    | GLU | X | 87 | 49.320 | 57.122 | 54.360 | 0.00 | 0.00 |
| ATOM | 1353 | N    | LEU | X | 88 | 50.589 | 55.821 | 55.600 | 0.00 | 0.00 |
| ATOM | 1354 | H    | LEU | X | 88 | 51.537 | 55.523 | 55.781 | 0.00 | 0.00 |
| ATOM | 1355 | CA   | LEU | X | 88 | 49.463 | 55.241 | 56.350 | 0.00 | 0.00 |
| ATOM | 1356 | HA   | LEU | X | 88 | 48.737 | 54.991 | 55.576 | 0.00 | 0.00 |
| ATOM | 1357 | CB   | LEU | X | 88 | 49.952 | 53.889 | 56.936 | 0.00 | 0.00 |
| ATOM | 1358 | HB2  | LEU | X | 88 | 50.503 | 54.171 | 57.833 | 0.00 | 0.00 |
| ATOM | 1359 | HB3  | LEU | X | 88 | 49.109 | 53.371 | 57.392 | 0.00 | 0.00 |
| ATOM | 1360 | CG   | LEU | X | 88 | 50.639 | 52.856 | 56.035 | 0.00 | 0.00 |
| ATOM | 1361 | HG   | LEU | X | 88 | 51.616 | 53.291 | 55.827 | 0.00 | 0.00 |
| ATOM | 1362 | CD1  | LEU | X | 88 | 50.921 | 51.512 | 56.854 | 0.00 | 0.00 |
| ATOM | 1363 | HD11 | LEU | X | 88 | 50.036 | 50.982 | 57.205 | 0.00 | 0.00 |
| ATOM | 1364 | HD12 | LEU | X | 88 | 51.372 | 50.790 | 56.174 | 0.00 | 0.00 |
| ATOM | 1365 | HD13 | LEU | X | 88 | 51.591 | 51.683 | 57.697 | 0.00 | 0.00 |
| ATOM | 1366 | CD2  | LEU | X | 88 | 49.875 | 52.604 | 54.716 | 0.00 | 0.00 |
| ATOM | 1367 | HD21 | LEU | X | 88 | 49.991 | 53.407 | 53.989 | 0.00 | 0.00 |
| ATOM | 1368 | HD22 | LEU | X | 88 | 50.333 | 51.773 | 54.178 | 0.00 | 0.00 |
| ATOM | 1369 | HD23 | LEU | X | 88 | 48.820 | 52.445 | 54.937 | 0.00 | 0.00 |



|      |      |      |     |   |    |        |        |        |      |      |
|------|------|------|-----|---|----|--------|--------|--------|------|------|
| ATOM | 1370 | C    | LEU | X | 88 | 48.869 | 56.147 | 57.434 | 0.00 | 0.00 |
| ATOM | 1371 | O    | LEU | X | 88 | 49.654 | 56.997 | 57.933 | 0.00 | 0.00 |
| ATOM | 1372 | N    | SER | X | 89 | 47.629 | 55.971 | 57.850 | 0.00 | 0.00 |
| ATOM | 1373 | H    | SER | X | 89 | 47.103 | 55.316 | 57.289 | 0.00 | 0.00 |
| ATOM | 1374 | CA   | SER | X | 89 | 46.822 | 56.784 | 58.770 | 0.00 | 0.00 |
| ATOM | 1375 | HA   | SER | X | 89 | 47.249 | 56.937 | 59.761 | 0.00 | 0.00 |
| ATOM | 1376 | CB   | SER | X | 89 | 46.570 | 58.191 | 58.078 | 0.00 | 0.00 |
| ATOM | 1377 | HB2  | SER | X | 89 | 46.127 | 58.058 | 57.091 | 0.00 | 0.00 |
| ATOM | 1378 | HB3  | SER | X | 89 | 45.838 | 58.754 | 58.658 | 0.00 | 0.00 |
| ATOM | 1379 | OG   | SER | X | 89 | 47.844 | 58.903 | 57.968 | 0.00 | 0.00 |
| ATOM | 1380 | HG   | SER | X | 89 | 48.444 | 58.216 | 57.671 | 0.00 | 0.00 |
| ATOM | 1381 | C    | SER | X | 89 | 45.504 | 56.067 | 59.028 | 0.00 | 0.00 |
| ATOM | 1382 | O    | SER | X | 89 | 45.213 | 55.030 | 58.536 | 0.00 | 0.00 |
| ATOM | 1383 | N    | GLU | X | 90 | 44.647 | 56.630 | 59.830 | 0.00 | 0.00 |
| ATOM | 1384 | H    | GLU | X | 90 | 45.008 | 57.112 | 60.641 | 0.00 | 0.00 |
| ATOM | 1385 | CA   | GLU | X | 90 | 43.214 | 56.440 | 59.877 | 0.00 | 0.00 |
| ATOM | 1386 | HA   | GLU | X | 90 | 42.949 | 55.547 | 59.310 | 0.00 | 0.00 |
| ATOM | 1387 | CB   | GLU | X | 90 | 42.722 | 56.293 | 61.325 | 0.00 | 0.00 |
| ATOM | 1388 | HB2  | GLU | X | 90 | 43.180 | 57.083 | 61.920 | 0.00 | 0.00 |
| ATOM | 1389 | HB3  | GLU | X | 90 | 41.635 | 56.322 | 61.248 | 0.00 | 0.00 |
| ATOM | 1390 | CG   | GLU | X | 90 | 43.173 | 54.938 | 61.899 | 0.00 | 0.00 |
| ATOM | 1391 | HG2  | GLU | X | 90 | 42.844 | 54.141 | 61.232 | 0.00 | 0.00 |
| ATOM | 1392 | HG3  | GLU | X | 90 | 44.262 | 54.900 | 61.870 | 0.00 | 0.00 |
| ATOM | 1393 | CD   | GLU | X | 90 | 42.666 | 54.771 | 63.324 | 0.00 | 0.00 |
| ATOM | 1394 | OE1  | GLU | X | 90 | 41.498 | 54.411 | 63.600 | 0.00 | 0.00 |
| ATOM | 1395 | OE2  | GLU | X | 90 | 43.376 | 55.141 | 64.243 | 0.00 | 0.00 |
| ATOM | 1396 | C    | GLU | X | 90 | 42.504 | 57.560 | 59.109 | 0.00 | 0.00 |
| ATOM | 1397 | O    | GLU | X | 90 | 41.249 | 57.609 | 59.079 | 0.00 | 0.00 |
| ATOM | 1398 | N    | ASP | X | 91 | 43.287 | 58.533 | 58.551 | 0.00 | 0.00 |
| ATOM | 1399 | H    | ASP | X | 91 | 44.296 | 58.509 | 58.497 | 0.00 | 0.00 |
| ATOM | 1400 | CA   | ASP | X | 91 | 42.664 | 59.431 | 57.600 | 0.00 | 0.00 |
| ATOM | 1401 | HA   | ASP | X | 91 | 41.604 | 59.648 | 57.731 | 0.00 | 0.00 |
| ATOM | 1402 | CB   | ASP | X | 91 | 43.333 | 60.827 | 57.704 | 0.00 | 0.00 |
| ATOM | 1403 | HB2  | ASP | X | 91 | 43.270 | 61.281 | 58.694 | 0.00 | 0.00 |
| ATOM | 1404 | HB3  | ASP | X | 91 | 44.396 | 60.814 | 57.467 | 0.00 | 0.00 |
| ATOM | 1405 | CG   | ASP | X | 91 | 42.705 | 61.856 | 56.780 | 0.00 | 0.00 |
| ATOM | 1406 | OD1  | ASP | X | 91 | 41.538 | 61.560 | 56.460 | 0.00 | 0.00 |
| ATOM | 1407 | OD2  | ASP | X | 91 | 43.339 | 62.871 | 56.426 | 0.00 | 0.00 |
| ATOM | 1408 | C    | ASP | X | 91 | 42.867 | 58.852 | 56.221 | 0.00 | 0.00 |
| ATOM | 1409 | O    | ASP | X | 91 | 44.034 | 58.756 | 55.761 | 0.00 | 0.00 |
| ATOM | 1410 | N    | CYX | X | 92 | 41.744 | 58.365 | 55.629 | 0.00 | 0.00 |
| ATOM | 1411 | H    | CYX | X | 92 | 40.886 | 58.396 | 56.161 | 0.00 | 0.00 |
| ATOM | 1412 | CA   | CYX | X | 92 | 41.833 | 57.331 | 54.634 | 0.00 | 0.00 |
| ATOM | 1413 | HA   | CYX | X | 92 | 42.437 | 57.735 | 53.822 | 0.00 | 0.00 |
| ATOM | 1414 | CB   | CYX | X | 92 | 42.547 | 56.113 | 55.220 | 0.00 | 0.00 |
| ATOM | 1415 | HB2  | CYX | X | 92 | 42.788 | 55.463 | 54.379 | 0.00 | 0.00 |
| ATOM | 1416 | HB3  | CYX | X | 92 | 43.421 | 56.395 | 55.808 | 0.00 | 0.00 |
| ATOM | 1417 | SG   | CYX | X | 92 | 41.723 | 54.990 | 56.395 | 0.00 | 0.00 |
| ATOM | 1418 | C    | CYX | X | 92 | 40.532 | 57.028 | 53.877 | 0.00 | 0.00 |
| ATOM | 1419 | O    | CYX | X | 92 | 40.561 | 56.154 | 53.050 | 0.00 | 0.00 |
| ATOM | 1420 | N    | LEU | X | 93 | 39.407 | 57.684 | 54.151 | 0.00 | 0.00 |
| ATOM | 1421 | H    | LEU | X | 93 | 39.479 | 58.360 | 54.898 | 0.00 | 0.00 |
| ATOM | 1422 | CA   | LEU | X | 93 | 38.217 | 57.755 | 53.270 | 0.00 | 0.00 |
| ATOM | 1423 | HA   | LEU | X | 93 | 38.056 | 56.806 | 52.759 | 0.00 | 0.00 |
| ATOM | 1424 | CB   | LEU | X | 93 | 36.983 | 57.926 | 54.165 | 0.00 | 0.00 |
| ATOM | 1425 | HB2  | LEU | X | 93 | 37.067 | 58.905 | 54.636 | 0.00 | 0.00 |
| ATOM | 1426 | HB3  | LEU | X | 93 | 36.031 | 57.959 | 53.636 | 0.00 | 0.00 |
| ATOM | 1427 | CG   | LEU | X | 93 | 36.762 | 56.769 | 55.195 | 0.00 | 0.00 |
| ATOM | 1428 | HG   | LEU | X | 93 | 37.585 | 56.855 | 55.905 | 0.00 | 0.00 |
| ATOM | 1429 | CD1  | LEU | X | 93 | 35.448 | 56.854 | 55.993 | 0.00 | 0.00 |
| ATOM | 1430 | HD11 | LEU | X | 93 | 34.555 | 56.552 | 55.446 | 0.00 | 0.00 |
| ATOM | 1431 | HD12 | LEU | X | 93 | 35.573 | 56.065 | 56.735 | 0.00 | 0.00 |
| ATOM | 1432 | HD13 | LEU | X | 93 | 35.144 | 57.774 | 56.492 | 0.00 | 0.00 |
| ATOM | 1433 | CD2  | LEU | X | 93 | 36.942 | 55.398 | 54.528 | 0.00 | 0.00 |
| ATOM | 1434 | HD21 | LEU | X | 93 | 37.994 | 55.301 | 54.258 | 0.00 | 0.00 |
| ATOM | 1435 | HD22 | LEU | X | 93 | 36.691 | 54.592 | 55.218 | 0.00 | 0.00 |
| ATOM | 1436 | HD23 | LEU | X | 93 | 36.328 | 55.179 | 53.655 | 0.00 | 0.00 |
| ATOM | 1437 | C    | LEU | X | 93 | 38.419 | 58.886 | 52.264 | 0.00 | 0.00 |
| ATOM | 1438 | O    | LEU | X | 93 | 37.858 | 59.958 | 52.417 | 0.00 | 0.00 |
| ATOM | 1439 | N    | TYR | X | 94 | 39.203 | 58.630 | 51.175 | 0.00 | 0.00 |

|      |      |      |     |   |    |        |        |        |      |      |
|------|------|------|-----|---|----|--------|--------|--------|------|------|
| ATOM | 1440 | H    | TYR | X | 94 | 39.743 | 57.777 | 51.207 | 0.00 | 0.00 |
| ATOM | 1441 | CA   | TYR | X | 94 | 39.175 | 59.538 | 50.005 | 0.00 | 0.00 |
| ATOM | 1442 | HA   | TYR | X | 94 | 38.545 | 60.424 | 50.095 | 0.00 | 0.00 |
| ATOM | 1443 | CB   | TYR | X | 94 | 40.650 | 59.985 | 49.746 | 0.00 | 0.00 |
| ATOM | 1444 | HB2  | TYR | X | 94 | 41.149 | 59.016 | 49.788 | 0.00 | 0.00 |
| ATOM | 1445 | HB3  | TYR | X | 94 | 40.765 | 60.497 | 48.791 | 0.00 | 0.00 |
| ATOM | 1446 | CG   | TYR | X | 94 | 41.208 | 60.893 | 50.834 | 0.00 | 0.00 |
| ATOM | 1447 | CD1  | TYR | X | 94 | 40.895 | 62.241 | 50.724 | 0.00 | 0.00 |
| ATOM | 1448 | HD1  | TYR | X | 94 | 40.331 | 62.482 | 49.835 | 0.00 | 0.00 |
| ATOM | 1449 | CE1  | TYR | X | 94 | 41.229 | 63.186 | 51.700 | 0.00 | 0.00 |
| ATOM | 1450 | HE1  | TYR | X | 94 | 40.941 | 64.211 | 51.520 | 0.00 | 0.00 |
| ATOM | 1451 | CZ   | TYR | X | 94 | 42.042 | 62.797 | 52.739 | 0.00 | 0.00 |
| ATOM | 1452 | OH   | TYR | X | 94 | 42.375 | 63.672 | 53.706 | 0.00 | 0.00 |
| ATOM | 1453 | HH   | TYR | X | 94 | 42.763 | 63.372 | 54.531 | 0.00 | 0.00 |
| ATOM | 1454 | CE2  | TYR | X | 94 | 42.360 | 61.426 | 52.905 | 0.00 | 0.00 |
| ATOM | 1455 | HE2  | TYR | X | 94 | 42.915 | 61.072 | 53.761 | 0.00 | 0.00 |
| ATOM | 1456 | CD2  | TYR | X | 94 | 41.976 | 60.481 | 51.926 | 0.00 | 0.00 |
| ATOM | 1457 | HD2  | TYR | X | 94 | 42.078 | 59.430 | 52.154 | 0.00 | 0.00 |
| ATOM | 1458 | C    | TYR | X | 94 | 38.754 | 58.873 | 48.634 | 0.00 | 0.00 |
| ATOM | 1459 | O    | TYR | X | 94 | 38.542 | 57.661 | 48.635 | 0.00 | 0.00 |
| ATOM | 1460 | N    | LEU | X | 95 | 38.679 | 59.517 | 47.476 | 0.00 | 0.00 |
| ATOM | 1461 | H    | LEU | X | 95 | 38.998 | 60.473 | 47.410 | 0.00 | 0.00 |
| ATOM | 1462 | CA   | LEU | X | 95 | 38.392 | 58.883 | 46.112 | 0.00 | 0.00 |
| ATOM | 1463 | HA   | LEU | X | 95 | 38.851 | 57.897 | 46.180 | 0.00 | 0.00 |
| ATOM | 1464 | CB   | LEU | X | 95 | 36.876 | 58.640 | 45.847 | 0.00 | 0.00 |
| ATOM | 1465 | HB2  | LEU | X | 95 | 36.842 | 58.296 | 44.813 | 0.00 | 0.00 |
| ATOM | 1466 | HB3  | LEU | X | 95 | 36.511 | 57.807 | 46.449 | 0.00 | 0.00 |
| ATOM | 1467 | CG   | LEU | X | 95 | 35.981 | 59.798 | 46.083 | 0.00 | 0.00 |
| ATOM | 1468 | HG   | LEU | X | 95 | 36.279 | 60.366 | 46.965 | 0.00 | 0.00 |
| ATOM | 1469 | CD1  | LEU | X | 95 | 36.052 | 60.762 | 44.902 | 0.00 | 0.00 |
| ATOM | 1470 | HD11 | LEU | X | 95 | 35.565 | 60.235 | 44.082 | 0.00 | 0.00 |
| ATOM | 1471 | HD12 | LEU | X | 95 | 35.464 | 61.612 | 45.250 | 0.00 | 0.00 |
| ATOM | 1472 | HD13 | LEU | X | 95 | 37.052 | 60.957 | 44.515 | 0.00 | 0.00 |
| ATOM | 1473 | CD2  | LEU | X | 95 | 34.470 | 59.454 | 46.227 | 0.00 | 0.00 |
| ATOM | 1474 | HD21 | LEU | X | 95 | 34.127 | 58.855 | 47.071 | 0.00 | 0.00 |
| ATOM | 1475 | HD22 | LEU | X | 95 | 33.969 | 60.417 | 46.319 | 0.00 | 0.00 |
| ATOM | 1476 | HD23 | LEU | X | 95 | 34.127 | 59.034 | 45.282 | 0.00 | 0.00 |
| ATOM | 1477 | C    | LEU | X | 95 | 39.108 | 59.763 | 45.045 | 0.00 | 0.00 |
| ATOM | 1478 | O    | LEU | X | 95 | 39.609 | 60.792 | 45.374 | 0.00 | 0.00 |
| ATOM | 1479 | N    | ASN | X | 96 | 39.068 | 59.385 | 43.790 | 0.00 | 0.00 |
| ATOM | 1480 | H    | ASN | X | 96 | 38.408 | 58.641 | 43.612 | 0.00 | 0.00 |
| ATOM | 1481 | CA   | ASN | X | 96 | 39.850 | 59.835 | 42.648 | 0.00 | 0.00 |
| ATOM | 1482 | HA   | ASN | X | 96 | 40.281 | 60.797 | 42.926 | 0.00 | 0.00 |
| ATOM | 1483 | CB   | ASN | X | 96 | 41.070 | 58.883 | 42.390 | 0.00 | 0.00 |
| ATOM | 1484 | HB2  | ASN | X | 96 | 40.754 | 57.928 | 41.972 | 0.00 | 0.00 |
| ATOM | 1485 | HB3  | ASN | X | 96 | 41.803 | 59.332 | 41.720 | 0.00 | 0.00 |
| ATOM | 1486 | CG   | ASN | X | 96 | 41.781 | 58.600 | 43.709 | 0.00 | 0.00 |
| ATOM | 1487 | OD1  | ASN | X | 96 | 42.536 | 59.449 | 44.246 | 0.00 | 0.00 |
| ATOM | 1488 | ND2  | ASN | X | 96 | 41.619 | 57.437 | 44.334 | 0.00 | 0.00 |
| ATOM | 1489 | HD21 | ASN | X | 96 | 42.125 | 57.225 | 45.182 | 0.00 | 0.00 |
| ATOM | 1490 | HD22 | ASN | X | 96 | 41.128 | 56.654 | 43.927 | 0.00 | 0.00 |
| ATOM | 1491 | C    | ASN | X | 96 | 39.051 | 59.832 | 41.359 | 0.00 | 0.00 |
| ATOM | 1492 | O    | ASN | X | 96 | 38.220 | 58.969 | 41.242 | 0.00 | 0.00 |
| ATOM | 1493 | N    | VAL | X | 97 | 39.226 | 60.795 | 40.480 | 0.00 | 0.00 |
| ATOM | 1494 | H    | VAL | X | 97 | 39.785 | 61.602 | 40.720 | 0.00 | 0.00 |
| ATOM | 1495 | CA   | VAL | X | 97 | 38.576 | 60.785 | 39.192 | 0.00 | 0.00 |
| ATOM | 1496 | HA   | VAL | X | 97 | 38.128 | 59.816 | 38.973 | 0.00 | 0.00 |
| ATOM | 1497 | CB   | VAL | X | 97 | 37.358 | 61.728 | 39.185 | 0.00 | 0.00 |
| ATOM | 1498 | HB   | VAL | X | 97 | 37.580 | 62.760 | 39.458 | 0.00 | 0.00 |
| ATOM | 1499 | CG1  | VAL | X | 97 | 36.671 | 61.597 | 37.844 | 0.00 | 0.00 |
| ATOM | 1500 | HG11 | VAL | X | 97 | 37.357 | 62.024 | 37.113 | 0.00 | 0.00 |
| ATOM | 1501 | HG12 | VAL | X | 97 | 36.318 | 60.579 | 37.678 | 0.00 | 0.00 |
| ATOM | 1502 | HG13 | VAL | X | 97 | 35.814 | 62.260 | 37.719 | 0.00 | 0.00 |
| ATOM | 1503 | CG2  | VAL | X | 97 | 36.357 | 61.400 | 40.326 | 0.00 | 0.00 |
| ATOM | 1504 | HG21 | VAL | X | 97 | 36.066 | 60.350 | 40.299 | 0.00 | 0.00 |
| ATOM | 1505 | HG22 | VAL | X | 97 | 36.933 | 61.606 | 41.228 | 0.00 | 0.00 |
| ATOM | 1506 | HG23 | VAL | X | 97 | 35.493 | 62.063 | 40.270 | 0.00 | 0.00 |
| ATOM | 1507 | C    | VAL | X | 97 | 39.633 | 61.035 | 38.036 | 0.00 | 0.00 |
| ATOM | 1508 | O    | VAL | X | 97 | 40.633 | 61.751 | 38.249 | 0.00 | 0.00 |
| ATOM | 1509 | N    | TRP | X | 98 | 39.536 | 60.368 | 36.915 | 0.00 | 0.00 |

|      |      |      |     |   |     |        |        |        |      |      |
|------|------|------|-----|---|-----|--------|--------|--------|------|------|
| ATOM | 1510 | H    | TRP | X | 98  | 38.852 | 59.627 | 36.867 | 0.00 | 0.00 |
| ATOM | 1511 | CA   | TRP | X | 98  | 40.343 | 60.629 | 35.714 | 0.00 | 0.00 |
| ATOM | 1512 | HA   | TRP | X | 98  | 40.903 | 61.559 | 35.808 | 0.00 | 0.00 |
| ATOM | 1513 | CB   | TRP | X | 98  | 41.209 | 59.422 | 35.378 | 0.00 | 0.00 |
| ATOM | 1514 | HB2  | TRP | X | 98  | 40.534 | 58.567 | 35.392 | 0.00 | 0.00 |
| ATOM | 1515 | HB3  | TRP | X | 98  | 41.673 | 59.507 | 34.395 | 0.00 | 0.00 |
| ATOM | 1516 | CG   | TRP | X | 98  | 42.327 | 59.231 | 36.429 | 0.00 | 0.00 |
| ATOM | 1517 | CD1  | TRP | X | 98  | 43.640 | 59.494 | 36.191 | 0.00 | 0.00 |
| ATOM | 1518 | HD1  | TRP | X | 98  | 43.961 | 60.040 | 35.316 | 0.00 | 0.00 |
| ATOM | 1519 | NE1  | TRP | X | 98  | 44.507 | 59.081 | 37.146 | 0.00 | 0.00 |
| ATOM | 1520 | HE1  | TRP | X | 98  | 45.506 | 59.231 | 37.118 | 0.00 | 0.00 |
| ATOM | 1521 | CE2  | TRP | X | 98  | 43.770 | 58.398 | 38.077 | 0.00 | 0.00 |
| ATOM | 1522 | CZ2  | TRP | X | 98  | 44.100 | 57.686 | 39.231 | 0.00 | 0.00 |
| ATOM | 1523 | HZ2  | TRP | X | 98  | 45.100 | 57.822 | 39.615 | 0.00 | 0.00 |
| ATOM | 1524 | CH2  | TRP | X | 98  | 43.048 | 57.132 | 40.034 | 0.00 | 0.00 |
| ATOM | 1525 | HH2  | TRP | X | 98  | 43.360 | 56.679 | 40.964 | 0.00 | 0.00 |
| ATOM | 1526 | CZ3  | TRP | X | 98  | 41.727 | 57.146 | 39.524 | 0.00 | 0.00 |
| ATOM | 1527 | HZ3  | TRP | X | 98  | 40.936 | 56.750 | 40.142 | 0.00 | 0.00 |
| ATOM | 1528 | CE3  | TRP | X | 98  | 41.386 | 57.778 | 38.354 | 0.00 | 0.00 |
| ATOM | 1529 | HE3  | TRP | X | 98  | 40.333 | 57.873 | 38.133 | 0.00 | 0.00 |
| ATOM | 1530 | CD2  | TRP | X | 98  | 42.406 | 58.439 | 37.674 | 0.00 | 0.00 |
| ATOM | 1531 | C    | TRP | X | 98  | 39.374 | 60.925 | 34.501 | 0.00 | 0.00 |
| ATOM | 1532 | O    | TRP | X | 98  | 38.401 | 60.192 | 34.299 | 0.00 | 0.00 |
| ATOM | 1533 | N    | THR | X | 99  | 39.591 | 61.889 | 33.644 | 0.00 | 0.00 |
| ATOM | 1534 | H    | THR | X | 99  | 40.505 | 62.306 | 33.745 | 0.00 | 0.00 |
| ATOM | 1535 | CA   | THR | X | 99  | 38.699 | 62.274 | 32.545 | 0.00 | 0.00 |
| ATOM | 1536 | HA   | THR | X | 99  | 38.206 | 61.402 | 32.117 | 0.00 | 0.00 |
| ATOM | 1537 | CB   | THR | X | 99  | 37.611 | 63.096 | 33.081 | 0.00 | 0.00 |
| ATOM | 1538 | HB   | THR | X | 99  | 37.094 | 62.553 | 33.873 | 0.00 | 0.00 |
| ATOM | 1539 | CG2  | THR | X | 99  | 38.058 | 64.514 | 33.478 | 0.00 | 0.00 |
| ATOM | 1540 | HG21 | THR | X | 99  | 37.223 | 64.969 | 34.009 | 0.00 | 0.00 |
| ATOM | 1541 | HG22 | THR | X | 99  | 38.967 | 64.657 | 34.062 | 0.00 | 0.00 |
| ATOM | 1542 | HG23 | THR | X | 99  | 38.128 | 65.143 | 32.590 | 0.00 | 0.00 |
| ATOM | 1543 | OG1  | THR | X | 99  | 36.647 | 63.318 | 32.126 | 0.00 | 0.00 |
| ATOM | 1544 | HG1  | THR | X | 99  | 35.813 | 63.680 | 32.434 | 0.00 | 0.00 |
| ATOM | 1545 | C    | THR | X | 99  | 39.495 | 62.974 | 31.427 | 0.00 | 0.00 |
| ATOM | 1546 | O    | THR | X | 99  | 40.594 | 63.379 | 31.827 | 0.00 | 0.00 |
| ATOM | 1547 | N    | PRO | X | 100 | 38.973 | 63.194 | 30.187 | 0.00 | 0.00 |
| ATOM | 1548 | CD   | PRO | X | 100 | 37.829 | 62.513 | 29.627 | 0.00 | 0.00 |
| ATOM | 1549 | HD2  | PRO | X | 100 | 37.036 | 63.246 | 29.775 | 0.00 | 0.00 |
| ATOM | 1550 | HD3  | PRO | X | 100 | 37.753 | 61.562 | 30.153 | 0.00 | 0.00 |
| ATOM | 1551 | CG   | PRO | X | 100 | 38.242 | 62.341 | 28.132 | 0.00 | 0.00 |
| ATOM | 1552 | HG2  | PRO | X | 100 | 37.384 | 62.160 | 27.485 | 0.00 | 0.00 |
| ATOM | 1553 | HG3  | PRO | X | 100 | 39.018 | 61.585 | 28.010 | 0.00 | 0.00 |
| ATOM | 1554 | CB   | PRO | X | 100 | 38.722 | 63.778 | 27.897 | 0.00 | 0.00 |
| ATOM | 1555 | HB2  | PRO | X | 100 | 37.940 | 64.536 | 27.863 | 0.00 | 0.00 |
| ATOM | 1556 | HB3  | PRO | X | 100 | 39.337 | 63.859 | 27.001 | 0.00 | 0.00 |
| ATOM | 1557 | CA   | PRO | X | 100 | 39.597 | 63.934 | 29.154 | 0.00 | 0.00 |
| ATOM | 1558 | HA   | PRO | X | 100 | 40.502 | 63.364 | 28.940 | 0.00 | 0.00 |
| ATOM | 1559 | C    | PRO | X | 100 | 39.953 | 65.391 | 29.594 | 0.00 | 0.00 |
| ATOM | 1560 | O    | PRO | X | 100 | 39.321 | 65.978 | 30.412 | 0.00 | 0.00 |
| ATOM | 1561 | N    | TYR | X | 101 | 40.973 | 65.942 | 28.880 | 0.00 | 0.00 |
| ATOM | 1562 | H    | TYR | X | 101 | 41.399 | 65.298 | 28.230 | 0.00 | 0.00 |
| ATOM | 1563 | CA   | TYR | X | 101 | 41.301 | 67.347 | 28.895 | 0.00 | 0.00 |
| ATOM | 1564 | HA   | TYR | X | 101 | 40.672 | 67.824 | 29.647 | 0.00 | 0.00 |
| ATOM | 1565 | CB   | TYR | X | 101 | 42.752 | 67.667 | 29.202 | 0.00 | 0.00 |
| ATOM | 1566 | HB2  | TYR | X | 101 | 42.961 | 67.177 | 30.152 | 0.00 | 0.00 |
| ATOM | 1567 | HB3  | TYR | X | 101 | 43.448 | 67.245 | 28.477 | 0.00 | 0.00 |
| ATOM | 1568 | CG   | TYR | X | 101 | 42.928 | 69.121 | 29.394 | 0.00 | 0.00 |
| ATOM | 1569 | CD1  | TYR | X | 101 | 43.191 | 69.891 | 28.234 | 0.00 | 0.00 |
| ATOM | 1570 | HD1  | TYR | X | 101 | 43.385 | 69.414 | 27.285 | 0.00 | 0.00 |
| ATOM | 1571 | CE1  | TYR | X | 101 | 43.301 | 71.251 | 28.256 | 0.00 | 0.00 |
| ATOM | 1572 | HE1  | TYR | X | 101 | 43.487 | 71.860 | 27.383 | 0.00 | 0.00 |
| ATOM | 1573 | CZ   | TYR | X | 101 | 43.085 | 71.922 | 29.506 | 0.00 | 0.00 |
| ATOM | 1574 | OH   | TYR | X | 101 | 43.100 | 73.263 | 29.531 | 0.00 | 0.00 |
| ATOM | 1575 | HH   | TYR | X | 101 | 43.298 | 73.695 | 28.697 | 0.00 | 0.00 |
| ATOM | 1576 | CE2  | TYR | X | 101 | 42.901 | 71.179 | 30.727 | 0.00 | 0.00 |
| ATOM | 1577 | HE2  | TYR | X | 101 | 42.783 | 71.684 | 31.674 | 0.00 | 0.00 |
| ATOM | 1578 | CD2  | TYR | X | 101 | 42.811 | 69.743 | 30.664 | 0.00 | 0.00 |
| ATOM | 1579 | HD2  | TYR | X | 101 | 42.728 | 69.154 | 31.566 | 0.00 | 0.00 |

|      |      |      |     |   |     |        |        |        |      |      |
|------|------|------|-----|---|-----|--------|--------|--------|------|------|
| ATOM | 1580 | C    | TYR | X | 101 | 40.825 | 68.019 | 27.576 | 0.00 | 0.00 |
| ATOM | 1581 | O    | TYR | X | 101 | 41.242 | 67.469 | 26.537 | 0.00 | 0.00 |
| ATOM | 1582 | N    | PRO | X | 102 | 39.981 | 69.073 | 27.455 | 0.00 | 0.00 |
| ATOM | 1583 | CD   | PRO | X | 102 | 39.770 | 69.750 | 26.213 | 0.00 | 0.00 |
| ATOM | 1584 | HD2  | PRO | X | 102 | 39.515 | 69.041 | 25.425 | 0.00 | 0.00 |
| ATOM | 1585 | HD3  | PRO | X | 102 | 40.662 | 70.326 | 25.965 | 0.00 | 0.00 |
| ATOM | 1586 | CG   | PRO | X | 102 | 38.575 | 70.778 | 26.437 | 0.00 | 0.00 |
| ATOM | 1587 | HG2  | PRO | X | 102 | 37.604 | 70.288 | 26.374 | 0.00 | 0.00 |
| ATOM | 1588 | HG3  | PRO | X | 102 | 38.663 | 71.701 | 25.862 | 0.00 | 0.00 |
| ATOM | 1589 | CB   | PRO | X | 102 | 38.777 | 71.026 | 27.968 | 0.00 | 0.00 |
| ATOM | 1590 | HB2  | PRO | X | 102 | 37.861 | 71.206 | 28.532 | 0.00 | 0.00 |
| ATOM | 1591 | HB3  | PRO | X | 102 | 39.315 | 71.962 | 28.119 | 0.00 | 0.00 |
| ATOM | 1592 | CA   | PRO | X | 102 | 39.459 | 69.789 | 28.590 | 0.00 | 0.00 |
| ATOM | 1593 | HA   | PRO | X | 102 | 40.281 | 70.128 | 29.219 | 0.00 | 0.00 |
| ATOM | 1594 | C    | PRO | X | 102 | 38.522 | 69.000 | 29.394 | 0.00 | 0.00 |
| ATOM | 1595 | O    | PRO | X | 102 | 37.695 | 68.247 | 28.886 | 0.00 | 0.00 |
| ATOM | 1596 | N    | ARG | X | 103 | 38.523 | 69.245 | 30.721 | 0.00 | 0.00 |
| ATOM | 1597 | H    | ARG | X | 103 | 39.241 | 69.866 | 31.065 | 0.00 | 0.00 |
| ATOM | 1598 | CA   | ARG | X | 103 | 37.656 | 68.665 | 31.771 | 0.00 | 0.00 |
| ATOM | 1599 | HA   | ARG | X | 103 | 37.919 | 67.608 | 31.818 | 0.00 | 0.00 |
| ATOM | 1600 | CB   | ARG | X | 103 | 37.927 | 69.353 | 33.156 | 0.00 | 0.00 |
| ATOM | 1601 | HB2  | ARG | X | 103 | 38.960 | 69.702 | 33.157 | 0.00 | 0.00 |
| ATOM | 1602 | HB3  | ARG | X | 103 | 37.475 | 70.342 | 33.086 | 0.00 | 0.00 |
| ATOM | 1603 | CG   | ARG | X | 103 | 37.492 | 68.504 | 34.391 | 0.00 | 0.00 |
| ATOM | 1604 | HG2  | ARG | X | 103 | 36.640 | 67.902 | 34.074 | 0.00 | 0.00 |
| ATOM | 1605 | HG3  | ARG | X | 103 | 38.375 | 67.874 | 34.491 | 0.00 | 0.00 |
| ATOM | 1606 | CD   | ARG | X | 103 | 37.090 | 69.245 | 35.658 | 0.00 | 0.00 |
| ATOM | 1607 | HD2  | ARG | X | 103 | 37.244 | 68.622 | 36.539 | 0.00 | 0.00 |
| ATOM | 1608 | HD3  | ARG | X | 103 | 37.718 | 70.134 | 35.719 | 0.00 | 0.00 |
| ATOM | 1609 | NE   | ARG | X | 103 | 35.732 | 69.650 | 35.500 | 0.00 | 0.00 |
| ATOM | 1610 | HE   | ARG | X | 103 | 35.043 | 68.955 | 35.750 | 0.00 | 0.00 |
| ATOM | 1611 | CZ   | ARG | X | 103 | 35.191 | 70.760 | 34.991 | 0.00 | 0.00 |
| ATOM | 1612 | NH1  | ARG | X | 103 | 35.898 | 71.775 | 34.426 | 0.00 | 0.00 |
| ATOM | 1613 | HH11 | ARG | X | 103 | 36.896 | 71.788 | 34.581 | 0.00 | 0.00 |
| ATOM | 1614 | HH12 | ARG | X | 103 | 35.427 | 72.494 | 33.896 | 0.00 | 0.00 |
| ATOM | 1615 | NH2  | ARG | X | 103 | 33.927 | 70.790 | 34.776 | 0.00 | 0.00 |
| ATOM | 1616 | HH21 | ARG | X | 103 | 33.374 | 69.995 | 35.062 | 0.00 | 0.00 |
| ATOM | 1617 | HH22 | ARG | X | 103 | 33.473 | 71.478 | 34.192 | 0.00 | 0.00 |
| ATOM | 1618 | C    | ARG | X | 103 | 36.175 | 68.821 | 31.322 | 0.00 | 0.00 |
| ATOM | 1619 | O    | ARG | X | 103 | 35.616 | 69.898 | 31.417 | 0.00 | 0.00 |
| ATOM | 1620 | N    | PRO | X | 104 | 35.452 | 67.731 | 30.896 | 0.00 | 0.00 |
| ATOM | 1621 | CD   | PRO | X | 104 | 35.970 | 66.427 | 30.669 | 0.00 | 0.00 |
| ATOM | 1622 | HD2  | PRO | X | 104 | 36.188 | 65.897 | 31.596 | 0.00 | 0.00 |
| ATOM | 1623 | HD3  | PRO | X | 104 | 36.821 | 66.454 | 29.989 | 0.00 | 0.00 |
| ATOM | 1624 | CG   | PRO | X | 104 | 34.987 | 65.590 | 29.853 | 0.00 | 0.00 |
| ATOM | 1625 | HG2  | PRO | X | 104 | 34.548 | 64.913 | 30.586 | 0.00 | 0.00 |
| ATOM | 1626 | HG3  | PRO | X | 104 | 35.419 | 65.134 | 28.963 | 0.00 | 0.00 |
| ATOM | 1627 | CB   | PRO | X | 104 | 33.902 | 66.603 | 29.363 | 0.00 | 0.00 |
| ATOM | 1628 | HB2  | PRO | X | 104 | 32.884 | 66.214 | 29.397 | 0.00 | 0.00 |
| ATOM | 1629 | HB3  | PRO | X | 104 | 34.148 | 66.858 | 28.332 | 0.00 | 0.00 |
| ATOM | 1630 | CA   | PRO | X | 104 | 34.113 | 67.738 | 30.418 | 0.00 | 0.00 |
| ATOM | 1631 | HA   | PRO | X | 104 | 33.993 | 68.670 | 29.866 | 0.00 | 0.00 |
| ATOM | 1632 | C    | PRO | X | 104 | 33.141 | 67.685 | 31.575 | 0.00 | 0.00 |
| ATOM | 1633 | O    | PRO | X | 104 | 33.425 | 67.116 | 32.613 | 0.00 | 0.00 |
| ATOM | 1634 | N    | THR | X | 105 | 31.965 | 68.356 | 31.360 | 0.00 | 0.00 |
| ATOM | 1635 | H    | THR | X | 105 | 31.946 | 68.909 | 30.515 | 0.00 | 0.00 |
| ATOM | 1636 | CA   | THR | X | 105 | 30.733 | 68.148 | 32.108 | 0.00 | 0.00 |
| ATOM | 1637 | HA   | THR | X | 105 | 31.077 | 67.626 | 33.000 | 0.00 | 0.00 |
| ATOM | 1638 | CB   | THR | X | 105 | 30.045 | 69.445 | 32.659 | 0.00 | 0.00 |
| ATOM | 1639 | HB   | THR | X | 105 | 29.110 | 69.147 | 33.133 | 0.00 | 0.00 |
| ATOM | 1640 | CG2  | THR | X | 105 | 30.997 | 70.076 | 33.655 | 0.00 | 0.00 |
| ATOM | 1641 | HG21 | THR | X | 105 | 31.926 | 70.419 | 33.199 | 0.00 | 0.00 |
| ATOM | 1642 | HG22 | THR | X | 105 | 30.441 | 70.906 | 34.091 | 0.00 | 0.00 |
| ATOM | 1643 | HG23 | THR | X | 105 | 31.130 | 69.304 | 34.413 | 0.00 | 0.00 |
| ATOM | 1644 | OG1  | THR | X | 105 | 29.924 | 70.253 | 31.548 | 0.00 | 0.00 |
| ATOM | 1645 | HG1  | THR | X | 105 | 29.365 | 69.815 | 30.902 | 0.00 | 0.00 |
| ATOM | 1646 | C    | THR | X | 105 | 29.650 | 67.279 | 31.389 | 0.00 | 0.00 |
| ATOM | 1647 | O    | THR | X | 105 | 28.774 | 66.778 | 32.088 | 0.00 | 0.00 |
| ATOM | 1648 | N    | SER | X | 106 | 29.718 | 67.113 | 30.041 | 0.00 | 0.00 |
| ATOM | 1649 | H    | SER | X | 106 | 30.440 | 67.600 | 29.531 | 0.00 | 0.00 |

|      |      |      |     |   |     |        |        |        |      |      |
|------|------|------|-----|---|-----|--------|--------|--------|------|------|
| ATOM | 1650 | CA   | SER | X | 106 | 28.770 | 66.336 | 29.139 | 0.00 | 0.00 |
| ATOM | 1651 | HA   | SER | X | 106 | 27.779 | 66.698 | 29.415 | 0.00 | 0.00 |
| ATOM | 1652 | CB   | SER | X | 106 | 29.013 | 66.640 | 27.681 | 0.00 | 0.00 |
| ATOM | 1653 | HB2  | SER | X | 106 | 30.006 | 66.280 | 27.412 | 0.00 | 0.00 |
| ATOM | 1654 | HB3  | SER | X | 106 | 28.371 | 66.011 | 27.064 | 0.00 | 0.00 |
| ATOM | 1655 | OG   | SER | X | 106 | 28.877 | 68.035 | 27.297 | 0.00 | 0.00 |
| ATOM | 1656 | HG   | SER | X | 106 | 27.945 | 68.241 | 27.401 | 0.00 | 0.00 |
| ATOM | 1657 | C    | SER | X | 106 | 28.867 | 64.789 | 29.456 | 0.00 | 0.00 |
| ATOM | 1658 | O    | SER | X | 106 | 30.012 | 64.310 | 29.522 | 0.00 | 0.00 |
| ATOM | 1659 | N    | PRO | X | 107 | 27.710 | 64.146 | 29.677 | 0.00 | 0.00 |
| ATOM | 1660 | CD   | PRO | X | 107 | 26.403 | 64.617 | 29.423 | 0.00 | 0.00 |
| ATOM | 1661 | HD2  | PRO | X | 107 | 26.244 | 64.978 | 28.407 | 0.00 | 0.00 |
| ATOM | 1662 | HD3  | PRO | X | 107 | 26.288 | 65.404 | 30.169 | 0.00 | 0.00 |
| ATOM | 1663 | CG   | PRO | X | 107 | 25.473 | 63.432 | 29.746 | 0.00 | 0.00 |
| ATOM | 1664 | HG2  | PRO | X | 107 | 24.995 | 62.875 | 28.940 | 0.00 | 0.00 |
| ATOM | 1665 | HG3  | PRO | X | 107 | 24.636 | 63.723 | 30.381 | 0.00 | 0.00 |
| ATOM | 1666 | CB   | PRO | X | 107 | 26.278 | 62.364 | 30.496 | 0.00 | 0.00 |
| ATOM | 1667 | HB2  | PRO | X | 107 | 25.935 | 61.385 | 30.162 | 0.00 | 0.00 |
| ATOM | 1668 | HB3  | PRO | X | 107 | 26.090 | 62.350 | 31.569 | 0.00 | 0.00 |
| ATOM | 1669 | CA   | PRO | X | 107 | 27.712 | 62.736 | 30.168 | 0.00 | 0.00 |
| ATOM | 1670 | HA   | PRO | X | 107 | 28.191 | 62.790 | 31.146 | 0.00 | 0.00 |
| ATOM | 1671 | C    | PRO | X | 107 | 28.399 | 61.729 | 29.269 | 0.00 | 0.00 |
| ATOM | 1672 | O    | PRO | X | 107 | 28.205 | 61.713 | 28.023 | 0.00 | 0.00 |
| ATOM | 1673 | N    | THR | X | 108 | 29.161 | 60.865 | 29.964 | 0.00 | 0.00 |
| ATOM | 1674 | H    | THR | X | 108 | 29.152 | 61.050 | 30.957 | 0.00 | 0.00 |
| ATOM | 1675 | CA   | THR | X | 108 | 30.045 | 59.821 | 29.378 | 0.00 | 0.00 |
| ATOM | 1676 | HA   | THR | X | 108 | 29.697 | 59.466 | 28.408 | 0.00 | 0.00 |
| ATOM | 1677 | CB   | THR | X | 108 | 31.457 | 60.350 | 29.232 | 0.00 | 0.00 |
| ATOM | 1678 | HB   | THR | X | 108 | 31.954 | 60.483 | 30.192 | 0.00 | 0.00 |
| ATOM | 1679 | CG2  | THR | X | 108 | 32.353 | 59.472 | 28.401 | 0.00 | 0.00 |
| ATOM | 1680 | HG21 | THR | X | 108 | 33.202 | 60.085 | 28.098 | 0.00 | 0.00 |
| ATOM | 1681 | HG22 | THR | X | 108 | 32.804 | 58.680 | 29.000 | 0.00 | 0.00 |
| ATOM | 1682 | HG23 | THR | X | 108 | 31.764 | 59.022 | 27.602 | 0.00 | 0.00 |
| ATOM | 1683 | OG1  | THR | X | 108 | 31.353 | 61.593 | 28.526 | 0.00 | 0.00 |
| ATOM | 1684 | HG1  | THR | X | 108 | 30.847 | 62.052 | 29.200 | 0.00 | 0.00 |
| ATOM | 1685 | C    | THR | X | 108 | 30.087 | 58.735 | 30.445 | 0.00 | 0.00 |
| ATOM | 1686 | O    | THR | X | 108 | 30.324 | 59.065 | 31.580 | 0.00 | 0.00 |
| ATOM | 1687 | N    | PRO | X | 109 | 29.821 | 57.442 | 30.132 | 0.00 | 0.00 |
| ATOM | 1688 | CD   | PRO | X | 109 | 29.406 | 57.043 | 28.820 | 0.00 | 0.00 |
| ATOM | 1689 | HD2  | PRO | X | 109 | 30.313 | 56.930 | 28.226 | 0.00 | 0.00 |
| ATOM | 1690 | HD3  | PRO | X | 109 | 28.792 | 57.813 | 28.354 | 0.00 | 0.00 |
| ATOM | 1691 | CG   | PRO | X | 109 | 28.710 | 55.637 | 29.004 | 0.00 | 0.00 |
| ATOM | 1692 | HG2  | PRO | X | 109 | 28.853 | 55.094 | 28.069 | 0.00 | 0.00 |
| ATOM | 1693 | HG3  | PRO | X | 109 | 27.690 | 55.684 | 29.386 | 0.00 | 0.00 |
| ATOM | 1694 | CB   | PRO | X | 109 | 29.553 | 55.100 | 30.174 | 0.00 | 0.00 |
| ATOM | 1695 | HB2  | PRO | X | 109 | 30.440 | 54.639 | 29.740 | 0.00 | 0.00 |
| ATOM | 1696 | HB3  | PRO | X | 109 | 28.940 | 54.397 | 30.738 | 0.00 | 0.00 |
| ATOM | 1697 | CA   | PRO | X | 109 | 29.758 | 56.338 | 31.039 | 0.00 | 0.00 |
| ATOM | 1698 | HA   | PRO | X | 109 | 28.907 | 56.605 | 31.666 | 0.00 | 0.00 |
| ATOM | 1699 | C    | PRO | X | 109 | 30.916 | 56.050 | 32.007 | 0.00 | 0.00 |
| ATOM | 1700 | O    | PRO | X | 109 | 32.116 | 56.371 | 31.728 | 0.00 | 0.00 |
| ATOM | 1701 | N    | VAL | X | 110 | 30.552 | 55.662 | 33.182 | 0.00 | 0.00 |
| ATOM | 1702 | H    | VAL | X | 110 | 29.646 | 55.235 | 33.310 | 0.00 | 0.00 |
| ATOM | 1703 | CA   | VAL | X | 110 | 31.434 | 55.692 | 34.419 | 0.00 | 0.00 |
| ATOM | 1704 | HA   | VAL | X | 110 | 32.327 | 56.204 | 34.062 | 0.00 | 0.00 |
| ATOM | 1705 | CB   | VAL | X | 110 | 30.749 | 56.450 | 35.575 | 0.00 | 0.00 |
| ATOM | 1706 | HB   | VAL | X | 110 | 29.864 | 55.856 | 35.804 | 0.00 | 0.00 |
| ATOM | 1707 | CG1  | VAL | X | 110 | 31.565 | 56.522 | 36.849 | 0.00 | 0.00 |
| ATOM | 1708 | HG11 | VAL | X | 110 | 32.507 | 57.055 | 36.724 | 0.00 | 0.00 |
| ATOM | 1709 | HG12 | VAL | X | 110 | 30.988 | 57.081 | 37.586 | 0.00 | 0.00 |
| ATOM | 1710 | HG13 | VAL | X | 110 | 31.934 | 55.546 | 37.166 | 0.00 | 0.00 |
| ATOM | 1711 | CG2  | VAL | X | 110 | 30.337 | 57.903 | 35.250 | 0.00 | 0.00 |
| ATOM | 1712 | HG21 | VAL | X | 110 | 31.189 | 58.556 | 35.063 | 0.00 | 0.00 |
| ATOM | 1713 | HG22 | VAL | X | 110 | 29.799 | 57.896 | 34.302 | 0.00 | 0.00 |
| ATOM | 1714 | HG23 | VAL | X | 110 | 29.668 | 58.342 | 35.990 | 0.00 | 0.00 |
| ATOM | 1715 | C    | VAL | X | 110 | 31.900 | 54.325 | 34.897 | 0.00 | 0.00 |
| ATOM | 1716 | O    | VAL | X | 110 | 31.242 | 53.343 | 34.694 | 0.00 | 0.00 |
| ATOM | 1717 | N    | LEU | X | 111 | 33.159 | 54.239 | 35.410 | 0.00 | 0.00 |
| ATOM | 1718 | H    | LEU | X | 111 | 33.641 | 55.123 | 35.332 | 0.00 | 0.00 |
| ATOM | 1719 | CA   | LEU | X | 111 | 33.851 | 52.998 | 35.650 | 0.00 | 0.00 |

|      |      |      |     |   |     |        |        |        |      |      |
|------|------|------|-----|---|-----|--------|--------|--------|------|------|
| ATOM | 1720 | HA   | LEU | X | 111 | 33.050 | 52.280 | 35.831 | 0.00 | 0.00 |
| ATOM | 1721 | CB   | LEU | X | 111 | 34.756 | 52.697 | 34.453 | 0.00 | 0.00 |
| ATOM | 1722 | HB2  | LEU | X | 111 | 34.957 | 53.581 | 33.848 | 0.00 | 0.00 |
| ATOM | 1723 | HB3  | LEU | X | 111 | 35.743 | 52.438 | 34.835 | 0.00 | 0.00 |
| ATOM | 1724 | CG   | LEU | X | 111 | 34.219 | 51.718 | 33.476 | 0.00 | 0.00 |
| ATOM | 1725 | HG   | LEU | X | 111 | 33.237 | 52.046 | 33.135 | 0.00 | 0.00 |
| ATOM | 1726 | CD1  | LEU | X | 111 | 35.106 | 51.420 | 32.282 | 0.00 | 0.00 |
| ATOM | 1727 | HD11 | LEU | X | 111 | 35.369 | 52.381 | 31.841 | 0.00 | 0.00 |
| ATOM | 1728 | HD12 | LEU | X | 111 | 36.030 | 50.952 | 32.622 | 0.00 | 0.00 |
| ATOM | 1729 | HD13 | LEU | X | 111 | 34.633 | 50.735 | 31.578 | 0.00 | 0.00 |
| ATOM | 1730 | CD2  | LEU | X | 111 | 34.008 | 50.303 | 34.103 | 0.00 | 0.00 |
| ATOM | 1731 | HD21 | LEU | X | 111 | 33.567 | 49.664 | 33.338 | 0.00 | 0.00 |
| ATOM | 1732 | HD22 | LEU | X | 111 | 34.957 | 49.900 | 34.456 | 0.00 | 0.00 |
| ATOM | 1733 | HD23 | LEU | X | 111 | 33.410 | 50.282 | 35.014 | 0.00 | 0.00 |
| ATOM | 1734 | C    | LEU | X | 111 | 34.567 | 53.077 | 37.017 | 0.00 | 0.00 |
| ATOM | 1735 | O    | LEU | X | 111 | 35.519 | 53.857 | 37.223 | 0.00 | 0.00 |
| ATOM | 1736 | N    | VAL | X | 112 | 34.095 | 52.366 | 38.022 | 0.00 | 0.00 |
| ATOM | 1737 | H    | VAL | X | 112 | 33.306 | 51.744 | 37.911 | 0.00 | 0.00 |
| ATOM | 1738 | CA   | VAL | X | 112 | 34.559 | 52.565 | 39.378 | 0.00 | 0.00 |
| ATOM | 1739 | HA   | VAL | X | 112 | 35.245 | 53.409 | 39.431 | 0.00 | 0.00 |
| ATOM | 1740 | CB   | VAL | X | 112 | 33.347 | 52.837 | 40.386 | 0.00 | 0.00 |
| ATOM | 1741 | HB   | VAL | X | 112 | 32.841 | 51.896 | 40.603 | 0.00 | 0.00 |
| ATOM | 1742 | CG1  | VAL | X | 112 | 33.783 | 53.445 | 41.697 | 0.00 | 0.00 |
| ATOM | 1743 | HG11 | VAL | X | 112 | 34.624 | 52.999 | 42.227 | 0.00 | 0.00 |
| ATOM | 1744 | HG12 | VAL | X | 112 | 34.028 | 54.488 | 41.495 | 0.00 | 0.00 |
| ATOM | 1745 | HG13 | VAL | X | 112 | 32.930 | 53.416 | 42.375 | 0.00 | 0.00 |
| ATOM | 1746 | CG2  | VAL | X | 112 | 32.331 | 53.869 | 39.770 | 0.00 | 0.00 |
| ATOM | 1747 | HG21 | VAL | X | 112 | 31.793 | 53.359 | 38.972 | 0.00 | 0.00 |
| ATOM | 1748 | HG22 | VAL | X | 112 | 31.625 | 54.087 | 40.571 | 0.00 | 0.00 |
| ATOM | 1749 | HG23 | VAL | X | 112 | 32.814 | 54.739 | 39.324 | 0.00 | 0.00 |
| ATOM | 1750 | C    | VAL | X | 112 | 35.376 | 51.382 | 39.946 | 0.00 | 0.00 |
| ATOM | 1751 | O    | VAL | X | 112 | 34.806 | 50.306 | 40.320 | 0.00 | 0.00 |
| ATOM | 1752 | N    | TRP | X | 113 | 36.657 | 51.565 | 39.996 | 0.00 | 0.00 |
| ATOM | 1753 | H    | TRP | X | 113 | 37.046 | 52.449 | 39.704 | 0.00 | 0.00 |
| ATOM | 1754 | CA   | TRP | X | 113 | 37.601 | 50.494 | 40.400 | 0.00 | 0.00 |
| ATOM | 1755 | HA   | TRP | X | 113 | 37.337 | 49.612 | 39.816 | 0.00 | 0.00 |
| ATOM | 1756 | CB   | TRP | X | 113 | 39.010 | 50.818 | 39.884 | 0.00 | 0.00 |
| ATOM | 1757 | HB2  | TRP | X | 113 | 38.916 | 51.077 | 38.829 | 0.00 | 0.00 |
| ATOM | 1758 | HB3  | TRP | X | 113 | 39.408 | 51.529 | 40.607 | 0.00 | 0.00 |
| ATOM | 1759 | CG   | TRP | X | 113 | 39.845 | 49.522 | 39.931 | 0.00 | 0.00 |
| ATOM | 1760 | CD1  | TRP | X | 113 | 40.460 | 49.100 | 41.091 | 0.00 | 0.00 |
| ATOM | 1761 | HD1  | TRP | X | 113 | 40.444 | 49.678 | 42.003 | 0.00 | 0.00 |
| ATOM | 1762 | NE1  | TRP | X | 113 | 40.956 | 47.870 | 40.848 | 0.00 | 0.00 |
| ATOM | 1763 | HE1  | TRP | X | 113 | 41.366 | 47.287 | 41.563 | 0.00 | 0.00 |
| ATOM | 1764 | CE2  | TRP | X | 113 | 40.870 | 47.503 | 39.473 | 0.00 | 0.00 |
| ATOM | 1765 | CZ2  | TRP | X | 113 | 41.315 | 46.318 | 38.849 | 0.00 | 0.00 |
| ATOM | 1766 | HZ2  | TRP | X | 113 | 41.997 | 45.588 | 39.259 | 0.00 | 0.00 |
| ATOM | 1767 | CH2  | TRP | X | 113 | 40.808 | 46.065 | 37.542 | 0.00 | 0.00 |
| ATOM | 1768 | HH2  | TRP | X | 113 | 41.112 | 45.172 | 37.017 | 0.00 | 0.00 |
| ATOM | 1769 | CZ3  | TRP | X | 113 | 40.118 | 47.092 | 36.862 | 0.00 | 0.00 |
| ATOM | 1770 | HZ3  | TRP | X | 113 | 39.688 | 46.902 | 35.889 | 0.00 | 0.00 |
| ATOM | 1771 | CE3  | TRP | X | 113 | 39.747 | 48.306 | 37.521 | 0.00 | 0.00 |
| ATOM | 1772 | HE3  | TRP | X | 113 | 39.191 | 49.089 | 37.025 | 0.00 | 0.00 |
| ATOM | 1773 | CD2  | TRP | X | 113 | 40.110 | 48.507 | 38.888 | 0.00 | 0.00 |
| ATOM | 1774 | C    | TRP | X | 113 | 37.641 | 50.228 | 41.939 | 0.00 | 0.00 |
| ATOM | 1775 | O    | TRP | X | 113 | 37.648 | 51.172 | 42.698 | 0.00 | 0.00 |
| ATOM | 1776 | N    | ILE | X | 114 | 37.521 | 48.997 | 42.419 | 0.00 | 0.00 |
| ATOM | 1777 | H    | ILE | X | 114 | 37.353 | 48.227 | 41.788 | 0.00 | 0.00 |
| ATOM | 1778 | CA   | ILE | X | 114 | 37.746 | 48.644 | 43.939 | 0.00 | 0.00 |
| ATOM | 1779 | HA   | ILE | X | 114 | 37.991 | 49.524 | 44.534 | 0.00 | 0.00 |
| ATOM | 1780 | CB   | ILE | X | 114 | 36.483 | 47.987 | 44.550 | 0.00 | 0.00 |
| ATOM | 1781 | HB   | ILE | X | 114 | 36.493 | 46.980 | 44.134 | 0.00 | 0.00 |
| ATOM | 1782 | CG2  | ILE | X | 114 | 36.610 | 47.931 | 46.138 | 0.00 | 0.00 |
| ATOM | 1783 | HG21 | ILE | X | 114 | 35.894 | 47.175 | 46.461 | 0.00 | 0.00 |
| ATOM | 1784 | HG22 | ILE | X | 114 | 37.603 | 47.552 | 46.380 | 0.00 | 0.00 |
| ATOM | 1785 | HG23 | ILE | X | 114 | 36.417 | 48.856 | 46.681 | 0.00 | 0.00 |
| ATOM | 1786 | CG1  | ILE | X | 114 | 35.124 | 48.679 | 44.098 | 0.00 | 0.00 |
| ATOM | 1787 | HG12 | ILE | X | 114 | 35.138 | 49.758 | 44.248 | 0.00 | 0.00 |
| ATOM | 1788 | HG13 | ILE | X | 114 | 34.974 | 48.333 | 43.076 | 0.00 | 0.00 |
| ATOM | 1789 | CD1  | ILE | X | 114 | 33.920 | 48.181 | 44.963 | 0.00 | 0.00 |

|      |      |      |     |   |     |        |        |        |      |      |
|------|------|------|-----|---|-----|--------|--------|--------|------|------|
| ATOM | 1790 | HD11 | ILE | X | 114 | 33.036 | 48.615 | 44.495 | 0.00 | 0.00 |
| ATOM | 1791 | HD12 | ILE | X | 114 | 33.923 | 47.093 | 44.897 | 0.00 | 0.00 |
| ATOM | 1792 | HD13 | ILE | X | 114 | 33.937 | 48.543 | 45.991 | 0.00 | 0.00 |
| ATOM | 1793 | C    | ILE | X | 114 | 38.985 | 47.669 | 43.954 | 0.00 | 0.00 |
| ATOM | 1794 | O    | ILE | X | 114 | 39.138 | 46.798 | 43.115 | 0.00 | 0.00 |
| ATOM | 1795 | N    | TYR | X | 115 | 39.903 | 47.844 | 44.885 | 0.00 | 0.00 |
| ATOM | 1796 | H    | TYR | X | 115 | 39.668 | 48.200 | 45.800 | 0.00 | 0.00 |
| ATOM | 1797 | CA   | TYR | X | 115 | 41.221 | 47.155 | 44.875 | 0.00 | 0.00 |
| ATOM | 1798 | HA   | TYR | X | 115 | 41.381 | 46.929 | 43.821 | 0.00 | 0.00 |
| ATOM | 1799 | CB   | TYR | X | 115 | 42.362 | 48.067 | 45.316 | 0.00 | 0.00 |
| ATOM | 1800 | HB2  | TYR | X | 115 | 43.245 | 47.431 | 45.378 | 0.00 | 0.00 |
| ATOM | 1801 | HB3  | TYR | X | 115 | 42.498 | 48.770 | 44.494 | 0.00 | 0.00 |
| ATOM | 1802 | CG   | TYR | X | 115 | 42.217 | 48.809 | 46.615 | 0.00 | 0.00 |
| ATOM | 1803 | CD1  | TYR | X | 115 | 42.142 | 48.097 | 47.758 | 0.00 | 0.00 |
| ATOM | 1804 | HD1  | TYR | X | 115 | 42.260 | 47.025 | 47.822 | 0.00 | 0.00 |
| ATOM | 1805 | CE1  | TYR | X | 115 | 41.929 | 48.767 | 49.013 | 0.00 | 0.00 |
| ATOM | 1806 | HE1  | TYR | X | 115 | 41.908 | 48.203 | 49.933 | 0.00 | 0.00 |
| ATOM | 1807 | CZ   | TYR | X | 115 | 41.694 | 50.162 | 49.063 | 0.00 | 0.00 |
| ATOM | 1808 | OH   | TYR | X | 115 | 41.653 | 50.798 | 50.234 | 0.00 | 0.00 |
| ATOM | 1809 | HH   | TYR | X | 115 | 41.711 | 51.754 | 50.177 | 0.00 | 0.00 |
| ATOM | 1810 | CE2  | TYR | X | 115 | 41.706 | 50.858 | 47.787 | 0.00 | 0.00 |
| ATOM | 1811 | HE2  | TYR | X | 115 | 41.665 | 51.936 | 47.746 | 0.00 | 0.00 |
| ATOM | 1812 | CD2  | TYR | X | 115 | 42.017 | 50.173 | 46.556 | 0.00 | 0.00 |
| ATOM | 1813 | HD2  | TYR | X | 115 | 41.979 | 50.614 | 45.571 | 0.00 | 0.00 |
| ATOM | 1814 | C    | TYR | X | 115 | 41.270 | 45.720 | 45.473 | 0.00 | 0.00 |
| ATOM | 1815 | O    | TYR | X | 115 | 40.709 | 45.433 | 46.565 | 0.00 | 0.00 |
| ATOM | 1816 | N    | GLY | X | 116 | 41.950 | 44.873 | 44.698 | 0.00 | 0.00 |
| ATOM | 1817 | H    | GLY | X | 116 | 42.299 | 45.215 | 43.814 | 0.00 | 0.00 |
| ATOM | 1818 | CA   | GLY | X | 116 | 42.701 | 43.711 | 45.209 | 0.00 | 0.00 |
| ATOM | 1819 | HA2  | GLY | X | 116 | 41.962 | 43.104 | 45.649 | 0.00 | 0.00 |
| ATOM | 1820 | HA3  | GLY | X | 116 | 43.181 | 43.200 | 44.371 | 0.00 | 0.00 |
| ATOM | 1821 | C    | GLY | X | 116 | 43.743 | 44.054 | 46.297 | 0.00 | 0.00 |
| ATOM | 1822 | O    | GLY | X | 116 | 44.111 | 45.181 | 46.435 | 0.00 | 0.00 |
| ATOM | 1823 | N    | GLY | X | 117 | 44.170 | 43.056 | 47.095 | 0.00 | 0.00 |
| ATOM | 1824 | H    | GLY | X | 117 | 44.003 | 42.078 | 46.907 | 0.00 | 0.00 |
| ATOM | 1825 | CA   | GLY | X | 117 | 45.044 | 43.322 | 48.273 | 0.00 | 0.00 |
| ATOM | 1826 | HA2  | GLY | X | 117 | 46.026 | 43.243 | 47.868 | 0.00 | 0.00 |
| ATOM | 1827 | HA3  | GLY | X | 117 | 45.023 | 44.315 | 48.701 | 0.00 | 0.00 |
| ATOM | 1828 | C    | GLY | X | 117 | 44.987 | 42.279 | 49.405 | 0.00 | 0.00 |
| ATOM | 1829 | O    | GLY | X | 117 | 45.485 | 42.510 | 50.514 | 0.00 | 0.00 |
| ATOM | 1830 | N    | GLY | X | 118 | 44.194 | 41.178 | 49.196 | 0.00 | 0.00 |
| ATOM | 1831 | H    | GLY | X | 118 | 43.811 | 40.958 | 48.288 | 0.00 | 0.00 |
| ATOM | 1832 | CA   | GLY | X | 118 | 43.982 | 40.230 | 50.270 | 0.00 | 0.00 |
| ATOM | 1833 | HA2  | GLY | X | 118 | 43.507 | 39.311 | 50.000 | 0.00 | 0.00 |
| ATOM | 1834 | HA3  | GLY | X | 118 | 44.933 | 40.059 | 50.682 | 0.00 | 0.00 |
| ATOM | 1835 | C    | GLY | X | 118 | 43.079 | 40.720 | 51.421 | 0.00 | 0.00 |
| ATOM | 1836 | O    | GLY | X | 118 | 43.071 | 40.034 | 52.398 | 0.00 | 0.00 |
| ATOM | 1837 | N    | PHE | X | 119 | 42.436 | 41.866 | 51.274 | 0.00 | 0.00 |
| ATOM | 1838 | H    | PHE | X | 119 | 42.620 | 42.345 | 50.404 | 0.00 | 0.00 |
| ATOM | 1839 | CA   | PHE | X | 119 | 41.655 | 42.661 | 52.265 | 0.00 | 0.00 |
| ATOM | 1840 | HA   | PHE | X | 119 | 41.355 | 43.614 | 51.830 | 0.00 | 0.00 |
| ATOM | 1841 | CB   | PHE | X | 119 | 40.386 | 41.950 | 52.822 | 0.00 | 0.00 |
| ATOM | 1842 | HB2  | PHE | X | 119 | 40.683 | 41.220 | 53.576 | 0.00 | 0.00 |
| ATOM | 1843 | HB3  | PHE | X | 119 | 39.893 | 42.800 | 53.293 | 0.00 | 0.00 |
| ATOM | 1844 | CG   | PHE | X | 119 | 39.492 | 41.273 | 51.871 | 0.00 | 0.00 |
| ATOM | 1845 | CD1  | PHE | X | 119 | 38.609 | 41.881 | 50.975 | 0.00 | 0.00 |
| ATOM | 1846 | HD1  | PHE | X | 119 | 38.395 | 42.938 | 50.915 | 0.00 | 0.00 |
| ATOM | 1847 | CE1  | PHE | X | 119 | 37.854 | 41.147 | 50.095 | 0.00 | 0.00 |
| ATOM | 1848 | HE1  | PHE | X | 119 | 37.145 | 41.662 | 49.464 | 0.00 | 0.00 |
| ATOM | 1849 | CZ   | PHE | X | 119 | 37.953 | 39.748 | 50.106 | 0.00 | 0.00 |
| ATOM | 1850 | HZ   | PHE | X | 119 | 37.303 | 39.189 | 49.448 | 0.00 | 0.00 |
| ATOM | 1851 | CE2  | PHE | X | 119 | 38.905 | 39.137 | 51.008 | 0.00 | 0.00 |
| ATOM | 1852 | HE2  | PHE | X | 119 | 38.977 | 38.065 | 51.125 | 0.00 | 0.00 |
| ATOM | 1853 | CD2  | PHE | X | 119 | 39.660 | 39.861 | 51.908 | 0.00 | 0.00 |
| ATOM | 1854 | HD2  | PHE | X | 119 | 40.266 | 39.360 | 52.648 | 0.00 | 0.00 |
| ATOM | 1855 | C    | PHE | X | 119 | 42.474 | 43.094 | 53.529 | 0.00 | 0.00 |
| ATOM | 1856 | O    | PHE | X | 119 | 42.002 | 44.006 | 54.203 | 0.00 | 0.00 |
| ATOM | 1857 | N    | TYR | X | 120 | 43.621 | 42.492 | 53.762 | 0.00 | 0.00 |
| ATOM | 1858 | H    | TYR | X | 120 | 43.832 | 41.667 | 53.220 | 0.00 | 0.00 |
| ATOM | 1859 | CA   | TYR | X | 120 | 44.578 | 42.913 | 54.840 | 0.00 | 0.00 |

|      |      |     |     |   |     |        |        |        |      |      |
|------|------|-----|-----|---|-----|--------|--------|--------|------|------|
| ATOM | 1860 | HA  | TYR | X | 120 | 44.128 | 43.208 | 55.788 | 0.00 | 0.00 |
| ATOM | 1861 | CB  | TYR | X | 120 | 45.552 | 41.754 | 55.087 | 0.00 | 0.00 |
| ATOM | 1862 | HB2 | TYR | X | 120 | 46.021 | 41.977 | 56.045 | 0.00 | 0.00 |
| ATOM | 1863 | HB3 | TYR | X | 120 | 45.082 | 40.785 | 55.258 | 0.00 | 0.00 |
| ATOM | 1864 | CG  | TYR | X | 120 | 46.774 | 41.564 | 54.203 | 0.00 | 0.00 |
| ATOM | 1865 | CD1 | TYR | X | 120 | 48.021 | 42.152 | 54.509 | 0.00 | 0.00 |
| ATOM | 1866 | HD1 | TYR | X | 120 | 48.052 | 42.813 | 55.362 | 0.00 | 0.00 |
| ATOM | 1867 | CE1 | TYR | X | 120 | 49.217 | 41.833 | 53.849 | 0.00 | 0.00 |
| ATOM | 1868 | HE1 | TYR | X | 120 | 50.129 | 42.328 | 54.148 | 0.00 | 0.00 |
| ATOM | 1869 | CZ  | TYR | X | 120 | 49.194 | 40.836 | 52.865 | 0.00 | 0.00 |
| ATOM | 1870 | OH  | TYR | X | 120 | 50.265 | 40.580 | 52.081 | 0.00 | 0.00 |
| ATOM | 1871 | HH  | TYR | X | 120 | 51.054 | 41.065 | 52.335 | 0.00 | 0.00 |
| ATOM | 1872 | CE2 | TYR | X | 120 | 47.934 | 40.212 | 52.585 | 0.00 | 0.00 |
| ATOM | 1873 | HE2 | TYR | X | 120 | 48.074 | 39.484 | 51.800 | 0.00 | 0.00 |
| ATOM | 1874 | CD2 | TYR | X | 120 | 46.785 | 40.589 | 53.186 | 0.00 | 0.00 |
| ATOM | 1875 | HD2 | TYR | X | 120 | 45.949 | 39.952 | 52.940 | 0.00 | 0.00 |
| ATOM | 1876 | C   | TYR | X | 120 | 45.405 | 44.119 | 54.418 | 0.00 | 0.00 |
| ATOM | 1877 | O   | TYR | X | 120 | 46.275 | 44.556 | 55.136 | 0.00 | 0.00 |
| ATOM | 1878 | N   | SER | X | 121 | 45.204 | 44.574 | 53.121 | 0.00 | 0.00 |
| ATOM | 1879 | H   | SER | X | 121 | 44.560 | 44.170 | 52.456 | 0.00 | 0.00 |
| ATOM | 1880 | CA  | SER | X | 121 | 46.139 | 45.608 | 52.505 | 0.00 | 0.00 |
| ATOM | 1881 | HA  | SER | X | 121 | 46.038 | 46.551 | 53.042 | 0.00 | 0.00 |
| ATOM | 1882 | CB  | SER | X | 121 | 47.584 | 45.119 | 52.305 | 0.00 | 0.00 |
| ATOM | 1883 | HB2 | SER | X | 121 | 48.156 | 45.912 | 51.824 | 0.00 | 0.00 |
| ATOM | 1884 | HB3 | SER | X | 121 | 48.043 | 44.908 | 53.271 | 0.00 | 0.00 |
| ATOM | 1885 | OG  | SER | X | 121 | 47.579 | 43.996 | 51.430 | 0.00 | 0.00 |
| ATOM | 1886 | HG  | SER | X | 121 | 46.786 | 43.455 | 51.423 | 0.00 | 0.00 |
| ATOM | 1887 | C   | SER | X | 121 | 45.538 | 45.945 | 51.112 | 0.00 | 0.00 |
| ATOM | 1888 | O   | SER | X | 121 | 44.486 | 45.358 | 50.690 | 0.00 | 0.00 |
| ATOM | 1889 | N   | GLY | X | 122 | 45.983 | 47.044 | 50.476 | 0.00 | 0.00 |
| ATOM | 1890 | H   | GLY | X | 122 | 46.701 | 47.553 | 50.972 | 0.00 | 0.00 |
| ATOM | 1891 | CA  | GLY | X | 122 | 45.415 | 47.679 | 49.282 | 0.00 | 0.00 |
| ATOM | 1892 | HA2 | GLY | X | 122 | 46.064 | 47.438 | 48.487 | 0.00 | 0.00 |
| ATOM | 1893 | HA3 | GLY | X | 122 | 44.381 | 47.314 | 49.067 | 0.00 | 0.00 |
| ATOM | 1894 | C   | GLY | X | 122 | 45.312 | 49.194 | 49.423 | 0.00 | 0.00 |
| ATOM | 1895 | O   | GLY | X | 122 | 45.080 | 49.715 | 50.532 | 0.00 | 0.00 |
| ATOM | 1896 | N   | ALA | X | 123 | 45.352 | 49.850 | 48.289 | 0.00 | 0.00 |
| ATOM | 1897 | H   | ALA | X | 123 | 45.451 | 49.315 | 47.438 | 0.00 | 0.00 |
| ATOM | 1898 | CA  | ALA | X | 123 | 45.026 | 51.271 | 48.179 | 0.00 | 0.00 |
| ATOM | 1899 | HA  | ALA | X | 123 | 44.105 | 51.466 | 48.729 | 0.00 | 0.00 |
| ATOM | 1900 | CB  | ALA | X | 123 | 46.160 | 52.227 | 48.700 | 0.00 | 0.00 |
| ATOM | 1901 | HB1 | ALA | X | 123 | 46.386 | 51.950 | 49.730 | 0.00 | 0.00 |
| ATOM | 1902 | HB2 | ALA | X | 123 | 47.083 | 52.144 | 48.126 | 0.00 | 0.00 |
| ATOM | 1903 | HB3 | ALA | X | 123 | 45.856 | 53.271 | 48.779 | 0.00 | 0.00 |
| ATOM | 1904 | C   | ALA | X | 123 | 44.802 | 51.758 | 46.770 | 0.00 | 0.00 |
| ATOM | 1905 | O   | ALA | X | 123 | 45.359 | 51.230 | 45.817 | 0.00 | 0.00 |
| ATOM | 1906 | N   | SER | X | 124 | 44.066 | 52.844 | 46.580 | 0.00 | 0.00 |
| ATOM | 1907 | H   | SER | X | 124 | 43.608 | 53.215 | 47.400 | 0.00 | 0.00 |
| ATOM | 1908 | CA  | SER | X | 124 | 43.969 | 53.569 | 45.327 | 0.00 | 0.00 |
| ATOM | 1909 | HA  | SER | X | 124 | 43.883 | 52.781 | 44.579 | 0.00 | 0.00 |
| ATOM | 1910 | CB  | SER | X | 124 | 42.677 | 54.353 | 45.244 | 0.00 | 0.00 |
| ATOM | 1911 | HB2 | SER | X | 124 | 42.627 | 55.037 | 44.397 | 0.00 | 0.00 |
| ATOM | 1912 | HB3 | SER | X | 124 | 41.894 | 53.605 | 45.117 | 0.00 | 0.00 |
| ATOM | 1913 | OG  | SER | X | 124 | 42.420 | 55.187 | 46.345 | 0.00 | 0.00 |
| ATOM | 1914 | HG  | SER | X | 124 | 41.526 | 54.954 | 46.606 | 0.00 | 0.00 |
| ATOM | 1915 | C   | SER | X | 124 | 45.202 | 54.453 | 44.914 | 0.00 | 0.00 |
| ATOM | 1916 | O   | SER | X | 124 | 45.251 | 54.920 | 43.753 | 0.00 | 0.00 |
| ATOM | 1917 | N   | SER | X | 125 | 46.304 | 54.605 | 45.716 | 0.00 | 0.00 |
| ATOM | 1918 | H   | SER | X | 125 | 46.305 | 54.140 | 46.612 | 0.00 | 0.00 |
| ATOM | 1919 | CA  | SER | X | 125 | 47.520 | 55.333 | 45.371 | 0.00 | 0.00 |
| ATOM | 1920 | HA  | SER | X | 125 | 47.207 | 56.260 | 44.891 | 0.00 | 0.00 |
| ATOM | 1921 | CB  | SER | X | 125 | 48.188 | 55.682 | 46.675 | 0.00 | 0.00 |
| ATOM | 1922 | HB2 | SER | X | 125 | 49.112 | 56.229 | 46.487 | 0.00 | 0.00 |
| ATOM | 1923 | HB3 | SER | X | 125 | 47.483 | 56.247 | 47.284 | 0.00 | 0.00 |
| ATOM | 1924 | OG  | SER | X | 125 | 48.498 | 54.459 | 47.299 | 0.00 | 0.00 |
| ATOM | 1925 | HG  | SER | X | 125 | 49.423 | 54.237 | 47.428 | 0.00 | 0.00 |
| ATOM | 1926 | C   | SER | X | 125 | 48.458 | 54.630 | 44.357 | 0.00 | 0.00 |
| ATOM | 1927 | O   | SER | X | 125 | 49.395 | 55.240 | 43.901 | 0.00 | 0.00 |
| ATOM | 1928 | N   | LEU | X | 126 | 48.252 | 53.346 | 44.038 | 0.00 | 0.00 |
| ATOM | 1929 | H   | LEU | X | 126 | 47.406 | 52.947 | 44.417 | 0.00 | 0.00 |



|      |      |      |     |   |     |        |        |        |      |      |
|------|------|------|-----|---|-----|--------|--------|--------|------|------|
| ATOM | 1930 | CA   | LEU | X | 126 | 49.268 | 52.381 | 43.609 | 0.00 | 0.00 |
| ATOM | 1931 | HA   | LEU | X | 126 | 50.262 | 52.600 | 43.999 | 0.00 | 0.00 |
| ATOM | 1932 | CB   | LEU | X | 126 | 48.953 | 50.975 | 44.137 | 0.00 | 0.00 |
| ATOM | 1933 | HB2  | LEU | X | 126 | 47.983 | 50.722 | 43.709 | 0.00 | 0.00 |
| ATOM | 1934 | HB3  | LEU | X | 126 | 49.693 | 50.263 | 43.772 | 0.00 | 0.00 |
| ATOM | 1935 | CG   | LEU | X | 126 | 48.915 | 50.907 | 45.677 | 0.00 | 0.00 |
| ATOM | 1936 | HG   | LEU | X | 126 | 48.099 | 51.512 | 46.073 | 0.00 | 0.00 |
| ATOM | 1937 | CD1  | LEU | X | 126 | 48.413 | 49.505 | 46.068 | 0.00 | 0.00 |
| ATOM | 1938 | HD11 | LEU | X | 126 | 49.111 | 48.793 | 45.628 | 0.00 | 0.00 |
| ATOM | 1939 | HD12 | LEU | X | 126 | 48.380 | 49.311 | 47.140 | 0.00 | 0.00 |
| ATOM | 1940 | HD13 | LEU | X | 126 | 47.541 | 49.182 | 45.500 | 0.00 | 0.00 |
| ATOM | 1941 | CD2  | LEU | X | 126 | 50.153 | 51.248 | 46.447 | 0.00 | 0.00 |
| ATOM | 1942 | HD21 | LEU | X | 126 | 50.614 | 52.185 | 46.137 | 0.00 | 0.00 |
| ATOM | 1943 | HD22 | LEU | X | 126 | 49.925 | 51.337 | 47.509 | 0.00 | 0.00 |
| ATOM | 1944 | HD23 | LEU | X | 126 | 50.904 | 50.481 | 46.255 | 0.00 | 0.00 |
| ATOM | 1945 | C    | LEU | X | 126 | 49.345 | 52.317 | 42.086 | 0.00 | 0.00 |
| ATOM | 1946 | O    | LEU | X | 126 | 48.389 | 52.616 | 41.402 | 0.00 | 0.00 |
| ATOM | 1947 | N    | ASP | X | 127 | 50.555 | 51.939 | 41.674 | 0.00 | 0.00 |
| ATOM | 1948 | H    | ASP | X | 127 | 51.211 | 51.495 | 42.300 | 0.00 | 0.00 |
| ATOM | 1949 | CA   | ASP | X | 127 | 51.192 | 52.424 | 40.363 | 0.00 | 0.00 |
| ATOM | 1950 | HA   | ASP | X | 127 | 51.083 | 53.506 | 40.277 | 0.00 | 0.00 |
| ATOM | 1951 | CB   | ASP | X | 127 | 52.707 | 52.173 | 40.526 | 0.00 | 0.00 |
| ATOM | 1952 | HB2  | ASP | X | 127 | 52.844 | 52.363 | 41.590 | 0.00 | 0.00 |
| ATOM | 1953 | HB3  | ASP | X | 127 | 52.910 | 51.148 | 40.215 | 0.00 | 0.00 |
| ATOM | 1954 | CG   | ASP | X | 127 | 53.639 | 53.093 | 39.739 | 0.00 | 0.00 |
| ATOM | 1955 | OD1  | ASP | X | 127 | 54.474 | 52.520 | 38.978 | 0.00 | 0.00 |
| ATOM | 1956 | OD2  | ASP | X | 127 | 53.752 | 54.327 | 39.927 | 0.00 | 0.00 |
| ATOM | 1957 | C    | ASP | X | 127 | 50.716 | 51.792 | 39.057 | 0.00 | 0.00 |
| ATOM | 1958 | O    | ASP | X | 127 | 51.222 | 52.328 | 38.067 | 0.00 | 0.00 |
| ATOM | 1959 | N    | VAL | X | 128 | 49.799 | 50.767 | 39.061 | 0.00 | 0.00 |
| ATOM | 1960 | H    | VAL | X | 128 | 49.408 | 50.579 | 39.973 | 0.00 | 0.00 |
| ATOM | 1961 | CA   | VAL | X | 128 | 49.086 | 50.282 | 37.867 | 0.00 | 0.00 |
| ATOM | 1962 | HA   | VAL | X | 128 | 49.662 | 50.649 | 37.018 | 0.00 | 0.00 |
| ATOM | 1963 | CB   | VAL | X | 128 | 48.883 | 48.791 | 38.024 | 0.00 | 0.00 |
| ATOM | 1964 | HB   | VAL | X | 128 | 48.175 | 48.556 | 38.819 | 0.00 | 0.00 |
| ATOM | 1965 | CG1  | VAL | X | 128 | 48.102 | 48.159 | 36.744 | 0.00 | 0.00 |
| ATOM | 1966 | HG11 | VAL | X | 128 | 47.038 | 48.045 | 36.953 | 0.00 | 0.00 |
| ATOM | 1967 | HG12 | VAL | X | 128 | 48.350 | 48.729 | 35.848 | 0.00 | 0.00 |
| ATOM | 1968 | HG13 | VAL | X | 128 | 48.494 | 47.167 | 36.519 | 0.00 | 0.00 |
| ATOM | 1969 | CG2  | VAL | X | 128 | 50.204 | 48.040 | 38.153 | 0.00 | 0.00 |
| ATOM | 1970 | HG21 | VAL | X | 128 | 50.624 | 48.269 | 39.132 | 0.00 | 0.00 |
| ATOM | 1971 | HG22 | VAL | X | 128 | 50.057 | 46.973 | 38.318 | 0.00 | 0.00 |
| ATOM | 1972 | HG23 | VAL | X | 128 | 50.893 | 48.168 | 37.318 | 0.00 | 0.00 |
| ATOM | 1973 | C    | VAL | X | 128 | 47.553 | 50.903 | 37.914 | 0.00 | 0.00 |
| ATOM | 1974 | O    | VAL | X | 128 | 46.921 | 50.898 | 36.848 | 0.00 | 0.00 |
| ATOM | 1975 | N    | TYR | X | 129 | 46.933 | 51.208 | 39.091 | 0.00 | 0.00 |
| ATOM | 1976 | H    | TYR | X | 129 | 47.475 | 51.154 | 39.942 | 0.00 | 0.00 |
| ATOM | 1977 | CA   | TYR | X | 129 | 45.632 | 51.722 | 39.208 | 0.00 | 0.00 |
| ATOM | 1978 | HA   | TYR | X | 129 | 45.126 | 51.217 | 38.385 | 0.00 | 0.00 |
| ATOM | 1979 | CB   | TYR | X | 129 | 45.021 | 51.509 | 40.625 | 0.00 | 0.00 |
| ATOM | 1980 | HB2  | TYR | X | 129 | 45.349 | 52.254 | 41.351 | 0.00 | 0.00 |
| ATOM | 1981 | HB3  | TYR | X | 129 | 43.935 | 51.580 | 40.585 | 0.00 | 0.00 |
| ATOM | 1982 | CG   | TYR | X | 129 | 45.039 | 50.156 | 41.386 | 0.00 | 0.00 |
| ATOM | 1983 | CD1  | TYR | X | 129 | 44.719 | 49.006 | 40.680 | 0.00 | 0.00 |
| ATOM | 1984 | HD1  | TYR | X | 129 | 44.402 | 49.110 | 39.653 | 0.00 | 0.00 |
| ATOM | 1985 | CE1  | TYR | X | 129 | 44.618 | 47.795 | 41.385 | 0.00 | 0.00 |
| ATOM | 1986 | HE1  | TYR | X | 129 | 44.149 | 46.949 | 40.905 | 0.00 | 0.00 |
| ATOM | 1987 | CZ   | TYR | X | 129 | 45.025 | 47.679 | 42.755 | 0.00 | 0.00 |
| ATOM | 1988 | OH   | TYR | X | 129 | 44.738 | 46.539 | 43.420 | 0.00 | 0.00 |
| ATOM | 1989 | HH   | TYR | X | 129 | 44.556 | 45.786 | 42.852 | 0.00 | 0.00 |
| ATOM | 1990 | CE2  | TYR | X | 129 | 45.488 | 48.933 | 43.373 | 0.00 | 0.00 |
| ATOM | 1991 | HE2  | TYR | X | 129 | 45.840 | 48.884 | 44.393 | 0.00 | 0.00 |
| ATOM | 1992 | CD2  | TYR | X | 129 | 45.543 | 50.140 | 42.716 | 0.00 | 0.00 |
| ATOM | 1993 | HD2  | TYR | X | 129 | 45.934 | 51.012 | 43.220 | 0.00 | 0.00 |
| ATOM | 1994 | C    | TYR | X | 129 | 45.431 | 53.192 | 38.752 | 0.00 | 0.00 |
| ATOM | 1995 | O    | TYR | X | 129 | 45.092 | 54.079 | 39.579 | 0.00 | 0.00 |
| ATOM | 1996 | N    | ASP | X | 130 | 45.536 | 53.453 | 37.457 | 0.00 | 0.00 |
| ATOM | 1997 | H    | ASP | X | 130 | 45.628 | 52.677 | 36.816 | 0.00 | 0.00 |
| ATOM | 1998 | CA   | ASP | X | 130 | 45.471 | 54.821 | 36.894 | 0.00 | 0.00 |
| ATOM | 1999 | HA   | ASP | X | 130 | 44.990 | 55.505 | 37.594 | 0.00 | 0.00 |

|      |      |      |     |   |     |        |        |        |      |      |
|------|------|------|-----|---|-----|--------|--------|--------|------|------|
| ATOM | 2000 | CB   | ASP | X | 130 | 46.966 | 55.263 | 36.805 | 0.00 | 0.00 |
| ATOM | 2001 | HB2  | ASP | X | 130 | 47.378 | 55.116 | 37.804 | 0.00 | 0.00 |
| ATOM | 2002 | HB3  | ASP | X | 130 | 47.489 | 54.441 | 36.316 | 0.00 | 0.00 |
| ATOM | 2003 | CG   | ASP | X | 130 | 47.041 | 56.667 | 36.083 | 0.00 | 0.00 |
| ATOM | 2004 | OD1  | ASP | X | 130 | 47.133 | 56.712 | 34.866 | 0.00 | 0.00 |
| ATOM | 2005 | OD2  | ASP | X | 130 | 47.111 | 57.743 | 36.776 | 0.00 | 0.00 |
| ATOM | 2006 | C    | ASP | X | 130 | 44.710 | 54.884 | 35.589 | 0.00 | 0.00 |
| ATOM | 2007 | O    | ASP | X | 130 | 44.849 | 54.007 | 34.715 | 0.00 | 0.00 |
| ATOM | 2008 | N    | GLY | X | 131 | 43.832 | 55.885 | 35.413 | 0.00 | 0.00 |
| ATOM | 2009 | H    | GLY | X | 131 | 43.787 | 56.579 | 36.146 | 0.00 | 0.00 |
| ATOM | 2010 | CA   | GLY | X | 131 | 42.901 | 55.895 | 34.327 | 0.00 | 0.00 |
| ATOM | 2011 | HA2  | GLY | X | 131 | 42.437 | 54.862 | 34.234 | 0.00 | 0.00 |
| ATOM | 2012 | HA3  | GLY | X | 131 | 42.190 | 56.599 | 34.636 | 0.00 | 0.00 |
| ATOM | 2013 | C    | GLY | X | 131 | 43.349 | 56.340 | 32.940 | 0.00 | 0.00 |
| ATOM | 2014 | O    | GLY | X | 131 | 42.724 | 55.998 | 31.942 | 0.00 | 0.00 |
| ATOM | 2015 | N    | ARG | X | 132 | 44.542 | 56.973 | 32.876 | 0.00 | 0.00 |
| ATOM | 2016 | H    | ARG | X | 132 | 45.133 | 56.901 | 33.692 | 0.00 | 0.00 |
| ATOM | 2017 | CA   | ARG | X | 132 | 44.937 | 57.867 | 31.814 | 0.00 | 0.00 |
| ATOM | 2018 | HA   | ARG | X | 132 | 44.246 | 58.710 | 31.848 | 0.00 | 0.00 |
| ATOM | 2019 | CB   | ARG | X | 132 | 46.331 | 58.428 | 32.070 | 0.00 | 0.00 |
| ATOM | 2020 | HB2  | ARG | X | 132 | 46.465 | 59.287 | 31.414 | 0.00 | 0.00 |
| ATOM | 2021 | HB3  | ARG | X | 132 | 46.377 | 58.899 | 33.052 | 0.00 | 0.00 |
| ATOM | 2022 | CG   | ARG | X | 132 | 47.598 | 57.596 | 31.786 | 0.00 | 0.00 |
| ATOM | 2023 | HG2  | ARG | X | 132 | 47.410 | 56.697 | 32.374 | 0.00 | 0.00 |
| ATOM | 2024 | HG3  | ARG | X | 132 | 47.646 | 57.317 | 30.734 | 0.00 | 0.00 |
| ATOM | 2025 | CD   | ARG | X | 132 | 48.785 | 58.395 | 32.280 | 0.00 | 0.00 |
| ATOM | 2026 | HD2  | ARG | X | 132 | 49.715 | 57.918 | 31.973 | 0.00 | 0.00 |
| ATOM | 2027 | HD3  | ARG | X | 132 | 48.783 | 59.396 | 31.849 | 0.00 | 0.00 |
| ATOM | 2028 | NE   | ARG | X | 132 | 48.726 | 58.595 | 33.709 | 0.00 | 0.00 |
| ATOM | 2029 | HE   | ARG | X | 132 | 47.935 | 58.170 | 34.171 | 0.00 | 0.00 |
| ATOM | 2030 | CZ   | ARG | X | 132 | 49.506 | 59.302 | 34.499 | 0.00 | 0.00 |
| ATOM | 2031 | NH1  | ARG | X | 132 | 50.502 | 59.937 | 34.056 | 0.00 | 0.00 |
| ATOM | 2032 | HH11 | ARG | X | 132 | 50.675 | 59.998 | 33.063 | 0.00 | 0.00 |
| ATOM | 2033 | HH12 | ARG | X | 132 | 51.113 | 60.416 | 34.703 | 0.00 | 0.00 |
| ATOM | 2034 | NH2  | ARG | X | 132 | 49.220 | 59.303 | 35.831 | 0.00 | 0.00 |
| ATOM | 2035 | HH21 | ARG | X | 132 | 48.557 | 58.665 | 36.247 | 0.00 | 0.00 |
| ATOM | 2036 | HH22 | ARG | X | 132 | 49.849 | 59.599 | 36.563 | 0.00 | 0.00 |
| ATOM | 2037 | C    | ARG | X | 132 | 44.737 | 57.214 | 30.433 | 0.00 | 0.00 |
| ATOM | 2038 | O    | ARG | X | 132 | 43.858 | 57.808 | 29.721 | 0.00 | 0.00 |
| ATOM | 2039 | N    | PHE | X | 133 | 45.392 | 56.116 | 30.043 | 0.00 | 0.00 |
| ATOM | 2040 | H    | PHE | X | 133 | 45.981 | 55.615 | 30.692 | 0.00 | 0.00 |
| ATOM | 2041 | CA   | PHE | X | 133 | 45.329 | 55.506 | 28.687 | 0.00 | 0.00 |
| ATOM | 2042 | HA   | PHE | X | 133 | 45.500 | 56.279 | 27.938 | 0.00 | 0.00 |
| ATOM | 2043 | CB   | PHE | X | 133 | 46.341 | 54.366 | 28.453 | 0.00 | 0.00 |
| ATOM | 2044 | HB2  | PHE | X | 133 | 46.034 | 53.472 | 28.996 | 0.00 | 0.00 |
| ATOM | 2045 | HB3  | PHE | X | 133 | 46.325 | 54.252 | 27.369 | 0.00 | 0.00 |
| ATOM | 2046 | CG   | PHE | X | 133 | 47.763 | 54.778 | 28.853 | 0.00 | 0.00 |
| ATOM | 2047 | CD1  | PHE | X | 133 | 48.406 | 54.174 | 30.007 | 0.00 | 0.00 |
| ATOM | 2048 | HD1  | PHE | X | 133 | 48.031 | 53.360 | 30.611 | 0.00 | 0.00 |
| ATOM | 2049 | CE1  | PHE | X | 133 | 49.668 | 54.631 | 30.333 | 0.00 | 0.00 |
| ATOM | 2050 | HE1  | PHE | X | 133 | 50.186 | 54.128 | 31.136 | 0.00 | 0.00 |
| ATOM | 2051 | CZ   | PHE | X | 133 | 50.373 | 55.537 | 29.590 | 0.00 | 0.00 |
| ATOM | 2052 | HZ   | PHE | X | 133 | 51.339 | 55.836 | 29.968 | 0.00 | 0.00 |
| ATOM | 2053 | CE2  | PHE | X | 133 | 49.775 | 56.207 | 28.465 | 0.00 | 0.00 |
| ATOM | 2054 | HE2  | PHE | X | 133 | 50.232 | 56.914 | 27.789 | 0.00 | 0.00 |
| ATOM | 2055 | CD2  | PHE | X | 133 | 48.465 | 55.771 | 28.065 | 0.00 | 0.00 |
| ATOM | 2056 | HD2  | PHE | X | 133 | 48.041 | 56.282 | 27.214 | 0.00 | 0.00 |
| ATOM | 2057 | C    | PHE | X | 133 | 43.945 | 54.935 | 28.305 | 0.00 | 0.00 |
| ATOM | 2058 | O    | PHE | X | 133 | 43.388 | 55.183 | 27.209 | 0.00 | 0.00 |
| ATOM | 2059 | N    | LEU | X | 134 | 43.300 | 54.256 | 29.256 | 0.00 | 0.00 |
| ATOM | 2060 | H    | LEU | X | 134 | 43.725 | 54.006 | 30.137 | 0.00 | 0.00 |
| ATOM | 2061 | CA   | LEU | X | 134 | 41.899 | 53.810 | 29.094 | 0.00 | 0.00 |
| ATOM | 2062 | HA   | LEU | X | 134 | 41.908 | 53.251 | 28.159 | 0.00 | 0.00 |
| ATOM | 2063 | CB   | LEU | X | 134 | 41.564 | 53.007 | 30.386 | 0.00 | 0.00 |
| ATOM | 2064 | HB2  | LEU | X | 134 | 42.215 | 52.134 | 30.436 | 0.00 | 0.00 |
| ATOM | 2065 | HB3  | LEU | X | 134 | 41.770 | 53.614 | 31.268 | 0.00 | 0.00 |
| ATOM | 2066 | CG   | LEU | X | 134 | 40.134 | 52.527 | 30.617 | 0.00 | 0.00 |
| ATOM | 2067 | HG   | LEU | X | 134 | 39.553 | 53.444 | 30.717 | 0.00 | 0.00 |
| ATOM | 2068 | CD1  | LEU | X | 134 | 39.382 | 51.800 | 29.510 | 0.00 | 0.00 |
| ATOM | 2069 | HD11 | LEU | X | 134 | 38.323 | 52.054 | 29.467 | 0.00 | 0.00 |

|      |      |      |     |   |     |        |        |        |      |      |
|------|------|------|-----|---|-----|--------|--------|--------|------|------|
| ATOM | 2070 | HD12 | LEU | X | 134 | 39.878 | 51.966 | 28.553 | 0.00 | 0.00 |
| ATOM | 2071 | HD13 | LEU | X | 134 | 39.613 | 50.740 | 29.615 | 0.00 | 0.00 |
| ATOM | 2072 | CD2  | LEU | X | 134 | 40.025 | 51.788 | 31.966 | 0.00 | 0.00 |
| ATOM | 2073 | HD21 | LEU | X | 134 | 39.066 | 51.320 | 32.189 | 0.00 | 0.00 |
| ATOM | 2074 | HD22 | LEU | X | 134 | 40.727 | 50.955 | 31.931 | 0.00 | 0.00 |
| ATOM | 2075 | HD23 | LEU | X | 134 | 40.322 | 52.468 | 32.764 | 0.00 | 0.00 |
| ATOM | 2076 | C    | LEU | X | 134 | 40.853 | 54.967 | 28.849 | 0.00 | 0.00 |
| ATOM | 2077 | O    | LEU | X | 134 | 39.957 | 54.990 | 28.026 | 0.00 | 0.00 |
| ATOM | 2078 | N    | VAL | X | 135 | 41.016 | 56.061 | 29.609 | 0.00 | 0.00 |
| ATOM | 2079 | H    | VAL | X | 135 | 41.676 | 55.943 | 30.365 | 0.00 | 0.00 |
| ATOM | 2080 | CA   | VAL | X | 135 | 40.213 | 57.337 | 29.524 | 0.00 | 0.00 |
| ATOM | 2081 | HA   | VAL | X | 135 | 39.165 | 57.040 | 29.496 | 0.00 | 0.00 |
| ATOM | 2082 | CB   | VAL | X | 135 | 40.387 | 58.155 | 30.800 | 0.00 | 0.00 |
| ATOM | 2083 | HB   | VAL | X | 135 | 41.464 | 58.234 | 30.942 | 0.00 | 0.00 |
| ATOM | 2084 | CG1  | VAL | X | 135 | 39.866 | 59.599 | 30.828 | 0.00 | 0.00 |
| ATOM | 2085 | HG11 | VAL | X | 135 | 40.459 | 60.156 | 30.103 | 0.00 | 0.00 |
| ATOM | 2086 | HG12 | VAL | X | 135 | 38.782 | 59.600 | 30.713 | 0.00 | 0.00 |
| ATOM | 2087 | HG13 | VAL | X | 135 | 40.152 | 59.896 | 31.837 | 0.00 | 0.00 |
| ATOM | 2088 | CG2  | VAL | X | 135 | 39.764 | 57.507 | 32.028 | 0.00 | 0.00 |
| ATOM | 2089 | HG21 | VAL | X | 135 | 40.042 | 56.458 | 32.129 | 0.00 | 0.00 |
| ATOM | 2090 | HG22 | VAL | X | 135 | 40.159 | 58.007 | 32.913 | 0.00 | 0.00 |
| ATOM | 2091 | HG23 | VAL | X | 135 | 38.684 | 57.364 | 31.989 | 0.00 | 0.00 |
| ATOM | 2092 | C    | VAL | X | 135 | 40.623 | 58.170 | 28.227 | 0.00 | 0.00 |
| ATOM | 2093 | O    | VAL | X | 135 | 39.833 | 59.008 | 27.814 | 0.00 | 0.00 |
| ATOM | 2094 | N    | GLN | X | 136 | 41.840 | 57.962 | 27.643 | 0.00 | 0.00 |
| ATOM | 2095 | H    | GLN | X | 136 | 42.508 | 57.379 | 28.127 | 0.00 | 0.00 |
| ATOM | 2096 | CA   | GLN | X | 136 | 42.240 | 58.579 | 26.371 | 0.00 | 0.00 |
| ATOM | 2097 | HA   | GLN | X | 136 | 41.880 | 59.605 | 26.298 | 0.00 | 0.00 |
| ATOM | 2098 | CB   | GLN | X | 136 | 43.804 | 58.673 | 26.244 | 0.00 | 0.00 |
| ATOM | 2099 | HB2  | GLN | X | 136 | 44.274 | 58.721 | 27.226 | 0.00 | 0.00 |
| ATOM | 2100 | HB3  | GLN | X | 136 | 44.004 | 57.700 | 25.795 | 0.00 | 0.00 |
| ATOM | 2101 | CG   | GLN | X | 136 | 44.270 | 59.836 | 25.291 | 0.00 | 0.00 |
| ATOM | 2102 | HG2  | GLN | X | 136 | 43.919 | 60.779 | 25.710 | 0.00 | 0.00 |
| ATOM | 2103 | HG3  | GLN | X | 136 | 45.354 | 59.952 | 25.263 | 0.00 | 0.00 |
| ATOM | 2104 | CD   | GLN | X | 136 | 43.772 | 59.738 | 23.801 | 0.00 | 0.00 |
| ATOM | 2105 | OE1  | GLN | X | 136 | 43.744 | 58.662 | 23.207 | 0.00 | 0.00 |
| ATOM | 2106 | NE2  | GLN | X | 136 | 43.274 | 60.821 | 23.255 | 0.00 | 0.00 |
| ATOM | 2107 | HE21 | GLN | X | 136 | 43.089 | 60.780 | 22.263 | 0.00 | 0.00 |
| ATOM | 2108 | HE22 | GLN | X | 136 | 43.246 | 61.697 | 23.757 | 0.00 | 0.00 |
| ATOM | 2109 | C    | GLN | X | 136 | 41.548 | 57.859 | 25.221 | 0.00 | 0.00 |
| ATOM | 2110 | O    | GLN | X | 136 | 40.906 | 58.462 | 24.309 | 0.00 | 0.00 |
| ATOM | 2111 | N    | ALA | X | 137 | 41.519 | 56.526 | 25.294 | 0.00 | 0.00 |
| ATOM | 2112 | H    | ALA | X | 137 | 42.109 | 56.147 | 26.021 | 0.00 | 0.00 |
| ATOM | 2113 | CA   | ALA | X | 137 | 40.872 | 55.642 | 24.355 | 0.00 | 0.00 |
| ATOM | 2114 | HA   | ALA | X | 137 | 41.158 | 55.979 | 23.358 | 0.00 | 0.00 |
| ATOM | 2115 | CB   | ALA | X | 137 | 41.426 | 54.221 | 24.480 | 0.00 | 0.00 |
| ATOM | 2116 | HB1  | ALA | X | 137 | 42.513 | 54.257 | 24.400 | 0.00 | 0.00 |
| ATOM | 2117 | HB2  | ALA | X | 137 | 41.066 | 53.722 | 25.379 | 0.00 | 0.00 |
| ATOM | 2118 | HB3  | ALA | X | 137 | 41.100 | 53.654 | 23.608 | 0.00 | 0.00 |
| ATOM | 2119 | C    | ALA | X | 137 | 39.380 | 55.688 | 24.293 | 0.00 | 0.00 |
| ATOM | 2120 | O    | ALA | X | 137 | 38.745 | 56.047 | 23.256 | 0.00 | 0.00 |
| ATOM | 2121 | N    | GLU | X | 138 | 38.765 | 55.079 | 25.381 | 0.00 | 0.00 |
| ATOM | 2122 | H    | GLU | X | 138 | 39.307 | 54.725 | 26.156 | 0.00 | 0.00 |
| ATOM | 2123 | CA   | GLU | X | 138 | 37.327 | 54.674 | 25.404 | 0.00 | 0.00 |
| ATOM | 2124 | HA   | GLU | X | 138 | 37.068 | 54.726 | 24.347 | 0.00 | 0.00 |
| ATOM | 2125 | CB   | GLU | X | 138 | 37.289 | 53.265 | 26.058 | 0.00 | 0.00 |
| ATOM | 2126 | HB2  | GLU | X | 138 | 37.728 | 53.288 | 27.055 | 0.00 | 0.00 |
| ATOM | 2127 | HB3  | GLU | X | 138 | 36.277 | 52.892 | 26.215 | 0.00 | 0.00 |
| ATOM | 2128 | CG   | GLU | X | 138 | 38.022 | 52.219 | 25.178 | 0.00 | 0.00 |
| ATOM | 2129 | HG2  | GLU | X | 138 | 39.079 | 52.462 | 25.074 | 0.00 | 0.00 |
| ATOM | 2130 | HG3  | GLU | X | 138 | 37.947 | 51.275 | 25.718 | 0.00 | 0.00 |
| ATOM | 2131 | CD   | GLU | X | 138 | 37.531 | 52.104 | 23.720 | 0.00 | 0.00 |
| ATOM | 2132 | OE1  | GLU | X | 138 | 36.292 | 52.091 | 23.394 | 0.00 | 0.00 |
| ATOM | 2133 | OE2  | GLU | X | 138 | 38.431 | 52.062 | 22.881 | 0.00 | 0.00 |
| ATOM | 2134 | C    | GLU | X | 138 | 36.457 | 55.674 | 26.059 | 0.00 | 0.00 |
| ATOM | 2135 | O    | GLU | X | 138 | 35.235 | 55.430 | 26.125 | 0.00 | 0.00 |
| ATOM | 2136 | N    | ARG | X | 139 | 37.029 | 56.752 | 26.575 | 0.00 | 0.00 |
| ATOM | 2137 | H    | ARG | X | 139 | 38.038 | 56.761 | 26.541 | 0.00 | 0.00 |
| ATOM | 2138 | CA   | ARG | X | 139 | 36.395 | 57.981 | 27.143 | 0.00 | 0.00 |
| ATOM | 2139 | HA   | ARG | X | 139 | 37.166 | 58.680 | 27.467 | 0.00 | 0.00 |

|      |      |      |     |   |     |        |        |        |      |      |
|------|------|------|-----|---|-----|--------|--------|--------|------|------|
| ATOM | 2140 | CB   | ARG | X | 139 | 35.594 | 58.784 | 26.098 | 0.00 | 0.00 |
| ATOM | 2141 | HB2  | ARG | X | 139 | 34.741 | 58.248 | 25.684 | 0.00 | 0.00 |
| ATOM | 2142 | HB3  | ARG | X | 139 | 35.169 | 59.680 | 26.551 | 0.00 | 0.00 |
| ATOM | 2143 | CG   | ARG | X | 139 | 36.264 | 59.165 | 24.818 | 0.00 | 0.00 |
| ATOM | 2144 | HG2  | ARG | X | 139 | 36.488 | 58.257 | 24.259 | 0.00 | 0.00 |
| ATOM | 2145 | HG3  | ARG | X | 139 | 35.601 | 59.830 | 24.264 | 0.00 | 0.00 |
| ATOM | 2146 | CD   | ARG | X | 139 | 37.499 | 59.987 | 25.147 | 0.00 | 0.00 |
| ATOM | 2147 | HD2  | ARG | X | 139 | 37.188 | 60.824 | 25.773 | 0.00 | 0.00 |
| ATOM | 2148 | HD3  | ARG | X | 139 | 38.228 | 59.414 | 25.718 | 0.00 | 0.00 |
| ATOM | 2149 | NE   | ARG | X | 139 | 38.158 | 60.605 | 23.964 | 0.00 | 0.00 |
| ATOM | 2150 | HE   | ARG | X | 139 | 37.693 | 60.456 | 23.080 | 0.00 | 0.00 |
| ATOM | 2151 | CZ   | ARG | X | 139 | 39.265 | 61.300 | 24.066 | 0.00 | 0.00 |
| ATOM | 2152 | NH1  | ARG | X | 139 | 39.873 | 61.410 | 25.212 | 0.00 | 0.00 |
| ATOM | 2153 | HH11 | ARG | X | 139 | 39.467 | 60.920 | 25.996 | 0.00 | 0.00 |
| ATOM | 2154 | HH12 | ARG | X | 139 | 40.746 | 61.906 | 25.319 | 0.00 | 0.00 |
| ATOM | 2155 | NH2  | ARG | X | 139 | 39.623 | 62.004 | 22.994 | 0.00 | 0.00 |
| ATOM | 2156 | HH21 | ARG | X | 139 | 39.205 | 61.858 | 22.086 | 0.00 | 0.00 |
| ATOM | 2157 | HH22 | ARG | X | 139 | 40.428 | 62.605 | 23.096 | 0.00 | 0.00 |
| ATOM | 2158 | C    | ARG | X | 139 | 35.662 | 57.807 | 28.478 | 0.00 | 0.00 |
| ATOM | 2159 | O    | ARG | X | 139 | 35.336 | 58.809 | 29.151 | 0.00 | 0.00 |
| ATOM | 2160 | N    | THR | X | 140 | 35.494 | 56.583 | 28.923 | 0.00 | 0.00 |
| ATOM | 2161 | H    | THR | X | 140 | 35.986 | 55.909 | 28.354 | 0.00 | 0.00 |
| ATOM | 2162 | CA   | THR | X | 140 | 34.762 | 56.142 | 30.180 | 0.00 | 0.00 |
| ATOM | 2163 | HA   | THR | X | 140 | 33.709 | 56.412 | 30.107 | 0.00 | 0.00 |
| ATOM | 2164 | CB   | THR | X | 140 | 34.731 | 54.646 | 30.363 | 0.00 | 0.00 |
| ATOM | 2165 | HB   | THR | X | 140 | 34.471 | 54.344 | 31.378 | 0.00 | 0.00 |
| ATOM | 2166 | CG2  | THR | X | 140 | 33.737 | 54.035 | 29.347 | 0.00 | 0.00 |
| ATOM | 2167 | HG21 | THR | X | 140 | 33.733 | 52.957 | 29.507 | 0.00 | 0.00 |
| ATOM | 2168 | HG22 | THR | X | 140 | 32.724 | 54.438 | 29.342 | 0.00 | 0.00 |
| ATOM | 2169 | HG23 | THR | X | 140 | 34.111 | 54.130 | 28.328 | 0.00 | 0.00 |
| ATOM | 2170 | OG1  | THR | X | 140 | 35.972 | 54.228 | 29.984 | 0.00 | 0.00 |
| ATOM | 2171 | HG1  | THR | X | 140 | 36.594 | 54.593 | 30.616 | 0.00 | 0.00 |
| ATOM | 2172 | C    | THR | X | 140 | 35.274 | 56.868 | 31.389 | 0.00 | 0.00 |
| ATOM | 2173 | O    | THR | X | 140 | 36.441 | 56.759 | 31.648 | 0.00 | 0.00 |
| ATOM | 2174 | N    | VAL | X | 141 | 34.454 | 57.582 | 32.195 | 0.00 | 0.00 |
| ATOM | 2175 | H    | VAL | X | 141 | 33.448 | 57.492 | 32.185 | 0.00 | 0.00 |
| ATOM | 2176 | CA   | VAL | X | 141 | 34.973 | 58.364 | 33.324 | 0.00 | 0.00 |
| ATOM | 2177 | HA   | VAL | X | 141 | 35.870 | 58.829 | 32.915 | 0.00 | 0.00 |
| ATOM | 2178 | CB   | VAL | X | 141 | 33.929 | 59.439 | 33.663 | 0.00 | 0.00 |
| ATOM | 2179 | HB   | VAL | X | 141 | 32.962 | 58.952 | 33.784 | 0.00 | 0.00 |
| ATOM | 2180 | CG1  | VAL | X | 141 | 34.287 | 60.129 | 34.998 | 0.00 | 0.00 |
| ATOM | 2181 | HG11 | VAL | X | 141 | 33.585 | 60.959 | 35.076 | 0.00 | 0.00 |
| ATOM | 2182 | HG12 | VAL | X | 141 | 34.152 | 59.397 | 35.794 | 0.00 | 0.00 |
| ATOM | 2183 | HG13 | VAL | X | 141 | 35.313 | 60.488 | 34.920 | 0.00 | 0.00 |
| ATOM | 2184 | CG2  | VAL | X | 141 | 33.901 | 60.484 | 32.465 | 0.00 | 0.00 |
| ATOM | 2185 | HG21 | VAL | X | 141 | 33.991 | 60.067 | 31.462 | 0.00 | 0.00 |
| ATOM | 2186 | HG22 | VAL | X | 141 | 32.972 | 61.044 | 32.577 | 0.00 | 0.00 |
| ATOM | 2187 | HG23 | VAL | X | 141 | 34.757 | 61.139 | 32.625 | 0.00 | 0.00 |
| ATOM | 2188 | C    | VAL | X | 141 | 35.432 | 57.319 | 34.415 | 0.00 | 0.00 |
| ATOM | 2189 | O    | VAL | X | 141 | 34.645 | 56.576 | 34.942 | 0.00 | 0.00 |
| ATOM | 2190 | N    | LEU | X | 142 | 36.780 | 57.186 | 34.545 | 0.00 | 0.00 |
| ATOM | 2191 | H    | LEU | X | 142 | 37.365 | 57.681 | 33.887 | 0.00 | 0.00 |
| ATOM | 2192 | CA   | LEU | X | 142 | 37.432 | 56.263 | 35.472 | 0.00 | 0.00 |
| ATOM | 2193 | HA   | LEU | X | 142 | 36.698 | 55.466 | 35.585 | 0.00 | 0.00 |
| ATOM | 2194 | CB   | LEU | X | 142 | 38.790 | 55.784 | 34.978 | 0.00 | 0.00 |
| ATOM | 2195 | HB2  | LEU | X | 142 | 38.710 | 55.443 | 33.946 | 0.00 | 0.00 |
| ATOM | 2196 | HB3  | LEU | X | 142 | 39.476 | 56.630 | 34.930 | 0.00 | 0.00 |
| ATOM | 2197 | CG   | LEU | X | 142 | 39.460 | 54.547 | 35.667 | 0.00 | 0.00 |
| ATOM | 2198 | HG   | LEU | X | 142 | 40.193 | 54.079 | 35.011 | 0.00 | 0.00 |
| ATOM | 2199 | CD1  | LEU | X | 142 | 40.368 | 55.161 | 36.781 | 0.00 | 0.00 |
| ATOM | 2200 | HD11 | LEU | X | 142 | 40.810 | 56.123 | 36.522 | 0.00 | 0.00 |
| ATOM | 2201 | HD12 | LEU | X | 142 | 39.746 | 55.325 | 37.661 | 0.00 | 0.00 |
| ATOM | 2202 | HD13 | LEU | X | 142 | 41.259 | 54.578 | 37.012 | 0.00 | 0.00 |
| ATOM | 2203 | CD2  | LEU | X | 142 | 38.556 | 53.462 | 36.155 | 0.00 | 0.00 |
| ATOM | 2204 | HD21 | LEU | X | 142 | 38.169 | 53.658 | 37.155 | 0.00 | 0.00 |
| ATOM | 2205 | HD22 | LEU | X | 142 | 37.806 | 53.198 | 35.409 | 0.00 | 0.00 |
| ATOM | 2206 | HD23 | LEU | X | 142 | 39.148 | 52.548 | 36.213 | 0.00 | 0.00 |
| ATOM | 2207 | C    | LEU | X | 142 | 37.515 | 56.936 | 36.845 | 0.00 | 0.00 |
| ATOM | 2208 | O    | LEU | X | 142 | 38.250 | 57.938 | 37.097 | 0.00 | 0.00 |
| ATOM | 2209 | N    | VAL | X | 143 | 36.915 | 56.345 | 37.843 | 0.00 | 0.00 |

|      |      |      |     |   |     |        |        |        |      |      |
|------|------|------|-----|---|-----|--------|--------|--------|------|------|
| ATOM | 2210 | H    | VAL | X | 143 | 36.525 | 55.441 | 37.617 | 0.00 | 0.00 |
| ATOM | 2211 | CA   | VAL | X | 143 | 36.878 | 56.715 | 39.267 | 0.00 | 0.00 |
| ATOM | 2212 | HA   | VAL | X | 143 | 37.360 | 57.664 | 39.502 | 0.00 | 0.00 |
| ATOM | 2213 | CB   | VAL | X | 143 | 35.446 | 56.728 | 39.887 | 0.00 | 0.00 |
| ATOM | 2214 | HB   | VAL | X | 143 | 35.002 | 55.740 | 39.762 | 0.00 | 0.00 |
| ATOM | 2215 | CG1  | VAL | X | 143 | 35.254 | 57.280 | 41.319 | 0.00 | 0.00 |
| ATOM | 2216 | HG11 | VAL | X | 143 | 35.618 | 56.601 | 42.090 | 0.00 | 0.00 |
| ATOM | 2217 | HG12 | VAL | X | 143 | 35.780 | 58.212 | 41.523 | 0.00 | 0.00 |
| ATOM | 2218 | HG13 | VAL | X | 143 | 34.182 | 57.436 | 41.438 | 0.00 | 0.00 |
| ATOM | 2219 | CG2  | VAL | X | 143 | 34.641 | 57.727 | 39.041 | 0.00 | 0.00 |
| ATOM | 2220 | HG21 | VAL | X | 143 | 34.753 | 57.615 | 37.962 | 0.00 | 0.00 |
| ATOM | 2221 | HG22 | VAL | X | 143 | 33.618 | 57.588 | 39.388 | 0.00 | 0.00 |
| ATOM | 2222 | HG23 | VAL | X | 143 | 34.913 | 58.767 | 39.227 | 0.00 | 0.00 |
| ATOM | 2223 | C    | VAL | X | 143 | 37.546 | 55.527 | 40.050 | 0.00 | 0.00 |
| ATOM | 2224 | O    | VAL | X | 143 | 37.544 | 54.413 | 39.623 | 0.00 | 0.00 |
| ATOM | 2225 | N    | SER | X | 144 | 38.040 | 55.752 | 41.240 | 0.00 | 0.00 |
| ATOM | 2226 | H    | SER | X | 144 | 38.170 | 56.712 | 41.528 | 0.00 | 0.00 |
| ATOM | 2227 | CA   | SER | X | 144 | 38.477 | 54.671 | 42.205 | 0.00 | 0.00 |
| ATOM | 2228 | HA   | SER | X | 144 | 37.734 | 53.874 | 42.212 | 0.00 | 0.00 |
| ATOM | 2229 | CB   | SER | X | 144 | 39.874 | 54.083 | 41.902 | 0.00 | 0.00 |
| ATOM | 2230 | HB2  | SER | X | 144 | 40.071 | 53.218 | 42.534 | 0.00 | 0.00 |
| ATOM | 2231 | HB3  | SER | X | 144 | 40.096 | 53.812 | 40.869 | 0.00 | 0.00 |
| ATOM | 2232 | OG   | SER | X | 144 | 40.882 | 55.013 | 42.258 | 0.00 | 0.00 |
| ATOM | 2233 | HG   | SER | X | 144 | 41.706 | 54.616 | 41.968 | 0.00 | 0.00 |
| ATOM | 2234 | C    | SER | X | 144 | 38.465 | 55.213 | 43.618 | 0.00 | 0.00 |
| ATOM | 2235 | O    | SER | X | 144 | 38.613 | 56.419 | 43.808 | 0.00 | 0.00 |
| ATOM | 2236 | N    | MET | X | 145 | 38.047 | 54.371 | 44.571 | 0.00 | 0.00 |
| ATOM | 2237 | H    | MET | X | 145 | 37.988 | 53.394 | 44.325 | 0.00 | 0.00 |
| ATOM | 2238 | CA   | MET | X | 145 | 37.739 | 54.687 | 45.979 | 0.00 | 0.00 |
| ATOM | 2239 | HA   | MET | X | 145 | 37.553 | 55.760 | 46.027 | 0.00 | 0.00 |
| ATOM | 2240 | CB   | MET | X | 145 | 36.323 | 54.076 | 46.252 | 0.00 | 0.00 |
| ATOM | 2241 | HB2  | MET | X | 145 | 36.048 | 54.465 | 47.232 | 0.00 | 0.00 |
| ATOM | 2242 | HB3  | MET | X | 145 | 35.565 | 54.472 | 45.575 | 0.00 | 0.00 |
| ATOM | 2243 | CG   | MET | X | 145 | 36.206 | 52.576 | 46.250 | 0.00 | 0.00 |
| ATOM | 2244 | HG2  | MET | X | 145 | 36.617 | 52.224 | 45.304 | 0.00 | 0.00 |
| ATOM | 2245 | HG3  | MET | X | 145 | 36.872 | 52.308 | 47.070 | 0.00 | 0.00 |
| ATOM | 2246 | SD   | MET | X | 145 | 34.619 | 51.757 | 46.541 | 0.00 | 0.00 |
| ATOM | 2247 | CE   | MET | X | 145 | 33.770 | 51.913 | 44.996 | 0.00 | 0.00 |
| ATOM | 2248 | HE1  | MET | X | 145 | 33.022 | 51.124 | 44.916 | 0.00 | 0.00 |
| ATOM | 2249 | HE2  | MET | X | 145 | 33.193 | 52.837 | 44.972 | 0.00 | 0.00 |
| ATOM | 2250 | HE3  | MET | X | 145 | 34.400 | 51.851 | 44.109 | 0.00 | 0.00 |
| ATOM | 2251 | C    | MET | X | 145 | 38.825 | 54.302 | 47.030 | 0.00 | 0.00 |
| ATOM | 2252 | O    | MET | X | 145 | 39.972 | 53.950 | 46.689 | 0.00 | 0.00 |
| ATOM | 2253 | N    | ASN | X | 146 | 38.466 | 54.360 | 48.287 | 0.00 | 0.00 |
| ATOM | 2254 | H    | ASN | X | 146 | 37.564 | 54.750 | 48.521 | 0.00 | 0.00 |
| ATOM | 2255 | CA   | ASN | X | 146 | 39.284 | 53.902 | 49.457 | 0.00 | 0.00 |
| ATOM | 2256 | HA   | ASN | X | 146 | 39.669 | 52.916 | 49.198 | 0.00 | 0.00 |
| ATOM | 2257 | CB   | ASN | X | 146 | 40.405 | 54.867 | 49.733 | 0.00 | 0.00 |
| ATOM | 2258 | HB2  | ASN | X | 146 | 40.668 | 55.334 | 48.784 | 0.00 | 0.00 |
| ATOM | 2259 | HB3  | ASN | X | 146 | 40.122 | 55.616 | 50.473 | 0.00 | 0.00 |
| ATOM | 2260 | CG   | ASN | X | 146 | 41.588 | 54.052 | 50.297 | 0.00 | 0.00 |
| ATOM | 2261 | OD1  | ASN | X | 146 | 42.396 | 53.429 | 49.568 | 0.00 | 0.00 |
| ATOM | 2262 | ND2  | ASN | X | 146 | 41.812 | 54.031 | 51.571 | 0.00 | 0.00 |
| ATOM | 2263 | HD21 | ASN | X | 146 | 42.681 | 53.585 | 51.829 | 0.00 | 0.00 |
| ATOM | 2264 | HD22 | ASN | X | 146 | 41.400 | 54.665 | 52.240 | 0.00 | 0.00 |
| ATOM | 2265 | C    | ASN | X | 146 | 38.374 | 53.666 | 50.700 | 0.00 | 0.00 |
| ATOM | 2266 | O    | ASN | X | 146 | 37.367 | 54.394 | 50.823 | 0.00 | 0.00 |
| ATOM | 2267 | N    | TYR | X | 147 | 38.633 | 52.630 | 51.513 | 0.00 | 0.00 |
| ATOM | 2268 | H    | TYR | X | 147 | 39.541 | 52.198 | 51.418 | 0.00 | 0.00 |
| ATOM | 2269 | CA   | TYR | X | 147 | 37.860 | 52.156 | 52.565 | 0.00 | 0.00 |
| ATOM | 2270 | HA   | TYR | X | 147 | 37.359 | 52.998 | 53.044 | 0.00 | 0.00 |
| ATOM | 2271 | CB   | TYR | X | 147 | 36.790 | 51.256 | 51.992 | 0.00 | 0.00 |
| ATOM | 2272 | HB2  | TYR | X | 147 | 36.356 | 50.691 | 52.817 | 0.00 | 0.00 |
| ATOM | 2273 | HB3  | TYR | X | 147 | 35.989 | 51.698 | 51.399 | 0.00 | 0.00 |
| ATOM | 2274 | CG   | TYR | X | 147 | 37.395 | 50.169 | 51.099 | 0.00 | 0.00 |
| ATOM | 2275 | CD1  | TYR | X | 147 | 37.776 | 50.355 | 49.732 | 0.00 | 0.00 |
| ATOM | 2276 | HD1  | TYR | X | 147 | 37.536 | 51.315 | 49.299 | 0.00 | 0.00 |
| ATOM | 2277 | CE1  | TYR | X | 147 | 38.337 | 49.305 | 48.952 | 0.00 | 0.00 |
| ATOM | 2278 | HE1  | TYR | X | 147 | 38.631 | 49.497 | 47.931 | 0.00 | 0.00 |
| ATOM | 2279 | CZ   | TYR | X | 147 | 38.610 | 48.080 | 49.630 | 0.00 | 0.00 |

|      |      |      |     |   |     |        |        |        |      |      |
|------|------|------|-----|---|-----|--------|--------|--------|------|------|
| ATOM | 2280 | OH   | TYR | X | 147 | 39.265 | 47.142 | 48.924 | 0.00 | 0.00 |
| ATOM | 2281 | HH   | TYR | X | 147 | 39.450 | 46.280 | 49.305 | 0.00 | 0.00 |
| ATOM | 2282 | CE2  | TYR | X | 147 | 38.144 | 47.816 | 50.939 | 0.00 | 0.00 |
| ATOM | 2283 | HE2  | TYR | X | 147 | 38.380 | 46.909 | 51.477 | 0.00 | 0.00 |
| ATOM | 2284 | CD2  | TYR | X | 147 | 37.570 | 48.845 | 51.623 | 0.00 | 0.00 |
| ATOM | 2285 | HD2  | TYR | X | 147 | 37.272 | 48.673 | 52.647 | 0.00 | 0.00 |
| ATOM | 2286 | C    | TYR | X | 147 | 38.807 | 51.425 | 53.514 | 0.00 | 0.00 |
| ATOM | 2287 | O    | TYR | X | 147 | 39.891 | 50.978 | 53.199 | 0.00 | 0.00 |
| ATOM | 2288 | N    | ARG | X | 148 | 38.286 | 51.222 | 54.710 | 0.00 | 0.00 |
| ATOM | 2289 | H    | ARG | X | 148 | 37.330 | 51.520 | 54.842 | 0.00 | 0.00 |
| ATOM | 2290 | CA   | ARG | X | 148 | 38.970 | 50.430 | 55.811 | 0.00 | 0.00 |
| ATOM | 2291 | HA   | ARG | X | 148 | 39.992 | 50.769 | 55.984 | 0.00 | 0.00 |
| ATOM | 2292 | CB   | ARG | X | 148 | 38.188 | 50.634 | 57.100 | 0.00 | 0.00 |
| ATOM | 2293 | HB2  | ARG | X | 148 | 37.145 | 50.319 | 57.059 | 0.00 | 0.00 |
| ATOM | 2294 | HB3  | ARG | X | 148 | 38.644 | 49.984 | 57.847 | 0.00 | 0.00 |
| ATOM | 2295 | CG   | ARG | X | 148 | 38.139 | 52.014 | 57.780 | 0.00 | 0.00 |
| ATOM | 2296 | HG2  | ARG | X | 148 | 39.137 | 52.328 | 58.084 | 0.00 | 0.00 |
| ATOM | 2297 | HG3  | ARG | X | 148 | 37.827 | 52.857 | 57.163 | 0.00 | 0.00 |
| ATOM | 2298 | CD   | ARG | X | 148 | 37.201 | 51.905 | 58.947 | 0.00 | 0.00 |
| ATOM | 2299 | HD2  | ARG | X | 148 | 37.311 | 51.027 | 59.582 | 0.00 | 0.00 |
| ATOM | 2300 | HD3  | ARG | X | 148 | 37.398 | 52.805 | 59.529 | 0.00 | 0.00 |
| ATOM | 2301 | NE   | ARG | X | 148 | 35.827 | 52.130 | 58.557 | 0.00 | 0.00 |
| ATOM | 2302 | HE   | ARG | X | 148 | 35.654 | 52.206 | 57.565 | 0.00 | 0.00 |
| ATOM | 2303 | CZ   | ARG | X | 148 | 34.764 | 52.351 | 59.349 | 0.00 | 0.00 |
| ATOM | 2304 | NH1  | ARG | X | 148 | 34.909 | 52.226 | 60.593 | 0.00 | 0.00 |
| ATOM | 2305 | HH11 | ARG | X | 148 | 35.863 | 52.120 | 60.909 | 0.00 | 0.00 |
| ATOM | 2306 | HH12 | ARG | X | 148 | 34.125 | 52.357 | 61.215 | 0.00 | 0.00 |
| ATOM | 2307 | NH2  | ARG | X | 148 | 33.579 | 52.681 | 58.908 | 0.00 | 0.00 |
| ATOM | 2308 | HH21 | ARG | X | 148 | 33.494 | 52.933 | 57.934 | 0.00 | 0.00 |
| ATOM | 2309 | HH22 | ARG | X | 148 | 32.886 | 52.944 | 59.594 | 0.00 | 0.00 |
| ATOM | 2310 | C    | ARG | X | 148 | 39.070 | 48.860 | 55.467 | 0.00 | 0.00 |
| ATOM | 2311 | O    | ARG | X | 148 | 38.199 | 48.074 | 55.872 | 0.00 | 0.00 |
| ATOM | 2312 | N    | VAL | X | 149 | 40.208 | 48.535 | 54.885 | 0.00 | 0.00 |
| ATOM | 2313 | H    | VAL | X | 149 | 40.695 | 49.174 | 54.273 | 0.00 | 0.00 |
| ATOM | 2314 | CA   | VAL | X | 149 | 40.919 | 47.279 | 55.069 | 0.00 | 0.00 |
| ATOM | 2315 | HA   | VAL | X | 149 | 40.355 | 46.432 | 54.678 | 0.00 | 0.00 |
| ATOM | 2316 | CB   | VAL | X | 149 | 42.207 | 47.226 | 54.206 | 0.00 | 0.00 |
| ATOM | 2317 | HB   | VAL | X | 149 | 42.655 | 46.240 | 54.330 | 0.00 | 0.00 |
| ATOM | 2318 | CG1  | VAL | X | 149 | 41.830 | 47.236 | 52.711 | 0.00 | 0.00 |
| ATOM | 2319 | HG11 | VAL | X | 149 | 41.263 | 46.308 | 52.638 | 0.00 | 0.00 |
| ATOM | 2320 | HG12 | VAL | X | 149 | 41.205 | 48.094 | 52.461 | 0.00 | 0.00 |
| ATOM | 2321 | HG13 | VAL | X | 149 | 42.708 | 47.266 | 52.067 | 0.00 | 0.00 |
| ATOM | 2322 | CG2  | VAL | X | 149 | 43.302 | 48.280 | 54.499 | 0.00 | 0.00 |
| ATOM | 2323 | HG21 | VAL | X | 149 | 43.360 | 48.446 | 55.574 | 0.00 | 0.00 |
| ATOM | 2324 | HG22 | VAL | X | 149 | 44.246 | 47.814 | 54.218 | 0.00 | 0.00 |
| ATOM | 2325 | HG23 | VAL | X | 149 | 43.219 | 49.240 | 53.989 | 0.00 | 0.00 |
| ATOM | 2326 | C    | VAL | X | 149 | 41.298 | 46.941 | 56.550 | 0.00 | 0.00 |
| ATOM | 2327 | O    | VAL | X | 149 | 41.331 | 47.785 | 57.471 | 0.00 | 0.00 |
| ATOM | 2328 | N    | GLY | X | 150 | 41.663 | 45.696 | 56.759 | 0.00 | 0.00 |
| ATOM | 2329 | H    | GLY | X | 150 | 41.570 | 45.119 | 55.935 | 0.00 | 0.00 |
| ATOM | 2330 | CA   | GLY | X | 150 | 42.139 | 45.128 | 58.051 | 0.00 | 0.00 |
| ATOM | 2331 | HA2  | GLY | X | 150 | 42.565 | 44.114 | 57.894 | 0.00 | 0.00 |
| ATOM | 2332 | HA3  | GLY | X | 150 | 42.917 | 45.779 | 58.484 | 0.00 | 0.00 |
| ATOM | 2333 | C    | GLY | X | 150 | 41.025 | 45.159 | 59.076 | 0.00 | 0.00 |
| ATOM | 2334 | O    | GLY | X | 150 | 39.851 | 45.402 | 58.799 | 0.00 | 0.00 |
| ATOM | 2335 | N    | ALA | X | 151 | 41.464 | 45.029 | 60.321 | 0.00 | 0.00 |
| ATOM | 2336 | H    | ALA | X | 151 | 42.429 | 44.742 | 60.401 | 0.00 | 0.00 |
| ATOM | 2337 | CA   | ALA | X | 151 | 40.618 | 45.055 | 61.477 | 0.00 | 0.00 |
| ATOM | 2338 | HA   | ALA | X | 151 | 39.773 | 44.371 | 61.404 | 0.00 | 0.00 |
| ATOM | 2339 | CB   | ALA | X | 151 | 41.433 | 44.609 | 62.680 | 0.00 | 0.00 |
| ATOM | 2340 | HB1  | ALA | X | 151 | 42.354 | 45.190 | 62.645 | 0.00 | 0.00 |
| ATOM | 2341 | HB2  | ALA | X | 151 | 40.856 | 44.791 | 63.587 | 0.00 | 0.00 |
| ATOM | 2342 | HB3  | ALA | X | 151 | 41.664 | 43.545 | 62.648 | 0.00 | 0.00 |
| ATOM | 2343 | C    | ALA | X | 151 | 40.056 | 46.429 | 61.755 | 0.00 | 0.00 |
| ATOM | 2344 | O    | ALA | X | 151 | 39.205 | 46.544 | 62.619 | 0.00 | 0.00 |
| ATOM | 2345 | N    | PHE | X | 152 | 40.531 | 47.450 | 60.983 | 0.00 | 0.00 |
| ATOM | 2346 | H    | PHE | X | 152 | 41.195 | 47.233 | 60.253 | 0.00 | 0.00 |
| ATOM | 2347 | CA   | PHE | X | 152 | 39.849 | 48.784 | 61.068 | 0.00 | 0.00 |
| ATOM | 2348 | HA   | PHE | X | 152 | 39.659 | 49.055 | 62.106 | 0.00 | 0.00 |
| ATOM | 2349 | CB   | PHE | X | 152 | 40.661 | 49.879 | 60.389 | 0.00 | 0.00 |

|      |      |      |     |   |     |        |        |        |      |      |
|------|------|------|-----|---|-----|--------|--------|--------|------|------|
| ATOM | 2350 | HB2  | PHE | X | 152 | 40.795 | 49.636 | 59.335 | 0.00 | 0.00 |
| ATOM | 2351 | HB3  | PHE | X | 152 | 40.065 | 50.785 | 60.489 | 0.00 | 0.00 |
| ATOM | 2352 | CG   | PHE | X | 152 | 42.063 | 49.996 | 60.951 | 0.00 | 0.00 |
| ATOM | 2353 | CD1  | PHE | X | 152 | 43.159 | 49.291 | 60.390 | 0.00 | 0.00 |
| ATOM | 2354 | HD1  | PHE | X | 152 | 43.058 | 48.617 | 59.552 | 0.00 | 0.00 |
| ATOM | 2355 | CE1  | PHE | X | 152 | 44.463 | 49.372 | 61.006 | 0.00 | 0.00 |
| ATOM | 2356 | HE1  | PHE | X | 152 | 45.242 | 48.763 | 60.571 | 0.00 | 0.00 |
| ATOM | 2357 | CZ   | PHE | X | 152 | 44.671 | 50.152 | 62.126 | 0.00 | 0.00 |
| ATOM | 2358 | HZ   | PHE | X | 152 | 45.636 | 50.058 | 62.601 | 0.00 | 0.00 |
| ATOM | 2359 | CE2  | PHE | X | 152 | 43.665 | 50.996 | 62.625 | 0.00 | 0.00 |
| ATOM | 2360 | HE2  | PHE | X | 152 | 43.863 | 51.614 | 63.488 | 0.00 | 0.00 |
| ATOM | 2361 | CD2  | PHE | X | 152 | 42.345 | 50.870 | 62.083 | 0.00 | 0.00 |
| ATOM | 2362 | HD2  | PHE | X | 152 | 41.552 | 51.468 | 62.507 | 0.00 | 0.00 |
| ATOM | 2363 | C    | PHE | X | 152 | 38.403 | 48.703 | 60.574 | 0.00 | 0.00 |
| ATOM | 2364 | O    | PHE | X | 152 | 37.558 | 49.381 | 61.187 | 0.00 | 0.00 |
| ATOM | 2365 | N    | GLY | X | 153 | 38.067 | 47.928 | 59.577 | 0.00 | 0.00 |
| ATOM | 2366 | H    | GLY | X | 153 | 38.717 | 47.249 | 59.205 | 0.00 | 0.00 |
| ATOM | 2367 | CA   | GLY | X | 153 | 36.730 | 47.886 | 58.974 | 0.00 | 0.00 |
| ATOM | 2368 | HA2  | GLY | X | 153 | 36.005 | 48.525 | 59.507 | 0.00 | 0.00 |
| ATOM | 2369 | HA3  | GLY | X | 153 | 36.923 | 48.259 | 57.952 | 0.00 | 0.00 |
| ATOM | 2370 | C    | GLY | X | 153 | 36.032 | 46.554 | 58.901 | 0.00 | 0.00 |
| ATOM | 2371 | O    | GLY | X | 153 | 34.811 | 46.541 | 59.040 | 0.00 | 0.00 |
| ATOM | 2372 | N    | PHE | X | 154 | 36.827 | 45.501 | 58.779 | 0.00 | 0.00 |
| ATOM | 2373 | H    | PHE | X | 154 | 37.782 | 45.651 | 58.487 | 0.00 | 0.00 |
| ATOM | 2374 | CA   | PHE | X | 154 | 36.236 | 44.207 | 58.558 | 0.00 | 0.00 |
| ATOM | 2375 | HA   | PHE | X | 154 | 35.183 | 44.218 | 58.277 | 0.00 | 0.00 |
| ATOM | 2376 | CB   | PHE | X | 154 | 37.074 | 43.640 | 57.359 | 0.00 | 0.00 |
| ATOM | 2377 | HB2  | PHE | X | 154 | 38.087 | 43.412 | 57.690 | 0.00 | 0.00 |
| ATOM | 2378 | HB3  | PHE | X | 154 | 36.655 | 42.656 | 57.149 | 0.00 | 0.00 |
| ATOM | 2379 | CG   | PHE | X | 154 | 37.047 | 44.336 | 55.977 | 0.00 | 0.00 |
| ATOM | 2380 | CD1  | PHE | X | 154 | 38.260 | 44.691 | 55.377 | 0.00 | 0.00 |
| ATOM | 2381 | HD1  | PHE | X | 154 | 39.126 | 44.651 | 56.021 | 0.00 | 0.00 |
| ATOM | 2382 | CE1  | PHE | X | 154 | 38.305 | 45.115 | 54.044 | 0.00 | 0.00 |
| ATOM | 2383 | HE1  | PHE | X | 154 | 39.244 | 45.250 | 53.527 | 0.00 | 0.00 |
| ATOM | 2384 | CZ   | PHE | X | 154 | 37.122 | 45.353 | 53.297 | 0.00 | 0.00 |
| ATOM | 2385 | HZ   | PHE | X | 154 | 37.054 | 45.528 | 52.234 | 0.00 | 0.00 |
| ATOM | 2386 | CE2  | PHE | X | 154 | 35.898 | 45.064 | 53.879 | 0.00 | 0.00 |
| ATOM | 2387 | HE2  | PHE | X | 154 | 34.978 | 45.116 | 53.317 | 0.00 | 0.00 |
| ATOM | 2388 | CD2  | PHE | X | 154 | 35.870 | 44.524 | 55.227 | 0.00 | 0.00 |
| ATOM | 2389 | HD2  | PHE | X | 154 | 34.948 | 44.216 | 55.697 | 0.00 | 0.00 |
| ATOM | 2390 | C    | PHE | X | 154 | 36.328 | 43.329 | 59.842 | 0.00 | 0.00 |
| ATOM | 2391 | O    | PHE | X | 154 | 36.180 | 42.131 | 59.664 | 0.00 | 0.00 |
| ATOM | 2392 | N    | LEU | X | 155 | 36.492 | 43.956 | 61.053 | 0.00 | 0.00 |
| ATOM | 2393 | H    | LEU | X | 155 | 36.970 | 44.840 | 61.151 | 0.00 | 0.00 |
| ATOM | 2394 | CA   | LEU | X | 155 | 36.225 | 43.282 | 62.365 | 0.00 | 0.00 |
| ATOM | 2395 | HA   | LEU | X | 155 | 36.472 | 42.223 | 62.292 | 0.00 | 0.00 |
| ATOM | 2396 | CB   | LEU | X | 155 | 37.214 | 43.890 | 63.404 | 0.00 | 0.00 |
| ATOM | 2397 | HB2  | LEU | X | 155 | 38.209 | 43.795 | 62.968 | 0.00 | 0.00 |
| ATOM | 2398 | HB3  | LEU | X | 155 | 37.104 | 44.945 | 63.655 | 0.00 | 0.00 |
| ATOM | 2399 | CG   | LEU | X | 155 | 37.122 | 43.116 | 64.689 | 0.00 | 0.00 |
| ATOM | 2400 | HG   | LEU | X | 155 | 36.987 | 42.044 | 64.549 | 0.00 | 0.00 |
| ATOM | 2401 | CD1  | LEU | X | 155 | 38.397 | 43.229 | 65.418 | 0.00 | 0.00 |
| ATOM | 2402 | HD11 | LEU | X | 155 | 39.201 | 42.920 | 64.751 | 0.00 | 0.00 |
| ATOM | 2403 | HD12 | LEU | X | 155 | 38.582 | 44.273 | 65.674 | 0.00 | 0.00 |
| ATOM | 2404 | HD13 | LEU | X | 155 | 38.407 | 42.581 | 66.294 | 0.00 | 0.00 |
| ATOM | 2405 | CD2  | LEU | X | 155 | 36.131 | 43.635 | 65.747 | 0.00 | 0.00 |
| ATOM | 2406 | HD21 | LEU | X | 155 | 36.338 | 44.617 | 66.172 | 0.00 | 0.00 |
| ATOM | 2407 | HD22 | LEU | X | 155 | 35.112 | 43.644 | 65.359 | 0.00 | 0.00 |
| ATOM | 2408 | HD23 | LEU | X | 155 | 36.085 | 42.904 | 66.554 | 0.00 | 0.00 |
| ATOM | 2409 | C    | LEU | X | 155 | 34.743 | 43.413 | 62.629 | 0.00 | 0.00 |
| ATOM | 2410 | O    | LEU | X | 155 | 34.096 | 44.394 | 62.367 | 0.00 | 0.00 |
| ATOM | 2411 | N    | ALA | X | 156 | 34.172 | 42.367 | 63.207 | 0.00 | 0.00 |
| ATOM | 2412 | H    | ALA | X | 156 | 34.807 | 41.593 | 63.338 | 0.00 | 0.00 |
| ATOM | 2413 | CA   | ALA | X | 156 | 32.933 | 42.245 | 63.820 | 0.00 | 0.00 |
| ATOM | 2414 | HA   | ALA | X | 156 | 32.560 | 43.218 | 64.141 | 0.00 | 0.00 |
| ATOM | 2415 | CB   | ALA | X | 156 | 32.001 | 41.551 | 62.920 | 0.00 | 0.00 |
| ATOM | 2416 | HB1  | ALA | X | 156 | 32.530 | 40.672 | 62.553 | 0.00 | 0.00 |
| ATOM | 2417 | HB2  | ALA | X | 156 | 31.155 | 41.167 | 63.492 | 0.00 | 0.00 |
| ATOM | 2418 | HB3  | ALA | X | 156 | 31.641 | 42.229 | 62.146 | 0.00 | 0.00 |
| ATOM | 2419 | C    | ALA | X | 156 | 33.144 | 41.435 | 65.159 | 0.00 | 0.00 |

|      |      |      |     |   |     |        |        |        |      |      |
|------|------|------|-----|---|-----|--------|--------|--------|------|------|
| ATOM | 2420 | O    | ALA | X | 156 | 33.964 | 40.515 | 65.241 | 0.00 | 0.00 |
| ATOM | 2421 | N    | LEU | X | 157 | 32.223 | 41.700 | 66.196 | 0.00 | 0.00 |
| ATOM | 2422 | H    | LEU | X | 157 | 31.508 | 42.387 | 66.003 | 0.00 | 0.00 |
| ATOM | 2423 | CA   | LEU | X | 157 | 32.243 | 41.060 | 67.475 | 0.00 | 0.00 |
| ATOM | 2424 | HA   | LEU | X | 157 | 32.900 | 40.192 | 67.437 | 0.00 | 0.00 |
| ATOM | 2425 | CB   | LEU | X | 157 | 32.912 | 41.950 | 68.561 | 0.00 | 0.00 |
| ATOM | 2426 | HB2  | LEU | X | 157 | 33.906 | 42.266 | 68.247 | 0.00 | 0.00 |
| ATOM | 2427 | HB3  | LEU | X | 157 | 32.218 | 42.750 | 68.816 | 0.00 | 0.00 |
| ATOM | 2428 | CG   | LEU | X | 157 | 33.128 | 41.240 | 69.960 | 0.00 | 0.00 |
| ATOM | 2429 | HG   | LEU | X | 157 | 32.159 | 40.850 | 70.271 | 0.00 | 0.00 |
| ATOM | 2430 | CD1  | LEU | X | 157 | 33.965 | 39.957 | 69.897 | 0.00 | 0.00 |
| ATOM | 2431 | HD11 | LEU | X | 157 | 33.775 | 39.358 | 70.787 | 0.00 | 0.00 |
| ATOM | 2432 | HD12 | LEU | X | 157 | 33.829 | 39.315 | 69.026 | 0.00 | 0.00 |
| ATOM | 2433 | HD13 | LEU | X | 157 | 35.029 | 40.160 | 69.775 | 0.00 | 0.00 |
| ATOM | 2434 | CD2  | LEU | X | 157 | 33.721 | 42.119 | 71.088 | 0.00 | 0.00 |
| ATOM | 2435 | HD21 | LEU | X | 157 | 32.869 | 42.707 | 71.431 | 0.00 | 0.00 |
| ATOM | 2436 | HD22 | LEU | X | 157 | 34.052 | 41.412 | 71.848 | 0.00 | 0.00 |
| ATOM | 2437 | HD23 | LEU | X | 157 | 34.495 | 42.811 | 70.757 | 0.00 | 0.00 |
| ATOM | 2438 | C    | LEU | X | 157 | 30.790 | 40.539 | 67.811 | 0.00 | 0.00 |
| ATOM | 2439 | O    | LEU | X | 157 | 30.141 | 41.134 | 68.638 | 0.00 | 0.00 |
| ATOM | 2440 | N    | PRO | X | 158 | 30.302 | 39.430 | 67.265 | 0.00 | 0.00 |
| ATOM | 2441 | CD   | PRO | X | 158 | 30.839 | 38.628 | 66.208 | 0.00 | 0.00 |
| ATOM | 2442 | HD2  | PRO | X | 158 | 31.378 | 37.757 | 66.582 | 0.00 | 0.00 |
| ATOM | 2443 | HD3  | PRO | X | 158 | 31.480 | 39.305 | 65.644 | 0.00 | 0.00 |
| ATOM | 2444 | CG   | PRO | X | 158 | 29.669 | 38.146 | 65.437 | 0.00 | 0.00 |
| ATOM | 2445 | HG2  | PRO | X | 158 | 30.059 | 37.283 | 64.898 | 0.00 | 0.00 |
| ATOM | 2446 | HG3  | PRO | X | 158 | 29.191 | 38.915 | 64.830 | 0.00 | 0.00 |
| ATOM | 2447 | CB   | PRO | X | 158 | 28.648 | 37.837 | 66.587 | 0.00 | 0.00 |
| ATOM | 2448 | HB2  | PRO | X | 158 | 28.894 | 36.878 | 67.044 | 0.00 | 0.00 |
| ATOM | 2449 | HB3  | PRO | X | 158 | 27.615 | 37.778 | 66.245 | 0.00 | 0.00 |
| ATOM | 2450 | CA   | PRO | X | 158 | 28.925 | 38.926 | 67.654 | 0.00 | 0.00 |
| ATOM | 2451 | HA   | PRO | X | 158 | 28.115 | 39.654 | 67.621 | 0.00 | 0.00 |
| ATOM | 2452 | C    | PRO | X | 158 | 28.916 | 38.443 | 69.097 | 0.00 | 0.00 |
| ATOM | 2453 | O    | PRO | X | 158 | 29.906 | 38.197 | 69.775 | 0.00 | 0.00 |
| ATOM | 2454 | N    | GLY | X | 159 | 27.746 | 38.156 | 69.633 | 0.00 | 0.00 |
| ATOM | 2455 | H    | GLY | X | 159 | 26.935 | 38.421 | 69.092 | 0.00 | 0.00 |
| ATOM | 2456 | CA   | GLY | X | 159 | 27.598 | 37.702 | 71.067 | 0.00 | 0.00 |
| ATOM | 2457 | HA2  | GLY | X | 159 | 26.676 | 37.088 | 71.102 | 0.00 | 0.00 |
| ATOM | 2458 | HA3  | GLY | X | 159 | 28.432 | 37.114 | 71.506 | 0.00 | 0.00 |
| ATOM | 2459 | C    | GLY | X | 159 | 27.259 | 38.796 | 72.005 | 0.00 | 0.00 |
| ATOM | 2460 | O    | GLY | X | 159 | 27.155 | 38.522 | 73.215 | 0.00 | 0.00 |
| ATOM | 2461 | N    | SER | X | 160 | 27.001 | 39.965 | 71.461 | 0.00 | 0.00 |
| ATOM | 2462 | H    | SER | X | 160 | 27.009 | 40.036 | 70.454 | 0.00 | 0.00 |
| ATOM | 2463 | CA   | SER | X | 160 | 26.873 | 41.262 | 72.065 | 0.00 | 0.00 |
| ATOM | 2464 | HA   | SER | X | 160 | 26.044 | 41.134 | 72.761 | 0.00 | 0.00 |
| ATOM | 2465 | CB   | SER | X | 160 | 28.109 | 41.679 | 72.841 | 0.00 | 0.00 |
| ATOM | 2466 | HB2  | SER | X | 160 | 27.910 | 42.566 | 73.443 | 0.00 | 0.00 |
| ATOM | 2467 | HB3  | SER | X | 160 | 28.297 | 40.966 | 73.644 | 0.00 | 0.00 |
| ATOM | 2468 | OG   | SER | X | 160 | 29.219 | 41.893 | 71.967 | 0.00 | 0.00 |
| ATOM | 2469 | HG   | SER | X | 160 | 29.915 | 41.259 | 72.155 | 0.00 | 0.00 |
| ATOM | 2470 | C    | SER | X | 160 | 26.444 | 42.336 | 70.982 | 0.00 | 0.00 |
| ATOM | 2471 | O    | SER | X | 160 | 26.697 | 42.144 | 69.807 | 0.00 | 0.00 |
| ATOM | 2472 | N    | ARG | X | 161 | 26.045 | 43.521 | 71.405 | 0.00 | 0.00 |
| ATOM | 2473 | H    | ARG | X | 161 | 26.216 | 43.695 | 72.385 | 0.00 | 0.00 |
| ATOM | 2474 | CA   | ARG | X | 161 | 25.533 | 44.605 | 70.597 | 0.00 | 0.00 |
| ATOM | 2475 | HA   | ARG | X | 161 | 25.425 | 44.258 | 69.569 | 0.00 | 0.00 |
| ATOM | 2476 | CB   | ARG | X | 161 | 24.089 | 45.061 | 71.063 | 0.00 | 0.00 |
| ATOM | 2477 | HB2  | ARG | X | 161 | 24.201 | 45.164 | 72.142 | 0.00 | 0.00 |
| ATOM | 2478 | HB3  | ARG | X | 161 | 23.823 | 46.059 | 70.714 | 0.00 | 0.00 |
| ATOM | 2479 | CG   | ARG | X | 161 | 22.937 | 44.117 | 70.949 | 0.00 | 0.00 |
| ATOM | 2480 | HG2  | ARG | X | 161 | 22.995 | 43.522 | 70.038 | 0.00 | 0.00 |
| ATOM | 2481 | HG3  | ARG | X | 161 | 23.045 | 43.375 | 71.740 | 0.00 | 0.00 |
| ATOM | 2482 | CD   | ARG | X | 161 | 21.519 | 44.732 | 70.936 | 0.00 | 0.00 |
| ATOM | 2483 | HD2  | ARG | X | 161 | 21.486 | 45.517 | 71.691 | 0.00 | 0.00 |
| ATOM | 2484 | HD3  | ARG | X | 161 | 21.199 | 45.078 | 69.953 | 0.00 | 0.00 |
| ATOM | 2485 | NE   | ARG | X | 161 | 20.546 | 43.676 | 71.329 | 0.00 | 0.00 |
| ATOM | 2486 | HE   | ARG | X | 161 | 20.928 | 42.756 | 71.165 | 0.00 | 0.00 |
| ATOM | 2487 | CZ   | ARG | X | 161 | 19.396 | 43.700 | 72.018 | 0.00 | 0.00 |
| ATOM | 2488 | NH1  | ARG | X | 161 | 18.836 | 44.745 | 72.509 | 0.00 | 0.00 |
| ATOM | 2489 | HH11 | ARG | X | 161 | 19.133 | 45.685 | 72.287 | 0.00 | 0.00 |



|      |      |      |     |   |     |        |        |        |      |      |
|------|------|------|-----|---|-----|--------|--------|--------|------|------|
| ATOM | 2490 | HH12 | ARG | X | 161 | 17.930 | 44.503 | 72.885 | 0.00 | 0.00 |
| ATOM | 2491 | NH2  | ARG | X | 161 | 18.677 | 42.654 | 72.225 | 0.00 | 0.00 |
| ATOM | 2492 | HH21 | ARG | X | 161 | 19.020 | 41.719 | 72.061 | 0.00 | 0.00 |
| ATOM | 2493 | HH22 | ARG | X | 161 | 17.791 | 42.650 | 72.710 | 0.00 | 0.00 |
| ATOM | 2494 | C    | ARG | X | 161 | 26.464 | 45.800 | 70.427 | 0.00 | 0.00 |
| ATOM | 2495 | O    | ARG | X | 161 | 26.094 | 46.851 | 69.874 | 0.00 | 0.00 |
| ATOM | 2496 | N    | GLU | X | 162 | 27.714 | 45.621 | 70.867 | 0.00 | 0.00 |
| ATOM | 2497 | H    | GLU | X | 162 | 27.886 | 44.681 | 71.195 | 0.00 | 0.00 |
| ATOM | 2498 | CA   | GLU | X | 162 | 28.719 | 46.660 | 71.078 | 0.00 | 0.00 |
| ATOM | 2499 | HA   | GLU | X | 162 | 28.264 | 47.538 | 71.538 | 0.00 | 0.00 |
| ATOM | 2500 | CB   | GLU | X | 162 | 29.840 | 46.185 | 72.057 | 0.00 | 0.00 |
| ATOM | 2501 | HB2  | GLU | X | 162 | 30.344 | 45.315 | 71.636 | 0.00 | 0.00 |
| ATOM | 2502 | HB3  | GLU | X | 162 | 30.528 | 47.028 | 72.127 | 0.00 | 0.00 |
| ATOM | 2503 | CG   | GLU | X | 162 | 29.239 | 45.854 | 73.431 | 0.00 | 0.00 |
| ATOM | 2504 | HG2  | GLU | X | 162 | 28.881 | 44.825 | 73.456 | 0.00 | 0.00 |
| ATOM | 2505 | HG3  | GLU | X | 162 | 30.140 | 45.896 | 74.042 | 0.00 | 0.00 |
| ATOM | 2506 | CD   | GLU | X | 162 | 28.318 | 46.926 | 74.023 | 0.00 | 0.00 |
| ATOM | 2507 | OE1  | GLU | X | 162 | 28.825 | 47.702 | 74.844 | 0.00 | 0.00 |
| ATOM | 2508 | OE2  | GLU | X | 162 | 27.081 | 46.882 | 73.832 | 0.00 | 0.00 |
| ATOM | 2509 | C    | GLU | X | 162 | 29.341 | 47.172 | 69.738 | 0.00 | 0.00 |
| ATOM | 2510 | O    | GLU | X | 162 | 29.635 | 48.390 | 69.657 | 0.00 | 0.00 |
| ATOM | 2511 | N    | ALA | X | 163 | 29.391 | 46.320 | 68.736 | 0.00 | 0.00 |
| ATOM | 2512 | H    | ALA | X | 163 | 29.061 | 45.384 | 68.922 | 0.00 | 0.00 |
| ATOM | 2513 | CA   | ALA | X | 163 | 29.821 | 46.753 | 67.318 | 0.00 | 0.00 |
| ATOM | 2514 | HA   | ALA | X | 163 | 29.721 | 47.832 | 67.197 | 0.00 | 0.00 |
| ATOM | 2515 | CB   | ALA | X | 163 | 31.306 | 46.373 | 67.166 | 0.00 | 0.00 |
| ATOM | 2516 | HB1  | ALA | X | 163 | 31.443 | 45.293 | 67.114 | 0.00 | 0.00 |
| ATOM | 2517 | HB2  | ALA | X | 163 | 31.660 | 46.709 | 66.192 | 0.00 | 0.00 |
| ATOM | 2518 | HB3  | ALA | X | 163 | 31.831 | 46.774 | 68.033 | 0.00 | 0.00 |
| ATOM | 2519 | C    | ALA | X | 163 | 28.907 | 46.090 | 66.282 | 0.00 | 0.00 |
| ATOM | 2520 | O    | ALA | X | 163 | 28.701 | 44.899 | 66.410 | 0.00 | 0.00 |
| ATOM | 2521 | N    | PRO | X | 164 | 28.487 | 46.790 | 65.245 | 0.00 | 0.00 |
| ATOM | 2522 | CD   | PRO | X | 164 | 28.699 | 48.232 | 64.995 | 0.00 | 0.00 |
| ATOM | 2523 | HD2  | PRO | X | 164 | 29.761 | 48.470 | 64.938 | 0.00 | 0.00 |
| ATOM | 2524 | HD3  | PRO | X | 164 | 28.175 | 48.781 | 65.777 | 0.00 | 0.00 |
| ATOM | 2525 | CG   | PRO | X | 164 | 27.958 | 48.601 | 63.713 | 0.00 | 0.00 |
| ATOM | 2526 | HG2  | PRO | X | 164 | 28.703 | 48.928 | 62.989 | 0.00 | 0.00 |
| ATOM | 2527 | HG3  | PRO | X | 164 | 27.374 | 49.501 | 63.910 | 0.00 | 0.00 |
| ATOM | 2528 | CB   | PRO | X | 164 | 27.163 | 47.325 | 63.377 | 0.00 | 0.00 |
| ATOM | 2529 | HB2  | PRO | X | 164 | 27.130 | 47.221 | 62.292 | 0.00 | 0.00 |
| ATOM | 2530 | HB3  | PRO | X | 164 | 26.140 | 47.400 | 63.745 | 0.00 | 0.00 |
| ATOM | 2531 | CA   | PRO | X | 164 | 27.911 | 46.196 | 64.081 | 0.00 | 0.00 |
| ATOM | 2532 | HA   | PRO | X | 164 | 27.171 | 45.477 | 64.431 | 0.00 | 0.00 |
| ATOM | 2533 | C    | PRO | X | 164 | 28.893 | 45.454 | 63.199 | 0.00 | 0.00 |
| ATOM | 2534 | O    | PRO | X | 164 | 28.664 | 44.321 | 62.851 | 0.00 | 0.00 |
| ATOM | 2535 | N    | GLY | X | 165 | 30.018 | 46.061 | 62.876 | 0.00 | 0.00 |
| ATOM | 2536 | H    | GLY | X | 165 | 30.309 | 46.909 | 63.342 | 0.00 | 0.00 |
| ATOM | 2537 | CA   | GLY | X | 165 | 31.135 | 45.439 | 62.207 | 0.00 | 0.00 |
| ATOM | 2538 | HA2  | GLY | X | 165 | 32.057 | 45.859 | 62.336 | 0.00 | 0.00 |
| ATOM | 2539 | HA3  | GLY | X | 165 | 31.352 | 44.428 | 62.562 | 0.00 | 0.00 |
| ATOM | 2540 | C    | GLY | X | 165 | 30.987 | 45.413 | 60.721 | 0.00 | 0.00 |
| ATOM | 2541 | O    | GLY | X | 165 | 30.068 | 46.038 | 60.146 | 0.00 | 0.00 |
| ATOM | 2542 | N    | ASN | X | 166 | 31.965 | 44.804 | 59.995 | 0.00 | 0.00 |
| ATOM | 2543 | H    | ASN | X | 166 | 32.735 | 44.339 | 60.453 | 0.00 | 0.00 |
| ATOM | 2544 | CA   | ASN | X | 166 | 31.967 | 44.682 | 58.583 | 0.00 | 0.00 |
| ATOM | 2545 | HA   | ASN | X | 166 | 32.926 | 44.212 | 58.365 | 0.00 | 0.00 |
| ATOM | 2546 | CB   | ASN | X | 166 | 30.821 | 43.705 | 58.154 | 0.00 | 0.00 |
| ATOM | 2547 | HB2  | ASN | X | 166 | 30.726 | 42.914 | 58.897 | 0.00 | 0.00 |
| ATOM | 2548 | HB3  | ASN | X | 166 | 29.887 | 44.265 | 58.191 | 0.00 | 0.00 |
| ATOM | 2549 | CG   | ASN | X | 166 | 31.104 | 43.183 | 56.760 | 0.00 | 0.00 |
| ATOM | 2550 | OD1  | ASN | X | 166 | 32.234 | 42.807 | 56.412 | 0.00 | 0.00 |
| ATOM | 2551 | ND2  | ASN | X | 166 | 30.085 | 43.072 | 55.911 | 0.00 | 0.00 |
| ATOM | 2552 | HD21 | ASN | X | 166 | 30.269 | 42.806 | 54.954 | 0.00 | 0.00 |
| ATOM | 2553 | HD22 | ASN | X | 166 | 29.187 | 43.359 | 56.272 | 0.00 | 0.00 |
| ATOM | 2554 | C    | ASN | X | 166 | 31.878 | 45.987 | 57.778 | 0.00 | 0.00 |
| ATOM | 2555 | O    | ASN | X | 166 | 31.748 | 45.933 | 56.526 | 0.00 | 0.00 |
| ATOM | 2556 | N    | VAL | X | 167 | 31.898 | 47.134 | 58.420 | 0.00 | 0.00 |
| ATOM | 2557 | H    | VAL | X | 167 | 31.758 | 47.185 | 59.419 | 0.00 | 0.00 |
| ATOM | 2558 | CA   | VAL | X | 167 | 31.685 | 48.474 | 57.804 | 0.00 | 0.00 |
| ATOM | 2559 | HA   | VAL | X | 167 | 30.785 | 48.518 | 57.191 | 0.00 | 0.00 |

|      |      |      |     |   |     |        |        |        |      |      |
|------|------|------|-----|---|-----|--------|--------|--------|------|------|
| ATOM | 2560 | CB   | VAL | X | 167 | 31.670 | 49.568 | 58.935 | 0.00 | 0.00 |
| ATOM | 2561 | HB   | VAL | X | 167 | 31.542 | 50.553 | 58.487 | 0.00 | 0.00 |
| ATOM | 2562 | CG1  | VAL | X | 167 | 30.424 | 49.395 | 59.832 | 0.00 | 0.00 |
| ATOM | 2563 | HG11 | VAL | X | 167 | 30.327 | 48.361 | 60.162 | 0.00 | 0.00 |
| ATOM | 2564 | HG12 | VAL | X | 167 | 30.431 | 49.852 | 60.822 | 0.00 | 0.00 |
| ATOM | 2565 | HG13 | VAL | X | 167 | 29.538 | 49.552 | 59.217 | 0.00 | 0.00 |
| ATOM | 2566 | CG2  | VAL | X | 167 | 32.909 | 49.564 | 59.807 | 0.00 | 0.00 |
| ATOM | 2567 | HG21 | VAL | X | 167 | 32.873 | 50.510 | 60.348 | 0.00 | 0.00 |
| ATOM | 2568 | HG22 | VAL | X | 167 | 32.743 | 48.774 | 60.540 | 0.00 | 0.00 |
| ATOM | 2569 | HG23 | VAL | X | 167 | 33.789 | 49.265 | 59.237 | 0.00 | 0.00 |
| ATOM | 2570 | C    | VAL | X | 167 | 32.719 | 48.883 | 56.714 | 0.00 | 0.00 |
| ATOM | 2571 | O    | VAL | X | 167 | 32.437 | 49.923 | 56.056 | 0.00 | 0.00 |
| ATOM | 2572 | N    | GLY | X | 168 | 33.750 | 48.087 | 56.444 | 0.00 | 0.00 |
| ATOM | 2573 | H    | GLY | X | 168 | 33.897 | 47.265 | 57.012 | 0.00 | 0.00 |
| ATOM | 2574 | CA   | GLY | X | 168 | 34.718 | 48.286 | 55.361 | 0.00 | 0.00 |
| ATOM | 2575 | HA2  | GLY | X | 168 | 35.115 | 49.303 | 55.462 | 0.00 | 0.00 |
| ATOM | 2576 | HA3  | GLY | X | 168 | 35.509 | 47.563 | 55.461 | 0.00 | 0.00 |
| ATOM | 2577 | C    | GLY | X | 168 | 34.114 | 48.121 | 53.991 | 0.00 | 0.00 |
| ATOM | 2578 | O    | GLY | X | 168 | 34.544 | 48.705 | 52.996 | 0.00 | 0.00 |
| ATOM | 2579 | N    | LEU | X | 169 | 33.008 | 47.354 | 53.876 | 0.00 | 0.00 |
| ATOM | 2580 | H    | LEU | X | 169 | 32.753 | 46.795 | 54.677 | 0.00 | 0.00 |
| ATOM | 2581 | CA   | LEU | X | 169 | 32.138 | 47.339 | 52.645 | 0.00 | 0.00 |
| ATOM | 2582 | HA   | LEU | X | 169 | 32.773 | 47.328 | 51.760 | 0.00 | 0.00 |
| ATOM | 2583 | CB   | LEU | X | 169 | 31.313 | 46.044 | 52.553 | 0.00 | 0.00 |
| ATOM | 2584 | HB2  | LEU | X | 169 | 30.698 | 46.027 | 53.453 | 0.00 | 0.00 |
| ATOM | 2585 | HB3  | LEU | X | 169 | 30.696 | 46.122 | 51.658 | 0.00 | 0.00 |
| ATOM | 2586 | CG   | LEU | X | 169 | 32.074 | 44.766 | 52.387 | 0.00 | 0.00 |
| ATOM | 2587 | HG   | LEU | X | 169 | 32.863 | 44.739 | 53.139 | 0.00 | 0.00 |
| ATOM | 2588 | CD1  | LEU | X | 169 | 31.012 | 43.637 | 52.570 | 0.00 | 0.00 |
| ATOM | 2589 | HD11 | LEU | X | 169 | 31.583 | 42.719 | 52.427 | 0.00 | 0.00 |
| ATOM | 2590 | HD12 | LEU | X | 169 | 30.541 | 43.653 | 53.553 | 0.00 | 0.00 |
| ATOM | 2591 | HD13 | LEU | X | 169 | 30.221 | 43.574 | 51.822 | 0.00 | 0.00 |
| ATOM | 2592 | CD2  | LEU | X | 169 | 32.672 | 44.597 | 51.004 | 0.00 | 0.00 |
| ATOM | 2593 | HD21 | LEU | X | 169 | 33.285 | 43.695 | 50.987 | 0.00 | 0.00 |
| ATOM | 2594 | HD22 | LEU | X | 169 | 31.920 | 44.576 | 50.216 | 0.00 | 0.00 |
| ATOM | 2595 | HD23 | LEU | X | 169 | 33.206 | 45.540 | 50.882 | 0.00 | 0.00 |
| ATOM | 2596 | C    | LEU | X | 169 | 31.175 | 48.560 | 52.589 | 0.00 | 0.00 |
| ATOM | 2597 | O    | LEU | X | 169 | 30.797 | 48.966 | 51.567 | 0.00 | 0.00 |
| ATOM | 2598 | N    | LEU | X | 170 | 30.768 | 49.086 | 53.765 | 0.00 | 0.00 |
| ATOM | 2599 | H    | LEU | X | 170 | 31.050 | 48.578 | 54.591 | 0.00 | 0.00 |
| ATOM | 2600 | CA   | LEU | X | 170 | 29.914 | 50.287 | 53.892 | 0.00 | 0.00 |
| ATOM | 2601 | HA   | LEU | X | 170 | 29.073 | 50.237 | 53.199 | 0.00 | 0.00 |
| ATOM | 2602 | CB   | LEU | X | 170 | 29.333 | 50.543 | 55.318 | 0.00 | 0.00 |
| ATOM | 2603 | HB2  | LEU | X | 170 | 28.781 | 49.649 | 55.608 | 0.00 | 0.00 |
| ATOM | 2604 | HB3  | LEU | X | 170 | 30.115 | 50.619 | 56.073 | 0.00 | 0.00 |
| ATOM | 2605 | CG   | LEU | X | 170 | 28.353 | 51.739 | 55.544 | 0.00 | 0.00 |
| ATOM | 2606 | HG   | LEU | X | 170 | 28.951 | 52.647 | 55.459 | 0.00 | 0.00 |
| ATOM | 2607 | CD1  | LEU | X | 170 | 27.204 | 51.718 | 54.457 | 0.00 | 0.00 |
| ATOM | 2608 | HD11 | LEU | X | 170 | 26.721 | 50.769 | 54.224 | 0.00 | 0.00 |
| ATOM | 2609 | HD12 | LEU | X | 170 | 26.359 | 52.351 | 54.730 | 0.00 | 0.00 |
| ATOM | 2610 | HD13 | LEU | X | 170 | 27.559 | 52.162 | 53.528 | 0.00 | 0.00 |
| ATOM | 2611 | CD2  | LEU | X | 170 | 27.660 | 51.598 | 56.940 | 0.00 | 0.00 |
| ATOM | 2612 | HD21 | LEU | X | 170 | 27.032 | 50.711 | 56.858 | 0.00 | 0.00 |
| ATOM | 2613 | HD22 | LEU | X | 170 | 28.430 | 51.523 | 57.709 | 0.00 | 0.00 |
| ATOM | 2614 | HD23 | LEU | X | 170 | 26.917 | 52.378 | 57.104 | 0.00 | 0.00 |
| ATOM | 2615 | C    | LEU | X | 170 | 30.665 | 51.609 | 53.440 | 0.00 | 0.00 |
| ATOM | 2616 | O    | LEU | X | 170 | 30.077 | 52.425 | 52.731 | 0.00 | 0.00 |
| ATOM | 2617 | N    | ASP | X | 171 | 31.964 | 51.721 | 53.690 | 0.00 | 0.00 |
| ATOM | 2618 | H    | ASP | X | 171 | 32.367 | 51.016 | 54.292 | 0.00 | 0.00 |
| ATOM | 2619 | CA   | ASP | X | 171 | 32.715 | 52.857 | 53.236 | 0.00 | 0.00 |
| ATOM | 2620 | HA   | ASP | X | 171 | 32.275 | 53.757 | 53.664 | 0.00 | 0.00 |
| ATOM | 2621 | CB   | ASP | X | 171 | 34.175 | 52.561 | 53.718 | 0.00 | 0.00 |
| ATOM | 2622 | HB2  | ASP | X | 171 | 34.517 | 51.623 | 53.279 | 0.00 | 0.00 |
| ATOM | 2623 | HB3  | ASP | X | 171 | 34.813 | 53.305 | 53.242 | 0.00 | 0.00 |
| ATOM | 2624 | CG   | ASP | X | 171 | 34.587 | 52.565 | 55.251 | 0.00 | 0.00 |
| ATOM | 2625 | OD1  | ASP | X | 171 | 33.739 | 52.825 | 56.156 | 0.00 | 0.00 |
| ATOM | 2626 | OD2  | ASP | X | 171 | 35.760 | 52.266 | 55.486 | 0.00 | 0.00 |
| ATOM | 2627 | C    | ASP | X | 171 | 32.709 | 52.978 | 51.762 | 0.00 | 0.00 |
| ATOM | 2628 | O    | ASP | X | 171 | 32.672 | 54.041 | 51.210 | 0.00 | 0.00 |
| ATOM | 2629 | N    | GLN | X | 172 | 32.808 | 51.826 | 51.070 | 0.00 | 0.00 |

|      |      |      |     |   |     |        |        |        |      |      |
|------|------|------|-----|---|-----|--------|--------|--------|------|------|
| ATOM | 2630 | H    | GLN | X | 172 | 32.927 | 50.991 | 51.626 | 0.00 | 0.00 |
| ATOM | 2631 | CA   | GLN | X | 172 | 32.682 | 51.680 | 49.617 | 0.00 | 0.00 |
| ATOM | 2632 | HA   | GLN | X | 172 | 33.399 | 52.311 | 49.093 | 0.00 | 0.00 |
| ATOM | 2633 | CB   | GLN | X | 172 | 32.957 | 50.387 | 49.078 | 0.00 | 0.00 |
| ATOM | 2634 | HB2  | GLN | X | 172 | 32.251 | 49.721 | 49.573 | 0.00 | 0.00 |
| ATOM | 2635 | HB3  | GLN | X | 172 | 32.706 | 50.347 | 48.018 | 0.00 | 0.00 |
| ATOM | 2636 | CG   | GLN | X | 172 | 34.341 | 49.818 | 49.390 | 0.00 | 0.00 |
| ATOM | 2637 | HG2  | GLN | X | 172 | 35.106 | 50.428 | 48.910 | 0.00 | 0.00 |
| ATOM | 2638 | HG3  | GLN | X | 172 | 34.506 | 49.788 | 50.467 | 0.00 | 0.00 |
| ATOM | 2639 | CD   | GLN | X | 172 | 34.467 | 48.346 | 48.956 | 0.00 | 0.00 |
| ATOM | 2640 | OE1  | GLN | X | 172 | 33.567 | 47.706 | 48.449 | 0.00 | 0.00 |
| ATOM | 2641 | NE2  | GLN | X | 172 | 35.526 | 47.573 | 49.247 | 0.00 | 0.00 |
| ATOM | 2642 | HE21 | GLN | X | 172 | 35.493 | 46.581 | 49.060 | 0.00 | 0.00 |
| ATOM | 2643 | HE22 | GLN | X | 172 | 36.301 | 47.978 | 49.753 | 0.00 | 0.00 |
| ATOM | 2644 | C    | GLN | X | 172 | 31.287 | 52.120 | 49.121 | 0.00 | 0.00 |
| ATOM | 2645 | O    | GLN | X | 172 | 31.178 | 52.934 | 48.241 | 0.00 | 0.00 |
| ATOM | 2646 | N    | ARG | X | 173 | 30.196 | 51.617 | 49.702 | 0.00 | 0.00 |
| ATOM | 2647 | H    | ARG | X | 173 | 30.341 | 50.903 | 50.400 | 0.00 | 0.00 |
| ATOM | 2648 | CA   | ARG | X | 173 | 28.730 | 52.099 | 49.514 | 0.00 | 0.00 |
| ATOM | 2649 | HA   | ARG | X | 173 | 28.444 | 51.955 | 48.472 | 0.00 | 0.00 |
| ATOM | 2650 | CB   | ARG | X | 173 | 27.805 | 51.274 | 50.483 | 0.00 | 0.00 |
| ATOM | 2651 | HB2  | ARG | X | 173 | 27.951 | 50.240 | 50.171 | 0.00 | 0.00 |
| ATOM | 2652 | HB3  | ARG | X | 173 | 28.074 | 51.293 | 51.539 | 0.00 | 0.00 |
| ATOM | 2653 | CG   | ARG | X | 173 | 26.346 | 51.703 | 50.445 | 0.00 | 0.00 |
| ATOM | 2654 | HG2  | ARG | X | 173 | 26.290 | 52.751 | 50.742 | 0.00 | 0.00 |
| ATOM | 2655 | HG3  | ARG | X | 173 | 25.955 | 51.498 | 49.449 | 0.00 | 0.00 |
| ATOM | 2656 | CD   | ARG | X | 173 | 25.364 | 51.059 | 51.393 | 0.00 | 0.00 |
| ATOM | 2657 | HD2  | ARG | X | 173 | 25.680 | 51.288 | 52.410 | 0.00 | 0.00 |
| ATOM | 2658 | HD3  | ARG | X | 173 | 24.371 | 51.451 | 51.173 | 0.00 | 0.00 |
| ATOM | 2659 | NE   | ARG | X | 173 | 25.435 | 49.582 | 51.255 | 0.00 | 0.00 |
| ATOM | 2660 | HE   | ARG | X | 173 | 25.576 | 49.220 | 50.323 | 0.00 | 0.00 |
| ATOM | 2661 | CZ   | ARG | X | 173 | 25.091 | 48.682 | 52.155 | 0.00 | 0.00 |
| ATOM | 2662 | NH1  | ARG | X | 173 | 24.611 | 49.204 | 53.287 | 0.00 | 0.00 |
| ATOM | 2663 | HH11 | ARG | X | 173 | 24.294 | 50.160 | 53.211 | 0.00 | 0.00 |
| ATOM | 2664 | HH12 | ARG | X | 173 | 24.254 | 48.587 | 54.002 | 0.00 | 0.00 |
| ATOM | 2665 | NH2  | ARG | X | 173 | 25.202 | 47.388 | 51.956 | 0.00 | 0.00 |
| ATOM | 2666 | HH21 | ARG | X | 173 | 25.461 | 46.994 | 51.063 | 0.00 | 0.00 |
| ATOM | 2667 | HH22 | ARG | X | 173 | 25.172 | 46.825 | 52.794 | 0.00 | 0.00 |
| ATOM | 2668 | C    | ARG | X | 173 | 28.580 | 53.591 | 49.786 | 0.00 | 0.00 |
| ATOM | 2669 | O    | ARG | X | 173 | 27.655 | 54.181 | 49.243 | 0.00 | 0.00 |
| ATOM | 2670 | N    | LEU | X | 174 | 29.405 | 54.210 | 50.665 | 0.00 | 0.00 |
| ATOM | 2671 | H    | LEU | X | 174 | 30.058 | 53.726 | 51.266 | 0.00 | 0.00 |
| ATOM | 2672 | CA   | LEU | X | 174 | 29.249 | 55.582 | 50.959 | 0.00 | 0.00 |
| ATOM | 2673 | HA   | LEU | X | 174 | 28.175 | 55.763 | 51.003 | 0.00 | 0.00 |
| ATOM | 2674 | CB   | LEU | X | 174 | 29.783 | 55.819 | 52.437 | 0.00 | 0.00 |
| ATOM | 2675 | HB2  | LEU | X | 174 | 29.127 | 55.282 | 53.122 | 0.00 | 0.00 |
| ATOM | 2676 | HB3  | LEU | X | 174 | 30.828 | 55.510 | 52.450 | 0.00 | 0.00 |
| ATOM | 2677 | CG   | LEU | X | 174 | 29.689 | 57.244 | 52.858 | 0.00 | 0.00 |
| ATOM | 2678 | HG   | LEU | X | 174 | 30.073 | 57.838 | 52.028 | 0.00 | 0.00 |
| ATOM | 2679 | CD1  | LEU | X | 174 | 28.231 | 57.618 | 53.053 | 0.00 | 0.00 |
| ATOM | 2680 | HD11 | LEU | X | 174 | 27.660 | 57.483 | 52.135 | 0.00 | 0.00 |
| ATOM | 2681 | HD12 | LEU | X | 174 | 27.742 | 57.092 | 53.873 | 0.00 | 0.00 |
| ATOM | 2682 | HD13 | LEU | X | 174 | 28.268 | 58.695 | 53.216 | 0.00 | 0.00 |
| ATOM | 2683 | CD2  | LEU | X | 174 | 30.558 | 57.530 | 54.128 | 0.00 | 0.00 |
| ATOM | 2684 | HD21 | LEU | X | 174 | 30.018 | 57.187 | 55.010 | 0.00 | 0.00 |
| ATOM | 2685 | HD22 | LEU | X | 174 | 31.621 | 57.289 | 54.135 | 0.00 | 0.00 |
| ATOM | 2686 | HD23 | LEU | X | 174 | 30.444 | 58.610 | 54.221 | 0.00 | 0.00 |
| ATOM | 2687 | C    | LEU | X | 174 | 29.935 | 56.482 | 49.882 | 0.00 | 0.00 |
| ATOM | 2688 | O    | LEU | X | 174 | 29.350 | 57.384 | 49.367 | 0.00 | 0.00 |
| ATOM | 2689 | N    | ALA | X | 175 | 31.061 | 56.002 | 49.329 | 0.00 | 0.00 |
| ATOM | 2690 | H    | ALA | X | 175 | 31.488 | 55.223 | 49.810 | 0.00 | 0.00 |
| ATOM | 2691 | CA   | ALA | X | 175 | 31.689 | 56.498 | 48.046 | 0.00 | 0.00 |
| ATOM | 2692 | HA   | ALA | X | 175 | 31.889 | 57.570 | 48.056 | 0.00 | 0.00 |
| ATOM | 2693 | CB   | ALA | X | 175 | 33.019 | 55.800 | 47.828 | 0.00 | 0.00 |
| ATOM | 2694 | HB1  | ALA | X | 175 | 33.690 | 56.068 | 48.644 | 0.00 | 0.00 |
| ATOM | 2695 | HB2  | ALA | X | 175 | 32.681 | 54.790 | 47.595 | 0.00 | 0.00 |
| ATOM | 2696 | HB3  | ALA | X | 175 | 33.466 | 56.245 | 46.939 | 0.00 | 0.00 |
| ATOM | 2697 | C    | ALA | X | 175 | 30.718 | 56.381 | 46.833 | 0.00 | 0.00 |
| ATOM | 2698 | O    | ALA | X | 175 | 30.727 | 57.318 | 46.092 | 0.00 | 0.00 |
| ATOM | 2699 | N    | LEU | X | 176 | 29.955 | 55.303 | 46.775 | 0.00 | 0.00 |

|      |      |      |     |   |     |        |        |        |      |      |
|------|------|------|-----|---|-----|--------|--------|--------|------|------|
| ATOM | 2700 | H    | LEU | X | 176 | 30.011 | 54.641 | 47.536 | 0.00 | 0.00 |
| ATOM | 2701 | CA   | LEU | X | 176 | 29.012 | 55.091 | 45.697 | 0.00 | 0.00 |
| ATOM | 2702 | HA   | LEU | X | 176 | 29.558 | 55.397 | 44.804 | 0.00 | 0.00 |
| ATOM | 2703 | CB   | LEU | X | 176 | 28.554 | 53.600 | 45.528 | 0.00 | 0.00 |
| ATOM | 2704 | HB2  | LEU | X | 176 | 28.169 | 53.194 | 46.463 | 0.00 | 0.00 |
| ATOM | 2705 | HB3  | LEU | X | 176 | 27.869 | 53.518 | 44.684 | 0.00 | 0.00 |
| ATOM | 2706 | CG   | LEU | X | 176 | 29.712 | 52.716 | 45.132 | 0.00 | 0.00 |
| ATOM | 2707 | HG   | LEU | X | 176 | 30.597 | 53.020 | 45.691 | 0.00 | 0.00 |
| ATOM | 2708 | CD1  | LEU | X | 176 | 29.407 | 51.254 | 45.547 | 0.00 | 0.00 |
| ATOM | 2709 | HD11 | LEU | X | 176 | 29.330 | 51.182 | 46.632 | 0.00 | 0.00 |
| ATOM | 2710 | HD12 | LEU | X | 176 | 28.519 | 50.791 | 45.118 | 0.00 | 0.00 |
| ATOM | 2711 | HD13 | LEU | X | 176 | 30.129 | 50.493 | 45.247 | 0.00 | 0.00 |
| ATOM | 2712 | CD2  | LEU | X | 176 | 30.026 | 52.742 | 43.656 | 0.00 | 0.00 |
| ATOM | 2713 | HD21 | LEU | X | 176 | 29.131 | 52.412 | 43.128 | 0.00 | 0.00 |
| ATOM | 2714 | HD22 | LEU | X | 176 | 30.359 | 53.690 | 43.232 | 0.00 | 0.00 |
| ATOM | 2715 | HD23 | LEU | X | 176 | 30.870 | 52.091 | 43.428 | 0.00 | 0.00 |
| ATOM | 2716 | C    | LEU | X | 176 | 27.823 | 56.065 | 45.808 | 0.00 | 0.00 |
| ATOM | 2717 | O    | LEU | X | 176 | 27.241 | 56.392 | 44.774 | 0.00 | 0.00 |
| ATOM | 2718 | N    | GLN | X | 177 | 27.542 | 56.647 | 47.016 | 0.00 | 0.00 |
| ATOM | 2719 | H    | GLN | X | 177 | 28.120 | 56.338 | 47.785 | 0.00 | 0.00 |
| ATOM | 2720 | CA   | GLN | X | 177 | 26.595 | 57.814 | 47.058 | 0.00 | 0.00 |
| ATOM | 2721 | HA   | GLN | X | 177 | 25.656 | 57.593 | 46.549 | 0.00 | 0.00 |
| ATOM | 2722 | CB   | GLN | X | 177 | 26.108 | 57.928 | 48.604 | 0.00 | 0.00 |
| ATOM | 2723 | HB2  | GLN | X | 177 | 27.003 | 57.850 | 49.221 | 0.00 | 0.00 |
| ATOM | 2724 | HB3  | GLN | X | 177 | 25.687 | 58.921 | 48.764 | 0.00 | 0.00 |
| ATOM | 2725 | CG   | GLN | X | 177 | 25.115 | 56.888 | 48.948 | 0.00 | 0.00 |
| ATOM | 2726 | HG2  | GLN | X | 177 | 24.124 | 57.231 | 48.649 | 0.00 | 0.00 |
| ATOM | 2727 | HG3  | GLN | X | 177 | 25.284 | 55.978 | 48.373 | 0.00 | 0.00 |
| ATOM | 2728 | CD   | GLN | X | 177 | 25.058 | 56.533 | 50.458 | 0.00 | 0.00 |
| ATOM | 2729 | OE1  | GLN | X | 177 | 24.574 | 57.436 | 51.181 | 0.00 | 0.00 |
| ATOM | 2730 | NE2  | GLN | X | 177 | 25.456 | 55.377 | 50.881 | 0.00 | 0.00 |
| ATOM | 2731 | HE21 | GLN | X | 177 | 25.192 | 55.144 | 51.828 | 0.00 | 0.00 |
| ATOM | 2732 | HE22 | GLN | X | 177 | 25.923 | 54.792 | 50.203 | 0.00 | 0.00 |
| ATOM | 2733 | C    | GLN | X | 177 | 27.291 | 59.133 | 46.547 | 0.00 | 0.00 |
| ATOM | 2734 | O    | GLN | X | 177 | 26.632 | 59.791 | 45.700 | 0.00 | 0.00 |
| ATOM | 2735 | N    | TRP | X | 178 | 28.523 | 59.476 | 46.867 | 0.00 | 0.00 |
| ATOM | 2736 | H    | TRP | X | 178 | 29.012 | 58.918 | 47.552 | 0.00 | 0.00 |
| ATOM | 2737 | CA   | TRP | X | 178 | 29.245 | 60.568 | 46.294 | 0.00 | 0.00 |
| ATOM | 2738 | HA   | TRP | X | 178 | 28.668 | 61.470 | 46.498 | 0.00 | 0.00 |
| ATOM | 2739 | CB   | TRP | X | 178 | 30.656 | 60.624 | 46.957 | 0.00 | 0.00 |
| ATOM | 2740 | HB2  | TRP | X | 178 | 30.505 | 60.414 | 48.016 | 0.00 | 0.00 |
| ATOM | 2741 | HB3  | TRP | X | 178 | 31.365 | 59.868 | 46.619 | 0.00 | 0.00 |
| ATOM | 2742 | CG   | TRP | X | 178 | 31.293 | 61.939 | 46.869 | 0.00 | 0.00 |
| ATOM | 2743 | CD1  | TRP | X | 178 | 31.239 | 62.914 | 47.817 | 0.00 | 0.00 |
| ATOM | 2744 | HD1  | TRP | X | 178 | 30.714 | 62.663 | 48.726 | 0.00 | 0.00 |
| ATOM | 2745 | NE1  | TRP | X | 178 | 31.857 | 64.058 | 47.406 | 0.00 | 0.00 |
| ATOM | 2746 | HE1  | TRP | X | 178 | 31.893 | 64.863 | 48.014 | 0.00 | 0.00 |
| ATOM | 2747 | CE2  | TRP | X | 178 | 32.608 | 63.806 | 46.271 | 0.00 | 0.00 |
| ATOM | 2748 | CZ2  | TRP | X | 178 | 33.467 | 64.525 | 45.410 | 0.00 | 0.00 |
| ATOM | 2749 | HZ2  | TRP | X | 178 | 33.718 | 65.531 | 45.711 | 0.00 | 0.00 |
| ATOM | 2750 | CH2  | TRP | X | 178 | 33.944 | 64.000 | 44.153 | 0.00 | 0.00 |
| ATOM | 2751 | HH2  | TRP | X | 178 | 34.718 | 64.482 | 43.575 | 0.00 | 0.00 |
| ATOM | 2752 | CZ3  | TRP | X | 178 | 33.470 | 62.710 | 43.746 | 0.00 | 0.00 |
| ATOM | 2753 | HZ3  | TRP | X | 178 | 33.801 | 62.276 | 42.815 | 0.00 | 0.00 |
| ATOM | 2754 | CE3  | TRP | X | 178 | 32.506 | 62.058 | 44.594 | 0.00 | 0.00 |
| ATOM | 2755 | HE3  | TRP | X | 178 | 31.898 | 61.229 | 44.263 | 0.00 | 0.00 |
| ATOM | 2756 | CD2  | TRP | X | 178 | 32.096 | 62.568 | 45.841 | 0.00 | 0.00 |
| ATOM | 2757 | C    | TRP | X | 178 | 29.375 | 60.439 | 44.741 | 0.00 | 0.00 |
| ATOM | 2758 | O    | TRP | X | 178 | 29.115 | 61.398 | 44.018 | 0.00 | 0.00 |
| ATOM | 2759 | N    | VAL | X | 179 | 29.709 | 59.181 | 44.269 | 0.00 | 0.00 |
| ATOM | 2760 | H    | VAL | X | 179 | 29.962 | 58.469 | 44.940 | 0.00 | 0.00 |
| ATOM | 2761 | CA   | VAL | X | 179 | 29.779 | 58.917 | 42.751 | 0.00 | 0.00 |
| ATOM | 2762 | HA   | VAL | X | 179 | 30.552 | 59.494 | 42.244 | 0.00 | 0.00 |
| ATOM | 2763 | CB   | VAL | X | 179 | 30.178 | 57.449 | 42.486 | 0.00 | 0.00 |
| ATOM | 2764 | HB   | VAL | X | 179 | 29.699 | 56.687 | 43.101 | 0.00 | 0.00 |
| ATOM | 2765 | CG1  | VAL | X | 179 | 30.007 | 57.070 | 41.033 | 0.00 | 0.00 |
| ATOM | 2766 | HG11 | VAL | X | 179 | 30.588 | 56.165 | 40.854 | 0.00 | 0.00 |
| ATOM | 2767 | HG12 | VAL | X | 179 | 28.996 | 56.692 | 40.883 | 0.00 | 0.00 |
| ATOM | 2768 | HG13 | VAL | X | 179 | 30.287 | 57.856 | 40.332 | 0.00 | 0.00 |
| ATOM | 2769 | CG2  | VAL | X | 179 | 31.681 | 57.353 | 42.926 | 0.00 | 0.00 |

|      |      |      |     |   |     |        |        |        |      |      |
|------|------|------|-----|---|-----|--------|--------|--------|------|------|
| ATOM | 2770 | HG21 | VAL | X | 179 | 31.924 | 56.292 | 42.867 | 0.00 | 0.00 |
| ATOM | 2771 | HG22 | VAL | X | 179 | 32.370 | 57.974 | 42.352 | 0.00 | 0.00 |
| ATOM | 2772 | HG23 | VAL | X | 179 | 31.879 | 57.683 | 43.945 | 0.00 | 0.00 |
| ATOM | 2773 | C    | VAL | X | 179 | 28.466 | 59.228 | 42.075 | 0.00 | 0.00 |
| ATOM | 2774 | O    | VAL | X | 179 | 28.481 | 59.847 | 41.017 | 0.00 | 0.00 |
| ATOM | 2775 | N    | GLN | X | 180 | 27.293 | 58.863 | 42.613 | 0.00 | 0.00 |
| ATOM | 2776 | H    | GLN | X | 180 | 27.336 | 58.303 | 43.452 | 0.00 | 0.00 |
| ATOM | 2777 | CA   | GLN | X | 180 | 25.942 | 59.444 | 42.160 | 0.00 | 0.00 |
| ATOM | 2778 | HA   | GLN | X | 180 | 25.745 | 59.224 | 41.111 | 0.00 | 0.00 |
| ATOM | 2779 | CB   | GLN | X | 180 | 24.887 | 58.826 | 43.057 | 0.00 | 0.00 |
| ATOM | 2780 | HB2  | GLN | X | 180 | 25.177 | 58.855 | 44.108 | 0.00 | 0.00 |
| ATOM | 2781 | HB3  | GLN | X | 180 | 23.984 | 59.377 | 42.792 | 0.00 | 0.00 |
| ATOM | 2782 | CG   | GLN | X | 180 | 24.609 | 57.412 | 42.593 | 0.00 | 0.00 |
| ATOM | 2783 | HG2  | GLN | X | 180 | 25.466 | 56.746 | 42.697 | 0.00 | 0.00 |
| ATOM | 2784 | HG3  | GLN | X | 180 | 23.865 | 57.044 | 43.300 | 0.00 | 0.00 |
| ATOM | 2785 | CD   | GLN | X | 180 | 24.077 | 57.307 | 41.181 | 0.00 | 0.00 |
| ATOM | 2786 | OE1  | GLN | X | 180 | 23.308 | 58.153 | 40.683 | 0.00 | 0.00 |
| ATOM | 2787 | NE2  | GLN | X | 180 | 24.599 | 56.369 | 40.429 | 0.00 | 0.00 |
| ATOM | 2788 | HE21 | GLN | X | 180 | 24.174 | 56.313 | 39.515 | 0.00 | 0.00 |
| ATOM | 2789 | HE22 | GLN | X | 180 | 25.098 | 55.633 | 40.909 | 0.00 | 0.00 |
| ATOM | 2790 | C    | GLN | X | 180 | 25.792 | 61.012 | 42.180 | 0.00 | 0.00 |
| ATOM | 2791 | O    | GLN | X | 180 | 25.306 | 61.551 | 41.220 | 0.00 | 0.00 |
| ATOM | 2792 | N    | GLU | X | 181 | 26.161 | 61.627 | 43.324 | 0.00 | 0.00 |
| ATOM | 2793 | H    | GLU | X | 181 | 26.603 | 61.033 | 44.012 | 0.00 | 0.00 |
| ATOM | 2794 | CA   | GLU | X | 181 | 25.860 | 63.050 | 43.524 | 0.00 | 0.00 |
| ATOM | 2795 | HA   | GLU | X | 181 | 24.843 | 63.076 | 43.134 | 0.00 | 0.00 |
| ATOM | 2796 | CB   | GLU | X | 181 | 25.792 | 63.235 | 45.034 | 0.00 | 0.00 |
| ATOM | 2797 | HB2  | GLU | X | 181 | 25.025 | 62.574 | 45.440 | 0.00 | 0.00 |
| ATOM | 2798 | HB3  | GLU | X | 181 | 26.728 | 62.967 | 45.524 | 0.00 | 0.00 |
| ATOM | 2799 | CG   | GLU | X | 181 | 25.476 | 64.624 | 45.621 | 0.00 | 0.00 |
| ATOM | 2800 | HG2  | GLU | X | 181 | 26.098 | 65.399 | 45.172 | 0.00 | 0.00 |
| ATOM | 2801 | HG3  | GLU | X | 181 | 24.447 | 64.838 | 45.333 | 0.00 | 0.00 |
| ATOM | 2802 | CD   | GLU | X | 181 | 25.648 | 64.694 | 47.116 | 0.00 | 0.00 |
| ATOM | 2803 | OE1  | GLU | X | 181 | 24.598 | 64.849 | 47.745 | 0.00 | 0.00 |
| ATOM | 2804 | OE2  | GLU | X | 181 | 26.781 | 64.508 | 47.596 | 0.00 | 0.00 |
| ATOM | 2805 | C    | GLU | X | 181 | 26.907 | 63.933 | 42.773 | 0.00 | 0.00 |
| ATOM | 2806 | O    | GLU | X | 181 | 26.581 | 65.093 | 42.638 | 0.00 | 0.00 |
| ATOM | 2807 | N    | ASN | X | 182 | 28.131 | 63.448 | 42.329 | 0.00 | 0.00 |
| ATOM | 2808 | H    | ASN | X | 182 | 28.325 | 62.474 | 42.509 | 0.00 | 0.00 |
| ATOM | 2809 | CA   | ASN | X | 182 | 29.252 | 64.352 | 41.965 | 0.00 | 0.00 |
| ATOM | 2810 | HA   | ASN | X | 182 | 28.826 | 65.296 | 41.625 | 0.00 | 0.00 |
| ATOM | 2811 | CB   | ASN | X | 182 | 30.154 | 64.605 | 43.176 | 0.00 | 0.00 |
| ATOM | 2812 | HB2  | ASN | X | 182 | 30.642 | 63.694 | 43.524 | 0.00 | 0.00 |
| ATOM | 2813 | HB3  | ASN | X | 182 | 30.881 | 65.315 | 42.782 | 0.00 | 0.00 |
| ATOM | 2814 | CG   | ASN | X | 182 | 29.424 | 65.396 | 44.338 | 0.00 | 0.00 |
| ATOM | 2815 | OD1  | ASN | X | 182 | 29.031 | 66.494 | 44.199 | 0.00 | 0.00 |
| ATOM | 2816 | ND2  | ASN | X | 182 | 29.182 | 64.696 | 45.436 | 0.00 | 0.00 |
| ATOM | 2817 | HD21 | ASN | X | 182 | 28.627 | 65.177 | 46.130 | 0.00 | 0.00 |
| ATOM | 2818 | HD22 | ASN | X | 182 | 29.477 | 63.739 | 45.562 | 0.00 | 0.00 |
| ATOM | 2819 | C    | ASN | X | 182 | 30.143 | 63.874 | 40.834 | 0.00 | 0.00 |
| ATOM | 2820 | O    | ASN | X | 182 | 31.074 | 64.656 | 40.481 | 0.00 | 0.00 |
| ATOM | 2821 | N    | VAL | X | 183 | 30.020 | 62.686 | 40.284 | 0.00 | 0.00 |
| ATOM | 2822 | H    | VAL | X | 183 | 29.184 | 62.177 | 40.531 | 0.00 | 0.00 |
| ATOM | 2823 | CA   | VAL | X | 183 | 30.920 | 62.410 | 39.095 | 0.00 | 0.00 |
| ATOM | 2824 | HA   | VAL | X | 183 | 31.916 | 62.666 | 39.454 | 0.00 | 0.00 |
| ATOM | 2825 | CB   | VAL | X | 183 | 31.032 | 60.918 | 38.781 | 0.00 | 0.00 |
| ATOM | 2826 | HB   | VAL | X | 183 | 31.176 | 60.383 | 39.719 | 0.00 | 0.00 |
| ATOM | 2827 | CG1  | VAL | X | 183 | 29.657 | 60.406 | 38.229 | 0.00 | 0.00 |
| ATOM | 2828 | HG11 | VAL | X | 183 | 29.492 | 59.353 | 38.459 | 0.00 | 0.00 |
| ATOM | 2829 | HG12 | VAL | X | 183 | 28.782 | 60.963 | 38.564 | 0.00 | 0.00 |
| ATOM | 2830 | HG13 | VAL | X | 183 | 29.627 | 60.469 | 37.142 | 0.00 | 0.00 |
| ATOM | 2831 | CG2  | VAL | X | 183 | 32.121 | 60.433 | 37.853 | 0.00 | 0.00 |
| ATOM | 2832 | HG21 | VAL | X | 183 | 32.029 | 61.004 | 36.929 | 0.00 | 0.00 |
| ATOM | 2833 | HG22 | VAL | X | 183 | 33.035 | 60.666 | 38.399 | 0.00 | 0.00 |
| ATOM | 2834 | HG23 | VAL | X | 183 | 31.936 | 59.361 | 37.798 | 0.00 | 0.00 |
| ATOM | 2835 | C    | VAL | X | 183 | 30.641 | 63.217 | 37.728 | 0.00 | 0.00 |
| ATOM | 2836 | O    | VAL | X | 183 | 31.510 | 63.381 | 36.897 | 0.00 | 0.00 |
| ATOM | 2837 | N    | ALA | X | 184 | 29.462 | 63.796 | 37.630 | 0.00 | 0.00 |
| ATOM | 2838 | H    | ALA | X | 184 | 28.776 | 63.585 | 38.341 | 0.00 | 0.00 |
| ATOM | 2839 | CA   | ALA | X | 184 | 29.014 | 64.582 | 36.517 | 0.00 | 0.00 |

|      |      |     |     |   |     |        |        |        |      |      |
|------|------|-----|-----|---|-----|--------|--------|--------|------|------|
| ATOM | 2840 | HA  | ALA | X | 184 | 29.196 | 64.069 | 35.573 | 0.00 | 0.00 |
| ATOM | 2841 | CB  | ALA | X | 184 | 27.514 | 64.886 | 36.573 | 0.00 | 0.00 |
| ATOM | 2842 | HB1 | ALA | X | 184 | 27.212 | 65.304 | 37.533 | 0.00 | 0.00 |
| ATOM | 2843 | HB2 | ALA | X | 184 | 27.120 | 65.575 | 35.826 | 0.00 | 0.00 |
| ATOM | 2844 | HB3 | ALA | X | 184 | 26.992 | 63.930 | 36.567 | 0.00 | 0.00 |
| ATOM | 2845 | C   | ALA | X | 184 | 29.834 | 65.885 | 36.433 | 0.00 | 0.00 |
| ATOM | 2846 | O   | ALA | X | 184 | 30.045 | 66.433 | 35.342 | 0.00 | 0.00 |
| ATOM | 2847 | N   | ALA | X | 185 | 30.472 | 66.305 | 37.567 | 0.00 | 0.00 |
| ATOM | 2848 | H   | ALA | X | 185 | 30.535 | 65.593 | 38.280 | 0.00 | 0.00 |
| ATOM | 2849 | CA  | ALA | X | 185 | 31.468 | 67.389 | 37.570 | 0.00 | 0.00 |
| ATOM | 2850 | HA  | ALA | X | 185 | 30.984 | 68.344 | 37.369 | 0.00 | 0.00 |
| ATOM | 2851 | CB  | ALA | X | 185 | 31.996 | 67.494 | 38.945 | 0.00 | 0.00 |
| ATOM | 2852 | HB1 | ALA | X | 185 | 31.193 | 67.813 | 39.609 | 0.00 | 0.00 |
| ATOM | 2853 | HB2 | ALA | X | 185 | 32.557 | 66.632 | 39.304 | 0.00 | 0.00 |
| ATOM | 2854 | HB3 | ALA | X | 185 | 32.689 | 68.330 | 39.039 | 0.00 | 0.00 |
| ATOM | 2855 | C   | ALA | X | 185 | 32.683 | 67.143 | 36.658 | 0.00 | 0.00 |
| ATOM | 2856 | O   | ALA | X | 185 | 33.289 | 68.045 | 36.029 | 0.00 | 0.00 |
| ATOM | 2857 | N   | PHE | X | 186 | 33.056 | 65.853 | 36.528 | 0.00 | 0.00 |
| ATOM | 2858 | H   | PHE | X | 186 | 32.457 | 65.209 | 37.025 | 0.00 | 0.00 |
| ATOM | 2859 | CA  | PHE | X | 186 | 34.193 | 65.410 | 35.803 | 0.00 | 0.00 |
| ATOM | 2860 | HA  | PHE | X | 186 | 34.757 | 66.301 | 35.526 | 0.00 | 0.00 |
| ATOM | 2861 | CB  | PHE | X | 186 | 34.955 | 64.448 | 36.667 | 0.00 | 0.00 |
| ATOM | 2862 | HB2 | PHE | X | 186 | 34.466 | 63.504 | 36.905 | 0.00 | 0.00 |
| ATOM | 2863 | HB3 | PHE | X | 186 | 35.885 | 64.122 | 36.200 | 0.00 | 0.00 |
| ATOM | 2864 | CG  | PHE | X | 186 | 35.400 | 64.998 | 37.991 | 0.00 | 0.00 |
| ATOM | 2865 | CD1 | PHE | X | 186 | 34.806 | 64.526 | 39.213 | 0.00 | 0.00 |
| ATOM | 2866 | HD1 | PHE | X | 186 | 33.986 | 63.824 | 39.196 | 0.00 | 0.00 |
| ATOM | 2867 | CE1 | PHE | X | 186 | 35.189 | 65.214 | 40.414 | 0.00 | 0.00 |
| ATOM | 2868 | HE1 | PHE | X | 186 | 34.716 | 64.907 | 41.335 | 0.00 | 0.00 |
| ATOM | 2869 | CZ  | PHE | X | 186 | 36.167 | 66.265 | 40.405 | 0.00 | 0.00 |
| ATOM | 2870 | HZ  | PHE | X | 186 | 36.488 | 66.753 | 41.313 | 0.00 | 0.00 |
| ATOM | 2871 | CE2 | PHE | X | 186 | 36.724 | 66.692 | 39.208 | 0.00 | 0.00 |
| ATOM | 2872 | HE2 | PHE | X | 186 | 37.446 | 67.488 | 39.312 | 0.00 | 0.00 |
| ATOM | 2873 | CD2 | PHE | X | 186 | 36.376 | 66.028 | 38.022 | 0.00 | 0.00 |
| ATOM | 2874 | HD2 | PHE | X | 186 | 36.766 | 66.454 | 37.110 | 0.00 | 0.00 |
| ATOM | 2875 | C   | PHE | X | 186 | 33.829 | 64.734 | 34.493 | 0.00 | 0.00 |
| ATOM | 2876 | O   | PHE | X | 186 | 34.701 | 64.207 | 33.791 | 0.00 | 0.00 |
| ATOM | 2877 | N   | GLY | X | 187 | 32.552 | 64.890 | 34.010 | 0.00 | 0.00 |
| ATOM | 2878 | H   | GLY | X | 187 | 31.956 | 65.437 | 34.615 | 0.00 | 0.00 |
| ATOM | 2879 | CA  | GLY | X | 187 | 32.025 | 64.366 | 32.740 | 0.00 | 0.00 |
| ATOM | 2880 | HA2 | GLY | X | 187 | 31.302 | 65.182 | 32.348 | 0.00 | 0.00 |
| ATOM | 2881 | HA3 | GLY | X | 187 | 32.869 | 64.211 | 32.028 | 0.00 | 0.00 |
| ATOM | 2882 | C   | GLY | X | 187 | 31.381 | 63.011 | 32.749 | 0.00 | 0.00 |
| ATOM | 2883 | O   | GLY | X | 187 | 31.083 | 62.400 | 31.733 | 0.00 | 0.00 |
| ATOM | 2884 | N   | GLY | X | 188 | 31.037 | 62.469 | 33.917 | 0.00 | 0.00 |
| ATOM | 2885 | H   | GLY | X | 188 | 31.140 | 63.104 | 34.696 | 0.00 | 0.00 |
| ATOM | 2886 | CA  | GLY | X | 188 | 30.303 | 61.260 | 34.143 | 0.00 | 0.00 |
| ATOM | 2887 | HA2 | GLY | X | 188 | 30.743 | 60.478 | 33.711 | 0.00 | 0.00 |
| ATOM | 2888 | HA3 | GLY | X | 188 | 30.305 | 61.152 | 35.246 | 0.00 | 0.00 |
| ATOM | 2889 | C   | GLY | X | 188 | 28.876 | 61.363 | 33.709 | 0.00 | 0.00 |
| ATOM | 2890 | O   | GLY | X | 188 | 28.194 | 62.381 | 33.730 | 0.00 | 0.00 |
| ATOM | 2891 | N   | ASP | X | 189 | 28.368 | 60.196 | 33.427 | 0.00 | 0.00 |
| ATOM | 2892 | H   | ASP | X | 189 | 29.072 | 59.479 | 33.328 | 0.00 | 0.00 |
| ATOM | 2893 | CA  | ASP | X | 189 | 27.033 | 59.704 | 33.339 | 0.00 | 0.00 |
| ATOM | 2894 | HA  | ASP | X | 189 | 26.257 | 60.469 | 33.357 | 0.00 | 0.00 |
| ATOM | 2895 | CB  | ASP | X | 189 | 26.904 | 58.852 | 32.036 | 0.00 | 0.00 |
| ATOM | 2896 | HB2 | ASP | X | 189 | 27.344 | 59.401 | 31.203 | 0.00 | 0.00 |
| ATOM | 2897 | HB3 | ASP | X | 189 | 27.533 | 57.962 | 32.071 | 0.00 | 0.00 |
| ATOM | 2898 | CG  | ASP | X | 189 | 25.483 | 58.364 | 31.828 | 0.00 | 0.00 |
| ATOM | 2899 | OD1 | ASP | X | 189 | 24.617 | 58.472 | 32.700 | 0.00 | 0.00 |
| ATOM | 2900 | OD2 | ASP | X | 189 | 25.113 | 57.743 | 30.811 | 0.00 | 0.00 |
| ATOM | 2901 | C   | ASP | X | 189 | 26.814 | 58.842 | 34.605 | 0.00 | 0.00 |
| ATOM | 2902 | O   | ASP | X | 189 | 27.093 | 57.685 | 34.597 | 0.00 | 0.00 |
| ATOM | 2903 | N   | PRO | X | 190 | 26.130 | 59.416 | 35.652 | 0.00 | 0.00 |
| ATOM | 2904 | CD  | PRO | X | 190 | 25.874 | 60.834 | 35.701 | 0.00 | 0.00 |
| ATOM | 2905 | HD2 | PRO | X | 190 | 24.948 | 61.015 | 35.156 | 0.00 | 0.00 |
| ATOM | 2906 | HD3 | PRO | X | 190 | 26.704 | 61.428 | 35.319 | 0.00 | 0.00 |
| ATOM | 2907 | CG  | PRO | X | 190 | 25.477 | 61.058 | 37.125 | 0.00 | 0.00 |
| ATOM | 2908 | HG2 | PRO | X | 190 | 24.723 | 61.825 | 37.305 | 0.00 | 0.00 |
| ATOM | 2909 | HG3 | PRO | X | 190 | 26.409 | 61.328 | 37.620 | 0.00 | 0.00 |

|      |      |      |     |   |     |        |        |        |      |      |
|------|------|------|-----|---|-----|--------|--------|--------|------|------|
| ATOM | 2910 | CB   | PRO | X | 190 | 25.074 | 59.744 | 37.769 | 0.00 | 0.00 |
| ATOM | 2911 | HB2  | PRO | X | 190 | 23.985 | 59.721 | 37.723 | 0.00 | 0.00 |
| ATOM | 2912 | HB3  | PRO | X | 190 | 25.355 | 59.581 | 38.809 | 0.00 | 0.00 |
| ATOM | 2913 | CA   | PRO | X | 190 | 25.662 | 58.720 | 36.833 | 0.00 | 0.00 |
| ATOM | 2914 | HA   | PRO | X | 190 | 26.536 | 58.278 | 37.312 | 0.00 | 0.00 |
| ATOM | 2915 | C    | PRO | X | 190 | 24.595 | 57.692 | 36.552 | 0.00 | 0.00 |
| ATOM | 2916 | O    | PRO | X | 190 | 24.385 | 56.743 | 37.323 | 0.00 | 0.00 |
| ATOM | 2917 | N    | THR | X | 191 | 23.883 | 57.752 | 35.436 | 0.00 | 0.00 |
| ATOM | 2918 | H    | THR | X | 191 | 24.127 | 58.510 | 34.816 | 0.00 | 0.00 |
| ATOM | 2919 | CA   | THR | X | 191 | 22.906 | 56.652 | 35.069 | 0.00 | 0.00 |
| ATOM | 2920 | HA   | THR | X | 191 | 22.408 | 56.285 | 35.967 | 0.00 | 0.00 |
| ATOM | 2921 | CB   | THR | X | 191 | 21.768 | 57.163 | 34.143 | 0.00 | 0.00 |
| ATOM | 2922 | HB   | THR | X | 191 | 21.023 | 56.369 | 34.082 | 0.00 | 0.00 |
| ATOM | 2923 | CG2  | THR | X | 191 | 21.141 | 58.444 | 34.597 | 0.00 | 0.00 |
| ATOM | 2924 | HG21 | THR | X | 191 | 21.763 | 59.333 | 34.488 | 0.00 | 0.00 |
| ATOM | 2925 | HG22 | THR | X | 191 | 20.142 | 58.559 | 34.174 | 0.00 | 0.00 |
| ATOM | 2926 | HG23 | THR | X | 191 | 20.912 | 58.310 | 35.654 | 0.00 | 0.00 |
| ATOM | 2927 | OG1  | THR | X | 191 | 22.208 | 57.350 | 32.794 | 0.00 | 0.00 |
| ATOM | 2928 | HG1  | THR | X | 191 | 23.038 | 57.832 | 32.767 | 0.00 | 0.00 |
| ATOM | 2929 | C    | THR | X | 191 | 23.545 | 55.419 | 34.407 | 0.00 | 0.00 |
| ATOM | 2930 | O    | THR | X | 191 | 22.840 | 54.538 | 33.953 | 0.00 | 0.00 |
| ATOM | 2931 | N    | SER | X | 192 | 24.910 | 55.411 | 34.283 | 0.00 | 0.00 |
| ATOM | 2932 | H    | SER | X | 192 | 25.448 | 56.206 | 34.597 | 0.00 | 0.00 |
| ATOM | 2933 | CA   | SER | X | 192 | 25.804 | 54.323 | 33.751 | 0.00 | 0.00 |
| ATOM | 2934 | HA   | SER | X | 192 | 25.090 | 53.523 | 33.556 | 0.00 | 0.00 |
| ATOM | 2935 | CB   | SER | X | 192 | 26.368 | 54.901 | 32.431 | 0.00 | 0.00 |
| ATOM | 2936 | HB2  | SER | X | 192 | 26.990 | 55.794 | 32.487 | 0.00 | 0.00 |
| ATOM | 2937 | HB3  | SER | X | 192 | 27.048 | 54.166 | 32.000 | 0.00 | 0.00 |
| ATOM | 2938 | OG   | SER | X | 192 | 25.333 | 55.129 | 31.527 | 0.00 | 0.00 |
| ATOM | 2939 | HG   | SER | X | 192 | 25.415 | 56.065 | 31.333 | 0.00 | 0.00 |
| ATOM | 2940 | C    | SER | X | 192 | 26.928 | 53.976 | 34.664 | 0.00 | 0.00 |
| ATOM | 2941 | O    | SER | X | 192 | 28.028 | 53.710 | 34.093 | 0.00 | 0.00 |
| ATOM | 2942 | N    | VAL | X | 193 | 26.753 | 53.948 | 35.979 | 0.00 | 0.00 |
| ATOM | 2943 | H    | VAL | X | 193 | 25.807 | 54.088 | 36.303 | 0.00 | 0.00 |
| ATOM | 2944 | CA   | VAL | X | 193 | 27.778 | 53.528 | 36.861 | 0.00 | 0.00 |
| ATOM | 2945 | HA   | VAL | X | 193 | 28.705 | 53.993 | 36.527 | 0.00 | 0.00 |
| ATOM | 2946 | CB   | VAL | X | 193 | 27.506 | 54.170 | 38.288 | 0.00 | 0.00 |
| ATOM | 2947 | HB   | VAL | X | 193 | 26.575 | 53.731 | 38.648 | 0.00 | 0.00 |
| ATOM | 2948 | CG1  | VAL | X | 193 | 28.524 | 53.702 | 39.350 | 0.00 | 0.00 |
| ATOM | 2949 | HG11 | VAL | X | 193 | 29.384 | 54.358 | 39.213 | 0.00 | 0.00 |
| ATOM | 2950 | HG12 | VAL | X | 193 | 28.190 | 53.873 | 40.373 | 0.00 | 0.00 |
| ATOM | 2951 | HG13 | VAL | X | 193 | 28.669 | 52.634 | 39.187 | 0.00 | 0.00 |
| ATOM | 2952 | CG2  | VAL | X | 193 | 27.513 | 55.691 | 38.288 | 0.00 | 0.00 |
| ATOM | 2953 | HG21 | VAL | X | 193 | 27.275 | 56.031 | 39.296 | 0.00 | 0.00 |
| ATOM | 2954 | HG22 | VAL | X | 193 | 28.471 | 56.090 | 37.955 | 0.00 | 0.00 |
| ATOM | 2955 | HG23 | VAL | X | 193 | 26.738 | 55.996 | 37.585 | 0.00 | 0.00 |
| ATOM | 2956 | C    | VAL | X | 193 | 28.053 | 52.041 | 36.810 | 0.00 | 0.00 |
| ATOM | 2957 | O    | VAL | X | 193 | 27.218 | 51.220 | 37.132 | 0.00 | 0.00 |
| ATOM | 2958 | N    | THR | X | 194 | 29.254 | 51.694 | 36.283 | 0.00 | 0.00 |
| ATOM | 2959 | H    | THR | X | 194 | 29.916 | 52.432 | 36.092 | 0.00 | 0.00 |
| ATOM | 2960 | CA   | THR | X | 194 | 29.720 | 50.296 | 36.210 | 0.00 | 0.00 |
| ATOM | 2961 | HA   | THR | X | 194 | 28.897 | 49.611 | 36.411 | 0.00 | 0.00 |
| ATOM | 2962 | CB   | THR | X | 194 | 30.315 | 50.057 | 34.824 | 0.00 | 0.00 |
| ATOM | 2963 | HB   | THR | X | 194 | 31.106 | 50.803 | 34.742 | 0.00 | 0.00 |
| ATOM | 2964 | CG2  | THR | X | 194 | 30.885 | 48.654 | 34.687 | 0.00 | 0.00 |
| ATOM | 2965 | HG21 | THR | X | 194 | 30.267 | 47.812 | 34.999 | 0.00 | 0.00 |
| ATOM | 2966 | HG22 | THR | X | 194 | 31.192 | 48.440 | 33.663 | 0.00 | 0.00 |
| ATOM | 2967 | HG23 | THR | X | 194 | 31.856 | 48.586 | 35.178 | 0.00 | 0.00 |
| ATOM | 2968 | OG1  | THR | X | 194 | 29.356 | 50.305 | 33.811 | 0.00 | 0.00 |
| ATOM | 2969 | HG1  | THR | X | 194 | 29.330 | 51.252 | 33.658 | 0.00 | 0.00 |
| ATOM | 2970 | C    | THR | X | 194 | 30.836 | 50.126 | 37.270 | 0.00 | 0.00 |
| ATOM | 2971 | O    | THR | X | 194 | 31.728 | 50.972 | 37.362 | 0.00 | 0.00 |
| ATOM | 2972 | N    | LEU | X | 195 | 30.817 | 49.008 | 37.993 | 0.00 | 0.00 |
| ATOM | 2973 | H    | LEU | X | 195 | 30.280 | 48.258 | 37.582 | 0.00 | 0.00 |
| ATOM | 2974 | CA   | LEU | X | 195 | 31.802 | 48.552 | 38.987 | 0.00 | 0.00 |
| ATOM | 2975 | HA   | LEU | X | 195 | 32.382 | 49.428 | 39.274 | 0.00 | 0.00 |
| ATOM | 2976 | CB   | LEU | X | 195 | 31.200 | 48.010 | 40.264 | 0.00 | 0.00 |
| ATOM | 2977 | HB2  | LEU | X | 195 | 30.738 | 47.045 | 40.052 | 0.00 | 0.00 |
| ATOM | 2978 | HB3  | LEU | X | 195 | 32.020 | 47.833 | 40.960 | 0.00 | 0.00 |
| ATOM | 2979 | CG   | LEU | X | 195 | 30.004 | 48.804 | 40.922 | 0.00 | 0.00 |

|      |      |      |     |   |     |        |        |        |      |      |
|------|------|------|-----|---|-----|--------|--------|--------|------|------|
| ATOM | 2980 | HG   | LEU | X | 195 | 29.018 | 48.656 | 40.482 | 0.00 | 0.00 |
| ATOM | 2981 | CD1  | LEU | X | 195 | 29.904 | 48.370 | 42.441 | 0.00 | 0.00 |
| ATOM | 2982 | HD11 | LEU | X | 195 | 30.746 | 48.535 | 43.113 | 0.00 | 0.00 |
| ATOM | 2983 | HD12 | LEU | X | 195 | 29.035 | 48.767 | 42.966 | 0.00 | 0.00 |
| ATOM | 2984 | HD13 | LEU | X | 195 | 29.874 | 47.282 | 42.392 | 0.00 | 0.00 |
| ATOM | 2985 | CD2  | LEU | X | 195 | 30.210 | 50.279 | 41.011 | 0.00 | 0.00 |
| ATOM | 2986 | HD21 | LEU | X | 195 | 30.077 | 50.821 | 40.075 | 0.00 | 0.00 |
| ATOM | 2987 | HD22 | LEU | X | 195 | 29.510 | 50.654 | 41.757 | 0.00 | 0.00 |
| ATOM | 2988 | HD23 | LEU | X | 195 | 31.238 | 50.542 | 41.261 | 0.00 | 0.00 |
| ATOM | 2989 | C    | LEU | X | 195 | 32.805 | 47.575 | 38.431 | 0.00 | 0.00 |
| ATOM | 2990 | O    | LEU | X | 195 | 32.458 | 46.615 | 37.826 | 0.00 | 0.00 |
| ATOM | 2991 | N    | PHE | X | 196 | 34.068 | 47.709 | 38.891 | 0.00 | 0.00 |
| ATOM | 2992 | H    | PHE | X | 196 | 34.302 | 48.384 | 39.605 | 0.00 | 0.00 |
| ATOM | 2993 | CA   | PHE | X | 196 | 35.151 | 46.775 | 38.474 | 0.00 | 0.00 |
| ATOM | 2994 | HA   | PHE | X | 196 | 34.639 | 45.814 | 38.498 | 0.00 | 0.00 |
| ATOM | 2995 | CB   | PHE | X | 196 | 35.496 | 46.972 | 36.949 | 0.00 | 0.00 |
| ATOM | 2996 | HB2  | PHE | X | 196 | 35.890 | 46.059 | 36.504 | 0.00 | 0.00 |
| ATOM | 2997 | HB3  | PHE | X | 196 | 34.555 | 47.052 | 36.404 | 0.00 | 0.00 |
| ATOM | 2998 | CG   | PHE | X | 196 | 36.186 | 48.152 | 36.450 | 0.00 | 0.00 |
| ATOM | 2999 | CD1  | PHE | X | 196 | 36.104 | 49.436 | 37.086 | 0.00 | 0.00 |
| ATOM | 3000 | HD1  | PHE | X | 196 | 35.507 | 49.546 | 37.979 | 0.00 | 0.00 |
| ATOM | 3001 | CE1  | PHE | X | 196 | 36.714 | 50.514 | 36.504 | 0.00 | 0.00 |
| ATOM | 3002 | HE1  | PHE | X | 196 | 36.690 | 51.492 | 36.961 | 0.00 | 0.00 |
| ATOM | 3003 | CZ   | PHE | X | 196 | 37.464 | 50.337 | 35.291 | 0.00 | 0.00 |
| ATOM | 3004 | HZ   | PHE | X | 196 | 37.989 | 51.121 | 34.767 | 0.00 | 0.00 |
| ATOM | 3005 | CE2  | PHE | X | 196 | 37.531 | 49.085 | 34.680 | 0.00 | 0.00 |
| ATOM | 3006 | HE2  | PHE | X | 196 | 38.119 | 49.061 | 33.775 | 0.00 | 0.00 |
| ATOM | 3007 | CD2  | PHE | X | 196 | 36.933 | 47.951 | 35.249 | 0.00 | 0.00 |
| ATOM | 3008 | HD2  | PHE | X | 196 | 37.003 | 46.941 | 34.872 | 0.00 | 0.00 |
| ATOM | 3009 | C    | PHE | X | 196 | 36.282 | 46.682 | 39.488 | 0.00 | 0.00 |
| ATOM | 3010 | O    | PHE | X | 196 | 36.408 | 47.546 | 40.333 | 0.00 | 0.00 |
| ATOM | 3011 | N    | GLY | X | 197 | 36.979 | 45.565 | 39.565 | 0.00 | 0.00 |
| ATOM | 3012 | H    | GLY | X | 197 | 36.764 | 44.787 | 38.959 | 0.00 | 0.00 |
| ATOM | 3013 | CA   | GLY | X | 197 | 38.146 | 45.345 | 40.455 | 0.00 | 0.00 |
| ATOM | 3014 | HA2  | GLY | X | 197 | 38.804 | 46.216 | 40.361 | 0.00 | 0.00 |
| ATOM | 3015 | HA3  | GLY | X | 197 | 37.836 | 45.506 | 41.489 | 0.00 | 0.00 |
| ATOM | 3016 | C    | GLY | X | 197 | 38.841 | 43.961 | 40.285 | 0.00 | 0.00 |
| ATOM | 3017 | O    | GLY | X | 197 | 38.432 | 43.156 | 39.444 | 0.00 | 0.00 |
| ATOM | 3018 | N    | GLU | X | 198 | 39.880 | 43.639 | 41.031 | 0.00 | 0.00 |
| ATOM | 3019 | H    | GLU | X | 198 | 40.212 | 44.327 | 41.692 | 0.00 | 0.00 |
| ATOM | 3020 | CA   | GLU | X | 198 | 40.439 | 42.288 | 41.103 | 0.00 | 0.00 |
| ATOM | 3021 | HA   | GLU | X | 198 | 39.876 | 41.695 | 40.382 | 0.00 | 0.00 |
| ATOM | 3022 | CB   | GLU | X | 198 | 41.879 | 42.189 | 40.596 | 0.00 | 0.00 |
| ATOM | 3023 | HB2  | GLU | X | 198 | 42.054 | 41.148 | 40.324 | 0.00 | 0.00 |
| ATOM | 3024 | HB3  | GLU | X | 198 | 42.016 | 42.646 | 39.616 | 0.00 | 0.00 |
| ATOM | 3025 | CG   | GLU | X | 198 | 43.071 | 42.723 | 41.455 | 0.00 | 0.00 |
| ATOM | 3026 | HG2  | GLU | X | 198 | 42.968 | 42.374 | 42.482 | 0.00 | 0.00 |
| ATOM | 3027 | HG3  | GLU | X | 198 | 43.969 | 42.226 | 41.086 | 0.00 | 0.00 |
| ATOM | 3028 | CD   | GLU | X | 198 | 43.289 | 44.208 | 41.656 | 0.00 | 0.00 |
| ATOM | 3029 | OE1  | GLU | X | 198 | 42.283 | 44.898 | 41.952 | 0.00 | 0.00 |
| ATOM | 3030 | OE2  | GLU | X | 198 | 44.470 | 44.697 | 41.616 | 0.00 | 0.00 |
| ATOM | 3031 | C    | GLU | X | 198 | 40.378 | 41.744 | 42.551 | 0.00 | 0.00 |
| ATOM | 3032 | O    | GLU | X | 198 | 40.320 | 42.361 | 43.560 | 0.00 | 0.00 |
| ATOM | 3033 | N    | XA1 | X | 199 | 40.312 | 40.433 | 42.623 | 0.00 | 0.00 |
| ATOM | 3034 | CA   | XA1 | X | 199 | 40.529 | 39.575 | 43.784 | 0.00 | 0.00 |
| ATOM | 3035 | C    | XA1 | X | 199 | 39.597 | 39.953 | 44.969 | 0.00 | 0.00 |
| ATOM | 3036 | O    | XA1 | X | 199 | 38.374 | 39.895 | 44.818 | 0.00 | 0.00 |
| ATOM | 3037 | CB   | XA1 | X | 199 | 41.975 | 39.616 | 44.347 | 0.00 | 0.00 |
| ATOM | 3038 | OG   | XA1 | X | 199 | 42.067 | 38.620 | 45.351 | 0.00 | 0.00 |
| ATOM | 3039 | P1   | XA1 | X | 199 | 43.088 | 39.081 | 46.488 | 0.00 | 0.00 |
| ATOM | 3040 | O1   | XA1 | X | 199 | 42.991 | 40.523 | 46.803 | 0.00 | 0.00 |
| ATOM | 3041 | O2   | XA1 | X | 199 | 44.514 | 38.715 | 46.255 | 0.00 | 0.00 |
| ATOM | 3042 | C1   | XA1 | X | 199 | 42.537 | 38.008 | 47.795 | 0.00 | 0.00 |
| ATOM | 3043 | H    | XA1 | X | 199 | 40.328 | 39.919 | 41.754 | 0.00 | 0.00 |
| ATOM | 3044 | HA   | XA1 | X | 199 | 40.349 | 38.530 | 43.536 | 0.00 | 0.00 |
| ATOM | 3045 | HB2  | XA1 | X | 199 | 42.731 | 39.423 | 43.582 | 0.00 | 0.00 |
| ATOM | 3046 | HB3  | XA1 | X | 199 | 42.107 | 40.649 | 44.680 | 0.00 | 0.00 |
| ATOM | 3047 | H11  | XA1 | X | 199 | 42.275 | 37.024 | 47.399 | 0.00 | 0.00 |
| ATOM | 3048 | H12  | XA1 | X | 199 | 43.338 | 37.890 | 48.528 | 0.00 | 0.00 |
| ATOM | 3049 | H13  | XA1 | X | 199 | 41.607 | 38.460 | 48.146 | 0.00 | 0.00 |



|      |      |      |     |   |     |        |        |        |      |      |
|------|------|------|-----|---|-----|--------|--------|--------|------|------|
| ATOM | 3050 | N    | ALA | X | 200 | 40.029 | 40.521 | 46.064 | 0.00 | 0.00 |
| ATOM | 3051 | H    | ALA | X | 200 | 41.018 | 40.487 | 46.267 | 0.00 | 0.00 |
| ATOM | 3052 | CA   | ALA | X | 200 | 39.269 | 41.224 | 47.084 | 0.00 | 0.00 |
| ATOM | 3053 | HA   | ALA | X | 200 | 38.575 | 40.558 | 47.595 | 0.00 | 0.00 |
| ATOM | 3054 | CB   | ALA | X | 200 | 40.283 | 41.705 | 48.101 | 0.00 | 0.00 |
| ATOM | 3055 | HB1  | ALA | X | 200 | 39.793 | 42.507 | 48.653 | 0.00 | 0.00 |
| ATOM | 3056 | HB2  | ALA | X | 200 | 40.516 | 40.876 | 48.770 | 0.00 | 0.00 |
| ATOM | 3057 | HB3  | ALA | X | 200 | 41.169 | 42.106 | 47.609 | 0.00 | 0.00 |
| ATOM | 3058 | C    | ALA | X | 200 | 38.334 | 42.395 | 46.577 | 0.00 | 0.00 |
| ATOM | 3059 | O    | ALA | X | 200 | 37.284 | 42.614 | 47.215 | 0.00 | 0.00 |
| ATOM | 3060 | N    | GLY | X | 201 | 38.763 | 43.137 | 45.513 | 0.00 | 0.00 |
| ATOM | 3061 | H    | GLY | X | 201 | 39.623 | 42.823 | 45.087 | 0.00 | 0.00 |
| ATOM | 3062 | CA   | GLY | X | 201 | 38.077 | 44.283 | 44.798 | 0.00 | 0.00 |
| ATOM | 3063 | HA2  | GLY | X | 201 | 37.678 | 45.018 | 45.522 | 0.00 | 0.00 |
| ATOM | 3064 | HA3  | GLY | X | 201 | 38.878 | 44.742 | 44.231 | 0.00 | 0.00 |
| ATOM | 3065 | C    | GLY | X | 201 | 37.010 | 43.854 | 43.811 | 0.00 | 0.00 |
| ATOM | 3066 | O    | GLY | X | 201 | 35.892 | 44.416 | 43.793 | 0.00 | 0.00 |
| ATOM | 3067 | N    | ALA | X | 202 | 37.309 | 42.677 | 43.190 | 0.00 | 0.00 |
| ATOM | 3068 | H    | ALA | X | 202 | 38.221 | 42.283 | 43.376 | 0.00 | 0.00 |
| ATOM | 3069 | CA   | ALA | X | 202 | 36.364 | 41.841 | 42.510 | 0.00 | 0.00 |
| ATOM | 3070 | HA   | ALA | X | 202 | 35.898 | 42.600 | 41.882 | 0.00 | 0.00 |
| ATOM | 3071 | CB   | ALA | X | 202 | 37.109 | 40.816 | 41.662 | 0.00 | 0.00 |
| ATOM | 3072 | HB1  | ALA | X | 202 | 36.383 | 40.131 | 41.223 | 0.00 | 0.00 |
| ATOM | 3073 | HB2  | ALA | X | 202 | 37.849 | 41.180 | 40.949 | 0.00 | 0.00 |
| ATOM | 3074 | HB3  | ALA | X | 202 | 37.591 | 40.187 | 42.410 | 0.00 | 0.00 |
| ATOM | 3075 | C    | ALA | X | 202 | 35.367 | 41.228 | 43.457 | 0.00 | 0.00 |
| ATOM | 3076 | O    | ALA | X | 202 | 34.160 | 41.541 | 43.298 | 0.00 | 0.00 |
| ATOM | 3077 | N    | ALA | X | 203 | 35.699 | 40.418 | 44.417 | 0.00 | 0.00 |
| ATOM | 3078 | H    | ALA | X | 203 | 36.694 | 40.309 | 44.553 | 0.00 | 0.00 |
| ATOM | 3079 | CA   | ALA | X | 203 | 34.827 | 39.937 | 45.510 | 0.00 | 0.00 |
| ATOM | 3080 | HA   | ALA | X | 203 | 34.070 | 39.200 | 45.243 | 0.00 | 0.00 |
| ATOM | 3081 | CB   | ALA | X | 203 | 35.695 | 39.123 | 46.618 | 0.00 | 0.00 |
| ATOM | 3082 | HB1  | ALA | X | 203 | 35.182 | 38.982 | 47.569 | 0.00 | 0.00 |
| ATOM | 3083 | HB2  | ALA | X | 203 | 35.969 | 38.116 | 46.305 | 0.00 | 0.00 |
| ATOM | 3084 | HB3  | ALA | X | 203 | 36.594 | 39.684 | 46.874 | 0.00 | 0.00 |
| ATOM | 3085 | C    | ALA | X | 203 | 34.073 | 41.117 | 46.208 | 0.00 | 0.00 |
| ATOM | 3086 | O    | ALA | X | 203 | 32.896 | 40.968 | 46.519 | 0.00 | 0.00 |
| ATOM | 3087 | N    | SER | X | 204 | 34.641 | 42.323 | 46.370 | 0.00 | 0.00 |
| ATOM | 3088 | H    | SER | X | 204 | 35.650 | 42.302 | 46.325 | 0.00 | 0.00 |
| ATOM | 3089 | CA   | SER | X | 204 | 33.910 | 43.470 | 46.875 | 0.00 | 0.00 |
| ATOM | 3090 | HA   | SER | X | 204 | 33.301 | 43.235 | 47.748 | 0.00 | 0.00 |
| ATOM | 3091 | CB   | SER | X | 204 | 34.695 | 44.700 | 47.289 | 0.00 | 0.00 |
| ATOM | 3092 | HB2  | SER | X | 204 | 35.193 | 45.001 | 46.367 | 0.00 | 0.00 |
| ATOM | 3093 | HB3  | SER | X | 204 | 33.999 | 45.455 | 47.654 | 0.00 | 0.00 |
| ATOM | 3094 | OG   | SER | X | 204 | 35.654 | 44.371 | 48.242 | 0.00 | 0.00 |
| ATOM | 3095 | HG   | SER | X | 204 | 36.452 | 44.071 | 47.801 | 0.00 | 0.00 |
| ATOM | 3096 | C    | SER | X | 204 | 32.784 | 43.889 | 45.970 | 0.00 | 0.00 |
| ATOM | 3097 | O    | SER | X | 204 | 31.701 | 44.110 | 46.462 | 0.00 | 0.00 |
| ATOM | 3098 | N    | VAL | X | 205 | 32.974 | 43.953 | 44.646 | 0.00 | 0.00 |
| ATOM | 3099 | H    | VAL | X | 205 | 33.931 | 43.833 | 44.348 | 0.00 | 0.00 |
| ATOM | 3100 | CA   | VAL | X | 205 | 31.981 | 44.199 | 43.630 | 0.00 | 0.00 |
| ATOM | 3101 | HA   | VAL | X | 205 | 31.639 | 45.205 | 43.873 | 0.00 | 0.00 |
| ATOM | 3102 | CB   | VAL | X | 205 | 32.531 | 44.199 | 42.156 | 0.00 | 0.00 |
| ATOM | 3103 | HB   | VAL | X | 205 | 33.039 | 43.274 | 41.884 | 0.00 | 0.00 |
| ATOM | 3104 | CG1  | VAL | X | 205 | 31.385 | 44.369 | 41.067 | 0.00 | 0.00 |
| ATOM | 3105 | HG11 | VAL | X | 205 | 30.695 | 45.201 | 41.204 | 0.00 | 0.00 |
| ATOM | 3106 | HG12 | VAL | X | 205 | 31.842 | 44.577 | 40.099 | 0.00 | 0.00 |
| ATOM | 3107 | HG13 | VAL | X | 205 | 30.774 | 43.497 | 40.836 | 0.00 | 0.00 |
| ATOM | 3108 | CG2  | VAL | X | 205 | 33.533 | 45.231 | 41.845 | 0.00 | 0.00 |
| ATOM | 3109 | HG21 | VAL | X | 205 | 34.547 | 45.102 | 42.223 | 0.00 | 0.00 |
| ATOM | 3110 | HG22 | VAL | X | 205 | 33.698 | 45.245 | 40.767 | 0.00 | 0.00 |
| ATOM | 3111 | HG23 | VAL | X | 205 | 33.207 | 46.176 | 42.278 | 0.00 | 0.00 |
| ATOM | 3112 | C    | VAL | X | 205 | 30.845 | 43.186 | 43.724 | 0.00 | 0.00 |
| ATOM | 3113 | O    | VAL | X | 205 | 29.670 | 43.449 | 43.674 | 0.00 | 0.00 |
| ATOM | 3114 | N    | GLY | X | 206 | 31.192 | 41.890 | 43.937 | 0.00 | 0.00 |
| ATOM | 3115 | H    | GLY | X | 206 | 32.186 | 41.711 | 43.947 | 0.00 | 0.00 |
| ATOM | 3116 | CA   | GLY | X | 206 | 30.192 | 40.817 | 44.175 | 0.00 | 0.00 |
| ATOM | 3117 | HA2  | GLY | X | 206 | 29.521 | 40.618 | 43.316 | 0.00 | 0.00 |
| ATOM | 3118 | HA3  | GLY | X | 206 | 30.830 | 39.920 | 44.401 | 0.00 | 0.00 |
| ATOM | 3119 | C    | GLY | X | 206 | 29.393 | 40.982 | 45.461 | 0.00 | 0.00 |

|      |      |      |     |   |     |        |        |        |      |      |
|------|------|------|-----|---|-----|--------|--------|--------|------|------|
| ATOM | 3120 | O    | GLY | X | 206 | 28.222 | 40.580 | 45.510 | 0.00 | 0.00 |
| ATOM | 3121 | N    | MET | X | 207 | 30.020 | 41.574 | 46.509 | 0.00 | 0.00 |
| ATOM | 3122 | H    | MET | X | 207 | 30.951 | 41.963 | 46.461 | 0.00 | 0.00 |
| ATOM | 3123 | CA   | MET | X | 207 | 29.205 | 41.829 | 47.726 | 0.00 | 0.00 |
| ATOM | 3124 | HA   | MET | X | 207 | 28.702 | 40.901 | 48.001 | 0.00 | 0.00 |
| ATOM | 3125 | CB   | MET | X | 207 | 30.008 | 42.234 | 48.956 | 0.00 | 0.00 |
| ATOM | 3126 | HB2  | MET | X | 207 | 30.383 | 43.232 | 48.734 | 0.00 | 0.00 |
| ATOM | 3127 | HB3  | MET | X | 207 | 29.328 | 42.484 | 49.771 | 0.00 | 0.00 |
| ATOM | 3128 | CG   | MET | X | 207 | 31.127 | 41.260 | 49.472 | 0.00 | 0.00 |
| ATOM | 3129 | HG2  | MET | X | 207 | 31.984 | 41.327 | 48.801 | 0.00 | 0.00 |
| ATOM | 3130 | HG3  | MET | X | 207 | 31.485 | 41.525 | 50.467 | 0.00 | 0.00 |
| ATOM | 3131 | SD   | MET | X | 207 | 30.556 | 39.541 | 49.439 | 0.00 | 0.00 |
| ATOM | 3132 | CE   | MET | X | 207 | 32.162 | 38.834 | 49.622 | 0.00 | 0.00 |
| ATOM | 3133 | HE1  | MET | X | 207 | 31.966 | 37.770 | 49.753 | 0.00 | 0.00 |
| ATOM | 3134 | HE2  | MET | X | 207 | 32.794 | 38.934 | 48.740 | 0.00 | 0.00 |
| ATOM | 3135 | HE3  | MET | X | 207 | 32.591 | 39.151 | 50.573 | 0.00 | 0.00 |
| ATOM | 3136 | C    | MET | X | 207 | 28.137 | 42.814 | 47.433 | 0.00 | 0.00 |
| ATOM | 3137 | O    | MET | X | 207 | 27.062 | 42.727 | 47.917 | 0.00 | 0.00 |
| ATOM | 3138 | N    | HIE | X | 208 | 28.500 | 43.828 | 46.579 | 0.00 | 0.00 |
| ATOM | 3139 | H    | HIE | X | 208 | 29.456 | 43.882 | 46.258 | 0.00 | 0.00 |
| ATOM | 3140 | CA   | HIE | X | 208 | 27.402 | 44.806 | 46.157 | 0.00 | 0.00 |
| ATOM | 3141 | HA   | HIE | X | 208 | 26.925 | 45.063 | 47.103 | 0.00 | 0.00 |
| ATOM | 3142 | CB   | HIE | X | 208 | 28.092 | 46.168 | 45.647 | 0.00 | 0.00 |
| ATOM | 3143 | HB2  | HIE | X | 208 | 28.512 | 46.102 | 44.644 | 0.00 | 0.00 |
| ATOM | 3144 | HB3  | HIE | X | 208 | 27.267 | 46.869 | 45.520 | 0.00 | 0.00 |
| ATOM | 3145 | CG   | HIE | X | 208 | 29.105 | 46.811 | 46.576 | 0.00 | 0.00 |
| ATOM | 3146 | ND1  | HIE | X | 208 | 28.883 | 47.176 | 47.903 | 0.00 | 0.00 |
| ATOM | 3147 | CE1  | HIE | X | 208 | 30.054 | 47.629 | 48.397 | 0.00 | 0.00 |
| ATOM | 3148 | HE1  | HIE | X | 208 | 30.323 | 47.816 | 49.426 | 0.00 | 0.00 |
| ATOM | 3149 | NE2  | HIE | X | 208 | 30.998 | 47.585 | 47.422 | 0.00 | 0.00 |
| ATOM | 3150 | HE2  | HIE | X | 208 | 31.982 | 47.798 | 47.493 | 0.00 | 0.00 |
| ATOM | 3151 | CD2  | HIE | X | 208 | 30.416 | 47.078 | 46.281 | 0.00 | 0.00 |
| ATOM | 3152 | HD2  | HIE | X | 208 | 30.924 | 46.892 | 45.347 | 0.00 | 0.00 |
| ATOM | 3153 | C    | HIE | X | 208 | 26.330 | 44.182 | 45.228 | 0.00 | 0.00 |
| ATOM | 3154 | O    | HIE | X | 208 | 25.181 | 44.551 | 45.299 | 0.00 | 0.00 |
| ATOM | 3155 | N    | LEU | X | 209 | 26.690 | 43.135 | 44.450 | 0.00 | 0.00 |
| ATOM | 3156 | H    | LEU | X | 209 | 27.694 | 43.027 | 44.482 | 0.00 | 0.00 |
| ATOM | 3157 | CA   | LEU | X | 209 | 25.772 | 42.250 | 43.725 | 0.00 | 0.00 |
| ATOM | 3158 | HA   | LEU | X | 209 | 25.042 | 42.768 | 43.104 | 0.00 | 0.00 |
| ATOM | 3159 | CB   | LEU | X | 209 | 26.539 | 41.346 | 42.747 | 0.00 | 0.00 |
| ATOM | 3160 | HB2  | LEU | X | 209 | 27.051 | 41.965 | 42.010 | 0.00 | 0.00 |
| ATOM | 3161 | HB3  | LEU | X | 209 | 27.349 | 40.881 | 43.308 | 0.00 | 0.00 |
| ATOM | 3162 | CG   | LEU | X | 209 | 25.721 | 40.262 | 41.898 | 0.00 | 0.00 |
| ATOM | 3163 | HG   | LEU | X | 209 | 25.039 | 39.715 | 42.549 | 0.00 | 0.00 |
| ATOM | 3164 | CD1  | LEU | X | 209 | 24.751 | 40.930 | 40.780 | 0.00 | 0.00 |
| ATOM | 3165 | HD11 | LEU | X | 209 | 25.391 | 41.448 | 40.065 | 0.00 | 0.00 |
| ATOM | 3166 | HD12 | LEU | X | 209 | 24.295 | 40.069 | 40.289 | 0.00 | 0.00 |
| ATOM | 3167 | HD13 | LEU | X | 209 | 24.058 | 41.609 | 41.275 | 0.00 | 0.00 |
| ATOM | 3168 | CD2  | LEU | X | 209 | 26.684 | 39.255 | 41.258 | 0.00 | 0.00 |
| ATOM | 3169 | HD21 | LEU | X | 209 | 27.317 | 38.841 | 42.042 | 0.00 | 0.00 |
| ATOM | 3170 | HD22 | LEU | X | 209 | 26.176 | 38.473 | 40.694 | 0.00 | 0.00 |
| ATOM | 3171 | HD23 | LEU | X | 209 | 27.304 | 39.834 | 40.573 | 0.00 | 0.00 |
| ATOM | 3172 | C    | LEU | X | 209 | 24.900 | 41.415 | 44.734 | 0.00 | 0.00 |
| ATOM | 3173 | O    | LEU | X | 209 | 23.760 | 41.256 | 44.458 | 0.00 | 0.00 |
| ATOM | 3174 | N    | LEU | X | 210 | 25.384 | 40.849 | 45.803 | 0.00 | 0.00 |
| ATOM | 3175 | H    | LEU | X | 210 | 26.394 | 40.865 | 45.838 | 0.00 | 0.00 |
| ATOM | 3176 | CA   | LEU | X | 210 | 24.655 | 40.164 | 46.882 | 0.00 | 0.00 |
| ATOM | 3177 | HA   | LEU | X | 210 | 23.861 | 39.570 | 46.432 | 0.00 | 0.00 |
| ATOM | 3178 | CB   | LEU | X | 210 | 25.692 | 39.172 | 47.495 | 0.00 | 0.00 |
| ATOM | 3179 | HB2  | LEU | X | 210 | 26.535 | 39.734 | 47.897 | 0.00 | 0.00 |
| ATOM | 3180 | HB3  | LEU | X | 210 | 25.170 | 38.686 | 48.319 | 0.00 | 0.00 |
| ATOM | 3181 | CG   | LEU | X | 210 | 26.370 | 38.118 | 46.479 | 0.00 | 0.00 |
| ATOM | 3182 | HG   | LEU | X | 210 | 26.830 | 38.654 | 45.648 | 0.00 | 0.00 |
| ATOM | 3183 | CD1  | LEU | X | 210 | 27.407 | 37.273 | 47.177 | 0.00 | 0.00 |
| ATOM | 3184 | HD11 | LEU | X | 210 | 27.801 | 36.486 | 46.534 | 0.00 | 0.00 |
| ATOM | 3185 | HD12 | LEU | X | 210 | 28.181 | 37.956 | 47.528 | 0.00 | 0.00 |
| ATOM | 3186 | HD13 | LEU | X | 210 | 26.903 | 36.765 | 47.999 | 0.00 | 0.00 |
| ATOM | 3187 | CD2  | LEU | X | 210 | 25.257 | 37.219 | 45.859 | 0.00 | 0.00 |
| ATOM | 3188 | HD21 | LEU | X | 210 | 25.656 | 36.692 | 44.992 | 0.00 | 0.00 |
| ATOM | 3189 | HD22 | LEU | X | 210 | 24.967 | 36.531 | 46.652 | 0.00 | 0.00 |

|      |      |      |     |   |     |        |        |        |      |      |
|------|------|------|-----|---|-----|--------|--------|--------|------|------|
| ATOM | 3190 | HD23 | LEU | X | 210 | 24.395 | 37.787 | 45.509 | 0.00 | 0.00 |
| ATOM | 3191 | C    | LEU | X | 210 | 23.955 | 40.956 | 47.965 | 0.00 | 0.00 |
| ATOM | 3192 | O    | LEU | X | 210 | 23.037 | 40.415 | 48.650 | 0.00 | 0.00 |
| ATOM | 3193 | N    | SER | X | 211 | 24.228 | 42.268 | 48.094 | 0.00 | 0.00 |
| ATOM | 3194 | H    | SER | X | 211 | 24.919 | 42.646 | 47.463 | 0.00 | 0.00 |
| ATOM | 3195 | CA   | SER | X | 211 | 23.601 | 43.150 | 49.044 | 0.00 | 0.00 |
| ATOM | 3196 | HA   | SER | X | 211 | 22.991 | 42.556 | 49.725 | 0.00 | 0.00 |
| ATOM | 3197 | CB   | SER | X | 211 | 24.704 | 43.745 | 49.962 | 0.00 | 0.00 |
| ATOM | 3198 | HB2  | SER | X | 211 | 25.308 | 42.869 | 50.200 | 0.00 | 0.00 |
| ATOM | 3199 | HB3  | SER | X | 211 | 25.305 | 44.463 | 49.405 | 0.00 | 0.00 |
| ATOM | 3200 | OG   | SER | X | 211 | 24.287 | 44.190 | 51.205 | 0.00 | 0.00 |
| ATOM | 3201 | HG   | SER | X | 211 | 24.374 | 43.512 | 51.879 | 0.00 | 0.00 |
| ATOM | 3202 | C    | SER | X | 211 | 22.777 | 44.252 | 48.365 | 0.00 | 0.00 |
| ATOM | 3203 | O    | SER | X | 211 | 23.255 | 45.307 | 48.017 | 0.00 | 0.00 |
| ATOM | 3204 | N    | PRO | X | 212 | 21.414 | 43.984 | 48.413 | 0.00 | 0.00 |
| ATOM | 3205 | CD   | PRO | X | 212 | 20.621 | 42.912 | 48.879 | 0.00 | 0.00 |
| ATOM | 3206 | HD2  | PRO | X | 212 | 20.430 | 42.871 | 49.951 | 0.00 | 0.00 |
| ATOM | 3207 | HD3  | PRO | X | 212 | 21.109 | 42.011 | 48.507 | 0.00 | 0.00 |
| ATOM | 3208 | CG   | PRO | X | 212 | 19.194 | 43.085 | 48.279 | 0.00 | 0.00 |
| ATOM | 3209 | HG2  | PRO | X | 212 | 18.383 | 42.570 | 48.794 | 0.00 | 0.00 |
| ATOM | 3210 | HG3  | PRO | X | 212 | 19.230 | 42.835 | 47.219 | 0.00 | 0.00 |
| ATOM | 3211 | CB   | PRO | X | 212 | 19.001 | 44.543 | 48.344 | 0.00 | 0.00 |
| ATOM | 3212 | HB2  | PRO | X | 212 | 18.772 | 44.873 | 49.357 | 0.00 | 0.00 |
| ATOM | 3213 | HB3  | PRO | X | 212 | 18.342 | 44.904 | 47.553 | 0.00 | 0.00 |
| ATOM | 3214 | CA   | PRO | X | 212 | 20.421 | 45.036 | 47.957 | 0.00 | 0.00 |
| ATOM | 3215 | HA   | PRO | X | 212 | 20.336 | 44.937 | 46.875 | 0.00 | 0.00 |
| ATOM | 3216 | C    | PRO | X | 212 | 20.612 | 46.525 | 48.449 | 0.00 | 0.00 |
| ATOM | 3217 | O    | PRO | X | 212 | 20.365 | 47.370 | 47.613 | 0.00 | 0.00 |
| ATOM | 3218 | N    | PRO | X | 213 | 20.986 | 46.890 | 49.755 | 0.00 | 0.00 |
| ATOM | 3219 | CD   | PRO | X | 213 | 21.064 | 46.075 | 50.864 | 0.00 | 0.00 |
| ATOM | 3220 | HD2  | PRO | X | 213 | 22.123 | 45.820 | 50.839 | 0.00 | 0.00 |
| ATOM | 3221 | HD3  | PRO | X | 213 | 20.529 | 45.126 | 50.841 | 0.00 | 0.00 |
| ATOM | 3222 | CG   | PRO | X | 213 | 20.699 | 46.883 | 52.006 | 0.00 | 0.00 |
| ATOM | 3223 | HG2  | PRO | X | 213 | 21.194 | 46.484 | 52.891 | 0.00 | 0.00 |
| ATOM | 3224 | HG3  | PRO | X | 213 | 19.617 | 47.006 | 51.972 | 0.00 | 0.00 |
| ATOM | 3225 | CB   | PRO | X | 213 | 21.257 | 48.282 | 51.661 | 0.00 | 0.00 |
| ATOM | 3226 | HB2  | PRO | X | 213 | 22.286 | 48.386 | 52.005 | 0.00 | 0.00 |
| ATOM | 3227 | HB3  | PRO | X | 213 | 20.616 | 49.046 | 52.102 | 0.00 | 0.00 |
| ATOM | 3228 | CA   | PRO | X | 213 | 21.194 | 48.283 | 50.131 | 0.00 | 0.00 |
| ATOM | 3229 | HA   | PRO | X | 213 | 20.359 | 48.862 | 49.737 | 0.00 | 0.00 |
| ATOM | 3230 | C    | PRO | X | 213 | 22.454 | 48.959 | 49.580 | 0.00 | 0.00 |
| ATOM | 3231 | O    | PRO | X | 213 | 22.496 | 50.198 | 49.474 | 0.00 | 0.00 |
| ATOM | 3232 | N    | SER | X | 214 | 23.331 | 48.107 | 48.957 | 0.00 | 0.00 |
| ATOM | 3233 | H    | SER | X | 214 | 23.194 | 47.108 | 48.901 | 0.00 | 0.00 |
| ATOM | 3234 | CA   | SER | X | 214 | 24.321 | 48.668 | 47.921 | 0.00 | 0.00 |
| ATOM | 3235 | HA   | SER | X | 214 | 24.766 | 49.615 | 48.226 | 0.00 | 0.00 |
| ATOM | 3236 | CB   | SER | X | 214 | 25.481 | 47.689 | 47.699 | 0.00 | 0.00 |
| ATOM | 3237 | HB2  | SER | X | 214 | 25.069 | 46.738 | 47.362 | 0.00 | 0.00 |
| ATOM | 3238 | HB3  | SER | X | 214 | 26.121 | 48.127 | 46.932 | 0.00 | 0.00 |
| ATOM | 3239 | OG   | SER | X | 214 | 26.185 | 47.530 | 48.858 | 0.00 | 0.00 |
| ATOM | 3240 | HG   | SER | X | 214 | 27.106 | 47.488 | 48.588 | 0.00 | 0.00 |
| ATOM | 3241 | C    | SER | X | 214 | 23.701 | 48.801 | 46.493 | 0.00 | 0.00 |
| ATOM | 3242 | O    | SER | X | 214 | 24.107 | 49.647 | 45.780 | 0.00 | 0.00 |
| ATOM | 3243 | N    | ARG | X | 215 | 22.803 | 47.860 | 46.204 | 0.00 | 0.00 |
| ATOM | 3244 | H    | ARG | X | 215 | 22.640 | 47.163 | 46.917 | 0.00 | 0.00 |
| ATOM | 3245 | CA   | ARG | X | 215 | 22.581 | 47.516 | 44.825 | 0.00 | 0.00 |
| ATOM | 3246 | HA   | ARG | X | 215 | 23.562 | 47.528 | 44.351 | 0.00 | 0.00 |
| ATOM | 3247 | CB   | ARG | X | 215 | 22.119 | 46.023 | 44.816 | 0.00 | 0.00 |
| ATOM | 3248 | HB2  | ARG | X | 215 | 22.595 | 45.461 | 45.619 | 0.00 | 0.00 |
| ATOM | 3249 | HB3  | ARG | X | 215 | 21.032 | 46.034 | 44.902 | 0.00 | 0.00 |
| ATOM | 3250 | CG   | ARG | X | 215 | 22.493 | 45.329 | 43.459 | 0.00 | 0.00 |
| ATOM | 3251 | HG2  | ARG | X | 215 | 21.800 | 45.719 | 42.714 | 0.00 | 0.00 |
| ATOM | 3252 | HG3  | ARG | X | 215 | 23.532 | 45.455 | 43.153 | 0.00 | 0.00 |
| ATOM | 3253 | CD   | ARG | X | 215 | 22.204 | 43.831 | 43.514 | 0.00 | 0.00 |
| ATOM | 3254 | HD2  | ARG | X | 215 | 22.331 | 43.495 | 42.485 | 0.00 | 0.00 |
| ATOM | 3255 | HD3  | ARG | X | 215 | 22.800 | 43.391 | 44.314 | 0.00 | 0.00 |
| ATOM | 3256 | NE   | ARG | X | 215 | 20.788 | 43.627 | 43.760 | 0.00 | 0.00 |
| ATOM | 3257 | HE   | ARG | X | 215 | 20.172 | 44.292 | 43.314 | 0.00 | 0.00 |
| ATOM | 3258 | CZ   | ARG | X | 215 | 20.219 | 42.628 | 44.430 | 0.00 | 0.00 |
| ATOM | 3259 | NH1  | ARG | X | 215 | 20.908 | 41.584 | 44.954 | 0.00 | 0.00 |

|      |      |      |     |   |     |        |        |        |      |      |
|------|------|------|-----|---|-----|--------|--------|--------|------|------|
| ATOM | 3260 | HH11 | ARG | X | 215 | 21.875 | 41.500 | 44.675 | 0.00 | 0.00 |
| ATOM | 3261 | HH12 | ARG | X | 215 | 20.464 | 40.887 | 45.534 | 0.00 | 0.00 |
| ATOM | 3262 | NH2  | ARG | X | 215 | 18.903 | 42.607 | 44.549 | 0.00 | 0.00 |
| ATOM | 3263 | HH21 | ARG | X | 215 | 18.310 | 43.371 | 44.258 | 0.00 | 0.00 |
| ATOM | 3264 | HH22 | ARG | X | 215 | 18.533 | 41.793 | 45.020 | 0.00 | 0.00 |
| ATOM | 3265 | C    | ARG | X | 215 | 21.807 | 48.568 | 43.946 | 0.00 | 0.00 |
| ATOM | 3266 | O    | ARG | X | 215 | 21.616 | 48.318 | 42.770 | 0.00 | 0.00 |
| ATOM | 3267 | N    | GLY | X | 216 | 21.419 | 49.767 | 44.442 | 0.00 | 0.00 |
| ATOM | 3268 | H    | GLY | X | 216 | 21.445 | 49.958 | 45.433 | 0.00 | 0.00 |
| ATOM | 3269 | CA   | GLY | X | 216 | 20.834 | 50.856 | 43.693 | 0.00 | 0.00 |
| ATOM | 3270 | HA2  | GLY | X | 216 | 20.353 | 50.527 | 42.703 | 0.00 | 0.00 |
| ATOM | 3271 | HA3  | GLY | X | 216 | 20.182 | 51.365 | 44.293 | 0.00 | 0.00 |
| ATOM | 3272 | C    | GLY | X | 216 | 21.802 | 51.992 | 43.318 | 0.00 | 0.00 |
| ATOM | 3273 | O    | GLY | X | 216 | 21.435 | 52.914 | 42.514 | 0.00 | 0.00 |
| ATOM | 3274 | N    | LEU | X | 217 | 23.108 | 52.041 | 43.789 | 0.00 | 0.00 |
| ATOM | 3275 | H    | LEU | X | 217 | 23.312 | 51.418 | 44.558 | 0.00 | 0.00 |
| ATOM | 3276 | CA   | LEU | X | 217 | 23.969 | 53.224 | 43.567 | 0.00 | 0.00 |
| ATOM | 3277 | HA   | LEU | X | 217 | 23.335 | 54.102 | 43.445 | 0.00 | 0.00 |
| ATOM | 3278 | CB   | LEU | X | 217 | 24.871 | 53.373 | 44.807 | 0.00 | 0.00 |
| ATOM | 3279 | HB2  | LEU | X | 217 | 25.442 | 52.462 | 44.986 | 0.00 | 0.00 |
| ATOM | 3280 | HB3  | LEU | X | 217 | 25.640 | 54.131 | 44.661 | 0.00 | 0.00 |
| ATOM | 3281 | CG   | LEU | X | 217 | 24.110 | 53.623 | 46.137 | 0.00 | 0.00 |
| ATOM | 3282 | HG   | LEU | X | 217 | 23.302 | 52.898 | 46.239 | 0.00 | 0.00 |
| ATOM | 3283 | CD1  | LEU | X | 217 | 24.985 | 53.280 | 47.333 | 0.00 | 0.00 |
| ATOM | 3284 | HD11 | LEU | X | 217 | 25.841 | 53.953 | 47.295 | 0.00 | 0.00 |
| ATOM | 3285 | HD12 | LEU | X | 217 | 24.347 | 53.395 | 48.210 | 0.00 | 0.00 |
| ATOM | 3286 | HD13 | LEU | X | 217 | 25.310 | 52.243 | 47.254 | 0.00 | 0.00 |
| ATOM | 3287 | CD2  | LEU | X | 217 | 23.654 | 55.076 | 46.172 | 0.00 | 0.00 |
| ATOM | 3288 | HD21 | LEU | X | 217 | 23.051 | 55.369 | 45.312 | 0.00 | 0.00 |
| ATOM | 3289 | HD22 | LEU | X | 217 | 23.116 | 55.197 | 47.112 | 0.00 | 0.00 |
| ATOM | 3290 | HD23 | LEU | X | 217 | 24.490 | 55.773 | 46.116 | 0.00 | 0.00 |
| ATOM | 3291 | C    | LEU | X | 217 | 24.777 | 53.088 | 42.247 | 0.00 | 0.00 |
| ATOM | 3292 | O    | LEU | X | 217 | 25.450 | 53.990 | 41.820 | 0.00 | 0.00 |
| ATOM | 3293 | N    | PHE | X | 218 | 24.658 | 51.868 | 41.662 | 0.00 | 0.00 |
| ATOM | 3294 | H    | PHE | X | 218 | 24.019 | 51.225 | 42.108 | 0.00 | 0.00 |
| ATOM | 3295 | CA   | PHE | X | 218 | 25.204 | 51.390 | 40.426 | 0.00 | 0.00 |
| ATOM | 3296 | HA   | PHE | X | 218 | 25.481 | 52.268 | 39.843 | 0.00 | 0.00 |
| ATOM | 3297 | CB   | PHE | X | 218 | 26.512 | 50.720 | 40.799 | 0.00 | 0.00 |
| ATOM | 3298 | HB2  | PHE | X | 218 | 27.064 | 50.681 | 39.860 | 0.00 | 0.00 |
| ATOM | 3299 | HB3  | PHE | X | 218 | 27.102 | 51.437 | 41.370 | 0.00 | 0.00 |
| ATOM | 3300 | CG   | PHE | X | 218 | 26.375 | 49.332 | 41.436 | 0.00 | 0.00 |
| ATOM | 3301 | CD1  | PHE | X | 218 | 26.195 | 49.145 | 42.788 | 0.00 | 0.00 |
| ATOM | 3302 | HD1  | PHE | X | 218 | 26.092 | 50.028 | 43.401 | 0.00 | 0.00 |
| ATOM | 3303 | CE1  | PHE | X | 218 | 26.072 | 47.884 | 43.341 | 0.00 | 0.00 |
| ATOM | 3304 | HE1  | PHE | X | 218 | 25.832 | 47.778 | 44.389 | 0.00 | 0.00 |
| ATOM | 3305 | CZ   | PHE | X | 218 | 26.163 | 46.776 | 42.505 | 0.00 | 0.00 |
| ATOM | 3306 | HZ   | PHE | X | 218 | 26.016 | 45.800 | 42.944 | 0.00 | 0.00 |
| ATOM | 3307 | CE2  | PHE | X | 218 | 26.406 | 46.962 | 41.128 | 0.00 | 0.00 |
| ATOM | 3308 | HE2  | PHE | X | 218 | 26.694 | 46.163 | 40.462 | 0.00 | 0.00 |
| ATOM | 3309 | CD2  | PHE | X | 218 | 26.581 | 48.247 | 40.606 | 0.00 | 0.00 |
| ATOM | 3310 | HD2  | PHE | X | 218 | 26.789 | 48.479 | 39.572 | 0.00 | 0.00 |
| ATOM | 3311 | C    | PHE | X | 218 | 24.283 | 50.479 | 39.577 | 0.00 | 0.00 |
| ATOM | 3312 | O    | PHE | X | 218 | 23.198 | 50.127 | 39.933 | 0.00 | 0.00 |
| ATOM | 3313 | N    | HIE | X | 219 | 24.724 | 50.193 | 38.337 | 0.00 | 0.00 |
| ATOM | 3314 | H    | HIE | X | 219 | 25.649 | 50.496 | 38.070 | 0.00 | 0.00 |
| ATOM | 3315 | CA   | HIE | X | 219 | 23.866 | 49.665 | 37.203 | 0.00 | 0.00 |
| ATOM | 3316 | HA   | HIE | X | 219 | 22.841 | 49.464 | 37.514 | 0.00 | 0.00 |
| ATOM | 3317 | CB   | HIE | X | 219 | 23.925 | 50.777 | 36.178 | 0.00 | 0.00 |
| ATOM | 3318 | HB2  | HIE | X | 219 | 24.963 | 51.006 | 35.936 | 0.00 | 0.00 |
| ATOM | 3319 | HB3  | HIE | X | 219 | 23.402 | 50.530 | 35.254 | 0.00 | 0.00 |
| ATOM | 3320 | CG   | HIE | X | 219 | 23.331 | 52.074 | 36.756 | 0.00 | 0.00 |
| ATOM | 3321 | ND1  | HIE | X | 219 | 24.018 | 53.115 | 37.351 | 0.00 | 0.00 |
| ATOM | 3322 | CE1  | HIE | X | 219 | 23.147 | 54.039 | 37.759 | 0.00 | 0.00 |
| ATOM | 3323 | HE1  | HIE | X | 219 | 23.341 | 54.971 | 38.268 | 0.00 | 0.00 |
| ATOM | 3324 | NE2  | HIE | X | 219 | 21.916 | 53.584 | 37.594 | 0.00 | 0.00 |
| ATOM | 3325 | HE2  | HIE | X | 219 | 21.077 | 54.050 | 37.907 | 0.00 | 0.00 |
| ATOM | 3326 | CD2  | HIE | X | 219 | 22.004 | 52.340 | 36.965 | 0.00 | 0.00 |
| ATOM | 3327 | HD2  | HIE | X | 219 | 21.163 | 51.683 | 36.797 | 0.00 | 0.00 |
| ATOM | 3328 | C    | HIE | X | 219 | 24.462 | 48.386 | 36.521 | 0.00 | 0.00 |
| ATOM | 3329 | O    | HIE | X | 219 | 23.676 | 47.699 | 35.841 | 0.00 | 0.00 |

|      |      |      |     |   |     |        |        |        |      |      |
|------|------|------|-----|---|-----|--------|--------|--------|------|------|
| ATOM | 3330 | N    | ARG | X | 220 | 25.757 | 48.089 | 36.715 | 0.00 | 0.00 |
| ATOM | 3331 | H    | ARG | X | 220 | 26.238 | 48.582 | 37.454 | 0.00 | 0.00 |
| ATOM | 3332 | CA   | ARG | X | 220 | 26.618 | 47.122 | 35.985 | 0.00 | 0.00 |
| ATOM | 3333 | HA   | ARG | X | 220 | 25.966 | 46.267 | 35.808 | 0.00 | 0.00 |
| ATOM | 3334 | CB   | ARG | X | 220 | 27.161 | 47.702 | 34.736 | 0.00 | 0.00 |
| ATOM | 3335 | HB2  | ARG | X | 220 | 27.287 | 48.754 | 34.989 | 0.00 | 0.00 |
| ATOM | 3336 | HB3  | ARG | X | 220 | 28.053 | 47.169 | 34.407 | 0.00 | 0.00 |
| ATOM | 3337 | CG   | ARG | X | 220 | 26.160 | 47.597 | 33.612 | 0.00 | 0.00 |
| ATOM | 3338 | HG2  | ARG | X | 220 | 25.873 | 46.555 | 33.470 | 0.00 | 0.00 |
| ATOM | 3339 | HG3  | ARG | X | 220 | 25.344 | 48.236 | 33.949 | 0.00 | 0.00 |
| ATOM | 3340 | CD   | ARG | X | 220 | 26.470 | 48.342 | 32.242 | 0.00 | 0.00 |
| ATOM | 3341 | HD2  | ARG | X | 220 | 26.772 | 49.360 | 32.486 | 0.00 | 0.00 |
| ATOM | 3342 | HD3  | ARG | X | 220 | 27.340 | 47.888 | 31.768 | 0.00 | 0.00 |
| ATOM | 3343 | NE   | ARG | X | 220 | 25.255 | 48.437 | 31.435 | 0.00 | 0.00 |
| ATOM | 3344 | HE   | ARG | X | 220 | 24.629 | 47.645 | 31.462 | 0.00 | 0.00 |
| ATOM | 3345 | CZ   | ARG | X | 220 | 24.783 | 49.494 | 30.828 | 0.00 | 0.00 |
| ATOM | 3346 | NH1  | ARG | X | 220 | 25.488 | 50.580 | 30.721 | 0.00 | 0.00 |
| ATOM | 3347 | HH11 | ARG | X | 220 | 26.388 | 50.681 | 31.168 | 0.00 | 0.00 |
| ATOM | 3348 | HH12 | ARG | X | 220 | 25.102 | 51.409 | 30.291 | 0.00 | 0.00 |
| ATOM | 3349 | NH2  | ARG | X | 220 | 23.643 | 49.234 | 30.204 | 0.00 | 0.00 |
| ATOM | 3350 | HH21 | ARG | X | 220 | 23.198 | 48.329 | 30.255 | 0.00 | 0.00 |
| ATOM | 3351 | HH22 | ARG | X | 220 | 23.236 | 49.892 | 29.555 | 0.00 | 0.00 |
| ATOM | 3352 | C    | ARG | X | 220 | 27.830 | 46.608 | 36.775 | 0.00 | 0.00 |
| ATOM | 3353 | O    | ARG | X | 220 | 28.396 | 47.439 | 37.547 | 0.00 | 0.00 |
| ATOM | 3354 | N    | ALA | X | 221 | 28.153 | 45.336 | 36.677 | 0.00 | 0.00 |
| ATOM | 3355 | H    | ALA | X | 221 | 27.607 | 44.776 | 36.038 | 0.00 | 0.00 |
| ATOM | 3356 | CA   | ALA | X | 221 | 29.066 | 44.646 | 37.537 | 0.00 | 0.00 |
| ATOM | 3357 | HA   | ALA | X | 221 | 29.552 | 45.339 | 38.224 | 0.00 | 0.00 |
| ATOM | 3358 | CB   | ALA | X | 221 | 28.140 | 43.784 | 38.415 | 0.00 | 0.00 |
| ATOM | 3359 | HB1  | ALA | X | 221 | 27.527 | 44.345 | 39.121 | 0.00 | 0.00 |
| ATOM | 3360 | HB2  | ALA | X | 221 | 27.502 | 43.165 | 37.784 | 0.00 | 0.00 |
| ATOM | 3361 | HB3  | ALA | X | 221 | 28.673 | 43.017 | 38.977 | 0.00 | 0.00 |
| ATOM | 3362 | C    | ALA | X | 221 | 30.150 | 43.833 | 36.810 | 0.00 | 0.00 |
| ATOM | 3363 | O    | ALA | X | 221 | 29.818 | 43.040 | 35.904 | 0.00 | 0.00 |
| ATOM | 3364 | N    | VAL | X | 222 | 31.373 | 43.954 | 37.340 | 0.00 | 0.00 |
| ATOM | 3365 | H    | VAL | X | 222 | 31.487 | 44.758 | 37.940 | 0.00 | 0.00 |
| ATOM | 3366 | CA   | VAL | X | 222 | 32.554 | 43.139 | 36.810 | 0.00 | 0.00 |
| ATOM | 3367 | HA   | VAL | X | 222 | 32.188 | 42.358 | 36.143 | 0.00 | 0.00 |
| ATOM | 3368 | CB   | VAL | X | 222 | 33.549 | 43.973 | 35.950 | 0.00 | 0.00 |
| ATOM | 3369 | HB   | VAL | X | 222 | 33.928 | 44.777 | 36.581 | 0.00 | 0.00 |
| ATOM | 3370 | CG1  | VAL | X | 222 | 34.830 | 43.254 | 35.504 | 0.00 | 0.00 |
| ATOM | 3371 | HG11 | VAL | X | 222 | 34.543 | 42.335 | 34.992 | 0.00 | 0.00 |
| ATOM | 3372 | HG12 | VAL | X | 222 | 35.394 | 43.933 | 34.865 | 0.00 | 0.00 |
| ATOM | 3373 | HG13 | VAL | X | 222 | 35.487 | 42.964 | 36.325 | 0.00 | 0.00 |
| ATOM | 3374 | CG2  | VAL | X | 222 | 32.920 | 44.700 | 34.717 | 0.00 | 0.00 |
| ATOM | 3375 | HG21 | VAL | X | 222 | 32.923 | 43.970 | 33.907 | 0.00 | 0.00 |
| ATOM | 3376 | HG22 | VAL | X | 222 | 31.915 | 45.084 | 34.892 | 0.00 | 0.00 |
| ATOM | 3377 | HG23 | VAL | X | 222 | 33.600 | 45.501 | 34.426 | 0.00 | 0.00 |
| ATOM | 3378 | C    | VAL | X | 222 | 33.399 | 42.493 | 37.956 | 0.00 | 0.00 |
| ATOM | 3379 | O    | VAL | X | 222 | 33.903 | 43.162 | 38.855 | 0.00 | 0.00 |
| ATOM | 3380 | N    | LEU | X | 223 | 33.745 | 41.207 | 37.790 | 0.00 | 0.00 |
| ATOM | 3381 | H    | LEU | X | 223 | 33.485 | 40.708 | 36.952 | 0.00 | 0.00 |
| ATOM | 3382 | CA   | LEU | X | 223 | 34.562 | 40.407 | 38.798 | 0.00 | 0.00 |
| ATOM | 3383 | HA   | LEU | X | 223 | 35.001 | 41.113 | 39.505 | 0.00 | 0.00 |
| ATOM | 3384 | CB   | LEU | X | 223 | 33.722 | 39.298 | 39.450 | 0.00 | 0.00 |
| ATOM | 3385 | HB2  | LEU | X | 223 | 33.209 | 38.702 | 38.696 | 0.00 | 0.00 |
| ATOM | 3386 | HB3  | LEU | X | 223 | 34.380 | 38.609 | 39.980 | 0.00 | 0.00 |
| ATOM | 3387 | CG   | LEU | X | 223 | 32.737 | 39.918 | 40.542 | 0.00 | 0.00 |
| ATOM | 3388 | HG   | LEU | X | 223 | 33.349 | 40.538 | 41.196 | 0.00 | 0.00 |
| ATOM | 3389 | CD1  | LEU | X | 223 | 31.444 | 40.608 | 39.969 | 0.00 | 0.00 |
| ATOM | 3390 | HD11 | LEU | X | 223 | 30.803 | 40.940 | 40.786 | 0.00 | 0.00 |
| ATOM | 3391 | HD12 | LEU | X | 223 | 31.653 | 41.480 | 39.350 | 0.00 | 0.00 |
| ATOM | 3392 | HD13 | LEU | X | 223 | 30.928 | 39.895 | 39.326 | 0.00 | 0.00 |
| ATOM | 3393 | CD2  | LEU | X | 223 | 32.120 | 38.776 | 41.371 | 0.00 | 0.00 |
| ATOM | 3394 | HD21 | LEU | X | 223 | 31.484 | 38.147 | 40.748 | 0.00 | 0.00 |
| ATOM | 3395 | HD22 | LEU | X | 223 | 32.883 | 38.199 | 41.893 | 0.00 | 0.00 |
| ATOM | 3396 | HD23 | LEU | X | 223 | 31.484 | 39.206 | 42.145 | 0.00 | 0.00 |
| ATOM | 3397 | C    | LEU | X | 223 | 35.828 | 39.734 | 38.056 | 0.00 | 0.00 |
| ATOM | 3398 | O    | LEU | X | 223 | 35.644 | 39.159 | 37.012 | 0.00 | 0.00 |
| ATOM | 3399 | N    | GLN | X | 224 | 37.093 | 39.852 | 38.596 | 0.00 | 0.00 |

|      |      |      |     |   |     |        |        |        |      |      |
|------|------|------|-----|---|-----|--------|--------|--------|------|------|
| ATOM | 3400 | H    | GLN | X | 224 | 37.098 | 40.468 | 39.396 | 0.00 | 0.00 |
| ATOM | 3401 | CA   | GLN | X | 224 | 38.350 | 39.421 | 38.012 | 0.00 | 0.00 |
| ATOM | 3402 | HA   | GLN | X | 224 | 38.205 | 38.732 | 37.179 | 0.00 | 0.00 |
| ATOM | 3403 | CB   | GLN | X | 224 | 39.241 | 40.610 | 37.495 | 0.00 | 0.00 |
| ATOM | 3404 | HB2  | GLN | X | 224 | 39.848 | 41.073 | 38.272 | 0.00 | 0.00 |
| ATOM | 3405 | HB3  | GLN | X | 224 | 39.987 | 40.110 | 36.877 | 0.00 | 0.00 |
| ATOM | 3406 | CG   | GLN | X | 224 | 38.441 | 41.568 | 36.615 | 0.00 | 0.00 |
| ATOM | 3407 | HG2  | GLN | X | 224 | 37.860 | 41.018 | 35.874 | 0.00 | 0.00 |
| ATOM | 3408 | HG3  | GLN | X | 224 | 37.755 | 42.095 | 37.278 | 0.00 | 0.00 |
| ATOM | 3409 | CD   | GLN | X | 224 | 39.256 | 42.536 | 35.826 | 0.00 | 0.00 |
| ATOM | 3410 | OE1  | GLN | X | 224 | 38.798 | 43.671 | 35.605 | 0.00 | 0.00 |
| ATOM | 3411 | NE2  | GLN | X | 224 | 40.317 | 42.089 | 35.211 | 0.00 | 0.00 |
| ATOM | 3412 | HE21 | GLN | X | 224 | 40.872 | 42.734 | 34.668 | 0.00 | 0.00 |
| ATOM | 3413 | HE22 | GLN | X | 224 | 40.712 | 41.187 | 35.434 | 0.00 | 0.00 |
| ATOM | 3414 | C    | GLN | X | 224 | 39.122 | 38.621 | 39.069 | 0.00 | 0.00 |
| ATOM | 3415 | O    | GLN | X | 224 | 39.496 | 39.142 | 40.158 | 0.00 | 0.00 |
| ATOM | 3416 | N    | SER | X | 225 | 39.497 | 37.400 | 38.748 | 0.00 | 0.00 |
| ATOM | 3417 | H    | SER | X | 225 | 39.187 | 37.059 | 37.849 | 0.00 | 0.00 |
| ATOM | 3418 | CA   | SER | X | 225 | 40.334 | 36.452 | 39.574 | 0.00 | 0.00 |
| ATOM | 3419 | HA   | SER | X | 225 | 40.214 | 35.465 | 39.130 | 0.00 | 0.00 |
| ATOM | 3420 | CB   | SER | X | 225 | 41.821 | 36.927 | 39.539 | 0.00 | 0.00 |
| ATOM | 3421 | HB2  | SER | X | 225 | 41.732 | 38.008 | 39.642 | 0.00 | 0.00 |
| ATOM | 3422 | HB3  | SER | X | 225 | 42.368 | 36.548 | 40.401 | 0.00 | 0.00 |
| ATOM | 3423 | OG   | SER | X | 225 | 42.518 | 36.664 | 38.346 | 0.00 | 0.00 |
| ATOM | 3424 | HG   | SER | X | 225 | 42.703 | 35.724 | 38.400 | 0.00 | 0.00 |
| ATOM | 3425 | C    | SER | X | 225 | 39.875 | 36.348 | 41.013 | 0.00 | 0.00 |
| ATOM | 3426 | O    | SER | X | 225 | 40.588 | 36.300 | 41.996 | 0.00 | 0.00 |
| ATOM | 3427 | N    | GLY | X | 226 | 38.563 | 36.282 | 41.159 | 0.00 | 0.00 |
| ATOM | 3428 | H    | GLY | X | 226 | 38.076 | 36.547 | 40.315 | 0.00 | 0.00 |
| ATOM | 3429 | CA   | GLY | X | 226 | 37.851 | 36.108 | 42.413 | 0.00 | 0.00 |
| ATOM | 3430 | HA2  | GLY | X | 226 | 38.165 | 35.134 | 42.780 | 0.00 | 0.00 |
| ATOM | 3431 | HA3  | GLY | X | 226 | 38.196 | 36.811 | 43.164 | 0.00 | 0.00 |
| ATOM | 3432 | C    | GLY | X | 226 | 36.378 | 36.151 | 42.315 | 0.00 | 0.00 |
| ATOM | 3433 | O    | GLY | X | 226 | 35.825 | 36.484 | 41.302 | 0.00 | 0.00 |
| ATOM | 3434 | N    | ALA | X | 227 | 35.783 | 35.730 | 43.397 | 0.00 | 0.00 |
| ATOM | 3435 | H    | ALA | X | 227 | 36.398 | 35.371 | 44.113 | 0.00 | 0.00 |
| ATOM | 3436 | CA   | ALA | X | 227 | 34.347 | 35.551 | 43.626 | 0.00 | 0.00 |
| ATOM | 3437 | HA   | ALA | X | 227 | 33.781 | 36.224 | 42.982 | 0.00 | 0.00 |
| ATOM | 3438 | CB   | ALA | X | 227 | 34.094 | 34.007 | 43.367 | 0.00 | 0.00 |
| ATOM | 3439 | HB1  | ALA | X | 227 | 34.368 | 33.691 | 42.361 | 0.00 | 0.00 |
| ATOM | 3440 | HB2  | ALA | X | 227 | 34.691 | 33.389 | 44.039 | 0.00 | 0.00 |
| ATOM | 3441 | HB3  | ALA | X | 227 | 33.042 | 33.724 | 43.381 | 0.00 | 0.00 |
| ATOM | 3442 | C    | ALA | X | 227 | 33.988 | 35.845 | 45.065 | 0.00 | 0.00 |
| ATOM | 3443 | O    | ALA | X | 227 | 34.828 | 35.581 | 45.952 | 0.00 | 0.00 |
| ATOM | 3444 | N    | PRO | X | 228 | 32.817 | 36.335 | 45.459 | 0.00 | 0.00 |
| ATOM | 3445 | CD   | PRO | X | 228 | 31.783 | 36.846 | 44.578 | 0.00 | 0.00 |
| ATOM | 3446 | HD2  | PRO | X | 228 | 31.525 | 36.223 | 43.722 | 0.00 | 0.00 |
| ATOM | 3447 | HD3  | PRO | X | 228 | 32.097 | 37.832 | 44.233 | 0.00 | 0.00 |
| ATOM | 3448 | CG   | PRO | X | 228 | 30.614 | 37.098 | 45.535 | 0.00 | 0.00 |
| ATOM | 3449 | HG2  | PRO | X | 228 | 30.026 | 36.186 | 45.637 | 0.00 | 0.00 |
| ATOM | 3450 | HG3  | PRO | X | 228 | 30.060 | 37.879 | 45.014 | 0.00 | 0.00 |
| ATOM | 3451 | CB   | PRO | X | 228 | 31.282 | 37.391 | 46.842 | 0.00 | 0.00 |
| ATOM | 3452 | HB2  | PRO | X | 228 | 30.594 | 37.299 | 47.683 | 0.00 | 0.00 |
| ATOM | 3453 | HB3  | PRO | X | 228 | 31.735 | 38.382 | 46.840 | 0.00 | 0.00 |
| ATOM | 3454 | CA   | PRO | X | 228 | 32.519 | 36.533 | 46.899 | 0.00 | 0.00 |
| ATOM | 3455 | HA   | PRO | X | 228 | 33.387 | 36.937 | 47.420 | 0.00 | 0.00 |
| ATOM | 3456 | C    | PRO | X | 228 | 32.243 | 35.141 | 47.502 | 0.00 | 0.00 |
| ATOM | 3457 | O    | PRO | X | 228 | 32.545 | 34.935 | 48.731 | 0.00 | 0.00 |
| ATOM | 3458 | N    | ASN | X | 229 | 31.722 | 34.162 | 46.707 | 0.00 | 0.00 |
| ATOM | 3459 | H    | ASN | X | 229 | 31.466 | 34.321 | 45.743 | 0.00 | 0.00 |
| ATOM | 3460 | CA   | ASN | X | 229 | 31.474 | 32.836 | 47.184 | 0.00 | 0.00 |
| ATOM | 3461 | HA   | ASN | X | 229 | 31.268 | 32.803 | 48.254 | 0.00 | 0.00 |
| ATOM | 3462 | CB   | ASN | X | 229 | 30.319 | 32.159 | 46.483 | 0.00 | 0.00 |
| ATOM | 3463 | HB2  | ASN | X | 229 | 30.182 | 31.160 | 46.899 | 0.00 | 0.00 |
| ATOM | 3464 | HB3  | ASN | X | 229 | 29.402 | 32.741 | 46.573 | 0.00 | 0.00 |
| ATOM | 3465 | CG   | ASN | X | 229 | 30.628 | 32.055 | 45.000 | 0.00 | 0.00 |
| ATOM | 3466 | OD1  | ASN | X | 229 | 30.692 | 33.087 | 44.343 | 0.00 | 0.00 |
| ATOM | 3467 | ND2  | ASN | X | 229 | 30.871 | 30.869 | 44.393 | 0.00 | 0.00 |
| ATOM | 3468 | HD21 | ASN | X | 229 | 31.100 | 30.915 | 43.410 | 0.00 | 0.00 |
| ATOM | 3469 | HD22 | ASN | X | 229 | 30.899 | 30.012 | 44.926 | 0.00 | 0.00 |

|      |      |      |     |   |     |        |        |        |      |      |
|------|------|------|-----|---|-----|--------|--------|--------|------|------|
| ATOM | 3470 | C    | ASN | X | 229 | 32.733 | 31.992 | 47.162 | 0.00 | 0.00 |
| ATOM | 3471 | O    | ASN | X | 229 | 32.612 | 30.778 | 47.417 | 0.00 | 0.00 |
| ATOM | 3472 | N    | GLY | X | 230 | 33.955 | 32.579 | 47.025 | 0.00 | 0.00 |
| ATOM | 3473 | H    | GLY | X | 230 | 34.003 | 33.553 | 46.764 | 0.00 | 0.00 |
| ATOM | 3474 | CA   | GLY | X | 230 | 35.258 | 31.899 | 47.251 | 0.00 | 0.00 |
| ATOM | 3475 | HA2  | GLY | X | 230 | 35.296 | 30.998 | 46.635 | 0.00 | 0.00 |
| ATOM | 3476 | HA3  | GLY | X | 230 | 36.098 | 32.485 | 46.862 | 0.00 | 0.00 |
| ATOM | 3477 | C    | GLY | X | 230 | 35.434 | 31.639 | 48.749 | 0.00 | 0.00 |
| ATOM | 3478 | O    | GLY | X | 230 | 35.017 | 32.518 | 49.539 | 0.00 | 0.00 |
| ATOM | 3479 | N    | PRO | X | 231 | 36.183 | 30.574 | 49.187 | 0.00 | 0.00 |
| ATOM | 3480 | CD   | PRO | X | 231 | 36.852 | 29.565 | 48.348 | 0.00 | 0.00 |
| ATOM | 3481 | HD2  | PRO | X | 231 | 37.524 | 30.109 | 47.685 | 0.00 | 0.00 |
| ATOM | 3482 | HD3  | PRO | X | 231 | 36.111 | 29.022 | 47.761 | 0.00 | 0.00 |
| ATOM | 3483 | CG   | PRO | X | 231 | 37.679 | 28.697 | 49.268 | 0.00 | 0.00 |
| ATOM | 3484 | HG2  | PRO | X | 231 | 38.671 | 29.112 | 49.444 | 0.00 | 0.00 |
| ATOM | 3485 | HG3  | PRO | X | 231 | 37.871 | 27.725 | 48.813 | 0.00 | 0.00 |
| ATOM | 3486 | CB   | PRO | X | 231 | 36.922 | 28.828 | 50.605 | 0.00 | 0.00 |
| ATOM | 3487 | HB2  | PRO | X | 231 | 37.472 | 28.620 | 51.522 | 0.00 | 0.00 |
| ATOM | 3488 | HB3  | PRO | X | 231 | 36.208 | 28.006 | 50.551 | 0.00 | 0.00 |
| ATOM | 3489 | CA   | PRO | X | 231 | 36.252 | 30.210 | 50.636 | 0.00 | 0.00 |
| ATOM | 3490 | HA   | PRO | X | 231 | 35.248 | 30.164 | 51.057 | 0.00 | 0.00 |
| ATOM | 3491 | C    | PRO | X | 231 | 37.019 | 31.220 | 51.461 | 0.00 | 0.00 |
| ATOM | 3492 | O    | PRO | X | 231 | 36.772 | 31.232 | 52.649 | 0.00 | 0.00 |
| ATOM | 3493 | N    | TRP | X | 232 | 37.779 | 32.111 | 50.882 | 0.00 | 0.00 |
| ATOM | 3494 | H    | TRP | X | 232 | 37.899 | 31.963 | 49.890 | 0.00 | 0.00 |
| ATOM | 3495 | CA   | TRP | X | 232 | 38.608 | 33.172 | 51.438 | 0.00 | 0.00 |
| ATOM | 3496 | HA   | TRP | X | 232 | 38.986 | 32.981 | 52.443 | 0.00 | 0.00 |
| ATOM | 3497 | CB   | TRP | X | 232 | 39.844 | 33.358 | 50.551 | 0.00 | 0.00 |
| ATOM | 3498 | HB2  | TRP | X | 232 | 40.297 | 34.324 | 50.772 | 0.00 | 0.00 |
| ATOM | 3499 | HB3  | TRP | X | 232 | 40.486 | 32.506 | 50.777 | 0.00 | 0.00 |
| ATOM | 3500 | CG   | TRP | X | 232 | 39.550 | 33.366 | 49.068 | 0.00 | 0.00 |
| ATOM | 3501 | CD1  | TRP | X | 232 | 39.405 | 32.302 | 48.209 | 0.00 | 0.00 |
| ATOM | 3502 | HD1  | TRP | X | 232 | 39.443 | 31.255 | 48.472 | 0.00 | 0.00 |
| ATOM | 3503 | NE1  | TRP | X | 232 | 38.920 | 32.720 | 46.997 | 0.00 | 0.00 |
| ATOM | 3504 | HE1  | TRP | X | 232 | 38.698 | 32.091 | 46.239 | 0.00 | 0.00 |
| ATOM | 3505 | CE2  | TRP | X | 232 | 38.994 | 34.133 | 46.910 | 0.00 | 0.00 |
| ATOM | 3506 | CZ2  | TRP | X | 232 | 38.784 | 35.086 | 45.908 | 0.00 | 0.00 |
| ATOM | 3507 | HZ2  | TRP | X | 232 | 38.707 | 34.693 | 44.905 | 0.00 | 0.00 |
| ATOM | 3508 | CH2  | TRP | X | 232 | 38.743 | 36.478 | 46.180 | 0.00 | 0.00 |
| ATOM | 3509 | HH2  | TRP | X | 232 | 38.644 | 37.160 | 45.349 | 0.00 | 0.00 |
| ATOM | 3510 | CZ3  | TRP | X | 232 | 39.053 | 36.910 | 47.487 | 0.00 | 0.00 |
| ATOM | 3511 | HZ3  | TRP | X | 232 | 39.049 | 37.973 | 47.676 | 0.00 | 0.00 |
| ATOM | 3512 | CE3  | TRP | X | 232 | 39.186 | 35.885 | 48.522 | 0.00 | 0.00 |
| ATOM | 3513 | HE3  | TRP | X | 232 | 39.530 | 36.154 | 49.510 | 0.00 | 0.00 |
| ATOM | 3514 | CD2  | TRP | X | 232 | 39.276 | 34.535 | 48.251 | 0.00 | 0.00 |
| ATOM | 3515 | C    | TRP | X | 232 | 37.934 | 34.525 | 51.590 | 0.00 | 0.00 |
| ATOM | 3516 | O    | TRP | X | 232 | 38.536 | 35.382 | 52.203 | 0.00 | 0.00 |
| ATOM | 3517 | N    | ALA | X | 233 | 36.783 | 34.755 | 50.915 | 0.00 | 0.00 |
| ATOM | 3518 | H    | ALA | X | 233 | 36.316 | 33.958 | 50.506 | 0.00 | 0.00 |
| ATOM | 3519 | CA   | ALA | X | 233 | 36.197 | 36.050 | 50.555 | 0.00 | 0.00 |
| ATOM | 3520 | HA   | ALA | X | 233 | 36.916 | 36.866 | 50.481 | 0.00 | 0.00 |
| ATOM | 3521 | CB   | ALA | X | 233 | 35.789 | 35.928 | 49.125 | 0.00 | 0.00 |
| ATOM | 3522 | HB1  | ALA | X | 233 | 36.677 | 36.085 | 48.514 | 0.00 | 0.00 |
| ATOM | 3523 | HB2  | ALA | X | 233 | 35.466 | 34.939 | 48.798 | 0.00 | 0.00 |
| ATOM | 3524 | HB3  | ALA | X | 233 | 34.989 | 36.639 | 48.917 | 0.00 | 0.00 |
| ATOM | 3525 | C    | ALA | X | 233 | 35.150 | 36.505 | 51.498 | 0.00 | 0.00 |
| ATOM | 3526 | O    | ALA | X | 233 | 34.541 | 37.550 | 51.308 | 0.00 | 0.00 |
| ATOM | 3527 | N    | THR | X | 234 | 34.818 | 35.712 | 52.536 | 0.00 | 0.00 |
| ATOM | 3528 | H    | THR | X | 234 | 35.217 | 34.785 | 52.565 | 0.00 | 0.00 |
| ATOM | 3529 | CA   | THR | X | 234 | 34.062 | 35.965 | 53.756 | 0.00 | 0.00 |
| ATOM | 3530 | HA   | THR | X | 234 | 34.198 | 36.994 | 54.090 | 0.00 | 0.00 |
| ATOM | 3531 | CB   | THR | X | 234 | 32.545 | 35.680 | 53.560 | 0.00 | 0.00 |
| ATOM | 3532 | HB   | THR | X | 234 | 32.312 | 34.776 | 54.122 | 0.00 | 0.00 |
| ATOM | 3533 | CG2  | THR | X | 234 | 31.668 | 36.729 | 54.238 | 0.00 | 0.00 |
| ATOM | 3534 | HG21 | THR | X | 234 | 30.636 | 36.394 | 54.138 | 0.00 | 0.00 |
| ATOM | 3535 | HG22 | THR | X | 234 | 31.935 | 36.914 | 55.278 | 0.00 | 0.00 |
| ATOM | 3536 | HG23 | THR | X | 234 | 31.677 | 37.710 | 53.764 | 0.00 | 0.00 |
| ATOM | 3537 | OG1  | THR | X | 234 | 32.109 | 35.621 | 52.237 | 0.00 | 0.00 |
| ATOM | 3538 | HG1  | THR | X | 234 | 32.355 | 36.353 | 51.666 | 0.00 | 0.00 |
| ATOM | 3539 | C    | THR | X | 234 | 34.567 | 35.156 | 54.932 | 0.00 | 0.00 |

|      |      |      |     |   |     |        |        |        |      |      |
|------|------|------|-----|---|-----|--------|--------|--------|------|------|
| ATOM | 3540 | O    | THR | X | 234 | 35.283 | 34.191 | 54.693 | 0.00 | 0.00 |
| ATOM | 3541 | N    | VAL | X | 235 | 34.215 | 35.618 | 56.146 | 0.00 | 0.00 |
| ATOM | 3542 | H    | VAL | X | 235 | 34.060 | 36.613 | 56.218 | 0.00 | 0.00 |
| ATOM | 3543 | CA   | VAL | X | 235 | 34.088 | 34.855 | 57.409 | 0.00 | 0.00 |
| ATOM | 3544 | HA   | VAL | X | 235 | 34.270 | 33.798 | 57.216 | 0.00 | 0.00 |
| ATOM | 3545 | CB   | VAL | X | 235 | 35.124 | 35.430 | 58.426 | 0.00 | 0.00 |
| ATOM | 3546 | HB   | VAL | X | 235 | 36.089 | 35.568 | 57.937 | 0.00 | 0.00 |
| ATOM | 3547 | CG1  | VAL | X | 235 | 34.802 | 36.752 | 59.084 | 0.00 | 0.00 |
| ATOM | 3548 | HG11 | VAL | X | 235 | 33.941 | 36.706 | 59.750 | 0.00 | 0.00 |
| ATOM | 3549 | HG12 | VAL | X | 235 | 35.522 | 36.955 | 59.877 | 0.00 | 0.00 |
| ATOM | 3550 | HG13 | VAL | X | 235 | 34.815 | 37.495 | 58.286 | 0.00 | 0.00 |
| ATOM | 3551 | CG2  | VAL | X | 235 | 35.456 | 34.340 | 59.459 | 0.00 | 0.00 |
| ATOM | 3552 | HG21 | VAL | X | 235 | 36.347 | 34.651 | 60.004 | 0.00 | 0.00 |
| ATOM | 3553 | HG22 | VAL | X | 235 | 34.727 | 34.360 | 60.269 | 0.00 | 0.00 |
| ATOM | 3554 | HG23 | VAL | X | 235 | 35.484 | 33.388 | 58.929 | 0.00 | 0.00 |
| ATOM | 3555 | C    | VAL | X | 235 | 32.688 | 34.801 | 58.042 | 0.00 | 0.00 |
| ATOM | 3556 | O    | VAL | X | 235 | 31.949 | 35.829 | 57.977 | 0.00 | 0.00 |
| ATOM | 3557 | N    | GLY | X | 236 | 32.381 | 33.745 | 58.739 | 0.00 | 0.00 |
| ATOM | 3558 | H    | GLY | X | 236 | 33.044 | 33.002 | 58.910 | 0.00 | 0.00 |
| ATOM | 3559 | CA   | GLY | X | 236 | 31.155 | 33.587 | 59.542 | 0.00 | 0.00 |
| ATOM | 3560 | HA2  | GLY | X | 236 | 30.288 | 34.149 | 59.154 | 0.00 | 0.00 |
| ATOM | 3561 | HA3  | GLY | X | 236 | 30.840 | 32.547 | 59.703 | 0.00 | 0.00 |
| ATOM | 3562 | C    | GLY | X | 236 | 31.326 | 34.201 | 60.951 | 0.00 | 0.00 |
| ATOM | 3563 | O    | GLY | X | 236 | 32.440 | 34.594 | 61.332 | 0.00 | 0.00 |
| ATOM | 3564 | N    | MET | X | 237 | 30.229 | 34.418 | 61.744 | 0.00 | 0.00 |
| ATOM | 3565 | H    | MET | X | 237 | 29.282 | 34.279 | 61.420 | 0.00 | 0.00 |
| ATOM | 3566 | CA   | MET | X | 237 | 30.157 | 34.979 | 63.032 | 0.00 | 0.00 |
| ATOM | 3567 | HA   | MET | X | 237 | 30.582 | 35.970 | 62.872 | 0.00 | 0.00 |
| ATOM | 3568 | CB   | MET | X | 237 | 28.685 | 35.107 | 63.461 | 0.00 | 0.00 |
| ATOM | 3569 | HB2  | MET | X | 237 | 28.238 | 34.122 | 63.592 | 0.00 | 0.00 |
| ATOM | 3570 | HB3  | MET | X | 237 | 28.535 | 35.558 | 64.443 | 0.00 | 0.00 |
| ATOM | 3571 | CG   | MET | X | 237 | 27.760 | 35.878 | 62.516 | 0.00 | 0.00 |
| ATOM | 3572 | HG2  | MET | X | 237 | 28.329 | 36.748 | 62.189 | 0.00 | 0.00 |
| ATOM | 3573 | HG3  | MET | X | 237 | 27.604 | 35.452 | 61.524 | 0.00 | 0.00 |
| ATOM | 3574 | SD   | MET | X | 237 | 26.232 | 36.447 | 63.234 | 0.00 | 0.00 |
| ATOM | 3575 | CE   | MET | X | 237 | 25.817 | 37.991 | 62.318 | 0.00 | 0.00 |
| ATOM | 3576 | HE1  | MET | X | 237 | 26.057 | 37.819 | 61.269 | 0.00 | 0.00 |
| ATOM | 3577 | HE2  | MET | X | 237 | 24.742 | 38.104 | 62.463 | 0.00 | 0.00 |
| ATOM | 3578 | HE3  | MET | X | 237 | 26.324 | 38.876 | 62.704 | 0.00 | 0.00 |
| ATOM | 3579 | C    | MET | X | 237 | 31.126 | 34.383 | 64.136 | 0.00 | 0.00 |
| ATOM | 3580 | O    | MET | X | 237 | 31.794 | 35.179 | 64.856 | 0.00 | 0.00 |
| ATOM | 3581 | N    | GLY | X | 238 | 31.077 | 33.033 | 64.324 | 0.00 | 0.00 |
| ATOM | 3582 | H    | GLY | X | 238 | 30.473 | 32.525 | 63.693 | 0.00 | 0.00 |
| ATOM | 3583 | CA   | GLY | X | 238 | 31.820 | 32.182 | 65.237 | 0.00 | 0.00 |
| ATOM | 3584 | HA2  | GLY | X | 238 | 31.467 | 32.288 | 66.290 | 0.00 | 0.00 |
| ATOM | 3585 | HA3  | GLY | X | 238 | 31.563 | 31.128 | 64.952 | 0.00 | 0.00 |
| ATOM | 3586 | C    | GLY | X | 238 | 33.295 | 32.479 | 65.162 | 0.00 | 0.00 |
| ATOM | 3587 | O    | GLY | X | 238 | 33.916 | 32.767 | 66.197 | 0.00 | 0.00 |
| ATOM | 3588 | N    | GLU | X | 239 | 33.821 | 32.537 | 63.917 | 0.00 | 0.00 |
| ATOM | 3589 | H    | GLU | X | 239 | 33.208 | 32.269 | 63.160 | 0.00 | 0.00 |
| ATOM | 3590 | CA   | GLU | X | 239 | 35.266 | 32.732 | 63.657 | 0.00 | 0.00 |
| ATOM | 3591 | HA   | GLU | X | 239 | 35.790 | 32.178 | 64.435 | 0.00 | 0.00 |
| ATOM | 3592 | CB   | GLU | X | 239 | 35.660 | 32.242 | 62.179 | 0.00 | 0.00 |
| ATOM | 3593 | HB2  | GLU | X | 239 | 34.915 | 32.620 | 61.479 | 0.00 | 0.00 |
| ATOM | 3594 | HB3  | GLU | X | 239 | 36.649 | 32.629 | 61.934 | 0.00 | 0.00 |
| ATOM | 3595 | CG   | GLU | X | 239 | 35.726 | 30.701 | 62.232 | 0.00 | 0.00 |
| ATOM | 3596 | HG2  | GLU | X | 239 | 34.799 | 30.332 | 62.671 | 0.00 | 0.00 |
| ATOM | 3597 | HG3  | GLU | X | 239 | 35.755 | 30.314 | 61.213 | 0.00 | 0.00 |
| ATOM | 3598 | CD   | GLU | X | 239 | 36.929 | 30.079 | 63.043 | 0.00 | 0.00 |
| ATOM | 3599 | OE1  | GLU | X | 239 | 38.060 | 30.489 | 62.757 | 0.00 | 0.00 |
| ATOM | 3600 | OE2  | GLU | X | 239 | 36.771 | 29.408 | 64.096 | 0.00 | 0.00 |
| ATOM | 3601 | C    | GLU | X | 239 | 35.629 | 34.237 | 63.847 | 0.00 | 0.00 |
| ATOM | 3602 | O    | GLU | X | 239 | 36.653 | 34.540 | 64.434 | 0.00 | 0.00 |
| ATOM | 3603 | N    | ALA | X | 240 | 34.752 | 35.147 | 63.381 | 0.00 | 0.00 |
| ATOM | 3604 | H    | ALA | X | 240 | 33.948 | 34.871 | 62.836 | 0.00 | 0.00 |
| ATOM | 3605 | CA   | ALA | X | 240 | 34.924 | 36.561 | 63.583 | 0.00 | 0.00 |
| ATOM | 3606 | HA   | ALA | X | 240 | 35.802 | 36.931 | 63.054 | 0.00 | 0.00 |
| ATOM | 3607 | CB   | ALA | X | 240 | 33.671 | 37.347 | 63.003 | 0.00 | 0.00 |
| ATOM | 3608 | HB1  | ALA | X | 240 | 32.710 | 37.221 | 63.502 | 0.00 | 0.00 |
| ATOM | 3609 | HB2  | ALA | X | 240 | 33.887 | 38.402 | 63.171 | 0.00 | 0.00 |



|      |      |      |     |   |     |        |        |        |      |      |
|------|------|------|-----|---|-----|--------|--------|--------|------|------|
| ATOM | 3610 | HB3  | ALA | X | 240 | 33.508 | 36.968 | 61.995 | 0.00 | 0.00 |
| ATOM | 3611 | C    | ALA | X | 240 | 35.027 | 36.942 | 65.097 | 0.00 | 0.00 |
| ATOM | 3612 | O    | ALA | X | 240 | 36.059 | 37.448 | 65.556 | 0.00 | 0.00 |
| ATOM | 3613 | N    | ARG | X | 241 | 34.064 | 36.476 | 65.883 | 0.00 | 0.00 |
| ATOM | 3614 | H    | ARG | X | 241 | 33.340 | 35.950 | 65.414 | 0.00 | 0.00 |
| ATOM | 3615 | CA   | ARG | X | 241 | 33.940 | 36.644 | 67.311 | 0.00 | 0.00 |
| ATOM | 3616 | HA   | ARG | X | 241 | 33.753 | 37.692 | 67.545 | 0.00 | 0.00 |
| ATOM | 3617 | CB   | ARG | X | 241 | 32.867 | 35.781 | 67.846 | 0.00 | 0.00 |
| ATOM | 3618 | HB2  | ARG | X | 241 | 31.982 | 35.815 | 67.210 | 0.00 | 0.00 |
| ATOM | 3619 | HB3  | ARG | X | 241 | 33.136 | 34.746 | 68.056 | 0.00 | 0.00 |
| ATOM | 3620 | CG   | ARG | X | 241 | 32.412 | 36.327 | 69.171 | 0.00 | 0.00 |
| ATOM | 3621 | HG2  | ARG | X | 241 | 33.355 | 36.412 | 69.711 | 0.00 | 0.00 |
| ATOM | 3622 | HG3  | ARG | X | 241 | 32.032 | 37.347 | 69.119 | 0.00 | 0.00 |
| ATOM | 3623 | CD   | ARG | X | 241 | 31.347 | 35.464 | 69.916 | 0.00 | 0.00 |
| ATOM | 3624 | HD2  | ARG | X | 241 | 31.756 | 34.603 | 70.444 | 0.00 | 0.00 |
| ATOM | 3625 | HD3  | ARG | X | 241 | 31.131 | 36.040 | 70.816 | 0.00 | 0.00 |
| ATOM | 3626 | NE   | ARG | X | 241 | 30.040 | 35.264 | 69.259 | 0.00 | 0.00 |
| ATOM | 3627 | HE   | ARG | X | 241 | 29.405 | 36.046 | 69.339 | 0.00 | 0.00 |
| ATOM | 3628 | CZ   | ARG | X | 241 | 29.503 | 34.178 | 68.584 | 0.00 | 0.00 |
| ATOM | 3629 | NH1  | ARG | X | 241 | 30.326 | 33.239 | 68.226 | 0.00 | 0.00 |
| ATOM | 3630 | HH11 | ARG | X | 241 | 31.270 | 33.264 | 68.583 | 0.00 | 0.00 |
| ATOM | 3631 | HH12 | ARG | X | 241 | 30.033 | 32.543 | 67.556 | 0.00 | 0.00 |
| ATOM | 3632 | NH2  | ARG | X | 241 | 28.197 | 34.088 | 68.350 | 0.00 | 0.00 |
| ATOM | 3633 | HH21 | ARG | X | 241 | 27.591 | 34.868 | 68.561 | 0.00 | 0.00 |
| ATOM | 3634 | HH22 | ARG | X | 241 | 27.812 | 33.205 | 68.044 | 0.00 | 0.00 |
| ATOM | 3635 | C    | ARG | X | 241 | 35.260 | 36.176 | 67.946 | 0.00 | 0.00 |
| ATOM | 3636 | O    | ARG | X | 241 | 36.010 | 36.914 | 68.529 | 0.00 | 0.00 |
| ATOM | 3637 | N    | ARG | X | 242 | 35.600 | 34.928 | 67.725 | 0.00 | 0.00 |
| ATOM | 3638 | H    | ARG | X | 242 | 34.995 | 34.299 | 67.216 | 0.00 | 0.00 |
| ATOM | 3639 | CA   | ARG | X | 242 | 36.781 | 34.251 | 68.172 | 0.00 | 0.00 |
| ATOM | 3640 | HA   | ARG | X | 242 | 36.615 | 34.110 | 69.240 | 0.00 | 0.00 |
| ATOM | 3641 | CB   | ARG | X | 242 | 36.798 | 32.900 | 67.510 | 0.00 | 0.00 |
| ATOM | 3642 | HB2  | ARG | X | 242 | 35.864 | 32.350 | 67.625 | 0.00 | 0.00 |
| ATOM | 3643 | HB3  | ARG | X | 242 | 36.902 | 32.975 | 66.427 | 0.00 | 0.00 |
| ATOM | 3644 | CG   | ARG | X | 242 | 37.873 | 32.002 | 68.058 | 0.00 | 0.00 |
| ATOM | 3645 | HG2  | ARG | X | 242 | 38.891 | 32.333 | 67.855 | 0.00 | 0.00 |
| ATOM | 3646 | HG3  | ARG | X | 242 | 37.835 | 31.995 | 69.147 | 0.00 | 0.00 |
| ATOM | 3647 | CD   | ARG | X | 242 | 37.790 | 30.556 | 67.728 | 0.00 | 0.00 |
| ATOM | 3648 | HD2  | ARG | X | 242 | 38.258 | 29.981 | 68.527 | 0.00 | 0.00 |
| ATOM | 3649 | HD3  | ARG | X | 242 | 36.729 | 30.310 | 67.706 | 0.00 | 0.00 |
| ATOM | 3650 | NE   | ARG | X | 242 | 38.370 | 30.142 | 66.425 | 0.00 | 0.00 |
| ATOM | 3651 | HE   | ARG | X | 242 | 37.811 | 30.051 | 65.588 | 0.00 | 0.00 |
| ATOM | 3652 | CZ   | ARG | X | 242 | 39.651 | 29.911 | 66.215 | 0.00 | 0.00 |
| ATOM | 3653 | NH1  | ARG | X | 242 | 40.648 | 30.113 | 67.053 | 0.00 | 0.00 |
| ATOM | 3654 | HH11 | ARG | X | 242 | 40.339 | 30.436 | 67.959 | 0.00 | 0.00 |
| ATOM | 3655 | HH12 | ARG | X | 242 | 41.593 | 29.801 | 66.878 | 0.00 | 0.00 |
| ATOM | 3656 | NH2  | ARG | X | 242 | 39.943 | 29.606 | 64.969 | 0.00 | 0.00 |
| ATOM | 3657 | HH21 | ARG | X | 242 | 39.240 | 29.462 | 64.259 | 0.00 | 0.00 |
| ATOM | 3658 | HH22 | ARG | X | 242 | 40.923 | 29.403 | 64.836 | 0.00 | 0.00 |
| ATOM | 3659 | C    | ARG | X | 242 | 38.098 | 35.027 | 67.827 | 0.00 | 0.00 |
| ATOM | 3660 | O    | ARG | X | 242 | 38.898 | 35.276 | 68.726 | 0.00 | 0.00 |
| ATOM | 3661 | N    | ARG | X | 243 | 38.271 | 35.423 | 66.565 | 0.00 | 0.00 |
| ATOM | 3662 | H    | ARG | X | 243 | 37.506 | 35.335 | 65.912 | 0.00 | 0.00 |
| ATOM | 3663 | CA   | ARG | X | 243 | 39.445 | 36.098 | 66.014 | 0.00 | 0.00 |
| ATOM | 3664 | HA   | ARG | X | 243 | 40.321 | 35.485 | 66.225 | 0.00 | 0.00 |
| ATOM | 3665 | CB   | ARG | X | 243 | 39.315 | 36.239 | 64.503 | 0.00 | 0.00 |
| ATOM | 3666 | HB2  | ARG | X | 243 | 38.832 | 35.313 | 64.193 | 0.00 | 0.00 |
| ATOM | 3667 | HB3  | ARG | X | 243 | 38.626 | 37.056 | 64.292 | 0.00 | 0.00 |
| ATOM | 3668 | CG   | ARG | X | 243 | 40.715 | 36.325 | 63.879 | 0.00 | 0.00 |
| ATOM | 3669 | HG2  | ARG | X | 243 | 41.196 | 37.221 | 64.271 | 0.00 | 0.00 |
| ATOM | 3670 | HG3  | ARG | X | 243 | 41.326 | 35.447 | 64.088 | 0.00 | 0.00 |
| ATOM | 3671 | CD   | ARG | X | 243 | 40.528 | 36.517 | 62.367 | 0.00 | 0.00 |
| ATOM | 3672 | HD2  | ARG | X | 243 | 39.958 | 37.400 | 62.078 | 0.00 | 0.00 |
| ATOM | 3673 | HD3  | ARG | X | 243 | 41.529 | 36.720 | 61.987 | 0.00 | 0.00 |
| ATOM | 3674 | NE   | ARG | X | 243 | 39.938 | 35.334 | 61.734 | 0.00 | 0.00 |
| ATOM | 3675 | HE   | ARG | X | 243 | 39.708 | 34.652 | 62.442 | 0.00 | 0.00 |
| ATOM | 3676 | CZ   | ARG | X | 243 | 39.721 | 35.084 | 60.426 | 0.00 | 0.00 |
| ATOM | 3677 | NH1  | ARG | X | 243 | 39.999 | 35.893 | 59.471 | 0.00 | 0.00 |
| ATOM | 3678 | HH11 | ARG | X | 243 | 40.431 | 36.781 | 59.680 | 0.00 | 0.00 |
| ATOM | 3679 | HH12 | ARG | X | 243 | 39.933 | 35.545 | 58.526 | 0.00 | 0.00 |

|      |      |      |     |   |     |        |        |        |      |      |
|------|------|------|-----|---|-----|--------|--------|--------|------|------|
| ATOM | 3680 | NH2  | ARG | X | 243 | 39.109 | 33.957 | 60.118 | 0.00 | 0.00 |
| ATOM | 3681 | HH21 | ARG | X | 243 | 39.046 | 33.152 | 60.726 | 0.00 | 0.00 |
| ATOM | 3682 | HH22 | ARG | X | 243 | 38.780 | 33.847 | 59.169 | 0.00 | 0.00 |
| ATOM | 3683 | C    | ARG | X | 243 | 39.786 | 37.437 | 66.654 | 0.00 | 0.00 |
| ATOM | 3684 | O    | ARG | X | 243 | 40.878 | 37.724 | 67.027 | 0.00 | 0.00 |
| ATOM | 3685 | N    | ALA | X | 244 | 38.720 | 38.243 | 66.888 | 0.00 | 0.00 |
| ATOM | 3686 | H    | ALA | X | 244 | 37.785 | 37.889 | 66.741 | 0.00 | 0.00 |
| ATOM | 3687 | CA   | ALA | X | 244 | 38.754 | 39.471 | 67.656 | 0.00 | 0.00 |
| ATOM | 3688 | HA   | ALA | X | 244 | 39.551 | 40.038 | 67.176 | 0.00 | 0.00 |
| ATOM | 3689 | CB   | ALA | X | 244 | 37.422 | 40.186 | 67.518 | 0.00 | 0.00 |
| ATOM | 3690 | HB1  | ALA | X | 244 | 37.358 | 40.369 | 66.446 | 0.00 | 0.00 |
| ATOM | 3691 | HB2  | ALA | X | 244 | 36.571 | 39.559 | 67.784 | 0.00 | 0.00 |
| ATOM | 3692 | HB3  | ALA | X | 244 | 37.400 | 41.081 | 68.139 | 0.00 | 0.00 |
| ATOM | 3693 | C    | ALA | X | 244 | 39.094 | 39.205 | 69.145 | 0.00 | 0.00 |
| ATOM | 3694 | O    | ALA | X | 244 | 39.795 | 39.958 | 69.779 | 0.00 | 0.00 |
| ATOM | 3695 | N    | THR | X | 245 | 38.572 | 38.149 | 69.792 | 0.00 | 0.00 |
| ATOM | 3696 | H    | THR | X | 245 | 37.914 | 37.544 | 69.320 | 0.00 | 0.00 |
| ATOM | 3697 | CA   | THR | X | 245 | 38.972 | 37.742 | 71.167 | 0.00 | 0.00 |
| ATOM | 3698 | HA   | THR | X | 245 | 38.768 | 38.624 | 71.775 | 0.00 | 0.00 |
| ATOM | 3699 | CB   | THR | X | 245 | 38.014 | 36.631 | 71.620 | 0.00 | 0.00 |
| ATOM | 3700 | HB   | THR | X | 245 | 37.945 | 35.773 | 70.951 | 0.00 | 0.00 |
| ATOM | 3701 | CG2  | THR | X | 245 | 38.480 | 35.922 | 72.871 | 0.00 | 0.00 |
| ATOM | 3702 | HG21 | THR | X | 245 | 37.665 | 35.230 | 73.080 | 0.00 | 0.00 |
| ATOM | 3703 | HG22 | THR | X | 245 | 39.404 | 35.371 | 72.700 | 0.00 | 0.00 |
| ATOM | 3704 | HG23 | THR | X | 245 | 38.677 | 36.656 | 73.652 | 0.00 | 0.00 |
| ATOM | 3705 | OG1  | THR | X | 245 | 36.736 | 37.141 | 71.845 | 0.00 | 0.00 |
| ATOM | 3706 | HG1  | THR | X | 245 | 36.123 | 36.549 | 71.402 | 0.00 | 0.00 |
| ATOM | 3707 | C    | THR | X | 245 | 40.498 | 37.399 | 71.218 | 0.00 | 0.00 |
| ATOM | 3708 | O    | THR | X | 245 | 41.183 | 37.976 | 72.073 | 0.00 | 0.00 |
| ATOM | 3709 | N    | GLN | X | 246 | 41.011 | 36.639 | 70.284 | 0.00 | 0.00 |
| ATOM | 3710 | H    | GLN | X | 246 | 40.486 | 36.293 | 69.494 | 0.00 | 0.00 |
| ATOM | 3711 | CA   | GLN | X | 246 | 42.463 | 36.466 | 70.225 | 0.00 | 0.00 |
| ATOM | 3712 | HA   | GLN | X | 246 | 42.627 | 35.939 | 71.165 | 0.00 | 0.00 |
| ATOM | 3713 | CB   | GLN | X | 246 | 42.855 | 35.690 | 68.972 | 0.00 | 0.00 |
| ATOM | 3714 | HB2  | GLN | X | 246 | 42.498 | 36.171 | 68.062 | 0.00 | 0.00 |
| ATOM | 3715 | HB3  | GLN | X | 246 | 43.936 | 35.611 | 68.860 | 0.00 | 0.00 |
| ATOM | 3716 | CG   | GLN | X | 246 | 42.389 | 34.236 | 69.168 | 0.00 | 0.00 |
| ATOM | 3717 | HG2  | GLN | X | 246 | 42.691 | 33.808 | 70.124 | 0.00 | 0.00 |
| ATOM | 3718 | HG3  | GLN | X | 246 | 41.308 | 34.216 | 69.300 | 0.00 | 0.00 |
| ATOM | 3719 | CD   | GLN | X | 246 | 42.704 | 33.292 | 68.036 | 0.00 | 0.00 |
| ATOM | 3720 | OE1  | GLN | X | 246 | 42.080 | 33.371 | 66.939 | 0.00 | 0.00 |
| ATOM | 3721 | NE2  | GLN | X | 246 | 43.654 | 32.432 | 68.178 | 0.00 | 0.00 |
| ATOM | 3722 | HE21 | GLN | X | 246 | 43.754 | 31.759 | 67.432 | 0.00 | 0.00 |
| ATOM | 3723 | HE22 | GLN | X | 246 | 44.208 | 32.400 | 69.022 | 0.00 | 0.00 |
| ATOM | 3724 | C    | GLN | X | 246 | 43.214 | 37.869 | 70.142 | 0.00 | 0.00 |
| ATOM | 3725 | O    | GLN | X | 246 | 44.282 | 38.057 | 70.761 | 0.00 | 0.00 |
| ATOM | 3726 | N    | LEU | X | 247 | 42.723 | 38.764 | 69.341 | 0.00 | 0.00 |
| ATOM | 3727 | H    | LEU | X | 247 | 41.858 | 38.644 | 68.835 | 0.00 | 0.00 |
| ATOM | 3728 | CA   | LEU | X | 247 | 43.376 | 40.044 | 69.050 | 0.00 | 0.00 |
| ATOM | 3729 | HA   | LEU | X | 247 | 44.422 | 39.798 | 68.864 | 0.00 | 0.00 |
| ATOM | 3730 | CB   | LEU | X | 247 | 42.788 | 40.673 | 67.777 | 0.00 | 0.00 |
| ATOM | 3731 | HB2  | LEU | X | 247 | 42.616 | 39.857 | 67.074 | 0.00 | 0.00 |
| ATOM | 3732 | HB3  | LEU | X | 247 | 41.818 | 41.103 | 68.027 | 0.00 | 0.00 |
| ATOM | 3733 | CG   | LEU | X | 247 | 43.627 | 41.768 | 67.123 | 0.00 | 0.00 |
| ATOM | 3734 | HG   | LEU | X | 247 | 43.731 | 42.495 | 67.929 | 0.00 | 0.00 |
| ATOM | 3735 | CD1  | LEU | X | 247 | 44.973 | 41.321 | 66.616 | 0.00 | 0.00 |
| ATOM | 3736 | HD11 | LEU | X | 247 | 45.647 | 42.156 | 66.425 | 0.00 | 0.00 |
| ATOM | 3737 | HD12 | LEU | X | 247 | 45.485 | 40.716 | 67.364 | 0.00 | 0.00 |
| ATOM | 3738 | HD13 | LEU | X | 247 | 44.818 | 40.611 | 65.803 | 0.00 | 0.00 |
| ATOM | 3739 | CD2  | LEU | X | 247 | 42.779 | 42.438 | 66.077 | 0.00 | 0.00 |
| ATOM | 3740 | HD21 | LEU | X | 247 | 41.931 | 43.010 | 66.454 | 0.00 | 0.00 |
| ATOM | 3741 | HD22 | LEU | X | 247 | 43.406 | 43.122 | 65.504 | 0.00 | 0.00 |
| ATOM | 3742 | HD23 | LEU | X | 247 | 42.461 | 41.685 | 65.357 | 0.00 | 0.00 |
| ATOM | 3743 | C    | LEU | X | 247 | 43.360 | 40.995 | 70.269 | 0.00 | 0.00 |
| ATOM | 3744 | O    | LEU | X | 247 | 44.396 | 41.407 | 70.684 | 0.00 | 0.00 |
| ATOM | 3745 | N    | ALA | X | 248 | 42.199 | 41.285 | 70.882 | 0.00 | 0.00 |
| ATOM | 3746 | H    | ALA | X | 248 | 41.348 | 40.920 | 70.480 | 0.00 | 0.00 |
| ATOM | 3747 | CA   | ALA | X | 248 | 42.145 | 41.860 | 72.169 | 0.00 | 0.00 |
| ATOM | 3748 | HA   | ALA | X | 248 | 42.439 | 42.892 | 71.978 | 0.00 | 0.00 |
| ATOM | 3749 | CB   | ALA | X | 248 | 40.677 | 41.733 | 72.633 | 0.00 | 0.00 |

|      |      |      |     |   |     |        |        |        |      |      |
|------|------|------|-----|---|-----|--------|--------|--------|------|------|
| ATOM | 3750 | HB1  | ALA | X | 248 | 40.360 | 40.699 | 72.776 | 0.00 | 0.00 |
| ATOM | 3751 | HB2  | ALA | X | 248 | 40.515 | 42.228 | 73.590 | 0.00 | 0.00 |
| ATOM | 3752 | HB3  | ALA | X | 248 | 40.101 | 42.322 | 71.920 | 0.00 | 0.00 |
| ATOM | 3753 | C    | ALA | X | 248 | 43.132 | 41.264 | 73.109 | 0.00 | 0.00 |
| ATOM | 3754 | O    | ALA | X | 248 | 43.940 | 42.027 | 73.711 | 0.00 | 0.00 |
| ATOM | 3755 | N    | HIE | X | 249 | 43.095 | 39.998 | 73.394 | 0.00 | 0.00 |
| ATOM | 3756 | H    | HIE | X | 249 | 42.515 | 39.334 | 72.901 | 0.00 | 0.00 |
| ATOM | 3757 | CA   | HIE | X | 249 | 44.142 | 39.479 | 74.274 | 0.00 | 0.00 |
| ATOM | 3758 | HA   | HIE | X | 249 | 43.801 | 39.768 | 75.268 | 0.00 | 0.00 |
| ATOM | 3759 | CB   | HIE | X | 249 | 44.034 | 37.963 | 74.115 | 0.00 | 0.00 |
| ATOM | 3760 | HB2  | HIE | X | 249 | 42.978 | 37.695 | 74.107 | 0.00 | 0.00 |
| ATOM | 3761 | HB3  | HIE | X | 249 | 44.446 | 37.735 | 73.132 | 0.00 | 0.00 |
| ATOM | 3762 | CG   | HIE | X | 249 | 44.782 | 37.120 | 75.149 | 0.00 | 0.00 |
| ATOM | 3763 | ND1  | HIE | X | 249 | 46.130 | 37.192 | 75.431 | 0.00 | 0.00 |
| ATOM | 3764 | CE1  | HIE | X | 249 | 46.306 | 36.482 | 76.522 | 0.00 | 0.00 |
| ATOM | 3765 | HE1  | HIE | X | 249 | 47.175 | 36.434 | 77.162 | 0.00 | 0.00 |
| ATOM | 3766 | NE2  | HIE | X | 249 | 45.219 | 35.788 | 76.883 | 0.00 | 0.00 |
| ATOM | 3767 | HE2  | HIE | X | 249 | 45.127 | 35.258 | 77.738 | 0.00 | 0.00 |
| ATOM | 3768 | CD2  | HIE | X | 249 | 44.219 | 36.159 | 75.990 | 0.00 | 0.00 |
| ATOM | 3769 | HD2  | HIE | X | 249 | 43.164 | 35.925 | 76.000 | 0.00 | 0.00 |
| ATOM | 3770 | C    | HIE | X | 249 | 45.626 | 39.837 | 73.903 | 0.00 | 0.00 |
| ATOM | 3771 | O    | HIE | X | 249 | 46.316 | 40.285 | 74.856 | 0.00 | 0.00 |
| ATOM | 3772 | N    | LEU | X | 250 | 46.071 | 39.828 | 72.595 | 0.00 | 0.00 |
| ATOM | 3773 | H    | LEU | X | 250 | 45.350 | 39.514 | 71.961 | 0.00 | 0.00 |
| ATOM | 3774 | CA   | LEU | X | 250 | 47.446 | 40.115 | 72.039 | 0.00 | 0.00 |
| ATOM | 3775 | HA   | LEU | X | 250 | 48.178 | 39.523 | 72.589 | 0.00 | 0.00 |
| ATOM | 3776 | CB   | LEU | X | 250 | 47.371 | 39.733 | 70.537 | 0.00 | 0.00 |
| ATOM | 3777 | HB2  | LEU | X | 250 | 46.407 | 40.013 | 70.113 | 0.00 | 0.00 |
| ATOM | 3778 | HB3  | LEU | X | 250 | 48.109 | 40.368 | 70.047 | 0.00 | 0.00 |
| ATOM | 3779 | CG   | LEU | X | 250 | 47.740 | 38.282 | 70.270 | 0.00 | 0.00 |
| ATOM | 3780 | HG   | LEU | X | 250 | 47.113 | 37.596 | 70.840 | 0.00 | 0.00 |
| ATOM | 3781 | CD1  | LEU | X | 250 | 47.484 | 37.886 | 68.872 | 0.00 | 0.00 |
| ATOM | 3782 | HD11 | LEU | X | 250 | 48.344 | 38.292 | 68.338 | 0.00 | 0.00 |
| ATOM | 3783 | HD12 | LEU | X | 250 | 47.472 | 36.798 | 68.821 | 0.00 | 0.00 |
| ATOM | 3784 | HD13 | LEU | X | 250 | 46.518 | 38.228 | 68.501 | 0.00 | 0.00 |
| ATOM | 3785 | CD2  | LEU | X | 250 | 49.175 | 37.914 | 70.801 | 0.00 | 0.00 |
| ATOM | 3786 | HD21 | LEU | X | 250 | 49.264 | 36.869 | 70.502 | 0.00 | 0.00 |
| ATOM | 3787 | HD22 | LEU | X | 250 | 49.832 | 38.591 | 70.256 | 0.00 | 0.00 |
| ATOM | 3788 | HD23 | LEU | X | 250 | 49.295 | 37.999 | 71.881 | 0.00 | 0.00 |
| ATOM | 3789 | C    | LEU | X | 250 | 47.685 | 41.625 | 72.198 | 0.00 | 0.00 |
| ATOM | 3790 | O    | LEU | X | 250 | 48.759 | 42.004 | 72.709 | 0.00 | 0.00 |
| ATOM | 3791 | N    | VAL | X | 251 | 46.670 | 42.493 | 71.855 | 0.00 | 0.00 |
| ATOM | 3792 | H    | VAL | X | 251 | 45.917 | 42.037 | 71.359 | 0.00 | 0.00 |
| ATOM | 3793 | CA   | VAL | X | 251 | 46.687 | 44.011 | 72.000 | 0.00 | 0.00 |
| ATOM | 3794 | HA   | VAL | X | 251 | 47.702 | 44.280 | 71.708 | 0.00 | 0.00 |
| ATOM | 3795 | CB   | VAL | X | 251 | 45.692 | 44.707 | 71.037 | 0.00 | 0.00 |
| ATOM | 3796 | HB   | VAL | X | 251 | 44.665 | 44.461 | 71.305 | 0.00 | 0.00 |
| ATOM | 3797 | CG1  | VAL | X | 251 | 45.801 | 46.256 | 70.978 | 0.00 | 0.00 |
| ATOM | 3798 | HG11 | VAL | X | 251 | 45.303 | 46.756 | 71.809 | 0.00 | 0.00 |
| ATOM | 3799 | HG12 | VAL | X | 251 | 46.843 | 46.573 | 70.966 | 0.00 | 0.00 |
| ATOM | 3800 | HG13 | VAL | X | 251 | 45.185 | 46.660 | 70.174 | 0.00 | 0.00 |
| ATOM | 3801 | CG2  | VAL | X | 251 | 45.926 | 44.290 | 69.581 | 0.00 | 0.00 |
| ATOM | 3802 | HG21 | VAL | X | 251 | 46.933 | 44.603 | 69.307 | 0.00 | 0.00 |
| ATOM | 3803 | HG22 | VAL | X | 251 | 45.813 | 43.208 | 69.505 | 0.00 | 0.00 |
| ATOM | 3804 | HG23 | VAL | X | 251 | 45.180 | 44.681 | 68.890 | 0.00 | 0.00 |
| ATOM | 3805 | C    | VAL | X | 251 | 46.615 | 44.419 | 73.471 | 0.00 | 0.00 |
| ATOM | 3806 | O    | VAL | X | 251 | 46.927 | 45.594 | 73.670 | 0.00 | 0.00 |
| ATOM | 3807 | N    | GLY | X | 252 | 46.300 | 43.595 | 74.472 | 0.00 | 0.00 |
| ATOM | 3808 | H    | GLY | X | 252 | 46.161 | 42.654 | 74.130 | 0.00 | 0.00 |
| ATOM | 3809 | CA   | GLY | X | 252 | 46.234 | 43.775 | 75.946 | 0.00 | 0.00 |
| ATOM | 3810 | HA2  | GLY | X | 252 | 46.315 | 42.896 | 76.523 | 0.00 | 0.00 |
| ATOM | 3811 | HA3  | GLY | X | 252 | 46.996 | 44.515 | 76.233 | 0.00 | 0.00 |
| ATOM | 3812 | C    | GLY | X | 252 | 44.934 | 44.402 | 76.381 | 0.00 | 0.00 |
| ATOM | 3813 | O    | GLY | X | 252 | 44.932 | 45.027 | 77.454 | 0.00 | 0.00 |
| ATOM | 3814 | N    | CYX | X | 253 | 43.891 | 44.130 | 75.655 | 0.00 | 0.00 |
| ATOM | 3815 | H    | CYX | X | 253 | 44.018 | 43.648 | 74.777 | 0.00 | 0.00 |
| ATOM | 3816 | CA   | CYX | X | 253 | 42.515 | 44.580 | 75.930 | 0.00 | 0.00 |
| ATOM | 3817 | HA   | CYX | X | 253 | 42.560 | 45.397 | 76.650 | 0.00 | 0.00 |
| ATOM | 3818 | CB   | CYX | X | 253 | 41.898 | 45.071 | 74.571 | 0.00 | 0.00 |
| ATOM | 3819 | HB2  | CYX | X | 253 | 42.312 | 44.437 | 73.787 | 0.00 | 0.00 |

|      |      |      |     |   |     |        |        |        |      |      |
|------|------|------|-----|---|-----|--------|--------|--------|------|------|
| ATOM | 3820 | HB3  | CYX | X | 253 | 40.816 | 45.206 | 74.559 | 0.00 | 0.00 |
| ATOM | 3821 | SG   | CYX | X | 253 | 42.468 | 46.739 | 74.159 | 0.00 | 0.00 |
| ATOM | 3822 | C    | CYX | X | 253 | 41.566 | 43.553 | 76.520 | 0.00 | 0.00 |
| ATOM | 3823 | O    | CYX | X | 253 | 41.529 | 42.371 | 76.085 | 0.00 | 0.00 |
| ATOM | 3824 | N    | PRO | X | 254 | 40.646 | 44.030 | 77.427 | 0.00 | 0.00 |
| ATOM | 3825 | CD   | PRO | X | 254 | 39.593 | 43.109 | 77.773 | 0.00 | 0.00 |
| ATOM | 3826 | HD2  | PRO | X | 254 | 40.023 | 42.146 | 78.049 | 0.00 | 0.00 |
| ATOM | 3827 | HD3  | PRO | X | 254 | 38.895 | 43.011 | 76.942 | 0.00 | 0.00 |
| ATOM | 3828 | CG   | PRO | X | 254 | 38.894 | 43.659 | 79.024 | 0.00 | 0.00 |
| ATOM | 3829 | HG2  | PRO | X | 254 | 39.446 | 43.419 | 79.933 | 0.00 | 0.00 |
| ATOM | 3830 | HG3  | PRO | X | 254 | 37.890 | 43.258 | 79.167 | 0.00 | 0.00 |
| ATOM | 3831 | CB   | PRO | X | 254 | 39.032 | 45.118 | 78.637 | 0.00 | 0.00 |
| ATOM | 3832 | HB2  | PRO | X | 254 | 38.863 | 45.682 | 79.554 | 0.00 | 0.00 |
| ATOM | 3833 | HB3  | PRO | X | 254 | 38.312 | 45.452 | 77.889 | 0.00 | 0.00 |
| ATOM | 3834 | CA   | PRO | X | 254 | 40.424 | 45.263 | 78.080 | 0.00 | 0.00 |
| ATOM | 3835 | HA   | PRO | X | 254 | 40.524 | 46.096 | 77.385 | 0.00 | 0.00 |
| ATOM | 3836 | C    | PRO | X | 254 | 41.509 | 45.482 | 79.215 | 0.00 | 0.00 |
| ATOM | 3837 | O    | PRO | X | 254 | 42.203 | 44.450 | 79.560 | 0.00 | 0.00 |
| ATOM | 3838 | N    | PRO | X | 255 | 41.688 | 46.622 | 79.806 | 0.00 | 0.00 |
| ATOM | 3839 | CD   | PRO | X | 255 | 40.858 | 47.863 | 79.673 | 0.00 | 0.00 |
| ATOM | 3840 | HD2  | PRO | X | 255 | 39.777 | 47.727 | 79.639 | 0.00 | 0.00 |
| ATOM | 3841 | HD3  | PRO | X | 255 | 41.181 | 48.402 | 78.783 | 0.00 | 0.00 |
| ATOM | 3842 | CG   | PRO | X | 255 | 41.376 | 48.746 | 80.888 | 0.00 | 0.00 |
| ATOM | 3843 | HG2  | PRO | X | 255 | 40.887 | 48.501 | 81.831 | 0.00 | 0.00 |
| ATOM | 3844 | HG3  | PRO | X | 255 | 41.293 | 49.818 | 80.711 | 0.00 | 0.00 |
| ATOM | 3845 | CB   | PRO | X | 255 | 42.766 | 48.263 | 81.209 | 0.00 | 0.00 |
| ATOM | 3846 | HB2  | PRO | X | 255 | 43.151 | 48.517 | 82.196 | 0.00 | 0.00 |
| ATOM | 3847 | HB3  | PRO | X | 255 | 43.475 | 48.612 | 80.458 | 0.00 | 0.00 |
| ATOM | 3848 | CA   | PRO | X | 255 | 42.658 | 46.783 | 80.930 | 0.00 | 0.00 |
| ATOM | 3849 | HA   | PRO | X | 255 | 43.639 | 46.602 | 80.491 | 0.00 | 0.00 |
| ATOM | 3850 | C    | PRO | X | 255 | 42.240 | 45.903 | 82.132 | 0.00 | 0.00 |
| ATOM | 3851 | O    | PRO | X | 255 | 41.062 | 45.634 | 82.331 | 0.00 | 0.00 |
| ATOM | 3852 | N    | GLY | X | 256 | 43.266 | 45.442 | 82.879 | 0.00 | 0.00 |
| ATOM | 3853 | H    | GLY | X | 256 | 44.215 | 45.756 | 82.733 | 0.00 | 0.00 |
| ATOM | 3854 | CA   | GLY | X | 256 | 43.087 | 44.684 | 84.129 | 0.00 | 0.00 |
| ATOM | 3855 | HA2  | GLY | X | 256 | 44.021 | 44.632 | 84.746 | 0.00 | 0.00 |
| ATOM | 3856 | HA3  | GLY | X | 256 | 42.347 | 45.311 | 84.770 | 0.00 | 0.00 |
| ATOM | 3857 | C    | GLY | X | 256 | 42.666 | 43.280 | 83.809 | 0.00 | 0.00 |
| ATOM | 3858 | O    | GLY | X | 256 | 42.236 | 42.540 | 84.748 | 0.00 | 0.00 |
| ATOM | 3859 | N    | GLY | X | 257 | 42.695 | 42.875 | 82.573 | 0.00 | 0.00 |
| ATOM | 3860 | H    | GLY | X | 257 | 42.831 | 43.550 | 81.834 | 0.00 | 0.00 |
| ATOM | 3861 | CA   | GLY | X | 257 | 42.132 | 41.582 | 81.975 | 0.00 | 0.00 |
| ATOM | 3862 | HA2  | GLY | X | 257 | 42.427 | 40.801 | 82.627 | 0.00 | 0.00 |
| ATOM | 3863 | HA3  | GLY | X | 257 | 41.099 | 41.522 | 81.897 | 0.00 | 0.00 |
| ATOM | 3864 | C    | GLY | X | 257 | 42.631 | 41.292 | 80.544 | 0.00 | 0.00 |
| ATOM | 3865 | O    | GLY | X | 257 | 43.603 | 41.946 | 80.038 | 0.00 | 0.00 |
| ATOM | 3866 | N    | THR | X | 258 | 42.001 | 40.348 | 79.869 | 0.00 | 0.00 |
| ATOM | 3867 | H    | THR | X | 258 | 41.428 | 39.740 | 80.437 | 0.00 | 0.00 |
| ATOM | 3868 | CA   | THR | X | 258 | 42.388 | 39.950 | 78.508 | 0.00 | 0.00 |
| ATOM | 3869 | HA   | THR | X | 258 | 42.545 | 40.829 | 77.882 | 0.00 | 0.00 |
| ATOM | 3870 | CB   | THR | X | 258 | 43.587 | 38.993 | 78.442 | 0.00 | 0.00 |
| ATOM | 3871 | HB   | THR | X | 258 | 43.698 | 38.601 | 77.431 | 0.00 | 0.00 |
| ATOM | 3872 | CG2  | THR | X | 258 | 44.895 | 39.669 | 78.749 | 0.00 | 0.00 |
| ATOM | 3873 | HG21 | THR | X | 258 | 45.635 | 39.150 | 78.140 | 0.00 | 0.00 |
| ATOM | 3874 | HG22 | THR | X | 258 | 44.783 | 40.680 | 78.357 | 0.00 | 0.00 |
| ATOM | 3875 | HG23 | THR | X | 258 | 45.153 | 39.572 | 79.804 | 0.00 | 0.00 |
| ATOM | 3876 | OG1  | THR | X | 258 | 43.393 | 37.943 | 79.335 | 0.00 | 0.00 |
| ATOM | 3877 | HG1  | THR | X | 258 | 42.465 | 37.711 | 79.266 | 0.00 | 0.00 |
| ATOM | 3878 | C    | THR | X | 258 | 41.175 | 39.239 | 77.894 | 0.00 | 0.00 |
| ATOM | 3879 | O    | THR | X | 258 | 40.877 | 38.114 | 78.304 | 0.00 | 0.00 |
| ATOM | 3880 | N    | GLY | X | 259 | 40.464 | 39.718 | 76.955 | 0.00 | 0.00 |
| ATOM | 3881 | H    | GLY | X | 259 | 40.836 | 40.576 | 76.572 | 0.00 | 0.00 |
| ATOM | 3882 | CA   | GLY | X | 259 | 39.202 | 39.193 | 76.466 | 0.00 | 0.00 |
| ATOM | 3883 | HA2  | GLY | X | 259 | 38.916 | 39.857 | 75.630 | 0.00 | 0.00 |
| ATOM | 3884 | HA3  | GLY | X | 259 | 39.301 | 38.145 | 76.092 | 0.00 | 0.00 |
| ATOM | 3885 | C    | GLY | X | 259 | 38.133 | 39.208 | 77.545 | 0.00 | 0.00 |
| ATOM | 3886 | O    | GLY | X | 259 | 38.293 | 39.487 | 78.736 | 0.00 | 0.00 |
| ATOM | 3887 | N    | GLY | X | 260 | 36.943 | 38.714 | 77.093 | 0.00 | 0.00 |
| ATOM | 3888 | H    | GLY | X | 260 | 36.675 | 38.604 | 76.125 | 0.00 | 0.00 |
| ATOM | 3889 | CA   | GLY | X | 260 | 35.864 | 38.635 | 78.002 | 0.00 | 0.00 |

|      |      |      |     |   |     |        |        |        |      |      |
|------|------|------|-----|---|-----|--------|--------|--------|------|------|
| ATOM | 3890 | HA2  | GLY | X | 260 | 35.362 | 37.709 | 77.666 | 0.00 | 0.00 |
| ATOM | 3891 | HA3  | GLY | X | 260 | 36.059 | 38.598 | 79.046 | 0.00 | 0.00 |
| ATOM | 3892 | C    | GLY | X | 260 | 34.957 | 39.804 | 77.709 | 0.00 | 0.00 |
| ATOM | 3893 | O    | GLY | X | 260 | 34.417 | 39.759 | 76.626 | 0.00 | 0.00 |
| ATOM | 3894 | N    | ASN | X | 261 | 34.730 | 40.739 | 78.623 | 0.00 | 0.00 |
| ATOM | 3895 | H    | ASN | X | 261 | 35.244 | 40.673 | 79.490 | 0.00 | 0.00 |
| ATOM | 3896 | CA   | ASN | X | 261 | 33.552 | 41.653 | 78.561 | 0.00 | 0.00 |
| ATOM | 3897 | HA   | ASN | X | 261 | 32.698 | 40.975 | 78.550 | 0.00 | 0.00 |
| ATOM | 3898 | CB   | ASN | X | 261 | 33.343 | 42.481 | 79.907 | 0.00 | 0.00 |
| ATOM | 3899 | HB2  | ASN | X | 261 | 33.197 | 41.844 | 80.779 | 0.00 | 0.00 |
| ATOM | 3900 | HB3  | ASN | X | 261 | 34.244 | 43.077 | 80.050 | 0.00 | 0.00 |
| ATOM | 3901 | CG   | ASN | X | 261 | 32.143 | 43.461 | 79.727 | 0.00 | 0.00 |
| ATOM | 3902 | OD1  | ASN | X | 261 | 32.304 | 44.603 | 79.433 | 0.00 | 0.00 |
| ATOM | 3903 | ND2  | ASN | X | 261 | 30.915 | 43.107 | 79.721 | 0.00 | 0.00 |
| ATOM | 3904 | HD21 | ASN | X | 261 | 30.271 | 43.832 | 79.440 | 0.00 | 0.00 |
| ATOM | 3905 | HD22 | ASN | X | 261 | 30.655 | 42.141 | 79.865 | 0.00 | 0.00 |
| ATOM | 3906 | C    | ASN | X | 261 | 33.590 | 42.614 | 77.347 | 0.00 | 0.00 |
| ATOM | 3907 | O    | ASN | X | 261 | 34.510 | 43.402 | 77.184 | 0.00 | 0.00 |
| ATOM | 3908 | N    | ASP | X | 262 | 32.634 | 42.536 | 76.426 | 0.00 | 0.00 |
| ATOM | 3909 | H    | ASP | X | 262 | 31.951 | 41.807 | 76.574 | 0.00 | 0.00 |
| ATOM | 3910 | CA   | ASP | X | 262 | 32.646 | 43.218 | 75.162 | 0.00 | 0.00 |
| ATOM | 3911 | HA   | ASP | X | 262 | 33.604 | 42.904 | 74.748 | 0.00 | 0.00 |
| ATOM | 3912 | CB   | ASP | X | 262 | 31.507 | 42.853 | 74.241 | 0.00 | 0.00 |
| ATOM | 3913 | HB2  | ASP | X | 262 | 30.625 | 43.303 | 74.697 | 0.00 | 0.00 |
| ATOM | 3914 | HB3  | ASP | X | 262 | 31.563 | 43.320 | 73.258 | 0.00 | 0.00 |
| ATOM | 3915 | CG   | ASP | X | 262 | 31.348 | 41.345 | 74.102 | 0.00 | 0.00 |
| ATOM | 3916 | OD1  | ASP | X | 262 | 30.910 | 40.810 | 75.163 | 0.00 | 0.00 |
| ATOM | 3917 | OD2  | ASP | X | 262 | 31.610 | 40.758 | 73.049 | 0.00 | 0.00 |
| ATOM | 3918 | C    | ASP | X | 262 | 32.750 | 44.768 | 75.305 | 0.00 | 0.00 |
| ATOM | 3919 | O    | ASP | X | 262 | 33.461 | 45.429 | 74.570 | 0.00 | 0.00 |
| ATOM | 3920 | N    | THR | X | 263 | 31.987 | 45.334 | 76.213 | 0.00 | 0.00 |
| ATOM | 3921 | H    | THR | X | 263 | 31.437 | 44.643 | 76.705 | 0.00 | 0.00 |
| ATOM | 3922 | CA   | THR | X | 263 | 31.832 | 46.786 | 76.391 | 0.00 | 0.00 |
| ATOM | 3923 | HA   | THR | X | 263 | 31.569 | 47.257 | 75.443 | 0.00 | 0.00 |
| ATOM | 3924 | CB   | THR | X | 263 | 30.710 | 47.003 | 77.385 | 0.00 | 0.00 |
| ATOM | 3925 | HB   | THR | X | 263 | 30.928 | 46.648 | 78.392 | 0.00 | 0.00 |
| ATOM | 3926 | CG2  | THR | X | 263 | 30.362 | 48.483 | 77.406 | 0.00 | 0.00 |
| ATOM | 3927 | HG21 | THR | X | 263 | 31.177 | 49.019 | 77.892 | 0.00 | 0.00 |
| ATOM | 3928 | HG22 | THR | X | 263 | 30.281 | 48.823 | 76.373 | 0.00 | 0.00 |
| ATOM | 3929 | HG23 | THR | X | 263 | 29.389 | 48.601 | 77.883 | 0.00 | 0.00 |
| ATOM | 3930 | OG1  | THR | X | 263 | 29.576 | 46.348 | 76.803 | 0.00 | 0.00 |
| ATOM | 3931 | HG1  | THR | X | 263 | 29.217 | 46.926 | 76.127 | 0.00 | 0.00 |
| ATOM | 3932 | C    | THR | X | 263 | 33.143 | 47.488 | 76.693 | 0.00 | 0.00 |
| ATOM | 3933 | O    | THR | X | 263 | 33.554 | 48.397 | 75.986 | 0.00 | 0.00 |
| ATOM | 3934 | N    | GLU | X | 264 | 33.919 | 46.935 | 77.619 | 0.00 | 0.00 |
| ATOM | 3935 | H    | GLU | X | 264 | 33.455 | 46.282 | 78.234 | 0.00 | 0.00 |
| ATOM | 3936 | CA   | GLU | X | 264 | 35.251 | 47.360 | 77.820 | 0.00 | 0.00 |
| ATOM | 3937 | HA   | GLU | X | 264 | 35.324 | 48.446 | 77.879 | 0.00 | 0.00 |
| ATOM | 3938 | CB   | GLU | X | 264 | 35.752 | 46.860 | 79.205 | 0.00 | 0.00 |
| ATOM | 3939 | HB2  | GLU | X | 264 | 35.684 | 45.773 | 79.229 | 0.00 | 0.00 |
| ATOM | 3940 | HB3  | GLU | X | 264 | 36.792 | 47.106 | 79.421 | 0.00 | 0.00 |
| ATOM | 3941 | CG   | GLU | X | 264 | 34.926 | 47.473 | 80.341 | 0.00 | 0.00 |
| ATOM | 3942 | HG2  | GLU | X | 264 | 33.962 | 46.964 | 80.372 | 0.00 | 0.00 |
| ATOM | 3943 | HG3  | GLU | X | 264 | 35.308 | 47.060 | 81.275 | 0.00 | 0.00 |
| ATOM | 3944 | CD   | GLU | X | 264 | 34.870 | 49.016 | 80.276 | 0.00 | 0.00 |
| ATOM | 3945 | OE1  | GLU | X | 264 | 33.708 | 49.584 | 80.240 | 0.00 | 0.00 |
| ATOM | 3946 | OE2  | GLU | X | 264 | 35.954 | 49.619 | 80.193 | 0.00 | 0.00 |
| ATOM | 3947 | C    | GLU | X | 264 | 36.271 | 46.877 | 76.737 | 0.00 | 0.00 |
| ATOM | 3948 | O    | GLU | X | 264 | 37.244 | 47.590 | 76.434 | 0.00 | 0.00 |
| ATOM | 3949 | N    | LEU | X | 265 | 36.160 | 45.652 | 76.179 | 0.00 | 0.00 |
| ATOM | 3950 | H    | LEU | X | 265 | 35.461 | 45.042 | 76.579 | 0.00 | 0.00 |
| ATOM | 3951 | CA   | LEU | X | 265 | 36.998 | 45.072 | 75.197 | 0.00 | 0.00 |
| ATOM | 3952 | HA   | LEU | X | 265 | 38.019 | 45.107 | 75.578 | 0.00 | 0.00 |
| ATOM | 3953 | CB   | LEU | X | 265 | 36.546 | 43.572 | 74.984 | 0.00 | 0.00 |
| ATOM | 3954 | HB2  | LEU | X | 265 | 36.342 | 43.085 | 75.937 | 0.00 | 0.00 |
| ATOM | 3955 | HB3  | LEU | X | 265 | 35.605 | 43.596 | 74.435 | 0.00 | 0.00 |
| ATOM | 3956 | CG   | LEU | X | 265 | 37.396 | 42.679 | 74.075 | 0.00 | 0.00 |
| ATOM | 3957 | HG   | LEU | X | 265 | 38.394 | 42.826 | 74.488 | 0.00 | 0.00 |
| ATOM | 3958 | CD1  | LEU | X | 265 | 36.977 | 41.145 | 74.208 | 0.00 | 0.00 |
| ATOM | 3959 | HD11 | LEU | X | 265 | 36.955 | 40.896 | 75.269 | 0.00 | 0.00 |

|      |      |      |     |   |     |        |        |        |      |      |
|------|------|------|-----|---|-----|--------|--------|--------|------|------|
| ATOM | 3960 | HD12 | LEU | X | 265 | 36.004 | 41.024 | 73.733 | 0.00 | 0.00 |
| ATOM | 3961 | HD13 | LEU | X | 265 | 37.688 | 40.503 | 73.687 | 0.00 | 0.00 |
| ATOM | 3962 | CD2  | LEU | X | 265 | 37.387 | 43.159 | 72.614 | 0.00 | 0.00 |
| ATOM | 3963 | HD21 | LEU | X | 265 | 36.368 | 43.382 | 72.297 | 0.00 | 0.00 |
| ATOM | 3964 | HD22 | LEU | X | 265 | 38.057 | 44.007 | 72.473 | 0.00 | 0.00 |
| ATOM | 3965 | HD23 | LEU | X | 265 | 37.881 | 42.418 | 71.985 | 0.00 | 0.00 |
| ATOM | 3966 | C    | LEU | X | 265 | 37.072 | 45.912 | 73.932 | 0.00 | 0.00 |
| ATOM | 3967 | O    | LEU | X | 265 | 38.175 | 46.306 | 73.449 | 0.00 | 0.00 |
| ATOM | 3968 | N    | VAL | X | 266 | 35.875 | 46.382 | 73.537 | 0.00 | 0.00 |
| ATOM | 3969 | H    | VAL | X | 266 | 35.063 | 45.948 | 73.952 | 0.00 | 0.00 |
| ATOM | 3970 | CA   | VAL | X | 266 | 35.668 | 47.277 | 72.390 | 0.00 | 0.00 |
| ATOM | 3971 | HA   | VAL | X | 266 | 36.283 | 46.913 | 71.567 | 0.00 | 0.00 |
| ATOM | 3972 | CB   | VAL | X | 266 | 34.180 | 47.008 | 71.912 | 0.00 | 0.00 |
| ATOM | 3973 | HB   | VAL | X | 266 | 33.431 | 47.155 | 72.690 | 0.00 | 0.00 |
| ATOM | 3974 | CG1  | VAL | X | 266 | 33.946 | 47.854 | 70.676 | 0.00 | 0.00 |
| ATOM | 3975 | HG11 | VAL | X | 266 | 32.912 | 47.839 | 70.330 | 0.00 | 0.00 |
| ATOM | 3976 | HG12 | VAL | X | 266 | 34.067 | 48.887 | 71.003 | 0.00 | 0.00 |
| ATOM | 3977 | HG13 | VAL | X | 266 | 34.622 | 47.617 | 69.855 | 0.00 | 0.00 |
| ATOM | 3978 | CG2  | VAL | X | 266 | 33.959 | 45.602 | 71.515 | 0.00 | 0.00 |
| ATOM | 3979 | HG21 | VAL | X | 266 | 34.740 | 45.407 | 70.780 | 0.00 | 0.00 |
| ATOM | 3980 | HG22 | VAL | X | 266 | 34.057 | 44.928 | 72.366 | 0.00 | 0.00 |
| ATOM | 3981 | HG23 | VAL | X | 266 | 33.010 | 45.489 | 70.993 | 0.00 | 0.00 |
| ATOM | 3982 | C    | VAL | X | 266 | 36.024 | 48.713 | 72.756 | 0.00 | 0.00 |
| ATOM | 3983 | O    | VAL | X | 266 | 36.698 | 49.304 | 71.972 | 0.00 | 0.00 |
| ATOM | 3984 | N    | ALA | X | 267 | 35.802 | 49.279 | 73.925 | 0.00 | 0.00 |
| ATOM | 3985 | H    | ALA | X | 267 | 35.306 | 48.730 | 74.612 | 0.00 | 0.00 |
| ATOM | 3986 | CA   | ALA | X | 267 | 36.366 | 50.583 | 74.419 | 0.00 | 0.00 |
| ATOM | 3987 | HA   | ALA | X | 267 | 35.968 | 51.364 | 73.772 | 0.00 | 0.00 |
| ATOM | 3988 | CB   | ALA | X | 267 | 35.885 | 50.704 | 75.822 | 0.00 | 0.00 |
| ATOM | 3989 | HB1  | ALA | X | 267 | 36.303 | 49.928 | 76.463 | 0.00 | 0.00 |
| ATOM | 3990 | HB2  | ALA | X | 267 | 36.229 | 51.631 | 76.281 | 0.00 | 0.00 |
| ATOM | 3991 | HB3  | ALA | X | 267 | 34.797 | 50.655 | 75.786 | 0.00 | 0.00 |
| ATOM | 3992 | C    | ALA | X | 267 | 37.853 | 50.651 | 74.233 | 0.00 | 0.00 |
| ATOM | 3993 | O    | ALA | X | 267 | 38.341 | 51.596 | 73.582 | 0.00 | 0.00 |
| ATOM | 3994 | N    | CYX | X | 268 | 38.600 | 49.654 | 74.755 | 0.00 | 0.00 |
| ATOM | 3995 | H    | CYX | X | 268 | 38.151 | 48.917 | 75.280 | 0.00 | 0.00 |
| ATOM | 3996 | CA   | CYX | X | 268 | 39.990 | 49.429 | 74.598 | 0.00 | 0.00 |
| ATOM | 3997 | HA   | CYX | X | 268 | 40.550 | 50.237 | 75.067 | 0.00 | 0.00 |
| ATOM | 3998 | CB   | CYX | X | 268 | 40.346 | 48.214 | 75.503 | 0.00 | 0.00 |
| ATOM | 3999 | HB2  | CYX | X | 268 | 40.011 | 48.429 | 76.518 | 0.00 | 0.00 |
| ATOM | 4000 | HB3  | CYX | X | 268 | 39.847 | 47.325 | 75.117 | 0.00 | 0.00 |
| ATOM | 4001 | SG   | CYX | X | 268 | 42.092 | 47.962 | 75.648 | 0.00 | 0.00 |
| ATOM | 4002 | C    | CYX | X | 268 | 40.426 | 49.203 | 73.139 | 0.00 | 0.00 |
| ATOM | 4003 | O    | CYX | X | 268 | 41.355 | 49.937 | 72.658 | 0.00 | 0.00 |
| ATOM | 4004 | N    | LEU | X | 269 | 39.748 | 48.309 | 72.372 | 0.00 | 0.00 |
| ATOM | 4005 | H    | LEU | X | 269 | 39.102 | 47.671 | 72.815 | 0.00 | 0.00 |
| ATOM | 4006 | CA   | LEU | X | 269 | 40.163 | 48.032 | 70.983 | 0.00 | 0.00 |
| ATOM | 4007 | HA   | LEU | X | 269 | 41.246 | 47.922 | 71.035 | 0.00 | 0.00 |
| ATOM | 4008 | CB   | LEU | X | 269 | 39.463 | 46.708 | 70.600 | 0.00 | 0.00 |
| ATOM | 4009 | HB2  | LEU | X | 269 | 39.384 | 46.014 | 71.437 | 0.00 | 0.00 |
| ATOM | 4010 | HB3  | LEU | X | 269 | 38.394 | 46.821 | 70.424 | 0.00 | 0.00 |
| ATOM | 4011 | CG   | LEU | X | 269 | 40.024 | 45.796 | 69.511 | 0.00 | 0.00 |
| ATOM | 4012 | HG   | LEU | X | 269 | 40.011 | 46.258 | 68.523 | 0.00 | 0.00 |
| ATOM | 4013 | CD1  | LEU | X | 269 | 41.489 | 45.305 | 69.857 | 0.00 | 0.00 |
| ATOM | 4014 | HD11 | LEU | X | 269 | 42.174 | 46.148 | 69.767 | 0.00 | 0.00 |
| ATOM | 4015 | HD12 | LEU | X | 269 | 41.537 | 44.942 | 70.883 | 0.00 | 0.00 |
| ATOM | 4016 | HD13 | LEU | X | 269 | 41.676 | 44.460 | 69.195 | 0.00 | 0.00 |
| ATOM | 4017 | CD2  | LEU | X | 269 | 39.162 | 44.548 | 69.429 | 0.00 | 0.00 |
| ATOM | 4018 | HD21 | LEU | X | 269 | 38.093 | 44.762 | 69.435 | 0.00 | 0.00 |
| ATOM | 4019 | HD22 | LEU | X | 269 | 39.423 | 44.098 | 68.471 | 0.00 | 0.00 |
| ATOM | 4020 | HD23 | LEU | X | 269 | 39.325 | 43.909 | 70.297 | 0.00 | 0.00 |
| ATOM | 4021 | C    | LEU | X | 269 | 39.963 | 49.188 | 70.027 | 0.00 | 0.00 |
| ATOM | 4022 | O    | LEU | X | 269 | 40.651 | 49.237 | 68.950 | 0.00 | 0.00 |
| ATOM | 4023 | N    | ARG | X | 270 | 39.153 | 50.203 | 70.361 | 0.00 | 0.00 |
| ATOM | 4024 | H    | ARG | X | 270 | 38.551 | 50.117 | 71.168 | 0.00 | 0.00 |
| ATOM | 4025 | CA   | ARG | X | 270 | 38.884 | 51.426 | 69.635 | 0.00 | 0.00 |
| ATOM | 4026 | HA   | ARG | X | 270 | 39.076 | 51.285 | 68.571 | 0.00 | 0.00 |
| ATOM | 4027 | CB   | ARG | X | 270 | 37.389 | 51.776 | 69.810 | 0.00 | 0.00 |
| ATOM | 4028 | HB2  | ARG | X | 270 | 37.096 | 51.755 | 70.859 | 0.00 | 0.00 |
| ATOM | 4029 | HB3  | ARG | X | 270 | 37.296 | 52.731 | 69.294 | 0.00 | 0.00 |

|      |      |      |     |   |     |        |        |        |      |      |
|------|------|------|-----|---|-----|--------|--------|--------|------|------|
| ATOM | 4030 | CG   | ARG | X | 270 | 36.486 | 50.830 | 68.977 | 0.00 | 0.00 |
| ATOM | 4031 | HG2  | ARG | X | 270 | 36.790 | 50.799 | 67.931 | 0.00 | 0.00 |
| ATOM | 4032 | HG3  | ARG | X | 270 | 36.533 | 49.840 | 69.429 | 0.00 | 0.00 |
| ATOM | 4033 | CD   | ARG | X | 270 | 35.006 | 51.286 | 68.825 | 0.00 | 0.00 |
| ATOM | 4034 | HD2  | ARG | X | 270 | 35.094 | 52.202 | 68.240 | 0.00 | 0.00 |
| ATOM | 4035 | HD3  | ARG | X | 270 | 34.413 | 50.631 | 68.187 | 0.00 | 0.00 |
| ATOM | 4036 | NE   | ARG | X | 270 | 34.438 | 51.413 | 70.144 | 0.00 | 0.00 |
| ATOM | 4037 | HE   | ARG | X | 270 | 34.621 | 50.656 | 70.786 | 0.00 | 0.00 |
| ATOM | 4038 | CZ   | ARG | X | 270 | 33.826 | 52.416 | 70.639 | 0.00 | 0.00 |
| ATOM | 4039 | NH1  | ARG | X | 270 | 33.457 | 53.446 | 69.915 | 0.00 | 0.00 |
| ATOM | 4040 | HH11 | ARG | X | 270 | 33.468 | 53.443 | 68.905 | 0.00 | 0.00 |
| ATOM | 4041 | HH12 | ARG | X | 270 | 32.916 | 54.214 | 70.287 | 0.00 | 0.00 |
| ATOM | 4042 | NH2  | ARG | X | 270 | 33.357 | 52.333 | 71.821 | 0.00 | 0.00 |
| ATOM | 4043 | HH21 | ARG | X | 270 | 33.174 | 51.423 | 72.218 | 0.00 | 0.00 |
| ATOM | 4044 | HH22 | ARG | X | 270 | 32.951 | 53.141 | 72.271 | 0.00 | 0.00 |
| ATOM | 4045 | C    | ARG | X | 270 | 39.830 | 52.555 | 70.138 | 0.00 | 0.00 |
| ATOM | 4046 | O    | ARG | X | 270 | 39.826 | 53.629 | 69.556 | 0.00 | 0.00 |
| ATOM | 4047 | N    | THR | X | 271 | 40.595 | 52.359 | 71.191 | 0.00 | 0.00 |
| ATOM | 4048 | H    | THR | X | 271 | 40.411 | 51.530 | 71.737 | 0.00 | 0.00 |
| ATOM | 4049 | CA   | THR | X | 271 | 41.398 | 53.356 | 71.951 | 0.00 | 0.00 |
| ATOM | 4050 | HA   | THR | X | 271 | 41.220 | 54.328 | 71.492 | 0.00 | 0.00 |
| ATOM | 4051 | CB   | THR | X | 271 | 40.876 | 53.431 | 73.400 | 0.00 | 0.00 |
| ATOM | 4052 | HB   | THR | X | 271 | 40.959 | 52.439 | 73.844 | 0.00 | 0.00 |
| ATOM | 4053 | CG2  | THR | X | 271 | 41.808 | 54.398 | 74.201 | 0.00 | 0.00 |
| ATOM | 4054 | HG21 | THR | X | 271 | 41.522 | 54.513 | 75.247 | 0.00 | 0.00 |
| ATOM | 4055 | HG22 | THR | X | 271 | 42.803 | 53.964 | 74.301 | 0.00 | 0.00 |
| ATOM | 4056 | HG23 | THR | X | 271 | 41.812 | 55.381 | 73.730 | 0.00 | 0.00 |
| ATOM | 4057 | OG1  | THR | X | 271 | 39.610 | 53.962 | 73.383 | 0.00 | 0.00 |
| ATOM | 4058 | HG1  | THR | X | 271 | 38.957 | 53.273 | 73.242 | 0.00 | 0.00 |
| ATOM | 4059 | C    | THR | X | 271 | 42.925 | 53.138 | 71.773 | 0.00 | 0.00 |
| ATOM | 4060 | O    | THR | X | 271 | 43.615 | 54.088 | 71.475 | 0.00 | 0.00 |
| ATOM | 4061 | N    | ARG | X | 272 | 43.368 | 51.888 | 71.739 | 0.00 | 0.00 |
| ATOM | 4062 | H    | ARG | X | 272 | 42.751 | 51.104 | 71.893 | 0.00 | 0.00 |
| ATOM | 4063 | CA   | ARG | X | 272 | 44.808 | 51.535 | 71.501 | 0.00 | 0.00 |
| ATOM | 4064 | HA   | ARG | X | 272 | 45.400 | 52.242 | 72.082 | 0.00 | 0.00 |
| ATOM | 4065 | CB   | ARG | X | 272 | 45.128 | 50.123 | 72.099 | 0.00 | 0.00 |
| ATOM | 4066 | HB2  | ARG | X | 272 | 44.489 | 49.414 | 71.572 | 0.00 | 0.00 |
| ATOM | 4067 | HB3  | ARG | X | 272 | 46.145 | 49.838 | 71.831 | 0.00 | 0.00 |
| ATOM | 4068 | CG   | ARG | X | 272 | 45.062 | 50.140 | 73.630 | 0.00 | 0.00 |
| ATOM | 4069 | HG2  | ARG | X | 272 | 45.825 | 50.865 | 73.914 | 0.00 | 0.00 |
| ATOM | 4070 | HG3  | ARG | X | 272 | 44.124 | 50.476 | 74.072 | 0.00 | 0.00 |
| ATOM | 4071 | CD   | ARG | X | 272 | 45.391 | 48.697 | 74.048 | 0.00 | 0.00 |
| ATOM | 4072 | HD2  | ARG | X | 272 | 44.737 | 48.016 | 73.504 | 0.00 | 0.00 |
| ATOM | 4073 | HD3  | ARG | X | 272 | 46.414 | 48.547 | 73.703 | 0.00 | 0.00 |
| ATOM | 4074 | NE   | ARG | X | 272 | 45.242 | 48.578 | 75.507 | 0.00 | 0.00 |
| ATOM | 4075 | HE   | ARG | X | 272 | 44.416 | 48.909 | 75.986 | 0.00 | 0.00 |
| ATOM | 4076 | CZ   | ARG | X | 272 | 46.252 | 48.216 | 76.315 | 0.00 | 0.00 |
| ATOM | 4077 | NH1  | ARG | X | 272 | 47.387 | 47.681 | 75.822 | 0.00 | 0.00 |
| ATOM | 4078 | HH11 | ARG | X | 272 | 47.391 | 47.270 | 74.900 | 0.00 | 0.00 |
| ATOM | 4079 | HH12 | ARG | X | 272 | 48.124 | 47.463 | 76.478 | 0.00 | 0.00 |
| ATOM | 4080 | NH2  | ARG | X | 272 | 46.195 | 48.546 | 77.584 | 0.00 | 0.00 |
| ATOM | 4081 | HH21 | ARG | X | 272 | 45.336 | 48.983 | 77.886 | 0.00 | 0.00 |
| ATOM | 4082 | HH22 | ARG | X | 272 | 46.922 | 48.217 | 78.204 | 0.00 | 0.00 |
| ATOM | 4083 | C    | ARG | X | 272 | 45.336 | 51.731 | 70.038 | 0.00 | 0.00 |
| ATOM | 4084 | O    | ARG | X | 272 | 44.459 | 51.775 | 69.093 | 0.00 | 0.00 |
| ATOM | 4085 | N    | PRO | X | 273 | 46.622 | 52.030 | 69.791 | 0.00 | 0.00 |
| ATOM | 4086 | CD   | PRO | X | 273 | 47.692 | 51.803 | 70.837 | 0.00 | 0.00 |
| ATOM | 4087 | HD2  | PRO | X | 273 | 48.025 | 50.766 | 70.865 | 0.00 | 0.00 |
| ATOM | 4088 | HD3  | PRO | X | 273 | 47.453 | 52.104 | 71.857 | 0.00 | 0.00 |
| ATOM | 4089 | CG   | PRO | X | 273 | 48.755 | 52.683 | 70.391 | 0.00 | 0.00 |
| ATOM | 4090 | HG2  | PRO | X | 273 | 49.773 | 52.324 | 70.542 | 0.00 | 0.00 |
| ATOM | 4091 | HG3  | PRO | X | 273 | 48.840 | 53.613 | 70.952 | 0.00 | 0.00 |
| ATOM | 4092 | CB   | PRO | X | 273 | 48.545 | 52.991 | 68.902 | 0.00 | 0.00 |
| ATOM | 4093 | HB2  | PRO | X | 273 | 49.246 | 52.364 | 68.351 | 0.00 | 0.00 |
| ATOM | 4094 | HB3  | PRO | X | 273 | 48.669 | 54.062 | 68.741 | 0.00 | 0.00 |
| ATOM | 4095 | CA   | PRO | X | 273 | 47.085 | 52.591 | 68.568 | 0.00 | 0.00 |
| ATOM | 4096 | HA   | PRO | X | 273 | 46.590 | 53.516 | 68.270 | 0.00 | 0.00 |
| ATOM | 4097 | C    | PRO | X | 273 | 47.050 | 51.671 | 67.420 | 0.00 | 0.00 |
| ATOM | 4098 | O    | PRO | X | 273 | 47.013 | 50.464 | 67.587 | 0.00 | 0.00 |
| ATOM | 4099 | N    | ALA | X | 274 | 47.126 | 52.215 | 66.186 | 0.00 | 0.00 |

|      |      |      |     |   |     |        |        |        |      |      |
|------|------|------|-----|---|-----|--------|--------|--------|------|------|
| ATOM | 4100 | H    | ALA | X | 274 | 47.048 | 53.219 | 66.113 | 0.00 | 0.00 |
| ATOM | 4101 | CA   | ALA | X | 274 | 47.030 | 51.467 | 64.958 | 0.00 | 0.00 |
| ATOM | 4102 | HA   | ALA | X | 274 | 46.294 | 50.666 | 65.035 | 0.00 | 0.00 |
| ATOM | 4103 | CB   | ALA | X | 274 | 46.820 | 52.511 | 63.876 | 0.00 | 0.00 |
| ATOM | 4104 | HB1  | ALA | X | 274 | 46.096 | 53.236 | 64.248 | 0.00 | 0.00 |
| ATOM | 4105 | HB2  | ALA | X | 274 | 47.675 | 53.112 | 63.568 | 0.00 | 0.00 |
| ATOM | 4106 | HB3  | ALA | X | 274 | 46.404 | 52.093 | 62.959 | 0.00 | 0.00 |
| ATOM | 4107 | C    | ALA | X | 274 | 48.296 | 50.647 | 64.546 | 0.00 | 0.00 |
| ATOM | 4108 | O    | ALA | X | 274 | 48.061 | 49.522 | 64.017 | 0.00 | 0.00 |
| ATOM | 4109 | N    | GLN | X | 275 | 49.530 | 50.998 | 64.756 | 0.00 | 0.00 |
| ATOM | 4110 | H    | GLN | X | 275 | 49.687 | 51.937 | 65.092 | 0.00 | 0.00 |
| ATOM | 4111 | CA   | GLN | X | 275 | 50.662 | 50.154 | 64.497 | 0.00 | 0.00 |
| ATOM | 4112 | HA   | GLN | X | 275 | 50.447 | 49.823 | 63.481 | 0.00 | 0.00 |
| ATOM | 4113 | CB   | GLN | X | 275 | 51.970 | 50.908 | 64.424 | 0.00 | 0.00 |
| ATOM | 4114 | HB2  | GLN | X | 275 | 52.019 | 51.599 | 65.266 | 0.00 | 0.00 |
| ATOM | 4115 | HB3  | GLN | X | 275 | 52.807 | 50.212 | 64.483 | 0.00 | 0.00 |
| ATOM | 4116 | CG   | GLN | X | 275 | 52.133 | 51.757 | 63.100 | 0.00 | 0.00 |
| ATOM | 4117 | HG2  | GLN | X | 275 | 52.165 | 51.108 | 62.225 | 0.00 | 0.00 |
| ATOM | 4118 | HG3  | GLN | X | 275 | 51.316 | 52.473 | 63.020 | 0.00 | 0.00 |
| ATOM | 4119 | CD   | GLN | X | 275 | 53.428 | 52.578 | 63.173 | 0.00 | 0.00 |
| ATOM | 4120 | OE1  | GLN | X | 275 | 53.577 | 53.514 | 64.002 | 0.00 | 0.00 |
| ATOM | 4121 | NE2  | GLN | X | 275 | 54.459 | 52.428 | 62.300 | 0.00 | 0.00 |
| ATOM | 4122 | HE21 | GLN | X | 275 | 55.302 | 52.973 | 62.407 | 0.00 | 0.00 |
| ATOM | 4123 | HE22 | GLN | X | 275 | 54.356 | 51.754 | 61.554 | 0.00 | 0.00 |
| ATOM | 4124 | C    | GLN | X | 275 | 50.879 | 48.808 | 65.293 | 0.00 | 0.00 |
| ATOM | 4125 | O    | GLN | X | 275 | 51.344 | 47.796 | 64.749 | 0.00 | 0.00 |
| ATOM | 4126 | N    | VAL | X | 276 | 50.421 | 48.850 | 66.538 | 0.00 | 0.00 |
| ATOM | 4127 | H    | VAL | X | 276 | 50.147 | 49.757 | 66.887 | 0.00 | 0.00 |
| ATOM | 4128 | CA   | VAL | X | 276 | 50.451 | 47.690 | 67.382 | 0.00 | 0.00 |
| ATOM | 4129 | HA   | VAL | X | 276 | 51.283 | 47.014 | 67.178 | 0.00 | 0.00 |
| ATOM | 4130 | CB   | VAL | X | 276 | 50.620 | 47.882 | 68.952 | 0.00 | 0.00 |
| ATOM | 4131 | HB   | VAL | X | 276 | 51.538 | 48.442 | 69.130 | 0.00 | 0.00 |
| ATOM | 4132 | CG1  | VAL | X | 276 | 49.535 | 48.796 | 69.502 | 0.00 | 0.00 |
| ATOM | 4133 | HG11 | VAL | X | 276 | 48.538 | 48.383 | 69.349 | 0.00 | 0.00 |
| ATOM | 4134 | HG12 | VAL | X | 276 | 49.671 | 48.932 | 70.575 | 0.00 | 0.00 |
| ATOM | 4135 | HG13 | VAL | X | 276 | 49.724 | 49.774 | 69.060 | 0.00 | 0.00 |
| ATOM | 4136 | CG2  | VAL | X | 276 | 50.758 | 46.636 | 69.916 | 0.00 | 0.00 |
| ATOM | 4137 | HG21 | VAL | X | 276 | 49.913 | 46.005 | 69.640 | 0.00 | 0.00 |
| ATOM | 4138 | HG22 | VAL | X | 276 | 51.683 | 46.089 | 69.732 | 0.00 | 0.00 |
| ATOM | 4139 | HG23 | VAL | X | 276 | 50.767 | 46.930 | 70.965 | 0.00 | 0.00 |
| ATOM | 4140 | C    | VAL | X | 276 | 49.231 | 46.789 | 67.105 | 0.00 | 0.00 |
| ATOM | 4141 | O    | VAL | X | 276 | 49.387 | 45.591 | 67.278 | 0.00 | 0.00 |
| ATOM | 4142 | N    | LEU | X | 277 | 48.101 | 47.320 | 66.578 | 0.00 | 0.00 |
| ATOM | 4143 | H    | LEU | X | 277 | 48.100 | 48.327 | 66.506 | 0.00 | 0.00 |
| ATOM | 4144 | CA   | LEU | X | 277 | 46.956 | 46.544 | 66.035 | 0.00 | 0.00 |
| ATOM | 4145 | HA   | LEU | X | 277 | 46.597 | 45.806 | 66.753 | 0.00 | 0.00 |
| ATOM | 4146 | CB   | LEU | X | 277 | 45.862 | 47.580 | 65.590 | 0.00 | 0.00 |
| ATOM | 4147 | HB2  | LEU | X | 277 | 45.655 | 48.240 | 66.433 | 0.00 | 0.00 |
| ATOM | 4148 | HB3  | LEU | X | 277 | 46.231 | 48.095 | 64.703 | 0.00 | 0.00 |
| ATOM | 4149 | CG   | LEU | X | 277 | 44.495 | 46.887 | 65.207 | 0.00 | 0.00 |
| ATOM | 4150 | HG   | LEU | X | 277 | 44.755 | 46.326 | 64.309 | 0.00 | 0.00 |
| ATOM | 4151 | CD1  | LEU | X | 277 | 43.980 | 45.917 | 66.258 | 0.00 | 0.00 |
| ATOM | 4152 | HD11 | LEU | X | 277 | 44.602 | 45.022 | 66.294 | 0.00 | 0.00 |
| ATOM | 4153 | HD12 | LEU | X | 277 | 43.925 | 46.416 | 67.225 | 0.00 | 0.00 |
| ATOM | 4154 | HD13 | LEU | X | 277 | 42.960 | 45.620 | 66.014 | 0.00 | 0.00 |
| ATOM | 4155 | CD2  | LEU | X | 277 | 43.468 | 47.971 | 65.057 | 0.00 | 0.00 |
| ATOM | 4156 | HD21 | LEU | X | 277 | 43.325 | 48.559 | 65.964 | 0.00 | 0.00 |
| ATOM | 4157 | HD22 | LEU | X | 277 | 43.692 | 48.608 | 64.201 | 0.00 | 0.00 |
| ATOM | 4158 | HD23 | LEU | X | 277 | 42.525 | 47.504 | 64.771 | 0.00 | 0.00 |
| ATOM | 4159 | C    | LEU | X | 277 | 47.448 | 45.650 | 64.856 | 0.00 | 0.00 |
| ATOM | 4160 | O    | LEU | X | 277 | 47.545 | 44.431 | 65.020 | 0.00 | 0.00 |
| ATOM | 4161 | N    | VAL | X | 278 | 47.993 | 46.191 | 63.757 | 0.00 | 0.00 |
| ATOM | 4162 | H    | VAL | X | 278 | 47.906 | 47.197 | 63.721 | 0.00 | 0.00 |
| ATOM | 4163 | CA   | VAL | X | 278 | 48.376 | 45.409 | 62.502 | 0.00 | 0.00 |
| ATOM | 4164 | HA   | VAL | X | 278 | 47.636 | 44.658 | 62.226 | 0.00 | 0.00 |
| ATOM | 4165 | CB   | VAL | X | 278 | 48.526 | 46.376 | 61.268 | 0.00 | 0.00 |
| ATOM | 4166 | HB   | VAL | X | 278 | 48.430 | 45.713 | 60.408 | 0.00 | 0.00 |
| ATOM | 4167 | CG1  | VAL | X | 278 | 47.349 | 47.355 | 61.168 | 0.00 | 0.00 |
| ATOM | 4168 | HG11 | VAL | X | 278 | 47.336 | 48.005 | 62.042 | 0.00 | 0.00 |
| ATOM | 4169 | HG12 | VAL | X | 278 | 47.364 | 47.918 | 60.235 | 0.00 | 0.00 |



|      |      |      |     |   |     |        |        |        |      |      |
|------|------|------|-----|---|-----|--------|--------|--------|------|------|
| ATOM | 4170 | HG13 | VAL | X | 278 | 46.465 | 46.718 | 61.161 | 0.00 | 0.00 |
| ATOM | 4171 | CG2  | VAL | X | 278 | 49.843 | 47.163 | 61.301 | 0.00 | 0.00 |
| ATOM | 4172 | HG21 | VAL | X | 278 | 49.928 | 47.957 | 62.043 | 0.00 | 0.00 |
| ATOM | 4173 | HG22 | VAL | X | 278 | 50.683 | 46.476 | 61.405 | 0.00 | 0.00 |
| ATOM | 4174 | HG23 | VAL | X | 278 | 49.920 | 47.652 | 60.330 | 0.00 | 0.00 |
| ATOM | 4175 | C    | VAL | X | 278 | 49.652 | 44.487 | 62.653 | 0.00 | 0.00 |
| ATOM | 4176 | O    | VAL | X | 278 | 49.778 | 43.525 | 61.883 | 0.00 | 0.00 |
| ATOM | 4177 | N    | ASN | X | 279 | 50.480 | 44.736 | 63.694 | 0.00 | 0.00 |
| ATOM | 4178 | H    | ASN | X | 279 | 50.312 | 45.459 | 64.379 | 0.00 | 0.00 |
| ATOM | 4179 | CA   | ASN | X | 279 | 51.464 | 43.866 | 64.278 | 0.00 | 0.00 |
| ATOM | 4180 | HA   | ASN | X | 279 | 52.238 | 43.645 | 63.543 | 0.00 | 0.00 |
| ATOM | 4181 | CB   | ASN | X | 279 | 52.155 | 44.468 | 65.462 | 0.00 | 0.00 |
| ATOM | 4182 | HB2  | ASN | X | 279 | 52.521 | 45.453 | 65.171 | 0.00 | 0.00 |
| ATOM | 4183 | HB3  | ASN | X | 279 | 51.440 | 44.505 | 66.283 | 0.00 | 0.00 |
| ATOM | 4184 | CG   | ASN | X | 279 | 53.368 | 43.678 | 65.892 | 0.00 | 0.00 |
| ATOM | 4185 | OD1  | ASN | X | 279 | 53.375 | 42.874 | 66.784 | 0.00 | 0.00 |
| ATOM | 4186 | ND2  | ASN | X | 279 | 54.448 | 44.032 | 65.234 | 0.00 | 0.00 |
| ATOM | 4187 | HD21 | ASN | X | 279 | 55.350 | 43.640 | 65.462 | 0.00 | 0.00 |
| ATOM | 4188 | HD22 | ASN | X | 279 | 54.446 | 44.571 | 64.380 | 0.00 | 0.00 |
| ATOM | 4189 | C    | ASN | X | 279 | 50.907 | 42.486 | 64.645 | 0.00 | 0.00 |
| ATOM | 4190 | O    | ASN | X | 279 | 51.402 | 41.431 | 64.259 | 0.00 | 0.00 |
| ATOM | 4191 | N    | HIE | X | 280 | 49.770 | 42.487 | 65.295 | 0.00 | 0.00 |
| ATOM | 4192 | H    | HIE | X | 280 | 49.350 | 43.396 | 65.425 | 0.00 | 0.00 |
| ATOM | 4193 | CA   | HIE | X | 280 | 49.085 | 41.292 | 65.844 | 0.00 | 0.00 |
| ATOM | 4194 | HA   | HIE | X | 280 | 49.847 | 40.513 | 65.870 | 0.00 | 0.00 |
| ATOM | 4195 | CB   | HIE | X | 280 | 48.617 | 41.463 | 67.335 | 0.00 | 0.00 |
| ATOM | 4196 | HB2  | HIE | X | 280 | 48.032 | 42.378 | 67.423 | 0.00 | 0.00 |
| ATOM | 4197 | HB3  | HIE | X | 280 | 48.072 | 40.536 | 67.512 | 0.00 | 0.00 |
| ATOM | 4198 | CG   | HIE | X | 280 | 49.761 | 41.576 | 68.191 | 0.00 | 0.00 |
| ATOM | 4199 | ND1  | HIE | X | 280 | 50.707 | 40.583 | 68.367 | 0.00 | 0.00 |
| ATOM | 4200 | CE1  | HIE | X | 280 | 51.474 | 40.966 | 69.432 | 0.00 | 0.00 |
| ATOM | 4201 | HE1  | HIE | X | 280 | 52.294 | 40.429 | 69.886 | 0.00 | 0.00 |
| ATOM | 4202 | NE2  | HIE | X | 280 | 51.050 | 42.164 | 69.883 | 0.00 | 0.00 |
| ATOM | 4203 | HE2  | HIE | X | 280 | 51.503 | 42.796 | 70.527 | 0.00 | 0.00 |
| ATOM | 4204 | CD2  | HIE | X | 280 | 49.912 | 42.511 | 69.175 | 0.00 | 0.00 |
| ATOM | 4205 | HD2  | HIE | X | 280 | 49.337 | 43.385 | 69.441 | 0.00 | 0.00 |
| ATOM | 4206 | C    | HIE | X | 280 | 47.936 | 40.809 | 64.916 | 0.00 | 0.00 |
| ATOM | 4207 | O    | HIE | X | 280 | 47.629 | 39.634 | 64.906 | 0.00 | 0.00 |
| ATOM | 4208 | N    | GLU | X | 281 | 47.363 | 41.671 | 64.042 | 0.00 | 0.00 |
| ATOM | 4209 | H    | GLU | X | 281 | 47.432 | 42.673 | 64.153 | 0.00 | 0.00 |
| ATOM | 4210 | CA   | GLU | X | 281 | 46.418 | 41.170 | 62.973 | 0.00 | 0.00 |
| ATOM | 4211 | HA   | GLU | X | 281 | 45.584 | 40.766 | 63.546 | 0.00 | 0.00 |
| ATOM | 4212 | CB   | GLU | X | 281 | 46.024 | 42.375 | 62.103 | 0.00 | 0.00 |
| ATOM | 4213 | HB2  | GLU | X | 281 | 46.184 | 43.246 | 62.739 | 0.00 | 0.00 |
| ATOM | 4214 | HB3  | GLU | X | 281 | 46.639 | 42.487 | 61.210 | 0.00 | 0.00 |
| ATOM | 4215 | CG   | GLU | X | 281 | 44.508 | 42.362 | 61.792 | 0.00 | 0.00 |
| ATOM | 4216 | HG2  | GLU | X | 281 | 44.207 | 41.315 | 61.748 | 0.00 | 0.00 |
| ATOM | 4217 | HG3  | GLU | X | 281 | 43.921 | 42.927 | 62.516 | 0.00 | 0.00 |
| ATOM | 4218 | CD   | GLU | X | 281 | 44.325 | 43.152 | 60.474 | 0.00 | 0.00 |
| ATOM | 4219 | OE1  | GLU | X | 281 | 44.087 | 44.356 | 60.597 | 0.00 | 0.00 |
| ATOM | 4220 | OE2  | GLU | X | 281 | 44.374 | 42.485 | 59.359 | 0.00 | 0.00 |
| ATOM | 4221 | C    | GLU | X | 281 | 47.118 | 40.138 | 62.029 | 0.00 | 0.00 |
| ATOM | 4222 | O    | GLU | X | 281 | 46.570 | 39.047 | 62.014 | 0.00 | 0.00 |
| ATOM | 4223 | N    | TRP | X | 282 | 48.351 | 40.376 | 61.579 | 0.00 | 0.00 |
| ATOM | 4224 | H    | TRP | X | 282 | 48.784 | 41.273 | 61.747 | 0.00 | 0.00 |
| ATOM | 4225 | CA   | TRP | X | 282 | 48.997 | 39.366 | 60.784 | 0.00 | 0.00 |
| ATOM | 4226 | HA   | TRP | X | 282 | 48.274 | 39.005 | 60.053 | 0.00 | 0.00 |
| ATOM | 4227 | CB   | TRP | X | 282 | 50.090 | 40.067 | 59.926 | 0.00 | 0.00 |
| ATOM | 4228 | HB2  | TRP | X | 282 | 49.972 | 41.144 | 59.806 | 0.00 | 0.00 |
| ATOM | 4229 | HB3  | TRP | X | 282 | 51.066 | 39.955 | 60.397 | 0.00 | 0.00 |
| ATOM | 4230 | CG   | TRP | X | 282 | 50.010 | 39.653 | 58.432 | 0.00 | 0.00 |
| ATOM | 4231 | CD1  | TRP | X | 282 | 49.180 | 40.151 | 57.511 | 0.00 | 0.00 |
| ATOM | 4232 | HD1  | TRP | X | 282 | 48.528 | 40.999 | 57.662 | 0.00 | 0.00 |
| ATOM | 4233 | NE1  | TRP | X | 282 | 49.411 | 39.519 | 56.308 | 0.00 | 0.00 |
| ATOM | 4234 | HE1  | TRP | X | 282 | 48.926 | 39.735 | 55.449 | 0.00 | 0.00 |
| ATOM | 4235 | CE2  | TRP | X | 282 | 50.470 | 38.580 | 56.405 | 0.00 | 0.00 |
| ATOM | 4236 | CZ2  | TRP | X | 282 | 51.244 | 37.901 | 55.421 | 0.00 | 0.00 |
| ATOM | 4237 | HZ2  | TRP | X | 282 | 50.918 | 38.028 | 54.399 | 0.00 | 0.00 |
| ATOM | 4238 | CH2  | TRP | X | 282 | 52.346 | 37.200 | 55.841 | 0.00 | 0.00 |
| ATOM | 4239 | HH2  | TRP | X | 282 | 53.016 | 36.783 | 55.104 | 0.00 | 0.00 |

|      |      |      |     |   |     |        |        |        |      |      |
|------|------|------|-----|---|-----|--------|--------|--------|------|------|
| ATOM | 4240 | CZ3  | TRP | X | 282 | 52.617 | 37.044 | 57.218 | 0.00 | 0.00 |
| ATOM | 4241 | HZ3  | TRP | X | 282 | 53.423 | 36.362 | 57.448 | 0.00 | 0.00 |
| ATOM | 4242 | CE3  | TRP | X | 282 | 51.951 | 37.859 | 58.129 | 0.00 | 0.00 |
| ATOM | 4243 | HE3  | TRP | X | 282 | 52.340 | 37.875 | 59.137 | 0.00 | 0.00 |
| ATOM | 4244 | CD2  | TRP | X | 282 | 50.812 | 38.649 | 57.770 | 0.00 | 0.00 |
| ATOM | 4245 | C    | TRP | X | 282 | 49.423 | 38.146 | 61.641 | 0.00 | 0.00 |
| ATOM | 4246 | O    | TRP | X | 282 | 50.105 | 37.243 | 61.118 | 0.00 | 0.00 |
| ATOM | 4247 | N    | HIE | X | 283 | 49.086 | 38.065 | 62.972 | 0.00 | 0.00 |
| ATOM | 4248 | H    | HIE | X | 283 | 48.646 | 38.840 | 63.449 | 0.00 | 0.00 |
| ATOM | 4249 | CA   | HIE | X | 283 | 49.339 | 36.982 | 63.910 | 0.00 | 0.00 |
| ATOM | 4250 | HA   | HIE | X | 283 | 50.039 | 36.250 | 63.507 | 0.00 | 0.00 |
| ATOM | 4251 | CB   | HIE | X | 283 | 50.039 | 37.574 | 65.107 | 0.00 | 0.00 |
| ATOM | 4252 | HB2  | HIE | X | 283 | 50.840 | 38.213 | 64.735 | 0.00 | 0.00 |
| ATOM | 4253 | HB3  | HIE | X | 283 | 49.352 | 38.156 | 65.722 | 0.00 | 0.00 |
| ATOM | 4254 | CG   | HIE | X | 283 | 50.861 | 36.608 | 65.950 | 0.00 | 0.00 |
| ATOM | 4255 | ND1  | HIE | X | 283 | 51.617 | 35.528 | 65.351 | 0.00 | 0.00 |
| ATOM | 4256 | CE1  | HIE | X | 283 | 52.319 | 34.963 | 66.387 | 0.00 | 0.00 |
| ATOM | 4257 | HE1  | HIE | X | 283 | 52.954 | 34.123 | 66.148 | 0.00 | 0.00 |
| ATOM | 4258 | NE2  | HIE | X | 283 | 51.987 | 35.532 | 67.597 | 0.00 | 0.00 |
| ATOM | 4259 | HE2  | HIE | X | 283 | 52.192 | 35.155 | 68.511 | 0.00 | 0.00 |
| ATOM | 4260 | CD2  | HIE | X | 283 | 51.050 | 36.554 | 67.296 | 0.00 | 0.00 |
| ATOM | 4261 | HD2  | HIE | X | 283 | 50.637 | 37.242 | 68.019 | 0.00 | 0.00 |
| ATOM | 4262 | C    | HIE | X | 283 | 48.058 | 36.286 | 64.359 | 0.00 | 0.00 |
| ATOM | 4263 | O    | HIE | X | 283 | 48.150 | 35.292 | 65.089 | 0.00 | 0.00 |
| ATOM | 4264 | N    | VAL | X | 284 | 46.872 | 36.787 | 63.980 | 0.00 | 0.00 |
| ATOM | 4265 | H    | VAL | X | 284 | 46.871 | 37.660 | 63.472 | 0.00 | 0.00 |
| ATOM | 4266 | CA   | VAL | X | 284 | 45.504 | 36.115 | 64.059 | 0.00 | 0.00 |
| ATOM | 4267 | HA   | VAL | X | 284 | 45.642 | 35.180 | 64.602 | 0.00 | 0.00 |
| ATOM | 4268 | CB   | VAL | X | 284 | 44.415 | 36.978 | 64.772 | 0.00 | 0.00 |
| ATOM | 4269 | HB   | VAL | X | 284 | 43.540 | 36.338 | 64.883 | 0.00 | 0.00 |
| ATOM | 4270 | CG1  | VAL | X | 284 | 44.859 | 37.345 | 66.190 | 0.00 | 0.00 |
| ATOM | 4271 | HG11 | VAL | X | 284 | 45.281 | 36.470 | 66.685 | 0.00 | 0.00 |
| ATOM | 4272 | HG12 | VAL | X | 284 | 45.631 | 38.114 | 66.181 | 0.00 | 0.00 |
| ATOM | 4273 | HG13 | VAL | X | 284 | 43.939 | 37.689 | 66.662 | 0.00 | 0.00 |
| ATOM | 4274 | CG2  | VAL | X | 284 | 44.135 | 38.310 | 64.116 | 0.00 | 0.00 |
| ATOM | 4275 | HG21 | VAL | X | 284 | 43.214 | 38.781 | 64.460 | 0.00 | 0.00 |
| ATOM | 4276 | HG22 | VAL | X | 284 | 45.032 | 38.928 | 64.147 | 0.00 | 0.00 |
| ATOM | 4277 | HG23 | VAL | X | 284 | 43.950 | 38.064 | 63.071 | 0.00 | 0.00 |
| ATOM | 4278 | C    | VAL | X | 284 | 45.179 | 35.599 | 62.618 | 0.00 | 0.00 |
| ATOM | 4279 | O    | VAL | X | 284 | 43.988 | 35.188 | 62.410 | 0.00 | 0.00 |
| ATOM | 4280 | N    | LEU | X | 285 | 46.099 | 35.690 | 61.620 | 0.00 | 0.00 |
| ATOM | 4281 | H    | LEU | X | 285 | 46.989 | 36.162 | 61.693 | 0.00 | 0.00 |
| ATOM | 4282 | CA   | LEU | X | 285 | 45.987 | 35.109 | 60.296 | 0.00 | 0.00 |
| ATOM | 4283 | HA   | LEU | X | 285 | 45.083 | 35.489 | 59.820 | 0.00 | 0.00 |
| ATOM | 4284 | CB   | LEU | X | 285 | 47.154 | 35.706 | 59.501 | 0.00 | 0.00 |
| ATOM | 4285 | HB2  | LEU | X | 285 | 47.058 | 36.790 | 59.448 | 0.00 | 0.00 |
| ATOM | 4286 | HB3  | LEU | X | 285 | 48.130 | 35.519 | 59.948 | 0.00 | 0.00 |
| ATOM | 4287 | CG   | LEU | X | 285 | 47.276 | 35.119 | 58.072 | 0.00 | 0.00 |
| ATOM | 4288 | HG   | LEU | X | 285 | 46.374 | 34.937 | 57.488 | 0.00 | 0.00 |
| ATOM | 4289 | CD1  | LEU | X | 285 | 47.862 | 36.198 | 57.134 | 0.00 | 0.00 |
| ATOM | 4290 | HD11 | LEU | X | 285 | 47.347 | 37.143 | 57.302 | 0.00 | 0.00 |
| ATOM | 4291 | HD12 | LEU | X | 285 | 48.906 | 36.402 | 57.373 | 0.00 | 0.00 |
| ATOM | 4292 | HD13 | LEU | X | 285 | 47.766 | 35.935 | 56.081 | 0.00 | 0.00 |
| ATOM | 4293 | CD2  | LEU | X | 285 | 48.167 | 33.832 | 57.850 | 0.00 | 0.00 |
| ATOM | 4294 | HD21 | LEU | X | 285 | 47.405 | 33.054 | 57.885 | 0.00 | 0.00 |
| ATOM | 4295 | HD22 | LEU | X | 285 | 48.595 | 33.814 | 56.848 | 0.00 | 0.00 |
| ATOM | 4296 | HD23 | LEU | X | 285 | 48.891 | 33.733 | 58.659 | 0.00 | 0.00 |
| ATOM | 4297 | C    | LEU | X | 285 | 45.984 | 33.553 | 60.418 | 0.00 | 0.00 |
| ATOM | 4298 | O    | LEU | X | 285 | 46.978 | 32.963 | 60.861 | 0.00 | 0.00 |
| ATOM | 4299 | N    | PRO | X | 286 | 44.739 | 32.920 | 60.290 | 0.00 | 0.00 |
| ATOM | 4300 | CD   | PRO | X | 286 | 43.552 | 33.474 | 59.696 | 0.00 | 0.00 |
| ATOM | 4301 | HD2  | PRO | X | 286 | 43.743 | 33.337 | 58.631 | 0.00 | 0.00 |
| ATOM | 4302 | HD3  | PRO | X | 286 | 43.407 | 34.492 | 60.056 | 0.00 | 0.00 |
| ATOM | 4303 | CG   | PRO | X | 286 | 42.268 | 32.598 | 60.033 | 0.00 | 0.00 |
| ATOM | 4304 | HG2  | PRO | X | 286 | 41.571 | 32.669 | 59.198 | 0.00 | 0.00 |
| ATOM | 4305 | HG3  | PRO | X | 286 | 41.851 | 32.738 | 61.031 | 0.00 | 0.00 |
| ATOM | 4306 | CB   | PRO | X | 286 | 42.991 | 31.253 | 60.035 | 0.00 | 0.00 |
| ATOM | 4307 | HB2  | PRO | X | 286 | 43.102 | 30.979 | 58.986 | 0.00 | 0.00 |
| ATOM | 4308 | HB3  | PRO | X | 286 | 42.461 | 30.481 | 60.593 | 0.00 | 0.00 |
| ATOM | 4309 | CA   | PRO | X | 286 | 44.450 | 31.480 | 60.563 | 0.00 | 0.00 |

|      |      |      |     |   |     |        |        |        |      |      |
|------|------|------|-----|---|-----|--------|--------|--------|------|------|
| ATOM | 4310 | HA   | PRO | X | 286 | 44.511 | 31.386 | 61.647 | 0.00 | 0.00 |
| ATOM | 4311 | C    | PRO | X | 286 | 45.522 | 30.526 | 59.951 | 0.00 | 0.00 |
| ATOM | 4312 | O    | PRO | X | 286 | 45.748 | 30.630 | 58.737 | 0.00 | 0.00 |
| ATOM | 4313 | N    | GLN | X | 287 | 46.078 | 29.589 | 60.698 | 0.00 | 0.00 |
| ATOM | 4314 | H    | GLN | X | 287 | 45.835 | 29.585 | 61.678 | 0.00 | 0.00 |
| ATOM | 4315 | CA   | GLN | X | 287 | 47.380 | 28.966 | 60.396 | 0.00 | 0.00 |
| ATOM | 4316 | HA   | GLN | X | 287 | 47.944 | 29.715 | 59.841 | 0.00 | 0.00 |
| ATOM | 4317 | CB   | GLN | X | 287 | 48.190 | 28.703 | 61.734 | 0.00 | 0.00 |
| ATOM | 4318 | HB2  | GLN | X | 287 | 47.502 | 28.147 | 62.371 | 0.00 | 0.00 |
| ATOM | 4319 | HB3  | GLN | X | 287 | 49.095 | 28.109 | 61.607 | 0.00 | 0.00 |
| ATOM | 4320 | CG   | GLN | X | 287 | 48.500 | 30.041 | 62.548 | 0.00 | 0.00 |
| ATOM | 4321 | HG2  | GLN | X | 287 | 47.629 | 30.691 | 62.455 | 0.00 | 0.00 |
| ATOM | 4322 | HG3  | GLN | X | 287 | 48.682 | 29.785 | 63.592 | 0.00 | 0.00 |
| ATOM | 4323 | CD   | GLN | X | 287 | 49.737 | 30.643 | 61.957 | 0.00 | 0.00 |
| ATOM | 4324 | OE1  | GLN | X | 287 | 50.832 | 30.083 | 62.098 | 0.00 | 0.00 |
| ATOM | 4325 | NE2  | GLN | X | 287 | 49.595 | 31.772 | 61.347 | 0.00 | 0.00 |
| ATOM | 4326 | HE21 | GLN | X | 287 | 50.324 | 32.161 | 60.766 | 0.00 | 0.00 |
| ATOM | 4327 | HE22 | GLN | X | 287 | 48.682 | 32.202 | 61.315 | 0.00 | 0.00 |
| ATOM | 4328 | C    | GLN | X | 287 | 47.234 | 27.783 | 59.496 | 0.00 | 0.00 |
| ATOM | 4329 | O    | GLN | X | 287 | 46.260 | 27.233 | 59.091 | 0.00 | 0.00 |
| ATOM | 4330 | N    | GLU | X | 288 | 48.446 | 27.291 | 59.093 | 0.00 | 0.00 |
| ATOM | 4331 | H    | GLU | X | 288 | 49.246 | 27.843 | 59.370 | 0.00 | 0.00 |
| ATOM | 4332 | CA   | GLU | X | 288 | 48.866 | 26.071 | 58.460 | 0.00 | 0.00 |
| ATOM | 4333 | HA   | GLU | X | 288 | 49.947 | 26.049 | 58.327 | 0.00 | 0.00 |
| ATOM | 4334 | CB   | GLU | X | 288 | 48.622 | 24.847 | 59.359 | 0.00 | 0.00 |
| ATOM | 4335 | HB2  | GLU | X | 288 | 48.362 | 25.108 | 60.385 | 0.00 | 0.00 |
| ATOM | 4336 | HB3  | GLU | X | 288 | 47.759 | 24.243 | 59.081 | 0.00 | 0.00 |
| ATOM | 4337 | CG   | GLU | X | 288 | 49.812 | 23.880 | 59.503 | 0.00 | 0.00 |
| ATOM | 4338 | HG2  | GLU | X | 288 | 49.417 | 23.121 | 60.179 | 0.00 | 0.00 |
| ATOM | 4339 | HG3  | GLU | X | 288 | 50.047 | 23.409 | 58.548 | 0.00 | 0.00 |
| ATOM | 4340 | CD   | GLU | X | 288 | 51.112 | 24.495 | 60.132 | 0.00 | 0.00 |
| ATOM | 4341 | OE1  | GLU | X | 288 | 52.185 | 24.420 | 59.591 | 0.00 | 0.00 |
| ATOM | 4342 | OE2  | GLU | X | 288 | 50.985 | 25.055 | 61.291 | 0.00 | 0.00 |
| ATOM | 4343 | C    | GLU | X | 288 | 48.226 | 25.887 | 57.055 | 0.00 | 0.00 |
| ATOM | 4344 | O    | GLU | X | 288 | 48.104 | 24.738 | 56.585 | 0.00 | 0.00 |
| ATOM | 4345 | N    | SER | X | 289 | 47.738 | 26.978 | 56.432 | 0.00 | 0.00 |
| ATOM | 4346 | H    | SER | X | 289 | 47.682 | 27.816 | 56.994 | 0.00 | 0.00 |
| ATOM | 4347 | CA   | SER | X | 289 | 47.438 | 26.986 | 54.999 | 0.00 | 0.00 |
| ATOM | 4348 | HA   | SER | X | 289 | 48.011 | 26.203 | 54.500 | 0.00 | 0.00 |
| ATOM | 4349 | CB   | SER | X | 289 | 46.023 | 26.594 | 54.637 | 0.00 | 0.00 |
| ATOM | 4350 | HB2  | SER | X | 289 | 45.306 | 27.280 | 55.088 | 0.00 | 0.00 |
| ATOM | 4351 | HB3  | SER | X | 289 | 45.969 | 26.561 | 53.549 | 0.00 | 0.00 |
| ATOM | 4352 | OG   | SER | X | 289 | 45.713 | 25.289 | 55.176 | 0.00 | 0.00 |
| ATOM | 4353 | HG   | SER | X | 289 | 46.138 | 25.182 | 56.030 | 0.00 | 0.00 |
| ATOM | 4354 | C    | SER | X | 289 | 47.757 | 28.273 | 54.261 | 0.00 | 0.00 |
| ATOM | 4355 | O    | SER | X | 289 | 47.747 | 29.348 | 54.819 | 0.00 | 0.00 |
| ATOM | 4356 | N    | VAL | X | 290 | 47.955 | 28.228 | 52.943 | 0.00 | 0.00 |
| ATOM | 4357 | H    | VAL | X | 290 | 47.993 | 27.339 | 52.467 | 0.00 | 0.00 |
| ATOM | 4358 | CA   | VAL | X | 290 | 47.925 | 29.372 | 52.080 | 0.00 | 0.00 |
| ATOM | 4359 | HA   | VAL | X | 290 | 48.231 | 30.278 | 52.605 | 0.00 | 0.00 |
| ATOM | 4360 | CB   | VAL | X | 290 | 48.768 | 29.392 | 50.808 | 0.00 | 0.00 |
| ATOM | 4361 | HB   | VAL | X | 290 | 48.558 | 30.349 | 50.330 | 0.00 | 0.00 |
| ATOM | 4362 | CG1  | VAL | X | 290 | 50.230 | 29.462 | 51.293 | 0.00 | 0.00 |
| ATOM | 4363 | HG11 | VAL | X | 290 | 50.501 | 30.336 | 51.885 | 0.00 | 0.00 |
| ATOM | 4364 | HG12 | VAL | X | 290 | 50.399 | 28.552 | 51.869 | 0.00 | 0.00 |
| ATOM | 4365 | HG13 | VAL | X | 290 | 50.913 | 29.353 | 50.451 | 0.00 | 0.00 |
| ATOM | 4366 | CG2  | VAL | X | 290 | 48.571 | 28.255 | 49.788 | 0.00 | 0.00 |
| ATOM | 4367 | HG21 | VAL | X | 290 | 47.502 | 28.349 | 49.592 | 0.00 | 0.00 |
| ATOM | 4368 | HG22 | VAL | X | 290 | 49.165 | 28.429 | 48.890 | 0.00 | 0.00 |
| ATOM | 4369 | HG23 | VAL | X | 290 | 48.738 | 27.315 | 50.313 | 0.00 | 0.00 |
| ATOM | 4370 | C    | VAL | X | 290 | 46.509 | 29.623 | 51.594 | 0.00 | 0.00 |
| ATOM | 4371 | O    | VAL | X | 290 | 45.579 | 28.843 | 51.693 | 0.00 | 0.00 |
| ATOM | 4372 | N    | PHE | X | 291 | 46.303 | 30.798 | 51.098 | 0.00 | 0.00 |
| ATOM | 4373 | H    | PHE | X | 291 | 47.073 | 31.450 | 51.062 | 0.00 | 0.00 |
| ATOM | 4374 | CA   | PHE | X | 291 | 44.994 | 31.290 | 50.736 | 0.00 | 0.00 |
| ATOM | 4375 | HA   | PHE | X | 291 | 45.087 | 32.259 | 50.244 | 0.00 | 0.00 |
| ATOM | 4376 | CB   | PHE | X | 291 | 44.294 | 30.394 | 49.596 | 0.00 | 0.00 |
| ATOM | 4377 | HB2  | PHE | X | 291 | 44.970 | 29.605 | 49.266 | 0.00 | 0.00 |
| ATOM | 4378 | HB3  | PHE | X | 291 | 43.428 | 29.868 | 49.998 | 0.00 | 0.00 |
| ATOM | 4379 | CG   | PHE | X | 291 | 43.667 | 31.069 | 48.381 | 0.00 | 0.00 |

|      |      |      |     |   |     |        |        |        |      |      |
|------|------|------|-----|---|-----|--------|--------|--------|------|------|
| ATOM | 4380 | CD1  | PHE | X | 291 | 42.998 | 32.280 | 48.585 | 0.00 | 0.00 |
| ATOM | 4381 | HD1  | PHE | X | 291 | 42.894 | 32.741 | 49.557 | 0.00 | 0.00 |
| ATOM | 4382 | CE1  | PHE | X | 291 | 42.624 | 32.988 | 47.413 | 0.00 | 0.00 |
| ATOM | 4383 | HE1  | PHE | X | 291 | 42.271 | 34.009 | 47.437 | 0.00 | 0.00 |
| ATOM | 4384 | CZ   | PHE | X | 291 | 42.881 | 32.430 | 46.172 | 0.00 | 0.00 |
| ATOM | 4385 | HZ   | PHE | X | 291 | 42.496 | 33.011 | 45.347 | 0.00 | 0.00 |
| ATOM | 4386 | CE2  | PHE | X | 291 | 43.475 | 31.237 | 45.993 | 0.00 | 0.00 |
| ATOM | 4387 | HE2  | PHE | X | 291 | 43.728 | 30.786 | 45.045 | 0.00 | 0.00 |
| ATOM | 4388 | CD2  | PHE | X | 291 | 43.862 | 30.478 | 47.119 | 0.00 | 0.00 |
| ATOM | 4389 | HD2  | PHE | X | 291 | 44.293 | 29.504 | 46.939 | 0.00 | 0.00 |
| ATOM | 4390 | C    | PHE | X | 291 | 44.095 | 31.691 | 51.974 | 0.00 | 0.00 |
| ATOM | 4391 | O    | PHE | X | 291 | 42.953 | 31.287 | 52.118 | 0.00 | 0.00 |
| ATOM | 4392 | N    | ARG | X | 292 | 44.713 | 32.354 | 53.000 | 0.00 | 0.00 |
| ATOM | 4393 | H    | ARG | X | 292 | 45.671 | 32.654 | 52.885 | 0.00 | 0.00 |
| ATOM | 4394 | CA   | ARG | X | 292 | 44.123 | 32.619 | 54.327 | 0.00 | 0.00 |
| ATOM | 4395 | HA   | ARG | X | 292 | 43.034 | 32.607 | 54.340 | 0.00 | 0.00 |
| ATOM | 4396 | CB   | ARG | X | 292 | 44.741 | 31.591 | 55.319 | 0.00 | 0.00 |
| ATOM | 4397 | HB2  | ARG | X | 292 | 45.772 | 31.381 | 55.036 | 0.00 | 0.00 |
| ATOM | 4398 | HB3  | ARG | X | 292 | 44.637 | 31.934 | 56.349 | 0.00 | 0.00 |
| ATOM | 4399 | CG   | ARG | X | 292 | 44.098 | 30.250 | 55.299 | 0.00 | 0.00 |
| ATOM | 4400 | HG2  | ARG | X | 292 | 44.205 | 29.858 | 54.288 | 0.00 | 0.00 |
| ATOM | 4401 | HG3  | ARG | X | 292 | 44.670 | 29.563 | 55.922 | 0.00 | 0.00 |
| ATOM | 4402 | CD   | ARG | X | 292 | 42.652 | 30.075 | 55.815 | 0.00 | 0.00 |
| ATOM | 4403 | HD2  | ARG | X | 292 | 42.582 | 29.031 | 56.120 | 0.00 | 0.00 |
| ATOM | 4404 | HD3  | ARG | X | 292 | 42.473 | 30.823 | 56.588 | 0.00 | 0.00 |
| ATOM | 4405 | NE   | ARG | X | 292 | 41.711 | 30.299 | 54.680 | 0.00 | 0.00 |
| ATOM | 4406 | HE   | ARG | X | 292 | 42.089 | 30.634 | 53.805 | 0.00 | 0.00 |
| ATOM | 4407 | CZ   | ARG | X | 292 | 40.375 | 30.067 | 54.598 | 0.00 | 0.00 |
| ATOM | 4408 | NH1  | ARG | X | 292 | 39.712 | 29.747 | 55.682 | 0.00 | 0.00 |
| ATOM | 4409 | HH11 | ARG | X | 292 | 40.231 | 29.762 | 56.548 | 0.00 | 0.00 |
| ATOM | 4410 | HH12 | ARG | X | 292 | 38.857 | 29.210 | 55.673 | 0.00 | 0.00 |
| ATOM | 4411 | NH2  | ARG | X | 292 | 39.660 | 30.087 | 53.462 | 0.00 | 0.00 |
| ATOM | 4412 | HH21 | ARG | X | 292 | 40.070 | 30.048 | 52.540 | 0.00 | 0.00 |
| ATOM | 4413 | HH22 | ARG | X | 292 | 38.677 | 29.947 | 53.650 | 0.00 | 0.00 |
| ATOM | 4414 | C    | ARG | X | 292 | 44.616 | 34.014 | 54.687 | 0.00 | 0.00 |
| ATOM | 4415 | O    | ARG | X | 292 | 45.726 | 34.375 | 54.235 | 0.00 | 0.00 |
| ATOM | 4416 | N    | PHE | X | 293 | 43.830 | 34.921 | 55.387 | 0.00 | 0.00 |
| ATOM | 4417 | H    | PHE | X | 293 | 42.987 | 34.480 | 55.727 | 0.00 | 0.00 |
| ATOM | 4418 | CA   | PHE | X | 293 | 44.143 | 36.309 | 55.736 | 0.00 | 0.00 |
| ATOM | 4419 | HA   | PHE | X | 293 | 45.224 | 36.397 | 55.627 | 0.00 | 0.00 |
| ATOM | 4420 | CB   | PHE | X | 293 | 43.499 | 37.276 | 54.690 | 0.00 | 0.00 |
| ATOM | 4421 | HB2  | PHE | X | 293 | 42.423 | 37.155 | 54.813 | 0.00 | 0.00 |
| ATOM | 4422 | HB3  | PHE | X | 293 | 43.801 | 38.270 | 55.021 | 0.00 | 0.00 |
| ATOM | 4423 | CG   | PHE | X | 293 | 43.976 | 37.120 | 53.258 | 0.00 | 0.00 |
| ATOM | 4424 | CD1  | PHE | X | 293 | 45.346 | 37.392 | 52.972 | 0.00 | 0.00 |
| ATOM | 4425 | HD1  | PHE | X | 293 | 45.940 | 37.616 | 53.846 | 0.00 | 0.00 |
| ATOM | 4426 | CE1  | PHE | X | 293 | 45.796 | 37.151 | 51.705 | 0.00 | 0.00 |
| ATOM | 4427 | HE1  | PHE | X | 293 | 46.796 | 37.474 | 51.456 | 0.00 | 0.00 |
| ATOM | 4428 | CZ   | PHE | X | 293 | 44.935 | 36.722 | 50.692 | 0.00 | 0.00 |
| ATOM | 4429 | HZ   | PHE | X | 293 | 45.230 | 36.793 | 49.655 | 0.00 | 0.00 |
| ATOM | 4430 | CE2  | PHE | X | 293 | 43.565 | 36.421 | 51.025 | 0.00 | 0.00 |
| ATOM | 4431 | HE2  | PHE | X | 293 | 42.848 | 36.196 | 50.250 | 0.00 | 0.00 |
| ATOM | 4432 | CD2  | PHE | X | 293 | 43.066 | 36.727 | 52.296 | 0.00 | 0.00 |
| ATOM | 4433 | HD2  | PHE | X | 293 | 42.026 | 36.500 | 52.480 | 0.00 | 0.00 |
| ATOM | 4434 | C    | PHE | X | 293 | 43.830 | 36.720 | 57.141 | 0.00 | 0.00 |
| ATOM | 4435 | O    | PHE | X | 293 | 43.131 | 36.028 | 57.858 | 0.00 | 0.00 |
| ATOM | 4436 | N    | SER | X | 294 | 44.449 | 37.873 | 57.495 | 0.00 | 0.00 |
| ATOM | 4437 | H    | SER | X | 294 | 44.812 | 38.527 | 56.816 | 0.00 | 0.00 |
| ATOM | 4438 | CA   | SER | X | 294 | 44.287 | 38.381 | 58.826 | 0.00 | 0.00 |
| ATOM | 4439 | HA   | SER | X | 294 | 44.508 | 37.595 | 59.548 | 0.00 | 0.00 |
| ATOM | 4440 | CB   | SER | X | 294 | 45.413 | 39.407 | 59.058 | 0.00 | 0.00 |
| ATOM | 4441 | HB2  | SER | X | 294 | 45.216 | 39.780 | 60.063 | 0.00 | 0.00 |
| ATOM | 4442 | HB3  | SER | X | 294 | 46.362 | 38.874 | 59.105 | 0.00 | 0.00 |
| ATOM | 4443 | OG   | SER | X | 294 | 45.378 | 40.442 | 58.073 | 0.00 | 0.00 |
| ATOM | 4444 | HG   | SER | X | 294 | 44.910 | 41.183 | 58.465 | 0.00 | 0.00 |
| ATOM | 4445 | C    | SER | X | 294 | 42.884 | 38.813 | 59.206 | 0.00 | 0.00 |
| ATOM | 4446 | O    | SER | X | 294 | 42.210 | 38.092 | 59.952 | 0.00 | 0.00 |
| ATOM | 4447 | N    | PHE | X | 295 | 42.296 | 39.919 | 58.668 | 0.00 | 0.00 |
| ATOM | 4448 | H    | PHE | X | 295 | 42.796 | 40.450 | 57.970 | 0.00 | 0.00 |
| ATOM | 4449 | CA   | PHE | X | 295 | 40.844 | 40.066 | 58.601 | 0.00 | 0.00 |

|      |      |      |     |   |     |        |        |        |      |      |
|------|------|------|-----|---|-----|--------|--------|--------|------|------|
| ATOM | 4450 | HA   | PHE | X | 295 | 40.399 | 39.146 | 58.980 | 0.00 | 0.00 |
| ATOM | 4451 | CB   | PHE | X | 295 | 40.308 | 41.193 | 59.556 | 0.00 | 0.00 |
| ATOM | 4452 | HB2  | PHE | X | 295 | 41.113 | 41.889 | 59.788 | 0.00 | 0.00 |
| ATOM | 4453 | HB3  | PHE | X | 295 | 39.513 | 41.842 | 59.186 | 0.00 | 0.00 |
| ATOM | 4454 | CG   | PHE | X | 295 | 39.689 | 40.570 | 60.748 | 0.00 | 0.00 |
| ATOM | 4455 | CD1  | PHE | X | 295 | 38.346 | 40.070 | 60.749 | 0.00 | 0.00 |
| ATOM | 4456 | HD1  | PHE | X | 295 | 37.680 | 40.119 | 59.900 | 0.00 | 0.00 |
| ATOM | 4457 | CE1  | PHE | X | 295 | 37.783 | 39.694 | 61.960 | 0.00 | 0.00 |
| ATOM | 4458 | HE1  | PHE | X | 295 | 36.802 | 39.247 | 62.030 | 0.00 | 0.00 |
| ATOM | 4459 | CZ   | PHE | X | 295 | 38.516 | 39.739 | 63.195 | 0.00 | 0.00 |
| ATOM | 4460 | HZ   | PHE | X | 295 | 38.137 | 39.339 | 64.124 | 0.00 | 0.00 |
| ATOM | 4461 | CE2  | PHE | X | 295 | 39.852 | 40.244 | 63.215 | 0.00 | 0.00 |
| ATOM | 4462 | HE2  | PHE | X | 295 | 40.356 | 40.289 | 64.169 | 0.00 | 0.00 |
| ATOM | 4463 | CD2  | PHE | X | 295 | 40.428 | 40.647 | 61.997 | 0.00 | 0.00 |
| ATOM | 4464 | HD2  | PHE | X | 295 | 41.433 | 41.039 | 61.954 | 0.00 | 0.00 |
| ATOM | 4465 | C    | PHE | X | 295 | 40.445 | 40.239 | 57.108 | 0.00 | 0.00 |
| ATOM | 4466 | O    | PHE | X | 295 | 41.268 | 40.217 | 56.186 | 0.00 | 0.00 |
| ATOM | 4467 | N    | VAL | X | 296 | 39.119 | 40.277 | 56.926 | 0.00 | 0.00 |
| ATOM | 4468 | H    | VAL | X | 296 | 38.627 | 40.538 | 57.769 | 0.00 | 0.00 |
| ATOM | 4469 | CA   | VAL | X | 296 | 38.368 | 39.787 | 55.788 | 0.00 | 0.00 |
| ATOM | 4470 | HA   | VAL | X | 296 | 38.690 | 40.302 | 54.883 | 0.00 | 0.00 |
| ATOM | 4471 | CB   | VAL | X | 296 | 38.705 | 38.281 | 55.594 | 0.00 | 0.00 |
| ATOM | 4472 | HB   | VAL | X | 296 | 39.754 | 38.135 | 55.336 | 0.00 | 0.00 |
| ATOM | 4473 | CG1  | VAL | X | 296 | 38.340 | 37.485 | 56.846 | 0.00 | 0.00 |
| ATOM | 4474 | HG11 | VAL | X | 296 | 38.325 | 36.411 | 56.658 | 0.00 | 0.00 |
| ATOM | 4475 | HG12 | VAL | X | 296 | 39.131 | 37.603 | 57.586 | 0.00 | 0.00 |
| ATOM | 4476 | HG13 | VAL | X | 296 | 37.347 | 37.724 | 57.226 | 0.00 | 0.00 |
| ATOM | 4477 | CG2  | VAL | X | 296 | 38.016 | 37.628 | 54.407 | 0.00 | 0.00 |
| ATOM | 4478 | HG21 | VAL | X | 296 | 38.315 | 36.580 | 54.385 | 0.00 | 0.00 |
| ATOM | 4479 | HG22 | VAL | X | 296 | 36.927 | 37.578 | 54.397 | 0.00 | 0.00 |
| ATOM | 4480 | HG23 | VAL | X | 296 | 38.401 | 38.106 | 53.507 | 0.00 | 0.00 |
| ATOM | 4481 | C    | VAL | X | 296 | 36.896 | 40.035 | 56.003 | 0.00 | 0.00 |
| ATOM | 4482 | O    | VAL | X | 296 | 36.515 | 40.061 | 57.162 | 0.00 | 0.00 |
| ATOM | 4483 | N    | PRO | X | 297 | 36.041 | 40.321 | 54.959 | 0.00 | 0.00 |
| ATOM | 4484 | CD   | PRO | X | 297 | 36.357 | 40.380 | 53.528 | 0.00 | 0.00 |
| ATOM | 4485 | HD2  | PRO | X | 297 | 36.306 | 39.356 | 53.160 | 0.00 | 0.00 |
| ATOM | 4486 | HD3  | PRO | X | 297 | 37.393 | 40.708 | 53.434 | 0.00 | 0.00 |
| ATOM | 4487 | CG   | PRO | X | 297 | 35.285 | 41.195 | 52.802 | 0.00 | 0.00 |
| ATOM | 4488 | HG2  | PRO | X | 297 | 35.247 | 40.792 | 51.790 | 0.00 | 0.00 |
| ATOM | 4489 | HG3  | PRO | X | 297 | 35.492 | 42.263 | 52.859 | 0.00 | 0.00 |
| ATOM | 4490 | CB   | PRO | X | 297 | 34.124 | 40.909 | 53.684 | 0.00 | 0.00 |
| ATOM | 4491 | HB2  | PRO | X | 297 | 33.680 | 39.950 | 53.420 | 0.00 | 0.00 |
| ATOM | 4492 | HB3  | PRO | X | 297 | 33.289 | 41.606 | 53.616 | 0.00 | 0.00 |
| ATOM | 4493 | CA   | PRO | X | 297 | 34.681 | 40.703 | 55.089 | 0.00 | 0.00 |
| ATOM | 4494 | HA   | PRO | X | 297 | 34.794 | 41.643 | 55.630 | 0.00 | 0.00 |
| ATOM | 4495 | C    | PRO | X | 297 | 33.885 | 39.655 | 55.966 | 0.00 | 0.00 |
| ATOM | 4496 | O    | PRO | X | 297 | 34.186 | 38.505 | 55.982 | 0.00 | 0.00 |
| ATOM | 4497 | N    | VAL | X | 298 | 32.813 | 40.080 | 56.672 | 0.00 | 0.00 |
| ATOM | 4498 | H    | VAL | X | 298 | 32.516 | 41.045 | 56.687 | 0.00 | 0.00 |
| ATOM | 4499 | CA   | VAL | X | 298 | 32.066 | 39.260 | 57.602 | 0.00 | 0.00 |
| ATOM | 4500 | HA   | VAL | X | 298 | 32.623 | 38.331 | 57.729 | 0.00 | 0.00 |
| ATOM | 4501 | CB   | VAL | X | 298 | 32.094 | 39.861 | 59.031 | 0.00 | 0.00 |
| ATOM | 4502 | HB   | VAL | X | 298 | 31.434 | 40.728 | 59.042 | 0.00 | 0.00 |
| ATOM | 4503 | CG1  | VAL | X | 298 | 31.527 | 38.774 | 59.941 | 0.00 | 0.00 |
| ATOM | 4504 | HG11 | VAL | X | 298 | 30.451 | 38.887 | 60.080 | 0.00 | 0.00 |
| ATOM | 4505 | HG12 | VAL | X | 298 | 31.916 | 37.802 | 59.638 | 0.00 | 0.00 |
| ATOM | 4506 | HG13 | VAL | X | 298 | 31.788 | 39.032 | 60.968 | 0.00 | 0.00 |
| ATOM | 4507 | CG2  | VAL | X | 298 | 33.506 | 40.261 | 59.503 | 0.00 | 0.00 |
| ATOM | 4508 | HG21 | VAL | X | 298 | 34.086 | 39.339 | 59.544 | 0.00 | 0.00 |
| ATOM | 4509 | HG22 | VAL | X | 298 | 33.949 | 40.960 | 58.793 | 0.00 | 0.00 |
| ATOM | 4510 | HG23 | VAL | X | 298 | 33.412 | 40.669 | 60.510 | 0.00 | 0.00 |
| ATOM | 4511 | C    | VAL | X | 298 | 30.667 | 38.975 | 57.104 | 0.00 | 0.00 |
| ATOM | 4512 | O    | VAL | X | 298 | 30.052 | 39.920 | 56.696 | 0.00 | 0.00 |
| ATOM | 4513 | N    | VAL | X | 299 | 30.080 | 37.763 | 57.229 | 0.00 | 0.00 |
| ATOM | 4514 | H    | VAL | X | 299 | 30.728 | 37.036 | 57.496 | 0.00 | 0.00 |
| ATOM | 4515 | CA   | VAL | X | 299 | 28.583 | 37.574 | 57.333 | 0.00 | 0.00 |
| ATOM | 4516 | HA   | VAL | X | 299 | 28.113 | 38.021 | 56.457 | 0.00 | 0.00 |
| ATOM | 4517 | CB   | VAL | X | 299 | 28.185 | 36.075 | 57.364 | 0.00 | 0.00 |
| ATOM | 4518 | HB   | VAL | X | 299 | 28.685 | 35.648 | 58.233 | 0.00 | 0.00 |
| ATOM | 4519 | CG1  | VAL | X | 299 | 26.742 | 35.608 | 57.533 | 0.00 | 0.00 |

|      |      |      |     |   |     |        |        |        |      |      |
|------|------|------|-----|---|-----|--------|--------|--------|------|------|
| ATOM | 4520 | HG11 | VAL | X | 299 | 26.346 | 35.817 | 58.527 | 0.00 | 0.00 |
| ATOM | 4521 | HG12 | VAL | X | 299 | 26.042 | 35.963 | 56.776 | 0.00 | 0.00 |
| ATOM | 4522 | HG13 | VAL | X | 299 | 26.798 | 34.520 | 57.564 | 0.00 | 0.00 |
| ATOM | 4523 | CG2  | VAL | X | 299 | 28.773 | 35.464 | 56.100 | 0.00 | 0.00 |
| ATOM | 4524 | HG21 | VAL | X | 299 | 29.859 | 35.498 | 56.181 | 0.00 | 0.00 |
| ATOM | 4525 | HG22 | VAL | X | 299 | 28.697 | 34.381 | 56.003 | 0.00 | 0.00 |
| ATOM | 4526 | HG23 | VAL | X | 299 | 28.507 | 35.890 | 55.133 | 0.00 | 0.00 |
| ATOM | 4527 | C    | VAL | X | 299 | 28.124 | 38.244 | 58.664 | 0.00 | 0.00 |
| ATOM | 4528 | O    | VAL | X | 299 | 28.221 | 37.697 | 59.730 | 0.00 | 0.00 |
| ATOM | 4529 | N    | ASP | X | 300 | 27.728 | 39.529 | 58.570 | 0.00 | 0.00 |
| ATOM | 4530 | H    | ASP | X | 300 | 28.018 | 39.992 | 57.721 | 0.00 | 0.00 |
| ATOM | 4531 | CA   | ASP | X | 300 | 27.360 | 40.449 | 59.707 | 0.00 | 0.00 |
| ATOM | 4532 | HA   | ASP | X | 300 | 27.812 | 39.907 | 60.538 | 0.00 | 0.00 |
| ATOM | 4533 | CB   | ASP | X | 300 | 28.068 | 41.775 | 59.462 | 0.00 | 0.00 |
| ATOM | 4534 | HB2  | ASP | X | 300 | 27.978 | 42.336 | 60.392 | 0.00 | 0.00 |
| ATOM | 4535 | HB3  | ASP | X | 300 | 29.129 | 41.596 | 59.286 | 0.00 | 0.00 |
| ATOM | 4536 | CG   | ASP | X | 300 | 27.499 | 42.621 | 58.283 | 0.00 | 0.00 |
| ATOM | 4537 | OD1  | ASP | X | 300 | 27.765 | 42.202 | 57.122 | 0.00 | 0.00 |
| ATOM | 4538 | OD2  | ASP | X | 300 | 26.953 | 43.710 | 58.593 | 0.00 | 0.00 |
| ATOM | 4539 | C    | ASP | X | 300 | 25.842 | 40.600 | 59.915 | 0.00 | 0.00 |
| ATOM | 4540 | O    | ASP | X | 300 | 25.387 | 41.053 | 60.952 | 0.00 | 0.00 |
| ATOM | 4541 | N    | GLY | X | 301 | 25.011 | 40.202 | 58.880 | 0.00 | 0.00 |
| ATOM | 4542 | H    | GLY | X | 301 | 25.423 | 39.690 | 58.112 | 0.00 | 0.00 |
| ATOM | 4543 | CA   | GLY | X | 301 | 23.537 | 40.200 | 59.052 | 0.00 | 0.00 |
| ATOM | 4544 | HA2  | GLY | X | 301 | 23.152 | 39.369 | 58.527 | 0.00 | 0.00 |
| ATOM | 4545 | HA3  | GLY | X | 301 | 23.328 | 40.035 | 60.175 | 0.00 | 0.00 |
| ATOM | 4546 | C    | GLY | X | 301 | 22.853 | 41.496 | 58.676 | 0.00 | 0.00 |
| ATOM | 4547 | O    | GLY | X | 301 | 21.672 | 41.399 | 58.291 | 0.00 | 0.00 |
| ATOM | 4548 | N    | ASP | X | 302 | 23.564 | 42.653 | 58.619 | 0.00 | 0.00 |
| ATOM | 4549 | H    | ASP | X | 302 | 24.549 | 42.505 | 58.785 | 0.00 | 0.00 |
| ATOM | 4550 | CA   | ASP | X | 302 | 23.070 | 43.992 | 58.212 | 0.00 | 0.00 |
| ATOM | 4551 | HA   | ASP | X | 302 | 21.984 | 43.939 | 58.123 | 0.00 | 0.00 |
| ATOM | 4552 | CB   | ASP | X | 302 | 23.431 | 45.063 | 59.163 | 0.00 | 0.00 |
| ATOM | 4553 | HB2  | ASP | X | 302 | 23.026 | 44.899 | 60.162 | 0.00 | 0.00 |
| ATOM | 4554 | HB3  | ASP | X | 302 | 24.499 | 45.065 | 59.379 | 0.00 | 0.00 |
| ATOM | 4555 | CG   | ASP | X | 302 | 23.046 | 46.476 | 58.673 | 0.00 | 0.00 |
| ATOM | 4556 | OD1  | ASP | X | 302 | 24.006 | 47.195 | 58.469 | 0.00 | 0.00 |
| ATOM | 4557 | OD2  | ASP | X | 302 | 21.851 | 46.880 | 58.719 | 0.00 | 0.00 |
| ATOM | 4558 | C    | ASP | X | 302 | 23.658 | 44.304 | 56.762 | 0.00 | 0.00 |
| ATOM | 4559 | O    | ASP | X | 302 | 22.907 | 44.795 | 55.880 | 0.00 | 0.00 |
| ATOM | 4560 | N    | PHE | X | 303 | 24.825 | 43.791 | 56.379 | 0.00 | 0.00 |
| ATOM | 4561 | H    | PHE | X | 303 | 25.491 | 43.461 | 57.062 | 0.00 | 0.00 |
| ATOM | 4562 | CA   | PHE | X | 303 | 25.189 | 43.732 | 54.948 | 0.00 | 0.00 |
| ATOM | 4563 | HA   | PHE | X | 303 | 24.706 | 44.540 | 54.398 | 0.00 | 0.00 |
| ATOM | 4564 | CB   | PHE | X | 303 | 26.704 | 43.932 | 54.922 | 0.00 | 0.00 |
| ATOM | 4565 | HB2  | PHE | X | 303 | 27.156 | 44.424 | 55.783 | 0.00 | 0.00 |
| ATOM | 4566 | HB3  | PHE | X | 303 | 27.214 | 42.969 | 54.898 | 0.00 | 0.00 |
| ATOM | 4567 | CG   | PHE | X | 303 | 27.153 | 44.857 | 53.765 | 0.00 | 0.00 |
| ATOM | 4568 | CD1  | PHE | X | 303 | 27.233 | 44.409 | 52.446 | 0.00 | 0.00 |
| ATOM | 4569 | HD1  | PHE | X | 303 | 26.977 | 43.379 | 52.249 | 0.00 | 0.00 |
| ATOM | 4570 | CE1  | PHE | X | 303 | 27.713 | 45.237 | 51.415 | 0.00 | 0.00 |
| ATOM | 4571 | HE1  | PHE | X | 303 | 27.855 | 44.912 | 50.395 | 0.00 | 0.00 |
| ATOM | 4572 | CZ   | PHE | X | 303 | 28.072 | 46.553 | 51.716 | 0.00 | 0.00 |
| ATOM | 4573 | HZ   | PHE | X | 303 | 28.487 | 47.219 | 50.974 | 0.00 | 0.00 |
| ATOM | 4574 | CE2  | PHE | X | 303 | 27.980 | 47.016 | 53.051 | 0.00 | 0.00 |
| ATOM | 4575 | HE2  | PHE | X | 303 | 28.163 | 48.037 | 53.352 | 0.00 | 0.00 |
| ATOM | 4576 | CD2  | PHE | X | 303 | 27.470 | 46.201 | 54.063 | 0.00 | 0.00 |
| ATOM | 4577 | HD2  | PHE | X | 303 | 27.518 | 46.605 | 55.063 | 0.00 | 0.00 |
| ATOM | 4578 | C    | PHE | X | 303 | 24.848 | 42.428 | 54.239 | 0.00 | 0.00 |
| ATOM | 4579 | O    | PHE | X | 303 | 24.329 | 42.492 | 53.106 | 0.00 | 0.00 |
| ATOM | 4580 | N    | LEU | X | 304 | 25.016 | 41.261 | 54.847 | 0.00 | 0.00 |
| ATOM | 4581 | H    | LEU | X | 304 | 25.192 | 41.250 | 55.841 | 0.00 | 0.00 |
| ATOM | 4582 | CA   | LEU | X | 304 | 24.789 | 39.882 | 54.119 | 0.00 | 0.00 |
| ATOM | 4583 | HA   | LEU | X | 304 | 24.292 | 40.028 | 53.159 | 0.00 | 0.00 |
| ATOM | 4584 | CB   | LEU | X | 304 | 26.148 | 39.098 | 54.050 | 0.00 | 0.00 |
| ATOM | 4585 | HB2  | LEU | X | 304 | 26.436 | 39.072 | 55.101 | 0.00 | 0.00 |
| ATOM | 4586 | HB3  | LEU | X | 304 | 25.973 | 38.152 | 53.538 | 0.00 | 0.00 |
| ATOM | 4587 | CG   | LEU | X | 304 | 27.222 | 39.890 | 53.281 | 0.00 | 0.00 |
| ATOM | 4588 | HG   | LEU | X | 304 | 27.298 | 40.896 | 53.693 | 0.00 | 0.00 |
| ATOM | 4589 | CD1  | LEU | X | 304 | 28.532 | 39.198 | 53.326 | 0.00 | 0.00 |

|      |      |      |     |   |     |        |        |        |      |      |
|------|------|------|-----|---|-----|--------|--------|--------|------|------|
| ATOM | 4590 | HD11 | LEU | X | 304 | 29.294 | 39.785 | 52.814 | 0.00 | 0.00 |
| ATOM | 4591 | HD12 | LEU | X | 304 | 28.897 | 39.038 | 54.341 | 0.00 | 0.00 |
| ATOM | 4592 | HD13 | LEU | X | 304 | 28.498 | 38.202 | 52.886 | 0.00 | 0.00 |
| ATOM | 4593 | CD2  | LEU | X | 304 | 26.907 | 40.042 | 51.792 | 0.00 | 0.00 |
| ATOM | 4594 | HD21 | LEU | X | 304 | 26.762 | 39.010 | 51.472 | 0.00 | 0.00 |
| ATOM | 4595 | HD22 | LEU | X | 304 | 25.959 | 40.536 | 51.577 | 0.00 | 0.00 |
| ATOM | 4596 | HD23 | LEU | X | 304 | 27.687 | 40.598 | 51.272 | 0.00 | 0.00 |
| ATOM | 4597 | C    | LEU | X | 304 | 23.945 | 39.082 | 55.055 | 0.00 | 0.00 |
| ATOM | 4598 | O    | LEU | X | 304 | 24.189 | 39.030 | 56.271 | 0.00 | 0.00 |
| ATOM | 4599 | N    | SER | X | 305 | 22.795 | 38.539 | 54.646 | 0.00 | 0.00 |
| ATOM | 4600 | H    | SER | X | 305 | 22.597 | 38.478 | 53.658 | 0.00 | 0.00 |
| ATOM | 4601 | CA   | SER | X | 305 | 21.887 | 37.807 | 55.603 | 0.00 | 0.00 |
| ATOM | 4602 | HA   | SER | X | 305 | 21.728 | 38.296 | 56.564 | 0.00 | 0.00 |
| ATOM | 4603 | CB   | SER | X | 305 | 20.484 | 37.699 | 54.935 | 0.00 | 0.00 |
| ATOM | 4604 | HB2  | SER | X | 305 | 20.568 | 37.143 | 54.001 | 0.00 | 0.00 |
| ATOM | 4605 | HB3  | SER | X | 305 | 19.744 | 37.198 | 55.559 | 0.00 | 0.00 |
| ATOM | 4606 | OG   | SER | X | 305 | 20.061 | 39.042 | 54.792 | 0.00 | 0.00 |
| ATOM | 4607 | HG   | SER | X | 305 | 19.305 | 39.144 | 54.209 | 0.00 | 0.00 |
| ATOM | 4608 | C    | SER | X | 305 | 22.403 | 36.450 | 55.970 | 0.00 | 0.00 |
| ATOM | 4609 | O    | SER | X | 305 | 21.703 | 35.766 | 56.713 | 0.00 | 0.00 |
| ATOM | 4610 | N    | ASP | X | 306 | 23.516 | 36.006 | 55.276 | 0.00 | 0.00 |
| ATOM | 4611 | H    | ASP | X | 306 | 24.063 | 36.698 | 54.785 | 0.00 | 0.00 |
| ATOM | 4612 | CA   | ASP | X | 306 | 24.048 | 34.622 | 55.242 | 0.00 | 0.00 |
| ATOM | 4613 | HA   | ASP | X | 306 | 24.233 | 34.321 | 56.273 | 0.00 | 0.00 |
| ATOM | 4614 | CB   | ASP | X | 306 | 23.017 | 33.594 | 54.673 | 0.00 | 0.00 |
| ATOM | 4615 | HB2  | ASP | X | 306 | 21.996 | 33.931 | 54.857 | 0.00 | 0.00 |
| ATOM | 4616 | HB3  | ASP | X | 306 | 23.258 | 33.625 | 53.611 | 0.00 | 0.00 |
| ATOM | 4617 | CG   | ASP | X | 306 | 23.295 | 32.145 | 55.156 | 0.00 | 0.00 |
| ATOM | 4618 | OD1  | ASP | X | 306 | 22.604 | 31.249 | 54.667 | 0.00 | 0.00 |
| ATOM | 4619 | OD2  | ASP | X | 306 | 24.110 | 31.903 | 56.060 | 0.00 | 0.00 |
| ATOM | 4620 | C    | ASP | X | 306 | 25.400 | 34.560 | 54.510 | 0.00 | 0.00 |
| ATOM | 4621 | O    | ASP | X | 306 | 25.878 | 35.579 | 53.953 | 0.00 | 0.00 |
| ATOM | 4622 | N    | THR | X | 307 | 25.998 | 33.409 | 54.252 | 0.00 | 0.00 |
| ATOM | 4623 | H    | THR | X | 307 | 25.618 | 32.597 | 54.716 | 0.00 | 0.00 |
| ATOM | 4624 | CA   | THR | X | 307 | 27.081 | 33.175 | 53.263 | 0.00 | 0.00 |
| ATOM | 4625 | HA   | THR | X | 307 | 27.988 | 33.653 | 53.633 | 0.00 | 0.00 |
| ATOM | 4626 | CB   | THR | X | 307 | 27.529 | 31.684 | 53.408 | 0.00 | 0.00 |
| ATOM | 4627 | HB   | THR | X | 307 | 28.109 | 31.381 | 52.537 | 0.00 | 0.00 |
| ATOM | 4628 | CG2  | THR | X | 307 | 28.391 | 31.453 | 54.688 | 0.00 | 0.00 |
| ATOM | 4629 | HG21 | THR | X | 307 | 27.970 | 31.869 | 55.603 | 0.00 | 0.00 |
| ATOM | 4630 | HG22 | THR | X | 307 | 28.432 | 30.370 | 54.798 | 0.00 | 0.00 |
| ATOM | 4631 | HG23 | THR | X | 307 | 29.383 | 31.887 | 54.556 | 0.00 | 0.00 |
| ATOM | 4632 | OG1  | THR | X | 307 | 26.398 | 30.922 | 53.353 | 0.00 | 0.00 |
| ATOM | 4633 | HG1  | THR | X | 307 | 25.979 | 31.170 | 52.526 | 0.00 | 0.00 |
| ATOM | 4634 | C    | THR | X | 307 | 26.874 | 33.589 | 51.864 | 0.00 | 0.00 |
| ATOM | 4635 | O    | THR | X | 307 | 25.813 | 33.199 | 51.352 | 0.00 | 0.00 |
| ATOM | 4636 | N    | PRO | X | 308 | 27.765 | 34.262 | 51.129 | 0.00 | 0.00 |
| ATOM | 4637 | CD   | PRO | X | 308 | 28.828 | 35.161 | 51.704 | 0.00 | 0.00 |
| ATOM | 4638 | HD2  | PRO | X | 308 | 29.627 | 34.483 | 52.004 | 0.00 | 0.00 |
| ATOM | 4639 | HD3  | PRO | X | 308 | 28.446 | 35.687 | 52.578 | 0.00 | 0.00 |
| ATOM | 4640 | CG   | PRO | X | 308 | 29.261 | 35.974 | 50.483 | 0.00 | 0.00 |
| ATOM | 4641 | HG2  | PRO | X | 308 | 30.262 | 36.399 | 50.555 | 0.00 | 0.00 |
| ATOM | 4642 | HG3  | PRO | X | 308 | 28.521 | 36.757 | 50.316 | 0.00 | 0.00 |
| ATOM | 4643 | CB   | PRO | X | 308 | 29.186 | 34.978 | 49.325 | 0.00 | 0.00 |
| ATOM | 4644 | HB2  | PRO | X | 308 | 29.992 | 34.246 | 49.292 | 0.00 | 0.00 |
| ATOM | 4645 | HB3  | PRO | X | 308 | 29.034 | 35.346 | 48.310 | 0.00 | 0.00 |
| ATOM | 4646 | CA   | PRO | X | 308 | 27.770 | 34.370 | 49.673 | 0.00 | 0.00 |
| ATOM | 4647 | HA   | PRO | X | 308 | 26.945 | 35.076 | 49.575 | 0.00 | 0.00 |
| ATOM | 4648 | C    | PRO | X | 308 | 27.400 | 33.030 | 49.037 | 0.00 | 0.00 |
| ATOM | 4649 | O    | PRO | X | 308 | 26.428 | 33.060 | 48.301 | 0.00 | 0.00 |
| ATOM | 4650 | N    | GLU | X | 309 | 28.005 | 31.889 | 49.381 | 0.00 | 0.00 |
| ATOM | 4651 | H    | GLU | X | 309 | 28.673 | 31.930 | 50.137 | 0.00 | 0.00 |
| ATOM | 4652 | CA   | GLU | X | 309 | 27.773 | 30.585 | 48.749 | 0.00 | 0.00 |
| ATOM | 4653 | HA   | GLU | X | 309 | 28.024 | 30.735 | 47.699 | 0.00 | 0.00 |
| ATOM | 4654 | CB   | GLU | X | 309 | 28.701 | 29.564 | 49.379 | 0.00 | 0.00 |
| ATOM | 4655 | HB2  | GLU | X | 309 | 29.738 | 29.783 | 49.122 | 0.00 | 0.00 |
| ATOM | 4656 | HB3  | GLU | X | 309 | 28.589 | 29.509 | 50.462 | 0.00 | 0.00 |
| ATOM | 4657 | CG   | GLU | X | 309 | 28.571 | 28.136 | 48.783 | 0.00 | 0.00 |
| ATOM | 4658 | HG2  | GLU | X | 309 | 27.555 | 27.766 | 48.916 | 0.00 | 0.00 |
| ATOM | 4659 | HG3  | GLU | X | 309 | 28.767 | 28.118 | 47.710 | 0.00 | 0.00 |

|      |      |      |     |   |     |        |        |        |      |      |
|------|------|------|-----|---|-----|--------|--------|--------|------|------|
| ATOM | 4660 | CD   | GLU | X | 309 | 29.561 | 27.231 | 49.549 | 0.00 | 0.00 |
| ATOM | 4661 | OE1  | GLU | X | 309 | 29.231 | 26.765 | 50.679 | 0.00 | 0.00 |
| ATOM | 4662 | OE2  | GLU | X | 309 | 30.674 | 27.052 | 48.998 | 0.00 | 0.00 |
| ATOM | 4663 | C    | GLU | X | 309 | 26.344 | 30.062 | 48.857 | 0.00 | 0.00 |
| ATOM | 4664 | O    | GLU | X | 309 | 25.887 | 29.434 | 47.938 | 0.00 | 0.00 |
| ATOM | 4665 | N    | ALA | X | 310 | 25.603 | 30.482 | 49.879 | 0.00 | 0.00 |
| ATOM | 4666 | H    | ALA | X | 310 | 25.947 | 31.225 | 50.471 | 0.00 | 0.00 |
| ATOM | 4667 | CA   | ALA | X | 310 | 24.121 | 30.401 | 49.958 | 0.00 | 0.00 |
| ATOM | 4668 | HA   | ALA | X | 310 | 23.846 | 29.460 | 49.481 | 0.00 | 0.00 |
| ATOM | 4669 | CB   | ALA | X | 310 | 23.838 | 30.524 | 51.499 | 0.00 | 0.00 |
| ATOM | 4670 | HB1  | ALA | X | 310 | 22.757 | 30.403 | 51.575 | 0.00 | 0.00 |
| ATOM | 4671 | HB2  | ALA | X | 310 | 24.244 | 29.661 | 52.025 | 0.00 | 0.00 |
| ATOM | 4672 | HB3  | ALA | X | 310 | 24.169 | 31.431 | 52.005 | 0.00 | 0.00 |
| ATOM | 4673 | C    | ALA | X | 310 | 23.442 | 31.536 | 49.189 | 0.00 | 0.00 |
| ATOM | 4674 | O    | ALA | X | 310 | 22.638 | 31.294 | 48.315 | 0.00 | 0.00 |
| ATOM | 4675 | N    | LEU | X | 311 | 23.681 | 32.797 | 49.519 | 0.00 | 0.00 |
| ATOM | 4676 | H    | LEU | X | 311 | 24.439 | 33.001 | 50.154 | 0.00 | 0.00 |
| ATOM | 4677 | CA   | LEU | X | 311 | 23.031 | 33.942 | 48.810 | 0.00 | 0.00 |
| ATOM | 4678 | HA   | LEU | X | 311 | 21.958 | 33.953 | 49.001 | 0.00 | 0.00 |
| ATOM | 4679 | CB   | LEU | X | 311 | 23.555 | 35.231 | 49.445 | 0.00 | 0.00 |
| ATOM | 4680 | HB2  | LEU | X | 311 | 24.638 | 35.156 | 49.350 | 0.00 | 0.00 |
| ATOM | 4681 | HB3  | LEU | X | 311 | 23.140 | 36.032 | 48.834 | 0.00 | 0.00 |
| ATOM | 4682 | CG   | LEU | X | 311 | 23.244 | 35.593 | 50.885 | 0.00 | 0.00 |
| ATOM | 4683 | HG   | LEU | X | 311 | 23.845 | 34.855 | 51.416 | 0.00 | 0.00 |
| ATOM | 4684 | CD1  | LEU | X | 311 | 23.957 | 36.864 | 51.223 | 0.00 | 0.00 |
| ATOM | 4685 | HD11 | LEU | X | 311 | 23.548 | 37.379 | 52.093 | 0.00 | 0.00 |
| ATOM | 4686 | HD12 | LEU | X | 311 | 25.035 | 36.787 | 51.368 | 0.00 | 0.00 |
| ATOM | 4687 | HD13 | LEU | X | 311 | 23.901 | 37.588 | 50.410 | 0.00 | 0.00 |
| ATOM | 4688 | CD2  | LEU | X | 311 | 21.782 | 35.617 | 51.304 | 0.00 | 0.00 |
| ATOM | 4689 | HD21 | LEU | X | 311 | 21.266 | 36.281 | 50.611 | 0.00 | 0.00 |
| ATOM | 4690 | HD22 | LEU | X | 311 | 21.399 | 34.605 | 51.173 | 0.00 | 0.00 |
| ATOM | 4691 | HD23 | LEU | X | 311 | 21.766 | 36.042 | 52.307 | 0.00 | 0.00 |
| ATOM | 4692 | C    | LEU | X | 311 | 23.120 | 33.967 | 47.284 | 0.00 | 0.00 |
| ATOM | 4693 | O    | LEU | X | 311 | 22.193 | 34.504 | 46.680 | 0.00 | 0.00 |
| ATOM | 4694 | N    | ILE | X | 312 | 24.114 | 33.400 | 46.559 | 0.00 | 0.00 |
| ATOM | 4695 | H    | ILE | X | 312 | 24.831 | 32.968 | 47.124 | 0.00 | 0.00 |
| ATOM | 4696 | CA   | ILE | X | 312 | 24.129 | 33.394 | 45.026 | 0.00 | 0.00 |
| ATOM | 4697 | HA   | ILE | X | 312 | 23.965 | 34.424 | 44.709 | 0.00 | 0.00 |
| ATOM | 4698 | CB   | ILE | X | 312 | 25.568 | 32.946 | 44.530 | 0.00 | 0.00 |
| ATOM | 4699 | HB   | ILE | X | 312 | 25.500 | 32.865 | 43.445 | 0.00 | 0.00 |
| ATOM | 4700 | CG2  | ILE | X | 312 | 26.552 | 34.062 | 44.819 | 0.00 | 0.00 |
| ATOM | 4701 | HG21 | ILE | X | 312 | 26.393 | 34.895 | 44.135 | 0.00 | 0.00 |
| ATOM | 4702 | HG22 | ILE | X | 312 | 26.479 | 34.402 | 45.852 | 0.00 | 0.00 |
| ATOM | 4703 | HG23 | ILE | X | 312 | 27.604 | 33.788 | 44.745 | 0.00 | 0.00 |
| ATOM | 4704 | CG1  | ILE | X | 312 | 26.038 | 31.608 | 45.100 | 0.00 | 0.00 |
| ATOM | 4705 | HG12 | ILE | X | 312 | 26.546 | 31.746 | 46.054 | 0.00 | 0.00 |
| ATOM | 4706 | HG13 | ILE | X | 312 | 25.240 | 30.888 | 45.284 | 0.00 | 0.00 |
| ATOM | 4707 | CD1  | ILE | X | 312 | 27.105 | 30.938 | 44.282 | 0.00 | 0.00 |
| ATOM | 4708 | HD11 | ILE | X | 312 | 27.906 | 31.666 | 44.158 | 0.00 | 0.00 |
| ATOM | 4709 | HD12 | ILE | X | 312 | 27.461 | 30.119 | 44.907 | 0.00 | 0.00 |
| ATOM | 4710 | HD13 | ILE | X | 312 | 26.707 | 30.638 | 43.312 | 0.00 | 0.00 |
| ATOM | 4711 | C    | ILE | X | 312 | 23.071 | 32.514 | 44.361 | 0.00 | 0.00 |
| ATOM | 4712 | O    | ILE | X | 312 | 22.831 | 32.791 | 43.165 | 0.00 | 0.00 |
| ATOM | 4713 | N    | ASN | X | 313 | 22.527 | 31.519 | 44.944 | 0.00 | 0.00 |
| ATOM | 4714 | H    | ASN | X | 313 | 22.662 | 31.408 | 45.939 | 0.00 | 0.00 |
| ATOM | 4715 | CA   | ASN | X | 313 | 21.384 | 30.663 | 44.472 | 0.00 | 0.00 |
| ATOM | 4716 | HA   | ASN | X | 313 | 21.406 | 30.692 | 43.382 | 0.00 | 0.00 |
| ATOM | 4717 | CB   | ASN | X | 313 | 21.762 | 29.217 | 44.914 | 0.00 | 0.00 |
| ATOM | 4718 | HB2  | ASN | X | 313 | 22.806 | 28.956 | 44.739 | 0.00 | 0.00 |
| ATOM | 4719 | HB3  | ASN | X | 313 | 21.623 | 29.144 | 45.993 | 0.00 | 0.00 |
| ATOM | 4720 | CG   | ASN | X | 313 | 20.781 | 28.179 | 44.288 | 0.00 | 0.00 |
| ATOM | 4721 | OD1  | ASN | X | 313 | 20.358 | 28.225 | 43.143 | 0.00 | 0.00 |
| ATOM | 4722 | ND2  | ASN | X | 313 | 20.678 | 27.020 | 44.940 | 0.00 | 0.00 |
| ATOM | 4723 | HD21 | ASN | X | 313 | 20.179 | 26.278 | 44.471 | 0.00 | 0.00 |
| ATOM | 4724 | HD22 | ASN | X | 313 | 21.079 | 26.933 | 45.863 | 0.00 | 0.00 |
| ATOM | 4725 | C    | ASN | X | 313 | 19.997 | 31.178 | 44.857 | 0.00 | 0.00 |
| ATOM | 4726 | O    | ASN | X | 313 | 18.937 | 30.761 | 44.290 | 0.00 | 0.00 |
| ATOM | 4727 | N    | ALA | X | 314 | 19.944 | 31.938 | 46.020 | 0.00 | 0.00 |
| ATOM | 4728 | H    | ALA | X | 314 | 20.842 | 32.072 | 46.460 | 0.00 | 0.00 |
| ATOM | 4729 | CA   | ALA | X | 314 | 18.682 | 32.362 | 46.666 | 0.00 | 0.00 |



|      |      |     |     |   |     |        |        |        |      |      |
|------|------|-----|-----|---|-----|--------|--------|--------|------|------|
| ATOM | 4730 | HA  | ALA | X | 314 | 17.905 | 31.629 | 46.448 | 0.00 | 0.00 |
| ATOM | 4731 | CB  | ALA | X | 314 | 18.882 | 32.398 | 48.193 | 0.00 | 0.00 |
| ATOM | 4732 | HB1 | ALA | X | 314 | 17.917 | 32.691 | 48.608 | 0.00 | 0.00 |
| ATOM | 4733 | HB2 | ALA | X | 314 | 19.168 | 31.397 | 48.517 | 0.00 | 0.00 |
| ATOM | 4734 | HB3 | ALA | X | 314 | 19.679 | 33.109 | 48.411 | 0.00 | 0.00 |
| ATOM | 4735 | C   | ALA | X | 314 | 18.170 | 33.660 | 46.064 | 0.00 | 0.00 |
| ATOM | 4736 | O   | ALA | X | 314 | 17.030 | 34.054 | 46.351 | 0.00 | 0.00 |
| ATOM | 4737 | N   | GLY | X | 315 | 19.003 | 34.386 | 45.352 | 0.00 | 0.00 |
| ATOM | 4738 | H   | GLY | X | 315 | 19.766 | 33.931 | 44.871 | 0.00 | 0.00 |
| ATOM | 4739 | CA  | GLY | X | 315 | 18.701 | 35.830 | 45.007 | 0.00 | 0.00 |
| ATOM | 4740 | HA2 | GLY | X | 315 | 17.794 | 36.114 | 45.557 | 0.00 | 0.00 |
| ATOM | 4741 | HA3 | GLY | X | 315 | 19.436 | 36.493 | 45.484 | 0.00 | 0.00 |
| ATOM | 4742 | C   | GLY | X | 315 | 18.477 | 36.177 | 43.499 | 0.00 | 0.00 |
| ATOM | 4743 | O   | GLY | X | 315 | 18.605 | 35.314 | 42.629 | 0.00 | 0.00 |
| ATOM | 4744 | N   | ASP | X | 316 | 17.912 | 37.364 | 43.326 | 0.00 | 0.00 |
| ATOM | 4745 | H   | ASP | X | 316 | 17.642 | 37.926 | 44.121 | 0.00 | 0.00 |
| ATOM | 4746 | CA  | ASP | X | 316 | 17.165 | 37.710 | 42.130 | 0.00 | 0.00 |
| ATOM | 4747 | HA  | ASP | X | 316 | 16.907 | 36.766 | 41.649 | 0.00 | 0.00 |
| ATOM | 4748 | CB  | ASP | X | 316 | 15.765 | 38.228 | 42.560 | 0.00 | 0.00 |
| ATOM | 4749 | HB2 | ASP | X | 316 | 15.319 | 37.450 | 43.180 | 0.00 | 0.00 |
| ATOM | 4750 | HB3 | ASP | X | 316 | 15.984 | 39.125 | 43.140 | 0.00 | 0.00 |
| ATOM | 4751 | CG  | ASP | X | 316 | 14.787 | 38.503 | 41.450 | 0.00 | 0.00 |
| ATOM | 4752 | OD1 | ASP | X | 316 | 13.910 | 39.309 | 41.740 | 0.00 | 0.00 |
| ATOM | 4753 | OD2 | ASP | X | 316 | 14.914 | 37.813 | 40.441 | 0.00 | 0.00 |
| ATOM | 4754 | C   | ASP | X | 316 | 17.916 | 38.712 | 41.301 | 0.00 | 0.00 |
| ATOM | 4755 | O   | ASP | X | 316 | 17.981 | 39.853 | 41.665 | 0.00 | 0.00 |
| ATOM | 4756 | N   | PHE | X | 317 | 18.529 | 38.214 | 40.251 | 0.00 | 0.00 |
| ATOM | 4757 | H   | PHE | X | 317 | 18.530 | 37.214 | 40.115 | 0.00 | 0.00 |
| ATOM | 4758 | CA  | PHE | X | 317 | 19.366 | 38.974 | 39.333 | 0.00 | 0.00 |
| ATOM | 4759 | HA  | PHE | X | 317 | 19.424 | 39.990 | 39.723 | 0.00 | 0.00 |
| ATOM | 4760 | CB  | PHE | X | 317 | 20.742 | 38.319 | 39.363 | 0.00 | 0.00 |
| ATOM | 4761 | HB2 | PHE | X | 317 | 20.746 | 37.527 | 38.615 | 0.00 | 0.00 |
| ATOM | 4762 | HB3 | PHE | X | 317 | 21.448 | 39.029 | 38.931 | 0.00 | 0.00 |
| ATOM | 4763 | CG  | PHE | X | 317 | 21.324 | 37.911 | 40.692 | 0.00 | 0.00 |
| ATOM | 4764 | CD1 | PHE | X | 317 | 21.863 | 38.911 | 41.564 | 0.00 | 0.00 |
| ATOM | 4765 | HD1 | PHE | X | 317 | 21.977 | 39.886 | 41.112 | 0.00 | 0.00 |
| ATOM | 4766 | CE1 | PHE | X | 317 | 22.446 | 38.593 | 42.739 | 0.00 | 0.00 |
| ATOM | 4767 | HE1 | PHE | X | 317 | 22.943 | 39.333 | 43.349 | 0.00 | 0.00 |
| ATOM | 4768 | CZ  | PHE | X | 317 | 22.244 | 37.275 | 43.295 | 0.00 | 0.00 |
| ATOM | 4769 | HZ  | PHE | X | 317 | 22.408 | 36.941 | 44.309 | 0.00 | 0.00 |
| ATOM | 4770 | CE2 | PHE | X | 317 | 21.763 | 36.244 | 42.400 | 0.00 | 0.00 |
| ATOM | 4771 | HE2 | PHE | X | 317 | 21.868 | 35.216 | 42.716 | 0.00 | 0.00 |
| ATOM | 4772 | CD2 | PHE | X | 317 | 21.218 | 36.581 | 41.164 | 0.00 | 0.00 |
| ATOM | 4773 | HD2 | PHE | X | 317 | 20.751 | 35.838 | 40.534 | 0.00 | 0.00 |
| ATOM | 4774 | C   | PHE | X | 317 | 18.760 | 39.047 | 37.911 | 0.00 | 0.00 |
| ATOM | 4775 | O   | PHE | X | 317 | 19.517 | 39.217 | 36.969 | 0.00 | 0.00 |
| ATOM | 4776 | N   | HIE | X | 318 | 17.452 | 38.781 | 37.718 | 0.00 | 0.00 |
| ATOM | 4777 | H   | HIE | X | 318 | 16.922 | 38.382 | 38.479 | 0.00 | 0.00 |
| ATOM | 4778 | CA  | HIE | X | 318 | 16.780 | 38.624 | 36.425 | 0.00 | 0.00 |
| ATOM | 4779 | HA  | HIE | X | 318 | 17.150 | 37.742 | 35.902 | 0.00 | 0.00 |
| ATOM | 4780 | CB  | HIE | X | 318 | 15.293 | 38.399 | 36.748 | 0.00 | 0.00 |
| ATOM | 4781 | HB2 | HIE | X | 318 | 15.334 | 37.582 | 37.468 | 0.00 | 0.00 |
| ATOM | 4782 | HB3 | HIE | X | 318 | 14.942 | 39.288 | 37.272 | 0.00 | 0.00 |
| ATOM | 4783 | CG  | HIE | X | 318 | 14.374 | 37.998 | 35.593 | 0.00 | 0.00 |
| ATOM | 4784 | ND1 | HIE | X | 318 | 14.736 | 38.320 | 34.259 | 0.00 | 0.00 |
| ATOM | 4785 | CE1 | HIE | X | 318 | 13.660 | 37.976 | 33.580 | 0.00 | 0.00 |
| ATOM | 4786 | HE1 | HIE | X | 318 | 13.574 | 38.060 | 32.506 | 0.00 | 0.00 |
| ATOM | 4787 | NE2 | HIE | X | 318 | 12.678 | 37.347 | 34.335 | 0.00 | 0.00 |
| ATOM | 4788 | HE2 | HIE | X | 318 | 11.748 | 37.121 | 34.013 | 0.00 | 0.00 |
| ATOM | 4789 | CD2 | HIE | X | 318 | 13.171 | 37.323 | 35.666 | 0.00 | 0.00 |
| ATOM | 4790 | HD2 | HIE | X | 318 | 12.702 | 37.035 | 36.595 | 0.00 | 0.00 |
| ATOM | 4791 | C   | HIE | X | 318 | 17.024 | 39.858 | 35.521 | 0.00 | 0.00 |
| ATOM | 4792 | O   | HIE | X | 318 | 16.494 | 40.940 | 35.793 | 0.00 | 0.00 |
| ATOM | 4793 | N   | GLY | X | 319 | 17.793 | 39.689 | 34.422 | 0.00 | 0.00 |
| ATOM | 4794 | H   | GLY | X | 319 | 18.070 | 38.778 | 34.086 | 0.00 | 0.00 |
| ATOM | 4795 | CA  | GLY | X | 319 | 18.044 | 40.853 | 33.524 | 0.00 | 0.00 |
| ATOM | 4796 | HA2 | GLY | X | 319 | 18.430 | 40.373 | 32.596 | 0.00 | 0.00 |
| ATOM | 4797 | HA3 | GLY | X | 319 | 17.072 | 41.377 | 33.242 | 0.00 | 0.00 |
| ATOM | 4798 | C   | GLY | X | 319 | 19.157 | 41.821 | 34.034 | 0.00 | 0.00 |
| ATOM | 4799 | O   | GLY | X | 319 | 19.642 | 42.677 | 33.274 | 0.00 | 0.00 |

|      |      |      |     |   |     |        |        |        |      |      |
|------|------|------|-----|---|-----|--------|--------|--------|------|------|
| ATOM | 4800 | N    | LEU | X | 320 | 19.714 | 41.576 | 35.233 | 0.00 | 0.00 |
| ATOM | 4801 | H    | LEU | X | 320 | 19.473 | 40.795 | 35.826 | 0.00 | 0.00 |
| ATOM | 4802 | CA   | LEU | X | 320 | 20.945 | 42.332 | 35.664 | 0.00 | 0.00 |
| ATOM | 4803 | HA   | LEU | X | 320 | 20.730 | 43.348 | 35.333 | 0.00 | 0.00 |
| ATOM | 4804 | CB   | LEU | X | 320 | 21.320 | 42.251 | 37.208 | 0.00 | 0.00 |
| ATOM | 4805 | HB2  | LEU | X | 320 | 21.159 | 41.201 | 37.452 | 0.00 | 0.00 |
| ATOM | 4806 | HB3  | LEU | X | 320 | 22.369 | 42.528 | 37.320 | 0.00 | 0.00 |
| ATOM | 4807 | CG   | LEU | X | 320 | 20.337 | 42.997 | 38.135 | 0.00 | 0.00 |
| ATOM | 4808 | HG   | LEU | X | 320 | 20.401 | 44.066 | 37.933 | 0.00 | 0.00 |
| ATOM | 4809 | CD1  | LEU | X | 320 | 18.849 | 42.736 | 37.911 | 0.00 | 0.00 |
| ATOM | 4810 | HD11 | LEU | X | 320 | 18.439 | 43.125 | 38.843 | 0.00 | 0.00 |
| ATOM | 4811 | HD12 | LEU | X | 320 | 18.504 | 43.288 | 37.036 | 0.00 | 0.00 |
| ATOM | 4812 | HD13 | LEU | X | 320 | 18.620 | 41.675 | 37.816 | 0.00 | 0.00 |
| ATOM | 4813 | CD2  | LEU | X | 320 | 20.802 | 42.839 | 39.609 | 0.00 | 0.00 |
| ATOM | 4814 | HD21 | LEU | X | 320 | 20.486 | 43.598 | 40.324 | 0.00 | 0.00 |
| ATOM | 4815 | HD22 | LEU | X | 320 | 20.339 | 41.902 | 39.919 | 0.00 | 0.00 |
| ATOM | 4816 | HD23 | LEU | X | 320 | 21.892 | 42.822 | 39.592 | 0.00 | 0.00 |
| ATOM | 4817 | C    | LEU | X | 320 | 22.190 | 41.881 | 34.838 | 0.00 | 0.00 |
| ATOM | 4818 | O    | LEU | X | 320 | 22.260 | 40.720 | 34.409 | 0.00 | 0.00 |
| ATOM | 4819 | N    | GLN | X | 321 | 23.197 | 42.743 | 34.633 | 0.00 | 0.00 |
| ATOM | 4820 | H    | GLN | X | 321 | 23.042 | 43.658 | 35.031 | 0.00 | 0.00 |
| ATOM | 4821 | CA   | GLN | X | 321 | 24.214 | 42.635 | 33.563 | 0.00 | 0.00 |
| ATOM | 4822 | HA   | GLN | X | 321 | 24.045 | 41.818 | 32.861 | 0.00 | 0.00 |
| ATOM | 4823 | CB   | GLN | X | 321 | 24.304 | 43.949 | 32.795 | 0.00 | 0.00 |
| ATOM | 4824 | HB2  | GLN | X | 321 | 24.335 | 44.759 | 33.523 | 0.00 | 0.00 |
| ATOM | 4825 | HB3  | GLN | X | 321 | 25.220 | 43.963 | 32.204 | 0.00 | 0.00 |
| ATOM | 4826 | CG   | GLN | X | 321 | 23.114 | 44.007 | 31.874 | 0.00 | 0.00 |
| ATOM | 4827 | HG2  | GLN | X | 321 | 23.334 | 43.442 | 30.968 | 0.00 | 0.00 |
| ATOM | 4828 | HG3  | GLN | X | 321 | 22.257 | 43.477 | 32.288 | 0.00 | 0.00 |
| ATOM | 4829 | CD   | GLN | X | 321 | 22.714 | 45.430 | 31.345 | 0.00 | 0.00 |
| ATOM | 4830 | OE1  | GLN | X | 321 | 23.328 | 46.480 | 31.627 | 0.00 | 0.00 |
| ATOM | 4831 | NE2  | GLN | X | 321 | 21.768 | 45.386 | 30.416 | 0.00 | 0.00 |
| ATOM | 4832 | HE21 | GLN | X | 321 | 21.508 | 46.214 | 29.900 | 0.00 | 0.00 |
| ATOM | 4833 | HE22 | GLN | X | 321 | 21.422 | 44.487 | 30.112 | 0.00 | 0.00 |
| ATOM | 4834 | C    | GLN | X | 321 | 25.480 | 42.410 | 34.401 | 0.00 | 0.00 |
| ATOM | 4835 | O    | GLN | X | 321 | 25.928 | 43.398 | 35.014 | 0.00 | 0.00 |
| ATOM | 4836 | N    | VAL | X | 322 | 26.136 | 41.210 | 34.407 | 0.00 | 0.00 |
| ATOM | 4837 | H    | VAL | X | 322 | 25.694 | 40.495 | 33.847 | 0.00 | 0.00 |
| ATOM | 4838 | CA   | VAL | X | 322 | 27.399 | 40.820 | 35.109 | 0.00 | 0.00 |
| ATOM | 4839 | HA   | VAL | X | 322 | 27.913 | 41.704 | 35.489 | 0.00 | 0.00 |
| ATOM | 4840 | CB   | VAL | X | 322 | 27.069 | 39.885 | 36.260 | 0.00 | 0.00 |
| ATOM | 4841 | HB   | VAL | X | 322 | 26.704 | 38.939 | 35.862 | 0.00 | 0.00 |
| ATOM | 4842 | CG1  | VAL | X | 322 | 28.239 | 39.519 | 37.104 | 0.00 | 0.00 |
| ATOM | 4843 | HG11 | VAL | X | 322 | 29.141 | 39.144 | 36.621 | 0.00 | 0.00 |
| ATOM | 4844 | HG12 | VAL | X | 322 | 28.555 | 40.381 | 37.691 | 0.00 | 0.00 |
| ATOM | 4845 | HG13 | VAL | X | 322 | 28.024 | 38.741 | 37.837 | 0.00 | 0.00 |
| ATOM | 4846 | CG2  | VAL | X | 322 | 26.091 | 40.472 | 37.224 | 0.00 | 0.00 |
| ATOM | 4847 | HG21 | VAL | X | 322 | 26.426 | 41.433 | 37.616 | 0.00 | 0.00 |
| ATOM | 4848 | HG22 | VAL | X | 322 | 25.148 | 40.624 | 36.698 | 0.00 | 0.00 |
| ATOM | 4849 | HG23 | VAL | X | 322 | 25.894 | 39.755 | 38.021 | 0.00 | 0.00 |
| ATOM | 4850 | C    | VAL | X | 322 | 28.527 | 40.222 | 34.260 | 0.00 | 0.00 |
| ATOM | 4851 | O    | VAL | X | 322 | 28.173 | 39.620 | 33.235 | 0.00 | 0.00 |
| ATOM | 4852 | N    | LEU | X | 323 | 29.822 | 40.499 | 34.534 | 0.00 | 0.00 |
| ATOM | 4853 | H    | LEU | X | 323 | 29.980 | 41.096 | 35.334 | 0.00 | 0.00 |
| ATOM | 4854 | CA   | LEU | X | 323 | 30.995 | 39.862 | 33.971 | 0.00 | 0.00 |
| ATOM | 4855 | HA   | LEU | X | 323 | 30.865 | 39.214 | 33.105 | 0.00 | 0.00 |
| ATOM | 4856 | CB   | LEU | X | 323 | 31.781 | 41.032 | 33.290 | 0.00 | 0.00 |
| ATOM | 4857 | HB2  | LEU | X | 323 | 31.016 | 41.735 | 32.959 | 0.00 | 0.00 |
| ATOM | 4858 | HB3  | LEU | X | 323 | 32.380 | 41.566 | 34.027 | 0.00 | 0.00 |
| ATOM | 4859 | CG   | LEU | X | 323 | 32.803 | 40.705 | 32.197 | 0.00 | 0.00 |
| ATOM | 4860 | HG   | LEU | X | 323 | 32.447 | 39.832 | 31.650 | 0.00 | 0.00 |
| ATOM | 4861 | CD1  | LEU | X | 323 | 32.837 | 41.864 | 31.193 | 0.00 | 0.00 |
| ATOM | 4862 | HD11 | LEU | X | 323 | 31.873 | 42.189 | 30.801 | 0.00 | 0.00 |
| ATOM | 4863 | HD12 | LEU | X | 323 | 33.407 | 42.779 | 31.349 | 0.00 | 0.00 |
| ATOM | 4864 | HD13 | LEU | X | 323 | 33.495 | 41.591 | 30.368 | 0.00 | 0.00 |
| ATOM | 4865 | CD2  | LEU | X | 323 | 34.204 | 40.448 | 32.856 | 0.00 | 0.00 |
| ATOM | 4866 | HD21 | LEU | X | 323 | 34.090 | 39.893 | 33.787 | 0.00 | 0.00 |
| ATOM | 4867 | HD22 | LEU | X | 323 | 34.739 | 39.660 | 32.324 | 0.00 | 0.00 |
| ATOM | 4868 | HD23 | LEU | X | 323 | 34.806 | 41.355 | 32.913 | 0.00 | 0.00 |
| ATOM | 4869 | C    | LEU | X | 323 | 31.822 | 39.159 | 35.016 | 0.00 | 0.00 |

|      |      |      |     |   |     |        |        |        |      |      |
|------|------|------|-----|---|-----|--------|--------|--------|------|------|
| ATOM | 4870 | O    | LEU | X | 323 | 32.067 | 39.785 | 36.046 | 0.00 | 0.00 |
| ATOM | 4871 | N    | VAL | X | 324 | 32.142 | 37.877 | 34.835 | 0.00 | 0.00 |
| ATOM | 4872 | H    | VAL | X | 324 | 32.075 | 37.499 | 33.900 | 0.00 | 0.00 |
| ATOM | 4873 | CA   | VAL | X | 324 | 32.954 | 37.069 | 35.828 | 0.00 | 0.00 |
| ATOM | 4874 | HA   | VAL | X | 324 | 33.381 | 37.712 | 36.598 | 0.00 | 0.00 |
| ATOM | 4875 | CB   | VAL | X | 324 | 32.062 | 36.038 | 36.623 | 0.00 | 0.00 |
| ATOM | 4876 | HB   | VAL | X | 324 | 31.904 | 35.261 | 35.875 | 0.00 | 0.00 |
| ATOM | 4877 | CG1  | VAL | X | 324 | 33.018 | 35.508 | 37.800 | 0.00 | 0.00 |
| ATOM | 4878 | HG11 | VAL | X | 324 | 34.068 | 35.480 | 37.509 | 0.00 | 0.00 |
| ATOM | 4879 | HG12 | VAL | X | 324 | 32.966 | 36.168 | 38.666 | 0.00 | 0.00 |
| ATOM | 4880 | HG13 | VAL | X | 324 | 32.772 | 34.521 | 38.190 | 0.00 | 0.00 |
| ATOM | 4881 | CG2  | VAL | X | 324 | 30.679 | 36.439 | 37.076 | 0.00 | 0.00 |
| ATOM | 4882 | HG21 | VAL | X | 324 | 30.076 | 36.577 | 36.179 | 0.00 | 0.00 |
| ATOM | 4883 | HG22 | VAL | X | 324 | 30.221 | 35.666 | 37.694 | 0.00 | 0.00 |
| ATOM | 4884 | HG23 | VAL | X | 324 | 30.708 | 37.313 | 37.726 | 0.00 | 0.00 |
| ATOM | 4885 | C    | VAL | X | 324 | 34.049 | 36.290 | 35.086 | 0.00 | 0.00 |
| ATOM | 4886 | O    | VAL | X | 324 | 33.713 | 35.528 | 34.156 | 0.00 | 0.00 |
| ATOM | 4887 | N    | GLY | X | 325 | 35.363 | 36.516 | 35.482 | 0.00 | 0.00 |
| ATOM | 4888 | H    | GLY | X | 325 | 35.540 | 37.198 | 36.206 | 0.00 | 0.00 |
| ATOM | 4889 | CA   | GLY | X | 325 | 36.471 | 35.715 | 34.915 | 0.00 | 0.00 |
| ATOM | 4890 | HA2  | GLY | X | 325 | 36.232 | 34.712 | 35.096 | 0.00 | 0.00 |
| ATOM | 4891 | HA3  | GLY | X | 325 | 36.556 | 35.795 | 33.850 | 0.00 | 0.00 |
| ATOM | 4892 | C    | GLY | X | 325 | 37.823 | 35.837 | 35.590 | 0.00 | 0.00 |
| ATOM | 4893 | O    | GLY | X | 325 | 37.912 | 36.473 | 36.659 | 0.00 | 0.00 |
| ATOM | 4894 | N    | VAL | X | 326 | 38.899 | 35.263 | 35.035 | 0.00 | 0.00 |
| ATOM | 4895 | H    | VAL | X | 326 | 38.924 | 35.069 | 34.044 | 0.00 | 0.00 |
| ATOM | 4896 | CA   | VAL | X | 326 | 39.994 | 34.664 | 35.773 | 0.00 | 0.00 |
| ATOM | 4897 | HA   | VAL | X | 326 | 40.188 | 35.334 | 36.610 | 0.00 | 0.00 |
| ATOM | 4898 | CB   | VAL | X | 326 | 39.719 | 33.094 | 36.143 | 0.00 | 0.00 |
| ATOM | 4899 | HB   | VAL | X | 326 | 40.514 | 32.762 | 36.809 | 0.00 | 0.00 |
| ATOM | 4900 | CG1  | VAL | X | 326 | 38.357 | 32.816 | 36.771 | 0.00 | 0.00 |
| ATOM | 4901 | HG11 | VAL | X | 326 | 38.188 | 33.462 | 37.632 | 0.00 | 0.00 |
| ATOM | 4902 | HG12 | VAL | X | 326 | 37.566 | 32.929 | 36.029 | 0.00 | 0.00 |
| ATOM | 4903 | HG13 | VAL | X | 326 | 38.193 | 31.846 | 37.239 | 0.00 | 0.00 |
| ATOM | 4904 | CG2  | VAL | X | 326 | 39.813 | 32.091 | 35.039 | 0.00 | 0.00 |
| ATOM | 4905 | HG21 | VAL | X | 326 | 39.139 | 32.309 | 34.211 | 0.00 | 0.00 |
| ATOM | 4906 | HG22 | VAL | X | 326 | 40.854 | 32.051 | 34.719 | 0.00 | 0.00 |
| ATOM | 4907 | HG23 | VAL | X | 326 | 39.681 | 31.110 | 35.498 | 0.00 | 0.00 |
| ATOM | 4908 | C    | VAL | X | 326 | 41.334 | 34.640 | 35.017 | 0.00 | 0.00 |
| ATOM | 4909 | O    | VAL | X | 326 | 41.279 | 34.834 | 33.772 | 0.00 | 0.00 |
| ATOM | 4910 | N    | VAL | X | 327 | 42.514 | 34.453 | 35.684 | 0.00 | 0.00 |
| ATOM | 4911 | H    | VAL | X | 327 | 42.480 | 34.438 | 36.694 | 0.00 | 0.00 |
| ATOM | 4912 | CA   | VAL | X | 327 | 43.790 | 34.293 | 35.032 | 0.00 | 0.00 |
| ATOM | 4913 | HA   | VAL | X | 327 | 43.586 | 34.596 | 34.005 | 0.00 | 0.00 |
| ATOM | 4914 | CB   | VAL | X | 327 | 44.909 | 35.073 | 35.836 | 0.00 | 0.00 |
| ATOM | 4915 | HB   | VAL | X | 327 | 44.796 | 34.846 | 36.896 | 0.00 | 0.00 |
| ATOM | 4916 | CG1  | VAL | X | 327 | 46.239 | 34.594 | 35.289 | 0.00 | 0.00 |
| ATOM | 4917 | HG11 | VAL | X | 327 | 46.464 | 33.607 | 35.692 | 0.00 | 0.00 |
| ATOM | 4918 | HG12 | VAL | X | 327 | 46.203 | 34.608 | 34.199 | 0.00 | 0.00 |
| ATOM | 4919 | HG13 | VAL | X | 327 | 46.982 | 35.334 | 35.588 | 0.00 | 0.00 |
| ATOM | 4920 | CG2  | VAL | X | 327 | 44.640 | 36.562 | 35.619 | 0.00 | 0.00 |
| ATOM | 4921 | HG21 | VAL | X | 327 | 43.807 | 36.882 | 36.245 | 0.00 | 0.00 |
| ATOM | 4922 | HG22 | VAL | X | 327 | 45.488 | 37.162 | 35.949 | 0.00 | 0.00 |
| ATOM | 4923 | HG23 | VAL | X | 327 | 44.300 | 36.736 | 34.598 | 0.00 | 0.00 |
| ATOM | 4924 | C    | VAL | X | 327 | 44.094 | 32.683 | 35.025 | 0.00 | 0.00 |
| ATOM | 4925 | O    | VAL | X | 327 | 43.664 | 31.919 | 35.892 | 0.00 | 0.00 |
| ATOM | 4926 | N    | LYS | X | 328 | 44.861 | 32.197 | 34.105 | 0.00 | 0.00 |
| ATOM | 4927 | H    | LYS | X | 328 | 45.133 | 32.955 | 33.495 | 0.00 | 0.00 |
| ATOM | 4928 | CA   | LYS | X | 328 | 45.126 | 30.847 | 33.843 | 0.00 | 0.00 |
| ATOM | 4929 | HA   | LYS | X | 328 | 44.243 | 30.350 | 33.443 | 0.00 | 0.00 |
| ATOM | 4930 | CB   | LYS | X | 328 | 46.228 | 30.847 | 32.789 | 0.00 | 0.00 |
| ATOM | 4931 | HB2  | LYS | X | 328 | 45.723 | 31.362 | 31.972 | 0.00 | 0.00 |
| ATOM | 4932 | HB3  | LYS | X | 328 | 47.143 | 31.418 | 32.948 | 0.00 | 0.00 |
| ATOM | 4933 | CG   | LYS | X | 328 | 46.613 | 29.418 | 32.401 | 0.00 | 0.00 |
| ATOM | 4934 | HG2  | LYS | X | 328 | 47.124 | 28.949 | 33.241 | 0.00 | 0.00 |
| ATOM | 4935 | HG3  | LYS | X | 328 | 45.722 | 28.855 | 32.123 | 0.00 | 0.00 |
| ATOM | 4936 | CD   | LYS | X | 328 | 47.481 | 29.303 | 31.155 | 0.00 | 0.00 |
| ATOM | 4937 | HD2  | LYS | X | 328 | 47.338 | 28.287 | 30.789 | 0.00 | 0.00 |
| ATOM | 4938 | HD3  | LYS | X | 328 | 47.164 | 29.857 | 30.272 | 0.00 | 0.00 |
| ATOM | 4939 | CE   | LYS | X | 328 | 48.995 | 29.495 | 31.462 | 0.00 | 0.00 |

|      |      |     |     |   |     |        |        |        |      |      |
|------|------|-----|-----|---|-----|--------|--------|--------|------|------|
| ATOM | 4940 | HE2 | LYS | X | 328 | 49.520 | 29.763 | 30.545 | 0.00 | 0.00 |
| ATOM | 4941 | HE3 | LYS | X | 328 | 49.157 | 30.357 | 32.108 | 0.00 | 0.00 |
| ATOM | 4942 | NZ  | LYS | X | 328 | 49.618 | 28.333 | 32.078 | 0.00 | 0.00 |
| ATOM | 4943 | HZ1 | LYS | X | 328 | 49.446 | 27.516 | 31.509 | 0.00 | 0.00 |
| ATOM | 4944 | HZ2 | LYS | X | 328 | 50.609 | 28.449 | 32.229 | 0.00 | 0.00 |
| ATOM | 4945 | HZ3 | LYS | X | 328 | 49.220 | 28.236 | 33.002 | 0.00 | 0.00 |
| ATOM | 4946 | C   | LYS | X | 328 | 45.532 | 29.985 | 35.079 | 0.00 | 0.00 |
| ATOM | 4947 | O   | LYS | X | 328 | 45.121 | 28.861 | 35.269 | 0.00 | 0.00 |
| ATOM | 4948 | N   | ASP | X | 329 | 46.509 | 30.461 | 35.857 | 0.00 | 0.00 |
| ATOM | 4949 | H   | ASP | X | 329 | 46.831 | 31.371 | 35.559 | 0.00 | 0.00 |
| ATOM | 4950 | CA  | ASP | X | 329 | 47.250 | 29.804 | 36.890 | 0.00 | 0.00 |
| ATOM | 4951 | HA  | ASP | X | 329 | 46.964 | 28.758 | 37.007 | 0.00 | 0.00 |
| ATOM | 4952 | CB  | ASP | X | 329 | 48.805 | 29.751 | 36.464 | 0.00 | 0.00 |
| ATOM | 4953 | HB2 | ASP | X | 329 | 49.109 | 30.794 | 36.556 | 0.00 | 0.00 |
| ATOM | 4954 | HB3 | ASP | X | 329 | 49.265 | 29.077 | 37.187 | 0.00 | 0.00 |
| ATOM | 4955 | CG  | ASP | X | 329 | 49.046 | 29.327 | 35.066 | 0.00 | 0.00 |
| ATOM | 4956 | OD1 | ASP | X | 329 | 49.106 | 28.113 | 34.785 | 0.00 | 0.00 |
| ATOM | 4957 | OD2 | ASP | X | 329 | 49.280 | 30.189 | 34.200 | 0.00 | 0.00 |
| ATOM | 4958 | C   | ASP | X | 329 | 47.070 | 30.469 | 38.213 | 0.00 | 0.00 |
| ATOM | 4959 | O   | ASP | X | 329 | 48.077 | 30.781 | 38.834 | 0.00 | 0.00 |
| ATOM | 4960 | N   | GLU | X | 330 | 45.809 | 30.697 | 38.637 | 0.00 | 0.00 |
| ATOM | 4961 | H   | GLU | X | 330 | 45.116 | 30.393 | 37.968 | 0.00 | 0.00 |
| ATOM | 4962 | CA  | GLU | X | 330 | 45.478 | 31.416 | 39.874 | 0.00 | 0.00 |
| ATOM | 4963 | HA  | GLU | X | 330 | 45.707 | 32.462 | 39.673 | 0.00 | 0.00 |
| ATOM | 4964 | CB  | GLU | X | 330 | 43.979 | 31.238 | 40.287 | 0.00 | 0.00 |
| ATOM | 4965 | HB2 | GLU | X | 330 | 43.657 | 30.197 | 40.287 | 0.00 | 0.00 |
| ATOM | 4966 | HB3 | GLU | X | 330 | 43.956 | 31.639 | 41.300 | 0.00 | 0.00 |
| ATOM | 4967 | CG  | GLU | X | 330 | 42.956 | 31.972 | 39.434 | 0.00 | 0.00 |
| ATOM | 4968 | HG2 | GLU | X | 330 | 43.075 | 31.578 | 38.425 | 0.00 | 0.00 |
| ATOM | 4969 | HG3 | GLU | X | 330 | 41.982 | 31.671 | 39.821 | 0.00 | 0.00 |
| ATOM | 4970 | CD  | GLU | X | 330 | 43.192 | 33.466 | 39.360 | 0.00 | 0.00 |
| ATOM | 4971 | OE1 | GLU | X | 330 | 43.652 | 33.979 | 40.418 | 0.00 | 0.00 |
| ATOM | 4972 | OE2 | GLU | X | 330 | 42.829 | 34.137 | 38.371 | 0.00 | 0.00 |
| ATOM | 4973 | C   | GLU | X | 330 | 46.302 | 30.953 | 41.121 | 0.00 | 0.00 |
| ATOM | 4974 | O   | GLU | X | 330 | 46.981 | 31.793 | 41.718 | 0.00 | 0.00 |
| ATOM | 4975 | N   | GLY | X | 331 | 46.210 | 29.651 | 41.444 | 0.00 | 0.00 |
| ATOM | 4976 | H   | GLY | X | 331 | 45.675 | 29.116 | 40.776 | 0.00 | 0.00 |
| ATOM | 4977 | CA  | GLY | X | 331 | 46.860 | 29.050 | 42.604 | 0.00 | 0.00 |
| ATOM | 4978 | HA2 | GLY | X | 331 | 46.450 | 29.416 | 43.506 | 0.00 | 0.00 |
| ATOM | 4979 | HA3 | GLY | X | 331 | 46.716 | 27.981 | 42.491 | 0.00 | 0.00 |
| ATOM | 4980 | C   | GLY | X | 331 | 48.367 | 29.247 | 42.730 | 0.00 | 0.00 |
| ATOM | 4981 | O   | GLY | X | 331 | 48.877 | 29.208 | 43.848 | 0.00 | 0.00 |
| ATOM | 4982 | N   | SER | X | 332 | 49.046 | 29.595 | 41.609 | 0.00 | 0.00 |
| ATOM | 4983 | H   | SER | X | 332 | 48.590 | 29.583 | 40.708 | 0.00 | 0.00 |
| ATOM | 4984 | CA  | SER | X | 332 | 50.534 | 29.762 | 41.559 | 0.00 | 0.00 |
| ATOM | 4985 | HA  | SER | X | 332 | 50.953 | 28.783 | 41.793 | 0.00 | 0.00 |
| ATOM | 4986 | CB  | SER | X | 332 | 51.126 | 30.113 | 40.176 | 0.00 | 0.00 |
| ATOM | 4987 | HB2 | SER | X | 332 | 50.756 | 31.060 | 39.783 | 0.00 | 0.00 |
| ATOM | 4988 | HB3 | SER | X | 332 | 52.191 | 30.197 | 40.391 | 0.00 | 0.00 |
| ATOM | 4989 | OG  | SER | X | 332 | 51.052 | 28.963 | 39.379 | 0.00 | 0.00 |
| ATOM | 4990 | HG  | SER | X | 332 | 50.947 | 29.345 | 38.505 | 0.00 | 0.00 |
| ATOM | 4991 | C   | SER | X | 332 | 51.074 | 30.812 | 42.512 | 0.00 | 0.00 |
| ATOM | 4992 | O   | SER | X | 332 | 52.100 | 30.581 | 43.203 | 0.00 | 0.00 |
| ATOM | 4993 | N   | TYR | X | 333 | 50.431 | 31.920 | 42.543 | 0.00 | 0.00 |
| ATOM | 4994 | H   | TYR | X | 333 | 49.544 | 31.924 | 42.059 | 0.00 | 0.00 |
| ATOM | 4995 | CA  | TYR | X | 333 | 50.700 | 33.098 | 43.382 | 0.00 | 0.00 |
| ATOM | 4996 | HA  | TYR | X | 333 | 51.607 | 33.588 | 43.027 | 0.00 | 0.00 |
| ATOM | 4997 | CB  | TYR | X | 333 | 49.596 | 34.153 | 43.049 | 0.00 | 0.00 |
| ATOM | 4998 | HB2 | TYR | X | 333 | 49.387 | 34.365 | 42.001 | 0.00 | 0.00 |
| ATOM | 4999 | HB3 | TYR | X | 333 | 48.624 | 33.782 | 43.374 | 0.00 | 0.00 |
| ATOM | 5000 | CG  | TYR | X | 333 | 49.788 | 35.598 | 43.558 | 0.00 | 0.00 |
| ATOM | 5001 | CD1 | TYR | X | 333 | 50.900 | 36.363 | 43.131 | 0.00 | 0.00 |
| ATOM | 5002 | HD1 | TYR | X | 333 | 51.572 | 36.180 | 42.305 | 0.00 | 0.00 |
| ATOM | 5003 | CE1 | TYR | X | 333 | 51.062 | 37.683 | 43.678 | 0.00 | 0.00 |
| ATOM | 5004 | HE1 | TYR | X | 333 | 51.806 | 38.351 | 43.270 | 0.00 | 0.00 |
| ATOM | 5005 | CZ  | TYR | X | 333 | 50.303 | 38.031 | 44.809 | 0.00 | 0.00 |
| ATOM | 5006 | OH  | TYR | X | 333 | 50.598 | 39.222 | 45.501 | 0.00 | 0.00 |
| ATOM | 5007 | HH  | TYR | X | 333 | 51.251 | 39.729 | 45.014 | 0.00 | 0.00 |
| ATOM | 5008 | CE2 | TYR | X | 333 | 49.278 | 37.181 | 45.279 | 0.00 | 0.00 |
| ATOM | 5009 | HE2 | TYR | X | 333 | 48.744 | 37.474 | 46.170 | 0.00 | 0.00 |

|      |      |      |     |   |     |        |        |        |      |      |
|------|------|------|-----|---|-----|--------|--------|--------|------|------|
| ATOM | 5010 | CD2  | TYR | X | 333 | 49.044 | 35.966 | 44.643 | 0.00 | 0.00 |
| ATOM | 5011 | HD2  | TYR | X | 333 | 48.243 | 35.305 | 44.941 | 0.00 | 0.00 |
| ATOM | 5012 | C    | TYR | X | 333 | 50.637 | 32.833 | 44.938 | 0.00 | 0.00 |
| ATOM | 5013 | O    | TYR | X | 333 | 51.374 | 33.445 | 45.720 | 0.00 | 0.00 |
| ATOM | 5014 | N    | PHE | X | 334 | 49.748 | 31.935 | 45.411 | 0.00 | 0.00 |
| ATOM | 5015 | H    | PHE | X | 334 | 49.221 | 31.518 | 44.658 | 0.00 | 0.00 |
| ATOM | 5016 | CA   | PHE | X | 334 | 49.632 | 31.339 | 46.771 | 0.00 | 0.00 |
| ATOM | 5017 | HA   | PHE | X | 334 | 49.883 | 32.123 | 47.486 | 0.00 | 0.00 |
| ATOM | 5018 | CB   | PHE | X | 334 | 48.146 | 30.975 | 46.959 | 0.00 | 0.00 |
| ATOM | 5019 | HB2  | PHE | X | 334 | 47.895 | 30.181 | 46.256 | 0.00 | 0.00 |
| ATOM | 5020 | HB3  | PHE | X | 334 | 47.835 | 30.563 | 47.919 | 0.00 | 0.00 |
| ATOM | 5021 | CG   | PHE | X | 334 | 47.279 | 32.228 | 46.933 | 0.00 | 0.00 |
| ATOM | 5022 | CD1  | PHE | X | 334 | 46.675 | 32.564 | 45.730 | 0.00 | 0.00 |
| ATOM | 5023 | HD1  | PHE | X | 334 | 46.903 | 32.043 | 44.812 | 0.00 | 0.00 |
| ATOM | 5024 | CE1  | PHE | X | 334 | 45.825 | 33.657 | 45.685 | 0.00 | 0.00 |
| ATOM | 5025 | HE1  | PHE | X | 334 | 45.328 | 33.918 | 44.763 | 0.00 | 0.00 |
| ATOM | 5026 | CZ   | PHE | X | 334 | 45.522 | 34.407 | 46.860 | 0.00 | 0.00 |
| ATOM | 5027 | HZ   | PHE | X | 334 | 44.825 | 35.229 | 46.792 | 0.00 | 0.00 |
| ATOM | 5028 | CE2  | PHE | X | 334 | 46.134 | 34.059 | 48.062 | 0.00 | 0.00 |
| ATOM | 5029 | HE2  | PHE | X | 334 | 45.917 | 34.613 | 48.964 | 0.00 | 0.00 |
| ATOM | 5030 | CD2  | PHE | X | 334 | 47.043 | 33.000 | 48.102 | 0.00 | 0.00 |
| ATOM | 5031 | HD2  | PHE | X | 334 | 47.482 | 32.675 | 49.034 | 0.00 | 0.00 |
| ATOM | 5032 | C    | PHE | X | 334 | 50.600 | 30.082 | 46.930 | 0.00 | 0.00 |
| ATOM | 5033 | O    | PHE | X | 334 | 51.082 | 29.872 | 48.043 | 0.00 | 0.00 |
| ATOM | 5034 | N    | LEU | X | 335 | 50.980 | 29.444 | 45.796 | 0.00 | 0.00 |
| ATOM | 5035 | H    | LEU | X | 335 | 50.525 | 29.653 | 44.919 | 0.00 | 0.00 |
| ATOM | 5036 | CA   | LEU | X | 335 | 52.043 | 28.342 | 45.909 | 0.00 | 0.00 |
| ATOM | 5037 | HA   | LEU | X | 335 | 51.851 | 27.845 | 46.860 | 0.00 | 0.00 |
| ATOM | 5038 | CB   | LEU | X | 335 | 51.969 | 27.404 | 44.707 | 0.00 | 0.00 |
| ATOM | 5039 | HB2  | LEU | X | 335 | 51.771 | 27.889 | 43.751 | 0.00 | 0.00 |
| ATOM | 5040 | HB3  | LEU | X | 335 | 52.880 | 26.834 | 44.527 | 0.00 | 0.00 |
| ATOM | 5041 | CG   | LEU | X | 335 | 50.697 | 26.550 | 44.813 | 0.00 | 0.00 |
| ATOM | 5042 | HG   | LEU | X | 335 | 49.804 | 27.078 | 45.148 | 0.00 | 0.00 |
| ATOM | 5043 | CD1  | LEU | X | 335 | 50.395 | 25.965 | 43.402 | 0.00 | 0.00 |
| ATOM | 5044 | HD11 | LEU | X | 335 | 50.026 | 26.818 | 42.833 | 0.00 | 0.00 |
| ATOM | 5045 | HD12 | LEU | X | 335 | 51.298 | 25.504 | 43.001 | 0.00 | 0.00 |
| ATOM | 5046 | HD13 | LEU | X | 335 | 49.658 | 25.165 | 43.464 | 0.00 | 0.00 |
| ATOM | 5047 | CD2  | LEU | X | 335 | 51.006 | 25.305 | 45.591 | 0.00 | 0.00 |
| ATOM | 5048 | HD21 | LEU | X | 335 | 51.788 | 24.851 | 44.982 | 0.00 | 0.00 |
| ATOM | 5049 | HD22 | LEU | X | 335 | 51.375 | 25.568 | 46.582 | 0.00 | 0.00 |
| ATOM | 5050 | HD23 | LEU | X | 335 | 50.115 | 24.681 | 45.652 | 0.00 | 0.00 |
| ATOM | 5051 | C    | LEU | X | 335 | 53.485 | 28.933 | 46.137 | 0.00 | 0.00 |
| ATOM | 5052 | O    | LEU | X | 335 | 54.268 | 28.356 | 46.887 | 0.00 | 0.00 |
| ATOM | 5053 | N    | VAL | X | 336 | 53.870 | 30.090 | 45.534 | 0.00 | 0.00 |
| ATOM | 5054 | H    | VAL | X | 336 | 53.384 | 30.343 | 44.685 | 0.00 | 0.00 |
| ATOM | 5055 | CA   | VAL | X | 336 | 55.163 | 30.758 | 45.834 | 0.00 | 0.00 |
| ATOM | 5056 | HA   | VAL | X | 336 | 55.882 | 29.939 | 45.815 | 0.00 | 0.00 |
| ATOM | 5057 | CB   | VAL | X | 336 | 55.506 | 31.701 | 44.654 | 0.00 | 0.00 |
| ATOM | 5058 | HB   | VAL | X | 336 | 55.305 | 31.219 | 43.697 | 0.00 | 0.00 |
| ATOM | 5059 | CG1  | VAL | X | 336 | 54.700 | 33.019 | 44.639 | 0.00 | 0.00 |
| ATOM | 5060 | HG11 | VAL | X | 336 | 54.841 | 33.582 | 43.717 | 0.00 | 0.00 |
| ATOM | 5061 | HG12 | VAL | X | 336 | 53.665 | 32.678 | 44.621 | 0.00 | 0.00 |
| ATOM | 5062 | HG13 | VAL | X | 336 | 54.959 | 33.658 | 45.483 | 0.00 | 0.00 |
| ATOM | 5063 | CG2  | VAL | X | 336 | 56.991 | 32.016 | 44.616 | 0.00 | 0.00 |
| ATOM | 5064 | HG21 | VAL | X | 336 | 57.309 | 32.715 | 45.389 | 0.00 | 0.00 |
| ATOM | 5065 | HG22 | VAL | X | 336 | 57.587 | 31.127 | 44.824 | 0.00 | 0.00 |
| ATOM | 5066 | HG23 | VAL | X | 336 | 57.340 | 32.621 | 43.780 | 0.00 | 0.00 |
| ATOM | 5067 | C    | VAL | X | 336 | 55.223 | 31.427 | 47.240 | 0.00 | 0.00 |
| ATOM | 5068 | O    | VAL | X | 336 | 56.045 | 32.326 | 47.471 | 0.00 | 0.00 |
| ATOM | 5069 | N    | TYR | X | 337 | 54.174 | 31.179 | 48.038 | 0.00 | 0.00 |
| ATOM | 5070 | H    | TYR | X | 337 | 53.410 | 30.614 | 47.694 | 0.00 | 0.00 |
| ATOM | 5071 | CA   | TYR | X | 337 | 54.089 | 31.853 | 49.297 | 0.00 | 0.00 |
| ATOM | 5072 | HA   | TYR | X | 337 | 55.034 | 32.358 | 49.500 | 0.00 | 0.00 |
| ATOM | 5073 | CB   | TYR | X | 337 | 52.884 | 32.792 | 49.252 | 0.00 | 0.00 |
| ATOM | 5074 | HB2  | TYR | X | 337 | 52.333 | 32.680 | 48.318 | 0.00 | 0.00 |
| ATOM | 5075 | HB3  | TYR | X | 337 | 52.226 | 32.606 | 50.100 | 0.00 | 0.00 |
| ATOM | 5076 | CG   | TYR | X | 337 | 53.262 | 34.259 | 49.230 | 0.00 | 0.00 |
| ATOM | 5077 | CD1  | TYR | X | 337 | 53.384 | 34.958 | 50.437 | 0.00 | 0.00 |
| ATOM | 5078 | HD1  | TYR | X | 337 | 53.202 | 34.481 | 51.388 | 0.00 | 0.00 |
| ATOM | 5079 | CE1  | TYR | X | 337 | 53.748 | 36.322 | 50.439 | 0.00 | 0.00 |

|      |      |     |     |   |     |        |        |        |      |      |
|------|------|-----|-----|---|-----|--------|--------|--------|------|------|
| ATOM | 5080 | HE1 | TYR | X | 337 | 53.715 | 36.848 | 51.381 | 0.00 | 0.00 |
| ATOM | 5081 | CZ  | TYR | X | 337 | 53.916 | 37.033 | 49.223 | 0.00 | 0.00 |
| ATOM | 5082 | OH  | TYR | X | 337 | 54.407 | 38.296 | 49.148 | 0.00 | 0.00 |
| ATOM | 5083 | HH  | TYR | X | 337 | 54.548 | 38.733 | 49.991 | 0.00 | 0.00 |
| ATOM | 5084 | CE2 | TYR | X | 337 | 53.687 | 36.324 | 48.002 | 0.00 | 0.00 |
| ATOM | 5085 | HE2 | TYR | X | 337 | 53.716 | 36.892 | 47.083 | 0.00 | 0.00 |
| ATOM | 5086 | CD2 | TYR | X | 337 | 53.433 | 34.898 | 47.987 | 0.00 | 0.00 |
| ATOM | 5087 | HD2 | TYR | X | 337 | 53.418 | 34.427 | 47.015 | 0.00 | 0.00 |
| ATOM | 5088 | C   | TYR | X | 337 | 54.016 | 30.923 | 50.558 | 0.00 | 0.00 |
| ATOM | 5089 | O   | TYR | X | 337 | 54.212 | 31.489 | 51.646 | 0.00 | 0.00 |
| ATOM | 5090 | N   | GLY | X | 338 | 53.721 | 29.657 | 50.444 | 0.00 | 0.00 |
| ATOM | 5091 | H   | GLY | X | 338 | 53.420 | 29.296 | 49.550 | 0.00 | 0.00 |
| ATOM | 5092 | CA  | GLY | X | 338 | 53.678 | 28.724 | 51.622 | 0.00 | 0.00 |
| ATOM | 5093 | HA2 | GLY | X | 338 | 54.615 | 28.733 | 52.204 | 0.00 | 0.00 |
| ATOM | 5094 | HA3 | GLY | X | 338 | 52.932 | 29.100 | 52.397 | 0.00 | 0.00 |
| ATOM | 5095 | C   | GLY | X | 338 | 53.433 | 27.222 | 51.340 | 0.00 | 0.00 |
| ATOM | 5096 | O   | GLY | X | 338 | 52.525 | 26.683 | 51.942 | 0.00 | 0.00 |
| ATOM | 5097 | N   | ALA | X | 339 | 54.248 | 26.630 | 50.464 | 0.00 | 0.00 |
| ATOM | 5098 | H   | ALA | X | 339 | 54.945 | 27.180 | 49.982 | 0.00 | 0.00 |
| ATOM | 5099 | CA  | ALA | X | 339 | 54.005 | 25.249 | 50.002 | 0.00 | 0.00 |
| ATOM | 5100 | HA  | ALA | X | 339 | 53.434 | 24.737 | 50.777 | 0.00 | 0.00 |
| ATOM | 5101 | CB  | ALA | X | 339 | 53.160 | 25.356 | 48.757 | 0.00 | 0.00 |
| ATOM | 5102 | HB1 | ALA | X | 339 | 52.165 | 25.749 | 48.967 | 0.00 | 0.00 |
| ATOM | 5103 | HB2 | ALA | X | 339 | 53.681 | 26.075 | 48.126 | 0.00 | 0.00 |
| ATOM | 5104 | HB3 | ALA | X | 339 | 53.102 | 24.399 | 48.237 | 0.00 | 0.00 |
| ATOM | 5105 | C   | ALA | X | 339 | 55.282 | 24.445 | 49.628 | 0.00 | 0.00 |
| ATOM | 5106 | O   | ALA | X | 339 | 56.229 | 25.121 | 49.122 | 0.00 | 0.00 |
| ATOM | 5107 | N   | PRO | X | 340 | 55.370 | 23.116 | 49.916 | 0.00 | 0.00 |
| ATOM | 5108 | CD  | PRO | X | 340 | 54.298 | 22.212 | 50.143 | 0.00 | 0.00 |
| ATOM | 5109 | HD2 | PRO | X | 340 | 53.537 | 22.333 | 49.372 | 0.00 | 0.00 |
| ATOM | 5110 | HD3 | PRO | X | 340 | 53.894 | 22.528 | 51.105 | 0.00 | 0.00 |
| ATOM | 5111 | CG  | PRO | X | 340 | 54.898 | 20.768 | 50.193 | 0.00 | 0.00 |
| ATOM | 5112 | HG2 | PRO | X | 340 | 54.898 | 20.375 | 49.177 | 0.00 | 0.00 |
| ATOM | 5113 | HG3 | PRO | X | 340 | 54.319 | 20.149 | 50.878 | 0.00 | 0.00 |
| ATOM | 5114 | CB  | PRO | X | 340 | 56.323 | 21.060 | 50.655 | 0.00 | 0.00 |
| ATOM | 5115 | HB2 | PRO | X | 340 | 56.921 | 20.214 | 50.315 | 0.00 | 0.00 |
| ATOM | 5116 | HB3 | PRO | X | 340 | 56.293 | 21.049 | 51.744 | 0.00 | 0.00 |
| ATOM | 5117 | CA  | PRO | X | 340 | 56.644 | 22.357 | 50.030 | 0.00 | 0.00 |
| ATOM | 5118 | HA  | PRO | X | 340 | 57.404 | 22.882 | 50.609 | 0.00 | 0.00 |
| ATOM | 5119 | C   | PRO | X | 340 | 57.425 | 22.211 | 48.735 | 0.00 | 0.00 |
| ATOM | 5120 | O   | PRO | X | 340 | 57.123 | 21.462 | 47.838 | 0.00 | 0.00 |
| ATOM | 5121 | N   | GLY | X | 341 | 58.599 | 22.840 | 48.661 | 0.00 | 0.00 |
| ATOM | 5122 | H   | GLY | X | 341 | 58.741 | 23.482 | 49.428 | 0.00 | 0.00 |
| ATOM | 5123 | CA  | GLY | X | 341 | 59.408 | 22.793 | 47.469 | 0.00 | 0.00 |
| ATOM | 5124 | HA2 | GLY | X | 341 | 60.437 | 22.786 | 47.807 | 0.00 | 0.00 |
| ATOM | 5125 | HA3 | GLY | X | 341 | 59.181 | 21.987 | 46.757 | 0.00 | 0.00 |
| ATOM | 5126 | C   | GLY | X | 341 | 59.321 | 24.103 | 46.632 | 0.00 | 0.00 |
| ATOM | 5127 | O   | GLY | X | 341 | 60.235 | 24.438 | 45.940 | 0.00 | 0.00 |
| ATOM | 5128 | N   | PHE | X | 342 | 58.239 | 24.889 | 46.831 | 0.00 | 0.00 |
| ATOM | 5129 | H   | PHE | X | 342 | 57.490 | 24.428 | 47.327 | 0.00 | 0.00 |
| ATOM | 5130 | CA  | PHE | X | 342 | 58.018 | 26.042 | 45.964 | 0.00 | 0.00 |
| ATOM | 5131 | HA  | PHE | X | 342 | 58.533 | 25.952 | 45.007 | 0.00 | 0.00 |
| ATOM | 5132 | CB  | PHE | X | 342 | 56.502 | 26.171 | 45.807 | 0.00 | 0.00 |
| ATOM | 5133 | HB2 | PHE | X | 342 | 56.006 | 26.302 | 46.768 | 0.00 | 0.00 |
| ATOM | 5134 | HB3 | PHE | X | 342 | 56.332 | 27.168 | 45.401 | 0.00 | 0.00 |
| ATOM | 5135 | CG  | PHE | X | 342 | 55.780 | 25.115 | 44.995 | 0.00 | 0.00 |
| ATOM | 5136 | CD1 | PHE | X | 342 | 55.547 | 25.298 | 43.649 | 0.00 | 0.00 |
| ATOM | 5137 | HD1 | PHE | X | 342 | 55.984 | 26.167 | 43.179 | 0.00 | 0.00 |
| ATOM | 5138 | CE1 | PHE | X | 342 | 54.812 | 24.381 | 42.831 | 0.00 | 0.00 |
| ATOM | 5139 | HE1 | PHE | X | 342 | 54.628 | 24.698 | 41.815 | 0.00 | 0.00 |
| ATOM | 5140 | CZ  | PHE | X | 342 | 54.324 | 23.205 | 43.435 | 0.00 | 0.00 |
| ATOM | 5141 | HZ  | PHE | X | 342 | 53.779 | 22.473 | 42.858 | 0.00 | 0.00 |
| ATOM | 5142 | CE2 | PHE | X | 342 | 54.584 | 23.022 | 44.810 | 0.00 | 0.00 |
| ATOM | 5143 | HE2 | PHE | X | 342 | 54.125 | 22.175 | 45.299 | 0.00 | 0.00 |
| ATOM | 5144 | CD2 | PHE | X | 342 | 55.174 | 23.972 | 45.606 | 0.00 | 0.00 |
| ATOM | 5145 | HD2 | PHE | X | 342 | 55.210 | 23.823 | 46.675 | 0.00 | 0.00 |
| ATOM | 5146 | C   | PHE | X | 342 | 58.502 | 27.382 | 46.510 | 0.00 | 0.00 |
| ATOM | 5147 | O   | PHE | X | 342 | 58.402 | 27.682 | 47.688 | 0.00 | 0.00 |
| ATOM | 5148 | N   | SER | X | 343 | 59.096 | 28.271 | 45.655 | 0.00 | 0.00 |
| ATOM | 5149 | H   | SER | X | 343 | 58.968 | 28.148 | 44.660 | 0.00 | 0.00 |

|      |      |      |     |   |     |        |        |        |      |      |
|------|------|------|-----|---|-----|--------|--------|--------|------|------|
| ATOM | 5150 | CA   | SER | X | 343 | 59.798 | 29.521 | 46.058 | 0.00 | 0.00 |
| ATOM | 5151 | HA   | SER | X | 343 | 59.222 | 30.191 | 46.696 | 0.00 | 0.00 |
| ATOM | 5152 | CB   | SER | X | 343 | 61.113 | 29.131 | 46.799 | 0.00 | 0.00 |
| ATOM | 5153 | HB2  | SER | X | 343 | 60.837 | 28.598 | 47.709 | 0.00 | 0.00 |
| ATOM | 5154 | HB3  | SER | X | 343 | 61.675 | 28.522 | 46.090 | 0.00 | 0.00 |
| ATOM | 5155 | OG   | SER | X | 343 | 62.023 | 30.207 | 47.087 | 0.00 | 0.00 |
| ATOM | 5156 | HG   | SER | X | 343 | 62.553 | 30.027 | 47.867 | 0.00 | 0.00 |
| ATOM | 5157 | C    | SER | X | 343 | 60.073 | 30.205 | 44.741 | 0.00 | 0.00 |
| ATOM | 5158 | O    | SER | X | 343 | 60.181 | 29.659 | 43.646 | 0.00 | 0.00 |
| ATOM | 5159 | N    | LYS | X | 344 | 60.313 | 31.517 | 44.812 | 0.00 | 0.00 |
| ATOM | 5160 | H    | LYS | X | 344 | 60.560 | 31.762 | 45.760 | 0.00 | 0.00 |
| ATOM | 5161 | CA   | LYS | X | 344 | 60.651 | 32.387 | 43.737 | 0.00 | 0.00 |
| ATOM | 5162 | HA   | LYS | X | 344 | 59.865 | 32.490 | 42.988 | 0.00 | 0.00 |
| ATOM | 5163 | CB   | LYS | X | 344 | 60.654 | 33.797 | 44.367 | 0.00 | 0.00 |
| ATOM | 5164 | HB2  | LYS | X | 344 | 59.644 | 33.990 | 44.731 | 0.00 | 0.00 |
| ATOM | 5165 | HB3  | LYS | X | 344 | 61.256 | 33.818 | 45.276 | 0.00 | 0.00 |
| ATOM | 5166 | CG   | LYS | X | 344 | 61.035 | 34.983 | 43.568 | 0.00 | 0.00 |
| ATOM | 5167 | HG2  | LYS | X | 344 | 62.103 | 34.991 | 43.348 | 0.00 | 0.00 |
| ATOM | 5168 | HG3  | LYS | X | 344 | 60.346 | 35.120 | 42.734 | 0.00 | 0.00 |
| ATOM | 5169 | CD   | LYS | X | 344 | 60.714 | 36.297 | 44.419 | 0.00 | 0.00 |
| ATOM | 5170 | HD2  | LYS | X | 344 | 59.664 | 36.292 | 44.713 | 0.00 | 0.00 |
| ATOM | 5171 | HD3  | LYS | X | 344 | 61.228 | 36.246 | 45.379 | 0.00 | 0.00 |
| ATOM | 5172 | CE   | LYS | X | 344 | 60.989 | 37.629 | 43.690 | 0.00 | 0.00 |
| ATOM | 5173 | HE2  | LYS | X | 344 | 60.442 | 37.715 | 42.751 | 0.00 | 0.00 |
| ATOM | 5174 | HE3  | LYS | X | 344 | 60.565 | 38.408 | 44.324 | 0.00 | 0.00 |
| ATOM | 5175 | NZ   | LYS | X | 344 | 62.476 | 37.864 | 43.519 | 0.00 | 0.00 |
| ATOM | 5176 | HZ1  | LYS | X | 344 | 62.771 | 38.796 | 43.264 | 0.00 | 0.00 |
| ATOM | 5177 | HZ2  | LYS | X | 344 | 63.001 | 37.682 | 44.362 | 0.00 | 0.00 |
| ATOM | 5178 | HZ3  | LYS | X | 344 | 62.863 | 37.228 | 42.836 | 0.00 | 0.00 |
| ATOM | 5179 | C    | LYS | X | 344 | 61.949 | 32.036 | 43.042 | 0.00 | 0.00 |
| ATOM | 5180 | O    | LYS | X | 344 | 62.193 | 32.446 | 41.858 | 0.00 | 0.00 |
| ATOM | 5181 | N    | ASP | X | 345 | 62.768 | 31.189 | 43.648 | 0.00 | 0.00 |
| ATOM | 5182 | H    | ASP | X | 345 | 62.554 | 30.764 | 44.539 | 0.00 | 0.00 |
| ATOM | 5183 | CA   | ASP | X | 345 | 64.026 | 30.698 | 43.017 | 0.00 | 0.00 |
| ATOM | 5184 | HA   | ASP | X | 345 | 63.975 | 30.864 | 41.941 | 0.00 | 0.00 |
| ATOM | 5185 | CB   | ASP | X | 345 | 65.179 | 31.611 | 43.358 | 0.00 | 0.00 |
| ATOM | 5186 | HB2  | ASP | X | 345 | 65.014 | 32.613 | 42.961 | 0.00 | 0.00 |
| ATOM | 5187 | HB3  | ASP | X | 345 | 65.355 | 31.472 | 44.425 | 0.00 | 0.00 |
| ATOM | 5188 | CG   | ASP | X | 345 | 66.485 | 31.193 | 42.640 | 0.00 | 0.00 |
| ATOM | 5189 | OD1  | ASP | X | 345 | 66.582 | 31.145 | 41.417 | 0.00 | 0.00 |
| ATOM | 5190 | OD2  | ASP | X | 345 | 67.437 | 30.933 | 43.425 | 0.00 | 0.00 |
| ATOM | 5191 | C    | ASP | X | 345 | 64.165 | 29.217 | 43.220 | 0.00 | 0.00 |
| ATOM | 5192 | O    | ASP | X | 345 | 65.282 | 28.752 | 43.508 | 0.00 | 0.00 |
| ATOM | 5193 | N    | ASN | X | 346 | 63.076 | 28.518 | 43.226 | 0.00 | 0.00 |
| ATOM | 5194 | H    | ASN | X | 346 | 62.250 | 29.084 | 43.094 | 0.00 | 0.00 |
| ATOM | 5195 | CA   | ASN | X | 346 | 63.053 | 27.074 | 43.006 | 0.00 | 0.00 |
| ATOM | 5196 | HA   | ASN | X | 346 | 64.097 | 26.798 | 42.856 | 0.00 | 0.00 |
| ATOM | 5197 | CB   | ASN | X | 346 | 62.691 | 26.567 | 44.400 | 0.00 | 0.00 |
| ATOM | 5198 | HB2  | ASN | X | 346 | 63.155 | 27.162 | 45.186 | 0.00 | 0.00 |
| ATOM | 5199 | HB3  | ASN | X | 346 | 61.625 | 26.599 | 44.628 | 0.00 | 0.00 |
| ATOM | 5200 | CG   | ASN | X | 346 | 63.142 | 25.124 | 44.548 | 0.00 | 0.00 |
| ATOM | 5201 | OD1  | ASN | X | 346 | 62.899 | 24.267 | 43.698 | 0.00 | 0.00 |
| ATOM | 5202 | ND2  | ASN | X | 346 | 63.809 | 24.815 | 45.661 | 0.00 | 0.00 |
| ATOM | 5203 | HD21 | ASN | X | 346 | 64.115 | 23.860 | 45.777 | 0.00 | 0.00 |
| ATOM | 5204 | HD22 | ASN | X | 346 | 64.054 | 25.591 | 46.260 | 0.00 | 0.00 |
| ATOM | 5205 | C    | ASN | X | 346 | 62.165 | 26.592 | 41.838 | 0.00 | 0.00 |
| ATOM | 5206 | O    | ASN | X | 346 | 61.036 | 26.972 | 41.684 | 0.00 | 0.00 |
| ATOM | 5207 | N    | GLU | X | 347 | 62.764 | 25.734 | 41.015 | 0.00 | 0.00 |
| ATOM | 5208 | H    | GLU | X | 347 | 63.705 | 25.387 | 41.137 | 0.00 | 0.00 |
| ATOM | 5209 | CA   | GLU | X | 347 | 62.029 | 25.183 | 39.852 | 0.00 | 0.00 |
| ATOM | 5210 | HA   | GLU | X | 347 | 61.548 | 26.055 | 39.408 | 0.00 | 0.00 |
| ATOM | 5211 | CB   | GLU | X | 347 | 63.028 | 24.690 | 38.740 | 0.00 | 0.00 |
| ATOM | 5212 | HB2  | GLU | X | 347 | 62.444 | 24.700 | 37.819 | 0.00 | 0.00 |
| ATOM | 5213 | HB3  | GLU | X | 347 | 63.708 | 25.515 | 38.527 | 0.00 | 0.00 |
| ATOM | 5214 | CG   | GLU | X | 347 | 63.730 | 23.341 | 38.982 | 0.00 | 0.00 |
| ATOM | 5215 | HG2  | GLU | X | 347 | 62.993 | 22.658 | 39.403 | 0.00 | 0.00 |
| ATOM | 5216 | HG3  | GLU | X | 347 | 63.830 | 22.896 | 37.992 | 0.00 | 0.00 |
| ATOM | 5217 | CD   | GLU | X | 347 | 65.031 | 23.317 | 39.745 | 0.00 | 0.00 |
| ATOM | 5218 | OE1  | GLU | X | 347 | 65.879 | 22.413 | 39.516 | 0.00 | 0.00 |
| ATOM | 5219 | OE2  | GLU | X | 347 | 65.189 | 24.296 | 40.470 | 0.00 | 0.00 |

|      |      |      |     |   |     |        |        |        |      |      |
|------|------|------|-----|---|-----|--------|--------|--------|------|------|
| ATOM | 5220 | C    | GLU | X | 347 | 60.848 | 24.254 | 40.260 | 0.00 | 0.00 |
| ATOM | 5221 | O    | GLU | X | 347 | 60.056 | 23.891 | 39.444 | 0.00 | 0.00 |
| ATOM | 5222 | N    | SER | X | 348 | 60.677 | 23.820 | 41.564 | 0.00 | 0.00 |
| ATOM | 5223 | H    | SER | X | 348 | 61.444 | 24.134 | 42.141 | 0.00 | 0.00 |
| ATOM | 5224 | CA   | SER | X | 348 | 59.603 | 23.038 | 42.154 | 0.00 | 0.00 |
| ATOM | 5225 | HA   | SER | X | 348 | 59.769 | 22.841 | 43.213 | 0.00 | 0.00 |
| ATOM | 5226 | CB   | SER | X | 348 | 58.324 | 23.892 | 42.140 | 0.00 | 0.00 |
| ATOM | 5227 | HB2  | SER | X | 348 | 57.998 | 24.094 | 41.119 | 0.00 | 0.00 |
| ATOM | 5228 | HB3  | SER | X | 348 | 57.493 | 23.455 | 42.694 | 0.00 | 0.00 |
| ATOM | 5229 | OG   | SER | X | 348 | 58.598 | 25.198 | 42.743 | 0.00 | 0.00 |
| ATOM | 5230 | HG   | SER | X | 348 | 59.406 | 25.441 | 42.285 | 0.00 | 0.00 |
| ATOM | 5231 | C    | SER | X | 348 | 59.196 | 21.742 | 41.436 | 0.00 | 0.00 |
| ATOM | 5232 | O    | SER | X | 348 | 58.050 | 21.337 | 41.422 | 0.00 | 0.00 |
| ATOM | 5233 | N    | LEU | X | 349 | 60.183 | 20.860 | 41.075 | 0.00 | 0.00 |
| ATOM | 5234 | H    | LEU | X | 349 | 61.085 | 21.257 | 41.294 | 0.00 | 0.00 |
| ATOM | 5235 | CA   | LEU | X | 349 | 60.038 | 19.476 | 40.576 | 0.00 | 0.00 |
| ATOM | 5236 | HA   | LEU | X | 349 | 59.122 | 19.401 | 39.991 | 0.00 | 0.00 |
| ATOM | 5237 | CB   | LEU | X | 349 | 61.323 | 19.080 | 39.743 | 0.00 | 0.00 |
| ATOM | 5238 | HB2  | LEU | X | 349 | 62.250 | 19.113 | 40.315 | 0.00 | 0.00 |
| ATOM | 5239 | HB3  | LEU | X | 349 | 61.247 | 18.019 | 39.503 | 0.00 | 0.00 |
| ATOM | 5240 | CG   | LEU | X | 349 | 61.443 | 19.937 | 38.346 | 0.00 | 0.00 |
| ATOM | 5241 | HG   | LEU | X | 349 | 61.516 | 20.996 | 38.594 | 0.00 | 0.00 |
| ATOM | 5242 | CD1  | LEU | X | 349 | 62.824 | 19.630 | 37.764 | 0.00 | 0.00 |
| ATOM | 5243 | HD11 | LEU | X | 349 | 62.987 | 20.152 | 36.821 | 0.00 | 0.00 |
| ATOM | 5244 | HD12 | LEU | X | 349 | 63.579 | 19.912 | 38.498 | 0.00 | 0.00 |
| ATOM | 5245 | HD13 | LEU | X | 349 | 62.881 | 18.549 | 37.640 | 0.00 | 0.00 |
| ATOM | 5246 | CD2  | LEU | X | 349 | 60.442 | 19.869 | 37.170 | 0.00 | 0.00 |
| ATOM | 5247 | HD21 | LEU | X | 349 | 59.391 | 19.895 | 37.456 | 0.00 | 0.00 |
| ATOM | 5248 | HD22 | LEU | X | 349 | 60.611 | 20.638 | 36.417 | 0.00 | 0.00 |
| ATOM | 5249 | HD23 | LEU | X | 349 | 60.603 | 18.952 | 36.602 | 0.00 | 0.00 |
| ATOM | 5250 | C    | LEU | X | 349 | 59.685 | 18.428 | 41.597 | 0.00 | 0.00 |
| ATOM | 5251 | O    | LEU | X | 349 | 60.509 | 17.668 | 42.015 | 0.00 | 0.00 |
| ATOM | 5252 | N    | ILE | X | 350 | 58.416 | 18.503 | 42.085 | 0.00 | 0.00 |
| ATOM | 5253 | H    | ILE | X | 350 | 57.739 | 19.197 | 41.804 | 0.00 | 0.00 |
| ATOM | 5254 | CA   | ILE | X | 350 | 57.988 | 17.792 | 43.257 | 0.00 | 0.00 |
| ATOM | 5255 | HA   | ILE | X | 350 | 58.832 | 17.659 | 43.934 | 0.00 | 0.00 |
| ATOM | 5256 | CB   | ILE | X | 350 | 56.845 | 18.535 | 43.987 | 0.00 | 0.00 |
| ATOM | 5257 | HB   | ILE | X | 350 | 56.313 | 17.832 | 44.628 | 0.00 | 0.00 |
| ATOM | 5258 | CG2  | ILE | X | 350 | 57.561 | 19.631 | 44.896 | 0.00 | 0.00 |
| ATOM | 5259 | HG21 | ILE | X | 350 | 58.407 | 19.191 | 45.425 | 0.00 | 0.00 |
| ATOM | 5260 | HG22 | ILE | X | 350 | 57.901 | 20.395 | 44.198 | 0.00 | 0.00 |
| ATOM | 5261 | HG23 | ILE | X | 350 | 56.813 | 20.021 | 45.586 | 0.00 | 0.00 |
| ATOM | 5262 | CG1  | ILE | X | 350 | 55.854 | 19.164 | 43.004 | 0.00 | 0.00 |
| ATOM | 5263 | HG12 | ILE | X | 350 | 56.162 | 20.073 | 42.487 | 0.00 | 0.00 |
| ATOM | 5264 | HG13 | ILE | X | 350 | 55.656 | 18.432 | 42.220 | 0.00 | 0.00 |
| ATOM | 5265 | CD1  | ILE | X | 350 | 54.507 | 19.293 | 43.706 | 0.00 | 0.00 |
| ATOM | 5266 | HD11 | ILE | X | 350 | 54.607 | 19.950 | 44.570 | 0.00 | 0.00 |
| ATOM | 5267 | HD12 | ILE | X | 350 | 53.777 | 19.699 | 43.006 | 0.00 | 0.00 |
| ATOM | 5268 | HD13 | ILE | X | 350 | 54.124 | 18.333 | 44.052 | 0.00 | 0.00 |
| ATOM | 5269 | C    | ILE | X | 350 | 57.607 | 16.331 | 42.898 | 0.00 | 0.00 |
| ATOM | 5270 | O    | ILE | X | 350 | 57.044 | 16.052 | 41.831 | 0.00 | 0.00 |
| ATOM | 5271 | N    | SER | X | 351 | 57.749 | 15.500 | 43.939 | 0.00 | 0.00 |
| ATOM | 5272 | H    | SER | X | 351 | 58.339 | 15.777 | 44.710 | 0.00 | 0.00 |
| ATOM | 5273 | CA   | SER | X | 351 | 57.252 | 14.053 | 44.058 | 0.00 | 0.00 |
| ATOM | 5274 | HA   | SER | X | 351 | 57.295 | 13.646 | 43.048 | 0.00 | 0.00 |
| ATOM | 5275 | CB   | SER | X | 351 | 58.053 | 13.247 | 45.040 | 0.00 | 0.00 |
| ATOM | 5276 | HB2  | SER | X | 351 | 57.759 | 12.198 | 45.010 | 0.00 | 0.00 |
| ATOM | 5277 | HB3  | SER | X | 351 | 59.092 | 13.326 | 44.720 | 0.00 | 0.00 |
| ATOM | 5278 | OG   | SER | X | 351 | 58.064 | 13.830 | 46.331 | 0.00 | 0.00 |
| ATOM | 5279 | HG   | SER | X | 351 | 58.261 | 14.764 | 46.229 | 0.00 | 0.00 |
| ATOM | 5280 | C    | SER | X | 351 | 55.775 | 13.987 | 44.458 | 0.00 | 0.00 |
| ATOM | 5281 | O    | SER | X | 351 | 55.328 | 14.879 | 45.195 | 0.00 | 0.00 |
| ATOM | 5282 | N    | ARG | X | 352 | 55.050 | 12.896 | 44.168 | 0.00 | 0.00 |
| ATOM | 5283 | H    | ARG | X | 352 | 55.354 | 12.414 | 43.335 | 0.00 | 0.00 |
| ATOM | 5284 | CA   | ARG | X | 352 | 53.621 | 12.701 | 44.565 | 0.00 | 0.00 |
| ATOM | 5285 | HA   | ARG | X | 352 | 53.004 | 13.465 | 44.091 | 0.00 | 0.00 |
| ATOM | 5286 | CB   | ARG | X | 352 | 53.215 | 11.330 | 43.973 | 0.00 | 0.00 |
| ATOM | 5287 | HB2  | ARG | X | 352 | 53.729 | 11.180 | 43.023 | 0.00 | 0.00 |
| ATOM | 5288 | HB3  | ARG | X | 352 | 53.647 | 10.543 | 44.590 | 0.00 | 0.00 |
| ATOM | 5289 | CG   | ARG | X | 352 | 51.720 | 11.085 | 43.939 | 0.00 | 0.00 |



|      |      |      |     |   |     |        |        |        |      |      |
|------|------|------|-----|---|-----|--------|--------|--------|------|------|
| ATOM | 5290 | HG2  | ARG | X | 352 | 51.325 | 11.077 | 44.955 | 0.00 | 0.00 |
| ATOM | 5291 | HG3  | ARG | X | 352 | 51.279 | 11.945 | 43.435 | 0.00 | 0.00 |
| ATOM | 5292 | CD   | ARG | X | 352 | 51.347 | 9.842  | 43.172 | 0.00 | 0.00 |
| ATOM | 5293 | HD2  | ARG | X | 352 | 51.730 | 9.829  | 42.152 | 0.00 | 0.00 |
| ATOM | 5294 | HD3  | ARG | X | 352 | 51.803 | 8.978  | 43.657 | 0.00 | 0.00 |
| ATOM | 5295 | NE   | ARG | X | 352 | 49.934 | 9.610  | 42.957 | 0.00 | 0.00 |
| ATOM | 5296 | HE   | ARG | X | 352 | 49.408 | 9.068  | 43.627 | 0.00 | 0.00 |
| ATOM | 5297 | CZ   | ARG | X | 352 | 49.245 | 10.186 | 41.957 | 0.00 | 0.00 |
| ATOM | 5298 | NH1  | ARG | X | 352 | 49.801 | 10.981 | 41.030 | 0.00 | 0.00 |
| ATOM | 5299 | HH11 | ARG | X | 352 | 50.799 | 11.055 | 40.896 | 0.00 | 0.00 |
| ATOM | 5300 | HH12 | ARG | X | 352 | 49.107 | 11.581 | 40.608 | 0.00 | 0.00 |
| ATOM | 5301 | NH2  | ARG | X | 352 | 47.953 | 10.013 | 41.990 | 0.00 | 0.00 |
| ATOM | 5302 | HH21 | ARG | X | 352 | 47.559 | 9.321  | 42.613 | 0.00 | 0.00 |
| ATOM | 5303 | HH22 | ARG | X | 352 | 47.309 | 10.605 | 41.485 | 0.00 | 0.00 |
| ATOM | 5304 | C    | ARG | X | 352 | 53.223 | 12.639 | 46.058 | 0.00 | 0.00 |
| ATOM | 5305 | O    | ARG | X | 352 | 52.148 | 13.112 | 46.338 | 0.00 | 0.00 |
| ATOM | 5306 | N    | ALA | X | 353 | 54.176 | 12.332 | 46.961 | 0.00 | 0.00 |
| ATOM | 5307 | H    | ALA | X | 353 | 55.067 | 11.971 | 46.653 | 0.00 | 0.00 |
| ATOM | 5308 | CA   | ALA | X | 353 | 54.140 | 12.582 | 48.459 | 0.00 | 0.00 |
| ATOM | 5309 | HA   | ALA | X | 353 | 53.260 | 12.141 | 48.928 | 0.00 | 0.00 |
| ATOM | 5310 | CB   | ALA | X | 353 | 55.385 | 11.968 | 49.010 | 0.00 | 0.00 |
| ATOM | 5311 | HB1  | ALA | X | 353 | 55.505 | 10.899 | 48.837 | 0.00 | 0.00 |
| ATOM | 5312 | HB2  | ALA | X | 353 | 56.205 | 12.546 | 48.583 | 0.00 | 0.00 |
| ATOM | 5313 | HB3  | ALA | X | 353 | 55.278 | 12.032 | 50.093 | 0.00 | 0.00 |
| ATOM | 5314 | C    | ALA | X | 353 | 54.112 | 14.142 | 48.684 | 0.00 | 0.00 |
| ATOM | 5315 | O    | ALA | X | 353 | 53.225 | 14.587 | 49.376 | 0.00 | 0.00 |
| ATOM | 5316 | N    | GLU | X | 354 | 54.924 | 14.941 | 48.014 | 0.00 | 0.00 |
| ATOM | 5317 | H    | GLU | X | 354 | 55.596 | 14.572 | 47.357 | 0.00 | 0.00 |
| ATOM | 5318 | CA   | GLU | X | 354 | 54.881 | 16.410 | 48.127 | 0.00 | 0.00 |
| ATOM | 5319 | HA   | GLU | X | 354 | 54.712 | 16.573 | 49.191 | 0.00 | 0.00 |
| ATOM | 5320 | CB   | GLU | X | 354 | 56.244 | 17.076 | 47.738 | 0.00 | 0.00 |
| ATOM | 5321 | HB2  | GLU | X | 354 | 56.319 | 16.822 | 46.681 | 0.00 | 0.00 |
| ATOM | 5322 | HB3  | GLU | X | 354 | 56.255 | 18.143 | 47.962 | 0.00 | 0.00 |
| ATOM | 5323 | CG   | GLU | X | 354 | 57.513 | 16.557 | 48.368 | 0.00 | 0.00 |
| ATOM | 5324 | HG2  | GLU | X | 354 | 57.592 | 17.080 | 49.321 | 0.00 | 0.00 |
| ATOM | 5325 | HG3  | GLU | X | 354 | 57.623 | 15.481 | 48.504 | 0.00 | 0.00 |
| ATOM | 5326 | CD   | GLU | X | 354 | 58.735 | 16.868 | 47.584 | 0.00 | 0.00 |
| ATOM | 5327 | OE1  | GLU | X | 354 | 59.702 | 17.455 | 48.122 | 0.00 | 0.00 |
| ATOM | 5328 | OE2  | GLU | X | 354 | 58.748 | 16.526 | 46.371 | 0.00 | 0.00 |
| ATOM | 5329 | C    | GLU | X | 354 | 53.701 | 17.118 | 47.354 | 0.00 | 0.00 |
| ATOM | 5330 | O    | GLU | X | 354 | 53.197 | 18.126 | 47.864 | 0.00 | 0.00 |
| ATOM | 5331 | N    | PHE | X | 355 | 53.153 | 16.524 | 46.292 | 0.00 | 0.00 |
| ATOM | 5332 | H    | PHE | X | 355 | 53.557 | 15.670 | 45.937 | 0.00 | 0.00 |
| ATOM | 5333 | CA   | PHE | X | 355 | 51.851 | 16.723 | 45.689 | 0.00 | 0.00 |
| ATOM | 5334 | HA   | PHE | X | 355 | 51.802 | 17.761 | 45.361 | 0.00 | 0.00 |
| ATOM | 5335 | CB   | PHE | X | 355 | 51.577 | 15.908 | 44.435 | 0.00 | 0.00 |
| ATOM | 5336 | HB2  | PHE | X | 355 | 52.397 | 15.909 | 43.717 | 0.00 | 0.00 |
| ATOM | 5337 | HB3  | PHE | X | 355 | 51.417 | 14.887 | 44.782 | 0.00 | 0.00 |
| ATOM | 5338 | CG   | PHE | X | 355 | 50.335 | 16.256 | 43.667 | 0.00 | 0.00 |
| ATOM | 5339 | CD1  | PHE | X | 355 | 50.353 | 17.360 | 42.820 | 0.00 | 0.00 |
| ATOM | 5340 | HD1  | PHE | X | 355 | 51.219 | 17.979 | 42.641 | 0.00 | 0.00 |
| ATOM | 5341 | CE1  | PHE | X | 355 | 49.225 | 17.689 | 42.042 | 0.00 | 0.00 |
| ATOM | 5342 | HE1  | PHE | X | 355 | 49.298 | 18.426 | 41.256 | 0.00 | 0.00 |
| ATOM | 5343 | CZ   | PHE | X | 355 | 47.991 | 17.054 | 42.182 | 0.00 | 0.00 |
| ATOM | 5344 | HZ   | PHE | X | 355 | 47.145 | 17.352 | 41.579 | 0.00 | 0.00 |
| ATOM | 5345 | CE2  | PHE | X | 355 | 47.945 | 16.021 | 43.123 | 0.00 | 0.00 |
| ATOM | 5346 | HE2  | PHE | X | 355 | 47.042 | 15.438 | 43.221 | 0.00 | 0.00 |
| ATOM | 5347 | CD2  | PHE | X | 355 | 49.081 | 15.690 | 43.917 | 0.00 | 0.00 |
| ATOM | 5348 | HD2  | PHE | X | 355 | 48.878 | 14.931 | 44.657 | 0.00 | 0.00 |
| ATOM | 5349 | C    | PHE | X | 355 | 50.682 | 16.608 | 46.759 | 0.00 | 0.00 |
| ATOM | 5350 | O    | PHE | X | 355 | 49.776 | 17.453 | 46.803 | 0.00 | 0.00 |
| ATOM | 5351 | N    | LEU | X | 356 | 50.698 | 15.526 | 47.562 | 0.00 | 0.00 |
| ATOM | 5352 | H    | LEU | X | 356 | 51.434 | 14.836 | 47.511 | 0.00 | 0.00 |
| ATOM | 5353 | CA   | LEU | X | 356 | 49.691 | 15.298 | 48.649 | 0.00 | 0.00 |
| ATOM | 5354 | HA   | LEU | X | 356 | 48.675 | 15.511 | 48.316 | 0.00 | 0.00 |
| ATOM | 5355 | CB   | LEU | X | 356 | 49.745 | 13.900 | 49.154 | 0.00 | 0.00 |
| ATOM | 5356 | HB2  | LEU | X | 356 | 49.930 | 13.203 | 48.336 | 0.00 | 0.00 |
| ATOM | 5357 | HB3  | LEU | X | 356 | 50.635 | 13.778 | 49.771 | 0.00 | 0.00 |
| ATOM | 5358 | CG   | LEU | X | 356 | 48.541 | 13.291 | 50.015 | 0.00 | 0.00 |
| ATOM | 5359 | HG   | LEU | X | 356 | 48.611 | 12.210 | 49.899 | 0.00 | 0.00 |

|      |      |      |     |   |     |        |        |        |      |      |
|------|------|------|-----|---|-----|--------|--------|--------|------|------|
| ATOM | 5360 | CD1  | LEU | X | 356 | 48.603 | 13.638 | 51.529 | 0.00 | 0.00 |
| ATOM | 5361 | HD11 | LEU | X | 356 | 48.542 | 14.726 | 51.523 | 0.00 | 0.00 |
| ATOM | 5362 | HD12 | LEU | X | 356 | 47.717 | 13.365 | 52.102 | 0.00 | 0.00 |
| ATOM | 5363 | HD13 | LEU | X | 356 | 49.532 | 13.255 | 51.951 | 0.00 | 0.00 |
| ATOM | 5364 | CD2  | LEU | X | 356 | 47.217 | 13.677 | 49.388 | 0.00 | 0.00 |
| ATOM | 5365 | HD21 | LEU | X | 356 | 47.049 | 14.754 | 49.389 | 0.00 | 0.00 |
| ATOM | 5366 | HD22 | LEU | X | 356 | 47.118 | 13.265 | 48.384 | 0.00 | 0.00 |
| ATOM | 5367 | HD23 | LEU | X | 356 | 46.357 | 13.247 | 49.901 | 0.00 | 0.00 |
| ATOM | 5368 | C    | LEU | X | 356 | 49.910 | 16.278 | 49.791 | 0.00 | 0.00 |
| ATOM | 5369 | O    | LEU | X | 356 | 48.922 | 16.914 | 50.241 | 0.00 | 0.00 |
| ATOM | 5370 | N    | ALA | X | 357 | 51.152 | 16.554 | 50.265 | 0.00 | 0.00 |
| ATOM | 5371 | H    | ALA | X | 357 | 51.893 | 16.140 | 49.716 | 0.00 | 0.00 |
| ATOM | 5372 | CA   | ALA | X | 357 | 51.444 | 17.662 | 51.232 | 0.00 | 0.00 |
| ATOM | 5373 | HA   | ALA | X | 357 | 50.971 | 17.318 | 52.152 | 0.00 | 0.00 |
| ATOM | 5374 | CB   | ALA | X | 357 | 52.936 | 17.756 | 51.325 | 0.00 | 0.00 |
| ATOM | 5375 | HB1  | ALA | X | 357 | 53.239 | 18.631 | 51.901 | 0.00 | 0.00 |
| ATOM | 5376 | HB2  | ALA | X | 357 | 53.239 | 16.847 | 51.844 | 0.00 | 0.00 |
| ATOM | 5377 | HB3  | ALA | X | 357 | 53.360 | 17.769 | 50.321 | 0.00 | 0.00 |
| ATOM | 5378 | C    | ALA | X | 357 | 50.874 | 19.001 | 50.712 | 0.00 | 0.00 |
| ATOM | 5379 | O    | ALA | X | 357 | 50.320 | 19.840 | 51.401 | 0.00 | 0.00 |
| ATOM | 5380 | N    | GLY | X | 358 | 51.121 | 19.195 | 49.416 | 0.00 | 0.00 |
| ATOM | 5381 | H    | GLY | X | 358 | 51.831 | 18.578 | 49.049 | 0.00 | 0.00 |
| ATOM | 5382 | CA   | GLY | X | 358 | 50.703 | 20.208 | 48.552 | 0.00 | 0.00 |
| ATOM | 5383 | HA2  | GLY | X | 358 | 51.293 | 21.105 | 48.736 | 0.00 | 0.00 |
| ATOM | 5384 | HA3  | GLY | X | 358 | 50.880 | 19.883 | 47.542 | 0.00 | 0.00 |
| ATOM | 5385 | C    | GLY | X | 358 | 49.165 | 20.597 | 48.545 | 0.00 | 0.00 |
| ATOM | 5386 | O    | GLY | X | 358 | 48.824 | 21.727 | 48.763 | 0.00 | 0.00 |
| ATOM | 5387 | N    | VAL | X | 359 | 48.304 | 19.561 | 48.293 | 0.00 | 0.00 |
| ATOM | 5388 | H    | VAL | X | 359 | 48.647 | 18.637 | 48.074 | 0.00 | 0.00 |
| ATOM | 5389 | CA   | VAL | X | 359 | 46.849 | 19.684 | 48.556 | 0.00 | 0.00 |
| ATOM | 5390 | HA   | VAL | X | 359 | 46.505 | 20.457 | 47.869 | 0.00 | 0.00 |
| ATOM | 5391 | CB   | VAL | X | 359 | 46.035 | 18.387 | 48.126 | 0.00 | 0.00 |
| ATOM | 5392 | HB   | VAL | X | 359 | 46.506 | 17.649 | 48.775 | 0.00 | 0.00 |
| ATOM | 5393 | CG1  | VAL | X | 359 | 44.617 | 18.475 | 48.539 | 0.00 | 0.00 |
| ATOM | 5394 | HG11 | VAL | X | 359 | 44.061 | 19.229 | 47.982 | 0.00 | 0.00 |
| ATOM | 5395 | HG12 | VAL | X | 359 | 44.045 | 17.568 | 48.345 | 0.00 | 0.00 |
| ATOM | 5396 | HG13 | VAL | X | 359 | 44.605 | 18.614 | 49.620 | 0.00 | 0.00 |
| ATOM | 5397 | CG2  | VAL | X | 359 | 46.222 | 17.852 | 46.652 | 0.00 | 0.00 |
| ATOM | 5398 | HG21 | VAL | X | 359 | 45.436 | 17.136 | 46.412 | 0.00 | 0.00 |
| ATOM | 5399 | HG22 | VAL | X | 359 | 45.955 | 18.717 | 46.045 | 0.00 | 0.00 |
| ATOM | 5400 | HG23 | VAL | X | 359 | 47.250 | 17.505 | 46.547 | 0.00 | 0.00 |
| ATOM | 5401 | C    | VAL | X | 359 | 46.593 | 19.979 | 50.063 | 0.00 | 0.00 |
| ATOM | 5402 | O    | VAL | X | 359 | 45.642 | 20.747 | 50.212 | 0.00 | 0.00 |
| ATOM | 5403 | N    | ARG | X | 360 | 47.340 | 19.463 | 51.066 | 0.00 | 0.00 |
| ATOM | 5404 | H    | ARG | X | 360 | 47.976 | 18.764 | 50.708 | 0.00 | 0.00 |
| ATOM | 5405 | CA   | ARG | X | 360 | 47.086 | 19.742 | 52.432 | 0.00 | 0.00 |
| ATOM | 5406 | HA   | ARG | X | 360 | 46.022 | 19.623 | 52.637 | 0.00 | 0.00 |
| ATOM | 5407 | CB   | ARG | X | 360 | 47.763 | 18.698 | 53.362 | 0.00 | 0.00 |
| ATOM | 5408 | HB2  | ARG | X | 360 | 48.786 | 18.579 | 53.005 | 0.00 | 0.00 |
| ATOM | 5409 | HB3  | ARG | X | 360 | 47.889 | 19.016 | 54.397 | 0.00 | 0.00 |
| ATOM | 5410 | CG   | ARG | X | 360 | 47.049 | 17.361 | 53.308 | 0.00 | 0.00 |
| ATOM | 5411 | HG2  | ARG | X | 360 | 46.737 | 17.076 | 52.303 | 0.00 | 0.00 |
| ATOM | 5412 | HG3  | ARG | X | 360 | 47.688 | 16.541 | 53.636 | 0.00 | 0.00 |
| ATOM | 5413 | CD   | ARG | X | 360 | 45.993 | 17.337 | 54.385 | 0.00 | 0.00 |
| ATOM | 5414 | HD2  | ARG | X | 360 | 45.266 | 18.148 | 54.336 | 0.00 | 0.00 |
| ATOM | 5415 | HD3  | ARG | X | 360 | 45.332 | 16.480 | 54.251 | 0.00 | 0.00 |
| ATOM | 5416 | NE   | ARG | X | 360 | 46.634 | 17.287 | 55.725 | 0.00 | 0.00 |
| ATOM | 5417 | HE   | ARG | X | 360 | 47.411 | 16.649 | 55.821 | 0.00 | 0.00 |
| ATOM | 5418 | CZ   | ARG | X | 360 | 46.356 | 17.994 | 56.753 | 0.00 | 0.00 |
| ATOM | 5419 | NH1  | ARG | X | 360 | 45.652 | 19.081 | 56.643 | 0.00 | 0.00 |
| ATOM | 5420 | HH11 | ARG | X | 360 | 45.350 | 19.494 | 55.773 | 0.00 | 0.00 |
| ATOM | 5421 | HH12 | ARG | X | 360 | 45.366 | 19.641 | 57.434 | 0.00 | 0.00 |
| ATOM | 5422 | NH2  | ARG | X | 360 | 46.825 | 17.594 | 57.926 | 0.00 | 0.00 |
| ATOM | 5423 | HH21 | ARG | X | 360 | 47.312 | 16.709 | 57.922 | 0.00 | 0.00 |
| ATOM | 5424 | HH22 | ARG | X | 360 | 46.662 | 18.215 | 58.706 | 0.00 | 0.00 |
| ATOM | 5425 | C    | ARG | X | 360 | 47.427 | 21.226 | 52.903 | 0.00 | 0.00 |
| ATOM | 5426 | O    | ARG | X | 360 | 46.746 | 21.793 | 53.771 | 0.00 | 0.00 |
| ATOM | 5427 | N    | VAL | X | 361 | 48.420 | 21.877 | 52.242 | 0.00 | 0.00 |
| ATOM | 5428 | H    | VAL | X | 361 | 48.864 | 21.419 | 51.459 | 0.00 | 0.00 |
| ATOM | 5429 | CA   | VAL | X | 361 | 48.803 | 23.352 | 52.402 | 0.00 | 0.00 |

|      |      |      |     |   |     |        |        |        |      |      |
|------|------|------|-----|---|-----|--------|--------|--------|------|------|
| ATOM | 5430 | HA   | VAL | X | 361 | 48.612 | 23.634 | 53.438 | 0.00 | 0.00 |
| ATOM | 5431 | CB   | VAL | X | 361 | 50.298 | 23.593 | 52.213 | 0.00 | 0.00 |
| ATOM | 5432 | HB   | VAL | X | 361 | 50.403 | 24.661 | 52.404 | 0.00 | 0.00 |
| ATOM | 5433 | CG1  | VAL | X | 361 | 51.248 | 22.787 | 53.186 | 0.00 | 0.00 |
| ATOM | 5434 | HG11 | VAL | X | 361 | 52.243 | 23.229 | 53.237 | 0.00 | 0.00 |
| ATOM | 5435 | HG12 | VAL | X | 361 | 50.875 | 22.915 | 54.202 | 0.00 | 0.00 |
| ATOM | 5436 | HG13 | VAL | X | 361 | 51.090 | 21.712 | 53.105 | 0.00 | 0.00 |
| ATOM | 5437 | CG2  | VAL | X | 361 | 50.807 | 23.384 | 50.755 | 0.00 | 0.00 |
| ATOM | 5438 | HG21 | VAL | X | 361 | 50.243 | 23.928 | 49.997 | 0.00 | 0.00 |
| ATOM | 5439 | HG22 | VAL | X | 361 | 51.891 | 23.477 | 50.678 | 0.00 | 0.00 |
| ATOM | 5440 | HG23 | VAL | X | 361 | 50.640 | 22.326 | 50.557 | 0.00 | 0.00 |
| ATOM | 5441 | C    | VAL | X | 361 | 47.983 | 24.373 | 51.530 | 0.00 | 0.00 |
| ATOM | 5442 | O    | VAL | X | 361 | 47.628 | 25.447 | 52.020 | 0.00 | 0.00 |
| ATOM | 5443 | N    | GLY | X | 362 | 47.673 | 24.036 | 50.280 | 0.00 | 0.00 |
| ATOM | 5444 | H    | GLY | X | 362 | 48.120 | 23.200 | 49.932 | 0.00 | 0.00 |
| ATOM | 5445 | CA   | GLY | X | 362 | 47.006 | 24.931 | 49.349 | 0.00 | 0.00 |
| ATOM | 5446 | HA2  | GLY | X | 362 | 47.333 | 26.033 | 49.513 | 0.00 | 0.00 |
| ATOM | 5447 | HA3  | GLY | X | 362 | 47.386 | 24.551 | 48.441 | 0.00 | 0.00 |
| ATOM | 5448 | C    | GLY | X | 362 | 45.411 | 24.830 | 49.388 | 0.00 | 0.00 |
| ATOM | 5449 | O    | GLY | X | 362 | 44.739 | 25.748 | 48.953 | 0.00 | 0.00 |
| ATOM | 5450 | N    | VAL | X | 363 | 44.840 | 23.770 | 49.943 | 0.00 | 0.00 |
| ATOM | 5451 | H    | VAL | X | 363 | 45.417 | 23.101 | 50.432 | 0.00 | 0.00 |
| ATOM | 5452 | CA   | VAL | X | 363 | 43.383 | 23.599 | 50.220 | 0.00 | 0.00 |
| ATOM | 5453 | HA   | VAL | X | 363 | 42.918 | 24.462 | 49.744 | 0.00 | 0.00 |
| ATOM | 5454 | CB   | VAL | X | 363 | 42.737 | 22.357 | 49.516 | 0.00 | 0.00 |
| ATOM | 5455 | HB   | VAL | X | 363 | 43.110 | 21.413 | 49.913 | 0.00 | 0.00 |
| ATOM | 5456 | CG1  | VAL | X | 363 | 41.269 | 22.128 | 49.800 | 0.00 | 0.00 |
| ATOM | 5457 | HG11 | VAL | X | 363 | 41.164 | 22.173 | 50.884 | 0.00 | 0.00 |
| ATOM | 5458 | HG12 | VAL | X | 363 | 40.748 | 23.020 | 49.452 | 0.00 | 0.00 |
| ATOM | 5459 | HG13 | VAL | X | 363 | 40.886 | 21.209 | 49.358 | 0.00 | 0.00 |
| ATOM | 5460 | CG2  | VAL | X | 363 | 42.953 | 22.394 | 47.980 | 0.00 | 0.00 |
| ATOM | 5461 | HG21 | VAL | X | 363 | 44.039 | 22.328 | 47.910 | 0.00 | 0.00 |
| ATOM | 5462 | HG22 | VAL | X | 363 | 42.531 | 21.447 | 47.645 | 0.00 | 0.00 |
| ATOM | 5463 | HG23 | VAL | X | 363 | 42.535 | 23.311 | 47.564 | 0.00 | 0.00 |
| ATOM | 5464 | C    | VAL | X | 363 | 43.261 | 23.642 | 51.755 | 0.00 | 0.00 |
| ATOM | 5465 | O    | VAL | X | 363 | 43.672 | 22.671 | 52.445 | 0.00 | 0.00 |
| ATOM | 5466 | N    | PRO | X | 364 | 42.591 | 24.685 | 52.288 | 0.00 | 0.00 |
| ATOM | 5467 | CD   | PRO | X | 364 | 42.325 | 25.975 | 51.662 | 0.00 | 0.00 |
| ATOM | 5468 | HD2  | PRO | X | 364 | 41.294 | 25.896 | 51.319 | 0.00 | 0.00 |
| ATOM | 5469 | HD3  | PRO | X | 364 | 43.064 | 26.248 | 50.908 | 0.00 | 0.00 |
| ATOM | 5470 | CG   | PRO | X | 364 | 42.384 | 27.081 | 52.774 | 0.00 | 0.00 |
| ATOM | 5471 | HG2  | PRO | X | 364 | 41.787 | 27.961 | 52.539 | 0.00 | 0.00 |
| ATOM | 5472 | HG3  | PRO | X | 364 | 43.441 | 27.338 | 52.837 | 0.00 | 0.00 |
| ATOM | 5473 | CB   | PRO | X | 364 | 41.991 | 26.271 | 53.986 | 0.00 | 0.00 |
| ATOM | 5474 | HB2  | PRO | X | 364 | 40.911 | 26.415 | 54.019 | 0.00 | 0.00 |
| ATOM | 5475 | HB3  | PRO | X | 364 | 42.374 | 26.650 | 54.933 | 0.00 | 0.00 |
| ATOM | 5476 | CA   | PRO | X | 364 | 42.349 | 24.837 | 53.776 | 0.00 | 0.00 |
| ATOM | 5477 | HA   | PRO | X | 364 | 43.312 | 24.609 | 54.233 | 0.00 | 0.00 |
| ATOM | 5478 | C    | PRO | X | 364 | 41.414 | 23.764 | 54.272 | 0.00 | 0.00 |
| ATOM | 5479 | O    | PRO | X | 364 | 40.521 | 23.468 | 53.562 | 0.00 | 0.00 |
| ATOM | 5480 | N    | GLN | X | 365 | 41.655 | 23.212 | 55.494 | 0.00 | 0.00 |
| ATOM | 5481 | H    | GLN | X | 365 | 42.471 | 23.644 | 55.904 | 0.00 | 0.00 |
| ATOM | 5482 | CA   | GLN | X | 365 | 40.860 | 22.318 | 56.292 | 0.00 | 0.00 |
| ATOM | 5483 | HA   | GLN | X | 365 | 41.291 | 22.241 | 57.290 | 0.00 | 0.00 |
| ATOM | 5484 | CB   | GLN | X | 365 | 39.401 | 22.792 | 56.362 | 0.00 | 0.00 |
| ATOM | 5485 | HB2  | GLN | X | 365 | 39.001 | 22.569 | 55.373 | 0.00 | 0.00 |
| ATOM | 5486 | HB3  | GLN | X | 365 | 38.827 | 22.111 | 56.990 | 0.00 | 0.00 |
| ATOM | 5487 | CG   | GLN | X | 365 | 39.166 | 24.212 | 56.997 | 0.00 | 0.00 |
| ATOM | 5488 | HG2  | GLN | X | 365 | 39.450 | 24.181 | 58.049 | 0.00 | 0.00 |
| ATOM | 5489 | HG3  | GLN | X | 365 | 39.853 | 24.840 | 56.431 | 0.00 | 0.00 |
| ATOM | 5490 | CD   | GLN | X | 365 | 37.740 | 24.720 | 56.743 | 0.00 | 0.00 |
| ATOM | 5491 | OE1  | GLN | X | 365 | 37.076 | 24.537 | 55.748 | 0.00 | 0.00 |
| ATOM | 5492 | NE2  | GLN | X | 365 | 37.142 | 25.326 | 57.701 | 0.00 | 0.00 |
| ATOM | 5493 | HE21 | GLN | X | 365 | 36.191 | 25.646 | 57.586 | 0.00 | 0.00 |
| ATOM | 5494 | HE22 | GLN | X | 365 | 37.647 | 25.731 | 58.476 | 0.00 | 0.00 |
| ATOM | 5495 | C    | GLN | X | 365 | 40.858 | 20.857 | 55.705 | 0.00 | 0.00 |
| ATOM | 5496 | O    | GLN | X | 365 | 40.379 | 19.927 | 56.400 | 0.00 | 0.00 |
| ATOM | 5497 | N    | VAL | X | 366 | 41.228 | 20.540 | 54.451 | 0.00 | 0.00 |
| ATOM | 5498 | H    | VAL | X | 366 | 41.791 | 21.225 | 53.966 | 0.00 | 0.00 |
| ATOM | 5499 | CA   | VAL | X | 366 | 41.153 | 19.206 | 53.792 | 0.00 | 0.00 |

|      |      |      |     |   |     |        |        |        |      |      |
|------|------|------|-----|---|-----|--------|--------|--------|------|------|
| ATOM | 5500 | HA   | VAL | X | 366 | 40.094 | 18.960 | 53.708 | 0.00 | 0.00 |
| ATOM | 5501 | CB   | VAL | X | 366 | 41.594 | 19.328 | 52.347 | 0.00 | 0.00 |
| ATOM | 5502 | HB   | VAL | X | 366 | 41.289 | 20.292 | 51.938 | 0.00 | 0.00 |
| ATOM | 5503 | CG1  | VAL | X | 366 | 43.115 | 19.360 | 52.231 | 0.00 | 0.00 |
| ATOM | 5504 | HG11 | VAL | X | 366 | 43.358 | 19.404 | 51.170 | 0.00 | 0.00 |
| ATOM | 5505 | HG12 | VAL | X | 366 | 43.621 | 20.054 | 52.902 | 0.00 | 0.00 |
| ATOM | 5506 | HG13 | VAL | X | 366 | 43.457 | 18.341 | 52.412 | 0.00 | 0.00 |
| ATOM | 5507 | CG2  | VAL | X | 366 | 41.017 | 18.161 | 51.495 | 0.00 | 0.00 |
| ATOM | 5508 | HG21 | VAL | X | 366 | 41.116 | 17.175 | 51.948 | 0.00 | 0.00 |
| ATOM | 5509 | HG22 | VAL | X | 366 | 39.954 | 18.375 | 51.382 | 0.00 | 0.00 |
| ATOM | 5510 | HG23 | VAL | X | 366 | 41.611 | 18.217 | 50.582 | 0.00 | 0.00 |
| ATOM | 5511 | C    | VAL | X | 366 | 41.813 | 18.131 | 54.597 | 0.00 | 0.00 |
| ATOM | 5512 | O    | VAL | X | 366 | 42.887 | 18.338 | 55.155 | 0.00 | 0.00 |
| ATOM | 5513 | N    | SER | X | 367 | 41.138 | 16.963 | 54.746 | 0.00 | 0.00 |
| ATOM | 5514 | H    | SER | X | 367 | 40.160 | 16.910 | 54.499 | 0.00 | 0.00 |
| ATOM | 5515 | CA   | SER | X | 367 | 41.561 | 15.864 | 55.586 | 0.00 | 0.00 |
| ATOM | 5516 | HA   | SER | X | 367 | 42.307 | 16.311 | 56.242 | 0.00 | 0.00 |
| ATOM | 5517 | CB   | SER | X | 367 | 40.317 | 15.449 | 56.392 | 0.00 | 0.00 |
| ATOM | 5518 | HB2  | SER | X | 367 | 39.448 | 15.157 | 55.802 | 0.00 | 0.00 |
| ATOM | 5519 | HB3  | SER | X | 367 | 40.515 | 14.664 | 57.122 | 0.00 | 0.00 |
| ATOM | 5520 | OG   | SER | X | 367 | 40.005 | 16.597 | 57.097 | 0.00 | 0.00 |
| ATOM | 5521 | HG   | SER | X | 367 | 39.243 | 16.340 | 57.622 | 0.00 | 0.00 |
| ATOM | 5522 | C    | SER | X | 367 | 42.197 | 14.762 | 54.740 | 0.00 | 0.00 |
| ATOM | 5523 | O    | SER | X | 367 | 42.313 | 14.914 | 53.534 | 0.00 | 0.00 |
| ATOM | 5524 | N    | ASP | X | 368 | 42.741 | 13.708 | 55.322 | 0.00 | 0.00 |
| ATOM | 5525 | H    | ASP | X | 368 | 42.776 | 13.799 | 56.328 | 0.00 | 0.00 |
| ATOM | 5526 | CA   | ASP | X | 368 | 43.760 | 12.882 | 54.728 | 0.00 | 0.00 |
| ATOM | 5527 | HA   | ASP | X | 368 | 44.558 | 13.509 | 54.329 | 0.00 | 0.00 |
| ATOM | 5528 | CB   | ASP | X | 368 | 44.416 | 12.069 | 55.847 | 0.00 | 0.00 |
| ATOM | 5529 | HB2  | ASP | X | 368 | 44.931 | 12.688 | 56.581 | 0.00 | 0.00 |
| ATOM | 5530 | HB3  | ASP | X | 368 | 43.605 | 11.777 | 56.514 | 0.00 | 0.00 |
| ATOM | 5531 | CG   | ASP | X | 368 | 45.172 | 10.834 | 55.330 | 0.00 | 0.00 |
| ATOM | 5532 | OD1  | ASP | X | 368 | 44.592 | 9.781  | 55.211 | 0.00 | 0.00 |
| ATOM | 5533 | OD2  | ASP | X | 368 | 46.428 | 10.909 | 55.297 | 0.00 | 0.00 |
| ATOM | 5534 | C    | ASP | X | 368 | 43.147 | 12.069 | 53.552 | 0.00 | 0.00 |
| ATOM | 5535 | O    | ASP | X | 368 | 43.632 | 12.028 | 52.412 | 0.00 | 0.00 |
| ATOM | 5536 | N    | LEU | X | 369 | 42.033 | 11.431 | 53.803 | 0.00 | 0.00 |
| ATOM | 5537 | H    | LEU | X | 369 | 41.790 | 11.573 | 54.773 | 0.00 | 0.00 |
| ATOM | 5538 | CA   | LEU | X | 369 | 41.121 | 10.620 | 52.936 | 0.00 | 0.00 |
| ATOM | 5539 | HA   | LEU | X | 369 | 41.679 | 9.857  | 52.394 | 0.00 | 0.00 |
| ATOM | 5540 | CB   | LEU | X | 369 | 40.127 | 9.851  | 53.880 | 0.00 | 0.00 |
| ATOM | 5541 | HB2  | LEU | X | 369 | 39.708 | 9.080  | 53.233 | 0.00 | 0.00 |
| ATOM | 5542 | HB3  | LEU | X | 369 | 40.563 | 9.275  | 54.697 | 0.00 | 0.00 |
| ATOM | 5543 | CG   | LEU | X | 369 | 38.975 | 10.656 | 54.478 | 0.00 | 0.00 |
| ATOM | 5544 | HG   | LEU | X | 369 | 38.486 | 11.218 | 53.682 | 0.00 | 0.00 |
| ATOM | 5545 | CD1  | LEU | X | 369 | 38.075 | 9.644  | 55.099 | 0.00 | 0.00 |
| ATOM | 5546 | HD11 | LEU | X | 369 | 37.310 | 10.179 | 55.662 | 0.00 | 0.00 |
| ATOM | 5547 | HD12 | LEU | X | 369 | 37.714 | 8.936  | 54.353 | 0.00 | 0.00 |
| ATOM | 5548 | HD13 | LEU | X | 369 | 38.651 | 9.052  | 55.810 | 0.00 | 0.00 |
| ATOM | 5549 | CD2  | LEU | X | 369 | 39.378 | 11.649 | 55.576 | 0.00 | 0.00 |
| ATOM | 5550 | HD21 | LEU | X | 369 | 40.046 | 11.189 | 56.304 | 0.00 | 0.00 |
| ATOM | 5551 | HD22 | LEU | X | 369 | 39.948 | 12.467 | 55.136 | 0.00 | 0.00 |
| ATOM | 5552 | HD23 | LEU | X | 369 | 38.539 | 12.108 | 56.098 | 0.00 | 0.00 |
| ATOM | 5553 | C    | LEU | X | 369 | 40.457 | 11.491 | 51.900 | 0.00 | 0.00 |
| ATOM | 5554 | O    | LEU | X | 369 | 40.296 | 11.051 | 50.784 | 0.00 | 0.00 |
| ATOM | 5555 | N    | ALA | X | 370 | 40.226 | 12.756 | 52.203 | 0.00 | 0.00 |
| ATOM | 5556 | H    | ALA | X | 370 | 40.583 | 13.160 | 53.057 | 0.00 | 0.00 |
| ATOM | 5557 | CA   | ALA | X | 370 | 39.705 | 13.680 | 51.204 | 0.00 | 0.00 |
| ATOM | 5558 | HA   | ALA | X | 370 | 38.952 | 13.181 | 50.594 | 0.00 | 0.00 |
| ATOM | 5559 | CB   | ALA | X | 370 | 39.005 | 14.841 | 51.852 | 0.00 | 0.00 |
| ATOM | 5560 | HB1  | ALA | X | 370 | 38.154 | 14.505 | 52.444 | 0.00 | 0.00 |
| ATOM | 5561 | HB2  | ALA | X | 370 | 39.639 | 15.236 | 52.645 | 0.00 | 0.00 |
| ATOM | 5562 | HB3  | ALA | X | 370 | 38.795 | 15.598 | 51.095 | 0.00 | 0.00 |
| ATOM | 5563 | C    | ALA | X | 370 | 40.793 | 14.064 | 50.316 | 0.00 | 0.00 |
| ATOM | 5564 | O    | ALA | X | 370 | 40.569 | 14.093 | 49.080 | 0.00 | 0.00 |
| ATOM | 5565 | N    | ALA | X | 371 | 42.001 | 14.412 | 50.751 | 0.00 | 0.00 |
| ATOM | 5566 | H    | ALA | X | 371 | 42.203 | 14.235 | 51.724 | 0.00 | 0.00 |
| ATOM | 5567 | CA   | ALA | X | 371 | 43.132 | 14.899 | 49.950 | 0.00 | 0.00 |
| ATOM | 5568 | HA   | ALA | X | 371 | 42.662 | 15.627 | 49.289 | 0.00 | 0.00 |
| ATOM | 5569 | CB   | ALA | X | 371 | 44.132 | 15.500 | 50.910 | 0.00 | 0.00 |

|      |      |      |     |   |     |        |        |        |      |      |
|------|------|------|-----|---|-----|--------|--------|--------|------|------|
| ATOM | 5570 | HB1  | ALA | X | 371 | 44.453 | 14.746 | 51.629 | 0.00 | 0.00 |
| ATOM | 5571 | HB2  | ALA | X | 371 | 45.024 | 15.842 | 50.386 | 0.00 | 0.00 |
| ATOM | 5572 | HB3  | ALA | X | 371 | 43.598 | 16.287 | 51.442 | 0.00 | 0.00 |
| ATOM | 5573 | C    | ALA | X | 371 | 43.645 | 13.799 | 49.066 | 0.00 | 0.00 |
| ATOM | 5574 | O    | ALA | X | 371 | 43.808 | 13.996 | 47.866 | 0.00 | 0.00 |
| ATOM | 5575 | N    | GLU | X | 372 | 43.922 | 12.586 | 49.651 | 0.00 | 0.00 |
| ATOM | 5576 | H    | GLU | X | 372 | 43.767 | 12.527 | 50.647 | 0.00 | 0.00 |
| ATOM | 5577 | CA   | GLU | X | 372 | 44.075 | 11.359 | 48.832 | 0.00 | 0.00 |
| ATOM | 5578 | HA   | GLU | X | 372 | 44.995 | 11.433 | 48.253 | 0.00 | 0.00 |
| ATOM | 5579 | CB   | GLU | X | 372 | 44.124 | 10.125 | 49.757 | 0.00 | 0.00 |
| ATOM | 5580 | HB2  | GLU | X | 372 | 43.272 | 10.313 | 50.410 | 0.00 | 0.00 |
| ATOM | 5581 | HB3  | GLU | X | 372 | 43.897 | 9.220  | 49.193 | 0.00 | 0.00 |
| ATOM | 5582 | CG   | GLU | X | 372 | 45.466 | 10.038 | 50.514 | 0.00 | 0.00 |
| ATOM | 5583 | HG2  | GLU | X | 372 | 46.301 | 10.026 | 49.813 | 0.00 | 0.00 |
| ATOM | 5584 | HG3  | GLU | X | 372 | 45.642 | 10.899 | 51.159 | 0.00 | 0.00 |
| ATOM | 5585 | CD   | GLU | X | 372 | 45.590 | 8.675  | 51.218 | 0.00 | 0.00 |
| ATOM | 5586 | OE1  | GLU | X | 372 | 44.661 | 7.814  | 51.262 | 0.00 | 0.00 |
| ATOM | 5587 | OE2  | GLU | X | 372 | 46.705 | 8.430  | 51.731 | 0.00 | 0.00 |
| ATOM | 5588 | C    | GLU | X | 372 | 43.071 | 11.254 | 47.687 | 0.00 | 0.00 |
| ATOM | 5589 | O    | GLU | X | 372 | 43.438 | 10.963 | 46.579 | 0.00 | 0.00 |
| ATOM | 5590 | N    | ALA | X | 373 | 41.735 | 11.424 | 47.966 | 0.00 | 0.00 |
| ATOM | 5591 | H    | ALA | X | 373 | 41.404 | 11.658 | 48.890 | 0.00 | 0.00 |
| ATOM | 5592 | CA   | ALA | X | 373 | 40.713 | 11.266 | 46.960 | 0.00 | 0.00 |
| ATOM | 5593 | HA   | ALA | X | 373 | 40.946 | 10.485 | 46.236 | 0.00 | 0.00 |
| ATOM | 5594 | CB   | ALA | X | 373 | 39.478 | 10.783 | 47.650 | 0.00 | 0.00 |
| ATOM | 5595 | HB1  | ALA | X | 373 | 39.258 | 11.465 | 48.471 | 0.00 | 0.00 |
| ATOM | 5596 | HB2  | ALA | X | 373 | 38.685 | 10.654 | 46.913 | 0.00 | 0.00 |
| ATOM | 5597 | HB3  | ALA | X | 373 | 39.553 | 9.822  | 48.159 | 0.00 | 0.00 |
| ATOM | 5598 | C    | ALA | X | 373 | 40.608 | 12.456 | 45.984 | 0.00 | 0.00 |
| ATOM | 5599 | O    | ALA | X | 373 | 40.315 | 12.304 | 44.761 | 0.00 | 0.00 |
| ATOM | 5600 | N    | VAL | X | 374 | 40.875 | 13.703 | 46.414 | 0.00 | 0.00 |
| ATOM | 5601 | H    | VAL | X | 374 | 40.980 | 13.703 | 47.419 | 0.00 | 0.00 |
| ATOM | 5602 | CA   | VAL | X | 374 | 41.267 | 14.834 | 45.539 | 0.00 | 0.00 |
| ATOM | 5603 | HA   | VAL | X | 374 | 40.382 | 14.878 | 44.903 | 0.00 | 0.00 |
| ATOM | 5604 | CB   | VAL | X | 374 | 41.643 | 16.193 | 46.183 | 0.00 | 0.00 |
| ATOM | 5605 | HB   | VAL | X | 374 | 42.412 | 16.099 | 46.949 | 0.00 | 0.00 |
| ATOM | 5606 | CG1  | VAL | X | 374 | 42.157 | 17.271 | 45.179 | 0.00 | 0.00 |
| ATOM | 5607 | HG11 | VAL | X | 374 | 41.447 | 17.441 | 44.369 | 0.00 | 0.00 |
| ATOM | 5608 | HG12 | VAL | X | 374 | 42.324 | 18.177 | 45.760 | 0.00 | 0.00 |
| ATOM | 5609 | HG13 | VAL | X | 374 | 43.077 | 16.949 | 44.692 | 0.00 | 0.00 |
| ATOM | 5610 | CG2  | VAL | X | 374 | 40.406 | 16.759 | 46.984 | 0.00 | 0.00 |
| ATOM | 5611 | HG21 | VAL | X | 374 | 40.034 | 16.137 | 47.798 | 0.00 | 0.00 |
| ATOM | 5612 | HG22 | VAL | X | 374 | 40.723 | 17.713 | 47.406 | 0.00 | 0.00 |
| ATOM | 5613 | HG23 | VAL | X | 374 | 39.491 | 16.922 | 46.414 | 0.00 | 0.00 |
| ATOM | 5614 | C    | VAL | X | 374 | 42.454 | 14.469 | 44.659 | 0.00 | 0.00 |
| ATOM | 5615 | O    | VAL | X | 374 | 42.395 | 14.628 | 43.435 | 0.00 | 0.00 |
| ATOM | 5616 | N    | VAL | X | 375 | 43.511 | 13.832 | 45.150 | 0.00 | 0.00 |
| ATOM | 5617 | H    | VAL | X | 375 | 43.546 | 13.856 | 46.159 | 0.00 | 0.00 |
| ATOM | 5618 | CA   | VAL | X | 375 | 44.735 | 13.456 | 44.368 | 0.00 | 0.00 |
| ATOM | 5619 | HA   | VAL | X | 375 | 45.007 | 14.333 | 43.781 | 0.00 | 0.00 |
| ATOM | 5620 | CB   | VAL | X | 375 | 45.911 | 13.140 | 45.349 | 0.00 | 0.00 |
| ATOM | 5621 | HB   | VAL | X | 375 | 45.617 | 12.418 | 46.110 | 0.00 | 0.00 |
| ATOM | 5622 | CG1  | VAL | X | 375 | 47.098 | 12.511 | 44.642 | 0.00 | 0.00 |
| ATOM | 5623 | HG11 | VAL | X | 375 | 46.753 | 11.575 | 44.202 | 0.00 | 0.00 |
| ATOM | 5624 | HG12 | VAL | X | 375 | 47.446 | 13.230 | 43.900 | 0.00 | 0.00 |
| ATOM | 5625 | HG13 | VAL | X | 375 | 47.871 | 12.279 | 45.374 | 0.00 | 0.00 |
| ATOM | 5626 | CG2  | VAL | X | 375 | 46.359 | 14.477 | 45.955 | 0.00 | 0.00 |
| ATOM | 5627 | HG21 | VAL | X | 375 | 47.271 | 14.476 | 46.551 | 0.00 | 0.00 |
| ATOM | 5628 | HG22 | VAL | X | 375 | 46.605 | 15.155 | 45.137 | 0.00 | 0.00 |
| ATOM | 5629 | HG23 | VAL | X | 375 | 45.620 | 14.861 | 46.657 | 0.00 | 0.00 |
| ATOM | 5630 | C    | VAL | X | 375 | 44.365 | 12.302 | 43.471 | 0.00 | 0.00 |
| ATOM | 5631 | O    | VAL | X | 375 | 44.745 | 12.363 | 42.281 | 0.00 | 0.00 |
| ATOM | 5632 | N    | LEU | X | 376 | 43.382 | 11.416 | 43.761 | 0.00 | 0.00 |
| ATOM | 5633 | H    | LEU | X | 376 | 43.158 | 11.239 | 44.730 | 0.00 | 0.00 |
| ATOM | 5634 | CA   | LEU | X | 376 | 42.869 | 10.466 | 42.731 | 0.00 | 0.00 |
| ATOM | 5635 | HA   | LEU | X | 376 | 43.708 | 9.910  | 42.311 | 0.00 | 0.00 |
| ATOM | 5636 | CB   | LEU | X | 376 | 41.970 | 9.490  | 43.511 | 0.00 | 0.00 |
| ATOM | 5637 | HB2  | LEU | X | 376 | 42.525 | 9.212  | 44.406 | 0.00 | 0.00 |
| ATOM | 5638 | HB3  | LEU | X | 376 | 41.052 | 10.012 | 43.779 | 0.00 | 0.00 |
| ATOM | 5639 | CG   | LEU | X | 376 | 41.619 | 8.126  | 42.773 | 0.00 | 0.00 |

|      |      |      |     |   |     |        |        |        |      |      |
|------|------|------|-----|---|-----|--------|--------|--------|------|------|
| ATOM | 5640 | HG   | LEU | X | 376 | 41.087 | 8.310  | 41.840 | 0.00 | 0.00 |
| ATOM | 5641 | CD1  | LEU | X | 376 | 42.983 | 7.461  | 42.329 | 0.00 | 0.00 |
| ATOM | 5642 | HD11 | LEU | X | 376 | 43.668 | 7.757  | 43.124 | 0.00 | 0.00 |
| ATOM | 5643 | HD12 | LEU | X | 376 | 42.954 | 6.383  | 42.170 | 0.00 | 0.00 |
| ATOM | 5644 | HD13 | LEU | X | 376 | 43.201 | 7.916  | 41.363 | 0.00 | 0.00 |
| ATOM | 5645 | CD2  | LEU | X | 376 | 40.838 | 7.198  | 43.606 | 0.00 | 0.00 |
| ATOM | 5646 | HD21 | LEU | X | 376 | 40.513 | 6.250  | 43.177 | 0.00 | 0.00 |
| ATOM | 5647 | HD22 | LEU | X | 376 | 41.312 | 6.989  | 44.565 | 0.00 | 0.00 |
| ATOM | 5648 | HD23 | LEU | X | 376 | 39.843 | 7.633  | 43.701 | 0.00 | 0.00 |
| ATOM | 5649 | C    | LEU | X | 376 | 42.188 | 11.272 | 41.492 | 0.00 | 0.00 |
| ATOM | 5650 | O    | LEU | X | 376 | 42.552 | 10.947 | 40.323 | 0.00 | 0.00 |
| ATOM | 5651 | N    | HIE | X | 377 | 41.252 | 12.153 | 41.688 | 0.00 | 0.00 |
| ATOM | 5652 | H    | HIE | X | 377 | 40.943 | 12.266 | 42.643 | 0.00 | 0.00 |
| ATOM | 5653 | CA   | HIE | X | 377 | 40.713 | 12.944 | 40.578 | 0.00 | 0.00 |
| ATOM | 5654 | HA   | HIE | X | 377 | 40.245 | 12.264 | 39.866 | 0.00 | 0.00 |
| ATOM | 5655 | CB   | HIE | X | 377 | 39.621 | 13.799 | 41.209 | 0.00 | 0.00 |
| ATOM | 5656 | HB2  | HIE | X | 377 | 39.048 | 13.206 | 41.921 | 0.00 | 0.00 |
| ATOM | 5657 | HB3  | HIE | X | 377 | 40.081 | 14.679 | 41.657 | 0.00 | 0.00 |
| ATOM | 5658 | CG   | HIE | X | 377 | 38.537 | 14.297 | 40.228 | 0.00 | 0.00 |
| ATOM | 5659 | ND1  | HIE | X | 377 | 37.651 | 13.439 | 39.572 | 0.00 | 0.00 |
| ATOM | 5660 | CE1  | HIE | X | 377 | 36.949 | 14.216 | 38.749 | 0.00 | 0.00 |
| ATOM | 5661 | HE1  | HIE | X | 377 | 36.233 | 13.813 | 38.049 | 0.00 | 0.00 |
| ATOM | 5662 | NE2  | HIE | X | 377 | 37.353 | 15.544 | 38.853 | 0.00 | 0.00 |
| ATOM | 5663 | HE2  | HIE | X | 377 | 37.102 | 16.221 | 38.146 | 0.00 | 0.00 |
| ATOM | 5664 | CD2  | HIE | X | 377 | 38.358 | 15.587 | 39.784 | 0.00 | 0.00 |
| ATOM | 5665 | HD2  | HIE | X | 377 | 38.991 | 16.434 | 40.006 | 0.00 | 0.00 |
| ATOM | 5666 | C    | HIE | X | 377 | 41.750 | 13.787 | 39.774 | 0.00 | 0.00 |
| ATOM | 5667 | O    | HIE | X | 377 | 41.571 | 13.978 | 38.505 | 0.00 | 0.00 |
| ATOM | 5668 | N    | TYR | X | 378 | 42.790 | 14.217 | 40.507 | 0.00 | 0.00 |
| ATOM | 5669 | H    | TYR | X | 378 | 42.738 | 14.154 | 41.513 | 0.00 | 0.00 |
| ATOM | 5670 | CA   | TYR | X | 378 | 43.831 | 15.124 | 39.894 | 0.00 | 0.00 |
| ATOM | 5671 | HA   | TYR | X | 378 | 43.302 | 15.637 | 39.091 | 0.00 | 0.00 |
| ATOM | 5672 | CB   | TYR | X | 378 | 44.123 | 16.288 | 40.877 | 0.00 | 0.00 |
| ATOM | 5673 | HB2  | TYR | X | 378 | 44.139 | 15.948 | 41.912 | 0.00 | 0.00 |
| ATOM | 5674 | HB3  | TYR | X | 378 | 45.113 | 16.662 | 40.614 | 0.00 | 0.00 |
| ATOM | 5675 | CG   | TYR | X | 378 | 43.205 | 17.469 | 40.816 | 0.00 | 0.00 |
| ATOM | 5676 | CD1  | TYR | X | 378 | 43.500 | 18.705 | 40.180 | 0.00 | 0.00 |
| ATOM | 5677 | HD1  | TYR | X | 378 | 44.359 | 18.707 | 39.526 | 0.00 | 0.00 |
| ATOM | 5678 | CE1  | TYR | X | 378 | 42.624 | 19.808 | 40.108 | 0.00 | 0.00 |
| ATOM | 5679 | HE1  | TYR | X | 378 | 42.866 | 20.753 | 39.644 | 0.00 | 0.00 |
| ATOM | 5680 | CZ   | TYR | X | 378 | 41.440 | 19.822 | 40.887 | 0.00 | 0.00 |
| ATOM | 5681 | OH   | TYR | X | 378 | 40.628 | 20.909 | 40.896 | 0.00 | 0.00 |
| ATOM | 5682 | HH   | TYR | X | 378 | 40.886 | 21.705 | 40.425 | 0.00 | 0.00 |
| ATOM | 5683 | CE2  | TYR | X | 378 | 41.086 | 18.645 | 41.498 | 0.00 | 0.00 |
| ATOM | 5684 | HE2  | TYR | X | 378 | 40.109 | 18.505 | 41.937 | 0.00 | 0.00 |
| ATOM | 5685 | CD2  | TYR | X | 378 | 41.992 | 17.491 | 41.592 | 0.00 | 0.00 |
| ATOM | 5686 | HD2  | TYR | X | 378 | 41.661 | 16.599 | 42.104 | 0.00 | 0.00 |
| ATOM | 5687 | C    | TYR | X | 378 | 45.016 | 14.364 | 39.286 | 0.00 | 0.00 |
| ATOM | 5688 | O    | TYR | X | 378 | 45.970 | 15.089 | 38.848 | 0.00 | 0.00 |
| ATOM | 5689 | N    | THR | X | 379 | 44.982 | 12.998 | 39.109 | 0.00 | 0.00 |
| ATOM | 5690 | H    | THR | X | 379 | 44.154 | 12.505 | 39.413 | 0.00 | 0.00 |
| ATOM | 5691 | CA   | THR | X | 379 | 46.017 | 12.112 | 38.582 | 0.00 | 0.00 |
| ATOM | 5692 | HA   | THR | X | 379 | 46.957 | 12.285 | 39.106 | 0.00 | 0.00 |
| ATOM | 5693 | CB   | THR | X | 379 | 45.605 | 10.658 | 38.879 | 0.00 | 0.00 |
| ATOM | 5694 | HB   | THR | X | 379 | 44.561 | 10.498 | 38.608 | 0.00 | 0.00 |
| ATOM | 5695 | CG2  | THR | X | 379 | 46.421 | 9.522  | 38.122 | 0.00 | 0.00 |
| ATOM | 5696 | HG21 | THR | X | 379 | 45.968 | 9.438  | 37.134 | 0.00 | 0.00 |
| ATOM | 5697 | HG22 | THR | X | 379 | 47.479 | 9.769  | 38.030 | 0.00 | 0.00 |
| ATOM | 5698 | HG23 | THR | X | 379 | 46.350 | 8.602  | 38.702 | 0.00 | 0.00 |
| ATOM | 5699 | OG1  | THR | X | 379 | 45.573 | 10.549 | 40.302 | 0.00 | 0.00 |
| ATOM | 5700 | HG1  | THR | X | 379 | 44.680 | 10.331 | 40.579 | 0.00 | 0.00 |
| ATOM | 5701 | C    | THR | X | 379 | 46.269 | 12.258 | 37.122 | 0.00 | 0.00 |
| ATOM | 5702 | O    | THR | X | 379 | 45.248 | 12.522 | 36.499 | 0.00 | 0.00 |
| ATOM | 5703 | N    | ASP | X | 380 | 47.461 | 12.077 | 36.544 | 0.00 | 0.00 |
| ATOM | 5704 | H    | ASP | X | 380 | 48.254 | 11.884 | 37.138 | 0.00 | 0.00 |
| ATOM | 5705 | CA   | ASP | X | 380 | 47.713 | 11.662 | 35.200 | 0.00 | 0.00 |
| ATOM | 5706 | HA   | ASP | X | 380 | 46.870 | 11.986 | 34.589 | 0.00 | 0.00 |
| ATOM | 5707 | CB   | ASP | X | 380 | 48.915 | 12.512 | 34.708 | 0.00 | 0.00 |
| ATOM | 5708 | HB2  | ASP | X | 380 | 48.783 | 13.543 | 35.037 | 0.00 | 0.00 |
| ATOM | 5709 | HB3  | ASP | X | 380 | 49.857 | 12.215 | 35.169 | 0.00 | 0.00 |

|      |      |      |     |   |     |        |        |        |      |      |
|------|------|------|-----|---|-----|--------|--------|--------|------|------|
| ATOM | 5710 | CG   | ASP | X | 380 | 49.042 | 12.469 | 33.204 | 0.00 | 0.00 |
| ATOM | 5711 | OD1  | ASP | X | 380 | 49.052 | 11.369 | 32.528 | 0.00 | 0.00 |
| ATOM | 5712 | OD2  | ASP | X | 380 | 49.154 | 13.511 | 32.543 | 0.00 | 0.00 |
| ATOM | 5713 | C    | ASP | X | 380 | 47.834 | 10.156 | 35.044 | 0.00 | 0.00 |
| ATOM | 5714 | O    | ASP | X | 380 | 48.678 | 9.567  | 35.718 | 0.00 | 0.00 |
| ATOM | 5715 | N    | TRP | X | 381 | 46.970 | 9.588  | 34.221 | 0.00 | 0.00 |
| ATOM | 5716 | H    | TRP | X | 381 | 46.310 | 10.214 | 33.782 | 0.00 | 0.00 |
| ATOM | 5717 | CA   | TRP | X | 381 | 46.722 | 8.126  | 34.209 | 0.00 | 0.00 |
| ATOM | 5718 | HA   | TRP | X | 381 | 46.642 | 7.787  | 35.242 | 0.00 | 0.00 |
| ATOM | 5719 | CB   | TRP | X | 381 | 45.317 | 7.867  | 33.636 | 0.00 | 0.00 |
| ATOM | 5720 | HB2  | TRP | X | 381 | 45.331 | 8.180  | 32.592 | 0.00 | 0.00 |
| ATOM | 5721 | HB3  | TRP | X | 381 | 45.155 | 6.789  | 33.613 | 0.00 | 0.00 |
| ATOM | 5722 | CG   | TRP | X | 381 | 44.218 | 8.666  | 34.381 | 0.00 | 0.00 |
| ATOM | 5723 | CD1  | TRP | X | 381 | 43.623 | 9.831  | 33.914 | 0.00 | 0.00 |
| ATOM | 5724 | HD1  | TRP | X | 381 | 44.007 | 10.354 | 33.051 | 0.00 | 0.00 |
| ATOM | 5725 | NE1  | TRP | X | 381 | 42.705 | 10.307 | 34.842 | 0.00 | 0.00 |
| ATOM | 5726 | HE1  | TRP | X | 381 | 42.306 | 11.235 | 34.818 | 0.00 | 0.00 |
| ATOM | 5727 | CE2  | TRP | X | 381 | 42.777 | 9.504  | 35.998 | 0.00 | 0.00 |
| ATOM | 5728 | CZ2  | TRP | X | 381 | 42.274 | 9.640  | 37.280 | 0.00 | 0.00 |
| ATOM | 5729 | HZ2  | TRP | X | 381 | 41.777 | 10.573 | 37.504 | 0.00 | 0.00 |
| ATOM | 5730 | CH2  | TRP | X | 381 | 42.465 | 8.658  | 38.253 | 0.00 | 0.00 |
| ATOM | 5731 | HH2  | TRP | X | 381 | 42.107 | 8.794  | 39.263 | 0.00 | 0.00 |
| ATOM | 5732 | CZ3  | TRP | X | 381 | 43.070 | 7.450  | 37.871 | 0.00 | 0.00 |
| ATOM | 5733 | HZ3  | TRP | X | 381 | 43.292 | 6.729  | 38.644 | 0.00 | 0.00 |
| ATOM | 5734 | CE3  | TRP | X | 381 | 43.672 | 7.363  | 36.605 | 0.00 | 0.00 |
| ATOM | 5735 | HE3  | TRP | X | 381 | 44.322 | 6.547  | 36.325 | 0.00 | 0.00 |
| ATOM | 5736 | CD2  | TRP | X | 381 | 43.563 | 8.398  | 35.678 | 0.00 | 0.00 |
| ATOM | 5737 | C    | TRP | X | 381 | 47.837 | 7.488  | 33.383 | 0.00 | 0.00 |
| ATOM | 5738 | O    | TRP | X | 381 | 48.062 | 6.279  | 33.571 | 0.00 | 0.00 |
| ATOM | 5739 | N    | LEU | X | 382 | 48.511 | 8.263  | 32.537 | 0.00 | 0.00 |
| ATOM | 5740 | H    | LEU | X | 382 | 48.312 | 9.244  | 32.403 | 0.00 | 0.00 |
| ATOM | 5741 | CA   | LEU | X | 382 | 49.726 | 7.753  | 31.880 | 0.00 | 0.00 |
| ATOM | 5742 | HA   | LEU | X | 382 | 49.706 | 6.669  | 31.766 | 0.00 | 0.00 |
| ATOM | 5743 | CB   | LEU | X | 382 | 49.708 | 8.323  | 30.407 | 0.00 | 0.00 |
| ATOM | 5744 | HB2  | LEU | X | 382 | 48.833 | 7.989  | 29.849 | 0.00 | 0.00 |
| ATOM | 5745 | HB3  | LEU | X | 382 | 49.820 | 9.400  | 30.525 | 0.00 | 0.00 |
| ATOM | 5746 | CG   | LEU | X | 382 | 50.998 | 7.779  | 29.737 | 0.00 | 0.00 |
| ATOM | 5747 | HG   | LEU | X | 382 | 51.888 | 8.091  | 30.282 | 0.00 | 0.00 |
| ATOM | 5748 | CD1  | LEU | X | 382 | 51.100 | 6.235  | 29.563 | 0.00 | 0.00 |
| ATOM | 5749 | HD11 | LEU | X | 382 | 51.828 | 5.885  | 28.831 | 0.00 | 0.00 |
| ATOM | 5750 | HD12 | LEU | X | 382 | 51.235 | 5.651  | 30.473 | 0.00 | 0.00 |
| ATOM | 5751 | HD13 | LEU | X | 382 | 50.213 | 5.777  | 29.126 | 0.00 | 0.00 |
| ATOM | 5752 | CD2  | LEU | X | 382 | 51.097 | 8.279  | 28.249 | 0.00 | 0.00 |
| ATOM | 5753 | HD21 | LEU | X | 382 | 50.369 | 7.752  | 27.632 | 0.00 | 0.00 |
| ATOM | 5754 | HD22 | LEU | X | 382 | 50.752 | 9.311  | 28.185 | 0.00 | 0.00 |
| ATOM | 5755 | HD23 | LEU | X | 382 | 52.154 | 8.432  | 28.027 | 0.00 | 0.00 |
| ATOM | 5756 | C    | LEU | X | 382 | 50.994 | 8.120  | 32.695 | 0.00 | 0.00 |
| ATOM | 5757 | O    | LEU | X | 382 | 51.888 | 7.354  | 32.732 | 0.00 | 0.00 |
| ATOM | 5758 | N    | HIE | X | 383 | 50.962 | 9.312  | 33.364 | 0.00 | 0.00 |
| ATOM | 5759 | H    | HIE | X | 383 | 50.162 | 9.898  | 33.170 | 0.00 | 0.00 |
| ATOM | 5760 | CA   | HIE | X | 383 | 52.135 | 9.871  | 34.064 | 0.00 | 0.00 |
| ATOM | 5761 | HA   | HIE | X | 383 | 52.960 | 9.162  | 33.992 | 0.00 | 0.00 |
| ATOM | 5762 | CB   | HIE | X | 383 | 52.510 | 11.201 | 33.333 | 0.00 | 0.00 |
| ATOM | 5763 | HB2  | HIE | X | 383 | 51.664 | 11.887 | 33.344 | 0.00 | 0.00 |
| ATOM | 5764 | HB3  | HIE | X | 383 | 53.365 | 11.731 | 33.753 | 0.00 | 0.00 |
| ATOM | 5765 | CG   | HIE | X | 383 | 52.856 | 10.917 | 31.909 | 0.00 | 0.00 |
| ATOM | 5766 | ND1  | HIE | X | 383 | 53.887 | 10.252 | 31.278 | 0.00 | 0.00 |
| ATOM | 5767 | CE1  | HIE | X | 383 | 53.612 | 10.262 | 29.998 | 0.00 | 0.00 |
| ATOM | 5768 | HE1  | HIE | X | 383 | 54.131 | 9.623  | 29.298 | 0.00 | 0.00 |
| ATOM | 5769 | NE2  | HIE | X | 383 | 52.461 | 10.922 | 29.722 | 0.00 | 0.00 |
| ATOM | 5770 | HE2  | HIE | X | 383 | 51.898 | 10.904 | 28.884 | 0.00 | 0.00 |
| ATOM | 5771 | CD2  | HIE | X | 383 | 51.999 | 11.339 | 30.938 | 0.00 | 0.00 |
| ATOM | 5772 | HD2  | HIE | X | 383 | 51.031 | 11.788 | 31.107 | 0.00 | 0.00 |
| ATOM | 5773 | C    | HIE | X | 383 | 51.889 | 10.178 | 35.612 | 0.00 | 0.00 |
| ATOM | 5774 | O    | HIE | X | 383 | 52.117 | 11.372 | 36.086 | 0.00 | 0.00 |
| ATOM | 5775 | N    | PRO | X | 384 | 51.460 | 9.207  | 36.422 | 0.00 | 0.00 |
| ATOM | 5776 | CD   | PRO | X | 384 | 51.344 | 7.757  | 36.067 | 0.00 | 0.00 |
| ATOM | 5777 | HD2  | PRO | X | 384 | 52.268 | 7.435  | 35.587 | 0.00 | 0.00 |
| ATOM | 5778 | HD3  | PRO | X | 384 | 50.456 | 7.624  | 35.449 | 0.00 | 0.00 |
| ATOM | 5779 | CG   | PRO | X | 384 | 51.118 | 7.002  | 37.363 | 0.00 | 0.00 |

|      |      |     |     |   |     |        |        |        |      |      |
|------|------|-----|-----|---|-----|--------|--------|--------|------|------|
| ATOM | 5780 | HG2 | PRO | X | 384 | 52.063 | 6.740  | 37.840 | 0.00 | 0.00 |
| ATOM | 5781 | HG3 | PRO | X | 384 | 50.534 | 6.103  | 37.168 | 0.00 | 0.00 |
| ATOM | 5782 | CB  | PRO | X | 384 | 50.430 | 8.062  | 38.207 | 0.00 | 0.00 |
| ATOM | 5783 | HB2 | PRO | X | 384 | 50.496 | 7.842  | 39.272 | 0.00 | 0.00 |
| ATOM | 5784 | HB3 | PRO | X | 384 | 49.372 | 8.233  | 38.009 | 0.00 | 0.00 |
| ATOM | 5785 | CA  | PRO | X | 384 | 51.210 | 9.345  | 37.834 | 0.00 | 0.00 |
| ATOM | 5786 | HA  | PRO | X | 384 | 50.491 | 10.125 | 38.085 | 0.00 | 0.00 |
| ATOM | 5787 | C   | PRO | X | 384 | 52.354 | 9.717  | 38.743 | 0.00 | 0.00 |
| ATOM | 5788 | O   | PRO | X | 384 | 52.237 | 9.898  | 39.960 | 0.00 | 0.00 |
| ATOM | 5789 | N   | GLU | X | 385 | 53.594 | 9.950  | 38.231 | 0.00 | 0.00 |
| ATOM | 5790 | H   | GLU | X | 385 | 53.680 | 10.025 | 37.227 | 0.00 | 0.00 |
| ATOM | 5791 | CA  | GLU | X | 385 | 54.799 | 10.428 | 39.040 | 0.00 | 0.00 |
| ATOM | 5792 | HA  | GLU | X | 385 | 54.447 | 10.831 | 39.989 | 0.00 | 0.00 |
| ATOM | 5793 | CB  | GLU | X | 385 | 55.789 | 9.260  | 39.265 | 0.00 | 0.00 |
| ATOM | 5794 | HB2 | GLU | X | 385 | 56.024 | 8.853  | 38.281 | 0.00 | 0.00 |
| ATOM | 5795 | HB3 | GLU | X | 385 | 56.678 | 9.533  | 39.833 | 0.00 | 0.00 |
| ATOM | 5796 | CG  | GLU | X | 385 | 55.225 | 8.093  | 40.005 | 0.00 | 0.00 |
| ATOM | 5797 | HG2 | GLU | X | 385 | 55.028 | 8.408  | 41.029 | 0.00 | 0.00 |
| ATOM | 5798 | HG3 | GLU | X | 385 | 54.303 | 7.746  | 39.537 | 0.00 | 0.00 |
| ATOM | 5799 | CD  | GLU | X | 385 | 56.207 | 6.971  | 39.973 | 0.00 | 0.00 |
| ATOM | 5800 | OE1 | GLU | X | 385 | 56.250 | 6.262  | 38.915 | 0.00 | 0.00 |
| ATOM | 5801 | OE2 | GLU | X | 385 | 57.040 | 6.814  | 40.927 | 0.00 | 0.00 |
| ATOM | 5802 | C   | GLU | X | 385 | 55.566 | 11.559 | 38.252 | 0.00 | 0.00 |
| ATOM | 5803 | O   | GLU | X | 385 | 56.672 | 11.927 | 38.720 | 0.00 | 0.00 |
| ATOM | 5804 | N   | ASP | X | 386 | 55.082 | 12.053 | 37.117 | 0.00 | 0.00 |
| ATOM | 5805 | H   | ASP | X | 386 | 54.096 | 11.882 | 36.981 | 0.00 | 0.00 |
| ATOM | 5806 | CA  | ASP | X | 386 | 55.817 | 13.034 | 36.314 | 0.00 | 0.00 |
| ATOM | 5807 | HA  | ASP | X | 386 | 56.828 | 12.629 | 36.269 | 0.00 | 0.00 |
| ATOM | 5808 | CB  | ASP | X | 386 | 55.289 | 13.006 | 34.863 | 0.00 | 0.00 |
| ATOM | 5809 | HB2 | ASP | X | 386 | 55.401 | 11.969 | 34.544 | 0.00 | 0.00 |
| ATOM | 5810 | HB3 | ASP | X | 386 | 54.218 | 13.205 | 34.890 | 0.00 | 0.00 |
| ATOM | 5811 | CG  | ASP | X | 386 | 55.970 | 13.997 | 33.913 | 0.00 | 0.00 |
| ATOM | 5812 | OD1 | ASP | X | 386 | 56.502 | 15.049 | 34.333 | 0.00 | 0.00 |
| ATOM | 5813 | OD2 | ASP | X | 386 | 56.202 | 13.596 | 32.729 | 0.00 | 0.00 |
| ATOM | 5814 | C   | ASP | X | 386 | 55.729 | 14.410 | 37.123 | 0.00 | 0.00 |
| ATOM | 5815 | O   | ASP | X | 386 | 54.641 | 14.882 | 37.438 | 0.00 | 0.00 |
| ATOM | 5816 | N   | PRO | X | 387 | 56.970 | 14.888 | 37.458 | 0.00 | 0.00 |
| ATOM | 5817 | CD  | PRO | X | 387 | 58.233 | 14.402 | 36.951 | 0.00 | 0.00 |
| ATOM | 5818 | HD2 | PRO | X | 387 | 58.301 | 14.460 | 35.865 | 0.00 | 0.00 |
| ATOM | 5819 | HD3 | PRO | X | 387 | 58.429 | 13.363 | 37.214 | 0.00 | 0.00 |
| ATOM | 5820 | CG  | PRO | X | 387 | 59.315 | 15.310 | 37.559 | 0.00 | 0.00 |
| ATOM | 5821 | HG2 | PRO | X | 387 | 59.617 | 15.944 | 36.725 | 0.00 | 0.00 |
| ATOM | 5822 | HG3 | PRO | X | 387 | 60.162 | 14.691 | 37.855 | 0.00 | 0.00 |
| ATOM | 5823 | CB  | PRO | X | 387 | 58.600 | 16.100 | 38.765 | 0.00 | 0.00 |
| ATOM | 5824 | HB2 | PRO | X | 387 | 59.071 | 17.062 | 38.966 | 0.00 | 0.00 |
| ATOM | 5825 | HB3 | PRO | X | 387 | 58.674 | 15.471 | 39.652 | 0.00 | 0.00 |
| ATOM | 5826 | CA  | PRO | X | 387 | 57.139 | 16.022 | 38.298 | 0.00 | 0.00 |
| ATOM | 5827 | HA  | PRO | X | 387 | 56.499 | 15.958 | 39.178 | 0.00 | 0.00 |
| ATOM | 5828 | C   | PRO | X | 387 | 56.692 | 17.290 | 37.571 | 0.00 | 0.00 |
| ATOM | 5829 | O   | PRO | X | 387 | 56.331 | 18.225 | 38.253 | 0.00 | 0.00 |
| ATOM | 5830 | N   | ALA | X | 388 | 56.693 | 17.393 | 36.236 | 0.00 | 0.00 |
| ATOM | 5831 | H   | ALA | X | 388 | 57.066 | 16.634 | 35.683 | 0.00 | 0.00 |
| ATOM | 5832 | CA  | ALA | X | 388 | 56.319 | 18.620 | 35.541 | 0.00 | 0.00 |
| ATOM | 5833 | HA  | ALA | X | 388 | 56.798 | 19.477 | 36.013 | 0.00 | 0.00 |
| ATOM | 5834 | CB  | ALA | X | 388 | 56.833 | 18.496 | 34.078 | 0.00 | 0.00 |
| ATOM | 5835 | HB1 | ALA | X | 388 | 57.910 | 18.659 | 34.064 | 0.00 | 0.00 |
| ATOM | 5836 | HB2 | ALA | X | 388 | 56.616 | 17.499 | 33.697 | 0.00 | 0.00 |
| ATOM | 5837 | HB3 | ALA | X | 388 | 56.343 | 19.251 | 33.462 | 0.00 | 0.00 |
| ATOM | 5838 | C   | ALA | X | 388 | 54.825 | 18.743 | 35.568 | 0.00 | 0.00 |
| ATOM | 5839 | O   | ALA | X | 388 | 54.238 | 19.855 | 35.609 | 0.00 | 0.00 |
| ATOM | 5840 | N   | ARG | X | 389 | 54.080 | 17.636 | 35.426 | 0.00 | 0.00 |
| ATOM | 5841 | H   | ARG | X | 389 | 54.692 | 16.833 | 35.431 | 0.00 | 0.00 |
| ATOM | 5842 | CA  | ARG | X | 389 | 52.612 | 17.471 | 35.417 | 0.00 | 0.00 |
| ATOM | 5843 | HA  | ARG | X | 389 | 52.137 | 18.302 | 34.895 | 0.00 | 0.00 |
| ATOM | 5844 | CB  | ARG | X | 389 | 52.239 | 16.203 | 34.711 | 0.00 | 0.00 |
| ATOM | 5845 | HB2 | ARG | X | 389 | 52.602 | 15.343 | 35.274 | 0.00 | 0.00 |
| ATOM | 5846 | HB3 | ARG | X | 389 | 51.149 | 16.173 | 34.726 | 0.00 | 0.00 |
| ATOM | 5847 | CG  | ARG | X | 389 | 52.869 | 16.131 | 33.393 | 0.00 | 0.00 |
| ATOM | 5848 | HG2 | ARG | X | 389 | 52.584 | 17.007 | 32.809 | 0.00 | 0.00 |
| ATOM | 5849 | HG3 | ARG | X | 389 | 53.944 | 15.951 | 33.371 | 0.00 | 0.00 |



|      |      |      |     |   |     |        |        |        |      |      |
|------|------|------|-----|---|-----|--------|--------|--------|------|------|
| ATOM | 5850 | CD   | ARG | X | 389 | 52.365 | 14.855 | 32.703 | 0.00 | 0.00 |
| ATOM | 5851 | HD2  | ARG | X | 389 | 52.699 | 14.018 | 33.317 | 0.00 | 0.00 |
| ATOM | 5852 | HD3  | ARG | X | 389 | 51.284 | 14.715 | 32.695 | 0.00 | 0.00 |
| ATOM | 5853 | NE   | ARG | X | 389 | 52.882 | 14.694 | 31.386 | 0.00 | 0.00 |
| ATOM | 5854 | HE   | ARG | X | 389 | 53.872 | 14.671 | 31.187 | 0.00 | 0.00 |
| ATOM | 5855 | CZ   | ARG | X | 389 | 52.240 | 14.430 | 30.269 | 0.00 | 0.00 |
| ATOM | 5856 | NH1  | ARG | X | 389 | 50.952 | 14.452 | 30.197 | 0.00 | 0.00 |
| ATOM | 5857 | HH11 | ARG | X | 389 | 50.496 | 14.536 | 31.094 | 0.00 | 0.00 |
| ATOM | 5858 | HH12 | ARG | X | 389 | 50.441 | 14.500 | 29.327 | 0.00 | 0.00 |
| ATOM | 5859 | NH2  | ARG | X | 389 | 52.834 | 14.167 | 29.165 | 0.00 | 0.00 |
| ATOM | 5860 | HH21 | ARG | X | 389 | 53.843 | 14.143 | 29.163 | 0.00 | 0.00 |
| ATOM | 5861 | HH22 | ARG | X | 389 | 52.345 | 13.993 | 28.298 | 0.00 | 0.00 |
| ATOM | 5862 | C    | ARG | X | 389 | 51.985 | 17.575 | 36.805 | 0.00 | 0.00 |
| ATOM | 5863 | O    | ARG | X | 389 | 50.962 | 18.270 | 36.986 | 0.00 | 0.00 |
| ATOM | 5864 | N    | LEU | X | 390 | 52.551 | 17.117 | 37.924 | 0.00 | 0.00 |
| ATOM | 5865 | H    | LEU | X | 390 | 53.349 | 16.520 | 37.761 | 0.00 | 0.00 |
| ATOM | 5866 | CA   | LEU | X | 390 | 52.154 | 17.231 | 39.298 | 0.00 | 0.00 |
| ATOM | 5867 | HA   | LEU | X | 390 | 51.101 | 16.983 | 39.430 | 0.00 | 0.00 |
| ATOM | 5868 | CB   | LEU | X | 390 | 52.922 | 16.252 | 40.242 | 0.00 | 0.00 |
| ATOM | 5869 | HB2  | LEU | X | 390 | 54.002 | 16.368 | 40.148 | 0.00 | 0.00 |
| ATOM | 5870 | HB3  | LEU | X | 390 | 52.931 | 16.497 | 41.304 | 0.00 | 0.00 |
| ATOM | 5871 | CG   | LEU | X | 390 | 52.625 | 14.712 | 40.131 | 0.00 | 0.00 |
| ATOM | 5872 | HG   | LEU | X | 390 | 52.568 | 14.441 | 39.076 | 0.00 | 0.00 |
| ATOM | 5873 | CD1  | LEU | X | 390 | 53.839 | 13.900 | 40.689 | 0.00 | 0.00 |
| ATOM | 5874 | HD11 | LEU | X | 390 | 54.194 | 14.151 | 41.688 | 0.00 | 0.00 |
| ATOM | 5875 | HD12 | LEU | X | 390 | 53.533 | 12.854 | 40.700 | 0.00 | 0.00 |
| ATOM | 5876 | HD13 | LEU | X | 390 | 54.668 | 14.002 | 39.989 | 0.00 | 0.00 |
| ATOM | 5877 | CD2  | LEU | X | 390 | 51.293 | 14.348 | 40.874 | 0.00 | 0.00 |
| ATOM | 5878 | HD21 | LEU | X | 390 | 50.647 | 15.225 | 40.836 | 0.00 | 0.00 |
| ATOM | 5879 | HD22 | LEU | X | 390 | 50.887 | 13.435 | 40.436 | 0.00 | 0.00 |
| ATOM | 5880 | HD23 | LEU | X | 390 | 51.484 | 14.151 | 41.929 | 0.00 | 0.00 |
| ATOM | 5881 | C    | LEU | X | 390 | 52.223 | 18.692 | 39.805 | 0.00 | 0.00 |
| ATOM | 5882 | O    | LEU | X | 390 | 51.271 | 19.294 | 40.338 | 0.00 | 0.00 |
| ATOM | 5883 | N    | ARG | X | 391 | 53.372 | 19.332 | 39.676 | 0.00 | 0.00 |
| ATOM | 5884 | H    | ARG | X | 391 | 54.129 | 18.693 | 39.479 | 0.00 | 0.00 |
| ATOM | 5885 | CA   | ARG | X | 391 | 53.702 | 20.726 | 39.837 | 0.00 | 0.00 |
| ATOM | 5886 | HA   | ARG | X | 391 | 53.602 | 21.046 | 40.874 | 0.00 | 0.00 |
| ATOM | 5887 | CB   | ARG | X | 391 | 55.143 | 20.967 | 39.335 | 0.00 | 0.00 |
| ATOM | 5888 | HB2  | ARG | X | 391 | 55.763 | 20.314 | 39.948 | 0.00 | 0.00 |
| ATOM | 5889 | HB3  | ARG | X | 391 | 55.278 | 20.604 | 38.317 | 0.00 | 0.00 |
| ATOM | 5890 | CG   | ARG | X | 391 | 55.561 | 22.393 | 39.526 | 0.00 | 0.00 |
| ATOM | 5891 | HG2  | ARG | X | 391 | 54.841 | 23.033 | 39.017 | 0.00 | 0.00 |
| ATOM | 5892 | HG3  | ARG | X | 391 | 55.724 | 22.601 | 40.583 | 0.00 | 0.00 |
| ATOM | 5893 | CD   | ARG | X | 391 | 56.812 | 22.768 | 38.814 | 0.00 | 0.00 |
| ATOM | 5894 | HD2  | ARG | X | 391 | 56.987 | 23.783 | 39.173 | 0.00 | 0.00 |
| ATOM | 5895 | HD3  | ARG | X | 391 | 57.604 | 22.144 | 39.228 | 0.00 | 0.00 |
| ATOM | 5896 | NE   | ARG | X | 391 | 56.777 | 22.659 | 37.311 | 0.00 | 0.00 |
| ATOM | 5897 | HE   | ARG | X | 391 | 57.535 | 22.175 | 36.851 | 0.00 | 0.00 |
| ATOM | 5898 | CZ   | ARG | X | 391 | 55.955 | 23.201 | 36.396 | 0.00 | 0.00 |
| ATOM | 5899 | NH1  | ARG | X | 391 | 55.101 | 24.129 | 36.786 | 0.00 | 0.00 |
| ATOM | 5900 | HH11 | ARG | X | 391 | 54.993 | 24.339 | 37.768 | 0.00 | 0.00 |
| ATOM | 5901 | HH12 | ARG | X | 391 | 54.526 | 24.437 | 36.015 | 0.00 | 0.00 |
| ATOM | 5902 | NH2  | ARG | X | 391 | 55.981 | 22.892 | 35.111 | 0.00 | 0.00 |
| ATOM | 5903 | HH21 | ARG | X | 391 | 56.620 | 22.169 | 34.812 | 0.00 | 0.00 |
| ATOM | 5904 | HH22 | ARG | X | 391 | 55.485 | 23.483 | 34.459 | 0.00 | 0.00 |
| ATOM | 5905 | C    | ARG | X | 391 | 52.557 | 21.517 | 39.151 | 0.00 | 0.00 |
| ATOM | 5906 | O    | ARG | X | 391 | 51.861 | 22.349 | 39.781 | 0.00 | 0.00 |
| ATOM | 5907 | N    | GLU | X | 392 | 52.291 | 21.244 | 37.914 | 0.00 | 0.00 |
| ATOM | 5908 | H    | GLU | X | 392 | 52.883 | 20.519 | 37.534 | 0.00 | 0.00 |
| ATOM | 5909 | CA   | GLU | X | 392 | 51.364 | 21.931 | 37.051 | 0.00 | 0.00 |
| ATOM | 5910 | HA   | GLU | X | 392 | 51.572 | 23.001 | 37.076 | 0.00 | 0.00 |
| ATOM | 5911 | CB   | GLU | X | 392 | 51.580 | 21.472 | 35.647 | 0.00 | 0.00 |
| ATOM | 5912 | HB2  | GLU | X | 392 | 52.660 | 21.471 | 35.494 | 0.00 | 0.00 |
| ATOM | 5913 | HB3  | GLU | X | 392 | 51.225 | 20.462 | 35.445 | 0.00 | 0.00 |
| ATOM | 5914 | CG   | GLU | X | 392 | 51.174 | 22.451 | 34.472 | 0.00 | 0.00 |
| ATOM | 5915 | HG2  | GLU | X | 392 | 51.806 | 22.303 | 33.596 | 0.00 | 0.00 |
| ATOM | 5916 | HG3  | GLU | X | 392 | 50.166 | 22.163 | 34.172 | 0.00 | 0.00 |
| ATOM | 5917 | CD   | GLU | X | 392 | 51.059 | 23.990 | 34.835 | 0.00 | 0.00 |
| ATOM | 5918 | OE1  | GLU | X | 392 | 52.137 | 24.640 | 35.033 | 0.00 | 0.00 |
| ATOM | 5919 | OE2  | GLU | X | 392 | 49.917 | 24.525 | 34.982 | 0.00 | 0.00 |

|      |      |      |     |   |     |        |        |        |      |      |
|------|------|------|-----|---|-----|--------|--------|--------|------|------|
| ATOM | 5920 | C    | GLU | X | 392 | 49.943 | 21.759 | 37.475 | 0.00 | 0.00 |
| ATOM | 5921 | O    | GLU | X | 392 | 49.235 | 22.748 | 37.634 | 0.00 | 0.00 |
| ATOM | 5922 | N    | ALA | X | 393 | 49.483 | 20.535 | 37.860 | 0.00 | 0.00 |
| ATOM | 5923 | H    | ALA | X | 393 | 50.109 | 19.770 | 37.650 | 0.00 | 0.00 |
| ATOM | 5924 | CA   | ALA | X | 393 | 48.118 | 20.277 | 38.296 | 0.00 | 0.00 |
| ATOM | 5925 | HA   | ALA | X | 393 | 47.470 | 20.888 | 37.668 | 0.00 | 0.00 |
| ATOM | 5926 | CB   | ALA | X | 393 | 47.678 | 18.812 | 38.203 | 0.00 | 0.00 |
| ATOM | 5927 | HB1  | ALA | X | 393 | 47.437 | 18.452 | 37.203 | 0.00 | 0.00 |
| ATOM | 5928 | HB2  | ALA | X | 393 | 48.292 | 18.117 | 38.775 | 0.00 | 0.00 |
| ATOM | 5929 | HB3  | ALA | X | 393 | 46.753 | 18.654 | 38.757 | 0.00 | 0.00 |
| ATOM | 5930 | C    | ALA | X | 393 | 47.856 | 20.896 | 39.700 | 0.00 | 0.00 |
| ATOM | 5931 | O    | ALA | X | 393 | 46.689 | 21.193 | 39.996 | 0.00 | 0.00 |
| ATOM | 5932 | N    | LEU | X | 394 | 48.831 | 21.025 | 40.624 | 0.00 | 0.00 |
| ATOM | 5933 | H    | LEU | X | 394 | 49.752 | 20.788 | 40.282 | 0.00 | 0.00 |
| ATOM | 5934 | CA   | LEU | X | 394 | 48.686 | 21.772 | 41.860 | 0.00 | 0.00 |
| ATOM | 5935 | HA   | LEU | X | 394 | 47.895 | 21.213 | 42.358 | 0.00 | 0.00 |
| ATOM | 5936 | CB   | LEU | X | 394 | 49.862 | 21.701 | 42.730 | 0.00 | 0.00 |
| ATOM | 5937 | HB2  | LEU | X | 394 | 50.303 | 20.707 | 42.665 | 0.00 | 0.00 |
| ATOM | 5938 | HB3  | LEU | X | 394 | 50.581 | 22.381 | 42.271 | 0.00 | 0.00 |
| ATOM | 5939 | CG   | LEU | X | 394 | 49.630 | 22.004 | 44.238 | 0.00 | 0.00 |
| ATOM | 5940 | HG   | LEU | X | 394 | 49.177 | 22.990 | 44.343 | 0.00 | 0.00 |
| ATOM | 5941 | CD1  | LEU | X | 394 | 48.665 | 21.032 | 44.927 | 0.00 | 0.00 |
| ATOM | 5942 | HD11 | LEU | X | 394 | 48.526 | 21.459 | 45.921 | 0.00 | 0.00 |
| ATOM | 5943 | HD12 | LEU | X | 394 | 47.716 | 21.047 | 44.390 | 0.00 | 0.00 |
| ATOM | 5944 | HD13 | LEU | X | 394 | 48.998 | 20.008 | 45.092 | 0.00 | 0.00 |
| ATOM | 5945 | CD2  | LEU | X | 394 | 50.946 | 21.835 | 44.973 | 0.00 | 0.00 |
| ATOM | 5946 | HD21 | LEU | X | 394 | 51.220 | 20.787 | 44.852 | 0.00 | 0.00 |
| ATOM | 5947 | HD22 | LEU | X | 394 | 51.639 | 22.560 | 44.547 | 0.00 | 0.00 |
| ATOM | 5948 | HD23 | LEU | X | 394 | 51.028 | 21.948 | 46.054 | 0.00 | 0.00 |
| ATOM | 5949 | C    | LEU | X | 394 | 48.323 | 23.248 | 41.757 | 0.00 | 0.00 |
| ATOM | 5950 | O    | LEU | X | 394 | 47.432 | 23.685 | 42.475 | 0.00 | 0.00 |
| ATOM | 5951 | N    | SER | X | 395 | 48.902 | 23.954 | 40.765 | 0.00 | 0.00 |
| ATOM | 5952 | H    | SER | X | 395 | 49.596 | 23.496 | 40.192 | 0.00 | 0.00 |
| ATOM | 5953 | CA   | SER | X | 395 | 48.522 | 25.382 | 40.610 | 0.00 | 0.00 |
| ATOM | 5954 | HA   | SER | X | 395 | 48.509 | 25.958 | 41.535 | 0.00 | 0.00 |
| ATOM | 5955 | CB   | SER | X | 395 | 49.421 | 26.122 | 39.639 | 0.00 | 0.00 |
| ATOM | 5956 | HB2  | SER | X | 395 | 49.318 | 27.207 | 39.670 | 0.00 | 0.00 |
| ATOM | 5957 | HB3  | SER | X | 395 | 50.436 | 25.849 | 39.925 | 0.00 | 0.00 |
| ATOM | 5958 | OG   | SER | X | 395 | 49.291 | 25.804 | 38.246 | 0.00 | 0.00 |
| ATOM | 5959 | HG   | SER | X | 395 | 50.026 | 26.210 | 37.780 | 0.00 | 0.00 |
| ATOM | 5960 | C    | SER | X | 395 | 47.065 | 25.416 | 40.130 | 0.00 | 0.00 |
| ATOM | 5961 | O    | SER | X | 395 | 46.275 | 26.361 | 40.456 | 0.00 | 0.00 |
| ATOM | 5962 | N    | ASP | X | 396 | 46.584 | 24.356 | 39.440 | 0.00 | 0.00 |
| ATOM | 5963 | H    | ASP | X | 396 | 47.241 | 23.642 | 39.158 | 0.00 | 0.00 |
| ATOM | 5964 | CA   | ASP | X | 396 | 45.117 | 24.092 | 39.232 | 0.00 | 0.00 |
| ATOM | 5965 | HA   | ASP | X | 396 | 44.712 | 25.047 | 38.897 | 0.00 | 0.00 |
| ATOM | 5966 | CB   | ASP | X | 396 | 44.839 | 23.094 | 38.162 | 0.00 | 0.00 |
| ATOM | 5967 | HB2  | ASP | X | 396 | 45.324 | 22.174 | 38.487 | 0.00 | 0.00 |
| ATOM | 5968 | HB3  | ASP | X | 396 | 43.766 | 22.939 | 38.046 | 0.00 | 0.00 |
| ATOM | 5969 | CG   | ASP | X | 396 | 45.300 | 23.463 | 36.785 | 0.00 | 0.00 |
| ATOM | 5970 | OD1  | ASP | X | 396 | 46.440 | 23.012 | 36.357 | 0.00 | 0.00 |
| ATOM | 5971 | OD2  | ASP | X | 396 | 44.674 | 24.289 | 36.150 | 0.00 | 0.00 |
| ATOM | 5972 | C    | ASP | X | 396 | 44.389 | 23.803 | 40.589 | 0.00 | 0.00 |
| ATOM | 5973 | O    | ASP | X | 396 | 43.382 | 24.427 | 40.862 | 0.00 | 0.00 |
| ATOM | 5974 | N    | VAL | X | 397 | 44.713 | 22.810 | 41.416 | 0.00 | 0.00 |
| ATOM | 5975 | H    | VAL | X | 397 | 45.262 | 22.075 | 40.993 | 0.00 | 0.00 |
| ATOM | 5976 | CA   | VAL | X | 397 | 44.024 | 22.499 | 42.671 | 0.00 | 0.00 |
| ATOM | 5977 | HA   | VAL | X | 397 | 43.066 | 22.076 | 42.369 | 0.00 | 0.00 |
| ATOM | 5978 | CB   | VAL | X | 397 | 44.751 | 21.450 | 43.599 | 0.00 | 0.00 |
| ATOM | 5979 | HB   | VAL | X | 397 | 45.623 | 21.931 | 44.042 | 0.00 | 0.00 |
| ATOM | 5980 | CG1  | VAL | X | 397 | 43.913 | 21.060 | 44.768 | 0.00 | 0.00 |
| ATOM | 5981 | HG11 | VAL | X | 397 | 44.494 | 20.617 | 45.576 | 0.00 | 0.00 |
| ATOM | 5982 | HG12 | VAL | X | 397 | 43.525 | 21.887 | 45.363 | 0.00 | 0.00 |
| ATOM | 5983 | HG13 | VAL | X | 397 | 43.129 | 20.375 | 44.443 | 0.00 | 0.00 |
| ATOM | 5984 | CG2  | VAL | X | 397 | 45.184 | 20.094 | 42.967 | 0.00 | 0.00 |
| ATOM | 5985 | HG21 | VAL | X | 397 | 44.304 | 19.520 | 42.680 | 0.00 | 0.00 |
| ATOM | 5986 | HG22 | VAL | X | 397 | 45.803 | 20.248 | 42.082 | 0.00 | 0.00 |
| ATOM | 5987 | HG23 | VAL | X | 397 | 45.671 | 19.453 | 43.701 | 0.00 | 0.00 |
| ATOM | 5988 | C    | VAL | X | 397 | 43.809 | 23.760 | 43.487 | 0.00 | 0.00 |
| ATOM | 5989 | O    | VAL | X | 397 | 42.684 | 24.011 | 43.917 | 0.00 | 0.00 |

|      |      |      |     |   |     |        |        |        |      |      |
|------|------|------|-----|---|-----|--------|--------|--------|------|------|
| ATOM | 5990 | N    | VAL | X | 398 | 44.893 | 24.592 | 43.642 | 0.00 | 0.00 |
| ATOM | 5991 | H    | VAL | X | 398 | 45.819 | 24.314 | 43.351 | 0.00 | 0.00 |
| ATOM | 5992 | CA   | VAL | X | 398 | 44.779 | 25.762 | 44.484 | 0.00 | 0.00 |
| ATOM | 5993 | HA   | VAL | X | 398 | 44.129 | 25.475 | 45.310 | 0.00 | 0.00 |
| ATOM | 5994 | CB   | VAL | X | 398 | 46.128 | 26.258 | 45.227 | 0.00 | 0.00 |
| ATOM | 5995 | HB   | VAL | X | 398 | 46.733 | 26.699 | 44.435 | 0.00 | 0.00 |
| ATOM | 5996 | CG1  | VAL | X | 398 | 45.982 | 27.422 | 46.214 | 0.00 | 0.00 |
| ATOM | 5997 | HG11 | VAL | X | 398 | 45.883 | 28.354 | 45.658 | 0.00 | 0.00 |
| ATOM | 5998 | HG12 | VAL | X | 398 | 45.074 | 27.163 | 46.759 | 0.00 | 0.00 |
| ATOM | 5999 | HG13 | VAL | X | 398 | 46.874 | 27.393 | 46.839 | 0.00 | 0.00 |
| ATOM | 6000 | CG2  | VAL | X | 398 | 46.914 | 25.104 | 45.879 | 0.00 | 0.00 |
| ATOM | 6001 | HG21 | VAL | X | 398 | 46.265 | 24.733 | 46.673 | 0.00 | 0.00 |
| ATOM | 6002 | HG22 | VAL | X | 398 | 47.310 | 24.299 | 45.260 | 0.00 | 0.00 |
| ATOM | 6003 | HG23 | VAL | X | 398 | 47.854 | 25.449 | 46.309 | 0.00 | 0.00 |
| ATOM | 6004 | C    | VAL | X | 398 | 44.049 | 26.949 | 43.769 | 0.00 | 0.00 |
| ATOM | 6005 | O    | VAL | X | 398 | 43.609 | 27.810 | 44.460 | 0.00 | 0.00 |
| ATOM | 6006 | N    | GLY | X | 399 | 43.879 | 26.946 | 42.480 | 0.00 | 0.00 |
| ATOM | 6007 | H    | GLY | X | 399 | 44.199 | 26.128 | 41.982 | 0.00 | 0.00 |
| ATOM | 6008 | CA   | GLY | X | 399 | 43.080 | 27.878 | 41.741 | 0.00 | 0.00 |
| ATOM | 6009 | HA2  | GLY | X | 399 | 43.075 | 28.921 | 42.034 | 0.00 | 0.00 |
| ATOM | 6010 | HA3  | GLY | X | 399 | 43.369 | 27.722 | 40.730 | 0.00 | 0.00 |
| ATOM | 6011 | C    | GLY | X | 399 | 41.607 | 27.475 | 41.699 | 0.00 | 0.00 |
| ATOM | 6012 | O    | GLY | X | 399 | 40.761 | 28.257 | 42.080 | 0.00 | 0.00 |
| ATOM | 6013 | N    | ASP | X | 400 | 41.318 | 26.222 | 41.320 | 0.00 | 0.00 |
| ATOM | 6014 | H    | ASP | X | 400 | 42.066 | 25.639 | 40.974 | 0.00 | 0.00 |
| ATOM | 6015 | CA   | ASP | X | 400 | 39.949 | 25.732 | 41.188 | 0.00 | 0.00 |
| ATOM | 6016 | HA   | ASP | X | 400 | 39.369 | 26.223 | 40.406 | 0.00 | 0.00 |
| ATOM | 6017 | CB   | ASP | X | 400 | 40.117 | 24.252 | 40.830 | 0.00 | 0.00 |
| ATOM | 6018 | HB2  | ASP | X | 400 | 40.747 | 23.860 | 41.628 | 0.00 | 0.00 |
| ATOM | 6019 | HB3  | ASP | X | 400 | 39.151 | 23.746 | 40.834 | 0.00 | 0.00 |
| ATOM | 6020 | CG   | ASP | X | 400 | 40.587 | 24.097 | 39.386 | 0.00 | 0.00 |
| ATOM | 6021 | OD1  | ASP | X | 400 | 40.514 | 25.055 | 38.581 | 0.00 | 0.00 |
| ATOM | 6022 | OD2  | ASP | X | 400 | 40.855 | 22.864 | 39.031 | 0.00 | 0.00 |
| ATOM | 6023 | C    | ASP | X | 400 | 39.133 | 25.882 | 42.507 | 0.00 | 0.00 |
| ATOM | 6024 | O    | ASP | X | 400 | 38.240 | 26.658 | 42.564 | 0.00 | 0.00 |
| ATOM | 6025 | N    | HIE | X | 401 | 39.565 | 25.230 | 43.623 | 0.00 | 0.00 |
| ATOM | 6026 | H    | HIE | X | 401 | 40.434 | 24.714 | 43.623 | 0.00 | 0.00 |
| ATOM | 6027 | CA   | HIE | X | 401 | 38.798 | 25.187 | 44.925 | 0.00 | 0.00 |
| ATOM | 6028 | HA   | HIE | X | 401 | 37.818 | 24.742 | 44.749 | 0.00 | 0.00 |
| ATOM | 6029 | CB   | HIE | X | 401 | 39.495 | 24.337 | 45.919 | 0.00 | 0.00 |
| ATOM | 6030 | HB2  | HIE | X | 401 | 39.293 | 23.309 | 45.619 | 0.00 | 0.00 |
| ATOM | 6031 | HB3  | HIE | X | 401 | 40.551 | 24.602 | 45.946 | 0.00 | 0.00 |
| ATOM | 6032 | CG   | HIE | X | 401 | 39.071 | 24.636 | 47.318 | 0.00 | 0.00 |
| ATOM | 6033 | ND1  | HIE | X | 401 | 37.927 | 24.251 | 47.910 | 0.00 | 0.00 |
| ATOM | 6034 | CE1  | HIE | X | 401 | 37.999 | 24.731 | 49.167 | 0.00 | 0.00 |
| ATOM | 6035 | HE1  | HIE | X | 401 | 37.120 | 24.822 | 49.788 | 0.00 | 0.00 |
| ATOM | 6036 | NE2  | HIE | X | 401 | 39.161 | 25.372 | 49.396 | 0.00 | 0.00 |
| ATOM | 6037 | HE2  | HIE | X | 401 | 39.405 | 25.914 | 50.213 | 0.00 | 0.00 |
| ATOM | 6038 | CD2  | HIE | X | 401 | 39.889 | 25.261 | 48.254 | 0.00 | 0.00 |
| ATOM | 6039 | HD2  | HIE | X | 401 | 40.861 | 25.714 | 48.133 | 0.00 | 0.00 |
| ATOM | 6040 | C    | HIE | X | 401 | 38.587 | 26.638 | 45.351 | 0.00 | 0.00 |
| ATOM | 6041 | O    | HIE | X | 401 | 37.480 | 26.994 | 45.843 | 0.00 | 0.00 |
| ATOM | 6042 | N    | ASN | X | 402 | 39.637 | 27.503 | 45.242 | 0.00 | 0.00 |
| ATOM | 6043 | H    | ASN | X | 402 | 40.504 | 27.112 | 44.901 | 0.00 | 0.00 |
| ATOM | 6044 | CA   | ASN | X | 402 | 39.554 | 28.855 | 45.744 | 0.00 | 0.00 |
| ATOM | 6045 | HA   | ASN | X | 402 | 38.879 | 28.786 | 46.598 | 0.00 | 0.00 |
| ATOM | 6046 | CB   | ASN | X | 402 | 40.911 | 29.372 | 46.294 | 0.00 | 0.00 |
| ATOM | 6047 | HB2  | ASN | X | 402 | 41.664 | 29.321 | 45.508 | 0.00 | 0.00 |
| ATOM | 6048 | HB3  | ASN | X | 402 | 40.773 | 30.430 | 46.517 | 0.00 | 0.00 |
| ATOM | 6049 | CG   | ASN | X | 402 | 41.425 | 28.420 | 47.438 | 0.00 | 0.00 |
| ATOM | 6050 | OD1  | ASN | X | 402 | 40.981 | 28.502 | 48.570 | 0.00 | 0.00 |
| ATOM | 6051 | ND2  | ASN | X | 402 | 42.289 | 27.580 | 47.028 | 0.00 | 0.00 |
| ATOM | 6052 | HD21 | ASN | X | 402 | 42.794 | 27.090 | 47.753 | 0.00 | 0.00 |
| ATOM | 6053 | HD22 | ASN | X | 402 | 42.593 | 27.622 | 46.066 | 0.00 | 0.00 |
| ATOM | 6054 | C    | ASN | X | 402 | 38.994 | 29.889 | 44.799 | 0.00 | 0.00 |
| ATOM | 6055 | O    | ASN | X | 402 | 38.200 | 30.746 | 45.220 | 0.00 | 0.00 |
| ATOM | 6056 | N    | VAL | X | 403 | 39.204 | 29.814 | 43.495 | 0.00 | 0.00 |
| ATOM | 6057 | H    | VAL | X | 403 | 39.882 | 29.119 | 43.217 | 0.00 | 0.00 |
| ATOM | 6058 | CA   | VAL | X | 403 | 38.831 | 30.921 | 42.571 | 0.00 | 0.00 |
| ATOM | 6059 | HA   | VAL | X | 403 | 38.286 | 31.718 | 43.077 | 0.00 | 0.00 |

|      |      |      |     |   |     |        |        |        |      |      |
|------|------|------|-----|---|-----|--------|--------|--------|------|------|
| ATOM | 6060 | CB   | VAL | X | 403 | 40.156 | 31.611 | 42.034 | 0.00 | 0.00 |
| ATOM | 6061 | HB   | VAL | X | 403 | 40.619 | 30.787 | 41.492 | 0.00 | 0.00 |
| ATOM | 6062 | CG1  | VAL | X | 403 | 39.860 | 32.868 | 41.173 | 0.00 | 0.00 |
| ATOM | 6063 | HG11 | VAL | X | 403 | 40.808 | 33.342 | 40.916 | 0.00 | 0.00 |
| ATOM | 6064 | HG12 | VAL | X | 403 | 39.341 | 32.582 | 40.258 | 0.00 | 0.00 |
| ATOM | 6065 | HG13 | VAL | X | 403 | 39.198 | 33.590 | 41.651 | 0.00 | 0.00 |
| ATOM | 6066 | CG2  | VAL | X | 403 | 41.016 | 32.102 | 43.202 | 0.00 | 0.00 |
| ATOM | 6067 | HG21 | VAL | X | 403 | 41.466 | 31.229 | 43.675 | 0.00 | 0.00 |
| ATOM | 6068 | HG22 | VAL | X | 403 | 41.789 | 32.770 | 42.823 | 0.00 | 0.00 |
| ATOM | 6069 | HG23 | VAL | X | 403 | 40.339 | 32.765 | 43.742 | 0.00 | 0.00 |
| ATOM | 6070 | C    | VAL | X | 403 | 37.962 | 30.428 | 41.364 | 0.00 | 0.00 |
| ATOM | 6071 | O    | VAL | X | 403 | 36.946 | 31.034 | 41.140 | 0.00 | 0.00 |
| ATOM | 6072 | N    | VAL | X | 404 | 38.362 | 29.330 | 40.593 | 0.00 | 0.00 |
| ATOM | 6073 | H    | VAL | X | 404 | 39.241 | 28.930 | 40.888 | 0.00 | 0.00 |
| ATOM | 6074 | CA   | VAL | X | 404 | 37.677 | 29.035 | 39.286 | 0.00 | 0.00 |
| ATOM | 6075 | HA   | VAL | X | 404 | 37.581 | 30.003 | 38.795 | 0.00 | 0.00 |
| ATOM | 6076 | CB   | VAL | X | 404 | 38.544 | 28.192 | 38.318 | 0.00 | 0.00 |
| ATOM | 6077 | HB   | VAL | X | 404 | 38.628 | 27.173 | 38.696 | 0.00 | 0.00 |
| ATOM | 6078 | CG1  | VAL | X | 404 | 37.806 | 28.170 | 36.940 | 0.00 | 0.00 |
| ATOM | 6079 | HG11 | VAL | X | 404 | 36.826 | 27.695 | 36.976 | 0.00 | 0.00 |
| ATOM | 6080 | HG12 | VAL | X | 404 | 37.880 | 29.143 | 36.454 | 0.00 | 0.00 |
| ATOM | 6081 | HG13 | VAL | X | 404 | 38.342 | 27.469 | 36.300 | 0.00 | 0.00 |
| ATOM | 6082 | CG2  | VAL | X | 404 | 39.897 | 28.806 | 38.036 | 0.00 | 0.00 |
| ATOM | 6083 | HG21 | VAL | X | 404 | 40.539 | 28.695 | 38.909 | 0.00 | 0.00 |
| ATOM | 6084 | HG22 | VAL | X | 404 | 40.449 | 28.444 | 37.169 | 0.00 | 0.00 |
| ATOM | 6085 | HG23 | VAL | X | 404 | 39.742 | 29.853 | 37.772 | 0.00 | 0.00 |
| ATOM | 6086 | C    | VAL | X | 404 | 36.372 | 28.301 | 39.651 | 0.00 | 0.00 |
| ATOM | 6087 | O    | VAL | X | 404 | 35.294 | 28.616 | 39.108 | 0.00 | 0.00 |
| ATOM | 6088 | N    | CYX | X | 405 | 36.314 | 27.323 | 40.554 | 0.00 | 0.00 |
| ATOM | 6089 | H    | CYX | X | 405 | 37.108 | 27.030 | 41.105 | 0.00 | 0.00 |
| ATOM | 6090 | CA   | CYX | X | 405 | 35.038 | 26.649 | 40.899 | 0.00 | 0.00 |
| ATOM | 6091 | HA   | CYX | X | 405 | 34.525 | 26.485 | 39.952 | 0.00 | 0.00 |
| ATOM | 6092 | CB   | CYX | X | 405 | 35.291 | 25.374 | 41.498 | 0.00 | 0.00 |
| ATOM | 6093 | HB2  | CYX | X | 405 | 35.972 | 25.516 | 42.337 | 0.00 | 0.00 |
| ATOM | 6094 | HB3  | CYX | X | 405 | 34.415 | 24.889 | 41.929 | 0.00 | 0.00 |
| ATOM | 6095 | SG   | CYX | X | 405 | 36.106 | 24.213 | 40.320 | 0.00 | 0.00 |
| ATOM | 6096 | C    | CYX | X | 405 | 34.052 | 27.604 | 41.547 | 0.00 | 0.00 |
| ATOM | 6097 | O    | CYX | X | 405 | 32.858 | 27.608 | 41.132 | 0.00 | 0.00 |
| ATOM | 6098 | N    | PRO | X | 406 | 34.420 | 28.549 | 42.430 | 0.00 | 0.00 |
| ATOM | 6099 | CD   | PRO | X | 406 | 35.472 | 28.257 | 43.409 | 0.00 | 0.00 |
| ATOM | 6100 | HD2  | PRO | X | 406 | 36.454 | 28.581 | 43.066 | 0.00 | 0.00 |
| ATOM | 6101 | HD3  | PRO | X | 406 | 35.459 | 27.212 | 43.718 | 0.00 | 0.00 |
| ATOM | 6102 | CG   | PRO | X | 406 | 34.961 | 29.055 | 44.599 | 0.00 | 0.00 |
| ATOM | 6103 | HG2  | PRO | X | 406 | 35.844 | 29.112 | 45.235 | 0.00 | 0.00 |
| ATOM | 6104 | HG3  | PRO | X | 406 | 34.214 | 28.471 | 45.136 | 0.00 | 0.00 |
| ATOM | 6105 | CB   | PRO | X | 406 | 34.396 | 30.371 | 43.958 | 0.00 | 0.00 |
| ATOM | 6106 | HB2  | PRO | X | 406 | 35.222 | 30.966 | 43.569 | 0.00 | 0.00 |
| ATOM | 6107 | HB3  | PRO | X | 406 | 33.737 | 30.983 | 44.574 | 0.00 | 0.00 |
| ATOM | 6108 | CA   | PRO | X | 406 | 33.624 | 29.678 | 42.862 | 0.00 | 0.00 |
| ATOM | 6109 | HA   | PRO | X | 406 | 32.781 | 29.131 | 43.285 | 0.00 | 0.00 |
| ATOM | 6110 | C    | PRO | X | 406 | 33.077 | 30.501 | 41.641 | 0.00 | 0.00 |
| ATOM | 6111 | O    | PRO | X | 406 | 31.861 | 30.680 | 41.432 | 0.00 | 0.00 |
| ATOM | 6112 | N    | VAL | X | 407 | 33.917 | 30.929 | 40.706 | 0.00 | 0.00 |
| ATOM | 6113 | H    | VAL | X | 407 | 34.878 | 30.626 | 40.777 | 0.00 | 0.00 |
| ATOM | 6114 | CA   | VAL | X | 407 | 33.598 | 31.770 | 39.514 | 0.00 | 0.00 |
| ATOM | 6115 | HA   | VAL | X | 407 | 33.060 | 32.680 | 39.781 | 0.00 | 0.00 |
| ATOM | 6116 | CB   | VAL | X | 407 | 34.902 | 32.234 | 38.740 | 0.00 | 0.00 |
| ATOM | 6117 | HB   | VAL | X | 407 | 35.655 | 31.447 | 38.687 | 0.00 | 0.00 |
| ATOM | 6118 | CG1  | VAL | X | 407 | 34.632 | 32.647 | 37.268 | 0.00 | 0.00 |
| ATOM | 6119 | HG11 | VAL | X | 407 | 33.665 | 33.066 | 36.991 | 0.00 | 0.00 |
| ATOM | 6120 | HG12 | VAL | X | 407 | 35.420 | 33.240 | 36.803 | 0.00 | 0.00 |
| ATOM | 6121 | HG13 | VAL | X | 407 | 34.763 | 31.709 | 36.729 | 0.00 | 0.00 |
| ATOM | 6122 | CG2  | VAL | X | 407 | 35.447 | 33.390 | 39.426 | 0.00 | 0.00 |
| ATOM | 6123 | HG21 | VAL | X | 407 | 36.424 | 33.632 | 39.005 | 0.00 | 0.00 |
| ATOM | 6124 | HG22 | VAL | X | 407 | 34.780 | 34.251 | 39.474 | 0.00 | 0.00 |
| ATOM | 6125 | HG23 | VAL | X | 407 | 35.627 | 33.158 | 40.476 | 0.00 | 0.00 |
| ATOM | 6126 | C    | VAL | X | 407 | 32.619 | 31.042 | 38.601 | 0.00 | 0.00 |
| ATOM | 6127 | O    | VAL | X | 407 | 31.597 | 31.564 | 38.214 | 0.00 | 0.00 |
| ATOM | 6128 | N    | ALA | X | 408 | 32.876 | 29.755 | 38.365 | 0.00 | 0.00 |
| ATOM | 6129 | H    | ALA | X | 408 | 33.671 | 29.290 | 38.778 | 0.00 | 0.00 |

|      |      |      |     |   |     |        |        |        |      |      |
|------|------|------|-----|---|-----|--------|--------|--------|------|------|
| ATOM | 6130 | CA   | ALA | X | 408 | 32.043 | 28.889 | 37.498 | 0.00 | 0.00 |
| ATOM | 6131 | HA   | ALA | X | 408 | 31.891 | 29.414 | 36.555 | 0.00 | 0.00 |
| ATOM | 6132 | CB   | ALA | X | 408 | 32.930 | 27.630 | 37.216 | 0.00 | 0.00 |
| ATOM | 6133 | HB1  | ALA | X | 408 | 33.960 | 27.765 | 36.885 | 0.00 | 0.00 |
| ATOM | 6134 | HB2  | ALA | X | 408 | 32.953 | 26.966 | 38.080 | 0.00 | 0.00 |
| ATOM | 6135 | HB3  | ALA | X | 408 | 32.540 | 27.068 | 36.368 | 0.00 | 0.00 |
| ATOM | 6136 | C    | ALA | X | 408 | 30.666 | 28.535 | 38.080 | 0.00 | 0.00 |
| ATOM | 6137 | O    | ALA | X | 408 | 29.659 | 28.567 | 37.372 | 0.00 | 0.00 |
| ATOM | 6138 | N    | GLN | X | 409 | 30.643 | 28.241 | 39.372 | 0.00 | 0.00 |
| ATOM | 6139 | H    | GLN | X | 409 | 31.489 | 28.377 | 39.906 | 0.00 | 0.00 |
| ATOM | 6140 | CA   | GLN | X | 409 | 29.367 | 28.092 | 40.080 | 0.00 | 0.00 |
| ATOM | 6141 | HA   | GLN | X | 409 | 28.754 | 27.359 | 39.558 | 0.00 | 0.00 |
| ATOM | 6142 | CB   | GLN | X | 409 | 29.663 | 27.552 | 41.450 | 0.00 | 0.00 |
| ATOM | 6143 | HB2  | GLN | X | 409 | 30.288 | 26.689 | 41.217 | 0.00 | 0.00 |
| ATOM | 6144 | HB3  | GLN | X | 409 | 30.238 | 28.328 | 41.956 | 0.00 | 0.00 |
| ATOM | 6145 | CG   | GLN | X | 409 | 28.427 | 27.159 | 42.297 | 0.00 | 0.00 |
| ATOM | 6146 | HG2  | GLN | X | 409 | 28.793 | 26.776 | 43.250 | 0.00 | 0.00 |
| ATOM | 6147 | HG3  | GLN | X | 409 | 28.012 | 28.151 | 42.472 | 0.00 | 0.00 |
| ATOM | 6148 | CD   | GLN | X | 409 | 27.550 | 26.141 | 41.510 | 0.00 | 0.00 |
| ATOM | 6149 | OE1  | GLN | X | 409 | 27.731 | 24.924 | 41.596 | 0.00 | 0.00 |
| ATOM | 6150 | NE2  | GLN | X | 409 | 26.553 | 26.604 | 40.656 | 0.00 | 0.00 |
| ATOM | 6151 | HE21 | GLN | X | 409 | 25.890 | 25.981 | 40.217 | 0.00 | 0.00 |
| ATOM | 6152 | HE22 | GLN | X | 409 | 26.357 | 27.595 | 40.665 | 0.00 | 0.00 |
| ATOM | 6153 | C    | GLN | X | 409 | 28.492 | 29.387 | 40.134 | 0.00 | 0.00 |
| ATOM | 6154 | O    | GLN | X | 409 | 27.265 | 29.358 | 39.785 | 0.00 | 0.00 |
| ATOM | 6155 | N    | LEU | X | 410 | 29.151 | 30.493 | 40.537 | 0.00 | 0.00 |
| ATOM | 6156 | H    | LEU | X | 410 | 30.114 | 30.299 | 40.770 | 0.00 | 0.00 |
| ATOM | 6157 | CA   | LEU | X | 410 | 28.564 | 31.872 | 40.444 | 0.00 | 0.00 |
| ATOM | 6158 | HA   | LEU | X | 410 | 27.762 | 32.028 | 41.164 | 0.00 | 0.00 |
| ATOM | 6159 | CB   | LEU | X | 410 | 29.614 | 32.880 | 40.848 | 0.00 | 0.00 |
| ATOM | 6160 | HB2  | LEU | X | 410 | 29.673 | 32.753 | 41.929 | 0.00 | 0.00 |
| ATOM | 6161 | HB3  | LEU | X | 410 | 30.576 | 32.625 | 40.404 | 0.00 | 0.00 |
| ATOM | 6162 | CG   | LEU | X | 410 | 29.326 | 34.318 | 40.704 | 0.00 | 0.00 |
| ATOM | 6163 | HG   | LEU | X | 410 | 28.673 | 34.413 | 39.837 | 0.00 | 0.00 |
| ATOM | 6164 | CD1  | LEU | X | 410 | 28.323 | 34.790 | 41.889 | 0.00 | 0.00 |
| ATOM | 6165 | HD11 | LEU | X | 410 | 27.915 | 35.775 | 41.663 | 0.00 | 0.00 |
| ATOM | 6166 | HD12 | LEU | X | 410 | 27.432 | 34.167 | 41.953 | 0.00 | 0.00 |
| ATOM | 6167 | HD13 | LEU | X | 410 | 28.809 | 34.785 | 42.865 | 0.00 | 0.00 |
| ATOM | 6168 | CD2  | LEU | X | 410 | 30.617 | 35.219 | 40.493 | 0.00 | 0.00 |
| ATOM | 6169 | HD21 | LEU | X | 410 | 30.980 | 35.517 | 41.477 | 0.00 | 0.00 |
| ATOM | 6170 | HD22 | LEU | X | 410 | 31.462 | 34.706 | 40.036 | 0.00 | 0.00 |
| ATOM | 6171 | HD23 | LEU | X | 410 | 30.262 | 36.121 | 39.993 | 0.00 | 0.00 |
| ATOM | 6172 | C    | LEU | X | 410 | 27.908 | 32.154 | 39.115 | 0.00 | 0.00 |
| ATOM | 6173 | O    | LEU | X | 410 | 26.693 | 32.306 | 39.069 | 0.00 | 0.00 |
| ATOM | 6174 | N    | ALA | X | 411 | 28.680 | 32.315 | 38.085 | 0.00 | 0.00 |
| ATOM | 6175 | H    | ALA | X | 411 | 29.675 | 32.227 | 38.229 | 0.00 | 0.00 |
| ATOM | 6176 | CA   | ALA | X | 411 | 28.200 | 32.576 | 36.625 | 0.00 | 0.00 |
| ATOM | 6177 | HA   | ALA | X | 411 | 27.805 | 33.584 | 36.751 | 0.00 | 0.00 |
| ATOM | 6178 | CB   | ALA | X | 411 | 29.452 | 32.616 | 35.703 | 0.00 | 0.00 |
| ATOM | 6179 | HB1  | ALA | X | 411 | 30.047 | 33.457 | 36.057 | 0.00 | 0.00 |
| ATOM | 6180 | HB2  | ALA | X | 411 | 30.003 | 31.679 | 35.779 | 0.00 | 0.00 |
| ATOM | 6181 | HB3  | ALA | X | 411 | 29.156 | 32.773 | 34.666 | 0.00 | 0.00 |
| ATOM | 6182 | C    | ALA | X | 411 | 27.095 | 31.604 | 36.296 | 0.00 | 0.00 |
| ATOM | 6183 | O    | ALA | X | 411 | 26.119 | 32.053 | 35.654 | 0.00 | 0.00 |
| ATOM | 6184 | N    | GLY | X | 412 | 27.163 | 30.319 | 36.719 | 0.00 | 0.00 |
| ATOM | 6185 | H    | GLY | X | 412 | 27.871 | 30.051 | 37.388 | 0.00 | 0.00 |
| ATOM | 6186 | CA   | GLY | X | 412 | 26.064 | 29.377 | 36.630 | 0.00 | 0.00 |
| ATOM | 6187 | HA2  | GLY | X | 412 | 25.896 | 29.257 | 35.527 | 0.00 | 0.00 |
| ATOM | 6188 | HA3  | GLY | X | 412 | 26.313 | 28.368 | 36.873 | 0.00 | 0.00 |
| ATOM | 6189 | C    | GLY | X | 412 | 24.719 | 29.753 | 37.206 | 0.00 | 0.00 |
| ATOM | 6190 | O    | GLY | X | 412 | 23.814 | 29.709 | 36.484 | 0.00 | 0.00 |
| ATOM | 6191 | N    | ARG | X | 413 | 24.725 | 30.153 | 38.442 | 0.00 | 0.00 |
| ATOM | 6192 | H    | ARG | X | 413 | 25.671 | 30.278 | 38.773 | 0.00 | 0.00 |
| ATOM | 6193 | CA   | ARG | X | 413 | 23.491 | 30.604 | 39.199 | 0.00 | 0.00 |
| ATOM | 6194 | HA   | ARG | X | 413 | 22.746 | 29.810 | 39.263 | 0.00 | 0.00 |
| ATOM | 6195 | CB   | ARG | X | 413 | 23.825 | 30.948 | 40.731 | 0.00 | 0.00 |
| ATOM | 6196 | HB2  | ARG | X | 413 | 24.625 | 31.682 | 40.647 | 0.00 | 0.00 |
| ATOM | 6197 | HB3  | ARG | X | 413 | 22.937 | 31.450 | 41.114 | 0.00 | 0.00 |
| ATOM | 6198 | CG   | ARG | X | 413 | 24.255 | 29.821 | 41.559 | 0.00 | 0.00 |
| ATOM | 6199 | HG2  | ARG | X | 413 | 25.304 | 29.627 | 41.335 | 0.00 | 0.00 |

|      |      |      |     |   |     |        |        |        |      |      |
|------|------|------|-----|---|-----|--------|--------|--------|------|------|
| ATOM | 6200 | HG3  | ARG | X | 413 | 24.230 | 30.015 | 42.631 | 0.00 | 0.00 |
| ATOM | 6201 | CD   | ARG | X | 413 | 23.555 | 28.452 | 41.257 | 0.00 | 0.00 |
| ATOM | 6202 | HD2  | ARG | X | 413 | 22.471 | 28.432 | 41.370 | 0.00 | 0.00 |
| ATOM | 6203 | HD3  | ARG | X | 413 | 23.689 | 28.161 | 40.215 | 0.00 | 0.00 |
| ATOM | 6204 | NE   | ARG | X | 413 | 23.915 | 27.340 | 42.229 | 0.00 | 0.00 |
| ATOM | 6205 | HE   | ARG | X | 413 | 24.783 | 27.388 | 42.742 | 0.00 | 0.00 |
| ATOM | 6206 | CZ   | ARG | X | 413 | 23.300 | 26.200 | 42.524 | 0.00 | 0.00 |
| ATOM | 6207 | NH1  | ARG | X | 413 | 22.297 | 25.808 | 41.744 | 0.00 | 0.00 |
| ATOM | 6208 | HH11 | ARG | X | 413 | 22.172 | 26.268 | 40.854 | 0.00 | 0.00 |
| ATOM | 6209 | HH12 | ARG | X | 413 | 21.746 | 24.985 | 41.942 | 0.00 | 0.00 |
| ATOM | 6210 | NH2  | ARG | X | 413 | 23.780 | 25.497 | 43.468 | 0.00 | 0.00 |
| ATOM | 6211 | HH21 | ARG | X | 413 | 24.541 | 25.831 | 44.041 | 0.00 | 0.00 |
| ATOM | 6212 | HH22 | ARG | X | 413 | 23.367 | 24.591 | 43.636 | 0.00 | 0.00 |
| ATOM | 6213 | C    | ARG | X | 413 | 22.896 | 31.821 | 38.646 | 0.00 | 0.00 |
| ATOM | 6214 | O    | ARG | X | 413 | 21.771 | 31.921 | 38.274 | 0.00 | 0.00 |
| ATOM | 6215 | N    | LEU | X | 414 | 23.727 | 32.855 | 38.437 | 0.00 | 0.00 |
| ATOM | 6216 | H    | LEU | X | 414 | 24.681 | 32.582 | 38.626 | 0.00 | 0.00 |
| ATOM | 6217 | CA   | LEU | X | 414 | 23.410 | 34.185 | 37.901 | 0.00 | 0.00 |
| ATOM | 6218 | HA   | LEU | X | 414 | 22.678 | 34.685 | 38.535 | 0.00 | 0.00 |
| ATOM | 6219 | CB   | LEU | X | 414 | 24.702 | 35.019 | 37.654 | 0.00 | 0.00 |
| ATOM | 6220 | HB2  | LEU | X | 414 | 25.352 | 34.537 | 36.924 | 0.00 | 0.00 |
| ATOM | 6221 | HB3  | LEU | X | 414 | 24.420 | 35.937 | 37.137 | 0.00 | 0.00 |
| ATOM | 6222 | CG   | LEU | X | 414 | 25.542 | 35.399 | 38.963 | 0.00 | 0.00 |
| ATOM | 6223 | HG   | LEU | X | 414 | 26.058 | 34.519 | 39.347 | 0.00 | 0.00 |
| ATOM | 6224 | CD1  | LEU | X | 414 | 26.670 | 36.413 | 38.598 | 0.00 | 0.00 |
| ATOM | 6225 | HD11 | LEU | X | 414 | 27.400 | 36.560 | 39.393 | 0.00 | 0.00 |
| ATOM | 6226 | HD12 | LEU | X | 414 | 27.290 | 36.029 | 37.788 | 0.00 | 0.00 |
| ATOM | 6227 | HD13 | LEU | X | 414 | 26.223 | 37.365 | 38.309 | 0.00 | 0.00 |
| ATOM | 6228 | CD2  | LEU | X | 414 | 24.587 | 35.862 | 40.114 | 0.00 | 0.00 |
| ATOM | 6229 | HD21 | LEU | X | 414 | 24.102 | 36.812 | 39.889 | 0.00 | 0.00 |
| ATOM | 6230 | HD22 | LEU | X | 414 | 23.846 | 35.152 | 40.481 | 0.00 | 0.00 |
| ATOM | 6231 | HD23 | LEU | X | 414 | 25.180 | 36.082 | 41.002 | 0.00 | 0.00 |
| ATOM | 6232 | C    | LEU | X | 414 | 22.620 | 34.016 | 36.560 | 0.00 | 0.00 |
| ATOM | 6233 | O    | LEU | X | 414 | 21.500 | 34.475 | 36.401 | 0.00 | 0.00 |
| ATOM | 6234 | N    | ALA | X | 415 | 23.119 | 33.191 | 35.641 | 0.00 | 0.00 |
| ATOM | 6235 | H    | ALA | X | 415 | 23.895 | 32.602 | 35.909 | 0.00 | 0.00 |
| ATOM | 6236 | CA   | ALA | X | 415 | 22.464 | 32.862 | 34.340 | 0.00 | 0.00 |
| ATOM | 6237 | HA   | ALA | X | 415 | 22.248 | 33.754 | 33.752 | 0.00 | 0.00 |
| ATOM | 6238 | CB   | ALA | X | 415 | 23.454 | 32.142 | 33.387 | 0.00 | 0.00 |
| ATOM | 6239 | HB1  | ALA | X | 415 | 24.196 | 32.853 | 33.025 | 0.00 | 0.00 |
| ATOM | 6240 | HB2  | ALA | X | 415 | 24.006 | 31.370 | 33.922 | 0.00 | 0.00 |
| ATOM | 6241 | HB3  | ALA | X | 415 | 23.046 | 31.759 | 32.451 | 0.00 | 0.00 |
| ATOM | 6242 | C    | ALA | X | 415 | 21.151 | 32.056 | 34.580 | 0.00 | 0.00 |
| ATOM | 6243 | O    | ALA | X | 415 | 20.110 | 32.443 | 34.052 | 0.00 | 0.00 |
| ATOM | 6244 | N    | ALA | X | 416 | 21.115 | 31.008 | 35.445 | 0.00 | 0.00 |
| ATOM | 6245 | H    | ALA | X | 416 | 21.999 | 30.827 | 35.899 | 0.00 | 0.00 |
| ATOM | 6246 | CA   | ALA | X | 416 | 19.891 | 30.284 | 35.829 | 0.00 | 0.00 |
| ATOM | 6247 | HA   | ALA | X | 416 | 19.470 | 29.725 | 34.993 | 0.00 | 0.00 |
| ATOM | 6248 | CB   | ALA | X | 416 | 20.259 | 29.256 | 36.881 | 0.00 | 0.00 |
| ATOM | 6249 | HB1  | ALA | X | 416 | 19.356 | 28.738 | 37.202 | 0.00 | 0.00 |
| ATOM | 6250 | HB2  | ALA | X | 416 | 20.990 | 28.610 | 36.396 | 0.00 | 0.00 |
| ATOM | 6251 | HB3  | ALA | X | 416 | 20.804 | 29.763 | 37.678 | 0.00 | 0.00 |
| ATOM | 6252 | C    | ALA | X | 416 | 18.789 | 31.241 | 36.376 | 0.00 | 0.00 |
| ATOM | 6253 | O    | ALA | X | 416 | 17.621 | 31.086 | 36.049 | 0.00 | 0.00 |
| ATOM | 6254 | N    | GLN | X | 417 | 19.176 | 32.363 | 37.093 | 0.00 | 0.00 |
| ATOM | 6255 | H    | GLN | X | 417 | 20.114 | 32.300 | 37.461 | 0.00 | 0.00 |
| ATOM | 6256 | CA   | GLN | X | 417 | 18.201 | 33.292 | 37.721 | 0.00 | 0.00 |
| ATOM | 6257 | HA   | GLN | X | 417 | 17.242 | 32.773 | 37.740 | 0.00 | 0.00 |
| ATOM | 6258 | CB   | GLN | X | 417 | 18.742 | 33.667 | 39.167 | 0.00 | 0.00 |
| ATOM | 6259 | HB2  | GLN | X | 417 | 19.786 | 33.958 | 39.048 | 0.00 | 0.00 |
| ATOM | 6260 | HB3  | GLN | X | 417 | 18.318 | 34.591 | 39.559 | 0.00 | 0.00 |
| ATOM | 6261 | CG   | GLN | X | 417 | 18.615 | 32.424 | 40.131 | 0.00 | 0.00 |
| ATOM | 6262 | HG2  | GLN | X | 417 | 17.764 | 32.539 | 40.803 | 0.00 | 0.00 |
| ATOM | 6263 | HG3  | GLN | X | 417 | 18.487 | 31.531 | 39.519 | 0.00 | 0.00 |
| ATOM | 6264 | CD   | GLN | X | 417 | 19.869 | 32.160 | 40.938 | 0.00 | 0.00 |
| ATOM | 6265 | OE1  | GLN | X | 417 | 20.467 | 31.069 | 40.935 | 0.00 | 0.00 |
| ATOM | 6266 | NE2  | GLN | X | 417 | 20.304 | 32.989 | 41.816 | 0.00 | 0.00 |
| ATOM | 6267 | HE21 | GLN | X | 417 | 21.215 | 32.774 | 42.194 | 0.00 | 0.00 |
| ATOM | 6268 | HE22 | GLN | X | 417 | 19.813 | 33.867 | 41.909 | 0.00 | 0.00 |
| ATOM | 6269 | C    | GLN | X | 417 | 17.845 | 34.541 | 36.912 | 0.00 | 0.00 |

|      |      |      |     |   |     |        |        |        |      |      |
|------|------|------|-----|---|-----|--------|--------|--------|------|------|
| ATOM | 6270 | O    | GLN | X | 417 | 17.337 | 35.493 | 37.430 | 0.00 | 0.00 |
| ATOM | 6271 | N    | GLY | X | 418 | 18.197 | 34.400 | 35.661 | 0.00 | 0.00 |
| ATOM | 6272 | H    | GLY | X | 418 | 18.955 | 33.753 | 35.498 | 0.00 | 0.00 |
| ATOM | 6273 | CA   | GLY | X | 418 | 17.924 | 35.397 | 34.618 | 0.00 | 0.00 |
| ATOM | 6274 | HA2  | GLY | X | 418 | 17.717 | 34.874 | 33.690 | 0.00 | 0.00 |
| ATOM | 6275 | HA3  | GLY | X | 418 | 17.033 | 35.892 | 34.888 | 0.00 | 0.00 |
| ATOM | 6276 | C    | GLY | X | 418 | 18.835 | 36.558 | 34.209 | 0.00 | 0.00 |
| ATOM | 6277 | O    | GLY | X | 418 | 18.408 | 37.352 | 33.329 | 0.00 | 0.00 |
| ATOM | 6278 | N    | ALA | X | 419 | 20.096 | 36.565 | 34.759 | 0.00 | 0.00 |
| ATOM | 6279 | H    | ALA | X | 419 | 20.313 | 35.831 | 35.417 | 0.00 | 0.00 |
| ATOM | 6280 | CA   | ALA | X | 419 | 21.155 | 37.566 | 34.445 | 0.00 | 0.00 |
| ATOM | 6281 | HA   | ALA | X | 419 | 20.819 | 38.601 | 34.509 | 0.00 | 0.00 |
| ATOM | 6282 | CB   | ALA | X | 419 | 22.312 | 37.464 | 35.496 | 0.00 | 0.00 |
| ATOM | 6283 | HB1  | ALA | X | 419 | 22.946 | 36.623 | 35.215 | 0.00 | 0.00 |
| ATOM | 6284 | HB2  | ALA | X | 419 | 23.005 | 38.304 | 35.528 | 0.00 | 0.00 |
| ATOM | 6285 | HB3  | ALA | X | 419 | 21.924 | 37.338 | 36.507 | 0.00 | 0.00 |
| ATOM | 6286 | C    | ALA | X | 419 | 21.631 | 37.429 | 32.982 | 0.00 | 0.00 |
| ATOM | 6287 | O    | ALA | X | 419 | 21.622 | 36.342 | 32.409 | 0.00 | 0.00 |
| ATOM | 6288 | N    | ARG | X | 420 | 22.288 | 38.511 | 32.569 | 0.00 | 0.00 |
| ATOM | 6289 | H    | ARG | X | 420 | 22.304 | 39.389 | 33.069 | 0.00 | 0.00 |
| ATOM | 6290 | CA   | ARG | X | 420 | 23.108 | 38.653 | 31.341 | 0.00 | 0.00 |
| ATOM | 6291 | HA   | ARG | X | 420 | 22.831 | 37.855 | 30.652 | 0.00 | 0.00 |
| ATOM | 6292 | CB   | ARG | X | 420 | 22.737 | 39.991 | 30.625 | 0.00 | 0.00 |
| ATOM | 6293 | HB2  | ARG | X | 420 | 21.673 | 39.954 | 30.390 | 0.00 | 0.00 |
| ATOM | 6294 | HB3  | ARG | X | 420 | 22.796 | 40.826 | 31.324 | 0.00 | 0.00 |
| ATOM | 6295 | CG   | ARG | X | 420 | 23.436 | 40.368 | 29.289 | 0.00 | 0.00 |
| ATOM | 6296 | HG2  | ARG | X | 420 | 24.490 | 40.502 | 29.531 | 0.00 | 0.00 |
| ATOM | 6297 | HG3  | ARG | X | 420 | 23.231 | 39.506 | 28.654 | 0.00 | 0.00 |
| ATOM | 6298 | CD   | ARG | X | 420 | 22.746 | 41.600 | 28.567 | 0.00 | 0.00 |
| ATOM | 6299 | HD2  | ARG | X | 420 | 21.681 | 41.375 | 28.623 | 0.00 | 0.00 |
| ATOM | 6300 | HD3  | ARG | X | 420 | 22.965 | 42.517 | 29.114 | 0.00 | 0.00 |
| ATOM | 6301 | NE   | ARG | X | 420 | 23.236 | 41.811 | 27.187 | 0.00 | 0.00 |
| ATOM | 6302 | HE   | ARG | X | 420 | 23.960 | 42.484 | 26.977 | 0.00 | 0.00 |
| ATOM | 6303 | CZ   | ARG | X | 420 | 22.888 | 41.015 | 26.183 | 0.00 | 0.00 |
| ATOM | 6304 | NH1  | ARG | X | 420 | 22.086 | 39.961 | 26.191 | 0.00 | 0.00 |
| ATOM | 6305 | HH11 | ARG | X | 420 | 21.792 | 39.577 | 27.078 | 0.00 | 0.00 |
| ATOM | 6306 | HH12 | ARG | X | 420 | 21.784 | 39.587 | 25.303 | 0.00 | 0.00 |
| ATOM | 6307 | NH2  | ARG | X | 420 | 23.337 | 41.353 | 25.010 | 0.00 | 0.00 |
| ATOM | 6308 | HH21 | ARG | X | 420 | 23.744 | 42.275 | 24.947 | 0.00 | 0.00 |
| ATOM | 6309 | HH22 | ARG | X | 420 | 23.043 | 40.814 | 24.208 | 0.00 | 0.00 |
| ATOM | 6310 | C    | ARG | X | 420 | 24.647 | 38.684 | 31.729 | 0.00 | 0.00 |
| ATOM | 6311 | O    | ARG | X | 420 | 25.194 | 39.764 | 32.066 | 0.00 | 0.00 |
| ATOM | 6312 | N    | VAL | X | 421 | 25.204 | 37.481 | 31.702 | 0.00 | 0.00 |
| ATOM | 6313 | H    | VAL | X | 421 | 24.590 | 36.776 | 31.321 | 0.00 | 0.00 |
| ATOM | 6314 | CA   | VAL | X | 421 | 26.540 | 36.986 | 32.178 | 0.00 | 0.00 |
| ATOM | 6315 | HA   | VAL | X | 421 | 26.840 | 37.637 | 32.999 | 0.00 | 0.00 |
| ATOM | 6316 | CB   | VAL | X | 421 | 26.398 | 35.618 | 32.909 | 0.00 | 0.00 |
| ATOM | 6317 | HB   | VAL | X | 421 | 26.003 | 34.824 | 32.275 | 0.00 | 0.00 |
| ATOM | 6318 | CG1  | VAL | X | 421 | 27.750 | 35.195 | 33.529 | 0.00 | 0.00 |
| ATOM | 6319 | HG11 | VAL | X | 421 | 28.431 | 35.078 | 32.687 | 0.00 | 0.00 |
| ATOM | 6320 | HG12 | VAL | X | 421 | 28.074 | 36.014 | 34.171 | 0.00 | 0.00 |
| ATOM | 6321 | HG13 | VAL | X | 421 | 27.681 | 34.302 | 34.150 | 0.00 | 0.00 |
| ATOM | 6322 | CG2  | VAL | X | 421 | 25.308 | 35.673 | 34.027 | 0.00 | 0.00 |
| ATOM | 6323 | HG21 | VAL | X | 421 | 25.498 | 36.482 | 34.732 | 0.00 | 0.00 |
| ATOM | 6324 | HG22 | VAL | X | 421 | 24.339 | 35.752 | 33.534 | 0.00 | 0.00 |
| ATOM | 6325 | HG23 | VAL | X | 421 | 25.201 | 34.695 | 34.497 | 0.00 | 0.00 |
| ATOM | 6326 | C    | VAL | X | 421 | 27.619 | 37.001 | 31.053 | 0.00 | 0.00 |
| ATOM | 6327 | O    | VAL | X | 421 | 27.165 | 36.771 | 29.915 | 0.00 | 0.00 |
| ATOM | 6328 | N    | TYR | X | 422 | 28.952 | 37.084 | 31.410 | 0.00 | 0.00 |
| ATOM | 6329 | H    | TYR | X | 422 | 29.154 | 37.468 | 32.322 | 0.00 | 0.00 |
| ATOM | 6330 | CA   | TYR | X | 422 | 30.097 | 36.987 | 30.493 | 0.00 | 0.00 |
| ATOM | 6331 | HA   | TYR | X | 422 | 29.817 | 36.426 | 29.601 | 0.00 | 0.00 |
| ATOM | 6332 | CB   | TYR | X | 422 | 30.415 | 38.433 | 30.019 | 0.00 | 0.00 |
| ATOM | 6333 | HB2  | TYR | X | 422 | 30.420 | 39.266 | 30.721 | 0.00 | 0.00 |
| ATOM | 6334 | HB3  | TYR | X | 422 | 31.451 | 38.494 | 29.685 | 0.00 | 0.00 |
| ATOM | 6335 | CG   | TYR | X | 422 | 29.460 | 38.823 | 28.883 | 0.00 | 0.00 |
| ATOM | 6336 | CD1  | TYR | X | 422 | 29.794 | 38.507 | 27.545 | 0.00 | 0.00 |
| ATOM | 6337 | HD1  | TYR | X | 422 | 30.653 | 37.856 | 27.467 | 0.00 | 0.00 |
| ATOM | 6338 | CE1  | TYR | X | 422 | 28.915 | 38.807 | 26.501 | 0.00 | 0.00 |
| ATOM | 6339 | HE1  | TYR | X | 422 | 29.046 | 38.415 | 25.504 | 0.00 | 0.00 |

|      |      |      |     |   |     |        |        |        |      |      |
|------|------|------|-----|---|-----|--------|--------|--------|------|------|
| ATOM | 6340 | CZ   | TYR | X | 422 | 27.687 | 39.518 | 26.819 | 0.00 | 0.00 |
| ATOM | 6341 | OH   | TYR | X | 422 | 26.737 | 39.733 | 25.903 | 0.00 | 0.00 |
| ATOM | 6342 | HH   | TYR | X | 422 | 26.923 | 39.449 | 25.005 | 0.00 | 0.00 |
| ATOM | 6343 | CE2  | TYR | X | 422 | 27.462 | 39.976 | 28.127 | 0.00 | 0.00 |
| ATOM | 6344 | HE2  | TYR | X | 422 | 26.487 | 40.408 | 28.295 | 0.00 | 0.00 |
| ATOM | 6345 | CD2  | TYR | X | 422 | 28.398 | 39.676 | 29.156 | 0.00 | 0.00 |
| ATOM | 6346 | HD2  | TYR | X | 422 | 28.157 | 39.926 | 30.179 | 0.00 | 0.00 |
| ATOM | 6347 | C    | TYR | X | 422 | 31.402 | 36.351 | 31.101 | 0.00 | 0.00 |
| ATOM | 6348 | O    | TYR | X | 422 | 31.805 | 36.777 | 32.180 | 0.00 | 0.00 |
| ATOM | 6349 | N    | ALA | X | 423 | 31.938 | 35.298 | 30.468 | 0.00 | 0.00 |
| ATOM | 6350 | H    | ALA | X | 423 | 31.458 | 34.947 | 29.651 | 0.00 | 0.00 |
| ATOM | 6351 | CA   | ALA | X | 423 | 33.058 | 34.572 | 31.047 | 0.00 | 0.00 |
| ATOM | 6352 | HA   | ALA | X | 423 | 33.419 | 34.982 | 31.991 | 0.00 | 0.00 |
| ATOM | 6353 | CB   | ALA | X | 423 | 32.584 | 33.184 | 31.403 | 0.00 | 0.00 |
| ATOM | 6354 | HB1  | ALA | X | 423 | 32.410 | 32.663 | 30.461 | 0.00 | 0.00 |
| ATOM | 6355 | HB2  | ALA | X | 423 | 33.425 | 32.621 | 31.806 | 0.00 | 0.00 |
| ATOM | 6356 | HB3  | ALA | X | 423 | 31.653 | 33.250 | 31.967 | 0.00 | 0.00 |
| ATOM | 6357 | C    | ALA | X | 423 | 34.296 | 34.565 | 30.091 | 0.00 | 0.00 |
| ATOM | 6358 | O    | ALA | X | 423 | 34.198 | 34.449 | 28.868 | 0.00 | 0.00 |
| ATOM | 6359 | N    | TYR | X | 424 | 35.486 | 34.539 | 30.731 | 0.00 | 0.00 |
| ATOM | 6360 | H    | TYR | X | 424 | 35.495 | 34.687 | 31.730 | 0.00 | 0.00 |
| ATOM | 6361 | CA   | TYR | X | 424 | 36.758 | 34.552 | 30.141 | 0.00 | 0.00 |
| ATOM | 6362 | HA   | TYR | X | 424 | 36.743 | 34.145 | 29.130 | 0.00 | 0.00 |
| ATOM | 6363 | CB   | TYR | X | 424 | 37.278 | 36.055 | 30.013 | 0.00 | 0.00 |
| ATOM | 6364 | HB2  | TYR | X | 424 | 38.107 | 35.982 | 29.308 | 0.00 | 0.00 |
| ATOM | 6365 | HB3  | TYR | X | 424 | 36.472 | 36.689 | 29.643 | 0.00 | 0.00 |
| ATOM | 6366 | CG   | TYR | X | 424 | 37.771 | 36.799 | 31.268 | 0.00 | 0.00 |
| ATOM | 6367 | CD1  | TYR | X | 424 | 39.179 | 36.880 | 31.533 | 0.00 | 0.00 |
| ATOM | 6368 | HD1  | TYR | X | 424 | 39.857 | 36.217 | 31.015 | 0.00 | 0.00 |
| ATOM | 6369 | CE1  | TYR | X | 424 | 39.543 | 37.642 | 32.650 | 0.00 | 0.00 |
| ATOM | 6370 | HE1  | TYR | X | 424 | 40.572 | 37.616 | 32.978 | 0.00 | 0.00 |
| ATOM | 6371 | CZ   | TYR | X | 424 | 38.642 | 38.341 | 33.454 | 0.00 | 0.00 |
| ATOM | 6372 | OH   | TYR | X | 424 | 39.032 | 38.749 | 34.689 | 0.00 | 0.00 |
| ATOM | 6373 | HH   | TYR | X | 424 | 39.990 | 38.797 | 34.728 | 0.00 | 0.00 |
| ATOM | 6374 | CE2  | TYR | X | 424 | 37.262 | 38.256 | 33.142 | 0.00 | 0.00 |
| ATOM | 6375 | HE2  | TYR | X | 424 | 36.589 | 38.800 | 33.788 | 0.00 | 0.00 |
| ATOM | 6376 | CD2  | TYR | X | 424 | 36.884 | 37.501 | 31.996 | 0.00 | 0.00 |
| ATOM | 6377 | HD2  | TYR | X | 424 | 35.835 | 37.401 | 31.762 | 0.00 | 0.00 |
| ATOM | 6378 | C    | TYR | X | 424 | 37.776 | 33.744 | 30.967 | 0.00 | 0.00 |
| ATOM | 6379 | O    | TYR | X | 424 | 37.660 | 33.825 | 32.218 | 0.00 | 0.00 |
| ATOM | 6380 | N    | VAL | X | 425 | 38.845 | 33.319 | 30.323 | 0.00 | 0.00 |
| ATOM | 6381 | H    | VAL | X | 425 | 38.842 | 33.377 | 29.314 | 0.00 | 0.00 |
| ATOM | 6382 | CA   | VAL | X | 425 | 40.113 | 32.974 | 30.983 | 0.00 | 0.00 |
| ATOM | 6383 | HA   | VAL | X | 425 | 40.172 | 33.250 | 32.036 | 0.00 | 0.00 |
| ATOM | 6384 | CB   | VAL | X | 425 | 40.392 | 31.475 | 30.922 | 0.00 | 0.00 |
| ATOM | 6385 | HB   | VAL | X | 425 | 40.531 | 31.187 | 29.880 | 0.00 | 0.00 |
| ATOM | 6386 | CG1  | VAL | X | 425 | 41.675 | 30.992 | 31.593 | 0.00 | 0.00 |
| ATOM | 6387 | HG11 | VAL | X | 425 | 42.585 | 31.573 | 31.442 | 0.00 | 0.00 |
| ATOM | 6388 | HG12 | VAL | X | 425 | 41.589 | 31.041 | 32.679 | 0.00 | 0.00 |
| ATOM | 6389 | HG13 | VAL | X | 425 | 41.953 | 30.038 | 31.145 | 0.00 | 0.00 |
| ATOM | 6390 | CG2  | VAL | X | 425 | 39.131 | 30.701 | 31.387 | 0.00 | 0.00 |
| ATOM | 6391 | HG21 | VAL | X | 425 | 39.152 | 30.460 | 32.450 | 0.00 | 0.00 |
| ATOM | 6392 | HG22 | VAL | X | 425 | 38.177 | 31.203 | 31.224 | 0.00 | 0.00 |
| ATOM | 6393 | HG23 | VAL | X | 425 | 39.228 | 29.736 | 30.890 | 0.00 | 0.00 |
| ATOM | 6394 | C    | VAL | X | 425 | 41.192 | 33.752 | 30.224 | 0.00 | 0.00 |
| ATOM | 6395 | O    | VAL | X | 425 | 41.393 | 33.584 | 28.979 | 0.00 | 0.00 |
| ATOM | 6396 | N    | PHE | X | 426 | 41.997 | 34.467 | 30.954 | 0.00 | 0.00 |
| ATOM | 6397 | H    | PHE | X | 426 | 41.823 | 34.443 | 31.949 | 0.00 | 0.00 |
| ATOM | 6398 | CA   | PHE | X | 426 | 43.158 | 35.266 | 30.511 | 0.00 | 0.00 |
| ATOM | 6399 | HA   | PHE | X | 426 | 43.021 | 35.474 | 29.450 | 0.00 | 0.00 |
| ATOM | 6400 | CB   | PHE | X | 426 | 43.261 | 36.529 | 31.341 | 0.00 | 0.00 |
| ATOM | 6401 | HB2  | PHE | X | 426 | 42.382 | 37.164 | 31.233 | 0.00 | 0.00 |
| ATOM | 6402 | HB3  | PHE | X | 426 | 43.302 | 36.266 | 32.398 | 0.00 | 0.00 |
| ATOM | 6403 | CG   | PHE | X | 426 | 44.536 | 37.340 | 31.035 | 0.00 | 0.00 |
| ATOM | 6404 | CD1  | PHE | X | 426 | 44.439 | 38.234 | 29.950 | 0.00 | 0.00 |
| ATOM | 6405 | HD1  | PHE | X | 426 | 43.503 | 38.384 | 29.432 | 0.00 | 0.00 |
| ATOM | 6406 | CE1  | PHE | X | 426 | 45.480 | 39.160 | 29.594 | 0.00 | 0.00 |
| ATOM | 6407 | HE1  | PHE | X | 426 | 45.316 | 39.940 | 28.866 | 0.00 | 0.00 |
| ATOM | 6408 | CZ   | PHE | X | 426 | 46.715 | 39.064 | 30.297 | 0.00 | 0.00 |
| ATOM | 6409 | HZ   | PHE | X | 426 | 47.568 | 39.720 | 30.206 | 0.00 | 0.00 |



|      |      |      |     |   |     |        |        |        |      |      |
|------|------|------|-----|---|-----|--------|--------|--------|------|------|
| ATOM | 6410 | CE2  | PHE | X | 426 | 46.838 | 38.109 | 31.297 | 0.00 | 0.00 |
| ATOM | 6411 | HE2  | PHE | X | 426 | 47.786 | 38.165 | 31.813 | 0.00 | 0.00 |
| ATOM | 6412 | CD2  | PHE | X | 426 | 45.766 | 37.254 | 31.722 | 0.00 | 0.00 |
| ATOM | 6413 | HD2  | PHE | X | 426 | 45.907 | 36.723 | 32.652 | 0.00 | 0.00 |
| ATOM | 6414 | C    | PHE | X | 426 | 44.411 | 34.415 | 30.646 | 0.00 | 0.00 |
| ATOM | 6415 | O    | PHE | X | 426 | 44.776 | 33.931 | 31.706 | 0.00 | 0.00 |
| ATOM | 6416 | N    | GLU | X | 427 | 45.242 | 34.337 | 29.626 | 0.00 | 0.00 |
| ATOM | 6417 | H    | GLU | X | 427 | 45.187 | 35.002 | 28.868 | 0.00 | 0.00 |
| ATOM | 6418 | CA   | GLU | X | 427 | 46.327 | 33.365 | 29.526 | 0.00 | 0.00 |
| ATOM | 6419 | HA   | GLU | X | 427 | 46.560 | 32.961 | 30.510 | 0.00 | 0.00 |
| ATOM | 6420 | CB   | GLU | X | 427 | 45.726 | 32.257 | 28.707 | 0.00 | 0.00 |
| ATOM | 6421 | HB2  | GLU | X | 427 | 46.541 | 31.533 | 28.710 | 0.00 | 0.00 |
| ATOM | 6422 | HB3  | GLU | X | 427 | 44.945 | 31.843 | 29.344 | 0.00 | 0.00 |
| ATOM | 6423 | CG   | GLU | X | 427 | 45.334 | 32.464 | 27.261 | 0.00 | 0.00 |
| ATOM | 6424 | HG2  | GLU | X | 427 | 44.476 | 33.135 | 27.223 | 0.00 | 0.00 |
| ATOM | 6425 | HG3  | GLU | X | 427 | 46.181 | 32.946 | 26.774 | 0.00 | 0.00 |
| ATOM | 6426 | CD   | GLU | X | 427 | 44.971 | 31.230 | 26.553 | 0.00 | 0.00 |
| ATOM | 6427 | OE1  | GLU | X | 427 | 45.534 | 31.021 | 25.434 | 0.00 | 0.00 |
| ATOM | 6428 | OE2  | GLU | X | 427 | 43.955 | 30.556 | 26.901 | 0.00 | 0.00 |
| ATOM | 6429 | C    | GLU | X | 427 | 47.587 | 33.891 | 29.000 | 0.00 | 0.00 |
| ATOM | 6430 | O    | GLU | X | 427 | 48.330 | 33.052 | 28.540 | 0.00 | 0.00 |
| ATOM | 6431 | N    | HIE | X | 428 | 47.819 | 35.222 | 29.024 | 0.00 | 0.00 |
| ATOM | 6432 | H    | HIE | X | 428 | 47.170 | 35.880 | 29.430 | 0.00 | 0.00 |
| ATOM | 6433 | CA   | HIE | X | 428 | 49.011 | 35.848 | 28.412 | 0.00 | 0.00 |
| ATOM | 6434 | HA   | HIE | X | 428 | 49.552 | 35.099 | 27.833 | 0.00 | 0.00 |
| ATOM | 6435 | CB   | HIE | X | 428 | 48.603 | 37.055 | 27.460 | 0.00 | 0.00 |
| ATOM | 6436 | HB2  | HIE | X | 428 | 47.992 | 36.731 | 26.618 | 0.00 | 0.00 |
| ATOM | 6437 | HB3  | HIE | X | 428 | 48.033 | 37.710 | 28.119 | 0.00 | 0.00 |
| ATOM | 6438 | CG   | HIE | X | 428 | 49.849 | 37.667 | 26.887 | 0.00 | 0.00 |
| ATOM | 6439 | ND1  | HIE | X | 428 | 50.798 | 36.938 | 26.232 | 0.00 | 0.00 |
| ATOM | 6440 | CE1  | HIE | X | 428 | 51.778 | 37.826 | 26.090 | 0.00 | 0.00 |
| ATOM | 6441 | HE1  | HIE | X | 428 | 52.645 | 37.660 | 25.468 | 0.00 | 0.00 |
| ATOM | 6442 | NE2  | HIE | X | 428 | 51.507 | 38.988 | 26.556 | 0.00 | 0.00 |
| ATOM | 6443 | HE2  | HIE | X | 428 | 51.990 | 39.875 | 26.567 | 0.00 | 0.00 |
| ATOM | 6444 | CD2  | HIE | X | 428 | 50.264 | 38.941 | 27.129 | 0.00 | 0.00 |
| ATOM | 6445 | HD2  | HIE | X | 428 | 49.890 | 39.682 | 27.819 | 0.00 | 0.00 |
| ATOM | 6446 | C    | HIE | X | 428 | 49.989 | 36.299 | 29.477 | 0.00 | 0.00 |
| ATOM | 6447 | O    | HIE | X | 428 | 49.602 | 37.216 | 30.236 | 0.00 | 0.00 |
| ATOM | 6448 | N    | ARG | X | 429 | 51.175 | 35.638 | 29.461 | 0.00 | 0.00 |
| ATOM | 6449 | H    | ARG | X | 429 | 51.300 | 34.830 | 28.868 | 0.00 | 0.00 |
| ATOM | 6450 | CA   | ARG | X | 429 | 52.348 | 36.070 | 30.204 | 0.00 | 0.00 |
| ATOM | 6451 | HA   | ARG | X | 429 | 52.012 | 36.412 | 31.183 | 0.00 | 0.00 |
| ATOM | 6452 | CB   | ARG | X | 429 | 53.437 | 34.984 | 30.493 | 0.00 | 0.00 |
| ATOM | 6453 | HB2  | ARG | X | 429 | 52.950 | 34.013 | 30.591 | 0.00 | 0.00 |
| ATOM | 6454 | HB3  | ARG | X | 429 | 54.087 | 34.979 | 29.618 | 0.00 | 0.00 |
| ATOM | 6455 | CG   | ARG | X | 429 | 54.240 | 35.332 | 31.809 | 0.00 | 0.00 |
| ATOM | 6456 | HG2  | ARG | X | 429 | 54.622 | 36.352 | 31.768 | 0.00 | 0.00 |
| ATOM | 6457 | HG3  | ARG | X | 429 | 53.684 | 35.285 | 32.745 | 0.00 | 0.00 |
| ATOM | 6458 | CD   | ARG | X | 429 | 55.424 | 34.342 | 32.039 | 0.00 | 0.00 |
| ATOM | 6459 | HD2  | ARG | X | 429 | 56.140 | 34.577 | 31.251 | 0.00 | 0.00 |
| ATOM | 6460 | HD3  | ARG | X | 429 | 55.877 | 34.574 | 33.003 | 0.00 | 0.00 |
| ATOM | 6461 | NE   | ARG | X | 429 | 55.145 | 32.928 | 31.747 | 0.00 | 0.00 |
| ATOM | 6462 | HE   | ARG | X | 429 | 54.444 | 32.693 | 31.059 | 0.00 | 0.00 |
| ATOM | 6463 | CZ   | ARG | X | 429 | 55.720 | 31.881 | 32.283 | 0.00 | 0.00 |
| ATOM | 6464 | NH1  | ARG | X | 429 | 56.352 | 31.917 | 33.401 | 0.00 | 0.00 |
| ATOM | 6465 | HH11 | ARG | X | 429 | 56.727 | 32.807 | 33.693 | 0.00 | 0.00 |
| ATOM | 6466 | HH12 | ARG | X | 429 | 56.559 | 31.089 | 33.941 | 0.00 | 0.00 |
| ATOM | 6467 | NH2  | ARG | X | 429 | 55.441 | 30.769 | 31.683 | 0.00 | 0.00 |
| ATOM | 6468 | HH21 | ARG | X | 429 | 54.788 | 30.771 | 30.912 | 0.00 | 0.00 |
| ATOM | 6469 | HH22 | ARG | X | 429 | 55.690 | 29.933 | 32.192 | 0.00 | 0.00 |
| ATOM | 6470 | C    | ARG | X | 429 | 53.024 | 37.286 | 29.532 | 0.00 | 0.00 |
| ATOM | 6471 | O    | ARG | X | 429 | 53.620 | 37.141 | 28.446 | 0.00 | 0.00 |
| ATOM | 6472 | N    | ALA | X | 430 | 52.975 | 38.406 | 30.249 | 0.00 | 0.00 |
| ATOM | 6473 | H    | ALA | X | 430 | 52.548 | 38.416 | 31.164 | 0.00 | 0.00 |
| ATOM | 6474 | CA   | ALA | X | 430 | 53.571 | 39.704 | 29.891 | 0.00 | 0.00 |
| ATOM | 6475 | HA   | ALA | X | 430 | 53.141 | 39.834 | 28.898 | 0.00 | 0.00 |
| ATOM | 6476 | CB   | ALA | X | 430 | 53.133 | 40.793 | 30.811 | 0.00 | 0.00 |
| ATOM | 6477 | HB1  | ALA | X | 430 | 53.435 | 41.757 | 30.402 | 0.00 | 0.00 |
| ATOM | 6478 | HB2  | ALA | X | 430 | 52.045 | 40.842 | 30.787 | 0.00 | 0.00 |
| ATOM | 6479 | HB3  | ALA | X | 430 | 53.451 | 40.442 | 31.793 | 0.00 | 0.00 |

|      |      |      |     |   |     |        |        |        |      |      |
|------|------|------|-----|---|-----|--------|--------|--------|------|------|
| ATOM | 6480 | C    | ALA | X | 430 | 55.130 | 39.631 | 29.753 | 0.00 | 0.00 |
| ATOM | 6481 | O    | ALA | X | 430 | 55.819 | 38.838 | 30.422 | 0.00 | 0.00 |
| ATOM | 6482 | N    | SER | X | 431 | 55.646 | 40.399 | 28.818 | 0.00 | 0.00 |
| ATOM | 6483 | H    | SER | X | 431 | 55.067 | 41.041 | 28.296 | 0.00 | 0.00 |
| ATOM | 6484 | CA   | SER | X | 431 | 57.046 | 40.189 | 28.399 | 0.00 | 0.00 |
| ATOM | 6485 | HA   | SER | X | 431 | 57.194 | 39.125 | 28.211 | 0.00 | 0.00 |
| ATOM | 6486 | CB   | SER | X | 431 | 57.392 | 40.878 | 27.074 | 0.00 | 0.00 |
| ATOM | 6487 | HB2  | SER | X | 431 | 58.463 | 40.783 | 26.897 | 0.00 | 0.00 |
| ATOM | 6488 | HB3  | SER | X | 431 | 56.852 | 40.419 | 26.245 | 0.00 | 0.00 |
| ATOM | 6489 | OG   | SER | X | 431 | 56.934 | 42.277 | 27.073 | 0.00 | 0.00 |
| ATOM | 6490 | HG   | SER | X | 431 | 56.061 | 42.334 | 26.679 | 0.00 | 0.00 |
| ATOM | 6491 | C    | SER | X | 431 | 58.226 | 40.401 | 29.403 | 0.00 | 0.00 |
| ATOM | 6492 | O    | SER | X | 431 | 59.306 | 39.838 | 29.244 | 0.00 | 0.00 |
| ATOM | 6493 | N    | THR | X | 432 | 57.940 | 41.192 | 30.400 | 0.00 | 0.00 |
| ATOM | 6494 | H    | THR | X | 432 | 57.010 | 41.552 | 30.565 | 0.00 | 0.00 |
| ATOM | 6495 | CA   | THR | X | 432 | 58.963 | 41.665 | 31.358 | 0.00 | 0.00 |
| ATOM | 6496 | HA   | THR | X | 432 | 59.955 | 41.309 | 31.080 | 0.00 | 0.00 |
| ATOM | 6497 | CB   | THR | X | 432 | 58.860 | 43.186 | 31.325 | 0.00 | 0.00 |
| ATOM | 6498 | HB   | THR | X | 432 | 59.387 | 43.666 | 32.150 | 0.00 | 0.00 |
| ATOM | 6499 | CG2  | THR | X | 432 | 59.389 | 43.712 | 30.032 | 0.00 | 0.00 |
| ATOM | 6500 | HG21 | THR | X | 432 | 58.687 | 43.459 | 29.238 | 0.00 | 0.00 |
| ATOM | 6501 | HG22 | THR | X | 432 | 59.450 | 44.800 | 30.055 | 0.00 | 0.00 |
| ATOM | 6502 | HG23 | THR | X | 432 | 60.391 | 43.336 | 29.826 | 0.00 | 0.00 |
| ATOM | 6503 | OG1  | THR | X | 432 | 57.490 | 43.533 | 31.502 | 0.00 | 0.00 |
| ATOM | 6504 | HG1  | THR | X | 432 | 57.251 | 43.185 | 32.363 | 0.00 | 0.00 |
| ATOM | 6505 | C    | THR | X | 432 | 58.773 | 41.163 | 32.835 | 0.00 | 0.00 |
| ATOM | 6506 | O    | THR | X | 432 | 59.493 | 41.572 | 33.702 | 0.00 | 0.00 |
| ATOM | 6507 | N    | LEU | X | 433 | 57.705 | 40.368 | 33.049 | 0.00 | 0.00 |
| ATOM | 6508 | H    | LEU | X | 433 | 57.113 | 40.065 | 32.288 | 0.00 | 0.00 |
| ATOM | 6509 | CA   | LEU | X | 433 | 57.369 | 39.727 | 34.354 | 0.00 | 0.00 |
| ATOM | 6510 | HA   | LEU | X | 433 | 57.091 | 40.495 | 35.075 | 0.00 | 0.00 |
| ATOM | 6511 | CB   | LEU | X | 433 | 56.239 | 38.749 | 34.024 | 0.00 | 0.00 |
| ATOM | 6512 | HB2  | LEU | X | 433 | 55.380 | 39.206 | 33.533 | 0.00 | 0.00 |
| ATOM | 6513 | HB3  | LEU | X | 433 | 56.671 | 38.006 | 33.354 | 0.00 | 0.00 |
| ATOM | 6514 | CG   | LEU | X | 433 | 55.742 | 37.988 | 35.221 | 0.00 | 0.00 |
| ATOM | 6515 | HG   | LEU | X | 433 | 56.561 | 37.486 | 35.737 | 0.00 | 0.00 |
| ATOM | 6516 | CD1  | LEU | X | 433 | 55.153 | 38.984 | 36.301 | 0.00 | 0.00 |
| ATOM | 6517 | HD11 | LEU | X | 433 | 55.894 | 39.195 | 37.072 | 0.00 | 0.00 |
| ATOM | 6518 | HD12 | LEU | X | 433 | 54.853 | 39.907 | 35.804 | 0.00 | 0.00 |
| ATOM | 6519 | HD13 | LEU | X | 433 | 54.308 | 38.535 | 36.823 | 0.00 | 0.00 |
| ATOM | 6520 | CD2  | LEU | X | 433 | 54.683 | 36.925 | 34.943 | 0.00 | 0.00 |
| ATOM | 6521 | HD21 | LEU | X | 433 | 54.291 | 36.476 | 35.855 | 0.00 | 0.00 |
| ATOM | 6522 | HD22 | LEU | X | 433 | 53.981 | 37.240 | 34.171 | 0.00 | 0.00 |
| ATOM | 6523 | HD23 | LEU | X | 433 | 55.127 | 36.108 | 34.375 | 0.00 | 0.00 |
| ATOM | 6524 | C    | LEU | X | 433 | 58.548 | 39.040 | 34.877 | 0.00 | 0.00 |
| ATOM | 6525 | O    | LEU | X | 433 | 59.222 | 38.302 | 34.164 | 0.00 | 0.00 |
| ATOM | 6526 | N    | SER | X | 434 | 58.776 | 39.193 | 36.146 | 0.00 | 0.00 |
| ATOM | 6527 | H    | SER | X | 434 | 58.132 | 39.772 | 36.664 | 0.00 | 0.00 |
| ATOM | 6528 | CA   | SER | X | 434 | 60.066 | 38.806 | 36.810 | 0.00 | 0.00 |
| ATOM | 6529 | HA   | SER | X | 434 | 60.766 | 38.343 | 36.114 | 0.00 | 0.00 |
| ATOM | 6530 | CB   | SER | X | 434 | 60.742 | 40.040 | 37.378 | 0.00 | 0.00 |
| ATOM | 6531 | HB2  | SER | X | 434 | 61.727 | 39.780 | 37.766 | 0.00 | 0.00 |
| ATOM | 6532 | HB3  | SER | X | 434 | 60.841 | 40.844 | 36.648 | 0.00 | 0.00 |
| ATOM | 6533 | OG   | SER | X | 434 | 59.980 | 40.545 | 38.451 | 0.00 | 0.00 |
| ATOM | 6534 | HG   | SER | X | 434 | 59.171 | 40.902 | 38.077 | 0.00 | 0.00 |
| ATOM | 6535 | C    | SER | X | 434 | 59.790 | 37.674 | 37.835 | 0.00 | 0.00 |
| ATOM | 6536 | O    | SER | X | 434 | 60.775 | 37.219 | 38.397 | 0.00 | 0.00 |
| ATOM | 6537 | N    | TRP | X | 435 | 58.578 | 37.107 | 37.973 | 0.00 | 0.00 |
| ATOM | 6538 | H    | TRP | X | 435 | 57.804 | 37.700 | 37.710 | 0.00 | 0.00 |
| ATOM | 6539 | CA   | TRP | X | 435 | 58.435 | 35.853 | 38.706 | 0.00 | 0.00 |
| ATOM | 6540 | HA   | TRP | X | 435 | 58.882 | 35.903 | 39.699 | 0.00 | 0.00 |
| ATOM | 6541 | CB   | TRP | X | 435 | 56.950 | 35.477 | 38.848 | 0.00 | 0.00 |
| ATOM | 6542 | HB2  | TRP | X | 435 | 56.455 | 35.546 | 37.880 | 0.00 | 0.00 |
| ATOM | 6543 | HB3  | TRP | X | 435 | 56.832 | 34.399 | 38.964 | 0.00 | 0.00 |
| ATOM | 6544 | CG   | TRP | X | 435 | 56.217 | 36.277 | 39.862 | 0.00 | 0.00 |
| ATOM | 6545 | CD1  | TRP | X | 435 | 55.091 | 37.002 | 39.502 | 0.00 | 0.00 |
| ATOM | 6546 | HD1  | TRP | X | 435 | 54.745 | 37.141 | 38.488 | 0.00 | 0.00 |
| ATOM | 6547 | NE1  | TRP | X | 435 | 54.472 | 37.483 | 40.620 | 0.00 | 0.00 |
| ATOM | 6548 | HE1  | TRP | X | 435 | 53.572 | 37.922 | 40.485 | 0.00 | 0.00 |
| ATOM | 6549 | CE2  | TRP | X | 435 | 55.122 | 37.109 | 41.803 | 0.00 | 0.00 |

|      |      |      |     |   |     |        |        |        |      |      |
|------|------|------|-----|---|-----|--------|--------|--------|------|------|
| ATOM | 6550 | CZ2  | TRP | X | 435 | 54.796 | 37.183 | 43.142 | 0.00 | 0.00 |
| ATOM | 6551 | HZ2  | TRP | X | 435 | 53.918 | 37.739 | 43.436 | 0.00 | 0.00 |
| ATOM | 6552 | CH2  | TRP | X | 435 | 55.582 | 36.510 | 44.114 | 0.00 | 0.00 |
| ATOM | 6553 | HH2  | TRP | X | 435 | 55.254 | 36.486 | 45.143 | 0.00 | 0.00 |
| ATOM | 6554 | CZ3  | TRP | X | 435 | 56.646 | 35.705 | 43.660 | 0.00 | 0.00 |
| ATOM | 6555 | HZ3  | TRP | X | 435 | 57.271 | 35.178 | 44.366 | 0.00 | 0.00 |
| ATOM | 6556 | CE3  | TRP | X | 435 | 56.920 | 35.624 | 42.256 | 0.00 | 0.00 |
| ATOM | 6557 | HE3  | TRP | X | 435 | 57.745 | 34.977 | 41.999 | 0.00 | 0.00 |
| ATOM | 6558 | CD2  | TRP | X | 435 | 56.208 | 36.341 | 41.307 | 0.00 | 0.00 |
| ATOM | 6559 | C    | TRP | X | 435 | 59.203 | 34.670 | 38.129 | 0.00 | 0.00 |
| ATOM | 6560 | O    | TRP | X | 435 | 59.429 | 34.685 | 36.906 | 0.00 | 0.00 |
| ATOM | 6561 | N    | PRO | X | 436 | 59.474 | 33.544 | 38.908 | 0.00 | 0.00 |
| ATOM | 6562 | CD   | PRO | X | 436 | 59.078 | 33.316 | 40.264 | 0.00 | 0.00 |
| ATOM | 6563 | HD2  | PRO | X | 436 | 58.059 | 33.699 | 40.324 | 0.00 | 0.00 |
| ATOM | 6564 | HD3  | PRO | X | 436 | 59.728 | 33.901 | 40.914 | 0.00 | 0.00 |
| ATOM | 6565 | CG   | PRO | X | 436 | 59.176 | 31.866 | 40.490 | 0.00 | 0.00 |
| ATOM | 6566 | HG2  | PRO | X | 436 | 58.236 | 31.430 | 40.153 | 0.00 | 0.00 |
| ATOM | 6567 | HG3  | PRO | X | 436 | 59.468 | 31.578 | 41.500 | 0.00 | 0.00 |
| ATOM | 6568 | CB   | PRO | X | 436 | 60.240 | 31.293 | 39.534 | 0.00 | 0.00 |
| ATOM | 6569 | HB2  | PRO | X | 436 | 59.949 | 30.290 | 39.223 | 0.00 | 0.00 |
| ATOM | 6570 | HB3  | PRO | X | 436 | 61.254 | 31.362 | 39.928 | 0.00 | 0.00 |
| ATOM | 6571 | CA   | PRO | X | 436 | 60.069 | 32.310 | 38.347 | 0.00 | 0.00 |
| ATOM | 6572 | HA   | PRO | X | 436 | 61.046 | 32.516 | 37.910 | 0.00 | 0.00 |
| ATOM | 6573 | C    | PRO | X | 436 | 59.184 | 31.766 | 37.243 | 0.00 | 0.00 |
| ATOM | 6574 | O    | PRO | X | 436 | 57.953 | 31.939 | 37.225 | 0.00 | 0.00 |
| ATOM | 6575 | N    | LEU | X | 437 | 59.765 | 30.967 | 36.363 | 0.00 | 0.00 |
| ATOM | 6576 | H    | LEU | X | 437 | 60.766 | 30.832 | 36.401 | 0.00 | 0.00 |
| ATOM | 6577 | CA   | LEU | X | 437 | 59.065 | 30.317 | 35.311 | 0.00 | 0.00 |
| ATOM | 6578 | HA   | LEU | X | 437 | 58.671 | 31.079 | 34.639 | 0.00 | 0.00 |
| ATOM | 6579 | CB   | LEU | X | 437 | 60.035 | 29.446 | 34.532 | 0.00 | 0.00 |
| ATOM | 6580 | HB2  | LEU | X | 437 | 60.801 | 30.187 | 34.305 | 0.00 | 0.00 |
| ATOM | 6581 | HB3  | LEU | X | 437 | 60.534 | 28.742 | 35.198 | 0.00 | 0.00 |
| ATOM | 6582 | CG   | LEU | X | 437 | 59.501 | 28.730 | 33.273 | 0.00 | 0.00 |
| ATOM | 6583 | HG   | LEU | X | 437 | 58.718 | 28.078 | 33.661 | 0.00 | 0.00 |
| ATOM | 6584 | CD1  | LEU | X | 437 | 59.023 | 29.692 | 32.235 | 0.00 | 0.00 |
| ATOM | 6585 | HD11 | LEU | X | 437 | 59.908 | 30.283 | 32.000 | 0.00 | 0.00 |
| ATOM | 6586 | HD12 | LEU | X | 437 | 58.635 | 29.299 | 31.295 | 0.00 | 0.00 |
| ATOM | 6587 | HD13 | LEU | X | 437 | 58.361 | 30.486 | 32.583 | 0.00 | 0.00 |
| ATOM | 6588 | CD2  | LEU | X | 437 | 60.679 | 27.848 | 32.820 | 0.00 | 0.00 |
| ATOM | 6589 | HD21 | LEU | X | 437 | 60.795 | 26.988 | 33.480 | 0.00 | 0.00 |
| ATOM | 6590 | HD22 | LEU | X | 437 | 60.586 | 27.555 | 31.774 | 0.00 | 0.00 |
| ATOM | 6591 | HD23 | LEU | X | 437 | 61.601 | 28.422 | 32.906 | 0.00 | 0.00 |
| ATOM | 6592 | C    | LEU | X | 437 | 57.837 | 29.498 | 35.558 | 0.00 | 0.00 |
| ATOM | 6593 | O    | LEU | X | 437 | 56.927 | 29.562 | 34.738 | 0.00 | 0.00 |
| ATOM | 6594 | N    | TRP | X | 438 | 57.882 | 28.771 | 36.627 | 0.00 | 0.00 |
| ATOM | 6595 | H    | TRP | X | 438 | 58.664 | 28.989 | 37.227 | 0.00 | 0.00 |
| ATOM | 6596 | CA   | TRP | X | 438 | 56.876 | 27.705 | 36.784 | 0.00 | 0.00 |
| ATOM | 6597 | HA   | TRP | X | 438 | 56.970 | 27.226 | 35.809 | 0.00 | 0.00 |
| ATOM | 6598 | CB   | TRP | X | 438 | 57.401 | 26.657 | 37.827 | 0.00 | 0.00 |
| ATOM | 6599 | HB2  | TRP | X | 438 | 56.699 | 25.840 | 37.996 | 0.00 | 0.00 |
| ATOM | 6600 | HB3  | TRP | X | 438 | 58.396 | 26.346 | 37.507 | 0.00 | 0.00 |
| ATOM | 6601 | CG   | TRP | X | 438 | 57.510 | 27.261 | 39.192 | 0.00 | 0.00 |
| ATOM | 6602 | CD1  | TRP | X | 438 | 58.660 | 27.692 | 39.764 | 0.00 | 0.00 |
| ATOM | 6603 | HD1  | TRP | X | 438 | 59.597 | 27.604 | 39.236 | 0.00 | 0.00 |
| ATOM | 6604 | NE1  | TRP | X | 438 | 58.434 | 28.271 | 41.013 | 0.00 | 0.00 |
| ATOM | 6605 | HE1  | TRP | X | 438 | 59.162 | 28.574 | 41.645 | 0.00 | 0.00 |
| ATOM | 6606 | CE2  | TRP | X | 438 | 57.078 | 28.240 | 41.298 | 0.00 | 0.00 |
| ATOM | 6607 | CZ2  | TRP | X | 438 | 56.300 | 28.662 | 42.401 | 0.00 | 0.00 |
| ATOM | 6608 | HZ2  | TRP | X | 438 | 56.778 | 29.252 | 43.169 | 0.00 | 0.00 |
| ATOM | 6609 | CH2  | TRP | X | 438 | 54.882 | 28.475 | 42.393 | 0.00 | 0.00 |
| ATOM | 6610 | HH2  | TRP | X | 438 | 54.242 | 28.770 | 43.211 | 0.00 | 0.00 |
| ATOM | 6611 | CZ3  | TRP | X | 438 | 54.238 | 27.802 | 41.357 | 0.00 | 0.00 |
| ATOM | 6612 | HZ3  | TRP | X | 438 | 53.178 | 27.616 | 41.446 | 0.00 | 0.00 |
| ATOM | 6613 | CE3  | TRP | X | 438 | 55.040 | 27.336 | 40.238 | 0.00 | 0.00 |
| ATOM | 6614 | HE3  | TRP | X | 438 | 54.628 | 26.752 | 39.428 | 0.00 | 0.00 |
| ATOM | 6615 | CD2  | TRP | X | 438 | 56.450 | 27.507 | 40.234 | 0.00 | 0.00 |
| ATOM | 6616 | C    | TRP | X | 438 | 55.376 | 28.085 | 36.949 | 0.00 | 0.00 |
| ATOM | 6617 | O    | TRP | X | 438 | 54.495 | 27.388 | 36.563 | 0.00 | 0.00 |
| ATOM | 6618 | N    | MET | X | 439 | 55.237 | 29.327 | 37.524 | 0.00 | 0.00 |
| ATOM | 6619 | H    | MET | X | 439 | 56.070 | 29.849 | 37.758 | 0.00 | 0.00 |

|      |      |      |     |   |     |        |        |        |      |      |
|------|------|------|-----|---|-----|--------|--------|--------|------|------|
| ATOM | 6620 | CA   | MET | X | 439 | 53.957 | 29.925 | 37.956 | 0.00 | 0.00 |
| ATOM | 6621 | HA   | MET | X | 439 | 53.492 | 29.203 | 38.628 | 0.00 | 0.00 |
| ATOM | 6622 | CB   | MET | X | 439 | 54.195 | 31.299 | 38.646 | 0.00 | 0.00 |
| ATOM | 6623 | HB2  | MET | X | 439 | 54.841 | 31.800 | 37.925 | 0.00 | 0.00 |
| ATOM | 6624 | HB3  | MET | X | 439 | 53.248 | 31.832 | 38.737 | 0.00 | 0.00 |
| ATOM | 6625 | CG   | MET | X | 439 | 54.749 | 31.233 | 40.054 | 0.00 | 0.00 |
| ATOM | 6626 | HG2  | MET | X | 439 | 54.037 | 30.782 | 40.746 | 0.00 | 0.00 |
| ATOM | 6627 | HG3  | MET | X | 439 | 55.585 | 30.538 | 39.971 | 0.00 | 0.00 |
| ATOM | 6628 | SD   | MET | X | 439 | 55.335 | 32.811 | 40.750 | 0.00 | 0.00 |
| ATOM | 6629 | CE   | MET | X | 439 | 53.722 | 33.663 | 40.782 | 0.00 | 0.00 |
| ATOM | 6630 | HE1  | MET | X | 439 | 53.781 | 34.370 | 41.609 | 0.00 | 0.00 |
| ATOM | 6631 | HE2  | MET | X | 439 | 53.617 | 34.191 | 39.834 | 0.00 | 0.00 |
| ATOM | 6632 | HE3  | MET | X | 439 | 52.922 | 32.926 | 40.846 | 0.00 | 0.00 |
| ATOM | 6633 | C    | MET | X | 439 | 52.967 | 30.155 | 36.777 | 0.00 | 0.00 |
| ATOM | 6634 | O    | MET | X | 439 | 51.774 | 30.118 | 37.011 | 0.00 | 0.00 |
| ATOM | 6635 | N    | GLY | X | 440 | 53.492 | 30.415 | 35.560 | 0.00 | 0.00 |
| ATOM | 6636 | H    | GLY | X | 440 | 54.492 | 30.394 | 35.425 | 0.00 | 0.00 |
| ATOM | 6637 | CA   | GLY | X | 440 | 52.782 | 30.839 | 34.361 | 0.00 | 0.00 |
| ATOM | 6638 | HA2  | GLY | X | 440 | 53.463 | 30.675 | 33.489 | 0.00 | 0.00 |
| ATOM | 6639 | HA3  | GLY | X | 440 | 51.930 | 30.141 | 34.265 | 0.00 | 0.00 |
| ATOM | 6640 | C    | GLY | X | 440 | 52.351 | 32.288 | 34.516 | 0.00 | 0.00 |
| ATOM | 6641 | O    | GLY | X | 440 | 53.191 | 33.150 | 34.453 | 0.00 | 0.00 |
| ATOM | 6642 | N    | VAL | X | 441 | 51.042 | 32.499 | 34.693 | 0.00 | 0.00 |
| ATOM | 6643 | H    | VAL | X | 441 | 50.414 | 31.708 | 34.679 | 0.00 | 0.00 |
| ATOM | 6644 | CA   | VAL | X | 441 | 50.423 | 33.805 | 34.901 | 0.00 | 0.00 |
| ATOM | 6645 | HA   | VAL | X | 441 | 51.260 | 34.503 | 34.859 | 0.00 | 0.00 |
| ATOM | 6646 | CB   | VAL | X | 441 | 49.398 | 34.178 | 33.777 | 0.00 | 0.00 |
| ATOM | 6647 | HB   | VAL | X | 441 | 48.376 | 33.846 | 33.961 | 0.00 | 0.00 |
| ATOM | 6648 | CG1  | VAL | X | 441 | 49.239 | 35.702 | 33.700 | 0.00 | 0.00 |
| ATOM | 6649 | HG11 | VAL | X | 441 | 50.258 | 36.074 | 33.601 | 0.00 | 0.00 |
| ATOM | 6650 | HG12 | VAL | X | 441 | 48.707 | 36.000 | 32.796 | 0.00 | 0.00 |
| ATOM | 6651 | HG13 | VAL | X | 441 | 48.643 | 36.002 | 34.562 | 0.00 | 0.00 |
| ATOM | 6652 | CG2  | VAL | X | 441 | 49.865 | 33.703 | 32.392 | 0.00 | 0.00 |
| ATOM | 6653 | HG21 | VAL | X | 441 | 50.913 | 33.967 | 32.247 | 0.00 | 0.00 |
| ATOM | 6654 | HG22 | VAL | X | 441 | 49.582 | 32.673 | 32.176 | 0.00 | 0.00 |
| ATOM | 6655 | HG23 | VAL | X | 441 | 49.222 | 34.168 | 31.645 | 0.00 | 0.00 |
| ATOM | 6656 | C    | VAL | X | 441 | 49.844 | 33.937 | 36.282 | 0.00 | 0.00 |
| ATOM | 6657 | O    | VAL | X | 441 | 48.901 | 33.177 | 36.653 | 0.00 | 0.00 |
| ATOM | 6658 | N    | PRO | X | 442 | 50.163 | 34.960 | 37.067 | 0.00 | 0.00 |
| ATOM | 6659 | CD   | PRO | X | 442 | 51.144 | 36.017 | 36.792 | 0.00 | 0.00 |
| ATOM | 6660 | HD2  | PRO | X | 442 | 50.696 | 36.866 | 36.275 | 0.00 | 0.00 |
| ATOM | 6661 | HD3  | PRO | X | 442 | 51.996 | 35.658 | 36.215 | 0.00 | 0.00 |
| ATOM | 6662 | CG   | PRO | X | 442 | 51.516 | 36.563 | 38.184 | 0.00 | 0.00 |
| ATOM | 6663 | HG2  | PRO | X | 442 | 51.741 | 37.630 | 38.194 | 0.00 | 0.00 |
| ATOM | 6664 | HG3  | PRO | X | 442 | 52.372 | 35.982 | 38.527 | 0.00 | 0.00 |
| ATOM | 6665 | CB   | PRO | X | 442 | 50.400 | 36.112 | 39.138 | 0.00 | 0.00 |
| ATOM | 6666 | HB2  | PRO | X | 442 | 49.782 | 36.973 | 39.395 | 0.00 | 0.00 |
| ATOM | 6667 | HB3  | PRO | X | 442 | 50.817 | 35.759 | 40.081 | 0.00 | 0.00 |
| ATOM | 6668 | CA   | PRO | X | 442 | 49.617 | 35.100 | 38.343 | 0.00 | 0.00 |
| ATOM | 6669 | HA   | PRO | X | 442 | 49.708 | 34.106 | 38.780 | 0.00 | 0.00 |
| ATOM | 6670 | C    | PRO | X | 442 | 48.097 | 35.484 | 38.386 | 0.00 | 0.00 |
| ATOM | 6671 | O    | PRO | X | 442 | 47.722 | 36.481 | 37.818 | 0.00 | 0.00 |
| ATOM | 6672 | N    | HIP | X | 443 | 47.487 | 34.986 | 39.426 | 0.00 | 0.00 |
| ATOM | 6673 | H    | HIP | X | 443 | 47.890 | 34.209 | 39.928 | 0.00 | 0.00 |
| ATOM | 6674 | CA   | HIP | X | 443 | 46.383 | 35.643 | 40.096 | 0.00 | 0.00 |
| ATOM | 6675 | HA   | HIP | X | 443 | 45.475 | 35.380 | 39.555 | 0.00 | 0.00 |
| ATOM | 6676 | CB   | HIP | X | 443 | 46.429 | 35.103 | 41.535 | 0.00 | 0.00 |
| ATOM | 6677 | HB2  | HIP | X | 443 | 46.134 | 34.054 | 41.510 | 0.00 | 0.00 |
| ATOM | 6678 | HB3  | HIP | X | 443 | 47.439 | 35.332 | 41.872 | 0.00 | 0.00 |
| ATOM | 6679 | CG   | HIP | X | 443 | 45.442 | 35.876 | 42.318 | 0.00 | 0.00 |
| ATOM | 6680 | ND1  | HIP | X | 443 | 44.049 | 35.705 | 42.392 | 0.00 | 0.00 |
| ATOM | 6681 | HD1  | HIP | X | 443 | 43.636 | 35.022 | 41.773 | 0.00 | 0.00 |
| ATOM | 6682 | CE1  | HIP | X | 443 | 43.709 | 36.557 | 43.387 | 0.00 | 0.00 |
| ATOM | 6683 | HE1  | HIP | X | 443 | 42.703 | 36.846 | 43.655 | 0.00 | 0.00 |
| ATOM | 6684 | NE2  | HIP | X | 443 | 44.781 | 37.173 | 43.972 | 0.00 | 0.00 |
| ATOM | 6685 | HE2  | HIP | X | 443 | 44.876 | 37.809 | 44.751 | 0.00 | 0.00 |
| ATOM | 6686 | CD2  | HIP | X | 443 | 45.901 | 36.678 | 43.299 | 0.00 | 0.00 |
| ATOM | 6687 | HD2  | HIP | X | 443 | 46.901 | 37.013 | 43.534 | 0.00 | 0.00 |
| ATOM | 6688 | C    | HIP | X | 443 | 46.251 | 37.194 | 40.011 | 0.00 | 0.00 |
| ATOM | 6689 | O    | HIP | X | 443 | 47.069 | 37.870 | 40.637 | 0.00 | 0.00 |

|      |      |      |     |   |     |        |        |        |      |      |
|------|------|------|-----|---|-----|--------|--------|--------|------|------|
| ATOM | 6690 | N    | GLY | X | 444 | 45.257 | 37.686 | 39.228 | 0.00 | 0.00 |
| ATOM | 6691 | H    | GLY | X | 444 | 44.611 | 37.058 | 38.773 | 0.00 | 0.00 |
| ATOM | 6692 | CA   | GLY | X | 444 | 44.809 | 39.066 | 39.066 | 0.00 | 0.00 |
| ATOM | 6693 | HA2  | GLY | X | 444 | 44.034 | 39.165 | 38.391 | 0.00 | 0.00 |
| ATOM | 6694 | HA3  | GLY | X | 444 | 44.472 | 39.473 | 40.016 | 0.00 | 0.00 |
| ATOM | 6695 | C    | GLY | X | 444 | 45.865 | 40.004 | 38.571 | 0.00 | 0.00 |
| ATOM | 6696 | O    | GLY | X | 444 | 45.878 | 41.186 | 38.768 | 0.00 | 0.00 |
| ATOM | 6697 | N    | TYR | X | 445 | 46.821 | 39.506 | 37.804 | 0.00 | 0.00 |
| ATOM | 6698 | H    | TYR | X | 445 | 46.771 | 38.530 | 37.551 | 0.00 | 0.00 |
| ATOM | 6699 | CA   | TYR | X | 445 | 47.971 | 40.256 | 37.263 | 0.00 | 0.00 |
| ATOM | 6700 | HA   | TYR | X | 445 | 48.086 | 41.106 | 37.934 | 0.00 | 0.00 |
| ATOM | 6701 | CB   | TYR | X | 445 | 49.276 | 39.387 | 37.313 | 0.00 | 0.00 |
| ATOM | 6702 | HB2  | TYR | X | 445 | 49.389 | 38.991 | 38.322 | 0.00 | 0.00 |
| ATOM | 6703 | HB3  | TYR | X | 445 | 49.109 | 38.570 | 36.611 | 0.00 | 0.00 |
| ATOM | 6704 | CG   | TYR | X | 445 | 50.540 | 40.129 | 36.860 | 0.00 | 0.00 |
| ATOM | 6705 | CD1  | TYR | X | 445 | 51.131 | 39.848 | 35.701 | 0.00 | 0.00 |
| ATOM | 6706 | HD1  | TYR | X | 445 | 50.778 | 39.112 | 34.994 | 0.00 | 0.00 |
| ATOM | 6707 | CE1  | TYR | X | 445 | 52.221 | 40.602 | 35.231 | 0.00 | 0.00 |
| ATOM | 6708 | HE1  | TYR | X | 445 | 52.503 | 40.435 | 34.202 | 0.00 | 0.00 |
| ATOM | 6709 | CZ   | TYR | X | 445 | 52.752 | 41.588 | 36.037 | 0.00 | 0.00 |
| ATOM | 6710 | OH   | TYR | X | 445 | 53.839 | 42.235 | 35.587 | 0.00 | 0.00 |
| ATOM | 6711 | HH   | TYR | X | 445 | 54.103 | 42.003 | 34.694 | 0.00 | 0.00 |
| ATOM | 6712 | CE2  | TYR | X | 445 | 52.096 | 41.974 | 37.182 | 0.00 | 0.00 |
| ATOM | 6713 | HE2  | TYR | X | 445 | 52.538 | 42.768 | 37.767 | 0.00 | 0.00 |
| ATOM | 6714 | CD2  | TYR | X | 445 | 50.991 | 41.283 | 37.566 | 0.00 | 0.00 |
| ATOM | 6715 | HD2  | TYR | X | 445 | 50.428 | 41.622 | 38.424 | 0.00 | 0.00 |
| ATOM | 6716 | C    | TYR | X | 445 | 47.688 | 40.734 | 35.832 | 0.00 | 0.00 |
| ATOM | 6717 | O    | TYR | X | 445 | 48.558 | 41.273 | 35.180 | 0.00 | 0.00 |
| ATOM | 6718 | N    | GLU | X | 446 | 46.510 | 40.563 | 35.242 | 0.00 | 0.00 |
| ATOM | 6719 | H    | GLU | X | 446 | 45.769 | 40.352 | 35.896 | 0.00 | 0.00 |
| ATOM | 6720 | CA   | GLU | X | 446 | 46.147 | 40.867 | 33.864 | 0.00 | 0.00 |
| ATOM | 6721 | HA   | GLU | X | 446 | 47.063 | 40.667 | 33.309 | 0.00 | 0.00 |
| ATOM | 6722 | CB   | GLU | X | 446 | 44.956 | 39.983 | 33.322 | 0.00 | 0.00 |
| ATOM | 6723 | HB2  | GLU | X | 446 | 44.983 | 40.058 | 32.235 | 0.00 | 0.00 |
| ATOM | 6724 | HB3  | GLU | X | 446 | 45.181 | 38.978 | 33.680 | 0.00 | 0.00 |
| ATOM | 6725 | CG   | GLU | X | 446 | 43.570 | 40.373 | 33.654 | 0.00 | 0.00 |
| ATOM | 6726 | HG2  | GLU | X | 446 | 43.369 | 41.418 | 33.415 | 0.00 | 0.00 |
| ATOM | 6727 | HG3  | GLU | X | 446 | 42.893 | 39.748 | 33.072 | 0.00 | 0.00 |
| ATOM | 6728 | CD   | GLU | X | 446 | 43.114 | 40.018 | 35.082 | 0.00 | 0.00 |
| ATOM | 6729 | OE1  | GLU | X | 446 | 43.935 | 40.122 | 36.021 | 0.00 | 0.00 |
| ATOM | 6730 | OE2  | GLU | X | 446 | 41.898 | 39.788 | 35.224 | 0.00 | 0.00 |
| ATOM | 6731 | C    | GLU | X | 446 | 45.849 | 42.360 | 33.726 | 0.00 | 0.00 |
| ATOM | 6732 | O    | GLU | X | 446 | 45.796 | 42.961 | 32.687 | 0.00 | 0.00 |
| ATOM | 6733 | N    | ILE | X | 447 | 45.553 | 43.003 | 34.877 | 0.00 | 0.00 |
| ATOM | 6734 | H    | ILE | X | 447 | 45.632 | 42.409 | 35.690 | 0.00 | 0.00 |
| ATOM | 6735 | CA   | ILE | X | 447 | 44.761 | 44.284 | 34.879 | 0.00 | 0.00 |
| ATOM | 6736 | HA   | ILE | X | 447 | 43.849 | 44.076 | 34.319 | 0.00 | 0.00 |
| ATOM | 6737 | CB   | ILE | X | 447 | 44.282 | 44.593 | 36.332 | 0.00 | 0.00 |
| ATOM | 6738 | HB   | ILE | X | 447 | 43.711 | 45.517 | 36.422 | 0.00 | 0.00 |
| ATOM | 6739 | CG2  | ILE | X | 447 | 43.368 | 43.462 | 36.856 | 0.00 | 0.00 |
| ATOM | 6740 | HG21 | ILE | X | 447 | 42.957 | 43.751 | 37.824 | 0.00 | 0.00 |
| ATOM | 6741 | HG22 | ILE | X | 447 | 42.588 | 43.451 | 36.095 | 0.00 | 0.00 |
| ATOM | 6742 | HG23 | ILE | X | 447 | 43.946 | 42.538 | 36.880 | 0.00 | 0.00 |
| ATOM | 6743 | CG1  | ILE | X | 447 | 45.487 | 44.783 | 37.181 | 0.00 | 0.00 |
| ATOM | 6744 | HG12 | ILE | X | 447 | 46.041 | 43.857 | 37.335 | 0.00 | 0.00 |
| ATOM | 6745 | HG13 | ILE | X | 447 | 46.155 | 45.500 | 36.704 | 0.00 | 0.00 |
| ATOM | 6746 | CD1  | ILE | X | 447 | 45.214 | 45.352 | 38.556 | 0.00 | 0.00 |
| ATOM | 6747 | HD11 | ILE | X | 447 | 44.381 | 46.055 | 38.569 | 0.00 | 0.00 |
| ATOM | 6748 | HD12 | ILE | X | 447 | 45.005 | 44.479 | 39.174 | 0.00 | 0.00 |
| ATOM | 6749 | HD13 | ILE | X | 447 | 46.131 | 45.783 | 38.959 | 0.00 | 0.00 |
| ATOM | 6750 | C    | ILE | X | 447 | 45.453 | 45.521 | 34.171 | 0.00 | 0.00 |
| ATOM | 6751 | O    | ILE | X | 447 | 44.781 | 46.482 | 33.788 | 0.00 | 0.00 |
| ATOM | 6752 | N    | GLU | X | 448 | 46.780 | 45.399 | 33.900 | 0.00 | 0.00 |
| ATOM | 6753 | H    | GLU | X | 448 | 47.289 | 44.570 | 34.173 | 0.00 | 0.00 |
| ATOM | 6754 | CA   | GLU | X | 448 | 47.473 | 46.448 | 33.080 | 0.00 | 0.00 |
| ATOM | 6755 | HA   | GLU | X | 448 | 47.383 | 47.400 | 33.603 | 0.00 | 0.00 |
| ATOM | 6756 | CB   | GLU | X | 448 | 49.010 | 46.234 | 33.158 | 0.00 | 0.00 |
| ATOM | 6757 | HB2  | GLU | X | 448 | 49.486 | 47.066 | 32.640 | 0.00 | 0.00 |
| ATOM | 6758 | HB3  | GLU | X | 448 | 49.243 | 46.241 | 34.223 | 0.00 | 0.00 |
| ATOM | 6759 | CG   | GLU | X | 448 | 49.634 | 44.904 | 32.620 | 0.00 | 0.00 |

|      |      |      |     |   |     |        |        |        |      |      |
|------|------|------|-----|---|-----|--------|--------|--------|------|------|
| ATOM | 6760 | HG2  | GLU | X | 448 | 49.038 | 44.069 | 32.986 | 0.00 | 0.00 |
| ATOM | 6761 | HG3  | GLU | X | 448 | 49.445 | 44.748 | 31.558 | 0.00 | 0.00 |
| ATOM | 6762 | CD   | GLU | X | 448 | 51.091 | 44.733 | 33.030 | 0.00 | 0.00 |
| ATOM | 6763 | OE1  | GLU | X | 448 | 51.604 | 43.594 | 33.200 | 0.00 | 0.00 |
| ATOM | 6764 | OE2  | GLU | X | 448 | 51.801 | 45.800 | 33.145 | 0.00 | 0.00 |
| ATOM | 6765 | C    | GLU | X | 448 | 46.926 | 46.473 | 31.677 | 0.00 | 0.00 |
| ATOM | 6766 | O    | GLU | X | 448 | 46.981 | 47.517 | 31.009 | 0.00 | 0.00 |
| ATOM | 6767 | N    | PHE | X | 449 | 46.247 | 45.442 | 31.217 | 0.00 | 0.00 |
| ATOM | 6768 | H    | PHE | X | 449 | 46.054 | 44.636 | 31.794 | 0.00 | 0.00 |
| ATOM | 6769 | CA   | PHE | X | 449 | 45.626 | 45.427 | 29.845 | 0.00 | 0.00 |
| ATOM | 6770 | HA   | PHE | X | 449 | 46.110 | 46.068 | 29.108 | 0.00 | 0.00 |
| ATOM | 6771 | CB   | PHE | X | 449 | 45.657 | 44.019 | 29.325 | 0.00 | 0.00 |
| ATOM | 6772 | HB2  | PHE | X | 449 | 45.189 | 43.342 | 30.038 | 0.00 | 0.00 |
| ATOM | 6773 | HB3  | PHE | X | 449 | 45.172 | 43.901 | 28.356 | 0.00 | 0.00 |
| ATOM | 6774 | CG   | PHE | X | 449 | 47.096 | 43.528 | 29.095 | 0.00 | 0.00 |
| ATOM | 6775 | CD1  | PHE | X | 449 | 47.689 | 42.470 | 29.839 | 0.00 | 0.00 |
| ATOM | 6776 | HD1  | PHE | X | 449 | 47.101 | 41.948 | 30.579 | 0.00 | 0.00 |
| ATOM | 6777 | CE1  | PHE | X | 449 | 48.894 | 41.944 | 29.480 | 0.00 | 0.00 |
| ATOM | 6778 | HE1  | PHE | X | 449 | 49.306 | 41.112 | 30.033 | 0.00 | 0.00 |
| ATOM | 6779 | CZ   | PHE | X | 449 | 49.649 | 42.415 | 28.442 | 0.00 | 0.00 |
| ATOM | 6780 | HZ   | PHE | X | 449 | 50.607 | 41.951 | 28.262 | 0.00 | 0.00 |
| ATOM | 6781 | CE2  | PHE | X | 449 | 49.135 | 43.499 | 27.761 | 0.00 | 0.00 |
| ATOM | 6782 | HE2  | PHE | X | 449 | 49.633 | 43.919 | 26.899 | 0.00 | 0.00 |
| ATOM | 6783 | CD2  | PHE | X | 449 | 47.921 | 44.050 | 28.094 | 0.00 | 0.00 |
| ATOM | 6784 | HD2  | PHE | X | 449 | 47.445 | 44.849 | 27.545 | 0.00 | 0.00 |
| ATOM | 6785 | C    | PHE | X | 449 | 44.216 | 46.069 | 29.949 | 0.00 | 0.00 |
| ATOM | 6786 | O    | PHE | X | 449 | 43.698 | 46.611 | 28.991 | 0.00 | 0.00 |
| ATOM | 6787 | N    | ILE | X | 450 | 43.576 | 46.080 | 31.150 | 0.00 | 0.00 |
| ATOM | 6788 | H    | ILE | X | 450 | 44.002 | 45.711 | 31.988 | 0.00 | 0.00 |
| ATOM | 6789 | CA   | ILE | X | 450 | 42.360 | 46.896 | 31.466 | 0.00 | 0.00 |
| ATOM | 6790 | HA   | ILE | X | 450 | 41.766 | 46.809 | 30.557 | 0.00 | 0.00 |
| ATOM | 6791 | CB   | ILE | X | 450 | 41.685 | 46.259 | 32.694 | 0.00 | 0.00 |
| ATOM | 6792 | HB   | ILE | X | 450 | 42.185 | 46.428 | 33.648 | 0.00 | 0.00 |
| ATOM | 6793 | CG2  | ILE | X | 450 | 40.367 | 47.057 | 32.949 | 0.00 | 0.00 |
| ATOM | 6794 | HG21 | ILE | X | 450 | 39.777 | 47.140 | 32.037 | 0.00 | 0.00 |
| ATOM | 6795 | HG22 | ILE | X | 450 | 39.668 | 46.601 | 33.649 | 0.00 | 0.00 |
| ATOM | 6796 | HG23 | ILE | X | 450 | 40.620 | 48.071 | 33.259 | 0.00 | 0.00 |
| ATOM | 6797 | CG1  | ILE | X | 450 | 41.374 | 44.740 | 32.616 | 0.00 | 0.00 |
| ATOM | 6798 | HG12 | ILE | X | 450 | 42.315 | 44.217 | 32.788 | 0.00 | 0.00 |
| ATOM | 6799 | HG13 | ILE | X | 450 | 40.744 | 44.400 | 33.438 | 0.00 | 0.00 |
| ATOM | 6800 | CD1  | ILE | X | 450 | 40.799 | 44.211 | 31.343 | 0.00 | 0.00 |
| ATOM | 6801 | HD11 | ILE | X | 450 | 40.489 | 43.185 | 31.544 | 0.00 | 0.00 |
| ATOM | 6802 | HD12 | ILE | X | 450 | 39.872 | 44.724 | 31.088 | 0.00 | 0.00 |
| ATOM | 6803 | HD13 | ILE | X | 450 | 41.605 | 44.274 | 30.612 | 0.00 | 0.00 |
| ATOM | 6804 | C    | ILE | X | 450 | 42.649 | 48.368 | 31.528 | 0.00 | 0.00 |
| ATOM | 6805 | O    | ILE | X | 450 | 42.107 | 49.071 | 30.704 | 0.00 | 0.00 |
| ATOM | 6806 | N    | PHE | X | 451 | 43.544 | 48.839 | 32.443 | 0.00 | 0.00 |
| ATOM | 6807 | H    | PHE | X | 451 | 43.913 | 48.267 | 33.189 | 0.00 | 0.00 |
| ATOM | 6808 | CA   | PHE | X | 451 | 44.007 | 50.250 | 32.446 | 0.00 | 0.00 |
| ATOM | 6809 | HA   | PHE | X | 451 | 43.184 | 50.957 | 32.549 | 0.00 | 0.00 |
| ATOM | 6810 | CB   | PHE | X | 451 | 44.879 | 50.435 | 33.629 | 0.00 | 0.00 |
| ATOM | 6811 | HB2  | PHE | X | 451 | 45.723 | 49.760 | 33.486 | 0.00 | 0.00 |
| ATOM | 6812 | HB3  | PHE | X | 451 | 45.279 | 51.443 | 33.731 | 0.00 | 0.00 |
| ATOM | 6813 | CG   | PHE | X | 451 | 44.135 | 50.181 | 34.903 | 0.00 | 0.00 |
| ATOM | 6814 | CD1  | PHE | X | 451 | 44.519 | 49.179 | 35.759 | 0.00 | 0.00 |
| ATOM | 6815 | HD1  | PHE | X | 451 | 45.310 | 48.488 | 35.509 | 0.00 | 0.00 |
| ATOM | 6816 | CE1  | PHE | X | 451 | 43.882 | 49.029 | 37.044 | 0.00 | 0.00 |
| ATOM | 6817 | HE1  | PHE | X | 451 | 44.160 | 48.244 | 37.731 | 0.00 | 0.00 |
| ATOM | 6818 | CZ   | PHE | X | 451 | 42.861 | 49.838 | 37.452 | 0.00 | 0.00 |
| ATOM | 6819 | HZ   | PHE | X | 451 | 42.456 | 49.788 | 38.452 | 0.00 | 0.00 |
| ATOM | 6820 | CE2  | PHE | X | 451 | 42.399 | 50.805 | 36.535 | 0.00 | 0.00 |
| ATOM | 6821 | HE2  | PHE | X | 451 | 41.615 | 51.468 | 36.870 | 0.00 | 0.00 |
| ATOM | 6822 | CD2  | PHE | X | 451 | 43.024 | 51.018 | 35.289 | 0.00 | 0.00 |
| ATOM | 6823 | HD2  | PHE | X | 451 | 42.755 | 51.804 | 34.599 | 0.00 | 0.00 |
| ATOM | 6824 | C    | PHE | X | 451 | 44.662 | 50.797 | 31.141 | 0.00 | 0.00 |
| ATOM | 6825 | O    | PHE | X | 451 | 44.679 | 51.981 | 30.910 | 0.00 | 0.00 |
| ATOM | 6826 | N    | GLY | X | 452 | 45.250 | 49.933 | 30.365 | 0.00 | 0.00 |
| ATOM | 6827 | H    | GLY | X | 452 | 45.257 | 48.963 | 30.644 | 0.00 | 0.00 |
| ATOM | 6828 | CA   | GLY | X | 452 | 46.006 | 50.303 | 29.129 | 0.00 | 0.00 |
| ATOM | 6829 | HA2  | GLY | X | 452 | 45.942 | 49.297 | 28.648 | 0.00 | 0.00 |

|      |      |      |     |   |     |        |        |        |      |      |
|------|------|------|-----|---|-----|--------|--------|--------|------|------|
| ATOM | 6830 | HA3  | GLY | X | 452 | 45.460 | 50.990 | 28.509 | 0.00 | 0.00 |
| ATOM | 6831 | C    | GLY | X | 452 | 47.461 | 50.666 | 29.279 | 0.00 | 0.00 |
| ATOM | 6832 | O    | GLY | X | 452 | 47.993 | 51.494 | 28.464 | 0.00 | 0.00 |
| ATOM | 6833 | N    | ILE | X | 453 | 48.224 | 50.125 | 30.273 | 0.00 | 0.00 |
| ATOM | 6834 | H    | ILE | X | 453 | 47.813 | 49.377 | 30.813 | 0.00 | 0.00 |
| ATOM | 6835 | CA   | ILE | X | 453 | 49.590 | 50.633 | 30.601 | 0.00 | 0.00 |
| ATOM | 6836 | HA   | ILE | X | 453 | 49.579 | 51.720 | 30.679 | 0.00 | 0.00 |
| ATOM | 6837 | CB   | ILE | X | 453 | 50.123 | 50.064 | 31.893 | 0.00 | 0.00 |
| ATOM | 6838 | HB   | ILE | X | 453 | 50.257 | 48.988 | 31.778 | 0.00 | 0.00 |
| ATOM | 6839 | CG2  | ILE | X | 453 | 51.512 | 50.610 | 32.302 | 0.00 | 0.00 |
| ATOM | 6840 | HG21 | ILE | X | 453 | 51.671 | 50.134 | 33.270 | 0.00 | 0.00 |
| ATOM | 6841 | HG22 | ILE | X | 453 | 52.281 | 50.291 | 31.599 | 0.00 | 0.00 |
| ATOM | 6842 | HG23 | ILE | X | 453 | 51.574 | 51.671 | 32.542 | 0.00 | 0.00 |
| ATOM | 6843 | CG1  | ILE | X | 453 | 49.219 | 50.370 | 33.085 | 0.00 | 0.00 |
| ATOM | 6844 | HG12 | ILE | X | 453 | 48.217 | 50.027 | 32.827 | 0.00 | 0.00 |
| ATOM | 6845 | HG13 | ILE | X | 453 | 49.540 | 49.803 | 33.959 | 0.00 | 0.00 |
| ATOM | 6846 | CD1  | ILE | X | 453 | 49.152 | 51.812 | 33.627 | 0.00 | 0.00 |
| ATOM | 6847 | HD11 | ILE | X | 453 | 48.944 | 52.618 | 32.923 | 0.00 | 0.00 |
| ATOM | 6848 | HD12 | ILE | X | 453 | 48.411 | 51.808 | 34.426 | 0.00 | 0.00 |
| ATOM | 6849 | HD13 | ILE | X | 453 | 50.061 | 52.134 | 34.135 | 0.00 | 0.00 |
| ATOM | 6850 | C    | ILE | X | 453 | 50.575 | 50.375 | 29.417 | 0.00 | 0.00 |
| ATOM | 6851 | O    | ILE | X | 453 | 51.516 | 51.216 | 29.264 | 0.00 | 0.00 |
| ATOM | 6852 | N    | PRO | X | 454 | 50.294 | 49.373 | 28.500 | 0.00 | 0.00 |
| ATOM | 6853 | CD   | PRO | X | 454 | 49.435 | 48.187 | 28.671 | 0.00 | 0.00 |
| ATOM | 6854 | HD2  | PRO | X | 454 | 48.381 | 48.334 | 28.436 | 0.00 | 0.00 |
| ATOM | 6855 | HD3  | PRO | X | 454 | 49.476 | 47.864 | 29.711 | 0.00 | 0.00 |
| ATOM | 6856 | CG   | PRO | X | 454 | 50.074 | 47.162 | 27.749 | 0.00 | 0.00 |
| ATOM | 6857 | HG2  | PRO | X | 454 | 49.445 | 46.294 | 27.552 | 0.00 | 0.00 |
| ATOM | 6858 | HG3  | PRO | X | 454 | 50.896 | 46.677 | 28.275 | 0.00 | 0.00 |
| ATOM | 6859 | CB   | PRO | X | 454 | 50.513 | 48.020 | 26.612 | 0.00 | 0.00 |
| ATOM | 6860 | HB2  | PRO | X | 454 | 49.599 | 48.241 | 26.061 | 0.00 | 0.00 |
| ATOM | 6861 | HB3  | PRO | X | 454 | 51.207 | 47.529 | 25.930 | 0.00 | 0.00 |
| ATOM | 6862 | CA   | PRO | X | 454 | 51.104 | 49.235 | 27.326 | 0.00 | 0.00 |
| ATOM | 6863 | HA   | PRO | X | 454 | 52.064 | 48.909 | 27.727 | 0.00 | 0.00 |
| ATOM | 6864 | C    | PRO | X | 454 | 51.276 | 50.422 | 26.348 | 0.00 | 0.00 |
| ATOM | 6865 | O    | PRO | X | 454 | 52.184 | 50.419 | 25.506 | 0.00 | 0.00 |
| ATOM | 6866 | N    | LEU | X | 455 | 50.482 | 51.481 | 26.534 | 0.00 | 0.00 |
| ATOM | 6867 | H    | LEU | X | 455 | 49.922 | 51.576 | 27.369 | 0.00 | 0.00 |
| ATOM | 6868 | CA   | LEU | X | 455 | 50.512 | 52.726 | 25.648 | 0.00 | 0.00 |
| ATOM | 6869 | HA   | LEU | X | 455 | 50.909 | 52.503 | 24.658 | 0.00 | 0.00 |
| ATOM | 6870 | CB   | LEU | X | 455 | 49.059 | 53.176 | 25.571 | 0.00 | 0.00 |
| ATOM | 6871 | HB2  | LEU | X | 455 | 48.706 | 53.290 | 26.596 | 0.00 | 0.00 |
| ATOM | 6872 | HB3  | LEU | X | 455 | 49.051 | 54.160 | 25.102 | 0.00 | 0.00 |
| ATOM | 6873 | CG   | LEU | X | 455 | 48.144 | 52.207 | 24.784 | 0.00 | 0.00 |
| ATOM | 6874 | HG   | LEU | X | 455 | 48.149 | 51.203 | 25.208 | 0.00 | 0.00 |
| ATOM | 6875 | CD1  | LEU | X | 455 | 46.678 | 52.628 | 25.101 | 0.00 | 0.00 |
| ATOM | 6876 | HD11 | LEU | X | 455 | 46.390 | 52.307 | 26.102 | 0.00 | 0.00 |
| ATOM | 6877 | HD12 | LEU | X | 455 | 46.569 | 53.697 | 24.918 | 0.00 | 0.00 |
| ATOM | 6878 | HD13 | LEU | X | 455 | 45.945 | 52.111 | 24.482 | 0.00 | 0.00 |
| ATOM | 6879 | CD2  | LEU | X | 455 | 48.254 | 52.189 | 23.222 | 0.00 | 0.00 |
| ATOM | 6880 | HD21 | LEU | X | 455 | 49.309 | 52.101 | 22.963 | 0.00 | 0.00 |
| ATOM | 6881 | HD22 | LEU | X | 455 | 47.793 | 51.319 | 22.755 | 0.00 | 0.00 |
| ATOM | 6882 | HD23 | LEU | X | 455 | 47.894 | 53.076 | 22.701 | 0.00 | 0.00 |
| ATOM | 6883 | C    | LEU | X | 455 | 51.510 | 53.775 | 26.133 | 0.00 | 0.00 |
| ATOM | 6884 | O    | LEU | X | 455 | 51.745 | 54.794 | 25.420 | 0.00 | 0.00 |
| ATOM | 6885 | N    | ASP | X | 456 | 52.208 | 53.572 | 27.260 | 0.00 | 0.00 |
| ATOM | 6886 | H    | ASP | X | 456 | 51.929 | 52.769 | 27.805 | 0.00 | 0.00 |
| ATOM | 6887 | CA   | ASP | X | 456 | 53.275 | 54.463 | 27.778 | 0.00 | 0.00 |
| ATOM | 6888 | HA   | ASP | X | 456 | 52.913 | 55.489 | 27.708 | 0.00 | 0.00 |
| ATOM | 6889 | CB   | ASP | X | 456 | 53.537 | 54.085 | 29.209 | 0.00 | 0.00 |
| ATOM | 6890 | HB2  | ASP | X | 456 | 52.643 | 53.782 | 29.754 | 0.00 | 0.00 |
| ATOM | 6891 | HB3  | ASP | X | 456 | 54.215 | 53.232 | 29.204 | 0.00 | 0.00 |
| ATOM | 6892 | CG   | ASP | X | 456 | 54.222 | 55.249 | 29.875 | 0.00 | 0.00 |
| ATOM | 6893 | OD1  | ASP | X | 456 | 55.474 | 55.336 | 29.673 | 0.00 | 0.00 |
| ATOM | 6894 | OD2  | ASP | X | 456 | 53.561 | 55.987 | 30.609 | 0.00 | 0.00 |
| ATOM | 6895 | C    | ASP | X | 456 | 54.551 | 54.286 | 26.978 | 0.00 | 0.00 |
| ATOM | 6896 | O    | ASP | X | 456 | 55.022 | 53.201 | 26.622 | 0.00 | 0.00 |
| ATOM | 6897 | N    | PRO | X | 457 | 55.223 | 55.360 | 26.542 | 0.00 | 0.00 |
| ATOM | 6898 | CD   | PRO | X | 457 | 54.687 | 56.713 | 26.571 | 0.00 | 0.00 |
| ATOM | 6899 | HD2  | PRO | X | 457 | 54.714 | 56.995 | 27.623 | 0.00 | 0.00 |

|      |      |      |     |   |     |        |        |        |      |      |
|------|------|------|-----|---|-----|--------|--------|--------|------|------|
| ATOM | 6900 | HD3  | PRO | X | 457 | 53.758 | 56.742 | 26.001 | 0.00 | 0.00 |
| ATOM | 6901 | CG   | PRO | X | 457 | 55.824 | 57.577 | 25.938 | 0.00 | 0.00 |
| ATOM | 6902 | HG2  | PRO | X | 457 | 56.488 | 57.915 | 26.733 | 0.00 | 0.00 |
| ATOM | 6903 | HG3  | PRO | X | 457 | 55.445 | 58.421 | 25.361 | 0.00 | 0.00 |
| ATOM | 6904 | CB   | PRO | X | 457 | 56.639 | 56.630 | 25.061 | 0.00 | 0.00 |
| ATOM | 6905 | HB2  | PRO | X | 457 | 57.649 | 57.015 | 24.916 | 0.00 | 0.00 |
| ATOM | 6906 | HB3  | PRO | X | 457 | 56.180 | 56.618 | 24.073 | 0.00 | 0.00 |
| ATOM | 6907 | CA   | PRO | X | 457 | 56.462 | 55.237 | 25.772 | 0.00 | 0.00 |
| ATOM | 6908 | HA   | PRO | X | 457 | 56.417 | 54.469 | 25.001 | 0.00 | 0.00 |
| ATOM | 6909 | C    | PRO | X | 457 | 57.651 | 54.838 | 26.687 | 0.00 | 0.00 |
| ATOM | 6910 | O    | PRO | X | 457 | 58.549 | 54.148 | 26.231 | 0.00 | 0.00 |
| ATOM | 6911 | N    | SER | X | 458 | 57.705 | 55.232 | 28.026 | 0.00 | 0.00 |
| ATOM | 6912 | H    | SER | X | 458 | 56.816 | 55.502 | 28.423 | 0.00 | 0.00 |
| ATOM | 6913 | CA   | SER | X | 458 | 58.788 | 55.084 | 29.012 | 0.00 | 0.00 |
| ATOM | 6914 | HA   | SER | X | 458 | 59.742 | 55.373 | 28.572 | 0.00 | 0.00 |
| ATOM | 6915 | CB   | SER | X | 458 | 58.522 | 55.947 | 30.251 | 0.00 | 0.00 |
| ATOM | 6916 | HB2  | SER | X | 458 | 59.490 | 56.098 | 30.728 | 0.00 | 0.00 |
| ATOM | 6917 | HB3  | SER | X | 458 | 58.158 | 56.962 | 30.093 | 0.00 | 0.00 |
| ATOM | 6918 | OG   | SER | X | 458 | 57.621 | 55.341 | 31.213 | 0.00 | 0.00 |
| ATOM | 6919 | HG   | SER | X | 458 | 56.765 | 55.371 | 30.780 | 0.00 | 0.00 |
| ATOM | 6920 | C    | SER | X | 458 | 58.855 | 53.623 | 29.436 | 0.00 | 0.00 |
| ATOM | 6921 | O    | SER | X | 458 | 59.933 | 53.199 | 29.811 | 0.00 | 0.00 |
| ATOM | 6922 | N    | ARG | X | 459 | 57.713 | 52.921 | 29.397 | 0.00 | 0.00 |
| ATOM | 6923 | H    | ARG | X | 459 | 56.951 | 53.374 | 28.914 | 0.00 | 0.00 |
| ATOM | 6924 | CA   | ARG | X | 459 | 57.603 | 51.517 | 29.974 | 0.00 | 0.00 |
| ATOM | 6925 | HA   | ARG | X | 459 | 58.452 | 51.381 | 30.644 | 0.00 | 0.00 |
| ATOM | 6926 | CB   | ARG | X | 459 | 56.379 | 51.283 | 30.890 | 0.00 | 0.00 |
| ATOM | 6927 | HB2  | ARG | X | 459 | 55.486 | 51.335 | 30.266 | 0.00 | 0.00 |
| ATOM | 6928 | HB3  | ARG | X | 459 | 56.444 | 50.268 | 31.282 | 0.00 | 0.00 |
| ATOM | 6929 | CG   | ARG | X | 459 | 56.334 | 52.348 | 32.116 | 0.00 | 0.00 |
| ATOM | 6930 | HG2  | ARG | X | 459 | 57.347 | 52.629 | 32.406 | 0.00 | 0.00 |
| ATOM | 6931 | HG3  | ARG | X | 459 | 55.880 | 53.257 | 31.722 | 0.00 | 0.00 |
| ATOM | 6932 | CD   | ARG | X | 459 | 55.593 | 51.711 | 33.287 | 0.00 | 0.00 |
| ATOM | 6933 | HD2  | ARG | X | 459 | 54.911 | 50.914 | 32.988 | 0.00 | 0.00 |
| ATOM | 6934 | HD3  | ARG | X | 459 | 56.442 | 51.285 | 33.821 | 0.00 | 0.00 |
| ATOM | 6935 | NE   | ARG | X | 459 | 54.988 | 52.642 | 34.232 | 0.00 | 0.00 |
| ATOM | 6936 | HE   | ARG | X | 459 | 54.751 | 53.505 | 33.763 | 0.00 | 0.00 |
| ATOM | 6937 | CZ   | ARG | X | 459 | 54.717 | 52.514 | 35.476 | 0.00 | 0.00 |
| ATOM | 6938 | NH1  | ARG | X | 459 | 55.087 | 51.568 | 36.322 | 0.00 | 0.00 |
| ATOM | 6939 | HH11 | ARG | X | 459 | 55.680 | 50.830 | 35.969 | 0.00 | 0.00 |
| ATOM | 6940 | HH12 | ARG | X | 459 | 54.971 | 51.751 | 37.308 | 0.00 | 0.00 |
| ATOM | 6941 | NH2  | ARG | X | 459 | 53.922 | 53.410 | 36.108 | 0.00 | 0.00 |
| ATOM | 6942 | HH21 | ARG | X | 459 | 53.496 | 54.245 | 35.733 | 0.00 | 0.00 |
| ATOM | 6943 | HH22 | ARG | X | 459 | 53.774 | 53.154 | 37.074 | 0.00 | 0.00 |
| ATOM | 6944 | C    | ARG | X | 459 | 57.764 | 50.429 | 28.839 | 0.00 | 0.00 |
| ATOM | 6945 | O    | ARG | X | 459 | 57.281 | 50.574 | 27.709 | 0.00 | 0.00 |
| ATOM | 6946 | N    | ASN | X | 460 | 58.485 | 49.390 | 29.200 | 0.00 | 0.00 |
| ATOM | 6947 | H    | ASN | X | 460 | 58.838 | 49.378 | 30.146 | 0.00 | 0.00 |
| ATOM | 6948 | CA   | ASN | X | 460 | 58.803 | 48.275 | 28.345 | 0.00 | 0.00 |
| ATOM | 6949 | HA   | ASN | X | 460 | 59.095 | 48.696 | 27.383 | 0.00 | 0.00 |
| ATOM | 6950 | CB   | ASN | X | 460 | 60.024 | 47.527 | 28.930 | 0.00 | 0.00 |
| ATOM | 6951 | HB2  | ASN | X | 460 | 60.731 | 48.331 | 29.136 | 0.00 | 0.00 |
| ATOM | 6952 | HB3  | ASN | X | 460 | 59.853 | 47.114 | 29.924 | 0.00 | 0.00 |
| ATOM | 6953 | CG   | ASN | X | 460 | 60.644 | 46.389 | 27.980 | 0.00 | 0.00 |
| ATOM | 6954 | OD1  | ASN | X | 460 | 59.985 | 45.849 | 27.140 | 0.00 | 0.00 |
| ATOM | 6955 | ND2  | ASN | X | 460 | 61.879 | 45.960 | 28.132 | 0.00 | 0.00 |
| ATOM | 6956 | HD21 | ASN | X | 460 | 62.296 | 45.371 | 27.425 | 0.00 | 0.00 |
| ATOM | 6957 | HD22 | ASN | X | 460 | 62.513 | 46.588 | 28.605 | 0.00 | 0.00 |
| ATOM | 6958 | C    | ASN | X | 460 | 57.541 | 47.385 | 28.081 | 0.00 | 0.00 |
| ATOM | 6959 | O    | ASN | X | 460 | 57.039 | 46.746 | 29.053 | 0.00 | 0.00 |
| ATOM | 6960 | N    | TYR | X | 461 | 57.160 | 47.299 | 26.827 | 0.00 | 0.00 |
| ATOM | 6961 | H    | TYR | X | 461 | 57.801 | 47.717 | 26.168 | 0.00 | 0.00 |
| ATOM | 6962 | CA   | TYR | X | 461 | 56.157 | 46.439 | 26.297 | 0.00 | 0.00 |
| ATOM | 6963 | HA   | TYR | X | 461 | 56.213 | 45.486 | 26.823 | 0.00 | 0.00 |
| ATOM | 6964 | CB   | TYR | X | 461 | 54.841 | 47.168 | 26.358 | 0.00 | 0.00 |
| ATOM | 6965 | HB2  | TYR | X | 461 | 55.020 | 48.190 | 26.025 | 0.00 | 0.00 |
| ATOM | 6966 | HB3  | TYR | X | 461 | 54.171 | 46.650 | 25.672 | 0.00 | 0.00 |
| ATOM | 6967 | CG   | TYR | X | 461 | 54.236 | 47.263 | 27.729 | 0.00 | 0.00 |
| ATOM | 6968 | CD1  | TYR | X | 461 | 54.293 | 48.500 | 28.336 | 0.00 | 0.00 |
| ATOM | 6969 | HD1  | TYR | X | 461 | 54.713 | 49.296 | 27.739 | 0.00 | 0.00 |



|      |      |      |     |   |     |        |        |        |      |      |
|------|------|------|-----|---|-----|--------|--------|--------|------|------|
| ATOM | 6970 | CE1  | TYR | X | 461 | 53.655 | 48.806 | 29.574 | 0.00 | 0.00 |
| ATOM | 6971 | HE1  | TYR | X | 461 | 53.664 | 49.788 | 30.022 | 0.00 | 0.00 |
| ATOM | 6972 | CZ   | TYR | X | 461 | 53.021 | 47.651 | 30.202 | 0.00 | 0.00 |
| ATOM | 6973 | OH   | TYR | X | 461 | 52.362 | 47.801 | 31.381 | 0.00 | 0.00 |
| ATOM | 6974 | HH   | TYR | X | 461 | 52.018 | 47.029 | 31.836 | 0.00 | 0.00 |
| ATOM | 6975 | CE2  | TYR | X | 461 | 52.995 | 46.354 | 29.614 | 0.00 | 0.00 |
| ATOM | 6976 | HE2  | TYR | X | 461 | 52.694 | 45.406 | 30.037 | 0.00 | 0.00 |
| ATOM | 6977 | CD2  | TYR | X | 461 | 53.587 | 46.204 | 28.362 | 0.00 | 0.00 |
| ATOM | 6978 | HD2  | TYR | X | 461 | 53.665 | 45.219 | 27.928 | 0.00 | 0.00 |
| ATOM | 6979 | C    | TYR | X | 461 | 56.415 | 46.107 | 24.880 | 0.00 | 0.00 |
| ATOM | 6980 | O    | TYR | X | 461 | 57.164 | 46.812 | 24.170 | 0.00 | 0.00 |
| ATOM | 6981 | N    | THR | X | 462 | 55.910 | 44.989 | 24.358 | 0.00 | 0.00 |
| ATOM | 6982 | H    | THR | X | 462 | 55.164 | 44.499 | 24.831 | 0.00 | 0.00 |
| ATOM | 6983 | CA   | THR | X | 462 | 56.017 | 44.678 | 22.936 | 0.00 | 0.00 |
| ATOM | 6984 | HA   | THR | X | 462 | 56.939 | 45.157 | 22.605 | 0.00 | 0.00 |
| ATOM | 6985 | CB   | THR | X | 462 | 55.994 | 43.181 | 22.541 | 0.00 | 0.00 |
| ATOM | 6986 | HB   | THR | X | 462 | 56.087 | 43.049 | 21.463 | 0.00 | 0.00 |
| ATOM | 6987 | CG2  | THR | X | 462 | 57.152 | 42.378 | 23.087 | 0.00 | 0.00 |
| ATOM | 6988 | HG21 | THR | X | 462 | 56.984 | 42.039 | 24.109 | 0.00 | 0.00 |
| ATOM | 6989 | HG22 | THR | X | 462 | 57.287 | 41.493 | 22.465 | 0.00 | 0.00 |
| ATOM | 6990 | HG23 | THR | X | 462 | 58.039 | 43.011 | 23.108 | 0.00 | 0.00 |
| ATOM | 6991 | OG1  | THR | X | 462 | 54.815 | 42.555 | 22.965 | 0.00 | 0.00 |
| ATOM | 6992 | HG1  | THR | X | 462 | 54.868 | 42.510 | 23.923 | 0.00 | 0.00 |
| ATOM | 6993 | C    | THR | X | 462 | 54.921 | 45.457 | 22.212 | 0.00 | 0.00 |
| ATOM | 6994 | O    | THR | X | 462 | 53.896 | 45.892 | 22.712 | 0.00 | 0.00 |
| ATOM | 6995 | N    | ALA | X | 463 | 55.157 | 45.511 | 20.884 | 0.00 | 0.00 |
| ATOM | 6996 | H    | ALA | X | 463 | 56.009 | 45.102 | 20.527 | 0.00 | 0.00 |
| ATOM | 6997 | CA   | ALA | X | 463 | 54.338 | 46.085 | 19.900 | 0.00 | 0.00 |
| ATOM | 6998 | HA   | ALA | X | 463 | 54.175 | 47.134 | 20.146 | 0.00 | 0.00 |
| ATOM | 6999 | CB   | ALA | X | 463 | 55.041 | 45.991 | 18.602 | 0.00 | 0.00 |
| ATOM | 7000 | HB1  | ALA | X | 463 | 54.280 | 45.879 | 17.830 | 0.00 | 0.00 |
| ATOM | 7001 | HB2  | ALA | X | 463 | 55.701 | 46.835 | 18.403 | 0.00 | 0.00 |
| ATOM | 7002 | HB3  | ALA | X | 463 | 55.655 | 45.090 | 18.582 | 0.00 | 0.00 |
| ATOM | 7003 | C    | ALA | X | 463 | 52.966 | 45.374 | 19.918 | 0.00 | 0.00 |
| ATOM | 7004 | O    | ALA | X | 463 | 51.931 | 46.064 | 19.821 | 0.00 | 0.00 |
| ATOM | 7005 | N    | GLU | X | 464 | 52.963 | 44.008 | 19.984 | 0.00 | 0.00 |
| ATOM | 7006 | H    | GLU | X | 464 | 53.911 | 43.673 | 19.895 | 0.00 | 0.00 |
| ATOM | 7007 | CA   | GLU | X | 464 | 51.781 | 43.191 | 19.862 | 0.00 | 0.00 |
| ATOM | 7008 | HA   | GLU | X | 464 | 51.071 | 43.630 | 19.161 | 0.00 | 0.00 |
| ATOM | 7009 | CB   | GLU | X | 464 | 52.121 | 41.721 | 19.560 | 0.00 | 0.00 |
| ATOM | 7010 | HB2  | GLU | X | 464 | 52.921 | 41.308 | 20.174 | 0.00 | 0.00 |
| ATOM | 7011 | HB3  | GLU | X | 464 | 51.243 | 41.098 | 19.730 | 0.00 | 0.00 |
| ATOM | 7012 | CG   | GLU | X | 464 | 52.579 | 41.641 | 18.087 | 0.00 | 0.00 |
| ATOM | 7013 | HG2  | GLU | X | 464 | 51.667 | 41.947 | 17.575 | 0.00 | 0.00 |
| ATOM | 7014 | HG3  | GLU | X | 464 | 53.358 | 42.360 | 17.833 | 0.00 | 0.00 |
| ATOM | 7015 | CD   | GLU | X | 464 | 53.020 | 40.280 | 17.888 | 0.00 | 0.00 |
| ATOM | 7016 | OE1  | GLU | X | 464 | 52.205 | 39.499 | 17.348 | 0.00 | 0.00 |
| ATOM | 7017 | OE2  | GLU | X | 464 | 54.193 | 39.863 | 18.114 | 0.00 | 0.00 |
| ATOM | 7018 | C    | GLU | X | 464 | 50.937 | 43.330 | 21.178 | 0.00 | 0.00 |
| ATOM | 7019 | O    | GLU | X | 464 | 49.688 | 43.288 | 21.154 | 0.00 | 0.00 |
| ATOM | 7020 | N    | GLU | X | 465 | 51.636 | 43.653 | 22.327 | 0.00 | 0.00 |
| ATOM | 7021 | H    | GLU | X | 465 | 52.637 | 43.529 | 22.289 | 0.00 | 0.00 |
| ATOM | 7022 | CA   | GLU | X | 465 | 51.023 | 43.755 | 23.596 | 0.00 | 0.00 |
| ATOM | 7023 | HA   | GLU | X | 465 | 50.336 | 42.915 | 23.702 | 0.00 | 0.00 |
| ATOM | 7024 | CB   | GLU | X | 465 | 52.129 | 43.581 | 24.800 | 0.00 | 0.00 |
| ATOM | 7025 | HB2  | GLU | X | 465 | 53.053 | 44.123 | 24.600 | 0.00 | 0.00 |
| ATOM | 7026 | HB3  | GLU | X | 465 | 51.666 | 43.965 | 25.709 | 0.00 | 0.00 |
| ATOM | 7027 | CG   | GLU | X | 465 | 52.439 | 42.119 | 25.184 | 0.00 | 0.00 |
| ATOM | 7028 | HG2  | GLU | X | 465 | 51.627 | 41.659 | 25.748 | 0.00 | 0.00 |
| ATOM | 7029 | HG3  | GLU | X | 465 | 52.701 | 41.463 | 24.354 | 0.00 | 0.00 |
| ATOM | 7030 | CD   | GLU | X | 465 | 53.669 | 41.973 | 25.978 | 0.00 | 0.00 |
| ATOM | 7031 | OE1  | GLU | X | 465 | 54.685 | 42.654 | 25.604 | 0.00 | 0.00 |
| ATOM | 7032 | OE2  | GLU | X | 465 | 53.823 | 41.202 | 26.939 | 0.00 | 0.00 |
| ATOM | 7033 | C    | GLU | X | 465 | 50.159 | 44.998 | 23.674 | 0.00 | 0.00 |
| ATOM | 7034 | O    | GLU | X | 465 | 49.039 | 44.938 | 24.170 | 0.00 | 0.00 |
| ATOM | 7035 | N    | LYS | X | 466 | 50.585 | 46.104 | 23.221 | 0.00 | 0.00 |
| ATOM | 7036 | H    | LYS | X | 466 | 51.587 | 46.132 | 23.101 | 0.00 | 0.00 |
| ATOM | 7037 | CA   | LYS | X | 466 | 49.817 | 47.378 | 23.190 | 0.00 | 0.00 |
| ATOM | 7038 | HA   | LYS | X | 466 | 49.471 | 47.574 | 24.205 | 0.00 | 0.00 |
| ATOM | 7039 | CB   | LYS | X | 466 | 50.791 | 48.534 | 22.948 | 0.00 | 0.00 |

|      |      |      |     |   |     |        |        |        |      |      |
|------|------|------|-----|---|-----|--------|--------|--------|------|------|
| ATOM | 7040 | HB2  | LYS | X | 466 | 50.420 | 49.556 | 23.028 | 0.00 | 0.00 |
| ATOM | 7041 | HB3  | LYS | X | 466 | 51.448 | 48.633 | 23.812 | 0.00 | 0.00 |
| ATOM | 7042 | CG   | LYS | X | 466 | 51.608 | 48.535 | 21.614 | 0.00 | 0.00 |
| ATOM | 7043 | HG2  | LYS | X | 466 | 52.371 | 47.772 | 21.768 | 0.00 | 0.00 |
| ATOM | 7044 | HG3  | LYS | X | 466 | 50.896 | 48.323 | 20.816 | 0.00 | 0.00 |
| ATOM | 7045 | CD   | LYS | X | 466 | 52.227 | 49.918 | 21.332 | 0.00 | 0.00 |
| ATOM | 7046 | HD2  | LYS | X | 466 | 51.451 | 50.578 | 20.944 | 0.00 | 0.00 |
| ATOM | 7047 | HD3  | LYS | X | 466 | 52.506 | 50.327 | 22.303 | 0.00 | 0.00 |
| ATOM | 7048 | CE   | LYS | X | 466 | 53.466 | 49.720 | 20.476 | 0.00 | 0.00 |
| ATOM | 7049 | HE2  | LYS | X | 466 | 53.930 | 48.806 | 20.846 | 0.00 | 0.00 |
| ATOM | 7050 | HE3  | LYS | X | 466 | 53.164 | 49.475 | 19.457 | 0.00 | 0.00 |
| ATOM | 7051 | NZ   | LYS | X | 466 | 54.347 | 50.905 | 20.500 | 0.00 | 0.00 |
| ATOM | 7052 | HZ1  | LYS | X | 466 | 54.122 | 51.498 | 19.713 | 0.00 | 0.00 |
| ATOM | 7053 | HZ2  | LYS | X | 466 | 54.268 | 51.386 | 21.384 | 0.00 | 0.00 |
| ATOM | 7054 | HZ3  | LYS | X | 466 | 55.298 | 50.647 | 20.280 | 0.00 | 0.00 |
| ATOM | 7055 | C    | LYS | X | 466 | 48.636 | 47.348 | 22.305 | 0.00 | 0.00 |
| ATOM | 7056 | O    | LYS | X | 466 | 47.631 | 47.922 | 22.632 | 0.00 | 0.00 |
| ATOM | 7057 | N    | ILE | X | 467 | 48.629 | 46.536 | 21.186 | 0.00 | 0.00 |
| ATOM | 7058 | H    | ILE | X | 467 | 49.427 | 45.930 | 21.062 | 0.00 | 0.00 |
| ATOM | 7059 | CA   | ILE | X | 467 | 47.337 | 46.177 | 20.433 | 0.00 | 0.00 |
| ATOM | 7060 | HA   | ILE | X | 467 | 46.887 | 47.160 | 20.295 | 0.00 | 0.00 |
| ATOM | 7061 | CB   | ILE | X | 467 | 47.679 | 45.507 | 19.104 | 0.00 | 0.00 |
| ATOM | 7062 | HB   | ILE | X | 467 | 48.315 | 44.665 | 19.376 | 0.00 | 0.00 |
| ATOM | 7063 | CG2  | ILE | X | 467 | 46.401 | 44.905 | 18.447 | 0.00 | 0.00 |
| ATOM | 7064 | HG21 | ILE | X | 467 | 45.634 | 45.646 | 18.225 | 0.00 | 0.00 |
| ATOM | 7065 | HG22 | ILE | X | 467 | 46.728 | 44.267 | 17.625 | 0.00 | 0.00 |
| ATOM | 7066 | HG23 | ILE | X | 467 | 45.959 | 44.221 | 19.171 | 0.00 | 0.00 |
| ATOM | 7067 | CG1  | ILE | X | 467 | 48.535 | 46.432 | 18.192 | 0.00 | 0.00 |
| ATOM | 7068 | HG12 | ILE | X | 467 | 48.115 | 47.425 | 18.032 | 0.00 | 0.00 |
| ATOM | 7069 | HG13 | ILE | X | 467 | 49.473 | 46.601 | 18.721 | 0.00 | 0.00 |
| ATOM | 7070 | CD1  | ILE | X | 467 | 48.938 | 45.884 | 16.837 | 0.00 | 0.00 |
| ATOM | 7071 | HD11 | ILE | X | 467 | 49.352 | 44.886 | 16.979 | 0.00 | 0.00 |
| ATOM | 7072 | HD12 | ILE | X | 467 | 48.087 | 45.756 | 16.168 | 0.00 | 0.00 |
| ATOM | 7073 | HD13 | ILE | X | 467 | 49.698 | 46.531 | 16.399 | 0.00 | 0.00 |
| ATOM | 7074 | C    | ILE | X | 467 | 46.429 | 45.385 | 21.327 | 0.00 | 0.00 |
| ATOM | 7075 | O    | ILE | X | 467 | 45.269 | 45.752 | 21.426 | 0.00 | 0.00 |
| ATOM | 7076 | N    | PHE | X | 468 | 46.867 | 44.325 | 21.980 | 0.00 | 0.00 |
| ATOM | 7077 | H    | PHE | X | 468 | 47.832 | 44.087 | 21.803 | 0.00 | 0.00 |
| ATOM | 7078 | CA   | PHE | X | 468 | 46.002 | 43.503 | 22.860 | 0.00 | 0.00 |
| ATOM | 7079 | HA   | PHE | X | 468 | 45.147 | 43.176 | 22.267 | 0.00 | 0.00 |
| ATOM | 7080 | CB   | PHE | X | 468 | 46.888 | 42.292 | 23.293 | 0.00 | 0.00 |
| ATOM | 7081 | HB2  | PHE | X | 468 | 47.115 | 41.734 | 22.384 | 0.00 | 0.00 |
| ATOM | 7082 | HB3  | PHE | X | 468 | 47.776 | 42.760 | 23.717 | 0.00 | 0.00 |
| ATOM | 7083 | CG   | PHE | X | 468 | 46.318 | 41.468 | 24.406 | 0.00 | 0.00 |
| ATOM | 7084 | CD1  | PHE | X | 468 | 45.053 | 40.828 | 24.195 | 0.00 | 0.00 |
| ATOM | 7085 | HD1  | PHE | X | 468 | 44.461 | 41.128 | 23.343 | 0.00 | 0.00 |
| ATOM | 7086 | CE1  | PHE | X | 468 | 44.581 | 39.852 | 25.100 | 0.00 | 0.00 |
| ATOM | 7087 | HE1  | PHE | X | 468 | 43.614 | 39.407 | 24.919 | 0.00 | 0.00 |
| ATOM | 7088 | CZ   | PHE | X | 468 | 45.372 | 39.542 | 26.239 | 0.00 | 0.00 |
| ATOM | 7089 | HZ   | PHE | X | 468 | 45.061 | 38.755 | 26.911 | 0.00 | 0.00 |
| ATOM | 7090 | CE2  | PHE | X | 468 | 46.591 | 40.190 | 26.469 | 0.00 | 0.00 |
| ATOM | 7091 | HE2  | PHE | X | 468 | 47.124 | 40.036 | 27.396 | 0.00 | 0.00 |
| ATOM | 7092 | CD2  | PHE | X | 468 | 47.042 | 41.144 | 25.574 | 0.00 | 0.00 |
| ATOM | 7093 | HD2  | PHE | X | 468 | 47.968 | 41.674 | 25.741 | 0.00 | 0.00 |
| ATOM | 7094 | C    | PHE | X | 468 | 45.411 | 44.277 | 24.064 | 0.00 | 0.00 |
| ATOM | 7095 | O    | PHE | X | 468 | 44.298 | 44.011 | 24.458 | 0.00 | 0.00 |
| ATOM | 7096 | N    | ALA | X | 469 | 46.109 | 45.314 | 24.634 | 0.00 | 0.00 |
| ATOM | 7097 | H    | ALA | X | 469 | 47.071 | 45.436 | 24.351 | 0.00 | 0.00 |
| ATOM | 7098 | CA   | ALA | X | 469 | 45.539 | 46.282 | 25.592 | 0.00 | 0.00 |
| ATOM | 7099 | HA   | ALA | X | 469 | 45.290 | 45.776 | 26.524 | 0.00 | 0.00 |
| ATOM | 7100 | CB   | ALA | X | 469 | 46.581 | 47.395 | 25.981 | 0.00 | 0.00 |
| ATOM | 7101 | HB1  | ALA | X | 469 | 46.176 | 47.970 | 26.814 | 0.00 | 0.00 |
| ATOM | 7102 | HB2  | ALA | X | 469 | 47.491 | 46.842 | 26.213 | 0.00 | 0.00 |
| ATOM | 7103 | HB3  | ALA | X | 469 | 46.757 | 47.988 | 25.084 | 0.00 | 0.00 |
| ATOM | 7104 | C    | ALA | X | 469 | 44.248 | 46.829 | 25.005 | 0.00 | 0.00 |
| ATOM | 7105 | O    | ALA | X | 469 | 43.150 | 46.642 | 25.546 | 0.00 | 0.00 |
| ATOM | 7106 | N    | GLN | X | 470 | 44.359 | 47.462 | 23.862 | 0.00 | 0.00 |
| ATOM | 7107 | H    | GLN | X | 470 | 45.276 | 47.497 | 23.442 | 0.00 | 0.00 |
| ATOM | 7108 | CA   | GLN | X | 470 | 43.262 | 48.163 | 23.247 | 0.00 | 0.00 |
| ATOM | 7109 | HA   | GLN | X | 470 | 42.961 | 49.001 | 23.877 | 0.00 | 0.00 |

|      |      |      |     |   |     |        |        |        |      |      |
|------|------|------|-----|---|-----|--------|--------|--------|------|------|
| ATOM | 7110 | CB   | GLN | X | 470 | 43.864 | 48.876 | 22.006 | 0.00 | 0.00 |
| ATOM | 7111 | HB2  | GLN | X | 470 | 44.507 | 48.168 | 21.483 | 0.00 | 0.00 |
| ATOM | 7112 | HB3  | GLN | X | 470 | 43.050 | 49.192 | 21.352 | 0.00 | 0.00 |
| ATOM | 7113 | CG   | GLN | X | 470 | 44.759 | 50.063 | 22.215 | 0.00 | 0.00 |
| ATOM | 7114 | HG2  | GLN | X | 470 | 44.346 | 50.751 | 22.952 | 0.00 | 0.00 |
| ATOM | 7115 | HG3  | GLN | X | 470 | 45.700 | 49.734 | 22.655 | 0.00 | 0.00 |
| ATOM | 7116 | CD   | GLN | X | 470 | 45.186 | 50.773 | 20.933 | 0.00 | 0.00 |
| ATOM | 7117 | OE1  | GLN | X | 470 | 46.257 | 50.515 | 20.282 | 0.00 | 0.00 |
| ATOM | 7118 | NE2  | GLN | X | 470 | 44.469 | 51.729 | 20.339 | 0.00 | 0.00 |
| ATOM | 7119 | HE21 | GLN | X | 470 | 44.882 | 52.203 | 19.549 | 0.00 | 0.00 |
| ATOM | 7120 | HE22 | GLN | X | 470 | 43.532 | 51.939 | 20.652 | 0.00 | 0.00 |
| ATOM | 7121 | C    | GLN | X | 470 | 41.979 | 47.236 | 22.926 | 0.00 | 0.00 |
| ATOM | 7122 | O    | GLN | X | 470 | 40.809 | 47.688 | 22.920 | 0.00 | 0.00 |
| ATOM | 7123 | N    | ARG | X | 471 | 42.304 | 45.938 | 22.837 | 0.00 | 0.00 |
| ATOM | 7124 | H    | ARG | X | 471 | 43.272 | 45.665 | 22.747 | 0.00 | 0.00 |
| ATOM | 7125 | CA   | ARG | X | 471 | 41.197 | 44.963 | 22.787 | 0.00 | 0.00 |
| ATOM | 7126 | HA   | ARG | X | 471 | 40.442 | 45.272 | 22.065 | 0.00 | 0.00 |
| ATOM | 7127 | CB   | ARG | X | 471 | 41.702 | 43.586 | 22.316 | 0.00 | 0.00 |
| ATOM | 7128 | HB2  | ARG | X | 471 | 42.569 | 43.223 | 22.867 | 0.00 | 0.00 |
| ATOM | 7129 | HB3  | ARG | X | 471 | 40.817 | 42.998 | 22.562 | 0.00 | 0.00 |
| ATOM | 7130 | CG   | ARG | X | 471 | 41.986 | 43.586 | 20.765 | 0.00 | 0.00 |
| ATOM | 7131 | HG2  | ARG | X | 471 | 41.104 | 43.688 | 20.133 | 0.00 | 0.00 |
| ATOM | 7132 | HG3  | ARG | X | 471 | 42.535 | 44.495 | 20.522 | 0.00 | 0.00 |
| ATOM | 7133 | CD   | ARG | X | 471 | 42.799 | 42.303 | 20.355 | 0.00 | 0.00 |
| ATOM | 7134 | HD2  | ARG | X | 471 | 42.891 | 42.435 | 19.277 | 0.00 | 0.00 |
| ATOM | 7135 | HD3  | ARG | X | 471 | 43.775 | 42.194 | 20.829 | 0.00 | 0.00 |
| ATOM | 7136 | NE   | ARG | X | 471 | 41.892 | 41.165 | 20.637 | 0.00 | 0.00 |
| ATOM | 7137 | HE   | ARG | X | 471 | 40.927 | 41.340 | 20.394 | 0.00 | 0.00 |
| ATOM | 7138 | CZ   | ARG | X | 471 | 42.257 | 39.953 | 21.094 | 0.00 | 0.00 |
| ATOM | 7139 | NH1  | ARG | X | 471 | 43.525 | 39.710 | 21.319 | 0.00 | 0.00 |
| ATOM | 7140 | HH11 | ARG | X | 471 | 44.202 | 40.459 | 21.300 | 0.00 | 0.00 |
| ATOM | 7141 | HH12 | ARG | X | 471 | 43.757 | 38.808 | 21.709 | 0.00 | 0.00 |
| ATOM | 7142 | NH2  | ARG | X | 471 | 41.343 | 39.048 | 21.336 | 0.00 | 0.00 |
| ATOM | 7143 | HH21 | ARG | X | 471 | 40.461 | 39.055 | 20.843 | 0.00 | 0.00 |
| ATOM | 7144 | HH22 | ARG | X | 471 | 41.704 | 38.213 | 21.775 | 0.00 | 0.00 |
| ATOM | 7145 | C    | ARG | X | 471 | 40.498 | 44.979 | 24.164 | 0.00 | 0.00 |
| ATOM | 7146 | O    | ARG | X | 471 | 39.285 | 45.186 | 24.168 | 0.00 | 0.00 |
| ATOM | 7147 | N    | LEU | X | 472 | 41.176 | 44.621 | 25.242 | 0.00 | 0.00 |
| ATOM | 7148 | H    | LEU | X | 472 | 42.149 | 44.366 | 25.153 | 0.00 | 0.00 |
| ATOM | 7149 | CA   | LEU | X | 472 | 40.539 | 44.515 | 26.567 | 0.00 | 0.00 |
| ATOM | 7150 | HA   | LEU | X | 472 | 39.659 | 43.873 | 26.537 | 0.00 | 0.00 |
| ATOM | 7151 | CB   | LEU | X | 472 | 41.437 | 43.995 | 27.658 | 0.00 | 0.00 |
| ATOM | 7152 | HB2  | LEU | X | 472 | 42.134 | 44.800 | 27.890 | 0.00 | 0.00 |
| ATOM | 7153 | HB3  | LEU | X | 472 | 40.941 | 43.736 | 28.593 | 0.00 | 0.00 |
| ATOM | 7154 | CG   | LEU | X | 472 | 42.279 | 42.748 | 27.435 | 0.00 | 0.00 |
| ATOM | 7155 | HG   | LEU | X | 472 | 43.250 | 43.081 | 27.068 | 0.00 | 0.00 |
| ATOM | 7156 | CD1  | LEU | X | 472 | 42.499 | 42.036 | 28.763 | 0.00 | 0.00 |
| ATOM | 7157 | HD11 | LEU | X | 472 | 42.939 | 42.743 | 29.467 | 0.00 | 0.00 |
| ATOM | 7158 | HD12 | LEU | X | 472 | 41.536 | 41.652 | 29.101 | 0.00 | 0.00 |
| ATOM | 7159 | HD13 | LEU | X | 472 | 43.135 | 41.164 | 28.613 | 0.00 | 0.00 |
| ATOM | 7160 | CD2  | LEU | X | 472 | 41.446 | 41.765 | 26.542 | 0.00 | 0.00 |
| ATOM | 7161 | HD21 | LEU | X | 472 | 41.624 | 42.118 | 25.526 | 0.00 | 0.00 |
| ATOM | 7162 | HD22 | LEU | X | 472 | 41.770 | 40.725 | 26.586 | 0.00 | 0.00 |
| ATOM | 7163 | HD23 | LEU | X | 472 | 40.431 | 41.919 | 26.910 | 0.00 | 0.00 |
| ATOM | 7164 | C    | LEU | X | 472 | 39.926 | 45.833 | 27.121 | 0.00 | 0.00 |
| ATOM | 7165 | O    | LEU | X | 472 | 38.831 | 45.796 | 27.745 | 0.00 | 0.00 |
| ATOM | 7166 | N    | MET | X | 473 | 40.583 | 46.949 | 26.906 | 0.00 | 0.00 |
| ATOM | 7167 | H    | MET | X | 473 | 41.573 | 46.795 | 26.779 | 0.00 | 0.00 |
| ATOM | 7168 | CA   | MET | X | 473 | 40.080 | 48.275 | 27.090 | 0.00 | 0.00 |
| ATOM | 7169 | HA   | MET | X | 473 | 39.853 | 48.566 | 28.116 | 0.00 | 0.00 |
| ATOM | 7170 | CB   | MET | X | 473 | 41.177 | 49.288 | 26.609 | 0.00 | 0.00 |
| ATOM | 7171 | HB2  | MET | X | 473 | 41.470 | 49.081 | 25.580 | 0.00 | 0.00 |
| ATOM | 7172 | HB3  | MET | X | 473 | 40.793 | 50.308 | 26.639 | 0.00 | 0.00 |
| ATOM | 7173 | CG   | MET | X | 473 | 42.468 | 49.276 | 27.412 | 0.00 | 0.00 |
| ATOM | 7174 | HG2  | MET | X | 473 | 42.239 | 49.907 | 28.271 | 0.00 | 0.00 |
| ATOM | 7175 | HG3  | MET | X | 473 | 42.755 | 48.280 | 27.747 | 0.00 | 0.00 |
| ATOM | 7176 | SD   | MET | X | 473 | 43.886 | 49.884 | 26.508 | 0.00 | 0.00 |
| ATOM | 7177 | CE   | MET | X | 473 | 43.287 | 51.571 | 26.103 | 0.00 | 0.00 |
| ATOM | 7178 | HE1  | MET | X | 473 | 42.267 | 51.453 | 25.737 | 0.00 | 0.00 |
| ATOM | 7179 | HE2  | MET | X | 473 | 43.229 | 52.193 | 26.996 | 0.00 | 0.00 |

|      |      |      |     |   |     |        |        |        |      |      |
|------|------|------|-----|---|-----|--------|--------|--------|------|------|
| ATOM | 7180 | HE3  | MET | X | 473 | 43.918 | 52.163 | 25.440 | 0.00 | 0.00 |
| ATOM | 7181 | C    | MET | X | 473 | 38.785 | 48.530 | 26.378 | 0.00 | 0.00 |
| ATOM | 7182 | O    | MET | X | 473 | 37.772 | 48.942 | 26.977 | 0.00 | 0.00 |
| ATOM | 7183 | N    | ARG | X | 474 | 38.650 | 48.103 | 25.149 | 0.00 | 0.00 |
| ATOM | 7184 | H    | ARG | X | 474 | 39.441 | 47.759 | 24.622 | 0.00 | 0.00 |
| ATOM | 7185 | CA   | ARG | X | 474 | 37.396 | 48.228 | 24.424 | 0.00 | 0.00 |
| ATOM | 7186 | HA   | ARG | X | 474 | 37.130 | 49.283 | 24.495 | 0.00 | 0.00 |
| ATOM | 7187 | CB   | ARG | X | 474 | 37.767 | 47.897 | 22.981 | 0.00 | 0.00 |
| ATOM | 7188 | HB2  | ARG | X | 474 | 38.518 | 48.636 | 22.702 | 0.00 | 0.00 |
| ATOM | 7189 | HB3  | ARG | X | 474 | 38.167 | 46.887 | 22.887 | 0.00 | 0.00 |
| ATOM | 7190 | CG   | ARG | X | 474 | 36.618 | 47.878 | 21.955 | 0.00 | 0.00 |
| ATOM | 7191 | HG2  | ARG | X | 474 | 37.099 | 47.743 | 20.986 | 0.00 | 0.00 |
| ATOM | 7192 | HG3  | ARG | X | 474 | 35.866 | 47.089 | 21.954 | 0.00 | 0.00 |
| ATOM | 7193 | CD   | ARG | X | 474 | 35.988 | 49.204 | 22.116 | 0.00 | 0.00 |
| ATOM | 7194 | HD2  | ARG | X | 474 | 35.398 | 49.125 | 23.029 | 0.00 | 0.00 |
| ATOM | 7195 | HD3  | ARG | X | 474 | 36.737 | 49.986 | 22.241 | 0.00 | 0.00 |
| ATOM | 7196 | NE   | ARG | X | 474 | 35.085 | 49.472 | 21.012 | 0.00 | 0.00 |
| ATOM | 7197 | HE   | ARG | X | 474 | 34.726 | 48.640 | 20.565 | 0.00 | 0.00 |
| ATOM | 7198 | CZ   | ARG | X | 474 | 34.701 | 50.622 | 20.490 | 0.00 | 0.00 |
| ATOM | 7199 | NH1  | ARG | X | 474 | 35.092 | 51.737 | 21.015 | 0.00 | 0.00 |
| ATOM | 7200 | HH11 | ARG | X | 474 | 35.881 | 51.782 | 21.644 | 0.00 | 0.00 |
| ATOM | 7201 | HH12 | ARG | X | 474 | 34.633 | 52.603 | 20.770 | 0.00 | 0.00 |
| ATOM | 7202 | NH2  | ARG | X | 474 | 33.878 | 50.729 | 19.469 | 0.00 | 0.00 |
| ATOM | 7203 | HH21 | ARG | X | 474 | 33.459 | 49.949 | 18.983 | 0.00 | 0.00 |
| ATOM | 7204 | HH22 | ARG | X | 474 | 33.764 | 51.643 | 19.055 | 0.00 | 0.00 |
| ATOM | 7205 | C    | ARG | X | 474 | 36.309 | 47.312 | 25.061 | 0.00 | 0.00 |
| ATOM | 7206 | O    | ARG | X | 474 | 35.224 | 47.789 | 25.295 | 0.00 | 0.00 |
| ATOM | 7207 | N    | TYR | X | 475 | 36.612 | 46.061 | 25.281 | 0.00 | 0.00 |
| ATOM | 7208 | H    | TYR | X | 475 | 37.551 | 45.723 | 25.122 | 0.00 | 0.00 |
| ATOM | 7209 | CA   | TYR | X | 475 | 35.543 | 45.123 | 25.735 | 0.00 | 0.00 |
| ATOM | 7210 | HA   | TYR | X | 475 | 34.745 | 45.210 | 24.997 | 0.00 | 0.00 |
| ATOM | 7211 | CB   | TYR | X | 475 | 36.005 | 43.698 | 25.732 | 0.00 | 0.00 |
| ATOM | 7212 | HB2  | TYR | X | 475 | 36.787 | 43.655 | 26.490 | 0.00 | 0.00 |
| ATOM | 7213 | HB3  | TYR | X | 475 | 35.092 | 43.132 | 25.918 | 0.00 | 0.00 |
| ATOM | 7214 | CG   | TYR | X | 475 | 36.681 | 43.152 | 24.537 | 0.00 | 0.00 |
| ATOM | 7215 | CD1  | TYR | X | 475 | 36.339 | 43.490 | 23.248 | 0.00 | 0.00 |
| ATOM | 7216 | HD1  | TYR | X | 475 | 35.624 | 44.283 | 23.087 | 0.00 | 0.00 |
| ATOM | 7217 | CE1  | TYR | X | 475 | 36.967 | 42.985 | 22.106 | 0.00 | 0.00 |
| ATOM | 7218 | HE1  | TYR | X | 475 | 36.683 | 43.264 | 21.102 | 0.00 | 0.00 |
| ATOM | 7219 | CZ   | TYR | X | 475 | 38.031 | 42.022 | 22.285 | 0.00 | 0.00 |
| ATOM | 7220 | OH   | TYR | X | 475 | 38.681 | 41.443 | 21.203 | 0.00 | 0.00 |
| ATOM | 7221 | HH   | TYR | X | 475 | 38.127 | 41.679 | 20.456 | 0.00 | 0.00 |
| ATOM | 7222 | CE2  | TYR | X | 475 | 38.310 | 41.616 | 23.619 | 0.00 | 0.00 |
| ATOM | 7223 | HE2  | TYR | X | 475 | 39.122 | 40.951 | 23.872 | 0.00 | 0.00 |
| ATOM | 7224 | CD2  | TYR | X | 475 | 37.668 | 42.194 | 24.720 | 0.00 | 0.00 |
| ATOM | 7225 | HD2  | TYR | X | 475 | 37.990 | 41.924 | 25.715 | 0.00 | 0.00 |
| ATOM | 7226 | C    | TYR | X | 475 | 34.989 | 45.516 | 27.107 | 0.00 | 0.00 |
| ATOM | 7227 | O    | TYR | X | 475 | 33.785 | 45.529 | 27.342 | 0.00 | 0.00 |
| ATOM | 7228 | N    | TRP | X | 476 | 35.845 | 45.930 | 28.073 | 0.00 | 0.00 |
| ATOM | 7229 | H    | TRP | X | 476 | 36.812 | 45.982 | 27.787 | 0.00 | 0.00 |
| ATOM | 7230 | CA   | TRP | X | 476 | 35.407 | 46.235 | 29.451 | 0.00 | 0.00 |
| ATOM | 7231 | HA   | TRP | X | 476 | 34.737 | 45.441 | 29.782 | 0.00 | 0.00 |
| ATOM | 7232 | CB   | TRP | X | 476 | 36.618 | 46.450 | 30.409 | 0.00 | 0.00 |
| ATOM | 7233 | HB2  | TRP | X | 476 | 37.489 | 46.638 | 29.783 | 0.00 | 0.00 |
| ATOM | 7234 | HB3  | TRP | X | 476 | 36.609 | 47.350 | 31.024 | 0.00 | 0.00 |
| ATOM | 7235 | CG   | TRP | X | 476 | 36.975 | 45.285 | 31.325 | 0.00 | 0.00 |
| ATOM | 7236 | CD1  | TRP | X | 476 | 37.049 | 45.408 | 32.639 | 0.00 | 0.00 |
| ATOM | 7237 | HD1  | TRP | X | 476 | 36.690 | 46.293 | 33.144 | 0.00 | 0.00 |
| ATOM | 7238 | NE1  | TRP | X | 476 | 37.427 | 44.148 | 33.196 | 0.00 | 0.00 |
| ATOM | 7239 | HE1  | TRP | X | 476 | 37.606 | 44.017 | 34.181 | 0.00 | 0.00 |
| ATOM | 7240 | CE2  | TRP | X | 476 | 37.495 | 43.194 | 32.201 | 0.00 | 0.00 |
| ATOM | 7241 | CZ2  | TRP | X | 476 | 37.765 | 41.808 | 32.221 | 0.00 | 0.00 |
| ATOM | 7242 | HZ2  | TRP | X | 476 | 37.872 | 41.252 | 33.140 | 0.00 | 0.00 |
| ATOM | 7243 | CH2  | TRP | X | 476 | 37.921 | 41.178 | 30.951 | 0.00 | 0.00 |
| ATOM | 7244 | HH2  | TRP | X | 476 | 38.230 | 40.143 | 30.932 | 0.00 | 0.00 |
| ATOM | 7245 | CZ3  | TRP | X | 476 | 37.898 | 41.913 | 29.741 | 0.00 | 0.00 |
| ATOM | 7246 | HZ3  | TRP | X | 476 | 37.987 | 41.416 | 28.786 | 0.00 | 0.00 |
| ATOM | 7247 | CE3  | TRP | X | 476 | 37.542 | 43.242 | 29.795 | 0.00 | 0.00 |
| ATOM | 7248 | HE3  | TRP | X | 476 | 37.530 | 43.852 | 28.903 | 0.00 | 0.00 |
| ATOM | 7249 | CD2  | TRP | X | 476 | 37.334 | 43.902 | 30.993 | 0.00 | 0.00 |

|      |      |      |     |   |     |        |        |        |      |      |
|------|------|------|-----|---|-----|--------|--------|--------|------|------|
| ATOM | 7250 | C    | TRP | X | 476 | 34.500 | 47.505 | 29.503 | 0.00 | 0.00 |
| ATOM | 7251 | O    | TRP | X | 476 | 33.521 | 47.556 | 30.230 | 0.00 | 0.00 |
| ATOM | 7252 | N    | ALA | X | 477 | 34.859 | 48.461 | 28.697 | 0.00 | 0.00 |
| ATOM | 7253 | H    | ALA | X | 477 | 35.810 | 48.333 | 28.382 | 0.00 | 0.00 |
| ATOM | 7254 | CA   | ALA | X | 477 | 34.151 | 49.731 | 28.517 | 0.00 | 0.00 |
| ATOM | 7255 | HA   | ALA | X | 477 | 33.747 | 50.041 | 29.481 | 0.00 | 0.00 |
| ATOM | 7256 | CB   | ALA | X | 477 | 35.153 | 50.772 | 28.129 | 0.00 | 0.00 |
| ATOM | 7257 | HB1  | ALA | X | 477 | 35.477 | 50.609 | 27.101 | 0.00 | 0.00 |
| ATOM | 7258 | HB2  | ALA | X | 477 | 34.823 | 51.810 | 28.088 | 0.00 | 0.00 |
| ATOM | 7259 | HB3  | ALA | X | 477 | 36.058 | 50.680 | 28.730 | 0.00 | 0.00 |
| ATOM | 7260 | C    | ALA | X | 477 | 32.990 | 49.594 | 27.475 | 0.00 | 0.00 |
| ATOM | 7261 | O    | ALA | X | 477 | 32.010 | 50.298 | 27.722 | 0.00 | 0.00 |
| ATOM | 7262 | N    | ASN | X | 478 | 33.025 | 48.732 | 26.467 | 0.00 | 0.00 |
| ATOM | 7263 | H    | ASN | X | 478 | 33.903 | 48.275 | 26.265 | 0.00 | 0.00 |
| ATOM | 7264 | CA   | ASN | X | 478 | 31.756 | 48.317 | 25.728 | 0.00 | 0.00 |
| ATOM | 7265 | HA   | ASN | X | 478 | 31.294 | 49.148 | 25.193 | 0.00 | 0.00 |
| ATOM | 7266 | CB   | ASN | X | 478 | 32.067 | 47.198 | 24.683 | 0.00 | 0.00 |
| ATOM | 7267 | HB2  | ASN | X | 478 | 32.579 | 46.378 | 25.187 | 0.00 | 0.00 |
| ATOM | 7268 | HB3  | ASN | X | 478 | 31.118 | 46.765 | 24.366 | 0.00 | 0.00 |
| ATOM | 7269 | CG   | ASN | X | 478 | 32.625 | 47.605 | 23.322 | 0.00 | 0.00 |
| ATOM | 7270 | OD1  | ASN | X | 478 | 32.502 | 48.747 | 22.902 | 0.00 | 0.00 |
| ATOM | 7271 | ND2  | ASN | X | 478 | 33.087 | 46.665 | 22.551 | 0.00 | 0.00 |
| ATOM | 7272 | HD21 | ASN | X | 478 | 33.331 | 46.967 | 21.618 | 0.00 | 0.00 |
| ATOM | 7273 | HD22 | ASN | X | 478 | 33.142 | 45.698 | 22.837 | 0.00 | 0.00 |
| ATOM | 7274 | C    | ASN | X | 478 | 30.638 | 47.701 | 26.582 | 0.00 | 0.00 |
| ATOM | 7275 | O    | ASN | X | 478 | 29.511 | 48.135 | 26.583 | 0.00 | 0.00 |
| ATOM | 7276 | N    | PHE | X | 479 | 31.088 | 46.871 | 27.488 | 0.00 | 0.00 |
| ATOM | 7277 | H    | PHE | X | 479 | 32.035 | 46.533 | 27.387 | 0.00 | 0.00 |
| ATOM | 7278 | CA   | PHE | X | 479 | 30.327 | 46.327 | 28.584 | 0.00 | 0.00 |
| ATOM | 7279 | HA   | PHE | X | 479 | 29.481 | 45.741 | 28.223 | 0.00 | 0.00 |
| ATOM | 7280 | CB   | PHE | X | 479 | 31.100 | 45.268 | 29.347 | 0.00 | 0.00 |
| ATOM | 7281 | HB2  | PHE | X | 479 | 31.287 | 44.448 | 28.653 | 0.00 | 0.00 |
| ATOM | 7282 | HB3  | PHE | X | 479 | 32.051 | 45.632 | 29.736 | 0.00 | 0.00 |
| ATOM | 7283 | CG   | PHE | X | 479 | 30.403 | 44.591 | 30.496 | 0.00 | 0.00 |
| ATOM | 7284 | CD1  | PHE | X | 479 | 29.564 | 43.491 | 30.215 | 0.00 | 0.00 |
| ATOM | 7285 | HD1  | PHE | X | 479 | 29.395 | 43.030 | 29.253 | 0.00 | 0.00 |
| ATOM | 7286 | CE1  | PHE | X | 479 | 28.762 | 42.976 | 31.226 | 0.00 | 0.00 |
| ATOM | 7287 | HE1  | PHE | X | 479 | 27.990 | 42.239 | 31.063 | 0.00 | 0.00 |
| ATOM | 7288 | CZ   | PHE | X | 479 | 28.816 | 43.436 | 32.555 | 0.00 | 0.00 |
| ATOM | 7289 | HZ   | PHE | X | 479 | 28.123 | 43.014 | 33.268 | 0.00 | 0.00 |
| ATOM | 7290 | CE2  | PHE | X | 479 | 29.702 | 44.465 | 32.855 | 0.00 | 0.00 |
| ATOM | 7291 | HE2  | PHE | X | 479 | 29.753 | 44.773 | 33.889 | 0.00 | 0.00 |
| ATOM | 7292 | CD2  | PHE | X | 479 | 30.497 | 45.060 | 31.825 | 0.00 | 0.00 |
| ATOM | 7293 | HD2  | PHE | X | 479 | 31.045 | 45.956 | 32.077 | 0.00 | 0.00 |
| ATOM | 7294 | C    | PHE | X | 479 | 29.732 | 47.442 | 29.457 | 0.00 | 0.00 |
| ATOM | 7295 | O    | PHE | X | 479 | 28.585 | 47.491 | 29.781 | 0.00 | 0.00 |
| ATOM | 7296 | N    | ALA | X | 480 | 30.536 | 48.479 | 29.768 | 0.00 | 0.00 |
| ATOM | 7297 | H    | ALA | X | 480 | 31.525 | 48.435 | 29.568 | 0.00 | 0.00 |
| ATOM | 7298 | CA   | ALA | X | 480 | 30.121 | 49.640 | 30.608 | 0.00 | 0.00 |
| ATOM | 7299 | HA   | ALA | X | 480 | 29.599 | 49.103 | 31.400 | 0.00 | 0.00 |
| ATOM | 7300 | CB   | ALA | X | 480 | 31.296 | 50.555 | 31.031 | 0.00 | 0.00 |
| ATOM | 7301 | HB1  | ALA | X | 480 | 31.699 | 51.126 | 30.195 | 0.00 | 0.00 |
| ATOM | 7302 | HB2  | ALA | X | 480 | 30.955 | 51.233 | 31.814 | 0.00 | 0.00 |
| ATOM | 7303 | HB3  | ALA | X | 480 | 32.102 | 50.033 | 31.548 | 0.00 | 0.00 |
| ATOM | 7304 | C    | ALA | X | 480 | 29.049 | 50.530 | 30.006 | 0.00 | 0.00 |
| ATOM | 7305 | O    | ALA | X | 480 | 28.223 | 51.126 | 30.682 | 0.00 | 0.00 |
| ATOM | 7306 | N    | ARG | X | 481 | 29.139 | 50.654 | 28.675 | 0.00 | 0.00 |
| ATOM | 7307 | H    | ARG | X | 481 | 29.970 | 50.214 | 28.305 | 0.00 | 0.00 |
| ATOM | 7308 | CA   | ARG | X | 481 | 28.129 | 51.324 | 27.799 | 0.00 | 0.00 |
| ATOM | 7309 | HA   | ARG | X | 481 | 27.863 | 52.334 | 28.109 | 0.00 | 0.00 |
| ATOM | 7310 | CB   | ARG | X | 481 | 28.652 | 51.432 | 26.350 | 0.00 | 0.00 |
| ATOM | 7311 | HB2  | ARG | X | 481 | 28.933 | 50.433 | 26.015 | 0.00 | 0.00 |
| ATOM | 7312 | HB3  | ARG | X | 481 | 27.841 | 51.837 | 25.745 | 0.00 | 0.00 |
| ATOM | 7313 | CG   | ARG | X | 481 | 29.927 | 52.346 | 26.377 | 0.00 | 0.00 |
| ATOM | 7314 | HG2  | ARG | X | 481 | 29.707 | 53.403 | 26.526 | 0.00 | 0.00 |
| ATOM | 7315 | HG3  | ARG | X | 481 | 30.601 | 52.188 | 27.219 | 0.00 | 0.00 |
| ATOM | 7316 | CD   | ARG | X | 481 | 30.714 | 52.051 | 25.061 | 0.00 | 0.00 |
| ATOM | 7317 | HD2  | ARG | X | 481 | 30.941 | 50.989 | 24.967 | 0.00 | 0.00 |
| ATOM | 7318 | HD3  | ARG | X | 481 | 30.140 | 52.384 | 24.196 | 0.00 | 0.00 |
| ATOM | 7319 | NE   | ARG | X | 481 | 31.931 | 52.809 | 24.984 | 0.00 | 0.00 |

|      |      |      |     |   |     |        |        |        |      |      |
|------|------|------|-----|---|-----|--------|--------|--------|------|------|
| ATOM | 7320 | HE   | ARG | X | 481 | 31.885 | 53.792 | 25.213 | 0.00 | 0.00 |
| ATOM | 7321 | CZ   | ARG | X | 481 | 33.128 | 52.427 | 24.585 | 0.00 | 0.00 |
| ATOM | 7322 | NH1  | ARG | X | 481 | 33.475 | 51.244 | 24.043 | 0.00 | 0.00 |
| ATOM | 7323 | HH11 | ARG | X | 481 | 32.832 | 50.488 | 23.859 | 0.00 | 0.00 |
| ATOM | 7324 | HH12 | ARG | X | 481 | 34.457 | 51.104 | 23.852 | 0.00 | 0.00 |
| ATOM | 7325 | NH2  | ARG | X | 481 | 34.117 | 53.229 | 24.853 | 0.00 | 0.00 |
| ATOM | 7326 | HH21 | ARG | X | 481 | 33.871 | 54.119 | 25.261 | 0.00 | 0.00 |
| ATOM | 7327 | HH22 | ARG | X | 481 | 35.027 | 52.892 | 24.573 | 0.00 | 0.00 |
| ATOM | 7328 | C    | ARG | X | 481 | 26.743 | 50.554 | 27.716 | 0.00 | 0.00 |
| ATOM | 7329 | O    | ARG | X | 481 | 25.649 | 51.172 | 27.797 | 0.00 | 0.00 |
| ATOM | 7330 | N    | THR | X | 482 | 26.675 | 49.244 | 27.442 | 0.00 | 0.00 |
| ATOM | 7331 | H    | THR | X | 482 | 27.541 | 48.732 | 27.354 | 0.00 | 0.00 |
| ATOM | 7332 | CA   | THR | X | 482 | 25.440 | 48.559 | 26.929 | 0.00 | 0.00 |
| ATOM | 7333 | HA   | THR | X | 482 | 24.622 | 49.273 | 26.830 | 0.00 | 0.00 |
| ATOM | 7334 | CB   | THR | X | 482 | 25.608 | 48.045 | 25.516 | 0.00 | 0.00 |
| ATOM | 7335 | HB   | THR | X | 482 | 24.721 | 47.453 | 25.290 | 0.00 | 0.00 |
| ATOM | 7336 | CG2  | THR | X | 482 | 25.650 | 49.202 | 24.525 | 0.00 | 0.00 |
| ATOM | 7337 | HG21 | THR | X | 482 | 24.859 | 49.939 | 24.669 | 0.00 | 0.00 |
| ATOM | 7338 | HG22 | THR | X | 482 | 26.562 | 49.789 | 24.632 | 0.00 | 0.00 |
| ATOM | 7339 | HG23 | THR | X | 482 | 25.574 | 48.769 | 23.528 | 0.00 | 0.00 |
| ATOM | 7340 | OG1  | THR | X | 482 | 26.769 | 47.238 | 25.448 | 0.00 | 0.00 |
| ATOM | 7341 | HG1  | THR | X | 482 | 26.667 | 46.356 | 25.083 | 0.00 | 0.00 |
| ATOM | 7342 | C    | THR | X | 482 | 24.983 | 47.422 | 27.761 | 0.00 | 0.00 |
| ATOM | 7343 | O    | THR | X | 482 | 23.762 | 47.100 | 27.817 | 0.00 | 0.00 |
| ATOM | 7344 | N    | GLY | X | 483 | 25.886 | 46.926 | 28.570 | 0.00 | 0.00 |
| ATOM | 7345 | H    | GLY | X | 483 | 26.783 | 47.361 | 28.732 | 0.00 | 0.00 |
| ATOM | 7346 | CA   | GLY | X | 483 | 25.661 | 45.722 | 29.406 | 0.00 | 0.00 |
| ATOM | 7347 | HA2  | GLY | X | 483 | 26.311 | 45.722 | 30.269 | 0.00 | 0.00 |
| ATOM | 7348 | HA3  | GLY | X | 483 | 24.613 | 45.646 | 29.534 | 0.00 | 0.00 |
| ATOM | 7349 | C    | GLY | X | 483 | 26.118 | 44.447 | 28.752 | 0.00 | 0.00 |
| ATOM | 7350 | O    | GLY | X | 483 | 25.641 | 43.390 | 29.106 | 0.00 | 0.00 |
| ATOM | 7351 | N    | ASP | X | 484 | 26.994 | 44.583 | 27.717 | 0.00 | 0.00 |
| ATOM | 7352 | H    | ASP | X | 484 | 27.286 | 45.493 | 27.390 | 0.00 | 0.00 |
| ATOM | 7353 | CA   | ASP | X | 484 | 27.603 | 43.557 | 26.925 | 0.00 | 0.00 |
| ATOM | 7354 | HA   | ASP | X | 484 | 27.920 | 42.673 | 27.478 | 0.00 | 0.00 |
| ATOM | 7355 | CB   | ASP | X | 484 | 26.574 | 42.832 | 26.005 | 0.00 | 0.00 |
| ATOM | 7356 | HB2  | ASP | X | 484 | 27.161 | 42.238 | 25.304 | 0.00 | 0.00 |
| ATOM | 7357 | HB3  | ASP | X | 484 | 26.034 | 42.213 | 26.721 | 0.00 | 0.00 |
| ATOM | 7358 | CG   | ASP | X | 484 | 25.766 | 43.838 | 25.315 | 0.00 | 0.00 |
| ATOM | 7359 | OD1  | ASP | X | 484 | 26.156 | 44.676 | 24.475 | 0.00 | 0.00 |
| ATOM | 7360 | OD2  | ASP | X | 484 | 24.567 | 43.932 | 25.721 | 0.00 | 0.00 |
| ATOM | 7361 | C    | ASP | X | 484 | 28.871 | 44.050 | 26.190 | 0.00 | 0.00 |
| ATOM | 7362 | O    | ASP | X | 484 | 28.961 | 45.229 | 25.926 | 0.00 | 0.00 |
| ATOM | 7363 | N    | PRO | X | 485 | 29.928 | 43.235 | 26.147 | 0.00 | 0.00 |
| ATOM | 7364 | CD   | PRO | X | 485 | 29.862 | 41.802 | 26.420 | 0.00 | 0.00 |
| ATOM | 7365 | HD2  | PRO | X | 485 | 29.097 | 41.358 | 25.783 | 0.00 | 0.00 |
| ATOM | 7366 | HD3  | PRO | X | 485 | 29.678 | 41.699 | 27.489 | 0.00 | 0.00 |
| ATOM | 7367 | CG   | PRO | X | 485 | 31.323 | 41.282 | 26.145 | 0.00 | 0.00 |
| ATOM | 7368 | HG2  | PRO | X | 485 | 31.351 | 40.876 | 25.134 | 0.00 | 0.00 |
| ATOM | 7369 | HG3  | PRO | X | 485 | 31.583 | 40.463 | 26.816 | 0.00 | 0.00 |
| ATOM | 7370 | CB   | PRO | X | 485 | 32.088 | 42.513 | 26.449 | 0.00 | 0.00 |
| ATOM | 7371 | HB2  | PRO | X | 485 | 33.141 | 42.483 | 26.166 | 0.00 | 0.00 |
| ATOM | 7372 | HB3  | PRO | X | 485 | 32.147 | 42.679 | 27.525 | 0.00 | 0.00 |
| ATOM | 7373 | CA   | PRO | X | 485 | 31.303 | 43.699 | 25.790 | 0.00 | 0.00 |
| ATOM | 7374 | HA   | PRO | X | 485 | 31.493 | 44.702 | 26.171 | 0.00 | 0.00 |
| ATOM | 7375 | C    | PRO | X | 485 | 31.526 | 43.683 | 24.272 | 0.00 | 0.00 |
| ATOM | 7376 | O    | PRO | X | 485 | 32.634 | 44.039 | 23.843 | 0.00 | 0.00 |
| ATOM | 7377 | N    | ASN | X | 486 | 30.536 | 43.229 | 23.460 | 0.00 | 0.00 |
| ATOM | 7378 | H    | ASN | X | 486 | 29.616 | 42.959 | 23.778 | 0.00 | 0.00 |
| ATOM | 7379 | CA   | ASN | X | 486 | 30.817 | 43.138 | 22.004 | 0.00 | 0.00 |
| ATOM | 7380 | HA   | ASN | X | 486 | 31.884 | 42.942 | 21.890 | 0.00 | 0.00 |
| ATOM | 7381 | CB   | ASN | X | 486 | 30.060 | 41.920 | 21.509 | 0.00 | 0.00 |
| ATOM | 7382 | HB2  | ASN | X | 486 | 30.212 | 41.811 | 20.435 | 0.00 | 0.00 |
| ATOM | 7383 | HB3  | ASN | X | 486 | 30.414 | 40.995 | 21.964 | 0.00 | 0.00 |
| ATOM | 7384 | CG   | ASN | X | 486 | 28.514 | 41.971 | 21.712 | 0.00 | 0.00 |
| ATOM | 7385 | OD1  | ASN | X | 486 | 28.016 | 41.360 | 22.697 | 0.00 | 0.00 |
| ATOM | 7386 | ND2  | ASN | X | 486 | 27.670 | 42.664 | 20.891 | 0.00 | 0.00 |
| ATOM | 7387 | HD21 | ASN | X | 486 | 26.695 | 42.748 | 21.141 | 0.00 | 0.00 |
| ATOM | 7388 | HD22 | ASN | X | 486 | 28.007 | 43.149 | 20.072 | 0.00 | 0.00 |
| ATOM | 7389 | C    | ASN | X | 486 | 30.391 | 44.444 | 21.332 | 0.00 | 0.00 |

|      |      |      |     |   |     |        |        |        |      |      |
|------|------|------|-----|---|-----|--------|--------|--------|------|------|
| ATOM | 7390 | O    | ASN | X | 486 | 29.611 | 45.162 | 21.917 | 0.00 | 0.00 |
| ATOM | 7391 | N    | GLU | X | 487 | 30.718 | 44.658 | 20.035 | 0.00 | 0.00 |
| ATOM | 7392 | H    | GLU | X | 487 | 31.261 | 43.938 | 19.581 | 0.00 | 0.00 |
| ATOM | 7393 | CA   | GLU | X | 487 | 30.193 | 45.753 | 19.162 | 0.00 | 0.00 |
| ATOM | 7394 | HA   | GLU | X | 487 | 30.352 | 46.661 | 19.743 | 0.00 | 0.00 |
| ATOM | 7395 | CB   | GLU | X | 487 | 31.116 | 45.861 | 17.889 | 0.00 | 0.00 |
| ATOM | 7396 | HB2  | GLU | X | 487 | 31.112 | 44.982 | 17.244 | 0.00 | 0.00 |
| ATOM | 7397 | HB3  | GLU | X | 487 | 30.755 | 46.690 | 17.282 | 0.00 | 0.00 |
| ATOM | 7398 | CG   | GLU | X | 487 | 32.571 | 46.157 | 18.181 | 0.00 | 0.00 |
| ATOM | 7399 | HG2  | GLU | X | 487 | 33.104 | 45.367 | 18.709 | 0.00 | 0.00 |
| ATOM | 7400 | HG3  | GLU | X | 487 | 33.098 | 46.359 | 17.248 | 0.00 | 0.00 |
| ATOM | 7401 | CD   | GLU | X | 487 | 32.742 | 47.468 | 18.986 | 0.00 | 0.00 |
| ATOM | 7402 | OE1  | GLU | X | 487 | 32.139 | 48.498 | 18.683 | 0.00 | 0.00 |
| ATOM | 7403 | OE2  | GLU | X | 487 | 33.705 | 47.398 | 19.774 | 0.00 | 0.00 |
| ATOM | 7404 | C    | GLU | X | 487 | 28.685 | 45.670 | 18.839 | 0.00 | 0.00 |
| ATOM | 7405 | O    | GLU | X | 487 | 28.208 | 44.547 | 18.537 | 0.00 | 0.00 |
| ATOM | 7406 | N    | PRO | X | 488 | 27.909 | 46.746 | 18.752 | 0.00 | 0.00 |
| ATOM | 7407 | CD   | PRO | X | 488 | 28.444 | 48.085 | 19.037 | 0.00 | 0.00 |
| ATOM | 7408 | HD2  | PRO | X | 488 | 29.371 | 48.151 | 18.467 | 0.00 | 0.00 |
| ATOM | 7409 | HD3  | PRO | X | 488 | 28.457 | 48.240 | 20.116 | 0.00 | 0.00 |
| ATOM | 7410 | CG   | PRO | X | 488 | 27.444 | 49.054 | 18.497 | 0.00 | 0.00 |
| ATOM | 7411 | HG2  | PRO | X | 488 | 27.826 | 49.302 | 17.507 | 0.00 | 0.00 |
| ATOM | 7412 | HG3  | PRO | X | 488 | 27.436 | 49.849 | 19.243 | 0.00 | 0.00 |
| ATOM | 7413 | CB   | PRO | X | 488 | 26.136 | 48.219 | 18.513 | 0.00 | 0.00 |
| ATOM | 7414 | HB2  | PRO | X | 488 | 25.376 | 48.566 | 17.812 | 0.00 | 0.00 |
| ATOM | 7415 | HB3  | PRO | X | 488 | 25.773 | 48.246 | 19.540 | 0.00 | 0.00 |
| ATOM | 7416 | CA   | PRO | X | 488 | 26.591 | 46.730 | 18.296 | 0.00 | 0.00 |
| ATOM | 7417 | HA   | PRO | X | 488 | 25.870 | 46.143 | 18.865 | 0.00 | 0.00 |
| ATOM | 7418 | C    | PRO | X | 488 | 26.501 | 46.477 | 16.797 | 0.00 | 0.00 |
| ATOM | 7419 | O    | PRO | X | 488 | 25.422 | 46.221 | 16.267 | 0.00 | 0.00 |
| ATOM | 7420 | N    | ARG | X | 489 | 27.651 | 46.350 | 16.087 | 0.00 | 0.00 |
| ATOM | 7421 | H    | ARG | X | 489 | 28.554 | 46.457 | 16.526 | 0.00 | 0.00 |
| ATOM | 7422 | CA   | ARG | X | 489 | 27.683 | 46.059 | 14.665 | 0.00 | 0.00 |
| ATOM | 7423 | HA   | ARG | X | 489 | 26.845 | 45.396 | 14.449 | 0.00 | 0.00 |
| ATOM | 7424 | CB   | ARG | X | 489 | 27.511 | 47.340 | 13.747 | 0.00 | 0.00 |
| ATOM | 7425 | HB2  | ARG | X | 489 | 26.882 | 48.092 | 14.224 | 0.00 | 0.00 |
| ATOM | 7426 | HB3  | ARG | X | 489 | 28.494 | 47.791 | 13.608 | 0.00 | 0.00 |
| ATOM | 7427 | CG   | ARG | X | 489 | 26.921 | 46.951 | 12.390 | 0.00 | 0.00 |
| ATOM | 7428 | HG2  | ARG | X | 489 | 27.625 | 46.363 | 11.802 | 0.00 | 0.00 |
| ATOM | 7429 | HG3  | ARG | X | 489 | 26.025 | 46.417 | 12.706 | 0.00 | 0.00 |
| ATOM | 7430 | CD   | ARG | X | 489 | 26.751 | 48.230 | 11.650 | 0.00 | 0.00 |
| ATOM | 7431 | HD2  | ARG | X | 489 | 26.062 | 48.840 | 12.235 | 0.00 | 0.00 |
| ATOM | 7432 | HD3  | ARG | X | 489 | 27.680 | 48.786 | 11.520 | 0.00 | 0.00 |
| ATOM | 7433 | NE   | ARG | X | 489 | 25.883 | 48.132 | 10.398 | 0.00 | 0.00 |
| ATOM | 7434 | HE   | ARG | X | 489 | 25.271 | 47.331 | 10.344 | 0.00 | 0.00 |
| ATOM | 7435 | CZ   | ARG | X | 489 | 25.730 | 49.196 | 9.610  | 0.00 | 0.00 |
| ATOM | 7436 | NH1  | ARG | X | 489 | 24.776 | 49.174 | 8.673  | 0.00 | 0.00 |
| ATOM | 7437 | HH11 | ARG | X | 489 | 24.302 | 48.293 | 8.531  | 0.00 | 0.00 |
| ATOM | 7438 | HH12 | ARG | X | 489 | 24.587 | 49.950 | 8.055  | 0.00 | 0.00 |
| ATOM | 7439 | NH2  | ARG | X | 489 | 26.394 | 50.277 | 9.740  | 0.00 | 0.00 |
| ATOM | 7440 | HH21 | ARG | X | 489 | 27.263 | 50.229 | 10.254 | 0.00 | 0.00 |
| ATOM | 7441 | HH22 | ARG | X | 489 | 26.265 | 50.954 | 9.002  | 0.00 | 0.00 |
| ATOM | 7442 | C    | ARG | X | 489 | 28.938 | 45.195 | 14.469 | 0.00 | 0.00 |
| ATOM | 7443 | O    | ARG | X | 489 | 29.994 | 45.694 | 14.700 | 0.00 | 0.00 |
| ATOM | 7444 | N    | ASP | X | 490 | 28.906 | 43.928 | 14.084 | 0.00 | 0.00 |
| ATOM | 7445 | H    | ASP | X | 490 | 28.021 | 43.442 | 14.077 | 0.00 | 0.00 |
| ATOM | 7446 | CA   | ASP | X | 490 | 30.063 | 43.058 | 14.001 | 0.00 | 0.00 |
| ATOM | 7447 | HA   | ASP | X | 490 | 30.576 | 43.334 | 14.922 | 0.00 | 0.00 |
| ATOM | 7448 | CB   | ASP | X | 490 | 29.702 | 41.665 | 14.241 | 0.00 | 0.00 |
| ATOM | 7449 | HB2  | ASP | X | 490 | 30.687 | 41.226 | 14.399 | 0.00 | 0.00 |
| ATOM | 7450 | HB3  | ASP | X | 490 | 28.944 | 41.555 | 15.017 | 0.00 | 0.00 |
| ATOM | 7451 | CG   | ASP | X | 490 | 29.020 | 40.970 | 13.040 | 0.00 | 0.00 |
| ATOM | 7452 | OD1  | ASP | X | 490 | 27.828 | 41.275 | 12.909 | 0.00 | 0.00 |
| ATOM | 7453 | OD2  | ASP | X | 490 | 29.721 | 40.087 | 12.478 | 0.00 | 0.00 |
| ATOM | 7454 | C    | ASP | X | 490 | 31.121 | 43.199 | 12.883 | 0.00 | 0.00 |
| ATOM | 7455 | O    | ASP | X | 490 | 30.682 | 43.046 | 11.741 | 0.00 | 0.00 |
| ATOM | 7456 | N    | PRO | X | 491 | 32.417 | 43.409 | 13.153 | 0.00 | 0.00 |
| ATOM | 7457 | CD   | PRO | X | 491 | 32.875 | 43.756 | 14.539 | 0.00 | 0.00 |
| ATOM | 7458 | HD2  | PRO | X | 491 | 32.531 | 43.025 | 15.270 | 0.00 | 0.00 |
| ATOM | 7459 | HD3  | PRO | X | 491 | 32.350 | 44.661 | 14.845 | 0.00 | 0.00 |

|      |      |      |     |   |     |        |        |        |      |      |
|------|------|------|-----|---|-----|--------|--------|--------|------|------|
| ATOM | 7460 | CG   | PRO | X | 491 | 34.380 | 44.044 | 14.497 | 0.00 | 0.00 |
| ATOM | 7461 | HG2  | PRO | X | 491 | 34.884 | 43.117 | 14.771 | 0.00 | 0.00 |
| ATOM | 7462 | HG3  | PRO | X | 491 | 34.733 | 44.866 | 15.119 | 0.00 | 0.00 |
| ATOM | 7463 | CB   | PRO | X | 491 | 34.554 | 44.347 | 13.012 | 0.00 | 0.00 |
| ATOM | 7464 | HB2  | PRO | X | 491 | 35.594 | 44.163 | 12.741 | 0.00 | 0.00 |
| ATOM | 7465 | HB3  | PRO | X | 491 | 34.246 | 45.392 | 12.994 | 0.00 | 0.00 |
| ATOM | 7466 | CA   | PRO | X | 491 | 33.532 | 43.487 | 12.227 | 0.00 | 0.00 |
| ATOM | 7467 | HA   | PRO | X | 491 | 33.249 | 44.112 | 11.380 | 0.00 | 0.00 |
| ATOM | 7468 | C    | PRO | X | 491 | 34.051 | 42.148 | 11.834 | 0.00 | 0.00 |
| ATOM | 7469 | O    | PRO | X | 491 | 33.431 | 41.155 | 12.216 | 0.00 | 0.00 |
| ATOM | 7470 | N    | LYS | X | 492 | 35.180 | 42.030 | 11.144 | 0.00 | 0.00 |
| ATOM | 7471 | H    | LYS | X | 492 | 35.741 | 42.812 | 10.840 | 0.00 | 0.00 |
| ATOM | 7472 | CA   | LYS | X | 492 | 35.831 | 40.699 | 10.764 | 0.00 | 0.00 |
| ATOM | 7473 | HA   | LYS | X | 492 | 35.158 | 39.989 | 10.283 | 0.00 | 0.00 |
| ATOM | 7474 | CB   | LYS | X | 492 | 36.974 | 40.929 | 9.801  | 0.00 | 0.00 |
| ATOM | 7475 | HB2  | LYS | X | 492 | 37.288 | 39.952 | 9.432  | 0.00 | 0.00 |
| ATOM | 7476 | HB3  | LYS | X | 492 | 36.520 | 41.334 | 8.897  | 0.00 | 0.00 |
| ATOM | 7477 | CG   | LYS | X | 492 | 38.178 | 41.777 | 10.341 | 0.00 | 0.00 |
| ATOM | 7478 | HG2  | LYS | X | 492 | 37.742 | 42.683 | 10.763 | 0.00 | 0.00 |
| ATOM | 7479 | HG3  | LYS | X | 492 | 38.684 | 41.238 | 11.142 | 0.00 | 0.00 |
| ATOM | 7480 | CD   | LYS | X | 492 | 39.134 | 42.192 | 9.159  | 0.00 | 0.00 |
| ATOM | 7481 | HD2  | LYS | X | 492 | 39.799 | 41.343 | 8.997  | 0.00 | 0.00 |
| ATOM | 7482 | HD3  | LYS | X | 492 | 38.477 | 42.474 | 8.337  | 0.00 | 0.00 |
| ATOM | 7483 | CE   | LYS | X | 492 | 40.069 | 43.304 | 9.622  | 0.00 | 0.00 |
| ATOM | 7484 | HE2  | LYS | X | 492 | 39.556 | 44.209 | 9.948  | 0.00 | 0.00 |
| ATOM | 7485 | HE3  | LYS | X | 492 | 40.512 | 42.889 | 10.527 | 0.00 | 0.00 |
| ATOM | 7486 | NZ   | LYS | X | 492 | 41.199 | 43.643 | 8.646  | 0.00 | 0.00 |
| ATOM | 7487 | HZ1  | LYS | X | 492 | 42.085 | 43.799 | 9.104  | 0.00 | 0.00 |
| ATOM | 7488 | HZ2  | LYS | X | 492 | 41.415 | 42.808 | 8.120  | 0.00 | 0.00 |
| ATOM | 7489 | HZ3  | LYS | X | 492 | 41.017 | 44.433 | 8.043  | 0.00 | 0.00 |
| ATOM | 7490 | C    | LYS | X | 492 | 36.394 | 39.985 | 12.077 | 0.00 | 0.00 |
| ATOM | 7491 | O    | LYS | X | 492 | 36.532 | 38.754 | 12.021 | 0.00 | 0.00 |
| ATOM | 7492 | N    | ALA | X | 493 | 36.770 | 40.803 | 13.077 | 0.00 | 0.00 |
| ATOM | 7493 | H    | ALA | X | 493 | 36.550 | 41.787 | 13.025 | 0.00 | 0.00 |
| ATOM | 7494 | CA   | ALA | X | 493 | 37.261 | 40.337 | 14.367 | 0.00 | 0.00 |
| ATOM | 7495 | HA   | ALA | X | 493 | 38.047 | 39.605 | 14.178 | 0.00 | 0.00 |
| ATOM | 7496 | CB   | ALA | X | 493 | 37.932 | 41.509 | 15.089 | 0.00 | 0.00 |
| ATOM | 7497 | HB1  | ALA | X | 493 | 38.368 | 41.327 | 16.071 | 0.00 | 0.00 |
| ATOM | 7498 | HB2  | ALA | X | 493 | 38.736 | 42.010 | 14.549 | 0.00 | 0.00 |
| ATOM | 7499 | HB3  | ALA | X | 493 | 37.124 | 42.219 | 15.268 | 0.00 | 0.00 |
| ATOM | 7500 | C    | ALA | X | 493 | 36.134 | 39.725 | 15.195 | 0.00 | 0.00 |
| ATOM | 7501 | O    | ALA | X | 493 | 35.076 | 40.353 | 15.343 | 0.00 | 0.00 |
| ATOM | 7502 | N    | PRO | X | 494 | 36.283 | 38.550 | 15.747 | 0.00 | 0.00 |
| ATOM | 7503 | CD   | PRO | X | 494 | 37.463 | 37.736 | 15.614 | 0.00 | 0.00 |
| ATOM | 7504 | HD2  | PRO | X | 494 | 38.202 | 38.244 | 16.233 | 0.00 | 0.00 |
| ATOM | 7505 | HD3  | PRO | X | 494 | 37.717 | 37.724 | 14.554 | 0.00 | 0.00 |
| ATOM | 7506 | CG   | PRO | X | 494 | 37.100 | 36.323 | 16.047 | 0.00 | 0.00 |
| ATOM | 7507 | HG2  | PRO | X | 494 | 37.930 | 35.788 | 16.507 | 0.00 | 0.00 |
| ATOM | 7508 | HG3  | PRO | X | 494 | 36.649 | 35.685 | 15.286 | 0.00 | 0.00 |
| ATOM | 7509 | CB   | PRO | X | 494 | 35.991 | 36.531 | 17.023 | 0.00 | 0.00 |
| ATOM | 7510 | HB2  | PRO | X | 494 | 36.367 | 36.767 | 18.018 | 0.00 | 0.00 |
| ATOM | 7511 | HB3  | PRO | X | 494 | 35.304 | 35.695 | 17.161 | 0.00 | 0.00 |
| ATOM | 7512 | CA   | PRO | X | 494 | 35.304 | 37.779 | 16.535 | 0.00 | 0.00 |
| ATOM | 7513 | HA   | PRO | X | 494 | 34.618 | 37.417 | 15.770 | 0.00 | 0.00 |
| ATOM | 7514 | C    | PRO | X | 494 | 34.719 | 38.498 | 17.743 | 0.00 | 0.00 |
| ATOM | 7515 | O    | PRO | X | 494 | 35.338 | 39.319 | 18.455 | 0.00 | 0.00 |
| ATOM | 7516 | N    | GLN | X | 495 | 33.413 | 38.185 | 18.012 | 0.00 | 0.00 |
| ATOM | 7517 | H    | GLN | X | 495 | 32.993 | 37.764 | 17.195 | 0.00 | 0.00 |
| ATOM | 7518 | CA   | GLN | X | 495 | 32.630 | 38.886 | 19.027 | 0.00 | 0.00 |
| ATOM | 7519 | HA   | GLN | X | 495 | 33.179 | 39.685 | 19.526 | 0.00 | 0.00 |
| ATOM | 7520 | CB   | GLN | X | 495 | 31.413 | 39.509 | 18.301 | 0.00 | 0.00 |
| ATOM | 7521 | HB2  | GLN | X | 495 | 30.843 | 38.776 | 17.731 | 0.00 | 0.00 |
| ATOM | 7522 | HB3  | GLN | X | 495 | 30.751 | 39.940 | 19.052 | 0.00 | 0.00 |
| ATOM | 7523 | CG   | GLN | X | 495 | 31.789 | 40.636 | 17.353 | 0.00 | 0.00 |
| ATOM | 7524 | HG2  | GLN | X | 495 | 32.327 | 40.139 | 16.546 | 0.00 | 0.00 |
| ATOM | 7525 | HG3  | GLN | X | 495 | 30.910 | 41.058 | 16.866 | 0.00 | 0.00 |
| ATOM | 7526 | CD   | GLN | X | 495 | 32.536 | 41.713 | 18.037 | 0.00 | 0.00 |
| ATOM | 7527 | OE1  | GLN | X | 495 | 32.156 | 42.438 | 18.946 | 0.00 | 0.00 |
| ATOM | 7528 | NE2  | GLN | X | 495 | 33.748 | 41.929 | 17.575 | 0.00 | 0.00 |
| ATOM | 7529 | HE21 | GLN | X | 495 | 34.306 | 42.738 | 17.809 | 0.00 | 0.00 |



|      |      |      |     |   |     |        |        |        |      |      |
|------|------|------|-----|---|-----|--------|--------|--------|------|------|
| ATOM | 7530 | HE22 | GLN | X | 495 | 34.184 | 41.252 | 16.966 | 0.00 | 0.00 |
| ATOM | 7531 | C    | GLN | X | 495 | 32.237 | 37.965 | 20.216 | 0.00 | 0.00 |
| ATOM | 7532 | O    | GLN | X | 495 | 31.442 | 37.030 | 20.003 | 0.00 | 0.00 |
| ATOM | 7533 | N    | TRP | X | 496 | 32.689 | 38.293 | 21.411 | 0.00 | 0.00 |
| ATOM | 7534 | H    | TRP | X | 496 | 33.204 | 39.160 | 21.474 | 0.00 | 0.00 |
| ATOM | 7535 | CA   | TRP | X | 496 | 32.457 | 37.622 | 22.672 | 0.00 | 0.00 |
| ATOM | 7536 | HA   | TRP | X | 496 | 33.042 | 36.703 | 22.690 | 0.00 | 0.00 |
| ATOM | 7537 | CB   | TRP | X | 496 | 33.126 | 38.456 | 23.803 | 0.00 | 0.00 |
| ATOM | 7538 | HB2  | TRP | X | 496 | 34.141 | 38.704 | 23.492 | 0.00 | 0.00 |
| ATOM | 7539 | HB3  | TRP | X | 496 | 32.581 | 39.390 | 23.941 | 0.00 | 0.00 |
| ATOM | 7540 | CG   | TRP | X | 496 | 33.211 | 37.857 | 25.204 | 0.00 | 0.00 |
| ATOM | 7541 | CD1  | TRP | X | 496 | 32.575 | 36.762 | 25.661 | 0.00 | 0.00 |
| ATOM | 7542 | HD1  | TRP | X | 496 | 32.083 | 36.052 | 25.013 | 0.00 | 0.00 |
| ATOM | 7543 | NE1  | TRP | X | 496 | 32.806 | 36.493 | 27.008 | 0.00 | 0.00 |
| ATOM | 7544 | HE1  | TRP | X | 496 | 32.536 | 35.607 | 27.409 | 0.00 | 0.00 |
| ATOM | 7545 | CE2  | TRP | X | 496 | 33.494 | 37.532 | 27.564 | 0.00 | 0.00 |
| ATOM | 7546 | CZ2  | TRP | X | 496 | 34.126 | 37.814 | 28.824 | 0.00 | 0.00 |
| ATOM | 7547 | HZ2  | TRP | X | 496 | 34.023 | 37.184 | 29.694 | 0.00 | 0.00 |
| ATOM | 7548 | CH2  | TRP | X | 496 | 34.915 | 39.017 | 28.964 | 0.00 | 0.00 |
| ATOM | 7549 | HH2  | TRP | X | 496 | 35.328 | 39.242 | 29.936 | 0.00 | 0.00 |
| ATOM | 7550 | CZ3  | TRP | X | 496 | 35.211 | 39.842 | 27.861 | 0.00 | 0.00 |
| ATOM | 7551 | HZ3  | TRP | X | 496 | 35.716 | 40.785 | 28.011 | 0.00 | 0.00 |
| ATOM | 7552 | CE3  | TRP | X | 496 | 34.741 | 39.506 | 26.614 | 0.00 | 0.00 |
| ATOM | 7553 | HE3  | TRP | X | 496 | 35.064 | 40.148 | 25.808 | 0.00 | 0.00 |
| ATOM | 7554 | CD2  | TRP | X | 496 | 33.881 | 38.376 | 26.400 | 0.00 | 0.00 |
| ATOM | 7555 | C    | TRP | X | 496 | 30.996 | 37.218 | 22.837 | 0.00 | 0.00 |
| ATOM | 7556 | O    | TRP | X | 496 | 30.078 | 38.071 | 22.973 | 0.00 | 0.00 |
| ATOM | 7557 | N    | PRO | X | 497 | 30.583 | 35.908 | 22.777 | 0.00 | 0.00 |
| ATOM | 7558 | CD   | PRO | X | 497 | 31.273 | 34.773 | 22.189 | 0.00 | 0.00 |
| ATOM | 7559 | HD2  | PRO | X | 497 | 32.277 | 34.672 | 22.601 | 0.00 | 0.00 |
| ATOM | 7560 | HD3  | PRO | X | 497 | 31.333 | 34.889 | 21.106 | 0.00 | 0.00 |
| ATOM | 7561 | CG   | PRO | X | 497 | 30.424 | 33.504 | 22.383 | 0.00 | 0.00 |
| ATOM | 7562 | HG2  | PRO | X | 497 | 30.636 | 32.959 | 23.303 | 0.00 | 0.00 |
| ATOM | 7563 | HG3  | PRO | X | 497 | 30.467 | 32.930 | 21.458 | 0.00 | 0.00 |
| ATOM | 7564 | CB   | PRO | X | 497 | 28.991 | 34.072 | 22.498 | 0.00 | 0.00 |
| ATOM | 7565 | HB2  | PRO | X | 497 | 28.402 | 33.532 | 23.240 | 0.00 | 0.00 |
| ATOM | 7566 | HB3  | PRO | X | 497 | 28.520 | 34.171 | 21.520 | 0.00 | 0.00 |
| ATOM | 7567 | CA   | PRO | X | 497 | 29.226 | 35.477 | 23.052 | 0.00 | 0.00 |
| ATOM | 7568 | HA   | PRO | X | 497 | 28.461 | 36.085 | 22.569 | 0.00 | 0.00 |
| ATOM | 7569 | C    | PRO | X | 497 | 28.995 | 35.431 | 24.583 | 0.00 | 0.00 |
| ATOM | 7570 | O    | PRO | X | 497 | 29.941 | 35.247 | 25.326 | 0.00 | 0.00 |
| ATOM | 7571 | N    | PRO | X | 498 | 27.717 | 35.515 | 25.058 | 0.00 | 0.00 |
| ATOM | 7572 | CD   | PRO | X | 498 | 26.500 | 35.480 | 24.243 | 0.00 | 0.00 |
| ATOM | 7573 | HD2  | PRO | X | 498 | 26.616 | 34.668 | 23.525 | 0.00 | 0.00 |
| ATOM | 7574 | HD3  | PRO | X | 498 | 26.296 | 36.393 | 23.685 | 0.00 | 0.00 |
| ATOM | 7575 | CG   | PRO | X | 498 | 25.357 | 35.381 | 25.253 | 0.00 | 0.00 |
| ATOM | 7576 | HG2  | PRO | X | 498 | 25.158 | 34.317 | 25.378 | 0.00 | 0.00 |
| ATOM | 7577 | HG3  | PRO | X | 498 | 24.576 | 36.115 | 25.055 | 0.00 | 0.00 |
| ATOM | 7578 | CB   | PRO | X | 498 | 25.908 | 35.791 | 26.544 | 0.00 | 0.00 |
| ATOM | 7579 | HB2  | PRO | X | 498 | 25.353 | 35.411 | 27.402 | 0.00 | 0.00 |
| ATOM | 7580 | HB3  | PRO | X | 498 | 25.816 | 36.872 | 26.642 | 0.00 | 0.00 |
| ATOM | 7581 | CA   | PRO | X | 498 | 27.367 | 35.389 | 26.437 | 0.00 | 0.00 |
| ATOM | 7582 | HA   | PRO | X | 498 | 27.978 | 36.187 | 26.859 | 0.00 | 0.00 |
| ATOM | 7583 | C    | PRO | X | 498 | 27.730 | 34.084 | 27.196 | 0.00 | 0.00 |
| ATOM | 7584 | O    | PRO | X | 498 | 27.832 | 33.045 | 26.558 | 0.00 | 0.00 |
| ATOM | 7585 | N    | TYR | X | 499 | 27.703 | 34.130 | 28.520 | 0.00 | 0.00 |
| ATOM | 7586 | H    | TYR | X | 499 | 27.591 | 35.033 | 28.957 | 0.00 | 0.00 |
| ATOM | 7587 | CA   | TYR | X | 499 | 27.685 | 32.897 | 29.276 | 0.00 | 0.00 |
| ATOM | 7588 | HA   | TYR | X | 499 | 28.058 | 32.007 | 28.768 | 0.00 | 0.00 |
| ATOM | 7589 | CB   | TYR | X | 499 | 28.539 | 33.045 | 30.525 | 0.00 | 0.00 |
| ATOM | 7590 | HB2  | TYR | X | 499 | 29.492 | 33.545 | 30.349 | 0.00 | 0.00 |
| ATOM | 7591 | HB3  | TYR | X | 499 | 27.995 | 33.731 | 31.174 | 0.00 | 0.00 |
| ATOM | 7592 | CG   | TYR | X | 499 | 28.778 | 31.748 | 31.277 | 0.00 | 0.00 |
| ATOM | 7593 | CD1  | TYR | X | 499 | 27.869 | 31.158 | 32.235 | 0.00 | 0.00 |
| ATOM | 7594 | HD1  | TYR | X | 499 | 26.983 | 31.682 | 32.561 | 0.00 | 0.00 |
| ATOM | 7595 | CE1  | TYR | X | 499 | 28.324 | 30.053 | 33.003 | 0.00 | 0.00 |
| ATOM | 7596 | HE1  | TYR | X | 499 | 27.738 | 29.699 | 33.839 | 0.00 | 0.00 |
| ATOM | 7597 | CZ   | TYR | X | 499 | 29.512 | 29.398 | 32.652 | 0.00 | 0.00 |
| ATOM | 7598 | OH   | TYR | X | 499 | 29.818 | 28.225 | 33.208 | 0.00 | 0.00 |
| ATOM | 7599 | HH   | TYR | X | 499 | 29.226 | 27.968 | 33.919 | 0.00 | 0.00 |

|      |      |      |     |   |     |        |        |        |      |      |
|------|------|------|-----|---|-----|--------|--------|--------|------|------|
| ATOM | 7600 | CE2  | TYR | X | 499 | 30.324 | 29.857 | 31.617 | 0.00 | 0.00 |
| ATOM | 7601 | HE2  | TYR | X | 499 | 31.187 | 29.244 | 31.403 | 0.00 | 0.00 |
| ATOM | 7602 | CD2  | TYR | X | 499 | 29.934 | 31.028 | 30.942 | 0.00 | 0.00 |
| ATOM | 7603 | HD2  | TYR | X | 499 | 30.657 | 31.275 | 30.178 | 0.00 | 0.00 |
| ATOM | 7604 | C    | TYR | X | 499 | 26.270 | 32.563 | 29.772 | 0.00 | 0.00 |
| ATOM | 7605 | O    | TYR | X | 499 | 25.541 | 33.433 | 30.227 | 0.00 | 0.00 |
| ATOM | 7606 | N    | THR | X | 500 | 25.925 | 31.290 | 29.735 | 0.00 | 0.00 |
| ATOM | 7607 | H    | THR | X | 500 | 26.576 | 30.601 | 29.385 | 0.00 | 0.00 |
| ATOM | 7608 | CA   | THR | X | 500 | 24.583 | 30.807 | 30.177 | 0.00 | 0.00 |
| ATOM | 7609 | HA   | THR | X | 500 | 24.104 | 31.567 | 30.794 | 0.00 | 0.00 |
| ATOM | 7610 | CB   | THR | X | 500 | 23.704 | 30.484 | 29.023 | 0.00 | 0.00 |
| ATOM | 7611 | HB   | THR | X | 500 | 22.766 | 30.132 | 29.454 | 0.00 | 0.00 |
| ATOM | 7612 | CG2  | THR | X | 500 | 23.313 | 31.626 | 28.104 | 0.00 | 0.00 |
| ATOM | 7613 | HG21 | THR | X | 500 | 22.624 | 31.237 | 27.354 | 0.00 | 0.00 |
| ATOM | 7614 | HG22 | THR | X | 500 | 22.827 | 32.403 | 28.695 | 0.00 | 0.00 |
| ATOM | 7615 | HG23 | THR | X | 500 | 24.233 | 32.060 | 27.714 | 0.00 | 0.00 |
| ATOM | 7616 | OG1  | THR | X | 500 | 24.320 | 29.587 | 28.082 | 0.00 | 0.00 |
| ATOM | 7617 | HG1  | THR | X | 500 | 23.656 | 29.253 | 27.473 | 0.00 | 0.00 |
| ATOM | 7618 | C    | THR | X | 500 | 24.679 | 29.631 | 31.049 | 0.00 | 0.00 |
| ATOM | 7619 | O    | THR | X | 500 | 25.613 | 28.849 | 31.033 | 0.00 | 0.00 |
| ATOM | 7620 | N    | ALA | X | 501 | 23.573 | 29.294 | 31.729 | 0.00 | 0.00 |
| ATOM | 7621 | H    | ALA | X | 501 | 22.723 | 29.801 | 31.528 | 0.00 | 0.00 |
| ATOM | 7622 | CA   | ALA | X | 501 | 23.434 | 28.092 | 32.641 | 0.00 | 0.00 |
| ATOM | 7623 | HA   | ALA | X | 501 | 24.272 | 28.196 | 33.330 | 0.00 | 0.00 |
| ATOM | 7624 | CB   | ALA | X | 501 | 22.118 | 28.301 | 33.507 | 0.00 | 0.00 |
| ATOM | 7625 | HB1  | ALA | X | 501 | 22.020 | 27.469 | 34.204 | 0.00 | 0.00 |
| ATOM | 7626 | HB2  | ALA | X | 501 | 22.267 | 29.169 | 34.150 | 0.00 | 0.00 |
| ATOM | 7627 | HB3  | ALA | X | 501 | 21.266 | 28.461 | 32.847 | 0.00 | 0.00 |
| ATOM | 7628 | C    | ALA | X | 501 | 23.576 | 26.795 | 31.824 | 0.00 | 0.00 |
| ATOM | 7629 | O    | ALA | X | 501 | 24.108 | 25.858 | 32.335 | 0.00 | 0.00 |
| ATOM | 7630 | N    | GLY | X | 502 | 23.002 | 26.684 | 30.560 | 0.00 | 0.00 |
| ATOM | 7631 | H    | GLY | X | 502 | 22.510 | 27.476 | 30.171 | 0.00 | 0.00 |
| ATOM | 7632 | CA   | GLY | X | 502 | 23.194 | 25.518 | 29.761 | 0.00 | 0.00 |
| ATOM | 7633 | HA2  | GLY | X | 502 | 23.189 | 24.684 | 30.433 | 0.00 | 0.00 |
| ATOM | 7634 | HA3  | GLY | X | 502 | 22.437 | 25.575 | 28.943 | 0.00 | 0.00 |
| ATOM | 7635 | C    | GLY | X | 502 | 24.530 | 25.392 | 29.080 | 0.00 | 0.00 |
| ATOM | 7636 | O    | GLY | X | 502 | 25.436 | 24.624 | 29.446 | 0.00 | 0.00 |
| ATOM | 7637 | N    | ALA | X | 503 | 24.752 | 26.220 | 28.062 | 0.00 | 0.00 |
| ATOM | 7638 | H    | ALA | X | 503 | 23.988 | 26.759 | 27.680 | 0.00 | 0.00 |
| ATOM | 7639 | CA   | ALA | X | 503 | 25.971 | 26.192 | 27.210 | 0.00 | 0.00 |
| ATOM | 7640 | HA   | ALA | X | 503 | 26.179 | 25.196 | 26.820 | 0.00 | 0.00 |
| ATOM | 7641 | CB   | ALA | X | 503 | 25.660 | 26.974 | 25.959 | 0.00 | 0.00 |
| ATOM | 7642 | HB1  | ALA | X | 503 | 25.454 | 28.019 | 26.193 | 0.00 | 0.00 |
| ATOM | 7643 | HB2  | ALA | X | 503 | 26.382 | 26.960 | 25.142 | 0.00 | 0.00 |
| ATOM | 7644 | HB3  | ALA | X | 503 | 24.710 | 26.603 | 25.575 | 0.00 | 0.00 |
| ATOM | 7645 | C    | ALA | X | 503 | 27.361 | 26.572 | 27.839 | 0.00 | 0.00 |
| ATOM | 7646 | O    | ALA | X | 503 | 28.365 | 26.040 | 27.471 | 0.00 | 0.00 |
| ATOM | 7647 | N    | GLN | X | 504 | 27.334 | 27.526 | 28.800 | 0.00 | 0.00 |
| ATOM | 7648 | H    | GLN | X | 504 | 26.387 | 27.828 | 28.980 | 0.00 | 0.00 |
| ATOM | 7649 | CA   | GLN | X | 504 | 28.466 | 27.768 | 29.648 | 0.00 | 0.00 |
| ATOM | 7650 | HA   | GLN | X | 504 | 28.230 | 28.666 | 30.219 | 0.00 | 0.00 |
| ATOM | 7651 | CB   | GLN | X | 504 | 28.611 | 26.542 | 30.662 | 0.00 | 0.00 |
| ATOM | 7652 | HB2  | GLN | X | 504 | 28.752 | 25.634 | 30.076 | 0.00 | 0.00 |
| ATOM | 7653 | HB3  | GLN | X | 504 | 29.518 | 26.724 | 31.239 | 0.00 | 0.00 |
| ATOM | 7654 | CG   | GLN | X | 504 | 27.436 | 26.432 | 31.669 | 0.00 | 0.00 |
| ATOM | 7655 | HG2  | GLN | X | 504 | 27.327 | 27.411 | 32.134 | 0.00 | 0.00 |
| ATOM | 7656 | HG3  | GLN | X | 504 | 26.485 | 26.158 | 31.212 | 0.00 | 0.00 |
| ATOM | 7657 | CD   | GLN | X | 504 | 27.664 | 25.518 | 32.865 | 0.00 | 0.00 |
| ATOM | 7658 | OE1  | GLN | X | 504 | 27.673 | 25.906 | 33.991 | 0.00 | 0.00 |
| ATOM | 7659 | NE2  | GLN | X | 504 | 27.653 | 24.239 | 32.695 | 0.00 | 0.00 |
| ATOM | 7660 | HE21 | GLN | X | 504 | 27.683 | 23.763 | 33.585 | 0.00 | 0.00 |
| ATOM | 7661 | HE22 | GLN | X | 504 | 27.751 | 23.869 | 31.761 | 0.00 | 0.00 |
| ATOM | 7662 | C    | GLN | X | 504 | 29.756 | 28.132 | 28.961 | 0.00 | 0.00 |
| ATOM | 7663 | O    | GLN | X | 504 | 30.870 | 27.692 | 29.257 | 0.00 | 0.00 |
| ATOM | 7664 | N    | GLN | X | 505 | 29.591 | 29.018 | 27.954 | 0.00 | 0.00 |
| ATOM | 7665 | H    | GLN | X | 505 | 28.659 | 29.392 | 27.840 | 0.00 | 0.00 |
| ATOM | 7666 | CA   | GLN | X | 505 | 30.650 | 29.401 | 27.011 | 0.00 | 0.00 |
| ATOM | 7667 | HA   | GLN | X | 505 | 31.408 | 28.624 | 26.906 | 0.00 | 0.00 |
| ATOM | 7668 | CB   | GLN | X | 505 | 30.230 | 29.717 | 25.529 | 0.00 | 0.00 |
| ATOM | 7669 | HB2  | GLN | X | 505 | 29.431 | 30.458 | 25.528 | 0.00 | 0.00 |

|      |      |      |     |   |     |        |        |        |      |      |
|------|------|------|-----|---|-----|--------|--------|--------|------|------|
| ATOM | 7670 | HB3  | GLN | X | 505 | 31.062 | 30.182 | 25.003 | 0.00 | 0.00 |
| ATOM | 7671 | CG   | GLN | X | 505 | 29.793 | 28.483 | 24.749 | 0.00 | 0.00 |
| ATOM | 7672 | HG2  | GLN | X | 505 | 30.613 | 27.767 | 24.803 | 0.00 | 0.00 |
| ATOM | 7673 | HG3  | GLN | X | 505 | 28.917 | 27.975 | 25.150 | 0.00 | 0.00 |
| ATOM | 7674 | CD   | GLN | X | 505 | 29.733 | 28.854 | 23.295 | 0.00 | 0.00 |
| ATOM | 7675 | OE1  | GLN | X | 505 | 30.379 | 28.304 | 22.357 | 0.00 | 0.00 |
| ATOM | 7676 | NE2  | GLN | X | 505 | 28.936 | 29.815 | 22.953 | 0.00 | 0.00 |
| ATOM | 7677 | HE21 | GLN | X | 505 | 28.693 | 29.905 | 21.977 | 0.00 | 0.00 |
| ATOM | 7678 | HE22 | GLN | X | 505 | 28.506 | 30.368 | 23.680 | 0.00 | 0.00 |
| ATOM | 7679 | C    | GLN | X | 505 | 31.454 | 30.644 | 27.437 | 0.00 | 0.00 |
| ATOM | 7680 | O    | GLN | X | 505 | 30.816 | 31.622 | 27.829 | 0.00 | 0.00 |
| ATOM | 7681 | N    | TYR | X | 506 | 32.794 | 30.616 | 27.245 | 0.00 | 0.00 |
| ATOM | 7682 | H    | TYR | X | 506 | 33.152 | 29.757 | 26.853 | 0.00 | 0.00 |
| ATOM | 7683 | CA   | TYR | X | 506 | 33.832 | 31.521 | 27.779 | 0.00 | 0.00 |
| ATOM | 7684 | HA   | TYR | X | 506 | 33.338 | 32.458 | 28.037 | 0.00 | 0.00 |
| ATOM | 7685 | CB   | TYR | X | 506 | 34.337 | 30.906 | 29.110 | 0.00 | 0.00 |
| ATOM | 7686 | HB2  | TYR | X | 506 | 34.848 | 31.714 | 29.633 | 0.00 | 0.00 |
| ATOM | 7687 | HB3  | TYR | X | 506 | 33.506 | 30.609 | 29.750 | 0.00 | 0.00 |
| ATOM | 7688 | CG   | TYR | X | 506 | 35.216 | 29.683 | 28.996 | 0.00 | 0.00 |
| ATOM | 7689 | CD1  | TYR | X | 506 | 34.728 | 28.318 | 29.004 | 0.00 | 0.00 |
| ATOM | 7690 | HD1  | TYR | X | 506 | 33.672 | 28.225 | 29.208 | 0.00 | 0.00 |
| ATOM | 7691 | CE1  | TYR | X | 506 | 35.670 | 27.206 | 28.814 | 0.00 | 0.00 |
| ATOM | 7692 | HE1  | TYR | X | 506 | 35.415 | 26.182 | 28.586 | 0.00 | 0.00 |
| ATOM | 7693 | CZ   | TYR | X | 506 | 37.052 | 27.500 | 28.865 | 0.00 | 0.00 |
| ATOM | 7694 | OH   | TYR | X | 506 | 37.949 | 26.530 | 28.848 | 0.00 | 0.00 |
| ATOM | 7695 | HH   | TYR | X | 506 | 37.601 | 25.657 | 28.654 | 0.00 | 0.00 |
| ATOM | 7696 | CE2  | TYR | X | 506 | 37.456 | 28.836 | 28.901 | 0.00 | 0.00 |
| ATOM | 7697 | HE2  | TYR | X | 506 | 38.516 | 29.030 | 28.976 | 0.00 | 0.00 |
| ATOM | 7698 | CD2  | TYR | X | 506 | 36.579 | 29.913 | 28.948 | 0.00 | 0.00 |
| ATOM | 7699 | HD2  | TYR | X | 506 | 37.064 | 30.867 | 28.806 | 0.00 | 0.00 |
| ATOM | 7700 | C    | TYR | X | 506 | 34.996 | 31.791 | 26.773 | 0.00 | 0.00 |
| ATOM | 7701 | O    | TYR | X | 506 | 35.343 | 30.916 | 26.013 | 0.00 | 0.00 |
| ATOM | 7702 | N    | VAL | X | 507 | 35.644 | 32.959 | 26.819 | 0.00 | 0.00 |
| ATOM | 7703 | H    | VAL | X | 507 | 35.358 | 33.618 | 27.529 | 0.00 | 0.00 |
| ATOM | 7704 | CA   | VAL | X | 507 | 36.600 | 33.336 | 25.795 | 0.00 | 0.00 |
| ATOM | 7705 | HA   | VAL | X | 507 | 36.585 | 32.604 | 24.988 | 0.00 | 0.00 |
| ATOM | 7706 | CB   | VAL | X | 507 | 36.453 | 34.784 | 25.282 | 0.00 | 0.00 |
| ATOM | 7707 | HB   | VAL | X | 507 | 37.338 | 34.961 | 24.670 | 0.00 | 0.00 |
| ATOM | 7708 | CG1  | VAL | X | 507 | 35.288 | 34.790 | 24.282 | 0.00 | 0.00 |
| ATOM | 7709 | HG11 | VAL | X | 507 | 34.318 | 34.540 | 24.712 | 0.00 | 0.00 |
| ATOM | 7710 | HG12 | VAL | X | 507 | 35.212 | 35.788 | 23.852 | 0.00 | 0.00 |
| ATOM | 7711 | HG13 | VAL | X | 507 | 35.458 | 34.110 | 23.447 | 0.00 | 0.00 |
| ATOM | 7712 | CG2  | VAL | X | 507 | 36.384 | 35.831 | 26.341 | 0.00 | 0.00 |
| ATOM | 7713 | HG21 | VAL | X | 507 | 37.258 | 35.790 | 26.990 | 0.00 | 0.00 |
| ATOM | 7714 | HG22 | VAL | X | 507 | 36.184 | 36.756 | 25.800 | 0.00 | 0.00 |
| ATOM | 7715 | HG23 | VAL | X | 507 | 35.432 | 35.648 | 26.839 | 0.00 | 0.00 |
| ATOM | 7716 | C    | VAL | X | 507 | 38.036 | 33.227 | 26.358 | 0.00 | 0.00 |
| ATOM | 7717 | O    | VAL | X | 507 | 38.352 | 33.376 | 27.528 | 0.00 | 0.00 |
| ATOM | 7718 | N    | SER | X | 508 | 39.017 | 33.005 | 25.411 | 0.00 | 0.00 |
| ATOM | 7719 | H    | SER | X | 508 | 38.796 | 32.776 | 24.453 | 0.00 | 0.00 |
| ATOM | 7720 | CA   | SER | X | 508 | 40.475 | 33.002 | 25.674 | 0.00 | 0.00 |
| ATOM | 7721 | HA   | SER | X | 508 | 40.668 | 32.766 | 26.721 | 0.00 | 0.00 |
| ATOM | 7722 | CB   | SER | X | 508 | 41.118 | 31.818 | 24.987 | 0.00 | 0.00 |
| ATOM | 7723 | HB2  | SER | X | 508 | 40.660 | 30.944 | 25.450 | 0.00 | 0.00 |
| ATOM | 7724 | HB3  | SER | X | 508 | 40.832 | 31.901 | 23.939 | 0.00 | 0.00 |
| ATOM | 7725 | OG   | SER | X | 508 | 42.508 | 31.842 | 24.815 | 0.00 | 0.00 |
| ATOM | 7726 | HG   | SER | X | 508 | 43.020 | 31.519 | 25.560 | 0.00 | 0.00 |
| ATOM | 7727 | C    | SER | X | 508 | 41.057 | 34.354 | 25.272 | 0.00 | 0.00 |
| ATOM | 7728 | O    | SER | X | 508 | 41.052 | 34.770 | 24.062 | 0.00 | 0.00 |
| ATOM | 7729 | N    | LEU | X | 509 | 41.524 | 35.065 | 26.319 | 0.00 | 0.00 |
| ATOM | 7730 | H    | LEU | X | 509 | 41.564 | 34.685 | 27.254 | 0.00 | 0.00 |
| ATOM | 7731 | CA   | LEU | X | 509 | 42.102 | 36.329 | 26.202 | 0.00 | 0.00 |
| ATOM | 7732 | HA   | LEU | X | 509 | 41.883 | 36.832 | 25.260 | 0.00 | 0.00 |
| ATOM | 7733 | CB   | LEU | X | 509 | 41.706 | 37.221 | 27.278 | 0.00 | 0.00 |
| ATOM | 7734 | HB2  | LEU | X | 509 | 42.035 | 36.817 | 28.235 | 0.00 | 0.00 |
| ATOM | 7735 | HB3  | LEU | X | 509 | 42.168 | 38.193 | 27.101 | 0.00 | 0.00 |
| ATOM | 7736 | CG   | LEU | X | 509 | 40.182 | 37.416 | 27.421 | 0.00 | 0.00 |
| ATOM | 7737 | HG   | LEU | X | 509 | 39.700 | 36.443 | 27.520 | 0.00 | 0.00 |
| ATOM | 7738 | CD1  | LEU | X | 509 | 40.033 | 38.427 | 28.569 | 0.00 | 0.00 |
| ATOM | 7739 | HD11 | LEU | X | 509 | 40.251 | 39.452 | 28.270 | 0.00 | 0.00 |

|      |      |      |     |   |     |        |        |        |      |      |
|------|------|------|-----|---|-----|--------|--------|--------|------|------|
| ATOM | 7740 | HD12 | LEU | X | 509 | 38.967 | 38.424 | 28.796 | 0.00 | 0.00 |
| ATOM | 7741 | HD13 | LEU | X | 509 | 40.529 | 38.118 | 29.490 | 0.00 | 0.00 |
| ATOM | 7742 | CD2  | LEU | X | 509 | 39.579 | 37.973 | 26.165 | 0.00 | 0.00 |
| ATOM | 7743 | HD21 | LEU | X | 509 | 38.490 | 37.956 | 26.199 | 0.00 | 0.00 |
| ATOM | 7744 | HD22 | LEU | X | 509 | 39.986 | 38.980 | 26.069 | 0.00 | 0.00 |
| ATOM | 7745 | HD23 | LEU | X | 509 | 39.810 | 37.375 | 25.284 | 0.00 | 0.00 |
| ATOM | 7746 | C    | LEU | X | 509 | 43.610 | 36.090 | 26.143 | 0.00 | 0.00 |
| ATOM | 7747 | O    | LEU | X | 509 | 44.210 | 35.614 | 27.087 | 0.00 | 0.00 |
| ATOM | 7748 | N    | ASP | X | 510 | 44.226 | 36.548 | 25.050 | 0.00 | 0.00 |
| ATOM | 7749 | H    | ASP | X | 510 | 43.537 | 36.899 | 24.400 | 0.00 | 0.00 |
| ATOM | 7750 | CA   | ASP | X | 510 | 45.581 | 36.242 | 24.594 | 0.00 | 0.00 |
| ATOM | 7751 | HA   | ASP | X | 510 | 46.216 | 36.259 | 25.480 | 0.00 | 0.00 |
| ATOM | 7752 | CB   | ASP | X | 510 | 45.508 | 34.838 | 23.954 | 0.00 | 0.00 |
| ATOM | 7753 | HB2  | ASP | X | 510 | 45.229 | 34.176 | 24.775 | 0.00 | 0.00 |
| ATOM | 7754 | HB3  | ASP | X | 510 | 44.679 | 34.788 | 23.248 | 0.00 | 0.00 |
| ATOM | 7755 | CG   | ASP | X | 510 | 46.788 | 34.335 | 23.325 | 0.00 | 0.00 |
| ATOM | 7756 | OD1  | ASP | X | 510 | 47.788 | 34.142 | 24.048 | 0.00 | 0.00 |
| ATOM | 7757 | OD2  | ASP | X | 510 | 46.884 | 34.328 | 22.076 | 0.00 | 0.00 |
| ATOM | 7758 | C    | ASP | X | 510 | 45.972 | 37.200 | 23.490 | 0.00 | 0.00 |
| ATOM | 7759 | O    | ASP | X | 510 | 45.037 | 37.649 | 22.840 | 0.00 | 0.00 |
| ATOM | 7760 | N    | LEU | X | 511 | 47.277 | 37.310 | 23.122 | 0.00 | 0.00 |
| ATOM | 7761 | H    | LEU | X | 511 | 47.915 | 36.576 | 23.395 | 0.00 | 0.00 |
| ATOM | 7762 | CA   | LEU | X | 511 | 47.717 | 38.087 | 21.964 | 0.00 | 0.00 |
| ATOM | 7763 | HA   | LEU | X | 511 | 47.456 | 39.122 | 22.182 | 0.00 | 0.00 |
| ATOM | 7764 | CB   | LEU | X | 511 | 49.218 | 37.844 | 21.790 | 0.00 | 0.00 |
| ATOM | 7765 | HB2  | LEU | X | 511 | 49.326 | 36.765 | 21.679 | 0.00 | 0.00 |
| ATOM | 7766 | HB3  | LEU | X | 511 | 49.510 | 38.297 | 20.843 | 0.00 | 0.00 |
| ATOM | 7767 | CG   | LEU | X | 511 | 50.093 | 38.324 | 23.003 | 0.00 | 0.00 |
| ATOM | 7768 | HG   | LEU | X | 511 | 49.794 | 37.694 | 23.841 | 0.00 | 0.00 |
| ATOM | 7769 | CD1  | LEU | X | 511 | 51.517 | 38.175 | 22.556 | 0.00 | 0.00 |
| ATOM | 7770 | HD11 | LEU | X | 511 | 51.723 | 38.931 | 21.799 | 0.00 | 0.00 |
| ATOM | 7771 | HD12 | LEU | X | 511 | 52.192 | 38.274 | 23.407 | 0.00 | 0.00 |
| ATOM | 7772 | HD13 | LEU | X | 511 | 51.661 | 37.182 | 22.131 | 0.00 | 0.00 |
| ATOM | 7773 | CD2  | LEU | X | 511 | 49.867 | 39.761 | 23.496 | 0.00 | 0.00 |
| ATOM | 7774 | HD21 | LEU | X | 511 | 50.575 | 39.920 | 24.310 | 0.00 | 0.00 |
| ATOM | 7775 | HD22 | LEU | X | 511 | 50.126 | 40.461 | 22.701 | 0.00 | 0.00 |
| ATOM | 7776 | HD23 | LEU | X | 511 | 48.849 | 39.893 | 23.863 | 0.00 | 0.00 |
| ATOM | 7777 | C    | LEU | X | 511 | 47.029 | 37.772 | 20.593 | 0.00 | 0.00 |
| ATOM | 7778 | O    | LEU | X | 511 | 46.834 | 38.739 | 19.914 | 0.00 | 0.00 |
| ATOM | 7779 | N    | ARG | X | 512 | 46.714 | 36.517 | 20.261 | 0.00 | 0.00 |
| ATOM | 7780 | H    | ARG | X | 512 | 46.910 | 35.765 | 20.906 | 0.00 | 0.00 |
| ATOM | 7781 | CA   | ARG | X | 512 | 45.991 | 36.157 | 19.049 | 0.00 | 0.00 |
| ATOM | 7782 | HA   | ARG | X | 512 | 46.470 | 36.718 | 18.247 | 0.00 | 0.00 |
| ATOM | 7783 | CB   | ARG | X | 512 | 46.223 | 34.645 | 18.827 | 0.00 | 0.00 |
| ATOM | 7784 | HB2  | ARG | X | 512 | 46.073 | 34.090 | 19.753 | 0.00 | 0.00 |
| ATOM | 7785 | HB3  | ARG | X | 512 | 45.464 | 34.290 | 18.130 | 0.00 | 0.00 |
| ATOM | 7786 | CG   | ARG | X | 512 | 47.531 | 34.149 | 18.201 | 0.00 | 0.00 |
| ATOM | 7787 | HG2  | ARG | X | 512 | 47.338 | 33.083 | 18.088 | 0.00 | 0.00 |
| ATOM | 7788 | HG3  | ARG | X | 512 | 47.526 | 34.584 | 17.202 | 0.00 | 0.00 |
| ATOM | 7789 | CD   | ARG | X | 512 | 48.892 | 34.296 | 18.848 | 0.00 | 0.00 |
| ATOM | 7790 | HD2  | ARG | X | 512 | 49.605 | 33.775 | 18.210 | 0.00 | 0.00 |
| ATOM | 7791 | HD3  | ARG | X | 512 | 49.064 | 35.366 | 18.969 | 0.00 | 0.00 |
| ATOM | 7792 | NE   | ARG | X | 512 | 48.887 | 33.755 | 20.198 | 0.00 | 0.00 |
| ATOM | 7793 | HE   | ARG | X | 512 | 48.043 | 33.919 | 20.728 | 0.00 | 0.00 |
| ATOM | 7794 | CZ   | ARG | X | 512 | 49.864 | 33.201 | 20.910 | 0.00 | 0.00 |
| ATOM | 7795 | NH1  | ARG | X | 512 | 50.991 | 32.893 | 20.313 | 0.00 | 0.00 |
| ATOM | 7796 | HH11 | ARG | X | 512 | 51.173 | 33.138 | 19.350 | 0.00 | 0.00 |
| ATOM | 7797 | HH12 | ARG | X | 512 | 51.674 | 32.237 | 20.664 | 0.00 | 0.00 |
| ATOM | 7798 | NH2  | ARG | X | 512 | 49.766 | 32.990 | 22.198 | 0.00 | 0.00 |
| ATOM | 7799 | HH21 | ARG | X | 512 | 49.138 | 33.515 | 22.791 | 0.00 | 0.00 |
| ATOM | 7800 | HH22 | ARG | X | 512 | 50.510 | 32.611 | 22.766 | 0.00 | 0.00 |
| ATOM | 7801 | C    | ARG | X | 512 | 44.530 | 36.511 | 19.129 | 0.00 | 0.00 |
| ATOM | 7802 | O    | ARG | X | 512 | 44.035 | 36.865 | 20.213 | 0.00 | 0.00 |
| ATOM | 7803 | N    | PRO | X | 513 | 43.733 | 36.393 | 18.035 | 0.00 | 0.00 |
| ATOM | 7804 | CD   | PRO | X | 513 | 44.119 | 36.389 | 16.635 | 0.00 | 0.00 |
| ATOM | 7805 | HD2  | PRO | X | 513 | 44.654 | 35.507 | 16.285 | 0.00 | 0.00 |
| ATOM | 7806 | HD3  | PRO | X | 513 | 44.751 | 37.273 | 16.545 | 0.00 | 0.00 |
| ATOM | 7807 | CG   | PRO | X | 513 | 42.915 | 36.545 | 15.770 | 0.00 | 0.00 |
| ATOM | 7808 | HG2  | PRO | X | 513 | 42.848 | 35.846 | 14.936 | 0.00 | 0.00 |
| ATOM | 7809 | HG3  | PRO | X | 513 | 42.809 | 37.528 | 15.312 | 0.00 | 0.00 |

|      |      |      |     |   |     |        |        |        |      |      |
|------|------|------|-----|---|-----|--------|--------|--------|------|------|
| ATOM | 7810 | CB   | PRO | X | 513 | 41.851 | 36.251 | 16.708 | 0.00 | 0.00 |
| ATOM | 7811 | HB2  | PRO | X | 513 | 41.655 | 35.179 | 16.723 | 0.00 | 0.00 |
| ATOM | 7812 | HB3  | PRO | X | 513 | 40.901 | 36.705 | 16.426 | 0.00 | 0.00 |
| ATOM | 7813 | CA   | PRO | X | 513 | 42.339 | 36.692 | 18.056 | 0.00 | 0.00 |
| ATOM | 7814 | HA   | PRO | X | 513 | 42.123 | 37.723 | 18.336 | 0.00 | 0.00 |
| ATOM | 7815 | C    | PRO | X | 513 | 41.563 | 35.999 | 19.163 | 0.00 | 0.00 |
| ATOM | 7816 | O    | PRO | X | 513 | 42.115 | 34.992 | 19.662 | 0.00 | 0.00 |
| ATOM | 7817 | N    | LEU | X | 514 | 40.373 | 36.424 | 19.556 | 0.00 | 0.00 |
| ATOM | 7818 | H    | LEU | X | 514 | 40.108 | 37.295 | 19.119 | 0.00 | 0.00 |
| ATOM | 7819 | CA   | LEU | X | 514 | 39.472 | 35.637 | 20.467 | 0.00 | 0.00 |
| ATOM | 7820 | HA   | LEU | X | 514 | 39.836 | 35.551 | 21.491 | 0.00 | 0.00 |
| ATOM | 7821 | CB   | LEU | X | 514 | 38.067 | 36.368 | 20.517 | 0.00 | 0.00 |
| ATOM | 7822 | HB2  | LEU | X | 514 | 37.859 | 36.616 | 19.476 | 0.00 | 0.00 |
| ATOM | 7823 | HB3  | LEU | X | 514 | 37.247 | 35.697 | 20.769 | 0.00 | 0.00 |
| ATOM | 7824 | CG   | LEU | X | 514 | 37.972 | 37.701 | 21.364 | 0.00 | 0.00 |
| ATOM | 7825 | HG   | LEU | X | 514 | 38.396 | 38.524 | 20.788 | 0.00 | 0.00 |
| ATOM | 7826 | CD1  | LEU | X | 514 | 36.464 | 38.029 | 21.521 | 0.00 | 0.00 |
| ATOM | 7827 | HD11 | LEU | X | 514 | 36.277 | 39.051 | 21.849 | 0.00 | 0.00 |
| ATOM | 7828 | HD12 | LEU | X | 514 | 36.001 | 37.873 | 20.547 | 0.00 | 0.00 |
| ATOM | 7829 | HD13 | LEU | X | 514 | 35.894 | 37.326 | 22.130 | 0.00 | 0.00 |
| ATOM | 7830 | CD2  | LEU | X | 514 | 38.538 | 37.670 | 22.797 | 0.00 | 0.00 |
| ATOM | 7831 | HD21 | LEU | X | 514 | 39.615 | 37.542 | 22.904 | 0.00 | 0.00 |
| ATOM | 7832 | HD22 | LEU | X | 514 | 38.284 | 38.609 | 23.287 | 0.00 | 0.00 |
| ATOM | 7833 | HD23 | LEU | X | 514 | 38.094 | 36.851 | 23.363 | 0.00 | 0.00 |
| ATOM | 7834 | C    | LEU | X | 514 | 39.265 | 34.242 | 19.889 | 0.00 | 0.00 |
| ATOM | 7835 | O    | LEU | X | 514 | 39.008 | 34.041 | 18.716 | 0.00 | 0.00 |
| ATOM | 7836 | N    | GLU | X | 515 | 39.185 | 33.309 | 20.846 | 0.00 | 0.00 |
| ATOM | 7837 | H    | GLU | X | 515 | 39.275 | 33.626 | 21.801 | 0.00 | 0.00 |
| ATOM | 7838 | CA   | GLU | X | 515 | 38.708 | 31.911 | 20.600 | 0.00 | 0.00 |
| ATOM | 7839 | HA   | GLU | X | 515 | 38.334 | 31.904 | 19.576 | 0.00 | 0.00 |
| ATOM | 7840 | CB   | GLU | X | 515 | 39.925 | 31.019 | 20.495 | 0.00 | 0.00 |
| ATOM | 7841 | HB2  | GLU | X | 515 | 40.413 | 31.372 | 19.587 | 0.00 | 0.00 |
| ATOM | 7842 | HB3  | GLU | X | 515 | 40.520 | 31.144 | 21.400 | 0.00 | 0.00 |
| ATOM | 7843 | CG   | GLU | X | 515 | 39.664 | 29.487 | 20.327 | 0.00 | 0.00 |
| ATOM | 7844 | HG2  | GLU | X | 515 | 38.718 | 29.284 | 20.829 | 0.00 | 0.00 |
| ATOM | 7845 | HG3  | GLU | X | 515 | 39.440 | 29.214 | 19.295 | 0.00 | 0.00 |
| ATOM | 7846 | CD   | GLU | X | 515 | 40.819 | 28.676 | 20.860 | 0.00 | 0.00 |
| ATOM | 7847 | OE1  | GLU | X | 515 | 40.479 | 27.790 | 21.638 | 0.00 | 0.00 |
| ATOM | 7848 | OE2  | GLU | X | 515 | 41.973 | 28.813 | 20.414 | 0.00 | 0.00 |
| ATOM | 7849 | C    | GLU | X | 515 | 37.653 | 31.522 | 21.680 | 0.00 | 0.00 |
| ATOM | 7850 | O    | GLU | X | 515 | 37.879 | 31.737 | 22.909 | 0.00 | 0.00 |
| ATOM | 7851 | N    | VAL | X | 516 | 36.498 | 31.085 | 21.253 | 0.00 | 0.00 |
| ATOM | 7852 | H    | VAL | X | 516 | 36.417 | 30.862 | 20.271 | 0.00 | 0.00 |
| ATOM | 7853 | CA   | VAL | X | 516 | 35.347 | 30.794 | 22.131 | 0.00 | 0.00 |
| ATOM | 7854 | HA   | VAL | X | 516 | 35.424 | 31.483 | 22.972 | 0.00 | 0.00 |
| ATOM | 7855 | CB   | VAL | X | 516 | 33.941 | 30.928 | 21.321 | 0.00 | 0.00 |
| ATOM | 7856 | HB   | VAL | X | 516 | 33.823 | 30.135 | 20.582 | 0.00 | 0.00 |
| ATOM | 7857 | CG1  | VAL | X | 516 | 32.765 | 30.760 | 22.272 | 0.00 | 0.00 |
| ATOM | 7858 | HG11 | VAL | X | 516 | 31.841 | 30.699 | 21.697 | 0.00 | 0.00 |
| ATOM | 7859 | HG12 | VAL | X | 516 | 32.839 | 29.769 | 22.719 | 0.00 | 0.00 |
| ATOM | 7860 | HG13 | VAL | X | 516 | 32.823 | 31.562 | 23.009 | 0.00 | 0.00 |
| ATOM | 7861 | CG2  | VAL | X | 516 | 33.739 | 32.291 | 20.711 | 0.00 | 0.00 |
| ATOM | 7862 | HG21 | VAL | X | 516 | 32.700 | 32.503 | 20.461 | 0.00 | 0.00 |
| ATOM | 7863 | HG22 | VAL | X | 516 | 34.106 | 32.945 | 21.502 | 0.00 | 0.00 |
| ATOM | 7864 | HG23 | VAL | X | 516 | 34.413 | 32.479 | 19.875 | 0.00 | 0.00 |
| ATOM | 7865 | C    | VAL | X | 516 | 35.447 | 29.318 | 22.606 | 0.00 | 0.00 |
| ATOM | 7866 | O    | VAL | X | 516 | 35.796 | 28.453 | 21.794 | 0.00 | 0.00 |
| ATOM | 7867 | N    | ARG | X | 517 | 35.285 | 29.006 | 23.916 | 0.00 | 0.00 |
| ATOM | 7868 | H    | ARG | X | 517 | 35.044 | 29.746 | 24.560 | 0.00 | 0.00 |
| ATOM | 7869 | CA   | ARG | X | 517 | 35.363 | 27.714 | 24.609 | 0.00 | 0.00 |
| ATOM | 7870 | HA   | ARG | X | 517 | 35.383 | 26.945 | 23.836 | 0.00 | 0.00 |
| ATOM | 7871 | CB   | ARG | X | 517 | 36.627 | 27.581 | 25.461 | 0.00 | 0.00 |
| ATOM | 7872 | HB2  | ARG | X | 517 | 36.659 | 28.304 | 26.276 | 0.00 | 0.00 |
| ATOM | 7873 | HB3  | ARG | X | 517 | 36.602 | 26.529 | 25.742 | 0.00 | 0.00 |
| ATOM | 7874 | CG   | ARG | X | 517 | 37.895 | 27.826 | 24.581 | 0.00 | 0.00 |
| ATOM | 7875 | HG2  | ARG | X | 517 | 37.958 | 27.002 | 23.871 | 0.00 | 0.00 |
| ATOM | 7876 | HG3  | ARG | X | 517 | 37.808 | 28.809 | 24.119 | 0.00 | 0.00 |
| ATOM | 7877 | CD   | ARG | X | 517 | 39.175 | 27.821 | 25.407 | 0.00 | 0.00 |
| ATOM | 7878 | HD2  | ARG | X | 517 | 39.087 | 28.580 | 26.183 | 0.00 | 0.00 |
| ATOM | 7879 | HD3  | ARG | X | 517 | 39.329 | 26.829 | 25.832 | 0.00 | 0.00 |

|      |      |      |     |   |     |        |        |        |      |      |
|------|------|------|-----|---|-----|--------|--------|--------|------|------|
| ATOM | 7880 | NE   | ARG | X | 517 | 40.308 | 28.051 | 24.512 | 0.00 | 0.00 |
| ATOM | 7881 | HE   | ARG | X | 517 | 40.185 | 27.931 | 23.516 | 0.00 | 0.00 |
| ATOM | 7882 | CZ   | ARG | X | 517 | 41.514 | 28.401 | 24.815 | 0.00 | 0.00 |
| ATOM | 7883 | NH1  | ARG | X | 517 | 41.968 | 28.568 | 26.046 | 0.00 | 0.00 |
| ATOM | 7884 | HH11 | ARG | X | 517 | 41.540 | 28.044 | 26.795 | 0.00 | 0.00 |
| ATOM | 7885 | HH12 | ARG | X | 517 | 42.760 | 29.176 | 26.200 | 0.00 | 0.00 |
| ATOM | 7886 | NH2  | ARG | X | 517 | 42.308 | 28.677 | 23.867 | 0.00 | 0.00 |
| ATOM | 7887 | HH21 | ARG | X | 517 | 42.009 | 28.774 | 22.908 | 0.00 | 0.00 |
| ATOM | 7888 | HH22 | ARG | X | 517 | 43.288 | 28.841 | 24.046 | 0.00 | 0.00 |
| ATOM | 7889 | C    | ARG | X | 517 | 34.089 | 27.374 | 25.423 | 0.00 | 0.00 |
| ATOM | 7890 | O    | ARG | X | 517 | 33.107 | 28.094 | 25.396 | 0.00 | 0.00 |
| ATOM | 7891 | N    | ARG | X | 518 | 34.002 | 26.203 | 26.065 | 0.00 | 0.00 |
| ATOM | 7892 | H    | ARG | X | 518 | 34.805 | 25.591 | 26.098 | 0.00 | 0.00 |
| ATOM | 7893 | CA   | ARG | X | 518 | 32.730 | 25.607 | 26.519 | 0.00 | 0.00 |
| ATOM | 7894 | HA   | ARG | X | 518 | 32.048 | 26.390 | 26.848 | 0.00 | 0.00 |
| ATOM | 7895 | CB   | ARG | X | 518 | 32.019 | 24.774 | 25.401 | 0.00 | 0.00 |
| ATOM | 7896 | HB2  | ARG | X | 518 | 31.596 | 25.458 | 24.666 | 0.00 | 0.00 |
| ATOM | 7897 | HB3  | ARG | X | 518 | 32.813 | 24.136 | 25.013 | 0.00 | 0.00 |
| ATOM | 7898 | CG   | ARG | X | 518 | 30.859 | 23.902 | 25.757 | 0.00 | 0.00 |
| ATOM | 7899 | HG2  | ARG | X | 518 | 31.177 | 23.215 | 26.542 | 0.00 | 0.00 |
| ATOM | 7900 | HG3  | ARG | X | 518 | 30.161 | 24.598 | 26.221 | 0.00 | 0.00 |
| ATOM | 7901 | CD   | ARG | X | 518 | 30.222 | 23.130 | 24.641 | 0.00 | 0.00 |
| ATOM | 7902 | HD2  | ARG | X | 518 | 30.876 | 22.377 | 24.201 | 0.00 | 0.00 |
| ATOM | 7903 | HD3  | ARG | X | 518 | 29.274 | 22.682 | 24.937 | 0.00 | 0.00 |
| ATOM | 7904 | NE   | ARG | X | 518 | 29.804 | 24.009 | 23.592 | 0.00 | 0.00 |
| ATOM | 7905 | HE   | ARG | X | 518 | 30.454 | 24.036 | 22.819 | 0.00 | 0.00 |
| ATOM | 7906 | CZ   | ARG | X | 518 | 28.693 | 24.726 | 23.431 | 0.00 | 0.00 |
| ATOM | 7907 | NH1  | ARG | X | 518 | 27.816 | 24.910 | 24.386 | 0.00 | 0.00 |
| ATOM | 7908 | HH11 | ARG | X | 518 | 27.894 | 24.410 | 25.260 | 0.00 | 0.00 |
| ATOM | 7909 | HH12 | ARG | X | 518 | 26.931 | 25.317 | 24.118 | 0.00 | 0.00 |
| ATOM | 7910 | NH2  | ARG | X | 518 | 28.464 | 25.382 | 22.298 | 0.00 | 0.00 |
| ATOM | 7911 | HH21 | ARG | X | 518 | 29.146 | 25.256 | 21.565 | 0.00 | 0.00 |
| ATOM | 7912 | HH22 | ARG | X | 518 | 27.702 | 26.026 | 22.140 | 0.00 | 0.00 |
| ATOM | 7913 | C    | ARG | X | 518 | 32.875 | 24.926 | 27.828 | 0.00 | 0.00 |
| ATOM | 7914 | O    | ARG | X | 518 | 33.798 | 24.179 | 28.031 | 0.00 | 0.00 |
| ATOM | 7915 | N    | GLY | X | 519 | 31.814 | 24.972 | 28.666 | 0.00 | 0.00 |
| ATOM | 7916 | H    | GLY | X | 519 | 31.051 | 25.552 | 28.346 | 0.00 | 0.00 |
| ATOM | 7917 | CA   | GLY | X | 519 | 31.634 | 24.053 | 29.801 | 0.00 | 0.00 |
| ATOM | 7918 | HA2  | GLY | X | 519 | 30.687 | 24.209 | 30.185 | 0.00 | 0.00 |
| ATOM | 7919 | HA3  | GLY | X | 519 | 31.728 | 22.999 | 29.443 | 0.00 | 0.00 |
| ATOM | 7920 | C    | GLY | X | 519 | 32.594 | 24.261 | 30.999 | 0.00 | 0.00 |
| ATOM | 7921 | O    | GLY | X | 519 | 33.038 | 23.348 | 31.599 | 0.00 | 0.00 |
| ATOM | 7922 | N    | LEU | X | 520 | 32.707 | 25.519 | 31.410 | 0.00 | 0.00 |
| ATOM | 7923 | H    | LEU | X | 520 | 32.047 | 26.122 | 30.941 | 0.00 | 0.00 |
| ATOM | 7924 | CA   | LEU | X | 520 | 33.741 | 26.052 | 32.306 | 0.00 | 0.00 |
| ATOM | 7925 | HA   | LEU | X | 520 | 34.632 | 26.161 | 31.688 | 0.00 | 0.00 |
| ATOM | 7926 | CB   | LEU | X | 520 | 33.334 | 27.457 | 32.740 | 0.00 | 0.00 |
| ATOM | 7927 | HB2  | LEU | X | 520 | 33.165 | 27.975 | 31.795 | 0.00 | 0.00 |
| ATOM | 7928 | HB3  | LEU | X | 520 | 32.397 | 27.323 | 33.281 | 0.00 | 0.00 |
| ATOM | 7929 | CG   | LEU | X | 520 | 34.344 | 28.244 | 33.567 | 0.00 | 0.00 |
| ATOM | 7930 | HG   | LEU | X | 520 | 34.633 | 27.715 | 34.476 | 0.00 | 0.00 |
| ATOM | 7931 | CD1  | LEU | X | 520 | 35.565 | 28.662 | 32.667 | 0.00 | 0.00 |
| ATOM | 7932 | HD11 | LEU | X | 520 | 35.152 | 29.151 | 31.785 | 0.00 | 0.00 |
| ATOM | 7933 | HD12 | LEU | X | 520 | 36.275 | 29.317 | 33.171 | 0.00 | 0.00 |
| ATOM | 7934 | HD13 | LEU | X | 520 | 36.091 | 27.760 | 32.354 | 0.00 | 0.00 |
| ATOM | 7935 | CD2  | LEU | X | 520 | 33.663 | 29.529 | 33.989 | 0.00 | 0.00 |
| ATOM | 7936 | HD21 | LEU | X | 520 | 33.392 | 30.214 | 33.185 | 0.00 | 0.00 |
| ATOM | 7937 | HD22 | LEU | X | 520 | 32.738 | 29.251 | 34.494 | 0.00 | 0.00 |
| ATOM | 7938 | HD23 | LEU | X | 520 | 34.243 | 30.056 | 34.747 | 0.00 | 0.00 |
| ATOM | 7939 | C    | LEU | X | 520 | 34.044 | 25.159 | 33.554 | 0.00 | 0.00 |
| ATOM | 7940 | O    | LEU | X | 520 | 33.382 | 25.249 | 34.604 | 0.00 | 0.00 |
| ATOM | 7941 | N    | ARG | X | 521 | 35.033 | 24.283 | 33.488 | 0.00 | 0.00 |
| ATOM | 7942 | H    | ARG | X | 521 | 35.508 | 24.236 | 32.597 | 0.00 | 0.00 |
| ATOM | 7943 | CA   | ARG | X | 521 | 35.602 | 23.601 | 34.654 | 0.00 | 0.00 |
| ATOM | 7944 | HA   | ARG | X | 521 | 36.445 | 23.063 | 34.221 | 0.00 | 0.00 |
| ATOM | 7945 | CB   | ARG | X | 521 | 35.961 | 24.622 | 35.729 | 0.00 | 0.00 |
| ATOM | 7946 | HB2  | ARG | X | 521 | 36.076 | 25.630 | 35.333 | 0.00 | 0.00 |
| ATOM | 7947 | HB3  | ARG | X | 521 | 35.164 | 24.801 | 36.451 | 0.00 | 0.00 |
| ATOM | 7948 | CG   | ARG | X | 521 | 37.248 | 24.273 | 36.499 | 0.00 | 0.00 |
| ATOM | 7949 | HG2  | ARG | X | 521 | 37.359 | 24.841 | 37.423 | 0.00 | 0.00 |

|      |      |      |     |   |     |        |        |        |      |      |
|------|------|------|-----|---|-----|--------|--------|--------|------|------|
| ATOM | 7950 | HG3  | ARG | X | 521 | 37.322 | 23.210 | 36.727 | 0.00 | 0.00 |
| ATOM | 7951 | CD   | ARG | X | 521 | 38.367 | 24.596 | 35.569 | 0.00 | 0.00 |
| ATOM | 7952 | HD2  | ARG | X | 521 | 38.253 | 24.184 | 34.566 | 0.00 | 0.00 |
| ATOM | 7953 | HD3  | ARG | X | 521 | 38.431 | 25.678 | 35.454 | 0.00 | 0.00 |
| ATOM | 7954 | NE   | ARG | X | 521 | 39.587 | 24.058 | 36.134 | 0.00 | 0.00 |
| ATOM | 7955 | HE   | ARG | X | 521 | 39.631 | 24.143 | 37.139 | 0.00 | 0.00 |
| ATOM | 7956 | CZ   | ARG | X | 521 | 40.701 | 23.997 | 35.509 | 0.00 | 0.00 |
| ATOM | 7957 | NH1  | ARG | X | 521 | 40.857 | 24.180 | 34.212 | 0.00 | 0.00 |
| ATOM | 7958 | HH11 | ARG | X | 521 | 40.105 | 24.325 | 33.554 | 0.00 | 0.00 |
| ATOM | 7959 | HH12 | ARG | X | 521 | 41.793 | 24.103 | 33.840 | 0.00 | 0.00 |
| ATOM | 7960 | NH2  | ARG | X | 521 | 41.757 | 23.800 | 36.252 | 0.00 | 0.00 |
| ATOM | 7961 | HH21 | ARG | X | 521 | 41.691 | 23.800 | 37.260 | 0.00 | 0.00 |
| ATOM | 7962 | HH22 | ARG | X | 521 | 42.667 | 23.762 | 35.815 | 0.00 | 0.00 |
| ATOM | 7963 | C    | ARG | X | 521 | 34.616 | 22.608 | 35.291 | 0.00 | 0.00 |
| ATOM | 7964 | O    | ARG | X | 521 | 34.782 | 22.138 | 36.435 | 0.00 | 0.00 |
| ATOM | 7965 | N    | ALA | X | 522 | 33.542 | 22.234 | 34.619 | 0.00 | 0.00 |
| ATOM | 7966 | H    | ALA | X | 522 | 33.477 | 22.412 | 33.627 | 0.00 | 0.00 |
| ATOM | 7967 | CA   | ALA | X | 522 | 32.413 | 21.437 | 35.146 | 0.00 | 0.00 |
| ATOM | 7968 | HA   | ALA | X | 522 | 32.012 | 21.933 | 36.030 | 0.00 | 0.00 |
| ATOM | 7969 | CB   | ALA | X | 522 | 31.311 | 21.386 | 34.161 | 0.00 | 0.00 |
| ATOM | 7970 | HB1  | ALA | X | 522 | 30.745 | 22.317 | 34.154 | 0.00 | 0.00 |
| ATOM | 7971 | HB2  | ALA | X | 522 | 31.772 | 21.396 | 33.173 | 0.00 | 0.00 |
| ATOM | 7972 | HB3  | ALA | X | 522 | 30.630 | 20.578 | 34.427 | 0.00 | 0.00 |
| ATOM | 7973 | C    | ALA | X | 522 | 32.893 | 19.996 | 35.560 | 0.00 | 0.00 |
| ATOM | 7974 | O    | ALA | X | 522 | 32.331 | 19.431 | 36.496 | 0.00 | 0.00 |
| ATOM | 7975 | N    | GLN | X | 523 | 33.939 | 19.437 | 34.980 | 0.00 | 0.00 |
| ATOM | 7976 | H    | GLN | X | 523 | 34.399 | 20.001 | 34.280 | 0.00 | 0.00 |
| ATOM | 7977 | CA   | GLN | X | 523 | 34.475 | 18.116 | 35.306 | 0.00 | 0.00 |
| ATOM | 7978 | HA   | GLN | X | 523 | 33.595 | 17.569 | 35.643 | 0.00 | 0.00 |
| ATOM | 7979 | CB   | GLN | X | 523 | 35.069 | 17.415 | 34.051 | 0.00 | 0.00 |
| ATOM | 7980 | HB2  | GLN | X | 523 | 35.886 | 18.067 | 33.744 | 0.00 | 0.00 |
| ATOM | 7981 | HB3  | GLN | X | 523 | 35.505 | 16.451 | 34.315 | 0.00 | 0.00 |
| ATOM | 7982 | CG   | GLN | X | 523 | 34.118 | 17.103 | 32.937 | 0.00 | 0.00 |
| ATOM | 7983 | HG2  | GLN | X | 523 | 34.084 | 17.983 | 32.294 | 0.00 | 0.00 |
| ATOM | 7984 | HG3  | GLN | X | 523 | 34.518 | 16.324 | 32.288 | 0.00 | 0.00 |
| ATOM | 7985 | CD   | GLN | X | 523 | 32.782 | 16.623 | 33.472 | 0.00 | 0.00 |
| ATOM | 7986 | OE1  | GLN | X | 523 | 31.866 | 17.437 | 33.666 | 0.00 | 0.00 |
| ATOM | 7987 | NE2  | GLN | X | 523 | 32.554 | 15.354 | 33.715 | 0.00 | 0.00 |
| ATOM | 7988 | HE21 | GLN | X | 523 | 31.703 | 15.099 | 34.195 | 0.00 | 0.00 |
| ATOM | 7989 | HE22 | GLN | X | 523 | 33.230 | 14.619 | 33.563 | 0.00 | 0.00 |
| ATOM | 7990 | C    | GLN | X | 523 | 35.509 | 18.120 | 36.459 | 0.00 | 0.00 |
| ATOM | 7991 | O    | GLN | X | 523 | 35.954 | 17.060 | 36.953 | 0.00 | 0.00 |
| ATOM | 7992 | N    | ALA | X | 524 | 35.763 | 19.246 | 37.068 | 0.00 | 0.00 |
| ATOM | 7993 | H    | ALA | X | 524 | 35.161 | 19.994 | 36.752 | 0.00 | 0.00 |
| ATOM | 7994 | CA   | ALA | X | 524 | 36.407 | 19.379 | 38.428 | 0.00 | 0.00 |
| ATOM | 7995 | HA   | ALA | X | 524 | 36.759 | 18.406 | 38.771 | 0.00 | 0.00 |
| ATOM | 7996 | CB   | ALA | X | 524 | 37.580 | 20.426 | 38.290 | 0.00 | 0.00 |
| ATOM | 7997 | HB1  | ALA | X | 524 | 38.420 | 20.126 | 38.916 | 0.00 | 0.00 |
| ATOM | 7998 | HB2  | ALA | X | 524 | 37.938 | 20.441 | 37.260 | 0.00 | 0.00 |
| ATOM | 7999 | HB3  | ALA | X | 524 | 37.240 | 21.460 | 38.352 | 0.00 | 0.00 |
| ATOM | 8000 | C    | ALA | X | 524 | 35.426 | 19.869 | 39.402 | 0.00 | 0.00 |
| ATOM | 8001 | O    | ALA | X | 524 | 35.236 | 19.262 | 40.482 | 0.00 | 0.00 |
| ATOM | 8002 | N    | CYX | X | 525 | 34.735 | 20.974 | 39.139 | 0.00 | 0.00 |
| ATOM | 8003 | H    | CYX | X | 525 | 34.911 | 21.414 | 38.247 | 0.00 | 0.00 |
| ATOM | 8004 | CA   | CYX | X | 525 | 33.827 | 21.531 | 40.207 | 0.00 | 0.00 |
| ATOM | 8005 | HA   | CYX | X | 525 | 34.469 | 21.532 | 41.089 | 0.00 | 0.00 |
| ATOM | 8006 | CB   | CYX | X | 525 | 33.360 | 22.824 | 39.642 | 0.00 | 0.00 |
| ATOM | 8007 | HB2  | CYX | X | 525 | 32.605 | 22.616 | 38.883 | 0.00 | 0.00 |
| ATOM | 8008 | HB3  | CYX | X | 525 | 32.821 | 23.305 | 40.459 | 0.00 | 0.00 |
| ATOM | 8009 | SG   | CYX | X | 525 | 34.605 | 23.957 | 38.941 | 0.00 | 0.00 |
| ATOM | 8010 | C    | CYX | X | 525 | 32.673 | 20.577 | 40.587 | 0.00 | 0.00 |
| ATOM | 8011 | O    | CYX | X | 525 | 32.276 | 20.659 | 41.704 | 0.00 | 0.00 |
| ATOM | 8012 | N    | ALA | X | 526 | 32.189 | 19.687 | 39.706 | 0.00 | 0.00 |
| ATOM | 8013 | H    | ALA | X | 526 | 32.551 | 19.743 | 38.765 | 0.00 | 0.00 |
| ATOM | 8014 | CA   | ALA | X | 526 | 31.221 | 18.586 | 40.088 | 0.00 | 0.00 |
| ATOM | 8015 | HA   | ALA | X | 526 | 30.324 | 18.977 | 40.569 | 0.00 | 0.00 |
| ATOM | 8016 | CB   | ALA | X | 526 | 30.701 | 18.042 | 38.759 | 0.00 | 0.00 |
| ATOM | 8017 | HB1  | ALA | X | 526 | 29.931 | 18.678 | 38.324 | 0.00 | 0.00 |
| ATOM | 8018 | HB2  | ALA | X | 526 | 31.531 | 17.816 | 38.089 | 0.00 | 0.00 |
| ATOM | 8019 | HB3  | ALA | X | 526 | 30.112 | 17.149 | 38.967 | 0.00 | 0.00 |

|      |      |      |     |   |     |        |        |        |      |      |
|------|------|------|-----|---|-----|--------|--------|--------|------|------|
| ATOM | 8020 | C    | ALA | X | 526 | 31.824 | 17.599 | 41.109 | 0.00 | 0.00 |
| ATOM | 8021 | O    | ALA | X | 526 | 31.197 | 17.529 | 42.193 | 0.00 | 0.00 |
| ATOM | 8022 | N    | PHE | X | 527 | 32.972 | 17.079 | 40.921 | 0.00 | 0.00 |
| ATOM | 8023 | H    | PHE | X | 527 | 33.441 | 17.103 | 40.027 | 0.00 | 0.00 |
| ATOM | 8024 | CA   | PHE | X | 527 | 33.663 | 16.291 | 41.964 | 0.00 | 0.00 |
| ATOM | 8025 | HA   | PHE | X | 527 | 33.167 | 15.329 | 42.100 | 0.00 | 0.00 |
| ATOM | 8026 | CB   | PHE | X | 527 | 35.132 | 15.975 | 41.414 | 0.00 | 0.00 |
| ATOM | 8027 | HB2  | PHE | X | 527 | 35.069 | 15.117 | 40.746 | 0.00 | 0.00 |
| ATOM | 8028 | HB3  | PHE | X | 527 | 35.459 | 16.847 | 40.847 | 0.00 | 0.00 |
| ATOM | 8029 | CG   | PHE | X | 527 | 36.217 | 15.593 | 42.451 | 0.00 | 0.00 |
| ATOM | 8030 | CD1  | PHE | X | 527 | 36.142 | 14.324 | 43.074 | 0.00 | 0.00 |
| ATOM | 8031 | HD1  | PHE | X | 527 | 35.432 | 13.622 | 42.661 | 0.00 | 0.00 |
| ATOM | 8032 | CE1  | PHE | X | 527 | 36.998 | 13.984 | 44.164 | 0.00 | 0.00 |
| ATOM | 8033 | HE1  | PHE | X | 527 | 36.771 | 13.065 | 44.683 | 0.00 | 0.00 |
| ATOM | 8034 | CZ   | PHE | X | 527 | 37.775 | 14.986 | 44.717 | 0.00 | 0.00 |
| ATOM | 8035 | HZ   | PHE | X | 527 | 38.205 | 14.865 | 45.700 | 0.00 | 0.00 |
| ATOM | 8036 | CE2  | PHE | X | 527 | 37.920 | 16.229 | 44.028 | 0.00 | 0.00 |
| ATOM | 8037 | HE2  | PHE | X | 527 | 38.557 | 16.952 | 44.518 | 0.00 | 0.00 |
| ATOM | 8038 | CD2  | PHE | X | 527 | 37.138 | 16.523 | 42.931 | 0.00 | 0.00 |
| ATOM | 8039 | HD2  | PHE | X | 527 | 37.186 | 17.521 | 42.521 | 0.00 | 0.00 |
| ATOM | 8040 | C    | PHE | X | 527 | 33.781 | 17.045 | 43.318 | 0.00 | 0.00 |
| ATOM | 8041 | O    | PHE | X | 527 | 33.182 | 16.515 | 44.293 | 0.00 | 0.00 |
| ATOM | 8042 | N    | TRP | X | 528 | 34.359 | 18.288 | 43.353 | 0.00 | 0.00 |
| ATOM | 8043 | H    | TRP | X | 528 | 34.743 | 18.617 | 42.478 | 0.00 | 0.00 |
| ATOM | 8044 | CA   | TRP | X | 528 | 34.469 | 19.164 | 44.539 | 0.00 | 0.00 |
| ATOM | 8045 | HA   | TRP | X | 528 | 35.162 | 18.748 | 45.270 | 0.00 | 0.00 |
| ATOM | 8046 | CB   | TRP | X | 528 | 34.932 | 20.563 | 44.166 | 0.00 | 0.00 |
| ATOM | 8047 | HB2  | TRP | X | 528 | 34.440 | 20.743 | 43.211 | 0.00 | 0.00 |
| ATOM | 8048 | HB3  | TRP | X | 528 | 34.821 | 21.327 | 44.936 | 0.00 | 0.00 |
| ATOM | 8049 | CG   | TRP | X | 528 | 36.461 | 20.683 | 43.983 | 0.00 | 0.00 |
| ATOM | 8050 | CD1  | TRP | X | 528 | 37.067 | 21.122 | 42.832 | 0.00 | 0.00 |
| ATOM | 8051 | HD1  | TRP | X | 528 | 36.646 | 21.533 | 41.926 | 0.00 | 0.00 |
| ATOM | 8052 | NE1  | TRP | X | 528 | 38.425 | 21.073 | 43.017 | 0.00 | 0.00 |
| ATOM | 8053 | HE1  | TRP | X | 528 | 39.096 | 21.211 | 42.275 | 0.00 | 0.00 |
| ATOM | 8054 | CE2  | TRP | X | 528 | 38.781 | 20.666 | 44.264 | 0.00 | 0.00 |
| ATOM | 8055 | CZ2  | TRP | X | 528 | 40.018 | 20.486 | 44.946 | 0.00 | 0.00 |
| ATOM | 8056 | HZ2  | TRP | X | 528 | 40.947 | 20.470 | 44.395 | 0.00 | 0.00 |
| ATOM | 8057 | CH2  | TRP | X | 528 | 39.993 | 20.119 | 46.325 | 0.00 | 0.00 |
| ATOM | 8058 | HH2  | TRP | X | 528 | 40.964 | 19.929 | 46.759 | 0.00 | 0.00 |
| ATOM | 8059 | CZ3  | TRP | X | 528 | 38.759 | 20.025 | 47.005 | 0.00 | 0.00 |
| ATOM | 8060 | HZ3  | TRP | X | 528 | 38.784 | 19.686 | 48.030 | 0.00 | 0.00 |
| ATOM | 8061 | CE3  | TRP | X | 528 | 37.565 | 20.148 | 46.338 | 0.00 | 0.00 |
| ATOM | 8062 | HE3  | TRP | X | 528 | 36.690 | 19.898 | 46.919 | 0.00 | 0.00 |
| ATOM | 8063 | CD2  | TRP | X | 528 | 37.498 | 20.432 | 44.942 | 0.00 | 0.00 |
| ATOM | 8064 | C    | TRP | X | 528 | 33.060 | 19.256 | 45.201 | 0.00 | 0.00 |
| ATOM | 8065 | O    | TRP | X | 528 | 32.989 | 19.120 | 46.412 | 0.00 | 0.00 |
| ATOM | 8066 | N    | ASN | X | 529 | 31.992 | 19.508 | 44.533 | 0.00 | 0.00 |
| ATOM | 8067 | H    | ASN | X | 529 | 32.044 | 19.760 | 43.556 | 0.00 | 0.00 |
| ATOM | 8068 | CA   | ASN | X | 529 | 30.634 | 19.583 | 45.083 | 0.00 | 0.00 |
| ATOM | 8069 | HA   | ASN | X | 529 | 30.579 | 20.289 | 45.911 | 0.00 | 0.00 |
| ATOM | 8070 | CB   | ASN | X | 529 | 29.645 | 20.185 | 44.121 | 0.00 | 0.00 |
| ATOM | 8071 | HB2  | ASN | X | 529 | 30.020 | 21.146 | 43.767 | 0.00 | 0.00 |
| ATOM | 8072 | HB3  | ASN | X | 529 | 29.515 | 19.517 | 43.270 | 0.00 | 0.00 |
| ATOM | 8073 | CG   | ASN | X | 529 | 28.248 | 20.319 | 44.677 | 0.00 | 0.00 |
| ATOM | 8074 | OD1  | ASN | X | 529 | 27.552 | 19.308 | 44.766 | 0.00 | 0.00 |
| ATOM | 8075 | ND2  | ASN | X | 529 | 27.898 | 21.363 | 45.298 | 0.00 | 0.00 |
| ATOM | 8076 | HD21 | ASN | X | 529 | 27.046 | 21.291 | 45.836 | 0.00 | 0.00 |
| ATOM | 8077 | HD22 | ASN | X | 529 | 28.360 | 22.256 | 45.208 | 0.00 | 0.00 |
| ATOM | 8078 | C    | ASN | X | 529 | 30.073 | 18.209 | 45.532 | 0.00 | 0.00 |
| ATOM | 8079 | O    | ASN | X | 529 | 29.581 | 18.112 | 46.661 | 0.00 | 0.00 |
| ATOM | 8080 | N    | ARG | X | 530 | 30.060 | 17.146 | 44.679 | 0.00 | 0.00 |
| ATOM | 8081 | H    | ARG | X | 530 | 30.578 | 17.271 | 43.821 | 0.00 | 0.00 |
| ATOM | 8082 | CA   | ARG | X | 530 | 29.080 | 15.992 | 44.761 | 0.00 | 0.00 |
| ATOM | 8083 | HA   | ARG | X | 530 | 28.142 | 16.403 | 45.136 | 0.00 | 0.00 |
| ATOM | 8084 | CB   | ARG | X | 530 | 28.734 | 15.314 | 43.418 | 0.00 | 0.00 |
| ATOM | 8085 | HB2  | ARG | X | 530 | 29.691 | 15.123 | 42.933 | 0.00 | 0.00 |
| ATOM | 8086 | HB3  | ARG | X | 530 | 28.093 | 14.474 | 43.685 | 0.00 | 0.00 |
| ATOM | 8087 | CG   | ARG | X | 530 | 27.867 | 16.111 | 42.434 | 0.00 | 0.00 |
| ATOM | 8088 | HG2  | ARG | X | 530 | 28.269 | 17.119 | 42.328 | 0.00 | 0.00 |
| ATOM | 8089 | HG3  | ARG | X | 530 | 27.949 | 15.625 | 41.462 | 0.00 | 0.00 |



|      |      |      |     |   |     |        |        |        |      |      |
|------|------|------|-----|---|-----|--------|--------|--------|------|------|
| ATOM | 8090 | CD   | ARG | X | 530 | 26.390 | 16.120 | 43.032 | 0.00 | 0.00 |
| ATOM | 8091 | HD2  | ARG | X | 530 | 25.724 | 16.250 | 42.179 | 0.00 | 0.00 |
| ATOM | 8092 | HD3  | ARG | X | 530 | 26.142 | 15.121 | 43.390 | 0.00 | 0.00 |
| ATOM | 8093 | NE   | ARG | X | 530 | 26.059 | 17.165 | 44.050 | 0.00 | 0.00 |
| ATOM | 8094 | HE   | ARG | X | 530 | 26.574 | 18.033 | 44.089 | 0.00 | 0.00 |
| ATOM | 8095 | CZ   | ARG | X | 530 | 24.923 | 17.384 | 44.687 | 0.00 | 0.00 |
| ATOM | 8096 | NH1  | ARG | X | 530 | 23.824 | 16.626 | 44.546 | 0.00 | 0.00 |
| ATOM | 8097 | HH11 | ARG | X | 530 | 23.856 | 15.861 | 43.888 | 0.00 | 0.00 |
| ATOM | 8098 | HH12 | ARG | X | 530 | 22.986 | 16.742 | 45.098 | 0.00 | 0.00 |
| ATOM | 8099 | NH2  | ARG | X | 530 | 24.746 | 18.494 | 45.348 | 0.00 | 0.00 |
| ATOM | 8100 | HH21 | ARG | X | 530 | 25.599 | 19.027 | 45.444 | 0.00 | 0.00 |
| ATOM | 8101 | HH22 | ARG | X | 530 | 23.809 | 18.848 | 45.478 | 0.00 | 0.00 |
| ATOM | 8102 | C    | ARG | X | 530 | 29.693 | 15.015 | 45.835 | 0.00 | 0.00 |
| ATOM | 8103 | O    | ARG | X | 530 | 29.117 | 14.754 | 46.910 | 0.00 | 0.00 |
| ATOM | 8104 | N    | PHE | X | 531 | 30.877 | 14.461 | 45.530 | 0.00 | 0.00 |
| ATOM | 8105 | H    | PHE | X | 531 | 31.173 | 14.559 | 44.569 | 0.00 | 0.00 |
| ATOM | 8106 | CA   | PHE | X | 531 | 31.412 | 13.254 | 46.177 | 0.00 | 0.00 |
| ATOM | 8107 | HA   | PHE | X | 531 | 30.574 | 12.593 | 46.399 | 0.00 | 0.00 |
| ATOM | 8108 | CB   | PHE | X | 531 | 32.281 | 12.468 | 45.155 | 0.00 | 0.00 |
| ATOM | 8109 | HB2  | PHE | X | 531 | 31.557 | 11.933 | 44.539 | 0.00 | 0.00 |
| ATOM | 8110 | HB3  | PHE | X | 531 | 32.801 | 13.146 | 44.479 | 0.00 | 0.00 |
| ATOM | 8111 | CG   | PHE | X | 531 | 33.231 | 11.497 | 45.730 | 0.00 | 0.00 |
| ATOM | 8112 | CD1  | PHE | X | 531 | 32.798 | 10.321 | 46.284 | 0.00 | 0.00 |
| ATOM | 8113 | HD1  | PHE | X | 531 | 31.813 | 9.933  | 46.074 | 0.00 | 0.00 |
| ATOM | 8114 | CE1  | PHE | X | 531 | 33.729 | 9.605  | 47.069 | 0.00 | 0.00 |
| ATOM | 8115 | HE1  | PHE | X | 531 | 33.533 | 8.619  | 47.463 | 0.00 | 0.00 |
| ATOM | 8116 | CZ   | PHE | X | 531 | 34.973 | 10.080 | 47.427 | 0.00 | 0.00 |
| ATOM | 8117 | HZ   | PHE | X | 531 | 35.659 | 9.495  | 48.022 | 0.00 | 0.00 |
| ATOM | 8118 | CE2  | PHE | X | 531 | 35.409 | 11.295 | 46.879 | 0.00 | 0.00 |
| ATOM | 8119 | HE2  | PHE | X | 531 | 36.343 | 11.758 | 47.160 | 0.00 | 0.00 |
| ATOM | 8120 | CD2  | PHE | X | 531 | 34.554 | 11.957 | 45.994 | 0.00 | 0.00 |
| ATOM | 8121 | HD2  | PHE | X | 531 | 34.815 | 12.951 | 45.661 | 0.00 | 0.00 |
| ATOM | 8122 | C    | PHE | X | 531 | 32.232 | 13.556 | 47.396 | 0.00 | 0.00 |
| ATOM | 8123 | O    | PHE | X | 531 | 32.319 | 12.810 | 48.415 | 0.00 | 0.00 |
| ATOM | 8124 | N    | LEU | X | 532 | 32.919 | 14.724 | 47.397 | 0.00 | 0.00 |
| ATOM | 8125 | H    | LEU | X | 532 | 32.885 | 15.339 | 46.596 | 0.00 | 0.00 |
| ATOM | 8126 | CA   | LEU | X | 532 | 33.902 | 15.143 | 48.435 | 0.00 | 0.00 |
| ATOM | 8127 | HA   | LEU | X | 532 | 34.640 | 14.346 | 48.522 | 0.00 | 0.00 |
| ATOM | 8128 | CB   | LEU | X | 532 | 34.684 | 16.298 | 47.953 | 0.00 | 0.00 |
| ATOM | 8129 | HB2  | LEU | X | 532 | 35.071 | 15.947 | 46.996 | 0.00 | 0.00 |
| ATOM | 8130 | HB3  | LEU | X | 532 | 34.109 | 17.196 | 47.727 | 0.00 | 0.00 |
| ATOM | 8131 | CG   | LEU | X | 532 | 35.844 | 16.958 | 48.768 | 0.00 | 0.00 |
| ATOM | 8132 | HG   | LEU | X | 532 | 36.278 | 17.808 | 48.241 | 0.00 | 0.00 |
| ATOM | 8133 | CD1  | LEU | X | 532 | 35.392 | 17.499 | 50.126 | 0.00 | 0.00 |
| ATOM | 8134 | HD11 | LEU | X | 532 | 34.399 | 17.919 | 49.968 | 0.00 | 0.00 |
| ATOM | 8135 | HD12 | LEU | X | 532 | 35.409 | 16.640 | 50.797 | 0.00 | 0.00 |
| ATOM | 8136 | HD13 | LEU | X | 532 | 36.152 | 18.233 | 50.393 | 0.00 | 0.00 |
| ATOM | 8137 | CD2  | LEU | X | 532 | 36.942 | 15.869 | 49.013 | 0.00 | 0.00 |
| ATOM | 8138 | HD21 | LEU | X | 532 | 36.737 | 15.252 | 49.889 | 0.00 | 0.00 |
| ATOM | 8139 | HD22 | LEU | X | 532 | 37.190 | 15.231 | 48.164 | 0.00 | 0.00 |
| ATOM | 8140 | HD23 | LEU | X | 532 | 37.868 | 16.368 | 49.299 | 0.00 | 0.00 |
| ATOM | 8141 | C    | LEU | X | 532 | 33.294 | 15.356 | 49.872 | 0.00 | 0.00 |
| ATOM | 8142 | O    | LEU | X | 532 | 33.815 | 14.698 | 50.785 | 0.00 | 0.00 |
| ATOM | 8143 | N    | PRO | X | 533 | 32.256 | 16.156 | 50.131 | 0.00 | 0.00 |
| ATOM | 8144 | CD   | PRO | X | 533 | 31.539 | 17.041 | 49.239 | 0.00 | 0.00 |
| ATOM | 8145 | HD2  | PRO | X | 533 | 31.241 | 16.501 | 48.340 | 0.00 | 0.00 |
| ATOM | 8146 | HD3  | PRO | X | 533 | 32.170 | 17.827 | 48.823 | 0.00 | 0.00 |
| ATOM | 8147 | CG   | PRO | X | 533 | 30.249 | 17.529 | 50.000 | 0.00 | 0.00 |
| ATOM | 8148 | HG2  | PRO | X | 533 | 29.460 | 16.788 | 49.868 | 0.00 | 0.00 |
| ATOM | 8149 | HG3  | PRO | X | 533 | 29.872 | 18.493 | 49.659 | 0.00 | 0.00 |
| ATOM | 8150 | CB   | PRO | X | 533 | 30.776 | 17.546 | 51.417 | 0.00 | 0.00 |
| ATOM | 8151 | HB2  | PRO | X | 533 | 29.938 | 17.430 | 52.104 | 0.00 | 0.00 |
| ATOM | 8152 | HB3  | PRO | X | 533 | 31.322 | 18.480 | 51.552 | 0.00 | 0.00 |
| ATOM | 8153 | CA   | PRO | X | 533 | 31.630 | 16.282 | 51.476 | 0.00 | 0.00 |
| ATOM | 8154 | HA   | PRO | X | 533 | 32.423 | 16.458 | 52.203 | 0.00 | 0.00 |
| ATOM | 8155 | C    | PRO | X | 533 | 30.890 | 14.990 | 51.860 | 0.00 | 0.00 |
| ATOM | 8156 | O    | PRO | X | 533 | 30.836 | 14.722 | 53.069 | 0.00 | 0.00 |
| ATOM | 8157 | N    | LYS | X | 534 | 30.468 | 14.180 | 50.885 | 0.00 | 0.00 |
| ATOM | 8158 | H    | LYS | X | 534 | 30.447 | 14.581 | 49.958 | 0.00 | 0.00 |
| ATOM | 8159 | CA   | LYS | X | 534 | 29.633 | 13.015 | 51.178 | 0.00 | 0.00 |

|      |      |      |     |   |     |        |        |        |      |      |
|------|------|------|-----|---|-----|--------|--------|--------|------|------|
| ATOM | 8160 | HA   | LYS | X | 534 | 28.851 | 13.306 | 51.880 | 0.00 | 0.00 |
| ATOM | 8161 | CB   | LYS | X | 534 | 29.007 | 12.426 | 49.843 | 0.00 | 0.00 |
| ATOM | 8162 | HB2  | LYS | X | 534 | 28.654 | 13.242 | 49.213 | 0.00 | 0.00 |
| ATOM | 8163 | HB3  | LYS | X | 534 | 29.827 | 11.924 | 49.329 | 0.00 | 0.00 |
| ATOM | 8164 | CG   | LYS | X | 534 | 27.899 | 11.449 | 50.228 | 0.00 | 0.00 |
| ATOM | 8165 | HG2  | LYS | X | 534 | 28.376 | 10.574 | 50.670 | 0.00 | 0.00 |
| ATOM | 8166 | HG3  | LYS | X | 534 | 27.251 | 11.872 | 50.996 | 0.00 | 0.00 |
| ATOM | 8167 | CD   | LYS | X | 534 | 27.100 | 11.121 | 48.970 | 0.00 | 0.00 |
| ATOM | 8168 | HD2  | LYS | X | 534 | 27.843 | 10.850 | 48.220 | 0.00 | 0.00 |
| ATOM | 8169 | HD3  | LYS | X | 534 | 26.511 | 10.276 | 49.328 | 0.00 | 0.00 |
| ATOM | 8170 | CE   | LYS | X | 534 | 26.233 | 12.307 | 48.482 | 0.00 | 0.00 |
| ATOM | 8171 | HE2  | LYS | X | 534 | 26.811 | 13.224 | 48.365 | 0.00 | 0.00 |
| ATOM | 8172 | HE3  | LYS | X | 534 | 25.818 | 11.925 | 47.549 | 0.00 | 0.00 |
| ATOM | 8173 | NZ   | LYS | X | 534 | 25.150 | 12.506 | 49.437 | 0.00 | 0.00 |
| ATOM | 8174 | HZ1  | LYS | X | 534 | 25.495 | 12.336 | 50.371 | 0.00 | 0.00 |
| ATOM | 8175 | HZ2  | LYS | X | 534 | 24.697 | 13.399 | 49.305 | 0.00 | 0.00 |
| ATOM | 8176 | HZ3  | LYS | X | 534 | 24.391 | 11.848 | 49.337 | 0.00 | 0.00 |
| ATOM | 8177 | C    | LYS | X | 534 | 30.520 | 11.934 | 51.793 | 0.00 | 0.00 |
| ATOM | 8178 | O    | LYS | X | 534 | 30.057 | 11.327 | 52.758 | 0.00 | 0.00 |
| ATOM | 8179 | N    | LEU | X | 535 | 31.744 | 11.770 | 51.324 | 0.00 | 0.00 |
| ATOM | 8180 | H    | LEU | X | 535 | 32.099 | 12.474 | 50.694 | 0.00 | 0.00 |
| ATOM | 8181 | CA   | LEU | X | 535 | 32.724 | 10.840 | 51.767 | 0.00 | 0.00 |
| ATOM | 8182 | HA   | LEU | X | 535 | 32.341 | 9.846  | 51.536 | 0.00 | 0.00 |
| ATOM | 8183 | CB   | LEU | X | 535 | 34.089 | 11.143 | 51.096 | 0.00 | 0.00 |
| ATOM | 8184 | HB2  | LEU | X | 535 | 33.780 | 11.040 | 50.056 | 0.00 | 0.00 |
| ATOM | 8185 | HB3  | LEU | X | 535 | 34.324 | 12.193 | 51.269 | 0.00 | 0.00 |
| ATOM | 8186 | CG   | LEU | X | 535 | 35.167 | 10.271 | 51.617 | 0.00 | 0.00 |
| ATOM | 8187 | HG   | LEU | X | 535 | 35.241 | 10.423 | 52.694 | 0.00 | 0.00 |
| ATOM | 8188 | CD1  | LEU | X | 535 | 34.834 | 8.718  | 51.331 | 0.00 | 0.00 |
| ATOM | 8189 | HD11 | LEU | X | 535 | 34.033 | 8.405  | 52.002 | 0.00 | 0.00 |
| ATOM | 8190 | HD12 | LEU | X | 535 | 34.574 | 8.405  | 50.320 | 0.00 | 0.00 |
| ATOM | 8191 | HD13 | LEU | X | 535 | 35.817 | 8.263  | 51.446 | 0.00 | 0.00 |
| ATOM | 8192 | CD2  | LEU | X | 535 | 36.501 | 10.690 | 50.956 | 0.00 | 0.00 |
| ATOM | 8193 | HD21 | LEU | X | 535 | 37.310 | 10.035 | 51.281 | 0.00 | 0.00 |
| ATOM | 8194 | HD22 | LEU | X | 535 | 36.415 | 10.619 | 49.872 | 0.00 | 0.00 |
| ATOM | 8195 | HD23 | LEU | X | 535 | 36.634 | 11.731 | 51.251 | 0.00 | 0.00 |
| ATOM | 8196 | C    | LEU | X | 535 | 32.823 | 10.975 | 53.270 | 0.00 | 0.00 |
| ATOM | 8197 | O    | LEU | X | 535 | 32.746 | 9.992  | 53.962 | 0.00 | 0.00 |
| ATOM | 8198 | N    | LEU | X | 536 | 33.037 | 12.180 | 53.809 | 0.00 | 0.00 |
| ATOM | 8199 | H    | LEU | X | 536 | 32.843 | 12.966 | 53.205 | 0.00 | 0.00 |
| ATOM | 8200 | CA   | LEU | X | 536 | 33.219 | 12.324 | 55.297 | 0.00 | 0.00 |
| ATOM | 8201 | HA   | LEU | X | 536 | 33.857 | 11.507 | 55.632 | 0.00 | 0.00 |
| ATOM | 8202 | CB   | LEU | X | 536 | 33.863 | 13.723 | 55.591 | 0.00 | 0.00 |
| ATOM | 8203 | HB2  | LEU | X | 536 | 32.991 | 14.341 | 55.380 | 0.00 | 0.00 |
| ATOM | 8204 | HB3  | LEU | X | 536 | 34.062 | 13.795 | 56.660 | 0.00 | 0.00 |
| ATOM | 8205 | CG   | LEU | X | 536 | 35.091 | 14.097 | 54.802 | 0.00 | 0.00 |
| ATOM | 8206 | HG   | LEU | X | 536 | 34.737 | 14.230 | 53.780 | 0.00 | 0.00 |
| ATOM | 8207 | CD1  | LEU | X | 536 | 35.478 | 15.495 | 55.209 | 0.00 | 0.00 |
| ATOM | 8208 | HD11 | LEU | X | 536 | 35.828 | 15.463 | 56.241 | 0.00 | 0.00 |
| ATOM | 8209 | HD12 | LEU | X | 536 | 36.304 | 15.828 | 54.581 | 0.00 | 0.00 |
| ATOM | 8210 | HD13 | LEU | X | 536 | 34.623 | 16.153 | 55.057 | 0.00 | 0.00 |
| ATOM | 8211 | CD2  | LEU | X | 536 | 36.127 | 13.044 | 54.905 | 0.00 | 0.00 |
| ATOM | 8212 | HD21 | LEU | X | 536 | 36.059 | 12.494 | 55.843 | 0.00 | 0.00 |
| ATOM | 8213 | HD22 | LEU | X | 536 | 35.870 | 12.406 | 54.059 | 0.00 | 0.00 |
| ATOM | 8214 | HD23 | LEU | X | 536 | 37.102 | 13.525 | 54.820 | 0.00 | 0.00 |
| ATOM | 8215 | C    | LEU | X | 536 | 31.983 | 12.152 | 56.108 | 0.00 | 0.00 |
| ATOM | 8216 | O    | LEU | X | 536 | 32.027 | 11.793 | 57.282 | 0.00 | 0.00 |
| ATOM | 8217 | N    | SER | X | 537 | 30.774 | 12.519 | 55.624 | 0.00 | 0.00 |
| ATOM | 8218 | H    | SER | X | 537 | 30.693 | 12.894 | 54.690 | 0.00 | 0.00 |
| ATOM | 8219 | CA   | SER | X | 537 | 29.520 | 12.292 | 56.351 | 0.00 | 0.00 |
| ATOM | 8220 | HA   | SER | X | 537 | 29.587 | 12.687 | 57.365 | 0.00 | 0.00 |
| ATOM | 8221 | CB   | SER | X | 537 | 28.276 | 12.998 | 55.695 | 0.00 | 0.00 |
| ATOM | 8222 | HB2  | SER | X | 537 | 27.332 | 12.456 | 55.741 | 0.00 | 0.00 |
| ATOM | 8223 | HB3  | SER | X | 537 | 28.138 | 13.960 | 56.189 | 0.00 | 0.00 |
| ATOM | 8224 | OG   | SER | X | 537 | 28.485 | 13.236 | 54.312 | 0.00 | 0.00 |
| ATOM | 8225 | HG   | SER | X | 537 | 27.801 | 13.851 | 54.038 | 0.00 | 0.00 |
| ATOM | 8226 | C    | SER | X | 537 | 29.183 | 10.825 | 56.564 | 0.00 | 0.00 |
| ATOM | 8227 | O    | SER | X | 537 | 28.785 | 10.431 | 57.644 | 0.00 | 0.00 |
| ATOM | 8228 | N    | ALA | X | 538 | 29.718 | 9.945  | 55.645 | 0.00 | 0.00 |
| ATOM | 8229 | H    | ALA | X | 538 | 30.112 | 10.363 | 54.814 | 0.00 | 0.00 |

|      |      |      |     |   |     |        |        |        |      |      |
|------|------|------|-----|---|-----|--------|--------|--------|------|------|
| ATOM | 8230 | CA   | ALA | X | 538 | 29.556 | 8.503  | 55.658 | 0.00 | 0.00 |
| ATOM | 8231 | HA   | ALA | X | 538 | 28.750 | 8.232  | 56.340 | 0.00 | 0.00 |
| ATOM | 8232 | CB   | ALA | X | 538 | 29.258 | 8.076  | 54.251 | 0.00 | 0.00 |
| ATOM | 8233 | HB1  | ALA | X | 538 | 29.111 | 7.000  | 54.164 | 0.00 | 0.00 |
| ATOM | 8234 | HB2  | ALA | X | 538 | 28.417 | 8.658  | 53.873 | 0.00 | 0.00 |
| ATOM | 8235 | HB3  | ALA | X | 538 | 30.127 | 8.392  | 53.672 | 0.00 | 0.00 |
| ATOM | 8236 | C    | ALA | X | 538 | 30.808 | 7.759  | 56.268 | 0.00 | 0.00 |
| ATOM | 8237 | O    | ALA | X | 538 | 30.821 | 6.548  | 56.187 | 0.00 | 0.00 |
| ATOM | 8238 | N    | THR | X | 539 | 31.807 | 8.476  | 56.817 | 0.00 | 0.00 |
| ATOM | 8239 | H    | THR | X | 539 | 31.705 | 9.480  | 56.832 | 0.00 | 0.00 |
| ATOM | 8240 | CA   | THR | X | 539 | 33.098 | 7.800  | 57.225 | 0.00 | 0.00 |
| ATOM | 8241 | HA   | THR | X | 539 | 33.270 | 6.786  | 56.867 | 0.00 | 0.00 |
| ATOM | 8242 | CB   | THR | X | 539 | 34.338 | 8.722  | 56.958 | 0.00 | 0.00 |
| ATOM | 8243 | HB   | THR | X | 539 | 34.043 | 9.764  | 57.084 | 0.00 | 0.00 |
| ATOM | 8244 | CG2  | THR | X | 539 | 35.596 | 8.497  | 57.804 | 0.00 | 0.00 |
| ATOM | 8245 | HG21 | THR | X | 539 | 36.284 | 9.293  | 57.522 | 0.00 | 0.00 |
| ATOM | 8246 | HG22 | THR | X | 539 | 35.294 | 8.509  | 58.851 | 0.00 | 0.00 |
| ATOM | 8247 | HG23 | THR | X | 539 | 36.002 | 7.525  | 57.524 | 0.00 | 0.00 |
| ATOM | 8248 | OG1  | THR | X | 539 | 34.694 | 8.705  | 55.619 | 0.00 | 0.00 |
| ATOM | 8249 | HG1  | THR | X | 539 | 34.046 | 9.235  | 55.150 | 0.00 | 0.00 |
| ATOM | 8250 | C    | THR | X | 539 | 33.038 | 7.537  | 58.750 | 0.00 | 0.00 |
| ATOM | 8251 | O    | THR | X | 539 | 32.735 | 6.350  | 59.054 | 0.00 | 0.00 |
| ATOM | 8252 | OXT  | THR | X | 539 | 32.907 | 8.501  | 59.529 | 0.00 | 0.00 |
| ATOM | 8253 | C    | LIG | X | 540 | 50.570 | 37.381 | 49.693 | 0.00 | 0.00 |
| ATOM | 8254 | C1   | LIG | X | 540 | 50.244 | 37.150 | 50.986 | 0.00 | 0.00 |
| ATOM | 8255 | C2   | LIG | X | 540 | 49.849 | 35.885 | 51.312 | 0.00 | 0.00 |
| ATOM | 8256 | C3   | LIG | X | 540 | 49.910 | 34.827 | 50.432 | 0.00 | 0.00 |
| ATOM | 8257 | C4   | LIG | X | 540 | 50.246 | 35.018 | 49.030 | 0.00 | 0.00 |
| ATOM | 8258 | C5   | LIG | X | 540 | 50.578 | 36.365 | 48.714 | 0.00 | 0.00 |
| ATOM | 8259 | C6   | LIG | X | 540 | 50.883 | 38.774 | 49.306 | 0.00 | 0.00 |
| ATOM | 8260 | N    | LIG | X | 540 | 49.659 | 39.690 | 49.180 | 0.00 | 0.00 |
| ATOM | 8261 | C7   | LIG | X | 540 | 50.034 | 40.950 | 48.525 | 0.00 | 0.00 |
| ATOM | 8262 | C8   | LIG | X | 540 | 48.773 | 41.931 | 48.509 | 0.00 | 0.00 |
| ATOM | 8263 | O    | LIG | X | 540 | 47.724 | 41.281 | 47.802 | 0.00 | 0.00 |
| ATOM | 8264 | C9   | LIG | X | 540 | 47.335 | 39.958 | 48.374 | 0.00 | 0.00 |
| ATOM | 8265 | C10  | LIG | X | 540 | 48.566 | 39.099 | 48.421 | 0.00 | 0.00 |
| ATOM | 8266 | H    | LIG | X | 540 | 49.329 | 39.945 | 50.125 | 0.00 | 0.00 |
| ATOM | 8267 | O1   | LIG | X | 540 | 49.519 | 35.665 | 52.602 | 0.00 | 0.00 |
| ATOM | 8268 | C11  | LIG | X | 540 | 50.558 | 35.031 | 53.442 | 0.00 | 0.00 |
| ATOM | 8269 | O2   | LIG | X | 540 | 49.610 | 33.604 | 50.856 | 0.00 | 0.00 |
| ATOM | 8270 | H1   | LIG | X | 540 | 49.129 | 33.621 | 51.703 | 0.00 | 0.00 |
| ATOM | 8271 | H2   | LIG | X | 540 | 50.188 | 37.985 | 51.680 | 0.00 | 0.00 |
| ATOM | 8272 | H3   | LIG | X | 540 | 50.145 | 34.201 | 48.320 | 0.00 | 0.00 |
| ATOM | 8273 | H4   | LIG | X | 540 | 50.794 | 36.585 | 47.672 | 0.00 | 0.00 |
| ATOM | 8274 | H5   | LIG | X | 540 | 51.525 | 39.301 | 50.013 | 0.00 | 0.00 |
| ATOM | 8275 | H6   | LIG | X | 540 | 51.495 | 38.806 | 48.404 | 0.00 | 0.00 |
| ATOM | 8276 | H7   | LIG | X | 540 | 50.114 | 40.794 | 47.448 | 0.00 | 0.00 |
| ATOM | 8277 | H8   | LIG | X | 540 | 50.919 | 41.362 | 49.012 | 0.00 | 0.00 |
| ATOM | 8278 | H9   | LIG | X | 540 | 48.605 | 42.263 | 49.537 | 0.00 | 0.00 |
| ATOM | 8279 | H10  | LIG | X | 540 | 49.057 | 42.843 | 47.978 | 0.00 | 0.00 |
| ATOM | 8280 | H11  | LIG | X | 540 | 47.111 | 40.132 | 49.430 | 0.00 | 0.00 |
| ATOM | 8281 | H12  | LIG | X | 540 | 46.503 | 39.633 | 47.744 | 0.00 | 0.00 |
| ATOM | 8282 | H13  | LIG | X | 540 | 48.998 | 39.029 | 47.422 | 0.00 | 0.00 |
| ATOM | 8283 | H14  | LIG | X | 540 | 48.376 | 38.087 | 48.781 | 0.00 | 0.00 |
| ATOM | 8284 | H15  | LIG | X | 540 | 50.256 | 35.016 | 54.493 | 0.00 | 0.00 |
| ATOM | 8285 | H16  | LIG | X | 540 | 51.489 | 35.601 | 53.395 | 0.00 | 0.00 |
| ATOM | 8286 | H17  | LIG | X | 540 | 50.773 | 34.023 | 53.079 | 0.00 | 0.00 |
| ATOM | 8287 | Na+  | Na+ | X | 541 | 58.007 | 49.464 | 40.654 | 0.00 | 0.00 |
| ATOM | 8288 | Na+  | Na+ | X | 542 | 53.322 | 21.969 | 65.993 | 0.00 | 0.00 |
| ATOM | 8289 | Na+  | Na+ | X | 543 | 29.763 | 8.632  | 61.746 | 0.00 | 0.00 |
| ATOM | 8290 | Na+  | Na+ | X | 544 | 53.254 | 3.060  | 50.605 | 0.00 | 0.00 |
| ATOM | 8291 | Na+  | Na+ | X | 545 | 48.254 | 24.648 | 36.659 | 0.00 | 0.00 |
| ATOM | 8292 | Na+  | Na+ | X | 546 | 16.197 | 7.461  | 77.630 | 0.00 | 0.00 |
| ATOM | 8293 | Na+  | Na+ | X | 547 | 53.436 | 44.691 | 34.431 | 0.00 | 0.00 |

END

The following are coordinates for each of the aged AChE frames used in our computational protocol.

#-----  
# 1B41 Production MD Frame 0000

#-----

|        |        |        |        |       |       |        |        |        |      |      |
|--------|--------|--------|--------|-------|-------|--------|--------|--------|------|------|
| CRYST1 | 86.314 | 86.314 | 86.314 | 90.00 | 90.00 | 90.00  | P 1    | 1      |      |      |
| ATOM   | 1      | N      | ASP    | X     | 1     | 22.176 | 40.204 | 12.337 | 0.00 | 0.00 |
| ATOM   | 2      | H1     | ASP    | X     | 1     | 21.550 | 40.487 | 11.596 | 0.00 | 0.00 |
| ATOM   | 3      | H2     | ASP    | X     | 1     | 21.665 | 39.839 | 13.128 | 0.00 | 0.00 |
| ATOM   | 4      | H3     | ASP    | X     | 1     | 22.639 | 39.441 | 11.864 | 0.00 | 0.00 |
| ATOM   | 5      | CA     | ASP    | X     | 1     | 23.176 | 41.225 | 12.674 | 0.00 | 0.00 |
| ATOM   | 6      | HA     | ASP    | X     | 1     | 23.864 | 40.730 | 13.359 | 0.00 | 0.00 |
| ATOM   | 7      | CB     | ASP    | X     | 1     | 23.958 | 41.716 | 11.513 | 0.00 | 0.00 |
| ATOM   | 8      | HB2    | ASP    | X     | 1     | 23.366 | 41.797 | 10.601 | 0.00 | 0.00 |
| ATOM   | 9      | HB3    | ASP    | X     | 1     | 24.456 | 42.656 | 11.751 | 0.00 | 0.00 |
| ATOM   | 10     | CG     | ASP    | X     | 1     | 24.999 | 40.698 | 11.057 | 0.00 | 0.00 |
| ATOM   | 11     | OD1    | ASP    | X     | 1     | 24.930 | 39.472 | 11.407 | 0.00 | 0.00 |
| ATOM   | 12     | OD2    | ASP    | X     | 1     | 25.956 | 41.207 | 10.422 | 0.00 | 0.00 |
| ATOM   | 13     | C      | ASP    | X     | 1     | 22.551 | 42.401 | 13.381 | 0.00 | 0.00 |
| ATOM   | 14     | O      | ASP    | X     | 1     | 23.297 | 43.108 | 14.066 | 0.00 | 0.00 |
| ATOM   | 15     | N      | ALA    | X     | 2     | 21.267 | 42.774 | 13.074 | 0.00 | 0.00 |
| ATOM   | 16     | H      | ALA    | X     | 2     | 20.757 | 42.233 | 12.391 | 0.00 | 0.00 |
| ATOM   | 17     | CA     | ALA    | X     | 2     | 20.729 | 44.120 | 13.425 | 0.00 | 0.00 |
| ATOM   | 18     | HA     | ALA    | X     | 2     | 21.285 | 44.823 | 12.806 | 0.00 | 0.00 |
| ATOM   | 19     | CB     | ALA    | X     | 2     | 19.227 | 44.238 | 12.993 | 0.00 | 0.00 |
| ATOM   | 20     | HB1    | ALA    | X     | 2     | 18.796 | 43.419 | 13.569 | 0.00 | 0.00 |
| ATOM   | 21     | HB2    | ALA    | X     | 2     | 19.046 | 44.073 | 11.931 | 0.00 | 0.00 |
| ATOM   | 22     | HB3    | ALA    | X     | 2     | 18.839 | 45.212 | 13.292 | 0.00 | 0.00 |
| ATOM   | 23     | C      | ALA    | X     | 2     | 20.942 | 44.620 | 14.878 | 0.00 | 0.00 |
| ATOM   | 24     | O      | ALA    | X     | 2     | 21.101 | 45.829 | 15.056 | 0.00 | 0.00 |
| ATOM   | 25     | N      | GLU    | X     | 3     | 21.166 | 43.713 | 15.874 | 0.00 | 0.00 |
| ATOM   | 26     | H      | GLU    | X     | 3     | 21.101 | 42.774 | 15.507 | 0.00 | 0.00 |
| ATOM   | 27     | CA     | GLU    | X     | 3     | 21.395 | 44.039 | 17.282 | 0.00 | 0.00 |
| ATOM   | 28     | HA     | GLU    | X     | 3     | 20.649 | 44.692 | 17.736 | 0.00 | 0.00 |
| ATOM   | 29     | CB     | GLU    | X     | 3     | 21.429 | 42.768 | 18.135 | 0.00 | 0.00 |
| ATOM   | 30     | HB2    | GLU    | X     | 3     | 22.290 | 42.117 | 17.978 | 0.00 | 0.00 |
| ATOM   | 31     | HB3    | GLU    | X     | 3     | 21.600 | 43.053 | 19.173 | 0.00 | 0.00 |
| ATOM   | 32     | CG     | GLU    | X     | 3     | 20.123 | 41.900 | 18.033 | 0.00 | 0.00 |
| ATOM   | 33     | HG2    | GLU    | X     | 3     | 19.245 | 42.540 | 17.951 | 0.00 | 0.00 |
| ATOM   | 34     | HG3    | GLU    | X     | 3     | 20.071 | 41.227 | 17.177 | 0.00 | 0.00 |
| ATOM   | 35     | CD     | GLU    | X     | 3     | 20.067 | 40.985 | 19.241 | 0.00 | 0.00 |
| ATOM   | 36     | OE1    | GLU    | X     | 3     | 21.104 | 40.571 | 19.827 | 0.00 | 0.00 |
| ATOM   | 37     | OE2    | GLU    | X     | 3     | 18.884 | 40.693 | 19.653 | 0.00 | 0.00 |
| ATOM   | 38     | C      | GLU    | X     | 3     | 22.679 | 44.773 | 17.578 | 0.00 | 0.00 |
| ATOM   | 39     | O      | GLU    | X     | 3     | 22.848 | 45.356 | 18.642 | 0.00 | 0.00 |
| ATOM   | 40     | N      | LEU    | X     | 4     | 23.707 | 44.646 | 16.739 | 0.00 | 0.00 |
| ATOM   | 41     | H      | LEU    | X     | 4     | 23.554 | 44.195 | 15.848 | 0.00 | 0.00 |
| ATOM   | 42     | CA     | LEU    | X     | 4     | 25.134 | 44.939 | 16.885 | 0.00 | 0.00 |
| ATOM   | 43     | HA     | LEU    | X     | 4     | 25.504 | 44.629 | 17.862 | 0.00 | 0.00 |
| ATOM   | 44     | CB     | LEU    | X     | 4     | 25.968 | 44.049 | 15.957 | 0.00 | 0.00 |
| ATOM   | 45     | HB2    | LEU    | X     | 4     | 25.714 | 44.306 | 14.929 | 0.00 | 0.00 |
| ATOM   | 46     | HB3    | LEU    | X     | 4     | 27.020 | 44.332 | 16.006 | 0.00 | 0.00 |
| ATOM   | 47     | CG     | LEU    | X     | 4     | 25.922 | 42.555 | 16.202 | 0.00 | 0.00 |
| ATOM   | 48     | HG     | LEU    | X     | 4     | 24.899 | 42.210 | 16.054 | 0.00 | 0.00 |
| ATOM   | 49     | CD1    | LEU    | X     | 4     | 26.764 | 41.856 | 15.094 | 0.00 | 0.00 |
| ATOM   | 50     | HD11   | LEU    | X     | 4     | 26.591 | 40.782 | 15.154 | 0.00 | 0.00 |
| ATOM   | 51     | HD12   | LEU    | X     | 4     | 27.822 | 42.115 | 15.083 | 0.00 | 0.00 |
| ATOM   | 52     | HD13   | LEU    | X     | 4     | 26.449 | 42.239 | 14.124 | 0.00 | 0.00 |
| ATOM   | 53     | CD2    | LEU    | X     | 4     | 26.336 | 42.152 | 17.623 | 0.00 | 0.00 |
| ATOM   | 54     | HD21   | LEU    | X     | 4     | 27.323 | 42.583 | 17.791 | 0.00 | 0.00 |
| ATOM   | 55     | HD22   | LEU    | X     | 4     | 25.610 | 42.536 | 18.340 | 0.00 | 0.00 |
| ATOM   | 56     | HD23   | LEU    | X     | 4     | 26.310 | 41.067 | 17.720 | 0.00 | 0.00 |
| ATOM   | 57     | C      | LEU    | X     | 4     | 25.444 | 46.417 | 16.828 | 0.00 | 0.00 |
| ATOM   | 58     | O      | LEU    | X     | 4     | 26.567 | 46.850 | 16.944 | 0.00 | 0.00 |
| ATOM   | 59     | N      | LEU    | X     | 5     | 24.427 | 47.266 | 16.745 | 0.00 | 0.00 |
| ATOM   | 60     | H      | LEU    | X     | 5     | 23.507 | 46.852 | 16.807 | 0.00 | 0.00 |
| ATOM   | 61     | CA     | LEU    | X     | 5     | 24.410 | 48.700 | 16.895 | 0.00 | 0.00 |
| ATOM   | 62     | HA     | LEU    | X     | 5     | 25.424 | 49.101 | 16.912 | 0.00 | 0.00 |
| ATOM   | 63     | CB     | LEU    | X     | 5     | 23.734 | 49.417 | 15.731 | 0.00 | 0.00 |
| ATOM   | 64     | HB2    | LEU    | X     | 5     | 22.665 | 49.209 | 15.771 | 0.00 | 0.00 |

|      |     |      |     |   |   |        |        |        |      |      |
|------|-----|------|-----|---|---|--------|--------|--------|------|------|
| ATOM | 65  | HB3  | LEU | X | 5 | 23.764 | 50.497 | 15.871 | 0.00 | 0.00 |
| ATOM | 66  | CG   | LEU | X | 5 | 24.330 | 49.250 | 14.308 | 0.00 | 0.00 |
| ATOM | 67  | HG   | LEU | X | 5 | 23.826 | 49.968 | 13.662 | 0.00 | 0.00 |
| ATOM | 68  | CD1  | LEU | X | 5 | 25.812 | 49.622 | 14.174 | 0.00 | 0.00 |
| ATOM | 69  | HD11 | LEU | X | 5 | 26.244 | 48.895 | 14.862 | 0.00 | 0.00 |
| ATOM | 70  | HD12 | LEU | X | 5 | 26.002 | 50.583 | 14.652 | 0.00 | 0.00 |
| ATOM | 71  | HD13 | LEU | X | 5 | 26.186 | 49.561 | 13.152 | 0.00 | 0.00 |
| ATOM | 72  | CD2  | LEU | X | 5 | 24.008 | 47.910 | 13.635 | 0.00 | 0.00 |
| ATOM | 73  | HD21 | LEU | X | 5 | 22.929 | 47.765 | 13.578 | 0.00 | 0.00 |
| ATOM | 74  | HD22 | LEU | X | 5 | 24.238 | 47.972 | 12.571 | 0.00 | 0.00 |
| ATOM | 75  | HD23 | LEU | X | 5 | 24.511 | 47.118 | 14.189 | 0.00 | 0.00 |
| ATOM | 76  | C    | LEU | X | 5 | 23.722 | 49.053 | 18.217 | 0.00 | 0.00 |
| ATOM | 77  | O    | LEU | X | 5 | 22.642 | 48.507 | 18.470 | 0.00 | 0.00 |
| ATOM | 78  | N    | VAL | X | 6 | 24.285 | 49.936 | 19.004 | 0.00 | 0.00 |
| ATOM | 79  | H    | VAL | X | 6 | 25.197 | 50.241 | 18.694 | 0.00 | 0.00 |
| ATOM | 80  | CA   | VAL | X | 6 | 23.760 | 50.402 | 20.343 | 0.00 | 0.00 |
| ATOM | 81  | HA   | VAL | X | 6 | 22.675 | 50.459 | 20.258 | 0.00 | 0.00 |
| ATOM | 82  | CB   | VAL | X | 6 | 24.214 | 49.508 | 21.480 | 0.00 | 0.00 |
| ATOM | 83  | HB   | VAL | X | 6 | 25.296 | 49.374 | 21.504 | 0.00 | 0.00 |
| ATOM | 84  | CG1  | VAL | X | 6 | 23.860 | 50.056 | 22.896 | 0.00 | 0.00 |
| ATOM | 85  | HG11 | VAL | X | 6 | 24.025 | 49.330 | 23.693 | 0.00 | 0.00 |
| ATOM | 86  | HG12 | VAL | X | 6 | 24.377 | 50.988 | 23.120 | 0.00 | 0.00 |
| ATOM | 87  | HG13 | VAL | X | 6 | 22.802 | 50.319 | 22.891 | 0.00 | 0.00 |
| ATOM | 88  | CG2  | VAL | X | 6 | 23.664 | 48.154 | 21.438 | 0.00 | 0.00 |
| ATOM | 89  | HG21 | VAL | X | 6 | 22.587 | 48.207 | 21.597 | 0.00 | 0.00 |
| ATOM | 90  | HG22 | VAL | X | 6 | 24.047 | 47.487 | 22.210 | 0.00 | 0.00 |
| ATOM | 91  | HG23 | VAL | X | 6 | 23.854 | 47.747 | 20.445 | 0.00 | 0.00 |
| ATOM | 92  | C    | VAL | X | 6 | 24.186 | 51.837 | 20.499 | 0.00 | 0.00 |
| ATOM | 93  | O    | VAL | X | 6 | 25.413 | 52.131 | 20.446 | 0.00 | 0.00 |
| ATOM | 94  | N    | THR | X | 7 | 23.258 | 52.763 | 20.858 | 0.00 | 0.00 |
| ATOM | 95  | H    | THR | X | 7 | 22.305 | 52.439 | 20.938 | 0.00 | 0.00 |
| ATOM | 96  | CA   | THR | X | 7 | 23.601 | 54.164 | 21.307 | 0.00 | 0.00 |
| ATOM | 97  | HA   | THR | X | 7 | 24.594 | 54.365 | 20.903 | 0.00 | 0.00 |
| ATOM | 98  | CB   | THR | X | 7 | 22.603 | 55.222 | 20.738 | 0.00 | 0.00 |
| ATOM | 99  | HB   | THR | X | 7 | 21.601 | 54.892 | 21.015 | 0.00 | 0.00 |
| ATOM | 100 | CG2  | THR | X | 7 | 23.027 | 56.615 | 21.174 | 0.00 | 0.00 |
| ATOM | 101 | HG21 | THR | X | 7 | 22.251 | 57.219 | 20.703 | 0.00 | 0.00 |
| ATOM | 102 | HG22 | THR | X | 7 | 24.007 | 56.884 | 20.780 | 0.00 | 0.00 |
| ATOM | 103 | HG23 | THR | X | 7 | 22.857 | 56.733 | 22.244 | 0.00 | 0.00 |
| ATOM | 104 | OG1  | THR | X | 7 | 22.585 | 55.114 | 19.336 | 0.00 | 0.00 |
| ATOM | 105 | HG1  | THR | X | 7 | 22.051 | 54.318 | 19.274 | 0.00 | 0.00 |
| ATOM | 106 | C    | THR | X | 7 | 23.720 | 54.158 | 22.782 | 0.00 | 0.00 |
| ATOM | 107 | O    | THR | X | 7 | 22.755 | 53.720 | 23.411 | 0.00 | 0.00 |
| ATOM | 108 | N    | VAL | X | 8 | 24.844 | 54.544 | 23.392 | 0.00 | 0.00 |
| ATOM | 109 | H    | VAL | X | 8 | 25.618 | 54.829 | 22.808 | 0.00 | 0.00 |
| ATOM | 110 | CA   | VAL | X | 8 | 24.905 | 54.793 | 24.847 | 0.00 | 0.00 |
| ATOM | 111 | HA   | VAL | X | 8 | 24.032 | 54.404 | 25.370 | 0.00 | 0.00 |
| ATOM | 112 | CB   | VAL | X | 8 | 26.103 | 54.080 | 25.477 | 0.00 | 0.00 |
| ATOM | 113 | HB   | VAL | X | 8 | 26.058 | 54.507 | 26.478 | 0.00 | 0.00 |
| ATOM | 114 | CG1  | VAL | X | 8 | 25.946 | 52.579 | 25.468 | 0.00 | 0.00 |
| ATOM | 115 | HG11 | VAL | X | 8 | 26.011 | 52.167 | 24.461 | 0.00 | 0.00 |
| ATOM | 116 | HG12 | VAL | X | 8 | 26.822 | 52.161 | 25.964 | 0.00 | 0.00 |
| ATOM | 117 | HG13 | VAL | X | 8 | 25.021 | 52.266 | 25.953 | 0.00 | 0.00 |
| ATOM | 118 | CG2  | VAL | X | 8 | 27.459 | 54.578 | 24.865 | 0.00 | 0.00 |
| ATOM | 119 | HG21 | VAL | X | 8 | 27.575 | 54.423 | 23.792 | 0.00 | 0.00 |
| ATOM | 120 | HG22 | VAL | X | 8 | 28.273 | 54.076 | 25.388 | 0.00 | 0.00 |
| ATOM | 121 | HG23 | VAL | X | 8 | 27.576 | 55.634 | 25.109 | 0.00 | 0.00 |
| ATOM | 122 | C    | VAL | X | 8 | 24.842 | 56.318 | 25.142 | 0.00 | 0.00 |
| ATOM | 123 | O    | VAL | X | 8 | 24.980 | 57.082 | 24.144 | 0.00 | 0.00 |
| ATOM | 124 | N    | ARG | X | 9 | 24.863 | 56.793 | 26.386 | 0.00 | 0.00 |
| ATOM | 125 | H    | ARG | X | 9 | 24.850 | 56.141 | 27.157 | 0.00 | 0.00 |
| ATOM | 126 | CA   | ARG | X | 9 | 24.862 | 58.294 | 26.663 | 0.00 | 0.00 |
| ATOM | 127 | HA   | ARG | X | 9 | 23.915 | 58.731 | 26.344 | 0.00 | 0.00 |
| ATOM | 128 | CB   | ARG | X | 9 | 25.147 | 58.426 | 28.132 | 0.00 | 0.00 |
| ATOM | 129 | HB2  | ARG | X | 9 | 24.344 | 57.810 | 28.536 | 0.00 | 0.00 |
| ATOM | 130 | HB3  | ARG | X | 9 | 26.164 | 58.083 | 28.320 | 0.00 | 0.00 |
| ATOM | 131 | CG   | ARG | X | 9 | 24.983 | 59.804 | 28.765 | 0.00 | 0.00 |

|      |     |      |     |   |    |        |        |        |      |      |
|------|-----|------|-----|---|----|--------|--------|--------|------|------|
| ATOM | 132 | HG2  | ARG | X | 9  | 25.387 | 59.817 | 29.778 | 0.00 | 0.00 |
| ATOM | 133 | HG3  | ARG | X | 9  | 25.552 | 60.551 | 28.211 | 0.00 | 0.00 |
| ATOM | 134 | CD   | ARG | X | 9  | 23.494 | 60.326 | 28.868 | 0.00 | 0.00 |
| ATOM | 135 | HD2  | ARG | X | 9  | 23.436 | 61.365 | 29.194 | 0.00 | 0.00 |
| ATOM | 136 | HD3  | ARG | X | 9  | 23.024 | 60.160 | 27.898 | 0.00 | 0.00 |
| ATOM | 137 | NE   | ARG | X | 9  | 22.724 | 59.559 | 29.815 | 0.00 | 0.00 |
| ATOM | 138 | HE   | ARG | X | 9  | 23.265 | 58.887 | 30.340 | 0.00 | 0.00 |
| ATOM | 139 | CZ   | ARG | X | 9  | 21.511 | 59.870 | 30.332 | 0.00 | 0.00 |
| ATOM | 140 | NH1  | ARG | X | 9  | 20.925 | 60.976 | 29.979 | 0.00 | 0.00 |
| ATOM | 141 | HH11 | ARG | X | 9  | 21.373 | 61.699 | 29.434 | 0.00 | 0.00 |
| ATOM | 142 | HH12 | ARG | X | 9  | 20.029 | 61.237 | 30.366 | 0.00 | 0.00 |
| ATOM | 143 | NH2  | ARG | X | 9  | 20.965 | 59.188 | 31.294 | 0.00 | 0.00 |
| ATOM | 144 | HH21 | ARG | X | 9  | 21.455 | 58.372 | 31.631 | 0.00 | 0.00 |
| ATOM | 145 | HH22 | ARG | X | 9  | 20.032 | 59.379 | 31.630 | 0.00 | 0.00 |
| ATOM | 146 | C    | ARG | X | 9  | 25.983 | 59.146 | 25.977 | 0.00 | 0.00 |
| ATOM | 147 | O    | ARG | X | 9  | 25.782 | 60.295 | 25.631 | 0.00 | 0.00 |
| ATOM | 148 | N    | GLY | X | 10 | 27.125 | 58.490 | 25.778 | 0.00 | 0.00 |
| ATOM | 149 | H    | GLY | X | 10 | 27.258 | 57.576 | 26.188 | 0.00 | 0.00 |
| ATOM | 150 | CA   | GLY | X | 10 | 28.274 | 59.141 | 25.104 | 0.00 | 0.00 |
| ATOM | 151 | HA2  | GLY | X | 10 | 28.373 | 60.194 | 25.368 | 0.00 | 0.00 |
| ATOM | 152 | HA3  | GLY | X | 10 | 29.187 | 58.571 | 25.273 | 0.00 | 0.00 |
| ATOM | 153 | C    | GLY | X | 10 | 28.145 | 59.004 | 23.567 | 0.00 | 0.00 |
| ATOM | 154 | O    | GLY | X | 10 | 28.967 | 59.676 | 22.888 | 0.00 | 0.00 |
| ATOM | 155 | N    | GLY | X | 11 | 27.220 | 58.193 | 22.938 | 0.00 | 0.00 |
| ATOM | 156 | H    | GLY | X | 11 | 26.606 | 57.685 | 23.559 | 0.00 | 0.00 |
| ATOM | 157 | CA   | GLY | X | 11 | 27.173 | 58.040 | 21.496 | 0.00 | 0.00 |
| ATOM | 158 | HA2  | GLY | X | 11 | 26.284 | 58.573 | 21.158 | 0.00 | 0.00 |
| ATOM | 159 | HA3  | GLY | X | 11 | 27.970 | 58.571 | 20.976 | 0.00 | 0.00 |
| ATOM | 160 | C    | GLY | X | 11 | 27.083 | 56.597 | 20.918 | 0.00 | 0.00 |
| ATOM | 161 | O    | GLY | X | 11 | 26.624 | 55.678 | 21.563 | 0.00 | 0.00 |
| ATOM | 162 | N    | ARG | X | 12 | 27.340 | 56.446 | 19.631 | 0.00 | 0.00 |
| ATOM | 163 | H    | ARG | X | 12 | 27.620 | 57.253 | 19.092 | 0.00 | 0.00 |
| ATOM | 164 | CA   | ARG | X | 12 | 27.063 | 55.234 | 18.817 | 0.00 | 0.00 |
| ATOM | 165 | HA   | ARG | X | 12 | 26.226 | 54.668 | 19.228 | 0.00 | 0.00 |
| ATOM | 166 | CB   | ARG | X | 12 | 26.681 | 55.638 | 17.357 | 0.00 | 0.00 |
| ATOM | 167 | HB2  | ARG | X | 12 | 27.349 | 56.412 | 16.977 | 0.00 | 0.00 |
| ATOM | 168 | HB3  | ARG | X | 12 | 26.708 | 54.696 | 16.810 | 0.00 | 0.00 |
| ATOM | 169 | CG   | ARG | X | 12 | 25.301 | 56.265 | 17.259 | 0.00 | 0.00 |
| ATOM | 170 | HG2  | ARG | X | 12 | 24.522 | 55.513 | 17.132 | 0.00 | 0.00 |
| ATOM | 171 | HG3  | ARG | X | 12 | 25.127 | 56.749 | 18.220 | 0.00 | 0.00 |
| ATOM | 172 | CD   | ARG | X | 12 | 25.192 | 57.289 | 16.133 | 0.00 | 0.00 |
| ATOM | 173 | HD2  | ARG | X | 12 | 24.220 | 57.762 | 16.269 | 0.00 | 0.00 |
| ATOM | 174 | HD3  | ARG | X | 12 | 25.914 | 58.099 | 16.232 | 0.00 | 0.00 |
| ATOM | 175 | NE   | ARG | X | 12 | 25.274 | 56.737 | 14.794 | 0.00 | 0.00 |
| ATOM | 176 | HE   | ARG | X | 12 | 25.381 | 55.734 | 14.741 | 0.00 | 0.00 |
| ATOM | 177 | CZ   | ARG | X | 12 | 25.445 | 57.478 | 13.688 | 0.00 | 0.00 |
| ATOM | 178 | NH1  | ARG | X | 12 | 25.288 | 58.826 | 13.673 | 0.00 | 0.00 |
| ATOM | 179 | HH11 | ARG | X | 12 | 24.976 | 59.345 | 14.482 | 0.00 | 0.00 |
| ATOM | 180 | HH12 | ARG | X | 12 | 25.448 | 59.229 | 12.761 | 0.00 | 0.00 |
| ATOM | 181 | NH2  | ARG | X | 12 | 25.901 | 56.873 | 12.606 | 0.00 | 0.00 |
| ATOM | 182 | HH21 | ARG | X | 12 | 26.115 | 55.886 | 12.611 | 0.00 | 0.00 |
| ATOM | 183 | HH22 | ARG | X | 12 | 26.067 | 57.356 | 11.735 | 0.00 | 0.00 |
| ATOM | 184 | C    | ARG | X | 12 | 28.183 | 54.276 | 18.937 | 0.00 | 0.00 |
| ATOM | 185 | O    | ARG | X | 12 | 29.334 | 54.676 | 18.996 | 0.00 | 0.00 |
| ATOM | 186 | N    | LEU | X | 13 | 27.855 | 53.011 | 18.975 | 0.00 | 0.00 |
| ATOM | 187 | H    | LEU | X | 13 | 26.875 | 52.766 | 18.947 | 0.00 | 0.00 |
| ATOM | 188 | CA   | LEU | X | 13 | 28.725 | 51.794 | 19.132 | 0.00 | 0.00 |
| ATOM | 189 | HA   | LEU | X | 13 | 29.784 | 51.977 | 18.950 | 0.00 | 0.00 |
| ATOM | 190 | CB   | LEU | X | 13 | 28.611 | 51.147 | 20.515 | 0.00 | 0.00 |
| ATOM | 191 | HB2  | LEU | X | 13 | 27.575 | 50.830 | 20.638 | 0.00 | 0.00 |
| ATOM | 192 | HB3  | LEU | X | 13 | 29.271 | 50.281 | 20.497 | 0.00 | 0.00 |
| ATOM | 193 | CG   | LEU | X | 13 | 29.117 | 52.052 | 21.696 | 0.00 | 0.00 |
| ATOM | 194 | HG   | LEU | X | 13 | 28.679 | 53.050 | 21.695 | 0.00 | 0.00 |
| ATOM | 195 | CD1  | LEU | X | 13 | 28.811 | 51.393 | 23.066 | 0.00 | 0.00 |
| ATOM | 196 | HD11 | LEU | X | 13 | 27.737 | 51.291 | 23.220 | 0.00 | 0.00 |
| ATOM | 197 | HD12 | LEU | X | 13 | 29.191 | 52.003 | 23.886 | 0.00 | 0.00 |
| ATOM | 198 | HD13 | LEU | X | 13 | 29.181 | 50.369 | 23.105 | 0.00 | 0.00 |

|      |     |      |     |   |    |        |        |        |      |      |
|------|-----|------|-----|---|----|--------|--------|--------|------|------|
| ATOM | 199 | CD2  | LEU | X | 13 | 30.659 | 52.279 | 21.625 | 0.00 | 0.00 |
| ATOM | 200 | HD21 | LEU | X | 13 | 30.874 | 52.839 | 20.715 | 0.00 | 0.00 |
| ATOM | 201 | HD22 | LEU | X | 13 | 31.044 | 52.834 | 22.481 | 0.00 | 0.00 |
| ATOM | 202 | HD23 | LEU | X | 13 | 31.296 | 51.397 | 21.557 | 0.00 | 0.00 |
| ATOM | 203 | C    | LEU | X | 13 | 28.343 | 50.680 | 18.188 | 0.00 | 0.00 |
| ATOM | 204 | O    | LEU | X | 13 | 27.149 | 50.376 | 18.101 | 0.00 | 0.00 |
| ATOM | 205 | N    | ARG | X | 14 | 29.360 | 50.172 | 17.446 | 0.00 | 0.00 |
| ATOM | 206 | H    | ARG | X | 14 | 30.311 | 50.479 | 17.592 | 0.00 | 0.00 |
| ATOM | 207 | CA   | ARG | X | 14 | 29.234 | 49.087 | 16.467 | 0.00 | 0.00 |
| ATOM | 208 | HA   | ARG | X | 14 | 28.185 | 48.801 | 16.535 | 0.00 | 0.00 |
| ATOM | 209 | CB   | ARG | X | 14 | 29.564 | 49.640 | 15.058 | 0.00 | 0.00 |
| ATOM | 210 | HB2  | ARG | X | 14 | 28.834 | 50.446 | 14.982 | 0.00 | 0.00 |
| ATOM | 211 | HB3  | ARG | X | 14 | 30.564 | 50.074 | 15.041 | 0.00 | 0.00 |
| ATOM | 212 | CG   | ARG | X | 14 | 29.223 | 48.650 | 13.916 | 0.00 | 0.00 |
| ATOM | 213 | HG2  | ARG | X | 14 | 28.665 | 47.796 | 14.300 | 0.00 | 0.00 |
| ATOM | 214 | HG3  | ARG | X | 14 | 28.669 | 49.151 | 13.122 | 0.00 | 0.00 |
| ATOM | 215 | CD   | ARG | X | 14 | 30.462 | 47.998 | 13.257 | 0.00 | 0.00 |
| ATOM | 216 | HD2  | ARG | X | 14 | 30.908 | 47.290 | 13.955 | 0.00 | 0.00 |
| ATOM | 217 | HD3  | ARG | X | 14 | 29.995 | 47.404 | 12.471 | 0.00 | 0.00 |
| ATOM | 218 | NE   | ARG | X | 14 | 31.456 | 48.976 | 12.778 | 0.00 | 0.00 |
| ATOM | 219 | HE   | ARG | X | 14 | 31.097 | 49.863 | 12.455 | 0.00 | 0.00 |
| ATOM | 220 | CZ   | ARG | X | 14 | 32.760 | 48.885 | 13.038 | 0.00 | 0.00 |
| ATOM | 221 | NH1  | ARG | X | 14 | 33.323 | 47.725 | 13.299 | 0.00 | 0.00 |
| ATOM | 222 | HH11 | ARG | X | 14 | 32.775 | 46.917 | 13.040 | 0.00 | 0.00 |
| ATOM | 223 | HH12 | ARG | X | 14 | 34.299 | 47.707 | 13.556 | 0.00 | 0.00 |
| ATOM | 224 | NH2  | ARG | X | 14 | 33.559 | 49.925 | 12.985 | 0.00 | 0.00 |
| ATOM | 225 | HH21 | ARG | X | 14 | 33.265 | 50.782 | 12.539 | 0.00 | 0.00 |
| ATOM | 226 | HH22 | ARG | X | 14 | 34.564 | 49.875 | 13.067 | 0.00 | 0.00 |
| ATOM | 227 | C    | ARG | X | 14 | 30.071 | 47.859 | 16.847 | 0.00 | 0.00 |
| ATOM | 228 | O    | ARG | X | 14 | 31.289 | 47.915 | 16.814 | 0.00 | 0.00 |
| ATOM | 229 | N    | GLY | X | 15 | 29.439 | 46.744 | 17.308 | 0.00 | 0.00 |
| ATOM | 230 | H    | GLY | X | 15 | 28.434 | 46.644 | 17.337 | 0.00 | 0.00 |
| ATOM | 231 | CA   | GLY | X | 15 | 30.099 | 45.527 | 17.866 | 0.00 | 0.00 |
| ATOM | 232 | HA2  | GLY | X | 15 | 31.117 | 45.709 | 18.211 | 0.00 | 0.00 |
| ATOM | 233 | HA3  | GLY | X | 15 | 29.615 | 45.281 | 18.811 | 0.00 | 0.00 |
| ATOM | 234 | C    | GLY | X | 15 | 29.980 | 44.302 | 16.943 | 0.00 | 0.00 |
| ATOM | 235 | O    | GLY | X | 15 | 30.027 | 44.471 | 15.706 | 0.00 | 0.00 |
| ATOM | 236 | N    | ILE | X | 16 | 30.116 | 43.109 | 17.515 | 0.00 | 0.00 |
| ATOM | 237 | H    | ILE | X | 16 | 30.071 | 43.147 | 18.524 | 0.00 | 0.00 |
| ATOM | 238 | CA   | ILE | X | 16 | 30.246 | 41.780 | 16.911 | 0.00 | 0.00 |
| ATOM | 239 | HA   | ILE | X | 16 | 29.865 | 41.917 | 15.899 | 0.00 | 0.00 |
| ATOM | 240 | CB   | ILE | X | 16 | 31.684 | 41.222 | 16.879 | 0.00 | 0.00 |
| ATOM | 241 | HB   | ILE | X | 16 | 31.635 | 40.183 | 16.554 | 0.00 | 0.00 |
| ATOM | 242 | CG2  | ILE | X | 16 | 32.678 | 41.946 | 15.935 | 0.00 | 0.00 |
| ATOM | 243 | HG21 | ILE | X | 16 | 32.919 | 42.924 | 16.351 | 0.00 | 0.00 |
| ATOM | 244 | HG22 | ILE | X | 16 | 32.263 | 42.158 | 14.949 | 0.00 | 0.00 |
| ATOM | 245 | HG23 | ILE | X | 16 | 33.610 | 41.406 | 15.769 | 0.00 | 0.00 |
| ATOM | 246 | CG1  | ILE | X | 16 | 32.355 | 41.243 | 18.293 | 0.00 | 0.00 |
| ATOM | 247 | HG12 | ILE | X | 16 | 32.509 | 42.243 | 18.699 | 0.00 | 0.00 |
| ATOM | 248 | HG13 | ILE | X | 16 | 31.712 | 40.697 | 18.983 | 0.00 | 0.00 |
| ATOM | 249 | CD1  | ILE | X | 16 | 33.632 | 40.418 | 18.351 | 0.00 | 0.00 |
| ATOM | 250 | HD11 | ILE | X | 16 | 33.511 | 39.439 | 17.888 | 0.00 | 0.00 |
| ATOM | 251 | HD12 | ILE | X | 16 | 33.994 | 40.230 | 19.361 | 0.00 | 0.00 |
| ATOM | 252 | HD13 | ILE | X | 16 | 34.459 | 40.966 | 17.900 | 0.00 | 0.00 |
| ATOM | 253 | C    | ILE | X | 16 | 29.310 | 40.806 | 17.540 | 0.00 | 0.00 |
| ATOM | 254 | O    | ILE | X | 16 | 29.080 | 40.882 | 18.749 | 0.00 | 0.00 |
| ATOM | 255 | N    | ARG | X | 17 | 28.866 | 39.808 | 16.764 | 0.00 | 0.00 |
| ATOM | 256 | H    | ARG | X | 17 | 29.254 | 39.783 | 15.831 | 0.00 | 0.00 |
| ATOM | 257 | CA   | ARG | X | 17 | 28.413 | 38.598 | 17.351 | 0.00 | 0.00 |
| ATOM | 258 | HA   | ARG | X | 17 | 27.944 | 38.812 | 18.312 | 0.00 | 0.00 |
| ATOM | 259 | CB   | ARG | X | 17 | 27.270 | 38.033 | 16.553 | 0.00 | 0.00 |
| ATOM | 260 | HB2  | ARG | X | 17 | 26.784 | 37.316 | 17.214 | 0.00 | 0.00 |
| ATOM | 261 | HB3  | ARG | X | 17 | 26.481 | 38.755 | 16.345 | 0.00 | 0.00 |
| ATOM | 262 | CG   | ARG | X | 17 | 27.586 | 37.418 | 15.238 | 0.00 | 0.00 |
| ATOM | 263 | HG2  | ARG | X | 17 | 27.949 | 38.186 | 14.556 | 0.00 | 0.00 |
| ATOM | 264 | HG3  | ARG | X | 17 | 28.472 | 36.784 | 15.274 | 0.00 | 0.00 |
| ATOM | 265 | CD   | ARG | X | 17 | 26.445 | 36.770 | 14.560 | 0.00 | 0.00 |

|      |     |      |     |   |    |        |        |        |      |      |
|------|-----|------|-----|---|----|--------|--------|--------|------|------|
| ATOM | 266 | HD2  | ARG | X | 17 | 26.103 | 35.966 | 15.213 | 0.00 | 0.00 |
| ATOM | 267 | HD3  | ARG | X | 17 | 25.628 | 37.478 | 14.422 | 0.00 | 0.00 |
| ATOM | 268 | NE   | ARG | X | 17 | 26.781 | 36.247 | 13.240 | 0.00 | 0.00 |
| ATOM | 269 | HE   | ARG | X | 17 | 27.190 | 36.943 | 12.633 | 0.00 | 0.00 |
| ATOM | 270 | CZ   | ARG | X | 17 | 26.475 | 35.101 | 12.689 | 0.00 | 0.00 |
| ATOM | 271 | NH1  | ARG | X | 17 | 25.751 | 34.191 | 13.336 | 0.00 | 0.00 |
| ATOM | 272 | HH11 | ARG | X | 17 | 25.190 | 34.379 | 14.154 | 0.00 | 0.00 |
| ATOM | 273 | HH12 | ARG | X | 17 | 25.796 | 33.272 | 12.919 | 0.00 | 0.00 |
| ATOM | 274 | NH2  | ARG | X | 17 | 26.881 | 34.866 | 11.493 | 0.00 | 0.00 |
| ATOM | 275 | HH21 | ARG | X | 17 | 27.517 | 35.511 | 11.046 | 0.00 | 0.00 |
| ATOM | 276 | HH22 | ARG | X | 17 | 26.690 | 34.034 | 10.953 | 0.00 | 0.00 |
| ATOM | 277 | C    | ARG | X | 17 | 29.518 | 37.592 | 17.639 | 0.00 | 0.00 |
| ATOM | 278 | O    | ARG | X | 17 | 30.274 | 37.322 | 16.697 | 0.00 | 0.00 |
| ATOM | 279 | N    | LEU | X | 18 | 29.552 | 36.935 | 18.831 | 0.00 | 0.00 |
| ATOM | 280 | H    | LEU | X | 18 | 28.933 | 37.294 | 19.544 | 0.00 | 0.00 |
| ATOM | 281 | CA   | LEU | X | 18 | 30.375 | 35.864 | 19.207 | 0.00 | 0.00 |
| ATOM | 282 | HA   | LEU | X | 18 | 31.234 | 35.834 | 18.537 | 0.00 | 0.00 |
| ATOM | 283 | CB   | LEU | X | 18 | 30.956 | 36.003 | 20.670 | 0.00 | 0.00 |
| ATOM | 284 | HB2  | LEU | X | 18 | 30.104 | 36.155 | 21.333 | 0.00 | 0.00 |
| ATOM | 285 | HB3  | LEU | X | 18 | 31.537 | 35.152 | 21.025 | 0.00 | 0.00 |
| ATOM | 286 | CG   | LEU | X | 18 | 31.782 | 37.229 | 20.844 | 0.00 | 0.00 |
| ATOM | 287 | HG   | LEU | X | 18 | 31.338 | 38.162 | 20.496 | 0.00 | 0.00 |
| ATOM | 288 | CD1  | LEU | X | 18 | 32.205 | 37.392 | 22.327 | 0.00 | 0.00 |
| ATOM | 289 | HD11 | LEU | X | 18 | 31.284 | 37.481 | 22.903 | 0.00 | 0.00 |
| ATOM | 290 | HD12 | LEU | X | 18 | 32.842 | 38.257 | 22.513 | 0.00 | 0.00 |
| ATOM | 291 | HD13 | LEU | X | 18 | 32.786 | 36.525 | 22.641 | 0.00 | 0.00 |
| ATOM | 292 | CD2  | LEU | X | 18 | 33.117 | 37.215 | 19.998 | 0.00 | 0.00 |
| ATOM | 293 | HD21 | LEU | X | 18 | 32.870 | 37.333 | 18.943 | 0.00 | 0.00 |
| ATOM | 294 | HD22 | LEU | X | 18 | 33.715 | 38.095 | 20.238 | 0.00 | 0.00 |
| ATOM | 295 | HD23 | LEU | X | 18 | 33.728 | 36.323 | 20.133 | 0.00 | 0.00 |
| ATOM | 296 | C    | LEU | X | 18 | 29.552 | 34.566 | 19.122 | 0.00 | 0.00 |
| ATOM | 297 | O    | LEU | X | 18 | 28.419 | 34.504 | 19.415 | 0.00 | 0.00 |
| ATOM | 298 | N    | LYS | X | 19 | 30.190 | 33.500 | 18.729 | 0.00 | 0.00 |
| ATOM | 299 | H    | LYS | X | 19 | 31.185 | 33.583 | 18.573 | 0.00 | 0.00 |
| ATOM | 300 | CA   | LYS | X | 19 | 29.560 | 32.135 | 18.540 | 0.00 | 0.00 |
| ATOM | 301 | HA   | LYS | X | 19 | 28.484 | 32.282 | 18.626 | 0.00 | 0.00 |
| ATOM | 302 | CB   | LYS | X | 19 | 29.895 | 31.455 | 17.212 | 0.00 | 0.00 |
| ATOM | 303 | HB2  | LYS | X | 19 | 30.955 | 31.202 | 17.229 | 0.00 | 0.00 |
| ATOM | 304 | HB3  | LYS | X | 19 | 29.192 | 30.686 | 16.891 | 0.00 | 0.00 |
| ATOM | 305 | CG   | LYS | X | 19 | 29.778 | 32.469 | 16.028 | 0.00 | 0.00 |
| ATOM | 306 | HG2  | LYS | X | 19 | 28.796 | 32.940 | 15.997 | 0.00 | 0.00 |
| ATOM | 307 | HG3  | LYS | X | 19 | 30.513 | 33.262 | 16.165 | 0.00 | 0.00 |
| ATOM | 308 | CD   | LYS | X | 19 | 29.951 | 31.866 | 14.635 | 0.00 | 0.00 |
| ATOM | 309 | HD2  | LYS | X | 19 | 30.067 | 32.718 | 13.964 | 0.00 | 0.00 |
| ATOM | 310 | HD3  | LYS | X | 19 | 30.779 | 31.160 | 14.587 | 0.00 | 0.00 |
| ATOM | 311 | CE   | LYS | X | 19 | 28.625 | 31.135 | 14.200 | 0.00 | 0.00 |
| ATOM | 312 | HE2  | LYS | X | 19 | 28.431 | 30.287 | 14.857 | 0.00 | 0.00 |
| ATOM | 313 | HE3  | LYS | X | 19 | 27.819 | 31.859 | 14.317 | 0.00 | 0.00 |
| ATOM | 314 | NZ   | LYS | X | 19 | 28.620 | 30.715 | 12.797 | 0.00 | 0.00 |
| ATOM | 315 | HZ1  | LYS | X | 19 | 29.235 | 29.938 | 12.603 | 0.00 | 0.00 |
| ATOM | 316 | HZ2  | LYS | X | 19 | 27.691 | 30.588 | 12.420 | 0.00 | 0.00 |
| ATOM | 317 | HZ3  | LYS | X | 19 | 29.086 | 31.498 | 12.362 | 0.00 | 0.00 |
| ATOM | 318 | C    | LYS | X | 19 | 30.040 | 31.222 | 19.700 | 0.00 | 0.00 |
| ATOM | 319 | O    | LYS | X | 19 | 31.147 | 31.246 | 20.200 | 0.00 | 0.00 |
| ATOM | 320 | N    | THR | X | 20 | 29.179 | 30.263 | 20.069 | 0.00 | 0.00 |
| ATOM | 321 | H    | THR | X | 20 | 28.338 | 30.122 | 19.528 | 0.00 | 0.00 |
| ATOM | 322 | CA   | THR | X | 20 | 29.431 | 29.297 | 21.174 | 0.00 | 0.00 |
| ATOM | 323 | HA   | THR | X | 20 | 30.490 | 29.066 | 21.294 | 0.00 | 0.00 |
| ATOM | 324 | CB   | THR | X | 20 | 28.980 | 29.929 | 22.519 | 0.00 | 0.00 |
| ATOM | 325 | HB   | THR | X | 20 | 27.968 | 30.330 | 22.473 | 0.00 | 0.00 |
| ATOM | 326 | CG2  | THR | X | 20 | 29.253 | 29.155 | 23.798 | 0.00 | 0.00 |
| ATOM | 327 | HG21 | THR | X | 20 | 30.301 | 28.872 | 23.898 | 0.00 | 0.00 |
| ATOM | 328 | HG22 | THR | X | 20 | 28.647 | 28.250 | 23.822 | 0.00 | 0.00 |
| ATOM | 329 | HG23 | THR | X | 20 | 28.878 | 29.695 | 24.667 | 0.00 | 0.00 |
| ATOM | 330 | OG1  | THR | X | 20 | 29.884 | 31.006 | 22.788 | 0.00 | 0.00 |
| ATOM | 331 | HG1  | THR | X | 20 | 30.462 | 31.122 | 22.030 | 0.00 | 0.00 |
| ATOM | 332 | C    | THR | X | 20 | 28.641 | 28.007 | 20.870 | 0.00 | 0.00 |



|      |     |      |     |   |    |        |        |        |      |      |
|------|-----|------|-----|---|----|--------|--------|--------|------|------|
| ATOM | 333 | O    | THR | X | 20 | 27.718 | 28.118 | 20.037 | 0.00 | 0.00 |
| ATOM | 334 | N    | PRO | X | 21 | 28.939 | 26.817 | 21.479 | 0.00 | 0.00 |
| ATOM | 335 | CD   | PRO | X | 21 | 30.233 | 26.470 | 22.147 | 0.00 | 0.00 |
| ATOM | 336 | HD2  | PRO | X | 21 | 30.051 | 26.460 | 23.222 | 0.00 | 0.00 |
| ATOM | 337 | HD3  | PRO | X | 21 | 31.067 | 27.134 | 21.921 | 0.00 | 0.00 |
| ATOM | 338 | CG   | PRO | X | 21 | 30.563 | 25.055 | 21.794 | 0.00 | 0.00 |
| ATOM | 339 | HG2  | PRO | X | 21 | 31.225 | 24.591 | 22.526 | 0.00 | 0.00 |
| ATOM | 340 | HG3  | PRO | X | 21 | 31.109 | 25.126 | 20.853 | 0.00 | 0.00 |
| ATOM | 341 | CB   | PRO | X | 21 | 29.169 | 24.473 | 21.799 | 0.00 | 0.00 |
| ATOM | 342 | HB2  | PRO | X | 21 | 28.831 | 24.299 | 22.821 | 0.00 | 0.00 |
| ATOM | 343 | HB3  | PRO | X | 21 | 29.185 | 23.566 | 21.195 | 0.00 | 0.00 |
| ATOM | 344 | CA   | PRO | X | 21 | 28.319 | 25.546 | 21.094 | 0.00 | 0.00 |
| ATOM | 345 | HA   | PRO | X | 21 | 28.556 | 25.395 | 20.040 | 0.00 | 0.00 |
| ATOM | 346 | C    | PRO | X | 21 | 26.790 | 25.328 | 21.277 | 0.00 | 0.00 |
| ATOM | 347 | O    | PRO | X | 21 | 26.297 | 24.202 | 21.024 | 0.00 | 0.00 |
| ATOM | 348 | N    | GLY | X | 22 | 26.014 | 26.236 | 21.789 | 0.00 | 0.00 |
| ATOM | 349 | H    | GLY | X | 22 | 26.509 | 27.075 | 22.058 | 0.00 | 0.00 |
| ATOM | 350 | CA   | GLY | X | 22 | 24.545 | 26.239 | 21.691 | 0.00 | 0.00 |
| ATOM | 351 | HA2  | GLY | X | 22 | 24.261 | 25.379 | 21.084 | 0.00 | 0.00 |
| ATOM | 352 | HA3  | GLY | X | 22 | 24.012 | 26.350 | 22.635 | 0.00 | 0.00 |
| ATOM | 353 | C    | GLY | X | 22 | 23.866 | 27.404 | 20.924 | 0.00 | 0.00 |
| ATOM | 354 | O    | GLY | X | 22 | 22.660 | 27.298 | 20.680 | 0.00 | 0.00 |
| ATOM | 355 | N    | GLY | X | 23 | 24.617 | 28.371 | 20.486 | 0.00 | 0.00 |
| ATOM | 356 | H    | GLY | X | 23 | 25.605 | 28.329 | 20.695 | 0.00 | 0.00 |
| ATOM | 357 | CA   | GLY | X | 23 | 24.210 | 29.613 | 19.812 | 0.00 | 0.00 |
| ATOM | 358 | HA2  | GLY | X | 23 | 23.891 | 29.369 | 18.798 | 0.00 | 0.00 |
| ATOM | 359 | HA3  | GLY | X | 23 | 23.294 | 29.933 | 20.308 | 0.00 | 0.00 |
| ATOM | 360 | C    | GLY | X | 23 | 25.110 | 30.829 | 19.857 | 0.00 | 0.00 |
| ATOM | 361 | O    | GLY | X | 23 | 26.278 | 30.710 | 20.220 | 0.00 | 0.00 |
| ATOM | 362 | N    | PRO | X | 24 | 24.670 | 31.969 | 19.348 | 0.00 | 0.00 |
| ATOM | 363 | CD   | PRO | X | 24 | 23.421 | 32.087 | 18.578 | 0.00 | 0.00 |
| ATOM | 364 | HD2  | PRO | X | 24 | 22.546 | 31.968 | 19.216 | 0.00 | 0.00 |
| ATOM | 365 | HD3  | PRO | X | 24 | 23.345 | 31.405 | 17.732 | 0.00 | 0.00 |
| ATOM | 366 | CG   | PRO | X | 24 | 23.443 | 33.488 | 17.968 | 0.00 | 0.00 |
| ATOM | 367 | HG2  | PRO | X | 24 | 22.896 | 34.224 | 18.557 | 0.00 | 0.00 |
| ATOM | 368 | HG3  | PRO | X | 24 | 23.056 | 33.513 | 16.950 | 0.00 | 0.00 |
| ATOM | 369 | CB   | PRO | X | 24 | 24.915 | 33.898 | 18.076 | 0.00 | 0.00 |
| ATOM | 370 | HB2  | PRO | X | 24 | 24.926 | 34.985 | 18.162 | 0.00 | 0.00 |
| ATOM | 371 | HB3  | PRO | X | 24 | 25.378 | 33.545 | 17.155 | 0.00 | 0.00 |
| ATOM | 372 | CA   | PRO | X | 24 | 25.374 | 33.215 | 19.310 | 0.00 | 0.00 |
| ATOM | 373 | HA   | PRO | X | 24 | 26.439 | 33.035 | 19.164 | 0.00 | 0.00 |
| ATOM | 374 | C    | PRO | X | 24 | 25.221 | 34.154 | 20.551 | 0.00 | 0.00 |
| ATOM | 375 | O    | PRO | X | 24 | 24.346 | 33.954 | 21.372 | 0.00 | 0.00 |
| ATOM | 376 | N    | VAL | X | 25 | 26.092 | 35.124 | 20.733 | 0.00 | 0.00 |
| ATOM | 377 | H    | VAL | X | 25 | 26.916 | 35.134 | 20.148 | 0.00 | 0.00 |
| ATOM | 378 | CA   | VAL | X | 25 | 25.968 | 36.167 | 21.796 | 0.00 | 0.00 |
| ATOM | 379 | HA   | VAL | X | 25 | 24.955 | 36.196 | 22.199 | 0.00 | 0.00 |
| ATOM | 380 | CB   | VAL | X | 25 | 27.089 | 35.980 | 22.802 | 0.00 | 0.00 |
| ATOM | 381 | HB   | VAL | X | 25 | 28.054 | 35.897 | 22.301 | 0.00 | 0.00 |
| ATOM | 382 | CG1  | VAL | X | 25 | 27.203 | 37.086 | 23.881 | 0.00 | 0.00 |
| ATOM | 383 | HG11 | VAL | X | 25 | 26.209 | 37.195 | 24.316 | 0.00 | 0.00 |
| ATOM | 384 | HG12 | VAL | X | 25 | 27.959 | 36.848 | 24.628 | 0.00 | 0.00 |
| ATOM | 385 | HG13 | VAL | X | 25 | 27.554 | 38.065 | 23.555 | 0.00 | 0.00 |
| ATOM | 386 | CG2  | VAL | X | 25 | 26.878 | 34.622 | 23.510 | 0.00 | 0.00 |
| ATOM | 387 | HG21 | VAL | X | 25 | 26.903 | 33.801 | 22.794 | 0.00 | 0.00 |
| ATOM | 388 | HG22 | VAL | X | 25 | 25.982 | 34.581 | 24.129 | 0.00 | 0.00 |
| ATOM | 389 | HG23 | VAL | X | 25 | 27.637 | 34.393 | 24.259 | 0.00 | 0.00 |
| ATOM | 390 | C    | VAL | X | 25 | 26.247 | 37.552 | 21.144 | 0.00 | 0.00 |
| ATOM | 391 | O    | VAL | X | 25 | 27.118 | 37.685 | 20.275 | 0.00 | 0.00 |
| ATOM | 392 | N    | SER | X | 26 | 25.569 | 38.650 | 21.574 | 0.00 | 0.00 |
| ATOM | 393 | H    | SER | X | 26 | 24.932 | 38.584 | 22.355 | 0.00 | 0.00 |
| ATOM | 394 | CA   | SER | X | 26 | 25.845 | 40.022 | 21.115 | 0.00 | 0.00 |
| ATOM | 395 | HA   | SER | X | 26 | 26.050 | 40.092 | 20.047 | 0.00 | 0.00 |
| ATOM | 396 | CB   | SER | X | 26 | 24.532 | 40.836 | 21.139 | 0.00 | 0.00 |
| ATOM | 397 | HB2  | SER | X | 26 | 23.943 | 40.484 | 21.986 | 0.00 | 0.00 |
| ATOM | 398 | HB3  | SER | X | 26 | 24.593 | 41.920 | 21.237 | 0.00 | 0.00 |
| ATOM | 399 | OG   | SER | X | 26 | 23.815 | 40.590 | 19.895 | 0.00 | 0.00 |

|      |     |      |     |   |    |        |        |        |      |      |
|------|-----|------|-----|---|----|--------|--------|--------|------|------|
| ATOM | 400 | HG   | SER | X | 26 | 22.868 | 40.586 | 20.051 | 0.00 | 0.00 |
| ATOM | 401 | C    | SER | X | 26 | 26.965 | 40.648 | 21.913 | 0.00 | 0.00 |
| ATOM | 402 | O    | SER | X | 26 | 26.895 | 40.758 | 23.122 | 0.00 | 0.00 |
| ATOM | 403 | N    | ALA | X | 27 | 28.117 | 41.106 | 21.351 | 0.00 | 0.00 |
| ATOM | 404 | H    | ALA | X | 27 | 28.294 | 41.078 | 20.357 | 0.00 | 0.00 |
| ATOM | 405 | CA   | ALA | X | 27 | 29.168 | 41.574 | 22.198 | 0.00 | 0.00 |
| ATOM | 406 | HA   | ALA | X | 27 | 28.798 | 41.823 | 23.192 | 0.00 | 0.00 |
| ATOM | 407 | CB   | ALA | X | 27 | 30.286 | 40.427 | 22.273 | 0.00 | 0.00 |
| ATOM | 408 | HB1  | ALA | X | 27 | 31.154 | 40.685 | 22.880 | 0.00 | 0.00 |
| ATOM | 409 | HB2  | ALA | X | 27 | 30.603 | 40.210 | 21.253 | 0.00 | 0.00 |
| ATOM | 410 | HB3  | ALA | X | 27 | 29.786 | 39.523 | 22.621 | 0.00 | 0.00 |
| ATOM | 411 | C    | ALA | X | 27 | 29.822 | 42.873 | 21.698 | 0.00 | 0.00 |
| ATOM | 412 | O    | ALA | X | 27 | 29.883 | 43.345 | 20.549 | 0.00 | 0.00 |
| ATOM | 413 | N    | PHE | X | 28 | 30.248 | 43.658 | 22.677 | 0.00 | 0.00 |
| ATOM | 414 | H    | PHE | X | 28 | 30.183 | 43.356 | 23.638 | 0.00 | 0.00 |
| ATOM | 415 | CA   | PHE | X | 28 | 30.832 | 45.027 | 22.494 | 0.00 | 0.00 |
| ATOM | 416 | HA   | PHE | X | 28 | 31.170 | 45.137 | 21.464 | 0.00 | 0.00 |
| ATOM | 417 | CB   | PHE | X | 28 | 29.738 | 46.089 | 22.794 | 0.00 | 0.00 |
| ATOM | 418 | HB2  | PHE | X | 28 | 29.441 | 45.931 | 23.831 | 0.00 | 0.00 |
| ATOM | 419 | HB3  | PHE | X | 28 | 30.318 | 47.005 | 22.683 | 0.00 | 0.00 |
| ATOM | 420 | CG   | PHE | X | 28 | 28.479 | 46.064 | 21.925 | 0.00 | 0.00 |
| ATOM | 421 | CD1  | PHE | X | 28 | 27.464 | 45.147 | 22.324 | 0.00 | 0.00 |
| ATOM | 422 | HD1  | PHE | X | 28 | 27.662 | 44.550 | 23.203 | 0.00 | 0.00 |
| ATOM | 423 | CE1  | PHE | X | 28 | 26.297 | 45.059 | 21.502 | 0.00 | 0.00 |
| ATOM | 424 | HE1  | PHE | X | 28 | 25.541 | 44.308 | 21.681 | 0.00 | 0.00 |
| ATOM | 425 | CZ   | PHE | X | 28 | 26.146 | 45.840 | 20.381 | 0.00 | 0.00 |
| ATOM | 426 | HZ   | PHE | X | 28 | 25.217 | 45.808 | 19.831 | 0.00 | 0.00 |
| ATOM | 427 | CE2  | PHE | X | 28 | 27.089 | 46.862 | 20.072 | 0.00 | 0.00 |
| ATOM | 428 | HE2  | PHE | X | 28 | 26.986 | 47.548 | 19.244 | 0.00 | 0.00 |
| ATOM | 429 | CD2  | PHE | X | 28 | 28.238 | 46.968 | 20.867 | 0.00 | 0.00 |
| ATOM | 430 | HD2  | PHE | X | 28 | 28.987 | 47.689 | 20.575 | 0.00 | 0.00 |
| ATOM | 431 | C    | PHE | X | 28 | 32.064 | 45.198 | 23.421 | 0.00 | 0.00 |
| ATOM | 432 | O    | PHE | X | 28 | 31.961 | 44.976 | 24.622 | 0.00 | 0.00 |
| ATOM | 433 | N    | LEU | X | 29 | 33.237 | 45.249 | 22.815 | 0.00 | 0.00 |
| ATOM | 434 | H    | LEU | X | 29 | 33.314 | 45.455 | 21.829 | 0.00 | 0.00 |
| ATOM | 435 | CA   | LEU | X | 29 | 34.530 | 45.303 | 23.466 | 0.00 | 0.00 |
| ATOM | 436 | HA   | LEU | X | 29 | 34.418 | 45.083 | 24.528 | 0.00 | 0.00 |
| ATOM | 437 | CB   | LEU | X | 29 | 35.391 | 44.179 | 22.846 | 0.00 | 0.00 |
| ATOM | 438 | HB2  | LEU | X | 29 | 35.653 | 44.463 | 21.827 | 0.00 | 0.00 |
| ATOM | 439 | HB3  | LEU | X | 29 | 36.314 | 44.050 | 23.411 | 0.00 | 0.00 |
| ATOM | 440 | CG   | LEU | X | 29 | 34.754 | 42.803 | 22.892 | 0.00 | 0.00 |
| ATOM | 441 | HG   | LEU | X | 29 | 33.874 | 42.796 | 22.250 | 0.00 | 0.00 |
| ATOM | 442 | CD1  | LEU | X | 29 | 35.734 | 41.845 | 22.233 | 0.00 | 0.00 |
| ATOM | 443 | HD11 | LEU | X | 29 | 35.844 | 42.169 | 21.198 | 0.00 | 0.00 |
| ATOM | 444 | HD12 | LEU | X | 29 | 35.393 | 40.810 | 22.218 | 0.00 | 0.00 |
| ATOM | 445 | HD13 | LEU | X | 29 | 36.698 | 41.892 | 22.740 | 0.00 | 0.00 |
| ATOM | 446 | CD2  | LEU | X | 29 | 34.406 | 42.299 | 24.289 | 0.00 | 0.00 |
| ATOM | 447 | HD21 | LEU | X | 29 | 34.047 | 41.270 | 24.294 | 0.00 | 0.00 |
| ATOM | 448 | HD22 | LEU | X | 29 | 35.195 | 42.529 | 25.004 | 0.00 | 0.00 |
| ATOM | 449 | HD23 | LEU | X | 29 | 33.588 | 42.921 | 24.652 | 0.00 | 0.00 |
| ATOM | 450 | C    | LEU | X | 29 | 35.186 | 46.667 | 23.358 | 0.00 | 0.00 |
| ATOM | 451 | O    | LEU | X | 29 | 34.813 | 47.360 | 22.435 | 0.00 | 0.00 |
| ATOM | 452 | N    | GLY | X | 30 | 36.066 | 47.067 | 24.229 | 0.00 | 0.00 |
| ATOM | 453 | H    | GLY | X | 30 | 36.303 | 46.488 | 25.022 | 0.00 | 0.00 |
| ATOM | 454 | CA   | GLY | X | 30 | 36.851 | 48.280 | 24.099 | 0.00 | 0.00 |
| ATOM | 455 | HA2  | GLY | X | 30 | 37.713 | 48.281 | 24.766 | 0.00 | 0.00 |
| ATOM | 456 | HA3  | GLY | X | 30 | 37.370 | 48.235 | 23.141 | 0.00 | 0.00 |
| ATOM | 457 | C    | GLY | X | 30 | 36.123 | 49.640 | 24.189 | 0.00 | 0.00 |
| ATOM | 458 | O    | GLY | X | 30 | 36.523 | 50.580 | 23.479 | 0.00 | 0.00 |
| ATOM | 459 | N    | ILE | X | 31 | 34.985 | 49.643 | 24.829 | 0.00 | 0.00 |
| ATOM | 460 | H    | ILE | X | 31 | 34.739 | 48.843 | 25.396 | 0.00 | 0.00 |
| ATOM | 461 | CA   | ILE | X | 31 | 34.155 | 50.833 | 24.990 | 0.00 | 0.00 |
| ATOM | 462 | HA   | ILE | X | 31 | 34.014 | 51.168 | 23.963 | 0.00 | 0.00 |
| ATOM | 463 | CB   | ILE | X | 31 | 32.783 | 50.492 | 25.576 | 0.00 | 0.00 |
| ATOM | 464 | HB   | ILE | X | 31 | 32.971 | 50.157 | 26.596 | 0.00 | 0.00 |
| ATOM | 465 | CG2  | ILE | X | 31 | 31.867 | 51.715 | 25.583 | 0.00 | 0.00 |
| ATOM | 466 | HG21 | ILE | X | 31 | 32.201 | 52.313 | 26.431 | 0.00 | 0.00 |

|      |     |      |     |   |    |        |        |        |      |      |
|------|-----|------|-----|---|----|--------|--------|--------|------|------|
| ATOM | 467 | HG22 | ILE | X | 31 | 30.829 | 51.453 | 25.787 | 0.00 | 0.00 |
| ATOM | 468 | HG23 | ILE | X | 31 | 31.985 | 52.082 | 24.564 | 0.00 | 0.00 |
| ATOM | 469 | CG1  | ILE | X | 31 | 32.086 | 49.308 | 24.761 | 0.00 | 0.00 |
| ATOM | 470 | HG12 | ILE | X | 31 | 31.802 | 49.661 | 23.769 | 0.00 | 0.00 |
| ATOM | 471 | HG13 | ILE | X | 31 | 32.796 | 48.483 | 24.710 | 0.00 | 0.00 |
| ATOM | 472 | CD1  | ILE | X | 31 | 30.775 | 48.757 | 25.440 | 0.00 | 0.00 |
| ATOM | 473 | HD11 | ILE | X | 31 | 30.478 | 47.918 | 24.810 | 0.00 | 0.00 |
| ATOM | 474 | HD12 | ILE | X | 31 | 29.883 | 49.379 | 25.505 | 0.00 | 0.00 |
| ATOM | 475 | HD13 | ILE | X | 31 | 31.088 | 48.270 | 26.363 | 0.00 | 0.00 |
| ATOM | 476 | C    | ILE | X | 31 | 34.840 | 51.812 | 25.988 | 0.00 | 0.00 |
| ATOM | 477 | O    | ILE | X | 31 | 35.187 | 51.440 | 27.071 | 0.00 | 0.00 |
| ATOM | 478 | N    | PRO | X | 32 | 34.936 | 53.078 | 25.621 | 0.00 | 0.00 |
| ATOM | 479 | CD   | PRO | X | 32 | 34.722 | 53.711 | 24.309 | 0.00 | 0.00 |
| ATOM | 480 | HD2  | PRO | X | 32 | 33.700 | 53.508 | 23.989 | 0.00 | 0.00 |
| ATOM | 481 | HD3  | PRO | X | 32 | 35.444 | 53.350 | 23.577 | 0.00 | 0.00 |
| ATOM | 482 | CG   | PRO | X | 32 | 34.954 | 55.227 | 24.490 | 0.00 | 0.00 |
| ATOM | 483 | HG2  | PRO | X | 32 | 34.030 | 55.660 | 24.872 | 0.00 | 0.00 |
| ATOM | 484 | HG3  | PRO | X | 32 | 35.293 | 55.661 | 23.549 | 0.00 | 0.00 |
| ATOM | 485 | CB   | PRO | X | 32 | 35.981 | 55.291 | 25.604 | 0.00 | 0.00 |
| ATOM | 486 | HB2  | PRO | X | 32 | 35.972 | 56.242 | 26.137 | 0.00 | 0.00 |
| ATOM | 487 | HB3  | PRO | X | 32 | 37.007 | 55.205 | 25.245 | 0.00 | 0.00 |
| ATOM | 488 | CA   | PRO | X | 32 | 35.583 | 54.077 | 26.504 | 0.00 | 0.00 |
| ATOM | 489 | HA   | PRO | X | 32 | 36.398 | 53.646 | 27.086 | 0.00 | 0.00 |
| ATOM | 490 | C    | PRO | X | 32 | 34.613 | 54.501 | 27.585 | 0.00 | 0.00 |
| ATOM | 491 | O    | PRO | X | 32 | 33.447 | 54.789 | 27.320 | 0.00 | 0.00 |
| ATOM | 492 | N    | PHE | X | 33 | 35.065 | 54.517 | 28.863 | 0.00 | 0.00 |
| ATOM | 493 | H    | PHE | X | 33 | 36.031 | 54.265 | 29.015 | 0.00 | 0.00 |
| ATOM | 494 | CA   | PHE | X | 33 | 34.234 | 54.947 | 30.022 | 0.00 | 0.00 |
| ATOM | 495 | HA   | PHE | X | 33 | 33.223 | 55.187 | 29.691 | 0.00 | 0.00 |
| ATOM | 496 | CB   | PHE | X | 33 | 33.948 | 53.740 | 30.975 | 0.00 | 0.00 |
| ATOM | 497 | HB2  | PHE | X | 33 | 33.264 | 54.076 | 31.754 | 0.00 | 0.00 |
| ATOM | 498 | HB3  | PHE | X | 33 | 33.435 | 52.941 | 30.438 | 0.00 | 0.00 |
| ATOM | 499 | CG   | PHE | X | 33 | 35.209 | 53.263 | 31.733 | 0.00 | 0.00 |
| ATOM | 500 | CD1  | PHE | X | 33 | 35.570 | 53.994 | 32.904 | 0.00 | 0.00 |
| ATOM | 501 | HD1  | PHE | X | 33 | 35.022 | 54.857 | 33.252 | 0.00 | 0.00 |
| ATOM | 502 | CE1  | PHE | X | 33 | 36.659 | 53.517 | 33.683 | 0.00 | 0.00 |
| ATOM | 503 | HE1  | PHE | X | 33 | 36.944 | 54.021 | 34.594 | 0.00 | 0.00 |
| ATOM | 504 | CZ   | PHE | X | 33 | 37.447 | 52.403 | 33.174 | 0.00 | 0.00 |
| ATOM | 505 | HZ   | PHE | X | 33 | 38.280 | 52.094 | 33.789 | 0.00 | 0.00 |
| ATOM | 506 | CE2  | PHE | X | 33 | 37.056 | 51.691 | 32.024 | 0.00 | 0.00 |
| ATOM | 507 | HE2  | PHE | X | 33 | 37.613 | 50.872 | 31.595 | 0.00 | 0.00 |
| ATOM | 508 | CD2  | PHE | X | 33 | 35.958 | 52.147 | 31.283 | 0.00 | 0.00 |
| ATOM | 509 | HD2  | PHE | X | 33 | 35.733 | 51.698 | 30.327 | 0.00 | 0.00 |
| ATOM | 510 | C    | PHE | X | 33 | 34.819 | 56.162 | 30.707 | 0.00 | 0.00 |
| ATOM | 511 | O    | PHE | X | 33 | 34.125 | 56.917 | 31.355 | 0.00 | 0.00 |
| ATOM | 512 | N    | ALA | X | 34 | 36.142 | 56.452 | 30.482 | 0.00 | 0.00 |
| ATOM | 513 | H    | ALA | X | 34 | 36.556 | 55.890 | 29.751 | 0.00 | 0.00 |
| ATOM | 514 | CA   | ALA | X | 34 | 36.844 | 57.627 | 31.000 | 0.00 | 0.00 |
| ATOM | 515 | HA   | ALA | X | 34 | 36.145 | 58.288 | 31.512 | 0.00 | 0.00 |
| ATOM | 516 | CB   | ALA | X | 34 | 37.898 | 57.122 | 32.007 | 0.00 | 0.00 |
| ATOM | 517 | HB1  | ALA | X | 34 | 37.470 | 56.433 | 32.734 | 0.00 | 0.00 |
| ATOM | 518 | HB2  | ALA | X | 34 | 38.291 | 58.004 | 32.514 | 0.00 | 0.00 |
| ATOM | 519 | HB3  | ALA | X | 34 | 38.661 | 56.606 | 31.423 | 0.00 | 0.00 |
| ATOM | 520 | C    | ALA | X | 34 | 37.501 | 58.484 | 29.837 | 0.00 | 0.00 |
| ATOM | 521 | O    | ALA | X | 34 | 37.635 | 58.032 | 28.704 | 0.00 | 0.00 |
| ATOM | 522 | N    | GLU | X | 35 | 38.072 | 59.670 | 30.117 | 0.00 | 0.00 |
| ATOM | 523 | H    | GLU | X | 35 | 38.114 | 59.960 | 31.084 | 0.00 | 0.00 |
| ATOM | 524 | CA   | GLU | X | 35 | 39.119 | 60.304 | 29.284 | 0.00 | 0.00 |
| ATOM | 525 | HA   | GLU | X | 35 | 38.902 | 60.079 | 28.240 | 0.00 | 0.00 |
| ATOM | 526 | CB   | GLU | X | 35 | 39.072 | 61.830 | 29.658 | 0.00 | 0.00 |
| ATOM | 527 | HB2  | GLU | X | 35 | 39.041 | 61.867 | 30.747 | 0.00 | 0.00 |
| ATOM | 528 | HB3  | GLU | X | 35 | 39.962 | 62.372 | 29.340 | 0.00 | 0.00 |
| ATOM | 529 | CG   | GLU | X | 35 | 37.850 | 62.583 | 29.155 | 0.00 | 0.00 |
| ATOM | 530 | HG2  | GLU | X | 35 | 37.033 | 62.152 | 29.733 | 0.00 | 0.00 |
| ATOM | 531 | HG3  | GLU | X | 35 | 38.014 | 63.620 | 29.449 | 0.00 | 0.00 |
| ATOM | 532 | CD   | GLU | X | 35 | 37.595 | 62.389 | 27.675 | 0.00 | 0.00 |
| ATOM | 533 | OE1  | GLU | X | 35 | 38.539 | 62.169 | 26.881 | 0.00 | 0.00 |

|      |     |     |     |   |    |        |        |        |      |      |
|------|-----|-----|-----|---|----|--------|--------|--------|------|------|
| ATOM | 534 | OE2 | GLU | X | 35 | 36.403 | 62.490 | 27.347 | 0.00 | 0.00 |
| ATOM | 535 | C   | GLU | X | 35 | 40.414 | 59.757 | 29.703 | 0.00 | 0.00 |
| ATOM | 536 | O   | GLU | X | 35 | 40.620 | 59.430 | 30.875 | 0.00 | 0.00 |
| ATOM | 537 | N   | PRO | X | 36 | 41.390 | 59.644 | 28.725 | 0.00 | 0.00 |
| ATOM | 538 | CD  | PRO | X | 36 | 41.394 | 60.232 | 27.357 | 0.00 | 0.00 |
| ATOM | 539 | HD2 | PRO | X | 36 | 41.055 | 61.268 | 27.358 | 0.00 | 0.00 |
| ATOM | 540 | HD3 | PRO | X | 36 | 40.727 | 59.632 | 26.738 | 0.00 | 0.00 |
| ATOM | 541 | CG  | PRO | X | 36 | 42.789 | 60.047 | 26.875 | 0.00 | 0.00 |
| ATOM | 542 | HG2 | PRO | X | 36 | 43.436 | 60.866 | 27.189 | 0.00 | 0.00 |
| ATOM | 543 | HG3 | PRO | X | 36 | 42.753 | 59.946 | 25.790 | 0.00 | 0.00 |
| ATOM | 544 | CB  | PRO | X | 36 | 43.253 | 58.761 | 27.573 | 0.00 | 0.00 |
| ATOM | 545 | HB2 | PRO | X | 36 | 44.340 | 58.683 | 27.565 | 0.00 | 0.00 |
| ATOM | 546 | HB3 | PRO | X | 36 | 42.867 | 57.909 | 27.014 | 0.00 | 0.00 |
| ATOM | 547 | CA  | PRO | X | 36 | 42.574 | 58.831 | 28.936 | 0.00 | 0.00 |
| ATOM | 548 | HA  | PRO | X | 36 | 42.443 | 57.779 | 29.190 | 0.00 | 0.00 |
| ATOM | 549 | C   | PRO | X | 36 | 43.572 | 59.419 | 29.965 | 0.00 | 0.00 |
| ATOM | 550 | O   | PRO | X | 36 | 43.953 | 60.583 | 29.927 | 0.00 | 0.00 |
| ATOM | 551 | N   | PRO | X | 37 | 44.054 | 58.536 | 30.870 | 0.00 | 0.00 |
| ATOM | 552 | CD  | PRO | X | 37 | 43.464 | 57.313 | 31.312 | 0.00 | 0.00 |
| ATOM | 553 | HD2 | PRO | X | 37 | 43.770 | 56.487 | 30.669 | 0.00 | 0.00 |
| ATOM | 554 | HD3 | PRO | X | 37 | 42.381 | 57.278 | 31.196 | 0.00 | 0.00 |
| ATOM | 555 | CG  | PRO | X | 37 | 43.829 | 57.003 | 32.768 | 0.00 | 0.00 |
| ATOM | 556 | HG2 | PRO | X | 37 | 43.936 | 55.929 | 32.924 | 0.00 | 0.00 |
| ATOM | 557 | HG3 | PRO | X | 37 | 43.099 | 57.568 | 33.349 | 0.00 | 0.00 |
| ATOM | 558 | CB  | PRO | X | 37 | 45.191 | 57.685 | 32.816 | 0.00 | 0.00 |
| ATOM | 559 | HB2 | PRO | X | 37 | 45.956 | 57.030 | 32.398 | 0.00 | 0.00 |
| ATOM | 560 | HB3 | PRO | X | 37 | 45.493 | 57.979 | 33.821 | 0.00 | 0.00 |
| ATOM | 561 | CA  | PRO | X | 37 | 45.054 | 58.961 | 31.924 | 0.00 | 0.00 |
| ATOM | 562 | HA  | PRO | X | 37 | 44.593 | 59.741 | 32.528 | 0.00 | 0.00 |
| ATOM | 563 | C   | PRO | X | 37 | 46.482 | 59.426 | 31.577 | 0.00 | 0.00 |
| ATOM | 564 | O   | PRO | X | 37 | 47.320 | 59.627 | 32.426 | 0.00 | 0.00 |
| ATOM | 565 | N   | MET | X | 38 | 46.663 | 59.621 | 30.208 | 0.00 | 0.00 |
| ATOM | 566 | H   | MET | X | 38 | 45.849 | 59.511 | 29.621 | 0.00 | 0.00 |
| ATOM | 567 | CA  | MET | X | 38 | 47.959 | 60.085 | 29.635 | 0.00 | 0.00 |
| ATOM | 568 | HA  | MET | X | 38 | 48.678 | 59.273 | 29.752 | 0.00 | 0.00 |
| ATOM | 569 | CB  | MET | X | 38 | 47.722 | 60.283 | 28.036 | 0.00 | 0.00 |
| ATOM | 570 | HB2 | MET | X | 38 | 46.911 | 60.977 | 27.816 | 0.00 | 0.00 |
| ATOM | 571 | HB3 | MET | X | 38 | 48.559 | 60.887 | 27.684 | 0.00 | 0.00 |
| ATOM | 572 | CG  | MET | X | 38 | 47.601 | 58.979 | 27.215 | 0.00 | 0.00 |
| ATOM | 573 | HG2 | MET | X | 38 | 46.877 | 58.397 | 27.784 | 0.00 | 0.00 |
| ATOM | 574 | HG3 | MET | X | 38 | 47.159 | 59.148 | 26.232 | 0.00 | 0.00 |
| ATOM | 575 | SD  | MET | X | 38 | 49.080 | 57.949 | 26.993 | 0.00 | 0.00 |
| ATOM | 576 | CE  | MET | X | 38 | 50.031 | 59.090 | 25.906 | 0.00 | 0.00 |
| ATOM | 577 | HE1 | MET | X | 38 | 50.955 | 58.573 | 25.649 | 0.00 | 0.00 |
| ATOM | 578 | HE2 | MET | X | 38 | 49.412 | 59.252 | 25.024 | 0.00 | 0.00 |
| ATOM | 579 | HE3 | MET | X | 38 | 50.214 | 60.003 | 26.472 | 0.00 | 0.00 |
| ATOM | 580 | C   | MET | X | 38 | 48.562 | 61.292 | 30.326 | 0.00 | 0.00 |
| ATOM | 581 | O   | MET | X | 38 | 47.918 | 62.368 | 30.511 | 0.00 | 0.00 |
| ATOM | 582 | N   | GLY | X | 39 | 49.879 | 61.252 | 30.545 | 0.00 | 0.00 |
| ATOM | 583 | H   | GLY | X | 39 | 50.247 | 60.331 | 30.354 | 0.00 | 0.00 |
| ATOM | 584 | CA  | GLY | X | 39 | 50.730 | 62.482 | 30.835 | 0.00 | 0.00 |
| ATOM | 585 | HA2 | GLY | X | 39 | 51.734 | 62.122 | 31.062 | 0.00 | 0.00 |
| ATOM | 586 | HA3 | GLY | X | 39 | 50.794 | 63.120 | 29.954 | 0.00 | 0.00 |
| ATOM | 587 | C   | GLY | X | 39 | 50.182 | 63.233 | 32.046 | 0.00 | 0.00 |
| ATOM | 588 | O   | GLY | X | 39 | 50.363 | 62.750 | 33.137 | 0.00 | 0.00 |
| ATOM | 589 | N   | PRO | X | 40 | 49.574 | 64.428 | 31.894 | 0.00 | 0.00 |
| ATOM | 590 | CD  | PRO | X | 40 | 49.313 | 65.137 | 30.666 | 0.00 | 0.00 |
| ATOM | 591 | HD2 | PRO | X | 40 | 49.056 | 64.428 | 29.879 | 0.00 | 0.00 |
| ATOM | 592 | HD3 | PRO | X | 40 | 50.171 | 65.761 | 30.419 | 0.00 | 0.00 |
| ATOM | 593 | CG  | PRO | X | 40 | 48.090 | 66.034 | 30.971 | 0.00 | 0.00 |
| ATOM | 594 | HG2 | PRO | X | 40 | 47.163 | 65.460 | 30.968 | 0.00 | 0.00 |
| ATOM | 595 | HG3 | PRO | X | 40 | 47.965 | 66.817 | 30.223 | 0.00 | 0.00 |
| ATOM | 596 | CB  | PRO | X | 40 | 48.351 | 66.411 | 32.402 | 0.00 | 0.00 |
| ATOM | 597 | HB2 | PRO | X | 40 | 47.459 | 66.840 | 32.858 | 0.00 | 0.00 |
| ATOM | 598 | HB3 | PRO | X | 40 | 49.161 | 67.135 | 32.494 | 0.00 | 0.00 |
| ATOM | 599 | CA  | PRO | X | 40 | 48.988 | 65.134 | 32.971 | 0.00 | 0.00 |
| ATOM | 600 | HA  | PRO | X | 40 | 49.736 | 65.513 | 33.667 | 0.00 | 0.00 |

|      |     |      |     |   |    |        |        |        |      |      |
|------|-----|------|-----|---|----|--------|--------|--------|------|------|
| ATOM | 601 | C    | PRO | X | 40 | 48.006 | 64.345 | 33.851 | 0.00 | 0.00 |
| ATOM | 602 | O    | PRO | X | 40 | 47.918 | 64.776 | 34.984 | 0.00 | 0.00 |
| ATOM | 603 | N    | ARG | X | 41 | 47.344 | 63.333 | 33.303 | 0.00 | 0.00 |
| ATOM | 604 | H    | ARG | X | 41 | 47.514 | 63.013 | 32.360 | 0.00 | 0.00 |
| ATOM | 605 | CA   | ARG | X | 41 | 46.212 | 62.751 | 34.033 | 0.00 | 0.00 |
| ATOM | 606 | HA   | ARG | X | 41 | 45.839 | 63.376 | 34.844 | 0.00 | 0.00 |
| ATOM | 607 | CB   | ARG | X | 41 | 45.039 | 62.305 | 33.143 | 0.00 | 0.00 |
| ATOM | 608 | HB2  | ARG | X | 41 | 45.272 | 61.924 | 32.149 | 0.00 | 0.00 |
| ATOM | 609 | HB3  | ARG | X | 41 | 44.311 | 61.687 | 33.669 | 0.00 | 0.00 |
| ATOM | 610 | CG   | ARG | X | 41 | 44.202 | 63.564 | 32.827 | 0.00 | 0.00 |
| ATOM | 611 | HG2  | ARG | X | 41 | 43.935 | 64.001 | 33.789 | 0.00 | 0.00 |
| ATOM | 612 | HG3  | ARG | X | 41 | 44.807 | 64.244 | 32.226 | 0.00 | 0.00 |
| ATOM | 613 | CD   | ARG | X | 41 | 42.961 | 63.292 | 32.017 | 0.00 | 0.00 |
| ATOM | 614 | HD2  | ARG | X | 41 | 43.306 | 62.985 | 31.029 | 0.00 | 0.00 |
| ATOM | 615 | HD3  | ARG | X | 41 | 42.372 | 62.491 | 32.462 | 0.00 | 0.00 |
| ATOM | 616 | NE   | ARG | X | 41 | 42.127 | 64.523 | 31.826 | 0.00 | 0.00 |
| ATOM | 617 | HE   | ARG | X | 41 | 41.465 | 64.721 | 32.562 | 0.00 | 0.00 |
| ATOM | 618 | CZ   | ARG | X | 41 | 42.123 | 65.444 | 30.881 | 0.00 | 0.00 |
| ATOM | 619 | NH1  | ARG | X | 41 | 42.953 | 65.353 | 29.867 | 0.00 | 0.00 |
| ATOM | 620 | HH11 | ARG | X | 41 | 43.534 | 64.532 | 29.772 | 0.00 | 0.00 |
| ATOM | 621 | HH12 | ARG | X | 41 | 42.961 | 66.144 | 29.239 | 0.00 | 0.00 |
| ATOM | 622 | NH2  | ARG | X | 41 | 41.202 | 66.380 | 30.975 | 0.00 | 0.00 |
| ATOM | 623 | HH21 | ARG | X | 41 | 40.538 | 66.305 | 31.733 | 0.00 | 0.00 |
| ATOM | 624 | HH22 | ARG | X | 41 | 40.996 | 67.097 | 30.294 | 0.00 | 0.00 |
| ATOM | 625 | C    | ARG | X | 41 | 46.776 | 61.510 | 34.846 | 0.00 | 0.00 |
| ATOM | 626 | O    | ARG | X | 41 | 46.015 | 60.774 | 35.521 | 0.00 | 0.00 |
| ATOM | 627 | N    | ARG | X | 42 | 48.077 | 61.192 | 34.739 | 0.00 | 0.00 |
| ATOM | 628 | H    | ARG | X | 42 | 48.626 | 61.837 | 34.190 | 0.00 | 0.00 |
| ATOM | 629 | CA   | ARG | X | 42 | 48.763 | 60.160 | 35.561 | 0.00 | 0.00 |
| ATOM | 630 | HA   | ARG | X | 42 | 48.294 | 59.206 | 35.318 | 0.00 | 0.00 |
| ATOM | 631 | CB   | ARG | X | 42 | 50.240 | 60.063 | 35.058 | 0.00 | 0.00 |
| ATOM | 632 | HB2  | ARG | X | 42 | 50.366 | 60.085 | 33.975 | 0.00 | 0.00 |
| ATOM | 633 | HB3  | ARG | X | 42 | 50.776 | 60.978 | 35.306 | 0.00 | 0.00 |
| ATOM | 634 | CG   | ARG | X | 42 | 51.001 | 58.840 | 35.595 | 0.00 | 0.00 |
| ATOM | 635 | HG2  | ARG | X | 42 | 50.912 | 58.911 | 36.679 | 0.00 | 0.00 |
| ATOM | 636 | HG3  | ARG | X | 42 | 50.527 | 57.959 | 35.162 | 0.00 | 0.00 |
| ATOM | 637 | CD   | ARG | X | 42 | 52.473 | 58.813 | 35.275 | 0.00 | 0.00 |
| ATOM | 638 | HD2  | ARG | X | 42 | 52.874 | 59.763 | 35.626 | 0.00 | 0.00 |
| ATOM | 639 | HD3  | ARG | X | 42 | 52.883 | 57.949 | 35.798 | 0.00 | 0.00 |
| ATOM | 640 | NE   | ARG | X | 42 | 52.703 | 58.615 | 33.875 | 0.00 | 0.00 |
| ATOM | 641 | HE   | ARG | X | 42 | 51.946 | 58.093 | 33.456 | 0.00 | 0.00 |
| ATOM | 642 | CZ   | ARG | X | 42 | 53.846 | 58.940 | 33.284 | 0.00 | 0.00 |
| ATOM | 643 | NH1  | ARG | X | 42 | 54.917 | 59.597 | 33.811 | 0.00 | 0.00 |
| ATOM | 644 | HH11 | ARG | X | 42 | 54.866 | 60.011 | 34.731 | 0.00 | 0.00 |
| ATOM | 645 | HH12 | ARG | X | 42 | 55.737 | 59.799 | 33.257 | 0.00 | 0.00 |
| ATOM | 646 | NH2  | ARG | X | 42 | 53.938 | 58.634 | 32.010 | 0.00 | 0.00 |
| ATOM | 647 | HH21 | ARG | X | 42 | 53.242 | 58.089 | 31.522 | 0.00 | 0.00 |
| ATOM | 648 | HH22 | ARG | X | 42 | 54.746 | 58.908 | 31.469 | 0.00 | 0.00 |
| ATOM | 649 | C    | ARG | X | 42 | 48.611 | 60.418 | 37.081 | 0.00 | 0.00 |
| ATOM | 650 | O    | ARG | X | 42 | 48.779 | 61.565 | 37.483 | 0.00 | 0.00 |
| ATOM | 651 | N    | PHE | X | 43 | 48.307 | 59.343 | 37.798 | 0.00 | 0.00 |
| ATOM | 652 | H    | PHE | X | 43 | 48.163 | 58.488 | 37.279 | 0.00 | 0.00 |
| ATOM | 653 | CA   | PHE | X | 43 | 47.972 | 59.365 | 39.207 | 0.00 | 0.00 |
| ATOM | 654 | HA   | PHE | X | 43 | 47.770 | 58.327 | 39.473 | 0.00 | 0.00 |
| ATOM | 655 | CB   | PHE | X | 43 | 49.206 | 59.827 | 40.069 | 0.00 | 0.00 |
| ATOM | 656 | HB2  | PHE | X | 43 | 49.174 | 60.907 | 40.214 | 0.00 | 0.00 |
| ATOM | 657 | HB3  | PHE | X | 43 | 49.124 | 59.393 | 41.065 | 0.00 | 0.00 |
| ATOM | 658 | CG   | PHE | X | 43 | 50.572 | 59.445 | 39.590 | 0.00 | 0.00 |
| ATOM | 659 | CD1  | PHE | X | 43 | 50.997 | 58.117 | 39.589 | 0.00 | 0.00 |
| ATOM | 660 | HD1  | PHE | X | 43 | 50.259 | 57.407 | 39.932 | 0.00 | 0.00 |
| ATOM | 661 | CE1  | PHE | X | 43 | 52.230 | 57.657 | 39.074 | 0.00 | 0.00 |
| ATOM | 662 | HE1  | PHE | X | 43 | 52.462 | 56.611 | 38.942 | 0.00 | 0.00 |
| ATOM | 663 | CZ   | PHE | X | 43 | 53.142 | 58.658 | 38.718 | 0.00 | 0.00 |
| ATOM | 664 | HZ   | PHE | X | 43 | 54.171 | 58.369 | 38.559 | 0.00 | 0.00 |
| ATOM | 665 | CE2  | PHE | X | 43 | 52.794 | 59.998 | 38.743 | 0.00 | 0.00 |
| ATOM | 666 | HE2  | PHE | X | 43 | 53.448 | 60.754 | 38.334 | 0.00 | 0.00 |
| ATOM | 667 | CD2  | PHE | X | 43 | 51.511 | 60.409 | 39.153 | 0.00 | 0.00 |

|      |     |      |     |   |    |        |        |        |      |      |
|------|-----|------|-----|---|----|--------|--------|--------|------|------|
| ATOM | 668 | HD2  | PHE | X | 43 | 51.245 | 61.446 | 39.016 | 0.00 | 0.00 |
| ATOM | 669 | C    | PHE | X | 43 | 46.765 | 60.121 | 39.720 | 0.00 | 0.00 |
| ATOM | 670 | O    | PHE | X | 43 | 46.469 | 60.036 | 40.874 | 0.00 | 0.00 |
| ATOM | 671 | N    | LEU | X | 44 | 46.005 | 60.751 | 38.831 | 0.00 | 0.00 |
| ATOM | 672 | H    | LEU | X | 44 | 46.274 | 60.831 | 37.861 | 0.00 | 0.00 |
| ATOM | 673 | CA   | LEU | X | 44 | 44.844 | 61.659 | 39.135 | 0.00 | 0.00 |
| ATOM | 674 | HA   | LEU | X | 44 | 44.900 | 62.045 | 40.153 | 0.00 | 0.00 |
| ATOM | 675 | CB   | LEU | X | 44 | 44.764 | 62.867 | 38.291 | 0.00 | 0.00 |
| ATOM | 676 | HB2  | LEU | X | 44 | 44.905 | 62.582 | 37.248 | 0.00 | 0.00 |
| ATOM | 677 | HB3  | LEU | X | 44 | 43.802 | 63.375 | 38.348 | 0.00 | 0.00 |
| ATOM | 678 | CG   | LEU | X | 44 | 45.838 | 63.991 | 38.440 | 0.00 | 0.00 |
| ATOM | 679 | HG   | LEU | X | 44 | 46.835 | 63.553 | 38.390 | 0.00 | 0.00 |
| ATOM | 680 | CD1  | LEU | X | 44 | 45.611 | 65.157 | 37.476 | 0.00 | 0.00 |
| ATOM | 681 | HD11 | LEU | X | 44 | 44.623 | 65.576 | 37.670 | 0.00 | 0.00 |
| ATOM | 682 | HD12 | LEU | X | 44 | 45.652 | 64.889 | 36.421 | 0.00 | 0.00 |
| ATOM | 683 | HD13 | LEU | X | 44 | 46.285 | 66.012 | 37.528 | 0.00 | 0.00 |
| ATOM | 684 | CD2  | LEU | X | 44 | 45.742 | 64.574 | 39.867 | 0.00 | 0.00 |
| ATOM | 685 | HD21 | LEU | X | 44 | 44.726 | 64.950 | 39.991 | 0.00 | 0.00 |
| ATOM | 686 | HD22 | LEU | X | 44 | 45.929 | 63.825 | 40.636 | 0.00 | 0.00 |
| ATOM | 687 | HD23 | LEU | X | 44 | 46.459 | 65.366 | 40.081 | 0.00 | 0.00 |
| ATOM | 688 | C    | LEU | X | 44 | 43.579 | 60.853 | 38.976 | 0.00 | 0.00 |
| ATOM | 689 | O    | LEU | X | 44 | 43.455 | 59.874 | 38.183 | 0.00 | 0.00 |
| ATOM | 690 | N    | PRO | X | 45 | 42.490 | 61.194 | 39.686 | 0.00 | 0.00 |
| ATOM | 691 | CD   | PRO | X | 45 | 42.414 | 62.056 | 40.852 | 0.00 | 0.00 |
| ATOM | 692 | HD2  | PRO | X | 45 | 42.412 | 63.091 | 40.507 | 0.00 | 0.00 |
| ATOM | 693 | HD3  | PRO | X | 45 | 43.301 | 61.901 | 41.466 | 0.00 | 0.00 |
| ATOM | 694 | CG   | PRO | X | 45 | 41.155 | 61.717 | 41.700 | 0.00 | 0.00 |
| ATOM | 695 | HG2  | PRO | X | 45 | 40.784 | 62.606 | 42.210 | 0.00 | 0.00 |
| ATOM | 696 | HG3  | PRO | X | 45 | 41.348 | 60.892 | 42.385 | 0.00 | 0.00 |
| ATOM | 697 | CB   | PRO | X | 45 | 40.286 | 61.271 | 40.562 | 0.00 | 0.00 |
| ATOM | 698 | HB2  | PRO | X | 45 | 39.732 | 62.110 | 40.142 | 0.00 | 0.00 |
| ATOM | 699 | HB3  | PRO | X | 45 | 39.546 | 60.553 | 40.917 | 0.00 | 0.00 |
| ATOM | 700 | CA   | PRO | X | 45 | 41.199 | 60.568 | 39.515 | 0.00 | 0.00 |
| ATOM | 701 | HA   | PRO | X | 45 | 41.328 | 59.530 | 39.823 | 0.00 | 0.00 |
| ATOM | 702 | C    | PRO | X | 45 | 40.646 | 60.673 | 38.064 | 0.00 | 0.00 |
| ATOM | 703 | O    | PRO | X | 45 | 40.949 | 61.686 | 37.440 | 0.00 | 0.00 |
| ATOM | 704 | N    | PRO | X | 46 | 39.858 | 59.684 | 37.584 | 0.00 | 0.00 |
| ATOM | 705 | CD   | PRO | X | 46 | 39.446 | 58.519 | 38.240 | 0.00 | 0.00 |
| ATOM | 706 | HD2  | PRO | X | 46 | 38.985 | 58.690 | 39.213 | 0.00 | 0.00 |
| ATOM | 707 | HD3  | PRO | X | 46 | 40.313 | 57.896 | 38.458 | 0.00 | 0.00 |
| ATOM | 708 | CG   | PRO | X | 46 | 38.511 | 57.802 | 37.220 | 0.00 | 0.00 |
| ATOM | 709 | HG2  | PRO | X | 46 | 37.479 | 58.121 | 37.365 | 0.00 | 0.00 |
| ATOM | 710 | HG3  | PRO | X | 46 | 38.632 | 56.726 | 37.351 | 0.00 | 0.00 |
| ATOM | 711 | CB   | PRO | X | 46 | 39.038 | 58.281 | 35.879 | 0.00 | 0.00 |
| ATOM | 712 | HB2  | PRO | X | 46 | 38.264 | 58.248 | 35.112 | 0.00 | 0.00 |
| ATOM | 713 | HB3  | PRO | X | 46 | 39.953 | 57.710 | 35.723 | 0.00 | 0.00 |
| ATOM | 714 | CA   | PRO | X | 46 | 39.432 | 59.739 | 36.168 | 0.00 | 0.00 |
| ATOM | 715 | HA   | PRO | X | 46 | 40.342 | 59.913 | 35.593 | 0.00 | 0.00 |
| ATOM | 716 | C    | PRO | X | 46 | 38.296 | 60.689 | 35.956 | 0.00 | 0.00 |
| ATOM | 717 | O    | PRO | X | 46 | 37.313 | 60.810 | 36.734 | 0.00 | 0.00 |
| ATOM | 718 | N    | GLU | X | 47 | 38.410 | 61.367 | 34.815 | 0.00 | 0.00 |
| ATOM | 719 | H    | GLU | X | 47 | 39.216 | 61.156 | 34.245 | 0.00 | 0.00 |
| ATOM | 720 | CA   | GLU | X | 47 | 37.371 | 62.240 | 34.217 | 0.00 | 0.00 |
| ATOM | 721 | HA   | GLU | X | 47 | 36.702 | 62.669 | 34.962 | 0.00 | 0.00 |
| ATOM | 722 | CB   | GLU | X | 47 | 37.926 | 63.411 | 33.418 | 0.00 | 0.00 |
| ATOM | 723 | HB2  | GLU | X | 47 | 38.664 | 62.952 | 32.760 | 0.00 | 0.00 |
| ATOM | 724 | HB3  | GLU | X | 47 | 37.155 | 63.820 | 32.764 | 0.00 | 0.00 |
| ATOM | 725 | CG   | GLU | X | 47 | 38.479 | 64.509 | 34.320 | 0.00 | 0.00 |
| ATOM | 726 | HG2  | GLU | X | 47 | 37.627 | 65.043 | 34.740 | 0.00 | 0.00 |
| ATOM | 727 | HG3  | GLU | X | 47 | 39.062 | 64.094 | 35.142 | 0.00 | 0.00 |
| ATOM | 728 | CD   | GLU | X | 47 | 39.236 | 65.521 | 33.532 | 0.00 | 0.00 |
| ATOM | 729 | OE1  | GLU | X | 47 | 38.611 | 66.357 | 32.809 | 0.00 | 0.00 |
| ATOM | 730 | OE2  | GLU | X | 47 | 40.466 | 65.642 | 33.772 | 0.00 | 0.00 |
| ATOM | 731 | C    | GLU | X | 47 | 36.451 | 61.400 | 33.326 | 0.00 | 0.00 |
| ATOM | 732 | O    | GLU | X | 47 | 36.932 | 60.563 | 32.544 | 0.00 | 0.00 |
| ATOM | 733 | N    | PRO | X | 48 | 35.112 | 61.500 | 33.505 | 0.00 | 0.00 |
| ATOM | 734 | CD   | PRO | X | 48 | 34.451 | 62.254 | 34.585 | 0.00 | 0.00 |

|      |     |      |     |   |    |        |        |        |      |      |
|------|-----|------|-----|---|----|--------|--------|--------|------|------|
| ATOM | 735 | HD2  | PRO | X | 48 | 34.369 | 63.305 | 34.307 | 0.00 | 0.00 |
| ATOM | 736 | HD3  | PRO | X | 48 | 34.855 | 62.070 | 35.580 | 0.00 | 0.00 |
| ATOM | 737 | CG   | PRO | X | 48 | 33.054 | 61.712 | 34.659 | 0.00 | 0.00 |
| ATOM | 738 | HG2  | PRO | X | 48 | 32.335 | 62.455 | 35.004 | 0.00 | 0.00 |
| ATOM | 739 | HG3  | PRO | X | 48 | 33.063 | 60.867 | 35.347 | 0.00 | 0.00 |
| ATOM | 740 | CB   | PRO | X | 48 | 32.739 | 61.177 | 33.188 | 0.00 | 0.00 |
| ATOM | 741 | HB2  | PRO | X | 48 | 32.391 | 62.006 | 32.572 | 0.00 | 0.00 |
| ATOM | 742 | HB3  | PRO | X | 48 | 32.066 | 60.320 | 33.218 | 0.00 | 0.00 |
| ATOM | 743 | CA   | PRO | X | 48 | 34.126 | 60.771 | 32.653 | 0.00 | 0.00 |
| ATOM | 744 | HA   | PRO | X | 48 | 34.279 | 59.703 | 32.810 | 0.00 | 0.00 |
| ATOM | 745 | C    | PRO | X | 48 | 34.322 | 61.082 | 31.182 | 0.00 | 0.00 |
| ATOM | 746 | O    | PRO | X | 48 | 34.628 | 62.207 | 30.819 | 0.00 | 0.00 |
| ATOM | 747 | N    | LYS | X | 49 | 34.098 | 60.113 | 30.327 | 0.00 | 0.00 |
| ATOM | 748 | H    | LYS | X | 49 | 33.900 | 59.190 | 30.685 | 0.00 | 0.00 |
| ATOM | 749 | CA   | LYS | X | 49 | 34.291 | 60.243 | 28.887 | 0.00 | 0.00 |
| ATOM | 750 | HA   | LYS | X | 49 | 35.283 | 60.607 | 28.622 | 0.00 | 0.00 |
| ATOM | 751 | CB   | LYS | X | 49 | 34.192 | 58.855 | 28.226 | 0.00 | 0.00 |
| ATOM | 752 | HB2  | LYS | X | 49 | 34.874 | 58.156 | 28.711 | 0.00 | 0.00 |
| ATOM | 753 | HB3  | LYS | X | 49 | 33.135 | 58.599 | 28.290 | 0.00 | 0.00 |
| ATOM | 754 | CG   | LYS | X | 49 | 34.530 | 58.894 | 26.696 | 0.00 | 0.00 |
| ATOM | 755 | HG2  | LYS | X | 49 | 34.461 | 57.882 | 26.298 | 0.00 | 0.00 |
| ATOM | 756 | HG3  | LYS | X | 49 | 33.787 | 59.556 | 26.251 | 0.00 | 0.00 |
| ATOM | 757 | CD   | LYS | X | 49 | 35.935 | 59.302 | 26.310 | 0.00 | 0.00 |
| ATOM | 758 | HD2  | LYS | X | 49 | 36.377 | 59.803 | 27.171 | 0.00 | 0.00 |
| ATOM | 759 | HD3  | LYS | X | 49 | 36.510 | 58.406 | 26.079 | 0.00 | 0.00 |
| ATOM | 760 | CE   | LYS | X | 49 | 35.941 | 60.201 | 25.096 | 0.00 | 0.00 |
| ATOM | 761 | HE2  | LYS | X | 49 | 35.791 | 59.532 | 24.248 | 0.00 | 0.00 |
| ATOM | 762 | HE3  | LYS | X | 49 | 35.073 | 60.855 | 25.181 | 0.00 | 0.00 |
| ATOM | 763 | NZ   | LYS | X | 49 | 37.171 | 60.997 | 24.897 | 0.00 | 0.00 |
| ATOM | 764 | HZ1  | LYS | X | 49 | 37.968 | 60.377 | 24.878 | 0.00 | 0.00 |
| ATOM | 765 | HZ2  | LYS | X | 49 | 37.151 | 61.599 | 24.087 | 0.00 | 0.00 |
| ATOM | 766 | HZ3  | LYS | X | 49 | 37.326 | 61.565 | 25.718 | 0.00 | 0.00 |
| ATOM | 767 | C    | LYS | X | 49 | 33.247 | 61.219 | 28.335 | 0.00 | 0.00 |
| ATOM | 768 | O    | LYS | X | 49 | 32.005 | 61.013 | 28.461 | 0.00 | 0.00 |
| ATOM | 769 | N    | GLN | X | 50 | 33.681 | 62.178 | 27.481 | 0.00 | 0.00 |
| ATOM | 770 | H    | GLN | X | 50 | 34.678 | 62.343 | 27.480 | 0.00 | 0.00 |
| ATOM | 771 | CA   | GLN | X | 50 | 32.891 | 63.112 | 26.733 | 0.00 | 0.00 |
| ATOM | 772 | HA   | GLN | X | 50 | 32.147 | 63.516 | 27.420 | 0.00 | 0.00 |
| ATOM | 773 | CB   | GLN | X | 50 | 33.807 | 64.229 | 26.209 | 0.00 | 0.00 |
| ATOM | 774 | HB2  | GLN | X | 50 | 34.649 | 63.799 | 25.666 | 0.00 | 0.00 |
| ATOM | 775 | HB3  | GLN | X | 50 | 33.314 | 64.836 | 25.450 | 0.00 | 0.00 |
| ATOM | 776 | CG   | GLN | X | 50 | 34.414 | 65.126 | 27.321 | 0.00 | 0.00 |
| ATOM | 777 | HG2  | GLN | X | 50 | 33.630 | 65.707 | 27.807 | 0.00 | 0.00 |
| ATOM | 778 | HG3  | GLN | X | 50 | 34.761 | 64.408 | 28.063 | 0.00 | 0.00 |
| ATOM | 779 | CD   | GLN | X | 50 | 35.532 | 66.025 | 26.819 | 0.00 | 0.00 |
| ATOM | 780 | OE1  | GLN | X | 50 | 35.410 | 67.166 | 26.474 | 0.00 | 0.00 |
| ATOM | 781 | NE2  | GLN | X | 50 | 36.695 | 65.458 | 26.699 | 0.00 | 0.00 |
| ATOM | 782 | HE21 | GLN | X | 50 | 37.495 | 65.984 | 26.379 | 0.00 | 0.00 |
| ATOM | 783 | HE22 | GLN | X | 50 | 36.783 | 64.467 | 26.872 | 0.00 | 0.00 |
| ATOM | 784 | C    | GLN | X | 50 | 32.277 | 62.422 | 25.530 | 0.00 | 0.00 |
| ATOM | 785 | O    | GLN | X | 50 | 32.941 | 61.564 | 24.896 | 0.00 | 0.00 |
| ATOM | 786 | N    | PRO | X | 51 | 31.028 | 62.819 | 25.148 | 0.00 | 0.00 |
| ATOM | 787 | CD   | PRO | X | 51 | 30.155 | 63.757 | 25.771 | 0.00 | 0.00 |
| ATOM | 788 | HD2  | PRO | X | 51 | 30.511 | 64.745 | 25.476 | 0.00 | 0.00 |
| ATOM | 789 | HD3  | PRO | X | 51 | 30.053 | 63.666 | 26.852 | 0.00 | 0.00 |
| ATOM | 790 | CG   | PRO | X | 51 | 28.733 | 63.482 | 25.261 | 0.00 | 0.00 |
| ATOM | 791 | HG2  | PRO | X | 51 | 28.150 | 64.391 | 25.115 | 0.00 | 0.00 |
| ATOM | 792 | HG3  | PRO | X | 51 | 28.228 | 62.692 | 25.818 | 0.00 | 0.00 |
| ATOM | 793 | CB   | PRO | X | 51 | 29.038 | 62.982 | 23.818 | 0.00 | 0.00 |
| ATOM | 794 | HB2  | PRO | X | 51 | 29.193 | 63.881 | 23.221 | 0.00 | 0.00 |
| ATOM | 795 | HB3  | PRO | X | 51 | 28.307 | 62.300 | 23.386 | 0.00 | 0.00 |
| ATOM | 796 | CA   | PRO | X | 51 | 30.395 | 62.295 | 23.930 | 0.00 | 0.00 |
| ATOM | 797 | HA   | PRO | X | 51 | 30.175 | 61.247 | 24.133 | 0.00 | 0.00 |
| ATOM | 798 | C    | PRO | X | 51 | 31.235 | 62.384 | 22.657 | 0.00 | 0.00 |
| ATOM | 799 | O    | PRO | X | 51 | 31.999 | 63.322 | 22.530 | 0.00 | 0.00 |
| ATOM | 800 | N    | TRP | X | 52 | 31.116 | 61.377 | 21.760 | 0.00 | 0.00 |
| ATOM | 801 | H    | TRP | X | 52 | 30.464 | 60.641 | 21.990 | 0.00 | 0.00 |

|      |     |      |     |   |    |        |        |        |      |      |
|------|-----|------|-----|---|----|--------|--------|--------|------|------|
| ATOM | 802 | CA   | TRP | X | 52 | 31.883 | 61.261 | 20.495 | 0.00 | 0.00 |
| ATOM | 803 | HA   | TRP | X | 52 | 32.554 | 62.120 | 20.472 | 0.00 | 0.00 |
| ATOM | 804 | CB   | TRP | X | 52 | 32.631 | 59.855 | 20.532 | 0.00 | 0.00 |
| ATOM | 805 | HB2  | TRP | X | 52 | 33.285 | 59.714 | 19.671 | 0.00 | 0.00 |
| ATOM | 806 | HB3  | TRP | X | 52 | 33.328 | 59.885 | 21.370 | 0.00 | 0.00 |
| ATOM | 807 | CG   | TRP | X | 52 | 31.681 | 58.654 | 20.746 | 0.00 | 0.00 |
| ATOM | 808 | CD1  | TRP | X | 52 | 30.989 | 57.988 | 19.791 | 0.00 | 0.00 |
| ATOM | 809 | HD1  | TRP | X | 52 | 30.967 | 58.351 | 18.774 | 0.00 | 0.00 |
| ATOM | 810 | NE1  | TRP | X | 52 | 30.393 | 56.828 | 20.314 | 0.00 | 0.00 |
| ATOM | 811 | HE1  | TRP | X | 52 | 29.864 | 56.145 | 19.789 | 0.00 | 0.00 |
| ATOM | 812 | CE2  | TRP | X | 52 | 30.718 | 56.660 | 21.672 | 0.00 | 0.00 |
| ATOM | 813 | CZ2  | TRP | X | 52 | 30.345 | 55.746 | 22.651 | 0.00 | 0.00 |
| ATOM | 814 | HZ2  | TRP | X | 52 | 29.696 | 54.919 | 22.402 | 0.00 | 0.00 |
| ATOM | 815 | CH2  | TRP | X | 52 | 30.623 | 56.080 | 23.963 | 0.00 | 0.00 |
| ATOM | 816 | HH2  | TRP | X | 52 | 30.238 | 55.418 | 24.725 | 0.00 | 0.00 |
| ATOM | 817 | CZ3  | TRP | X | 52 | 31.417 | 57.228 | 24.293 | 0.00 | 0.00 |
| ATOM | 818 | HZ3  | TRP | X | 52 | 31.692 | 57.434 | 25.317 | 0.00 | 0.00 |
| ATOM | 819 | CE3  | TRP | X | 52 | 31.800 | 58.117 | 23.282 | 0.00 | 0.00 |
| ATOM | 820 | HE3  | TRP | X | 52 | 32.420 | 58.964 | 23.537 | 0.00 | 0.00 |
| ATOM | 821 | CD2  | TRP | X | 52 | 31.425 | 57.884 | 21.974 | 0.00 | 0.00 |
| ATOM | 822 | C    | TRP | X | 52 | 30.992 | 61.426 | 19.292 | 0.00 | 0.00 |
| ATOM | 823 | O    | TRP | X | 52 | 29.762 | 61.265 | 19.360 | 0.00 | 0.00 |
| ATOM | 824 | N    | SER | X | 53 | 31.619 | 61.842 | 18.199 | 0.00 | 0.00 |
| ATOM | 825 | H    | SER | X | 53 | 32.596 | 62.092 | 18.251 | 0.00 | 0.00 |
| ATOM | 826 | CA   | SER | X | 53 | 31.053 | 61.965 | 16.791 | 0.00 | 0.00 |
| ATOM | 827 | HA   | SER | X | 53 | 30.013 | 62.253 | 16.943 | 0.00 | 0.00 |
| ATOM | 828 | CB   | SER | X | 53 | 31.859 | 63.011 | 16.132 | 0.00 | 0.00 |
| ATOM | 829 | HB2  | SER | X | 53 | 31.585 | 63.004 | 15.077 | 0.00 | 0.00 |
| ATOM | 830 | HB3  | SER | X | 53 | 31.707 | 64.040 | 16.459 | 0.00 | 0.00 |
| ATOM | 831 | OG   | SER | X | 53 | 33.247 | 62.779 | 16.176 | 0.00 | 0.00 |
| ATOM | 832 | HG   | SER | X | 53 | 33.730 | 63.526 | 15.813 | 0.00 | 0.00 |
| ATOM | 833 | C    | SER | X | 53 | 31.001 | 60.621 | 15.986 | 0.00 | 0.00 |
| ATOM | 834 | O    | SER | X | 53 | 31.757 | 59.696 | 16.276 | 0.00 | 0.00 |
| ATOM | 835 | N    | GLY | X | 54 | 29.990 | 60.516 | 15.122 | 0.00 | 0.00 |
| ATOM | 836 | H    | GLY | X | 54 | 29.428 | 61.306 | 14.838 | 0.00 | 0.00 |
| ATOM | 837 | CA   | GLY | X | 54 | 29.903 | 59.412 | 14.182 | 0.00 | 0.00 |
| ATOM | 838 | HA2  | GLY | X | 54 | 29.219 | 59.699 | 13.383 | 0.00 | 0.00 |
| ATOM | 839 | HA3  | GLY | X | 54 | 30.880 | 59.180 | 13.757 | 0.00 | 0.00 |
| ATOM | 840 | C    | GLY | X | 54 | 29.438 | 58.095 | 14.845 | 0.00 | 0.00 |
| ATOM | 841 | O    | GLY | X | 54 | 28.240 | 57.841 | 14.937 | 0.00 | 0.00 |
| ATOM | 842 | N    | VAL | X | 55 | 30.378 | 57.329 | 15.372 | 0.00 | 0.00 |
| ATOM | 843 | H    | VAL | X | 55 | 31.276 | 57.791 | 15.411 | 0.00 | 0.00 |
| ATOM | 844 | CA   | VAL | X | 55 | 30.333 | 55.966 | 15.887 | 0.00 | 0.00 |
| ATOM | 845 | HA   | VAL | X | 55 | 29.694 | 56.097 | 16.760 | 0.00 | 0.00 |
| ATOM | 846 | CB   | VAL | X | 55 | 29.655 | 55.009 | 14.848 | 0.00 | 0.00 |
| ATOM | 847 | HB   | VAL | X | 55 | 28.635 | 55.351 | 14.676 | 0.00 | 0.00 |
| ATOM | 848 | CG1  | VAL | X | 55 | 30.235 | 55.047 | 13.378 | 0.00 | 0.00 |
| ATOM | 849 | HG11 | VAL | X | 55 | 30.400 | 56.071 | 13.043 | 0.00 | 0.00 |
| ATOM | 850 | HG12 | VAL | X | 55 | 31.217 | 54.575 | 13.346 | 0.00 | 0.00 |
| ATOM | 851 | HG13 | VAL | X | 55 | 29.576 | 54.503 | 12.702 | 0.00 | 0.00 |
| ATOM | 852 | CG2  | VAL | X | 55 | 29.469 | 53.603 | 15.312 | 0.00 | 0.00 |
| ATOM | 853 | HG21 | VAL | X | 55 | 30.446 | 53.164 | 15.514 | 0.00 | 0.00 |
| ATOM | 854 | HG22 | VAL | X | 55 | 29.008 | 52.985 | 14.541 | 0.00 | 0.00 |
| ATOM | 855 | HG23 | VAL | X | 55 | 28.872 | 53.599 | 16.224 | 0.00 | 0.00 |
| ATOM | 856 | C    | VAL | X | 55 | 31.696 | 55.495 | 16.249 | 0.00 | 0.00 |
| ATOM | 857 | O    | VAL | X | 55 | 32.673 | 55.727 | 15.542 | 0.00 | 0.00 |
| ATOM | 858 | N    | VAL | X | 56 | 31.826 | 54.813 | 17.393 | 0.00 | 0.00 |
| ATOM | 859 | H    | VAL | X | 56 | 30.978 | 54.589 | 17.895 | 0.00 | 0.00 |
| ATOM | 860 | CA   | VAL | X | 56 | 33.016 | 54.106 | 17.842 | 0.00 | 0.00 |
| ATOM | 861 | HA   | VAL | X | 56 | 33.861 | 54.516 | 17.290 | 0.00 | 0.00 |
| ATOM | 862 | CB   | VAL | X | 56 | 33.216 | 54.342 | 19.345 | 0.00 | 0.00 |
| ATOM | 863 | HB   | VAL | X | 56 | 32.215 | 54.317 | 19.774 | 0.00 | 0.00 |
| ATOM | 864 | CG1  | VAL | X | 56 | 33.995 | 53.291 | 20.108 | 0.00 | 0.00 |
| ATOM | 865 | HG11 | VAL | X | 56 | 33.523 | 52.309 | 20.144 | 0.00 | 0.00 |
| ATOM | 866 | HG12 | VAL | X | 56 | 34.976 | 53.128 | 19.661 | 0.00 | 0.00 |
| ATOM | 867 | HG13 | VAL | X | 56 | 34.194 | 53.690 | 21.103 | 0.00 | 0.00 |
| ATOM | 868 | CG2  | VAL | X | 56 | 33.790 | 55.782 | 19.513 | 0.00 | 0.00 |



|      |     |      |     |   |    |        |        |        |      |      |
|------|-----|------|-----|---|----|--------|--------|--------|------|------|
| ATOM | 869 | HG21 | VAL | X | 56 | 33.822 | 55.974 | 20.586 | 0.00 | 0.00 |
| ATOM | 870 | HG22 | VAL | X | 56 | 33.149 | 56.507 | 19.012 | 0.00 | 0.00 |
| ATOM | 871 | HG23 | VAL | X | 56 | 34.816 | 55.785 | 19.144 | 0.00 | 0.00 |
| ATOM | 872 | C    | VAL | X | 56 | 32.857 | 52.620 | 17.432 | 0.00 | 0.00 |
| ATOM | 873 | O    | VAL | X | 56 | 31.777 | 52.049 | 17.627 | 0.00 | 0.00 |
| ATOM | 874 | N    | ASP | X | 57 | 33.977 | 52.045 | 16.895 | 0.00 | 0.00 |
| ATOM | 875 | H    | ASP | X | 57 | 34.795 | 52.601 | 16.693 | 0.00 | 0.00 |
| ATOM | 876 | CA   | ASP | X | 57 | 34.157 | 50.598 | 16.763 | 0.00 | 0.00 |
| ATOM | 877 | HA   | ASP | X | 57 | 33.285 | 50.180 | 16.261 | 0.00 | 0.00 |
| ATOM | 878 | CB   | ASP | X | 57 | 35.413 | 50.391 | 15.839 | 0.00 | 0.00 |
| ATOM | 879 | HB2  | ASP | X | 57 | 35.315 | 51.081 | 15.001 | 0.00 | 0.00 |
| ATOM | 880 | HB3  | ASP | X | 57 | 36.295 | 50.691 | 16.405 | 0.00 | 0.00 |
| ATOM | 881 | CG   | ASP | X | 57 | 35.605 | 48.941 | 15.346 | 0.00 | 0.00 |
| ATOM | 882 | OD1  | ASP | X | 57 | 35.700 | 47.978 | 16.118 | 0.00 | 0.00 |
| ATOM | 883 | OD2  | ASP | X | 57 | 35.916 | 48.906 | 14.112 | 0.00 | 0.00 |
| ATOM | 884 | C    | ASP | X | 57 | 34.366 | 49.866 | 18.112 | 0.00 | 0.00 |
| ATOM | 885 | O    | ASP | X | 57 | 35.165 | 50.238 | 18.986 | 0.00 | 0.00 |
| ATOM | 886 | N    | ALA | X | 58 | 33.586 | 48.811 | 18.329 | 0.00 | 0.00 |
| ATOM | 887 | H    | ALA | X | 58 | 33.044 | 48.435 | 17.564 | 0.00 | 0.00 |
| ATOM | 888 | CA   | ALA | X | 58 | 33.593 | 48.062 | 19.621 | 0.00 | 0.00 |
| ATOM | 889 | HA   | ALA | X | 58 | 34.374 | 48.489 | 20.250 | 0.00 | 0.00 |
| ATOM | 890 | CB   | ALA | X | 58 | 32.185 | 48.356 | 20.335 | 0.00 | 0.00 |
| ATOM | 891 | HB1  | ALA | X | 58 | 32.125 | 49.444 | 20.373 | 0.00 | 0.00 |
| ATOM | 892 | HB2  | ALA | X | 58 | 32.196 | 47.960 | 21.350 | 0.00 | 0.00 |
| ATOM | 893 | HB3  | ALA | X | 58 | 31.410 | 47.931 | 19.696 | 0.00 | 0.00 |
| ATOM | 894 | C    | ALA | X | 58 | 33.868 | 46.591 | 19.384 | 0.00 | 0.00 |
| ATOM | 895 | O    | ALA | X | 58 | 33.341 | 45.713 | 20.117 | 0.00 | 0.00 |
| ATOM | 896 | N    | THR | X | 59 | 34.732 | 46.229 | 18.335 | 0.00 | 0.00 |
| ATOM | 897 | H    | THR | X | 59 | 35.175 | 46.996 | 17.850 | 0.00 | 0.00 |
| ATOM | 898 | CA   | THR | X | 59 | 34.902 | 44.858 | 17.784 | 0.00 | 0.00 |
| ATOM | 899 | HA   | THR | X | 59 | 34.056 | 44.243 | 18.090 | 0.00 | 0.00 |
| ATOM | 900 | CB   | THR | X | 59 | 34.995 | 44.813 | 16.258 | 0.00 | 0.00 |
| ATOM | 901 | HB   | THR | X | 59 | 35.032 | 43.788 | 15.890 | 0.00 | 0.00 |
| ATOM | 902 | CG2  | THR | X | 59 | 33.741 | 45.477 | 15.568 | 0.00 | 0.00 |
| ATOM | 903 | HG21 | THR | X | 59 | 33.822 | 45.304 | 14.494 | 0.00 | 0.00 |
| ATOM | 904 | HG22 | THR | X | 59 | 33.772 | 46.552 | 15.746 | 0.00 | 0.00 |
| ATOM | 905 | HG23 | THR | X | 59 | 32.791 | 45.132 | 15.977 | 0.00 | 0.00 |
| ATOM | 906 | OG1  | THR | X | 59 | 36.145 | 45.453 | 15.844 | 0.00 | 0.00 |
| ATOM | 907 | HG1  | THR | X | 59 | 36.063 | 46.401 | 15.967 | 0.00 | 0.00 |
| ATOM | 908 | C    | THR | X | 59 | 36.108 | 44.086 | 18.278 | 0.00 | 0.00 |
| ATOM | 909 | O    | THR | X | 59 | 36.339 | 42.945 | 17.917 | 0.00 | 0.00 |
| ATOM | 910 | N    | THR | X | 60 | 36.881 | 44.693 | 19.157 | 0.00 | 0.00 |
| ATOM | 911 | H    | THR | X | 60 | 36.602 | 45.603 | 19.493 | 0.00 | 0.00 |
| ATOM | 912 | CA   | THR | X | 60 | 37.998 | 44.064 | 19.791 | 0.00 | 0.00 |
| ATOM | 913 | HA   | THR | X | 60 | 37.820 | 43.000 | 19.947 | 0.00 | 0.00 |
| ATOM | 914 | CB   | THR | X | 60 | 39.319 | 44.216 | 18.903 | 0.00 | 0.00 |
| ATOM | 915 | HB   | THR | X | 60 | 39.053 | 43.621 | 18.029 | 0.00 | 0.00 |
| ATOM | 916 | CG2  | THR | X | 60 | 39.569 | 45.636 | 18.527 | 0.00 | 0.00 |
| ATOM | 917 | HG21 | THR | X | 60 | 38.851 | 46.062 | 17.827 | 0.00 | 0.00 |
| ATOM | 918 | HG22 | THR | X | 60 | 40.461 | 45.688 | 17.903 | 0.00 | 0.00 |
| ATOM | 919 | HG23 | THR | X | 60 | 39.631 | 46.309 | 19.383 | 0.00 | 0.00 |
| ATOM | 920 | OG1  | THR | X | 60 | 40.388 | 43.674 | 19.582 | 0.00 | 0.00 |
| ATOM | 921 | HG1  | THR | X | 60 | 40.620 | 44.393 | 20.175 | 0.00 | 0.00 |
| ATOM | 922 | C    | THR | X | 60 | 38.266 | 44.628 | 21.153 | 0.00 | 0.00 |
| ATOM | 923 | O    | THR | X | 60 | 37.998 | 45.826 | 21.346 | 0.00 | 0.00 |
| ATOM | 924 | N    | PHE | X | 61 | 38.896 | 43.880 | 22.081 | 0.00 | 0.00 |
| ATOM | 925 | H    | PHE | X | 61 | 39.025 | 42.899 | 21.879 | 0.00 | 0.00 |
| ATOM | 926 | CA   | PHE | X | 61 | 39.557 | 44.421 | 23.280 | 0.00 | 0.00 |
| ATOM | 927 | HA   | PHE | X | 61 | 38.805 | 44.862 | 23.935 | 0.00 | 0.00 |
| ATOM | 928 | CB   | PHE | X | 61 | 40.311 | 43.247 | 23.977 | 0.00 | 0.00 |
| ATOM | 929 | HB2  | PHE | X | 61 | 40.936 | 42.827 | 23.190 | 0.00 | 0.00 |
| ATOM | 930 | HB3  | PHE | X | 61 | 40.884 | 43.749 | 24.757 | 0.00 | 0.00 |
| ATOM | 931 | CG   | PHE | X | 61 | 39.454 | 42.121 | 24.534 | 0.00 | 0.00 |
| ATOM | 932 | CD1  | PHE | X | 61 | 38.602 | 42.505 | 25.521 | 0.00 | 0.00 |
| ATOM | 933 | HD1  | PHE | X | 61 | 38.566 | 43.520 | 25.889 | 0.00 | 0.00 |
| ATOM | 934 | CE1  | PHE | X | 61 | 37.726 | 41.461 | 26.034 | 0.00 | 0.00 |
| ATOM | 935 | HE1  | PHE | X | 61 | 37.057 | 41.754 | 26.830 | 0.00 | 0.00 |

|      |      |      |     |   |    |        |        |        |      |      |
|------|------|------|-----|---|----|--------|--------|--------|------|------|
| ATOM | 936  | CZ   | PHE | X | 61 | 37.901 | 40.153 | 25.610 | 0.00 | 0.00 |
| ATOM | 937  | HZ   | PHE | X | 61 | 37.328 | 39.370 | 26.084 | 0.00 | 0.00 |
| ATOM | 938  | CE2  | PHE | X | 61 | 38.891 | 39.801 | 24.684 | 0.00 | 0.00 |
| ATOM | 939  | HE2  | PHE | X | 61 | 39.041 | 38.766 | 24.412 | 0.00 | 0.00 |
| ATOM | 940  | CD2  | PHE | X | 61 | 39.673 | 40.792 | 24.103 | 0.00 | 0.00 |
| ATOM | 941  | HD2  | PHE | X | 61 | 40.356 | 40.598 | 23.289 | 0.00 | 0.00 |
| ATOM | 942  | C    | PHE | X | 61 | 40.658 | 45.466 | 22.891 | 0.00 | 0.00 |
| ATOM | 943  | O    | PHE | X | 61 | 41.285 | 45.323 | 21.859 | 0.00 | 0.00 |
| ATOM | 944  | N    | GLN | X | 62 | 40.759 | 46.522 | 23.731 | 0.00 | 0.00 |
| ATOM | 945  | H    | GLN | X | 62 | 40.214 | 46.483 | 24.581 | 0.00 | 0.00 |
| ATOM | 946  | CA   | GLN | X | 62 | 41.623 | 47.670 | 23.463 | 0.00 | 0.00 |
| ATOM | 947  | HA   | GLN | X | 62 | 41.734 | 47.761 | 22.382 | 0.00 | 0.00 |
| ATOM | 948  | CB   | GLN | X | 62 | 40.831 | 48.956 | 23.934 | 0.00 | 0.00 |
| ATOM | 949  | HB2  | GLN | X | 62 | 39.855 | 48.647 | 24.306 | 0.00 | 0.00 |
| ATOM | 950  | HB3  | GLN | X | 62 | 41.429 | 49.454 | 24.697 | 0.00 | 0.00 |
| ATOM | 951  | CG   | GLN | X | 62 | 40.568 | 50.051 | 22.823 | 0.00 | 0.00 |
| ATOM | 952  | HG2  | GLN | X | 62 | 40.299 | 49.568 | 21.884 | 0.00 | 0.00 |
| ATOM | 953  | HG3  | GLN | X | 62 | 39.756 | 50.727 | 23.090 | 0.00 | 0.00 |
| ATOM | 954  | CD   | GLN | X | 62 | 41.720 | 50.925 | 22.581 | 0.00 | 0.00 |
| ATOM | 955  | OE1  | GLN | X | 62 | 42.865 | 50.484 | 22.380 | 0.00 | 0.00 |
| ATOM | 956  | NE2  | GLN | X | 62 | 41.647 | 52.201 | 22.536 | 0.00 | 0.00 |
| ATOM | 957  | HE21 | GLN | X | 62 | 42.545 | 52.602 | 22.306 | 0.00 | 0.00 |
| ATOM | 958  | HE22 | GLN | X | 62 | 40.801 | 52.742 | 22.641 | 0.00 | 0.00 |
| ATOM | 959  | C    | GLN | X | 62 | 43.005 | 47.495 | 24.170 | 0.00 | 0.00 |
| ATOM | 960  | O    | GLN | X | 62 | 43.403 | 46.348 | 24.460 | 0.00 | 0.00 |
| ATOM | 961  | N    | SER | X | 63 | 43.752 | 48.598 | 24.304 | 0.00 | 0.00 |
| ATOM | 962  | H    | SER | X | 63 | 43.382 | 49.413 | 23.836 | 0.00 | 0.00 |
| ATOM | 963  | CA   | SER | X | 63 | 45.053 | 48.759 | 24.941 | 0.00 | 0.00 |
| ATOM | 964  | HA   | SER | X | 63 | 45.588 | 47.919 | 24.497 | 0.00 | 0.00 |
| ATOM | 965  | CB   | SER | X | 63 | 45.706 | 50.117 | 24.571 | 0.00 | 0.00 |
| ATOM | 966  | HB2  | SER | X | 63 | 45.003 | 50.864 | 24.940 | 0.00 | 0.00 |
| ATOM | 967  | HB3  | SER | X | 63 | 46.669 | 50.155 | 25.080 | 0.00 | 0.00 |
| ATOM | 968  | OG   | SER | X | 63 | 45.790 | 50.423 | 23.176 | 0.00 | 0.00 |
| ATOM | 969  | HG   | SER | X | 63 | 44.905 | 50.650 | 22.882 | 0.00 | 0.00 |
| ATOM | 970  | C    | SER | X | 63 | 45.014 | 48.546 | 26.428 | 0.00 | 0.00 |
| ATOM | 971  | O    | SER | X | 63 | 44.133 | 49.175 | 27.094 | 0.00 | 0.00 |
| ATOM | 972  | N    | VAL | X | 64 | 45.951 | 47.762 | 26.979 | 0.00 | 0.00 |
| ATOM | 973  | H    | VAL | X | 64 | 46.757 | 47.463 | 26.449 | 0.00 | 0.00 |
| ATOM | 974  | CA   | VAL | X | 64 | 45.926 | 47.290 | 28.379 | 0.00 | 0.00 |
| ATOM | 975  | HA   | VAL | X | 64 | 44.887 | 47.306 | 28.708 | 0.00 | 0.00 |
| ATOM | 976  | CB   | VAL | X | 64 | 46.525 | 45.862 | 28.500 | 0.00 | 0.00 |
| ATOM | 977  | HB   | VAL | X | 64 | 47.468 | 45.960 | 27.962 | 0.00 | 0.00 |
| ATOM | 978  | CG1  | VAL | X | 64 | 46.952 | 45.517 | 29.963 | 0.00 | 0.00 |
| ATOM | 979  | HG11 | VAL | X | 64 | 47.757 | 46.171 | 30.299 | 0.00 | 0.00 |
| ATOM | 980  | HG12 | VAL | X | 64 | 46.088 | 45.546 | 30.627 | 0.00 | 0.00 |
| ATOM | 981  | HG13 | VAL | X | 64 | 47.361 | 44.509 | 29.895 | 0.00 | 0.00 |
| ATOM | 982  | CG2  | VAL | X | 64 | 45.667 | 44.844 | 27.902 | 0.00 | 0.00 |
| ATOM | 983  | HG21 | VAL | X | 64 | 45.556 | 45.038 | 26.835 | 0.00 | 0.00 |
| ATOM | 984  | HG22 | VAL | X | 64 | 44.693 | 44.836 | 28.391 | 0.00 | 0.00 |
| ATOM | 985  | HG23 | VAL | X | 64 | 46.168 | 43.877 | 27.874 | 0.00 | 0.00 |
| ATOM | 986  | C    | VAL | X | 64 | 46.770 | 48.295 | 29.136 | 0.00 | 0.00 |
| ATOM | 987  | O    | VAL | X | 64 | 47.727 | 48.848 | 28.597 | 0.00 | 0.00 |
| ATOM | 988  | N    | CYX | X | 65 | 46.370 | 48.667 | 30.346 | 0.00 | 0.00 |
| ATOM | 989  | H    | CYX | X | 65 | 45.543 | 48.196 | 30.684 | 0.00 | 0.00 |
| ATOM | 990  | CA   | CYX | X | 65 | 46.928 | 49.706 | 31.203 | 0.00 | 0.00 |
| ATOM | 991  | HA   | CYX | X | 65 | 47.000 | 50.628 | 30.625 | 0.00 | 0.00 |
| ATOM | 992  | CB   | CYX | X | 65 | 46.061 | 49.913 | 32.456 | 0.00 | 0.00 |
| ATOM | 993  | HB2  | CYX | X | 65 | 45.928 | 48.948 | 32.945 | 0.00 | 0.00 |
| ATOM | 994  | HB3  | CYX | X | 65 | 46.673 | 50.553 | 33.092 | 0.00 | 0.00 |
| ATOM | 995  | SG   | CYX | X | 65 | 44.446 | 50.684 | 32.259 | 0.00 | 0.00 |
| ATOM | 996  | C    | CYX | X | 65 | 48.398 | 49.323 | 31.554 | 0.00 | 0.00 |
| ATOM | 997  | O    | CYX | X | 65 | 48.603 | 48.150 | 31.919 | 0.00 | 0.00 |
| ATOM | 998  | N    | TYR | X | 66 | 49.352 | 50.277 | 31.505 | 0.00 | 0.00 |
| ATOM | 999  | H    | TYR | X | 66 | 49.040 | 51.046 | 30.930 | 0.00 | 0.00 |
| ATOM | 1000 | CA   | TYR | X | 66 | 50.771 | 50.060 | 31.605 | 0.00 | 0.00 |
| ATOM | 1001 | HA   | TYR | X | 66 | 51.028 | 49.291 | 30.876 | 0.00 | 0.00 |
| ATOM | 1002 | CB   | TYR | X | 66 | 51.544 | 51.338 | 31.300 | 0.00 | 0.00 |

|      |      |      |     |   |    |        |        |        |      |      |
|------|------|------|-----|---|----|--------|--------|--------|------|------|
| ATOM | 1003 | HB2  | TYR | X | 66 | 50.959 | 52.017 | 30.680 | 0.00 | 0.00 |
| ATOM | 1004 | HB3  | TYR | X | 66 | 51.663 | 51.824 | 32.268 | 0.00 | 0.00 |
| ATOM | 1005 | CG   | TYR | X | 66 | 52.862 | 51.081 | 30.550 | 0.00 | 0.00 |
| ATOM | 1006 | CD1  | TYR | X | 66 | 52.976 | 51.267 | 29.168 | 0.00 | 0.00 |
| ATOM | 1007 | HD1  | TYR | X | 66 | 52.114 | 51.490 | 28.557 | 0.00 | 0.00 |
| ATOM | 1008 | CE1  | TYR | X | 66 | 54.151 | 50.940 | 28.524 | 0.00 | 0.00 |
| ATOM | 1009 | HE1  | TYR | X | 66 | 54.141 | 50.925 | 27.444 | 0.00 | 0.00 |
| ATOM | 1010 | CZ   | TYR | X | 66 | 55.241 | 50.538 | 29.273 | 0.00 | 0.00 |
| ATOM | 1011 | OH   | TYR | X | 66 | 56.395 | 50.240 | 28.577 | 0.00 | 0.00 |
| ATOM | 1012 | HH   | TYR | X | 66 | 56.311 | 50.291 | 27.622 | 0.00 | 0.00 |
| ATOM | 1013 | CE2  | TYR | X | 66 | 55.215 | 50.430 | 30.663 | 0.00 | 0.00 |
| ATOM | 1014 | HE2  | TYR | X | 66 | 56.092 | 50.096 | 31.197 | 0.00 | 0.00 |
| ATOM | 1015 | CD2  | TYR | X | 66 | 53.982 | 50.694 | 31.323 | 0.00 | 0.00 |
| ATOM | 1016 | HD2  | TYR | X | 66 | 54.000 | 50.637 | 32.402 | 0.00 | 0.00 |
| ATOM | 1017 | C    | TYR | X | 66 | 51.172 | 49.410 | 32.970 | 0.00 | 0.00 |
| ATOM | 1018 | O    | TYR | X | 66 | 50.597 | 49.791 | 33.989 | 0.00 | 0.00 |
| ATOM | 1019 | N    | GLN | X | 67 | 52.059 | 48.384 | 32.952 | 0.00 | 0.00 |
| ATOM | 1020 | H    | GLN | X | 67 | 52.552 | 48.217 | 32.086 | 0.00 | 0.00 |
| ATOM | 1021 | CA   | GLN | X | 67 | 52.224 | 47.465 | 34.042 | 0.00 | 0.00 |
| ATOM | 1022 | HA   | GLN | X | 67 | 52.295 | 47.854 | 35.058 | 0.00 | 0.00 |
| ATOM | 1023 | CB   | GLN | X | 67 | 50.957 | 46.589 | 34.121 | 0.00 | 0.00 |
| ATOM | 1024 | HB2  | GLN | X | 67 | 51.039 | 45.902 | 34.963 | 0.00 | 0.00 |
| ATOM | 1025 | HB3  | GLN | X | 67 | 50.080 | 47.225 | 34.241 | 0.00 | 0.00 |
| ATOM | 1026 | CG   | GLN | X | 67 | 50.705 | 45.652 | 32.877 | 0.00 | 0.00 |
| ATOM | 1027 | HG2  | GLN | X | 67 | 50.612 | 46.390 | 32.081 | 0.00 | 0.00 |
| ATOM | 1028 | HG3  | GLN | X | 67 | 51.539 | 44.979 | 32.676 | 0.00 | 0.00 |
| ATOM | 1029 | CD   | GLN | X | 67 | 49.464 | 44.886 | 33.086 | 0.00 | 0.00 |
| ATOM | 1030 | OE1  | GLN | X | 67 | 49.413 | 43.713 | 33.441 | 0.00 | 0.00 |
| ATOM | 1031 | NE2  | GLN | X | 67 | 48.314 | 45.536 | 32.851 | 0.00 | 0.00 |
| ATOM | 1032 | HE21 | GLN | X | 67 | 47.430 | 45.099 | 33.071 | 0.00 | 0.00 |
| ATOM | 1033 | HE22 | GLN | X | 67 | 48.312 | 46.494 | 32.532 | 0.00 | 0.00 |
| ATOM | 1034 | C    | GLN | X | 67 | 53.508 | 46.596 | 33.856 | 0.00 | 0.00 |
| ATOM | 1035 | O    | GLN | X | 67 | 54.053 | 46.566 | 32.733 | 0.00 | 0.00 |
| ATOM | 1036 | N    | TYR | X | 68 | 53.933 | 45.878 | 34.864 | 0.00 | 0.00 |
| ATOM | 1037 | H    | TYR | X | 68 | 53.429 | 45.916 | 35.738 | 0.00 | 0.00 |
| ATOM | 1038 | CA   | TYR | X | 68 | 54.972 | 44.795 | 34.731 | 0.00 | 0.00 |
| ATOM | 1039 | HA   | TYR | X | 68 | 55.827 | 45.249 | 34.229 | 0.00 | 0.00 |
| ATOM | 1040 | CB   | TYR | X | 68 | 55.470 | 44.554 | 36.130 | 0.00 | 0.00 |
| ATOM | 1041 | HB2  | TYR | X | 68 | 55.854 | 45.488 | 36.538 | 0.00 | 0.00 |
| ATOM | 1042 | HB3  | TYR | X | 68 | 54.650 | 44.199 | 36.756 | 0.00 | 0.00 |
| ATOM | 1043 | CG   | TYR | X | 68 | 56.536 | 43.464 | 36.177 | 0.00 | 0.00 |
| ATOM | 1044 | CD1  | TYR | X | 68 | 57.846 | 43.637 | 35.748 | 0.00 | 0.00 |
| ATOM | 1045 | HD1  | TYR | X | 68 | 58.184 | 44.617 | 35.448 | 0.00 | 0.00 |
| ATOM | 1046 | CE1  | TYR | X | 68 | 58.855 | 42.648 | 35.556 | 0.00 | 0.00 |
| ATOM | 1047 | HE1  | TYR | X | 68 | 59.889 | 42.812 | 35.290 | 0.00 | 0.00 |
| ATOM | 1048 | CZ   | TYR | X | 68 | 58.443 | 41.381 | 36.129 | 0.00 | 0.00 |
| ATOM | 1049 | OH   | TYR | X | 68 | 59.430 | 40.429 | 36.281 | 0.00 | 0.00 |
| ATOM | 1050 | HH   | TYR | X | 68 | 60.233 | 40.767 | 35.877 | 0.00 | 0.00 |
| ATOM | 1051 | CE2  | TYR | X | 68 | 57.129 | 41.146 | 36.637 | 0.00 | 0.00 |
| ATOM | 1052 | HE2  | TYR | X | 68 | 56.961 | 40.120 | 36.930 | 0.00 | 0.00 |
| ATOM | 1053 | CD2  | TYR | X | 68 | 56.171 | 42.136 | 36.657 | 0.00 | 0.00 |
| ATOM | 1054 | HD2  | TYR | X | 68 | 55.139 | 41.996 | 36.944 | 0.00 | 0.00 |
| ATOM | 1055 | C    | TYR | X | 68 | 54.440 | 43.572 | 34.003 | 0.00 | 0.00 |
| ATOM | 1056 | O    | TYR | X | 68 | 53.202 | 43.344 | 33.943 | 0.00 | 0.00 |
| ATOM | 1057 | N    | VAL | X | 69 | 55.384 | 42.828 | 33.417 | 0.00 | 0.00 |
| ATOM | 1058 | H    | VAL | X | 69 | 56.344 | 43.123 | 33.526 | 0.00 | 0.00 |
| ATOM | 1059 | CA   | VAL | X | 69 | 55.146 | 41.585 | 32.658 | 0.00 | 0.00 |
| ATOM | 1060 | HA   | VAL | X | 69 | 54.127 | 41.220 | 32.793 | 0.00 | 0.00 |
| ATOM | 1061 | CB   | VAL | X | 69 | 55.381 | 41.746 | 31.146 | 0.00 | 0.00 |
| ATOM | 1062 | HB   | VAL | X | 69 | 56.415 | 42.027 | 30.945 | 0.00 | 0.00 |
| ATOM | 1063 | CG1  | VAL | X | 69 | 55.250 | 40.444 | 30.316 | 0.00 | 0.00 |
| ATOM | 1064 | HG11 | VAL | X | 69 | 55.949 | 39.648 | 30.571 | 0.00 | 0.00 |
| ATOM | 1065 | HG12 | VAL | X | 69 | 54.272 | 39.992 | 30.476 | 0.00 | 0.00 |
| ATOM | 1066 | HG13 | VAL | X | 69 | 55.326 | 40.723 | 29.265 | 0.00 | 0.00 |
| ATOM | 1067 | CG2  | VAL | X | 69 | 54.471 | 42.774 | 30.525 | 0.00 | 0.00 |
| ATOM | 1068 | HG21 | VAL | X | 69 | 54.577 | 42.830 | 29.442 | 0.00 | 0.00 |
| ATOM | 1069 | HG22 | VAL | X | 69 | 54.690 | 43.741 | 30.979 | 0.00 | 0.00 |

|      |      |      |     |   |    |        |        |        |      |      |
|------|------|------|-----|---|----|--------|--------|--------|------|------|
| ATOM | 1070 | HG23 | VAL | X | 69 | 53.409 | 42.551 | 30.628 | 0.00 | 0.00 |
| ATOM | 1071 | C    | VAL | X | 69 | 56.084 | 40.460 | 33.217 | 0.00 | 0.00 |
| ATOM | 1072 | O    | VAL | X | 69 | 57.241 | 40.762 | 33.459 | 0.00 | 0.00 |
| ATOM | 1073 | N    | ASP | X | 70 | 55.492 | 39.319 | 33.474 | 0.00 | 0.00 |
| ATOM | 1074 | H    | ASP | X | 70 | 54.531 | 39.250 | 33.171 | 0.00 | 0.00 |
| ATOM | 1075 | CA   | ASP | X | 70 | 56.112 | 38.251 | 34.249 | 0.00 | 0.00 |
| ATOM | 1076 | HA   | ASP | X | 70 | 56.749 | 38.687 | 35.018 | 0.00 | 0.00 |
| ATOM | 1077 | CB   | ASP | X | 70 | 55.138 | 37.357 | 34.953 | 0.00 | 0.00 |
| ATOM | 1078 | HB2  | ASP | X | 70 | 54.619 | 37.872 | 35.762 | 0.00 | 0.00 |
| ATOM | 1079 | HB3  | ASP | X | 70 | 54.322 | 37.042 | 34.304 | 0.00 | 0.00 |
| ATOM | 1080 | CG   | ASP | X | 70 | 55.704 | 36.071 | 35.615 | 0.00 | 0.00 |
| ATOM | 1081 | OD1  | ASP | X | 70 | 56.956 | 35.862 | 35.593 | 0.00 | 0.00 |
| ATOM | 1082 | OD2  | ASP | X | 70 | 54.927 | 35.402 | 36.307 | 0.00 | 0.00 |
| ATOM | 1083 | C    | ASP | X | 70 | 57.057 | 37.396 | 33.350 | 0.00 | 0.00 |
| ATOM | 1084 | O    | ASP | X | 70 | 56.613 | 36.581 | 32.515 | 0.00 | 0.00 |
| ATOM | 1085 | N    | THR | X | 71 | 58.403 | 37.575 | 33.489 | 0.00 | 0.00 |
| ATOM | 1086 | H    | THR | X | 71 | 58.811 | 38.198 | 34.171 | 0.00 | 0.00 |
| ATOM | 1087 | CA   | THR | X | 71 | 59.390 | 36.769 | 32.762 | 0.00 | 0.00 |
| ATOM | 1088 | HA   | THR | X | 71 | 58.824 | 36.136 | 32.079 | 0.00 | 0.00 |
| ATOM | 1089 | CB   | THR | X | 71 | 60.211 | 37.688 | 31.834 | 0.00 | 0.00 |
| ATOM | 1090 | HB   | THR | X | 71 | 60.757 | 37.050 | 31.140 | 0.00 | 0.00 |
| ATOM | 1091 | CG2  | THR | X | 71 | 59.312 | 38.651 | 31.049 | 0.00 | 0.00 |
| ATOM | 1092 | HG21 | THR | X | 71 | 58.871 | 39.380 | 31.729 | 0.00 | 0.00 |
| ATOM | 1093 | HG22 | THR | X | 71 | 58.550 | 38.074 | 30.524 | 0.00 | 0.00 |
| ATOM | 1094 | HG23 | THR | X | 71 | 59.929 | 39.132 | 30.290 | 0.00 | 0.00 |
| ATOM | 1095 | OG1  | THR | X | 71 | 61.076 | 38.332 | 32.697 | 0.00 | 0.00 |
| ATOM | 1096 | HG1  | THR | X | 71 | 61.607 | 37.594 | 33.007 | 0.00 | 0.00 |
| ATOM | 1097 | C    | THR | X | 71 | 60.111 | 35.821 | 33.646 | 0.00 | 0.00 |
| ATOM | 1098 | O    | THR | X | 71 | 61.305 | 35.712 | 33.452 | 0.00 | 0.00 |
| ATOM | 1099 | N    | LEU | X | 72 | 59.571 | 35.263 | 34.661 | 0.00 | 0.00 |
| ATOM | 1100 | H    | LEU | X | 72 | 58.612 | 35.451 | 34.916 | 0.00 | 0.00 |
| ATOM | 1101 | CA   | LEU | X | 72 | 60.230 | 34.274 | 35.498 | 0.00 | 0.00 |
| ATOM | 1102 | HA   | LEU | X | 72 | 61.263 | 34.532 | 35.728 | 0.00 | 0.00 |
| ATOM | 1103 | CB   | LEU | X | 72 | 59.368 | 34.013 | 36.717 | 0.00 | 0.00 |
| ATOM | 1104 | HB2  | LEU | X | 72 | 59.442 | 34.933 | 37.296 | 0.00 | 0.00 |
| ATOM | 1105 | HB3  | LEU | X | 72 | 58.355 | 33.697 | 36.465 | 0.00 | 0.00 |
| ATOM | 1106 | CG   | LEU | X | 72 | 60.012 | 32.859 | 37.547 | 0.00 | 0.00 |
| ATOM | 1107 | HG   | LEU | X | 72 | 59.945 | 31.987 | 36.896 | 0.00 | 0.00 |
| ATOM | 1108 | CD1  | LEU | X | 72 | 61.425 | 33.079 | 38.134 | 0.00 | 0.00 |
| ATOM | 1109 | HD11 | LEU | X | 72 | 62.149 | 33.372 | 37.374 | 0.00 | 0.00 |
| ATOM | 1110 | HD12 | LEU | X | 72 | 61.676 | 32.235 | 38.777 | 0.00 | 0.00 |
| ATOM | 1111 | HD13 | LEU | X | 72 | 61.315 | 33.873 | 38.872 | 0.00 | 0.00 |
| ATOM | 1112 | CD2  | LEU | X | 72 | 59.082 | 32.485 | 38.691 | 0.00 | 0.00 |
| ATOM | 1113 | HD21 | LEU | X | 72 | 58.088 | 32.326 | 38.274 | 0.00 | 0.00 |
| ATOM | 1114 | HD22 | LEU | X | 72 | 59.443 | 31.549 | 39.119 | 0.00 | 0.00 |
| ATOM | 1115 | HD23 | LEU | X | 72 | 58.941 | 33.340 | 39.352 | 0.00 | 0.00 |
| ATOM | 1116 | C    | LEU | X | 72 | 60.430 | 32.987 | 34.630 | 0.00 | 0.00 |
| ATOM | 1117 | O    | LEU | X | 72 | 61.501 | 32.409 | 34.597 | 0.00 | 0.00 |
| ATOM | 1118 | N    | TYR | X | 73 | 59.387 | 32.622 | 33.866 | 0.00 | 0.00 |
| ATOM | 1119 | H    | TYR | X | 73 | 58.552 | 33.175 | 33.995 | 0.00 | 0.00 |
| ATOM | 1120 | CA   | TYR | X | 73 | 59.350 | 31.468 | 32.941 | 0.00 | 0.00 |
| ATOM | 1121 | HA   | TYR | X | 73 | 60.351 | 31.059 | 32.811 | 0.00 | 0.00 |
| ATOM | 1122 | CB   | TYR | X | 73 | 58.478 | 30.305 | 33.493 | 0.00 | 0.00 |
| ATOM | 1123 | HB2  | TYR | X | 73 | 57.456 | 30.648 | 33.648 | 0.00 | 0.00 |
| ATOM | 1124 | HB3  | TYR | X | 73 | 58.519 | 29.453 | 32.814 | 0.00 | 0.00 |
| ATOM | 1125 | CG   | TYR | X | 73 | 58.963 | 29.826 | 34.807 | 0.00 | 0.00 |
| ATOM | 1126 | CD1  | TYR | X | 73 | 60.161 | 29.090 | 34.968 | 0.00 | 0.00 |
| ATOM | 1127 | HD1  | TYR | X | 73 | 60.855 | 28.995 | 34.147 | 0.00 | 0.00 |
| ATOM | 1128 | CE1  | TYR | X | 73 | 60.506 | 28.462 | 36.225 | 0.00 | 0.00 |
| ATOM | 1129 | HE1  | TYR | X | 73 | 61.429 | 27.917 | 36.356 | 0.00 | 0.00 |
| ATOM | 1130 | CZ   | TYR | X | 73 | 59.635 | 28.649 | 37.323 | 0.00 | 0.00 |
| ATOM | 1131 | OH   | TYR | X | 73 | 59.896 | 28.102 | 38.513 | 0.00 | 0.00 |
| ATOM | 1132 | HH   | TYR | X | 73 | 59.220 | 28.379 | 39.135 | 0.00 | 0.00 |
| ATOM | 1133 | CE2  | TYR | X | 73 | 58.437 | 29.400 | 37.139 | 0.00 | 0.00 |
| ATOM | 1134 | HE2  | TYR | X | 73 | 57.835 | 29.672 | 37.993 | 0.00 | 0.00 |
| ATOM | 1135 | CD2  | TYR | X | 73 | 58.157 | 29.987 | 35.935 | 0.00 | 0.00 |
| ATOM | 1136 | HD2  | TYR | X | 73 | 57.220 | 30.522 | 35.904 | 0.00 | 0.00 |

|      |      |     |     |   |    |        |        |        |      |      |
|------|------|-----|-----|---|----|--------|--------|--------|------|------|
| ATOM | 1137 | C   | TYR | X | 73 | 58.904 | 31.766 | 31.466 | 0.00 | 0.00 |
| ATOM | 1138 | O   | TYR | X | 73 | 57.784 | 31.527 | 31.153 | 0.00 | 0.00 |
| ATOM | 1139 | N   | PRO | X | 74 | 59.787 | 32.406 | 30.699 | 0.00 | 0.00 |
| ATOM | 1140 | CD  | PRO | X | 74 | 61.201 | 32.891 | 30.962 | 0.00 | 0.00 |
| ATOM | 1141 | HD2 | PRO | X | 74 | 61.757 | 31.960 | 30.852 | 0.00 | 0.00 |
| ATOM | 1142 | HD3 | PRO | X | 74 | 61.293 | 33.249 | 31.987 | 0.00 | 0.00 |
| ATOM | 1143 | CG  | PRO | X | 74 | 61.457 | 33.924 | 29.917 | 0.00 | 0.00 |
| ATOM | 1144 | HG2 | PRO | X | 74 | 62.519 | 34.059 | 29.710 | 0.00 | 0.00 |
| ATOM | 1145 | HG3 | PRO | X | 74 | 60.961 | 34.851 | 30.202 | 0.00 | 0.00 |
| ATOM | 1146 | CB  | PRO | X | 74 | 60.704 | 33.321 | 28.744 | 0.00 | 0.00 |
| ATOM | 1147 | HB2 | PRO | X | 74 | 61.345 | 32.631 | 28.197 | 0.00 | 0.00 |
| ATOM | 1148 | HB3 | PRO | X | 74 | 60.397 | 34.042 | 27.986 | 0.00 | 0.00 |
| ATOM | 1149 | CA  | PRO | X | 74 | 59.463 | 32.674 | 29.315 | 0.00 | 0.00 |
| ATOM | 1150 | HA  | PRO | X | 74 | 58.631 | 33.377 | 29.346 | 0.00 | 0.00 |
| ATOM | 1151 | C   | PRO | X | 74 | 59.082 | 31.352 | 28.612 | 0.00 | 0.00 |
| ATOM | 1152 | O   | PRO | X | 74 | 59.675 | 30.308 | 28.989 | 0.00 | 0.00 |
| ATOM | 1153 | N   | GLY | X | 75 | 58.257 | 31.431 | 27.548 | 0.00 | 0.00 |
| ATOM | 1154 | H   | GLY | X | 75 | 57.748 | 32.272 | 27.314 | 0.00 | 0.00 |
| ATOM | 1155 | CA  | GLY | X | 75 | 57.866 | 30.199 | 26.775 | 0.00 | 0.00 |
| ATOM | 1156 | HA2 | GLY | X | 75 | 57.419 | 30.536 | 25.840 | 0.00 | 0.00 |
| ATOM | 1157 | HA3 | GLY | X | 75 | 58.775 | 29.649 | 26.530 | 0.00 | 0.00 |
| ATOM | 1158 | C   | GLY | X | 75 | 56.892 | 29.213 | 27.404 | 0.00 | 0.00 |
| ATOM | 1159 | O   | GLY | X | 75 | 56.406 | 28.320 | 26.738 | 0.00 | 0.00 |
| ATOM | 1160 | N   | PHE | X | 76 | 56.687 | 29.410 | 28.721 | 0.00 | 0.00 |
| ATOM | 1161 | H   | PHE | X | 76 | 57.108 | 30.209 | 29.171 | 0.00 | 0.00 |
| ATOM | 1162 | CA  | PHE | X | 76 | 55.769 | 28.562 | 29.542 | 0.00 | 0.00 |
| ATOM | 1163 | HA  | PHE | X | 76 | 55.662 | 27.621 | 29.003 | 0.00 | 0.00 |
| ATOM | 1164 | CB  | PHE | X | 76 | 56.483 | 28.364 | 30.874 | 0.00 | 0.00 |
| ATOM | 1165 | HB2 | PHE | X | 76 | 57.414 | 27.810 | 30.761 | 0.00 | 0.00 |
| ATOM | 1166 | HB3 | PHE | X | 76 | 56.803 | 29.308 | 31.316 | 0.00 | 0.00 |
| ATOM | 1167 | CG  | PHE | X | 76 | 55.647 | 27.628 | 31.853 | 0.00 | 0.00 |
| ATOM | 1168 | CD1 | PHE | X | 76 | 55.331 | 26.288 | 31.679 | 0.00 | 0.00 |
| ATOM | 1169 | HD1 | PHE | X | 76 | 55.680 | 25.741 | 30.815 | 0.00 | 0.00 |
| ATOM | 1170 | CE1 | PHE | X | 76 | 54.594 | 25.539 | 32.614 | 0.00 | 0.00 |
| ATOM | 1171 | HE1 | PHE | X | 76 | 54.339 | 24.490 | 32.578 | 0.00 | 0.00 |
| ATOM | 1172 | CZ  | PHE | X | 76 | 54.156 | 26.193 | 33.821 | 0.00 | 0.00 |
| ATOM | 1173 | HZ  | PHE | X | 76 | 53.505 | 25.707 | 34.533 | 0.00 | 0.00 |
| ATOM | 1174 | CE2 | PHE | X | 76 | 54.481 | 27.507 | 34.010 | 0.00 | 0.00 |
| ATOM | 1175 | HE2 | PHE | X | 76 | 54.171 | 28.038 | 34.898 | 0.00 | 0.00 |
| ATOM | 1176 | CD2 | PHE | X | 76 | 55.289 | 28.235 | 33.088 | 0.00 | 0.00 |
| ATOM | 1177 | HD2 | PHE | X | 76 | 55.530 | 29.271 | 33.279 | 0.00 | 0.00 |
| ATOM | 1178 | C   | PHE | X | 76 | 54.365 | 29.129 | 29.780 | 0.00 | 0.00 |
| ATOM | 1179 | O   | PHE | X | 76 | 54.249 | 30.241 | 30.266 | 0.00 | 0.00 |
| ATOM | 1180 | N   | GLU | X | 77 | 53.342 | 28.319 | 29.417 | 0.00 | 0.00 |
| ATOM | 1181 | H   | GLU | X | 77 | 53.602 | 27.458 | 28.958 | 0.00 | 0.00 |
| ATOM | 1182 | CA  | GLU | X | 77 | 51.921 | 28.635 | 29.490 | 0.00 | 0.00 |
| ATOM | 1183 | HA  | GLU | X | 77 | 51.698 | 29.378 | 28.724 | 0.00 | 0.00 |
| ATOM | 1184 | CB  | GLU | X | 77 | 51.055 | 27.424 | 29.161 | 0.00 | 0.00 |
| ATOM | 1185 | HB2 | GLU | X | 77 | 51.340 | 26.967 | 28.214 | 0.00 | 0.00 |
| ATOM | 1186 | HB3 | GLU | X | 77 | 51.212 | 26.568 | 29.817 | 0.00 | 0.00 |
| ATOM | 1187 | CG  | GLU | X | 77 | 49.535 | 27.742 | 29.026 | 0.00 | 0.00 |
| ATOM | 1188 | HG2 | GLU | X | 77 | 49.131 | 28.267 | 29.892 | 0.00 | 0.00 |
| ATOM | 1189 | HG3 | GLU | X | 77 | 49.321 | 28.409 | 28.190 | 0.00 | 0.00 |
| ATOM | 1190 | CD  | GLU | X | 77 | 48.754 | 26.449 | 28.918 | 0.00 | 0.00 |
| ATOM | 1191 | OE1 | GLU | X | 77 | 48.709 | 25.657 | 29.896 | 0.00 | 0.00 |
| ATOM | 1192 | OE2 | GLU | X | 77 | 48.131 | 26.151 | 27.845 | 0.00 | 0.00 |
| ATOM | 1193 | C   | GLU | X | 77 | 51.587 | 29.229 | 30.866 | 0.00 | 0.00 |
| ATOM | 1194 | O   | GLU | X | 77 | 51.006 | 30.271 | 30.886 | 0.00 | 0.00 |
| ATOM | 1195 | N   | GLY | X | 78 | 51.873 | 28.594 | 31.995 | 0.00 | 0.00 |
| ATOM | 1196 | H   | GLY | X | 78 | 52.307 | 27.682 | 31.999 | 0.00 | 0.00 |
| ATOM | 1197 | CA  | GLY | X | 78 | 51.347 | 29.004 | 33.315 | 0.00 | 0.00 |
| ATOM | 1198 | HA2 | GLY | X | 78 | 50.260 | 28.976 | 33.382 | 0.00 | 0.00 |
| ATOM | 1199 | HA3 | GLY | X | 78 | 51.760 | 28.344 | 34.078 | 0.00 | 0.00 |
| ATOM | 1200 | C   | GLY | X | 78 | 51.727 | 30.390 | 33.749 | 0.00 | 0.00 |
| ATOM | 1201 | O   | GLY | X | 78 | 51.049 | 30.820 | 34.670 | 0.00 | 0.00 |
| ATOM | 1202 | N   | THR | X | 79 | 52.668 | 31.045 | 33.086 | 0.00 | 0.00 |
| ATOM | 1203 | H   | THR | X | 79 | 53.040 | 30.551 | 32.288 | 0.00 | 0.00 |

|      |      |      |     |   |    |        |        |        |      |      |
|------|------|------|-----|---|----|--------|--------|--------|------|------|
| ATOM | 1204 | CA   | THR | X | 79 | 53.092 | 32.454 | 33.187 | 0.00 | 0.00 |
| ATOM | 1205 | HA   | THR | X | 79 | 52.716 | 32.899 | 34.108 | 0.00 | 0.00 |
| ATOM | 1206 | CB   | THR | X | 79 | 54.636 | 32.394 | 33.236 | 0.00 | 0.00 |
| ATOM | 1207 | HB   | THR | X | 79 | 55.089 | 31.817 | 32.430 | 0.00 | 0.00 |
| ATOM | 1208 | CG2  | THR | X | 79 | 55.234 | 33.797 | 33.117 | 0.00 | 0.00 |
| ATOM | 1209 | HG21 | THR | X | 79 | 56.248 | 33.829 | 33.516 | 0.00 | 0.00 |
| ATOM | 1210 | HG22 | THR | X | 79 | 54.761 | 34.534 | 33.766 | 0.00 | 0.00 |
| ATOM | 1211 | HG23 | THR | X | 79 | 55.105 | 34.127 | 32.086 | 0.00 | 0.00 |
| ATOM | 1212 | OG1  | THR | X | 79 | 54.876 | 31.878 | 34.502 | 0.00 | 0.00 |
| ATOM | 1213 | HG1  | THR | X | 79 | 54.952 | 32.657 | 35.059 | 0.00 | 0.00 |
| ATOM | 1214 | C    | THR | X | 79 | 52.458 | 33.244 | 32.044 | 0.00 | 0.00 |
| ATOM | 1215 | O    | THR | X | 79 | 51.660 | 34.180 | 32.293 | 0.00 | 0.00 |
| ATOM | 1216 | N    | GLU | X | 80 | 52.756 | 32.855 | 30.814 | 0.00 | 0.00 |
| ATOM | 1217 | H    | GLU | X | 80 | 53.352 | 32.047 | 30.702 | 0.00 | 0.00 |
| ATOM | 1218 | CA   | GLU | X | 80 | 52.454 | 33.632 | 29.645 | 0.00 | 0.00 |
| ATOM | 1219 | HA   | GLU | X | 80 | 52.809 | 34.659 | 29.733 | 0.00 | 0.00 |
| ATOM | 1220 | CB   | GLU | X | 80 | 53.160 | 32.975 | 28.460 | 0.00 | 0.00 |
| ATOM | 1221 | HB2  | GLU | X | 80 | 52.866 | 31.936 | 28.309 | 0.00 | 0.00 |
| ATOM | 1222 | HB3  | GLU | X | 80 | 52.898 | 33.636 | 27.635 | 0.00 | 0.00 |
| ATOM | 1223 | CG   | GLU | X | 80 | 54.713 | 33.083 | 28.540 | 0.00 | 0.00 |
| ATOM | 1224 | HG2  | GLU | X | 80 | 55.016 | 34.114 | 28.718 | 0.00 | 0.00 |
| ATOM | 1225 | HG3  | GLU | X | 80 | 55.072 | 32.552 | 29.421 | 0.00 | 0.00 |
| ATOM | 1226 | CD   | GLU | X | 80 | 55.402 | 32.726 | 27.196 | 0.00 | 0.00 |
| ATOM | 1227 | OE1  | GLU | X | 80 | 55.002 | 31.758 | 26.535 | 0.00 | 0.00 |
| ATOM | 1228 | OE2  | GLU | X | 80 | 56.268 | 33.525 | 26.743 | 0.00 | 0.00 |
| ATOM | 1229 | C    | GLU | X | 80 | 50.944 | 33.740 | 29.426 | 0.00 | 0.00 |
| ATOM | 1230 | O    | GLU | X | 80 | 50.503 | 34.627 | 28.697 | 0.00 | 0.00 |
| ATOM | 1231 | N    | MET | X | 81 | 50.138 | 32.852 | 29.907 | 0.00 | 0.00 |
| ATOM | 1232 | H    | MET | X | 81 | 50.536 | 32.044 | 30.365 | 0.00 | 0.00 |
| ATOM | 1233 | CA   | MET | X | 81 | 48.647 | 33.067 | 29.851 | 0.00 | 0.00 |
| ATOM | 1234 | HA   | MET | X | 81 | 48.377 | 33.094 | 28.796 | 0.00 | 0.00 |
| ATOM | 1235 | CB   | MET | X | 81 | 47.917 | 31.820 | 30.422 | 0.00 | 0.00 |
| ATOM | 1236 | HB2  | MET | X | 81 | 46.845 | 31.963 | 30.290 | 0.00 | 0.00 |
| ATOM | 1237 | HB3  | MET | X | 81 | 48.208 | 31.000 | 29.765 | 0.00 | 0.00 |
| ATOM | 1238 | CG   | MET | X | 81 | 48.168 | 31.461 | 31.936 | 0.00 | 0.00 |
| ATOM | 1239 | HG2  | MET | X | 81 | 49.249 | 31.397 | 32.060 | 0.00 | 0.00 |
| ATOM | 1240 | HD3  | MET | X | 81 | 47.825 | 32.304 | 32.536 | 0.00 | 0.00 |
| ATOM | 1241 | SD   | MET | X | 81 | 47.422 | 29.947 | 32.561 | 0.00 | 0.00 |
| ATOM | 1242 | CE   | MET | X | 81 | 45.681 | 30.462 | 32.717 | 0.00 | 0.00 |
| ATOM | 1243 | HE1  | MET | X | 81 | 45.109 | 29.582 | 33.010 | 0.00 | 0.00 |
| ATOM | 1244 | HE2  | MET | X | 81 | 45.616 | 31.183 | 33.533 | 0.00 | 0.00 |
| ATOM | 1245 | HE3  | MET | X | 81 | 45.289 | 30.928 | 31.812 | 0.00 | 0.00 |
| ATOM | 1246 | C    | MET | X | 81 | 48.213 | 34.358 | 30.486 | 0.00 | 0.00 |
| ATOM | 1247 | O    | MET | X | 81 | 47.532 | 35.147 | 29.797 | 0.00 | 0.00 |
| ATOM | 1248 | N    | TRP | X | 82 | 48.745 | 34.773 | 31.662 | 0.00 | 0.00 |
| ATOM | 1249 | H    | TRP | X | 82 | 49.321 | 34.173 | 32.235 | 0.00 | 0.00 |
| ATOM | 1250 | CA   | TRP | X | 82 | 48.361 | 35.963 | 32.432 | 0.00 | 0.00 |
| ATOM | 1251 | HA   | TRP | X | 82 | 47.284 | 36.092 | 32.541 | 0.00 | 0.00 |
| ATOM | 1252 | CB   | TRP | X | 82 | 48.930 | 35.683 | 33.832 | 0.00 | 0.00 |
| ATOM | 1253 | HB2  | TRP | X | 82 | 50.014 | 35.589 | 33.767 | 0.00 | 0.00 |
| ATOM | 1254 | HB3  | TRP | X | 82 | 48.823 | 36.608 | 34.399 | 0.00 | 0.00 |
| ATOM | 1255 | CG   | TRP | X | 82 | 48.304 | 34.469 | 34.576 | 0.00 | 0.00 |
| ATOM | 1256 | CD1  | TRP | X | 82 | 49.024 | 33.360 | 34.839 | 0.00 | 0.00 |
| ATOM | 1257 | HD1  | TRP | X | 82 | 50.048 | 33.215 | 34.529 | 0.00 | 0.00 |
| ATOM | 1258 | NE1  | TRP | X | 82 | 48.183 | 32.380 | 35.318 | 0.00 | 0.00 |
| ATOM | 1259 | HE1  | TRP | X | 82 | 48.509 | 31.468 | 35.604 | 0.00 | 0.00 |
| ATOM | 1260 | CE2  | TRP | X | 82 | 46.954 | 32.892 | 35.620 | 0.00 | 0.00 |
| ATOM | 1261 | CZ2  | TRP | X | 82 | 45.784 | 32.365 | 36.230 | 0.00 | 0.00 |
| ATOM | 1262 | HZ2  | TRP | X | 82 | 45.789 | 31.344 | 36.582 | 0.00 | 0.00 |
| ATOM | 1263 | CH2  | TRP | X | 82 | 44.620 | 33.182 | 36.244 | 0.00 | 0.00 |
| ATOM | 1264 | HH2  | TRP | X | 82 | 43.695 | 32.782 | 36.632 | 0.00 | 0.00 |
| ATOM | 1265 | CZ3  | TRP | X | 82 | 44.657 | 34.438 | 35.672 | 0.00 | 0.00 |
| ATOM | 1266 | HZ3  | TRP | X | 82 | 43.758 | 35.033 | 35.718 | 0.00 | 0.00 |
| ATOM | 1267 | CE3  | TRP | X | 82 | 45.797 | 34.990 | 35.091 | 0.00 | 0.00 |
| ATOM | 1268 | HE3  | TRP | X | 82 | 45.843 | 36.015 | 34.754 | 0.00 | 0.00 |
| ATOM | 1269 | CD2  | TRP | X | 82 | 47.005 | 34.225 | 35.051 | 0.00 | 0.00 |
| ATOM | 1270 | C    | TRP | X | 82 | 49.060 | 37.268 | 31.898 | 0.00 | 0.00 |

|      |      |      |     |   |    |        |        |        |      |      |
|------|------|------|-----|---|----|--------|--------|--------|------|------|
| ATOM | 1271 | O    | TRP | X | 82 | 48.435 | 38.325 | 31.958 | 0.00 | 0.00 |
| ATOM | 1272 | N    | ASN | X | 83 | 50.221 | 37.095 | 31.262 | 0.00 | 0.00 |
| ATOM | 1273 | H    | ASN | X | 83 | 50.765 | 36.257 | 31.412 | 0.00 | 0.00 |
| ATOM | 1274 | CA   | ASN | X | 83 | 50.753 | 38.216 | 30.589 | 0.00 | 0.00 |
| ATOM | 1275 | HA   | ASN | X | 83 | 50.975 | 39.006 | 31.306 | 0.00 | 0.00 |
| ATOM | 1276 | CB   | ASN | X | 83 | 52.199 | 37.798 | 30.096 | 0.00 | 0.00 |
| ATOM | 1277 | HB2  | ASN | X | 83 | 52.206 | 36.844 | 29.569 | 0.00 | 0.00 |
| ATOM | 1278 | HB3  | ASN | X | 83 | 52.614 | 38.568 | 29.444 | 0.00 | 0.00 |
| ATOM | 1279 | CG   | ASN | X | 83 | 53.272 | 37.655 | 31.162 | 0.00 | 0.00 |
| ATOM | 1280 | OD1  | ASN | X | 83 | 53.158 | 38.207 | 32.246 | 0.00 | 0.00 |
| ATOM | 1281 | ND2  | ASN | X | 83 | 54.263 | 36.881 | 30.878 | 0.00 | 0.00 |
| ATOM | 1282 | HD21 | ASN | X | 83 | 55.024 | 36.793 | 31.536 | 0.00 | 0.00 |
| ATOM | 1283 | HD22 | ASN | X | 83 | 54.318 | 36.501 | 29.944 | 0.00 | 0.00 |
| ATOM | 1284 | C    | ASN | X | 83 | 49.888 | 38.742 | 29.423 | 0.00 | 0.00 |
| ATOM | 1285 | O    | ASN | X | 83 | 49.129 | 38.004 | 28.775 | 0.00 | 0.00 |
| ATOM | 1286 | N    | PRO | X | 84 | 49.969 | 40.073 | 29.118 | 0.00 | 0.00 |
| ATOM | 1287 | CD   | PRO | X | 84 | 50.754 | 41.060 | 29.799 | 0.00 | 0.00 |
| ATOM | 1288 | HD2  | PRO | X | 84 | 51.721 | 40.654 | 30.095 | 0.00 | 0.00 |
| ATOM | 1289 | HD3  | PRO | X | 84 | 50.293 | 41.214 | 30.774 | 0.00 | 0.00 |
| ATOM | 1290 | CG   | PRO | X | 84 | 50.719 | 42.306 | 28.836 | 0.00 | 0.00 |
| ATOM | 1291 | HG2  | PRO | X | 84 | 51.410 | 42.159 | 28.006 | 0.00 | 0.00 |
| ATOM | 1292 | HG3  | PRO | X | 84 | 50.983 | 43.226 | 29.357 | 0.00 | 0.00 |
| ATOM | 1293 | CB   | PRO | X | 84 | 49.310 | 42.245 | 28.369 | 0.00 | 0.00 |
| ATOM | 1294 | HB2  | PRO | X | 84 | 49.170 | 42.771 | 27.425 | 0.00 | 0.00 |
| ATOM | 1295 | HB3  | PRO | X | 84 | 48.664 | 42.624 | 29.161 | 0.00 | 0.00 |
| ATOM | 1296 | CA   | PRO | X | 84 | 49.025 | 40.752 | 28.255 | 0.00 | 0.00 |
| ATOM | 1297 | HA   | PRO | X | 84 | 48.010 | 40.579 | 28.610 | 0.00 | 0.00 |
| ATOM | 1298 | C    | PRO | X | 84 | 49.071 | 40.243 | 26.764 | 0.00 | 0.00 |
| ATOM | 1299 | O    | PRO | X | 84 | 50.055 | 39.578 | 26.368 | 0.00 | 0.00 |
| ATOM | 1300 | N    | ASN | X | 85 | 48.039 | 40.515 | 26.001 | 0.00 | 0.00 |
| ATOM | 1301 | H    | ASN | X | 85 | 47.199 | 40.912 | 26.397 | 0.00 | 0.00 |
| ATOM | 1302 | CA   | ASN | X | 85 | 47.946 | 40.048 | 24.539 | 0.00 | 0.00 |
| ATOM | 1303 | HA   | ASN | X | 85 | 48.979 | 39.803 | 24.293 | 0.00 | 0.00 |
| ATOM | 1304 | CB   | ASN | X | 85 | 47.095 | 38.777 | 24.398 | 0.00 | 0.00 |
| ATOM | 1305 | HB2  | ASN | X | 85 | 47.245 | 38.310 | 23.425 | 0.00 | 0.00 |
| ATOM | 1306 | HB3  | ASN | X | 85 | 47.415 | 38.065 | 25.159 | 0.00 | 0.00 |
| ATOM | 1307 | CG   | ASN | X | 85 | 45.609 | 39.120 | 24.632 | 0.00 | 0.00 |
| ATOM | 1308 | OD1  | ASN | X | 85 | 44.995 | 39.731 | 23.736 | 0.00 | 0.00 |
| ATOM | 1309 | ND2  | ASN | X | 85 | 45.080 | 38.916 | 25.812 | 0.00 | 0.00 |
| ATOM | 1310 | HD21 | ASN | X | 85 | 44.085 | 39.041 | 25.931 | 0.00 | 0.00 |
| ATOM | 1311 | HD22 | ASN | X | 85 | 45.577 | 38.429 | 26.544 | 0.00 | 0.00 |
| ATOM | 1312 | C    | ASN | X | 85 | 47.517 | 41.184 | 23.595 | 0.00 | 0.00 |
| ATOM | 1313 | O    | ASN | X | 85 | 47.452 | 40.974 | 22.385 | 0.00 | 0.00 |
| ATOM | 1314 | N    | ARG | X | 86 | 47.335 | 42.337 | 24.183 | 0.00 | 0.00 |
| ATOM | 1315 | H    | ARG | X | 86 | 47.466 | 42.386 | 25.183 | 0.00 | 0.00 |
| ATOM | 1316 | CA   | ARG | X | 86 | 47.122 | 43.575 | 23.538 | 0.00 | 0.00 |
| ATOM | 1317 | HA   | ARG | X | 86 | 47.233 | 43.395 | 22.469 | 0.00 | 0.00 |
| ATOM | 1318 | CB   | ARG | X | 86 | 45.709 | 44.093 | 23.738 | 0.00 | 0.00 |
| ATOM | 1319 | HB2  | ARG | X | 86 | 45.460 | 44.294 | 24.780 | 0.00 | 0.00 |
| ATOM | 1320 | HB3  | ARG | X | 86 | 45.545 | 45.067 | 23.278 | 0.00 | 0.00 |
| ATOM | 1321 | CG   | ARG | X | 86 | 44.524 | 43.269 | 23.273 | 0.00 | 0.00 |
| ATOM | 1322 | HG2  | ARG | X | 86 | 44.394 | 42.475 | 24.008 | 0.00 | 0.00 |
| ATOM | 1323 | HG3  | ARG | X | 86 | 43.646 | 43.909 | 23.361 | 0.00 | 0.00 |
| ATOM | 1324 | CD   | ARG | X | 86 | 44.556 | 42.699 | 21.871 | 0.00 | 0.00 |
| ATOM | 1325 | HD2  | ARG | X | 86 | 44.825 | 43.571 | 21.275 | 0.00 | 0.00 |
| ATOM | 1326 | HD3  | ARG | X | 86 | 45.320 | 41.921 | 21.863 | 0.00 | 0.00 |
| ATOM | 1327 | NE   | ARG | X | 86 | 43.246 | 42.364 | 21.300 | 0.00 | 0.00 |
| ATOM | 1328 | HE   | ARG | X | 86 | 42.668 | 43.124 | 20.969 | 0.00 | 0.00 |
| ATOM | 1329 | CZ   | ARG | X | 86 | 42.727 | 41.157 | 21.009 | 0.00 | 0.00 |
| ATOM | 1330 | NH1  | ARG | X | 86 | 43.281 | 40.055 | 21.484 | 0.00 | 0.00 |
| ATOM | 1331 | HH11 | ARG | X | 86 | 43.948 | 40.047 | 22.243 | 0.00 | 0.00 |
| ATOM | 1332 | HH12 | ARG | X | 86 | 42.766 | 39.269 | 21.116 | 0.00 | 0.00 |
| ATOM | 1333 | NH2  | ARG | X | 86 | 41.615 | 41.150 | 20.309 | 0.00 | 0.00 |
| ATOM | 1334 | HH21 | ARG | X | 86 | 41.234 | 41.987 | 19.891 | 0.00 | 0.00 |
| ATOM | 1335 | HH22 | ARG | X | 86 | 41.214 | 40.249 | 20.093 | 0.00 | 0.00 |
| ATOM | 1336 | C    | ARG | X | 86 | 48.140 | 44.649 | 24.025 | 0.00 | 0.00 |
| ATOM | 1337 | O    | ARG | X | 86 | 48.780 | 44.558 | 25.080 | 0.00 | 0.00 |

|      |      |      |     |   |    |        |        |        |      |      |
|------|------|------|-----|---|----|--------|--------|--------|------|------|
| ATOM | 1338 | N    | GLU | X | 87 | 48.455 | 45.636 | 23.127 | 0.00 | 0.00 |
| ATOM | 1339 | H    | GLU | X | 87 | 47.893 | 45.649 | 22.287 | 0.00 | 0.00 |
| ATOM | 1340 | CA   | GLU | X | 87 | 49.477 | 46.678 | 23.298 | 0.00 | 0.00 |
| ATOM | 1341 | HA   | GLU | X | 87 | 50.409 | 46.113 | 23.305 | 0.00 | 0.00 |
| ATOM | 1342 | CB   | GLU | X | 87 | 49.459 | 47.662 | 22.088 | 0.00 | 0.00 |
| ATOM | 1343 | HB2  | GLU | X | 87 | 49.078 | 47.047 | 21.272 | 0.00 | 0.00 |
| ATOM | 1344 | HB3  | GLU | X | 87 | 48.800 | 48.513 | 22.254 | 0.00 | 0.00 |
| ATOM | 1345 | CG   | GLU | X | 87 | 50.878 | 48.062 | 21.729 | 0.00 | 0.00 |
| ATOM | 1346 | HG2  | GLU | X | 87 | 51.270 | 48.780 | 22.449 | 0.00 | 0.00 |
| ATOM | 1347 | HG3  | GLU | X | 87 | 51.479 | 47.154 | 21.690 | 0.00 | 0.00 |
| ATOM | 1348 | CD   | GLU | X | 87 | 50.858 | 48.662 | 20.304 | 0.00 | 0.00 |
| ATOM | 1349 | OE1  | GLU | X | 87 | 50.919 | 47.857 | 19.321 | 0.00 | 0.00 |
| ATOM | 1350 | OE2  | GLU | X | 87 | 50.672 | 49.887 | 20.112 | 0.00 | 0.00 |
| ATOM | 1351 | C    | GLU | X | 87 | 49.328 | 47.442 | 24.595 | 0.00 | 0.00 |
| ATOM | 1352 | O    | GLU | X | 87 | 48.185 | 47.642 | 24.998 | 0.00 | 0.00 |
| ATOM | 1353 | N    | LEU | X | 88 | 50.423 | 47.944 | 25.220 | 0.00 | 0.00 |
| ATOM | 1354 | H    | LEU | X | 88 | 51.329 | 47.962 | 24.773 | 0.00 | 0.00 |
| ATOM | 1355 | CA   | LEU | X | 88 | 50.362 | 48.557 | 26.523 | 0.00 | 0.00 |
| ATOM | 1356 | HA   | LEU | X | 88 | 49.460 | 48.248 | 27.053 | 0.00 | 0.00 |
| ATOM | 1357 | CB   | LEU | X | 88 | 51.582 | 48.206 | 27.353 | 0.00 | 0.00 |
| ATOM | 1358 | HB2  | LEU | X | 88 | 52.404 | 48.306 | 26.645 | 0.00 | 0.00 |
| ATOM | 1359 | HB3  | LEU | X | 88 | 51.604 | 48.952 | 28.147 | 0.00 | 0.00 |
| ATOM | 1360 | CG   | LEU | X | 88 | 51.616 | 46.812 | 27.962 | 0.00 | 0.00 |
| ATOM | 1361 | HG   | LEU | X | 88 | 51.481 | 46.089 | 27.158 | 0.00 | 0.00 |
| ATOM | 1362 | CD1  | LEU | X | 88 | 52.999 | 46.502 | 28.563 | 0.00 | 0.00 |
| ATOM | 1363 | HD11 | LEU | X | 88 | 53.190 | 47.242 | 29.341 | 0.00 | 0.00 |
| ATOM | 1364 | HD12 | LEU | X | 88 | 53.778 | 46.387 | 27.809 | 0.00 | 0.00 |
| ATOM | 1365 | HD13 | LEU | X | 88 | 53.027 | 45.516 | 29.027 | 0.00 | 0.00 |
| ATOM | 1366 | CD2  | LEU | X | 88 | 50.553 | 46.620 | 29.031 | 0.00 | 0.00 |
| ATOM | 1367 | HD21 | LEU | X | 88 | 49.539 | 46.583 | 28.631 | 0.00 | 0.00 |
| ATOM | 1368 | HD22 | LEU | X | 88 | 50.699 | 45.633 | 29.469 | 0.00 | 0.00 |
| ATOM | 1369 | HD23 | LEU | X | 88 | 50.685 | 47.297 | 29.875 | 0.00 | 0.00 |
| ATOM | 1370 | C    | LEU | X | 88 | 50.331 | 50.085 | 26.440 | 0.00 | 0.00 |
| ATOM | 1371 | O    | LEU | X | 88 | 50.806 | 50.561 | 25.422 | 0.00 | 0.00 |
| ATOM | 1372 | N    | SER | X | 89 | 49.588 | 50.772 | 27.314 | 0.00 | 0.00 |
| ATOM | 1373 | H    | SER | X | 89 | 49.001 | 50.202 | 27.906 | 0.00 | 0.00 |
| ATOM | 1374 | CA   | SER | X | 89 | 49.316 | 52.237 | 27.170 | 0.00 | 0.00 |
| ATOM | 1375 | HA   | SER | X | 89 | 50.159 | 52.794 | 26.760 | 0.00 | 0.00 |
| ATOM | 1376 | CB   | SER | X | 89 | 48.118 | 52.327 | 26.207 | 0.00 | 0.00 |
| ATOM | 1377 | HB2  | SER | X | 89 | 48.352 | 51.778 | 25.295 | 0.00 | 0.00 |
| ATOM | 1378 | HB3  | SER | X | 89 | 47.242 | 51.845 | 26.640 | 0.00 | 0.00 |
| ATOM | 1379 | OG   | SER | X | 89 | 47.905 | 53.696 | 25.799 | 0.00 | 0.00 |
| ATOM | 1380 | HG   | SER | X | 89 | 46.962 | 53.871 | 25.840 | 0.00 | 0.00 |
| ATOM | 1381 | C    | SER | X | 89 | 48.884 | 52.747 | 28.547 | 0.00 | 0.00 |
| ATOM | 1382 | O    | SER | X | 89 | 48.465 | 51.962 | 29.364 | 0.00 | 0.00 |
| ATOM | 1383 | N    | GLU | X | 90 | 48.896 | 54.091 | 28.718 | 0.00 | 0.00 |
| ATOM | 1384 | H    | GLU | X | 90 | 49.203 | 54.630 | 27.921 | 0.00 | 0.00 |
| ATOM | 1385 | CA   | GLU | X | 90 | 48.143 | 54.798 | 29.750 | 0.00 | 0.00 |
| ATOM | 1386 | HA   | GLU | X | 90 | 47.983 | 54.056 | 30.533 | 0.00 | 0.00 |
| ATOM | 1387 | CB   | GLU | X | 90 | 49.026 | 56.008 | 30.225 | 0.00 | 0.00 |
| ATOM | 1388 | HB2  | GLU | X | 90 | 49.332 | 56.669 | 29.414 | 0.00 | 0.00 |
| ATOM | 1389 | HB3  | GLU | X | 90 | 48.448 | 56.611 | 30.925 | 0.00 | 0.00 |
| ATOM | 1390 | CG   | GLU | X | 90 | 50.227 | 55.526 | 31.010 | 0.00 | 0.00 |
| ATOM | 1391 | HG2  | GLU | X | 90 | 49.903 | 54.994 | 31.905 | 0.00 | 0.00 |
| ATOM | 1392 | HG3  | GLU | X | 90 | 50.854 | 54.875 | 30.401 | 0.00 | 0.00 |
| ATOM | 1393 | CD   | GLU | X | 90 | 51.103 | 56.636 | 31.458 | 0.00 | 0.00 |
| ATOM | 1394 | OE1  | GLU | X | 90 | 50.756 | 57.184 | 32.514 | 0.00 | 0.00 |
| ATOM | 1395 | OE2  | GLU | X | 90 | 52.130 | 56.891 | 30.824 | 0.00 | 0.00 |
| ATOM | 1396 | C    | GLU | X | 90 | 46.782 | 55.346 | 29.283 | 0.00 | 0.00 |
| ATOM | 1397 | O    | GLU | X | 90 | 45.878 | 55.509 | 30.054 | 0.00 | 0.00 |
| ATOM | 1398 | N    | ASP | X | 91 | 46.622 | 55.550 | 27.979 | 0.00 | 0.00 |
| ATOM | 1399 | H    | ASP | X | 91 | 47.481 | 55.330 | 27.496 | 0.00 | 0.00 |
| ATOM | 1400 | CA   | ASP | X | 91 | 45.343 | 55.556 | 27.221 | 0.00 | 0.00 |
| ATOM | 1401 | HA   | ASP | X | 91 | 44.555 | 56.101 | 27.740 | 0.00 | 0.00 |
| ATOM | 1402 | CB   | ASP | X | 91 | 45.604 | 56.145 | 25.878 | 0.00 | 0.00 |
| ATOM | 1403 | HB2  | ASP | X | 91 | 46.234 | 57.024 | 26.011 | 0.00 | 0.00 |
| ATOM | 1404 | HB3  | ASP | X | 91 | 46.163 | 55.428 | 25.276 | 0.00 | 0.00 |



|      |      |      |     |   |    |        |        |        |      |      |
|------|------|------|-----|---|----|--------|--------|--------|------|------|
| ATOM | 1405 | CG   | ASP | X | 91 | 44.345 | 56.616 | 25.136 | 0.00 | 0.00 |
| ATOM | 1406 | OD1  | ASP | X | 91 | 43.313 | 55.899 | 25.073 | 0.00 | 0.00 |
| ATOM | 1407 | OD2  | ASP | X | 91 | 44.491 | 57.723 | 24.614 | 0.00 | 0.00 |
| ATOM | 1408 | C    | ASP | X | 91 | 44.673 | 54.125 | 27.113 | 0.00 | 0.00 |
| ATOM | 1409 | O    | ASP | X | 91 | 44.924 | 53.396 | 26.116 | 0.00 | 0.00 |
| ATOM | 1410 | N    | CYX | X | 92 | 44.068 | 53.738 | 28.227 | 0.00 | 0.00 |
| ATOM | 1411 | H    | CYX | X | 92 | 44.065 | 54.408 | 28.983 | 0.00 | 0.00 |
| ATOM | 1412 | CA   | CYX | X | 92 | 43.712 | 52.368 | 28.553 | 0.00 | 0.00 |
| ATOM | 1413 | HA   | CYX | X | 92 | 43.641 | 51.812 | 27.618 | 0.00 | 0.00 |
| ATOM | 1414 | CB   | CYX | X | 92 | 44.799 | 51.814 | 29.491 | 0.00 | 0.00 |
| ATOM | 1415 | HB2  | CYX | X | 92 | 44.798 | 50.725 | 29.533 | 0.00 | 0.00 |
| ATOM | 1416 | HB3  | CYX | X | 92 | 45.753 | 52.112 | 29.057 | 0.00 | 0.00 |
| ATOM | 1417 | SG   | CYX | X | 92 | 44.893 | 52.383 | 31.247 | 0.00 | 0.00 |
| ATOM | 1418 | C    | CYX | X | 92 | 42.340 | 52.170 | 29.249 | 0.00 | 0.00 |
| ATOM | 1419 | O    | CYX | X | 92 | 41.916 | 51.036 | 29.407 | 0.00 | 0.00 |
| ATOM | 1420 | N    | LEU | X | 93 | 41.608 | 53.196 | 29.644 | 0.00 | 0.00 |
| ATOM | 1421 | H    | LEU | X | 93 | 41.957 | 54.099 | 29.356 | 0.00 | 0.00 |
| ATOM | 1422 | CA   | LEU | X | 93 | 40.331 | 53.114 | 30.374 | 0.00 | 0.00 |
| ATOM | 1423 | HA   | LEU | X | 93 | 40.424 | 52.310 | 31.105 | 0.00 | 0.00 |
| ATOM | 1424 | CB   | LEU | X | 93 | 40.162 | 54.371 | 31.282 | 0.00 | 0.00 |
| ATOM | 1425 | HB2  | LEU | X | 93 | 40.051 | 55.280 | 30.690 | 0.00 | 0.00 |
| ATOM | 1426 | HB3  | LEU | X | 93 | 39.156 | 54.253 | 31.685 | 0.00 | 0.00 |
| ATOM | 1427 | CG   | LEU | X | 93 | 41.192 | 54.499 | 32.471 | 0.00 | 0.00 |
| ATOM | 1428 | HG   | LEU | X | 93 | 42.131 | 54.691 | 31.951 | 0.00 | 0.00 |
| ATOM | 1429 | CD1  | LEU | X | 93 | 40.816 | 55.583 | 33.436 | 0.00 | 0.00 |
| ATOM | 1430 | HD11 | LEU | X | 93 | 40.673 | 56.545 | 32.944 | 0.00 | 0.00 |
| ATOM | 1431 | HD12 | LEU | X | 93 | 41.470 | 55.731 | 34.296 | 0.00 | 0.00 |
| ATOM | 1432 | HD13 | LEU | X | 93 | 39.848 | 55.339 | 33.872 | 0.00 | 0.00 |
| ATOM | 1433 | CD2  | LEU | X | 93 | 41.398 | 53.200 | 33.311 | 0.00 | 0.00 |
| ATOM | 1434 | HD21 | LEU | X | 93 | 40.396 | 52.947 | 33.656 | 0.00 | 0.00 |
| ATOM | 1435 | HD22 | LEU | X | 93 | 41.842 | 52.350 | 32.792 | 0.00 | 0.00 |
| ATOM | 1436 | HD23 | LEU | X | 93 | 42.046 | 53.439 | 34.154 | 0.00 | 0.00 |
| ATOM | 1437 | C    | LEU | X | 93 | 39.138 | 52.763 | 29.409 | 0.00 | 0.00 |
| ATOM | 1438 | O    | LEU | X | 93 | 38.216 | 53.521 | 29.171 | 0.00 | 0.00 |
| ATOM | 1439 | N    | TYR | X | 94 | 39.157 | 51.519 | 28.945 | 0.00 | 0.00 |
| ATOM | 1440 | H    | TYR | X | 94 | 39.943 | 50.920 | 29.153 | 0.00 | 0.00 |
| ATOM | 1441 | CA   | TYR | X | 94 | 38.146 | 50.924 | 28.195 | 0.00 | 0.00 |
| ATOM | 1442 | HA   | TYR | X | 94 | 37.288 | 51.588 | 28.097 | 0.00 | 0.00 |
| ATOM | 1443 | CB   | TYR | X | 94 | 38.633 | 50.502 | 26.807 | 0.00 | 0.00 |
| ATOM | 1444 | HB2  | TYR | X | 94 | 39.373 | 49.704 | 26.875 | 0.00 | 0.00 |
| ATOM | 1445 | HB3  | TYR | X | 94 | 37.875 | 50.094 | 26.139 | 0.00 | 0.00 |
| ATOM | 1446 | CG   | TYR | X | 94 | 39.337 | 51.587 | 25.986 | 0.00 | 0.00 |
| ATOM | 1447 | CD1  | TYR | X | 94 | 38.537 | 52.432 | 25.179 | 0.00 | 0.00 |
| ATOM | 1448 | HD1  | TYR | X | 94 | 37.488 | 52.189 | 25.100 | 0.00 | 0.00 |
| ATOM | 1449 | CE1  | TYR | X | 94 | 39.102 | 53.578 | 24.612 | 0.00 | 0.00 |
| ATOM | 1450 | HE1  | TYR | X | 94 | 38.446 | 54.241 | 24.068 | 0.00 | 0.00 |
| ATOM | 1451 | CZ   | TYR | X | 94 | 40.492 | 53.908 | 24.834 | 0.00 | 0.00 |
| ATOM | 1452 | OH   | TYR | X | 94 | 40.905 | 55.143 | 24.483 | 0.00 | 0.00 |
| ATOM | 1453 | HH   | TYR | X | 94 | 41.820 | 55.363 | 24.673 | 0.00 | 0.00 |
| ATOM | 1454 | CE2  | TYR | X | 94 | 41.320 | 52.992 | 25.512 | 0.00 | 0.00 |
| ATOM | 1455 | HE2  | TYR | X | 94 | 42.299 | 53.255 | 25.883 | 0.00 | 0.00 |
| ATOM | 1456 | CD2  | TYR | X | 94 | 40.710 | 51.909 | 26.195 | 0.00 | 0.00 |
| ATOM | 1457 | HD2  | TYR | X | 94 | 41.300 | 51.307 | 26.870 | 0.00 | 0.00 |
| ATOM | 1458 | C    | TYR | X | 94 | 37.472 | 49.719 | 28.989 | 0.00 | 0.00 |
| ATOM | 1459 | O    | TYR | X | 94 | 38.099 | 49.119 | 29.867 | 0.00 | 0.00 |
| ATOM | 1460 | N    | LEU | X | 95 | 36.209 | 49.376 | 28.711 | 0.00 | 0.00 |
| ATOM | 1461 | H    | LEU | X | 95 | 35.720 | 49.746 | 27.908 | 0.00 | 0.00 |
| ATOM | 1462 | CA   | LEU | X | 95 | 35.451 | 48.261 | 29.284 | 0.00 | 0.00 |
| ATOM | 1463 | HA   | LEU | X | 95 | 36.114 | 47.606 | 29.849 | 0.00 | 0.00 |
| ATOM | 1464 | CB   | LEU | X | 95 | 34.475 | 48.752 | 30.397 | 0.00 | 0.00 |
| ATOM | 1465 | HB2  | LEU | X | 95 | 33.978 | 47.926 | 30.906 | 0.00 | 0.00 |
| ATOM | 1466 | HB3  | LEU | X | 95 | 35.128 | 49.382 | 31.001 | 0.00 | 0.00 |
| ATOM | 1467 | CG   | LEU | X | 95 | 33.332 | 49.685 | 30.002 | 0.00 | 0.00 |
| ATOM | 1468 | HG   | LEU | X | 95 | 33.771 | 50.476 | 29.395 | 0.00 | 0.00 |
| ATOM | 1469 | CD1  | LEU | X | 95 | 32.154 | 49.034 | 29.283 | 0.00 | 0.00 |
| ATOM | 1470 | HD11 | LEU | X | 95 | 31.837 | 48.181 | 29.884 | 0.00 | 0.00 |
| ATOM | 1471 | HD12 | LEU | X | 95 | 32.449 | 48.738 | 28.276 | 0.00 | 0.00 |

|      |      |      |     |   |    |        |        |        |      |      |
|------|------|------|-----|---|----|--------|--------|--------|------|------|
| ATOM | 1472 | HD13 | LEU | X | 95 | 31.386 | 49.804 | 29.200 | 0.00 | 0.00 |
| ATOM | 1473 | CD2  | LEU | X | 95 | 32.732 | 50.337 | 31.245 | 0.00 | 0.00 |
| ATOM | 1474 | HD21 | LEU | X | 95 | 32.276 | 49.665 | 31.973 | 0.00 | 0.00 |
| ATOM | 1475 | HD22 | LEU | X | 95 | 33.493 | 50.828 | 31.852 | 0.00 | 0.00 |
| ATOM | 1476 | HD23 | LEU | X | 95 | 32.019 | 51.117 | 30.979 | 0.00 | 0.00 |
| ATOM | 1477 | C    | LEU | X | 95 | 34.757 | 47.486 | 28.129 | 0.00 | 0.00 |
| ATOM | 1478 | O    | LEU | X | 95 | 34.772 | 47.881 | 26.947 | 0.00 | 0.00 |
| ATOM | 1479 | N    | ASN | X | 96 | 34.138 | 46.367 | 28.407 | 0.00 | 0.00 |
| ATOM | 1480 | H    | ASN | X | 96 | 34.225 | 46.126 | 29.384 | 0.00 | 0.00 |
| ATOM | 1481 | CA   | ASN | X | 96 | 33.557 | 45.369 | 27.546 | 0.00 | 0.00 |
| ATOM | 1482 | HA   | ASN | X | 96 | 33.451 | 45.721 | 26.521 | 0.00 | 0.00 |
| ATOM | 1483 | CB   | ASN | X | 96 | 34.541 | 44.121 | 27.569 | 0.00 | 0.00 |
| ATOM | 1484 | HB2  | ASN | X | 96 | 34.353 | 43.609 | 28.513 | 0.00 | 0.00 |
| ATOM | 1485 | HB3  | ASN | X | 96 | 34.202 | 43.467 | 26.766 | 0.00 | 0.00 |
| ATOM | 1486 | CG   | ASN | X | 96 | 36.028 | 44.497 | 27.381 | 0.00 | 0.00 |
| ATOM | 1487 | OD1  | ASN | X | 96 | 36.424 | 45.023 | 26.346 | 0.00 | 0.00 |
| ATOM | 1488 | ND2  | ASN | X | 96 | 36.786 | 44.239 | 28.411 | 0.00 | 0.00 |
| ATOM | 1489 | HD21 | ASN | X | 96 | 37.763 | 44.492 | 28.447 | 0.00 | 0.00 |
| ATOM | 1490 | HD22 | ASN | X | 96 | 36.329 | 43.872 | 29.234 | 0.00 | 0.00 |
| ATOM | 1491 | C    | ASN | X | 96 | 32.210 | 44.883 | 28.084 | 0.00 | 0.00 |
| ATOM | 1492 | O    | ASN | X | 96 | 32.008 | 44.761 | 29.309 | 0.00 | 0.00 |
| ATOM | 1493 | N    | VAL | X | 97 | 31.211 | 44.548 | 27.270 | 0.00 | 0.00 |
| ATOM | 1494 | H    | VAL | X | 97 | 31.417 | 44.577 | 26.282 | 0.00 | 0.00 |
| ATOM | 1495 | CA   | VAL | X | 97 | 29.853 | 44.067 | 27.588 | 0.00 | 0.00 |
| ATOM | 1496 | HA   | VAL | X | 97 | 29.844 | 43.710 | 28.618 | 0.00 | 0.00 |
| ATOM | 1497 | CB   | VAL | X | 97 | 28.796 | 45.192 | 27.449 | 0.00 | 0.00 |
| ATOM | 1498 | HB   | VAL | X | 97 | 28.913 | 45.588 | 26.440 | 0.00 | 0.00 |
| ATOM | 1499 | CG1  | VAL | X | 97 | 27.406 | 44.647 | 27.848 | 0.00 | 0.00 |
| ATOM | 1500 | HG11 | VAL | X | 97 | 27.116 | 43.917 | 27.093 | 0.00 | 0.00 |
| ATOM | 1501 | HG12 | VAL | X | 97 | 27.342 | 44.353 | 28.896 | 0.00 | 0.00 |
| ATOM | 1502 | HG13 | VAL | X | 97 | 26.692 | 45.464 | 27.742 | 0.00 | 0.00 |
| ATOM | 1503 | CG2  | VAL | X | 97 | 29.192 | 46.469 | 28.291 | 0.00 | 0.00 |
| ATOM | 1504 | HG21 | VAL | X | 97 | 30.203 | 46.801 | 28.055 | 0.00 | 0.00 |
| ATOM | 1505 | HG22 | VAL | X | 97 | 29.155 | 46.293 | 29.366 | 0.00 | 0.00 |
| ATOM | 1506 | HG23 | VAL | X | 97 | 28.470 | 47.269 | 28.126 | 0.00 | 0.00 |
| ATOM | 1507 | C    | VAL | X | 97 | 29.452 | 42.905 | 26.629 | 0.00 | 0.00 |
| ATOM | 1508 | O    | VAL | X | 97 | 29.539 | 42.951 | 25.396 | 0.00 | 0.00 |
| ATOM | 1509 | N    | TRP | X | 98 | 28.886 | 41.885 | 27.206 | 0.00 | 0.00 |
| ATOM | 1510 | H    | TRP | X | 98 | 28.940 | 41.846 | 28.214 | 0.00 | 0.00 |
| ATOM | 1511 | CA   | TRP | X | 98 | 28.324 | 40.692 | 26.544 | 0.00 | 0.00 |
| ATOM | 1512 | HA   | TRP | X | 98 | 28.349 | 40.703 | 25.455 | 0.00 | 0.00 |
| ATOM | 1513 | CB   | TRP | X | 98 | 29.060 | 39.371 | 27.008 | 0.00 | 0.00 |
| ATOM | 1514 | HB2  | TRP | X | 98 | 29.046 | 39.283 | 28.095 | 0.00 | 0.00 |
| ATOM | 1515 | HB3  | TRP | X | 98 | 28.450 | 38.510 | 26.735 | 0.00 | 0.00 |
| ATOM | 1516 | CG   | TRP | X | 98 | 30.514 | 39.128 | 26.641 | 0.00 | 0.00 |
| ATOM | 1517 | CD1  | TRP | X | 98 | 30.933 | 38.161 | 25.777 | 0.00 | 0.00 |
| ATOM | 1518 | HD1  | TRP | X | 98 | 30.311 | 37.421 | 25.295 | 0.00 | 0.00 |
| ATOM | 1519 | NE1  | TRP | X | 98 | 32.309 | 38.154 | 25.800 | 0.00 | 0.00 |
| ATOM | 1520 | HE1  | TRP | X | 98 | 32.807 | 37.331 | 25.492 | 0.00 | 0.00 |
| ATOM | 1521 | CE2  | TRP | X | 98 | 32.830 | 39.110 | 26.674 | 0.00 | 0.00 |
| ATOM | 1522 | CZ2  | TRP | X | 98 | 34.169 | 39.425 | 26.954 | 0.00 | 0.00 |
| ATOM | 1523 | HZ2  | TRP | X | 98 | 35.039 | 38.852 | 26.670 | 0.00 | 0.00 |
| ATOM | 1524 | CH2  | TRP | X | 98 | 34.429 | 40.444 | 27.953 | 0.00 | 0.00 |
| ATOM | 1525 | HH2  | TRP | X | 98 | 35.413 | 40.647 | 28.349 | 0.00 | 0.00 |
| ATOM | 1526 | CZ3  | TRP | X | 98 | 33.315 | 41.098 | 28.527 | 0.00 | 0.00 |
| ATOM | 1527 | HZ3  | TRP | X | 98 | 33.470 | 41.712 | 29.401 | 0.00 | 0.00 |
| ATOM | 1528 | CE3  | TRP | X | 98 | 31.998 | 40.852 | 28.138 | 0.00 | 0.00 |
| ATOM | 1529 | HE3  | TRP | X | 98 | 31.214 | 41.267 | 28.754 | 0.00 | 0.00 |
| ATOM | 1530 | CD2  | TRP | X | 98 | 31.733 | 39.782 | 27.253 | 0.00 | 0.00 |
| ATOM | 1531 | C    | TRP | X | 98 | 26.893 | 40.536 | 26.978 | 0.00 | 0.00 |
| ATOM | 1532 | O    | TRP | X | 98 | 26.534 | 40.639 | 28.179 | 0.00 | 0.00 |
| ATOM | 1533 | N    | THR | X | 99 | 25.992 | 40.443 | 25.996 | 0.00 | 0.00 |
| ATOM | 1534 | H    | THR | X | 99 | 26.408 | 40.484 | 25.077 | 0.00 | 0.00 |
| ATOM | 1535 | CA   | THR | X | 99 | 24.554 | 40.303 | 26.189 | 0.00 | 0.00 |
| ATOM | 1536 | HA   | THR | X | 99 | 24.464 | 39.934 | 27.210 | 0.00 | 0.00 |
| ATOM | 1537 | CB   | THR | X | 99 | 23.772 | 41.608 | 26.020 | 0.00 | 0.00 |
| ATOM | 1538 | HB   | THR | X | 99 | 24.248 | 42.341 | 26.671 | 0.00 | 0.00 |

|      |      |      |     |   |     |        |        |        |      |      |
|------|------|------|-----|---|-----|--------|--------|--------|------|------|
| ATOM | 1539 | CG2  | THR | X | 99  | 23.817 | 42.232 | 24.635 | 0.00 | 0.00 |
| ATOM | 1540 | HG21 | THR | X | 99  | 24.801 | 42.511 | 24.259 | 0.00 | 0.00 |
| ATOM | 1541 | HG22 | THR | X | 99  | 23.152 | 43.096 | 24.653 | 0.00 | 0.00 |
| ATOM | 1542 | HG23 | THR | X | 99  | 23.387 | 41.511 | 23.940 | 0.00 | 0.00 |
| ATOM | 1543 | OG1  | THR | X | 99  | 22.471 | 41.366 | 26.489 | 0.00 | 0.00 |
| ATOM | 1544 | HG1  | THR | X | 99  | 22.045 | 42.202 | 26.689 | 0.00 | 0.00 |
| ATOM | 1545 | C    | THR | X | 99  | 24.047 | 39.174 | 25.309 | 0.00 | 0.00 |
| ATOM | 1546 | O    | THR | X | 99  | 24.543 | 39.107 | 24.210 | 0.00 | 0.00 |
| ATOM | 1547 | N    | PRO | X | 100 | 23.116 | 38.299 | 25.683 | 0.00 | 0.00 |
| ATOM | 1548 | CD   | PRO | X | 100 | 22.409 | 38.359 | 26.940 | 0.00 | 0.00 |
| ATOM | 1549 | HD2  | PRO | X | 100 | 21.537 | 38.975 | 26.719 | 0.00 | 0.00 |
| ATOM | 1550 | HD3  | PRO | X | 100 | 23.009 | 38.707 | 27.780 | 0.00 | 0.00 |
| ATOM | 1551 | CG   | PRO | X | 100 | 21.858 | 36.960 | 27.156 | 0.00 | 0.00 |
| ATOM | 1552 | HG2  | PRO | X | 100 | 21.010 | 37.102 | 27.826 | 0.00 | 0.00 |
| ATOM | 1553 | HG3  | PRO | X | 100 | 22.598 | 36.272 | 27.565 | 0.00 | 0.00 |
| ATOM | 1554 | CB   | PRO | X | 100 | 21.457 | 36.559 | 25.772 | 0.00 | 0.00 |
| ATOM | 1555 | HB2  | PRO | X | 100 | 20.442 | 36.871 | 25.526 | 0.00 | 0.00 |
| ATOM | 1556 | HB3  | PRO | X | 100 | 21.486 | 35.490 | 25.560 | 0.00 | 0.00 |
| ATOM | 1557 | CA   | PRO | X | 100 | 22.547 | 37.209 | 24.842 | 0.00 | 0.00 |
| ATOM | 1558 | HA   | PRO | X | 100 | 23.333 | 36.462 | 24.735 | 0.00 | 0.00 |
| ATOM | 1559 | C    | PRO | X | 100 | 21.930 | 37.550 | 23.551 | 0.00 | 0.00 |
| ATOM | 1560 | O    | PRO | X | 100 | 21.280 | 38.603 | 23.428 | 0.00 | 0.00 |
| ATOM | 1561 | N    | TYR | X | 101 | 21.947 | 36.694 | 22.580 | 0.00 | 0.00 |
| ATOM | 1562 | H    | TYR | X | 101 | 22.693 | 36.015 | 22.641 | 0.00 | 0.00 |
| ATOM | 1563 | CA   | TYR | X | 101 | 21.362 | 36.932 | 21.246 | 0.00 | 0.00 |
| ATOM | 1564 | HA   | TYR | X | 101 | 21.152 | 38.002 | 21.272 | 0.00 | 0.00 |
| ATOM | 1565 | CB   | TYR | X | 101 | 22.347 | 36.720 | 20.092 | 0.00 | 0.00 |
| ATOM | 1566 | HB2  | TYR | X | 101 | 23.340 | 37.140 | 20.251 | 0.00 | 0.00 |
| ATOM | 1567 | HB3  | TYR | X | 101 | 22.607 | 35.662 | 20.077 | 0.00 | 0.00 |
| ATOM | 1568 | CG   | TYR | X | 101 | 21.956 | 37.213 | 18.701 | 0.00 | 0.00 |
| ATOM | 1569 | CD1  | TYR | X | 101 | 20.847 | 36.755 | 17.995 | 0.00 | 0.00 |
| ATOM | 1570 | HD1  | TYR | X | 101 | 20.276 | 35.955 | 18.442 | 0.00 | 0.00 |
| ATOM | 1571 | CE1  | TYR | X | 101 | 20.489 | 37.324 | 16.799 | 0.00 | 0.00 |
| ATOM | 1572 | HE1  | TYR | X | 101 | 19.641 | 36.910 | 16.273 | 0.00 | 0.00 |
| ATOM | 1573 | CZ   | TYR | X | 101 | 21.319 | 38.284 | 16.174 | 0.00 | 0.00 |
| ATOM | 1574 | OH   | TYR | X | 101 | 21.028 | 38.839 | 14.990 | 0.00 | 0.00 |
| ATOM | 1575 | HH   | TYR | X | 101 | 20.183 | 38.476 | 14.713 | 0.00 | 0.00 |
| ATOM | 1576 | CE2  | TYR | X | 101 | 22.472 | 38.704 | 16.799 | 0.00 | 0.00 |
| ATOM | 1577 | HE2  | TYR | X | 101 | 23.107 | 39.412 | 16.288 | 0.00 | 0.00 |
| ATOM | 1578 | CD2  | TYR | X | 101 | 22.773 | 38.209 | 18.051 | 0.00 | 0.00 |
| ATOM | 1579 | HD2  | TYR | X | 101 | 23.639 | 38.488 | 18.633 | 0.00 | 0.00 |
| ATOM | 1580 | C    | TYR | X | 101 | 20.163 | 36.031 | 21.049 | 0.00 | 0.00 |
| ATOM | 1581 | O    | TYR | X | 101 | 20.266 | 34.783 | 20.952 | 0.00 | 0.00 |
| ATOM | 1582 | N    | PRO | X | 102 | 18.956 | 36.568 | 20.905 | 0.00 | 0.00 |
| ATOM | 1583 | CD   | PRO | X | 102 | 17.788 | 35.745 | 20.575 | 0.00 | 0.00 |
| ATOM | 1584 | HD2  | PRO | X | 102 | 17.742 | 34.996 | 21.365 | 0.00 | 0.00 |
| ATOM | 1585 | HD3  | PRO | X | 102 | 17.890 | 35.315 | 19.579 | 0.00 | 0.00 |
| ATOM | 1586 | CG   | PRO | X | 102 | 16.604 | 36.710 | 20.691 | 0.00 | 0.00 |
| ATOM | 1587 | HG2  | PRO | X | 102 | 16.288 | 36.648 | 21.732 | 0.00 | 0.00 |
| ATOM | 1588 | HG3  | PRO | X | 102 | 15.844 | 36.448 | 19.955 | 0.00 | 0.00 |
| ATOM | 1589 | CB   | PRO | X | 102 | 17.232 | 38.021 | 20.236 | 0.00 | 0.00 |
| ATOM | 1590 | HB2  | PRO | X | 102 | 16.635 | 38.878 | 20.548 | 0.00 | 0.00 |
| ATOM | 1591 | HB3  | PRO | X | 102 | 17.349 | 38.059 | 19.153 | 0.00 | 0.00 |
| ATOM | 1592 | CA   | PRO | X | 102 | 18.588 | 37.963 | 20.940 | 0.00 | 0.00 |
| ATOM | 1593 | HA   | PRO | X | 102 | 19.279 | 38.567 | 20.352 | 0.00 | 0.00 |
| ATOM | 1594 | C    | PRO | X | 102 | 18.490 | 38.643 | 22.316 | 0.00 | 0.00 |
| ATOM | 1595 | O    | PRO | X | 102 | 18.331 | 38.014 | 23.365 | 0.00 | 0.00 |
| ATOM | 1596 | N    | ARG | X | 103 | 18.621 | 40.014 | 22.327 | 0.00 | 0.00 |
| ATOM | 1597 | H    | ARG | X | 103 | 18.783 | 40.414 | 21.414 | 0.00 | 0.00 |
| ATOM | 1598 | CA   | ARG | X | 103 | 18.787 | 40.861 | 23.540 | 0.00 | 0.00 |
| ATOM | 1599 | HA   | ARG | X | 103 | 19.764 | 40.722 | 24.002 | 0.00 | 0.00 |
| ATOM | 1600 | CB   | ARG | X | 103 | 18.997 | 42.279 | 22.887 | 0.00 | 0.00 |
| ATOM | 1601 | HB2  | ARG | X | 103 | 19.989 | 42.262 | 22.435 | 0.00 | 0.00 |
| ATOM | 1602 | HB3  | ARG | X | 103 | 18.201 | 42.491 | 22.173 | 0.00 | 0.00 |
| ATOM | 1603 | CG   | ARG | X | 103 | 19.065 | 43.409 | 23.871 | 0.00 | 0.00 |
| ATOM | 1604 | HG2  | ARG | X | 103 | 18.109 | 43.910 | 24.022 | 0.00 | 0.00 |
| ATOM | 1605 | HG3  | ARG | X | 103 | 19.283 | 42.915 | 24.818 | 0.00 | 0.00 |

|      |      |      |     |   |     |        |        |        |      |      |
|------|------|------|-----|---|-----|--------|--------|--------|------|------|
| ATOM | 1606 | CD   | ARG | X | 103 | 20.173 | 44.419 | 23.573 | 0.00 | 0.00 |
| ATOM | 1607 | HD2  | ARG | X | 103 | 20.239 | 45.149 | 24.379 | 0.00 | 0.00 |
| ATOM | 1608 | HD3  | ARG | X | 103 | 21.178 | 44.004 | 23.495 | 0.00 | 0.00 |
| ATOM | 1609 | NE   | ARG | X | 103 | 19.876 | 45.172 | 22.366 | 0.00 | 0.00 |
| ATOM | 1610 | HE   | ARG | X | 103 | 19.175 | 45.893 | 22.455 | 0.00 | 0.00 |
| ATOM | 1611 | CZ   | ARG | X | 103 | 20.704 | 45.416 | 21.384 | 0.00 | 0.00 |
| ATOM | 1612 | NH1  | ARG | X | 103 | 21.866 | 44.805 | 21.153 | 0.00 | 0.00 |
| ATOM | 1613 | HH11 | ARG | X | 103 | 22.136 | 44.027 | 21.737 | 0.00 | 0.00 |
| ATOM | 1614 | HH12 | ARG | X | 103 | 22.368 | 45.137 | 20.342 | 0.00 | 0.00 |
| ATOM | 1615 | NH2  | ARG | X | 103 | 20.369 | 46.323 | 20.511 | 0.00 | 0.00 |
| ATOM | 1616 | HH21 | ARG | X | 103 | 19.618 | 46.975 | 20.688 | 0.00 | 0.00 |
| ATOM | 1617 | HH22 | ARG | X | 103 | 21.017 | 46.614 | 19.792 | 0.00 | 0.00 |
| ATOM | 1618 | C    | ARG | X | 103 | 17.534 | 40.754 | 24.448 | 0.00 | 0.00 |
| ATOM | 1619 | O    | ARG | X | 103 | 16.440 | 40.843 | 23.942 | 0.00 | 0.00 |
| ATOM | 1620 | N    | PRO | X | 104 | 17.690 | 40.594 | 25.749 | 0.00 | 0.00 |
| ATOM | 1621 | CD   | PRO | X | 104 | 19.038 | 40.476 | 26.394 | 0.00 | 0.00 |
| ATOM | 1622 | HD2  | PRO | X | 104 | 19.450 | 41.485 | 26.409 | 0.00 | 0.00 |
| ATOM | 1623 | HD3  | PRO | X | 104 | 19.694 | 39.785 | 25.864 | 0.00 | 0.00 |
| ATOM | 1624 | CG   | PRO | X | 104 | 18.714 | 39.977 | 27.752 | 0.00 | 0.00 |
| ATOM | 1625 | HG2  | PRO | X | 104 | 19.406 | 40.261 | 28.545 | 0.00 | 0.00 |
| ATOM | 1626 | HG3  | PRO | X | 104 | 18.670 | 38.890 | 27.686 | 0.00 | 0.00 |
| ATOM | 1627 | CB   | PRO | X | 104 | 17.409 | 40.667 | 28.070 | 0.00 | 0.00 |
| ATOM | 1628 | HB2  | PRO | X | 104 | 17.542 | 41.711 | 28.354 | 0.00 | 0.00 |
| ATOM | 1629 | HB3  | PRO | X | 104 | 16.835 | 40.101 | 28.804 | 0.00 | 0.00 |
| ATOM | 1630 | CA   | PRO | X | 104 | 16.650 | 40.650 | 26.719 | 0.00 | 0.00 |
| ATOM | 1631 | HA   | PRO | X | 104 | 16.166 | 39.675 | 26.664 | 0.00 | 0.00 |
| ATOM | 1632 | C    | PRO | X | 104 | 15.565 | 41.699 | 26.494 | 0.00 | 0.00 |
| ATOM | 1633 | O    | PRO | X | 104 | 15.873 | 42.849 | 26.562 | 0.00 | 0.00 |
| ATOM | 1634 | N    | THR | X | 105 | 14.292 | 41.201 | 26.349 | 0.00 | 0.00 |
| ATOM | 1635 | H    | THR | X | 105 | 14.149 | 40.201 | 26.372 | 0.00 | 0.00 |
| ATOM | 1636 | CA   | THR | X | 105 | 13.034 | 41.944 | 26.344 | 0.00 | 0.00 |
| ATOM | 1637 | HA   | THR | X | 105 | 13.176 | 42.824 | 25.717 | 0.00 | 0.00 |
| ATOM | 1638 | CB   | THR | X | 105 | 11.857 | 41.057 | 25.777 | 0.00 | 0.00 |
| ATOM | 1639 | HB   | THR | X | 105 | 10.893 | 41.548 | 25.905 | 0.00 | 0.00 |
| ATOM | 1640 | CG2  | THR | X | 105 | 12.155 | 40.724 | 24.336 | 0.00 | 0.00 |
| ATOM | 1641 | HG21 | THR | X | 105 | 11.384 | 40.032 | 23.998 | 0.00 | 0.00 |
| ATOM | 1642 | HG22 | THR | X | 105 | 13.056 | 40.112 | 24.292 | 0.00 | 0.00 |
| ATOM | 1643 | HG23 | THR | X | 105 | 12.266 | 41.609 | 23.709 | 0.00 | 0.00 |
| ATOM | 1644 | OG1  | THR | X | 105 | 11.897 | 39.885 | 26.434 | 0.00 | 0.00 |
| ATOM | 1645 | HG1  | THR | X | 105 | 11.191 | 39.977 | 27.078 | 0.00 | 0.00 |
| ATOM | 1646 | C    | THR | X | 105 | 12.681 | 42.543 | 27.691 | 0.00 | 0.00 |
| ATOM | 1647 | O    | THR | X | 105 | 12.083 | 43.595 | 27.794 | 0.00 | 0.00 |
| ATOM | 1648 | N    | SER | X | 106 | 13.070 | 41.856 | 28.687 | 0.00 | 0.00 |
| ATOM | 1649 | H    | SER | X | 106 | 13.589 | 41.000 | 28.553 | 0.00 | 0.00 |
| ATOM | 1650 | CA   | SER | X | 106 | 12.950 | 42.305 | 30.112 | 0.00 | 0.00 |
| ATOM | 1651 | HA   | SER | X | 106 | 12.556 | 43.319 | 30.166 | 0.00 | 0.00 |
| ATOM | 1652 | CB   | SER | X | 106 | 12.098 | 41.346 | 30.972 | 0.00 | 0.00 |
| ATOM | 1653 | HB2  | SER | X | 106 | 12.546 | 40.369 | 31.153 | 0.00 | 0.00 |
| ATOM | 1654 | HB3  | SER | X | 106 | 12.073 | 41.806 | 31.960 | 0.00 | 0.00 |
| ATOM | 1655 | OG   | SER | X | 106 | 10.811 | 41.195 | 30.447 | 0.00 | 0.00 |
| ATOM | 1656 | HG   | SER | X | 106 | 10.370 | 42.028 | 30.630 | 0.00 | 0.00 |
| ATOM | 1657 | C    | SER | X | 106 | 14.381 | 42.363 | 30.632 | 0.00 | 0.00 |
| ATOM | 1658 | O    | SER | X | 106 | 15.178 | 41.477 | 30.252 | 0.00 | 0.00 |
| ATOM | 1659 | N    | PRO | X | 107 | 14.659 | 43.290 | 31.579 | 0.00 | 0.00 |
| ATOM | 1660 | CD   | PRO | X | 107 | 13.831 | 44.419 | 32.070 | 0.00 | 0.00 |
| ATOM | 1661 | HD2  | PRO | X | 107 | 13.198 | 44.110 | 32.902 | 0.00 | 0.00 |
| ATOM | 1662 | HD3  | PRO | X | 107 | 13.194 | 44.852 | 31.298 | 0.00 | 0.00 |
| ATOM | 1663 | CG   | PRO | X | 107 | 14.765 | 45.456 | 32.616 | 0.00 | 0.00 |
| ATOM | 1664 | HG2  | PRO | X | 107 | 14.271 | 46.011 | 33.414 | 0.00 | 0.00 |
| ATOM | 1665 | HG3  | PRO | X | 107 | 15.019 | 46.223 | 31.884 | 0.00 | 0.00 |
| ATOM | 1666 | CB   | PRO | X | 107 | 15.907 | 44.622 | 33.128 | 0.00 | 0.00 |
| ATOM | 1667 | HB2  | PRO | X | 107 | 15.801 | 44.380 | 34.186 | 0.00 | 0.00 |
| ATOM | 1668 | HB3  | PRO | X | 107 | 16.824 | 45.209 | 33.080 | 0.00 | 0.00 |
| ATOM | 1669 | CA   | PRO | X | 107 | 16.043 | 43.423 | 32.107 | 0.00 | 0.00 |
| ATOM | 1670 | HA   | PRO | X | 107 | 16.673 | 43.643 | 31.245 | 0.00 | 0.00 |
| ATOM | 1671 | C    | PRO | X | 107 | 16.579 | 42.159 | 32.838 | 0.00 | 0.00 |
| ATOM | 1672 | O    | PRO | X | 107 | 15.933 | 41.706 | 33.764 | 0.00 | 0.00 |

|      |      |      |     |   |     |        |        |        |      |      |
|------|------|------|-----|---|-----|--------|--------|--------|------|------|
| ATOM | 1673 | N    | THR | X | 108 | 17.733 | 41.664 | 32.411 | 0.00 | 0.00 |
| ATOM | 1674 | H    | THR | X | 108 | 18.210 | 42.035 | 31.602 | 0.00 | 0.00 |
| ATOM | 1675 | CA   | THR | X | 108 | 18.289 | 40.432 | 32.989 | 0.00 | 0.00 |
| ATOM | 1676 | HA   | THR | X | 108 | 17.511 | 39.873 | 33.510 | 0.00 | 0.00 |
| ATOM | 1677 | CB   | THR | X | 108 | 18.799 | 39.539 | 31.879 | 0.00 | 0.00 |
| ATOM | 1678 | HB   | THR | X | 108 | 18.072 | 39.448 | 31.072 | 0.00 | 0.00 |
| ATOM | 1679 | CG2  | THR | X | 108 | 20.108 | 39.990 | 31.197 | 0.00 | 0.00 |
| ATOM | 1680 | HG21 | THR | X | 108 | 19.889 | 40.983 | 30.804 | 0.00 | 0.00 |
| ATOM | 1681 | HG22 | THR | X | 108 | 20.398 | 39.254 | 30.446 | 0.00 | 0.00 |
| ATOM | 1682 | HG23 | THR | X | 108 | 20.892 | 40.010 | 31.954 | 0.00 | 0.00 |
| ATOM | 1683 | OG1  | THR | X | 108 | 19.055 | 38.332 | 32.413 | 0.00 | 0.00 |
| ATOM | 1684 | HG1  | THR | X | 108 | 19.336 | 37.731 | 31.719 | 0.00 | 0.00 |
| ATOM | 1685 | C    | THR | X | 108 | 19.376 | 40.856 | 34.010 | 0.00 | 0.00 |
| ATOM | 1686 | O    | THR | X | 108 | 20.039 | 41.873 | 33.766 | 0.00 | 0.00 |
| ATOM | 1687 | N    | PRO | X | 109 | 19.582 | 40.119 | 35.103 | 0.00 | 0.00 |
| ATOM | 1688 | CD   | PRO | X | 109 | 18.810 | 38.979 | 35.537 | 0.00 | 0.00 |
| ATOM | 1689 | HD2  | PRO | X | 109 | 18.731 | 38.200 | 34.778 | 0.00 | 0.00 |
| ATOM | 1690 | HD3  | PRO | X | 109 | 17.878 | 39.365 | 35.948 | 0.00 | 0.00 |
| ATOM | 1691 | CG   | PRO | X | 109 | 19.643 | 38.350 | 36.741 | 0.00 | 0.00 |
| ATOM | 1692 | HG2  | PRO | X | 109 | 20.361 | 37.579 | 36.459 | 0.00 | 0.00 |
| ATOM | 1693 | HG3  | PRO | X | 109 | 18.984 | 37.986 | 37.530 | 0.00 | 0.00 |
| ATOM | 1694 | CB   | PRO | X | 109 | 20.348 | 39.520 | 37.313 | 0.00 | 0.00 |
| ATOM | 1695 | HB2  | PRO | X | 109 | 21.267 | 39.211 | 37.810 | 0.00 | 0.00 |
| ATOM | 1696 | HB3  | PRO | X | 109 | 19.695 | 40.042 | 38.013 | 0.00 | 0.00 |
| ATOM | 1697 | CA   | PRO | X | 109 | 20.554 | 40.486 | 36.145 | 0.00 | 0.00 |
| ATOM | 1698 | HA   | PRO | X | 109 | 20.229 | 41.461 | 36.508 | 0.00 | 0.00 |
| ATOM | 1699 | C    | PRO | X | 109 | 22.031 | 40.506 | 35.629 | 0.00 | 0.00 |
| ATOM | 1700 | O    | PRO | X | 109 | 22.365 | 39.879 | 34.615 | 0.00 | 0.00 |
| ATOM | 1701 | N    | VAL | X | 110 | 22.839 | 41.441 | 36.122 | 0.00 | 0.00 |
| ATOM | 1702 | H    | VAL | X | 110 | 22.487 | 41.801 | 36.997 | 0.00 | 0.00 |
| ATOM | 1703 | CA   | VAL | X | 110 | 24.158 | 41.850 | 35.665 | 0.00 | 0.00 |
| ATOM | 1704 | HA   | VAL | X | 110 | 24.317 | 41.450 | 34.664 | 0.00 | 0.00 |
| ATOM | 1705 | CB   | VAL | X | 110 | 24.241 | 43.390 | 35.581 | 0.00 | 0.00 |
| ATOM | 1706 | HB   | VAL | X | 110 | 24.096 | 43.849 | 36.559 | 0.00 | 0.00 |
| ATOM | 1707 | CG1  | VAL | X | 110 | 25.572 | 43.945 | 34.990 | 0.00 | 0.00 |
| ATOM | 1708 | HG11 | VAL | X | 110 | 25.796 | 43.451 | 34.045 | 0.00 | 0.00 |
| ATOM | 1709 | HG12 | VAL | X | 110 | 25.586 | 45.034 | 35.008 | 0.00 | 0.00 |
| ATOM | 1710 | HG13 | VAL | X | 110 | 26.292 | 43.628 | 35.745 | 0.00 | 0.00 |
| ATOM | 1711 | CG2  | VAL | X | 110 | 23.081 | 43.902 | 34.640 | 0.00 | 0.00 |
| ATOM | 1712 | HG21 | VAL | X | 110 | 23.334 | 43.573 | 33.632 | 0.00 | 0.00 |
| ATOM | 1713 | HG22 | VAL | X | 110 | 23.042 | 44.989 | 34.575 | 0.00 | 0.00 |
| ATOM | 1714 | HG23 | VAL | X | 110 | 22.180 | 43.495 | 35.100 | 0.00 | 0.00 |
| ATOM | 1715 | C    | VAL | X | 110 | 25.258 | 41.317 | 36.576 | 0.00 | 0.00 |
| ATOM | 1716 | O    | VAL | X | 110 | 25.247 | 41.454 | 37.751 | 0.00 | 0.00 |
| ATOM | 1717 | N    | LEU | X | 111 | 26.299 | 40.760 | 35.974 | 0.00 | 0.00 |
| ATOM | 1718 | H    | LEU | X | 111 | 26.293 | 40.747 | 34.964 | 0.00 | 0.00 |
| ATOM | 1719 | CA   | LEU | X | 111 | 27.588 | 40.467 | 36.636 | 0.00 | 0.00 |
| ATOM | 1720 | HA   | LEU | X | 111 | 27.410 | 40.719 | 37.682 | 0.00 | 0.00 |
| ATOM | 1721 | CB   | LEU | X | 111 | 27.897 | 38.971 | 36.367 | 0.00 | 0.00 |
| ATOM | 1722 | HB2  | LEU | X | 111 | 27.538 | 38.695 | 35.375 | 0.00 | 0.00 |
| ATOM | 1723 | HB3  | LEU | X | 111 | 28.978 | 38.853 | 36.282 | 0.00 | 0.00 |
| ATOM | 1724 | CG   | LEU | X | 111 | 27.260 | 37.951 | 37.300 | 0.00 | 0.00 |
| ATOM | 1725 | HG   | LEU | X | 111 | 26.237 | 38.247 | 37.533 | 0.00 | 0.00 |
| ATOM | 1726 | CD1  | LEU | X | 111 | 27.216 | 36.599 | 36.696 | 0.00 | 0.00 |
| ATOM | 1727 | HD11 | LEU | X | 111 | 26.680 | 36.749 | 35.759 | 0.00 | 0.00 |
| ATOM | 1728 | HD12 | LEU | X | 111 | 26.668 | 35.888 | 37.314 | 0.00 | 0.00 |
| ATOM | 1729 | HD13 | LEU | X | 111 | 28.266 | 36.365 | 36.521 | 0.00 | 0.00 |
| ATOM | 1730 | CD2  | LEU | X | 111 | 28.004 | 37.974 | 38.636 | 0.00 | 0.00 |
| ATOM | 1731 | HD21 | LEU | X | 111 | 27.370 | 37.510 | 39.392 | 0.00 | 0.00 |
| ATOM | 1732 | HD22 | LEU | X | 111 | 29.003 | 37.540 | 38.623 | 0.00 | 0.00 |
| ATOM | 1733 | HD23 | LEU | X | 111 | 28.171 | 38.977 | 39.029 | 0.00 | 0.00 |
| ATOM | 1734 | C    | LEU | X | 111 | 28.714 | 41.376 | 36.047 | 0.00 | 0.00 |
| ATOM | 1735 | O    | LEU | X | 111 | 28.810 | 41.505 | 34.837 | 0.00 | 0.00 |
| ATOM | 1736 | N    | VAL | X | 112 | 29.573 | 41.924 | 36.918 | 0.00 | 0.00 |
| ATOM | 1737 | H    | VAL | X | 112 | 29.311 | 41.734 | 37.874 | 0.00 | 0.00 |
| ATOM | 1738 | CA   | VAL | X | 112 | 30.681 | 42.769 | 36.629 | 0.00 | 0.00 |
| ATOM | 1739 | HA   | VAL | X | 112 | 30.658 | 42.926 | 35.551 | 0.00 | 0.00 |

|      |      |      |     |   |     |        |        |        |      |      |
|------|------|------|-----|---|-----|--------|--------|--------|------|------|
| ATOM | 1740 | CB   | VAL | X | 112 | 30.460 | 44.205 | 37.171 | 0.00 | 0.00 |
| ATOM | 1741 | HB   | VAL | X | 112 | 30.663 | 44.187 | 38.242 | 0.00 | 0.00 |
| ATOM | 1742 | CG1  | VAL | X | 112 | 31.542 | 45.176 | 36.665 | 0.00 | 0.00 |
| ATOM | 1743 | HG11 | VAL | X | 112 | 31.628 | 45.149 | 35.579 | 0.00 | 0.00 |
| ATOM | 1744 | HG12 | VAL | X | 112 | 31.305 | 46.193 | 36.977 | 0.00 | 0.00 |
| ATOM | 1745 | HG13 | VAL | X | 112 | 32.491 | 44.878 | 37.112 | 0.00 | 0.00 |
| ATOM | 1746 | CG2  | VAL | X | 112 | 29.110 | 44.851 | 36.828 | 0.00 | 0.00 |
| ATOM | 1747 | HG21 | VAL | X | 112 | 28.984 | 45.792 | 37.362 | 0.00 | 0.00 |
| ATOM | 1748 | HG22 | VAL | X | 112 | 28.348 | 44.170 | 37.206 | 0.00 | 0.00 |
| ATOM | 1749 | HG23 | VAL | X | 112 | 29.003 | 45.061 | 35.763 | 0.00 | 0.00 |
| ATOM | 1750 | C    | VAL | X | 112 | 31.920 | 42.112 | 37.184 | 0.00 | 0.00 |
| ATOM | 1751 | O    | VAL | X | 112 | 31.969 | 41.960 | 38.407 | 0.00 | 0.00 |
| ATOM | 1752 | N    | TRP | X | 113 | 32.880 | 41.815 | 36.272 | 0.00 | 0.00 |
| ATOM | 1753 | H    | TRP | X | 113 | 32.736 | 42.033 | 35.296 | 0.00 | 0.00 |
| ATOM | 1754 | CA   | TRP | X | 113 | 34.123 | 41.225 | 36.669 | 0.00 | 0.00 |
| ATOM | 1755 | HA   | TRP | X | 113 | 33.939 | 40.631 | 37.564 | 0.00 | 0.00 |
| ATOM | 1756 | CB   | TRP | X | 113 | 34.692 | 40.328 | 35.493 | 0.00 | 0.00 |
| ATOM | 1757 | HB2  | TRP | X | 113 | 33.962 | 39.556 | 35.252 | 0.00 | 0.00 |
| ATOM | 1758 | HB3  | TRP | X | 113 | 34.785 | 41.031 | 34.666 | 0.00 | 0.00 |
| ATOM | 1759 | CG   | TRP | X | 113 | 35.972 | 39.649 | 35.809 | 0.00 | 0.00 |
| ATOM | 1760 | CD1  | TRP | X | 113 | 37.109 | 39.736 | 35.073 | 0.00 | 0.00 |
| ATOM | 1761 | HD1  | TRP | X | 113 | 37.256 | 40.370 | 34.211 | 0.00 | 0.00 |
| ATOM | 1762 | NE1  | TRP | X | 113 | 38.057 | 38.955 | 35.632 | 0.00 | 0.00 |
| ATOM | 1763 | HE1  | TRP | X | 113 | 38.975 | 38.861 | 35.223 | 0.00 | 0.00 |
| ATOM | 1764 | CE2  | TRP | X | 113 | 37.631 | 38.147 | 36.605 | 0.00 | 0.00 |
| ATOM | 1765 | CZ2  | TRP | X | 113 | 38.131 | 37.071 | 37.340 | 0.00 | 0.00 |
| ATOM | 1766 | HZ2  | TRP | X | 113 | 39.156 | 36.760 | 37.202 | 0.00 | 0.00 |
| ATOM | 1767 | CH2  | TRP | X | 113 | 37.333 | 36.396 | 38.277 | 0.00 | 0.00 |
| ATOM | 1768 | HH2  | TRP | X | 113 | 37.749 | 35.589 | 38.862 | 0.00 | 0.00 |
| ATOM | 1769 | CZ3  | TRP | X | 113 | 35.971 | 36.773 | 38.453 | 0.00 | 0.00 |
| ATOM | 1770 | HZ3  | TRP | X | 113 | 35.390 | 36.349 | 39.259 | 0.00 | 0.00 |
| ATOM | 1771 | CE3  | TRP | X | 113 | 35.470 | 37.848 | 37.728 | 0.00 | 0.00 |
| ATOM | 1772 | HE3  | TRP | X | 113 | 34.434 | 38.101 | 37.898 | 0.00 | 0.00 |
| ATOM | 1773 | CD2  | TRP | X | 113 | 36.268 | 38.568 | 36.732 | 0.00 | 0.00 |
| ATOM | 1774 | C    | TRP | X | 113 | 35.167 | 42.242 | 37.037 | 0.00 | 0.00 |
| ATOM | 1775 | O    | TRP | X | 113 | 35.363 | 43.143 | 36.293 | 0.00 | 0.00 |
| ATOM | 1776 | N    | ILE | X | 114 | 35.968 | 41.972 | 38.057 | 0.00 | 0.00 |
| ATOM | 1777 | H    | ILE | X | 114 | 35.597 | 41.265 | 38.676 | 0.00 | 0.00 |
| ATOM | 1778 | CA   | ILE | X | 114 | 37.250 | 42.630 | 38.410 | 0.00 | 0.00 |
| ATOM | 1779 | HA   | ILE | X | 114 | 37.579 | 43.347 | 37.658 | 0.00 | 0.00 |
| ATOM | 1780 | CB   | ILE | X | 114 | 37.154 | 43.460 | 39.733 | 0.00 | 0.00 |
| ATOM | 1781 | HB   | ILE | X | 114 | 37.117 | 42.749 | 40.559 | 0.00 | 0.00 |
| ATOM | 1782 | CG2  | ILE | X | 114 | 38.312 | 44.418 | 39.822 | 0.00 | 0.00 |
| ATOM | 1783 | HG21 | ILE | X | 114 | 38.256 | 45.247 | 39.118 | 0.00 | 0.00 |
| ATOM | 1784 | HG22 | ILE | X | 114 | 39.166 | 43.759 | 39.665 | 0.00 | 0.00 |
| ATOM | 1785 | HG23 | ILE | X | 114 | 38.303 | 44.795 | 40.845 | 0.00 | 0.00 |
| ATOM | 1786 | CG1  | ILE | X | 114 | 35.856 | 44.410 | 39.655 | 0.00 | 0.00 |
| ATOM | 1787 | HG12 | ILE | X | 114 | 35.948 | 44.996 | 38.741 | 0.00 | 0.00 |
| ATOM | 1788 | HG13 | ILE | X | 114 | 34.902 | 43.907 | 39.493 | 0.00 | 0.00 |
| ATOM | 1789 | CD1  | ILE | X | 114 | 35.662 | 45.351 | 40.906 | 0.00 | 0.00 |
| ATOM | 1790 | HD11 | ILE | X | 114 | 35.814 | 44.791 | 41.828 | 0.00 | 0.00 |
| ATOM | 1791 | HD12 | ILE | X | 114 | 34.692 | 45.844 | 40.971 | 0.00 | 0.00 |
| ATOM | 1792 | HD13 | ILE | X | 114 | 36.466 | 46.085 | 40.838 | 0.00 | 0.00 |
| ATOM | 1793 | C    | ILE | X | 114 | 38.348 | 41.551 | 38.526 | 0.00 | 0.00 |
| ATOM | 1794 | O    | ILE | X | 114 | 38.069 | 40.468 | 39.009 | 0.00 | 0.00 |
| ATOM | 1795 | N    | TYR | X | 115 | 39.524 | 41.726 | 37.906 | 0.00 | 0.00 |
| ATOM | 1796 | H    | TYR | X | 115 | 39.824 | 42.593 | 37.484 | 0.00 | 0.00 |
| ATOM | 1797 | CA   | TYR | X | 115 | 40.500 | 40.698 | 37.710 | 0.00 | 0.00 |
| ATOM | 1798 | HA   | TYR | X | 115 | 40.022 | 39.723 | 37.807 | 0.00 | 0.00 |
| ATOM | 1799 | CB   | TYR | X | 115 | 41.082 | 40.817 | 36.309 | 0.00 | 0.00 |
| ATOM | 1800 | HB2  | TYR | X | 115 | 41.889 | 40.084 | 36.284 | 0.00 | 0.00 |
| ATOM | 1801 | HB3  | TYR | X | 115 | 40.436 | 40.426 | 35.524 | 0.00 | 0.00 |
| ATOM | 1802 | CG   | TYR | X | 115 | 41.593 | 42.133 | 35.948 | 0.00 | 0.00 |
| ATOM | 1803 | CD1  | TYR | X | 115 | 42.796 | 42.605 | 36.515 | 0.00 | 0.00 |
| ATOM | 1804 | HD1  | TYR | X | 115 | 43.295 | 41.996 | 37.254 | 0.00 | 0.00 |
| ATOM | 1805 | CE1  | TYR | X | 115 | 43.325 | 43.860 | 36.167 | 0.00 | 0.00 |
| ATOM | 1806 | HE1  | TYR | X | 115 | 44.329 | 44.072 | 36.504 | 0.00 | 0.00 |

|      |      |     |     |   |     |        |        |        |      |      |
|------|------|-----|-----|---|-----|--------|--------|--------|------|------|
| ATOM | 1807 | CZ  | TYR | X | 115 | 42.543 | 44.706 | 35.321 | 0.00 | 0.00 |
| ATOM | 1808 | OH  | TYR | X | 115 | 43.000 | 45.923 | 34.889 | 0.00 | 0.00 |
| ATOM | 1809 | HH  | TYR | X | 115 | 42.427 | 46.446 | 34.323 | 0.00 | 0.00 |
| ATOM | 1810 | CE2 | TYR | X | 115 | 41.288 | 44.252 | 34.802 | 0.00 | 0.00 |
| ATOM | 1811 | HE2 | TYR | X | 115 | 40.774 | 44.930 | 34.137 | 0.00 | 0.00 |
| ATOM | 1812 | CD2 | TYR | X | 115 | 40.841 | 42.995 | 35.170 | 0.00 | 0.00 |
| ATOM | 1813 | HD2 | TYR | X | 115 | 39.893 | 42.638 | 34.796 | 0.00 | 0.00 |
| ATOM | 1814 | C   | TYR | X | 115 | 41.602 | 40.636 | 38.801 | 0.00 | 0.00 |
| ATOM | 1815 | O   | TYR | X | 115 | 41.916 | 41.644 | 39.422 | 0.00 | 0.00 |
| ATOM | 1816 | N   | GLY | X | 116 | 42.228 | 39.437 | 39.040 | 0.00 | 0.00 |
| ATOM | 1817 | H   | GLY | X | 116 | 41.878 | 38.540 | 38.734 | 0.00 | 0.00 |
| ATOM | 1818 | CA  | GLY | X | 116 | 43.483 | 39.367 | 39.848 | 0.00 | 0.00 |
| ATOM | 1819 | HA2 | GLY | X | 116 | 43.499 | 39.946 | 40.771 | 0.00 | 0.00 |
| ATOM | 1820 | HA3 | GLY | X | 116 | 43.685 | 38.333 | 40.124 | 0.00 | 0.00 |
| ATOM | 1821 | C   | GLY | X | 116 | 44.733 | 39.763 | 39.045 | 0.00 | 0.00 |
| ATOM | 1822 | O   | GLY | X | 116 | 44.697 | 39.984 | 37.776 | 0.00 | 0.00 |
| ATOM | 1823 | N   | GLY | X | 117 | 45.899 | 39.766 | 39.779 | 0.00 | 0.00 |
| ATOM | 1824 | H   | GLY | X | 117 | 45.825 | 39.440 | 40.732 | 0.00 | 0.00 |
| ATOM | 1825 | CA  | GLY | X | 117 | 47.154 | 40.387 | 39.284 | 0.00 | 0.00 |
| ATOM | 1826 | HA2 | GLY | X | 117 | 47.810 | 39.599 | 38.912 | 0.00 | 0.00 |
| ATOM | 1827 | HA3 | GLY | X | 117 | 47.004 | 41.041 | 38.425 | 0.00 | 0.00 |
| ATOM | 1828 | C   | GLY | X | 117 | 48.019 | 41.152 | 40.272 | 0.00 | 0.00 |
| ATOM | 1829 | O   | GLY | X | 117 | 48.905 | 41.955 | 39.903 | 0.00 | 0.00 |
| ATOM | 1830 | N   | GLY | X | 118 | 47.662 | 41.066 | 41.548 | 0.00 | 0.00 |
| ATOM | 1831 | H   | GLY | X | 118 | 46.953 | 40.379 | 41.760 | 0.00 | 0.00 |
| ATOM | 1832 | CA  | GLY | X | 118 | 48.285 | 41.676 | 42.688 | 0.00 | 0.00 |
| ATOM | 1833 | HA2 | GLY | X | 118 | 47.816 | 41.203 | 43.550 | 0.00 | 0.00 |
| ATOM | 1834 | HA3 | GLY | X | 118 | 49.349 | 41.447 | 42.630 | 0.00 | 0.00 |
| ATOM | 1835 | C   | GLY | X | 118 | 48.193 | 43.189 | 42.880 | 0.00 | 0.00 |
| ATOM | 1836 | O   | GLY | X | 118 | 48.920 | 43.824 | 43.608 | 0.00 | 0.00 |
| ATOM | 1837 | N   | PHE | X | 119 | 47.282 | 43.795 | 42.121 | 0.00 | 0.00 |
| ATOM | 1838 | H   | PHE | X | 119 | 46.641 | 43.268 | 41.547 | 0.00 | 0.00 |
| ATOM | 1839 | CA  | PHE | X | 119 | 47.189 | 45.249 | 41.877 | 0.00 | 0.00 |
| ATOM | 1840 | HA  | PHE | X | 119 | 46.237 | 45.495 | 41.407 | 0.00 | 0.00 |
| ATOM | 1841 | CB  | PHE | X | 119 | 47.099 | 46.099 | 43.164 | 0.00 | 0.00 |
| ATOM | 1842 | HB2 | PHE | X | 119 | 47.969 | 46.049 | 43.819 | 0.00 | 0.00 |
| ATOM | 1843 | HB3 | PHE | X | 119 | 46.994 | 47.152 | 42.904 | 0.00 | 0.00 |
| ATOM | 1844 | CG  | PHE | X | 119 | 45.876 | 45.773 | 43.988 | 0.00 | 0.00 |
| ATOM | 1845 | CD1 | PHE | X | 119 | 44.595 | 46.358 | 43.648 | 0.00 | 0.00 |
| ATOM | 1846 | HD1 | PHE | X | 119 | 44.541 | 46.960 | 42.753 | 0.00 | 0.00 |
| ATOM | 1847 | CE1 | PHE | X | 119 | 43.452 | 46.095 | 44.379 | 0.00 | 0.00 |
| ATOM | 1848 | HE1 | PHE | X | 119 | 42.491 | 46.525 | 44.138 | 0.00 | 0.00 |
| ATOM | 1849 | CZ  | PHE | X | 119 | 43.518 | 45.324 | 45.534 | 0.00 | 0.00 |
| ATOM | 1850 | HZ  | PHE | X | 119 | 42.628 | 45.153 | 46.122 | 0.00 | 0.00 |
| ATOM | 1851 | CE2 | PHE | X | 119 | 44.805 | 44.770 | 45.913 | 0.00 | 0.00 |
| ATOM | 1852 | HE2 | PHE | X | 119 | 44.813 | 44.162 | 46.805 | 0.00 | 0.00 |
| ATOM | 1853 | CD2 | PHE | X | 119 | 45.899 | 44.961 | 45.126 | 0.00 | 0.00 |
| ATOM | 1854 | HD2 | PHE | X | 119 | 46.845 | 44.499 | 45.370 | 0.00 | 0.00 |
| ATOM | 1855 | C   | PHE | X | 119 | 48.310 | 45.853 | 40.953 | 0.00 | 0.00 |
| ATOM | 1856 | O   | PHE | X | 119 | 48.220 | 46.991 | 40.595 | 0.00 | 0.00 |
| ATOM | 1857 | N   | TYR | X | 120 | 49.387 | 45.126 | 40.588 | 0.00 | 0.00 |
| ATOM | 1858 | H   | TYR | X | 120 | 49.435 | 44.154 | 40.857 | 0.00 | 0.00 |
| ATOM | 1859 | CA  | TYR | X | 120 | 50.552 | 45.660 | 39.904 | 0.00 | 0.00 |
| ATOM | 1860 | HA  | TYR | X | 120 | 50.614 | 46.748 | 39.912 | 0.00 | 0.00 |
| ATOM | 1861 | CB  | TYR | X | 120 | 51.843 | 45.178 | 40.397 | 0.00 | 0.00 |
| ATOM | 1862 | HB2 | TYR | X | 120 | 52.679 | 45.743 | 39.987 | 0.00 | 0.00 |
| ATOM | 1863 | HB3 | TYR | X | 120 | 51.838 | 45.495 | 41.440 | 0.00 | 0.00 |
| ATOM | 1864 | CG  | TYR | X | 120 | 52.104 | 43.702 | 40.331 | 0.00 | 0.00 |
| ATOM | 1865 | CD1 | TYR | X | 120 | 52.700 | 43.148 | 39.179 | 0.00 | 0.00 |
| ATOM | 1866 | HD1 | TYR | X | 120 | 52.915 | 43.792 | 38.339 | 0.00 | 0.00 |
| ATOM | 1867 | CE1 | TYR | X | 120 | 52.844 | 41.710 | 39.105 | 0.00 | 0.00 |
| ATOM | 1868 | HE1 | TYR | X | 120 | 53.279 | 41.275 | 38.216 | 0.00 | 0.00 |
| ATOM | 1869 | CZ  | TYR | X | 120 | 52.450 | 40.882 | 40.117 | 0.00 | 0.00 |
| ATOM | 1870 | OH  | TYR | X | 120 | 52.536 | 39.521 | 39.959 | 0.00 | 0.00 |
| ATOM | 1871 | HH  | TYR | X | 120 | 52.850 | 39.212 | 39.106 | 0.00 | 0.00 |
| ATOM | 1872 | CE2 | TYR | X | 120 | 51.787 | 41.361 | 41.276 | 0.00 | 0.00 |
| ATOM | 1873 | HE2 | TYR | X | 120 | 51.459 | 40.674 | 42.042 | 0.00 | 0.00 |

|      |      |      |     |   |     |        |        |        |      |      |
|------|------|------|-----|---|-----|--------|--------|--------|------|------|
| ATOM | 1874 | CD2  | TYR | X | 120 | 51.651 | 42.808 | 41.348 | 0.00 | 0.00 |
| ATOM | 1875 | HD2  | TYR | X | 120 | 51.155 | 43.210 | 42.220 | 0.00 | 0.00 |
| ATOM | 1876 | C    | TYR | X | 120 | 50.444 | 45.232 | 38.390 | 0.00 | 0.00 |
| ATOM | 1877 | O    | TYR | X | 120 | 51.319 | 45.689 | 37.574 | 0.00 | 0.00 |
| ATOM | 1878 | N    | SER | X | 121 | 49.411 | 44.417 | 38.011 | 0.00 | 0.00 |
| ATOM | 1879 | H    | SER | X | 121 | 48.701 | 44.136 | 38.672 | 0.00 | 0.00 |
| ATOM | 1880 | CA   | SER | X | 121 | 49.280 | 43.700 | 36.735 | 0.00 | 0.00 |
| ATOM | 1881 | HA   | SER | X | 121 | 49.436 | 44.460 | 35.969 | 0.00 | 0.00 |
| ATOM | 1882 | CB   | SER | X | 121 | 50.326 | 42.613 | 36.618 | 0.00 | 0.00 |
| ATOM | 1883 | HB2  | SER | X | 121 | 50.181 | 42.365 | 35.566 | 0.00 | 0.00 |
| ATOM | 1884 | HB3  | SER | X | 121 | 51.297 | 43.074 | 36.796 | 0.00 | 0.00 |
| ATOM | 1885 | OG   | SER | X | 121 | 50.059 | 41.487 | 37.449 | 0.00 | 0.00 |
| ATOM | 1886 | HG   | SER | X | 121 | 50.034 | 41.769 | 38.367 | 0.00 | 0.00 |
| ATOM | 1887 | C    | SER | X | 121 | 47.885 | 43.112 | 36.498 | 0.00 | 0.00 |
| ATOM | 1888 | O    | SER | X | 121 | 47.018 | 43.276 | 37.359 | 0.00 | 0.00 |
| ATOM | 1889 | N    | GLY | X | 122 | 47.561 | 42.566 | 35.277 | 0.00 | 0.00 |
| ATOM | 1890 | H    | GLY | X | 122 | 48.292 | 42.572 | 34.580 | 0.00 | 0.00 |
| ATOM | 1891 | CA   | GLY | X | 122 | 46.179 | 42.059 | 34.962 | 0.00 | 0.00 |
| ATOM | 1892 | HA2  | GLY | X | 122 | 46.322 | 41.053 | 34.566 | 0.00 | 0.00 |
| ATOM | 1893 | HA3  | GLY | X | 122 | 45.503 | 42.118 | 35.815 | 0.00 | 0.00 |
| ATOM | 1894 | C    | GLY | X | 122 | 45.590 | 42.887 | 33.847 | 0.00 | 0.00 |
| ATOM | 1895 | O    | GLY | X | 122 | 46.088 | 43.978 | 33.465 | 0.00 | 0.00 |
| ATOM | 1896 | N    | ALA | X | 123 | 44.430 | 42.436 | 33.281 | 0.00 | 0.00 |
| ATOM | 1897 | H    | ALA | X | 123 | 44.005 | 41.644 | 33.742 | 0.00 | 0.00 |
| ATOM | 1898 | CA   | ALA | X | 123 | 43.757 | 43.136 | 32.157 | 0.00 | 0.00 |
| ATOM | 1899 | HA   | ALA | X | 123 | 43.746 | 44.212 | 32.327 | 0.00 | 0.00 |
| ATOM | 1900 | CB   | ALA | X | 123 | 44.532 | 42.885 | 30.868 | 0.00 | 0.00 |
| ATOM | 1901 | HB1  | ALA | X | 123 | 45.522 | 43.341 | 30.898 | 0.00 | 0.00 |
| ATOM | 1902 | HB2  | ALA | X | 123 | 44.050 | 43.304 | 29.985 | 0.00 | 0.00 |
| ATOM | 1903 | HB3  | ALA | X | 123 | 44.628 | 41.814 | 30.692 | 0.00 | 0.00 |
| ATOM | 1904 | C    | ALA | X | 123 | 42.322 | 42.609 | 31.998 | 0.00 | 0.00 |
| ATOM | 1905 | O    | ALA | X | 123 | 42.086 | 41.427 | 32.160 | 0.00 | 0.00 |
| ATOM | 1906 | N    | SER | X | 124 | 41.362 | 43.451 | 31.549 | 0.00 | 0.00 |
| ATOM | 1907 | H    | SER | X | 124 | 41.644 | 44.364 | 31.222 | 0.00 | 0.00 |
| ATOM | 1908 | CA   | SER | X | 124 | 40.005 | 42.929 | 31.239 | 0.00 | 0.00 |
| ATOM | 1909 | HA   | SER | X | 124 | 39.548 | 42.446 | 32.103 | 0.00 | 0.00 |
| ATOM | 1910 | CB   | SER | X | 124 | 39.203 | 44.201 | 30.930 | 0.00 | 0.00 |
| ATOM | 1911 | HB2  | SER | X | 124 | 38.172 | 43.855 | 30.850 | 0.00 | 0.00 |
| ATOM | 1912 | HB3  | SER | X | 124 | 39.266 | 44.837 | 31.814 | 0.00 | 0.00 |
| ATOM | 1913 | OG   | SER | X | 124 | 39.631 | 44.855 | 29.777 | 0.00 | 0.00 |
| ATOM | 1914 | HG   | SER | X | 124 | 40.381 | 45.426 | 29.959 | 0.00 | 0.00 |
| ATOM | 1915 | C    | SER | X | 124 | 39.905 | 41.913 | 30.059 | 0.00 | 0.00 |
| ATOM | 1916 | O    | SER | X | 124 | 38.813 | 41.456 | 29.767 | 0.00 | 0.00 |
| ATOM | 1917 | N    | SER | X | 125 | 40.978 | 41.667 | 29.322 | 0.00 | 0.00 |
| ATOM | 1918 | H    | SER | X | 125 | 41.845 | 42.094 | 29.617 | 0.00 | 0.00 |
| ATOM | 1919 | CA   | SER | X | 125 | 41.025 | 41.114 | 27.998 | 0.00 | 0.00 |
| ATOM | 1920 | HA   | SER | X | 125 | 40.025 | 40.993 | 27.581 | 0.00 | 0.00 |
| ATOM | 1921 | CB   | SER | X | 125 | 41.670 | 42.160 | 27.102 | 0.00 | 0.00 |
| ATOM | 1922 | HB2  | SER | X | 125 | 41.642 | 41.763 | 26.088 | 0.00 | 0.00 |
| ATOM | 1923 | HB3  | SER | X | 125 | 41.103 | 43.090 | 27.093 | 0.00 | 0.00 |
| ATOM | 1924 | OG   | SER | X | 125 | 43.006 | 42.301 | 27.550 | 0.00 | 0.00 |
| ATOM | 1925 | HG   | SER | X | 125 | 43.534 | 41.613 | 27.138 | 0.00 | 0.00 |
| ATOM | 1926 | C    | SER | X | 125 | 41.776 | 39.774 | 27.810 | 0.00 | 0.00 |
| ATOM | 1927 | O    | SER | X | 125 | 42.401 | 39.506 | 26.764 | 0.00 | 0.00 |
| ATOM | 1928 | N    | LEU | X | 126 | 41.934 | 38.979 | 28.885 | 0.00 | 0.00 |
| ATOM | 1929 | H    | LEU | X | 126 | 41.435 | 39.239 | 29.724 | 0.00 | 0.00 |
| ATOM | 1930 | CA   | LEU | X | 126 | 42.539 | 37.675 | 28.879 | 0.00 | 0.00 |
| ATOM | 1931 | HA   | LEU | X | 126 | 43.350 | 37.563 | 28.159 | 0.00 | 0.00 |
| ATOM | 1932 | CB   | LEU | X | 126 | 43.081 | 37.288 | 30.330 | 0.00 | 0.00 |
| ATOM | 1933 | HB2  | LEU | X | 126 | 42.282 | 37.137 | 31.055 | 0.00 | 0.00 |
| ATOM | 1934 | HB3  | LEU | X | 126 | 43.640 | 36.354 | 30.276 | 0.00 | 0.00 |
| ATOM | 1935 | CG   | LEU | X | 126 | 44.119 | 38.362 | 30.888 | 0.00 | 0.00 |
| ATOM | 1936 | HG   | LEU | X | 126 | 43.568 | 39.291 | 31.033 | 0.00 | 0.00 |
| ATOM | 1937 | CD1  | LEU | X | 126 | 44.725 | 37.851 | 32.197 | 0.00 | 0.00 |
| ATOM | 1938 | HD11 | LEU | X | 126 | 45.426 | 37.026 | 32.069 | 0.00 | 0.00 |
| ATOM | 1939 | HD12 | LEU | X | 126 | 43.889 | 37.520 | 32.813 | 0.00 | 0.00 |
| ATOM | 1940 | HD13 | LEU | X | 126 | 45.310 | 38.599 | 32.732 | 0.00 | 0.00 |



|      |      |      |     |   |     |        |        |        |      |      |
|------|------|------|-----|---|-----|--------|--------|--------|------|------|
| ATOM | 1941 | CD2  | LEU | X | 126 | 45.302 | 38.600 | 29.882 | 0.00 | 0.00 |
| ATOM | 1942 | HD21 | LEU | X | 126 | 44.952 | 39.115 | 28.987 | 0.00 | 0.00 |
| ATOM | 1943 | HD22 | LEU | X | 126 | 46.025 | 39.325 | 30.256 | 0.00 | 0.00 |
| ATOM | 1944 | HD23 | LEU | X | 126 | 45.716 | 37.629 | 29.610 | 0.00 | 0.00 |
| ATOM | 1945 | C    | LEU | X | 126 | 41.497 | 36.591 | 28.515 | 0.00 | 0.00 |
| ATOM | 1946 | O    | LEU | X | 126 | 40.326 | 36.679 | 28.794 | 0.00 | 0.00 |
| ATOM | 1947 | N    | ASP | X | 127 | 42.022 | 35.531 | 27.915 | 0.00 | 0.00 |
| ATOM | 1948 | H    | ASP | X | 127 | 42.993 | 35.629 | 27.656 | 0.00 | 0.00 |
| ATOM | 1949 | CA   | ASP | X | 127 | 41.290 | 34.477 | 27.239 | 0.00 | 0.00 |
| ATOM | 1950 | HA   | ASP | X | 127 | 40.619 | 34.920 | 26.502 | 0.00 | 0.00 |
| ATOM | 1951 | CB   | ASP | X | 127 | 42.266 | 33.468 | 26.591 | 0.00 | 0.00 |
| ATOM | 1952 | HB2  | ASP | X | 127 | 43.302 | 33.791 | 26.692 | 0.00 | 0.00 |
| ATOM | 1953 | HB3  | ASP | X | 127 | 42.253 | 32.563 | 27.197 | 0.00 | 0.00 |
| ATOM | 1954 | CG   | ASP | X | 127 | 41.985 | 33.245 | 25.109 | 0.00 | 0.00 |
| ATOM | 1955 | OD1  | ASP | X | 127 | 42.098 | 34.192 | 24.317 | 0.00 | 0.00 |
| ATOM | 1956 | OD2  | ASP | X | 127 | 41.757 | 32.065 | 24.777 | 0.00 | 0.00 |
| ATOM | 1957 | C    | ASP | X | 127 | 40.365 | 33.691 | 28.161 | 0.00 | 0.00 |
| ATOM | 1958 | O    | ASP | X | 127 | 39.415 | 33.076 | 27.767 | 0.00 | 0.00 |
| ATOM | 1959 | N    | VAL | X | 128 | 40.592 | 33.823 | 29.496 | 0.00 | 0.00 |
| ATOM | 1960 | H    | VAL | X | 128 | 41.374 | 34.421 | 29.720 | 0.00 | 0.00 |
| ATOM | 1961 | CA   | VAL | X | 128 | 39.905 | 33.243 | 30.650 | 0.00 | 0.00 |
| ATOM | 1962 | HA   | VAL | X | 128 | 39.441 | 32.319 | 30.307 | 0.00 | 0.00 |
| ATOM | 1963 | CB   | VAL | X | 128 | 40.946 | 32.889 | 31.759 | 0.00 | 0.00 |
| ATOM | 1964 | HB   | VAL | X | 128 | 41.782 | 32.372 | 31.289 | 0.00 | 0.00 |
| ATOM | 1965 | CG1  | VAL | X | 128 | 41.655 | 34.106 | 32.416 | 0.00 | 0.00 |
| ATOM | 1966 | HG11 | VAL | X | 128 | 42.025 | 34.795 | 31.657 | 0.00 | 0.00 |
| ATOM | 1967 | HG12 | VAL | X | 128 | 40.845 | 34.474 | 33.046 | 0.00 | 0.00 |
| ATOM | 1968 | HG13 | VAL | X | 128 | 42.496 | 33.753 | 33.013 | 0.00 | 0.00 |
| ATOM | 1969 | CG2  | VAL | X | 128 | 40.299 | 31.941 | 32.842 | 0.00 | 0.00 |
| ATOM | 1970 | HG21 | VAL | X | 128 | 39.476 | 32.333 | 33.441 | 0.00 | 0.00 |
| ATOM | 1971 | HG22 | VAL | X | 128 | 41.065 | 31.719 | 33.584 | 0.00 | 0.00 |
| ATOM | 1972 | HG23 | VAL | X | 128 | 39.949 | 31.043 | 32.334 | 0.00 | 0.00 |
| ATOM | 1973 | C    | VAL | X | 128 | 38.773 | 34.150 | 31.143 | 0.00 | 0.00 |
| ATOM | 1974 | O    | VAL | X | 128 | 37.835 | 33.693 | 31.820 | 0.00 | 0.00 |
| ATOM | 1975 | N    | TYR | X | 129 | 38.631 | 35.386 | 30.631 | 0.00 | 0.00 |
| ATOM | 1976 | H    | TYR | X | 129 | 39.322 | 35.591 | 29.923 | 0.00 | 0.00 |
| ATOM | 1977 | CA   | TYR | X | 129 | 37.599 | 36.370 | 31.056 | 0.00 | 0.00 |
| ATOM | 1978 | HA   | TYR | X | 129 | 37.109 | 35.907 | 31.912 | 0.00 | 0.00 |
| ATOM | 1979 | CB   | TYR | X | 129 | 38.239 | 37.690 | 31.518 | 0.00 | 0.00 |
| ATOM | 1980 | HB2  | TYR | X | 129 | 38.740 | 38.105 | 30.643 | 0.00 | 0.00 |
| ATOM | 1981 | HB3  | TYR | X | 129 | 37.500 | 38.393 | 31.901 | 0.00 | 0.00 |
| ATOM | 1982 | CG   | TYR | X | 129 | 39.302 | 37.707 | 32.580 | 0.00 | 0.00 |
| ATOM | 1983 | CD1  | TYR | X | 129 | 39.218 | 36.687 | 33.638 | 0.00 | 0.00 |
| ATOM | 1984 | HD1  | TYR | X | 129 | 38.438 | 35.941 | 33.695 | 0.00 | 0.00 |
| ATOM | 1985 | CE1  | TYR | X | 129 | 40.269 | 36.614 | 34.551 | 0.00 | 0.00 |
| ATOM | 1986 | HE1  | TYR | X | 129 | 40.247 | 35.884 | 35.346 | 0.00 | 0.00 |
| ATOM | 1987 | CZ   | TYR | X | 129 | 41.273 | 37.577 | 34.558 | 0.00 | 0.00 |
| ATOM | 1988 | OH   | TYR | X | 129 | 42.163 | 37.554 | 35.591 | 0.00 | 0.00 |
| ATOM | 1989 | HH   | TYR | X | 129 | 42.952 | 38.096 | 35.516 | 0.00 | 0.00 |
| ATOM | 1990 | CE2  | TYR | X | 129 | 41.302 | 38.586 | 33.554 | 0.00 | 0.00 |
| ATOM | 1991 | HE2  | TYR | X | 129 | 42.138 | 39.269 | 33.520 | 0.00 | 0.00 |
| ATOM | 1992 | CD2  | TYR | X | 129 | 40.335 | 38.616 | 32.493 | 0.00 | 0.00 |
| ATOM | 1993 | HD2  | TYR | X | 129 | 40.317 | 39.430 | 31.784 | 0.00 | 0.00 |
| ATOM | 1994 | C    | TYR | X | 129 | 36.557 | 36.627 | 29.999 | 0.00 | 0.00 |
| ATOM | 1995 | O    | TYR | X | 129 | 35.777 | 37.627 | 30.042 | 0.00 | 0.00 |
| ATOM | 1996 | N    | ASP | X | 130 | 36.473 | 35.810 | 28.917 | 0.00 | 0.00 |
| ATOM | 1997 | H    | ASP | X | 130 | 37.108 | 35.025 | 28.907 | 0.00 | 0.00 |
| ATOM | 1998 | CA   | ASP | X | 130 | 35.473 | 35.881 | 27.868 | 0.00 | 0.00 |
| ATOM | 1999 | HA   | ASP | X | 130 | 35.278 | 36.909 | 27.563 | 0.00 | 0.00 |
| ATOM | 2000 | CB   | ASP | X | 130 | 35.990 | 35.202 | 26.553 | 0.00 | 0.00 |
| ATOM | 2001 | HB2  | ASP | X | 130 | 37.024 | 35.454 | 26.316 | 0.00 | 0.00 |
| ATOM | 2002 | HB3  | ASP | X | 130 | 35.887 | 34.122 | 26.663 | 0.00 | 0.00 |
| ATOM | 2003 | CG   | ASP | X | 130 | 35.126 | 35.590 | 25.338 | 0.00 | 0.00 |
| ATOM | 2004 | OD1  | ASP | X | 130 | 33.864 | 35.849 | 25.463 | 0.00 | 0.00 |
| ATOM | 2005 | OD2  | ASP | X | 130 | 35.627 | 35.630 | 24.212 | 0.00 | 0.00 |
| ATOM | 2006 | C    | ASP | X | 130 | 34.151 | 35.322 | 28.391 | 0.00 | 0.00 |
| ATOM | 2007 | O    | ASP | X | 130 | 33.962 | 34.108 | 28.603 | 0.00 | 0.00 |

|      |      |      |     |   |     |        |        |        |      |      |
|------|------|------|-----|---|-----|--------|--------|--------|------|------|
| ATOM | 2008 | N    | GLY | X | 131 | 33.173 | 36.197 | 28.678 | 0.00 | 0.00 |
| ATOM | 2009 | H    | GLY | X | 131 | 33.514 | 37.141 | 28.799 | 0.00 | 0.00 |
| ATOM | 2010 | CA   | GLY | X | 131 | 31.819 | 35.921 | 29.213 | 0.00 | 0.00 |
| ATOM | 2011 | HA2  | GLY | X | 131 | 31.995 | 35.250 | 30.054 | 0.00 | 0.00 |
| ATOM | 2012 | HA3  | GLY | X | 131 | 31.356 | 36.848 | 29.553 | 0.00 | 0.00 |
| ATOM | 2013 | C    | GLY | X | 131 | 30.869 | 35.265 | 28.219 | 0.00 | 0.00 |
| ATOM | 2014 | O    | GLY | X | 131 | 29.812 | 34.893 | 28.688 | 0.00 | 0.00 |
| ATOM | 2015 | N    | ARG | X | 132 | 31.289 | 34.961 | 26.977 | 0.00 | 0.00 |
| ATOM | 2016 | H    | ARG | X | 132 | 32.194 | 35.270 | 26.650 | 0.00 | 0.00 |
| ATOM | 2017 | CA   | ARG | X | 132 | 30.466 | 34.267 | 26.041 | 0.00 | 0.00 |
| ATOM | 2018 | HA   | ARG | X | 132 | 29.683 | 35.011 | 25.892 | 0.00 | 0.00 |
| ATOM | 2019 | CB   | ARG | X | 132 | 31.098 | 34.148 | 24.656 | 0.00 | 0.00 |
| ATOM | 2020 | HB2  | ARG | X | 132 | 30.252 | 33.971 | 23.991 | 0.00 | 0.00 |
| ATOM | 2021 | HB3  | ARG | X | 132 | 31.458 | 35.135 | 24.365 | 0.00 | 0.00 |
| ATOM | 2022 | CG   | ARG | X | 132 | 32.165 | 33.115 | 24.525 | 0.00 | 0.00 |
| ATOM | 2023 | HG2  | ARG | X | 132 | 32.995 | 33.387 | 25.177 | 0.00 | 0.00 |
| ATOM | 2024 | HG3  | ARG | X | 132 | 31.656 | 32.183 | 24.771 | 0.00 | 0.00 |
| ATOM | 2025 | CD   | ARG | X | 132 | 32.609 | 32.950 | 23.042 | 0.00 | 0.00 |
| ATOM | 2026 | HD2  | ARG | X | 132 | 32.894 | 31.898 | 23.066 | 0.00 | 0.00 |
| ATOM | 2027 | HD3  | ARG | X | 132 | 31.847 | 33.065 | 22.271 | 0.00 | 0.00 |
| ATOM | 2028 | NE   | ARG | X | 132 | 33.742 | 33.815 | 22.774 | 0.00 | 0.00 |
| ATOM | 2029 | HE   | ARG | X | 132 | 34.044 | 34.504 | 23.449 | 0.00 | 0.00 |
| ATOM | 2030 | CZ   | ARG | X | 132 | 34.502 | 33.815 | 21.683 | 0.00 | 0.00 |
| ATOM | 2031 | NH1  | ARG | X | 132 | 34.264 | 33.089 | 20.622 | 0.00 | 0.00 |
| ATOM | 2032 | HH11 | ARG | X | 132 | 33.545 | 32.381 | 20.588 | 0.00 | 0.00 |
| ATOM | 2033 | HH12 | ARG | X | 132 | 34.809 | 33.165 | 19.775 | 0.00 | 0.00 |
| ATOM | 2034 | NH2  | ARG | X | 132 | 35.649 | 34.494 | 21.619 | 0.00 | 0.00 |
| ATOM | 2035 | HH21 | ARG | X | 132 | 35.989 | 34.981 | 22.436 | 0.00 | 0.00 |
| ATOM | 2036 | HH22 | ARG | X | 132 | 36.134 | 34.584 | 20.738 | 0.00 | 0.00 |
| ATOM | 2037 | C    | ARG | X | 132 | 29.845 | 32.961 | 26.546 | 0.00 | 0.00 |
| ATOM | 2038 | O    | ARG | X | 132 | 28.655 | 32.750 | 26.385 | 0.00 | 0.00 |
| ATOM | 2039 | N    | PHE | X | 133 | 30.610 | 32.082 | 27.138 | 0.00 | 0.00 |
| ATOM | 2040 | H    | PHE | X | 133 | 31.585 | 32.301 | 27.282 | 0.00 | 0.00 |
| ATOM | 2041 | CA   | PHE | X | 133 | 30.074 | 30.730 | 27.587 | 0.00 | 0.00 |
| ATOM | 2042 | HA   | PHE | X | 133 | 29.513 | 30.206 | 26.813 | 0.00 | 0.00 |
| ATOM | 2043 | CB   | PHE | X | 133 | 31.262 | 29.918 | 28.087 | 0.00 | 0.00 |
| ATOM | 2044 | HB2  | PHE | X | 133 | 31.639 | 30.277 | 29.045 | 0.00 | 0.00 |
| ATOM | 2045 | HB3  | PHE | X | 133 | 30.878 | 28.900 | 28.150 | 0.00 | 0.00 |
| ATOM | 2046 | CG   | PHE | X | 133 | 32.396 | 29.926 | 27.115 | 0.00 | 0.00 |
| ATOM | 2047 | CD1  | PHE | X | 133 | 33.485 | 30.849 | 27.232 | 0.00 | 0.00 |
| ATOM | 2048 | HD1  | PHE | X | 133 | 33.546 | 31.541 | 28.059 | 0.00 | 0.00 |
| ATOM | 2049 | CE1  | PHE | X | 133 | 34.525 | 30.867 | 26.298 | 0.00 | 0.00 |
| ATOM | 2050 | HE1  | PHE | X | 133 | 35.322 | 31.572 | 26.485 | 0.00 | 0.00 |
| ATOM | 2051 | CZ   | PHE | X | 133 | 34.483 | 29.967 | 25.203 | 0.00 | 0.00 |
| ATOM | 2052 | HZ   | PHE | X | 133 | 35.295 | 29.907 | 24.493 | 0.00 | 0.00 |
| ATOM | 2053 | CE2  | PHE | X | 133 | 33.429 | 29.040 | 25.057 | 0.00 | 0.00 |
| ATOM | 2054 | HE2  | PHE | X | 133 | 33.342 | 28.438 | 24.165 | 0.00 | 0.00 |
| ATOM | 2055 | CD2  | PHE | X | 133 | 32.373 | 29.077 | 26.041 | 0.00 | 0.00 |
| ATOM | 2056 | HD2  | PHE | X | 133 | 31.523 | 28.420 | 25.934 | 0.00 | 0.00 |
| ATOM | 2057 | C    | PHE | X | 133 | 28.965 | 30.928 | 28.700 | 0.00 | 0.00 |
| ATOM | 2058 | O    | PHE | X | 133 | 27.843 | 30.458 | 28.455 | 0.00 | 0.00 |
| ATOM | 2059 | N    | LEU | X | 134 | 29.281 | 31.677 | 29.731 | 0.00 | 0.00 |
| ATOM | 2060 | H    | LEU | X | 134 | 30.241 | 31.912 | 29.942 | 0.00 | 0.00 |
| ATOM | 2061 | CA   | LEU | X | 134 | 28.376 | 32.092 | 30.805 | 0.00 | 0.00 |
| ATOM | 2062 | HA   | LEU | X | 134 | 28.025 | 31.205 | 31.333 | 0.00 | 0.00 |
| ATOM | 2063 | CB   | LEU | X | 134 | 29.107 | 33.074 | 31.728 | 0.00 | 0.00 |
| ATOM | 2064 | HB2  | LEU | X | 134 | 29.878 | 32.476 | 32.213 | 0.00 | 0.00 |
| ATOM | 2065 | HB3  | LEU | X | 134 | 29.590 | 33.889 | 31.188 | 0.00 | 0.00 |
| ATOM | 2066 | CG   | LEU | X | 134 | 28.281 | 33.635 | 32.913 | 0.00 | 0.00 |
| ATOM | 2067 | HG   | LEU | X | 134 | 27.469 | 34.246 | 32.519 | 0.00 | 0.00 |
| ATOM | 2068 | CD1  | LEU | X | 134 | 27.594 | 32.548 | 33.744 | 0.00 | 0.00 |
| ATOM | 2069 | HD11 | LEU | X | 134 | 26.873 | 31.895 | 33.251 | 0.00 | 0.00 |
| ATOM | 2070 | HD12 | LEU | X | 134 | 27.162 | 33.098 | 34.581 | 0.00 | 0.00 |
| ATOM | 2071 | HD13 | LEU | X | 134 | 28.387 | 31.911 | 34.136 | 0.00 | 0.00 |
| ATOM | 2072 | CD2  | LEU | X | 134 | 29.172 | 34.521 | 33.734 | 0.00 | 0.00 |
| ATOM | 2073 | HD21 | LEU | X | 134 | 28.542 | 34.907 | 34.536 | 0.00 | 0.00 |
| ATOM | 2074 | HD22 | LEU | X | 134 | 29.938 | 33.938 | 34.246 | 0.00 | 0.00 |

|      |      |      |     |   |     |        |        |        |      |      |
|------|------|------|-----|---|-----|--------|--------|--------|------|------|
| ATOM | 2075 | HD23 | LEU | X | 134 | 29.511 | 35.331 | 33.089 | 0.00 | 0.00 |
| ATOM | 2076 | C    | LEU | X | 134 | 27.104 | 32.767 | 30.254 | 0.00 | 0.00 |
| ATOM | 2077 | O    | LEU | X | 134 | 25.999 | 32.259 | 30.504 | 0.00 | 0.00 |
| ATOM | 2078 | N    | VAL | X | 135 | 27.280 | 33.852 | 29.464 | 0.00 | 0.00 |
| ATOM | 2079 | H    | VAL | X | 135 | 28.238 | 34.137 | 29.318 | 0.00 | 0.00 |
| ATOM | 2080 | CA   | VAL | X | 135 | 26.141 | 34.614 | 28.836 | 0.00 | 0.00 |
| ATOM | 2081 | HA   | VAL | X | 135 | 25.492 | 34.908 | 29.661 | 0.00 | 0.00 |
| ATOM | 2082 | CB   | VAL | X | 135 | 26.699 | 35.924 | 28.201 | 0.00 | 0.00 |
| ATOM | 2083 | HB   | VAL | X | 135 | 27.551 | 35.640 | 27.583 | 0.00 | 0.00 |
| ATOM | 2084 | CG1  | VAL | X | 135 | 25.682 | 36.661 | 27.251 | 0.00 | 0.00 |
| ATOM | 2085 | HG11 | VAL | X | 135 | 24.740 | 36.871 | 27.757 | 0.00 | 0.00 |
| ATOM | 2086 | HG12 | VAL | X | 135 | 26.048 | 37.584 | 26.802 | 0.00 | 0.00 |
| ATOM | 2087 | HG13 | VAL | X | 135 | 25.321 | 35.997 | 26.466 | 0.00 | 0.00 |
| ATOM | 2088 | CG2  | VAL | X | 135 | 27.147 | 36.944 | 29.170 | 0.00 | 0.00 |
| ATOM | 2089 | HG21 | VAL | X | 135 | 26.317 | 37.073 | 29.864 | 0.00 | 0.00 |
| ATOM | 2090 | HG22 | VAL | X | 135 | 27.572 | 37.837 | 28.713 | 0.00 | 0.00 |
| ATOM | 2091 | HG23 | VAL | X | 135 | 27.967 | 36.520 | 29.751 | 0.00 | 0.00 |
| ATOM | 2092 | C    | VAL | X | 135 | 25.249 | 33.828 | 27.840 | 0.00 | 0.00 |
| ATOM | 2093 | O    | VAL | X | 135 | 24.044 | 34.085 | 27.815 | 0.00 | 0.00 |
| ATOM | 2094 | N    | GLN | X | 136 | 25.776 | 32.863 | 27.069 | 0.00 | 0.00 |
| ATOM | 2095 | H    | GLN | X | 136 | 26.780 | 32.801 | 27.151 | 0.00 | 0.00 |
| ATOM | 2096 | CA   | GLN | X | 136 | 25.011 | 32.024 | 26.137 | 0.00 | 0.00 |
| ATOM | 2097 | HA   | GLN | X | 136 | 24.217 | 32.557 | 25.613 | 0.00 | 0.00 |
| ATOM | 2098 | CB   | GLN | X | 136 | 26.002 | 31.522 | 25.124 | 0.00 | 0.00 |
| ATOM | 2099 | HB2  | GLN | X | 136 | 26.621 | 32.338 | 24.752 | 0.00 | 0.00 |
| ATOM | 2100 | HB3  | GLN | X | 136 | 26.686 | 30.791 | 25.553 | 0.00 | 0.00 |
| ATOM | 2101 | CG   | GLN | X | 136 | 25.310 | 30.811 | 23.892 | 0.00 | 0.00 |
| ATOM | 2102 | HG2  | GLN | X | 136 | 24.292 | 31.199 | 23.850 | 0.00 | 0.00 |
| ATOM | 2103 | HG3  | GLN | X | 136 | 25.796 | 31.055 | 22.948 | 0.00 | 0.00 |
| ATOM | 2104 | CD   | GLN | X | 136 | 25.331 | 29.294 | 23.919 | 0.00 | 0.00 |
| ATOM | 2105 | OE1  | GLN | X | 136 | 26.185 | 28.616 | 23.344 | 0.00 | 0.00 |
| ATOM | 2106 | NE2  | GLN | X | 136 | 24.474 | 28.650 | 24.608 | 0.00 | 0.00 |
| ATOM | 2107 | HE21 | GLN | X | 136 | 24.552 | 27.649 | 24.720 | 0.00 | 0.00 |
| ATOM | 2108 | HE22 | GLN | X | 136 | 23.844 | 29.232 | 25.141 | 0.00 | 0.00 |
| ATOM | 2109 | C    | GLN | X | 136 | 24.295 | 30.856 | 26.891 | 0.00 | 0.00 |
| ATOM | 2110 | O    | GLN | X | 136 | 23.255 | 30.364 | 26.427 | 0.00 | 0.00 |
| ATOM | 2111 | N    | ALA | X | 137 | 24.838 | 30.318 | 28.007 | 0.00 | 0.00 |
| ATOM | 2112 | H    | ALA | X | 137 | 25.698 | 30.722 | 28.349 | 0.00 | 0.00 |
| ATOM | 2113 | CA   | ALA | X | 137 | 24.231 | 29.286 | 28.862 | 0.00 | 0.00 |
| ATOM | 2114 | HA   | ALA | X | 137 | 23.833 | 28.423 | 28.327 | 0.00 | 0.00 |
| ATOM | 2115 | CB   | ALA | X | 137 | 25.355 | 28.697 | 29.708 | 0.00 | 0.00 |
| ATOM | 2116 | HB1  | ALA | X | 137 | 26.148 | 28.182 | 29.166 | 0.00 | 0.00 |
| ATOM | 2117 | HB2  | ALA | X | 137 | 24.943 | 27.956 | 30.393 | 0.00 | 0.00 |
| ATOM | 2118 | HB3  | ALA | X | 137 | 25.789 | 29.462 | 30.353 | 0.00 | 0.00 |
| ATOM | 2119 | C    | ALA | X | 137 | 23.118 | 29.829 | 29.787 | 0.00 | 0.00 |
| ATOM | 2120 | O    | ALA | X | 137 | 22.039 | 29.252 | 29.837 | 0.00 | 0.00 |
| ATOM | 2121 | N    | GLU | X | 138 | 23.356 | 31.002 | 30.457 | 0.00 | 0.00 |
| ATOM | 2122 | H    | GLU | X | 138 | 24.288 | 31.385 | 30.391 | 0.00 | 0.00 |
| ATOM | 2123 | CA   | GLU | X | 138 | 22.563 | 31.447 | 31.584 | 0.00 | 0.00 |
| ATOM | 2124 | HA   | GLU | X | 138 | 21.792 | 30.733 | 31.870 | 0.00 | 0.00 |
| ATOM | 2125 | CB   | GLU | X | 138 | 23.478 | 31.551 | 32.861 | 0.00 | 0.00 |
| ATOM | 2126 | HB2  | GLU | X | 138 | 24.374 | 32.104 | 32.580 | 0.00 | 0.00 |
| ATOM | 2127 | HB3  | GLU | X | 138 | 22.933 | 32.078 | 33.644 | 0.00 | 0.00 |
| ATOM | 2128 | CG   | GLU | X | 138 | 23.813 | 30.059 | 33.361 | 0.00 | 0.00 |
| ATOM | 2129 | HG2  | GLU | X | 138 | 24.441 | 29.500 | 32.668 | 0.00 | 0.00 |
| ATOM | 2130 | HG3  | GLU | X | 138 | 24.347 | 30.256 | 34.291 | 0.00 | 0.00 |
| ATOM | 2131 | CD   | GLU | X | 138 | 22.582 | 29.267 | 33.749 | 0.00 | 0.00 |
| ATOM | 2132 | OE1  | GLU | X | 138 | 21.812 | 29.688 | 34.695 | 0.00 | 0.00 |
| ATOM | 2133 | OE2  | GLU | X | 138 | 22.368 | 28.188 | 33.181 | 0.00 | 0.00 |
| ATOM | 2134 | C    | GLU | X | 138 | 21.830 | 32.823 | 31.385 | 0.00 | 0.00 |
| ATOM | 2135 | O    | GLU | X | 138 | 21.102 | 33.276 | 32.255 | 0.00 | 0.00 |
| ATOM | 2136 | N    | ARG | X | 139 | 22.108 | 33.460 | 30.228 | 0.00 | 0.00 |
| ATOM | 2137 | H    | ARG | X | 139 | 22.769 | 33.065 | 29.575 | 0.00 | 0.00 |
| ATOM | 2138 | CA   | ARG | X | 139 | 21.240 | 34.536 | 29.715 | 0.00 | 0.00 |
| ATOM | 2139 | HA   | ARG | X | 139 | 21.676 | 34.878 | 28.777 | 0.00 | 0.00 |
| ATOM | 2140 | CB   | ARG | X | 139 | 19.853 | 33.965 | 29.384 | 0.00 | 0.00 |
| ATOM | 2141 | HB2  | ARG | X | 139 | 19.823 | 32.880 | 29.283 | 0.00 | 0.00 |

|      |      |      |     |   |     |        |        |        |      |      |
|------|------|------|-----|---|-----|--------|--------|--------|------|------|
| ATOM | 2142 | HB3  | ARG | X | 139 | 19.187 | 34.186 | 30.218 | 0.00 | 0.00 |
| ATOM | 2143 | CG   | ARG | X | 139 | 19.360 | 34.578 | 28.048 | 0.00 | 0.00 |
| ATOM | 2144 | HG2  | ARG | X | 139 | 19.339 | 35.664 | 28.145 | 0.00 | 0.00 |
| ATOM | 2145 | HG3  | ARG | X | 139 | 20.172 | 34.367 | 27.353 | 0.00 | 0.00 |
| ATOM | 2146 | CD   | ARG | X | 139 | 18.019 | 33.990 | 27.475 | 0.00 | 0.00 |
| ATOM | 2147 | HD2  | ARG | X | 139 | 17.970 | 32.932 | 27.733 | 0.00 | 0.00 |
| ATOM | 2148 | HD3  | ARG | X | 139 | 17.144 | 34.460 | 27.925 | 0.00 | 0.00 |
| ATOM | 2149 | NE   | ARG | X | 139 | 18.002 | 34.069 | 25.994 | 0.00 | 0.00 |
| ATOM | 2150 | HE   | ARG | X | 139 | 18.027 | 33.168 | 25.538 | 0.00 | 0.00 |
| ATOM | 2151 | CZ   | ARG | X | 139 | 17.960 | 35.160 | 25.317 | 0.00 | 0.00 |
| ATOM | 2152 | NH1  | ARG | X | 139 | 17.934 | 36.378 | 25.767 | 0.00 | 0.00 |
| ATOM | 2153 | HH11 | ARG | X | 139 | 18.007 | 36.526 | 26.764 | 0.00 | 0.00 |
| ATOM | 2154 | HH12 | ARG | X | 139 | 17.921 | 37.109 | 25.071 | 0.00 | 0.00 |
| ATOM | 2155 | NH2  | ARG | X | 139 | 17.975 | 35.012 | 24.000 | 0.00 | 0.00 |
| ATOM | 2156 | HH21 | ARG | X | 139 | 18.138 | 34.096 | 23.607 | 0.00 | 0.00 |
| ATOM | 2157 | HH22 | ARG | X | 139 | 18.022 | 35.820 | 23.395 | 0.00 | 0.00 |
| ATOM | 2158 | C    | ARG | X | 139 | 21.229 | 35.839 | 30.611 | 0.00 | 0.00 |
| ATOM | 2159 | O    | ARG | X | 139 | 20.324 | 36.681 | 30.357 | 0.00 | 0.00 |
| ATOM | 2160 | N    | THR | X | 140 | 22.149 | 35.905 | 31.611 | 0.00 | 0.00 |
| ATOM | 2161 | H    | THR | X | 140 | 22.825 | 35.158 | 31.675 | 0.00 | 0.00 |
| ATOM | 2162 | CA   | THR | X | 140 | 22.677 | 37.114 | 32.261 | 0.00 | 0.00 |
| ATOM | 2163 | HA   | THR | X | 140 | 21.784 | 37.584 | 32.675 | 0.00 | 0.00 |
| ATOM | 2164 | CB   | THR | X | 140 | 23.588 | 36.719 | 33.445 | 0.00 | 0.00 |
| ATOM | 2165 | HB   | THR | X | 140 | 24.058 | 37.597 | 33.888 | 0.00 | 0.00 |
| ATOM | 2166 | CG2  | THR | X | 140 | 22.785 | 36.017 | 34.530 | 0.00 | 0.00 |
| ATOM | 2167 | HG21 | THR | X | 140 | 23.483 | 35.910 | 35.359 | 0.00 | 0.00 |
| ATOM | 2168 | HG22 | THR | X | 140 | 22.444 | 35.071 | 34.108 | 0.00 | 0.00 |
| ATOM | 2169 | HG23 | THR | X | 140 | 21.903 | 36.596 | 34.804 | 0.00 | 0.00 |
| ATOM | 2170 | OG1  | THR | X | 140 | 24.574 | 35.887 | 32.904 | 0.00 | 0.00 |
| ATOM | 2171 | HG1  | THR | X | 140 | 25.033 | 36.406 | 32.239 | 0.00 | 0.00 |
| ATOM | 2172 | C    | THR | X | 140 | 23.382 | 38.106 | 31.374 | 0.00 | 0.00 |
| ATOM | 2173 | O    | THR | X | 140 | 23.776 | 37.631 | 30.296 | 0.00 | 0.00 |
| ATOM | 2174 | N    | VAL | X | 141 | 23.581 | 39.322 | 31.705 | 0.00 | 0.00 |
| ATOM | 2175 | H    | VAL | X | 141 | 23.292 | 39.676 | 32.606 | 0.00 | 0.00 |
| ATOM | 2176 | CA   | VAL | X | 141 | 24.586 | 40.267 | 31.108 | 0.00 | 0.00 |
| ATOM | 2177 | HA   | VAL | X | 141 | 24.677 | 40.045 | 30.045 | 0.00 | 0.00 |
| ATOM | 2178 | CB   | VAL | X | 141 | 24.102 | 41.697 | 31.098 | 0.00 | 0.00 |
| ATOM | 2179 | HB   | VAL | X | 141 | 23.644 | 41.942 | 32.057 | 0.00 | 0.00 |
| ATOM | 2180 | CG1  | VAL | X | 141 | 25.189 | 42.774 | 30.834 | 0.00 | 0.00 |
| ATOM | 2181 | HG11 | VAL | X | 141 | 25.623 | 42.698 | 29.836 | 0.00 | 0.00 |
| ATOM | 2182 | HG12 | VAL | X | 141 | 24.680 | 43.726 | 30.984 | 0.00 | 0.00 |
| ATOM | 2183 | HG13 | VAL | X | 141 | 25.931 | 42.700 | 31.628 | 0.00 | 0.00 |
| ATOM | 2184 | CG2  | VAL | X | 141 | 23.048 | 41.824 | 30.006 | 0.00 | 0.00 |
| ATOM | 2185 | HG21 | VAL | X | 141 | 22.288 | 41.044 | 30.053 | 0.00 | 0.00 |
| ATOM | 2186 | HG22 | VAL | X | 141 | 23.507 | 41.785 | 29.017 | 0.00 | 0.00 |
| ATOM | 2187 | HG23 | VAL | X | 141 | 22.640 | 42.833 | 30.055 | 0.00 | 0.00 |
| ATOM | 2188 | C    | VAL | X | 141 | 25.903 | 40.112 | 31.866 | 0.00 | 0.00 |
| ATOM | 2189 | O    | VAL | X | 141 | 25.887 | 39.734 | 33.046 | 0.00 | 0.00 |
| ATOM | 2190 | N    | LEU | X | 142 | 27.013 | 40.233 | 31.214 | 0.00 | 0.00 |
| ATOM | 2191 | H    | LEU | X | 142 | 26.935 | 40.558 | 30.261 | 0.00 | 0.00 |
| ATOM | 2192 | CA   | LEU | X | 142 | 28.351 | 40.126 | 31.785 | 0.00 | 0.00 |
| ATOM | 2193 | HA   | LEU | X | 142 | 28.287 | 40.132 | 32.873 | 0.00 | 0.00 |
| ATOM | 2194 | CB   | LEU | X | 142 | 29.014 | 38.800 | 31.412 | 0.00 | 0.00 |
| ATOM | 2195 | HB2  | LEU | X | 142 | 28.295 | 38.006 | 31.615 | 0.00 | 0.00 |
| ATOM | 2196 | HB3  | LEU | X | 142 | 29.078 | 38.691 | 30.329 | 0.00 | 0.00 |
| ATOM | 2197 | CG   | LEU | X | 142 | 30.379 | 38.432 | 31.901 | 0.00 | 0.00 |
| ATOM | 2198 | HG   | LEU | X | 142 | 30.562 | 37.367 | 31.761 | 0.00 | 0.00 |
| ATOM | 2199 | CD1  | LEU | X | 142 | 31.495 | 39.162 | 31.136 | 0.00 | 0.00 |
| ATOM | 2200 | HD11 | LEU | X | 142 | 31.578 | 40.193 | 31.480 | 0.00 | 0.00 |
| ATOM | 2201 | HD12 | LEU | X | 142 | 31.436 | 39.040 | 30.055 | 0.00 | 0.00 |
| ATOM | 2202 | HD13 | LEU | X | 142 | 32.468 | 38.712 | 31.335 | 0.00 | 0.00 |
| ATOM | 2203 | CD2  | LEU | X | 142 | 30.697 | 38.732 | 33.352 | 0.00 | 0.00 |
| ATOM | 2204 | HD21 | LEU | X | 142 | 30.173 | 38.041 | 34.012 | 0.00 | 0.00 |
| ATOM | 2205 | HD22 | LEU | X | 142 | 31.734 | 38.476 | 33.569 | 0.00 | 0.00 |
| ATOM | 2206 | HD23 | LEU | X | 142 | 30.431 | 39.746 | 33.652 | 0.00 | 0.00 |
| ATOM | 2207 | C    | LEU | X | 142 | 29.112 | 41.410 | 31.359 | 0.00 | 0.00 |
| ATOM | 2208 | O    | LEU | X | 142 | 29.170 | 41.699 | 30.146 | 0.00 | 0.00 |

|      |      |      |     |   |     |        |        |        |      |      |
|------|------|------|-----|---|-----|--------|--------|--------|------|------|
| ATOM | 2209 | N    | VAL | X | 143 | 29.861 | 42.020 | 32.255 | 0.00 | 0.00 |
| ATOM | 2210 | H    | VAL | X | 143 | 29.777 | 41.747 | 33.224 | 0.00 | 0.00 |
| ATOM | 2211 | CA   | VAL | X | 143 | 30.700 | 43.256 | 32.043 | 0.00 | 0.00 |
| ATOM | 2212 | HA   | VAL | X | 143 | 30.745 | 43.456 | 30.973 | 0.00 | 0.00 |
| ATOM | 2213 | CB   | VAL | X | 143 | 30.038 | 44.463 | 32.750 | 0.00 | 0.00 |
| ATOM | 2214 | HB   | VAL | X | 143 | 30.038 | 44.354 | 33.834 | 0.00 | 0.00 |
| ATOM | 2215 | CG1  | VAL | X | 143 | 30.749 | 45.818 | 32.453 | 0.00 | 0.00 |
| ATOM | 2216 | HG11 | VAL | X | 143 | 30.761 | 45.966 | 31.373 | 0.00 | 0.00 |
| ATOM | 2217 | HG12 | VAL | X | 143 | 30.265 | 46.739 | 32.777 | 0.00 | 0.00 |
| ATOM | 2218 | HG13 | VAL | X | 143 | 31.767 | 45.787 | 32.842 | 0.00 | 0.00 |
| ATOM | 2219 | CG2  | VAL | X | 143 | 28.634 | 44.683 | 32.279 | 0.00 | 0.00 |
| ATOM | 2220 | HG21 | VAL | X | 143 | 28.286 | 45.638 | 32.673 | 0.00 | 0.00 |
| ATOM | 2221 | HG22 | VAL | X | 143 | 28.070 | 43.821 | 32.636 | 0.00 | 0.00 |
| ATOM | 2222 | HG23 | VAL | X | 143 | 28.510 | 44.652 | 31.197 | 0.00 | 0.00 |
| ATOM | 2223 | C    | VAL | X | 143 | 32.125 | 43.040 | 32.535 | 0.00 | 0.00 |
| ATOM | 2224 | O    | VAL | X | 143 | 32.309 | 42.322 | 33.534 | 0.00 | 0.00 |
| ATOM | 2225 | N    | SER | X | 144 | 33.150 | 43.688 | 31.925 | 0.00 | 0.00 |
| ATOM | 2226 | H    | SER | X | 144 | 33.008 | 44.330 | 31.159 | 0.00 | 0.00 |
| ATOM | 2227 | CA   | SER | X | 144 | 34.494 | 43.736 | 32.523 | 0.00 | 0.00 |
| ATOM | 2228 | HA   | SER | X | 144 | 34.333 | 43.642 | 33.597 | 0.00 | 0.00 |
| ATOM | 2229 | CB   | SER | X | 144 | 35.370 | 42.505 | 32.135 | 0.00 | 0.00 |
| ATOM | 2230 | HB2  | SER | X | 144 | 36.194 | 42.375 | 32.837 | 0.00 | 0.00 |
| ATOM | 2231 | HB3  | SER | X | 144 | 34.737 | 41.620 | 32.202 | 0.00 | 0.00 |
| ATOM | 2232 | OG   | SER | X | 144 | 35.872 | 42.584 | 30.830 | 0.00 | 0.00 |
| ATOM | 2233 | HG   | SER | X | 144 | 36.070 | 41.670 | 30.614 | 0.00 | 0.00 |
| ATOM | 2234 | C    | SER | X | 144 | 35.104 | 45.113 | 32.168 | 0.00 | 0.00 |
| ATOM | 2235 | O    | SER | X | 144 | 34.857 | 45.600 | 31.047 | 0.00 | 0.00 |
| ATOM | 2236 | N    | MET | X | 145 | 35.976 | 45.683 | 33.049 | 0.00 | 0.00 |
| ATOM | 2237 | H    | MET | X | 145 | 36.128 | 45.198 | 33.922 | 0.00 | 0.00 |
| ATOM | 2238 | CA   | MET | X | 145 | 36.638 | 46.976 | 32.785 | 0.00 | 0.00 |
| ATOM | 2239 | HA   | MET | X | 145 | 36.469 | 47.234 | 31.740 | 0.00 | 0.00 |
| ATOM | 2240 | CB   | MET | X | 145 | 36.027 | 48.115 | 33.613 | 0.00 | 0.00 |
| ATOM | 2241 | HB2  | MET | X | 145 | 36.307 | 49.023 | 33.078 | 0.00 | 0.00 |
| ATOM | 2242 | HB3  | MET | X | 145 | 34.968 | 47.974 | 33.829 | 0.00 | 0.00 |
| ATOM | 2243 | CG   | MET | X | 145 | 36.636 | 48.324 | 35.016 | 0.00 | 0.00 |
| ATOM | 2244 | HG2  | MET | X | 145 | 37.720 | 48.362 | 34.905 | 0.00 | 0.00 |
| ATOM | 2245 | HD3  | MET | X | 145 | 36.257 | 49.278 | 35.383 | 0.00 | 0.00 |
| ATOM | 2246 | SD   | MET | X | 145 | 36.269 | 46.975 | 36.220 | 0.00 | 0.00 |
| ATOM | 2247 | CE   | MET | X | 145 | 34.532 | 47.346 | 36.523 | 0.00 | 0.00 |
| ATOM | 2248 | HE1  | MET | X | 145 | 34.039 | 46.635 | 37.186 | 0.00 | 0.00 |
| ATOM | 2249 | HE2  | MET | X | 145 | 34.452 | 48.313 | 37.019 | 0.00 | 0.00 |
| ATOM | 2250 | HE3  | MET | X | 145 | 34.010 | 47.205 | 35.577 | 0.00 | 0.00 |
| ATOM | 2251 | C    | MET | X | 145 | 38.130 | 46.872 | 33.008 | 0.00 | 0.00 |
| ATOM | 2252 | O    | MET | X | 145 | 38.569 | 46.156 | 33.848 | 0.00 | 0.00 |
| ATOM | 2253 | N    | ASN | X | 146 | 38.921 | 47.638 | 32.264 | 0.00 | 0.00 |
| ATOM | 2254 | H    | ASN | X | 146 | 38.542 | 48.064 | 31.430 | 0.00 | 0.00 |
| ATOM | 2255 | CA   | ASN | X | 146 | 40.262 | 48.019 | 32.655 | 0.00 | 0.00 |
| ATOM | 2256 | HA   | ASN | X | 146 | 40.757 | 47.127 | 33.041 | 0.00 | 0.00 |
| ATOM | 2257 | CB   | ASN | X | 146 | 41.100 | 48.532 | 31.472 | 0.00 | 0.00 |
| ATOM | 2258 | HB2  | ASN | X | 146 | 40.539 | 49.201 | 30.819 | 0.00 | 0.00 |
| ATOM | 2259 | HB3  | ASN | X | 146 | 41.996 | 49.038 | 31.833 | 0.00 | 0.00 |
| ATOM | 2260 | CG   | ASN | X | 146 | 41.718 | 47.467 | 30.484 | 0.00 | 0.00 |
| ATOM | 2261 | OD1  | ASN | X | 146 | 41.678 | 46.260 | 30.564 | 0.00 | 0.00 |
| ATOM | 2262 | ND2  | ASN | X | 146 | 42.295 | 47.989 | 29.374 | 0.00 | 0.00 |
| ATOM | 2263 | HD21 | ASN | X | 146 | 42.566 | 47.405 | 28.596 | 0.00 | 0.00 |
| ATOM | 2264 | HD22 | ASN | X | 146 | 42.264 | 48.996 | 29.293 | 0.00 | 0.00 |
| ATOM | 2265 | C    | ASN | X | 146 | 40.289 | 49.122 | 33.678 | 0.00 | 0.00 |
| ATOM | 2266 | O    | ASN | X | 146 | 39.421 | 49.995 | 33.809 | 0.00 | 0.00 |
| ATOM | 2267 | N    | TYR | X | 147 | 41.380 | 49.089 | 34.467 | 0.00 | 0.00 |
| ATOM | 2268 | H    | TYR | X | 147 | 42.186 | 48.563 | 34.161 | 0.00 | 0.00 |
| ATOM | 2269 | CA   | TYR | X | 147 | 41.743 | 50.128 | 35.433 | 0.00 | 0.00 |
| ATOM | 2270 | HA   | TYR | X | 147 | 41.383 | 51.099 | 35.093 | 0.00 | 0.00 |
| ATOM | 2271 | CB   | TYR | X | 147 | 41.085 | 49.838 | 36.802 | 0.00 | 0.00 |
| ATOM | 2272 | HB2  | TYR | X | 147 | 41.363 | 50.586 | 37.546 | 0.00 | 0.00 |
| ATOM | 2273 | HB3  | TYR | X | 147 | 40.021 | 50.058 | 36.710 | 0.00 | 0.00 |
| ATOM | 2274 | CG   | TYR | X | 147 | 41.267 | 48.471 | 37.395 | 0.00 | 0.00 |
| ATOM | 2275 | CD1  | TYR | X | 147 | 40.415 | 47.397 | 37.003 | 0.00 | 0.00 |

|      |      |      |     |   |     |        |        |        |      |      |
|------|------|------|-----|---|-----|--------|--------|--------|------|------|
| ATOM | 2276 | HD1  | TYR | X | 147 | 39.628 | 47.541 | 36.278 | 0.00 | 0.00 |
| ATOM | 2277 | CE1  | TYR | X | 147 | 40.548 | 46.158 | 37.520 | 0.00 | 0.00 |
| ATOM | 2278 | HE1  | TYR | X | 147 | 39.828 | 45.430 | 37.177 | 0.00 | 0.00 |
| ATOM | 2279 | CZ   | TYR | X | 147 | 41.587 | 45.848 | 38.406 | 0.00 | 0.00 |
| ATOM | 2280 | OH   | TYR | X | 147 | 41.759 | 44.606 | 38.917 | 0.00 | 0.00 |
| ATOM | 2281 | HH   | TYR | X | 147 | 42.537 | 44.487 | 39.466 | 0.00 | 0.00 |
| ATOM | 2282 | CE2  | TYR | X | 147 | 42.482 | 46.883 | 38.783 | 0.00 | 0.00 |
| ATOM | 2283 | HE2  | TYR | X | 147 | 43.338 | 46.682 | 39.409 | 0.00 | 0.00 |
| ATOM | 2284 | CD2  | TYR | X | 147 | 42.343 | 48.151 | 38.253 | 0.00 | 0.00 |
| ATOM | 2285 | HD2  | TYR | X | 147 | 43.113 | 48.878 | 38.467 | 0.00 | 0.00 |
| ATOM | 2286 | C    | TYR | X | 147 | 43.280 | 50.211 | 35.546 | 0.00 | 0.00 |
| ATOM | 2287 | O    | TYR | X | 147 | 43.990 | 49.255 | 35.218 | 0.00 | 0.00 |
| ATOM | 2288 | N    | ARG | X | 148 | 43.737 | 51.332 | 36.166 | 0.00 | 0.00 |
| ATOM | 2289 | H    | ARG | X | 148 | 43.115 | 52.078 | 36.442 | 0.00 | 0.00 |
| ATOM | 2290 | CA   | ARG | X | 148 | 45.181 | 51.508 | 36.352 | 0.00 | 0.00 |
| ATOM | 2291 | HA   | ARG | X | 148 | 45.711 | 51.242 | 35.437 | 0.00 | 0.00 |
| ATOM | 2292 | CB   | ARG | X | 148 | 45.466 | 53.017 | 36.643 | 0.00 | 0.00 |
| ATOM | 2293 | HB2  | ARG | X | 148 | 44.757 | 53.296 | 37.423 | 0.00 | 0.00 |
| ATOM | 2294 | HB3  | ARG | X | 148 | 46.502 | 53.184 | 36.936 | 0.00 | 0.00 |
| ATOM | 2295 | CG   | ARG | X | 148 | 45.278 | 53.818 | 35.335 | 0.00 | 0.00 |
| ATOM | 2296 | HG2  | ARG | X | 148 | 46.120 | 53.645 | 34.664 | 0.00 | 0.00 |
| ATOM | 2297 | HG3  | ARG | X | 148 | 44.397 | 53.619 | 34.724 | 0.00 | 0.00 |
| ATOM | 2298 | CD   | ARG | X | 148 | 45.338 | 55.300 | 35.639 | 0.00 | 0.00 |
| ATOM | 2299 | HD2  | ARG | X | 148 | 46.137 | 55.490 | 36.355 | 0.00 | 0.00 |
| ATOM | 2300 | HD3  | ARG | X | 148 | 45.586 | 55.824 | 34.716 | 0.00 | 0.00 |
| ATOM | 2301 | NE   | ARG | X | 148 | 44.052 | 55.714 | 36.211 | 0.00 | 0.00 |
| ATOM | 2302 | HE   | ARG | X | 148 | 43.337 | 55.008 | 36.319 | 0.00 | 0.00 |
| ATOM | 2303 | CZ   | ARG | X | 148 | 43.841 | 56.913 | 36.666 | 0.00 | 0.00 |
| ATOM | 2304 | NH1  | ARG | X | 148 | 44.746 | 57.890 | 36.543 | 0.00 | 0.00 |
| ATOM | 2305 | HH11 | ARG | X | 148 | 45.607 | 57.591 | 36.106 | 0.00 | 0.00 |
| ATOM | 2306 | HH12 | ARG | X | 148 | 44.453 | 58.818 | 36.813 | 0.00 | 0.00 |
| ATOM | 2307 | NH2  | ARG | X | 148 | 42.704 | 57.305 | 37.202 | 0.00 | 0.00 |
| ATOM | 2308 | HH21 | ARG | X | 148 | 41.928 | 56.665 | 37.120 | 0.00 | 0.00 |
| ATOM | 2309 | HH22 | ARG | X | 148 | 42.571 | 58.281 | 37.427 | 0.00 | 0.00 |
| ATOM | 2310 | C    | ARG | X | 148 | 45.673 | 50.609 | 37.502 | 0.00 | 0.00 |
| ATOM | 2311 | O    | ARG | X | 148 | 45.046 | 50.599 | 38.569 | 0.00 | 0.00 |
| ATOM | 2312 | N    | VAL | X | 149 | 46.816 | 49.948 | 37.320 | 0.00 | 0.00 |
| ATOM | 2313 | H    | VAL | X | 149 | 47.288 | 50.140 | 36.448 | 0.00 | 0.00 |
| ATOM | 2314 | CA   | VAL | X | 149 | 47.524 | 49.064 | 38.214 | 0.00 | 0.00 |
| ATOM | 2315 | HA   | VAL | X | 149 | 47.059 | 48.960 | 39.195 | 0.00 | 0.00 |
| ATOM | 2316 | CB   | VAL | X | 149 | 47.529 | 47.656 | 37.620 | 0.00 | 0.00 |
| ATOM | 2317 | HB   | VAL | X | 149 | 48.277 | 47.005 | 38.071 | 0.00 | 0.00 |
| ATOM | 2318 | CG1  | VAL | X | 149 | 46.126 | 46.980 | 37.749 | 0.00 | 0.00 |
| ATOM | 2319 | HG11 | VAL | X | 149 | 46.206 | 45.955 | 37.386 | 0.00 | 0.00 |
| ATOM | 2320 | HG12 | VAL | X | 149 | 45.862 | 46.916 | 38.805 | 0.00 | 0.00 |
| ATOM | 2321 | HG13 | VAL | X | 149 | 45.295 | 47.477 | 37.248 | 0.00 | 0.00 |
| ATOM | 2322 | CG2  | VAL | X | 149 | 48.002 | 47.580 | 36.140 | 0.00 | 0.00 |
| ATOM | 2323 | HG21 | VAL | X | 149 | 48.023 | 46.504 | 35.968 | 0.00 | 0.00 |
| ATOM | 2324 | HG22 | VAL | X | 149 | 48.928 | 48.118 | 35.937 | 0.00 | 0.00 |
| ATOM | 2325 | HG23 | VAL | X | 149 | 47.181 | 47.987 | 35.550 | 0.00 | 0.00 |
| ATOM | 2326 | C    | VAL | X | 149 | 49.013 | 49.570 | 38.394 | 0.00 | 0.00 |
| ATOM | 2327 | O    | VAL | X | 149 | 49.431 | 50.444 | 37.628 | 0.00 | 0.00 |
| ATOM | 2328 | N    | GLY | X | 150 | 49.722 | 49.062 | 39.347 | 0.00 | 0.00 |
| ATOM | 2329 | H    | GLY | X | 150 | 49.235 | 48.433 | 39.969 | 0.00 | 0.00 |
| ATOM | 2330 | CA   | GLY | X | 150 | 51.101 | 49.400 | 39.684 | 0.00 | 0.00 |
| ATOM | 2331 | HA2  | GLY | X | 150 | 51.417 | 48.734 | 40.487 | 0.00 | 0.00 |
| ATOM | 2332 | HA3  | GLY | X | 150 | 51.777 | 49.136 | 38.871 | 0.00 | 0.00 |
| ATOM | 2333 | C    | GLY | X | 150 | 51.186 | 50.899 | 40.129 | 0.00 | 0.00 |
| ATOM | 2334 | O    | GLY | X | 150 | 50.248 | 51.485 | 40.634 | 0.00 | 0.00 |
| ATOM | 2335 | N    | ALA | X | 151 | 52.273 | 51.573 | 39.899 | 0.00 | 0.00 |
| ATOM | 2336 | H    | ALA | X | 151 | 53.050 | 50.968 | 39.673 | 0.00 | 0.00 |
| ATOM | 2337 | CA   | ALA | X | 151 | 52.476 | 52.988 | 40.218 | 0.00 | 0.00 |
| ATOM | 2338 | HA   | ALA | X | 151 | 52.405 | 53.114 | 41.298 | 0.00 | 0.00 |
| ATOM | 2339 | CB   | ALA | X | 151 | 53.894 | 53.356 | 39.745 | 0.00 | 0.00 |
| ATOM | 2340 | HB1  | ALA | X | 151 | 54.591 | 52.759 | 40.333 | 0.00 | 0.00 |
| ATOM | 2341 | HB2  | ALA | X | 151 | 54.110 | 54.404 | 39.951 | 0.00 | 0.00 |
| ATOM | 2342 | HB3  | ALA | X | 151 | 53.991 | 53.203 | 38.670 | 0.00 | 0.00 |

|      |      |      |     |   |     |        |        |        |      |      |
|------|------|------|-----|---|-----|--------|--------|--------|------|------|
| ATOM | 2343 | C    | ALA | X | 151 | 51.401 | 53.847 | 39.575 | 0.00 | 0.00 |
| ATOM | 2344 | O    | ALA | X | 151 | 50.835 | 54.759 | 40.233 | 0.00 | 0.00 |
| ATOM | 2345 | N    | PHE | X | 152 | 51.048 | 53.626 | 38.293 | 0.00 | 0.00 |
| ATOM | 2346 | H    | PHE | X | 152 | 51.479 | 52.831 | 37.843 | 0.00 | 0.00 |
| ATOM | 2347 | CA   | PHE | X | 152 | 50.000 | 54.336 | 37.549 | 0.00 | 0.00 |
| ATOM | 2348 | HA   | PHE | X | 152 | 50.342 | 55.344 | 37.316 | 0.00 | 0.00 |
| ATOM | 2349 | CB   | PHE | X | 152 | 49.784 | 53.741 | 36.146 | 0.00 | 0.00 |
| ATOM | 2350 | HB2  | PHE | X | 152 | 49.332 | 52.754 | 36.242 | 0.00 | 0.00 |
| ATOM | 2351 | HB3  | PHE | X | 152 | 49.158 | 54.321 | 35.468 | 0.00 | 0.00 |
| ATOM | 2352 | CG   | PHE | X | 152 | 51.127 | 53.553 | 35.439 | 0.00 | 0.00 |
| ATOM | 2353 | CD1  | PHE | X | 152 | 51.807 | 52.295 | 35.561 | 0.00 | 0.00 |
| ATOM | 2354 | HD1  | PHE | X | 152 | 51.487 | 51.545 | 36.270 | 0.00 | 0.00 |
| ATOM | 2355 | CE1  | PHE | X | 152 | 53.057 | 52.118 | 34.892 | 0.00 | 0.00 |
| ATOM | 2356 | HE1  | PHE | X | 152 | 53.723 | 51.303 | 35.135 | 0.00 | 0.00 |
| ATOM | 2357 | CZ   | PHE | X | 152 | 53.499 | 53.116 | 34.029 | 0.00 | 0.00 |
| ATOM | 2358 | HZ   | PHE | X | 152 | 54.507 | 53.011 | 33.657 | 0.00 | 0.00 |
| ATOM | 2359 | CE2  | PHE | X | 152 | 52.820 | 54.344 | 33.924 | 0.00 | 0.00 |
| ATOM | 2360 | HE2  | PHE | X | 152 | 53.282 | 55.213 | 33.479 | 0.00 | 0.00 |
| ATOM | 2361 | CD2  | PHE | X | 152 | 51.595 | 54.579 | 34.613 | 0.00 | 0.00 |
| ATOM | 2362 | HD2  | PHE | X | 152 | 51.020 | 55.479 | 34.454 | 0.00 | 0.00 |
| ATOM | 2363 | C    | PHE | X | 152 | 48.683 | 54.506 | 38.277 | 0.00 | 0.00 |
| ATOM | 2364 | O    | PHE | X | 152 | 47.977 | 55.463 | 37.985 | 0.00 | 0.00 |
| ATOM | 2365 | N    | GLY | X | 153 | 48.287 | 53.476 | 39.081 | 0.00 | 0.00 |
| ATOM | 2366 | H    | GLY | X | 153 | 48.870 | 52.662 | 39.217 | 0.00 | 0.00 |
| ATOM | 2367 | CA   | GLY | X | 153 | 47.016 | 53.516 | 39.718 | 0.00 | 0.00 |
| ATOM | 2368 | HA2  | GLY | X | 153 | 46.440 | 54.384 | 39.397 | 0.00 | 0.00 |
| ATOM | 2369 | HA3  | GLY | X | 153 | 46.522 | 52.564 | 39.524 | 0.00 | 0.00 |
| ATOM | 2370 | C    | GLY | X | 153 | 47.073 | 53.610 | 41.206 | 0.00 | 0.00 |
| ATOM | 2371 | O    | GLY | X | 153 | 46.050 | 53.899 | 41.810 | 0.00 | 0.00 |
| ATOM | 2372 | N    | PHE | X | 154 | 48.206 | 53.280 | 41.843 | 0.00 | 0.00 |
| ATOM | 2373 | H    | PHE | X | 154 | 48.935 | 52.935 | 41.234 | 0.00 | 0.00 |
| ATOM | 2374 | CA   | PHE | X | 154 | 48.392 | 53.136 | 43.236 | 0.00 | 0.00 |
| ATOM | 2375 | HA   | PHE | X | 154 | 47.556 | 53.564 | 43.790 | 0.00 | 0.00 |
| ATOM | 2376 | CB   | PHE | X | 154 | 48.231 | 51.612 | 43.552 | 0.00 | 0.00 |
| ATOM | 2377 | HB2  | PHE | X | 154 | 48.919 | 51.033 | 42.937 | 0.00 | 0.00 |
| ATOM | 2378 | HB3  | PHE | X | 154 | 48.488 | 51.392 | 44.588 | 0.00 | 0.00 |
| ATOM | 2379 | CG   | PHE | X | 154 | 46.848 | 51.007 | 43.316 | 0.00 | 0.00 |
| ATOM | 2380 | CD1  | PHE | X | 154 | 46.547 | 50.173 | 42.198 | 0.00 | 0.00 |
| ATOM | 2381 | HD1  | PHE | X | 154 | 47.364 | 49.813 | 41.591 | 0.00 | 0.00 |
| ATOM | 2382 | CE1  | PHE | X | 154 | 45.212 | 49.779 | 41.924 | 0.00 | 0.00 |
| ATOM | 2383 | HE1  | PHE | X | 154 | 44.978 | 49.114 | 41.106 | 0.00 | 0.00 |
| ATOM | 2384 | CZ   | PHE | X | 154 | 44.188 | 50.158 | 42.824 | 0.00 | 0.00 |
| ATOM | 2385 | HZ   | PHE | X | 154 | 43.172 | 49.945 | 42.528 | 0.00 | 0.00 |
| ATOM | 2386 | CE2  | PHE | X | 154 | 44.533 | 50.893 | 43.977 | 0.00 | 0.00 |
| ATOM | 2387 | HE2  | PHE | X | 154 | 43.785 | 51.096 | 44.729 | 0.00 | 0.00 |
| ATOM | 2388 | CD2  | PHE | X | 154 | 45.858 | 51.389 | 44.207 | 0.00 | 0.00 |
| ATOM | 2389 | HD2  | PHE | X | 154 | 46.120 | 52.068 | 45.005 | 0.00 | 0.00 |
| ATOM | 2390 | C    | PHE | X | 154 | 49.672 | 53.752 | 43.820 | 0.00 | 0.00 |
| ATOM | 2391 | O    | PHE | X | 154 | 49.952 | 53.538 | 45.020 | 0.00 | 0.00 |
| ATOM | 2392 | N    | LEU | X | 155 | 50.435 | 54.477 | 43.069 | 0.00 | 0.00 |
| ATOM | 2393 | H    | LEU | X | 155 | 50.247 | 54.548 | 42.080 | 0.00 | 0.00 |
| ATOM | 2394 | CA   | LEU | X | 155 | 51.426 | 55.356 | 43.713 | 0.00 | 0.00 |
| ATOM | 2395 | HA   | LEU | X | 155 | 52.055 | 54.859 | 44.452 | 0.00 | 0.00 |
| ATOM | 2396 | CB   | LEU | X | 155 | 52.408 | 55.899 | 42.651 | 0.00 | 0.00 |
| ATOM | 2397 | HB2  | LEU | X | 155 | 52.838 | 55.031 | 42.151 | 0.00 | 0.00 |
| ATOM | 2398 | HB3  | LEU | X | 155 | 51.755 | 56.386 | 41.927 | 0.00 | 0.00 |
| ATOM | 2399 | CG   | LEU | X | 155 | 53.508 | 56.846 | 43.168 | 0.00 | 0.00 |
| ATOM | 2400 | HG   | LEU | X | 155 | 53.728 | 56.611 | 44.210 | 0.00 | 0.00 |
| ATOM | 2401 | CD1  | LEU | X | 155 | 54.838 | 56.745 | 42.376 | 0.00 | 0.00 |
| ATOM | 2402 | HD11 | LEU | X | 155 | 54.792 | 56.914 | 41.300 | 0.00 | 0.00 |
| ATOM | 2403 | HD12 | LEU | X | 155 | 55.201 | 55.721 | 42.457 | 0.00 | 0.00 |
| ATOM | 2404 | HD13 | LEU | X | 155 | 55.622 | 57.349 | 42.832 | 0.00 | 0.00 |
| ATOM | 2405 | CD2  | LEU | X | 155 | 53.093 | 58.306 | 43.053 | 0.00 | 0.00 |
| ATOM | 2406 | HD21 | LEU | X | 155 | 52.192 | 58.466 | 43.646 | 0.00 | 0.00 |
| ATOM | 2407 | HD22 | LEU | X | 155 | 53.900 | 58.904 | 43.476 | 0.00 | 0.00 |
| ATOM | 2408 | HD23 | LEU | X | 155 | 52.952 | 58.637 | 42.024 | 0.00 | 0.00 |
| ATOM | 2409 | C    | LEU | X | 155 | 50.568 | 56.481 | 44.444 | 0.00 | 0.00 |

|      |      |      |     |   |     |        |        |        |      |      |
|------|------|------|-----|---|-----|--------|--------|--------|------|------|
| ATOM | 2410 | O    | LEU | X | 155 | 49.688 | 57.052 | 43.898 | 0.00 | 0.00 |
| ATOM | 2411 | N    | ALA | X | 156 | 51.000 | 56.736 | 45.660 | 0.00 | 0.00 |
| ATOM | 2412 | H    | ALA | X | 156 | 51.744 | 56.126 | 45.968 | 0.00 | 0.00 |
| ATOM | 2413 | CA   | ALA | X | 156 | 50.229 | 57.558 | 46.541 | 0.00 | 0.00 |
| ATOM | 2414 | HA   | ALA | X | 156 | 49.518 | 58.164 | 45.980 | 0.00 | 0.00 |
| ATOM | 2415 | CB   | ALA | X | 156 | 49.478 | 56.627 | 47.470 | 0.00 | 0.00 |
| ATOM | 2416 | HB1  | ALA | X | 156 | 48.787 | 57.221 | 48.067 | 0.00 | 0.00 |
| ATOM | 2417 | HB2  | ALA | X | 156 | 50.140 | 56.169 | 48.205 | 0.00 | 0.00 |
| ATOM | 2418 | HB3  | ALA | X | 156 | 48.893 | 55.897 | 46.911 | 0.00 | 0.00 |
| ATOM | 2419 | C    | ALA | X | 156 | 51.093 | 58.522 | 47.397 | 0.00 | 0.00 |
| ATOM | 2420 | O    | ALA | X | 156 | 51.928 | 58.035 | 48.206 | 0.00 | 0.00 |
| ATOM | 2421 | N    | LEU | X | 157 | 50.803 | 59.816 | 47.309 | 0.00 | 0.00 |
| ATOM | 2422 | H    | LEU | X | 157 | 50.125 | 60.087 | 46.612 | 0.00 | 0.00 |
| ATOM | 2423 | CA   | LEU | X | 157 | 51.119 | 60.861 | 48.295 | 0.00 | 0.00 |
| ATOM | 2424 | HA   | LEU | X | 157 | 51.726 | 60.435 | 49.093 | 0.00 | 0.00 |
| ATOM | 2425 | CB   | LEU | X | 157 | 51.928 | 62.047 | 47.569 | 0.00 | 0.00 |
| ATOM | 2426 | HB2  | LEU | X | 157 | 51.768 | 62.047 | 46.491 | 0.00 | 0.00 |
| ATOM | 2427 | HB3  | LEU | X | 157 | 51.601 | 62.989 | 48.009 | 0.00 | 0.00 |
| ATOM | 2428 | CG   | LEU | X | 157 | 53.439 | 62.015 | 47.767 | 0.00 | 0.00 |
| ATOM | 2429 | HG   | LEU | X | 157 | 53.695 | 62.220 | 48.806 | 0.00 | 0.00 |
| ATOM | 2430 | CD1  | LEU | X | 157 | 54.140 | 60.672 | 47.425 | 0.00 | 0.00 |
| ATOM | 2431 | HD11 | LEU | X | 157 | 55.224 | 60.748 | 47.504 | 0.00 | 0.00 |
| ATOM | 2432 | HD12 | LEU | X | 157 | 53.884 | 60.347 | 46.416 | 0.00 | 0.00 |
| ATOM | 2433 | HD13 | LEU | X | 157 | 53.781 | 59.863 | 48.061 | 0.00 | 0.00 |
| ATOM | 2434 | CD2  | LEU | X | 157 | 54.114 | 63.085 | 46.828 | 0.00 | 0.00 |
| ATOM | 2435 | HD21 | LEU | X | 157 | 53.541 | 64.006 | 46.940 | 0.00 | 0.00 |
| ATOM | 2436 | HD22 | LEU | X | 157 | 55.130 | 63.319 | 47.144 | 0.00 | 0.00 |
| ATOM | 2437 | HD23 | LEU | X | 157 | 54.195 | 62.770 | 45.788 | 0.00 | 0.00 |
| ATOM | 2438 | C    | LEU | X | 157 | 49.768 | 61.310 | 48.933 | 0.00 | 0.00 |
| ATOM | 2439 | O    | LEU | X | 157 | 49.234 | 62.355 | 48.499 | 0.00 | 0.00 |
| ATOM | 2440 | N    | PRO | X | 158 | 49.357 | 60.616 | 50.023 | 0.00 | 0.00 |
| ATOM | 2441 | CD   | PRO | X | 158 | 49.926 | 59.414 | 50.638 | 0.00 | 0.00 |
| ATOM | 2442 | HD2  | PRO | X | 158 | 50.751 | 59.602 | 51.325 | 0.00 | 0.00 |
| ATOM | 2443 | HD3  | PRO | X | 158 | 50.246 | 58.653 | 49.925 | 0.00 | 0.00 |
| ATOM | 2444 | CG   | PRO | X | 158 | 48.707 | 58.842 | 51.343 | 0.00 | 0.00 |
| ATOM | 2445 | HG2  | PRO | X | 158 | 49.038 | 58.116 | 52.085 | 0.00 | 0.00 |
| ATOM | 2446 | HG3  | PRO | X | 158 | 48.024 | 58.366 | 50.639 | 0.00 | 0.00 |
| ATOM | 2447 | CB   | PRO | X | 158 | 48.102 | 60.124 | 52.043 | 0.00 | 0.00 |
| ATOM | 2448 | HB2  | PRO | X | 158 | 48.640 | 60.439 | 52.937 | 0.00 | 0.00 |
| ATOM | 2449 | HB3  | PRO | X | 158 | 47.051 | 59.900 | 52.228 | 0.00 | 0.00 |
| ATOM | 2450 | CA   | PRO | X | 158 | 48.282 | 61.125 | 50.921 | 0.00 | 0.00 |
| ATOM | 2451 | HA   | PRO | X | 158 | 47.433 | 61.091 | 50.238 | 0.00 | 0.00 |
| ATOM | 2452 | C    | PRO | X | 158 | 48.571 | 62.512 | 51.425 | 0.00 | 0.00 |
| ATOM | 2453 | O    | PRO | X | 158 | 49.658 | 62.711 | 51.927 | 0.00 | 0.00 |
| ATOM | 2454 | N    | GLY | X | 159 | 47.627 | 63.456 | 51.263 | 0.00 | 0.00 |
| ATOM | 2455 | H    | GLY | X | 159 | 46.725 | 63.126 | 50.950 | 0.00 | 0.00 |
| ATOM | 2456 | CA   | GLY | X | 159 | 47.933 | 64.848 | 51.472 | 0.00 | 0.00 |
| ATOM | 2457 | HA2  | GLY | X | 159 | 47.162 | 65.450 | 51.953 | 0.00 | 0.00 |
| ATOM | 2458 | HA3  | GLY | X | 159 | 48.816 | 64.908 | 52.109 | 0.00 | 0.00 |
| ATOM | 2459 | C    | GLY | X | 159 | 48.285 | 65.654 | 50.174 | 0.00 | 0.00 |
| ATOM | 2460 | O    | GLY | X | 159 | 48.172 | 66.871 | 50.182 | 0.00 | 0.00 |
| ATOM | 2461 | N    | SER | X | 160 | 48.508 | 65.004 | 49.036 | 0.00 | 0.00 |
| ATOM | 2462 | H    | SER | X | 160 | 48.663 | 64.007 | 49.047 | 0.00 | 0.00 |
| ATOM | 2463 | CA   | SER | X | 160 | 48.568 | 65.697 | 47.723 | 0.00 | 0.00 |
| ATOM | 2464 | HA   | SER | X | 160 | 48.755 | 66.755 | 47.908 | 0.00 | 0.00 |
| ATOM | 2465 | CB   | SER | X | 160 | 49.641 | 65.056 | 46.840 | 0.00 | 0.00 |
| ATOM | 2466 | HB2  | SER | X | 160 | 49.980 | 65.774 | 46.093 | 0.00 | 0.00 |
| ATOM | 2467 | HB3  | SER | X | 160 | 50.531 | 64.904 | 47.450 | 0.00 | 0.00 |
| ATOM | 2468 | OG   | SER | X | 160 | 49.256 | 63.813 | 46.238 | 0.00 | 0.00 |
| ATOM | 2469 | HG   | SER | X | 160 | 49.335 | 63.133 | 46.911 | 0.00 | 0.00 |
| ATOM | 2470 | C    | SER | X | 160 | 47.163 | 65.653 | 46.989 | 0.00 | 0.00 |
| ATOM | 2471 | O    | SER | X | 160 | 46.347 | 64.738 | 47.202 | 0.00 | 0.00 |
| ATOM | 2472 | N    | ARG | X | 161 | 46.902 | 66.671 | 46.136 | 0.00 | 0.00 |
| ATOM | 2473 | H    | ARG | X | 161 | 47.578 | 67.412 | 46.015 | 0.00 | 0.00 |
| ATOM | 2474 | CA   | ARG | X | 161 | 45.894 | 66.613 | 45.158 | 0.00 | 0.00 |
| ATOM | 2475 | HA   | ARG | X | 161 | 45.085 | 65.970 | 45.505 | 0.00 | 0.00 |
| ATOM | 2476 | CB   | ARG | X | 161 | 45.313 | 68.015 | 44.890 | 0.00 | 0.00 |



|      |      |      |     |   |     |        |        |        |      |      |
|------|------|------|-----|---|-----|--------|--------|--------|------|------|
| ATOM | 2477 | HB2  | ARG | X | 161 | 46.125 | 68.686 | 44.608 | 0.00 | 0.00 |
| ATOM | 2478 | HB3  | ARG | X | 161 | 44.664 | 67.901 | 44.022 | 0.00 | 0.00 |
| ATOM | 2479 | CG   | ARG | X | 161 | 44.455 | 68.541 | 46.068 | 0.00 | 0.00 |
| ATOM | 2480 | HG2  | ARG | X | 161 | 43.617 | 67.874 | 46.271 | 0.00 | 0.00 |
| ATOM | 2481 | HG3  | ARG | X | 161 | 45.012 | 68.602 | 47.003 | 0.00 | 0.00 |
| ATOM | 2482 | CD   | ARG | X | 161 | 43.767 | 69.928 | 45.811 | 0.00 | 0.00 |
| ATOM | 2483 | HD2  | ARG | X | 161 | 43.151 | 69.732 | 44.933 | 0.00 | 0.00 |
| ATOM | 2484 | HD3  | ARG | X | 161 | 43.093 | 70.059 | 46.658 | 0.00 | 0.00 |
| ATOM | 2485 | NE   | ARG | X | 161 | 44.619 | 71.021 | 45.758 | 0.00 | 0.00 |
| ATOM | 2486 | HE   | ARG | X | 161 | 45.587 | 70.775 | 45.908 | 0.00 | 0.00 |
| ATOM | 2487 | CZ   | ARG | X | 161 | 44.301 | 72.266 | 45.474 | 0.00 | 0.00 |
| ATOM | 2488 | NH1  | ARG | X | 161 | 43.052 | 72.574 | 45.254 | 0.00 | 0.00 |
| ATOM | 2489 | HH11 | ARG | X | 161 | 42.348 | 71.854 | 45.342 | 0.00 | 0.00 |
| ATOM | 2490 | HH12 | ARG | X | 161 | 42.847 | 73.547 | 45.073 | 0.00 | 0.00 |
| ATOM | 2491 | NH2  | ARG | X | 161 | 45.230 | 73.199 | 45.262 | 0.00 | 0.00 |
| ATOM | 2492 | HH21 | ARG | X | 161 | 46.218 | 72.998 | 45.316 | 0.00 | 0.00 |
| ATOM | 2493 | HH22 | ARG | X | 161 | 44.923 | 74.127 | 45.011 | 0.00 | 0.00 |
| ATOM | 2494 | C    | ARG | X | 161 | 46.367 | 65.991 | 43.809 | 0.00 | 0.00 |
| ATOM | 2495 | O    | ARG | X | 161 | 45.516 | 65.512 | 43.039 | 0.00 | 0.00 |
| ATOM | 2496 | N    | GLU | X | 162 | 47.623 | 66.031 | 43.606 | 0.00 | 0.00 |
| ATOM | 2497 | H    | GLU | X | 162 | 48.094 | 66.400 | 44.420 | 0.00 | 0.00 |
| ATOM | 2498 | CA   | GLU | X | 162 | 48.343 | 65.631 | 42.390 | 0.00 | 0.00 |
| ATOM | 2499 | HA   | GLU | X | 162 | 47.710 | 66.017 | 41.592 | 0.00 | 0.00 |
| ATOM | 2500 | CB   | GLU | X | 162 | 49.734 | 66.386 | 42.530 | 0.00 | 0.00 |
| ATOM | 2501 | HB2  | GLU | X | 162 | 50.237 | 66.082 | 43.448 | 0.00 | 0.00 |
| ATOM | 2502 | HB3  | GLU | X | 162 | 50.334 | 66.062 | 41.679 | 0.00 | 0.00 |
| ATOM | 2503 | CG   | GLU | X | 162 | 49.693 | 67.930 | 42.611 | 0.00 | 0.00 |
| ATOM | 2504 | HG2  | GLU | X | 162 | 50.614 | 68.324 | 42.181 | 0.00 | 0.00 |
| ATOM | 2505 | HG3  | GLU | X | 162 | 48.953 | 68.309 | 41.906 | 0.00 | 0.00 |
| ATOM | 2506 | CD   | GLU | X | 162 | 49.430 | 68.544 | 43.959 | 0.00 | 0.00 |
| ATOM | 2507 | OE1  | GLU | X | 162 | 49.072 | 67.839 | 44.958 | 0.00 | 0.00 |
| ATOM | 2508 | OE2  | GLU | X | 162 | 49.527 | 69.824 | 44.083 | 0.00 | 0.00 |
| ATOM | 2509 | C    | GLU | X | 162 | 48.533 | 64.148 | 42.136 | 0.00 | 0.00 |
| ATOM | 2510 | O    | GLU | X | 162 | 48.515 | 63.679 | 40.993 | 0.00 | 0.00 |
| ATOM | 2511 | N    | ALA | X | 163 | 48.593 | 63.318 | 43.233 | 0.00 | 0.00 |
| ATOM | 2512 | H    | ALA | X | 163 | 48.599 | 63.642 | 44.189 | 0.00 | 0.00 |
| ATOM | 2513 | CA   | ALA | X | 163 | 48.742 | 61.852 | 43.143 | 0.00 | 0.00 |
| ATOM | 2514 | HA   | ALA | X | 163 | 48.120 | 61.506 | 42.317 | 0.00 | 0.00 |
| ATOM | 2515 | CB   | ALA | X | 163 | 50.204 | 61.405 | 42.951 | 0.00 | 0.00 |
| ATOM | 2516 | HB1  | ALA | X | 163 | 50.888 | 61.841 | 43.679 | 0.00 | 0.00 |
| ATOM | 2517 | HB2  | ALA | X | 163 | 50.566 | 61.775 | 41.992 | 0.00 | 0.00 |
| ATOM | 2518 | HB3  | ALA | X | 163 | 50.341 | 60.325 | 42.999 | 0.00 | 0.00 |
| ATOM | 2519 | C    | ALA | X | 163 | 48.307 | 61.314 | 44.525 | 0.00 | 0.00 |
| ATOM | 2520 | O    | ALA | X | 163 | 49.126 | 60.706 | 45.290 | 0.00 | 0.00 |
| ATOM | 2521 | N    | PRO | X | 164 | 47.050 | 61.441 | 44.940 | 0.00 | 0.00 |
| ATOM | 2522 | CD   | PRO | X | 164 | 45.942 | 61.963 | 44.173 | 0.00 | 0.00 |
| ATOM | 2523 | HD2  | PRO | X | 164 | 46.034 | 61.656 | 43.131 | 0.00 | 0.00 |
| ATOM | 2524 | HD3  | PRO | X | 164 | 46.062 | 63.046 | 44.163 | 0.00 | 0.00 |
| ATOM | 2525 | CG   | PRO | X | 164 | 44.657 | 61.476 | 44.836 | 0.00 | 0.00 |
| ATOM | 2526 | HG2  | PRO | X | 164 | 44.387 | 60.500 | 44.432 | 0.00 | 0.00 |
| ATOM | 2527 | HG3  | PRO | X | 164 | 43.880 | 62.154 | 44.483 | 0.00 | 0.00 |
| ATOM | 2528 | CB   | PRO | X | 164 | 45.114 | 61.429 | 46.311 | 0.00 | 0.00 |
| ATOM | 2529 | HB2  | PRO | X | 164 | 44.434 | 60.759 | 46.838 | 0.00 | 0.00 |
| ATOM | 2530 | HB3  | PRO | X | 164 | 45.072 | 62.440 | 46.716 | 0.00 | 0.00 |
| ATOM | 2531 | CA   | PRO | X | 164 | 46.592 | 60.970 | 46.238 | 0.00 | 0.00 |
| ATOM | 2532 | HA   | PRO | X | 164 | 47.104 | 61.495 | 47.044 | 0.00 | 0.00 |
| ATOM | 2533 | C    | PRO | X | 164 | 46.737 | 59.516 | 46.606 | 0.00 | 0.00 |
| ATOM | 2534 | O    | PRO | X | 164 | 46.921 | 59.190 | 47.742 | 0.00 | 0.00 |
| ATOM | 2535 | N    | GLY | X | 165 | 46.645 | 58.657 | 45.567 | 0.00 | 0.00 |
| ATOM | 2536 | H    | GLY | X | 165 | 46.363 | 59.096 | 44.702 | 0.00 | 0.00 |
| ATOM | 2537 | CA   | GLY | X | 165 | 46.482 | 57.168 | 45.576 | 0.00 | 0.00 |
| ATOM | 2538 | HA2  | GLY | X | 165 | 47.141 | 56.748 | 44.816 | 0.00 | 0.00 |
| ATOM | 2539 | HA3  | GLY | X | 165 | 46.706 | 56.765 | 46.563 | 0.00 | 0.00 |
| ATOM | 2540 | C    | GLY | X | 165 | 45.068 | 56.702 | 45.185 | 0.00 | 0.00 |
| ATOM | 2541 | O    | GLY | X | 165 | 44.241 | 57.492 | 44.698 | 0.00 | 0.00 |
| ATOM | 2542 | N    | ASN | X | 166 | 44.906 | 55.388 | 45.247 | 0.00 | 0.00 |
| ATOM | 2543 | H    | ASN | X | 166 | 45.740 | 54.903 | 45.546 | 0.00 | 0.00 |

|      |      |      |     |   |     |        |        |        |      |      |
|------|------|------|-----|---|-----|--------|--------|--------|------|------|
| ATOM | 2544 | CA   | ASN | X | 166 | 43.621 | 54.644 | 45.099 | 0.00 | 0.00 |
| ATOM | 2545 | HA   | ASN | X | 166 | 43.920 | 53.598 | 45.168 | 0.00 | 0.00 |
| ATOM | 2546 | CB   | ASN | X | 166 | 42.719 | 55.020 | 46.312 | 0.00 | 0.00 |
| ATOM | 2547 | HB2  | ASN | X | 166 | 42.529 | 56.091 | 46.380 | 0.00 | 0.00 |
| ATOM | 2548 | HB3  | ASN | X | 166 | 41.806 | 54.454 | 46.124 | 0.00 | 0.00 |
| ATOM | 2549 | CG   | ASN | X | 166 | 43.305 | 54.401 | 47.584 | 0.00 | 0.00 |
| ATOM | 2550 | OD1  | ASN | X | 166 | 44.117 | 53.485 | 47.561 | 0.00 | 0.00 |
| ATOM | 2551 | ND2  | ASN | X | 166 | 42.897 | 54.883 | 48.718 | 0.00 | 0.00 |
| ATOM | 2552 | HD21 | ASN | X | 166 | 43.214 | 54.438 | 49.567 | 0.00 | 0.00 |
| ATOM | 2553 | HD22 | ASN | X | 166 | 42.183 | 55.591 | 48.813 | 0.00 | 0.00 |
| ATOM | 2554 | C    | ASN | X | 166 | 42.930 | 54.810 | 43.746 | 0.00 | 0.00 |
| ATOM | 2555 | O    | ASN | X | 166 | 41.826 | 54.267 | 43.608 | 0.00 | 0.00 |
| ATOM | 2556 | N    | VAL | X | 167 | 43.436 | 55.544 | 42.738 | 0.00 | 0.00 |
| ATOM | 2557 | H    | VAL | X | 167 | 44.375 | 55.911 | 42.806 | 0.00 | 0.00 |
| ATOM | 2558 | CA   | VAL | X | 167 | 42.659 | 55.867 | 41.521 | 0.00 | 0.00 |
| ATOM | 2559 | HA   | VAL | X | 167 | 41.703 | 56.255 | 41.870 | 0.00 | 0.00 |
| ATOM | 2560 | CB   | VAL | X | 167 | 43.382 | 57.004 | 40.722 | 0.00 | 0.00 |
| ATOM | 2561 | HB   | VAL | X | 167 | 42.647 | 57.336 | 39.989 | 0.00 | 0.00 |
| ATOM | 2562 | CG1  | VAL | X | 167 | 43.704 | 58.183 | 41.572 | 0.00 | 0.00 |
| ATOM | 2563 | HG11 | VAL | X | 167 | 44.576 | 58.070 | 42.215 | 0.00 | 0.00 |
| ATOM | 2564 | HG12 | VAL | X | 167 | 43.994 | 59.016 | 40.932 | 0.00 | 0.00 |
| ATOM | 2565 | HG13 | VAL | X | 167 | 42.818 | 58.515 | 42.115 | 0.00 | 0.00 |
| ATOM | 2566 | CG2  | VAL | X | 167 | 44.681 | 56.617 | 39.905 | 0.00 | 0.00 |
| ATOM | 2567 | HG21 | VAL | X | 167 | 45.006 | 57.445 | 39.275 | 0.00 | 0.00 |
| ATOM | 2568 | HG22 | VAL | X | 167 | 44.555 | 55.699 | 39.330 | 0.00 | 0.00 |
| ATOM | 2569 | HG23 | VAL | X | 167 | 45.494 | 56.370 | 40.589 | 0.00 | 0.00 |
| ATOM | 2570 | C    | VAL | X | 167 | 42.369 | 54.688 | 40.630 | 0.00 | 0.00 |
| ATOM | 2571 | O    | VAL | X | 167 | 41.480 | 54.853 | 39.791 | 0.00 | 0.00 |
| ATOM | 2572 | N    | GLY | X | 168 | 42.979 | 53.504 | 40.790 | 0.00 | 0.00 |
| ATOM | 2573 | H    | GLY | X | 168 | 43.659 | 53.443 | 41.535 | 0.00 | 0.00 |
| ATOM | 2574 | CA   | GLY | X | 168 | 42.557 | 52.258 | 40.122 | 0.00 | 0.00 |
| ATOM | 2575 | HA2  | GLY | X | 168 | 42.417 | 52.604 | 39.098 | 0.00 | 0.00 |
| ATOM | 2576 | HA3  | GLY | X | 168 | 43.318 | 51.499 | 40.309 | 0.00 | 0.00 |
| ATOM | 2577 | C    | GLY | X | 168 | 41.190 | 51.777 | 40.627 | 0.00 | 0.00 |
| ATOM | 2578 | O    | GLY | X | 168 | 40.447 | 51.182 | 39.866 | 0.00 | 0.00 |
| ATOM | 2579 | N    | LEU | X | 169 | 40.850 | 52.119 | 41.860 | 0.00 | 0.00 |
| ATOM | 2580 | H    | LEU | X | 169 | 41.566 | 52.589 | 42.394 | 0.00 | 0.00 |
| ATOM | 2581 | CA   | LEU | X | 169 | 39.528 | 51.814 | 42.457 | 0.00 | 0.00 |
| ATOM | 2582 | HA   | LEU | X | 169 | 39.206 | 50.857 | 42.047 | 0.00 | 0.00 |
| ATOM | 2583 | CB   | LEU | X | 169 | 39.596 | 51.770 | 44.002 | 0.00 | 0.00 |
| ATOM | 2584 | HB2  | LEU | X | 169 | 39.820 | 52.728 | 44.471 | 0.00 | 0.00 |
| ATOM | 2585 | HB3  | LEU | X | 169 | 38.578 | 51.580 | 44.343 | 0.00 | 0.00 |
| ATOM | 2586 | CG   | LEU | X | 169 | 40.556 | 50.723 | 44.585 | 0.00 | 0.00 |
| ATOM | 2587 | HG   | LEU | X | 169 | 41.578 | 50.987 | 44.315 | 0.00 | 0.00 |
| ATOM | 2588 | CD1  | LEU | X | 169 | 40.628 | 50.914 | 46.149 | 0.00 | 0.00 |
| ATOM | 2589 | HD11 | LEU | X | 169 | 40.722 | 51.960 | 46.439 | 0.00 | 0.00 |
| ATOM | 2590 | HD12 | LEU | X | 169 | 41.390 | 50.310 | 46.642 | 0.00 | 0.00 |
| ATOM | 2591 | HD13 | LEU | X | 169 | 39.673 | 50.614 | 46.580 | 0.00 | 0.00 |
| ATOM | 2592 | CD2  | LEU | X | 169 | 40.199 | 49.322 | 44.168 | 0.00 | 0.00 |
| ATOM | 2593 | HD21 | LEU | X | 169 | 40.831 | 48.575 | 44.649 | 0.00 | 0.00 |
| ATOM | 2594 | HD22 | LEU | X | 169 | 39.150 | 49.109 | 44.373 | 0.00 | 0.00 |
| ATOM | 2595 | HD23 | LEU | X | 169 | 40.334 | 49.249 | 43.089 | 0.00 | 0.00 |
| ATOM | 2596 | C    | LEU | X | 169 | 38.438 | 52.844 | 42.063 | 0.00 | 0.00 |
| ATOM | 2597 | O    | LEU | X | 169 | 37.238 | 52.605 | 42.140 | 0.00 | 0.00 |
| ATOM | 2598 | N    | LEU | X | 170 | 38.875 | 54.025 | 41.646 | 0.00 | 0.00 |
| ATOM | 2599 | H    | LEU | X | 170 | 39.867 | 54.185 | 41.544 | 0.00 | 0.00 |
| ATOM | 2600 | CA   | LEU | X | 170 | 38.039 | 55.123 | 41.108 | 0.00 | 0.00 |
| ATOM | 2601 | HA   | LEU | X | 170 | 37.100 | 55.065 | 41.658 | 0.00 | 0.00 |
| ATOM | 2602 | CB   | LEU | X | 170 | 38.744 | 56.500 | 41.322 | 0.00 | 0.00 |
| ATOM | 2603 | HB2  | LEU | X | 170 | 39.745 | 56.459 | 40.893 | 0.00 | 0.00 |
| ATOM | 2604 | HB3  | LEU | X | 170 | 38.206 | 57.305 | 40.821 | 0.00 | 0.00 |
| ATOM | 2605 | CG   | LEU | X | 170 | 38.896 | 56.881 | 42.810 | 0.00 | 0.00 |
| ATOM | 2606 | HG   | LEU | X | 170 | 39.503 | 56.131 | 43.317 | 0.00 | 0.00 |
| ATOM | 2607 | CD1  | LEU | X | 170 | 39.614 | 58.162 | 42.832 | 0.00 | 0.00 |
| ATOM | 2608 | HD11 | LEU | X | 170 | 39.822 | 58.485 | 43.853 | 0.00 | 0.00 |
| ATOM | 2609 | HD12 | LEU | X | 170 | 38.980 | 58.971 | 42.469 | 0.00 | 0.00 |
| ATOM | 2610 | HD13 | LEU | X | 170 | 40.519 | 58.152 | 42.225 | 0.00 | 0.00 |

|      |      |      |     |   |     |        |        |        |      |      |
|------|------|------|-----|---|-----|--------|--------|--------|------|------|
| ATOM | 2611 | CD2  | LEU | X | 170 | 37.529 | 57.079 | 43.501 | 0.00 | 0.00 |
| ATOM | 2612 | HD21 | LEU | X | 170 | 36.953 | 56.154 | 43.473 | 0.00 | 0.00 |
| ATOM | 2613 | HD22 | LEU | X | 170 | 37.685 | 57.328 | 44.551 | 0.00 | 0.00 |
| ATOM | 2614 | HD23 | LEU | X | 170 | 37.012 | 57.894 | 42.994 | 0.00 | 0.00 |
| ATOM | 2615 | C    | LEU | X | 170 | 37.749 | 54.845 | 39.645 | 0.00 | 0.00 |
| ATOM | 2616 | O    | LEU | X | 170 | 36.666 | 55.094 | 39.114 | 0.00 | 0.00 |
| ATOM | 2617 | N    | ASP | X | 171 | 38.691 | 54.232 | 38.902 | 0.00 | 0.00 |
| ATOM | 2618 | H    | ASP | X | 171 | 39.628 | 54.150 | 39.269 | 0.00 | 0.00 |
| ATOM | 2619 | CA   | ASP | X | 171 | 38.529 | 53.723 | 37.517 | 0.00 | 0.00 |
| ATOM | 2620 | HA   | ASP | X | 171 | 38.245 | 54.512 | 36.821 | 0.00 | 0.00 |
| ATOM | 2621 | CB   | ASP | X | 171 | 39.806 | 53.211 | 36.949 | 0.00 | 0.00 |
| ATOM | 2622 | HB2  | ASP | X | 171 | 40.110 | 52.305 | 37.473 | 0.00 | 0.00 |
| ATOM | 2623 | HB3  | ASP | X | 171 | 39.602 | 52.847 | 35.942 | 0.00 | 0.00 |
| ATOM | 2624 | CG   | ASP | X | 171 | 41.007 | 54.183 | 36.867 | 0.00 | 0.00 |
| ATOM | 2625 | OD1  | ASP | X | 171 | 40.752 | 55.414 | 36.805 | 0.00 | 0.00 |
| ATOM | 2626 | OD2  | ASP | X | 171 | 42.147 | 53.655 | 36.717 | 0.00 | 0.00 |
| ATOM | 2627 | C    | ASP | X | 171 | 37.401 | 52.713 | 37.430 | 0.00 | 0.00 |
| ATOM | 2628 | O    | ASP | X | 171 | 36.477 | 52.885 | 36.702 | 0.00 | 0.00 |
| ATOM | 2629 | N    | GLN | X | 172 | 37.457 | 51.642 | 38.292 | 0.00 | 0.00 |
| ATOM | 2630 | H    | GLN | X | 172 | 38.242 | 51.692 | 38.925 | 0.00 | 0.00 |
| ATOM | 2631 | CA   | GLN | X | 172 | 36.413 | 50.671 | 38.694 | 0.00 | 0.00 |
| ATOM | 2632 | HA   | GLN | X | 172 | 36.298 | 50.013 | 37.833 | 0.00 | 0.00 |
| ATOM | 2633 | CB   | GLN | X | 172 | 36.862 | 49.766 | 39.893 | 0.00 | 0.00 |
| ATOM | 2634 | HB2  | GLN | X | 172 | 37.150 | 50.453 | 40.688 | 0.00 | 0.00 |
| ATOM | 2635 | HB3  | GLN | X | 172 | 36.051 | 49.109 | 40.209 | 0.00 | 0.00 |
| ATOM | 2636 | CG   | GLN | X | 172 | 38.079 | 48.947 | 39.492 | 0.00 | 0.00 |
| ATOM | 2637 | HG2  | GLN | X | 172 | 37.859 | 48.183 | 38.746 | 0.00 | 0.00 |
| ATOM | 2638 | HG3  | GLN | X | 172 | 38.955 | 49.425 | 39.054 | 0.00 | 0.00 |
| ATOM | 2639 | CD   | GLN | X | 172 | 38.611 | 48.117 | 40.626 | 0.00 | 0.00 |
| ATOM | 2640 | OE1  | GLN | X | 172 | 38.144 | 48.228 | 41.786 | 0.00 | 0.00 |
| ATOM | 2641 | NE2  | GLN | X | 172 | 39.708 | 47.344 | 40.480 | 0.00 | 0.00 |
| ATOM | 2642 | HE21 | GLN | X | 172 | 39.968 | 46.839 | 41.315 | 0.00 | 0.00 |
| ATOM | 2643 | HE22 | GLN | X | 172 | 40.179 | 47.152 | 39.607 | 0.00 | 0.00 |
| ATOM | 2644 | C    | GLN | X | 172 | 35.063 | 51.295 | 39.048 | 0.00 | 0.00 |
| ATOM | 2645 | O    | GLN | X | 172 | 34.060 | 51.007 | 38.423 | 0.00 | 0.00 |
| ATOM | 2646 | N    | ARG | X | 173 | 35.030 | 52.235 | 39.951 | 0.00 | 0.00 |
| ATOM | 2647 | H    | ARG | X | 173 | 35.937 | 52.536 | 40.278 | 0.00 | 0.00 |
| ATOM | 2648 | CA   | ARG | X | 173 | 33.866 | 53.014 | 40.445 | 0.00 | 0.00 |
| ATOM | 2649 | HA   | ARG | X | 173 | 33.078 | 52.310 | 40.711 | 0.00 | 0.00 |
| ATOM | 2650 | CB   | ARG | X | 173 | 34.229 | 53.893 | 41.662 | 0.00 | 0.00 |
| ATOM | 2651 | HB2  | ARG | X | 173 | 34.657 | 53.305 | 42.474 | 0.00 | 0.00 |
| ATOM | 2652 | HB3  | ARG | X | 173 | 34.865 | 54.683 | 41.261 | 0.00 | 0.00 |
| ATOM | 2653 | CG   | ARG | X | 173 | 32.917 | 54.649 | 42.101 | 0.00 | 0.00 |
| ATOM | 2654 | HG2  | ARG | X | 173 | 32.515 | 55.403 | 41.424 | 0.00 | 0.00 |
| ATOM | 2655 | HG3  | ARG | X | 173 | 32.126 | 53.905 | 42.193 | 0.00 | 0.00 |
| ATOM | 2656 | CD   | ARG | X | 173 | 33.128 | 55.418 | 43.349 | 0.00 | 0.00 |
| ATOM | 2657 | HD2  | ARG | X | 173 | 34.040 | 56.005 | 43.243 | 0.00 | 0.00 |
| ATOM | 2658 | HD3  | ARG | X | 173 | 32.315 | 56.114 | 43.555 | 0.00 | 0.00 |
| ATOM | 2659 | NE   | ARG | X | 173 | 33.373 | 54.498 | 44.473 | 0.00 | 0.00 |
| ATOM | 2660 | HE   | ARG | X | 173 | 32.713 | 53.734 | 44.519 | 0.00 | 0.00 |
| ATOM | 2661 | CZ   | ARG | X | 173 | 34.085 | 54.702 | 45.566 | 0.00 | 0.00 |
| ATOM | 2662 | NH1  | ARG | X | 173 | 34.566 | 55.882 | 45.891 | 0.00 | 0.00 |
| ATOM | 2663 | HH11 | ARG | X | 173 | 34.393 | 56.704 | 45.330 | 0.00 | 0.00 |
| ATOM | 2664 | HH12 | ARG | X | 173 | 35.156 | 55.981 | 46.704 | 0.00 | 0.00 |
| ATOM | 2665 | NH2  | ARG | X | 173 | 34.043 | 53.761 | 46.502 | 0.00 | 0.00 |
| ATOM | 2666 | HH21 | ARG | X | 173 | 33.616 | 52.883 | 46.242 | 0.00 | 0.00 |
| ATOM | 2667 | HH22 | ARG | X | 173 | 34.360 | 53.968 | 47.438 | 0.00 | 0.00 |
| ATOM | 2668 | C    | ARG | X | 173 | 33.239 | 53.733 | 39.222 | 0.00 | 0.00 |
| ATOM | 2669 | O    | ARG | X | 173 | 32.061 | 53.899 | 39.253 | 0.00 | 0.00 |
| ATOM | 2670 | N    | LEU | X | 174 | 34.053 | 54.275 | 38.302 | 0.00 | 0.00 |
| ATOM | 2671 | H    | LEU | X | 174 | 35.050 | 54.245 | 38.463 | 0.00 | 0.00 |
| ATOM | 2672 | CA   | LEU | X | 174 | 33.595 | 55.080 | 37.189 | 0.00 | 0.00 |
| ATOM | 2673 | HA   | LEU | X | 174 | 32.843 | 55.695 | 37.683 | 0.00 | 0.00 |
| ATOM | 2674 | CB   | LEU | X | 174 | 34.712 | 56.008 | 36.657 | 0.00 | 0.00 |
| ATOM | 2675 | HB2  | LEU | X | 174 | 35.017 | 56.706 | 37.436 | 0.00 | 0.00 |
| ATOM | 2676 | HB3  | LEU | X | 174 | 35.638 | 55.479 | 36.429 | 0.00 | 0.00 |
| ATOM | 2677 | CG   | LEU | X | 174 | 34.316 | 56.966 | 35.466 | 0.00 | 0.00 |

|      |      |      |     |   |     |        |        |        |      |      |
|------|------|------|-----|---|-----|--------|--------|--------|------|------|
| ATOM | 2678 | HG   | LEU | X | 174 | 33.911 | 56.412 | 34.619 | 0.00 | 0.00 |
| ATOM | 2679 | CD1  | LEU | X | 174 | 33.149 | 57.948 | 35.774 | 0.00 | 0.00 |
| ATOM | 2680 | HD11 | LEU | X | 174 | 33.421 | 58.448 | 36.704 | 0.00 | 0.00 |
| ATOM | 2681 | HD12 | LEU | X | 174 | 32.200 | 57.418 | 35.695 | 0.00 | 0.00 |
| ATOM | 2682 | HD13 | LEU | X | 174 | 33.071 | 58.684 | 34.974 | 0.00 | 0.00 |
| ATOM | 2683 | CD2  | LEU | X | 174 | 35.501 | 57.771 | 34.920 | 0.00 | 0.00 |
| ATOM | 2684 | HD21 | LEU | X | 174 | 35.189 | 58.133 | 33.941 | 0.00 | 0.00 |
| ATOM | 2685 | HD22 | LEU | X | 174 | 35.796 | 58.569 | 35.603 | 0.00 | 0.00 |
| ATOM | 2686 | HD23 | LEU | X | 174 | 36.288 | 57.029 | 34.787 | 0.00 | 0.00 |
| ATOM | 2687 | C    | LEU | X | 174 | 32.967 | 54.161 | 36.108 | 0.00 | 0.00 |
| ATOM | 2688 | O    | LEU | X | 174 | 31.891 | 54.450 | 35.559 | 0.00 | 0.00 |
| ATOM | 2689 | N    | ALA | X | 175 | 33.495 | 52.935 | 35.863 | 0.00 | 0.00 |
| ATOM | 2690 | H    | ALA | X | 175 | 34.328 | 52.680 | 36.375 | 0.00 | 0.00 |
| ATOM | 2691 | CA   | ALA | X | 175 | 32.828 | 51.891 | 35.106 | 0.00 | 0.00 |
| ATOM | 2692 | HA   | ALA | X | 175 | 32.625 | 52.275 | 34.106 | 0.00 | 0.00 |
| ATOM | 2693 | CB   | ALA | X | 175 | 33.825 | 50.724 | 34.836 | 0.00 | 0.00 |
| ATOM | 2694 | HB1  | ALA | X | 175 | 34.757 | 51.096 | 34.412 | 0.00 | 0.00 |
| ATOM | 2695 | HB2  | ALA | X | 175 | 33.287 | 49.926 | 34.322 | 0.00 | 0.00 |
| ATOM | 2696 | HB3  | ALA | X | 175 | 34.131 | 50.236 | 35.761 | 0.00 | 0.00 |
| ATOM | 2697 | C    | ALA | X | 175 | 31.484 | 51.413 | 35.736 | 0.00 | 0.00 |
| ATOM | 2698 | O    | ALA | X | 175 | 30.480 | 51.211 | 35.063 | 0.00 | 0.00 |
| ATOM | 2699 | N    | LEU | X | 176 | 31.379 | 51.349 | 37.081 | 0.00 | 0.00 |
| ATOM | 2700 | H    | LEU | X | 176 | 32.242 | 51.443 | 37.597 | 0.00 | 0.00 |
| ATOM | 2701 | CA   | LEU | X | 176 | 30.148 | 51.092 | 37.828 | 0.00 | 0.00 |
| ATOM | 2702 | HA   | LEU | X | 176 | 29.715 | 50.202 | 37.372 | 0.00 | 0.00 |
| ATOM | 2703 | CB   | LEU | X | 176 | 30.503 | 50.728 | 39.264 | 0.00 | 0.00 |
| ATOM | 2704 | HB2  | LEU | X | 176 | 31.066 | 51.526 | 39.748 | 0.00 | 0.00 |
| ATOM | 2705 | HB3  | LEU | X | 176 | 29.605 | 50.614 | 39.871 | 0.00 | 0.00 |
| ATOM | 2706 | CG   | LEU | X | 176 | 31.251 | 49.387 | 39.508 | 0.00 | 0.00 |
| ATOM | 2707 | HG   | LEU | X | 176 | 32.164 | 49.382 | 38.913 | 0.00 | 0.00 |
| ATOM | 2708 | CD1  | LEU | X | 176 | 31.599 | 49.288 | 40.976 | 0.00 | 0.00 |
| ATOM | 2709 | HD11 | LEU | X | 176 | 30.678 | 49.269 | 41.559 | 0.00 | 0.00 |
| ATOM | 2710 | HD12 | LEU | X | 176 | 32.126 | 50.133 | 41.418 | 0.00 | 0.00 |
| ATOM | 2711 | HD13 | LEU | X | 176 | 32.049 | 48.320 | 41.200 | 0.00 | 0.00 |
| ATOM | 2712 | CD2  | LEU | X | 176 | 30.435 | 48.157 | 39.097 | 0.00 | 0.00 |
| ATOM | 2713 | HD21 | LEU | X | 176 | 30.121 | 48.204 | 38.055 | 0.00 | 0.00 |
| ATOM | 2714 | HD22 | LEU | X | 176 | 31.037 | 47.249 | 39.150 | 0.00 | 0.00 |
| ATOM | 2715 | HD23 | LEU | X | 176 | 29.492 | 48.116 | 39.641 | 0.00 | 0.00 |
| ATOM | 2716 | C    | LEU | X | 176 | 29.103 | 52.242 | 37.655 | 0.00 | 0.00 |
| ATOM | 2717 | O    | LEU | X | 176 | 27.921 | 52.099 | 37.396 | 0.00 | 0.00 |
| ATOM | 2718 | N    | GLN | X | 177 | 29.565 | 53.542 | 37.716 | 0.00 | 0.00 |
| ATOM | 2719 | H    | GLN | X | 177 | 30.546 | 53.657 | 37.929 | 0.00 | 0.00 |
| ATOM | 2720 | CA   | GLN | X | 177 | 28.719 | 54.726 | 37.366 | 0.00 | 0.00 |
| ATOM | 2721 | HA   | GLN | X | 177 | 27.842 | 54.831 | 38.006 | 0.00 | 0.00 |
| ATOM | 2722 | CB   | GLN | X | 177 | 29.489 | 56.027 | 37.542 | 0.00 | 0.00 |
| ATOM | 2723 | HB2  | GLN | X | 177 | 30.419 | 56.086 | 36.977 | 0.00 | 0.00 |
| ATOM | 2724 | HB3  | GLN | X | 177 | 28.847 | 56.754 | 37.044 | 0.00 | 0.00 |
| ATOM | 2725 | CG   | GLN | X | 177 | 29.667 | 56.433 | 38.991 | 0.00 | 0.00 |
| ATOM | 2726 | HG2  | GLN | X | 177 | 28.711 | 56.524 | 39.507 | 0.00 | 0.00 |
| ATOM | 2727 | HG3  | GLN | X | 177 | 30.196 | 55.625 | 39.497 | 0.00 | 0.00 |
| ATOM | 2728 | CD   | GLN | X | 177 | 30.386 | 57.780 | 39.039 | 0.00 | 0.00 |
| ATOM | 2729 | OE1  | GLN | X | 177 | 31.350 | 57.927 | 39.788 | 0.00 | 0.00 |
| ATOM | 2730 | NE2  | GLN | X | 177 | 29.893 | 58.780 | 38.311 | 0.00 | 0.00 |
| ATOM | 2731 | HE21 | GLN | X | 177 | 30.364 | 59.672 | 38.261 | 0.00 | 0.00 |
| ATOM | 2732 | HE22 | GLN | X | 177 | 29.095 | 58.608 | 37.716 | 0.00 | 0.00 |
| ATOM | 2733 | C    | GLN | X | 177 | 28.277 | 54.639 | 35.875 | 0.00 | 0.00 |
| ATOM | 2734 | O    | GLN | X | 177 | 27.086 | 54.957 | 35.600 | 0.00 | 0.00 |
| ATOM | 2735 | N    | TRP | X | 178 | 29.127 | 54.232 | 34.959 | 0.00 | 0.00 |
| ATOM | 2736 | H    | TRP | X | 178 | 30.084 | 54.034 | 35.213 | 0.00 | 0.00 |
| ATOM | 2737 | CA   | TRP | X | 178 | 28.767 | 53.961 | 33.614 | 0.00 | 0.00 |
| ATOM | 2738 | HA   | TRP | X | 178 | 28.361 | 54.901 | 33.237 | 0.00 | 0.00 |
| ATOM | 2739 | CB   | TRP | X | 178 | 30.060 | 53.677 | 32.832 | 0.00 | 0.00 |
| ATOM | 2740 | HB2  | TRP | X | 178 | 30.784 | 54.446 | 33.098 | 0.00 | 0.00 |
| ATOM | 2741 | HB3  | TRP | X | 178 | 30.499 | 52.772 | 33.252 | 0.00 | 0.00 |
| ATOM | 2742 | CG   | TRP | X | 178 | 29.862 | 53.618 | 31.260 | 0.00 | 0.00 |
| ATOM | 2743 | CD1  | TRP | X | 178 | 30.192 | 54.619 | 30.388 | 0.00 | 0.00 |
| ATOM | 2744 | HD1  | TRP | X | 178 | 30.628 | 55.580 | 30.622 | 0.00 | 0.00 |

|      |      |      |     |   |     |        |        |        |      |      |
|------|------|------|-----|---|-----|--------|--------|--------|------|------|
| ATOM | 2745 | NE1  | TRP | X | 178 | 30.053 | 54.180 | 29.130 | 0.00 | 0.00 |
| ATOM | 2746 | HE1  | TRP | X | 178 | 30.098 | 54.827 | 28.356 | 0.00 | 0.00 |
| ATOM | 2747 | CE2  | TRP | X | 178 | 29.441 | 52.918 | 29.101 | 0.00 | 0.00 |
| ATOM | 2748 | CZ2  | TRP | X | 178 | 29.109 | 52.008 | 28.054 | 0.00 | 0.00 |
| ATOM | 2749 | HZ2  | TRP | X | 178 | 29.144 | 52.321 | 27.021 | 0.00 | 0.00 |
| ATOM | 2750 | CH2  | TRP | X | 178 | 28.818 | 50.644 | 28.345 | 0.00 | 0.00 |
| ATOM | 2751 | HH2  | TRP | X | 178 | 28.659 | 49.930 | 27.551 | 0.00 | 0.00 |
| ATOM | 2752 | CZ3  | TRP | X | 178 | 28.742 | 50.244 | 29.680 | 0.00 | 0.00 |
| ATOM | 2753 | HZ3  | TRP | X | 178 | 28.355 | 49.270 | 29.938 | 0.00 | 0.00 |
| ATOM | 2754 | CE3  | TRP | X | 178 | 29.122 | 51.114 | 30.680 | 0.00 | 0.00 |
| ATOM | 2755 | HE3  | TRP | X | 178 | 29.149 | 50.851 | 31.727 | 0.00 | 0.00 |
| ATOM | 2756 | CD2  | TRP | X | 178 | 29.448 | 52.452 | 30.452 | 0.00 | 0.00 |
| ATOM | 2757 | C    | TRP | X | 178 | 27.752 | 52.895 | 33.431 | 0.00 | 0.00 |
| ATOM | 2758 | O    | TRP | X | 178 | 26.713 | 53.093 | 32.738 | 0.00 | 0.00 |
| ATOM | 2759 | N    | VAL | X | 179 | 27.905 | 51.750 | 34.095 | 0.00 | 0.00 |
| ATOM | 2760 | H    | VAL | X | 179 | 28.833 | 51.570 | 34.451 | 0.00 | 0.00 |
| ATOM | 2761 | CA   | VAL | X | 179 | 26.898 | 50.682 | 34.137 | 0.00 | 0.00 |
| ATOM | 2762 | HA   | VAL | X | 179 | 26.762 | 50.307 | 33.123 | 0.00 | 0.00 |
| ATOM | 2763 | CB   | VAL | X | 179 | 27.499 | 49.550 | 34.980 | 0.00 | 0.00 |
| ATOM | 2764 | HB   | VAL | X | 179 | 28.037 | 49.923 | 35.851 | 0.00 | 0.00 |
| ATOM | 2765 | CG1  | VAL | X | 179 | 26.439 | 48.583 | 35.543 | 0.00 | 0.00 |
| ATOM | 2766 | HG11 | VAL | X | 179 | 25.891 | 48.073 | 34.751 | 0.00 | 0.00 |
| ATOM | 2767 | HG12 | VAL | X | 179 | 26.944 | 47.859 | 36.181 | 0.00 | 0.00 |
| ATOM | 2768 | HG13 | VAL | X | 179 | 25.750 | 49.061 | 36.240 | 0.00 | 0.00 |
| ATOM | 2769 | CG2  | VAL | X | 179 | 28.526 | 48.691 | 34.228 | 0.00 | 0.00 |
| ATOM | 2770 | HG21 | VAL | X | 179 | 29.047 | 47.954 | 34.840 | 0.00 | 0.00 |
| ATOM | 2771 | HG22 | VAL | X | 179 | 29.221 | 49.348 | 33.705 | 0.00 | 0.00 |
| ATOM | 2772 | HG23 | VAL | X | 179 | 27.996 | 48.203 | 33.410 | 0.00 | 0.00 |
| ATOM | 2773 | C    | VAL | X | 179 | 25.572 | 51.160 | 34.734 | 0.00 | 0.00 |
| ATOM | 2774 | O    | VAL | X | 179 | 24.498 | 50.994 | 34.079 | 0.00 | 0.00 |
| ATOM | 2775 | N    | GLN | X | 180 | 25.601 | 51.949 | 35.823 | 0.00 | 0.00 |
| ATOM | 2776 | H    | GLN | X | 180 | 26.485 | 52.287 | 36.175 | 0.00 | 0.00 |
| ATOM | 2777 | CA   | GLN | X | 180 | 24.399 | 52.497 | 36.464 | 0.00 | 0.00 |
| ATOM | 2778 | HA   | GLN | X | 180 | 23.754 | 51.619 | 36.491 | 0.00 | 0.00 |
| ATOM | 2779 | CB   | GLN | X | 180 | 24.748 | 53.060 | 37.881 | 0.00 | 0.00 |
| ATOM | 2780 | HB2  | GLN | X | 180 | 25.630 | 53.700 | 37.830 | 0.00 | 0.00 |
| ATOM | 2781 | HB3  | GLN | X | 180 | 23.980 | 53.742 | 38.247 | 0.00 | 0.00 |
| ATOM | 2782 | CG   | GLN | X | 180 | 24.812 | 51.828 | 38.941 | 0.00 | 0.00 |
| ATOM | 2783 | HG2  | GLN | X | 180 | 25.562 | 51.141 | 38.547 | 0.00 | 0.00 |
| ATOM | 2784 | HG3  | GLN | X | 180 | 25.046 | 52.232 | 39.926 | 0.00 | 0.00 |
| ATOM | 2785 | CD   | GLN | X | 180 | 23.517 | 51.119 | 39.146 | 0.00 | 0.00 |
| ATOM | 2786 | OE1  | GLN | X | 180 | 22.442 | 51.599 | 38.799 | 0.00 | 0.00 |
| ATOM | 2787 | NE2  | GLN | X | 180 | 23.576 | 49.879 | 39.653 | 0.00 | 0.00 |
| ATOM | 2788 | HE21 | GLN | X | 180 | 22.681 | 49.432 | 39.512 | 0.00 | 0.00 |
| ATOM | 2789 | HE22 | GLN | X | 180 | 24.460 | 49.429 | 39.841 | 0.00 | 0.00 |
| ATOM | 2790 | C    | GLN | X | 180 | 23.606 | 53.592 | 35.656 | 0.00 | 0.00 |
| ATOM | 2791 | O    | GLN | X | 180 | 22.516 | 53.882 | 36.062 | 0.00 | 0.00 |
| ATOM | 2792 | N    | GLU | X | 181 | 24.090 | 54.077 | 34.492 | 0.00 | 0.00 |
| ATOM | 2793 | H    | GLU | X | 181 | 25.068 | 53.884 | 34.329 | 0.00 | 0.00 |
| ATOM | 2794 | CA   | GLU | X | 181 | 23.289 | 54.846 | 33.577 | 0.00 | 0.00 |
| ATOM | 2795 | HA   | GLU | X | 181 | 22.297 | 54.897 | 34.026 | 0.00 | 0.00 |
| ATOM | 2796 | CB   | GLU | X | 181 | 23.688 | 56.340 | 33.517 | 0.00 | 0.00 |
| ATOM | 2797 | HB2  | GLU | X | 181 | 22.983 | 56.775 | 32.809 | 0.00 | 0.00 |
| ATOM | 2798 | HB3  | GLU | X | 181 | 23.638 | 56.786 | 34.511 | 0.00 | 0.00 |
| ATOM | 2799 | CG   | GLU | X | 181 | 25.121 | 56.498 | 32.969 | 0.00 | 0.00 |
| ATOM | 2800 | HG2  | GLU | X | 181 | 25.760 | 56.695 | 33.830 | 0.00 | 0.00 |
| ATOM | 2801 | HG3  | GLU | X | 181 | 25.549 | 55.623 | 32.480 | 0.00 | 0.00 |
| ATOM | 2802 | CD   | GLU | X | 181 | 25.302 | 57.723 | 32.010 | 0.00 | 0.00 |
| ATOM | 2803 | OE1  | GLU | X | 181 | 24.385 | 58.599 | 31.976 | 0.00 | 0.00 |
| ATOM | 2804 | OE2  | GLU | X | 181 | 26.387 | 57.735 | 31.291 | 0.00 | 0.00 |
| ATOM | 2805 | C    | GLU | X | 181 | 22.947 | 54.192 | 32.241 | 0.00 | 0.00 |
| ATOM | 2806 | O    | GLU | X | 181 | 21.925 | 54.488 | 31.638 | 0.00 | 0.00 |
| ATOM | 2807 | N    | ASN | X | 182 | 23.865 | 53.324 | 31.730 | 0.00 | 0.00 |
| ATOM | 2808 | H    | ASN | X | 182 | 24.762 | 53.204 | 32.177 | 0.00 | 0.00 |
| ATOM | 2809 | CA   | ASN | X | 182 | 23.812 | 52.764 | 30.367 | 0.00 | 0.00 |
| ATOM | 2810 | HA   | ASN | X | 182 | 23.154 | 53.385 | 29.759 | 0.00 | 0.00 |
| ATOM | 2811 | CB   | ASN | X | 182 | 25.256 | 52.916 | 29.738 | 0.00 | 0.00 |

|      |      |      |     |   |     |        |        |        |      |      |
|------|------|------|-----|---|-----|--------|--------|--------|------|------|
| ATOM | 2812 | HB2  | ASN | X | 182 | 26.098 | 52.465 | 30.262 | 0.00 | 0.00 |
| ATOM | 2813 | HB3  | ASN | X | 182 | 25.249 | 52.392 | 28.783 | 0.00 | 0.00 |
| ATOM | 2814 | CG   | ASN | X | 182 | 25.557 | 54.431 | 29.495 | 0.00 | 0.00 |
| ATOM | 2815 | OD1  | ASN | X | 182 | 24.904 | 55.143 | 28.795 | 0.00 | 0.00 |
| ATOM | 2816 | ND2  | ASN | X | 182 | 26.595 | 54.985 | 30.115 | 0.00 | 0.00 |
| ATOM | 2817 | HD21 | ASN | X | 182 | 26.820 | 55.948 | 29.910 | 0.00 | 0.00 |
| ATOM | 2818 | HD22 | ASN | X | 182 | 26.995 | 54.470 | 30.886 | 0.00 | 0.00 |
| ATOM | 2819 | C    | ASN | X | 182 | 23.373 | 51.301 | 30.232 | 0.00 | 0.00 |
| ATOM | 2820 | O    | ASN | X | 182 | 22.934 | 50.922 | 29.139 | 0.00 | 0.00 |
| ATOM | 2821 | N    | VAL | X | 183 | 23.513 | 50.472 | 31.286 | 0.00 | 0.00 |
| ATOM | 2822 | H    | VAL | X | 183 | 23.729 | 50.863 | 32.192 | 0.00 | 0.00 |
| ATOM | 2823 | CA   | VAL | X | 183 | 23.453 | 48.951 | 31.064 | 0.00 | 0.00 |
| ATOM | 2824 | HA   | VAL | X | 183 | 24.151 | 48.692 | 30.268 | 0.00 | 0.00 |
| ATOM | 2825 | CB   | VAL | X | 183 | 23.901 | 48.165 | 32.292 | 0.00 | 0.00 |
| ATOM | 2826 | HB   | VAL | X | 183 | 24.775 | 48.646 | 32.732 | 0.00 | 0.00 |
| ATOM | 2827 | CG1  | VAL | X | 183 | 22.828 | 48.163 | 33.410 | 0.00 | 0.00 |
| ATOM | 2828 | HG11 | VAL | X | 183 | 23.383 | 47.877 | 34.304 | 0.00 | 0.00 |
| ATOM | 2829 | HG12 | VAL | X | 183 | 22.509 | 49.178 | 33.646 | 0.00 | 0.00 |
| ATOM | 2830 | HG13 | VAL | X | 183 | 22.020 | 47.492 | 33.119 | 0.00 | 0.00 |
| ATOM | 2831 | CG2  | VAL | X | 183 | 24.420 | 46.729 | 31.989 | 0.00 | 0.00 |
| ATOM | 2832 | HG21 | VAL | X | 183 | 25.258 | 46.816 | 31.297 | 0.00 | 0.00 |
| ATOM | 2833 | HG22 | VAL | X | 183 | 23.544 | 46.200 | 31.613 | 0.00 | 0.00 |
| ATOM | 2834 | HG23 | VAL | X | 183 | 24.854 | 46.260 | 32.872 | 0.00 | 0.00 |
| ATOM | 2835 | C    | VAL | X | 183 | 22.120 | 48.484 | 30.565 | 0.00 | 0.00 |
| ATOM | 2836 | O    | VAL | X | 183 | 21.986 | 47.445 | 29.838 | 0.00 | 0.00 |
| ATOM | 2837 | N    | ALA | X | 184 | 21.101 | 49.298 | 30.822 | 0.00 | 0.00 |
| ATOM | 2838 | H    | ALA | X | 184 | 21.273 | 50.076 | 31.443 | 0.00 | 0.00 |
| ATOM | 2839 | CA   | ALA | X | 184 | 19.766 | 49.052 | 30.323 | 0.00 | 0.00 |
| ATOM | 2840 | HA   | ALA | X | 184 | 19.472 | 48.023 | 30.530 | 0.00 | 0.00 |
| ATOM | 2841 | CB   | ALA | X | 184 | 18.865 | 50.058 | 30.981 | 0.00 | 0.00 |
| ATOM | 2842 | HB1  | ALA | X | 184 | 17.868 | 50.017 | 30.544 | 0.00 | 0.00 |
| ATOM | 2843 | HB2  | ALA | X | 184 | 19.091 | 51.100 | 30.755 | 0.00 | 0.00 |
| ATOM | 2844 | HB3  | ALA | X | 184 | 18.733 | 49.951 | 32.057 | 0.00 | 0.00 |
| ATOM | 2845 | C    | ALA | X | 184 | 19.623 | 49.011 | 28.788 | 0.00 | 0.00 |
| ATOM | 2846 | O    | ALA | X | 184 | 18.834 | 48.260 | 28.205 | 0.00 | 0.00 |
| ATOM | 2847 | N    | ALA | X | 185 | 20.518 | 49.718 | 28.036 | 0.00 | 0.00 |
| ATOM | 2848 | H    | ALA | X | 185 | 21.185 | 50.301 | 28.521 | 0.00 | 0.00 |
| ATOM | 2849 | CA   | ALA | X | 185 | 20.552 | 49.578 | 26.566 | 0.00 | 0.00 |
| ATOM | 2850 | HA   | ALA | X | 185 | 19.568 | 49.900 | 26.225 | 0.00 | 0.00 |
| ATOM | 2851 | CB   | ALA | X | 185 | 21.495 | 50.700 | 26.092 | 0.00 | 0.00 |
| ATOM | 2852 | HB1  | ALA | X | 185 | 21.272 | 51.656 | 26.567 | 0.00 | 0.00 |
| ATOM | 2853 | HB2  | ALA | X | 185 | 21.443 | 50.896 | 25.021 | 0.00 | 0.00 |
| ATOM | 2854 | HB3  | ALA | X | 185 | 22.527 | 50.491 | 26.371 | 0.00 | 0.00 |
| ATOM | 2855 | C    | ALA | X | 185 | 20.945 | 48.207 | 26.069 | 0.00 | 0.00 |
| ATOM | 2856 | O    | ALA | X | 185 | 20.413 | 47.914 | 25.001 | 0.00 | 0.00 |
| ATOM | 2857 | N    | PHE | X | 186 | 21.832 | 47.525 | 26.800 | 0.00 | 0.00 |
| ATOM | 2858 | H    | PHE | X | 186 | 22.162 | 47.816 | 27.709 | 0.00 | 0.00 |
| ATOM | 2859 | CA   | PHE | X | 186 | 22.182 | 46.144 | 26.478 | 0.00 | 0.00 |
| ATOM | 2860 | HA   | PHE | X | 186 | 22.152 | 46.099 | 25.390 | 0.00 | 0.00 |
| ATOM | 2861 | CB   | PHE | X | 186 | 23.612 | 45.951 | 27.005 | 0.00 | 0.00 |
| ATOM | 2862 | HB2  | PHE | X | 186 | 23.604 | 46.005 | 28.093 | 0.00 | 0.00 |
| ATOM | 2863 | HB3  | PHE | X | 186 | 23.879 | 44.921 | 26.768 | 0.00 | 0.00 |
| ATOM | 2864 | CG   | PHE | X | 186 | 24.632 | 46.937 | 26.513 | 0.00 | 0.00 |
| ATOM | 2865 | CD1  | PHE | X | 186 | 24.812 | 48.195 | 27.122 | 0.00 | 0.00 |
| ATOM | 2866 | HD1  | PHE | X | 186 | 24.253 | 48.393 | 28.025 | 0.00 | 0.00 |
| ATOM | 2867 | CE1  | PHE | X | 186 | 25.795 | 49.071 | 26.626 | 0.00 | 0.00 |
| ATOM | 2868 | HE1  | PHE | X | 186 | 25.977 | 49.910 | 27.282 | 0.00 | 0.00 |
| ATOM | 2869 | CZ   | PHE | X | 186 | 26.477 | 48.912 | 25.439 | 0.00 | 0.00 |
| ATOM | 2870 | HZ   | PHE | X | 186 | 27.229 | 49.569 | 25.027 | 0.00 | 0.00 |
| ATOM | 2871 | CE2  | PHE | X | 186 | 26.255 | 47.660 | 24.789 | 0.00 | 0.00 |
| ATOM | 2872 | HE2  | PHE | X | 186 | 26.723 | 47.538 | 23.823 | 0.00 | 0.00 |
| ATOM | 2873 | CD2  | PHE | X | 186 | 25.365 | 46.673 | 25.340 | 0.00 | 0.00 |
| ATOM | 2874 | HD2  | PHE | X | 186 | 25.293 | 45.711 | 24.855 | 0.00 | 0.00 |
| ATOM | 2875 | C    | PHE | X | 186 | 21.233 | 45.035 | 26.962 | 0.00 | 0.00 |
| ATOM | 2876 | O    | PHE | X | 186 | 21.420 | 43.890 | 26.672 | 0.00 | 0.00 |
| ATOM | 2877 | N    | GLY | X | 187 | 20.174 | 45.407 | 27.670 | 0.00 | 0.00 |
| ATOM | 2878 | H    | GLY | X | 187 | 20.048 | 46.409 | 27.686 | 0.00 | 0.00 |

|      |      |      |     |   |     |        |        |        |      |      |
|------|------|------|-----|---|-----|--------|--------|--------|------|------|
| ATOM | 2879 | CA   | GLY | X | 187 | 19.171 | 44.552 | 28.210 | 0.00 | 0.00 |
| ATOM | 2880 | HA2  | GLY | X | 187 | 18.182 | 45.010 | 28.177 | 0.00 | 0.00 |
| ATOM | 2881 | HA3  | GLY | X | 187 | 19.098 | 43.597 | 27.689 | 0.00 | 0.00 |
| ATOM | 2882 | C    | GLY | X | 187 | 19.454 | 44.163 | 29.693 | 0.00 | 0.00 |
| ATOM | 2883 | O    | GLY | X | 187 | 18.876 | 43.174 | 30.241 | 0.00 | 0.00 |
| ATOM | 2884 | N    | GLY | X | 188 | 20.351 | 44.831 | 30.399 | 0.00 | 0.00 |
| ATOM | 2885 | H    | GLY | X | 188 | 20.841 | 45.572 | 29.920 | 0.00 | 0.00 |
| ATOM | 2886 | CA   | GLY | X | 188 | 20.727 | 44.498 | 31.774 | 0.00 | 0.00 |
| ATOM | 2887 | HA2  | GLY | X | 188 | 20.710 | 43.422 | 31.943 | 0.00 | 0.00 |
| ATOM | 2888 | HA3  | GLY | X | 188 | 21.766 | 44.822 | 31.847 | 0.00 | 0.00 |
| ATOM | 2889 | C    | GLY | X | 188 | 19.967 | 45.302 | 32.831 | 0.00 | 0.00 |
| ATOM | 2890 | O    | GLY | X | 188 | 19.529 | 46.430 | 32.622 | 0.00 | 0.00 |
| ATOM | 2891 | N    | ASP | X | 189 | 19.800 | 44.674 | 34.020 | 0.00 | 0.00 |
| ATOM | 2892 | H    | ASP | X | 189 | 20.073 | 43.702 | 34.005 | 0.00 | 0.00 |
| ATOM | 2893 | CA   | ASP | X | 189 | 19.109 | 45.162 | 35.193 | 0.00 | 0.00 |
| ATOM | 2894 | HA   | ASP | X | 189 | 18.247 | 45.761 | 34.899 | 0.00 | 0.00 |
| ATOM | 2895 | CB   | ASP | X | 189 | 18.459 | 44.043 | 36.022 | 0.00 | 0.00 |
| ATOM | 2896 | HB2  | ASP | X | 189 | 17.896 | 43.486 | 35.274 | 0.00 | 0.00 |
| ATOM | 2897 | HB3  | ASP | X | 189 | 19.219 | 43.392 | 36.454 | 0.00 | 0.00 |
| ATOM | 2898 | CG   | ASP | X | 189 | 17.512 | 44.491 | 37.116 | 0.00 | 0.00 |
| ATOM | 2899 | OD1  | ASP | X | 189 | 17.425 | 45.730 | 37.312 | 0.00 | 0.00 |
| ATOM | 2900 | OD2  | ASP | X | 189 | 16.757 | 43.648 | 37.675 | 0.00 | 0.00 |
| ATOM | 2901 | C    | ASP | X | 189 | 19.975 | 46.073 | 36.108 | 0.00 | 0.00 |
| ATOM | 2902 | O    | ASP | X | 189 | 20.666 | 45.468 | 36.964 | 0.00 | 0.00 |
| ATOM | 2903 | N    | PRO | X | 190 | 19.881 | 47.393 | 36.145 | 0.00 | 0.00 |
| ATOM | 2904 | CD   | PRO | X | 190 | 19.054 | 48.209 | 35.259 | 0.00 | 0.00 |
| ATOM | 2905 | HD2  | PRO | X | 190 | 18.017 | 47.870 | 35.249 | 0.00 | 0.00 |
| ATOM | 2906 | HD3  | PRO | X | 190 | 19.498 | 48.087 | 34.271 | 0.00 | 0.00 |
| ATOM | 2907 | CG   | PRO | X | 190 | 19.123 | 49.698 | 35.695 | 0.00 | 0.00 |
| ATOM | 2908 | HG2  | PRO | X | 190 | 18.316 | 49.932 | 36.390 | 0.00 | 0.00 |
| ATOM | 2909 | HG3  | PRO | X | 190 | 19.078 | 50.429 | 34.888 | 0.00 | 0.00 |
| ATOM | 2910 | CB   | PRO | X | 190 | 20.463 | 49.670 | 36.439 | 0.00 | 0.00 |
| ATOM | 2911 | HB2  | PRO | X | 190 | 20.505 | 50.490 | 37.156 | 0.00 | 0.00 |
| ATOM | 2912 | HB3  | PRO | X | 190 | 21.260 | 49.797 | 35.707 | 0.00 | 0.00 |
| ATOM | 2913 | CA   | PRO | X | 190 | 20.621 | 48.262 | 37.080 | 0.00 | 0.00 |
| ATOM | 2914 | HA   | PRO | X | 190 | 21.680 | 48.005 | 37.071 | 0.00 | 0.00 |
| ATOM | 2915 | C    | PRO | X | 190 | 20.168 | 48.205 | 38.568 | 0.00 | 0.00 |
| ATOM | 2916 | O    | PRO | X | 190 | 20.842 | 48.582 | 39.512 | 0.00 | 0.00 |
| ATOM | 2917 | N    | THR | X | 191 | 19.069 | 47.501 | 38.829 | 0.00 | 0.00 |
| ATOM | 2918 | H    | THR | X | 191 | 18.512 | 47.170 | 38.055 | 0.00 | 0.00 |
| ATOM | 2919 | CA   | THR | X | 191 | 18.608 | 47.167 | 40.196 | 0.00 | 0.00 |
| ATOM | 2920 | HA   | THR | X | 191 | 19.097 | 47.871 | 40.868 | 0.00 | 0.00 |
| ATOM | 2921 | CB   | THR | X | 191 | 17.107 | 47.445 | 40.319 | 0.00 | 0.00 |
| ATOM | 2922 | HB   | THR | X | 191 | 16.833 | 47.384 | 41.372 | 0.00 | 0.00 |
| ATOM | 2923 | CG2  | THR | X | 191 | 16.764 | 48.860 | 39.822 | 0.00 | 0.00 |
| ATOM | 2924 | HG21 | THR | X | 191 | 17.369 | 49.564 | 40.394 | 0.00 | 0.00 |
| ATOM | 2925 | HG22 | THR | X | 191 | 15.722 | 49.101 | 40.032 | 0.00 | 0.00 |
| ATOM | 2926 | HG23 | THR | X | 191 | 16.884 | 48.983 | 38.746 | 0.00 | 0.00 |
| ATOM | 2927 | OG1  | THR | X | 191 | 16.283 | 46.488 | 39.652 | 0.00 | 0.00 |
| ATOM | 2928 | HG1  | THR | X | 191 | 16.766 | 46.345 | 38.835 | 0.00 | 0.00 |
| ATOM | 2929 | C    | THR | X | 191 | 18.999 | 45.744 | 40.558 | 0.00 | 0.00 |
| ATOM | 2930 | O    | THR | X | 191 | 18.621 | 45.224 | 41.604 | 0.00 | 0.00 |
| ATOM | 2931 | N    | SER | X | 192 | 19.754 | 45.029 | 39.687 | 0.00 | 0.00 |
| ATOM | 2932 | H    | SER | X | 192 | 19.928 | 45.346 | 38.744 | 0.00 | 0.00 |
| ATOM | 2933 | CA   | SER | X | 192 | 20.227 | 43.665 | 40.041 | 0.00 | 0.00 |
| ATOM | 2934 | HA   | SER | X | 192 | 20.280 | 43.672 | 41.130 | 0.00 | 0.00 |
| ATOM | 2935 | CB   | SER | X | 192 | 19.190 | 42.667 | 39.614 | 0.00 | 0.00 |
| ATOM | 2936 | HB2  | SER | X | 192 | 18.280 | 43.015 | 40.101 | 0.00 | 0.00 |
| ATOM | 2937 | HB3  | SER | X | 192 | 19.127 | 42.600 | 38.528 | 0.00 | 0.00 |
| ATOM | 2938 | OG   | SER | X | 192 | 19.536 | 41.400 | 40.164 | 0.00 | 0.00 |
| ATOM | 2939 | HG   | SER | X | 192 | 20.247 | 40.932 | 39.720 | 0.00 | 0.00 |
| ATOM | 2940 | C    | SER | X | 192 | 21.624 | 43.361 | 39.564 | 0.00 | 0.00 |
| ATOM | 2941 | O    | SER | X | 192 | 21.910 | 42.329 | 38.932 | 0.00 | 0.00 |
| ATOM | 2942 | N    | VAL | X | 193 | 22.483 | 44.322 | 39.950 | 0.00 | 0.00 |
| ATOM | 2943 | H    | VAL | X | 193 | 22.150 | 45.004 | 40.616 | 0.00 | 0.00 |
| ATOM | 2944 | CA   | VAL | X | 193 | 23.936 | 44.283 | 39.631 | 0.00 | 0.00 |
| ATOM | 2945 | HA   | VAL | X | 193 | 24.075 | 43.774 | 38.678 | 0.00 | 0.00 |

|      |      |      |     |   |     |        |        |        |      |      |
|------|------|------|-----|---|-----|--------|--------|--------|------|------|
| ATOM | 2946 | CB   | VAL | X | 193 | 24.528 | 45.726 | 39.456 | 0.00 | 0.00 |
| ATOM | 2947 | HB   | VAL | X | 193 | 24.455 | 46.287 | 40.387 | 0.00 | 0.00 |
| ATOM | 2948 | CG1  | VAL | X | 193 | 26.079 | 45.726 | 39.242 | 0.00 | 0.00 |
| ATOM | 2949 | HG11 | VAL | X | 193 | 26.636 | 45.299 | 40.075 | 0.00 | 0.00 |
| ATOM | 2950 | HG12 | VAL | X | 193 | 26.300 | 45.116 | 38.366 | 0.00 | 0.00 |
| ATOM | 2951 | HG13 | VAL | X | 193 | 26.411 | 46.739 | 39.014 | 0.00 | 0.00 |
| ATOM | 2952 | CG2  | VAL | X | 193 | 23.778 | 46.491 | 38.363 | 0.00 | 0.00 |
| ATOM | 2953 | HG21 | VAL | X | 193 | 23.947 | 46.045 | 37.383 | 0.00 | 0.00 |
| ATOM | 2954 | HG22 | VAL | X | 193 | 24.238 | 47.473 | 38.248 | 0.00 | 0.00 |
| ATOM | 2955 | HG23 | VAL | X | 193 | 22.692 | 46.546 | 38.425 | 0.00 | 0.00 |
| ATOM | 2956 | C    | VAL | X | 193 | 24.755 | 43.510 | 40.667 | 0.00 | 0.00 |
| ATOM | 2957 | O    | VAL | X | 193 | 24.605 | 43.733 | 41.863 | 0.00 | 0.00 |
| ATOM | 2958 | N    | THR | X | 194 | 25.606 | 42.574 | 40.242 | 0.00 | 0.00 |
| ATOM | 2959 | H    | THR | X | 194 | 25.736 | 42.429 | 39.251 | 0.00 | 0.00 |
| ATOM | 2960 | CA   | THR | X | 194 | 26.465 | 41.719 | 41.142 | 0.00 | 0.00 |
| ATOM | 2961 | HA   | THR | X | 194 | 26.383 | 41.973 | 42.199 | 0.00 | 0.00 |
| ATOM | 2962 | CB   | THR | X | 194 | 26.004 | 40.255 | 40.960 | 0.00 | 0.00 |
| ATOM | 2963 | HB   | THR | X | 194 | 26.095 | 40.037 | 39.896 | 0.00 | 0.00 |
| ATOM | 2964 | CG2  | THR | X | 194 | 26.835 | 39.282 | 41.847 | 0.00 | 0.00 |
| ATOM | 2965 | HG21 | THR | X | 194 | 26.601 | 39.478 | 42.893 | 0.00 | 0.00 |
| ATOM | 2966 | HG22 | THR | X | 194 | 27.895 | 39.182 | 41.613 | 0.00 | 0.00 |
| ATOM | 2967 | HG23 | THR | X | 194 | 26.441 | 38.273 | 41.724 | 0.00 | 0.00 |
| ATOM | 2968 | OG1  | THR | X | 194 | 24.654 | 40.240 | 41.227 | 0.00 | 0.00 |
| ATOM | 2969 | HG1  | THR | X | 194 | 24.118 | 40.430 | 40.453 | 0.00 | 0.00 |
| ATOM | 2970 | C    | THR | X | 194 | 27.888 | 41.890 | 40.746 | 0.00 | 0.00 |
| ATOM | 2971 | O    | THR | X | 194 | 28.196 | 41.761 | 39.596 | 0.00 | 0.00 |
| ATOM | 2972 | N    | LEU | X | 195 | 28.778 | 42.143 | 41.709 | 0.00 | 0.00 |
| ATOM | 2973 | H    | LEU | X | 195 | 28.446 | 42.197 | 42.661 | 0.00 | 0.00 |
| ATOM | 2974 | CA   | LEU | X | 195 | 30.251 | 42.185 | 41.491 | 0.00 | 0.00 |
| ATOM | 2975 | HA   | LEU | X | 195 | 30.492 | 42.538 | 40.488 | 0.00 | 0.00 |
| ATOM | 2976 | CB   | LEU | X | 195 | 30.850 | 43.212 | 42.526 | 0.00 | 0.00 |
| ATOM | 2977 | HB2  | LEU | X | 195 | 30.775 | 42.822 | 43.541 | 0.00 | 0.00 |
| ATOM | 2978 | HB3  | LEU | X | 195 | 31.902 | 43.257 | 42.248 | 0.00 | 0.00 |
| ATOM | 2979 | CG   | LEU | X | 195 | 30.230 | 44.604 | 42.412 | 0.00 | 0.00 |
| ATOM | 2980 | HG   | LEU | X | 195 | 29.216 | 44.723 | 42.796 | 0.00 | 0.00 |
| ATOM | 2981 | CD1  | LEU | X | 195 | 31.026 | 45.601 | 43.321 | 0.00 | 0.00 |
| ATOM | 2982 | HD11 | LEU | X | 195 | 31.115 | 45.088 | 44.279 | 0.00 | 0.00 |
| ATOM | 2983 | HD12 | LEU | X | 195 | 30.500 | 46.544 | 43.468 | 0.00 | 0.00 |
| ATOM | 2984 | HD13 | LEU | X | 195 | 32.023 | 45.868 | 42.972 | 0.00 | 0.00 |
| ATOM | 2985 | CD2  | LEU | X | 195 | 30.135 | 45.229 | 40.992 | 0.00 | 0.00 |
| ATOM | 2986 | HD21 | LEU | X | 195 | 29.793 | 46.251 | 41.155 | 0.00 | 0.00 |
| ATOM | 2987 | HD22 | LEU | X | 195 | 31.094 | 45.257 | 40.475 | 0.00 | 0.00 |
| ATOM | 2988 | HD23 | LEU | X | 195 | 29.329 | 44.659 | 40.531 | 0.00 | 0.00 |
| ATOM | 2989 | C    | LEU | X | 195 | 30.808 | 40.811 | 41.782 | 0.00 | 0.00 |
| ATOM | 2990 | O    | LEU | X | 195 | 30.313 | 40.108 | 42.669 | 0.00 | 0.00 |
| ATOM | 2991 | N    | PHE | X | 196 | 31.847 | 40.455 | 41.065 | 0.00 | 0.00 |
| ATOM | 2992 | H    | PHE | X | 196 | 32.047 | 40.993 | 40.235 | 0.00 | 0.00 |
| ATOM | 2993 | CA   | PHE | X | 196 | 32.629 | 39.211 | 41.162 | 0.00 | 0.00 |
| ATOM | 2994 | HA   | PHE | X | 196 | 32.645 | 39.106 | 42.247 | 0.00 | 0.00 |
| ATOM | 2995 | CB   | PHE | X | 196 | 31.966 | 37.916 | 40.601 | 0.00 | 0.00 |
| ATOM | 2996 | HB2  | PHE | X | 196 | 32.481 | 37.091 | 41.093 | 0.00 | 0.00 |
| ATOM | 2997 | HB3  | PHE | X | 196 | 30.905 | 37.862 | 40.843 | 0.00 | 0.00 |
| ATOM | 2998 | CG   | PHE | X | 196 | 32.100 | 37.632 | 39.109 | 0.00 | 0.00 |
| ATOM | 2999 | CD1  | PHE | X | 196 | 31.642 | 38.585 | 38.191 | 0.00 | 0.00 |
| ATOM | 3000 | HD1  | PHE | X | 196 | 31.161 | 39.482 | 38.551 | 0.00 | 0.00 |
| ATOM | 3001 | CE1  | PHE | X | 196 | 31.701 | 38.395 | 36.796 | 0.00 | 0.00 |
| ATOM | 3002 | HE1  | PHE | X | 196 | 31.434 | 39.224 | 36.158 | 0.00 | 0.00 |
| ATOM | 3003 | CZ   | PHE | X | 196 | 32.188 | 37.180 | 36.316 | 0.00 | 0.00 |
| ATOM | 3004 | HZ   | PHE | X | 196 | 32.226 | 36.953 | 35.261 | 0.00 | 0.00 |
| ATOM | 3005 | CE2  | PHE | X | 196 | 32.559 | 36.110 | 37.209 | 0.00 | 0.00 |
| ATOM | 3006 | HE2  | PHE | X | 196 | 32.881 | 35.132 | 36.883 | 0.00 | 0.00 |
| ATOM | 3007 | CD2  | PHE | X | 196 | 32.590 | 36.365 | 38.632 | 0.00 | 0.00 |
| ATOM | 3008 | HD2  | PHE | X | 196 | 32.894 | 35.545 | 39.266 | 0.00 | 0.00 |
| ATOM | 3009 | C    | PHE | X | 196 | 34.073 | 39.471 | 40.697 | 0.00 | 0.00 |
| ATOM | 3010 | O    | PHE | X | 196 | 34.352 | 40.406 | 39.909 | 0.00 | 0.00 |
| ATOM | 3011 | N    | GLY | X | 197 | 35.048 | 38.722 | 41.291 | 0.00 | 0.00 |
| ATOM | 3012 | H    | GLY | X | 197 | 34.854 | 37.917 | 41.870 | 0.00 | 0.00 |



|      |      |     |     |   |     |        |        |        |      |      |
|------|------|-----|-----|---|-----|--------|--------|--------|------|------|
| ATOM | 3013 | CA  | GLY | X | 197 | 36.474 | 38.888 | 41.048 | 0.00 | 0.00 |
| ATOM | 3014 | HA2 | GLY | X | 197 | 36.693 | 38.884 | 39.980 | 0.00 | 0.00 |
| ATOM | 3015 | HA3 | GLY | X | 197 | 36.783 | 39.885 | 41.359 | 0.00 | 0.00 |
| ATOM | 3016 | C   | GLY | X | 197 | 37.274 | 37.863 | 41.855 | 0.00 | 0.00 |
| ATOM | 3017 | O   | GLY | X | 197 | 36.929 | 37.359 | 42.905 | 0.00 | 0.00 |
| ATOM | 3018 | N   | GLU | X | 198 | 38.467 | 37.636 | 41.358 | 0.00 | 0.00 |
| ATOM | 3019 | H   | GLU | X | 198 | 38.757 | 38.180 | 40.558 | 0.00 | 0.00 |
| ATOM | 3020 | CA  | GLU | X | 198 | 39.495 | 36.839 | 42.018 | 0.00 | 0.00 |
| ATOM | 3021 | HA  | GLU | X | 198 | 39.051 | 36.265 | 42.832 | 0.00 | 0.00 |
| ATOM | 3022 | CB  | GLU | X | 198 | 39.945 | 35.807 | 40.958 | 0.00 | 0.00 |
| ATOM | 3023 | HB2 | GLU | X | 198 | 38.992 | 35.326 | 40.741 | 0.00 | 0.00 |
| ATOM | 3024 | HB3 | GLU | X | 198 | 40.197 | 36.371 | 40.060 | 0.00 | 0.00 |
| ATOM | 3025 | CG  | GLU | X | 198 | 41.046 | 34.764 | 41.334 | 0.00 | 0.00 |
| ATOM | 3026 | HG2 | GLU | X | 198 | 41.007 | 34.640 | 42.417 | 0.00 | 0.00 |
| ATOM | 3027 | HG3 | GLU | X | 198 | 40.780 | 33.786 | 40.932 | 0.00 | 0.00 |
| ATOM | 3028 | CD  | GLU | X | 198 | 42.480 | 35.243 | 41.086 | 0.00 | 0.00 |
| ATOM | 3029 | OE1 | GLU | X | 198 | 42.729 | 36.222 | 40.355 | 0.00 | 0.00 |
| ATOM | 3030 | OE2 | GLU | X | 198 | 43.386 | 34.612 | 41.669 | 0.00 | 0.00 |
| ATOM | 3031 | C   | GLU | X | 198 | 40.667 | 37.702 | 42.652 | 0.00 | 0.00 |
| ATOM | 3032 | O   | GLU | X | 198 | 40.959 | 38.754 | 42.120 | 0.00 | 0.00 |
| ATOM | 3033 | N   | XA1 | X | 199 | 41.190 | 37.360 | 43.780 | 0.00 | 0.00 |
| ATOM | 3034 | CA  | XA1 | X | 199 | 42.500 | 37.808 | 44.311 | 0.00 | 0.00 |
| ATOM | 3035 | C   | XA1 | X | 199 | 42.507 | 39.354 | 44.520 | 0.00 | 0.00 |
| ATOM | 3036 | O   | XA1 | X | 199 | 41.786 | 39.743 | 45.453 | 0.00 | 0.00 |
| ATOM | 3037 | CB  | XA1 | X | 199 | 43.639 | 37.318 | 43.429 | 0.00 | 0.00 |
| ATOM | 3038 | OG  | XA1 | X | 199 | 44.919 | 37.497 | 44.142 | 0.00 | 0.00 |
| ATOM | 3039 | P1  | XA1 | X | 199 | 46.124 | 37.948 | 43.209 | 0.00 | 0.00 |
| ATOM | 3040 | O1  | XA1 | X | 199 | 45.777 | 39.146 | 42.389 | 0.00 | 0.00 |
| ATOM | 3041 | O2  | XA1 | X | 199 | 46.617 | 36.786 | 42.403 | 0.00 | 0.00 |
| ATOM | 3042 | C1  | XA1 | X | 199 | 47.445 | 38.352 | 44.397 | 0.00 | 0.00 |
| ATOM | 3043 | H   | XA1 | X | 199 | 40.739 | 36.608 | 44.281 | 0.00 | 0.00 |
| ATOM | 3044 | HA  | XA1 | X | 199 | 42.612 | 37.402 | 45.316 | 0.00 | 0.00 |
| ATOM | 3045 | HB2 | XA1 | X | 199 | 43.480 | 36.240 | 43.352 | 0.00 | 0.00 |
| ATOM | 3046 | HB3 | XA1 | X | 199 | 43.699 | 37.729 | 42.418 | 0.00 | 0.00 |
| ATOM | 3047 | H11 | XA1 | X | 199 | 47.716 | 37.452 | 44.953 | 0.00 | 0.00 |
| ATOM | 3048 | H12 | XA1 | X | 199 | 48.330 | 38.798 | 43.939 | 0.00 | 0.00 |
| ATOM | 3049 | H13 | XA1 | X | 199 | 47.000 | 39.078 | 45.081 | 0.00 | 0.00 |
| ATOM | 3050 | N   | ALA | X | 200 | 43.295 | 40.178 | 43.778 | 0.00 | 0.00 |
| ATOM | 3051 | H   | ALA | X | 200 | 44.035 | 39.760 | 43.233 | 0.00 | 0.00 |
| ATOM | 3052 | CA  | ALA | X | 200 | 43.288 | 41.651 | 43.788 | 0.00 | 0.00 |
| ATOM | 3053 | HA  | ALA | X | 200 | 43.434 | 41.945 | 44.828 | 0.00 | 0.00 |
| ATOM | 3054 | CB  | ALA | X | 200 | 44.462 | 42.222 | 42.925 | 0.00 | 0.00 |
| ATOM | 3055 | HB1 | ALA | X | 200 | 44.383 | 41.949 | 41.873 | 0.00 | 0.00 |
| ATOM | 3056 | HB2 | ALA | X | 200 | 45.412 | 41.905 | 43.356 | 0.00 | 0.00 |
| ATOM | 3057 | HB3 | ALA | X | 200 | 44.434 | 43.311 | 42.889 | 0.00 | 0.00 |
| ATOM | 3058 | C   | ALA | X | 200 | 41.940 | 42.206 | 43.315 | 0.00 | 0.00 |
| ATOM | 3059 | O   | ALA | X | 200 | 41.493 | 43.255 | 43.771 | 0.00 | 0.00 |
| ATOM | 3060 | N   | GLY | X | 201 | 41.220 | 41.467 | 42.449 | 0.00 | 0.00 |
| ATOM | 3061 | H   | GLY | X | 201 | 41.637 | 40.599 | 42.144 | 0.00 | 0.00 |
| ATOM | 3062 | CA  | GLY | X | 201 | 39.851 | 41.773 | 42.015 | 0.00 | 0.00 |
| ATOM | 3063 | HA2 | GLY | X | 201 | 39.805 | 42.843 | 41.814 | 0.00 | 0.00 |
| ATOM | 3064 | HA3 | GLY | X | 201 | 39.539 | 41.161 | 41.169 | 0.00 | 0.00 |
| ATOM | 3065 | C   | GLY | X | 201 | 38.842 | 41.381 | 43.083 | 0.00 | 0.00 |
| ATOM | 3066 | O   | GLY | X | 201 | 37.979 | 42.169 | 43.461 | 0.00 | 0.00 |
| ATOM | 3067 | N   | ALA | X | 202 | 39.023 | 40.263 | 43.785 | 0.00 | 0.00 |
| ATOM | 3068 | H   | ALA | X | 202 | 39.823 | 39.703 | 43.526 | 0.00 | 0.00 |
| ATOM | 3069 | CA  | ALA | X | 202 | 38.251 | 39.978 | 45.000 | 0.00 | 0.00 |
| ATOM | 3070 | HA  | ALA | X | 202 | 37.195 | 39.912 | 44.740 | 0.00 | 0.00 |
| ATOM | 3071 | CB  | ALA | X | 202 | 38.635 | 38.595 | 45.563 | 0.00 | 0.00 |
| ATOM | 3072 | HB1 | ALA | X | 202 | 39.694 | 38.415 | 45.752 | 0.00 | 0.00 |
| ATOM | 3073 | HB2 | ALA | X | 202 | 38.455 | 37.824 | 44.815 | 0.00 | 0.00 |
| ATOM | 3074 | HB3 | ALA | X | 202 | 38.068 | 38.386 | 46.470 | 0.00 | 0.00 |
| ATOM | 3075 | C   | ALA | X | 202 | 38.415 | 41.082 | 46.071 | 0.00 | 0.00 |
| ATOM | 3076 | O   | ALA | X | 202 | 37.529 | 41.648 | 46.633 | 0.00 | 0.00 |
| ATOM | 3077 | N   | ALA | X | 203 | 39.686 | 41.380 | 46.426 | 0.00 | 0.00 |
| ATOM | 3078 | H   | ALA | X | 203 | 40.413 | 40.817 | 46.008 | 0.00 | 0.00 |
| ATOM | 3079 | CA  | ALA | X | 203 | 40.032 | 42.463 | 47.335 | 0.00 | 0.00 |

|      |      |      |     |   |     |        |        |        |      |      |
|------|------|------|-----|---|-----|--------|--------|--------|------|------|
| ATOM | 3080 | HA   | ALA | X | 203 | 39.519 | 42.189 | 48.257 | 0.00 | 0.00 |
| ATOM | 3081 | CB   | ALA | X | 203 | 41.537 | 42.537 | 47.475 | 0.00 | 0.00 |
| ATOM | 3082 | HB1  | ALA | X | 203 | 41.964 | 41.603 | 47.840 | 0.00 | 0.00 |
| ATOM | 3083 | HB2  | ALA | X | 203 | 41.944 | 43.358 | 48.065 | 0.00 | 0.00 |
| ATOM | 3084 | HB3  | ALA | X | 203 | 42.008 | 42.675 | 46.502 | 0.00 | 0.00 |
| ATOM | 3085 | C    | ALA | X | 203 | 39.421 | 43.793 | 46.899 | 0.00 | 0.00 |
| ATOM | 3086 | O    | ALA | X | 203 | 38.848 | 44.515 | 47.742 | 0.00 | 0.00 |
| ATOM | 3087 | N    | SER | X | 204 | 39.401 | 44.037 | 45.589 | 0.00 | 0.00 |
| ATOM | 3088 | H    | SER | X | 204 | 40.038 | 43.540 | 44.983 | 0.00 | 0.00 |
| ATOM | 3089 | CA   | SER | X | 204 | 38.790 | 45.261 | 45.048 | 0.00 | 0.00 |
| ATOM | 3090 | HA   | SER | X | 204 | 39.221 | 46.099 | 45.596 | 0.00 | 0.00 |
| ATOM | 3091 | CB   | SER | X | 204 | 38.959 | 45.458 | 43.516 | 0.00 | 0.00 |
| ATOM | 3092 | HB2  | SER | X | 204 | 38.465 | 44.662 | 42.959 | 0.00 | 0.00 |
| ATOM | 3093 | HB3  | SER | X | 204 | 38.426 | 46.340 | 43.161 | 0.00 | 0.00 |
| ATOM | 3094 | OG   | SER | X | 204 | 40.344 | 45.494 | 43.236 | 0.00 | 0.00 |
| ATOM | 3095 | HG   | SER | X | 204 | 40.788 | 44.707 | 43.558 | 0.00 | 0.00 |
| ATOM | 3096 | C    | SER | X | 204 | 37.273 | 45.230 | 45.334 | 0.00 | 0.00 |
| ATOM | 3097 | O    | SER | X | 204 | 36.709 | 46.201 | 45.867 | 0.00 | 0.00 |
| ATOM | 3098 | N    | VAL | X | 205 | 36.524 | 44.113 | 45.132 | 0.00 | 0.00 |
| ATOM | 3099 | H    | VAL | X | 205 | 37.059 | 43.398 | 44.660 | 0.00 | 0.00 |
| ATOM | 3100 | CA   | VAL | X | 205 | 35.093 | 43.903 | 45.487 | 0.00 | 0.00 |
| ATOM | 3101 | HA   | VAL | X | 205 | 34.583 | 44.703 | 44.950 | 0.00 | 0.00 |
| ATOM | 3102 | CB   | VAL | X | 205 | 34.573 | 42.555 | 44.945 | 0.00 | 0.00 |
| ATOM | 3103 | HB   | VAL | X | 205 | 35.190 | 41.729 | 45.301 | 0.00 | 0.00 |
| ATOM | 3104 | CG1  | VAL | X | 205 | 33.146 | 42.230 | 45.350 | 0.00 | 0.00 |
| ATOM | 3105 | HG11 | VAL | X | 205 | 32.520 | 43.081 | 45.080 | 0.00 | 0.00 |
| ATOM | 3106 | HG12 | VAL | X | 205 | 32.705 | 41.354 | 44.874 | 0.00 | 0.00 |
| ATOM | 3107 | HG13 | VAL | X | 205 | 33.027 | 42.153 | 46.430 | 0.00 | 0.00 |
| ATOM | 3108 | CG2  | VAL | X | 205 | 34.574 | 42.568 | 43.377 | 0.00 | 0.00 |
| ATOM | 3109 | HG21 | VAL | X | 205 | 35.562 | 42.461 | 42.929 | 0.00 | 0.00 |
| ATOM | 3110 | HG22 | VAL | X | 205 | 34.172 | 43.521 | 43.034 | 0.00 | 0.00 |
| ATOM | 3111 | HG23 | VAL | X | 205 | 34.114 | 41.660 | 42.987 | 0.00 | 0.00 |
| ATOM | 3112 | C    | VAL | X | 205 | 34.782 | 44.065 | 47.001 | 0.00 | 0.00 |
| ATOM | 3113 | O    | VAL | X | 205 | 33.729 | 44.617 | 47.358 | 0.00 | 0.00 |
| ATOM | 3114 | N    | GLY | X | 206 | 35.727 | 43.608 | 47.861 | 0.00 | 0.00 |
| ATOM | 3115 | H    | GLY | X | 206 | 36.510 | 43.071 | 47.515 | 0.00 | 0.00 |
| ATOM | 3116 | CA   | GLY | X | 206 | 35.726 | 43.822 | 49.294 | 0.00 | 0.00 |
| ATOM | 3117 | HA2  | GLY | X | 206 | 34.775 | 43.478 | 49.700 | 0.00 | 0.00 |
| ATOM | 3118 | HA3  | GLY | X | 206 | 36.552 | 43.242 | 49.706 | 0.00 | 0.00 |
| ATOM | 3119 | C    | GLY | X | 206 | 35.788 | 45.297 | 49.637 | 0.00 | 0.00 |
| ATOM | 3120 | O    | GLY | X | 206 | 35.148 | 45.712 | 50.593 | 0.00 | 0.00 |
| ATOM | 3121 | N    | MET | X | 207 | 36.513 | 46.143 | 48.895 | 0.00 | 0.00 |
| ATOM | 3122 | H    | MET | X | 207 | 37.096 | 45.646 | 48.236 | 0.00 | 0.00 |
| ATOM | 3123 | CA   | MET | X | 207 | 36.703 | 47.559 | 49.152 | 0.00 | 0.00 |
| ATOM | 3124 | HA   | MET | X | 207 | 36.773 | 47.662 | 50.235 | 0.00 | 0.00 |
| ATOM | 3125 | CB   | MET | X | 207 | 37.987 | 48.067 | 48.449 | 0.00 | 0.00 |
| ATOM | 3126 | HB2  | MET | X | 207 | 37.875 | 47.820 | 47.394 | 0.00 | 0.00 |
| ATOM | 3127 | HB3  | MET | X | 207 | 38.053 | 49.140 | 48.631 | 0.00 | 0.00 |
| ATOM | 3128 | CG   | MET | X | 207 | 39.215 | 47.428 | 49.152 | 0.00 | 0.00 |
| ATOM | 3129 | HG2  | MET | X | 207 | 39.278 | 47.698 | 50.206 | 0.00 | 0.00 |
| ATOM | 3130 | HG3  | MET | X | 207 | 39.021 | 46.355 | 49.144 | 0.00 | 0.00 |
| ATOM | 3131 | SD   | MET | X | 207 | 40.848 | 47.897 | 48.358 | 0.00 | 0.00 |
| ATOM | 3132 | CE   | MET | X | 207 | 41.826 | 46.408 | 48.878 | 0.00 | 0.00 |
| ATOM | 3133 | HE1  | MET | X | 207 | 41.913 | 46.409 | 49.965 | 0.00 | 0.00 |
| ATOM | 3134 | HE2  | MET | X | 207 | 41.388 | 45.511 | 48.441 | 0.00 | 0.00 |
| ATOM | 3135 | HE3  | MET | X | 207 | 42.843 | 46.492 | 48.495 | 0.00 | 0.00 |
| ATOM | 3136 | C    | MET | X | 207 | 35.477 | 48.335 | 48.664 | 0.00 | 0.00 |
| ATOM | 3137 | O    | MET | X | 207 | 35.023 | 49.256 | 49.381 | 0.00 | 0.00 |
| ATOM | 3138 | N    | HIE | X | 208 | 34.831 | 47.904 | 47.600 | 0.00 | 0.00 |
| ATOM | 3139 | H    | HIE | X | 208 | 35.271 | 47.157 | 47.083 | 0.00 | 0.00 |
| ATOM | 3140 | CA   | HIE | X | 208 | 33.526 | 48.385 | 47.171 | 0.00 | 0.00 |
| ATOM | 3141 | HA   | HIE | X | 208 | 33.539 | 49.474 | 47.137 | 0.00 | 0.00 |
| ATOM | 3142 | CB   | HIE | X | 208 | 33.198 | 47.918 | 45.736 | 0.00 | 0.00 |
| ATOM | 3143 | HB2  | HIE | X | 208 | 33.314 | 46.837 | 45.665 | 0.00 | 0.00 |
| ATOM | 3144 | HB3  | HIE | X | 208 | 32.171 | 48.218 | 45.524 | 0.00 | 0.00 |
| ATOM | 3145 | CG   | HIE | X | 208 | 34.105 | 48.579 | 44.678 | 0.00 | 0.00 |
| ATOM | 3146 | ND1  | HIE | X | 208 | 34.347 | 49.942 | 44.441 | 0.00 | 0.00 |

|      |      |      |     |   |     |        |        |        |      |      |
|------|------|------|-----|---|-----|--------|--------|--------|------|------|
| ATOM | 3147 | CE1  | HIE | X | 208 | 35.228 | 49.963 | 43.452 | 0.00 | 0.00 |
| ATOM | 3148 | HE1  | HIE | X | 208 | 35.730 | 50.869 | 43.145 | 0.00 | 0.00 |
| ATOM | 3149 | NE2  | HIE | X | 208 | 35.658 | 48.697 | 43.145 | 0.00 | 0.00 |
| ATOM | 3150 | HE2  | HIE | X | 208 | 36.527 | 48.559 | 42.649 | 0.00 | 0.00 |
| ATOM | 3151 | CD2  | HIE | X | 208 | 34.916 | 47.843 | 43.901 | 0.00 | 0.00 |
| ATOM | 3152 | HD2  | HIE | X | 208 | 35.016 | 46.768 | 43.924 | 0.00 | 0.00 |
| ATOM | 3153 | C    | HIE | X | 208 | 32.411 | 47.978 | 48.136 | 0.00 | 0.00 |
| ATOM | 3154 | O    | HIE | X | 208 | 31.442 | 48.738 | 48.242 | 0.00 | 0.00 |
| ATOM | 3155 | N    | LEU | X | 209 | 32.489 | 46.879 | 48.895 | 0.00 | 0.00 |
| ATOM | 3156 | H    | LEU | X | 209 | 33.237 | 46.236 | 48.676 | 0.00 | 0.00 |
| ATOM | 3157 | CA   | LEU | X | 209 | 31.579 | 46.561 | 50.045 | 0.00 | 0.00 |
| ATOM | 3158 | HA   | LEU | X | 209 | 30.533 | 46.661 | 49.754 | 0.00 | 0.00 |
| ATOM | 3159 | CB   | LEU | X | 209 | 31.818 | 45.042 | 50.353 | 0.00 | 0.00 |
| ATOM | 3160 | HB2  | LEU | X | 209 | 32.882 | 44.805 | 50.381 | 0.00 | 0.00 |
| ATOM | 3161 | HB3  | LEU | X | 209 | 31.540 | 44.907 | 51.398 | 0.00 | 0.00 |
| ATOM | 3162 | CG   | LEU | X | 209 | 31.117 | 44.045 | 49.465 | 0.00 | 0.00 |
| ATOM | 3163 | HG   | LEU | X | 209 | 31.320 | 44.189 | 48.404 | 0.00 | 0.00 |
| ATOM | 3164 | CD1  | LEU | X | 209 | 31.613 | 42.693 | 49.849 | 0.00 | 0.00 |
| ATOM | 3165 | HD11 | LEU | X | 209 | 31.534 | 42.505 | 50.920 | 0.00 | 0.00 |
| ATOM | 3166 | HD12 | LEU | X | 209 | 32.674 | 42.676 | 49.601 | 0.00 | 0.00 |
| ATOM | 3167 | HD13 | LEU | X | 209 | 31.064 | 41.898 | 49.343 | 0.00 | 0.00 |
| ATOM | 3168 | CD2  | LEU | X | 209 | 29.623 | 44.097 | 49.605 | 0.00 | 0.00 |
| ATOM | 3169 | HD21 | LEU | X | 209 | 29.397 | 44.076 | 50.671 | 0.00 | 0.00 |
| ATOM | 3170 | HD22 | LEU | X | 209 | 29.100 | 45.033 | 49.410 | 0.00 | 0.00 |
| ATOM | 3171 | HD23 | LEU | X | 209 | 29.133 | 43.227 | 49.168 | 0.00 | 0.00 |
| ATOM | 3172 | C    | LEU | X | 209 | 31.840 | 47.506 | 51.259 | 0.00 | 0.00 |
| ATOM | 3173 | O    | LEU | X | 209 | 30.931 | 47.653 | 52.111 | 0.00 | 0.00 |
| ATOM | 3174 | N    | LEU | X | 210 | 33.004 | 48.121 | 51.465 | 0.00 | 0.00 |
| ATOM | 3175 | H    | LEU | X | 210 | 33.726 | 48.030 | 50.765 | 0.00 | 0.00 |
| ATOM | 3176 | CA   | LEU | X | 210 | 33.345 | 48.986 | 52.621 | 0.00 | 0.00 |
| ATOM | 3177 | HA   | LEU | X | 210 | 32.629 | 48.812 | 53.425 | 0.00 | 0.00 |
| ATOM | 3178 | CB   | LEU | X | 210 | 34.703 | 48.615 | 53.201 | 0.00 | 0.00 |
| ATOM | 3179 | HB2  | LEU | X | 210 | 35.496 | 48.720 | 52.460 | 0.00 | 0.00 |
| ATOM | 3180 | HB3  | LEU | X | 210 | 34.996 | 49.307 | 53.991 | 0.00 | 0.00 |
| ATOM | 3181 | CG   | LEU | X | 210 | 34.888 | 47.139 | 53.761 | 0.00 | 0.00 |
| ATOM | 3182 | HG   | LEU | X | 210 | 34.640 | 46.403 | 52.997 | 0.00 | 0.00 |
| ATOM | 3183 | CD1  | LEU | X | 210 | 36.390 | 46.890 | 54.098 | 0.00 | 0.00 |
| ATOM | 3184 | HD11 | LEU | X | 210 | 36.768 | 47.563 | 54.869 | 0.00 | 0.00 |
| ATOM | 3185 | HD12 | LEU | X | 210 | 37.082 | 47.014 | 53.265 | 0.00 | 0.00 |
| ATOM | 3186 | HD13 | LEU | X | 210 | 36.451 | 45.888 | 54.523 | 0.00 | 0.00 |
| ATOM | 3187 | CD2  | LEU | X | 210 | 33.999 | 46.885 | 54.928 | 0.00 | 0.00 |
| ATOM | 3188 | HD21 | LEU | X | 210 | 34.274 | 45.877 | 55.239 | 0.00 | 0.00 |
| ATOM | 3189 | HD22 | LEU | X | 210 | 34.240 | 47.600 | 55.714 | 0.00 | 0.00 |
| ATOM | 3190 | HD23 | LEU | X | 210 | 32.956 | 46.922 | 54.613 | 0.00 | 0.00 |
| ATOM | 3191 | C    | LEU | X | 210 | 33.198 | 50.487 | 52.341 | 0.00 | 0.00 |
| ATOM | 3192 | O    | LEU | X | 210 | 32.715 | 51.298 | 53.117 | 0.00 | 0.00 |
| ATOM | 3193 | N    | SER | X | 211 | 33.620 | 50.873 | 51.136 | 0.00 | 0.00 |
| ATOM | 3194 | H    | SER | X | 211 | 34.102 | 50.297 | 50.461 | 0.00 | 0.00 |
| ATOM | 3195 | CA   | SER | X | 211 | 33.619 | 52.286 | 50.688 | 0.00 | 0.00 |
| ATOM | 3196 | HA   | SER | X | 211 | 34.073 | 52.768 | 51.554 | 0.00 | 0.00 |
| ATOM | 3197 | CB   | SER | X | 211 | 34.556 | 52.490 | 49.504 | 0.00 | 0.00 |
| ATOM | 3198 | HB2  | SER | X | 211 | 35.518 | 52.029 | 49.728 | 0.00 | 0.00 |
| ATOM | 3199 | HB3  | SER | X | 211 | 34.108 | 52.119 | 48.581 | 0.00 | 0.00 |
| ATOM | 3200 | OG   | SER | X | 211 | 34.758 | 53.921 | 49.371 | 0.00 | 0.00 |
| ATOM | 3201 | HG   | SER | X | 211 | 35.488 | 54.250 | 49.901 | 0.00 | 0.00 |
| ATOM | 3202 | C    | SER | X | 211 | 32.206 | 52.795 | 50.397 | 0.00 | 0.00 |
| ATOM | 3203 | O    | SER | X | 211 | 31.726 | 52.362 | 49.354 | 0.00 | 0.00 |
| ATOM | 3204 | N    | PRO | X | 212 | 31.585 | 53.663 | 51.210 | 0.00 | 0.00 |
| ATOM | 3205 | CD   | PRO | X | 212 | 32.160 | 54.465 | 52.319 | 0.00 | 0.00 |
| ATOM | 3206 | HD2  | PRO | X | 212 | 32.737 | 55.262 | 51.849 | 0.00 | 0.00 |
| ATOM | 3207 | HD3  | PRO | X | 212 | 32.821 | 53.912 | 52.987 | 0.00 | 0.00 |
| ATOM | 3208 | CG   | PRO | X | 212 | 30.974 | 54.946 | 53.137 | 0.00 | 0.00 |
| ATOM | 3209 | HG2  | PRO | X | 212 | 31.192 | 55.808 | 53.767 | 0.00 | 0.00 |
| ATOM | 3210 | HG3  | PRO | X | 212 | 30.655 | 54.147 | 53.806 | 0.00 | 0.00 |
| ATOM | 3211 | CB   | PRO | X | 212 | 29.877 | 55.160 | 52.095 | 0.00 | 0.00 |
| ATOM | 3212 | HB2  | PRO | X | 212 | 30.031 | 56.150 | 51.665 | 0.00 | 0.00 |
| ATOM | 3213 | HB3  | PRO | X | 212 | 28.866 | 55.175 | 52.501 | 0.00 | 0.00 |

|      |      |      |     |   |     |        |        |        |      |      |
|------|------|------|-----|---|-----|--------|--------|--------|------|------|
| ATOM | 3214 | CA   | PRO | X | 212 | 30.160 | 54.070 | 51.034 | 0.00 | 0.00 |
| ATOM | 3215 | HA   | PRO | X | 212 | 29.466 | 53.289 | 51.343 | 0.00 | 0.00 |
| ATOM | 3216 | C    | PRO | X | 212 | 29.699 | 54.619 | 49.639 | 0.00 | 0.00 |
| ATOM | 3217 | O    | PRO | X | 212 | 28.529 | 54.335 | 49.432 | 0.00 | 0.00 |
| ATOM | 3218 | N    | PRO | X | 213 | 30.550 | 55.370 | 48.841 | 0.00 | 0.00 |
| ATOM | 3219 | CD   | PRO | X | 213 | 31.724 | 56.076 | 49.130 | 0.00 | 0.00 |
| ATOM | 3220 | HD2  | PRO | X | 213 | 32.567 | 55.427 | 48.892 | 0.00 | 0.00 |
| ATOM | 3221 | HD3  | PRO | X | 213 | 31.750 | 56.338 | 50.188 | 0.00 | 0.00 |
| ATOM | 3222 | CG   | PRO | X | 213 | 31.782 | 57.280 | 48.219 | 0.00 | 0.00 |
| ATOM | 3223 | HG2  | PRO | X | 213 | 32.839 | 57.471 | 48.036 | 0.00 | 0.00 |
| ATOM | 3224 | HG3  | PRO | X | 213 | 31.271 | 58.120 | 48.691 | 0.00 | 0.00 |
| ATOM | 3225 | CB   | PRO | X | 213 | 31.067 | 56.747 | 46.966 | 0.00 | 0.00 |
| ATOM | 3226 | HB2  | PRO | X | 213 | 31.826 | 56.339 | 46.298 | 0.00 | 0.00 |
| ATOM | 3227 | HB3  | PRO | X | 213 | 30.565 | 57.543 | 46.417 | 0.00 | 0.00 |
| ATOM | 3228 | CA   | PRO | X | 213 | 30.098 | 55.761 | 47.470 | 0.00 | 0.00 |
| ATOM | 3229 | HA   | PRO | X | 213 | 29.127 | 56.257 | 47.486 | 0.00 | 0.00 |
| ATOM | 3230 | C    | PRO | X | 213 | 29.969 | 54.480 | 46.520 | 0.00 | 0.00 |
| ATOM | 3231 | O    | PRO | X | 213 | 29.374 | 54.664 | 45.492 | 0.00 | 0.00 |
| ATOM | 3232 | N    | SER | X | 214 | 30.448 | 53.290 | 46.763 | 0.00 | 0.00 |
| ATOM | 3233 | H    | SER | X | 214 | 30.967 | 53.129 | 47.614 | 0.00 | 0.00 |
| ATOM | 3234 | CA   | SER | X | 214 | 30.121 | 52.016 | 45.992 | 0.00 | 0.00 |
| ATOM | 3235 | HA   | SER | X | 214 | 29.995 | 52.234 | 44.932 | 0.00 | 0.00 |
| ATOM | 3236 | CB   | SER | X | 214 | 31.360 | 51.126 | 46.032 | 0.00 | 0.00 |
| ATOM | 3237 | HB2  | SER | X | 214 | 31.649 | 50.979 | 47.073 | 0.00 | 0.00 |
| ATOM | 3238 | HB3  | SER | X | 214 | 31.198 | 50.127 | 45.626 | 0.00 | 0.00 |
| ATOM | 3239 | OG   | SER | X | 214 | 32.480 | 51.742 | 45.377 | 0.00 | 0.00 |
| ATOM | 3240 | HG   | SER | X | 214 | 33.127 | 51.115 | 45.043 | 0.00 | 0.00 |
| ATOM | 3241 | C    | SER | X | 214 | 28.901 | 51.334 | 46.515 | 0.00 | 0.00 |
| ATOM | 3242 | O    | SER | X | 214 | 28.199 | 50.619 | 45.732 | 0.00 | 0.00 |
| ATOM | 3243 | N    | ARG | X | 215 | 28.498 | 51.529 | 47.766 | 0.00 | 0.00 |
| ATOM | 3244 | H    | ARG | X | 215 | 29.225 | 51.909 | 48.355 | 0.00 | 0.00 |
| ATOM | 3245 | CA   | ARG | X | 215 | 27.364 | 50.942 | 48.420 | 0.00 | 0.00 |
| ATOM | 3246 | HA   | ARG | X | 215 | 27.409 | 49.872 | 48.218 | 0.00 | 0.00 |
| ATOM | 3247 | CB   | ARG | X | 215 | 27.469 | 51.100 | 49.916 | 0.00 | 0.00 |
| ATOM | 3248 | HB2  | ARG | X | 215 | 27.618 | 52.131 | 50.236 | 0.00 | 0.00 |
| ATOM | 3249 | HB3  | ARG | X | 215 | 26.500 | 50.822 | 50.330 | 0.00 | 0.00 |
| ATOM | 3250 | CG   | ARG | X | 215 | 28.516 | 50.211 | 50.553 | 0.00 | 0.00 |
| ATOM | 3251 | HG2  | ARG | X | 215 | 29.443 | 50.209 | 49.978 | 0.00 | 0.00 |
| ATOM | 3252 | HG3  | ARG | X | 215 | 28.810 | 50.606 | 51.525 | 0.00 | 0.00 |
| ATOM | 3253 | CD   | ARG | X | 215 | 27.974 | 48.753 | 50.783 | 0.00 | 0.00 |
| ATOM | 3254 | HD2  | ARG | X | 215 | 27.434 | 48.458 | 49.883 | 0.00 | 0.00 |
| ATOM | 3255 | HD3  | ARG | X | 215 | 28.774 | 48.021 | 50.894 | 0.00 | 0.00 |
| ATOM | 3256 | NE   | ARG | X | 215 | 27.032 | 48.640 | 51.872 | 0.00 | 0.00 |
| ATOM | 3257 | HE   | ARG | X | 215 | 26.138 | 49.053 | 51.647 | 0.00 | 0.00 |
| ATOM | 3258 | CZ   | ARG | X | 215 | 27.250 | 48.125 | 53.095 | 0.00 | 0.00 |
| ATOM | 3259 | NH1  | ARG | X | 215 | 28.424 | 47.692 | 53.495 | 0.00 | 0.00 |
| ATOM | 3260 | HH11 | ARG | X | 215 | 29.202 | 47.660 | 52.853 | 0.00 | 0.00 |
| ATOM | 3261 | HH12 | ARG | X | 215 | 28.481 | 47.275 | 54.414 | 0.00 | 0.00 |
| ATOM | 3262 | NH2  | ARG | X | 215 | 26.258 | 48.079 | 53.965 | 0.00 | 0.00 |
| ATOM | 3263 | HH21 | ARG | X | 215 | 25.333 | 48.310 | 53.631 | 0.00 | 0.00 |
| ATOM | 3264 | HH22 | ARG | X | 215 | 26.385 | 47.849 | 54.940 | 0.00 | 0.00 |
| ATOM | 3265 | C    | ARG | X | 215 | 26.035 | 51.525 | 47.880 | 0.00 | 0.00 |
| ATOM | 3266 | O    | ARG | X | 215 | 24.951 | 51.150 | 48.342 | 0.00 | 0.00 |
| ATOM | 3267 | N    | GLY | X | 216 | 25.975 | 52.368 | 46.828 | 0.00 | 0.00 |
| ATOM | 3268 | H    | GLY | X | 216 | 26.861 | 52.768 | 46.555 | 0.00 | 0.00 |
| ATOM | 3269 | CA   | GLY | X | 216 | 24.875 | 52.727 | 45.984 | 0.00 | 0.00 |
| ATOM | 3270 | HA2  | GLY | X | 216 | 23.992 | 52.341 | 46.494 | 0.00 | 0.00 |
| ATOM | 3271 | HA3  | GLY | X | 216 | 24.852 | 53.816 | 45.999 | 0.00 | 0.00 |
| ATOM | 3272 | C    | GLY | X | 216 | 24.815 | 52.208 | 44.549 | 0.00 | 0.00 |
| ATOM | 3273 | O    | GLY | X | 216 | 23.937 | 52.622 | 43.815 | 0.00 | 0.00 |
| ATOM | 3274 | N    | LEU | X | 217 | 25.833 | 51.412 | 44.089 | 0.00 | 0.00 |
| ATOM | 3275 | H    | LEU | X | 217 | 26.560 | 51.130 | 44.732 | 0.00 | 0.00 |
| ATOM | 3276 | CA   | LEU | X | 217 | 26.047 | 50.990 | 42.660 | 0.00 | 0.00 |
| ATOM | 3277 | HA   | LEU | X | 217 | 25.343 | 51.619 | 42.115 | 0.00 | 0.00 |
| ATOM | 3278 | CB   | LEU | X | 217 | 27.531 | 51.351 | 42.295 | 0.00 | 0.00 |
| ATOM | 3279 | HB2  | LEU | X | 217 | 28.241 | 50.780 | 42.893 | 0.00 | 0.00 |
| ATOM | 3280 | HB3  | LEU | X | 217 | 27.705 | 50.951 | 41.296 | 0.00 | 0.00 |

|      |      |      |     |   |     |        |        |        |      |      |
|------|------|------|-----|---|-----|--------|--------|--------|------|------|
| ATOM | 3281 | CG   | LEU | X | 217 | 27.948 | 52.844 | 42.441 | 0.00 | 0.00 |
| ATOM | 3282 | HG   | LEU | X | 217 | 27.849 | 53.218 | 43.460 | 0.00 | 0.00 |
| ATOM | 3283 | CD1  | LEU | X | 217 | 29.380 | 52.987 | 41.970 | 0.00 | 0.00 |
| ATOM | 3284 | HD11 | LEU | X | 217 | 29.616 | 54.015 | 42.244 | 0.00 | 0.00 |
| ATOM | 3285 | HD12 | LEU | X | 217 | 29.341 | 52.852 | 40.889 | 0.00 | 0.00 |
| ATOM | 3286 | HD13 | LEU | X | 217 | 30.085 | 52.341 | 42.493 | 0.00 | 0.00 |
| ATOM | 3287 | CD2  | LEU | X | 217 | 27.085 | 53.771 | 41.584 | 0.00 | 0.00 |
| ATOM | 3288 | HD21 | LEU | X | 217 | 26.045 | 53.664 | 41.894 | 0.00 | 0.00 |
| ATOM | 3289 | HD22 | LEU | X | 217 | 27.238 | 54.847 | 41.660 | 0.00 | 0.00 |
| ATOM | 3290 | HD23 | LEU | X | 217 | 27.139 | 53.527 | 40.523 | 0.00 | 0.00 |
| ATOM | 3291 | C    | LEU | X | 217 | 25.748 | 49.533 | 42.441 | 0.00 | 0.00 |
| ATOM | 3292 | O    | LEU | X | 217 | 25.668 | 49.103 | 41.267 | 0.00 | 0.00 |
| ATOM | 3293 | N    | PHE | X | 218 | 25.495 | 48.665 | 43.482 | 0.00 | 0.00 |
| ATOM | 3294 | H    | PHE | X | 218 | 25.288 | 49.033 | 44.400 | 0.00 | 0.00 |
| ATOM | 3295 | CA   | PHE | X | 218 | 25.398 | 47.253 | 43.342 | 0.00 | 0.00 |
| ATOM | 3296 | HA   | PHE | X | 218 | 24.786 | 47.069 | 42.460 | 0.00 | 0.00 |
| ATOM | 3297 | CB   | PHE | X | 218 | 26.788 | 46.636 | 43.206 | 0.00 | 0.00 |
| ATOM | 3298 | HB2  | PHE | X | 218 | 26.585 | 45.601 | 42.930 | 0.00 | 0.00 |
| ATOM | 3299 | HB3  | PHE | X | 218 | 27.372 | 47.084 | 42.402 | 0.00 | 0.00 |
| ATOM | 3300 | CG   | PHE | X | 218 | 27.685 | 46.674 | 44.461 | 0.00 | 0.00 |
| ATOM | 3301 | CD1  | PHE | X | 218 | 28.533 | 47.732 | 44.815 | 0.00 | 0.00 |
| ATOM | 3302 | HD1  | PHE | X | 218 | 28.454 | 48.652 | 44.254 | 0.00 | 0.00 |
| ATOM | 3303 | CE1  | PHE | X | 218 | 29.413 | 47.662 | 45.907 | 0.00 | 0.00 |
| ATOM | 3304 | HE1  | PHE | X | 218 | 29.952 | 48.542 | 46.226 | 0.00 | 0.00 |
| ATOM | 3305 | CZ   | PHE | X | 218 | 29.443 | 46.539 | 46.690 | 0.00 | 0.00 |
| ATOM | 3306 | HZ   | PHE | X | 218 | 29.948 | 46.482 | 47.643 | 0.00 | 0.00 |
| ATOM | 3307 | CE2  | PHE | X | 218 | 28.612 | 45.411 | 46.312 | 0.00 | 0.00 |
| ATOM | 3308 | HE2  | PHE | X | 218 | 28.615 | 44.533 | 46.941 | 0.00 | 0.00 |
| ATOM | 3309 | CD2  | PHE | X | 218 | 27.764 | 45.550 | 45.212 | 0.00 | 0.00 |
| ATOM | 3310 | HD2  | PHE | X | 218 | 27.121 | 44.699 | 45.037 | 0.00 | 0.00 |
| ATOM | 3311 | C    | PHE | X | 218 | 24.688 | 46.659 | 44.586 | 0.00 | 0.00 |
| ATOM | 3312 | O    | PHE | X | 218 | 24.648 | 47.255 | 45.675 | 0.00 | 0.00 |
| ATOM | 3313 | N    | HIE | X | 219 | 24.189 | 45.407 | 44.454 | 0.00 | 0.00 |
| ATOM | 3314 | H    | HIE | X | 219 | 24.322 | 45.064 | 43.513 | 0.00 | 0.00 |
| ATOM | 3315 | CA   | HIE | X | 219 | 23.253 | 44.659 | 45.317 | 0.00 | 0.00 |
| ATOM | 3316 | HA   | HIE | X | 219 | 23.005 | 45.401 | 46.076 | 0.00 | 0.00 |
| ATOM | 3317 | CB   | HIE | X | 219 | 21.998 | 44.449 | 44.482 | 0.00 | 0.00 |
| ATOM | 3318 | HB2  | HIE | X | 219 | 22.231 | 43.612 | 43.824 | 0.00 | 0.00 |
| ATOM | 3319 | HB3  | HIE | X | 219 | 21.233 | 44.136 | 45.193 | 0.00 | 0.00 |
| ATOM | 3320 | CG   | HIE | X | 219 | 21.582 | 45.632 | 43.675 | 0.00 | 0.00 |
| ATOM | 3321 | ND1  | HIE | X | 219 | 22.074 | 45.961 | 42.420 | 0.00 | 0.00 |
| ATOM | 3322 | CE1  | HIE | X | 219 | 21.722 | 47.240 | 42.229 | 0.00 | 0.00 |
| ATOM | 3323 | HE1  | HIE | X | 219 | 21.996 | 47.928 | 41.443 | 0.00 | 0.00 |
| ATOM | 3324 | NE2  | HIE | X | 219 | 21.126 | 47.742 | 43.247 | 0.00 | 0.00 |
| ATOM | 3325 | HE2  | HIE | X | 219 | 20.934 | 48.716 | 43.433 | 0.00 | 0.00 |
| ATOM | 3326 | CD2  | HIE | X | 219 | 21.121 | 46.777 | 44.245 | 0.00 | 0.00 |
| ATOM | 3327 | HD2  | HIE | X | 219 | 20.914 | 46.993 | 45.283 | 0.00 | 0.00 |
| ATOM | 3328 | C    | HIE | X | 219 | 23.809 | 43.375 | 45.951 | 0.00 | 0.00 |
| ATOM | 3329 | O    | HIE | X | 219 | 23.310 | 42.925 | 46.990 | 0.00 | 0.00 |
| ATOM | 3330 | N    | ARG | X | 220 | 24.763 | 42.702 | 45.304 | 0.00 | 0.00 |
| ATOM | 3331 | H    | ARG | X | 220 | 25.042 | 42.996 | 44.379 | 0.00 | 0.00 |
| ATOM | 3332 | CA   | ARG | X | 220 | 25.268 | 41.409 | 45.716 | 0.00 | 0.00 |
| ATOM | 3333 | HA   | ARG | X | 220 | 25.050 | 41.288 | 46.777 | 0.00 | 0.00 |
| ATOM | 3334 | CB   | ARG | X | 220 | 24.507 | 40.253 | 44.944 | 0.00 | 0.00 |
| ATOM | 3335 | HB2  | ARG | X | 220 | 24.744 | 40.294 | 43.881 | 0.00 | 0.00 |
| ATOM | 3336 | HB3  | ARG | X | 220 | 24.947 | 39.308 | 45.264 | 0.00 | 0.00 |
| ATOM | 3337 | CG   | ARG | X | 220 | 22.973 | 40.151 | 45.122 | 0.00 | 0.00 |
| ATOM | 3338 | HG2  | ARG | X | 220 | 22.800 | 40.107 | 46.197 | 0.00 | 0.00 |
| ATOM | 3339 | HG3  | ARG | X | 220 | 22.525 | 41.051 | 44.702 | 0.00 | 0.00 |
| ATOM | 3340 | CD   | ARG | X | 220 | 22.250 | 38.941 | 44.557 | 0.00 | 0.00 |
| ATOM | 3341 | HD2  | ARG | X | 220 | 22.486 | 38.871 | 43.495 | 0.00 | 0.00 |
| ATOM | 3342 | HD3  | ARG | X | 220 | 22.630 | 38.005 | 44.967 | 0.00 | 0.00 |
| ATOM | 3343 | NE   | ARG | X | 220 | 20.814 | 39.061 | 44.740 | 0.00 | 0.00 |
| ATOM | 3344 | HE   | ARG | X | 220 | 20.529 | 38.800 | 45.672 | 0.00 | 0.00 |
| ATOM | 3345 | CZ   | ARG | X | 220 | 19.861 | 39.574 | 43.967 | 0.00 | 0.00 |
| ATOM | 3346 | NH1  | ARG | X | 220 | 20.096 | 39.928 | 42.690 | 0.00 | 0.00 |
| ATOM | 3347 | HH11 | ARG | X | 220 | 20.927 | 39.618 | 42.208 | 0.00 | 0.00 |

|      |      |      |     |   |     |        |        |        |      |      |
|------|------|------|-----|---|-----|--------|--------|--------|------|------|
| ATOM | 3348 | HH12 | ARG | X | 220 | 19.334 | 40.352 | 42.181 | 0.00 | 0.00 |
| ATOM | 3349 | NH2  | ARG | X | 220 | 18.643 | 39.636 | 44.403 | 0.00 | 0.00 |
| ATOM | 3350 | HH21 | ARG | X | 220 | 18.349 | 39.365 | 45.330 | 0.00 | 0.00 |
| ATOM | 3351 | HH22 | ARG | X | 220 | 18.073 | 40.187 | 43.777 | 0.00 | 0.00 |
| ATOM | 3352 | C    | ARG | X | 220 | 26.767 | 41.326 | 45.356 | 0.00 | 0.00 |
| ATOM | 3353 | O    | ARG | X | 220 | 27.255 | 41.934 | 44.388 | 0.00 | 0.00 |
| ATOM | 3354 | N    | ALA | X | 221 | 27.550 | 40.475 | 46.094 | 0.00 | 0.00 |
| ATOM | 3355 | H    | ALA | X | 221 | 27.169 | 39.887 | 46.821 | 0.00 | 0.00 |
| ATOM | 3356 | CA   | ALA | X | 221 | 29.007 | 40.376 | 45.839 | 0.00 | 0.00 |
| ATOM | 3357 | HA   | ALA | X | 221 | 29.225 | 40.804 | 44.861 | 0.00 | 0.00 |
| ATOM | 3358 | CB   | ALA | X | 221 | 29.667 | 41.306 | 46.911 | 0.00 | 0.00 |
| ATOM | 3359 | HB1  | ALA | X | 221 | 29.411 | 40.927 | 47.901 | 0.00 | 0.00 |
| ATOM | 3360 | HB2  | ALA | X | 221 | 29.356 | 42.350 | 46.889 | 0.00 | 0.00 |
| ATOM | 3361 | HB3  | ALA | X | 221 | 30.751 | 41.391 | 46.837 | 0.00 | 0.00 |
| ATOM | 3362 | C    | ALA | X | 221 | 29.543 | 38.886 | 45.897 | 0.00 | 0.00 |
| ATOM | 3363 | O    | ALA | X | 221 | 28.933 | 38.019 | 46.594 | 0.00 | 0.00 |
| ATOM | 3364 | N    | VAL | X | 222 | 30.667 | 38.660 | 45.140 | 0.00 | 0.00 |
| ATOM | 3365 | H    | VAL | X | 222 | 30.910 | 39.291 | 44.390 | 0.00 | 0.00 |
| ATOM | 3366 | CA   | VAL | X | 222 | 31.506 | 37.452 | 45.199 | 0.00 | 0.00 |
| ATOM | 3367 | HA   | VAL | X | 222 | 31.076 | 36.880 | 46.021 | 0.00 | 0.00 |
| ATOM | 3368 | CB   | VAL | X | 222 | 31.410 | 36.630 | 43.931 | 0.00 | 0.00 |
| ATOM | 3369 | HB   | VAL | X | 222 | 31.898 | 37.216 | 43.152 | 0.00 | 0.00 |
| ATOM | 3370 | CG1  | VAL | X | 222 | 32.027 | 35.261 | 44.167 | 0.00 | 0.00 |
| ATOM | 3371 | HG11 | VAL | X | 222 | 31.417 | 34.767 | 44.923 | 0.00 | 0.00 |
| ATOM | 3372 | HG12 | VAL | X | 222 | 31.902 | 34.667 | 43.262 | 0.00 | 0.00 |
| ATOM | 3373 | HG13 | VAL | X | 222 | 33.067 | 35.275 | 44.490 | 0.00 | 0.00 |
| ATOM | 3374 | CG2  | VAL | X | 222 | 29.946 | 36.524 | 43.443 | 0.00 | 0.00 |
| ATOM | 3375 | HG21 | VAL | X | 222 | 29.184 | 36.151 | 44.127 | 0.00 | 0.00 |
| ATOM | 3376 | HG22 | VAL | X | 222 | 29.933 | 35.801 | 42.628 | 0.00 | 0.00 |
| ATOM | 3377 | HG23 | VAL | X | 222 | 29.657 | 37.494 | 43.039 | 0.00 | 0.00 |
| ATOM | 3378 | C    | VAL | X | 222 | 32.931 | 37.841 | 45.433 | 0.00 | 0.00 |
| ATOM | 3379 | O    | VAL | X | 222 | 33.424 | 38.744 | 44.802 | 0.00 | 0.00 |
| ATOM | 3380 | N    | LEU | X | 223 | 33.621 | 37.051 | 46.220 | 0.00 | 0.00 |
| ATOM | 3381 | H    | LEU | X | 223 | 33.153 | 36.352 | 46.780 | 0.00 | 0.00 |
| ATOM | 3382 | CA   | LEU | X | 223 | 35.086 | 37.121 | 46.431 | 0.00 | 0.00 |
| ATOM | 3383 | HA   | LEU | X | 223 | 35.543 | 37.735 | 45.655 | 0.00 | 0.00 |
| ATOM | 3384 | CB   | LEU | X | 223 | 35.445 | 37.736 | 47.793 | 0.00 | 0.00 |
| ATOM | 3385 | HB2  | LEU | X | 223 | 34.973 | 37.170 | 48.596 | 0.00 | 0.00 |
| ATOM | 3386 | HB3  | LEU | X | 223 | 36.510 | 37.592 | 47.973 | 0.00 | 0.00 |
| ATOM | 3387 | CG   | LEU | X | 223 | 35.119 | 39.261 | 47.977 | 0.00 | 0.00 |
| ATOM | 3388 | HG   | LEU | X | 223 | 35.311 | 39.759 | 47.027 | 0.00 | 0.00 |
| ATOM | 3389 | CD1  | LEU | X | 223 | 33.644 | 39.604 | 48.364 | 0.00 | 0.00 |
| ATOM | 3390 | HD11 | LEU | X | 223 | 33.375 | 39.121 | 49.304 | 0.00 | 0.00 |
| ATOM | 3391 | HD12 | LEU | X | 223 | 32.985 | 39.215 | 47.588 | 0.00 | 0.00 |
| ATOM | 3392 | HD13 | LEU | X | 223 | 33.614 | 40.693 | 48.354 | 0.00 | 0.00 |
| ATOM | 3393 | CD2  | LEU | X | 223 | 36.161 | 39.816 | 49.016 | 0.00 | 0.00 |
| ATOM | 3394 | HD21 | LEU | X | 223 | 36.070 | 39.233 | 49.933 | 0.00 | 0.00 |
| ATOM | 3395 | HD22 | LEU | X | 223 | 37.155 | 39.681 | 48.591 | 0.00 | 0.00 |
| ATOM | 3396 | HD23 | LEU | X | 223 | 36.022 | 40.864 | 49.281 | 0.00 | 0.00 |
| ATOM | 3397 | C    | LEU | X | 223 | 35.749 | 35.771 | 46.284 | 0.00 | 0.00 |
| ATOM | 3398 | O    | LEU | X | 223 | 35.333 | 34.759 | 46.949 | 0.00 | 0.00 |
| ATOM | 3399 | N    | GLN | X | 224 | 36.732 | 35.679 | 45.416 | 0.00 | 0.00 |
| ATOM | 3400 | H    | GLN | X | 224 | 36.942 | 36.468 | 44.821 | 0.00 | 0.00 |
| ATOM | 3401 | CA   | GLN | X | 224 | 37.392 | 34.328 | 45.011 | 0.00 | 0.00 |
| ATOM | 3402 | HA   | GLN | X | 224 | 37.009 | 33.486 | 45.587 | 0.00 | 0.00 |
| ATOM | 3403 | CB   | GLN | X | 224 | 37.158 | 33.983 | 43.505 | 0.00 | 0.00 |
| ATOM | 3404 | HB2  | GLN | X | 224 | 37.597 | 34.790 | 42.918 | 0.00 | 0.00 |
| ATOM | 3405 | HB3  | GLN | X | 224 | 37.653 | 33.034 | 43.301 | 0.00 | 0.00 |
| ATOM | 3406 | CG   | GLN | X | 224 | 35.689 | 33.951 | 43.138 | 0.00 | 0.00 |
| ATOM | 3407 | HG2  | GLN | X | 224 | 35.194 | 33.118 | 43.637 | 0.00 | 0.00 |
| ATOM | 3408 | HG3  | GLN | X | 224 | 35.336 | 34.912 | 43.512 | 0.00 | 0.00 |
| ATOM | 3409 | CD   | GLN | X | 224 | 35.379 | 33.894 | 41.630 | 0.00 | 0.00 |
| ATOM | 3410 | OE1  | GLN | X | 224 | 34.327 | 34.259 | 41.135 | 0.00 | 0.00 |
| ATOM | 3411 | NE2  | GLN | X | 224 | 36.219 | 33.326 | 40.814 | 0.00 | 0.00 |
| ATOM | 3412 | HE21 | GLN | X | 224 | 35.943 | 33.459 | 39.852 | 0.00 | 0.00 |
| ATOM | 3413 | HE22 | GLN | X | 224 | 37.024 | 32.807 | 41.134 | 0.00 | 0.00 |
| ATOM | 3414 | C    | GLN | X | 224 | 38.843 | 34.441 | 45.335 | 0.00 | 0.00 |

|      |      |      |     |   |     |        |        |        |      |      |
|------|------|------|-----|---|-----|--------|--------|--------|------|------|
| ATOM | 3415 | O    | GLN | X | 224 | 39.545 | 35.304 | 44.818 | 0.00 | 0.00 |
| ATOM | 3416 | N    | SER | X | 225 | 39.387 | 33.703 | 46.299 | 0.00 | 0.00 |
| ATOM | 3417 | H    | SER | X | 225 | 38.776 | 33.009 | 46.705 | 0.00 | 0.00 |
| ATOM | 3418 | CA   | SER | X | 225 | 40.840 | 33.578 | 46.612 | 0.00 | 0.00 |
| ATOM | 3419 | HA   | SER | X | 225 | 40.928 | 32.929 | 47.483 | 0.00 | 0.00 |
| ATOM | 3420 | CB   | SER | X | 225 | 41.516 | 32.880 | 45.449 | 0.00 | 0.00 |
| ATOM | 3421 | HB2  | SER | X | 225 | 41.242 | 33.405 | 44.534 | 0.00 | 0.00 |
| ATOM | 3422 | HB3  | SER | X | 225 | 42.578 | 32.959 | 45.677 | 0.00 | 0.00 |
| ATOM | 3423 | OG   | SER | X | 225 | 41.216 | 31.495 | 45.371 | 0.00 | 0.00 |
| ATOM | 3424 | HG   | SER | X | 225 | 41.831 | 31.052 | 45.960 | 0.00 | 0.00 |
| ATOM | 3425 | C    | SER | X | 225 | 41.538 | 34.958 | 46.917 | 0.00 | 0.00 |
| ATOM | 3426 | O    | SER | X | 225 | 42.734 | 35.240 | 46.694 | 0.00 | 0.00 |
| ATOM | 3427 | N    | GLY | X | 226 | 40.723 | 35.933 | 47.431 | 0.00 | 0.00 |
| ATOM | 3428 | H    | GLY | X | 226 | 39.744 | 35.689 | 47.380 | 0.00 | 0.00 |
| ATOM | 3429 | CA   | GLY | X | 226 | 41.282 | 37.163 | 48.005 | 0.00 | 0.00 |
| ATOM | 3430 | HA2  | GLY | X | 226 | 42.136 | 36.973 | 48.657 | 0.00 | 0.00 |
| ATOM | 3431 | HA3  | GLY | X | 226 | 41.597 | 37.840 | 47.211 | 0.00 | 0.00 |
| ATOM | 3432 | C    | GLY | X | 226 | 40.286 | 37.962 | 48.895 | 0.00 | 0.00 |
| ATOM | 3433 | O    | GLY | X | 226 | 39.096 | 37.696 | 48.994 | 0.00 | 0.00 |
| ATOM | 3434 | N    | ALA | X | 227 | 40.813 | 39.015 | 49.567 | 0.00 | 0.00 |
| ATOM | 3435 | H    | ALA | X | 227 | 41.816 | 39.130 | 49.535 | 0.00 | 0.00 |
| ATOM | 3436 | CA   | ALA | X | 227 | 40.170 | 39.829 | 50.602 | 0.00 | 0.00 |
| ATOM | 3437 | HA   | ALA | X | 227 | 39.145 | 40.072 | 50.321 | 0.00 | 0.00 |
| ATOM | 3438 | CB   | ALA | X | 227 | 40.062 | 38.934 | 51.879 | 0.00 | 0.00 |
| ATOM | 3439 | HB1  | ALA | X | 227 | 39.345 | 39.467 | 52.503 | 0.00 | 0.00 |
| ATOM | 3440 | HB2  | ALA | X | 227 | 41.037 | 38.783 | 52.342 | 0.00 | 0.00 |
| ATOM | 3441 | HB3  | ALA | X | 227 | 39.520 | 38.032 | 51.594 | 0.00 | 0.00 |
| ATOM | 3442 | C    | ALA | X | 227 | 40.895 | 41.155 | 50.969 | 0.00 | 0.00 |
| ATOM | 3443 | O    | ALA | X | 227 | 42.117 | 41.119 | 50.933 | 0.00 | 0.00 |
| ATOM | 3444 | N    | PRO | X | 228 | 40.184 | 42.258 | 51.237 | 0.00 | 0.00 |
| ATOM | 3445 | CD   | PRO | X | 228 | 38.736 | 42.245 | 51.494 | 0.00 | 0.00 |
| ATOM | 3446 | HD2  | PRO | X | 228 | 38.424 | 41.446 | 52.166 | 0.00 | 0.00 |
| ATOM | 3447 | HD3  | PRO | X | 228 | 38.270 | 42.082 | 50.522 | 0.00 | 0.00 |
| ATOM | 3448 | CG   | PRO | X | 228 | 38.319 | 43.565 | 52.117 | 0.00 | 0.00 |
| ATOM | 3449 | HG2  | PRO | X | 228 | 38.293 | 43.465 | 53.202 | 0.00 | 0.00 |
| ATOM | 3450 | HG3  | PRO | X | 228 | 37.315 | 43.906 | 51.862 | 0.00 | 0.00 |
| ATOM | 3451 | CB   | PRO | X | 228 | 39.447 | 44.485 | 51.576 | 0.00 | 0.00 |
| ATOM | 3452 | HB2  | PRO | X | 228 | 39.697 | 45.369 | 52.162 | 0.00 | 0.00 |
| ATOM | 3453 | HB3  | PRO | X | 228 | 39.193 | 44.796 | 50.563 | 0.00 | 0.00 |
| ATOM | 3454 | CA   | PRO | X | 228 | 40.693 | 43.590 | 51.446 | 0.00 | 0.00 |
| ATOM | 3455 | HA   | PRO | X | 228 | 41.308 | 43.864 | 50.589 | 0.00 | 0.00 |
| ATOM | 3456 | C    | PRO | X | 228 | 41.447 | 43.588 | 52.768 | 0.00 | 0.00 |
| ATOM | 3457 | O    | PRO | X | 228 | 42.418 | 44.294 | 52.817 | 0.00 | 0.00 |
| ATOM | 3458 | N    | ASN | X | 229 | 41.092 | 42.805 | 53.760 | 0.00 | 0.00 |
| ATOM | 3459 | H    | ASN | X | 229 | 40.295 | 42.203 | 53.611 | 0.00 | 0.00 |
| ATOM | 3460 | CA   | ASN | X | 229 | 41.829 | 42.630 | 55.027 | 0.00 | 0.00 |
| ATOM | 3461 | HA   | ASN | X | 229 | 42.305 | 43.566 | 55.318 | 0.00 | 0.00 |
| ATOM | 3462 | CB   | ASN | X | 229 | 40.819 | 42.167 | 56.095 | 0.00 | 0.00 |
| ATOM | 3463 | HB2  | ASN | X | 229 | 41.320 | 42.078 | 57.059 | 0.00 | 0.00 |
| ATOM | 3464 | HB3  | ASN | X | 229 | 40.100 | 42.953 | 56.323 | 0.00 | 0.00 |
| ATOM | 3465 | CG   | ASN | X | 229 | 39.984 | 40.893 | 55.713 | 0.00 | 0.00 |
| ATOM | 3466 | OD1  | ASN | X | 229 | 39.392 | 40.825 | 54.634 | 0.00 | 0.00 |
| ATOM | 3467 | ND2  | ASN | X | 229 | 39.896 | 39.950 | 56.653 | 0.00 | 0.00 |
| ATOM | 3468 | HD21 | ASN | X | 229 | 39.325 | 39.143 | 56.448 | 0.00 | 0.00 |
| ATOM | 3469 | HD22 | ASN | X | 229 | 40.229 | 40.010 | 57.604 | 0.00 | 0.00 |
| ATOM | 3470 | C    | ASN | X | 229 | 42.977 | 41.649 | 54.832 | 0.00 | 0.00 |
| ATOM | 3471 | O    | ASN | X | 229 | 43.633 | 41.263 | 55.807 | 0.00 | 0.00 |
| ATOM | 3472 | N    | GLY | X | 230 | 43.270 | 41.168 | 53.628 | 0.00 | 0.00 |
| ATOM | 3473 | H    | GLY | X | 230 | 42.731 | 41.368 | 52.798 | 0.00 | 0.00 |
| ATOM | 3474 | CA   | GLY | X | 230 | 44.476 | 40.361 | 53.372 | 0.00 | 0.00 |
| ATOM | 3475 | HA2  | GLY | X | 230 | 44.399 | 39.569 | 54.117 | 0.00 | 0.00 |
| ATOM | 3476 | HA3  | GLY | X | 230 | 44.414 | 40.063 | 52.325 | 0.00 | 0.00 |
| ATOM | 3477 | C    | GLY | X | 230 | 45.719 | 41.184 | 53.582 | 0.00 | 0.00 |
| ATOM | 3478 | O    | GLY | X | 230 | 45.740 | 42.375 | 53.241 | 0.00 | 0.00 |
| ATOM | 3479 | N    | PRO | X | 231 | 46.781 | 40.694 | 54.216 | 0.00 | 0.00 |
| ATOM | 3480 | CD   | PRO | X | 231 | 46.970 | 39.313 | 54.569 | 0.00 | 0.00 |
| ATOM | 3481 | HD2  | PRO | X | 231 | 46.774 | 38.630 | 53.743 | 0.00 | 0.00 |

|      |      |      |     |   |     |        |        |        |      |      |
|------|------|------|-----|---|-----|--------|--------|--------|------|------|
| ATOM | 3482 | HD3  | PRO | X | 231 | 46.354 | 39.058 | 55.431 | 0.00 | 0.00 |
| ATOM | 3483 | CG   | PRO | X | 231 | 48.411 | 39.136 | 54.962 | 0.00 | 0.00 |
| ATOM | 3484 | HG2  | PRO | X | 231 | 49.113 | 39.044 | 54.133 | 0.00 | 0.00 |
| ATOM | 3485 | HG3  | PRO | X | 231 | 48.587 | 38.283 | 55.618 | 0.00 | 0.00 |
| ATOM | 3486 | CB   | PRO | X | 231 | 48.749 | 40.493 | 55.615 | 0.00 | 0.00 |
| ATOM | 3487 | HB2  | PRO | X | 231 | 49.818 | 40.698 | 55.552 | 0.00 | 0.00 |
| ATOM | 3488 | HB3  | PRO | X | 231 | 48.377 | 40.566 | 56.637 | 0.00 | 0.00 |
| ATOM | 3489 | CA   | PRO | X | 231 | 47.913 | 41.466 | 54.714 | 0.00 | 0.00 |
| ATOM | 3490 | HA   | PRO | X | 231 | 47.503 | 42.244 | 55.358 | 0.00 | 0.00 |
| ATOM | 3491 | C    | PRO | X | 231 | 48.757 | 42.103 | 53.653 | 0.00 | 0.00 |
| ATOM | 3492 | O    | PRO | X | 231 | 49.556 | 43.020 | 53.962 | 0.00 | 0.00 |
| ATOM | 3493 | N    | TRP | X | 232 | 48.627 | 41.695 | 52.424 | 0.00 | 0.00 |
| ATOM | 3494 | H    | TRP | X | 232 | 47.971 | 40.945 | 52.261 | 0.00 | 0.00 |
| ATOM | 3495 | CA   | TRP | X | 232 | 49.125 | 42.267 | 51.202 | 0.00 | 0.00 |
| ATOM | 3496 | HA   | TRP | X | 232 | 50.052 | 42.793 | 51.429 | 0.00 | 0.00 |
| ATOM | 3497 | CB   | TRP | X | 232 | 49.420 | 41.009 | 50.291 | 0.00 | 0.00 |
| ATOM | 3498 | HB2  | TRP | X | 232 | 49.877 | 41.266 | 49.336 | 0.00 | 0.00 |
| ATOM | 3499 | HB3  | TRP | X | 232 | 50.109 | 40.358 | 50.829 | 0.00 | 0.00 |
| ATOM | 3500 | CG   | TRP | X | 232 | 48.133 | 40.254 | 49.903 | 0.00 | 0.00 |
| ATOM | 3501 | CD1  | TRP | X | 232 | 47.688 | 39.199 | 50.584 | 0.00 | 0.00 |
| ATOM | 3502 | HD1  | TRP | X | 232 | 48.331 | 38.799 | 51.355 | 0.00 | 0.00 |
| ATOM | 3503 | NE1  | TRP | X | 232 | 46.481 | 38.780 | 50.121 | 0.00 | 0.00 |
| ATOM | 3504 | HE1  | TRP | X | 232 | 46.007 | 37.968 | 50.492 | 0.00 | 0.00 |
| ATOM | 3505 | CE2  | TRP | X | 232 | 46.168 | 39.490 | 48.990 | 0.00 | 0.00 |
| ATOM | 3506 | CZ2  | TRP | X | 232 | 45.111 | 39.417 | 48.063 | 0.00 | 0.00 |
| ATOM | 3507 | HZ2  | TRP | X | 232 | 44.346 | 38.657 | 48.123 | 0.00 | 0.00 |
| ATOM | 3508 | CH2  | TRP | X | 232 | 44.940 | 40.324 | 47.038 | 0.00 | 0.00 |
| ATOM | 3509 | HH2  | TRP | X | 232 | 44.167 | 40.255 | 46.287 | 0.00 | 0.00 |
| ATOM | 3510 | CZ3  | TRP | X | 232 | 45.923 | 41.357 | 46.965 | 0.00 | 0.00 |
| ATOM | 3511 | HZ3  | TRP | X | 232 | 45.859 | 42.061 | 46.148 | 0.00 | 0.00 |
| ATOM | 3512 | CE3  | TRP | X | 232 | 46.948 | 41.480 | 47.915 | 0.00 | 0.00 |
| ATOM | 3513 | HE3  | TRP | X | 232 | 47.693 | 42.257 | 47.822 | 0.00 | 0.00 |
| ATOM | 3514 | CD2  | TRP | X | 232 | 47.106 | 40.525 | 48.947 | 0.00 | 0.00 |
| ATOM | 3515 | C    | TRP | X | 232 | 48.285 | 43.280 | 50.444 | 0.00 | 0.00 |
| ATOM | 3516 | O    | TRP | X | 232 | 48.818 | 43.967 | 49.569 | 0.00 | 0.00 |
| ATOM | 3517 | N    | ALA | X | 233 | 46.962 | 43.399 | 50.776 | 0.00 | 0.00 |
| ATOM | 3518 | H    | ALA | X | 233 | 46.683 | 42.881 | 51.597 | 0.00 | 0.00 |
| ATOM | 3519 | CA   | ALA | X | 233 | 46.001 | 44.093 | 49.960 | 0.00 | 0.00 |
| ATOM | 3520 | HA   | ALA | X | 233 | 46.255 | 43.894 | 48.919 | 0.00 | 0.00 |
| ATOM | 3521 | CB   | ALA | X | 233 | 44.685 | 43.309 | 50.199 | 0.00 | 0.00 |
| ATOM | 3522 | HB1  | ALA | X | 233 | 43.913 | 43.637 | 49.502 | 0.00 | 0.00 |
| ATOM | 3523 | HB2  | ALA | X | 233 | 44.340 | 43.290 | 51.233 | 0.00 | 0.00 |
| ATOM | 3524 | HB3  | ALA | X | 233 | 44.845 | 42.307 | 49.801 | 0.00 | 0.00 |
| ATOM | 3525 | C    | ALA | X | 233 | 45.877 | 45.578 | 50.291 | 0.00 | 0.00 |
| ATOM | 3526 | O    | ALA | X | 233 | 45.322 | 46.309 | 49.516 | 0.00 | 0.00 |
| ATOM | 3527 | N    | THR | X | 234 | 46.264 | 46.050 | 51.474 | 0.00 | 0.00 |
| ATOM | 3528 | H    | THR | X | 234 | 46.747 | 45.439 | 52.118 | 0.00 | 0.00 |
| ATOM | 3529 | CA   | THR | X | 234 | 46.183 | 47.443 | 51.885 | 0.00 | 0.00 |
| ATOM | 3530 | HA   | THR | X | 234 | 46.015 | 48.049 | 50.995 | 0.00 | 0.00 |
| ATOM | 3531 | CB   | THR | X | 234 | 44.944 | 47.723 | 52.815 | 0.00 | 0.00 |
| ATOM | 3532 | HB   | THR | X | 234 | 45.062 | 48.716 | 53.248 | 0.00 | 0.00 |
| ATOM | 3533 | CG2  | THR | X | 234 | 43.702 | 47.856 | 51.955 | 0.00 | 0.00 |
| ATOM | 3534 | HG21 | THR | X | 234 | 43.903 | 48.527 | 51.120 | 0.00 | 0.00 |
| ATOM | 3535 | HG22 | THR | X | 234 | 42.871 | 48.351 | 52.459 | 0.00 | 0.00 |
| ATOM | 3536 | HG23 | THR | X | 234 | 43.390 | 46.857 | 51.649 | 0.00 | 0.00 |
| ATOM | 3537 | OG1  | THR | X | 234 | 44.707 | 46.744 | 53.760 | 0.00 | 0.00 |
| ATOM | 3538 | HG1  | THR | X | 234 | 44.362 | 45.929 | 53.388 | 0.00 | 0.00 |
| ATOM | 3539 | C    | THR | X | 234 | 47.450 | 47.932 | 52.566 | 0.00 | 0.00 |
| ATOM | 3540 | O    | THR | X | 234 | 48.066 | 47.296 | 53.412 | 0.00 | 0.00 |
| ATOM | 3541 | N    | VAL | X | 235 | 47.873 | 49.099 | 52.252 | 0.00 | 0.00 |
| ATOM | 3542 | H    | VAL | X | 235 | 47.285 | 49.516 | 51.545 | 0.00 | 0.00 |
| ATOM | 3543 | CA   | VAL | X | 235 | 49.069 | 49.830 | 52.771 | 0.00 | 0.00 |
| ATOM | 3544 | HA   | VAL | X | 235 | 49.576 | 49.096 | 53.398 | 0.00 | 0.00 |
| ATOM | 3545 | CB   | VAL | X | 235 | 50.021 | 50.173 | 51.613 | 0.00 | 0.00 |
| ATOM | 3546 | HB   | VAL | X | 235 | 50.112 | 49.266 | 51.016 | 0.00 | 0.00 |
| ATOM | 3547 | CG1  | VAL | X | 235 | 49.563 | 51.256 | 50.614 | 0.00 | 0.00 |
| ATOM | 3548 | HG11 | VAL | X | 235 | 49.366 | 52.190 | 51.140 | 0.00 | 0.00 |



|      |      |      |     |   |     |        |        |        |      |      |
|------|------|------|-----|---|-----|--------|--------|--------|------|------|
| ATOM | 3549 | HG12 | VAL | X | 235 | 50.344 | 51.448 | 49.879 | 0.00 | 0.00 |
| ATOM | 3550 | HG13 | VAL | X | 235 | 48.614 | 51.080 | 50.107 | 0.00 | 0.00 |
| ATOM | 3551 | CG2  | VAL | X | 235 | 51.390 | 50.587 | 52.061 | 0.00 | 0.00 |
| ATOM | 3552 | HG21 | VAL | X | 235 | 51.449 | 51.572 | 52.524 | 0.00 | 0.00 |
| ATOM | 3553 | HG22 | VAL | X | 235 | 52.025 | 50.637 | 51.176 | 0.00 | 0.00 |
| ATOM | 3554 | HG23 | VAL | X | 235 | 51.913 | 49.829 | 52.644 | 0.00 | 0.00 |
| ATOM | 3555 | C    | VAL | X | 235 | 48.696 | 51.078 | 53.611 | 0.00 | 0.00 |
| ATOM | 3556 | O    | VAL | X | 235 | 47.770 | 51.867 | 53.281 | 0.00 | 0.00 |
| ATOM | 3557 | N    | GLY | X | 236 | 49.503 | 51.293 | 54.643 | 0.00 | 0.00 |
| ATOM | 3558 | H    | GLY | X | 236 | 50.217 | 50.613 | 54.861 | 0.00 | 0.00 |
| ATOM | 3559 | CA   | GLY | X | 236 | 49.345 | 52.434 | 55.539 | 0.00 | 0.00 |
| ATOM | 3560 | HA2  | GLY | X | 236 | 48.358 | 52.860 | 55.719 | 0.00 | 0.00 |
| ATOM | 3561 | HA3  | GLY | X | 236 | 49.741 | 52.198 | 56.527 | 0.00 | 0.00 |
| ATOM | 3562 | C    | GLY | X | 236 | 50.144 | 53.655 | 55.061 | 0.00 | 0.00 |
| ATOM | 3563 | O    | GLY | X | 236 | 51.202 | 53.551 | 54.449 | 0.00 | 0.00 |
| ATOM | 3564 | N    | MET | X | 237 | 49.609 | 54.879 | 55.273 | 0.00 | 0.00 |
| ATOM | 3565 | H    | MET | X | 237 | 48.749 | 54.946 | 55.798 | 0.00 | 0.00 |
| ATOM | 3566 | CA   | MET | X | 237 | 50.106 | 56.158 | 54.770 | 0.00 | 0.00 |
| ATOM | 3567 | HA   | MET | X | 237 | 49.756 | 56.212 | 53.739 | 0.00 | 0.00 |
| ATOM | 3568 | CB   | MET | X | 237 | 49.405 | 57.215 | 55.646 | 0.00 | 0.00 |
| ATOM | 3569 | HB2  | MET | X | 237 | 49.641 | 57.186 | 56.710 | 0.00 | 0.00 |
| ATOM | 3570 | HB3  | MET | X | 237 | 49.754 | 58.188 | 55.302 | 0.00 | 0.00 |
| ATOM | 3571 | CG   | MET | X | 237 | 47.845 | 57.288 | 55.489 | 0.00 | 0.00 |
| ATOM | 3572 | HG2  | MET | X | 237 | 47.609 | 57.499 | 54.446 | 0.00 | 0.00 |
| ATOM | 3573 | HG3  | MET | X | 237 | 47.315 | 56.395 | 55.822 | 0.00 | 0.00 |
| ATOM | 3574 | SD   | MET | X | 237 | 47.104 | 58.550 | 56.581 | 0.00 | 0.00 |
| ATOM | 3575 | CE   | MET | X | 237 | 45.356 | 58.479 | 55.971 | 0.00 | 0.00 |
| ATOM | 3576 | HE1  | MET | X | 237 | 45.406 | 58.735 | 54.913 | 0.00 | 0.00 |
| ATOM | 3577 | HE2  | MET | X | 237 | 44.979 | 57.457 | 56.000 | 0.00 | 0.00 |
| ATOM | 3578 | HE3  | MET | X | 237 | 44.838 | 59.239 | 56.557 | 0.00 | 0.00 |
| ATOM | 3579 | C    | MET | X | 237 | 51.610 | 56.407 | 54.855 | 0.00 | 0.00 |
| ATOM | 3580 | O    | MET | X | 237 | 52.198 | 56.846 | 53.874 | 0.00 | 0.00 |
| ATOM | 3581 | N    | GLY | X | 238 | 52.260 | 56.065 | 56.045 | 0.00 | 0.00 |
| ATOM | 3582 | H    | GLY | X | 238 | 51.774 | 55.689 | 56.847 | 0.00 | 0.00 |
| ATOM | 3583 | CA   | GLY | X | 238 | 53.712 | 56.172 | 56.236 | 0.00 | 0.00 |
| ATOM | 3584 | HA2  | GLY | X | 238 | 53.952 | 57.215 | 56.028 | 0.00 | 0.00 |
| ATOM | 3585 | HA3  | GLY | X | 238 | 53.820 | 56.029 | 57.311 | 0.00 | 0.00 |
| ATOM | 3586 | C    | GLY | X | 238 | 54.581 | 55.198 | 55.464 | 0.00 | 0.00 |
| ATOM | 3587 | O    | GLY | X | 238 | 55.809 | 55.439 | 55.449 | 0.00 | 0.00 |
| ATOM | 3588 | N    | GLU | X | 239 | 54.035 | 54.132 | 54.846 | 0.00 | 0.00 |
| ATOM | 3589 | H    | GLU | X | 239 | 53.034 | 54.029 | 54.927 | 0.00 | 0.00 |
| ATOM | 3590 | CA   | GLU | X | 239 | 54.786 | 53.308 | 53.941 | 0.00 | 0.00 |
| ATOM | 3591 | HA   | GLU | X | 239 | 55.848 | 53.498 | 54.096 | 0.00 | 0.00 |
| ATOM | 3592 | CB   | GLU | X | 239 | 54.441 | 51.844 | 54.200 | 0.00 | 0.00 |
| ATOM | 3593 | HB2  | GLU | X | 239 | 53.654 | 51.804 | 54.952 | 0.00 | 0.00 |
| ATOM | 3594 | HB3  | GLU | X | 239 | 53.946 | 51.394 | 53.340 | 0.00 | 0.00 |
| ATOM | 3595 | CG   | GLU | X | 239 | 55.618 | 50.945 | 54.642 | 0.00 | 0.00 |
| ATOM | 3596 | HG2  | GLU | X | 239 | 56.250 | 51.417 | 55.394 | 0.00 | 0.00 |
| ATOM | 3597 | HG3  | GLU | X | 239 | 55.175 | 50.020 | 55.011 | 0.00 | 0.00 |
| ATOM | 3598 | CD   | GLU | X | 239 | 56.479 | 50.538 | 53.463 | 0.00 | 0.00 |
| ATOM | 3599 | OE1  | GLU | X | 239 | 57.254 | 51.386 | 52.992 | 0.00 | 0.00 |
| ATOM | 3600 | OE2  | GLU | X | 239 | 56.245 | 49.437 | 52.859 | 0.00 | 0.00 |
| ATOM | 3601 | C    | GLU | X | 239 | 54.449 | 53.799 | 52.528 | 0.00 | 0.00 |
| ATOM | 3602 | O    | GLU | X | 239 | 55.349 | 53.831 | 51.718 | 0.00 | 0.00 |
| ATOM | 3603 | N    | ALA | X | 240 | 53.139 | 54.077 | 52.234 | 0.00 | 0.00 |
| ATOM | 3604 | H    | ALA | X | 240 | 52.438 | 53.905 | 52.940 | 0.00 | 0.00 |
| ATOM | 3605 | CA   | ALA | X | 240 | 52.695 | 54.512 | 50.893 | 0.00 | 0.00 |
| ATOM | 3606 | HA   | ALA | X | 240 | 52.896 | 53.647 | 50.260 | 0.00 | 0.00 |
| ATOM | 3607 | CB   | ALA | X | 240 | 51.257 | 54.859 | 50.920 | 0.00 | 0.00 |
| ATOM | 3608 | HB1  | ALA | X | 240 | 50.704 | 54.054 | 51.404 | 0.00 | 0.00 |
| ATOM | 3609 | HB2  | ALA | X | 240 | 50.838 | 55.006 | 49.925 | 0.00 | 0.00 |
| ATOM | 3610 | HB3  | ALA | X | 240 | 51.097 | 55.711 | 51.582 | 0.00 | 0.00 |
| ATOM | 3611 | C    | ALA | X | 240 | 53.587 | 55.644 | 50.271 | 0.00 | 0.00 |
| ATOM | 3612 | O    | ALA | X | 240 | 54.293 | 55.431 | 49.276 | 0.00 | 0.00 |
| ATOM | 3613 | N    | ARG | X | 241 | 53.661 | 56.850 | 50.974 | 0.00 | 0.00 |
| ATOM | 3614 | H    | ARG | X | 241 | 53.227 | 56.849 | 51.886 | 0.00 | 0.00 |
| ATOM | 3615 | CA   | ARG | X | 241 | 54.461 | 57.956 | 50.558 | 0.00 | 0.00 |

|      |      |      |     |   |     |        |        |        |      |      |
|------|------|------|-----|---|-----|--------|--------|--------|------|------|
| ATOM | 3616 | HA   | ARG | X | 241 | 54.288 | 58.203 | 49.510 | 0.00 | 0.00 |
| ATOM | 3617 | CB   | ARG | X | 241 | 54.006 | 59.254 | 51.230 | 0.00 | 0.00 |
| ATOM | 3618 | HB2  | ARG | X | 241 | 54.453 | 60.101 | 50.708 | 0.00 | 0.00 |
| ATOM | 3619 | HB3  | ARG | X | 241 | 52.928 | 59.329 | 51.082 | 0.00 | 0.00 |
| ATOM | 3620 | CG   | ARG | X | 241 | 54.414 | 59.438 | 52.690 | 0.00 | 0.00 |
| ATOM | 3621 | HG2  | ARG | X | 241 | 53.881 | 58.679 | 53.263 | 0.00 | 0.00 |
| ATOM | 3622 | HG3  | ARG | X | 241 | 55.502 | 59.402 | 52.755 | 0.00 | 0.00 |
| ATOM | 3623 | CD   | ARG | X | 241 | 53.872 | 60.788 | 53.255 | 0.00 | 0.00 |
| ATOM | 3624 | HD2  | ARG | X | 241 | 52.808 | 60.775 | 53.021 | 0.00 | 0.00 |
| ATOM | 3625 | HD3  | ARG | X | 241 | 54.153 | 60.798 | 54.308 | 0.00 | 0.00 |
| ATOM | 3626 | NE   | ARG | X | 241 | 54.492 | 61.913 | 52.598 | 0.00 | 0.00 |
| ATOM | 3627 | HE   | ARG | X | 241 | 55.467 | 62.013 | 52.839 | 0.00 | 0.00 |
| ATOM | 3628 | CZ   | ARG | X | 241 | 53.929 | 62.815 | 51.803 | 0.00 | 0.00 |
| ATOM | 3629 | NH1  | ARG | X | 241 | 52.646 | 62.706 | 51.541 | 0.00 | 0.00 |
| ATOM | 3630 | HH11 | ARG | X | 241 | 52.010 | 62.207 | 52.147 | 0.00 | 0.00 |
| ATOM | 3631 | HH12 | ARG | X | 241 | 52.313 | 63.365 | 50.851 | 0.00 | 0.00 |
| ATOM | 3632 | NH2  | ARG | X | 241 | 54.673 | 63.788 | 51.346 | 0.00 | 0.00 |
| ATOM | 3633 | HH21 | ARG | X | 241 | 55.655 | 63.851 | 51.573 | 0.00 | 0.00 |
| ATOM | 3634 | HH22 | ARG | X | 241 | 54.204 | 64.397 | 50.691 | 0.00 | 0.00 |
| ATOM | 3635 | C    | ARG | X | 241 | 55.994 | 57.665 | 50.529 | 0.00 | 0.00 |
| ATOM | 3636 | O    | ARG | X | 241 | 56.824 | 58.135 | 49.665 | 0.00 | 0.00 |
| ATOM | 3637 | N    | ARG | X | 242 | 56.440 | 56.719 | 51.386 | 0.00 | 0.00 |
| ATOM | 3638 | H    | ARG | X | 242 | 55.828 | 56.231 | 52.025 | 0.00 | 0.00 |
| ATOM | 3639 | CA   | ARG | X | 242 | 57.882 | 56.331 | 51.457 | 0.00 | 0.00 |
| ATOM | 3640 | HA   | ARG | X | 242 | 58.506 | 57.216 | 51.331 | 0.00 | 0.00 |
| ATOM | 3641 | CB   | ARG | X | 242 | 58.163 | 55.435 | 52.702 | 0.00 | 0.00 |
| ATOM | 3642 | HB2  | ARG | X | 242 | 57.602 | 55.863 | 53.533 | 0.00 | 0.00 |
| ATOM | 3643 | HB3  | ARG | X | 242 | 57.646 | 54.520 | 52.413 | 0.00 | 0.00 |
| ATOM | 3644 | CG   | ARG | X | 242 | 59.580 | 55.219 | 53.108 | 0.00 | 0.00 |
| ATOM | 3645 | HG2  | ARG | X | 242 | 60.131 | 55.129 | 52.172 | 0.00 | 0.00 |
| ATOM | 3646 | HG3  | ARG | X | 242 | 59.893 | 56.132 | 53.613 | 0.00 | 0.00 |
| ATOM | 3647 | CD   | ARG | X | 242 | 59.903 | 54.009 | 54.007 | 0.00 | 0.00 |
| ATOM | 3648 | HD2  | ARG | X | 242 | 60.976 | 53.990 | 54.200 | 0.00 | 0.00 |
| ATOM | 3649 | HD3  | ARG | X | 242 | 59.330 | 54.059 | 54.933 | 0.00 | 0.00 |
| ATOM | 3650 | NE   | ARG | X | 242 | 59.614 | 52.787 | 53.214 | 0.00 | 0.00 |
| ATOM | 3651 | HE   | ARG | X | 242 | 58.689 | 52.397 | 53.324 | 0.00 | 0.00 |
| ATOM | 3652 | CZ   | ARG | X | 242 | 60.371 | 52.241 | 52.286 | 0.00 | 0.00 |
| ATOM | 3653 | NH1  | ARG | X | 242 | 61.579 | 52.659 | 52.070 | 0.00 | 0.00 |
| ATOM | 3654 | HH11 | ARG | X | 242 | 61.952 | 53.423 | 52.614 | 0.00 | 0.00 |
| ATOM | 3655 | HH12 | ARG | X | 242 | 62.071 | 52.265 | 51.281 | 0.00 | 0.00 |
| ATOM | 3656 | NH2  | ARG | X | 242 | 59.874 | 51.291 | 51.493 | 0.00 | 0.00 |
| ATOM | 3657 | HH21 | ARG | X | 242 | 58.926 | 51.020 | 51.711 | 0.00 | 0.00 |
| ATOM | 3658 | HH22 | ARG | X | 242 | 60.392 | 51.001 | 50.676 | 0.00 | 0.00 |
| ATOM | 3659 | C    | ARG | X | 242 | 58.274 | 55.445 | 50.191 | 0.00 | 0.00 |
| ATOM | 3660 | O    | ARG | X | 242 | 59.296 | 55.772 | 49.624 | 0.00 | 0.00 |
| ATOM | 3661 | N    | ARG | X | 243 | 57.406 | 54.550 | 49.743 | 0.00 | 0.00 |
| ATOM | 3662 | H    | ARG | X | 243 | 56.600 | 54.330 | 50.311 | 0.00 | 0.00 |
| ATOM | 3663 | CA   | ARG | X | 243 | 57.589 | 53.784 | 48.500 | 0.00 | 0.00 |
| ATOM | 3664 | HA   | ARG | X | 243 | 58.541 | 53.258 | 48.561 | 0.00 | 0.00 |
| ATOM | 3665 | CB   | ARG | X | 243 | 56.496 | 52.722 | 48.347 | 0.00 | 0.00 |
| ATOM | 3666 | HB2  | ARG | X | 243 | 55.521 | 53.184 | 48.501 | 0.00 | 0.00 |
| ATOM | 3667 | HB3  | ARG | X | 243 | 56.500 | 52.354 | 47.321 | 0.00 | 0.00 |
| ATOM | 3668 | CG   | ARG | X | 243 | 56.677 | 51.600 | 49.367 | 0.00 | 0.00 |
| ATOM | 3669 | HG2  | ARG | X | 243 | 57.687 | 51.197 | 49.299 | 0.00 | 0.00 |
| ATOM | 3670 | HG3  | ARG | X | 243 | 56.477 | 51.960 | 50.377 | 0.00 | 0.00 |
| ATOM | 3671 | CD   | ARG | X | 243 | 55.570 | 50.594 | 49.093 | 0.00 | 0.00 |
| ATOM | 3672 | HD2  | ARG | X | 243 | 54.625 | 51.133 | 49.026 | 0.00 | 0.00 |
| ATOM | 3673 | HD3  | ARG | X | 243 | 55.764 | 50.185 | 48.101 | 0.00 | 0.00 |
| ATOM | 3674 | NE   | ARG | X | 243 | 55.630 | 49.584 | 50.134 | 0.00 | 0.00 |
| ATOM | 3675 | HE   | ARG | X | 243 | 56.050 | 49.751 | 51.037 | 0.00 | 0.00 |
| ATOM | 3676 | CZ   | ARG | X | 243 | 54.886 | 48.481 | 50.089 | 0.00 | 0.00 |
| ATOM | 3677 | NH1  | ARG | X | 243 | 54.182 | 48.151 | 49.051 | 0.00 | 0.00 |
| ATOM | 3678 | HH11 | ARG | X | 243 | 54.165 | 48.723 | 48.220 | 0.00 | 0.00 |
| ATOM | 3679 | HH12 | ARG | X | 243 | 53.825 | 47.211 | 48.955 | 0.00 | 0.00 |
| ATOM | 3680 | NH2  | ARG | X | 243 | 54.828 | 47.816 | 51.210 | 0.00 | 0.00 |
| ATOM | 3681 | HH21 | ARG | X | 243 | 55.340 | 48.144 | 52.016 | 0.00 | 0.00 |
| ATOM | 3682 | HH22 | ARG | X | 243 | 54.304 | 46.954 | 51.240 | 0.00 | 0.00 |

|      |      |      |     |   |     |        |        |        |      |      |
|------|------|------|-----|---|-----|--------|--------|--------|------|------|
| ATOM | 3683 | C    | ARG | X | 243 | 57.587 | 54.843 | 47.365 | 0.00 | 0.00 |
| ATOM | 3684 | O    | ARG | X | 243 | 58.543 | 54.882 | 46.592 | 0.00 | 0.00 |
| ATOM | 3685 | N    | ALA | X | 244 | 56.576 | 55.679 | 47.269 | 0.00 | 0.00 |
| ATOM | 3686 | H    | ALA | X | 244 | 55.796 | 55.646 | 47.910 | 0.00 | 0.00 |
| ATOM | 3687 | CA   | ALA | X | 244 | 56.443 | 56.650 | 46.223 | 0.00 | 0.00 |
| ATOM | 3688 | HA   | ALA | X | 244 | 56.338 | 56.188 | 45.241 | 0.00 | 0.00 |
| ATOM | 3689 | CB   | ALA | X | 244 | 55.195 | 57.536 | 46.483 | 0.00 | 0.00 |
| ATOM | 3690 | HB1  | ALA | X | 244 | 54.244 | 57.003 | 46.486 | 0.00 | 0.00 |
| ATOM | 3691 | HB2  | ALA | X | 244 | 55.077 | 58.342 | 45.758 | 0.00 | 0.00 |
| ATOM | 3692 | HB3  | ALA | X | 244 | 55.247 | 58.054 | 47.441 | 0.00 | 0.00 |
| ATOM | 3693 | C    | ALA | X | 244 | 57.742 | 57.595 | 46.096 | 0.00 | 0.00 |
| ATOM | 3694 | O    | ALA | X | 244 | 58.237 | 57.805 | 44.970 | 0.00 | 0.00 |
| ATOM | 3695 | N    | THR | X | 245 | 58.298 | 57.996 | 47.241 | 0.00 | 0.00 |
| ATOM | 3696 | H    | THR | X | 245 | 57.804 | 57.930 | 48.119 | 0.00 | 0.00 |
| ATOM | 3697 | CA   | THR | X | 245 | 59.591 | 58.728 | 47.364 | 0.00 | 0.00 |
| ATOM | 3698 | HA   | THR | X | 245 | 59.627 | 59.622 | 46.742 | 0.00 | 0.00 |
| ATOM | 3699 | CB   | THR | X | 245 | 59.686 | 59.292 | 48.749 | 0.00 | 0.00 |
| ATOM | 3700 | HB   | THR | X | 245 | 59.693 | 58.471 | 49.466 | 0.00 | 0.00 |
| ATOM | 3701 | CG2  | THR | X | 245 | 60.954 | 60.141 | 48.958 | 0.00 | 0.00 |
| ATOM | 3702 | HG21 | THR | X | 245 | 60.895 | 61.030 | 48.330 | 0.00 | 0.00 |
| ATOM | 3703 | HG22 | THR | X | 245 | 61.861 | 59.563 | 48.782 | 0.00 | 0.00 |
| ATOM | 3704 | HG23 | THR | X | 245 | 60.988 | 60.325 | 50.032 | 0.00 | 0.00 |
| ATOM | 3705 | OG1  | THR | X | 245 | 58.528 | 60.121 | 49.045 | 0.00 | 0.00 |
| ATOM | 3706 | HG1  | THR | X | 245 | 57.861 | 59.479 | 49.300 | 0.00 | 0.00 |
| ATOM | 3707 | C    | THR | X | 245 | 60.783 | 57.919 | 47.012 | 0.00 | 0.00 |
| ATOM | 3708 | O    | THR | X | 245 | 61.639 | 58.427 | 46.309 | 0.00 | 0.00 |
| ATOM | 3709 | N    | GLN | X | 246 | 60.794 | 56.627 | 47.382 | 0.00 | 0.00 |
| ATOM | 3710 | H    | GLN | X | 246 | 60.033 | 56.262 | 47.937 | 0.00 | 0.00 |
| ATOM | 3711 | CA   | GLN | X | 246 | 61.790 | 55.663 | 46.856 | 0.00 | 0.00 |
| ATOM | 3712 | HA   | GLN | X | 246 | 62.738 | 56.166 | 47.047 | 0.00 | 0.00 |
| ATOM | 3713 | CB   | GLN | X | 246 | 61.684 | 54.383 | 47.628 | 0.00 | 0.00 |
| ATOM | 3714 | HB2  | GLN | X | 246 | 61.681 | 54.601 | 48.695 | 0.00 | 0.00 |
| ATOM | 3715 | HB3  | GLN | X | 246 | 60.668 | 54.000 | 47.535 | 0.00 | 0.00 |
| ATOM | 3716 | CG   | GLN | X | 246 | 62.820 | 53.454 | 47.308 | 0.00 | 0.00 |
| ATOM | 3717 | HG2  | GLN | X | 246 | 62.658 | 53.075 | 46.299 | 0.00 | 0.00 |
| ATOM | 3718 | HG3  | GLN | X | 246 | 63.725 | 54.055 | 47.216 | 0.00 | 0.00 |
| ATOM | 3719 | CD   | GLN | X | 246 | 62.992 | 52.364 | 48.362 | 0.00 | 0.00 |
| ATOM | 3720 | OE1  | GLN | X | 246 | 62.616 | 52.418 | 49.497 | 0.00 | 0.00 |
| ATOM | 3721 | NE2  | GLN | X | 246 | 63.810 | 51.370 | 48.089 | 0.00 | 0.00 |
| ATOM | 3722 | HE21 | GLN | X | 246 | 63.877 | 50.565 | 48.695 | 0.00 | 0.00 |
| ATOM | 3723 | HE22 | GLN | X | 246 | 64.221 | 51.172 | 47.188 | 0.00 | 0.00 |
| ATOM | 3724 | C    | GLN | X | 246 | 61.865 | 55.536 | 45.314 | 0.00 | 0.00 |
| ATOM | 3725 | O    | GLN | X | 246 | 62.977 | 55.438 | 44.767 | 0.00 | 0.00 |
| ATOM | 3726 | N    | LEU | X | 247 | 60.692 | 55.399 | 44.625 | 0.00 | 0.00 |
| ATOM | 3727 | H    | LEU | X | 247 | 59.830 | 55.464 | 45.147 | 0.00 | 0.00 |
| ATOM | 3728 | CA   | LEU | X | 247 | 60.658 | 55.448 | 43.172 | 0.00 | 0.00 |
| ATOM | 3729 | HA   | LEU | X | 247 | 61.457 | 54.754 | 42.912 | 0.00 | 0.00 |
| ATOM | 3730 | CB   | LEU | X | 247 | 59.219 | 55.121 | 42.705 | 0.00 | 0.00 |
| ATOM | 3731 | HB2  | LEU | X | 247 | 58.797 | 54.317 | 43.307 | 0.00 | 0.00 |
| ATOM | 3732 | HB3  | LEU | X | 247 | 58.652 | 56.013 | 42.971 | 0.00 | 0.00 |
| ATOM | 3733 | CG   | LEU | X | 247 | 59.152 | 54.853 | 41.153 | 0.00 | 0.00 |
| ATOM | 3734 | HG   | LEU | X | 247 | 59.758 | 55.558 | 40.584 | 0.00 | 0.00 |
| ATOM | 3735 | CD1  | LEU | X | 247 | 59.745 | 53.502 | 40.824 | 0.00 | 0.00 |
| ATOM | 3736 | HD11 | LEU | X | 247 | 59.482 | 52.769 | 41.587 | 0.00 | 0.00 |
| ATOM | 3737 | HD12 | LEU | X | 247 | 60.808 | 53.701 | 40.963 | 0.00 | 0.00 |
| ATOM | 3738 | HD13 | LEU | X | 247 | 59.552 | 53.164 | 39.806 | 0.00 | 0.00 |
| ATOM | 3739 | CD2  | LEU | X | 247 | 57.702 | 54.951 | 40.697 | 0.00 | 0.00 |
| ATOM | 3740 | HD21 | LEU | X | 247 | 57.424 | 56.001 | 40.789 | 0.00 | 0.00 |
| ATOM | 3741 | HD22 | LEU | X | 247 | 57.700 | 54.714 | 39.633 | 0.00 | 0.00 |
| ATOM | 3742 | HD23 | LEU | X | 247 | 57.021 | 54.264 | 41.200 | 0.00 | 0.00 |
| ATOM | 3743 | C    | LEU | X | 247 | 61.152 | 56.755 | 42.570 | 0.00 | 0.00 |
| ATOM | 3744 | O    | LEU | X | 247 | 62.111 | 56.723 | 41.746 | 0.00 | 0.00 |
| ATOM | 3745 | N    | ALA | X | 248 | 60.746 | 57.894 | 43.159 | 0.00 | 0.00 |
| ATOM | 3746 | H    | ALA | X | 248 | 60.136 | 57.812 | 43.960 | 0.00 | 0.00 |
| ATOM | 3747 | CA   | ALA | X | 248 | 61.241 | 59.226 | 42.785 | 0.00 | 0.00 |
| ATOM | 3748 | HA   | ALA | X | 248 | 60.958 | 59.328 | 41.737 | 0.00 | 0.00 |
| ATOM | 3749 | CB   | ALA | X | 248 | 60.386 | 60.229 | 43.560 | 0.00 | 0.00 |

|      |      |      |     |   |     |        |        |        |      |      |
|------|------|------|-----|---|-----|--------|--------|--------|------|------|
| ATOM | 3750 | HB1  | ALA | X | 248 | 60.643 | 61.232 | 43.219 | 0.00 | 0.00 |
| ATOM | 3751 | HB2  | ALA | X | 248 | 60.554 | 60.133 | 44.633 | 0.00 | 0.00 |
| ATOM | 3752 | HB3  | ALA | X | 248 | 59.312 | 60.079 | 43.450 | 0.00 | 0.00 |
| ATOM | 3753 | C    | ALA | X | 248 | 62.758 | 59.367 | 42.995 | 0.00 | 0.00 |
| ATOM | 3754 | O    | ALA | X | 248 | 63.383 | 59.756 | 42.031 | 0.00 | 0.00 |
| ATOM | 3755 | N    | HIE | X | 249 | 63.335 | 58.990 | 44.189 | 0.00 | 0.00 |
| ATOM | 3756 | H    | HIE | X | 249 | 62.733 | 58.929 | 44.998 | 0.00 | 0.00 |
| ATOM | 3757 | CA   | HIE | X | 249 | 64.835 | 58.961 | 44.388 | 0.00 | 0.00 |
| ATOM | 3758 | HA   | HIE | X | 249 | 65.148 | 60.005 | 44.415 | 0.00 | 0.00 |
| ATOM | 3759 | CB   | HIE | X | 249 | 65.125 | 58.268 | 45.721 | 0.00 | 0.00 |
| ATOM | 3760 | HB2  | HIE | X | 249 | 64.483 | 57.389 | 45.784 | 0.00 | 0.00 |
| ATOM | 3761 | HB3  | HIE | X | 249 | 66.157 | 57.942 | 45.845 | 0.00 | 0.00 |
| ATOM | 3762 | CG   | HIE | X | 249 | 64.898 | 59.135 | 46.955 | 0.00 | 0.00 |
| ATOM | 3763 | ND1  | HIE | X | 249 | 64.946 | 60.548 | 46.985 | 0.00 | 0.00 |
| ATOM | 3764 | CE1  | HIE | X | 249 | 64.662 | 60.866 | 48.278 | 0.00 | 0.00 |
| ATOM | 3765 | HE1  | HIE | X | 249 | 64.588 | 61.836 | 48.747 | 0.00 | 0.00 |
| ATOM | 3766 | NE2  | HIE | X | 249 | 64.443 | 59.782 | 49.011 | 0.00 | 0.00 |
| ATOM | 3767 | HE2  | HIE | X | 249 | 64.163 | 59.797 | 49.981 | 0.00 | 0.00 |
| ATOM | 3768 | CD2  | HIE | X | 249 | 64.665 | 58.694 | 48.205 | 0.00 | 0.00 |
| ATOM | 3769 | HD2  | HIE | X | 249 | 64.613 | 57.664 | 48.522 | 0.00 | 0.00 |
| ATOM | 3770 | C    | HIE | X | 249 | 65.679 | 58.203 | 43.370 | 0.00 | 0.00 |
| ATOM | 3771 | O    | HIE | X | 249 | 66.857 | 58.582 | 43.071 | 0.00 | 0.00 |
| ATOM | 3772 | N    | LEU | X | 250 | 65.062 | 57.169 | 42.761 | 0.00 | 0.00 |
| ATOM | 3773 | H    | LEU | X | 250 | 64.212 | 56.769 | 43.133 | 0.00 | 0.00 |
| ATOM | 3774 | CA   | LEU | X | 250 | 65.708 | 56.378 | 41.757 | 0.00 | 0.00 |
| ATOM | 3775 | HA   | LEU | X | 250 | 66.783 | 56.346 | 41.936 | 0.00 | 0.00 |
| ATOM | 3776 | CB   | LEU | X | 250 | 65.106 | 54.929 | 41.741 | 0.00 | 0.00 |
| ATOM | 3777 | HB2  | LEU | X | 250 | 64.033 | 55.101 | 41.666 | 0.00 | 0.00 |
| ATOM | 3778 | HB3  | LEU | X | 250 | 65.459 | 54.500 | 40.803 | 0.00 | 0.00 |
| ATOM | 3779 | CG   | LEU | X | 250 | 65.420 | 54.087 | 42.969 | 0.00 | 0.00 |
| ATOM | 3780 | HG   | LEU | X | 250 | 65.260 | 54.622 | 43.905 | 0.00 | 0.00 |
| ATOM | 3781 | CD1  | LEU | X | 250 | 64.461 | 52.876 | 43.050 | 0.00 | 0.00 |
| ATOM | 3782 | HD11 | LEU | X | 250 | 64.723 | 52.347 | 43.966 | 0.00 | 0.00 |
| ATOM | 3783 | HD12 | LEU | X | 250 | 64.652 | 52.230 | 42.193 | 0.00 | 0.00 |
| ATOM | 3784 | HD13 | LEU | X | 250 | 63.440 | 53.255 | 43.091 | 0.00 | 0.00 |
| ATOM | 3785 | CD2  | LEU | X | 250 | 66.879 | 53.635 | 42.925 | 0.00 | 0.00 |
| ATOM | 3786 | HD21 | LEU | X | 250 | 67.253 | 53.254 | 41.975 | 0.00 | 0.00 |
| ATOM | 3787 | HD22 | LEU | X | 250 | 67.514 | 54.520 | 42.951 | 0.00 | 0.00 |
| ATOM | 3788 | HD23 | LEU | X | 250 | 67.086 | 52.915 | 43.717 | 0.00 | 0.00 |
| ATOM | 3789 | C    | LEU | X | 250 | 65.532 | 56.978 | 40.373 | 0.00 | 0.00 |
| ATOM | 3790 | O    | LEU | X | 250 | 66.468 | 57.012 | 39.617 | 0.00 | 0.00 |
| ATOM | 3791 | N    | VAL | X | 251 | 64.269 | 57.375 | 40.061 | 0.00 | 0.00 |
| ATOM | 3792 | H    | VAL | X | 251 | 63.576 | 57.115 | 40.748 | 0.00 | 0.00 |
| ATOM | 3793 | CA   | VAL | X | 251 | 63.885 | 57.845 | 38.741 | 0.00 | 0.00 |
| ATOM | 3794 | HA   | VAL | X | 251 | 64.336 | 57.250 | 37.947 | 0.00 | 0.00 |
| ATOM | 3795 | CB   | VAL | X | 251 | 62.302 | 57.752 | 38.589 | 0.00 | 0.00 |
| ATOM | 3796 | HB   | VAL | X | 251 | 61.806 | 58.115 | 39.489 | 0.00 | 0.00 |
| ATOM | 3797 | CG1  | VAL | X | 251 | 61.703 | 58.501 | 37.357 | 0.00 | 0.00 |
| ATOM | 3798 | HG11 | VAL | X | 251 | 62.358 | 58.205 | 36.537 | 0.00 | 0.00 |
| ATOM | 3799 | HG12 | VAL | X | 251 | 60.689 | 58.175 | 37.128 | 0.00 | 0.00 |
| ATOM | 3800 | HG13 | VAL | X | 251 | 61.599 | 59.573 | 37.521 | 0.00 | 0.00 |
| ATOM | 3801 | CG2  | VAL | X | 251 | 61.957 | 56.275 | 38.357 | 0.00 | 0.00 |
| ATOM | 3802 | HG21 | VAL | X | 251 | 62.391 | 55.715 | 39.185 | 0.00 | 0.00 |
| ATOM | 3803 | HG22 | VAL | X | 251 | 62.404 | 55.883 | 37.443 | 0.00 | 0.00 |
| ATOM | 3804 | HG23 | VAL | X | 251 | 60.869 | 56.245 | 38.411 | 0.00 | 0.00 |
| ATOM | 3805 | C    | VAL | X | 251 | 64.391 | 59.334 | 38.550 | 0.00 | 0.00 |
| ATOM | 3806 | O    | VAL | X | 251 | 64.235 | 59.918 | 37.482 | 0.00 | 0.00 |
| ATOM | 3807 | N    | GLY | X | 252 | 64.926 | 60.002 | 39.599 | 0.00 | 0.00 |
| ATOM | 3808 | H    | GLY | X | 252 | 64.804 | 59.586 | 40.511 | 0.00 | 0.00 |
| ATOM | 3809 | CA   | GLY | X | 252 | 65.563 | 61.321 | 39.388 | 0.00 | 0.00 |
| ATOM | 3810 | HA2  | GLY | X | 252 | 66.423 | 61.310 | 40.057 | 0.00 | 0.00 |
| ATOM | 3811 | HA3  | GLY | X | 252 | 66.002 | 61.525 | 38.411 | 0.00 | 0.00 |
| ATOM | 3812 | C    | GLY | X | 252 | 64.704 | 62.554 | 39.848 | 0.00 | 0.00 |
| ATOM | 3813 | O    | GLY | X | 252 | 64.725 | 63.532 | 39.136 | 0.00 | 0.00 |
| ATOM | 3814 | N    | CYX | X | 253 | 63.908 | 62.521 | 40.950 | 0.00 | 0.00 |
| ATOM | 3815 | H    | CYX | X | 253 | 63.889 | 61.616 | 41.398 | 0.00 | 0.00 |
| ATOM | 3816 | CA   | CYX | X | 253 | 63.037 | 63.630 | 41.434 | 0.00 | 0.00 |

|      |      |      |     |   |     |        |        |        |      |      |
|------|------|------|-----|---|-----|--------|--------|--------|------|------|
| ATOM | 3817 | HA   | CYX | X | 253 | 63.328 | 64.588 | 41.004 | 0.00 | 0.00 |
| ATOM | 3818 | CB   | CYX | X | 253 | 61.599 | 63.218 | 41.013 | 0.00 | 0.00 |
| ATOM | 3819 | HB2  | CYX | X | 253 | 61.351 | 62.230 | 41.400 | 0.00 | 0.00 |
| ATOM | 3820 | HB3  | CYX | X | 253 | 60.964 | 63.925 | 41.548 | 0.00 | 0.00 |
| ATOM | 3821 | SG   | CYX | X | 253 | 61.326 | 63.398 | 39.229 | 0.00 | 0.00 |
| ATOM | 3822 | C    | CYX | X | 253 | 63.161 | 63.736 | 42.973 | 0.00 | 0.00 |
| ATOM | 3823 | O    | CYX | X | 253 | 63.070 | 62.701 | 43.622 | 0.00 | 0.00 |
| ATOM | 3824 | N    | PRO | X | 254 | 63.136 | 64.933 | 43.604 | 0.00 | 0.00 |
| ATOM | 3825 | CD   | PRO | X | 254 | 63.066 | 65.027 | 45.017 | 0.00 | 0.00 |
| ATOM | 3826 | HD2  | PRO | X | 254 | 64.065 | 65.066 | 45.453 | 0.00 | 0.00 |
| ATOM | 3827 | HD3  | PRO | X | 254 | 62.405 | 64.280 | 45.455 | 0.00 | 0.00 |
| ATOM | 3828 | CG   | PRO | X | 254 | 62.260 | 66.322 | 45.315 | 0.00 | 0.00 |
| ATOM | 3829 | HG2  | PRO | X | 254 | 62.417 | 66.845 | 46.258 | 0.00 | 0.00 |
| ATOM | 3830 | HG3  | PRO | X | 254 | 61.194 | 66.164 | 45.152 | 0.00 | 0.00 |
| ATOM | 3831 | CB   | PRO | X | 254 | 62.739 | 67.230 | 44.141 | 0.00 | 0.00 |
| ATOM | 3832 | HB2  | PRO | X | 254 | 63.632 | 67.767 | 44.459 | 0.00 | 0.00 |
| ATOM | 3833 | HB3  | PRO | X | 254 | 61.995 | 67.960 | 43.822 | 0.00 | 0.00 |
| ATOM | 3834 | CA   | PRO | X | 254 | 63.119 | 66.290 | 43.010 | 0.00 | 0.00 |
| ATOM | 3835 | HA   | PRO | X | 254 | 62.272 | 66.256 | 42.325 | 0.00 | 0.00 |
| ATOM | 3836 | C    | PRO | X | 254 | 64.465 | 66.643 | 42.306 | 0.00 | 0.00 |
| ATOM | 3837 | O    | PRO | X | 254 | 65.346 | 65.832 | 42.368 | 0.00 | 0.00 |
| ATOM | 3838 | N    | PRO | X | 255 | 64.592 | 67.846 | 41.683 | 0.00 | 0.00 |
| ATOM | 3839 | CD   | PRO | X | 255 | 63.520 | 68.764 | 41.338 | 0.00 | 0.00 |
| ATOM | 3840 | HD2  | PRO | X | 255 | 63.339 | 69.257 | 42.293 | 0.00 | 0.00 |
| ATOM | 3841 | HD3  | PRO | X | 255 | 62.679 | 68.237 | 40.887 | 0.00 | 0.00 |
| ATOM | 3842 | CG   | PRO | X | 255 | 64.140 | 69.706 | 40.333 | 0.00 | 0.00 |
| ATOM | 3843 | HG2  | PRO | X | 255 | 63.616 | 70.661 | 40.369 | 0.00 | 0.00 |
| ATOM | 3844 | HG3  | PRO | X | 255 | 64.046 | 69.244 | 39.350 | 0.00 | 0.00 |
| ATOM | 3845 | CB   | PRO | X | 255 | 65.577 | 69.812 | 40.787 | 0.00 | 0.00 |
| ATOM | 3846 | HB2  | PRO | X | 255 | 65.538 | 70.460 | 41.663 | 0.00 | 0.00 |
| ATOM | 3847 | HB3  | PRO | X | 255 | 66.237 | 70.182 | 40.003 | 0.00 | 0.00 |
| ATOM | 3848 | CA   | PRO | X | 255 | 65.910 | 68.393 | 41.272 | 0.00 | 0.00 |
| ATOM | 3849 | HA   | PRO | X | 255 | 66.425 | 67.791 | 40.523 | 0.00 | 0.00 |
| ATOM | 3850 | C    | PRO | X | 255 | 66.908 | 68.534 | 42.459 | 0.00 | 0.00 |
| ATOM | 3851 | O    | PRO | X | 255 | 66.442 | 68.624 | 43.619 | 0.00 | 0.00 |
| ATOM | 3852 | N    | GLY | X | 256 | 68.209 | 68.672 | 42.155 | 0.00 | 0.00 |
| ATOM | 3853 | H    | GLY | X | 256 | 68.536 | 68.530 | 41.210 | 0.00 | 0.00 |
| ATOM | 3854 | CA   | GLY | X | 256 | 69.269 | 68.540 | 43.138 | 0.00 | 0.00 |
| ATOM | 3855 | HA2  | GLY | X | 256 | 69.035 | 67.744 | 43.844 | 0.00 | 0.00 |
| ATOM | 3856 | HA3  | GLY | X | 256 | 70.270 | 68.339 | 42.756 | 0.00 | 0.00 |
| ATOM | 3857 | C    | GLY | X | 256 | 69.477 | 69.772 | 44.026 | 0.00 | 0.00 |
| ATOM | 3858 | O    | GLY | X | 256 | 70.382 | 69.686 | 44.863 | 0.00 | 0.00 |
| ATOM | 3859 | N    | GLY | X | 257 | 68.665 | 70.827 | 43.813 | 0.00 | 0.00 |
| ATOM | 3860 | H    | GLY | X | 257 | 67.974 | 70.760 | 43.079 | 0.00 | 0.00 |
| ATOM | 3861 | CA   | GLY | X | 257 | 68.592 | 72.016 | 44.685 | 0.00 | 0.00 |
| ATOM | 3862 | HA2  | GLY | X | 257 | 69.585 | 72.258 | 45.063 | 0.00 | 0.00 |
| ATOM | 3863 | HA3  | GLY | X | 257 | 68.247 | 72.917 | 44.178 | 0.00 | 0.00 |
| ATOM | 3864 | C    | GLY | X | 257 | 67.641 | 71.788 | 45.859 | 0.00 | 0.00 |
| ATOM | 3865 | O    | GLY | X | 257 | 67.800 | 72.324 | 46.907 | 0.00 | 0.00 |
| ATOM | 3866 | N    | THR | X | 258 | 66.569 | 71.030 | 45.658 | 0.00 | 0.00 |
| ATOM | 3867 | H    | THR | X | 258 | 66.433 | 70.627 | 44.743 | 0.00 | 0.00 |
| ATOM | 3868 | CA   | THR | X | 258 | 65.510 | 70.599 | 46.658 | 0.00 | 0.00 |
| ATOM | 3869 | HA   | THR | X | 258 | 65.045 | 69.737 | 46.179 | 0.00 | 0.00 |
| ATOM | 3870 | CB   | THR | X | 258 | 66.014 | 70.201 | 48.038 | 0.00 | 0.00 |
| ATOM | 3871 | HB   | THR | X | 258 | 65.278 | 69.665 | 48.637 | 0.00 | 0.00 |
| ATOM | 3872 | CG2  | THR | X | 258 | 67.200 | 69.279 | 47.916 | 0.00 | 0.00 |
| ATOM | 3873 | HG21 | THR | X | 258 | 67.577 | 68.893 | 48.863 | 0.00 | 0.00 |
| ATOM | 3874 | HG22 | THR | X | 258 | 68.057 | 69.720 | 47.406 | 0.00 | 0.00 |
| ATOM | 3875 | HG23 | THR | X | 258 | 66.926 | 68.477 | 47.231 | 0.00 | 0.00 |
| ATOM | 3876 | OG1  | THR | X | 258 | 66.419 | 71.274 | 48.791 | 0.00 | 0.00 |
| ATOM | 3877 | HG1  | THR | X | 258 | 66.946 | 71.886 | 48.272 | 0.00 | 0.00 |
| ATOM | 3878 | C    | THR | X | 258 | 64.349 | 71.705 | 46.864 | 0.00 | 0.00 |
| ATOM | 3879 | O    | THR | X | 258 | 64.480 | 72.805 | 46.392 | 0.00 | 0.00 |
| ATOM | 3880 | N    | GLY | X | 259 | 63.281 | 71.237 | 47.506 | 0.00 | 0.00 |
| ATOM | 3881 | H    | GLY | X | 259 | 63.373 | 70.299 | 47.870 | 0.00 | 0.00 |
| ATOM | 3882 | CA   | GLY | X | 259 | 62.040 | 71.960 | 47.847 | 0.00 | 0.00 |
| ATOM | 3883 | HA2  | GLY | X | 259 | 62.207 | 72.907 | 48.359 | 0.00 | 0.00 |

|      |      |      |     |   |     |        |        |        |      |      |
|------|------|------|-----|---|-----|--------|--------|--------|------|------|
| ATOM | 3884 | HA3  | GLY | X | 259 | 61.573 | 72.147 | 46.880 | 0.00 | 0.00 |
| ATOM | 3885 | C    | GLY | X | 259 | 61.185 | 71.097 | 48.689 | 0.00 | 0.00 |
| ATOM | 3886 | O    | GLY | X | 259 | 60.922 | 71.424 | 49.863 | 0.00 | 0.00 |
| ATOM | 3887 | N    | GLY | X | 260 | 60.922 | 69.921 | 48.197 | 0.00 | 0.00 |
| ATOM | 3888 | H    | GLY | X | 260 | 61.117 | 69.721 | 47.226 | 0.00 | 0.00 |
| ATOM | 3889 | CA   | GLY | X | 260 | 60.285 | 68.833 | 48.903 | 0.00 | 0.00 |
| ATOM | 3890 | HA2  | GLY | X | 260 | 60.606 | 67.909 | 48.422 | 0.00 | 0.00 |
| ATOM | 3891 | HA3  | GLY | X | 260 | 60.650 | 68.730 | 49.925 | 0.00 | 0.00 |
| ATOM | 3892 | C    | GLY | X | 260 | 58.768 | 68.763 | 48.839 | 0.00 | 0.00 |
| ATOM | 3893 | O    | GLY | X | 260 | 58.172 | 67.948 | 49.513 | 0.00 | 0.00 |
| ATOM | 3894 | N    | ASN | X | 261 | 58.192 | 69.671 | 48.037 | 0.00 | 0.00 |
| ATOM | 3895 | H    | ASN | X | 261 | 58.796 | 70.353 | 47.602 | 0.00 | 0.00 |
| ATOM | 3896 | CA   | ASN | X | 261 | 56.753 | 69.746 | 47.994 | 0.00 | 0.00 |
| ATOM | 3897 | HA   | ASN | X | 261 | 56.314 | 69.733 | 48.992 | 0.00 | 0.00 |
| ATOM | 3898 | CB   | ASN | X | 261 | 56.335 | 71.058 | 47.296 | 0.00 | 0.00 |
| ATOM | 3899 | HB2  | ASN | X | 261 | 56.757 | 71.888 | 47.863 | 0.00 | 0.00 |
| ATOM | 3900 | HB3  | ASN | X | 261 | 56.716 | 71.171 | 46.281 | 0.00 | 0.00 |
| ATOM | 3901 | CG   | ASN | X | 261 | 54.831 | 71.271 | 47.197 | 0.00 | 0.00 |
| ATOM | 3902 | OD1  | ASN | X | 261 | 54.004 | 70.421 | 47.529 | 0.00 | 0.00 |
| ATOM | 3903 | ND2  | ASN | X | 261 | 54.414 | 72.456 | 46.713 | 0.00 | 0.00 |
| ATOM | 3904 | HD21 | ASN | X | 261 | 53.426 | 72.643 | 46.618 | 0.00 | 0.00 |
| ATOM | 3905 | HD22 | ASN | X | 261 | 55.100 | 73.161 | 46.486 | 0.00 | 0.00 |
| ATOM | 3906 | C    | ASN | X | 261 | 56.157 | 68.548 | 47.207 | 0.00 | 0.00 |
| ATOM | 3907 | O    | ASN | X | 261 | 56.651 | 68.146 | 46.212 | 0.00 | 0.00 |
| ATOM | 3908 | N    | ASP | X | 262 | 55.093 | 67.887 | 47.737 | 0.00 | 0.00 |
| ATOM | 3909 | H    | ASP | X | 262 | 54.697 | 68.342 | 48.548 | 0.00 | 0.00 |
| ATOM | 3910 | CA   | ASP | X | 262 | 54.327 | 66.786 | 47.169 | 0.00 | 0.00 |
| ATOM | 3911 | HA   | ASP | X | 262 | 54.917 | 65.869 | 47.172 | 0.00 | 0.00 |
| ATOM | 3912 | CB   | ASP | X | 262 | 53.033 | 66.542 | 47.888 | 0.00 | 0.00 |
| ATOM | 3913 | HB2  | ASP | X | 262 | 52.454 | 67.457 | 48.011 | 0.00 | 0.00 |
| ATOM | 3914 | HB3  | ASP | X | 262 | 52.535 | 65.780 | 47.288 | 0.00 | 0.00 |
| ATOM | 3915 | CG   | ASP | X | 262 | 53.215 | 65.864 | 49.256 | 0.00 | 0.00 |
| ATOM | 3916 | OD1  | ASP | X | 262 | 53.881 | 66.514 | 50.085 | 0.00 | 0.00 |
| ATOM | 3917 | OD2  | ASP | X | 262 | 52.600 | 64.841 | 49.532 | 0.00 | 0.00 |
| ATOM | 3918 | C    | ASP | X | 262 | 53.945 | 67.101 | 45.688 | 0.00 | 0.00 |
| ATOM | 3919 | O    | ASP | X | 262 | 54.201 | 66.248 | 44.877 | 0.00 | 0.00 |
| ATOM | 3920 | N    | THR | X | 263 | 53.587 | 68.375 | 45.438 | 0.00 | 0.00 |
| ATOM | 3921 | H    | THR | X | 263 | 53.508 | 68.971 | 46.249 | 0.00 | 0.00 |
| ATOM | 3922 | CA   | THR | X | 263 | 53.359 | 68.952 | 44.018 | 0.00 | 0.00 |
| ATOM | 3923 | HA   | THR | X | 263 | 52.578 | 68.394 | 43.502 | 0.00 | 0.00 |
| ATOM | 3924 | CB   | THR | X | 263 | 52.927 | 70.442 | 44.100 | 0.00 | 0.00 |
| ATOM | 3925 | HB   | THR | X | 263 | 53.815 | 70.983 | 44.424 | 0.00 | 0.00 |
| ATOM | 3926 | CG2  | THR | X | 263 | 52.376 | 70.955 | 42.788 | 0.00 | 0.00 |
| ATOM | 3927 | HG21 | THR | X | 263 | 51.937 | 71.944 | 42.917 | 0.00 | 0.00 |
| ATOM | 3928 | HG22 | THR | X | 263 | 51.618 | 70.357 | 42.282 | 0.00 | 0.00 |
| ATOM | 3929 | HG23 | THR | X | 263 | 53.246 | 70.957 | 42.132 | 0.00 | 0.00 |
| ATOM | 3930 | OG1  | THR | X | 263 | 51.851 | 70.655 | 45.044 | 0.00 | 0.00 |
| ATOM | 3931 | HG1  | THR | X | 263 | 51.014 | 70.346 | 44.691 | 0.00 | 0.00 |
| ATOM | 3932 | C    | THR | X | 263 | 54.566 | 68.810 | 43.091 | 0.00 | 0.00 |
| ATOM | 3933 | O    | THR | X | 263 | 54.443 | 68.260 | 42.005 | 0.00 | 0.00 |
| ATOM | 3934 | N    | GLU | X | 264 | 55.800 | 69.258 | 43.471 | 0.00 | 0.00 |
| ATOM | 3935 | H    | GLU | X | 264 | 55.792 | 69.528 | 44.444 | 0.00 | 0.00 |
| ATOM | 3936 | CA   | GLU | X | 264 | 57.099 | 69.193 | 42.801 | 0.00 | 0.00 |
| ATOM | 3937 | HA   | GLU | X | 264 | 57.096 | 69.757 | 41.868 | 0.00 | 0.00 |
| ATOM | 3938 | CB   | GLU | X | 264 | 58.142 | 69.889 | 43.721 | 0.00 | 0.00 |
| ATOM | 3939 | HB2  | GLU | X | 264 | 57.892 | 70.947 | 43.788 | 0.00 | 0.00 |
| ATOM | 3940 | HB3  | GLU | X | 264 | 58.074 | 69.419 | 44.702 | 0.00 | 0.00 |
| ATOM | 3941 | CG   | GLU | X | 264 | 59.544 | 69.788 | 43.183 | 0.00 | 0.00 |
| ATOM | 3942 | HG2  | GLU | X | 264 | 59.757 | 68.758 | 42.895 | 0.00 | 0.00 |
| ATOM | 3943 | HG3  | GLU | X | 264 | 59.719 | 70.386 | 42.289 | 0.00 | 0.00 |
| ATOM | 3944 | CD   | GLU | X | 264 | 60.575 | 70.191 | 44.197 | 0.00 | 0.00 |
| ATOM | 3945 | OE1  | GLU | X | 264 | 60.372 | 69.923 | 45.404 | 0.00 | 0.00 |
| ATOM | 3946 | OE2  | GLU | X | 264 | 61.563 | 70.802 | 43.755 | 0.00 | 0.00 |
| ATOM | 3947 | C    | GLU | X | 264 | 57.383 | 67.751 | 42.455 | 0.00 | 0.00 |
| ATOM | 3948 | O    | GLU | X | 264 | 57.730 | 67.436 | 41.360 | 0.00 | 0.00 |
| ATOM | 3949 | N    | LEU | X | 265 | 57.329 | 66.855 | 43.540 | 0.00 | 0.00 |
| ATOM | 3950 | H    | LEU | X | 265 | 57.110 | 67.177 | 44.472 | 0.00 | 0.00 |

|      |      |      |     |   |     |        |        |        |      |      |
|------|------|------|-----|---|-----|--------|--------|--------|------|------|
| ATOM | 3951 | CA   | LEU | X | 265 | 57.676 | 65.474 | 43.326 | 0.00 | 0.00 |
| ATOM | 3952 | HA   | LEU | X | 265 | 58.733 | 65.460 | 43.058 | 0.00 | 0.00 |
| ATOM | 3953 | CB   | LEU | X | 265 | 57.543 | 64.732 | 44.715 | 0.00 | 0.00 |
| ATOM | 3954 | HB2  | LEU | X | 265 | 57.882 | 65.397 | 45.509 | 0.00 | 0.00 |
| ATOM | 3955 | HB3  | LEU | X | 265 | 56.460 | 64.623 | 44.778 | 0.00 | 0.00 |
| ATOM | 3956 | CG   | LEU | X | 265 | 58.250 | 63.364 | 44.765 | 0.00 | 0.00 |
| ATOM | 3957 | HG   | LEU | X | 265 | 58.116 | 62.852 | 43.812 | 0.00 | 0.00 |
| ATOM | 3958 | CD1  | LEU | X | 265 | 59.765 | 63.545 | 44.980 | 0.00 | 0.00 |
| ATOM | 3959 | HD11 | LEU | X | 265 | 59.940 | 64.242 | 45.799 | 0.00 | 0.00 |
| ATOM | 3960 | HD12 | LEU | X | 265 | 60.173 | 63.977 | 44.066 | 0.00 | 0.00 |
| ATOM | 3961 | HD13 | LEU | X | 265 | 60.206 | 62.587 | 45.257 | 0.00 | 0.00 |
| ATOM | 3962 | CD2  | LEU | X | 265 | 57.677 | 62.484 | 45.816 | 0.00 | 0.00 |
| ATOM | 3963 | HD21 | LEU | X | 265 | 56.624 | 62.311 | 45.598 | 0.00 | 0.00 |
| ATOM | 3964 | HD22 | LEU | X | 265 | 58.168 | 61.518 | 45.933 | 0.00 | 0.00 |
| ATOM | 3965 | HD23 | LEU | X | 265 | 57.887 | 62.983 | 46.762 | 0.00 | 0.00 |
| ATOM | 3966 | C    | LEU | X | 265 | 56.879 | 64.752 | 42.256 | 0.00 | 0.00 |
| ATOM | 3967 | O    | LEU | X | 265 | 57.380 | 64.129 | 41.375 | 0.00 | 0.00 |
| ATOM | 3968 | N    | VAL | X | 266 | 55.528 | 65.016 | 42.293 | 0.00 | 0.00 |
| ATOM | 3969 | H    | VAL | X | 266 | 55.187 | 65.530 | 43.093 | 0.00 | 0.00 |
| ATOM | 3970 | CA   | VAL | X | 266 | 54.573 | 64.424 | 41.308 | 0.00 | 0.00 |
| ATOM | 3971 | HA   | VAL | X | 266 | 54.752 | 63.355 | 41.192 | 0.00 | 0.00 |
| ATOM | 3972 | CB   | VAL | X | 266 | 53.101 | 64.533 | 41.773 | 0.00 | 0.00 |
| ATOM | 3973 | HB   | VAL | X | 266 | 52.830 | 65.587 | 41.834 | 0.00 | 0.00 |
| ATOM | 3974 | CG1  | VAL | X | 266 | 52.200 | 63.968 | 40.716 | 0.00 | 0.00 |
| ATOM | 3975 | HG11 | VAL | X | 266 | 51.164 | 63.926 | 41.050 | 0.00 | 0.00 |
| ATOM | 3976 | HG12 | VAL | X | 266 | 52.221 | 64.591 | 39.822 | 0.00 | 0.00 |
| ATOM | 3977 | HG13 | VAL | X | 266 | 52.432 | 62.916 | 40.546 | 0.00 | 0.00 |
| ATOM | 3978 | CG2  | VAL | X | 266 | 53.009 | 63.704 | 43.031 | 0.00 | 0.00 |
| ATOM | 3979 | HG21 | VAL | X | 266 | 53.160 | 62.645 | 42.820 | 0.00 | 0.00 |
| ATOM | 3980 | HG22 | VAL | X | 266 | 52.015 | 63.873 | 43.445 | 0.00 | 0.00 |
| ATOM | 3981 | HG23 | VAL | X | 266 | 53.755 | 63.977 | 43.778 | 0.00 | 0.00 |
| ATOM | 3982 | C    | VAL | X | 266 | 54.748 | 65.106 | 39.935 | 0.00 | 0.00 |
| ATOM | 3983 | O    | VAL | X | 266 | 55.026 | 64.368 | 38.961 | 0.00 | 0.00 |
| ATOM | 3984 | N    | ALA | X | 267 | 54.657 | 66.409 | 39.830 | 0.00 | 0.00 |
| ATOM | 3985 | H    | ALA | X | 267 | 54.528 | 66.975 | 40.657 | 0.00 | 0.00 |
| ATOM | 3986 | CA   | ALA | X | 267 | 55.086 | 67.110 | 38.580 | 0.00 | 0.00 |
| ATOM | 3987 | HA   | ALA | X | 267 | 54.356 | 66.954 | 37.786 | 0.00 | 0.00 |
| ATOM | 3988 | CB   | ALA | X | 267 | 55.063 | 68.597 | 38.844 | 0.00 | 0.00 |
| ATOM | 3989 | HB1  | ALA | X | 267 | 55.158 | 69.152 | 37.911 | 0.00 | 0.00 |
| ATOM | 3990 | HB2  | ALA | X | 267 | 55.895 | 68.940 | 39.460 | 0.00 | 0.00 |
| ATOM | 3991 | HB3  | ALA | X | 267 | 54.184 | 68.967 | 39.371 | 0.00 | 0.00 |
| ATOM | 3992 | C    | ALA | X | 267 | 56.355 | 66.598 | 37.923 | 0.00 | 0.00 |
| ATOM | 3993 | O    | ALA | X | 267 | 56.260 | 66.176 | 36.782 | 0.00 | 0.00 |
| ATOM | 3994 | N    | CYX | X | 268 | 57.468 | 66.526 | 38.639 | 0.00 | 0.00 |
| ATOM | 3995 | H    | CYX | X | 268 | 57.460 | 66.871 | 39.588 | 0.00 | 0.00 |
| ATOM | 3996 | CA   | CYX | X | 268 | 58.728 | 65.950 | 38.114 | 0.00 | 0.00 |
| ATOM | 3997 | HA   | CYX | X | 268 | 59.026 | 66.581 | 37.277 | 0.00 | 0.00 |
| ATOM | 3998 | CB   | CYX | X | 268 | 59.828 | 65.916 | 39.166 | 0.00 | 0.00 |
| ATOM | 3999 | HB2  | CYX | X | 268 | 59.932 | 66.941 | 39.523 | 0.00 | 0.00 |
| ATOM | 4000 | HB3  | CYX | X | 268 | 59.424 | 65.353 | 40.008 | 0.00 | 0.00 |
| ATOM | 4001 | SG   | CYX | X | 268 | 61.442 | 65.302 | 38.715 | 0.00 | 0.00 |
| ATOM | 4002 | C    | CYX | X | 268 | 58.471 | 64.544 | 37.566 | 0.00 | 0.00 |
| ATOM | 4003 | O    | CYX | X | 268 | 58.843 | 64.300 | 36.426 | 0.00 | 0.00 |
| ATOM | 4004 | N    | LEU | X | 269 | 57.750 | 63.685 | 38.251 | 0.00 | 0.00 |
| ATOM | 4005 | H    | LEU | X | 269 | 57.423 | 63.812 | 39.198 | 0.00 | 0.00 |
| ATOM | 4006 | CA   | LEU | X | 269 | 57.456 | 62.308 | 37.838 | 0.00 | 0.00 |
| ATOM | 4007 | HA   | LEU | X | 269 | 58.376 | 61.806 | 37.537 | 0.00 | 0.00 |
| ATOM | 4008 | CB   | LEU | X | 269 | 56.927 | 61.560 | 39.146 | 0.00 | 0.00 |
| ATOM | 4009 | HB2  | LEU | X | 269 | 57.575 | 62.003 | 39.903 | 0.00 | 0.00 |
| ATOM | 4010 | HB3  | LEU | X | 269 | 55.912 | 61.875 | 39.387 | 0.00 | 0.00 |
| ATOM | 4011 | CG   | LEU | X | 269 | 57.032 | 60.043 | 39.119 | 0.00 | 0.00 |
| ATOM | 4012 | HG   | LEU | X | 269 | 56.424 | 59.677 | 38.292 | 0.00 | 0.00 |
| ATOM | 4013 | CD1  | LEU | X | 269 | 58.489 | 59.473 | 39.079 | 0.00 | 0.00 |
| ATOM | 4014 | HD11 | LEU | X | 269 | 59.017 | 60.074 | 39.819 | 0.00 | 0.00 |
| ATOM | 4015 | HD12 | LEU | X | 269 | 58.945 | 59.585 | 38.096 | 0.00 | 0.00 |
| ATOM | 4016 | HD13 | LEU | X | 269 | 58.535 | 58.394 | 39.225 | 0.00 | 0.00 |
| ATOM | 4017 | CD2  | LEU | X | 269 | 56.375 | 59.425 | 40.420 | 0.00 | 0.00 |

|      |      |      |     |   |     |        |        |        |      |      |
|------|------|------|-----|---|-----|--------|--------|--------|------|------|
| ATOM | 4018 | HD21 | LEU | X | 269 | 57.000 | 59.730 | 41.259 | 0.00 | 0.00 |
| ATOM | 4019 | HD22 | LEU | X | 269 | 55.361 | 59.822 | 40.471 | 0.00 | 0.00 |
| ATOM | 4020 | HD23 | LEU | X | 269 | 56.289 | 58.342 | 40.334 | 0.00 | 0.00 |
| ATOM | 4021 | C    | LEU | X | 269 | 56.440 | 62.166 | 36.719 | 0.00 | 0.00 |
| ATOM | 4022 | O    | LEU | X | 269 | 56.434 | 61.154 | 36.011 | 0.00 | 0.00 |
| ATOM | 4023 | N    | ARG | X | 270 | 55.717 | 63.191 | 36.316 | 0.00 | 0.00 |
| ATOM | 4024 | H    | ARG | X | 270 | 55.739 | 64.004 | 36.914 | 0.00 | 0.00 |
| ATOM | 4025 | CA   | ARG | X | 270 | 54.837 | 63.151 | 35.125 | 0.00 | 0.00 |
| ATOM | 4026 | HA   | ARG | X | 270 | 54.157 | 62.300 | 35.173 | 0.00 | 0.00 |
| ATOM | 4027 | CB   | ARG | X | 270 | 53.810 | 64.333 | 35.144 | 0.00 | 0.00 |
| ATOM | 4028 | HB2  | ARG | X | 270 | 54.420 | 65.236 | 35.157 | 0.00 | 0.00 |
| ATOM | 4029 | HB3  | ARG | X | 270 | 53.306 | 64.401 | 34.180 | 0.00 | 0.00 |
| ATOM | 4030 | CG   | ARG | X | 270 | 52.897 | 64.430 | 36.335 | 0.00 | 0.00 |
| ATOM | 4031 | HG2  | ARG | X | 270 | 52.454 | 63.450 | 36.517 | 0.00 | 0.00 |
| ATOM | 4032 | HG3  | ARG | X | 270 | 53.498 | 64.669 | 37.213 | 0.00 | 0.00 |
| ATOM | 4033 | CD   | ARG | X | 270 | 51.895 | 65.598 | 36.089 | 0.00 | 0.00 |
| ATOM | 4034 | HD2  | ARG | X | 270 | 52.557 | 66.406 | 35.779 | 0.00 | 0.00 |
| ATOM | 4035 | HD3  | ARG | X | 270 | 51.173 | 65.285 | 35.334 | 0.00 | 0.00 |
| ATOM | 4036 | NE   | ARG | X | 270 | 51.117 | 65.959 | 37.319 | 0.00 | 0.00 |
| ATOM | 4037 | HE   | ARG | X | 270 | 51.099 | 66.939 | 37.563 | 0.00 | 0.00 |
| ATOM | 4038 | CZ   | ARG | X | 270 | 50.175 | 65.197 | 37.841 | 0.00 | 0.00 |
| ATOM | 4039 | NH1  | ARG | X | 270 | 49.797 | 64.050 | 37.350 | 0.00 | 0.00 |
| ATOM | 4040 | HH11 | ARG | X | 270 | 50.093 | 63.792 | 36.419 | 0.00 | 0.00 |
| ATOM | 4041 | HH12 | ARG | X | 270 | 49.148 | 63.453 | 37.843 | 0.00 | 0.00 |
| ATOM | 4042 | NH2  | ARG | X | 270 | 49.572 | 65.575 | 38.938 | 0.00 | 0.00 |
| ATOM | 4043 | HH21 | ARG | X | 270 | 50.015 | 66.363 | 39.388 | 0.00 | 0.00 |
| ATOM | 4044 | HH22 | ARG | X | 270 | 48.902 | 64.987 | 39.414 | 0.00 | 0.00 |
| ATOM | 4045 | C    | ARG | X | 270 | 55.515 | 63.188 | 33.841 | 0.00 | 0.00 |
| ATOM | 4046 | O    | ARG | X | 270 | 55.077 | 62.652 | 32.820 | 0.00 | 0.00 |
| ATOM | 4047 | N    | THR | X | 271 | 56.693 | 63.813 | 33.817 | 0.00 | 0.00 |
| ATOM | 4048 | H    | THR | X | 271 | 57.037 | 64.309 | 34.626 | 0.00 | 0.00 |
| ATOM | 4049 | CA   | THR | X | 271 | 57.519 | 63.982 | 32.628 | 0.00 | 0.00 |
| ATOM | 4050 | HA   | THR | X | 271 | 56.956 | 64.522 | 31.867 | 0.00 | 0.00 |
| ATOM | 4051 | CB   | THR | X | 271 | 58.826 | 64.756 | 32.970 | 0.00 | 0.00 |
| ATOM | 4052 | HB   | THR | X | 271 | 59.396 | 64.731 | 32.041 | 0.00 | 0.00 |
| ATOM | 4053 | CG2  | THR | X | 271 | 58.566 | 66.167 | 33.523 | 0.00 | 0.00 |
| ATOM | 4054 | HG21 | THR | X | 271 | 57.841 | 66.717 | 32.923 | 0.00 | 0.00 |
| ATOM | 4055 | HG22 | THR | X | 271 | 59.534 | 66.638 | 33.692 | 0.00 | 0.00 |
| ATOM | 4056 | HG23 | THR | X | 271 | 58.108 | 66.047 | 34.505 | 0.00 | 0.00 |
| ATOM | 4057 | OG1  | THR | X | 271 | 59.673 | 64.120 | 33.932 | 0.00 | 0.00 |
| ATOM | 4058 | HG1  | THR | X | 271 | 59.212 | 64.269 | 34.761 | 0.00 | 0.00 |
| ATOM | 4059 | C    | THR | X | 271 | 57.975 | 62.635 | 32.017 | 0.00 | 0.00 |
| ATOM | 4060 | O    | THR | X | 271 | 58.315 | 62.593 | 30.846 | 0.00 | 0.00 |
| ATOM | 4061 | N    | ARG | X | 272 | 58.206 | 61.584 | 32.786 | 0.00 | 0.00 |
| ATOM | 4062 | H    | ARG | X | 272 | 57.969 | 61.691 | 33.762 | 0.00 | 0.00 |
| ATOM | 4063 | CA   | ARG | X | 272 | 58.889 | 60.335 | 32.357 | 0.00 | 0.00 |
| ATOM | 4064 | HA   | ARG | X | 272 | 59.824 | 60.609 | 31.869 | 0.00 | 0.00 |
| ATOM | 4065 | CB   | ARG | X | 272 | 59.218 | 59.460 | 33.587 | 0.00 | 0.00 |
| ATOM | 4066 | HB2  | ARG | X | 272 | 58.310 | 59.024 | 34.005 | 0.00 | 0.00 |
| ATOM | 4067 | HB3  | ARG | X | 272 | 59.898 | 58.707 | 33.189 | 0.00 | 0.00 |
| ATOM | 4068 | CG   | ARG | X | 272 | 59.994 | 60.380 | 34.671 | 0.00 | 0.00 |
| ATOM | 4069 | HG2  | ARG | X | 272 | 59.370 | 61.141 | 35.139 | 0.00 | 0.00 |
| ATOM | 4070 | HG3  | ARG | X | 272 | 60.213 | 59.638 | 35.439 | 0.00 | 0.00 |
| ATOM | 4071 | CD   | ARG | X | 272 | 61.419 | 60.888 | 34.167 | 0.00 | 0.00 |
| ATOM | 4072 | HD2  | ARG | X | 272 | 61.892 | 60.093 | 33.591 | 0.00 | 0.00 |
| ATOM | 4073 | HD3  | ARG | X | 272 | 61.396 | 61.709 | 33.451 | 0.00 | 0.00 |
| ATOM | 4074 | NE   | ARG | X | 272 | 62.354 | 61.211 | 35.294 | 0.00 | 0.00 |
| ATOM | 4075 | HE   | ARG | X | 272 | 62.865 | 60.454 | 35.723 | 0.00 | 0.00 |
| ATOM | 4076 | CZ   | ARG | X | 272 | 62.626 | 62.412 | 35.778 | 0.00 | 0.00 |
| ATOM | 4077 | NH1  | ARG | X | 272 | 62.024 | 63.538 | 35.382 | 0.00 | 0.00 |
| ATOM | 4078 | HH11 | ARG | X | 272 | 61.201 | 63.526 | 34.797 | 0.00 | 0.00 |
| ATOM | 4079 | HH12 | ARG | X | 272 | 62.354 | 64.428 | 35.727 | 0.00 | 0.00 |
| ATOM | 4080 | NH2  | ARG | X | 272 | 63.532 | 62.496 | 36.703 | 0.00 | 0.00 |
| ATOM | 4081 | HH21 | ARG | X | 272 | 64.075 | 61.698 | 37.001 | 0.00 | 0.00 |
| ATOM | 4082 | HH22 | ARG | X | 272 | 63.684 | 63.359 | 37.206 | 0.00 | 0.00 |
| ATOM | 4083 | C    | ARG | X | 272 | 58.057 | 59.434 | 31.467 | 0.00 | 0.00 |
| ATOM | 4084 | O    | ARG | X | 272 | 56.839 | 59.364 | 31.699 | 0.00 | 0.00 |



|      |      |      |     |   |     |        |        |        |      |      |
|------|------|------|-----|---|-----|--------|--------|--------|------|------|
| ATOM | 4085 | N    | PRO | X | 273 | 58.599 | 58.723 | 30.448 | 0.00 | 0.00 |
| ATOM | 4086 | CD   | PRO | X | 273 | 59.869 | 59.090 | 29.848 | 0.00 | 0.00 |
| ATOM | 4087 | HD2  | PRO | X | 273 | 60.687 | 58.577 | 30.353 | 0.00 | 0.00 |
| ATOM | 4088 | HD3  | PRO | X | 273 | 60.069 | 60.161 | 29.831 | 0.00 | 0.00 |
| ATOM | 4089 | CG   | PRO | X | 273 | 59.832 | 58.384 | 28.491 | 0.00 | 0.00 |
| ATOM | 4090 | HG2  | PRO | X | 273 | 60.845 | 58.089 | 28.216 | 0.00 | 0.00 |
| ATOM | 4091 | HG3  | PRO | X | 273 | 59.415 | 59.037 | 27.725 | 0.00 | 0.00 |
| ATOM | 4092 | CB   | PRO | X | 273 | 58.880 | 57.162 | 28.601 | 0.00 | 0.00 |
| ATOM | 4093 | HB2  | PRO | X | 273 | 59.478 | 56.290 | 28.864 | 0.00 | 0.00 |
| ATOM | 4094 | HB3  | PRO | X | 273 | 58.272 | 56.925 | 27.728 | 0.00 | 0.00 |
| ATOM | 4095 | CA   | PRO | X | 273 | 57.933 | 57.647 | 29.731 | 0.00 | 0.00 |
| ATOM | 4096 | HA   | PRO | X | 273 | 57.011 | 58.010 | 29.277 | 0.00 | 0.00 |
| ATOM | 4097 | C    | PRO | X | 273 | 57.612 | 56.513 | 30.678 | 0.00 | 0.00 |
| ATOM | 4098 | O    | PRO | X | 273 | 58.519 | 56.018 | 31.442 | 0.00 | 0.00 |
| ATOM | 4099 | N    | ALA | X | 274 | 56.376 | 55.941 | 30.595 | 0.00 | 0.00 |
| ATOM | 4100 | H    | ALA | X | 274 | 55.856 | 56.242 | 29.783 | 0.00 | 0.00 |
| ATOM | 4101 | CA   | ALA | X | 274 | 55.802 | 54.890 | 31.489 | 0.00 | 0.00 |
| ATOM | 4102 | HA   | ALA | X | 274 | 55.468 | 55.352 | 32.418 | 0.00 | 0.00 |
| ATOM | 4103 | CB   | ALA | X | 274 | 54.646 | 54.274 | 30.643 | 0.00 | 0.00 |
| ATOM | 4104 | HB1  | ALA | X | 274 | 54.990 | 53.894 | 29.681 | 0.00 | 0.00 |
| ATOM | 4105 | HB2  | ALA | X | 274 | 53.817 | 54.977 | 30.556 | 0.00 | 0.00 |
| ATOM | 4106 | HB3  | ALA | X | 274 | 54.189 | 53.523 | 31.287 | 0.00 | 0.00 |
| ATOM | 4107 | C    | ALA | X | 274 | 56.787 | 53.702 | 31.821 | 0.00 | 0.00 |
| ATOM | 4108 | O    | ALA | X | 274 | 56.865 | 53.290 | 32.946 | 0.00 | 0.00 |
| ATOM | 4109 | N    | GLN | X | 275 | 57.551 | 53.246 | 30.865 | 0.00 | 0.00 |
| ATOM | 4110 | H    | GLN | X | 275 | 57.413 | 53.640 | 29.946 | 0.00 | 0.00 |
| ATOM | 4111 | CA   | GLN | X | 275 | 58.566 | 52.148 | 30.996 | 0.00 | 0.00 |
| ATOM | 4112 | HA   | GLN | X | 275 | 58.037 | 51.238 | 31.279 | 0.00 | 0.00 |
| ATOM | 4113 | CB   | GLN | X | 275 | 59.305 | 51.857 | 29.678 | 0.00 | 0.00 |
| ATOM | 4114 | HB2  | GLN | X | 275 | 58.578 | 51.906 | 28.867 | 0.00 | 0.00 |
| ATOM | 4115 | HB3  | GLN | X | 275 | 60.095 | 52.603 | 29.594 | 0.00 | 0.00 |
| ATOM | 4116 | CG   | GLN | X | 275 | 59.919 | 50.416 | 29.661 | 0.00 | 0.00 |
| ATOM | 4117 | HG2  | GLN | X | 275 | 60.717 | 50.354 | 30.401 | 0.00 | 0.00 |
| ATOM | 4118 | HG3  | GLN | X | 275 | 59.110 | 49.691 | 29.743 | 0.00 | 0.00 |
| ATOM | 4119 | CD   | GLN | X | 275 | 60.642 | 50.246 | 28.359 | 0.00 | 0.00 |
| ATOM | 4120 | OE1  | GLN | X | 275 | 61.265 | 51.177 | 27.854 | 0.00 | 0.00 |
| ATOM | 4121 | NE2  | GLN | X | 275 | 60.670 | 49.083 | 27.714 | 0.00 | 0.00 |
| ATOM | 4122 | HE21 | GLN | X | 275 | 61.200 | 49.045 | 26.855 | 0.00 | 0.00 |
| ATOM | 4123 | HE22 | GLN | X | 275 | 60.134 | 48.284 | 28.020 | 0.00 | 0.00 |
| ATOM | 4124 | C    | GLN | X | 275 | 59.594 | 52.464 | 32.081 | 0.00 | 0.00 |
| ATOM | 4125 | O    | GLN | X | 275 | 59.943 | 51.582 | 32.852 | 0.00 | 0.00 |
| ATOM | 4126 | N    | VAL | X | 276 | 60.010 | 53.748 | 32.272 | 0.00 | 0.00 |
| ATOM | 4127 | H    | VAL | X | 276 | 59.621 | 54.504 | 31.727 | 0.00 | 0.00 |
| ATOM | 4128 | CA   | VAL | X | 276 | 61.045 | 54.177 | 33.249 | 0.00 | 0.00 |
| ATOM | 4129 | HA   | VAL | X | 276 | 61.927 | 53.579 | 33.022 | 0.00 | 0.00 |
| ATOM | 4130 | CB   | VAL | X | 276 | 61.297 | 55.735 | 33.086 | 0.00 | 0.00 |
| ATOM | 4131 | HB   | VAL | X | 276 | 60.345 | 56.234 | 33.268 | 0.00 | 0.00 |
| ATOM | 4132 | CG1  | VAL | X | 276 | 62.377 | 56.291 | 33.982 | 0.00 | 0.00 |
| ATOM | 4133 | HG11 | VAL | X | 276 | 63.297 | 55.713 | 34.065 | 0.00 | 0.00 |
| ATOM | 4134 | HG12 | VAL | X | 276 | 62.564 | 57.329 | 33.705 | 0.00 | 0.00 |
| ATOM | 4135 | HG13 | VAL | X | 276 | 62.072 | 56.328 | 35.028 | 0.00 | 0.00 |
| ATOM | 4136 | CG2  | VAL | X | 276 | 61.777 | 56.017 | 31.601 | 0.00 | 0.00 |
| ATOM | 4137 | HG21 | VAL | X | 276 | 62.754 | 55.539 | 31.535 | 0.00 | 0.00 |
| ATOM | 4138 | HG22 | VAL | X | 276 | 62.064 | 57.067 | 31.538 | 0.00 | 0.00 |
| ATOM | 4139 | HG23 | VAL | X | 276 | 61.062 | 55.651 | 30.864 | 0.00 | 0.00 |
| ATOM | 4140 | C    | VAL | X | 276 | 60.598 | 53.944 | 34.673 | 0.00 | 0.00 |
| ATOM | 4141 | O    | VAL | X | 276 | 61.375 | 53.601 | 35.575 | 0.00 | 0.00 |
| ATOM | 4142 | N    | LEU | X | 277 | 59.289 | 54.035 | 34.903 | 0.00 | 0.00 |
| ATOM | 4143 | H    | LEU | X | 277 | 58.594 | 54.222 | 34.194 | 0.00 | 0.00 |
| ATOM | 4144 | CA   | LEU | X | 277 | 58.694 | 53.552 | 36.166 | 0.00 | 0.00 |
| ATOM | 4145 | HA   | LEU | X | 277 | 59.229 | 53.990 | 37.009 | 0.00 | 0.00 |
| ATOM | 4146 | CB   | LEU | X | 277 | 57.196 | 54.052 | 36.407 | 0.00 | 0.00 |
| ATOM | 4147 | HB2  | LEU | X | 277 | 56.559 | 53.510 | 35.709 | 0.00 | 0.00 |
| ATOM | 4148 | HB3  | LEU | X | 277 | 56.812 | 53.831 | 37.403 | 0.00 | 0.00 |
| ATOM | 4149 | CG   | LEU | X | 277 | 56.965 | 55.555 | 36.116 | 0.00 | 0.00 |
| ATOM | 4150 | HG   | LEU | X | 277 | 57.236 | 55.600 | 35.061 | 0.00 | 0.00 |
| ATOM | 4151 | CD1  | LEU | X | 277 | 55.513 | 55.950 | 36.321 | 0.00 | 0.00 |

|      |      |      |     |   |     |        |        |        |      |      |
|------|------|------|-----|---|-----|--------|--------|--------|------|------|
| ATOM | 4152 | HD11 | LEU | X | 277 | 55.246 | 55.629 | 37.328 | 0.00 | 0.00 |
| ATOM | 4153 | HD12 | LEU | X | 277 | 54.893 | 55.362 | 35.644 | 0.00 | 0.00 |
| ATOM | 4154 | HD13 | LEU | X | 277 | 55.326 | 57.005 | 36.126 | 0.00 | 0.00 |
| ATOM | 4155 | CD2  | LEU | X | 277 | 57.923 | 56.500 | 36.915 | 0.00 | 0.00 |
| ATOM | 4156 | HD21 | LEU | X | 277 | 57.558 | 56.409 | 37.938 | 0.00 | 0.00 |
| ATOM | 4157 | HD22 | LEU | X | 277 | 58.997 | 56.324 | 36.854 | 0.00 | 0.00 |
| ATOM | 4158 | HD23 | LEU | X | 277 | 57.739 | 57.485 | 36.486 | 0.00 | 0.00 |
| ATOM | 4159 | C    | LEU | X | 277 | 58.805 | 52.081 | 36.368 | 0.00 | 0.00 |
| ATOM | 4160 | O    | LEU | X | 277 | 59.279 | 51.627 | 37.408 | 0.00 | 0.00 |
| ATOM | 4161 | N    | VAL | X | 278 | 58.452 | 51.298 | 35.307 | 0.00 | 0.00 |
| ATOM | 4162 | H    | VAL | X | 278 | 58.040 | 51.802 | 34.535 | 0.00 | 0.00 |
| ATOM | 4163 | CA   | VAL | X | 278 | 58.321 | 49.866 | 35.479 | 0.00 | 0.00 |
| ATOM | 4164 | HA   | VAL | X | 278 | 57.676 | 49.738 | 36.348 | 0.00 | 0.00 |
| ATOM | 4165 | CB   | VAL | X | 278 | 57.586 | 49.255 | 34.252 | 0.00 | 0.00 |
| ATOM | 4166 | HB   | VAL | X | 278 | 58.007 | 49.649 | 33.327 | 0.00 | 0.00 |
| ATOM | 4167 | CG1  | VAL | X | 278 | 57.625 | 47.739 | 34.229 | 0.00 | 0.00 |
| ATOM | 4168 | HG11 | VAL | X | 278 | 58.598 | 47.315 | 33.984 | 0.00 | 0.00 |
| ATOM | 4169 | HG12 | VAL | X | 278 | 57.288 | 47.320 | 35.177 | 0.00 | 0.00 |
| ATOM | 4170 | HG13 | VAL | X | 278 | 56.911 | 47.333 | 33.512 | 0.00 | 0.00 |
| ATOM | 4171 | CG2  | VAL | X | 278 | 56.106 | 49.728 | 34.244 | 0.00 | 0.00 |
| ATOM | 4172 | HG21 | VAL | X | 278 | 56.159 | 50.757 | 33.889 | 0.00 | 0.00 |
| ATOM | 4173 | HG22 | VAL | X | 278 | 55.587 | 49.563 | 35.189 | 0.00 | 0.00 |
| ATOM | 4174 | HG23 | VAL | X | 278 | 55.605 | 49.262 | 33.396 | 0.00 | 0.00 |
| ATOM | 4175 | C    | VAL | X | 278 | 59.644 | 49.189 | 35.618 | 0.00 | 0.00 |
| ATOM | 4176 | O    | VAL | X | 278 | 59.700 | 48.121 | 36.223 | 0.00 | 0.00 |
| ATOM | 4177 | N    | ASN | X | 279 | 60.730 | 49.848 | 35.165 | 0.00 | 0.00 |
| ATOM | 4178 | H    | ASN | X | 279 | 60.635 | 50.589 | 34.485 | 0.00 | 0.00 |
| ATOM | 4179 | CA   | ASN | X | 279 | 62.082 | 49.300 | 35.417 | 0.00 | 0.00 |
| ATOM | 4180 | HA   | ASN | X | 279 | 62.075 | 48.300 | 34.983 | 0.00 | 0.00 |
| ATOM | 4181 | CB   | ASN | X | 279 | 63.056 | 50.299 | 34.737 | 0.00 | 0.00 |
| ATOM | 4182 | HB2  | ASN | X | 279 | 62.718 | 51.332 | 34.824 | 0.00 | 0.00 |
| ATOM | 4183 | HB3  | ASN | X | 279 | 64.037 | 50.200 | 35.201 | 0.00 | 0.00 |
| ATOM | 4184 | CG   | ASN | X | 279 | 63.345 | 49.970 | 33.209 | 0.00 | 0.00 |
| ATOM | 4185 | OD1  | ASN | X | 279 | 64.191 | 49.189 | 32.861 | 0.00 | 0.00 |
| ATOM | 4186 | ND2  | ASN | X | 279 | 62.638 | 50.570 | 32.279 | 0.00 | 0.00 |
| ATOM | 4187 | HD21 | ASN | X | 279 | 62.724 | 50.336 | 31.300 | 0.00 | 0.00 |
| ATOM | 4188 | HD22 | ASN | X | 279 | 61.789 | 51.023 | 32.586 | 0.00 | 0.00 |
| ATOM | 4189 | C    | ASN | X | 279 | 62.489 | 49.292 | 36.899 | 0.00 | 0.00 |
| ATOM | 4190 | O    | ASN | X | 279 | 63.213 | 48.453 | 37.370 | 0.00 | 0.00 |
| ATOM | 4191 | N    | HIE | X | 280 | 61.903 | 50.251 | 37.662 | 0.00 | 0.00 |
| ATOM | 4192 | H    | HIE | X | 280 | 61.399 | 50.990 | 37.191 | 0.00 | 0.00 |
| ATOM | 4193 | CA   | HIE | X | 280 | 62.296 | 50.489 | 39.086 | 0.00 | 0.00 |
| ATOM | 4194 | HA   | HIE | X | 280 | 63.144 | 49.888 | 39.416 | 0.00 | 0.00 |
| ATOM | 4195 | CB   | HIE | X | 280 | 62.696 | 51.993 | 39.095 | 0.00 | 0.00 |
| ATOM | 4196 | HB2  | HIE | X | 280 | 61.916 | 52.595 | 38.630 | 0.00 | 0.00 |
| ATOM | 4197 | HB3  | HIE | X | 280 | 62.735 | 52.190 | 40.167 | 0.00 | 0.00 |
| ATOM | 4198 | CG   | HIE | X | 280 | 63.993 | 52.207 | 38.307 | 0.00 | 0.00 |
| ATOM | 4199 | ND1  | HIE | X | 280 | 64.168 | 52.739 | 37.027 | 0.00 | 0.00 |
| ATOM | 4200 | CE1  | HIE | X | 280 | 65.522 | 52.816 | 36.814 | 0.00 | 0.00 |
| ATOM | 4201 | HE1  | HIE | X | 280 | 66.009 | 53.234 | 35.945 | 0.00 | 0.00 |
| ATOM | 4202 | NE2  | HIE | X | 280 | 66.149 | 52.254 | 37.828 | 0.00 | 0.00 |
| ATOM | 4203 | HE2  | HIE | X | 280 | 67.149 | 52.181 | 37.946 | 0.00 | 0.00 |
| ATOM | 4204 | CD2  | HIE | X | 280 | 65.232 | 51.850 | 38.767 | 0.00 | 0.00 |
| ATOM | 4205 | HD2  | HIE | X | 280 | 65.446 | 51.426 | 39.738 | 0.00 | 0.00 |
| ATOM | 4206 | C    | HIE | X | 280 | 61.151 | 50.147 | 40.056 | 0.00 | 0.00 |
| ATOM | 4207 | O    | HIE | X | 280 | 61.399 | 50.121 | 41.247 | 0.00 | 0.00 |
| ATOM | 4208 | N    | GLU | X | 281 | 59.902 | 49.841 | 39.624 | 0.00 | 0.00 |
| ATOM | 4209 | H    | GLU | X | 281 | 59.666 | 49.909 | 38.645 | 0.00 | 0.00 |
| ATOM | 4210 | CA   | GLU | X | 281 | 58.772 | 49.675 | 40.607 | 0.00 | 0.00 |
| ATOM | 4211 | HA   | GLU | X | 281 | 58.599 | 50.583 | 41.185 | 0.00 | 0.00 |
| ATOM | 4212 | CB   | GLU | X | 281 | 57.508 | 49.470 | 39.783 | 0.00 | 0.00 |
| ATOM | 4213 | HB2  | GLU | X | 281 | 57.437 | 50.336 | 39.125 | 0.00 | 0.00 |
| ATOM | 4214 | HB3  | GLU | X | 281 | 57.545 | 48.527 | 39.237 | 0.00 | 0.00 |
| ATOM | 4215 | CG   | GLU | X | 281 | 56.300 | 49.365 | 40.754 | 0.00 | 0.00 |
| ATOM | 4216 | HG2  | GLU | X | 281 | 56.320 | 48.359 | 41.174 | 0.00 | 0.00 |
| ATOM | 4217 | HG3  | GLU | X | 281 | 56.437 | 50.096 | 41.550 | 0.00 | 0.00 |
| ATOM | 4218 | CD   | GLU | X | 281 | 54.919 | 49.626 | 40.226 | 0.00 | 0.00 |

|      |      |      |     |   |     |        |        |        |      |      |
|------|------|------|-----|---|-----|--------|--------|--------|------|------|
| ATOM | 4219 | OE1  | GLU | X | 281 | 54.785 | 50.446 | 39.276 | 0.00 | 0.00 |
| ATOM | 4220 | OE2  | GLU | X | 281 | 53.936 | 49.016 | 40.715 | 0.00 | 0.00 |
| ATOM | 4221 | C    | GLU | X | 281 | 58.967 | 48.545 | 41.625 | 0.00 | 0.00 |
| ATOM | 4222 | O    | GLU | X | 281 | 58.651 | 48.774 | 42.845 | 0.00 | 0.00 |
| ATOM | 4223 | N    | TRP | X | 282 | 59.538 | 47.368 | 41.327 | 0.00 | 0.00 |
| ATOM | 4224 | H    | TRP | X | 282 | 59.703 | 47.101 | 40.367 | 0.00 | 0.00 |
| ATOM | 4225 | CA   | TRP | X | 282 | 59.894 | 46.312 | 42.358 | 0.00 | 0.00 |
| ATOM | 4226 | HA   | TRP | X | 282 | 59.003 | 46.018 | 42.914 | 0.00 | 0.00 |
| ATOM | 4227 | CB   | TRP | X | 282 | 60.433 | 45.068 | 41.621 | 0.00 | 0.00 |
| ATOM | 4228 | HB2  | TRP | X | 282 | 61.297 | 45.351 | 41.020 | 0.00 | 0.00 |
| ATOM | 4229 | HB3  | TRP | X | 282 | 60.866 | 44.386 | 42.353 | 0.00 | 0.00 |
| ATOM | 4230 | CG   | TRP | X | 282 | 59.320 | 44.331 | 40.811 | 0.00 | 0.00 |
| ATOM | 4231 | CD1  | TRP | X | 282 | 59.247 | 44.218 | 39.514 | 0.00 | 0.00 |
| ATOM | 4232 | HD1  | TRP | X | 282 | 59.950 | 44.480 | 38.738 | 0.00 | 0.00 |
| ATOM | 4233 | NE1  | TRP | X | 282 | 58.114 | 43.440 | 39.127 | 0.00 | 0.00 |
| ATOM | 4234 | HE1  | TRP | X | 282 | 57.904 | 43.153 | 38.182 | 0.00 | 0.00 |
| ATOM | 4235 | CE2  | TRP | X | 282 | 57.402 | 43.151 | 40.225 | 0.00 | 0.00 |
| ATOM | 4236 | CZ2  | TRP | X | 282 | 56.136 | 42.600 | 40.351 | 0.00 | 0.00 |
| ATOM | 4237 | HZ2  | TRP | X | 282 | 55.649 | 42.062 | 39.551 | 0.00 | 0.00 |
| ATOM | 4238 | CH2  | TRP | X | 282 | 55.621 | 42.433 | 41.632 | 0.00 | 0.00 |
| ATOM | 4239 | HH2  | TRP | X | 282 | 54.714 | 41.856 | 41.732 | 0.00 | 0.00 |
| ATOM | 4240 | CZ3  | TRP | X | 282 | 56.229 | 42.957 | 42.774 | 0.00 | 0.00 |
| ATOM | 4241 | HZ3  | TRP | X | 282 | 55.848 | 42.687 | 43.748 | 0.00 | 0.00 |
| ATOM | 4242 | CE3  | TRP | X | 282 | 57.443 | 43.625 | 42.645 | 0.00 | 0.00 |
| ATOM | 4243 | HE3  | TRP | X | 282 | 58.013 | 43.975 | 43.493 | 0.00 | 0.00 |
| ATOM | 4244 | CD2  | TRP | X | 282 | 58.086 | 43.741 | 41.376 | 0.00 | 0.00 |
| ATOM | 4245 | C    | TRP | X | 282 | 60.933 | 46.821 | 43.345 | 0.00 | 0.00 |
| ATOM | 4246 | O    | TRP | X | 282 | 60.987 | 46.353 | 44.430 | 0.00 | 0.00 |
| ATOM | 4247 | N    | HIE | X | 283 | 61.756 | 47.820 | 43.055 | 0.00 | 0.00 |
| ATOM | 4248 | H    | HIE | X | 283 | 61.598 | 48.322 | 42.193 | 0.00 | 0.00 |
| ATOM | 4249 | CA   | HIE | X | 283 | 62.900 | 48.239 | 43.900 | 0.00 | 0.00 |
| ATOM | 4250 | HA   | HIE | X | 283 | 63.531 | 47.410 | 44.221 | 0.00 | 0.00 |
| ATOM | 4251 | CB   | HIE | X | 283 | 63.818 | 49.140 | 43.083 | 0.00 | 0.00 |
| ATOM | 4252 | HB2  | HIE | X | 283 | 63.284 | 50.059 | 42.842 | 0.00 | 0.00 |
| ATOM | 4253 | HB3  | HIE | X | 283 | 64.642 | 49.311 | 43.776 | 0.00 | 0.00 |
| ATOM | 4254 | CG   | HIE | X | 283 | 64.428 | 48.610 | 41.879 | 0.00 | 0.00 |
| ATOM | 4255 | ND1  | HIE | X | 283 | 63.874 | 47.677 | 41.027 | 0.00 | 0.00 |
| ATOM | 4256 | CE1  | HIE | X | 283 | 64.750 | 47.485 | 40.053 | 0.00 | 0.00 |
| ATOM | 4257 | HE1  | HIE | X | 283 | 64.574 | 46.833 | 39.210 | 0.00 | 0.00 |
| ATOM | 4258 | NE2  | HIE | X | 283 | 65.834 | 48.214 | 40.243 | 0.00 | 0.00 |
| ATOM | 4259 | HE2  | HIE | X | 283 | 66.486 | 48.441 | 39.506 | 0.00 | 0.00 |
| ATOM | 4260 | CD2  | HIE | X | 283 | 65.588 | 48.983 | 41.378 | 0.00 | 0.00 |
| ATOM | 4261 | HD2  | HIE | X | 283 | 66.253 | 49.757 | 41.730 | 0.00 | 0.00 |
| ATOM | 4262 | C    | HIE | X | 283 | 62.380 | 49.011 | 45.196 | 0.00 | 0.00 |
| ATOM | 4263 | O    | HIE | X | 283 | 63.166 | 49.239 | 46.082 | 0.00 | 0.00 |
| ATOM | 4264 | N    | VAL | X | 284 | 61.096 | 49.356 | 45.338 | 0.00 | 0.00 |
| ATOM | 4265 | H    | VAL | X | 284 | 60.504 | 49.099 | 44.561 | 0.00 | 0.00 |
| ATOM | 4266 | CA   | VAL | X | 284 | 60.540 | 50.110 | 46.456 | 0.00 | 0.00 |
| ATOM | 4267 | HA   | VAL | X | 284 | 61.226 | 50.830 | 46.902 | 0.00 | 0.00 |
| ATOM | 4268 | CB   | VAL | X | 284 | 59.319 | 51.026 | 46.056 | 0.00 | 0.00 |
| ATOM | 4269 | HB   | VAL | X | 284 | 59.116 | 51.750 | 46.845 | 0.00 | 0.00 |
| ATOM | 4270 | CG1  | VAL | X | 284 | 59.565 | 51.879 | 44.805 | 0.00 | 0.00 |
| ATOM | 4271 | HG11 | VAL | X | 284 | 59.660 | 51.266 | 43.909 | 0.00 | 0.00 |
| ATOM | 4272 | HG12 | VAL | X | 284 | 58.780 | 52.627 | 44.687 | 0.00 | 0.00 |
| ATOM | 4273 | HG13 | VAL | X | 284 | 60.549 | 52.297 | 45.017 | 0.00 | 0.00 |
| ATOM | 4274 | CG2  | VAL | X | 284 | 58.001 | 50.251 | 45.746 | 0.00 | 0.00 |
| ATOM | 4275 | HG21 | VAL | X | 284 | 58.116 | 49.524 | 44.942 | 0.00 | 0.00 |
| ATOM | 4276 | HG22 | VAL | X | 284 | 57.283 | 50.994 | 45.397 | 0.00 | 0.00 |
| ATOM | 4277 | HG23 | VAL | X | 284 | 57.581 | 49.707 | 46.591 | 0.00 | 0.00 |
| ATOM | 4278 | C    | VAL | X | 284 | 60.054 | 49.124 | 47.545 | 0.00 | 0.00 |
| ATOM | 4279 | O    | VAL | X | 284 | 59.792 | 49.591 | 48.632 | 0.00 | 0.00 |
| ATOM | 4280 | N    | LEU | X | 285 | 59.989 | 47.808 | 47.369 | 0.00 | 0.00 |
| ATOM | 4281 | H    | LEU | X | 285 | 60.293 | 47.496 | 46.458 | 0.00 | 0.00 |
| ATOM | 4282 | CA   | LEU | X | 285 | 59.301 | 46.857 | 48.208 | 0.00 | 0.00 |
| ATOM | 4283 | HA   | LEU | X | 285 | 58.342 | 47.256 | 48.539 | 0.00 | 0.00 |
| ATOM | 4284 | CB   | LEU | X | 285 | 58.968 | 45.588 | 47.329 | 0.00 | 0.00 |
| ATOM | 4285 | HB2  | LEU | X | 285 | 58.417 | 45.894 | 46.440 | 0.00 | 0.00 |

|      |      |      |     |   |     |        |        |        |      |      |
|------|------|------|-----|---|-----|--------|--------|--------|------|------|
| ATOM | 4286 | HB3  | LEU | X | 285 | 59.929 | 45.168 | 47.033 | 0.00 | 0.00 |
| ATOM | 4287 | CG   | LEU | X | 285 | 58.162 | 44.526 | 48.002 | 0.00 | 0.00 |
| ATOM | 4288 | HG   | LEU | X | 285 | 58.641 | 44.207 | 48.928 | 0.00 | 0.00 |
| ATOM | 4289 | CD1  | LEU | X | 285 | 56.715 | 45.011 | 48.318 | 0.00 | 0.00 |
| ATOM | 4290 | HD11 | LEU | X | 285 | 56.219 | 45.246 | 47.377 | 0.00 | 0.00 |
| ATOM | 4291 | HD12 | LEU | X | 285 | 56.670 | 45.891 | 48.959 | 0.00 | 0.00 |
| ATOM | 4292 | HD13 | LEU | X | 285 | 56.186 | 44.262 | 48.907 | 0.00 | 0.00 |
| ATOM | 4293 | CD2  | LEU | X | 285 | 58.066 | 43.258 | 47.179 | 0.00 | 0.00 |
| ATOM | 4294 | HD21 | LEU | X | 285 | 57.504 | 43.390 | 46.254 | 0.00 | 0.00 |
| ATOM | 4295 | HD22 | LEU | X | 285 | 59.041 | 42.841 | 46.925 | 0.00 | 0.00 |
| ATOM | 4296 | HD23 | LEU | X | 285 | 57.458 | 42.489 | 47.655 | 0.00 | 0.00 |
| ATOM | 4297 | C    | LEU | X | 285 | 60.284 | 46.471 | 49.377 | 0.00 | 0.00 |
| ATOM | 4298 | O    | LEU | X | 285 | 61.429 | 46.147 | 49.061 | 0.00 | 0.00 |
| ATOM | 4299 | N    | PRO | X | 286 | 59.888 | 46.447 | 50.658 | 0.00 | 0.00 |
| ATOM | 4300 | CD   | PRO | X | 286 | 58.660 | 47.035 | 51.133 | 0.00 | 0.00 |
| ATOM | 4301 | HD2  | PRO | X | 286 | 57.819 | 46.351 | 51.019 | 0.00 | 0.00 |
| ATOM | 4302 | HD3  | PRO | X | 286 | 58.405 | 47.986 | 50.667 | 0.00 | 0.00 |
| ATOM | 4303 | CG   | PRO | X | 286 | 58.794 | 47.198 | 52.616 | 0.00 | 0.00 |
| ATOM | 4304 | HG2  | PRO | X | 286 | 57.830 | 47.193 | 53.125 | 0.00 | 0.00 |
| ATOM | 4305 | HG3  | PRO | X | 286 | 59.188 | 48.192 | 52.829 | 0.00 | 0.00 |
| ATOM | 4306 | CB   | PRO | X | 286 | 59.720 | 46.013 | 52.975 | 0.00 | 0.00 |
| ATOM | 4307 | HB2  | PRO | X | 286 | 59.191 | 45.072 | 53.129 | 0.00 | 0.00 |
| ATOM | 4308 | HB3  | PRO | X | 286 | 60.234 | 46.203 | 53.917 | 0.00 | 0.00 |
| ATOM | 4309 | CA   | PRO | X | 286 | 60.661 | 45.907 | 51.816 | 0.00 | 0.00 |
| ATOM | 4310 | HA   | PRO | X | 286 | 61.485 | 46.619 | 51.858 | 0.00 | 0.00 |
| ATOM | 4311 | C    | PRO | X | 286 | 61.202 | 44.438 | 51.571 | 0.00 | 0.00 |
| ATOM | 4312 | O    | PRO | X | 286 | 60.484 | 43.536 | 51.186 | 0.00 | 0.00 |
| ATOM | 4313 | N    | GLN | X | 287 | 62.500 | 44.292 | 51.629 | 0.00 | 0.00 |
| ATOM | 4314 | H    | GLN | X | 287 | 63.038 | 45.063 | 51.997 | 0.00 | 0.00 |
| ATOM | 4315 | CA   | GLN | X | 287 | 63.214 | 43.111 | 51.135 | 0.00 | 0.00 |
| ATOM | 4316 | HA   | GLN | X | 287 | 62.642 | 42.759 | 50.277 | 0.00 | 0.00 |
| ATOM | 4317 | CB   | GLN | X | 287 | 64.665 | 43.398 | 50.803 | 0.00 | 0.00 |
| ATOM | 4318 | HB2  | GLN | X | 287 | 65.172 | 43.685 | 51.724 | 0.00 | 0.00 |
| ATOM | 4319 | HB3  | GLN | X | 287 | 65.104 | 42.452 | 50.486 | 0.00 | 0.00 |
| ATOM | 4320 | CG   | GLN | X | 287 | 64.741 | 44.468 | 49.640 | 0.00 | 0.00 |
| ATOM | 4321 | HG2  | GLN | X | 287 | 64.311 | 44.040 | 48.734 | 0.00 | 0.00 |
| ATOM | 4322 | HG3  | GLN | X | 287 | 64.258 | 45.425 | 49.834 | 0.00 | 0.00 |
| ATOM | 4323 | CD   | GLN | X | 287 | 66.184 | 44.754 | 49.259 | 0.00 | 0.00 |
| ATOM | 4324 | OE1  | GLN | X | 287 | 67.185 | 44.326 | 49.887 | 0.00 | 0.00 |
| ATOM | 4325 | NE2  | GLN | X | 287 | 66.378 | 45.353 | 48.131 | 0.00 | 0.00 |
| ATOM | 4326 | HE21 | GLN | X | 287 | 67.337 | 45.578 | 47.908 | 0.00 | 0.00 |
| ATOM | 4327 | HE22 | GLN | X | 287 | 65.648 | 45.683 | 47.515 | 0.00 | 0.00 |
| ATOM | 4328 | C    | GLN | X | 287 | 63.086 | 41.883 | 52.104 | 0.00 | 0.00 |
| ATOM | 4329 | O    | GLN | X | 287 | 63.008 | 42.040 | 53.347 | 0.00 | 0.00 |
| ATOM | 4330 | N    | GLU | X | 288 | 63.040 | 40.715 | 51.458 | 0.00 | 0.00 |
| ATOM | 4331 | H    | GLU | X | 288 | 63.067 | 40.725 | 50.448 | 0.00 | 0.00 |
| ATOM | 4332 | CA   | GLU | X | 288 | 62.831 | 39.413 | 52.045 | 0.00 | 0.00 |
| ATOM | 4333 | HA   | GLU | X | 288 | 63.064 | 38.637 | 51.316 | 0.00 | 0.00 |
| ATOM | 4334 | CB   | GLU | X | 288 | 63.593 | 39.052 | 53.318 | 0.00 | 0.00 |
| ATOM | 4335 | HB2  | GLU | X | 288 | 63.389 | 39.755 | 54.126 | 0.00 | 0.00 |
| ATOM | 4336 | HB3  | GLU | X | 288 | 63.276 | 38.084 | 53.706 | 0.00 | 0.00 |
| ATOM | 4337 | CG   | GLU | X | 288 | 65.114 | 39.090 | 53.031 | 0.00 | 0.00 |
| ATOM | 4338 | HG2  | GLU | X | 288 | 65.203 | 39.072 | 51.945 | 0.00 | 0.00 |
| ATOM | 4339 | HG3  | GLU | X | 288 | 65.565 | 39.974 | 53.481 | 0.00 | 0.00 |
| ATOM | 4340 | CD   | GLU | X | 288 | 65.804 | 37.902 | 53.597 | 0.00 | 0.00 |
| ATOM | 4341 | OE1  | GLU | X | 288 | 66.176 | 36.973 | 52.875 | 0.00 | 0.00 |
| ATOM | 4342 | OE2  | GLU | X | 288 | 65.846 | 37.789 | 54.854 | 0.00 | 0.00 |
| ATOM | 4343 | C    | GLU | X | 288 | 61.335 | 39.211 | 52.344 | 0.00 | 0.00 |
| ATOM | 4344 | O    | GLU | X | 288 | 60.879 | 39.110 | 53.482 | 0.00 | 0.00 |
| ATOM | 4345 | N    | SER | X | 289 | 60.621 | 38.990 | 51.262 | 0.00 | 0.00 |
| ATOM | 4346 | H    | SER | X | 289 | 61.025 | 39.055 | 50.338 | 0.00 | 0.00 |
| ATOM | 4347 | CA   | SER | X | 289 | 59.140 | 38.658 | 51.205 | 0.00 | 0.00 |
| ATOM | 4348 | HA   | SER | X | 289 | 58.888 | 37.927 | 51.973 | 0.00 | 0.00 |
| ATOM | 4349 | CB   | SER | X | 289 | 58.289 | 39.952 | 51.556 | 0.00 | 0.00 |
| ATOM | 4350 | HB2  | SER | X | 289 | 57.295 | 39.538 | 51.724 | 0.00 | 0.00 |
| ATOM | 4351 | HB3  | SER | X | 289 | 58.585 | 40.373 | 52.517 | 0.00 | 0.00 |
| ATOM | 4352 | OG   | SER | X | 289 | 58.250 | 40.937 | 50.590 | 0.00 | 0.00 |

|      |      |      |     |   |     |        |        |        |      |      |
|------|------|------|-----|---|-----|--------|--------|--------|------|------|
| ATOM | 4353 | HG   | SER | X | 289 | 59.168 | 41.158 | 50.418 | 0.00 | 0.00 |
| ATOM | 4354 | C    | SER | X | 289 | 58.679 | 37.958 | 49.911 | 0.00 | 0.00 |
| ATOM | 4355 | O    | SER | X | 289 | 59.237 | 38.189 | 48.855 | 0.00 | 0.00 |
| ATOM | 4356 | N    | VAL | X | 290 | 57.531 | 37.258 | 49.964 | 0.00 | 0.00 |
| ATOM | 4357 | H    | VAL | X | 290 | 57.194 | 36.900 | 50.846 | 0.00 | 0.00 |
| ATOM | 4358 | CA   | VAL | X | 290 | 56.759 | 36.744 | 48.813 | 0.00 | 0.00 |
| ATOM | 4359 | HA   | VAL | X | 290 | 56.947 | 37.381 | 47.949 | 0.00 | 0.00 |
| ATOM | 4360 | CB   | VAL | X | 290 | 57.146 | 35.266 | 48.507 | 0.00 | 0.00 |
| ATOM | 4361 | HB   | VAL | X | 290 | 58.230 | 35.193 | 48.596 | 0.00 | 0.00 |
| ATOM | 4362 | CG1  | VAL | X | 290 | 56.530 | 34.330 | 49.551 | 0.00 | 0.00 |
| ATOM | 4363 | HG11 | VAL | X | 290 | 56.805 | 33.287 | 49.393 | 0.00 | 0.00 |
| ATOM | 4364 | HG12 | VAL | X | 290 | 56.890 | 34.537 | 50.559 | 0.00 | 0.00 |
| ATOM | 4365 | HG13 | VAL | X | 290 | 55.441 | 34.330 | 49.525 | 0.00 | 0.00 |
| ATOM | 4366 | CG2  | VAL | X | 290 | 56.741 | 34.836 | 47.099 | 0.00 | 0.00 |
| ATOM | 4367 | HG21 | VAL | X | 290 | 57.281 | 35.442 | 46.371 | 0.00 | 0.00 |
| ATOM | 4368 | HG22 | VAL | X | 290 | 55.679 | 34.917 | 46.867 | 0.00 | 0.00 |
| ATOM | 4369 | HG23 | VAL | X | 290 | 57.092 | 33.832 | 46.858 | 0.00 | 0.00 |
| ATOM | 4370 | C    | VAL | X | 290 | 55.261 | 36.945 | 49.128 | 0.00 | 0.00 |
| ATOM | 4371 | O    | VAL | X | 290 | 54.866 | 37.058 | 50.290 | 0.00 | 0.00 |
| ATOM | 4372 | N    | PHE | X | 291 | 54.456 | 37.063 | 48.056 | 0.00 | 0.00 |
| ATOM | 4373 | H    | PHE | X | 291 | 54.792 | 36.914 | 47.115 | 0.00 | 0.00 |
| ATOM | 4374 | CA   | PHE | X | 291 | 53.019 | 37.457 | 48.124 | 0.00 | 0.00 |
| ATOM | 4375 | HA   | PHE | X | 291 | 52.676 | 37.473 | 47.089 | 0.00 | 0.00 |
| ATOM | 4376 | CB   | PHE | X | 291 | 52.267 | 36.266 | 48.806 | 0.00 | 0.00 |
| ATOM | 4377 | HB2  | PHE | X | 291 | 52.640 | 35.263 | 48.598 | 0.00 | 0.00 |
| ATOM | 4378 | HB3  | PHE | X | 291 | 52.333 | 36.461 | 49.876 | 0.00 | 0.00 |
| ATOM | 4379 | CG   | PHE | X | 291 | 50.771 | 36.121 | 48.489 | 0.00 | 0.00 |
| ATOM | 4380 | CD1  | PHE | X | 291 | 49.970 | 37.178 | 48.090 | 0.00 | 0.00 |
| ATOM | 4381 | HD1  | PHE | X | 291 | 50.376 | 38.155 | 47.872 | 0.00 | 0.00 |
| ATOM | 4382 | CE1  | PHE | X | 291 | 48.664 | 37.075 | 47.700 | 0.00 | 0.00 |
| ATOM | 4383 | HE1  | PHE | X | 291 | 48.056 | 37.900 | 47.359 | 0.00 | 0.00 |
| ATOM | 4384 | CZ   | PHE | X | 291 | 48.013 | 35.833 | 47.763 | 0.00 | 0.00 |
| ATOM | 4385 | HZ   | PHE | X | 291 | 46.988 | 35.632 | 47.485 | 0.00 | 0.00 |
| ATOM | 4386 | CE2  | PHE | X | 291 | 48.767 | 34.739 | 48.138 | 0.00 | 0.00 |
| ATOM | 4387 | HE2  | PHE | X | 291 | 48.333 | 33.752 | 48.213 | 0.00 | 0.00 |
| ATOM | 4388 | CD2  | PHE | X | 291 | 50.127 | 34.851 | 48.501 | 0.00 | 0.00 |
| ATOM | 4389 | HD2  | PHE | X | 291 | 50.652 | 33.930 | 48.702 | 0.00 | 0.00 |
| ATOM | 4390 | C    | PHE | X | 291 | 52.851 | 38.869 | 48.759 | 0.00 | 0.00 |
| ATOM | 4391 | O    | PHE | X | 291 | 51.999 | 39.058 | 49.613 | 0.00 | 0.00 |
| ATOM | 4392 | N    | ARG | X | 292 | 53.704 | 39.758 | 48.351 | 0.00 | 0.00 |
| ATOM | 4393 | H    | ARG | X | 292 | 54.418 | 39.483 | 47.692 | 0.00 | 0.00 |
| ATOM | 4394 | CA   | ARG | X | 292 | 53.680 | 41.214 | 48.613 | 0.00 | 0.00 |
| ATOM | 4395 | HA   | ARG | X | 292 | 52.660 | 41.509 | 48.862 | 0.00 | 0.00 |
| ATOM | 4396 | CB   | ARG | X | 292 | 54.610 | 41.616 | 49.798 | 0.00 | 0.00 |
| ATOM | 4397 | HB2  | ARG | X | 292 | 55.667 | 41.560 | 49.539 | 0.00 | 0.00 |
| ATOM | 4398 | HB3  | ARG | X | 292 | 54.428 | 42.645 | 50.107 | 0.00 | 0.00 |
| ATOM | 4399 | CG   | ARG | X | 292 | 54.317 | 40.833 | 51.051 | 0.00 | 0.00 |
| ATOM | 4400 | HG2  | ARG | X | 292 | 54.609 | 39.824 | 50.757 | 0.00 | 0.00 |
| ATOM | 4401 | HG3  | ARG | X | 292 | 54.994 | 41.111 | 51.859 | 0.00 | 0.00 |
| ATOM | 4402 | CD   | ARG | X | 292 | 52.934 | 40.995 | 51.761 | 0.00 | 0.00 |
| ATOM | 4403 | HD2  | ARG | X | 292 | 53.031 | 41.783 | 52.507 | 0.00 | 0.00 |
| ATOM | 4404 | HD3  | ARG | X | 292 | 52.237 | 41.450 | 51.058 | 0.00 | 0.00 |
| ATOM | 4405 | NE   | ARG | X | 292 | 52.305 | 39.808 | 52.369 | 0.00 | 0.00 |
| ATOM | 4406 | HE   | ARG | X | 292 | 52.114 | 39.028 | 51.756 | 0.00 | 0.00 |
| ATOM | 4407 | CZ   | ARG | X | 292 | 52.142 | 39.624 | 53.662 | 0.00 | 0.00 |
| ATOM | 4408 | NH1  | ARG | X | 292 | 52.423 | 40.530 | 54.587 | 0.00 | 0.00 |
| ATOM | 4409 | HH11 | ARG | X | 292 | 52.615 | 41.485 | 54.318 | 0.00 | 0.00 |
| ATOM | 4410 | HH12 | ARG | X | 292 | 52.504 | 40.226 | 55.547 | 0.00 | 0.00 |
| ATOM | 4411 | NH2  | ARG | X | 292 | 51.677 | 38.442 | 54.058 | 0.00 | 0.00 |
| ATOM | 4412 | HH21 | ARG | X | 292 | 51.405 | 37.838 | 53.295 | 0.00 | 0.00 |
| ATOM | 4413 | HH22 | ARG | X | 292 | 51.468 | 38.281 | 55.033 | 0.00 | 0.00 |
| ATOM | 4414 | C    | ARG | X | 292 | 54.134 | 42.051 | 47.383 | 0.00 | 0.00 |
| ATOM | 4415 | O    | ARG | X | 292 | 55.064 | 41.621 | 46.742 | 0.00 | 0.00 |
| ATOM | 4416 | N    | PHE | X | 293 | 53.440 | 43.188 | 47.205 | 0.00 | 0.00 |
| ATOM | 4417 | H    | PHE | X | 293 | 52.676 | 43.423 | 47.823 | 0.00 | 0.00 |
| ATOM | 4418 | CA   | PHE | X | 293 | 53.515 | 43.910 | 45.957 | 0.00 | 0.00 |
| ATOM | 4419 | HA   | PHE | X | 293 | 54.201 | 43.446 | 45.249 | 0.00 | 0.00 |

|      |      |      |     |   |     |        |        |        |      |      |
|------|------|------|-----|---|-----|--------|--------|--------|------|------|
| ATOM | 4420 | CB   | PHE | X | 293 | 52.182 | 43.730 | 45.207 | 0.00 | 0.00 |
| ATOM | 4421 | HB2  | PHE | X | 293 | 51.390 | 44.315 | 45.675 | 0.00 | 0.00 |
| ATOM | 4422 | HB3  | PHE | X | 293 | 52.299 | 43.959 | 44.147 | 0.00 | 0.00 |
| ATOM | 4423 | CG   | PHE | X | 293 | 51.716 | 42.251 | 45.202 | 0.00 | 0.00 |
| ATOM | 4424 | CD1  | PHE | X | 293 | 52.532 | 41.243 | 44.579 | 0.00 | 0.00 |
| ATOM | 4425 | HD1  | PHE | X | 293 | 53.404 | 41.582 | 44.039 | 0.00 | 0.00 |
| ATOM | 4426 | CE1  | PHE | X | 293 | 52.139 | 39.869 | 44.571 | 0.00 | 0.00 |
| ATOM | 4427 | HE1  | PHE | X | 293 | 52.768 | 39.122 | 44.109 | 0.00 | 0.00 |
| ATOM | 4428 | CZ   | PHE | X | 293 | 50.966 | 39.477 | 45.212 | 0.00 | 0.00 |
| ATOM | 4429 | HZ   | PHE | X | 293 | 50.700 | 38.430 | 45.200 | 0.00 | 0.00 |
| ATOM | 4430 | CE2  | PHE | X | 293 | 50.100 | 40.501 | 45.805 | 0.00 | 0.00 |
| ATOM | 4431 | HE2  | PHE | X | 293 | 49.179 | 40.203 | 46.284 | 0.00 | 0.00 |
| ATOM | 4432 | CD2  | PHE | X | 293 | 50.512 | 41.850 | 45.840 | 0.00 | 0.00 |
| ATOM | 4433 | HD2  | PHE | X | 293 | 49.905 | 42.563 | 46.377 | 0.00 | 0.00 |
| ATOM | 4434 | C    | PHE | X | 293 | 53.866 | 45.382 | 46.179 | 0.00 | 0.00 |
| ATOM | 4435 | O    | PHE | X | 293 | 53.630 | 46.014 | 47.254 | 0.00 | 0.00 |
| ATOM | 4436 | N    | SER | X | 294 | 54.345 | 46.105 | 45.160 | 0.00 | 0.00 |
| ATOM | 4437 | H    | SER | X | 294 | 54.661 | 45.589 | 44.351 | 0.00 | 0.00 |
| ATOM | 4438 | CA   | SER | X | 294 | 54.942 | 47.477 | 45.315 | 0.00 | 0.00 |
| ATOM | 4439 | HA   | SER | X | 294 | 55.625 | 47.566 | 46.159 | 0.00 | 0.00 |
| ATOM | 4440 | CB   | SER | X | 294 | 55.765 | 47.876 | 44.170 | 0.00 | 0.00 |
| ATOM | 4441 | HB2  | SER | X | 294 | 55.262 | 47.803 | 43.206 | 0.00 | 0.00 |
| ATOM | 4442 | HB3  | SER | X | 294 | 55.914 | 48.947 | 44.312 | 0.00 | 0.00 |
| ATOM | 4443 | OG   | SER | X | 294 | 56.949 | 47.123 | 44.109 | 0.00 | 0.00 |
| ATOM | 4444 | HG   | SER | X | 294 | 57.568 | 47.574 | 43.530 | 0.00 | 0.00 |
| ATOM | 4445 | C    | SER | X | 294 | 53.932 | 48.567 | 45.574 | 0.00 | 0.00 |
| ATOM | 4446 | O    | SER | X | 294 | 54.151 | 49.282 | 46.529 | 0.00 | 0.00 |
| ATOM | 4447 | N    | PHE | X | 295 | 52.956 | 48.670 | 44.727 | 0.00 | 0.00 |
| ATOM | 4448 | H    | PHE | X | 295 | 52.754 | 47.999 | 44.000 | 0.00 | 0.00 |
| ATOM | 4449 | CA   | PHE | X | 295 | 51.906 | 49.686 | 44.932 | 0.00 | 0.00 |
| ATOM | 4450 | HA   | PHE | X | 295 | 52.010 | 50.108 | 45.932 | 0.00 | 0.00 |
| ATOM | 4451 | CB   | PHE | X | 295 | 51.947 | 50.845 | 43.920 | 0.00 | 0.00 |
| ATOM | 4452 | HB2  | PHE | X | 295 | 51.931 | 50.497 | 42.887 | 0.00 | 0.00 |
| ATOM | 4453 | HB3  | PHE | X | 295 | 50.988 | 51.312 | 44.143 | 0.00 | 0.00 |
| ATOM | 4454 | CG   | PHE | X | 295 | 53.151 | 51.704 | 44.079 | 0.00 | 0.00 |
| ATOM | 4455 | CD1  | PHE | X | 295 | 53.272 | 52.543 | 45.215 | 0.00 | 0.00 |
| ATOM | 4456 | HD1  | PHE | X | 295 | 52.408 | 52.706 | 45.843 | 0.00 | 0.00 |
| ATOM | 4457 | CE1  | PHE | X | 295 | 54.396 | 53.378 | 45.474 | 0.00 | 0.00 |
| ATOM | 4458 | HE1  | PHE | X | 295 | 54.383 | 54.017 | 46.345 | 0.00 | 0.00 |
| ATOM | 4459 | CZ   | PHE | X | 295 | 55.436 | 53.358 | 44.530 | 0.00 | 0.00 |
| ATOM | 4460 | HZ   | PHE | X | 295 | 56.291 | 53.970 | 44.776 | 0.00 | 0.00 |
| ATOM | 4461 | CE2  | PHE | X | 295 | 55.361 | 52.469 | 43.418 | 0.00 | 0.00 |
| ATOM | 4462 | HE2  | PHE | X | 295 | 56.244 | 52.394 | 42.801 | 0.00 | 0.00 |
| ATOM | 4463 | CD2  | PHE | X | 295 | 54.190 | 51.753 | 43.137 | 0.00 | 0.00 |
| ATOM | 4464 | HD2  | PHE | X | 295 | 54.134 | 51.089 | 42.287 | 0.00 | 0.00 |
| ATOM | 4465 | C    | PHE | X | 295 | 50.463 | 49.059 | 44.895 | 0.00 | 0.00 |
| ATOM | 4466 | O    | PHE | X | 295 | 50.131 | 48.257 | 44.020 | 0.00 | 0.00 |
| ATOM | 4467 | N    | VAL | X | 296 | 49.749 | 49.288 | 45.978 | 0.00 | 0.00 |
| ATOM | 4468 | H    | VAL | X | 296 | 50.083 | 49.967 | 46.647 | 0.00 | 0.00 |
| ATOM | 4469 | CA   | VAL | X | 296 | 48.478 | 48.602 | 46.324 | 0.00 | 0.00 |
| ATOM | 4470 | HA   | VAL | X | 296 | 48.053 | 48.160 | 45.423 | 0.00 | 0.00 |
| ATOM | 4471 | CB   | VAL | X | 296 | 48.693 | 47.453 | 47.324 | 0.00 | 0.00 |
| ATOM | 4472 | HB   | VAL | X | 296 | 47.694 | 47.098 | 47.575 | 0.00 | 0.00 |
| ATOM | 4473 | CG1  | VAL | X | 296 | 49.540 | 46.330 | 46.763 | 0.00 | 0.00 |
| ATOM | 4474 | HG11 | VAL | X | 296 | 49.519 | 45.468 | 47.429 | 0.00 | 0.00 |
| ATOM | 4475 | HG12 | VAL | X | 296 | 49.081 | 46.142 | 45.792 | 0.00 | 0.00 |
| ATOM | 4476 | HG13 | VAL | X | 296 | 50.586 | 46.593 | 46.611 | 0.00 | 0.00 |
| ATOM | 4477 | CG2  | VAL | X | 296 | 49.344 | 47.845 | 48.693 | 0.00 | 0.00 |
| ATOM | 4478 | HG21 | VAL | X | 296 | 48.706 | 48.497 | 49.289 | 0.00 | 0.00 |
| ATOM | 4479 | HG22 | VAL | X | 296 | 50.331 | 48.294 | 48.582 | 0.00 | 0.00 |
| ATOM | 4480 | HG23 | VAL | X | 296 | 49.519 | 46.906 | 49.218 | 0.00 | 0.00 |
| ATOM | 4481 | C    | VAL | X | 296 | 47.527 | 49.634 | 46.948 | 0.00 | 0.00 |
| ATOM | 4482 | O    | VAL | X | 296 | 47.967 | 50.711 | 47.316 | 0.00 | 0.00 |
| ATOM | 4483 | N    | PRO | X | 297 | 46.178 | 49.362 | 47.078 | 0.00 | 0.00 |
| ATOM | 4484 | CD   | PRO | X | 297 | 45.474 | 48.200 | 46.430 | 0.00 | 0.00 |
| ATOM | 4485 | HD2  | PRO | X | 297 | 45.753 | 47.376 | 47.087 | 0.00 | 0.00 |
| ATOM | 4486 | HD3  | PRO | X | 297 | 45.735 | 47.988 | 45.393 | 0.00 | 0.00 |

|      |      |      |     |   |     |        |        |        |      |      |
|------|------|------|-----|---|-----|--------|--------|--------|------|------|
| ATOM | 4487 | CG   | PRO | X | 297 | 44.013 | 48.554 | 46.600 | 0.00 | 0.00 |
| ATOM | 4488 | HG2  | PRO | X | 297 | 43.366 | 47.685 | 46.721 | 0.00 | 0.00 |
| ATOM | 4489 | HG3  | PRO | X | 297 | 43.644 | 49.267 | 45.864 | 0.00 | 0.00 |
| ATOM | 4490 | CB   | PRO | X | 297 | 44.004 | 49.301 | 47.973 | 0.00 | 0.00 |
| ATOM | 4491 | HB2  | PRO | X | 297 | 44.088 | 48.605 | 48.808 | 0.00 | 0.00 |
| ATOM | 4492 | HB3  | PRO | X | 297 | 43.170 | 49.999 | 48.049 | 0.00 | 0.00 |
| ATOM | 4493 | CA   | PRO | X | 297 | 45.210 | 50.176 | 47.853 | 0.00 | 0.00 |
| ATOM | 4494 | HA   | PRO | X | 297 | 44.948 | 50.964 | 47.148 | 0.00 | 0.00 |
| ATOM | 4495 | C    | PRO | X | 297 | 45.743 | 50.669 | 49.225 | 0.00 | 0.00 |
| ATOM | 4496 | O    | PRO | X | 297 | 46.398 | 50.009 | 50.033 | 0.00 | 0.00 |
| ATOM | 4497 | N    | VAL | X | 298 | 45.507 | 51.952 | 49.404 | 0.00 | 0.00 |
| ATOM | 4498 | H    | VAL | X | 298 | 44.945 | 52.389 | 48.688 | 0.00 | 0.00 |
| ATOM | 4499 | CA   | VAL | X | 298 | 45.941 | 52.756 | 50.559 | 0.00 | 0.00 |
| ATOM | 4500 | HA   | VAL | X | 298 | 46.649 | 52.125 | 51.096 | 0.00 | 0.00 |
| ATOM | 4501 | CB   | VAL | X | 298 | 46.540 | 54.069 | 50.107 | 0.00 | 0.00 |
| ATOM | 4502 | HB   | VAL | X | 298 | 45.761 | 54.705 | 49.687 | 0.00 | 0.00 |
| ATOM | 4503 | CG1  | VAL | X | 298 | 47.302 | 54.738 | 51.224 | 0.00 | 0.00 |
| ATOM | 4504 | HG11 | VAL | X | 298 | 48.109 | 54.087 | 51.559 | 0.00 | 0.00 |
| ATOM | 4505 | HG12 | VAL | X | 298 | 47.753 | 55.679 | 50.908 | 0.00 | 0.00 |
| ATOM | 4506 | HG13 | VAL | X | 298 | 46.586 | 54.971 | 52.012 | 0.00 | 0.00 |
| ATOM | 4507 | CG2  | VAL | X | 298 | 47.563 | 53.934 | 48.931 | 0.00 | 0.00 |
| ATOM | 4508 | HG21 | VAL | X | 298 | 47.782 | 54.946 | 48.591 | 0.00 | 0.00 |
| ATOM | 4509 | HG22 | VAL | X | 298 | 47.137 | 53.510 | 48.022 | 0.00 | 0.00 |
| ATOM | 4510 | HG23 | VAL | X | 298 | 48.445 | 53.421 | 49.315 | 0.00 | 0.00 |
| ATOM | 4511 | C    | VAL | X | 298 | 44.781 | 52.958 | 51.537 | 0.00 | 0.00 |
| ATOM | 4512 | O    | VAL | X | 298 | 43.678 | 53.345 | 51.101 | 0.00 | 0.00 |
| ATOM | 4513 | N    | VAL | X | 299 | 45.010 | 52.799 | 52.832 | 0.00 | 0.00 |
| ATOM | 4514 | H    | VAL | X | 299 | 45.977 | 52.721 | 53.112 | 0.00 | 0.00 |
| ATOM | 4515 | CA   | VAL | X | 299 | 44.118 | 53.362 | 53.832 | 0.00 | 0.00 |
| ATOM | 4516 | HA   | VAL | X | 299 | 43.071 | 53.244 | 53.554 | 0.00 | 0.00 |
| ATOM | 4517 | CB   | VAL | X | 299 | 44.369 | 52.709 | 55.202 | 0.00 | 0.00 |
| ATOM | 4518 | HB   | VAL | X | 299 | 45.382 | 52.930 | 55.539 | 0.00 | 0.00 |
| ATOM | 4519 | CG1  | VAL | X | 299 | 43.421 | 53.222 | 56.323 | 0.00 | 0.00 |
| ATOM | 4520 | HG11 | VAL | X | 299 | 43.633 | 54.287 | 56.418 | 0.00 | 0.00 |
| ATOM | 4521 | HG12 | VAL | X | 299 | 42.403 | 53.158 | 55.939 | 0.00 | 0.00 |
| ATOM | 4522 | HG13 | VAL | X | 299 | 43.516 | 52.710 | 57.281 | 0.00 | 0.00 |
| ATOM | 4523 | CG2  | VAL | X | 299 | 44.159 | 51.213 | 55.191 | 0.00 | 0.00 |
| ATOM | 4524 | HG21 | VAL | X | 299 | 43.266 | 50.934 | 54.632 | 0.00 | 0.00 |
| ATOM | 4525 | HG22 | VAL | X | 299 | 44.149 | 50.839 | 56.215 | 0.00 | 0.00 |
| ATOM | 4526 | HG23 | VAL | X | 299 | 44.988 | 50.800 | 54.618 | 0.00 | 0.00 |
| ATOM | 4527 | C    | VAL | X | 299 | 44.369 | 54.931 | 53.916 | 0.00 | 0.00 |
| ATOM | 4528 | O    | VAL | X | 299 | 45.420 | 55.337 | 54.348 | 0.00 | 0.00 |
| ATOM | 4529 | N    | ASP | X | 300 | 43.459 | 55.699 | 53.347 | 0.00 | 0.00 |
| ATOM | 4530 | H    | ASP | X | 300 | 42.623 | 55.231 | 53.025 | 0.00 | 0.00 |
| ATOM | 4531 | CA   | ASP | X | 300 | 43.619 | 57.136 | 53.002 | 0.00 | 0.00 |
| ATOM | 4532 | HA   | ASP | X | 300 | 44.685 | 57.339 | 53.106 | 0.00 | 0.00 |
| ATOM | 4533 | CB   | ASP | X | 300 | 43.259 | 57.207 | 51.484 | 0.00 | 0.00 |
| ATOM | 4534 | HB2  | ASP | X | 300 | 43.453 | 58.221 | 51.132 | 0.00 | 0.00 |
| ATOM | 4535 | HB3  | ASP | X | 300 | 43.863 | 56.568 | 50.840 | 0.00 | 0.00 |
| ATOM | 4536 | CG   | ASP | X | 300 | 41.864 | 56.893 | 51.150 | 0.00 | 0.00 |
| ATOM | 4537 | OD1  | ASP | X | 300 | 41.082 | 56.487 | 51.985 | 0.00 | 0.00 |
| ATOM | 4538 | OD2  | ASP | X | 300 | 41.481 | 57.101 | 49.980 | 0.00 | 0.00 |
| ATOM | 4539 | C    | ASP | X | 300 | 42.776 | 58.098 | 53.882 | 0.00 | 0.00 |
| ATOM | 4540 | O    | ASP | X | 300 | 43.108 | 59.282 | 53.875 | 0.00 | 0.00 |
| ATOM | 4541 | N    | GLY | X | 301 | 41.727 | 57.602 | 54.561 | 0.00 | 0.00 |
| ATOM | 4542 | H    | GLY | X | 301 | 41.583 | 56.603 | 54.521 | 0.00 | 0.00 |
| ATOM | 4543 | CA   | GLY | X | 301 | 40.746 | 58.334 | 55.377 | 0.00 | 0.00 |
| ATOM | 4544 | HA2  | GLY | X | 301 | 40.437 | 57.772 | 56.258 | 0.00 | 0.00 |
| ATOM | 4545 | HA3  | GLY | X | 301 | 41.285 | 59.223 | 55.705 | 0.00 | 0.00 |
| ATOM | 4546 | C    | GLY | X | 301 | 39.465 | 58.861 | 54.675 | 0.00 | 0.00 |
| ATOM | 4547 | O    | GLY | X | 301 | 38.694 | 59.534 | 55.287 | 0.00 | 0.00 |
| ATOM | 4548 | N    | ASP | X | 302 | 39.396 | 58.642 | 53.326 | 0.00 | 0.00 |
| ATOM | 4549 | H    | ASP | X | 302 | 40.042 | 57.966 | 52.945 | 0.00 | 0.00 |
| ATOM | 4550 | CA   | ASP | X | 302 | 38.373 | 59.206 | 52.402 | 0.00 | 0.00 |
| ATOM | 4551 | HA   | ASP | X | 302 | 37.515 | 59.497 | 53.009 | 0.00 | 0.00 |
| ATOM | 4552 | CB   | ASP | X | 302 | 38.958 | 60.429 | 51.733 | 0.00 | 0.00 |
| ATOM | 4553 | HB2  | ASP | X | 302 | 39.588 | 60.894 | 52.491 | 0.00 | 0.00 |

|      |      |      |     |   |     |        |        |        |      |      |
|------|------|------|-----|---|-----|--------|--------|--------|------|------|
| ATOM | 4554 | HB3  | ASP | X | 302 | 39.532 | 60.248 | 50.825 | 0.00 | 0.00 |
| ATOM | 4555 | CG   | ASP | X | 302 | 37.825 | 61.416 | 51.391 | 0.00 | 0.00 |
| ATOM | 4556 | OD1  | ASP | X | 302 | 37.173 | 62.038 | 52.293 | 0.00 | 0.00 |
| ATOM | 4557 | OD2  | ASP | X | 302 | 37.546 | 61.574 | 50.190 | 0.00 | 0.00 |
| ATOM | 4558 | C    | ASP | X | 302 | 37.725 | 58.161 | 51.530 | 0.00 | 0.00 |
| ATOM | 4559 | O    | ASP | X | 302 | 36.490 | 58.095 | 51.398 | 0.00 | 0.00 |
| ATOM | 4560 | N    | PHE | X | 303 | 38.457 | 57.286 | 50.808 | 0.00 | 0.00 |
| ATOM | 4561 | H    | PHE | X | 303 | 39.460 | 57.321 | 50.917 | 0.00 | 0.00 |
| ATOM | 4562 | CA   | PHE | X | 303 | 37.882 | 56.102 | 50.195 | 0.00 | 0.00 |
| ATOM | 4563 | HA   | PHE | X | 303 | 37.004 | 56.376 | 49.610 | 0.00 | 0.00 |
| ATOM | 4564 | CB   | PHE | X | 303 | 38.822 | 55.615 | 49.118 | 0.00 | 0.00 |
| ATOM | 4565 | HB2  | PHE | X | 303 | 39.196 | 56.469 | 48.553 | 0.00 | 0.00 |
| ATOM | 4566 | HB3  | PHE | X | 303 | 39.676 | 55.246 | 49.687 | 0.00 | 0.00 |
| ATOM | 4567 | CG   | PHE | X | 303 | 38.301 | 54.545 | 48.155 | 0.00 | 0.00 |
| ATOM | 4568 | CD1  | PHE | X | 303 | 38.139 | 53.195 | 48.549 | 0.00 | 0.00 |
| ATOM | 4569 | HD1  | PHE | X | 303 | 38.447 | 52.807 | 49.509 | 0.00 | 0.00 |
| ATOM | 4570 | CE1  | PHE | X | 303 | 37.581 | 52.290 | 47.611 | 0.00 | 0.00 |
| ATOM | 4571 | HE1  | PHE | X | 303 | 37.467 | 51.246 | 47.863 | 0.00 | 0.00 |
| ATOM | 4572 | CZ   | PHE | X | 303 | 37.141 | 52.776 | 46.350 | 0.00 | 0.00 |
| ATOM | 4573 | HZ   | PHE | X | 303 | 36.686 | 52.111 | 45.630 | 0.00 | 0.00 |
| ATOM | 4574 | CE2  | PHE | X | 303 | 37.413 | 54.135 | 45.993 | 0.00 | 0.00 |
| ATOM | 4575 | HE2  | PHE | X | 303 | 37.102 | 54.507 | 45.028 | 0.00 | 0.00 |
| ATOM | 4576 | CD2  | PHE | X | 303 | 37.934 | 55.018 | 46.900 | 0.00 | 0.00 |
| ATOM | 4577 | HD2  | PHE | X | 303 | 38.139 | 56.054 | 46.673 | 0.00 | 0.00 |
| ATOM | 4578 | C    | PHE | X | 303 | 37.614 | 54.966 | 51.278 | 0.00 | 0.00 |
| ATOM | 4579 | O    | PHE | X | 303 | 36.583 | 54.259 | 51.215 | 0.00 | 0.00 |
| ATOM | 4580 | N    | LEU | X | 304 | 38.548 | 54.914 | 52.248 | 0.00 | 0.00 |
| ATOM | 4581 | H    | LEU | X | 304 | 39.297 | 55.592 | 52.260 | 0.00 | 0.00 |
| ATOM | 4582 | CA   | LEU | X | 304 | 38.384 | 54.135 | 53.511 | 0.00 | 0.00 |
| ATOM | 4583 | HA   | LEU | X | 304 | 37.381 | 53.709 | 53.537 | 0.00 | 0.00 |
| ATOM | 4584 | CB   | LEU | X | 304 | 39.392 | 52.996 | 53.461 | 0.00 | 0.00 |
| ATOM | 4585 | HB2  | LEU | X | 304 | 40.397 | 53.413 | 53.517 | 0.00 | 0.00 |
| ATOM | 4586 | HB3  | LEU | X | 304 | 39.215 | 52.382 | 54.344 | 0.00 | 0.00 |
| ATOM | 4587 | CG   | LEU | X | 304 | 39.358 | 52.057 | 52.272 | 0.00 | 0.00 |
| ATOM | 4588 | HG   | LEU | X | 304 | 39.571 | 52.647 | 51.381 | 0.00 | 0.00 |
| ATOM | 4589 | CD1  | LEU | X | 304 | 40.449 | 50.992 | 52.438 | 0.00 | 0.00 |
| ATOM | 4590 | HD11 | LEU | X | 304 | 40.460 | 50.483 | 53.402 | 0.00 | 0.00 |
| ATOM | 4591 | HD12 | LEU | X | 304 | 41.407 | 51.511 | 52.434 | 0.00 | 0.00 |
| ATOM | 4592 | HD13 | LEU | X | 304 | 40.523 | 50.255 | 51.639 | 0.00 | 0.00 |
| ATOM | 4593 | CD2  | LEU | X | 304 | 37.985 | 51.308 | 52.161 | 0.00 | 0.00 |
| ATOM | 4594 | HD21 | LEU | X | 304 | 37.903 | 50.630 | 51.311 | 0.00 | 0.00 |
| ATOM | 4595 | HD22 | LEU | X | 304 | 37.790 | 50.780 | 53.094 | 0.00 | 0.00 |
| ATOM | 4596 | HD23 | LEU | X | 304 | 37.164 | 52.023 | 52.118 | 0.00 | 0.00 |
| ATOM | 4597 | C    | LEU | X | 304 | 38.660 | 55.091 | 54.695 | 0.00 | 0.00 |
| ATOM | 4598 | O    | LEU | X | 304 | 39.809 | 55.545 | 54.859 | 0.00 | 0.00 |
| ATOM | 4599 | N    | SER | X | 305 | 37.716 | 55.311 | 55.612 | 0.00 | 0.00 |
| ATOM | 4600 | H    | SER | X | 305 | 36.821 | 54.880 | 55.431 | 0.00 | 0.00 |
| ATOM | 4601 | CA   | SER | X | 305 | 37.771 | 56.122 | 56.806 | 0.00 | 0.00 |
| ATOM | 4602 | HA   | SER | X | 305 | 38.391 | 56.959 | 56.484 | 0.00 | 0.00 |
| ATOM | 4603 | CB   | SER | X | 305 | 36.384 | 56.583 | 57.099 | 0.00 | 0.00 |
| ATOM | 4604 | HB2  | SER | X | 305 | 36.424 | 57.131 | 58.040 | 0.00 | 0.00 |
| ATOM | 4605 | HB3  | SER | X | 305 | 35.990 | 57.347 | 56.429 | 0.00 | 0.00 |
| ATOM | 4606 | OG   | SER | X | 305 | 35.387 | 55.603 | 57.265 | 0.00 | 0.00 |
| ATOM | 4607 | HG   | SER | X | 305 | 34.665 | 56.067 | 57.695 | 0.00 | 0.00 |
| ATOM | 4608 | C    | SER | X | 305 | 38.426 | 55.472 | 58.008 | 0.00 | 0.00 |
| ATOM | 4609 | O    | SER | X | 305 | 38.657 | 56.191 | 58.925 | 0.00 | 0.00 |
| ATOM | 4610 | N    | ASP | X | 306 | 38.884 | 54.267 | 57.914 | 0.00 | 0.00 |
| ATOM | 4611 | H    | ASP | X | 306 | 38.687 | 53.770 | 57.057 | 0.00 | 0.00 |
| ATOM | 4612 | CA   | ASP | X | 306 | 39.726 | 53.556 | 58.818 | 0.00 | 0.00 |
| ATOM | 4613 | HA   | ASP | X | 306 | 40.548 | 54.235 | 59.046 | 0.00 | 0.00 |
| ATOM | 4614 | CB   | ASP | X | 306 | 39.076 | 53.171 | 60.128 | 0.00 | 0.00 |
| ATOM | 4615 | HB2  | ASP | X | 306 | 38.375 | 53.927 | 60.483 | 0.00 | 0.00 |
| ATOM | 4616 | HB3  | ASP | X | 306 | 38.508 | 52.251 | 59.995 | 0.00 | 0.00 |
| ATOM | 4617 | CG   | ASP | X | 306 | 40.061 | 53.097 | 61.241 | 0.00 | 0.00 |
| ATOM | 4618 | OD1  | ASP | X | 306 | 40.916 | 52.182 | 61.317 | 0.00 | 0.00 |
| ATOM | 4619 | OD2  | ASP | X | 306 | 40.123 | 53.989 | 62.065 | 0.00 | 0.00 |
| ATOM | 4620 | C    | ASP | X | 306 | 40.279 | 52.312 | 58.047 | 0.00 | 0.00 |



|      |      |      |     |   |     |        |        |        |      |      |
|------|------|------|-----|---|-----|--------|--------|--------|------|------|
| ATOM | 4621 | O    | ASP | X | 306 | 39.915 | 52.100 | 56.882 | 0.00 | 0.00 |
| ATOM | 4622 | N    | THR | X | 307 | 41.117 | 51.456 | 58.661 | 0.00 | 0.00 |
| ATOM | 4623 | H    | THR | X | 307 | 41.290 | 51.639 | 59.639 | 0.00 | 0.00 |
| ATOM | 4624 | CA   | THR | X | 307 | 41.582 | 50.146 | 58.207 | 0.00 | 0.00 |
| ATOM | 4625 | HA   | THR | X | 307 | 42.090 | 50.282 | 57.253 | 0.00 | 0.00 |
| ATOM | 4626 | CB   | THR | X | 307 | 42.401 | 49.468 | 59.284 | 0.00 | 0.00 |
| ATOM | 4627 | HB   | THR | X | 307 | 42.651 | 48.457 | 58.959 | 0.00 | 0.00 |
| ATOM | 4628 | CG2  | THR | X | 307 | 43.674 | 50.257 | 59.647 | 0.00 | 0.00 |
| ATOM | 4629 | HG21 | THR | X | 307 | 43.419 | 51.197 | 60.138 | 0.00 | 0.00 |
| ATOM | 4630 | HG22 | THR | X | 307 | 44.212 | 50.388 | 58.708 | 0.00 | 0.00 |
| ATOM | 4631 | HG23 | THR | X | 307 | 44.308 | 49.843 | 60.430 | 0.00 | 0.00 |
| ATOM | 4632 | OG1  | THR | X | 307 | 41.653 | 49.417 | 60.452 | 0.00 | 0.00 |
| ATOM | 4633 | HG1  | THR | X | 307 | 41.334 | 50.285 | 60.708 | 0.00 | 0.00 |
| ATOM | 4634 | C    | THR | X | 307 | 40.365 | 49.312 | 57.791 | 0.00 | 0.00 |
| ATOM | 4635 | O    | THR | X | 307 | 39.285 | 49.420 | 58.392 | 0.00 | 0.00 |
| ATOM | 4636 | N    | PRO | X | 308 | 40.561 | 48.429 | 56.812 | 0.00 | 0.00 |
| ATOM | 4637 | CD   | PRO | X | 308 | 41.625 | 48.349 | 55.882 | 0.00 | 0.00 |
| ATOM | 4638 | HD2  | PRO | X | 308 | 42.511 | 47.865 | 56.293 | 0.00 | 0.00 |
| ATOM | 4639 | HD3  | PRO | X | 308 | 41.730 | 49.320 | 55.398 | 0.00 | 0.00 |
| ATOM | 4640 | CG   | PRO | X | 308 | 41.150 | 47.462 | 54.754 | 0.00 | 0.00 |
| ATOM | 4641 | HG2  | PRO | X | 308 | 41.939 | 46.867 | 54.294 | 0.00 | 0.00 |
| ATOM | 4642 | HG3  | PRO | X | 308 | 40.620 | 48.055 | 54.009 | 0.00 | 0.00 |
| ATOM | 4643 | CB   | PRO | X | 308 | 40.228 | 46.474 | 55.503 | 0.00 | 0.00 |
| ATOM | 4644 | HB2  | PRO | X | 308 | 40.766 | 45.669 | 56.002 | 0.00 | 0.00 |
| ATOM | 4645 | HB3  | PRO | X | 308 | 39.445 | 45.960 | 54.945 | 0.00 | 0.00 |
| ATOM | 4646 | CA   | PRO | X | 308 | 39.630 | 47.372 | 56.522 | 0.00 | 0.00 |
| ATOM | 4647 | HA   | PRO | X | 308 | 38.750 | 47.894 | 56.145 | 0.00 | 0.00 |
| ATOM | 4648 | C    | PRO | X | 308 | 39.278 | 46.596 | 57.792 | 0.00 | 0.00 |
| ATOM | 4649 | O    | PRO | X | 308 | 38.125 | 46.336 | 57.946 | 0.00 | 0.00 |
| ATOM | 4650 | N    | GLU | X | 309 | 40.267 | 46.214 | 58.635 | 0.00 | 0.00 |
| ATOM | 4651 | H    | GLU | X | 309 | 41.225 | 46.494 | 58.480 | 0.00 | 0.00 |
| ATOM | 4652 | CA   | GLU | X | 309 | 40.047 | 45.669 | 59.978 | 0.00 | 0.00 |
| ATOM | 4653 | HA   | GLU | X | 309 | 39.662 | 44.652 | 59.920 | 0.00 | 0.00 |
| ATOM | 4654 | CB   | GLU | X | 309 | 41.408 | 45.653 | 60.696 | 0.00 | 0.00 |
| ATOM | 4655 | HB2  | GLU | X | 309 | 42.162 | 45.175 | 60.071 | 0.00 | 0.00 |
| ATOM | 4656 | HB3  | GLU | X | 309 | 41.790 | 46.654 | 60.894 | 0.00 | 0.00 |
| ATOM | 4657 | CG   | GLU | X | 309 | 41.416 | 44.870 | 62.006 | 0.00 | 0.00 |
| ATOM | 4658 | HG2  | GLU | X | 309 | 40.569 | 45.099 | 62.653 | 0.00 | 0.00 |
| ATOM | 4659 | HG3  | GLU | X | 309 | 41.491 | 43.807 | 61.777 | 0.00 | 0.00 |
| ATOM | 4660 | CD   | GLU | X | 309 | 42.674 | 45.122 | 62.887 | 0.00 | 0.00 |
| ATOM | 4661 | OE1  | GLU | X | 309 | 42.592 | 45.343 | 64.110 | 0.00 | 0.00 |
| ATOM | 4662 | OE2  | GLU | X | 309 | 43.795 | 45.235 | 62.343 | 0.00 | 0.00 |
| ATOM | 4663 | C    | GLU | X | 309 | 38.960 | 46.294 | 60.832 | 0.00 | 0.00 |
| ATOM | 4664 | O    | GLU | X | 309 | 37.978 | 45.612 | 61.228 | 0.00 | 0.00 |
| ATOM | 4665 | N    | ALA | X | 310 | 39.097 | 47.585 | 60.984 | 0.00 | 0.00 |
| ATOM | 4666 | H    | ALA | X | 310 | 39.842 | 48.120 | 60.561 | 0.00 | 0.00 |
| ATOM | 4667 | CA   | ALA | X | 310 | 38.150 | 48.451 | 61.758 | 0.00 | 0.00 |
| ATOM | 4668 | HA   | ALA | X | 310 | 38.104 | 47.977 | 62.739 | 0.00 | 0.00 |
| ATOM | 4669 | CB   | ALA | X | 310 | 38.751 | 49.807 | 62.029 | 0.00 | 0.00 |
| ATOM | 4670 | HB1  | ALA | X | 310 | 38.021 | 50.288 | 62.680 | 0.00 | 0.00 |
| ATOM | 4671 | HB2  | ALA | X | 310 | 38.846 | 50.343 | 61.085 | 0.00 | 0.00 |
| ATOM | 4672 | HB3  | ALA | X | 310 | 39.717 | 49.667 | 62.514 | 0.00 | 0.00 |
| ATOM | 4673 | C    | ALA | X | 310 | 36.790 | 48.477 | 61.125 | 0.00 | 0.00 |
| ATOM | 4674 | O    | ALA | X | 310 | 35.730 | 48.351 | 61.807 | 0.00 | 0.00 |
| ATOM | 4675 | N    | LEU | X | 311 | 36.766 | 48.731 | 59.797 | 0.00 | 0.00 |
| ATOM | 4676 | H    | LEU | X | 311 | 37.642 | 48.990 | 59.368 | 0.00 | 0.00 |
| ATOM | 4677 | CA   | LEU | X | 311 | 35.546 | 48.862 | 58.973 | 0.00 | 0.00 |
| ATOM | 4678 | HA   | LEU | X | 311 | 34.805 | 49.525 | 59.419 | 0.00 | 0.00 |
| ATOM | 4679 | CB   | LEU | X | 311 | 35.792 | 49.431 | 57.499 | 0.00 | 0.00 |
| ATOM | 4680 | HB2  | LEU | X | 311 | 36.535 | 48.761 | 57.067 | 0.00 | 0.00 |
| ATOM | 4681 | HB3  | LEU | X | 311 | 34.900 | 49.387 | 56.875 | 0.00 | 0.00 |
| ATOM | 4682 | CG   | LEU | X | 311 | 36.403 | 50.839 | 57.471 | 0.00 | 0.00 |
| ATOM | 4683 | HG   | LEU | X | 311 | 37.279 | 50.848 | 58.119 | 0.00 | 0.00 |
| ATOM | 4684 | CD1  | LEU | X | 311 | 36.806 | 51.173 | 56.003 | 0.00 | 0.00 |
| ATOM | 4685 | HD11 | LEU | X | 311 | 35.951 | 51.244 | 55.330 | 0.00 | 0.00 |
| ATOM | 4686 | HD12 | LEU | X | 311 | 37.383 | 50.334 | 55.614 | 0.00 | 0.00 |
| ATOM | 4687 | HD13 | LEU | X | 311 | 37.347 | 52.094 | 55.788 | 0.00 | 0.00 |

|      |      |      |     |   |     |        |        |        |      |      |
|------|------|------|-----|---|-----|--------|--------|--------|------|------|
| ATOM | 4688 | CD2  | LEU | X | 311 | 35.504 | 51.861 | 58.107 | 0.00 | 0.00 |
| ATOM | 4689 | HD21 | LEU | X | 311 | 35.533 | 51.637 | 59.173 | 0.00 | 0.00 |
| ATOM | 4690 | HD22 | LEU | X | 311 | 35.944 | 52.851 | 57.987 | 0.00 | 0.00 |
| ATOM | 4691 | HD23 | LEU | X | 311 | 34.505 | 51.877 | 57.672 | 0.00 | 0.00 |
| ATOM | 4692 | C    | LEU | X | 311 | 34.690 | 47.594 | 58.950 | 0.00 | 0.00 |
| ATOM | 4693 | O    | LEU | X | 311 | 33.471 | 47.609 | 59.099 | 0.00 | 0.00 |
| ATOM | 4694 | N    | ILE | X | 312 | 35.418 | 46.428 | 58.953 | 0.00 | 0.00 |
| ATOM | 4695 | H    | ILE | X | 312 | 36.422 | 46.488 | 58.856 | 0.00 | 0.00 |
| ATOM | 4696 | CA   | ILE | X | 312 | 34.722 | 45.090 | 58.991 | 0.00 | 0.00 |
| ATOM | 4697 | HA   | ILE | X | 312 | 33.838 | 45.154 | 58.357 | 0.00 | 0.00 |
| ATOM | 4698 | CB   | ILE | X | 312 | 35.665 | 43.952 | 58.485 | 0.00 | 0.00 |
| ATOM | 4699 | HB   | ILE | X | 312 | 36.616 | 43.963 | 59.018 | 0.00 | 0.00 |
| ATOM | 4700 | CG2  | ILE | X | 312 | 35.038 | 42.545 | 58.730 | 0.00 | 0.00 |
| ATOM | 4701 | HG21 | ILE | X | 312 | 34.101 | 42.382 | 58.198 | 0.00 | 0.00 |
| ATOM | 4702 | HG22 | ILE | X | 312 | 34.841 | 42.501 | 59.801 | 0.00 | 0.00 |
| ATOM | 4703 | HG23 | ILE | X | 312 | 35.787 | 41.782 | 58.519 | 0.00 | 0.00 |
| ATOM | 4704 | CG1  | ILE | X | 312 | 35.980 | 44.149 | 56.995 | 0.00 | 0.00 |
| ATOM | 4705 | HG12 | ILE | X | 312 | 35.099 | 43.932 | 56.390 | 0.00 | 0.00 |
| ATOM | 4706 | HG13 | ILE | X | 312 | 36.224 | 45.178 | 56.732 | 0.00 | 0.00 |
| ATOM | 4707 | CD1  | ILE | X | 312 | 37.205 | 43.286 | 56.571 | 0.00 | 0.00 |
| ATOM | 4708 | HD11 | ILE | X | 312 | 37.481 | 43.455 | 55.530 | 0.00 | 0.00 |
| ATOM | 4709 | HD12 | ILE | X | 312 | 36.942 | 42.232 | 56.665 | 0.00 | 0.00 |
| ATOM | 4710 | HD13 | ILE | X | 312 | 38.051 | 43.601 | 57.182 | 0.00 | 0.00 |
| ATOM | 4711 | C    | ILE | X | 312 | 34.215 | 44.825 | 60.483 | 0.00 | 0.00 |
| ATOM | 4712 | O    | ILE | X | 312 | 33.068 | 44.346 | 60.733 | 0.00 | 0.00 |
| ATOM | 4713 | N    | ASN | X | 313 | 35.020 | 45.190 | 61.479 | 0.00 | 0.00 |
| ATOM | 4714 | H    | ASN | X | 313 | 35.922 | 45.580 | 61.245 | 0.00 | 0.00 |
| ATOM | 4715 | CA   | ASN | X | 313 | 34.613 | 45.167 | 62.896 | 0.00 | 0.00 |
| ATOM | 4716 | HA   | ASN | X | 313 | 34.339 | 44.145 | 63.156 | 0.00 | 0.00 |
| ATOM | 4717 | CB   | ASN | X | 313 | 35.803 | 45.429 | 63.792 | 0.00 | 0.00 |
| ATOM | 4718 | HB2  | ASN | X | 313 | 36.270 | 46.388 | 63.568 | 0.00 | 0.00 |
| ATOM | 4719 | HB3  | ASN | X | 313 | 35.526 | 45.429 | 64.847 | 0.00 | 0.00 |
| ATOM | 4720 | CG   | ASN | X | 313 | 36.924 | 44.322 | 63.739 | 0.00 | 0.00 |
| ATOM | 4721 | OD1  | ASN | X | 313 | 36.638 | 43.169 | 63.466 | 0.00 | 0.00 |
| ATOM | 4722 | ND2  | ASN | X | 313 | 38.115 | 44.625 | 64.211 | 0.00 | 0.00 |
| ATOM | 4723 | HD21 | ASN | X | 313 | 38.882 | 43.969 | 64.195 | 0.00 | 0.00 |
| ATOM | 4724 | HD22 | ASN | X | 313 | 38.182 | 45.569 | 64.563 | 0.00 | 0.00 |
| ATOM | 4725 | C    | ASN | X | 313 | 33.346 | 46.039 | 63.283 | 0.00 | 0.00 |
| ATOM | 4726 | O    | ASN | X | 313 | 32.798 | 45.873 | 64.403 | 0.00 | 0.00 |
| ATOM | 4727 | N    | ALA | X | 314 | 33.049 | 47.079 | 62.493 | 0.00 | 0.00 |
| ATOM | 4728 | H    | ALA | X | 314 | 33.700 | 47.097 | 61.721 | 0.00 | 0.00 |
| ATOM | 4729 | CA   | ALA | X | 314 | 32.142 | 48.137 | 62.948 | 0.00 | 0.00 |
| ATOM | 4730 | HA   | ALA | X | 314 | 31.647 | 47.844 | 63.874 | 0.00 | 0.00 |
| ATOM | 4731 | CB   | ALA | X | 314 | 32.821 | 49.413 | 63.124 | 0.00 | 0.00 |
| ATOM | 4732 | HB1  | ALA | X | 314 | 31.994 | 50.058 | 63.419 | 0.00 | 0.00 |
| ATOM | 4733 | HB2  | ALA | X | 314 | 33.248 | 49.796 | 62.197 | 0.00 | 0.00 |
| ATOM | 4734 | HB3  | ALA | X | 314 | 33.548 | 49.419 | 63.936 | 0.00 | 0.00 |
| ATOM | 4735 | C    | ALA | X | 314 | 30.998 | 48.301 | 61.931 | 0.00 | 0.00 |
| ATOM | 4736 | O    | ALA | X | 314 | 30.036 | 48.903 | 62.395 | 0.00 | 0.00 |
| ATOM | 4737 | N    | GLY | X | 315 | 31.012 | 47.786 | 60.742 | 0.00 | 0.00 |
| ATOM | 4738 | H    | GLY | X | 315 | 31.846 | 47.303 | 60.441 | 0.00 | 0.00 |
| ATOM | 4739 | CA   | GLY | X | 315 | 30.088 | 48.053 | 59.616 | 0.00 | 0.00 |
| ATOM | 4740 | HA2  | GLY | X | 315 | 29.790 | 49.070 | 59.870 | 0.00 | 0.00 |
| ATOM | 4741 | HA3  | GLY | X | 315 | 30.612 | 47.906 | 58.671 | 0.00 | 0.00 |
| ATOM | 4742 | C    | GLY | X | 315 | 28.847 | 47.168 | 59.697 | 0.00 | 0.00 |
| ATOM | 4743 | O    | GLY | X | 315 | 28.844 | 46.011 | 60.135 | 0.00 | 0.00 |
| ATOM | 4744 | N    | ASP | X | 316 | 27.721 | 47.751 | 59.242 | 0.00 | 0.00 |
| ATOM | 4745 | H    | ASP | X | 316 | 27.856 | 48.660 | 58.823 | 0.00 | 0.00 |
| ATOM | 4746 | CA   | ASP | X | 316 | 26.428 | 47.056 | 59.043 | 0.00 | 0.00 |
| ATOM | 4747 | HA   | ASP | X | 316 | 26.332 | 46.185 | 59.692 | 0.00 | 0.00 |
| ATOM | 4748 | CB   | ASP | X | 316 | 25.277 | 48.086 | 59.348 | 0.00 | 0.00 |
| ATOM | 4749 | HB2  | ASP | X | 316 | 25.336 | 48.739 | 60.219 | 0.00 | 0.00 |
| ATOM | 4750 | HB3  | ASP | X | 316 | 25.195 | 48.808 | 58.536 | 0.00 | 0.00 |
| ATOM | 4751 | CG   | ASP | X | 316 | 23.952 | 47.336 | 59.566 | 0.00 | 0.00 |
| ATOM | 4752 | OD1  | ASP | X | 316 | 23.382 | 46.703 | 58.658 | 0.00 | 0.00 |
| ATOM | 4753 | OD2  | ASP | X | 316 | 23.371 | 47.519 | 60.662 | 0.00 | 0.00 |
| ATOM | 4754 | C    | ASP | X | 316 | 26.342 | 46.400 | 57.619 | 0.00 | 0.00 |

|      |      |      |     |   |     |        |        |        |      |      |
|------|------|------|-----|---|-----|--------|--------|--------|------|------|
| ATOM | 4755 | O    | ASP | X | 316 | 26.699 | 46.953 | 56.614 | 0.00 | 0.00 |
| ATOM | 4756 | N    | PHE | X | 317 | 25.821 | 45.173 | 57.543 | 0.00 | 0.00 |
| ATOM | 4757 | H    | PHE | X | 317 | 25.376 | 44.870 | 58.397 | 0.00 | 0.00 |
| ATOM | 4758 | CA   | PHE | X | 317 | 25.638 | 44.420 | 56.330 | 0.00 | 0.00 |
| ATOM | 4759 | HA   | PHE | X | 317 | 25.573 | 45.041 | 55.436 | 0.00 | 0.00 |
| ATOM | 4760 | CB   | PHE | X | 317 | 26.863 | 43.466 | 56.141 | 0.00 | 0.00 |
| ATOM | 4761 | HB2  | PHE | X | 317 | 26.835 | 42.773 | 56.981 | 0.00 | 0.00 |
| ATOM | 4762 | HB3  | PHE | X | 317 | 26.817 | 42.962 | 55.176 | 0.00 | 0.00 |
| ATOM | 4763 | CG   | PHE | X | 317 | 28.169 | 44.149 | 56.222 | 0.00 | 0.00 |
| ATOM | 4764 | CD1  | PHE | X | 317 | 28.794 | 44.656 | 55.077 | 0.00 | 0.00 |
| ATOM | 4765 | HD1  | PHE | X | 317 | 28.298 | 44.582 | 54.120 | 0.00 | 0.00 |
| ATOM | 4766 | CE1  | PHE | X | 317 | 30.036 | 45.317 | 55.180 | 0.00 | 0.00 |
| ATOM | 4767 | HE1  | PHE | X | 317 | 30.400 | 45.777 | 54.273 | 0.00 | 0.00 |
| ATOM | 4768 | CZ   | PHE | X | 317 | 30.700 | 45.421 | 56.444 | 0.00 | 0.00 |
| ATOM | 4769 | HZ   | PHE | X | 317 | 31.694 | 45.842 | 56.406 | 0.00 | 0.00 |
| ATOM | 4770 | CE2  | PHE | X | 317 | 30.106 | 44.841 | 57.582 | 0.00 | 0.00 |
| ATOM | 4771 | HE2  | PHE | X | 317 | 30.576 | 44.808 | 58.554 | 0.00 | 0.00 |
| ATOM | 4772 | CD2  | PHE | X | 317 | 28.774 | 44.303 | 57.479 | 0.00 | 0.00 |
| ATOM | 4773 | HD2  | PHE | X | 317 | 28.330 | 43.854 | 58.356 | 0.00 | 0.00 |
| ATOM | 4774 | C    | PHE | X | 317 | 24.251 | 43.711 | 56.221 | 0.00 | 0.00 |
| ATOM | 4775 | O    | PHE | X | 317 | 24.132 | 42.716 | 55.456 | 0.00 | 0.00 |
| ATOM | 4776 | N    | HIE | X | 318 | 23.214 | 44.185 | 56.980 | 0.00 | 0.00 |
| ATOM | 4777 | H    | HIE | X | 318 | 23.296 | 45.014 | 57.550 | 0.00 | 0.00 |
| ATOM | 4778 | CA   | HIE | X | 318 | 21.852 | 43.660 | 56.791 | 0.00 | 0.00 |
| ATOM | 4779 | HA   | HIE | X | 318 | 21.985 | 42.601 | 57.013 | 0.00 | 0.00 |
| ATOM | 4780 | CB   | HIE | X | 318 | 20.929 | 44.312 | 57.843 | 0.00 | 0.00 |
| ATOM | 4781 | HB2  | HIE | X | 318 | 21.290 | 45.339 | 57.905 | 0.00 | 0.00 |
| ATOM | 4782 | HB3  | HIE | X | 318 | 19.894 | 44.260 | 57.503 | 0.00 | 0.00 |
| ATOM | 4783 | CG   | HIE | X | 318 | 20.998 | 43.638 | 59.191 | 0.00 | 0.00 |
| ATOM | 4784 | ND1  | HIE | X | 318 | 20.275 | 42.531 | 59.598 | 0.00 | 0.00 |
| ATOM | 4785 | CE1  | HIE | X | 318 | 20.720 | 42.229 | 60.796 | 0.00 | 0.00 |
| ATOM | 4786 | HE1  | HIE | X | 318 | 20.281 | 41.395 | 61.323 | 0.00 | 0.00 |
| ATOM | 4787 | NE2  | HIE | X | 318 | 21.541 | 43.207 | 61.235 | 0.00 | 0.00 |
| ATOM | 4788 | HE2  | HIE | X | 318 | 22.033 | 43.202 | 62.117 | 0.00 | 0.00 |
| ATOM | 4789 | CD2  | HIE | X | 318 | 21.778 | 44.074 | 60.192 | 0.00 | 0.00 |
| ATOM | 4790 | HD2  | HIE | X | 318 | 22.395 | 44.959 | 60.212 | 0.00 | 0.00 |
| ATOM | 4791 | C    | HIE | X | 318 | 21.377 | 43.852 | 55.361 | 0.00 | 0.00 |
| ATOM | 4792 | O    | HIE | X | 318 | 21.632 | 44.804 | 54.627 | 0.00 | 0.00 |
| ATOM | 4793 | N    | GLY | X | 319 | 20.525 | 42.922 | 54.916 | 0.00 | 0.00 |
| ATOM | 4794 | H    | GLY | X | 319 | 20.263 | 42.133 | 55.490 | 0.00 | 0.00 |
| ATOM | 4795 | CA   | GLY | X | 319 | 19.971 | 42.859 | 53.506 | 0.00 | 0.00 |
| ATOM | 4796 | HA2  | GLY | X | 319 | 19.111 | 42.193 | 53.440 | 0.00 | 0.00 |
| ATOM | 4797 | HA3  | GLY | X | 319 | 19.598 | 43.839 | 53.207 | 0.00 | 0.00 |
| ATOM | 4798 | C    | GLY | X | 319 | 20.988 | 42.472 | 52.424 | 0.00 | 0.00 |
| ATOM | 4799 | O    | GLY | X | 319 | 20.520 | 42.007 | 51.386 | 0.00 | 0.00 |
| ATOM | 4800 | N    | LEU | X | 320 | 22.334 | 42.548 | 52.636 | 0.00 | 0.00 |
| ATOM | 4801 | H    | LEU | X | 320 | 22.667 | 43.027 | 53.461 | 0.00 | 0.00 |
| ATOM | 4802 | CA   | LEU | X | 320 | 23.358 | 42.187 | 51.643 | 0.00 | 0.00 |
| ATOM | 4803 | HA   | LEU | X | 320 | 23.026 | 42.643 | 50.711 | 0.00 | 0.00 |
| ATOM | 4804 | CB   | LEU | X | 320 | 24.668 | 42.764 | 52.100 | 0.00 | 0.00 |
| ATOM | 4805 | HB2  | LEU | X | 320 | 24.477 | 43.339 | 53.006 | 0.00 | 0.00 |
| ATOM | 4806 | HB3  | LEU | X | 320 | 25.315 | 41.931 | 52.374 | 0.00 | 0.00 |
| ATOM | 4807 | CG   | LEU | X | 320 | 25.359 | 43.643 | 51.064 | 0.00 | 0.00 |
| ATOM | 4808 | HG   | LEU | X | 320 | 24.666 | 44.410 | 50.719 | 0.00 | 0.00 |
| ATOM | 4809 | CD1  | LEU | X | 320 | 26.520 | 44.429 | 51.610 | 0.00 | 0.00 |
| ATOM | 4810 | HD11 | LEU | X | 320 | 26.876 | 45.118 | 50.843 | 0.00 | 0.00 |
| ATOM | 4811 | HD12 | LEU | X | 320 | 27.330 | 43.721 | 51.782 | 0.00 | 0.00 |
| ATOM | 4812 | HD13 | LEU | X | 320 | 26.242 | 44.866 | 52.569 | 0.00 | 0.00 |
| ATOM | 4813 | CD2  | LEU | X | 320 | 25.857 | 42.880 | 49.831 | 0.00 | 0.00 |
| ATOM | 4814 | HD21 | LEU | X | 320 | 26.352 | 43.543 | 49.121 | 0.00 | 0.00 |
| ATOM | 4815 | HD22 | LEU | X | 320 | 26.521 | 42.084 | 50.167 | 0.00 | 0.00 |
| ATOM | 4816 | HD23 | LEU | X | 320 | 24.992 | 42.456 | 49.322 | 0.00 | 0.00 |
| ATOM | 4817 | C    | LEU | X | 320 | 23.345 | 40.637 | 51.434 | 0.00 | 0.00 |
| ATOM | 4818 | O    | LEU | X | 320 | 23.044 | 39.918 | 52.401 | 0.00 | 0.00 |
| ATOM | 4819 | N    | GLN | X | 321 | 23.658 | 40.172 | 50.266 | 0.00 | 0.00 |
| ATOM | 4820 | H    | GLN | X | 321 | 23.765 | 40.852 | 49.527 | 0.00 | 0.00 |
| ATOM | 4821 | CA   | GLN | X | 321 | 23.998 | 38.833 | 49.919 | 0.00 | 0.00 |

|      |      |      |     |   |     |        |        |        |      |      |
|------|------|------|-----|---|-----|--------|--------|--------|------|------|
| ATOM | 4822 | HA   | GLN | X | 321 | 23.978 | 38.250 | 50.840 | 0.00 | 0.00 |
| ATOM | 4823 | CB   | GLN | X | 321 | 22.926 | 38.241 | 48.960 | 0.00 | 0.00 |
| ATOM | 4824 | HB2  | GLN | X | 321 | 23.019 | 38.634 | 47.948 | 0.00 | 0.00 |
| ATOM | 4825 | HB3  | GLN | X | 321 | 23.139 | 37.172 | 48.920 | 0.00 | 0.00 |
| ATOM | 4826 | CG   | GLN | X | 321 | 21.497 | 38.371 | 49.489 | 0.00 | 0.00 |
| ATOM | 4827 | HG2  | GLN | X | 321 | 21.018 | 37.392 | 49.464 | 0.00 | 0.00 |
| ATOM | 4828 | HG3  | GLN | X | 321 | 21.424 | 38.735 | 50.514 | 0.00 | 0.00 |
| ATOM | 4829 | CD   | GLN | X | 321 | 20.674 | 39.298 | 48.607 | 0.00 | 0.00 |
| ATOM | 4830 | OE1  | GLN | X | 321 | 20.262 | 38.907 | 47.530 | 0.00 | 0.00 |
| ATOM | 4831 | NE2  | GLN | X | 321 | 20.387 | 40.483 | 49.061 | 0.00 | 0.00 |
| ATOM | 4832 | HE21 | GLN | X | 321 | 19.870 | 41.101 | 48.451 | 0.00 | 0.00 |
| ATOM | 4833 | HE22 | GLN | X | 321 | 20.571 | 40.773 | 50.011 | 0.00 | 0.00 |
| ATOM | 4834 | C    | GLN | X | 321 | 25.368 | 38.737 | 49.342 | 0.00 | 0.00 |
| ATOM | 4835 | O    | GLN | X | 321 | 25.746 | 39.571 | 48.490 | 0.00 | 0.00 |
| ATOM | 4836 | N    | VAL | X | 322 | 26.144 | 37.744 | 49.714 | 0.00 | 0.00 |
| ATOM | 4837 | H    | VAL | X | 322 | 25.862 | 36.939 | 50.255 | 0.00 | 0.00 |
| ATOM | 4838 | CA   | VAL | X | 322 | 27.606 | 37.635 | 49.495 | 0.00 | 0.00 |
| ATOM | 4839 | HA   | VAL | X | 322 | 27.846 | 38.249 | 48.627 | 0.00 | 0.00 |
| ATOM | 4840 | CB   | VAL | X | 322 | 28.408 | 38.198 | 50.720 | 0.00 | 0.00 |
| ATOM | 4841 | HB   | VAL | X | 322 | 28.198 | 37.669 | 51.650 | 0.00 | 0.00 |
| ATOM | 4842 | CG1  | VAL | X | 322 | 29.889 | 38.101 | 50.374 | 0.00 | 0.00 |
| ATOM | 4843 | HG11 | VAL | X | 322 | 30.225 | 37.068 | 50.282 | 0.00 | 0.00 |
| ATOM | 4844 | HG12 | VAL | X | 322 | 30.068 | 38.693 | 49.476 | 0.00 | 0.00 |
| ATOM | 4845 | HG13 | VAL | X | 322 | 30.416 | 38.609 | 51.181 | 0.00 | 0.00 |
| ATOM | 4846 | CG2  | VAL | X | 322 | 27.943 | 39.623 | 51.034 | 0.00 | 0.00 |
| ATOM | 4847 | HG21 | VAL | X | 322 | 28.505 | 40.050 | 51.865 | 0.00 | 0.00 |
| ATOM | 4848 | HG22 | VAL | X | 322 | 26.894 | 39.673 | 51.325 | 0.00 | 0.00 |
| ATOM | 4849 | HG23 | VAL | X | 322 | 28.123 | 40.240 | 50.154 | 0.00 | 0.00 |
| ATOM | 4850 | C    | VAL | X | 322 | 28.054 | 36.158 | 49.270 | 0.00 | 0.00 |
| ATOM | 4851 | O    | VAL | X | 322 | 27.642 | 35.339 | 50.094 | 0.00 | 0.00 |
| ATOM | 4852 | N    | LEU | X | 323 | 28.950 | 35.875 | 48.321 | 0.00 | 0.00 |
| ATOM | 4853 | H    | LEU | X | 323 | 29.454 | 36.647 | 47.907 | 0.00 | 0.00 |
| ATOM | 4854 | CA   | LEU | X | 323 | 29.490 | 34.553 | 48.108 | 0.00 | 0.00 |
| ATOM | 4855 | HA   | LEU | X | 323 | 29.135 | 33.870 | 48.880 | 0.00 | 0.00 |
| ATOM | 4856 | CB   | LEU | X | 323 | 29.071 | 34.116 | 46.646 | 0.00 | 0.00 |
| ATOM | 4857 | HB2  | LEU | X | 323 | 27.982 | 34.123 | 46.695 | 0.00 | 0.00 |
| ATOM | 4858 | HB3  | LEU | X | 323 | 29.392 | 34.897 | 45.957 | 0.00 | 0.00 |
| ATOM | 4859 | CG   | LEU | X | 323 | 29.679 | 32.777 | 46.143 | 0.00 | 0.00 |
| ATOM | 4860 | HG   | LEU | X | 323 | 30.763 | 32.874 | 46.186 | 0.00 | 0.00 |
| ATOM | 4861 | CD1  | LEU | X | 323 | 29.264 | 31.578 | 46.990 | 0.00 | 0.00 |
| ATOM | 4862 | HD11 | LEU | X | 323 | 29.751 | 30.710 | 46.546 | 0.00 | 0.00 |
| ATOM | 4863 | HD12 | LEU | X | 323 | 28.176 | 31.538 | 46.950 | 0.00 | 0.00 |
| ATOM | 4864 | HD13 | LEU | X | 323 | 29.492 | 31.735 | 48.044 | 0.00 | 0.00 |
| ATOM | 4865 | CD2  | LEU | X | 323 | 29.265 | 32.591 | 44.683 | 0.00 | 0.00 |
| ATOM | 4866 | HD21 | LEU | X | 323 | 29.717 | 31.678 | 44.296 | 0.00 | 0.00 |
| ATOM | 4867 | HD22 | LEU | X | 323 | 28.195 | 32.472 | 44.510 | 0.00 | 0.00 |
| ATOM | 4868 | HD23 | LEU | X | 323 | 29.633 | 33.493 | 44.194 | 0.00 | 0.00 |
| ATOM | 4869 | C    | LEU | X | 323 | 31.007 | 34.565 | 48.316 | 0.00 | 0.00 |
| ATOM | 4870 | O    | LEU | X | 323 | 31.653 | 35.506 | 47.889 | 0.00 | 0.00 |
| ATOM | 4871 | N    | VAL | X | 324 | 31.600 | 33.612 | 49.068 | 0.00 | 0.00 |
| ATOM | 4872 | H    | VAL | X | 324 | 31.072 | 32.786 | 49.311 | 0.00 | 0.00 |
| ATOM | 4873 | CA   | VAL | X | 324 | 33.040 | 33.629 | 49.391 | 0.00 | 0.00 |
| ATOM | 4874 | HA   | VAL | X | 324 | 33.522 | 34.314 | 48.693 | 0.00 | 0.00 |
| ATOM | 4875 | CB   | VAL | X | 324 | 33.367 | 34.058 | 50.863 | 0.00 | 0.00 |
| ATOM | 4876 | HB   | VAL | X | 324 | 34.441 | 33.907 | 50.975 | 0.00 | 0.00 |
| ATOM | 4877 | CG1  | VAL | X | 324 | 33.009 | 35.536 | 51.150 | 0.00 | 0.00 |
| ATOM | 4878 | HG11 | VAL | X | 324 | 33.291 | 36.162 | 50.302 | 0.00 | 0.00 |
| ATOM | 4879 | HG12 | VAL | X | 324 | 31.923 | 35.618 | 51.094 | 0.00 | 0.00 |
| ATOM | 4880 | HG13 | VAL | X | 324 | 33.398 | 35.798 | 52.133 | 0.00 | 0.00 |
| ATOM | 4881 | CG2  | VAL | X | 324 | 32.781 | 33.137 | 51.910 | 0.00 | 0.00 |
| ATOM | 4882 | HG21 | VAL | X | 324 | 31.701 | 33.250 | 51.995 | 0.00 | 0.00 |
| ATOM | 4883 | HG22 | VAL | X | 324 | 33.235 | 33.410 | 52.863 | 0.00 | 0.00 |
| ATOM | 4884 | HG23 | VAL | X | 324 | 32.960 | 32.114 | 51.581 | 0.00 | 0.00 |
| ATOM | 4885 | C    | VAL | X | 324 | 33.613 | 32.244 | 49.114 | 0.00 | 0.00 |
| ATOM | 4886 | O    | VAL | X | 324 | 32.859 | 31.261 | 49.130 | 0.00 | 0.00 |
| ATOM | 4887 | N    | GLY | X | 325 | 34.911 | 32.142 | 48.903 | 0.00 | 0.00 |
| ATOM | 4888 | H    | GLY | X | 325 | 35.410 | 33.013 | 48.791 | 0.00 | 0.00 |

|      |      |      |     |   |     |        |        |        |      |      |
|------|------|------|-----|---|-----|--------|--------|--------|------|------|
| ATOM | 4889 | CA   | GLY | X | 325 | 35.649 | 30.890 | 48.859 | 0.00 | 0.00 |
| ATOM | 4890 | HA2  | GLY | X | 325 | 35.627 | 30.420 | 49.842 | 0.00 | 0.00 |
| ATOM | 4891 | HA3  | GLY | X | 325 | 35.103 | 30.197 | 48.220 | 0.00 | 0.00 |
| ATOM | 4892 | C    | GLY | X | 325 | 37.008 | 30.978 | 48.320 | 0.00 | 0.00 |
| ATOM | 4893 | O    | GLY | X | 325 | 37.598 | 32.014 | 47.968 | 0.00 | 0.00 |
| ATOM | 4894 | N    | VAL | X | 326 | 37.652 | 29.788 | 48.264 | 0.00 | 0.00 |
| ATOM | 4895 | H    | VAL | X | 326 | 37.199 | 28.995 | 48.695 | 0.00 | 0.00 |
| ATOM | 4896 | CA   | VAL | X | 326 | 39.165 | 29.631 | 48.031 | 0.00 | 0.00 |
| ATOM | 4897 | HA   | VAL | X | 326 | 39.496 | 30.444 | 47.384 | 0.00 | 0.00 |
| ATOM | 4898 | CB   | VAL | X | 326 | 39.957 | 29.606 | 49.334 | 0.00 | 0.00 |
| ATOM | 4899 | HB   | VAL | X | 326 | 40.962 | 29.216 | 49.172 | 0.00 | 0.00 |
| ATOM | 4900 | CG1  | VAL | X | 326 | 39.980 | 30.922 | 50.125 | 0.00 | 0.00 |
| ATOM | 4901 | HG11 | VAL | X | 326 | 40.302 | 31.765 | 49.514 | 0.00 | 0.00 |
| ATOM | 4902 | HG12 | VAL | X | 326 | 38.941 | 31.010 | 50.443 | 0.00 | 0.00 |
| ATOM | 4903 | HG13 | VAL | X | 326 | 40.556 | 30.871 | 51.049 | 0.00 | 0.00 |
| ATOM | 4904 | CG2  | VAL | X | 326 | 39.462 | 28.483 | 50.341 | 0.00 | 0.00 |
| ATOM | 4905 | HG21 | VAL | X | 326 | 39.602 | 27.548 | 49.797 | 0.00 | 0.00 |
| ATOM | 4906 | HG22 | VAL | X | 326 | 38.414 | 28.522 | 50.638 | 0.00 | 0.00 |
| ATOM | 4907 | HG23 | VAL | X | 326 | 40.181 | 28.345 | 51.148 | 0.00 | 0.00 |
| ATOM | 4908 | C    | VAL | X | 326 | 39.401 | 28.333 | 47.240 | 0.00 | 0.00 |
| ATOM | 4909 | O    | VAL | X | 326 | 38.532 | 27.506 | 47.132 | 0.00 | 0.00 |
| ATOM | 4910 | N    | VAL | X | 327 | 40.564 | 28.186 | 46.618 | 0.00 | 0.00 |
| ATOM | 4911 | H    | VAL | X | 327 | 41.258 | 28.920 | 46.635 | 0.00 | 0.00 |
| ATOM | 4912 | CA   | VAL | X | 327 | 41.086 | 26.842 | 46.129 | 0.00 | 0.00 |
| ATOM | 4913 | HA   | VAL | X | 327 | 40.166 | 26.284 | 45.951 | 0.00 | 0.00 |
| ATOM | 4914 | CB   | VAL | X | 327 | 41.997 | 26.944 | 44.851 | 0.00 | 0.00 |
| ATOM | 4915 | HB   | VAL | X | 327 | 42.155 | 25.900 | 44.579 | 0.00 | 0.00 |
| ATOM | 4916 | CG1  | VAL | X | 327 | 41.269 | 27.691 | 43.670 | 0.00 | 0.00 |
| ATOM | 4917 | HG11 | VAL | X | 327 | 40.365 | 27.102 | 43.519 | 0.00 | 0.00 |
| ATOM | 4918 | HG12 | VAL | X | 327 | 41.092 | 28.714 | 44.002 | 0.00 | 0.00 |
| ATOM | 4919 | HG13 | VAL | X | 327 | 41.893 | 27.564 | 42.785 | 0.00 | 0.00 |
| ATOM | 4920 | CG2  | VAL | X | 327 | 43.372 | 27.589 | 45.159 | 0.00 | 0.00 |
| ATOM | 4921 | HG21 | VAL | X | 327 | 43.854 | 27.106 | 46.009 | 0.00 | 0.00 |
| ATOM | 4922 | HG22 | VAL | X | 327 | 43.272 | 28.645 | 45.410 | 0.00 | 0.00 |
| ATOM | 4923 | HG23 | VAL | X | 327 | 44.053 | 27.369 | 44.337 | 0.00 | 0.00 |
| ATOM | 4924 | C    | VAL | X | 327 | 41.782 | 26.070 | 47.214 | 0.00 | 0.00 |
| ATOM | 4925 | O    | VAL | X | 327 | 42.182 | 26.590 | 48.276 | 0.00 | 0.00 |
| ATOM | 4926 | N    | LYS | X | 328 | 42.012 | 24.767 | 47.050 | 0.00 | 0.00 |
| ATOM | 4927 | H    | LYS | X | 328 | 41.449 | 24.384 | 46.303 | 0.00 | 0.00 |
| ATOM | 4928 | CA   | LYS | X | 328 | 42.478 | 23.863 | 48.065 | 0.00 | 0.00 |
| ATOM | 4929 | HA   | LYS | X | 328 | 41.928 | 23.991 | 48.997 | 0.00 | 0.00 |
| ATOM | 4930 | CB   | LYS | X | 328 | 42.275 | 22.395 | 47.496 | 0.00 | 0.00 |
| ATOM | 4931 | HB2  | LYS | X | 328 | 41.254 | 22.433 | 47.116 | 0.00 | 0.00 |
| ATOM | 4932 | HB3  | LYS | X | 328 | 42.845 | 22.159 | 46.597 | 0.00 | 0.00 |
| ATOM | 4933 | CG   | LYS | X | 328 | 42.341 | 21.208 | 48.512 | 0.00 | 0.00 |
| ATOM | 4934 | HG2  | LYS | X | 328 | 42.101 | 21.612 | 49.496 | 0.00 | 0.00 |
| ATOM | 4935 | HG3  | LYS | X | 328 | 41.677 | 20.400 | 48.204 | 0.00 | 0.00 |
| ATOM | 4936 | CD   | LYS | X | 328 | 43.727 | 20.528 | 48.554 | 0.00 | 0.00 |
| ATOM | 4937 | HD2  | LYS | X | 328 | 44.511 | 21.285 | 48.558 | 0.00 | 0.00 |
| ATOM | 4938 | HD3  | LYS | X | 328 | 43.797 | 19.850 | 49.405 | 0.00 | 0.00 |
| ATOM | 4939 | CE   | LYS | X | 328 | 43.905 | 19.702 | 47.246 | 0.00 | 0.00 |
| ATOM | 4940 | HE2  | LYS | X | 328 | 43.140 | 18.932 | 47.149 | 0.00 | 0.00 |
| ATOM | 4941 | HE3  | LYS | X | 328 | 43.687 | 20.415 | 46.451 | 0.00 | 0.00 |
| ATOM | 4942 | NZ   | LYS | X | 328 | 45.265 | 19.261 | 47.106 | 0.00 | 0.00 |
| ATOM | 4943 | HZ1  | LYS | X | 328 | 45.516 | 18.547 | 47.775 | 0.00 | 0.00 |
| ATOM | 4944 | HZ2  | LYS | X | 328 | 45.339 | 18.785 | 46.218 | 0.00 | 0.00 |
| ATOM | 4945 | HZ3  | LYS | X | 328 | 45.943 | 20.007 | 47.170 | 0.00 | 0.00 |
| ATOM | 4946 | C    | LYS | X | 328 | 43.948 | 24.074 | 48.487 | 0.00 | 0.00 |
| ATOM | 4947 | O    | LYS | X | 328 | 44.307 | 23.823 | 49.601 | 0.00 | 0.00 |
| ATOM | 4948 | N    | ASP | X | 329 | 44.783 | 24.572 | 47.579 | 0.00 | 0.00 |
| ATOM | 4949 | H    | ASP | X | 329 | 44.384 | 24.636 | 46.653 | 0.00 | 0.00 |
| ATOM | 4950 | CA   | ASP | X | 329 | 46.227 | 24.652 | 47.802 | 0.00 | 0.00 |
| ATOM | 4951 | HA   | ASP | X | 329 | 46.531 | 24.222 | 48.757 | 0.00 | 0.00 |
| ATOM | 4952 | CB   | ASP | X | 329 | 46.921 | 23.748 | 46.780 | 0.00 | 0.00 |
| ATOM | 4953 | HB2  | ASP | X | 329 | 46.719 | 24.102 | 45.769 | 0.00 | 0.00 |
| ATOM | 4954 | HB3  | ASP | X | 329 | 47.979 | 23.841 | 47.027 | 0.00 | 0.00 |
| ATOM | 4955 | CG   | ASP | X | 329 | 46.496 | 22.327 | 46.763 | 0.00 | 0.00 |

|      |      |     |     |   |     |        |        |        |      |      |
|------|------|-----|-----|---|-----|--------|--------|--------|------|------|
| ATOM | 4956 | OD1 | ASP | X | 329 | 46.950 | 21.424 | 47.480 | 0.00 | 0.00 |
| ATOM | 4957 | OD2 | ASP | X | 329 | 45.488 | 22.059 | 46.027 | 0.00 | 0.00 |
| ATOM | 4958 | C   | ASP | X | 329 | 46.688 | 26.112 | 47.643 | 0.00 | 0.00 |
| ATOM | 4959 | O   | ASP | X | 329 | 47.918 | 26.189 | 47.447 | 0.00 | 0.00 |
| ATOM | 4960 | N   | GLU | X | 330 | 45.836 | 27.148 | 47.775 | 0.00 | 0.00 |
| ATOM | 4961 | H   | GLU | X | 330 | 44.899 | 26.873 | 48.033 | 0.00 | 0.00 |
| ATOM | 4962 | CA  | GLU | X | 330 | 46.132 | 28.630 | 47.572 | 0.00 | 0.00 |
| ATOM | 4963 | HA  | GLU | X | 330 | 45.529 | 28.987 | 46.737 | 0.00 | 0.00 |
| ATOM | 4964 | CB  | GLU | X | 330 | 45.565 | 29.431 | 48.818 | 0.00 | 0.00 |
| ATOM | 4965 | HB2 | GLU | X | 330 | 45.854 | 28.835 | 49.683 | 0.00 | 0.00 |
| ATOM | 4966 | HB3 | GLU | X | 330 | 46.100 | 30.381 | 48.804 | 0.00 | 0.00 |
| ATOM | 4967 | CG  | GLU | X | 330 | 44.066 | 29.707 | 48.851 | 0.00 | 0.00 |
| ATOM | 4968 | HG2 | GLU | X | 330 | 43.502 | 28.776 | 48.789 | 0.00 | 0.00 |
| ATOM | 4969 | HG3 | GLU | X | 330 | 43.725 | 30.217 | 49.752 | 0.00 | 0.00 |
| ATOM | 4970 | CD  | GLU | X | 330 | 43.503 | 30.463 | 47.630 | 0.00 | 0.00 |
| ATOM | 4971 | OE1 | GLU | X | 330 | 44.186 | 31.409 | 47.240 | 0.00 | 0.00 |
| ATOM | 4972 | OE2 | GLU | X | 330 | 42.351 | 30.159 | 47.216 | 0.00 | 0.00 |
| ATOM | 4973 | C   | GLU | X | 330 | 47.599 | 29.061 | 47.297 | 0.00 | 0.00 |
| ATOM | 4974 | O   | GLU | X | 330 | 47.950 | 29.429 | 46.208 | 0.00 | 0.00 |
| ATOM | 4975 | N   | GLY | X | 331 | 48.407 | 28.850 | 48.358 | 0.00 | 0.00 |
| ATOM | 4976 | H   | GLY | X | 331 | 48.038 | 28.334 | 49.144 | 0.00 | 0.00 |
| ATOM | 4977 | CA  | GLY | X | 331 | 49.732 | 29.473 | 48.339 | 0.00 | 0.00 |
| ATOM | 4978 | HA2 | GLY | X | 331 | 49.612 | 30.521 | 48.064 | 0.00 | 0.00 |
| ATOM | 4979 | HA3 | GLY | X | 331 | 50.122 | 29.564 | 49.352 | 0.00 | 0.00 |
| ATOM | 4980 | C   | GLY | X | 331 | 50.752 | 28.769 | 47.454 | 0.00 | 0.00 |
| ATOM | 4981 | O   | GLY | X | 331 | 51.822 | 29.351 | 47.280 | 0.00 | 0.00 |
| ATOM | 4982 | N   | SER | X | 332 | 50.512 | 27.581 | 46.924 | 0.00 | 0.00 |
| ATOM | 4983 | H   | SER | X | 332 | 49.626 | 27.117 | 47.066 | 0.00 | 0.00 |
| ATOM | 4984 | CA  | SER | X | 332 | 51.493 | 26.836 | 46.151 | 0.00 | 0.00 |
| ATOM | 4985 | HA  | SER | X | 332 | 52.341 | 26.642 | 46.808 | 0.00 | 0.00 |
| ATOM | 4986 | CB  | SER | X | 332 | 50.823 | 25.521 | 45.694 | 0.00 | 0.00 |
| ATOM | 4987 | HB2 | SER | X | 332 | 51.588 | 24.904 | 45.223 | 0.00 | 0.00 |
| ATOM | 4988 | HB3 | SER | X | 332 | 50.346 | 25.114 | 46.585 | 0.00 | 0.00 |
| ATOM | 4989 | OG  | SER | X | 332 | 49.813 | 25.751 | 44.724 | 0.00 | 0.00 |
| ATOM | 4990 | HG  | SER | X | 332 | 49.386 | 24.891 | 44.714 | 0.00 | 0.00 |
| ATOM | 4991 | C   | SER | X | 332 | 52.103 | 27.698 | 44.960 | 0.00 | 0.00 |
| ATOM | 4992 | O   | SER | X | 332 | 53.290 | 27.740 | 44.649 | 0.00 | 0.00 |
| ATOM | 4993 | N   | TYR | X | 333 | 51.226 | 28.400 | 44.213 | 0.00 | 0.00 |
| ATOM | 4994 | H   | TYR | X | 333 | 50.256 | 28.386 | 44.494 | 0.00 | 0.00 |
| ATOM | 4995 | CA  | TYR | X | 333 | 51.642 | 29.096 | 42.961 | 0.00 | 0.00 |
| ATOM | 4996 | HA  | TYR | X | 333 | 52.117 | 28.451 | 42.222 | 0.00 | 0.00 |
| ATOM | 4997 | CB  | TYR | X | 333 | 50.408 | 29.807 | 42.430 | 0.00 | 0.00 |
| ATOM | 4998 | HB2 | TYR | X | 333 | 49.751 | 28.972 | 42.188 | 0.00 | 0.00 |
| ATOM | 4999 | HB3 | TYR | X | 333 | 50.019 | 30.369 | 43.279 | 0.00 | 0.00 |
| ATOM | 5000 | CG  | TYR | X | 333 | 50.600 | 30.692 | 41.212 | 0.00 | 0.00 |
| ATOM | 5001 | CD1 | TYR | X | 333 | 50.266 | 30.230 | 39.941 | 0.00 | 0.00 |
| ATOM | 5002 | HD1 | TYR | X | 333 | 49.939 | 29.206 | 39.842 | 0.00 | 0.00 |
| ATOM | 5003 | CE1 | TYR | X | 333 | 50.474 | 31.061 | 38.746 | 0.00 | 0.00 |
| ATOM | 5004 | HE1 | TYR | X | 333 | 50.246 | 30.636 | 37.779 | 0.00 | 0.00 |
| ATOM | 5005 | CZ  | TYR | X | 333 | 50.933 | 32.385 | 38.947 | 0.00 | 0.00 |
| ATOM | 5006 | OH  | TYR | X | 333 | 51.121 | 33.137 | 37.845 | 0.00 | 0.00 |
| ATOM | 5007 | HH  | TYR | X | 333 | 50.935 | 32.603 | 37.069 | 0.00 | 0.00 |
| ATOM | 5008 | CE2 | TYR | X | 333 | 51.212 | 32.860 | 40.262 | 0.00 | 0.00 |
| ATOM | 5009 | HE2 | TYR | X | 333 | 51.677 | 33.835 | 40.289 | 0.00 | 0.00 |
| ATOM | 5010 | CD2 | TYR | X | 333 | 50.994 | 32.026 | 41.359 | 0.00 | 0.00 |
| ATOM | 5011 | HD2 | TYR | X | 333 | 51.152 | 32.517 | 42.308 | 0.00 | 0.00 |
| ATOM | 5012 | C   | TYR | X | 333 | 52.721 | 30.148 | 43.324 | 0.00 | 0.00 |
| ATOM | 5013 | O   | TYR | X | 333 | 53.689 | 30.289 | 42.555 | 0.00 | 0.00 |
| ATOM | 5014 | N   | PHE | X | 334 | 52.723 | 30.746 | 44.517 | 0.00 | 0.00 |
| ATOM | 5015 | H   | PHE | X | 334 | 51.958 | 30.553 | 45.147 | 0.00 | 0.00 |
| ATOM | 5016 | CA  | PHE | X | 334 | 53.589 | 31.859 | 44.843 | 0.00 | 0.00 |
| ATOM | 5017 | HA  | PHE | X | 334 | 53.657 | 32.541 | 43.995 | 0.00 | 0.00 |
| ATOM | 5018 | CB  | PHE | X | 334 | 52.908 | 32.621 | 46.030 | 0.00 | 0.00 |
| ATOM | 5019 | HB2 | PHE | X | 334 | 52.671 | 31.905 | 46.818 | 0.00 | 0.00 |
| ATOM | 5020 | HB3 | PHE | X | 334 | 53.586 | 33.353 | 46.469 | 0.00 | 0.00 |
| ATOM | 5021 | CG  | PHE | X | 334 | 51.573 | 33.205 | 45.663 | 0.00 | 0.00 |
| ATOM | 5022 | CD1 | PHE | X | 334 | 50.360 | 32.375 | 45.682 | 0.00 | 0.00 |

|      |      |      |     |   |     |        |        |        |      |      |
|------|------|------|-----|---|-----|--------|--------|--------|------|------|
| ATOM | 5023 | HD1  | PHE | X | 334 | 50.448 | 31.431 | 46.200 | 0.00 | 0.00 |
| ATOM | 5024 | CE1  | PHE | X | 334 | 49.163 | 32.955 | 45.335 | 0.00 | 0.00 |
| ATOM | 5025 | HE1  | PHE | X | 334 | 48.234 | 32.409 | 45.403 | 0.00 | 0.00 |
| ATOM | 5026 | CZ   | PHE | X | 334 | 49.126 | 34.336 | 44.866 | 0.00 | 0.00 |
| ATOM | 5027 | HZ   | PHE | X | 334 | 48.216 | 34.796 | 44.509 | 0.00 | 0.00 |
| ATOM | 5028 | CE2  | PHE | X | 334 | 50.288 | 35.112 | 44.833 | 0.00 | 0.00 |
| ATOM | 5029 | HE2  | PHE | X | 334 | 50.223 | 36.144 | 44.520 | 0.00 | 0.00 |
| ATOM | 5030 | CD2  | PHE | X | 334 | 51.506 | 34.541 | 45.244 | 0.00 | 0.00 |
| ATOM | 5031 | HD2  | PHE | X | 334 | 52.378 | 35.173 | 45.162 | 0.00 | 0.00 |
| ATOM | 5032 | C    | PHE | X | 334 | 54.990 | 31.465 | 45.108 | 0.00 | 0.00 |
| ATOM | 5033 | O    | PHE | X | 334 | 55.897 | 32.183 | 44.888 | 0.00 | 0.00 |
| ATOM | 5034 | N    | LEU | X | 335 | 55.220 | 30.197 | 45.514 | 0.00 | 0.00 |
| ATOM | 5035 | H    | LEU | X | 335 | 54.391 | 29.630 | 45.613 | 0.00 | 0.00 |
| ATOM | 5036 | CA   | LEU | X | 335 | 56.468 | 29.750 | 46.142 | 0.00 | 0.00 |
| ATOM | 5037 | HA   | LEU | X | 335 | 56.761 | 30.415 | 46.954 | 0.00 | 0.00 |
| ATOM | 5038 | CB   | LEU | X | 335 | 56.267 | 28.388 | 46.846 | 0.00 | 0.00 |
| ATOM | 5039 | HB2  | LEU | X | 335 | 55.745 | 27.702 | 46.179 | 0.00 | 0.00 |
| ATOM | 5040 | HB3  | LEU | X | 335 | 57.199 | 27.937 | 47.186 | 0.00 | 0.00 |
| ATOM | 5041 | CG   | LEU | X | 335 | 55.345 | 28.472 | 48.105 | 0.00 | 0.00 |
| ATOM | 5042 | HG   | LEU | X | 335 | 54.394 | 28.953 | 47.876 | 0.00 | 0.00 |
| ATOM | 5043 | CD1  | LEU | X | 335 | 55.046 | 27.034 | 48.605 | 0.00 | 0.00 |
| ATOM | 5044 | HD11 | LEU | X | 335 | 54.531 | 26.531 | 47.786 | 0.00 | 0.00 |
| ATOM | 5045 | HD12 | LEU | X | 335 | 54.267 | 27.109 | 49.365 | 0.00 | 0.00 |
| ATOM | 5046 | HD13 | LEU | X | 335 | 55.942 | 26.533 | 48.973 | 0.00 | 0.00 |
| ATOM | 5047 | CD2  | LEU | X | 335 | 56.089 | 29.197 | 49.225 | 0.00 | 0.00 |
| ATOM | 5048 | HD21 | LEU | X | 335 | 55.361 | 29.210 | 50.035 | 0.00 | 0.00 |
| ATOM | 5049 | HD22 | LEU | X | 335 | 57.066 | 28.765 | 49.445 | 0.00 | 0.00 |
| ATOM | 5050 | HD23 | LEU | X | 335 | 56.300 | 30.210 | 48.882 | 0.00 | 0.00 |
| ATOM | 5051 | C    | LEU | X | 335 | 57.684 | 29.743 | 45.156 | 0.00 | 0.00 |
| ATOM | 5052 | O    | LEU | X | 335 | 58.776 | 30.207 | 45.510 | 0.00 | 0.00 |
| ATOM | 5053 | N    | VAL | X | 336 | 57.422 | 29.360 | 43.910 | 0.00 | 0.00 |
| ATOM | 5054 | H    | VAL | X | 336 | 56.495 | 29.174 | 43.554 | 0.00 | 0.00 |
| ATOM | 5055 | CA   | VAL | X | 336 | 58.518 | 29.286 | 42.915 | 0.00 | 0.00 |
| ATOM | 5056 | HA   | VAL | X | 336 | 59.355 | 28.729 | 43.335 | 0.00 | 0.00 |
| ATOM | 5057 | CB   | VAL | X | 336 | 58.020 | 28.609 | 41.669 | 0.00 | 0.00 |
| ATOM | 5058 | HB   | VAL | X | 336 | 58.733 | 28.463 | 40.858 | 0.00 | 0.00 |
| ATOM | 5059 | CG1  | VAL | X | 336 | 57.534 | 27.198 | 41.956 | 0.00 | 0.00 |
| ATOM | 5060 | HG11 | VAL | X | 336 | 57.230 | 26.748 | 41.011 | 0.00 | 0.00 |
| ATOM | 5061 | HG12 | VAL | X | 336 | 58.317 | 26.605 | 42.429 | 0.00 | 0.00 |
| ATOM | 5062 | HG13 | VAL | X | 336 | 56.663 | 27.134 | 42.608 | 0.00 | 0.00 |
| ATOM | 5063 | CG2  | VAL | X | 336 | 56.826 | 29.315 | 41.001 | 0.00 | 0.00 |
| ATOM | 5064 | HG21 | VAL | X | 336 | 57.081 | 30.288 | 40.582 | 0.00 | 0.00 |
| ATOM | 5065 | HG22 | VAL | X | 336 | 56.023 | 29.381 | 41.735 | 0.00 | 0.00 |
| ATOM | 5066 | HG23 | VAL | X | 336 | 56.401 | 28.763 | 40.162 | 0.00 | 0.00 |
| ATOM | 5067 | C    | VAL | X | 336 | 59.149 | 30.626 | 42.518 | 0.00 | 0.00 |
| ATOM | 5068 | O    | VAL | X | 336 | 60.107 | 30.591 | 41.750 | 0.00 | 0.00 |
| ATOM | 5069 | N    | TYR | X | 337 | 58.595 | 31.772 | 42.955 | 0.00 | 0.00 |
| ATOM | 5070 | H    | TYR | X | 337 | 57.797 | 31.707 | 43.571 | 0.00 | 0.00 |
| ATOM | 5071 | CA   | TYR | X | 337 | 59.099 | 33.122 | 42.625 | 0.00 | 0.00 |
| ATOM | 5072 | HA   | TYR | X | 337 | 59.500 | 33.156 | 41.611 | 0.00 | 0.00 |
| ATOM | 5073 | CB   | TYR | X | 337 | 57.984 | 34.186 | 42.762 | 0.00 | 0.00 |
| ATOM | 5074 | HB2  | TYR | X | 337 | 57.459 | 34.117 | 43.715 | 0.00 | 0.00 |
| ATOM | 5075 | HB3  | TYR | X | 337 | 58.452 | 35.169 | 42.709 | 0.00 | 0.00 |
| ATOM | 5076 | CG   | TYR | X | 337 | 56.999 | 34.011 | 41.555 | 0.00 | 0.00 |
| ATOM | 5077 | CD1  | TYR | X | 337 | 57.038 | 34.883 | 40.507 | 0.00 | 0.00 |
| ATOM | 5078 | HD1  | TYR | X | 337 | 57.807 | 35.641 | 40.488 | 0.00 | 0.00 |
| ATOM | 5079 | CE1  | TYR | X | 337 | 56.230 | 34.754 | 39.364 | 0.00 | 0.00 |
| ATOM | 5080 | HE1  | TYR | X | 337 | 56.442 | 35.310 | 38.463 | 0.00 | 0.00 |
| ATOM | 5081 | CZ   | TYR | X | 337 | 55.267 | 33.701 | 39.308 | 0.00 | 0.00 |
| ATOM | 5082 | OH   | TYR | X | 337 | 54.492 | 33.428 | 38.220 | 0.00 | 0.00 |
| ATOM | 5083 | HH   | TYR | X | 337 | 54.645 | 34.060 | 37.513 | 0.00 | 0.00 |
| ATOM | 5084 | CE2  | TYR | X | 337 | 55.111 | 32.863 | 40.458 | 0.00 | 0.00 |
| ATOM | 5085 | HE2  | TYR | X | 337 | 54.383 | 32.065 | 40.452 | 0.00 | 0.00 |
| ATOM | 5086 | CD2  | TYR | X | 337 | 56.031 | 32.983 | 41.556 | 0.00 | 0.00 |
| ATOM | 5087 | HD2  | TYR | X | 337 | 55.925 | 32.433 | 42.479 | 0.00 | 0.00 |
| ATOM | 5088 | C    | TYR | X | 337 | 60.337 | 33.451 | 43.524 | 0.00 | 0.00 |
| ATOM | 5089 | O    | TYR | X | 337 | 61.119 | 34.371 | 43.177 | 0.00 | 0.00 |

|      |      |     |     |   |     |        |        |        |      |      |
|------|------|-----|-----|---|-----|--------|--------|--------|------|------|
| ATOM | 5090 | N   | GLY | X | 338 | 60.571 | 32.813 | 44.629 | 0.00 | 0.00 |
| ATOM | 5091 | H   | GLY | X | 338 | 59.935 | 32.095 | 44.945 | 0.00 | 0.00 |
| ATOM | 5092 | CA  | GLY | X | 338 | 61.602 | 33.073 | 45.587 | 0.00 | 0.00 |
| ATOM | 5093 | HA2 | GLY | X | 338 | 62.587 | 33.040 | 45.120 | 0.00 | 0.00 |
| ATOM | 5094 | HA3 | GLY | X | 338 | 61.616 | 34.125 | 45.870 | 0.00 | 0.00 |
| ATOM | 5095 | C   | GLY | X | 338 | 61.803 | 32.208 | 46.858 | 0.00 | 0.00 |
| ATOM | 5096 | O   | GLY | X | 338 | 62.731 | 32.466 | 47.663 | 0.00 | 0.00 |
| ATOM | 5097 | N   | ALA | X | 339 | 60.927 | 31.260 | 47.123 | 0.00 | 0.00 |
| ATOM | 5098 | H   | ALA | X | 339 | 60.108 | 31.044 | 46.572 | 0.00 | 0.00 |
| ATOM | 5099 | CA  | ALA | X | 339 | 61.286 | 30.307 | 48.171 | 0.00 | 0.00 |
| ATOM | 5100 | HA  | ALA | X | 339 | 61.522 | 30.829 | 49.098 | 0.00 | 0.00 |
| ATOM | 5101 | CB  | ALA | X | 339 | 59.913 | 29.648 | 48.578 | 0.00 | 0.00 |
| ATOM | 5102 | HB1 | ALA | X | 339 | 60.113 | 29.046 | 49.464 | 0.00 | 0.00 |
| ATOM | 5103 | HB2 | ALA | X | 339 | 59.564 | 28.989 | 47.784 | 0.00 | 0.00 |
| ATOM | 5104 | HB3 | ALA | X | 339 | 59.155 | 30.398 | 48.807 | 0.00 | 0.00 |
| ATOM | 5105 | C   | ALA | X | 339 | 62.405 | 29.314 | 47.862 | 0.00 | 0.00 |
| ATOM | 5106 | O   | ALA | X | 339 | 62.354 | 28.769 | 46.777 | 0.00 | 0.00 |
| ATOM | 5107 | N   | PRO | X | 340 | 63.363 | 28.938 | 48.695 | 0.00 | 0.00 |
| ATOM | 5108 | CD  | PRO | X | 340 | 63.367 | 29.290 | 50.099 | 0.00 | 0.00 |
| ATOM | 5109 | HD2 | PRO | X | 340 | 62.409 | 29.007 | 50.534 | 0.00 | 0.00 |
| ATOM | 5110 | HD3 | PRO | X | 340 | 63.721 | 30.318 | 50.179 | 0.00 | 0.00 |
| ATOM | 5111 | CG  | PRO | X | 340 | 64.583 | 28.548 | 50.674 | 0.00 | 0.00 |
| ATOM | 5112 | HG2 | PRO | X | 340 | 64.285 | 27.565 | 51.040 | 0.00 | 0.00 |
| ATOM | 5113 | HG3 | PRO | X | 340 | 65.076 | 29.166 | 51.424 | 0.00 | 0.00 |
| ATOM | 5114 | CB  | PRO | X | 340 | 65.530 | 28.363 | 49.496 | 0.00 | 0.00 |
| ATOM | 5115 | HB2 | PRO | X | 340 | 66.262 | 27.567 | 49.631 | 0.00 | 0.00 |
| ATOM | 5116 | HB3 | PRO | X | 340 | 66.010 | 29.317 | 49.279 | 0.00 | 0.00 |
| ATOM | 5117 | CA  | PRO | X | 340 | 64.506 | 28.135 | 48.340 | 0.00 | 0.00 |
| ATOM | 5118 | HA  | PRO | X | 340 | 64.970 | 28.540 | 47.441 | 0.00 | 0.00 |
| ATOM | 5119 | C   | PRO | X | 340 | 64.112 | 26.672 | 48.141 | 0.00 | 0.00 |
| ATOM | 5120 | O   | PRO | X | 340 | 63.316 | 26.221 | 48.960 | 0.00 | 0.00 |
| ATOM | 5121 | N   | GLY | X | 341 | 64.697 | 26.075 | 47.132 | 0.00 | 0.00 |
| ATOM | 5122 | H   | GLY | X | 341 | 65.398 | 26.583 | 46.612 | 0.00 | 0.00 |
| ATOM | 5123 | CA  | GLY | X | 341 | 64.391 | 24.669 | 46.718 | 0.00 | 0.00 |
| ATOM | 5124 | HA2 | GLY | X | 341 | 65.271 | 24.330 | 46.171 | 0.00 | 0.00 |
| ATOM | 5125 | HA3 | GLY | X | 341 | 64.320 | 24.026 | 47.596 | 0.00 | 0.00 |
| ATOM | 5126 | C   | GLY | X | 341 | 63.154 | 24.500 | 45.795 | 0.00 | 0.00 |
| ATOM | 5127 | O   | GLY | X | 341 | 62.972 | 23.379 | 45.349 | 0.00 | 0.00 |
| ATOM | 5128 | N   | PHE | X | 342 | 62.381 | 25.558 | 45.542 | 0.00 | 0.00 |
| ATOM | 5129 | H   | PHE | X | 342 | 62.489 | 26.411 | 46.071 | 0.00 | 0.00 |
| ATOM | 5130 | CA  | PHE | X | 342 | 61.247 | 25.388 | 44.692 | 0.00 | 0.00 |
| ATOM | 5131 | HA  | PHE | X | 342 | 60.941 | 24.342 | 44.720 | 0.00 | 0.00 |
| ATOM | 5132 | CB  | PHE | X | 342 | 60.160 | 26.336 | 45.187 | 0.00 | 0.00 |
| ATOM | 5133 | HB2 | PHE | X | 342 | 60.600 | 27.304 | 45.427 | 0.00 | 0.00 |
| ATOM | 5134 | HB3 | PHE | X | 342 | 59.437 | 26.519 | 44.393 | 0.00 | 0.00 |
| ATOM | 5135 | CG  | PHE | X | 342 | 59.363 | 25.861 | 46.475 | 0.00 | 0.00 |
| ATOM | 5136 | CD1 | PHE | X | 342 | 58.136 | 25.168 | 46.423 | 0.00 | 0.00 |
| ATOM | 5137 | HD1 | PHE | X | 342 | 57.640 | 25.010 | 45.477 | 0.00 | 0.00 |
| ATOM | 5138 | CE1 | PHE | X | 342 | 57.516 | 24.773 | 47.587 | 0.00 | 0.00 |
| ATOM | 5139 | HE1 | PHE | X | 342 | 56.575 | 24.247 | 47.533 | 0.00 | 0.00 |
| ATOM | 5140 | CZ  | PHE | X | 342 | 58.130 | 24.964 | 48.804 | 0.00 | 0.00 |
| ATOM | 5141 | HZ  | PHE | X | 342 | 57.637 | 24.624 | 49.703 | 0.00 | 0.00 |
| ATOM | 5142 | CE2 | PHE | X | 342 | 59.342 | 25.668 | 48.860 | 0.00 | 0.00 |
| ATOM | 5143 | HE2 | PHE | X | 342 | 59.815 | 25.759 | 49.827 | 0.00 | 0.00 |
| ATOM | 5144 | CD2 | PHE | X | 342 | 59.996 | 26.094 | 47.726 | 0.00 | 0.00 |
| ATOM | 5145 | HD2 | PHE | X | 342 | 60.877 | 26.712 | 47.817 | 0.00 | 0.00 |
| ATOM | 5146 | C   | PHE | X | 342 | 61.508 | 25.666 | 43.220 | 0.00 | 0.00 |
| ATOM | 5147 | O   | PHE | X | 342 | 62.320 | 26.490 | 42.839 | 0.00 | 0.00 |
| ATOM | 5148 | N   | SER | X | 343 | 60.763 | 24.975 | 42.302 | 0.00 | 0.00 |
| ATOM | 5149 | H   | SER | X | 343 | 60.029 | 24.374 | 42.647 | 0.00 | 0.00 |
| ATOM | 5150 | CA  | SER | X | 343 | 60.752 | 25.105 | 40.834 | 0.00 | 0.00 |
| ATOM | 5151 | HA  | SER | X | 343 | 60.801 | 26.176 | 40.634 | 0.00 | 0.00 |
| ATOM | 5152 | CB  | SER | X | 343 | 62.090 | 24.538 | 40.229 | 0.00 | 0.00 |
| ATOM | 5153 | HB2 | SER | X | 343 | 62.873 | 25.075 | 40.765 | 0.00 | 0.00 |
| ATOM | 5154 | HB3 | SER | X | 343 | 62.213 | 23.468 | 40.397 | 0.00 | 0.00 |
| ATOM | 5155 | OG  | SER | X | 343 | 62.127 | 24.728 | 38.812 | 0.00 | 0.00 |
| ATOM | 5156 | HG  | SER | X | 343 | 63.045 | 24.744 | 38.530 | 0.00 | 0.00 |



|      |      |      |     |   |     |        |        |        |      |      |
|------|------|------|-----|---|-----|--------|--------|--------|------|------|
| ATOM | 5157 | C    | SER | X | 343 | 59.462 | 24.486 | 40.206 | 0.00 | 0.00 |
| ATOM | 5158 | O    | SER | X | 343 | 58.857 | 23.542 | 40.733 | 0.00 | 0.00 |
| ATOM | 5159 | N    | LYS | X | 344 | 59.052 | 25.039 | 39.014 | 0.00 | 0.00 |
| ATOM | 5160 | H    | LYS | X | 344 | 59.598 | 25.782 | 38.600 | 0.00 | 0.00 |
| ATOM | 5161 | CA   | LYS | X | 344 | 58.120 | 24.263 | 38.221 | 0.00 | 0.00 |
| ATOM | 5162 | HA   | LYS | X | 344 | 57.256 | 23.954 | 38.809 | 0.00 | 0.00 |
| ATOM | 5163 | CB   | LYS | X | 344 | 57.571 | 25.149 | 37.070 | 0.00 | 0.00 |
| ATOM | 5164 | HB2  | LYS | X | 344 | 56.644 | 24.740 | 36.668 | 0.00 | 0.00 |
| ATOM | 5165 | HB3  | LYS | X | 344 | 57.310 | 26.145 | 37.427 | 0.00 | 0.00 |
| ATOM | 5166 | CG   | LYS | X | 344 | 58.516 | 25.293 | 35.876 | 0.00 | 0.00 |
| ATOM | 5167 | HG2  | LYS | X | 344 | 59.495 | 25.654 | 36.192 | 0.00 | 0.00 |
| ATOM | 5168 | HG3  | LYS | X | 344 | 58.595 | 24.285 | 35.470 | 0.00 | 0.00 |
| ATOM | 5169 | CD   | LYS | X | 344 | 58.014 | 26.209 | 34.703 | 0.00 | 0.00 |
| ATOM | 5170 | HD2  | LYS | X | 344 | 56.970 | 25.969 | 34.501 | 0.00 | 0.00 |
| ATOM | 5171 | HD3  | LYS | X | 344 | 58.062 | 27.254 | 35.009 | 0.00 | 0.00 |
| ATOM | 5172 | CE   | LYS | X | 344 | 58.797 | 26.006 | 33.461 | 0.00 | 0.00 |
| ATOM | 5173 | HE2  | LYS | X | 344 | 58.553 | 25.003 | 33.111 | 0.00 | 0.00 |
| ATOM | 5174 | HE3  | LYS | X | 344 | 58.414 | 26.686 | 32.699 | 0.00 | 0.00 |
| ATOM | 5175 | NZ   | LYS | X | 344 | 60.290 | 26.146 | 33.652 | 0.00 | 0.00 |
| ATOM | 5176 | HZ1  | LYS | X | 344 | 60.616 | 25.315 | 34.124 | 0.00 | 0.00 |
| ATOM | 5177 | HZ2  | LYS | X | 344 | 60.749 | 26.090 | 32.754 | 0.00 | 0.00 |
| ATOM | 5178 | HZ3  | LYS | X | 344 | 60.649 | 27.005 | 34.044 | 0.00 | 0.00 |
| ATOM | 5179 | C    | LYS | X | 344 | 58.648 | 22.989 | 37.603 | 0.00 | 0.00 |
| ATOM | 5180 | O    | LYS | X | 344 | 57.843 | 22.051 | 37.310 | 0.00 | 0.00 |
| ATOM | 5181 | N    | ASP | X | 345 | 59.949 | 22.912 | 37.326 | 0.00 | 0.00 |
| ATOM | 5182 | H    | ASP | X | 345 | 60.603 | 23.638 | 37.580 | 0.00 | 0.00 |
| ATOM | 5183 | CA   | ASP | X | 345 | 60.513 | 21.856 | 36.475 | 0.00 | 0.00 |
| ATOM | 5184 | HA   | ASP | X | 345 | 59.825 | 21.684 | 35.646 | 0.00 | 0.00 |
| ATOM | 5185 | CB   | ASP | X | 345 | 61.888 | 22.408 | 36.001 | 0.00 | 0.00 |
| ATOM | 5186 | HB2  | ASP | X | 345 | 62.610 | 22.643 | 36.783 | 0.00 | 0.00 |
| ATOM | 5187 | HB3  | ASP | X | 345 | 62.417 | 21.655 | 35.416 | 0.00 | 0.00 |
| ATOM | 5188 | CG   | ASP | X | 345 | 61.674 | 23.601 | 35.023 | 0.00 | 0.00 |
| ATOM | 5189 | OD1  | ASP | X | 345 | 61.190 | 23.410 | 33.911 | 0.00 | 0.00 |
| ATOM | 5190 | OD2  | ASP | X | 345 | 61.786 | 24.759 | 35.441 | 0.00 | 0.00 |
| ATOM | 5191 | C    | ASP | X | 345 | 60.728 | 20.536 | 37.210 | 0.00 | 0.00 |
| ATOM | 5192 | O    | ASP | X | 345 | 60.855 | 19.510 | 36.605 | 0.00 | 0.00 |
| ATOM | 5193 | N    | ASN | X | 346 | 60.721 | 20.483 | 38.544 | 0.00 | 0.00 |
| ATOM | 5194 | H    | ASN | X | 346 | 60.691 | 21.386 | 38.995 | 0.00 | 0.00 |
| ATOM | 5195 | CA   | ASN | X | 346 | 60.902 | 19.348 | 39.419 | 0.00 | 0.00 |
| ATOM | 5196 | HA   | ASN | X | 346 | 60.725 | 18.411 | 38.892 | 0.00 | 0.00 |
| ATOM | 5197 | CB   | ASN | X | 346 | 62.353 | 19.387 | 39.928 | 0.00 | 0.00 |
| ATOM | 5198 | HB2  | ASN | X | 346 | 62.612 | 18.432 | 40.386 | 0.00 | 0.00 |
| ATOM | 5199 | HB3  | ASN | X | 346 | 62.946 | 19.486 | 39.018 | 0.00 | 0.00 |
| ATOM | 5200 | CG   | ASN | X | 346 | 62.681 | 20.456 | 40.905 | 0.00 | 0.00 |
| ATOM | 5201 | OD1  | ASN | X | 346 | 61.951 | 20.689 | 41.823 | 0.00 | 0.00 |
| ATOM | 5202 | ND2  | ASN | X | 346 | 63.731 | 21.226 | 40.749 | 0.00 | 0.00 |
| ATOM | 5203 | HD21 | ASN | X | 346 | 63.977 | 21.765 | 41.567 | 0.00 | 0.00 |
| ATOM | 5204 | HD22 | ASN | X | 346 | 64.464 | 20.853 | 40.163 | 0.00 | 0.00 |
| ATOM | 5205 | C    | ASN | X | 346 | 59.780 | 19.266 | 40.467 | 0.00 | 0.00 |
| ATOM | 5206 | O    | ASN | X | 346 | 58.924 | 20.111 | 40.609 | 0.00 | 0.00 |
| ATOM | 5207 | N    | GLU | X | 347 | 59.881 | 18.234 | 41.327 | 0.00 | 0.00 |
| ATOM | 5208 | H    | GLU | X | 347 | 60.602 | 17.544 | 41.171 | 0.00 | 0.00 |
| ATOM | 5209 | CA   | GLU | X | 347 | 58.855 | 17.862 | 42.376 | 0.00 | 0.00 |
| ATOM | 5210 | HA   | GLU | X | 347 | 57.863 | 18.037 | 41.960 | 0.00 | 0.00 |
| ATOM | 5211 | CB   | GLU | X | 347 | 58.834 | 16.372 | 42.641 | 0.00 | 0.00 |
| ATOM | 5212 | HB2  | GLU | X | 347 | 59.890 | 16.107 | 42.695 | 0.00 | 0.00 |
| ATOM | 5213 | HB3  | GLU | X | 347 | 58.259 | 16.273 | 43.562 | 0.00 | 0.00 |
| ATOM | 5214 | CG   | GLU | X | 347 | 58.314 | 15.543 | 41.454 | 0.00 | 0.00 |
| ATOM | 5215 | HG2  | GLU | X | 347 | 57.302 | 15.855 | 41.195 | 0.00 | 0.00 |
| ATOM | 5216 | HG3  | GLU | X | 347 | 58.860 | 15.802 | 40.546 | 0.00 | 0.00 |
| ATOM | 5217 | CD   | GLU | X | 347 | 58.350 | 14.027 | 41.656 | 0.00 | 0.00 |
| ATOM | 5218 | OE1  | GLU | X | 347 | 57.521 | 13.473 | 42.386 | 0.00 | 0.00 |
| ATOM | 5219 | OE2  | GLU | X | 347 | 59.181 | 13.335 | 41.006 | 0.00 | 0.00 |
| ATOM | 5220 | C    | GLU | X | 347 | 58.951 | 18.768 | 43.613 | 0.00 | 0.00 |
| ATOM | 5221 | O    | GLU | X | 347 | 58.163 | 18.592 | 44.548 | 0.00 | 0.00 |
| ATOM | 5222 | N    | SER | X | 348 | 59.924 | 19.619 | 43.800 | 0.00 | 0.00 |
| ATOM | 5223 | H    | SER | X | 348 | 60.519 | 19.745 | 42.994 | 0.00 | 0.00 |

|      |      |      |     |   |     |        |        |        |      |      |
|------|------|------|-----|---|-----|--------|--------|--------|------|------|
| ATOM | 5224 | CA   | SER | X | 348 | 60.057 | 20.638 | 44.836 | 0.00 | 0.00 |
| ATOM | 5225 | HA   | SER | X | 348 | 61.013 | 21.158 | 44.768 | 0.00 | 0.00 |
| ATOM | 5226 | CB   | SER | X | 348 | 59.050 | 21.801 | 44.731 | 0.00 | 0.00 |
| ATOM | 5227 | HB2  | SER | X | 348 | 58.031 | 21.417 | 44.763 | 0.00 | 0.00 |
| ATOM | 5228 | HB3  | SER | X | 348 | 59.200 | 22.493 | 45.560 | 0.00 | 0.00 |
| ATOM | 5229 | OG   | SER | X | 348 | 59.207 | 22.425 | 43.487 | 0.00 | 0.00 |
| ATOM | 5230 | HG   | SER | X | 348 | 59.000 | 21.854 | 42.744 | 0.00 | 0.00 |
| ATOM | 5231 | C    | SER | X | 348 | 60.063 | 20.093 | 46.276 | 0.00 | 0.00 |
| ATOM | 5232 | O    | SER | X | 348 | 59.236 | 20.471 | 47.093 | 0.00 | 0.00 |
| ATOM | 5233 | N    | LEU | X | 349 | 60.993 | 19.134 | 46.533 | 0.00 | 0.00 |
| ATOM | 5234 | H    | LEU | X | 349 | 61.760 | 19.070 | 45.879 | 0.00 | 0.00 |
| ATOM | 5235 | CA   | LEU | X | 349 | 61.268 | 18.633 | 47.898 | 0.00 | 0.00 |
| ATOM | 5236 | HA   | LEU | X | 349 | 60.404 | 18.679 | 48.561 | 0.00 | 0.00 |
| ATOM | 5237 | CB   | LEU | X | 349 | 61.819 | 17.157 | 47.792 | 0.00 | 0.00 |
| ATOM | 5238 | HB2  | LEU | X | 349 | 62.749 | 17.077 | 47.230 | 0.00 | 0.00 |
| ATOM | 5239 | HB3  | LEU | X | 349 | 62.179 | 16.908 | 48.790 | 0.00 | 0.00 |
| ATOM | 5240 | CG   | LEU | X | 349 | 60.885 | 15.976 | 47.351 | 0.00 | 0.00 |
| ATOM | 5241 | HG   | LEU | X | 349 | 61.479 | 15.067 | 47.447 | 0.00 | 0.00 |
| ATOM | 5242 | CD1  | LEU | X | 349 | 59.630 | 15.955 | 48.289 | 0.00 | 0.00 |
| ATOM | 5243 | HD11 | LEU | X | 349 | 59.961 | 15.782 | 49.313 | 0.00 | 0.00 |
| ATOM | 5244 | HD12 | LEU | X | 349 | 59.092 | 15.096 | 47.890 | 0.00 | 0.00 |
| ATOM | 5245 | HD13 | LEU | X | 349 | 59.045 | 16.858 | 48.110 | 0.00 | 0.00 |
| ATOM | 5246 | CD2  | LEU | X | 349 | 60.445 | 16.126 | 45.885 | 0.00 | 0.00 |
| ATOM | 5247 | HD21 | LEU | X | 349 | 61.288 | 16.268 | 45.209 | 0.00 | 0.00 |
| ATOM | 5248 | HD22 | LEU | X | 349 | 59.918 | 15.202 | 45.648 | 0.00 | 0.00 |
| ATOM | 5249 | HD23 | LEU | X | 349 | 59.689 | 16.906 | 45.798 | 0.00 | 0.00 |
| ATOM | 5250 | C    | LEU | X | 349 | 62.303 | 19.596 | 48.542 | 0.00 | 0.00 |
| ATOM | 5251 | O    | LEU | X | 349 | 63.224 | 20.045 | 47.867 | 0.00 | 0.00 |
| ATOM | 5252 | N    | ILE | X | 350 | 62.056 | 19.979 | 49.774 | 0.00 | 0.00 |
| ATOM | 5253 | H    | ILE | X | 350 | 61.321 | 19.490 | 50.266 | 0.00 | 0.00 |
| ATOM | 5254 | CA   | ILE | X | 350 | 62.808 | 20.988 | 50.527 | 0.00 | 0.00 |
| ATOM | 5255 | HA   | ILE | X | 350 | 63.633 | 21.287 | 49.881 | 0.00 | 0.00 |
| ATOM | 5256 | CB   | ILE | X | 350 | 61.999 | 22.260 | 50.738 | 0.00 | 0.00 |
| ATOM | 5257 | HB   | ILE | X | 350 | 62.726 | 22.925 | 51.206 | 0.00 | 0.00 |
| ATOM | 5258 | CG2  | ILE | X | 350 | 61.640 | 22.877 | 49.386 | 0.00 | 0.00 |
| ATOM | 5259 | HG21 | ILE | X | 350 | 62.434 | 22.965 | 48.645 | 0.00 | 0.00 |
| ATOM | 5260 | HG22 | ILE | X | 350 | 61.213 | 23.871 | 49.523 | 0.00 | 0.00 |
| ATOM | 5261 | HG23 | ILE | X | 350 | 60.837 | 22.333 | 48.889 | 0.00 | 0.00 |
| ATOM | 5262 | CG1  | ILE | X | 350 | 60.801 | 22.158 | 51.697 | 0.00 | 0.00 |
| ATOM | 5263 | HG12 | ILE | X | 350 | 60.110 | 21.594 | 51.070 | 0.00 | 0.00 |
| ATOM | 5264 | HG13 | ILE | X | 350 | 61.099 | 21.569 | 52.564 | 0.00 | 0.00 |
| ATOM | 5265 | CD1  | ILE | X | 350 | 60.055 | 23.436 | 52.060 | 0.00 | 0.00 |
| ATOM | 5266 | HD11 | ILE | X | 350 | 60.703 | 24.240 | 52.411 | 0.00 | 0.00 |
| ATOM | 5267 | HD12 | ILE | X | 350 | 59.326 | 23.182 | 52.830 | 0.00 | 0.00 |
| ATOM | 5268 | HD13 | ILE | X | 350 | 59.529 | 23.726 | 51.151 | 0.00 | 0.00 |
| ATOM | 5269 | C    | ILE | X | 350 | 63.423 | 20.419 | 51.810 | 0.00 | 0.00 |
| ATOM | 5270 | O    | ILE | X | 350 | 62.749 | 19.656 | 52.438 | 0.00 | 0.00 |
| ATOM | 5271 | N    | SER | X | 351 | 64.645 | 20.772 | 52.139 | 0.00 | 0.00 |
| ATOM | 5272 | H    | SER | X | 351 | 65.186 | 21.347 | 51.510 | 0.00 | 0.00 |
| ATOM | 5273 | CA   | SER | X | 351 | 65.198 | 20.469 | 53.456 | 0.00 | 0.00 |
| ATOM | 5274 | HA   | SER | X | 351 | 64.940 | 19.435 | 53.685 | 0.00 | 0.00 |
| ATOM | 5275 | CB   | SER | X | 351 | 66.724 | 20.648 | 53.473 | 0.00 | 0.00 |
| ATOM | 5276 | HB2  | SER | X | 351 | 67.072 | 20.454 | 54.488 | 0.00 | 0.00 |
| ATOM | 5277 | HB3  | SER | X | 351 | 67.222 | 20.023 | 52.733 | 0.00 | 0.00 |
| ATOM | 5278 | OG   | SER | X | 351 | 67.011 | 21.990 | 53.160 | 0.00 | 0.00 |
| ATOM | 5279 | HG   | SER | X | 351 | 66.832 | 22.041 | 52.219 | 0.00 | 0.00 |
| ATOM | 5280 | C    | SER | X | 351 | 64.556 | 21.285 | 54.517 | 0.00 | 0.00 |
| ATOM | 5281 | O    | SER | X | 351 | 63.870 | 22.270 | 54.259 | 0.00 | 0.00 |
| ATOM | 5282 | N    | ARG | X | 352 | 64.819 | 20.849 | 55.770 | 0.00 | 0.00 |
| ATOM | 5283 | H    | ARG | X | 352 | 65.111 | 19.891 | 55.896 | 0.00 | 0.00 |
| ATOM | 5284 | CA   | ARG | X | 352 | 64.357 | 21.554 | 56.982 | 0.00 | 0.00 |
| ATOM | 5285 | HA   | ARG | X | 352 | 63.269 | 21.630 | 56.999 | 0.00 | 0.00 |
| ATOM | 5286 | CB   | ARG | X | 352 | 64.808 | 20.754 | 58.214 | 0.00 | 0.00 |
| ATOM | 5287 | HB2  | ARG | X | 352 | 64.534 | 19.713 | 58.042 | 0.00 | 0.00 |
| ATOM | 5288 | HB3  | ARG | X | 352 | 65.884 | 20.927 | 58.177 | 0.00 | 0.00 |
| ATOM | 5289 | CG   | ARG | X | 352 | 64.263 | 21.267 | 59.578 | 0.00 | 0.00 |
| ATOM | 5290 | HG2  | ARG | X | 352 | 64.924 | 20.879 | 60.353 | 0.00 | 0.00 |

|      |      |      |     |   |     |        |        |        |      |      |
|------|------|------|-----|---|-----|--------|--------|--------|------|------|
| ATOM | 5291 | HG3  | ARG | X | 352 | 64.237 | 22.355 | 59.644 | 0.00 | 0.00 |
| ATOM | 5292 | CD   | ARG | X | 352 | 62.802 | 20.869 | 59.769 | 0.00 | 0.00 |
| ATOM | 5293 | HD2  | ARG | X | 352 | 62.155 | 21.423 | 59.090 | 0.00 | 0.00 |
| ATOM | 5294 | HD3  | ARG | X | 352 | 62.656 | 19.818 | 59.518 | 0.00 | 0.00 |
| ATOM | 5295 | NE   | ARG | X | 352 | 62.376 | 21.054 | 61.167 | 0.00 | 0.00 |
| ATOM | 5296 | HE   | ARG | X | 352 | 63.087 | 21.106 | 61.882 | 0.00 | 0.00 |
| ATOM | 5297 | CZ   | ARG | X | 352 | 61.210 | 21.226 | 61.653 | 0.00 | 0.00 |
| ATOM | 5298 | NH1  | ARG | X | 352 | 60.060 | 21.197 | 60.951 | 0.00 | 0.00 |
| ATOM | 5299 | HH11 | ARG | X | 352 | 60.098 | 20.825 | 60.013 | 0.00 | 0.00 |
| ATOM | 5300 | HH12 | ARG | X | 352 | 59.166 | 21.307 | 61.409 | 0.00 | 0.00 |
| ATOM | 5301 | NH2  | ARG | X | 352 | 61.067 | 21.345 | 62.967 | 0.00 | 0.00 |
| ATOM | 5302 | HH21 | ARG | X | 352 | 61.866 | 21.328 | 63.585 | 0.00 | 0.00 |
| ATOM | 5303 | HH22 | ARG | X | 352 | 60.174 | 21.446 | 63.427 | 0.00 | 0.00 |
| ATOM | 5304 | C    | ARG | X | 352 | 64.845 | 23.003 | 57.019 | 0.00 | 0.00 |
| ATOM | 5305 | O    | ARG | X | 352 | 64.087 | 23.882 | 57.338 | 0.00 | 0.00 |
| ATOM | 5306 | N    | ALA | X | 353 | 66.076 | 23.219 | 56.550 | 0.00 | 0.00 |
| ATOM | 5307 | H    | ALA | X | 353 | 66.601 | 22.425 | 56.211 | 0.00 | 0.00 |
| ATOM | 5308 | CA   | ALA | X | 353 | 66.734 | 24.547 | 56.520 | 0.00 | 0.00 |
| ATOM | 5309 | HA   | ALA | X | 353 | 66.586 | 25.023 | 57.490 | 0.00 | 0.00 |
| ATOM | 5310 | CB   | ALA | X | 353 | 68.187 | 24.483 | 56.218 | 0.00 | 0.00 |
| ATOM | 5311 | HB1  | ALA | X | 353 | 68.661 | 25.460 | 56.123 | 0.00 | 0.00 |
| ATOM | 5312 | HB2  | ALA | X | 353 | 68.301 | 23.917 | 55.294 | 0.00 | 0.00 |
| ATOM | 5313 | HB3  | ALA | X | 353 | 68.801 | 23.895 | 56.900 | 0.00 | 0.00 |
| ATOM | 5314 | C    | ALA | X | 353 | 66.047 | 25.463 | 55.502 | 0.00 | 0.00 |
| ATOM | 5315 | O    | ALA | X | 353 | 65.751 | 26.607 | 55.765 | 0.00 | 0.00 |
| ATOM | 5316 | N    | GLU | X | 354 | 65.628 | 24.929 | 54.379 | 0.00 | 0.00 |
| ATOM | 5317 | H    | GLU | X | 354 | 65.776 | 23.950 | 54.179 | 0.00 | 0.00 |
| ATOM | 5318 | CA   | GLU | X | 354 | 65.011 | 25.713 | 53.288 | 0.00 | 0.00 |
| ATOM | 5319 | HA   | GLU | X | 354 | 65.652 | 26.576 | 53.111 | 0.00 | 0.00 |
| ATOM | 5320 | CB   | GLU | X | 354 | 65.060 | 24.774 | 52.019 | 0.00 | 0.00 |
| ATOM | 5321 | HB2  | GLU | X | 354 | 64.771 | 23.740 | 52.207 | 0.00 | 0.00 |
| ATOM | 5322 | HB3  | GLU | X | 354 | 64.415 | 25.210 | 51.256 | 0.00 | 0.00 |
| ATOM | 5323 | CG   | GLU | X | 354 | 66.456 | 24.802 | 51.488 | 0.00 | 0.00 |
| ATOM | 5324 | HG2  | GLU | X | 354 | 66.679 | 25.798 | 51.108 | 0.00 | 0.00 |
| ATOM | 5325 | HG3  | GLU | X | 354 | 67.142 | 24.610 | 52.313 | 0.00 | 0.00 |
| ATOM | 5326 | CD   | GLU | X | 354 | 66.696 | 23.710 | 50.389 | 0.00 | 0.00 |
| ATOM | 5327 | OE1  | GLU | X | 354 | 66.358 | 22.504 | 50.604 | 0.00 | 0.00 |
| ATOM | 5328 | OE2  | GLU | X | 354 | 67.558 | 23.990 | 49.557 | 0.00 | 0.00 |
| ATOM | 5329 | C    | GLU | X | 354 | 63.554 | 26.032 | 53.688 | 0.00 | 0.00 |
| ATOM | 5330 | O    | GLU | X | 354 | 63.058 | 27.079 | 53.384 | 0.00 | 0.00 |
| ATOM | 5331 | N    | PHE | X | 355 | 62.842 | 25.149 | 54.407 | 0.00 | 0.00 |
| ATOM | 5332 | H    | PHE | X | 355 | 63.194 | 24.213 | 54.547 | 0.00 | 0.00 |
| ATOM | 5333 | CA   | PHE | X | 355 | 61.527 | 25.407 | 55.093 | 0.00 | 0.00 |
| ATOM | 5334 | HA   | PHE | X | 355 | 60.728 | 25.757 | 54.441 | 0.00 | 0.00 |
| ATOM | 5335 | CB   | PHE | X | 355 | 61.021 | 24.096 | 55.733 | 0.00 | 0.00 |
| ATOM | 5336 | HB2  | PHE | X | 355 | 60.847 | 23.399 | 54.913 | 0.00 | 0.00 |
| ATOM | 5337 | HB3  | PHE | X | 355 | 61.778 | 23.643 | 56.374 | 0.00 | 0.00 |
| ATOM | 5338 | CG   | PHE | X | 355 | 59.768 | 24.258 | 56.539 | 0.00 | 0.00 |
| ATOM | 5339 | CD1  | PHE | X | 355 | 58.488 | 24.466 | 55.903 | 0.00 | 0.00 |
| ATOM | 5340 | HD1  | PHE | X | 355 | 58.381 | 24.393 | 54.831 | 0.00 | 0.00 |
| ATOM | 5341 | CE1  | PHE | X | 355 | 57.355 | 24.684 | 56.714 | 0.00 | 0.00 |
| ATOM | 5342 | HE1  | PHE | X | 355 | 56.375 | 24.850 | 56.290 | 0.00 | 0.00 |
| ATOM | 5343 | CZ   | PHE | X | 355 | 57.469 | 24.579 | 58.148 | 0.00 | 0.00 |
| ATOM | 5344 | HZ   | PHE | X | 355 | 56.592 | 24.840 | 58.721 | 0.00 | 0.00 |
| ATOM | 5345 | CE2  | PHE | X | 355 | 58.738 | 24.518 | 58.720 | 0.00 | 0.00 |
| ATOM | 5346 | HE2  | PHE | X | 355 | 58.819 | 24.684 | 59.784 | 0.00 | 0.00 |
| ATOM | 5347 | CD2  | PHE | X | 355 | 59.900 | 24.341 | 57.937 | 0.00 | 0.00 |
| ATOM | 5348 | HD2  | PHE | X | 355 | 60.874 | 24.346 | 58.405 | 0.00 | 0.00 |
| ATOM | 5349 | C    | PHE | X | 355 | 61.650 | 26.523 | 56.158 | 0.00 | 0.00 |
| ATOM | 5350 | O    | PHE | X | 355 | 60.837 | 27.412 | 56.158 | 0.00 | 0.00 |
| ATOM | 5351 | N    | LEU | X | 356 | 62.650 | 26.472 | 57.018 | 0.00 | 0.00 |
| ATOM | 5352 | H    | LEU | X | 356 | 63.308 | 25.706 | 56.979 | 0.00 | 0.00 |
| ATOM | 5353 | CA   | LEU | X | 356 | 62.869 | 27.549 | 57.992 | 0.00 | 0.00 |
| ATOM | 5354 | HA   | LEU | X | 356 | 61.959 | 27.766 | 58.552 | 0.00 | 0.00 |
| ATOM | 5355 | CB   | LEU | X | 356 | 63.918 | 27.065 | 58.983 | 0.00 | 0.00 |
| ATOM | 5356 | HB2  | LEU | X | 356 | 64.882 | 26.790 | 58.554 | 0.00 | 0.00 |
| ATOM | 5357 | HB3  | LEU | X | 356 | 64.081 | 27.889 | 59.678 | 0.00 | 0.00 |

|      |      |      |     |   |     |        |        |        |      |      |
|------|------|------|-----|---|-----|--------|--------|--------|------|------|
| ATOM | 5358 | CG   | LEU | X | 356 | 63.533 | 25.916 | 59.863 | 0.00 | 0.00 |
| ATOM | 5359 | HG   | LEU | X | 356 | 63.210 | 25.089 | 59.231 | 0.00 | 0.00 |
| ATOM | 5360 | CD1  | LEU | X | 356 | 64.743 | 25.400 | 60.619 | 0.00 | 0.00 |
| ATOM | 5361 | HD11 | LEU | X | 356 | 65.442 | 25.025 | 59.871 | 0.00 | 0.00 |
| ATOM | 5362 | HD12 | LEU | X | 356 | 64.592 | 24.524 | 61.251 | 0.00 | 0.00 |
| ATOM | 5363 | HD13 | LEU | X | 356 | 65.166 | 26.212 | 61.210 | 0.00 | 0.00 |
| ATOM | 5364 | CD2  | LEU | X | 356 | 62.373 | 26.390 | 60.835 | 0.00 | 0.00 |
| ATOM | 5365 | HD21 | LEU | X | 356 | 62.792 | 27.249 | 61.360 | 0.00 | 0.00 |
| ATOM | 5366 | HD22 | LEU | X | 356 | 61.491 | 26.731 | 60.294 | 0.00 | 0.00 |
| ATOM | 5367 | HD23 | LEU | X | 356 | 61.999 | 25.664 | 61.557 | 0.00 | 0.00 |
| ATOM | 5368 | C    | LEU | X | 356 | 63.174 | 28.997 | 57.334 | 0.00 | 0.00 |
| ATOM | 5369 | O    | LEU | X | 356 | 62.637 | 30.036 | 57.682 | 0.00 | 0.00 |
| ATOM | 5370 | N    | ALA | X | 357 | 63.970 | 28.992 | 56.255 | 0.00 | 0.00 |
| ATOM | 5371 | H    | ALA | X | 357 | 64.510 | 28.175 | 56.009 | 0.00 | 0.00 |
| ATOM | 5372 | CA   | ALA | X | 357 | 64.104 | 30.204 | 55.437 | 0.00 | 0.00 |
| ATOM | 5373 | HA   | ALA | X | 357 | 64.283 | 31.015 | 56.143 | 0.00 | 0.00 |
| ATOM | 5374 | CB   | ALA | X | 357 | 65.340 | 29.966 | 54.498 | 0.00 | 0.00 |
| ATOM | 5375 | HB1  | ALA | X | 357 | 65.066 | 29.177 | 53.797 | 0.00 | 0.00 |
| ATOM | 5376 | HB2  | ALA | X | 357 | 66.271 | 29.687 | 54.991 | 0.00 | 0.00 |
| ATOM | 5377 | HB3  | ALA | X | 357 | 65.507 | 30.836 | 53.863 | 0.00 | 0.00 |
| ATOM | 5378 | C    | ALA | X | 357 | 62.855 | 30.593 | 54.704 | 0.00 | 0.00 |
| ATOM | 5379 | O    | ALA | X | 357 | 62.418 | 31.805 | 54.694 | 0.00 | 0.00 |
| ATOM | 5380 | N    | GLY | X | 358 | 62.095 | 29.619 | 54.179 | 0.00 | 0.00 |
| ATOM | 5381 | H    | GLY | X | 358 | 62.515 | 28.702 | 54.130 | 0.00 | 0.00 |
| ATOM | 5382 | CA   | GLY | X | 358 | 60.794 | 29.785 | 53.432 | 0.00 | 0.00 |
| ATOM | 5383 | HA2  | GLY | X | 358 | 60.942 | 30.416 | 52.555 | 0.00 | 0.00 |
| ATOM | 5384 | HA3  | GLY | X | 358 | 60.413 | 28.801 | 53.157 | 0.00 | 0.00 |
| ATOM | 5385 | C    | GLY | X | 358 | 59.681 | 30.371 | 54.274 | 0.00 | 0.00 |
| ATOM | 5386 | O    | GLY | X | 358 | 58.956 | 31.253 | 53.837 | 0.00 | 0.00 |
| ATOM | 5387 | N    | VAL | X | 359 | 59.652 | 30.038 | 55.558 | 0.00 | 0.00 |
| ATOM | 5388 | H    | VAL | X | 359 | 60.105 | 29.173 | 55.817 | 0.00 | 0.00 |
| ATOM | 5389 | CA   | VAL | X | 359 | 58.728 | 30.613 | 56.514 | 0.00 | 0.00 |
| ATOM | 5390 | HA   | VAL | X | 359 | 57.781 | 30.368 | 56.032 | 0.00 | 0.00 |
| ATOM | 5391 | CB   | VAL | X | 359 | 58.794 | 29.860 | 57.864 | 0.00 | 0.00 |
| ATOM | 5392 | HB   | VAL | X | 359 | 59.846 | 29.767 | 58.132 | 0.00 | 0.00 |
| ATOM | 5393 | CG1  | VAL | X | 359 | 58.180 | 30.629 | 59.050 | 0.00 | 0.00 |
| ATOM | 5394 | HG11 | VAL | X | 359 | 58.202 | 30.005 | 59.944 | 0.00 | 0.00 |
| ATOM | 5395 | HG12 | VAL | X | 359 | 58.754 | 31.536 | 59.239 | 0.00 | 0.00 |
| ATOM | 5396 | HG13 | VAL | X | 359 | 57.149 | 30.867 | 58.790 | 0.00 | 0.00 |
| ATOM | 5397 | CG2  | VAL | X | 359 | 58.185 | 28.444 | 57.873 | 0.00 | 0.00 |
| ATOM | 5398 | HG21 | VAL | X | 359 | 57.120 | 28.499 | 57.648 | 0.00 | 0.00 |
| ATOM | 5399 | HG22 | VAL | X | 359 | 58.241 | 28.062 | 58.893 | 0.00 | 0.00 |
| ATOM | 5400 | HG23 | VAL | X | 359 | 58.809 | 27.859 | 57.197 | 0.00 | 0.00 |
| ATOM | 5401 | C    | VAL | X | 359 | 58.925 | 32.128 | 56.715 | 0.00 | 0.00 |
| ATOM | 5402 | O    | VAL | X | 359 | 57.971 | 32.852 | 56.672 | 0.00 | 0.00 |
| ATOM | 5403 | N    | ARG | X | 360 | 60.227 | 32.537 | 56.707 | 0.00 | 0.00 |
| ATOM | 5404 | H    | ARG | X | 360 | 60.990 | 31.876 | 56.672 | 0.00 | 0.00 |
| ATOM | 5405 | CA   | ARG | X | 360 | 60.519 | 33.910 | 56.842 | 0.00 | 0.00 |
| ATOM | 5406 | HA   | ARG | X | 360 | 59.992 | 34.347 | 57.690 | 0.00 | 0.00 |
| ATOM | 5407 | CB   | ARG | X | 360 | 62.023 | 34.231 | 57.080 | 0.00 | 0.00 |
| ATOM | 5408 | HB2  | ARG | X | 360 | 62.627 | 34.041 | 56.192 | 0.00 | 0.00 |
| ATOM | 5409 | HB3  | ARG | X | 360 | 62.225 | 35.303 | 57.074 | 0.00 | 0.00 |
| ATOM | 5410 | CG   | ARG | X | 360 | 62.650 | 33.567 | 58.353 | 0.00 | 0.00 |
| ATOM | 5411 | HG2  | ARG | X | 360 | 63.063 | 32.593 | 58.093 | 0.00 | 0.00 |
| ATOM | 5412 | HG3  | ARG | X | 360 | 63.534 | 34.157 | 58.598 | 0.00 | 0.00 |
| ATOM | 5413 | CD   | ARG | X | 360 | 61.799 | 33.512 | 59.614 | 0.00 | 0.00 |
| ATOM | 5414 | HD2  | ARG | X | 360 | 60.890 | 32.946 | 59.411 | 0.00 | 0.00 |
| ATOM | 5415 | HD3  | ARG | X | 360 | 62.340 | 32.866 | 60.305 | 0.00 | 0.00 |
| ATOM | 5416 | NE   | ARG | X | 360 | 61.574 | 34.860 | 60.172 | 0.00 | 0.00 |
| ATOM | 5417 | HE   | ARG | X | 360 | 60.732 | 35.371 | 59.946 | 0.00 | 0.00 |
| ATOM | 5418 | CZ   | ARG | X | 360 | 62.308 | 35.571 | 61.020 | 0.00 | 0.00 |
| ATOM | 5419 | NH1  | ARG | X | 360 | 63.518 | 35.193 | 61.357 | 0.00 | 0.00 |
| ATOM | 5420 | HH11 | ARG | X | 360 | 63.916 | 34.309 | 61.075 | 0.00 | 0.00 |
| ATOM | 5421 | HH12 | ARG | X | 360 | 63.984 | 35.797 | 62.019 | 0.00 | 0.00 |
| ATOM | 5422 | NH2  | ARG | X | 360 | 61.781 | 36.643 | 61.533 | 0.00 | 0.00 |
| ATOM | 5423 | HH21 | ARG | X | 360 | 60.813 | 36.877 | 61.369 | 0.00 | 0.00 |
| ATOM | 5424 | HH22 | ARG | X | 360 | 62.216 | 37.145 | 62.294 | 0.00 | 0.00 |

|      |      |      |     |   |     |        |        |        |      |      |
|------|------|------|-----|---|-----|--------|--------|--------|------|------|
| ATOM | 5425 | C    | ARG | X | 360 | 59.980 | 34.683 | 55.598 | 0.00 | 0.00 |
| ATOM | 5426 | O    | ARG | X | 360 | 59.251 | 35.657 | 55.791 | 0.00 | 0.00 |
| ATOM | 5427 | N    | VAL | X | 361 | 60.264 | 34.254 | 54.366 | 0.00 | 0.00 |
| ATOM | 5428 | H    | VAL | X | 361 | 60.855 | 33.450 | 54.211 | 0.00 | 0.00 |
| ATOM | 5429 | CA   | VAL | X | 361 | 59.732 | 34.975 | 53.148 | 0.00 | 0.00 |
| ATOM | 5430 | HA   | VAL | X | 361 | 59.994 | 36.025 | 53.282 | 0.00 | 0.00 |
| ATOM | 5431 | CB   | VAL | X | 361 | 60.452 | 34.656 | 51.845 | 0.00 | 0.00 |
| ATOM | 5432 | HB   | VAL | X | 361 | 59.957 | 35.108 | 50.985 | 0.00 | 0.00 |
| ATOM | 5433 | CG1  | VAL | X | 361 | 61.944 | 35.147 | 51.848 | 0.00 | 0.00 |
| ATOM | 5434 | HG11 | VAL | X | 361 | 62.491 | 34.604 | 52.619 | 0.00 | 0.00 |
| ATOM | 5435 | HG12 | VAL | X | 361 | 62.377 | 35.019 | 50.856 | 0.00 | 0.00 |
| ATOM | 5436 | HG13 | VAL | X | 361 | 61.984 | 36.181 | 52.190 | 0.00 | 0.00 |
| ATOM | 5437 | CG2  | VAL | X | 361 | 60.544 | 33.173 | 51.548 | 0.00 | 0.00 |
| ATOM | 5438 | HG21 | VAL | X | 361 | 60.976 | 32.906 | 50.583 | 0.00 | 0.00 |
| ATOM | 5439 | HG22 | VAL | X | 361 | 59.506 | 32.844 | 51.612 | 0.00 | 0.00 |
| ATOM | 5440 | HG23 | VAL | X | 361 | 61.163 | 32.723 | 52.323 | 0.00 | 0.00 |
| ATOM | 5441 | C    | VAL | X | 361 | 58.216 | 34.866 | 52.982 | 0.00 | 0.00 |
| ATOM | 5442 | O    | VAL | X | 361 | 57.579 | 35.779 | 52.426 | 0.00 | 0.00 |
| ATOM | 5443 | N    | GLY | X | 362 | 57.611 | 33.808 | 53.396 | 0.00 | 0.00 |
| ATOM | 5444 | H    | GLY | X | 362 | 58.156 | 33.107 | 53.877 | 0.00 | 0.00 |
| ATOM | 5445 | CA   | GLY | X | 362 | 56.142 | 33.658 | 53.404 | 0.00 | 0.00 |
| ATOM | 5446 | HA2  | GLY | X | 362 | 55.729 | 34.007 | 52.458 | 0.00 | 0.00 |
| ATOM | 5447 | HA3  | GLY | X | 362 | 55.915 | 32.604 | 53.566 | 0.00 | 0.00 |
| ATOM | 5448 | C    | GLY | X | 362 | 55.420 | 34.416 | 54.530 | 0.00 | 0.00 |
| ATOM | 5449 | O    | GLY | X | 362 | 54.289 | 34.843 | 54.398 | 0.00 | 0.00 |
| ATOM | 5450 | N    | VAL | X | 363 | 56.169 | 34.598 | 55.622 | 0.00 | 0.00 |
| ATOM | 5451 | H    | VAL | X | 363 | 57.078 | 34.167 | 55.715 | 0.00 | 0.00 |
| ATOM | 5452 | CA   | VAL | X | 363 | 55.696 | 35.409 | 56.796 | 0.00 | 0.00 |
| ATOM | 5453 | HA   | VAL | X | 363 | 54.689 | 35.785 | 56.613 | 0.00 | 0.00 |
| ATOM | 5454 | CB   | VAL | X | 363 | 55.588 | 34.465 | 58.045 | 0.00 | 0.00 |
| ATOM | 5455 | HB   | VAL | X | 363 | 56.528 | 34.228 | 58.543 | 0.00 | 0.00 |
| ATOM | 5456 | CG1  | VAL | X | 363 | 54.730 | 35.175 | 59.107 | 0.00 | 0.00 |
| ATOM | 5457 | HG11 | VAL | X | 363 | 55.088 | 36.174 | 59.356 | 0.00 | 0.00 |
| ATOM | 5458 | HG12 | VAL | X | 363 | 53.752 | 35.371 | 58.667 | 0.00 | 0.00 |
| ATOM | 5459 | HG13 | VAL | X | 363 | 54.526 | 34.591 | 60.005 | 0.00 | 0.00 |
| ATOM | 5460 | CG2  | VAL | X | 363 | 54.825 | 33.158 | 57.731 | 0.00 | 0.00 |
| ATOM | 5461 | HG21 | VAL | X | 363 | 53.893 | 33.345 | 57.197 | 0.00 | 0.00 |
| ATOM | 5462 | HG22 | VAL | X | 363 | 54.539 | 32.697 | 58.676 | 0.00 | 0.00 |
| ATOM | 5463 | HG23 | VAL | X | 363 | 55.469 | 32.459 | 57.198 | 0.00 | 0.00 |
| ATOM | 5464 | C    | VAL | X | 363 | 56.623 | 36.582 | 57.019 | 0.00 | 0.00 |
| ATOM | 5465 | O    | VAL | X | 363 | 57.376 | 36.537 | 58.010 | 0.00 | 0.00 |
| ATOM | 5466 | N    | PRO | X | 364 | 56.676 | 37.582 | 56.132 | 0.00 | 0.00 |
| ATOM | 5467 | CD   | PRO | X | 364 | 55.779 | 37.835 | 55.052 | 0.00 | 0.00 |
| ATOM | 5468 | HD2  | PRO | X | 364 | 54.744 | 37.799 | 55.392 | 0.00 | 0.00 |
| ATOM | 5469 | HD3  | PRO | X | 364 | 55.882 | 37.132 | 54.226 | 0.00 | 0.00 |
| ATOM | 5470 | CG   | PRO | X | 364 | 56.094 | 39.188 | 54.490 | 0.00 | 0.00 |
| ATOM | 5471 | HG2  | PRO | X | 364 | 55.453 | 39.868 | 55.051 | 0.00 | 0.00 |
| ATOM | 5472 | HG3  | PRO | X | 364 | 55.872 | 39.249 | 53.424 | 0.00 | 0.00 |
| ATOM | 5473 | CB   | PRO | X | 364 | 57.572 | 39.385 | 54.879 | 0.00 | 0.00 |
| ATOM | 5474 | HB2  | PRO | X | 364 | 57.896 | 40.425 | 54.915 | 0.00 | 0.00 |
| ATOM | 5475 | HB3  | PRO | X | 364 | 58.249 | 38.826 | 54.233 | 0.00 | 0.00 |
| ATOM | 5476 | CA   | PRO | X | 364 | 57.669 | 38.710 | 56.238 | 0.00 | 0.00 |
| ATOM | 5477 | HA   | PRO | X | 364 | 58.675 | 38.339 | 56.438 | 0.00 | 0.00 |
| ATOM | 5478 | C    | PRO | X | 364 | 57.299 | 39.699 | 57.444 | 0.00 | 0.00 |
| ATOM | 5479 | O    | PRO | X | 364 | 56.186 | 39.523 | 58.033 | 0.00 | 0.00 |
| ATOM | 5480 | N    | GLN | X | 365 | 58.300 | 40.566 | 57.783 | 0.00 | 0.00 |
| ATOM | 5481 | H    | GLN | X | 365 | 59.110 | 40.595 | 57.180 | 0.00 | 0.00 |
| ATOM | 5482 | CA   | GLN | X | 365 | 58.313 | 41.572 | 58.881 | 0.00 | 0.00 |
| ATOM | 5483 | HA   | GLN | X | 365 | 59.262 | 42.097 | 58.767 | 0.00 | 0.00 |
| ATOM | 5484 | CB   | GLN | X | 365 | 57.370 | 42.719 | 58.529 | 0.00 | 0.00 |
| ATOM | 5485 | HB2  | GLN | X | 365 | 57.529 | 43.526 | 59.245 | 0.00 | 0.00 |
| ATOM | 5486 | HB3  | GLN | X | 365 | 57.609 | 42.965 | 57.495 | 0.00 | 0.00 |
| ATOM | 5487 | CG   | GLN | X | 365 | 55.902 | 42.452 | 58.562 | 0.00 | 0.00 |
| ATOM | 5488 | HG2  | GLN | X | 365 | 55.651 | 41.945 | 57.630 | 0.00 | 0.00 |
| ATOM | 5489 | HG3  | GLN | X | 365 | 55.633 | 41.799 | 59.393 | 0.00 | 0.00 |
| ATOM | 5490 | CD   | GLN | X | 365 | 55.003 | 43.724 | 58.576 | 0.00 | 0.00 |
| ATOM | 5491 | OE1  | GLN | X | 365 | 54.987 | 44.413 | 59.558 | 0.00 | 0.00 |

|      |      |      |     |   |     |        |        |        |      |      |
|------|------|------|-----|---|-----|--------|--------|--------|------|------|
| ATOM | 5492 | NE2  | GLN | X | 365 | 54.067 | 43.898 | 57.694 | 0.00 | 0.00 |
| ATOM | 5493 | HE21 | GLN | X | 365 | 53.592 | 44.769 | 57.883 | 0.00 | 0.00 |
| ATOM | 5494 | HE22 | GLN | X | 365 | 53.797 | 43.302 | 56.924 | 0.00 | 0.00 |
| ATOM | 5495 | C    | GLN | X | 365 | 58.041 | 41.115 | 60.288 | 0.00 | 0.00 |
| ATOM | 5496 | O    | GLN | X | 365 | 58.194 | 41.826 | 61.269 | 0.00 | 0.00 |
| ATOM | 5497 | N    | VAL | X | 366 | 57.679 | 39.855 | 60.421 | 0.00 | 0.00 |
| ATOM | 5498 | H    | VAL | X | 366 | 57.572 | 39.264 | 59.609 | 0.00 | 0.00 |
| ATOM | 5499 | CA   | VAL | X | 366 | 57.382 | 39.064 | 61.678 | 0.00 | 0.00 |
| ATOM | 5500 | HA   | VAL | X | 366 | 56.700 | 39.588 | 62.348 | 0.00 | 0.00 |
| ATOM | 5501 | CB   | VAL | X | 366 | 56.617 | 37.775 | 61.329 | 0.00 | 0.00 |
| ATOM | 5502 | HB   | VAL | X | 366 | 56.247 | 37.929 | 60.315 | 0.00 | 0.00 |
| ATOM | 5503 | CG1  | VAL | X | 366 | 57.484 | 36.514 | 61.273 | 0.00 | 0.00 |
| ATOM | 5504 | HG11 | VAL | X | 366 | 57.891 | 36.266 | 62.253 | 0.00 | 0.00 |
| ATOM | 5505 | HG12 | VAL | X | 366 | 56.870 | 35.683 | 60.926 | 0.00 | 0.00 |
| ATOM | 5506 | HG13 | VAL | X | 366 | 58.406 | 36.565 | 60.694 | 0.00 | 0.00 |
| ATOM | 5507 | CG2  | VAL | X | 366 | 55.341 | 37.635 | 62.152 | 0.00 | 0.00 |
| ATOM | 5508 | HG21 | VAL | X | 366 | 54.731 | 36.771 | 61.885 | 0.00 | 0.00 |
| ATOM | 5509 | HG22 | VAL | X | 366 | 54.702 | 38.490 | 61.931 | 0.00 | 0.00 |
| ATOM | 5510 | HG23 | VAL | X | 366 | 55.579 | 37.485 | 63.205 | 0.00 | 0.00 |
| ATOM | 5511 | C    | VAL | X | 366 | 58.630 | 38.797 | 62.610 | 0.00 | 0.00 |
| ATOM | 5512 | O    | VAL | X | 366 | 59.659 | 38.610 | 62.000 | 0.00 | 0.00 |
| ATOM | 5513 | N    | SER | X | 367 | 58.479 | 38.795 | 63.955 | 0.00 | 0.00 |
| ATOM | 5514 | H    | SER | X | 367 | 57.582 | 39.037 | 64.352 | 0.00 | 0.00 |
| ATOM | 5515 | CA   | SER | X | 367 | 59.580 | 38.614 | 64.908 | 0.00 | 0.00 |
| ATOM | 5516 | HA   | SER | X | 367 | 60.441 | 39.141 | 64.497 | 0.00 | 0.00 |
| ATOM | 5517 | CB   | SER | X | 367 | 59.184 | 39.246 | 66.257 | 0.00 | 0.00 |
| ATOM | 5518 | HB2  | SER | X | 367 | 59.921 | 38.997 | 67.020 | 0.00 | 0.00 |
| ATOM | 5519 | HB3  | SER | X | 367 | 59.221 | 40.329 | 66.146 | 0.00 | 0.00 |
| ATOM | 5520 | OG   | SER | X | 367 | 57.923 | 38.652 | 66.659 | 0.00 | 0.00 |
| ATOM | 5521 | HG   | SER | X | 367 | 57.582 | 39.172 | 67.390 | 0.00 | 0.00 |
| ATOM | 5522 | C    | SER | X | 367 | 59.966 | 37.147 | 65.026 | 0.00 | 0.00 |
| ATOM | 5523 | O    | SER | X | 367 | 59.243 | 36.232 | 64.661 | 0.00 | 0.00 |
| ATOM | 5524 | N    | ASP | X | 368 | 61.180 | 36.887 | 65.446 | 0.00 | 0.00 |
| ATOM | 5525 | H    | ASP | X | 368 | 61.802 | 37.675 | 65.561 | 0.00 | 0.00 |
| ATOM | 5526 | CA   | ASP | X | 368 | 61.738 | 35.552 | 65.413 | 0.00 | 0.00 |
| ATOM | 5527 | HA   | ASP | X | 368 | 61.676 | 35.118 | 64.416 | 0.00 | 0.00 |
| ATOM | 5528 | CB   | ASP | X | 368 | 63.289 | 35.659 | 65.739 | 0.00 | 0.00 |
| ATOM | 5529 | HB2  | ASP | X | 368 | 63.346 | 36.038 | 66.760 | 0.00 | 0.00 |
| ATOM | 5530 | HB3  | ASP | X | 368 | 63.637 | 34.628 | 65.784 | 0.00 | 0.00 |
| ATOM | 5531 | CG   | ASP | X | 368 | 64.298 | 36.363 | 64.726 | 0.00 | 0.00 |
| ATOM | 5532 | OD1  | ASP | X | 368 | 63.934 | 36.668 | 63.556 | 0.00 | 0.00 |
| ATOM | 5533 | OD2  | ASP | X | 368 | 65.478 | 36.546 | 65.110 | 0.00 | 0.00 |
| ATOM | 5534 | C    | ASP | X | 368 | 61.084 | 34.538 | 66.322 | 0.00 | 0.00 |
| ATOM | 5535 | O    | ASP | X | 368 | 61.051 | 33.377 | 65.986 | 0.00 | 0.00 |
| ATOM | 5536 | N    | LEU | X | 369 | 60.388 | 35.032 | 67.319 | 0.00 | 0.00 |
| ATOM | 5537 | H    | LEU | X | 369 | 60.438 | 36.028 | 67.477 | 0.00 | 0.00 |
| ATOM | 5538 | CA   | LEU | X | 369 | 59.544 | 34.255 | 68.206 | 0.00 | 0.00 |
| ATOM | 5539 | HA   | LEU | X | 369 | 60.034 | 33.316 | 68.463 | 0.00 | 0.00 |
| ATOM | 5540 | CB   | LEU | X | 369 | 59.242 | 35.069 | 69.481 | 0.00 | 0.00 |
| ATOM | 5541 | HB2  | LEU | X | 369 | 60.157 | 35.432 | 69.949 | 0.00 | 0.00 |
| ATOM | 5542 | HB3  | LEU | X | 369 | 58.796 | 35.998 | 69.124 | 0.00 | 0.00 |
| ATOM | 5543 | CG   | LEU | X | 369 | 58.404 | 34.392 | 70.582 | 0.00 | 0.00 |
| ATOM | 5544 | HG   | LEU | X | 369 | 57.414 | 34.229 | 70.156 | 0.00 | 0.00 |
| ATOM | 5545 | CD1  | LEU | X | 369 | 59.058 | 33.139 | 71.114 | 0.00 | 0.00 |
| ATOM | 5546 | HD11 | LEU | X | 369 | 59.120 | 32.369 | 70.345 | 0.00 | 0.00 |
| ATOM | 5547 | HD12 | LEU | X | 369 | 58.501 | 32.584 | 71.869 | 0.00 | 0.00 |
| ATOM | 5548 | HD13 | LEU | X | 369 | 60.065 | 33.321 | 71.490 | 0.00 | 0.00 |
| ATOM | 5549 | CD2  | LEU | X | 369 | 58.104 | 35.423 | 71.661 | 0.00 | 0.00 |
| ATOM | 5550 | HD21 | LEU | X | 369 | 59.054 | 35.635 | 72.153 | 0.00 | 0.00 |
| ATOM | 5551 | HD22 | LEU | X | 369 | 57.501 | 36.226 | 71.238 | 0.00 | 0.00 |
| ATOM | 5552 | HD23 | LEU | X | 369 | 57.476 | 34.963 | 72.424 | 0.00 | 0.00 |
| ATOM | 5553 | C    | LEU | X | 369 | 58.228 | 33.864 | 67.504 | 0.00 | 0.00 |
| ATOM | 5554 | O    | LEU | X | 369 | 57.717 | 32.803 | 67.873 | 0.00 | 0.00 |
| ATOM | 5555 | N    | ALA | X | 370 | 57.694 | 34.643 | 66.506 | 0.00 | 0.00 |
| ATOM | 5556 | H    | ALA | X | 370 | 58.138 | 35.500 | 66.209 | 0.00 | 0.00 |
| ATOM | 5557 | CA   | ALA | X | 370 | 56.507 | 34.345 | 65.764 | 0.00 | 0.00 |
| ATOM | 5558 | HA   | ALA | X | 370 | 55.718 | 33.956 | 66.408 | 0.00 | 0.00 |

|      |      |      |     |   |     |        |        |        |      |      |
|------|------|------|-----|---|-----|--------|--------|--------|------|------|
| ATOM | 5559 | CB   | ALA | X | 370 | 55.975 | 35.632 | 65.107 | 0.00 | 0.00 |
| ATOM | 5560 | HB1  | ALA | X | 370 | 56.736 | 35.981 | 64.409 | 0.00 | 0.00 |
| ATOM | 5561 | HB2  | ALA | X | 370 | 55.729 | 36.369 | 65.871 | 0.00 | 0.00 |
| ATOM | 5562 | HB3  | ALA | X | 370 | 55.064 | 35.352 | 64.578 | 0.00 | 0.00 |
| ATOM | 5563 | C    | ALA | X | 370 | 56.844 | 33.276 | 64.666 | 0.00 | 0.00 |
| ATOM | 5564 | O    | ALA | X | 370 | 56.029 | 32.463 | 64.390 | 0.00 | 0.00 |
| ATOM | 5565 | N    | ALA | X | 371 | 58.069 | 33.264 | 64.162 | 0.00 | 0.00 |
| ATOM | 5566 | H    | ALA | X | 371 | 58.638 | 34.019 | 64.519 | 0.00 | 0.00 |
| ATOM | 5567 | CA   | ALA | X | 371 | 58.642 | 32.227 | 63.303 | 0.00 | 0.00 |
| ATOM | 5568 | HA   | ALA | X | 371 | 57.963 | 32.050 | 62.469 | 0.00 | 0.00 |
| ATOM | 5569 | CB   | ALA | X | 371 | 60.007 | 32.654 | 62.720 | 0.00 | 0.00 |
| ATOM | 5570 | HB1  | ALA | X | 371 | 60.750 | 32.792 | 63.506 | 0.00 | 0.00 |
| ATOM | 5571 | HB2  | ALA | X | 371 | 59.938 | 33.593 | 62.172 | 0.00 | 0.00 |
| ATOM | 5572 | HB3  | ALA | X | 371 | 60.363 | 31.875 | 62.045 | 0.00 | 0.00 |
| ATOM | 5573 | C    | ALA | X | 371 | 58.715 | 30.877 | 64.087 | 0.00 | 0.00 |
| ATOM | 5574 | O    | ALA | X | 371 | 58.168 | 29.912 | 63.620 | 0.00 | 0.00 |
| ATOM | 5575 | N    | GLU | X | 372 | 59.194 | 30.867 | 65.349 | 0.00 | 0.00 |
| ATOM | 5576 | H    | GLU | X | 372 | 59.676 | 31.724 | 65.581 | 0.00 | 0.00 |
| ATOM | 5577 | CA   | GLU | X | 372 | 59.191 | 29.714 | 66.217 | 0.00 | 0.00 |
| ATOM | 5578 | HA   | GLU | X | 372 | 59.566 | 28.837 | 65.690 | 0.00 | 0.00 |
| ATOM | 5579 | CB   | GLU | X | 372 | 59.857 | 30.085 | 67.503 | 0.00 | 0.00 |
| ATOM | 5580 | HB2  | GLU | X | 372 | 59.738 | 31.147 | 67.719 | 0.00 | 0.00 |
| ATOM | 5581 | HB3  | GLU | X | 372 | 59.348 | 29.619 | 68.347 | 0.00 | 0.00 |
| ATOM | 5582 | CG   | GLU | X | 372 | 61.312 | 29.488 | 67.492 | 0.00 | 0.00 |
| ATOM | 5583 | HG2  | GLU | X | 372 | 61.902 | 29.670 | 66.593 | 0.00 | 0.00 |
| ATOM | 5584 | HG3  | GLU | X | 372 | 61.793 | 29.938 | 68.361 | 0.00 | 0.00 |
| ATOM | 5585 | CD   | GLU | X | 372 | 61.448 | 27.952 | 67.814 | 0.00 | 0.00 |
| ATOM | 5586 | OE1  | GLU | X | 372 | 60.882 | 27.486 | 68.839 | 0.00 | 0.00 |
| ATOM | 5587 | OE2  | GLU | X | 372 | 62.025 | 27.226 | 67.025 | 0.00 | 0.00 |
| ATOM | 5588 | C    | GLU | X | 372 | 57.725 | 29.232 | 66.465 | 0.00 | 0.00 |
| ATOM | 5589 | O    | GLU | X | 372 | 57.447 | 28.050 | 66.395 | 0.00 | 0.00 |
| ATOM | 5590 | N    | ALA | X | 373 | 56.826 | 30.226 | 66.553 | 0.00 | 0.00 |
| ATOM | 5591 | H    | ALA | X | 373 | 57.134 | 31.130 | 66.879 | 0.00 | 0.00 |
| ATOM | 5592 | CA   | ALA | X | 373 | 55.406 | 29.850 | 66.747 | 0.00 | 0.00 |
| ATOM | 5593 | HA   | ALA | X | 373 | 55.372 | 29.148 | 67.580 | 0.00 | 0.00 |
| ATOM | 5594 | CB   | ALA | X | 373 | 54.657 | 31.027 | 67.340 | 0.00 | 0.00 |
| ATOM | 5595 | HB1  | ALA | X | 373 | 53.677 | 30.735 | 67.717 | 0.00 | 0.00 |
| ATOM | 5596 | HB2  | ALA | X | 373 | 54.538 | 31.750 | 66.533 | 0.00 | 0.00 |
| ATOM | 5597 | HB3  | ALA | X | 373 | 55.175 | 31.355 | 68.241 | 0.00 | 0.00 |
| ATOM | 5598 | C    | ALA | X | 373 | 54.654 | 29.241 | 65.507 | 0.00 | 0.00 |
| ATOM | 5599 | O    | ALA | X | 373 | 53.883 | 28.266 | 65.658 | 0.00 | 0.00 |
| ATOM | 5600 | N    | VAL | X | 374 | 54.928 | 29.794 | 64.330 | 0.00 | 0.00 |
| ATOM | 5601 | H    | VAL | X | 374 | 55.402 | 30.686 | 64.318 | 0.00 | 0.00 |
| ATOM | 5602 | CA   | VAL | X | 374 | 54.390 | 29.178 | 63.086 | 0.00 | 0.00 |
| ATOM | 5603 | HA   | VAL | X | 374 | 53.307 | 29.182 | 63.203 | 0.00 | 0.00 |
| ATOM | 5604 | CB   | VAL | X | 374 | 54.862 | 30.111 | 61.888 | 0.00 | 0.00 |
| ATOM | 5605 | HB   | VAL | X | 374 | 55.908 | 30.397 | 61.999 | 0.00 | 0.00 |
| ATOM | 5606 | CG1  | VAL | X | 374 | 54.722 | 29.407 | 60.508 | 0.00 | 0.00 |
| ATOM | 5607 | HG11 | VAL | X | 374 | 54.944 | 30.104 | 59.700 | 0.00 | 0.00 |
| ATOM | 5608 | HG12 | VAL | X | 374 | 55.311 | 28.497 | 60.395 | 0.00 | 0.00 |
| ATOM | 5609 | HG13 | VAL | X | 374 | 53.671 | 29.143 | 60.390 | 0.00 | 0.00 |
| ATOM | 5610 | CG2  | VAL | X | 374 | 54.056 | 31.441 | 61.920 | 0.00 | 0.00 |
| ATOM | 5611 | HG21 | VAL | X | 374 | 54.155 | 31.930 | 62.890 | 0.00 | 0.00 |
| ATOM | 5612 | HG22 | VAL | X | 374 | 53.023 | 31.249 | 61.629 | 0.00 | 0.00 |
| ATOM | 5613 | HG23 | VAL | X | 374 | 54.497 | 32.152 | 61.222 | 0.00 | 0.00 |
| ATOM | 5614 | C    | VAL | X | 374 | 54.998 | 27.757 | 62.951 | 0.00 | 0.00 |
| ATOM | 5615 | O    | VAL | X | 374 | 54.212 | 26.859 | 62.800 | 0.00 | 0.00 |
| ATOM | 5616 | N    | VAL | X | 375 | 56.328 | 27.646 | 63.139 | 0.00 | 0.00 |
| ATOM | 5617 | H    | VAL | X | 375 | 56.781 | 28.509 | 63.405 | 0.00 | 0.00 |
| ATOM | 5618 | CA   | VAL | X | 375 | 57.089 | 26.356 | 63.084 | 0.00 | 0.00 |
| ATOM | 5619 | HA   | VAL | X | 375 | 56.953 | 25.843 | 62.131 | 0.00 | 0.00 |
| ATOM | 5620 | CB   | VAL | X | 375 | 58.617 | 26.477 | 63.288 | 0.00 | 0.00 |
| ATOM | 5621 | HB   | VAL | X | 375 | 58.801 | 26.999 | 64.227 | 0.00 | 0.00 |
| ATOM | 5622 | CG1  | VAL | X | 375 | 59.369 | 25.184 | 63.486 | 0.00 | 0.00 |
| ATOM | 5623 | HG11 | VAL | X | 375 | 59.384 | 24.520 | 62.622 | 0.00 | 0.00 |
| ATOM | 5624 | HG12 | VAL | X | 375 | 60.433 | 25.395 | 63.590 | 0.00 | 0.00 |
| ATOM | 5625 | HG13 | VAL | X | 375 | 59.011 | 24.669 | 64.377 | 0.00 | 0.00 |

|      |      |      |     |   |     |        |        |        |      |      |
|------|------|------|-----|---|-----|--------|--------|--------|------|------|
| ATOM | 5626 | CG2  | VAL | X | 375 | 59.289 | 27.198 | 62.114 | 0.00 | 0.00 |
| ATOM | 5627 | HG21 | VAL | X | 375 | 59.060 | 26.581 | 61.245 | 0.00 | 0.00 |
| ATOM | 5628 | HG22 | VAL | X | 375 | 60.351 | 27.384 | 62.273 | 0.00 | 0.00 |
| ATOM | 5629 | HG23 | VAL | X | 375 | 58.694 | 28.089 | 61.916 | 0.00 | 0.00 |
| ATOM | 5630 | C    | VAL | X | 375 | 56.496 | 25.389 | 64.172 | 0.00 | 0.00 |
| ATOM | 5631 | O    | VAL | X | 375 | 56.220 | 24.256 | 63.807 | 0.00 | 0.00 |
| ATOM | 5632 | N    | LEU | X | 376 | 56.054 | 25.843 | 65.370 | 0.00 | 0.00 |
| ATOM | 5633 | H    | LEU | X | 376 | 56.101 | 26.841 | 65.521 | 0.00 | 0.00 |
| ATOM | 5634 | CA   | LEU | X | 376 | 55.345 | 24.955 | 66.317 | 0.00 | 0.00 |
| ATOM | 5635 | HA   | LEU | X | 376 | 56.056 | 24.143 | 66.474 | 0.00 | 0.00 |
| ATOM | 5636 | CB   | LEU | X | 376 | 55.154 | 25.750 | 67.654 | 0.00 | 0.00 |
| ATOM | 5637 | HB2  | LEU | X | 376 | 56.101 | 26.213 | 67.930 | 0.00 | 0.00 |
| ATOM | 5638 | HB3  | LEU | X | 376 | 54.460 | 26.579 | 67.513 | 0.00 | 0.00 |
| ATOM | 5639 | CG   | LEU | X | 376 | 54.659 | 24.904 | 68.822 | 0.00 | 0.00 |
| ATOM | 5640 | HG   | LEU | X | 376 | 53.697 | 24.463 | 68.561 | 0.00 | 0.00 |
| ATOM | 5641 | CD1  | LEU | X | 376 | 55.529 | 23.793 | 69.281 | 0.00 | 0.00 |
| ATOM | 5642 | HD11 | LEU | X | 376 | 56.514 | 24.123 | 69.611 | 0.00 | 0.00 |
| ATOM | 5643 | HD12 | LEU | X | 376 | 55.438 | 23.114 | 68.433 | 0.00 | 0.00 |
| ATOM | 5644 | HD13 | LEU | X | 376 | 55.013 | 23.284 | 70.095 | 0.00 | 0.00 |
| ATOM | 5645 | CD2  | LEU | X | 376 | 54.474 | 25.908 | 69.952 | 0.00 | 0.00 |
| ATOM | 5646 | HD21 | LEU | X | 376 | 55.442 | 26.279 | 70.288 | 0.00 | 0.00 |
| ATOM | 5647 | HD22 | LEU | X | 376 | 53.803 | 26.740 | 69.740 | 0.00 | 0.00 |
| ATOM | 5648 | HD23 | LEU | X | 376 | 54.012 | 25.394 | 70.795 | 0.00 | 0.00 |
| ATOM | 5649 | C    | LEU | X | 376 | 54.073 | 24.326 | 65.840 | 0.00 | 0.00 |
| ATOM | 5650 | O    | LEU | X | 376 | 53.829 | 23.167 | 66.130 | 0.00 | 0.00 |
| ATOM | 5651 | N    | HIE | X | 377 | 53.246 | 25.129 | 65.068 | 0.00 | 0.00 |
| ATOM | 5652 | H    | HIE | X | 377 | 53.560 | 26.063 | 64.848 | 0.00 | 0.00 |
| ATOM | 5653 | CA   | HIE | X | 377 | 51.915 | 24.653 | 64.634 | 0.00 | 0.00 |
| ATOM | 5654 | HA   | HIE | X | 377 | 51.505 | 23.966 | 65.375 | 0.00 | 0.00 |
| ATOM | 5655 | CB   | HIE | X | 377 | 50.936 | 25.825 | 64.493 | 0.00 | 0.00 |
| ATOM | 5656 | HB2  | HIE | X | 377 | 50.872 | 26.324 | 65.460 | 0.00 | 0.00 |
| ATOM | 5657 | HB3  | HIE | X | 377 | 51.392 | 26.489 | 63.759 | 0.00 | 0.00 |
| ATOM | 5658 | CG   | HIE | X | 377 | 49.543 | 25.427 | 64.106 | 0.00 | 0.00 |
| ATOM | 5659 | ND1  | HIE | X | 377 | 48.559 | 24.813 | 64.937 | 0.00 | 0.00 |
| ATOM | 5660 | CE1  | HIE | X | 377 | 47.456 | 24.609 | 64.161 | 0.00 | 0.00 |
| ATOM | 5661 | HE1  | HIE | X | 377 | 46.641 | 24.031 | 64.569 | 0.00 | 0.00 |
| ATOM | 5662 | NE2  | HIE | X | 377 | 47.745 | 25.084 | 62.890 | 0.00 | 0.00 |
| ATOM | 5663 | HE2  | HIE | X | 377 | 47.046 | 25.047 | 62.162 | 0.00 | 0.00 |
| ATOM | 5664 | CD2  | HIE | X | 377 | 48.997 | 25.623 | 62.842 | 0.00 | 0.00 |
| ATOM | 5665 | HD2  | HIE | X | 377 | 49.521 | 26.048 | 61.998 | 0.00 | 0.00 |
| ATOM | 5666 | C    | HIE | X | 377 | 52.003 | 23.899 | 63.320 | 0.00 | 0.00 |
| ATOM | 5667 | O    | HIE | X | 377 | 51.401 | 22.825 | 63.172 | 0.00 | 0.00 |
| ATOM | 5668 | N    | TYR | X | 378 | 52.862 | 24.327 | 62.362 | 0.00 | 0.00 |
| ATOM | 5669 | H    | TYR | X | 378 | 53.368 | 25.183 | 62.538 | 0.00 | 0.00 |
| ATOM | 5670 | CA   | TYR | X | 378 | 52.926 | 23.816 | 60.955 | 0.00 | 0.00 |
| ATOM | 5671 | HA   | TYR | X | 378 | 51.935 | 23.392 | 60.793 | 0.00 | 0.00 |
| ATOM | 5672 | CB   | TYR | X | 378 | 53.127 | 25.046 | 60.053 | 0.00 | 0.00 |
| ATOM | 5673 | HB2  | TYR | X | 378 | 53.935 | 25.697 | 60.387 | 0.00 | 0.00 |
| ATOM | 5674 | HB3  | TYR | X | 378 | 53.382 | 24.693 | 59.053 | 0.00 | 0.00 |
| ATOM | 5675 | CG   | TYR | X | 378 | 51.871 | 25.911 | 59.781 | 0.00 | 0.00 |
| ATOM | 5676 | CD1  | TYR | X | 378 | 50.923 | 25.505 | 58.847 | 0.00 | 0.00 |
| ATOM | 5677 | HD1  | TYR | X | 378 | 51.056 | 24.648 | 58.203 | 0.00 | 0.00 |
| ATOM | 5678 | CE1  | TYR | X | 378 | 49.810 | 26.333 | 58.604 | 0.00 | 0.00 |
| ATOM | 5679 | HE1  | TYR | X | 378 | 49.043 | 26.086 | 57.885 | 0.00 | 0.00 |
| ATOM | 5680 | CZ   | TYR | X | 378 | 49.653 | 27.569 | 59.380 | 0.00 | 0.00 |
| ATOM | 5681 | OH   | TYR | X | 378 | 48.554 | 28.346 | 59.131 | 0.00 | 0.00 |
| ATOM | 5682 | HH   | TYR | X | 378 | 48.036 | 27.871 | 58.476 | 0.00 | 0.00 |
| ATOM | 5683 | CE2  | TYR | X | 378 | 50.621 | 27.999 | 60.279 | 0.00 | 0.00 |
| ATOM | 5684 | HE2  | TYR | X | 378 | 50.392 | 28.848 | 60.906 | 0.00 | 0.00 |
| ATOM | 5685 | CD2  | TYR | X | 378 | 51.759 | 27.131 | 60.485 | 0.00 | 0.00 |
| ATOM | 5686 | HD2  | TYR | X | 378 | 52.539 | 27.482 | 61.144 | 0.00 | 0.00 |
| ATOM | 5687 | C    | TYR | X | 378 | 53.871 | 22.663 | 60.762 | 0.00 | 0.00 |
| ATOM | 5688 | O    | TYR | X | 378 | 53.833 | 22.013 | 59.687 | 0.00 | 0.00 |
| ATOM | 5689 | N    | THR | X | 379 | 54.779 | 22.347 | 61.658 | 0.00 | 0.00 |
| ATOM | 5690 | H    | THR | X | 379 | 54.711 | 22.973 | 62.448 | 0.00 | 0.00 |
| ATOM | 5691 | CA   | THR | X | 379 | 55.633 | 21.109 | 61.645 | 0.00 | 0.00 |
| ATOM | 5692 | HA   | THR | X | 379 | 55.983 | 20.916 | 60.631 | 0.00 | 0.00 |



|      |      |      |     |   |     |        |        |        |      |      |
|------|------|------|-----|---|-----|--------|--------|--------|------|------|
| ATOM | 5693 | CB   | THR | X | 379 | 56.833 | 21.132 | 62.624 | 0.00 | 0.00 |
| ATOM | 5694 | HB   | THR | X | 379 | 56.537 | 21.383 | 63.643 | 0.00 | 0.00 |
| ATOM | 5695 | CG2  | THR | X | 379 | 57.593 | 19.866 | 62.750 | 0.00 | 0.00 |
| ATOM | 5696 | HG21 | THR | X | 379 | 56.930 | 19.235 | 63.343 | 0.00 | 0.00 |
| ATOM | 5697 | HG22 | THR | X | 379 | 58.432 | 19.833 | 63.445 | 0.00 | 0.00 |
| ATOM | 5698 | HG23 | THR | X | 379 | 57.713 | 19.472 | 61.741 | 0.00 | 0.00 |
| ATOM | 5699 | OG1  | THR | X | 379 | 57.608 | 22.231 | 62.189 | 0.00 | 0.00 |
| ATOM | 5700 | HG1  | THR | X | 379 | 57.276 | 23.015 | 62.631 | 0.00 | 0.00 |
| ATOM | 5701 | C    | THR | X | 379 | 54.708 | 19.942 | 62.014 | 0.00 | 0.00 |
| ATOM | 5702 | O    | THR | X | 379 | 53.817 | 20.147 | 62.835 | 0.00 | 0.00 |
| ATOM | 5703 | N    | ASP | X | 380 | 55.016 | 18.778 | 61.411 | 0.00 | 0.00 |
| ATOM | 5704 | H    | ASP | X | 380 | 55.848 | 18.759 | 60.839 | 0.00 | 0.00 |
| ATOM | 5705 | CA   | ASP | X | 380 | 54.556 | 17.459 | 61.828 | 0.00 | 0.00 |
| ATOM | 5706 | HA   | ASP | X | 380 | 53.539 | 17.468 | 62.219 | 0.00 | 0.00 |
| ATOM | 5707 | CB   | ASP | X | 380 | 54.489 | 16.458 | 60.630 | 0.00 | 0.00 |
| ATOM | 5708 | HB2  | ASP | X | 380 | 53.791 | 16.934 | 59.941 | 0.00 | 0.00 |
| ATOM | 5709 | HB3  | ASP | X | 380 | 55.476 | 16.413 | 60.170 | 0.00 | 0.00 |
| ATOM | 5710 | CG   | ASP | X | 380 | 53.926 | 15.108 | 60.998 | 0.00 | 0.00 |
| ATOM | 5711 | OD1  | ASP | X | 380 | 54.284 | 14.630 | 62.079 | 0.00 | 0.00 |
| ATOM | 5712 | OD2  | ASP | X | 380 | 53.148 | 14.540 | 60.194 | 0.00 | 0.00 |
| ATOM | 5713 | C    | ASP | X | 380 | 55.644 | 16.957 | 62.873 | 0.00 | 0.00 |
| ATOM | 5714 | O    | ASP | X | 380 | 56.792 | 16.638 | 62.490 | 0.00 | 0.00 |
| ATOM | 5715 | N    | TRP | X | 381 | 55.281 | 16.878 | 64.147 | 0.00 | 0.00 |
| ATOM | 5716 | H    | TRP | X | 381 | 54.335 | 17.035 | 64.464 | 0.00 | 0.00 |
| ATOM | 5717 | CA   | TRP | X | 381 | 56.169 | 16.494 | 65.284 | 0.00 | 0.00 |
| ATOM | 5718 | HA   | TRP | X | 381 | 57.161 | 16.867 | 65.029 | 0.00 | 0.00 |
| ATOM | 5719 | CB   | TRP | X | 381 | 55.782 | 17.236 | 66.554 | 0.00 | 0.00 |
| ATOM | 5720 | HB2  | TRP | X | 381 | 54.738 | 16.998 | 66.757 | 0.00 | 0.00 |
| ATOM | 5721 | HB3  | TRP | X | 381 | 56.407 | 16.946 | 67.399 | 0.00 | 0.00 |
| ATOM | 5722 | CG   | TRP | X | 381 | 55.968 | 18.708 | 66.472 | 0.00 | 0.00 |
| ATOM | 5723 | CD1  | TRP | X | 381 | 55.022 | 19.724 | 66.332 | 0.00 | 0.00 |
| ATOM | 5724 | HD1  | TRP | X | 381 | 53.980 | 19.450 | 66.406 | 0.00 | 0.00 |
| ATOM | 5725 | NE1  | TRP | X | 381 | 55.606 | 20.926 | 66.280 | 0.00 | 0.00 |
| ATOM | 5726 | HE1  | TRP | X | 381 | 55.009 | 21.740 | 66.255 | 0.00 | 0.00 |
| ATOM | 5727 | CE2  | TRP | X | 381 | 57.017 | 20.856 | 66.231 | 0.00 | 0.00 |
| ATOM | 5728 | CZ2  | TRP | X | 381 | 57.992 | 21.790 | 65.966 | 0.00 | 0.00 |
| ATOM | 5729 | HZ2  | TRP | X | 381 | 57.764 | 22.832 | 65.793 | 0.00 | 0.00 |
| ATOM | 5730 | CH2  | TRP | X | 381 | 59.337 | 21.439 | 66.011 | 0.00 | 0.00 |
| ATOM | 5731 | HH2  | TRP | X | 381 | 60.145 | 22.119 | 65.787 | 0.00 | 0.00 |
| ATOM | 5732 | CZ3  | TRP | X | 381 | 59.616 | 20.084 | 66.180 | 0.00 | 0.00 |
| ATOM | 5733 | HZ3  | TRP | X | 381 | 60.652 | 19.791 | 66.265 | 0.00 | 0.00 |
| ATOM | 5734 | CE3  | TRP | X | 381 | 58.608 | 19.124 | 66.360 | 0.00 | 0.00 |
| ATOM | 5735 | HE3  | TRP | X | 381 | 58.862 | 18.075 | 66.404 | 0.00 | 0.00 |
| ATOM | 5736 | CD2  | TRP | X | 381 | 57.241 | 19.489 | 66.362 | 0.00 | 0.00 |
| ATOM | 5737 | C    | TRP | X | 381 | 56.367 | 14.992 | 65.367 | 0.00 | 0.00 |
| ATOM | 5738 | O    | TRP | X | 381 | 57.173 | 14.615 | 66.268 | 0.00 | 0.00 |
| ATOM | 5739 | N    | LEU | X | 382 | 55.781 | 14.151 | 64.591 | 0.00 | 0.00 |
| ATOM | 5740 | H    | LEU | X | 382 | 55.062 | 14.501 | 63.974 | 0.00 | 0.00 |
| ATOM | 5741 | CA   | LEU | X | 382 | 56.102 | 12.717 | 64.472 | 0.00 | 0.00 |
| ATOM | 5742 | HA   | LEU | X | 382 | 56.486 | 12.370 | 65.431 | 0.00 | 0.00 |
| ATOM | 5743 | CB   | LEU | X | 382 | 54.738 | 11.974 | 64.191 | 0.00 | 0.00 |
| ATOM | 5744 | HB2  | LEU | X | 382 | 53.903 | 12.559 | 64.578 | 0.00 | 0.00 |
| ATOM | 5745 | HB3  | LEU | X | 382 | 54.531 | 11.842 | 63.129 | 0.00 | 0.00 |
| ATOM | 5746 | CG   | LEU | X | 382 | 54.694 | 10.531 | 64.693 | 0.00 | 0.00 |
| ATOM | 5747 | HG   | LEU | X | 382 | 53.763 | 10.064 | 64.372 | 0.00 | 0.00 |
| ATOM | 5748 | CD1  | LEU | X | 382 | 55.802 | 9.716  | 64.118 | 0.00 | 0.00 |
| ATOM | 5749 | HD11 | LEU | X | 382 | 56.804 | 9.895  | 64.507 | 0.00 | 0.00 |
| ATOM | 5750 | HD12 | LEU | X | 382 | 55.846 | 9.814  | 63.033 | 0.00 | 0.00 |
| ATOM | 5751 | HD13 | LEU | X | 382 | 55.550 | 8.660  | 64.214 | 0.00 | 0.00 |
| ATOM | 5752 | CD2  | LEU | X | 382 | 54.674 | 10.471 | 66.220 | 0.00 | 0.00 |
| ATOM | 5753 | HD21 | LEU | X | 382 | 53.794 | 11.010 | 66.570 | 0.00 | 0.00 |
| ATOM | 5754 | HD22 | LEU | X | 382 | 54.542 | 9.437  | 66.541 | 0.00 | 0.00 |
| ATOM | 5755 | HD23 | LEU | X | 382 | 55.613 | 10.892 | 66.579 | 0.00 | 0.00 |
| ATOM | 5756 | C    | LEU | X | 382 | 57.181 | 12.649 | 63.290 | 0.00 | 0.00 |
| ATOM | 5757 | O    | LEU | X | 382 | 58.214 | 11.947 | 63.399 | 0.00 | 0.00 |
| ATOM | 5758 | N    | HIE | X | 383 | 56.972 | 13.349 | 62.197 | 0.00 | 0.00 |
| ATOM | 5759 | H    | HIE | X | 383 | 56.051 | 13.757 | 62.124 | 0.00 | 0.00 |

|      |      |     |     |   |     |        |        |        |      |      |
|------|------|-----|-----|---|-----|--------|--------|--------|------|------|
| ATOM | 5760 | CA  | HIE | X | 383 | 57.791 | 13.394 | 60.945 | 0.00 | 0.00 |
| ATOM | 5761 | HA  | HIE | X | 383 | 58.638 | 12.726 | 61.104 | 0.00 | 0.00 |
| ATOM | 5762 | CB  | HIE | X | 383 | 56.914 | 12.824 | 59.817 | 0.00 | 0.00 |
| ATOM | 5763 | HB2 | HIE | X | 383 | 56.139 | 13.576 | 59.668 | 0.00 | 0.00 |
| ATOM | 5764 | HB3 | HIE | X | 383 | 57.510 | 12.806 | 58.904 | 0.00 | 0.00 |
| ATOM | 5765 | CG  | HIE | X | 383 | 56.343 | 11.440 | 60.102 | 0.00 | 0.00 |
| ATOM | 5766 | ND1 | HIE | X | 383 | 56.856 | 10.210 | 59.706 | 0.00 | 0.00 |
| ATOM | 5767 | CE1 | HIE | X | 383 | 55.898 | 9.290  | 59.965 | 0.00 | 0.00 |
| ATOM | 5768 | HE1 | HIE | X | 383 | 56.057 | 8.234  | 59.802 | 0.00 | 0.00 |
| ATOM | 5769 | NE2 | HIE | X | 383 | 54.765 | 9.895  | 60.471 | 0.00 | 0.00 |
| ATOM | 5770 | HE2 | HIE | X | 383 | 53.978 | 9.376  | 60.835 | 0.00 | 0.00 |
| ATOM | 5771 | CD2 | HIE | X | 383 | 55.003 | 11.202 | 60.484 | 0.00 | 0.00 |
| ATOM | 5772 | HD2 | HIE | X | 383 | 54.262 | 11.903 | 60.837 | 0.00 | 0.00 |
| ATOM | 5773 | C   | HIE | X | 383 | 58.437 | 14.766 | 60.609 | 0.00 | 0.00 |
| ATOM | 5774 | O   | HIE | X | 383 | 58.182 | 15.282 | 59.522 | 0.00 | 0.00 |
| ATOM | 5775 | N   | PRO | X | 384 | 59.257 | 15.374 | 61.501 | 0.00 | 0.00 |
| ATOM | 5776 | CD  | PRO | X | 384 | 59.766 | 14.925 | 62.752 | 0.00 | 0.00 |
| ATOM | 5777 | HD2 | PRO | X | 384 | 60.694 | 14.368 | 62.626 | 0.00 | 0.00 |
| ATOM | 5778 | HD3 | PRO | X | 384 | 59.088 | 14.245 | 63.267 | 0.00 | 0.00 |
| ATOM | 5779 | CG  | PRO | X | 384 | 59.971 | 16.194 | 63.633 | 0.00 | 0.00 |
| ATOM | 5780 | HG2 | PRO | X | 384 | 60.754 | 16.019 | 64.371 | 0.00 | 0.00 |
| ATOM | 5781 | HG3 | PRO | X | 384 | 59.036 | 16.503 | 64.102 | 0.00 | 0.00 |
| ATOM | 5782 | CB  | PRO | X | 384 | 60.372 | 17.223 | 62.627 | 0.00 | 0.00 |
| ATOM | 5783 | HB2 | PRO | X | 384 | 61.462 | 17.203 | 62.628 | 0.00 | 0.00 |
| ATOM | 5784 | HB3 | PRO | X | 384 | 60.045 | 18.237 | 62.859 | 0.00 | 0.00 |
| ATOM | 5785 | CA  | PRO | X | 384 | 59.650 | 16.782 | 61.278 | 0.00 | 0.00 |
| ATOM | 5786 | HA  | PRO | X | 384 | 58.729 | 17.351 | 61.150 | 0.00 | 0.00 |
| ATOM | 5787 | C   | PRO | X | 384 | 60.564 | 17.186 | 60.136 | 0.00 | 0.00 |
| ATOM | 5788 | O   | PRO | X | 384 | 60.418 | 18.171 | 59.511 | 0.00 | 0.00 |
| ATOM | 5789 | N   | GLU | X | 385 | 61.404 | 16.286 | 59.731 | 0.00 | 0.00 |
| ATOM | 5790 | H   | GLU | X | 385 | 61.392 | 15.382 | 60.181 | 0.00 | 0.00 |
| ATOM | 5791 | CA  | GLU | X | 385 | 62.372 | 16.476 | 58.603 | 0.00 | 0.00 |
| ATOM | 5792 | HA  | GLU | X | 385 | 62.619 | 17.531 | 58.494 | 0.00 | 0.00 |
| ATOM | 5793 | CB  | GLU | X | 385 | 63.666 | 15.731 | 58.901 | 0.00 | 0.00 |
| ATOM | 5794 | HB2 | GLU | X | 385 | 63.429 | 14.669 | 58.967 | 0.00 | 0.00 |
| ATOM | 5795 | HB3 | GLU | X | 385 | 64.431 | 15.947 | 58.156 | 0.00 | 0.00 |
| ATOM | 5796 | CG  | GLU | X | 385 | 64.374 | 16.117 | 60.185 | 0.00 | 0.00 |
| ATOM | 5797 | HG2 | GLU | X | 385 | 63.641 | 15.899 | 60.962 | 0.00 | 0.00 |
| ATOM | 5798 | HG3 | GLU | X | 385 | 65.257 | 15.494 | 60.326 | 0.00 | 0.00 |
| ATOM | 5799 | CD  | GLU | X | 385 | 64.779 | 17.594 | 60.226 | 0.00 | 0.00 |
| ATOM | 5800 | OE1 | GLU | X | 385 | 65.715 | 18.028 | 59.440 | 0.00 | 0.00 |
| ATOM | 5801 | OE2 | GLU | X | 385 | 64.209 | 18.369 | 61.065 | 0.00 | 0.00 |
| ATOM | 5802 | C   | GLU | X | 385 | 61.761 | 15.958 | 57.261 | 0.00 | 0.00 |
| ATOM | 5803 | O   | GLU | X | 385 | 62.603 | 15.878 | 56.316 | 0.00 | 0.00 |
| ATOM | 5804 | N   | ASP | X | 386 | 60.522 | 15.614 | 57.126 | 0.00 | 0.00 |
| ATOM | 5805 | H   | ASP | X | 386 | 59.931 | 15.748 | 57.935 | 0.00 | 0.00 |
| ATOM | 5806 | CA  | ASP | X | 386 | 59.910 | 15.030 | 55.864 | 0.00 | 0.00 |
| ATOM | 5807 | HA  | ASP | X | 386 | 60.607 | 14.261 | 55.529 | 0.00 | 0.00 |
| ATOM | 5808 | CB  | ASP | X | 386 | 58.587 | 14.456 | 56.112 | 0.00 | 0.00 |
| ATOM | 5809 | HB2 | ASP | X | 386 | 58.625 | 13.777 | 56.964 | 0.00 | 0.00 |
| ATOM | 5810 | HB3 | ASP | X | 386 | 57.919 | 15.217 | 56.513 | 0.00 | 0.00 |
| ATOM | 5811 | CG  | ASP | X | 386 | 57.775 | 13.751 | 54.965 | 0.00 | 0.00 |
| ATOM | 5812 | OD1 | ASP | X | 386 | 57.811 | 14.267 | 53.798 | 0.00 | 0.00 |
| ATOM | 5813 | OD2 | ASP | X | 386 | 57.124 | 12.728 | 55.230 | 0.00 | 0.00 |
| ATOM | 5814 | C   | ASP | X | 386 | 59.838 | 16.123 | 54.736 | 0.00 | 0.00 |
| ATOM | 5815 | O   | ASP | X | 386 | 59.050 | 16.994 | 54.844 | 0.00 | 0.00 |
| ATOM | 5816 | N   | PRO | X | 387 | 60.581 | 16.000 | 53.657 | 0.00 | 0.00 |
| ATOM | 5817 | CD  | PRO | X | 387 | 61.629 | 15.002 | 53.360 | 0.00 | 0.00 |
| ATOM | 5818 | HD2 | PRO | X | 387 | 61.157 | 14.217 | 52.769 | 0.00 | 0.00 |
| ATOM | 5819 | HD3 | PRO | X | 387 | 62.177 | 14.631 | 54.226 | 0.00 | 0.00 |
| ATOM | 5820 | CG  | PRO | X | 387 | 62.750 | 15.651 | 52.540 | 0.00 | 0.00 |
| ATOM | 5821 | HG2 | PRO | X | 387 | 63.256 | 14.893 | 51.943 | 0.00 | 0.00 |
| ATOM | 5822 | HG3 | PRO | X | 387 | 63.375 | 16.219 | 53.228 | 0.00 | 0.00 |
| ATOM | 5823 | CB  | PRO | X | 387 | 61.849 | 16.570 | 51.705 | 0.00 | 0.00 |
| ATOM | 5824 | HB2 | PRO | X | 387 | 61.484 | 16.052 | 50.818 | 0.00 | 0.00 |
| ATOM | 5825 | HB3 | PRO | X | 387 | 62.425 | 17.450 | 51.420 | 0.00 | 0.00 |
| ATOM | 5826 | CA  | PRO | X | 387 | 60.677 | 17.001 | 52.596 | 0.00 | 0.00 |

|      |      |      |     |   |     |        |        |        |      |      |
|------|------|------|-----|---|-----|--------|--------|--------|------|------|
| ATOM | 5827 | HA   | PRO | X | 387 | 60.984 | 17.946 | 53.043 | 0.00 | 0.00 |
| ATOM | 5828 | C    | PRO | X | 387 | 59.412 | 17.290 | 51.784 | 0.00 | 0.00 |
| ATOM | 5829 | O    | PRO | X | 387 | 59.293 | 18.330 | 51.114 | 0.00 | 0.00 |
| ATOM | 5830 | N    | ALA | X | 388 | 58.399 | 16.453 | 51.818 | 0.00 | 0.00 |
| ATOM | 5831 | H    | ALA | X | 388 | 58.447 | 15.653 | 52.432 | 0.00 | 0.00 |
| ATOM | 5832 | CA   | ALA | X | 388 | 57.046 | 16.688 | 51.214 | 0.00 | 0.00 |
| ATOM | 5833 | HA   | ALA | X | 388 | 57.130 | 17.383 | 50.380 | 0.00 | 0.00 |
| ATOM | 5834 | CB   | ALA | X | 388 | 56.489 | 15.327 | 50.778 | 0.00 | 0.00 |
| ATOM | 5835 | HB1  | ALA | X | 388 | 57.163 | 14.845 | 50.070 | 0.00 | 0.00 |
| ATOM | 5836 | HB2  | ALA | X | 388 | 55.630 | 15.511 | 50.133 | 0.00 | 0.00 |
| ATOM | 5837 | HB3  | ALA | X | 388 | 56.329 | 14.637 | 51.607 | 0.00 | 0.00 |
| ATOM | 5838 | C    | ALA | X | 388 | 56.108 | 17.320 | 52.298 | 0.00 | 0.00 |
| ATOM | 5839 | O    | ALA | X | 388 | 55.406 | 18.306 | 52.107 | 0.00 | 0.00 |
| ATOM | 5840 | N    | ARG | X | 389 | 56.104 | 16.795 | 53.597 | 0.00 | 0.00 |
| ATOM | 5841 | H    | ARG | X | 389 | 56.748 | 16.082 | 53.909 | 0.00 | 0.00 |
| ATOM | 5842 | CA   | ARG | X | 389 | 55.267 | 17.447 | 54.628 | 0.00 | 0.00 |
| ATOM | 5843 | HA   | ARG | X | 389 | 54.220 | 17.393 | 54.330 | 0.00 | 0.00 |
| ATOM | 5844 | CB   | ARG | X | 389 | 55.341 | 16.658 | 55.952 | 0.00 | 0.00 |
| ATOM | 5845 | HB2  | ARG | X | 389 | 56.372 | 16.713 | 56.299 | 0.00 | 0.00 |
| ATOM | 5846 | HB3  | ARG | X | 389 | 54.684 | 17.208 | 56.626 | 0.00 | 0.00 |
| ATOM | 5847 | CG   | ARG | X | 389 | 54.732 | 15.281 | 55.832 | 0.00 | 0.00 |
| ATOM | 5848 | HG2  | ARG | X | 389 | 53.696 | 15.313 | 55.493 | 0.00 | 0.00 |
| ATOM | 5849 | HG3  | ARG | X | 389 | 55.246 | 14.663 | 55.096 | 0.00 | 0.00 |
| ATOM | 5850 | CD   | ARG | X | 389 | 54.738 | 14.554 | 57.219 | 0.00 | 0.00 |
| ATOM | 5851 | HD2  | ARG | X | 389 | 55.717 | 14.778 | 57.644 | 0.00 | 0.00 |
| ATOM | 5852 | HD3  | ARG | X | 389 | 53.872 | 14.906 | 57.780 | 0.00 | 0.00 |
| ATOM | 5853 | NE   | ARG | X | 389 | 54.677 | 13.098 | 56.958 | 0.00 | 0.00 |
| ATOM | 5854 | HE   | ARG | X | 389 | 55.398 | 12.710 | 56.366 | 0.00 | 0.00 |
| ATOM | 5855 | CZ   | ARG | X | 389 | 53.855 | 12.185 | 57.457 | 0.00 | 0.00 |
| ATOM | 5856 | NH1  | ARG | X | 389 | 52.954 | 12.434 | 58.388 | 0.00 | 0.00 |
| ATOM | 5857 | HH11 | ARG | X | 389 | 52.994 | 13.225 | 59.015 | 0.00 | 0.00 |
| ATOM | 5858 | HH12 | ARG | X | 389 | 52.391 | 11.637 | 58.651 | 0.00 | 0.00 |
| ATOM | 5859 | NH2  | ARG | X | 389 | 53.944 | 10.938 | 56.994 | 0.00 | 0.00 |
| ATOM | 5860 | HH21 | ARG | X | 389 | 54.703 | 10.620 | 56.408 | 0.00 | 0.00 |
| ATOM | 5861 | HH22 | ARG | X | 389 | 53.366 | 10.334 | 57.561 | 0.00 | 0.00 |
| ATOM | 5862 | C    | ARG | X | 389 | 55.681 | 18.863 | 54.762 | 0.00 | 0.00 |
| ATOM | 5863 | O    | ARG | X | 389 | 54.853 | 19.734 | 54.924 | 0.00 | 0.00 |
| ATOM | 5864 | N    | LEU | X | 390 | 57.000 | 19.187 | 54.766 | 0.00 | 0.00 |
| ATOM | 5865 | H    | LEU | X | 390 | 57.659 | 18.432 | 54.642 | 0.00 | 0.00 |
| ATOM | 5866 | CA   | LEU | X | 390 | 57.620 | 20.512 | 54.866 | 0.00 | 0.00 |
| ATOM | 5867 | HA   | LEU | X | 390 | 57.182 | 21.046 | 55.709 | 0.00 | 0.00 |
| ATOM | 5868 | CB   | LEU | X | 390 | 59.186 | 20.326 | 54.824 | 0.00 | 0.00 |
| ATOM | 5869 | HB2  | LEU | X | 390 | 59.454 | 19.676 | 53.991 | 0.00 | 0.00 |
| ATOM | 5870 | HB3  | LEU | X | 390 | 59.565 | 21.331 | 54.641 | 0.00 | 0.00 |
| ATOM | 5871 | CG   | LEU | X | 390 | 59.809 | 19.822 | 56.178 | 0.00 | 0.00 |
| ATOM | 5872 | HG   | LEU | X | 390 | 59.219 | 18.926 | 56.372 | 0.00 | 0.00 |
| ATOM | 5873 | CD1  | LEU | X | 390 | 61.282 | 19.378 | 56.020 | 0.00 | 0.00 |
| ATOM | 5874 | HD11 | LEU | X | 390 | 61.641 | 19.065 | 57.000 | 0.00 | 0.00 |
| ATOM | 5875 | HD12 | LEU | X | 390 | 61.847 | 20.237 | 55.657 | 0.00 | 0.00 |
| ATOM | 5876 | HD13 | LEU | X | 390 | 61.299 | 18.621 | 55.235 | 0.00 | 0.00 |
| ATOM | 5877 | CD2  | LEU | X | 390 | 59.720 | 20.796 | 57.313 | 0.00 | 0.00 |
| ATOM | 5878 | HD21 | LEU | X | 390 | 58.681 | 20.997 | 57.575 | 0.00 | 0.00 |
| ATOM | 5879 | HD22 | LEU | X | 390 | 60.241 | 20.311 | 58.138 | 0.00 | 0.00 |
| ATOM | 5880 | HD23 | LEU | X | 390 | 60.315 | 21.685 | 57.105 | 0.00 | 0.00 |
| ATOM | 5881 | C    | LEU | X | 390 | 57.241 | 21.391 | 53.644 | 0.00 | 0.00 |
| ATOM | 5882 | O    | LEU | X | 390 | 56.882 | 22.530 | 53.816 | 0.00 | 0.00 |
| ATOM | 5883 | N    | ARG | X | 391 | 57.202 | 20.831 | 52.396 | 0.00 | 0.00 |
| ATOM | 5884 | H    | ARG | X | 391 | 57.513 | 19.870 | 52.372 | 0.00 | 0.00 |
| ATOM | 5885 | CA   | ARG | X | 391 | 56.637 | 21.508 | 51.205 | 0.00 | 0.00 |
| ATOM | 5886 | HA   | ARG | X | 391 | 57.180 | 22.439 | 51.038 | 0.00 | 0.00 |
| ATOM | 5887 | CB   | ARG | X | 391 | 56.772 | 20.654 | 49.984 | 0.00 | 0.00 |
| ATOM | 5888 | HB2  | ARG | X | 391 | 57.722 | 20.122 | 50.038 | 0.00 | 0.00 |
| ATOM | 5889 | HB3  | ARG | X | 391 | 55.989 | 19.902 | 50.085 | 0.00 | 0.00 |
| ATOM | 5890 | CG   | ARG | X | 391 | 56.584 | 21.488 | 48.721 | 0.00 | 0.00 |
| ATOM | 5891 | HG2  | ARG | X | 391 | 55.901 | 22.307 | 48.943 | 0.00 | 0.00 |
| ATOM | 5892 | HG3  | ARG | X | 391 | 57.548 | 21.847 | 48.361 | 0.00 | 0.00 |
| ATOM | 5893 | CD   | ARG | X | 391 | 55.859 | 20.618 | 47.617 | 0.00 | 0.00 |

|      |      |      |     |   |     |        |        |        |      |      |
|------|------|------|-----|---|-----|--------|--------|--------|------|------|
| ATOM | 5894 | HD2  | ARG | X | 391 | 54.883 | 20.391 | 48.048 | 0.00 | 0.00 |
| ATOM | 5895 | HD3  | ARG | X | 391 | 55.640 | 21.237 | 46.747 | 0.00 | 0.00 |
| ATOM | 5896 | NE   | ARG | X | 391 | 56.662 | 19.496 | 47.181 | 0.00 | 0.00 |
| ATOM | 5897 | HE   | ARG | X | 391 | 57.536 | 19.778 | 46.761 | 0.00 | 0.00 |
| ATOM | 5898 | CZ   | ARG | X | 391 | 56.296 | 18.231 | 47.336 | 0.00 | 0.00 |
| ATOM | 5899 | NH1  | ARG | X | 391 | 55.274 | 17.811 | 48.062 | 0.00 | 0.00 |
| ATOM | 5900 | HH11 | ARG | X | 391 | 54.715 | 18.492 | 48.557 | 0.00 | 0.00 |
| ATOM | 5901 | HH12 | ARG | X | 391 | 54.966 | 16.849 | 48.077 | 0.00 | 0.00 |
| ATOM | 5902 | NH2  | ARG | X | 391 | 57.012 | 17.344 | 46.656 | 0.00 | 0.00 |
| ATOM | 5903 | HH21 | ARG | X | 391 | 57.668 | 17.755 | 46.007 | 0.00 | 0.00 |
| ATOM | 5904 | HH22 | ARG | X | 391 | 56.809 | 16.360 | 46.759 | 0.00 | 0.00 |
| ATOM | 5905 | C    | ARG | X | 391 | 55.226 | 21.878 | 51.431 | 0.00 | 0.00 |
| ATOM | 5906 | O    | ARG | X | 391 | 54.889 | 23.055 | 51.249 | 0.00 | 0.00 |
| ATOM | 5907 | N    | GLU | X | 392 | 54.318 | 20.987 | 51.873 | 0.00 | 0.00 |
| ATOM | 5908 | H    | GLU | X | 392 | 54.578 | 20.016 | 51.770 | 0.00 | 0.00 |
| ATOM | 5909 | CA   | GLU | X | 392 | 52.888 | 21.210 | 51.993 | 0.00 | 0.00 |
| ATOM | 5910 | HA   | GLU | X | 392 | 52.474 | 21.586 | 51.058 | 0.00 | 0.00 |
| ATOM | 5911 | CB   | GLU | X | 392 | 52.154 | 19.878 | 52.366 | 0.00 | 0.00 |
| ATOM | 5912 | HB2  | GLU | X | 392 | 52.703 | 19.168 | 52.984 | 0.00 | 0.00 |
| ATOM | 5913 | HB3  | GLU | X | 392 | 51.324 | 20.086 | 53.042 | 0.00 | 0.00 |
| ATOM | 5914 | CG   | GLU | X | 392 | 51.659 | 19.148 | 51.194 | 0.00 | 0.00 |
| ATOM | 5915 | HG2  | GLU | X | 392 | 51.083 | 18.276 | 51.504 | 0.00 | 0.00 |
| ATOM | 5916 | HG3  | GLU | X | 392 | 50.981 | 19.797 | 50.639 | 0.00 | 0.00 |
| ATOM | 5917 | CD   | GLU | X | 392 | 52.818 | 18.494 | 50.389 | 0.00 | 0.00 |
| ATOM | 5918 | OE1  | GLU | X | 392 | 53.598 | 19.298 | 49.721 | 0.00 | 0.00 |
| ATOM | 5919 | OE2  | GLU | X | 392 | 52.933 | 17.245 | 50.360 | 0.00 | 0.00 |
| ATOM | 5920 | C    | GLU | X | 392 | 52.647 | 22.257 | 53.138 | 0.00 | 0.00 |
| ATOM | 5921 | O    | GLU | X | 392 | 51.891 | 23.166 | 52.906 | 0.00 | 0.00 |
| ATOM | 5922 | N    | ALA | X | 393 | 53.410 | 22.075 | 54.292 | 0.00 | 0.00 |
| ATOM | 5923 | H    | ALA | X | 393 | 53.947 | 21.235 | 54.452 | 0.00 | 0.00 |
| ATOM | 5924 | CA   | ALA | X | 393 | 53.330 | 23.003 | 55.398 | 0.00 | 0.00 |
| ATOM | 5925 | HA   | ALA | X | 393 | 52.321 | 23.016 | 55.809 | 0.00 | 0.00 |
| ATOM | 5926 | CB   | ALA | X | 393 | 54.226 | 22.510 | 56.488 | 0.00 | 0.00 |
| ATOM | 5927 | HB1  | ALA | X | 393 | 54.324 | 23.234 | 57.297 | 0.00 | 0.00 |
| ATOM | 5928 | HB2  | ALA | X | 393 | 55.249 | 22.567 | 56.116 | 0.00 | 0.00 |
| ATOM | 5929 | HB3  | ALA | X | 393 | 53.964 | 21.514 | 56.846 | 0.00 | 0.00 |
| ATOM | 5930 | C    | ALA | X | 393 | 53.567 | 24.494 | 54.963 | 0.00 | 0.00 |
| ATOM | 5931 | O    | ALA | X | 393 | 52.905 | 25.396 | 55.417 | 0.00 | 0.00 |
| ATOM | 5932 | N    | LEU | X | 394 | 54.539 | 24.754 | 54.121 | 0.00 | 0.00 |
| ATOM | 5933 | H    | LEU | X | 394 | 55.110 | 24.000 | 53.768 | 0.00 | 0.00 |
| ATOM | 5934 | CA   | LEU | X | 394 | 54.792 | 26.147 | 53.645 | 0.00 | 0.00 |
| ATOM | 5935 | HA   | LEU | X | 394 | 54.836 | 26.666 | 54.602 | 0.00 | 0.00 |
| ATOM | 5936 | CB   | LEU | X | 394 | 56.166 | 26.284 | 52.890 | 0.00 | 0.00 |
| ATOM | 5937 | HB2  | LEU | X | 394 | 56.908 | 25.764 | 53.496 | 0.00 | 0.00 |
| ATOM | 5938 | HB3  | LEU | X | 394 | 56.166 | 25.751 | 51.939 | 0.00 | 0.00 |
| ATOM | 5939 | CG   | LEU | X | 394 | 56.737 | 27.644 | 52.708 | 0.00 | 0.00 |
| ATOM | 5940 | HG   | LEU | X | 394 | 56.058 | 28.216 | 52.075 | 0.00 | 0.00 |
| ATOM | 5941 | CD1  | LEU | X | 394 | 56.838 | 28.417 | 54.008 | 0.00 | 0.00 |
| ATOM | 5942 | HD11 | LEU | X | 394 | 57.143 | 29.453 | 53.857 | 0.00 | 0.00 |
| ATOM | 5943 | HD12 | LEU | X | 394 | 57.482 | 27.921 | 54.734 | 0.00 | 0.00 |
| ATOM | 5944 | HD13 | LEU | X | 394 | 55.840 | 28.577 | 54.415 | 0.00 | 0.00 |
| ATOM | 5945 | CD2  | LEU | X | 394 | 58.089 | 27.564 | 52.018 | 0.00 | 0.00 |
| ATOM | 5946 | HD21 | LEU | X | 394 | 58.418 | 28.552 | 51.696 | 0.00 | 0.00 |
| ATOM | 5947 | HD22 | LEU | X | 394 | 58.894 | 27.124 | 52.606 | 0.00 | 0.00 |
| ATOM | 5948 | HD23 | LEU | X | 394 | 57.907 | 27.087 | 51.055 | 0.00 | 0.00 |
| ATOM | 5949 | C    | LEU | X | 394 | 53.699 | 26.655 | 52.690 | 0.00 | 0.00 |
| ATOM | 5950 | O    | LEU | X | 394 | 53.339 | 27.844 | 52.786 | 0.00 | 0.00 |
| ATOM | 5951 | N    | SER | X | 395 | 53.201 | 25.748 | 51.786 | 0.00 | 0.00 |
| ATOM | 5952 | H    | SER | X | 395 | 53.623 | 24.831 | 51.825 | 0.00 | 0.00 |
| ATOM | 5953 | CA   | SER | X | 395 | 52.033 | 26.101 | 50.952 | 0.00 | 0.00 |
| ATOM | 5954 | HA   | SER | X | 395 | 52.186 | 26.957 | 50.295 | 0.00 | 0.00 |
| ATOM | 5955 | CB   | SER | X | 395 | 51.812 | 24.943 | 50.039 | 0.00 | 0.00 |
| ATOM | 5956 | HB2  | SER | X | 395 | 52.742 | 24.687 | 49.531 | 0.00 | 0.00 |
| ATOM | 5957 | HB3  | SER | X | 395 | 51.467 | 24.094 | 50.629 | 0.00 | 0.00 |
| ATOM | 5958 | OG   | SER | X | 395 | 50.862 | 25.341 | 49.050 | 0.00 | 0.00 |
| ATOM | 5959 | HG   | SER | X | 395 | 50.006 | 25.541 | 49.436 | 0.00 | 0.00 |
| ATOM | 5960 | C    | SER | X | 395 | 50.761 | 26.468 | 51.786 | 0.00 | 0.00 |

|      |      |      |     |   |     |        |        |        |      |      |
|------|------|------|-----|---|-----|--------|--------|--------|------|------|
| ATOM | 5961 | O    | SER | X | 395 | 50.087 | 27.412 | 51.415 | 0.00 | 0.00 |
| ATOM | 5962 | N    | ASP | X | 396 | 50.488 | 25.694 | 52.875 | 0.00 | 0.00 |
| ATOM | 5963 | H    | ASP | X | 396 | 50.877 | 24.764 | 52.932 | 0.00 | 0.00 |
| ATOM | 5964 | CA   | ASP | X | 396 | 49.473 | 25.962 | 53.873 | 0.00 | 0.00 |
| ATOM | 5965 | HA   | ASP | X | 396 | 48.484 | 26.057 | 53.423 | 0.00 | 0.00 |
| ATOM | 5966 | CB   | ASP | X | 396 | 49.488 | 24.786 | 54.842 | 0.00 | 0.00 |
| ATOM | 5967 | HB2  | ASP | X | 396 | 50.523 | 24.485 | 55.001 | 0.00 | 0.00 |
| ATOM | 5968 | HB3  | ASP | X | 396 | 49.126 | 25.184 | 55.790 | 0.00 | 0.00 |
| ATOM | 5969 | CG   | ASP | X | 396 | 48.583 | 23.531 | 54.542 | 0.00 | 0.00 |
| ATOM | 5970 | OD1  | ASP | X | 396 | 48.300 | 23.199 | 53.363 | 0.00 | 0.00 |
| ATOM | 5971 | OD2  | ASP | X | 396 | 48.047 | 23.005 | 55.546 | 0.00 | 0.00 |
| ATOM | 5972 | C    | ASP | X | 396 | 49.694 | 27.302 | 54.568 | 0.00 | 0.00 |
| ATOM | 5973 | O    | ASP | X | 396 | 48.841 | 28.161 | 54.626 | 0.00 | 0.00 |
| ATOM | 5974 | N    | VAL | X | 397 | 50.903 | 27.491 | 55.115 | 0.00 | 0.00 |
| ATOM | 5975 | H    | VAL | X | 397 | 51.505 | 26.680 | 55.075 | 0.00 | 0.00 |
| ATOM | 5976 | CA   | VAL | X | 397 | 51.351 | 28.769 | 55.716 | 0.00 | 0.00 |
| ATOM | 5977 | HA   | VAL | X | 397 | 50.798 | 28.757 | 56.655 | 0.00 | 0.00 |
| ATOM | 5978 | CB   | VAL | X | 397 | 52.840 | 28.790 | 56.162 | 0.00 | 0.00 |
| ATOM | 5979 | HB   | VAL | X | 397 | 53.386 | 28.327 | 55.340 | 0.00 | 0.00 |
| ATOM | 5980 | CG1  | VAL | X | 397 | 53.453 | 30.199 | 56.342 | 0.00 | 0.00 |
| ATOM | 5981 | HG11 | VAL | X | 397 | 52.892 | 30.905 | 56.955 | 0.00 | 0.00 |
| ATOM | 5982 | HG12 | VAL | X | 397 | 54.476 | 30.157 | 56.715 | 0.00 | 0.00 |
| ATOM | 5983 | HG13 | VAL | X | 397 | 53.512 | 30.605 | 55.332 | 0.00 | 0.00 |
| ATOM | 5984 | CG2  | VAL | X | 397 | 52.984 | 28.066 | 57.520 | 0.00 | 0.00 |
| ATOM | 5985 | HG21 | VAL | X | 397 | 54.057 | 27.963 | 57.680 | 0.00 | 0.00 |
| ATOM | 5986 | HG22 | VAL | X | 397 | 52.588 | 27.065 | 57.351 | 0.00 | 0.00 |
| ATOM | 5987 | HG23 | VAL | X | 397 | 52.508 | 28.654 | 58.305 | 0.00 | 0.00 |
| ATOM | 5988 | C    | VAL | X | 397 | 51.027 | 29.942 | 54.804 | 0.00 | 0.00 |
| ATOM | 5989 | O    | VAL | X | 397 | 50.427 | 30.902 | 55.281 | 0.00 | 0.00 |
| ATOM | 5990 | N    | VAL | X | 398 | 51.582 | 29.951 | 53.582 | 0.00 | 0.00 |
| ATOM | 5991 | H    | VAL | X | 398 | 52.020 | 29.090 | 53.286 | 0.00 | 0.00 |
| ATOM | 5992 | CA   | VAL | X | 398 | 51.445 | 31.079 | 52.652 | 0.00 | 0.00 |
| ATOM | 5993 | HA   | VAL | X | 398 | 51.771 | 31.981 | 53.169 | 0.00 | 0.00 |
| ATOM | 5994 | CB   | VAL | X | 398 | 52.321 | 30.855 | 51.373 | 0.00 | 0.00 |
| ATOM | 5995 | HB   | VAL | X | 398 | 52.165 | 29.901 | 50.870 | 0.00 | 0.00 |
| ATOM | 5996 | CG1  | VAL | X | 398 | 52.089 | 31.848 | 50.254 | 0.00 | 0.00 |
| ATOM | 5997 | HG11 | VAL | X | 398 | 51.063 | 31.896 | 49.890 | 0.00 | 0.00 |
| ATOM | 5998 | HG12 | VAL | X | 398 | 52.119 | 32.872 | 50.625 | 0.00 | 0.00 |
| ATOM | 5999 | HG13 | VAL | X | 398 | 52.848 | 31.776 | 49.474 | 0.00 | 0.00 |
| ATOM | 6000 | CG2  | VAL | X | 398 | 53.761 | 31.074 | 51.879 | 0.00 | 0.00 |
| ATOM | 6001 | HG21 | VAL | X | 398 | 53.874 | 32.053 | 52.346 | 0.00 | 0.00 |
| ATOM | 6002 | HG22 | VAL | X | 398 | 54.421 | 30.958 | 51.019 | 0.00 | 0.00 |
| ATOM | 6003 | HG23 | VAL | X | 398 | 54.111 | 30.296 | 52.558 | 0.00 | 0.00 |
| ATOM | 6004 | C    | VAL | X | 398 | 49.928 | 31.283 | 52.243 | 0.00 | 0.00 |
| ATOM | 6005 | O    | VAL | X | 398 | 49.556 | 32.398 | 52.076 | 0.00 | 0.00 |
| ATOM | 6006 | N    | GLY | X | 399 | 49.095 | 30.213 | 52.023 | 0.00 | 0.00 |
| ATOM | 6007 | H    | GLY | X | 399 | 49.342 | 29.244 | 52.168 | 0.00 | 0.00 |
| ATOM | 6008 | CA   | GLY | X | 399 | 47.693 | 30.378 | 51.796 | 0.00 | 0.00 |
| ATOM | 6009 | HA2  | GLY | X | 399 | 47.503 | 31.073 | 50.978 | 0.00 | 0.00 |
| ATOM | 6010 | HA3  | GLY | X | 399 | 47.376 | 29.353 | 51.605 | 0.00 | 0.00 |
| ATOM | 6011 | C    | GLY | X | 399 | 46.913 | 30.957 | 52.977 | 0.00 | 0.00 |
| ATOM | 6012 | O    | GLY | X | 399 | 46.000 | 31.772 | 52.741 | 0.00 | 0.00 |
| ATOM | 6013 | N    | ASP | X | 400 | 47.197 | 30.525 | 54.196 | 0.00 | 0.00 |
| ATOM | 6014 | H    | ASP | X | 400 | 47.813 | 29.729 | 54.275 | 0.00 | 0.00 |
| ATOM | 6015 | CA   | ASP | X | 400 | 46.480 | 30.932 | 55.389 | 0.00 | 0.00 |
| ATOM | 6016 | HA   | ASP | X | 400 | 45.429 | 30.679 | 55.249 | 0.00 | 0.00 |
| ATOM | 6017 | CB   | ASP | X | 400 | 46.949 | 30.111 | 56.563 | 0.00 | 0.00 |
| ATOM | 6018 | HB2  | ASP | X | 400 | 48.039 | 30.093 | 56.580 | 0.00 | 0.00 |
| ATOM | 6019 | HB3  | ASP | X | 400 | 46.581 | 30.687 | 57.412 | 0.00 | 0.00 |
| ATOM | 6020 | CG   | ASP | X | 400 | 46.313 | 28.709 | 56.630 | 0.00 | 0.00 |
| ATOM | 6021 | OD1  | ASP | X | 400 | 45.250 | 28.467 | 56.023 | 0.00 | 0.00 |
| ATOM | 6022 | OD2  | ASP | X | 400 | 46.911 | 27.846 | 57.361 | 0.00 | 0.00 |
| ATOM | 6023 | C    | ASP | X | 400 | 46.638 | 32.445 | 55.666 | 0.00 | 0.00 |
| ATOM | 6024 | O    | ASP | X | 400 | 45.680 | 33.149 | 55.622 | 0.00 | 0.00 |
| ATOM | 6025 | N    | HIE | X | 401 | 47.889 | 32.840 | 55.823 | 0.00 | 0.00 |
| ATOM | 6026 | H    | HIE | X | 401 | 48.604 | 32.140 | 55.687 | 0.00 | 0.00 |
| ATOM | 6027 | CA   | HIE | X | 401 | 48.287 | 34.237 | 56.095 | 0.00 | 0.00 |

|      |      |      |     |   |     |        |        |        |      |      |
|------|------|------|-----|---|-----|--------|--------|--------|------|------|
| ATOM | 6028 | HA   | HIE | X | 401 | 47.884 | 34.498 | 57.073 | 0.00 | 0.00 |
| ATOM | 6029 | CB   | HIE | X | 401 | 49.807 | 34.157 | 56.193 | 0.00 | 0.00 |
| ATOM | 6030 | HB2  | HIE | X | 401 | 50.057 | 33.331 | 56.860 | 0.00 | 0.00 |
| ATOM | 6031 | HB3  | HIE | X | 401 | 50.273 | 33.762 | 55.290 | 0.00 | 0.00 |
| ATOM | 6032 | CG   | HIE | X | 401 | 50.555 | 35.414 | 56.618 | 0.00 | 0.00 |
| ATOM | 6033 | ND1  | HIE | X | 401 | 49.998 | 36.503 | 57.258 | 0.00 | 0.00 |
| ATOM | 6034 | CE1  | HIE | X | 401 | 50.981 | 37.307 | 57.509 | 0.00 | 0.00 |
| ATOM | 6035 | HE1  | HIE | X | 401 | 50.833 | 38.217 | 58.072 | 0.00 | 0.00 |
| ATOM | 6036 | NE2  | HIE | X | 401 | 52.147 | 36.821 | 57.083 | 0.00 | 0.00 |
| ATOM | 6037 | HE2  | HIE | X | 401 | 53.062 | 37.137 | 57.369 | 0.00 | 0.00 |
| ATOM | 6038 | CD2  | HIE | X | 401 | 51.910 | 35.613 | 56.424 | 0.00 | 0.00 |
| ATOM | 6039 | HD2  | HIE | X | 401 | 52.607 | 34.881 | 56.042 | 0.00 | 0.00 |
| ATOM | 6040 | C    | HIE | X | 401 | 47.765 | 35.169 | 55.047 | 0.00 | 0.00 |
| ATOM | 6041 | O    | HIE | X | 401 | 47.235 | 36.230 | 55.428 | 0.00 | 0.00 |
| ATOM | 6042 | N    | ASN | X | 402 | 48.011 | 34.803 | 53.772 | 0.00 | 0.00 |
| ATOM | 6043 | H    | ASN | X | 402 | 48.500 | 33.969 | 53.477 | 0.00 | 0.00 |
| ATOM | 6044 | CA   | ASN | X | 402 | 47.605 | 35.665 | 52.755 | 0.00 | 0.00 |
| ATOM | 6045 | HA   | ASN | X | 402 | 47.748 | 36.669 | 53.155 | 0.00 | 0.00 |
| ATOM | 6046 | CB   | ASN | X | 402 | 48.545 | 35.676 | 51.579 | 0.00 | 0.00 |
| ATOM | 6047 | HB2  | ASN | X | 402 | 48.514 | 34.747 | 51.009 | 0.00 | 0.00 |
| ATOM | 6048 | HB3  | ASN | X | 402 | 48.215 | 36.428 | 50.861 | 0.00 | 0.00 |
| ATOM | 6049 | CG   | ASN | X | 402 | 50.058 | 35.963 | 51.886 | 0.00 | 0.00 |
| ATOM | 6050 | OD1  | ASN | X | 402 | 50.435 | 37.099 | 52.081 | 0.00 | 0.00 |
| ATOM | 6051 | ND2  | ASN | X | 402 | 50.914 | 34.936 | 52.056 | 0.00 | 0.00 |
| ATOM | 6052 | HD21 | ASN | X | 402 | 51.888 | 35.024 | 52.307 | 0.00 | 0.00 |
| ATOM | 6053 | HD22 | ASN | X | 402 | 50.555 | 33.996 | 51.969 | 0.00 | 0.00 |
| ATOM | 6054 | C    | ASN | X | 402 | 46.124 | 35.654 | 52.279 | 0.00 | 0.00 |
| ATOM | 6055 | O    | ASN | X | 402 | 45.616 | 36.754 | 51.939 | 0.00 | 0.00 |
| ATOM | 6056 | N    | VAL | X | 403 | 45.478 | 34.510 | 52.324 | 0.00 | 0.00 |
| ATOM | 6057 | H    | VAL | X | 403 | 45.975 | 33.686 | 52.631 | 0.00 | 0.00 |
| ATOM | 6058 | CA   | VAL | X | 403 | 44.080 | 34.415 | 51.806 | 0.00 | 0.00 |
| ATOM | 6059 | HA   | VAL | X | 403 | 43.676 | 35.412 | 51.629 | 0.00 | 0.00 |
| ATOM | 6060 | CB   | VAL | X | 403 | 44.182 | 33.672 | 50.409 | 0.00 | 0.00 |
| ATOM | 6061 | HB   | VAL | X | 403 | 44.592 | 32.665 | 50.481 | 0.00 | 0.00 |
| ATOM | 6062 | CG1  | VAL | X | 403 | 42.779 | 33.493 | 49.930 | 0.00 | 0.00 |
| ATOM | 6063 | HG11 | VAL | X | 403 | 42.799 | 33.026 | 48.946 | 0.00 | 0.00 |
| ATOM | 6064 | HG12 | VAL | X | 403 | 42.203 | 32.836 | 50.583 | 0.00 | 0.00 |
| ATOM | 6065 | HG13 | VAL | X | 403 | 42.226 | 34.431 | 49.871 | 0.00 | 0.00 |
| ATOM | 6066 | CG2  | VAL | X | 403 | 45.064 | 34.440 | 49.363 | 0.00 | 0.00 |
| ATOM | 6067 | HG21 | VAL | X | 403 | 46.120 | 34.389 | 49.630 | 0.00 | 0.00 |
| ATOM | 6068 | HG22 | VAL | X | 403 | 44.648 | 35.442 | 49.259 | 0.00 | 0.00 |
| ATOM | 6069 | HG23 | VAL | X | 403 | 45.126 | 33.909 | 48.413 | 0.00 | 0.00 |
| ATOM | 6070 | C    | VAL | X | 403 | 43.180 | 33.739 | 52.767 | 0.00 | 0.00 |
| ATOM | 6071 | O    | VAL | X | 403 | 42.210 | 34.370 | 53.152 | 0.00 | 0.00 |
| ATOM | 6072 | N    | VAL | X | 404 | 43.413 | 32.461 | 53.161 | 0.00 | 0.00 |
| ATOM | 6073 | H    | VAL | X | 404 | 44.218 | 31.969 | 52.800 | 0.00 | 0.00 |
| ATOM | 6074 | CA   | VAL | X | 404 | 42.302 | 31.634 | 53.721 | 0.00 | 0.00 |
| ATOM | 6075 | HA   | VAL | X | 404 | 41.447 | 31.726 | 53.050 | 0.00 | 0.00 |
| ATOM | 6076 | CB   | VAL | X | 404 | 42.660 | 30.195 | 53.879 | 0.00 | 0.00 |
| ATOM | 6077 | HB   | VAL | X | 404 | 43.321 | 30.084 | 54.739 | 0.00 | 0.00 |
| ATOM | 6078 | CG1  | VAL | X | 404 | 41.420 | 29.426 | 54.217 | 0.00 | 0.00 |
| ATOM | 6079 | HG11 | VAL | X | 404 | 41.000 | 29.709 | 55.182 | 0.00 | 0.00 |
| ATOM | 6080 | HG12 | VAL | X | 404 | 40.679 | 29.536 | 53.425 | 0.00 | 0.00 |
| ATOM | 6081 | HG13 | VAL | X | 404 | 41.689 | 28.379 | 54.357 | 0.00 | 0.00 |
| ATOM | 6082 | CG2  | VAL | X | 404 | 43.221 | 29.575 | 52.566 | 0.00 | 0.00 |
| ATOM | 6083 | HG21 | VAL | X | 404 | 42.552 | 29.585 | 51.706 | 0.00 | 0.00 |
| ATOM | 6084 | HG22 | VAL | X | 404 | 43.456 | 28.533 | 52.786 | 0.00 | 0.00 |
| ATOM | 6085 | HG23 | VAL | X | 404 | 44.070 | 30.142 | 52.185 | 0.00 | 0.00 |
| ATOM | 6086 | C    | VAL | X | 404 | 41.765 | 32.141 | 55.103 | 0.00 | 0.00 |
| ATOM | 6087 | O    | VAL | X | 404 | 40.571 | 32.446 | 55.261 | 0.00 | 0.00 |
| ATOM | 6088 | N    | CYX | X | 405 | 42.705 | 32.568 | 55.973 | 0.00 | 0.00 |
| ATOM | 6089 | H    | CYX | X | 405 | 43.696 | 32.498 | 55.792 | 0.00 | 0.00 |
| ATOM | 6090 | CA   | CYX | X | 405 | 42.332 | 33.137 | 57.269 | 0.00 | 0.00 |
| ATOM | 6091 | HA   | CYX | X | 405 | 41.505 | 32.536 | 57.648 | 0.00 | 0.00 |
| ATOM | 6092 | CB   | CYX | X | 405 | 43.455 | 32.903 | 58.306 | 0.00 | 0.00 |
| ATOM | 6093 | HB2  | CYX | X | 405 | 44.343 | 33.331 | 57.840 | 0.00 | 0.00 |
| ATOM | 6094 | HB3  | CYX | X | 405 | 43.258 | 33.436 | 59.236 | 0.00 | 0.00 |

|      |      |      |     |   |     |        |        |        |      |      |
|------|------|------|-----|---|-----|--------|--------|--------|------|------|
| ATOM | 6095 | SG   | CYX | X | 405 | 43.758 | 31.140 | 58.576 | 0.00 | 0.00 |
| ATOM | 6096 | C    | CYX | X | 405 | 41.700 | 34.550 | 57.262 | 0.00 | 0.00 |
| ATOM | 6097 | O    | CYX | X | 405 | 40.692 | 34.748 | 57.959 | 0.00 | 0.00 |
| ATOM | 6098 | N    | PRO | X | 406 | 42.228 | 35.441 | 56.391 | 0.00 | 0.00 |
| ATOM | 6099 | CD   | PRO | X | 406 | 43.577 | 35.569 | 55.853 | 0.00 | 0.00 |
| ATOM | 6100 | HD2  | PRO | X | 406 | 43.631 | 34.913 | 54.984 | 0.00 | 0.00 |
| ATOM | 6101 | HD3  | PRO | X | 406 | 44.303 | 35.370 | 56.641 | 0.00 | 0.00 |
| ATOM | 6102 | CG   | PRO | X | 406 | 43.794 | 37.008 | 55.396 | 0.00 | 0.00 |
| ATOM | 6103 | HG2  | PRO | X | 406 | 44.487 | 37.162 | 54.569 | 0.00 | 0.00 |
| ATOM | 6104 | HG3  | PRO | X | 406 | 44.049 | 37.524 | 56.321 | 0.00 | 0.00 |
| ATOM | 6105 | CB   | PRO | X | 406 | 42.340 | 37.462 | 55.047 | 0.00 | 0.00 |
| ATOM | 6106 | HB2  | PRO | X | 406 | 42.237 | 37.203 | 53.993 | 0.00 | 0.00 |
| ATOM | 6107 | HB3  | PRO | X | 406 | 42.304 | 38.549 | 55.117 | 0.00 | 0.00 |
| ATOM | 6108 | CA   | PRO | X | 406 | 41.470 | 36.679 | 56.068 | 0.00 | 0.00 |
| ATOM | 6109 | HA   | PRO | X | 406 | 41.437 | 37.312 | 56.955 | 0.00 | 0.00 |
| ATOM | 6110 | C    | PRO | X | 406 | 40.047 | 36.501 | 55.499 | 0.00 | 0.00 |
| ATOM | 6111 | O    | PRO | X | 406 | 39.101 | 37.096 | 56.058 | 0.00 | 0.00 |
| ATOM | 6112 | N    | VAL | X | 407 | 39.840 | 35.668 | 54.422 | 0.00 | 0.00 |
| ATOM | 6113 | H    | VAL | X | 407 | 40.601 | 35.205 | 53.947 | 0.00 | 0.00 |
| ATOM | 6114 | CA   | VAL | X | 407 | 38.543 | 35.299 | 53.864 | 0.00 | 0.00 |
| ATOM | 6115 | HA   | VAL | X | 407 | 38.051 | 36.195 | 53.486 | 0.00 | 0.00 |
| ATOM | 6116 | CB   | VAL | X | 407 | 38.758 | 34.308 | 52.664 | 0.00 | 0.00 |
| ATOM | 6117 | HB   | VAL | X | 407 | 39.380 | 33.454 | 52.931 | 0.00 | 0.00 |
| ATOM | 6118 | CG1  | VAL | X | 407 | 37.398 | 33.642 | 52.267 | 0.00 | 0.00 |
| ATOM | 6119 | HG11 | VAL | X | 407 | 36.689 | 34.431 | 52.014 | 0.00 | 0.00 |
| ATOM | 6120 | HG12 | VAL | X | 407 | 37.497 | 33.003 | 51.389 | 0.00 | 0.00 |
| ATOM | 6121 | HG13 | VAL | X | 407 | 37.005 | 32.961 | 53.021 | 0.00 | 0.00 |
| ATOM | 6122 | CG2  | VAL | X | 407 | 39.322 | 35.103 | 51.451 | 0.00 | 0.00 |
| ATOM | 6123 | HG21 | VAL | X | 407 | 39.637 | 34.335 | 50.745 | 0.00 | 0.00 |
| ATOM | 6124 | HG22 | VAL | X | 407 | 40.278 | 35.539 | 51.739 | 0.00 | 0.00 |
| ATOM | 6125 | HG23 | VAL | X | 407 | 38.601 | 35.826 | 51.067 | 0.00 | 0.00 |
| ATOM | 6126 | C    | VAL | X | 407 | 37.624 | 34.708 | 54.915 | 0.00 | 0.00 |
| ATOM | 6127 | O    | VAL | X | 407 | 36.517 | 35.253 | 54.979 | 0.00 | 0.00 |
| ATOM | 6128 | N    | ALA | X | 408 | 38.045 | 33.816 | 55.764 | 0.00 | 0.00 |
| ATOM | 6129 | H    | ALA | X | 408 | 39.003 | 33.501 | 55.715 | 0.00 | 0.00 |
| ATOM | 6130 | CA   | ALA | X | 408 | 37.277 | 33.265 | 56.904 | 0.00 | 0.00 |
| ATOM | 6131 | HA   | ALA | X | 408 | 36.330 | 32.845 | 56.565 | 0.00 | 0.00 |
| ATOM | 6132 | CB   | ALA | X | 408 | 37.983 | 32.017 | 57.455 | 0.00 | 0.00 |
| ATOM | 6133 | HB1  | ALA | X | 408 | 38.872 | 32.324 | 58.006 | 0.00 | 0.00 |
| ATOM | 6134 | HB2  | ALA | X | 408 | 38.274 | 31.251 | 56.737 | 0.00 | 0.00 |
| ATOM | 6135 | HB3  | ALA | X | 408 | 37.326 | 31.558 | 58.194 | 0.00 | 0.00 |
| ATOM | 6136 | C    | ALA | X | 408 | 36.872 | 34.336 | 57.955 | 0.00 | 0.00 |
| ATOM | 6137 | O    | ALA | X | 408 | 35.723 | 34.292 | 58.405 | 0.00 | 0.00 |
| ATOM | 6138 | N    | GLN | X | 409 | 37.748 | 35.290 | 58.288 | 0.00 | 0.00 |
| ATOM | 6139 | H    | GLN | X | 409 | 38.644 | 35.235 | 57.826 | 0.00 | 0.00 |
| ATOM | 6140 | CA   | GLN | X | 409 | 37.511 | 36.433 | 59.141 | 0.00 | 0.00 |
| ATOM | 6141 | HA   | GLN | X | 409 | 37.251 | 36.012 | 60.112 | 0.00 | 0.00 |
| ATOM | 6142 | CB   | GLN | X | 409 | 38.832 | 37.260 | 59.255 | 0.00 | 0.00 |
| ATOM | 6143 | HB2  | GLN | X | 409 | 39.625 | 36.569 | 59.542 | 0.00 | 0.00 |
| ATOM | 6144 | HB3  | GLN | X | 409 | 39.144 | 37.741 | 58.328 | 0.00 | 0.00 |
| ATOM | 6145 | CG   | GLN | X | 409 | 38.774 | 38.347 | 60.293 | 0.00 | 0.00 |
| ATOM | 6146 | HG2  | GLN | X | 409 | 37.866 | 38.921 | 60.110 | 0.00 | 0.00 |
| ATOM | 6147 | HG3  | GLN | X | 409 | 38.731 | 37.869 | 61.272 | 0.00 | 0.00 |
| ATOM | 6148 | CD   | GLN | X | 409 | 40.046 | 39.211 | 60.430 | 0.00 | 0.00 |
| ATOM | 6149 | OE1  | GLN | X | 409 | 40.425 | 39.822 | 59.433 | 0.00 | 0.00 |
| ATOM | 6150 | NE2  | GLN | X | 409 | 40.777 | 39.259 | 61.559 | 0.00 | 0.00 |
| ATOM | 6151 | HE21 | GLN | X | 409 | 41.626 | 39.806 | 61.535 | 0.00 | 0.00 |
| ATOM | 6152 | HE22 | GLN | X | 409 | 40.574 | 38.796 | 62.434 | 0.00 | 0.00 |
| ATOM | 6153 | C    | GLN | X | 409 | 36.361 | 37.254 | 58.613 | 0.00 | 0.00 |
| ATOM | 6154 | O    | GLN | X | 409 | 35.361 | 37.495 | 59.331 | 0.00 | 0.00 |
| ATOM | 6155 | N    | LEU | X | 410 | 36.467 | 37.634 | 57.329 | 0.00 | 0.00 |
| ATOM | 6156 | H    | LEU | X | 410 | 37.290 | 37.318 | 56.835 | 0.00 | 0.00 |
| ATOM | 6157 | CA   | LEU | X | 410 | 35.534 | 38.534 | 56.570 | 0.00 | 0.00 |
| ATOM | 6158 | HA   | LEU | X | 410 | 35.533 | 39.446 | 57.167 | 0.00 | 0.00 |
| ATOM | 6159 | CB   | LEU | X | 410 | 36.129 | 38.832 | 55.164 | 0.00 | 0.00 |
| ATOM | 6160 | HB2  | LEU | X | 410 | 37.042 | 39.419 | 55.266 | 0.00 | 0.00 |
| ATOM | 6161 | HB3  | LEU | X | 410 | 36.450 | 37.915 | 54.671 | 0.00 | 0.00 |

|      |      |      |     |   |     |        |        |        |      |      |
|------|------|------|-----|---|-----|--------|--------|--------|------|------|
| ATOM | 6162 | CG   | LEU | X | 410 | 35.103 | 39.639 | 54.260 | 0.00 | 0.00 |
| ATOM | 6163 | HG   | LEU | X | 410 | 34.224 | 39.005 | 54.145 | 0.00 | 0.00 |
| ATOM | 6164 | CD1  | LEU | X | 410 | 34.868 | 41.092 | 54.763 | 0.00 | 0.00 |
| ATOM | 6165 | HD11 | LEU | X | 410 | 35.790 | 41.671 | 54.813 | 0.00 | 0.00 |
| ATOM | 6166 | HD12 | LEU | X | 410 | 34.433 | 41.140 | 55.761 | 0.00 | 0.00 |
| ATOM | 6167 | HD13 | LEU | X | 410 | 34.152 | 41.647 | 54.156 | 0.00 | 0.00 |
| ATOM | 6168 | CD2  | LEU | X | 410 | 35.784 | 39.728 | 52.883 | 0.00 | 0.00 |
| ATOM | 6169 | HD21 | LEU | X | 410 | 36.728 | 40.272 | 52.881 | 0.00 | 0.00 |
| ATOM | 6170 | HD22 | LEU | X | 410 | 35.933 | 38.716 | 52.506 | 0.00 | 0.00 |
| ATOM | 6171 | HD23 | LEU | X | 410 | 35.112 | 40.197 | 52.165 | 0.00 | 0.00 |
| ATOM | 6172 | C    | LEU | X | 410 | 34.150 | 37.849 | 56.524 | 0.00 | 0.00 |
| ATOM | 6173 | O    | LEU | X | 410 | 33.199 | 38.449 | 56.990 | 0.00 | 0.00 |
| ATOM | 6174 | N    | ALA | X | 411 | 34.185 | 36.582 | 56.155 | 0.00 | 0.00 |
| ATOM | 6175 | H    | ALA | X | 411 | 35.088 | 36.152 | 56.014 | 0.00 | 0.00 |
| ATOM | 6176 | CA   | ALA | X | 411 | 32.990 | 35.781 | 56.063 | 0.00 | 0.00 |
| ATOM | 6177 | HA   | ALA | X | 411 | 32.322 | 36.260 | 55.349 | 0.00 | 0.00 |
| ATOM | 6178 | CB   | ALA | X | 411 | 33.385 | 34.373 | 55.520 | 0.00 | 0.00 |
| ATOM | 6179 | HB1  | ALA | X | 411 | 33.977 | 34.459 | 54.609 | 0.00 | 0.00 |
| ATOM | 6180 | HB2  | ALA | X | 411 | 32.469 | 33.797 | 55.391 | 0.00 | 0.00 |
| ATOM | 6181 | HB3  | ALA | X | 411 | 34.055 | 33.899 | 56.237 | 0.00 | 0.00 |
| ATOM | 6182 | C    | ALA | X | 411 | 32.231 | 35.723 | 57.361 | 0.00 | 0.00 |
| ATOM | 6183 | O    | ALA | X | 411 | 31.012 | 35.952 | 57.476 | 0.00 | 0.00 |
| ATOM | 6184 | N    | GLY | X | 412 | 32.895 | 35.428 | 58.481 | 0.00 | 0.00 |
| ATOM | 6185 | H    | GLY | X | 412 | 33.875 | 35.237 | 58.332 | 0.00 | 0.00 |
| ATOM | 6186 | CA   | GLY | X | 412 | 32.333 | 35.291 | 59.829 | 0.00 | 0.00 |
| ATOM | 6187 | HA2  | GLY | X | 412 | 31.511 | 34.577 | 59.788 | 0.00 | 0.00 |
| ATOM | 6188 | HA3  | GLY | X | 412 | 33.136 | 35.003 | 60.508 | 0.00 | 0.00 |
| ATOM | 6189 | C    | GLY | X | 412 | 31.765 | 36.600 | 60.380 | 0.00 | 0.00 |
| ATOM | 6190 | O    | GLY | X | 412 | 30.652 | 36.619 | 60.891 | 0.00 | 0.00 |
| ATOM | 6191 | N    | ARG | X | 413 | 32.490 | 37.736 | 60.174 | 0.00 | 0.00 |
| ATOM | 6192 | H    | ARG | X | 413 | 33.353 | 37.680 | 59.652 | 0.00 | 0.00 |
| ATOM | 6193 | CA   | ARG | X | 413 | 32.013 | 39.089 | 60.521 | 0.00 | 0.00 |
| ATOM | 6194 | HA   | ARG | X | 413 | 31.663 | 39.131 | 61.552 | 0.00 | 0.00 |
| ATOM | 6195 | CB   | ARG | X | 413 | 33.205 | 40.005 | 60.302 | 0.00 | 0.00 |
| ATOM | 6196 | HB2  | ARG | X | 413 | 33.807 | 39.622 | 59.478 | 0.00 | 0.00 |
| ATOM | 6197 | HB3  | ARG | X | 413 | 32.817 | 40.983 | 60.016 | 0.00 | 0.00 |
| ATOM | 6198 | CG   | ARG | X | 413 | 34.083 | 40.107 | 61.584 | 0.00 | 0.00 |
| ATOM | 6199 | HG2  | ARG | X | 413 | 34.165 | 39.124 | 62.049 | 0.00 | 0.00 |
| ATOM | 6200 | HG3  | ARG | X | 413 | 35.051 | 40.533 | 61.320 | 0.00 | 0.00 |
| ATOM | 6201 | CD   | ARG | X | 413 | 33.394 | 41.109 | 62.548 | 0.00 | 0.00 |
| ATOM | 6202 | HD2  | ARG | X | 413 | 33.156 | 42.024 | 62.006 | 0.00 | 0.00 |
| ATOM | 6203 | HD3  | ARG | X | 413 | 32.496 | 40.556 | 62.822 | 0.00 | 0.00 |
| ATOM | 6204 | NE   | ARG | X | 413 | 34.240 | 41.476 | 63.682 | 0.00 | 0.00 |
| ATOM | 6205 | HE   | ARG | X | 413 | 35.246 | 41.455 | 63.767 | 0.00 | 0.00 |
| ATOM | 6206 | CZ   | ARG | X | 413 | 33.768 | 42.096 | 64.810 | 0.00 | 0.00 |
| ATOM | 6207 | NH1  | ARG | X | 413 | 32.492 | 42.302 | 64.965 | 0.00 | 0.00 |
| ATOM | 6208 | HH11 | ARG | X | 413 | 31.799 | 42.101 | 64.258 | 0.00 | 0.00 |
| ATOM | 6209 | HH12 | ARG | X | 413 | 32.195 | 42.795 | 65.795 | 0.00 | 0.00 |
| ATOM | 6210 | NH2  | ARG | X | 413 | 34.570 | 42.515 | 65.724 | 0.00 | 0.00 |
| ATOM | 6211 | HH21 | ARG | X | 413 | 35.539 | 42.231 | 65.745 | 0.00 | 0.00 |
| ATOM | 6212 | HH22 | ARG | X | 413 | 34.204 | 42.948 | 66.560 | 0.00 | 0.00 |
| ATOM | 6213 | C    | ARG | X | 413 | 30.777 | 39.503 | 59.707 | 0.00 | 0.00 |
| ATOM | 6214 | O    | ARG | X | 413 | 29.751 | 39.742 | 60.332 | 0.00 | 0.00 |
| ATOM | 6215 | N    | LEU | X | 414 | 30.839 | 39.387 | 58.354 | 0.00 | 0.00 |
| ATOM | 6216 | H    | LEU | X | 414 | 31.700 | 39.076 | 57.926 | 0.00 | 0.00 |
| ATOM | 6217 | CA   | LEU | X | 414 | 29.710 | 39.577 | 57.473 | 0.00 | 0.00 |
| ATOM | 6218 | HA   | LEU | X | 414 | 29.316 | 40.590 | 57.557 | 0.00 | 0.00 |
| ATOM | 6219 | CB   | LEU | X | 414 | 30.023 | 39.222 | 56.030 | 0.00 | 0.00 |
| ATOM | 6220 | HB2  | LEU | X | 414 | 30.434 | 38.213 | 56.068 | 0.00 | 0.00 |
| ATOM | 6221 | HB3  | LEU | X | 414 | 29.154 | 39.112 | 55.381 | 0.00 | 0.00 |
| ATOM | 6222 | CG   | LEU | X | 414 | 30.983 | 40.197 | 55.285 | 0.00 | 0.00 |
| ATOM | 6223 | HG   | LEU | X | 414 | 31.943 | 40.230 | 55.801 | 0.00 | 0.00 |
| ATOM | 6224 | CD1  | LEU | X | 414 | 31.286 | 39.638 | 53.868 | 0.00 | 0.00 |
| ATOM | 6225 | HD11 | LEU | X | 414 | 31.889 | 40.319 | 53.266 | 0.00 | 0.00 |
| ATOM | 6226 | HD12 | LEU | X | 414 | 30.391 | 39.384 | 53.301 | 0.00 | 0.00 |
| ATOM | 6227 | HD13 | LEU | X | 414 | 31.823 | 38.693 | 53.940 | 0.00 | 0.00 |
| ATOM | 6228 | CD2  | LEU | X | 414 | 30.371 | 41.605 | 55.068 | 0.00 | 0.00 |



|      |      |      |     |   |     |        |        |        |      |      |
|------|------|------|-----|---|-----|--------|--------|--------|------|------|
| ATOM | 6229 | HD21 | LEU | X | 414 | 30.262 | 42.174 | 55.991 | 0.00 | 0.00 |
| ATOM | 6230 | HD22 | LEU | X | 414 | 31.020 | 42.212 | 54.437 | 0.00 | 0.00 |
| ATOM | 6231 | HD23 | LEU | X | 414 | 29.393 | 41.552 | 54.589 | 0.00 | 0.00 |
| ATOM | 6232 | C    | LEU | X | 414 | 28.459 | 38.827 | 57.950 | 0.00 | 0.00 |
| ATOM | 6233 | O    | LEU | X | 414 | 27.346 | 39.411 | 58.096 | 0.00 | 0.00 |
| ATOM | 6234 | N    | ALA | X | 415 | 28.604 | 37.568 | 58.170 | 0.00 | 0.00 |
| ATOM | 6235 | H    | ALA | X | 415 | 29.492 | 37.156 | 57.922 | 0.00 | 0.00 |
| ATOM | 6236 | CA   | ALA | X | 415 | 27.426 | 36.699 | 58.519 | 0.00 | 0.00 |
| ATOM | 6237 | HA   | ALA | X | 415 | 26.719 | 36.841 | 57.701 | 0.00 | 0.00 |
| ATOM | 6238 | CB   | ALA | X | 415 | 27.946 | 35.213 | 58.482 | 0.00 | 0.00 |
| ATOM | 6239 | HB1  | ALA | X | 415 | 28.424 | 34.868 | 57.565 | 0.00 | 0.00 |
| ATOM | 6240 | HB2  | ALA | X | 415 | 27.034 | 34.623 | 58.573 | 0.00 | 0.00 |
| ATOM | 6241 | HB3  | ALA | X | 415 | 28.586 | 35.078 | 59.353 | 0.00 | 0.00 |
| ATOM | 6242 | C    | ALA | X | 415 | 26.879 | 37.024 | 59.891 | 0.00 | 0.00 |
| ATOM | 6243 | O    | ALA | X | 415 | 25.655 | 36.846 | 60.154 | 0.00 | 0.00 |
| ATOM | 6244 | N    | ALA | X | 416 | 27.672 | 37.523 | 60.867 | 0.00 | 0.00 |
| ATOM | 6245 | H    | ALA | X | 416 | 28.666 | 37.544 | 60.688 | 0.00 | 0.00 |
| ATOM | 6246 | CA   | ALA | X | 416 | 27.220 | 37.997 | 62.254 | 0.00 | 0.00 |
| ATOM | 6247 | HA   | ALA | X | 416 | 26.543 | 37.282 | 62.721 | 0.00 | 0.00 |
| ATOM | 6248 | CB   | ALA | X | 416 | 28.465 | 38.024 | 63.090 | 0.00 | 0.00 |
| ATOM | 6249 | HB1  | ALA | X | 416 | 29.136 | 38.738 | 62.612 | 0.00 | 0.00 |
| ATOM | 6250 | HB2  | ALA | X | 416 | 28.923 | 37.037 | 63.152 | 0.00 | 0.00 |
| ATOM | 6251 | HB3  | ALA | X | 416 | 28.200 | 38.265 | 64.120 | 0.00 | 0.00 |
| ATOM | 6252 | C    | ALA | X | 416 | 26.544 | 39.396 | 62.153 | 0.00 | 0.00 |
| ATOM | 6253 | O    | ALA | X | 416 | 25.794 | 39.742 | 63.021 | 0.00 | 0.00 |
| ATOM | 6254 | N    | GLN | X | 417 | 26.868 | 40.253 | 61.115 | 0.00 | 0.00 |
| ATOM | 6255 | H    | GLN | X | 417 | 27.490 | 39.858 | 60.425 | 0.00 | 0.00 |
| ATOM | 6256 | CA   | GLN | X | 417 | 26.406 | 41.654 | 60.986 | 0.00 | 0.00 |
| ATOM | 6257 | HA   | GLN | X | 417 | 25.815 | 42.007 | 61.832 | 0.00 | 0.00 |
| ATOM | 6258 | CB   | GLN | X | 417 | 27.663 | 42.566 | 60.821 | 0.00 | 0.00 |
| ATOM | 6259 | HB2  | GLN | X | 417 | 28.263 | 42.149 | 60.012 | 0.00 | 0.00 |
| ATOM | 6260 | HB3  | GLN | X | 417 | 27.257 | 43.517 | 60.475 | 0.00 | 0.00 |
| ATOM | 6261 | CG   | GLN | X | 417 | 28.328 | 42.772 | 62.169 | 0.00 | 0.00 |
| ATOM | 6262 | HG2  | GLN | X | 417 | 27.833 | 43.636 | 62.613 | 0.00 | 0.00 |
| ATOM | 6263 | HG3  | GLN | X | 417 | 28.013 | 41.953 | 62.815 | 0.00 | 0.00 |
| ATOM | 6264 | CD   | GLN | X | 417 | 29.831 | 43.017 | 62.174 | 0.00 | 0.00 |
| ATOM | 6265 | OE1  | GLN | X | 417 | 30.658 | 42.474 | 62.924 | 0.00 | 0.00 |
| ATOM | 6266 | NE2  | GLN | X | 417 | 30.310 | 43.921 | 61.332 | 0.00 | 0.00 |
| ATOM | 6267 | HE21 | GLN | X | 417 | 31.318 | 43.934 | 61.272 | 0.00 | 0.00 |
| ATOM | 6268 | HE22 | GLN | X | 417 | 29.651 | 44.510 | 60.843 | 0.00 | 0.00 |
| ATOM | 6269 | C    | GLN | X | 417 | 25.426 | 41.848 | 59.816 | 0.00 | 0.00 |
| ATOM | 6270 | O    | GLN | X | 417 | 25.202 | 42.972 | 59.306 | 0.00 | 0.00 |
| ATOM | 6271 | N    | GLY | X | 418 | 24.751 | 40.698 | 59.497 | 0.00 | 0.00 |
| ATOM | 6272 | H    | GLY | X | 418 | 25.045 | 39.831 | 59.924 | 0.00 | 0.00 |
| ATOM | 6273 | CA   | GLY | X | 418 | 23.520 | 40.696 | 58.746 | 0.00 | 0.00 |
| ATOM | 6274 | HA2  | GLY | X | 418 | 22.889 | 39.980 | 59.272 | 0.00 | 0.00 |
| ATOM | 6275 | HA3  | GLY | X | 418 | 23.044 | 41.677 | 58.735 | 0.00 | 0.00 |
| ATOM | 6276 | C    | GLY | X | 418 | 23.560 | 40.218 | 57.281 | 0.00 | 0.00 |
| ATOM | 6277 | O    | GLY | X | 418 | 22.541 | 40.103 | 56.691 | 0.00 | 0.00 |
| ATOM | 6278 | N    | ALA | X | 419 | 24.747 | 39.777 | 56.763 | 0.00 | 0.00 |
| ATOM | 6279 | H    | ALA | X | 419 | 25.595 | 39.797 | 57.311 | 0.00 | 0.00 |
| ATOM | 6280 | CA   | ALA | X | 419 | 24.842 | 39.379 | 55.340 | 0.00 | 0.00 |
| ATOM | 6281 | HA   | ALA | X | 419 | 24.182 | 39.980 | 54.715 | 0.00 | 0.00 |
| ATOM | 6282 | CB   | ALA | X | 419 | 26.255 | 39.561 | 54.855 | 0.00 | 0.00 |
| ATOM | 6283 | HB1  | ALA | X | 419 | 26.291 | 39.405 | 53.777 | 0.00 | 0.00 |
| ATOM | 6284 | HB2  | ALA | X | 419 | 26.871 | 38.768 | 55.281 | 0.00 | 0.00 |
| ATOM | 6285 | HB3  | ALA | X | 419 | 26.488 | 40.603 | 55.072 | 0.00 | 0.00 |
| ATOM | 6286 | C    | ALA | X | 419 | 24.501 | 37.842 | 55.139 | 0.00 | 0.00 |
| ATOM | 6287 | O    | ALA | X | 419 | 25.075 | 36.953 | 55.791 | 0.00 | 0.00 |
| ATOM | 6288 | N    | ARG | X | 420 | 23.799 | 37.574 | 54.009 | 0.00 | 0.00 |
| ATOM | 6289 | H    | ARG | X | 420 | 23.392 | 38.352 | 53.509 | 0.00 | 0.00 |
| ATOM | 6290 | CA   | ARG | X | 420 | 23.527 | 36.196 | 53.601 | 0.00 | 0.00 |
| ATOM | 6291 | HA   | ARG | X | 420 | 23.336 | 35.553 | 54.461 | 0.00 | 0.00 |
| ATOM | 6292 | CB   | ARG | X | 420 | 22.258 | 36.268 | 52.689 | 0.00 | 0.00 |
| ATOM | 6293 | HB2  | ARG | X | 420 | 21.426 | 36.587 | 53.317 | 0.00 | 0.00 |
| ATOM | 6294 | HB3  | ARG | X | 420 | 22.385 | 36.908 | 51.816 | 0.00 | 0.00 |
| ATOM | 6295 | CG   | ARG | X | 420 | 21.854 | 34.821 | 52.246 | 0.00 | 0.00 |

|      |      |      |     |   |     |        |        |        |      |      |
|------|------|------|-----|---|-----|--------|--------|--------|------|------|
| ATOM | 6296 | HG2  | ARG | X | 420 | 21.521 | 34.804 | 51.208 | 0.00 | 0.00 |
| ATOM | 6297 | HG3  | ARG | X | 420 | 22.629 | 34.087 | 52.467 | 0.00 | 0.00 |
| ATOM | 6298 | CD   | ARG | X | 420 | 20.582 | 34.314 | 52.934 | 0.00 | 0.00 |
| ATOM | 6299 | HD2  | ARG | X | 420 | 20.790 | 34.184 | 53.996 | 0.00 | 0.00 |
| ATOM | 6300 | HD3  | ARG | X | 420 | 19.800 | 35.068 | 52.844 | 0.00 | 0.00 |
| ATOM | 6301 | NE   | ARG | X | 420 | 20.031 | 33.144 | 52.294 | 0.00 | 0.00 |
| ATOM | 6302 | HE   | ARG | X | 420 | 20.379 | 32.946 | 51.367 | 0.00 | 0.00 |
| ATOM | 6303 | CZ   | ARG | X | 420 | 19.138 | 32.280 | 52.812 | 0.00 | 0.00 |
| ATOM | 6304 | NH1  | ARG | X | 420 | 18.659 | 32.439 | 54.032 | 0.00 | 0.00 |
| ATOM | 6305 | HH11 | ARG | X | 420 | 18.614 | 33.348 | 54.471 | 0.00 | 0.00 |
| ATOM | 6306 | HH12 | ARG | X | 420 | 18.059 | 31.721 | 54.411 | 0.00 | 0.00 |
| ATOM | 6307 | NH2  | ARG | X | 420 | 18.626 | 31.321 | 52.036 | 0.00 | 0.00 |
| ATOM | 6308 | HH21 | ARG | X | 420 | 18.660 | 31.283 | 51.028 | 0.00 | 0.00 |
| ATOM | 6309 | HH22 | ARG | X | 420 | 17.889 | 30.743 | 52.412 | 0.00 | 0.00 |
| ATOM | 6310 | C    | ARG | X | 420 | 24.763 | 35.725 | 52.917 | 0.00 | 0.00 |
| ATOM | 6311 | O    | ARG | X | 420 | 24.877 | 35.863 | 51.639 | 0.00 | 0.00 |
| ATOM | 6312 | N    | VAL | X | 421 | 25.761 | 35.201 | 53.707 | 0.00 | 0.00 |
| ATOM | 6313 | H    | VAL | X | 421 | 25.574 | 35.214 | 54.699 | 0.00 | 0.00 |
| ATOM | 6314 | CA   | VAL | X | 421 | 27.042 | 34.745 | 53.208 | 0.00 | 0.00 |
| ATOM | 6315 | HA   | VAL | X | 421 | 27.367 | 35.318 | 52.340 | 0.00 | 0.00 |
| ATOM | 6316 | CB   | VAL | X | 421 | 28.206 | 34.959 | 54.294 | 0.00 | 0.00 |
| ATOM | 6317 | HB   | VAL | X | 421 | 27.945 | 34.355 | 55.163 | 0.00 | 0.00 |
| ATOM | 6318 | CG1  | VAL | X | 421 | 29.594 | 34.564 | 53.746 | 0.00 | 0.00 |
| ATOM | 6319 | HG11 | VAL | X | 421 | 29.896 | 35.042 | 52.815 | 0.00 | 0.00 |
| ATOM | 6320 | HG12 | VAL | X | 421 | 30.352 | 34.781 | 54.499 | 0.00 | 0.00 |
| ATOM | 6321 | HG13 | VAL | X | 421 | 29.573 | 33.486 | 53.582 | 0.00 | 0.00 |
| ATOM | 6322 | CG2  | VAL | X | 421 | 28.298 | 36.399 | 54.772 | 0.00 | 0.00 |
| ATOM | 6323 | HG21 | VAL | X | 421 | 29.085 | 36.561 | 55.507 | 0.00 | 0.00 |
| ATOM | 6324 | HG22 | VAL | X | 421 | 27.364 | 36.690 | 55.254 | 0.00 | 0.00 |
| ATOM | 6325 | HG23 | VAL | X | 421 | 28.333 | 37.073 | 53.915 | 0.00 | 0.00 |
| ATOM | 6326 | C    | VAL | X | 421 | 26.997 | 33.239 | 52.867 | 0.00 | 0.00 |
| ATOM | 6327 | O    | VAL | X | 421 | 26.368 | 32.504 | 53.572 | 0.00 | 0.00 |
| ATOM | 6328 | N    | TYR | X | 422 | 27.733 | 32.796 | 51.843 | 0.00 | 0.00 |
| ATOM | 6329 | H    | TYR | X | 422 | 28.265 | 33.478 | 51.321 | 0.00 | 0.00 |
| ATOM | 6330 | CA   | TYR | X | 422 | 27.878 | 31.344 | 51.405 | 0.00 | 0.00 |
| ATOM | 6331 | HA   | TYR | X | 422 | 27.586 | 30.648 | 52.192 | 0.00 | 0.00 |
| ATOM | 6332 | CB   | TYR | X | 422 | 27.084 | 31.054 | 50.145 | 0.00 | 0.00 |
| ATOM | 6333 | HB2  | TYR | X | 422 | 27.442 | 31.821 | 49.458 | 0.00 | 0.00 |
| ATOM | 6334 | HB3  | TYR | X | 422 | 27.344 | 30.104 | 49.677 | 0.00 | 0.00 |
| ATOM | 6335 | CG   | TYR | X | 422 | 25.531 | 31.167 | 50.234 | 0.00 | 0.00 |
| ATOM | 6336 | CD1  | TYR | X | 422 | 24.693 | 29.997 | 50.338 | 0.00 | 0.00 |
| ATOM | 6337 | HD1  | TYR | X | 422 | 25.178 | 29.048 | 50.163 | 0.00 | 0.00 |
| ATOM | 6338 | CE1  | TYR | X | 422 | 23.346 | 30.114 | 50.464 | 0.00 | 0.00 |
| ATOM | 6339 | HE1  | TYR | X | 422 | 22.757 | 29.225 | 50.635 | 0.00 | 0.00 |
| ATOM | 6340 | CZ   | TYR | X | 422 | 22.708 | 31.380 | 50.306 | 0.00 | 0.00 |
| ATOM | 6341 | OH   | TYR | X | 422 | 21.367 | 31.476 | 50.279 | 0.00 | 0.00 |
| ATOM | 6342 | HH   | TYR | X | 422 | 21.002 | 30.613 | 50.073 | 0.00 | 0.00 |
| ATOM | 6343 | CE2  | TYR | X | 422 | 23.521 | 32.561 | 50.228 | 0.00 | 0.00 |
| ATOM | 6344 | HE2  | TYR | X | 422 | 23.101 | 33.555 | 50.168 | 0.00 | 0.00 |
| ATOM | 6345 | CD2  | TYR | X | 422 | 24.945 | 32.414 | 50.199 | 0.00 | 0.00 |
| ATOM | 6346 | HD2  | TYR | X | 422 | 25.553 | 33.305 | 50.148 | 0.00 | 0.00 |
| ATOM | 6347 | C    | TYR | X | 422 | 29.390 | 31.057 | 51.104 | 0.00 | 0.00 |
| ATOM | 6348 | O    | TYR | X | 422 | 30.045 | 31.801 | 50.419 | 0.00 | 0.00 |
| ATOM | 6349 | N    | ALA | X | 423 | 29.893 | 29.886 | 51.502 | 0.00 | 0.00 |
| ATOM | 6350 | H    | ALA | X | 423 | 29.209 | 29.262 | 51.905 | 0.00 | 0.00 |
| ATOM | 6351 | CA   | ALA | X | 423 | 31.354 | 29.519 | 51.388 | 0.00 | 0.00 |
| ATOM | 6352 | HA   | ALA | X | 423 | 31.904 | 30.384 | 51.019 | 0.00 | 0.00 |
| ATOM | 6353 | CB   | ALA | X | 423 | 31.842 | 29.375 | 52.885 | 0.00 | 0.00 |
| ATOM | 6354 | HB1  | ALA | X | 423 | 31.342 | 28.566 | 53.417 | 0.00 | 0.00 |
| ATOM | 6355 | HB2  | ALA | X | 423 | 31.607 | 30.249 | 53.493 | 0.00 | 0.00 |
| ATOM | 6356 | HB3  | ALA | X | 423 | 32.928 | 29.290 | 52.847 | 0.00 | 0.00 |
| ATOM | 6357 | C    | ALA | X | 423 | 31.610 | 28.213 | 50.599 | 0.00 | 0.00 |
| ATOM | 6358 | O    | ALA | X | 423 | 30.893 | 27.237 | 50.737 | 0.00 | 0.00 |
| ATOM | 6359 | N    | TYR | X | 424 | 32.729 | 28.198 | 49.846 | 0.00 | 0.00 |
| ATOM | 6360 | H    | TYR | X | 424 | 33.352 | 28.990 | 49.777 | 0.00 | 0.00 |
| ATOM | 6361 | CA   | TYR | X | 424 | 33.294 | 27.028 | 49.208 | 0.00 | 0.00 |
| ATOM | 6362 | HA   | TYR | X | 424 | 32.768 | 26.136 | 49.549 | 0.00 | 0.00 |

|      |      |      |     |   |     |        |        |        |      |      |
|------|------|------|-----|---|-----|--------|--------|--------|------|------|
| ATOM | 6363 | CB   | TYR | X | 424 | 33.099 | 27.075 | 47.639 | 0.00 | 0.00 |
| ATOM | 6364 | HB2  | TYR | X | 424 | 33.335 | 26.089 | 47.238 | 0.00 | 0.00 |
| ATOM | 6365 | HB3  | TYR | X | 424 | 32.023 | 27.130 | 47.470 | 0.00 | 0.00 |
| ATOM | 6366 | CG   | TYR | X | 424 | 33.841 | 28.129 | 46.848 | 0.00 | 0.00 |
| ATOM | 6367 | CD1  | TYR | X | 424 | 35.091 | 27.802 | 46.325 | 0.00 | 0.00 |
| ATOM | 6368 | HD1  | TYR | X | 424 | 35.620 | 26.881 | 46.519 | 0.00 | 0.00 |
| ATOM | 6369 | CE1  | TYR | X | 424 | 35.765 | 28.773 | 45.560 | 0.00 | 0.00 |
| ATOM | 6370 | HE1  | TYR | X | 424 | 36.793 | 28.629 | 45.262 | 0.00 | 0.00 |
| ATOM | 6371 | CZ   | TYR | X | 424 | 35.128 | 29.998 | 45.288 | 0.00 | 0.00 |
| ATOM | 6372 | OH   | TYR | X | 424 | 35.770 | 30.990 | 44.579 | 0.00 | 0.00 |
| ATOM | 6373 | HH   | TYR | X | 424 | 36.637 | 30.747 | 44.248 | 0.00 | 0.00 |
| ATOM | 6374 | CE2  | TYR | X | 424 | 33.870 | 30.321 | 45.813 | 0.00 | 0.00 |
| ATOM | 6375 | HE2  | TYR | X | 424 | 33.410 | 31.297 | 45.772 | 0.00 | 0.00 |
| ATOM | 6376 | CD2  | TYR | X | 424 | 33.249 | 29.353 | 46.625 | 0.00 | 0.00 |
| ATOM | 6377 | HD2  | TYR | X | 424 | 32.339 | 29.614 | 47.145 | 0.00 | 0.00 |
| ATOM | 6378 | C    | TYR | X | 424 | 34.849 | 26.790 | 49.442 | 0.00 | 0.00 |
| ATOM | 6379 | O    | TYR | X | 424 | 35.668 | 27.793 | 49.568 | 0.00 | 0.00 |
| ATOM | 6380 | N    | VAL | X | 425 | 35.234 | 25.505 | 49.287 | 0.00 | 0.00 |
| ATOM | 6381 | H    | VAL | X | 425 | 34.519 | 24.851 | 49.001 | 0.00 | 0.00 |
| ATOM | 6382 | CA   | VAL | X | 425 | 36.607 | 25.191 | 48.934 | 0.00 | 0.00 |
| ATOM | 6383 | HA   | VAL | X | 425 | 37.214 | 26.094 | 48.860 | 0.00 | 0.00 |
| ATOM | 6384 | CB   | VAL | X | 425 | 37.330 | 24.334 | 49.957 | 0.00 | 0.00 |
| ATOM | 6385 | HB   | VAL | X | 425 | 36.689 | 23.488 | 50.202 | 0.00 | 0.00 |
| ATOM | 6386 | CG1  | VAL | X | 425 | 38.700 | 23.820 | 49.435 | 0.00 | 0.00 |
| ATOM | 6387 | HG11 | VAL | X | 425 | 39.259 | 24.720 | 49.177 | 0.00 | 0.00 |
| ATOM | 6388 | HG12 | VAL | X | 425 | 39.178 | 23.241 | 50.225 | 0.00 | 0.00 |
| ATOM | 6389 | HG13 | VAL | X | 425 | 38.553 | 23.115 | 48.618 | 0.00 | 0.00 |
| ATOM | 6390 | CG2  | VAL | X | 425 | 37.455 | 25.121 | 51.310 | 0.00 | 0.00 |
| ATOM | 6391 | HG21 | VAL | X | 425 | 36.495 | 25.515 | 51.642 | 0.00 | 0.00 |
| ATOM | 6392 | HG22 | VAL | X | 425 | 38.068 | 26.011 | 51.170 | 0.00 | 0.00 |
| ATOM | 6393 | HG23 | VAL | X | 425 | 37.928 | 24.559 | 52.116 | 0.00 | 0.00 |
| ATOM | 6394 | C    | VAL | X | 425 | 36.571 | 24.465 | 47.575 | 0.00 | 0.00 |
| ATOM | 6395 | O    | VAL | X | 425 | 35.664 | 23.630 | 47.417 | 0.00 | 0.00 |
| ATOM | 6396 | N    | PHE | X | 426 | 37.448 | 24.796 | 46.636 | 0.00 | 0.00 |
| ATOM | 6397 | H    | PHE | X | 426 | 38.163 | 25.449 | 46.924 | 0.00 | 0.00 |
| ATOM | 6398 | CA   | PHE | X | 426 | 37.505 | 24.261 | 45.242 | 0.00 | 0.00 |
| ATOM | 6399 | HA   | PHE | X | 426 | 36.608 | 23.697 | 44.986 | 0.00 | 0.00 |
| ATOM | 6400 | CB   | PHE | X | 426 | 37.571 | 25.413 | 44.245 | 0.00 | 0.00 |
| ATOM | 6401 | HB2  | PHE | X | 426 | 36.792 | 26.147 | 44.450 | 0.00 | 0.00 |
| ATOM | 6402 | HB3  | PHE | X | 426 | 38.488 | 25.980 | 44.410 | 0.00 | 0.00 |
| ATOM | 6403 | CG   | PHE | X | 426 | 37.492 | 25.140 | 42.766 | 0.00 | 0.00 |
| ATOM | 6404 | CD1  | PHE | X | 426 | 36.308 | 25.336 | 42.004 | 0.00 | 0.00 |
| ATOM | 6405 | HD1  | PHE | X | 426 | 35.353 | 25.541 | 42.465 | 0.00 | 0.00 |
| ATOM | 6406 | CE1  | PHE | X | 426 | 36.309 | 25.045 | 40.629 | 0.00 | 0.00 |
| ATOM | 6407 | HE1  | PHE | X | 426 | 35.431 | 25.051 | 40.001 | 0.00 | 0.00 |
| ATOM | 6408 | CZ   | PHE | X | 426 | 37.524 | 24.560 | 40.038 | 0.00 | 0.00 |
| ATOM | 6409 | HZ   | PHE | X | 426 | 37.592 | 24.166 | 39.035 | 0.00 | 0.00 |
| ATOM | 6410 | CE2  | PHE | X | 426 | 38.726 | 24.393 | 40.814 | 0.00 | 0.00 |
| ATOM | 6411 | HE2  | PHE | X | 426 | 39.684 | 24.145 | 40.381 | 0.00 | 0.00 |
| ATOM | 6412 | CD2  | PHE | X | 426 | 38.735 | 24.792 | 42.166 | 0.00 | 0.00 |
| ATOM | 6413 | HD2  | PHE | X | 426 | 39.674 | 24.683 | 42.689 | 0.00 | 0.00 |
| ATOM | 6414 | C    | PHE | X | 426 | 38.723 | 23.354 | 45.121 | 0.00 | 0.00 |
| ATOM | 6415 | O    | PHE | X | 426 | 39.819 | 23.709 | 45.544 | 0.00 | 0.00 |
| ATOM | 6416 | N    | GLU | X | 427 | 38.484 | 22.178 | 44.544 | 0.00 | 0.00 |
| ATOM | 6417 | H    | GLU | X | 427 | 37.506 | 22.094 | 44.307 | 0.00 | 0.00 |
| ATOM | 6418 | CA   | GLU | X | 427 | 39.305 | 20.981 | 44.723 | 0.00 | 0.00 |
| ATOM | 6419 | HA   | GLU | X | 427 | 40.312 | 21.398 | 44.735 | 0.00 | 0.00 |
| ATOM | 6420 | CB   | GLU | X | 427 | 39.001 | 20.359 | 46.129 | 0.00 | 0.00 |
| ATOM | 6421 | HB2  | GLU | X | 427 | 39.789 | 19.624 | 46.287 | 0.00 | 0.00 |
| ATOM | 6422 | HB3  | GLU | X | 427 | 39.014 | 21.128 | 46.901 | 0.00 | 0.00 |
| ATOM | 6423 | CG   | GLU | X | 427 | 37.547 | 19.689 | 46.253 | 0.00 | 0.00 |
| ATOM | 6424 | HG2  | GLU | X | 427 | 36.889 | 20.400 | 45.752 | 0.00 | 0.00 |
| ATOM | 6425 | HG3  | GLU | X | 427 | 37.567 | 18.690 | 45.817 | 0.00 | 0.00 |
| ATOM | 6426 | CD   | GLU | X | 427 | 37.150 | 19.488 | 47.702 | 0.00 | 0.00 |
| ATOM | 6427 | OE1  | GLU | X | 427 | 37.085 | 18.382 | 48.161 | 0.00 | 0.00 |
| ATOM | 6428 | OE2  | GLU | X | 427 | 36.877 | 20.499 | 48.372 | 0.00 | 0.00 |
| ATOM | 6429 | C    | GLU | X | 427 | 39.340 | 19.924 | 43.677 | 0.00 | 0.00 |

|      |      |      |     |   |     |        |        |        |      |      |
|------|------|------|-----|---|-----|--------|--------|--------|------|------|
| ATOM | 6430 | O    | GLU | X | 427 | 39.913 | 18.818 | 43.887 | 0.00 | 0.00 |
| ATOM | 6431 | N    | HIE | X | 428 | 38.821 | 20.214 | 42.487 | 0.00 | 0.00 |
| ATOM | 6432 | H    | HIE | X | 428 | 38.228 | 21.030 | 42.435 | 0.00 | 0.00 |
| ATOM | 6433 | CA   | HIE | X | 428 | 39.093 | 19.560 | 41.243 | 0.00 | 0.00 |
| ATOM | 6434 | HA   | HIE | X | 428 | 39.235 | 18.496 | 41.432 | 0.00 | 0.00 |
| ATOM | 6435 | CB   | HIE | X | 428 | 37.873 | 19.754 | 40.320 | 0.00 | 0.00 |
| ATOM | 6436 | HB2  | HIE | X | 428 | 36.937 | 19.297 | 40.639 | 0.00 | 0.00 |
| ATOM | 6437 | HB3  | HIE | X | 428 | 37.598 | 20.794 | 40.147 | 0.00 | 0.00 |
| ATOM | 6438 | CG   | HIE | X | 428 | 38.225 | 19.186 | 38.908 | 0.00 | 0.00 |
| ATOM | 6439 | ND1  | HIE | X | 428 | 38.374 | 17.782 | 38.587 | 0.00 | 0.00 |
| ATOM | 6440 | CE1  | HIE | X | 428 | 38.609 | 17.756 | 37.274 | 0.00 | 0.00 |
| ATOM | 6441 | HE1  | HIE | X | 428 | 38.861 | 16.862 | 36.723 | 0.00 | 0.00 |
| ATOM | 6442 | NE2  | HIE | X | 428 | 38.610 | 18.989 | 36.763 | 0.00 | 0.00 |
| ATOM | 6443 | HE2  | HIE | X | 428 | 39.062 | 19.227 | 35.891 | 0.00 | 0.00 |
| ATOM | 6444 | CD2  | HIE | X | 428 | 38.394 | 19.897 | 37.818 | 0.00 | 0.00 |
| ATOM | 6445 | HD2  | HIE | X | 428 | 38.342 | 20.970 | 37.705 | 0.00 | 0.00 |
| ATOM | 6446 | C    | HIE | X | 428 | 40.347 | 20.160 | 40.595 | 0.00 | 0.00 |
| ATOM | 6447 | O    | HIE | X | 428 | 40.452 | 21.395 | 40.408 | 0.00 | 0.00 |
| ATOM | 6448 | N    | ARG | X | 429 | 41.280 | 19.327 | 40.176 | 0.00 | 0.00 |
| ATOM | 6449 | H    | ARG | X | 429 | 41.207 | 18.323 | 40.250 | 0.00 | 0.00 |
| ATOM | 6450 | CA   | ARG | X | 429 | 42.464 | 19.748 | 39.365 | 0.00 | 0.00 |
| ATOM | 6451 | HA   | ARG | X | 429 | 42.598 | 20.811 | 39.565 | 0.00 | 0.00 |
| ATOM | 6452 | CB   | ARG | X | 429 | 43.682 | 18.906 | 39.732 | 0.00 | 0.00 |
| ATOM | 6453 | HB2  | ARG | X | 429 | 43.788 | 18.862 | 40.816 | 0.00 | 0.00 |
| ATOM | 6454 | HB3  | ARG | X | 429 | 43.621 | 17.904 | 39.308 | 0.00 | 0.00 |
| ATOM | 6455 | CG   | ARG | X | 429 | 44.902 | 19.586 | 39.115 | 0.00 | 0.00 |
| ATOM | 6456 | HG2  | ARG | X | 429 | 44.754 | 19.685 | 38.039 | 0.00 | 0.00 |
| ATOM | 6457 | HG3  | ARG | X | 429 | 45.008 | 20.606 | 39.485 | 0.00 | 0.00 |
| ATOM | 6458 | CD   | ARG | X | 429 | 46.212 | 18.784 | 39.426 | 0.00 | 0.00 |
| ATOM | 6459 | HD2  | ARG | X | 429 | 46.168 | 18.406 | 40.447 | 0.00 | 0.00 |
| ATOM | 6460 | HD3  | ARG | X | 429 | 46.121 | 17.909 | 38.782 | 0.00 | 0.00 |
| ATOM | 6461 | NE   | ARG | X | 429 | 47.420 | 19.638 | 39.304 | 0.00 | 0.00 |
| ATOM | 6462 | HE   | ARG | X | 429 | 47.685 | 20.120 | 40.150 | 0.00 | 0.00 |
| ATOM | 6463 | CZ   | ARG | X | 429 | 48.117 | 19.909 | 38.207 | 0.00 | 0.00 |
| ATOM | 6464 | NH1  | ARG | X | 429 | 47.792 | 19.338 | 37.001 | 0.00 | 0.00 |
| ATOM | 6465 | HH11 | ARG | X | 429 | 46.943 | 18.819 | 36.832 | 0.00 | 0.00 |
| ATOM | 6466 | HH12 | ARG | X | 429 | 48.425 | 19.417 | 36.217 | 0.00 | 0.00 |
| ATOM | 6467 | NH2  | ARG | X | 429 | 49.187 | 20.684 | 38.190 | 0.00 | 0.00 |
| ATOM | 6468 | HH21 | ARG | X | 429 | 49.592 | 21.074 | 39.030 | 0.00 | 0.00 |
| ATOM | 6469 | HH22 | ARG | X | 429 | 49.773 | 20.703 | 37.368 | 0.00 | 0.00 |
| ATOM | 6470 | C    | ARG | X | 429 | 42.046 | 19.649 | 37.876 | 0.00 | 0.00 |
| ATOM | 6471 | O    | ARG | X | 429 | 41.890 | 18.530 | 37.476 | 0.00 | 0.00 |
| ATOM | 6472 | N    | ALA | X | 430 | 42.111 | 20.708 | 37.101 | 0.00 | 0.00 |
| ATOM | 6473 | H    | ALA | X | 430 | 42.213 | 21.608 | 37.548 | 0.00 | 0.00 |
| ATOM | 6474 | CA   | ALA | X | 430 | 42.010 | 20.705 | 35.648 | 0.00 | 0.00 |
| ATOM | 6475 | HA   | ALA | X | 430 | 40.975 | 20.410 | 35.478 | 0.00 | 0.00 |
| ATOM | 6476 | CB   | ALA | X | 430 | 42.248 | 22.150 | 35.202 | 0.00 | 0.00 |
| ATOM | 6477 | HB1  | ALA | X | 430 | 42.014 | 22.224 | 34.140 | 0.00 | 0.00 |
| ATOM | 6478 | HB2  | ALA | X | 430 | 43.277 | 22.476 | 35.355 | 0.00 | 0.00 |
| ATOM | 6479 | HB3  | ALA | X | 430 | 41.573 | 22.832 | 35.719 | 0.00 | 0.00 |
| ATOM | 6480 | C    | ALA | X | 430 | 42.982 | 19.811 | 34.851 | 0.00 | 0.00 |
| ATOM | 6481 | O    | ALA | X | 430 | 44.160 | 19.831 | 35.134 | 0.00 | 0.00 |
| ATOM | 6482 | N    | SER | X | 431 | 42.419 | 19.179 | 33.832 | 0.00 | 0.00 |
| ATOM | 6483 | H    | SER | X | 431 | 41.421 | 19.263 | 33.700 | 0.00 | 0.00 |
| ATOM | 6484 | CA   | SER | X | 431 | 43.136 | 18.324 | 32.836 | 0.00 | 0.00 |
| ATOM | 6485 | HA   | SER | X | 431 | 43.689 | 17.520 | 33.323 | 0.00 | 0.00 |
| ATOM | 6486 | CB   | SER | X | 431 | 42.129 | 17.730 | 31.889 | 0.00 | 0.00 |
| ATOM | 6487 | HB2  | SER | X | 431 | 42.559 | 17.140 | 31.079 | 0.00 | 0.00 |
| ATOM | 6488 | HB3  | SER | X | 431 | 41.380 | 17.097 | 32.365 | 0.00 | 0.00 |
| ATOM | 6489 | OG   | SER | X | 431 | 41.487 | 18.754 | 31.131 | 0.00 | 0.00 |
| ATOM | 6490 | HG   | SER | X | 431 | 40.562 | 18.757 | 31.385 | 0.00 | 0.00 |
| ATOM | 6491 | C    | SER | X | 431 | 44.117 | 19.095 | 31.916 | 0.00 | 0.00 |
| ATOM | 6492 | O    | SER | X | 431 | 45.131 | 18.549 | 31.441 | 0.00 | 0.00 |
| ATOM | 6493 | N    | THR | X | 432 | 43.824 | 20.410 | 31.751 | 0.00 | 0.00 |
| ATOM | 6494 | H    | THR | X | 432 | 43.007 | 20.699 | 32.269 | 0.00 | 0.00 |
| ATOM | 6495 | CA   | THR | X | 432 | 44.402 | 21.407 | 30.866 | 0.00 | 0.00 |
| ATOM | 6496 | HA   | THR | X | 432 | 44.856 | 20.821 | 30.067 | 0.00 | 0.00 |

|      |      |      |     |   |     |        |        |        |      |      |
|------|------|------|-----|---|-----|--------|--------|--------|------|------|
| ATOM | 6497 | CB   | THR | X | 432 | 43.267 | 22.158 | 30.073 | 0.00 | 0.00 |
| ATOM | 6498 | HB   | THR | X | 432 | 42.651 | 22.626 | 30.841 | 0.00 | 0.00 |
| ATOM | 6499 | CG2  | THR | X | 432 | 43.843 | 23.117 | 29.087 | 0.00 | 0.00 |
| ATOM | 6500 | HG21 | THR | X | 432 | 44.589 | 22.600 | 28.483 | 0.00 | 0.00 |
| ATOM | 6501 | HG22 | THR | X | 432 | 44.248 | 23.964 | 29.641 | 0.00 | 0.00 |
| ATOM | 6502 | HG23 | THR | X | 432 | 43.031 | 23.434 | 28.433 | 0.00 | 0.00 |
| ATOM | 6503 | OG1  | THR | X | 432 | 42.479 | 21.165 | 29.496 | 0.00 | 0.00 |
| ATOM | 6504 | HG1  | THR | X | 432 | 42.220 | 20.581 | 30.213 | 0.00 | 0.00 |
| ATOM | 6505 | C    | THR | X | 432 | 45.598 | 22.248 | 31.521 | 0.00 | 0.00 |
| ATOM | 6506 | O    | THR | X | 432 | 46.295 | 22.908 | 30.791 | 0.00 | 0.00 |
| ATOM | 6507 | N    | LEU | X | 433 | 45.743 | 22.065 | 32.895 | 0.00 | 0.00 |
| ATOM | 6508 | H    | LEU | X | 433 | 45.270 | 21.252 | 33.263 | 0.00 | 0.00 |
| ATOM | 6509 | CA   | LEU | X | 433 | 46.722 | 22.854 | 33.729 | 0.00 | 0.00 |
| ATOM | 6510 | HA   | LEU | X | 433 | 46.557 | 23.914 | 33.537 | 0.00 | 0.00 |
| ATOM | 6511 | CB   | LEU | X | 433 | 46.499 | 22.484 | 35.260 | 0.00 | 0.00 |
| ATOM | 6512 | HB2  | LEU | X | 433 | 45.631 | 21.825 | 35.286 | 0.00 | 0.00 |
| ATOM | 6513 | HB3  | LEU | X | 433 | 47.316 | 21.912 | 35.699 | 0.00 | 0.00 |
| ATOM | 6514 | CG   | LEU | X | 433 | 46.207 | 23.757 | 36.107 | 0.00 | 0.00 |
| ATOM | 6515 | HG   | LEU | X | 433 | 45.505 | 24.447 | 35.639 | 0.00 | 0.00 |
| ATOM | 6516 | CD1  | LEU | X | 433 | 45.668 | 23.296 | 37.453 | 0.00 | 0.00 |
| ATOM | 6517 | HD11 | LEU | X | 433 | 46.468 | 22.912 | 38.086 | 0.00 | 0.00 |
| ATOM | 6518 | HD12 | LEU | X | 433 | 44.769 | 22.683 | 37.388 | 0.00 | 0.00 |
| ATOM | 6519 | HD13 | LEU | X | 433 | 45.244 | 24.111 | 38.038 | 0.00 | 0.00 |
| ATOM | 6520 | CD2  | LEU | X | 433 | 47.464 | 24.563 | 36.261 | 0.00 | 0.00 |
| ATOM | 6521 | HD21 | LEU | X | 433 | 47.196 | 25.434 | 36.859 | 0.00 | 0.00 |
| ATOM | 6522 | HD22 | LEU | X | 433 | 48.282 | 23.916 | 36.577 | 0.00 | 0.00 |
| ATOM | 6523 | HD23 | LEU | X | 433 | 47.716 | 24.961 | 35.278 | 0.00 | 0.00 |
| ATOM | 6524 | C    | LEU | X | 433 | 48.194 | 22.557 | 33.318 | 0.00 | 0.00 |
| ATOM | 6525 | O    | LEU | X | 433 | 48.603 | 21.359 | 33.184 | 0.00 | 0.00 |
| ATOM | 6526 | N    | SER | X | 434 | 49.073 | 23.539 | 33.151 | 0.00 | 0.00 |
| ATOM | 6527 | H    | SER | X | 434 | 48.821 | 24.515 | 33.203 | 0.00 | 0.00 |
| ATOM | 6528 | CA   | SER | X | 434 | 50.459 | 23.300 | 32.730 | 0.00 | 0.00 |
| ATOM | 6529 | HA   | SER | X | 434 | 50.532 | 22.353 | 32.194 | 0.00 | 0.00 |
| ATOM | 6530 | CB   | SER | X | 434 | 50.914 | 24.388 | 31.693 | 0.00 | 0.00 |
| ATOM | 6531 | HB2  | SER | X | 434 | 51.997 | 24.412 | 31.578 | 0.00 | 0.00 |
| ATOM | 6532 | HB3  | SER | X | 434 | 50.676 | 24.033 | 30.690 | 0.00 | 0.00 |
| ATOM | 6533 | OG   | SER | X | 434 | 50.300 | 25.622 | 31.980 | 0.00 | 0.00 |
| ATOM | 6534 | HG   | SER | X | 434 | 49.659 | 25.808 | 31.290 | 0.00 | 0.00 |
| ATOM | 6535 | C    | SER | X | 434 | 51.454 | 23.228 | 33.934 | 0.00 | 0.00 |
| ATOM | 6536 | O    | SER | X | 434 | 52.489 | 22.545 | 33.826 | 0.00 | 0.00 |
| ATOM | 6537 | N    | TRP | X | 435 | 51.072 | 23.780 | 35.125 | 0.00 | 0.00 |
| ATOM | 6538 | H    | TRP | X | 435 | 50.176 | 24.238 | 35.207 | 0.00 | 0.00 |
| ATOM | 6539 | CA   | TRP | X | 435 | 51.910 | 23.637 | 36.348 | 0.00 | 0.00 |
| ATOM | 6540 | HA   | TRP | X | 435 | 52.889 | 24.037 | 36.086 | 0.00 | 0.00 |
| ATOM | 6541 | CB   | TRP | X | 435 | 51.341 | 24.574 | 37.376 | 0.00 | 0.00 |
| ATOM | 6542 | HB2  | TRP | X | 435 | 50.276 | 24.414 | 37.540 | 0.00 | 0.00 |
| ATOM | 6543 | HB3  | TRP | X | 435 | 51.770 | 24.433 | 38.368 | 0.00 | 0.00 |
| ATOM | 6544 | CG   | TRP | X | 435 | 51.432 | 26.030 | 37.024 | 0.00 | 0.00 |
| ATOM | 6545 | CD1  | TRP | X | 435 | 50.415 | 26.804 | 36.602 | 0.00 | 0.00 |
| ATOM | 6546 | HD1  | TRP | X | 435 | 49.391 | 26.505 | 36.432 | 0.00 | 0.00 |
| ATOM | 6547 | NE1  | TRP | X | 435 | 50.864 | 28.115 | 36.466 | 0.00 | 0.00 |
| ATOM | 6548 | HE1  | TRP | X | 435 | 50.245 | 28.902 | 36.338 | 0.00 | 0.00 |
| ATOM | 6549 | CE2  | TRP | X | 435 | 52.189 | 28.258 | 36.827 | 0.00 | 0.00 |
| ATOM | 6550 | CZ2  | TRP | X | 435 | 53.002 | 29.364 | 36.993 | 0.00 | 0.00 |
| ATOM | 6551 | HZ2  | TRP | X | 435 | 52.645 | 30.350 | 36.733 | 0.00 | 0.00 |
| ATOM | 6552 | CH2  | TRP | X | 435 | 54.341 | 29.149 | 37.442 | 0.00 | 0.00 |
| ATOM | 6553 | HH2  | TRP | X | 435 | 54.995 | 29.990 | 37.619 | 0.00 | 0.00 |
| ATOM | 6554 | CZ3  | TRP | X | 435 | 54.712 | 27.847 | 37.751 | 0.00 | 0.00 |
| ATOM | 6555 | HZ3  | TRP | X | 435 | 55.726 | 27.686 | 38.089 | 0.00 | 0.00 |
| ATOM | 6556 | CE3  | TRP | X | 435 | 53.826 | 26.761 | 37.625 | 0.00 | 0.00 |
| ATOM | 6557 | HE3  | TRP | X | 435 | 54.155 | 25.824 | 38.050 | 0.00 | 0.00 |
| ATOM | 6558 | CD2  | TRP | X | 435 | 52.553 | 26.931 | 37.102 | 0.00 | 0.00 |
| ATOM | 6559 | C    | TRP | X | 435 | 52.089 | 22.174 | 36.815 | 0.00 | 0.00 |
| ATOM | 6560 | O    | TRP | X | 435 | 51.192 | 21.379 | 36.493 | 0.00 | 0.00 |
| ATOM | 6561 | N    | PRO | X | 436 | 53.133 | 21.869 | 37.597 | 0.00 | 0.00 |
| ATOM | 6562 | CD   | PRO | X | 436 | 54.183 | 22.775 | 37.991 | 0.00 | 0.00 |
| ATOM | 6563 | HD2  | PRO | X | 436 | 53.878 | 23.758 | 38.352 | 0.00 | 0.00 |

|      |      |      |     |   |     |        |        |        |      |      |
|------|------|------|-----|---|-----|--------|--------|--------|------|------|
| ATOM | 6564 | HD3  | PRO | X | 436 | 54.804 | 22.980 | 37.118 | 0.00 | 0.00 |
| ATOM | 6565 | CG   | PRO | X | 436 | 54.943 | 22.061 | 39.063 | 0.00 | 0.00 |
| ATOM | 6566 | HG2  | PRO | X | 436 | 54.481 | 22.225 | 40.036 | 0.00 | 0.00 |
| ATOM | 6567 | HG3  | PRO | X | 436 | 55.979 | 22.369 | 39.205 | 0.00 | 0.00 |
| ATOM | 6568 | CB   | PRO | X | 436 | 54.817 | 20.587 | 38.718 | 0.00 | 0.00 |
| ATOM | 6569 | HB2  | PRO | X | 436 | 54.883 | 19.957 | 39.604 | 0.00 | 0.00 |
| ATOM | 6570 | HB3  | PRO | X | 436 | 55.552 | 20.374 | 37.942 | 0.00 | 0.00 |
| ATOM | 6571 | CA   | PRO | X | 436 | 53.410 | 20.531 | 38.088 | 0.00 | 0.00 |
| ATOM | 6572 | HA   | PRO | X | 436 | 53.485 | 19.834 | 37.253 | 0.00 | 0.00 |
| ATOM | 6573 | C    | PRO | X | 436 | 52.340 | 20.098 | 39.079 | 0.00 | 0.00 |
| ATOM | 6574 | O    | PRO | X | 436 | 51.678 | 20.917 | 39.700 | 0.00 | 0.00 |
| ATOM | 6575 | N    | LEU | X | 437 | 52.278 | 18.818 | 39.359 | 0.00 | 0.00 |
| ATOM | 6576 | H    | LEU | X | 437 | 52.880 | 18.155 | 38.893 | 0.00 | 0.00 |
| ATOM | 6577 | CA   | LEU | X | 437 | 51.317 | 18.209 | 40.197 | 0.00 | 0.00 |
| ATOM | 6578 | HA   | LEU | X | 437 | 50.307 | 18.557 | 39.980 | 0.00 | 0.00 |
| ATOM | 6579 | CB   | LEU | X | 437 | 51.308 | 16.654 | 40.009 | 0.00 | 0.00 |
| ATOM | 6580 | HB2  | LEU | X | 437 | 51.236 | 16.532 | 38.929 | 0.00 | 0.00 |
| ATOM | 6581 | HB3  | LEU | X | 437 | 52.293 | 16.283 | 40.294 | 0.00 | 0.00 |
| ATOM | 6582 | CG   | LEU | X | 437 | 50.272 | 15.853 | 40.738 | 0.00 | 0.00 |
| ATOM | 6583 | HG   | LEU | X | 437 | 50.415 | 15.981 | 41.811 | 0.00 | 0.00 |
| ATOM | 6584 | CD1  | LEU | X | 437 | 48.821 | 16.126 | 40.328 | 0.00 | 0.00 |
| ATOM | 6585 | HD11 | LEU | X | 437 | 48.185 | 15.334 | 40.722 | 0.00 | 0.00 |
| ATOM | 6586 | HD12 | LEU | X | 437 | 48.715 | 16.102 | 39.244 | 0.00 | 0.00 |
| ATOM | 6587 | HD13 | LEU | X | 437 | 48.566 | 17.133 | 40.660 | 0.00 | 0.00 |
| ATOM | 6588 | CD2  | LEU | X | 437 | 50.540 | 14.364 | 40.434 | 0.00 | 0.00 |
| ATOM | 6589 | HD21 | LEU | X | 437 | 50.432 | 14.187 | 39.364 | 0.00 | 0.00 |
| ATOM | 6590 | HD22 | LEU | X | 437 | 51.586 | 14.179 | 40.676 | 0.00 | 0.00 |
| ATOM | 6591 | HD23 | LEU | X | 437 | 49.864 | 13.814 | 41.090 | 0.00 | 0.00 |
| ATOM | 6592 | C    | LEU | X | 437 | 51.504 | 18.637 | 41.664 | 0.00 | 0.00 |
| ATOM | 6593 | O    | LEU | X | 437 | 50.459 | 18.763 | 42.305 | 0.00 | 0.00 |
| ATOM | 6594 | N    | TRP | X | 438 | 52.734 | 18.967 | 42.100 | 0.00 | 0.00 |
| ATOM | 6595 | H    | TRP | X | 438 | 53.511 | 19.109 | 41.470 | 0.00 | 0.00 |
| ATOM | 6596 | CA   | TRP | X | 438 | 52.973 | 19.306 | 43.538 | 0.00 | 0.00 |
| ATOM | 6597 | HA   | TRP | X | 438 | 52.575 | 18.441 | 44.068 | 0.00 | 0.00 |
| ATOM | 6598 | CB   | TRP | X | 438 | 54.507 | 19.368 | 43.764 | 0.00 | 0.00 |
| ATOM | 6599 | HB2  | TRP | X | 438 | 54.584 | 19.443 | 44.848 | 0.00 | 0.00 |
| ATOM | 6600 | HB3  | TRP | X | 438 | 54.971 | 18.474 | 43.347 | 0.00 | 0.00 |
| ATOM | 6601 | CG   | TRP | X | 438 | 55.242 | 20.562 | 43.187 | 0.00 | 0.00 |
| ATOM | 6602 | CD1  | TRP | X | 438 | 56.088 | 20.532 | 42.150 | 0.00 | 0.00 |
| ATOM | 6603 | HD1  | TRP | X | 438 | 56.255 | 19.641 | 41.562 | 0.00 | 0.00 |
| ATOM | 6604 | NE1  | TRP | X | 438 | 56.685 | 21.755 | 42.005 | 0.00 | 0.00 |
| ATOM | 6605 | HE1  | TRP | X | 438 | 57.414 | 21.964 | 41.338 | 0.00 | 0.00 |
| ATOM | 6606 | CE2  | TRP | X | 438 | 56.117 | 22.732 | 42.874 | 0.00 | 0.00 |
| ATOM | 6607 | CZ2  | TRP | X | 438 | 56.374 | 24.078 | 43.159 | 0.00 | 0.00 |
| ATOM | 6608 | HZ2  | TRP | X | 438 | 57.125 | 24.557 | 42.549 | 0.00 | 0.00 |
| ATOM | 6609 | CH2  | TRP | X | 438 | 55.636 | 24.754 | 44.096 | 0.00 | 0.00 |
| ATOM | 6610 | HH2  | TRP | X | 438 | 55.853 | 25.805 | 44.214 | 0.00 | 0.00 |
| ATOM | 6611 | CZ3  | TRP | X | 438 | 54.704 | 24.060 | 44.857 | 0.00 | 0.00 |
| ATOM | 6612 | HZ3  | TRP | X | 438 | 54.158 | 24.547 | 45.651 | 0.00 | 0.00 |
| ATOM | 6613 | CE3  | TRP | X | 438 | 54.540 | 22.680 | 44.713 | 0.00 | 0.00 |
| ATOM | 6614 | HE3  | TRP | X | 438 | 53.845 | 22.247 | 45.417 | 0.00 | 0.00 |
| ATOM | 6615 | CD2  | TRP | X | 438 | 55.183 | 21.971 | 43.670 | 0.00 | 0.00 |
| ATOM | 6616 | C    | TRP | X | 438 | 52.203 | 20.546 | 44.007 | 0.00 | 0.00 |
| ATOM | 6617 | O    | TRP | X | 438 | 51.925 | 20.671 | 45.197 | 0.00 | 0.00 |
| ATOM | 6618 | N    | MET | X | 439 | 51.886 | 21.456 | 43.108 | 0.00 | 0.00 |
| ATOM | 6619 | H    | MET | X | 439 | 52.208 | 21.328 | 42.160 | 0.00 | 0.00 |
| ATOM | 6620 | CA   | MET | X | 439 | 51.016 | 22.660 | 43.416 | 0.00 | 0.00 |
| ATOM | 6621 | HA   | MET | X | 439 | 51.335 | 23.225 | 44.292 | 0.00 | 0.00 |
| ATOM | 6622 | CB   | MET | X | 439 | 51.055 | 23.625 | 42.220 | 0.00 | 0.00 |
| ATOM | 6623 | HB2  | MET | X | 439 | 51.051 | 23.051 | 41.293 | 0.00 | 0.00 |
| ATOM | 6624 | HB3  | MET | X | 439 | 50.231 | 24.335 | 42.288 | 0.00 | 0.00 |
| ATOM | 6625 | CG   | MET | X | 439 | 52.319 | 24.444 | 42.235 | 0.00 | 0.00 |
| ATOM | 6626 | HG2  | MET | X | 439 | 52.465 | 24.986 | 43.169 | 0.00 | 0.00 |
| ATOM | 6627 | HG3  | MET | X | 439 | 53.107 | 23.696 | 42.144 | 0.00 | 0.00 |
| ATOM | 6628 | SD   | MET | X | 439 | 52.546 | 25.714 | 41.014 | 0.00 | 0.00 |
| ATOM | 6629 | CE   | MET | X | 439 | 54.145 | 26.514 | 41.418 | 0.00 | 0.00 |
| ATOM | 6630 | HE1  | MET | X | 439 | 54.068 | 26.887 | 42.439 | 0.00 | 0.00 |

|      |      |      |     |   |     |        |        |        |      |      |
|------|------|------|-----|---|-----|--------|--------|--------|------|------|
| ATOM | 6631 | HE2  | MET | X | 439 | 54.969 | 25.805 | 41.487 | 0.00 | 0.00 |
| ATOM | 6632 | HE3  | MET | X | 439 | 54.275 | 27.338 | 40.715 | 0.00 | 0.00 |
| ATOM | 6633 | C    | MET | X | 439 | 49.606 | 22.383 | 43.718 | 0.00 | 0.00 |
| ATOM | 6634 | O    | MET | X | 439 | 48.930 | 23.323 | 44.168 | 0.00 | 0.00 |
| ATOM | 6635 | N    | GLY | X | 440 | 49.104 | 21.202 | 43.380 | 0.00 | 0.00 |
| ATOM | 6636 | H    | GLY | X | 440 | 49.672 | 20.400 | 43.147 | 0.00 | 0.00 |
| ATOM | 6637 | CA   | GLY | X | 440 | 47.705 | 20.777 | 43.743 | 0.00 | 0.00 |
| ATOM | 6638 | HA2  | GLY | X | 440 | 47.680 | 19.688 | 43.707 | 0.00 | 0.00 |
| ATOM | 6639 | HA3  | GLY | X | 440 | 47.419 | 21.001 | 44.771 | 0.00 | 0.00 |
| ATOM | 6640 | C    | GLY | X | 440 | 46.743 | 21.480 | 42.760 | 0.00 | 0.00 |
| ATOM | 6641 | O    | GLY | X | 440 | 46.859 | 21.256 | 41.598 | 0.00 | 0.00 |
| ATOM | 6642 | N    | VAL | X | 441 | 45.790 | 22.264 | 43.250 | 0.00 | 0.00 |
| ATOM | 6643 | H    | VAL | X | 441 | 45.686 | 22.195 | 44.253 | 0.00 | 0.00 |
| ATOM | 6644 | CA   | VAL | X | 441 | 44.892 | 23.152 | 42.531 | 0.00 | 0.00 |
| ATOM | 6645 | HA   | VAL | X | 441 | 44.878 | 22.842 | 41.486 | 0.00 | 0.00 |
| ATOM | 6646 | CB   | VAL | X | 441 | 43.426 | 22.921 | 42.929 | 0.00 | 0.00 |
| ATOM | 6647 | HB   | VAL | X | 441 | 43.237 | 23.263 | 43.947 | 0.00 | 0.00 |
| ATOM | 6648 | CG1  | VAL | X | 441 | 42.444 | 23.784 | 42.041 | 0.00 | 0.00 |
| ATOM | 6649 | HG11 | VAL | X | 441 | 41.423 | 23.551 | 42.344 | 0.00 | 0.00 |
| ATOM | 6650 | HG12 | VAL | X | 441 | 42.528 | 24.852 | 42.244 | 0.00 | 0.00 |
| ATOM | 6651 | HG13 | VAL | X | 441 | 42.538 | 23.634 | 40.965 | 0.00 | 0.00 |
| ATOM | 6652 | CG2  | VAL | X | 441 | 43.080 | 21.453 | 42.851 | 0.00 | 0.00 |
| ATOM | 6653 | HG21 | VAL | X | 441 | 42.000 | 21.354 | 42.966 | 0.00 | 0.00 |
| ATOM | 6654 | HG22 | VAL | X | 441 | 43.665 | 20.843 | 43.539 | 0.00 | 0.00 |
| ATOM | 6655 | HG23 | VAL | X | 441 | 43.315 | 21.253 | 41.806 | 0.00 | 0.00 |
| ATOM | 6656 | C    | VAL | X | 441 | 45.386 | 24.514 | 43.013 | 0.00 | 0.00 |
| ATOM | 6657 | O    | VAL | X | 441 | 44.919 | 24.966 | 44.042 | 0.00 | 0.00 |
| ATOM | 6658 | N    | PRO | X | 442 | 46.277 | 25.178 | 42.177 | 0.00 | 0.00 |
| ATOM | 6659 | CD   | PRO | X | 442 | 46.902 | 24.628 | 40.986 | 0.00 | 0.00 |
| ATOM | 6660 | HD2  | PRO | X | 442 | 46.113 | 24.350 | 40.287 | 0.00 | 0.00 |
| ATOM | 6661 | HD3  | PRO | X | 442 | 47.599 | 23.810 | 41.171 | 0.00 | 0.00 |
| ATOM | 6662 | CG   | PRO | X | 442 | 47.726 | 25.767 | 40.363 | 0.00 | 0.00 |
| ATOM | 6663 | HG2  | PRO | X | 442 | 47.118 | 26.410 | 39.727 | 0.00 | 0.00 |
| ATOM | 6664 | HG3  | PRO | X | 442 | 48.646 | 25.395 | 39.913 | 0.00 | 0.00 |
| ATOM | 6665 | CB   | PRO | X | 442 | 47.991 | 26.665 | 41.564 | 0.00 | 0.00 |
| ATOM | 6666 | HB2  | PRO | X | 442 | 48.021 | 27.700 | 41.222 | 0.00 | 0.00 |
| ATOM | 6667 | HB3  | PRO | X | 442 | 48.991 | 26.470 | 41.951 | 0.00 | 0.00 |
| ATOM | 6668 | CA   | PRO | X | 442 | 46.797 | 26.489 | 42.502 | 0.00 | 0.00 |
| ATOM | 6669 | HA   | PRO | X | 442 | 47.144 | 26.354 | 43.527 | 0.00 | 0.00 |
| ATOM | 6670 | C    | PRO | X | 442 | 45.823 | 27.618 | 42.330 | 0.00 | 0.00 |
| ATOM | 6671 | O    | PRO | X | 442 | 44.881 | 27.539 | 41.566 | 0.00 | 0.00 |
| ATOM | 6672 | N    | HIP | X | 443 | 46.029 | 28.695 | 43.068 | 0.00 | 0.00 |
| ATOM | 6673 | H    | HIP | X | 443 | 46.754 | 28.725 | 43.770 | 0.00 | 0.00 |
| ATOM | 6674 | CA   | HIP | X | 443 | 45.194 | 29.882 | 43.160 | 0.00 | 0.00 |
| ATOM | 6675 | HA   | HIP | X | 443 | 44.244 | 29.540 | 43.570 | 0.00 | 0.00 |
| ATOM | 6676 | CB   | HIP | X | 443 | 46.029 | 30.837 | 44.097 | 0.00 | 0.00 |
| ATOM | 6677 | HB2  | HIP | X | 443 | 46.022 | 30.418 | 45.104 | 0.00 | 0.00 |
| ATOM | 6678 | HB3  | HIP | X | 443 | 47.092 | 30.911 | 43.869 | 0.00 | 0.00 |
| ATOM | 6679 | CG   | HIP | X | 443 | 45.560 | 32.296 | 44.074 | 0.00 | 0.00 |
| ATOM | 6680 | ND1  | HIP | X | 443 | 45.147 | 33.034 | 45.182 | 0.00 | 0.00 |
| ATOM | 6681 | HD1  | HIP | X | 443 | 44.851 | 32.650 | 46.067 | 0.00 | 0.00 |
| ATOM | 6682 | CE1  | HIP | X | 443 | 45.042 | 34.276 | 44.870 | 0.00 | 0.00 |
| ATOM | 6683 | HE1  | HIP | X | 443 | 44.780 | 35.066 | 45.557 | 0.00 | 0.00 |
| ATOM | 6684 | NE2  | HIP | X | 443 | 45.472 | 34.427 | 43.588 | 0.00 | 0.00 |
| ATOM | 6685 | HE2  | HIP | X | 443 | 45.438 | 35.328 | 43.132 | 0.00 | 0.00 |
| ATOM | 6686 | CD2  | HIP | X | 443 | 45.710 | 33.177 | 43.056 | 0.00 | 0.00 |
| ATOM | 6687 | HD2  | HIP | X | 443 | 45.990 | 32.907 | 42.048 | 0.00 | 0.00 |
| ATOM | 6688 | C    | HIP | X | 443 | 44.887 | 30.500 | 41.782 | 0.00 | 0.00 |
| ATOM | 6689 | O    | HIP | X | 443 | 45.916 | 30.705 | 41.066 | 0.00 | 0.00 |
| ATOM | 6690 | N    | GLY | X | 444 | 43.646 | 30.809 | 41.464 | 0.00 | 0.00 |
| ATOM | 6691 | H    | GLY | X | 444 | 42.875 | 30.612 | 42.087 | 0.00 | 0.00 |
| ATOM | 6692 | CA   | GLY | X | 444 | 43.269 | 31.376 | 40.155 | 0.00 | 0.00 |
| ATOM | 6693 | HA2  | GLY | X | 444 | 42.435 | 32.066 | 40.285 | 0.00 | 0.00 |
| ATOM | 6694 | HA3  | GLY | X | 444 | 44.007 | 32.067 | 39.748 | 0.00 | 0.00 |
| ATOM | 6695 | C    | GLY | X | 444 | 42.890 | 30.401 | 39.087 | 0.00 | 0.00 |
| ATOM | 6696 | O    | GLY | X | 444 | 42.421 | 30.868 | 38.042 | 0.00 | 0.00 |
| ATOM | 6697 | N    | TYR | X | 445 | 43.014 | 29.081 | 39.211 | 0.00 | 0.00 |

|      |      |      |     |   |     |        |        |        |      |      |
|------|------|------|-----|---|-----|--------|--------|--------|------|------|
| ATOM | 6698 | H    | TYR | X | 445 | 43.362 | 28.743 | 40.096 | 0.00 | 0.00 |
| ATOM | 6699 | CA   | TYR | X | 445 | 42.716 | 28.104 | 38.171 | 0.00 | 0.00 |
| ATOM | 6700 | HA   | TYR | X | 445 | 42.722 | 28.596 | 37.199 | 0.00 | 0.00 |
| ATOM | 6701 | CB   | TYR | X | 445 | 43.850 | 27.081 | 38.161 | 0.00 | 0.00 |
| ATOM | 6702 | HB2  | TYR | X | 445 | 44.008 | 26.742 | 39.185 | 0.00 | 0.00 |
| ATOM | 6703 | HB3  | TYR | X | 445 | 43.598 | 26.211 | 37.554 | 0.00 | 0.00 |
| ATOM | 6704 | CG   | TYR | X | 445 | 45.056 | 27.684 | 37.512 | 0.00 | 0.00 |
| ATOM | 6705 | CD1  | TYR | X | 445 | 45.203 | 27.588 | 36.125 | 0.00 | 0.00 |
| ATOM | 6706 | HD1  | TYR | X | 445 | 44.440 | 27.098 | 35.538 | 0.00 | 0.00 |
| ATOM | 6707 | CE1  | TYR | X | 445 | 46.289 | 28.146 | 35.435 | 0.00 | 0.00 |
| ATOM | 6708 | HE1  | TYR | X | 445 | 46.420 | 28.090 | 34.365 | 0.00 | 0.00 |
| ATOM | 6709 | CZ   | TYR | X | 445 | 47.274 | 28.884 | 36.180 | 0.00 | 0.00 |
| ATOM | 6710 | OH   | TYR | X | 445 | 48.360 | 29.321 | 35.534 | 0.00 | 0.00 |
| ATOM | 6711 | HH   | TYR | X | 445 | 48.043 | 29.393 | 34.631 | 0.00 | 0.00 |
| ATOM | 6712 | CE2  | TYR | X | 445 | 47.156 | 28.914 | 37.542 | 0.00 | 0.00 |
| ATOM | 6713 | HE2  | TYR | X | 445 | 47.835 | 29.521 | 38.121 | 0.00 | 0.00 |
| ATOM | 6714 | CD2  | TYR | X | 445 | 46.059 | 28.367 | 38.226 | 0.00 | 0.00 |
| ATOM | 6715 | HD2  | TYR | X | 445 | 45.839 | 28.551 | 39.267 | 0.00 | 0.00 |
| ATOM | 6716 | C    | TYR | X | 445 | 41.287 | 27.552 | 38.332 | 0.00 | 0.00 |
| ATOM | 6717 | O    | TYR | X | 445 | 40.963 | 26.465 | 37.797 | 0.00 | 0.00 |
| ATOM | 6718 | N    | GLU | X | 446 | 40.408 | 28.181 | 39.187 | 0.00 | 0.00 |
| ATOM | 6719 | H    | GLU | X | 446 | 40.717 | 29.018 | 39.661 | 0.00 | 0.00 |
| ATOM | 6720 | CA   | GLU | X | 446 | 38.999 | 27.903 | 39.314 | 0.00 | 0.00 |
| ATOM | 6721 | HA   | GLU | X | 446 | 38.770 | 26.864 | 39.079 | 0.00 | 0.00 |
| ATOM | 6722 | CB   | GLU | X | 446 | 38.433 | 28.190 | 40.715 | 0.00 | 0.00 |
| ATOM | 6723 | HB2  | GLU | X | 446 | 37.541 | 27.568 | 40.797 | 0.00 | 0.00 |
| ATOM | 6724 | HB3  | GLU | X | 446 | 39.140 | 27.762 | 41.425 | 0.00 | 0.00 |
| ATOM | 6725 | CG   | GLU | X | 446 | 38.018 | 29.631 | 41.078 | 0.00 | 0.00 |
| ATOM | 6726 | HG2  | GLU | X | 446 | 37.183 | 29.837 | 40.408 | 0.00 | 0.00 |
| ATOM | 6727 | HG3  | GLU | X | 446 | 37.747 | 29.646 | 42.134 | 0.00 | 0.00 |
| ATOM | 6728 | CD   | GLU | X | 446 | 39.021 | 30.733 | 40.987 | 0.00 | 0.00 |
| ATOM | 6729 | OE1  | GLU | X | 446 | 40.146 | 30.501 | 40.424 | 0.00 | 0.00 |
| ATOM | 6730 | OE2  | GLU | X | 446 | 38.554 | 31.873 | 41.234 | 0.00 | 0.00 |
| ATOM | 6731 | C    | GLU | X | 446 | 38.280 | 28.807 | 38.269 | 0.00 | 0.00 |
| ATOM | 6732 | O    | GLU | X | 446 | 37.290 | 28.385 | 37.683 | 0.00 | 0.00 |
| ATOM | 6733 | N    | ILE | X | 447 | 38.812 | 29.985 | 37.973 | 0.00 | 0.00 |
| ATOM | 6734 | H    | ILE | X | 447 | 39.657 | 30.150 | 38.502 | 0.00 | 0.00 |
| ATOM | 6735 | CA   | ILE | X | 447 | 38.223 | 31.018 | 37.208 | 0.00 | 0.00 |
| ATOM | 6736 | HA   | ILE | X | 447 | 37.326 | 31.363 | 37.722 | 0.00 | 0.00 |
| ATOM | 6737 | CB   | ILE | X | 447 | 39.145 | 32.222 | 36.817 | 0.00 | 0.00 |
| ATOM | 6738 | HB   | ILE | X | 447 | 39.919 | 31.883 | 36.130 | 0.00 | 0.00 |
| ATOM | 6739 | CG2  | ILE | X | 447 | 38.329 | 33.260 | 36.065 | 0.00 | 0.00 |
| ATOM | 6740 | HG21 | ILE | X | 447 | 38.936 | 34.148 | 35.888 | 0.00 | 0.00 |
| ATOM | 6741 | HG22 | ILE | X | 447 | 37.458 | 33.477 | 36.683 | 0.00 | 0.00 |
| ATOM | 6742 | HG23 | ILE | X | 447 | 37.985 | 32.898 | 35.096 | 0.00 | 0.00 |
| ATOM | 6743 | CG1  | ILE | X | 447 | 39.839 | 32.849 | 38.106 | 0.00 | 0.00 |
| ATOM | 6744 | HG12 | ILE | X | 447 | 39.048 | 33.236 | 38.748 | 0.00 | 0.00 |
| ATOM | 6745 | HG13 | ILE | X | 447 | 40.381 | 32.069 | 38.642 | 0.00 | 0.00 |
| ATOM | 6746 | CD1  | ILE | X | 447 | 40.944 | 33.861 | 37.891 | 0.00 | 0.00 |
| ATOM | 6747 | HD11 | ILE | X | 447 | 41.579 | 33.500 | 37.082 | 0.00 | 0.00 |
| ATOM | 6748 | HD12 | ILE | X | 447 | 41.536 | 34.012 | 38.794 | 0.00 | 0.00 |
| ATOM | 6749 | HD13 | ILE | X | 447 | 40.580 | 34.786 | 37.445 | 0.00 | 0.00 |
| ATOM | 6750 | C    | ILE | X | 447 | 37.758 | 30.410 | 35.844 | 0.00 | 0.00 |
| ATOM | 6751 | O    | ILE | X | 447 | 36.665 | 30.690 | 35.372 | 0.00 | 0.00 |
| ATOM | 6752 | N    | GLU | X | 448 | 38.579 | 29.635 | 35.191 | 0.00 | 0.00 |
| ATOM | 6753 | H    | GLU | X | 448 | 39.392 | 29.345 | 35.715 | 0.00 | 0.00 |
| ATOM | 6754 | CA   | GLU | X | 448 | 38.286 | 29.017 | 33.866 | 0.00 | 0.00 |
| ATOM | 6755 | HA   | GLU | X | 448 | 38.112 | 29.819 | 33.149 | 0.00 | 0.00 |
| ATOM | 6756 | CB   | GLU | X | 448 | 39.482 | 28.211 | 33.380 | 0.00 | 0.00 |
| ATOM | 6757 | HB2  | GLU | X | 448 | 39.210 | 27.809 | 32.405 | 0.00 | 0.00 |
| ATOM | 6758 | HB3  | GLU | X | 448 | 40.297 | 28.924 | 33.254 | 0.00 | 0.00 |
| ATOM | 6759 | CG   | GLU | X | 448 | 39.994 | 27.091 | 34.357 | 0.00 | 0.00 |
| ATOM | 6760 | HG2  | GLU | X | 448 | 40.107 | 27.503 | 35.359 | 0.00 | 0.00 |
| ATOM | 6761 | HG3  | GLU | X | 448 | 39.181 | 26.367 | 34.422 | 0.00 | 0.00 |
| ATOM | 6762 | CD   | GLU | X | 448 | 41.358 | 26.471 | 33.996 | 0.00 | 0.00 |
| ATOM | 6763 | OE1  | GLU | X | 448 | 41.416 | 25.256 | 33.762 | 0.00 | 0.00 |
| ATOM | 6764 | OE2  | GLU | X | 448 | 42.324 | 27.250 | 33.856 | 0.00 | 0.00 |



|      |      |      |     |   |     |        |        |        |      |      |
|------|------|------|-----|---|-----|--------|--------|--------|------|------|
| ATOM | 6765 | C    | GLU | X | 448 | 36.994 | 28.212 | 33.854 | 0.00 | 0.00 |
| ATOM | 6766 | O    | GLU | X | 448 | 36.231 | 28.225 | 32.847 | 0.00 | 0.00 |
| ATOM | 6767 | N    | PHE | X | 449 | 36.565 | 27.558 | 34.950 | 0.00 | 0.00 |
| ATOM | 6768 | H    | PHE | X | 449 | 37.027 | 27.705 | 35.835 | 0.00 | 0.00 |
| ATOM | 6769 | CA   | PHE | X | 449 | 35.253 | 26.817 | 35.091 | 0.00 | 0.00 |
| ATOM | 6770 | HA   | PHE | X | 449 | 35.009 | 26.368 | 34.128 | 0.00 | 0.00 |
| ATOM | 6771 | CB   | PHE | X | 449 | 35.432 | 25.710 | 36.111 | 0.00 | 0.00 |
| ATOM | 6772 | HB2  | PHE | X | 449 | 35.643 | 26.168 | 37.078 | 0.00 | 0.00 |
| ATOM | 6773 | HB3  | PHE | X | 449 | 34.444 | 25.254 | 36.177 | 0.00 | 0.00 |
| ATOM | 6774 | CG   | PHE | X | 449 | 36.494 | 24.733 | 35.787 | 0.00 | 0.00 |
| ATOM | 6775 | CD1  | PHE | X | 449 | 37.817 | 25.000 | 36.275 | 0.00 | 0.00 |
| ATOM | 6776 | HD1  | PHE | X | 449 | 38.103 | 25.890 | 36.815 | 0.00 | 0.00 |
| ATOM | 6777 | CE1  | PHE | X | 449 | 38.804 | 24.025 | 36.042 | 0.00 | 0.00 |
| ATOM | 6778 | HE1  | PHE | X | 449 | 39.833 | 24.261 | 36.268 | 0.00 | 0.00 |
| ATOM | 6779 | CZ   | PHE | X | 449 | 38.503 | 22.809 | 35.401 | 0.00 | 0.00 |
| ATOM | 6780 | HZ   | PHE | X | 449 | 39.296 | 22.112 | 35.173 | 0.00 | 0.00 |
| ATOM | 6781 | CE2  | PHE | X | 449 | 37.165 | 22.528 | 34.995 | 0.00 | 0.00 |
| ATOM | 6782 | HE2  | PHE | X | 449 | 36.881 | 21.592 | 34.536 | 0.00 | 0.00 |
| ATOM | 6783 | CD2  | PHE | X | 449 | 36.151 | 23.528 | 35.184 | 0.00 | 0.00 |
| ATOM | 6784 | HD2  | PHE | X | 449 | 35.129 | 23.275 | 34.940 | 0.00 | 0.00 |
| ATOM | 6785 | C    | PHE | X | 449 | 34.137 | 27.746 | 35.516 | 0.00 | 0.00 |
| ATOM | 6786 | O    | PHE | X | 449 | 33.016 | 27.473 | 35.189 | 0.00 | 0.00 |
| ATOM | 6787 | N    | ILE | X | 450 | 34.432 | 28.862 | 36.161 | 0.00 | 0.00 |
| ATOM | 6788 | H    | ILE | X | 450 | 35.370 | 29.073 | 36.470 | 0.00 | 0.00 |
| ATOM | 6789 | CA   | ILE | X | 450 | 33.446 | 29.925 | 36.465 | 0.00 | 0.00 |
| ATOM | 6790 | HA   | ILE | X | 450 | 32.526 | 29.489 | 36.856 | 0.00 | 0.00 |
| ATOM | 6791 | CB   | ILE | X | 450 | 34.026 | 30.956 | 37.519 | 0.00 | 0.00 |
| ATOM | 6792 | HB   | ILE | X | 450 | 34.933 | 31.371 | 37.080 | 0.00 | 0.00 |
| ATOM | 6793 | CG2  | ILE | X | 450 | 32.978 | 31.951 | 37.847 | 0.00 | 0.00 |
| ATOM | 6794 | HG21 | ILE | X | 450 | 32.049 | 31.529 | 38.228 | 0.00 | 0.00 |
| ATOM | 6795 | HG22 | ILE | X | 450 | 32.643 | 32.509 | 36.972 | 0.00 | 0.00 |
| ATOM | 6796 | HG23 | ILE | X | 450 | 33.397 | 32.728 | 38.487 | 0.00 | 0.00 |
| ATOM | 6797 | CG1  | ILE | X | 450 | 34.531 | 30.228 | 38.837 | 0.00 | 0.00 |
| ATOM | 6798 | HG12 | ILE | X | 450 | 35.502 | 29.777 | 38.637 | 0.00 | 0.00 |
| ATOM | 6799 | HG13 | ILE | X | 450 | 34.732 | 30.968 | 39.611 | 0.00 | 0.00 |
| ATOM | 6800 | CD1  | ILE | X | 450 | 33.591 | 29.195 | 39.428 | 0.00 | 0.00 |
| ATOM | 6801 | HD11 | ILE | X | 450 | 32.577 | 29.537 | 39.634 | 0.00 | 0.00 |
| ATOM | 6802 | HD12 | ILE | X | 450 | 34.039 | 28.951 | 40.391 | 0.00 | 0.00 |
| ATOM | 6803 | HD13 | ILE | X | 450 | 33.409 | 28.305 | 38.824 | 0.00 | 0.00 |
| ATOM | 6804 | C    | ILE | X | 450 | 33.040 | 30.653 | 35.184 | 0.00 | 0.00 |
| ATOM | 6805 | O    | ILE | X | 450 | 31.840 | 30.853 | 34.980 | 0.00 | 0.00 |
| ATOM | 6806 | N    | PHE | X | 451 | 33.938 | 31.032 | 34.225 | 0.00 | 0.00 |
| ATOM | 6807 | H    | PHE | X | 451 | 34.923 | 31.040 | 34.449 | 0.00 | 0.00 |
| ATOM | 6808 | CA   | PHE | X | 451 | 33.519 | 31.734 | 32.969 | 0.00 | 0.00 |
| ATOM | 6809 | HA   | PHE | X | 451 | 32.741 | 32.435 | 33.270 | 0.00 | 0.00 |
| ATOM | 6810 | CB   | PHE | X | 451 | 34.747 | 32.417 | 32.441 | 0.00 | 0.00 |
| ATOM | 6811 | HB2  | PHE | X | 451 | 35.663 | 31.844 | 32.583 | 0.00 | 0.00 |
| ATOM | 6812 | HB3  | PHE | X | 451 | 34.627 | 32.612 | 31.375 | 0.00 | 0.00 |
| ATOM | 6813 | CG   | PHE | X | 451 | 34.859 | 33.827 | 33.042 | 0.00 | 0.00 |
| ATOM | 6814 | CD1  | PHE | X | 451 | 35.320 | 34.093 | 34.359 | 0.00 | 0.00 |
| ATOM | 6815 | HD1  | PHE | X | 451 | 35.796 | 33.351 | 34.984 | 0.00 | 0.00 |
| ATOM | 6816 | CE1  | PHE | X | 451 | 35.378 | 35.384 | 34.901 | 0.00 | 0.00 |
| ATOM | 6817 | HE1  | PHE | X | 451 | 35.738 | 35.533 | 35.908 | 0.00 | 0.00 |
| ATOM | 6818 | CZ   | PHE | X | 451 | 34.956 | 36.503 | 34.126 | 0.00 | 0.00 |
| ATOM | 6819 | HZ   | PHE | X | 451 | 35.070 | 37.496 | 34.534 | 0.00 | 0.00 |
| ATOM | 6820 | CE2  | PHE | X | 451 | 34.520 | 36.315 | 32.812 | 0.00 | 0.00 |
| ATOM | 6821 | HE2  | PHE | X | 451 | 34.171 | 37.140 | 32.208 | 0.00 | 0.00 |
| ATOM | 6822 | CD2  | PHE | X | 451 | 34.433 | 34.983 | 32.332 | 0.00 | 0.00 |
| ATOM | 6823 | HD2  | PHE | X | 451 | 33.959 | 34.777 | 31.384 | 0.00 | 0.00 |
| ATOM | 6824 | C    | PHE | X | 451 | 32.940 | 30.752 | 31.931 | 0.00 | 0.00 |
| ATOM | 6825 | O    | PHE | X | 451 | 32.256 | 31.291 | 31.004 | 0.00 | 0.00 |
| ATOM | 6826 | N    | GLY | X | 452 | 33.228 | 29.482 | 32.066 | 0.00 | 0.00 |
| ATOM | 6827 | H    | GLY | X | 452 | 33.906 | 29.170 | 32.746 | 0.00 | 0.00 |
| ATOM | 6828 | CA   | GLY | X | 452 | 32.735 | 28.387 | 31.186 | 0.00 | 0.00 |
| ATOM | 6829 | HA2  | GLY | X | 452 | 32.633 | 27.451 | 31.735 | 0.00 | 0.00 |
| ATOM | 6830 | HA3  | GLY | X | 452 | 31.827 | 28.792 | 30.739 | 0.00 | 0.00 |
| ATOM | 6831 | C    | GLY | X | 452 | 33.722 | 28.018 | 30.134 | 0.00 | 0.00 |

|      |      |      |     |   |     |        |        |        |      |      |
|------|------|------|-----|---|-----|--------|--------|--------|------|------|
| ATOM | 6832 | O    | GLY | X | 452 | 33.372 | 27.478 | 29.066 | 0.00 | 0.00 |
| ATOM | 6833 | N    | ILE | X | 453 | 35.023 | 28.402 | 30.282 | 0.00 | 0.00 |
| ATOM | 6834 | H    | ILE | X | 453 | 35.250 | 28.781 | 31.189 | 0.00 | 0.00 |
| ATOM | 6835 | CA   | ILE | X | 453 | 36.079 | 28.109 | 29.268 | 0.00 | 0.00 |
| ATOM | 6836 | HA   | ILE | X | 453 | 35.843 | 28.660 | 28.357 | 0.00 | 0.00 |
| ATOM | 6837 | CB   | ILE | X | 453 | 37.421 | 28.776 | 29.700 | 0.00 | 0.00 |
| ATOM | 6838 | HB   | ILE | X | 453 | 37.685 | 28.212 | 30.595 | 0.00 | 0.00 |
| ATOM | 6839 | CG2  | ILE | X | 453 | 38.495 | 28.691 | 28.615 | 0.00 | 0.00 |
| ATOM | 6840 | HG21 | ILE | X | 453 | 38.663 | 27.614 | 28.576 | 0.00 | 0.00 |
| ATOM | 6841 | HG22 | ILE | X | 453 | 39.452 | 29.143 | 28.878 | 0.00 | 0.00 |
| ATOM | 6842 | HG23 | ILE | X | 453 | 38.099 | 29.150 | 27.710 | 0.00 | 0.00 |
| ATOM | 6843 | CG1  | ILE | X | 453 | 37.268 | 30.178 | 30.256 | 0.00 | 0.00 |
| ATOM | 6844 | HG12 | ILE | X | 453 | 36.767 | 30.164 | 31.224 | 0.00 | 0.00 |
| ATOM | 6845 | HG13 | ILE | X | 453 | 38.247 | 30.549 | 30.561 | 0.00 | 0.00 |
| ATOM | 6846 | CD1  | ILE | X | 453 | 36.572 | 31.218 | 29.367 | 0.00 | 0.00 |
| ATOM | 6847 | HD11 | ILE | X | 453 | 35.511 | 31.011 | 29.228 | 0.00 | 0.00 |
| ATOM | 6848 | HD12 | ILE | X | 453 | 37.050 | 31.316 | 28.392 | 0.00 | 0.00 |
| ATOM | 6849 | HD13 | ILE | X | 453 | 36.679 | 32.159 | 29.906 | 0.00 | 0.00 |
| ATOM | 6850 | C    | ILE | X | 453 | 36.200 | 26.657 | 28.781 | 0.00 | 0.00 |
| ATOM | 6851 | O    | ILE | X | 453 | 36.334 | 26.513 | 27.577 | 0.00 | 0.00 |
| ATOM | 6852 | N    | PRO | X | 454 | 36.153 | 25.638 | 29.630 | 0.00 | 0.00 |
| ATOM | 6853 | CD   | PRO | X | 454 | 36.018 | 25.642 | 31.077 | 0.00 | 0.00 |
| ATOM | 6854 | HD2  | PRO | X | 454 | 35.022 | 25.971 | 31.373 | 0.00 | 0.00 |
| ATOM | 6855 | HD3  | PRO | X | 454 | 36.778 | 26.347 | 31.414 | 0.00 | 0.00 |
| ATOM | 6856 | CG   | PRO | X | 454 | 36.255 | 24.268 | 31.568 | 0.00 | 0.00 |
| ATOM | 6857 | HG2  | PRO | X | 454 | 35.790 | 24.112 | 32.542 | 0.00 | 0.00 |
| ATOM | 6858 | HG3  | PRO | X | 454 | 37.317 | 24.026 | 31.537 | 0.00 | 0.00 |
| ATOM | 6859 | CB   | PRO | X | 454 | 35.526 | 23.488 | 30.439 | 0.00 | 0.00 |
| ATOM | 6860 | HB2  | PRO | X | 454 | 34.454 | 23.464 | 30.632 | 0.00 | 0.00 |
| ATOM | 6861 | HB3  | PRO | X | 454 | 35.754 | 22.422 | 30.462 | 0.00 | 0.00 |
| ATOM | 6862 | CA   | PRO | X | 454 | 35.994 | 24.276 | 29.186 | 0.00 | 0.00 |
| ATOM | 6863 | HA   | PRO | X | 454 | 36.981 | 23.961 | 28.847 | 0.00 | 0.00 |
| ATOM | 6864 | C    | PRO | X | 454 | 34.985 | 23.972 | 28.065 | 0.00 | 0.00 |
| ATOM | 6865 | O    | PRO | X | 454 | 35.067 | 22.861 | 27.553 | 0.00 | 0.00 |
| ATOM | 6866 | N    | LEU | X | 455 | 34.007 | 24.873 | 27.790 | 0.00 | 0.00 |
| ATOM | 6867 | H    | LEU | X | 455 | 33.989 | 25.748 | 28.294 | 0.00 | 0.00 |
| ATOM | 6868 | CA   | LEU | X | 455 | 33.055 | 24.680 | 26.629 | 0.00 | 0.00 |
| ATOM | 6869 | HA   | LEU | X | 455 | 32.885 | 23.619 | 26.446 | 0.00 | 0.00 |
| ATOM | 6870 | CB   | LEU | X | 455 | 31.750 | 25.423 | 27.008 | 0.00 | 0.00 |
| ATOM | 6871 | HB2  | LEU | X | 455 | 32.134 | 26.431 | 27.163 | 0.00 | 0.00 |
| ATOM | 6872 | HB3  | LEU | X | 455 | 31.080 | 25.420 | 26.148 | 0.00 | 0.00 |
| ATOM | 6873 | CG   | LEU | X | 455 | 31.044 | 24.847 | 28.239 | 0.00 | 0.00 |
| ATOM | 6874 | HG   | LEU | X | 455 | 31.666 | 24.887 | 29.134 | 0.00 | 0.00 |
| ATOM | 6875 | CD1  | LEU | X | 455 | 29.846 | 25.790 | 28.629 | 0.00 | 0.00 |
| ATOM | 6876 | HD11 | LEU | X | 455 | 29.138 | 25.793 | 27.800 | 0.00 | 0.00 |
| ATOM | 6877 | HD12 | LEU | X | 455 | 30.329 | 26.748 | 28.824 | 0.00 | 0.00 |
| ATOM | 6878 | HD13 | LEU | X | 455 | 29.347 | 25.252 | 29.435 | 0.00 | 0.00 |
| ATOM | 6879 | CD2  | LEU | X | 455 | 30.589 | 23.373 | 28.099 | 0.00 | 0.00 |
| ATOM | 6880 | HD21 | LEU | X | 455 | 30.097 | 22.986 | 28.991 | 0.00 | 0.00 |
| ATOM | 6881 | HD22 | LEU | X | 455 | 29.932 | 23.323 | 27.230 | 0.00 | 0.00 |
| ATOM | 6882 | HD23 | LEU | X | 455 | 31.469 | 22.784 | 27.842 | 0.00 | 0.00 |
| ATOM | 6883 | C    | LEU | X | 455 | 33.620 | 25.056 | 25.254 | 0.00 | 0.00 |
| ATOM | 6884 | O    | LEU | X | 455 | 32.881 | 24.875 | 24.292 | 0.00 | 0.00 |
| ATOM | 6885 | N    | ASP | X | 456 | 34.753 | 25.670 | 25.134 | 0.00 | 0.00 |
| ATOM | 6886 | H    | ASP | X | 456 | 35.191 | 26.031 | 25.970 | 0.00 | 0.00 |
| ATOM | 6887 | CA   | ASP | X | 456 | 35.412 | 25.943 | 23.834 | 0.00 | 0.00 |
| ATOM | 6888 | HA   | ASP | X | 456 | 34.591 | 26.254 | 23.188 | 0.00 | 0.00 |
| ATOM | 6889 | CB   | ASP | X | 456 | 36.491 | 26.998 | 23.958 | 0.00 | 0.00 |
| ATOM | 6890 | HB2  | ASP | X | 456 | 36.041 | 27.898 | 24.375 | 0.00 | 0.00 |
| ATOM | 6891 | HB3  | ASP | X | 456 | 37.162 | 26.721 | 24.772 | 0.00 | 0.00 |
| ATOM | 6892 | CG   | ASP | X | 456 | 37.334 | 27.340 | 22.749 | 0.00 | 0.00 |
| ATOM | 6893 | OD1  | ASP | X | 456 | 37.293 | 26.558 | 21.771 | 0.00 | 0.00 |
| ATOM | 6894 | OD2  | ASP | X | 456 | 37.960 | 28.425 | 22.799 | 0.00 | 0.00 |
| ATOM | 6895 | C    | ASP | X | 456 | 35.934 | 24.638 | 23.193 | 0.00 | 0.00 |
| ATOM | 6896 | O    | ASP | X | 456 | 36.759 | 24.013 | 23.915 | 0.00 | 0.00 |
| ATOM | 6897 | N    | PRO | X | 457 | 35.514 | 24.163 | 22.022 | 0.00 | 0.00 |
| ATOM | 6898 | CD   | PRO | X | 457 | 34.488 | 24.733 | 21.197 | 0.00 | 0.00 |

|      |      |      |     |   |     |        |        |        |      |      |
|------|------|------|-----|---|-----|--------|--------|--------|------|------|
| ATOM | 6899 | HD2  | PRO | X | 457 | 34.887 | 25.435 | 20.464 | 0.00 | 0.00 |
| ATOM | 6900 | HD3  | PRO | X | 457 | 33.688 | 25.208 | 21.765 | 0.00 | 0.00 |
| ATOM | 6901 | CG   | PRO | X | 457 | 33.895 | 23.622 | 20.351 | 0.00 | 0.00 |
| ATOM | 6902 | HG2  | PRO | X | 457 | 33.429 | 23.999 | 19.441 | 0.00 | 0.00 |
| ATOM | 6903 | HG3  | PRO | X | 457 | 33.213 | 22.944 | 20.865 | 0.00 | 0.00 |
| ATOM | 6904 | CB   | PRO | X | 457 | 35.112 | 22.800 | 20.153 | 0.00 | 0.00 |
| ATOM | 6905 | HB2  | PRO | X | 457 | 35.736 | 23.202 | 19.354 | 0.00 | 0.00 |
| ATOM | 6906 | HB3  | PRO | X | 457 | 34.856 | 21.789 | 19.837 | 0.00 | 0.00 |
| ATOM | 6907 | CA   | PRO | X | 457 | 35.961 | 22.903 | 21.450 | 0.00 | 0.00 |
| ATOM | 6908 | HA   | PRO | X | 457 | 35.821 | 22.090 | 22.162 | 0.00 | 0.00 |
| ATOM | 6909 | C    | PRO | X | 457 | 37.405 | 22.809 | 21.078 | 0.00 | 0.00 |
| ATOM | 6910 | O    | PRO | X | 457 | 37.818 | 21.704 | 20.831 | 0.00 | 0.00 |
| ATOM | 6911 | N    | SER | X | 458 | 38.165 | 23.922 | 21.061 | 0.00 | 0.00 |
| ATOM | 6912 | H    | SER | X | 458 | 37.834 | 24.853 | 21.269 | 0.00 | 0.00 |
| ATOM | 6913 | CA   | SER | X | 458 | 39.628 | 23.865 | 20.826 | 0.00 | 0.00 |
| ATOM | 6914 | HA   | SER | X | 458 | 39.802 | 23.192 | 19.987 | 0.00 | 0.00 |
| ATOM | 6915 | CB   | SER | X | 458 | 40.135 | 25.246 | 20.398 | 0.00 | 0.00 |
| ATOM | 6916 | HB2  | SER | X | 458 | 41.174 | 25.077 | 20.114 | 0.00 | 0.00 |
| ATOM | 6917 | HB3  | SER | X | 458 | 39.543 | 25.577 | 19.544 | 0.00 | 0.00 |
| ATOM | 6918 | OG   | SER | X | 458 | 39.955 | 26.334 | 21.366 | 0.00 | 0.00 |
| ATOM | 6919 | HG   | SER | X | 458 | 39.035 | 26.567 | 21.510 | 0.00 | 0.00 |
| ATOM | 6920 | C    | SER | X | 458 | 40.453 | 23.433 | 22.115 | 0.00 | 0.00 |
| ATOM | 6921 | O    | SER | X | 458 | 41.663 | 23.175 | 22.055 | 0.00 | 0.00 |
| ATOM | 6922 | N    | ARG | X | 459 | 39.768 | 23.441 | 23.289 | 0.00 | 0.00 |
| ATOM | 6923 | H    | ARG | X | 459 | 38.781 | 23.646 | 23.235 | 0.00 | 0.00 |
| ATOM | 6924 | CA   | ARG | X | 459 | 40.440 | 23.274 | 24.582 | 0.00 | 0.00 |
| ATOM | 6925 | HA   | ARG | X | 459 | 41.523 | 23.381 | 24.524 | 0.00 | 0.00 |
| ATOM | 6926 | CB   | ARG | X | 459 | 39.943 | 24.210 | 25.664 | 0.00 | 0.00 |
| ATOM | 6927 | HB2  | ARG | X | 459 | 38.960 | 23.856 | 25.976 | 0.00 | 0.00 |
| ATOM | 6928 | HB3  | ARG | X | 459 | 40.493 | 24.145 | 26.602 | 0.00 | 0.00 |
| ATOM | 6929 | CG   | ARG | X | 459 | 39.718 | 25.664 | 25.164 | 0.00 | 0.00 |
| ATOM | 6930 | HG2  | ARG | X | 459 | 38.974 | 25.643 | 24.368 | 0.00 | 0.00 |
| ATOM | 6931 | HG3  | ARG | X | 459 | 39.371 | 26.226 | 26.031 | 0.00 | 0.00 |
| ATOM | 6932 | CD   | ARG | X | 459 | 40.934 | 26.454 | 24.650 | 0.00 | 0.00 |
| ATOM | 6933 | HD2  | ARG | X | 459 | 41.611 | 26.554 | 25.500 | 0.00 | 0.00 |
| ATOM | 6934 | HD3  | ARG | X | 459 | 41.502 | 25.846 | 23.946 | 0.00 | 0.00 |
| ATOM | 6935 | NE   | ARG | X | 459 | 40.469 | 27.746 | 24.155 | 0.00 | 0.00 |
| ATOM | 6936 | HE   | ARG | X | 459 | 39.642 | 27.706 | 23.576 | 0.00 | 0.00 |
| ATOM | 6937 | CZ   | ARG | X | 459 | 40.913 | 28.996 | 24.364 | 0.00 | 0.00 |
| ATOM | 6938 | NH1  | ARG | X | 459 | 42.009 | 29.212 | 25.085 | 0.00 | 0.00 |
| ATOM | 6939 | HH11 | ARG | X | 459 | 42.562 | 28.514 | 25.562 | 0.00 | 0.00 |
| ATOM | 6940 | HH12 | ARG | X | 459 | 42.217 | 30.191 | 25.224 | 0.00 | 0.00 |
| ATOM | 6941 | NH2  | ARG | X | 459 | 40.274 | 29.965 | 23.844 | 0.00 | 0.00 |
| ATOM | 6942 | HH21 | ARG | X | 459 | 39.459 | 29.802 | 23.271 | 0.00 | 0.00 |
| ATOM | 6943 | HH22 | ARG | X | 459 | 40.663 | 30.895 | 23.911 | 0.00 | 0.00 |
| ATOM | 6944 | C    | ARG | X | 459 | 40.136 | 21.862 | 25.055 | 0.00 | 0.00 |
| ATOM | 6945 | O    | ARG | X | 459 | 39.008 | 21.372 | 24.967 | 0.00 | 0.00 |
| ATOM | 6946 | N    | ASN | X | 460 | 41.179 | 21.066 | 25.477 | 0.00 | 0.00 |
| ATOM | 6947 | H    | ASN | X | 460 | 42.094 | 21.490 | 25.539 | 0.00 | 0.00 |
| ATOM | 6948 | CA   | ASN | X | 460 | 41.186 | 19.649 | 25.784 | 0.00 | 0.00 |
| ATOM | 6949 | HA   | ASN | X | 460 | 40.846 | 19.080 | 24.920 | 0.00 | 0.00 |
| ATOM | 6950 | CB   | ASN | X | 460 | 42.678 | 19.322 | 25.947 | 0.00 | 0.00 |
| ATOM | 6951 | HB2  | ASN | X | 460 | 43.036 | 19.877 | 26.814 | 0.00 | 0.00 |
| ATOM | 6952 | HB3  | ASN | X | 460 | 42.762 | 18.272 | 26.226 | 0.00 | 0.00 |
| ATOM | 6953 | CG   | ASN | X | 460 | 43.549 | 19.561 | 24.652 | 0.00 | 0.00 |
| ATOM | 6954 | OD1  | ASN | X | 460 | 44.023 | 20.630 | 24.374 | 0.00 | 0.00 |
| ATOM | 6955 | ND2  | ASN | X | 460 | 43.607 | 18.562 | 23.797 | 0.00 | 0.00 |
| ATOM | 6956 | HD21 | ASN | X | 460 | 44.198 | 18.621 | 22.981 | 0.00 | 0.00 |
| ATOM | 6957 | HD22 | ASN | X | 460 | 43.131 | 17.720 | 24.088 | 0.00 | 0.00 |
| ATOM | 6958 | C    | ASN | X | 460 | 40.325 | 19.117 | 26.959 | 0.00 | 0.00 |
| ATOM | 6959 | O    | ASN | X | 460 | 40.390 | 17.908 | 27.294 | 0.00 | 0.00 |
| ATOM | 6960 | N    | TYR | X | 461 | 39.543 | 19.972 | 27.597 | 0.00 | 0.00 |
| ATOM | 6961 | H    | TYR | X | 461 | 39.547 | 20.939 | 27.309 | 0.00 | 0.00 |
| ATOM | 6962 | CA   | TYR | X | 461 | 38.807 | 19.631 | 28.834 | 0.00 | 0.00 |
| ATOM | 6963 | HA   | TYR | X | 461 | 39.464 | 19.256 | 29.619 | 0.00 | 0.00 |
| ATOM | 6964 | CB   | TYR | X | 461 | 38.054 | 20.806 | 29.389 | 0.00 | 0.00 |
| ATOM | 6965 | HB2  | TYR | X | 461 | 37.277 | 21.071 | 28.672 | 0.00 | 0.00 |

|      |      |      |     |   |     |        |        |        |      |      |
|------|------|------|-----|---|-----|--------|--------|--------|------|------|
| ATOM | 6966 | HB3  | TYR | X | 461 | 37.573 | 20.506 | 30.321 | 0.00 | 0.00 |
| ATOM | 6967 | CG   | TYR | X | 461 | 38.908 | 22.021 | 29.883 | 0.00 | 0.00 |
| ATOM | 6968 | CD1  | TYR | X | 461 | 39.182 | 23.086 | 29.007 | 0.00 | 0.00 |
| ATOM | 6969 | HD1  | TYR | X | 461 | 38.678 | 23.064 | 28.052 | 0.00 | 0.00 |
| ATOM | 6970 | CE1  | TYR | X | 461 | 40.050 | 24.163 | 29.369 | 0.00 | 0.00 |
| ATOM | 6971 | HE1  | TYR | X | 461 | 40.244 | 25.003 | 28.718 | 0.00 | 0.00 |
| ATOM | 6972 | CZ   | TYR | X | 461 | 40.477 | 24.181 | 30.686 | 0.00 | 0.00 |
| ATOM | 6973 | OH   | TYR | X | 461 | 41.192 | 25.236 | 31.187 | 0.00 | 0.00 |
| ATOM | 6974 | HH   | TYR | X | 461 | 41.362 | 25.184 | 32.131 | 0.00 | 0.00 |
| ATOM | 6975 | CE2  | TYR | X | 461 | 40.125 | 23.202 | 31.630 | 0.00 | 0.00 |
| ATOM | 6976 | HE2  | TYR | X | 461 | 40.393 | 23.275 | 32.674 | 0.00 | 0.00 |
| ATOM | 6977 | CD2  | TYR | X | 461 | 39.353 | 22.083 | 31.227 | 0.00 | 0.00 |
| ATOM | 6978 | HD2  | TYR | X | 461 | 39.140 | 21.331 | 31.973 | 0.00 | 0.00 |
| ATOM | 6979 | C    | TYR | X | 461 | 37.857 | 18.452 | 28.508 | 0.00 | 0.00 |
| ATOM | 6980 | O    | TYR | X | 461 | 37.140 | 18.450 | 27.497 | 0.00 | 0.00 |
| ATOM | 6981 | N    | THR | X | 462 | 37.839 | 17.460 | 29.400 | 0.00 | 0.00 |
| ATOM | 6982 | H    | THR | X | 462 | 38.291 | 17.582 | 30.295 | 0.00 | 0.00 |
| ATOM | 6983 | CA   | THR | X | 462 | 36.984 | 16.253 | 29.307 | 0.00 | 0.00 |
| ATOM | 6984 | HA   | THR | X | 462 | 37.144 | 15.734 | 28.362 | 0.00 | 0.00 |
| ATOM | 6985 | CB   | THR | X | 462 | 37.464 | 15.171 | 30.290 | 0.00 | 0.00 |
| ATOM | 6986 | HB   | THR | X | 462 | 36.802 | 14.311 | 30.188 | 0.00 | 0.00 |
| ATOM | 6987 | CG2  | THR | X | 462 | 38.926 | 14.763 | 30.167 | 0.00 | 0.00 |
| ATOM | 6988 | HG21 | THR | X | 462 | 39.044 | 14.624 | 29.093 | 0.00 | 0.00 |
| ATOM | 6989 | HG22 | THR | X | 462 | 39.210 | 13.895 | 30.763 | 0.00 | 0.00 |
| ATOM | 6990 | HG23 | THR | X | 462 | 39.570 | 15.619 | 30.367 | 0.00 | 0.00 |
| ATOM | 6991 | OG1  | THR | X | 462 | 37.493 | 15.641 | 31.616 | 0.00 | 0.00 |
| ATOM | 6992 | HG1  | THR | X | 462 | 37.512 | 14.905 | 32.231 | 0.00 | 0.00 |
| ATOM | 6993 | C    | THR | X | 462 | 35.466 | 16.553 | 29.455 | 0.00 | 0.00 |
| ATOM | 6994 | O    | THR | X | 462 | 34.999 | 17.655 | 29.760 | 0.00 | 0.00 |
| ATOM | 6995 | N    | ALA | X | 463 | 34.584 | 15.487 | 29.313 | 0.00 | 0.00 |
| ATOM | 6996 | H    | ALA | X | 463 | 34.951 | 14.626 | 28.935 | 0.00 | 0.00 |
| ATOM | 6997 | CA   | ALA | X | 463 | 33.130 | 15.705 | 29.387 | 0.00 | 0.00 |
| ATOM | 6998 | HA   | ALA | X | 463 | 32.798 | 16.583 | 28.833 | 0.00 | 0.00 |
| ATOM | 6999 | CB   | ALA | X | 463 | 32.398 | 14.468 | 28.875 | 0.00 | 0.00 |
| ATOM | 7000 | HB1  | ALA | X | 463 | 32.765 | 13.676 | 29.527 | 0.00 | 0.00 |
| ATOM | 7001 | HB2  | ALA | X | 463 | 32.505 | 14.215 | 27.820 | 0.00 | 0.00 |
| ATOM | 7002 | HB3  | ALA | X | 463 | 31.321 | 14.573 | 29.006 | 0.00 | 0.00 |
| ATOM | 7003 | C    | ALA | X | 463 | 32.732 | 16.066 | 30.860 | 0.00 | 0.00 |
| ATOM | 7004 | O    | ALA | X | 463 | 31.888 | 16.944 | 31.090 | 0.00 | 0.00 |
| ATOM | 7005 | N    | GLU | X | 464 | 33.375 | 15.430 | 31.915 | 0.00 | 0.00 |
| ATOM | 7006 | H    | GLU | X | 464 | 34.015 | 14.653 | 31.838 | 0.00 | 0.00 |
| ATOM | 7007 | CA   | GLU | X | 464 | 33.039 | 15.793 | 33.290 | 0.00 | 0.00 |
| ATOM | 7008 | HA   | GLU | X | 464 | 31.985 | 15.603 | 33.491 | 0.00 | 0.00 |
| ATOM | 7009 | CB   | GLU | X | 464 | 33.776 | 14.747 | 34.199 | 0.00 | 0.00 |
| ATOM | 7010 | HB2  | GLU | X | 464 | 33.294 | 14.978 | 35.149 | 0.00 | 0.00 |
| ATOM | 7011 | HB3  | GLU | X | 464 | 33.471 | 13.807 | 33.739 | 0.00 | 0.00 |
| ATOM | 7012 | CG   | GLU | X | 464 | 35.328 | 14.920 | 34.260 | 0.00 | 0.00 |
| ATOM | 7013 | HG2  | GLU | X | 464 | 35.673 | 15.541 | 33.434 | 0.00 | 0.00 |
| ATOM | 7014 | HG3  | GLU | X | 464 | 35.596 | 15.457 | 35.171 | 0.00 | 0.00 |
| ATOM | 7015 | CD   | GLU | X | 464 | 36.134 | 13.608 | 34.164 | 0.00 | 0.00 |
| ATOM | 7016 | OE1  | GLU | X | 464 | 35.908 | 12.654 | 34.984 | 0.00 | 0.00 |
| ATOM | 7017 | OE2  | GLU | X | 464 | 36.909 | 13.437 | 33.163 | 0.00 | 0.00 |
| ATOM | 7018 | C    | GLU | X | 464 | 33.416 | 17.237 | 33.693 | 0.00 | 0.00 |
| ATOM | 7019 | O    | GLU | X | 464 | 32.635 | 17.818 | 34.459 | 0.00 | 0.00 |
| ATOM | 7020 | N    | GLU | X | 465 | 34.416 | 17.826 | 33.050 | 0.00 | 0.00 |
| ATOM | 7021 | H    | GLU | X | 465 | 35.003 | 17.360 | 32.373 | 0.00 | 0.00 |
| ATOM | 7022 | CA   | GLU | X | 465 | 34.883 | 19.190 | 33.206 | 0.00 | 0.00 |
| ATOM | 7023 | HA   | GLU | X | 465 | 34.966 | 19.467 | 34.257 | 0.00 | 0.00 |
| ATOM | 7024 | CB   | GLU | X | 465 | 36.276 | 19.239 | 32.604 | 0.00 | 0.00 |
| ATOM | 7025 | HB2  | GLU | X | 465 | 36.317 | 18.770 | 31.621 | 0.00 | 0.00 |
| ATOM | 7026 | HB3  | GLU | X | 465 | 36.566 | 20.290 | 32.602 | 0.00 | 0.00 |
| ATOM | 7027 | CG   | GLU | X | 465 | 37.330 | 18.527 | 33.532 | 0.00 | 0.00 |
| ATOM | 7028 | HG2  | GLU | X | 465 | 37.269 | 18.840 | 34.575 | 0.00 | 0.00 |
| ATOM | 7029 | HG3  | GLU | X | 465 | 37.147 | 17.453 | 33.553 | 0.00 | 0.00 |
| ATOM | 7030 | CD   | GLU | X | 465 | 38.784 | 18.774 | 33.162 | 0.00 | 0.00 |
| ATOM | 7031 | OE1  | GLU | X | 465 | 39.099 | 18.669 | 31.944 | 0.00 | 0.00 |
| ATOM | 7032 | OE2  | GLU | X | 465 | 39.636 | 18.940 | 34.111 | 0.00 | 0.00 |

|      |      |      |     |   |     |        |        |        |      |      |
|------|------|------|-----|---|-----|--------|--------|--------|------|------|
| ATOM | 7033 | C    | GLU | X | 465 | 33.899 | 20.132 | 32.441 | 0.00 | 0.00 |
| ATOM | 7034 | O    | GLU | X | 465 | 33.568 | 21.173 | 32.993 | 0.00 | 0.00 |
| ATOM | 7035 | N    | LYS | X | 466 | 33.400 | 19.752 | 31.277 | 0.00 | 0.00 |
| ATOM | 7036 | H    | LYS | X | 466 | 33.699 | 18.889 | 30.845 | 0.00 | 0.00 |
| ATOM | 7037 | CA   | LYS | X | 466 | 32.325 | 20.536 | 30.589 | 0.00 | 0.00 |
| ATOM | 7038 | HA   | LYS | X | 466 | 32.609 | 21.584 | 30.496 | 0.00 | 0.00 |
| ATOM | 7039 | CB   | LYS | X | 466 | 32.176 | 19.935 | 29.175 | 0.00 | 0.00 |
| ATOM | 7040 | HB2  | LYS | X | 466 | 32.263 | 18.850 | 29.227 | 0.00 | 0.00 |
| ATOM | 7041 | HB3  | LYS | X | 466 | 31.167 | 20.140 | 28.814 | 0.00 | 0.00 |
| ATOM | 7042 | CG   | LYS | X | 466 | 33.290 | 20.448 | 28.223 | 0.00 | 0.00 |
| ATOM | 7043 | HG2  | LYS | X | 466 | 33.095 | 21.475 | 27.914 | 0.00 | 0.00 |
| ATOM | 7044 | HG3  | LYS | X | 466 | 34.301 | 20.398 | 28.626 | 0.00 | 0.00 |
| ATOM | 7045 | CD   | LYS | X | 466 | 33.354 | 19.589 | 26.949 | 0.00 | 0.00 |
| ATOM | 7046 | HD2  | LYS | X | 466 | 33.825 | 18.634 | 27.181 | 0.00 | 0.00 |
| ATOM | 7047 | HD3  | LYS | X | 466 | 32.362 | 19.427 | 26.528 | 0.00 | 0.00 |
| ATOM | 7048 | CE   | LYS | X | 466 | 34.232 | 20.204 | 25.821 | 0.00 | 0.00 |
| ATOM | 7049 | HE2  | LYS | X | 466 | 34.139 | 19.577 | 24.934 | 0.00 | 0.00 |
| ATOM | 7050 | HE3  | LYS | X | 466 | 33.757 | 21.154 | 25.578 | 0.00 | 0.00 |
| ATOM | 7051 | NZ   | LYS | X | 466 | 35.663 | 20.318 | 26.099 | 0.00 | 0.00 |
| ATOM | 7052 | HZ1  | LYS | X | 466 | 36.116 | 19.460 | 26.381 | 0.00 | 0.00 |
| ATOM | 7053 | HZ2  | LYS | X | 466 | 36.141 | 20.797 | 25.349 | 0.00 | 0.00 |
| ATOM | 7054 | HZ3  | LYS | X | 466 | 35.821 | 20.968 | 26.855 | 0.00 | 0.00 |
| ATOM | 7055 | C    | LYS | X | 466 | 31.000 | 20.538 | 31.393 | 0.00 | 0.00 |
| ATOM | 7056 | O    | LYS | X | 466 | 30.408 | 21.671 | 31.500 | 0.00 | 0.00 |
| ATOM | 7057 | N    | ILE | X | 467 | 30.618 | 19.394 | 32.014 | 0.00 | 0.00 |
| ATOM | 7058 | H    | ILE | X | 467 | 31.245 | 18.631 | 31.801 | 0.00 | 0.00 |
| ATOM | 7059 | CA   | ILE | X | 467 | 29.510 | 19.353 | 32.975 | 0.00 | 0.00 |
| ATOM | 7060 | HA   | ILE | X | 467 | 28.673 | 19.876 | 32.514 | 0.00 | 0.00 |
| ATOM | 7061 | CB   | ILE | X | 467 | 29.201 | 17.884 | 33.302 | 0.00 | 0.00 |
| ATOM | 7062 | HB   | ILE | X | 467 | 30.115 | 17.341 | 33.538 | 0.00 | 0.00 |
| ATOM | 7063 | CG2  | ILE | X | 467 | 28.154 | 17.781 | 34.406 | 0.00 | 0.00 |
| ATOM | 7064 | HG21 | ILE | X | 467 | 27.206 | 18.257 | 34.155 | 0.00 | 0.00 |
| ATOM | 7065 | HG22 | ILE | X | 467 | 28.573 | 18.109 | 35.357 | 0.00 | 0.00 |
| ATOM | 7066 | HG23 | ILE | X | 467 | 27.976 | 16.730 | 34.637 | 0.00 | 0.00 |
| ATOM | 7067 | CG1  | ILE | X | 467 | 28.587 | 17.242 | 31.963 | 0.00 | 0.00 |
| ATOM | 7068 | HG12 | ILE | X | 467 | 27.570 | 17.604 | 31.811 | 0.00 | 0.00 |
| ATOM | 7069 | HG13 | ILE | X | 467 | 29.265 | 17.460 | 31.138 | 0.00 | 0.00 |
| ATOM | 7070 | CD1  | ILE | X | 467 | 28.578 | 15.715 | 32.051 | 0.00 | 0.00 |
| ATOM | 7071 | HD11 | ILE | X | 467 | 29.548 | 15.344 | 32.383 | 0.00 | 0.00 |
| ATOM | 7072 | HD12 | ILE | X | 467 | 28.337 | 15.239 | 31.101 | 0.00 | 0.00 |
| ATOM | 7073 | HD13 | ILE | X | 467 | 27.789 | 15.440 | 32.751 | 0.00 | 0.00 |
| ATOM | 7074 | C    | ILE | X | 467 | 29.753 | 20.164 | 34.206 | 0.00 | 0.00 |
| ATOM | 7075 | O    | ILE | X | 467 | 28.833 | 20.815 | 34.760 | 0.00 | 0.00 |
| ATOM | 7076 | N    | PHE | X | 468 | 30.982 | 20.016 | 34.776 | 0.00 | 0.00 |
| ATOM | 7077 | H    | PHE | X | 468 | 31.654 | 19.511 | 34.216 | 0.00 | 0.00 |
| ATOM | 7078 | CA   | PHE | X | 468 | 31.387 | 20.773 | 35.984 | 0.00 | 0.00 |
| ATOM | 7079 | HA   | PHE | X | 468 | 30.637 | 20.578 | 36.751 | 0.00 | 0.00 |
| ATOM | 7080 | CB   | PHE | X | 468 | 32.756 | 20.277 | 36.443 | 0.00 | 0.00 |
| ATOM | 7081 | HB2  | PHE | X | 468 | 32.727 | 19.196 | 36.578 | 0.00 | 0.00 |
| ATOM | 7082 | HB3  | PHE | X | 468 | 33.417 | 20.558 | 35.623 | 0.00 | 0.00 |
| ATOM | 7083 | CG   | PHE | X | 468 | 33.363 | 20.842 | 37.702 | 0.00 | 0.00 |
| ATOM | 7084 | CD1  | PHE | X | 468 | 32.660 | 20.881 | 38.920 | 0.00 | 0.00 |
| ATOM | 7085 | HD1  | PHE | X | 468 | 31.660 | 20.474 | 38.957 | 0.00 | 0.00 |
| ATOM | 7086 | CE1  | PHE | X | 468 | 33.299 | 21.314 | 40.150 | 0.00 | 0.00 |
| ATOM | 7087 | HE1  | PHE | X | 468 | 32.714 | 21.432 | 41.051 | 0.00 | 0.00 |
| ATOM | 7088 | CZ   | PHE | X | 468 | 34.607 | 21.768 | 40.074 | 0.00 | 0.00 |
| ATOM | 7089 | HZ   | PHE | X | 468 | 35.043 | 22.228 | 40.949 | 0.00 | 0.00 |
| ATOM | 7090 | CE2  | PHE | X | 468 | 35.329 | 21.751 | 38.868 | 0.00 | 0.00 |
| ATOM | 7091 | HE2  | PHE | X | 468 | 36.343 | 22.111 | 38.779 | 0.00 | 0.00 |
| ATOM | 7092 | CD2  | PHE | X | 468 | 34.682 | 21.391 | 37.690 | 0.00 | 0.00 |
| ATOM | 7093 | HD2  | PHE | X | 468 | 35.253 | 21.257 | 36.783 | 0.00 | 0.00 |
| ATOM | 7094 | C    | PHE | X | 468 | 31.365 | 22.292 | 35.768 | 0.00 | 0.00 |
| ATOM | 7095 | O    | PHE | X | 468 | 30.772 | 22.962 | 36.656 | 0.00 | 0.00 |
| ATOM | 7096 | N    | ALA | X | 469 | 31.799 | 22.843 | 34.666 | 0.00 | 0.00 |
| ATOM | 7097 | H    | ALA | X | 469 | 32.379 | 22.238 | 34.101 | 0.00 | 0.00 |
| ATOM | 7098 | CA   | ALA | X | 469 | 31.681 | 24.249 | 34.295 | 0.00 | 0.00 |
| ATOM | 7099 | HA   | ALA | X | 469 | 32.165 | 24.839 | 35.074 | 0.00 | 0.00 |

|      |      |      |     |   |     |        |        |        |      |      |
|------|------|------|-----|---|-----|--------|--------|--------|------|------|
| ATOM | 7100 | CB   | ALA | X | 469 | 32.527 | 24.432 | 32.990 | 0.00 | 0.00 |
| ATOM | 7101 | HB1  | ALA | X | 469 | 33.580 | 24.231 | 33.188 | 0.00 | 0.00 |
| ATOM | 7102 | HB2  | ALA | X | 469 | 32.418 | 25.471 | 32.679 | 0.00 | 0.00 |
| ATOM | 7103 | HB3  | ALA | X | 469 | 32.130 | 23.821 | 32.180 | 0.00 | 0.00 |
| ATOM | 7104 | C    | ALA | X | 469 | 30.228 | 24.703 | 34.086 | 0.00 | 0.00 |
| ATOM | 7105 | O    | ALA | X | 469 | 29.913 | 25.771 | 34.565 | 0.00 | 0.00 |
| ATOM | 7106 | N    | GLN | X | 470 | 29.382 | 23.836 | 33.517 | 0.00 | 0.00 |
| ATOM | 7107 | H    | GLN | X | 470 | 29.732 | 22.970 | 33.132 | 0.00 | 0.00 |
| ATOM | 7108 | CA   | GLN | X | 470 | 27.932 | 24.077 | 33.417 | 0.00 | 0.00 |
| ATOM | 7109 | HA   | GLN | X | 470 | 27.734 | 25.023 | 32.914 | 0.00 | 0.00 |
| ATOM | 7110 | CB   | GLN | X | 470 | 27.304 | 23.042 | 32.518 | 0.00 | 0.00 |
| ATOM | 7111 | HB2  | GLN | X | 470 | 27.698 | 22.074 | 32.826 | 0.00 | 0.00 |
| ATOM | 7112 | HB3  | GLN | X | 470 | 26.223 | 23.063 | 32.659 | 0.00 | 0.00 |
| ATOM | 7113 | CG   | GLN | X | 470 | 27.628 | 23.253 | 31.058 | 0.00 | 0.00 |
| ATOM | 7114 | HG2  | GLN | X | 470 | 27.148 | 24.100 | 30.567 | 0.00 | 0.00 |
| ATOM | 7115 | HG3  | GLN | X | 470 | 28.709 | 23.373 | 31.000 | 0.00 | 0.00 |
| ATOM | 7116 | CD   | GLN | X | 470 | 27.220 | 22.064 | 30.157 | 0.00 | 0.00 |
| ATOM | 7117 | OE1  | GLN | X | 470 | 28.019 | 21.425 | 29.499 | 0.00 | 0.00 |
| ATOM | 7118 | NE2  | GLN | X | 470 | 25.884 | 21.800 | 29.982 | 0.00 | 0.00 |
| ATOM | 7119 | HE21 | GLN | X | 470 | 25.626 | 21.132 | 29.269 | 0.00 | 0.00 |
| ATOM | 7120 | HE22 | GLN | X | 470 | 25.172 | 22.294 | 30.499 | 0.00 | 0.00 |
| ATOM | 7121 | C    | GLN | X | 470 | 27.248 | 24.241 | 34.764 | 0.00 | 0.00 |
| ATOM | 7122 | O    | GLN | X | 470 | 26.471 | 25.155 | 34.961 | 0.00 | 0.00 |
| ATOM | 7123 | N    | ARG | X | 471 | 27.587 | 23.325 | 35.702 | 0.00 | 0.00 |
| ATOM | 7124 | H    | ARG | X | 471 | 28.232 | 22.600 | 35.423 | 0.00 | 0.00 |
| ATOM | 7125 | CA   | ARG | X | 471 | 27.243 | 23.354 | 37.107 | 0.00 | 0.00 |
| ATOM | 7126 | HA   | ARG | X | 471 | 26.155 | 23.353 | 37.167 | 0.00 | 0.00 |
| ATOM | 7127 | CB   | ARG | X | 471 | 27.684 | 22.094 | 37.710 | 0.00 | 0.00 |
| ATOM | 7128 | HB2  | ARG | X | 471 | 27.140 | 21.277 | 37.235 | 0.00 | 0.00 |
| ATOM | 7129 | HB3  | ARG | X | 471 | 28.735 | 21.891 | 37.502 | 0.00 | 0.00 |
| ATOM | 7130 | CG   | ARG | X | 471 | 27.654 | 22.001 | 39.175 | 0.00 | 0.00 |
| ATOM | 7131 | HG2  | ARG | X | 471 | 28.378 | 22.704 | 39.586 | 0.00 | 0.00 |
| ATOM | 7132 | HG3  | ARG | X | 471 | 26.688 | 22.307 | 39.577 | 0.00 | 0.00 |
| ATOM | 7133 | CD   | ARG | X | 471 | 28.061 | 20.646 | 39.683 | 0.00 | 0.00 |
| ATOM | 7134 | HD2  | ARG | X | 471 | 27.284 | 19.917 | 39.452 | 0.00 | 0.00 |
| ATOM | 7135 | HD3  | ARG | X | 471 | 28.948 | 20.383 | 39.106 | 0.00 | 0.00 |
| ATOM | 7136 | NE   | ARG | X | 471 | 28.383 | 20.580 | 41.128 | 0.00 | 0.00 |
| ATOM | 7137 | HE   | ARG | X | 471 | 28.046 | 21.347 | 41.691 | 0.00 | 0.00 |
| ATOM | 7138 | CZ   | ARG | X | 471 | 29.200 | 19.675 | 41.731 | 0.00 | 0.00 |
| ATOM | 7139 | NH1  | ARG | X | 471 | 29.647 | 18.663 | 41.075 | 0.00 | 0.00 |
| ATOM | 7140 | HH11 | ARG | X | 471 | 29.472 | 18.537 | 40.089 | 0.00 | 0.00 |
| ATOM | 7141 | HH12 | ARG | X | 471 | 30.417 | 18.085 | 41.381 | 0.00 | 0.00 |
| ATOM | 7142 | NH2  | ARG | X | 471 | 29.598 | 19.769 | 42.966 | 0.00 | 0.00 |
| ATOM | 7143 | HH21 | ARG | X | 471 | 29.442 | 20.589 | 43.534 | 0.00 | 0.00 |
| ATOM | 7144 | HH22 | ARG | X | 471 | 30.218 | 19.057 | 43.326 | 0.00 | 0.00 |
| ATOM | 7145 | C    | ARG | X | 471 | 27.693 | 24.650 | 37.795 | 0.00 | 0.00 |
| ATOM | 7146 | O    | ARG | X | 471 | 26.980 | 25.247 | 38.536 | 0.00 | 0.00 |
| ATOM | 7147 | N    | LEU | X | 472 | 28.922 | 25.115 | 37.597 | 0.00 | 0.00 |
| ATOM | 7148 | H    | LEU | X | 472 | 29.444 | 24.623 | 36.887 | 0.00 | 0.00 |
| ATOM | 7149 | CA   | LEU | X | 472 | 29.530 | 26.282 | 38.301 | 0.00 | 0.00 |
| ATOM | 7150 | HA   | LEU | X | 472 | 29.280 | 26.288 | 39.362 | 0.00 | 0.00 |
| ATOM | 7151 | CB   | LEU | X | 472 | 31.111 | 26.232 | 38.208 | 0.00 | 0.00 |
| ATOM | 7152 | HB2  | LEU | X | 472 | 31.349 | 26.091 | 37.154 | 0.00 | 0.00 |
| ATOM | 7153 | HB3  | LEU | X | 472 | 31.520 | 27.223 | 38.407 | 0.00 | 0.00 |
| ATOM | 7154 | CG   | LEU | X | 472 | 31.739 | 25.116 | 39.084 | 0.00 | 0.00 |
| ATOM | 7155 | HG   | LEU | X | 472 | 31.065 | 24.263 | 39.010 | 0.00 | 0.00 |
| ATOM | 7156 | CD1  | LEU | X | 472 | 33.145 | 24.688 | 38.504 | 0.00 | 0.00 |
| ATOM | 7157 | HD11 | LEU | X | 472 | 33.738 | 25.600 | 38.435 | 0.00 | 0.00 |
| ATOM | 7158 | HD12 | LEU | X | 472 | 33.099 | 24.228 | 37.517 | 0.00 | 0.00 |
| ATOM | 7159 | HD13 | LEU | X | 472 | 33.698 | 24.043 | 39.186 | 0.00 | 0.00 |
| ATOM | 7160 | CD2  | LEU | X | 472 | 31.818 | 25.508 | 40.571 | 0.00 | 0.00 |
| ATOM | 7161 | HD21 | LEU | X | 472 | 32.384 | 26.421 | 40.754 | 0.00 | 0.00 |
| ATOM | 7162 | HD22 | LEU | X | 472 | 30.797 | 25.746 | 40.869 | 0.00 | 0.00 |
| ATOM | 7163 | HD23 | LEU | X | 472 | 32.302 | 24.748 | 41.185 | 0.00 | 0.00 |
| ATOM | 7164 | C    | LEU | X | 472 | 29.025 | 27.621 | 37.749 | 0.00 | 0.00 |
| ATOM | 7165 | O    | LEU | X | 472 | 28.690 | 28.429 | 38.598 | 0.00 | 0.00 |
| ATOM | 7166 | N    | MET | X | 473 | 28.879 | 27.877 | 36.418 | 0.00 | 0.00 |

|      |      |      |     |   |     |        |        |        |      |      |
|------|------|------|-----|---|-----|--------|--------|--------|------|------|
| ATOM | 7167 | H    | MET | X | 473 | 29.417 | 27.317 | 35.771 | 0.00 | 0.00 |
| ATOM | 7168 | CA   | MET | X | 473 | 28.169 | 29.013 | 35.920 | 0.00 | 0.00 |
| ATOM | 7169 | HA   | MET | X | 473 | 28.725 | 29.928 | 36.124 | 0.00 | 0.00 |
| ATOM | 7170 | CB   | MET | X | 473 | 28.086 | 28.826 | 34.408 | 0.00 | 0.00 |
| ATOM | 7171 | HB2  | MET | X | 473 | 27.747 | 27.864 | 34.025 | 0.00 | 0.00 |
| ATOM | 7172 | HB3  | MET | X | 473 | 27.453 | 29.654 | 34.088 | 0.00 | 0.00 |
| ATOM | 7173 | CG   | MET | X | 473 | 29.420 | 28.973 | 33.611 | 0.00 | 0.00 |
| ATOM | 7174 | HG2  | MET | X | 473 | 29.918 | 29.854 | 34.014 | 0.00 | 0.00 |
| ATOM | 7175 | HG3  | MET | X | 473 | 30.133 | 28.204 | 33.906 | 0.00 | 0.00 |
| ATOM | 7176 | SD   | MET | X | 473 | 29.290 | 28.909 | 31.839 | 0.00 | 0.00 |
| ATOM | 7177 | CE   | MET | X | 473 | 28.509 | 27.266 | 31.483 | 0.00 | 0.00 |
| ATOM | 7178 | HE1  | MET | X | 473 | 28.300 | 27.149 | 30.419 | 0.00 | 0.00 |
| ATOM | 7179 | HE2  | MET | X | 473 | 29.270 | 26.543 | 31.776 | 0.00 | 0.00 |
| ATOM | 7180 | HE3  | MET | X | 473 | 27.557 | 27.163 | 32.004 | 0.00 | 0.00 |
| ATOM | 7181 | C    | MET | X | 473 | 26.758 | 29.133 | 36.530 | 0.00 | 0.00 |
| ATOM | 7182 | O    | MET | X | 473 | 26.253 | 30.218 | 36.822 | 0.00 | 0.00 |
| ATOM | 7183 | N    | ARG | X | 474 | 26.103 | 27.962 | 36.741 | 0.00 | 0.00 |
| ATOM | 7184 | H    | ARG | X | 474 | 26.455 | 27.095 | 36.360 | 0.00 | 0.00 |
| ATOM | 7185 | CA   | ARG | X | 474 | 24.755 | 27.946 | 37.305 | 0.00 | 0.00 |
| ATOM | 7186 | HA   | ARG | X | 474 | 24.131 | 28.559 | 36.654 | 0.00 | 0.00 |
| ATOM | 7187 | CB   | ARG | X | 474 | 24.172 | 26.553 | 37.217 | 0.00 | 0.00 |
| ATOM | 7188 | HB2  | ARG | X | 474 | 24.459 | 26.064 | 36.286 | 0.00 | 0.00 |
| ATOM | 7189 | HB3  | ARG | X | 474 | 24.645 | 25.980 | 38.015 | 0.00 | 0.00 |
| ATOM | 7190 | CG   | ARG | X | 474 | 22.708 | 26.455 | 37.453 | 0.00 | 0.00 |
| ATOM | 7191 | HG2  | ARG | X | 474 | 22.516 | 25.386 | 37.359 | 0.00 | 0.00 |
| ATOM | 7192 | HG3  | ARG | X | 474 | 22.366 | 26.738 | 38.448 | 0.00 | 0.00 |
| ATOM | 7193 | CD   | ARG | X | 474 | 21.859 | 27.140 | 36.349 | 0.00 | 0.00 |
| ATOM | 7194 | HD2  | ARG | X | 474 | 22.052 | 28.209 | 36.448 | 0.00 | 0.00 |
| ATOM | 7195 | HD3  | ARG | X | 474 | 22.318 | 26.799 | 35.422 | 0.00 | 0.00 |
| ATOM | 7196 | NE   | ARG | X | 474 | 20.424 | 26.915 | 36.451 | 0.00 | 0.00 |
| ATOM | 7197 | HE   | ARG | X | 474 | 20.044 | 26.586 | 37.327 | 0.00 | 0.00 |
| ATOM | 7198 | CZ   | ARG | X | 474 | 19.483 | 27.060 | 35.521 | 0.00 | 0.00 |
| ATOM | 7199 | NH1  | ARG | X | 474 | 19.848 | 27.497 | 34.387 | 0.00 | 0.00 |
| ATOM | 7200 | HH11 | ARG | X | 474 | 20.815 | 27.785 | 34.342 | 0.00 | 0.00 |
| ATOM | 7201 | HH12 | ARG | X | 474 | 19.150 | 27.601 | 33.664 | 0.00 | 0.00 |
| ATOM | 7202 | NH2  | ARG | X | 474 | 18.223 | 26.737 | 35.823 | 0.00 | 0.00 |
| ATOM | 7203 | HH21 | ARG | X | 474 | 18.022 | 26.271 | 36.696 | 0.00 | 0.00 |
| ATOM | 7204 | HH22 | ARG | X | 474 | 17.462 | 27.034 | 35.229 | 0.00 | 0.00 |
| ATOM | 7205 | C    | ARG | X | 474 | 24.659 | 28.490 | 38.743 | 0.00 | 0.00 |
| ATOM | 7206 | O    | ARG | X | 474 | 23.737 | 29.284 | 38.972 | 0.00 | 0.00 |
| ATOM | 7207 | N    | TYR | X | 475 | 25.633 | 28.191 | 39.600 | 0.00 | 0.00 |
| ATOM | 7208 | H    | TYR | X | 475 | 26.320 | 27.472 | 39.417 | 0.00 | 0.00 |
| ATOM | 7209 | CA   | TYR | X | 475 | 25.666 | 28.722 | 40.995 | 0.00 | 0.00 |
| ATOM | 7210 | HA   | TYR | X | 475 | 24.646 | 28.575 | 41.352 | 0.00 | 0.00 |
| ATOM | 7211 | CB   | TYR | X | 475 | 26.730 | 27.983 | 41.774 | 0.00 | 0.00 |
| ATOM | 7212 | HB2  | TYR | X | 475 | 27.674 | 28.189 | 41.270 | 0.00 | 0.00 |
| ATOM | 7213 | HB3  | TYR | X | 475 | 26.850 | 28.411 | 42.769 | 0.00 | 0.00 |
| ATOM | 7214 | CG   | TYR | X | 475 | 26.608 | 26.492 | 41.950 | 0.00 | 0.00 |
| ATOM | 7215 | CD1  | TYR | X | 475 | 25.348 | 25.851 | 42.237 | 0.00 | 0.00 |
| ATOM | 7216 | HD1  | TYR | X | 475 | 24.467 | 26.471 | 42.308 | 0.00 | 0.00 |
| ATOM | 7217 | CE1  | TYR | X | 475 | 25.253 | 24.451 | 42.369 | 0.00 | 0.00 |
| ATOM | 7218 | HE1  | TYR | X | 475 | 24.348 | 23.935 | 42.652 | 0.00 | 0.00 |
| ATOM | 7219 | CZ   | TYR | X | 475 | 26.431 | 23.672 | 42.325 | 0.00 | 0.00 |
| ATOM | 7220 | OH   | TYR | X | 475 | 26.415 | 22.363 | 42.586 | 0.00 | 0.00 |
| ATOM | 7221 | HH   | TYR | X | 475 | 25.528 | 22.093 | 42.836 | 0.00 | 0.00 |
| ATOM | 7222 | CE2  | TYR | X | 475 | 27.632 | 24.291 | 42.060 | 0.00 | 0.00 |
| ATOM | 7223 | HE2  | TYR | X | 475 | 28.554 | 23.729 | 42.060 | 0.00 | 0.00 |
| ATOM | 7224 | CD2  | TYR | X | 475 | 27.762 | 25.681 | 41.767 | 0.00 | 0.00 |
| ATOM | 7225 | HD2  | TYR | X | 475 | 28.767 | 26.038 | 41.592 | 0.00 | 0.00 |
| ATOM | 7226 | C    | TYR | X | 475 | 25.881 | 30.225 | 41.001 | 0.00 | 0.00 |
| ATOM | 7227 | O    | TYR | X | 475 | 25.133 | 30.886 | 41.685 | 0.00 | 0.00 |
| ATOM | 7228 | N    | TRP | X | 476 | 26.852 | 30.767 | 40.262 | 0.00 | 0.00 |
| ATOM | 7229 | H    | TRP | X | 476 | 27.407 | 30.201 | 39.636 | 0.00 | 0.00 |
| ATOM | 7230 | CA   | TRP | X | 476 | 27.168 | 32.161 | 40.157 | 0.00 | 0.00 |
| ATOM | 7231 | HA   | TRP | X | 476 | 27.243 | 32.566 | 41.166 | 0.00 | 0.00 |
| ATOM | 7232 | CB   | TRP | X | 476 | 28.452 | 32.496 | 39.308 | 0.00 | 0.00 |
| ATOM | 7233 | HB2  | TRP | X | 476 | 28.589 | 31.756 | 38.520 | 0.00 | 0.00 |

|      |      |      |     |   |     |        |        |        |      |      |
|------|------|------|-----|---|-----|--------|--------|--------|------|------|
| ATOM | 7234 | HB3  | TRP | X | 476 | 28.422 | 33.441 | 38.766 | 0.00 | 0.00 |
| ATOM | 7235 | CG   | TRP | X | 476 | 29.708 | 32.483 | 40.163 | 0.00 | 0.00 |
| ATOM | 7236 | CD1  | TRP | X | 476 | 30.540 | 33.624 | 40.276 | 0.00 | 0.00 |
| ATOM | 7237 | HD1  | TRP | X | 476 | 30.324 | 34.549 | 39.763 | 0.00 | 0.00 |
| ATOM | 7238 | NE1  | TRP | X | 476 | 31.671 | 33.315 | 40.987 | 0.00 | 0.00 |
| ATOM | 7239 | HE1  | TRP | X | 476 | 32.466 | 33.930 | 41.089 | 0.00 | 0.00 |
| ATOM | 7240 | CE2  | TRP | X | 476 | 31.572 | 32.046 | 41.492 | 0.00 | 0.00 |
| ATOM | 7241 | CZ2  | TRP | X | 476 | 32.456 | 31.342 | 42.346 | 0.00 | 0.00 |
| ATOM | 7242 | HZ2  | TRP | X | 476 | 33.374 | 31.775 | 42.715 | 0.00 | 0.00 |
| ATOM | 7243 | CH2  | TRP | X | 476 | 32.174 | 29.962 | 42.676 | 0.00 | 0.00 |
| ATOM | 7244 | HH2  | TRP | X | 476 | 32.820 | 29.340 | 43.278 | 0.00 | 0.00 |
| ATOM | 7245 | CZ3  | TRP | X | 476 | 31.030 | 29.310 | 42.157 | 0.00 | 0.00 |
| ATOM | 7246 | HZ3  | TRP | X | 476 | 30.830 | 28.298 | 42.477 | 0.00 | 0.00 |
| ATOM | 7247 | CE3  | TRP | X | 476 | 30.159 | 30.122 | 41.333 | 0.00 | 0.00 |
| ATOM | 7248 | HE3  | TRP | X | 476 | 29.277 | 29.635 | 40.943 | 0.00 | 0.00 |
| ATOM | 7249 | CD2  | TRP | X | 476 | 30.406 | 31.482 | 40.972 | 0.00 | 0.00 |
| ATOM | 7250 | C    | TRP | X | 476 | 25.977 | 32.874 | 39.476 | 0.00 | 0.00 |
| ATOM | 7251 | O    | TRP | X | 476 | 25.620 | 33.976 | 39.900 | 0.00 | 0.00 |
| ATOM | 7252 | N    | ALA | X | 477 | 25.304 | 32.321 | 38.444 | 0.00 | 0.00 |
| ATOM | 7253 | H    | ALA | X | 477 | 25.558 | 31.393 | 38.139 | 0.00 | 0.00 |
| ATOM | 7254 | CA   | ALA | X | 477 | 24.084 | 32.923 | 37.842 | 0.00 | 0.00 |
| ATOM | 7255 | HA   | ALA | X | 477 | 24.396 | 33.947 | 37.636 | 0.00 | 0.00 |
| ATOM | 7256 | CB   | ALA | X | 477 | 23.797 | 32.172 | 36.519 | 0.00 | 0.00 |
| ATOM | 7257 | HB1  | ALA | X | 477 | 24.679 | 32.327 | 35.897 | 0.00 | 0.00 |
| ATOM | 7258 | HB2  | ALA | X | 477 | 22.960 | 32.640 | 36.000 | 0.00 | 0.00 |
| ATOM | 7259 | HB3  | ALA | X | 477 | 23.563 | 31.113 | 36.630 | 0.00 | 0.00 |
| ATOM | 7260 | C    | ALA | X | 477 | 22.848 | 32.986 | 38.799 | 0.00 | 0.00 |
| ATOM | 7261 | O    | ALA | X | 477 | 22.223 | 33.993 | 38.832 | 0.00 | 0.00 |
| ATOM | 7262 | N    | ASN | X | 478 | 22.643 | 31.928 | 39.586 | 0.00 | 0.00 |
| ATOM | 7263 | H    | ASN | X | 478 | 23.289 | 31.157 | 39.497 | 0.00 | 0.00 |
| ATOM | 7264 | CA   | ASN | X | 478 | 21.568 | 31.871 | 40.540 | 0.00 | 0.00 |
| ATOM | 7265 | HA   | ASN | X | 478 | 20.645 | 32.228 | 40.082 | 0.00 | 0.00 |
| ATOM | 7266 | CB   | ASN | X | 478 | 21.267 | 30.466 | 41.050 | 0.00 | 0.00 |
| ATOM | 7267 | HB2  | ASN | X | 478 | 22.222 | 29.973 | 41.232 | 0.00 | 0.00 |
| ATOM | 7268 | HB3  | ASN | X | 478 | 20.588 | 30.527 | 41.900 | 0.00 | 0.00 |
| ATOM | 7269 | CG   | ASN | X | 478 | 20.520 | 29.497 | 40.077 | 0.00 | 0.00 |
| ATOM | 7270 | OD1  | ASN | X | 478 | 19.839 | 29.926 | 39.168 | 0.00 | 0.00 |
| ATOM | 7271 | ND2  | ASN | X | 478 | 20.701 | 28.195 | 40.303 | 0.00 | 0.00 |
| ATOM | 7272 | HD21 | ASN | X | 478 | 20.290 | 27.558 | 39.635 | 0.00 | 0.00 |
| ATOM | 7273 | HD22 | ASN | X | 478 | 21.433 | 27.978 | 40.964 | 0.00 | 0.00 |
| ATOM | 7274 | C    | ASN | X | 478 | 21.861 | 32.902 | 41.701 | 0.00 | 0.00 |
| ATOM | 7275 | O    | ASN | X | 478 | 21.018 | 33.742 | 42.050 | 0.00 | 0.00 |
| ATOM | 7276 | N    | PHE | X | 479 | 23.109 | 32.892 | 42.200 | 0.00 | 0.00 |
| ATOM | 7277 | H    | PHE | X | 479 | 23.875 | 32.341 | 41.838 | 0.00 | 0.00 |
| ATOM | 7278 | CA   | PHE | X | 479 | 23.497 | 33.969 | 43.159 | 0.00 | 0.00 |
| ATOM | 7279 | HA   | PHE | X | 479 | 22.911 | 33.962 | 44.078 | 0.00 | 0.00 |
| ATOM | 7280 | CB   | PHE | X | 479 | 24.901 | 33.789 | 43.603 | 0.00 | 0.00 |
| ATOM | 7281 | HB2  | PHE | X | 479 | 24.916 | 32.839 | 44.138 | 0.00 | 0.00 |
| ATOM | 7282 | HB3  | PHE | X | 479 | 25.496 | 33.722 | 42.692 | 0.00 | 0.00 |
| ATOM | 7283 | CG   | PHE | X | 479 | 25.432 | 34.754 | 44.577 | 0.00 | 0.00 |
| ATOM | 7284 | CD1  | PHE | X | 479 | 25.064 | 34.628 | 45.927 | 0.00 | 0.00 |
| ATOM | 7285 | HD1  | PHE | X | 479 | 24.423 | 33.814 | 46.232 | 0.00 | 0.00 |
| ATOM | 7286 | CE1  | PHE | X | 479 | 25.486 | 35.587 | 46.782 | 0.00 | 0.00 |
| ATOM | 7287 | HE1  | PHE | X | 479 | 25.185 | 35.493 | 47.815 | 0.00 | 0.00 |
| ATOM | 7288 | CZ   | PHE | X | 479 | 26.170 | 36.749 | 46.325 | 0.00 | 0.00 |
| ATOM | 7289 | HZ   | PHE | X | 479 | 26.569 | 37.497 | 46.993 | 0.00 | 0.00 |
| ATOM | 7290 | CE2  | PHE | X | 479 | 26.606 | 36.860 | 44.973 | 0.00 | 0.00 |
| ATOM | 7291 | HE2  | PHE | X | 479 | 27.193 | 37.716 | 44.674 | 0.00 | 0.00 |
| ATOM | 7292 | CD2  | PHE | X | 479 | 26.271 | 35.792 | 44.071 | 0.00 | 0.00 |
| ATOM | 7293 | HD2  | PHE | X | 479 | 26.483 | 35.960 | 43.026 | 0.00 | 0.00 |
| ATOM | 7294 | C    | PHE | X | 479 | 23.258 | 35.461 | 42.623 | 0.00 | 0.00 |
| ATOM | 7295 | O    | PHE | X | 479 | 22.593 | 36.269 | 43.302 | 0.00 | 0.00 |
| ATOM | 7296 | N    | ALA | X | 480 | 23.552 | 35.681 | 41.314 | 0.00 | 0.00 |
| ATOM | 7297 | H    | ALA | X | 480 | 24.088 | 34.964 | 40.848 | 0.00 | 0.00 |
| ATOM | 7298 | CA   | ALA | X | 480 | 23.352 | 36.988 | 40.733 | 0.00 | 0.00 |
| ATOM | 7299 | HA   | ALA | X | 480 | 23.689 | 37.771 | 41.411 | 0.00 | 0.00 |
| ATOM | 7300 | CB   | ALA | X | 480 | 24.184 | 36.970 | 39.403 | 0.00 | 0.00 |



|      |      |      |     |   |     |        |        |        |      |      |
|------|------|------|-----|---|-----|--------|--------|--------|------|------|
| ATOM | 7301 | HB1  | ALA | X | 480 | 25.261 | 36.879 | 39.545 | 0.00 | 0.00 |
| ATOM | 7302 | HB2  | ALA | X | 480 | 23.945 | 37.895 | 38.879 | 0.00 | 0.00 |
| ATOM | 7303 | HB3  | ALA | X | 480 | 23.824 | 36.099 | 38.856 | 0.00 | 0.00 |
| ATOM | 7304 | C    | ALA | X | 480 | 21.827 | 37.322 | 40.542 | 0.00 | 0.00 |
| ATOM | 7305 | O    | ALA | X | 480 | 21.467 | 38.470 | 40.707 | 0.00 | 0.00 |
| ATOM | 7306 | N    | ARG | X | 481 | 21.019 | 36.406 | 40.141 | 0.00 | 0.00 |
| ATOM | 7307 | H    | ARG | X | 481 | 21.470 | 35.515 | 39.991 | 0.00 | 0.00 |
| ATOM | 7308 | CA   | ARG | X | 481 | 19.520 | 36.382 | 40.072 | 0.00 | 0.00 |
| ATOM | 7309 | HA   | ARG | X | 481 | 19.314 | 37.196 | 39.376 | 0.00 | 0.00 |
| ATOM | 7310 | CB   | ARG | X | 481 | 18.994 | 35.086 | 39.561 | 0.00 | 0.00 |
| ATOM | 7311 | HB2  | ARG | X | 481 | 19.421 | 34.265 | 40.137 | 0.00 | 0.00 |
| ATOM | 7312 | HB3  | ARG | X | 481 | 17.908 | 35.090 | 39.653 | 0.00 | 0.00 |
| ATOM | 7313 | CG   | ARG | X | 481 | 19.244 | 34.849 | 38.058 | 0.00 | 0.00 |
| ATOM | 7314 | HG2  | ARG | X | 481 | 18.558 | 35.521 | 37.543 | 0.00 | 0.00 |
| ATOM | 7315 | HG3  | ARG | X | 481 | 20.281 | 35.080 | 37.816 | 0.00 | 0.00 |
| ATOM | 7316 | CD   | ARG | X | 481 | 18.888 | 33.390 | 37.646 | 0.00 | 0.00 |
| ATOM | 7317 | HD2  | ARG | X | 481 | 19.383 | 32.686 | 38.315 | 0.00 | 0.00 |
| ATOM | 7318 | HD3  | ARG | X | 481 | 17.811 | 33.270 | 37.765 | 0.00 | 0.00 |
| ATOM | 7319 | NE   | ARG | X | 481 | 19.301 | 33.136 | 36.267 | 0.00 | 0.00 |
| ATOM | 7320 | HE   | ARG | X | 481 | 19.039 | 33.837 | 35.589 | 0.00 | 0.00 |
| ATOM | 7321 | CZ   | ARG | X | 481 | 20.012 | 32.116 | 35.826 | 0.00 | 0.00 |
| ATOM | 7322 | NH1  | ARG | X | 481 | 20.323 | 31.081 | 36.557 | 0.00 | 0.00 |
| ATOM | 7323 | HH11 | ARG | X | 481 | 20.085 | 30.922 | 37.526 | 0.00 | 0.00 |
| ATOM | 7324 | HH12 | ARG | X | 481 | 20.875 | 30.345 | 36.141 | 0.00 | 0.00 |
| ATOM | 7325 | NH2  | ARG | X | 481 | 20.257 | 31.983 | 34.491 | 0.00 | 0.00 |
| ATOM | 7326 | HH21 | ARG | X | 481 | 20.338 | 32.732 | 33.817 | 0.00 | 0.00 |
| ATOM | 7327 | HH22 | ARG | X | 481 | 20.793 | 31.162 | 34.249 | 0.00 | 0.00 |
| ATOM | 7328 | C    | ARG | X | 481 | 18.866 | 36.698 | 41.428 | 0.00 | 0.00 |
| ATOM | 7329 | O    | ARG | X | 481 | 17.830 | 37.355 | 41.423 | 0.00 | 0.00 |
| ATOM | 7330 | N    | THR | X | 482 | 19.343 | 36.102 | 42.565 | 0.00 | 0.00 |
| ATOM | 7331 | H    | THR | X | 482 | 20.252 | 35.664 | 42.514 | 0.00 | 0.00 |
| ATOM | 7332 | CA   | THR | X | 482 | 18.552 | 35.992 | 43.768 | 0.00 | 0.00 |
| ATOM | 7333 | HA   | THR | X | 482 | 17.856 | 36.829 | 43.724 | 0.00 | 0.00 |
| ATOM | 7334 | CB   | THR | X | 482 | 17.803 | 34.603 | 43.882 | 0.00 | 0.00 |
| ATOM | 7335 | HB   | THR | X | 482 | 17.203 | 34.610 | 44.792 | 0.00 | 0.00 |
| ATOM | 7336 | CG2  | THR | X | 482 | 16.765 | 34.420 | 42.735 | 0.00 | 0.00 |
| ATOM | 7337 | HG21 | THR | X | 482 | 17.185 | 34.020 | 41.813 | 0.00 | 0.00 |
| ATOM | 7338 | HG22 | THR | X | 482 | 16.250 | 35.375 | 42.631 | 0.00 | 0.00 |
| ATOM | 7339 | HG23 | THR | X | 482 | 16.081 | 33.625 | 43.035 | 0.00 | 0.00 |
| ATOM | 7340 | OG1  | THR | X | 482 | 18.640 | 33.497 | 43.965 | 0.00 | 0.00 |
| ATOM | 7341 | HG1  | THR | X | 482 | 19.376 | 33.671 | 43.374 | 0.00 | 0.00 |
| ATOM | 7342 | C    | THR | X | 482 | 19.308 | 36.193 | 45.089 | 0.00 | 0.00 |
| ATOM | 7343 | O    | THR | X | 482 | 18.652 | 36.564 | 46.069 | 0.00 | 0.00 |
| ATOM | 7344 | N    | GLY | X | 483 | 20.611 | 35.862 | 45.122 | 0.00 | 0.00 |
| ATOM | 7345 | H    | GLY | X | 483 | 21.065 | 35.579 | 44.266 | 0.00 | 0.00 |
| ATOM | 7346 | CA   | GLY | X | 483 | 21.333 | 35.704 | 46.383 | 0.00 | 0.00 |
| ATOM | 7347 | HA2  | GLY | X | 483 | 22.322 | 36.107 | 46.164 | 0.00 | 0.00 |
| ATOM | 7348 | HA3  | GLY | X | 483 | 20.863 | 36.310 | 47.157 | 0.00 | 0.00 |
| ATOM | 7349 | C    | GLY | X | 483 | 21.448 | 34.329 | 46.897 | 0.00 | 0.00 |
| ATOM | 7350 | O    | GLY | X | 483 | 22.281 | 34.176 | 47.764 | 0.00 | 0.00 |
| ATOM | 7351 | N    | ASP | X | 484 | 20.641 | 33.308 | 46.438 | 0.00 | 0.00 |
| ATOM | 7352 | H    | ASP | X | 484 | 19.871 | 33.597 | 45.851 | 0.00 | 0.00 |
| ATOM | 7353 | CA   | ASP | X | 484 | 20.748 | 31.893 | 46.742 | 0.00 | 0.00 |
| ATOM | 7354 | HA   | ASP | X | 484 | 21.365 | 31.831 | 47.638 | 0.00 | 0.00 |
| ATOM | 7355 | CB   | ASP | X | 484 | 19.326 | 31.302 | 47.077 | 0.00 | 0.00 |
| ATOM | 7356 | HB2  | ASP | X | 484 | 18.538 | 32.049 | 46.979 | 0.00 | 0.00 |
| ATOM | 7357 | HB3  | ASP | X | 484 | 19.033 | 30.518 | 46.379 | 0.00 | 0.00 |
| ATOM | 7358 | CG   | ASP | X | 484 | 19.222 | 30.629 | 48.422 | 0.00 | 0.00 |
| ATOM | 7359 | OD1  | ASP | X | 484 | 20.007 | 29.692 | 48.606 | 0.00 | 0.00 |
| ATOM | 7360 | OD2  | ASP | X | 484 | 18.361 | 31.101 | 49.210 | 0.00 | 0.00 |
| ATOM | 7361 | C    | ASP | X | 484 | 21.422 | 31.126 | 45.546 | 0.00 | 0.00 |
| ATOM | 7362 | O    | ASP | X | 484 | 20.949 | 31.231 | 44.387 | 0.00 | 0.00 |
| ATOM | 7363 | N    | PRO | X | 485 | 22.528 | 30.348 | 45.765 | 0.00 | 0.00 |
| ATOM | 7364 | CD   | PRO | X | 485 | 23.389 | 30.456 | 46.925 | 0.00 | 0.00 |
| ATOM | 7365 | HD2  | PRO | X | 485 | 23.084 | 29.666 | 47.611 | 0.00 | 0.00 |
| ATOM | 7366 | HD3  | PRO | X | 485 | 23.334 | 31.396 | 47.474 | 0.00 | 0.00 |
| ATOM | 7367 | CG   | PRO | X | 485 | 24.825 | 30.124 | 46.497 | 0.00 | 0.00 |

|      |      |      |     |   |     |        |        |        |      |      |
|------|------|------|-----|---|-----|--------|--------|--------|------|------|
| ATOM | 7368 | HG2  | PRO | X | 485 | 25.390 | 29.578 | 47.253 | 0.00 | 0.00 |
| ATOM | 7369 | HG3  | PRO | X | 485 | 25.296 | 31.053 | 46.176 | 0.00 | 0.00 |
| ATOM | 7370 | CB   | PRO | X | 485 | 24.650 | 29.301 | 45.248 | 0.00 | 0.00 |
| ATOM | 7371 | HB2  | PRO | X | 485 | 24.542 | 28.261 | 45.558 | 0.00 | 0.00 |
| ATOM | 7372 | HB3  | PRO | X | 485 | 25.429 | 29.417 | 44.495 | 0.00 | 0.00 |
| ATOM | 7373 | CA   | PRO | X | 485 | 23.239 | 29.626 | 44.678 | 0.00 | 0.00 |
| ATOM | 7374 | HA   | PRO | X | 485 | 23.325 | 30.404 | 43.921 | 0.00 | 0.00 |
| ATOM | 7375 | C    | PRO | X | 485 | 22.498 | 28.495 | 44.071 | 0.00 | 0.00 |
| ATOM | 7376 | O    | PRO | X | 485 | 22.669 | 28.143 | 42.894 | 0.00 | 0.00 |
| ATOM | 7377 | N    | ASN | X | 486 | 21.695 | 27.815 | 44.813 | 0.00 | 0.00 |
| ATOM | 7378 | H    | ASN | X | 486 | 21.438 | 28.254 | 45.686 | 0.00 | 0.00 |
| ATOM | 7379 | CA   | ASN | X | 486 | 20.972 | 26.597 | 44.426 | 0.00 | 0.00 |
| ATOM | 7380 | HA   | ASN | X | 486 | 21.543 | 26.103 | 43.640 | 0.00 | 0.00 |
| ATOM | 7381 | CB   | ASN | X | 486 | 20.713 | 25.633 | 45.598 | 0.00 | 0.00 |
| ATOM | 7382 | HB2  | ASN | X | 486 | 19.902 | 24.949 | 45.346 | 0.00 | 0.00 |
| ATOM | 7383 | HB3  | ASN | X | 486 | 21.627 | 25.082 | 45.819 | 0.00 | 0.00 |
| ATOM | 7384 | CG   | ASN | X | 486 | 20.368 | 26.314 | 46.906 | 0.00 | 0.00 |
| ATOM | 7385 | OD1  | ASN | X | 486 | 20.935 | 25.912 | 47.893 | 0.00 | 0.00 |
| ATOM | 7386 | ND2  | ASN | X | 486 | 19.512 | 27.290 | 46.957 | 0.00 | 0.00 |
| ATOM | 7387 | HD21 | ASN | X | 486 | 19.713 | 27.972 | 47.674 | 0.00 | 0.00 |
| ATOM | 7388 | HD22 | ASN | X | 486 | 19.188 | 27.660 | 46.075 | 0.00 | 0.00 |
| ATOM | 7389 | C    | ASN | X | 486 | 19.624 | 26.929 | 43.783 | 0.00 | 0.00 |
| ATOM | 7390 | O    | ASN | X | 486 | 18.976 | 27.927 | 44.063 | 0.00 | 0.00 |
| ATOM | 7391 | N    | GLU | X | 487 | 19.097 | 26.077 | 42.913 | 0.00 | 0.00 |
| ATOM | 7392 | H    | GLU | X | 487 | 19.658 | 25.259 | 42.722 | 0.00 | 0.00 |
| ATOM | 7393 | CA   | GLU | X | 487 | 17.953 | 26.381 | 42.010 | 0.00 | 0.00 |
| ATOM | 7394 | HA   | GLU | X | 487 | 18.331 | 27.041 | 41.229 | 0.00 | 0.00 |
| ATOM | 7395 | CB   | GLU | X | 487 | 17.392 | 25.109 | 41.366 | 0.00 | 0.00 |
| ATOM | 7396 | HB2  | GLU | X | 487 | 17.285 | 24.328 | 42.120 | 0.00 | 0.00 |
| ATOM | 7397 | HB3  | GLU | X | 487 | 16.420 | 25.371 | 40.948 | 0.00 | 0.00 |
| ATOM | 7398 | CG   | GLU | X | 487 | 18.340 | 24.598 | 40.286 | 0.00 | 0.00 |
| ATOM | 7399 | HG2  | GLU | X | 487 | 19.344 | 24.537 | 40.706 | 0.00 | 0.00 |
| ATOM | 7400 | HG3  | GLU | X | 487 | 18.020 | 23.625 | 39.913 | 0.00 | 0.00 |
| ATOM | 7401 | CD   | GLU | X | 487 | 18.372 | 25.522 | 39.065 | 0.00 | 0.00 |
| ATOM | 7402 | OE1  | GLU | X | 487 | 17.439 | 25.403 | 38.270 | 0.00 | 0.00 |
| ATOM | 7403 | OE2  | GLU | X | 487 | 19.371 | 26.216 | 38.911 | 0.00 | 0.00 |
| ATOM | 7404 | C    | GLU | X | 487 | 16.735 | 27.010 | 42.660 | 0.00 | 0.00 |
| ATOM | 7405 | O    | GLU | X | 487 | 16.104 | 26.439 | 43.559 | 0.00 | 0.00 |
| ATOM | 7406 | N    | PRO | X | 488 | 16.452 | 28.256 | 42.205 | 0.00 | 0.00 |
| ATOM | 7407 | CD   | PRO | X | 488 | 17.332 | 29.216 | 41.553 | 0.00 | 0.00 |
| ATOM | 7408 | HD2  | PRO | X | 488 | 17.334 | 29.180 | 40.464 | 0.00 | 0.00 |
| ATOM | 7409 | HD3  | PRO | X | 488 | 18.374 | 29.220 | 41.872 | 0.00 | 0.00 |
| ATOM | 7410 | CG   | PRO | X | 488 | 16.678 | 30.598 | 41.936 | 0.00 | 0.00 |
| ATOM | 7411 | HG2  | PRO | X | 488 | 16.789 | 31.394 | 41.199 | 0.00 | 0.00 |
| ATOM | 7412 | HG3  | PRO | X | 488 | 17.038 | 30.959 | 42.900 | 0.00 | 0.00 |
| ATOM | 7413 | CB   | PRO | X | 488 | 15.266 | 30.340 | 42.108 | 0.00 | 0.00 |
| ATOM | 7414 | HB2  | PRO | X | 488 | 14.793 | 30.503 | 41.140 | 0.00 | 0.00 |
| ATOM | 7415 | HB3  | PRO | X | 488 | 14.881 | 31.064 | 42.826 | 0.00 | 0.00 |
| ATOM | 7416 | CA   | PRO | X | 488 | 15.155 | 28.872 | 42.534 | 0.00 | 0.00 |
| ATOM | 7417 | HA   | PRO | X | 488 | 15.072 | 28.741 | 43.613 | 0.00 | 0.00 |
| ATOM | 7418 | C    | PRO | X | 488 | 13.956 | 28.149 | 41.940 | 0.00 | 0.00 |
| ATOM | 7419 | O    | PRO | X | 488 | 13.829 | 28.099 | 40.726 | 0.00 | 0.00 |
| ATOM | 7420 | N    | ARG | X | 489 | 13.175 | 27.500 | 42.808 | 0.00 | 0.00 |
| ATOM | 7421 | H    | ARG | X | 489 | 13.446 | 27.533 | 43.781 | 0.00 | 0.00 |
| ATOM | 7422 | CA   | ARG | X | 489 | 12.095 | 26.523 | 42.632 | 0.00 | 0.00 |
| ATOM | 7423 | HA   | ARG | X | 489 | 11.400 | 26.917 | 43.373 | 0.00 | 0.00 |
| ATOM | 7424 | CB   | ARG | X | 489 | 11.383 | 26.450 | 41.272 | 0.00 | 0.00 |
| ATOM | 7425 | HB2  | ARG | X | 489 | 10.378 | 26.065 | 41.442 | 0.00 | 0.00 |
| ATOM | 7426 | HB3  | ARG | X | 489 | 11.198 | 27.495 | 41.020 | 0.00 | 0.00 |
| ATOM | 7427 | CG   | ARG | X | 489 | 12.054 | 25.719 | 40.095 | 0.00 | 0.00 |
| ATOM | 7428 | HG2  | ARG | X | 489 | 13.124 | 25.610 | 40.269 | 0.00 | 0.00 |
| ATOM | 7429 | HG3  | ARG | X | 489 | 11.630 | 24.714 | 40.107 | 0.00 | 0.00 |
| ATOM | 7430 | CD   | ARG | X | 489 | 11.920 | 26.340 | 38.767 | 0.00 | 0.00 |
| ATOM | 7431 | HD2  | ARG | X | 489 | 10.871 | 26.365 | 38.470 | 0.00 | 0.00 |
| ATOM | 7432 | HD3  | ARG | X | 489 | 12.248 | 27.366 | 38.930 | 0.00 | 0.00 |
| ATOM | 7433 | NE   | ARG | X | 489 | 12.791 | 25.683 | 37.754 | 0.00 | 0.00 |
| ATOM | 7434 | HE   | ARG | X | 489 | 12.263 | 25.179 | 37.055 | 0.00 | 0.00 |

|      |      |      |     |   |     |        |        |        |      |      |
|------|------|------|-----|---|-----|--------|--------|--------|------|------|
| ATOM | 7435 | CZ   | ARG | X | 489 | 14.179 | 25.681 | 37.804 | 0.00 | 0.00 |
| ATOM | 7436 | NH1  | ARG | X | 489 | 14.823 | 24.905 | 36.931 | 0.00 | 0.00 |
| ATOM | 7437 | HH11 | ARG | X | 489 | 14.310 | 24.373 | 36.242 | 0.00 | 0.00 |
| ATOM | 7438 | HH12 | ARG | X | 489 | 15.831 | 24.850 | 36.945 | 0.00 | 0.00 |
| ATOM | 7439 | NH2  | ARG | X | 489 | 14.871 | 26.411 | 38.646 | 0.00 | 0.00 |
| ATOM | 7440 | HH21 | ARG | X | 489 | 14.380 | 26.908 | 39.376 | 0.00 | 0.00 |
| ATOM | 7441 | HH22 | ARG | X | 489 | 15.870 | 26.263 | 38.626 | 0.00 | 0.00 |
| ATOM | 7442 | C    | ARG | X | 489 | 12.663 | 25.236 | 43.163 | 0.00 | 0.00 |
| ATOM | 7443 | O    | ARG | X | 489 | 13.319 | 24.485 | 42.363 | 0.00 | 0.00 |
| ATOM | 7444 | N    | ASP | X | 490 | 12.542 | 24.957 | 44.497 | 0.00 | 0.00 |
| ATOM | 7445 | H    | ASP | X | 490 | 11.966 | 25.582 | 45.042 | 0.00 | 0.00 |
| ATOM | 7446 | CA   | ASP | X | 490 | 13.339 | 24.036 | 45.292 | 0.00 | 0.00 |
| ATOM | 7447 | HA   | ASP | X | 490 | 14.365 | 24.384 | 45.174 | 0.00 | 0.00 |
| ATOM | 7448 | CB   | ASP | X | 490 | 13.022 | 24.118 | 46.798 | 0.00 | 0.00 |
| ATOM | 7449 | HB2  | ASP | X | 490 | 13.448 | 23.226 | 47.258 | 0.00 | 0.00 |
| ATOM | 7450 | HB3  | ASP | X | 490 | 13.459 | 25.068 | 47.106 | 0.00 | 0.00 |
| ATOM | 7451 | CG   | ASP | X | 490 | 11.531 | 24.188 | 47.107 | 0.00 | 0.00 |
| ATOM | 7452 | OD1  | ASP | X | 490 | 10.912 | 23.319 | 47.792 | 0.00 | 0.00 |
| ATOM | 7453 | OD2  | ASP | X | 490 | 10.998 | 25.275 | 46.759 | 0.00 | 0.00 |
| ATOM | 7454 | C    | ASP | X | 490 | 13.288 | 22.581 | 44.815 | 0.00 | 0.00 |
| ATOM | 7455 | O    | ASP | X | 490 | 12.280 | 21.973 | 45.126 | 0.00 | 0.00 |
| ATOM | 7456 | N    | PRO | X | 491 | 14.309 | 21.979 | 44.153 | 0.00 | 0.00 |
| ATOM | 7457 | CD   | PRO | X | 491 | 15.529 | 22.645 | 43.679 | 0.00 | 0.00 |
| ATOM | 7458 | HD2  | PRO | X | 491 | 16.423 | 22.405 | 44.254 | 0.00 | 0.00 |
| ATOM | 7459 | HD3  | PRO | X | 491 | 15.377 | 23.719 | 43.571 | 0.00 | 0.00 |
| ATOM | 7460 | CG   | PRO | X | 491 | 15.661 | 22.119 | 42.311 | 0.00 | 0.00 |
| ATOM | 7461 | HG2  | PRO | X | 491 | 16.631 | 22.327 | 41.860 | 0.00 | 0.00 |
| ATOM | 7462 | HG3  | PRO | X | 491 | 14.981 | 22.625 | 41.627 | 0.00 | 0.00 |
| ATOM | 7463 | CB   | PRO | X | 491 | 15.393 | 20.652 | 42.497 | 0.00 | 0.00 |
| ATOM | 7464 | HB2  | PRO | X | 491 | 16.313 | 20.182 | 42.843 | 0.00 | 0.00 |
| ATOM | 7465 | HB3  | PRO | X | 491 | 15.043 | 20.149 | 41.595 | 0.00 | 0.00 |
| ATOM | 7466 | CA   | PRO | X | 491 | 14.329 | 20.656 | 43.574 | 0.00 | 0.00 |
| ATOM | 7467 | HA   | PRO | X | 491 | 13.329 | 20.578 | 43.148 | 0.00 | 0.00 |
| ATOM | 7468 | C    | PRO | X | 491 | 14.464 | 19.474 | 44.600 | 0.00 | 0.00 |
| ATOM | 7469 | O    | PRO | X | 491 | 13.788 | 19.466 | 45.681 | 0.00 | 0.00 |
| ATOM | 7470 | N    | LYS | X | 492 | 15.413 | 18.552 | 44.349 | 0.00 | 0.00 |
| ATOM | 7471 | H    | LYS | X | 492 | 15.898 | 18.704 | 43.477 | 0.00 | 0.00 |
| ATOM | 7472 | CA   | LYS | X | 492 | 15.535 | 17.249 | 45.152 | 0.00 | 0.00 |
| ATOM | 7473 | HA   | LYS | X | 492 | 15.225 | 17.515 | 46.162 | 0.00 | 0.00 |
| ATOM | 7474 | CB   | LYS | X | 492 | 14.627 | 16.152 | 44.734 | 0.00 | 0.00 |
| ATOM | 7475 | HB2  | LYS | X | 492 | 14.793 | 15.255 | 45.331 | 0.00 | 0.00 |
| ATOM | 7476 | HB3  | LYS | X | 492 | 13.621 | 16.458 | 45.021 | 0.00 | 0.00 |
| ATOM | 7477 | CG   | LYS | X | 492 | 14.588 | 15.838 | 43.262 | 0.00 | 0.00 |
| ATOM | 7478 | HG2  | LYS | X | 492 | 15.582 | 16.055 | 42.871 | 0.00 | 0.00 |
| ATOM | 7479 | HG3  | LYS | X | 492 | 14.342 | 14.795 | 43.063 | 0.00 | 0.00 |
| ATOM | 7480 | CD   | LYS | X | 492 | 13.682 | 16.645 | 42.351 | 0.00 | 0.00 |
| ATOM | 7481 | HD2  | LYS | X | 492 | 12.665 | 16.374 | 42.634 | 0.00 | 0.00 |
| ATOM | 7482 | HD3  | LYS | X | 492 | 13.931 | 17.702 | 42.443 | 0.00 | 0.00 |
| ATOM | 7483 | CE   | LYS | X | 492 | 13.795 | 16.252 | 40.903 | 0.00 | 0.00 |
| ATOM | 7484 | HE2  | LYS | X | 492 | 14.801 | 16.415 | 40.518 | 0.00 | 0.00 |
| ATOM | 7485 | HE3  | LYS | X | 492 | 13.555 | 15.202 | 40.729 | 0.00 | 0.00 |
| ATOM | 7486 | NZ   | LYS | X | 492 | 12.958 | 17.073 | 40.071 | 0.00 | 0.00 |
| ATOM | 7487 | HZ1  | LYS | X | 492 | 13.207 | 18.050 | 40.132 | 0.00 | 0.00 |
| ATOM | 7488 | HZ2  | LYS | X | 492 | 13.052 | 16.801 | 39.103 | 0.00 | 0.00 |
| ATOM | 7489 | HZ3  | LYS | X | 492 | 11.981 | 16.928 | 40.285 | 0.00 | 0.00 |
| ATOM | 7490 | C    | LYS | X | 492 | 17.047 | 16.790 | 45.258 | 0.00 | 0.00 |
| ATOM | 7491 | O    | LYS | X | 492 | 17.369 | 15.572 | 45.416 | 0.00 | 0.00 |
| ATOM | 7492 | N    | ALA | X | 493 | 17.921 | 17.771 | 45.205 | 0.00 | 0.00 |
| ATOM | 7493 | H    | ALA | X | 493 | 17.601 | 18.709 | 45.400 | 0.00 | 0.00 |
| ATOM | 7494 | CA   | ALA | X | 493 | 19.356 | 17.654 | 45.226 | 0.00 | 0.00 |
| ATOM | 7495 | HA   | ALA | X | 493 | 19.568 | 16.585 | 45.201 | 0.00 | 0.00 |
| ATOM | 7496 | CB   | ALA | X | 493 | 19.891 | 18.275 | 43.932 | 0.00 | 0.00 |
| ATOM | 7497 | HB1  | ALA | X | 493 | 20.970 | 18.128 | 43.895 | 0.00 | 0.00 |
| ATOM | 7498 | HB2  | ALA | X | 493 | 19.792 | 19.358 | 44.006 | 0.00 | 0.00 |
| ATOM | 7499 | HB3  | ALA | X | 493 | 19.487 | 17.780 | 43.048 | 0.00 | 0.00 |
| ATOM | 7500 | C    | ALA | X | 493 | 20.018 | 18.239 | 46.475 | 0.00 | 0.00 |
| ATOM | 7501 | O    | ALA | X | 493 | 19.307 | 18.794 | 47.318 | 0.00 | 0.00 |

|      |      |      |     |   |     |        |        |        |      |      |
|------|------|------|-----|---|-----|--------|--------|--------|------|------|
| ATOM | 7502 | N    | PRO | X | 494 | 21.334 | 18.068 | 46.710 | 0.00 | 0.00 |
| ATOM | 7503 | CD   | PRO | X | 494 | 22.160 | 17.014 | 46.078 | 0.00 | 0.00 |
| ATOM | 7504 | HD2  | PRO | X | 494 | 22.611 | 17.298 | 45.127 | 0.00 | 0.00 |
| ATOM | 7505 | HD3  | PRO | X | 494 | 21.638 | 16.068 | 45.935 | 0.00 | 0.00 |
| ATOM | 7506 | CG   | PRO | X | 494 | 23.383 | 16.812 | 47.001 | 0.00 | 0.00 |
| ATOM | 7507 | HG2  | PRO | X | 494 | 24.302 | 16.443 | 46.545 | 0.00 | 0.00 |
| ATOM | 7508 | HG3  | PRO | X | 494 | 23.060 | 16.079 | 47.740 | 0.00 | 0.00 |
| ATOM | 7509 | CB   | PRO | X | 494 | 23.546 | 18.218 | 47.572 | 0.00 | 0.00 |
| ATOM | 7510 | HB2  | PRO | X | 494 | 24.090 | 18.841 | 46.862 | 0.00 | 0.00 |
| ATOM | 7511 | HB3  | PRO | X | 494 | 24.051 | 18.102 | 48.531 | 0.00 | 0.00 |
| ATOM | 7512 | CA   | PRO | X | 494 | 22.117 | 18.705 | 47.725 | 0.00 | 0.00 |
| ATOM | 7513 | HA   | PRO | X | 494 | 21.786 | 18.490 | 48.741 | 0.00 | 0.00 |
| ATOM | 7514 | C    | PRO | X | 494 | 22.067 | 20.227 | 47.558 | 0.00 | 0.00 |
| ATOM | 7515 | O    | PRO | X | 494 | 22.219 | 20.753 | 46.442 | 0.00 | 0.00 |
| ATOM | 7516 | N    | GLN | X | 495 | 21.836 | 20.911 | 48.691 | 0.00 | 0.00 |
| ATOM | 7517 | H    | GLN | X | 495 | 21.775 | 20.413 | 49.567 | 0.00 | 0.00 |
| ATOM | 7518 | CA   | GLN | X | 495 | 21.731 | 22.381 | 48.767 | 0.00 | 0.00 |
| ATOM | 7519 | HA   | GLN | X | 495 | 21.649 | 22.813 | 47.769 | 0.00 | 0.00 |
| ATOM | 7520 | CB   | GLN | X | 495 | 20.436 | 22.741 | 49.469 | 0.00 | 0.00 |
| ATOM | 7521 | HB2  | GLN | X | 495 | 20.610 | 22.268 | 50.435 | 0.00 | 0.00 |
| ATOM | 7522 | HB3  | GLN | X | 495 | 20.317 | 23.817 | 49.598 | 0.00 | 0.00 |
| ATOM | 7523 | CG   | GLN | X | 495 | 19.129 | 22.215 | 48.766 | 0.00 | 0.00 |
| ATOM | 7524 | HG2  | GLN | X | 495 | 19.197 | 21.193 | 48.393 | 0.00 | 0.00 |
| ATOM | 7525 | HG3  | GLN | X | 495 | 18.325 | 22.349 | 49.489 | 0.00 | 0.00 |
| ATOM | 7526 | CD   | GLN | X | 495 | 18.794 | 23.015 | 47.533 | 0.00 | 0.00 |
| ATOM | 7527 | OE1  | GLN | X | 495 | 19.250 | 22.735 | 46.422 | 0.00 | 0.00 |
| ATOM | 7528 | NE2  | GLN | X | 495 | 18.079 | 24.136 | 47.655 | 0.00 | 0.00 |
| ATOM | 7529 | HE21 | GLN | X | 495 | 17.955 | 24.696 | 46.823 | 0.00 | 0.00 |
| ATOM | 7530 | HE22 | GLN | X | 495 | 17.837 | 24.522 | 48.557 | 0.00 | 0.00 |
| ATOM | 7531 | C    | GLN | X | 495 | 22.996 | 23.015 | 49.455 | 0.00 | 0.00 |
| ATOM | 7532 | O    | GLN | X | 495 | 23.787 | 22.356 | 50.106 | 0.00 | 0.00 |
| ATOM | 7533 | N    | TRP | X | 496 | 23.240 | 24.321 | 49.277 | 0.00 | 0.00 |
| ATOM | 7534 | H    | TRP | X | 496 | 22.502 | 24.767 | 48.751 | 0.00 | 0.00 |
| ATOM | 7535 | CA   | TRP | X | 496 | 24.407 | 25.059 | 49.773 | 0.00 | 0.00 |
| ATOM | 7536 | HA   | TRP | X | 496 | 25.203 | 24.335 | 49.949 | 0.00 | 0.00 |
| ATOM | 7537 | CB   | TRP | X | 496 | 24.838 | 26.015 | 48.694 | 0.00 | 0.00 |
| ATOM | 7538 | HB2  | TRP | X | 496 | 24.815 | 25.551 | 47.708 | 0.00 | 0.00 |
| ATOM | 7539 | HB3  | TRP | X | 496 | 24.045 | 26.744 | 48.526 | 0.00 | 0.00 |
| ATOM | 7540 | CG   | TRP | X | 496 | 26.198 | 26.662 | 48.814 | 0.00 | 0.00 |
| ATOM | 7541 | CD1  | TRP | X | 496 | 26.949 | 26.846 | 49.906 | 0.00 | 0.00 |
| ATOM | 7542 | HD1  | TRP | X | 496 | 26.597 | 26.641 | 50.906 | 0.00 | 0.00 |
| ATOM | 7543 | NE1  | TRP | X | 496 | 28.152 | 27.411 | 49.633 | 0.00 | 0.00 |
| ATOM | 7544 | HE1  | TRP | X | 496 | 28.867 | 27.562 | 50.331 | 0.00 | 0.00 |
| ATOM | 7545 | CE2  | TRP | X | 496 | 28.308 | 27.540 | 48.284 | 0.00 | 0.00 |
| ATOM | 7546 | CZ2  | TRP | X | 496 | 29.316 | 28.033 | 47.496 | 0.00 | 0.00 |
| ATOM | 7547 | HZ2  | TRP | X | 496 | 30.173 | 28.470 | 47.988 | 0.00 | 0.00 |
| ATOM | 7548 | CH2  | TRP | X | 496 | 29.256 | 27.979 | 46.101 | 0.00 | 0.00 |
| ATOM | 7549 | HH2  | TRP | X | 496 | 30.062 | 28.307 | 45.460 | 0.00 | 0.00 |
| ATOM | 7550 | CZ3  | TRP | X | 496 | 28.077 | 27.517 | 45.483 | 0.00 | 0.00 |
| ATOM | 7551 | HZ3  | TRP | X | 496 | 28.052 | 27.494 | 44.404 | 0.00 | 0.00 |
| ATOM | 7552 | CE3  | TRP | X | 496 | 27.041 | 26.997 | 46.299 | 0.00 | 0.00 |
| ATOM | 7553 | HE3  | TRP | X | 496 | 26.193 | 26.544 | 45.806 | 0.00 | 0.00 |
| ATOM | 7554 | CD2  | TRP | X | 496 | 27.077 | 27.049 | 47.709 | 0.00 | 0.00 |
| ATOM | 7555 | C    | TRP | X | 496 | 24.072 | 25.782 | 51.078 | 0.00 | 0.00 |
| ATOM | 7556 | O    | TRP | X | 496 | 23.430 | 26.854 | 50.987 | 0.00 | 0.00 |
| ATOM | 7557 | N    | PRO | X | 497 | 24.570 | 25.381 | 52.284 | 0.00 | 0.00 |
| ATOM | 7558 | CD   | PRO | X | 497 | 25.296 | 24.174 | 52.501 | 0.00 | 0.00 |
| ATOM | 7559 | HD2  | PRO | X | 497 | 26.369 | 24.272 | 52.334 | 0.00 | 0.00 |
| ATOM | 7560 | HD3  | PRO | X | 497 | 24.937 | 23.369 | 51.861 | 0.00 | 0.00 |
| ATOM | 7561 | CG   | PRO | X | 497 | 24.938 | 23.831 | 53.958 | 0.00 | 0.00 |
| ATOM | 7562 | HG2  | PRO | X | 497 | 25.607 | 23.154 | 54.489 | 0.00 | 0.00 |
| ATOM | 7563 | HG3  | PRO | X | 497 | 23.988 | 23.305 | 54.042 | 0.00 | 0.00 |
| ATOM | 7564 | CB   | PRO | X | 497 | 24.866 | 25.214 | 54.601 | 0.00 | 0.00 |
| ATOM | 7565 | HB2  | PRO | X | 497 | 25.857 | 25.623 | 54.798 | 0.00 | 0.00 |
| ATOM | 7566 | HB3  | PRO | X | 497 | 24.208 | 25.187 | 55.469 | 0.00 | 0.00 |
| ATOM | 7567 | CA   | PRO | X | 497 | 24.296 | 26.080 | 53.555 | 0.00 | 0.00 |
| ATOM | 7568 | HA   | PRO | X | 497 | 23.214 | 26.170 | 53.645 | 0.00 | 0.00 |

|      |      |      |     |   |     |        |        |        |      |      |
|------|------|------|-----|---|-----|--------|--------|--------|------|------|
| ATOM | 7569 | C    | PRO | X | 497 | 24.961 | 27.497 | 53.568 | 0.00 | 0.00 |
| ATOM | 7570 | O    | PRO | X | 497 | 26.121 | 27.559 | 53.210 | 0.00 | 0.00 |
| ATOM | 7571 | N    | PRO | X | 498 | 24.304 | 28.563 | 54.104 | 0.00 | 0.00 |
| ATOM | 7572 | CD   | PRO | X | 498 | 22.884 | 28.671 | 54.270 | 0.00 | 0.00 |
| ATOM | 7573 | HD2  | PRO | X | 498 | 22.616 | 28.259 | 55.243 | 0.00 | 0.00 |
| ATOM | 7574 | HD3  | PRO | X | 498 | 22.365 | 28.145 | 53.470 | 0.00 | 0.00 |
| ATOM | 7575 | CG   | PRO | X | 498 | 22.510 | 30.151 | 54.263 | 0.00 | 0.00 |
| ATOM | 7576 | HG2  | PRO | X | 498 | 21.630 | 30.290 | 54.891 | 0.00 | 0.00 |
| ATOM | 7577 | HG3  | PRO | X | 498 | 22.336 | 30.520 | 53.252 | 0.00 | 0.00 |
| ATOM | 7578 | CB   | PRO | X | 498 | 23.720 | 30.759 | 54.931 | 0.00 | 0.00 |
| ATOM | 7579 | HB2  | PRO | X | 498 | 23.626 | 30.774 | 56.017 | 0.00 | 0.00 |
| ATOM | 7580 | HB3  | PRO | X | 498 | 23.942 | 31.781 | 54.626 | 0.00 | 0.00 |
| ATOM | 7581 | CA   | PRO | X | 498 | 24.872 | 29.826 | 54.468 | 0.00 | 0.00 |
| ATOM | 7582 | HA   | PRO | X | 498 | 25.342 | 30.191 | 53.555 | 0.00 | 0.00 |
| ATOM | 7583 | C    | PRO | X | 498 | 25.992 | 29.695 | 55.583 | 0.00 | 0.00 |
| ATOM | 7584 | O    | PRO | X | 498 | 25.867 | 28.881 | 56.541 | 0.00 | 0.00 |
| ATOM | 7585 | N    | TYR | X | 499 | 27.103 | 30.467 | 55.432 | 0.00 | 0.00 |
| ATOM | 7586 | H    | TYR | X | 499 | 27.140 | 31.095 | 54.642 | 0.00 | 0.00 |
| ATOM | 7587 | CA   | TYR | X | 499 | 28.259 | 30.299 | 56.371 | 0.00 | 0.00 |
| ATOM | 7588 | HA   | TYR | X | 499 | 28.259 | 29.231 | 56.592 | 0.00 | 0.00 |
| ATOM | 7589 | CB   | TYR | X | 499 | 29.554 | 30.785 | 55.635 | 0.00 | 0.00 |
| ATOM | 7590 | HB2  | TYR | X | 499 | 29.753 | 30.126 | 54.789 | 0.00 | 0.00 |
| ATOM | 7591 | HB3  | TYR | X | 499 | 29.291 | 31.779 | 55.274 | 0.00 | 0.00 |
| ATOM | 7592 | CG   | TYR | X | 499 | 30.810 | 30.758 | 56.432 | 0.00 | 0.00 |
| ATOM | 7593 | CD1  | TYR | X | 499 | 31.313 | 31.874 | 57.141 | 0.00 | 0.00 |
| ATOM | 7594 | HD1  | TYR | X | 499 | 30.825 | 32.823 | 56.969 | 0.00 | 0.00 |
| ATOM | 7595 | CE1  | TYR | X | 499 | 32.498 | 31.858 | 57.840 | 0.00 | 0.00 |
| ATOM | 7596 | HE1  | TYR | X | 499 | 32.872 | 32.768 | 58.286 | 0.00 | 0.00 |
| ATOM | 7597 | CZ   | TYR | X | 499 | 33.219 | 30.654 | 58.037 | 0.00 | 0.00 |
| ATOM | 7598 | OH   | TYR | X | 499 | 34.321 | 30.569 | 58.825 | 0.00 | 0.00 |
| ATOM | 7599 | HH   | TYR | X | 499 | 34.665 | 31.442 | 59.028 | 0.00 | 0.00 |
| ATOM | 7600 | CE2  | TYR | X | 499 | 32.644 | 29.549 | 57.360 | 0.00 | 0.00 |
| ATOM | 7601 | HE2  | TYR | X | 499 | 33.199 | 28.641 | 57.541 | 0.00 | 0.00 |
| ATOM | 7602 | CD2  | TYR | X | 499 | 31.502 | 29.558 | 56.602 | 0.00 | 0.00 |
| ATOM | 7603 | HD2  | TYR | X | 499 | 31.259 | 28.606 | 56.154 | 0.00 | 0.00 |
| ATOM | 7604 | C    | TYR | X | 499 | 27.929 | 31.097 | 57.616 | 0.00 | 0.00 |
| ATOM | 7605 | O    | TYR | X | 499 | 28.302 | 32.274 | 57.735 | 0.00 | 0.00 |
| ATOM | 7606 | N    | THR | X | 500 | 27.310 | 30.401 | 58.621 | 0.00 | 0.00 |
| ATOM | 7607 | H    | THR | X | 500 | 27.044 | 29.442 | 58.447 | 0.00 | 0.00 |
| ATOM | 7608 | CA   | THR | X | 500 | 27.143 | 30.936 | 60.019 | 0.00 | 0.00 |
| ATOM | 7609 | HA   | THR | X | 500 | 27.050 | 32.020 | 59.955 | 0.00 | 0.00 |
| ATOM | 7610 | CB   | THR | X | 500 | 25.839 | 30.528 | 60.788 | 0.00 | 0.00 |
| ATOM | 7611 | HB   | THR | X | 500 | 25.013 | 31.043 | 60.297 | 0.00 | 0.00 |
| ATOM | 7612 | CG2  | THR | X | 500 | 25.697 | 29.042 | 60.981 | 0.00 | 0.00 |
| ATOM | 7613 | HG21 | THR | X | 500 | 24.752 | 28.981 | 61.519 | 0.00 | 0.00 |
| ATOM | 7614 | HG22 | THR | X | 500 | 26.537 | 28.650 | 61.554 | 0.00 | 0.00 |
| ATOM | 7615 | HG23 | THR | X | 500 | 25.610 | 28.575 | 60.000 | 0.00 | 0.00 |
| ATOM | 7616 | OG1  | THR | X | 500 | 26.023 | 31.082 | 62.084 | 0.00 | 0.00 |
| ATOM | 7617 | HG1  | THR | X | 500 | 25.198 | 31.486 | 62.362 | 0.00 | 0.00 |
| ATOM | 7618 | C    | THR | X | 500 | 28.408 | 30.792 | 60.819 | 0.00 | 0.00 |
| ATOM | 7619 | O    | THR | X | 500 | 28.987 | 29.685 | 60.820 | 0.00 | 0.00 |
| ATOM | 7620 | N    | ALA | X | 501 | 28.892 | 31.862 | 61.481 | 0.00 | 0.00 |
| ATOM | 7621 | H    | ALA | X | 501 | 28.309 | 32.687 | 61.505 | 0.00 | 0.00 |
| ATOM | 7622 | CA   | ALA | X | 501 | 30.186 | 31.914 | 62.138 | 0.00 | 0.00 |
| ATOM | 7623 | HA   | ALA | X | 501 | 30.952 | 31.657 | 61.407 | 0.00 | 0.00 |
| ATOM | 7624 | CB   | ALA | X | 501 | 30.473 | 33.323 | 62.665 | 0.00 | 0.00 |
| ATOM | 7625 | HB1  | ALA | X | 501 | 30.348 | 34.060 | 61.872 | 0.00 | 0.00 |
| ATOM | 7626 | HB2  | ALA | X | 501 | 31.485 | 33.403 | 63.061 | 0.00 | 0.00 |
| ATOM | 7627 | HB3  | ALA | X | 501 | 29.867 | 33.604 | 63.526 | 0.00 | 0.00 |
| ATOM | 7628 | C    | ALA | X | 501 | 30.419 | 30.865 | 63.283 | 0.00 | 0.00 |
| ATOM | 7629 | O    | ALA | X | 501 | 31.581 | 30.634 | 63.608 | 0.00 | 0.00 |
| ATOM | 7630 | N    | GLY | X | 502 | 29.357 | 30.247 | 63.852 | 0.00 | 0.00 |
| ATOM | 7631 | H    | GLY | X | 502 | 28.483 | 30.623 | 63.515 | 0.00 | 0.00 |
| ATOM | 7632 | CA   | GLY | X | 502 | 29.390 | 29.143 | 64.842 | 0.00 | 0.00 |
| ATOM | 7633 | HA2  | GLY | X | 502 | 30.177 | 29.334 | 65.571 | 0.00 | 0.00 |
| ATOM | 7634 | HA3  | GLY | X | 502 | 28.403 | 29.126 | 65.304 | 0.00 | 0.00 |
| ATOM | 7635 | C    | GLY | X | 502 | 29.662 | 27.776 | 64.197 | 0.00 | 0.00 |

|      |      |      |     |   |     |        |        |        |      |      |
|------|------|------|-----|---|-----|--------|--------|--------|------|------|
| ATOM | 7636 | O    | GLY | X | 502 | 30.572 | 26.991 | 64.496 | 0.00 | 0.00 |
| ATOM | 7637 | N    | ALA | X | 503 | 28.872 | 27.478 | 63.167 | 0.00 | 0.00 |
| ATOM | 7638 | H    | ALA | X | 503 | 28.164 | 28.117 | 62.835 | 0.00 | 0.00 |
| ATOM | 7639 | CA   | ALA | X | 503 | 28.875 | 26.118 | 62.447 | 0.00 | 0.00 |
| ATOM | 7640 | HA   | ALA | X | 503 | 29.118 | 25.383 | 63.214 | 0.00 | 0.00 |
| ATOM | 7641 | CB   | ALA | X | 503 | 27.538 | 25.870 | 61.825 | 0.00 | 0.00 |
| ATOM | 7642 | HB1  | ALA | X | 503 | 27.494 | 24.942 | 61.254 | 0.00 | 0.00 |
| ATOM | 7643 | HB2  | ALA | X | 503 | 27.269 | 26.649 | 61.113 | 0.00 | 0.00 |
| ATOM | 7644 | HB3  | ALA | X | 503 | 26.812 | 25.860 | 62.638 | 0.00 | 0.00 |
| ATOM | 7645 | C    | ALA | X | 503 | 29.984 | 25.978 | 61.403 | 0.00 | 0.00 |
| ATOM | 7646 | O    | ALA | X | 503 | 30.678 | 24.958 | 61.353 | 0.00 | 0.00 |
| ATOM | 7647 | N    | GLN | X | 504 | 30.215 | 27.038 | 60.636 | 0.00 | 0.00 |
| ATOM | 7648 | H    | GLN | X | 504 | 29.645 | 27.858 | 60.782 | 0.00 | 0.00 |
| ATOM | 7649 | CA   | GLN | X | 504 | 31.308 | 27.225 | 59.678 | 0.00 | 0.00 |
| ATOM | 7650 | HA   | GLN | X | 504 | 31.169 | 28.236 | 59.294 | 0.00 | 0.00 |
| ATOM | 7651 | CB   | GLN | X | 504 | 32.703 | 27.276 | 60.399 | 0.00 | 0.00 |
| ATOM | 7652 | HB2  | GLN | X | 504 | 32.905 | 26.274 | 60.780 | 0.00 | 0.00 |
| ATOM | 7653 | HB3  | GLN | X | 504 | 33.452 | 27.553 | 59.658 | 0.00 | 0.00 |
| ATOM | 7654 | CG   | GLN | X | 504 | 32.741 | 28.307 | 61.567 | 0.00 | 0.00 |
| ATOM | 7655 | HG2  | GLN | X | 504 | 32.425 | 29.292 | 61.225 | 0.00 | 0.00 |
| ATOM | 7656 | HG3  | GLN | X | 504 | 32.004 | 27.982 | 62.302 | 0.00 | 0.00 |
| ATOM | 7657 | CD   | GLN | X | 504 | 34.106 | 28.417 | 62.220 | 0.00 | 0.00 |
| ATOM | 7658 | OE1  | GLN | X | 504 | 35.055 | 27.753 | 61.883 | 0.00 | 0.00 |
| ATOM | 7659 | NE2  | GLN | X | 504 | 34.248 | 29.273 | 63.162 | 0.00 | 0.00 |
| ATOM | 7660 | HE21 | GLN | X | 504 | 35.132 | 29.314 | 63.650 | 0.00 | 0.00 |
| ATOM | 7661 | HE22 | GLN | X | 504 | 33.433 | 29.800 | 63.439 | 0.00 | 0.00 |
| ATOM | 7662 | C    | GLN | X | 504 | 31.236 | 26.281 | 58.483 | 0.00 | 0.00 |
| ATOM | 7663 | O    | GLN | X | 504 | 32.262 | 25.610 | 58.135 | 0.00 | 0.00 |
| ATOM | 7664 | N    | GLN | X | 505 | 30.068 | 26.329 | 57.887 | 0.00 | 0.00 |
| ATOM | 7665 | H    | GLN | X | 505 | 29.320 | 26.925 | 58.211 | 0.00 | 0.00 |
| ATOM | 7666 | CA   | GLN | X | 505 | 29.697 | 25.331 | 56.850 | 0.00 | 0.00 |
| ATOM | 7667 | HA   | GLN | X | 505 | 30.235 | 24.397 | 57.014 | 0.00 | 0.00 |
| ATOM | 7668 | CB   | GLN | X | 505 | 28.169 | 25.021 | 56.826 | 0.00 | 0.00 |
| ATOM | 7669 | HB2  | GLN | X | 505 | 27.625 | 25.942 | 57.032 | 0.00 | 0.00 |
| ATOM | 7670 | HB3  | GLN | X | 505 | 27.881 | 24.494 | 55.917 | 0.00 | 0.00 |
| ATOM | 7671 | CG   | GLN | X | 505 | 27.873 | 24.030 | 58.005 | 0.00 | 0.00 |
| ATOM | 7672 | HG2  | GLN | X | 505 | 28.398 | 23.091 | 57.827 | 0.00 | 0.00 |
| ATOM | 7673 | HG3  | GLN | X | 505 | 28.272 | 24.490 | 58.909 | 0.00 | 0.00 |
| ATOM | 7674 | CD   | GLN | X | 505 | 26.359 | 23.698 | 58.153 | 0.00 | 0.00 |
| ATOM | 7675 | OE1  | GLN | X | 505 | 25.669 | 24.207 | 59.033 | 0.00 | 0.00 |
| ATOM | 7676 | NE2  | GLN | X | 505 | 25.870 | 22.896 | 57.285 | 0.00 | 0.00 |
| ATOM | 7677 | HE21 | GLN | X | 505 | 24.941 | 22.540 | 57.461 | 0.00 | 0.00 |
| ATOM | 7678 | HE22 | GLN | X | 505 | 26.519 | 22.376 | 56.713 | 0.00 | 0.00 |
| ATOM | 7679 | C    | GLN | X | 505 | 30.206 | 25.866 | 55.550 | 0.00 | 0.00 |
| ATOM | 7680 | O    | GLN | X | 505 | 29.847 | 26.996 | 55.117 | 0.00 | 0.00 |
| ATOM | 7681 | N    | TYR | X | 506 | 30.953 | 25.003 | 54.818 | 0.00 | 0.00 |
| ATOM | 7682 | H    | TYR | X | 506 | 30.979 | 24.009 | 54.992 | 0.00 | 0.00 |
| ATOM | 7683 | CA   | TYR | X | 506 | 31.289 | 25.265 | 53.419 | 0.00 | 0.00 |
| ATOM | 7684 | HA   | TYR | X | 506 | 30.616 | 26.003 | 52.981 | 0.00 | 0.00 |
| ATOM | 7685 | CB   | TYR | X | 506 | 32.733 | 25.784 | 53.471 | 0.00 | 0.00 |
| ATOM | 7686 | HB2  | TYR | X | 506 | 33.059 | 26.117 | 52.486 | 0.00 | 0.00 |
| ATOM | 7687 | HB3  | TYR | X | 506 | 32.822 | 26.664 | 54.109 | 0.00 | 0.00 |
| ATOM | 7688 | CG   | TYR | X | 506 | 33.739 | 24.675 | 53.904 | 0.00 | 0.00 |
| ATOM | 7689 | CD1  | TYR | X | 506 | 33.894 | 24.460 | 55.287 | 0.00 | 0.00 |
| ATOM | 7690 | HD1  | TYR | X | 506 | 33.331 | 25.018 | 56.021 | 0.00 | 0.00 |
| ATOM | 7691 | CE1  | TYR | X | 506 | 34.841 | 23.490 | 55.720 | 0.00 | 0.00 |
| ATOM | 7692 | HE1  | TYR | X | 506 | 35.019 | 23.266 | 56.762 | 0.00 | 0.00 |
| ATOM | 7693 | CZ   | TYR | X | 506 | 35.708 | 22.785 | 54.814 | 0.00 | 0.00 |
| ATOM | 7694 | OH   | TYR | X | 506 | 36.569 | 21.803 | 55.188 | 0.00 | 0.00 |
| ATOM | 7695 | HH   | TYR | X | 506 | 36.803 | 21.798 | 56.119 | 0.00 | 0.00 |
| ATOM | 7696 | CE2  | TYR | X | 506 | 35.411 | 22.977 | 53.431 | 0.00 | 0.00 |
| ATOM | 7697 | HE2  | TYR | X | 506 | 36.023 | 22.437 | 52.723 | 0.00 | 0.00 |
| ATOM | 7698 | CD2  | TYR | X | 506 | 34.502 | 23.915 | 52.964 | 0.00 | 0.00 |
| ATOM | 7699 | HD2  | TYR | X | 506 | 34.347 | 23.999 | 51.899 | 0.00 | 0.00 |
| ATOM | 7700 | C    | TYR | X | 506 | 31.077 | 24.019 | 52.531 | 0.00 | 0.00 |
| ATOM | 7701 | O    | TYR | X | 506 | 31.007 | 22.874 | 53.062 | 0.00 | 0.00 |
| ATOM | 7702 | N    | VAL | X | 507 | 30.980 | 24.240 | 51.249 | 0.00 | 0.00 |

|      |      |      |     |   |     |        |        |        |      |      |
|------|------|------|-----|---|-----|--------|--------|--------|------|------|
| ATOM | 7703 | H    | VAL | X | 507 | 30.960 | 25.171 | 50.857 | 0.00 | 0.00 |
| ATOM | 7704 | CA   | VAL | X | 507 | 30.906 | 23.094 | 50.344 | 0.00 | 0.00 |
| ATOM | 7705 | HA   | VAL | X | 507 | 30.704 | 22.176 | 50.896 | 0.00 | 0.00 |
| ATOM | 7706 | CB   | VAL | X | 507 | 29.871 | 23.320 | 49.147 | 0.00 | 0.00 |
| ATOM | 7707 | HB   | VAL | X | 507 | 29.879 | 22.531 | 48.395 | 0.00 | 0.00 |
| ATOM | 7708 | CG1  | VAL | X | 507 | 28.503 | 23.535 | 49.856 | 0.00 | 0.00 |
| ATOM | 7709 | HG11 | VAL | X | 507 | 28.571 | 24.347 | 50.580 | 0.00 | 0.00 |
| ATOM | 7710 | HG12 | VAL | X | 507 | 27.640 | 23.762 | 49.229 | 0.00 | 0.00 |
| ATOM | 7711 | HG13 | VAL | X | 507 | 28.378 | 22.663 | 50.497 | 0.00 | 0.00 |
| ATOM | 7712 | CG2  | VAL | X | 507 | 30.219 | 24.574 | 48.319 | 0.00 | 0.00 |
| ATOM | 7713 | HG21 | VAL | X | 507 | 29.489 | 24.767 | 47.534 | 0.00 | 0.00 |
| ATOM | 7714 | HG22 | VAL | X | 507 | 31.115 | 24.296 | 47.764 | 0.00 | 0.00 |
| ATOM | 7715 | HG23 | VAL | X | 507 | 30.309 | 25.455 | 48.955 | 0.00 | 0.00 |
| ATOM | 7716 | C    | VAL | X | 507 | 32.264 | 22.730 | 49.676 | 0.00 | 0.00 |
| ATOM | 7717 | O    | VAL | X | 507 | 33.161 | 23.578 | 49.436 | 0.00 | 0.00 |
| ATOM | 7718 | N    | SER | X | 508 | 32.388 | 21.463 | 49.223 | 0.00 | 0.00 |
| ATOM | 7719 | H    | SER | X | 508 | 31.703 | 20.767 | 49.481 | 0.00 | 0.00 |
| ATOM | 7720 | CA   | SER | X | 508 | 33.307 | 21.138 | 48.128 | 0.00 | 0.00 |
| ATOM | 7721 | HA   | SER | X | 508 | 34.227 | 21.710 | 48.250 | 0.00 | 0.00 |
| ATOM | 7722 | CB   | SER | X | 508 | 33.672 | 19.653 | 48.085 | 0.00 | 0.00 |
| ATOM | 7723 | HB2  | SER | X | 508 | 34.588 | 19.638 | 47.495 | 0.00 | 0.00 |
| ATOM | 7724 | HB3  | SER | X | 508 | 33.916 | 19.300 | 49.087 | 0.00 | 0.00 |
| ATOM | 7725 | OG   | SER | X | 508 | 32.701 | 18.750 | 47.483 | 0.00 | 0.00 |
| ATOM | 7726 | HG   | SER | X | 508 | 32.980 | 18.512 | 46.596 | 0.00 | 0.00 |
| ATOM | 7727 | C    | SER | X | 508 | 32.792 | 21.547 | 46.717 | 0.00 | 0.00 |
| ATOM | 7728 | O    | SER | X | 508 | 31.641 | 21.387 | 46.350 | 0.00 | 0.00 |
| ATOM | 7729 | N    | LEU | X | 509 | 33.718 | 22.181 | 45.961 | 0.00 | 0.00 |
| ATOM | 7730 | H    | LEU | X | 509 | 34.606 | 22.306 | 46.427 | 0.00 | 0.00 |
| ATOM | 7731 | CA   | LEU | X | 509 | 33.561 | 22.448 | 44.502 | 0.00 | 0.00 |
| ATOM | 7732 | HA   | LEU | X | 509 | 32.606 | 22.042 | 44.169 | 0.00 | 0.00 |
| ATOM | 7733 | CB   | LEU | X | 509 | 33.603 | 23.938 | 44.080 | 0.00 | 0.00 |
| ATOM | 7734 | HB2  | LEU | X | 509 | 34.523 | 24.458 | 44.348 | 0.00 | 0.00 |
| ATOM | 7735 | HB3  | LEU | X | 509 | 33.538 | 24.006 | 42.994 | 0.00 | 0.00 |
| ATOM | 7736 | CG   | LEU | X | 509 | 32.448 | 24.811 | 44.647 | 0.00 | 0.00 |
| ATOM | 7737 | HG   | LEU | X | 509 | 32.352 | 24.710 | 45.728 | 0.00 | 0.00 |
| ATOM | 7738 | CD1  | LEU | X | 509 | 32.668 | 26.269 | 44.207 | 0.00 | 0.00 |
| ATOM | 7739 | HD11 | LEU | X | 509 | 31.969 | 26.877 | 44.782 | 0.00 | 0.00 |
| ATOM | 7740 | HD12 | LEU | X | 509 | 32.565 | 26.344 | 43.125 | 0.00 | 0.00 |
| ATOM | 7741 | HD13 | LEU | X | 509 | 33.678 | 26.597 | 44.455 | 0.00 | 0.00 |
| ATOM | 7742 | CD2  | LEU | X | 509 | 31.043 | 24.293 | 44.222 | 0.00 | 0.00 |
| ATOM | 7743 | HD21 | LEU | X | 509 | 30.920 | 24.271 | 43.139 | 0.00 | 0.00 |
| ATOM | 7744 | HD22 | LEU | X | 509 | 30.808 | 23.305 | 44.616 | 0.00 | 0.00 |
| ATOM | 7745 | HD23 | LEU | X | 509 | 30.300 | 24.979 | 44.631 | 0.00 | 0.00 |
| ATOM | 7746 | C    | LEU | X | 509 | 34.507 | 21.529 | 43.724 | 0.00 | 0.00 |
| ATOM | 7747 | O    | LEU | X | 509 | 35.644 | 21.908 | 43.457 | 0.00 | 0.00 |
| ATOM | 7748 | N    | ASP | X | 510 | 34.019 | 20.383 | 43.295 | 0.00 | 0.00 |
| ATOM | 7749 | H    | ASP | X | 510 | 33.113 | 20.067 | 43.608 | 0.00 | 0.00 |
| ATOM | 7750 | CA   | ASP | X | 510 | 34.674 | 19.319 | 42.555 | 0.00 | 0.00 |
| ATOM | 7751 | HA   | ASP | X | 510 | 35.320 | 19.806 | 41.825 | 0.00 | 0.00 |
| ATOM | 7752 | CB   | ASP | X | 510 | 35.479 | 18.366 | 43.491 | 0.00 | 0.00 |
| ATOM | 7753 | HB2  | ASP | X | 510 | 36.150 | 17.793 | 42.851 | 0.00 | 0.00 |
| ATOM | 7754 | HB3  | ASP | X | 510 | 35.959 | 19.005 | 44.232 | 0.00 | 0.00 |
| ATOM | 7755 | CG   | ASP | X | 510 | 34.604 | 17.428 | 44.338 | 0.00 | 0.00 |
| ATOM | 7756 | OD1  | ASP | X | 510 | 34.484 | 16.214 | 43.994 | 0.00 | 0.00 |
| ATOM | 7757 | OD2  | ASP | X | 510 | 34.069 | 17.909 | 45.386 | 0.00 | 0.00 |
| ATOM | 7758 | C    | ASP | X | 510 | 33.562 | 18.472 | 41.829 | 0.00 | 0.00 |
| ATOM | 7759 | O    | ASP | X | 510 | 32.367 | 18.818 | 41.814 | 0.00 | 0.00 |
| ATOM | 7760 | N    | LEU | X | 511 | 34.009 | 17.362 | 41.138 | 0.00 | 0.00 |
| ATOM | 7761 | H    | LEU | X | 511 | 34.991 | 17.139 | 41.222 | 0.00 | 0.00 |
| ATOM | 7762 | CA   | LEU | X | 511 | 33.236 | 16.504 | 40.283 | 0.00 | 0.00 |
| ATOM | 7763 | HA   | LEU | X | 511 | 32.733 | 17.057 | 39.490 | 0.00 | 0.00 |
| ATOM | 7764 | CB   | LEU | X | 511 | 34.112 | 15.495 | 39.592 | 0.00 | 0.00 |
| ATOM | 7765 | HB2  | LEU | X | 511 | 34.633 | 15.007 | 40.415 | 0.00 | 0.00 |
| ATOM | 7766 | HB3  | LEU | X | 511 | 33.513 | 14.850 | 38.949 | 0.00 | 0.00 |
| ATOM | 7767 | CG   | LEU | X | 511 | 35.258 | 16.132 | 38.658 | 0.00 | 0.00 |
| ATOM | 7768 | HG   | LEU | X | 511 | 35.929 | 16.659 | 39.335 | 0.00 | 0.00 |
| ATOM | 7769 | CD1  | LEU | X | 511 | 36.028 | 15.037 | 37.949 | 0.00 | 0.00 |

|      |      |      |     |   |     |        |        |        |      |      |
|------|------|------|-----|---|-----|--------|--------|--------|------|------|
| ATOM | 7770 | HD11 | LEU | X | 511 | 35.306 | 14.582 | 37.271 | 0.00 | 0.00 |
| ATOM | 7771 | HD12 | LEU | X | 511 | 36.392 | 14.266 | 38.629 | 0.00 | 0.00 |
| ATOM | 7772 | HD13 | LEU | X | 511 | 36.819 | 15.395 | 37.291 | 0.00 | 0.00 |
| ATOM | 7773 | CD2  | LEU | X | 511 | 34.655 | 17.054 | 37.638 | 0.00 | 0.00 |
| ATOM | 7774 | HD21 | LEU | X | 511 | 35.450 | 17.332 | 36.945 | 0.00 | 0.00 |
| ATOM | 7775 | HD22 | LEU | X | 511 | 33.818 | 16.574 | 37.130 | 0.00 | 0.00 |
| ATOM | 7776 | HD23 | LEU | X | 511 | 34.190 | 17.938 | 38.073 | 0.00 | 0.00 |
| ATOM | 7777 | C    | LEU | X | 511 | 32.131 | 15.815 | 41.135 | 0.00 | 0.00 |
| ATOM | 7778 | O    | LEU | X | 511 | 31.046 | 15.621 | 40.577 | 0.00 | 0.00 |
| ATOM | 7779 | N    | ARG | X | 512 | 32.342 | 15.387 | 42.356 | 0.00 | 0.00 |
| ATOM | 7780 | H    | ARG | X | 512 | 33.244 | 15.570 | 42.772 | 0.00 | 0.00 |
| ATOM | 7781 | CA   | ARG | X | 512 | 31.330 | 15.022 | 43.304 | 0.00 | 0.00 |
| ATOM | 7782 | HA   | ARG | X | 512 | 30.807 | 14.147 | 42.920 | 0.00 | 0.00 |
| ATOM | 7783 | CB   | ARG | X | 512 | 31.960 | 14.475 | 44.626 | 0.00 | 0.00 |
| ATOM | 7784 | HB2  | ARG | X | 512 | 32.397 | 15.317 | 45.162 | 0.00 | 0.00 |
| ATOM | 7785 | HB3  | ARG | X | 512 | 31.126 | 14.169 | 45.258 | 0.00 | 0.00 |
| ATOM | 7786 | CG   | ARG | X | 512 | 32.964 | 13.359 | 44.506 | 0.00 | 0.00 |
| ATOM | 7787 | HG2  | ARG | X | 512 | 32.450 | 12.420 | 44.299 | 0.00 | 0.00 |
| ATOM | 7788 | HG3  | ARG | X | 512 | 33.634 | 13.506 | 43.659 | 0.00 | 0.00 |
| ATOM | 7789 | CD   | ARG | X | 512 | 33.751 | 13.215 | 45.830 | 0.00 | 0.00 |
| ATOM | 7790 | HD2  | ARG | X | 512 | 34.446 | 14.040 | 45.984 | 0.00 | 0.00 |
| ATOM | 7791 | HD3  | ARG | X | 512 | 33.059 | 13.219 | 46.672 | 0.00 | 0.00 |
| ATOM | 7792 | NE   | ARG | X | 512 | 34.563 | 11.957 | 45.870 | 0.00 | 0.00 |
| ATOM | 7793 | HE   | ARG | X | 512 | 34.619 | 11.580 | 44.935 | 0.00 | 0.00 |
| ATOM | 7794 | CZ   | ARG | X | 512 | 35.139 | 11.356 | 46.954 | 0.00 | 0.00 |
| ATOM | 7795 | NH1  | ARG | X | 512 | 35.155 | 11.945 | 48.178 | 0.00 | 0.00 |
| ATOM | 7796 | HH11 | ARG | X | 512 | 34.782 | 12.844 | 48.446 | 0.00 | 0.00 |
| ATOM | 7797 | HH12 | ARG | X | 512 | 35.642 | 11.498 | 48.942 | 0.00 | 0.00 |
| ATOM | 7798 | NH2  | ARG | X | 512 | 35.727 | 10.186 | 46.819 | 0.00 | 0.00 |
| ATOM | 7799 | HH21 | ARG | X | 512 | 35.507 | 9.698  | 45.963 | 0.00 | 0.00 |
| ATOM | 7800 | HH22 | ARG | X | 512 | 36.096 | 9.640  | 47.585 | 0.00 | 0.00 |
| ATOM | 7801 | C    | ARG | X | 512 | 30.237 | 16.047 | 43.589 | 0.00 | 0.00 |
| ATOM | 7802 | O    | ARG | X | 512 | 30.449 | 17.255 | 43.492 | 0.00 | 0.00 |
| ATOM | 7803 | N    | PRO | X | 513 | 28.992 | 15.584 | 43.842 | 0.00 | 0.00 |
| ATOM | 7804 | CD   | PRO | X | 513 | 28.508 | 14.170 | 43.854 | 0.00 | 0.00 |
| ATOM | 7805 | HD2  | PRO | X | 513 | 28.904 | 13.682 | 44.745 | 0.00 | 0.00 |
| ATOM | 7806 | HD3  | PRO | X | 513 | 28.856 | 13.644 | 42.965 | 0.00 | 0.00 |
| ATOM | 7807 | CG   | PRO | X | 513 | 27.016 | 14.266 | 44.030 | 0.00 | 0.00 |
| ATOM | 7808 | HG2  | PRO | X | 513 | 26.606 | 13.334 | 44.418 | 0.00 | 0.00 |
| ATOM | 7809 | HG3  | PRO | X | 513 | 26.627 | 14.615 | 43.073 | 0.00 | 0.00 |
| ATOM | 7810 | CB   | PRO | X | 513 | 26.923 | 15.386 | 45.010 | 0.00 | 0.00 |
| ATOM | 7811 | HB2  | PRO | X | 513 | 27.000 | 15.160 | 46.074 | 0.00 | 0.00 |
| ATOM | 7812 | HB3  | PRO | X | 513 | 25.937 | 15.835 | 44.895 | 0.00 | 0.00 |
| ATOM | 7813 | CA   | PRO | X | 513 | 27.977 | 16.431 | 44.562 | 0.00 | 0.00 |
| ATOM | 7814 | HA   | PRO | X | 513 | 27.564 | 17.243 | 43.963 | 0.00 | 0.00 |
| ATOM | 7815 | C    | PRO | X | 513 | 28.613 | 17.101 | 45.752 | 0.00 | 0.00 |
| ATOM | 7816 | O    | PRO | X | 513 | 29.526 | 16.614 | 46.422 | 0.00 | 0.00 |
| ATOM | 7817 | N    | LEU | X | 514 | 27.976 | 18.194 | 46.166 | 0.00 | 0.00 |
| ATOM | 7818 | H    | LEU | X | 514 | 27.295 | 18.642 | 45.570 | 0.00 | 0.00 |
| ATOM | 7819 | CA   | LEU | X | 514 | 28.490 | 19.220 | 47.143 | 0.00 | 0.00 |
| ATOM | 7820 | HA   | LEU | X | 514 | 29.433 | 19.582 | 46.734 | 0.00 | 0.00 |
| ATOM | 7821 | CB   | LEU | X | 514 | 27.420 | 20.390 | 47.266 | 0.00 | 0.00 |
| ATOM | 7822 | HB2  | LEU | X | 514 | 26.475 | 19.985 | 47.629 | 0.00 | 0.00 |
| ATOM | 7823 | HB3  | LEU | X | 514 | 27.830 | 21.020 | 48.055 | 0.00 | 0.00 |
| ATOM | 7824 | CG   | LEU | X | 514 | 27.188 | 21.233 | 45.982 | 0.00 | 0.00 |
| ATOM | 7825 | HG   | LEU | X | 514 | 26.893 | 20.669 | 45.096 | 0.00 | 0.00 |
| ATOM | 7826 | CD1  | LEU | X | 514 | 26.160 | 22.278 | 46.326 | 0.00 | 0.00 |
| ATOM | 7827 | HD11 | LEU | X | 514 | 25.842 | 22.844 | 45.450 | 0.00 | 0.00 |
| ATOM | 7828 | HD12 | LEU | X | 514 | 26.480 | 22.961 | 47.113 | 0.00 | 0.00 |
| ATOM | 7829 | HD13 | LEU | X | 514 | 25.236 | 21.771 | 46.603 | 0.00 | 0.00 |
| ATOM | 7830 | CD2  | LEU | X | 514 | 28.501 | 22.017 | 45.601 | 0.00 | 0.00 |
| ATOM | 7831 | HD21 | LEU | X | 514 | 28.405 | 22.549 | 44.654 | 0.00 | 0.00 |
| ATOM | 7832 | HD22 | LEU | X | 514 | 28.921 | 22.694 | 46.345 | 0.00 | 0.00 |
| ATOM | 7833 | HD23 | LEU | X | 514 | 29.253 | 21.254 | 45.400 | 0.00 | 0.00 |
| ATOM | 7834 | C    | LEU | X | 514 | 28.729 | 18.561 | 48.506 | 0.00 | 0.00 |
| ATOM | 7835 | O    | LEU | X | 514 | 27.807 | 18.313 | 49.295 | 0.00 | 0.00 |
| ATOM | 7836 | N    | GLU | X | 515 | 30.033 | 18.373 | 48.804 | 0.00 | 0.00 |



|      |      |      |     |   |     |        |        |        |      |      |
|------|------|------|-----|---|-----|--------|--------|--------|------|------|
| ATOM | 7837 | H    | GLU | X | 515 | 30.750 | 18.568 | 48.119 | 0.00 | 0.00 |
| ATOM | 7838 | CA   | GLU | X | 515 | 30.395 | 17.847 | 50.109 | 0.00 | 0.00 |
| ATOM | 7839 | HA   | GLU | X | 515 | 29.653 | 17.109 | 50.413 | 0.00 | 0.00 |
| ATOM | 7840 | CB   | GLU | X | 515 | 31.723 | 17.082 | 50.128 | 0.00 | 0.00 |
| ATOM | 7841 | HB2  | GLU | X | 515 | 31.679 | 16.284 | 49.386 | 0.00 | 0.00 |
| ATOM | 7842 | HB3  | GLU | X | 515 | 32.576 | 17.754 | 50.040 | 0.00 | 0.00 |
| ATOM | 7843 | CG   | GLU | X | 515 | 31.837 | 16.279 | 51.476 | 0.00 | 0.00 |
| ATOM | 7844 | HG2  | GLU | X | 515 | 31.573 | 16.977 | 52.271 | 0.00 | 0.00 |
| ATOM | 7845 | HG3  | GLU | X | 515 | 31.081 | 15.497 | 51.555 | 0.00 | 0.00 |
| ATOM | 7846 | CD   | GLU | X | 515 | 33.193 | 15.629 | 51.708 | 0.00 | 0.00 |
| ATOM | 7847 | OE1  | GLU | X | 515 | 33.749 | 15.086 | 50.733 | 0.00 | 0.00 |
| ATOM | 7848 | OE2  | GLU | X | 515 | 33.810 | 15.798 | 52.758 | 0.00 | 0.00 |
| ATOM | 7849 | C    | GLU | X | 515 | 30.236 | 18.976 | 51.078 | 0.00 | 0.00 |
| ATOM | 7850 | O    | GLU | X | 515 | 31.220 | 19.638 | 51.401 | 0.00 | 0.00 |
| ATOM | 7851 | N    | VAL | X | 516 | 29.110 | 19.098 | 51.734 | 0.00 | 0.00 |
| ATOM | 7852 | H    | VAL | X | 516 | 28.374 | 18.624 | 51.231 | 0.00 | 0.00 |
| ATOM | 7853 | CA   | VAL | X | 516 | 28.914 | 19.949 | 52.939 | 0.00 | 0.00 |
| ATOM | 7854 | HA   | VAL | X | 516 | 29.194 | 20.967 | 52.665 | 0.00 | 0.00 |
| ATOM | 7855 | CB   | VAL | X | 516 | 27.453 | 20.104 | 53.364 | 0.00 | 0.00 |
| ATOM | 7856 | HB   | VAL | X | 516 | 27.009 | 19.125 | 53.545 | 0.00 | 0.00 |
| ATOM | 7857 | CG1  | VAL | X | 516 | 27.265 | 20.943 | 54.693 | 0.00 | 0.00 |
| ATOM | 7858 | HG11 | VAL | X | 516 | 27.686 | 21.926 | 54.479 | 0.00 | 0.00 |
| ATOM | 7859 | HG12 | VAL | X | 516 | 26.216 | 21.093 | 54.946 | 0.00 | 0.00 |
| ATOM | 7860 | HG13 | VAL | X | 516 | 27.818 | 20.412 | 55.468 | 0.00 | 0.00 |
| ATOM | 7861 | CG2  | VAL | X | 516 | 26.508 | 20.654 | 52.284 | 0.00 | 0.00 |
| ATOM | 7862 | HG21 | VAL | X | 516 | 26.922 | 21.635 | 52.051 | 0.00 | 0.00 |
| ATOM | 7863 | HG22 | VAL | X | 516 | 25.470 | 20.807 | 52.580 | 0.00 | 0.00 |
| ATOM | 7864 | HG23 | VAL | X | 516 | 26.456 | 20.107 | 51.342 | 0.00 | 0.00 |
| ATOM | 7865 | C    | VAL | X | 516 | 29.814 | 19.557 | 54.157 | 0.00 | 0.00 |
| ATOM | 7866 | O    | VAL | X | 516 | 29.663 | 18.484 | 54.713 | 0.00 | 0.00 |
| ATOM | 7867 | N    | ARG | X | 517 | 30.758 | 20.393 | 54.539 | 0.00 | 0.00 |
| ATOM | 7868 | H    | ARG | X | 517 | 30.813 | 21.282 | 54.063 | 0.00 | 0.00 |
| ATOM | 7869 | CA   | ARG | X | 517 | 31.720 | 20.245 | 55.612 | 0.00 | 0.00 |
| ATOM | 7870 | HA   | ARG | X | 517 | 31.527 | 19.305 | 56.129 | 0.00 | 0.00 |
| ATOM | 7871 | CB   | ARG | X | 517 | 33.093 | 20.276 | 55.040 | 0.00 | 0.00 |
| ATOM | 7872 | HB2  | ARG | X | 517 | 33.267 | 21.222 | 54.527 | 0.00 | 0.00 |
| ATOM | 7873 | HB3  | ARG | X | 517 | 33.821 | 20.239 | 55.850 | 0.00 | 0.00 |
| ATOM | 7874 | CG   | ARG | X | 517 | 33.427 | 19.067 | 54.119 | 0.00 | 0.00 |
| ATOM | 7875 | HG2  | ARG | X | 517 | 33.564 | 18.134 | 54.667 | 0.00 | 0.00 |
| ATOM | 7876 | HG3  | ARG | X | 517 | 32.531 | 18.876 | 53.529 | 0.00 | 0.00 |
| ATOM | 7877 | CD   | ARG | X | 517 | 34.701 | 19.317 | 53.270 | 0.00 | 0.00 |
| ATOM | 7878 | HD2  | ARG | X | 517 | 34.506 | 20.263 | 52.764 | 0.00 | 0.00 |
| ATOM | 7879 | HD3  | ARG | X | 517 | 35.509 | 19.478 | 53.984 | 0.00 | 0.00 |
| ATOM | 7880 | NE   | ARG | X | 517 | 34.936 | 18.294 | 52.269 | 0.00 | 0.00 |
| ATOM | 7881 | HE   | ARG | X | 517 | 34.499 | 17.390 | 52.371 | 0.00 | 0.00 |
| ATOM | 7882 | CZ   | ARG | X | 517 | 35.638 | 18.352 | 51.151 | 0.00 | 0.00 |
| ATOM | 7883 | NH1  | ARG | X | 517 | 36.303 | 19.412 | 50.876 | 0.00 | 0.00 |
| ATOM | 7884 | HH11 | ARG | X | 517 | 36.307 | 20.173 | 51.540 | 0.00 | 0.00 |
| ATOM | 7885 | HH12 | ARG | X | 517 | 36.632 | 19.468 | 49.923 | 0.00 | 0.00 |
| ATOM | 7886 | NH2  | ARG | X | 517 | 35.674 | 17.352 | 50.351 | 0.00 | 0.00 |
| ATOM | 7887 | HH21 | ARG | X | 517 | 35.073 | 16.546 | 50.450 | 0.00 | 0.00 |
| ATOM | 7888 | HH22 | ARG | X | 517 | 36.146 | 17.406 | 49.459 | 0.00 | 0.00 |
| ATOM | 7889 | C    | ARG | X | 517 | 31.610 | 21.366 | 56.616 | 0.00 | 0.00 |
| ATOM | 7890 | O    | ARG | X | 517 | 30.911 | 22.365 | 56.382 | 0.00 | 0.00 |
| ATOM | 7891 | N    | ARG | X | 518 | 32.233 | 21.228 | 57.803 | 0.00 | 0.00 |
| ATOM | 7892 | H    | ARG | X | 518 | 32.682 | 20.345 | 57.997 | 0.00 | 0.00 |
| ATOM | 7893 | CA   | ARG | X | 518 | 32.244 | 22.221 | 58.885 | 0.00 | 0.00 |
| ATOM | 7894 | HA   | ARG | X | 518 | 31.780 | 23.132 | 58.505 | 0.00 | 0.00 |
| ATOM | 7895 | CB   | ARG | X | 518 | 31.766 | 21.682 | 60.174 | 0.00 | 0.00 |
| ATOM | 7896 | HB2  | ARG | X | 518 | 32.024 | 20.662 | 60.458 | 0.00 | 0.00 |
| ATOM | 7897 | HB3  | ARG | X | 518 | 32.267 | 22.304 | 60.915 | 0.00 | 0.00 |
| ATOM | 7898 | CG   | ARG | X | 518 | 30.202 | 21.835 | 60.188 | 0.00 | 0.00 |
| ATOM | 7899 | HG2  | ARG | X | 518 | 29.801 | 22.816 | 59.931 | 0.00 | 0.00 |
| ATOM | 7900 | HG3  | ARG | X | 518 | 29.760 | 21.112 | 59.502 | 0.00 | 0.00 |
| ATOM | 7901 | CD   | ARG | X | 518 | 29.616 | 21.389 | 61.549 | 0.00 | 0.00 |
| ATOM | 7902 | HD2  | ARG | X | 518 | 28.536 | 21.294 | 61.437 | 0.00 | 0.00 |
| ATOM | 7903 | HD3  | ARG | X | 518 | 30.007 | 20.393 | 61.756 | 0.00 | 0.00 |

|      |      |      |     |   |     |        |        |        |      |      |
|------|------|------|-----|---|-----|--------|--------|--------|------|------|
| ATOM | 7904 | NE   | ARG | X | 518 | 30.015 | 22.219 | 62.649 | 0.00 | 0.00 |
| ATOM | 7905 | HE   | ARG | X | 518 | 30.545 | 23.034 | 62.375 | 0.00 | 0.00 |
| ATOM | 7906 | CZ   | ARG | X | 518 | 29.691 | 22.123 | 63.946 | 0.00 | 0.00 |
| ATOM | 7907 | NH1  | ARG | X | 518 | 28.870 | 21.195 | 64.412 | 0.00 | 0.00 |
| ATOM | 7908 | HH11 | ARG | X | 518 | 28.445 | 20.453 | 63.876 | 0.00 | 0.00 |
| ATOM | 7909 | HH12 | ARG | X | 518 | 28.631 | 21.153 | 65.393 | 0.00 | 0.00 |
| ATOM | 7910 | NH2  | ARG | X | 518 | 30.185 | 22.988 | 64.780 | 0.00 | 0.00 |
| ATOM | 7911 | HH21 | ARG | X | 518 | 30.861 | 23.710 | 64.577 | 0.00 | 0.00 |
| ATOM | 7912 | HH22 | ARG | X | 518 | 29.837 | 22.975 | 65.728 | 0.00 | 0.00 |
| ATOM | 7913 | C    | ARG | X | 518 | 33.750 | 22.546 | 59.140 | 0.00 | 0.00 |
| ATOM | 7914 | O    | ARG | X | 518 | 34.600 | 21.665 | 59.130 | 0.00 | 0.00 |
| ATOM | 7915 | N    | GLY | X | 519 | 34.012 | 23.832 | 59.538 | 0.00 | 0.00 |
| ATOM | 7916 | H    | GLY | X | 519 | 33.188 | 24.413 | 59.476 | 0.00 | 0.00 |
| ATOM | 7917 | CA   | GLY | X | 519 | 35.296 | 24.445 | 59.963 | 0.00 | 0.00 |
| ATOM | 7918 | HA2  | GLY | X | 519 | 35.052 | 25.325 | 60.559 | 0.00 | 0.00 |
| ATOM | 7919 | HA3  | GLY | X | 519 | 35.878 | 23.759 | 60.579 | 0.00 | 0.00 |
| ATOM | 7920 | C    | GLY | X | 519 | 36.087 | 24.801 | 58.727 | 0.00 | 0.00 |
| ATOM | 7921 | O    | GLY | X | 519 | 36.905 | 24.001 | 58.285 | 0.00 | 0.00 |
| ATOM | 7922 | N    | LEU | X | 520 | 35.856 | 26.026 | 58.218 | 0.00 | 0.00 |
| ATOM | 7923 | H    | LEU | X | 520 | 35.230 | 26.630 | 58.731 | 0.00 | 0.00 |
| ATOM | 7924 | CA   | LEU | X | 520 | 36.668 | 26.580 | 57.139 | 0.00 | 0.00 |
| ATOM | 7925 | HA   | LEU | X | 520 | 36.697 | 25.819 | 56.359 | 0.00 | 0.00 |
| ATOM | 7926 | CB   | LEU | X | 520 | 35.879 | 27.743 | 56.554 | 0.00 | 0.00 |
| ATOM | 7927 | HB2  | LEU | X | 520 | 34.914 | 27.404 | 56.177 | 0.00 | 0.00 |
| ATOM | 7928 | HB3  | LEU | X | 520 | 35.863 | 28.392 | 57.429 | 0.00 | 0.00 |
| ATOM | 7929 | CG   | LEU | X | 520 | 36.692 | 28.424 | 55.428 | 0.00 | 0.00 |
| ATOM | 7930 | HG   | LEU | X | 520 | 37.630 | 28.826 | 55.811 | 0.00 | 0.00 |
| ATOM | 7931 | CD1  | LEU | X | 520 | 37.051 | 27.503 | 54.195 | 0.00 | 0.00 |
| ATOM | 7932 | HD11 | LEU | X | 520 | 37.612 | 28.108 | 53.483 | 0.00 | 0.00 |
| ATOM | 7933 | HD12 | LEU | X | 520 | 36.156 | 27.078 | 53.741 | 0.00 | 0.00 |
| ATOM | 7934 | HD13 | LEU | X | 520 | 37.681 | 26.684 | 54.542 | 0.00 | 0.00 |
| ATOM | 7935 | CD2  | LEU | X | 520 | 35.856 | 29.629 | 54.879 | 0.00 | 0.00 |
| ATOM | 7936 | HD21 | LEU | X | 520 | 36.392 | 30.092 | 54.051 | 0.00 | 0.00 |
| ATOM | 7937 | HD22 | LEU | X | 520 | 34.870 | 29.297 | 54.553 | 0.00 | 0.00 |
| ATOM | 7938 | HD23 | LEU | X | 520 | 35.730 | 30.274 | 55.749 | 0.00 | 0.00 |
| ATOM | 7939 | C    | LEU | X | 520 | 38.085 | 26.879 | 57.752 | 0.00 | 0.00 |
| ATOM | 7940 | O    | LEU | X | 520 | 38.283 | 27.975 | 58.332 | 0.00 | 0.00 |
| ATOM | 7941 | N    | ARG | X | 521 | 39.010 | 25.984 | 57.696 | 0.00 | 0.00 |
| ATOM | 7942 | H    | ARG | X | 521 | 38.636 | 25.066 | 57.504 | 0.00 | 0.00 |
| ATOM | 7943 | CA   | ARG | X | 521 | 40.442 | 26.159 | 58.088 | 0.00 | 0.00 |
| ATOM | 7944 | HA   | ARG | X | 521 | 40.879 | 25.168 | 57.964 | 0.00 | 0.00 |
| ATOM | 7945 | CB   | ARG | X | 521 | 41.022 | 27.125 | 57.134 | 0.00 | 0.00 |
| ATOM | 7946 | HB2  | ARG | X | 521 | 40.607 | 26.928 | 56.146 | 0.00 | 0.00 |
| ATOM | 7947 | HB3  | ARG | X | 521 | 40.742 | 28.120 | 57.482 | 0.00 | 0.00 |
| ATOM | 7948 | CG   | ARG | X | 521 | 42.512 | 27.067 | 56.869 | 0.00 | 0.00 |
| ATOM | 7949 | HG2  | ARG | X | 521 | 42.843 | 27.922 | 56.279 | 0.00 | 0.00 |
| ATOM | 7950 | HG3  | ARG | X | 521 | 43.026 | 27.215 | 57.818 | 0.00 | 0.00 |
| ATOM | 7951 | CD   | ARG | X | 521 | 43.130 | 25.832 | 56.305 | 0.00 | 0.00 |
| ATOM | 7952 | HD2  | ARG | X | 521 | 42.788 | 24.925 | 56.802 | 0.00 | 0.00 |
| ATOM | 7953 | HD3  | ARG | X | 521 | 42.882 | 25.769 | 55.245 | 0.00 | 0.00 |
| ATOM | 7954 | NE   | ARG | X | 521 | 44.561 | 25.867 | 56.390 | 0.00 | 0.00 |
| ATOM | 7955 | HE   | ARG | X | 521 | 45.039 | 26.753 | 56.468 | 0.00 | 0.00 |
| ATOM | 7956 | CZ   | ARG | X | 521 | 45.454 | 24.919 | 56.219 | 0.00 | 0.00 |
| ATOM | 7957 | NH1  | ARG | X | 521 | 45.187 | 23.715 | 55.819 | 0.00 | 0.00 |
| ATOM | 7958 | HH11 | ARG | X | 521 | 44.307 | 23.499 | 55.375 | 0.00 | 0.00 |
| ATOM | 7959 | HH12 | ARG | X | 521 | 45.942 | 23.054 | 55.702 | 0.00 | 0.00 |
| ATOM | 7960 | NH2  | ARG | X | 521 | 46.696 | 25.211 | 56.459 | 0.00 | 0.00 |
| ATOM | 7961 | HH21 | ARG | X | 521 | 46.888 | 26.126 | 56.842 | 0.00 | 0.00 |
| ATOM | 7962 | HH22 | ARG | X | 521 | 47.420 | 24.516 | 56.350 | 0.00 | 0.00 |
| ATOM | 7963 | C    | ARG | X | 521 | 40.631 | 26.518 | 59.632 | 0.00 | 0.00 |
| ATOM | 7964 | O    | ARG | X | 521 | 41.663 | 27.045 | 60.054 | 0.00 | 0.00 |
| ATOM | 7965 | N    | ALA | X | 522 | 39.587 | 26.284 | 60.414 | 0.00 | 0.00 |
| ATOM | 7966 | H    | ALA | X | 522 | 38.790 | 25.856 | 59.965 | 0.00 | 0.00 |
| ATOM | 7967 | CA   | ALA | X | 522 | 39.370 | 27.010 | 61.712 | 0.00 | 0.00 |
| ATOM | 7968 | HA   | ALA | X | 522 | 39.083 | 28.052 | 61.564 | 0.00 | 0.00 |
| ATOM | 7969 | CB   | ALA | X | 522 | 38.127 | 26.340 | 62.367 | 0.00 | 0.00 |
| ATOM | 7970 | HB1  | ALA | X | 522 | 38.271 | 25.275 | 62.553 | 0.00 | 0.00 |

|      |      |      |     |   |     |        |        |        |      |      |
|------|------|------|-----|---|-----|--------|--------|--------|------|------|
| ATOM | 7971 | HB2  | ALA | X | 522 | 37.208 | 26.396 | 61.783 | 0.00 | 0.00 |
| ATOM | 7972 | HB3  | ALA | X | 522 | 37.955 | 26.851 | 63.314 | 0.00 | 0.00 |
| ATOM | 7973 | C    | ALA | X | 522 | 40.573 | 26.968 | 62.733 | 0.00 | 0.00 |
| ATOM | 7974 | O    | ALA | X | 522 | 40.904 | 28.024 | 63.319 | 0.00 | 0.00 |
| ATOM | 7975 | N    | GLN | X | 523 | 41.295 | 25.864 | 62.952 | 0.00 | 0.00 |
| ATOM | 7976 | H    | GLN | X | 523 | 40.933 | 25.055 | 62.466 | 0.00 | 0.00 |
| ATOM | 7977 | CA   | GLN | X | 523 | 42.298 | 25.780 | 64.039 | 0.00 | 0.00 |
| ATOM | 7978 | HA   | GLN | X | 523 | 42.056 | 26.286 | 64.974 | 0.00 | 0.00 |
| ATOM | 7979 | CB   | GLN | X | 523 | 42.615 | 24.281 | 64.323 | 0.00 | 0.00 |
| ATOM | 7980 | HB2  | GLN | X | 523 | 43.091 | 23.801 | 63.468 | 0.00 | 0.00 |
| ATOM | 7981 | HB3  | GLN | X | 523 | 43.366 | 24.204 | 65.109 | 0.00 | 0.00 |
| ATOM | 7982 | CG   | GLN | X | 523 | 41.363 | 23.487 | 64.795 | 0.00 | 0.00 |
| ATOM | 7983 | HG2  | GLN | X | 523 | 40.631 | 23.437 | 63.989 | 0.00 | 0.00 |
| ATOM | 7984 | HG3  | GLN | X | 523 | 41.689 | 22.456 | 64.937 | 0.00 | 0.00 |
| ATOM | 7985 | CD   | GLN | X | 523 | 40.645 | 23.915 | 66.022 | 0.00 | 0.00 |
| ATOM | 7986 | OE1  | GLN | X | 523 | 40.525 | 25.060 | 66.343 | 0.00 | 0.00 |
| ATOM | 7987 | NE2  | GLN | X | 523 | 39.971 | 22.976 | 66.635 | 0.00 | 0.00 |
| ATOM | 7988 | HE21 | GLN | X | 523 | 39.428 | 23.350 | 67.399 | 0.00 | 0.00 |
| ATOM | 7989 | HE22 | GLN | X | 523 | 40.050 | 21.977 | 66.514 | 0.00 | 0.00 |
| ATOM | 7990 | C    | GLN | X | 523 | 43.545 | 26.460 | 63.603 | 0.00 | 0.00 |
| ATOM | 7991 | O    | GLN | X | 523 | 44.183 | 27.107 | 64.451 | 0.00 | 0.00 |
| ATOM | 7992 | N    | ALA | X | 524 | 43.875 | 26.541 | 62.278 | 0.00 | 0.00 |
| ATOM | 7993 | H    | ALA | X | 524 | 43.381 | 26.013 | 61.573 | 0.00 | 0.00 |
| ATOM | 7994 | CA   | ALA | X | 524 | 44.943 | 27.398 | 61.839 | 0.00 | 0.00 |
| ATOM | 7995 | HA   | ALA | X | 524 | 45.782 | 27.254 | 62.520 | 0.00 | 0.00 |
| ATOM | 7996 | CB   | ALA | X | 524 | 45.306 | 26.942 | 60.385 | 0.00 | 0.00 |
| ATOM | 7997 | HB1  | ALA | X | 524 | 44.412 | 27.074 | 59.776 | 0.00 | 0.00 |
| ATOM | 7998 | HB2  | ALA | X | 524 | 45.575 | 25.889 | 60.314 | 0.00 | 0.00 |
| ATOM | 7999 | HB3  | ALA | X | 524 | 46.172 | 27.472 | 59.989 | 0.00 | 0.00 |
| ATOM | 8000 | C    | ALA | X | 524 | 44.634 | 28.894 | 61.936 | 0.00 | 0.00 |
| ATOM | 8001 | O    | ALA | X | 524 | 45.476 | 29.734 | 62.259 | 0.00 | 0.00 |
| ATOM | 8002 | N    | CYX | X | 525 | 43.456 | 29.323 | 61.500 | 0.00 | 0.00 |
| ATOM | 8003 | H    | CYX | X | 525 | 42.820 | 28.653 | 61.091 | 0.00 | 0.00 |
| ATOM | 8004 | CA   | CYX | X | 525 | 42.962 | 30.707 | 61.609 | 0.00 | 0.00 |
| ATOM | 8005 | HA   | CYX | X | 525 | 43.741 | 31.303 | 61.132 | 0.00 | 0.00 |
| ATOM | 8006 | CB   | CYX | X | 525 | 41.712 | 30.840 | 60.765 | 0.00 | 0.00 |
| ATOM | 8007 | HB2  | CYX | X | 525 | 40.899 | 30.253 | 61.192 | 0.00 | 0.00 |
| ATOM | 8008 | HB3  | CYX | X | 525 | 41.365 | 31.869 | 60.860 | 0.00 | 0.00 |
| ATOM | 8009 | SG   | CYX | X | 525 | 41.896 | 30.416 | 58.967 | 0.00 | 0.00 |
| ATOM | 8010 | C    | CYX | X | 525 | 42.792 | 31.209 | 63.076 | 0.00 | 0.00 |
| ATOM | 8011 | O    | CYX | X | 525 | 42.877 | 32.398 | 63.385 | 0.00 | 0.00 |
| ATOM | 8012 | N    | ALA | X | 526 | 42.708 | 30.289 | 64.068 | 0.00 | 0.00 |
| ATOM | 8013 | H    | ALA | X | 526 | 42.575 | 29.328 | 63.788 | 0.00 | 0.00 |
| ATOM | 8014 | CA   | ALA | X | 526 | 42.760 | 30.683 | 65.484 | 0.00 | 0.00 |
| ATOM | 8015 | HA   | ALA | X | 526 | 42.054 | 31.497 | 65.648 | 0.00 | 0.00 |
| ATOM | 8016 | CB   | ALA | X | 526 | 42.404 | 29.445 | 66.315 | 0.00 | 0.00 |
| ATOM | 8017 | HB1  | ALA | X | 526 | 41.372 | 29.107 | 66.231 | 0.00 | 0.00 |
| ATOM | 8018 | HB2  | ALA | X | 526 | 42.511 | 29.649 | 67.380 | 0.00 | 0.00 |
| ATOM | 8019 | HB3  | ALA | X | 526 | 43.171 | 28.697 | 66.110 | 0.00 | 0.00 |
| ATOM | 8020 | C    | ALA | X | 526 | 44.175 | 31.317 | 65.825 | 0.00 | 0.00 |
| ATOM | 8021 | O    | ALA | X | 526 | 44.304 | 32.391 | 66.458 | 0.00 | 0.00 |
| ATOM | 8022 | N    | PHE | X | 527 | 45.253 | 30.735 | 65.276 | 0.00 | 0.00 |
| ATOM | 8023 | H    | PHE | X | 527 | 45.068 | 29.921 | 64.706 | 0.00 | 0.00 |
| ATOM | 8024 | CA   | PHE | X | 527 | 46.590 | 31.285 | 65.325 | 0.00 | 0.00 |
| ATOM | 8025 | HA   | PHE | X | 527 | 46.780 | 31.623 | 66.344 | 0.00 | 0.00 |
| ATOM | 8026 | CB   | PHE | X | 527 | 47.633 | 30.407 | 64.682 | 0.00 | 0.00 |
| ATOM | 8027 | HB2  | PHE | X | 527 | 47.622 | 29.536 | 65.338 | 0.00 | 0.00 |
| ATOM | 8028 | HB3  | PHE | X | 527 | 47.270 | 29.964 | 63.754 | 0.00 | 0.00 |
| ATOM | 8029 | CG   | PHE | X | 527 | 48.965 | 31.024 | 64.581 | 0.00 | 0.00 |
| ATOM | 8030 | CD1  | PHE | X | 527 | 49.748 | 31.080 | 65.737 | 0.00 | 0.00 |
| ATOM | 8031 | HD1  | PHE | X | 527 | 49.370 | 30.617 | 66.636 | 0.00 | 0.00 |
| ATOM | 8032 | CE1  | PHE | X | 527 | 51.082 | 31.478 | 65.645 | 0.00 | 0.00 |
| ATOM | 8033 | HE1  | PHE | X | 527 | 51.709 | 31.511 | 66.523 | 0.00 | 0.00 |
| ATOM | 8034 | CZ   | PHE | X | 527 | 51.621 | 31.952 | 64.402 | 0.00 | 0.00 |
| ATOM | 8035 | HZ   | PHE | X | 527 | 52.573 | 32.459 | 64.353 | 0.00 | 0.00 |
| ATOM | 8036 | CE2  | PHE | X | 527 | 50.824 | 31.949 | 63.309 | 0.00 | 0.00 |
| ATOM | 8037 | HE2  | PHE | X | 527 | 51.195 | 32.488 | 62.450 | 0.00 | 0.00 |

|      |      |      |     |   |     |        |        |        |      |      |
|------|------|------|-----|---|-----|--------|--------|--------|------|------|
| ATOM | 8038 | CD2  | PHE | X | 527 | 49.517 | 31.481 | 63.386 | 0.00 | 0.00 |
| ATOM | 8039 | HD2  | PHE | X | 527 | 48.891 | 31.462 | 62.507 | 0.00 | 0.00 |
| ATOM | 8040 | C    | PHE | X | 527 | 46.513 | 32.686 | 64.673 | 0.00 | 0.00 |
| ATOM | 8041 | O    | PHE | X | 527 | 46.871 | 33.666 | 65.274 | 0.00 | 0.00 |
| ATOM | 8042 | N    | TRP | X | 528 | 46.259 | 32.811 | 63.385 | 0.00 | 0.00 |
| ATOM | 8043 | H    | TRP | X | 528 | 46.160 | 31.999 | 62.793 | 0.00 | 0.00 |
| ATOM | 8044 | CA   | TRP | X | 528 | 46.488 | 34.047 | 62.676 | 0.00 | 0.00 |
| ATOM | 8045 | HA   | TRP | X | 528 | 47.482 | 34.422 | 62.918 | 0.00 | 0.00 |
| ATOM | 8046 | CB   | TRP | X | 528 | 46.272 | 33.807 | 61.168 | 0.00 | 0.00 |
| ATOM | 8047 | HB2  | TRP | X | 528 | 45.332 | 33.329 | 60.890 | 0.00 | 0.00 |
| ATOM | 8048 | HB3  | TRP | X | 528 | 46.309 | 34.722 | 60.578 | 0.00 | 0.00 |
| ATOM | 8049 | CG   | TRP | X | 528 | 47.329 | 33.013 | 60.513 | 0.00 | 0.00 |
| ATOM | 8050 | CD1  | TRP | X | 528 | 47.175 | 31.777 | 59.990 | 0.00 | 0.00 |
| ATOM | 8051 | HD1  | TRP | X | 528 | 46.266 | 31.194 | 60.020 | 0.00 | 0.00 |
| ATOM | 8052 | NE1  | TRP | X | 528 | 48.372 | 31.293 | 59.499 | 0.00 | 0.00 |
| ATOM | 8053 | HE1  | TRP | X | 528 | 48.453 | 30.347 | 59.155 | 0.00 | 0.00 |
| ATOM | 8054 | CE2  | TRP | X | 528 | 49.393 | 32.193 | 59.743 | 0.00 | 0.00 |
| ATOM | 8055 | CZ2  | TRP | X | 528 | 50.773 | 32.125 | 59.440 | 0.00 | 0.00 |
| ATOM | 8056 | HZ2  | TRP | X | 528 | 51.211 | 31.210 | 59.070 | 0.00 | 0.00 |
| ATOM | 8057 | CH2  | TRP | X | 528 | 51.483 | 33.321 | 59.660 | 0.00 | 0.00 |
| ATOM | 8058 | HH2  | TRP | X | 528 | 52.548 | 33.305 | 59.482 | 0.00 | 0.00 |
| ATOM | 8059 | CZ3  | TRP | X | 528 | 50.863 | 34.423 | 60.187 | 0.00 | 0.00 |
| ATOM | 8060 | HZ3  | TRP | X | 528 | 51.403 | 35.347 | 60.336 | 0.00 | 0.00 |
| ATOM | 8061 | CE3  | TRP | X | 528 | 49.547 | 34.425 | 60.496 | 0.00 | 0.00 |
| ATOM | 8062 | HE3  | TRP | X | 528 | 49.081 | 35.340 | 60.829 | 0.00 | 0.00 |
| ATOM | 8063 | CD2  | TRP | X | 528 | 48.770 | 33.301 | 60.286 | 0.00 | 0.00 |
| ATOM | 8064 | C    | TRP | X | 528 | 45.535 | 35.165 | 63.168 | 0.00 | 0.00 |
| ATOM | 8065 | O    | TRP | X | 528 | 45.902 | 36.279 | 63.462 | 0.00 | 0.00 |
| ATOM | 8066 | N    | ASN | X | 529 | 44.244 | 34.855 | 63.320 | 0.00 | 0.00 |
| ATOM | 8067 | H    | ASN | X | 529 | 43.932 | 33.895 | 63.287 | 0.00 | 0.00 |
| ATOM | 8068 | CA   | ASN | X | 529 | 43.200 | 35.852 | 63.583 | 0.00 | 0.00 |
| ATOM | 8069 | HA   | ASN | X | 529 | 43.472 | 36.859 | 63.269 | 0.00 | 0.00 |
| ATOM | 8070 | CB   | ASN | X | 529 | 41.849 | 35.362 | 63.026 | 0.00 | 0.00 |
| ATOM | 8071 | HB2  | ASN | X | 529 | 41.580 | 34.443 | 63.545 | 0.00 | 0.00 |
| ATOM | 8072 | HB3  | ASN | X | 529 | 41.115 | 36.130 | 63.273 | 0.00 | 0.00 |
| ATOM | 8073 | CG   | ASN | X | 529 | 41.839 | 35.269 | 61.473 | 0.00 | 0.00 |
| ATOM | 8074 | OD1  | ASN | X | 529 | 42.748 | 35.678 | 60.744 | 0.00 | 0.00 |
| ATOM | 8075 | ND2  | ASN | X | 529 | 40.906 | 34.554 | 60.873 | 0.00 | 0.00 |
| ATOM | 8076 | HD21 | ASN | X | 529 | 40.863 | 34.464 | 59.868 | 0.00 | 0.00 |
| ATOM | 8077 | HD22 | ASN | X | 529 | 40.169 | 34.186 | 61.457 | 0.00 | 0.00 |
| ATOM | 8078 | C    | ASN | X | 529 | 43.014 | 36.202 | 65.065 | 0.00 | 0.00 |
| ATOM | 8079 | O    | ASN | X | 529 | 42.279 | 37.157 | 65.375 | 0.00 | 0.00 |
| ATOM | 8080 | N    | ARG | X | 530 | 43.541 | 35.388 | 65.991 | 0.00 | 0.00 |
| ATOM | 8081 | H    | ARG | X | 530 | 44.007 | 34.552 | 65.671 | 0.00 | 0.00 |
| ATOM | 8082 | CA   | ARG | X | 530 | 43.235 | 35.408 | 67.419 | 0.00 | 0.00 |
| ATOM | 8083 | HA   | ARG | X | 530 | 42.773 | 36.384 | 67.563 | 0.00 | 0.00 |
| ATOM | 8084 | CB   | ARG | X | 530 | 42.221 | 34.327 | 67.815 | 0.00 | 0.00 |
| ATOM | 8085 | HB2  | ARG | X | 530 | 41.490 | 34.221 | 67.013 | 0.00 | 0.00 |
| ATOM | 8086 | HB3  | ARG | X | 530 | 42.653 | 33.327 | 67.847 | 0.00 | 0.00 |
| ATOM | 8087 | CG   | ARG | X | 530 | 41.421 | 34.631 | 69.128 | 0.00 | 0.00 |
| ATOM | 8088 | HG2  | ARG | X | 530 | 42.030 | 34.439 | 70.011 | 0.00 | 0.00 |
| ATOM | 8089 | HG3  | ARG | X | 530 | 40.995 | 35.634 | 69.157 | 0.00 | 0.00 |
| ATOM | 8090 | CD   | ARG | X | 530 | 40.166 | 33.667 | 69.176 | 0.00 | 0.00 |
| ATOM | 8091 | HD2  | ARG | X | 530 | 40.487 | 32.645 | 68.979 | 0.00 | 0.00 |
| ATOM | 8092 | HD3  | ARG | X | 530 | 39.823 | 33.609 | 70.209 | 0.00 | 0.00 |
| ATOM | 8093 | NE   | ARG | X | 530 | 39.077 | 34.174 | 68.314 | 0.00 | 0.00 |
| ATOM | 8094 | HE   | ARG | X | 530 | 38.994 | 35.172 | 68.184 | 0.00 | 0.00 |
| ATOM | 8095 | CZ   | ARG | X | 530 | 38.155 | 33.394 | 67.737 | 0.00 | 0.00 |
| ATOM | 8096 | NH1  | ARG | X | 530 | 38.027 | 32.118 | 67.998 | 0.00 | 0.00 |
| ATOM | 8097 | HH11 | ARG | X | 530 | 38.675 | 31.647 | 68.612 | 0.00 | 0.00 |
| ATOM | 8098 | HH12 | ARG | X | 530 | 37.203 | 31.649 | 67.650 | 0.00 | 0.00 |
| ATOM | 8099 | NH2  | ARG | X | 530 | 37.233 | 33.901 | 66.944 | 0.00 | 0.00 |
| ATOM | 8100 | HH21 | ARG | X | 530 | 37.262 | 34.911 | 66.935 | 0.00 | 0.00 |
| ATOM | 8101 | HH22 | ARG | X | 530 | 36.413 | 33.396 | 66.642 | 0.00 | 0.00 |
| ATOM | 8102 | C    | ARG | X | 530 | 44.475 | 35.314 | 68.415 | 0.00 | 0.00 |
| ATOM | 8103 | O    | ARG | X | 530 | 44.320 | 35.806 | 69.509 | 0.00 | 0.00 |
| ATOM | 8104 | N    | PHE | X | 531 | 45.667 | 34.784 | 68.019 | 0.00 | 0.00 |

|      |      |      |     |   |     |        |        |        |      |      |
|------|------|------|-----|---|-----|--------|--------|--------|------|------|
| ATOM | 8105 | H    | PHE | X | 531 | 45.661 | 34.364 | 67.101 | 0.00 | 0.00 |
| ATOM | 8106 | CA   | PHE | X | 531 | 46.905 | 34.642 | 68.851 | 0.00 | 0.00 |
| ATOM | 8107 | HA   | PHE | X | 531 | 46.760 | 34.993 | 69.873 | 0.00 | 0.00 |
| ATOM | 8108 | CB   | PHE | X | 531 | 47.240 | 33.150 | 68.935 | 0.00 | 0.00 |
| ATOM | 8109 | HB2  | PHE | X | 531 | 46.420 | 32.511 | 69.265 | 0.00 | 0.00 |
| ATOM | 8110 | HB3  | PHE | X | 531 | 47.592 | 32.898 | 67.935 | 0.00 | 0.00 |
| ATOM | 8111 | CG   | PHE | X | 531 | 48.474 | 32.893 | 69.827 | 0.00 | 0.00 |
| ATOM | 8112 | CD1  | PHE | X | 531 | 48.385 | 32.992 | 71.194 | 0.00 | 0.00 |
| ATOM | 8113 | HD1  | PHE | X | 531 | 47.431 | 33.099 | 71.688 | 0.00 | 0.00 |
| ATOM | 8114 | CE1  | PHE | X | 531 | 49.489 | 32.762 | 71.992 | 0.00 | 0.00 |
| ATOM | 8115 | HE1  | PHE | X | 531 | 49.480 | 32.767 | 73.072 | 0.00 | 0.00 |
| ATOM | 8116 | CZ   | PHE | X | 531 | 50.759 | 32.503 | 71.349 | 0.00 | 0.00 |
| ATOM | 8117 | HZ   | PHE | X | 531 | 51.613 | 32.264 | 71.965 | 0.00 | 0.00 |
| ATOM | 8118 | CE2  | PHE | X | 531 | 50.853 | 32.408 | 69.961 | 0.00 | 0.00 |
| ATOM | 8119 | HE2  | PHE | X | 531 | 51.787 | 32.133 | 69.493 | 0.00 | 0.00 |
| ATOM | 8120 | CD2  | PHE | X | 531 | 49.732 | 32.708 | 69.230 | 0.00 | 0.00 |
| ATOM | 8121 | HD2  | PHE | X | 531 | 49.775 | 32.701 | 68.151 | 0.00 | 0.00 |
| ATOM | 8122 | C    | PHE | X | 531 | 48.092 | 35.505 | 68.335 | 0.00 | 0.00 |
| ATOM | 8123 | O    | PHE | X | 531 | 48.695 | 36.316 | 69.005 | 0.00 | 0.00 |
| ATOM | 8124 | N    | LEU | X | 532 | 48.392 | 35.403 | 67.019 | 0.00 | 0.00 |
| ATOM | 8125 | H    | LEU | X | 532 | 47.912 | 34.659 | 66.533 | 0.00 | 0.00 |
| ATOM | 8126 | CA   | LEU | X | 532 | 49.620 | 35.992 | 66.376 | 0.00 | 0.00 |
| ATOM | 8127 | HA   | LEU | X | 532 | 50.449 | 35.487 | 66.871 | 0.00 | 0.00 |
| ATOM | 8128 | CB   | LEU | X | 532 | 49.635 | 35.595 | 64.910 | 0.00 | 0.00 |
| ATOM | 8129 | HB2  | LEU | X | 532 | 49.674 | 34.511 | 64.809 | 0.00 | 0.00 |
| ATOM | 8130 | HB3  | LEU | X | 532 | 48.682 | 35.924 | 64.494 | 0.00 | 0.00 |
| ATOM | 8131 | CG   | LEU | X | 532 | 50.823 | 35.983 | 64.025 | 0.00 | 0.00 |
| ATOM | 8132 | HG   | LEU | X | 532 | 50.753 | 35.246 | 63.225 | 0.00 | 0.00 |
| ATOM | 8133 | CD1  | LEU | X | 532 | 50.662 | 37.375 | 63.461 | 0.00 | 0.00 |
| ATOM | 8134 | HD11 | LEU | X | 532 | 51.404 | 37.648 | 62.710 | 0.00 | 0.00 |
| ATOM | 8135 | HD12 | LEU | X | 532 | 50.798 | 38.184 | 64.178 | 0.00 | 0.00 |
| ATOM | 8136 | HD13 | LEU | X | 532 | 49.674 | 37.408 | 63.001 | 0.00 | 0.00 |
| ATOM | 8137 | CD2  | LEU | X | 532 | 52.153 | 35.887 | 64.781 | 0.00 | 0.00 |
| ATOM | 8138 | HD21 | LEU | X | 532 | 52.951 | 36.076 | 64.062 | 0.00 | 0.00 |
| ATOM | 8139 | HD22 | LEU | X | 532 | 52.236 | 36.624 | 65.579 | 0.00 | 0.00 |
| ATOM | 8140 | HD23 | LEU | X | 532 | 52.353 | 34.882 | 65.151 | 0.00 | 0.00 |
| ATOM | 8141 | C    | LEU | X | 532 | 49.644 | 37.526 | 66.612 | 0.00 | 0.00 |
| ATOM | 8142 | O    | LEU | X | 532 | 50.657 | 38.123 | 66.871 | 0.00 | 0.00 |
| ATOM | 8143 | N    | PRO | X | 533 | 48.533 | 38.310 | 66.475 | 0.00 | 0.00 |
| ATOM | 8144 | CD   | PRO | X | 533 | 47.193 | 37.900 | 66.048 | 0.00 | 0.00 |
| ATOM | 8145 | HD2  | PRO | X | 533 | 46.630 | 37.418 | 66.847 | 0.00 | 0.00 |
| ATOM | 8146 | HD3  | PRO | X | 533 | 47.227 | 37.318 | 65.127 | 0.00 | 0.00 |
| ATOM | 8147 | CG   | PRO | X | 533 | 46.471 | 39.190 | 65.778 | 0.00 | 0.00 |
| ATOM | 8148 | HG2  | PRO | X | 533 | 45.382 | 39.150 | 65.813 | 0.00 | 0.00 |
| ATOM | 8149 | HG3  | PRO | X | 533 | 46.701 | 39.560 | 64.779 | 0.00 | 0.00 |
| ATOM | 8150 | CB   | PRO | X | 533 | 47.028 | 40.253 | 66.666 | 0.00 | 0.00 |
| ATOM | 8151 | HB2  | PRO | X | 533 | 46.595 | 40.237 | 67.666 | 0.00 | 0.00 |
| ATOM | 8152 | HB3  | PRO | X | 533 | 46.965 | 41.200 | 66.130 | 0.00 | 0.00 |
| ATOM | 8153 | CA   | PRO | X | 533 | 48.429 | 39.757 | 66.876 | 0.00 | 0.00 |
| ATOM | 8154 | HA   | PRO | X | 533 | 49.068 | 40.321 | 66.196 | 0.00 | 0.00 |
| ATOM | 8155 | C    | PRO | X | 533 | 48.827 | 39.990 | 68.336 | 0.00 | 0.00 |
| ATOM | 8156 | O    | PRO | X | 533 | 49.449 | 41.003 | 68.615 | 0.00 | 0.00 |
| ATOM | 8157 | N    | LYS | X | 534 | 48.425 | 39.169 | 69.354 | 0.00 | 0.00 |
| ATOM | 8158 | H    | LYS | X | 534 | 47.913 | 38.323 | 69.147 | 0.00 | 0.00 |
| ATOM | 8159 | CA   | LYS | X | 534 | 48.896 | 39.357 | 70.752 | 0.00 | 0.00 |
| ATOM | 8160 | HA   | LYS | X | 534 | 48.531 | 40.344 | 71.037 | 0.00 | 0.00 |
| ATOM | 8161 | CB   | LYS | X | 534 | 48.232 | 38.427 | 71.726 | 0.00 | 0.00 |
| ATOM | 8162 | HB2  | LYS | X | 534 | 48.523 | 37.396 | 71.521 | 0.00 | 0.00 |
| ATOM | 8163 | HB3  | LYS | X | 534 | 48.468 | 38.755 | 72.739 | 0.00 | 0.00 |
| ATOM | 8164 | CG   | LYS | X | 534 | 46.707 | 38.419 | 71.573 | 0.00 | 0.00 |
| ATOM | 8165 | HG2  | LYS | X | 534 | 46.329 | 39.418 | 71.792 | 0.00 | 0.00 |
| ATOM | 8166 | HG3  | LYS | X | 534 | 46.430 | 38.103 | 70.567 | 0.00 | 0.00 |
| ATOM | 8167 | CD   | LYS | X | 534 | 46.091 | 37.452 | 72.575 | 0.00 | 0.00 |
| ATOM | 8168 | HD2  | LYS | X | 534 | 46.465 | 36.434 | 72.465 | 0.00 | 0.00 |
| ATOM | 8169 | HD3  | LYS | X | 534 | 46.452 | 37.763 | 73.555 | 0.00 | 0.00 |
| ATOM | 8170 | CE   | LYS | X | 534 | 44.587 | 37.392 | 72.525 | 0.00 | 0.00 |
| ATOM | 8171 | HE2  | LYS | X | 534 | 44.165 | 38.396 | 72.529 | 0.00 | 0.00 |

|      |      |      |     |   |     |        |        |        |      |      |
|------|------|------|-----|---|-----|--------|--------|--------|------|------|
| ATOM | 8172 | HE3  | LYS | X | 534 | 44.352 | 36.939 | 71.561 | 0.00 | 0.00 |
| ATOM | 8173 | NZ   | LYS | X | 534 | 44.131 | 36.462 | 73.598 | 0.00 | 0.00 |
| ATOM | 8174 | HZ1  | LYS | X | 534 | 44.182 | 36.856 | 74.527 | 0.00 | 0.00 |
| ATOM | 8175 | HZ2  | LYS | X | 534 | 43.202 | 36.095 | 73.448 | 0.00 | 0.00 |
| ATOM | 8176 | HZ3  | LYS | X | 534 | 44.678 | 35.612 | 73.582 | 0.00 | 0.00 |
| ATOM | 8177 | C    | LYS | X | 534 | 50.471 | 39.243 | 70.825 | 0.00 | 0.00 |
| ATOM | 8178 | O    | LYS | X | 534 | 51.084 | 40.017 | 71.563 | 0.00 | 0.00 |
| ATOM | 8179 | N    | LEU | X | 535 | 51.068 | 38.281 | 70.073 | 0.00 | 0.00 |
| ATOM | 8180 | H    | LEU | X | 535 | 50.420 | 37.750 | 69.508 | 0.00 | 0.00 |
| ATOM | 8181 | CA   | LEU | X | 535 | 52.525 | 38.003 | 70.109 | 0.00 | 0.00 |
| ATOM | 8182 | HA   | LEU | X | 535 | 52.801 | 37.995 | 71.164 | 0.00 | 0.00 |
| ATOM | 8183 | CB   | LEU | X | 535 | 52.748 | 36.629 | 69.323 | 0.00 | 0.00 |
| ATOM | 8184 | HB2  | LEU | X | 535 | 51.981 | 35.936 | 69.669 | 0.00 | 0.00 |
| ATOM | 8185 | HB3  | LEU | X | 535 | 52.543 | 36.840 | 68.274 | 0.00 | 0.00 |
| ATOM | 8186 | CG   | LEU | X | 535 | 54.103 | 35.931 | 69.440 | 0.00 | 0.00 |
| ATOM | 8187 | HG   | LEU | X | 535 | 54.359 | 35.747 | 70.483 | 0.00 | 0.00 |
| ATOM | 8188 | CD1  | LEU | X | 535 | 54.028 | 34.648 | 68.732 | 0.00 | 0.00 |
| ATOM | 8189 | HD11 | LEU | X | 535 | 53.832 | 34.869 | 67.682 | 0.00 | 0.00 |
| ATOM | 8190 | HD12 | LEU | X | 535 | 53.229 | 33.985 | 69.064 | 0.00 | 0.00 |
| ATOM | 8191 | HD13 | LEU | X | 535 | 54.983 | 34.133 | 68.842 | 0.00 | 0.00 |
| ATOM | 8192 | CD2  | LEU | X | 535 | 55.268 | 36.761 | 68.779 | 0.00 | 0.00 |
| ATOM | 8193 | HD21 | LEU | X | 535 | 55.580 | 37.576 | 69.432 | 0.00 | 0.00 |
| ATOM | 8194 | HD22 | LEU | X | 535 | 56.204 | 36.256 | 68.542 | 0.00 | 0.00 |
| ATOM | 8195 | HD23 | LEU | X | 535 | 54.949 | 37.135 | 67.806 | 0.00 | 0.00 |
| ATOM | 8196 | C    | LEU | X | 535 | 53.366 | 39.201 | 69.556 | 0.00 | 0.00 |
| ATOM | 8197 | O    | LEU | X | 535 | 54.301 | 39.650 | 70.218 | 0.00 | 0.00 |
| ATOM | 8198 | N    | LEU | X | 536 | 52.904 | 39.773 | 68.439 | 0.00 | 0.00 |
| ATOM | 8199 | H    | LEU | X | 536 | 52.166 | 39.297 | 67.939 | 0.00 | 0.00 |
| ATOM | 8200 | CA   | LEU | X | 536 | 53.352 | 40.980 | 67.850 | 0.00 | 0.00 |
| ATOM | 8201 | HA   | LEU | X | 536 | 54.440 | 40.929 | 67.886 | 0.00 | 0.00 |
| ATOM | 8202 | CB   | LEU | X | 536 | 52.806 | 41.226 | 66.408 | 0.00 | 0.00 |
| ATOM | 8203 | HB2  | LEU | X | 536 | 51.717 | 41.181 | 66.409 | 0.00 | 0.00 |
| ATOM | 8204 | HB3  | LEU | X | 536 | 53.203 | 42.204 | 66.138 | 0.00 | 0.00 |
| ATOM | 8205 | CG   | LEU | X | 536 | 53.364 | 40.198 | 65.320 | 0.00 | 0.00 |
| ATOM | 8206 | HG   | LEU | X | 536 | 53.028 | 39.179 | 65.511 | 0.00 | 0.00 |
| ATOM | 8207 | CD1  | LEU | X | 536 | 52.668 | 40.583 | 63.999 | 0.00 | 0.00 |
| ATOM | 8208 | HD11 | LEU | X | 536 | 52.902 | 39.808 | 63.268 | 0.00 | 0.00 |
| ATOM | 8209 | HD12 | LEU | X | 536 | 52.951 | 41.599 | 63.723 | 0.00 | 0.00 |
| ATOM | 8210 | HD13 | LEU | X | 536 | 51.596 | 40.594 | 64.193 | 0.00 | 0.00 |
| ATOM | 8211 | CD2  | LEU | X | 536 | 54.891 | 40.192 | 65.195 | 0.00 | 0.00 |
| ATOM | 8212 | HD21 | LEU | X | 536 | 55.225 | 39.729 | 64.267 | 0.00 | 0.00 |
| ATOM | 8213 | HD22 | LEU | X | 536 | 55.373 | 41.163 | 65.308 | 0.00 | 0.00 |
| ATOM | 8214 | HD23 | LEU | X | 536 | 55.290 | 39.709 | 66.087 | 0.00 | 0.00 |
| ATOM | 8215 | C    | LEU | X | 536 | 53.189 | 42.185 | 68.704 | 0.00 | 0.00 |
| ATOM | 8216 | O    | LEU | X | 536 | 53.982 | 43.103 | 68.732 | 0.00 | 0.00 |
| ATOM | 8217 | N    | SER | X | 537 | 52.123 | 42.207 | 69.537 | 0.00 | 0.00 |
| ATOM | 8218 | H    | SER | X | 537 | 51.494 | 41.426 | 69.420 | 0.00 | 0.00 |
| ATOM | 8219 | CA   | SER | X | 537 | 51.817 | 43.143 | 70.640 | 0.00 | 0.00 |
| ATOM | 8220 | HA   | SER | X | 537 | 52.118 | 44.148 | 70.343 | 0.00 | 0.00 |
| ATOM | 8221 | CB   | SER | X | 537 | 50.338 | 43.234 | 70.929 | 0.00 | 0.00 |
| ATOM | 8222 | HB2  | SER | X | 537 | 49.755 | 43.318 | 70.013 | 0.00 | 0.00 |
| ATOM | 8223 | HB3  | SER | X | 537 | 50.001 | 42.247 | 71.248 | 0.00 | 0.00 |
| ATOM | 8224 | OG   | SER | X | 537 | 50.012 | 44.215 | 71.935 | 0.00 | 0.00 |
| ATOM | 8225 | HG   | SER | X | 537 | 50.648 | 44.289 | 72.649 | 0.00 | 0.00 |
| ATOM | 8226 | C    | SER | X | 537 | 52.706 | 42.896 | 71.944 | 0.00 | 0.00 |
| ATOM | 8227 | O    | SER | X | 537 | 52.583 | 43.640 | 72.943 | 0.00 | 0.00 |
| ATOM | 8228 | N    | ALA | X | 538 | 53.537 | 41.872 | 71.936 | 0.00 | 0.00 |
| ATOM | 8229 | H    | ALA | X | 538 | 53.418 | 41.247 | 71.151 | 0.00 | 0.00 |
| ATOM | 8230 | CA   | ALA | X | 538 | 54.438 | 41.468 | 73.036 | 0.00 | 0.00 |
| ATOM | 8231 | HA   | ALA | X | 538 | 54.499 | 42.286 | 73.754 | 0.00 | 0.00 |
| ATOM | 8232 | CB   | ALA | X | 538 | 53.773 | 40.244 | 73.652 | 0.00 | 0.00 |
| ATOM | 8233 | HB1  | ALA | X | 538 | 54.351 | 40.018 | 74.549 | 0.00 | 0.00 |
| ATOM | 8234 | HB2  | ALA | X | 538 | 53.908 | 39.392 | 72.987 | 0.00 | 0.00 |
| ATOM | 8235 | HB3  | ALA | X | 538 | 52.772 | 40.403 | 74.053 | 0.00 | 0.00 |
| ATOM | 8236 | C    | ALA | X | 538 | 55.893 | 41.325 | 72.527 | 0.00 | 0.00 |
| ATOM | 8237 | O    | ALA | X | 538 | 56.781 | 40.793 | 73.261 | 0.00 | 0.00 |
| ATOM | 8238 | N    | THR | X | 539 | 56.169 | 41.588 | 71.256 | 0.00 | 0.00 |

|      |      |      |     |   |     |        |        |        |      |      |
|------|------|------|-----|---|-----|--------|--------|--------|------|------|
| ATOM | 8239 | H    | THR | X | 539 | 55.422 | 42.005 | 70.720 | 0.00 | 0.00 |
| ATOM | 8240 | CA   | THR | X | 539 | 57.493 | 41.704 | 70.663 | 0.00 | 0.00 |
| ATOM | 8241 | HA   | THR | X | 539 | 58.168 | 41.710 | 71.519 | 0.00 | 0.00 |
| ATOM | 8242 | CB   | THR | X | 539 | 57.849 | 40.401 | 69.840 | 0.00 | 0.00 |
| ATOM | 8243 | HB   | THR | X | 539 | 58.770 | 40.595 | 69.290 | 0.00 | 0.00 |
| ATOM | 8244 | CG2  | THR | X | 539 | 58.090 | 39.165 | 70.764 | 0.00 | 0.00 |
| ATOM | 8245 | HG21 | THR | X | 539 | 58.723 | 39.470 | 71.597 | 0.00 | 0.00 |
| ATOM | 8246 | HG22 | THR | X | 539 | 58.582 | 38.388 | 70.179 | 0.00 | 0.00 |
| ATOM | 8247 | HG23 | THR | X | 539 | 57.120 | 38.828 | 71.131 | 0.00 | 0.00 |
| ATOM | 8248 | OG1  | THR | X | 539 | 56.786 | 40.010 | 68.975 | 0.00 | 0.00 |
| ATOM | 8249 | HG1  | THR | X | 539 | 56.007 | 40.130 | 69.524 | 0.00 | 0.00 |
| ATOM | 8250 | C    | THR | X | 539 | 57.689 | 42.995 | 69.845 | 0.00 | 0.00 |
| ATOM | 8251 | O    | THR | X | 539 | 57.331 | 44.094 | 70.374 | 0.00 | 0.00 |
| ATOM | 8252 | OXT  | THR | X | 539 | 58.186 | 43.033 | 68.701 | 0.00 | 0.00 |

END

#-----  
# 1B41 Production MD Frame 0200  
#-----

| CRYST1 | 82.081 | 82.081 | 82.081 | 90.00 | 90.00 | 90.00  | P      | 1      | 1    |      |
|--------|--------|--------|--------|-------|-------|--------|--------|--------|------|------|
| ATOM   | 1      | N      | ASP    | X     | 1     | 15.821 | 43.613 | 11.121 | 0.00 | 0.00 |
| ATOM   | 2      | H1     | ASP    | X     | 1     | 16.093 | 43.133 | 11.967 | 0.00 | 0.00 |
| ATOM   | 3      | H2     | ASP    | X     | 1     | 15.475 | 42.980 | 10.414 | 0.00 | 0.00 |
| ATOM   | 4      | H3     | ASP    | X     | 1     | 14.992 | 44.130 | 11.374 | 0.00 | 0.00 |
| ATOM   | 5      | CA     | ASP    | X     | 1     | 16.805 | 44.442 | 10.493 | 0.00 | 0.00 |
| ATOM   | 6      | HA     | ASP    | X     | 1     | 17.509 | 43.810 | 9.953  | 0.00 | 0.00 |
| ATOM   | 7      | CB     | ASP    | X     | 1     | 16.206 | 45.341 | 9.459  | 0.00 | 0.00 |
| ATOM   | 8      | HB2    | ASP    | X     | 1     | 15.872 | 44.683 | 8.657  | 0.00 | 0.00 |
| ATOM   | 9      | HB3    | ASP    | X     | 1     | 15.312 | 45.829 | 9.846  | 0.00 | 0.00 |
| ATOM   | 10     | CG     | ASP    | X     | 1     | 17.242 | 46.308 | 8.936  | 0.00 | 0.00 |
| ATOM   | 11     | OD1    | ASP    | X     | 1     | 17.154 | 47.515 | 9.225  | 0.00 | 0.00 |
| ATOM   | 12     | OD2    | ASP    | X     | 1     | 18.251 | 45.906 | 8.253  | 0.00 | 0.00 |
| ATOM   | 13     | C      | ASP    | X     | 1     | 17.585 | 45.122 | 11.539 | 0.00 | 0.00 |
| ATOM   | 14     | O      | ASP    | X     | 1     | 18.768 | 44.889 | 11.629 | 0.00 | 0.00 |
| ATOM   | 15     | N      | ALA    | X     | 2     | 17.012 | 46.012 | 12.333 | 0.00 | 0.00 |
| ATOM   | 16     | H      | ALA    | X     | 2     | 16.041 | 46.236 | 12.170 | 0.00 | 0.00 |
| ATOM   | 17     | CA     | ALA    | X     | 2     | 17.746 | 46.964 | 13.198 | 0.00 | 0.00 |
| ATOM   | 18     | HA     | ALA    | X     | 2     | 18.527 | 47.366 | 12.553 | 0.00 | 0.00 |
| ATOM   | 19     | CB     | ALA    | X     | 2     | 16.766 | 48.147 | 13.504 | 0.00 | 0.00 |
| ATOM   | 20     | HB1    | ALA    | X     | 2     | 17.362 | 49.010 | 13.798 | 0.00 | 0.00 |
| ATOM   | 21     | HB2    | ALA    | X     | 2     | 16.109 | 47.802 | 14.303 | 0.00 | 0.00 |
| ATOM   | 22     | HB3    | ALA    | X     | 2     | 16.198 | 48.462 | 12.629 | 0.00 | 0.00 |
| ATOM   | 23     | C      | ALA    | X     | 2     | 18.387 | 46.365 | 14.467 | 0.00 | 0.00 |
| ATOM   | 24     | O      | ALA    | X     | 2     | 18.307 | 46.957 | 15.533 | 0.00 | 0.00 |
| ATOM   | 25     | N      | GLU    | X     | 3     | 18.876 | 45.113 | 14.445 | 0.00 | 0.00 |
| ATOM   | 26     | H      | GLU    | X     | 3     | 18.887 | 44.594 | 13.578 | 0.00 | 0.00 |
| ATOM   | 27     | CA     | GLU    | X     | 3     | 19.105 | 44.367 | 15.657 | 0.00 | 0.00 |
| ATOM   | 28     | HA     | GLU    | X     | 3     | 18.241 | 44.429 | 16.318 | 0.00 | 0.00 |
| ATOM   | 29     | CB     | GLU    | X     | 3     | 19.474 | 42.846 | 15.377 | 0.00 | 0.00 |
| ATOM   | 30     | HB2    | GLU    | X     | 3     | 20.190 | 42.776 | 14.558 | 0.00 | 0.00 |
| ATOM   | 31     | HB3    | GLU    | X     | 3     | 20.080 | 42.467 | 16.200 | 0.00 | 0.00 |
| ATOM   | 32     | CG     | GLU    | X     | 3     | 18.311 | 41.845 | 15.168 | 0.00 | 0.00 |
| ATOM   | 33     | HG2    | GLU    | X     | 3     | 18.719 | 40.864 | 14.926 | 0.00 | 0.00 |
| ATOM   | 34     | HG3    | GLU    | X     | 3     | 17.676 | 41.779 | 16.051 | 0.00 | 0.00 |
| ATOM   | 35     | CD     | GLU    | X     | 3     | 17.486 | 42.300 | 13.986 | 0.00 | 0.00 |
| ATOM   | 36     | OE1    | GLU    | X     | 3     | 16.320 | 42.840 | 14.104 | 0.00 | 0.00 |
| ATOM   | 37     | OE2    | GLU    | X     | 3     | 18.068 | 42.224 | 12.908 | 0.00 | 0.00 |
| ATOM   | 38     | C      | GLU    | X     | 3     | 20.316 | 44.966 | 16.345 | 0.00 | 0.00 |
| ATOM   | 39     | O      | GLU    | X     | 3     | 20.399 | 44.893 | 17.609 | 0.00 | 0.00 |
| ATOM   | 40     | N      | LEU    | X     | 4     | 21.217 | 45.552 | 15.584 | 0.00 | 0.00 |
| ATOM   | 41     | H      | LEU    | X     | 4     | 21.134 | 45.551 | 14.577 | 0.00 | 0.00 |
| ATOM   | 42     | CA     | LEU    | X     | 4     | 22.497 | 46.115 | 15.996 | 0.00 | 0.00 |
| ATOM   | 43     | HA     | LEU    | X     | 4     | 22.786 | 45.740 | 16.978 | 0.00 | 0.00 |
| ATOM   | 44     | CB     | LEU    | X     | 4     | 23.578 | 45.717 | 14.912 | 0.00 | 0.00 |

|      |     |      |     |   |   |        |        |        |      |      |
|------|-----|------|-----|---|---|--------|--------|--------|------|------|
| ATOM | 45  | HB2  | LEU | X | 4 | 23.195 | 46.234 | 14.032 | 0.00 | 0.00 |
| ATOM | 46  | HB3  | LEU | X | 4 | 24.509 | 46.157 | 15.268 | 0.00 | 0.00 |
| ATOM | 47  | CG   | LEU | X | 4 | 23.654 | 44.225 | 14.650 | 0.00 | 0.00 |
| ATOM | 48  | HG   | LEU | X | 4 | 22.691 | 43.772 | 14.414 | 0.00 | 0.00 |
| ATOM | 49  | CD1  | LEU | X | 4 | 24.517 | 43.988 | 13.442 | 0.00 | 0.00 |
| ATOM | 50  | HD11 | LEU | X | 4 | 25.479 | 44.435 | 13.691 | 0.00 | 0.00 |
| ATOM | 51  | HD12 | LEU | X | 4 | 24.107 | 44.430 | 12.533 | 0.00 | 0.00 |
| ATOM | 52  | HD13 | LEU | X | 4 | 24.560 | 42.928 | 13.194 | 0.00 | 0.00 |
| ATOM | 53  | CD2  | LEU | X | 4 | 24.150 | 43.488 | 15.915 | 0.00 | 0.00 |
| ATOM | 54  | HD21 | LEU | X | 4 | 23.665 | 43.477 | 16.891 | 0.00 | 0.00 |
| ATOM | 55  | HD22 | LEU | X | 4 | 24.287 | 42.447 | 15.621 | 0.00 | 0.00 |
| ATOM | 56  | HD23 | LEU | X | 4 | 25.159 | 43.827 | 16.151 | 0.00 | 0.00 |
| ATOM | 57  | C    | LEU | X | 4 | 22.642 | 47.585 | 15.965 | 0.00 | 0.00 |
| ATOM | 58  | O    | LEU | X | 4 | 23.660 | 48.117 | 16.386 | 0.00 | 0.00 |
| ATOM | 59  | N    | LEU | X | 5 | 21.540 | 48.291 | 15.731 | 0.00 | 0.00 |
| ATOM | 60  | H    | LEU | X | 5 | 20.690 | 47.759 | 15.609 | 0.00 | 0.00 |
| ATOM | 61  | CA   | LEU | X | 5 | 21.362 | 49.676 | 15.956 | 0.00 | 0.00 |
| ATOM | 62  | HA   | LEU | X | 5 | 22.357 | 50.111 | 16.052 | 0.00 | 0.00 |
| ATOM | 63  | CB   | LEU | X | 5 | 20.525 | 50.290 | 14.814 | 0.00 | 0.00 |
| ATOM | 64  | HB2  | LEU | X | 5 | 19.569 | 49.771 | 14.752 | 0.00 | 0.00 |
| ATOM | 65  | HB3  | LEU | X | 5 | 20.326 | 51.323 | 15.102 | 0.00 | 0.00 |
| ATOM | 66  | CG   | LEU | X | 5 | 21.202 | 50.387 | 13.440 | 0.00 | 0.00 |
| ATOM | 67  | HG   | LEU | X | 5 | 20.386 | 50.756 | 12.818 | 0.00 | 0.00 |
| ATOM | 68  | CD1  | LEU | X | 5 | 22.398 | 51.416 | 13.488 | 0.00 | 0.00 |
| ATOM | 69  | HD11 | LEU | X | 5 | 23.278 | 51.011 | 13.989 | 0.00 | 0.00 |
| ATOM | 70  | HD12 | LEU | X | 5 | 22.186 | 52.379 | 13.952 | 0.00 | 0.00 |
| ATOM | 71  | HD13 | LEU | X | 5 | 22.721 | 51.560 | 12.457 | 0.00 | 0.00 |
| ATOM | 72  | CD2  | LEU | X | 5 | 21.709 | 49.141 | 12.704 | 0.00 | 0.00 |
| ATOM | 73  | HD21 | LEU | X | 5 | 22.607 | 48.747 | 13.181 | 0.00 | 0.00 |
| ATOM | 74  | HD22 | LEU | X | 5 | 20.970 | 48.341 | 12.659 | 0.00 | 0.00 |
| ATOM | 75  | HD23 | LEU | X | 5 | 21.867 | 49.465 | 11.675 | 0.00 | 0.00 |
| ATOM | 76  | C    | LEU | X | 5 | 20.584 | 49.644 | 17.322 | 0.00 | 0.00 |
| ATOM | 77  | O    | LEU | X | 5 | 19.575 | 48.965 | 17.457 | 0.00 | 0.00 |
| ATOM | 78  | N    | VAL | X | 6 | 20.994 | 50.301 | 18.431 | 0.00 | 0.00 |
| ATOM | 79  | H    | VAL | X | 6 | 21.655 | 51.045 | 18.258 | 0.00 | 0.00 |
| ATOM | 80  | CA   | VAL | X | 6 | 20.280 | 50.366 | 19.714 | 0.00 | 0.00 |
| ATOM | 81  | HA   | VAL | X | 6 | 19.216 | 50.157 | 19.603 | 0.00 | 0.00 |
| ATOM | 82  | CB   | VAL | X | 6 | 20.800 | 49.214 | 20.595 | 0.00 | 0.00 |
| ATOM | 83  | HB   | VAL | X | 6 | 20.758 | 48.264 | 20.061 | 0.00 | 0.00 |
| ATOM | 84  | CG1  | VAL | X | 6 | 22.138 | 49.408 | 21.249 | 0.00 | 0.00 |
| ATOM | 85  | HG11 | VAL | X | 6 | 22.768 | 49.833 | 20.467 | 0.00 | 0.00 |
| ATOM | 86  | HG12 | VAL | X | 6 | 22.082 | 50.164 | 22.032 | 0.00 | 0.00 |
| ATOM | 87  | HG13 | VAL | X | 6 | 22.524 | 48.476 | 21.662 | 0.00 | 0.00 |
| ATOM | 88  | CG2  | VAL | X | 6 | 19.927 | 49.023 | 21.813 | 0.00 | 0.00 |
| ATOM | 89  | HG21 | VAL | X | 6 | 20.086 | 49.839 | 22.519 | 0.00 | 0.00 |
| ATOM | 90  | HG22 | VAL | X | 6 | 20.215 | 48.140 | 22.383 | 0.00 | 0.00 |
| ATOM | 91  | HG23 | VAL | X | 6 | 18.871 | 48.875 | 21.584 | 0.00 | 0.00 |
| ATOM | 92  | C    | VAL | X | 6 | 20.566 | 51.738 | 20.424 | 0.00 | 0.00 |
| ATOM | 93  | O    | VAL | X | 6 | 21.649 | 52.296 | 20.274 | 0.00 | 0.00 |
| ATOM | 94  | N    | THR | X | 7 | 19.610 | 52.254 | 21.223 | 0.00 | 0.00 |
| ATOM | 95  | H    | THR | X | 7 | 18.712 | 51.808 | 21.098 | 0.00 | 0.00 |
| ATOM | 96  | CA   | THR | X | 7 | 19.619 | 53.504 | 21.937 | 0.00 | 0.00 |
| ATOM | 97  | HA   | THR | X | 7 | 20.462 | 54.050 | 21.515 | 0.00 | 0.00 |
| ATOM | 98  | CB   | THR | X | 7 | 18.429 | 54.393 | 21.532 | 0.00 | 0.00 |
| ATOM | 99  | HB   | THR | X | 7 | 17.564 | 54.117 | 22.135 | 0.00 | 0.00 |
| ATOM | 100 | CG2  | THR | X | 7 | 18.736 | 55.847 | 21.797 | 0.00 | 0.00 |
| ATOM | 101 | HG21 | THR | X | 7 | 19.808 | 56.019 | 21.894 | 0.00 | 0.00 |
| ATOM | 102 | HG22 | THR | X | 7 | 18.307 | 56.102 | 22.767 | 0.00 | 0.00 |
| ATOM | 103 | HG23 | THR | X | 7 | 18.375 | 56.466 | 20.976 | 0.00 | 0.00 |
| ATOM | 104 | OG1  | THR | X | 7 | 18.174 | 54.147 | 20.193 | 0.00 | 0.00 |
| ATOM | 105 | HG1  | THR | X | 7 | 17.331 | 54.592 | 20.075 | 0.00 | 0.00 |
| ATOM | 106 | C    | THR | X | 7 | 19.937 | 53.460 | 23.475 | 0.00 | 0.00 |
| ATOM | 107 | O    | THR | X | 7 | 19.290 | 52.856 | 24.302 | 0.00 | 0.00 |
| ATOM | 108 | N    | VAL | X | 8 | 21.009 | 54.119 | 23.942 | 0.00 | 0.00 |
| ATOM | 109 | H    | VAL | X | 8 | 21.580 | 54.684 | 23.329 | 0.00 | 0.00 |
| ATOM | 110 | CA   | VAL | X | 8 | 21.261 | 54.349 | 25.442 | 0.00 | 0.00 |
| ATOM | 111 | HA   | VAL | X | 8 | 20.669 | 53.688 | 26.075 | 0.00 | 0.00 |



|      |     |      |     |   |    |        |        |        |      |      |
|------|-----|------|-----|---|----|--------|--------|--------|------|------|
| ATOM | 112 | CB   | VAL | X | 8  | 22.694 | 53.989 | 25.848 | 0.00 | 0.00 |
| ATOM | 113 | HB   | VAL | X | 8  | 22.787 | 54.233 | 26.906 | 0.00 | 0.00 |
| ATOM | 114 | CG1  | VAL | X | 8  | 22.902 | 52.477 | 25.581 | 0.00 | 0.00 |
| ATOM | 115 | HG11 | VAL | X | 8  | 23.861 | 52.114 | 25.953 | 0.00 | 0.00 |
| ATOM | 116 | HG12 | VAL | X | 8  | 22.020 | 51.961 | 25.960 | 0.00 | 0.00 |
| ATOM | 117 | HG13 | VAL | X | 8  | 23.022 | 52.377 | 24.502 | 0.00 | 0.00 |
| ATOM | 118 | CG2  | VAL | X | 8  | 23.701 | 54.881 | 25.137 | 0.00 | 0.00 |
| ATOM | 119 | HG21 | VAL | X | 8  | 23.685 | 54.519 | 24.109 | 0.00 | 0.00 |
| ATOM | 120 | HG22 | VAL | X | 8  | 24.651 | 54.808 | 25.666 | 0.00 | 0.00 |
| ATOM | 121 | HG23 | VAL | X | 8  | 23.477 | 55.938 | 25.280 | 0.00 | 0.00 |
| ATOM | 122 | C    | VAL | X | 8  | 20.974 | 55.871 | 25.803 | 0.00 | 0.00 |
| ATOM | 123 | O    | VAL | X | 8  | 20.761 | 56.701 | 24.908 | 0.00 | 0.00 |
| ATOM | 124 | N    | ARG | X | 9  | 20.935 | 56.236 | 27.137 | 0.00 | 0.00 |
| ATOM | 125 | H    | ARG | X | 9  | 21.155 | 55.521 | 27.816 | 0.00 | 0.00 |
| ATOM | 126 | CA   | ARG | X | 9  | 20.838 | 57.537 | 27.627 | 0.00 | 0.00 |
| ATOM | 127 | HA   | ARG | X | 9  | 19.863 | 57.932 | 27.341 | 0.00 | 0.00 |
| ATOM | 128 | CB   | ARG | X | 9  | 20.951 | 57.611 | 29.174 | 0.00 | 0.00 |
| ATOM | 129 | HB2  | ARG | X | 9  | 20.148 | 56.954 | 29.507 | 0.00 | 0.00 |
| ATOM | 130 | HB3  | ARG | X | 9  | 21.916 | 57.165 | 29.413 | 0.00 | 0.00 |
| ATOM | 131 | CG   | ARG | X | 9  | 20.690 | 58.975 | 29.802 | 0.00 | 0.00 |
| ATOM | 132 | HG2  | ARG | X | 9  | 20.819 | 58.803 | 30.870 | 0.00 | 0.00 |
| ATOM | 133 | HG3  | ARG | X | 9  | 21.515 | 59.645 | 29.565 | 0.00 | 0.00 |
| ATOM | 134 | CD   | ARG | X | 9  | 19.368 | 59.657 | 29.492 | 0.00 | 0.00 |
| ATOM | 135 | HD2  | ARG | X | 9  | 19.367 | 60.611 | 30.019 | 0.00 | 0.00 |
| ATOM | 136 | HD3  | ARG | X | 9  | 19.241 | 59.806 | 28.420 | 0.00 | 0.00 |
| ATOM | 137 | NE   | ARG | X | 9  | 18.328 | 58.910 | 30.161 | 0.00 | 0.00 |
| ATOM | 138 | HE   | ARG | X | 9  | 18.644 | 58.406 | 30.977 | 0.00 | 0.00 |
| ATOM | 139 | CZ   | ARG | X | 9  | 16.995 | 58.962 | 29.981 | 0.00 | 0.00 |
| ATOM | 140 | NH1  | ARG | X | 9  | 16.473 | 59.872 | 29.175 | 0.00 | 0.00 |
| ATOM | 141 | HH11 | ARG | X | 9  | 16.957 | 60.598 | 28.665 | 0.00 | 0.00 |
| ATOM | 142 | HH12 | ARG | X | 9  | 15.470 | 59.830 | 29.063 | 0.00 | 0.00 |
| ATOM | 143 | NH2  | ARG | X | 9  | 16.123 | 58.223 | 30.610 | 0.00 | 0.00 |
| ATOM | 144 | HH21 | ARG | X | 9  | 16.619 | 57.537 | 31.161 | 0.00 | 0.00 |
| ATOM | 145 | HH22 | ARG | X | 9  | 15.188 | 58.214 | 30.229 | 0.00 | 0.00 |
| ATOM | 146 | C    | ARG | X | 9  | 21.801 | 58.568 | 26.950 | 0.00 | 0.00 |
| ATOM | 147 | O    | ARG | X | 9  | 21.440 | 59.720 | 26.769 | 0.00 | 0.00 |
| ATOM | 148 | N    | GLY | X | 10 | 23.023 | 58.198 | 26.628 | 0.00 | 0.00 |
| ATOM | 149 | H    | GLY | X | 10 | 23.381 | 57.315 | 26.961 | 0.00 | 0.00 |
| ATOM | 150 | CA   | GLY | X | 10 | 23.888 | 58.938 | 25.686 | 0.00 | 0.00 |
| ATOM | 151 | HA2  | GLY | X | 10 | 24.128 | 59.897 | 26.145 | 0.00 | 0.00 |
| ATOM | 152 | HA3  | GLY | X | 10 | 24.812 | 58.363 | 25.623 | 0.00 | 0.00 |
| ATOM | 153 | C    | GLY | X | 10 | 23.339 | 59.157 | 24.272 | 0.00 | 0.00 |
| ATOM | 154 | O    | GLY | X | 10 | 23.222 | 60.296 | 23.855 | 0.00 | 0.00 |
| ATOM | 155 | N    | GLY | X | 11 | 23.068 | 58.103 | 23.515 | 0.00 | 0.00 |
| ATOM | 156 | H    | GLY | X | 11 | 23.238 | 57.231 | 23.994 | 0.00 | 0.00 |
| ATOM | 157 | CA   | GLY | X | 11 | 22.394 | 58.084 | 22.223 | 0.00 | 0.00 |
| ATOM | 158 | HA2  | GLY | X | 11 | 21.364 | 58.391 | 22.401 | 0.00 | 0.00 |
| ATOM | 159 | HA3  | GLY | X | 11 | 22.851 | 58.833 | 21.576 | 0.00 | 0.00 |
| ATOM | 160 | C    | GLY | X | 11 | 22.518 | 56.735 | 21.533 | 0.00 | 0.00 |
| ATOM | 161 | O    | GLY | X | 11 | 22.667 | 55.695 | 22.177 | 0.00 | 0.00 |
| ATOM | 162 | N    | ARG | X | 12 | 22.309 | 56.707 | 20.187 | 0.00 | 0.00 |
| ATOM | 163 | H    | ARG | X | 12 | 22.045 | 57.607 | 19.813 | 0.00 | 0.00 |
| ATOM | 164 | CA   | ARG | X | 12 | 22.454 | 55.584 | 19.264 | 0.00 | 0.00 |
| ATOM | 165 | HA   | ARG | X | 12 | 21.887 | 54.779 | 19.732 | 0.00 | 0.00 |
| ATOM | 166 | CB   | ARG | X | 12 | 21.808 | 55.968 | 17.907 | 0.00 | 0.00 |
| ATOM | 167 | HB2  | ARG | X | 12 | 21.071 | 56.771 | 17.922 | 0.00 | 0.00 |
| ATOM | 168 | HB3  | ARG | X | 12 | 22.575 | 56.230 | 17.179 | 0.00 | 0.00 |
| ATOM | 169 | CG   | ARG | X | 12 | 21.201 | 54.670 | 17.316 | 0.00 | 0.00 |
| ATOM | 170 | HG2  | ARG | X | 12 | 21.898 | 53.837 | 17.233 | 0.00 | 0.00 |
| ATOM | 171 | HG3  | ARG | X | 12 | 20.511 | 54.315 | 18.081 | 0.00 | 0.00 |
| ATOM | 172 | CD   | ARG | X | 12 | 20.566 | 54.906 | 15.945 | 0.00 | 0.00 |
| ATOM | 173 | HD2  | ARG | X | 12 | 20.036 | 55.855 | 16.025 | 0.00 | 0.00 |
| ATOM | 174 | HD3  | ARG | X | 12 | 21.346 | 55.026 | 15.194 | 0.00 | 0.00 |
| ATOM | 175 | NE   | ARG | X | 12 | 19.653 | 53.844 | 15.569 | 0.00 | 0.00 |
| ATOM | 176 | HE   | ARG | X | 12 | 19.278 | 53.352 | 16.368 | 0.00 | 0.00 |
| ATOM | 177 | CZ   | ARG | X | 12 | 19.136 | 53.476 | 14.342 | 0.00 | 0.00 |
| ATOM | 178 | NH1  | ARG | X | 12 | 19.601 | 53.951 | 13.201 | 0.00 | 0.00 |

|      |     |      |     |   |    |        |        |        |      |      |
|------|-----|------|-----|---|----|--------|--------|--------|------|------|
| ATOM | 179 | HH11 | ARG | X | 12 | 20.282 | 54.696 | 13.156 | 0.00 | 0.00 |
| ATOM | 180 | HH12 | ARG | X | 12 | 19.116 | 53.602 | 12.387 | 0.00 | 0.00 |
| ATOM | 181 | NH2  | ARG | X | 12 | 18.247 | 52.534 | 14.469 | 0.00 | 0.00 |
| ATOM | 182 | HH21 | ARG | X | 12 | 17.705 | 52.357 | 15.303 | 0.00 | 0.00 |
| ATOM | 183 | HH22 | ARG | X | 12 | 18.036 | 52.115 | 13.575 | 0.00 | 0.00 |
| ATOM | 184 | C    | ARG | X | 12 | 23.877 | 55.053 | 19.163 | 0.00 | 0.00 |
| ATOM | 185 | O    | ARG | X | 12 | 24.824 | 55.767 | 18.828 | 0.00 | 0.00 |
| ATOM | 186 | N    | LEU | X | 13 | 23.995 | 53.692 | 19.239 | 0.00 | 0.00 |
| ATOM | 187 | H    | LEU | X | 13 | 23.151 | 53.168 | 19.423 | 0.00 | 0.00 |
| ATOM | 188 | CA   | LEU | X | 13 | 25.206 | 52.852 | 19.120 | 0.00 | 0.00 |
| ATOM | 189 | HA   | LEU | X | 13 | 26.014 | 53.557 | 18.928 | 0.00 | 0.00 |
| ATOM | 190 | CB   | LEU | X | 13 | 25.442 | 52.116 | 20.393 | 0.00 | 0.00 |
| ATOM | 191 | HB2  | LEU | X | 13 | 24.562 | 51.539 | 20.678 | 0.00 | 0.00 |
| ATOM | 192 | HB3  | LEU | X | 13 | 26.099 | 51.263 | 20.223 | 0.00 | 0.00 |
| ATOM | 193 | CG   | LEU | X | 13 | 25.821 | 52.937 | 21.574 | 0.00 | 0.00 |
| ATOM | 194 | HG   | LEU | X | 13 | 25.048 | 53.693 | 21.709 | 0.00 | 0.00 |
| ATOM | 195 | CD1  | LEU | X | 13 | 25.760 | 52.080 | 22.903 | 0.00 | 0.00 |
| ATOM | 196 | HD11 | LEU | X | 13 | 24.768 | 51.653 | 23.051 | 0.00 | 0.00 |
| ATOM | 197 | HD12 | LEU | X | 13 | 26.033 | 52.619 | 23.811 | 0.00 | 0.00 |
| ATOM | 198 | HD13 | LEU | X | 13 | 26.510 | 51.290 | 22.858 | 0.00 | 0.00 |
| ATOM | 199 | CD2  | LEU | X | 13 | 27.157 | 53.622 | 21.494 | 0.00 | 0.00 |
| ATOM | 200 | HD21 | LEU | X | 13 | 26.953 | 54.234 | 20.616 | 0.00 | 0.00 |
| ATOM | 201 | HD22 | LEU | X | 13 | 27.451 | 54.318 | 22.280 | 0.00 | 0.00 |
| ATOM | 202 | HD23 | LEU | X | 13 | 27.997 | 52.935 | 21.392 | 0.00 | 0.00 |
| ATOM | 203 | C    | LEU | X | 13 | 25.001 | 51.824 | 17.941 | 0.00 | 0.00 |
| ATOM | 204 | O    | LEU | X | 13 | 23.885 | 51.433 | 17.605 | 0.00 | 0.00 |
| ATOM | 205 | N    | ARG | X | 14 | 26.120 | 51.435 | 17.384 | 0.00 | 0.00 |
| ATOM | 206 | H    | ARG | X | 14 | 27.010 | 51.784 | 17.710 | 0.00 | 0.00 |
| ATOM | 207 | CA   | ARG | X | 14 | 26.045 | 50.403 | 16.265 | 0.00 | 0.00 |
| ATOM | 208 | HA   | ARG | X | 14 | 25.085 | 49.910 | 16.114 | 0.00 | 0.00 |
| ATOM | 209 | CB   | ARG | X | 14 | 26.321 | 51.119 | 14.929 | 0.00 | 0.00 |
| ATOM | 210 | HB2  | ARG | X | 14 | 25.620 | 51.949 | 14.844 | 0.00 | 0.00 |
| ATOM | 211 | HB3  | ARG | X | 14 | 27.372 | 51.405 | 14.951 | 0.00 | 0.00 |
| ATOM | 212 | CG   | ARG | X | 14 | 26.079 | 50.082 | 13.787 | 0.00 | 0.00 |
| ATOM | 213 | HG2  | ARG | X | 14 | 26.819 | 49.283 | 13.755 | 0.00 | 0.00 |
| ATOM | 214 | HG3  | ARG | X | 14 | 25.081 | 49.671 | 13.938 | 0.00 | 0.00 |
| ATOM | 215 | CD   | ARG | X | 14 | 26.087 | 50.655 | 12.347 | 0.00 | 0.00 |
| ATOM | 216 | HD2  | ARG | X | 14 | 25.298 | 51.403 | 12.278 | 0.00 | 0.00 |
| ATOM | 217 | HD3  | ARG | X | 14 | 27.055 | 51.136 | 12.204 | 0.00 | 0.00 |
| ATOM | 218 | NE   | ARG | X | 14 | 25.846 | 49.527 | 11.421 | 0.00 | 0.00 |
| ATOM | 219 | HE   | ARG | X | 14 | 25.251 | 48.818 | 11.825 | 0.00 | 0.00 |
| ATOM | 220 | CZ   | ARG | X | 14 | 26.263 | 49.317 | 10.236 | 0.00 | 0.00 |
| ATOM | 221 | NH1  | ARG | X | 14 | 26.727 | 50.207 | 9.356  | 0.00 | 0.00 |
| ATOM | 222 | HH11 | ARG | X | 14 | 26.869 | 51.163 | 9.651  | 0.00 | 0.00 |
| ATOM | 223 | HH12 | ARG | X | 14 | 26.986 | 49.867 | 8.441  | 0.00 | 0.00 |
| ATOM | 224 | NH2  | ARG | X | 14 | 26.180 | 48.093 | 9.850  | 0.00 | 0.00 |
| ATOM | 225 | HH21 | ARG | X | 14 | 25.772 | 47.385 | 10.444 | 0.00 | 0.00 |
| ATOM | 226 | HH22 | ARG | X | 14 | 26.392 | 47.845 | 8.894  | 0.00 | 0.00 |
| ATOM | 227 | C    | ARG | X | 14 | 27.111 | 49.286 | 16.515 | 0.00 | 0.00 |
| ATOM | 228 | O    | ARG | X | 14 | 28.348 | 49.478 | 16.662 | 0.00 | 0.00 |
| ATOM | 229 | N    | GLY | X | 15 | 26.551 | 48.089 | 16.665 | 0.00 | 0.00 |
| ATOM | 230 | H    | GLY | X | 15 | 25.543 | 48.085 | 16.598 | 0.00 | 0.00 |
| ATOM | 231 | CA   | GLY | X | 15 | 27.172 | 46.864 | 17.117 | 0.00 | 0.00 |
| ATOM | 232 | HA2  | GLY | X | 15 | 28.052 | 47.047 | 17.733 | 0.00 | 0.00 |
| ATOM | 233 | HA3  | GLY | X | 15 | 26.442 | 46.269 | 17.665 | 0.00 | 0.00 |
| ATOM | 234 | C    | GLY | X | 15 | 27.571 | 45.889 | 16.021 | 0.00 | 0.00 |
| ATOM | 235 | O    | GLY | X | 15 | 27.555 | 46.296 | 14.819 | 0.00 | 0.00 |
| ATOM | 236 | N    | ILE | X | 16 | 27.902 | 44.584 | 16.236 | 0.00 | 0.00 |
| ATOM | 237 | H    | ILE | X | 16 | 28.022 | 44.274 | 17.190 | 0.00 | 0.00 |
| ATOM | 238 | CA   | ILE | X | 16 | 28.212 | 43.569 | 15.224 | 0.00 | 0.00 |
| ATOM | 239 | HA   | ILE | X | 16 | 27.868 | 43.925 | 14.252 | 0.00 | 0.00 |
| ATOM | 240 | CB   | ILE | X | 16 | 29.682 | 43.317 | 15.115 | 0.00 | 0.00 |
| ATOM | 241 | HB   | ILE | X | 16 | 29.843 | 42.458 | 14.463 | 0.00 | 0.00 |
| ATOM | 242 | CG2  | ILE | X | 16 | 30.383 | 44.535 | 14.521 | 0.00 | 0.00 |
| ATOM | 243 | HG21 | ILE | X | 16 | 29.798 | 44.957 | 13.703 | 0.00 | 0.00 |
| ATOM | 244 | HG22 | ILE | X | 16 | 31.295 | 44.181 | 14.040 | 0.00 | 0.00 |
| ATOM | 245 | HG23 | ILE | X | 16 | 30.516 | 45.346 | 15.236 | 0.00 | 0.00 |

|      |     |      |     |   |    |        |        |        |      |      |
|------|-----|------|-----|---|----|--------|--------|--------|------|------|
| ATOM | 246 | CG1  | ILE | X | 16 | 30.441 | 42.960 | 16.444 | 0.00 | 0.00 |
| ATOM | 247 | HG12 | ILE | X | 16 | 30.399 | 43.779 | 17.162 | 0.00 | 0.00 |
| ATOM | 248 | HG13 | ILE | X | 16 | 29.961 | 42.064 | 16.838 | 0.00 | 0.00 |
| ATOM | 249 | CD1  | ILE | X | 16 | 31.907 | 42.549 | 16.227 | 0.00 | 0.00 |
| ATOM | 250 | HD11 | ILE | X | 16 | 32.402 | 42.393 | 17.185 | 0.00 | 0.00 |
| ATOM | 251 | HD12 | ILE | X | 16 | 32.500 | 43.249 | 15.638 | 0.00 | 0.00 |
| ATOM | 252 | HD13 | ILE | X | 16 | 31.965 | 41.592 | 15.708 | 0.00 | 0.00 |
| ATOM | 253 | C    | ILE | X | 16 | 27.529 | 42.215 | 15.616 | 0.00 | 0.00 |
| ATOM | 254 | O    | ILE | X | 16 | 27.385 | 41.891 | 16.789 | 0.00 | 0.00 |
| ATOM | 255 | N    | ARG | X | 17 | 27.101 | 41.432 | 14.573 | 0.00 | 0.00 |
| ATOM | 256 | H    | ARG | X | 17 | 27.025 | 41.802 | 13.636 | 0.00 | 0.00 |
| ATOM | 257 | CA   | ARG | X | 17 | 26.742 | 40.017 | 14.845 | 0.00 | 0.00 |
| ATOM | 258 | HA   | ARG | X | 17 | 26.023 | 39.960 | 15.662 | 0.00 | 0.00 |
| ATOM | 259 | CB   | ARG | X | 17 | 25.872 | 39.458 | 13.708 | 0.00 | 0.00 |
| ATOM | 260 | HB2  | ARG | X | 17 | 25.258 | 40.259 | 13.296 | 0.00 | 0.00 |
| ATOM | 261 | HB3  | ARG | X | 17 | 26.593 | 39.155 | 12.949 | 0.00 | 0.00 |
| ATOM | 262 | CG   | ARG | X | 17 | 25.000 | 38.306 | 14.124 | 0.00 | 0.00 |
| ATOM | 263 | HG2  | ARG | X | 17 | 25.623 | 37.444 | 14.360 | 0.00 | 0.00 |
| ATOM | 264 | HG3  | ARG | X | 17 | 24.366 | 38.545 | 14.978 | 0.00 | 0.00 |
| ATOM | 265 | CD   | ARG | X | 17 | 24.083 | 37.767 | 13.030 | 0.00 | 0.00 |
| ATOM | 266 | HD2  | ARG | X | 17 | 23.567 | 36.879 | 13.396 | 0.00 | 0.00 |
| ATOM | 267 | HD3  | ARG | X | 17 | 23.366 | 38.496 | 12.653 | 0.00 | 0.00 |
| ATOM | 268 | NE   | ARG | X | 17 | 24.844 | 37.298 | 11.848 | 0.00 | 0.00 |
| ATOM | 269 | HE   | ARG | X | 17 | 25.837 | 37.123 | 11.907 | 0.00 | 0.00 |
| ATOM | 270 | CZ   | ARG | X | 17 | 24.210 | 36.873 | 10.695 | 0.00 | 0.00 |
| ATOM | 271 | NH1  | ARG | X | 17 | 22.923 | 36.784 | 10.637 | 0.00 | 0.00 |
| ATOM | 272 | HH11 | ARG | X | 17 | 22.382 | 36.954 | 11.472 | 0.00 | 0.00 |
| ATOM | 273 | HH12 | ARG | X | 17 | 22.483 | 36.531 | 9.764  | 0.00 | 0.00 |
| ATOM | 274 | NH2  | ARG | X | 17 | 24.791 | 36.383 | 9.623  | 0.00 | 0.00 |
| ATOM | 275 | HH21 | ARG | X | 17 | 25.763 | 36.130 | 9.730  | 0.00 | 0.00 |
| ATOM | 276 | HH22 | ARG | X | 17 | 24.245 | 36.189 | 8.796  | 0.00 | 0.00 |
| ATOM | 277 | C    | ARG | X | 17 | 27.974 | 39.166 | 15.110 | 0.00 | 0.00 |
| ATOM | 278 | O    | ARG | X | 17 | 29.147 | 39.376 | 14.649 | 0.00 | 0.00 |
| ATOM | 279 | N    | LEU | X | 18 | 27.756 | 38.145 | 15.963 | 0.00 | 0.00 |
| ATOM | 280 | H    | LEU | X | 18 | 26.817 | 38.107 | 16.332 | 0.00 | 0.00 |
| ATOM | 281 | CA   | LEU | X | 18 | 28.612 | 37.011 | 16.232 | 0.00 | 0.00 |
| ATOM | 282 | HA   | LEU | X | 18 | 29.456 | 37.043 | 15.543 | 0.00 | 0.00 |
| ATOM | 283 | CB   | LEU | X | 18 | 29.139 | 37.298 | 17.641 | 0.00 | 0.00 |
| ATOM | 284 | HB2  | LEU | X | 18 | 28.360 | 37.688 | 18.297 | 0.00 | 0.00 |
| ATOM | 285 | HB3  | LEU | X | 18 | 29.352 | 36.303 | 18.031 | 0.00 | 0.00 |
| ATOM | 286 | CG   | LEU | X | 18 | 30.367 | 38.267 | 17.827 | 0.00 | 0.00 |
| ATOM | 287 | HG   | LEU | X | 18 | 30.098 | 39.263 | 17.477 | 0.00 | 0.00 |
| ATOM | 288 | CD1  | LEU | X | 18 | 30.605 | 38.502 | 19.313 | 0.00 | 0.00 |
| ATOM | 289 | HD11 | LEU | X | 18 | 30.839 | 37.617 | 19.905 | 0.00 | 0.00 |
| ATOM | 290 | HD12 | LEU | X | 18 | 29.706 | 39.001 | 19.675 | 0.00 | 0.00 |
| ATOM | 291 | HD13 | LEU | X | 18 | 31.423 | 39.216 | 19.412 | 0.00 | 0.00 |
| ATOM | 292 | CD2  | LEU | X | 18 | 31.556 | 37.731 | 16.997 | 0.00 | 0.00 |
| ATOM | 293 | HD21 | LEU | X | 18 | 31.684 | 36.661 | 17.157 | 0.00 | 0.00 |
| ATOM | 294 | HD22 | LEU | X | 18 | 31.322 | 37.849 | 15.939 | 0.00 | 0.00 |
| ATOM | 295 | HD23 | LEU | X | 18 | 32.435 | 38.321 | 17.258 | 0.00 | 0.00 |
| ATOM | 296 | C    | LEU | X | 18 | 27.893 | 35.724 | 15.995 | 0.00 | 0.00 |
| ATOM | 297 | O    | LEU | X | 18 | 26.743 | 35.659 | 16.343 | 0.00 | 0.00 |
| ATOM | 298 | N    | LYS | X | 19 | 28.568 | 34.728 | 15.405 | 0.00 | 0.00 |
| ATOM | 299 | H    | LYS | X | 19 | 29.530 | 34.926 | 15.169 | 0.00 | 0.00 |
| ATOM | 300 | CA   | LYS | X | 19 | 28.057 | 33.364 | 15.329 | 0.00 | 0.00 |
| ATOM | 301 | HA   | LYS | X | 19 | 26.970 | 33.410 | 15.405 | 0.00 | 0.00 |
| ATOM | 302 | CB   | LYS | X | 19 | 28.481 | 32.643 | 14.029 | 0.00 | 0.00 |
| ATOM | 303 | HB2  | LYS | X | 19 | 29.570 | 32.613 | 14.049 | 0.00 | 0.00 |
| ATOM | 304 | HB3  | LYS | X | 19 | 28.137 | 31.617 | 13.903 | 0.00 | 0.00 |
| ATOM | 305 | CG   | LYS | X | 19 | 28.157 | 33.372 | 12.698 | 0.00 | 0.00 |
| ATOM | 306 | HG2  | LYS | X | 19 | 27.102 | 33.626 | 12.603 | 0.00 | 0.00 |
| ATOM | 307 | HG3  | LYS | X | 19 | 28.663 | 34.335 | 12.632 | 0.00 | 0.00 |
| ATOM | 308 | CD   | LYS | X | 19 | 28.509 | 32.556 | 11.423 | 0.00 | 0.00 |
| ATOM | 309 | HD2  | LYS | X | 19 | 28.144 | 33.127 | 10.570 | 0.00 | 0.00 |
| ATOM | 310 | HD3  | LYS | X | 19 | 29.592 | 32.433 | 11.423 | 0.00 | 0.00 |
| ATOM | 311 | CE   | LYS | X | 19 | 27.895 | 31.183 | 11.314 | 0.00 | 0.00 |
| ATOM | 312 | HE2  | LYS | X | 19 | 28.361 | 30.432 | 11.952 | 0.00 | 0.00 |

|      |     |      |     |   |    |        |        |        |      |      |
|------|-----|------|-----|---|----|--------|--------|--------|------|------|
| ATOM | 313 | HE3  | LYS | X | 19 | 26.810 | 31.215 | 11.405 | 0.00 | 0.00 |
| ATOM | 314 | NZ   | LYS | X | 19 | 28.070 | 30.675 | 9.925  | 0.00 | 0.00 |
| ATOM | 315 | HZ1  | LYS | X | 19 | 27.656 | 29.755 | 9.876  | 0.00 | 0.00 |
| ATOM | 316 | HZ2  | LYS | X | 19 | 27.556 | 31.173 | 9.213  | 0.00 | 0.00 |
| ATOM | 317 | HZ3  | LYS | X | 19 | 29.040 | 30.602 | 9.652  | 0.00 | 0.00 |
| ATOM | 318 | C    | LYS | X | 19 | 28.557 | 32.460 | 16.481 | 0.00 | 0.00 |
| ATOM | 319 | O    | LYS | X | 19 | 29.487 | 32.792 | 17.195 | 0.00 | 0.00 |
| ATOM | 320 | N    | THR | X | 20 | 27.882 | 31.344 | 16.503 | 0.00 | 0.00 |
| ATOM | 321 | H    | THR | X | 20 | 27.122 | 31.238 | 15.846 | 0.00 | 0.00 |
| ATOM | 322 | CA   | THR | X | 20 | 28.305 | 30.037 | 17.062 | 0.00 | 0.00 |
| ATOM | 323 | HA   | THR | X | 20 | 29.393 | 29.968 | 17.073 | 0.00 | 0.00 |
| ATOM | 324 | CB   | THR | X | 20 | 27.789 | 29.815 | 18.484 | 0.00 | 0.00 |
| ATOM | 325 | HB   | THR | X | 20 | 28.309 | 28.942 | 18.877 | 0.00 | 0.00 |
| ATOM | 326 | CG2  | THR | X | 20 | 28.147 | 31.011 | 19.435 | 0.00 | 0.00 |
| ATOM | 327 | HG21 | THR | X | 20 | 27.782 | 30.850 | 20.449 | 0.00 | 0.00 |
| ATOM | 328 | HG22 | THR | X | 20 | 27.686 | 31.922 | 19.054 | 0.00 | 0.00 |
| ATOM | 329 | HG23 | THR | X | 20 | 29.237 | 31.021 | 19.463 | 0.00 | 0.00 |
| ATOM | 330 | OG1  | THR | X | 20 | 26.479 | 29.477 | 18.485 | 0.00 | 0.00 |
| ATOM | 331 | HG1  | THR | X | 20 | 26.093 | 30.314 | 18.214 | 0.00 | 0.00 |
| ATOM | 332 | C    | THR | X | 20 | 27.795 | 28.930 | 16.124 | 0.00 | 0.00 |
| ATOM | 333 | O    | THR | X | 20 | 26.982 | 29.251 | 15.303 | 0.00 | 0.00 |
| ATOM | 334 | N    | PRO | X | 21 | 28.302 | 27.705 | 16.090 | 0.00 | 0.00 |
| ATOM | 335 | CD   | PRO | X | 21 | 29.564 | 27.335 | 16.696 | 0.00 | 0.00 |
| ATOM | 336 | HD2  | PRO | X | 21 | 29.298 | 27.179 | 17.741 | 0.00 | 0.00 |
| ATOM | 337 | HD3  | PRO | X | 21 | 30.365 | 28.061 | 16.555 | 0.00 | 0.00 |
| ATOM | 338 | CG   | PRO | X | 21 | 29.875 | 26.020 | 16.088 | 0.00 | 0.00 |
| ATOM | 339 | HG2  | PRO | X | 21 | 30.525 | 25.392 | 16.698 | 0.00 | 0.00 |
| ATOM | 340 | HG3  | PRO | X | 21 | 30.308 | 26.232 | 15.110 | 0.00 | 0.00 |
| ATOM | 341 | CB   | PRO | X | 21 | 28.481 | 25.342 | 15.864 | 0.00 | 0.00 |
| ATOM | 342 | HB2  | PRO | X | 21 | 28.102 | 24.944 | 16.806 | 0.00 | 0.00 |
| ATOM | 343 | HB3  | PRO | X | 21 | 28.546 | 24.413 | 15.296 | 0.00 | 0.00 |
| ATOM | 344 | CA   | PRO | X | 21 | 27.667 | 26.561 | 15.363 | 0.00 | 0.00 |
| ATOM | 345 | HA   | PRO | X | 21 | 27.947 | 26.613 | 14.310 | 0.00 | 0.00 |
| ATOM | 346 | C    | PRO | X | 21 | 26.149 | 26.438 | 15.510 | 0.00 | 0.00 |
| ATOM | 347 | O    | PRO | X | 21 | 25.557 | 26.259 | 14.421 | 0.00 | 0.00 |
| ATOM | 348 | N    | GLY | X | 22 | 25.587 | 26.553 | 16.733 | 0.00 | 0.00 |
| ATOM | 349 | H    | GLY | X | 22 | 26.170 | 26.539 | 17.557 | 0.00 | 0.00 |
| ATOM | 350 | CA   | GLY | X | 22 | 24.122 | 26.425 | 16.942 | 0.00 | 0.00 |
| ATOM | 351 | HA2  | GLY | X | 22 | 23.740 | 25.808 | 16.128 | 0.00 | 0.00 |
| ATOM | 352 | HA3  | GLY | X | 22 | 23.948 | 25.849 | 17.851 | 0.00 | 0.00 |
| ATOM | 353 | C    | GLY | X | 22 | 23.335 | 27.702 | 17.104 | 0.00 | 0.00 |
| ATOM | 354 | O    | GLY | X | 22 | 22.156 | 27.612 | 17.469 | 0.00 | 0.00 |
| ATOM | 355 | N    | GLY | X | 23 | 23.790 | 28.840 | 16.583 | 0.00 | 0.00 |
| ATOM | 356 | H    | GLY | X | 23 | 24.742 | 28.790 | 16.248 | 0.00 | 0.00 |
| ATOM | 357 | CA   | GLY | X | 23 | 23.056 | 30.097 | 16.367 | 0.00 | 0.00 |
| ATOM | 358 | HA2  | GLY | X | 23 | 22.823 | 30.133 | 15.303 | 0.00 | 0.00 |
| ATOM | 359 | HA3  | GLY | X | 23 | 22.168 | 30.203 | 16.990 | 0.00 | 0.00 |
| ATOM | 360 | C    | GLY | X | 23 | 23.863 | 31.373 | 16.739 | 0.00 | 0.00 |
| ATOM | 361 | O    | GLY | X | 23 | 24.904 | 31.310 | 17.360 | 0.00 | 0.00 |
| ATOM | 362 | N    | PRO | X | 24 | 23.436 | 32.522 | 16.208 | 0.00 | 0.00 |
| ATOM | 363 | CD   | PRO | X | 24 | 22.328 | 32.662 | 15.304 | 0.00 | 0.00 |
| ATOM | 364 | HD2  | PRO | X | 24 | 21.391 | 32.277 | 15.707 | 0.00 | 0.00 |
| ATOM | 365 | HD3  | PRO | X | 24 | 22.538 | 32.160 | 14.359 | 0.00 | 0.00 |
| ATOM | 366 | CG   | PRO | X | 24 | 22.165 | 34.145 | 15.045 | 0.00 | 0.00 |
| ATOM | 367 | HG2  | PRO | X | 24 | 21.500 | 34.577 | 15.793 | 0.00 | 0.00 |
| ATOM | 368 | HG3  | PRO | X | 24 | 21.901 | 34.363 | 14.010 | 0.00 | 0.00 |
| ATOM | 369 | CB   | PRO | X | 24 | 23.612 | 34.642 | 15.171 | 0.00 | 0.00 |
| ATOM | 370 | HB2  | PRO | X | 24 | 23.581 | 35.719 | 15.334 | 0.00 | 0.00 |
| ATOM | 371 | HB3  | PRO | X | 24 | 24.278 | 34.399 | 14.343 | 0.00 | 0.00 |
| ATOM | 372 | CA   | PRO | X | 24 | 24.105 | 33.830 | 16.376 | 0.00 | 0.00 |
| ATOM | 373 | HA   | PRO | X | 24 | 25.186 | 33.707 | 16.324 | 0.00 | 0.00 |
| ATOM | 374 | C    | PRO | X | 24 | 23.797 | 34.600 | 17.761 | 0.00 | 0.00 |
| ATOM | 375 | O    | PRO | X | 24 | 22.847 | 34.248 | 18.460 | 0.00 | 0.00 |
| ATOM | 376 | N    | VAL | X | 25 | 24.642 | 35.627 | 18.047 | 0.00 | 0.00 |
| ATOM | 377 | H    | VAL | X | 25 | 25.370 | 35.722 | 17.354 | 0.00 | 0.00 |
| ATOM | 378 | CA   | VAL | X | 25 | 24.687 | 36.414 | 19.245 | 0.00 | 0.00 |
| ATOM | 379 | HA   | VAL | X | 25 | 23.763 | 36.387 | 19.823 | 0.00 | 0.00 |

|      |     |      |     |   |    |        |        |        |      |      |
|------|-----|------|-----|---|----|--------|--------|--------|------|------|
| ATOM | 380 | CB   | VAL | X | 25 | 25.747 | 35.803 | 20.194 | 0.00 | 0.00 |
| ATOM | 381 | HB   | VAL | X | 25 | 26.485 | 35.390 | 19.507 | 0.00 | 0.00 |
| ATOM | 382 | CG1  | VAL | X | 25 | 26.432 | 36.762 | 21.206 | 0.00 | 0.00 |
| ATOM | 383 | HG11 | VAL | X | 25 | 25.754 | 37.478 | 21.671 | 0.00 | 0.00 |
| ATOM | 384 | HG12 | VAL | X | 25 | 26.973 | 36.186 | 21.956 | 0.00 | 0.00 |
| ATOM | 385 | HG13 | VAL | X | 25 | 27.113 | 37.305 | 20.551 | 0.00 | 0.00 |
| ATOM | 386 | CG2  | VAL | X | 25 | 25.123 | 34.754 | 21.021 | 0.00 | 0.00 |
| ATOM | 387 | HG21 | VAL | X | 25 | 25.899 | 34.344 | 21.666 | 0.00 | 0.00 |
| ATOM | 388 | HG22 | VAL | X | 25 | 24.674 | 33.934 | 20.461 | 0.00 | 0.00 |
| ATOM | 389 | HG23 | VAL | X | 25 | 24.366 | 35.196 | 21.670 | 0.00 | 0.00 |
| ATOM | 390 | C    | VAL | X | 25 | 24.960 | 37.886 | 18.843 | 0.00 | 0.00 |
| ATOM | 391 | O    | VAL | X | 25 | 25.321 | 38.111 | 17.689 | 0.00 | 0.00 |
| ATOM | 392 | N    | SER | X | 26 | 24.668 | 38.956 | 19.505 | 0.00 | 0.00 |
| ATOM | 393 | H    | SER | X | 26 | 24.349 | 38.839 | 20.456 | 0.00 | 0.00 |
| ATOM | 394 | CA   | SER | X | 26 | 24.968 | 40.349 | 19.141 | 0.00 | 0.00 |
| ATOM | 395 | HA   | SER | X | 26 | 25.503 | 40.528 | 18.207 | 0.00 | 0.00 |
| ATOM | 396 | CB   | SER | X | 26 | 23.735 | 41.205 | 18.865 | 0.00 | 0.00 |
| ATOM | 397 | HB2  | SER | X | 26 | 24.075 | 42.239 | 18.925 | 0.00 | 0.00 |
| ATOM | 398 | HB3  | SER | X | 26 | 23.441 | 41.088 | 17.822 | 0.00 | 0.00 |
| ATOM | 399 | OG   | SER | X | 26 | 22.651 | 41.116 | 19.816 | 0.00 | 0.00 |
| ATOM | 400 | HG   | SER | X | 26 | 22.381 | 40.197 | 19.876 | 0.00 | 0.00 |
| ATOM | 401 | C    | SER | X | 26 | 25.878 | 41.045 | 20.177 | 0.00 | 0.00 |
| ATOM | 402 | O    | SER | X | 26 | 25.676 | 40.808 | 21.380 | 0.00 | 0.00 |
| ATOM | 403 | N    | ALA | X | 27 | 26.889 | 41.738 | 19.690 | 0.00 | 0.00 |
| ATOM | 404 | H    | ALA | X | 27 | 26.950 | 41.886 | 18.693 | 0.00 | 0.00 |
| ATOM | 405 | CA   | ALA | X | 27 | 27.787 | 42.463 | 20.554 | 0.00 | 0.00 |
| ATOM | 406 | HA   | ALA | X | 27 | 27.504 | 42.343 | 21.600 | 0.00 | 0.00 |
| ATOM | 407 | CB   | ALA | X | 27 | 29.178 | 41.802 | 20.364 | 0.00 | 0.00 |
| ATOM | 408 | HB1  | ALA | X | 27 | 29.163 | 40.722 | 20.508 | 0.00 | 0.00 |
| ATOM | 409 | HB2  | ALA | X | 27 | 29.993 | 42.195 | 20.971 | 0.00 | 0.00 |
| ATOM | 410 | HB3  | ALA | X | 27 | 29.454 | 41.882 | 19.313 | 0.00 | 0.00 |
| ATOM | 411 | C    | ALA | X | 27 | 27.919 | 43.923 | 20.123 | 0.00 | 0.00 |
| ATOM | 412 | O    | ALA | X | 27 | 27.954 | 44.304 | 18.968 | 0.00 | 0.00 |
| ATOM | 413 | N    | PHE | X | 28 | 28.122 | 44.626 | 21.187 | 0.00 | 0.00 |
| ATOM | 414 | H    | PHE | X | 28 | 28.212 | 44.118 | 22.055 | 0.00 | 0.00 |
| ATOM | 415 | CA   | PHE | X | 28 | 28.251 | 46.080 | 21.289 | 0.00 | 0.00 |
| ATOM | 416 | HA   | PHE | X | 28 | 28.321 | 46.526 | 20.297 | 0.00 | 0.00 |
| ATOM | 417 | CB   | PHE | X | 28 | 26.953 | 46.658 | 21.903 | 0.00 | 0.00 |
| ATOM | 418 | HB2  | PHE | X | 28 | 26.954 | 46.281 | 22.926 | 0.00 | 0.00 |
| ATOM | 419 | HB3  | PHE | X | 28 | 27.128 | 47.733 | 21.960 | 0.00 | 0.00 |
| ATOM | 420 | CG   | PHE | X | 28 | 25.751 | 46.372 | 21.081 | 0.00 | 0.00 |
| ATOM | 421 | CD1  | PHE | X | 28 | 25.053 | 45.185 | 21.355 | 0.00 | 0.00 |
| ATOM | 422 | HD1  | PHE | X | 28 | 25.463 | 44.579 | 22.149 | 0.00 | 0.00 |
| ATOM | 423 | CE1  | PHE | X | 28 | 23.868 | 44.861 | 20.703 | 0.00 | 0.00 |
| ATOM | 424 | HE1  | PHE | X | 28 | 23.315 | 43.966 | 20.946 | 0.00 | 0.00 |
| ATOM | 425 | CZ   | PHE | X | 28 | 23.232 | 45.784 | 19.855 | 0.00 | 0.00 |
| ATOM | 426 | HZ   | PHE | X | 28 | 22.265 | 45.614 | 19.405 | 0.00 | 0.00 |
| ATOM | 427 | CE2  | PHE | X | 28 | 23.959 | 46.998 | 19.604 | 0.00 | 0.00 |
| ATOM | 428 | HE2  | PHE | X | 28 | 23.589 | 47.702 | 18.873 | 0.00 | 0.00 |
| ATOM | 429 | CD2  | PHE | X | 28 | 25.248 | 47.247 | 20.093 | 0.00 | 0.00 |
| ATOM | 430 | HD2  | PHE | X | 28 | 25.765 | 48.166 | 19.861 | 0.00 | 0.00 |
| ATOM | 431 | C    | PHE | X | 28 | 29.443 | 46.375 | 22.196 | 0.00 | 0.00 |
| ATOM | 432 | O    | PHE | X | 28 | 29.467 | 46.085 | 23.378 | 0.00 | 0.00 |
| ATOM | 433 | N    | LEU | X | 29 | 30.470 | 46.899 | 21.581 | 0.00 | 0.00 |
| ATOM | 434 | H    | LEU | X | 29 | 30.255 | 47.267 | 20.665 | 0.00 | 0.00 |
| ATOM | 435 | CA   | LEU | X | 29 | 31.822 | 46.894 | 22.092 | 0.00 | 0.00 |
| ATOM | 436 | HA   | LEU | X | 29 | 31.902 | 46.584 | 23.134 | 0.00 | 0.00 |
| ATOM | 437 | CB   | LEU | X | 29 | 32.643 | 45.894 | 21.234 | 0.00 | 0.00 |
| ATOM | 438 | HB2  | LEU | X | 29 | 32.630 | 46.217 | 20.193 | 0.00 | 0.00 |
| ATOM | 439 | HB3  | LEU | X | 29 | 33.720 | 45.978 | 21.380 | 0.00 | 0.00 |
| ATOM | 440 | CG   | LEU | X | 29 | 32.059 | 44.462 | 21.190 | 0.00 | 0.00 |
| ATOM | 441 | HG   | LEU | X | 29 | 31.035 | 44.540 | 20.825 | 0.00 | 0.00 |
| ATOM | 442 | CD1  | LEU | X | 29 | 32.980 | 43.667 | 20.197 | 0.00 | 0.00 |
| ATOM | 443 | HD11 | LEU | X | 29 | 32.810 | 44.014 | 19.178 | 0.00 | 0.00 |
| ATOM | 444 | HD12 | LEU | X | 29 | 32.812 | 42.596 | 20.309 | 0.00 | 0.00 |
| ATOM | 445 | HD13 | LEU | X | 29 | 34.009 | 43.700 | 20.556 | 0.00 | 0.00 |
| ATOM | 446 | CD2  | LEU | X | 29 | 32.039 | 43.842 | 22.539 | 0.00 | 0.00 |

|      |     |      |     |   |    |        |        |        |      |      |
|------|-----|------|-----|---|----|--------|--------|--------|------|------|
| ATOM | 447 | HD21 | LEU | X | 29 | 31.287 | 44.364 | 23.130 | 0.00 | 0.00 |
| ATOM | 448 | HD22 | LEU | X | 29 | 31.636 | 42.837 | 22.417 | 0.00 | 0.00 |
| ATOM | 449 | HD23 | LEU | X | 29 | 32.957 | 43.790 | 23.124 | 0.00 | 0.00 |
| ATOM | 450 | C    | LEU | X | 29 | 32.377 | 48.258 | 22.009 | 0.00 | 0.00 |
| ATOM | 451 | O    | LEU | X | 29 | 32.030 | 48.963 | 21.091 | 0.00 | 0.00 |
| ATOM | 452 | N    | GLY | X | 30 | 33.242 | 48.611 | 22.951 | 0.00 | 0.00 |
| ATOM | 453 | H    | GLY | X | 30 | 33.459 | 47.924 | 23.658 | 0.00 | 0.00 |
| ATOM | 454 | CA   | GLY | X | 30 | 33.962 | 49.902 | 22.914 | 0.00 | 0.00 |
| ATOM | 455 | HA2  | GLY | X | 30 | 34.578 | 49.805 | 23.808 | 0.00 | 0.00 |
| ATOM | 456 | HA3  | GLY | X | 30 | 34.546 | 50.051 | 22.006 | 0.00 | 0.00 |
| ATOM | 457 | C    | GLY | X | 30 | 32.980 | 51.045 | 23.071 | 0.00 | 0.00 |
| ATOM | 458 | O    | GLY | X | 30 | 33.002 | 52.036 | 22.324 | 0.00 | 0.00 |
| ATOM | 459 | N    | ILE | X | 31 | 32.057 | 50.898 | 24.126 | 0.00 | 0.00 |
| ATOM | 460 | H    | ILE | X | 31 | 32.200 | 50.049 | 24.654 | 0.00 | 0.00 |
| ATOM | 461 | CA   | ILE | X | 31 | 31.002 | 51.844 | 24.515 | 0.00 | 0.00 |
| ATOM | 462 | HA   | ILE | X | 31 | 30.787 | 52.448 | 23.633 | 0.00 | 0.00 |
| ATOM | 463 | CB   | ILE | X | 31 | 29.658 | 51.237 | 25.009 | 0.00 | 0.00 |
| ATOM | 464 | HB   | ILE | X | 31 | 29.826 | 51.009 | 26.061 | 0.00 | 0.00 |
| ATOM | 465 | CG2  | ILE | X | 31 | 28.623 | 52.400 | 25.012 | 0.00 | 0.00 |
| ATOM | 466 | HG21 | ILE | X | 31 | 27.637 | 52.053 | 25.322 | 0.00 | 0.00 |
| ATOM | 467 | HG22 | ILE | X | 31 | 28.571 | 52.699 | 23.965 | 0.00 | 0.00 |
| ATOM | 468 | HG23 | ILE | X | 31 | 28.962 | 53.210 | 25.657 | 0.00 | 0.00 |
| ATOM | 469 | CG1  | ILE | X | 31 | 29.085 | 50.178 | 24.109 | 0.00 | 0.00 |
| ATOM | 470 | HG12 | ILE | X | 31 | 28.782 | 50.597 | 23.149 | 0.00 | 0.00 |
| ATOM | 471 | HG13 | ILE | X | 31 | 29.834 | 49.394 | 24.000 | 0.00 | 0.00 |
| ATOM | 472 | CD1  | ILE | X | 31 | 27.907 | 49.381 | 24.825 | 0.00 | 0.00 |
| ATOM | 473 | HD11 | ILE | X | 31 | 28.118 | 49.126 | 25.863 | 0.00 | 0.00 |
| ATOM | 474 | HD12 | ILE | X | 31 | 27.783 | 48.481 | 24.223 | 0.00 | 0.00 |
| ATOM | 475 | HD13 | ILE | X | 31 | 27.051 | 50.052 | 24.753 | 0.00 | 0.00 |
| ATOM | 476 | C    | ILE | X | 31 | 31.572 | 52.720 | 25.599 | 0.00 | 0.00 |
| ATOM | 477 | O    | ILE | X | 31 | 31.962 | 52.223 | 26.697 | 0.00 | 0.00 |
| ATOM | 478 | N    | PRO | X | 32 | 31.632 | 54.041 | 25.373 | 0.00 | 0.00 |
| ATOM | 479 | CD   | PRO | X | 32 | 31.246 | 54.771 | 24.174 | 0.00 | 0.00 |
| ATOM | 480 | HD2  | PRO | X | 32 | 30.158 | 54.759 | 24.099 | 0.00 | 0.00 |
| ATOM | 481 | HD3  | PRO | X | 32 | 31.736 | 54.381 | 23.282 | 0.00 | 0.00 |
| ATOM | 482 | CG   | PRO | X | 32 | 31.624 | 56.263 | 24.377 | 0.00 | 0.00 |
| ATOM | 483 | HG2  | PRO | X | 32 | 30.782 | 56.855 | 24.735 | 0.00 | 0.00 |
| ATOM | 484 | HG3  | PRO | X | 32 | 32.150 | 56.624 | 23.494 | 0.00 | 0.00 |
| ATOM | 485 | CB   | PRO | X | 32 | 32.554 | 56.173 | 25.577 | 0.00 | 0.00 |
| ATOM | 486 | HB2  | PRO | X | 32 | 32.376 | 57.041 | 26.212 | 0.00 | 0.00 |
| ATOM | 487 | HB3  | PRO | X | 32 | 33.611 | 56.168 | 25.310 | 0.00 | 0.00 |
| ATOM | 488 | CA   | PRO | X | 32 | 32.206 | 54.910 | 26.421 | 0.00 | 0.00 |
| ATOM | 489 | HA   | PRO | X | 32 | 33.144 | 54.456 | 26.739 | 0.00 | 0.00 |
| ATOM | 490 | C    | PRO | X | 32 | 31.184 | 55.041 | 27.555 | 0.00 | 0.00 |
| ATOM | 491 | O    | PRO | X | 32 | 30.061 | 55.465 | 27.371 | 0.00 | 0.00 |
| ATOM | 492 | N    | PHE | X | 33 | 31.672 | 54.797 | 28.772 | 0.00 | 0.00 |
| ATOM | 493 | H    | PHE | X | 33 | 32.608 | 54.453 | 28.936 | 0.00 | 0.00 |
| ATOM | 494 | CA   | PHE | X | 33 | 30.848 | 55.057 | 29.964 | 0.00 | 0.00 |
| ATOM | 495 | HA   | PHE | X | 33 | 29.838 | 55.310 | 29.643 | 0.00 | 0.00 |
| ATOM | 496 | CB   | PHE | X | 33 | 30.692 | 53.760 | 30.755 | 0.00 | 0.00 |
| ATOM | 497 | HB2  | PHE | X | 33 | 29.836 | 53.748 | 31.429 | 0.00 | 0.00 |
| ATOM | 498 | HB3  | PHE | X | 33 | 30.373 | 52.955 | 30.093 | 0.00 | 0.00 |
| ATOM | 499 | CG   | PHE | X | 33 | 31.958 | 53.357 | 31.502 | 0.00 | 0.00 |
| ATOM | 500 | CD1  | PHE | X | 33 | 32.149 | 53.909 | 32.735 | 0.00 | 0.00 |
| ATOM | 501 | HD1  | PHE | X | 33 | 31.397 | 54.621 | 33.044 | 0.00 | 0.00 |
| ATOM | 502 | CE1  | PHE | X | 33 | 33.315 | 53.601 | 33.421 | 0.00 | 0.00 |
| ATOM | 503 | HE1  | PHE | X | 33 | 33.444 | 54.090 | 34.376 | 0.00 | 0.00 |
| ATOM | 504 | CZ   | PHE | X | 33 | 34.178 | 52.540 | 32.971 | 0.00 | 0.00 |
| ATOM | 505 | HZ   | PHE | X | 33 | 35.046 | 52.228 | 33.534 | 0.00 | 0.00 |
| ATOM | 506 | CE2  | PHE | X | 33 | 33.979 | 52.006 | 31.645 | 0.00 | 0.00 |
| ATOM | 507 | HE2  | PHE | X | 33 | 34.645 | 51.277 | 31.208 | 0.00 | 0.00 |
| ATOM | 508 | CD2  | PHE | X | 33 | 32.866 | 52.434 | 30.944 | 0.00 | 0.00 |
| ATOM | 509 | HD2  | PHE | X | 33 | 32.723 | 52.045 | 29.947 | 0.00 | 0.00 |
| ATOM | 510 | C    | PHE | X | 33 | 31.224 | 56.248 | 30.842 | 0.00 | 0.00 |
| ATOM | 511 | O    | PHE | X | 33 | 30.479 | 56.537 | 31.821 | 0.00 | 0.00 |
| ATOM | 512 | N    | ALA | X | 34 | 32.222 | 56.975 | 30.494 | 0.00 | 0.00 |
| ATOM | 513 | H    | ALA | X | 34 | 32.821 | 56.646 | 29.751 | 0.00 | 0.00 |

|      |     |     |     |   |    |        |        |        |      |      |
|------|-----|-----|-----|---|----|--------|--------|--------|------|------|
| ATOM | 514 | CA  | ALA | X | 34 | 32.717 | 58.091 | 31.269 | 0.00 | 0.00 |
| ATOM | 515 | HA  | ALA | X | 34 | 31.839 | 58.556 | 31.717 | 0.00 | 0.00 |
| ATOM | 516 | CB  | ALA | X | 34 | 33.591 | 57.585 | 32.419 | 0.00 | 0.00 |
| ATOM | 517 | HB1 | ALA | X | 34 | 34.511 | 57.217 | 31.965 | 0.00 | 0.00 |
| ATOM | 518 | HB2 | ALA | X | 34 | 33.226 | 56.687 | 32.918 | 0.00 | 0.00 |
| ATOM | 519 | HB3 | ALA | X | 34 | 33.801 | 58.430 | 33.075 | 0.00 | 0.00 |
| ATOM | 520 | C   | ALA | X | 34 | 33.448 | 59.104 | 30.302 | 0.00 | 0.00 |
| ATOM | 521 | O   | ALA | X | 34 | 33.863 | 58.708 | 29.199 | 0.00 | 0.00 |
| ATOM | 522 | N   | GLU | X | 35 | 33.678 | 60.325 | 30.732 | 0.00 | 0.00 |
| ATOM | 523 | H   | GLU | X | 35 | 33.315 | 60.620 | 31.627 | 0.00 | 0.00 |
| ATOM | 524 | CA  | GLU | X | 35 | 34.694 | 61.203 | 30.071 | 0.00 | 0.00 |
| ATOM | 525 | HA  | GLU | X | 35 | 34.397 | 61.300 | 29.027 | 0.00 | 0.00 |
| ATOM | 526 | CB  | GLU | X | 35 | 34.643 | 62.580 | 30.684 | 0.00 | 0.00 |
| ATOM | 527 | HB2 | GLU | X | 35 | 34.838 | 62.466 | 31.750 | 0.00 | 0.00 |
| ATOM | 528 | HB3 | GLU | X | 35 | 35.392 | 63.211 | 30.204 | 0.00 | 0.00 |
| ATOM | 529 | CG  | GLU | X | 35 | 33.416 | 63.330 | 30.490 | 0.00 | 0.00 |
| ATOM | 530 | HG2 | GLU | X | 35 | 32.684 | 62.578 | 30.783 | 0.00 | 0.00 |
| ATOM | 531 | HG3 | GLU | X | 35 | 33.357 | 64.185 | 31.164 | 0.00 | 0.00 |
| ATOM | 532 | CD  | GLU | X | 35 | 33.257 | 63.870 | 29.140 | 0.00 | 0.00 |
| ATOM | 533 | OE1 | GLU | X | 35 | 32.451 | 63.271 | 28.408 | 0.00 | 0.00 |
| ATOM | 534 | OE2 | GLU | X | 35 | 33.947 | 64.865 | 28.827 | 0.00 | 0.00 |
| ATOM | 535 | C   | GLU | X | 35 | 36.077 | 60.609 | 30.289 | 0.00 | 0.00 |
| ATOM | 536 | O   | GLU | X | 35 | 36.281 | 59.942 | 31.282 | 0.00 | 0.00 |
| ATOM | 537 | N   | PRO | X | 36 | 37.089 | 60.820 | 29.416 | 0.00 | 0.00 |
| ATOM | 538 | CD  | PRO | X | 36 | 37.013 | 61.748 | 28.293 | 0.00 | 0.00 |
| ATOM | 539 | HD2 | PRO | X | 36 | 36.434 | 62.640 | 28.532 | 0.00 | 0.00 |
| ATOM | 540 | HD3 | PRO | X | 36 | 36.568 | 61.285 | 27.413 | 0.00 | 0.00 |
| ATOM | 541 | CG  | PRO | X | 36 | 38.406 | 62.111 | 27.973 | 0.00 | 0.00 |
| ATOM | 542 | HG2 | PRO | X | 36 | 38.666 | 62.913 | 28.664 | 0.00 | 0.00 |
| ATOM | 543 | HG3 | PRO | X | 36 | 38.516 | 62.386 | 26.925 | 0.00 | 0.00 |
| ATOM | 544 | CB  | PRO | X | 36 | 39.156 | 60.892 | 28.357 | 0.00 | 0.00 |
| ATOM | 545 | HB2 | PRO | X | 36 | 40.215 | 61.109 | 28.496 | 0.00 | 0.00 |
| ATOM | 546 | HB3 | PRO | X | 36 | 39.266 | 60.219 | 27.508 | 0.00 | 0.00 |
| ATOM | 547 | CA  | PRO | X | 36 | 38.440 | 60.229 | 29.543 | 0.00 | 0.00 |
| ATOM | 548 | HA  | PRO | X | 36 | 38.377 | 59.170 | 29.296 | 0.00 | 0.00 |
| ATOM | 549 | C   | PRO | X | 36 | 39.110 | 60.576 | 30.853 | 0.00 | 0.00 |
| ATOM | 550 | O   | PRO | X | 36 | 39.146 | 61.784 | 31.310 | 0.00 | 0.00 |
| ATOM | 551 | N   | PRO | X | 37 | 39.820 | 59.639 | 31.544 | 0.00 | 0.00 |
| ATOM | 552 | CD  | PRO | X | 37 | 39.836 | 58.192 | 31.241 | 0.00 | 0.00 |
| ATOM | 553 | HD2 | PRO | X | 37 | 40.405 | 57.968 | 30.338 | 0.00 | 0.00 |
| ATOM | 554 | HD3 | PRO | X | 37 | 38.779 | 57.928 | 31.227 | 0.00 | 0.00 |
| ATOM | 555 | CG  | PRO | X | 37 | 40.510 | 57.570 | 32.429 | 0.00 | 0.00 |
| ATOM | 556 | HG2 | PRO | X | 37 | 41.598 | 57.530 | 32.370 | 0.00 | 0.00 |
| ATOM | 557 | HG3 | PRO | X | 37 | 40.171 | 56.587 | 32.757 | 0.00 | 0.00 |
| ATOM | 558 | CB  | PRO | X | 37 | 40.136 | 58.485 | 33.542 | 0.00 | 0.00 |
| ATOM | 559 | HB2 | PRO | X | 37 | 40.523 | 58.365 | 34.554 | 0.00 | 0.00 |
| ATOM | 560 | HB3 | PRO | X | 37 | 39.060 | 58.314 | 33.588 | 0.00 | 0.00 |
| ATOM | 561 | CA  | PRO | X | 37 | 40.329 | 59.904 | 32.929 | 0.00 | 0.00 |
| ATOM | 562 | HA  | PRO | X | 37 | 39.712 | 60.630 | 33.459 | 0.00 | 0.00 |
| ATOM | 563 | C   | PRO | X | 37 | 41.793 | 60.306 | 32.988 | 0.00 | 0.00 |
| ATOM | 564 | O   | PRO | X | 37 | 42.440 | 60.237 | 34.035 | 0.00 | 0.00 |
| ATOM | 565 | N   | MET | X | 38 | 42.252 | 60.797 | 31.832 | 0.00 | 0.00 |
| ATOM | 566 | H   | MET | X | 38 | 41.642 | 60.797 | 31.027 | 0.00 | 0.00 |
| ATOM | 567 | CA  | MET | X | 38 | 43.587 | 61.258 | 31.535 | 0.00 | 0.00 |
| ATOM | 568 | HA  | MET | X | 38 | 44.228 | 60.529 | 32.031 | 0.00 | 0.00 |
| ATOM | 569 | CB  | MET | X | 38 | 43.711 | 61.377 | 30.007 | 0.00 | 0.00 |
| ATOM | 570 | HB2 | MET | X | 38 | 44.764 | 61.272 | 29.748 | 0.00 | 0.00 |
| ATOM | 571 | HB3 | MET | X | 38 | 43.213 | 60.527 | 29.540 | 0.00 | 0.00 |
| ATOM | 572 | CG  | MET | X | 38 | 43.032 | 62.607 | 29.419 | 0.00 | 0.00 |
| ATOM | 573 | HG2 | MET | X | 38 | 42.072 | 62.610 | 29.936 | 0.00 | 0.00 |
| ATOM | 574 | HG3 | MET | X | 38 | 43.533 | 63.500 | 29.792 | 0.00 | 0.00 |
| ATOM | 575 | SD  | MET | X | 38 | 42.750 | 62.542 | 27.649 | 0.00 | 0.00 |
| ATOM | 576 | CE  | MET | X | 38 | 41.683 | 64.049 | 27.560 | 0.00 | 0.00 |
| ATOM | 577 | HE1 | MET | X | 38 | 42.326 | 64.930 | 27.562 | 0.00 | 0.00 |
| ATOM | 578 | HE2 | MET | X | 38 | 41.127 | 64.171 | 26.630 | 0.00 | 0.00 |
| ATOM | 579 | HE3 | MET | X | 38 | 41.002 | 64.154 | 28.405 | 0.00 | 0.00 |
| ATOM | 580 | C   | MET | X | 38 | 43.971 | 62.508 | 32.300 | 0.00 | 0.00 |

|      |     |      |     |   |    |        |        |        |      |      |
|------|-----|------|-----|---|----|--------|--------|--------|------|------|
| ATOM | 581 | O    | MET | X | 38 | 43.212 | 63.253 | 32.935 | 0.00 | 0.00 |
| ATOM | 582 | N    | GLY | X | 39 | 45.298 | 62.927 | 32.185 | 0.00 | 0.00 |
| ATOM | 583 | H    | GLY | X | 39 | 45.841 | 62.384 | 31.530 | 0.00 | 0.00 |
| ATOM | 584 | CA   | GLY | X | 39 | 45.945 | 64.186 | 32.774 | 0.00 | 0.00 |
| ATOM | 585 | HA2  | GLY | X | 39 | 47.009 | 63.959 | 32.839 | 0.00 | 0.00 |
| ATOM | 586 | HA3  | GLY | X | 39 | 45.732 | 64.944 | 32.020 | 0.00 | 0.00 |
| ATOM | 587 | C    | GLY | X | 39 | 45.318 | 64.645 | 34.098 | 0.00 | 0.00 |
| ATOM | 588 | O    | GLY | X | 39 | 45.723 | 63.955 | 35.085 | 0.00 | 0.00 |
| ATOM | 589 | N    | PRO | X | 40 | 44.498 | 65.686 | 34.227 | 0.00 | 0.00 |
| ATOM | 590 | CD   | PRO | X | 40 | 43.833 | 66.486 | 33.168 | 0.00 | 0.00 |
| ATOM | 591 | HD2  | PRO | X | 40 | 43.153 | 65.752 | 32.735 | 0.00 | 0.00 |
| ATOM | 592 | HD3  | PRO | X | 40 | 44.531 | 66.937 | 32.463 | 0.00 | 0.00 |
| ATOM | 593 | CG   | PRO | X | 40 | 43.163 | 67.708 | 33.901 | 0.00 | 0.00 |
| ATOM | 594 | HG2  | PRO | X | 40 | 42.104 | 67.586 | 33.672 | 0.00 | 0.00 |
| ATOM | 595 | HG3  | PRO | X | 40 | 43.455 | 68.681 | 33.506 | 0.00 | 0.00 |
| ATOM | 596 | CB   | PRO | X | 40 | 43.370 | 67.546 | 35.440 | 0.00 | 0.00 |
| ATOM | 597 | HB2  | PRO | X | 40 | 42.383 | 67.571 | 35.902 | 0.00 | 0.00 |
| ATOM | 598 | HB3  | PRO | X | 40 | 44.053 | 68.342 | 35.734 | 0.00 | 0.00 |
| ATOM | 599 | CA   | PRO | X | 40 | 44.125 | 66.200 | 35.571 | 0.00 | 0.00 |
| ATOM | 600 | HA   | PRO | X | 40 | 45.023 | 66.294 | 36.183 | 0.00 | 0.00 |
| ATOM | 601 | C    | PRO | X | 40 | 43.197 | 65.269 | 36.362 | 0.00 | 0.00 |
| ATOM | 602 | O    | PRO | X | 40 | 42.811 | 65.676 | 37.414 | 0.00 | 0.00 |
| ATOM | 603 | N    | ARG | X | 41 | 42.733 | 64.137 | 35.781 | 0.00 | 0.00 |
| ATOM | 604 | H    | ARG | X | 41 | 42.946 | 63.853 | 34.835 | 0.00 | 0.00 |
| ATOM | 605 | CA   | ARG | X | 41 | 41.905 | 63.135 | 36.450 | 0.00 | 0.00 |
| ATOM | 606 | HA   | ARG | X | 41 | 41.369 | 63.516 | 37.319 | 0.00 | 0.00 |
| ATOM | 607 | CB   | ARG | X | 41 | 40.742 | 62.816 | 35.529 | 0.00 | 0.00 |
| ATOM | 608 | HB2  | ARG | X | 41 | 41.045 | 62.200 | 34.683 | 0.00 | 0.00 |
| ATOM | 609 | HB3  | ARG | X | 41 | 40.068 | 62.106 | 36.009 | 0.00 | 0.00 |
| ATOM | 610 | CG   | ARG | X | 41 | 39.891 | 64.016 | 34.968 | 0.00 | 0.00 |
| ATOM | 611 | HG2  | ARG | X | 41 | 39.454 | 64.495 | 35.844 | 0.00 | 0.00 |
| ATOM | 612 | HG3  | ARG | X | 41 | 40.515 | 64.734 | 34.436 | 0.00 | 0.00 |
| ATOM | 613 | CD   | ARG | X | 41 | 38.793 | 63.456 | 34.070 | 0.00 | 0.00 |
| ATOM | 614 | HD2  | ARG | X | 41 | 39.360 | 63.378 | 33.142 | 0.00 | 0.00 |
| ATOM | 615 | HD3  | ARG | X | 41 | 38.324 | 62.561 | 34.477 | 0.00 | 0.00 |
| ATOM | 616 | NE   | ARG | X | 41 | 37.768 | 64.482 | 33.825 | 0.00 | 0.00 |
| ATOM | 617 | HE   | ARG | X | 41 | 37.281 | 64.879 | 34.616 | 0.00 | 0.00 |
| ATOM | 618 | CZ   | ARG | X | 41 | 37.315 | 65.007 | 32.700 | 0.00 | 0.00 |
| ATOM | 619 | NH1  | ARG | X | 41 | 37.692 | 64.633 | 31.508 | 0.00 | 0.00 |
| ATOM | 620 | HH11 | ARG | X | 41 | 38.270 | 63.809 | 31.422 | 0.00 | 0.00 |
| ATOM | 621 | HH12 | ARG | X | 41 | 37.417 | 65.023 | 30.617 | 0.00 | 0.00 |
| ATOM | 622 | NH2  | ARG | X | 41 | 36.343 | 65.821 | 32.808 | 0.00 | 0.00 |
| ATOM | 623 | HH21 | ARG | X | 41 | 36.207 | 66.298 | 33.688 | 0.00 | 0.00 |
| ATOM | 624 | HH22 | ARG | X | 41 | 36.022 | 66.273 | 31.964 | 0.00 | 0.00 |
| ATOM | 625 | C    | ARG | X | 41 | 42.654 | 61.840 | 36.912 | 0.00 | 0.00 |
| ATOM | 626 | O    | ARG | X | 41 | 42.219 | 61.041 | 37.695 | 0.00 | 0.00 |
| ATOM | 627 | N    | ARG | X | 42 | 43.917 | 61.634 | 36.460 | 0.00 | 0.00 |
| ATOM | 628 | H    | ARG | X | 42 | 44.269 | 62.276 | 35.764 | 0.00 | 0.00 |
| ATOM | 629 | CA   | ARG | X | 42 | 44.839 | 60.521 | 36.853 | 0.00 | 0.00 |
| ATOM | 630 | HA   | ARG | X | 42 | 44.340 | 59.585 | 36.599 | 0.00 | 0.00 |
| ATOM | 631 | CB   | ARG | X | 42 | 46.170 | 60.575 | 36.124 | 0.00 | 0.00 |
| ATOM | 632 | HB2  | ARG | X | 42 | 46.065 | 60.525 | 35.040 | 0.00 | 0.00 |
| ATOM | 633 | HB3  | ARG | X | 42 | 46.569 | 61.524 | 36.480 | 0.00 | 0.00 |
| ATOM | 634 | CG   | ARG | X | 42 | 47.060 | 59.326 | 36.519 | 0.00 | 0.00 |
| ATOM | 635 | HG2  | ARG | X | 42 | 47.019 | 59.090 | 37.583 | 0.00 | 0.00 |
| ATOM | 636 | HG3  | ARG | X | 42 | 46.718 | 58.351 | 36.173 | 0.00 | 0.00 |
| ATOM | 637 | CD   | ARG | X | 42 | 48.557 | 59.532 | 36.121 | 0.00 | 0.00 |
| ATOM | 638 | HD2  | ARG | X | 42 | 48.988 | 60.349 | 36.700 | 0.00 | 0.00 |
| ATOM | 639 | HD3  | ARG | X | 42 | 49.115 | 58.634 | 36.388 | 0.00 | 0.00 |
| ATOM | 640 | NE   | ARG | X | 42 | 48.802 | 59.686 | 34.649 | 0.00 | 0.00 |
| ATOM | 641 | HE   | ARG | X | 42 | 48.204 | 59.347 | 33.910 | 0.00 | 0.00 |
| ATOM | 642 | CZ   | ARG | X | 42 | 49.963 | 60.104 | 34.176 | 0.00 | 0.00 |
| ATOM | 643 | NH1  | ARG | X | 42 | 50.942 | 60.567 | 34.926 | 0.00 | 0.00 |
| ATOM | 644 | HH11 | ARG | X | 42 | 50.853 | 60.776 | 35.910 | 0.00 | 0.00 |
| ATOM | 645 | HH12 | ARG | X | 42 | 51.781 | 60.915 | 34.485 | 0.00 | 0.00 |
| ATOM | 646 | NH2  | ARG | X | 42 | 50.232 | 59.910 | 32.935 | 0.00 | 0.00 |
| ATOM | 647 | HH21 | ARG | X | 42 | 49.479 | 59.616 | 32.329 | 0.00 | 0.00 |



|      |     |      |     |   |    |        |        |        |      |      |
|------|-----|------|-----|---|----|--------|--------|--------|------|------|
| ATOM | 648 | HH22 | ARG | X | 42 | 51.141 | 60.087 | 32.533 | 0.00 | 0.00 |
| ATOM | 649 | C    | ARG | X | 42 | 44.998 | 60.468 | 38.437 | 0.00 | 0.00 |
| ATOM | 650 | O    | ARG | X | 42 | 45.423 | 61.490 | 38.957 | 0.00 | 0.00 |
| ATOM | 651 | N    | PHE | X | 43 | 44.622 | 59.347 | 39.155 | 0.00 | 0.00 |
| ATOM | 652 | H    | PHE | X | 43 | 44.285 | 58.539 | 38.652 | 0.00 | 0.00 |
| ATOM | 653 | CA   | PHE | X | 43 | 44.611 | 59.147 | 40.640 | 0.00 | 0.00 |
| ATOM | 654 | HA   | PHE | X | 43 | 44.562 | 58.074 | 40.824 | 0.00 | 0.00 |
| ATOM | 655 | CB   | PHE | X | 43 | 45.815 | 59.709 | 41.405 | 0.00 | 0.00 |
| ATOM | 656 | HB2  | PHE | X | 43 | 45.695 | 60.787 | 41.507 | 0.00 | 0.00 |
| ATOM | 657 | HB3  | PHE | X | 43 | 45.895 | 59.214 | 42.373 | 0.00 | 0.00 |
| ATOM | 658 | CG   | PHE | X | 43 | 47.126 | 59.500 | 40.744 | 0.00 | 0.00 |
| ATOM | 659 | CD1  | PHE | X | 43 | 47.409 | 58.176 | 40.388 | 0.00 | 0.00 |
| ATOM | 660 | HD1  | PHE | X | 43 | 46.654 | 57.432 | 40.594 | 0.00 | 0.00 |
| ATOM | 661 | CE1  | PHE | X | 43 | 48.704 | 57.878 | 39.928 | 0.00 | 0.00 |
| ATOM | 662 | HE1  | PHE | X | 43 | 49.057 | 56.860 | 39.849 | 0.00 | 0.00 |
| ATOM | 663 | CZ   | PHE | X | 43 | 49.639 | 58.854 | 39.643 | 0.00 | 0.00 |
| ATOM | 664 | HZ   | PHE | X | 43 | 50.643 | 58.580 | 39.355 | 0.00 | 0.00 |
| ATOM | 665 | CE2  | PHE | X | 43 | 49.260 | 60.178 | 39.802 | 0.00 | 0.00 |
| ATOM | 666 | HE2  | PHE | X | 43 | 49.951 | 60.999 | 39.684 | 0.00 | 0.00 |
| ATOM | 667 | CD2  | PHE | X | 43 | 47.995 | 60.517 | 40.433 | 0.00 | 0.00 |
| ATOM | 668 | HD2  | PHE | X | 43 | 47.772 | 61.557 | 40.616 | 0.00 | 0.00 |
| ATOM | 669 | C    | PHE | X | 43 | 43.305 | 59.783 | 41.230 | 0.00 | 0.00 |
| ATOM | 670 | O    | PHE | X | 43 | 43.060 | 59.725 | 42.447 | 0.00 | 0.00 |
| ATOM | 671 | N    | LEU | X | 44 | 42.368 | 60.317 | 40.449 | 0.00 | 0.00 |
| ATOM | 672 | H    | LEU | X | 44 | 42.522 | 60.372 | 39.452 | 0.00 | 0.00 |
| ATOM | 673 | CA   | LEU | X | 44 | 41.219 | 61.039 | 40.931 | 0.00 | 0.00 |
| ATOM | 674 | HA   | LEU | X | 44 | 41.159 | 60.877 | 42.007 | 0.00 | 0.00 |
| ATOM | 675 | CB   | LEU | X | 44 | 41.409 | 62.544 | 40.708 | 0.00 | 0.00 |
| ATOM | 676 | HB2  | LEU | X | 44 | 41.763 | 62.579 | 39.678 | 0.00 | 0.00 |
| ATOM | 677 | HB3  | LEU | X | 44 | 40.389 | 62.910 | 40.826 | 0.00 | 0.00 |
| ATOM | 678 | CG   | LEU | X | 44 | 42.407 | 63.285 | 41.656 | 0.00 | 0.00 |
| ATOM | 679 | HG   | LEU | X | 44 | 43.334 | 62.782 | 41.932 | 0.00 | 0.00 |
| ATOM | 680 | CD1  | LEU | X | 44 | 42.692 | 64.612 | 41.041 | 0.00 | 0.00 |
| ATOM | 681 | HD11 | LEU | X | 44 | 43.408 | 65.150 | 41.661 | 0.00 | 0.00 |
| ATOM | 682 | HD12 | LEU | X | 44 | 41.843 | 65.222 | 40.733 | 0.00 | 0.00 |
| ATOM | 683 | HD13 | LEU | X | 44 | 43.252 | 64.469 | 40.117 | 0.00 | 0.00 |
| ATOM | 684 | CD2  | LEU | X | 44 | 41.649 | 63.390 | 42.981 | 0.00 | 0.00 |
| ATOM | 685 | HD21 | LEU | X | 44 | 42.270 | 63.910 | 43.712 | 0.00 | 0.00 |
| ATOM | 686 | HD22 | LEU | X | 44 | 40.683 | 63.872 | 42.834 | 0.00 | 0.00 |
| ATOM | 687 | HD23 | LEU | X | 44 | 41.559 | 62.371 | 43.359 | 0.00 | 0.00 |
| ATOM | 688 | C    | LEU | X | 44 | 39.845 | 60.551 | 40.306 | 0.00 | 0.00 |
| ATOM | 689 | O    | LEU | X | 44 | 39.882 | 59.885 | 39.254 | 0.00 | 0.00 |
| ATOM | 690 | N    | PRO | X | 45 | 38.657 | 60.766 | 40.955 | 0.00 | 0.00 |
| ATOM | 691 | CD   | PRO | X | 45 | 38.555 | 61.541 | 42.150 | 0.00 | 0.00 |
| ATOM | 692 | HD2  | PRO | X | 45 | 38.519 | 62.600 | 41.896 | 0.00 | 0.00 |
| ATOM | 693 | HD3  | PRO | X | 45 | 39.328 | 61.318 | 42.885 | 0.00 | 0.00 |
| ATOM | 694 | CG   | PRO | X | 45 | 37.203 | 61.099 | 42.744 | 0.00 | 0.00 |
| ATOM | 695 | HG2  | PRO | X | 45 | 36.727 | 61.840 | 43.386 | 0.00 | 0.00 |
| ATOM | 696 | HG3  | PRO | X | 45 | 37.463 | 60.174 | 43.258 | 0.00 | 0.00 |
| ATOM | 697 | CB   | PRO | X | 45 | 36.408 | 60.703 | 41.533 | 0.00 | 0.00 |
| ATOM | 698 | HB2  | PRO | X | 45 | 35.976 | 61.648 | 41.203 | 0.00 | 0.00 |
| ATOM | 699 | HB3  | PRO | X | 45 | 35.589 | 60.038 | 41.809 | 0.00 | 0.00 |
| ATOM | 700 | CA   | PRO | X | 45 | 37.389 | 60.134 | 40.571 | 0.00 | 0.00 |
| ATOM | 701 | HA   | PRO | X | 45 | 37.441 | 59.069 | 40.798 | 0.00 | 0.00 |
| ATOM | 702 | C    | PRO | X | 45 | 36.974 | 60.336 | 39.074 | 0.00 | 0.00 |
| ATOM | 703 | O    | PRO | X | 45 | 37.361 | 61.445 | 38.553 | 0.00 | 0.00 |
| ATOM | 704 | N    | PRO | X | 46 | 36.142 | 59.472 | 38.394 | 0.00 | 0.00 |
| ATOM | 705 | CD   | PRO | X | 46 | 35.611 | 58.231 | 38.919 | 0.00 | 0.00 |
| ATOM | 706 | HD2  | PRO | X | 46 | 35.154 | 58.248 | 39.908 | 0.00 | 0.00 |
| ATOM | 707 | HD3  | PRO | X | 46 | 36.440 | 57.524 | 38.904 | 0.00 | 0.00 |
| ATOM | 708 | CG   | PRO | X | 46 | 34.616 | 57.793 | 37.958 | 0.00 | 0.00 |
| ATOM | 709 | HG2  | PRO | X | 46 | 33.644 | 58.252 | 38.140 | 0.00 | 0.00 |
| ATOM | 710 | HG3  | PRO | X | 46 | 34.557 | 56.705 | 37.987 | 0.00 | 0.00 |
| ATOM | 711 | CB   | PRO | X | 46 | 35.213 | 58.291 | 36.631 | 0.00 | 0.00 |
| ATOM | 712 | HB2  | PRO | X | 46 | 34.466 | 58.437 | 35.852 | 0.00 | 0.00 |
| ATOM | 713 | HB3  | PRO | X | 46 | 36.050 | 57.663 | 36.325 | 0.00 | 0.00 |
| ATOM | 714 | CA   | PRO | X | 46 | 35.733 | 59.678 | 37.017 | 0.00 | 0.00 |

|      |     |     |     |   |    |        |        |        |      |      |
|------|-----|-----|-----|---|----|--------|--------|--------|------|------|
| ATOM | 715 | HA  | PRO | X | 46 | 36.560 | 59.907 | 36.344 | 0.00 | 0.00 |
| ATOM | 716 | C   | PRO | X | 46 | 34.582 | 60.803 | 36.927 | 0.00 | 0.00 |
| ATOM | 717 | O   | PRO | X | 46 | 34.089 | 61.288 | 37.936 | 0.00 | 0.00 |
| ATOM | 718 | N   | GLU | X | 47 | 34.111 | 61.108 | 35.688 | 0.00 | 0.00 |
| ATOM | 719 | H   | GLU | X | 47 | 34.632 | 60.624 | 34.971 | 0.00 | 0.00 |
| ATOM | 720 | CA  | GLU | X | 47 | 32.951 | 61.963 | 35.409 | 0.00 | 0.00 |
| ATOM | 721 | HA  | GLU | X | 47 | 32.463 | 62.127 | 36.370 | 0.00 | 0.00 |
| ATOM | 722 | CB  | GLU | X | 47 | 33.512 | 63.278 | 34.876 | 0.00 | 0.00 |
| ATOM | 723 | HB2 | GLU | X | 47 | 34.269 | 63.031 | 34.131 | 0.00 | 0.00 |
| ATOM | 724 | HB3 | GLU | X | 47 | 32.698 | 63.836 | 34.414 | 0.00 | 0.00 |
| ATOM | 725 | CG  | GLU | X | 47 | 34.090 | 64.073 | 36.115 | 0.00 | 0.00 |
| ATOM | 726 | HG2 | GLU | X | 47 | 33.272 | 64.395 | 36.761 | 0.00 | 0.00 |
| ATOM | 727 | HG3 | GLU | X | 47 | 34.798 | 63.544 | 36.753 | 0.00 | 0.00 |
| ATOM | 728 | CD  | GLU | X | 47 | 34.855 | 65.284 | 35.751 | 0.00 | 0.00 |
| ATOM | 729 | OE1 | GLU | X | 47 | 34.261 | 66.206 | 35.208 | 0.00 | 0.00 |
| ATOM | 730 | OE2 | GLU | X | 47 | 36.113 | 65.320 | 35.883 | 0.00 | 0.00 |
| ATOM | 731 | C   | GLU | X | 47 | 32.086 | 61.291 | 34.264 | 0.00 | 0.00 |
| ATOM | 732 | O   | GLU | X | 47 | 32.629 | 60.690 | 33.319 | 0.00 | 0.00 |
| ATOM | 733 | N   | PRO | X | 48 | 30.724 | 61.289 | 34.266 | 0.00 | 0.00 |
| ATOM | 734 | CD  | PRO | X | 48 | 29.970 | 61.667 | 35.459 | 0.00 | 0.00 |
| ATOM | 735 | HD2 | PRO | X | 48 | 29.908 | 62.742 | 35.628 | 0.00 | 0.00 |
| ATOM | 736 | HD3 | PRO | X | 48 | 30.359 | 61.145 | 36.333 | 0.00 | 0.00 |
| ATOM | 737 | CG  | PRO | X | 48 | 28.564 | 61.108 | 35.122 | 0.00 | 0.00 |
| ATOM | 738 | HG2 | PRO | X | 48 | 27.802 | 61.713 | 35.613 | 0.00 | 0.00 |
| ATOM | 739 | HG3 | PRO | X | 48 | 28.468 | 60.081 | 35.472 | 0.00 | 0.00 |
| ATOM | 740 | CB  | PRO | X | 48 | 28.442 | 61.207 | 33.630 | 0.00 | 0.00 |
| ATOM | 741 | HB2 | PRO | X | 48 | 28.220 | 62.229 | 33.325 | 0.00 | 0.00 |
| ATOM | 742 | HB3 | PRO | X | 48 | 27.671 | 60.511 | 33.299 | 0.00 | 0.00 |
| ATOM | 743 | CA  | PRO | X | 48 | 29.809 | 60.831 | 33.185 | 0.00 | 0.00 |
| ATOM | 744 | HA  | PRO | X | 48 | 29.832 | 59.741 | 33.165 | 0.00 | 0.00 |
| ATOM | 745 | C   | PRO | X | 48 | 30.097 | 61.403 | 31.829 | 0.00 | 0.00 |
| ATOM | 746 | O   | PRO | X | 48 | 30.507 | 62.523 | 31.650 | 0.00 | 0.00 |
| ATOM | 747 | N   | LYS | X | 49 | 29.975 | 60.506 | 30.871 | 0.00 | 0.00 |
| ATOM | 748 | H   | LYS | X | 49 | 29.711 | 59.578 | 31.172 | 0.00 | 0.00 |
| ATOM | 749 | CA  | LYS | X | 49 | 30.253 | 60.707 | 29.352 | 0.00 | 0.00 |
| ATOM | 750 | HA  | LYS | X | 49 | 31.281 | 61.059 | 29.267 | 0.00 | 0.00 |
| ATOM | 751 | CB  | LYS | X | 49 | 29.971 | 59.427 | 28.615 | 0.00 | 0.00 |
| ATOM | 752 | HB2 | LYS | X | 49 | 30.635 | 58.725 | 29.120 | 0.00 | 0.00 |
| ATOM | 753 | HB3 | LYS | X | 49 | 29.003 | 59.039 | 28.931 | 0.00 | 0.00 |
| ATOM | 754 | CG  | LYS | X | 49 | 30.211 | 59.420 | 27.086 | 0.00 | 0.00 |
| ATOM | 755 | HG2 | LYS | X | 49 | 30.151 | 58.446 | 26.601 | 0.00 | 0.00 |
| ATOM | 756 | HG3 | LYS | X | 49 | 29.445 | 60.049 | 26.634 | 0.00 | 0.00 |
| ATOM | 757 | CD  | LYS | X | 49 | 31.637 | 59.854 | 26.710 | 0.00 | 0.00 |
| ATOM | 758 | HD2 | LYS | X | 49 | 31.796 | 60.905 | 26.952 | 0.00 | 0.00 |
| ATOM | 759 | HD3 | LYS | X | 49 | 32.420 | 59.272 | 27.195 | 0.00 | 0.00 |
| ATOM | 760 | CE  | LYS | X | 49 | 31.925 | 59.748 | 25.217 | 0.00 | 0.00 |
| ATOM | 761 | HE2 | LYS | X | 49 | 31.949 | 58.684 | 24.982 | 0.00 | 0.00 |
| ATOM | 762 | HE3 | LYS | X | 49 | 31.124 | 60.129 | 24.583 | 0.00 | 0.00 |
| ATOM | 763 | NZ  | LYS | X | 49 | 33.217 | 60.370 | 24.826 | 0.00 | 0.00 |
| ATOM | 764 | HZ1 | LYS | X | 49 | 33.213 | 60.453 | 23.820 | 0.00 | 0.00 |
| ATOM | 765 | HZ2 | LYS | X | 49 | 33.350 | 61.279 | 25.245 | 0.00 | 0.00 |
| ATOM | 766 | HZ3 | LYS | X | 49 | 34.013 | 59.778 | 25.014 | 0.00 | 0.00 |
| ATOM | 767 | C   | LYS | X | 49 | 29.314 | 61.756 | 28.788 | 0.00 | 0.00 |
| ATOM | 768 | O   | LYS | X | 49 | 28.091 | 61.679 | 29.046 | 0.00 | 0.00 |
| ATOM | 769 | N   | GLN | X | 50 | 29.732 | 62.772 | 28.028 | 0.00 | 0.00 |
| ATOM | 770 | H   | GLN | X | 50 | 30.732 | 62.868 | 27.922 | 0.00 | 0.00 |
| ATOM | 771 | CA  | GLN | X | 50 | 28.821 | 63.783 | 27.429 | 0.00 | 0.00 |
| ATOM | 772 | HA  | GLN | X | 50 | 28.193 | 64.084 | 28.267 | 0.00 | 0.00 |
| ATOM | 773 | CB  | GLN | X | 50 | 29.533 | 65.062 | 26.940 | 0.00 | 0.00 |
| ATOM | 774 | HB2 | GLN | X | 50 | 30.370 | 64.733 | 26.324 | 0.00 | 0.00 |
| ATOM | 775 | HB3 | GLN | X | 50 | 28.884 | 65.731 | 26.375 | 0.00 | 0.00 |
| ATOM | 776 | CG  | GLN | X | 50 | 30.105 | 65.806 | 28.184 | 0.00 | 0.00 |
| ATOM | 777 | HG2 | GLN | X | 50 | 29.356 | 66.197 | 28.873 | 0.00 | 0.00 |
| ATOM | 778 | HG3 | GLN | X | 50 | 30.752 | 65.221 | 28.838 | 0.00 | 0.00 |
| ATOM | 779 | CD  | GLN | X | 50 | 31.023 | 66.902 | 27.768 | 0.00 | 0.00 |
| ATOM | 780 | OE1 | GLN | X | 50 | 30.589 | 67.967 | 27.426 | 0.00 | 0.00 |
| ATOM | 781 | NE2 | GLN | X | 50 | 32.317 | 66.638 | 27.628 | 0.00 | 0.00 |

|      |     |      |     |   |    |        |        |        |      |      |
|------|-----|------|-----|---|----|--------|--------|--------|------|------|
| ATOM | 782 | HE21 | GLN | X | 50 | 32.849 | 67.444 | 27.334 | 0.00 | 0.00 |
| ATOM | 783 | HE22 | GLN | X | 50 | 32.672 | 65.757 | 27.971 | 0.00 | 0.00 |
| ATOM | 784 | C    | GLN | X | 50 | 27.923 | 63.004 | 26.453 | 0.00 | 0.00 |
| ATOM | 785 | O    | GLN | X | 50 | 28.478 | 62.167 | 25.659 | 0.00 | 0.00 |
| ATOM | 786 | N    | PRO | X | 51 | 26.590 | 63.190 | 26.397 | 0.00 | 0.00 |
| ATOM | 787 | CD   | PRO | X | 51 | 25.860 | 64.226 | 27.162 | 0.00 | 0.00 |
| ATOM | 788 | HD2  | PRO | X | 51 | 26.319 | 65.211 | 27.080 | 0.00 | 0.00 |
| ATOM | 789 | HD3  | PRO | X | 51 | 26.007 | 63.901 | 28.191 | 0.00 | 0.00 |
| ATOM | 790 | CG   | PRO | X | 51 | 24.469 | 64.215 | 26.532 | 0.00 | 0.00 |
| ATOM | 791 | HG2  | PRO | X | 51 | 24.436 | 65.105 | 25.903 | 0.00 | 0.00 |
| ATOM | 792 | HG3  | PRO | X | 51 | 23.624 | 64.363 | 27.204 | 0.00 | 0.00 |
| ATOM | 793 | CB   | PRO | X | 51 | 24.265 | 62.932 | 25.767 | 0.00 | 0.00 |
| ATOM | 794 | HB2  | PRO | X | 51 | 23.603 | 63.062 | 24.911 | 0.00 | 0.00 |
| ATOM | 795 | HB3  | PRO | X | 51 | 23.953 | 62.141 | 26.449 | 0.00 | 0.00 |
| ATOM | 796 | CA   | PRO | X | 51 | 25.687 | 62.485 | 25.421 | 0.00 | 0.00 |
| ATOM | 797 | HA   | PRO | X | 51 | 25.741 | 61.397 | 25.425 | 0.00 | 0.00 |
| ATOM | 798 | C    | PRO | X | 51 | 26.081 | 62.957 | 23.953 | 0.00 | 0.00 |
| ATOM | 799 | O    | PRO | X | 51 | 26.968 | 63.763 | 23.807 | 0.00 | 0.00 |
| ATOM | 800 | N    | TRP | X | 52 | 25.447 | 62.262 | 22.970 | 0.00 | 0.00 |
| ATOM | 801 | H    | TRP | X | 52 | 24.818 | 61.507 | 23.203 | 0.00 | 0.00 |
| ATOM | 802 | CA   | TRP | X | 52 | 25.858 | 62.530 | 21.545 | 0.00 | 0.00 |
| ATOM | 803 | HA   | TRP | X | 52 | 26.231 | 63.545 | 21.410 | 0.00 | 0.00 |
| ATOM | 804 | CB   | TRP | X | 52 | 26.921 | 61.499 | 21.134 | 0.00 | 0.00 |
| ATOM | 805 | HB2  | TRP | X | 52 | 27.185 | 61.680 | 20.092 | 0.00 | 0.00 |
| ATOM | 806 | HB3  | TRP | X | 52 | 27.751 | 61.673 | 21.818 | 0.00 | 0.00 |
| ATOM | 807 | CG   | TRP | X | 52 | 26.451 | 60.032 | 21.181 | 0.00 | 0.00 |
| ATOM | 808 | CD1  | TRP | X | 52 | 25.892 | 59.309 | 20.190 | 0.00 | 0.00 |
| ATOM | 809 | HD1  | TRP | X | 52 | 25.477 | 59.662 | 19.258 | 0.00 | 0.00 |
| ATOM | 810 | NE1  | TRP | X | 52 | 25.675 | 58.000 | 20.600 | 0.00 | 0.00 |
| ATOM | 811 | HE1  | TRP | X | 52 | 25.178 | 57.302 | 20.065 | 0.00 | 0.00 |
| ATOM | 812 | CE2  | TRP | X | 52 | 26.173 | 57.805 | 21.877 | 0.00 | 0.00 |
| ATOM | 813 | CZ2  | TRP | X | 52 | 26.165 | 56.624 | 22.690 | 0.00 | 0.00 |
| ATOM | 814 | HZ2  | TRP | X | 52 | 25.774 | 55.670 | 22.367 | 0.00 | 0.00 |
| ATOM | 815 | CH2  | TRP | X | 52 | 26.811 | 56.716 | 23.897 | 0.00 | 0.00 |
| ATOM | 816 | HH2  | TRP | X | 52 | 26.879 | 55.824 | 24.503 | 0.00 | 0.00 |
| ATOM | 817 | CZ3  | TRP | X | 52 | 27.321 | 57.930 | 24.322 | 0.00 | 0.00 |
| ATOM | 818 | HZ3  | TRP | X | 52 | 27.754 | 57.966 | 25.310 | 0.00 | 0.00 |
| ATOM | 819 | CE3  | TRP | X | 52 | 27.097 | 59.177 | 23.596 | 0.00 | 0.00 |
| ATOM | 820 | HE3  | TRP | X | 52 | 27.501 | 60.082 | 24.026 | 0.00 | 0.00 |
| ATOM | 821 | CD2  | TRP | X | 52 | 26.566 | 59.089 | 22.270 | 0.00 | 0.00 |
| ATOM | 822 | C    | TRP | X | 52 | 24.706 | 62.455 | 20.552 | 0.00 | 0.00 |
| ATOM | 823 | O    | TRP | X | 52 | 23.687 | 61.710 | 20.684 | 0.00 | 0.00 |
| ATOM | 824 | N    | SER | X | 53 | 24.929 | 63.248 | 19.501 | 0.00 | 0.00 |
| ATOM | 825 | H    | SER | X | 53 | 25.729 | 63.863 | 19.508 | 0.00 | 0.00 |
| ATOM | 826 | CA   | SER | X | 53 | 24.161 | 63.284 | 18.190 | 0.00 | 0.00 |
| ATOM | 827 | HA   | SER | X | 53 | 23.199 | 62.806 | 18.374 | 0.00 | 0.00 |
| ATOM | 828 | CB   | SER | X | 53 | 23.785 | 64.709 | 17.738 | 0.00 | 0.00 |
| ATOM | 829 | HB2  | SER | X | 53 | 24.587 | 65.204 | 17.191 | 0.00 | 0.00 |
| ATOM | 830 | HB3  | SER | X | 53 | 22.952 | 64.653 | 17.037 | 0.00 | 0.00 |
| ATOM | 831 | OG   | SER | X | 53 | 23.403 | 65.581 | 18.846 | 0.00 | 0.00 |
| ATOM | 832 | HG   | SER | X | 53 | 23.922 | 65.315 | 19.609 | 0.00 | 0.00 |
| ATOM | 833 | C    | SER | X | 53 | 24.764 | 62.424 | 17.112 | 0.00 | 0.00 |
| ATOM | 834 | O    | SER | X | 53 | 25.945 | 62.214 | 16.996 | 0.00 | 0.00 |
| ATOM | 835 | N    | GLY | X | 54 | 23.793 | 61.922 | 16.354 | 0.00 | 0.00 |
| ATOM | 836 | H    | GLY | X | 54 | 22.846 | 62.029 | 16.689 | 0.00 | 0.00 |
| ATOM | 837 | CA   | GLY | X | 54 | 24.054 | 60.855 | 15.346 | 0.00 | 0.00 |
| ATOM | 838 | HA2  | GLY | X | 54 | 23.165 | 60.656 | 14.747 | 0.00 | 0.00 |
| ATOM | 839 | HA3  | GLY | X | 54 | 24.804 | 61.174 | 14.623 | 0.00 | 0.00 |
| ATOM | 840 | C    | GLY | X | 54 | 24.485 | 59.526 | 15.943 | 0.00 | 0.00 |
| ATOM | 841 | O    | GLY | X | 54 | 24.405 | 59.312 | 17.168 | 0.00 | 0.00 |
| ATOM | 842 | N    | VAL | X | 55 | 24.812 | 58.547 | 15.102 | 0.00 | 0.00 |
| ATOM | 843 | H    | VAL | X | 55 | 24.638 | 58.707 | 14.121 | 0.00 | 0.00 |
| ATOM | 844 | CA   | VAL | X | 55 | 25.214 | 57.186 | 15.559 | 0.00 | 0.00 |
| ATOM | 845 | HA   | VAL | X | 55 | 24.625 | 57.030 | 16.462 | 0.00 | 0.00 |
| ATOM | 846 | CB   | VAL | X | 55 | 24.822 | 56.112 | 14.616 | 0.00 | 0.00 |
| ATOM | 847 | HB   | VAL | X | 55 | 23.795 | 56.326 | 14.319 | 0.00 | 0.00 |
| ATOM | 848 | CG1  | VAL | X | 55 | 25.656 | 55.899 | 13.316 | 0.00 | 0.00 |

|      |     |      |     |   |    |        |        |        |      |      |
|------|-----|------|-----|---|----|--------|--------|--------|------|------|
| ATOM | 849 | HG11 | VAL | X | 55 | 25.228 | 55.071 | 12.750 | 0.00 | 0.00 |
| ATOM | 850 | HG12 | VAL | X | 55 | 25.617 | 56.809 | 12.716 | 0.00 | 0.00 |
| ATOM | 851 | HG13 | VAL | X | 55 | 26.629 | 55.519 | 13.627 | 0.00 | 0.00 |
| ATOM | 852 | CG2  | VAL | X | 55 | 24.868 | 54.784 | 15.400 | 0.00 | 0.00 |
| ATOM | 853 | HG21 | VAL | X | 55 | 25.883 | 54.585 | 15.744 | 0.00 | 0.00 |
| ATOM | 854 | HG22 | VAL | X | 55 | 24.637 | 53.919 | 14.779 | 0.00 | 0.00 |
| ATOM | 855 | HG23 | VAL | X | 55 | 24.129 | 54.878 | 16.195 | 0.00 | 0.00 |
| ATOM | 856 | C    | VAL | X | 55 | 26.705 | 57.099 | 15.834 | 0.00 | 0.00 |
| ATOM | 857 | O    | VAL | X | 55 | 27.441 | 57.612 | 15.030 | 0.00 | 0.00 |
| ATOM | 858 | N    | VAL | X | 56 | 27.082 | 56.390 | 16.940 | 0.00 | 0.00 |
| ATOM | 859 | H    | VAL | X | 56 | 26.371 | 56.177 | 17.625 | 0.00 | 0.00 |
| ATOM | 860 | CA   | VAL | X | 56 | 28.465 | 56.117 | 17.319 | 0.00 | 0.00 |
| ATOM | 861 | HA   | VAL | X | 56 | 29.077 | 56.621 | 16.571 | 0.00 | 0.00 |
| ATOM | 862 | CB   | VAL | X | 56 | 28.765 | 56.513 | 18.802 | 0.00 | 0.00 |
| ATOM | 863 | HB   | VAL | X | 56 | 27.829 | 56.243 | 19.291 | 0.00 | 0.00 |
| ATOM | 864 | CG1  | VAL | X | 56 | 29.792 | 55.704 | 19.526 | 0.00 | 0.00 |
| ATOM | 865 | HG11 | VAL | X | 56 | 29.823 | 56.135 | 20.526 | 0.00 | 0.00 |
| ATOM | 866 | HG12 | VAL | X | 56 | 29.594 | 54.634 | 19.591 | 0.00 | 0.00 |
| ATOM | 867 | HG13 | VAL | X | 56 | 30.694 | 55.855 | 18.933 | 0.00 | 0.00 |
| ATOM | 868 | CG2  | VAL | X | 56 | 28.951 | 58.059 | 18.747 | 0.00 | 0.00 |
| ATOM | 869 | HG21 | VAL | X | 56 | 28.003 | 58.515 | 18.464 | 0.00 | 0.00 |
| ATOM | 870 | HG22 | VAL | X | 56 | 29.685 | 58.282 | 17.972 | 0.00 | 0.00 |
| ATOM | 871 | HG23 | VAL | X | 56 | 29.368 | 58.320 | 19.720 | 0.00 | 0.00 |
| ATOM | 872 | C    | VAL | X | 56 | 28.779 | 54.564 | 17.049 | 0.00 | 0.00 |
| ATOM | 873 | O    | VAL | X | 56 | 27.946 | 53.761 | 17.505 | 0.00 | 0.00 |
| ATOM | 874 | N    | ASP | X | 57 | 29.856 | 54.153 | 16.365 | 0.00 | 0.00 |
| ATOM | 875 | H    | ASP | X | 57 | 30.387 | 54.925 | 15.988 | 0.00 | 0.00 |
| ATOM | 876 | CA   | ASP | X | 57 | 30.299 | 52.790 | 16.180 | 0.00 | 0.00 |
| ATOM | 877 | HA   | ASP | X | 57 | 29.564 | 52.179 | 15.656 | 0.00 | 0.00 |
| ATOM | 878 | CB   | ASP | X | 57 | 31.571 | 52.885 | 15.328 | 0.00 | 0.00 |
| ATOM | 879 | HB2  | ASP | X | 57 | 31.342 | 53.435 | 14.416 | 0.00 | 0.00 |
| ATOM | 880 | HB3  | ASP | X | 57 | 32.271 | 53.421 | 15.968 | 0.00 | 0.00 |
| ATOM | 881 | CG   | ASP | X | 57 | 32.049 | 51.419 | 14.999 | 0.00 | 0.00 |
| ATOM | 882 | OD1  | ASP | X | 57 | 31.851 | 51.026 | 13.849 | 0.00 | 0.00 |
| ATOM | 883 | OD2  | ASP | X | 57 | 32.692 | 50.757 | 15.810 | 0.00 | 0.00 |
| ATOM | 884 | C    | ASP | X | 57 | 30.678 | 52.133 | 17.508 | 0.00 | 0.00 |
| ATOM | 885 | O    | ASP | X | 57 | 30.910 | 52.762 | 18.507 | 0.00 | 0.00 |
| ATOM | 886 | N    | ALA | X | 58 | 30.464 | 50.801 | 17.649 | 0.00 | 0.00 |
| ATOM | 887 | H    | ALA | X | 58 | 30.112 | 50.310 | 16.840 | 0.00 | 0.00 |
| ATOM | 888 | CA   | ALA | X | 58 | 30.613 | 49.987 | 18.845 | 0.00 | 0.00 |
| ATOM | 889 | HA   | ALA | X | 58 | 31.487 | 50.444 | 19.309 | 0.00 | 0.00 |
| ATOM | 890 | CB   | ALA | X | 58 | 29.417 | 50.236 | 19.768 | 0.00 | 0.00 |
| ATOM | 891 | HB1  | ALA | X | 58 | 29.167 | 51.297 | 19.775 | 0.00 | 0.00 |
| ATOM | 892 | HB2  | ALA | X | 58 | 29.558 | 49.781 | 20.748 | 0.00 | 0.00 |
| ATOM | 893 | HB3  | ALA | X | 58 | 28.524 | 49.761 | 19.361 | 0.00 | 0.00 |
| ATOM | 894 | C    | ALA | X | 58 | 30.998 | 48.518 | 18.453 | 0.00 | 0.00 |
| ATOM | 895 | O    | ALA | X | 58 | 30.475 | 47.514 | 18.925 | 0.00 | 0.00 |
| ATOM | 896 | N    | THR | X | 59 | 31.843 | 48.385 | 17.469 | 0.00 | 0.00 |
| ATOM | 897 | H    | THR | X | 59 | 32.374 | 49.223 | 17.277 | 0.00 | 0.00 |
| ATOM | 898 | CA   | THR | X | 59 | 32.188 | 47.160 | 16.687 | 0.00 | 0.00 |
| ATOM | 899 | HA   | THR | X | 59 | 31.478 | 46.368 | 16.922 | 0.00 | 0.00 |
| ATOM | 900 | CB   | THR | X | 59 | 32.281 | 47.424 | 15.189 | 0.00 | 0.00 |
| ATOM | 901 | HB   | THR | X | 59 | 32.443 | 46.411 | 14.823 | 0.00 | 0.00 |
| ATOM | 902 | CG2  | THR | X | 59 | 30.931 | 48.053 | 14.577 | 0.00 | 0.00 |
| ATOM | 903 | HG21 | THR | X | 59 | 31.014 | 47.948 | 13.495 | 0.00 | 0.00 |
| ATOM | 904 | HG22 | THR | X | 59 | 30.665 | 49.058 | 14.904 | 0.00 | 0.00 |
| ATOM | 905 | HG23 | THR | X | 59 | 30.054 | 47.437 | 14.778 | 0.00 | 0.00 |
| ATOM | 906 | OG1  | THR | X | 59 | 33.262 | 48.322 | 14.884 | 0.00 | 0.00 |
| ATOM | 907 | HG1  | THR | X | 59 | 32.917 | 49.163 | 15.194 | 0.00 | 0.00 |
| ATOM | 908 | C    | THR | X | 59 | 33.398 | 46.436 | 17.175 | 0.00 | 0.00 |
| ATOM | 909 | O    | THR | X | 59 | 33.692 | 45.317 | 16.749 | 0.00 | 0.00 |
| ATOM | 910 | N    | THR | X | 60 | 34.178 | 47.086 | 17.999 | 0.00 | 0.00 |
| ATOM | 911 | H    | THR | X | 60 | 33.927 | 48.022 | 18.283 | 0.00 | 0.00 |
| ATOM | 912 | CA   | THR | X | 60 | 35.561 | 46.701 | 18.310 | 0.00 | 0.00 |
| ATOM | 913 | HA   | THR | X | 60 | 35.619 | 45.614 | 18.364 | 0.00 | 0.00 |
| ATOM | 914 | CB   | THR | X | 60 | 36.413 | 47.064 | 17.144 | 0.00 | 0.00 |
| ATOM | 915 | HB   | THR | X | 60 | 35.928 | 46.921 | 16.178 | 0.00 | 0.00 |

|      |     |      |     |   |    |        |        |        |      |      |
|------|-----|------|-----|---|----|--------|--------|--------|------|------|
| ATOM | 916 | CG2  | THR | X | 60 | 36.841 | 48.524 | 17.251 | 0.00 | 0.00 |
| ATOM | 917 | HG21 | THR | X | 60 | 37.641 | 48.704 | 17.970 | 0.00 | 0.00 |
| ATOM | 918 | HG22 | THR | X | 60 | 35.992 | 49.171 | 17.468 | 0.00 | 0.00 |
| ATOM | 919 | HG23 | THR | X | 60 | 37.231 | 48.887 | 16.300 | 0.00 | 0.00 |
| ATOM | 920 | OG1  | THR | X | 60 | 37.538 | 46.248 | 17.211 | 0.00 | 0.00 |
| ATOM | 921 | HG1  | THR | X | 60 | 37.675 | 45.786 | 16.381 | 0.00 | 0.00 |
| ATOM | 922 | C    | THR | X | 60 | 36.106 | 47.121 | 19.660 | 0.00 | 0.00 |
| ATOM | 923 | O    | THR | X | 60 | 35.640 | 48.077 | 20.201 | 0.00 | 0.00 |
| ATOM | 924 | N    | PHE | X | 61 | 37.098 | 46.434 | 20.243 | 0.00 | 0.00 |
| ATOM | 925 | H    | PHE | X | 61 | 37.578 | 45.814 | 19.606 | 0.00 | 0.00 |
| ATOM | 926 | CA   | PHE | X | 61 | 37.729 | 46.800 | 21.531 | 0.00 | 0.00 |
| ATOM | 927 | HA   | PHE | X | 61 | 37.008 | 47.142 | 22.274 | 0.00 | 0.00 |
| ATOM | 928 | CB   | PHE | X | 61 | 38.578 | 45.617 | 22.051 | 0.00 | 0.00 |
| ATOM | 929 | HB2  | PHE | X | 61 | 39.282 | 45.244 | 21.307 | 0.00 | 0.00 |
| ATOM | 930 | HB3  | PHE | X | 61 | 39.123 | 45.804 | 22.977 | 0.00 | 0.00 |
| ATOM | 931 | CG   | PHE | X | 61 | 37.636 | 44.478 | 22.369 | 0.00 | 0.00 |
| ATOM | 932 | CD1  | PHE | X | 61 | 36.626 | 44.520 | 23.314 | 0.00 | 0.00 |
| ATOM | 933 | HD1  | PHE | X | 61 | 36.526 | 45.422 | 23.899 | 0.00 | 0.00 |
| ATOM | 934 | CE1  | PHE | X | 61 | 35.866 | 43.417 | 23.631 | 0.00 | 0.00 |
| ATOM | 935 | HE1  | PHE | X | 61 | 35.114 | 43.526 | 24.399 | 0.00 | 0.00 |
| ATOM | 936 | CZ   | PHE | X | 61 | 36.055 | 42.198 | 22.976 | 0.00 | 0.00 |
| ATOM | 937 | HZ   | PHE | X | 61 | 35.435 | 41.354 | 23.238 | 0.00 | 0.00 |
| ATOM | 938 | CE2  | PHE | X | 61 | 36.969 | 42.067 | 21.946 | 0.00 | 0.00 |
| ATOM | 939 | HE2  | PHE | X | 61 | 37.126 | 41.199 | 21.323 | 0.00 | 0.00 |
| ATOM | 940 | CD2  | PHE | X | 61 | 37.851 | 43.185 | 21.739 | 0.00 | 0.00 |
| ATOM | 941 | HD2  | PHE | X | 61 | 38.770 | 43.039 | 21.191 | 0.00 | 0.00 |
| ATOM | 942 | C    | PHE | X | 61 | 38.637 | 48.028 | 21.325 | 0.00 | 0.00 |
| ATOM | 943 | O    | PHE | X | 61 | 39.419 | 48.167 | 20.381 | 0.00 | 0.00 |
| ATOM | 944 | N    | GLN | X | 62 | 38.604 | 48.967 | 22.267 | 0.00 | 0.00 |
| ATOM | 945 | H    | GLN | X | 62 | 37.920 | 48.749 | 22.977 | 0.00 | 0.00 |
| ATOM | 946 | CA   | GLN | X | 62 | 39.453 | 50.160 | 22.249 | 0.00 | 0.00 |
| ATOM | 947 | HA   | GLN | X | 62 | 39.774 | 50.376 | 21.230 | 0.00 | 0.00 |
| ATOM | 948 | CB   | GLN | X | 62 | 38.606 | 51.334 | 22.767 | 0.00 | 0.00 |
| ATOM | 949 | HB2  | GLN | X | 62 | 38.597 | 51.352 | 23.857 | 0.00 | 0.00 |
| ATOM | 950 | HB3  | GLN | X | 62 | 39.150 | 52.267 | 22.619 | 0.00 | 0.00 |
| ATOM | 951 | CG   | GLN | X | 62 | 37.154 | 51.571 | 22.372 | 0.00 | 0.00 |
| ATOM | 952 | HG2  | GLN | X | 62 | 36.491 | 50.763 | 22.683 | 0.00 | 0.00 |
| ATOM | 953 | HG3  | GLN | X | 62 | 36.804 | 52.457 | 22.901 | 0.00 | 0.00 |
| ATOM | 954 | CD   | GLN | X | 62 | 36.931 | 51.670 | 20.804 | 0.00 | 0.00 |
| ATOM | 955 | OE1  | GLN | X | 62 | 37.732 | 51.278 | 20.027 | 0.00 | 0.00 |
| ATOM | 956 | NE2  | GLN | X | 62 | 35.787 | 52.144 | 20.341 | 0.00 | 0.00 |
| ATOM | 957 | HE21 | GLN | X | 62 | 35.525 | 51.954 | 19.384 | 0.00 | 0.00 |
| ATOM | 958 | HE22 | GLN | X | 62 | 35.134 | 52.624 | 20.943 | 0.00 | 0.00 |
| ATOM | 959 | C    | GLN | X | 62 | 40.728 | 49.866 | 23.029 | 0.00 | 0.00 |
| ATOM | 960 | O    | GLN | X | 62 | 41.357 | 48.865 | 22.746 | 0.00 | 0.00 |
| ATOM | 961 | N    | SER | X | 63 | 41.126 | 50.758 | 23.954 | 0.00 | 0.00 |
| ATOM | 962 | H    | SER | X | 63 | 40.584 | 51.588 | 24.143 | 0.00 | 0.00 |
| ATOM | 963 | CA   | SER | X | 63 | 42.357 | 50.676 | 24.808 | 0.00 | 0.00 |
| ATOM | 964 | HA   | SER | X | 63 | 43.022 | 49.987 | 24.287 | 0.00 | 0.00 |
| ATOM | 965 | CB   | SER | X | 63 | 43.115 | 52.018 | 24.960 | 0.00 | 0.00 |
| ATOM | 966 | HB2  | SER | X | 63 | 42.597 | 52.697 | 25.637 | 0.00 | 0.00 |
| ATOM | 967 | HB3  | SER | X | 63 | 44.112 | 51.732 | 25.294 | 0.00 | 0.00 |
| ATOM | 968 | OG   | SER | X | 63 | 43.284 | 52.781 | 23.757 | 0.00 | 0.00 |
| ATOM | 969 | HG   | SER | X | 63 | 42.504 | 53.313 | 23.584 | 0.00 | 0.00 |
| ATOM | 970 | C    | SER | X | 63 | 42.208 | 50.103 | 26.179 | 0.00 | 0.00 |
| ATOM | 971 | O    | SER | X | 63 | 41.262 | 50.407 | 26.937 | 0.00 | 0.00 |
| ATOM | 972 | N    | VAL | X | 64 | 43.098 | 49.270 | 26.630 | 0.00 | 0.00 |
| ATOM | 973 | H    | VAL | X | 64 | 43.998 | 49.378 | 26.183 | 0.00 | 0.00 |
| ATOM | 974 | CA   | VAL | X | 64 | 43.214 | 48.739 | 27.983 | 0.00 | 0.00 |
| ATOM | 975 | HA   | VAL | X | 64 | 42.251 | 48.507 | 28.437 | 0.00 | 0.00 |
| ATOM | 976 | CB   | VAL | X | 64 | 44.018 | 47.438 | 27.969 | 0.00 | 0.00 |
| ATOM | 977 | HB   | VAL | X | 64 | 45.033 | 47.684 | 27.659 | 0.00 | 0.00 |
| ATOM | 978 | CG1  | VAL | X | 64 | 44.267 | 46.917 | 29.404 | 0.00 | 0.00 |
| ATOM | 979 | HG11 | VAL | X | 64 | 44.972 | 47.587 | 29.896 | 0.00 | 0.00 |
| ATOM | 980 | HG12 | VAL | X | 64 | 43.377 | 46.739 | 30.007 | 0.00 | 0.00 |
| ATOM | 981 | HG13 | VAL | X | 64 | 44.752 | 45.941 | 29.425 | 0.00 | 0.00 |
| ATOM | 982 | CG2  | VAL | X | 64 | 43.278 | 46.301 | 27.188 | 0.00 | 0.00 |

|      |      |      |     |   |    |        |        |        |      |      |
|------|------|------|-----|---|----|--------|--------|--------|------|------|
| ATOM | 983  | HG21 | VAL | X | 64 | 42.416 | 46.024 | 27.795 | 0.00 | 0.00 |
| ATOM | 984  | HG22 | VAL | X | 64 | 43.968 | 45.458 | 27.146 | 0.00 | 0.00 |
| ATOM | 985  | HG23 | VAL | X | 64 | 43.088 | 46.570 | 26.149 | 0.00 | 0.00 |
| ATOM | 986  | C    | VAL | X | 64 | 43.910 | 49.701 | 28.854 | 0.00 | 0.00 |
| ATOM | 987  | O    | VAL | X | 64 | 44.738 | 50.453 | 28.355 | 0.00 | 0.00 |
| ATOM | 988  | N    | CYX | X | 65 | 43.487 | 49.913 | 30.120 | 0.00 | 0.00 |
| ATOM | 989  | H    | CYX | X | 65 | 42.656 | 49.425 | 30.423 | 0.00 | 0.00 |
| ATOM | 990  | CA   | CYX | X | 65 | 44.196 | 50.922 | 30.938 | 0.00 | 0.00 |
| ATOM | 991  | HA   | CYX | X | 65 | 44.235 | 51.838 | 30.349 | 0.00 | 0.00 |
| ATOM | 992  | CB   | CYX | X | 65 | 43.348 | 51.057 | 32.258 | 0.00 | 0.00 |
| ATOM | 993  | HB2  | CYX | X | 65 | 43.160 | 50.051 | 32.634 | 0.00 | 0.00 |
| ATOM | 994  | HB3  | CYX | X | 65 | 43.846 | 51.747 | 32.939 | 0.00 | 0.00 |
| ATOM | 995  | SG   | CYX | X | 65 | 41.641 | 51.766 | 32.031 | 0.00 | 0.00 |
| ATOM | 996  | C    | CYX | X | 65 | 45.594 | 50.426 | 31.331 | 0.00 | 0.00 |
| ATOM | 997  | O    | CYX | X | 65 | 45.858 | 49.262 | 31.503 | 0.00 | 0.00 |
| ATOM | 998  | N    | TYR | X | 66 | 46.480 | 51.358 | 31.304 | 0.00 | 0.00 |
| ATOM | 999  | H    | TYR | X | 66 | 46.215 | 52.329 | 31.215 | 0.00 | 0.00 |
| ATOM | 1000 | CA   | TYR | X | 66 | 47.918 | 51.192 | 31.662 | 0.00 | 0.00 |
| ATOM | 1001 | HA   | TYR | X | 66 | 48.300 | 50.620 | 30.817 | 0.00 | 0.00 |
| ATOM | 1002 | CB   | TYR | X | 66 | 48.687 | 52.552 | 31.756 | 0.00 | 0.00 |
| ATOM | 1003 | HB2  | TYR | X | 66 | 48.013 | 53.408 | 31.711 | 0.00 | 0.00 |
| ATOM | 1004 | HB3  | TYR | X | 66 | 49.296 | 52.560 | 32.660 | 0.00 | 0.00 |
| ATOM | 1005 | CG   | TYR | X | 66 | 49.515 | 52.774 | 30.504 | 0.00 | 0.00 |
| ATOM | 1006 | CD1  | TYR | X | 66 | 49.061 | 53.663 | 29.530 | 0.00 | 0.00 |
| ATOM | 1007 | HD1  | TYR | X | 66 | 48.123 | 54.186 | 29.642 | 0.00 | 0.00 |
| ATOM | 1008 | CE1  | TYR | X | 66 | 49.870 | 53.919 | 28.361 | 0.00 | 0.00 |
| ATOM | 1009 | HE1  | TYR | X | 66 | 49.630 | 54.707 | 27.663 | 0.00 | 0.00 |
| ATOM | 1010 | CZ   | TYR | X | 66 | 51.081 | 53.230 | 28.133 | 0.00 | 0.00 |
| ATOM | 1011 | OH   | TYR | X | 66 | 51.871 | 53.619 | 27.093 | 0.00 | 0.00 |
| ATOM | 1012 | HH   | TYR | X | 66 | 51.445 | 54.116 | 26.391 | 0.00 | 0.00 |
| ATOM | 1013 | CE2  | TYR | X | 66 | 51.520 | 52.303 | 29.125 | 0.00 | 0.00 |
| ATOM | 1014 | HE2  | TYR | X | 66 | 52.517 | 51.886 | 29.125 | 0.00 | 0.00 |
| ATOM | 1015 | CD2  | TYR | X | 66 | 50.737 | 52.125 | 30.275 | 0.00 | 0.00 |
| ATOM | 1016 | HD2  | TYR | X | 66 | 51.088 | 51.498 | 31.081 | 0.00 | 0.00 |
| ATOM | 1017 | C    | TYR | X | 66 | 48.147 | 50.384 | 32.901 | 0.00 | 0.00 |
| ATOM | 1018 | O    | TYR | X | 66 | 47.544 | 50.604 | 33.923 | 0.00 | 0.00 |
| ATOM | 1019 | N    | GLN | X | 67 | 49.081 | 49.462 | 32.714 | 0.00 | 0.00 |
| ATOM | 1020 | H    | GLN | X | 67 | 49.538 | 49.398 | 31.816 | 0.00 | 0.00 |
| ATOM | 1021 | CA   | GLN | X | 67 | 49.536 | 48.410 | 33.681 | 0.00 | 0.00 |
| ATOM | 1022 | HA   | GLN | X | 67 | 49.636 | 48.741 | 34.715 | 0.00 | 0.00 |
| ATOM | 1023 | CB   | GLN | X | 67 | 48.611 | 47.102 | 33.619 | 0.00 | 0.00 |
| ATOM | 1024 | HB2  | GLN | X | 67 | 49.115 | 46.324 | 34.193 | 0.00 | 0.00 |
| ATOM | 1025 | HB3  | GLN | X | 67 | 47.728 | 47.467 | 34.144 | 0.00 | 0.00 |
| ATOM | 1026 | CG   | GLN | X | 67 | 48.328 | 46.589 | 32.164 | 0.00 | 0.00 |
| ATOM | 1027 | HG2  | GLN | X | 67 | 48.065 | 47.434 | 31.527 | 0.00 | 0.00 |
| ATOM | 1028 | HG3  | GLN | X | 67 | 49.134 | 46.022 | 31.698 | 0.00 | 0.00 |
| ATOM | 1029 | CD   | GLN | X | 67 | 47.042 | 45.806 | 32.189 | 0.00 | 0.00 |
| ATOM | 1030 | OE1  | GLN | X | 67 | 47.007 | 44.605 | 32.340 | 0.00 | 0.00 |
| ATOM | 1031 | NE2  | GLN | X | 67 | 45.900 | 46.403 | 32.165 | 0.00 | 0.00 |
| ATOM | 1032 | HE21 | GLN | X | 67 | 45.112 | 45.781 | 32.057 | 0.00 | 0.00 |
| ATOM | 1033 | HE22 | GLN | X | 67 | 45.824 | 47.373 | 31.894 | 0.00 | 0.00 |
| ATOM | 1034 | C    | GLN | X | 67 | 50.919 | 47.910 | 33.146 | 0.00 | 0.00 |
| ATOM | 1035 | O    | GLN | X | 67 | 51.276 | 48.096 | 31.997 | 0.00 | 0.00 |
| ATOM | 1036 | N    | TYR | X | 68 | 51.663 | 47.244 | 33.973 | 0.00 | 0.00 |
| ATOM | 1037 | H    | TYR | X | 68 | 51.354 | 47.074 | 34.920 | 0.00 | 0.00 |
| ATOM | 1038 | CA   | TYR | X | 68 | 52.795 | 46.490 | 33.502 | 0.00 | 0.00 |
| ATOM | 1039 | HA   | TYR | X | 68 | 53.350 | 47.170 | 32.856 | 0.00 | 0.00 |
| ATOM | 1040 | CB   | TYR | X | 68 | 53.761 | 46.130 | 34.663 | 0.00 | 0.00 |
| ATOM | 1041 | HB2  | TYR | X | 68 | 53.841 | 46.991 | 35.326 | 0.00 | 0.00 |
| ATOM | 1042 | HB3  | TYR | X | 68 | 53.340 | 45.310 | 35.246 | 0.00 | 0.00 |
| ATOM | 1043 | CG   | TYR | X | 68 | 55.204 | 45.777 | 34.111 | 0.00 | 0.00 |
| ATOM | 1044 | CD1  | TYR | X | 68 | 56.181 | 46.837 | 33.952 | 0.00 | 0.00 |
| ATOM | 1045 | HD1  | TYR | X | 68 | 55.998 | 47.889 | 34.112 | 0.00 | 0.00 |
| ATOM | 1046 | CE1  | TYR | X | 68 | 57.469 | 46.446 | 33.666 | 0.00 | 0.00 |
| ATOM | 1047 | HE1  | TYR | X | 68 | 58.206 | 47.202 | 33.441 | 0.00 | 0.00 |
| ATOM | 1048 | CZ   | TYR | X | 68 | 57.847 | 45.071 | 33.580 | 0.00 | 0.00 |
| ATOM | 1049 | OH   | TYR | X | 68 | 59.155 | 44.812 | 33.250 | 0.00 | 0.00 |

|      |      |      |     |   |    |        |        |        |      |      |
|------|------|------|-----|---|----|--------|--------|--------|------|------|
| ATOM | 1050 | HH   | TYR | X | 68 | 59.760 | 45.517 | 33.006 | 0.00 | 0.00 |
| ATOM | 1051 | CE2  | TYR | X | 68 | 56.923 | 44.061 | 33.752 | 0.00 | 0.00 |
| ATOM | 1052 | HE2  | TYR | X | 68 | 57.352 | 43.073 | 33.671 | 0.00 | 0.00 |
| ATOM | 1053 | CD2  | TYR | X | 68 | 55.615 | 44.402 | 34.202 | 0.00 | 0.00 |
| ATOM | 1054 | HD2  | TYR | X | 68 | 54.972 | 43.628 | 34.595 | 0.00 | 0.00 |
| ATOM | 1055 | C    | TYR | X | 68 | 52.342 | 45.295 | 32.635 | 0.00 | 0.00 |
| ATOM | 1056 | O    | TYR | X | 68 | 51.198 | 44.881 | 32.785 | 0.00 | 0.00 |
| ATOM | 1057 | N    | VAL | X | 69 | 53.237 | 44.725 | 31.830 | 0.00 | 0.00 |
| ATOM | 1058 | H    | VAL | X | 69 | 54.158 | 45.115 | 31.687 | 0.00 | 0.00 |
| ATOM | 1059 | CA   | VAL | X | 69 | 52.918 | 43.493 | 31.067 | 0.00 | 0.00 |
| ATOM | 1060 | HA   | VAL | X | 69 | 52.044 | 42.977 | 31.465 | 0.00 | 0.00 |
| ATOM | 1061 | CB   | VAL | X | 69 | 52.685 | 43.910 | 29.568 | 0.00 | 0.00 |
| ATOM | 1062 | HB   | VAL | X | 69 | 53.582 | 44.331 | 29.113 | 0.00 | 0.00 |
| ATOM | 1063 | CG1  | VAL | X | 69 | 52.453 | 42.675 | 28.713 | 0.00 | 0.00 |
| ATOM | 1064 | HG11 | VAL | X | 69 | 52.048 | 42.965 | 27.743 | 0.00 | 0.00 |
| ATOM | 1065 | HG12 | VAL | X | 69 | 53.232 | 41.915 | 28.771 | 0.00 | 0.00 |
| ATOM | 1066 | HG13 | VAL | X | 69 | 51.547 | 42.258 | 29.153 | 0.00 | 0.00 |
| ATOM | 1067 | CG2  | VAL | X | 69 | 51.448 | 44.829 | 29.457 | 0.00 | 0.00 |
| ATOM | 1068 | HG21 | VAL | X | 69 | 51.477 | 45.664 | 30.157 | 0.00 | 0.00 |
| ATOM | 1069 | HG22 | VAL | X | 69 | 50.494 | 44.372 | 29.717 | 0.00 | 0.00 |
| ATOM | 1070 | HG23 | VAL | X | 69 | 51.529 | 45.304 | 28.479 | 0.00 | 0.00 |
| ATOM | 1071 | C    | VAL | X | 69 | 54.132 | 42.603 | 31.140 | 0.00 | 0.00 |
| ATOM | 1072 | O    | VAL | X | 69 | 55.248 | 43.168 | 31.230 | 0.00 | 0.00 |
| ATOM | 1073 | N    | ASP | X | 70 | 53.893 | 41.366 | 31.208 | 0.00 | 0.00 |
| ATOM | 1074 | H    | ASP | X | 70 | 52.973 | 41.066 | 30.919 | 0.00 | 0.00 |
| ATOM | 1075 | CA   | ASP | X | 70 | 54.764 | 40.318 | 31.688 | 0.00 | 0.00 |
| ATOM | 1076 | HA   | ASP | X | 70 | 54.906 | 40.490 | 32.755 | 0.00 | 0.00 |
| ATOM | 1077 | CB   | ASP | X | 70 | 54.168 | 38.955 | 31.615 | 0.00 | 0.00 |
| ATOM | 1078 | HB2  | ASP | X | 70 | 53.125 | 38.992 | 31.930 | 0.00 | 0.00 |
| ATOM | 1079 | HB3  | ASP | X | 70 | 54.305 | 38.729 | 30.557 | 0.00 | 0.00 |
| ATOM | 1080 | CG   | ASP | X | 70 | 54.787 | 37.912 | 32.486 | 0.00 | 0.00 |
| ATOM | 1081 | OD1  | ASP | X | 70 | 55.510 | 37.077 | 31.944 | 0.00 | 0.00 |
| ATOM | 1082 | OD2  | ASP | X | 70 | 54.629 | 37.962 | 33.717 | 0.00 | 0.00 |
| ATOM | 1083 | C    | ASP | X | 70 | 56.166 | 40.263 | 31.018 | 0.00 | 0.00 |
| ATOM | 1084 | O    | ASP | X | 70 | 56.235 | 40.453 | 29.800 | 0.00 | 0.00 |
| ATOM | 1085 | N    | THR | X | 71 | 57.211 | 40.028 | 31.779 | 0.00 | 0.00 |
| ATOM | 1086 | H    | THR | X | 71 | 57.125 | 40.001 | 32.785 | 0.00 | 0.00 |
| ATOM | 1087 | CA   | THR | X | 71 | 58.603 | 39.814 | 31.186 | 0.00 | 0.00 |
| ATOM | 1088 | HA   | THR | X | 71 | 58.520 | 39.816 | 30.100 | 0.00 | 0.00 |
| ATOM | 1089 | CB   | THR | X | 71 | 59.540 | 40.971 | 31.599 | 0.00 | 0.00 |
| ATOM | 1090 | HB   | THR | X | 71 | 60.560 | 40.748 | 31.287 | 0.00 | 0.00 |
| ATOM | 1091 | CG2  | THR | X | 71 | 59.100 | 42.249 | 30.866 | 0.00 | 0.00 |
| ATOM | 1092 | HG21 | THR | X | 71 | 59.781 | 43.079 | 31.055 | 0.00 | 0.00 |
| ATOM | 1093 | HG22 | THR | X | 71 | 58.101 | 42.516 | 31.212 | 0.00 | 0.00 |
| ATOM | 1094 | HG23 | THR | X | 71 | 59.016 | 42.034 | 29.801 | 0.00 | 0.00 |
| ATOM | 1095 | OG1  | THR | X | 71 | 59.506 | 41.212 | 32.985 | 0.00 | 0.00 |
| ATOM | 1096 | HG1  | THR | X | 71 | 60.320 | 41.669 | 33.207 | 0.00 | 0.00 |
| ATOM | 1097 | C    | THR | X | 71 | 59.131 | 38.405 | 31.624 | 0.00 | 0.00 |
| ATOM | 1098 | O    | THR | X | 71 | 60.176 | 37.990 | 31.148 | 0.00 | 0.00 |
| ATOM | 1099 | N    | LEU | X | 72 | 58.449 | 37.600 | 32.546 | 0.00 | 0.00 |
| ATOM | 1100 | H    | LEU | X | 72 | 57.468 | 37.787 | 32.698 | 0.00 | 0.00 |
| ATOM | 1101 | CA   | LEU | X | 72 | 59.061 | 36.441 | 33.095 | 0.00 | 0.00 |
| ATOM | 1102 | HA   | LEU | X | 72 | 60.134 | 36.628 | 33.120 | 0.00 | 0.00 |
| ATOM | 1103 | CB   | LEU | X | 72 | 58.381 | 36.201 | 34.457 | 0.00 | 0.00 |
| ATOM | 1104 | HB2  | LEU | X | 72 | 58.436 | 37.115 | 35.049 | 0.00 | 0.00 |
| ATOM | 1105 | HB3  | LEU | X | 72 | 57.333 | 35.907 | 34.414 | 0.00 | 0.00 |
| ATOM | 1106 | CG   | LEU | X | 72 | 59.019 | 35.057 | 35.216 | 0.00 | 0.00 |
| ATOM | 1107 | HG   | LEU | X | 72 | 58.996 | 34.237 | 34.498 | 0.00 | 0.00 |
| ATOM | 1108 | CD1  | LEU | X | 72 | 60.514 | 35.192 | 35.474 | 0.00 | 0.00 |
| ATOM | 1109 | HD11 | LEU | X | 72 | 60.735 | 35.945 | 36.230 | 0.00 | 0.00 |
| ATOM | 1110 | HD12 | LEU | X | 72 | 60.997 | 35.437 | 34.528 | 0.00 | 0.00 |
| ATOM | 1111 | HD13 | LEU | X | 72 | 60.897 | 34.237 | 35.831 | 0.00 | 0.00 |
| ATOM | 1112 | CD2  | LEU | X | 72 | 58.263 | 34.594 | 36.509 | 0.00 | 0.00 |
| ATOM | 1113 | HD21 | LEU | X | 72 | 58.291 | 35.465 | 37.164 | 0.00 | 0.00 |
| ATOM | 1114 | HD22 | LEU | X | 72 | 57.258 | 34.295 | 36.213 | 0.00 | 0.00 |
| ATOM | 1115 | HD23 | LEU | X | 72 | 58.830 | 33.771 | 36.944 | 0.00 | 0.00 |
| ATOM | 1116 | C    | LEU | X | 72 | 58.882 | 35.283 | 32.085 | 0.00 | 0.00 |

|      |      |     |     |   |    |        |        |        |      |      |
|------|------|-----|-----|---|----|--------|--------|--------|------|------|
| ATOM | 1117 | O   | LEU | X | 72 | 59.916 | 34.678 | 31.717 | 0.00 | 0.00 |
| ATOM | 1118 | N   | TYR | X | 73 | 57.653 | 35.052 | 31.587 | 0.00 | 0.00 |
| ATOM | 1119 | H   | TYR | X | 73 | 56.933 | 35.734 | 31.778 | 0.00 | 0.00 |
| ATOM | 1120 | CA  | TYR | X | 73 | 57.282 | 34.038 | 30.580 | 0.00 | 0.00 |
| ATOM | 1121 | HA  | TYR | X | 73 | 58.122 | 33.536 | 30.099 | 0.00 | 0.00 |
| ATOM | 1122 | CB  | TYR | X | 73 | 56.683 | 32.892 | 31.441 | 0.00 | 0.00 |
| ATOM | 1123 | HB2 | TYR | X | 73 | 55.751 | 33.276 | 31.855 | 0.00 | 0.00 |
| ATOM | 1124 | HB3 | TYR | X | 73 | 56.501 | 31.969 | 30.890 | 0.00 | 0.00 |
| ATOM | 1125 | CG  | TYR | X | 73 | 57.445 | 32.320 | 32.662 | 0.00 | 0.00 |
| ATOM | 1126 | CD1 | TYR | X | 73 | 58.744 | 31.843 | 32.534 | 0.00 | 0.00 |
| ATOM | 1127 | HD1 | TYR | X | 73 | 59.344 | 31.980 | 31.647 | 0.00 | 0.00 |
| ATOM | 1128 | CE1 | TYR | X | 73 | 59.356 | 31.458 | 33.757 | 0.00 | 0.00 |
| ATOM | 1129 | HE1 | TYR | X | 73 | 60.371 | 31.091 | 33.743 | 0.00 | 0.00 |
| ATOM | 1130 | CZ  | TYR | X | 73 | 58.606 | 31.275 | 34.994 | 0.00 | 0.00 |
| ATOM | 1131 | OH  | TYR | X | 73 | 59.236 | 30.838 | 36.172 | 0.00 | 0.00 |
| ATOM | 1132 | HH  | TYR | X | 73 | 58.736 | 31.050 | 36.964 | 0.00 | 0.00 |
| ATOM | 1133 | CE2 | TYR | X | 73 | 57.245 | 31.685 | 35.001 | 0.00 | 0.00 |
| ATOM | 1134 | HE2 | TYR | X | 73 | 56.613 | 31.585 | 35.871 | 0.00 | 0.00 |
| ATOM | 1135 | CD2 | TYR | X | 73 | 56.674 | 32.170 | 33.791 | 0.00 | 0.00 |
| ATOM | 1136 | HD2 | TYR | X | 73 | 55.640 | 32.481 | 33.783 | 0.00 | 0.00 |
| ATOM | 1137 | C   | TYR | X | 73 | 56.267 | 34.477 | 29.535 | 0.00 | 0.00 |
| ATOM | 1138 | O   | TYR | X | 73 | 55.380 | 33.703 | 29.160 | 0.00 | 0.00 |
| ATOM | 1139 | N   | PRO | X | 74 | 56.432 | 35.607 | 28.879 | 0.00 | 0.00 |
| ATOM | 1140 | CD  | PRO | X | 74 | 57.325 | 36.798 | 29.213 | 0.00 | 0.00 |
| ATOM | 1141 | HD2 | PRO | X | 74 | 58.358 | 36.457 | 29.284 | 0.00 | 0.00 |
| ATOM | 1142 | HD3 | PRO | X | 74 | 57.076 | 37.253 | 30.171 | 0.00 | 0.00 |
| ATOM | 1143 | CG  | PRO | X | 74 | 57.179 | 37.838 | 28.105 | 0.00 | 0.00 |
| ATOM | 1144 | HG2 | PRO | X | 74 | 57.939 | 37.615 | 27.357 | 0.00 | 0.00 |
| ATOM | 1145 | HB3 | PRO | X | 74 | 57.261 | 38.886 | 28.393 | 0.00 | 0.00 |
| ATOM | 1146 | CB  | PRO | X | 74 | 55.884 | 37.481 | 27.390 | 0.00 | 0.00 |
| ATOM | 1147 | HB2 | PRO | X | 74 | 55.877 | 37.545 | 26.302 | 0.00 | 0.00 |
| ATOM | 1148 | HB3 | PRO | X | 74 | 55.123 | 38.161 | 27.772 | 0.00 | 0.00 |
| ATOM | 1149 | CA  | PRO | X | 74 | 55.577 | 35.968 | 27.730 | 0.00 | 0.00 |
| ATOM | 1150 | HA  | PRO | X | 74 | 54.532 | 35.790 | 27.985 | 0.00 | 0.00 |
| ATOM | 1151 | C   | PRO | X | 74 | 55.787 | 35.029 | 26.508 | 0.00 | 0.00 |
| ATOM | 1152 | O   | PRO | X | 74 | 56.962 | 34.784 | 26.120 | 0.00 | 0.00 |
| ATOM | 1153 | N   | GLY | X | 75 | 54.702 | 34.767 | 25.781 | 0.00 | 0.00 |
| ATOM | 1154 | H   | GLY | X | 75 | 53.837 | 35.202 | 26.069 | 0.00 | 0.00 |
| ATOM | 1155 | CA  | GLY | X | 75 | 54.789 | 33.812 | 24.718 | 0.00 | 0.00 |
| ATOM | 1156 | HA2 | GLY | X | 75 | 54.148 | 34.215 | 23.933 | 0.00 | 0.00 |
| ATOM | 1157 | HA3 | GLY | X | 75 | 55.782 | 33.887 | 24.275 | 0.00 | 0.00 |
| ATOM | 1158 | C   | GLY | X | 75 | 54.428 | 32.399 | 25.086 | 0.00 | 0.00 |
| ATOM | 1159 | O   | GLY | X | 75 | 54.273 | 31.539 | 24.197 | 0.00 | 0.00 |
| ATOM | 1160 | N   | PHE | X | 76 | 54.282 | 32.050 | 26.327 | 0.00 | 0.00 |
| ATOM | 1161 | H   | PHE | X | 76 | 54.400 | 32.810 | 26.982 | 0.00 | 0.00 |
| ATOM | 1162 | CA  | PHE | X | 76 | 53.715 | 30.795 | 26.846 | 0.00 | 0.00 |
| ATOM | 1163 | HA  | PHE | X | 76 | 53.980 | 29.991 | 26.159 | 0.00 | 0.00 |
| ATOM | 1164 | CB  | PHE | X | 76 | 54.323 | 30.447 | 28.205 | 0.00 | 0.00 |
| ATOM | 1165 | HB2 | PHE | X | 76 | 55.403 | 30.596 | 28.239 | 0.00 | 0.00 |
| ATOM | 1166 | HB3 | PHE | X | 76 | 53.783 | 31.042 | 28.941 | 0.00 | 0.00 |
| ATOM | 1167 | CG  | PHE | X | 76 | 54.192 | 28.992 | 28.532 | 0.00 | 0.00 |
| ATOM | 1168 | CD1 | PHE | X | 76 | 55.027 | 27.988 | 27.928 | 0.00 | 0.00 |
| ATOM | 1169 | HD1 | PHE | X | 76 | 55.710 | 28.164 | 27.110 | 0.00 | 0.00 |
| ATOM | 1170 | CE1 | PHE | X | 76 | 54.823 | 26.626 | 28.242 | 0.00 | 0.00 |
| ATOM | 1171 | HE1 | PHE | X | 76 | 55.412 | 25.814 | 27.843 | 0.00 | 0.00 |
| ATOM | 1172 | CZ  | PHE | X | 76 | 53.878 | 26.251 | 29.236 | 0.00 | 0.00 |
| ATOM | 1173 | HZ  | PHE | X | 76 | 53.800 | 25.199 | 29.469 | 0.00 | 0.00 |
| ATOM | 1174 | CE2 | PHE | X | 76 | 53.137 | 27.245 | 29.899 | 0.00 | 0.00 |
| ATOM | 1175 | HE2 | PHE | X | 76 | 52.480 | 27.040 | 30.731 | 0.00 | 0.00 |
| ATOM | 1176 | CD2 | PHE | X | 76 | 53.279 | 28.598 | 29.562 | 0.00 | 0.00 |
| ATOM | 1177 | HD2 | PHE | X | 76 | 52.754 | 29.281 | 30.213 | 0.00 | 0.00 |
| ATOM | 1178 | C   | PHE | X | 76 | 52.168 | 30.907 | 26.989 | 0.00 | 0.00 |
| ATOM | 1179 | O   | PHE | X | 76 | 51.768 | 31.972 | 27.546 | 0.00 | 0.00 |
| ATOM | 1180 | N   | GLU | X | 77 | 51.345 | 29.971 | 26.579 | 0.00 | 0.00 |
| ATOM | 1181 | H   | GLU | X | 77 | 51.684 | 29.047 | 26.355 | 0.00 | 0.00 |
| ATOM | 1182 | CA  | GLU | X | 77 | 49.912 | 30.073 | 26.569 | 0.00 | 0.00 |
| ATOM | 1183 | HA  | GLU | X | 77 | 49.572 | 30.748 | 25.784 | 0.00 | 0.00 |



|      |      |      |     |   |    |        |        |        |      |      |
|------|------|------|-----|---|----|--------|--------|--------|------|------|
| ATOM | 1184 | CB   | GLU | X | 77 | 49.370 | 28.683 | 26.243 | 0.00 | 0.00 |
| ATOM | 1185 | HB2  | GLU | X | 77 | 49.895 | 28.230 | 25.402 | 0.00 | 0.00 |
| ATOM | 1186 | HB3  | GLU | X | 77 | 49.706 | 28.041 | 27.058 | 0.00 | 0.00 |
| ATOM | 1187 | CG   | GLU | X | 77 | 47.889 | 28.598 | 26.045 | 0.00 | 0.00 |
| ATOM | 1188 | HG2  | GLU | X | 77 | 47.348 | 28.942 | 26.927 | 0.00 | 0.00 |
| ATOM | 1189 | HG3  | GLU | X | 77 | 47.614 | 29.316 | 25.273 | 0.00 | 0.00 |
| ATOM | 1190 | CD   | GLU | X | 77 | 47.420 | 27.236 | 25.703 | 0.00 | 0.00 |
| ATOM | 1191 | OE1  | GLU | X | 77 | 47.738 | 26.795 | 24.582 | 0.00 | 0.00 |
| ATOM | 1192 | OE2  | GLU | X | 77 | 46.816 | 26.638 | 26.605 | 0.00 | 0.00 |
| ATOM | 1193 | C    | GLU | X | 77 | 49.312 | 30.508 | 27.927 | 0.00 | 0.00 |
| ATOM | 1194 | O    | GLU | X | 77 | 48.495 | 31.416 | 27.868 | 0.00 | 0.00 |
| ATOM | 1195 | N    | GLY | X | 78 | 49.674 | 29.902 | 29.043 | 0.00 | 0.00 |
| ATOM | 1196 | H    | GLY | X | 78 | 50.474 | 29.288 | 28.990 | 0.00 | 0.00 |
| ATOM | 1197 | CA   | GLY | X | 78 | 49.033 | 30.210 | 30.315 | 0.00 | 0.00 |
| ATOM | 1198 | HA2  | GLY | X | 78 | 47.964 | 30.284 | 30.120 | 0.00 | 0.00 |
| ATOM | 1199 | HA3  | GLY | X | 78 | 49.292 | 29.416 | 31.016 | 0.00 | 0.00 |
| ATOM | 1200 | C    | GLY | X | 78 | 49.429 | 31.579 | 30.877 | 0.00 | 0.00 |
| ATOM | 1201 | O    | GLY | X | 78 | 49.102 | 31.894 | 32.005 | 0.00 | 0.00 |
| ATOM | 1202 | N    | THR | X | 79 | 50.173 | 32.396 | 30.070 | 0.00 | 0.00 |
| ATOM | 1203 | H    | THR | X | 79 | 50.436 | 31.920 | 29.220 | 0.00 | 0.00 |
| ATOM | 1204 | CA   | THR | X | 79 | 50.586 | 33.810 | 30.240 | 0.00 | 0.00 |
| ATOM | 1205 | HA   | THR | X | 79 | 50.180 | 34.092 | 31.211 | 0.00 | 0.00 |
| ATOM | 1206 | CB   | THR | X | 79 | 52.150 | 33.946 | 30.289 | 0.00 | 0.00 |
| ATOM | 1207 | HB   | THR | X | 79 | 52.554 | 33.600 | 29.338 | 0.00 | 0.00 |
| ATOM | 1208 | CG2  | THR | X | 79 | 52.659 | 35.393 | 30.533 | 0.00 | 0.00 |
| ATOM | 1209 | HG21 | THR | X | 79 | 52.525 | 36.072 | 29.691 | 0.00 | 0.00 |
| ATOM | 1210 | HG22 | THR | X | 79 | 53.700 | 35.447 | 30.850 | 0.00 | 0.00 |
| ATOM | 1211 | HG23 | THR | X | 79 | 52.050 | 35.795 | 31.343 | 0.00 | 0.00 |
| ATOM | 1212 | OG1  | THR | X | 79 | 52.827 | 33.264 | 31.318 | 0.00 | 0.00 |
| ATOM | 1213 | HG1  | THR | X | 79 | 53.352 | 33.957 | 31.726 | 0.00 | 0.00 |
| ATOM | 1214 | C    | THR | X | 79 | 49.971 | 34.714 | 29.191 | 0.00 | 0.00 |
| ATOM | 1215 | O    | THR | X | 79 | 49.529 | 35.787 | 29.543 | 0.00 | 0.00 |
| ATOM | 1216 | N    | GLU | X | 80 | 49.904 | 34.158 | 27.936 | 0.00 | 0.00 |
| ATOM | 1217 | H    | GLU | X | 80 | 50.316 | 33.243 | 27.825 | 0.00 | 0.00 |
| ATOM | 1218 | CA   | GLU | X | 80 | 49.427 | 34.877 | 26.772 | 0.00 | 0.00 |
| ATOM | 1219 | HA   | GLU | X | 80 | 49.964 | 35.825 | 26.739 | 0.00 | 0.00 |
| ATOM | 1220 | CB   | GLU | X | 80 | 49.999 | 34.104 | 25.541 | 0.00 | 0.00 |
| ATOM | 1221 | HB2  | GLU | X | 80 | 51.082 | 34.051 | 25.650 | 0.00 | 0.00 |
| ATOM | 1222 | HB3  | GLU | X | 80 | 49.630 | 33.087 | 25.407 | 0.00 | 0.00 |
| ATOM | 1223 | CG   | GLU | X | 80 | 49.625 | 34.810 | 24.254 | 0.00 | 0.00 |
| ATOM | 1224 | HG2  | GLU | X | 80 | 48.550 | 34.829 | 24.075 | 0.00 | 0.00 |
| ATOM | 1225 | HG3  | GLU | X | 80 | 49.980 | 35.840 | 24.297 | 0.00 | 0.00 |
| ATOM | 1226 | CD   | GLU | X | 80 | 50.407 | 34.192 | 23.123 | 0.00 | 0.00 |
| ATOM | 1227 | OE1  | GLU | X | 80 | 49.974 | 33.095 | 22.709 | 0.00 | 0.00 |
| ATOM | 1228 | OE2  | GLU | X | 80 | 51.309 | 34.829 | 22.523 | 0.00 | 0.00 |
| ATOM | 1229 | C    | GLU | X | 80 | 47.920 | 35.058 | 26.733 | 0.00 | 0.00 |
| ATOM | 1230 | O    | GLU | X | 80 | 47.521 | 36.029 | 26.085 | 0.00 | 0.00 |
| ATOM | 1231 | N    | MET | X | 81 | 47.197 | 34.153 | 27.414 | 0.00 | 0.00 |
| ATOM | 1232 | H    | MET | X | 81 | 47.696 | 33.353 | 27.775 | 0.00 | 0.00 |
| ATOM | 1233 | CA   | MET | X | 81 | 45.754 | 34.267 | 27.533 | 0.00 | 0.00 |
| ATOM | 1234 | HA   | MET | X | 81 | 45.429 | 34.518 | 26.523 | 0.00 | 0.00 |
| ATOM | 1235 | CB   | MET | X | 81 | 45.239 | 32.913 | 27.960 | 0.00 | 0.00 |
| ATOM | 1236 | HB2  | MET | X | 81 | 44.184 | 32.761 | 27.731 | 0.00 | 0.00 |
| ATOM | 1237 | HB3  | MET | X | 81 | 45.624 | 32.103 | 27.340 | 0.00 | 0.00 |
| ATOM | 1238 | CG   | MET | X | 81 | 45.428 | 32.503 | 29.426 | 0.00 | 0.00 |
| ATOM | 1239 | HG2  | MET | X | 81 | 46.417 | 32.784 | 29.788 | 0.00 | 0.00 |
| ATOM | 1240 | HG3  | MET | X | 81 | 44.691 | 33.052 | 30.012 | 0.00 | 0.00 |
| ATOM | 1241 | SD   | MET | X | 81 | 45.357 | 30.634 | 29.627 | 0.00 | 0.00 |
| ATOM | 1242 | CE   | MET | X | 81 | 43.611 | 30.551 | 29.746 | 0.00 | 0.00 |
| ATOM | 1243 | HE1  | MET | X | 81 | 43.222 | 29.813 | 29.044 | 0.00 | 0.00 |
| ATOM | 1244 | HE2  | MET | X | 81 | 43.235 | 30.123 | 30.675 | 0.00 | 0.00 |
| ATOM | 1245 | HE3  | MET | X | 81 | 43.091 | 31.501 | 29.626 | 0.00 | 0.00 |
| ATOM | 1246 | C    | MET | X | 81 | 45.492 | 35.464 | 28.501 | 0.00 | 0.00 |
| ATOM | 1247 | O    | MET | X | 81 | 44.431 | 36.126 | 28.347 | 0.00 | 0.00 |
| ATOM | 1248 | N    | TRP | X | 82 | 46.361 | 35.768 | 29.461 | 0.00 | 0.00 |
| ATOM | 1249 | H    | TRP | X | 82 | 47.119 | 35.155 | 29.728 | 0.00 | 0.00 |
| ATOM | 1250 | CA   | TRP | X | 82 | 46.221 | 36.864 | 30.399 | 0.00 | 0.00 |

|      |      |      |     |   |    |        |        |        |      |      |
|------|------|------|-----|---|----|--------|--------|--------|------|------|
| ATOM | 1251 | HA   | TRP | X | 82 | 45.153 | 36.995 | 30.577 | 0.00 | 0.00 |
| ATOM | 1252 | CB   | TRP | X | 82 | 46.692 | 36.487 | 31.812 | 0.00 | 0.00 |
| ATOM | 1253 | HB2  | TRP | X | 82 | 47.781 | 36.468 | 31.812 | 0.00 | 0.00 |
| ATOM | 1254 | HB3  | TRP | X | 82 | 46.395 | 37.214 | 32.568 | 0.00 | 0.00 |
| ATOM | 1255 | CG   | TRP | X | 82 | 46.179 | 35.127 | 32.239 | 0.00 | 0.00 |
| ATOM | 1256 | CD1  | TRP | X | 82 | 46.960 | 34.031 | 32.407 | 0.00 | 0.00 |
| ATOM | 1257 | HD1  | TRP | X | 82 | 48.033 | 34.151 | 32.440 | 0.00 | 0.00 |
| ATOM | 1258 | NE1  | TRP | X | 82 | 46.204 | 32.974 | 32.900 | 0.00 | 0.00 |
| ATOM | 1259 | HE1  | TRP | X | 82 | 46.621 | 32.057 | 32.968 | 0.00 | 0.00 |
| ATOM | 1260 | CE2  | TRP | X | 82 | 44.856 | 33.321 | 32.806 | 0.00 | 0.00 |
| ATOM | 1261 | CZ2  | TRP | X | 82 | 43.676 | 32.504 | 32.853 | 0.00 | 0.00 |
| ATOM | 1262 | HZ2  | TRP | X | 82 | 43.724 | 31.459 | 33.124 | 0.00 | 0.00 |
| ATOM | 1263 | CH2  | TRP | X | 82 | 42.437 | 33.111 | 32.817 | 0.00 | 0.00 |
| ATOM | 1264 | HH2  | TRP | X | 82 | 41.490 | 32.606 | 32.941 | 0.00 | 0.00 |
| ATOM | 1265 | CZ3  | TRP | X | 82 | 42.396 | 34.516 | 32.443 | 0.00 | 0.00 |
| ATOM | 1266 | HZ3  | TRP | X | 82 | 41.415 | 34.876 | 32.169 | 0.00 | 0.00 |
| ATOM | 1267 | CE3  | TRP | X | 82 | 43.508 | 35.299 | 32.239 | 0.00 | 0.00 |
| ATOM | 1268 | HE3  | TRP | X | 82 | 43.417 | 36.271 | 31.777 | 0.00 | 0.00 |
| ATOM | 1269 | CD2  | TRP | X | 82 | 44.807 | 34.764 | 32.440 | 0.00 | 0.00 |
| ATOM | 1270 | C    | TRP | X | 82 | 46.756 | 38.199 | 29.911 | 0.00 | 0.00 |
| ATOM | 1271 | O    | TRP | X | 82 | 46.068 | 39.214 | 30.014 | 0.00 | 0.00 |
| ATOM | 1272 | N    | ASN | X | 83 | 47.997 | 38.360 | 29.390 | 0.00 | 0.00 |
| ATOM | 1273 | H    | ASN | X | 83 | 48.674 | 37.610 | 29.396 | 0.00 | 0.00 |
| ATOM | 1274 | CA   | ASN | X | 83 | 48.525 | 39.655 | 29.003 | 0.00 | 0.00 |
| ATOM | 1275 | HA   | ASN | X | 83 | 48.432 | 40.178 | 29.955 | 0.00 | 0.00 |
| ATOM | 1276 | CB   | ASN | X | 83 | 50.030 | 39.497 | 28.832 | 0.00 | 0.00 |
| ATOM | 1277 | HB2  | ASN | X | 83 | 50.319 | 38.786 | 28.057 | 0.00 | 0.00 |
| ATOM | 1278 | HB3  | ASN | X | 83 | 50.321 | 40.493 | 28.497 | 0.00 | 0.00 |
| ATOM | 1279 | CG   | ASN | X | 83 | 50.695 | 39.291 | 30.213 | 0.00 | 0.00 |
| ATOM | 1280 | OD1  | ASN | X | 83 | 51.257 | 40.238 | 30.877 | 0.00 | 0.00 |
| ATOM | 1281 | ND2  | ASN | X | 83 | 50.560 | 38.179 | 30.820 | 0.00 | 0.00 |
| ATOM | 1282 | HD21 | ASN | X | 83 | 50.974 | 38.179 | 31.741 | 0.00 | 0.00 |
| ATOM | 1283 | HD22 | ASN | X | 83 | 50.135 | 37.382 | 30.367 | 0.00 | 0.00 |
| ATOM | 1284 | C    | ASN | X | 83 | 47.625 | 40.426 | 28.005 | 0.00 | 0.00 |
| ATOM | 1285 | O    | ASN | X | 83 | 47.050 | 39.801 | 27.083 | 0.00 | 0.00 |
| ATOM | 1286 | N    | PRO | X | 84 | 47.472 | 41.767 | 28.160 | 0.00 | 0.00 |
| ATOM | 1287 | CD   | PRO | X | 84 | 48.224 | 42.696 | 29.038 | 0.00 | 0.00 |
| ATOM | 1288 | HD2  | PRO | X | 84 | 49.275 | 42.810 | 28.773 | 0.00 | 0.00 |
| ATOM | 1289 | HD3  | PRO | X | 84 | 48.003 | 42.372 | 30.055 | 0.00 | 0.00 |
| ATOM | 1290 | CG   | PRO | X | 84 | 47.511 | 44.090 | 28.821 | 0.00 | 0.00 |
| ATOM | 1291 | HG2  | PRO | X | 84 | 48.260 | 44.868 | 28.965 | 0.00 | 0.00 |
| ATOM | 1292 | HG3  | PRO | X | 84 | 46.686 | 44.197 | 29.526 | 0.00 | 0.00 |
| ATOM | 1293 | CB   | PRO | X | 84 | 47.046 | 44.129 | 27.424 | 0.00 | 0.00 |
| ATOM | 1294 | HB2  | PRO | X | 84 | 47.880 | 44.436 | 26.793 | 0.00 | 0.00 |
| ATOM | 1295 | HB3  | PRO | X | 84 | 46.123 | 44.682 | 27.251 | 0.00 | 0.00 |
| ATOM | 1296 | CA   | PRO | X | 84 | 46.692 | 42.603 | 27.204 | 0.00 | 0.00 |
| ATOM | 1297 | HA   | PRO | X | 84 | 45.644 | 42.470 | 27.471 | 0.00 | 0.00 |
| ATOM | 1298 | C    | PRO | X | 84 | 46.942 | 42.295 | 25.750 | 0.00 | 0.00 |
| ATOM | 1299 | O    | PRO | X | 84 | 48.053 | 42.173 | 25.277 | 0.00 | 0.00 |
| ATOM | 1300 | N    | ASN | X | 85 | 45.827 | 42.291 | 24.987 | 0.00 | 0.00 |
| ATOM | 1301 | H    | ASN | X | 85 | 44.941 | 42.212 | 25.466 | 0.00 | 0.00 |
| ATOM | 1302 | CA   | ASN | X | 85 | 45.734 | 41.986 | 23.547 | 0.00 | 0.00 |
| ATOM | 1303 | HA   | ASN | X | 85 | 46.677 | 41.590 | 23.170 | 0.00 | 0.00 |
| ATOM | 1304 | CB   | ASN | X | 85 | 44.710 | 40.860 | 23.368 | 0.00 | 0.00 |
| ATOM | 1305 | HB2  | ASN | X | 85 | 44.785 | 40.401 | 22.383 | 0.00 | 0.00 |
| ATOM | 1306 | HB3  | ASN | X | 85 | 44.976 | 40.099 | 24.102 | 0.00 | 0.00 |
| ATOM | 1307 | CG   | ASN | X | 85 | 43.292 | 41.173 | 23.733 | 0.00 | 0.00 |
| ATOM | 1308 | OD1  | ASN | X | 85 | 42.967 | 42.181 | 24.406 | 0.00 | 0.00 |
| ATOM | 1309 | ND2  | ASN | X | 85 | 42.384 | 40.261 | 23.513 | 0.00 | 0.00 |
| ATOM | 1310 | HD21 | ASN | X | 85 | 41.402 | 40.470 | 23.627 | 0.00 | 0.00 |
| ATOM | 1311 | HD22 | ASN | X | 85 | 42.658 | 39.327 | 23.242 | 0.00 | 0.00 |
| ATOM | 1312 | C    | ASN | X | 85 | 45.231 | 43.153 | 22.763 | 0.00 | 0.00 |
| ATOM | 1313 | O    | ASN | X | 85 | 44.827 | 43.075 | 21.600 | 0.00 | 0.00 |
| ATOM | 1314 | N    | ARG | X | 86 | 45.126 | 44.355 | 23.304 | 0.00 | 0.00 |
| ATOM | 1315 | H    | ARG | X | 86 | 45.416 | 44.345 | 24.272 | 0.00 | 0.00 |
| ATOM | 1316 | CA   | ARG | X | 86 | 44.730 | 45.727 | 22.877 | 0.00 | 0.00 |
| ATOM | 1317 | HA   | ARG | X | 86 | 44.925 | 45.723 | 21.804 | 0.00 | 0.00 |

|      |      |      |     |   |    |        |        |        |      |      |
|------|------|------|-----|---|----|--------|--------|--------|------|------|
| ATOM | 1318 | CB   | ARG | X | 86 | 43.243 | 45.900 | 23.186 | 0.00 | 0.00 |
| ATOM | 1319 | HB2  | ARG | X | 86 | 43.140 | 45.334 | 24.112 | 0.00 | 0.00 |
| ATOM | 1320 | HB3  | ARG | X | 86 | 43.048 | 46.969 | 23.278 | 0.00 | 0.00 |
| ATOM | 1321 | CG   | ARG | X | 86 | 42.224 | 45.240 | 22.270 | 0.00 | 0.00 |
| ATOM | 1322 | HG2  | ARG | X | 86 | 42.206 | 44.153 | 22.355 | 0.00 | 0.00 |
| ATOM | 1323 | HG3  | ARG | X | 86 | 41.244 | 45.557 | 22.629 | 0.00 | 0.00 |
| ATOM | 1324 | CD   | ARG | X | 86 | 42.434 | 45.780 | 20.842 | 0.00 | 0.00 |
| ATOM | 1325 | HD2  | ARG | X | 86 | 43.356 | 45.300 | 20.512 | 0.00 | 0.00 |
| ATOM | 1326 | HD3  | ARG | X | 86 | 41.720 | 45.441 | 20.092 | 0.00 | 0.00 |
| ATOM | 1327 | NE   | ARG | X | 86 | 42.471 | 47.179 | 20.833 | 0.00 | 0.00 |
| ATOM | 1328 | HE   | ARG | X | 86 | 41.994 | 47.693 | 21.560 | 0.00 | 0.00 |
| ATOM | 1329 | CZ   | ARG | X | 86 | 43.058 | 47.923 | 19.914 | 0.00 | 0.00 |
| ATOM | 1330 | NH1  | ARG | X | 86 | 43.627 | 47.385 | 18.843 | 0.00 | 0.00 |
| ATOM | 1331 | HH11 | ARG | X | 86 | 43.534 | 46.403 | 18.623 | 0.00 | 0.00 |
| ATOM | 1332 | HH12 | ARG | X | 86 | 44.243 | 47.917 | 18.245 | 0.00 | 0.00 |
| ATOM | 1333 | NH2  | ARG | X | 86 | 43.162 | 49.217 | 20.121 | 0.00 | 0.00 |
| ATOM | 1334 | HH21 | ARG | X | 86 | 42.713 | 49.738 | 20.860 | 0.00 | 0.00 |
| ATOM | 1335 | HH22 | ARG | X | 86 | 43.589 | 49.785 | 19.403 | 0.00 | 0.00 |
| ATOM | 1336 | C    | ARG | X | 86 | 45.556 | 46.792 | 23.643 | 0.00 | 0.00 |
| ATOM | 1337 | O    | ARG | X | 86 | 46.250 | 46.462 | 24.582 | 0.00 | 0.00 |
| ATOM | 1338 | N    | GLU | X | 87 | 45.591 | 48.030 | 23.074 | 0.00 | 0.00 |
| ATOM | 1339 | H    | GLU | X | 87 | 45.066 | 48.015 | 22.211 | 0.00 | 0.00 |
| ATOM | 1340 | CA   | GLU | X | 87 | 46.640 | 49.036 | 23.308 | 0.00 | 0.00 |
| ATOM | 1341 | HA   | GLU | X | 87 | 47.629 | 48.607 | 23.144 | 0.00 | 0.00 |
| ATOM | 1342 | CB   | GLU | X | 87 | 46.495 | 50.130 | 22.206 | 0.00 | 0.00 |
| ATOM | 1343 | HB2  | GLU | X | 87 | 46.534 | 49.807 | 21.166 | 0.00 | 0.00 |
| ATOM | 1344 | HB3  | GLU | X | 87 | 45.514 | 50.593 | 22.093 | 0.00 | 0.00 |
| ATOM | 1345 | CG   | GLU | X | 87 | 47.642 | 51.183 | 22.362 | 0.00 | 0.00 |
| ATOM | 1346 | HG2  | GLU | X | 87 | 47.610 | 51.638 | 23.352 | 0.00 | 0.00 |
| ATOM | 1347 | HG3  | GLU | X | 87 | 48.538 | 50.563 | 22.378 | 0.00 | 0.00 |
| ATOM | 1348 | CD   | GLU | X | 87 | 47.618 | 52.152 | 21.207 | 0.00 | 0.00 |
| ATOM | 1349 | OE1  | GLU | X | 87 | 47.813 | 51.885 | 20.038 | 0.00 | 0.00 |
| ATOM | 1350 | OE2  | GLU | X | 87 | 47.346 | 53.333 | 21.559 | 0.00 | 0.00 |
| ATOM | 1351 | C    | GLU | X | 87 | 46.580 | 49.634 | 24.794 | 0.00 | 0.00 |
| ATOM | 1352 | O    | GLU | X | 87 | 45.464 | 49.926 | 25.283 | 0.00 | 0.00 |
| ATOM | 1353 | N    | LEU | X | 88 | 47.693 | 49.915 | 25.454 | 0.00 | 0.00 |
| ATOM | 1354 | H    | LEU | X | 88 | 48.575 | 49.932 | 24.961 | 0.00 | 0.00 |
| ATOM | 1355 | CA   | LEU | X | 88 | 47.767 | 50.601 | 26.733 | 0.00 | 0.00 |
| ATOM | 1356 | HA   | LEU | X | 88 | 46.899 | 50.365 | 27.349 | 0.00 | 0.00 |
| ATOM | 1357 | CB   | LEU | X | 88 | 49.042 | 50.240 | 27.526 | 0.00 | 0.00 |
| ATOM | 1358 | HB2  | LEU | X | 88 | 49.890 | 50.669 | 26.992 | 0.00 | 0.00 |
| ATOM | 1359 | HB3  | LEU | X | 88 | 48.893 | 50.732 | 28.487 | 0.00 | 0.00 |
| ATOM | 1360 | CG   | LEU | X | 88 | 49.311 | 48.761 | 27.735 | 0.00 | 0.00 |
| ATOM | 1361 | HG   | LEU | X | 88 | 49.374 | 48.280 | 26.760 | 0.00 | 0.00 |
| ATOM | 1362 | CD1  | LEU | X | 88 | 50.691 | 48.605 | 28.492 | 0.00 | 0.00 |
| ATOM | 1363 | HD11 | LEU | X | 88 | 50.626 | 48.673 | 29.578 | 0.00 | 0.00 |
| ATOM | 1364 | HD12 | LEU | X | 88 | 51.453 | 49.239 | 28.038 | 0.00 | 0.00 |
| ATOM | 1365 | HD13 | LEU | X | 88 | 51.005 | 47.572 | 28.344 | 0.00 | 0.00 |
| ATOM | 1366 | CD2  | LEU | X | 88 | 48.180 | 48.041 | 28.399 | 0.00 | 0.00 |
| ATOM | 1367 | HD21 | LEU | X | 88 | 48.367 | 46.972 | 28.494 | 0.00 | 0.00 |
| ATOM | 1368 | HD22 | LEU | X | 88 | 47.837 | 48.600 | 29.270 | 0.00 | 0.00 |
| ATOM | 1369 | HD23 | LEU | X | 88 | 47.393 | 48.175 | 27.656 | 0.00 | 0.00 |
| ATOM | 1370 | C    | LEU | X | 88 | 47.643 | 52.117 | 26.468 | 0.00 | 0.00 |
| ATOM | 1371 | O    | LEU | X | 88 | 48.419 | 52.647 | 25.599 | 0.00 | 0.00 |
| ATOM | 1372 | N    | SER | X | 89 | 46.607 | 52.739 | 27.030 | 0.00 | 0.00 |
| ATOM | 1373 | H    | SER | X | 89 | 46.026 | 52.132 | 27.590 | 0.00 | 0.00 |
| ATOM | 1374 | CA   | SER | X | 89 | 46.236 | 54.189 | 26.958 | 0.00 | 0.00 |
| ATOM | 1375 | HA   | SER | X | 89 | 47.137 | 54.792 | 26.842 | 0.00 | 0.00 |
| ATOM | 1376 | CB   | SER | X | 89 | 45.287 | 54.574 | 25.775 | 0.00 | 0.00 |
| ATOM | 1377 | HB2  | SER | X | 89 | 45.697 | 54.175 | 24.848 | 0.00 | 0.00 |
| ATOM | 1378 | HB3  | SER | X | 89 | 44.373 | 54.055 | 26.066 | 0.00 | 0.00 |
| ATOM | 1379 | OG   | SER | X | 89 | 45.101 | 55.923 | 25.623 | 0.00 | 0.00 |
| ATOM | 1380 | HG   | SER | X | 89 | 44.725 | 55.885 | 24.741 | 0.00 | 0.00 |
| ATOM | 1381 | C    | SER | X | 89 | 45.679 | 54.624 | 28.332 | 0.00 | 0.00 |
| ATOM | 1382 | O    | SER | X | 89 | 45.424 | 53.723 | 29.168 | 0.00 | 0.00 |
| ATOM | 1383 | N    | GLU | X | 90 | 45.525 | 55.911 | 28.512 | 0.00 | 0.00 |
| ATOM | 1384 | H    | GLU | X | 90 | 45.830 | 56.493 | 27.745 | 0.00 | 0.00 |

|      |      |      |     |   |    |        |        |        |      |      |
|------|------|------|-----|---|----|--------|--------|--------|------|------|
| ATOM | 1385 | CA   | GLU | X | 90 | 44.743 | 56.561 | 29.539 | 0.00 | 0.00 |
| ATOM | 1386 | HA   | GLU | X | 90 | 44.501 | 55.832 | 30.313 | 0.00 | 0.00 |
| ATOM | 1387 | CB   | GLU | X | 90 | 45.589 | 57.657 | 30.230 | 0.00 | 0.00 |
| ATOM | 1388 | HB2  | GLU | X | 90 | 46.023 | 58.254 | 29.428 | 0.00 | 0.00 |
| ATOM | 1389 | HB3  | GLU | X | 90 | 44.993 | 58.289 | 30.888 | 0.00 | 0.00 |
| ATOM | 1390 | CG   | GLU | X | 90 | 46.680 | 56.979 | 31.060 | 0.00 | 0.00 |
| ATOM | 1391 | HG2  | GLU | X | 90 | 46.376 | 56.172 | 31.726 | 0.00 | 0.00 |
| ATOM | 1392 | HG3  | GLU | X | 90 | 47.523 | 56.577 | 30.497 | 0.00 | 0.00 |
| ATOM | 1393 | CD   | GLU | X | 90 | 47.313 | 58.068 | 31.878 | 0.00 | 0.00 |
| ATOM | 1394 | OE1  | GLU | X | 90 | 46.902 | 58.224 | 33.075 | 0.00 | 0.00 |
| ATOM | 1395 | OE2  | GLU | X | 90 | 48.195 | 58.778 | 31.349 | 0.00 | 0.00 |
| ATOM | 1396 | C    | GLU | X | 90 | 43.419 | 57.170 | 29.013 | 0.00 | 0.00 |
| ATOM | 1397 | O    | GLU | X | 90 | 42.758 | 57.896 | 29.702 | 0.00 | 0.00 |
| ATOM | 1398 | N    | ASP | X | 91 | 43.177 | 56.990 | 27.741 | 0.00 | 0.00 |
| ATOM | 1399 | H    | ASP | X | 91 | 43.848 | 56.478 | 27.187 | 0.00 | 0.00 |
| ATOM | 1400 | CA   | ASP | X | 91 | 41.757 | 56.909 | 27.208 | 0.00 | 0.00 |
| ATOM | 1401 | HA   | ASP | X | 91 | 41.096 | 57.410 | 27.916 | 0.00 | 0.00 |
| ATOM | 1402 | CB   | ASP | X | 91 | 41.578 | 57.751 | 25.907 | 0.00 | 0.00 |
| ATOM | 1403 | HB2  | ASP | X | 91 | 41.752 | 58.787 | 26.197 | 0.00 | 0.00 |
| ATOM | 1404 | HB3  | ASP | X | 91 | 42.245 | 57.348 | 25.145 | 0.00 | 0.00 |
| ATOM | 1405 | CG   | ASP | X | 91 | 40.071 | 57.679 | 25.393 | 0.00 | 0.00 |
| ATOM | 1406 | OD1  | ASP | X | 91 | 39.116 | 57.939 | 26.163 | 0.00 | 0.00 |
| ATOM | 1407 | OD2  | ASP | X | 91 | 39.859 | 57.353 | 24.205 | 0.00 | 0.00 |
| ATOM | 1408 | C    | ASP | X | 91 | 41.320 | 55.470 | 27.046 | 0.00 | 0.00 |
| ATOM | 1409 | O    | ASP | X | 91 | 41.553 | 54.745 | 26.066 | 0.00 | 0.00 |
| ATOM | 1410 | N    | CYX | X | 92 | 40.726 | 54.993 | 28.162 | 0.00 | 0.00 |
| ATOM | 1411 | H    | CYX | X | 92 | 40.579 | 55.616 | 28.942 | 0.00 | 0.00 |
| ATOM | 1412 | CA   | CYX | X | 92 | 40.559 | 53.581 | 28.528 | 0.00 | 0.00 |
| ATOM | 1413 | HA   | CYX | X | 92 | 40.506 | 53.001 | 27.607 | 0.00 | 0.00 |
| ATOM | 1414 | CB   | CYX | X | 92 | 41.829 | 53.130 | 29.198 | 0.00 | 0.00 |
| ATOM | 1415 | HB2  | CYX | X | 92 | 41.885 | 52.045 | 29.109 | 0.00 | 0.00 |
| ATOM | 1416 | HB3  | CYX | X | 92 | 42.700 | 53.645 | 28.794 | 0.00 | 0.00 |
| ATOM | 1417 | SG   | CYX | X | 92 | 41.965 | 53.546 | 30.937 | 0.00 | 0.00 |
| ATOM | 1418 | C    | CYX | X | 92 | 39.201 | 53.128 | 29.235 | 0.00 | 0.00 |
| ATOM | 1419 | O    | CYX | X | 92 | 38.943 | 51.902 | 29.396 | 0.00 | 0.00 |
| ATOM | 1420 | N    | LEU | X | 93 | 38.352 | 54.064 | 29.690 | 0.00 | 0.00 |
| ATOM | 1421 | H    | LEU | X | 93 | 38.516 | 55.024 | 29.424 | 0.00 | 0.00 |
| ATOM | 1422 | CA   | LEU | X | 93 | 37.072 | 53.785 | 30.352 | 0.00 | 0.00 |
| ATOM | 1423 | HA   | LEU | X | 93 | 37.202 | 52.829 | 30.861 | 0.00 | 0.00 |
| ATOM | 1424 | CB   | LEU | X | 93 | 36.763 | 54.851 | 31.430 | 0.00 | 0.00 |
| ATOM | 1425 | HB2  | LEU | X | 93 | 36.711 | 55.848 | 30.992 | 0.00 | 0.00 |
| ATOM | 1426 | HB3  | LEU | X | 93 | 35.737 | 54.646 | 31.738 | 0.00 | 0.00 |
| ATOM | 1427 | CG   | LEU | X | 93 | 37.648 | 54.866 | 32.676 | 0.00 | 0.00 |
| ATOM | 1428 | HG   | LEU | X | 93 | 38.667 | 55.187 | 32.461 | 0.00 | 0.00 |
| ATOM | 1429 | CD1  | LEU | X | 93 | 36.967 | 55.891 | 33.663 | 0.00 | 0.00 |
| ATOM | 1430 | HD11 | LEU | X | 93 | 37.711 | 55.872 | 34.459 | 0.00 | 0.00 |
| ATOM | 1431 | HD12 | LEU | X | 93 | 36.067 | 55.448 | 34.089 | 0.00 | 0.00 |
| ATOM | 1432 | HD13 | LEU | X | 93 | 36.859 | 56.897 | 33.257 | 0.00 | 0.00 |
| ATOM | 1433 | CD2  | LEU | X | 93 | 37.941 | 53.494 | 33.250 | 0.00 | 0.00 |
| ATOM | 1434 | HD21 | LEU | X | 93 | 37.003 | 53.036 | 33.562 | 0.00 | 0.00 |
| ATOM | 1435 | HD22 | LEU | X | 93 | 38.534 | 52.988 | 32.488 | 0.00 | 0.00 |
| ATOM | 1436 | HD23 | LEU | X | 93 | 38.541 | 53.605 | 34.153 | 0.00 | 0.00 |
| ATOM | 1437 | C    | LEU | X | 93 | 36.034 | 53.602 | 29.293 | 0.00 | 0.00 |
| ATOM | 1438 | O    | LEU | X | 93 | 35.437 | 54.542 | 28.811 | 0.00 | 0.00 |
| ATOM | 1439 | N    | TYR | X | 94 | 35.922 | 52.325 | 28.871 | 0.00 | 0.00 |
| ATOM | 1440 | H    | TYR | X | 94 | 36.330 | 51.622 | 29.469 | 0.00 | 0.00 |
| ATOM | 1441 | CA   | TYR | X | 94 | 34.963 | 51.756 | 27.911 | 0.00 | 0.00 |
| ATOM | 1442 | HA   | TYR | X | 94 | 34.131 | 52.449 | 27.781 | 0.00 | 0.00 |
| ATOM | 1443 | CB   | TYR | X | 94 | 35.702 | 51.626 | 26.603 | 0.00 | 0.00 |
| ATOM | 1444 | HB2  | TYR | X | 94 | 36.593 | 51.028 | 26.795 | 0.00 | 0.00 |
| ATOM | 1445 | HB3  | TYR | X | 94 | 35.044 | 51.134 | 25.887 | 0.00 | 0.00 |
| ATOM | 1446 | CG   | TYR | X | 94 | 36.159 | 52.913 | 25.909 | 0.00 | 0.00 |
| ATOM | 1447 | CD1  | TYR | X | 94 | 35.320 | 53.456 | 24.963 | 0.00 | 0.00 |
| ATOM | 1448 | HD1  | TYR | X | 94 | 34.395 | 52.975 | 24.681 | 0.00 | 0.00 |
| ATOM | 1449 | CE1  | TYR | X | 94 | 35.570 | 54.680 | 24.262 | 0.00 | 0.00 |
| ATOM | 1450 | HE1  | TYR | X | 94 | 34.974 | 55.045 | 23.438 | 0.00 | 0.00 |
| ATOM | 1451 | CZ   | TYR | X | 94 | 36.724 | 55.394 | 24.665 | 0.00 | 0.00 |

|      |      |      |     |   |    |        |        |        |      |      |
|------|------|------|-----|---|----|--------|--------|--------|------|------|
| ATOM | 1452 | OH   | TYR | X | 94 | 36.928 | 56.686 | 24.258 | 0.00 | 0.00 |
| ATOM | 1453 | HH   | TYR | X | 94 | 37.777 | 56.994 | 24.583 | 0.00 | 0.00 |
| ATOM | 1454 | CE2  | TYR | X | 94 | 37.673 | 54.809 | 25.584 | 0.00 | 0.00 |
| ATOM | 1455 | HE2  | TYR | X | 94 | 38.577 | 55.261 | 25.963 | 0.00 | 0.00 |
| ATOM | 1456 | CD2  | TYR | X | 94 | 37.359 | 53.520 | 26.138 | 0.00 | 0.00 |
| ATOM | 1457 | HD2  | TYR | X | 94 | 37.922 | 53.053 | 26.933 | 0.00 | 0.00 |
| ATOM | 1458 | C    | TYR | X | 94 | 34.426 | 50.384 | 28.429 | 0.00 | 0.00 |
| ATOM | 1459 | O    | TYR | X | 94 | 35.167 | 49.725 | 29.119 | 0.00 | 0.00 |
| ATOM | 1460 | N    | LEU | X | 95 | 33.226 | 49.975 | 28.060 | 0.00 | 0.00 |
| ATOM | 1461 | H    | LEU | X | 95 | 32.781 | 50.383 | 27.250 | 0.00 | 0.00 |
| ATOM | 1462 | CA   | LEU | X | 95 | 32.654 | 48.675 | 28.467 | 0.00 | 0.00 |
| ATOM | 1463 | HA   | LEU | X | 95 | 33.452 | 47.978 | 28.721 | 0.00 | 0.00 |
| ATOM | 1464 | CB   | LEU | X | 95 | 31.672 | 48.683 | 29.648 | 0.00 | 0.00 |
| ATOM | 1465 | HB2  | LEU | X | 95 | 31.463 | 47.653 | 29.936 | 0.00 | 0.00 |
| ATOM | 1466 | HB3  | LEU | X | 95 | 32.290 | 49.094 | 30.447 | 0.00 | 0.00 |
| ATOM | 1467 | CG   | LEU | X | 95 | 30.277 | 49.421 | 29.552 | 0.00 | 0.00 |
| ATOM | 1468 | HG   | LEU | X | 95 | 30.351 | 50.483 | 29.316 | 0.00 | 0.00 |
| ATOM | 1469 | CD1  | LEU | X | 95 | 29.244 | 48.723 | 28.610 | 0.00 | 0.00 |
| ATOM | 1470 | HD11 | LEU | X | 95 | 28.479 | 49.483 | 28.455 | 0.00 | 0.00 |
| ATOM | 1471 | HD12 | LEU | X | 95 | 28.827 | 47.772 | 28.943 | 0.00 | 0.00 |
| ATOM | 1472 | HD13 | LEU | X | 95 | 29.672 | 48.599 | 27.615 | 0.00 | 0.00 |
| ATOM | 1473 | CD2  | LEU | X | 95 | 29.674 | 49.502 | 30.948 | 0.00 | 0.00 |
| ATOM | 1474 | HD21 | LEU | X | 95 | 30.021 | 50.358 | 31.528 | 0.00 | 0.00 |
| ATOM | 1475 | HD22 | LEU | X | 95 | 28.618 | 49.768 | 30.900 | 0.00 | 0.00 |
| ATOM | 1476 | HD23 | LEU | X | 95 | 29.837 | 48.536 | 31.427 | 0.00 | 0.00 |
| ATOM | 1477 | C    | LEU | X | 95 | 32.089 | 47.997 | 27.208 | 0.00 | 0.00 |
| ATOM | 1478 | O    | LEU | X | 95 | 32.107 | 48.598 | 26.152 | 0.00 | 0.00 |
| ATOM | 1479 | N    | ASN | X | 96 | 31.623 | 46.686 | 27.267 | 0.00 | 0.00 |
| ATOM | 1480 | H    | ASN | X | 96 | 31.490 | 46.219 | 28.152 | 0.00 | 0.00 |
| ATOM | 1481 | CA   | ASN | X | 96 | 31.364 | 45.742 | 26.170 | 0.00 | 0.00 |
| ATOM | 1482 | HA   | ASN | X | 96 | 31.219 | 46.341 | 25.271 | 0.00 | 0.00 |
| ATOM | 1483 | CB   | ASN | X | 96 | 32.669 | 44.940 | 25.924 | 0.00 | 0.00 |
| ATOM | 1484 | HB2  | ASN | X | 96 | 32.836 | 44.284 | 26.779 | 0.00 | 0.00 |
| ATOM | 1485 | HB3  | ASN | X | 96 | 32.517 | 44.145 | 25.194 | 0.00 | 0.00 |
| ATOM | 1486 | CG   | ASN | X | 96 | 33.953 | 45.705 | 25.564 | 0.00 | 0.00 |
| ATOM | 1487 | OD1  | ASN | X | 96 | 34.140 | 46.337 | 24.562 | 0.00 | 0.00 |
| ATOM | 1488 | ND2  | ASN | X | 96 | 34.925 | 45.727 | 26.504 | 0.00 | 0.00 |
| ATOM | 1489 | HD21 | ASN | X | 96 | 35.855 | 46.044 | 26.269 | 0.00 | 0.00 |
| ATOM | 1490 | HD22 | ASN | X | 96 | 34.849 | 45.272 | 27.402 | 0.00 | 0.00 |
| ATOM | 1491 | C    | ASN | X | 96 | 30.205 | 44.818 | 26.619 | 0.00 | 0.00 |
| ATOM | 1492 | O    | ASN | X | 96 | 30.158 | 44.413 | 27.764 | 0.00 | 0.00 |
| ATOM | 1493 | N    | VAL | X | 97 | 29.242 | 44.708 | 25.800 | 0.00 | 0.00 |
| ATOM | 1494 | H    | VAL | X | 97 | 29.399 | 45.226 | 24.948 | 0.00 | 0.00 |
| ATOM | 1495 | CA   | VAL | X | 97 | 27.932 | 44.050 | 25.994 | 0.00 | 0.00 |
| ATOM | 1496 | HA   | VAL | X | 97 | 27.971 | 43.589 | 26.981 | 0.00 | 0.00 |
| ATOM | 1497 | CB   | VAL | X | 97 | 26.715 | 45.069 | 26.017 | 0.00 | 0.00 |
| ATOM | 1498 | HB   | VAL | X | 97 | 26.634 | 45.506 | 25.021 | 0.00 | 0.00 |
| ATOM | 1499 | CG1  | VAL | X | 97 | 25.372 | 44.451 | 26.427 | 0.00 | 0.00 |
| ATOM | 1500 | HG11 | VAL | X | 97 | 25.404 | 43.856 | 27.339 | 0.00 | 0.00 |
| ATOM | 1501 | HG12 | VAL | X | 97 | 24.642 | 45.256 | 26.504 | 0.00 | 0.00 |
| ATOM | 1502 | HG13 | VAL | X | 97 | 25.001 | 43.708 | 25.722 | 0.00 | 0.00 |
| ATOM | 1503 | CG2  | VAL | X | 97 | 26.982 | 46.260 | 27.021 | 0.00 | 0.00 |
| ATOM | 1504 | HG21 | VAL | X | 97 | 27.724 | 47.027 | 26.803 | 0.00 | 0.00 |
| ATOM | 1505 | HG22 | VAL | X | 97 | 27.217 | 45.785 | 27.974 | 0.00 | 0.00 |
| ATOM | 1506 | HG23 | VAL | X | 97 | 26.038 | 46.715 | 27.320 | 0.00 | 0.00 |
| ATOM | 1507 | C    | VAL | X | 97 | 27.611 | 42.996 | 24.871 | 0.00 | 0.00 |
| ATOM | 1508 | O    | VAL | X | 97 | 27.825 | 43.275 | 23.705 | 0.00 | 0.00 |
| ATOM | 1509 | N    | TRP | X | 98 | 27.140 | 41.817 | 25.270 | 0.00 | 0.00 |
| ATOM | 1510 | H    | TRP | X | 98 | 27.016 | 41.548 | 26.236 | 0.00 | 0.00 |
| ATOM | 1511 | CA   | TRP | X | 98 | 26.601 | 40.677 | 24.439 | 0.00 | 0.00 |
| ATOM | 1512 | HA   | TRP | X | 98 | 26.563 | 40.974 | 23.391 | 0.00 | 0.00 |
| ATOM | 1513 | CB   | TRP | X | 98 | 27.520 | 39.475 | 24.602 | 0.00 | 0.00 |
| ATOM | 1514 | HB2  | TRP | X | 98 | 27.730 | 39.377 | 25.667 | 0.00 | 0.00 |
| ATOM | 1515 | HB3  | TRP | X | 98 | 27.114 | 38.490 | 24.371 | 0.00 | 0.00 |
| ATOM | 1516 | CG   | TRP | X | 98 | 28.860 | 39.510 | 23.910 | 0.00 | 0.00 |
| ATOM | 1517 | CD1  | TRP | X | 98 | 29.156 | 38.880 | 22.749 | 0.00 | 0.00 |
| ATOM | 1518 | HD1  | TRP | X | 98 | 28.453 | 38.427 | 22.065 | 0.00 | 0.00 |

|      |      |      |     |   |     |        |        |        |      |      |
|------|------|------|-----|---|-----|--------|--------|--------|------|------|
| ATOM | 1519 | NE1  | TRP | X | 98  | 30.534 | 38.946 | 22.574 | 0.00 | 0.00 |
| ATOM | 1520 | HE1  | TRP | X | 98  | 31.072 | 38.603 | 21.791 | 0.00 | 0.00 |
| ATOM | 1521 | CE2  | TRP | X | 98  | 31.216 | 39.587 | 23.553 | 0.00 | 0.00 |
| ATOM | 1522 | CZ2  | TRP | X | 98  | 32.526 | 39.959 | 23.816 | 0.00 | 0.00 |
| ATOM | 1523 | HZ2  | TRP | X | 98  | 33.305 | 39.827 | 23.080 | 0.00 | 0.00 |
| ATOM | 1524 | CH2  | TRP | X | 98  | 32.866 | 40.579 | 25.014 | 0.00 | 0.00 |
| ATOM | 1525 | HH2  | TRP | X | 98  | 33.874 | 40.949 | 25.133 | 0.00 | 0.00 |
| ATOM | 1526 | CZ3  | TRP | X | 98  | 31.857 | 41.029 | 25.863 | 0.00 | 0.00 |
| ATOM | 1527 | HZ3  | TRP | X | 98  | 32.212 | 41.490 | 26.773 | 0.00 | 0.00 |
| ATOM | 1528 | CE3  | TRP | X | 98  | 30.458 | 40.744 | 25.612 | 0.00 | 0.00 |
| ATOM | 1529 | HE3  | TRP | X | 98  | 29.671 | 41.091 | 26.265 | 0.00 | 0.00 |
| ATOM | 1530 | CD2  | TRP | X | 98  | 30.148 | 40.031 | 24.439 | 0.00 | 0.00 |
| ATOM | 1531 | C    | TRP | X | 98  | 25.171 | 40.256 | 24.927 | 0.00 | 0.00 |
| ATOM | 1532 | O    | TRP | X | 98  | 24.869 | 40.045 | 26.147 | 0.00 | 0.00 |
| ATOM | 1533 | N    | THR | X | 99  | 24.301 | 40.164 | 23.921 | 0.00 | 0.00 |
| ATOM | 1534 | H    | THR | X | 99  | 24.663 | 40.293 | 22.987 | 0.00 | 0.00 |
| ATOM | 1535 | CA   | THR | X | 99  | 22.914 | 39.783 | 24.093 | 0.00 | 0.00 |
| ATOM | 1536 | HA   | THR | X | 99  | 22.826 | 39.144 | 24.971 | 0.00 | 0.00 |
| ATOM | 1537 | CB   | THR | X | 99  | 21.959 | 41.022 | 24.238 | 0.00 | 0.00 |
| ATOM | 1538 | HB   | THR | X | 99  | 22.227 | 41.537 | 25.160 | 0.00 | 0.00 |
| ATOM | 1539 | CG2  | THR | X | 99  | 22.121 | 41.977 | 23.060 | 0.00 | 0.00 |
| ATOM | 1540 | HG21 | THR | X | 99  | 23.059 | 42.510 | 23.215 | 0.00 | 0.00 |
| ATOM | 1541 | HG22 | THR | X | 99  | 21.270 | 42.654 | 23.129 | 0.00 | 0.00 |
| ATOM | 1542 | HG23 | THR | X | 99  | 22.075 | 41.371 | 22.155 | 0.00 | 0.00 |
| ATOM | 1543 | OG1  | THR | X | 99  | 20.649 | 40.461 | 24.229 | 0.00 | 0.00 |
| ATOM | 1544 | HG1  | THR | X | 99  | 20.158 | 41.230 | 24.525 | 0.00 | 0.00 |
| ATOM | 1545 | C    | THR | X | 99  | 22.541 | 38.911 | 22.839 | 0.00 | 0.00 |
| ATOM | 1546 | O    | THR | X | 99  | 23.307 | 39.122 | 21.874 | 0.00 | 0.00 |
| ATOM | 1547 | N    | PRO | X | 100 | 21.627 | 37.927 | 22.800 | 0.00 | 0.00 |
| ATOM | 1548 | CD   | PRO | X | 100 | 20.784 | 37.496 | 23.930 | 0.00 | 0.00 |
| ATOM | 1549 | HD2  | PRO | X | 100 | 19.903 | 38.137 | 23.947 | 0.00 | 0.00 |
| ATOM | 1550 | HD3  | PRO | X | 100 | 21.309 | 37.531 | 24.884 | 0.00 | 0.00 |
| ATOM | 1551 | CG   | PRO | X | 100 | 20.429 | 36.070 | 23.607 | 0.00 | 0.00 |
| ATOM | 1552 | HG2  | PRO | X | 100 | 19.448 | 35.848 | 24.025 | 0.00 | 0.00 |
| ATOM | 1553 | HG3  | PRO | X | 100 | 21.229 | 35.441 | 23.999 | 0.00 | 0.00 |
| ATOM | 1554 | CB   | PRO | X | 100 | 20.413 | 35.996 | 22.112 | 0.00 | 0.00 |
| ATOM | 1555 | HB2  | PRO | X | 100 | 19.487 | 36.284 | 21.614 | 0.00 | 0.00 |
| ATOM | 1556 | HB3  | PRO | X | 100 | 20.697 | 35.007 | 21.753 | 0.00 | 0.00 |
| ATOM | 1557 | CA   | PRO | X | 100 | 21.477 | 36.988 | 21.672 | 0.00 | 0.00 |
| ATOM | 1558 | HA   | PRO | X | 100 | 22.424 | 36.460 | 21.556 | 0.00 | 0.00 |
| ATOM | 1559 | C    | PRO | X | 100 | 21.020 | 37.768 | 20.394 | 0.00 | 0.00 |
| ATOM | 1560 | O    | PRO | X | 100 | 20.674 | 38.962 | 20.437 | 0.00 | 0.00 |
| ATOM | 1561 | N    | TYR | X | 101 | 21.167 | 37.170 | 19.242 | 0.00 | 0.00 |
| ATOM | 1562 | H    | TYR | X | 101 | 21.589 | 36.253 | 19.272 | 0.00 | 0.00 |
| ATOM | 1563 | CA   | TYR | X | 101 | 20.689 | 37.769 | 17.987 | 0.00 | 0.00 |
| ATOM | 1564 | HA   | TYR | X | 101 | 20.409 | 38.819 | 18.066 | 0.00 | 0.00 |
| ATOM | 1565 | CB   | TYR | X | 101 | 21.853 | 37.738 | 16.986 | 0.00 | 0.00 |
| ATOM | 1566 | HB2  | TYR | X | 101 | 22.715 | 38.319 | 17.315 | 0.00 | 0.00 |
| ATOM | 1567 | HB3  | TYR | X | 101 | 22.226 | 36.731 | 16.798 | 0.00 | 0.00 |
| ATOM | 1568 | CG   | TYR | X | 101 | 21.513 | 38.333 | 15.623 | 0.00 | 0.00 |
| ATOM | 1569 | CD1  | TYR | X | 101 | 20.677 | 37.703 | 14.664 | 0.00 | 0.00 |
| ATOM | 1570 | HD1  | TYR | X | 101 | 20.535 | 36.633 | 14.681 | 0.00 | 0.00 |
| ATOM | 1571 | CE1  | TYR | X | 101 | 20.144 | 38.433 | 13.563 | 0.00 | 0.00 |
| ATOM | 1572 | HE1  | TYR | X | 101 | 19.476 | 37.926 | 12.883 | 0.00 | 0.00 |
| ATOM | 1573 | CZ   | TYR | X | 101 | 20.656 | 39.706 | 13.268 | 0.00 | 0.00 |
| ATOM | 1574 | OH   | TYR | X | 101 | 20.364 | 40.302 | 12.119 | 0.00 | 0.00 |
| ATOM | 1575 | HH   | TYR | X | 101 | 19.687 | 39.806 | 11.654 | 0.00 | 0.00 |
| ATOM | 1576 | CE2  | TYR | X | 101 | 21.649 | 40.252 | 14.086 | 0.00 | 0.00 |
| ATOM | 1577 | HE2  | TYR | X | 101 | 22.152 | 41.156 | 13.778 | 0.00 | 0.00 |
| ATOM | 1578 | CD2  | TYR | X | 101 | 21.980 | 39.586 | 15.294 | 0.00 | 0.00 |
| ATOM | 1579 | HD2  | TYR | X | 101 | 22.603 | 40.095 | 16.015 | 0.00 | 0.00 |
| ATOM | 1580 | C    | TYR | X | 101 | 19.496 | 36.896 | 17.506 | 0.00 | 0.00 |
| ATOM | 1581 | O    | TYR | X | 101 | 19.643 | 35.659 | 17.560 | 0.00 | 0.00 |
| ATOM | 1582 | N    | PRO | X | 102 | 18.411 | 37.445 | 16.980 | 0.00 | 0.00 |
| ATOM | 1583 | CD   | PRO | X | 102 | 17.215 | 36.672 | 16.558 | 0.00 | 0.00 |
| ATOM | 1584 | HD2  | PRO | X | 102 | 17.016 | 35.906 | 17.307 | 0.00 | 0.00 |
| ATOM | 1585 | HD3  | PRO | X | 102 | 17.405 | 36.211 | 15.588 | 0.00 | 0.00 |

|      |      |      |     |   |     |        |        |        |      |      |
|------|------|------|-----|---|-----|--------|--------|--------|------|------|
| ATOM | 1586 | CG   | PRO | X | 102 | 16.064 | 37.617 | 16.457 | 0.00 | 0.00 |
| ATOM | 1587 | HG2  | PRO | X | 102 | 15.559 | 37.772 | 17.411 | 0.00 | 0.00 |
| ATOM | 1588 | HG3  | PRO | X | 102 | 15.368 | 37.285 | 15.687 | 0.00 | 0.00 |
| ATOM | 1589 | CB   | PRO | X | 102 | 16.782 | 38.888 | 16.054 | 0.00 | 0.00 |
| ATOM | 1590 | HB2  | PRO | X | 102 | 16.173 | 39.782 | 16.190 | 0.00 | 0.00 |
| ATOM | 1591 | HB3  | PRO | X | 102 | 17.037 | 38.628 | 15.027 | 0.00 | 0.00 |
| ATOM | 1592 | CA   | PRO | X | 102 | 18.036 | 38.852 | 16.995 | 0.00 | 0.00 |
| ATOM | 1593 | HA   | PRO | X | 102 | 18.838 | 39.485 | 16.615 | 0.00 | 0.00 |
| ATOM | 1594 | C    | PRO | X | 102 | 17.755 | 39.276 | 18.479 | 0.00 | 0.00 |
| ATOM | 1595 | O    | PRO | X | 102 | 17.543 | 38.370 | 19.351 | 0.00 | 0.00 |
| ATOM | 1596 | N    | ARG | X | 103 | 17.758 | 40.611 | 18.761 | 0.00 | 0.00 |
| ATOM | 1597 | H    | ARG | X | 103 | 17.862 | 41.152 | 17.915 | 0.00 | 0.00 |
| ATOM | 1598 | CA   | ARG | X | 103 | 17.876 | 41.192 | 20.093 | 0.00 | 0.00 |
| ATOM | 1599 | HA   | ARG | X | 103 | 18.709 | 40.686 | 20.581 | 0.00 | 0.00 |
| ATOM | 1600 | CB   | ARG | X | 103 | 18.200 | 42.638 | 19.975 | 0.00 | 0.00 |
| ATOM | 1601 | HB2  | ARG | X | 103 | 18.917 | 42.743 | 19.161 | 0.00 | 0.00 |
| ATOM | 1602 | HB3  | ARG | X | 103 | 17.287 | 43.182 | 19.733 | 0.00 | 0.00 |
| ATOM | 1603 | CG   | ARG | X | 103 | 18.895 | 43.354 | 21.220 | 0.00 | 0.00 |
| ATOM | 1604 | HG2  | ARG | X | 103 | 18.287 | 43.328 | 22.124 | 0.00 | 0.00 |
| ATOM | 1605 | HG3  | ARG | X | 103 | 19.797 | 42.755 | 21.346 | 0.00 | 0.00 |
| ATOM | 1606 | CD   | ARG | X | 103 | 19.271 | 44.781 | 20.993 | 0.00 | 0.00 |
| ATOM | 1607 | HD2  | ARG | X | 103 | 19.868 | 45.108 | 21.844 | 0.00 | 0.00 |
| ATOM | 1608 | HD3  | ARG | X | 103 | 19.946 | 44.865 | 20.140 | 0.00 | 0.00 |
| ATOM | 1609 | NE   | ARG | X | 103 | 18.097 | 45.669 | 20.823 | 0.00 | 0.00 |
| ATOM | 1610 | HE   | ARG | X | 103 | 17.392 | 45.598 | 21.544 | 0.00 | 0.00 |
| ATOM | 1611 | CZ   | ARG | X | 103 | 17.904 | 46.595 | 19.896 | 0.00 | 0.00 |
| ATOM | 1612 | NH1  | ARG | X | 103 | 18.695 | 46.617 | 18.829 | 0.00 | 0.00 |
| ATOM | 1613 | HH11 | ARG | X | 103 | 19.324 | 45.832 | 18.742 | 0.00 | 0.00 |
| ATOM | 1614 | HH12 | ARG | X | 103 | 18.667 | 47.369 | 18.155 | 0.00 | 0.00 |
| ATOM | 1615 | NH2  | ARG | X | 103 | 17.032 | 47.518 | 20.111 | 0.00 | 0.00 |
| ATOM | 1616 | HH21 | ARG | X | 103 | 16.474 | 47.606 | 20.949 | 0.00 | 0.00 |
| ATOM | 1617 | HH22 | ARG | X | 103 | 16.863 | 48.143 | 19.337 | 0.00 | 0.00 |
| ATOM | 1618 | C    | ARG | X | 103 | 16.600 | 40.978 | 20.971 | 0.00 | 0.00 |
| ATOM | 1619 | O    | ARG | X | 103 | 15.566 | 41.547 | 20.600 | 0.00 | 0.00 |
| ATOM | 1620 | N    | PRO | X | 104 | 16.704 | 40.242 | 22.111 | 0.00 | 0.00 |
| ATOM | 1621 | CD   | PRO | X | 104 | 17.833 | 39.334 | 22.530 | 0.00 | 0.00 |
| ATOM | 1622 | HD2  | PRO | X | 104 | 18.576 | 39.986 | 22.989 | 0.00 | 0.00 |
| ATOM | 1623 | HD3  | PRO | X | 104 | 18.321 | 38.932 | 21.642 | 0.00 | 0.00 |
| ATOM | 1624 | CG   | PRO | X | 104 | 17.160 | 38.315 | 23.458 | 0.00 | 0.00 |
| ATOM | 1625 | HG2  | PRO | X | 104 | 17.914 | 37.895 | 24.124 | 0.00 | 0.00 |
| ATOM | 1626 | HG3  | PRO | X | 104 | 16.692 | 37.494 | 22.916 | 0.00 | 0.00 |
| ATOM | 1627 | CB   | PRO | X | 104 | 16.145 | 39.104 | 24.236 | 0.00 | 0.00 |
| ATOM | 1628 | HB2  | PRO | X | 104 | 16.730 | 39.718 | 24.920 | 0.00 | 0.00 |
| ATOM | 1629 | HB3  | PRO | X | 104 | 15.462 | 38.444 | 24.771 | 0.00 | 0.00 |
| ATOM | 1630 | CA   | PRO | X | 104 | 15.527 | 39.884 | 23.022 | 0.00 | 0.00 |
| ATOM | 1631 | HA   | PRO | X | 104 | 14.858 | 39.270 | 22.419 | 0.00 | 0.00 |
| ATOM | 1632 | C    | PRO | X | 104 | 14.902 | 41.241 | 23.532 | 0.00 | 0.00 |
| ATOM | 1633 | O    | PRO | X | 104 | 15.610 | 42.178 | 23.813 | 0.00 | 0.00 |
| ATOM | 1634 | N    | THR | X | 105 | 13.572 | 41.234 | 23.733 | 0.00 | 0.00 |
| ATOM | 1635 | H    | THR | X | 105 | 12.968 | 40.511 | 23.368 | 0.00 | 0.00 |
| ATOM | 1636 | CA   | THR | X | 105 | 12.789 | 42.318 | 24.435 | 0.00 | 0.00 |
| ATOM | 1637 | HA   | THR | X | 105 | 13.364 | 43.218 | 24.652 | 0.00 | 0.00 |
| ATOM | 1638 | CB   | THR | X | 105 | 11.634 | 42.847 | 23.525 | 0.00 | 0.00 |
| ATOM | 1639 | HB   | THR | X | 105 | 11.113 | 43.665 | 24.023 | 0.00 | 0.00 |
| ATOM | 1640 | CG2  | THR | X | 105 | 12.070 | 43.437 | 22.188 | 0.00 | 0.00 |
| ATOM | 1641 | HG21 | THR | X | 105 | 11.177 | 43.528 | 21.569 | 0.00 | 0.00 |
| ATOM | 1642 | HG22 | THR | X | 105 | 12.736 | 42.770 | 21.641 | 0.00 | 0.00 |
| ATOM | 1643 | HG23 | THR | X | 105 | 12.513 | 44.411 | 22.394 | 0.00 | 0.00 |
| ATOM | 1644 | OG1  | THR | X | 105 | 10.757 | 41.718 | 23.380 | 0.00 | 0.00 |
| ATOM | 1645 | HG1  | THR | X | 105 | 9.882  | 42.104 | 23.464 | 0.00 | 0.00 |
| ATOM | 1646 | C    | THR | X | 105 | 12.275 | 41.812 | 25.744 | 0.00 | 0.00 |
| ATOM | 1647 | O    | THR | X | 105 | 11.803 | 42.643 | 26.527 | 0.00 | 0.00 |
| ATOM | 1648 | N    | SER | X | 106 | 12.338 | 40.510 | 26.085 | 0.00 | 0.00 |
| ATOM | 1649 | H    | SER | X | 106 | 12.845 | 39.968 | 25.400 | 0.00 | 0.00 |
| ATOM | 1650 | CA   | SER | X | 106 | 12.057 | 39.830 | 27.385 | 0.00 | 0.00 |
| ATOM | 1651 | HA   | SER | X | 106 | 11.053 | 40.170 | 27.640 | 0.00 | 0.00 |
| ATOM | 1652 | CB   | SER | X | 106 | 12.028 | 38.258 | 27.152 | 0.00 | 0.00 |

|      |      |      |     |   |     |        |        |        |      |      |
|------|------|------|-----|---|-----|--------|--------|--------|------|------|
| ATOM | 1653 | HB2  | SER | X | 106 | 11.725 | 37.723 | 28.052 | 0.00 | 0.00 |
| ATOM | 1654 | HB3  | SER | X | 106 | 11.264 | 38.141 | 26.383 | 0.00 | 0.00 |
| ATOM | 1655 | OG   | SER | X | 106 | 13.302 | 37.873 | 26.686 | 0.00 | 0.00 |
| ATOM | 1656 | HG   | SER | X | 106 | 13.901 | 38.559 | 26.989 | 0.00 | 0.00 |
| ATOM | 1657 | C    | SER | X | 106 | 13.115 | 40.120 | 28.451 | 0.00 | 0.00 |
| ATOM | 1658 | O    | SER | X | 106 | 14.286 | 40.394 | 28.150 | 0.00 | 0.00 |
| ATOM | 1659 | N    | PRO | X | 107 | 12.775 | 40.244 | 29.727 | 0.00 | 0.00 |
| ATOM | 1660 | CD   | PRO | X | 107 | 11.393 | 40.067 | 30.117 | 0.00 | 0.00 |
| ATOM | 1661 | HD2  | PRO | X | 107 | 11.085 | 39.118 | 29.677 | 0.00 | 0.00 |
| ATOM | 1662 | HD3  | PRO | X | 107 | 10.719 | 40.878 | 29.843 | 0.00 | 0.00 |
| ATOM | 1663 | CG   | PRO | X | 107 | 11.422 | 39.968 | 31.644 | 0.00 | 0.00 |
| ATOM | 1664 | HG2  | PRO | X | 107 | 11.484 | 38.911 | 31.902 | 0.00 | 0.00 |
| ATOM | 1665 | HG3  | PRO | X | 107 | 10.503 | 40.399 | 32.041 | 0.00 | 0.00 |
| ATOM | 1666 | CB   | PRO | X | 107 | 12.731 | 40.649 | 32.018 | 0.00 | 0.00 |
| ATOM | 1667 | HB2  | PRO | X | 107 | 13.132 | 40.400 | 33.001 | 0.00 | 0.00 |
| ATOM | 1668 | HB3  | PRO | X | 107 | 12.545 | 41.723 | 32.006 | 0.00 | 0.00 |
| ATOM | 1669 | CA   | PRO | X | 107 | 13.644 | 40.368 | 30.848 | 0.00 | 0.00 |
| ATOM | 1670 | HA   | PRO | X | 107 | 14.345 | 41.183 | 30.666 | 0.00 | 0.00 |
| ATOM | 1671 | C    | PRO | X | 107 | 14.397 | 39.046 | 31.098 | 0.00 | 0.00 |
| ATOM | 1672 | O    | PRO | X | 107 | 13.801 | 37.974 | 30.909 | 0.00 | 0.00 |
| ATOM | 1673 | N    | THR | X | 108 | 15.636 | 39.178 | 31.455 | 0.00 | 0.00 |
| ATOM | 1674 | H    | THR | X | 108 | 16.143 | 40.049 | 31.390 | 0.00 | 0.00 |
| ATOM | 1675 | CA   | THR | X | 108 | 16.437 | 38.041 | 31.975 | 0.00 | 0.00 |
| ATOM | 1676 | HA   | THR | X | 108 | 15.787 | 37.526 | 32.683 | 0.00 | 0.00 |
| ATOM | 1677 | CB   | THR | X | 108 | 16.681 | 36.955 | 30.940 | 0.00 | 0.00 |
| ATOM | 1678 | HB   | THR | X | 108 | 15.993 | 37.096 | 30.106 | 0.00 | 0.00 |
| ATOM | 1679 | CG2  | THR | X | 108 | 18.129 | 36.850 | 30.326 | 0.00 | 0.00 |
| ATOM | 1680 | HG21 | THR | X | 108 | 18.810 | 36.603 | 31.142 | 0.00 | 0.00 |
| ATOM | 1681 | HG22 | THR | X | 108 | 18.550 | 37.777 | 29.937 | 0.00 | 0.00 |
| ATOM | 1682 | HG23 | THR | X | 108 | 18.145 | 36.060 | 29.575 | 0.00 | 0.00 |
| ATOM | 1683 | OG1  | THR | X | 108 | 16.331 | 35.693 | 31.523 | 0.00 | 0.00 |
| ATOM | 1684 | HG1  | THR | X | 108 | 15.380 | 35.571 | 31.500 | 0.00 | 0.00 |
| ATOM | 1685 | C    | THR | X | 108 | 17.758 | 38.604 | 32.637 | 0.00 | 0.00 |
| ATOM | 1686 | O    | THR | X | 108 | 18.165 | 39.737 | 32.272 | 0.00 | 0.00 |
| ATOM | 1687 | N    | PRO | X | 109 | 18.503 | 37.766 | 33.462 | 0.00 | 0.00 |
| ATOM | 1688 | CD   | PRO | X | 109 | 18.153 | 36.505 | 34.063 | 0.00 | 0.00 |
| ATOM | 1689 | HD2  | PRO | X | 109 | 18.541 | 35.677 | 33.469 | 0.00 | 0.00 |
| ATOM | 1690 | HD3  | PRO | X | 109 | 17.078 | 36.420 | 34.224 | 0.00 | 0.00 |
| ATOM | 1691 | CG   | PRO | X | 109 | 18.730 | 36.471 | 35.413 | 0.00 | 0.00 |
| ATOM | 1692 | HG2  | PRO | X | 109 | 19.038 | 35.513 | 35.832 | 0.00 | 0.00 |
| ATOM | 1693 | HG3  | PRO | X | 109 | 18.020 | 36.937 | 36.096 | 0.00 | 0.00 |
| ATOM | 1694 | CB   | PRO | X | 109 | 19.990 | 37.361 | 35.315 | 0.00 | 0.00 |
| ATOM | 1695 | HB2  | PRO | X | 109 | 20.815 | 36.700 | 35.050 | 0.00 | 0.00 |
| ATOM | 1696 | HB3  | PRO | X | 109 | 20.250 | 37.904 | 36.223 | 0.00 | 0.00 |
| ATOM | 1697 | CA   | PRO | X | 109 | 19.567 | 38.398 | 34.280 | 0.00 | 0.00 |
| ATOM | 1698 | HA   | PRO | X | 109 | 19.239 | 39.295 | 34.806 | 0.00 | 0.00 |
| ATOM | 1699 | C    | PRO | X | 109 | 20.813 | 38.931 | 33.577 | 0.00 | 0.00 |
| ATOM | 1700 | O    | PRO | X | 109 | 21.293 | 38.417 | 32.514 | 0.00 | 0.00 |
| ATOM | 1701 | N    | VAL | X | 110 | 21.420 | 39.944 | 34.187 | 0.00 | 0.00 |
| ATOM | 1702 | H    | VAL | X | 110 | 21.051 | 40.185 | 35.096 | 0.00 | 0.00 |
| ATOM | 1703 | CA   | VAL | X | 110 | 22.571 | 40.748 | 33.810 | 0.00 | 0.00 |
| ATOM | 1704 | HA   | VAL | X | 110 | 22.678 | 40.734 | 32.726 | 0.00 | 0.00 |
| ATOM | 1705 | CB   | VAL | X | 110 | 22.271 | 42.225 | 34.215 | 0.00 | 0.00 |
| ATOM | 1706 | HB   | VAL | X | 110 | 21.712 | 42.219 | 35.150 | 0.00 | 0.00 |
| ATOM | 1707 | CG1  | VAL | X | 110 | 23.502 | 43.132 | 34.250 | 0.00 | 0.00 |
| ATOM | 1708 | HG11 | VAL | X | 110 | 23.229 | 44.186 | 34.307 | 0.00 | 0.00 |
| ATOM | 1709 | HG12 | VAL | X | 110 | 23.970 | 42.868 | 35.198 | 0.00 | 0.00 |
| ATOM | 1710 | HG13 | VAL | X | 110 | 24.152 | 43.033 | 33.380 | 0.00 | 0.00 |
| ATOM | 1711 | CG2  | VAL | X | 110 | 21.192 | 42.731 | 33.193 | 0.00 | 0.00 |
| ATOM | 1712 | HG21 | VAL | X | 110 | 21.730 | 43.282 | 32.421 | 0.00 | 0.00 |
| ATOM | 1713 | HG22 | VAL | X | 110 | 20.599 | 43.407 | 33.810 | 0.00 | 0.00 |
| ATOM | 1714 | HG23 | VAL | X | 110 | 20.502 | 42.056 | 32.686 | 0.00 | 0.00 |
| ATOM | 1715 | C    | VAL | X | 110 | 23.730 | 40.152 | 34.559 | 0.00 | 0.00 |
| ATOM | 1716 | O    | VAL | X | 110 | 23.647 | 40.014 | 35.793 | 0.00 | 0.00 |
| ATOM | 1717 | N    | LEU | X | 111 | 24.794 | 39.678 | 33.863 | 0.00 | 0.00 |
| ATOM | 1718 | H    | LEU | X | 111 | 24.746 | 39.596 | 32.858 | 0.00 | 0.00 |
| ATOM | 1719 | CA   | LEU | X | 111 | 26.007 | 39.262 | 34.523 | 0.00 | 0.00 |



|      |      |      |     |   |     |        |        |        |      |      |
|------|------|------|-----|---|-----|--------|--------|--------|------|------|
| ATOM | 1720 | HA   | LEU | X | 111 | 25.853 | 39.171 | 35.598 | 0.00 | 0.00 |
| ATOM | 1721 | CB   | LEU | X | 111 | 26.462 | 37.893 | 33.911 | 0.00 | 0.00 |
| ATOM | 1722 | HB2  | LEU | X | 111 | 26.621 | 38.089 | 32.851 | 0.00 | 0.00 |
| ATOM | 1723 | HB3  | LEU | X | 111 | 27.416 | 37.617 | 34.362 | 0.00 | 0.00 |
| ATOM | 1724 | CG   | LEU | X | 111 | 25.494 | 36.655 | 33.914 | 0.00 | 0.00 |
| ATOM | 1725 | HG   | LEU | X | 111 | 24.517 | 36.993 | 33.568 | 0.00 | 0.00 |
| ATOM | 1726 | CD1  | LEU | X | 111 | 25.994 | 35.535 | 32.955 | 0.00 | 0.00 |
| ATOM | 1727 | HD11 | LEU | X | 111 | 25.254 | 34.739 | 33.030 | 0.00 | 0.00 |
| ATOM | 1728 | HD12 | LEU | X | 111 | 26.905 | 35.132 | 33.396 | 0.00 | 0.00 |
| ATOM | 1729 | HD13 | LEU | X | 111 | 26.212 | 35.756 | 31.910 | 0.00 | 0.00 |
| ATOM | 1730 | CD2  | LEU | X | 111 | 25.300 | 36.123 | 35.340 | 0.00 | 0.00 |
| ATOM | 1731 | HD21 | LEU | X | 111 | 24.512 | 35.375 | 35.254 | 0.00 | 0.00 |
| ATOM | 1732 | HD22 | LEU | X | 111 | 26.196 | 35.607 | 35.686 | 0.00 | 0.00 |
| ATOM | 1733 | HD23 | LEU | X | 111 | 24.954 | 36.956 | 35.952 | 0.00 | 0.00 |
| ATOM | 1734 | C    | LEU | X | 111 | 27.074 | 40.337 | 34.262 | 0.00 | 0.00 |
| ATOM | 1735 | O    | LEU | X | 111 | 27.538 | 40.461 | 33.105 | 0.00 | 0.00 |
| ATOM | 1736 | N    | VAL | X | 112 | 27.606 | 41.007 | 35.283 | 0.00 | 0.00 |
| ATOM | 1737 | H    | VAL | X | 112 | 27.287 | 40.725 | 36.199 | 0.00 | 0.00 |
| ATOM | 1738 | CA   | VAL | X | 112 | 28.638 | 42.047 | 35.180 | 0.00 | 0.00 |
| ATOM | 1739 | HA   | VAL | X | 112 | 28.656 | 42.355 | 34.135 | 0.00 | 0.00 |
| ATOM | 1740 | CB   | VAL | X | 112 | 28.311 | 43.425 | 35.900 | 0.00 | 0.00 |
| ATOM | 1741 | HB   | VAL | X | 112 | 28.310 | 43.399 | 36.990 | 0.00 | 0.00 |
| ATOM | 1742 | CG1  | VAL | X | 112 | 29.208 | 44.577 | 35.364 | 0.00 | 0.00 |
| ATOM | 1743 | HG11 | VAL | X | 112 | 28.914 | 45.528 | 35.808 | 0.00 | 0.00 |
| ATOM | 1744 | HG12 | VAL | X | 112 | 30.265 | 44.541 | 35.628 | 0.00 | 0.00 |
| ATOM | 1745 | HG13 | VAL | X | 112 | 29.160 | 44.579 | 34.275 | 0.00 | 0.00 |
| ATOM | 1746 | CG2  | VAL | X | 112 | 26.866 | 43.779 | 35.613 | 0.00 | 0.00 |
| ATOM | 1747 | HG21 | VAL | X | 112 | 26.693 | 44.047 | 34.571 | 0.00 | 0.00 |
| ATOM | 1748 | HG22 | VAL | X | 112 | 26.474 | 44.555 | 36.271 | 0.00 | 0.00 |
| ATOM | 1749 | HG23 | VAL | X | 112 | 26.230 | 42.905 | 35.755 | 0.00 | 0.00 |
| ATOM | 1750 | C    | VAL | X | 112 | 30.012 | 41.567 | 35.641 | 0.00 | 0.00 |
| ATOM | 1751 | O    | VAL | X | 112 | 30.249 | 41.203 | 36.807 | 0.00 | 0.00 |
| ATOM | 1752 | N    | TRP | X | 113 | 30.937 | 41.498 | 34.672 | 0.00 | 0.00 |
| ATOM | 1753 | H    | TRP | X | 113 | 30.613 | 41.719 | 33.742 | 0.00 | 0.00 |
| ATOM | 1754 | CA   | TRP | X | 113 | 32.228 | 40.690 | 34.745 | 0.00 | 0.00 |
| ATOM | 1755 | HA   | TRP | X | 113 | 32.107 | 39.958 | 35.543 | 0.00 | 0.00 |
| ATOM | 1756 | CB   | TRP | X | 113 | 32.604 | 40.130 | 33.340 | 0.00 | 0.00 |
| ATOM | 1757 | HB2  | TRP | X | 113 | 31.777 | 39.540 | 32.946 | 0.00 | 0.00 |
| ATOM | 1758 | HB3  | TRP | X | 113 | 32.748 | 40.963 | 32.652 | 0.00 | 0.00 |
| ATOM | 1759 | CG   | TRP | X | 113 | 33.914 | 39.419 | 33.461 | 0.00 | 0.00 |
| ATOM | 1760 | CD1  | TRP | X | 113 | 35.118 | 39.860 | 32.946 | 0.00 | 0.00 |
| ATOM | 1761 | HD1  | TRP | X | 113 | 35.265 | 40.817 | 32.467 | 0.00 | 0.00 |
| ATOM | 1762 | NE1  | TRP | X | 113 | 36.106 | 39.038 | 33.360 | 0.00 | 0.00 |
| ATOM | 1763 | HE1  | TRP | X | 113 | 37.084 | 39.248 | 33.218 | 0.00 | 0.00 |
| ATOM | 1764 | CE2  | TRP | X | 113 | 35.575 | 38.034 | 34.158 | 0.00 | 0.00 |
| ATOM | 1765 | CZ2  | TRP | X | 113 | 36.170 | 36.968 | 34.826 | 0.00 | 0.00 |
| ATOM | 1766 | HZ2  | TRP | X | 113 | 37.243 | 36.878 | 34.755 | 0.00 | 0.00 |
| ATOM | 1767 | CH2  | TRP | X | 113 | 35.432 | 36.035 | 35.594 | 0.00 | 0.00 |
| ATOM | 1768 | HH2  | TRP | X | 113 | 35.935 | 35.172 | 36.004 | 0.00 | 0.00 |
| ATOM | 1769 | CZ3  | TRP | X | 113 | 34.091 | 36.217 | 35.712 | 0.00 | 0.00 |
| ATOM | 1770 | HZ3  | TRP | X | 113 | 33.424 | 35.573 | 36.266 | 0.00 | 0.00 |
| ATOM | 1771 | CE3  | TRP | X | 113 | 33.522 | 37.431 | 35.111 | 0.00 | 0.00 |
| ATOM | 1772 | HE3  | TRP | X | 113 | 32.490 | 37.702 | 35.282 | 0.00 | 0.00 |
| ATOM | 1773 | CD2  | TRP | X | 113 | 34.237 | 38.308 | 34.298 | 0.00 | 0.00 |
| ATOM | 1774 | C    | TRP | X | 113 | 33.330 | 41.588 | 35.240 | 0.00 | 0.00 |
| ATOM | 1775 | O    | TRP | X | 113 | 33.600 | 42.675 | 34.669 | 0.00 | 0.00 |
| ATOM | 1776 | N    | ILE | X | 114 | 34.109 | 41.065 | 36.189 | 0.00 | 0.00 |
| ATOM | 1777 | H    | ILE | X | 114 | 33.910 | 40.196 | 36.664 | 0.00 | 0.00 |
| ATOM | 1778 | CA   | ILE | X | 114 | 35.241 | 41.841 | 36.806 | 0.00 | 0.00 |
| ATOM | 1779 | HA   | ILE | X | 114 | 35.474 | 42.658 | 36.123 | 0.00 | 0.00 |
| ATOM | 1780 | CB   | ILE | X | 114 | 34.844 | 42.411 | 38.189 | 0.00 | 0.00 |
| ATOM | 1781 | HB   | ILE | X | 114 | 34.939 | 41.627 | 38.941 | 0.00 | 0.00 |
| ATOM | 1782 | CG2  | ILE | X | 114 | 35.762 | 43.642 | 38.526 | 0.00 | 0.00 |
| ATOM | 1783 | HG21 | ILE | X | 114 | 35.804 | 44.351 | 37.699 | 0.00 | 0.00 |
| ATOM | 1784 | HG22 | ILE | X | 114 | 36.711 | 43.168 | 38.776 | 0.00 | 0.00 |
| ATOM | 1785 | HG23 | ILE | X | 114 | 35.415 | 44.144 | 39.429 | 0.00 | 0.00 |
| ATOM | 1786 | CG1  | ILE | X | 114 | 33.286 | 42.758 | 38.254 | 0.00 | 0.00 |

|      |      |      |     |   |     |        |        |        |      |      |
|------|------|------|-----|---|-----|--------|--------|--------|------|------|
| ATOM | 1787 | HG12 | ILE | X | 114 | 33.071 | 43.541 | 37.527 | 0.00 | 0.00 |
| ATOM | 1788 | HG13 | ILE | X | 114 | 32.681 | 41.872 | 38.059 | 0.00 | 0.00 |
| ATOM | 1789 | CD1  | ILE | X | 114 | 32.778 | 43.376 | 39.578 | 0.00 | 0.00 |
| ATOM | 1790 | HD11 | ILE | X | 114 | 33.168 | 44.391 | 39.652 | 0.00 | 0.00 |
| ATOM | 1791 | HD12 | ILE | X | 114 | 33.352 | 42.939 | 40.395 | 0.00 | 0.00 |
| ATOM | 1792 | HD13 | ILE | X | 114 | 31.695 | 43.485 | 39.632 | 0.00 | 0.00 |
| ATOM | 1793 | C    | ILE | X | 114 | 36.476 | 40.891 | 36.944 | 0.00 | 0.00 |
| ATOM | 1794 | O    | ILE | X | 114 | 36.348 | 39.916 | 37.628 | 0.00 | 0.00 |
| ATOM | 1795 | N    | TYR | X | 115 | 37.619 | 41.210 | 36.380 | 0.00 | 0.00 |
| ATOM | 1796 | H    | TYR | X | 115 | 37.609 | 41.996 | 35.746 | 0.00 | 0.00 |
| ATOM | 1797 | CA   | TYR | X | 115 | 38.754 | 40.271 | 36.220 | 0.00 | 0.00 |
| ATOM | 1798 | HA   | TYR | X | 115 | 38.372 | 39.281 | 36.470 | 0.00 | 0.00 |
| ATOM | 1799 | CB   | TYR | X | 115 | 39.241 | 40.360 | 34.762 | 0.00 | 0.00 |
| ATOM | 1800 | HB2  | TYR | X | 115 | 40.219 | 39.892 | 34.655 | 0.00 | 0.00 |
| ATOM | 1801 | HB3  | TYR | X | 115 | 38.578 | 39.851 | 34.062 | 0.00 | 0.00 |
| ATOM | 1802 | CG   | TYR | X | 115 | 39.366 | 41.741 | 34.165 | 0.00 | 0.00 |
| ATOM | 1803 | CD1  | TYR | X | 115 | 40.299 | 42.679 | 34.723 | 0.00 | 0.00 |
| ATOM | 1804 | HD1  | TYR | X | 115 | 40.977 | 42.415 | 35.521 | 0.00 | 0.00 |
| ATOM | 1805 | CE1  | TYR | X | 115 | 40.268 | 43.967 | 34.271 | 0.00 | 0.00 |
| ATOM | 1806 | HE1  | TYR | X | 115 | 40.977 | 44.719 | 34.585 | 0.00 | 0.00 |
| ATOM | 1807 | CZ   | TYR | X | 115 | 39.279 | 44.418 | 33.338 | 0.00 | 0.00 |
| ATOM | 1808 | OH   | TYR | X | 115 | 39.137 | 45.789 | 33.060 | 0.00 | 0.00 |
| ATOM | 1809 | HH   | TYR | X | 115 | 38.262 | 45.910 | 32.685 | 0.00 | 0.00 |
| ATOM | 1810 | CE2  | TYR | X | 115 | 38.378 | 43.462 | 32.835 | 0.00 | 0.00 |
| ATOM | 1811 | HE2  | TYR | X | 115 | 37.607 | 43.818 | 32.167 | 0.00 | 0.00 |
| ATOM | 1812 | CD2  | TYR | X | 115 | 38.466 | 42.101 | 33.219 | 0.00 | 0.00 |
| ATOM | 1813 | HD2  | TYR | X | 115 | 37.781 | 41.413 | 32.747 | 0.00 | 0.00 |
| ATOM | 1814 | C    | TYR | X | 115 | 39.891 | 40.574 | 37.244 | 0.00 | 0.00 |
| ATOM | 1815 | O    | TYR | X | 115 | 40.053 | 41.649 | 37.810 | 0.00 | 0.00 |
| ATOM | 1816 | N    | GLY | X | 116 | 40.692 | 39.531 | 37.386 | 0.00 | 0.00 |
| ATOM | 1817 | H    | GLY | X | 116 | 40.402 | 38.659 | 36.965 | 0.00 | 0.00 |
| ATOM | 1818 | CA   | GLY | X | 116 | 42.012 | 39.481 | 38.089 | 0.00 | 0.00 |
| ATOM | 1819 | HA2  | GLY | X | 116 | 41.908 | 39.855 | 39.107 | 0.00 | 0.00 |
| ATOM | 1820 | HA3  | GLY | X | 116 | 42.366 | 38.451 | 38.121 | 0.00 | 0.00 |
| ATOM | 1821 | C    | GLY | X | 116 | 43.101 | 40.362 | 37.438 | 0.00 | 0.00 |
| ATOM | 1822 | O    | GLY | X | 116 | 42.912 | 41.054 | 36.460 | 0.00 | 0.00 |
| ATOM | 1823 | N    | GLY | X | 117 | 44.300 | 40.322 | 38.041 | 0.00 | 0.00 |
| ATOM | 1824 | H    | GLY | X | 117 | 44.381 | 39.571 | 38.713 | 0.00 | 0.00 |
| ATOM | 1825 | CA   | GLY | X | 117 | 45.481 | 41.080 | 37.674 | 0.00 | 0.00 |
| ATOM | 1826 | HA2  | GLY | X | 117 | 46.260 | 40.411 | 37.310 | 0.00 | 0.00 |
| ATOM | 1827 | HA3  | GLY | X | 117 | 45.216 | 41.773 | 36.875 | 0.00 | 0.00 |
| ATOM | 1828 | C    | GLY | X | 117 | 45.942 | 41.922 | 38.880 | 0.00 | 0.00 |
| ATOM | 1829 | O    | GLY | X | 117 | 46.694 | 42.883 | 38.711 | 0.00 | 0.00 |
| ATOM | 1830 | N    | GLY | X | 118 | 45.555 | 41.499 | 40.065 | 0.00 | 0.00 |
| ATOM | 1831 | H    | GLY | X | 118 | 44.938 | 40.701 | 40.108 | 0.00 | 0.00 |
| ATOM | 1832 | CA   | GLY | X | 118 | 46.322 | 41.939 | 41.299 | 0.00 | 0.00 |
| ATOM | 1833 | HA2  | GLY | X | 118 | 45.951 | 41.269 | 42.074 | 0.00 | 0.00 |
| ATOM | 1834 | HA3  | GLY | X | 118 | 47.397 | 41.819 | 41.158 | 0.00 | 0.00 |
| ATOM | 1835 | C    | GLY | X | 118 | 46.112 | 43.374 | 41.672 | 0.00 | 0.00 |
| ATOM | 1836 | O    | GLY | X | 118 | 46.887 | 43.838 | 42.439 | 0.00 | 0.00 |
| ATOM | 1837 | N    | PHE | X | 119 | 45.124 | 43.982 | 41.096 | 0.00 | 0.00 |
| ATOM | 1838 | H    | PHE | X | 119 | 44.584 | 43.341 | 40.532 | 0.00 | 0.00 |
| ATOM | 1839 | CA   | PHE | X | 119 | 44.801 | 45.351 | 41.068 | 0.00 | 0.00 |
| ATOM | 1840 | HA   | PHE | X | 119 | 43.807 | 45.468 | 40.636 | 0.00 | 0.00 |
| ATOM | 1841 | CB   | PHE | X | 119 | 44.504 | 45.939 | 42.438 | 0.00 | 0.00 |
| ATOM | 1842 | HB2  | PHE | X | 119 | 45.366 | 45.800 | 43.090 | 0.00 | 0.00 |
| ATOM | 1843 | HB3  | PHE | X | 119 | 44.285 | 46.999 | 42.316 | 0.00 | 0.00 |
| ATOM | 1844 | CG   | PHE | X | 119 | 43.251 | 45.395 | 43.168 | 0.00 | 0.00 |
| ATOM | 1845 | CD1  | PHE | X | 119 | 42.023 | 45.981 | 43.097 | 0.00 | 0.00 |
| ATOM | 1846 | HD1  | PHE | X | 119 | 41.921 | 46.801 | 42.403 | 0.00 | 0.00 |
| ATOM | 1847 | CE1  | PHE | X | 119 | 40.898 | 45.493 | 43.700 | 0.00 | 0.00 |
| ATOM | 1848 | HE1  | PHE | X | 119 | 39.921 | 45.915 | 43.514 | 0.00 | 0.00 |
| ATOM | 1849 | CZ   | PHE | X | 119 | 40.999 | 44.422 | 44.562 | 0.00 | 0.00 |
| ATOM | 1850 | HZ   | PHE | X | 119 | 40.104 | 43.954 | 44.944 | 0.00 | 0.00 |
| ATOM | 1851 | CE2  | PHE | X | 119 | 42.303 | 43.834 | 44.731 | 0.00 | 0.00 |
| ATOM | 1852 | HE2  | PHE | X | 119 | 42.408 | 42.983 | 45.388 | 0.00 | 0.00 |
| ATOM | 1853 | CD2  | PHE | X | 119 | 43.429 | 44.334 | 44.025 | 0.00 | 0.00 |

|      |      |     |     |   |     |        |        |        |      |      |
|------|------|-----|-----|---|-----|--------|--------|--------|------|------|
| ATOM | 1854 | HD2 | PHE | X | 119 | 44.351 | 43.781 | 44.125 | 0.00 | 0.00 |
| ATOM | 1855 | C   | PHE | X | 119 | 45.838 | 46.233 | 40.267 | 0.00 | 0.00 |
| ATOM | 1856 | O   | PHE | X | 119 | 45.574 | 47.434 | 40.128 | 0.00 | 0.00 |
| ATOM | 1857 | N   | TYR | X | 120 | 47.016 | 45.683 | 39.860 | 0.00 | 0.00 |
| ATOM | 1858 | H   | TYR | X | 120 | 47.210 | 44.720 | 40.095 | 0.00 | 0.00 |
| ATOM | 1859 | CA  | TYR | X | 120 | 47.869 | 46.395 | 38.967 | 0.00 | 0.00 |
| ATOM | 1860 | HA  | TYR | X | 120 | 47.694 | 47.449 | 39.178 | 0.00 | 0.00 |
| ATOM | 1861 | CB  | TYR | X | 120 | 49.382 | 46.174 | 39.379 | 0.00 | 0.00 |
| ATOM | 1862 | HB2 | TYR | X | 120 | 49.956 | 47.017 | 38.995 | 0.00 | 0.00 |
| ATOM | 1863 | HB3 | TYR | X | 120 | 49.437 | 46.157 | 40.467 | 0.00 | 0.00 |
| ATOM | 1864 | CG  | TYR | X | 120 | 49.981 | 44.873 | 38.862 | 0.00 | 0.00 |
| ATOM | 1865 | CD1 | TYR | X | 120 | 50.604 | 44.803 | 37.599 | 0.00 | 0.00 |
| ATOM | 1866 | HD1 | TYR | X | 120 | 50.643 | 45.684 | 36.975 | 0.00 | 0.00 |
| ATOM | 1867 | CE1 | TYR | X | 120 | 51.021 | 43.603 | 37.090 | 0.00 | 0.00 |
| ATOM | 1868 | HE1 | TYR | X | 120 | 51.519 | 43.607 | 36.131 | 0.00 | 0.00 |
| ATOM | 1869 | CZ  | TYR | X | 120 | 50.761 | 42.379 | 37.786 | 0.00 | 0.00 |
| ATOM | 1870 | OH  | TYR | X | 120 | 51.131 | 41.167 | 37.296 | 0.00 | 0.00 |
| ATOM | 1871 | HH  | TYR | X | 120 | 51.448 | 41.219 | 36.391 | 0.00 | 0.00 |
| ATOM | 1872 | CE2 | TYR | X | 120 | 50.097 | 42.479 | 39.031 | 0.00 | 0.00 |
| ATOM | 1873 | HE2 | TYR | X | 120 | 49.992 | 41.521 | 39.518 | 0.00 | 0.00 |
| ATOM | 1874 | CD2 | TYR | X | 120 | 49.638 | 43.663 | 39.598 | 0.00 | 0.00 |
| ATOM | 1875 | HD2 | TYR | X | 120 | 48.995 | 43.659 | 40.466 | 0.00 | 0.00 |
| ATOM | 1876 | C   | TYR | X | 120 | 47.617 | 46.213 | 37.508 | 0.00 | 0.00 |
| ATOM | 1877 | O   | TYR | X | 120 | 48.230 | 46.869 | 36.648 | 0.00 | 0.00 |
| ATOM | 1878 | N   | SER | X | 121 | 46.760 | 45.239 | 37.115 | 0.00 | 0.00 |
| ATOM | 1879 | H   | SER | X | 121 | 46.294 | 44.605 | 37.748 | 0.00 | 0.00 |
| ATOM | 1880 | CA  | SER | X | 121 | 46.578 | 44.936 | 35.688 | 0.00 | 0.00 |
| ATOM | 1881 | HA  | SER | X | 121 | 46.756 | 45.831 | 35.093 | 0.00 | 0.00 |
| ATOM | 1882 | CB  | SER | X | 121 | 47.729 | 43.976 | 35.319 | 0.00 | 0.00 |
| ATOM | 1883 | HB2 | SER | X | 121 | 47.688 | 43.561 | 34.312 | 0.00 | 0.00 |
| ATOM | 1884 | HB3 | SER | X | 121 | 48.681 | 44.508 | 35.325 | 0.00 | 0.00 |
| ATOM | 1885 | OG  | SER | X | 121 | 47.732 | 42.817 | 36.120 | 0.00 | 0.00 |
| ATOM | 1886 | HG  | SER | X | 121 | 47.812 | 43.121 | 37.027 | 0.00 | 0.00 |
| ATOM | 1887 | C   | SER | X | 121 | 45.244 | 44.282 | 35.310 | 0.00 | 0.00 |
| ATOM | 1888 | O   | SER | X | 121 | 44.487 | 44.144 | 36.254 | 0.00 | 0.00 |
| ATOM | 1889 | N   | GLY | X | 122 | 45.008 | 43.993 | 34.000 | 0.00 | 0.00 |
| ATOM | 1890 | H   | GLY | X | 122 | 45.739 | 44.174 | 33.328 | 0.00 | 0.00 |
| ATOM | 1891 | CA  | GLY | X | 122 | 43.816 | 43.204 | 33.578 | 0.00 | 0.00 |
| ATOM | 1892 | HA2 | GLY | X | 122 | 44.102 | 42.216 | 33.216 | 0.00 | 0.00 |
| ATOM | 1893 | HA3 | GLY | X | 122 | 43.194 | 43.108 | 34.468 | 0.00 | 0.00 |
| ATOM | 1894 | C   | GLY | X | 122 | 43.110 | 43.864 | 32.415 | 0.00 | 0.00 |
| ATOM | 1895 | O   | GLY | X | 122 | 43.370 | 45.022 | 32.119 | 0.00 | 0.00 |
| ATOM | 1896 | N   | ALA | X | 123 | 42.165 | 43.192 | 31.828 | 0.00 | 0.00 |
| ATOM | 1897 | H   | ALA | X | 123 | 41.981 | 42.259 | 32.170 | 0.00 | 0.00 |
| ATOM | 1898 | CA  | ALA | X | 123 | 41.416 | 43.686 | 30.717 | 0.00 | 0.00 |
| ATOM | 1899 | HA  | ALA | X | 123 | 41.173 | 44.735 | 30.890 | 0.00 | 0.00 |
| ATOM | 1900 | CB  | ALA | X | 123 | 42.275 | 43.725 | 29.483 | 0.00 | 0.00 |
| ATOM | 1901 | HB1 | ALA | X | 123 | 42.467 | 42.723 | 29.098 | 0.00 | 0.00 |
| ATOM | 1902 | HB2 | ALA | X | 123 | 43.236 | 44.104 | 29.831 | 0.00 | 0.00 |
| ATOM | 1903 | HB3 | ALA | X | 123 | 41.849 | 44.347 | 28.696 | 0.00 | 0.00 |
| ATOM | 1904 | C   | ALA | X | 123 | 40.071 | 42.970 | 30.292 | 0.00 | 0.00 |
| ATOM | 1905 | O   | ALA | X | 123 | 39.979 | 41.729 | 30.364 | 0.00 | 0.00 |
| ATOM | 1906 | N   | SER | X | 124 | 39.092 | 43.829 | 29.855 | 0.00 | 0.00 |
| ATOM | 1907 | H   | SER | X | 124 | 39.206 | 44.830 | 29.926 | 0.00 | 0.00 |
| ATOM | 1908 | CA  | SER | X | 124 | 37.795 | 43.418 | 29.315 | 0.00 | 0.00 |
| ATOM | 1909 | HA  | SER | X | 124 | 37.333 | 42.699 | 29.992 | 0.00 | 0.00 |
| ATOM | 1910 | CB  | SER | X | 124 | 36.892 | 44.596 | 29.261 | 0.00 | 0.00 |
| ATOM | 1911 | HB2 | SER | X | 124 | 35.899 | 44.307 | 28.918 | 0.00 | 0.00 |
| ATOM | 1912 | HB3 | SER | X | 124 | 36.778 | 45.014 | 30.261 | 0.00 | 0.00 |
| ATOM | 1913 | OG  | SER | X | 124 | 37.390 | 45.560 | 28.342 | 0.00 | 0.00 |
| ATOM | 1914 | HG  | SER | X | 124 | 38.082 | 46.080 | 28.758 | 0.00 | 0.00 |
| ATOM | 1915 | C   | SER | X | 124 | 37.840 | 42.720 | 27.936 | 0.00 | 0.00 |
| ATOM | 1916 | O   | SER | X | 124 | 36.932 | 41.937 | 27.632 | 0.00 | 0.00 |
| ATOM | 1917 | N   | SER | X | 125 | 38.896 | 42.927 | 27.123 | 0.00 | 0.00 |
| ATOM | 1918 | H   | SER | X | 125 | 39.694 | 43.341 | 27.583 | 0.00 | 0.00 |
| ATOM | 1919 | CA  | SER | X | 125 | 39.024 | 42.532 | 25.784 | 0.00 | 0.00 |
| ATOM | 1920 | HA  | SER | X | 125 | 38.047 | 42.454 | 25.308 | 0.00 | 0.00 |

|      |      |      |     |   |     |        |        |        |      |      |
|------|------|------|-----|---|-----|--------|--------|--------|------|------|
| ATOM | 1921 | CB   | SER | X | 125 | 39.891 | 43.568 | 25.119 | 0.00 | 0.00 |
| ATOM | 1922 | HB2  | SER | X | 125 | 39.958 | 43.403 | 24.044 | 0.00 | 0.00 |
| ATOM | 1923 | HB3  | SER | X | 125 | 39.308 | 44.465 | 25.328 | 0.00 | 0.00 |
| ATOM | 1924 | OG   | SER | X | 125 | 41.139 | 43.712 | 25.771 | 0.00 | 0.00 |
| ATOM | 1925 | HG   | SER | X | 125 | 41.804 | 43.170 | 25.342 | 0.00 | 0.00 |
| ATOM | 1926 | C    | SER | X | 125 | 39.700 | 41.161 | 25.532 | 0.00 | 0.00 |
| ATOM | 1927 | O    | SER | X | 125 | 39.734 | 40.710 | 24.321 | 0.00 | 0.00 |
| ATOM | 1928 | N    | LEU | X | 126 | 40.191 | 40.522 | 26.572 | 0.00 | 0.00 |
| ATOM | 1929 | H    | LEU | X | 126 | 40.225 | 41.004 | 27.459 | 0.00 | 0.00 |
| ATOM | 1930 | CA   | LEU | X | 126 | 40.833 | 39.189 | 26.493 | 0.00 | 0.00 |
| ATOM | 1931 | HA   | LEU | X | 126 | 41.590 | 39.240 | 25.710 | 0.00 | 0.00 |
| ATOM | 1932 | CB   | LEU | X | 126 | 41.430 | 38.866 | 27.915 | 0.00 | 0.00 |
| ATOM | 1933 | HB2  | LEU | X | 126 | 40.594 | 38.715 | 28.598 | 0.00 | 0.00 |
| ATOM | 1934 | HB3  | LEU | X | 126 | 41.846 | 37.865 | 27.805 | 0.00 | 0.00 |
| ATOM | 1935 | CG   | LEU | X | 126 | 42.425 | 39.850 | 28.456 | 0.00 | 0.00 |
| ATOM | 1936 | HG   | LEU | X | 126 | 42.017 | 40.829 | 28.710 | 0.00 | 0.00 |
| ATOM | 1937 | CD1  | LEU | X | 126 | 43.081 | 39.351 | 29.734 | 0.00 | 0.00 |
| ATOM | 1938 | HD11 | LEU | X | 126 | 42.410 | 39.038 | 30.534 | 0.00 | 0.00 |
| ATOM | 1939 | HD12 | LEU | X | 126 | 43.695 | 40.090 | 30.249 | 0.00 | 0.00 |
| ATOM | 1940 | HD13 | LEU | X | 126 | 43.732 | 38.497 | 29.545 | 0.00 | 0.00 |
| ATOM | 1941 | CD2  | LEU | X | 126 | 43.590 | 40.159 | 27.461 | 0.00 | 0.00 |
| ATOM | 1942 | HD21 | LEU | X | 126 | 44.376 | 40.741 | 27.944 | 0.00 | 0.00 |
| ATOM | 1943 | HD22 | LEU | X | 126 | 44.089 | 39.197 | 27.344 | 0.00 | 0.00 |
| ATOM | 1944 | HD23 | LEU | X | 126 | 43.241 | 40.533 | 26.499 | 0.00 | 0.00 |
| ATOM | 1945 | C    | LEU | X | 126 | 39.848 | 38.169 | 26.012 | 0.00 | 0.00 |
| ATOM | 1946 | O    | LEU | X | 126 | 38.769 | 38.060 | 26.594 | 0.00 | 0.00 |
| ATOM | 1947 | N    | ASP | X | 127 | 40.268 | 37.330 | 25.020 | 0.00 | 0.00 |
| ATOM | 1948 | H    | ASP | X | 127 | 41.123 | 37.579 | 24.543 | 0.00 | 0.00 |
| ATOM | 1949 | CA   | ASP | X | 127 | 39.409 | 36.349 | 24.368 | 0.00 | 0.00 |
| ATOM | 1950 | HA   | ASP | X | 127 | 38.647 | 36.892 | 23.809 | 0.00 | 0.00 |
| ATOM | 1951 | CB   | ASP | X | 127 | 40.335 | 35.513 | 23.353 | 0.00 | 0.00 |
| ATOM | 1952 | HB2  | ASP | X | 127 | 41.339 | 35.452 | 23.774 | 0.00 | 0.00 |
| ATOM | 1953 | HB3  | ASP | X | 127 | 39.855 | 34.544 | 23.212 | 0.00 | 0.00 |
| ATOM | 1954 | CG   | ASP | X | 127 | 40.504 | 36.183 | 21.888 | 0.00 | 0.00 |
| ATOM | 1955 | OD1  | ASP | X | 127 | 41.530 | 36.952 | 21.705 | 0.00 | 0.00 |
| ATOM | 1956 | OD2  | ASP | X | 127 | 39.752 | 35.870 | 20.943 | 0.00 | 0.00 |
| ATOM | 1957 | C    | ASP | X | 127 | 38.654 | 35.398 | 25.284 | 0.00 | 0.00 |
| ATOM | 1958 | O    | ASP | X | 127 | 37.568 | 34.970 | 24.940 | 0.00 | 0.00 |
| ATOM | 1959 | N    | VAL | X | 128 | 39.228 | 35.124 | 26.447 | 0.00 | 0.00 |
| ATOM | 1960 | H    | VAL | X | 128 | 40.156 | 35.468 | 26.648 | 0.00 | 0.00 |
| ATOM | 1961 | CA   | VAL | X | 128 | 38.639 | 34.168 | 27.364 | 0.00 | 0.00 |
| ATOM | 1962 | HA   | VAL | X | 128 | 38.304 | 33.399 | 26.668 | 0.00 | 0.00 |
| ATOM | 1963 | CB   | VAL | X | 128 | 39.762 | 33.568 | 28.125 | 0.00 | 0.00 |
| ATOM | 1964 | HB   | VAL | X | 128 | 40.645 | 33.515 | 27.488 | 0.00 | 0.00 |
| ATOM | 1965 | CG1  | VAL | X | 128 | 40.083 | 34.350 | 29.424 | 0.00 | 0.00 |
| ATOM | 1966 | HG11 | VAL | X | 128 | 39.954 | 35.399 | 29.158 | 0.00 | 0.00 |
| ATOM | 1967 | HG12 | VAL | X | 128 | 39.365 | 34.114 | 30.210 | 0.00 | 0.00 |
| ATOM | 1968 | HG13 | VAL | X | 128 | 41.068 | 34.141 | 29.842 | 0.00 | 0.00 |
| ATOM | 1969 | CG2  | VAL | X | 128 | 39.536 | 32.092 | 28.509 | 0.00 | 0.00 |
| ATOM | 1970 | HG21 | VAL | X | 128 | 40.385 | 31.489 | 28.831 | 0.00 | 0.00 |
| ATOM | 1971 | HG22 | VAL | X | 128 | 39.111 | 31.591 | 27.640 | 0.00 | 0.00 |
| ATOM | 1972 | HG23 | VAL | X | 128 | 38.887 | 32.058 | 29.384 | 0.00 | 0.00 |
| ATOM | 1973 | C    | VAL | X | 128 | 37.472 | 34.697 | 28.239 | 0.00 | 0.00 |
| ATOM | 1974 | O    | VAL | X | 128 | 36.774 | 33.917 | 28.871 | 0.00 | 0.00 |
| ATOM | 1975 | N    | TYR | X | 129 | 37.079 | 35.985 | 28.090 | 0.00 | 0.00 |
| ATOM | 1976 | H    | TYR | X | 129 | 37.748 | 36.655 | 27.740 | 0.00 | 0.00 |
| ATOM | 1977 | CA   | TYR | X | 129 | 35.937 | 36.583 | 28.738 | 0.00 | 0.00 |
| ATOM | 1978 | HA   | TYR | X | 129 | 35.434 | 35.867 | 29.388 | 0.00 | 0.00 |
| ATOM | 1979 | CB   | TYR | X | 129 | 36.345 | 37.897 | 29.459 | 0.00 | 0.00 |
| ATOM | 1980 | HB2  | TYR | X | 129 | 36.650 | 38.604 | 28.687 | 0.00 | 0.00 |
| ATOM | 1981 | HB3  | TYR | X | 129 | 35.407 | 38.218 | 29.909 | 0.00 | 0.00 |
| ATOM | 1982 | CG   | TYR | X | 129 | 37.446 | 37.808 | 30.501 | 0.00 | 0.00 |
| ATOM | 1983 | CD1  | TYR | X | 129 | 37.494 | 36.677 | 31.389 | 0.00 | 0.00 |
| ATOM | 1984 | HD1  | TYR | X | 129 | 36.761 | 35.892 | 31.275 | 0.00 | 0.00 |
| ATOM | 1985 | CE1  | TYR | X | 129 | 38.422 | 36.611 | 32.422 | 0.00 | 0.00 |
| ATOM | 1986 | HE1  | TYR | X | 129 | 38.320 | 35.836 | 33.167 | 0.00 | 0.00 |
| ATOM | 1987 | CZ   | TYR | X | 129 | 39.522 | 37.527 | 32.487 | 0.00 | 0.00 |

|      |      |      |     |   |     |        |        |        |      |      |
|------|------|------|-----|---|-----|--------|--------|--------|------|------|
| ATOM | 1988 | OH   | TYR | X | 129 | 40.454 | 37.553 | 33.503 | 0.00 | 0.00 |
| ATOM | 1989 | HH   | TYR | X | 129 | 40.139 | 37.300 | 34.374 | 0.00 | 0.00 |
| ATOM | 1990 | CE2  | TYR | X | 129 | 39.576 | 38.618 | 31.535 | 0.00 | 0.00 |
| ATOM | 1991 | HE2  | TYR | X | 129 | 40.345 | 39.374 | 31.589 | 0.00 | 0.00 |
| ATOM | 1992 | CD2  | TYR | X | 129 | 38.539 | 38.713 | 30.568 | 0.00 | 0.00 |
| ATOM | 1993 | HD2  | TYR | X | 129 | 38.611 | 39.505 | 29.837 | 0.00 | 0.00 |
| ATOM | 1994 | C    | TYR | X | 129 | 34.904 | 36.945 | 27.641 | 0.00 | 0.00 |
| ATOM | 1995 | O    | TYR | X | 129 | 34.051 | 37.790 | 27.879 | 0.00 | 0.00 |
| ATOM | 1996 | N    | ASP | X | 130 | 35.041 | 36.545 | 26.410 | 0.00 | 0.00 |
| ATOM | 1997 | H    | ASP | X | 130 | 35.890 | 36.093 | 26.100 | 0.00 | 0.00 |
| ATOM | 1998 | CA   | ASP | X | 130 | 34.041 | 36.754 | 25.301 | 0.00 | 0.00 |
| ATOM | 1999 | HA   | ASP | X | 130 | 33.763 | 37.806 | 25.238 | 0.00 | 0.00 |
| ATOM | 2000 | CB   | ASP | X | 130 | 34.549 | 36.395 | 23.939 | 0.00 | 0.00 |
| ATOM | 2001 | HB2  | ASP | X | 130 | 35.481 | 36.947 | 23.823 | 0.00 | 0.00 |
| ATOM | 2002 | HB3  | ASP | X | 130 | 34.713 | 35.326 | 23.805 | 0.00 | 0.00 |
| ATOM | 2003 | CG   | ASP | X | 130 | 33.500 | 36.831 | 22.819 | 0.00 | 0.00 |
| ATOM | 2004 | OD1  | ASP | X | 130 | 32.437 | 36.139 | 22.588 | 0.00 | 0.00 |
| ATOM | 2005 | OD2  | ASP | X | 130 | 33.868 | 37.676 | 21.970 | 0.00 | 0.00 |
| ATOM | 2006 | C    | ASP | X | 130 | 32.781 | 35.948 | 25.614 | 0.00 | 0.00 |
| ATOM | 2007 | O    | ASP | X | 130 | 32.921 | 34.757 | 25.898 | 0.00 | 0.00 |
| ATOM | 2008 | N    | GLY | X | 131 | 31.581 | 36.448 | 25.347 | 0.00 | 0.00 |
| ATOM | 2009 | H    | GLY | X | 131 | 31.508 | 37.421 | 25.088 | 0.00 | 0.00 |
| ATOM | 2010 | CA   | GLY | X | 131 | 30.336 | 35.802 | 25.796 | 0.00 | 0.00 |
| ATOM | 2011 | HA2  | GLY | X | 131 | 30.497 | 35.096 | 26.611 | 0.00 | 0.00 |
| ATOM | 2012 | HA3  | GLY | X | 131 | 29.633 | 36.564 | 26.132 | 0.00 | 0.00 |
| ATOM | 2013 | C    | GLY | X | 131 | 29.604 | 34.915 | 24.760 | 0.00 | 0.00 |
| ATOM | 2014 | O    | GLY | X | 131 | 28.590 | 34.217 | 25.132 | 0.00 | 0.00 |
| ATOM | 2015 | N    | ARG | X | 132 | 30.005 | 34.834 | 23.488 | 0.00 | 0.00 |
| ATOM | 2016 | H    | ARG | X | 132 | 30.701 | 35.489 | 23.161 | 0.00 | 0.00 |
| ATOM | 2017 | CA   | ARG | X | 132 | 29.305 | 34.111 | 22.427 | 0.00 | 0.00 |
| ATOM | 2018 | HA   | ARG | X | 132 | 28.491 | 34.707 | 22.015 | 0.00 | 0.00 |
| ATOM | 2019 | CB   | ARG | X | 132 | 30.195 | 34.004 | 21.146 | 0.00 | 0.00 |
| ATOM | 2020 | HB2  | ARG | X | 132 | 29.580 | 33.626 | 20.330 | 0.00 | 0.00 |
| ATOM | 2021 | HB3  | ARG | X | 132 | 30.379 | 35.039 | 20.858 | 0.00 | 0.00 |
| ATOM | 2022 | CG   | ARG | X | 132 | 31.499 | 33.186 | 21.316 | 0.00 | 0.00 |
| ATOM | 2023 | HG2  | ARG | X | 132 | 32.097 | 33.509 | 22.168 | 0.00 | 0.00 |
| ATOM | 2024 | HG3  | ARG | X | 132 | 31.245 | 32.129 | 21.391 | 0.00 | 0.00 |
| ATOM | 2025 | CD   | ARG | X | 132 | 32.446 | 33.340 | 20.071 | 0.00 | 0.00 |
| ATOM | 2026 | HD2  | ARG | X | 132 | 33.267 | 32.663 | 20.307 | 0.00 | 0.00 |
| ATOM | 2027 | HD3  | ARG | X | 132 | 31.956 | 32.996 | 19.160 | 0.00 | 0.00 |
| ATOM | 2028 | NE   | ARG | X | 132 | 33.072 | 34.647 | 20.098 | 0.00 | 0.00 |
| ATOM | 2029 | HE   | ARG | X | 132 | 32.819 | 35.289 | 20.836 | 0.00 | 0.00 |
| ATOM | 2030 | CZ   | ARG | X | 132 | 33.552 | 35.306 | 19.026 | 0.00 | 0.00 |
| ATOM | 2031 | NH1  | ARG | X | 132 | 33.574 | 34.819 | 17.836 | 0.00 | 0.00 |
| ATOM | 2032 | HH11 | ARG | X | 132 | 33.338 | 33.865 | 17.605 | 0.00 | 0.00 |
| ATOM | 2033 | HH12 | ARG | X | 132 | 33.740 | 35.499 | 17.107 | 0.00 | 0.00 |
| ATOM | 2034 | NH2  | ARG | X | 132 | 33.834 | 36.578 | 19.183 | 0.00 | 0.00 |
| ATOM | 2035 | HH21 | ARG | X | 132 | 33.589 | 37.029 | 20.053 | 0.00 | 0.00 |
| ATOM | 2036 | HH22 | ARG | X | 132 | 34.590 | 36.997 | 18.661 | 0.00 | 0.00 |
| ATOM | 2037 | C    | ARG | X | 132 | 28.713 | 32.760 | 22.838 | 0.00 | 0.00 |
| ATOM | 2038 | O    | ARG | X | 132 | 27.461 | 32.586 | 22.765 | 0.00 | 0.00 |
| ATOM | 2039 | N    | PHE | X | 133 | 29.446 | 31.743 | 23.320 | 0.00 | 0.00 |
| ATOM | 2040 | H    | PHE | X | 133 | 30.448 | 31.831 | 23.228 | 0.00 | 0.00 |
| ATOM | 2041 | CA   | PHE | X | 133 | 28.894 | 30.451 | 23.705 | 0.00 | 0.00 |
| ATOM | 2042 | HA   | PHE | X | 133 | 28.168 | 30.095 | 22.974 | 0.00 | 0.00 |
| ATOM | 2043 | CB   | PHE | X | 133 | 30.007 | 29.414 | 23.967 | 0.00 | 0.00 |
| ATOM | 2044 | HB2  | PHE | X | 133 | 30.699 | 29.674 | 24.768 | 0.00 | 0.00 |
| ATOM | 2045 | HB3  | PHE | X | 133 | 29.553 | 28.490 | 24.325 | 0.00 | 0.00 |
| ATOM | 2046 | CG   | PHE | X | 133 | 30.784 | 29.125 | 22.750 | 0.00 | 0.00 |
| ATOM | 2047 | CD1  | PHE | X | 133 | 32.037 | 29.669 | 22.582 | 0.00 | 0.00 |
| ATOM | 2048 | HD1  | PHE | X | 133 | 32.328 | 30.228 | 23.459 | 0.00 | 0.00 |
| ATOM | 2049 | CE1  | PHE | X | 133 | 32.602 | 29.786 | 21.365 | 0.00 | 0.00 |
| ATOM | 2050 | HE1  | PHE | X | 133 | 33.572 | 30.252 | 21.275 | 0.00 | 0.00 |
| ATOM | 2051 | CZ   | PHE | X | 133 | 32.146 | 29.100 | 20.275 | 0.00 | 0.00 |
| ATOM | 2052 | HZ   | PHE | X | 133 | 32.746 | 29.163 | 19.379 | 0.00 | 0.00 |
| ATOM | 2053 | CE2  | PHE | X | 133 | 30.888 | 28.445 | 20.373 | 0.00 | 0.00 |
| ATOM | 2054 | HE2  | PHE | X | 133 | 30.360 | 27.966 | 19.562 | 0.00 | 0.00 |

|      |      |      |     |   |     |        |        |        |      |      |
|------|------|------|-----|---|-----|--------|--------|--------|------|------|
| ATOM | 2055 | CD2  | PHE | X | 133 | 30.221 | 28.452 | 21.585 | 0.00 | 0.00 |
| ATOM | 2056 | HD2  | PHE | X | 133 | 29.203 | 28.096 | 21.651 | 0.00 | 0.00 |
| ATOM | 2057 | C    | PHE | X | 133 | 27.911 | 30.395 | 24.961 | 0.00 | 0.00 |
| ATOM | 2058 | O    | PHE | X | 133 | 26.815 | 29.838 | 24.846 | 0.00 | 0.00 |
| ATOM | 2059 | N    | LEU | X | 134 | 28.340 | 31.101 | 25.983 | 0.00 | 0.00 |
| ATOM | 2060 | H    | LEU | X | 134 | 29.253 | 31.517 | 25.870 | 0.00 | 0.00 |
| ATOM | 2061 | CA   | LEU | X | 134 | 27.554 | 31.286 | 27.165 | 0.00 | 0.00 |
| ATOM | 2062 | HA   | LEU | X | 134 | 27.214 | 30.300 | 27.482 | 0.00 | 0.00 |
| ATOM | 2063 | CB   | LEU | X | 134 | 28.309 | 32.004 | 28.284 | 0.00 | 0.00 |
| ATOM | 2064 | HB2  | LEU | X | 134 | 29.123 | 31.383 | 28.658 | 0.00 | 0.00 |
| ATOM | 2065 | HB3  | LEU | X | 134 | 28.789 | 32.840 | 27.775 | 0.00 | 0.00 |
| ATOM | 2066 | CG   | LEU | X | 134 | 27.536 | 32.666 | 29.483 | 0.00 | 0.00 |
| ATOM | 2067 | HG   | LEU | X | 134 | 26.586 | 33.123 | 29.206 | 0.00 | 0.00 |
| ATOM | 2068 | CD1  | LEU | X | 134 | 27.053 | 31.620 | 30.506 | 0.00 | 0.00 |
| ATOM | 2069 | HD11 | LEU | X | 134 | 26.419 | 32.078 | 31.264 | 0.00 | 0.00 |
| ATOM | 2070 | HD12 | LEU | X | 134 | 27.938 | 31.166 | 30.952 | 0.00 | 0.00 |
| ATOM | 2071 | HD13 | LEU | X | 134 | 26.375 | 30.851 | 30.136 | 0.00 | 0.00 |
| ATOM | 2072 | CD2  | LEU | X | 134 | 28.301 | 33.843 | 30.140 | 0.00 | 0.00 |
| ATOM | 2073 | HD21 | LEU | X | 134 | 28.347 | 34.686 | 29.450 | 0.00 | 0.00 |
| ATOM | 2074 | HD22 | LEU | X | 134 | 27.869 | 34.146 | 31.095 | 0.00 | 0.00 |
| ATOM | 2075 | HD23 | LEU | X | 134 | 29.273 | 33.418 | 30.388 | 0.00 | 0.00 |
| ATOM | 2076 | C    | LEU | X | 134 | 26.307 | 32.043 | 26.794 | 0.00 | 0.00 |
| ATOM | 2077 | O    | LEU | X | 134 | 25.247 | 31.568 | 27.201 | 0.00 | 0.00 |
| ATOM | 2078 | N    | VAL | X | 135 | 26.379 | 33.215 | 26.153 | 0.00 | 0.00 |
| ATOM | 2079 | H    | VAL | X | 135 | 27.336 | 33.522 | 26.052 | 0.00 | 0.00 |
| ATOM | 2080 | CA   | VAL | X | 135 | 25.197 | 34.036 | 25.837 | 0.00 | 0.00 |
| ATOM | 2081 | HA   | VAL | X | 135 | 24.660 | 34.028 | 26.786 | 0.00 | 0.00 |
| ATOM | 2082 | CB   | VAL | X | 135 | 25.535 | 35.471 | 25.407 | 0.00 | 0.00 |
| ATOM | 2083 | HB   | VAL | X | 135 | 26.148 | 35.505 | 24.506 | 0.00 | 0.00 |
| ATOM | 2084 | CG1  | VAL | X | 135 | 24.214 | 36.192 | 25.015 | 0.00 | 0.00 |
| ATOM | 2085 | HG11 | VAL | X | 135 | 23.367 | 35.766 | 25.552 | 0.00 | 0.00 |
| ATOM | 2086 | HG12 | VAL | X | 135 | 24.226 | 37.276 | 25.131 | 0.00 | 0.00 |
| ATOM | 2087 | HG13 | VAL | X | 135 | 24.047 | 35.998 | 23.955 | 0.00 | 0.00 |
| ATOM | 2088 | CG2  | VAL | X | 135 | 26.277 | 36.338 | 26.409 | 0.00 | 0.00 |
| ATOM | 2089 | HG21 | VAL | X | 135 | 25.684 | 36.453 | 27.317 | 0.00 | 0.00 |
| ATOM | 2090 | HG22 | VAL | X | 135 | 26.356 | 37.362 | 26.043 | 0.00 | 0.00 |
| ATOM | 2091 | HG23 | VAL | X | 135 | 27.257 | 35.952 | 26.688 | 0.00 | 0.00 |
| ATOM | 2092 | C    | VAL | X | 135 | 24.302 | 33.250 | 24.838 | 0.00 | 0.00 |
| ATOM | 2093 | O    | VAL | X | 135 | 23.084 | 33.255 | 24.950 | 0.00 | 0.00 |
| ATOM | 2094 | N    | GLN | X | 136 | 24.818 | 32.442 | 23.868 | 0.00 | 0.00 |
| ATOM | 2095 | H    | GLN | X | 136 | 25.825 | 32.360 | 23.840 | 0.00 | 0.00 |
| ATOM | 2096 | CA   | GLN | X | 136 | 23.949 | 31.738 | 22.945 | 0.00 | 0.00 |
| ATOM | 2097 | HA   | GLN | X | 136 | 23.166 | 32.411 | 22.597 | 0.00 | 0.00 |
| ATOM | 2098 | CB   | GLN | X | 136 | 24.801 | 31.244 | 21.871 | 0.00 | 0.00 |
| ATOM | 2099 | HB2  | GLN | X | 136 | 25.313 | 32.106 | 21.441 | 0.00 | 0.00 |
| ATOM | 2100 | HB3  | GLN | X | 136 | 25.541 | 30.643 | 22.399 | 0.00 | 0.00 |
| ATOM | 2101 | CG   | GLN | X | 136 | 23.985 | 30.600 | 20.713 | 0.00 | 0.00 |
| ATOM | 2102 | HG2  | GLN | X | 136 | 23.054 | 31.150 | 20.573 | 0.00 | 0.00 |
| ATOM | 2103 | HG3  | GLN | X | 136 | 24.522 | 30.654 | 19.766 | 0.00 | 0.00 |
| ATOM | 2104 | CD   | GLN | X | 136 | 23.680 | 29.149 | 20.871 | 0.00 | 0.00 |
| ATOM | 2105 | OE1  | GLN | X | 136 | 24.373 | 28.368 | 21.463 | 0.00 | 0.00 |
| ATOM | 2106 | NE2  | GLN | X | 136 | 22.569 | 28.713 | 20.296 | 0.00 | 0.00 |
| ATOM | 2107 | HE21 | GLN | X | 136 | 22.149 | 27.822 | 20.516 | 0.00 | 0.00 |
| ATOM | 2108 | HE22 | GLN | X | 136 | 22.067 | 29.253 | 19.607 | 0.00 | 0.00 |
| ATOM | 2109 | C    | GLN | X | 136 | 23.142 | 30.585 | 23.645 | 0.00 | 0.00 |
| ATOM | 2110 | O    | GLN | X | 136 | 22.107 | 30.212 | 23.170 | 0.00 | 0.00 |
| ATOM | 2111 | N    | ALA | X | 137 | 23.673 | 30.018 | 24.724 | 0.00 | 0.00 |
| ATOM | 2112 | H    | ALA | X | 137 | 24.480 | 30.467 | 25.134 | 0.00 | 0.00 |
| ATOM | 2113 | CA   | ALA | X | 137 | 23.060 | 28.985 | 25.531 | 0.00 | 0.00 |
| ATOM | 2114 | HA   | ALA | X | 137 | 22.501 | 28.208 | 25.009 | 0.00 | 0.00 |
| ATOM | 2115 | CB   | ALA | X | 137 | 24.164 | 28.152 | 26.267 | 0.00 | 0.00 |
| ATOM | 2116 | HB1  | ALA | X | 137 | 23.619 | 27.444 | 26.893 | 0.00 | 0.00 |
| ATOM | 2117 | HB2  | ALA | X | 137 | 24.686 | 28.756 | 27.009 | 0.00 | 0.00 |
| ATOM | 2118 | HB3  | ALA | X | 137 | 24.806 | 27.596 | 25.584 | 0.00 | 0.00 |
| ATOM | 2119 | C    | ALA | X | 137 | 22.049 | 29.665 | 26.437 | 0.00 | 0.00 |
| ATOM | 2120 | O    | ALA | X | 137 | 20.821 | 29.665 | 26.236 | 0.00 | 0.00 |
| ATOM | 2121 | N    | GLU | X | 138 | 22.649 | 30.292 | 27.460 | 0.00 | 0.00 |

|      |      |      |     |   |     |        |        |        |      |      |
|------|------|------|-----|---|-----|--------|--------|--------|------|------|
| ATOM | 2122 | H    | GLU | X | 138 | 23.647 | 30.446 | 27.446 | 0.00 | 0.00 |
| ATOM | 2123 | CA   | GLU | X | 138 | 21.876 | 30.678 | 28.675 | 0.00 | 0.00 |
| ATOM | 2124 | HA   | GLU | X | 138 | 21.100 | 29.947 | 28.899 | 0.00 | 0.00 |
| ATOM | 2125 | CB   | GLU | X | 138 | 22.813 | 30.691 | 29.875 | 0.00 | 0.00 |
| ATOM | 2126 | HB2  | GLU | X | 138 | 23.639 | 31.372 | 29.666 | 0.00 | 0.00 |
| ATOM | 2127 | HB3  | GLU | X | 138 | 22.202 | 31.082 | 30.688 | 0.00 | 0.00 |
| ATOM | 2128 | CG   | GLU | X | 138 | 23.319 | 29.358 | 30.253 | 0.00 | 0.00 |
| ATOM | 2129 | HG2  | GLU | X | 138 | 24.039 | 29.000 | 29.518 | 0.00 | 0.00 |
| ATOM | 2130 | HG3  | GLU | X | 138 | 23.907 | 29.384 | 31.170 | 0.00 | 0.00 |
| ATOM | 2131 | CD   | GLU | X | 138 | 22.194 | 28.362 | 30.454 | 0.00 | 0.00 |
| ATOM | 2132 | OE1  | GLU | X | 138 | 21.416 | 28.519 | 31.407 | 0.00 | 0.00 |
| ATOM | 2133 | OE2  | GLU | X | 138 | 22.040 | 27.385 | 29.649 | 0.00 | 0.00 |
| ATOM | 2134 | C    | GLU | X | 138 | 21.102 | 31.976 | 28.471 | 0.00 | 0.00 |
| ATOM | 2135 | O    | GLU | X | 138 | 20.043 | 32.153 | 29.075 | 0.00 | 0.00 |
| ATOM | 2136 | N    | ARG | X | 139 | 21.450 | 32.779 | 27.511 | 0.00 | 0.00 |
| ATOM | 2137 | H    | ARG | X | 139 | 22.291 | 32.491 | 27.032 | 0.00 | 0.00 |
| ATOM | 2138 | CA   | ARG | X | 139 | 20.652 | 33.874 | 26.923 | 0.00 | 0.00 |
| ATOM | 2139 | HA   | ARG | X | 139 | 21.163 | 34.310 | 26.065 | 0.00 | 0.00 |
| ATOM | 2140 | CB   | ARG | X | 139 | 19.440 | 33.330 | 26.258 | 0.00 | 0.00 |
| ATOM | 2141 | HB2  | ARG | X | 139 | 19.077 | 32.510 | 26.877 | 0.00 | 0.00 |
| ATOM | 2142 | HB3  | ARG | X | 139 | 18.594 | 34.016 | 26.208 | 0.00 | 0.00 |
| ATOM | 2143 | CG   | ARG | X | 139 | 19.745 | 32.723 | 24.908 | 0.00 | 0.00 |
| ATOM | 2144 | HG2  | ARG | X | 139 | 19.869 | 33.481 | 24.135 | 0.00 | 0.00 |
| ATOM | 2145 | HG3  | ARG | X | 139 | 20.742 | 32.298 | 25.025 | 0.00 | 0.00 |
| ATOM | 2146 | CD   | ARG | X | 139 | 18.656 | 31.659 | 24.550 | 0.00 | 0.00 |
| ATOM | 2147 | HD2  | ARG | X | 139 | 18.899 | 31.086 | 23.655 | 0.00 | 0.00 |
| ATOM | 2148 | HD3  | ARG | X | 139 | 18.596 | 30.956 | 25.381 | 0.00 | 0.00 |
| ATOM | 2149 | NE   | ARG | X | 139 | 17.389 | 32.356 | 24.265 | 0.00 | 0.00 |
| ATOM | 2150 | HE   | ARG | X | 139 | 17.354 | 33.073 | 23.554 | 0.00 | 0.00 |
| ATOM | 2151 | CZ   | ARG | X | 139 | 16.352 | 32.261 | 25.099 | 0.00 | 0.00 |
| ATOM | 2152 | NH1  | ARG | X | 139 | 16.207 | 31.409 | 25.995 | 0.00 | 0.00 |
| ATOM | 2153 | HH11 | ARG | X | 139 | 16.706 | 30.531 | 26.012 | 0.00 | 0.00 |
| ATOM | 2154 | HH12 | ARG | X | 139 | 15.275 | 31.450 | 26.383 | 0.00 | 0.00 |
| ATOM | 2155 | NH2  | ARG | X | 139 | 15.345 | 32.997 | 24.844 | 0.00 | 0.00 |
| ATOM | 2156 | HH21 | ARG | X | 139 | 15.318 | 33.615 | 24.046 | 0.00 | 0.00 |
| ATOM | 2157 | HH22 | ARG | X | 139 | 14.451 | 32.805 | 25.273 | 0.00 | 0.00 |
| ATOM | 2158 | C    | ARG | X | 139 | 20.534 | 35.079 | 27.893 | 0.00 | 0.00 |
| ATOM | 2159 | O    | ARG | X | 139 | 19.842 | 36.032 | 27.493 | 0.00 | 0.00 |
| ATOM | 2160 | N    | THR | X | 140 | 21.184 | 34.985 | 29.059 | 0.00 | 0.00 |
| ATOM | 2161 | H    | THR | X | 140 | 21.498 | 34.067 | 29.339 | 0.00 | 0.00 |
| ATOM | 2162 | CA   | THR | X | 140 | 21.587 | 36.116 | 29.946 | 0.00 | 0.00 |
| ATOM | 2163 | HA   | THR | X | 140 | 20.810 | 36.501 | 30.606 | 0.00 | 0.00 |
| ATOM | 2164 | CB   | THR | X | 140 | 22.727 | 35.723 | 30.910 | 0.00 | 0.00 |
| ATOM | 2165 | HB   | THR | X | 140 | 23.364 | 36.521 | 31.291 | 0.00 | 0.00 |
| ATOM | 2166 | CG2  | THR | X | 140 | 22.183 | 34.789 | 32.099 | 0.00 | 0.00 |
| ATOM | 2167 | HG21 | THR | X | 140 | 21.167 | 35.048 | 32.395 | 0.00 | 0.00 |
| ATOM | 2168 | HG22 | THR | X | 140 | 22.860 | 35.083 | 32.902 | 0.00 | 0.00 |
| ATOM | 2169 | HG23 | THR | X | 140 | 22.284 | 33.718 | 31.921 | 0.00 | 0.00 |
| ATOM | 2170 | OG1  | THR | X | 140 | 23.577 | 34.685 | 30.252 | 0.00 | 0.00 |
| ATOM | 2171 | HG1  | THR | X | 140 | 24.106 | 35.215 | 29.651 | 0.00 | 0.00 |
| ATOM | 2172 | C    | THR | X | 140 | 22.202 | 37.269 | 29.117 | 0.00 | 0.00 |
| ATOM | 2173 | O    | THR | X | 140 | 22.641 | 37.003 | 27.972 | 0.00 | 0.00 |
| ATOM | 2174 | N    | VAL | X | 141 | 22.298 | 38.413 | 29.693 | 0.00 | 0.00 |
| ATOM | 2175 | H    | VAL | X | 141 | 22.065 | 38.504 | 30.671 | 0.00 | 0.00 |
| ATOM | 2176 | CA   | VAL | X | 141 | 23.053 | 39.536 | 29.204 | 0.00 | 0.00 |
| ATOM | 2177 | HA   | VAL | X | 141 | 23.151 | 39.302 | 28.144 | 0.00 | 0.00 |
| ATOM | 2178 | CB   | VAL | X | 141 | 22.265 | 40.834 | 29.373 | 0.00 | 0.00 |
| ATOM | 2179 | HB   | VAL | X | 141 | 21.935 | 41.036 | 30.392 | 0.00 | 0.00 |
| ATOM | 2180 | CG1  | VAL | X | 141 | 23.233 | 41.961 | 29.075 | 0.00 | 0.00 |
| ATOM | 2181 | HG11 | VAL | X | 141 | 23.545 | 41.927 | 28.031 | 0.00 | 0.00 |
| ATOM | 2182 | HG12 | VAL | X | 141 | 22.670 | 42.890 | 29.165 | 0.00 | 0.00 |
| ATOM | 2183 | HG13 | VAL | X | 141 | 23.976 | 42.061 | 29.867 | 0.00 | 0.00 |
| ATOM | 2184 | CG2  | VAL | X | 141 | 21.101 | 40.788 | 28.354 | 0.00 | 0.00 |
| ATOM | 2185 | HG21 | VAL | X | 141 | 20.645 | 41.776 | 28.419 | 0.00 | 0.00 |
| ATOM | 2186 | HG22 | VAL | X | 141 | 20.385 | 40.004 | 28.600 | 0.00 | 0.00 |
| ATOM | 2187 | HG23 | VAL | X | 141 | 21.609 | 40.600 | 27.408 | 0.00 | 0.00 |
| ATOM | 2188 | C    | VAL | X | 141 | 24.443 | 39.590 | 29.819 | 0.00 | 0.00 |

|      |      |      |     |   |     |        |        |        |      |      |
|------|------|------|-----|---|-----|--------|--------|--------|------|------|
| ATOM | 2189 | O    | VAL | X | 141 | 24.588 | 39.721 | 31.005 | 0.00 | 0.00 |
| ATOM | 2190 | N    | LEU | X | 142 | 25.460 | 39.544 | 29.018 | 0.00 | 0.00 |
| ATOM | 2191 | H    | LEU | X | 142 | 25.262 | 39.735 | 28.046 | 0.00 | 0.00 |
| ATOM | 2192 | CA   | LEU | X | 142 | 26.883 | 39.540 | 29.440 | 0.00 | 0.00 |
| ATOM | 2193 | HA   | LEU | X | 142 | 26.925 | 39.224 | 30.482 | 0.00 | 0.00 |
| ATOM | 2194 | CB   | LEU | X | 142 | 27.692 | 38.496 | 28.648 | 0.00 | 0.00 |
| ATOM | 2195 | HB2  | LEU | X | 142 | 27.210 | 37.518 | 28.662 | 0.00 | 0.00 |
| ATOM | 2196 | HB3  | LEU | X | 142 | 27.764 | 38.737 | 27.587 | 0.00 | 0.00 |
| ATOM | 2197 | CG   | LEU | X | 142 | 29.171 | 38.250 | 29.138 | 0.00 | 0.00 |
| ATOM | 2198 | HG   | LEU | X | 142 | 29.552 | 37.295 | 28.776 | 0.00 | 0.00 |
| ATOM | 2199 | CD1  | LEU | X | 142 | 30.273 | 39.206 | 28.848 | 0.00 | 0.00 |
| ATOM | 2200 | HD11 | LEU | X | 142 | 30.405 | 39.223 | 27.766 | 0.00 | 0.00 |
| ATOM | 2201 | HD12 | LEU | X | 142 | 31.194 | 38.771 | 29.236 | 0.00 | 0.00 |
| ATOM | 2202 | HD13 | LEU | X | 142 | 30.105 | 40.233 | 29.173 | 0.00 | 0.00 |
| ATOM | 2203 | CD2  | LEU | X | 142 | 29.217 | 38.099 | 30.690 | 0.00 | 0.00 |
| ATOM | 2204 | HD21 | LEU | X | 142 | 28.442 | 37.409 | 31.025 | 0.00 | 0.00 |
| ATOM | 2205 | HD22 | LEU | X | 142 | 30.172 | 37.723 | 31.058 | 0.00 | 0.00 |
| ATOM | 2206 | HD23 | LEU | X | 142 | 29.136 | 39.082 | 31.153 | 0.00 | 0.00 |
| ATOM | 2207 | C    | LEU | X | 142 | 27.454 | 40.962 | 29.299 | 0.00 | 0.00 |
| ATOM | 2208 | O    | LEU | X | 142 | 27.122 | 41.672 | 28.331 | 0.00 | 0.00 |
| ATOM | 2209 | N    | VAL | X | 143 | 28.086 | 41.417 | 30.385 | 0.00 | 0.00 |
| ATOM | 2210 | H    | VAL | X | 143 | 28.057 | 40.957 | 31.284 | 0.00 | 0.00 |
| ATOM | 2211 | CA   | VAL | X | 143 | 28.712 | 42.714 | 30.460 | 0.00 | 0.00 |
| ATOM | 2212 | HA   | VAL | X | 143 | 28.851 | 43.036 | 29.428 | 0.00 | 0.00 |
| ATOM | 2213 | CB   | VAL | X | 143 | 27.856 | 43.657 | 31.373 | 0.00 | 0.00 |
| ATOM | 2214 | HB   | VAL | X | 143 | 27.924 | 43.299 | 32.400 | 0.00 | 0.00 |
| ATOM | 2215 | CG1  | VAL | X | 143 | 28.506 | 45.047 | 31.461 | 0.00 | 0.00 |
| ATOM | 2216 | HG11 | VAL | X | 143 | 29.542 | 44.980 | 31.795 | 0.00 | 0.00 |
| ATOM | 2217 | HG12 | VAL | X | 143 | 28.588 | 45.471 | 30.460 | 0.00 | 0.00 |
| ATOM | 2218 | HG13 | VAL | X | 143 | 27.887 | 45.704 | 32.072 | 0.00 | 0.00 |
| ATOM | 2219 | CG2  | VAL | X | 143 | 26.356 | 43.808 | 30.925 | 0.00 | 0.00 |
| ATOM | 2220 | HG21 | VAL | X | 143 | 25.754 | 42.907 | 31.038 | 0.00 | 0.00 |
| ATOM | 2221 | HG22 | VAL | X | 143 | 26.356 | 44.201 | 29.908 | 0.00 | 0.00 |
| ATOM | 2222 | HG23 | VAL | X | 143 | 25.876 | 44.545 | 31.569 | 0.00 | 0.00 |
| ATOM | 2223 | C    | VAL | X | 143 | 30.145 | 42.472 | 30.956 | 0.00 | 0.00 |
| ATOM | 2224 | O    | VAL | X | 143 | 30.393 | 41.675 | 31.817 | 0.00 | 0.00 |
| ATOM | 2225 | N    | SER | X | 144 | 31.090 | 43.318 | 30.533 | 0.00 | 0.00 |
| ATOM | 2226 | H    | SER | X | 144 | 30.905 | 43.980 | 29.794 | 0.00 | 0.00 |
| ATOM | 2227 | CA   | SER | X | 144 | 32.524 | 43.347 | 30.903 | 0.00 | 0.00 |
| ATOM | 2228 | HA   | SER | X | 144 | 32.751 | 43.138 | 31.948 | 0.00 | 0.00 |
| ATOM | 2229 | CB   | SER | X | 144 | 33.207 | 42.295 | 30.098 | 0.00 | 0.00 |
| ATOM | 2230 | HB2  | SER | X | 144 | 32.734 | 41.354 | 30.380 | 0.00 | 0.00 |
| ATOM | 2231 | HB3  | SER | X | 144 | 33.053 | 42.481 | 29.035 | 0.00 | 0.00 |
| ATOM | 2232 | OG   | SER | X | 144 | 34.571 | 42.136 | 30.287 | 0.00 | 0.00 |
| ATOM | 2233 | HG   | SER | X | 144 | 34.864 | 41.520 | 29.611 | 0.00 | 0.00 |
| ATOM | 2234 | C    | SER | X | 144 | 33.132 | 44.737 | 30.617 | 0.00 | 0.00 |
| ATOM | 2235 | O    | SER | X | 144 | 32.867 | 45.273 | 29.528 | 0.00 | 0.00 |
| ATOM | 2236 | N    | MET | X | 145 | 33.909 | 45.280 | 31.521 | 0.00 | 0.00 |
| ATOM | 2237 | H    | MET | X | 145 | 34.251 | 44.748 | 32.308 | 0.00 | 0.00 |
| ATOM | 2238 | CA   | MET | X | 145 | 34.295 | 46.708 | 31.527 | 0.00 | 0.00 |
| ATOM | 2239 | HA   | MET | X | 145 | 34.091 | 47.246 | 30.601 | 0.00 | 0.00 |
| ATOM | 2240 | CB   | MET | X | 145 | 33.536 | 47.416 | 32.686 | 0.00 | 0.00 |
| ATOM | 2241 | HB2  | MET | X | 145 | 33.883 | 48.442 | 32.812 | 0.00 | 0.00 |
| ATOM | 2242 | HB3  | MET | X | 145 | 32.492 | 47.519 | 32.391 | 0.00 | 0.00 |
| ATOM | 2243 | CG   | MET | X | 145 | 33.783 | 46.643 | 34.046 | 0.00 | 0.00 |
| ATOM | 2244 | HG2  | MET | X | 145 | 33.282 | 45.675 | 34.066 | 0.00 | 0.00 |
| ATOM | 2245 | HG3  | MET | X | 145 | 34.862 | 46.629 | 34.203 | 0.00 | 0.00 |
| ATOM | 2246 | SD   | MET | X | 145 | 33.327 | 47.618 | 35.513 | 0.00 | 0.00 |
| ATOM | 2247 | CE   | MET | X | 145 | 32.989 | 46.216 | 36.724 | 0.00 | 0.00 |
| ATOM | 2248 | HE1  | MET | X | 145 | 32.022 | 45.731 | 36.588 | 0.00 | 0.00 |
| ATOM | 2249 | HE2  | MET | X | 145 | 33.830 | 45.583 | 36.443 | 0.00 | 0.00 |
| ATOM | 2250 | HE3  | MET | X | 145 | 33.081 | 46.573 | 37.750 | 0.00 | 0.00 |
| ATOM | 2251 | C    | MET | X | 145 | 35.838 | 46.901 | 31.782 | 0.00 | 0.00 |
| ATOM | 2252 | O    | MET | X | 145 | 36.490 | 46.110 | 32.433 | 0.00 | 0.00 |
| ATOM | 2253 | N    | ASN | X | 146 | 36.438 | 47.997 | 31.358 | 0.00 | 0.00 |
| ATOM | 2254 | H    | ASN | X | 146 | 35.879 | 48.773 | 31.034 | 0.00 | 0.00 |
| ATOM | 2255 | CA   | ASN | X | 146 | 37.765 | 48.404 | 31.789 | 0.00 | 0.00 |



|      |      |      |     |   |     |        |        |        |      |      |
|------|------|------|-----|---|-----|--------|--------|--------|------|------|
| ATOM | 2256 | HA   | ASN | X | 146 | 38.441 | 47.608 | 32.101 | 0.00 | 0.00 |
| ATOM | 2257 | CB   | ASN | X | 146 | 38.421 | 49.097 | 30.603 | 0.00 | 0.00 |
| ATOM | 2258 | HB2  | ASN | X | 146 | 37.654 | 49.557 | 29.979 | 0.00 | 0.00 |
| ATOM | 2259 | HB3  | ASN | X | 146 | 39.199 | 49.758 | 30.985 | 0.00 | 0.00 |
| ATOM | 2260 | CG   | ASN | X | 146 | 39.099 | 48.069 | 29.696 | 0.00 | 0.00 |
| ATOM | 2261 | OD1  | ASN | X | 146 | 39.025 | 46.878 | 29.936 | 0.00 | 0.00 |
| ATOM | 2262 | ND2  | ASN | X | 146 | 39.861 | 48.449 | 28.603 | 0.00 | 0.00 |
| ATOM | 2263 | HD21 | ASN | X | 146 | 40.345 | 47.763 | 28.042 | 0.00 | 0.00 |
| ATOM | 2264 | HD22 | ASN | X | 146 | 40.122 | 49.416 | 28.474 | 0.00 | 0.00 |
| ATOM | 2265 | C    | ASN | X | 146 | 37.740 | 49.385 | 32.955 | 0.00 | 0.00 |
| ATOM | 2266 | O    | ASN | X | 146 | 36.710 | 50.032 | 33.227 | 0.00 | 0.00 |
| ATOM | 2267 | N    | TYR | X | 147 | 38.878 | 49.617 | 33.671 | 0.00 | 0.00 |
| ATOM | 2268 | H    | TYR | X | 147 | 39.689 | 49.140 | 33.304 | 0.00 | 0.00 |
| ATOM | 2269 | CA   | TYR | X | 147 | 39.031 | 50.353 | 34.887 | 0.00 | 0.00 |
| ATOM | 2270 | HA   | TYR | X | 147 | 38.660 | 51.348 | 34.641 | 0.00 | 0.00 |
| ATOM | 2271 | CB   | TYR | X | 147 | 38.220 | 49.841 | 36.047 | 0.00 | 0.00 |
| ATOM | 2272 | HB2  | TYR | X | 147 | 38.484 | 50.384 | 36.954 | 0.00 | 0.00 |
| ATOM | 2273 | HB3  | TYR | X | 147 | 37.200 | 50.105 | 35.769 | 0.00 | 0.00 |
| ATOM | 2274 | CG   | TYR | X | 147 | 38.258 | 48.314 | 36.363 | 0.00 | 0.00 |
| ATOM | 2275 | CD1  | TYR | X | 147 | 37.318 | 47.434 | 35.807 | 0.00 | 0.00 |
| ATOM | 2276 | HD1  | TYR | X | 147 | 36.485 | 47.817 | 35.235 | 0.00 | 0.00 |
| ATOM | 2277 | CE1  | TYR | X | 147 | 37.503 | 45.993 | 35.965 | 0.00 | 0.00 |
| ATOM | 2278 | HE1  | TYR | X | 147 | 36.766 | 45.384 | 35.462 | 0.00 | 0.00 |
| ATOM | 2279 | CZ   | TYR | X | 147 | 38.539 | 45.491 | 36.740 | 0.00 | 0.00 |
| ATOM | 2280 | OH   | TYR | X | 147 | 38.696 | 44.134 | 36.860 | 0.00 | 0.00 |
| ATOM | 2281 | HH   | TYR | X | 147 | 39.561 | 43.907 | 37.208 | 0.00 | 0.00 |
| ATOM | 2282 | CE2  | TYR | X | 147 | 39.376 | 46.378 | 37.467 | 0.00 | 0.00 |
| ATOM | 2283 | HE2  | TYR | X | 147 | 40.164 | 46.006 | 38.105 | 0.00 | 0.00 |
| ATOM | 2284 | CD2  | TYR | X | 147 | 39.286 | 47.802 | 37.140 | 0.00 | 0.00 |
| ATOM | 2285 | HD2  | TYR | X | 147 | 40.044 | 48.481 | 37.502 | 0.00 | 0.00 |
| ATOM | 2286 | C    | TYR | X | 147 | 40.432 | 50.700 | 35.187 | 0.00 | 0.00 |
| ATOM | 2287 | O    | TYR | X | 147 | 41.356 | 50.031 | 34.697 | 0.00 | 0.00 |
| ATOM | 2288 | N    | ARG | X | 148 | 40.711 | 51.745 | 35.972 | 0.00 | 0.00 |
| ATOM | 2289 | H    | ARG | X | 148 | 39.920 | 52.280 | 36.300 | 0.00 | 0.00 |
| ATOM | 2290 | CA   | ARG | X | 148 | 42.097 | 52.183 | 36.162 | 0.00 | 0.00 |
| ATOM | 2291 | HA   | ARG | X | 148 | 42.642 | 52.087 | 35.223 | 0.00 | 0.00 |
| ATOM | 2292 | CB   | ARG | X | 148 | 42.103 | 53.652 | 36.545 | 0.00 | 0.00 |
| ATOM | 2293 | HB2  | ARG | X | 148 | 41.393 | 53.767 | 37.365 | 0.00 | 0.00 |
| ATOM | 2294 | HB3  | ARG | X | 148 | 43.039 | 53.887 | 37.051 | 0.00 | 0.00 |
| ATOM | 2295 | CG   | ARG | X | 148 | 41.984 | 54.587 | 35.319 | 0.00 | 0.00 |
| ATOM | 2296 | HG2  | ARG | X | 148 | 42.708 | 54.346 | 34.540 | 0.00 | 0.00 |
| ATOM | 2297 | HG3  | ARG | X | 148 | 41.093 | 54.157 | 34.861 | 0.00 | 0.00 |
| ATOM | 2298 | CD   | ARG | X | 148 | 42.078 | 56.021 | 35.621 | 0.00 | 0.00 |
| ATOM | 2299 | HD2  | ARG | X | 148 | 42.943 | 56.278 | 36.232 | 0.00 | 0.00 |
| ATOM | 2300 | HD3  | ARG | X | 148 | 42.064 | 56.638 | 34.723 | 0.00 | 0.00 |
| ATOM | 2301 | NE   | ARG | X | 148 | 40.871 | 56.343 | 36.351 | 0.00 | 0.00 |
| ATOM | 2302 | HE   | ARG | X | 148 | 40.385 | 55.499 | 36.622 | 0.00 | 0.00 |
| ATOM | 2303 | CZ   | ARG | X | 148 | 40.526 | 57.421 | 37.029 | 0.00 | 0.00 |
| ATOM | 2304 | NH1  | ARG | X | 148 | 41.413 | 58.415 | 37.148 | 0.00 | 0.00 |
| ATOM | 2305 | HH11 | ARG | X | 148 | 42.378 | 58.264 | 36.892 | 0.00 | 0.00 |
| ATOM | 2306 | HH12 | ARG | X | 148 | 41.135 | 59.335 | 37.459 | 0.00 | 0.00 |
| ATOM | 2307 | NH2  | ARG | X | 148 | 39.329 | 57.560 | 37.556 | 0.00 | 0.00 |
| ATOM | 2308 | HH21 | ARG | X | 148 | 38.600 | 56.887 | 37.368 | 0.00 | 0.00 |
| ATOM | 2309 | HH22 | ARG | X | 148 | 39.072 | 58.348 | 38.133 | 0.00 | 0.00 |
| ATOM | 2310 | C    | ARG | X | 148 | 42.715 | 51.301 | 37.186 | 0.00 | 0.00 |
| ATOM | 2311 | O    | ARG | X | 148 | 42.594 | 51.505 | 38.321 | 0.00 | 0.00 |
| ATOM | 2312 | N    | VAL | X | 149 | 43.272 | 50.150 | 36.708 | 0.00 | 0.00 |
| ATOM | 2313 | H    | VAL | X | 149 | 43.115 | 49.887 | 35.745 | 0.00 | 0.00 |
| ATOM | 2314 | CA   | VAL | X | 149 | 44.231 | 49.291 | 37.474 | 0.00 | 0.00 |
| ATOM | 2315 | HA   | VAL | X | 149 | 43.911 | 49.203 | 38.513 | 0.00 | 0.00 |
| ATOM | 2316 | CB   | VAL | X | 149 | 44.364 | 47.836 | 36.932 | 0.00 | 0.00 |
| ATOM | 2317 | HB   | VAL | X | 149 | 45.050 | 47.378 | 37.646 | 0.00 | 0.00 |
| ATOM | 2318 | CG1  | VAL | X | 149 | 43.004 | 47.173 | 36.972 | 0.00 | 0.00 |
| ATOM | 2319 | HG11 | VAL | X | 149 | 42.616 | 47.129 | 37.990 | 0.00 | 0.00 |
| ATOM | 2320 | HG12 | VAL | X | 149 | 42.342 | 47.752 | 36.328 | 0.00 | 0.00 |
| ATOM | 2321 | HG13 | VAL | X | 149 | 43.137 | 46.198 | 36.504 | 0.00 | 0.00 |
| ATOM | 2322 | CG2  | VAL | X | 149 | 45.008 | 47.915 | 35.485 | 0.00 | 0.00 |

|      |      |      |     |   |     |        |        |        |      |      |
|------|------|------|-----|---|-----|--------|--------|--------|------|------|
| ATOM | 2323 | HG21 | VAL | X | 149 | 44.373 | 48.471 | 34.796 | 0.00 | 0.00 |
| ATOM | 2324 | HG22 | VAL | X | 149 | 44.937 | 46.944 | 34.994 | 0.00 | 0.00 |
| ATOM | 2325 | HG23 | VAL | X | 149 | 46.017 | 48.302 | 35.624 | 0.00 | 0.00 |
| ATOM | 2326 | C    | VAL | X | 149 | 45.603 | 50.031 | 37.419 | 0.00 | 0.00 |
| ATOM | 2327 | O    | VAL | X | 149 | 45.800 | 51.101 | 36.824 | 0.00 | 0.00 |
| ATOM | 2328 | N    | GLY | X | 150 | 46.555 | 49.436 | 38.209 | 0.00 | 0.00 |
| ATOM | 2329 | H    | GLY | X | 150 | 46.298 | 48.553 | 38.626 | 0.00 | 0.00 |
| ATOM | 2330 | CA   | GLY | X | 150 | 47.890 | 49.983 | 38.415 | 0.00 | 0.00 |
| ATOM | 2331 | HA2  | GLY | X | 150 | 48.497 | 49.201 | 38.870 | 0.00 | 0.00 |
| ATOM | 2332 | HA3  | GLY | X | 150 | 48.476 | 50.147 | 37.510 | 0.00 | 0.00 |
| ATOM | 2333 | C    | GLY | X | 150 | 47.868 | 51.255 | 39.256 | 0.00 | 0.00 |
| ATOM | 2334 | O    | GLY | X | 150 | 46.912 | 51.677 | 39.860 | 0.00 | 0.00 |
| ATOM | 2335 | N    | ALA | X | 151 | 49.025 | 52.005 | 39.217 | 0.00 | 0.00 |
| ATOM | 2336 | H    | ALA | X | 151 | 49.850 | 51.608 | 38.791 | 0.00 | 0.00 |
| ATOM | 2337 | CA   | ALA | X | 151 | 49.156 | 53.299 | 39.913 | 0.00 | 0.00 |
| ATOM | 2338 | HA   | ALA | X | 151 | 49.108 | 53.093 | 40.982 | 0.00 | 0.00 |
| ATOM | 2339 | CB   | ALA | X | 151 | 50.478 | 54.043 | 39.646 | 0.00 | 0.00 |
| ATOM | 2340 | HB1  | ALA | X | 151 | 50.493 | 55.025 | 40.119 | 0.00 | 0.00 |
| ATOM | 2341 | HB2  | ALA | X | 151 | 50.795 | 54.144 | 38.608 | 0.00 | 0.00 |
| ATOM | 2342 | HB3  | ALA | X | 151 | 51.311 | 53.433 | 39.997 | 0.00 | 0.00 |
| ATOM | 2343 | C    | ALA | X | 151 | 47.869 | 54.144 | 39.538 | 0.00 | 0.00 |
| ATOM | 2344 | O    | ALA | X | 151 | 47.259 | 54.641 | 40.466 | 0.00 | 0.00 |
| ATOM | 2345 | N    | PHE | X | 152 | 47.601 | 54.190 | 38.275 | 0.00 | 0.00 |
| ATOM | 2346 | H    | PHE | X | 152 | 48.056 | 53.531 | 37.659 | 0.00 | 0.00 |
| ATOM | 2347 | CA   | PHE | X | 152 | 46.574 | 55.030 | 37.665 | 0.00 | 0.00 |
| ATOM | 2348 | HA   | PHE | X | 152 | 46.990 | 56.033 | 37.764 | 0.00 | 0.00 |
| ATOM | 2349 | CB   | PHE | X | 152 | 46.391 | 54.702 | 36.120 | 0.00 | 0.00 |
| ATOM | 2350 | HB2  | PHE | X | 152 | 45.911 | 53.737 | 35.961 | 0.00 | 0.00 |
| ATOM | 2351 | HB3  | PHE | X | 152 | 45.698 | 55.386 | 35.630 | 0.00 | 0.00 |
| ATOM | 2352 | CG   | PHE | X | 152 | 47.719 | 54.642 | 35.393 | 0.00 | 0.00 |
| ATOM | 2353 | CD1  | PHE | X | 152 | 48.621 | 53.548 | 35.626 | 0.00 | 0.00 |
| ATOM | 2354 | HD1  | PHE | X | 152 | 48.312 | 52.539 | 35.857 | 0.00 | 0.00 |
| ATOM | 2355 | CE1  | PHE | X | 152 | 49.948 | 53.679 | 35.307 | 0.00 | 0.00 |
| ATOM | 2356 | HE1  | PHE | X | 152 | 50.560 | 52.813 | 35.514 | 0.00 | 0.00 |
| ATOM | 2357 | CZ   | PHE | X | 152 | 50.568 | 54.801 | 34.770 | 0.00 | 0.00 |
| ATOM | 2358 | HZ   | PHE | X | 152 | 51.631 | 54.896 | 34.605 | 0.00 | 0.00 |
| ATOM | 2359 | CE2  | PHE | X | 152 | 49.692 | 55.868 | 34.402 | 0.00 | 0.00 |
| ATOM | 2360 | HE2  | PHE | X | 152 | 50.185 | 56.746 | 34.011 | 0.00 | 0.00 |
| ATOM | 2361 | CD2  | PHE | X | 152 | 48.296 | 55.819 | 34.821 | 0.00 | 0.00 |
| ATOM | 2362 | HD2  | PHE | X | 152 | 47.703 | 56.691 | 34.590 | 0.00 | 0.00 |
| ATOM | 2363 | C    | PHE | X | 152 | 45.153 | 54.996 | 38.352 | 0.00 | 0.00 |
| ATOM | 2364 | O    | PHE | X | 152 | 44.484 | 56.009 | 38.266 | 0.00 | 0.00 |
| ATOM | 2365 | N    | GLY | X | 153 | 44.770 | 53.950 | 39.157 | 0.00 | 0.00 |
| ATOM | 2366 | H    | GLY | X | 153 | 45.259 | 53.067 | 39.106 | 0.00 | 0.00 |
| ATOM | 2367 | CA   | GLY | X | 153 | 43.618 | 54.016 | 40.071 | 0.00 | 0.00 |
| ATOM | 2368 | HA2  | GLY | X | 153 | 42.948 | 54.858 | 39.903 | 0.00 | 0.00 |
| ATOM | 2369 | HA3  | GLY | X | 153 | 42.954 | 53.171 | 39.885 | 0.00 | 0.00 |
| ATOM | 2370 | C    | GLY | X | 153 | 43.884 | 53.809 | 41.582 | 0.00 | 0.00 |
| ATOM | 2371 | O    | GLY | X | 153 | 43.088 | 54.204 | 42.431 | 0.00 | 0.00 |
| ATOM | 2372 | N    | PHE | X | 154 | 45.008 | 53.153 | 41.915 | 0.00 | 0.00 |
| ATOM | 2373 | H    | PHE | X | 154 | 45.688 | 53.025 | 41.179 | 0.00 | 0.00 |
| ATOM | 2374 | CA   | PHE | X | 154 | 45.171 | 52.642 | 43.310 | 0.00 | 0.00 |
| ATOM | 2375 | HA   | PHE | X | 154 | 44.340 | 52.848 | 43.984 | 0.00 | 0.00 |
| ATOM | 2376 | CB   | PHE | X | 154 | 45.279 | 51.115 | 43.217 | 0.00 | 0.00 |
| ATOM | 2377 | HB2  | PHE | X | 154 | 46.040 | 50.841 | 42.486 | 0.00 | 0.00 |
| ATOM | 2378 | HB3  | PHE | X | 154 | 45.589 | 50.668 | 44.162 | 0.00 | 0.00 |
| ATOM | 2379 | CG   | PHE | X | 154 | 43.961 | 50.456 | 42.807 | 0.00 | 0.00 |
| ATOM | 2380 | CD1  | PHE | X | 154 | 43.809 | 49.835 | 41.568 | 0.00 | 0.00 |
| ATOM | 2381 | HD1  | PHE | X | 154 | 44.639 | 49.803 | 40.877 | 0.00 | 0.00 |
| ATOM | 2382 | CE1  | PHE | X | 154 | 42.460 | 49.396 | 41.186 | 0.00 | 0.00 |
| ATOM | 2383 | HE1  | PHE | X | 154 | 42.299 | 48.922 | 40.228 | 0.00 | 0.00 |
| ATOM | 2384 | CZ   | PHE | X | 154 | 41.389 | 49.369 | 42.122 | 0.00 | 0.00 |
| ATOM | 2385 | HZ   | PHE | X | 154 | 40.427 | 48.942 | 41.878 | 0.00 | 0.00 |
| ATOM | 2386 | CE2  | PHE | X | 154 | 41.647 | 49.887 | 43.388 | 0.00 | 0.00 |
| ATOM | 2387 | HE2  | PHE | X | 154 | 40.875 | 49.884 | 44.143 | 0.00 | 0.00 |
| ATOM | 2388 | CD2  | PHE | X | 154 | 42.871 | 50.529 | 43.738 | 0.00 | 0.00 |
| ATOM | 2389 | HD2  | PHE | X | 154 | 42.861 | 50.993 | 44.713 | 0.00 | 0.00 |

|      |      |      |     |   |     |        |        |        |      |      |
|------|------|------|-----|---|-----|--------|--------|--------|------|------|
| ATOM | 2390 | C    | PHE | X | 154 | 46.381 | 53.262 | 44.074 | 0.00 | 0.00 |
| ATOM | 2391 | O    | PHE | X | 154 | 46.747 | 52.830 | 45.124 | 0.00 | 0.00 |
| ATOM | 2392 | N    | LEU | X | 155 | 47.098 | 54.201 | 43.460 | 0.00 | 0.00 |
| ATOM | 2393 | H    | LEU | X | 155 | 46.861 | 54.389 | 42.497 | 0.00 | 0.00 |
| ATOM | 2394 | CA   | LEU | X | 155 | 48.151 | 54.988 | 44.106 | 0.00 | 0.00 |
| ATOM | 2395 | HA   | LEU | X | 155 | 48.671 | 54.302 | 44.774 | 0.00 | 0.00 |
| ATOM | 2396 | CB   | LEU | X | 155 | 49.222 | 55.510 | 43.064 | 0.00 | 0.00 |
| ATOM | 2397 | HB2  | LEU | X | 155 | 49.590 | 54.616 | 42.562 | 0.00 | 0.00 |
| ATOM | 2398 | HB3  | LEU | X | 155 | 48.728 | 56.066 | 42.267 | 0.00 | 0.00 |
| ATOM | 2399 | CG   | LEU | X | 155 | 50.244 | 56.473 | 43.695 | 0.00 | 0.00 |
| ATOM | 2400 | HG   | LEU | X | 155 | 50.494 | 55.990 | 44.640 | 0.00 | 0.00 |
| ATOM | 2401 | CD1  | LEU | X | 155 | 51.549 | 56.455 | 42.869 | 0.00 | 0.00 |
| ATOM | 2402 | HD11 | LEU | X | 155 | 51.402 | 56.544 | 41.793 | 0.00 | 0.00 |
| ATOM | 2403 | HD12 | LEU | X | 155 | 52.066 | 55.501 | 42.975 | 0.00 | 0.00 |
| ATOM | 2404 | HD13 | LEU | X | 155 | 52.202 | 57.271 | 43.179 | 0.00 | 0.00 |
| ATOM | 2405 | CD2  | LEU | X | 155 | 49.586 | 57.868 | 43.886 | 0.00 | 0.00 |
| ATOM | 2406 | HD21 | LEU | X | 155 | 48.960 | 58.206 | 43.060 | 0.00 | 0.00 |
| ATOM | 2407 | HD22 | LEU | X | 155 | 48.969 | 57.955 | 44.780 | 0.00 | 0.00 |
| ATOM | 2408 | HD23 | LEU | X | 155 | 50.354 | 58.636 | 43.981 | 0.00 | 0.00 |
| ATOM | 2409 | C    | LEU | X | 155 | 47.423 | 55.935 | 45.032 | 0.00 | 0.00 |
| ATOM | 2410 | O    | LEU | X | 155 | 46.579 | 56.733 | 44.547 | 0.00 | 0.00 |
| ATOM | 2411 | N    | ALA | X | 156 | 47.781 | 55.826 | 46.327 | 0.00 | 0.00 |
| ATOM | 2412 | H    | ALA | X | 156 | 48.408 | 55.062 | 46.535 | 0.00 | 0.00 |
| ATOM | 2413 | CA   | ALA | X | 156 | 47.355 | 56.843 | 47.260 | 0.00 | 0.00 |
| ATOM | 2414 | HA   | ALA | X | 156 | 46.782 | 57.647 | 46.797 | 0.00 | 0.00 |
| ATOM | 2415 | CB   | ALA | X | 156 | 46.473 | 56.363 | 48.438 | 0.00 | 0.00 |
| ATOM | 2416 | HB1  | ALA | X | 156 | 47.132 | 55.666 | 48.956 | 0.00 | 0.00 |
| ATOM | 2417 | HB2  | ALA | X | 156 | 45.549 | 55.961 | 48.023 | 0.00 | 0.00 |
| ATOM | 2418 | HB3  | ALA | X | 156 | 46.048 | 57.079 | 49.142 | 0.00 | 0.00 |
| ATOM | 2419 | C    | ALA | X | 156 | 48.624 | 57.482 | 47.903 | 0.00 | 0.00 |
| ATOM | 2420 | O    | ALA | X | 156 | 49.600 | 56.819 | 48.138 | 0.00 | 0.00 |
| ATOM | 2421 | N    | LEU | X | 157 | 48.587 | 58.783 | 48.205 | 0.00 | 0.00 |
| ATOM | 2422 | H    | LEU | X | 157 | 47.719 | 59.286 | 48.088 | 0.00 | 0.00 |
| ATOM | 2423 | CA   | LEU | X | 157 | 49.507 | 59.432 | 49.069 | 0.00 | 0.00 |
| ATOM | 2424 | HA   | LEU | X | 157 | 50.284 | 58.748 | 49.409 | 0.00 | 0.00 |
| ATOM | 2425 | CB   | LEU | X | 157 | 50.305 | 60.517 | 48.295 | 0.00 | 0.00 |
| ATOM | 2426 | HB2  | LEU | X | 157 | 49.625 | 61.145 | 47.721 | 0.00 | 0.00 |
| ATOM | 2427 | HB3  | LEU | X | 157 | 50.731 | 61.067 | 49.134 | 0.00 | 0.00 |
| ATOM | 2428 | CG   | LEU | X | 157 | 51.478 | 60.042 | 47.435 | 0.00 | 0.00 |
| ATOM | 2429 | HG   | LEU | X | 157 | 51.218 | 59.005 | 47.219 | 0.00 | 0.00 |
| ATOM | 2430 | CD1  | LEU | X | 157 | 51.583 | 60.743 | 46.058 | 0.00 | 0.00 |
| ATOM | 2431 | HD11 | LEU | X | 157 | 52.319 | 60.215 | 45.452 | 0.00 | 0.00 |
| ATOM | 2432 | HD12 | LEU | X | 157 | 51.808 | 61.781 | 46.304 | 0.00 | 0.00 |
| ATOM | 2433 | HD13 | LEU | X | 157 | 50.646 | 60.762 | 45.501 | 0.00 | 0.00 |
| ATOM | 2434 | CD2  | LEU | X | 157 | 52.794 | 60.161 | 48.194 | 0.00 | 0.00 |
| ATOM | 2435 | HD21 | LEU | X | 157 | 52.998 | 61.232 | 48.189 | 0.00 | 0.00 |
| ATOM | 2436 | HD22 | LEU | X | 157 | 52.628 | 59.721 | 49.177 | 0.00 | 0.00 |
| ATOM | 2437 | HD23 | LEU | X | 157 | 53.680 | 59.762 | 47.702 | 0.00 | 0.00 |
| ATOM | 2438 | C    | LEU | X | 157 | 48.771 | 60.051 | 50.310 | 0.00 | 0.00 |
| ATOM | 2439 | O    | LEU | X | 157 | 48.257 | 61.186 | 50.267 | 0.00 | 0.00 |
| ATOM | 2440 | N    | PRO | X | 158 | 48.689 | 59.275 | 51.428 | 0.00 | 0.00 |
| ATOM | 2441 | CD   | PRO | X | 158 | 48.929 | 57.884 | 51.652 | 0.00 | 0.00 |
| ATOM | 2442 | HD2  | PRO | X | 158 | 49.971 | 57.900 | 51.974 | 0.00 | 0.00 |
| ATOM | 2443 | HD3  | PRO | X | 158 | 48.852 | 57.146 | 50.854 | 0.00 | 0.00 |
| ATOM | 2444 | CG   | PRO | X | 158 | 48.008 | 57.513 | 52.812 | 0.00 | 0.00 |
| ATOM | 2445 | HG2  | PRO | X | 158 | 48.359 | 56.663 | 53.398 | 0.00 | 0.00 |
| ATOM | 2446 | HG3  | PRO | X | 158 | 46.958 | 57.502 | 52.518 | 0.00 | 0.00 |
| ATOM | 2447 | CB   | PRO | X | 158 | 48.237 | 58.774 | 53.638 | 0.00 | 0.00 |
| ATOM | 2448 | HB2  | PRO | X | 158 | 49.168 | 58.715 | 54.201 | 0.00 | 0.00 |
| ATOM | 2449 | HB3  | PRO | X | 158 | 47.389 | 58.986 | 54.290 | 0.00 | 0.00 |
| ATOM | 2450 | CA   | PRO | X | 158 | 48.135 | 59.864 | 52.640 | 0.00 | 0.00 |
| ATOM | 2451 | HA   | PRO | X | 158 | 47.125 | 60.190 | 52.389 | 0.00 | 0.00 |
| ATOM | 2452 | C    | PRO | X | 158 | 48.967 | 61.104 | 53.023 | 0.00 | 0.00 |
| ATOM | 2453 | O    | PRO | X | 158 | 50.238 | 61.143 | 52.828 | 0.00 | 0.00 |
| ATOM | 2454 | N    | GLY | X | 159 | 48.299 | 62.128 | 53.447 | 0.00 | 0.00 |
| ATOM | 2455 | H    | GLY | X | 159 | 47.330 | 62.008 | 53.703 | 0.00 | 0.00 |
| ATOM | 2456 | CA   | GLY | X | 159 | 48.825 | 63.478 | 53.689 | 0.00 | 0.00 |

|      |      |      |     |   |     |        |        |        |      |      |
|------|------|------|-----|---|-----|--------|--------|--------|------|------|
| ATOM | 2457 | HA2  | GLY | X | 159 | 48.322 | 63.826 | 54.591 | 0.00 | 0.00 |
| ATOM | 2458 | HA3  | GLY | X | 159 | 49.912 | 63.537 | 53.752 | 0.00 | 0.00 |
| ATOM | 2459 | C    | GLY | X | 159 | 48.396 | 64.434 | 52.564 | 0.00 | 0.00 |
| ATOM | 2460 | O    | GLY | X | 159 | 48.516 | 65.619 | 52.801 | 0.00 | 0.00 |
| ATOM | 2461 | N    | SER | X | 160 | 48.066 | 63.972 | 51.422 | 0.00 | 0.00 |
| ATOM | 2462 | H    | SER | X | 160 | 48.074 | 62.964 | 51.353 | 0.00 | 0.00 |
| ATOM | 2463 | CA   | SER | X | 160 | 47.592 | 64.782 | 50.245 | 0.00 | 0.00 |
| ATOM | 2464 | HA   | SER | X | 160 | 47.794 | 65.839 | 50.419 | 0.00 | 0.00 |
| ATOM | 2465 | CB   | SER | X | 160 | 48.271 | 64.361 | 48.957 | 0.00 | 0.00 |
| ATOM | 2466 | HB2  | SER | X | 160 | 48.261 | 65.300 | 48.403 | 0.00 | 0.00 |
| ATOM | 2467 | HB3  | SER | X | 160 | 49.290 | 64.049 | 49.187 | 0.00 | 0.00 |
| ATOM | 2468 | OG   | SER | X | 160 | 47.408 | 63.456 | 48.248 | 0.00 | 0.00 |
| ATOM | 2469 | HG   | SER | X | 160 | 47.292 | 62.696 | 48.823 | 0.00 | 0.00 |
| ATOM | 2470 | C    | SER | X | 160 | 46.068 | 64.728 | 50.172 | 0.00 | 0.00 |
| ATOM | 2471 | O    | SER | X | 160 | 45.444 | 63.871 | 50.802 | 0.00 | 0.00 |
| ATOM | 2472 | N    | ARG | X | 161 | 45.415 | 65.585 | 49.366 | 0.00 | 0.00 |
| ATOM | 2473 | H    | ARG | X | 161 | 45.927 | 66.401 | 49.063 | 0.00 | 0.00 |
| ATOM | 2474 | CA   | ARG | X | 161 | 44.064 | 65.391 | 48.845 | 0.00 | 0.00 |
| ATOM | 2475 | HA   | ARG | X | 161 | 43.585 | 64.506 | 49.262 | 0.00 | 0.00 |
| ATOM | 2476 | CB   | ARG | X | 161 | 43.283 | 66.612 | 49.044 | 0.00 | 0.00 |
| ATOM | 2477 | HB2  | ARG | X | 161 | 43.868 | 67.459 | 48.688 | 0.00 | 0.00 |
| ATOM | 2478 | HB3  | ARG | X | 161 | 42.378 | 66.503 | 48.446 | 0.00 | 0.00 |
| ATOM | 2479 | CG   | ARG | X | 161 | 43.005 | 66.847 | 50.541 | 0.00 | 0.00 |
| ATOM | 2480 | HG2  | ARG | X | 161 | 42.543 | 65.985 | 51.024 | 0.00 | 0.00 |
| ATOM | 2481 | HG3  | ARG | X | 161 | 43.982 | 67.088 | 50.961 | 0.00 | 0.00 |
| ATOM | 2482 | CD   | ARG | X | 161 | 42.075 | 68.055 | 50.720 | 0.00 | 0.00 |
| ATOM | 2483 | HD2  | ARG | X | 161 | 42.378 | 68.933 | 50.149 | 0.00 | 0.00 |
| ATOM | 2484 | HD3  | ARG | X | 161 | 41.118 | 67.731 | 50.313 | 0.00 | 0.00 |
| ATOM | 2485 | NE   | ARG | X | 161 | 41.973 | 68.391 | 52.176 | 0.00 | 0.00 |
| ATOM | 2486 | HE   | ARG | X | 161 | 41.225 | 67.981 | 52.716 | 0.00 | 0.00 |
| ATOM | 2487 | CZ   | ARG | X | 161 | 42.741 | 69.190 | 52.890 | 0.00 | 0.00 |
| ATOM | 2488 | NH1  | ARG | X | 161 | 43.953 | 69.603 | 52.523 | 0.00 | 0.00 |
| ATOM | 2489 | HH11 | ARG | X | 161 | 44.485 | 69.044 | 51.872 | 0.00 | 0.00 |
| ATOM | 2490 | HH12 | ARG | X | 161 | 44.424 | 70.183 | 53.203 | 0.00 | 0.00 |
| ATOM | 2491 | NH2  | ARG | X | 161 | 42.404 | 69.586 | 54.085 | 0.00 | 0.00 |
| ATOM | 2492 | HH21 | ARG | X | 161 | 41.456 | 69.462 | 54.409 | 0.00 | 0.00 |
| ATOM | 2493 | HH22 | ARG | X | 161 | 42.972 | 70.287 | 54.539 | 0.00 | 0.00 |
| ATOM | 2494 | C    | ARG | X | 161 | 44.252 | 65.065 | 47.361 | 0.00 | 0.00 |
| ATOM | 2495 | O    | ARG | X | 161 | 43.341 | 64.644 | 46.671 | 0.00 | 0.00 |
| ATOM | 2496 | N    | GLU | X | 162 | 45.347 | 65.357 | 46.773 | 0.00 | 0.00 |
| ATOM | 2497 | H    | GLU | X | 162 | 46.123 | 65.758 | 47.281 | 0.00 | 0.00 |
| ATOM | 2498 | CA   | GLU | X | 162 | 45.694 | 65.315 | 45.366 | 0.00 | 0.00 |
| ATOM | 2499 | HA   | GLU | X | 162 | 44.848 | 65.807 | 44.886 | 0.00 | 0.00 |
| ATOM | 2500 | CB   | GLU | X | 162 | 46.949 | 66.180 | 45.084 | 0.00 | 0.00 |
| ATOM | 2501 | HB2  | GLU | X | 162 | 47.704 | 65.841 | 45.795 | 0.00 | 0.00 |
| ATOM | 2502 | HB3  | GLU | X | 162 | 47.348 | 65.976 | 44.091 | 0.00 | 0.00 |
| ATOM | 2503 | CG   | GLU | X | 162 | 46.828 | 67.666 | 45.309 | 0.00 | 0.00 |
| ATOM | 2504 | HG2  | GLU | X | 162 | 47.789 | 68.125 | 45.078 | 0.00 | 0.00 |
| ATOM | 2505 | HG3  | GLU | X | 162 | 46.044 | 68.066 | 44.665 | 0.00 | 0.00 |
| ATOM | 2506 | CD   | GLU | X | 162 | 46.505 | 67.975 | 46.766 | 0.00 | 0.00 |
| ATOM | 2507 | OE1  | GLU | X | 162 | 45.587 | 68.798 | 46.956 | 0.00 | 0.00 |
| ATOM | 2508 | OE2  | GLU | X | 162 | 47.103 | 67.402 | 47.723 | 0.00 | 0.00 |
| ATOM | 2509 | C    | GLU | X | 162 | 45.920 | 63.824 | 44.799 | 0.00 | 0.00 |
| ATOM | 2510 | O    | GLU | X | 162 | 45.720 | 63.725 | 43.605 | 0.00 | 0.00 |
| ATOM | 2511 | N    | ALA | X | 163 | 46.279 | 62.808 | 45.619 | 0.00 | 0.00 |
| ATOM | 2512 | H    | ALA | X | 163 | 46.627 | 63.052 | 46.535 | 0.00 | 0.00 |
| ATOM | 2513 | CA   | ALA | X | 163 | 46.299 | 61.349 | 45.299 | 0.00 | 0.00 |
| ATOM | 2514 | HA   | ALA | X | 163 | 45.682 | 61.258 | 44.405 | 0.00 | 0.00 |
| ATOM | 2515 | CB   | ALA | X | 163 | 47.740 | 60.910 | 44.972 | 0.00 | 0.00 |
| ATOM | 2516 | HB1  | ALA | X | 163 | 47.751 | 59.944 | 44.468 | 0.00 | 0.00 |
| ATOM | 2517 | HB2  | ALA | X | 163 | 48.384 | 60.866 | 45.851 | 0.00 | 0.00 |
| ATOM | 2518 | HB3  | ALA | X | 163 | 48.055 | 61.707 | 44.298 | 0.00 | 0.00 |
| ATOM | 2519 | C    | ALA | X | 163 | 45.616 | 60.582 | 46.440 | 0.00 | 0.00 |
| ATOM | 2520 | O    | ALA | X | 163 | 46.337 | 60.048 | 47.315 | 0.00 | 0.00 |
| ATOM | 2521 | N    | PRO | X | 164 | 44.233 | 60.544 | 46.433 | 0.00 | 0.00 |
| ATOM | 2522 | CD   | PRO | X | 164 | 43.369 | 61.272 | 45.544 | 0.00 | 0.00 |
| ATOM | 2523 | HD2  | PRO | X | 164 | 43.459 | 61.071 | 44.477 | 0.00 | 0.00 |

|      |      |      |     |   |     |        |        |        |      |      |
|------|------|------|-----|---|-----|--------|--------|--------|------|------|
| ATOM | 2524 | HD3  | PRO | X | 164 | 43.498 | 62.340 | 45.725 | 0.00 | 0.00 |
| ATOM | 2525 | CG   | PRO | X | 164 | 41.932 | 60.742 | 45.911 | 0.00 | 0.00 |
| ATOM | 2526 | HG2  | PRO | X | 164 | 41.610 | 59.885 | 45.319 | 0.00 | 0.00 |
| ATOM | 2527 | HG3  | PRO | X | 164 | 41.223 | 61.565 | 45.824 | 0.00 | 0.00 |
| ATOM | 2528 | CB   | PRO | X | 164 | 42.139 | 60.376 | 47.376 | 0.00 | 0.00 |
| ATOM | 2529 | HB2  | PRO | X | 164 | 41.538 | 59.507 | 47.645 | 0.00 | 0.00 |
| ATOM | 2530 | HB3  | PRO | X | 164 | 41.878 | 61.196 | 48.046 | 0.00 | 0.00 |
| ATOM | 2531 | CA   | PRO | X | 164 | 43.591 | 59.897 | 47.546 | 0.00 | 0.00 |
| ATOM | 2532 | HA   | PRO | X | 164 | 43.855 | 60.317 | 48.517 | 0.00 | 0.00 |
| ATOM | 2533 | C    | PRO | X | 164 | 43.686 | 58.378 | 47.296 | 0.00 | 0.00 |
| ATOM | 2534 | O    | PRO | X | 164 | 43.559 | 57.680 | 48.309 | 0.00 | 0.00 |
| ATOM | 2535 | N    | GLY | X | 165 | 43.746 | 57.885 | 46.048 | 0.00 | 0.00 |
| ATOM | 2536 | H    | GLY | X | 165 | 43.867 | 58.588 | 45.334 | 0.00 | 0.00 |
| ATOM | 2537 | CA   | GLY | X | 165 | 43.783 | 56.492 | 45.631 | 0.00 | 0.00 |
| ATOM | 2538 | HA2  | GLY | X | 165 | 44.023 | 56.312 | 44.584 | 0.00 | 0.00 |
| ATOM | 2539 | HA3  | GLY | X | 165 | 44.424 | 55.840 | 46.225 | 0.00 | 0.00 |
| ATOM | 2540 | C    | GLY | X | 165 | 42.411 | 55.846 | 45.704 | 0.00 | 0.00 |
| ATOM | 2541 | O    | GLY | X | 165 | 41.371 | 56.496 | 45.885 | 0.00 | 0.00 |
| ATOM | 2542 | N    | ASN | X | 166 | 42.393 | 54.477 | 45.511 | 0.00 | 0.00 |
| ATOM | 2543 | H    | ASN | X | 166 | 43.257 | 54.014 | 45.270 | 0.00 | 0.00 |
| ATOM | 2544 | CA   | ASN | X | 166 | 41.150 | 53.683 | 45.493 | 0.00 | 0.00 |
| ATOM | 2545 | HA   | ASN | X | 166 | 41.492 | 52.656 | 45.362 | 0.00 | 0.00 |
| ATOM | 2546 | CB   | ASN | X | 166 | 40.454 | 53.688 | 46.893 | 0.00 | 0.00 |
| ATOM | 2547 | HB2  | ASN | X | 166 | 40.168 | 54.721 | 47.088 | 0.00 | 0.00 |
| ATOM | 2548 | HB3  | ASN | X | 166 | 39.523 | 53.128 | 46.797 | 0.00 | 0.00 |
| ATOM | 2549 | CG   | ASN | X | 166 | 41.269 | 53.120 | 48.023 | 0.00 | 0.00 |
| ATOM | 2550 | OD1  | ASN | X | 166 | 41.955 | 52.125 | 47.797 | 0.00 | 0.00 |
| ATOM | 2551 | ND2  | ASN | X | 166 | 41.346 | 53.671 | 49.235 | 0.00 | 0.00 |
| ATOM | 2552 | HD21 | ASN | X | 166 | 41.807 | 53.206 | 50.005 | 0.00 | 0.00 |
| ATOM | 2553 | HD22 | ASN | X | 166 | 40.790 | 54.480 | 49.473 | 0.00 | 0.00 |
| ATOM | 2554 | C    | ASN | X | 166 | 40.127 | 53.880 | 44.332 | 0.00 | 0.00 |
| ATOM | 2555 | O    | ASN | X | 166 | 39.151 | 53.080 | 44.209 | 0.00 | 0.00 |
| ATOM | 2556 | N    | VAL | X | 167 | 40.382 | 54.882 | 43.508 | 0.00 | 0.00 |
| ATOM | 2557 | H    | VAL | X | 167 | 41.210 | 55.400 | 43.765 | 0.00 | 0.00 |
| ATOM | 2558 | CA   | VAL | X | 167 | 39.408 | 55.333 | 42.526 | 0.00 | 0.00 |
| ATOM | 2559 | HA   | VAL | X | 167 | 38.475 | 55.591 | 43.026 | 0.00 | 0.00 |
| ATOM | 2560 | CB   | VAL | X | 167 | 39.799 | 56.650 | 41.894 | 0.00 | 0.00 |
| ATOM | 2561 | HB   | VAL | X | 167 | 38.985 | 56.923 | 41.222 | 0.00 | 0.00 |
| ATOM | 2562 | CG1  | VAL | X | 167 | 39.917 | 57.753 | 42.965 | 0.00 | 0.00 |
| ATOM | 2563 | HG11 | VAL | X | 167 | 40.153 | 58.714 | 42.508 | 0.00 | 0.00 |
| ATOM | 2564 | HG12 | VAL | X | 167 | 39.045 | 57.979 | 43.580 | 0.00 | 0.00 |
| ATOM | 2565 | HG13 | VAL | X | 167 | 40.700 | 57.495 | 43.677 | 0.00 | 0.00 |
| ATOM | 2566 | CG2  | VAL | X | 167 | 41.115 | 56.624 | 41.087 | 0.00 | 0.00 |
| ATOM | 2567 | HG21 | VAL | X | 167 | 41.143 | 57.591 | 40.584 | 0.00 | 0.00 |
| ATOM | 2568 | HG22 | VAL | X | 167 | 40.997 | 55.940 | 40.246 | 0.00 | 0.00 |
| ATOM | 2569 | HG23 | VAL | X | 167 | 42.005 | 56.251 | 41.594 | 0.00 | 0.00 |
| ATOM | 2570 | C    | VAL | X | 167 | 39.100 | 54.399 | 41.388 | 0.00 | 0.00 |
| ATOM | 2571 | O    | VAL | X | 167 | 38.044 | 54.445 | 40.759 | 0.00 | 0.00 |
| ATOM | 2572 | N    | GLY | X | 168 | 39.970 | 53.399 | 41.143 | 0.00 | 0.00 |
| ATOM | 2573 | H    | GLY | X | 168 | 40.779 | 53.371 | 41.748 | 0.00 | 0.00 |
| ATOM | 2574 | CA   | GLY | X | 168 | 39.809 | 52.379 | 40.094 | 0.00 | 0.00 |
| ATOM | 2575 | HA2  | GLY | X | 168 | 39.673 | 52.842 | 39.117 | 0.00 | 0.00 |
| ATOM | 2576 | HA3  | GLY | X | 168 | 40.732 | 51.801 | 40.042 | 0.00 | 0.00 |
| ATOM | 2577 | C    | GLY | X | 168 | 38.606 | 51.415 | 40.435 | 0.00 | 0.00 |
| ATOM | 2578 | O    | GLY | X | 168 | 38.121 | 50.708 | 39.536 | 0.00 | 0.00 |
| ATOM | 2579 | N    | LEU | X | 169 | 38.064 | 51.611 | 41.702 | 0.00 | 0.00 |
| ATOM | 2580 | H    | LEU | X | 169 | 38.671 | 52.180 | 42.273 | 0.00 | 0.00 |
| ATOM | 2581 | CA   | LEU | X | 169 | 36.747 | 51.059 | 42.169 | 0.00 | 0.00 |
| ATOM | 2582 | HA   | LEU | X | 169 | 36.539 | 50.171 | 41.571 | 0.00 | 0.00 |
| ATOM | 2583 | CB   | LEU | X | 169 | 36.734 | 50.609 | 43.664 | 0.00 | 0.00 |
| ATOM | 2584 | HB2  | LEU | X | 169 | 36.976 | 51.545 | 44.168 | 0.00 | 0.00 |
| ATOM | 2585 | HB3  | LEU | X | 169 | 35.744 | 50.250 | 43.945 | 0.00 | 0.00 |
| ATOM | 2586 | CG   | LEU | X | 169 | 37.793 | 49.576 | 44.037 | 0.00 | 0.00 |
| ATOM | 2587 | HG   | LEU | X | 169 | 38.771 | 50.020 | 43.848 | 0.00 | 0.00 |
| ATOM | 2588 | CD1  | LEU | X | 169 | 37.797 | 49.217 | 45.614 | 0.00 | 0.00 |
| ATOM | 2589 | HD11 | LEU | X | 169 | 36.862 | 48.688 | 45.799 | 0.00 | 0.00 |
| ATOM | 2590 | HD12 | LEU | X | 169 | 37.844 | 50.175 | 46.131 | 0.00 | 0.00 |

|      |      |      |     |   |     |        |        |        |      |      |
|------|------|------|-----|---|-----|--------|--------|--------|------|------|
| ATOM | 2591 | HD13 | LEU | X | 169 | 38.599 | 48.550 | 45.930 | 0.00 | 0.00 |
| ATOM | 2592 | CD2  | LEU | X | 169 | 37.769 | 48.237 | 43.257 | 0.00 | 0.00 |
| ATOM | 2593 | HD21 | LEU | X | 169 | 37.711 | 48.387 | 42.179 | 0.00 | 0.00 |
| ATOM | 2594 | HD22 | LEU | X | 169 | 38.622 | 47.585 | 43.444 | 0.00 | 0.00 |
| ATOM | 2595 | HD23 | LEU | X | 169 | 36.880 | 47.677 | 43.548 | 0.00 | 0.00 |
| ATOM | 2596 | C    | LEU | X | 169 | 35.560 | 52.011 | 42.060 | 0.00 | 0.00 |
| ATOM | 2597 | O    | LEU | X | 169 | 34.379 | 51.635 | 42.025 | 0.00 | 0.00 |
| ATOM | 2598 | N    | LEU | X | 170 | 35.844 | 53.345 | 41.977 | 0.00 | 0.00 |
| ATOM | 2599 | H    | LEU | X | 170 | 36.813 | 53.564 | 41.793 | 0.00 | 0.00 |
| ATOM | 2600 | CA   | LEU | X | 170 | 34.820 | 54.312 | 41.596 | 0.00 | 0.00 |
| ATOM | 2601 | HA   | LEU | X | 170 | 34.016 | 54.054 | 42.285 | 0.00 | 0.00 |
| ATOM | 2602 | CB   | LEU | X | 170 | 35.313 | 55.775 | 41.977 | 0.00 | 0.00 |
| ATOM | 2603 | HB2  | LEU | X | 170 | 36.131 | 56.091 | 41.330 | 0.00 | 0.00 |
| ATOM | 2604 | HB3  | LEU | X | 170 | 34.617 | 56.547 | 41.649 | 0.00 | 0.00 |
| ATOM | 2605 | CG   | LEU | X | 170 | 35.682 | 56.000 | 43.473 | 0.00 | 0.00 |
| ATOM | 2606 | HG   | LEU | X | 170 | 36.491 | 55.304 | 43.695 | 0.00 | 0.00 |
| ATOM | 2607 | CD1  | LEU | X | 170 | 36.344 | 57.436 | 43.627 | 0.00 | 0.00 |
| ATOM | 2608 | HD11 | LEU | X | 170 | 35.514 | 58.118 | 43.442 | 0.00 | 0.00 |
| ATOM | 2609 | HD12 | LEU | X | 170 | 37.117 | 57.440 | 42.859 | 0.00 | 0.00 |
| ATOM | 2610 | HD13 | LEU | X | 170 | 36.698 | 57.635 | 44.639 | 0.00 | 0.00 |
| ATOM | 2611 | CD2  | LEU | X | 170 | 34.554 | 55.894 | 44.465 | 0.00 | 0.00 |
| ATOM | 2612 | HD21 | LEU | X | 170 | 34.170 | 54.875 | 44.422 | 0.00 | 0.00 |
| ATOM | 2613 | HD22 | LEU | X | 170 | 34.926 | 56.108 | 45.467 | 0.00 | 0.00 |
| ATOM | 2614 | HD23 | LEU | X | 170 | 33.731 | 56.537 | 44.150 | 0.00 | 0.00 |
| ATOM | 2615 | C    | LEU | X | 170 | 34.388 | 54.146 | 40.104 | 0.00 | 0.00 |
| ATOM | 2616 | O    | LEU | X | 170 | 33.215 | 54.373 | 39.834 | 0.00 | 0.00 |
| ATOM | 2617 | N    | ASP | X | 171 | 35.394 | 53.854 | 39.265 | 0.00 | 0.00 |
| ATOM | 2618 | H    | ASP | X | 171 | 36.295 | 53.872 | 39.721 | 0.00 | 0.00 |
| ATOM | 2619 | CA   | ASP | X | 171 | 35.321 | 53.551 | 37.836 | 0.00 | 0.00 |
| ATOM | 2620 | HA   | ASP | X | 171 | 34.799 | 54.377 | 37.353 | 0.00 | 0.00 |
| ATOM | 2621 | CB   | ASP | X | 171 | 36.634 | 53.351 | 37.113 | 0.00 | 0.00 |
| ATOM | 2622 | HB2  | ASP | X | 171 | 37.016 | 52.444 | 37.581 | 0.00 | 0.00 |
| ATOM | 2623 | HB3  | ASP | X | 171 | 36.327 | 53.096 | 36.099 | 0.00 | 0.00 |
| ATOM | 2624 | CG   | ASP | X | 171 | 37.647 | 54.471 | 37.068 | 0.00 | 0.00 |
| ATOM | 2625 | OD1  | ASP | X | 171 | 37.339 | 55.669 | 37.340 | 0.00 | 0.00 |
| ATOM | 2626 | OD2  | ASP | X | 171 | 38.839 | 54.094 | 36.827 | 0.00 | 0.00 |
| ATOM | 2627 | C    | ASP | X | 171 | 34.533 | 52.345 | 37.474 | 0.00 | 0.00 |
| ATOM | 2628 | O    | ASP | X | 171 | 33.592 | 52.364 | 36.699 | 0.00 | 0.00 |
| ATOM | 2629 | N    | GLN | X | 172 | 34.707 | 51.305 | 38.276 | 0.00 | 0.00 |
| ATOM | 2630 | H    | GLN | X | 172 | 35.494 | 51.198 | 38.900 | 0.00 | 0.00 |
| ATOM | 2631 | CA   | GLN | X | 172 | 33.763 | 50.206 | 38.275 | 0.00 | 0.00 |
| ATOM | 2632 | HA   | GLN | X | 172 | 33.496 | 49.922 | 37.257 | 0.00 | 0.00 |
| ATOM | 2633 | CB   | GLN | X | 172 | 34.205 | 48.952 | 39.123 | 0.00 | 0.00 |
| ATOM | 2634 | HB2  | GLN | X | 172 | 34.278 | 49.195 | 40.183 | 0.00 | 0.00 |
| ATOM | 2635 | HB3  | GLN | X | 172 | 33.367 | 48.258 | 39.044 | 0.00 | 0.00 |
| ATOM | 2636 | CG   | GLN | X | 172 | 35.407 | 48.127 | 38.626 | 0.00 | 0.00 |
| ATOM | 2637 | HG2  | GLN | X | 172 | 35.021 | 47.556 | 37.782 | 0.00 | 0.00 |
| ATOM | 2638 | HG3  | GLN | X | 172 | 36.242 | 48.729 | 38.268 | 0.00 | 0.00 |
| ATOM | 2639 | CD   | GLN | X | 172 | 35.855 | 47.137 | 39.681 | 0.00 | 0.00 |
| ATOM | 2640 | OE1  | GLN | X | 172 | 35.090 | 46.692 | 40.483 | 0.00 | 0.00 |
| ATOM | 2641 | NE2  | GLN | X | 172 | 37.076 | 46.666 | 39.632 | 0.00 | 0.00 |
| ATOM | 2642 | HE21 | GLN | X | 172 | 37.330 | 45.962 | 40.311 | 0.00 | 0.00 |
| ATOM | 2643 | HE22 | GLN | X | 172 | 37.645 | 46.878 | 38.825 | 0.00 | 0.00 |
| ATOM | 2644 | C    | GLN | X | 172 | 32.364 | 50.674 | 38.784 | 0.00 | 0.00 |
| ATOM | 2645 | O    | GLN | X | 172 | 31.374 | 50.261 | 38.169 | 0.00 | 0.00 |
| ATOM | 2646 | N    | ARG | X | 173 | 32.233 | 51.575 | 39.830 | 0.00 | 0.00 |
| ATOM | 2647 | H    | ARG | X | 173 | 33.073 | 51.843 | 40.324 | 0.00 | 0.00 |
| ATOM | 2648 | CA   | ARG | X | 173 | 30.938 | 51.920 | 40.427 | 0.00 | 0.00 |
| ATOM | 2649 | HA   | ARG | X | 173 | 30.344 | 51.031 | 40.635 | 0.00 | 0.00 |
| ATOM | 2650 | CB   | ARG | X | 173 | 31.210 | 52.742 | 41.799 | 0.00 | 0.00 |
| ATOM | 2651 | HB2  | ARG | X | 173 | 31.762 | 52.138 | 42.519 | 0.00 | 0.00 |
| ATOM | 2652 | HB3  | ARG | X | 173 | 31.639 | 53.694 | 41.486 | 0.00 | 0.00 |
| ATOM | 2653 | CG   | ARG | X | 173 | 29.835 | 53.135 | 42.431 | 0.00 | 0.00 |
| ATOM | 2654 | HG2  | ARG | X | 173 | 29.169 | 53.597 | 41.703 | 0.00 | 0.00 |
| ATOM | 2655 | HG3  | ARG | X | 173 | 29.289 | 52.305 | 42.880 | 0.00 | 0.00 |
| ATOM | 2656 | CD   | ARG | X | 173 | 29.915 | 54.088 | 43.571 | 0.00 | 0.00 |
| ATOM | 2657 | HD2  | ARG | X | 173 | 30.241 | 55.061 | 43.204 | 0.00 | 0.00 |

|      |      |      |     |   |     |        |        |        |      |      |
|------|------|------|-----|---|-----|--------|--------|--------|------|------|
| ATOM | 2658 | HD3  | ARG | X | 173 | 28.884 | 54.267 | 43.877 | 0.00 | 0.00 |
| ATOM | 2659 | NE   | ARG | X | 173 | 30.734 | 53.662 | 44.717 | 0.00 | 0.00 |
| ATOM | 2660 | HE   | ARG | X | 173 | 30.745 | 52.654 | 44.788 | 0.00 | 0.00 |
| ATOM | 2661 | CZ   | ARG | X | 173 | 31.509 | 54.353 | 45.536 | 0.00 | 0.00 |
| ATOM | 2662 | NH1  | ARG | X | 173 | 31.515 | 55.679 | 45.561 | 0.00 | 0.00 |
| ATOM | 2663 | HH11 | ARG | X | 173 | 30.940 | 56.223 | 44.934 | 0.00 | 0.00 |
| ATOM | 2664 | HH12 | ARG | X | 173 | 31.984 | 56.230 | 46.267 | 0.00 | 0.00 |
| ATOM | 2665 | NH2  | ARG | X | 173 | 32.131 | 53.751 | 46.494 | 0.00 | 0.00 |
| ATOM | 2666 | HH21 | ARG | X | 173 | 32.010 | 52.749 | 46.540 | 0.00 | 0.00 |
| ATOM | 2667 | HH22 | ARG | X | 173 | 32.555 | 54.284 | 47.239 | 0.00 | 0.00 |
| ATOM | 2668 | C    | ARG | X | 173 | 30.153 | 52.795 | 39.413 | 0.00 | 0.00 |
| ATOM | 2669 | O    | ARG | X | 173 | 28.969 | 52.428 | 39.226 | 0.00 | 0.00 |
| ATOM | 2670 | N    | LEU | X | 174 | 30.770 | 53.644 | 38.637 | 0.00 | 0.00 |
| ATOM | 2671 | H    | LEU | X | 174 | 31.763 | 53.666 | 38.820 | 0.00 | 0.00 |
| ATOM | 2672 | CA   | LEU | X | 174 | 30.207 | 54.411 | 37.486 | 0.00 | 0.00 |
| ATOM | 2673 | HA   | LEU | X | 174 | 29.357 | 55.012 | 37.811 | 0.00 | 0.00 |
| ATOM | 2674 | CB   | LEU | X | 174 | 31.221 | 55.455 | 37.054 | 0.00 | 0.00 |
| ATOM | 2675 | HB2  | LEU | X | 174 | 31.645 | 56.027 | 37.880 | 0.00 | 0.00 |
| ATOM | 2676 | HB3  | LEU | X | 174 | 32.100 | 54.911 | 36.709 | 0.00 | 0.00 |
| ATOM | 2677 | CG   | LEU | X | 174 | 30.781 | 56.416 | 35.970 | 0.00 | 0.00 |
| ATOM | 2678 | HG   | LEU | X | 174 | 30.584 | 55.866 | 35.050 | 0.00 | 0.00 |
| ATOM | 2679 | CD1  | LEU | X | 174 | 29.559 | 57.300 | 36.258 | 0.00 | 0.00 |
| ATOM | 2680 | HD11 | LEU | X | 174 | 29.573 | 57.790 | 37.231 | 0.00 | 0.00 |
| ATOM | 2681 | HD12 | LEU | X | 174 | 28.692 | 56.639 | 36.251 | 0.00 | 0.00 |
| ATOM | 2682 | HD13 | LEU | X | 174 | 29.396 | 58.031 | 35.466 | 0.00 | 0.00 |
| ATOM | 2683 | CD2  | LEU | X | 174 | 31.987 | 57.325 | 35.675 | 0.00 | 0.00 |
| ATOM | 2684 | HD21 | LEU | X | 174 | 31.696 | 57.930 | 34.816 | 0.00 | 0.00 |
| ATOM | 2685 | HD22 | LEU | X | 174 | 32.116 | 58.082 | 36.448 | 0.00 | 0.00 |
| ATOM | 2686 | HD23 | LEU | X | 174 | 32.887 | 56.775 | 35.398 | 0.00 | 0.00 |
| ATOM | 2687 | C    | LEU | X | 174 | 29.747 | 53.556 | 36.291 | 0.00 | 0.00 |
| ATOM | 2688 | O    | LEU | X | 174 | 28.833 | 54.061 | 35.689 | 0.00 | 0.00 |
| ATOM | 2689 | N    | ALA | X | 175 | 30.375 | 52.418 | 36.092 | 0.00 | 0.00 |
| ATOM | 2690 | H    | ALA | X | 175 | 31.145 | 52.207 | 36.711 | 0.00 | 0.00 |
| ATOM | 2691 | CA   | ALA | X | 175 | 29.887 | 51.407 | 35.103 | 0.00 | 0.00 |
| ATOM | 2692 | HA   | ALA | X | 175 | 29.538 | 51.837 | 34.164 | 0.00 | 0.00 |
| ATOM | 2693 | CB   | ALA | X | 175 | 30.990 | 50.391 | 34.644 | 0.00 | 0.00 |
| ATOM | 2694 | HB1  | ALA | X | 175 | 31.715 | 50.907 | 34.014 | 0.00 | 0.00 |
| ATOM | 2695 | HB2  | ALA | X | 175 | 30.471 | 49.579 | 34.135 | 0.00 | 0.00 |
| ATOM | 2696 | HB3  | ALA | X | 175 | 31.550 | 50.039 | 35.510 | 0.00 | 0.00 |
| ATOM | 2697 | C    | ALA | X | 175 | 28.698 | 50.648 | 35.694 | 0.00 | 0.00 |
| ATOM | 2698 | O    | ALA | X | 175 | 27.677 | 50.588 | 35.025 | 0.00 | 0.00 |
| ATOM | 2699 | N    | LEU | X | 176 | 28.751 | 50.236 | 36.963 | 0.00 | 0.00 |
| ATOM | 2700 | H    | LEU | X | 176 | 29.541 | 50.370 | 37.577 | 0.00 | 0.00 |
| ATOM | 2701 | CA   | LEU | X | 176 | 27.587 | 49.615 | 37.578 | 0.00 | 0.00 |
| ATOM | 2702 | HA   | LEU | X | 176 | 27.306 | 48.730 | 37.007 | 0.00 | 0.00 |
| ATOM | 2703 | CB   | LEU | X | 176 | 27.875 | 49.091 | 39.095 | 0.00 | 0.00 |
| ATOM | 2704 | HB2  | LEU | X | 176 | 28.031 | 49.921 | 39.784 | 0.00 | 0.00 |
| ATOM | 2705 | HB3  | LEU | X | 176 | 26.965 | 48.669 | 39.522 | 0.00 | 0.00 |
| ATOM | 2706 | CG   | LEU | X | 176 | 29.006 | 48.045 | 39.262 | 0.00 | 0.00 |
| ATOM | 2707 | HG   | LEU | X | 176 | 29.953 | 48.486 | 38.950 | 0.00 | 0.00 |
| ATOM | 2708 | CD1  | LEU | X | 176 | 29.015 | 47.523 | 40.736 | 0.00 | 0.00 |
| ATOM | 2709 | HD11 | LEU | X | 176 | 28.007 | 47.233 | 41.032 | 0.00 | 0.00 |
| ATOM | 2710 | HD12 | LEU | X | 176 | 29.324 | 48.303 | 41.431 | 0.00 | 0.00 |
| ATOM | 2711 | HD13 | LEU | X | 176 | 29.796 | 46.767 | 40.817 | 0.00 | 0.00 |
| ATOM | 2712 | CD2  | LEU | X | 176 | 28.887 | 46.806 | 38.306 | 0.00 | 0.00 |
| ATOM | 2713 | HD21 | LEU | X | 176 | 29.815 | 46.245 | 38.416 | 0.00 | 0.00 |
| ATOM | 2714 | HD22 | LEU | X | 176 | 27.985 | 46.218 | 38.482 | 0.00 | 0.00 |
| ATOM | 2715 | HD23 | LEU | X | 176 | 28.868 | 47.120 | 37.263 | 0.00 | 0.00 |
| ATOM | 2716 | C    | LEU | X | 176 | 26.321 | 50.511 | 37.532 | 0.00 | 0.00 |
| ATOM | 2717 | O    | LEU | X | 176 | 25.226 | 50.165 | 37.200 | 0.00 | 0.00 |
| ATOM | 2718 | N    | GLN | X | 177 | 26.510 | 51.815 | 37.800 | 0.00 | 0.00 |
| ATOM | 2719 | H    | GLN | X | 177 | 27.453 | 51.981 | 38.121 | 0.00 | 0.00 |
| ATOM | 2720 | CA   | GLN | X | 177 | 25.486 | 52.871 | 37.607 | 0.00 | 0.00 |
| ATOM | 2721 | HA   | GLN | X | 177 | 24.554 | 52.642 | 38.123 | 0.00 | 0.00 |
| ATOM | 2722 | CB   | GLN | X | 177 | 26.033 | 54.273 | 38.087 | 0.00 | 0.00 |
| ATOM | 2723 | HB2  | GLN | X | 177 | 26.435 | 54.208 | 39.098 | 0.00 | 0.00 |
| ATOM | 2724 | HB3  | GLN | X | 177 | 26.860 | 54.539 | 37.429 | 0.00 | 0.00 |

|      |      |      |     |   |     |        |        |        |      |      |
|------|------|------|-----|---|-----|--------|--------|--------|------|------|
| ATOM | 2725 | CG   | GLN | X | 177 | 24.946 | 55.402 | 38.177 | 0.00 | 0.00 |
| ATOM | 2726 | HG2  | GLN | X | 177 | 24.274 | 55.367 | 37.320 | 0.00 | 0.00 |
| ATOM | 2727 | HG3  | GLN | X | 177 | 24.163 | 55.220 | 38.913 | 0.00 | 0.00 |
| ATOM | 2728 | CD   | GLN | X | 177 | 25.550 | 56.770 | 38.368 | 0.00 | 0.00 |
| ATOM | 2729 | OE1  | GLN | X | 177 | 25.802 | 57.232 | 39.431 | 0.00 | 0.00 |
| ATOM | 2730 | NE2  | GLN | X | 177 | 25.998 | 57.354 | 37.299 | 0.00 | 0.00 |
| ATOM | 2731 | HE21 | GLN | X | 177 | 26.303 | 58.297 | 37.494 | 0.00 | 0.00 |
| ATOM | 2732 | HE22 | GLN | X | 177 | 25.668 | 57.102 | 36.379 | 0.00 | 0.00 |
| ATOM | 2733 | C    | GLN | X | 177 | 25.053 | 53.002 | 36.194 | 0.00 | 0.00 |
| ATOM | 2734 | O    | GLN | X | 177 | 23.908 | 52.957 | 35.975 | 0.00 | 0.00 |
| ATOM | 2735 | N    | TRP | X | 178 | 26.016 | 52.989 | 35.232 | 0.00 | 0.00 |
| ATOM | 2736 | H    | TRP | X | 178 | 26.970 | 52.855 | 35.537 | 0.00 | 0.00 |
| ATOM | 2737 | CA   | TRP | X | 178 | 25.661 | 52.891 | 33.755 | 0.00 | 0.00 |
| ATOM | 2738 | HA   | TRP | X | 178 | 25.105 | 53.767 | 33.421 | 0.00 | 0.00 |
| ATOM | 2739 | CB   | TRP | X | 178 | 26.928 | 52.972 | 32.845 | 0.00 | 0.00 |
| ATOM | 2740 | HB2  | TRP | X | 178 | 27.351 | 53.945 | 33.093 | 0.00 | 0.00 |
| ATOM | 2741 | HB3  | TRP | X | 178 | 27.701 | 52.261 | 33.135 | 0.00 | 0.00 |
| ATOM | 2742 | CG   | TRP | X | 178 | 26.796 | 52.995 | 31.296 | 0.00 | 0.00 |
| ATOM | 2743 | CD1  | TRP | X | 178 | 26.954 | 53.987 | 30.405 | 0.00 | 0.00 |
| ATOM | 2744 | HD1  | TRP | X | 178 | 27.373 | 54.944 | 30.679 | 0.00 | 0.00 |
| ATOM | 2745 | NE1  | TRP | X | 178 | 26.751 | 53.558 | 29.159 | 0.00 | 0.00 |
| ATOM | 2746 | HE1  | TRP | X | 178 | 26.971 | 54.098 | 28.335 | 0.00 | 0.00 |
| ATOM | 2747 | CE2  | TRP | X | 178 | 26.350 | 52.224 | 29.126 | 0.00 | 0.00 |
| ATOM | 2748 | CZ2  | TRP | X | 178 | 26.149 | 51.264 | 28.080 | 0.00 | 0.00 |
| ATOM | 2749 | HZ2  | TRP | X | 178 | 26.165 | 51.608 | 27.057 | 0.00 | 0.00 |
| ATOM | 2750 | CH2  | TRP | X | 178 | 26.014 | 49.875 | 28.319 | 0.00 | 0.00 |
| ATOM | 2751 | HH2  | TRP | X | 178 | 26.051 | 49.147 | 27.522 | 0.00 | 0.00 |
| ATOM | 2752 | CZ3  | TRP | X | 178 | 26.033 | 49.471 | 29.666 | 0.00 | 0.00 |
| ATOM | 2753 | HZ3  | TRP | X | 178 | 25.913 | 48.440 | 29.966 | 0.00 | 0.00 |
| ATOM | 2754 | CE3  | TRP | X | 178 | 26.218 | 50.448 | 30.721 | 0.00 | 0.00 |
| ATOM | 2755 | HE3  | TRP | X | 178 | 26.259 | 50.112 | 31.746 | 0.00 | 0.00 |
| ATOM | 2756 | CD2  | TRP | X | 178 | 26.408 | 51.860 | 30.495 | 0.00 | 0.00 |
| ATOM | 2757 | C    | TRP | X | 178 | 24.741 | 51.685 | 33.437 | 0.00 | 0.00 |
| ATOM | 2758 | O    | TRP | X | 178 | 23.809 | 51.838 | 32.676 | 0.00 | 0.00 |
| ATOM | 2759 | N    | VAL | X | 179 | 25.116 | 50.511 | 33.973 | 0.00 | 0.00 |
| ATOM | 2760 | H    | VAL | X | 179 | 26.000 | 50.414 | 34.451 | 0.00 | 0.00 |
| ATOM | 2761 | CA   | VAL | X | 179 | 24.366 | 49.243 | 33.816 | 0.00 | 0.00 |
| ATOM | 2762 | HA   | VAL | X | 179 | 24.368 | 49.021 | 32.749 | 0.00 | 0.00 |
| ATOM | 2763 | CB   | VAL | X | 179 | 24.984 | 47.985 | 34.510 | 0.00 | 0.00 |
| ATOM | 2764 | HB   | VAL | X | 179 | 25.381 | 48.293 | 35.477 | 0.00 | 0.00 |
| ATOM | 2765 | CG1  | VAL | X | 179 | 24.113 | 46.757 | 34.887 | 0.00 | 0.00 |
| ATOM | 2766 | HG11 | VAL | X | 179 | 23.573 | 46.548 | 33.963 | 0.00 | 0.00 |
| ATOM | 2767 | HG12 | VAL | X | 179 | 24.753 | 45.984 | 35.312 | 0.00 | 0.00 |
| ATOM | 2768 | HG13 | VAL | X | 179 | 23.346 | 47.018 | 35.616 | 0.00 | 0.00 |
| ATOM | 2769 | CG2  | VAL | X | 179 | 26.200 | 47.449 | 33.816 | 0.00 | 0.00 |
| ATOM | 2770 | HG21 | VAL | X | 179 | 26.648 | 46.638 | 34.391 | 0.00 | 0.00 |
| ATOM | 2771 | HG22 | VAL | X | 179 | 27.003 | 48.185 | 33.807 | 0.00 | 0.00 |
| ATOM | 2772 | HG23 | VAL | X | 179 | 26.038 | 47.177 | 32.773 | 0.00 | 0.00 |
| ATOM | 2773 | C    | VAL | X | 179 | 22.893 | 49.386 | 34.236 | 0.00 | 0.00 |
| ATOM | 2774 | O    | VAL | X | 179 | 21.967 | 49.293 | 33.382 | 0.00 | 0.00 |
| ATOM | 2775 | N    | GLN | X | 180 | 22.684 | 49.679 | 35.493 | 0.00 | 0.00 |
| ATOM | 2776 | H    | GLN | X | 180 | 23.495 | 49.831 | 36.076 | 0.00 | 0.00 |
| ATOM | 2777 | CA   | GLN | X | 180 | 21.283 | 50.055 | 36.091 | 0.00 | 0.00 |
| ATOM | 2778 | HA   | GLN | X | 180 | 20.662 | 49.167 | 35.971 | 0.00 | 0.00 |
| ATOM | 2779 | CB   | GLN | X | 180 | 21.489 | 50.680 | 37.519 | 0.00 | 0.00 |
| ATOM | 2780 | HB2  | GLN | X | 180 | 22.294 | 51.414 | 37.479 | 0.00 | 0.00 |
| ATOM | 2781 | HB3  | GLN | X | 180 | 20.560 | 51.183 | 37.787 | 0.00 | 0.00 |
| ATOM | 2782 | CG   | GLN | X | 180 | 21.796 | 49.623 | 38.572 | 0.00 | 0.00 |
| ATOM | 2783 | HG2  | GLN | X | 180 | 22.698 | 49.020 | 38.467 | 0.00 | 0.00 |
| ATOM | 2784 | HG3  | GLN | X | 180 | 21.806 | 50.231 | 39.477 | 0.00 | 0.00 |
| ATOM | 2785 | CD   | GLN | X | 180 | 20.650 | 48.681 | 38.716 | 0.00 | 0.00 |
| ATOM | 2786 | OE1  | GLN | X | 180 | 19.534 | 48.798 | 38.312 | 0.00 | 0.00 |
| ATOM | 2787 | NE2  | GLN | X | 180 | 20.927 | 47.474 | 39.129 | 0.00 | 0.00 |
| ATOM | 2788 | HE21 | GLN | X | 180 | 20.107 | 46.889 | 39.054 | 0.00 | 0.00 |
| ATOM | 2789 | HE22 | GLN | X | 180 | 21.868 | 47.181 | 39.350 | 0.00 | 0.00 |
| ATOM | 2790 | C    | GLN | X | 180 | 20.576 | 51.150 | 35.262 | 0.00 | 0.00 |
| ATOM | 2791 | O    | GLN | X | 180 | 19.341 | 51.066 | 35.152 | 0.00 | 0.00 |



|      |      |      |     |   |     |        |        |        |      |      |
|------|------|------|-----|---|-----|--------|--------|--------|------|------|
| ATOM | 2792 | N    | GLU | X | 181 | 21.295 | 52.086 | 34.621 | 0.00 | 0.00 |
| ATOM | 2793 | H    | GLU | X | 181 | 22.266 | 52.231 | 34.858 | 0.00 | 0.00 |
| ATOM | 2794 | CA   | GLU | X | 181 | 20.665 | 53.125 | 33.797 | 0.00 | 0.00 |
| ATOM | 2795 | HA   | GLU | X | 181 | 19.665 | 53.355 | 34.165 | 0.00 | 0.00 |
| ATOM | 2796 | CB   | GLU | X | 181 | 21.633 | 54.320 | 33.745 | 0.00 | 0.00 |
| ATOM | 2797 | HB2  | GLU | X | 181 | 21.937 | 54.534 | 34.769 | 0.00 | 0.00 |
| ATOM | 2798 | HB3  | GLU | X | 181 | 22.563 | 54.015 | 33.265 | 0.00 | 0.00 |
| ATOM | 2799 | CG   | GLU | X | 181 | 20.967 | 55.541 | 33.129 | 0.00 | 0.00 |
| ATOM | 2800 | HG2  | GLU | X | 181 | 20.914 | 55.494 | 32.041 | 0.00 | 0.00 |
| ATOM | 2801 | HG3  | GLU | X | 181 | 19.947 | 55.529 | 33.512 | 0.00 | 0.00 |
| ATOM | 2802 | CD   | GLU | X | 181 | 21.641 | 56.900 | 33.460 | 0.00 | 0.00 |
| ATOM | 2803 | OE1  | GLU | X | 181 | 20.921 | 57.899 | 33.628 | 0.00 | 0.00 |
| ATOM | 2804 | OE2  | GLU | X | 181 | 22.868 | 57.065 | 33.447 | 0.00 | 0.00 |
| ATOM | 2805 | C    | GLU | X | 181 | 20.245 | 52.634 | 32.427 | 0.00 | 0.00 |
| ATOM | 2806 | O    | GLU | X | 181 | 19.084 | 52.876 | 32.043 | 0.00 | 0.00 |
| ATOM | 2807 | N    | ASN | X | 182 | 21.125 | 51.847 | 31.733 | 0.00 | 0.00 |
| ATOM | 2808 | H    | ASN | X | 182 | 21.979 | 51.679 | 32.245 | 0.00 | 0.00 |
| ATOM | 2809 | CA   | ASN | X | 182 | 21.061 | 51.632 | 30.299 | 0.00 | 0.00 |
| ATOM | 2810 | HA   | ASN | X | 182 | 20.149 | 52.104 | 29.933 | 0.00 | 0.00 |
| ATOM | 2811 | CB   | ASN | X | 182 | 22.293 | 52.230 | 29.588 | 0.00 | 0.00 |
| ATOM | 2812 | HB2  | ASN | X | 182 | 23.148 | 51.807 | 30.114 | 0.00 | 0.00 |
| ATOM | 2813 | HB3  | ASN | X | 182 | 22.285 | 51.948 | 28.535 | 0.00 | 0.00 |
| ATOM | 2814 | CG   | ASN | X | 182 | 22.206 | 53.804 | 29.684 | 0.00 | 0.00 |
| ATOM | 2815 | OD1  | ASN | X | 182 | 21.215 | 54.392 | 29.385 | 0.00 | 0.00 |
| ATOM | 2816 | ND2  | ASN | X | 182 | 23.242 | 54.247 | 30.337 | 0.00 | 0.00 |
| ATOM | 2817 | HD21 | ASN | X | 182 | 23.279 | 55.252 | 30.436 | 0.00 | 0.00 |
| ATOM | 2818 | HD22 | ASN | X | 182 | 24.007 | 53.635 | 30.582 | 0.00 | 0.00 |
| ATOM | 2819 | C    | ASN | X | 182 | 20.970 | 50.160 | 29.838 | 0.00 | 0.00 |
| ATOM | 2820 | O    | ASN | X | 182 | 20.524 | 49.967 | 28.670 | 0.00 | 0.00 |
| ATOM | 2821 | N    | VAL | X | 183 | 21.344 | 49.102 | 30.653 | 0.00 | 0.00 |
| ATOM | 2822 | H    | VAL | X | 183 | 21.768 | 49.305 | 31.547 | 0.00 | 0.00 |
| ATOM | 2823 | CA   | VAL | X | 183 | 21.428 | 47.642 | 30.210 | 0.00 | 0.00 |
| ATOM | 2824 | HA   | VAL | X | 183 | 22.136 | 47.596 | 29.382 | 0.00 | 0.00 |
| ATOM | 2825 | CB   | VAL | X | 183 | 22.153 | 46.766 | 31.331 | 0.00 | 0.00 |
| ATOM | 2826 | HB   | VAL | X | 183 | 22.914 | 47.441 | 31.722 | 0.00 | 0.00 |
| ATOM | 2827 | CG1  | VAL | X | 183 | 21.208 | 46.336 | 32.473 | 0.00 | 0.00 |
| ATOM | 2828 | HG11 | VAL | X | 183 | 21.662 | 45.567 | 33.098 | 0.00 | 0.00 |
| ATOM | 2829 | HG12 | VAL | X | 183 | 20.758 | 47.112 | 33.092 | 0.00 | 0.00 |
| ATOM | 2830 | HG13 | VAL | X | 183 | 20.336 | 45.812 | 32.084 | 0.00 | 0.00 |
| ATOM | 2831 | CG2  | VAL | X | 183 | 22.823 | 45.542 | 30.644 | 0.00 | 0.00 |
| ATOM | 2832 | HG21 | VAL | X | 183 | 23.480 | 45.877 | 29.841 | 0.00 | 0.00 |
| ATOM | 2833 | HG22 | VAL | X | 183 | 22.059 | 44.960 | 30.127 | 0.00 | 0.00 |
| ATOM | 2834 | HG23 | VAL | X | 183 | 23.424 | 44.917 | 31.304 | 0.00 | 0.00 |
| ATOM | 2835 | C    | VAL | X | 183 | 20.085 | 47.069 | 29.712 | 0.00 | 0.00 |
| ATOM | 2836 | O    | VAL | X | 183 | 19.992 | 46.080 | 28.948 | 0.00 | 0.00 |
| ATOM | 2837 | N    | ALA | X | 184 | 18.979 | 47.642 | 30.175 | 0.00 | 0.00 |
| ATOM | 2838 | H    | ALA | X | 184 | 19.014 | 48.282 | 30.956 | 0.00 | 0.00 |
| ATOM | 2839 | CA   | ALA | X | 184 | 17.672 | 47.115 | 29.717 | 0.00 | 0.00 |
| ATOM | 2840 | HA   | ALA | X | 184 | 17.729 | 46.069 | 30.016 | 0.00 | 0.00 |
| ATOM | 2841 | CB   | ALA | X | 184 | 16.612 | 47.874 | 30.520 | 0.00 | 0.00 |
| ATOM | 2842 | HB1  | ALA | X | 184 | 16.327 | 48.811 | 30.042 | 0.00 | 0.00 |
| ATOM | 2843 | HB2  | ALA | X | 184 | 16.848 | 47.977 | 31.579 | 0.00 | 0.00 |
| ATOM | 2844 | HB3  | ALA | X | 184 | 15.668 | 47.334 | 30.434 | 0.00 | 0.00 |
| ATOM | 2845 | C    | ALA | X | 184 | 17.452 | 47.194 | 28.203 | 0.00 | 0.00 |
| ATOM | 2846 | O    | ALA | X | 184 | 16.750 | 46.315 | 27.649 | 0.00 | 0.00 |
| ATOM | 2847 | N    | ALA | X | 185 | 18.064 | 48.218 | 27.567 | 0.00 | 0.00 |
| ATOM | 2848 | H    | ALA | X | 185 | 18.571 | 48.877 | 28.139 | 0.00 | 0.00 |
| ATOM | 2849 | CA   | ALA | X | 185 | 18.068 | 48.428 | 26.106 | 0.00 | 0.00 |
| ATOM | 2850 | HA   | ALA | X | 185 | 17.097 | 48.793 | 25.772 | 0.00 | 0.00 |
| ATOM | 2851 | CB   | ALA | X | 185 | 19.071 | 49.495 | 25.756 | 0.00 | 0.00 |
| ATOM | 2852 | HB1  | ALA | X | 185 | 20.083 | 49.090 | 25.757 | 0.00 | 0.00 |
| ATOM | 2853 | HB2  | ALA | X | 185 | 19.029 | 50.351 | 26.429 | 0.00 | 0.00 |
| ATOM | 2854 | HB3  | ALA | X | 185 | 18.777 | 49.859 | 24.771 | 0.00 | 0.00 |
| ATOM | 2855 | C    | ALA | X | 185 | 18.430 | 47.186 | 25.305 | 0.00 | 0.00 |
| ATOM | 2856 | O    | ALA | X | 185 | 17.953 | 46.931 | 24.163 | 0.00 | 0.00 |
| ATOM | 2857 | N    | PHE | X | 186 | 19.230 | 46.269 | 25.892 | 0.00 | 0.00 |
| ATOM | 2858 | H    | PHE | X | 186 | 19.555 | 46.343 | 26.846 | 0.00 | 0.00 |

|      |      |      |     |   |     |        |        |        |      |      |
|------|------|------|-----|---|-----|--------|--------|--------|------|------|
| ATOM | 2859 | CA   | PHE | X | 186 | 19.752 | 45.081 | 25.239 | 0.00 | 0.00 |
| ATOM | 2860 | HA   | PHE | X | 186 | 19.895 | 45.221 | 24.167 | 0.00 | 0.00 |
| ATOM | 2861 | CB   | PHE | X | 186 | 21.179 | 44.871 | 25.722 | 0.00 | 0.00 |
| ATOM | 2862 | HB2  | PHE | X | 186 | 21.162 | 44.699 | 26.798 | 0.00 | 0.00 |
| ATOM | 2863 | HB3  | PHE | X | 186 | 21.563 | 43.961 | 25.259 | 0.00 | 0.00 |
| ATOM | 2864 | CG   | PHE | X | 186 | 22.171 | 46.038 | 25.491 | 0.00 | 0.00 |
| ATOM | 2865 | CD1  | PHE | X | 186 | 22.233 | 47.060 | 26.472 | 0.00 | 0.00 |
| ATOM | 2866 | HD1  | PHE | X | 186 | 21.562 | 47.082 | 27.318 | 0.00 | 0.00 |
| ATOM | 2867 | CE1  | PHE | X | 186 | 23.229 | 48.031 | 26.427 | 0.00 | 0.00 |
| ATOM | 2868 | HE1  | PHE | X | 186 | 23.354 | 48.694 | 27.270 | 0.00 | 0.00 |
| ATOM | 2869 | CZ   | PHE | X | 186 | 24.051 | 48.112 | 25.276 | 0.00 | 0.00 |
| ATOM | 2870 | HZ   | PHE | X | 186 | 24.737 | 48.936 | 25.144 | 0.00 | 0.00 |
| ATOM | 2871 | CE2  | PHE | X | 186 | 23.896 | 47.152 | 24.273 | 0.00 | 0.00 |
| ATOM | 2872 | HE2  | PHE | X | 186 | 24.430 | 47.239 | 23.339 | 0.00 | 0.00 |
| ATOM | 2873 | CD2  | PHE | X | 186 | 22.997 | 46.071 | 24.379 | 0.00 | 0.00 |
| ATOM | 2874 | HD2  | PHE | X | 186 | 23.031 | 45.367 | 23.561 | 0.00 | 0.00 |
| ATOM | 2875 | C    | PHE | X | 186 | 18.966 | 43.761 | 25.437 | 0.00 | 0.00 |
| ATOM | 2876 | O    | PHE | X | 186 | 19.379 | 42.735 | 24.930 | 0.00 | 0.00 |
| ATOM | 2877 | N    | GLY | X | 187 | 17.892 | 43.754 | 26.207 | 0.00 | 0.00 |
| ATOM | 2878 | H    | GLY | X | 187 | 17.648 | 44.667 | 26.563 | 0.00 | 0.00 |
| ATOM | 2879 | CA   | GLY | X | 187 | 17.250 | 42.607 | 26.746 | 0.00 | 0.00 |
| ATOM | 2880 | HA2  | GLY | X | 187 | 16.196 | 42.882 | 26.705 | 0.00 | 0.00 |
| ATOM | 2881 | HA3  | GLY | X | 187 | 17.373 | 41.835 | 25.986 | 0.00 | 0.00 |
| ATOM | 2882 | C    | GLY | X | 187 | 17.703 | 42.126 | 28.116 | 0.00 | 0.00 |
| ATOM | 2883 | O    | GLY | X | 187 | 17.262 | 41.069 | 28.530 | 0.00 | 0.00 |
| ATOM | 2884 | N    | GLY | X | 188 | 18.421 | 43.006 | 28.855 | 0.00 | 0.00 |
| ATOM | 2885 | H    | GLY | X | 188 | 18.610 | 43.893 | 28.410 | 0.00 | 0.00 |
| ATOM | 2886 | CA   | GLY | X | 188 | 18.762 | 42.713 | 30.276 | 0.00 | 0.00 |
| ATOM | 2887 | HA2  | GLY | X | 188 | 18.894 | 41.637 | 30.387 | 0.00 | 0.00 |
| ATOM | 2888 | HA3  | GLY | X | 188 | 19.691 | 43.219 | 30.541 | 0.00 | 0.00 |
| ATOM | 2889 | C    | GLY | X | 188 | 17.719 | 43.194 | 31.262 | 0.00 | 0.00 |
| ATOM | 2890 | O    | GLY | X | 188 | 17.076 | 44.212 | 31.083 | 0.00 | 0.00 |
| ATOM | 2891 | N    | ASP | X | 189 | 17.539 | 42.474 | 32.372 | 0.00 | 0.00 |
| ATOM | 2892 | H    | ASP | X | 189 | 17.967 | 41.561 | 32.425 | 0.00 | 0.00 |
| ATOM | 2893 | CA   | ASP | X | 189 | 16.644 | 42.832 | 33.430 | 0.00 | 0.00 |
| ATOM | 2894 | HA   | ASP | X | 189 | 15.870 | 43.501 | 33.056 | 0.00 | 0.00 |
| ATOM | 2895 | CB   | ASP | X | 189 | 16.069 | 41.563 | 34.144 | 0.00 | 0.00 |
| ATOM | 2896 | HB2  | ASP | X | 189 | 15.425 | 41.024 | 33.449 | 0.00 | 0.00 |
| ATOM | 2897 | HB3  | ASP | X | 189 | 16.893 | 40.949 | 34.507 | 0.00 | 0.00 |
| ATOM | 2898 | CG   | ASP | X | 189 | 15.302 | 41.973 | 35.430 | 0.00 | 0.00 |
| ATOM | 2899 | OD1  | ASP | X | 189 | 15.163 | 41.089 | 36.365 | 0.00 | 0.00 |
| ATOM | 2900 | OD2  | ASP | X | 189 | 14.688 | 43.071 | 35.580 | 0.00 | 0.00 |
| ATOM | 2901 | C    | ASP | X | 189 | 17.425 | 43.646 | 34.543 | 0.00 | 0.00 |
| ATOM | 2902 | O    | ASP | X | 189 | 18.406 | 43.094 | 35.132 | 0.00 | 0.00 |
| ATOM | 2903 | N    | PRO | X | 190 | 17.115 | 44.947 | 34.800 | 0.00 | 0.00 |
| ATOM | 2904 | CD   | PRO | X | 190 | 15.979 | 45.783 | 34.311 | 0.00 | 0.00 |
| ATOM | 2905 | HD2  | PRO | X | 190 | 15.045 | 45.312 | 34.617 | 0.00 | 0.00 |
| ATOM | 2906 | HD3  | PRO | X | 190 | 16.036 | 45.827 | 33.223 | 0.00 | 0.00 |
| ATOM | 2907 | CG   | PRO | X | 190 | 16.166 | 47.163 | 34.949 | 0.00 | 0.00 |
| ATOM | 2908 | HG2  | PRO | X | 190 | 15.515 | 47.198 | 35.823 | 0.00 | 0.00 |
| ATOM | 2909 | HG3  | PRO | X | 190 | 15.912 | 47.999 | 34.298 | 0.00 | 0.00 |
| ATOM | 2910 | CB   | PRO | X | 190 | 17.635 | 47.125 | 35.358 | 0.00 | 0.00 |
| ATOM | 2911 | HB2  | PRO | X | 190 | 17.843 | 47.862 | 36.133 | 0.00 | 0.00 |
| ATOM | 2912 | HB3  | PRO | X | 190 | 18.293 | 47.439 | 34.547 | 0.00 | 0.00 |
| ATOM | 2913 | CA   | PRO | X | 190 | 17.901 | 45.680 | 35.775 | 0.00 | 0.00 |
| ATOM | 2914 | HA   | PRO | X | 190 | 18.979 | 45.552 | 35.680 | 0.00 | 0.00 |
| ATOM | 2915 | C    | PRO | X | 190 | 17.550 | 45.359 | 37.207 | 0.00 | 0.00 |
| ATOM | 2916 | O    | PRO | X | 190 | 18.186 | 45.892 | 38.128 | 0.00 | 0.00 |
| ATOM | 2917 | N    | THR | X | 191 | 16.539 | 44.481 | 37.465 | 0.00 | 0.00 |
| ATOM | 2918 | H    | THR | X | 191 | 16.125 | 43.970 | 36.700 | 0.00 | 0.00 |
| ATOM | 2919 | CA   | THR | X | 191 | 16.213 | 44.041 | 38.802 | 0.00 | 0.00 |
| ATOM | 2920 | HA   | THR | X | 191 | 16.406 | 44.738 | 39.618 | 0.00 | 0.00 |
| ATOM | 2921 | CB   | THR | X | 191 | 14.727 | 43.640 | 38.886 | 0.00 | 0.00 |
| ATOM | 2922 | HB   | THR | X | 191 | 14.599 | 42.587 | 38.634 | 0.00 | 0.00 |
| ATOM | 2923 | CG2  | THR | X | 191 | 14.182 | 43.911 | 40.270 | 0.00 | 0.00 |
| ATOM | 2924 | HG21 | THR | X | 191 | 14.963 | 43.675 | 40.993 | 0.00 | 0.00 |
| ATOM | 2925 | HG22 | THR | X | 191 | 13.384 | 43.184 | 40.420 | 0.00 | 0.00 |

|      |      |      |     |   |     |        |        |        |      |      |
|------|------|------|-----|---|-----|--------|--------|--------|------|------|
| ATOM | 2926 | HG23 | THR | X | 191 | 13.880 | 44.947 | 40.421 | 0.00 | 0.00 |
| ATOM | 2927 | OG1  | THR | X | 191 | 13.937 | 44.354 | 37.851 | 0.00 | 0.00 |
| ATOM | 2928 | HG1  | THR | X | 191 | 14.151 | 43.879 | 37.044 | 0.00 | 0.00 |
| ATOM | 2929 | C    | THR | X | 191 | 17.070 | 42.813 | 39.090 | 0.00 | 0.00 |
| ATOM | 2930 | O    | THR | X | 191 | 16.944 | 42.223 | 40.163 | 0.00 | 0.00 |
| ATOM | 2931 | N    | SER | X | 192 | 17.788 | 42.264 | 38.108 | 0.00 | 0.00 |
| ATOM | 2932 | H    | SER | X | 192 | 17.851 | 42.881 | 37.311 | 0.00 | 0.00 |
| ATOM | 2933 | CA   | SER | X | 192 | 18.543 | 40.996 | 38.217 | 0.00 | 0.00 |
| ATOM | 2934 | HA   | SER | X | 192 | 18.550 | 40.597 | 39.231 | 0.00 | 0.00 |
| ATOM | 2935 | CB   | SER | X | 192 | 17.878 | 39.850 | 37.369 | 0.00 | 0.00 |
| ATOM | 2936 | HB2  | SER | X | 192 | 17.653 | 40.332 | 36.417 | 0.00 | 0.00 |
| ATOM | 2937 | HB3  | SER | X | 192 | 18.664 | 39.099 | 37.279 | 0.00 | 0.00 |
| ATOM | 2938 | OG   | SER | X | 192 | 16.656 | 39.333 | 37.926 | 0.00 | 0.00 |
| ATOM | 2939 | HG   | SER | X | 192 | 15.983 | 39.964 | 37.659 | 0.00 | 0.00 |
| ATOM | 2940 | C    | SER | X | 192 | 19.996 | 41.285 | 37.814 | 0.00 | 0.00 |
| ATOM | 2941 | O    | SER | X | 192 | 20.532 | 40.554 | 36.974 | 0.00 | 0.00 |
| ATOM | 2942 | N    | VAL | X | 193 | 20.589 | 42.341 | 38.391 | 0.00 | 0.00 |
| ATOM | 2943 | H    | VAL | X | 193 | 20.085 | 42.909 | 39.058 | 0.00 | 0.00 |
| ATOM | 2944 | CA   | VAL | X | 193 | 22.063 | 42.567 | 38.264 | 0.00 | 0.00 |
| ATOM | 2945 | HA   | VAL | X | 193 | 22.236 | 42.157 | 37.269 | 0.00 | 0.00 |
| ATOM | 2946 | CB   | VAL | X | 193 | 22.511 | 44.078 | 38.268 | 0.00 | 0.00 |
| ATOM | 2947 | HB   | VAL | X | 193 | 22.205 | 44.469 | 39.239 | 0.00 | 0.00 |
| ATOM | 2948 | CG1  | VAL | X | 193 | 24.062 | 44.291 | 38.156 | 0.00 | 0.00 |
| ATOM | 2949 | HG11 | VAL | X | 193 | 24.340 | 45.335 | 38.016 | 0.00 | 0.00 |
| ATOM | 2950 | HG12 | VAL | X | 193 | 24.567 | 43.978 | 39.069 | 0.00 | 0.00 |
| ATOM | 2951 | HG13 | VAL | X | 193 | 24.310 | 43.802 | 37.214 | 0.00 | 0.00 |
| ATOM | 2952 | CG2  | VAL | X | 193 | 21.755 | 44.902 | 37.236 | 0.00 | 0.00 |
| ATOM | 2953 | HG21 | VAL | X | 193 | 21.941 | 44.586 | 36.209 | 0.00 | 0.00 |
| ATOM | 2954 | HG22 | VAL | X | 193 | 22.157 | 45.915 | 37.278 | 0.00 | 0.00 |
| ATOM | 2955 | HG23 | VAL | X | 193 | 20.686 | 44.844 | 37.440 | 0.00 | 0.00 |
| ATOM | 2956 | C    | VAL | X | 193 | 22.828 | 41.651 | 39.173 | 0.00 | 0.00 |
| ATOM | 2957 | O    | VAL | X | 193 | 22.720 | 41.765 | 40.411 | 0.00 | 0.00 |
| ATOM | 2958 | N    | THR | X | 194 | 23.649 | 40.732 | 38.610 | 0.00 | 0.00 |
| ATOM | 2959 | H    | THR | X | 194 | 23.888 | 40.723 | 37.629 | 0.00 | 0.00 |
| ATOM | 2960 | CA   | THR | X | 194 | 24.473 | 39.804 | 39.361 | 0.00 | 0.00 |
| ATOM | 2961 | HA   | THR | X | 194 | 24.302 | 39.884 | 40.435 | 0.00 | 0.00 |
| ATOM | 2962 | CB   | THR | X | 194 | 24.189 | 38.347 | 38.920 | 0.00 | 0.00 |
| ATOM | 2963 | HB   | THR | X | 194 | 24.358 | 38.126 | 37.866 | 0.00 | 0.00 |
| ATOM | 2964 | CG2  | THR | X | 194 | 25.032 | 37.316 | 39.685 | 0.00 | 0.00 |
| ATOM | 2965 | HG21 | THR | X | 194 | 25.077 | 36.425 | 39.060 | 0.00 | 0.00 |
| ATOM | 2966 | HG22 | THR | X | 194 | 24.506 | 37.017 | 40.592 | 0.00 | 0.00 |
| ATOM | 2967 | HG23 | THR | X | 194 | 26.009 | 37.709 | 39.969 | 0.00 | 0.00 |
| ATOM | 2968 | OG1  | THR | X | 194 | 22.909 | 37.919 | 39.210 | 0.00 | 0.00 |
| ATOM | 2969 | HG1  | THR | X | 194 | 22.295 | 38.654 | 39.151 | 0.00 | 0.00 |
| ATOM | 2970 | C    | THR | X | 194 | 25.962 | 40.122 | 38.954 | 0.00 | 0.00 |
| ATOM | 2971 | O    | THR | X | 194 | 26.346 | 40.121 | 37.804 | 0.00 | 0.00 |
| ATOM | 2972 | N    | LEU | X | 195 | 26.794 | 40.416 | 39.991 | 0.00 | 0.00 |
| ATOM | 2973 | H    | LEU | X | 195 | 26.414 | 40.368 | 40.925 | 0.00 | 0.00 |
| ATOM | 2974 | CA   | LEU | X | 195 | 28.231 | 40.694 | 39.795 | 0.00 | 0.00 |
| ATOM | 2975 | HA   | LEU | X | 195 | 28.450 | 41.098 | 38.806 | 0.00 | 0.00 |
| ATOM | 2976 | CB   | LEU | X | 195 | 28.749 | 41.641 | 40.906 | 0.00 | 0.00 |
| ATOM | 2977 | HB2  | LEU | X | 195 | 28.551 | 41.081 | 41.819 | 0.00 | 0.00 |
| ATOM | 2978 | HB3  | LEU | X | 195 | 29.838 | 41.664 | 40.852 | 0.00 | 0.00 |
| ATOM | 2979 | CG   | LEU | X | 195 | 28.134 | 43.048 | 41.077 | 0.00 | 0.00 |
| ATOM | 2980 | HG   | LEU | X | 195 | 27.143 | 42.840 | 41.481 | 0.00 | 0.00 |
| ATOM | 2981 | CD1  | LEU | X | 195 | 29.030 | 43.862 | 41.975 | 0.00 | 0.00 |
| ATOM | 2982 | HD11 | LEU | X | 195 | 28.562 | 44.847 | 41.994 | 0.00 | 0.00 |
| ATOM | 2983 | HD12 | LEU | X | 195 | 30.016 | 43.985 | 41.528 | 0.00 | 0.00 |
| ATOM | 2984 | HD13 | LEU | X | 195 | 29.157 | 43.497 | 42.994 | 0.00 | 0.00 |
| ATOM | 2985 | CD2  | LEU | X | 195 | 27.848 | 43.741 | 39.786 | 0.00 | 0.00 |
| ATOM | 2986 | HD21 | LEU | X | 195 | 27.158 | 44.552 | 40.022 | 0.00 | 0.00 |
| ATOM | 2987 | HD22 | LEU | X | 195 | 28.823 | 44.077 | 39.432 | 0.00 | 0.00 |
| ATOM | 2988 | HD23 | LEU | X | 195 | 27.354 | 43.069 | 39.085 | 0.00 | 0.00 |
| ATOM | 2989 | C    | LEU | X | 195 | 29.032 | 39.414 | 39.912 | 0.00 | 0.00 |
| ATOM | 2990 | O    | LEU | X | 195 | 28.763 | 38.685 | 40.846 | 0.00 | 0.00 |
| ATOM | 2991 | N    | PHE | X | 196 | 30.035 | 39.117 | 39.093 | 0.00 | 0.00 |
| ATOM | 2992 | H    | PHE | X | 196 | 30.158 | 39.682 | 38.265 | 0.00 | 0.00 |

|      |      |     |     |   |     |        |        |        |      |      |
|------|------|-----|-----|---|-----|--------|--------|--------|------|------|
| ATOM | 2993 | CA  | PHE | X | 196 | 30.879 | 37.920 | 39.029 | 0.00 | 0.00 |
| ATOM | 2994 | HA  | PHE | X | 196 | 30.919 | 37.503 | 40.035 | 0.00 | 0.00 |
| ATOM | 2995 | CB  | PHE | X | 196 | 30.150 | 36.795 | 38.273 | 0.00 | 0.00 |
| ATOM | 2996 | HB2 | PHE | X | 196 | 30.663 | 35.862 | 38.510 | 0.00 | 0.00 |
| ATOM | 2997 | HB3 | PHE | X | 196 | 29.102 | 36.645 | 38.531 | 0.00 | 0.00 |
| ATOM | 2998 | CG  | PHE | X | 196 | 30.234 | 36.796 | 36.728 | 0.00 | 0.00 |
| ATOM | 2999 | CD1 | PHE | X | 196 | 30.018 | 37.944 | 35.967 | 0.00 | 0.00 |
| ATOM | 3000 | HD1 | PHE | X | 196 | 29.739 | 38.915 | 36.348 | 0.00 | 0.00 |
| ATOM | 3001 | CE1 | PHE | X | 196 | 30.096 | 37.988 | 34.548 | 0.00 | 0.00 |
| ATOM | 3002 | HE1 | PHE | X | 196 | 29.940 | 38.885 | 33.967 | 0.00 | 0.00 |
| ATOM | 3003 | CZ  | PHE | X | 196 | 30.332 | 36.746 | 33.961 | 0.00 | 0.00 |
| ATOM | 3004 | HZ  | PHE | X | 196 | 30.271 | 36.677 | 32.885 | 0.00 | 0.00 |
| ATOM | 3005 | CE2 | PHE | X | 196 | 30.547 | 35.512 | 34.695 | 0.00 | 0.00 |
| ATOM | 3006 | HE2 | PHE | X | 196 | 30.617 | 34.573 | 34.166 | 0.00 | 0.00 |
| ATOM | 3007 | CD2 | PHE | X | 196 | 30.500 | 35.574 | 36.105 | 0.00 | 0.00 |
| ATOM | 3008 | HD2 | PHE | X | 196 | 30.645 | 34.640 | 36.628 | 0.00 | 0.00 |
| ATOM | 3009 | C   | PHE | X | 196 | 32.318 | 38.253 | 38.515 | 0.00 | 0.00 |
| ATOM | 3010 | O   | PHE | X | 196 | 32.484 | 39.260 | 37.838 | 0.00 | 0.00 |
| ATOM | 3011 | N   | GLY | X | 197 | 33.299 | 37.420 | 38.862 | 0.00 | 0.00 |
| ATOM | 3012 | H   | GLY | X | 197 | 33.077 | 36.590 | 39.394 | 0.00 | 0.00 |
| ATOM | 3013 | CA  | GLY | X | 197 | 34.738 | 37.732 | 38.739 | 0.00 | 0.00 |
| ATOM | 3014 | HA2 | GLY | X | 197 | 35.115 | 37.646 | 37.720 | 0.00 | 0.00 |
| ATOM | 3015 | HA3 | GLY | X | 197 | 34.784 | 38.759 | 39.099 | 0.00 | 0.00 |
| ATOM | 3016 | C   | GLY | X | 197 | 35.690 | 36.831 | 39.608 | 0.00 | 0.00 |
| ATOM | 3017 | O   | GLY | X | 197 | 35.278 | 36.338 | 40.679 | 0.00 | 0.00 |
| ATOM | 3018 | N   | GLU | X | 198 | 36.908 | 36.746 | 39.066 | 0.00 | 0.00 |
| ATOM | 3019 | H   | GLU | X | 198 | 37.133 | 37.310 | 38.259 | 0.00 | 0.00 |
| ATOM | 3020 | CA  | GLU | X | 198 | 37.914 | 35.940 | 39.674 | 0.00 | 0.00 |
| ATOM | 3021 | HA  | GLU | X | 198 | 37.421 | 35.453 | 40.516 | 0.00 | 0.00 |
| ATOM | 3022 | CB  | GLU | X | 198 | 38.438 | 34.761 | 38.761 | 0.00 | 0.00 |
| ATOM | 3023 | HB2 | GLU | X | 198 | 39.326 | 34.284 | 39.176 | 0.00 | 0.00 |
| ATOM | 3024 | HB3 | GLU | X | 198 | 37.684 | 33.993 | 38.590 | 0.00 | 0.00 |
| ATOM | 3025 | CG  | GLU | X | 198 | 38.896 | 35.042 | 37.254 | 0.00 | 0.00 |
| ATOM | 3026 | HG2 | GLU | X | 198 | 39.233 | 34.113 | 36.794 | 0.00 | 0.00 |
| ATOM | 3027 | HG3 | GLU | X | 198 | 38.004 | 35.363 | 36.716 | 0.00 | 0.00 |
| ATOM | 3028 | CD  | GLU | X | 198 | 39.921 | 36.236 | 37.003 | 0.00 | 0.00 |
| ATOM | 3029 | OE1 | GLU | X | 198 | 39.755 | 36.997 | 35.988 | 0.00 | 0.00 |
| ATOM | 3030 | OE2 | GLU | X | 198 | 41.013 | 36.225 | 37.580 | 0.00 | 0.00 |
| ATOM | 3031 | C   | GLU | X | 198 | 39.060 | 36.824 | 40.151 | 0.00 | 0.00 |
| ATOM | 3032 | O   | GLU | X | 198 | 39.179 | 37.959 | 39.658 | 0.00 | 0.00 |
| ATOM | 3033 | N   | XA1 | X | 199 | 39.764 | 36.362 | 41.127 | 0.00 | 0.00 |
| ATOM | 3034 | CA  | XA1 | X | 199 | 41.021 | 36.928 | 41.672 | 0.00 | 0.00 |
| ATOM | 3035 | C   | XA1 | X | 199 | 40.799 | 38.354 | 42.226 | 0.00 | 0.00 |
| ATOM | 3036 | O   | XA1 | X | 199 | 39.994 | 38.668 | 43.062 | 0.00 | 0.00 |
| ATOM | 3037 | CB  | XA1 | X | 199 | 42.223 | 36.801 | 40.701 | 0.00 | 0.00 |
| ATOM | 3038 | OG  | XA1 | X | 199 | 43.410 | 36.761 | 41.564 | 0.00 | 0.00 |
| ATOM | 3039 | P1  | XA1 | X | 199 | 44.517 | 37.795 | 41.197 | 0.00 | 0.00 |
| ATOM | 3040 | O1  | XA1 | X | 199 | 44.107 | 39.031 | 40.535 | 0.00 | 0.00 |
| ATOM | 3041 | O2  | XA1 | X | 199 | 45.337 | 37.130 | 40.164 | 0.00 | 0.00 |
| ATOM | 3042 | C1  | XA1 | X | 199 | 45.568 | 37.961 | 42.612 | 0.00 | 0.00 |
| ATOM | 3043 | H   | XA1 | X | 199 | 39.318 | 35.670 | 41.711 | 0.00 | 0.00 |
| ATOM | 3044 | HA  | XA1 | X | 199 | 41.108 | 36.279 | 42.543 | 0.00 | 0.00 |
| ATOM | 3045 | HB2 | XA1 | X | 199 | 42.193 | 35.813 | 40.235 | 0.00 | 0.00 |
| ATOM | 3046 | HB3 | XA1 | X | 199 | 42.265 | 37.592 | 39.948 | 0.00 | 0.00 |
| ATOM | 3047 | H11 | XA1 | X | 199 | 46.126 | 37.028 | 42.717 | 0.00 | 0.00 |
| ATOM | 3048 | H12 | XA1 | X | 199 | 46.095 | 38.896 | 42.412 | 0.00 | 0.00 |
| ATOM | 3049 | H13 | XA1 | X | 199 | 44.944 | 38.131 | 43.492 | 0.00 | 0.00 |
| ATOM | 3050 | N   | ALA | X | 200 | 41.590 | 39.364 | 41.722 | 0.00 | 0.00 |
| ATOM | 3051 | H   | ALA | X | 200 | 42.230 | 39.273 | 40.945 | 0.00 | 0.00 |
| ATOM | 3052 | CA  | ALA | X | 200 | 41.325 | 40.804 | 42.076 | 0.00 | 0.00 |
| ATOM | 3053 | HA  | ALA | X | 200 | 41.365 | 41.021 | 43.144 | 0.00 | 0.00 |
| ATOM | 3054 | CB  | ALA | X | 200 | 42.379 | 41.718 | 41.342 | 0.00 | 0.00 |
| ATOM | 3055 | HB1 | ALA | X | 200 | 41.973 | 42.693 | 41.071 | 0.00 | 0.00 |
| ATOM | 3056 | HB2 | ALA | X | 200 | 42.713 | 41.350 | 40.372 | 0.00 | 0.00 |
| ATOM | 3057 | HB3 | ALA | X | 200 | 43.280 | 41.781 | 41.952 | 0.00 | 0.00 |
| ATOM | 3058 | C   | ALA | X | 200 | 39.924 | 41.217 | 41.708 | 0.00 | 0.00 |
| ATOM | 3059 | O   | ALA | X | 200 | 39.407 | 42.127 | 42.380 | 0.00 | 0.00 |

|      |      |      |     |   |     |        |        |        |      |      |
|------|------|------|-----|---|-----|--------|--------|--------|------|------|
| ATOM | 3060 | N    | GLY | X | 201 | 39.268 | 40.541 | 40.756 | 0.00 | 0.00 |
| ATOM | 3061 | H    | GLY | X | 201 | 39.740 | 39.746 | 40.349 | 0.00 | 0.00 |
| ATOM | 3062 | CA   | GLY | X | 201 | 37.807 | 40.540 | 40.437 | 0.00 | 0.00 |
| ATOM | 3063 | HA2  | GLY | X | 201 | 37.525 | 41.520 | 40.051 | 0.00 | 0.00 |
| ATOM | 3064 | HA3  | GLY | X | 201 | 37.640 | 39.938 | 39.544 | 0.00 | 0.00 |
| ATOM | 3065 | C    | GLY | X | 201 | 36.901 | 40.144 | 41.536 | 0.00 | 0.00 |
| ATOM | 3066 | O    | GLY | X | 201 | 36.036 | 40.947 | 41.973 | 0.00 | 0.00 |
| ATOM | 3067 | N    | ALA | X | 202 | 37.134 | 38.943 | 42.081 | 0.00 | 0.00 |
| ATOM | 3068 | H    | ALA | X | 202 | 37.902 | 38.361 | 41.779 | 0.00 | 0.00 |
| ATOM | 3069 | CA   | ALA | X | 202 | 36.295 | 38.315 | 43.107 | 0.00 | 0.00 |
| ATOM | 3070 | HA   | ALA | X | 202 | 35.257 | 38.253 | 42.778 | 0.00 | 0.00 |
| ATOM | 3071 | CB   | ALA | X | 202 | 36.740 | 36.861 | 43.426 | 0.00 | 0.00 |
| ATOM | 3072 | HB1  | ALA | X | 202 | 36.608 | 36.144 | 42.616 | 0.00 | 0.00 |
| ATOM | 3073 | HB2  | ALA | X | 202 | 36.151 | 36.516 | 44.276 | 0.00 | 0.00 |
| ATOM | 3074 | HB3  | ALA | X | 202 | 37.808 | 36.864 | 43.645 | 0.00 | 0.00 |
| ATOM | 3075 | C    | ALA | X | 202 | 36.480 | 39.159 | 44.386 | 0.00 | 0.00 |
| ATOM | 3076 | O    | ALA | X | 202 | 35.511 | 39.573 | 44.989 | 0.00 | 0.00 |
| ATOM | 3077 | N    | ALA | X | 203 | 37.718 | 39.603 | 44.669 | 0.00 | 0.00 |
| ATOM | 3078 | H    | ALA | X | 203 | 38.506 | 39.265 | 44.135 | 0.00 | 0.00 |
| ATOM | 3079 | CA   | ALA | X | 203 | 37.952 | 40.573 | 45.664 | 0.00 | 0.00 |
| ATOM | 3080 | HA   | ALA | X | 203 | 37.528 | 40.205 | 46.598 | 0.00 | 0.00 |
| ATOM | 3081 | CB   | ALA | X | 203 | 39.449 | 40.844 | 45.755 | 0.00 | 0.00 |
| ATOM | 3082 | HB1  | ALA | X | 203 | 39.607 | 41.521 | 46.594 | 0.00 | 0.00 |
| ATOM | 3083 | HB2  | ALA | X | 203 | 39.808 | 41.134 | 44.767 | 0.00 | 0.00 |
| ATOM | 3084 | HB3  | ALA | X | 203 | 39.863 | 39.854 | 45.942 | 0.00 | 0.00 |
| ATOM | 3085 | C    | ALA | X | 203 | 37.149 | 41.872 | 45.413 | 0.00 | 0.00 |
| ATOM | 3086 | O    | ALA | X | 203 | 36.556 | 42.333 | 46.330 | 0.00 | 0.00 |
| ATOM | 3087 | N    | SER | X | 204 | 37.182 | 42.420 | 44.153 | 0.00 | 0.00 |
| ATOM | 3088 | H    | SER | X | 204 | 37.879 | 42.030 | 43.534 | 0.00 | 0.00 |
| ATOM | 3089 | CA   | SER | X | 204 | 36.410 | 43.607 | 43.736 | 0.00 | 0.00 |
| ATOM | 3090 | HA   | SER | X | 204 | 36.623 | 44.457 | 44.384 | 0.00 | 0.00 |
| ATOM | 3091 | CB   | SER | X | 204 | 36.692 | 43.932 | 42.291 | 0.00 | 0.00 |
| ATOM | 3092 | HB2  | SER | X | 204 | 36.704 | 43.043 | 41.661 | 0.00 | 0.00 |
| ATOM | 3093 | HB3  | SER | X | 204 | 35.898 | 44.635 | 42.038 | 0.00 | 0.00 |
| ATOM | 3094 | OG   | SER | X | 204 | 37.949 | 44.546 | 42.045 | 0.00 | 0.00 |
| ATOM | 3095 | HG   | SER | X | 204 | 38.661 | 43.939 | 42.259 | 0.00 | 0.00 |
| ATOM | 3096 | C    | SER | X | 204 | 34.835 | 43.453 | 43.940 | 0.00 | 0.00 |
| ATOM | 3097 | O    | SER | X | 204 | 34.128 | 44.369 | 44.289 | 0.00 | 0.00 |
| ATOM | 3098 | N    | VAL | X | 205 | 34.303 | 42.251 | 43.673 | 0.00 | 0.00 |
| ATOM | 3099 | H    | VAL | X | 205 | 34.896 | 41.512 | 43.323 | 0.00 | 0.00 |
| ATOM | 3100 | CA   | VAL | X | 205 | 32.902 | 41.935 | 43.940 | 0.00 | 0.00 |
| ATOM | 3101 | HA   | VAL | X | 205 | 32.221 | 42.577 | 43.381 | 0.00 | 0.00 |
| ATOM | 3102 | CB   | VAL | X | 205 | 32.423 | 40.624 | 43.300 | 0.00 | 0.00 |
| ATOM | 3103 | HB   | VAL | X | 205 | 32.909 | 39.768 | 43.766 | 0.00 | 0.00 |
| ATOM | 3104 | CG1  | VAL | X | 205 | 30.956 | 40.341 | 43.533 | 0.00 | 0.00 |
| ATOM | 3105 | HG11 | VAL | X | 205 | 30.420 | 41.262 | 43.304 | 0.00 | 0.00 |
| ATOM | 3106 | HG12 | VAL | X | 205 | 30.634 | 39.585 | 42.818 | 0.00 | 0.00 |
| ATOM | 3107 | HG13 | VAL | X | 205 | 30.822 | 40.084 | 44.584 | 0.00 | 0.00 |
| ATOM | 3108 | CG2  | VAL | X | 205 | 32.741 | 40.481 | 41.817 | 0.00 | 0.00 |
| ATOM | 3109 | HG21 | VAL | X | 205 | 32.208 | 41.323 | 41.376 | 0.00 | 0.00 |
| ATOM | 3110 | HG22 | VAL | X | 205 | 32.414 | 39.521 | 41.419 | 0.00 | 0.00 |
| ATOM | 3111 | HG23 | VAL | X | 205 | 33.803 | 40.641 | 41.628 | 0.00 | 0.00 |
| ATOM | 3112 | C    | VAL | X | 205 | 32.584 | 41.962 | 45.441 | 0.00 | 0.00 |
| ATOM | 3113 | O    | VAL | X | 205 | 31.502 | 42.446 | 45.864 | 0.00 | 0.00 |
| ATOM | 3114 | N    | GLY | X | 206 | 33.503 | 41.513 | 46.298 | 0.00 | 0.00 |
| ATOM | 3115 | H    | GLY | X | 206 | 34.386 | 41.199 | 45.924 | 0.00 | 0.00 |
| ATOM | 3116 | CA   | GLY | X | 206 | 33.480 | 41.643 | 47.716 | 0.00 | 0.00 |
| ATOM | 3117 | HA2  | GLY | X | 206 | 32.596 | 41.129 | 48.093 | 0.00 | 0.00 |
| ATOM | 3118 | HA3  | GLY | X | 206 | 34.303 | 41.068 | 48.139 | 0.00 | 0.00 |
| ATOM | 3119 | C    | GLY | X | 206 | 33.626 | 43.071 | 48.271 | 0.00 | 0.00 |
| ATOM | 3120 | O    | GLY | X | 206 | 33.032 | 43.366 | 49.248 | 0.00 | 0.00 |
| ATOM | 3121 | N    | MET | X | 207 | 34.478 | 43.913 | 47.723 | 0.00 | 0.00 |
| ATOM | 3122 | H    | MET | X | 207 | 34.937 | 43.569 | 46.891 | 0.00 | 0.00 |
| ATOM | 3123 | CA   | MET | X | 207 | 34.695 | 45.372 | 48.037 | 0.00 | 0.00 |
| ATOM | 3124 | HA   | MET | X | 207 | 34.981 | 45.564 | 49.071 | 0.00 | 0.00 |
| ATOM | 3125 | CB   | MET | X | 207 | 35.743 | 45.959 | 47.128 | 0.00 | 0.00 |
| ATOM | 3126 | HB2  | MET | X | 207 | 35.418 | 45.848 | 46.094 | 0.00 | 0.00 |

|      |      |      |     |   |     |        |        |        |      |      |
|------|------|------|-----|---|-----|--------|--------|--------|------|------|
| ATOM | 3127 | HB3  | MET | X | 207 | 35.946 | 47.005 | 47.356 | 0.00 | 0.00 |
| ATOM | 3128 | CG   | MET | X | 207 | 37.145 | 45.318 | 47.318 | 0.00 | 0.00 |
| ATOM | 3129 | HG2  | MET | X | 207 | 37.183 | 44.233 | 47.220 | 0.00 | 0.00 |
| ATOM | 3130 | HG3  | MET | X | 207 | 37.837 | 45.843 | 46.660 | 0.00 | 0.00 |
| ATOM | 3131 | SD   | MET | X | 207 | 37.830 | 45.902 | 48.894 | 0.00 | 0.00 |
| ATOM | 3132 | CE   | MET | X | 207 | 39.127 | 44.625 | 49.133 | 0.00 | 0.00 |
| ATOM | 3133 | HE1  | MET | X | 207 | 38.579 | 43.751 | 49.484 | 0.00 | 0.00 |
| ATOM | 3134 | HE2  | MET | X | 207 | 39.519 | 44.421 | 48.136 | 0.00 | 0.00 |
| ATOM | 3135 | HE3  | MET | X | 207 | 39.922 | 44.983 | 49.788 | 0.00 | 0.00 |
| ATOM | 3136 | C    | MET | X | 207 | 33.359 | 46.060 | 47.672 | 0.00 | 0.00 |
| ATOM | 3137 | O    | MET | X | 207 | 32.917 | 46.919 | 48.379 | 0.00 | 0.00 |
| ATOM | 3138 | N    | HIE | X | 208 | 32.636 | 45.770 | 46.541 | 0.00 | 0.00 |
| ATOM | 3139 | H    | HIE | X | 208 | 33.118 | 45.246 | 45.825 | 0.00 | 0.00 |
| ATOM | 3140 | CA   | HIE | X | 208 | 31.305 | 46.334 | 46.292 | 0.00 | 0.00 |
| ATOM | 3141 | HA   | HIE | X | 208 | 31.356 | 47.417 | 46.396 | 0.00 | 0.00 |
| ATOM | 3142 | CB   | HIE | X | 208 | 30.919 | 46.009 | 44.850 | 0.00 | 0.00 |
| ATOM | 3143 | HB2  | HIE | X | 208 | 31.013 | 44.926 | 44.769 | 0.00 | 0.00 |
| ATOM | 3144 | HB3  | HIE | X | 208 | 29.836 | 46.131 | 44.858 | 0.00 | 0.00 |
| ATOM | 3145 | CG   | HIE | X | 208 | 31.643 | 46.832 | 43.795 | 0.00 | 0.00 |
| ATOM | 3146 | ND1  | HIE | X | 208 | 32.041 | 48.176 | 43.875 | 0.00 | 0.00 |
| ATOM | 3147 | CE1  | HIE | X | 208 | 32.762 | 48.357 | 42.790 | 0.00 | 0.00 |
| ATOM | 3148 | HE1  | HIE | X | 208 | 33.259 | 49.292 | 42.575 | 0.00 | 0.00 |
| ATOM | 3149 | NE2  | HIE | X | 208 | 32.770 | 47.278 | 42.013 | 0.00 | 0.00 |
| ATOM | 3150 | HE2  | HIE | X | 208 | 33.371 | 47.215 | 41.204 | 0.00 | 0.00 |
| ATOM | 3151 | CD2  | HIE | X | 208 | 32.052 | 46.303 | 42.601 | 0.00 | 0.00 |
| ATOM | 3152 | HD2  | HIE | X | 208 | 32.049 | 45.272 | 42.279 | 0.00 | 0.00 |
| ATOM | 3153 | C    | HIE | X | 208 | 30.280 | 45.936 | 47.355 | 0.00 | 0.00 |
| ATOM | 3154 | O    | HIE | X | 208 | 29.262 | 46.650 | 47.503 | 0.00 | 0.00 |
| ATOM | 3155 | N    | LEU | X | 209 | 30.460 | 44.815 | 48.030 | 0.00 | 0.00 |
| ATOM | 3156 | H    | LEU | X | 209 | 31.247 | 44.241 | 47.765 | 0.00 | 0.00 |
| ATOM | 3157 | CA   | LEU | X | 209 | 29.570 | 44.317 | 49.024 | 0.00 | 0.00 |
| ATOM | 3158 | HA   | LEU | X | 209 | 28.529 | 44.518 | 48.768 | 0.00 | 0.00 |
| ATOM | 3159 | CB   | LEU | X | 209 | 29.852 | 42.764 | 49.188 | 0.00 | 0.00 |
| ATOM | 3160 | HB2  | LEU | X | 209 | 30.933 | 42.621 | 49.192 | 0.00 | 0.00 |
| ATOM | 3161 | HB3  | LEU | X | 209 | 29.523 | 42.491 | 50.191 | 0.00 | 0.00 |
| ATOM | 3162 | CG   | LEU | X | 209 | 29.130 | 41.847 | 48.208 | 0.00 | 0.00 |
| ATOM | 3163 | HG   | LEU | X | 209 | 29.355 | 42.329 | 47.256 | 0.00 | 0.00 |
| ATOM | 3164 | CD1  | LEU | X | 209 | 29.732 | 40.372 | 48.324 | 0.00 | 0.00 |
| ATOM | 3165 | HD11 | LEU | X | 209 | 29.641 | 40.173 | 49.392 | 0.00 | 0.00 |
| ATOM | 3166 | HD12 | LEU | X | 209 | 30.816 | 40.300 | 48.231 | 0.00 | 0.00 |
| ATOM | 3167 | HD13 | LEU | X | 209 | 29.122 | 39.699 | 47.722 | 0.00 | 0.00 |
| ATOM | 3168 | CD2  | LEU | X | 209 | 27.588 | 41.854 | 48.426 | 0.00 | 0.00 |
| ATOM | 3169 | HD21 | LEU | X | 209 | 27.171 | 42.844 | 48.240 | 0.00 | 0.00 |
| ATOM | 3170 | HD22 | LEU | X | 209 | 27.078 | 41.170 | 47.748 | 0.00 | 0.00 |
| ATOM | 3171 | HD23 | LEU | X | 209 | 27.487 | 41.305 | 49.363 | 0.00 | 0.00 |
| ATOM | 3172 | C    | LEU | X | 209 | 29.719 | 45.037 | 50.390 | 0.00 | 0.00 |
| ATOM | 3173 | O    | LEU | X | 209 | 28.887 | 44.855 | 51.240 | 0.00 | 0.00 |
| ATOM | 3174 | N    | LEU | X | 210 | 30.710 | 45.944 | 50.490 | 0.00 | 0.00 |
| ATOM | 3175 | H    | LEU | X | 210 | 31.304 | 46.102 | 49.689 | 0.00 | 0.00 |
| ATOM | 3176 | CA   | LEU | X | 210 | 31.098 | 46.657 | 51.727 | 0.00 | 0.00 |
| ATOM | 3177 | HA   | LEU | X | 210 | 30.393 | 46.371 | 52.508 | 0.00 | 0.00 |
| ATOM | 3178 | CB   | LEU | X | 210 | 32.525 | 46.302 | 52.105 | 0.00 | 0.00 |
| ATOM | 3179 | HB2  | LEU | X | 210 | 33.280 | 46.396 | 51.325 | 0.00 | 0.00 |
| ATOM | 3180 | HB3  | LEU | X | 210 | 32.894 | 46.971 | 52.882 | 0.00 | 0.00 |
| ATOM | 3181 | CG   | LEU | X | 210 | 32.781 | 44.837 | 52.635 | 0.00 | 0.00 |
| ATOM | 3182 | HG   | LEU | X | 210 | 32.610 | 44.167 | 51.792 | 0.00 | 0.00 |
| ATOM | 3183 | CD1  | LEU | X | 210 | 34.237 | 44.637 | 53.016 | 0.00 | 0.00 |
| ATOM | 3184 | HD11 | LEU | X | 210 | 34.521 | 45.177 | 53.919 | 0.00 | 0.00 |
| ATOM | 3185 | HD12 | LEU | X | 210 | 34.894 | 44.779 | 52.157 | 0.00 | 0.00 |
| ATOM | 3186 | HD13 | LEU | X | 210 | 34.378 | 43.573 | 53.206 | 0.00 | 0.00 |
| ATOM | 3187 | CD2  | LEU | X | 210 | 31.907 | 44.472 | 53.853 | 0.00 | 0.00 |
| ATOM | 3188 | HD21 | LEU | X | 210 | 32.115 | 43.420 | 54.047 | 0.00 | 0.00 |
| ATOM | 3189 | HD22 | LEU | X | 210 | 32.056 | 45.142 | 54.699 | 0.00 | 0.00 |
| ATOM | 3190 | HD23 | LEU | X | 210 | 30.870 | 44.568 | 53.532 | 0.00 | 0.00 |
| ATOM | 3191 | C    | LEU | X | 210 | 30.934 | 48.201 | 51.415 | 0.00 | 0.00 |
| ATOM | 3192 | O    | LEU | X | 210 | 30.453 | 48.903 | 52.268 | 0.00 | 0.00 |
| ATOM | 3193 | N    | SER | X | 211 | 31.110 | 48.590 | 50.173 | 0.00 | 0.00 |

|      |      |      |     |   |     |        |        |        |      |      |
|------|------|------|-----|---|-----|--------|--------|--------|------|------|
| ATOM | 3194 | H    | SER | X | 211 | 31.368 | 47.876 | 49.507 | 0.00 | 0.00 |
| ATOM | 3195 | CA   | SER | X | 211 | 30.859 | 49.932 | 49.714 | 0.00 | 0.00 |
| ATOM | 3196 | HA   | SER | X | 211 | 31.153 | 50.677 | 50.454 | 0.00 | 0.00 |
| ATOM | 3197 | CB   | SER | X | 211 | 31.826 | 50.245 | 48.657 | 0.00 | 0.00 |
| ATOM | 3198 | HB2  | SER | X | 211 | 32.806 | 49.806 | 48.843 | 0.00 | 0.00 |
| ATOM | 3199 | HB3  | SER | X | 211 | 31.415 | 49.858 | 47.724 | 0.00 | 0.00 |
| ATOM | 3200 | OG   | SER | X | 211 | 31.911 | 51.668 | 48.663 | 0.00 | 0.00 |
| ATOM | 3201 | HG   | SER | X | 211 | 32.393 | 51.881 | 49.465 | 0.00 | 0.00 |
| ATOM | 3202 | C    | SER | X | 211 | 29.393 | 50.328 | 49.305 | 0.00 | 0.00 |
| ATOM | 3203 | O    | SER | X | 211 | 28.916 | 49.897 | 48.291 | 0.00 | 0.00 |
| ATOM | 3204 | N    | PRO | X | 212 | 28.730 | 51.136 | 50.168 | 0.00 | 0.00 |
| ATOM | 3205 | CD   | PRO | X | 212 | 29.279 | 51.728 | 51.398 | 0.00 | 0.00 |
| ATOM | 3206 | HD2  | PRO | X | 212 | 29.795 | 52.646 | 51.118 | 0.00 | 0.00 |
| ATOM | 3207 | HD3  | PRO | X | 212 | 29.912 | 51.019 | 51.933 | 0.00 | 0.00 |
| ATOM | 3208 | CG   | PRO | X | 212 | 28.129 | 52.142 | 52.307 | 0.00 | 0.00 |
| ATOM | 3209 | HG2  | PRO | X | 212 | 28.400 | 53.094 | 52.763 | 0.00 | 0.00 |
| ATOM | 3210 | HG3  | PRO | X | 212 | 27.945 | 51.337 | 53.019 | 0.00 | 0.00 |
| ATOM | 3211 | CB   | PRO | X | 212 | 26.921 | 52.257 | 51.310 | 0.00 | 0.00 |
| ATOM | 3212 | HB2  | PRO | X | 212 | 26.821 | 53.305 | 51.027 | 0.00 | 0.00 |
| ATOM | 3213 | HB3  | PRO | X | 212 | 26.011 | 51.903 | 51.795 | 0.00 | 0.00 |
| ATOM | 3214 | CA   | PRO | X | 212 | 27.280 | 51.341 | 50.139 | 0.00 | 0.00 |
| ATOM | 3215 | HA   | PRO | X | 212 | 26.842 | 50.361 | 50.329 | 0.00 | 0.00 |
| ATOM | 3216 | C    | PRO | X | 212 | 26.691 | 51.839 | 48.779 | 0.00 | 0.00 |
| ATOM | 3217 | O    | PRO | X | 212 | 25.714 | 51.277 | 48.309 | 0.00 | 0.00 |
| ATOM | 3218 | N    | PRO | X | 213 | 27.183 | 52.918 | 48.215 | 0.00 | 0.00 |
| ATOM | 3219 | CD   | PRO | X | 213 | 28.364 | 53.693 | 48.522 | 0.00 | 0.00 |
| ATOM | 3220 | HD2  | PRO | X | 213 | 29.312 | 53.157 | 48.471 | 0.00 | 0.00 |
| ATOM | 3221 | HD3  | PRO | X | 213 | 28.290 | 54.184 | 49.493 | 0.00 | 0.00 |
| ATOM | 3222 | CG   | PRO | X | 213 | 28.411 | 54.817 | 47.433 | 0.00 | 0.00 |
| ATOM | 3223 | HG2  | PRO | X | 213 | 29.058 | 54.518 | 46.608 | 0.00 | 0.00 |
| ATOM | 3224 | HG3  | PRO | X | 213 | 28.715 | 55.710 | 47.978 | 0.00 | 0.00 |
| ATOM | 3225 | CB   | PRO | X | 213 | 26.988 | 54.887 | 46.932 | 0.00 | 0.00 |
| ATOM | 3226 | HB2  | PRO | X | 213 | 26.990 | 55.220 | 45.894 | 0.00 | 0.00 |
| ATOM | 3227 | HB3  | PRO | X | 213 | 26.235 | 55.413 | 47.518 | 0.00 | 0.00 |
| ATOM | 3228 | CA   | PRO | X | 213 | 26.658 | 53.396 | 46.965 | 0.00 | 0.00 |
| ATOM | 3229 | HA   | PRO | X | 213 | 25.592 | 53.178 | 46.896 | 0.00 | 0.00 |
| ATOM | 3230 | C    | PRO | X | 213 | 27.045 | 52.614 | 45.695 | 0.00 | 0.00 |
| ATOM | 3231 | O    | PRO | X | 213 | 26.357 | 52.844 | 44.687 | 0.00 | 0.00 |
| ATOM | 3232 | N    | SER | X | 214 | 27.877 | 51.489 | 45.804 | 0.00 | 0.00 |
| ATOM | 3233 | H    | SER | X | 214 | 28.567 | 51.418 | 46.538 | 0.00 | 0.00 |
| ATOM | 3234 | CA   | SER | X | 214 | 27.890 | 50.379 | 44.778 | 0.00 | 0.00 |
| ATOM | 3235 | HA   | SER | X | 214 | 27.726 | 50.709 | 43.752 | 0.00 | 0.00 |
| ATOM | 3236 | CB   | SER | X | 214 | 29.257 | 49.702 | 44.817 | 0.00 | 0.00 |
| ATOM | 3237 | HB2  | SER | X | 214 | 29.201 | 49.060 | 45.696 | 0.00 | 0.00 |
| ATOM | 3238 | HB3  | SER | X | 214 | 29.445 | 49.026 | 43.982 | 0.00 | 0.00 |
| ATOM | 3239 | OG   | SER | X | 214 | 30.346 | 50.559 | 45.074 | 0.00 | 0.00 |
| ATOM | 3240 | HG   | SER | X | 214 | 31.065 | 50.097 | 44.637 | 0.00 | 0.00 |
| ATOM | 3241 | C    | SER | X | 214 | 26.858 | 49.387 | 45.067 | 0.00 | 0.00 |
| ATOM | 3242 | O    | SER | X | 214 | 26.239 | 48.768 | 44.157 | 0.00 | 0.00 |
| ATOM | 3243 | N    | ARG | X | 215 | 26.620 | 49.092 | 46.336 | 0.00 | 0.00 |
| ATOM | 3244 | H    | ARG | X | 215 | 27.266 | 49.535 | 46.973 | 0.00 | 0.00 |
| ATOM | 3245 | CA   | ARG | X | 215 | 25.865 | 47.900 | 46.900 | 0.00 | 0.00 |
| ATOM | 3246 | HA   | ARG | X | 215 | 26.152 | 46.930 | 46.494 | 0.00 | 0.00 |
| ATOM | 3247 | CB   | ARG | X | 215 | 26.215 | 47.838 | 48.414 | 0.00 | 0.00 |
| ATOM | 3248 | HB2  | ARG | X | 215 | 27.276 | 47.741 | 48.646 | 0.00 | 0.00 |
| ATOM | 3249 | HB3  | ARG | X | 215 | 25.852 | 48.785 | 48.813 | 0.00 | 0.00 |
| ATOM | 3250 | CG   | ARG | X | 215 | 25.472 | 46.651 | 49.059 | 0.00 | 0.00 |
| ATOM | 3251 | HG2  | ARG | X | 215 | 24.394 | 46.755 | 49.188 | 0.00 | 0.00 |
| ATOM | 3252 | HG3  | ARG | X | 215 | 25.625 | 45.822 | 48.368 | 0.00 | 0.00 |
| ATOM | 3253 | CD   | ARG | X | 215 | 26.033 | 46.326 | 50.482 | 0.00 | 0.00 |
| ATOM | 3254 | HD2  | ARG | X | 215 | 26.903 | 45.670 | 50.497 | 0.00 | 0.00 |
| ATOM | 3255 | HD3  | ARG | X | 215 | 26.368 | 47.208 | 51.029 | 0.00 | 0.00 |
| ATOM | 3256 | NE   | ARG | X | 215 | 25.043 | 45.670 | 51.274 | 0.00 | 0.00 |
| ATOM | 3257 | HE   | ARG | X | 215 | 24.087 | 45.780 | 50.967 | 0.00 | 0.00 |
| ATOM | 3258 | CZ   | ARG | X | 215 | 25.238 | 45.161 | 52.526 | 0.00 | 0.00 |
| ATOM | 3259 | NH1  | ARG | X | 215 | 26.434 | 45.028 | 52.997 | 0.00 | 0.00 |
| ATOM | 3260 | HH11 | ARG | X | 215 | 27.139 | 45.407 | 52.380 | 0.00 | 0.00 |

|      |      |      |     |   |     |        |        |        |      |      |
|------|------|------|-----|---|-----|--------|--------|--------|------|------|
| ATOM | 3261 | HH12 | ARG | X | 215 | 26.634 | 44.554 | 53.866 | 0.00 | 0.00 |
| ATOM | 3262 | NH2  | ARG | X | 215 | 24.212 | 44.811 | 53.316 | 0.00 | 0.00 |
| ATOM | 3263 | HH21 | ARG | X | 215 | 23.267 | 44.809 | 52.959 | 0.00 | 0.00 |
| ATOM | 3264 | HH22 | ARG | X | 215 | 24.251 | 44.562 | 54.294 | 0.00 | 0.00 |
| ATOM | 3265 | C    | ARG | X | 215 | 24.386 | 47.923 | 46.608 | 0.00 | 0.00 |
| ATOM | 3266 | O    | ARG | X | 215 | 23.781 | 46.885 | 46.442 | 0.00 | 0.00 |
| ATOM | 3267 | N    | GLY | X | 216 | 23.861 | 49.090 | 46.382 | 0.00 | 0.00 |
| ATOM | 3268 | H    | GLY | X | 216 | 24.528 | 49.848 | 46.340 | 0.00 | 0.00 |
| ATOM | 3269 | CA   | GLY | X | 216 | 22.474 | 49.305 | 45.848 | 0.00 | 0.00 |
| ATOM | 3270 | HA2  | GLY | X | 216 | 21.891 | 48.455 | 46.202 | 0.00 | 0.00 |
| ATOM | 3271 | HA3  | GLY | X | 216 | 22.153 | 50.283 | 46.207 | 0.00 | 0.00 |
| ATOM | 3272 | C    | GLY | X | 216 | 22.499 | 49.342 | 44.291 | 0.00 | 0.00 |
| ATOM | 3273 | O    | GLY | X | 216 | 21.413 | 49.571 | 43.760 | 0.00 | 0.00 |
| ATOM | 3274 | N    | LEU | X | 217 | 23.610 | 49.236 | 43.604 | 0.00 | 0.00 |
| ATOM | 3275 | H    | LEU | X | 217 | 24.411 | 49.062 | 44.195 | 0.00 | 0.00 |
| ATOM | 3276 | CA   | LEU | X | 217 | 23.628 | 49.121 | 42.120 | 0.00 | 0.00 |
| ATOM | 3277 | HA   | LEU | X | 217 | 22.768 | 49.528 | 41.588 | 0.00 | 0.00 |
| ATOM | 3278 | CB   | LEU | X | 217 | 24.869 | 49.893 | 41.558 | 0.00 | 0.00 |
| ATOM | 3279 | HB2  | LEU | X | 217 | 25.729 | 49.297 | 41.865 | 0.00 | 0.00 |
| ATOM | 3280 | HB3  | LEU | X | 217 | 24.728 | 49.925 | 40.478 | 0.00 | 0.00 |
| ATOM | 3281 | CG   | LEU | X | 217 | 25.119 | 51.308 | 42.089 | 0.00 | 0.00 |
| ATOM | 3282 | HG   | LEU | X | 217 | 25.228 | 51.231 | 43.171 | 0.00 | 0.00 |
| ATOM | 3283 | CD1  | LEU | X | 217 | 26.416 | 51.940 | 41.599 | 0.00 | 0.00 |
| ATOM | 3284 | HD11 | LEU | X | 217 | 27.244 | 51.269 | 41.827 | 0.00 | 0.00 |
| ATOM | 3285 | HD12 | LEU | X | 217 | 26.523 | 52.920 | 42.065 | 0.00 | 0.00 |
| ATOM | 3286 | HD13 | LEU | X | 217 | 26.379 | 51.987 | 40.510 | 0.00 | 0.00 |
| ATOM | 3287 | CD2  | LEU | X | 217 | 23.937 | 52.239 | 41.735 | 0.00 | 0.00 |
| ATOM | 3288 | HD21 | LEU | X | 217 | 23.864 | 52.343 | 40.652 | 0.00 | 0.00 |
| ATOM | 3289 | HD22 | LEU | X | 217 | 22.979 | 51.860 | 42.091 | 0.00 | 0.00 |
| ATOM | 3290 | HD23 | LEU | X | 217 | 24.097 | 53.207 | 42.209 | 0.00 | 0.00 |
| ATOM | 3291 | C    | LEU | X | 217 | 23.605 | 47.629 | 41.642 | 0.00 | 0.00 |
| ATOM | 3292 | O    | LEU | X | 217 | 23.523 | 47.395 | 40.454 | 0.00 | 0.00 |
| ATOM | 3293 | N    | PHE | X | 218 | 23.402 | 46.727 | 42.542 | 0.00 | 0.00 |
| ATOM | 3294 | H    | PHE | X | 218 | 23.430 | 46.931 | 43.530 | 0.00 | 0.00 |
| ATOM | 3295 | CA   | PHE | X | 218 | 23.360 | 45.288 | 42.218 | 0.00 | 0.00 |
| ATOM | 3296 | HA   | PHE | X | 218 | 22.732 | 45.153 | 41.338 | 0.00 | 0.00 |
| ATOM | 3297 | CB   | PHE | X | 218 | 24.733 | 44.747 | 41.811 | 0.00 | 0.00 |
| ATOM | 3298 | HB2  | PHE | X | 218 | 24.616 | 43.798 | 41.288 | 0.00 | 0.00 |
| ATOM | 3299 | HB3  | PHE | X | 218 | 25.262 | 45.416 | 41.132 | 0.00 | 0.00 |
| ATOM | 3300 | CG   | PHE | X | 218 | 25.672 | 44.628 | 42.960 | 0.00 | 0.00 |
| ATOM | 3301 | CD1  | PHE | X | 218 | 26.382 | 45.756 | 43.390 | 0.00 | 0.00 |
| ATOM | 3302 | HD1  | PHE | X | 218 | 26.400 | 46.635 | 42.763 | 0.00 | 0.00 |
| ATOM | 3303 | CE1  | PHE | X | 218 | 27.241 | 45.732 | 44.468 | 0.00 | 0.00 |
| ATOM | 3304 | HE1  | PHE | X | 218 | 27.774 | 46.612 | 44.796 | 0.00 | 0.00 |
| ATOM | 3305 | CZ   | PHE | X | 218 | 27.390 | 44.494 | 45.217 | 0.00 | 0.00 |
| ATOM | 3306 | HZ   | PHE | X | 218 | 28.146 | 44.510 | 45.988 | 0.00 | 0.00 |
| ATOM | 3307 | CE2  | PHE | X | 218 | 26.705 | 43.295 | 44.861 | 0.00 | 0.00 |
| ATOM | 3308 | HE2  | PHE | X | 218 | 26.912 | 42.351 | 45.344 | 0.00 | 0.00 |
| ATOM | 3309 | CD2  | PHE | X | 218 | 25.880 | 43.399 | 43.693 | 0.00 | 0.00 |
| ATOM | 3310 | HD2  | PHE | X | 218 | 25.347 | 42.506 | 43.401 | 0.00 | 0.00 |
| ATOM | 3311 | C    | PHE | X | 218 | 22.729 | 44.461 | 43.349 | 0.00 | 0.00 |
| ATOM | 3312 | O    | PHE | X | 218 | 22.356 | 44.962 | 44.371 | 0.00 | 0.00 |
| ATOM | 3313 | N    | HIE | X | 219 | 22.563 | 43.197 | 43.018 | 0.00 | 0.00 |
| ATOM | 3314 | H    | HIE | X | 219 | 22.749 | 42.793 | 42.111 | 0.00 | 0.00 |
| ATOM | 3315 | CA   | HIE | X | 219 | 21.713 | 42.313 | 43.858 | 0.00 | 0.00 |
| ATOM | 3316 | HA   | HIE | X | 219 | 21.274 | 42.876 | 44.682 | 0.00 | 0.00 |
| ATOM | 3317 | CB   | HIE | X | 219 | 20.436 | 41.962 | 43.057 | 0.00 | 0.00 |
| ATOM | 3318 | HB2  | HIE | X | 219 | 20.653 | 41.260 | 42.252 | 0.00 | 0.00 |
| ATOM | 3319 | HB3  | HIE | X | 219 | 19.689 | 41.388 | 43.607 | 0.00 | 0.00 |
| ATOM | 3320 | CG   | HIE | X | 219 | 19.798 | 43.121 | 42.370 | 0.00 | 0.00 |
| ATOM | 3321 | ND1  | HIE | X | 219 | 20.192 | 43.656 | 41.093 | 0.00 | 0.00 |
| ATOM | 3322 | CE1  | HIE | X | 219 | 19.520 | 44.776 | 40.982 | 0.00 | 0.00 |
| ATOM | 3323 | HE1  | HIE | X | 219 | 19.530 | 45.400 | 40.100 | 0.00 | 0.00 |
| ATOM | 3324 | NE2  | HIE | X | 219 | 18.581 | 44.887 | 41.947 | 0.00 | 0.00 |
| ATOM | 3325 | HE2  | HIE | X | 219 | 17.810 | 45.537 | 41.900 | 0.00 | 0.00 |
| ATOM | 3326 | CD2  | HIE | X | 219 | 18.849 | 43.975 | 42.839 | 0.00 | 0.00 |
| ATOM | 3327 | HD2  | HIE | X | 219 | 18.310 | 43.756 | 43.749 | 0.00 | 0.00 |



|      |      |      |     |   |     |        |        |        |      |      |
|------|------|------|-----|---|-----|--------|--------|--------|------|------|
| ATOM | 3328 | C    | HIE | X | 219 | 22.400 | 41.017 | 44.356 | 0.00 | 0.00 |
| ATOM | 3329 | O    | HIE | X | 219 | 22.566 | 40.843 | 45.554 | 0.00 | 0.00 |
| ATOM | 3330 | N    | ARG | X | 220 | 22.935 | 40.218 | 43.364 | 0.00 | 0.00 |
| ATOM | 3331 | H    | ARG | X | 220 | 23.000 | 40.576 | 42.422 | 0.00 | 0.00 |
| ATOM | 3332 | CA   | ARG | X | 220 | 23.521 | 38.876 | 43.660 | 0.00 | 0.00 |
| ATOM | 3333 | HA   | ARG | X | 220 | 23.382 | 38.664 | 44.720 | 0.00 | 0.00 |
| ATOM | 3334 | CB   | ARG | X | 220 | 22.832 | 37.770 | 42.835 | 0.00 | 0.00 |
| ATOM | 3335 | HB2  | ARG | X | 220 | 22.874 | 37.938 | 41.759 | 0.00 | 0.00 |
| ATOM | 3336 | HB3  | ARG | X | 220 | 23.273 | 36.800 | 43.062 | 0.00 | 0.00 |
| ATOM | 3337 | CG   | ARG | X | 220 | 21.384 | 37.737 | 43.236 | 0.00 | 0.00 |
| ATOM | 3338 | HG2  | ARG | X | 220 | 21.431 | 37.605 | 44.317 | 0.00 | 0.00 |
| ATOM | 3339 | HG3  | ARG | X | 220 | 21.019 | 38.721 | 42.943 | 0.00 | 0.00 |
| ATOM | 3340 | CD   | ARG | X | 220 | 20.519 | 36.617 | 42.634 | 0.00 | 0.00 |
| ATOM | 3341 | HD2  | ARG | X | 220 | 20.580 | 36.794 | 41.560 | 0.00 | 0.00 |
| ATOM | 3342 | HD3  | ARG | X | 220 | 20.960 | 35.635 | 42.807 | 0.00 | 0.00 |
| ATOM | 3343 | NE   | ARG | X | 220 | 19.129 | 36.720 | 43.101 | 0.00 | 0.00 |
| ATOM | 3344 | HE   | ARG | X | 220 | 19.072 | 36.993 | 44.072 | 0.00 | 0.00 |
| ATOM | 3345 | CZ   | ARG | X | 220 | 18.058 | 36.611 | 42.361 | 0.00 | 0.00 |
| ATOM | 3346 | NH1  | ARG | X | 220 | 18.121 | 36.278 | 41.049 | 0.00 | 0.00 |
| ATOM | 3347 | HH11 | ARG | X | 220 | 18.979 | 35.969 | 40.615 | 0.00 | 0.00 |
| ATOM | 3348 | HH12 | ARG | X | 220 | 17.371 | 36.708 | 40.527 | 0.00 | 0.00 |
| ATOM | 3349 | NH2  | ARG | X | 220 | 16.865 | 36.880 | 42.909 | 0.00 | 0.00 |
| ATOM | 3350 | HH21 | ARG | X | 220 | 16.732 | 37.199 | 43.858 | 0.00 | 0.00 |
| ATOM | 3351 | HH22 | ARG | X | 220 | 16.007 | 36.731 | 42.397 | 0.00 | 0.00 |
| ATOM | 3352 | C    | ARG | X | 220 | 25.019 | 38.846 | 43.391 | 0.00 | 0.00 |
| ATOM | 3353 | O    | ARG | X | 220 | 25.444 | 39.607 | 42.557 | 0.00 | 0.00 |
| ATOM | 3354 | N    | ALA | X | 221 | 25.813 | 38.017 | 43.949 | 0.00 | 0.00 |
| ATOM | 3355 | H    | ALA | X | 221 | 25.366 | 37.665 | 44.783 | 0.00 | 0.00 |
| ATOM | 3356 | CA   | ALA | X | 221 | 27.283 | 38.127 | 43.945 | 0.00 | 0.00 |
| ATOM | 3357 | HA   | ALA | X | 221 | 27.626 | 38.663 | 43.060 | 0.00 | 0.00 |
| ATOM | 3358 | CB   | ALA | X | 221 | 27.617 | 38.999 | 45.150 | 0.00 | 0.00 |
| ATOM | 3359 | HB1  | ALA | X | 221 | 28.670 | 39.246 | 45.016 | 0.00 | 0.00 |
| ATOM | 3360 | HB2  | ALA | X | 221 | 27.639 | 38.499 | 46.118 | 0.00 | 0.00 |
| ATOM | 3361 | HB3  | ALA | X | 221 | 26.969 | 39.874 | 45.203 | 0.00 | 0.00 |
| ATOM | 3362 | C    | ALA | X | 221 | 28.098 | 36.851 | 43.937 | 0.00 | 0.00 |
| ATOM | 3363 | O    | ALA | X | 221 | 27.916 | 36.023 | 44.786 | 0.00 | 0.00 |
| ATOM | 3364 | N    | VAL | X | 222 | 29.045 | 36.756 | 42.963 | 0.00 | 0.00 |
| ATOM | 3365 | H    | VAL | X | 222 | 29.024 | 37.534 | 42.319 | 0.00 | 0.00 |
| ATOM | 3366 | CA   | VAL | X | 222 | 29.884 | 35.560 | 42.711 | 0.00 | 0.00 |
| ATOM | 3367 | HA   | VAL | X | 222 | 29.626 | 34.806 | 43.455 | 0.00 | 0.00 |
| ATOM | 3368 | CB   | VAL | X | 222 | 29.586 | 34.941 | 41.264 | 0.00 | 0.00 |
| ATOM | 3369 | HB   | VAL | X | 222 | 29.806 | 35.738 | 40.553 | 0.00 | 0.00 |
| ATOM | 3370 | CG1  | VAL | X | 222 | 30.564 | 33.821 | 40.908 | 0.00 | 0.00 |
| ATOM | 3371 | HG11 | VAL | X | 222 | 30.424 | 33.683 | 39.835 | 0.00 | 0.00 |
| ATOM | 3372 | HG12 | VAL | X | 222 | 31.559 | 34.257 | 40.989 | 0.00 | 0.00 |
| ATOM | 3373 | HG13 | VAL | X | 222 | 30.433 | 32.868 | 41.421 | 0.00 | 0.00 |
| ATOM | 3374 | CG2  | VAL | X | 222 | 28.172 | 34.479 | 40.990 | 0.00 | 0.00 |
| ATOM | 3375 | HG21 | VAL | X | 222 | 28.008 | 34.528 | 39.914 | 0.00 | 0.00 |
| ATOM | 3376 | HG22 | VAL | X | 222 | 27.432 | 35.263 | 41.150 | 0.00 | 0.00 |
| ATOM | 3377 | HG23 | VAL | X | 222 | 27.838 | 33.544 | 41.439 | 0.00 | 0.00 |
| ATOM | 3378 | C    | VAL | X | 222 | 31.386 | 35.986 | 42.851 | 0.00 | 0.00 |
| ATOM | 3379 | O    | VAL | X | 222 | 31.741 | 37.054 | 42.384 | 0.00 | 0.00 |
| ATOM | 3380 | N    | LEU | X | 223 | 32.109 | 35.169 | 43.609 | 0.00 | 0.00 |
| ATOM | 3381 | H    | LEU | X | 223 | 31.482 | 34.506 | 44.042 | 0.00 | 0.00 |
| ATOM | 3382 | CA   | LEU | X | 223 | 33.482 | 35.309 | 44.041 | 0.00 | 0.00 |
| ATOM | 3383 | HA   | LEU | X | 223 | 33.985 | 36.082 | 43.460 | 0.00 | 0.00 |
| ATOM | 3384 | CB   | LEU | X | 223 | 33.524 | 35.671 | 45.507 | 0.00 | 0.00 |
| ATOM | 3385 | HB2  | LEU | X | 223 | 32.832 | 35.069 | 46.095 | 0.00 | 0.00 |
| ATOM | 3386 | HB3  | LEU | X | 223 | 34.577 | 35.645 | 45.785 | 0.00 | 0.00 |
| ATOM | 3387 | CG   | LEU | X | 223 | 33.003 | 37.028 | 45.956 | 0.00 | 0.00 |
| ATOM | 3388 | HG   | LEU | X | 223 | 33.177 | 37.692 | 45.109 | 0.00 | 0.00 |
| ATOM | 3389 | CD1  | LEU | X | 223 | 31.526 | 37.138 | 46.300 | 0.00 | 0.00 |
| ATOM | 3390 | HD11 | LEU | X | 223 | 31.041 | 36.274 | 45.846 | 0.00 | 0.00 |
| ATOM | 3391 | HD12 | LEU | X | 223 | 31.106 | 38.045 | 45.864 | 0.00 | 0.00 |
| ATOM | 3392 | HD13 | LEU | X | 223 | 31.277 | 37.097 | 47.360 | 0.00 | 0.00 |
| ATOM | 3393 | CD2  | LEU | X | 223 | 33.761 | 37.534 | 47.139 | 0.00 | 0.00 |
| ATOM | 3394 | HD21 | LEU | X | 223 | 33.780 | 36.715 | 47.857 | 0.00 | 0.00 |

|      |      |      |     |   |     |        |        |        |      |      |
|------|------|------|-----|---|-----|--------|--------|--------|------|------|
| ATOM | 3395 | HD22 | LEU | X | 223 | 34.730 | 37.796 | 46.715 | 0.00 | 0.00 |
| ATOM | 3396 | HD23 | LEU | X | 223 | 33.296 | 38.369 | 47.663 | 0.00 | 0.00 |
| ATOM | 3397 | C    | LEU | X | 223 | 34.280 | 33.998 | 43.822 | 0.00 | 0.00 |
| ATOM | 3398 | O    | LEU | X | 223 | 33.954 | 32.952 | 44.411 | 0.00 | 0.00 |
| ATOM | 3399 | N    | GLN | X | 224 | 35.114 | 34.011 | 42.770 | 0.00 | 0.00 |
| ATOM | 3400 | H    | GLN | X | 224 | 35.363 | 34.825 | 42.225 | 0.00 | 0.00 |
| ATOM | 3401 | CA   | GLN | X | 224 | 35.919 | 32.934 | 42.301 | 0.00 | 0.00 |
| ATOM | 3402 | HA   | GLN | X | 224 | 35.738 | 31.994 | 42.823 | 0.00 | 0.00 |
| ATOM | 3403 | CB   | GLN | X | 224 | 35.650 | 32.839 | 40.845 | 0.00 | 0.00 |
| ATOM | 3404 | HB2  | GLN | X | 224 | 35.871 | 33.835 | 40.462 | 0.00 | 0.00 |
| ATOM | 3405 | HB3  | GLN | X | 224 | 36.355 | 32.147 | 40.387 | 0.00 | 0.00 |
| ATOM | 3406 | CG   | GLN | X | 224 | 34.240 | 32.487 | 40.555 | 0.00 | 0.00 |
| ATOM | 3407 | HG2  | GLN | X | 224 | 34.075 | 31.586 | 41.146 | 0.00 | 0.00 |
| ATOM | 3408 | HG3  | GLN | X | 224 | 33.516 | 33.273 | 40.770 | 0.00 | 0.00 |
| ATOM | 3409 | CD   | GLN | X | 224 | 33.973 | 32.180 | 39.073 | 0.00 | 0.00 |
| ATOM | 3410 | OE1  | GLN | X | 224 | 33.138 | 32.741 | 38.400 | 0.00 | 0.00 |
| ATOM | 3411 | NE2  | GLN | X | 224 | 34.558 | 31.093 | 38.560 | 0.00 | 0.00 |
| ATOM | 3412 | HE21 | GLN | X | 224 | 34.226 | 30.718 | 37.683 | 0.00 | 0.00 |
| ATOM | 3413 | HE22 | GLN | X | 224 | 35.329 | 30.617 | 39.006 | 0.00 | 0.00 |
| ATOM | 3414 | C    | GLN | X | 224 | 37.421 | 33.143 | 42.496 | 0.00 | 0.00 |
| ATOM | 3415 | O    | GLN | X | 224 | 37.930 | 34.291 | 42.411 | 0.00 | 0.00 |
| ATOM | 3416 | N    | SER | X | 225 | 38.133 | 32.098 | 42.878 | 0.00 | 0.00 |
| ATOM | 3417 | H    | SER | X | 225 | 37.557 | 31.294 | 43.083 | 0.00 | 0.00 |
| ATOM | 3418 | CA   | SER | X | 225 | 39.576 | 32.015 | 43.000 | 0.00 | 0.00 |
| ATOM | 3419 | HA   | SER | X | 225 | 39.750 | 31.129 | 43.610 | 0.00 | 0.00 |
| ATOM | 3420 | CB   | SER | X | 225 | 40.081 | 31.704 | 41.602 | 0.00 | 0.00 |
| ATOM | 3421 | HB2  | SER | X | 225 | 39.367 | 31.027 | 41.134 | 0.00 | 0.00 |
| ATOM | 3422 | HB3  | SER | X | 225 | 39.992 | 32.624 | 41.023 | 0.00 | 0.00 |
| ATOM | 3423 | OG   | SER | X | 225 | 41.291 | 30.963 | 41.512 | 0.00 | 0.00 |
| ATOM | 3424 | HG   | SER | X | 225 | 41.423 | 30.476 | 42.329 | 0.00 | 0.00 |
| ATOM | 3425 | C    | SER | X | 225 | 40.198 | 33.192 | 43.770 | 0.00 | 0.00 |
| ATOM | 3426 | O    | SER | X | 225 | 41.281 | 33.594 | 43.512 | 0.00 | 0.00 |
| ATOM | 3427 | N    | GLY | X | 226 | 39.445 | 33.844 | 44.728 | 0.00 | 0.00 |
| ATOM | 3428 | H    | GLY | X | 226 | 38.488 | 33.520 | 44.741 | 0.00 | 0.00 |
| ATOM | 3429 | CA   | GLY | X | 226 | 39.848 | 35.044 | 45.528 | 0.00 | 0.00 |
| ATOM | 3430 | HA2  | GLY | X | 226 | 40.664 | 34.810 | 46.212 | 0.00 | 0.00 |
| ATOM | 3431 | HA3  | GLY | X | 226 | 40.208 | 35.814 | 44.845 | 0.00 | 0.00 |
| ATOM | 3432 | C    | GLY | X | 226 | 38.779 | 35.627 | 46.512 | 0.00 | 0.00 |
| ATOM | 3433 | O    | GLY | X | 226 | 37.632 | 35.187 | 46.477 | 0.00 | 0.00 |
| ATOM | 3434 | N    | ALA | X | 227 | 39.100 | 36.575 | 47.363 | 0.00 | 0.00 |
| ATOM | 3435 | H    | ALA | X | 227 | 40.073 | 36.841 | 47.408 | 0.00 | 0.00 |
| ATOM | 3436 | CA   | ALA | X | 227 | 38.237 | 37.249 | 48.316 | 0.00 | 0.00 |
| ATOM | 3437 | HA   | ALA | X | 227 | 37.189 | 37.242 | 48.018 | 0.00 | 0.00 |
| ATOM | 3438 | CB   | ALA | X | 227 | 38.308 | 36.350 | 49.511 | 0.00 | 0.00 |
| ATOM | 3439 | HB1  | ALA | X | 227 | 39.313 | 36.462 | 49.917 | 0.00 | 0.00 |
| ATOM | 3440 | HB2  | ALA | X | 227 | 37.964 | 35.340 | 49.291 | 0.00 | 0.00 |
| ATOM | 3441 | HB3  | ALA | X | 227 | 37.665 | 36.693 | 50.322 | 0.00 | 0.00 |
| ATOM | 3442 | C    | ALA | X | 227 | 38.745 | 38.687 | 48.666 | 0.00 | 0.00 |
| ATOM | 3443 | O    | ALA | X | 227 | 39.896 | 39.005 | 48.439 | 0.00 | 0.00 |
| ATOM | 3444 | N    | PRO | X | 228 | 37.826 | 39.598 | 49.072 | 0.00 | 0.00 |
| ATOM | 3445 | CD   | PRO | X | 228 | 36.427 | 39.250 | 49.439 | 0.00 | 0.00 |
| ATOM | 3446 | HD2  | PRO | X | 228 | 36.306 | 38.365 | 50.063 | 0.00 | 0.00 |
| ATOM | 3447 | HD3  | PRO | X | 228 | 35.905 | 39.244 | 48.482 | 0.00 | 0.00 |
| ATOM | 3448 | CG   | PRO | X | 228 | 35.876 | 40.446 | 50.278 | 0.00 | 0.00 |
| ATOM | 3449 | HG2  | PRO | X | 228 | 35.986 | 40.352 | 51.359 | 0.00 | 0.00 |
| ATOM | 3450 | HG3  | PRO | X | 228 | 34.805 | 40.557 | 50.111 | 0.00 | 0.00 |
| ATOM | 3451 | CB   | PRO | X | 228 | 36.812 | 41.650 | 49.849 | 0.00 | 0.00 |
| ATOM | 3452 | HB2  | PRO | X | 228 | 36.879 | 42.451 | 50.585 | 0.00 | 0.00 |
| ATOM | 3453 | HB3  | PRO | X | 228 | 36.514 | 42.046 | 48.878 | 0.00 | 0.00 |
| ATOM | 3454 | CA   | PRO | X | 228 | 38.160 | 40.948 | 49.623 | 0.00 | 0.00 |
| ATOM | 3455 | HA   | PRO | X | 228 | 38.697 | 41.517 | 48.864 | 0.00 | 0.00 |
| ATOM | 3456 | C    | PRO | X | 228 | 38.923 | 40.889 | 50.996 | 0.00 | 0.00 |
| ATOM | 3457 | O    | PRO | X | 228 | 39.803 | 41.655 | 51.311 | 0.00 | 0.00 |
| ATOM | 3458 | N    | ASN | X | 229 | 38.655 | 39.849 | 51.774 | 0.00 | 0.00 |
| ATOM | 3459 | H    | ASN | X | 229 | 38.018 | 39.131 | 51.461 | 0.00 | 0.00 |
| ATOM | 3460 | CA   | ASN | X | 229 | 39.398 | 39.608 | 53.034 | 0.00 | 0.00 |
| ATOM | 3461 | HA   | ASN | X | 229 | 39.734 | 40.530 | 53.508 | 0.00 | 0.00 |

|      |      |      |     |   |     |        |        |        |      |      |
|------|------|------|-----|---|-----|--------|--------|--------|------|------|
| ATOM | 3462 | CB   | ASN | X | 229 | 38.446 | 38.919 | 54.149 | 0.00 | 0.00 |
| ATOM | 3463 | HB2  | ASN | X | 229 | 39.000 | 38.890 | 55.087 | 0.00 | 0.00 |
| ATOM | 3464 | HB3  | ASN | X | 229 | 37.528 | 39.508 | 54.151 | 0.00 | 0.00 |
| ATOM | 3465 | CG   | ASN | X | 229 | 37.972 | 37.560 | 53.718 | 0.00 | 0.00 |
| ATOM | 3466 | OD1  | ASN | X | 229 | 37.582 | 37.360 | 52.586 | 0.00 | 0.00 |
| ATOM | 3467 | ND2  | ASN | X | 229 | 37.974 | 36.643 | 54.606 | 0.00 | 0.00 |
| ATOM | 3468 | HD21 | ASN | X | 229 | 37.693 | 35.702 | 54.369 | 0.00 | 0.00 |
| ATOM | 3469 | HD22 | ASN | X | 229 | 38.384 | 36.877 | 55.499 | 0.00 | 0.00 |
| ATOM | 3470 | C    | ASN | X | 229 | 40.623 | 38.760 | 52.792 | 0.00 | 0.00 |
| ATOM | 3471 | O    | ASN | X | 229 | 41.228 | 38.278 | 53.765 | 0.00 | 0.00 |
| ATOM | 3472 | N    | GLY | X | 230 | 40.959 | 38.504 | 51.520 | 0.00 | 0.00 |
| ATOM | 3473 | H    | GLY | X | 230 | 40.411 | 38.936 | 50.790 | 0.00 | 0.00 |
| ATOM | 3474 | CA   | GLY | X | 230 | 42.264 | 37.930 | 51.189 | 0.00 | 0.00 |
| ATOM | 3475 | HA2  | GLY | X | 230 | 42.347 | 37.103 | 51.893 | 0.00 | 0.00 |
| ATOM | 3476 | HA3  | GLY | X | 230 | 42.240 | 37.410 | 50.231 | 0.00 | 0.00 |
| ATOM | 3477 | C    | GLY | X | 230 | 43.451 | 38.952 | 51.351 | 0.00 | 0.00 |
| ATOM | 3478 | O    | GLY | X | 230 | 43.385 | 40.097 | 50.936 | 0.00 | 0.00 |
| ATOM | 3479 | N    | PRO | X | 231 | 44.515 | 38.657 | 52.115 | 0.00 | 0.00 |
| ATOM | 3480 | CD   | PRO | X | 231 | 44.731 | 37.337 | 52.702 | 0.00 | 0.00 |
| ATOM | 3481 | HD2  | PRO | X | 231 | 44.720 | 36.587 | 51.911 | 0.00 | 0.00 |
| ATOM | 3482 | HD3  | PRO | X | 231 | 43.919 | 37.200 | 53.416 | 0.00 | 0.00 |
| ATOM | 3483 | CG   | PRO | X | 231 | 46.131 | 37.339 | 53.319 | 0.00 | 0.00 |
| ATOM | 3484 | HG2  | PRO | X | 231 | 46.908 | 36.929 | 52.674 | 0.00 | 0.00 |
| ATOM | 3485 | HG3  | PRO | X | 231 | 46.177 | 36.805 | 54.268 | 0.00 | 0.00 |
| ATOM | 3486 | CB   | PRO | X | 231 | 46.442 | 38.848 | 53.453 | 0.00 | 0.00 |
| ATOM | 3487 | HB2  | PRO | X | 231 | 47.436 | 39.122 | 53.101 | 0.00 | 0.00 |
| ATOM | 3488 | HB3  | PRO | X | 231 | 46.285 | 39.196 | 54.474 | 0.00 | 0.00 |
| ATOM | 3489 | CA   | PRO | X | 231 | 45.444 | 39.675 | 52.639 | 0.00 | 0.00 |
| ATOM | 3490 | HA   | PRO | X | 231 | 44.767 | 40.309 | 53.212 | 0.00 | 0.00 |
| ATOM | 3491 | C    | PRO | X | 231 | 46.038 | 40.618 | 51.616 | 0.00 | 0.00 |
| ATOM | 3492 | O    | PRO | X | 231 | 46.200 | 41.817 | 51.941 | 0.00 | 0.00 |
| ATOM | 3493 | N    | TRP | X | 232 | 46.298 | 40.141 | 50.345 | 0.00 | 0.00 |
| ATOM | 3494 | H    | TRP | X | 232 | 46.035 | 39.168 | 50.288 | 0.00 | 0.00 |
| ATOM | 3495 | CA   | TRP | X | 232 | 46.914 | 40.814 | 49.212 | 0.00 | 0.00 |
| ATOM | 3496 | HA   | TRP | X | 232 | 47.779 | 41.411 | 49.501 | 0.00 | 0.00 |
| ATOM | 3497 | CB   | TRP | X | 232 | 47.309 | 39.759 | 48.167 | 0.00 | 0.00 |
| ATOM | 3498 | HB2  | TRP | X | 232 | 47.653 | 40.363 | 47.327 | 0.00 | 0.00 |
| ATOM | 3499 | HB3  | TRP | X | 232 | 48.073 | 39.180 | 48.686 | 0.00 | 0.00 |
| ATOM | 3500 | CG   | TRP | X | 232 | 46.172 | 38.896 | 47.854 | 0.00 | 0.00 |
| ATOM | 3501 | CD1  | TRP | X | 232 | 45.765 | 37.779 | 48.442 | 0.00 | 0.00 |
| ATOM | 3502 | HD1  | TRP | X | 232 | 46.390 | 37.308 | 49.186 | 0.00 | 0.00 |
| ATOM | 3503 | NE1  | TRP | X | 232 | 44.551 | 37.289 | 47.900 | 0.00 | 0.00 |
| ATOM | 3504 | HE1  | TRP | X | 232 | 44.009 | 36.543 | 48.312 | 0.00 | 0.00 |
| ATOM | 3505 | CE2  | TRP | X | 232 | 44.125 | 38.127 | 46.864 | 0.00 | 0.00 |
| ATOM | 3506 | CZ2  | TRP | X | 232 | 42.957 | 38.178 | 46.092 | 0.00 | 0.00 |
| ATOM | 3507 | HZ2  | TRP | X | 232 | 42.198 | 37.412 | 46.149 | 0.00 | 0.00 |
| ATOM | 3508 | CH2  | TRP | X | 232 | 42.810 | 39.240 | 45.195 | 0.00 | 0.00 |
| ATOM | 3509 | HH2  | TRP | X | 232 | 41.832 | 39.417 | 44.774 | 0.00 | 0.00 |
| ATOM | 3510 | CZ3  | TRP | X | 232 | 43.835 | 40.191 | 44.975 | 0.00 | 0.00 |
| ATOM | 3511 | HZ3  | TRP | X | 232 | 43.702 | 40.899 | 44.170 | 0.00 | 0.00 |
| ATOM | 3512 | CE3  | TRP | X | 232 | 45.005 | 40.091 | 45.761 | 0.00 | 0.00 |
| ATOM | 3513 | HE3  | TRP | X | 232 | 45.756 | 40.868 | 45.743 | 0.00 | 0.00 |
| ATOM | 3514 | CD2  | TRP | X | 232 | 45.172 | 39.068 | 46.736 | 0.00 | 0.00 |
| ATOM | 3515 | C    | TRP | X | 232 | 45.947 | 41.776 | 48.573 | 0.00 | 0.00 |
| ATOM | 3516 | O    | TRP | X | 232 | 46.349 | 42.607 | 47.737 | 0.00 | 0.00 |
| ATOM | 3517 | N    | ALA | X | 233 | 44.648 | 41.758 | 48.961 | 0.00 | 0.00 |
| ATOM | 3518 | H    | ALA | X | 233 | 44.347 | 41.089 | 49.655 | 0.00 | 0.00 |
| ATOM | 3519 | CA   | ALA | X | 233 | 43.656 | 42.664 | 48.422 | 0.00 | 0.00 |
| ATOM | 3520 | HA   | ALA | X | 233 | 43.966 | 42.976 | 47.425 | 0.00 | 0.00 |
| ATOM | 3521 | CB   | ALA | X | 233 | 42.384 | 41.727 | 48.247 | 0.00 | 0.00 |
| ATOM | 3522 | HB1  | ALA | X | 233 | 41.535 | 42.297 | 47.868 | 0.00 | 0.00 |
| ATOM | 3523 | HB2  | ALA | X | 233 | 42.080 | 41.350 | 49.223 | 0.00 | 0.00 |
| ATOM | 3524 | HB3  | ALA | X | 233 | 42.541 | 40.867 | 47.597 | 0.00 | 0.00 |
| ATOM | 3525 | C    | ALA | X | 233 | 43.521 | 44.021 | 49.109 | 0.00 | 0.00 |
| ATOM | 3526 | O    | ALA | X | 233 | 42.823 | 44.891 | 48.610 | 0.00 | 0.00 |
| ATOM | 3527 | N    | THR | X | 234 | 44.218 | 44.178 | 50.157 | 0.00 | 0.00 |
| ATOM | 3528 | H    | THR | X | 234 | 44.754 | 43.364 | 50.421 | 0.00 | 0.00 |

|      |      |      |     |   |     |        |        |        |      |      |
|------|------|------|-----|---|-----|--------|--------|--------|------|------|
| ATOM | 3529 | CA   | THR | X | 234 | 44.231 | 45.413 | 50.991 | 0.00 | 0.00 |
| ATOM | 3530 | HA   | THR | X | 234 | 43.916 | 46.245 | 50.361 | 0.00 | 0.00 |
| ATOM | 3531 | CB   | THR | X | 234 | 43.364 | 45.271 | 52.235 | 0.00 | 0.00 |
| ATOM | 3532 | HB   | THR | X | 234 | 43.703 | 44.483 | 52.906 | 0.00 | 0.00 |
| ATOM | 3533 | CG2  | THR | X | 234 | 43.283 | 46.531 | 53.055 | 0.00 | 0.00 |
| ATOM | 3534 | HG21 | THR | X | 234 | 42.406 | 46.446 | 53.696 | 0.00 | 0.00 |
| ATOM | 3535 | HG22 | THR | X | 234 | 43.123 | 47.412 | 52.433 | 0.00 | 0.00 |
| ATOM | 3536 | HG23 | THR | X | 234 | 44.178 | 46.614 | 53.673 | 0.00 | 0.00 |
| ATOM | 3537 | OG1  | THR | X | 234 | 41.998 | 44.995 | 51.794 | 0.00 | 0.00 |
| ATOM | 3538 | HG1  | THR | X | 234 | 41.678 | 45.818 | 51.417 | 0.00 | 0.00 |
| ATOM | 3539 | C    | THR | X | 234 | 45.605 | 45.781 | 51.442 | 0.00 | 0.00 |
| ATOM | 3540 | O    | THR | X | 234 | 46.389 | 44.828 | 51.647 | 0.00 | 0.00 |
| ATOM | 3541 | N    | VAL | X | 235 | 45.910 | 47.073 | 51.698 | 0.00 | 0.00 |
| ATOM | 3542 | H    | VAL | X | 235 | 45.289 | 47.827 | 51.441 | 0.00 | 0.00 |
| ATOM | 3543 | CA   | VAL | X | 235 | 47.219 | 47.519 | 52.187 | 0.00 | 0.00 |
| ATOM | 3544 | HA   | VAL | X | 235 | 47.636 | 46.632 | 52.663 | 0.00 | 0.00 |
| ATOM | 3545 | CB   | VAL | X | 235 | 48.216 | 47.792 | 50.962 | 0.00 | 0.00 |
| ATOM | 3546 | HB   | VAL | X | 235 | 48.139 | 46.907 | 50.330 | 0.00 | 0.00 |
| ATOM | 3547 | CG1  | VAL | X | 235 | 47.821 | 49.122 | 50.232 | 0.00 | 0.00 |
| ATOM | 3548 | HG11 | VAL | X | 235 | 48.302 | 49.207 | 49.258 | 0.00 | 0.00 |
| ATOM | 3549 | HG12 | VAL | X | 235 | 46.735 | 49.210 | 50.185 | 0.00 | 0.00 |
| ATOM | 3550 | HG13 | VAL | X | 235 | 48.271 | 50.017 | 50.663 | 0.00 | 0.00 |
| ATOM | 3551 | CG2  | VAL | X | 235 | 49.700 | 47.878 | 51.345 | 0.00 | 0.00 |
| ATOM | 3552 | HG21 | VAL | X | 235 | 49.985 | 46.860 | 51.610 | 0.00 | 0.00 |
| ATOM | 3553 | HG22 | VAL | X | 235 | 50.038 | 48.530 | 52.151 | 0.00 | 0.00 |
| ATOM | 3554 | HG23 | VAL | X | 235 | 50.268 | 48.054 | 50.432 | 0.00 | 0.00 |
| ATOM | 3555 | C    | VAL | X | 235 | 47.108 | 48.711 | 53.088 | 0.00 | 0.00 |
| ATOM | 3556 | O    | VAL | X | 235 | 46.068 | 49.416 | 53.112 | 0.00 | 0.00 |
| ATOM | 3557 | N    | GLY | X | 236 | 48.140 | 48.937 | 53.956 | 0.00 | 0.00 |
| ATOM | 3558 | H    | GLY | X | 236 | 48.900 | 48.284 | 53.829 | 0.00 | 0.00 |
| ATOM | 3559 | CA   | GLY | X | 236 | 48.276 | 50.074 | 54.799 | 0.00 | 0.00 |
| ATOM | 3560 | HA2  | GLY | X | 236 | 47.237 | 50.301 | 55.037 | 0.00 | 0.00 |
| ATOM | 3561 | HA3  | GLY | X | 236 | 48.901 | 49.783 | 55.643 | 0.00 | 0.00 |
| ATOM | 3562 | C    | GLY | X | 236 | 48.854 | 51.389 | 54.202 | 0.00 | 0.00 |
| ATOM | 3563 | O    | GLY | X | 236 | 49.575 | 51.457 | 53.241 | 0.00 | 0.00 |
| ATOM | 3564 | N    | MET | X | 237 | 48.531 | 52.466 | 54.908 | 0.00 | 0.00 |
| ATOM | 3565 | H    | MET | X | 237 | 47.818 | 52.326 | 55.610 | 0.00 | 0.00 |
| ATOM | 3566 | CA   | MET | X | 237 | 49.048 | 53.866 | 54.625 | 0.00 | 0.00 |
| ATOM | 3567 | HA   | MET | X | 237 | 48.564 | 54.189 | 53.703 | 0.00 | 0.00 |
| ATOM | 3568 | CB   | MET | X | 237 | 48.586 | 54.796 | 55.766 | 0.00 | 0.00 |
| ATOM | 3569 | HB2  | MET | X | 237 | 49.008 | 54.481 | 56.720 | 0.00 | 0.00 |
| ATOM | 3570 | HB3  | MET | X | 237 | 49.052 | 55.778 | 55.684 | 0.00 | 0.00 |
| ATOM | 3571 | CG   | MET | X | 237 | 47.123 | 55.090 | 55.739 | 0.00 | 0.00 |
| ATOM | 3572 | HG2  | MET | X | 237 | 46.838 | 55.699 | 54.881 | 0.00 | 0.00 |
| ATOM | 3573 | HG3  | MET | X | 237 | 46.608 | 54.134 | 55.654 | 0.00 | 0.00 |
| ATOM | 3574 | SD   | MET | X | 237 | 46.523 | 55.983 | 57.140 | 0.00 | 0.00 |
| ATOM | 3575 | CE   | MET | X | 237 | 44.829 | 55.491 | 57.049 | 0.00 | 0.00 |
| ATOM | 3576 | HE1  | MET | X | 237 | 44.791 | 54.407 | 56.937 | 0.00 | 0.00 |
| ATOM | 3577 | HE2  | MET | X | 237 | 44.287 | 55.846 | 57.925 | 0.00 | 0.00 |
| ATOM | 3578 | HE3  | MET | X | 237 | 44.343 | 55.911 | 56.169 | 0.00 | 0.00 |
| ATOM | 3579 | C    | MET | X | 237 | 50.530 | 53.962 | 54.486 | 0.00 | 0.00 |
| ATOM | 3580 | O    | MET | X | 237 | 51.038 | 54.559 | 53.532 | 0.00 | 0.00 |
| ATOM | 3581 | N    | GLY | X | 238 | 51.248 | 53.441 | 55.470 | 0.00 | 0.00 |
| ATOM | 3582 | H    | GLY | X | 238 | 50.811 | 52.911 | 56.210 | 0.00 | 0.00 |
| ATOM | 3583 | CA   | GLY | X | 238 | 52.736 | 53.650 | 55.583 | 0.00 | 0.00 |
| ATOM | 3584 | HA2  | GLY | X | 238 | 52.948 | 54.716 | 55.502 | 0.00 | 0.00 |
| ATOM | 3585 | HA3  | GLY | X | 238 | 53.122 | 53.172 | 56.483 | 0.00 | 0.00 |
| ATOM | 3586 | C    | GLY | X | 238 | 53.515 | 52.975 | 54.452 | 0.00 | 0.00 |
| ATOM | 3587 | O    | GLY | X | 238 | 54.438 | 53.620 | 53.971 | 0.00 | 0.00 |
| ATOM | 3588 | N    | GLU | X | 239 | 53.100 | 51.870 | 53.946 | 0.00 | 0.00 |
| ATOM | 3589 | H    | GLU | X | 239 | 52.414 | 51.398 | 54.516 | 0.00 | 0.00 |
| ATOM | 3590 | CA   | GLU | X | 239 | 53.591 | 51.189 | 52.721 | 0.00 | 0.00 |
| ATOM | 3591 | HA   | GLU | X | 239 | 54.679 | 51.148 | 52.754 | 0.00 | 0.00 |
| ATOM | 3592 | CB   | GLU | X | 239 | 52.941 | 49.769 | 52.604 | 0.00 | 0.00 |
| ATOM | 3593 | HB2  | GLU | X | 239 | 52.033 | 49.698 | 53.202 | 0.00 | 0.00 |
| ATOM | 3594 | HB3  | GLU | X | 239 | 52.821 | 49.642 | 51.528 | 0.00 | 0.00 |
| ATOM | 3595 | CG   | GLU | X | 239 | 53.996 | 48.730 | 53.161 | 0.00 | 0.00 |

|      |      |      |     |   |     |        |        |        |      |      |
|------|------|------|-----|---|-----|--------|--------|--------|------|------|
| ATOM | 3596 | HG2  | GLU | X | 239 | 54.201 | 48.895 | 54.218 | 0.00 | 0.00 |
| ATOM | 3597 | HG3  | GLU | X | 239 | 53.589 | 47.722 | 53.087 | 0.00 | 0.00 |
| ATOM | 3598 | CD   | GLU | X | 239 | 55.345 | 48.773 | 52.443 | 0.00 | 0.00 |
| ATOM | 3599 | OE1  | GLU | X | 239 | 55.405 | 48.278 | 51.288 | 0.00 | 0.00 |
| ATOM | 3600 | OE2  | GLU | X | 239 | 56.360 | 49.042 | 53.057 | 0.00 | 0.00 |
| ATOM | 3601 | C    | GLU | X | 239 | 53.239 | 52.114 | 51.534 | 0.00 | 0.00 |
| ATOM | 3602 | O    | GLU | X | 239 | 54.126 | 52.343 | 50.705 | 0.00 | 0.00 |
| ATOM | 3603 | N    | ALA | X | 240 | 52.020 | 52.505 | 51.370 | 0.00 | 0.00 |
| ATOM | 3604 | H    | ALA | X | 240 | 51.405 | 52.183 | 52.103 | 0.00 | 0.00 |
| ATOM | 3605 | CA   | ALA | X | 240 | 51.484 | 53.250 | 50.232 | 0.00 | 0.00 |
| ATOM | 3606 | HA   | ALA | X | 240 | 51.588 | 52.629 | 49.343 | 0.00 | 0.00 |
| ATOM | 3607 | CB   | ALA | X | 240 | 49.920 | 53.448 | 50.325 | 0.00 | 0.00 |
| ATOM | 3608 | HB1  | ALA | X | 240 | 49.371 | 52.597 | 50.727 | 0.00 | 0.00 |
| ATOM | 3609 | HB2  | ALA | X | 240 | 49.511 | 53.766 | 49.367 | 0.00 | 0.00 |
| ATOM | 3610 | HB3  | ALA | X | 240 | 49.720 | 54.272 | 51.011 | 0.00 | 0.00 |
| ATOM | 3611 | C    | ALA | X | 240 | 52.344 | 54.577 | 50.032 | 0.00 | 0.00 |
| ATOM | 3612 | O    | ALA | X | 240 | 52.814 | 54.855 | 48.911 | 0.00 | 0.00 |
| ATOM | 3613 | N    | ARG | X | 241 | 52.663 | 55.266 | 51.169 | 0.00 | 0.00 |
| ATOM | 3614 | H    | ARG | X | 241 | 52.211 | 54.856 | 51.974 | 0.00 | 0.00 |
| ATOM | 3615 | CA   | ARG | X | 241 | 53.364 | 56.559 | 51.054 | 0.00 | 0.00 |
| ATOM | 3616 | HA   | ARG | X | 241 | 52.905 | 57.116 | 50.237 | 0.00 | 0.00 |
| ATOM | 3617 | CB   | ARG | X | 241 | 53.319 | 57.190 | 52.530 | 0.00 | 0.00 |
| ATOM | 3618 | HB2  | ARG | X | 241 | 52.364 | 57.117 | 53.051 | 0.00 | 0.00 |
| ATOM | 3619 | HB3  | ARG | X | 241 | 54.124 | 56.839 | 53.176 | 0.00 | 0.00 |
| ATOM | 3620 | CG   | ARG | X | 241 | 53.466 | 58.725 | 52.346 | 0.00 | 0.00 |
| ATOM | 3621 | HG2  | ARG | X | 241 | 54.498 | 58.921 | 52.054 | 0.00 | 0.00 |
| ATOM | 3622 | HG3  | ARG | X | 241 | 52.824 | 59.104 | 51.551 | 0.00 | 0.00 |
| ATOM | 3623 | CD   | ARG | X | 241 | 53.179 | 59.449 | 53.716 | 0.00 | 0.00 |
| ATOM | 3624 | HD2  | ARG | X | 241 | 52.122 | 59.378 | 53.972 | 0.00 | 0.00 |
| ATOM | 3625 | HD3  | ARG | X | 241 | 53.710 | 58.967 | 54.537 | 0.00 | 0.00 |
| ATOM | 3626 | NE   | ARG | X | 241 | 53.523 | 60.872 | 53.767 | 0.00 | 0.00 |
| ATOM | 3627 | HE   | ARG | X | 241 | 52.744 | 61.480 | 53.555 | 0.00 | 0.00 |
| ATOM | 3628 | CZ   | ARG | X | 241 | 54.697 | 61.470 | 53.849 | 0.00 | 0.00 |
| ATOM | 3629 | NH1  | ARG | X | 241 | 55.783 | 60.747 | 53.986 | 0.00 | 0.00 |
| ATOM | 3630 | HH11 | ARG | X | 241 | 55.709 | 59.759 | 54.181 | 0.00 | 0.00 |
| ATOM | 3631 | HH12 | ARG | X | 241 | 56.707 | 61.129 | 54.131 | 0.00 | 0.00 |
| ATOM | 3632 | NH2  | ARG | X | 241 | 54.803 | 62.775 | 53.753 | 0.00 | 0.00 |
| ATOM | 3633 | HH21 | ARG | X | 241 | 54.081 | 63.420 | 53.467 | 0.00 | 0.00 |
| ATOM | 3634 | HH22 | ARG | X | 241 | 55.703 | 63.212 | 53.894 | 0.00 | 0.00 |
| ATOM | 3635 | C    | ARG | X | 241 | 54.848 | 56.416 | 50.708 | 0.00 | 0.00 |
| ATOM | 3636 | O    | ARG | X | 241 | 55.419 | 57.172 | 49.875 | 0.00 | 0.00 |
| ATOM | 3637 | N    | ARG | X | 242 | 55.524 | 55.334 | 51.303 | 0.00 | 0.00 |
| ATOM | 3638 | H    | ARG | X | 242 | 55.092 | 54.810 | 52.051 | 0.00 | 0.00 |
| ATOM | 3639 | CA   | ARG | X | 242 | 56.845 | 54.780 | 50.834 | 0.00 | 0.00 |
| ATOM | 3640 | HA   | ARG | X | 242 | 57.534 | 55.577 | 51.113 | 0.00 | 0.00 |
| ATOM | 3641 | CB   | ARG | X | 242 | 57.276 | 53.578 | 51.623 | 0.00 | 0.00 |
| ATOM | 3642 | HB2  | ARG | X | 242 | 57.274 | 53.861 | 52.676 | 0.00 | 0.00 |
| ATOM | 3643 | HB3  | ARG | X | 242 | 56.570 | 52.763 | 51.460 | 0.00 | 0.00 |
| ATOM | 3644 | CG   | ARG | X | 242 | 58.686 | 53.095 | 51.377 | 0.00 | 0.00 |
| ATOM | 3645 | HG2  | ARG | X | 242 | 58.629 | 52.724 | 50.354 | 0.00 | 0.00 |
| ATOM | 3646 | HG3  | ARG | X | 242 | 59.410 | 53.909 | 51.393 | 0.00 | 0.00 |
| ATOM | 3647 | CD   | ARG | X | 242 | 59.192 | 51.828 | 52.134 | 0.00 | 0.00 |
| ATOM | 3648 | HD2  | ARG | X | 242 | 60.237 | 51.612 | 51.911 | 0.00 | 0.00 |
| ATOM | 3649 | HD3  | ARG | X | 242 | 59.090 | 51.925 | 53.215 | 0.00 | 0.00 |
| ATOM | 3650 | NE   | ARG | X | 242 | 58.338 | 50.696 | 51.710 | 0.00 | 0.00 |
| ATOM | 3651 | HE   | ARG | X | 242 | 57.716 | 50.412 | 52.454 | 0.00 | 0.00 |
| ATOM | 3652 | CZ   | ARG | X | 242 | 58.455 | 49.978 | 50.570 | 0.00 | 0.00 |
| ATOM | 3653 | NH1  | ARG | X | 242 | 59.170 | 50.405 | 49.567 | 0.00 | 0.00 |
| ATOM | 3654 | HH11 | ARG | X | 242 | 59.660 | 51.288 | 49.527 | 0.00 | 0.00 |
| ATOM | 3655 | HH12 | ARG | X | 242 | 59.379 | 49.725 | 48.850 | 0.00 | 0.00 |
| ATOM | 3656 | NH2  | ARG | X | 242 | 57.820 | 48.840 | 50.341 | 0.00 | 0.00 |
| ATOM | 3657 | HH21 | ARG | X | 242 | 57.031 | 48.673 | 50.949 | 0.00 | 0.00 |
| ATOM | 3658 | HH22 | ARG | X | 242 | 57.928 | 48.347 | 49.467 | 0.00 | 0.00 |
| ATOM | 3659 | C    | ARG | X | 242 | 56.828 | 54.458 | 49.282 | 0.00 | 0.00 |
| ATOM | 3660 | O    | ARG | X | 242 | 57.600 | 55.089 | 48.575 | 0.00 | 0.00 |
| ATOM | 3661 | N    | ARG | X | 243 | 55.915 | 53.640 | 48.826 | 0.00 | 0.00 |
| ATOM | 3662 | H    | ARG | X | 243 | 55.261 | 53.304 | 49.519 | 0.00 | 0.00 |

|      |      |      |     |   |     |        |        |        |      |      |
|------|------|------|-----|---|-----|--------|--------|--------|------|------|
| ATOM | 3663 | CA   | ARG | X | 243 | 55.827 | 53.259 | 47.380 | 0.00 | 0.00 |
| ATOM | 3664 | HA   | ARG | X | 243 | 56.756 | 52.751 | 47.121 | 0.00 | 0.00 |
| ATOM | 3665 | CB   | ARG | X | 243 | 54.687 | 52.205 | 47.250 | 0.00 | 0.00 |
| ATOM | 3666 | HB2  | ARG | X | 243 | 53.807 | 52.683 | 47.680 | 0.00 | 0.00 |
| ATOM | 3667 | HB3  | ARG | X | 243 | 54.448 | 52.029 | 46.202 | 0.00 | 0.00 |
| ATOM | 3668 | CG   | ARG | X | 243 | 55.027 | 50.866 | 47.929 | 0.00 | 0.00 |
| ATOM | 3669 | HG2  | ARG | X | 243 | 55.802 | 50.356 | 47.357 | 0.00 | 0.00 |
| ATOM | 3670 | HG3  | ARG | X | 243 | 55.330 | 51.050 | 48.959 | 0.00 | 0.00 |
| ATOM | 3671 | CD   | ARG | X | 243 | 53.734 | 50.002 | 47.980 | 0.00 | 0.00 |
| ATOM | 3672 | HD2  | ARG | X | 243 | 52.969 | 50.553 | 48.527 | 0.00 | 0.00 |
| ATOM | 3673 | HD3  | ARG | X | 243 | 53.456 | 49.712 | 46.967 | 0.00 | 0.00 |
| ATOM | 3674 | NE   | ARG | X | 243 | 54.056 | 48.863 | 48.823 | 0.00 | 0.00 |
| ATOM | 3675 | HE   | ARG | X | 243 | 54.654 | 48.991 | 49.628 | 0.00 | 0.00 |
| ATOM | 3676 | CZ   | ARG | X | 243 | 53.477 | 47.682 | 48.620 | 0.00 | 0.00 |
| ATOM | 3677 | NH1  | ARG | X | 243 | 52.672 | 47.384 | 47.695 | 0.00 | 0.00 |
| ATOM | 3678 | HH11 | ARG | X | 243 | 52.417 | 47.974 | 46.916 | 0.00 | 0.00 |
| ATOM | 3679 | HH12 | ARG | X | 243 | 52.251 | 46.466 | 47.676 | 0.00 | 0.00 |
| ATOM | 3680 | NH2  | ARG | X | 243 | 53.788 | 46.774 | 49.557 | 0.00 | 0.00 |
| ATOM | 3681 | HH21 | ARG | X | 243 | 54.462 | 47.120 | 50.225 | 0.00 | 0.00 |
| ATOM | 3682 | HH22 | ARG | X | 243 | 53.348 | 45.865 | 49.575 | 0.00 | 0.00 |
| ATOM | 3683 | C    | ARG | X | 243 | 55.675 | 54.464 | 46.529 | 0.00 | 0.00 |
| ATOM | 3684 | O    | ARG | X | 243 | 56.586 | 54.737 | 45.687 | 0.00 | 0.00 |
| ATOM | 3685 | N    | ALA | X | 244 | 54.585 | 55.123 | 46.671 | 0.00 | 0.00 |
| ATOM | 3686 | H    | ALA | X | 244 | 53.848 | 54.801 | 47.281 | 0.00 | 0.00 |
| ATOM | 3687 | CA   | ALA | X | 244 | 54.350 | 56.314 | 45.884 | 0.00 | 0.00 |
| ATOM | 3688 | HA   | ALA | X | 244 | 54.215 | 55.988 | 44.853 | 0.00 | 0.00 |
| ATOM | 3689 | CB   | ALA | X | 244 | 53.059 | 56.862 | 46.411 | 0.00 | 0.00 |
| ATOM | 3690 | HB1  | ALA | X | 244 | 52.297 | 56.082 | 46.412 | 0.00 | 0.00 |
| ATOM | 3691 | HB2  | ALA | X | 244 | 52.764 | 57.747 | 45.847 | 0.00 | 0.00 |
| ATOM | 3692 | HB3  | ALA | X | 244 | 53.197 | 57.321 | 47.390 | 0.00 | 0.00 |
| ATOM | 3693 | C    | ALA | X | 244 | 55.532 | 57.350 | 45.783 | 0.00 | 0.00 |
| ATOM | 3694 | O    | ALA | X | 244 | 55.876 | 57.893 | 44.752 | 0.00 | 0.00 |
| ATOM | 3695 | N    | THR | X | 245 | 56.134 | 57.650 | 46.976 | 0.00 | 0.00 |
| ATOM | 3696 | H    | THR | X | 245 | 55.870 | 57.171 | 47.826 | 0.00 | 0.00 |
| ATOM | 3697 | CA   | THR | X | 245 | 57.382 | 58.557 | 47.077 | 0.00 | 0.00 |
| ATOM | 3698 | HA   | THR | X | 245 | 57.088 | 59.426 | 46.489 | 0.00 | 0.00 |
| ATOM | 3699 | CB   | THR | X | 245 | 57.708 | 58.992 | 48.529 | 0.00 | 0.00 |
| ATOM | 3700 | HB   | THR | X | 245 | 58.039 | 58.099 | 49.059 | 0.00 | 0.00 |
| ATOM | 3701 | CG2  | THR | X | 245 | 58.756 | 60.071 | 48.573 | 0.00 | 0.00 |
| ATOM | 3702 | HG21 | THR | X | 245 | 59.658 | 59.538 | 48.272 | 0.00 | 0.00 |
| ATOM | 3703 | HG22 | THR | X | 245 | 58.936 | 60.493 | 49.562 | 0.00 | 0.00 |
| ATOM | 3704 | HG23 | THR | X | 245 | 58.452 | 60.957 | 48.016 | 0.00 | 0.00 |
| ATOM | 3705 | OG1  | THR | X | 245 | 56.523 | 59.443 | 49.124 | 0.00 | 0.00 |
| ATOM | 3706 | HG1  | THR | X | 245 | 56.095 | 58.610 | 49.331 | 0.00 | 0.00 |
| ATOM | 3707 | C    | THR | X | 245 | 58.585 | 57.983 | 46.325 | 0.00 | 0.00 |
| ATOM | 3708 | O    | THR | X | 245 | 59.224 | 58.774 | 45.580 | 0.00 | 0.00 |
| ATOM | 3709 | N    | GLN | X | 246 | 59.002 | 56.763 | 46.533 | 0.00 | 0.00 |
| ATOM | 3710 | H    | GLN | X | 246 | 58.484 | 56.300 | 47.266 | 0.00 | 0.00 |
| ATOM | 3711 | CA   | GLN | X | 246 | 60.079 | 56.091 | 45.748 | 0.00 | 0.00 |
| ATOM | 3712 | HA   | GLN | X | 246 | 60.936 | 56.750 | 45.888 | 0.00 | 0.00 |
| ATOM | 3713 | CB   | GLN | X | 246 | 60.356 | 54.660 | 46.327 | 0.00 | 0.00 |
| ATOM | 3714 | HB2  | GLN | X | 246 | 59.403 | 54.152 | 46.480 | 0.00 | 0.00 |
| ATOM | 3715 | HB3  | GLN | X | 246 | 61.015 | 54.179 | 45.604 | 0.00 | 0.00 |
| ATOM | 3716 | CG   | GLN | X | 246 | 61.083 | 54.685 | 47.660 | 0.00 | 0.00 |
| ATOM | 3717 | HG2  | GLN | X | 246 | 61.986 | 55.294 | 47.614 | 0.00 | 0.00 |
| ATOM | 3718 | HG3  | GLN | X | 246 | 60.436 | 55.183 | 48.382 | 0.00 | 0.00 |
| ATOM | 3719 | CD   | GLN | X | 246 | 61.453 | 53.270 | 48.075 | 0.00 | 0.00 |
| ATOM | 3720 | OE1  | GLN | X | 246 | 60.826 | 52.675 | 48.990 | 0.00 | 0.00 |
| ATOM | 3721 | NE2  | GLN | X | 246 | 62.427 | 52.606 | 47.518 | 0.00 | 0.00 |
| ATOM | 3722 | HE21 | GLN | X | 246 | 62.683 | 51.665 | 47.779 | 0.00 | 0.00 |
| ATOM | 3723 | HE22 | GLN | X | 246 | 63.052 | 53.162 | 46.953 | 0.00 | 0.00 |
| ATOM | 3724 | C    | GLN | X | 246 | 59.766 | 56.010 | 44.243 | 0.00 | 0.00 |
| ATOM | 3725 | O    | GLN | X | 246 | 60.561 | 56.367 | 43.416 | 0.00 | 0.00 |
| ATOM | 3726 | N    | LEU | X | 247 | 58.535 | 55.630 | 43.864 | 0.00 | 0.00 |
| ATOM | 3727 | H    | LEU | X | 247 | 57.859 | 55.325 | 44.550 | 0.00 | 0.00 |
| ATOM | 3728 | CA   | LEU | X | 247 | 58.033 | 55.770 | 42.455 | 0.00 | 0.00 |
| ATOM | 3729 | HA   | LEU | X | 247 | 58.591 | 55.149 | 41.753 | 0.00 | 0.00 |

|      |      |      |     |   |     |        |        |        |      |      |
|------|------|------|-----|---|-----|--------|--------|--------|------|------|
| ATOM | 3730 | CB   | LEU | X | 247 | 56.615 | 55.298 | 42.584 | 0.00 | 0.00 |
| ATOM | 3731 | HB2  | LEU | X | 247 | 56.610 | 54.295 | 43.012 | 0.00 | 0.00 |
| ATOM | 3732 | HB3  | LEU | X | 247 | 56.036 | 55.929 | 43.259 | 0.00 | 0.00 |
| ATOM | 3733 | CG   | LEU | X | 247 | 55.892 | 55.230 | 41.266 | 0.00 | 0.00 |
| ATOM | 3734 | HG   | LEU | X | 247 | 55.798 | 56.192 | 40.761 | 0.00 | 0.00 |
| ATOM | 3735 | CD1  | LEU | X | 247 | 56.569 | 54.250 | 40.261 | 0.00 | 0.00 |
| ATOM | 3736 | HD11 | LEU | X | 247 | 57.561 | 54.636 | 40.027 | 0.00 | 0.00 |
| ATOM | 3737 | HD12 | LEU | X | 247 | 55.953 | 54.199 | 39.363 | 0.00 | 0.00 |
| ATOM | 3738 | HD13 | LEU | X | 247 | 56.754 | 53.269 | 40.698 | 0.00 | 0.00 |
| ATOM | 3739 | CD2  | LEU | X | 247 | 54.530 | 54.557 | 41.441 | 0.00 | 0.00 |
| ATOM | 3740 | HD21 | LEU | X | 247 | 54.091 | 54.913 | 42.372 | 0.00 | 0.00 |
| ATOM | 3741 | HD22 | LEU | X | 247 | 53.937 | 54.728 | 40.543 | 0.00 | 0.00 |
| ATOM | 3742 | HD23 | LEU | X | 247 | 54.664 | 53.489 | 41.615 | 0.00 | 0.00 |
| ATOM | 3743 | C    | LEU | X | 247 | 58.140 | 57.230 | 41.838 | 0.00 | 0.00 |
| ATOM | 3744 | O    | LEU | X | 247 | 58.686 | 57.414 | 40.762 | 0.00 | 0.00 |
| ATOM | 3745 | N    | ALA | X | 248 | 57.705 | 58.321 | 42.514 | 0.00 | 0.00 |
| ATOM | 3746 | H    | ALA | X | 248 | 57.446 | 58.145 | 43.474 | 0.00 | 0.00 |
| ATOM | 3747 | CA   | ALA | X | 248 | 57.825 | 59.719 | 42.083 | 0.00 | 0.00 |
| ATOM | 3748 | HA   | ALA | X | 248 | 57.441 | 59.789 | 41.066 | 0.00 | 0.00 |
| ATOM | 3749 | CB   | ALA | X | 248 | 56.953 | 60.488 | 43.049 | 0.00 | 0.00 |
| ATOM | 3750 | HB1  | ALA | X | 248 | 57.383 | 60.402 | 44.046 | 0.00 | 0.00 |
| ATOM | 3751 | HB2  | ALA | X | 248 | 55.930 | 60.112 | 43.018 | 0.00 | 0.00 |
| ATOM | 3752 | HB3  | ALA | X | 248 | 56.921 | 61.537 | 42.752 | 0.00 | 0.00 |
| ATOM | 3753 | C    | ALA | X | 248 | 59.358 | 60.043 | 42.032 | 0.00 | 0.00 |
| ATOM | 3754 | O    | ALA | X | 248 | 59.857 | 60.583 | 41.072 | 0.00 | 0.00 |
| ATOM | 3755 | N    | HIE | X | 249 | 60.097 | 59.711 | 43.072 | 0.00 | 0.00 |
| ATOM | 3756 | H    | HIE | X | 249 | 59.619 | 59.259 | 43.839 | 0.00 | 0.00 |
| ATOM | 3757 | CA   | HIE | X | 249 | 61.583 | 59.880 | 43.156 | 0.00 | 0.00 |
| ATOM | 3758 | HA   | HIE | X | 249 | 61.904 | 60.919 | 43.228 | 0.00 | 0.00 |
| ATOM | 3759 | CB   | HIE | X | 249 | 62.108 | 59.227 | 44.505 | 0.00 | 0.00 |
| ATOM | 3760 | HB2  | HIE | X | 249 | 61.869 | 59.898 | 45.330 | 0.00 | 0.00 |
| ATOM | 3761 | HB3  | HIE | X | 249 | 61.568 | 58.293 | 44.661 | 0.00 | 0.00 |
| ATOM | 3762 | CG   | HIE | X | 249 | 63.608 | 58.915 | 44.622 | 0.00 | 0.00 |
| ATOM | 3763 | ND1  | HIE | X | 249 | 64.060 | 57.633 | 44.608 | 0.00 | 0.00 |
| ATOM | 3764 | CE1  | HIE | X | 249 | 65.440 | 57.626 | 44.527 | 0.00 | 0.00 |
| ATOM | 3765 | HE1  | HIE | X | 249 | 66.104 | 56.775 | 44.568 | 0.00 | 0.00 |
| ATOM | 3766 | NE2  | HIE | X | 249 | 65.818 | 58.936 | 44.534 | 0.00 | 0.00 |
| ATOM | 3767 | HE2  | HIE | X | 249 | 66.789 | 59.197 | 44.624 | 0.00 | 0.00 |
| ATOM | 3768 | CD2  | HIE | X | 249 | 64.688 | 59.763 | 44.559 | 0.00 | 0.00 |
| ATOM | 3769 | HD2  | HIE | X | 249 | 64.646 | 60.833 | 44.419 | 0.00 | 0.00 |
| ATOM | 3770 | C    | HIE | X | 249 | 62.257 | 59.291 | 41.930 | 0.00 | 0.00 |
| ATOM | 3771 | O    | HIE | X | 249 | 63.082 | 59.964 | 41.338 | 0.00 | 0.00 |
| ATOM | 3772 | N    | LEU | X | 250 | 61.925 | 58.111 | 41.389 | 0.00 | 0.00 |
| ATOM | 3773 | H    | LEU | X | 250 | 61.173 | 57.628 | 41.859 | 0.00 | 0.00 |
| ATOM | 3774 | CA   | LEU | X | 250 | 62.536 | 57.486 | 40.238 | 0.00 | 0.00 |
| ATOM | 3775 | HA   | LEU | X | 250 | 63.601 | 57.685 | 40.121 | 0.00 | 0.00 |
| ATOM | 3776 | CB   | LEU | X | 250 | 62.320 | 55.970 | 40.368 | 0.00 | 0.00 |
| ATOM | 3777 | HB2  | LEU | X | 250 | 61.274 | 55.667 | 40.415 | 0.00 | 0.00 |
| ATOM | 3778 | HB3  | LEU | X | 250 | 62.898 | 55.611 | 39.516 | 0.00 | 0.00 |
| ATOM | 3779 | CG   | LEU | X | 250 | 63.072 | 55.416 | 41.616 | 0.00 | 0.00 |
| ATOM | 3780 | HG   | LEU | X | 250 | 62.947 | 56.020 | 42.514 | 0.00 | 0.00 |
| ATOM | 3781 | CD1  | LEU | X | 250 | 62.544 | 54.049 | 41.989 | 0.00 | 0.00 |
| ATOM | 3782 | HD11 | LEU | X | 250 | 61.497 | 54.136 | 42.280 | 0.00 | 0.00 |
| ATOM | 3783 | HD12 | LEU | X | 250 | 63.078 | 53.618 | 42.837 | 0.00 | 0.00 |
| ATOM | 3784 | HD13 | LEU | X | 250 | 62.616 | 53.405 | 41.113 | 0.00 | 0.00 |
| ATOM | 3785 | CD2  | LEU | X | 250 | 64.567 | 55.359 | 41.406 | 0.00 | 0.00 |
| ATOM | 3786 | HD21 | LEU | X | 250 | 65.061 | 56.256 | 41.033 | 0.00 | 0.00 |
| ATOM | 3787 | HD22 | LEU | X | 250 | 65.047 | 55.186 | 42.370 | 0.00 | 0.00 |
| ATOM | 3788 | HD23 | LEU | X | 250 | 64.878 | 54.549 | 40.747 | 0.00 | 0.00 |
| ATOM | 3789 | C    | LEU | X | 250 | 61.902 | 57.986 | 38.944 | 0.00 | 0.00 |
| ATOM | 3790 | O    | LEU | X | 250 | 62.661 | 58.099 | 38.019 | 0.00 | 0.00 |
| ATOM | 3791 | N    | VAL | X | 251 | 60.632 | 58.436 | 38.884 | 0.00 | 0.00 |
| ATOM | 3792 | H    | VAL | X | 251 | 60.043 | 58.226 | 39.677 | 0.00 | 0.00 |
| ATOM | 3793 | CA   | VAL | X | 251 | 60.003 | 59.153 | 37.749 | 0.00 | 0.00 |
| ATOM | 3794 | HA   | VAL | X | 251 | 60.254 | 58.722 | 36.780 | 0.00 | 0.00 |
| ATOM | 3795 | CB   | VAL | X | 251 | 58.479 | 59.325 | 37.966 | 0.00 | 0.00 |
| ATOM | 3796 | HB   | VAL | X | 251 | 58.420 | 59.685 | 38.993 | 0.00 | 0.00 |

|      |      |      |     |   |     |        |        |        |      |      |
|------|------|------|-----|---|-----|--------|--------|--------|------|------|
| ATOM | 3797 | CG1  | VAL | X | 251 | 57.781 | 60.322 | 37.019 | 0.00 | 0.00 |
| ATOM | 3798 | HG11 | VAL | X | 251 | 58.031 | 60.144 | 35.973 | 0.00 | 0.00 |
| ATOM | 3799 | HG12 | VAL | X | 251 | 56.713 | 60.344 | 37.237 | 0.00 | 0.00 |
| ATOM | 3800 | HG13 | VAL | X | 251 | 58.122 | 61.346 | 37.166 | 0.00 | 0.00 |
| ATOM | 3801 | CG2  | VAL | X | 251 | 57.596 | 58.075 | 37.786 | 0.00 | 0.00 |
| ATOM | 3802 | HG21 | VAL | X | 251 | 57.894 | 57.147 | 38.273 | 0.00 | 0.00 |
| ATOM | 3803 | HG22 | VAL | X | 251 | 57.371 | 57.851 | 36.744 | 0.00 | 0.00 |
| ATOM | 3804 | HG23 | VAL | X | 251 | 56.565 | 58.234 | 38.103 | 0.00 | 0.00 |
| ATOM | 3805 | C    | VAL | X | 251 | 60.748 | 60.495 | 37.562 | 0.00 | 0.00 |
| ATOM | 3806 | O    | VAL | X | 251 | 61.006 | 60.959 | 36.481 | 0.00 | 0.00 |
| ATOM | 3807 | N    | GLY | X | 252 | 61.068 | 61.146 | 38.694 | 0.00 | 0.00 |
| ATOM | 3808 | H    | GLY | X | 252 | 60.895 | 60.596 | 39.523 | 0.00 | 0.00 |
| ATOM | 3809 | CA   | GLY | X | 252 | 61.702 | 62.458 | 38.829 | 0.00 | 0.00 |
| ATOM | 3810 | HA2  | GLY | X | 252 | 62.554 | 62.350 | 39.500 | 0.00 | 0.00 |
| ATOM | 3811 | HA3  | GLY | X | 252 | 61.989 | 62.926 | 37.888 | 0.00 | 0.00 |
| ATOM | 3812 | C    | GLY | X | 252 | 60.831 | 63.589 | 39.331 | 0.00 | 0.00 |
| ATOM | 3813 | O    | GLY | X | 252 | 60.951 | 64.748 | 38.965 | 0.00 | 0.00 |
| ATOM | 3814 | N    | CYX | X | 253 | 59.995 | 63.296 | 40.333 | 0.00 | 0.00 |
| ATOM | 3815 | H    | CYX | X | 253 | 59.930 | 62.355 | 40.694 | 0.00 | 0.00 |
| ATOM | 3816 | CA   | CYX | X | 253 | 59.070 | 64.243 | 40.866 | 0.00 | 0.00 |
| ATOM | 3817 | HA   | CYX | X | 253 | 59.147 | 65.120 | 40.224 | 0.00 | 0.00 |
| ATOM | 3818 | CB   | CYX | X | 253 | 57.629 | 63.714 | 40.749 | 0.00 | 0.00 |
| ATOM | 3819 | HB2  | CYX | X | 253 | 57.436 | 62.738 | 41.195 | 0.00 | 0.00 |
| ATOM | 3820 | HB3  | CYX | X | 253 | 56.957 | 64.458 | 41.179 | 0.00 | 0.00 |
| ATOM | 3821 | SG   | CYX | X | 253 | 57.069 | 63.383 | 38.988 | 0.00 | 0.00 |
| ATOM | 3822 | C    | CYX | X | 253 | 59.486 | 64.480 | 42.294 | 0.00 | 0.00 |
| ATOM | 3823 | O    | CYX | X | 253 | 59.978 | 63.550 | 42.859 | 0.00 | 0.00 |
| ATOM | 3824 | N    | PRO | X | 254 | 59.309 | 65.671 | 42.935 | 0.00 | 0.00 |
| ATOM | 3825 | CD   | PRO | X | 254 | 59.192 | 65.977 | 44.343 | 0.00 | 0.00 |
| ATOM | 3826 | HD2  | PRO | X | 254 | 60.191 | 66.102 | 44.761 | 0.00 | 0.00 |
| ATOM | 3827 | HD3  | PRO | X | 254 | 58.760 | 65.104 | 44.832 | 0.00 | 0.00 |
| ATOM | 3828 | CG   | PRO | X | 254 | 58.496 | 67.296 | 44.473 | 0.00 | 0.00 |
| ATOM | 3829 | HG2  | PRO | X | 254 | 58.872 | 67.797 | 45.365 | 0.00 | 0.00 |
| ATOM | 3830 | HG3  | PRO | X | 254 | 57.419 | 67.176 | 44.596 | 0.00 | 0.00 |
| ATOM | 3831 | CB   | PRO | X | 254 | 59.029 | 68.043 | 43.283 | 0.00 | 0.00 |
| ATOM | 3832 | HB2  | PRO | X | 254 | 60.046 | 68.360 | 43.511 | 0.00 | 0.00 |
| ATOM | 3833 | HB3  | PRO | X | 254 | 58.311 | 68.827 | 43.044 | 0.00 | 0.00 |
| ATOM | 3834 | CA   | PRO | X | 254 | 59.162 | 66.932 | 42.176 | 0.00 | 0.00 |
| ATOM | 3835 | HA   | PRO | X | 254 | 58.280 | 66.845 | 41.542 | 0.00 | 0.00 |
| ATOM | 3836 | C    | PRO | X | 254 | 60.373 | 67.316 | 41.335 | 0.00 | 0.00 |
| ATOM | 3837 | O    | PRO | X | 254 | 61.460 | 66.694 | 41.521 | 0.00 | 0.00 |
| ATOM | 3838 | N    | PRO | X | 255 | 60.235 | 68.232 | 40.342 | 0.00 | 0.00 |
| ATOM | 3839 | CD   | PRO | X | 255 | 58.993 | 68.662 | 39.768 | 0.00 | 0.00 |
| ATOM | 3840 | HD2  | PRO | X | 255 | 58.573 | 69.471 | 40.365 | 0.00 | 0.00 |
| ATOM | 3841 | HD3  | PRO | X | 255 | 58.312 | 67.813 | 39.718 | 0.00 | 0.00 |
| ATOM | 3842 | CG   | PRO | X | 255 | 59.359 | 69.004 | 38.271 | 0.00 | 0.00 |
| ATOM | 3843 | HG2  | PRO | X | 255 | 58.654 | 69.681 | 37.787 | 0.00 | 0.00 |
| ATOM | 3844 | HG3  | PRO | X | 255 | 59.328 | 68.096 | 37.669 | 0.00 | 0.00 |
| ATOM | 3845 | CB   | PRO | X | 255 | 60.762 | 69.569 | 38.464 | 0.00 | 0.00 |
| ATOM | 3846 | HB2  | PRO | X | 255 | 60.690 | 70.553 | 38.929 | 0.00 | 0.00 |
| ATOM | 3847 | HB3  | PRO | X | 255 | 61.254 | 69.615 | 37.493 | 0.00 | 0.00 |
| ATOM | 3848 | CA   | PRO | X | 255 | 61.351 | 68.527 | 39.364 | 0.00 | 0.00 |
| ATOM | 3849 | HA   | PRO | X | 255 | 61.503 | 67.557 | 38.891 | 0.00 | 0.00 |
| ATOM | 3850 | C    | PRO | X | 255 | 62.590 | 68.943 | 40.045 | 0.00 | 0.00 |
| ATOM | 3851 | O    | PRO | X | 255 | 62.691 | 69.837 | 40.878 | 0.00 | 0.00 |
| ATOM | 3852 | N    | GLY | X | 256 | 63.714 | 68.335 | 39.529 | 0.00 | 0.00 |
| ATOM | 3853 | H    | GLY | X | 256 | 63.500 | 67.526 | 38.963 | 0.00 | 0.00 |
| ATOM | 3854 | CA   | GLY | X | 256 | 65.124 | 68.626 | 39.818 | 0.00 | 0.00 |
| ATOM | 3855 | HA2  | GLY | X | 256 | 65.766 | 67.868 | 39.370 | 0.00 | 0.00 |
| ATOM | 3856 | HA3  | GLY | X | 256 | 65.253 | 69.593 | 39.332 | 0.00 | 0.00 |
| ATOM | 3857 | C    | GLY | X | 256 | 65.457 | 68.714 | 41.345 | 0.00 | 0.00 |
| ATOM | 3858 | O    | GLY | X | 256 | 66.512 | 69.276 | 41.635 | 0.00 | 0.00 |
| ATOM | 3859 | N    | GLY | X | 257 | 64.619 | 68.001 | 42.119 | 0.00 | 0.00 |
| ATOM | 3860 | H    | GLY | X | 257 | 63.767 | 67.617 | 41.735 | 0.00 | 0.00 |
| ATOM | 3861 | CA   | GLY | X | 257 | 64.885 | 68.057 | 43.530 | 0.00 | 0.00 |
| ATOM | 3862 | HA2  | GLY | X | 257 | 65.953 | 67.923 | 43.708 | 0.00 | 0.00 |
| ATOM | 3863 | HA3  | GLY | X | 257 | 64.677 | 69.074 | 43.862 | 0.00 | 0.00 |



|      |      |      |     |   |     |        |        |        |      |      |
|------|------|------|-----|---|-----|--------|--------|--------|------|------|
| ATOM | 3864 | C    | GLY | X | 257 | 64.240 | 66.958 | 44.410 | 0.00 | 0.00 |
| ATOM | 3865 | O    | GLY | X | 257 | 63.637 | 66.004 | 43.923 | 0.00 | 0.00 |
| ATOM | 3866 | N    | THR | X | 258 | 64.368 | 67.088 | 45.727 | 0.00 | 0.00 |
| ATOM | 3867 | H    | THR | X | 258 | 64.821 | 67.874 | 46.170 | 0.00 | 0.00 |
| ATOM | 3868 | CA   | THR | X | 258 | 63.901 | 66.093 | 46.627 | 0.00 | 0.00 |
| ATOM | 3869 | HA   | THR | X | 258 | 63.985 | 65.149 | 46.088 | 0.00 | 0.00 |
| ATOM | 3870 | CB   | THR | X | 258 | 64.873 | 66.008 | 47.797 | 0.00 | 0.00 |
| ATOM | 3871 | HB   | THR | X | 258 | 64.535 | 65.259 | 48.514 | 0.00 | 0.00 |
| ATOM | 3872 | CG2  | THR | X | 258 | 66.271 | 65.701 | 47.400 | 0.00 | 0.00 |
| ATOM | 3873 | HG21 | THR | X | 258 | 66.149 | 65.060 | 46.527 | 0.00 | 0.00 |
| ATOM | 3874 | HG22 | THR | X | 258 | 66.784 | 65.152 | 48.189 | 0.00 | 0.00 |
| ATOM | 3875 | HG23 | THR | X | 258 | 66.933 | 66.544 | 47.201 | 0.00 | 0.00 |
| ATOM | 3876 | OG1  | THR | X | 258 | 64.910 | 67.317 | 48.420 | 0.00 | 0.00 |
| ATOM | 3877 | HG1  | THR | X | 258 | 64.362 | 67.252 | 49.206 | 0.00 | 0.00 |
| ATOM | 3878 | C    | THR | X | 258 | 62.492 | 66.211 | 47.212 | 0.00 | 0.00 |
| ATOM | 3879 | O    | THR | X | 258 | 61.936 | 65.158 | 47.344 | 0.00 | 0.00 |
| ATOM | 3880 | N    | GLY | X | 259 | 61.983 | 67.417 | 47.336 | 0.00 | 0.00 |
| ATOM | 3881 | H    | GLY | X | 259 | 62.463 | 68.295 | 47.196 | 0.00 | 0.00 |
| ATOM | 3882 | CA   | GLY | X | 259 | 60.525 | 67.557 | 47.504 | 0.00 | 0.00 |
| ATOM | 3883 | HA2  | GLY | X | 259 | 60.242 | 68.457 | 46.958 | 0.00 | 0.00 |
| ATOM | 3884 | HA3  | GLY | X | 259 | 59.921 | 66.762 | 47.067 | 0.00 | 0.00 |
| ATOM | 3885 | C    | GLY | X | 259 | 60.239 | 67.622 | 48.967 | 0.00 | 0.00 |
| ATOM | 3886 | O    | GLY | X | 259 | 60.642 | 66.730 | 49.697 | 0.00 | 0.00 |
| ATOM | 3887 | N    | GLY | X | 260 | 59.660 | 68.723 | 49.376 | 0.00 | 0.00 |
| ATOM | 3888 | H    | GLY | X | 260 | 59.376 | 69.396 | 48.679 | 0.00 | 0.00 |
| ATOM | 3889 | CA   | GLY | X | 260 | 59.143 | 69.033 | 50.710 | 0.00 | 0.00 |
| ATOM | 3890 | HA2  | GLY | X | 260 | 59.355 | 68.287 | 51.476 | 0.00 | 0.00 |
| ATOM | 3891 | HA3  | GLY | X | 260 | 59.563 | 70.023 | 50.888 | 0.00 | 0.00 |
| ATOM | 3892 | C    | GLY | X | 260 | 57.638 | 69.242 | 50.656 | 0.00 | 0.00 |
| ATOM | 3893 | O    | GLY | X | 260 | 57.200 | 69.955 | 51.568 | 0.00 | 0.00 |
| ATOM | 3894 | N    | ASN | X | 261 | 56.866 | 68.761 | 49.695 | 0.00 | 0.00 |
| ATOM | 3895 | H    | ASN | X | 261 | 57.387 | 68.235 | 49.008 | 0.00 | 0.00 |
| ATOM | 3896 | CA   | ASN | X | 261 | 55.367 | 68.999 | 49.617 | 0.00 | 0.00 |
| ATOM | 3897 | HA   | ASN | X | 261 | 54.935 | 68.971 | 50.617 | 0.00 | 0.00 |
| ATOM | 3898 | CB   | ASN | X | 261 | 55.102 | 70.449 | 49.092 | 0.00 | 0.00 |
| ATOM | 3899 | HB2  | ASN | X | 261 | 55.393 | 71.227 | 49.798 | 0.00 | 0.00 |
| ATOM | 3900 | HB3  | ASN | X | 261 | 55.642 | 70.678 | 48.174 | 0.00 | 0.00 |
| ATOM | 3901 | CG   | ASN | X | 261 | 53.617 | 70.587 | 48.716 | 0.00 | 0.00 |
| ATOM | 3902 | OD1  | ASN | X | 261 | 53.270 | 70.686 | 47.534 | 0.00 | 0.00 |
| ATOM | 3903 | ND2  | ASN | X | 261 | 52.641 | 70.656 | 49.565 | 0.00 | 0.00 |
| ATOM | 3904 | HD21 | ASN | X | 261 | 51.688 | 70.704 | 49.232 | 0.00 | 0.00 |
| ATOM | 3905 | HD22 | ASN | X | 261 | 52.835 | 70.844 | 50.539 | 0.00 | 0.00 |
| ATOM | 3906 | C    | ASN | X | 261 | 54.616 | 67.926 | 48.632 | 0.00 | 0.00 |
| ATOM | 3907 | O    | ASN | X | 261 | 55.136 | 67.648 | 47.550 | 0.00 | 0.00 |
| ATOM | 3908 | N    | ASP | X | 262 | 53.402 | 67.433 | 49.036 | 0.00 | 0.00 |
| ATOM | 3909 | H    | ASP | X | 262 | 52.987 | 67.823 | 49.870 | 0.00 | 0.00 |
| ATOM | 3910 | CA   | ASP | X | 262 | 52.557 | 66.445 | 48.285 | 0.00 | 0.00 |
| ATOM | 3911 | HA   | ASP | X | 262 | 52.985 | 65.443 | 48.325 | 0.00 | 0.00 |
| ATOM | 3912 | CB   | ASP | X | 262 | 51.232 | 66.288 | 49.095 | 0.00 | 0.00 |
| ATOM | 3913 | HB2  | ASP | X | 262 | 50.664 | 67.214 | 49.179 | 0.00 | 0.00 |
| ATOM | 3914 | HB3  | ASP | X | 262 | 50.624 | 65.520 | 48.617 | 0.00 | 0.00 |
| ATOM | 3915 | CG   | ASP | X | 262 | 51.469 | 65.736 | 50.475 | 0.00 | 0.00 |
| ATOM | 3916 | OD1  | ASP | X | 262 | 51.259 | 66.486 | 51.454 | 0.00 | 0.00 |
| ATOM | 3917 | OD2  | ASP | X | 262 | 51.964 | 64.570 | 50.613 | 0.00 | 0.00 |
| ATOM | 3918 | C    | ASP | X | 262 | 52.105 | 66.886 | 46.872 | 0.00 | 0.00 |
| ATOM | 3919 | O    | ASP | X | 262 | 52.352 | 66.186 | 45.867 | 0.00 | 0.00 |
| ATOM | 3920 | N    | THR | X | 263 | 51.522 | 68.097 | 46.747 | 0.00 | 0.00 |
| ATOM | 3921 | H    | THR | X | 263 | 51.401 | 68.548 | 47.643 | 0.00 | 0.00 |
| ATOM | 3922 | CA   | THR | X | 263 | 51.112 | 68.802 | 45.493 | 0.00 | 0.00 |
| ATOM | 3923 | HA   | THR | X | 263 | 50.354 | 68.180 | 45.017 | 0.00 | 0.00 |
| ATOM | 3924 | CB   | THR | X | 263 | 50.364 | 70.095 | 45.837 | 0.00 | 0.00 |
| ATOM | 3925 | HB   | THR | X | 263 | 50.942 | 70.680 | 46.553 | 0.00 | 0.00 |
| ATOM | 3926 | CG2  | THR | X | 263 | 49.931 | 70.997 | 44.707 | 0.00 | 0.00 |
| ATOM | 3927 | HG21 | THR | X | 263 | 49.424 | 71.906 | 45.031 | 0.00 | 0.00 |
| ATOM | 3928 | HG22 | THR | X | 263 | 49.444 | 70.384 | 43.949 | 0.00 | 0.00 |
| ATOM | 3929 | HG23 | THR | X | 263 | 50.831 | 71.279 | 44.161 | 0.00 | 0.00 |
| ATOM | 3930 | OG1  | THR | X | 263 | 49.034 | 69.828 | 46.296 | 0.00 | 0.00 |

|      |      |      |     |   |     |        |        |        |      |      |
|------|------|------|-----|---|-----|--------|--------|--------|------|------|
| ATOM | 3931 | HG1  | THR | X | 263 | 49.161 | 69.312 | 47.096 | 0.00 | 0.00 |
| ATOM | 3932 | C    | THR | X | 263 | 52.316 | 68.962 | 44.521 | 0.00 | 0.00 |
| ATOM | 3933 | O    | THR | X | 263 | 52.129 | 68.695 | 43.381 | 0.00 | 0.00 |
| ATOM | 3934 | N    | GLU | X | 264 | 53.499 | 69.398 | 45.023 | 0.00 | 0.00 |
| ATOM | 3935 | H    | GLU | X | 264 | 53.541 | 69.656 | 45.999 | 0.00 | 0.00 |
| ATOM | 3936 | CA   | GLU | X | 264 | 54.658 | 69.438 | 44.130 | 0.00 | 0.00 |
| ATOM | 3937 | HA   | GLU | X | 264 | 54.344 | 69.936 | 43.212 | 0.00 | 0.00 |
| ATOM | 3938 | CB   | GLU | X | 264 | 55.844 | 70.115 | 44.720 | 0.00 | 0.00 |
| ATOM | 3939 | HB2  | GLU | X | 264 | 56.053 | 69.803 | 45.743 | 0.00 | 0.00 |
| ATOM | 3940 | HB3  | GLU | X | 264 | 56.667 | 70.060 | 44.007 | 0.00 | 0.00 |
| ATOM | 3941 | CG   | GLU | X | 264 | 55.449 | 71.588 | 44.745 | 0.00 | 0.00 |
| ATOM | 3942 | HG2  | GLU | X | 264 | 55.237 | 71.940 | 43.736 | 0.00 | 0.00 |
| ATOM | 3943 | HG3  | GLU | X | 264 | 54.476 | 71.666 | 45.230 | 0.00 | 0.00 |
| ATOM | 3944 | CD   | GLU | X | 264 | 56.491 | 72.483 | 45.440 | 0.00 | 0.00 |
| ATOM | 3945 | OE1  | GLU | X | 264 | 57.708 | 72.280 | 45.285 | 0.00 | 0.00 |
| ATOM | 3946 | OE2  | GLU | X | 264 | 56.093 | 73.284 | 46.308 | 0.00 | 0.00 |
| ATOM | 3947 | C    | GLU | X | 264 | 55.137 | 68.021 | 43.643 | 0.00 | 0.00 |
| ATOM | 3948 | O    | GLU | X | 264 | 55.816 | 67.942 | 42.636 | 0.00 | 0.00 |
| ATOM | 3949 | N    | LEU | X | 265 | 54.803 | 66.939 | 44.345 | 0.00 | 0.00 |
| ATOM | 3950 | H    | LEU | X | 265 | 54.430 | 67.122 | 45.266 | 0.00 | 0.00 |
| ATOM | 3951 | CA   | LEU | X | 265 | 55.154 | 65.566 | 43.929 | 0.00 | 0.00 |
| ATOM | 3952 | HA   | LEU | X | 265 | 56.102 | 65.445 | 43.405 | 0.00 | 0.00 |
| ATOM | 3953 | CB   | LEU | X | 265 | 55.223 | 64.686 | 45.116 | 0.00 | 0.00 |
| ATOM | 3954 | HB2  | LEU | X | 265 | 55.834 | 65.260 | 45.812 | 0.00 | 0.00 |
| ATOM | 3955 | HB3  | LEU | X | 265 | 54.245 | 64.629 | 45.593 | 0.00 | 0.00 |
| ATOM | 3956 | CG   | LEU | X | 265 | 55.752 | 63.279 | 44.818 | 0.00 | 0.00 |
| ATOM | 3957 | HG   | LEU | X | 265 | 56.373 | 63.324 | 43.923 | 0.00 | 0.00 |
| ATOM | 3958 | CD1  | LEU | X | 265 | 56.665 | 62.922 | 45.977 | 0.00 | 0.00 |
| ATOM | 3959 | HD11 | LEU | X | 265 | 57.175 | 61.993 | 45.721 | 0.00 | 0.00 |
| ATOM | 3960 | HD12 | LEU | X | 265 | 56.108 | 62.662 | 46.878 | 0.00 | 0.00 |
| ATOM | 3961 | HD13 | LEU | X | 265 | 57.395 | 63.698 | 46.206 | 0.00 | 0.00 |
| ATOM | 3962 | CD2  | LEU | X | 265 | 54.622 | 62.341 | 44.523 | 0.00 | 0.00 |
| ATOM | 3963 | HD21 | LEU | X | 265 | 54.974 | 61.325 | 44.700 | 0.00 | 0.00 |
| ATOM | 3964 | HD22 | LEU | X | 265 | 53.780 | 62.482 | 45.201 | 0.00 | 0.00 |
| ATOM | 3965 | HD23 | LEU | X | 265 | 54.201 | 62.503 | 43.531 | 0.00 | 0.00 |
| ATOM | 3966 | C    | LEU | X | 265 | 54.154 | 65.004 | 42.905 | 0.00 | 0.00 |
| ATOM | 3967 | O    | LEU | X | 265 | 54.482 | 64.748 | 41.743 | 0.00 | 0.00 |
| ATOM | 3968 | N    | VAL | X | 266 | 52.888 | 65.144 | 43.252 | 0.00 | 0.00 |
| ATOM | 3969 | H    | VAL | X | 266 | 52.738 | 65.576 | 44.153 | 0.00 | 0.00 |
| ATOM | 3970 | CA   | VAL | X | 266 | 51.836 | 64.621 | 42.466 | 0.00 | 0.00 |
| ATOM | 3971 | HA   | VAL | X | 266 | 51.964 | 63.590 | 42.135 | 0.00 | 0.00 |
| ATOM | 3972 | CB   | VAL | X | 266 | 50.536 | 64.474 | 43.279 | 0.00 | 0.00 |
| ATOM | 3973 | HB   | VAL | X | 266 | 50.244 | 65.438 | 43.694 | 0.00 | 0.00 |
| ATOM | 3974 | CG1  | VAL | X | 266 | 49.277 | 63.893 | 42.632 | 0.00 | 0.00 |
| ATOM | 3975 | HG11 | VAL | X | 266 | 49.410 | 62.816 | 42.527 | 0.00 | 0.00 |
| ATOM | 3976 | HG12 | VAL | X | 266 | 48.495 | 64.159 | 43.343 | 0.00 | 0.00 |
| ATOM | 3977 | HG13 | VAL | X | 266 | 49.025 | 64.222 | 41.624 | 0.00 | 0.00 |
| ATOM | 3978 | CG2  | VAL | X | 266 | 50.830 | 63.642 | 44.464 | 0.00 | 0.00 |
| ATOM | 3979 | HG21 | VAL | X | 266 | 51.519 | 64.116 | 45.162 | 0.00 | 0.00 |
| ATOM | 3980 | HG22 | VAL | X | 266 | 51.339 | 62.732 | 44.148 | 0.00 | 0.00 |
| ATOM | 3981 | HG23 | VAL | X | 266 | 49.963 | 63.355 | 45.060 | 0.00 | 0.00 |
| ATOM | 3982 | C    | VAL | X | 266 | 51.476 | 65.437 | 41.222 | 0.00 | 0.00 |
| ATOM | 3983 | O    | VAL | X | 266 | 50.995 | 64.798 | 40.272 | 0.00 | 0.00 |
| ATOM | 3984 | N    | ALA | X | 267 | 51.692 | 66.766 | 41.124 | 0.00 | 0.00 |
| ATOM | 3985 | H    | ALA | X | 267 | 51.945 | 67.278 | 41.957 | 0.00 | 0.00 |
| ATOM | 3986 | CA   | ALA | X | 267 | 51.487 | 67.518 | 39.867 | 0.00 | 0.00 |
| ATOM | 3987 | HA   | ALA | X | 267 | 50.469 | 67.482 | 39.478 | 0.00 | 0.00 |
| ATOM | 3988 | CB   | ALA | X | 267 | 51.866 | 68.928 | 40.050 | 0.00 | 0.00 |
| ATOM | 3989 | HB1  | ALA | X | 267 | 52.857 | 68.977 | 40.502 | 0.00 | 0.00 |
| ATOM | 3990 | HB2  | ALA | X | 267 | 51.053 | 69.412 | 40.591 | 0.00 | 0.00 |
| ATOM | 3991 | HB3  | ALA | X | 267 | 51.942 | 69.555 | 39.161 | 0.00 | 0.00 |
| ATOM | 3992 | C    | ALA | X | 267 | 52.397 | 67.034 | 38.714 | 0.00 | 0.00 |
| ATOM | 3993 | O    | ALA | X | 267 | 52.002 | 66.745 | 37.612 | 0.00 | 0.00 |
| ATOM | 3994 | N    | CYX | X | 268 | 53.638 | 66.780 | 39.062 | 0.00 | 0.00 |
| ATOM | 3995 | H    | CYX | X | 268 | 53.945 | 67.064 | 39.981 | 0.00 | 0.00 |
| ATOM | 3996 | CA   | CYX | X | 268 | 54.609 | 66.112 | 38.163 | 0.00 | 0.00 |
| ATOM | 3997 | HA   | CYX | X | 268 | 54.559 | 66.559 | 37.170 | 0.00 | 0.00 |

|      |      |      |     |   |     |        |        |        |      |      |
|------|------|------|-----|---|-----|--------|--------|--------|------|------|
| ATOM | 3998 | CB   | CYX | X | 268 | 56.024 | 66.261 | 38.764 | 0.00 | 0.00 |
| ATOM | 3999 | HB2  | CYX | X | 268 | 56.267 | 67.312 | 38.607 | 0.00 | 0.00 |
| ATOM | 4000 | HB3  | CYX | X | 268 | 56.027 | 66.092 | 39.841 | 0.00 | 0.00 |
| ATOM | 4001 | SG   | CYX | X | 268 | 57.314 | 65.192 | 38.138 | 0.00 | 0.00 |
| ATOM | 4002 | C    | CYX | X | 268 | 54.184 | 64.643 | 38.007 | 0.00 | 0.00 |
| ATOM | 4003 | O    | CYX | X | 268 | 54.171 | 64.191 | 36.917 | 0.00 | 0.00 |
| ATOM | 4004 | N    | LEU | X | 269 | 53.816 | 63.892 | 39.017 | 0.00 | 0.00 |
| ATOM | 4005 | H    | LEU | X | 269 | 53.841 | 64.345 | 39.919 | 0.00 | 0.00 |
| ATOM | 4006 | CA   | LEU | X | 269 | 53.366 | 62.520 | 38.830 | 0.00 | 0.00 |
| ATOM | 4007 | HA   | LEU | X | 269 | 54.104 | 61.997 | 38.222 | 0.00 | 0.00 |
| ATOM | 4008 | CB   | LEU | X | 269 | 53.163 | 61.918 | 40.223 | 0.00 | 0.00 |
| ATOM | 4009 | HB2  | LEU | X | 269 | 53.965 | 62.190 | 40.909 | 0.00 | 0.00 |
| ATOM | 4010 | HB3  | LEU | X | 269 | 52.212 | 62.287 | 40.608 | 0.00 | 0.00 |
| ATOM | 4011 | CG   | LEU | X | 269 | 53.163 | 60.366 | 40.164 | 0.00 | 0.00 |
| ATOM | 4012 | HG   | LEU | X | 269 | 52.441 | 60.004 | 39.433 | 0.00 | 0.00 |
| ATOM | 4013 | CD1  | LEU | X | 269 | 54.601 | 59.885 | 39.881 | 0.00 | 0.00 |
| ATOM | 4014 | HD11 | LEU | X | 269 | 55.056 | 60.525 | 39.126 | 0.00 | 0.00 |
| ATOM | 4015 | HD12 | LEU | X | 269 | 54.664 | 58.817 | 39.671 | 0.00 | 0.00 |
| ATOM | 4016 | HD13 | LEU | X | 269 | 55.204 | 60.010 | 40.781 | 0.00 | 0.00 |
| ATOM | 4017 | CD2  | LEU | X | 269 | 52.716 | 59.917 | 41.591 | 0.00 | 0.00 |
| ATOM | 4018 | HD21 | LEU | X | 269 | 52.542 | 58.847 | 41.475 | 0.00 | 0.00 |
| ATOM | 4019 | HD22 | LEU | X | 269 | 53.402 | 60.170 | 42.400 | 0.00 | 0.00 |
| ATOM | 4020 | HD23 | LEU | X | 269 | 51.757 | 60.366 | 41.847 | 0.00 | 0.00 |
| ATOM | 4021 | C    | LEU | X | 269 | 52.104 | 62.422 | 37.996 | 0.00 | 0.00 |
| ATOM | 4022 | O    | LEU | X | 269 | 51.781 | 61.322 | 37.534 | 0.00 | 0.00 |
| ATOM | 4023 | N    | ARG | X | 270 | 51.391 | 63.544 | 37.680 | 0.00 | 0.00 |
| ATOM | 4024 | H    | ARG | X | 270 | 51.669 | 64.452 | 38.023 | 0.00 | 0.00 |
| ATOM | 4025 | CA   | ARG | X | 270 | 50.284 | 63.575 | 36.739 | 0.00 | 0.00 |
| ATOM | 4026 | HA   | ARG | X | 270 | 49.947 | 62.545 | 36.622 | 0.00 | 0.00 |
| ATOM | 4027 | CB   | ARG | X | 270 | 49.133 | 64.508 | 37.157 | 0.00 | 0.00 |
| ATOM | 4028 | HB2  | ARG | X | 270 | 49.550 | 65.447 | 37.520 | 0.00 | 0.00 |
| ATOM | 4029 | HB3  | ARG | X | 270 | 48.505 | 64.754 | 36.301 | 0.00 | 0.00 |
| ATOM | 4030 | CG   | ARG | X | 270 | 48.177 | 63.742 | 38.029 | 0.00 | 0.00 |
| ATOM | 4031 | HG2  | ARG | X | 270 | 48.182 | 62.736 | 37.608 | 0.00 | 0.00 |
| ATOM | 4032 | HG3  | ARG | X | 270 | 48.496 | 63.694 | 39.070 | 0.00 | 0.00 |
| ATOM | 4033 | CD   | ARG | X | 270 | 46.778 | 64.385 | 38.042 | 0.00 | 0.00 |
| ATOM | 4034 | HD2  | ARG | X | 270 | 46.676 | 65.091 | 37.218 | 0.00 | 0.00 |
| ATOM | 4035 | HD3  | ARG | X | 270 | 45.925 | 63.711 | 37.970 | 0.00 | 0.00 |
| ATOM | 4036 | NE   | ARG | X | 270 | 46.594 | 65.223 | 39.227 | 0.00 | 0.00 |
| ATOM | 4037 | HE   | ARG | X | 270 | 46.760 | 66.208 | 39.078 | 0.00 | 0.00 |
| ATOM | 4038 | CZ   | ARG | X | 270 | 46.130 | 64.814 | 40.428 | 0.00 | 0.00 |
| ATOM | 4039 | NH1  | ARG | X | 270 | 45.854 | 63.554 | 40.750 | 0.00 | 0.00 |
| ATOM | 4040 | HH11 | ARG | X | 270 | 46.033 | 62.818 | 40.081 | 0.00 | 0.00 |
| ATOM | 4041 | HH12 | ARG | X | 270 | 45.689 | 63.326 | 41.720 | 0.00 | 0.00 |
| ATOM | 4042 | NH2  | ARG | X | 270 | 45.914 | 65.735 | 41.329 | 0.00 | 0.00 |
| ATOM | 4043 | HH21 | ARG | X | 270 | 46.122 | 66.695 | 41.095 | 0.00 | 0.00 |
| ATOM | 4044 | HH22 | ARG | X | 270 | 45.614 | 65.487 | 42.261 | 0.00 | 0.00 |
| ATOM | 4045 | C    | ARG | X | 270 | 50.802 | 63.977 | 35.321 | 0.00 | 0.00 |
| ATOM | 4046 | O    | ARG | X | 270 | 50.263 | 63.501 | 34.338 | 0.00 | 0.00 |
| ATOM | 4047 | N    | THR | X | 271 | 51.788 | 64.884 | 35.262 | 0.00 | 0.00 |
| ATOM | 4048 | H    | THR | X | 271 | 52.136 | 65.379 | 36.071 | 0.00 | 0.00 |
| ATOM | 4049 | CA   | THR | X | 271 | 52.284 | 65.433 | 33.997 | 0.00 | 0.00 |
| ATOM | 4050 | HA   | THR | X | 271 | 51.446 | 65.611 | 33.323 | 0.00 | 0.00 |
| ATOM | 4051 | CB   | THR | X | 271 | 52.877 | 66.721 | 34.516 | 0.00 | 0.00 |
| ATOM | 4052 | HB   | THR | X | 271 | 53.599 | 66.528 | 35.310 | 0.00 | 0.00 |
| ATOM | 4053 | CG2  | THR | X | 271 | 53.565 | 67.502 | 33.379 | 0.00 | 0.00 |
| ATOM | 4054 | HG21 | THR | X | 271 | 54.410 | 66.958 | 32.958 | 0.00 | 0.00 |
| ATOM | 4055 | HG22 | THR | X | 271 | 53.858 | 68.465 | 33.797 | 0.00 | 0.00 |
| ATOM | 4056 | HG23 | THR | X | 271 | 52.969 | 67.815 | 32.522 | 0.00 | 0.00 |
| ATOM | 4057 | OG1  | THR | X | 271 | 51.853 | 67.543 | 34.962 | 0.00 | 0.00 |
| ATOM | 4058 | HG1  | THR | X | 271 | 52.291 | 68.290 | 35.374 | 0.00 | 0.00 |
| ATOM | 4059 | C    | THR | X | 271 | 53.218 | 64.505 | 33.293 | 0.00 | 0.00 |
| ATOM | 4060 | O    | THR | X | 271 | 53.376 | 64.531 | 32.086 | 0.00 | 0.00 |
| ATOM | 4061 | N    | ARG | X | 272 | 54.020 | 63.678 | 33.981 | 0.00 | 0.00 |
| ATOM | 4062 | H    | ARG | X | 272 | 53.956 | 63.599 | 34.986 | 0.00 | 0.00 |
| ATOM | 4063 | CA   | ARG | X | 272 | 55.147 | 62.924 | 33.312 | 0.00 | 0.00 |
| ATOM | 4064 | HA   | ARG | X | 272 | 55.647 | 63.454 | 32.501 | 0.00 | 0.00 |

|      |      |      |     |   |     |        |        |        |      |      |
|------|------|------|-----|---|-----|--------|--------|--------|------|------|
| ATOM | 4065 | CB   | ARG | X | 272 | 56.132 | 62.558 | 34.384 | 0.00 | 0.00 |
| ATOM | 4066 | HB2  | ARG | X | 272 | 55.654 | 62.028 | 35.208 | 0.00 | 0.00 |
| ATOM | 4067 | HB3  | ARG | X | 272 | 56.892 | 61.833 | 34.093 | 0.00 | 0.00 |
| ATOM | 4068 | CG   | ARG | X | 272 | 56.918 | 63.764 | 34.867 | 0.00 | 0.00 |
| ATOM | 4069 | HG2  | ARG | X | 272 | 56.272 | 64.634 | 34.982 | 0.00 | 0.00 |
| ATOM | 4070 | HG3  | ARG | X | 272 | 57.486 | 63.437 | 35.739 | 0.00 | 0.00 |
| ATOM | 4071 | CD   | ARG | X | 272 | 57.891 | 64.202 | 33.797 | 0.00 | 0.00 |
| ATOM | 4072 | HD2  | ARG | X | 272 | 58.527 | 63.348 | 33.564 | 0.00 | 0.00 |
| ATOM | 4073 | HD3  | ARG | X | 272 | 57.401 | 64.447 | 32.854 | 0.00 | 0.00 |
| ATOM | 4074 | NE   | ARG | X | 272 | 58.805 | 65.368 | 34.195 | 0.00 | 0.00 |
| ATOM | 4075 | HE   | ARG | X | 272 | 59.510 | 65.207 | 34.901 | 0.00 | 0.00 |
| ATOM | 4076 | CZ   | ARG | X | 272 | 58.552 | 66.645 | 34.099 | 0.00 | 0.00 |
| ATOM | 4077 | NH1  | ARG | X | 272 | 57.596 | 67.118 | 33.294 | 0.00 | 0.00 |
| ATOM | 4078 | HH11 | ARG | X | 272 | 57.115 | 66.561 | 32.602 | 0.00 | 0.00 |
| ATOM | 4079 | HH12 | ARG | X | 272 | 57.420 | 68.106 | 33.180 | 0.00 | 0.00 |
| ATOM | 4080 | NH2  | ARG | X | 272 | 59.282 | 67.450 | 34.802 | 0.00 | 0.00 |
| ATOM | 4081 | HH21 | ARG | X | 272 | 59.877 | 66.915 | 35.420 | 0.00 | 0.00 |
| ATOM | 4082 | HH22 | ARG | X | 272 | 59.505 | 68.414 | 34.602 | 0.00 | 0.00 |
| ATOM | 4083 | C    | ARG | X | 272 | 54.559 | 61.621 | 32.734 | 0.00 | 0.00 |
| ATOM | 4084 | O    | ARG | X | 272 | 53.607 | 61.033 | 33.300 | 0.00 | 0.00 |
| ATOM | 4085 | N    | PRO | X | 273 | 55.087 | 61.152 | 31.574 | 0.00 | 0.00 |
| ATOM | 4086 | CD   | PRO | X | 273 | 56.292 | 61.686 | 30.876 | 0.00 | 0.00 |
| ATOM | 4087 | HD2  | PRO | X | 273 | 57.151 | 61.905 | 31.510 | 0.00 | 0.00 |
| ATOM | 4088 | HD3  | PRO | X | 273 | 56.191 | 62.638 | 30.353 | 0.00 | 0.00 |
| ATOM | 4089 | CG   | PRO | X | 273 | 56.708 | 60.544 | 29.969 | 0.00 | 0.00 |
| ATOM | 4090 | HG2  | PRO | X | 273 | 57.187 | 59.748 | 30.538 | 0.00 | 0.00 |
| ATOM | 4091 | HG3  | PRO | X | 273 | 57.305 | 60.843 | 29.108 | 0.00 | 0.00 |
| ATOM | 4092 | CB   | PRO | X | 273 | 55.359 | 59.943 | 29.466 | 0.00 | 0.00 |
| ATOM | 4093 | HB2  | PRO | X | 273 | 55.483 | 58.922 | 29.104 | 0.00 | 0.00 |
| ATOM | 4094 | HB3  | PRO | X | 273 | 54.957 | 60.568 | 28.669 | 0.00 | 0.00 |
| ATOM | 4095 | CA   | PRO | X | 273 | 54.468 | 60.082 | 30.761 | 0.00 | 0.00 |
| ATOM | 4096 | HA   | PRO | X | 273 | 53.501 | 60.435 | 30.403 | 0.00 | 0.00 |
| ATOM | 4097 | C    | PRO | X | 273 | 54.152 | 58.747 | 31.415 | 0.00 | 0.00 |
| ATOM | 4098 | O    | PRO | X | 273 | 54.608 | 58.390 | 32.534 | 0.00 | 0.00 |
| ATOM | 4099 | N    | ALA | X | 274 | 53.193 | 57.963 | 30.814 | 0.00 | 0.00 |
| ATOM | 4100 | H    | ALA | X | 274 | 52.785 | 58.364 | 29.981 | 0.00 | 0.00 |
| ATOM | 4101 | CA   | ALA | X | 274 | 52.700 | 56.690 | 31.354 | 0.00 | 0.00 |
| ATOM | 4102 | HA   | ALA | X | 274 | 52.499 | 56.827 | 32.417 | 0.00 | 0.00 |
| ATOM | 4103 | CB   | ALA | X | 274 | 51.357 | 56.320 | 30.715 | 0.00 | 0.00 |
| ATOM | 4104 | HB1  | ALA | X | 274 | 51.446 | 56.307 | 29.629 | 0.00 | 0.00 |
| ATOM | 4105 | HB2  | ALA | X | 274 | 50.618 | 57.008 | 31.125 | 0.00 | 0.00 |
| ATOM | 4106 | HB3  | ALA | X | 274 | 51.173 | 55.305 | 31.069 | 0.00 | 0.00 |
| ATOM | 4107 | C    | ALA | X | 274 | 53.591 | 55.467 | 31.273 | 0.00 | 0.00 |
| ATOM | 4108 | O    | ALA | X | 274 | 53.527 | 54.635 | 32.216 | 0.00 | 0.00 |
| ATOM | 4109 | N    | GLN | X | 275 | 54.478 | 55.342 | 30.260 | 0.00 | 0.00 |
| ATOM | 4110 | H    | GLN | X | 275 | 54.436 | 55.993 | 29.489 | 0.00 | 0.00 |
| ATOM | 4111 | CA   | GLN | X | 275 | 55.305 | 54.200 | 30.156 | 0.00 | 0.00 |
| ATOM | 4112 | HA   | GLN | X | 275 | 54.825 | 53.250 | 30.393 | 0.00 | 0.00 |
| ATOM | 4113 | CB   | GLN | X | 275 | 55.892 | 54.217 | 28.698 | 0.00 | 0.00 |
| ATOM | 4114 | HB2  | GLN | X | 275 | 55.086 | 53.837 | 28.071 | 0.00 | 0.00 |
| ATOM | 4115 | HB3  | GLN | X | 275 | 56.013 | 55.232 | 28.320 | 0.00 | 0.00 |
| ATOM | 4116 | CG   | GLN | X | 275 | 57.119 | 53.283 | 28.482 | 0.00 | 0.00 |
| ATOM | 4117 | HG2  | GLN | X | 275 | 56.999 | 52.350 | 29.032 | 0.00 | 0.00 |
| ATOM | 4118 | HG3  | GLN | X | 275 | 57.144 | 52.974 | 27.438 | 0.00 | 0.00 |
| ATOM | 4119 | CD   | GLN | X | 275 | 58.464 | 53.896 | 28.773 | 0.00 | 0.00 |
| ATOM | 4120 | OE1  | GLN | X | 275 | 58.810 | 55.065 | 28.454 | 0.00 | 0.00 |
| ATOM | 4121 | NE2  | GLN | X | 275 | 59.358 | 53.217 | 29.388 | 0.00 | 0.00 |
| ATOM | 4122 | HE21 | GLN | X | 275 | 60.173 | 53.731 | 29.691 | 0.00 | 0.00 |
| ATOM | 4123 | HE22 | GLN | X | 275 | 59.172 | 52.299 | 29.767 | 0.00 | 0.00 |
| ATOM | 4124 | C    | GLN | X | 275 | 56.381 | 54.329 | 31.184 | 0.00 | 0.00 |
| ATOM | 4125 | O    | GLN | X | 275 | 56.566 | 53.367 | 31.946 | 0.00 | 0.00 |
| ATOM | 4126 | N    | VAL | X | 276 | 56.898 | 55.562 | 31.392 | 0.00 | 0.00 |
| ATOM | 4127 | H    | VAL | X | 276 | 56.713 | 56.304 | 30.731 | 0.00 | 0.00 |
| ATOM | 4128 | CA   | VAL | X | 276 | 57.994 | 55.635 | 32.437 | 0.00 | 0.00 |
| ATOM | 4129 | HA   | VAL | X | 276 | 58.686 | 54.811 | 32.260 | 0.00 | 0.00 |
| ATOM | 4130 | CB   | VAL | X | 276 | 58.860 | 56.935 | 32.512 | 0.00 | 0.00 |
| ATOM | 4131 | HB   | VAL | X | 276 | 59.101 | 57.155 | 31.472 | 0.00 | 0.00 |

|      |      |      |     |   |     |        |        |        |      |      |
|------|------|------|-----|---|-----|--------|--------|--------|------|------|
| ATOM | 4132 | CG1  | VAL | X | 276 | 58.158 | 58.132 | 33.132 | 0.00 | 0.00 |
| ATOM | 4133 | HG11 | VAL | X | 276 | 57.184 | 58.240 | 32.656 | 0.00 | 0.00 |
| ATOM | 4134 | HG12 | VAL | X | 276 | 58.084 | 58.005 | 34.212 | 0.00 | 0.00 |
| ATOM | 4135 | HG13 | VAL | X | 276 | 58.707 | 59.049 | 32.920 | 0.00 | 0.00 |
| ATOM | 4136 | CG2  | VAL | X | 276 | 60.212 | 56.761 | 33.196 | 0.00 | 0.00 |
| ATOM | 4137 | HG21 | VAL | X | 276 | 60.847 | 57.620 | 32.979 | 0.00 | 0.00 |
| ATOM | 4138 | HG22 | VAL | X | 276 | 60.776 | 55.896 | 32.848 | 0.00 | 0.00 |
| ATOM | 4139 | HG23 | VAL | X | 276 | 60.148 | 56.662 | 34.280 | 0.00 | 0.00 |
| ATOM | 4140 | C    | VAL | X | 276 | 57.466 | 55.380 | 33.849 | 0.00 | 0.00 |
| ATOM | 4141 | O    | VAL | X | 276 | 58.146 | 54.806 | 34.669 | 0.00 | 0.00 |
| ATOM | 4142 | N    | LEU | X | 277 | 56.227 | 55.872 | 34.090 | 0.00 | 0.00 |
| ATOM | 4143 | H    | LEU | X | 277 | 55.710 | 56.387 | 33.391 | 0.00 | 0.00 |
| ATOM | 4144 | CA   | LEU | X | 277 | 55.583 | 55.759 | 35.383 | 0.00 | 0.00 |
| ATOM | 4145 | HA   | LEU | X | 277 | 56.250 | 56.157 | 36.147 | 0.00 | 0.00 |
| ATOM | 4146 | CB   | LEU | X | 277 | 54.276 | 56.695 | 35.334 | 0.00 | 0.00 |
| ATOM | 4147 | HB2  | LEU | X | 277 | 54.466 | 57.655 | 34.855 | 0.00 | 0.00 |
| ATOM | 4148 | HB3  | LEU | X | 277 | 53.513 | 56.196 | 34.736 | 0.00 | 0.00 |
| ATOM | 4149 | CG   | LEU | X | 277 | 53.868 | 57.079 | 36.800 | 0.00 | 0.00 |
| ATOM | 4150 | HG   | LEU | X | 277 | 54.725 | 57.528 | 37.302 | 0.00 | 0.00 |
| ATOM | 4151 | CD1  | LEU | X | 277 | 52.802 | 58.154 | 36.739 | 0.00 | 0.00 |
| ATOM | 4152 | HD11 | LEU | X | 277 | 53.175 | 59.040 | 36.225 | 0.00 | 0.00 |
| ATOM | 4153 | HD12 | LEU | X | 277 | 52.568 | 58.418 | 37.770 | 0.00 | 0.00 |
| ATOM | 4154 | HD13 | LEU | X | 277 | 51.908 | 57.760 | 36.256 | 0.00 | 0.00 |
| ATOM | 4155 | CD2  | LEU | X | 277 | 53.269 | 55.973 | 37.677 | 0.00 | 0.00 |
| ATOM | 4156 | HD21 | LEU | X | 277 | 52.240 | 55.734 | 37.410 | 0.00 | 0.00 |
| ATOM | 4157 | HD22 | LEU | X | 277 | 53.888 | 55.076 | 37.706 | 0.00 | 0.00 |
| ATOM | 4158 | HD23 | LEU | X | 277 | 53.359 | 56.261 | 38.724 | 0.00 | 0.00 |
| ATOM | 4159 | C    | LEU | X | 277 | 55.399 | 54.307 | 35.643 | 0.00 | 0.00 |
| ATOM | 4160 | O    | LEU | X | 277 | 56.026 | 53.730 | 36.577 | 0.00 | 0.00 |
| ATOM | 4161 | N    | VAL | X | 278 | 54.766 | 53.603 | 34.706 | 0.00 | 0.00 |
| ATOM | 4162 | H    | VAL | X | 278 | 54.493 | 53.992 | 33.814 | 0.00 | 0.00 |
| ATOM | 4163 | CA   | VAL | X | 278 | 54.512 | 52.151 | 34.863 | 0.00 | 0.00 |
| ATOM | 4164 | HA   | VAL | X | 278 | 54.139 | 51.983 | 35.874 | 0.00 | 0.00 |
| ATOM | 4165 | CB   | VAL | X | 278 | 53.339 | 51.744 | 33.936 | 0.00 | 0.00 |
| ATOM | 4166 | HB   | VAL | X | 278 | 52.755 | 52.627 | 33.677 | 0.00 | 0.00 |
| ATOM | 4167 | CG1  | VAL | X | 278 | 53.736 | 51.084 | 32.615 | 0.00 | 0.00 |
| ATOM | 4168 | HG11 | VAL | X | 278 | 52.817 | 50.919 | 32.053 | 0.00 | 0.00 |
| ATOM | 4169 | HG12 | VAL | X | 278 | 54.529 | 51.605 | 32.080 | 0.00 | 0.00 |
| ATOM | 4170 | HG13 | VAL | X | 278 | 54.013 | 50.050 | 32.820 | 0.00 | 0.00 |
| ATOM | 4171 | CG2  | VAL | X | 278 | 52.402 | 50.817 | 34.617 | 0.00 | 0.00 |
| ATOM | 4172 | HG21 | VAL | X | 278 | 52.897 | 49.871 | 34.834 | 0.00 | 0.00 |
| ATOM | 4173 | HG22 | VAL | X | 278 | 51.492 | 50.598 | 34.059 | 0.00 | 0.00 |
| ATOM | 4174 | HG23 | VAL | X | 278 | 52.141 | 51.227 | 35.593 | 0.00 | 0.00 |
| ATOM | 4175 | C    | VAL | X | 278 | 55.718 | 51.159 | 34.875 | 0.00 | 0.00 |
| ATOM | 4176 | O    | VAL | X | 278 | 55.662 | 50.140 | 35.502 | 0.00 | 0.00 |
| ATOM | 4177 | N    | ASN | X | 279 | 56.836 | 51.589 | 34.280 | 0.00 | 0.00 |
| ATOM | 4178 | H    | ASN | X | 279 | 56.798 | 52.483 | 33.810 | 0.00 | 0.00 |
| ATOM | 4179 | CA   | ASN | X | 279 | 58.076 | 50.846 | 34.337 | 0.00 | 0.00 |
| ATOM | 4180 | HA   | ASN | X | 279 | 57.829 | 49.805 | 34.128 | 0.00 | 0.00 |
| ATOM | 4181 | CB   | ASN | X | 279 | 58.944 | 51.414 | 33.221 | 0.00 | 0.00 |
| ATOM | 4182 | HB2  | ASN | X | 279 | 58.769 | 52.480 | 33.075 | 0.00 | 0.00 |
| ATOM | 4183 | HB3  | ASN | X | 279 | 59.995 | 51.371 | 33.508 | 0.00 | 0.00 |
| ATOM | 4184 | CG   | ASN | X | 279 | 58.856 | 50.587 | 31.953 | 0.00 | 0.00 |
| ATOM | 4185 | OD1  | ASN | X | 279 | 59.580 | 49.604 | 31.755 | 0.00 | 0.00 |
| ATOM | 4186 | ND2  | ASN | X | 279 | 58.019 | 50.961 | 31.042 | 0.00 | 0.00 |
| ATOM | 4187 | HD21 | ASN | X | 279 | 57.877 | 50.431 | 30.194 | 0.00 | 0.00 |
| ATOM | 4188 | HD22 | ASN | X | 279 | 57.385 | 51.701 | 31.306 | 0.00 | 0.00 |
| ATOM | 4189 | C    | ASN | X | 279 | 58.808 | 51.047 | 35.750 | 0.00 | 0.00 |
| ATOM | 4190 | O    | ASN | X | 279 | 59.604 | 50.121 | 36.097 | 0.00 | 0.00 |
| ATOM | 4191 | N    | HIE | X | 280 | 58.548 | 52.072 | 36.524 | 0.00 | 0.00 |
| ATOM | 4192 | H    | HIE | X | 280 | 58.000 | 52.807 | 36.100 | 0.00 | 0.00 |
| ATOM | 4193 | CA   | HIE | X | 280 | 58.928 | 52.194 | 37.954 | 0.00 | 0.00 |
| ATOM | 4194 | HA   | HIE | X | 280 | 59.783 | 51.620 | 38.311 | 0.00 | 0.00 |
| ATOM | 4195 | CB   | HIE | X | 280 | 59.269 | 53.652 | 38.209 | 0.00 | 0.00 |
| ATOM | 4196 | HB2  | HIE | X | 280 | 58.503 | 54.382 | 37.946 | 0.00 | 0.00 |
| ATOM | 4197 | HB3  | HIE | X | 280 | 59.441 | 53.700 | 39.284 | 0.00 | 0.00 |
| ATOM | 4198 | CG   | HIE | X | 280 | 60.562 | 54.091 | 37.610 | 0.00 | 0.00 |

|      |      |     |     |   |     |        |        |        |      |      |
|------|------|-----|-----|---|-----|--------|--------|--------|------|------|
| ATOM | 4199 | ND1 | HIE | X | 280 | 61.756 | 53.413 | 37.695 | 0.00 | 0.00 |
| ATOM | 4200 | CE1 | HIE | X | 280 | 62.618 | 54.212 | 36.974 | 0.00 | 0.00 |
| ATOM | 4201 | HE1 | HIE | X | 280 | 63.687 | 54.078 | 36.897 | 0.00 | 0.00 |
| ATOM | 4202 | NE2 | HIE | X | 280 | 62.008 | 55.235 | 36.340 | 0.00 | 0.00 |
| ATOM | 4203 | HE2 | HIE | X | 280 | 62.450 | 55.966 | 35.801 | 0.00 | 0.00 |
| ATOM | 4204 | CD2 | HIE | X | 280 | 60.711 | 55.173 | 36.759 | 0.00 | 0.00 |
| ATOM | 4205 | HD2 | HIE | X | 280 | 59.905 | 55.832 | 36.473 | 0.00 | 0.00 |
| ATOM | 4206 | C   | HIE | X | 280 | 57.867 | 51.644 | 38.928 | 0.00 | 0.00 |
| ATOM | 4207 | O   | HIE | X | 280 | 58.256 | 51.330 | 40.046 | 0.00 | 0.00 |
| ATOM | 4208 | N   | GLU | X | 281 | 56.565 | 51.566 | 38.574 | 0.00 | 0.00 |
| ATOM | 4209 | H   | GLU | X | 281 | 56.237 | 52.071 | 37.763 | 0.00 | 0.00 |
| ATOM | 4210 | CA  | GLU | X | 281 | 55.676 | 50.758 | 39.430 | 0.00 | 0.00 |
| ATOM | 4211 | HA  | GLU | X | 281 | 55.605 | 51.272 | 40.389 | 0.00 | 0.00 |
| ATOM | 4212 | CB  | GLU | X | 281 | 54.268 | 50.704 | 38.883 | 0.00 | 0.00 |
| ATOM | 4213 | HB2 | GLU | X | 281 | 54.068 | 51.617 | 38.323 | 0.00 | 0.00 |
| ATOM | 4214 | HB3 | GLU | X | 281 | 54.145 | 49.803 | 38.281 | 0.00 | 0.00 |
| ATOM | 4215 | CG  | GLU | X | 281 | 53.206 | 50.683 | 39.932 | 0.00 | 0.00 |
| ATOM | 4216 | HG2 | GLU | X | 281 | 53.580 | 49.981 | 40.677 | 0.00 | 0.00 |
| ATOM | 4217 | HG3 | GLU | X | 281 | 53.150 | 51.694 | 40.335 | 0.00 | 0.00 |
| ATOM | 4218 | CD  | GLU | X | 281 | 51.876 | 50.216 | 39.362 | 0.00 | 0.00 |
| ATOM | 4219 | OE1 | GLU | X | 281 | 51.386 | 50.874 | 38.399 | 0.00 | 0.00 |
| ATOM | 4220 | OE2 | GLU | X | 281 | 51.378 | 49.137 | 39.809 | 0.00 | 0.00 |
| ATOM | 4221 | C   | GLU | X | 281 | 56.235 | 49.405 | 39.756 | 0.00 | 0.00 |
| ATOM | 4222 | O   | GLU | X | 281 | 56.293 | 49.008 | 40.927 | 0.00 | 0.00 |
| ATOM | 4223 | N   | TRP | X | 282 | 56.828 | 48.793 | 38.732 | 0.00 | 0.00 |
| ATOM | 4224 | H   | TRP | X | 282 | 56.774 | 49.253 | 37.834 | 0.00 | 0.00 |
| ATOM | 4225 | CA  | TRP | X | 282 | 57.389 | 47.384 | 38.915 | 0.00 | 0.00 |
| ATOM | 4226 | HA  | TRP | X | 282 | 56.808 | 46.823 | 39.647 | 0.00 | 0.00 |
| ATOM | 4227 | CB  | TRP | X | 282 | 57.475 | 46.682 | 37.535 | 0.00 | 0.00 |
| ATOM | 4228 | HB2 | TRP | X | 282 | 57.423 | 47.376 | 36.696 | 0.00 | 0.00 |
| ATOM | 4229 | HB3 | TRP | X | 282 | 58.465 | 46.227 | 37.497 | 0.00 | 0.00 |
| ATOM | 4230 | CG  | TRP | X | 282 | 56.190 | 45.840 | 37.548 | 0.00 | 0.00 |
| ATOM | 4231 | CD1 | TRP | X | 282 | 54.965 | 46.390 | 37.795 | 0.00 | 0.00 |
| ATOM | 4232 | HD1 | TRP | X | 282 | 54.694 | 47.427 | 37.927 | 0.00 | 0.00 |
| ATOM | 4233 | NE1 | TRP | X | 282 | 54.058 | 45.316 | 38.069 | 0.00 | 0.00 |
| ATOM | 4234 | HE1 | TRP | X | 282 | 53.110 | 45.422 | 38.401 | 0.00 | 0.00 |
| ATOM | 4235 | CE2 | TRP | X | 282 | 54.675 | 44.134 | 37.880 | 0.00 | 0.00 |
| ATOM | 4236 | CZ2 | TRP | X | 282 | 54.264 | 42.812 | 38.038 | 0.00 | 0.00 |
| ATOM | 4237 | HZ2 | TRP | X | 282 | 53.299 | 42.561 | 38.454 | 0.00 | 0.00 |
| ATOM | 4238 | CH2 | TRP | X | 282 | 55.174 | 41.715 | 37.721 | 0.00 | 0.00 |
| ATOM | 4239 | HH2 | TRP | X | 282 | 54.873 | 40.680 | 37.799 | 0.00 | 0.00 |
| ATOM | 4240 | CZ3 | TRP | X | 282 | 56.456 | 42.025 | 37.194 | 0.00 | 0.00 |
| ATOM | 4241 | HZ3 | TRP | X | 282 | 57.126 | 41.234 | 36.890 | 0.00 | 0.00 |
| ATOM | 4242 | CE3 | TRP | X | 282 | 56.893 | 43.378 | 37.118 | 0.00 | 0.00 |
| ATOM | 4243 | HE3 | TRP | X | 282 | 57.824 | 43.660 | 36.648 | 0.00 | 0.00 |
| ATOM | 4244 | CD2 | TRP | X | 282 | 56.012 | 44.403 | 37.449 | 0.00 | 0.00 |
| ATOM | 4245 | C   | TRP | X | 282 | 58.762 | 47.436 | 39.634 | 0.00 | 0.00 |
| ATOM | 4246 | O   | TRP | X | 282 | 59.372 | 46.376 | 39.899 | 0.00 | 0.00 |
| ATOM | 4247 | N   | HIE | X | 283 | 59.301 | 48.617 | 39.915 | 0.00 | 0.00 |
| ATOM | 4248 | H   | HIE | X | 283 | 58.773 | 49.423 | 39.613 | 0.00 | 0.00 |
| ATOM | 4249 | CA  | HIE | X | 283 | 60.257 | 48.890 | 41.004 | 0.00 | 0.00 |
| ATOM | 4250 | HA  | HIE | X | 283 | 61.009 | 48.105 | 40.928 | 0.00 | 0.00 |
| ATOM | 4251 | CB  | HIE | X | 283 | 61.092 | 50.118 | 40.532 | 0.00 | 0.00 |
| ATOM | 4252 | HB2 | HIE | X | 283 | 61.191 | 50.082 | 39.448 | 0.00 | 0.00 |
| ATOM | 4253 | HB3 | HIE | X | 283 | 60.557 | 51.018 | 40.835 | 0.00 | 0.00 |
| ATOM | 4254 | CG  | HIE | X | 283 | 62.477 | 50.255 | 41.051 | 0.00 | 0.00 |
| ATOM | 4255 | ND1 | HIE | X | 283 | 63.575 | 49.788 | 40.412 | 0.00 | 0.00 |
| ATOM | 4256 | CE1 | HIE | X | 283 | 64.590 | 50.230 | 41.121 | 0.00 | 0.00 |
| ATOM | 4257 | HE1 | HIE | X | 283 | 65.642 | 50.095 | 40.914 | 0.00 | 0.00 |
| ATOM | 4258 | NE2 | HIE | X | 283 | 64.186 | 50.881 | 42.218 | 0.00 | 0.00 |
| ATOM | 4259 | HE2 | HIE | X | 283 | 64.774 | 51.156 | 42.992 | 0.00 | 0.00 |
| ATOM | 4260 | CD2 | HIE | X | 283 | 62.848 | 50.898 | 42.160 | 0.00 | 0.00 |
| ATOM | 4261 | HD2 | HIE | X | 283 | 62.216 | 51.462 | 42.830 | 0.00 | 0.00 |
| ATOM | 4262 | C   | HIE | X | 283 | 59.744 | 49.096 | 42.474 | 0.00 | 0.00 |
| ATOM | 4263 | O   | HIE | X | 283 | 60.472 | 49.167 | 43.458 | 0.00 | 0.00 |
| ATOM | 4264 | N   | VAL | X | 284 | 58.401 | 49.150 | 42.630 | 0.00 | 0.00 |
| ATOM | 4265 | H   | VAL | X | 284 | 57.867 | 49.144 | 41.773 | 0.00 | 0.00 |

|      |      |      |     |   |     |        |        |        |      |      |
|------|------|------|-----|---|-----|--------|--------|--------|------|------|
| ATOM | 4266 | CA   | VAL | X | 284 | 57.577 | 49.229 | 43.827 | 0.00 | 0.00 |
| ATOM | 4267 | HA   | VAL | X | 284 | 58.197 | 48.900 | 44.661 | 0.00 | 0.00 |
| ATOM | 4268 | CB   | VAL | X | 284 | 57.132 | 50.681 | 44.184 | 0.00 | 0.00 |
| ATOM | 4269 | HB   | VAL | X | 284 | 56.540 | 50.592 | 45.095 | 0.00 | 0.00 |
| ATOM | 4270 | CG1  | VAL | X | 284 | 58.305 | 51.680 | 44.495 | 0.00 | 0.00 |
| ATOM | 4271 | HG11 | VAL | X | 284 | 58.772 | 51.242 | 45.377 | 0.00 | 0.00 |
| ATOM | 4272 | HG12 | VAL | X | 284 | 58.987 | 51.876 | 43.668 | 0.00 | 0.00 |
| ATOM | 4273 | HG13 | VAL | X | 284 | 57.860 | 52.632 | 44.787 | 0.00 | 0.00 |
| ATOM | 4274 | CG2  | VAL | X | 284 | 56.234 | 51.437 | 43.194 | 0.00 | 0.00 |
| ATOM | 4275 | HG21 | VAL | X | 284 | 55.948 | 52.417 | 43.576 | 0.00 | 0.00 |
| ATOM | 4276 | HG22 | VAL | X | 284 | 55.401 | 50.805 | 42.886 | 0.00 | 0.00 |
| ATOM | 4277 | HG23 | VAL | X | 284 | 56.851 | 51.711 | 42.338 | 0.00 | 0.00 |
| ATOM | 4278 | C    | VAL | X | 284 | 56.472 | 48.170 | 43.908 | 0.00 | 0.00 |
| ATOM | 4279 | O    | VAL | X | 284 | 55.392 | 48.493 | 44.375 | 0.00 | 0.00 |
| ATOM | 4280 | N    | LEU | X | 285 | 56.776 | 47.004 | 43.437 | 0.00 | 0.00 |
| ATOM | 4281 | H    | LEU | X | 285 | 57.723 | 46.954 | 43.090 | 0.00 | 0.00 |
| ATOM | 4282 | CA   | LEU | X | 285 | 56.372 | 45.628 | 43.813 | 0.00 | 0.00 |
| ATOM | 4283 | HA   | LEU | X | 285 | 55.302 | 45.497 | 43.979 | 0.00 | 0.00 |
| ATOM | 4284 | CB   | LEU | X | 285 | 56.929 | 44.652 | 42.738 | 0.00 | 0.00 |
| ATOM | 4285 | HB2  | LEU | X | 285 | 57.644 | 45.212 | 42.135 | 0.00 | 0.00 |
| ATOM | 4286 | HB3  | LEU | X | 285 | 57.574 | 43.970 | 43.292 | 0.00 | 0.00 |
| ATOM | 4287 | CG   | LEU | X | 285 | 55.938 | 43.836 | 41.913 | 0.00 | 0.00 |
| ATOM | 4288 | HG   | LEU | X | 285 | 55.657 | 43.011 | 42.568 | 0.00 | 0.00 |
| ATOM | 4289 | CD1  | LEU | X | 285 | 54.691 | 44.531 | 41.390 | 0.00 | 0.00 |
| ATOM | 4290 | HD11 | LEU | X | 285 | 54.275 | 45.170 | 42.169 | 0.00 | 0.00 |
| ATOM | 4291 | HD12 | LEU | X | 285 | 53.963 | 43.752 | 41.163 | 0.00 | 0.00 |
| ATOM | 4292 | HD13 | LEU | X | 285 | 54.919 | 45.052 | 40.460 | 0.00 | 0.00 |
| ATOM | 4293 | CD2  | LEU | X | 285 | 56.674 | 43.189 | 40.710 | 0.00 | 0.00 |
| ATOM | 4294 | HD21 | LEU | X | 285 | 55.984 | 42.504 | 40.216 | 0.00 | 0.00 |
| ATOM | 4295 | HD22 | LEU | X | 285 | 56.989 | 43.995 | 40.047 | 0.00 | 0.00 |
| ATOM | 4296 | HD23 | LEU | X | 285 | 57.506 | 42.638 | 41.147 | 0.00 | 0.00 |
| ATOM | 4297 | C    | LEU | X | 285 | 56.965 | 45.379 | 45.218 | 0.00 | 0.00 |
| ATOM | 4298 | O    | LEU | X | 285 | 57.924 | 45.996 | 45.606 | 0.00 | 0.00 |
| ATOM | 4299 | N    | PRO | X | 286 | 56.338 | 44.557 | 46.121 | 0.00 | 0.00 |
| ATOM | 4300 | CD   | PRO | X | 286 | 54.933 | 44.161 | 45.967 | 0.00 | 0.00 |
| ATOM | 4301 | HD2  | PRO | X | 286 | 54.825 | 43.588 | 45.046 | 0.00 | 0.00 |
| ATOM | 4302 | HD3  | PRO | X | 286 | 54.270 | 45.019 | 46.081 | 0.00 | 0.00 |
| ATOM | 4303 | CG   | PRO | X | 286 | 54.693 | 43.177 | 47.160 | 0.00 | 0.00 |
| ATOM | 4304 | HG2  | PRO | X | 286 | 54.818 | 42.127 | 46.899 | 0.00 | 0.00 |
| ATOM | 4305 | HG3  | PRO | X | 286 | 53.717 | 43.425 | 47.579 | 0.00 | 0.00 |
| ATOM | 4306 | CB   | PRO | X | 286 | 55.736 | 43.637 | 48.205 | 0.00 | 0.00 |
| ATOM | 4307 | HB2  | PRO | X | 286 | 56.093 | 42.830 | 48.845 | 0.00 | 0.00 |
| ATOM | 4308 | HB3  | PRO | X | 286 | 55.276 | 44.453 | 48.762 | 0.00 | 0.00 |
| ATOM | 4309 | CA   | PRO | X | 286 | 56.934 | 44.230 | 47.401 | 0.00 | 0.00 |
| ATOM | 4310 | HA   | PRO | X | 286 | 57.181 | 45.194 | 47.846 | 0.00 | 0.00 |
| ATOM | 4311 | C    | PRO | X | 286 | 58.102 | 43.307 | 47.162 | 0.00 | 0.00 |
| ATOM | 4312 | O    | PRO | X | 286 | 57.932 | 42.175 | 46.615 | 0.00 | 0.00 |
| ATOM | 4313 | N    | GLN | X | 287 | 59.337 | 43.712 | 47.541 | 0.00 | 0.00 |
| ATOM | 4314 | H    | GLN | X | 287 | 59.390 | 44.589 | 48.039 | 0.00 | 0.00 |
| ATOM | 4315 | CA   | GLN | X | 287 | 60.464 | 42.877 | 47.367 | 0.00 | 0.00 |
| ATOM | 4316 | HA   | GLN | X | 287 | 60.411 | 42.483 | 46.352 | 0.00 | 0.00 |
| ATOM | 4317 | CB   | GLN | X | 287 | 61.777 | 43.696 | 47.460 | 0.00 | 0.00 |
| ATOM | 4318 | HB2  | GLN | X | 287 | 61.865 | 44.120 | 48.460 | 0.00 | 0.00 |
| ATOM | 4319 | HB3  | GLN | X | 287 | 62.637 | 43.073 | 47.214 | 0.00 | 0.00 |
| ATOM | 4320 | CG   | GLN | X | 287 | 61.868 | 44.943 | 46.590 | 0.00 | 0.00 |
| ATOM | 4321 | HG2  | GLN | X | 287 | 61.144 | 45.633 | 47.023 | 0.00 | 0.00 |
| ATOM | 4322 | HG3  | GLN | X | 287 | 62.828 | 45.445 | 46.708 | 0.00 | 0.00 |
| ATOM | 4323 | CD   | GLN | X | 287 | 61.617 | 44.662 | 45.059 | 0.00 | 0.00 |
| ATOM | 4324 | OE1  | GLN | X | 287 | 62.462 | 44.389 | 44.240 | 0.00 | 0.00 |
| ATOM | 4325 | NE2  | GLN | X | 287 | 60.356 | 44.561 | 44.663 | 0.00 | 0.00 |
| ATOM | 4326 | HE21 | GLN | X | 287 | 60.345 | 44.305 | 43.686 | 0.00 | 0.00 |
| ATOM | 4327 | HE22 | GLN | X | 287 | 59.547 | 44.673 | 45.258 | 0.00 | 0.00 |
| ATOM | 4328 | C    | GLN | X | 287 | 60.534 | 41.652 | 48.335 | 0.00 | 0.00 |
| ATOM | 4329 | O    | GLN | X | 287 | 60.096 | 41.842 | 49.434 | 0.00 | 0.00 |
| ATOM | 4330 | N    | GLU | X | 288 | 60.986 | 40.437 | 47.968 | 0.00 | 0.00 |
| ATOM | 4331 | H    | GLU | X | 288 | 61.312 | 40.347 | 47.016 | 0.00 | 0.00 |
| ATOM | 4332 | CA   | GLU | X | 288 | 61.042 | 39.207 | 48.845 | 0.00 | 0.00 |

|      |      |      |     |   |     |        |        |        |      |      |
|------|------|------|-----|---|-----|--------|--------|--------|------|------|
| ATOM | 4333 | HA   | GLU | X | 288 | 61.347 | 38.369 | 48.218 | 0.00 | 0.00 |
| ATOM | 4334 | CB   | GLU | X | 288 | 61.874 | 39.366 | 50.097 | 0.00 | 0.00 |
| ATOM | 4335 | HB2  | GLU | X | 288 | 61.598 | 40.209 | 50.730 | 0.00 | 0.00 |
| ATOM | 4336 | HB3  | GLU | X | 288 | 61.730 | 38.440 | 50.653 | 0.00 | 0.00 |
| ATOM | 4337 | CG   | GLU | X | 288 | 63.343 | 39.428 | 49.787 | 0.00 | 0.00 |
| ATOM | 4338 | HG2  | GLU | X | 288 | 63.552 | 38.417 | 49.438 | 0.00 | 0.00 |
| ATOM | 4339 | HG3  | GLU | X | 288 | 63.465 | 40.129 | 48.961 | 0.00 | 0.00 |
| ATOM | 4340 | CD   | GLU | X | 288 | 64.162 | 39.765 | 51.047 | 0.00 | 0.00 |
| ATOM | 4341 | OE1  | GLU | X | 288 | 63.779 | 40.602 | 51.859 | 0.00 | 0.00 |
| ATOM | 4342 | OE2  | GLU | X | 288 | 65.293 | 39.197 | 51.180 | 0.00 | 0.00 |
| ATOM | 4343 | C    | GLU | X | 288 | 59.612 | 38.856 | 49.270 | 0.00 | 0.00 |
| ATOM | 4344 | O    | GLU | X | 288 | 59.286 | 38.484 | 50.377 | 0.00 | 0.00 |
| ATOM | 4345 | N    | SER | X | 289 | 58.728 | 38.853 | 48.294 | 0.00 | 0.00 |
| ATOM | 4346 | H    | SER | X | 289 | 59.010 | 39.076 | 47.350 | 0.00 | 0.00 |
| ATOM | 4347 | CA   | SER | X | 289 | 57.287 | 38.621 | 48.441 | 0.00 | 0.00 |
| ATOM | 4348 | HA   | SER | X | 289 | 57.086 | 37.871 | 49.206 | 0.00 | 0.00 |
| ATOM | 4349 | CB   | SER | X | 289 | 56.574 | 39.942 | 49.001 | 0.00 | 0.00 |
| ATOM | 4350 | HB2  | SER | X | 289 | 57.080 | 40.129 | 49.949 | 0.00 | 0.00 |
| ATOM | 4351 | HB3  | SER | X | 289 | 56.794 | 40.752 | 48.305 | 0.00 | 0.00 |
| ATOM | 4352 | OG   | SER | X | 289 | 55.181 | 39.748 | 49.155 | 0.00 | 0.00 |
| ATOM | 4353 | HG   | SER | X | 289 | 54.784 | 40.487 | 49.622 | 0.00 | 0.00 |
| ATOM | 4354 | C    | SER | X | 289 | 56.597 | 38.061 | 47.175 | 0.00 | 0.00 |
| ATOM | 4355 | O    | SER | X | 289 | 57.033 | 38.470 | 46.060 | 0.00 | 0.00 |
| ATOM | 4356 | N    | VAL | X | 290 | 55.518 | 37.357 | 47.389 | 0.00 | 0.00 |
| ATOM | 4357 | H    | VAL | X | 290 | 55.215 | 37.164 | 48.332 | 0.00 | 0.00 |
| ATOM | 4358 | CA   | VAL | X | 290 | 54.788 | 36.661 | 46.325 | 0.00 | 0.00 |
| ATOM | 4359 | HA   | VAL | X | 290 | 54.930 | 37.263 | 45.427 | 0.00 | 0.00 |
| ATOM | 4360 | CB   | VAL | X | 290 | 55.504 | 35.268 | 45.963 | 0.00 | 0.00 |
| ATOM | 4361 | HB   | VAL | X | 290 | 56.593 | 35.279 | 45.950 | 0.00 | 0.00 |
| ATOM | 4362 | CG1  | VAL | X | 290 | 55.121 | 34.124 | 46.842 | 0.00 | 0.00 |
| ATOM | 4363 | HG11 | VAL | X | 290 | 55.345 | 34.548 | 47.822 | 0.00 | 0.00 |
| ATOM | 4364 | HG12 | VAL | X | 290 | 54.076 | 33.815 | 46.845 | 0.00 | 0.00 |
| ATOM | 4365 | HG13 | VAL | X | 290 | 55.771 | 33.272 | 46.645 | 0.00 | 0.00 |
| ATOM | 4366 | CG2  | VAL | X | 290 | 55.136 | 34.807 | 44.507 | 0.00 | 0.00 |
| ATOM | 4367 | HG21 | VAL | X | 290 | 54.100 | 34.473 | 44.468 | 0.00 | 0.00 |
| ATOM | 4368 | HG22 | VAL | X | 290 | 55.677 | 33.881 | 44.312 | 0.00 | 0.00 |
| ATOM | 4369 | HG23 | VAL | X | 290 | 55.171 | 35.607 | 43.768 | 0.00 | 0.00 |
| ATOM | 4370 | C    | VAL | X | 290 | 53.284 | 36.492 | 46.676 | 0.00 | 0.00 |
| ATOM | 4371 | O    | VAL | X | 290 | 52.890 | 36.582 | 47.834 | 0.00 | 0.00 |
| ATOM | 4372 | N    | PHE | X | 291 | 52.434 | 36.473 | 45.668 | 0.00 | 0.00 |
| ATOM | 4373 | H    | PHE | X | 291 | 52.957 | 36.377 | 44.810 | 0.00 | 0.00 |
| ATOM | 4374 | CA   | PHE | X | 291 | 51.002 | 36.631 | 45.666 | 0.00 | 0.00 |
| ATOM | 4375 | HA   | PHE | X | 291 | 50.638 | 36.662 | 44.639 | 0.00 | 0.00 |
| ATOM | 4376 | CB   | PHE | X | 291 | 50.431 | 35.343 | 46.339 | 0.00 | 0.00 |
| ATOM | 4377 | HB2  | PHE | X | 291 | 51.181 | 34.601 | 46.065 | 0.00 | 0.00 |
| ATOM | 4378 | HB3  | PHE | X | 291 | 50.286 | 35.518 | 47.405 | 0.00 | 0.00 |
| ATOM | 4379 | CG   | PHE | X | 291 | 49.056 | 34.753 | 45.967 | 0.00 | 0.00 |
| ATOM | 4380 | CD1  | PHE | X | 291 | 48.105 | 35.406 | 45.187 | 0.00 | 0.00 |
| ATOM | 4381 | HD1  | PHE | X | 291 | 48.273 | 36.444 | 44.941 | 0.00 | 0.00 |
| ATOM | 4382 | CE1  | PHE | X | 291 | 46.888 | 34.795 | 44.857 | 0.00 | 0.00 |
| ATOM | 4383 | HE1  | PHE | X | 291 | 46.145 | 35.236 | 44.208 | 0.00 | 0.00 |
| ATOM | 4384 | CZ   | PHE | X | 291 | 46.672 | 33.433 | 45.160 | 0.00 | 0.00 |
| ATOM | 4385 | HZ   | PHE | X | 291 | 45.875 | 32.832 | 44.749 | 0.00 | 0.00 |
| ATOM | 4386 | CE2  | PHE | X | 291 | 47.670 | 32.739 | 45.914 | 0.00 | 0.00 |
| ATOM | 4387 | HE2  | PHE | X | 291 | 47.490 | 31.692 | 46.110 | 0.00 | 0.00 |
| ATOM | 4388 | CD2  | PHE | X | 291 | 48.806 | 33.411 | 46.351 | 0.00 | 0.00 |
| ATOM | 4389 | HD2  | PHE | X | 291 | 49.592 | 32.925 | 46.910 | 0.00 | 0.00 |
| ATOM | 4390 | C    | PHE | X | 291 | 50.570 | 37.949 | 46.238 | 0.00 | 0.00 |
| ATOM | 4391 | O    | PHE | X | 291 | 49.701 | 38.114 | 47.086 | 0.00 | 0.00 |
| ATOM | 4392 | N    | ARG | X | 292 | 51.347 | 38.965 | 45.861 | 0.00 | 0.00 |
| ATOM | 4393 | H    | ARG | X | 292 | 52.023 | 38.821 | 45.124 | 0.00 | 0.00 |
| ATOM | 4394 | CA   | ARG | X | 292 | 51.363 | 40.359 | 46.469 | 0.00 | 0.00 |
| ATOM | 4395 | HA   | ARG | X | 292 | 50.333 | 40.709 | 46.539 | 0.00 | 0.00 |
| ATOM | 4396 | CB   | ARG | X | 292 | 52.205 | 40.485 | 47.693 | 0.00 | 0.00 |
| ATOM | 4397 | HB2  | ARG | X | 292 | 53.104 | 39.899 | 47.499 | 0.00 | 0.00 |
| ATOM | 4398 | HB3  | ARG | X | 292 | 52.545 | 41.520 | 47.701 | 0.00 | 0.00 |
| ATOM | 4399 | CG   | ARG | X | 292 | 51.705 | 39.967 | 49.032 | 0.00 | 0.00 |



|      |      |      |     |   |     |        |        |        |      |      |
|------|------|------|-----|---|-----|--------|--------|--------|------|------|
| ATOM | 4400 | HG2  | ARG | X | 292 | 51.727 | 38.877 | 49.016 | 0.00 | 0.00 |
| ATOM | 4401 | HG3  | ARG | X | 292 | 52.453 | 40.280 | 49.760 | 0.00 | 0.00 |
| ATOM | 4402 | CD   | ARG | X | 292 | 50.380 | 40.345 | 49.523 | 0.00 | 0.00 |
| ATOM | 4403 | HD2  | ARG | X | 292 | 50.260 | 41.329 | 49.976 | 0.00 | 0.00 |
| ATOM | 4404 | HD3  | ARG | X | 292 | 49.766 | 40.370 | 48.623 | 0.00 | 0.00 |
| ATOM | 4405 | NE   | ARG | X | 292 | 49.862 | 39.251 | 50.342 | 0.00 | 0.00 |
| ATOM | 4406 | HE   | ARG | X | 292 | 49.698 | 38.362 | 49.892 | 0.00 | 0.00 |
| ATOM | 4407 | CZ   | ARG | X | 292 | 49.768 | 39.267 | 51.714 | 0.00 | 0.00 |
| ATOM | 4408 | NH1  | ARG | X | 292 | 49.947 | 40.383 | 52.394 | 0.00 | 0.00 |
| ATOM | 4409 | HH11 | ARG | X | 292 | 50.051 | 41.238 | 51.866 | 0.00 | 0.00 |
| ATOM | 4410 | HH12 | ARG | X | 292 | 49.856 | 40.454 | 53.398 | 0.00 | 0.00 |
| ATOM | 4411 | NH2  | ARG | X | 292 | 49.559 | 38.116 | 52.326 | 0.00 | 0.00 |
| ATOM | 4412 | HH21 | ARG | X | 292 | 49.397 | 37.286 | 51.773 | 0.00 | 0.00 |
| ATOM | 4413 | HH22 | ARG | X | 292 | 49.485 | 38.051 | 53.331 | 0.00 | 0.00 |
| ATOM | 4414 | C    | ARG | X | 292 | 52.001 | 41.394 | 45.416 | 0.00 | 0.00 |
| ATOM | 4415 | O    | ARG | X | 292 | 52.878 | 41.067 | 44.638 | 0.00 | 0.00 |
| ATOM | 4416 | N    | PHE | X | 293 | 51.461 | 42.569 | 45.460 | 0.00 | 0.00 |
| ATOM | 4417 | H    | PHE | X | 293 | 50.726 | 42.660 | 46.147 | 0.00 | 0.00 |
| ATOM | 4418 | CA   | PHE | X | 293 | 51.293 | 43.439 | 44.313 | 0.00 | 0.00 |
| ATOM | 4419 | HA   | PHE | X | 293 | 52.017 | 43.075 | 43.584 | 0.00 | 0.00 |
| ATOM | 4420 | CB   | PHE | X | 293 | 49.913 | 43.187 | 43.674 | 0.00 | 0.00 |
| ATOM | 4421 | HB2  | PHE | X | 293 | 49.184 | 43.704 | 44.298 | 0.00 | 0.00 |
| ATOM | 4422 | HB3  | PHE | X | 293 | 49.900 | 43.725 | 42.726 | 0.00 | 0.00 |
| ATOM | 4423 | CG   | PHE | X | 293 | 49.480 | 41.742 | 43.462 | 0.00 | 0.00 |
| ATOM | 4424 | CD1  | PHE | X | 293 | 50.118 | 40.960 | 42.466 | 0.00 | 0.00 |
| ATOM | 4425 | HD1  | PHE | X | 293 | 50.901 | 41.398 | 41.865 | 0.00 | 0.00 |
| ATOM | 4426 | CE1  | PHE | X | 293 | 49.743 | 39.573 | 42.354 | 0.00 | 0.00 |
| ATOM | 4427 | HE1  | PHE | X | 293 | 50.269 | 38.958 | 41.638 | 0.00 | 0.00 |
| ATOM | 4428 | CZ   | PHE | X | 293 | 48.771 | 39.005 | 43.145 | 0.00 | 0.00 |
| ATOM | 4429 | HZ   | PHE | X | 293 | 48.527 | 37.959 | 43.032 | 0.00 | 0.00 |
| ATOM | 4430 | CE2  | PHE | X | 293 | 48.171 | 39.810 | 44.108 | 0.00 | 0.00 |
| ATOM | 4431 | HE2  | PHE | X | 293 | 47.552 | 39.278 | 44.816 | 0.00 | 0.00 |
| ATOM | 4432 | CD2  | PHE | X | 293 | 48.514 | 41.167 | 44.292 | 0.00 | 0.00 |
| ATOM | 4433 | HD2  | PHE | X | 293 | 48.119 | 41.676 | 45.159 | 0.00 | 0.00 |
| ATOM | 4434 | C    | PHE | X | 293 | 51.571 | 44.935 | 44.715 | 0.00 | 0.00 |
| ATOM | 4435 | O    | PHE | X | 293 | 51.605 | 45.301 | 45.874 | 0.00 | 0.00 |
| ATOM | 4436 | N    | SER | X | 294 | 51.934 | 45.735 | 43.696 | 0.00 | 0.00 |
| ATOM | 4437 | H    | SER | X | 294 | 51.632 | 45.462 | 42.772 | 0.00 | 0.00 |
| ATOM | 4438 | CA   | SER | X | 294 | 52.292 | 47.114 | 43.753 | 0.00 | 0.00 |
| ATOM | 4439 | HA   | SER | X | 294 | 53.164 | 47.063 | 44.405 | 0.00 | 0.00 |
| ATOM | 4440 | CB   | SER | X | 294 | 52.664 | 47.530 | 42.332 | 0.00 | 0.00 |
| ATOM | 4441 | HB2  | SER | X | 294 | 52.830 | 48.606 | 42.382 | 0.00 | 0.00 |
| ATOM | 4442 | HB3  | SER | X | 294 | 53.559 | 47.013 | 41.986 | 0.00 | 0.00 |
| ATOM | 4443 | OG   | SER | X | 294 | 51.568 | 47.223 | 41.419 | 0.00 | 0.00 |
| ATOM | 4444 | HG   | SER | X | 294 | 51.529 | 47.915 | 40.755 | 0.00 | 0.00 |
| ATOM | 4445 | C    | SER | X | 294 | 51.280 | 48.133 | 44.281 | 0.00 | 0.00 |
| ATOM | 4446 | O    | SER | X | 294 | 51.580 | 48.779 | 45.281 | 0.00 | 0.00 |
| ATOM | 4447 | N    | PHE | X | 295 | 50.077 | 48.283 | 43.742 | 0.00 | 0.00 |
| ATOM | 4448 | H    | PHE | X | 295 | 49.917 | 47.756 | 42.896 | 0.00 | 0.00 |
| ATOM | 4449 | CA   | PHE | X | 295 | 48.953 | 49.010 | 44.313 | 0.00 | 0.00 |
| ATOM | 4450 | HA   | PHE | X | 295 | 49.174 | 49.149 | 45.371 | 0.00 | 0.00 |
| ATOM | 4451 | CB   | PHE | X | 295 | 48.868 | 50.395 | 43.692 | 0.00 | 0.00 |
| ATOM | 4452 | HB2  | PHE | X | 295 | 48.873 | 50.211 | 42.618 | 0.00 | 0.00 |
| ATOM | 4453 | HB3  | PHE | X | 295 | 47.917 | 50.892 | 43.886 | 0.00 | 0.00 |
| ATOM | 4454 | CG   | PHE | X | 295 | 49.986 | 51.362 | 44.045 | 0.00 | 0.00 |
| ATOM | 4455 | CD1  | PHE | X | 295 | 49.993 | 52.142 | 45.243 | 0.00 | 0.00 |
| ATOM | 4456 | HD1  | PHE | X | 295 | 49.248 | 51.853 | 45.969 | 0.00 | 0.00 |
| ATOM | 4457 | CE1  | PHE | X | 295 | 51.001 | 53.024 | 45.688 | 0.00 | 0.00 |
| ATOM | 4458 | HE1  | PHE | X | 295 | 50.975 | 53.444 | 46.682 | 0.00 | 0.00 |
| ATOM | 4459 | CZ   | PHE | X | 295 | 52.057 | 53.329 | 44.747 | 0.00 | 0.00 |
| ATOM | 4460 | HZ   | PHE | X | 295 | 52.861 | 54.032 | 44.908 | 0.00 | 0.00 |
| ATOM | 4461 | CE2  | PHE | X | 295 | 52.005 | 52.688 | 43.446 | 0.00 | 0.00 |
| ATOM | 4462 | HE2  | PHE | X | 295 | 52.683 | 52.986 | 42.660 | 0.00 | 0.00 |
| ATOM | 4463 | CD2  | PHE | X | 295 | 51.075 | 51.670 | 43.167 | 0.00 | 0.00 |
| ATOM | 4464 | HD2  | PHE | X | 295 | 51.217 | 51.180 | 42.215 | 0.00 | 0.00 |
| ATOM | 4465 | C    | PHE | X | 295 | 47.578 | 48.279 | 44.192 | 0.00 | 0.00 |
| ATOM | 4466 | O    | PHE | X | 295 | 47.086 | 47.902 | 43.092 | 0.00 | 0.00 |

|      |      |      |     |   |     |        |        |        |      |      |
|------|------|------|-----|---|-----|--------|--------|--------|------|------|
| ATOM | 4467 | N    | VAL | X | 296 | 46.956 | 48.254 | 45.359 | 0.00 | 0.00 |
| ATOM | 4468 | H    | VAL | X | 296 | 47.358 | 48.869 | 46.052 | 0.00 | 0.00 |
| ATOM | 4469 | CA   | VAL | X | 296 | 45.731 | 47.542 | 45.674 | 0.00 | 0.00 |
| ATOM | 4470 | HA   | VAL | X | 296 | 45.089 | 47.453 | 44.798 | 0.00 | 0.00 |
| ATOM | 4471 | CB   | VAL | X | 296 | 46.033 | 46.068 | 46.331 | 0.00 | 0.00 |
| ATOM | 4472 | HB   | VAL | X | 296 | 45.111 | 45.497 | 46.226 | 0.00 | 0.00 |
| ATOM | 4473 | CG1  | VAL | X | 296 | 47.035 | 45.276 | 45.457 | 0.00 | 0.00 |
| ATOM | 4474 | HG11 | VAL | X | 296 | 48.060 | 45.537 | 45.721 | 0.00 | 0.00 |
| ATOM | 4475 | HG12 | VAL | X | 296 | 46.729 | 44.230 | 45.479 | 0.00 | 0.00 |
| ATOM | 4476 | HG13 | VAL | X | 296 | 46.909 | 45.635 | 44.435 | 0.00 | 0.00 |
| ATOM | 4477 | CG2  | VAL | X | 296 | 46.352 | 46.140 | 47.826 | 0.00 | 0.00 |
| ATOM | 4478 | HG21 | VAL | X | 296 | 47.101 | 46.903 | 48.038 | 0.00 | 0.00 |
| ATOM | 4479 | HG22 | VAL | X | 296 | 46.708 | 45.172 | 48.181 | 0.00 | 0.00 |
| ATOM | 4480 | HG23 | VAL | X | 296 | 45.396 | 46.378 | 48.293 | 0.00 | 0.00 |
| ATOM | 4481 | C    | VAL | X | 296 | 45.033 | 48.415 | 46.713 | 0.00 | 0.00 |
| ATOM | 4482 | O    | VAL | X | 296 | 45.600 | 49.295 | 47.303 | 0.00 | 0.00 |
| ATOM | 4483 | N    | PRO | X | 297 | 43.723 | 48.115 | 46.968 | 0.00 | 0.00 |
| ATOM | 4484 | CD   | PRO | X | 297 | 42.870 | 47.207 | 46.187 | 0.00 | 0.00 |
| ATOM | 4485 | HD2  | PRO | X | 297 | 43.267 | 46.192 | 46.182 | 0.00 | 0.00 |
| ATOM | 4486 | HD3  | PRO | X | 297 | 42.765 | 47.553 | 45.159 | 0.00 | 0.00 |
| ATOM | 4487 | CG   | PRO | X | 297 | 41.519 | 47.245 | 46.816 | 0.00 | 0.00 |
| ATOM | 4488 | HG2  | PRO | X | 297 | 41.270 | 46.191 | 46.940 | 0.00 | 0.00 |
| ATOM | 4489 | HG3  | PRO | X | 297 | 40.763 | 47.653 | 46.145 | 0.00 | 0.00 |
| ATOM | 4490 | CB   | PRO | X | 297 | 41.694 | 47.934 | 48.172 | 0.00 | 0.00 |
| ATOM | 4491 | HB2  | PRO | X | 297 | 42.126 | 47.177 | 48.828 | 0.00 | 0.00 |
| ATOM | 4492 | HB3  | PRO | X | 297 | 40.749 | 48.371 | 48.494 | 0.00 | 0.00 |
| ATOM | 4493 | CA   | PRO | X | 297 | 42.915 | 48.870 | 47.949 | 0.00 | 0.00 |
| ATOM | 4494 | HA   | PRO | X | 297 | 42.552 | 49.815 | 47.543 | 0.00 | 0.00 |
| ATOM | 4495 | C    | PRO | X | 297 | 43.547 | 49.268 | 49.304 | 0.00 | 0.00 |
| ATOM | 4496 | O    | PRO | X | 297 | 44.045 | 48.391 | 50.024 | 0.00 | 0.00 |
| ATOM | 4497 | N    | VAL | X | 298 | 43.501 | 50.517 | 49.561 | 0.00 | 0.00 |
| ATOM | 4498 | H    | VAL | X | 298 | 43.108 | 51.071 | 48.814 | 0.00 | 0.00 |
| ATOM | 4499 | CA   | VAL | X | 298 | 44.151 | 51.168 | 50.751 | 0.00 | 0.00 |
| ATOM | 4500 | HA   | VAL | X | 298 | 44.902 | 50.482 | 51.143 | 0.00 | 0.00 |
| ATOM | 4501 | CB   | VAL | X | 298 | 44.989 | 52.403 | 50.295 | 0.00 | 0.00 |
| ATOM | 4502 | HB   | VAL | X | 298 | 44.314 | 53.234 | 50.088 | 0.00 | 0.00 |
| ATOM | 4503 | CG1  | VAL | X | 298 | 45.925 | 52.892 | 51.407 | 0.00 | 0.00 |
| ATOM | 4504 | HG11 | VAL | X | 298 | 45.322 | 53.221 | 52.254 | 0.00 | 0.00 |
| ATOM | 4505 | HG12 | VAL | X | 298 | 46.519 | 52.054 | 51.771 | 0.00 | 0.00 |
| ATOM | 4506 | HG13 | VAL | X | 298 | 46.613 | 53.671 | 51.079 | 0.00 | 0.00 |
| ATOM | 4507 | CG2  | VAL | X | 298 | 45.976 | 52.241 | 49.072 | 0.00 | 0.00 |
| ATOM | 4508 | HG21 | VAL | X | 298 | 46.776 | 51.523 | 49.253 | 0.00 | 0.00 |
| ATOM | 4509 | HG22 | VAL | X | 298 | 46.599 | 53.066 | 48.728 | 0.00 | 0.00 |
| ATOM | 4510 | HG23 | VAL | X | 298 | 45.421 | 51.975 | 48.173 | 0.00 | 0.00 |
| ATOM | 4511 | C    | VAL | X | 298 | 43.184 | 51.560 | 51.776 | 0.00 | 0.00 |
| ATOM | 4512 | O    | VAL | X | 298 | 42.140 | 52.125 | 51.470 | 0.00 | 0.00 |
| ATOM | 4513 | N    | VAL | X | 299 | 43.479 | 51.130 | 53.059 | 0.00 | 0.00 |
| ATOM | 4514 | H    | VAL | X | 299 | 44.338 | 50.612 | 53.180 | 0.00 | 0.00 |
| ATOM | 4515 | CA   | VAL | X | 299 | 42.770 | 51.601 | 54.233 | 0.00 | 0.00 |
| ATOM | 4516 | HA   | VAL | X | 299 | 41.708 | 51.460 | 54.032 | 0.00 | 0.00 |
| ATOM | 4517 | CB   | VAL | X | 299 | 43.094 | 50.887 | 55.569 | 0.00 | 0.00 |
| ATOM | 4518 | HB   | VAL | X | 299 | 44.154 | 50.948 | 55.819 | 0.00 | 0.00 |
| ATOM | 4519 | CG1  | VAL | X | 299 | 42.366 | 51.513 | 56.682 | 0.00 | 0.00 |
| ATOM | 4520 | HG11 | VAL | X | 299 | 42.837 | 52.469 | 56.914 | 0.00 | 0.00 |
| ATOM | 4521 | HG12 | VAL | X | 299 | 41.303 | 51.671 | 56.495 | 0.00 | 0.00 |
| ATOM | 4522 | HG13 | VAL | X | 299 | 42.373 | 50.832 | 57.533 | 0.00 | 0.00 |
| ATOM | 4523 | CG2  | VAL | X | 299 | 42.745 | 49.373 | 55.440 | 0.00 | 0.00 |
| ATOM | 4524 | HG21 | VAL | X | 299 | 41.675 | 49.334 | 55.233 | 0.00 | 0.00 |
| ATOM | 4525 | HG22 | VAL | X | 299 | 42.902 | 48.867 | 56.393 | 0.00 | 0.00 |
| ATOM | 4526 | HG23 | VAL | X | 299 | 43.380 | 48.901 | 54.690 | 0.00 | 0.00 |
| ATOM | 4527 | C    | VAL | X | 299 | 43.041 | 53.091 | 54.275 | 0.00 | 0.00 |
| ATOM | 4528 | O    | VAL | X | 299 | 44.145 | 53.479 | 54.517 | 0.00 | 0.00 |
| ATOM | 4529 | N    | ASP | X | 300 | 42.009 | 53.931 | 54.051 | 0.00 | 0.00 |
| ATOM | 4530 | H    | ASP | X | 300 | 41.120 | 53.506 | 53.832 | 0.00 | 0.00 |
| ATOM | 4531 | CA   | ASP | X | 300 | 42.221 | 55.301 | 53.698 | 0.00 | 0.00 |
| ATOM | 4532 | HA   | ASP | X | 300 | 43.245 | 55.605 | 53.912 | 0.00 | 0.00 |
| ATOM | 4533 | CB   | ASP | X | 300 | 42.053 | 55.405 | 52.171 | 0.00 | 0.00 |

|      |      |      |     |   |     |        |        |        |      |      |
|------|------|------|-----|---|-----|--------|--------|--------|------|------|
| ATOM | 4534 | HB2  | ASP | X | 300 | 42.579 | 56.320 | 51.896 | 0.00 | 0.00 |
| ATOM | 4535 | HB3  | ASP | X | 300 | 42.637 | 54.591 | 51.742 | 0.00 | 0.00 |
| ATOM | 4536 | CG   | ASP | X | 300 | 40.537 | 55.382 | 51.731 | 0.00 | 0.00 |
| ATOM | 4537 | OD1  | ASP | X | 300 | 39.679 | 54.758 | 52.386 | 0.00 | 0.00 |
| ATOM | 4538 | OD2  | ASP | X | 300 | 40.193 | 55.920 | 50.620 | 0.00 | 0.00 |
| ATOM | 4539 | C    | ASP | X | 300 | 41.299 | 56.269 | 54.456 | 0.00 | 0.00 |
| ATOM | 4540 | O    | ASP | X | 300 | 41.236 | 57.449 | 54.141 | 0.00 | 0.00 |
| ATOM | 4541 | N    | GLY | X | 301 | 40.532 | 55.726 | 55.385 | 0.00 | 0.00 |
| ATOM | 4542 | H    | GLY | X | 301 | 40.598 | 54.730 | 55.541 | 0.00 | 0.00 |
| ATOM | 4543 | CA   | GLY | X | 301 | 39.658 | 56.511 | 56.253 | 0.00 | 0.00 |
| ATOM | 4544 | HA2  | GLY | X | 301 | 39.368 | 55.879 | 57.093 | 0.00 | 0.00 |
| ATOM | 4545 | HA3  | GLY | X | 301 | 40.021 | 57.503 | 56.521 | 0.00 | 0.00 |
| ATOM | 4546 | C    | GLY | X | 301 | 38.365 | 56.780 | 55.533 | 0.00 | 0.00 |
| ATOM | 4547 | O    | GLY | X | 301 | 37.657 | 57.640 | 56.042 | 0.00 | 0.00 |
| ATOM | 4548 | N    | ASP | X | 302 | 38.125 | 56.371 | 54.259 | 0.00 | 0.00 |
| ATOM | 4549 | H    | ASP | X | 302 | 38.759 | 55.639 | 53.971 | 0.00 | 0.00 |
| ATOM | 4550 | CA   | ASP | X | 302 | 37.051 | 56.893 | 53.390 | 0.00 | 0.00 |
| ATOM | 4551 | HA   | ASP | X | 302 | 36.371 | 57.521 | 53.965 | 0.00 | 0.00 |
| ATOM | 4552 | CB   | ASP | X | 302 | 37.775 | 57.887 | 52.442 | 0.00 | 0.00 |
| ATOM | 4553 | HB2  | ASP | X | 302 | 38.125 | 58.769 | 52.978 | 0.00 | 0.00 |
| ATOM | 4554 | HB3  | ASP | X | 302 | 38.541 | 57.345 | 51.888 | 0.00 | 0.00 |
| ATOM | 4555 | CG   | ASP | X | 302 | 36.760 | 58.498 | 51.437 | 0.00 | 0.00 |
| ATOM | 4556 | OD1  | ASP | X | 302 | 37.129 | 58.744 | 50.282 | 0.00 | 0.00 |
| ATOM | 4557 | OD2  | ASP | X | 302 | 35.636 | 58.871 | 51.776 | 0.00 | 0.00 |
| ATOM | 4558 | C    | ASP | X | 302 | 36.262 | 55.784 | 52.763 | 0.00 | 0.00 |
| ATOM | 4559 | O    | ASP | X | 302 | 35.120 | 55.624 | 53.114 | 0.00 | 0.00 |
| ATOM | 4560 | N    | PHE | X | 303 | 36.900 | 55.080 | 51.865 | 0.00 | 0.00 |
| ATOM | 4561 | H    | PHE | X | 303 | 37.870 | 55.339 | 51.750 | 0.00 | 0.00 |
| ATOM | 4562 | CA   | PHE | X | 303 | 36.368 | 53.911 | 51.239 | 0.00 | 0.00 |
| ATOM | 4563 | HA   | PHE | X | 303 | 35.298 | 54.032 | 51.070 | 0.00 | 0.00 |
| ATOM | 4564 | CB   | PHE | X | 303 | 37.008 | 53.795 | 49.857 | 0.00 | 0.00 |
| ATOM | 4565 | HB2  | PHE | X | 303 | 36.912 | 54.792 | 49.427 | 0.00 | 0.00 |
| ATOM | 4566 | HB3  | PHE | X | 303 | 38.067 | 53.577 | 49.997 | 0.00 | 0.00 |
| ATOM | 4567 | CG   | PHE | X | 303 | 36.296 | 52.778 | 48.924 | 0.00 | 0.00 |
| ATOM | 4568 | CD1  | PHE | X | 303 | 36.088 | 51.423 | 49.275 | 0.00 | 0.00 |
| ATOM | 4569 | HD1  | PHE | X | 303 | 36.381 | 51.169 | 50.283 | 0.00 | 0.00 |
| ATOM | 4570 | CE1  | PHE | X | 303 | 35.451 | 50.532 | 48.449 | 0.00 | 0.00 |
| ATOM | 4571 | HE1  | PHE | X | 303 | 35.399 | 49.515 | 48.809 | 0.00 | 0.00 |
| ATOM | 4572 | CZ   | PHE | X | 303 | 34.978 | 50.948 | 47.199 | 0.00 | 0.00 |
| ATOM | 4573 | HZ   | PHE | X | 303 | 34.418 | 50.221 | 46.630 | 0.00 | 0.00 |
| ATOM | 4574 | CE2  | PHE | X | 303 | 35.147 | 52.311 | 46.827 | 0.00 | 0.00 |
| ATOM | 4575 | HE2  | PHE | X | 303 | 34.818 | 52.720 | 45.882 | 0.00 | 0.00 |
| ATOM | 4576 | CD2  | PHE | X | 303 | 35.797 | 53.196 | 47.671 | 0.00 | 0.00 |
| ATOM | 4577 | HD2  | PHE | X | 303 | 35.923 | 54.237 | 47.410 | 0.00 | 0.00 |
| ATOM | 4578 | C    | PHE | X | 303 | 36.545 | 52.711 | 52.184 | 0.00 | 0.00 |
| ATOM | 4579 | O    | PHE | X | 303 | 35.591 | 51.978 | 52.503 | 0.00 | 0.00 |
| ATOM | 4580 | N    | LEU | X | 304 | 37.729 | 52.470 | 52.699 | 0.00 | 0.00 |
| ATOM | 4581 | H    | LEU | X | 304 | 38.405 | 53.205 | 52.550 | 0.00 | 0.00 |
| ATOM | 4582 | CA   | LEU | X | 304 | 38.025 | 51.490 | 53.688 | 0.00 | 0.00 |
| ATOM | 4583 | HA   | LEU | X | 304 | 37.174 | 50.872 | 53.975 | 0.00 | 0.00 |
| ATOM | 4584 | CB   | LEU | X | 304 | 39.186 | 50.637 | 53.064 | 0.00 | 0.00 |
| ATOM | 4585 | HB2  | LEU | X | 304 | 40.003 | 51.292 | 52.762 | 0.00 | 0.00 |
| ATOM | 4586 | HB3  | LEU | X | 304 | 39.545 | 50.060 | 53.916 | 0.00 | 0.00 |
| ATOM | 4587 | CG   | LEU | X | 304 | 38.722 | 49.654 | 52.005 | 0.00 | 0.00 |
| ATOM | 4588 | HG   | LEU | X | 304 | 38.515 | 50.301 | 51.153 | 0.00 | 0.00 |
| ATOM | 4589 | CD1  | LEU | X | 304 | 39.869 | 48.779 | 51.559 | 0.00 | 0.00 |
| ATOM | 4590 | HD11 | LEU | X | 304 | 40.797 | 49.350 | 51.596 | 0.00 | 0.00 |
| ATOM | 4591 | HD12 | LEU | X | 304 | 39.701 | 48.427 | 50.541 | 0.00 | 0.00 |
| ATOM | 4592 | HD13 | LEU | X | 304 | 39.962 | 47.957 | 52.269 | 0.00 | 0.00 |
| ATOM | 4593 | CD2  | LEU | X | 304 | 37.575 | 48.696 | 52.373 | 0.00 | 0.00 |
| ATOM | 4594 | HD21 | LEU | X | 304 | 37.476 | 48.034 | 51.513 | 0.00 | 0.00 |
| ATOM | 4595 | HD22 | LEU | X | 304 | 37.991 | 48.124 | 53.203 | 0.00 | 0.00 |
| ATOM | 4596 | HD23 | LEU | X | 304 | 36.558 | 48.956 | 52.666 | 0.00 | 0.00 |
| ATOM | 4597 | C    | LEU | X | 304 | 38.410 | 52.259 | 55.004 | 0.00 | 0.00 |
| ATOM | 4598 | O    | LEU | X | 304 | 39.508 | 52.825 | 55.147 | 0.00 | 0.00 |
| ATOM | 4599 | N    | SER | X | 305 | 37.455 | 52.186 | 55.982 | 0.00 | 0.00 |
| ATOM | 4600 | H    | SER | X | 305 | 36.526 | 51.814 | 55.849 | 0.00 | 0.00 |

|      |      |      |     |   |     |        |        |        |      |      |
|------|------|------|-----|---|-----|--------|--------|--------|------|------|
| ATOM | 4601 | CA   | SER | X | 305 | 37.705 | 52.823 | 57.220 | 0.00 | 0.00 |
| ATOM | 4602 | HA   | SER | X | 305 | 38.252 | 53.742 | 57.010 | 0.00 | 0.00 |
| ATOM | 4603 | CB   | SER | X | 305 | 36.452 | 53.239 | 58.004 | 0.00 | 0.00 |
| ATOM | 4604 | HB2  | SER | X | 305 | 36.762 | 53.751 | 58.915 | 0.00 | 0.00 |
| ATOM | 4605 | HB3  | SER | X | 305 | 35.952 | 53.989 | 57.393 | 0.00 | 0.00 |
| ATOM | 4606 | OG   | SER | X | 305 | 35.571 | 52.131 | 58.236 | 0.00 | 0.00 |
| ATOM | 4607 | HG   | SER | X | 305 | 35.274 | 51.800 | 57.385 | 0.00 | 0.00 |
| ATOM | 4608 | C    | SER | X | 305 | 38.604 | 51.885 | 58.092 | 0.00 | 0.00 |
| ATOM | 4609 | O    | SER | X | 305 | 39.358 | 52.445 | 58.918 | 0.00 | 0.00 |
| ATOM | 4610 | N    | ASP | X | 306 | 38.651 | 50.589 | 57.789 | 0.00 | 0.00 |
| ATOM | 4611 | H    | ASP | X | 306 | 38.175 | 50.306 | 56.944 | 0.00 | 0.00 |
| ATOM | 4612 | CA   | ASP | X | 306 | 39.468 | 49.582 | 58.416 | 0.00 | 0.00 |
| ATOM | 4613 | HA   | ASP | X | 306 | 40.347 | 50.035 | 58.874 | 0.00 | 0.00 |
| ATOM | 4614 | CB   | ASP | X | 306 | 38.630 | 48.916 | 59.495 | 0.00 | 0.00 |
| ATOM | 4615 | HB2  | ASP | X | 306 | 37.872 | 49.572 | 59.922 | 0.00 | 0.00 |
| ATOM | 4616 | HB3  | ASP | X | 306 | 38.053 | 48.121 | 59.024 | 0.00 | 0.00 |
| ATOM | 4617 | CG   | ASP | X | 306 | 39.417 | 48.331 | 60.673 | 0.00 | 0.00 |
| ATOM | 4618 | OD1  | ASP | X | 306 | 39.025 | 48.332 | 61.822 | 0.00 | 0.00 |
| ATOM | 4619 | OD2  | ASP | X | 306 | 40.557 | 47.816 | 60.502 | 0.00 | 0.00 |
| ATOM | 4620 | C    | ASP | X | 306 | 39.827 | 48.510 | 57.340 | 0.00 | 0.00 |
| ATOM | 4621 | O    | ASP | X | 306 | 39.541 | 48.732 | 56.143 | 0.00 | 0.00 |
| ATOM | 4622 | N    | THR | X | 307 | 40.373 | 47.251 | 57.670 | 0.00 | 0.00 |
| ATOM | 4623 | H    | THR | X | 307 | 40.525 | 47.127 | 58.660 | 0.00 | 0.00 |
| ATOM | 4624 | CA   | THR | X | 307 | 40.600 | 46.137 | 56.680 | 0.00 | 0.00 |
| ATOM | 4625 | HA   | THR | X | 307 | 40.874 | 46.707 | 55.792 | 0.00 | 0.00 |
| ATOM | 4626 | CB   | THR | X | 307 | 41.782 | 45.203 | 56.961 | 0.00 | 0.00 |
| ATOM | 4627 | HB   | THR | X | 307 | 41.951 | 44.542 | 56.111 | 0.00 | 0.00 |
| ATOM | 4628 | CG2  | THR | X | 307 | 43.124 | 46.003 | 57.047 | 0.00 | 0.00 |
| ATOM | 4629 | HG21 | THR | X | 307 | 43.911 | 45.342 | 57.410 | 0.00 | 0.00 |
| ATOM | 4630 | HG22 | THR | X | 307 | 43.176 | 46.855 | 57.725 | 0.00 | 0.00 |
| ATOM | 4631 | HG23 | THR | X | 307 | 43.423 | 46.263 | 56.032 | 0.00 | 0.00 |
| ATOM | 4632 | OG1  | THR | X | 307 | 41.511 | 44.597 | 58.167 | 0.00 | 0.00 |
| ATOM | 4633 | HG1  | THR | X | 307 | 41.962 | 43.751 | 58.127 | 0.00 | 0.00 |
| ATOM | 4634 | C    | THR | X | 307 | 39.253 | 45.449 | 56.381 | 0.00 | 0.00 |
| ATOM | 4635 | O    | THR | X | 307 | 38.522 | 45.376 | 57.327 | 0.00 | 0.00 |
| ATOM | 4636 | N    | PRO | X | 308 | 38.988 | 45.061 | 55.125 | 0.00 | 0.00 |
| ATOM | 4637 | CD   | PRO | X | 308 | 39.704 | 45.404 | 53.926 | 0.00 | 0.00 |
| ATOM | 4638 | HD2  | PRO | X | 308 | 40.503 | 44.688 | 53.734 | 0.00 | 0.00 |
| ATOM | 4639 | HD3  | PRO | X | 308 | 40.074 | 46.424 | 53.825 | 0.00 | 0.00 |
| ATOM | 4640 | CG   | PRO | X | 308 | 38.715 | 45.112 | 52.830 | 0.00 | 0.00 |
| ATOM | 4641 | HG2  | PRO | X | 308 | 39.033 | 45.043 | 51.790 | 0.00 | 0.00 |
| ATOM | 4642 | HG3  | PRO | X | 308 | 37.940 | 45.874 | 52.750 | 0.00 | 0.00 |
| ATOM | 4643 | CB   | PRO | X | 308 | 37.956 | 43.847 | 53.319 | 0.00 | 0.00 |
| ATOM | 4644 | HB2  | PRO | X | 308 | 38.598 | 42.968 | 53.261 | 0.00 | 0.00 |
| ATOM | 4645 | HB3  | PRO | X | 308 | 36.995 | 43.777 | 52.810 | 0.00 | 0.00 |
| ATOM | 4646 | CA   | PRO | X | 308 | 37.705 | 44.360 | 54.776 | 0.00 | 0.00 |
| ATOM | 4647 | HA   | PRO | X | 308 | 36.914 | 45.104 | 54.867 | 0.00 | 0.00 |
| ATOM | 4648 | C    | PRO | X | 308 | 37.407 | 43.145 | 55.666 | 0.00 | 0.00 |
| ATOM | 4649 | O    | PRO | X | 308 | 36.252 | 43.019 | 56.070 | 0.00 | 0.00 |
| ATOM | 4650 | N    | GLU | X | 309 | 38.300 | 42.337 | 56.110 | 0.00 | 0.00 |
| ATOM | 4651 | H    | GLU | X | 309 | 39.231 | 42.436 | 55.731 | 0.00 | 0.00 |
| ATOM | 4652 | CA   | GLU | X | 309 | 38.045 | 41.317 | 57.150 | 0.00 | 0.00 |
| ATOM | 4653 | HA   | GLU | X | 309 | 37.602 | 40.432 | 56.693 | 0.00 | 0.00 |
| ATOM | 4654 | CB   | GLU | X | 309 | 39.465 | 40.814 | 57.621 | 0.00 | 0.00 |
| ATOM | 4655 | HB2  | GLU | X | 309 | 39.948 | 40.352 | 56.760 | 0.00 | 0.00 |
| ATOM | 4656 | HB3  | GLU | X | 309 | 40.017 | 41.709 | 57.907 | 0.00 | 0.00 |
| ATOM | 4657 | CG   | GLU | X | 309 | 39.412 | 39.824 | 58.800 | 0.00 | 0.00 |
| ATOM | 4658 | HG2  | GLU | X | 309 | 39.072 | 40.326 | 59.707 | 0.00 | 0.00 |
| ATOM | 4659 | HG3  | GLU | X | 309 | 38.684 | 39.051 | 58.552 | 0.00 | 0.00 |
| ATOM | 4660 | CD   | GLU | X | 309 | 40.799 | 39.214 | 59.042 | 0.00 | 0.00 |
| ATOM | 4661 | OE1  | GLU | X | 309 | 41.743 | 39.949 | 59.307 | 0.00 | 0.00 |
| ATOM | 4662 | OE2  | GLU | X | 309 | 40.933 | 38.005 | 58.747 | 0.00 | 0.00 |
| ATOM | 4663 | C    | GLU | X | 309 | 37.270 | 41.977 | 58.344 | 0.00 | 0.00 |
| ATOM | 4664 | O    | GLU | X | 309 | 36.254 | 41.359 | 58.756 | 0.00 | 0.00 |
| ATOM | 4665 | N    | ALA | X | 310 | 37.688 | 43.110 | 58.925 | 0.00 | 0.00 |
| ATOM | 4666 | H    | ALA | X | 310 | 38.390 | 43.627 | 58.415 | 0.00 | 0.00 |
| ATOM | 4667 | CA   | ALA | X | 310 | 37.004 | 43.707 | 60.041 | 0.00 | 0.00 |

|      |      |      |     |   |     |        |        |        |      |      |
|------|------|------|-----|---|-----|--------|--------|--------|------|------|
| ATOM | 4668 | HA   | ALA | X | 310 | 36.655 | 42.849 | 60.615 | 0.00 | 0.00 |
| ATOM | 4669 | CB   | ALA | X | 310 | 38.014 | 44.496 | 60.871 | 0.00 | 0.00 |
| ATOM | 4670 | HB1  | ALA | X | 310 | 38.542 | 45.143 | 60.171 | 0.00 | 0.00 |
| ATOM | 4671 | HB2  | ALA | X | 310 | 38.775 | 43.832 | 61.281 | 0.00 | 0.00 |
| ATOM | 4672 | HB3  | ALA | X | 310 | 37.477 | 45.043 | 61.646 | 0.00 | 0.00 |
| ATOM | 4673 | C    | ALA | X | 310 | 35.733 | 44.484 | 59.645 | 0.00 | 0.00 |
| ATOM | 4674 | O    | ALA | X | 310 | 34.757 | 44.603 | 60.441 | 0.00 | 0.00 |
| ATOM | 4675 | N    | LEU | X | 311 | 35.693 | 45.014 | 58.416 | 0.00 | 0.00 |
| ATOM | 4676 | H    | LEU | X | 311 | 36.546 | 44.952 | 57.879 | 0.00 | 0.00 |
| ATOM | 4677 | CA   | LEU | X | 311 | 34.427 | 45.489 | 57.838 | 0.00 | 0.00 |
| ATOM | 4678 | HA   | LEU | X | 311 | 33.937 | 45.974 | 58.682 | 0.00 | 0.00 |
| ATOM | 4679 | CB   | LEU | X | 311 | 34.738 | 46.237 | 56.545 | 0.00 | 0.00 |
| ATOM | 4680 | HB2  | LEU | X | 311 | 35.208 | 45.577 | 55.815 | 0.00 | 0.00 |
| ATOM | 4681 | HB3  | LEU | X | 311 | 33.820 | 46.525 | 56.032 | 0.00 | 0.00 |
| ATOM | 4682 | CG   | LEU | X | 311 | 35.658 | 47.433 | 56.639 | 0.00 | 0.00 |
| ATOM | 4683 | HG   | LEU | X | 311 | 36.690 | 47.294 | 56.960 | 0.00 | 0.00 |
| ATOM | 4684 | CD1  | LEU | X | 311 | 35.718 | 48.161 | 55.277 | 0.00 | 0.00 |
| ATOM | 4685 | HD11 | LEU | X | 311 | 36.321 | 47.486 | 54.669 | 0.00 | 0.00 |
| ATOM | 4686 | HD12 | LEU | X | 311 | 36.246 | 49.113 | 55.322 | 0.00 | 0.00 |
| ATOM | 4687 | HD13 | LEU | X | 311 | 34.744 | 48.187 | 54.788 | 0.00 | 0.00 |
| ATOM | 4688 | CD2  | LEU | X | 311 | 35.033 | 48.402 | 57.617 | 0.00 | 0.00 |
| ATOM | 4689 | HD21 | LEU | X | 311 | 35.041 | 47.903 | 58.586 | 0.00 | 0.00 |
| ATOM | 4690 | HD22 | LEU | X | 311 | 35.565 | 49.353 | 57.588 | 0.00 | 0.00 |
| ATOM | 4691 | HD23 | LEU | X | 311 | 34.045 | 48.693 | 57.261 | 0.00 | 0.00 |
| ATOM | 4692 | C    | LEU | X | 311 | 33.358 | 44.432 | 57.532 | 0.00 | 0.00 |
| ATOM | 4693 | O    | LEU | X | 311 | 32.172 | 44.655 | 57.635 | 0.00 | 0.00 |
| ATOM | 4694 | N    | ILE | X | 312 | 33.801 | 43.153 | 57.273 | 0.00 | 0.00 |
| ATOM | 4695 | H    | ILE | X | 312 | 34.780 | 42.992 | 57.082 | 0.00 | 0.00 |
| ATOM | 4696 | CA   | ILE | X | 312 | 32.888 | 41.939 | 57.407 | 0.00 | 0.00 |
| ATOM | 4697 | HA   | ILE | X | 312 | 31.930 | 42.127 | 56.923 | 0.00 | 0.00 |
| ATOM | 4698 | CB   | ILE | X | 312 | 33.616 | 40.813 | 56.628 | 0.00 | 0.00 |
| ATOM | 4699 | HB   | ILE | X | 312 | 34.597 | 40.775 | 57.101 | 0.00 | 0.00 |
| ATOM | 4700 | CG2  | ILE | X | 312 | 32.890 | 39.441 | 56.755 | 0.00 | 0.00 |
| ATOM | 4701 | HG21 | ILE | X | 312 | 31.900 | 39.550 | 56.313 | 0.00 | 0.00 |
| ATOM | 4702 | HG22 | ILE | X | 312 | 32.834 | 39.193 | 57.815 | 0.00 | 0.00 |
| ATOM | 4703 | HG23 | ILE | X | 312 | 33.404 | 38.710 | 56.130 | 0.00 | 0.00 |
| ATOM | 4704 | CG1  | ILE | X | 312 | 33.719 | 41.101 | 55.148 | 0.00 | 0.00 |
| ATOM | 4705 | HG12 | ILE | X | 312 | 32.834 | 40.735 | 54.628 | 0.00 | 0.00 |
| ATOM | 4706 | HG13 | ILE | X | 312 | 33.867 | 42.175 | 55.038 | 0.00 | 0.00 |
| ATOM | 4707 | CD1  | ILE | X | 312 | 34.977 | 40.386 | 54.438 | 0.00 | 0.00 |
| ATOM | 4708 | HD11 | ILE | X | 312 | 35.883 | 40.651 | 54.983 | 0.00 | 0.00 |
| ATOM | 4709 | HD12 | ILE | X | 312 | 35.176 | 40.718 | 53.419 | 0.00 | 0.00 |
| ATOM | 4710 | HD13 | ILE | X | 312 | 34.840 | 39.307 | 54.507 | 0.00 | 0.00 |
| ATOM | 4711 | C    | ILE | X | 312 | 32.518 | 41.645 | 58.828 | 0.00 | 0.00 |
| ATOM | 4712 | O    | ILE | X | 312 | 31.342 | 41.302 | 59.060 | 0.00 | 0.00 |
| ATOM | 4713 | N    | ASN | X | 313 | 33.476 | 41.723 | 59.718 | 0.00 | 0.00 |
| ATOM | 4714 | H    | ASN | X | 313 | 34.413 | 41.963 | 59.425 | 0.00 | 0.00 |
| ATOM | 4715 | CA   | ASN | X | 313 | 33.277 | 41.426 | 61.165 | 0.00 | 0.00 |
| ATOM | 4716 | HA   | ASN | X | 313 | 33.077 | 40.357 | 61.242 | 0.00 | 0.00 |
| ATOM | 4717 | CB   | ASN | X | 313 | 34.549 | 41.629 | 62.014 | 0.00 | 0.00 |
| ATOM | 4718 | HB2  | ASN | X | 313 | 35.386 | 40.974 | 61.773 | 0.00 | 0.00 |
| ATOM | 4719 | HB3  | ASN | X | 313 | 34.808 | 42.685 | 61.926 | 0.00 | 0.00 |
| ATOM | 4720 | CG   | ASN | X | 313 | 34.319 | 41.381 | 63.530 | 0.00 | 0.00 |
| ATOM | 4721 | OD1  | ASN | X | 313 | 34.024 | 40.289 | 64.000 | 0.00 | 0.00 |
| ATOM | 4722 | ND2  | ASN | X | 313 | 34.356 | 42.463 | 64.252 | 0.00 | 0.00 |
| ATOM | 4723 | HD21 | ASN | X | 313 | 34.430 | 42.449 | 65.259 | 0.00 | 0.00 |
| ATOM | 4724 | HD22 | ASN | X | 313 | 34.665 | 43.342 | 63.860 | 0.00 | 0.00 |
| ATOM | 4725 | C    | ASN | X | 313 | 32.259 | 42.423 | 61.832 | 0.00 | 0.00 |
| ATOM | 4726 | O    | ASN | X | 313 | 31.561 | 42.145 | 62.781 | 0.00 | 0.00 |
| ATOM | 4727 | N    | ALA | X | 314 | 32.223 | 43.599 | 61.284 | 0.00 | 0.00 |
| ATOM | 4728 | H    | ALA | X | 314 | 32.836 | 43.726 | 60.491 | 0.00 | 0.00 |
| ATOM | 4729 | CA   | ALA | X | 314 | 31.181 | 44.681 | 61.572 | 0.00 | 0.00 |
| ATOM | 4730 | HA   | ALA | X | 314 | 30.903 | 44.667 | 62.626 | 0.00 | 0.00 |
| ATOM | 4731 | CB   | ALA | X | 314 | 31.781 | 46.075 | 61.317 | 0.00 | 0.00 |
| ATOM | 4732 | HB1  | ALA | X | 314 | 32.655 | 46.243 | 61.946 | 0.00 | 0.00 |
| ATOM | 4733 | HB2  | ALA | X | 314 | 30.995 | 46.801 | 61.523 | 0.00 | 0.00 |
| ATOM | 4734 | HB3  | ALA | X | 314 | 32.035 | 46.103 | 60.257 | 0.00 | 0.00 |

|      |      |     |     |   |     |        |        |        |      |      |
|------|------|-----|-----|---|-----|--------|--------|--------|------|------|
| ATOM | 4735 | C   | ALA | X | 314 | 29.955 | 44.480 | 60.708 | 0.00 | 0.00 |
| ATOM | 4736 | O   | ALA | X | 314 | 29.101 | 45.384 | 60.754 | 0.00 | 0.00 |
| ATOM | 4737 | N   | GLY | X | 315 | 29.895 | 43.549 | 59.760 | 0.00 | 0.00 |
| ATOM | 4738 | H   | GLY | X | 315 | 30.417 | 42.685 | 59.804 | 0.00 | 0.00 |
| ATOM | 4739 | CA  | GLY | X | 315 | 29.016 | 43.536 | 58.568 | 0.00 | 0.00 |
| ATOM | 4740 | HA2 | GLY | X | 315 | 28.820 | 44.566 | 58.270 | 0.00 | 0.00 |
| ATOM | 4741 | HA3 | GLY | X | 315 | 29.433 | 42.940 | 57.756 | 0.00 | 0.00 |
| ATOM | 4742 | C   | GLY | X | 315 | 27.656 | 42.924 | 58.855 | 0.00 | 0.00 |
| ATOM | 4743 | O   | GLY | X | 315 | 27.478 | 42.309 | 59.892 | 0.00 | 0.00 |
| ATOM | 4744 | N   | ASP | X | 316 | 26.683 | 43.051 | 57.874 | 0.00 | 0.00 |
| ATOM | 4745 | H   | ASP | X | 316 | 26.875 | 43.552 | 57.018 | 0.00 | 0.00 |
| ATOM | 4746 | CA  | ASP | X | 316 | 25.282 | 42.722 | 58.105 | 0.00 | 0.00 |
| ATOM | 4747 | HA  | ASP | X | 316 | 25.244 | 41.839 | 58.744 | 0.00 | 0.00 |
| ATOM | 4748 | CB  | ASP | X | 316 | 24.534 | 43.894 | 58.771 | 0.00 | 0.00 |
| ATOM | 4749 | HB2 | ASP | X | 316 | 25.151 | 44.274 | 59.584 | 0.00 | 0.00 |
| ATOM | 4750 | HB3 | ASP | X | 316 | 24.270 | 44.681 | 58.064 | 0.00 | 0.00 |
| ATOM | 4751 | CG  | ASP | X | 316 | 23.227 | 43.349 | 59.324 | 0.00 | 0.00 |
| ATOM | 4752 | OD1 | ASP | X | 316 | 22.339 | 42.863 | 58.597 | 0.00 | 0.00 |
| ATOM | 4753 | OD2 | ASP | X | 316 | 23.149 | 43.521 | 60.570 | 0.00 | 0.00 |
| ATOM | 4754 | C   | ASP | X | 316 | 24.735 | 42.614 | 56.652 | 0.00 | 0.00 |
| ATOM | 4755 | O   | ASP | X | 316 | 24.767 | 43.537 | 55.877 | 0.00 | 0.00 |
| ATOM | 4756 | N   | PHE | X | 317 | 24.405 | 41.327 | 56.297 | 0.00 | 0.00 |
| ATOM | 4757 | H   | PHE | X | 317 | 24.281 | 40.771 | 57.132 | 0.00 | 0.00 |
| ATOM | 4758 | CA  | PHE | X | 317 | 24.282 | 40.780 | 55.009 | 0.00 | 0.00 |
| ATOM | 4759 | HA  | PHE | X | 317 | 24.288 | 41.696 | 54.418 | 0.00 | 0.00 |
| ATOM | 4760 | CB  | PHE | X | 317 | 25.475 | 39.789 | 54.779 | 0.00 | 0.00 |
| ATOM | 4761 | HB2 | PHE | X | 317 | 25.344 | 38.921 | 55.425 | 0.00 | 0.00 |
| ATOM | 4762 | HB3 | PHE | X | 317 | 25.581 | 39.428 | 53.756 | 0.00 | 0.00 |
| ATOM | 4763 | CG  | PHE | X | 317 | 26.828 | 40.390 | 55.084 | 0.00 | 0.00 |
| ATOM | 4764 | CD1 | PHE | X | 317 | 27.299 | 41.493 | 54.357 | 0.00 | 0.00 |
| ATOM | 4765 | HD1 | PHE | X | 317 | 26.783 | 42.047 | 53.586 | 0.00 | 0.00 |
| ATOM | 4766 | CE1 | PHE | X | 317 | 28.646 | 41.886 | 54.517 | 0.00 | 0.00 |
| ATOM | 4767 | HE1 | PHE | X | 317 | 29.073 | 42.729 | 53.994 | 0.00 | 0.00 |
| ATOM | 4768 | CZ  | PHE | X | 317 | 29.452 | 41.199 | 55.384 | 0.00 | 0.00 |
| ATOM | 4769 | HZ  | PHE | X | 317 | 30.461 | 41.547 | 55.547 | 0.00 | 0.00 |
| ATOM | 4770 | CE2 | PHE | X | 317 | 28.950 | 40.083 | 56.041 | 0.00 | 0.00 |
| ATOM | 4771 | HE2 | PHE | X | 317 | 29.576 | 39.563 | 56.751 | 0.00 | 0.00 |
| ATOM | 4772 | CD2 | PHE | X | 317 | 27.666 | 39.598 | 55.815 | 0.00 | 0.00 |
| ATOM | 4773 | HD2 | PHE | X | 317 | 27.455 | 38.632 | 56.248 | 0.00 | 0.00 |
| ATOM | 4774 | C   | PHE | X | 317 | 22.895 | 40.157 | 54.709 | 0.00 | 0.00 |
| ATOM | 4775 | O   | PHE | X | 317 | 22.740 | 39.643 | 53.581 | 0.00 | 0.00 |
| ATOM | 4776 | N   | HIE | X | 318 | 21.954 | 40.346 | 55.619 | 0.00 | 0.00 |
| ATOM | 4777 | H   | HIE | X | 318 | 22.207 | 40.924 | 56.408 | 0.00 | 0.00 |
| ATOM | 4778 | CA  | HIE | X | 318 | 20.516 | 40.003 | 55.522 | 0.00 | 0.00 |
| ATOM | 4779 | HA  | HIE | X | 318 | 20.327 | 38.931 | 55.589 | 0.00 | 0.00 |
| ATOM | 4780 | CB  | HIE | X | 318 | 19.789 | 40.599 | 56.697 | 0.00 | 0.00 |
| ATOM | 4781 | HB2 | HIE | X | 318 | 20.252 | 40.100 | 57.548 | 0.00 | 0.00 |
| ATOM | 4782 | HB3 | HIE | X | 318 | 20.008 | 41.667 | 56.676 | 0.00 | 0.00 |
| ATOM | 4783 | CG  | HIE | X | 318 | 18.346 | 40.426 | 56.798 | 0.00 | 0.00 |
| ATOM | 4784 | ND1 | HIE | X | 318 | 17.432 | 40.045 | 55.786 | 0.00 | 0.00 |
| ATOM | 4785 | CE1 | HIE | X | 318 | 16.213 | 39.968 | 56.461 | 0.00 | 0.00 |
| ATOM | 4786 | HE1 | HIE | X | 318 | 15.291 | 39.946 | 55.899 | 0.00 | 0.00 |
| ATOM | 4787 | NE2 | HIE | X | 318 | 16.359 | 40.301 | 57.770 | 0.00 | 0.00 |
| ATOM | 4788 | HE2 | HIE | X | 318 | 15.633 | 40.528 | 58.435 | 0.00 | 0.00 |
| ATOM | 4789 | CD2 | HIE | X | 318 | 17.674 | 40.582 | 57.985 | 0.00 | 0.00 |
| ATOM | 4790 | HD2 | HIE | X | 318 | 18.196 | 40.859 | 58.889 | 0.00 | 0.00 |
| ATOM | 4791 | C   | HIE | X | 318 | 20.018 | 40.475 | 54.146 | 0.00 | 0.00 |
| ATOM | 4792 | O   | HIE | X | 318 | 19.988 | 41.741 | 53.888 | 0.00 | 0.00 |
| ATOM | 4793 | N   | GLY | X | 319 | 19.476 | 39.594 | 53.290 | 0.00 | 0.00 |
| ATOM | 4794 | H   | GLY | X | 319 | 19.438 | 38.632 | 53.597 | 0.00 | 0.00 |
| ATOM | 4795 | CA  | GLY | X | 319 | 18.874 | 39.930 | 52.034 | 0.00 | 0.00 |
| ATOM | 4796 | HA2 | GLY | X | 319 | 17.912 | 39.417 | 52.054 | 0.00 | 0.00 |
| ATOM | 4797 | HA3 | GLY | X | 319 | 18.554 | 40.966 | 51.927 | 0.00 | 0.00 |
| ATOM | 4798 | C   | GLY | X | 319 | 19.695 | 39.548 | 50.737 | 0.00 | 0.00 |
| ATOM | 4799 | O   | GLY | X | 319 | 19.214 | 39.737 | 49.638 | 0.00 | 0.00 |
| ATOM | 4800 | N   | LEU | X | 320 | 21.011 | 39.218 | 50.907 | 0.00 | 0.00 |
| ATOM | 4801 | H   | LEU | X | 320 | 21.252 | 39.015 | 51.866 | 0.00 | 0.00 |

|      |      |      |     |   |     |        |        |        |      |      |
|------|------|------|-----|---|-----|--------|--------|--------|------|------|
| ATOM | 4802 | CA   | LEU | X | 320 | 21.837 | 38.951 | 49.811 | 0.00 | 0.00 |
| ATOM | 4803 | HA   | LEU | X | 320 | 21.516 | 39.587 | 48.986 | 0.00 | 0.00 |
| ATOM | 4804 | CB   | LEU | X | 320 | 23.270 | 39.348 | 50.215 | 0.00 | 0.00 |
| ATOM | 4805 | HB2  | LEU | X | 320 | 23.654 | 38.743 | 51.036 | 0.00 | 0.00 |
| ATOM | 4806 | HB3  | LEU | X | 320 | 23.955 | 39.023 | 49.431 | 0.00 | 0.00 |
| ATOM | 4807 | CG   | LEU | X | 320 | 23.545 | 40.806 | 50.428 | 0.00 | 0.00 |
| ATOM | 4808 | HG   | LEU | X | 320 | 22.646 | 41.197 | 50.904 | 0.00 | 0.00 |
| ATOM | 4809 | CD1  | LEU | X | 320 | 24.815 | 41.076 | 51.199 | 0.00 | 0.00 |
| ATOM | 4810 | HD11 | LEU | X | 320 | 24.905 | 42.141 | 51.413 | 0.00 | 0.00 |
| ATOM | 4811 | HD12 | LEU | X | 320 | 25.629 | 40.693 | 50.583 | 0.00 | 0.00 |
| ATOM | 4812 | HD13 | LEU | X | 320 | 24.824 | 40.629 | 52.193 | 0.00 | 0.00 |
| ATOM | 4813 | CD2  | LEU | X | 320 | 23.585 | 41.606 | 49.100 | 0.00 | 0.00 |
| ATOM | 4814 | HD21 | LEU | X | 320 | 23.980 | 42.613 | 49.236 | 0.00 | 0.00 |
| ATOM | 4815 | HD22 | LEU | X | 320 | 24.215 | 41.177 | 48.321 | 0.00 | 0.00 |
| ATOM | 4816 | HD23 | LEU | X | 320 | 22.578 | 41.537 | 48.689 | 0.00 | 0.00 |
| ATOM | 4817 | C    | LEU | X | 320 | 21.802 | 37.501 | 49.305 | 0.00 | 0.00 |
| ATOM | 4818 | O    | LEU | X | 320 | 21.774 | 36.581 | 50.130 | 0.00 | 0.00 |
| ATOM | 4819 | N    | GLN | X | 321 | 21.986 | 37.252 | 47.990 | 0.00 | 0.00 |
| ATOM | 4820 | H    | GLN | X | 321 | 22.074 | 38.019 | 47.339 | 0.00 | 0.00 |
| ATOM | 4821 | CA   | GLN | X | 321 | 22.450 | 35.986 | 47.542 | 0.00 | 0.00 |
| ATOM | 4822 | HA   | GLN | X | 321 | 22.495 | 35.224 | 48.320 | 0.00 | 0.00 |
| ATOM | 4823 | CB   | GLN | X | 321 | 21.481 | 35.286 | 46.577 | 0.00 | 0.00 |
| ATOM | 4824 | HB2  | GLN | X | 321 | 21.720 | 35.718 | 45.605 | 0.00 | 0.00 |
| ATOM | 4825 | HB3  | GLN | X | 321 | 21.724 | 34.231 | 46.454 | 0.00 | 0.00 |
| ATOM | 4826 | CG   | GLN | X | 321 | 19.879 | 35.303 | 46.783 | 0.00 | 0.00 |
| ATOM | 4827 | HG2  | GLN | X | 321 | 19.372 | 34.850 | 45.931 | 0.00 | 0.00 |
| ATOM | 4828 | HG3  | GLN | X | 321 | 19.649 | 34.601 | 47.586 | 0.00 | 0.00 |
| ATOM | 4829 | CD   | GLN | X | 321 | 19.204 | 36.651 | 46.921 | 0.00 | 0.00 |
| ATOM | 4830 | OE1  | GLN | X | 321 | 19.077 | 37.368 | 45.918 | 0.00 | 0.00 |
| ATOM | 4831 | NE2  | GLN | X | 321 | 18.815 | 37.083 | 48.113 | 0.00 | 0.00 |
| ATOM | 4832 | HE21 | GLN | X | 321 | 18.186 | 37.873 | 48.097 | 0.00 | 0.00 |
| ATOM | 4833 | HE22 | GLN | X | 321 | 18.872 | 36.351 | 48.807 | 0.00 | 0.00 |
| ATOM | 4834 | C    | GLN | X | 321 | 23.819 | 35.943 | 46.898 | 0.00 | 0.00 |
| ATOM | 4835 | O    | GLN | X | 321 | 24.220 | 36.858 | 46.151 | 0.00 | 0.00 |
| ATOM | 4836 | N    | VAL | X | 322 | 24.670 | 35.042 | 47.403 | 0.00 | 0.00 |
| ATOM | 4837 | H    | VAL | X | 322 | 24.391 | 34.443 | 48.168 | 0.00 | 0.00 |
| ATOM | 4838 | CA   | VAL | X | 322 | 26.065 | 35.095 | 47.202 | 0.00 | 0.00 |
| ATOM | 4839 | HA   | VAL | X | 322 | 26.192 | 35.742 | 46.334 | 0.00 | 0.00 |
| ATOM | 4840 | CB   | VAL | X | 322 | 26.887 | 35.720 | 48.441 | 0.00 | 0.00 |
| ATOM | 4841 | HB   | VAL | X | 322 | 26.843 | 35.027 | 49.281 | 0.00 | 0.00 |
| ATOM | 4842 | CG1  | VAL | X | 322 | 28.413 | 35.969 | 48.189 | 0.00 | 0.00 |
| ATOM | 4843 | HG11 | VAL | X | 322 | 28.925 | 35.009 | 48.116 | 0.00 | 0.00 |
| ATOM | 4844 | HG12 | VAL | X | 322 | 28.608 | 36.542 | 47.283 | 0.00 | 0.00 |
| ATOM | 4845 | HG13 | VAL | X | 322 | 28.873 | 36.397 | 49.080 | 0.00 | 0.00 |
| ATOM | 4846 | CG2  | VAL | X | 322 | 26.330 | 37.086 | 48.933 | 0.00 | 0.00 |
| ATOM | 4847 | HG21 | VAL | X | 322 | 26.916 | 37.628 | 49.675 | 0.00 | 0.00 |
| ATOM | 4848 | HG22 | VAL | X | 322 | 25.438 | 36.804 | 49.493 | 0.00 | 0.00 |
| ATOM | 4849 | HG23 | VAL | X | 322 | 26.038 | 37.772 | 48.138 | 0.00 | 0.00 |
| ATOM | 4850 | C    | VAL | X | 322 | 26.574 | 33.760 | 46.787 | 0.00 | 0.00 |
| ATOM | 4851 | O    | VAL | X | 322 | 26.115 | 32.643 | 47.168 | 0.00 | 0.00 |
| ATOM | 4852 | N    | LEU | X | 323 | 27.741 | 33.740 | 46.080 | 0.00 | 0.00 |
| ATOM | 4853 | H    | LEU | X | 323 | 28.155 | 34.623 | 45.817 | 0.00 | 0.00 |
| ATOM | 4854 | CA   | LEU | X | 323 | 28.483 | 32.556 | 45.589 | 0.00 | 0.00 |
| ATOM | 4855 | HA   | LEU | X | 323 | 28.139 | 31.705 | 46.176 | 0.00 | 0.00 |
| ATOM | 4856 | CB   | LEU | X | 323 | 28.095 | 32.311 | 44.013 | 0.00 | 0.00 |
| ATOM | 4857 | HB2  | LEU | X | 323 | 27.037 | 32.572 | 43.984 | 0.00 | 0.00 |
| ATOM | 4858 | HB3  | LEU | X | 323 | 28.628 | 32.947 | 43.306 | 0.00 | 0.00 |
| ATOM | 4859 | CG   | LEU | X | 323 | 28.187 | 30.909 | 43.497 | 0.00 | 0.00 |
| ATOM | 4860 | HG   | LEU | X | 323 | 27.789 | 30.140 | 44.159 | 0.00 | 0.00 |
| ATOM | 4861 | CD1  | LEU | X | 323 | 27.544 | 30.779 | 42.022 | 0.00 | 0.00 |
| ATOM | 4862 | HD11 | LEU | X | 323 | 27.945 | 31.485 | 41.296 | 0.00 | 0.00 |
| ATOM | 4863 | HD12 | LEU | X | 323 | 26.459 | 30.888 | 42.035 | 0.00 | 0.00 |
| ATOM | 4864 | HD13 | LEU | X | 323 | 27.768 | 29.851 | 41.496 | 0.00 | 0.00 |
| ATOM | 4865 | CD2  | LEU | X | 323 | 29.722 | 30.556 | 43.416 | 0.00 | 0.00 |
| ATOM | 4866 | HD21 | LEU | X | 323 | 30.239 | 31.485 | 43.177 | 0.00 | 0.00 |
| ATOM | 4867 | HD22 | LEU | X | 323 | 30.035 | 30.041 | 44.325 | 0.00 | 0.00 |
| ATOM | 4868 | HD23 | LEU | X | 323 | 29.898 | 29.858 | 42.597 | 0.00 | 0.00 |

|      |      |      |     |   |     |        |        |        |      |      |
|------|------|------|-----|---|-----|--------|--------|--------|------|------|
| ATOM | 4869 | C    | LEU | X | 323 | 29.999 | 32.743 | 45.805 | 0.00 | 0.00 |
| ATOM | 4870 | O    | LEU | X | 323 | 30.648 | 33.740 | 45.367 | 0.00 | 0.00 |
| ATOM | 4871 | N    | VAL | X | 324 | 30.634 | 31.788 | 46.452 | 0.00 | 0.00 |
| ATOM | 4872 | H    | VAL | X | 324 | 30.162 | 30.911 | 46.625 | 0.00 | 0.00 |
| ATOM | 4873 | CA   | VAL | X | 324 | 32.084 | 31.812 | 46.828 | 0.00 | 0.00 |
| ATOM | 4874 | HA   | VAL | X | 324 | 32.559 | 32.627 | 46.282 | 0.00 | 0.00 |
| ATOM | 4875 | CB   | VAL | X | 324 | 32.215 | 32.158 | 48.341 | 0.00 | 0.00 |
| ATOM | 4876 | HB   | VAL | X | 324 | 33.247 | 32.436 | 48.557 | 0.00 | 0.00 |
| ATOM | 4877 | CG1  | VAL | X | 324 | 31.447 | 33.414 | 48.712 | 0.00 | 0.00 |
| ATOM | 4878 | HG11 | VAL | X | 324 | 31.575 | 33.876 | 49.691 | 0.00 | 0.00 |
| ATOM | 4879 | HG12 | VAL | X | 324 | 31.663 | 34.258 | 48.057 | 0.00 | 0.00 |
| ATOM | 4880 | HG13 | VAL | X | 324 | 30.370 | 33.247 | 48.704 | 0.00 | 0.00 |
| ATOM | 4881 | CG2  | VAL | X | 324 | 32.103 | 31.030 | 49.388 | 0.00 | 0.00 |
| ATOM | 4882 | HG21 | VAL | X | 324 | 31.128 | 30.567 | 49.237 | 0.00 | 0.00 |
| ATOM | 4883 | HG22 | VAL | X | 324 | 32.238 | 31.314 | 50.431 | 0.00 | 0.00 |
| ATOM | 4884 | HG23 | VAL | X | 324 | 32.852 | 30.286 | 49.117 | 0.00 | 0.00 |
| ATOM | 4885 | C    | VAL | X | 324 | 32.733 | 30.456 | 46.535 | 0.00 | 0.00 |
| ATOM | 4886 | O    | VAL | X | 324 | 32.132 | 29.469 | 46.892 | 0.00 | 0.00 |
| ATOM | 4887 | N    | GLY | X | 325 | 33.943 | 30.405 | 45.942 | 0.00 | 0.00 |
| ATOM | 4888 | H    | GLY | X | 325 | 34.360 | 31.278 | 45.653 | 0.00 | 0.00 |
| ATOM | 4889 | CA   | GLY | X | 325 | 34.654 | 29.152 | 45.856 | 0.00 | 0.00 |
| ATOM | 4890 | HA2  | GLY | X | 325 | 35.063 | 29.018 | 46.857 | 0.00 | 0.00 |
| ATOM | 4891 | HA3  | GLY | X | 325 | 34.058 | 28.265 | 45.641 | 0.00 | 0.00 |
| ATOM | 4892 | C    | GLY | X | 325 | 35.897 | 29.169 | 44.977 | 0.00 | 0.00 |
| ATOM | 4893 | O    | GLY | X | 325 | 36.275 | 30.248 | 44.492 | 0.00 | 0.00 |
| ATOM | 4894 | N    | VAL | X | 326 | 36.628 | 28.032 | 44.856 | 0.00 | 0.00 |
| ATOM | 4895 | H    | VAL | X | 326 | 36.154 | 27.260 | 45.303 | 0.00 | 0.00 |
| ATOM | 4896 | CA   | VAL | X | 326 | 38.107 | 28.084 | 44.581 | 0.00 | 0.00 |
| ATOM | 4897 | HA   | VAL | X | 326 | 38.378 | 29.009 | 44.071 | 0.00 | 0.00 |
| ATOM | 4898 | CB   | VAL | X | 326 | 38.968 | 27.993 | 45.841 | 0.00 | 0.00 |
| ATOM | 4899 | HB   | VAL | X | 326 | 40.006 | 27.953 | 45.510 | 0.00 | 0.00 |
| ATOM | 4900 | CG1  | VAL | X | 326 | 38.778 | 29.241 | 46.738 | 0.00 | 0.00 |
| ATOM | 4901 | HG11 | VAL | X | 326 | 38.880 | 30.155 | 46.153 | 0.00 | 0.00 |
| ATOM | 4902 | HG12 | VAL | X | 326 | 37.868 | 29.068 | 47.313 | 0.00 | 0.00 |
| ATOM | 4903 | HG13 | VAL | X | 326 | 39.483 | 29.243 | 47.570 | 0.00 | 0.00 |
| ATOM | 4904 | CG2  | VAL | X | 326 | 38.601 | 26.746 | 46.658 | 0.00 | 0.00 |
| ATOM | 4905 | HG21 | VAL | X | 326 | 38.601 | 25.809 | 46.101 | 0.00 | 0.00 |
| ATOM | 4906 | HG22 | VAL | X | 326 | 37.622 | 26.816 | 47.134 | 0.00 | 0.00 |
| ATOM | 4907 | HG23 | VAL | X | 326 | 39.280 | 26.611 | 47.500 | 0.00 | 0.00 |
| ATOM | 4908 | C    | VAL | X | 326 | 38.622 | 26.973 | 43.664 | 0.00 | 0.00 |
| ATOM | 4909 | O    | VAL | X | 326 | 37.909 | 25.958 | 43.477 | 0.00 | 0.00 |
| ATOM | 4910 | N    | VAL | X | 327 | 39.766 | 27.140 | 43.064 | 0.00 | 0.00 |
| ATOM | 4911 | H    | VAL | X | 327 | 40.287 | 27.977 | 43.285 | 0.00 | 0.00 |
| ATOM | 4912 | CA   | VAL | X | 327 | 40.460 | 26.099 | 42.339 | 0.00 | 0.00 |
| ATOM | 4913 | HA   | VAL | X | 327 | 39.650 | 25.596 | 41.811 | 0.00 | 0.00 |
| ATOM | 4914 | CB   | VAL | X | 327 | 41.348 | 26.623 | 41.236 | 0.00 | 0.00 |
| ATOM | 4915 | HB   | VAL | X | 327 | 41.650 | 25.748 | 40.660 | 0.00 | 0.00 |
| ATOM | 4916 | CG1  | VAL | X | 327 | 40.480 | 27.433 | 40.298 | 0.00 | 0.00 |
| ATOM | 4917 | HG11 | VAL | X | 327 | 39.813 | 26.756 | 39.764 | 0.00 | 0.00 |
| ATOM | 4918 | HG12 | VAL | X | 327 | 39.940 | 28.258 | 40.762 | 0.00 | 0.00 |
| ATOM | 4919 | HG13 | VAL | X | 327 | 41.074 | 27.945 | 39.540 | 0.00 | 0.00 |
| ATOM | 4920 | CG2  | VAL | X | 327 | 42.549 | 27.415 | 41.761 | 0.00 | 0.00 |
| ATOM | 4921 | HG21 | VAL | X | 327 | 42.729 | 27.171 | 42.807 | 0.00 | 0.00 |
| ATOM | 4922 | HG22 | VAL | X | 327 | 42.252 | 28.463 | 41.803 | 0.00 | 0.00 |
| ATOM | 4923 | HG23 | VAL | X | 327 | 43.476 | 27.367 | 41.190 | 0.00 | 0.00 |
| ATOM | 4924 | C    | VAL | X | 327 | 41.106 | 25.114 | 43.308 | 0.00 | 0.00 |
| ATOM | 4925 | O    | VAL | X | 327 | 41.387 | 25.411 | 44.546 | 0.00 | 0.00 |
| ATOM | 4926 | N    | LYS | X | 328 | 41.504 | 23.948 | 42.795 | 0.00 | 0.00 |
| ATOM | 4927 | H    | LYS | X | 328 | 41.270 | 23.742 | 41.834 | 0.00 | 0.00 |
| ATOM | 4928 | CA   | LYS | X | 328 | 42.053 | 22.931 | 43.727 | 0.00 | 0.00 |
| ATOM | 4929 | HA   | LYS | X | 328 | 41.440 | 22.966 | 44.627 | 0.00 | 0.00 |
| ATOM | 4930 | CB   | LYS | X | 328 | 41.885 | 21.489 | 43.091 | 0.00 | 0.00 |
| ATOM | 4931 | HB2  | LYS | X | 328 | 40.806 | 21.347 | 43.037 | 0.00 | 0.00 |
| ATOM | 4932 | HB3  | LYS | X | 328 | 42.336 | 21.521 | 42.099 | 0.00 | 0.00 |
| ATOM | 4933 | CG   | LYS | X | 328 | 42.483 | 20.281 | 43.874 | 0.00 | 0.00 |
| ATOM | 4934 | HG2  | LYS | X | 328 | 43.551 | 20.425 | 44.039 | 0.00 | 0.00 |
| ATOM | 4935 | HG3  | LYS | X | 328 | 42.044 | 20.266 | 44.872 | 0.00 | 0.00 |



|      |      |     |     |   |     |        |        |        |      |      |
|------|------|-----|-----|---|-----|--------|--------|--------|------|------|
| ATOM | 4936 | CD  | LYS | X | 328 | 42.236 | 18.849 | 43.245 | 0.00 | 0.00 |
| ATOM | 4937 | HD2 | LYS | X | 328 | 42.584 | 18.108 | 43.964 | 0.00 | 0.00 |
| ATOM | 4938 | HD3 | LYS | X | 328 | 41.181 | 18.577 | 43.213 | 0.00 | 0.00 |
| ATOM | 4939 | CE  | LYS | X | 328 | 42.831 | 18.652 | 41.863 | 0.00 | 0.00 |
| ATOM | 4940 | HE2 | LYS | X | 328 | 42.766 | 17.620 | 41.519 | 0.00 | 0.00 |
| ATOM | 4941 | HE3 | LYS | X | 328 | 42.320 | 19.379 | 41.231 | 0.00 | 0.00 |
| ATOM | 4942 | NZ  | LYS | X | 328 | 44.268 | 18.895 | 41.849 | 0.00 | 0.00 |
| ATOM | 4943 | HZ1 | LYS | X | 328 | 44.541 | 19.829 | 42.121 | 0.00 | 0.00 |
| ATOM | 4944 | HZ2 | LYS | X | 328 | 44.698 | 18.238 | 42.484 | 0.00 | 0.00 |
| ATOM | 4945 | HZ3 | LYS | X | 328 | 44.671 | 18.615 | 40.967 | 0.00 | 0.00 |
| ATOM | 4946 | C   | LYS | X | 328 | 43.458 | 23.150 | 44.329 | 0.00 | 0.00 |
| ATOM | 4947 | O   | LYS | X | 328 | 43.805 | 22.694 | 45.419 | 0.00 | 0.00 |
| ATOM | 4948 | N   | ASP | X | 329 | 44.228 | 23.958 | 43.624 | 0.00 | 0.00 |
| ATOM | 4949 | H   | ASP | X | 329 | 43.767 | 24.448 | 42.870 | 0.00 | 0.00 |
| ATOM | 4950 | CA  | ASP | X | 329 | 45.618 | 24.387 | 43.944 | 0.00 | 0.00 |
| ATOM | 4951 | HA  | ASP | X | 329 | 45.837 | 24.296 | 45.008 | 0.00 | 0.00 |
| ATOM | 4952 | CB  | ASP | X | 329 | 46.553 | 23.428 | 43.122 | 0.00 | 0.00 |
| ATOM | 4953 | HB2 | ASP | X | 329 | 46.442 | 23.696 | 42.071 | 0.00 | 0.00 |
| ATOM | 4954 | HB3 | ASP | X | 329 | 47.603 | 23.585 | 43.368 | 0.00 | 0.00 |
| ATOM | 4955 | CG  | ASP | X | 329 | 46.275 | 22.002 | 43.227 | 0.00 | 0.00 |
| ATOM | 4956 | OD1 | ASP | X | 329 | 46.735 | 21.474 | 44.313 | 0.00 | 0.00 |
| ATOM | 4957 | OD2 | ASP | X | 329 | 45.591 | 21.406 | 42.419 | 0.00 | 0.00 |
| ATOM | 4958 | C   | ASP | X | 329 | 45.801 | 25.878 | 43.540 | 0.00 | 0.00 |
| ATOM | 4959 | O   | ASP | X | 329 | 46.344 | 26.187 | 42.482 | 0.00 | 0.00 |
| ATOM | 4960 | N   | GLU | X | 330 | 45.256 | 26.751 | 44.408 | 0.00 | 0.00 |
| ATOM | 4961 | H   | GLU | X | 330 | 44.769 | 26.330 | 45.186 | 0.00 | 0.00 |
| ATOM | 4962 | CA  | GLU | X | 330 | 45.393 | 28.173 | 44.222 | 0.00 | 0.00 |
| ATOM | 4963 | HA  | GLU | X | 330 | 44.935 | 28.353 | 43.249 | 0.00 | 0.00 |
| ATOM | 4964 | CB  | GLU | X | 330 | 44.624 | 28.991 | 45.377 | 0.00 | 0.00 |
| ATOM | 4965 | HB2 | GLU | X | 330 | 45.025 | 28.638 | 46.327 | 0.00 | 0.00 |
| ATOM | 4966 | HB3 | GLU | X | 330 | 44.770 | 30.069 | 45.453 | 0.00 | 0.00 |
| ATOM | 4967 | CG  | GLU | X | 330 | 43.082 | 28.796 | 45.270 | 0.00 | 0.00 |
| ATOM | 4968 | HG2 | GLU | X | 330 | 42.905 | 27.803 | 44.857 | 0.00 | 0.00 |
| ATOM | 4969 | HG3 | GLU | X | 330 | 42.567 | 28.919 | 46.223 | 0.00 | 0.00 |
| ATOM | 4970 | CD  | GLU | X | 330 | 42.389 | 29.628 | 44.270 | 0.00 | 0.00 |
| ATOM | 4971 | OE1 | GLU | X | 330 | 42.988 | 30.559 | 43.664 | 0.00 | 0.00 |
| ATOM | 4972 | OE2 | GLU | X | 330 | 41.223 | 29.363 | 43.874 | 0.00 | 0.00 |
| ATOM | 4973 | C   | GLU | X | 330 | 46.853 | 28.642 | 44.071 | 0.00 | 0.00 |
| ATOM | 4974 | O   | GLU | X | 330 | 47.153 | 29.291 | 43.093 | 0.00 | 0.00 |
| ATOM | 4975 | N   | GLY | X | 331 | 47.707 | 28.396 | 45.124 | 0.00 | 0.00 |
| ATOM | 4976 | H   | GLY | X | 331 | 47.343 | 27.726 | 45.786 | 0.00 | 0.00 |
| ATOM | 4977 | CA  | GLY | X | 331 | 49.069 | 28.947 | 45.217 | 0.00 | 0.00 |
| ATOM | 4978 | HA2 | GLY | X | 331 | 48.862 | 29.996 | 45.006 | 0.00 | 0.00 |
| ATOM | 4979 | HA3 | GLY | X | 331 | 49.435 | 28.799 | 46.234 | 0.00 | 0.00 |
| ATOM | 4980 | C   | GLY | X | 331 | 50.107 | 28.399 | 44.252 | 0.00 | 0.00 |
| ATOM | 4981 | O   | GLY | X | 331 | 51.103 | 29.029 | 43.994 | 0.00 | 0.00 |
| ATOM | 4982 | N   | SER | X | 332 | 49.724 | 27.274 | 43.573 | 0.00 | 0.00 |
| ATOM | 4983 | H   | SER | X | 332 | 48.914 | 26.767 | 43.899 | 0.00 | 0.00 |
| ATOM | 4984 | CA  | SER | X | 332 | 50.483 | 26.733 | 42.431 | 0.00 | 0.00 |
| ATOM | 4985 | HA  | SER | X | 332 | 51.427 | 26.316 | 42.783 | 0.00 | 0.00 |
| ATOM | 4986 | CB  | SER | X | 332 | 49.776 | 25.533 | 41.750 | 0.00 | 0.00 |
| ATOM | 4987 | HB2 | SER | X | 332 | 50.465 | 25.257 | 40.952 | 0.00 | 0.00 |
| ATOM | 4988 | HB3 | SER | X | 332 | 49.495 | 24.813 | 42.519 | 0.00 | 0.00 |
| ATOM | 4989 | OG  | SER | X | 332 | 48.636 | 25.999 | 41.039 | 0.00 | 0.00 |
| ATOM | 4990 | HG  | SER | X | 332 | 47.856 | 25.853 | 41.580 | 0.00 | 0.00 |
| ATOM | 4991 | C   | SER | X | 332 | 50.953 | 27.792 | 41.425 | 0.00 | 0.00 |
| ATOM | 4992 | O   | SER | X | 332 | 52.130 | 27.994 | 41.165 | 0.00 | 0.00 |
| ATOM | 4993 | N   | TYR | X | 333 | 50.018 | 28.640 | 41.026 | 0.00 | 0.00 |
| ATOM | 4994 | H   | TYR | X | 333 | 49.060 | 28.349 | 41.162 | 0.00 | 0.00 |
| ATOM | 4995 | CA  | TYR | X | 333 | 50.276 | 29.528 | 39.898 | 0.00 | 0.00 |
| ATOM | 4996 | HA  | TYR | X | 333 | 50.594 | 28.952 | 39.030 | 0.00 | 0.00 |
| ATOM | 4997 | CB  | TYR | X | 333 | 48.867 | 30.052 | 39.541 | 0.00 | 0.00 |
| ATOM | 4998 | HB2 | TYR | X | 333 | 48.061 | 29.319 | 39.510 | 0.00 | 0.00 |
| ATOM | 4999 | HB3 | TYR | X | 333 | 48.604 | 30.762 | 40.326 | 0.00 | 0.00 |
| ATOM | 5000 | CG  | TYR | X | 333 | 48.882 | 30.885 | 38.212 | 0.00 | 0.00 |
| ATOM | 5001 | CD1 | TYR | X | 333 | 48.625 | 30.213 | 36.977 | 0.00 | 0.00 |
| ATOM | 5002 | HD1 | TYR | X | 333 | 48.468 | 29.152 | 37.102 | 0.00 | 0.00 |

|      |      |      |     |   |     |        |        |        |      |      |
|------|------|------|-----|---|-----|--------|--------|--------|------|------|
| ATOM | 5003 | CE1  | TYR | X | 333 | 48.801 | 30.921 | 35.759 | 0.00 | 0.00 |
| ATOM | 5004 | HE1  | TYR | X | 333 | 48.689 | 30.435 | 34.801 | 0.00 | 0.00 |
| ATOM | 5005 | CZ   | TYR | X | 333 | 49.174 | 32.314 | 35.685 | 0.00 | 0.00 |
| ATOM | 5006 | OH   | TYR | X | 333 | 49.404 | 32.908 | 34.490 | 0.00 | 0.00 |
| ATOM | 5007 | HH   | TYR | X | 333 | 49.321 | 32.331 | 33.727 | 0.00 | 0.00 |
| ATOM | 5008 | CE2  | TYR | X | 333 | 49.307 | 32.990 | 36.932 | 0.00 | 0.00 |
| ATOM | 5009 | HE2  | TYR | X | 333 | 49.549 | 34.041 | 36.996 | 0.00 | 0.00 |
| ATOM | 5010 | CD2  | TYR | X | 333 | 49.268 | 32.291 | 38.168 | 0.00 | 0.00 |
| ATOM | 5011 | HD2  | TYR | X | 333 | 49.504 | 32.799 | 39.092 | 0.00 | 0.00 |
| ATOM | 5012 | C    | TYR | X | 333 | 51.228 | 30.699 | 40.100 | 0.00 | 0.00 |
| ATOM | 5013 | O    | TYR | X | 333 | 51.901 | 31.178 | 39.166 | 0.00 | 0.00 |
| ATOM | 5014 | N    | PHE | X | 334 | 51.335 | 31.039 | 41.405 | 0.00 | 0.00 |
| ATOM | 5015 | H    | PHE | X | 334 | 50.775 | 30.519 | 42.065 | 0.00 | 0.00 |
| ATOM | 5016 | CA   | PHE | X | 334 | 52.239 | 32.080 | 41.943 | 0.00 | 0.00 |
| ATOM | 5017 | HA   | PHE | X | 334 | 52.443 | 32.839 | 41.188 | 0.00 | 0.00 |
| ATOM | 5018 | CB   | PHE | X | 334 | 51.560 | 32.817 | 43.095 | 0.00 | 0.00 |
| ATOM | 5019 | HB2  | PHE | X | 334 | 51.225 | 32.064 | 43.809 | 0.00 | 0.00 |
| ATOM | 5020 | HB3  | PHE | X | 334 | 52.212 | 33.398 | 43.747 | 0.00 | 0.00 |
| ATOM | 5021 | CG   | PHE | X | 334 | 50.374 | 33.632 | 42.617 | 0.00 | 0.00 |
| ATOM | 5022 | CD1  | PHE | X | 334 | 49.100 | 33.057 | 42.672 | 0.00 | 0.00 |
| ATOM | 5023 | HD1  | PHE | X | 334 | 48.928 | 32.114 | 43.170 | 0.00 | 0.00 |
| ATOM | 5024 | CE1  | PHE | X | 334 | 48.040 | 33.735 | 42.045 | 0.00 | 0.00 |
| ATOM | 5025 | HE1  | PHE | X | 334 | 47.062 | 33.293 | 42.167 | 0.00 | 0.00 |
| ATOM | 5026 | CZ   | PHE | X | 334 | 48.228 | 34.915 | 41.249 | 0.00 | 0.00 |
| ATOM | 5027 | HZ   | PHE | X | 334 | 47.378 | 35.448 | 40.849 | 0.00 | 0.00 |
| ATOM | 5028 | CE2  | PHE | X | 334 | 49.567 | 35.420 | 41.240 | 0.00 | 0.00 |
| ATOM | 5029 | HE2  | PHE | X | 334 | 49.662 | 36.433 | 40.876 | 0.00 | 0.00 |
| ATOM | 5030 | CD2  | PHE | X | 334 | 50.604 | 34.849 | 41.923 | 0.00 | 0.00 |
| ATOM | 5031 | HD2  | PHE | X | 334 | 51.561 | 35.342 | 41.838 | 0.00 | 0.00 |
| ATOM | 5032 | C    | PHE | X | 334 | 53.605 | 31.431 | 42.394 | 0.00 | 0.00 |
| ATOM | 5033 | O    | PHE | X | 334 | 54.618 | 32.110 | 42.304 | 0.00 | 0.00 |
| ATOM | 5034 | N    | LEU | X | 335 | 53.640 | 30.129 | 42.709 | 0.00 | 0.00 |
| ATOM | 5035 | H    | LEU | X | 335 | 52.788 | 29.621 | 42.898 | 0.00 | 0.00 |
| ATOM | 5036 | CA   | LEU | X | 335 | 54.912 | 29.439 | 43.001 | 0.00 | 0.00 |
| ATOM | 5037 | HA   | LEU | X | 335 | 55.498 | 29.975 | 43.748 | 0.00 | 0.00 |
| ATOM | 5038 | CB   | LEU | X | 335 | 54.617 | 28.053 | 43.546 | 0.00 | 0.00 |
| ATOM | 5039 | HB2  | LEU | X | 335 | 53.832 | 27.604 | 42.938 | 0.00 | 0.00 |
| ATOM | 5040 | HB3  | LEU | X | 335 | 55.504 | 27.445 | 43.370 | 0.00 | 0.00 |
| ATOM | 5041 | CG   | LEU | X | 335 | 54.284 | 27.936 | 45.096 | 0.00 | 0.00 |
| ATOM | 5042 | HG   | LEU | X | 335 | 53.521 | 28.665 | 45.368 | 0.00 | 0.00 |
| ATOM | 5043 | CD1  | LEU | X | 335 | 53.815 | 26.584 | 45.527 | 0.00 | 0.00 |
| ATOM | 5044 | HD11 | LEU | X | 335 | 53.485 | 26.631 | 46.565 | 0.00 | 0.00 |
| ATOM | 5045 | HD12 | LEU | X | 335 | 54.526 | 25.793 | 45.292 | 0.00 | 0.00 |
| ATOM | 5046 | HD13 | LEU | X | 335 | 53.026 | 26.294 | 44.834 | 0.00 | 0.00 |
| ATOM | 5047 | CD2  | LEU | X | 335 | 55.466 | 28.292 | 45.998 | 0.00 | 0.00 |
| ATOM | 5048 | HD21 | LEU | X | 335 | 55.567 | 29.357 | 45.789 | 0.00 | 0.00 |
| ATOM | 5049 | HD22 | LEU | X | 335 | 55.244 | 28.110 | 47.049 | 0.00 | 0.00 |
| ATOM | 5050 | HD23 | LEU | X | 335 | 56.363 | 27.693 | 45.840 | 0.00 | 0.00 |
| ATOM | 5051 | C    | LEU | X | 335 | 55.862 | 29.391 | 41.770 | 0.00 | 0.00 |
| ATOM | 5052 | O    | LEU | X | 335 | 57.009 | 29.798 | 41.912 | 0.00 | 0.00 |
| ATOM | 5053 | N    | VAL | X | 336 | 55.418 | 28.857 | 40.651 | 0.00 | 0.00 |
| ATOM | 5054 | H    | VAL | X | 336 | 54.490 | 28.466 | 40.740 | 0.00 | 0.00 |
| ATOM | 5055 | CA   | VAL | X | 336 | 56.143 | 28.825 | 39.384 | 0.00 | 0.00 |
| ATOM | 5056 | HA   | VAL | X | 336 | 57.060 | 28.236 | 39.402 | 0.00 | 0.00 |
| ATOM | 5057 | CB   | VAL | X | 336 | 55.335 | 28.180 | 38.215 | 0.00 | 0.00 |
| ATOM | 5058 | HB   | VAL | X | 336 | 55.891 | 28.538 | 37.349 | 0.00 | 0.00 |
| ATOM | 5059 | CG1  | VAL | X | 336 | 55.330 | 26.660 | 38.062 | 0.00 | 0.00 |
| ATOM | 5060 | HG11 | VAL | X | 336 | 56.346 | 26.266 | 38.044 | 0.00 | 0.00 |
| ATOM | 5061 | HG12 | VAL | X | 336 | 54.899 | 26.335 | 39.010 | 0.00 | 0.00 |
| ATOM | 5062 | HG13 | VAL | X | 336 | 54.807 | 26.316 | 37.170 | 0.00 | 0.00 |
| ATOM | 5063 | CG2  | VAL | X | 336 | 53.909 | 28.612 | 38.164 | 0.00 | 0.00 |
| ATOM | 5064 | HG21 | VAL | X | 336 | 53.382 | 28.174 | 37.317 | 0.00 | 0.00 |
| ATOM | 5065 | HG22 | VAL | X | 336 | 53.908 | 29.677 | 37.932 | 0.00 | 0.00 |
| ATOM | 5066 | HG23 | VAL | X | 336 | 53.369 | 28.323 | 39.066 | 0.00 | 0.00 |
| ATOM | 5067 | C    | VAL | X | 336 | 56.603 | 30.300 | 38.966 | 0.00 | 0.00 |
| ATOM | 5068 | O    | VAL | X | 336 | 57.667 | 30.507 | 38.381 | 0.00 | 0.00 |
| ATOM | 5069 | N    | TYR | X | 337 | 55.771 | 31.297 | 39.399 | 0.00 | 0.00 |

|      |      |     |     |   |     |        |        |        |      |      |
|------|------|-----|-----|---|-----|--------|--------|--------|------|------|
| ATOM | 5070 | H   | TYR | X | 337 | 54.865 | 30.982 | 39.715 | 0.00 | 0.00 |
| ATOM | 5071 | CA  | TYR | X | 337 | 55.912 | 32.723 | 39.085 | 0.00 | 0.00 |
| ATOM | 5072 | HA  | TYR | X | 337 | 56.443 | 32.765 | 38.134 | 0.00 | 0.00 |
| ATOM | 5073 | CB  | TYR | X | 337 | 54.560 | 33.401 | 38.824 | 0.00 | 0.00 |
| ATOM | 5074 | HB2 | TYR | X | 337 | 53.741 | 32.699 | 38.981 | 0.00 | 0.00 |
| ATOM | 5075 | HB3 | TYR | X | 337 | 54.430 | 34.174 | 39.581 | 0.00 | 0.00 |
| ATOM | 5076 | CG  | TYR | X | 337 | 54.346 | 33.955 | 37.444 | 0.00 | 0.00 |
| ATOM | 5077 | CD1 | TYR | X | 337 | 55.006 | 35.119 | 37.054 | 0.00 | 0.00 |
| ATOM | 5078 | HD1 | TYR | X | 337 | 55.689 | 35.680 | 37.675 | 0.00 | 0.00 |
| ATOM | 5079 | CE1 | TYR | X | 337 | 54.807 | 35.540 | 35.674 | 0.00 | 0.00 |
| ATOM | 5080 | HE1 | TYR | X | 337 | 55.352 | 36.390 | 35.289 | 0.00 | 0.00 |
| ATOM | 5081 | CZ  | TYR | X | 337 | 53.893 | 34.906 | 34.859 | 0.00 | 0.00 |
| ATOM | 5082 | OH  | TYR | X | 337 | 53.787 | 35.302 | 33.559 | 0.00 | 0.00 |
| ATOM | 5083 | HH  | TYR | X | 337 | 54.283 | 36.117 | 33.457 | 0.00 | 0.00 |
| ATOM | 5084 | CE2 | TYR | X | 337 | 53.319 | 33.685 | 35.260 | 0.00 | 0.00 |
| ATOM | 5085 | HE2 | TYR | X | 337 | 52.574 | 33.233 | 34.622 | 0.00 | 0.00 |
| ATOM | 5086 | CD2 | TYR | X | 337 | 53.450 | 33.258 | 36.575 | 0.00 | 0.00 |
| ATOM | 5087 | HD2 | TYR | X | 337 | 52.888 | 32.361 | 36.790 | 0.00 | 0.00 |
| ATOM | 5088 | C   | TYR | X | 337 | 56.818 | 33.526 | 40.058 | 0.00 | 0.00 |
| ATOM | 5089 | O   | TYR | X | 337 | 57.323 | 34.628 | 39.633 | 0.00 | 0.00 |
| ATOM | 5090 | N   | GLY | X | 338 | 57.192 | 33.100 | 41.226 | 0.00 | 0.00 |
| ATOM | 5091 | H   | GLY | X | 338 | 56.834 | 32.216 | 41.558 | 0.00 | 0.00 |
| ATOM | 5092 | CA  | GLY | X | 338 | 57.793 | 34.003 | 42.133 | 0.00 | 0.00 |
| ATOM | 5093 | HA2 | GLY | X | 338 | 58.675 | 34.444 | 41.666 | 0.00 | 0.00 |
| ATOM | 5094 | HA3 | GLY | X | 338 | 57.113 | 34.818 | 42.378 | 0.00 | 0.00 |
| ATOM | 5095 | C   | GLY | X | 338 | 58.343 | 33.532 | 43.494 | 0.00 | 0.00 |
| ATOM | 5096 | O   | GLY | X | 338 | 58.631 | 34.369 | 44.399 | 0.00 | 0.00 |
| ATOM | 5097 | N   | ALA | X | 339 | 58.491 | 32.238 | 43.563 | 0.00 | 0.00 |
| ATOM | 5098 | H   | ALA | X | 339 | 58.298 | 31.652 | 42.764 | 0.00 | 0.00 |
| ATOM | 5099 | CA  | ALA | X | 339 | 59.025 | 31.592 | 44.729 | 0.00 | 0.00 |
| ATOM | 5100 | HA  | ALA | X | 339 | 59.269 | 32.375 | 45.447 | 0.00 | 0.00 |
| ATOM | 5101 | CB  | ALA | X | 339 | 57.988 | 30.603 | 45.202 | 0.00 | 0.00 |
| ATOM | 5102 | HB1 | ALA | X | 339 | 57.059 | 31.113 | 45.458 | 0.00 | 0.00 |
| ATOM | 5103 | HB2 | ALA | X | 339 | 58.371 | 30.195 | 46.137 | 0.00 | 0.00 |
| ATOM | 5104 | HB3 | ALA | X | 339 | 57.857 | 29.823 | 44.452 | 0.00 | 0.00 |
| ATOM | 5105 | C   | ALA | X | 339 | 60.412 | 30.872 | 44.508 | 0.00 | 0.00 |
| ATOM | 5106 | O   | ALA | X | 339 | 60.608 | 30.455 | 43.393 | 0.00 | 0.00 |
| ATOM | 5107 | N   | PRO | X | 340 | 61.348 | 30.894 | 45.482 | 0.00 | 0.00 |
| ATOM | 5108 | CD  | PRO | X | 340 | 61.168 | 31.397 | 46.868 | 0.00 | 0.00 |
| ATOM | 5109 | HD2 | PRO | X | 340 | 60.277 | 31.027 | 47.375 | 0.00 | 0.00 |
| ATOM | 5110 | HD3 | PRO | X | 340 | 61.232 | 32.484 | 46.821 | 0.00 | 0.00 |
| ATOM | 5111 | CG  | PRO | X | 340 | 62.414 | 30.850 | 47.615 | 0.00 | 0.00 |
| ATOM | 5112 | HG2 | PRO | X | 340 | 62.127 | 29.912 | 48.091 | 0.00 | 0.00 |
| ATOM | 5113 | HG3 | PRO | X | 340 | 62.691 | 31.606 | 48.349 | 0.00 | 0.00 |
| ATOM | 5114 | CB  | PRO | X | 340 | 63.410 | 30.760 | 46.518 | 0.00 | 0.00 |
| ATOM | 5115 | HB2 | PRO | X | 340 | 64.291 | 30.261 | 46.921 | 0.00 | 0.00 |
| ATOM | 5116 | HB3 | PRO | X | 340 | 63.819 | 31.721 | 46.205 | 0.00 | 0.00 |
| ATOM | 5117 | CA  | PRO | X | 340 | 62.704 | 30.324 | 45.231 | 0.00 | 0.00 |
| ATOM | 5118 | HA  | PRO | X | 340 | 63.157 | 30.788 | 44.354 | 0.00 | 0.00 |
| ATOM | 5119 | C   | PRO | X | 340 | 62.687 | 28.773 | 44.966 | 0.00 | 0.00 |
| ATOM | 5120 | O   | PRO | X | 340 | 62.038 | 28.052 | 45.768 | 0.00 | 0.00 |
| ATOM | 5121 | N   | GLY | X | 341 | 63.439 | 28.249 | 43.982 | 0.00 | 0.00 |
| ATOM | 5122 | H   | GLY | X | 341 | 63.947 | 28.870 | 43.369 | 0.00 | 0.00 |
| ATOM | 5123 | CA  | GLY | X | 341 | 63.529 | 26.840 | 43.677 | 0.00 | 0.00 |
| ATOM | 5124 | HA2 | GLY | X | 341 | 64.445 | 26.539 | 43.169 | 0.00 | 0.00 |
| ATOM | 5125 | HA3 | GLY | X | 341 | 63.540 | 26.280 | 44.612 | 0.00 | 0.00 |
| ATOM | 5126 | C   | GLY | X | 341 | 62.435 | 26.374 | 42.723 | 0.00 | 0.00 |
| ATOM | 5127 | O   | GLY | X | 341 | 62.328 | 25.161 | 42.463 | 0.00 | 0.00 |
| ATOM | 5128 | N   | PHE | X | 342 | 61.633 | 27.432 | 42.265 | 0.00 | 0.00 |
| ATOM | 5129 | H   | PHE | X | 342 | 61.803 | 28.322 | 42.711 | 0.00 | 0.00 |
| ATOM | 5130 | CA  | PHE | X | 342 | 60.462 | 27.147 | 41.432 | 0.00 | 0.00 |
| ATOM | 5131 | HA  | PHE | X | 342 | 60.453 | 26.068 | 41.284 | 0.00 | 0.00 |
| ATOM | 5132 | CB  | PHE | X | 342 | 59.212 | 27.478 | 42.245 | 0.00 | 0.00 |
| ATOM | 5133 | HB2 | PHE | X | 342 | 59.343 | 28.407 | 42.801 | 0.00 | 0.00 |
| ATOM | 5134 | HB3 | PHE | X | 342 | 58.414 | 27.585 | 41.510 | 0.00 | 0.00 |
| ATOM | 5135 | CG  | PHE | X | 342 | 58.820 | 26.398 | 43.256 | 0.00 | 0.00 |
| ATOM | 5136 | CD1 | PHE | X | 342 | 57.936 | 25.446 | 42.784 | 0.00 | 0.00 |

|      |      |      |     |   |     |        |        |        |      |      |
|------|------|------|-----|---|-----|--------|--------|--------|------|------|
| ATOM | 5137 | HD1  | PHE | X | 342 | 57.640 | 25.364 | 41.749 | 0.00 | 0.00 |
| ATOM | 5138 | CE1  | PHE | X | 342 | 57.474 | 24.450 | 43.626 | 0.00 | 0.00 |
| ATOM | 5139 | HE1  | PHE | X | 342 | 56.952 | 23.614 | 43.184 | 0.00 | 0.00 |
| ATOM | 5140 | CZ   | PHE | X | 342 | 57.695 | 24.535 | 45.051 | 0.00 | 0.00 |
| ATOM | 5141 | HZ   | PHE | X | 342 | 57.275 | 23.840 | 45.762 | 0.00 | 0.00 |
| ATOM | 5142 | CE2  | PHE | X | 342 | 58.504 | 25.584 | 45.545 | 0.00 | 0.00 |
| ATOM | 5143 | HE2  | PHE | X | 342 | 58.606 | 25.806 | 46.597 | 0.00 | 0.00 |
| ATOM | 5144 | CD2  | PHE | X | 342 | 59.121 | 26.508 | 44.672 | 0.00 | 0.00 |
| ATOM | 5145 | HD2  | PHE | X | 342 | 59.664 | 27.374 | 45.019 | 0.00 | 0.00 |
| ATOM | 5146 | C    | PHE | X | 342 | 60.586 | 27.782 | 40.057 | 0.00 | 0.00 |
| ATOM | 5147 | O    | PHE | X | 342 | 60.914 | 28.944 | 39.960 | 0.00 | 0.00 |
| ATOM | 5148 | N    | SER | X | 343 | 59.989 | 27.072 | 39.049 | 0.00 | 0.00 |
| ATOM | 5149 | H    | SER | X | 343 | 59.870 | 26.070 | 39.095 | 0.00 | 0.00 |
| ATOM | 5150 | CA   | SER | X | 343 | 59.513 | 27.600 | 37.725 | 0.00 | 0.00 |
| ATOM | 5151 | HA   | SER | X | 343 | 58.728 | 28.329 | 37.925 | 0.00 | 0.00 |
| ATOM | 5152 | CB   | SER | X | 343 | 60.712 | 28.097 | 36.832 | 0.00 | 0.00 |
| ATOM | 5153 | HB2  | SER | X | 343 | 61.156 | 29.040 | 37.152 | 0.00 | 0.00 |
| ATOM | 5154 | HB3  | SER | X | 343 | 61.513 | 27.366 | 36.947 | 0.00 | 0.00 |
| ATOM | 5155 | OG   | SER | X | 343 | 60.380 | 28.131 | 35.464 | 0.00 | 0.00 |
| ATOM | 5156 | HG   | SER | X | 343 | 61.134 | 28.515 | 35.012 | 0.00 | 0.00 |
| ATOM | 5157 | C    | SER | X | 343 | 58.840 | 26.436 | 37.037 | 0.00 | 0.00 |
| ATOM | 5158 | O    | SER | X | 343 | 59.218 | 25.265 | 37.311 | 0.00 | 0.00 |
| ATOM | 5159 | N    | LYS | X | 344 | 57.952 | 26.760 | 36.114 | 0.00 | 0.00 |
| ATOM | 5160 | H    | LYS | X | 344 | 57.845 | 27.741 | 35.895 | 0.00 | 0.00 |
| ATOM | 5161 | CA   | LYS | X | 344 | 57.377 | 25.715 | 35.255 | 0.00 | 0.00 |
| ATOM | 5162 | HA   | LYS | X | 344 | 57.070 | 24.971 | 35.990 | 0.00 | 0.00 |
| ATOM | 5163 | CB   | LYS | X | 344 | 56.194 | 26.309 | 34.405 | 0.00 | 0.00 |
| ATOM | 5164 | HB2  | LYS | X | 344 | 55.760 | 25.497 | 33.821 | 0.00 | 0.00 |
| ATOM | 5165 | HB3  | LYS | X | 344 | 55.478 | 26.679 | 35.139 | 0.00 | 0.00 |
| ATOM | 5166 | CG   | LYS | X | 344 | 56.714 | 27.423 | 33.462 | 0.00 | 0.00 |
| ATOM | 5167 | HG2  | LYS | X | 344 | 56.612 | 28.388 | 33.959 | 0.00 | 0.00 |
| ATOM | 5168 | HG3  | LYS | X | 344 | 57.752 | 27.203 | 33.211 | 0.00 | 0.00 |
| ATOM | 5169 | CD   | LYS | X | 344 | 55.868 | 27.440 | 32.248 | 0.00 | 0.00 |
| ATOM | 5170 | HD2  | LYS | X | 344 | 55.748 | 26.427 | 31.865 | 0.00 | 0.00 |
| ATOM | 5171 | HD3  | LYS | X | 344 | 54.890 | 27.715 | 32.643 | 0.00 | 0.00 |
| ATOM | 5172 | CE   | LYS | X | 344 | 56.180 | 28.632 | 31.250 | 0.00 | 0.00 |
| ATOM | 5173 | HE2  | LYS | X | 344 | 55.238 | 28.686 | 30.702 | 0.00 | 0.00 |
| ATOM | 5174 | HE3  | LYS | X | 344 | 56.287 | 29.587 | 31.764 | 0.00 | 0.00 |
| ATOM | 5175 | NZ   | LYS | X | 344 | 57.400 | 28.382 | 30.395 | 0.00 | 0.00 |
| ATOM | 5176 | HZ1  | LYS | X | 344 | 57.346 | 27.498 | 29.909 | 0.00 | 0.00 |
| ATOM | 5177 | HZ2  | LYS | X | 344 | 57.563 | 28.956 | 29.580 | 0.00 | 0.00 |
| ATOM | 5178 | HZ3  | LYS | X | 344 | 58.261 | 28.305 | 30.916 | 0.00 | 0.00 |
| ATOM | 5179 | C    | LYS | X | 344 | 58.388 | 24.940 | 34.492 | 0.00 | 0.00 |
| ATOM | 5180 | O    | LYS | X | 344 | 58.123 | 23.779 | 34.224 | 0.00 | 0.00 |
| ATOM | 5181 | N    | ASP | X | 345 | 59.573 | 25.463 | 34.243 | 0.00 | 0.00 |
| ATOM | 5182 | H    | ASP | X | 345 | 59.702 | 26.448 | 34.423 | 0.00 | 0.00 |
| ATOM | 5183 | CA   | ASP | X | 345 | 60.655 | 24.824 | 33.449 | 0.00 | 0.00 |
| ATOM | 5184 | HA   | ASP | X | 345 | 60.350 | 24.068 | 32.726 | 0.00 | 0.00 |
| ATOM | 5185 | CB   | ASP | X | 345 | 61.357 | 25.984 | 32.676 | 0.00 | 0.00 |
| ATOM | 5186 | HB2  | ASP | X | 345 | 61.593 | 26.708 | 33.456 | 0.00 | 0.00 |
| ATOM | 5187 | HB3  | ASP | X | 345 | 62.226 | 25.573 | 32.163 | 0.00 | 0.00 |
| ATOM | 5188 | CG   | ASP | X | 345 | 60.406 | 26.745 | 31.634 | 0.00 | 0.00 |
| ATOM | 5189 | OD1  | ASP | X | 345 | 60.005 | 27.882 | 31.826 | 0.00 | 0.00 |
| ATOM | 5190 | OD2  | ASP | X | 345 | 60.135 | 26.014 | 30.650 | 0.00 | 0.00 |
| ATOM | 5191 | C    | ASP | X | 345 | 61.716 | 24.060 | 34.258 | 0.00 | 0.00 |
| ATOM | 5192 | O    | ASP | X | 345 | 62.691 | 23.597 | 33.703 | 0.00 | 0.00 |
| ATOM | 5193 | N    | ASN | X | 346 | 61.577 | 24.085 | 35.589 | 0.00 | 0.00 |
| ATOM | 5194 | H    | ASN | X | 346 | 60.708 | 24.468 | 35.934 | 0.00 | 0.00 |
| ATOM | 5195 | CA   | ASN | X | 346 | 62.360 | 23.496 | 36.652 | 0.00 | 0.00 |
| ATOM | 5196 | HA   | ASN | X | 346 | 63.308 | 23.119 | 36.269 | 0.00 | 0.00 |
| ATOM | 5197 | CB   | ASN | X | 346 | 62.459 | 24.590 | 37.714 | 0.00 | 0.00 |
| ATOM | 5198 | HB2  | ASN | X | 346 | 62.639 | 25.552 | 37.235 | 0.00 | 0.00 |
| ATOM | 5199 | HB3  | ASN | X | 346 | 61.459 | 24.745 | 38.121 | 0.00 | 0.00 |
| ATOM | 5200 | CG   | ASN | X | 346 | 63.442 | 24.192 | 38.831 | 0.00 | 0.00 |
| ATOM | 5201 | OD1  | ASN | X | 346 | 63.122 | 23.422 | 39.712 | 0.00 | 0.00 |
| ATOM | 5202 | ND2  | ASN | X | 346 | 64.571 | 24.790 | 38.771 | 0.00 | 0.00 |
| ATOM | 5203 | HD21 | ASN | X | 346 | 65.259 | 24.663 | 39.499 | 0.00 | 0.00 |

|      |      |      |     |   |     |        |        |        |      |      |
|------|------|------|-----|---|-----|--------|--------|--------|------|------|
| ATOM | 5204 | HD22 | ASN | X | 346 | 64.647 | 25.479 | 38.036 | 0.00 | 0.00 |
| ATOM | 5205 | C    | ASN | X | 346 | 61.561 | 22.322 | 37.293 | 0.00 | 0.00 |
| ATOM | 5206 | O    | ASN | X | 346 | 60.313 | 22.323 | 37.413 | 0.00 | 0.00 |
| ATOM | 5207 | N    | GLU | X | 347 | 62.351 | 21.324 | 37.822 | 0.00 | 0.00 |
| ATOM | 5208 | H    | GLU | X | 347 | 63.357 | 21.330 | 37.731 | 0.00 | 0.00 |
| ATOM | 5209 | CA   | GLU | X | 347 | 61.774 | 20.134 | 38.379 | 0.00 | 0.00 |
| ATOM | 5210 | HA   | GLU | X | 347 | 61.123 | 19.705 | 37.617 | 0.00 | 0.00 |
| ATOM | 5211 | CB   | GLU | X | 347 | 62.932 | 19.137 | 38.744 | 0.00 | 0.00 |
| ATOM | 5212 | HB2  | GLU | X | 347 | 63.666 | 19.114 | 37.938 | 0.00 | 0.00 |
| ATOM | 5213 | HB3  | GLU | X | 347 | 63.565 | 19.558 | 39.525 | 0.00 | 0.00 |
| ATOM | 5214 | CG   | GLU | X | 347 | 62.493 | 17.757 | 39.175 | 0.00 | 0.00 |
| ATOM | 5215 | HG2  | GLU | X | 347 | 63.306 | 17.181 | 39.616 | 0.00 | 0.00 |
| ATOM | 5216 | HG3  | GLU | X | 347 | 61.734 | 17.880 | 39.947 | 0.00 | 0.00 |
| ATOM | 5217 | CD   | GLU | X | 347 | 61.975 | 16.844 | 37.979 | 0.00 | 0.00 |
| ATOM | 5218 | OE1  | GLU | X | 347 | 60.759 | 16.585 | 37.892 | 0.00 | 0.00 |
| ATOM | 5219 | OE2  | GLU | X | 347 | 62.774 | 16.551 | 37.010 | 0.00 | 0.00 |
| ATOM | 5220 | C    | GLU | X | 347 | 60.854 | 20.463 | 39.548 | 0.00 | 0.00 |
| ATOM | 5221 | O    | GLU | X | 347 | 59.858 | 19.831 | 39.808 | 0.00 | 0.00 |
| ATOM | 5222 | N    | SER | X | 348 | 61.279 | 21.331 | 40.459 | 0.00 | 0.00 |
| ATOM | 5223 | H    | SER | X | 348 | 62.099 | 21.873 | 40.226 | 0.00 | 0.00 |
| ATOM | 5224 | CA   | SER | X | 348 | 60.493 | 22.008 | 41.494 | 0.00 | 0.00 |
| ATOM | 5225 | HA   | SER | X | 348 | 60.962 | 22.956 | 41.758 | 0.00 | 0.00 |
| ATOM | 5226 | CB   | SER | X | 348 | 59.167 | 22.496 | 40.866 | 0.00 | 0.00 |
| ATOM | 5227 | HB2  | SER | X | 348 | 58.646 | 21.754 | 40.260 | 0.00 | 0.00 |
| ATOM | 5228 | HB3  | SER | X | 348 | 58.595 | 22.933 | 41.684 | 0.00 | 0.00 |
| ATOM | 5229 | OG   | SER | X | 348 | 59.580 | 23.607 | 40.005 | 0.00 | 0.00 |
| ATOM | 5230 | HG   | SER | X | 348 | 59.681 | 23.387 | 39.076 | 0.00 | 0.00 |
| ATOM | 5231 | C    | SER | X | 348 | 60.259 | 21.156 | 42.826 | 0.00 | 0.00 |
| ATOM | 5232 | O    | SER | X | 348 | 59.715 | 21.680 | 43.782 | 0.00 | 0.00 |
| ATOM | 5233 | N    | LEU | X | 349 | 60.962 | 19.983 | 42.827 | 0.00 | 0.00 |
| ATOM | 5234 | H    | LEU | X | 349 | 61.370 | 19.675 | 41.956 | 0.00 | 0.00 |
| ATOM | 5235 | CA   | LEU | X | 349 | 61.023 | 18.998 | 43.946 | 0.00 | 0.00 |
| ATOM | 5236 | HA   | LEU | X | 349 | 60.158 | 19.015 | 44.609 | 0.00 | 0.00 |
| ATOM | 5237 | CB   | LEU | X | 349 | 61.290 | 17.591 | 43.459 | 0.00 | 0.00 |
| ATOM | 5238 | HB2  | LEU | X | 349 | 62.015 | 17.560 | 42.646 | 0.00 | 0.00 |
| ATOM | 5239 | HB3  | LEU | X | 349 | 61.625 | 17.070 | 44.356 | 0.00 | 0.00 |
| ATOM | 5240 | CG   | LEU | X | 349 | 59.998 | 16.910 | 42.940 | 0.00 | 0.00 |
| ATOM | 5241 | HG   | LEU | X | 349 | 59.716 | 17.551 | 42.104 | 0.00 | 0.00 |
| ATOM | 5242 | CD1  | LEU | X | 349 | 60.363 | 15.551 | 42.397 | 0.00 | 0.00 |
| ATOM | 5243 | HD11 | LEU | X | 349 | 61.133 | 15.490 | 41.629 | 0.00 | 0.00 |
| ATOM | 5244 | HD12 | LEU | X | 349 | 59.545 | 15.086 | 41.847 | 0.00 | 0.00 |
| ATOM | 5245 | HD13 | LEU | X | 349 | 60.797 | 14.989 | 43.224 | 0.00 | 0.00 |
| ATOM | 5246 | CD2  | LEU | X | 349 | 58.776 | 16.928 | 43.859 | 0.00 | 0.00 |
| ATOM | 5247 | HD21 | LEU | X | 349 | 58.383 | 17.940 | 43.957 | 0.00 | 0.00 |
| ATOM | 5248 | HD22 | LEU | X | 349 | 57.930 | 16.317 | 43.546 | 0.00 | 0.00 |
| ATOM | 5249 | HD23 | LEU | X | 349 | 59.235 | 16.709 | 44.823 | 0.00 | 0.00 |
| ATOM | 5250 | C    | LEU | X | 349 | 62.087 | 19.574 | 44.845 | 0.00 | 0.00 |
| ATOM | 5251 | O    | LEU | X | 349 | 63.170 | 19.035 | 44.843 | 0.00 | 0.00 |
| ATOM | 5252 | N    | ILE | X | 350 | 61.786 | 20.720 | 45.431 | 0.00 | 0.00 |
| ATOM | 5253 | H    | ILE | X | 350 | 60.876 | 21.095 | 45.203 | 0.00 | 0.00 |
| ATOM | 5254 | CA   | ILE | X | 350 | 62.620 | 21.522 | 46.390 | 0.00 | 0.00 |
| ATOM | 5255 | HA   | ILE | X | 350 | 63.536 | 21.899 | 45.935 | 0.00 | 0.00 |
| ATOM | 5256 | CB   | ILE | X | 350 | 61.767 | 22.688 | 46.907 | 0.00 | 0.00 |
| ATOM | 5257 | HB   | ILE | X | 350 | 62.423 | 23.229 | 47.589 | 0.00 | 0.00 |
| ATOM | 5258 | CG2  | ILE | X | 350 | 61.504 | 23.831 | 45.866 | 0.00 | 0.00 |
| ATOM | 5259 | HG21 | ILE | X | 350 | 62.405 | 23.971 | 45.268 | 0.00 | 0.00 |
| ATOM | 5260 | HG22 | ILE | X | 350 | 61.134 | 24.749 | 46.324 | 0.00 | 0.00 |
| ATOM | 5261 | HG23 | ILE | X | 350 | 60.657 | 23.481 | 45.276 | 0.00 | 0.00 |
| ATOM | 5262 | CG1  | ILE | X | 350 | 60.441 | 22.318 | 47.685 | 0.00 | 0.00 |
| ATOM | 5263 | HG12 | ILE | X | 350 | 59.731 | 21.877 | 46.986 | 0.00 | 0.00 |
| ATOM | 5264 | HG13 | ILE | X | 350 | 60.646 | 21.523 | 48.402 | 0.00 | 0.00 |
| ATOM | 5265 | CD1  | ILE | X | 350 | 59.764 | 23.478 | 48.412 | 0.00 | 0.00 |
| ATOM | 5266 | HD11 | ILE | X | 350 | 60.428 | 23.805 | 49.212 | 0.00 | 0.00 |
| ATOM | 5267 | HD12 | ILE | X | 350 | 58.872 | 23.062 | 48.880 | 0.00 | 0.00 |
| ATOM | 5268 | HD13 | ILE | X | 350 | 59.538 | 24.340 | 47.783 | 0.00 | 0.00 |
| ATOM | 5269 | C    | ILE | X | 350 | 63.193 | 20.824 | 47.622 | 0.00 | 0.00 |
| ATOM | 5270 | O    | ILE | X | 350 | 62.624 | 19.794 | 48.082 | 0.00 | 0.00 |

|      |      |      |     |   |     |        |        |        |      |      |
|------|------|------|-----|---|-----|--------|--------|--------|------|------|
| ATOM | 5271 | N    | SER | X | 351 | 64.170 | 21.438 | 48.293 | 0.00 | 0.00 |
| ATOM | 5272 | H    | SER | X | 351 | 64.622 | 22.242 | 47.882 | 0.00 | 0.00 |
| ATOM | 5273 | CA   | SER | X | 351 | 64.769 | 20.921 | 49.543 | 0.00 | 0.00 |
| ATOM | 5274 | HA   | SER | X | 351 | 64.616 | 19.848 | 49.652 | 0.00 | 0.00 |
| ATOM | 5275 | CB   | SER | X | 351 | 66.279 | 21.241 | 49.379 | 0.00 | 0.00 |
| ATOM | 5276 | HB2  | SER | X | 351 | 66.833 | 20.864 | 50.238 | 0.00 | 0.00 |
| ATOM | 5277 | HB3  | SER | X | 351 | 66.628 | 20.754 | 48.468 | 0.00 | 0.00 |
| ATOM | 5278 | OG   | SER | X | 351 | 66.556 | 22.630 | 49.202 | 0.00 | 0.00 |
| ATOM | 5279 | HG   | SER | X | 351 | 66.206 | 22.820 | 48.328 | 0.00 | 0.00 |
| ATOM | 5280 | C    | SER | X | 351 | 64.202 | 21.744 | 50.726 | 0.00 | 0.00 |
| ATOM | 5281 | O    | SER | X | 351 | 63.645 | 22.862 | 50.564 | 0.00 | 0.00 |
| ATOM | 5282 | N    | ARG | X | 352 | 64.458 | 21.299 | 51.927 | 0.00 | 0.00 |
| ATOM | 5283 | H    | ARG | X | 352 | 64.977 | 20.437 | 52.020 | 0.00 | 0.00 |
| ATOM | 5284 | CA   | ARG | X | 352 | 63.822 | 21.794 | 53.175 | 0.00 | 0.00 |
| ATOM | 5285 | HA   | ARG | X | 352 | 62.745 | 21.860 | 53.021 | 0.00 | 0.00 |
| ATOM | 5286 | CB   | ARG | X | 352 | 64.204 | 20.842 | 54.281 | 0.00 | 0.00 |
| ATOM | 5287 | HB2  | ARG | X | 352 | 63.886 | 19.844 | 53.979 | 0.00 | 0.00 |
| ATOM | 5288 | HB3  | ARG | X | 352 | 65.293 | 20.801 | 54.315 | 0.00 | 0.00 |
| ATOM | 5289 | CG   | ARG | X | 352 | 63.594 | 21.248 | 55.629 | 0.00 | 0.00 |
| ATOM | 5290 | HG2  | ARG | X | 352 | 63.986 | 20.628 | 56.435 | 0.00 | 0.00 |
| ATOM | 5291 | HG3  | ARG | X | 352 | 63.799 | 22.311 | 55.753 | 0.00 | 0.00 |
| ATOM | 5292 | CD   | ARG | X | 352 | 62.077 | 21.140 | 55.699 | 0.00 | 0.00 |
| ATOM | 5293 | HD2  | ARG | X | 352 | 61.691 | 21.757 | 54.887 | 0.00 | 0.00 |
| ATOM | 5294 | HD3  | ARG | X | 352 | 61.770 | 20.096 | 55.634 | 0.00 | 0.00 |
| ATOM | 5295 | NE   | ARG | X | 352 | 61.623 | 21.661 | 57.027 | 0.00 | 0.00 |
| ATOM | 5296 | HE   | ARG | X | 352 | 62.218 | 22.212 | 57.629 | 0.00 | 0.00 |
| ATOM | 5297 | CZ   | ARG | X | 352 | 60.447 | 21.498 | 57.577 | 0.00 | 0.00 |
| ATOM | 5298 | NH1  | ARG | X | 352 | 59.482 | 20.695 | 57.115 | 0.00 | 0.00 |
| ATOM | 5299 | HH11 | ARG | X | 352 | 59.645 | 20.097 | 56.317 | 0.00 | 0.00 |
| ATOM | 5300 | HH12 | ARG | X | 352 | 58.665 | 20.568 | 57.695 | 0.00 | 0.00 |
| ATOM | 5301 | NH2  | ARG | X | 352 | 60.177 | 22.018 | 58.771 | 0.00 | 0.00 |
| ATOM | 5302 | HH21 | ARG | X | 352 | 60.809 | 22.702 | 59.161 | 0.00 | 0.00 |
| ATOM | 5303 | HH22 | ARG | X | 352 | 59.462 | 21.601 | 59.350 | 0.00 | 0.00 |
| ATOM | 5304 | C    | ARG | X | 352 | 64.274 | 23.294 | 53.354 | 0.00 | 0.00 |
| ATOM | 5305 | O    | ARG | X | 352 | 63.456 | 24.049 | 53.846 | 0.00 | 0.00 |
| ATOM | 5306 | N    | ALA | X | 353 | 65.451 | 23.734 | 52.913 | 0.00 | 0.00 |
| ATOM | 5307 | H    | ALA | X | 353 | 66.156 | 23.074 | 52.617 | 0.00 | 0.00 |
| ATOM | 5308 | CA   | ALA | X | 353 | 65.701 | 25.157 | 53.039 | 0.00 | 0.00 |
| ATOM | 5309 | HA   | ALA | X | 353 | 65.531 | 25.435 | 54.079 | 0.00 | 0.00 |
| ATOM | 5310 | CB   | ALA | X | 353 | 67.221 | 25.474 | 52.723 | 0.00 | 0.00 |
| ATOM | 5311 | HB1  | ALA | X | 353 | 67.424 | 26.542 | 52.802 | 0.00 | 0.00 |
| ATOM | 5312 | HB2  | ALA | X | 353 | 67.381 | 25.184 | 51.684 | 0.00 | 0.00 |
| ATOM | 5313 | HB3  | ALA | X | 353 | 67.934 | 24.929 | 53.342 | 0.00 | 0.00 |
| ATOM | 5314 | C    | ALA | X | 353 | 64.880 | 26.048 | 52.135 | 0.00 | 0.00 |
| ATOM | 5315 | O    | ALA | X | 353 | 64.610 | 27.200 | 52.477 | 0.00 | 0.00 |
| ATOM | 5316 | N    | GLU | X | 354 | 64.623 | 25.536 | 50.877 | 0.00 | 0.00 |
| ATOM | 5317 | H    | GLU | X | 354 | 64.920 | 24.576 | 50.773 | 0.00 | 0.00 |
| ATOM | 5318 | CA   | GLU | X | 354 | 63.842 | 26.273 | 49.806 | 0.00 | 0.00 |
| ATOM | 5319 | HA   | GLU | X | 354 | 64.211 | 27.299 | 49.809 | 0.00 | 0.00 |
| ATOM | 5320 | CB   | GLU | X | 354 | 63.959 | 25.642 | 48.375 | 0.00 | 0.00 |
| ATOM | 5321 | HB2  | GLU | X | 354 | 63.605 | 24.612 | 48.356 | 0.00 | 0.00 |
| ATOM | 5322 | HB3  | GLU | X | 354 | 63.307 | 26.149 | 47.664 | 0.00 | 0.00 |
| ATOM | 5323 | CG   | GLU | X | 354 | 65.428 | 25.652 | 47.924 | 0.00 | 0.00 |
| ATOM | 5324 | HG2  | GLU | X | 354 | 65.722 | 26.661 | 47.635 | 0.00 | 0.00 |
| ATOM | 5325 | HG3  | GLU | X | 354 | 66.083 | 25.271 | 48.708 | 0.00 | 0.00 |
| ATOM | 5326 | CD   | GLU | X | 354 | 65.683 | 24.751 | 46.714 | 0.00 | 0.00 |
| ATOM | 5327 | OE1  | GLU | X | 354 | 65.482 | 23.516 | 46.848 | 0.00 | 0.00 |
| ATOM | 5328 | OE2  | GLU | X | 354 | 66.208 | 25.270 | 45.693 | 0.00 | 0.00 |
| ATOM | 5329 | C    | GLU | X | 354 | 62.362 | 26.293 | 50.202 | 0.00 | 0.00 |
| ATOM | 5330 | O    | GLU | X | 354 | 61.760 | 27.330 | 50.056 | 0.00 | 0.00 |
| ATOM | 5331 | N    | PHE | X | 355 | 61.785 | 25.262 | 50.825 | 0.00 | 0.00 |
| ATOM | 5332 | H    | PHE | X | 355 | 62.262 | 24.377 | 50.925 | 0.00 | 0.00 |
| ATOM | 5333 | CA   | PHE | X | 355 | 60.459 | 25.353 | 51.472 | 0.00 | 0.00 |
| ATOM | 5334 | HA   | PHE | X | 355 | 59.694 | 25.629 | 50.747 | 0.00 | 0.00 |
| ATOM | 5335 | CB   | PHE | X | 355 | 60.248 | 23.939 | 52.059 | 0.00 | 0.00 |
| ATOM | 5336 | HB2  | PHE | X | 355 | 59.984 | 23.241 | 51.264 | 0.00 | 0.00 |
| ATOM | 5337 | HB3  | PHE | X | 355 | 61.111 | 23.488 | 52.549 | 0.00 | 0.00 |

|      |      |      |     |   |     |        |        |        |      |      |
|------|------|------|-----|---|-----|--------|--------|--------|------|------|
| ATOM | 5338 | CG   | PHE | X | 355 | 59.087 | 23.933 | 52.957 | 0.00 | 0.00 |
| ATOM | 5339 | CD1  | PHE | X | 355 | 57.795 | 23.716 | 52.531 | 0.00 | 0.00 |
| ATOM | 5340 | HD1  | PHE | X | 355 | 57.511 | 23.625 | 51.493 | 0.00 | 0.00 |
| ATOM | 5341 | CE1  | PHE | X | 355 | 56.695 | 23.601 | 53.340 | 0.00 | 0.00 |
| ATOM | 5342 | HE1  | PHE | X | 355 | 55.699 | 23.477 | 52.942 | 0.00 | 0.00 |
| ATOM | 5343 | CZ   | PHE | X | 355 | 56.909 | 23.606 | 54.706 | 0.00 | 0.00 |
| ATOM | 5344 | HZ   | PHE | X | 355 | 56.117 | 23.507 | 55.433 | 0.00 | 0.00 |
| ATOM | 5345 | CE2  | PHE | X | 355 | 58.212 | 23.728 | 55.235 | 0.00 | 0.00 |
| ATOM | 5346 | HE2  | PHE | X | 355 | 58.357 | 23.549 | 56.290 | 0.00 | 0.00 |
| ATOM | 5347 | CD2  | PHE | X | 355 | 59.335 | 23.826 | 54.365 | 0.00 | 0.00 |
| ATOM | 5348 | HD2  | PHE | X | 355 | 60.323 | 23.854 | 54.801 | 0.00 | 0.00 |
| ATOM | 5349 | C    | PHE | X | 355 | 60.403 | 26.456 | 52.563 | 0.00 | 0.00 |
| ATOM | 5350 | O    | PHE | X | 355 | 59.410 | 27.108 | 52.506 | 0.00 | 0.00 |
| ATOM | 5351 | N    | LEU | X | 356 | 61.402 | 26.704 | 53.404 | 0.00 | 0.00 |
| ATOM | 5352 | H    | LEU | X | 356 | 62.231 | 26.137 | 53.290 | 0.00 | 0.00 |
| ATOM | 5353 | CA   | LEU | X | 356 | 61.479 | 27.785 | 54.335 | 0.00 | 0.00 |
| ATOM | 5354 | HA   | LEU | X | 356 | 60.534 | 27.674 | 54.865 | 0.00 | 0.00 |
| ATOM | 5355 | CB   | LEU | X | 356 | 62.742 | 27.523 | 55.160 | 0.00 | 0.00 |
| ATOM | 5356 | HB2  | LEU | X | 356 | 62.526 | 26.512 | 55.504 | 0.00 | 0.00 |
| ATOM | 5357 | HB3  | LEU | X | 356 | 63.615 | 27.689 | 54.529 | 0.00 | 0.00 |
| ATOM | 5358 | CG   | LEU | X | 356 | 62.963 | 28.286 | 56.527 | 0.00 | 0.00 |
| ATOM | 5359 | HG   | LEU | X | 356 | 63.836 | 27.830 | 56.995 | 0.00 | 0.00 |
| ATOM | 5360 | CD1  | LEU | X | 356 | 63.246 | 29.826 | 56.333 | 0.00 | 0.00 |
| ATOM | 5361 | HD11 | LEU | X | 356 | 62.458 | 30.303 | 55.750 | 0.00 | 0.00 |
| ATOM | 5362 | HD12 | LEU | X | 356 | 64.105 | 29.990 | 55.681 | 0.00 | 0.00 |
| ATOM | 5363 | HD13 | LEU | X | 356 | 63.306 | 30.351 | 57.286 | 0.00 | 0.00 |
| ATOM | 5364 | CD2  | LEU | X | 356 | 61.721 | 28.017 | 57.404 | 0.00 | 0.00 |
| ATOM | 5365 | HD21 | LEU | X | 356 | 61.701 | 26.992 | 57.776 | 0.00 | 0.00 |
| ATOM | 5366 | HD22 | LEU | X | 356 | 61.806 | 28.725 | 58.228 | 0.00 | 0.00 |
| ATOM | 5367 | HD23 | LEU | X | 356 | 60.780 | 28.437 | 57.050 | 0.00 | 0.00 |
| ATOM | 5368 | C    | LEU | X | 356 | 61.419 | 29.180 | 53.642 | 0.00 | 0.00 |
| ATOM | 5369 | O    | LEU | X | 356 | 60.522 | 29.977 | 53.904 | 0.00 | 0.00 |
| ATOM | 5370 | N    | ALA | X | 357 | 62.326 | 29.434 | 52.711 | 0.00 | 0.00 |
| ATOM | 5371 | H    | ALA | X | 357 | 63.036 | 28.729 | 52.574 | 0.00 | 0.00 |
| ATOM | 5372 | CA   | ALA | X | 357 | 62.301 | 30.694 | 51.919 | 0.00 | 0.00 |
| ATOM | 5373 | HA   | ALA | X | 357 | 62.480 | 31.604 | 52.491 | 0.00 | 0.00 |
| ATOM | 5374 | CB   | ALA | X | 357 | 63.477 | 30.592 | 50.949 | 0.00 | 0.00 |
| ATOM | 5375 | HB1  | ALA | X | 357 | 64.441 | 30.847 | 51.389 | 0.00 | 0.00 |
| ATOM | 5376 | HB2  | ALA | X | 357 | 63.515 | 31.408 | 50.228 | 0.00 | 0.00 |
| ATOM | 5377 | HB3  | ALA | X | 357 | 63.477 | 29.766 | 50.238 | 0.00 | 0.00 |
| ATOM | 5378 | C    | ALA | X | 357 | 60.997 | 30.924 | 51.190 | 0.00 | 0.00 |
| ATOM | 5379 | O    | ALA | X | 357 | 60.539 | 32.055 | 51.045 | 0.00 | 0.00 |
| ATOM | 5380 | N    | GLY | X | 358 | 60.337 | 29.879 | 50.728 | 0.00 | 0.00 |
| ATOM | 5381 | H    | GLY | X | 358 | 60.863 | 29.031 | 50.566 | 0.00 | 0.00 |
| ATOM | 5382 | CA   | GLY | X | 358 | 58.963 | 29.884 | 50.231 | 0.00 | 0.00 |
| ATOM | 5383 | HA2  | GLY | X | 358 | 58.863 | 30.554 | 49.377 | 0.00 | 0.00 |
| ATOM | 5384 | HA3  | GLY | X | 358 | 58.651 | 28.892 | 49.902 | 0.00 | 0.00 |
| ATOM | 5385 | C    | GLY | X | 358 | 57.990 | 30.333 | 51.260 | 0.00 | 0.00 |
| ATOM | 5386 | O    | GLY | X | 358 | 57.090 | 31.104 | 50.909 | 0.00 | 0.00 |
| ATOM | 5387 | N    | VAL | X | 359 | 58.048 | 29.891 | 52.513 | 0.00 | 0.00 |
| ATOM | 5388 | H    | VAL | X | 359 | 58.764 | 29.250 | 52.822 | 0.00 | 0.00 |
| ATOM | 5389 | CA   | VAL | X | 359 | 57.191 | 30.517 | 53.524 | 0.00 | 0.00 |
| ATOM | 5390 | HA   | VAL | X | 359 | 56.200 | 30.364 | 53.099 | 0.00 | 0.00 |
| ATOM | 5391 | CB   | VAL | X | 359 | 57.185 | 29.682 | 54.865 | 0.00 | 0.00 |
| ATOM | 5392 | HB   | VAL | X | 359 | 58.201 | 29.484 | 55.207 | 0.00 | 0.00 |
| ATOM | 5393 | CG1  | VAL | X | 359 | 56.424 | 30.334 | 56.114 | 0.00 | 0.00 |
| ATOM | 5394 | HG11 | VAL | X | 359 | 55.365 | 30.389 | 55.861 | 0.00 | 0.00 |
| ATOM | 5395 | HG12 | VAL | X | 359 | 56.502 | 29.742 | 57.026 | 0.00 | 0.00 |
| ATOM | 5396 | HG13 | VAL | X | 359 | 56.896 | 31.263 | 56.435 | 0.00 | 0.00 |
| ATOM | 5397 | CG2  | VAL | X | 359 | 56.668 | 28.270 | 54.674 | 0.00 | 0.00 |
| ATOM | 5398 | HG21 | VAL | X | 359 | 56.363 | 27.842 | 55.629 | 0.00 | 0.00 |
| ATOM | 5399 | HG22 | VAL | X | 359 | 57.489 | 27.676 | 54.274 | 0.00 | 0.00 |
| ATOM | 5400 | HG23 | VAL | X | 359 | 55.742 | 28.329 | 54.101 | 0.00 | 0.00 |
| ATOM | 5401 | C    | VAL | X | 359 | 57.405 | 31.986 | 53.822 | 0.00 | 0.00 |
| ATOM | 5402 | O    | VAL | X | 359 | 56.447 | 32.751 | 53.766 | 0.00 | 0.00 |
| ATOM | 5403 | N    | ARG | X | 360 | 58.672 | 32.460 | 53.801 | 0.00 | 0.00 |
| ATOM | 5404 | H    | ARG | X | 360 | 59.436 | 31.815 | 53.949 | 0.00 | 0.00 |

|      |      |      |     |   |     |        |        |        |      |      |
|------|------|------|-----|---|-----|--------|--------|--------|------|------|
| ATOM | 5405 | CA   | ARG | X | 360 | 58.980 | 33.905 | 54.021 | 0.00 | 0.00 |
| ATOM | 5406 | HA   | ARG | X | 360 | 58.556 | 34.381 | 54.905 | 0.00 | 0.00 |
| ATOM | 5407 | CB   | ARG | X | 360 | 60.516 | 34.122 | 54.171 | 0.00 | 0.00 |
| ATOM | 5408 | HB2  | ARG | X | 360 | 60.923 | 33.826 | 53.205 | 0.00 | 0.00 |
| ATOM | 5409 | HB3  | ARG | X | 360 | 60.755 | 35.127 | 54.519 | 0.00 | 0.00 |
| ATOM | 5410 | CG   | ARG | X | 360 | 61.185 | 33.248 | 55.278 | 0.00 | 0.00 |
| ATOM | 5411 | HG2  | ARG | X | 360 | 61.169 | 32.205 | 54.963 | 0.00 | 0.00 |
| ATOM | 5412 | HG3  | ARG | X | 360 | 62.205 | 33.589 | 55.453 | 0.00 | 0.00 |
| ATOM | 5413 | CD   | ARG | X | 360 | 60.464 | 33.241 | 56.673 | 0.00 | 0.00 |
| ATOM | 5414 | HD2  | ARG | X | 360 | 59.393 | 33.069 | 56.572 | 0.00 | 0.00 |
| ATOM | 5415 | HD3  | ARG | X | 360 | 60.790 | 32.384 | 57.262 | 0.00 | 0.00 |
| ATOM | 5416 | NE   | ARG | X | 360 | 60.635 | 34.495 | 57.405 | 0.00 | 0.00 |
| ATOM | 5417 | HE   | ARG | X | 360 | 60.329 | 35.366 | 56.996 | 0.00 | 0.00 |
| ATOM | 5418 | CZ   | ARG | X | 360 | 60.846 | 34.605 | 58.712 | 0.00 | 0.00 |
| ATOM | 5419 | NH1  | ARG | X | 360 | 61.164 | 33.583 | 59.467 | 0.00 | 0.00 |
| ATOM | 5420 | HH11 | ARG | X | 360 | 61.118 | 32.613 | 59.189 | 0.00 | 0.00 |
| ATOM | 5421 | HH12 | ARG | X | 360 | 61.371 | 33.790 | 60.433 | 0.00 | 0.00 |
| ATOM | 5422 | NH2  | ARG | X | 360 | 60.762 | 35.835 | 59.267 | 0.00 | 0.00 |
| ATOM | 5423 | HH21 | ARG | X | 360 | 60.478 | 36.597 | 58.669 | 0.00 | 0.00 |
| ATOM | 5424 | HH22 | ARG | X | 360 | 60.950 | 35.983 | 60.249 | 0.00 | 0.00 |
| ATOM | 5425 | C    | ARG | X | 360 | 58.397 | 34.688 | 52.799 | 0.00 | 0.00 |
| ATOM | 5426 | O    | ARG | X | 360 | 57.673 | 35.665 | 53.078 | 0.00 | 0.00 |
| ATOM | 5427 | N    | VAL | X | 361 | 58.594 | 34.222 | 51.555 | 0.00 | 0.00 |
| ATOM | 5428 | H    | VAL | X | 361 | 59.423 | 33.671 | 51.384 | 0.00 | 0.00 |
| ATOM | 5429 | CA   | VAL | X | 361 | 57.925 | 34.964 | 50.404 | 0.00 | 0.00 |
| ATOM | 5430 | HA   | VAL | X | 361 | 58.073 | 36.041 | 50.468 | 0.00 | 0.00 |
| ATOM | 5431 | CB   | VAL | X | 361 | 58.573 | 34.665 | 49.005 | 0.00 | 0.00 |
| ATOM | 5432 | HB   | VAL | X | 361 | 58.085 | 35.332 | 48.294 | 0.00 | 0.00 |
| ATOM | 5433 | CG1  | VAL | X | 361 | 60.107 | 34.970 | 48.976 | 0.00 | 0.00 |
| ATOM | 5434 | HG11 | VAL | X | 361 | 60.155 | 35.863 | 49.598 | 0.00 | 0.00 |
| ATOM | 5435 | HG12 | VAL | X | 361 | 60.613 | 34.156 | 49.495 | 0.00 | 0.00 |
| ATOM | 5436 | HG13 | VAL | X | 361 | 60.480 | 35.107 | 47.961 | 0.00 | 0.00 |
| ATOM | 5437 | CG2  | VAL | X | 361 | 58.319 | 33.256 | 48.489 | 0.00 | 0.00 |
| ATOM | 5438 | HG21 | VAL | X | 361 | 57.271 | 32.981 | 48.611 | 0.00 | 0.00 |
| ATOM | 5439 | HG22 | VAL | X | 361 | 58.958 | 32.684 | 49.160 | 0.00 | 0.00 |
| ATOM | 5440 | HG23 | VAL | X | 361 | 58.590 | 33.291 | 47.433 | 0.00 | 0.00 |
| ATOM | 5441 | C    | VAL | X | 361 | 56.405 | 34.782 | 50.336 | 0.00 | 0.00 |
| ATOM | 5442 | O    | VAL | X | 361 | 55.711 | 35.679 | 49.938 | 0.00 | 0.00 |
| ATOM | 5443 | N    | GLY | X | 362 | 55.821 | 33.645 | 50.824 | 0.00 | 0.00 |
| ATOM | 5444 | H    | GLY | X | 362 | 56.428 | 32.856 | 50.992 | 0.00 | 0.00 |
| ATOM | 5445 | CA   | GLY | X | 362 | 54.409 | 33.284 | 50.733 | 0.00 | 0.00 |
| ATOM | 5446 | HA2  | GLY | X | 362 | 53.907 | 33.718 | 49.869 | 0.00 | 0.00 |
| ATOM | 5447 | HA3  | GLY | X | 362 | 54.377 | 32.196 | 50.669 | 0.00 | 0.00 |
| ATOM | 5448 | C    | GLY | X | 362 | 53.547 | 33.653 | 51.843 | 0.00 | 0.00 |
| ATOM | 5449 | O    | GLY | X | 362 | 52.385 | 34.090 | 51.523 | 0.00 | 0.00 |
| ATOM | 5450 | N    | VAL | X | 363 | 54.150 | 33.744 | 53.028 | 0.00 | 0.00 |
| ATOM | 5451 | H    | VAL | X | 363 | 55.113 | 33.450 | 53.098 | 0.00 | 0.00 |
| ATOM | 5452 | CA   | VAL | X | 363 | 53.589 | 34.520 | 54.172 | 0.00 | 0.00 |
| ATOM | 5453 | HA   | VAL | X | 363 | 52.573 | 34.879 | 54.009 | 0.00 | 0.00 |
| ATOM | 5454 | CB   | VAL | X | 363 | 53.526 | 33.590 | 55.422 | 0.00 | 0.00 |
| ATOM | 5455 | HB   | VAL | X | 363 | 54.481 | 33.226 | 55.801 | 0.00 | 0.00 |
| ATOM | 5456 | CG1  | VAL | X | 363 | 52.783 | 34.212 | 56.682 | 0.00 | 0.00 |
| ATOM | 5457 | HG11 | VAL | X | 363 | 53.232 | 35.150 | 57.009 | 0.00 | 0.00 |
| ATOM | 5458 | HG12 | VAL | X | 363 | 51.766 | 34.521 | 56.439 | 0.00 | 0.00 |
| ATOM | 5459 | HG13 | VAL | X | 363 | 52.601 | 33.427 | 57.415 | 0.00 | 0.00 |
| ATOM | 5460 | CG2  | VAL | X | 363 | 52.793 | 32.274 | 54.987 | 0.00 | 0.00 |
| ATOM | 5461 | HG21 | VAL | X | 363 | 53.515 | 31.516 | 54.684 | 0.00 | 0.00 |
| ATOM | 5462 | HG22 | VAL | X | 363 | 52.028 | 32.417 | 54.223 | 0.00 | 0.00 |
| ATOM | 5463 | HG23 | VAL | X | 363 | 52.196 | 31.883 | 55.811 | 0.00 | 0.00 |
| ATOM | 5464 | C    | VAL | X | 363 | 54.522 | 35.712 | 54.491 | 0.00 | 0.00 |
| ATOM | 5465 | O    | VAL | X | 363 | 55.457 | 35.660 | 55.285 | 0.00 | 0.00 |
| ATOM | 5466 | N    | PRO | X | 364 | 54.264 | 36.851 | 53.816 | 0.00 | 0.00 |
| ATOM | 5467 | CD   | PRO | X | 364 | 53.367 | 36.969 | 52.648 | 0.00 | 0.00 |
| ATOM | 5468 | HD2  | PRO | X | 364 | 52.368 | 36.567 | 52.817 | 0.00 | 0.00 |
| ATOM | 5469 | HD3  | PRO | X | 364 | 53.795 | 36.441 | 51.796 | 0.00 | 0.00 |
| ATOM | 5470 | CG   | PRO | X | 364 | 53.230 | 38.482 | 52.443 | 0.00 | 0.00 |
| ATOM | 5471 | HG2  | PRO | X | 364 | 52.397 | 38.909 | 53.002 | 0.00 | 0.00 |



|      |      |      |     |   |     |        |        |        |      |      |
|------|------|------|-----|---|-----|--------|--------|--------|------|------|
| ATOM | 5472 | HG3  | PRO | X | 364 | 53.247 | 38.706 | 51.377 | 0.00 | 0.00 |
| ATOM | 5473 | CB   | PRO | X | 364 | 54.489 | 39.083 | 53.079 | 0.00 | 0.00 |
| ATOM | 5474 | HB2  | PRO | X | 364 | 54.313 | 40.112 | 53.393 | 0.00 | 0.00 |
| ATOM | 5475 | HB3  | PRO | X | 364 | 55.223 | 39.079 | 52.273 | 0.00 | 0.00 |
| ATOM | 5476 | CA   | PRO | X | 364 | 54.863 | 38.170 | 54.232 | 0.00 | 0.00 |
| ATOM | 5477 | HA   | PRO | X | 364 | 55.939 | 38.170 | 54.409 | 0.00 | 0.00 |
| ATOM | 5478 | C    | PRO | X | 364 | 54.216 | 38.660 | 55.512 | 0.00 | 0.00 |
| ATOM | 5479 | O    | PRO | X | 364 | 53.166 | 38.131 | 55.869 | 0.00 | 0.00 |
| ATOM | 5480 | N    | GLN | X | 365 | 54.829 | 39.586 | 56.232 | 0.00 | 0.00 |
| ATOM | 5481 | H    | GLN | X | 365 | 55.731 | 39.959 | 55.974 | 0.00 | 0.00 |
| ATOM | 5482 | CA   | GLN | X | 365 | 54.348 | 40.320 | 57.415 | 0.00 | 0.00 |
| ATOM | 5483 | HA   | GLN | X | 365 | 55.058 | 41.126 | 57.600 | 0.00 | 0.00 |
| ATOM | 5484 | CB   | GLN | X | 365 | 52.983 | 41.117 | 57.053 | 0.00 | 0.00 |
| ATOM | 5485 | HB2  | GLN | X | 365 | 52.300 | 40.466 | 56.507 | 0.00 | 0.00 |
| ATOM | 5486 | HB3  | GLN | X | 365 | 52.341 | 41.405 | 57.885 | 0.00 | 0.00 |
| ATOM | 5487 | CG   | GLN | X | 365 | 53.220 | 42.408 | 56.224 | 0.00 | 0.00 |
| ATOM | 5488 | HG2  | GLN | X | 365 | 54.026 | 43.006 | 56.648 | 0.00 | 0.00 |
| ATOM | 5489 | HG3  | GLN | X | 365 | 53.497 | 42.136 | 55.206 | 0.00 | 0.00 |
| ATOM | 5490 | CD   | GLN | X | 365 | 51.968 | 43.352 | 56.014 | 0.00 | 0.00 |
| ATOM | 5491 | OE1  | GLN | X | 365 | 50.876 | 43.058 | 56.452 | 0.00 | 0.00 |
| ATOM | 5492 | NE2  | GLN | X | 365 | 52.164 | 44.544 | 55.491 | 0.00 | 0.00 |
| ATOM | 5493 | HE21 | GLN | X | 365 | 51.403 | 45.190 | 55.339 | 0.00 | 0.00 |
| ATOM | 5494 | HE22 | GLN | X | 365 | 53.091 | 44.924 | 55.362 | 0.00 | 0.00 |
| ATOM | 5495 | C    | GLN | X | 365 | 54.149 | 39.472 | 58.621 | 0.00 | 0.00 |
| ATOM | 5496 | O    | GLN | X | 365 | 53.010 | 39.095 | 58.931 | 0.00 | 0.00 |
| ATOM | 5497 | N    | VAL | X | 366 | 55.113 | 39.189 | 59.461 | 0.00 | 0.00 |
| ATOM | 5498 | H    | VAL | X | 366 | 56.004 | 39.608 | 59.239 | 0.00 | 0.00 |
| ATOM | 5499 | CA   | VAL | X | 366 | 55.023 | 38.007 | 60.320 | 0.00 | 0.00 |
| ATOM | 5500 | HA   | VAL | X | 366 | 54.152 | 37.987 | 60.975 | 0.00 | 0.00 |
| ATOM | 5501 | CB   | VAL | X | 366 | 55.016 | 36.713 | 59.469 | 0.00 | 0.00 |
| ATOM | 5502 | HB   | VAL | X | 366 | 54.161 | 36.843 | 58.806 | 0.00 | 0.00 |
| ATOM | 5503 | CG1  | VAL | X | 366 | 56.145 | 36.607 | 58.427 | 0.00 | 0.00 |
| ATOM | 5504 | HG11 | VAL | X | 366 | 57.107 | 36.641 | 58.938 | 0.00 | 0.00 |
| ATOM | 5505 | HG12 | VAL | X | 366 | 56.000 | 35.669 | 57.892 | 0.00 | 0.00 |
| ATOM | 5506 | HG13 | VAL | X | 366 | 56.001 | 37.372 | 57.664 | 0.00 | 0.00 |
| ATOM | 5507 | CG2  | VAL | X | 366 | 54.606 | 35.473 | 60.277 | 0.00 | 0.00 |
| ATOM | 5508 | HG21 | VAL | X | 366 | 55.325 | 35.357 | 61.087 | 0.00 | 0.00 |
| ATOM | 5509 | HG22 | VAL | X | 366 | 54.708 | 34.561 | 59.689 | 0.00 | 0.00 |
| ATOM | 5510 | HG23 | VAL | X | 366 | 53.553 | 35.523 | 60.552 | 0.00 | 0.00 |
| ATOM | 5511 | C    | VAL | X | 366 | 56.261 | 38.026 | 61.237 | 0.00 | 0.00 |
| ATOM | 5512 | O    | VAL | X | 366 | 57.343 | 38.461 | 60.786 | 0.00 | 0.00 |
| ATOM | 5513 | N    | SER | X | 367 | 56.100 | 37.578 | 62.506 | 0.00 | 0.00 |
| ATOM | 5514 | H    | SER | X | 367 | 55.227 | 37.141 | 62.765 | 0.00 | 0.00 |
| ATOM | 5515 | CA   | SER | X | 367 | 57.233 | 37.438 | 63.428 | 0.00 | 0.00 |
| ATOM | 5516 | HA   | SER | X | 367 | 57.944 | 38.223 | 63.167 | 0.00 | 0.00 |
| ATOM | 5517 | CB   | SER | X | 367 | 56.779 | 37.643 | 64.920 | 0.00 | 0.00 |
| ATOM | 5518 | HB2  | SER | X | 367 | 57.632 | 37.379 | 65.546 | 0.00 | 0.00 |
| ATOM | 5519 | HB3  | SER | X | 367 | 56.453 | 38.645 | 65.199 | 0.00 | 0.00 |
| ATOM | 5520 | OG   | SER | X | 367 | 55.615 | 36.854 | 65.270 | 0.00 | 0.00 |
| ATOM | 5521 | HG   | SER | X | 367 | 55.228 | 37.219 | 66.068 | 0.00 | 0.00 |
| ATOM | 5522 | C    | SER | X | 367 | 57.810 | 36.057 | 63.364 | 0.00 | 0.00 |
| ATOM | 5523 | O    | SER | X | 367 | 57.272 | 35.172 | 62.700 | 0.00 | 0.00 |
| ATOM | 5524 | N    | ASP | X | 368 | 59.029 | 35.791 | 63.824 | 0.00 | 0.00 |
| ATOM | 5525 | H    | ASP | X | 368 | 59.543 | 36.554 | 64.240 | 0.00 | 0.00 |
| ATOM | 5526 | CA   | ASP | X | 368 | 59.728 | 34.525 | 63.709 | 0.00 | 0.00 |
| ATOM | 5527 | HA   | ASP | X | 368 | 59.722 | 34.082 | 62.713 | 0.00 | 0.00 |
| ATOM | 5528 | CB   | ASP | X | 368 | 61.131 | 34.777 | 64.096 | 0.00 | 0.00 |
| ATOM | 5529 | HB2  | ASP | X | 368 | 61.224 | 35.277 | 65.060 | 0.00 | 0.00 |
| ATOM | 5530 | HB3  | ASP | X | 368 | 61.615 | 33.801 | 64.143 | 0.00 | 0.00 |
| ATOM | 5531 | CG   | ASP | X | 368 | 61.929 | 35.593 | 63.060 | 0.00 | 0.00 |
| ATOM | 5532 | OD1  | ASP | X | 368 | 62.689 | 36.500 | 63.496 | 0.00 | 0.00 |
| ATOM | 5533 | OD2  | ASP | X | 368 | 61.919 | 35.117 | 61.863 | 0.00 | 0.00 |
| ATOM | 5534 | C    | ASP | X | 368 | 59.054 | 33.379 | 64.566 | 0.00 | 0.00 |
| ATOM | 5535 | O    | ASP | X | 368 | 59.195 | 32.189 | 64.313 | 0.00 | 0.00 |
| ATOM | 5536 | N    | LEU | X | 369 | 58.370 | 33.802 | 65.626 | 0.00 | 0.00 |
| ATOM | 5537 | H    | LEU | X | 369 | 58.357 | 34.767 | 65.924 | 0.00 | 0.00 |
| ATOM | 5538 | CA   | LEU | X | 369 | 57.664 | 32.856 | 66.520 | 0.00 | 0.00 |

|      |      |      |     |   |     |        |        |        |      |      |
|------|------|------|-----|---|-----|--------|--------|--------|------|------|
| ATOM | 5539 | HA   | LEU | X | 369 | 58.392 | 32.049 | 66.610 | 0.00 | 0.00 |
| ATOM | 5540 | CB   | LEU | X | 369 | 57.424 | 33.573 | 67.831 | 0.00 | 0.00 |
| ATOM | 5541 | HB2  | LEU | X | 369 | 57.051 | 34.590 | 67.708 | 0.00 | 0.00 |
| ATOM | 5542 | HB3  | LEU | X | 369 | 56.611 | 33.052 | 68.337 | 0.00 | 0.00 |
| ATOM | 5543 | CG   | LEU | X | 369 | 58.570 | 33.569 | 68.835 | 0.00 | 0.00 |
| ATOM | 5544 | HG   | LEU | X | 369 | 59.374 | 34.027 | 68.260 | 0.00 | 0.00 |
| ATOM | 5545 | CD1  | LEU | X | 369 | 58.384 | 34.360 | 70.170 | 0.00 | 0.00 |
| ATOM | 5546 | HD11 | LEU | X | 369 | 57.558 | 33.978 | 70.769 | 0.00 | 0.00 |
| ATOM | 5547 | HD12 | LEU | X | 369 | 58.176 | 35.412 | 69.973 | 0.00 | 0.00 |
| ATOM | 5548 | HD13 | LEU | X | 369 | 59.303 | 34.399 | 70.755 | 0.00 | 0.00 |
| ATOM | 5549 | CD2  | LEU | X | 369 | 59.065 | 32.159 | 69.097 | 0.00 | 0.00 |
| ATOM | 5550 | HD21 | LEU | X | 369 | 59.822 | 31.785 | 68.408 | 0.00 | 0.00 |
| ATOM | 5551 | HD22 | LEU | X | 369 | 59.581 | 32.151 | 70.057 | 0.00 | 0.00 |
| ATOM | 5552 | HD23 | LEU | X | 369 | 58.227 | 31.462 | 69.072 | 0.00 | 0.00 |
| ATOM | 5553 | C    | LEU | X | 369 | 56.407 | 32.295 | 65.869 | 0.00 | 0.00 |
| ATOM | 5554 | O    | LEU | X | 369 | 55.951 | 31.190 | 66.067 | 0.00 | 0.00 |
| ATOM | 5555 | N    | ALA | X | 370 | 55.880 | 33.126 | 64.952 | 0.00 | 0.00 |
| ATOM | 5556 | H    | ALA | X | 370 | 56.295 | 34.028 | 64.770 | 0.00 | 0.00 |
| ATOM | 5557 | CA   | ALA | X | 370 | 54.691 | 32.823 | 64.119 | 0.00 | 0.00 |
| ATOM | 5558 | HA   | ALA | X | 370 | 53.924 | 32.260 | 64.650 | 0.00 | 0.00 |
| ATOM | 5559 | CB   | ALA | X | 370 | 54.125 | 34.112 | 63.707 | 0.00 | 0.00 |
| ATOM | 5560 | HB1  | ALA | X | 370 | 53.676 | 34.568 | 64.590 | 0.00 | 0.00 |
| ATOM | 5561 | HB2  | ALA | X | 370 | 53.422 | 34.035 | 62.877 | 0.00 | 0.00 |
| ATOM | 5562 | HB3  | ALA | X | 370 | 54.786 | 34.889 | 63.324 | 0.00 | 0.00 |
| ATOM | 5563 | C    | ALA | X | 370 | 55.127 | 32.031 | 62.917 | 0.00 | 0.00 |
| ATOM | 5564 | O    | ALA | X | 370 | 54.521 | 30.930 | 62.701 | 0.00 | 0.00 |
| ATOM | 5565 | N    | ALA | X | 371 | 56.103 | 32.415 | 62.140 | 0.00 | 0.00 |
| ATOM | 5566 | H    | ALA | X | 371 | 56.521 | 33.318 | 62.316 | 0.00 | 0.00 |
| ATOM | 5567 | CA   | ALA | X | 371 | 56.733 | 31.643 | 61.119 | 0.00 | 0.00 |
| ATOM | 5568 | HA   | ALA | X | 371 | 55.964 | 31.612 | 60.347 | 0.00 | 0.00 |
| ATOM | 5569 | CB   | ALA | X | 371 | 57.832 | 32.615 | 60.635 | 0.00 | 0.00 |
| ATOM | 5570 | HB1  | ALA | X | 371 | 57.474 | 33.590 | 60.305 | 0.00 | 0.00 |
| ATOM | 5571 | HB2  | ALA | X | 371 | 58.326 | 32.147 | 59.783 | 0.00 | 0.00 |
| ATOM | 5572 | HB3  | ALA | X | 371 | 58.579 | 32.833 | 61.398 | 0.00 | 0.00 |
| ATOM | 5573 | C    | ALA | X | 371 | 57.198 | 30.184 | 61.554 | 0.00 | 0.00 |
| ATOM | 5574 | O    | ALA | X | 371 | 56.883 | 29.271 | 60.801 | 0.00 | 0.00 |
| ATOM | 5575 | N    | GLU | X | 372 | 57.938 | 30.038 | 62.688 | 0.00 | 0.00 |
| ATOM | 5576 | H    | GLU | X | 372 | 58.255 | 30.875 | 63.156 | 0.00 | 0.00 |
| ATOM | 5577 | CA   | GLU | X | 372 | 58.016 | 28.750 | 63.370 | 0.00 | 0.00 |
| ATOM | 5578 | HA   | GLU | X | 372 | 58.690 | 28.159 | 62.749 | 0.00 | 0.00 |
| ATOM | 5579 | CB   | GLU | X | 372 | 58.533 | 28.792 | 64.812 | 0.00 | 0.00 |
| ATOM | 5580 | HB2  | GLU | X | 372 | 57.968 | 29.596 | 65.285 | 0.00 | 0.00 |
| ATOM | 5581 | HB3  | GLU | X | 372 | 58.361 | 27.816 | 65.266 | 0.00 | 0.00 |
| ATOM | 5582 | CG   | GLU | X | 372 | 60.062 | 29.054 | 64.808 | 0.00 | 0.00 |
| ATOM | 5583 | HG2  | GLU | X | 372 | 60.210 | 29.937 | 64.187 | 0.00 | 0.00 |
| ATOM | 5584 | HG3  | GLU | X | 372 | 60.199 | 29.249 | 65.871 | 0.00 | 0.00 |
| ATOM | 5585 | CD   | GLU | X | 372 | 60.909 | 27.918 | 64.306 | 0.00 | 0.00 |
| ATOM | 5586 | OE1  | GLU | X | 372 | 60.818 | 26.827 | 64.926 | 0.00 | 0.00 |
| ATOM | 5587 | OE2  | GLU | X | 372 | 61.581 | 27.976 | 63.258 | 0.00 | 0.00 |
| ATOM | 5588 | C    | GLU | X | 372 | 56.680 | 27.951 | 63.439 | 0.00 | 0.00 |
| ATOM | 5589 | O    | GLU | X | 372 | 56.572 | 26.927 | 62.848 | 0.00 | 0.00 |
| ATOM | 5590 | N    | ALA | X | 373 | 55.659 | 28.598 | 63.962 | 0.00 | 0.00 |
| ATOM | 5591 | H    | ALA | X | 373 | 55.707 | 29.530 | 64.349 | 0.00 | 0.00 |
| ATOM | 5592 | CA   | ALA | X | 373 | 54.378 | 28.012 | 64.268 | 0.00 | 0.00 |
| ATOM | 5593 | HA   | ALA | X | 373 | 54.599 | 27.026 | 64.678 | 0.00 | 0.00 |
| ATOM | 5594 | CB   | ALA | X | 373 | 53.603 | 29.010 | 65.084 | 0.00 | 0.00 |
| ATOM | 5595 | HB1  | ALA | X | 373 | 53.104 | 29.770 | 64.482 | 0.00 | 0.00 |
| ATOM | 5596 | HB2  | ALA | X | 373 | 54.360 | 29.406 | 65.761 | 0.00 | 0.00 |
| ATOM | 5597 | HB3  | ALA | X | 373 | 52.867 | 28.544 | 65.739 | 0.00 | 0.00 |
| ATOM | 5598 | C    | ALA | X | 373 | 53.665 | 27.687 | 62.901 | 0.00 | 0.00 |
| ATOM | 5599 | O    | ALA | X | 373 | 53.120 | 26.648 | 62.757 | 0.00 | 0.00 |
| ATOM | 5600 | N    | VAL | X | 374 | 53.951 | 28.429 | 61.797 | 0.00 | 0.00 |
| ATOM | 5601 | H    | VAL | X | 374 | 54.525 | 29.246 | 61.949 | 0.00 | 0.00 |
| ATOM | 5602 | CA   | VAL | X | 374 | 53.560 | 28.090 | 60.315 | 0.00 | 0.00 |
| ATOM | 5603 | HA   | VAL | X | 374 | 52.505 | 27.849 | 60.184 | 0.00 | 0.00 |
| ATOM | 5604 | CB   | VAL | X | 374 | 53.762 | 29.222 | 59.354 | 0.00 | 0.00 |
| ATOM | 5605 | HB   | VAL | X | 374 | 54.805 | 29.539 | 59.375 | 0.00 | 0.00 |

|      |      |      |     |   |     |        |        |        |      |      |
|------|------|------|-----|---|-----|--------|--------|--------|------|------|
| ATOM | 5606 | CG1  | VAL | X | 374 | 53.459 | 28.769 | 57.877 | 0.00 | 0.00 |
| ATOM | 5607 | HG11 | VAL | X | 374 | 53.137 | 29.587 | 57.232 | 0.00 | 0.00 |
| ATOM | 5608 | HG12 | VAL | X | 374 | 54.407 | 28.428 | 57.461 | 0.00 | 0.00 |
| ATOM | 5609 | HG13 | VAL | X | 374 | 52.695 | 27.991 | 57.852 | 0.00 | 0.00 |
| ATOM | 5610 | CG2  | VAL | X | 374 | 52.761 | 30.338 | 59.625 | 0.00 | 0.00 |
| ATOM | 5611 | HG21 | VAL | X | 374 | 52.867 | 30.760 | 60.624 | 0.00 | 0.00 |
| ATOM | 5612 | HG22 | VAL | X | 374 | 51.783 | 29.870 | 59.518 | 0.00 | 0.00 |
| ATOM | 5613 | HG23 | VAL | X | 374 | 52.815 | 31.196 | 58.955 | 0.00 | 0.00 |
| ATOM | 5614 | C    | VAL | X | 374 | 54.246 | 26.780 | 59.953 | 0.00 | 0.00 |
| ATOM | 5615 | O    | VAL | X | 374 | 53.629 | 25.761 | 59.648 | 0.00 | 0.00 |
| ATOM | 5616 | N    | VAL | X | 375 | 55.567 | 26.825 | 59.982 | 0.00 | 0.00 |
| ATOM | 5617 | H    | VAL | X | 375 | 56.018 | 27.677 | 60.281 | 0.00 | 0.00 |
| ATOM | 5618 | CA   | VAL | X | 375 | 56.418 | 25.774 | 59.491 | 0.00 | 0.00 |
| ATOM | 5619 | HA   | VAL | X | 375 | 56.030 | 25.503 | 58.509 | 0.00 | 0.00 |
| ATOM | 5620 | CB   | VAL | X | 375 | 57.917 | 26.302 | 59.414 | 0.00 | 0.00 |
| ATOM | 5621 | HB   | VAL | X | 375 | 58.201 | 26.670 | 60.400 | 0.00 | 0.00 |
| ATOM | 5622 | CG1  | VAL | X | 375 | 58.895 | 25.160 | 59.151 | 0.00 | 0.00 |
| ATOM | 5623 | HG11 | VAL | X | 375 | 59.852 | 25.613 | 59.410 | 0.00 | 0.00 |
| ATOM | 5624 | HG12 | VAL | X | 375 | 58.810 | 24.399 | 59.927 | 0.00 | 0.00 |
| ATOM | 5625 | HG13 | VAL | X | 375 | 58.886 | 24.935 | 58.085 | 0.00 | 0.00 |
| ATOM | 5626 | CG2  | VAL | X | 375 | 58.142 | 27.506 | 58.453 | 0.00 | 0.00 |
| ATOM | 5627 | HG21 | VAL | X | 375 | 58.769 | 28.245 | 58.952 | 0.00 | 0.00 |
| ATOM | 5628 | HG22 | VAL | X | 375 | 57.154 | 27.829 | 58.124 | 0.00 | 0.00 |
| ATOM | 5629 | HG23 | VAL | X | 375 | 58.584 | 27.161 | 57.519 | 0.00 | 0.00 |
| ATOM | 5630 | C    | VAL | X | 375 | 56.206 | 24.439 | 60.205 | 0.00 | 0.00 |
| ATOM | 5631 | O    | VAL | X | 375 | 56.401 | 23.372 | 59.596 | 0.00 | 0.00 |
| ATOM | 5632 | N    | LEU | X | 376 | 55.850 | 24.492 | 61.473 | 0.00 | 0.00 |
| ATOM | 5633 | H    | LEU | X | 376 | 55.734 | 25.446 | 61.785 | 0.00 | 0.00 |
| ATOM | 5634 | CA   | LEU | X | 376 | 55.754 | 23.373 | 62.403 | 0.00 | 0.00 |
| ATOM | 5635 | HA   | LEU | X | 376 | 56.495 | 22.621 | 62.131 | 0.00 | 0.00 |
| ATOM | 5636 | CB   | LEU | X | 376 | 55.896 | 23.970 | 63.849 | 0.00 | 0.00 |
| ATOM | 5637 | HB2  | LEU | X | 376 | 56.912 | 24.359 | 63.901 | 0.00 | 0.00 |
| ATOM | 5638 | HB3  | LEU | X | 376 | 55.261 | 24.844 | 63.995 | 0.00 | 0.00 |
| ATOM | 5639 | CG   | LEU | X | 376 | 55.602 | 23.028 | 64.931 | 0.00 | 0.00 |
| ATOM | 5640 | HG   | LEU | X | 376 | 54.583 | 22.673 | 64.779 | 0.00 | 0.00 |
| ATOM | 5641 | CD1  | LEU | X | 376 | 56.678 | 21.924 | 64.894 | 0.00 | 0.00 |
| ATOM | 5642 | HD11 | LEU | X | 376 | 56.713 | 21.474 | 63.901 | 0.00 | 0.00 |
| ATOM | 5643 | HD12 | LEU | X | 376 | 56.436 | 21.121 | 65.590 | 0.00 | 0.00 |
| ATOM | 5644 | HD13 | LEU | X | 376 | 57.632 | 22.304 | 65.259 | 0.00 | 0.00 |
| ATOM | 5645 | CD2  | LEU | X | 376 | 55.538 | 23.732 | 66.270 | 0.00 | 0.00 |
| ATOM | 5646 | HD21 | LEU | X | 376 | 55.255 | 22.946 | 66.971 | 0.00 | 0.00 |
| ATOM | 5647 | HD22 | LEU | X | 376 | 56.542 | 24.073 | 66.523 | 0.00 | 0.00 |
| ATOM | 5648 | HD23 | LEU | X | 376 | 54.814 | 24.546 | 66.259 | 0.00 | 0.00 |
| ATOM | 5649 | C    | LEU | X | 376 | 54.394 | 22.703 | 62.212 | 0.00 | 0.00 |
| ATOM | 5650 | O    | LEU | X | 376 | 54.302 | 21.484 | 62.185 | 0.00 | 0.00 |
| ATOM | 5651 | N    | HIE | X | 377 | 53.359 | 23.542 | 61.992 | 0.00 | 0.00 |
| ATOM | 5652 | H    | HIE | X | 377 | 53.636 | 24.510 | 62.078 | 0.00 | 0.00 |
| ATOM | 5653 | CA   | HIE | X | 377 | 51.926 | 23.193 | 61.671 | 0.00 | 0.00 |
| ATOM | 5654 | HA   | HIE | X | 377 | 51.610 | 22.491 | 62.443 | 0.00 | 0.00 |
| ATOM | 5655 | CB   | HIE | X | 377 | 51.063 | 24.438 | 61.796 | 0.00 | 0.00 |
| ATOM | 5656 | HB2  | HIE | X | 377 | 51.140 | 24.862 | 62.797 | 0.00 | 0.00 |
| ATOM | 5657 | HB3  | HIE | X | 377 | 51.461 | 25.190 | 61.114 | 0.00 | 0.00 |
| ATOM | 5658 | CG   | HIE | X | 377 | 49.555 | 24.301 | 61.388 | 0.00 | 0.00 |
| ATOM | 5659 | ND1  | HIE | X | 377 | 48.561 | 23.492 | 61.981 | 0.00 | 0.00 |
| ATOM | 5660 | CE1  | HIE | X | 377 | 47.492 | 23.667 | 61.168 | 0.00 | 0.00 |
| ATOM | 5661 | HE1  | HIE | X | 377 | 46.484 | 23.296 | 61.280 | 0.00 | 0.00 |
| ATOM | 5662 | NE2  | HIE | X | 377 | 47.736 | 24.594 | 60.229 | 0.00 | 0.00 |
| ATOM | 5663 | HE2  | HIE | X | 377 | 47.091 | 24.939 | 59.533 | 0.00 | 0.00 |
| ATOM | 5664 | CD2  | HIE | X | 377 | 49.012 | 25.030 | 60.365 | 0.00 | 0.00 |
| ATOM | 5665 | HD2  | HIE | X | 377 | 49.526 | 25.769 | 59.768 | 0.00 | 0.00 |
| ATOM | 5666 | C    | HIE | X | 377 | 51.724 | 22.476 | 60.313 | 0.00 | 0.00 |
| ATOM | 5667 | O    | HIE | X | 377 | 50.655 | 21.921 | 60.109 | 0.00 | 0.00 |
| ATOM | 5668 | N    | TYR | X | 378 | 52.712 | 22.528 | 59.439 | 0.00 | 0.00 |
| ATOM | 5669 | H    | TYR | X | 378 | 53.398 | 23.216 | 59.714 | 0.00 | 0.00 |
| ATOM | 5670 | CA   | TYR | X | 378 | 52.787 | 21.914 | 58.064 | 0.00 | 0.00 |
| ATOM | 5671 | HA   | TYR | X | 378 | 51.922 | 21.304 | 57.800 | 0.00 | 0.00 |
| ATOM | 5672 | CB   | TYR | X | 378 | 52.800 | 23.054 | 56.974 | 0.00 | 0.00 |

|      |      |      |     |   |     |        |        |        |      |      |
|------|------|------|-----|---|-----|--------|--------|--------|------|------|
| ATOM | 5673 | HB2  | TYR | X | 378 | 53.530 | 23.811 | 57.260 | 0.00 | 0.00 |
| ATOM | 5674 | HB3  | TYR | X | 378 | 53.158 | 22.580 | 56.060 | 0.00 | 0.00 |
| ATOM | 5675 | CG   | TYR | X | 378 | 51.466 | 23.693 | 56.722 | 0.00 | 0.00 |
| ATOM | 5676 | CD1  | TYR | X | 378 | 50.536 | 23.021 | 55.953 | 0.00 | 0.00 |
| ATOM | 5677 | HD1  | TYR | X | 378 | 50.682 | 22.053 | 55.498 | 0.00 | 0.00 |
| ATOM | 5678 | CE1  | TYR | X | 378 | 49.346 | 23.725 | 55.607 | 0.00 | 0.00 |
| ATOM | 5679 | HE1  | TYR | X | 378 | 48.587 | 23.302 | 54.966 | 0.00 | 0.00 |
| ATOM | 5680 | CZ   | TYR | X | 378 | 49.063 | 25.038 | 56.145 | 0.00 | 0.00 |
| ATOM | 5681 | OH   | TYR | X | 378 | 47.918 | 25.745 | 55.886 | 0.00 | 0.00 |
| ATOM | 5682 | HH   | TYR | X | 378 | 47.480 | 25.422 | 55.095 | 0.00 | 0.00 |
| ATOM | 5683 | CE2  | TYR | X | 378 | 50.058 | 25.661 | 56.982 | 0.00 | 0.00 |
| ATOM | 5684 | HE2  | TYR | X | 378 | 49.864 | 26.637 | 57.403 | 0.00 | 0.00 |
| ATOM | 5685 | CD2  | TYR | X | 378 | 51.169 | 24.930 | 57.285 | 0.00 | 0.00 |
| ATOM | 5686 | HD2  | TYR | X | 378 | 51.784 | 25.396 | 58.041 | 0.00 | 0.00 |
| ATOM | 5687 | C    | TYR | X | 378 | 53.980 | 20.995 | 57.880 | 0.00 | 0.00 |
| ATOM | 5688 | O    | TYR | X | 378 | 54.276 | 20.599 | 56.746 | 0.00 | 0.00 |
| ATOM | 5689 | N    | THR | X | 379 | 54.728 | 20.603 | 58.952 | 0.00 | 0.00 |
| ATOM | 5690 | H    | THR | X | 379 | 54.518 | 20.897 | 59.896 | 0.00 | 0.00 |
| ATOM | 5691 | CA   | THR | X | 379 | 55.650 | 19.439 | 58.967 | 0.00 | 0.00 |
| ATOM | 5692 | HA   | THR | X | 379 | 55.911 | 19.136 | 57.953 | 0.00 | 0.00 |
| ATOM | 5693 | CB   | THR | X | 379 | 56.880 | 19.667 | 59.736 | 0.00 | 0.00 |
| ATOM | 5694 | HB   | THR | X | 379 | 56.576 | 19.733 | 60.781 | 0.00 | 0.00 |
| ATOM | 5695 | CG2  | THR | X | 379 | 57.989 | 18.579 | 59.593 | 0.00 | 0.00 |
| ATOM | 5696 | HG21 | THR | X | 379 | 57.608 | 17.606 | 59.903 | 0.00 | 0.00 |
| ATOM | 5697 | HG22 | THR | X | 379 | 58.797 | 18.841 | 60.276 | 0.00 | 0.00 |
| ATOM | 5698 | HG23 | THR | X | 379 | 58.365 | 18.475 | 58.575 | 0.00 | 0.00 |
| ATOM | 5699 | OG1  | THR | X | 379 | 57.572 | 20.792 | 59.264 | 0.00 | 0.00 |
| ATOM | 5700 | HG1  | THR | X | 379 | 56.936 | 21.509 | 59.329 | 0.00 | 0.00 |
| ATOM | 5701 | C    | THR | X | 379 | 54.957 | 18.216 | 59.569 | 0.00 | 0.00 |
| ATOM | 5702 | O    | THR | X | 379 | 54.607 | 18.198 | 60.760 | 0.00 | 0.00 |
| ATOM | 5703 | N    | ASP | X | 380 | 54.831 | 17.192 | 58.710 | 0.00 | 0.00 |
| ATOM | 5704 | H    | ASP | X | 380 | 55.241 | 17.301 | 57.793 | 0.00 | 0.00 |
| ATOM | 5705 | CA   | ASP | X | 380 | 54.606 | 15.804 | 59.159 | 0.00 | 0.00 |
| ATOM | 5706 | HA   | ASP | X | 380 | 53.973 | 15.809 | 60.047 | 0.00 | 0.00 |
| ATOM | 5707 | CB   | ASP | X | 380 | 54.036 | 14.945 | 58.019 | 0.00 | 0.00 |
| ATOM | 5708 | HB2  | ASP | X | 380 | 53.004 | 15.248 | 57.845 | 0.00 | 0.00 |
| ATOM | 5709 | HB3  | ASP | X | 380 | 54.589 | 14.932 | 57.079 | 0.00 | 0.00 |
| ATOM | 5710 | CG   | ASP | X | 380 | 53.797 | 13.482 | 58.474 | 0.00 | 0.00 |
| ATOM | 5711 | OD1  | ASP | X | 380 | 54.706 | 12.641 | 58.221 | 0.00 | 0.00 |
| ATOM | 5712 | OD2  | ASP | X | 380 | 52.911 | 13.247 | 59.317 | 0.00 | 0.00 |
| ATOM | 5713 | C    | ASP | X | 380 | 55.968 | 15.232 | 59.616 | 0.00 | 0.00 |
| ATOM | 5714 | O    | ASP | X | 380 | 56.988 | 15.456 | 58.945 | 0.00 | 0.00 |
| ATOM | 5715 | N    | TRP | X | 381 | 56.005 | 14.722 | 60.833 | 0.00 | 0.00 |
| ATOM | 5716 | H    | TRP | X | 381 | 55.131 | 14.578 | 61.317 | 0.00 | 0.00 |
| ATOM | 5717 | CA   | TRP | X | 381 | 57.233 | 14.243 | 61.461 | 0.00 | 0.00 |
| ATOM | 5718 | HA   | TRP | X | 381 | 57.978 | 15.012 | 61.262 | 0.00 | 0.00 |
| ATOM | 5719 | CB   | TRP | X | 381 | 57.062 | 14.168 | 63.013 | 0.00 | 0.00 |
| ATOM | 5720 | HB2  | TRP | X | 381 | 56.187 | 13.529 | 63.129 | 0.00 | 0.00 |
| ATOM | 5721 | HB3  | TRP | X | 381 | 57.906 | 13.600 | 63.405 | 0.00 | 0.00 |
| ATOM | 5722 | CG   | TRP | X | 381 | 57.059 | 15.579 | 63.663 | 0.00 | 0.00 |
| ATOM | 5723 | CD1  | TRP | X | 381 | 56.188 | 16.578 | 63.329 | 0.00 | 0.00 |
| ATOM | 5724 | HD1  | TRP | X | 381 | 55.505 | 16.486 | 62.498 | 0.00 | 0.00 |
| ATOM | 5725 | NE1  | TRP | X | 381 | 56.418 | 17.672 | 64.150 | 0.00 | 0.00 |
| ATOM | 5726 | HE1  | TRP | X | 381 | 55.852 | 18.507 | 64.104 | 0.00 | 0.00 |
| ATOM | 5727 | CE2  | TRP | X | 381 | 57.454 | 17.444 | 65.033 | 0.00 | 0.00 |
| ATOM | 5728 | CZ2  | TRP | X | 381 | 57.897 | 18.154 | 66.167 | 0.00 | 0.00 |
| ATOM | 5729 | HZ2  | TRP | X | 381 | 57.368 | 19.051 | 66.454 | 0.00 | 0.00 |
| ATOM | 5730 | CH2  | TRP | X | 381 | 58.986 | 17.634 | 66.896 | 0.00 | 0.00 |
| ATOM | 5731 | HH2  | TRP | X | 381 | 59.445 | 18.154 | 67.724 | 0.00 | 0.00 |
| ATOM | 5732 | CZ3  | TRP | X | 381 | 59.516 | 16.401 | 66.490 | 0.00 | 0.00 |
| ATOM | 5733 | HZ3  | TRP | X | 381 | 60.323 | 15.951 | 67.050 | 0.00 | 0.00 |
| ATOM | 5734 | CE3  | TRP | X | 381 | 59.000 | 15.607 | 65.485 | 0.00 | 0.00 |
| ATOM | 5735 | HE3  | TRP | X | 381 | 59.364 | 14.612 | 65.274 | 0.00 | 0.00 |
| ATOM | 5736 | CD2  | TRP | X | 381 | 57.881 | 16.086 | 64.754 | 0.00 | 0.00 |
| ATOM | 5737 | C    | TRP | X | 381 | 57.840 | 12.862 | 60.962 | 0.00 | 0.00 |
| ATOM | 5738 | O    | TRP | X | 381 | 59.060 | 12.744 | 61.163 | 0.00 | 0.00 |
| ATOM | 5739 | N    | LEU | X | 382 | 57.112 | 12.003 | 60.271 | 0.00 | 0.00 |

|      |      |      |     |   |     |        |        |        |      |      |
|------|------|------|-----|---|-----|--------|--------|--------|------|------|
| ATOM | 5740 | H    | LEU | X | 382 | 56.130 | 12.205 | 60.147 | 0.00 | 0.00 |
| ATOM | 5741 | CA   | LEU | X | 382 | 57.672 | 10.807 | 59.604 | 0.00 | 0.00 |
| ATOM | 5742 | HA   | LEU | X | 382 | 58.345 | 10.295 | 60.292 | 0.00 | 0.00 |
| ATOM | 5743 | CB   | LEU | X | 382 | 56.468 | 9.925  | 59.152 | 0.00 | 0.00 |
| ATOM | 5744 | HB2  | LEU | X | 382 | 55.677 | 9.887  | 59.901 | 0.00 | 0.00 |
| ATOM | 5745 | HB3  | LEU | X | 382 | 56.115 | 10.360 | 58.217 | 0.00 | 0.00 |
| ATOM | 5746 | CG   | LEU | X | 382 | 56.857 | 8.469  | 58.877 | 0.00 | 0.00 |
| ATOM | 5747 | HG   | LEU | X | 382 | 57.583 | 8.459  | 58.063 | 0.00 | 0.00 |
| ATOM | 5748 | CD1  | LEU | X | 382 | 57.420 | 7.653  | 60.026 | 0.00 | 0.00 |
| ATOM | 5749 | HD11 | LEU | X | 382 | 56.644 | 7.712  | 60.788 | 0.00 | 0.00 |
| ATOM | 5750 | HD12 | LEU | X | 382 | 58.338 | 8.103  | 60.405 | 0.00 | 0.00 |
| ATOM | 5751 | HD13 | LEU | X | 382 | 57.535 | 6.635  | 59.652 | 0.00 | 0.00 |
| ATOM | 5752 | CD2  | LEU | X | 382 | 55.602 | 7.664  | 58.379 | 0.00 | 0.00 |
| ATOM | 5753 | HD21 | LEU | X | 382 | 55.307 | 8.143  | 57.446 | 0.00 | 0.00 |
| ATOM | 5754 | HD22 | LEU | X | 382 | 55.925 | 6.654  | 58.128 | 0.00 | 0.00 |
| ATOM | 5755 | HD23 | LEU | X | 382 | 54.774 | 7.545  | 59.078 | 0.00 | 0.00 |
| ATOM | 5756 | C    | LEU | X | 382 | 58.485 | 11.184 | 58.398 | 0.00 | 0.00 |
| ATOM | 5757 | O    | LEU | X | 382 | 59.559 | 10.558 | 58.228 | 0.00 | 0.00 |
| ATOM | 5758 | N    | HIE | X | 383 | 58.047 | 12.195 | 57.643 | 0.00 | 0.00 |
| ATOM | 5759 | H    | HIE | X | 383 | 57.134 | 12.554 | 57.883 | 0.00 | 0.00 |
| ATOM | 5760 | CA   | HIE | X | 383 | 58.716 | 12.704 | 56.396 | 0.00 | 0.00 |
| ATOM | 5761 | HA   | HIE | X | 383 | 59.641 | 12.150 | 56.234 | 0.00 | 0.00 |
| ATOM | 5762 | CB   | HIE | X | 383 | 57.865 | 12.158 | 55.239 | 0.00 | 0.00 |
| ATOM | 5763 | HB2  | HIE | X | 383 | 56.818 | 12.460 | 55.251 | 0.00 | 0.00 |
| ATOM | 5764 | HB3  | HIE | X | 383 | 58.230 | 12.625 | 54.325 | 0.00 | 0.00 |
| ATOM | 5765 | CG   | HIE | X | 383 | 57.861 | 10.644 | 55.155 | 0.00 | 0.00 |
| ATOM | 5766 | ND1  | HIE | X | 383 | 58.926 | 9.836  | 54.776 | 0.00 | 0.00 |
| ATOM | 5767 | CE1  | HIE | X | 383 | 58.449 | 8.643  | 54.618 | 0.00 | 0.00 |
| ATOM | 5768 | HE1  | HIE | X | 383 | 58.955 | 7.743  | 54.299 | 0.00 | 0.00 |
| ATOM | 5769 | NE2  | HIE | X | 383 | 57.218 | 8.602  | 55.090 | 0.00 | 0.00 |
| ATOM | 5770 | HE2  | HIE | X | 383 | 56.608 | 7.798  | 55.052 | 0.00 | 0.00 |
| ATOM | 5771 | CD2  | HIE | X | 383 | 56.759 | 9.889  | 55.404 | 0.00 | 0.00 |
| ATOM | 5772 | HD2  | HIE | X | 383 | 55.736 | 10.145 | 55.639 | 0.00 | 0.00 |
| ATOM | 5773 | C    | HIE | X | 383 | 58.990 | 14.241 | 56.349 | 0.00 | 0.00 |
| ATOM | 5774 | O    | HIE | X | 383 | 58.397 | 14.898 | 55.470 | 0.00 | 0.00 |
| ATOM | 5775 | N    | PRO | X | 384 | 59.885 | 14.767 | 57.166 | 0.00 | 0.00 |
| ATOM | 5776 | CD   | PRO | X | 384 | 60.667 | 14.011 | 58.179 | 0.00 | 0.00 |
| ATOM | 5777 | HD2  | PRO | X | 384 | 61.397 | 13.331 | 57.741 | 0.00 | 0.00 |
| ATOM | 5778 | HD3  | PRO | X | 384 | 59.937 | 13.561 | 58.852 | 0.00 | 0.00 |
| ATOM | 5779 | CG   | PRO | X | 384 | 61.422 | 15.099 | 58.945 | 0.00 | 0.00 |
| ATOM | 5780 | HG2  | PRO | X | 384 | 62.429 | 15.311 | 58.584 | 0.00 | 0.00 |
| ATOM | 5781 | HG3  | PRO | X | 384 | 61.361 | 14.814 | 59.995 | 0.00 | 0.00 |
| ATOM | 5782 | CB   | PRO | X | 384 | 60.623 | 16.388 | 58.712 | 0.00 | 0.00 |
| ATOM | 5783 | HB2  | PRO | X | 384 | 61.284 | 17.233 | 58.905 | 0.00 | 0.00 |
| ATOM | 5784 | HB3  | PRO | X | 384 | 59.807 | 16.268 | 59.426 | 0.00 | 0.00 |
| ATOM | 5785 | CA   | PRO | X | 384 | 60.002 | 16.178 | 57.342 | 0.00 | 0.00 |
| ATOM | 5786 | HA   | PRO | X | 384 | 59.055 | 16.718 | 57.334 | 0.00 | 0.00 |
| ATOM | 5787 | C    | PRO | X | 384 | 60.795 | 16.811 | 56.214 | 0.00 | 0.00 |
| ATOM | 5788 | O    | PRO | X | 384 | 60.868 | 18.027 | 56.180 | 0.00 | 0.00 |
| ATOM | 5789 | N    | GLU | X | 385 | 61.447 | 16.009 | 55.363 | 0.00 | 0.00 |
| ATOM | 5790 | H    | GLU | X | 385 | 61.488 | 15.033 | 55.618 | 0.00 | 0.00 |
| ATOM | 5791 | CA   | GLU | X | 385 | 62.340 | 16.542 | 54.250 | 0.00 | 0.00 |
| ATOM | 5792 | HA   | GLU | X | 385 | 62.112 | 17.600 | 54.119 | 0.00 | 0.00 |
| ATOM | 5793 | CB   | GLU | X | 385 | 63.724 | 16.312 | 54.792 | 0.00 | 0.00 |
| ATOM | 5794 | HB2  | GLU | X | 385 | 63.839 | 15.282 | 55.129 | 0.00 | 0.00 |
| ATOM | 5795 | HB3  | GLU | X | 385 | 64.443 | 16.462 | 53.987 | 0.00 | 0.00 |
| ATOM | 5796 | CG   | GLU | X | 385 | 64.142 | 17.210 | 55.952 | 0.00 | 0.00 |
| ATOM | 5797 | HG2  | GLU | X | 385 | 64.303 | 18.208 | 55.542 | 0.00 | 0.00 |
| ATOM | 5798 | HG3  | GLU | X | 385 | 63.313 | 17.274 | 56.657 | 0.00 | 0.00 |
| ATOM | 5799 | CD   | GLU | X | 385 | 65.400 | 16.700 | 56.755 | 0.00 | 0.00 |
| ATOM | 5800 | OE1  | GLU | X | 385 | 65.182 | 16.310 | 57.925 | 0.00 | 0.00 |
| ATOM | 5801 | OE2  | GLU | X | 385 | 66.565 | 16.826 | 56.192 | 0.00 | 0.00 |
| ATOM | 5802 | C    | GLU | X | 385 | 62.137 | 15.835 | 52.847 | 0.00 | 0.00 |
| ATOM | 5803 | O    | GLU | X | 385 | 62.960 | 16.037 | 51.970 | 0.00 | 0.00 |
| ATOM | 5804 | N    | ASP | X | 386 | 61.065 | 15.065 | 52.783 | 0.00 | 0.00 |
| ATOM | 5805 | H    | ASP | X | 386 | 60.670 | 14.713 | 53.644 | 0.00 | 0.00 |
| ATOM | 5806 | CA   | ASP | X | 386 | 60.722 | 14.464 | 51.483 | 0.00 | 0.00 |

|      |      |      |     |   |     |        |        |        |      |      |
|------|------|------|-----|---|-----|--------|--------|--------|------|------|
| ATOM | 5807 | HA   | ASP | X | 386 | 61.607 | 13.939 | 51.122 | 0.00 | 0.00 |
| ATOM | 5808 | CB   | ASP | X | 386 | 59.594 | 13.492 | 51.765 | 0.00 | 0.00 |
| ATOM | 5809 | HB2  | ASP | X | 386 | 59.909 | 12.744 | 52.493 | 0.00 | 0.00 |
| ATOM | 5810 | HB3  | ASP | X | 386 | 58.701 | 14.012 | 52.111 | 0.00 | 0.00 |
| ATOM | 5811 | CG   | ASP | X | 386 | 59.129 | 12.794 | 50.506 | 0.00 | 0.00 |
| ATOM | 5812 | OD1  | ASP | X | 386 | 59.658 | 11.713 | 50.263 | 0.00 | 0.00 |
| ATOM | 5813 | OD2  | ASP | X | 386 | 58.344 | 13.284 | 49.696 | 0.00 | 0.00 |
| ATOM | 5814 | C    | ASP | X | 386 | 60.245 | 15.663 | 50.571 | 0.00 | 0.00 |
| ATOM | 5815 | O    | ASP | X | 386 | 59.406 | 16.436 | 51.019 | 0.00 | 0.00 |
| ATOM | 5816 | N    | PRO | X | 387 | 60.794 | 15.695 | 49.349 | 0.00 | 0.00 |
| ATOM | 5817 | CD   | PRO | X | 387 | 61.714 | 14.789 | 48.704 | 0.00 | 0.00 |
| ATOM | 5818 | HD2  | PRO | X | 387 | 61.358 | 13.760 | 48.750 | 0.00 | 0.00 |
| ATOM | 5819 | HD3  | PRO | X | 387 | 62.710 | 14.720 | 49.142 | 0.00 | 0.00 |
| ATOM | 5820 | CG   | PRO | X | 387 | 61.955 | 15.251 | 47.270 | 0.00 | 0.00 |
| ATOM | 5821 | HG2  | PRO | X | 387 | 61.106 | 14.898 | 46.684 | 0.00 | 0.00 |
| ATOM | 5822 | HG3  | PRO | X | 387 | 62.829 | 14.935 | 46.701 | 0.00 | 0.00 |
| ATOM | 5823 | CB   | PRO | X | 387 | 61.915 | 16.808 | 47.489 | 0.00 | 0.00 |
| ATOM | 5824 | HB2  | PRO | X | 387 | 61.733 | 17.410 | 46.599 | 0.00 | 0.00 |
| ATOM | 5825 | HB3  | PRO | X | 387 | 62.857 | 17.117 | 47.940 | 0.00 | 0.00 |
| ATOM | 5826 | CA   | PRO | X | 387 | 60.773 | 16.951 | 48.533 | 0.00 | 0.00 |
| ATOM | 5827 | HA   | PRO | X | 387 | 60.996 | 17.810 | 49.166 | 0.00 | 0.00 |
| ATOM | 5828 | C    | PRO | X | 387 | 59.438 | 17.193 | 47.867 | 0.00 | 0.00 |
| ATOM | 5829 | O    | PRO | X | 387 | 59.033 | 18.350 | 47.695 | 0.00 | 0.00 |
| ATOM | 5830 | N    | ALA | X | 388 | 58.751 | 16.114 | 47.443 | 0.00 | 0.00 |
| ATOM | 5831 | H    | ALA | X | 388 | 59.140 | 15.210 | 47.672 | 0.00 | 0.00 |
| ATOM | 5832 | CA   | ALA | X | 388 | 57.402 | 16.250 | 46.816 | 0.00 | 0.00 |
| ATOM | 5833 | HA   | ALA | X | 388 | 57.376 | 17.032 | 46.057 | 0.00 | 0.00 |
| ATOM | 5834 | CB   | ALA | X | 388 | 57.037 | 14.873 | 46.250 | 0.00 | 0.00 |
| ATOM | 5835 | HB1  | ALA | X | 388 | 56.856 | 14.114 | 47.011 | 0.00 | 0.00 |
| ATOM | 5836 | HB2  | ALA | X | 388 | 57.827 | 14.541 | 45.577 | 0.00 | 0.00 |
| ATOM | 5837 | HB3  | ALA | X | 388 | 56.106 | 14.937 | 45.688 | 0.00 | 0.00 |
| ATOM | 5838 | C    | ALA | X | 388 | 56.405 | 16.586 | 47.896 | 0.00 | 0.00 |
| ATOM | 5839 | O    | ALA | X | 388 | 55.409 | 17.213 | 47.513 | 0.00 | 0.00 |
| ATOM | 5840 | N    | ARG | X | 389 | 56.619 | 16.224 | 49.181 | 0.00 | 0.00 |
| ATOM | 5841 | H    | ARG | X | 389 | 57.485 | 15.707 | 49.247 | 0.00 | 0.00 |
| ATOM | 5842 | CA   | ARG | X | 389 | 55.865 | 16.562 | 50.354 | 0.00 | 0.00 |
| ATOM | 5843 | HA   | ARG | X | 389 | 54.805 | 16.619 | 50.104 | 0.00 | 0.00 |
| ATOM | 5844 | CB   | ARG | X | 389 | 56.006 | 15.437 | 51.431 | 0.00 | 0.00 |
| ATOM | 5845 | HB2  | ARG | X | 389 | 55.968 | 14.472 | 50.925 | 0.00 | 0.00 |
| ATOM | 5846 | HB3  | ARG | X | 389 | 57.008 | 15.534 | 51.849 | 0.00 | 0.00 |
| ATOM | 5847 | CG   | ARG | X | 389 | 54.993 | 15.592 | 52.546 | 0.00 | 0.00 |
| ATOM | 5848 | HG2  | ARG | X | 389 | 55.046 | 16.600 | 52.956 | 0.00 | 0.00 |
| ATOM | 5849 | HG3  | ARG | X | 389 | 53.953 | 15.456 | 52.249 | 0.00 | 0.00 |
| ATOM | 5850 | CD   | ARG | X | 389 | 55.383 | 14.600 | 53.617 | 0.00 | 0.00 |
| ATOM | 5851 | HD2  | ARG | X | 389 | 56.472 | 14.584 | 53.667 | 0.00 | 0.00 |
| ATOM | 5852 | HD3  | ARG | X | 389 | 54.966 | 14.954 | 54.560 | 0.00 | 0.00 |
| ATOM | 5853 | NE   | ARG | X | 389 | 54.997 | 13.208 | 53.262 | 0.00 | 0.00 |
| ATOM | 5854 | HE   | ARG | X | 389 | 55.567 | 12.680 | 52.617 | 0.00 | 0.00 |
| ATOM | 5855 | CZ   | ARG | X | 389 | 53.872 | 12.647 | 53.636 | 0.00 | 0.00 |
| ATOM | 5856 | NH1  | ARG | X | 389 | 53.073 | 13.222 | 54.495 | 0.00 | 0.00 |
| ATOM | 5857 | HH11 | ARG | X | 389 | 53.376 | 14.107 | 54.875 | 0.00 | 0.00 |
| ATOM | 5858 | HH12 | ARG | X | 389 | 52.326 | 12.695 | 54.924 | 0.00 | 0.00 |
| ATOM | 5859 | NH2  | ARG | X | 389 | 53.474 | 11.514 | 53.211 | 0.00 | 0.00 |
| ATOM | 5860 | HH21 | ARG | X | 389 | 53.973 | 10.910 | 52.573 | 0.00 | 0.00 |
| ATOM | 5861 | HH22 | ARG | X | 389 | 52.645 | 11.128 | 53.638 | 0.00 | 0.00 |
| ATOM | 5862 | C    | ARG | X | 389 | 56.148 | 17.974 | 50.938 | 0.00 | 0.00 |
| ATOM | 5863 | O    | ARG | X | 389 | 55.247 | 18.703 | 51.426 | 0.00 | 0.00 |
| ATOM | 5864 | N    | LEU | X | 390 | 57.386 | 18.491 | 50.758 | 0.00 | 0.00 |
| ATOM | 5865 | H    | LEU | X | 390 | 58.181 | 17.947 | 50.455 | 0.00 | 0.00 |
| ATOM | 5866 | CA   | LEU | X | 390 | 57.637 | 19.879 | 50.913 | 0.00 | 0.00 |
| ATOM | 5867 | HA   | LEU | X | 390 | 57.281 | 20.123 | 51.914 | 0.00 | 0.00 |
| ATOM | 5868 | CB   | LEU | X | 390 | 59.147 | 20.152 | 50.765 | 0.00 | 0.00 |
| ATOM | 5869 | HB2  | LEU | X | 390 | 59.547 | 19.814 | 49.809 | 0.00 | 0.00 |
| ATOM | 5870 | HB3  | LEU | X | 390 | 59.164 | 21.236 | 50.883 | 0.00 | 0.00 |
| ATOM | 5871 | CG   | LEU | X | 390 | 60.119 | 19.644 | 51.825 | 0.00 | 0.00 |
| ATOM | 5872 | HG   | LEU | X | 390 | 59.882 | 18.592 | 51.981 | 0.00 | 0.00 |
| ATOM | 5873 | CD1  | LEU | X | 390 | 61.603 | 19.749 | 51.484 | 0.00 | 0.00 |

|      |      |      |     |   |     |        |        |        |      |      |
|------|------|------|-----|---|-----|--------|--------|--------|------|------|
| ATOM | 5874 | HD11 | LEU | X | 390 | 62.314 | 19.703 | 52.310 | 0.00 | 0.00 |
| ATOM | 5875 | HD12 | LEU | X | 390 | 61.751 | 20.704 | 50.980 | 0.00 | 0.00 |
| ATOM | 5876 | HD13 | LEU | X | 390 | 61.912 | 18.928 | 50.838 | 0.00 | 0.00 |
| ATOM | 5877 | CD2  | LEU | X | 390 | 59.931 | 20.198 | 53.233 | 0.00 | 0.00 |
| ATOM | 5878 | HD21 | LEU | X | 390 | 60.216 | 21.248 | 53.285 | 0.00 | 0.00 |
| ATOM | 5879 | HD22 | LEU | X | 390 | 58.885 | 20.125 | 53.531 | 0.00 | 0.00 |
| ATOM | 5880 | HD23 | LEU | X | 390 | 60.588 | 19.630 | 53.892 | 0.00 | 0.00 |
| ATOM | 5881 | C    | LEU | X | 390 | 56.831 | 20.659 | 49.901 | 0.00 | 0.00 |
| ATOM | 5882 | O    | LEU | X | 390 | 56.115 | 21.601 | 50.216 | 0.00 | 0.00 |
| ATOM | 5883 | N    | ARG | X | 391 | 56.877 | 20.355 | 48.562 | 0.00 | 0.00 |
| ATOM | 5884 | H    | ARG | X | 391 | 57.512 | 19.630 | 48.261 | 0.00 | 0.00 |
| ATOM | 5885 | CA   | ARG | X | 391 | 56.099 | 21.068 | 47.562 | 0.00 | 0.00 |
| ATOM | 5886 | HA   | ARG | X | 391 | 56.577 | 22.041 | 47.668 | 0.00 | 0.00 |
| ATOM | 5887 | CB   | ARG | X | 391 | 56.496 | 20.469 | 46.213 | 0.00 | 0.00 |
| ATOM | 5888 | HB2  | ARG | X | 391 | 57.552 | 20.656 | 46.018 | 0.00 | 0.00 |
| ATOM | 5889 | HB3  | ARG | X | 391 | 56.206 | 19.422 | 46.131 | 0.00 | 0.00 |
| ATOM | 5890 | CG   | ARG | X | 391 | 55.627 | 21.077 | 45.088 | 0.00 | 0.00 |
| ATOM | 5891 | HG2  | ARG | X | 391 | 54.559 | 20.956 | 45.270 | 0.00 | 0.00 |
| ATOM | 5892 | HG3  | ARG | X | 391 | 55.862 | 22.141 | 45.106 | 0.00 | 0.00 |
| ATOM | 5893 | CD   | ARG | X | 391 | 55.805 | 20.685 | 43.570 | 0.00 | 0.00 |
| ATOM | 5894 | HD2  | ARG | X | 391 | 55.128 | 21.245 | 42.924 | 0.00 | 0.00 |
| ATOM | 5895 | HD3  | ARG | X | 391 | 56.774 | 21.033 | 43.212 | 0.00 | 0.00 |
| ATOM | 5896 | NE   | ARG | X | 391 | 55.667 | 19.202 | 43.370 | 0.00 | 0.00 |
| ATOM | 5897 | HE   | ARG | X | 391 | 56.393 | 18.893 | 42.739 | 0.00 | 0.00 |
| ATOM | 5898 | CZ   | ARG | X | 391 | 54.784 | 18.278 | 43.847 | 0.00 | 0.00 |
| ATOM | 5899 | NH1  | ARG | X | 391 | 53.685 | 18.651 | 44.540 | 0.00 | 0.00 |
| ATOM | 5900 | HH11 | ARG | X | 391 | 53.712 | 19.632 | 44.782 | 0.00 | 0.00 |
| ATOM | 5901 | HH12 | ARG | X | 391 | 52.982 | 17.986 | 44.829 | 0.00 | 0.00 |
| ATOM | 5902 | NH2  | ARG | X | 391 | 55.000 | 17.012 | 43.645 | 0.00 | 0.00 |
| ATOM | 5903 | HH21 | ARG | X | 391 | 55.706 | 16.778 | 42.961 | 0.00 | 0.00 |
| ATOM | 5904 | HH22 | ARG | X | 391 | 54.311 | 16.321 | 43.907 | 0.00 | 0.00 |
| ATOM | 5905 | C    | ARG | X | 391 | 54.492 | 21.017 | 47.939 | 0.00 | 0.00 |
| ATOM | 5906 | O    | ARG | X | 391 | 53.796 | 22.044 | 47.899 | 0.00 | 0.00 |
| ATOM | 5907 | N    | GLU | X | 392 | 53.883 | 19.837 | 48.323 | 0.00 | 0.00 |
| ATOM | 5908 | H    | GLU | X | 392 | 54.466 | 19.013 | 48.297 | 0.00 | 0.00 |
| ATOM | 5909 | CA   | GLU | X | 392 | 52.439 | 19.644 | 48.612 | 0.00 | 0.00 |
| ATOM | 5910 | HA   | GLU | X | 392 | 51.975 | 19.831 | 47.644 | 0.00 | 0.00 |
| ATOM | 5911 | CB   | GLU | X | 392 | 52.203 | 18.115 | 48.835 | 0.00 | 0.00 |
| ATOM | 5912 | HB2  | GLU | X | 392 | 52.953 | 17.606 | 48.229 | 0.00 | 0.00 |
| ATOM | 5913 | HB3  | GLU | X | 392 | 52.373 | 17.902 | 49.891 | 0.00 | 0.00 |
| ATOM | 5914 | CG   | GLU | X | 392 | 50.764 | 17.630 | 48.464 | 0.00 | 0.00 |
| ATOM | 5915 | HG2  | GLU | X | 392 | 50.649 | 16.712 | 49.040 | 0.00 | 0.00 |
| ATOM | 5916 | HG3  | GLU | X | 392 | 49.976 | 18.323 | 48.759 | 0.00 | 0.00 |
| ATOM | 5917 | CD   | GLU | X | 392 | 50.631 | 17.259 | 46.999 | 0.00 | 0.00 |
| ATOM | 5918 | OE1  | GLU | X | 392 | 50.827 | 16.078 | 46.663 | 0.00 | 0.00 |
| ATOM | 5919 | OE2  | GLU | X | 392 | 50.343 | 18.225 | 46.244 | 0.00 | 0.00 |
| ATOM | 5920 | C    | GLU | X | 392 | 51.996 | 20.526 | 49.778 | 0.00 | 0.00 |
| ATOM | 5921 | O    | GLU | X | 392 | 50.807 | 21.003 | 49.798 | 0.00 | 0.00 |
| ATOM | 5922 | N    | ALA | X | 393 | 52.847 | 20.679 | 50.839 | 0.00 | 0.00 |
| ATOM | 5923 | H    | ALA | X | 393 | 53.692 | 20.129 | 50.786 | 0.00 | 0.00 |
| ATOM | 5924 | CA   | ALA | X | 393 | 52.627 | 21.451 | 51.990 | 0.00 | 0.00 |
| ATOM | 5925 | HA   | ALA | X | 393 | 51.656 | 21.274 | 52.453 | 0.00 | 0.00 |
| ATOM | 5926 | CB   | ALA | X | 393 | 53.632 | 21.013 | 53.034 | 0.00 | 0.00 |
| ATOM | 5927 | HB1  | ALA | X | 393 | 53.535 | 19.930 | 53.114 | 0.00 | 0.00 |
| ATOM | 5928 | HB2  | ALA | X | 393 | 53.597 | 21.587 | 53.961 | 0.00 | 0.00 |
| ATOM | 5929 | HB3  | ALA | X | 393 | 54.640 | 21.218 | 52.676 | 0.00 | 0.00 |
| ATOM | 5930 | C    | ALA | X | 393 | 52.675 | 22.951 | 51.591 | 0.00 | 0.00 |
| ATOM | 5931 | O    | ALA | X | 393 | 51.731 | 23.684 | 51.710 | 0.00 | 0.00 |
| ATOM | 5932 | N    | LEU | X | 394 | 53.740 | 23.544 | 51.030 | 0.00 | 0.00 |
| ATOM | 5933 | H    | LEU | X | 394 | 54.505 | 22.917 | 50.824 | 0.00 | 0.00 |
| ATOM | 5934 | CA   | LEU | X | 394 | 53.863 | 24.936 | 50.574 | 0.00 | 0.00 |
| ATOM | 5935 | HA   | LEU | X | 394 | 53.776 | 25.520 | 51.490 | 0.00 | 0.00 |
| ATOM | 5936 | CB   | LEU | X | 394 | 55.234 | 25.062 | 49.982 | 0.00 | 0.00 |
| ATOM | 5937 | HB2  | LEU | X | 394 | 55.967 | 24.580 | 50.629 | 0.00 | 0.00 |
| ATOM | 5938 | HB3  | LEU | X | 394 | 55.354 | 24.494 | 49.059 | 0.00 | 0.00 |
| ATOM | 5939 | CG   | LEU | X | 394 | 55.667 | 26.539 | 49.693 | 0.00 | 0.00 |
| ATOM | 5940 | HG   | LEU | X | 394 | 54.865 | 27.068 | 49.178 | 0.00 | 0.00 |

|      |      |      |     |   |     |        |        |        |      |      |
|------|------|------|-----|---|-----|--------|--------|--------|------|------|
| ATOM | 5941 | CD1  | LEU | X | 394 | 56.064 | 27.236 | 50.967 | 0.00 | 0.00 |
| ATOM | 5942 | HD11 | LEU | X | 394 | 56.504 | 28.202 | 50.722 | 0.00 | 0.00 |
| ATOM | 5943 | HD12 | LEU | X | 394 | 56.848 | 26.751 | 51.549 | 0.00 | 0.00 |
| ATOM | 5944 | HD13 | LEU | X | 394 | 55.217 | 27.468 | 51.613 | 0.00 | 0.00 |
| ATOM | 5945 | CD2  | LEU | X | 394 | 56.930 | 26.403 | 48.820 | 0.00 | 0.00 |
| ATOM | 5946 | HD21 | LEU | X | 394 | 57.495 | 27.320 | 48.650 | 0.00 | 0.00 |
| ATOM | 5947 | HD22 | LEU | X | 394 | 57.665 | 25.714 | 49.235 | 0.00 | 0.00 |
| ATOM | 5948 | HD23 | LEU | X | 394 | 56.662 | 26.011 | 47.838 | 0.00 | 0.00 |
| ATOM | 5949 | C    | LEU | X | 394 | 52.683 | 25.422 | 49.738 | 0.00 | 0.00 |
| ATOM | 5950 | O    | LEU | X | 394 | 52.170 | 26.478 | 50.050 | 0.00 | 0.00 |
| ATOM | 5951 | N    | SER | X | 395 | 52.261 | 24.647 | 48.756 | 0.00 | 0.00 |
| ATOM | 5952 | H    | SER | X | 395 | 52.822 | 23.838 | 48.528 | 0.00 | 0.00 |
| ATOM | 5953 | CA   | SER | X | 395 | 51.228 | 25.094 | 47.802 | 0.00 | 0.00 |
| ATOM | 5954 | HA   | SER | X | 395 | 51.492 | 26.042 | 47.334 | 0.00 | 0.00 |
| ATOM | 5955 | CB   | SER | X | 395 | 51.038 | 24.142 | 46.623 | 0.00 | 0.00 |
| ATOM | 5956 | HB2  | SER | X | 395 | 50.629 | 23.186 | 46.952 | 0.00 | 0.00 |
| ATOM | 5957 | HB3  | SER | X | 395 | 50.241 | 24.493 | 45.969 | 0.00 | 0.00 |
| ATOM | 5958 | OG   | SER | X | 395 | 52.277 | 23.834 | 45.933 | 0.00 | 0.00 |
| ATOM | 5959 | HG   | SER | X | 395 | 52.620 | 22.967 | 46.162 | 0.00 | 0.00 |
| ATOM | 5960 | C    | SER | X | 395 | 49.892 | 25.275 | 48.604 | 0.00 | 0.00 |
| ATOM | 5961 | O    | SER | X | 395 | 49.147 | 26.183 | 48.400 | 0.00 | 0.00 |
| ATOM | 5962 | N    | ASP | X | 396 | 49.674 | 24.456 | 49.664 | 0.00 | 0.00 |
| ATOM | 5963 | H    | ASP | X | 396 | 50.359 | 23.740 | 49.860 | 0.00 | 0.00 |
| ATOM | 5964 | CA   | ASP | X | 396 | 48.619 | 24.601 | 50.660 | 0.00 | 0.00 |
| ATOM | 5965 | HA   | ASP | X | 396 | 47.614 | 24.737 | 50.260 | 0.00 | 0.00 |
| ATOM | 5966 | CB   | ASP | X | 396 | 48.537 | 23.322 | 51.550 | 0.00 | 0.00 |
| ATOM | 5967 | HB2  | ASP | X | 396 | 49.495 | 22.853 | 51.776 | 0.00 | 0.00 |
| ATOM | 5968 | HB3  | ASP | X | 396 | 48.212 | 23.733 | 52.506 | 0.00 | 0.00 |
| ATOM | 5969 | CG   | ASP | X | 396 | 47.489 | 22.278 | 51.220 | 0.00 | 0.00 |
| ATOM | 5970 | OD1  | ASP | X | 396 | 47.073 | 22.164 | 50.075 | 0.00 | 0.00 |
| ATOM | 5971 | OD2  | ASP | X | 396 | 47.194 | 21.494 | 52.188 | 0.00 | 0.00 |
| ATOM | 5972 | C    | ASP | X | 396 | 48.780 | 25.887 | 51.453 | 0.00 | 0.00 |
| ATOM | 5973 | O    | ASP | X | 396 | 47.908 | 26.769 | 51.298 | 0.00 | 0.00 |
| ATOM | 5974 | N    | VAL | X | 397 | 49.855 | 26.097 | 52.148 | 0.00 | 0.00 |
| ATOM | 5975 | H    | VAL | X | 397 | 50.402 | 25.262 | 52.304 | 0.00 | 0.00 |
| ATOM | 5976 | CA   | VAL | X | 397 | 50.264 | 27.335 | 52.874 | 0.00 | 0.00 |
| ATOM | 5977 | HA   | VAL | X | 397 | 49.628 | 27.458 | 53.751 | 0.00 | 0.00 |
| ATOM | 5978 | CB   | VAL | X | 397 | 51.746 | 27.369 | 53.354 | 0.00 | 0.00 |
| ATOM | 5979 | HB   | VAL | X | 397 | 52.444 | 27.185 | 52.537 | 0.00 | 0.00 |
| ATOM | 5980 | CG1  | VAL | X | 397 | 52.241 | 28.707 | 54.038 | 0.00 | 0.00 |
| ATOM | 5981 | HG11 | VAL | X | 397 | 51.555 | 29.017 | 54.826 | 0.00 | 0.00 |
| ATOM | 5982 | HG12 | VAL | X | 397 | 53.236 | 28.563 | 54.459 | 0.00 | 0.00 |
| ATOM | 5983 | HG13 | VAL | X | 397 | 52.409 | 29.552 | 53.371 | 0.00 | 0.00 |
| ATOM | 5984 | CG2  | VAL | X | 397 | 52.105 | 26.272 | 54.339 | 0.00 | 0.00 |
| ATOM | 5985 | HG21 | VAL | X | 397 | 53.177 | 26.251 | 54.539 | 0.00 | 0.00 |
| ATOM | 5986 | HG22 | VAL | X | 397 | 51.764 | 25.316 | 53.943 | 0.00 | 0.00 |
| ATOM | 5987 | HG23 | VAL | X | 397 | 51.771 | 26.520 | 55.347 | 0.00 | 0.00 |
| ATOM | 5988 | C    | VAL | X | 397 | 49.946 | 28.573 | 52.059 | 0.00 | 0.00 |
| ATOM | 5989 | O    | VAL | X | 397 | 49.223 | 29.485 | 52.463 | 0.00 | 0.00 |
| ATOM | 5990 | N    | VAL | X | 398 | 50.525 | 28.592 | 50.872 | 0.00 | 0.00 |
| ATOM | 5991 | H    | VAL | X | 398 | 51.083 | 27.794 | 50.603 | 0.00 | 0.00 |
| ATOM | 5992 | CA   | VAL | X | 398 | 50.476 | 29.680 | 49.909 | 0.00 | 0.00 |
| ATOM | 5993 | HA   | VAL | X | 398 | 50.787 | 30.559 | 50.473 | 0.00 | 0.00 |
| ATOM | 5994 | CB   | VAL | X | 398 | 51.589 | 29.485 | 48.756 | 0.00 | 0.00 |
| ATOM | 5995 | HB   | VAL | X | 398 | 51.370 | 28.507 | 48.327 | 0.00 | 0.00 |
| ATOM | 5996 | CG1  | VAL | X | 398 | 51.471 | 30.495 | 47.593 | 0.00 | 0.00 |
| ATOM | 5997 | HG11 | VAL | X | 398 | 50.545 | 30.374 | 47.031 | 0.00 | 0.00 |
| ATOM | 5998 | HG12 | VAL | X | 398 | 51.598 | 31.520 | 47.942 | 0.00 | 0.00 |
| ATOM | 5999 | HG13 | VAL | X | 398 | 52.269 | 30.218 | 46.904 | 0.00 | 0.00 |
| ATOM | 6000 | CG2  | VAL | X | 398 | 53.042 | 29.533 | 49.261 | 0.00 | 0.00 |
| ATOM | 6001 | HG21 | VAL | X | 398 | 53.532 | 30.506 | 49.243 | 0.00 | 0.00 |
| ATOM | 6002 | HG22 | VAL | X | 398 | 53.630 | 29.033 | 48.491 | 0.00 | 0.00 |
| ATOM | 6003 | HG23 | VAL | X | 398 | 53.181 | 28.950 | 50.171 | 0.00 | 0.00 |
| ATOM | 6004 | C    | VAL | X | 398 | 49.068 | 30.028 | 49.269 | 0.00 | 0.00 |
| ATOM | 6005 | O    | VAL | X | 398 | 48.853 | 31.220 | 48.961 | 0.00 | 0.00 |
| ATOM | 6006 | N    | GLY | X | 399 | 48.087 | 29.054 | 49.185 | 0.00 | 0.00 |
| ATOM | 6007 | H    | GLY | X | 399 | 48.245 | 28.149 | 49.604 | 0.00 | 0.00 |



|      |      |      |     |   |     |        |        |        |      |      |
|------|------|------|-----|---|-----|--------|--------|--------|------|------|
| ATOM | 6008 | CA   | GLY | X | 399 | 46.699 | 29.345 | 48.805 | 0.00 | 0.00 |
| ATOM | 6009 | HA2  | GLY | X | 399 | 46.766 | 30.199 | 48.131 | 0.00 | 0.00 |
| ATOM | 6010 | HA3  | GLY | X | 399 | 46.279 | 28.454 | 48.339 | 0.00 | 0.00 |
| ATOM | 6011 | C    | GLY | X | 399 | 45.899 | 29.657 | 50.058 | 0.00 | 0.00 |
| ATOM | 6012 | O    | GLY | X | 399 | 45.064 | 30.536 | 49.992 | 0.00 | 0.00 |
| ATOM | 6013 | N    | ASP | X | 400 | 46.167 | 28.949 | 51.162 | 0.00 | 0.00 |
| ATOM | 6014 | H    | ASP | X | 400 | 46.953 | 28.315 | 51.171 | 0.00 | 0.00 |
| ATOM | 6015 | CA   | ASP | X | 400 | 45.248 | 28.882 | 52.287 | 0.00 | 0.00 |
| ATOM | 6016 | HA   | ASP | X | 400 | 44.273 | 28.654 | 51.854 | 0.00 | 0.00 |
| ATOM | 6017 | CB   | ASP | X | 400 | 45.711 | 27.832 | 53.365 | 0.00 | 0.00 |
| ATOM | 6018 | HB2  | ASP | X | 400 | 46.705 | 28.077 | 53.739 | 0.00 | 0.00 |
| ATOM | 6019 | HB3  | ASP | X | 400 | 45.076 | 27.844 | 54.251 | 0.00 | 0.00 |
| ATOM | 6020 | CG   | ASP | X | 400 | 45.575 | 26.386 | 52.854 | 0.00 | 0.00 |
| ATOM | 6021 | OD1  | ASP | X | 400 | 44.947 | 26.015 | 51.813 | 0.00 | 0.00 |
| ATOM | 6022 | OD2  | ASP | X | 400 | 46.114 | 25.564 | 53.632 | 0.00 | 0.00 |
| ATOM | 6023 | C    | ASP | X | 400 | 45.186 | 30.268 | 52.880 | 0.00 | 0.00 |
| ATOM | 6024 | O    | ASP | X | 400 | 44.112 | 30.907 | 52.803 | 0.00 | 0.00 |
| ATOM | 6025 | N    | HIE | X | 401 | 46.304 | 30.744 | 53.368 | 0.00 | 0.00 |
| ATOM | 6026 | H    | HIE | X | 401 | 47.154 | 30.204 | 53.442 | 0.00 | 0.00 |
| ATOM | 6027 | CA   | HIE | X | 401 | 46.588 | 32.030 | 53.790 | 0.00 | 0.00 |
| ATOM | 6028 | HA   | HIE | X | 401 | 46.121 | 32.128 | 54.770 | 0.00 | 0.00 |
| ATOM | 6029 | CB   | HIE | X | 401 | 48.102 | 32.239 | 53.893 | 0.00 | 0.00 |
| ATOM | 6030 | HB2  | HIE | X | 401 | 48.566 | 31.639 | 54.676 | 0.00 | 0.00 |
| ATOM | 6031 | HB3  | HIE | X | 401 | 48.598 | 31.817 | 53.019 | 0.00 | 0.00 |
| ATOM | 6032 | CG   | HIE | X | 401 | 48.583 | 33.672 | 54.072 | 0.00 | 0.00 |
| ATOM | 6033 | ND1  | HIE | X | 401 | 47.965 | 34.583 | 54.895 | 0.00 | 0.00 |
| ATOM | 6034 | CE1  | HIE | X | 401 | 48.865 | 35.642 | 54.924 | 0.00 | 0.00 |
| ATOM | 6035 | HE1  | HIE | X | 401 | 48.738 | 36.524 | 55.535 | 0.00 | 0.00 |
| ATOM | 6036 | NE2  | HIE | X | 401 | 49.987 | 35.380 | 54.205 | 0.00 | 0.00 |
| ATOM | 6037 | HE2  | HIE | X | 401 | 50.771 | 35.999 | 54.055 | 0.00 | 0.00 |
| ATOM | 6038 | CD2  | HIE | X | 401 | 49.805 | 34.130 | 53.692 | 0.00 | 0.00 |
| ATOM | 6039 | HD2  | HIE | X | 401 | 50.535 | 33.605 | 53.094 | 0.00 | 0.00 |
| ATOM | 6040 | C    | HIE | X | 401 | 46.008 | 33.152 | 52.810 | 0.00 | 0.00 |
| ATOM | 6041 | O    | HIE | X | 401 | 45.173 | 33.862 | 53.246 | 0.00 | 0.00 |
| ATOM | 6042 | N    | ASN | X | 402 | 46.420 | 33.216 | 51.599 | 0.00 | 0.00 |
| ATOM | 6043 | H    | ASN | X | 402 | 46.881 | 32.376 | 51.280 | 0.00 | 0.00 |
| ATOM | 6044 | CA   | ASN | X | 402 | 46.049 | 34.320 | 50.624 | 0.00 | 0.00 |
| ATOM | 6045 | HA   | ASN | X | 402 | 46.256 | 35.289 | 51.079 | 0.00 | 0.00 |
| ATOM | 6046 | CB   | ASN | X | 402 | 47.076 | 34.139 | 49.532 | 0.00 | 0.00 |
| ATOM | 6047 | HB2  | ASN | X | 402 | 47.132 | 33.123 | 49.142 | 0.00 | 0.00 |
| ATOM | 6048 | HB3  | ASN | X | 402 | 46.678 | 34.665 | 48.664 | 0.00 | 0.00 |
| ATOM | 6049 | CG   | ASN | X | 402 | 48.393 | 34.842 | 49.811 | 0.00 | 0.00 |
| ATOM | 6050 | OD1  | ASN | X | 402 | 48.451 | 35.889 | 50.400 | 0.00 | 0.00 |
| ATOM | 6051 | ND2  | ASN | X | 402 | 49.460 | 34.095 | 49.657 | 0.00 | 0.00 |
| ATOM | 6052 | HD21 | ASN | X | 402 | 50.329 | 34.411 | 50.064 | 0.00 | 0.00 |
| ATOM | 6053 | HD22 | ASN | X | 402 | 49.412 | 33.146 | 49.313 | 0.00 | 0.00 |
| ATOM | 6054 | C    | ASN | X | 402 | 44.588 | 34.220 | 50.232 | 0.00 | 0.00 |
| ATOM | 6055 | O    | ASN | X | 402 | 44.048 | 35.238 | 49.969 | 0.00 | 0.00 |
| ATOM | 6056 | N    | VAL | X | 403 | 43.979 | 33.034 | 50.105 | 0.00 | 0.00 |
| ATOM | 6057 | H    | VAL | X | 403 | 44.498 | 32.218 | 50.397 | 0.00 | 0.00 |
| ATOM | 6058 | CA   | VAL | X | 403 | 42.701 | 32.806 | 49.466 | 0.00 | 0.00 |
| ATOM | 6059 | HA   | VAL | X | 403 | 42.132 | 33.733 | 49.388 | 0.00 | 0.00 |
| ATOM | 6060 | CB   | VAL | X | 403 | 42.788 | 32.195 | 48.097 | 0.00 | 0.00 |
| ATOM | 6061 | HB   | VAL | X | 403 | 43.327 | 31.248 | 48.125 | 0.00 | 0.00 |
| ATOM | 6062 | CG1  | VAL | X | 403 | 41.405 | 32.008 | 47.436 | 0.00 | 0.00 |
| ATOM | 6063 | HG11 | VAL | X | 403 | 40.745 | 31.322 | 47.967 | 0.00 | 0.00 |
| ATOM | 6064 | HG12 | VAL | X | 403 | 40.820 | 32.925 | 47.503 | 0.00 | 0.00 |
| ATOM | 6065 | HG13 | VAL | X | 403 | 41.458 | 31.762 | 46.376 | 0.00 | 0.00 |
| ATOM | 6066 | CG2  | VAL | X | 403 | 43.521 | 33.162 | 47.179 | 0.00 | 0.00 |
| ATOM | 6067 | HG21 | VAL | X | 403 | 44.537 | 33.231 | 47.567 | 0.00 | 0.00 |
| ATOM | 6068 | HG22 | VAL | X | 403 | 43.004 | 34.098 | 47.390 | 0.00 | 0.00 |
| ATOM | 6069 | HG23 | VAL | X | 403 | 43.489 | 32.996 | 46.102 | 0.00 | 0.00 |
| ATOM | 6070 | C    | VAL | X | 403 | 41.766 | 31.862 | 50.290 | 0.00 | 0.00 |
| ATOM | 6071 | O    | VAL | X | 403 | 40.684 | 32.327 | 50.736 | 0.00 | 0.00 |
| ATOM | 6072 | N    | VAL | X | 404 | 42.101 | 30.595 | 50.471 | 0.00 | 0.00 |
| ATOM | 6073 | H    | VAL | X | 404 | 43.050 | 30.389 | 50.192 | 0.00 | 0.00 |
| ATOM | 6074 | CA   | VAL | X | 404 | 41.145 | 29.502 | 50.707 | 0.00 | 0.00 |

|      |      |      |     |   |     |        |        |        |      |      |
|------|------|------|-----|---|-----|--------|--------|--------|------|------|
| ATOM | 6075 | HA   | VAL | X | 404 | 40.347 | 29.620 | 49.974 | 0.00 | 0.00 |
| ATOM | 6076 | CB   | VAL | X | 404 | 41.794 | 28.129 | 50.534 | 0.00 | 0.00 |
| ATOM | 6077 | HB   | VAL | X | 404 | 42.462 | 27.905 | 51.366 | 0.00 | 0.00 |
| ATOM | 6078 | CG1  | VAL | X | 404 | 40.698 | 27.096 | 50.362 | 0.00 | 0.00 |
| ATOM | 6079 | HG11 | VAL | X | 404 | 40.070 | 27.045 | 51.251 | 0.00 | 0.00 |
| ATOM | 6080 | HG12 | VAL | X | 404 | 40.098 | 27.171 | 49.454 | 0.00 | 0.00 |
| ATOM | 6081 | HG13 | VAL | X | 404 | 41.164 | 26.112 | 50.392 | 0.00 | 0.00 |
| ATOM | 6082 | CG2  | VAL | X | 404 | 42.546 | 28.033 | 49.173 | 0.00 | 0.00 |
| ATOM | 6083 | HG21 | VAL | X | 404 | 41.848 | 28.308 | 48.383 | 0.00 | 0.00 |
| ATOM | 6084 | HG22 | VAL | X | 404 | 42.990 | 27.044 | 49.059 | 0.00 | 0.00 |
| ATOM | 6085 | HG23 | VAL | X | 404 | 43.412 | 28.693 | 49.223 | 0.00 | 0.00 |
| ATOM | 6086 | C    | VAL | X | 404 | 40.568 | 29.652 | 52.091 | 0.00 | 0.00 |
| ATOM | 6087 | O    | VAL | X | 404 | 39.360 | 29.515 | 52.154 | 0.00 | 0.00 |
| ATOM | 6088 | N    | CYX | X | 405 | 41.393 | 29.982 | 53.123 | 0.00 | 0.00 |
| ATOM | 6089 | H    | CYX | X | 405 | 42.354 | 30.228 | 52.933 | 0.00 | 0.00 |
| ATOM | 6090 | CA   | CYX | X | 405 | 40.948 | 30.341 | 54.435 | 0.00 | 0.00 |
| ATOM | 6091 | HA   | CYX | X | 405 | 40.172 | 29.598 | 54.620 | 0.00 | 0.00 |
| ATOM | 6092 | CB   | CYX | X | 405 | 41.997 | 30.145 | 55.528 | 0.00 | 0.00 |
| ATOM | 6093 | HB2  | CYX | X | 405 | 42.923 | 30.678 | 55.312 | 0.00 | 0.00 |
| ATOM | 6094 | HB3  | CYX | X | 405 | 41.622 | 30.497 | 56.489 | 0.00 | 0.00 |
| ATOM | 6095 | SG   | CYX | X | 405 | 42.272 | 28.322 | 55.857 | 0.00 | 0.00 |
| ATOM | 6096 | C    | CYX | X | 405 | 40.033 | 31.560 | 54.543 | 0.00 | 0.00 |
| ATOM | 6097 | O    | CYX | X | 405 | 38.916 | 31.367 | 55.010 | 0.00 | 0.00 |
| ATOM | 6098 | N    | PRO | X | 406 | 40.445 | 32.791 | 54.047 | 0.00 | 0.00 |
| ATOM | 6099 | CD   | PRO | X | 406 | 41.731 | 33.063 | 53.587 | 0.00 | 0.00 |
| ATOM | 6100 | HD2  | PRO | X | 406 | 42.052 | 32.377 | 52.803 | 0.00 | 0.00 |
| ATOM | 6101 | HD3  | PRO | X | 406 | 42.431 | 33.164 | 54.416 | 0.00 | 0.00 |
| ATOM | 6102 | CG   | PRO | X | 406 | 41.729 | 34.552 | 53.064 | 0.00 | 0.00 |
| ATOM | 6103 | HG2  | PRO | X | 406 | 42.320 | 34.621 | 52.151 | 0.00 | 0.00 |
| ATOM | 6104 | HG3  | PRO | X | 406 | 42.133 | 35.319 | 53.725 | 0.00 | 0.00 |
| ATOM | 6105 | CB   | PRO | X | 406 | 40.290 | 34.863 | 52.839 | 0.00 | 0.00 |
| ATOM | 6106 | HB2  | PRO | X | 406 | 40.043 | 34.638 | 51.801 | 0.00 | 0.00 |
| ATOM | 6107 | HB3  | PRO | X | 406 | 40.092 | 35.886 | 53.159 | 0.00 | 0.00 |
| ATOM | 6108 | CA   | PRO | X | 406 | 39.558 | 33.936 | 53.756 | 0.00 | 0.00 |
| ATOM | 6109 | HA   | PRO | X | 406 | 39.307 | 34.505 | 54.651 | 0.00 | 0.00 |
| ATOM | 6110 | C    | PRO | X | 406 | 38.223 | 33.591 | 53.130 | 0.00 | 0.00 |
| ATOM | 6111 | O    | PRO | X | 406 | 37.259 | 34.054 | 53.631 | 0.00 | 0.00 |
| ATOM | 6112 | N    | VAL | X | 407 | 38.161 | 32.649 | 52.148 | 0.00 | 0.00 |
| ATOM | 6113 | H    | VAL | X | 407 | 39.049 | 32.444 | 51.714 | 0.00 | 0.00 |
| ATOM | 6114 | CA   | VAL | X | 407 | 36.848 | 32.122 | 51.630 | 0.00 | 0.00 |
| ATOM | 6115 | HA   | VAL | X | 407 | 36.284 | 33.052 | 51.562 | 0.00 | 0.00 |
| ATOM | 6116 | CB   | VAL | X | 407 | 37.008 | 31.472 | 50.227 | 0.00 | 0.00 |
| ATOM | 6117 | HB   | VAL | X | 407 | 37.837 | 30.766 | 50.177 | 0.00 | 0.00 |
| ATOM | 6118 | CG1  | VAL | X | 407 | 35.757 | 30.621 | 49.823 | 0.00 | 0.00 |
| ATOM | 6119 | HG11 | VAL | X | 407 | 34.871 | 31.254 | 49.770 | 0.00 | 0.00 |
| ATOM | 6120 | HG12 | VAL | X | 407 | 35.915 | 30.261 | 48.806 | 0.00 | 0.00 |
| ATOM | 6121 | HG13 | VAL | X | 407 | 35.591 | 29.758 | 50.468 | 0.00 | 0.00 |
| ATOM | 6122 | CG2  | VAL | X | 407 | 37.165 | 32.515 | 49.078 | 0.00 | 0.00 |
| ATOM | 6123 | HG21 | VAL | X | 407 | 37.997 | 33.150 | 49.383 | 0.00 | 0.00 |
| ATOM | 6124 | HG22 | VAL | X | 407 | 36.299 | 33.168 | 49.176 | 0.00 | 0.00 |
| ATOM | 6125 | HG23 | VAL | X | 407 | 37.284 | 32.099 | 48.077 | 0.00 | 0.00 |
| ATOM | 6126 | C    | VAL | X | 407 | 36.017 | 31.389 | 52.642 | 0.00 | 0.00 |
| ATOM | 6127 | O    | VAL | X | 407 | 34.827 | 31.670 | 52.679 | 0.00 | 0.00 |
| ATOM | 6128 | N    | ALA | X | 408 | 36.645 | 30.479 | 53.478 | 0.00 | 0.00 |
| ATOM | 6129 | H    | ALA | X | 408 | 37.645 | 30.515 | 53.338 | 0.00 | 0.00 |
| ATOM | 6130 | CA   | ALA | X | 408 | 35.938 | 29.672 | 54.464 | 0.00 | 0.00 |
| ATOM | 6131 | HA   | ALA | X | 408 | 34.997 | 29.263 | 54.097 | 0.00 | 0.00 |
| ATOM | 6132 | CB   | ALA | X | 408 | 36.824 | 28.500 | 54.870 | 0.00 | 0.00 |
| ATOM | 6133 | HB1  | ALA | X | 408 | 36.983 | 27.800 | 54.049 | 0.00 | 0.00 |
| ATOM | 6134 | HB2  | ALA | X | 408 | 36.301 | 27.946 | 55.649 | 0.00 | 0.00 |
| ATOM | 6135 | HB3  | ALA | X | 408 | 37.776 | 28.823 | 55.290 | 0.00 | 0.00 |
| ATOM | 6136 | C    | ALA | X | 408 | 35.548 | 30.637 | 55.663 | 0.00 | 0.00 |
| ATOM | 6137 | O    | ALA | X | 408 | 34.562 | 30.465 | 56.309 | 0.00 | 0.00 |
| ATOM | 6138 | N    | GLN | X | 409 | 36.132 | 31.816 | 55.843 | 0.00 | 0.00 |
| ATOM | 6139 | H    | GLN | X | 409 | 36.979 | 32.051 | 55.346 | 0.00 | 0.00 |
| ATOM | 6140 | CA   | GLN | X | 409 | 35.720 | 32.879 | 56.753 | 0.00 | 0.00 |
| ATOM | 6141 | HA   | GLN | X | 409 | 35.450 | 32.450 | 57.718 | 0.00 | 0.00 |

|      |      |      |     |   |     |        |        |        |      |      |
|------|------|------|-----|---|-----|--------|--------|--------|------|------|
| ATOM | 6142 | CB   | GLN | X | 409 | 36.961 | 33.840 | 56.912 | 0.00 | 0.00 |
| ATOM | 6143 | HB2  | GLN | X | 409 | 37.791 | 33.383 | 57.450 | 0.00 | 0.00 |
| ATOM | 6144 | HB3  | GLN | X | 409 | 37.378 | 34.323 | 56.028 | 0.00 | 0.00 |
| ATOM | 6145 | CG   | GLN | X | 409 | 36.656 | 35.027 | 57.813 | 0.00 | 0.00 |
| ATOM | 6146 | HG2  | GLN | X | 409 | 37.561 | 35.634 | 57.855 | 0.00 | 0.00 |
| ATOM | 6147 | HG3  | GLN | X | 409 | 35.781 | 35.623 | 57.553 | 0.00 | 0.00 |
| ATOM | 6148 | CD   | GLN | X | 409 | 36.434 | 34.628 | 59.281 | 0.00 | 0.00 |
| ATOM | 6149 | OE1  | GLN | X | 409 | 35.401 | 34.227 | 59.732 | 0.00 | 0.00 |
| ATOM | 6150 | NE2  | GLN | X | 409 | 37.371 | 34.718 | 60.179 | 0.00 | 0.00 |
| ATOM | 6151 | HE21 | GLN | X | 409 | 37.105 | 34.418 | 61.106 | 0.00 | 0.00 |
| ATOM | 6152 | HE22 | GLN | X | 409 | 38.328 | 34.987 | 60.002 | 0.00 | 0.00 |
| ATOM | 6153 | C    | GLN | X | 409 | 34.456 | 33.550 | 56.183 | 0.00 | 0.00 |
| ATOM | 6154 | O    | GLN | X | 409 | 33.438 | 33.630 | 56.883 | 0.00 | 0.00 |
| ATOM | 6155 | N    | LEU | X | 410 | 34.666 | 34.000 | 54.885 | 0.00 | 0.00 |
| ATOM | 6156 | H    | LEU | X | 410 | 35.519 | 33.865 | 54.361 | 0.00 | 0.00 |
| ATOM | 6157 | CA   | LEU | X | 410 | 33.606 | 34.865 | 54.390 | 0.00 | 0.00 |
| ATOM | 6158 | HA   | LEU | X | 410 | 33.400 | 35.627 | 55.142 | 0.00 | 0.00 |
| ATOM | 6159 | CB   | LEU | X | 410 | 33.918 | 35.349 | 52.970 | 0.00 | 0.00 |
| ATOM | 6160 | HB2  | LEU | X | 410 | 34.815 | 35.960 | 53.074 | 0.00 | 0.00 |
| ATOM | 6161 | HB3  | LEU | X | 410 | 34.025 | 34.371 | 52.502 | 0.00 | 0.00 |
| ATOM | 6162 | CG   | LEU | X | 410 | 32.991 | 36.304 | 52.319 | 0.00 | 0.00 |
| ATOM | 6163 | HG   | LEU | X | 410 | 32.083 | 35.721 | 52.164 | 0.00 | 0.00 |
| ATOM | 6164 | CD1  | LEU | X | 410 | 32.642 | 37.573 | 53.179 | 0.00 | 0.00 |
| ATOM | 6165 | HD11 | LEU | X | 410 | 32.170 | 38.261 | 52.477 | 0.00 | 0.00 |
| ATOM | 6166 | HD12 | LEU | X | 410 | 33.582 | 38.048 | 53.461 | 0.00 | 0.00 |
| ATOM | 6167 | HD13 | LEU | X | 410 | 31.918 | 37.338 | 53.959 | 0.00 | 0.00 |
| ATOM | 6168 | CD2  | LEU | X | 410 | 33.570 | 36.912 | 50.977 | 0.00 | 0.00 |
| ATOM | 6169 | HD21 | LEU | X | 410 | 33.648 | 36.079 | 50.279 | 0.00 | 0.00 |
| ATOM | 6170 | HD22 | LEU | X | 410 | 32.935 | 37.613 | 50.435 | 0.00 | 0.00 |
| ATOM | 6171 | HD23 | LEU | X | 410 | 34.587 | 37.299 | 51.031 | 0.00 | 0.00 |
| ATOM | 6172 | C    | LEU | X | 410 | 32.269 | 34.035 | 54.352 | 0.00 | 0.00 |
| ATOM | 6173 | O    | LEU | X | 410 | 31.116 | 34.554 | 54.602 | 0.00 | 0.00 |
| ATOM | 6174 | N    | ALA | X | 411 | 32.434 | 32.756 | 53.984 | 0.00 | 0.00 |
| ATOM | 6175 | H    | ALA | X | 411 | 33.375 | 32.514 | 53.707 | 0.00 | 0.00 |
| ATOM | 6176 | CA   | ALA | X | 411 | 31.312 | 31.827 | 53.692 | 0.00 | 0.00 |
| ATOM | 6177 | HA   | ALA | X | 411 | 30.620 | 32.334 | 53.019 | 0.00 | 0.00 |
| ATOM | 6178 | CB   | ALA | X | 411 | 31.842 | 30.479 | 53.127 | 0.00 | 0.00 |
| ATOM | 6179 | HB1  | ALA | X | 411 | 31.126 | 30.092 | 52.402 | 0.00 | 0.00 |
| ATOM | 6180 | HB2  | ALA | X | 411 | 32.189 | 29.815 | 53.919 | 0.00 | 0.00 |
| ATOM | 6181 | HB3  | ALA | X | 411 | 32.654 | 30.682 | 52.428 | 0.00 | 0.00 |
| ATOM | 6182 | C    | ALA | X | 411 | 30.516 | 31.516 | 54.954 | 0.00 | 0.00 |
| ATOM | 6183 | O    | ALA | X | 411 | 29.294 | 31.409 | 54.896 | 0.00 | 0.00 |
| ATOM | 6184 | N    | GLY | X | 412 | 31.285 | 31.389 | 56.090 | 0.00 | 0.00 |
| ATOM | 6185 | H    | GLY | X | 412 | 32.250 | 31.685 | 56.098 | 0.00 | 0.00 |
| ATOM | 6186 | CA   | GLY | X | 412 | 30.696 | 31.223 | 57.421 | 0.00 | 0.00 |
| ATOM | 6187 | HA2  | GLY | X | 412 | 29.836 | 30.564 | 57.302 | 0.00 | 0.00 |
| ATOM | 6188 | HA3  | GLY | X | 412 | 31.366 | 30.822 | 58.181 | 0.00 | 0.00 |
| ATOM | 6189 | C    | GLY | X | 412 | 30.114 | 32.540 | 58.027 | 0.00 | 0.00 |
| ATOM | 6190 | O    | GLY | X | 412 | 29.074 | 32.456 | 58.675 | 0.00 | 0.00 |
| ATOM | 6191 | N    | ARG | X | 413 | 30.788 | 33.694 | 57.833 | 0.00 | 0.00 |
| ATOM | 6192 | H    | ARG | X | 413 | 31.625 | 33.659 | 57.268 | 0.00 | 0.00 |
| ATOM | 6193 | CA   | ARG | X | 413 | 30.237 | 35.102 | 58.221 | 0.00 | 0.00 |
| ATOM | 6194 | HA   | ARG | X | 413 | 30.013 | 35.140 | 59.287 | 0.00 | 0.00 |
| ATOM | 6195 | CB   | ARG | X | 413 | 31.310 | 36.140 | 57.844 | 0.00 | 0.00 |
| ATOM | 6196 | HB2  | ARG | X | 413 | 31.565 | 35.957 | 56.800 | 0.00 | 0.00 |
| ATOM | 6197 | HB3  | ARG | X | 413 | 30.839 | 37.111 | 57.992 | 0.00 | 0.00 |
| ATOM | 6198 | CG   | ARG | X | 413 | 32.526 | 36.133 | 58.801 | 0.00 | 0.00 |
| ATOM | 6199 | HG2  | ARG | X | 413 | 32.840 | 35.118 | 59.045 | 0.00 | 0.00 |
| ATOM | 6200 | HG3  | ARG | X | 413 | 33.361 | 36.586 | 58.266 | 0.00 | 0.00 |
| ATOM | 6201 | CD   | ARG | X | 413 | 32.318 | 36.907 | 60.108 | 0.00 | 0.00 |
| ATOM | 6202 | HD2  | ARG | X | 413 | 31.819 | 37.854 | 59.904 | 0.00 | 0.00 |
| ATOM | 6203 | HD3  | ARG | X | 413 | 31.714 | 36.305 | 60.787 | 0.00 | 0.00 |
| ATOM | 6204 | NE   | ARG | X | 413 | 33.627 | 37.221 | 60.735 | 0.00 | 0.00 |
| ATOM | 6205 | HE   | ARG | X | 413 | 34.436 | 37.155 | 60.134 | 0.00 | 0.00 |
| ATOM | 6206 | CZ   | ARG | X | 413 | 33.766 | 37.737 | 61.918 | 0.00 | 0.00 |
| ATOM | 6207 | NH1  | ARG | X | 413 | 32.780 | 38.009 | 62.771 | 0.00 | 0.00 |
| ATOM | 6208 | HH11 | ARG | X | 413 | 31.823 | 37.902 | 62.466 | 0.00 | 0.00 |

|      |      |      |     |   |     |        |        |        |      |      |
|------|------|------|-----|---|-----|--------|--------|--------|------|------|
| ATOM | 6209 | HH12 | ARG | X | 413 | 32.908 | 38.385 | 63.699 | 0.00 | 0.00 |
| ATOM | 6210 | NH2  | ARG | X | 413 | 34.901 | 38.087 | 62.426 | 0.00 | 0.00 |
| ATOM | 6211 | HH21 | ARG | X | 413 | 35.726 | 37.984 | 61.853 | 0.00 | 0.00 |
| ATOM | 6212 | HH22 | ARG | X | 413 | 35.012 | 38.361 | 63.392 | 0.00 | 0.00 |
| ATOM | 6213 | C    | ARG | X | 413 | 28.942 | 35.470 | 57.543 | 0.00 | 0.00 |
| ATOM | 6214 | O    | ARG | X | 413 | 27.959 | 35.770 | 58.241 | 0.00 | 0.00 |
| ATOM | 6215 | N    | LEU | X | 414 | 28.935 | 35.457 | 56.200 | 0.00 | 0.00 |
| ATOM | 6216 | H    | LEU | X | 414 | 29.793 | 35.152 | 55.761 | 0.00 | 0.00 |
| ATOM | 6217 | CA   | LEU | X | 414 | 27.717 | 35.617 | 55.333 | 0.00 | 0.00 |
| ATOM | 6218 | HA   | LEU | X | 414 | 27.543 | 36.682 | 55.180 | 0.00 | 0.00 |
| ATOM | 6219 | CB   | LEU | X | 414 | 27.999 | 35.166 | 53.867 | 0.00 | 0.00 |
| ATOM | 6220 | HB2  | LEU | X | 414 | 28.668 | 34.305 | 53.910 | 0.00 | 0.00 |
| ATOM | 6221 | HB3  | LEU | X | 414 | 27.061 | 34.919 | 53.371 | 0.00 | 0.00 |
| ATOM | 6222 | CG   | LEU | X | 414 | 28.699 | 36.204 | 52.990 | 0.00 | 0.00 |
| ATOM | 6223 | HG   | LEU | X | 414 | 29.639 | 36.404 | 53.505 | 0.00 | 0.00 |
| ATOM | 6224 | CD1  | LEU | X | 414 | 29.160 | 35.584 | 51.712 | 0.00 | 0.00 |
| ATOM | 6225 | HD11 | LEU | X | 414 | 29.806 | 36.338 | 51.261 | 0.00 | 0.00 |
| ATOM | 6226 | HD12 | LEU | X | 414 | 28.263 | 35.341 | 51.143 | 0.00 | 0.00 |
| ATOM | 6227 | HD13 | LEU | X | 414 | 29.801 | 34.720 | 51.890 | 0.00 | 0.00 |
| ATOM | 6228 | CD2  | LEU | X | 414 | 27.999 | 37.553 | 52.773 | 0.00 | 0.00 |
| ATOM | 6229 | HD21 | LEU | X | 414 | 28.117 | 38.198 | 53.644 | 0.00 | 0.00 |
| ATOM | 6230 | HD22 | LEU | X | 414 | 28.386 | 38.141 | 51.941 | 0.00 | 0.00 |
| ATOM | 6231 | HD23 | LEU | X | 414 | 26.947 | 37.401 | 52.534 | 0.00 | 0.00 |
| ATOM | 6232 | C    | LEU | X | 414 | 26.500 | 34.906 | 55.976 | 0.00 | 0.00 |
| ATOM | 6233 | O    | LEU | X | 414 | 25.503 | 35.668 | 56.078 | 0.00 | 0.00 |
| ATOM | 6234 | N    | ALA | X | 415 | 26.528 | 33.619 | 56.206 | 0.00 | 0.00 |
| ATOM | 6235 | H    | ALA | X | 415 | 27.367 | 33.144 | 55.906 | 0.00 | 0.00 |
| ATOM | 6236 | CA   | ALA | X | 415 | 25.389 | 32.803 | 56.620 | 0.00 | 0.00 |
| ATOM | 6237 | HA   | ALA | X | 415 | 24.552 | 33.099 | 55.988 | 0.00 | 0.00 |
| ATOM | 6238 | CB   | ALA | X | 415 | 25.739 | 31.344 | 56.326 | 0.00 | 0.00 |
| ATOM | 6239 | HB1  | ALA | X | 415 | 24.948 | 30.706 | 56.719 | 0.00 | 0.00 |
| ATOM | 6240 | HB2  | ALA | X | 415 | 26.645 | 31.197 | 56.913 | 0.00 | 0.00 |
| ATOM | 6241 | HB3  | ALA | X | 415 | 25.957 | 31.049 | 55.299 | 0.00 | 0.00 |
| ATOM | 6242 | C    | ALA | X | 415 | 24.882 | 33.060 | 58.046 | 0.00 | 0.00 |
| ATOM | 6243 | O    | ALA | X | 415 | 23.695 | 33.065 | 58.304 | 0.00 | 0.00 |
| ATOM | 6244 | N    | ALA | X | 416 | 25.765 | 33.231 | 59.036 | 0.00 | 0.00 |
| ATOM | 6245 | H    | ALA | X | 416 | 26.709 | 33.104 | 58.700 | 0.00 | 0.00 |
| ATOM | 6246 | CA   | ALA | X | 416 | 25.445 | 33.562 | 60.426 | 0.00 | 0.00 |
| ATOM | 6247 | HA   | ALA | X | 416 | 24.556 | 32.944 | 60.550 | 0.00 | 0.00 |
| ATOM | 6248 | CB   | ALA | X | 416 | 26.494 | 33.146 | 61.451 | 0.00 | 0.00 |
| ATOM | 6249 | HB1  | ALA | X | 416 | 26.799 | 32.103 | 61.367 | 0.00 | 0.00 |
| ATOM | 6250 | HB2  | ALA | X | 416 | 26.079 | 33.388 | 62.430 | 0.00 | 0.00 |
| ATOM | 6251 | HB3  | ALA | X | 416 | 27.282 | 33.898 | 61.417 | 0.00 | 0.00 |
| ATOM | 6252 | C    | ALA | X | 416 | 25.125 | 35.057 | 60.581 | 0.00 | 0.00 |
| ATOM | 6253 | O    | ALA | X | 416 | 24.148 | 35.371 | 61.298 | 0.00 | 0.00 |
| ATOM | 6254 | N    | GLN | X | 417 | 25.666 | 35.981 | 59.744 | 0.00 | 0.00 |
| ATOM | 6255 | H    | GLN | X | 417 | 26.361 | 35.645 | 59.091 | 0.00 | 0.00 |
| ATOM | 6256 | CA   | GLN | X | 417 | 25.202 | 37.354 | 59.547 | 0.00 | 0.00 |
| ATOM | 6257 | HA   | GLN | X | 417 | 24.684 | 37.741 | 60.425 | 0.00 | 0.00 |
| ATOM | 6258 | CB   | GLN | X | 417 | 26.416 | 38.308 | 59.346 | 0.00 | 0.00 |
| ATOM | 6259 | HB2  | GLN | X | 417 | 27.046 | 38.003 | 58.510 | 0.00 | 0.00 |
| ATOM | 6260 | HB3  | GLN | X | 417 | 26.099 | 39.327 | 59.124 | 0.00 | 0.00 |
| ATOM | 6261 | CG   | GLN | X | 417 | 27.176 | 38.315 | 60.626 | 0.00 | 0.00 |
| ATOM | 6262 | HG2  | GLN | X | 417 | 26.580 | 38.985 | 61.246 | 0.00 | 0.00 |
| ATOM | 6263 | HG3  | GLN | X | 417 | 27.086 | 37.374 | 61.167 | 0.00 | 0.00 |
| ATOM | 6264 | CD   | GLN | X | 417 | 28.645 | 38.775 | 60.521 | 0.00 | 0.00 |
| ATOM | 6265 | OE1  | GLN | X | 417 | 29.553 | 38.019 | 60.906 | 0.00 | 0.00 |
| ATOM | 6266 | NE2  | GLN | X | 417 | 28.994 | 39.867 | 59.825 | 0.00 | 0.00 |
| ATOM | 6267 | HE21 | GLN | X | 417 | 29.985 | 40.058 | 59.780 | 0.00 | 0.00 |
| ATOM | 6268 | HE22 | GLN | X | 417 | 28.270 | 40.383 | 59.347 | 0.00 | 0.00 |
| ATOM | 6269 | C    | GLN | X | 417 | 24.121 | 37.527 | 58.407 | 0.00 | 0.00 |
| ATOM | 6270 | O    | GLN | X | 417 | 23.805 | 38.659 | 57.988 | 0.00 | 0.00 |
| ATOM | 6271 | N    | GLY | X | 418 | 23.575 | 36.475 | 57.898 | 0.00 | 0.00 |
| ATOM | 6272 | H    | GLY | X | 418 | 24.056 | 35.628 | 58.166 | 0.00 | 0.00 |
| ATOM | 6273 | CA   | GLY | X | 418 | 22.176 | 36.435 | 57.443 | 0.00 | 0.00 |
| ATOM | 6274 | HA2  | GLY | X | 418 | 21.625 | 35.571 | 57.813 | 0.00 | 0.00 |
| ATOM | 6275 | HA3  | GLY | X | 418 | 21.650 | 37.339 | 57.751 | 0.00 | 0.00 |

|      |      |      |     |   |     |        |        |        |      |      |
|------|------|------|-----|---|-----|--------|--------|--------|------|------|
| ATOM | 6276 | C    | GLY | X | 418 | 21.940 | 36.301 | 55.919 | 0.00 | 0.00 |
| ATOM | 6277 | O    | GLY | X | 418 | 20.838 | 36.471 | 55.430 | 0.00 | 0.00 |
| ATOM | 6278 | N    | ALA | X | 419 | 22.986 | 36.132 | 55.077 | 0.00 | 0.00 |
| ATOM | 6279 | H    | ALA | X | 419 | 23.899 | 36.124 | 55.509 | 0.00 | 0.00 |
| ATOM | 6280 | CA   | ALA | X | 419 | 23.031 | 35.904 | 53.649 | 0.00 | 0.00 |
| ATOM | 6281 | HA   | ALA | X | 419 | 22.113 | 36.355 | 53.273 | 0.00 | 0.00 |
| ATOM | 6282 | CB   | ALA | X | 419 | 24.298 | 36.484 | 52.986 | 0.00 | 0.00 |
| ATOM | 6283 | HB1  | ALA | X | 419 | 25.206 | 36.066 | 53.419 | 0.00 | 0.00 |
| ATOM | 6284 | HB2  | ALA | X | 419 | 24.226 | 37.518 | 53.322 | 0.00 | 0.00 |
| ATOM | 6285 | HB3  | ALA | X | 419 | 24.261 | 36.374 | 51.902 | 0.00 | 0.00 |
| ATOM | 6286 | C    | ALA | X | 419 | 22.859 | 34.456 | 53.178 | 0.00 | 0.00 |
| ATOM | 6287 | O    | ALA | X | 419 | 23.244 | 33.494 | 53.842 | 0.00 | 0.00 |
| ATOM | 6288 | N    | ARG | X | 420 | 22.348 | 34.238 | 51.978 | 0.00 | 0.00 |
| ATOM | 6289 | H    | ARG | X | 420 | 22.148 | 35.098 | 51.488 | 0.00 | 0.00 |
| ATOM | 6290 | CA   | ARG | X | 420 | 22.213 | 32.947 | 51.307 | 0.00 | 0.00 |
| ATOM | 6291 | HA   | ARG | X | 420 | 22.190 | 32.145 | 52.044 | 0.00 | 0.00 |
| ATOM | 6292 | CB   | ARG | X | 420 | 20.896 | 32.962 | 50.383 | 0.00 | 0.00 |
| ATOM | 6293 | HB2  | ARG | X | 420 | 20.099 | 33.107 | 51.112 | 0.00 | 0.00 |
| ATOM | 6294 | HB3  | ARG | X | 420 | 20.994 | 33.770 | 49.658 | 0.00 | 0.00 |
| ATOM | 6295 | CG   | ARG | X | 420 | 20.677 | 31.556 | 49.789 | 0.00 | 0.00 |
| ATOM | 6296 | HG2  | ARG | X | 420 | 21.333 | 31.452 | 48.925 | 0.00 | 0.00 |
| ATOM | 6297 | HG3  | ARG | X | 420 | 20.897 | 30.822 | 50.564 | 0.00 | 0.00 |
| ATOM | 6298 | CD   | ARG | X | 420 | 19.216 | 31.387 | 49.354 | 0.00 | 0.00 |
| ATOM | 6299 | HD2  | ARG | X | 420 | 18.642 | 31.444 | 50.278 | 0.00 | 0.00 |
| ATOM | 6300 | HD3  | ARG | X | 420 | 18.921 | 32.244 | 48.747 | 0.00 | 0.00 |
| ATOM | 6301 | NE   | ARG | X | 420 | 18.911 | 30.107 | 48.553 | 0.00 | 0.00 |
| ATOM | 6302 | HE   | ARG | X | 420 | 19.564 | 29.342 | 48.647 | 0.00 | 0.00 |
| ATOM | 6303 | CZ   | ARG | X | 420 | 17.948 | 29.754 | 47.742 | 0.00 | 0.00 |
| ATOM | 6304 | NH1  | ARG | X | 420 | 16.994 | 30.594 | 47.409 | 0.00 | 0.00 |
| ATOM | 6305 | HH11 | ARG | X | 420 | 16.996 | 31.473 | 47.907 | 0.00 | 0.00 |
| ATOM | 6306 | HH12 | ARG | X | 420 | 16.151 | 30.333 | 46.918 | 0.00 | 0.00 |
| ATOM | 6307 | NH2  | ARG | X | 420 | 17.743 | 28.545 | 47.311 | 0.00 | 0.00 |
| ATOM | 6308 | HH21 | ARG | X | 420 | 18.476 | 27.886 | 47.533 | 0.00 | 0.00 |
| ATOM | 6309 | HH22 | ARG | X | 420 | 17.080 | 28.469 | 46.554 | 0.00 | 0.00 |
| ATOM | 6310 | C    | ARG | X | 420 | 23.525 | 32.840 | 50.531 | 0.00 | 0.00 |
| ATOM | 6311 | O    | ARG | X | 420 | 23.973 | 33.658 | 49.763 | 0.00 | 0.00 |
| ATOM | 6312 | N    | VAL | X | 421 | 24.180 | 31.701 | 50.762 | 0.00 | 0.00 |
| ATOM | 6313 | H    | VAL | X | 421 | 23.829 | 30.976 | 51.370 | 0.00 | 0.00 |
| ATOM | 6314 | CA   | VAL | X | 421 | 25.530 | 31.457 | 50.270 | 0.00 | 0.00 |
| ATOM | 6315 | HA   | VAL | X | 421 | 25.882 | 32.184 | 49.538 | 0.00 | 0.00 |
| ATOM | 6316 | CB   | VAL | X | 421 | 26.469 | 31.311 | 51.563 | 0.00 | 0.00 |
| ATOM | 6317 | HB   | VAL | X | 421 | 26.363 | 30.327 | 52.018 | 0.00 | 0.00 |
| ATOM | 6318 | CG1  | VAL | X | 421 | 27.922 | 31.353 | 51.063 | 0.00 | 0.00 |
| ATOM | 6319 | HG11 | VAL | X | 421 | 28.205 | 32.404 | 51.004 | 0.00 | 0.00 |
| ATOM | 6320 | HG12 | VAL | X | 421 | 28.657 | 30.819 | 51.666 | 0.00 | 0.00 |
| ATOM | 6321 | HG13 | VAL | X | 421 | 28.022 | 31.012 | 50.032 | 0.00 | 0.00 |
| ATOM | 6322 | CG2  | VAL | X | 421 | 26.279 | 32.493 | 52.547 | 0.00 | 0.00 |
| ATOM | 6323 | HG21 | VAL | X | 421 | 26.885 | 32.435 | 53.451 | 0.00 | 0.00 |
| ATOM | 6324 | HG22 | VAL | X | 421 | 25.253 | 32.466 | 52.913 | 0.00 | 0.00 |
| ATOM | 6325 | HG23 | VAL | X | 421 | 26.424 | 33.464 | 52.075 | 0.00 | 0.00 |
| ATOM | 6326 | C    | VAL | X | 421 | 25.585 | 30.049 | 49.642 | 0.00 | 0.00 |
| ATOM | 6327 | O    | VAL | X | 421 | 25.019 | 29.142 | 50.295 | 0.00 | 0.00 |
| ATOM | 6328 | N    | TYR | X | 422 | 26.279 | 29.901 | 48.455 | 0.00 | 0.00 |
| ATOM | 6329 | H    | TYR | X | 422 | 26.535 | 30.809 | 48.094 | 0.00 | 0.00 |
| ATOM | 6330 | CA   | TYR | X | 422 | 26.750 | 28.675 | 47.842 | 0.00 | 0.00 |
| ATOM | 6331 | HA   | TYR | X | 422 | 26.460 | 27.801 | 48.426 | 0.00 | 0.00 |
| ATOM | 6332 | CB   | TYR | X | 422 | 26.039 | 28.413 | 46.561 | 0.00 | 0.00 |
| ATOM | 6333 | HB2  | TYR | X | 422 | 26.231 | 29.318 | 45.984 | 0.00 | 0.00 |
| ATOM | 6334 | HB3  | TYR | X | 422 | 26.580 | 27.673 | 45.971 | 0.00 | 0.00 |
| ATOM | 6335 | CG   | TYR | X | 422 | 24.534 | 28.127 | 46.621 | 0.00 | 0.00 |
| ATOM | 6336 | CD1  | TYR | X | 422 | 24.099 | 26.779 | 46.501 | 0.00 | 0.00 |
| ATOM | 6337 | HD1  | TYR | X | 422 | 24.768 | 25.933 | 46.433 | 0.00 | 0.00 |
| ATOM | 6338 | CE1  | TYR | X | 422 | 22.709 | 26.528 | 46.685 | 0.00 | 0.00 |
| ATOM | 6339 | HE1  | TYR | X | 422 | 22.396 | 25.494 | 46.715 | 0.00 | 0.00 |
| ATOM | 6340 | CZ   | TYR | X | 422 | 21.753 | 27.608 | 46.908 | 0.00 | 0.00 |
| ATOM | 6341 | OH   | TYR | X | 422 | 20.419 | 27.328 | 46.993 | 0.00 | 0.00 |
| ATOM | 6342 | HH   | TYR | X | 422 | 20.188 | 26.489 | 46.587 | 0.00 | 0.00 |

|      |      |      |     |   |     |        |        |        |      |      |
|------|------|------|-----|---|-----|--------|--------|--------|------|------|
| ATOM | 6343 | CE2  | TYR | X | 422 | 22.234 | 28.906 | 47.064 | 0.00 | 0.00 |
| ATOM | 6344 | HE2  | TYR | X | 422 | 21.497 | 29.695 | 47.066 | 0.00 | 0.00 |
| ATOM | 6345 | CD2  | TYR | X | 422 | 23.617 | 29.148 | 46.973 | 0.00 | 0.00 |
| ATOM | 6346 | HD2  | TYR | X | 422 | 23.965 | 30.170 | 47.019 | 0.00 | 0.00 |
| ATOM | 6347 | C    | TYR | X | 422 | 28.310 | 28.584 | 47.701 | 0.00 | 0.00 |
| ATOM | 6348 | O    | TYR | X | 422 | 28.930 | 29.601 | 47.315 | 0.00 | 0.00 |
| ATOM | 6349 | N    | ALA | X | 423 | 28.887 | 27.438 | 48.047 | 0.00 | 0.00 |
| ATOM | 6350 | H    | ALA | X | 423 | 28.261 | 26.758 | 48.455 | 0.00 | 0.00 |
| ATOM | 6351 | CA   | ALA | X | 423 | 30.339 | 27.034 | 48.095 | 0.00 | 0.00 |
| ATOM | 6352 | HA   | ALA | X | 423 | 30.991 | 27.822 | 47.718 | 0.00 | 0.00 |
| ATOM | 6353 | CB   | ALA | X | 423 | 30.840 | 26.759 | 49.529 | 0.00 | 0.00 |
| ATOM | 6354 | HB1  | ALA | X | 423 | 30.786 | 27.745 | 49.990 | 0.00 | 0.00 |
| ATOM | 6355 | HB2  | ALA | X | 423 | 31.894 | 26.483 | 49.564 | 0.00 | 0.00 |
| ATOM | 6356 | HB3  | ALA | X | 423 | 30.324 | 25.975 | 50.083 | 0.00 | 0.00 |
| ATOM | 6357 | C    | ALA | X | 423 | 30.681 | 25.834 | 47.184 | 0.00 | 0.00 |
| ATOM | 6358 | O    | ALA | X | 423 | 30.047 | 24.831 | 47.206 | 0.00 | 0.00 |
| ATOM | 6359 | N    | TYR | X | 424 | 31.908 | 25.937 | 46.641 | 0.00 | 0.00 |
| ATOM | 6360 | H    | TYR | X | 424 | 32.381 | 26.827 | 46.709 | 0.00 | 0.00 |
| ATOM | 6361 | CA   | TYR | X | 424 | 32.567 | 24.934 | 45.773 | 0.00 | 0.00 |
| ATOM | 6362 | HA   | TYR | X | 424 | 32.283 | 23.947 | 46.138 | 0.00 | 0.00 |
| ATOM | 6363 | CB   | TYR | X | 424 | 32.081 | 25.205 | 44.368 | 0.00 | 0.00 |
| ATOM | 6364 | HB2  | TYR | X | 424 | 32.126 | 24.294 | 43.773 | 0.00 | 0.00 |
| ATOM | 6365 | HB3  | TYR | X | 424 | 31.024 | 25.469 | 44.400 | 0.00 | 0.00 |
| ATOM | 6366 | CG   | TYR | X | 424 | 32.844 | 26.287 | 43.686 | 0.00 | 0.00 |
| ATOM | 6367 | CD1  | TYR | X | 424 | 34.019 | 25.969 | 42.916 | 0.00 | 0.00 |
| ATOM | 6368 | HD1  | TYR | X | 424 | 34.323 | 24.933 | 42.929 | 0.00 | 0.00 |
| ATOM | 6369 | CE1  | TYR | X | 424 | 34.758 | 26.999 | 42.240 | 0.00 | 0.00 |
| ATOM | 6370 | HE1  | TYR | X | 424 | 35.620 | 26.707 | 41.659 | 0.00 | 0.00 |
| ATOM | 6371 | CZ   | TYR | X | 424 | 34.271 | 28.328 | 42.208 | 0.00 | 0.00 |
| ATOM | 6372 | OH   | TYR | X | 424 | 34.946 | 29.327 | 41.647 | 0.00 | 0.00 |
| ATOM | 6373 | HH   | TYR | X | 424 | 35.591 | 29.008 | 41.012 | 0.00 | 0.00 |
| ATOM | 6374 | CE2  | TYR | X | 424 | 33.096 | 28.647 | 42.896 | 0.00 | 0.00 |
| ATOM | 6375 | HE2  | TYR | X | 424 | 32.708 | 29.650 | 42.797 | 0.00 | 0.00 |
| ATOM | 6376 | CD2  | TYR | X | 424 | 32.432 | 27.654 | 43.654 | 0.00 | 0.00 |
| ATOM | 6377 | HD2  | TYR | X | 424 | 31.558 | 27.888 | 44.243 | 0.00 | 0.00 |
| ATOM | 6378 | C    | TYR | X | 424 | 34.078 | 24.900 | 45.750 | 0.00 | 0.00 |
| ATOM | 6379 | O    | TYR | X | 424 | 34.808 | 25.803 | 46.179 | 0.00 | 0.00 |
| ATOM | 6380 | N    | VAL | X | 425 | 34.676 | 23.773 | 45.273 | 0.00 | 0.00 |
| ATOM | 6381 | H    | VAL | X | 425 | 34.081 | 22.985 | 45.061 | 0.00 | 0.00 |
| ATOM | 6382 | CA   | VAL | X | 425 | 36.116 | 23.465 | 45.124 | 0.00 | 0.00 |
| ATOM | 6383 | HA   | VAL | X | 425 | 36.667 | 24.395 | 44.984 | 0.00 | 0.00 |
| ATOM | 6384 | CB   | VAL | X | 425 | 36.783 | 22.688 | 46.347 | 0.00 | 0.00 |
| ATOM | 6385 | HB   | VAL | X | 425 | 36.118 | 21.837 | 46.495 | 0.00 | 0.00 |
| ATOM | 6386 | CG1  | VAL | X | 425 | 38.228 | 22.156 | 46.146 | 0.00 | 0.00 |
| ATOM | 6387 | HG11 | VAL | X | 425 | 38.305 | 21.382 | 45.382 | 0.00 | 0.00 |
| ATOM | 6388 | HG12 | VAL | X | 425 | 38.848 | 23.039 | 45.991 | 0.00 | 0.00 |
| ATOM | 6389 | HG13 | VAL | X | 425 | 38.575 | 21.635 | 47.038 | 0.00 | 0.00 |
| ATOM | 6390 | CG2  | VAL | X | 425 | 36.667 | 23.543 | 47.626 | 0.00 | 0.00 |
| ATOM | 6391 | HG21 | VAL | X | 425 | 37.285 | 24.441 | 47.633 | 0.00 | 0.00 |
| ATOM | 6392 | HG22 | VAL | X | 425 | 36.996 | 22.976 | 48.496 | 0.00 | 0.00 |
| ATOM | 6393 | HG23 | VAL | X | 425 | 35.643 | 23.840 | 47.850 | 0.00 | 0.00 |
| ATOM | 6394 | C    | VAL | X | 425 | 36.157 | 22.609 | 43.908 | 0.00 | 0.00 |
| ATOM | 6395 | O    | VAL | X | 425 | 35.363 | 21.609 | 43.694 | 0.00 | 0.00 |
| ATOM | 6396 | N    | PHE | X | 426 | 36.948 | 23.165 | 42.964 | 0.00 | 0.00 |
| ATOM | 6397 | H    | PHE | X | 426 | 37.555 | 23.938 | 43.193 | 0.00 | 0.00 |
| ATOM | 6398 | CA   | PHE | X | 426 | 36.957 | 22.762 | 41.572 | 0.00 | 0.00 |
| ATOM | 6399 | HA   | PHE | X | 426 | 36.007 | 22.244 | 41.435 | 0.00 | 0.00 |
| ATOM | 6400 | CB   | PHE | X | 426 | 36.885 | 24.047 | 40.738 | 0.00 | 0.00 |
| ATOM | 6401 | HB2  | PHE | X | 426 | 36.097 | 24.765 | 40.961 | 0.00 | 0.00 |
| ATOM | 6402 | HB3  | PHE | X | 426 | 37.784 | 24.628 | 40.946 | 0.00 | 0.00 |
| ATOM | 6403 | CG   | PHE | X | 426 | 36.999 | 23.829 | 39.255 | 0.00 | 0.00 |
| ATOM | 6404 | CD1  | PHE | X | 426 | 35.801 | 23.689 | 38.489 | 0.00 | 0.00 |
| ATOM | 6405 | HD1  | PHE | X | 426 | 34.860 | 23.829 | 39.000 | 0.00 | 0.00 |
| ATOM | 6406 | CE1  | PHE | X | 426 | 35.898 | 23.485 | 37.075 | 0.00 | 0.00 |
| ATOM | 6407 | HE1  | PHE | X | 426 | 34.985 | 23.307 | 36.526 | 0.00 | 0.00 |
| ATOM | 6408 | CZ   | PHE | X | 426 | 37.173 | 23.286 | 36.491 | 0.00 | 0.00 |
| ATOM | 6409 | HZ   | PHE | X | 426 | 37.220 | 23.076 | 35.433 | 0.00 | 0.00 |

|      |      |      |     |   |     |        |        |        |      |      |
|------|------|------|-----|---|-----|--------|--------|--------|------|------|
| ATOM | 6410 | CE2  | PHE | X | 426 | 38.370 | 23.334 | 37.340 | 0.00 | 0.00 |
| ATOM | 6411 | HE2  | PHE | X | 426 | 39.349 | 23.028 | 37.003 | 0.00 | 0.00 |
| ATOM | 6412 | CD2  | PHE | X | 426 | 38.263 | 23.636 | 38.660 | 0.00 | 0.00 |
| ATOM | 6413 | HD2  | PHE | X | 426 | 39.106 | 23.718 | 39.329 | 0.00 | 0.00 |
| ATOM | 6414 | C    | PHE | X | 426 | 38.106 | 21.741 | 41.302 | 0.00 | 0.00 |
| ATOM | 6415 | O    | PHE | X | 426 | 39.265 | 22.090 | 41.284 | 0.00 | 0.00 |
| ATOM | 6416 | N    | GLU | X | 427 | 37.783 | 20.460 | 41.082 | 0.00 | 0.00 |
| ATOM | 6417 | H    | GLU | X | 427 | 36.859 | 20.057 | 41.023 | 0.00 | 0.00 |
| ATOM | 6418 | CA   | GLU | X | 427 | 38.788 | 19.400 | 41.224 | 0.00 | 0.00 |
| ATOM | 6419 | HA   | GLU | X | 427 | 39.798 | 19.777 | 41.383 | 0.00 | 0.00 |
| ATOM | 6420 | CB   | GLU | X | 427 | 38.388 | 18.430 | 42.353 | 0.00 | 0.00 |
| ATOM | 6421 | HB2  | GLU | X | 427 | 39.177 | 17.678 | 42.370 | 0.00 | 0.00 |
| ATOM | 6422 | HB3  | GLU | X | 427 | 38.275 | 18.874 | 43.342 | 0.00 | 0.00 |
| ATOM | 6423 | CG   | GLU | X | 427 | 37.040 | 17.609 | 42.178 | 0.00 | 0.00 |
| ATOM | 6424 | HG2  | GLU | X | 427 | 36.244 | 18.348 | 42.268 | 0.00 | 0.00 |
| ATOM | 6425 | HG3  | GLU | X | 427 | 36.974 | 17.138 | 41.197 | 0.00 | 0.00 |
| ATOM | 6426 | CD   | GLU | X | 427 | 36.823 | 16.503 | 43.244 | 0.00 | 0.00 |
| ATOM | 6427 | OE1  | GLU | X | 427 | 37.338 | 16.636 | 44.300 | 0.00 | 0.00 |
| ATOM | 6428 | OE2  | GLU | X | 427 | 36.108 | 15.539 | 42.839 | 0.00 | 0.00 |
| ATOM | 6429 | C    | GLU | X | 427 | 38.978 | 18.533 | 40.005 | 0.00 | 0.00 |
| ATOM | 6430 | O    | GLU | X | 427 | 40.024 | 17.866 | 39.955 | 0.00 | 0.00 |
| ATOM | 6431 | N    | HIE | X | 428 | 38.244 | 18.785 | 38.914 | 0.00 | 0.00 |
| ATOM | 6432 | H    | HIE | X | 428 | 37.421 | 19.359 | 39.028 | 0.00 | 0.00 |
| ATOM | 6433 | CA   | HIE | X | 428 | 38.639 | 18.439 | 37.540 | 0.00 | 0.00 |
| ATOM | 6434 | HA   | HIE | X | 428 | 38.881 | 17.378 | 37.595 | 0.00 | 0.00 |
| ATOM | 6435 | CB   | HIE | X | 428 | 37.371 | 18.608 | 36.715 | 0.00 | 0.00 |
| ATOM | 6436 | HB2  | HIE | X | 428 | 36.611 | 17.908 | 37.065 | 0.00 | 0.00 |
| ATOM | 6437 | HB3  | HIE | X | 428 | 36.927 | 19.594 | 36.848 | 0.00 | 0.00 |
| ATOM | 6438 | CG   | HIE | X | 428 | 37.634 | 18.335 | 35.236 | 0.00 | 0.00 |
| ATOM | 6439 | ND1  | HIE | X | 428 | 37.902 | 17.031 | 34.724 | 0.00 | 0.00 |
| ATOM | 6440 | CE1  | HIE | X | 428 | 38.259 | 17.181 | 33.429 | 0.00 | 0.00 |
| ATOM | 6441 | HE1  | HIE | X | 428 | 38.564 | 16.366 | 32.789 | 0.00 | 0.00 |
| ATOM | 6442 | NE2  | HIE | X | 428 | 38.326 | 18.509 | 33.118 | 0.00 | 0.00 |
| ATOM | 6443 | HE2  | HIE | X | 428 | 38.583 | 18.838 | 32.198 | 0.00 | 0.00 |
| ATOM | 6444 | CD2  | HIE | X | 428 | 37.909 | 19.218 | 34.239 | 0.00 | 0.00 |
| ATOM | 6445 | HD2  | HIE | X | 428 | 37.872 | 20.296 | 34.279 | 0.00 | 0.00 |
| ATOM | 6446 | C    | HIE | X | 428 | 39.857 | 19.306 | 37.075 | 0.00 | 0.00 |
| ATOM | 6447 | O    | HIE | X | 428 | 39.896 | 20.518 | 37.206 | 0.00 | 0.00 |
| ATOM | 6448 | N    | ARG | X | 429 | 40.915 | 18.689 | 36.553 | 0.00 | 0.00 |
| ATOM | 6449 | H    | ARG | X | 429 | 40.982 | 17.686 | 36.649 | 0.00 | 0.00 |
| ATOM | 6450 | CA   | ARG | X | 429 | 41.873 | 19.266 | 35.630 | 0.00 | 0.00 |
| ATOM | 6451 | HA   | ARG | X | 429 | 42.043 | 20.279 | 35.993 | 0.00 | 0.00 |
| ATOM | 6452 | CB   | ARG | X | 429 | 43.182 | 18.396 | 35.879 | 0.00 | 0.00 |
| ATOM | 6453 | HB2  | ARG | X | 429 | 43.253 | 18.235 | 36.955 | 0.00 | 0.00 |
| ATOM | 6454 | HB3  | ARG | X | 429 | 43.115 | 17.372 | 35.512 | 0.00 | 0.00 |
| ATOM | 6455 | CG   | ARG | X | 429 | 44.457 | 19.200 | 35.367 | 0.00 | 0.00 |
| ATOM | 6456 | HG2  | ARG | X | 429 | 44.551 | 19.062 | 34.289 | 0.00 | 0.00 |
| ATOM | 6457 | HG3  | ARG | X | 429 | 44.286 | 20.255 | 35.580 | 0.00 | 0.00 |
| ATOM | 6458 | CD   | ARG | X | 429 | 45.762 | 18.586 | 35.945 | 0.00 | 0.00 |
| ATOM | 6459 | HD2  | ARG | X | 429 | 45.607 | 18.327 | 36.993 | 0.00 | 0.00 |
| ATOM | 6460 | HD3  | ARG | X | 429 | 46.009 | 17.656 | 35.435 | 0.00 | 0.00 |
| ATOM | 6461 | NE   | ARG | X | 429 | 46.906 | 19.499 | 35.840 | 0.00 | 0.00 |
| ATOM | 6462 | HE   | ARG | X | 429 | 46.871 | 20.263 | 36.499 | 0.00 | 0.00 |
| ATOM | 6463 | CZ   | ARG | X | 429 | 47.740 | 19.547 | 34.804 | 0.00 | 0.00 |
| ATOM | 6464 | NH1  | ARG | X | 429 | 47.610 | 18.754 | 33.806 | 0.00 | 0.00 |
| ATOM | 6465 | HH11 | ARG | X | 429 | 46.923 | 18.013 | 33.791 | 0.00 | 0.00 |
| ATOM | 6466 | HH12 | ARG | X | 429 | 48.236 | 18.815 | 33.016 | 0.00 | 0.00 |
| ATOM | 6467 | NH2  | ARG | X | 429 | 48.664 | 20.519 | 34.639 | 0.00 | 0.00 |
| ATOM | 6468 | HH21 | ARG | X | 429 | 49.029 | 20.984 | 35.458 | 0.00 | 0.00 |
| ATOM | 6469 | HH22 | ARG | X | 429 | 49.205 | 20.576 | 33.788 | 0.00 | 0.00 |
| ATOM | 6470 | C    | ARG | X | 429 | 41.493 | 19.257 | 34.179 | 0.00 | 0.00 |
| ATOM | 6471 | O    | ARG | X | 429 | 41.223 | 18.172 | 33.629 | 0.00 | 0.00 |
| ATOM | 6472 | N    | ALA | X | 430 | 41.445 | 20.417 | 33.492 | 0.00 | 0.00 |
| ATOM | 6473 | H    | ALA | X | 430 | 41.815 | 21.213 | 33.992 | 0.00 | 0.00 |
| ATOM | 6474 | CA   | ALA | X | 430 | 41.165 | 20.584 | 32.012 | 0.00 | 0.00 |
| ATOM | 6475 | HA   | ALA | X | 430 | 40.150 | 20.358 | 31.686 | 0.00 | 0.00 |
| ATOM | 6476 | CB   | ALA | X | 430 | 41.353 | 22.076 | 31.593 | 0.00 | 0.00 |

|      |      |      |     |   |     |        |        |        |      |      |
|------|------|------|-----|---|-----|--------|--------|--------|------|------|
| ATOM | 6477 | HB1  | ALA | X | 430 | 40.617 | 22.738 | 32.050 | 0.00 | 0.00 |
| ATOM | 6478 | HB2  | ALA | X | 430 | 41.198 | 22.280 | 30.534 | 0.00 | 0.00 |
| ATOM | 6479 | HB3  | ALA | X | 430 | 42.390 | 22.366 | 31.762 | 0.00 | 0.00 |
| ATOM | 6480 | C    | ALA | X | 430 | 42.082 | 19.631 | 31.214 | 0.00 | 0.00 |
| ATOM | 6481 | O    | ALA | X | 430 | 43.332 | 19.644 | 31.364 | 0.00 | 0.00 |
| ATOM | 6482 | N    | SER | X | 431 | 41.623 | 18.778 | 30.305 | 0.00 | 0.00 |
| ATOM | 6483 | H    | SER | X | 431 | 40.622 | 18.695 | 30.197 | 0.00 | 0.00 |
| ATOM | 6484 | CA   | SER | X | 431 | 42.403 | 17.973 | 29.428 | 0.00 | 0.00 |
| ATOM | 6485 | HA   | SER | X | 431 | 43.043 | 17.378 | 30.079 | 0.00 | 0.00 |
| ATOM | 6486 | CB   | SER | X | 431 | 41.450 | 17.172 | 28.605 | 0.00 | 0.00 |
| ATOM | 6487 | HB2  | SER | X | 431 | 41.947 | 16.590 | 27.829 | 0.00 | 0.00 |
| ATOM | 6488 | HB3  | SER | X | 431 | 40.863 | 16.470 | 29.198 | 0.00 | 0.00 |
| ATOM | 6489 | OG   | SER | X | 431 | 40.607 | 18.053 | 27.821 | 0.00 | 0.00 |
| ATOM | 6490 | HG   | SER | X | 431 | 39.770 | 18.014 | 28.289 | 0.00 | 0.00 |
| ATOM | 6491 | C    | SER | X | 431 | 43.273 | 18.794 | 28.495 | 0.00 | 0.00 |
| ATOM | 6492 | O    | SER | X | 431 | 44.131 | 18.259 | 27.787 | 0.00 | 0.00 |
| ATOM | 6493 | N    | THR | X | 432 | 42.943 | 20.076 | 28.400 | 0.00 | 0.00 |
| ATOM | 6494 | H    | THR | X | 432 | 42.082 | 20.334 | 28.860 | 0.00 | 0.00 |
| ATOM | 6495 | CA   | THR | X | 432 | 43.514 | 21.084 | 27.570 | 0.00 | 0.00 |
| ATOM | 6496 | HA   | THR | X | 432 | 44.341 | 20.605 | 27.045 | 0.00 | 0.00 |
| ATOM | 6497 | CB   | THR | X | 432 | 42.493 | 21.534 | 26.514 | 0.00 | 0.00 |
| ATOM | 6498 | HB   | THR | X | 432 | 41.771 | 22.193 | 26.996 | 0.00 | 0.00 |
| ATOM | 6499 | CG2  | THR | X | 432 | 43.268 | 22.366 | 25.583 | 0.00 | 0.00 |
| ATOM | 6500 | HG21 | THR | X | 432 | 42.531 | 22.810 | 24.913 | 0.00 | 0.00 |
| ATOM | 6501 | HG22 | THR | X | 432 | 43.920 | 21.768 | 24.946 | 0.00 | 0.00 |
| ATOM | 6502 | HG23 | THR | X | 432 | 43.851 | 23.132 | 26.094 | 0.00 | 0.00 |
| ATOM | 6503 | OG1  | THR | X | 432 | 41.808 | 20.439 | 25.881 | 0.00 | 0.00 |
| ATOM | 6504 | HG1  | THR | X | 432 | 41.406 | 19.933 | 26.591 | 0.00 | 0.00 |
| ATOM | 6505 | C    | THR | X | 432 | 44.163 | 22.180 | 28.427 | 0.00 | 0.00 |
| ATOM | 6506 | O    | THR | X | 432 | 43.488 | 23.036 | 28.938 | 0.00 | 0.00 |
| ATOM | 6507 | N    | LEU | X | 433 | 45.423 | 22.122 | 28.673 | 0.00 | 0.00 |
| ATOM | 6508 | H    | LEU | X | 433 | 46.016 | 21.392 | 28.303 | 0.00 | 0.00 |
| ATOM | 6509 | CA   | LEU | X | 433 | 46.105 | 23.043 | 29.635 | 0.00 | 0.00 |
| ATOM | 6510 | HA   | LEU | X | 433 | 45.724 | 24.038 | 29.404 | 0.00 | 0.00 |
| ATOM | 6511 | CB   | LEU | X | 433 | 45.836 | 22.585 | 31.151 | 0.00 | 0.00 |
| ATOM | 6512 | HB2  | LEU | X | 433 | 44.777 | 22.507 | 31.398 | 0.00 | 0.00 |
| ATOM | 6513 | HB3  | LEU | X | 433 | 46.280 | 21.592 | 31.213 | 0.00 | 0.00 |
| ATOM | 6514 | CG   | LEU | X | 433 | 46.452 | 23.483 | 32.274 | 0.00 | 0.00 |
| ATOM | 6515 | HG   | LEU | X | 433 | 47.541 | 23.493 | 32.217 | 0.00 | 0.00 |
| ATOM | 6516 | CD1  | LEU | X | 433 | 45.878 | 24.892 | 32.306 | 0.00 | 0.00 |
| ATOM | 6517 | HD11 | LEU | X | 433 | 46.224 | 25.537 | 31.498 | 0.00 | 0.00 |
| ATOM | 6518 | HD12 | LEU | X | 433 | 46.118 | 25.274 | 33.298 | 0.00 | 0.00 |
| ATOM | 6519 | HD13 | LEU | X | 433 | 44.792 | 24.925 | 32.214 | 0.00 | 0.00 |
| ATOM | 6520 | CD2  | LEU | X | 433 | 46.174 | 22.829 | 33.595 | 0.00 | 0.00 |
| ATOM | 6521 | HD21 | LEU | X | 433 | 46.601 | 21.827 | 33.552 | 0.00 | 0.00 |
| ATOM | 6522 | HD22 | LEU | X | 433 | 46.627 | 23.341 | 34.445 | 0.00 | 0.00 |
| ATOM | 6523 | HD23 | LEU | X | 433 | 45.116 | 22.666 | 33.802 | 0.00 | 0.00 |
| ATOM | 6524 | C    | LEU | X | 433 | 47.651 | 23.053 | 29.385 | 0.00 | 0.00 |
| ATOM | 6525 | O    | LEU | X | 433 | 48.279 | 22.045 | 29.222 | 0.00 | 0.00 |
| ATOM | 6526 | N    | SER | X | 434 | 48.166 | 24.228 | 29.429 | 0.00 | 0.00 |
| ATOM | 6527 | H    | SER | X | 434 | 47.484 | 24.968 | 29.341 | 0.00 | 0.00 |
| ATOM | 6528 | CA   | SER | X | 434 | 49.556 | 24.504 | 29.098 | 0.00 | 0.00 |
| ATOM | 6529 | HA   | SER | X | 434 | 49.799 | 23.811 | 28.293 | 0.00 | 0.00 |
| ATOM | 6530 | CB   | SER | X | 434 | 49.694 | 25.979 | 28.551 | 0.00 | 0.00 |
| ATOM | 6531 | HB2  | SER | X | 434 | 50.737 | 26.162 | 28.290 | 0.00 | 0.00 |
| ATOM | 6532 | HB3  | SER | X | 434 | 49.032 | 26.160 | 27.704 | 0.00 | 0.00 |
| ATOM | 6533 | OG   | SER | X | 434 | 49.286 | 26.859 | 29.639 | 0.00 | 0.00 |
| ATOM | 6534 | HG   | SER | X | 434 | 48.381 | 26.586 | 29.806 | 0.00 | 0.00 |
| ATOM | 6535 | C    | SER | X | 434 | 50.646 | 24.062 | 30.072 | 0.00 | 0.00 |
| ATOM | 6536 | O    | SER | X | 434 | 51.829 | 23.888 | 29.690 | 0.00 | 0.00 |
| ATOM | 6537 | N    | TRP | X | 435 | 50.292 | 23.926 | 31.348 | 0.00 | 0.00 |
| ATOM | 6538 | H    | TRP | X | 435 | 49.308 | 23.950 | 31.573 | 0.00 | 0.00 |
| ATOM | 6539 | CA   | TRP | X | 435 | 51.120 | 23.853 | 32.527 | 0.00 | 0.00 |
| ATOM | 6540 | HA   | TRP | X | 435 | 52.087 | 24.327 | 32.357 | 0.00 | 0.00 |
| ATOM | 6541 | CB   | TRP | X | 435 | 50.414 | 24.593 | 33.669 | 0.00 | 0.00 |
| ATOM | 6542 | HB2  | TRP | X | 435 | 49.470 | 24.150 | 33.986 | 0.00 | 0.00 |
| ATOM | 6543 | HB3  | TRP | X | 435 | 51.033 | 24.376 | 34.540 | 0.00 | 0.00 |



|      |      |      |     |   |     |        |        |        |      |      |
|------|------|------|-----|---|-----|--------|--------|--------|------|------|
| ATOM | 6544 | CG   | TRP | X | 435 | 50.237 | 26.034 | 33.642 | 0.00 | 0.00 |
| ATOM | 6545 | CD1  | TRP | X | 435 | 49.187 | 26.714 | 33.166 | 0.00 | 0.00 |
| ATOM | 6546 | HD1  | TRP | X | 435 | 48.368 | 26.269 | 32.620 | 0.00 | 0.00 |
| ATOM | 6547 | NE1  | TRP | X | 435 | 49.275 | 28.010 | 33.359 | 0.00 | 0.00 |
| ATOM | 6548 | HE1  | TRP | X | 435 | 48.640 | 28.705 | 32.994 | 0.00 | 0.00 |
| ATOM | 6549 | CE2  | TRP | X | 435 | 50.552 | 28.345 | 33.779 | 0.00 | 0.00 |
| ATOM | 6550 | CZ2  | TRP | X | 435 | 51.074 | 29.652 | 33.828 | 0.00 | 0.00 |
| ATOM | 6551 | HZ2  | TRP | X | 435 | 50.490 | 30.509 | 33.526 | 0.00 | 0.00 |
| ATOM | 6552 | CH2  | TRP | X | 435 | 52.412 | 29.744 | 34.200 | 0.00 | 0.00 |
| ATOM | 6553 | HH2  | TRP | X | 435 | 52.925 | 30.683 | 34.346 | 0.00 | 0.00 |
| ATOM | 6554 | CZ3  | TRP | X | 435 | 53.196 | 28.609 | 34.586 | 0.00 | 0.00 |
| ATOM | 6555 | HZ3  | TRP | X | 435 | 54.217 | 28.693 | 34.927 | 0.00 | 0.00 |
| ATOM | 6556 | CE3  | TRP | X | 435 | 52.587 | 27.305 | 34.375 | 0.00 | 0.00 |
| ATOM | 6557 | HE3  | TRP | X | 435 | 53.172 | 26.410 | 34.528 | 0.00 | 0.00 |
| ATOM | 6558 | CD2  | TRP | X | 435 | 51.204 | 27.106 | 34.032 | 0.00 | 0.00 |
| ATOM | 6559 | C    | TRP | X | 435 | 51.467 | 22.384 | 32.887 | 0.00 | 0.00 |
| ATOM | 6560 | O    | TRP | X | 435 | 50.641 | 21.568 | 32.604 | 0.00 | 0.00 |
| ATOM | 6561 | N    | PRO | X | 436 | 52.486 | 22.095 | 33.737 | 0.00 | 0.00 |
| ATOM | 6562 | CD   | PRO | X | 436 | 53.528 | 23.078 | 34.139 | 0.00 | 0.00 |
| ATOM | 6563 | HD2  | PRO | X | 436 | 53.134 | 23.951 | 34.659 | 0.00 | 0.00 |
| ATOM | 6564 | HD3  | PRO | X | 436 | 54.093 | 23.468 | 33.293 | 0.00 | 0.00 |
| ATOM | 6565 | CG   | PRO | X | 436 | 54.443 | 22.301 | 35.022 | 0.00 | 0.00 |
| ATOM | 6566 | HG2  | PRO | X | 436 | 54.006 | 22.327 | 36.021 | 0.00 | 0.00 |
| ATOM | 6567 | HG3  | PRO | X | 436 | 55.462 | 22.686 | 35.041 | 0.00 | 0.00 |
| ATOM | 6568 | CB   | PRO | X | 436 | 54.339 | 20.869 | 34.471 | 0.00 | 0.00 |
| ATOM | 6569 | HB2  | PRO | X | 436 | 54.661 | 20.034 | 35.094 | 0.00 | 0.00 |
| ATOM | 6570 | HB3  | PRO | X | 436 | 55.041 | 20.851 | 33.637 | 0.00 | 0.00 |
| ATOM | 6571 | CA   | PRO | X | 436 | 52.884 | 20.744 | 34.070 | 0.00 | 0.00 |
| ATOM | 6572 | HA   | PRO | X | 436 | 52.778 | 20.093 | 33.203 | 0.00 | 0.00 |
| ATOM | 6573 | C    | PRO | X | 436 | 51.991 | 20.158 | 35.225 | 0.00 | 0.00 |
| ATOM | 6574 | O    | PRO | X | 436 | 51.448 | 20.816 | 36.117 | 0.00 | 0.00 |
| ATOM | 6575 | N    | LEU | X | 437 | 52.044 | 18.885 | 35.271 | 0.00 | 0.00 |
| ATOM | 6576 | H    | LEU | X | 437 | 52.752 | 18.366 | 34.772 | 0.00 | 0.00 |
| ATOM | 6577 | CA   | LEU | X | 437 | 51.071 | 18.031 | 36.090 | 0.00 | 0.00 |
| ATOM | 6578 | HA   | LEU | X | 437 | 50.040 | 18.241 | 35.805 | 0.00 | 0.00 |
| ATOM | 6579 | CB   | LEU | X | 437 | 51.475 | 16.590 | 35.798 | 0.00 | 0.00 |
| ATOM | 6580 | HB2  | LEU | X | 437 | 51.869 | 16.513 | 34.785 | 0.00 | 0.00 |
| ATOM | 6581 | HB3  | LEU | X | 437 | 52.377 | 16.324 | 36.348 | 0.00 | 0.00 |
| ATOM | 6582 | CG   | LEU | X | 437 | 50.374 | 15.540 | 36.140 | 0.00 | 0.00 |
| ATOM | 6583 | HG   | LEU | X | 437 | 50.189 | 15.669 | 37.207 | 0.00 | 0.00 |
| ATOM | 6584 | CD1  | LEU | X | 437 | 49.058 | 15.656 | 35.303 | 0.00 | 0.00 |
| ATOM | 6585 | HD11 | LEU | X | 437 | 48.529 | 16.601 | 35.419 | 0.00 | 0.00 |
| ATOM | 6586 | HD12 | LEU | X | 437 | 48.312 | 14.962 | 35.692 | 0.00 | 0.00 |
| ATOM | 6587 | HD13 | LEU | X | 437 | 49.186 | 15.542 | 34.227 | 0.00 | 0.00 |
| ATOM | 6588 | CD2  | LEU | X | 437 | 50.860 | 14.080 | 36.096 | 0.00 | 0.00 |
| ATOM | 6589 | HD21 | LEU | X | 437 | 50.096 | 13.501 | 36.615 | 0.00 | 0.00 |
| ATOM | 6590 | HD22 | LEU | X | 437 | 51.010 | 13.667 | 35.099 | 0.00 | 0.00 |
| ATOM | 6591 | HD23 | LEU | X | 437 | 51.780 | 13.950 | 36.665 | 0.00 | 0.00 |
| ATOM | 6592 | C    | LEU | X | 437 | 51.224 | 18.266 | 37.591 | 0.00 | 0.00 |
| ATOM | 6593 | O    | LEU | X | 437 | 50.254 | 18.176 | 38.408 | 0.00 | 0.00 |
| ATOM | 6594 | N    | TRP | X | 438 | 52.466 | 18.504 | 37.902 | 0.00 | 0.00 |
| ATOM | 6595 | H    | TRP | X | 438 | 53.131 | 18.441 | 37.145 | 0.00 | 0.00 |
| ATOM | 6596 | CA   | TRP | X | 438 | 52.934 | 18.643 | 39.282 | 0.00 | 0.00 |
| ATOM | 6597 | HA   | TRP | X | 438 | 52.762 | 17.695 | 39.791 | 0.00 | 0.00 |
| ATOM | 6598 | CB   | TRP | X | 438 | 54.463 | 18.767 | 39.318 | 0.00 | 0.00 |
| ATOM | 6599 | HB2  | TRP | X | 438 | 54.860 | 18.421 | 40.272 | 0.00 | 0.00 |
| ATOM | 6600 | HB3  | TRP | X | 438 | 54.779 | 17.944 | 38.676 | 0.00 | 0.00 |
| ATOM | 6601 | CG   | TRP | X | 438 | 55.107 | 19.948 | 38.778 | 0.00 | 0.00 |
| ATOM | 6602 | CD1  | TRP | X | 438 | 55.775 | 20.009 | 37.588 | 0.00 | 0.00 |
| ATOM | 6603 | HD1  | TRP | X | 438 | 55.898 | 19.195 | 36.889 | 0.00 | 0.00 |
| ATOM | 6604 | NE1  | TRP | X | 438 | 56.370 | 21.225 | 37.491 | 0.00 | 0.00 |
| ATOM | 6605 | HE1  | TRP | X | 438 | 57.086 | 21.356 | 36.791 | 0.00 | 0.00 |
| ATOM | 6606 | CE2  | TRP | X | 438 | 55.936 | 22.039 | 38.512 | 0.00 | 0.00 |
| ATOM | 6607 | CZ2  | TRP | X | 438 | 56.313 | 23.319 | 38.972 | 0.00 | 0.00 |
| ATOM | 6608 | HZ2  | TRP | X | 438 | 57.029 | 23.854 | 38.365 | 0.00 | 0.00 |
| ATOM | 6609 | CH2  | TRP | X | 438 | 55.987 | 23.795 | 40.215 | 0.00 | 0.00 |
| ATOM | 6610 | HH2  | TRP | X | 438 | 56.255 | 24.818 | 40.432 | 0.00 | 0.00 |

|      |      |      |     |   |     |        |        |        |      |      |
|------|------|------|-----|---|-----|--------|--------|--------|------|------|
| ATOM | 6611 | CZ3  | TRP | X | 438 | 55.079 | 23.054 | 40.980 | 0.00 | 0.00 |
| ATOM | 6612 | HZ3  | TRP | X | 438 | 54.709 | 23.400 | 41.933 | 0.00 | 0.00 |
| ATOM | 6613 | CE3  | TRP | X | 438 | 54.720 | 21.743 | 40.627 | 0.00 | 0.00 |
| ATOM | 6614 | HE3  | TRP | X | 438 | 54.037 | 21.108 | 41.173 | 0.00 | 0.00 |
| ATOM | 6615 | CD2  | TRP | X | 438 | 55.155 | 21.222 | 39.398 | 0.00 | 0.00 |
| ATOM | 6616 | C    | TRP | X | 438 | 52.128 | 19.749 | 40.038 | 0.00 | 0.00 |
| ATOM | 6617 | O    | TRP | X | 438 | 52.005 | 19.767 | 41.252 | 0.00 | 0.00 |
| ATOM | 6618 | N    | MET | X | 439 | 51.653 | 20.729 | 39.239 | 0.00 | 0.00 |
| ATOM | 6619 | H    | MET | X | 439 | 51.881 | 20.778 | 38.256 | 0.00 | 0.00 |
| ATOM | 6620 | CA   | MET | X | 439 | 50.933 | 21.855 | 39.820 | 0.00 | 0.00 |
| ATOM | 6621 | HA   | MET | X | 439 | 51.512 | 22.136 | 40.699 | 0.00 | 0.00 |
| ATOM | 6622 | CB   | MET | X | 439 | 50.903 | 23.019 | 38.875 | 0.00 | 0.00 |
| ATOM | 6623 | HB2  | MET | X | 439 | 50.535 | 22.661 | 37.914 | 0.00 | 0.00 |
| ATOM | 6624 | HB3  | MET | X | 439 | 50.316 | 23.809 | 39.344 | 0.00 | 0.00 |
| ATOM | 6625 | CG   | MET | X | 439 | 52.342 | 23.623 | 38.665 | 0.00 | 0.00 |
| ATOM | 6626 | HG2  | MET | X | 439 | 52.771 | 24.054 | 39.569 | 0.00 | 0.00 |
| ATOM | 6627 | HG3  | MET | X | 439 | 53.030 | 22.847 | 38.329 | 0.00 | 0.00 |
| ATOM | 6628 | SD   | MET | X | 439 | 52.422 | 24.795 | 37.335 | 0.00 | 0.00 |
| ATOM | 6629 | CE   | MET | X | 439 | 51.367 | 26.172 | 37.987 | 0.00 | 0.00 |
| ATOM | 6630 | HE1  | MET | X | 439 | 51.963 | 26.742 | 38.699 | 0.00 | 0.00 |
| ATOM | 6631 | HE2  | MET | X | 439 | 51.133 | 26.926 | 37.235 | 0.00 | 0.00 |
| ATOM | 6632 | HE3  | MET | X | 439 | 50.406 | 25.795 | 38.336 | 0.00 | 0.00 |
| ATOM | 6633 | C    | MET | X | 439 | 49.501 | 21.505 | 40.262 | 0.00 | 0.00 |
| ATOM | 6634 | O    | MET | X | 439 | 48.979 | 22.266 | 41.092 | 0.00 | 0.00 |
| ATOM | 6635 | N    | GLY | X | 440 | 48.894 | 20.409 | 39.745 | 0.00 | 0.00 |
| ATOM | 6636 | H    | GLY | X | 440 | 49.488 | 19.803 | 39.197 | 0.00 | 0.00 |
| ATOM | 6637 | CA   | GLY | X | 440 | 47.391 | 20.234 | 39.935 | 0.00 | 0.00 |
| ATOM | 6638 | HA2  | GLY | X | 440 | 47.145 | 19.199 | 39.701 | 0.00 | 0.00 |
| ATOM | 6639 | HA3  | GLY | X | 440 | 47.152 | 20.417 | 40.982 | 0.00 | 0.00 |
| ATOM | 6640 | C    | GLY | X | 440 | 46.594 | 21.197 | 39.057 | 0.00 | 0.00 |
| ATOM | 6641 | O    | GLY | X | 440 | 46.881 | 21.202 | 37.840 | 0.00 | 0.00 |
| ATOM | 6642 | N    | VAL | X | 441 | 45.685 | 21.937 | 39.603 | 0.00 | 0.00 |
| ATOM | 6643 | H    | VAL | X | 441 | 45.585 | 21.760 | 40.592 | 0.00 | 0.00 |
| ATOM | 6644 | CA   | VAL | X | 441 | 44.681 | 22.790 | 38.963 | 0.00 | 0.00 |
| ATOM | 6645 | HA   | VAL | X | 441 | 44.688 | 22.725 | 37.875 | 0.00 | 0.00 |
| ATOM | 6646 | CB   | VAL | X | 441 | 43.207 | 22.333 | 39.262 | 0.00 | 0.00 |
| ATOM | 6647 | HB   | VAL | X | 441 | 43.100 | 22.485 | 40.336 | 0.00 | 0.00 |
| ATOM | 6648 | CG1  | VAL | X | 441 | 42.177 | 23.314 | 38.736 | 0.00 | 0.00 |
| ATOM | 6649 | HG11 | VAL | X | 441 | 41.190 | 22.860 | 38.812 | 0.00 | 0.00 |
| ATOM | 6650 | HG12 | VAL | X | 441 | 42.254 | 24.226 | 39.328 | 0.00 | 0.00 |
| ATOM | 6651 | HG13 | VAL | X | 441 | 42.365 | 23.567 | 37.692 | 0.00 | 0.00 |
| ATOM | 6652 | CG2  | VAL | X | 441 | 42.874 | 20.937 | 38.935 | 0.00 | 0.00 |
| ATOM | 6653 | HG21 | VAL | X | 441 | 41.812 | 20.753 | 39.093 | 0.00 | 0.00 |
| ATOM | 6654 | HG22 | VAL | X | 441 | 43.581 | 20.243 | 39.389 | 0.00 | 0.00 |
| ATOM | 6655 | HG23 | VAL | X | 441 | 42.975 | 20.616 | 37.899 | 0.00 | 0.00 |
| ATOM | 6656 | C    | VAL | X | 441 | 44.837 | 24.279 | 39.333 | 0.00 | 0.00 |
| ATOM | 6657 | O    | VAL | X | 441 | 44.531 | 24.650 | 40.476 | 0.00 | 0.00 |
| ATOM | 6658 | N    | PRO | X | 442 | 45.424 | 25.085 | 38.449 | 0.00 | 0.00 |
| ATOM | 6659 | CD   | PRO | X | 442 | 45.998 | 24.625 | 37.175 | 0.00 | 0.00 |
| ATOM | 6660 | HD2  | PRO | X | 442 | 45.262 | 24.115 | 36.553 | 0.00 | 0.00 |
| ATOM | 6661 | HD3  | PRO | X | 442 | 46.844 | 23.993 | 37.444 | 0.00 | 0.00 |
| ATOM | 6662 | CG   | PRO | X | 442 | 46.669 | 25.783 | 36.526 | 0.00 | 0.00 |
| ATOM | 6663 | HG2  | PRO | X | 442 | 46.052 | 26.303 | 35.794 | 0.00 | 0.00 |
| ATOM | 6664 | HG3  | PRO | X | 442 | 47.583 | 25.614 | 35.956 | 0.00 | 0.00 |
| ATOM | 6665 | CB   | PRO | X | 442 | 46.947 | 26.799 | 37.629 | 0.00 | 0.00 |
| ATOM | 6666 | HB2  | PRO | X | 442 | 46.745 | 27.776 | 37.189 | 0.00 | 0.00 |
| ATOM | 6667 | HB3  | PRO | X | 442 | 47.958 | 26.619 | 37.994 | 0.00 | 0.00 |
| ATOM | 6668 | CA   | PRO | X | 442 | 45.919 | 26.419 | 38.700 | 0.00 | 0.00 |
| ATOM | 6669 | HA   | PRO | X | 442 | 46.442 | 26.401 | 39.655 | 0.00 | 0.00 |
| ATOM | 6670 | C    | PRO | X | 442 | 44.907 | 27.485 | 38.897 | 0.00 | 0.00 |
| ATOM | 6671 | O    | PRO | X | 442 | 43.719 | 27.329 | 38.515 | 0.00 | 0.00 |
| ATOM | 6672 | N    | HIP | X | 443 | 45.270 | 28.580 | 39.575 | 0.00 | 0.00 |
| ATOM | 6673 | H    | HIP | X | 443 | 46.145 | 28.566 | 40.080 | 0.00 | 0.00 |
| ATOM | 6674 | CA   | HIP | X | 443 | 44.453 | 29.757 | 39.839 | 0.00 | 0.00 |
| ATOM | 6675 | HA   | HIP | X | 443 | 43.630 | 29.632 | 40.543 | 0.00 | 0.00 |
| ATOM | 6676 | CB   | HIP | X | 443 | 45.533 | 30.748 | 40.374 | 0.00 | 0.00 |
| ATOM | 6677 | HB2  | HIP | X | 443 | 45.973 | 30.279 | 41.254 | 0.00 | 0.00 |

|      |      |      |     |   |     |        |        |        |      |      |
|------|------|------|-----|---|-----|--------|--------|--------|------|------|
| ATOM | 6678 | HB3  | HIP | X | 443 | 46.335 | 31.003 | 39.681 | 0.00 | 0.00 |
| ATOM | 6679 | CG   | HIP | X | 443 | 45.034 | 32.121 | 40.853 | 0.00 | 0.00 |
| ATOM | 6680 | ND1  | HIP | X | 443 | 44.211 | 32.347 | 41.930 | 0.00 | 0.00 |
| ATOM | 6681 | HD1  | HIP | X | 443 | 43.780 | 31.576 | 42.420 | 0.00 | 0.00 |
| ATOM | 6682 | CE1  | HIP | X | 443 | 43.949 | 33.667 | 42.034 | 0.00 | 0.00 |
| ATOM | 6683 | HE1  | HIP | X | 443 | 43.393 | 34.176 | 42.808 | 0.00 | 0.00 |
| ATOM | 6684 | NE2  | HIP | X | 443 | 44.621 | 34.287 | 41.029 | 0.00 | 0.00 |
| ATOM | 6685 | HE2  | HIP | X | 443 | 44.642 | 35.285 | 40.870 | 0.00 | 0.00 |
| ATOM | 6686 | CD2  | HIP | X | 443 | 45.246 | 33.349 | 40.315 | 0.00 | 0.00 |
| ATOM | 6687 | HD2  | HIP | X | 443 | 45.766 | 33.516 | 39.383 | 0.00 | 0.00 |
| ATOM | 6688 | C    | HIP | X | 443 | 43.803 | 30.350 | 38.583 | 0.00 | 0.00 |
| ATOM | 6689 | O    | HIP | X | 443 | 44.538 | 30.792 | 37.665 | 0.00 | 0.00 |
| ATOM | 6690 | N    | GLY | X | 444 | 42.411 | 30.444 | 38.511 | 0.00 | 0.00 |
| ATOM | 6691 | H    | GLY | X | 444 | 41.900 | 30.033 | 39.279 | 0.00 | 0.00 |
| ATOM | 6692 | CA   | GLY | X | 444 | 41.723 | 31.147 | 37.445 | 0.00 | 0.00 |
| ATOM | 6693 | HA2  | GLY | X | 444 | 40.774 | 31.614 | 37.710 | 0.00 | 0.00 |
| ATOM | 6694 | HA3  | GLY | X | 444 | 42.396 | 31.967 | 37.192 | 0.00 | 0.00 |
| ATOM | 6695 | C    | GLY | X | 444 | 41.339 | 30.271 | 36.211 | 0.00 | 0.00 |
| ATOM | 6696 | O    | GLY | X | 444 | 41.173 | 30.886 | 35.143 | 0.00 | 0.00 |
| ATOM | 6697 | N    | TYR | X | 445 | 41.362 | 28.920 | 36.276 | 0.00 | 0.00 |
| ATOM | 6698 | H    | TYR | X | 445 | 41.660 | 28.526 | 37.157 | 0.00 | 0.00 |
| ATOM | 6699 | CA   | TYR | X | 445 | 41.191 | 28.131 | 35.029 | 0.00 | 0.00 |
| ATOM | 6700 | HA   | TYR | X | 445 | 41.096 | 28.820 | 34.190 | 0.00 | 0.00 |
| ATOM | 6701 | CB   | TYR | X | 445 | 42.437 | 27.191 | 34.924 | 0.00 | 0.00 |
| ATOM | 6702 | HB2  | TYR | X | 445 | 42.741 | 26.696 | 35.845 | 0.00 | 0.00 |
| ATOM | 6703 | HB3  | TYR | X | 445 | 42.162 | 26.463 | 34.160 | 0.00 | 0.00 |
| ATOM | 6704 | CG   | TYR | X | 445 | 43.723 | 27.912 | 34.402 | 0.00 | 0.00 |
| ATOM | 6705 | CD1  | TYR | X | 445 | 44.049 | 27.722 | 33.008 | 0.00 | 0.00 |
| ATOM | 6706 | HD1  | TYR | X | 445 | 43.457 | 27.069 | 32.384 | 0.00 | 0.00 |
| ATOM | 6707 | CE1  | TYR | X | 445 | 45.083 | 28.426 | 32.465 | 0.00 | 0.00 |
| ATOM | 6708 | HE1  | TYR | X | 445 | 45.399 | 28.259 | 31.445 | 0.00 | 0.00 |
| ATOM | 6709 | CZ   | TYR | X | 445 | 45.865 | 29.252 | 33.235 | 0.00 | 0.00 |
| ATOM | 6710 | OH   | TYR | X | 445 | 46.915 | 29.953 | 32.635 | 0.00 | 0.00 |
| ATOM | 6711 | HH   | TYR | X | 445 | 46.954 | 29.934 | 31.676 | 0.00 | 0.00 |
| ATOM | 6712 | CE2  | TYR | X | 445 | 45.581 | 29.410 | 34.617 | 0.00 | 0.00 |
| ATOM | 6713 | HE2  | TYR | X | 445 | 46.113 | 30.182 | 35.154 | 0.00 | 0.00 |
| ATOM | 6714 | CD2  | TYR | X | 445 | 44.565 | 28.711 | 35.156 | 0.00 | 0.00 |
| ATOM | 6715 | HD2  | TYR | X | 445 | 44.218 | 28.864 | 36.167 | 0.00 | 0.00 |
| ATOM | 6716 | C    | TYR | X | 445 | 39.916 | 27.339 | 34.913 | 0.00 | 0.00 |
| ATOM | 6717 | O    | TYR | X | 445 | 39.661 | 26.725 | 33.903 | 0.00 | 0.00 |
| ATOM | 6718 | N    | GLU | X | 446 | 39.017 | 27.485 | 35.904 | 0.00 | 0.00 |
| ATOM | 6719 | H    | GLU | X | 446 | 39.209 | 28.155 | 36.635 | 0.00 | 0.00 |
| ATOM | 6720 | CA   | GLU | X | 446 | 37.627 | 27.055 | 35.789 | 0.00 | 0.00 |
| ATOM | 6721 | HA   | GLU | X | 446 | 37.682 | 26.086 | 35.294 | 0.00 | 0.00 |
| ATOM | 6722 | CB   | GLU | X | 446 | 36.947 | 26.896 | 37.129 | 0.00 | 0.00 |
| ATOM | 6723 | HB2  | GLU | X | 446 | 36.159 | 26.152 | 37.017 | 0.00 | 0.00 |
| ATOM | 6724 | HB3  | GLU | X | 446 | 37.699 | 26.422 | 37.760 | 0.00 | 0.00 |
| ATOM | 6725 | CG   | GLU | X | 446 | 36.223 | 28.010 | 37.869 | 0.00 | 0.00 |
| ATOM | 6726 | HG2  | GLU | X | 446 | 35.503 | 28.588 | 37.290 | 0.00 | 0.00 |
| ATOM | 6727 | HG3  | GLU | X | 446 | 35.629 | 27.495 | 38.624 | 0.00 | 0.00 |
| ATOM | 6728 | CD   | GLU | X | 446 | 37.203 | 29.020 | 38.484 | 0.00 | 0.00 |
| ATOM | 6729 | OE1  | GLU | X | 446 | 38.284 | 29.310 | 37.863 | 0.00 | 0.00 |
| ATOM | 6730 | OE2  | GLU | X | 446 | 36.803 | 29.469 | 39.588 | 0.00 | 0.00 |
| ATOM | 6731 | C    | GLU | X | 446 | 36.861 | 28.058 | 34.904 | 0.00 | 0.00 |
| ATOM | 6732 | O    | GLU | X | 446 | 35.927 | 27.678 | 34.127 | 0.00 | 0.00 |
| ATOM | 6733 | N    | ILE | X | 447 | 37.258 | 29.293 | 34.947 | 0.00 | 0.00 |
| ATOM | 6734 | H    | ILE | X | 447 | 37.737 | 29.585 | 35.787 | 0.00 | 0.00 |
| ATOM | 6735 | CA   | ILE | X | 447 | 36.585 | 30.339 | 34.147 | 0.00 | 0.00 |
| ATOM | 6736 | HA   | ILE | X | 447 | 35.538 | 30.365 | 34.449 | 0.00 | 0.00 |
| ATOM | 6737 | CB   | ILE | X | 447 | 37.137 | 31.771 | 34.438 | 0.00 | 0.00 |
| ATOM | 6738 | HB   | ILE | X | 447 | 36.471 | 32.490 | 33.959 | 0.00 | 0.00 |
| ATOM | 6739 | CG2  | ILE | X | 447 | 36.944 | 32.090 | 35.908 | 0.00 | 0.00 |
| ATOM | 6740 | HG21 | ILE | X | 447 | 36.877 | 33.176 | 35.964 | 0.00 | 0.00 |
| ATOM | 6741 | HG22 | ILE | X | 447 | 37.810 | 31.793 | 36.500 | 0.00 | 0.00 |
| ATOM | 6742 | HG23 | ILE | X | 447 | 36.100 | 31.635 | 36.426 | 0.00 | 0.00 |
| ATOM | 6743 | CG1  | ILE | X | 447 | 38.557 | 32.052 | 33.916 | 0.00 | 0.00 |
| ATOM | 6744 | HG12 | ILE | X | 447 | 39.067 | 32.843 | 34.466 | 0.00 | 0.00 |

|      |      |      |     |   |     |        |        |        |      |      |
|------|------|------|-----|---|-----|--------|--------|--------|------|------|
| ATOM | 6745 | HG13 | ILE | X | 447 | 39.091 | 31.105 | 33.997 | 0.00 | 0.00 |
| ATOM | 6746 | CD1  | ILE | X | 447 | 38.607 | 32.661 | 32.530 | 0.00 | 0.00 |
| ATOM | 6747 | HD11 | ILE | X | 447 | 39.617 | 32.514 | 32.148 | 0.00 | 0.00 |
| ATOM | 6748 | HD12 | ILE | X | 447 | 38.332 | 33.709 | 32.650 | 0.00 | 0.00 |
| ATOM | 6749 | HD13 | ILE | X | 447 | 37.936 | 32.204 | 31.802 | 0.00 | 0.00 |
| ATOM | 6750 | C    | ILE | X | 447 | 36.443 | 30.054 | 32.639 | 0.00 | 0.00 |
| ATOM | 6751 | O    | ILE | X | 447 | 35.522 | 30.469 | 31.956 | 0.00 | 0.00 |
| ATOM | 6752 | N    | GLU | X | 448 | 37.226 | 29.072 | 32.104 | 0.00 | 0.00 |
| ATOM | 6753 | H    | GLU | X | 448 | 37.751 | 28.539 | 32.783 | 0.00 | 0.00 |
| ATOM | 6754 | CA   | GLU | X | 448 | 37.070 | 28.671 | 30.689 | 0.00 | 0.00 |
| ATOM | 6755 | HA   | GLU | X | 448 | 36.940 | 29.516 | 30.013 | 0.00 | 0.00 |
| ATOM | 6756 | CB   | GLU | X | 448 | 38.317 | 27.968 | 30.194 | 0.00 | 0.00 |
| ATOM | 6757 | HB2  | GLU | X | 448 | 38.352 | 26.995 | 30.684 | 0.00 | 0.00 |
| ATOM | 6758 | HB3  | GLU | X | 448 | 38.196 | 27.706 | 29.143 | 0.00 | 0.00 |
| ATOM | 6759 | CG   | GLU | X | 448 | 39.639 | 28.716 | 30.352 | 0.00 | 0.00 |
| ATOM | 6760 | HG2  | GLU | X | 448 | 39.456 | 29.788 | 30.277 | 0.00 | 0.00 |
| ATOM | 6761 | HG3  | GLU | X | 448 | 40.042 | 28.499 | 31.341 | 0.00 | 0.00 |
| ATOM | 6762 | CD   | GLU | X | 448 | 40.644 | 28.312 | 29.255 | 0.00 | 0.00 |
| ATOM | 6763 | OE1  | GLU | X | 448 | 41.355 | 27.317 | 29.498 | 0.00 | 0.00 |
| ATOM | 6764 | OE2  | GLU | X | 448 | 40.849 | 28.898 | 28.158 | 0.00 | 0.00 |
| ATOM | 6765 | C    | GLU | X | 448 | 35.804 | 27.778 | 30.461 | 0.00 | 0.00 |
| ATOM | 6766 | O    | GLU | X | 448 | 35.248 | 27.840 | 29.358 | 0.00 | 0.00 |
| ATOM | 6767 | N    | PHE | X | 449 | 35.294 | 27.030 | 31.484 | 0.00 | 0.00 |
| ATOM | 6768 | H    | PHE | X | 449 | 35.863 | 27.063 | 32.318 | 0.00 | 0.00 |
| ATOM | 6769 | CA   | PHE | X | 449 | 34.073 | 26.199 | 31.533 | 0.00 | 0.00 |
| ATOM | 6770 | HA   | PHE | X | 449 | 33.750 | 25.903 | 30.534 | 0.00 | 0.00 |
| ATOM | 6771 | CB   | PHE | X | 449 | 34.290 | 25.096 | 32.551 | 0.00 | 0.00 |
| ATOM | 6772 | HB2  | PHE | X | 449 | 34.532 | 25.443 | 33.555 | 0.00 | 0.00 |
| ATOM | 6773 | HB3  | PHE | X | 449 | 33.381 | 24.634 | 32.936 | 0.00 | 0.00 |
| ATOM | 6774 | CG   | PHE | X | 449 | 35.382 | 24.068 | 32.207 | 0.00 | 0.00 |
| ATOM | 6775 | CD1  | PHE | X | 449 | 36.577 | 24.042 | 32.957 | 0.00 | 0.00 |
| ATOM | 6776 | HD1  | PHE | X | 449 | 36.802 | 24.859 | 33.626 | 0.00 | 0.00 |
| ATOM | 6777 | CE1  | PHE | X | 449 | 37.546 | 23.108 | 32.749 | 0.00 | 0.00 |
| ATOM | 6778 | HE1  | PHE | X | 449 | 38.442 | 23.195 | 33.345 | 0.00 | 0.00 |
| ATOM | 6779 | CZ   | PHE | X | 449 | 37.380 | 22.127 | 31.735 | 0.00 | 0.00 |
| ATOM | 6780 | HZ   | PHE | X | 449 | 38.207 | 21.451 | 31.577 | 0.00 | 0.00 |
| ATOM | 6781 | CE2  | PHE | X | 449 | 36.144 | 22.090 | 30.995 | 0.00 | 0.00 |
| ATOM | 6782 | HE2  | PHE | X | 449 | 36.013 | 21.550 | 30.069 | 0.00 | 0.00 |
| ATOM | 6783 | CD2  | PHE | X | 449 | 35.163 | 23.060 | 31.269 | 0.00 | 0.00 |
| ATOM | 6784 | HD2  | PHE | X | 449 | 34.268 | 23.176 | 30.676 | 0.00 | 0.00 |
| ATOM | 6785 | C    | PHE | X | 449 | 32.854 | 27.075 | 31.965 | 0.00 | 0.00 |
| ATOM | 6786 | O    | PHE | X | 449 | 31.733 | 26.790 | 31.564 | 0.00 | 0.00 |
| ATOM | 6787 | N    | ILE | X | 450 | 33.104 | 28.237 | 32.595 | 0.00 | 0.00 |
| ATOM | 6788 | H    | ILE | X | 450 | 34.001 | 28.298 | 33.055 | 0.00 | 0.00 |
| ATOM | 6789 | CA   | ILE | X | 450 | 32.134 | 29.345 | 32.901 | 0.00 | 0.00 |
| ATOM | 6790 | HA   | ILE | X | 450 | 31.213 | 28.952 | 33.332 | 0.00 | 0.00 |
| ATOM | 6791 | CB   | ILE | X | 450 | 32.666 | 30.272 | 34.018 | 0.00 | 0.00 |
| ATOM | 6792 | HB   | ILE | X | 450 | 33.544 | 30.787 | 33.628 | 0.00 | 0.00 |
| ATOM | 6793 | CG2  | ILE | X | 450 | 31.535 | 31.328 | 34.331 | 0.00 | 0.00 |
| ATOM | 6794 | HG21 | ILE | X | 450 | 30.532 | 30.929 | 34.481 | 0.00 | 0.00 |
| ATOM | 6795 | HG22 | ILE | X | 450 | 31.498 | 32.121 | 33.584 | 0.00 | 0.00 |
| ATOM | 6796 | HG23 | ILE | X | 450 | 31.746 | 31.914 | 35.225 | 0.00 | 0.00 |
| ATOM | 6797 | CG1  | ILE | X | 450 | 33.276 | 29.674 | 35.258 | 0.00 | 0.00 |
| ATOM | 6798 | HG12 | ILE | X | 450 | 34.056 | 29.010 | 34.887 | 0.00 | 0.00 |
| ATOM | 6799 | HG13 | ILE | X | 450 | 33.722 | 30.459 | 35.869 | 0.00 | 0.00 |
| ATOM | 6800 | CD1  | ILE | X | 450 | 32.245 | 28.897 | 36.150 | 0.00 | 0.00 |
| ATOM | 6801 | HD11 | ILE | X | 450 | 31.707 | 28.175 | 35.535 | 0.00 | 0.00 |
| ATOM | 6802 | HD12 | ILE | X | 450 | 31.474 | 29.534 | 36.584 | 0.00 | 0.00 |
| ATOM | 6803 | HD13 | ILE | X | 450 | 32.658 | 28.325 | 36.982 | 0.00 | 0.00 |
| ATOM | 6804 | C    | ILE | X | 450 | 31.698 | 30.141 | 31.723 | 0.00 | 0.00 |
| ATOM | 6805 | O    | ILE | X | 450 | 30.504 | 30.276 | 31.457 | 0.00 | 0.00 |
| ATOM | 6806 | N    | PHE | X | 451 | 32.648 | 30.577 | 30.907 | 0.00 | 0.00 |
| ATOM | 6807 | H    | PHE | X | 451 | 33.582 | 30.248 | 31.108 | 0.00 | 0.00 |
| ATOM | 6808 | CA   | PHE | X | 451 | 32.477 | 31.269 | 29.676 | 0.00 | 0.00 |
| ATOM | 6809 | HA   | PHE | X | 451 | 31.607 | 31.913 | 29.799 | 0.00 | 0.00 |
| ATOM | 6810 | CB   | PHE | X | 451 | 33.681 | 32.161 | 29.343 | 0.00 | 0.00 |
| ATOM | 6811 | HB2  | PHE | X | 451 | 34.580 | 31.552 | 29.435 | 0.00 | 0.00 |

|      |      |      |     |   |     |        |        |        |      |      |
|------|------|------|-----|---|-----|--------|--------|--------|------|------|
| ATOM | 6812 | HB3  | PHE | X | 451 | 33.747 | 32.367 | 28.275 | 0.00 | 0.00 |
| ATOM | 6813 | CG   | PHE | X | 451 | 33.652 | 33.445 | 30.089 | 0.00 | 0.00 |
| ATOM | 6814 | CD1  | PHE | X | 451 | 34.273 | 33.511 | 31.341 | 0.00 | 0.00 |
| ATOM | 6815 | HD1  | PHE | X | 451 | 34.853 | 32.719 | 31.791 | 0.00 | 0.00 |
| ATOM | 6816 | CE1  | PHE | X | 451 | 34.163 | 34.665 | 32.080 | 0.00 | 0.00 |
| ATOM | 6817 | HE1  | PHE | X | 451 | 34.787 | 34.755 | 32.957 | 0.00 | 0.00 |
| ATOM | 6818 | CZ   | PHE | X | 451 | 33.424 | 35.745 | 31.567 | 0.00 | 0.00 |
| ATOM | 6819 | HZ   | PHE | X | 451 | 33.447 | 36.683 | 32.103 | 0.00 | 0.00 |
| ATOM | 6820 | CE2  | PHE | X | 451 | 32.822 | 35.686 | 30.265 | 0.00 | 0.00 |
| ATOM | 6821 | HE2  | PHE | X | 451 | 32.305 | 36.518 | 29.810 | 0.00 | 0.00 |
| ATOM | 6822 | CD2  | PHE | X | 451 | 33.044 | 34.546 | 29.447 | 0.00 | 0.00 |
| ATOM | 6823 | HD2  | PHE | X | 451 | 32.564 | 34.477 | 28.482 | 0.00 | 0.00 |
| ATOM | 6824 | C    | PHE | X | 451 | 32.190 | 30.306 | 28.522 | 0.00 | 0.00 |
| ATOM | 6825 | O    | PHE | X | 451 | 31.866 | 30.740 | 27.392 | 0.00 | 0.00 |
| ATOM | 6826 | N    | GLY | X | 452 | 32.123 | 28.953 | 28.697 | 0.00 | 0.00 |
| ATOM | 6827 | H    | GLY | X | 452 | 32.311 | 28.493 | 29.577 | 0.00 | 0.00 |
| ATOM | 6828 | CA   | GLY | X | 452 | 31.626 | 28.093 | 27.629 | 0.00 | 0.00 |
| ATOM | 6829 | HA2  | GLY | X | 452 | 31.364 | 27.138 | 28.084 | 0.00 | 0.00 |
| ATOM | 6830 | HA3  | GLY | X | 452 | 30.840 | 28.672 | 27.145 | 0.00 | 0.00 |
| ATOM | 6831 | C    | GLY | X | 452 | 32.698 | 27.779 | 26.617 | 0.00 | 0.00 |
| ATOM | 6832 | O    | GLY | X | 452 | 32.353 | 27.442 | 25.524 | 0.00 | 0.00 |
| ATOM | 6833 | N    | ILE | X | 453 | 33.985 | 27.798 | 26.854 | 0.00 | 0.00 |
| ATOM | 6834 | H    | ILE | X | 453 | 34.284 | 28.123 | 27.762 | 0.00 | 0.00 |
| ATOM | 6835 | CA   | ILE | X | 453 | 35.015 | 27.641 | 25.812 | 0.00 | 0.00 |
| ATOM | 6836 | HA   | ILE | X | 453 | 34.767 | 28.469 | 25.148 | 0.00 | 0.00 |
| ATOM | 6837 | CB   | ILE | X | 453 | 36.408 | 27.765 | 26.445 | 0.00 | 0.00 |
| ATOM | 6838 | HB   | ILE | X | 453 | 36.396 | 27.142 | 27.339 | 0.00 | 0.00 |
| ATOM | 6839 | CG2  | ILE | X | 453 | 37.476 | 27.161 | 25.458 | 0.00 | 0.00 |
| ATOM | 6840 | HG21 | ILE | X | 453 | 38.408 | 27.667 | 25.707 | 0.00 | 0.00 |
| ATOM | 6841 | HG22 | ILE | X | 453 | 37.272 | 27.428 | 24.420 | 0.00 | 0.00 |
| ATOM | 6842 | HG23 | ILE | X | 453 | 37.518 | 26.080 | 25.589 | 0.00 | 0.00 |
| ATOM | 6843 | CG1  | ILE | X | 453 | 36.771 | 29.229 | 26.770 | 0.00 | 0.00 |
| ATOM | 6844 | HG12 | ILE | X | 453 | 36.028 | 29.643 | 27.452 | 0.00 | 0.00 |
| ATOM | 6845 | HG13 | ILE | X | 453 | 37.734 | 29.198 | 27.280 | 0.00 | 0.00 |
| ATOM | 6846 | CD1  | ILE | X | 453 | 36.917 | 30.221 | 25.546 | 0.00 | 0.00 |
| ATOM | 6847 | HD11 | ILE | X | 453 | 36.981 | 31.204 | 26.013 | 0.00 | 0.00 |
| ATOM | 6848 | HD12 | ILE | X | 453 | 36.069 | 30.071 | 24.878 | 0.00 | 0.00 |
| ATOM | 6849 | HD13 | ILE | X | 453 | 37.859 | 30.106 | 25.009 | 0.00 | 0.00 |
| ATOM | 6850 | C    | ILE | X | 453 | 34.904 | 26.306 | 24.989 | 0.00 | 0.00 |
| ATOM | 6851 | O    | ILE | X | 453 | 35.242 | 26.302 | 23.799 | 0.00 | 0.00 |
| ATOM | 6852 | N    | PRO | X | 454 | 34.554 | 25.185 | 25.550 | 0.00 | 0.00 |
| ATOM | 6853 | CD   | PRO | X | 454 | 34.430 | 24.863 | 26.971 | 0.00 | 0.00 |
| ATOM | 6854 | HD2  | PRO | X | 454 | 33.664 | 25.364 | 27.562 | 0.00 | 0.00 |
| ATOM | 6855 | HD3  | PRO | X | 454 | 35.401 | 24.848 | 27.466 | 0.00 | 0.00 |
| ATOM | 6856 | CG   | PRO | X | 454 | 33.964 | 23.392 | 26.950 | 0.00 | 0.00 |
| ATOM | 6857 | HG2  | PRO | X | 454 | 32.888 | 23.260 | 26.843 | 0.00 | 0.00 |
| ATOM | 6858 | HG3  | PRO | X | 454 | 34.299 | 22.935 | 27.882 | 0.00 | 0.00 |
| ATOM | 6859 | CB   | PRO | X | 454 | 34.574 | 22.721 | 25.765 | 0.00 | 0.00 |
| ATOM | 6860 | HB2  | PRO | X | 454 | 34.129 | 21.765 | 25.490 | 0.00 | 0.00 |
| ATOM | 6861 | HB3  | PRO | X | 454 | 35.587 | 22.418 | 26.029 | 0.00 | 0.00 |
| ATOM | 6862 | CA   | PRO | X | 454 | 34.553 | 23.883 | 24.762 | 0.00 | 0.00 |
| ATOM | 6863 | HA   | PRO | X | 454 | 35.484 | 23.831 | 24.197 | 0.00 | 0.00 |
| ATOM | 6864 | C    | PRO | X | 454 | 33.339 | 23.757 | 23.862 | 0.00 | 0.00 |
| ATOM | 6865 | O    | PRO | X | 454 | 33.212 | 22.687 | 23.232 | 0.00 | 0.00 |
| ATOM | 6866 | N    | LEU | X | 455 | 32.497 | 24.740 | 23.765 | 0.00 | 0.00 |
| ATOM | 6867 | H    | LEU | X | 455 | 32.592 | 25.481 | 24.445 | 0.00 | 0.00 |
| ATOM | 6868 | CA   | LEU | X | 455 | 31.391 | 24.673 | 22.831 | 0.00 | 0.00 |
| ATOM | 6869 | HA   | LEU | X | 455 | 30.963 | 23.679 | 22.962 | 0.00 | 0.00 |
| ATOM | 6870 | CB   | LEU | X | 455 | 30.235 | 25.683 | 23.224 | 0.00 | 0.00 |
| ATOM | 6871 | HB2  | LEU | X | 455 | 30.751 | 26.542 | 23.653 | 0.00 | 0.00 |
| ATOM | 6872 | HB3  | LEU | X | 455 | 29.716 | 25.964 | 22.307 | 0.00 | 0.00 |
| ATOM | 6873 | CG   | LEU | X | 455 | 29.231 | 25.173 | 24.183 | 0.00 | 0.00 |
| ATOM | 6874 | HG   | LEU | X | 455 | 28.636 | 26.036 | 24.481 | 0.00 | 0.00 |
| ATOM | 6875 | CD1  | LEU | X | 455 | 28.255 | 24.146 | 23.486 | 0.00 | 0.00 |
| ATOM | 6876 | HD11 | LEU | X | 455 | 27.373 | 23.968 | 24.100 | 0.00 | 0.00 |
| ATOM | 6877 | HD12 | LEU | X | 455 | 28.760 | 23.202 | 23.280 | 0.00 | 0.00 |
| ATOM | 6878 | HD13 | LEU | X | 455 | 27.881 | 24.598 | 22.567 | 0.00 | 0.00 |

|      |      |      |     |   |     |        |        |        |      |      |
|------|------|------|-----|---|-----|--------|--------|--------|------|------|
| ATOM | 6879 | CD2  | LEU | X | 455 | 29.742 | 24.486 | 25.386 | 0.00 | 0.00 |
| ATOM | 6880 | HD21 | LEU | X | 455 | 28.916 | 24.036 | 25.937 | 0.00 | 0.00 |
| ATOM | 6881 | HD22 | LEU | X | 455 | 30.469 | 23.701 | 25.176 | 0.00 | 0.00 |
| ATOM | 6882 | HD23 | LEU | X | 455 | 30.121 | 25.272 | 26.040 | 0.00 | 0.00 |
| ATOM | 6883 | C    | LEU | X | 455 | 31.785 | 24.863 | 21.359 | 0.00 | 0.00 |
| ATOM | 6884 | O    | LEU | X | 455 | 30.980 | 24.495 | 20.466 | 0.00 | 0.00 |
| ATOM | 6885 | N    | ASP | X | 456 | 32.992 | 25.334 | 21.080 | 0.00 | 0.00 |
| ATOM | 6886 | H    | ASP | X | 456 | 33.549 | 25.632 | 21.869 | 0.00 | 0.00 |
| ATOM | 6887 | CA   | ASP | X | 456 | 33.560 | 25.359 | 19.733 | 0.00 | 0.00 |
| ATOM | 6888 | HA   | ASP | X | 456 | 32.724 | 25.564 | 19.064 | 0.00 | 0.00 |
| ATOM | 6889 | CB   | ASP | X | 456 | 34.653 | 26.457 | 19.714 | 0.00 | 0.00 |
| ATOM | 6890 | HB2  | ASP | X | 456 | 34.313 | 27.343 | 20.250 | 0.00 | 0.00 |
| ATOM | 6891 | HB3  | ASP | X | 456 | 35.500 | 26.004 | 20.230 | 0.00 | 0.00 |
| ATOM | 6892 | CG   | ASP | X | 456 | 35.166 | 26.917 | 18.347 | 0.00 | 0.00 |
| ATOM | 6893 | OD1  | ASP | X | 456 | 35.515 | 26.016 | 17.520 | 0.00 | 0.00 |
| ATOM | 6894 | OD2  | ASP | X | 456 | 35.223 | 28.126 | 18.029 | 0.00 | 0.00 |
| ATOM | 6895 | C    | ASP | X | 456 | 34.318 | 24.063 | 19.354 | 0.00 | 0.00 |
| ATOM | 6896 | O    | ASP | X | 456 | 35.201 | 23.634 | 20.134 | 0.00 | 0.00 |
| ATOM | 6897 | N    | PRO | X | 457 | 33.962 | 23.375 | 18.264 | 0.00 | 0.00 |
| ATOM | 6898 | CD   | PRO | X | 457 | 33.030 | 23.805 | 17.225 | 0.00 | 0.00 |
| ATOM | 6899 | HD2  | PRO | X | 457 | 33.558 | 24.608 | 16.710 | 0.00 | 0.00 |
| ATOM | 6900 | HD3  | PRO | X | 457 | 32.111 | 24.232 | 17.627 | 0.00 | 0.00 |
| ATOM | 6901 | CG   | PRO | X | 457 | 32.834 | 22.645 | 16.250 | 0.00 | 0.00 |
| ATOM | 6902 | HG2  | PRO | X | 457 | 33.449 | 22.654 | 15.349 | 0.00 | 0.00 |
| ATOM | 6903 | HG3  | PRO | X | 457 | 31.786 | 22.566 | 15.961 | 0.00 | 0.00 |
| ATOM | 6904 | CB   | PRO | X | 457 | 33.240 | 21.440 | 17.040 | 0.00 | 0.00 |
| ATOM | 6905 | HB2  | PRO | X | 457 | 33.719 | 20.633 | 16.486 | 0.00 | 0.00 |
| ATOM | 6906 | HB3  | PRO | X | 457 | 32.363 | 21.079 | 17.578 | 0.00 | 0.00 |
| ATOM | 6907 | CA   | PRO | X | 457 | 34.333 | 22.028 | 17.924 | 0.00 | 0.00 |
| ATOM | 6908 | HA   | PRO | X | 457 | 34.228 | 21.444 | 18.839 | 0.00 | 0.00 |
| ATOM | 6909 | C    | PRO | X | 457 | 35.790 | 21.876 | 17.417 | 0.00 | 0.00 |
| ATOM | 6910 | O    | PRO | X | 457 | 36.282 | 20.812 | 17.064 | 0.00 | 0.00 |
| ATOM | 6911 | N    | SER | X | 458 | 36.559 | 22.979 | 17.371 | 0.00 | 0.00 |
| ATOM | 6912 | H    | SER | X | 458 | 36.100 | 23.828 | 17.670 | 0.00 | 0.00 |
| ATOM | 6913 | CA   | SER | X | 458 | 38.005 | 23.037 | 17.007 | 0.00 | 0.00 |
| ATOM | 6914 | HA   | SER | X | 458 | 38.199 | 22.274 | 16.253 | 0.00 | 0.00 |
| ATOM | 6915 | CB   | SER | X | 458 | 38.240 | 24.347 | 16.340 | 0.00 | 0.00 |
| ATOM | 6916 | HB2  | SER | X | 458 | 39.250 | 24.367 | 15.930 | 0.00 | 0.00 |
| ATOM | 6917 | HB3  | SER | X | 458 | 37.560 | 24.533 | 15.508 | 0.00 | 0.00 |
| ATOM | 6918 | OG   | SER | X | 458 | 38.055 | 25.339 | 17.245 | 0.00 | 0.00 |
| ATOM | 6919 | HG   | SER | X | 458 | 37.122 | 25.524 | 17.374 | 0.00 | 0.00 |
| ATOM | 6920 | C    | SER | X | 458 | 39.023 | 22.761 | 18.140 | 0.00 | 0.00 |
| ATOM | 6921 | O    | SER | X | 458 | 40.218 | 22.540 | 17.862 | 0.00 | 0.00 |
| ATOM | 6922 | N    | ARG | X | 459 | 38.592 | 22.845 | 19.362 | 0.00 | 0.00 |
| ATOM | 6923 | H    | ARG | X | 459 | 37.595 | 22.913 | 19.510 | 0.00 | 0.00 |
| ATOM | 6924 | CA   | ARG | X | 459 | 39.420 | 22.736 | 20.568 | 0.00 | 0.00 |
| ATOM | 6925 | HA   | ARG | X | 459 | 40.372 | 23.243 | 20.409 | 0.00 | 0.00 |
| ATOM | 6926 | CB   | ARG | X | 459 | 38.674 | 23.481 | 21.622 | 0.00 | 0.00 |
| ATOM | 6927 | HB2  | ARG | X | 459 | 37.704 | 22.994 | 21.715 | 0.00 | 0.00 |
| ATOM | 6928 | HB3  | ARG | X | 459 | 39.259 | 23.361 | 22.534 | 0.00 | 0.00 |
| ATOM | 6929 | CG   | ARG | X | 459 | 38.504 | 24.938 | 21.367 | 0.00 | 0.00 |
| ATOM | 6930 | HG2  | ARG | X | 459 | 38.065 | 25.175 | 20.398 | 0.00 | 0.00 |
| ATOM | 6931 | HG3  | ARG | X | 459 | 37.663 | 25.206 | 22.006 | 0.00 | 0.00 |
| ATOM | 6932 | CD   | ARG | X | 459 | 39.753 | 25.746 | 21.759 | 0.00 | 0.00 |
| ATOM | 6933 | HD2  | ARG | X | 459 | 40.261 | 25.226 | 22.572 | 0.00 | 0.00 |
| ATOM | 6934 | HD3  | ARG | X | 459 | 40.330 | 25.688 | 20.836 | 0.00 | 0.00 |
| ATOM | 6935 | NE   | ARG | X | 459 | 39.489 | 27.136 | 22.030 | 0.00 | 0.00 |
| ATOM | 6936 | HE   | ARG | X | 459 | 38.534 | 27.428 | 22.182 | 0.00 | 0.00 |
| ATOM | 6937 | CZ   | ARG | X | 459 | 40.498 | 28.063 | 21.954 | 0.00 | 0.00 |
| ATOM | 6938 | NH1  | ARG | X | 459 | 41.818 | 27.807 | 21.951 | 0.00 | 0.00 |
| ATOM | 6939 | HH11 | ARG | X | 459 | 42.137 | 26.877 | 21.718 | 0.00 | 0.00 |
| ATOM | 6940 | HH12 | ARG | X | 459 | 42.434 | 28.600 | 22.061 | 0.00 | 0.00 |
| ATOM | 6941 | NH2  | ARG | X | 459 | 40.200 | 29.292 | 22.132 | 0.00 | 0.00 |
| ATOM | 6942 | HH21 | ARG | X | 459 | 39.253 | 29.641 | 22.118 | 0.00 | 0.00 |
| ATOM | 6943 | HH22 | ARG | X | 459 | 40.998 | 29.788 | 22.504 | 0.00 | 0.00 |
| ATOM | 6944 | C    | ARG | X | 459 | 39.631 | 21.279 | 20.926 | 0.00 | 0.00 |
| ATOM | 6945 | O    | ARG | X | 459 | 38.939 | 20.387 | 20.406 | 0.00 | 0.00 |

|      |      |      |     |   |     |        |        |        |      |      |
|------|------|------|-----|---|-----|--------|--------|--------|------|------|
| ATOM | 6946 | N    | ASN | X | 460 | 40.602 | 20.926 | 21.752 | 0.00 | 0.00 |
| ATOM | 6947 | H    | ASN | X | 460 | 41.096 | 21.701 | 22.169 | 0.00 | 0.00 |
| ATOM | 6948 | CA   | ASN | X | 460 | 41.042 | 19.579 | 22.208 | 0.00 | 0.00 |
| ATOM | 6949 | HA   | ASN | X | 460 | 40.912 | 18.906 | 21.360 | 0.00 | 0.00 |
| ATOM | 6950 | CB   | ASN | X | 460 | 42.547 | 19.772 | 22.467 | 0.00 | 0.00 |
| ATOM | 6951 | HB2  | ASN | X | 460 | 43.048 | 19.931 | 21.512 | 0.00 | 0.00 |
| ATOM | 6952 | HB3  | ASN | X | 460 | 42.705 | 20.589 | 23.171 | 0.00 | 0.00 |
| ATOM | 6953 | CG   | ASN | X | 460 | 43.169 | 18.565 | 23.132 | 0.00 | 0.00 |
| ATOM | 6954 | OD1  | ASN | X | 460 | 43.524 | 17.590 | 22.483 | 0.00 | 0.00 |
| ATOM | 6955 | ND2  | ASN | X | 460 | 43.342 | 18.489 | 24.413 | 0.00 | 0.00 |
| ATOM | 6956 | HD21 | ASN | X | 460 | 43.778 | 17.661 | 24.792 | 0.00 | 0.00 |
| ATOM | 6957 | HD22 | ASN | X | 460 | 42.933 | 19.215 | 24.984 | 0.00 | 0.00 |
| ATOM | 6958 | C    | ASN | X | 460 | 40.247 | 19.019 | 23.434 | 0.00 | 0.00 |
| ATOM | 6959 | O    | ASN | X | 460 | 40.359 | 17.832 | 23.850 | 0.00 | 0.00 |
| ATOM | 6960 | N    | TYR | X | 461 | 39.206 | 19.734 | 24.018 | 0.00 | 0.00 |
| ATOM | 6961 | H    | TYR | X | 461 | 39.107 | 20.697 | 23.730 | 0.00 | 0.00 |
| ATOM | 6962 | CA   | TYR | X | 461 | 38.495 | 19.286 | 25.157 | 0.00 | 0.00 |
| ATOM | 6963 | HA   | TYR | X | 461 | 39.268 | 19.076 | 25.895 | 0.00 | 0.00 |
| ATOM | 6964 | CB   | TYR | X | 461 | 37.596 | 20.379 | 25.792 | 0.00 | 0.00 |
| ATOM | 6965 | HB2  | TYR | X | 461 | 36.858 | 20.691 | 25.054 | 0.00 | 0.00 |
| ATOM | 6966 | HB3  | TYR | X | 461 | 36.916 | 19.917 | 26.509 | 0.00 | 0.00 |
| ATOM | 6967 | CG   | TYR | X | 461 | 38.413 | 21.423 | 26.579 | 0.00 | 0.00 |
| ATOM | 6968 | CD1  | TYR | X | 461 | 38.927 | 22.565 | 25.878 | 0.00 | 0.00 |
| ATOM | 6969 | HD1  | TYR | X | 461 | 38.947 | 22.470 | 24.802 | 0.00 | 0.00 |
| ATOM | 6970 | CE1  | TYR | X | 461 | 39.547 | 23.611 | 26.563 | 0.00 | 0.00 |
| ATOM | 6971 | HE1  | TYR | X | 461 | 39.875 | 24.531 | 26.101 | 0.00 | 0.00 |
| ATOM | 6972 | CZ   | TYR | X | 461 | 39.539 | 23.575 | 28.007 | 0.00 | 0.00 |
| ATOM | 6973 | OH   | TYR | X | 461 | 39.940 | 24.659 | 28.700 | 0.00 | 0.00 |
| ATOM | 6974 | HH   | TYR | X | 461 | 40.076 | 24.480 | 29.634 | 0.00 | 0.00 |
| ATOM | 6975 | CE2  | TYR | X | 461 | 38.950 | 22.527 | 28.675 | 0.00 | 0.00 |
| ATOM | 6976 | HE2  | TYR | X | 461 | 38.938 | 22.509 | 29.755 | 0.00 | 0.00 |
| ATOM | 6977 | CD2  | TYR | X | 461 | 38.374 | 21.439 | 27.990 | 0.00 | 0.00 |
| ATOM | 6978 | HD2  | TYR | X | 461 | 37.877 | 20.600 | 28.452 | 0.00 | 0.00 |
| ATOM | 6979 | C    | TYR | X | 461 | 37.590 | 18.052 | 24.874 | 0.00 | 0.00 |
| ATOM | 6980 | O    | TYR | X | 461 | 37.247 | 17.803 | 23.712 | 0.00 | 0.00 |
| ATOM | 6981 | N    | THR | X | 462 | 37.314 | 17.179 | 25.771 | 0.00 | 0.00 |
| ATOM | 6982 | H    | THR | X | 462 | 37.832 | 17.209 | 26.638 | 0.00 | 0.00 |
| ATOM | 6983 | CA   | THR | X | 462 | 36.581 | 15.937 | 25.533 | 0.00 | 0.00 |
| ATOM | 6984 | HA   | THR | X | 462 | 36.876 | 15.624 | 24.531 | 0.00 | 0.00 |
| ATOM | 6985 | CB   | THR | X | 462 | 37.055 | 14.894 | 26.646 | 0.00 | 0.00 |
| ATOM | 6986 | HB   | THR | X | 462 | 36.565 | 13.942 | 26.441 | 0.00 | 0.00 |
| ATOM | 6987 | CG2  | THR | X | 462 | 38.522 | 14.659 | 26.625 | 0.00 | 0.00 |
| ATOM | 6988 | HG21 | THR | X | 462 | 38.822 | 13.854 | 27.296 | 0.00 | 0.00 |
| ATOM | 6989 | HG22 | THR | X | 462 | 38.996 | 15.596 | 26.920 | 0.00 | 0.00 |
| ATOM | 6990 | HG23 | THR | X | 462 | 38.775 | 14.366 | 25.607 | 0.00 | 0.00 |
| ATOM | 6991 | OG1  | THR | X | 462 | 36.733 | 15.360 | 27.960 | 0.00 | 0.00 |
| ATOM | 6992 | HG1  | THR | X | 462 | 37.393 | 16.022 | 28.180 | 0.00 | 0.00 |
| ATOM | 6993 | C    | THR | X | 462 | 35.063 | 16.143 | 25.589 | 0.00 | 0.00 |
| ATOM | 6994 | O    | THR | X | 462 | 34.549 | 17.206 | 25.916 | 0.00 | 0.00 |
| ATOM | 6995 | N    | ALA | X | 463 | 34.351 | 15.091 | 25.152 | 0.00 | 0.00 |
| ATOM | 6996 | H    | ALA | X | 463 | 34.847 | 14.307 | 24.754 | 0.00 | 0.00 |
| ATOM | 6997 | CA   | ALA | X | 463 | 32.914 | 15.147 | 25.004 | 0.00 | 0.00 |
| ATOM | 6998 | HA   | ALA | X | 463 | 32.720 | 16.097 | 24.506 | 0.00 | 0.00 |
| ATOM | 6999 | CB   | ALA | X | 463 | 32.547 | 13.922 | 24.149 | 0.00 | 0.00 |
| ATOM | 7000 | HB1  | ALA | X | 463 | 33.212 | 13.836 | 23.290 | 0.00 | 0.00 |
| ATOM | 7001 | HB2  | ALA | X | 463 | 31.564 | 13.989 | 23.682 | 0.00 | 0.00 |
| ATOM | 7002 | HB3  | ALA | X | 463 | 32.709 | 12.991 | 24.692 | 0.00 | 0.00 |
| ATOM | 7003 | C    | ALA | X | 463 | 32.158 | 15.200 | 26.332 | 0.00 | 0.00 |
| ATOM | 7004 | O    | ALA | X | 463 | 31.034 | 15.628 | 26.384 | 0.00 | 0.00 |
| ATOM | 7005 | N    | GLU | X | 464 | 32.813 | 14.795 | 27.415 | 0.00 | 0.00 |
| ATOM | 7006 | H    | GLU | X | 464 | 33.790 | 14.579 | 27.274 | 0.00 | 0.00 |
| ATOM | 7007 | CA   | GLU | X | 464 | 32.376 | 14.934 | 28.819 | 0.00 | 0.00 |
| ATOM | 7008 | HA   | GLU | X | 464 | 31.286 | 14.947 | 28.805 | 0.00 | 0.00 |
| ATOM | 7009 | CB   | GLU | X | 464 | 32.700 | 13.724 | 29.665 | 0.00 | 0.00 |
| ATOM | 7010 | HB2  | GLU | X | 464 | 32.202 | 13.821 | 30.631 | 0.00 | 0.00 |
| ATOM | 7011 | HB3  | GLU | X | 464 | 32.316 | 12.925 | 29.032 | 0.00 | 0.00 |
| ATOM | 7012 | CG   | GLU | X | 464 | 34.177 | 13.453 | 29.885 | 0.00 | 0.00 |

|      |      |      |     |   |     |        |        |        |      |      |
|------|------|------|-----|---|-----|--------|--------|--------|------|------|
| ATOM | 7013 | HG2  | GLU | X | 464 | 34.701 | 14.397 | 29.731 | 0.00 | 0.00 |
| ATOM | 7014 | HG3  | GLU | X | 464 | 34.311 | 13.077 | 30.900 | 0.00 | 0.00 |
| ATOM | 7015 | CD   | GLU | X | 464 | 34.671 | 12.422 | 28.876 | 0.00 | 0.00 |
| ATOM | 7016 | OE1  | GLU | X | 464 | 34.701 | 12.732 | 27.660 | 0.00 | 0.00 |
| ATOM | 7017 | OE2  | GLU | X | 464 | 35.017 | 11.287 | 29.303 | 0.00 | 0.00 |
| ATOM | 7018 | C    | GLU | X | 464 | 32.631 | 16.293 | 29.403 | 0.00 | 0.00 |
| ATOM | 7019 | O    | GLU | X | 464 | 31.833 | 16.638 | 30.250 | 0.00 | 0.00 |
| ATOM | 7020 | N    | GLU | X | 465 | 33.727 | 16.938 | 29.032 | 0.00 | 0.00 |
| ATOM | 7021 | H    | GLU | X | 465 | 34.254 | 16.628 | 28.228 | 0.00 | 0.00 |
| ATOM | 7022 | CA   | GLU | X | 465 | 34.046 | 18.332 | 29.309 | 0.00 | 0.00 |
| ATOM | 7023 | HA   | GLU | X | 465 | 33.921 | 18.488 | 30.381 | 0.00 | 0.00 |
| ATOM | 7024 | CB   | GLU | X | 465 | 35.483 | 18.715 | 28.932 | 0.00 | 0.00 |
| ATOM | 7025 | HB2  | GLU | X | 465 | 35.649 | 18.250 | 27.960 | 0.00 | 0.00 |
| ATOM | 7026 | HB3  | GLU | X | 465 | 35.646 | 19.790 | 28.848 | 0.00 | 0.00 |
| ATOM | 7027 | CG   | GLU | X | 465 | 36.420 | 18.158 | 30.045 | 0.00 | 0.00 |
| ATOM | 7028 | HG2  | GLU | X | 465 | 36.421 | 18.880 | 30.862 | 0.00 | 0.00 |
| ATOM | 7029 | HG3  | GLU | X | 465 | 36.128 | 17.162 | 30.379 | 0.00 | 0.00 |
| ATOM | 7030 | CD   | GLU | X | 465 | 37.887 | 18.142 | 29.600 | 0.00 | 0.00 |
| ATOM | 7031 | OE1  | GLU | X | 465 | 38.177 | 17.328 | 28.666 | 0.00 | 0.00 |
| ATOM | 7032 | OE2  | GLU | X | 465 | 38.698 | 18.871 | 30.207 | 0.00 | 0.00 |
| ATOM | 7033 | C    | GLU | X | 465 | 33.023 | 19.295 | 28.711 | 0.00 | 0.00 |
| ATOM | 7034 | O    | GLU | X | 465 | 32.663 | 20.249 | 29.373 | 0.00 | 0.00 |
| ATOM | 7035 | N    | LYS | X | 466 | 32.514 | 19.078 | 27.454 | 0.00 | 0.00 |
| ATOM | 7036 | H    | LYS | X | 466 | 33.014 | 18.426 | 26.867 | 0.00 | 0.00 |
| ATOM | 7037 | CA   | LYS | X | 466 | 31.488 | 20.014 | 26.865 | 0.00 | 0.00 |
| ATOM | 7038 | HA   | LYS | X | 466 | 31.914 | 21.017 | 26.865 | 0.00 | 0.00 |
| ATOM | 7039 | CB   | LYS | X | 466 | 31.344 | 19.554 | 25.377 | 0.00 | 0.00 |
| ATOM | 7040 | HB2  | LYS | X | 466 | 32.329 | 19.396 | 24.938 | 0.00 | 0.00 |
| ATOM | 7041 | HB3  | LYS | X | 466 | 30.889 | 18.568 | 25.280 | 0.00 | 0.00 |
| ATOM | 7042 | CG   | LYS | X | 466 | 30.597 | 20.491 | 24.383 | 0.00 | 0.00 |
| ATOM | 7043 | HG2  | LYS | X | 466 | 29.546 | 20.624 | 24.640 | 0.00 | 0.00 |
| ATOM | 7044 | HG3  | LYS | X | 466 | 31.095 | 21.457 | 24.463 | 0.00 | 0.00 |
| ATOM | 7045 | CD   | LYS | X | 466 | 30.736 | 20.194 | 22.874 | 0.00 | 0.00 |
| ATOM | 7046 | HD2  | LYS | X | 466 | 30.500 | 21.048 | 22.240 | 0.00 | 0.00 |
| ATOM | 7047 | HD3  | LYS | X | 466 | 31.809 | 20.088 | 22.710 | 0.00 | 0.00 |
| ATOM | 7048 | CE   | LYS | X | 466 | 29.983 | 18.897 | 22.470 | 0.00 | 0.00 |
| ATOM | 7049 | HE2  | LYS | X | 466 | 30.454 | 18.582 | 21.539 | 0.00 | 0.00 |
| ATOM | 7050 | HE3  | LYS | X | 466 | 30.084 | 18.094 | 23.201 | 0.00 | 0.00 |
| ATOM | 7051 | NZ   | LYS | X | 466 | 28.550 | 19.104 | 22.114 | 0.00 | 0.00 |
| ATOM | 7052 | HZ1  | LYS | X | 466 | 27.946 | 19.363 | 22.881 | 0.00 | 0.00 |
| ATOM | 7053 | HZ2  | LYS | X | 466 | 28.365 | 19.843 | 21.452 | 0.00 | 0.00 |
| ATOM | 7054 | HZ3  | LYS | X | 466 | 28.159 | 18.261 | 21.719 | 0.00 | 0.00 |
| ATOM | 7055 | C    | LYS | X | 466 | 30.128 | 19.844 | 27.569 | 0.00 | 0.00 |
| ATOM | 7056 | O    | LYS | X | 466 | 29.467 | 20.914 | 27.731 | 0.00 | 0.00 |
| ATOM | 7057 | N    | ILE | X | 467 | 29.741 | 18.696 | 28.088 | 0.00 | 0.00 |
| ATOM | 7058 | H    | ILE | X | 467 | 30.309 | 17.916 | 27.792 | 0.00 | 0.00 |
| ATOM | 7059 | CA   | ILE | X | 467 | 28.550 | 18.501 | 28.997 | 0.00 | 0.00 |
| ATOM | 7060 | HA   | ILE | X | 467 | 27.606 | 18.955 | 28.693 | 0.00 | 0.00 |
| ATOM | 7061 | CB   | ILE | X | 467 | 28.258 | 16.985 | 29.119 | 0.00 | 0.00 |
| ATOM | 7062 | HB   | ILE | X | 467 | 29.156 | 16.511 | 29.516 | 0.00 | 0.00 |
| ATOM | 7063 | CG2  | ILE | X | 467 | 27.072 | 16.898 | 30.174 | 0.00 | 0.00 |
| ATOM | 7064 | HG21 | ILE | X | 467 | 26.611 | 15.916 | 30.072 | 0.00 | 0.00 |
| ATOM | 7065 | HG22 | ILE | X | 467 | 26.224 | 17.514 | 29.875 | 0.00 | 0.00 |
| ATOM | 7066 | HG23 | ILE | X | 467 | 27.403 | 16.996 | 31.208 | 0.00 | 0.00 |
| ATOM | 7067 | CG1  | ILE | X | 467 | 27.912 | 16.231 | 27.802 | 0.00 | 0.00 |
| ATOM | 7068 | HG12 | ILE | X | 467 | 28.680 | 16.470 | 27.067 | 0.00 | 0.00 |
| ATOM | 7069 | HG13 | ILE | X | 467 | 28.003 | 15.170 | 28.034 | 0.00 | 0.00 |
| ATOM | 7070 | CD1  | ILE | X | 467 | 26.558 | 16.638 | 27.142 | 0.00 | 0.00 |
| ATOM | 7071 | HD11 | ILE | X | 467 | 25.770 | 16.310 | 27.820 | 0.00 | 0.00 |
| ATOM | 7072 | HD12 | ILE | X | 467 | 26.313 | 16.140 | 26.204 | 0.00 | 0.00 |
| ATOM | 7073 | HD13 | ILE | X | 467 | 26.472 | 17.725 | 27.124 | 0.00 | 0.00 |
| ATOM | 7074 | C    | ILE | X | 467 | 28.903 | 19.320 | 30.314 | 0.00 | 0.00 |
| ATOM | 7075 | O    | ILE | X | 467 | 28.021 | 20.060 | 30.880 | 0.00 | 0.00 |
| ATOM | 7076 | N    | PHE | X | 468 | 30.132 | 19.175 | 30.851 | 0.00 | 0.00 |
| ATOM | 7077 | H    | PHE | X | 468 | 30.728 | 18.439 | 30.500 | 0.00 | 0.00 |
| ATOM | 7078 | CA   | PHE | X | 468 | 30.521 | 19.869 | 32.107 | 0.00 | 0.00 |
| ATOM | 7079 | HA   | PHE | X | 468 | 29.838 | 19.467 | 32.854 | 0.00 | 0.00 |



|      |      |      |     |   |     |        |        |        |      |      |
|------|------|------|-----|---|-----|--------|--------|--------|------|------|
| ATOM | 7080 | CB   | PHE | X | 468 | 31.936 | 19.303 | 32.518 | 0.00 | 0.00 |
| ATOM | 7081 | HB2  | PHE | X | 468 | 31.834 | 18.218 | 32.484 | 0.00 | 0.00 |
| ATOM | 7082 | HB3  | PHE | X | 468 | 32.625 | 19.620 | 31.735 | 0.00 | 0.00 |
| ATOM | 7083 | CG   | PHE | X | 468 | 32.493 | 19.776 | 33.863 | 0.00 | 0.00 |
| ATOM | 7084 | CD1  | PHE | X | 468 | 31.832 | 19.615 | 35.076 | 0.00 | 0.00 |
| ATOM | 7085 | HD1  | PHE | X | 468 | 30.819 | 19.239 | 35.069 | 0.00 | 0.00 |
| ATOM | 7086 | CE1  | PHE | X | 468 | 32.490 | 19.882 | 36.227 | 0.00 | 0.00 |
| ATOM | 7087 | HE1  | PHE | X | 468 | 32.007 | 19.681 | 37.172 | 0.00 | 0.00 |
| ATOM | 7088 | CZ   | PHE | X | 468 | 33.878 | 20.200 | 36.312 | 0.00 | 0.00 |
| ATOM | 7089 | HZ   | PHE | X | 468 | 34.440 | 20.331 | 37.225 | 0.00 | 0.00 |
| ATOM | 7090 | CE2  | PHE | X | 468 | 34.538 | 20.400 | 35.073 | 0.00 | 0.00 |
| ATOM | 7091 | HE2  | PHE | X | 468 | 35.588 | 20.652 | 35.042 | 0.00 | 0.00 |
| ATOM | 7092 | CD2  | PHE | X | 468 | 33.829 | 20.221 | 33.899 | 0.00 | 0.00 |
| ATOM | 7093 | HD2  | PHE | X | 468 | 34.314 | 20.454 | 32.962 | 0.00 | 0.00 |
| ATOM | 7094 | C    | PHE | X | 468 | 30.426 | 21.411 | 32.094 | 0.00 | 0.00 |
| ATOM | 7095 | O    | PHE | X | 468 | 30.088 | 22.075 | 33.088 | 0.00 | 0.00 |
| ATOM | 7096 | N    | ALA | X | 469 | 30.829 | 21.973 | 30.963 | 0.00 | 0.00 |
| ATOM | 7097 | H    | ALA | X | 469 | 31.258 | 21.413 | 30.240 | 0.00 | 0.00 |
| ATOM | 7098 | CA   | ALA | X | 469 | 30.638 | 23.413 | 30.725 | 0.00 | 0.00 |
| ATOM | 7099 | HA   | ALA | X | 469 | 30.992 | 23.927 | 31.619 | 0.00 | 0.00 |
| ATOM | 7100 | CB   | ALA | X | 469 | 31.422 | 23.832 | 29.544 | 0.00 | 0.00 |
| ATOM | 7101 | HB1  | ALA | X | 469 | 31.136 | 23.103 | 28.786 | 0.00 | 0.00 |
| ATOM | 7102 | HB2  | ALA | X | 469 | 32.479 | 23.656 | 29.742 | 0.00 | 0.00 |
| ATOM | 7103 | HB3  | ALA | X | 469 | 31.193 | 24.850 | 29.229 | 0.00 | 0.00 |
| ATOM | 7104 | C    | ALA | X | 469 | 29.124 | 23.703 | 30.672 | 0.00 | 0.00 |
| ATOM | 7105 | O    | ALA | X | 469 | 28.691 | 24.662 | 31.319 | 0.00 | 0.00 |
| ATOM | 7106 | N    | GLN | X | 470 | 28.295 | 22.823 | 30.039 | 0.00 | 0.00 |
| ATOM | 7107 | H    | GLN | X | 470 | 28.645 | 22.018 | 29.540 | 0.00 | 0.00 |
| ATOM | 7108 | CA   | GLN | X | 470 | 26.872 | 23.123 | 29.950 | 0.00 | 0.00 |
| ATOM | 7109 | HA   | GLN | X | 470 | 26.758 | 24.146 | 29.591 | 0.00 | 0.00 |
| ATOM | 7110 | CB   | GLN | X | 470 | 26.181 | 22.098 | 29.037 | 0.00 | 0.00 |
| ATOM | 7111 | HB2  | GLN | X | 470 | 26.584 | 21.114 | 29.278 | 0.00 | 0.00 |
| ATOM | 7112 | HB3  | GLN | X | 470 | 25.118 | 22.192 | 29.261 | 0.00 | 0.00 |
| ATOM | 7113 | CG   | GLN | X | 470 | 26.442 | 22.513 | 27.526 | 0.00 | 0.00 |
| ATOM | 7114 | HG2  | GLN | X | 470 | 26.031 | 23.478 | 27.230 | 0.00 | 0.00 |
| ATOM | 7115 | HG3  | GLN | X | 470 | 27.520 | 22.670 | 27.496 | 0.00 | 0.00 |
| ATOM | 7116 | CD   | GLN | X | 470 | 26.075 | 21.492 | 26.447 | 0.00 | 0.00 |
| ATOM | 7117 | OE1  | GLN | X | 470 | 26.721 | 21.420 | 25.436 | 0.00 | 0.00 |
| ATOM | 7118 | NE2  | GLN | X | 470 | 25.167 | 20.554 | 26.786 | 0.00 | 0.00 |
| ATOM | 7119 | HE21 | GLN | X | 470 | 24.936 | 19.820 | 26.133 | 0.00 | 0.00 |
| ATOM | 7120 | HE22 | GLN | X | 470 | 24.763 | 20.616 | 27.710 | 0.00 | 0.00 |
| ATOM | 7121 | C    | GLN | X | 470 | 26.372 | 23.113 | 31.421 | 0.00 | 0.00 |
| ATOM | 7122 | O    | GLN | X | 470 | 25.513 | 23.973 | 31.791 | 0.00 | 0.00 |
| ATOM | 7123 | N    | ARG | X | 471 | 26.834 | 22.160 | 32.261 | 0.00 | 0.00 |
| ATOM | 7124 | H    | ARG | X | 471 | 27.591 | 21.560 | 31.969 | 0.00 | 0.00 |
| ATOM | 7125 | CA   | ARG | X | 471 | 26.349 | 22.060 | 33.630 | 0.00 | 0.00 |
| ATOM | 7126 | HA   | ARG | X | 471 | 25.262 | 22.116 | 33.575 | 0.00 | 0.00 |
| ATOM | 7127 | CB   | ARG | X | 471 | 26.797 | 20.734 | 34.158 | 0.00 | 0.00 |
| ATOM | 7128 | HB2  | ARG | X | 471 | 27.803 | 20.533 | 33.792 | 0.00 | 0.00 |
| ATOM | 7129 | HB3  | ARG | X | 471 | 26.922 | 20.740 | 35.241 | 0.00 | 0.00 |
| ATOM | 7130 | CG   | ARG | X | 471 | 25.891 | 19.580 | 33.759 | 0.00 | 0.00 |
| ATOM | 7131 | HG2  | ARG | X | 471 | 24.909 | 19.693 | 34.218 | 0.00 | 0.00 |
| ATOM | 7132 | HG3  | ARG | X | 471 | 25.526 | 19.579 | 32.732 | 0.00 | 0.00 |
| ATOM | 7133 | CD   | ARG | X | 471 | 26.442 | 18.124 | 33.980 | 0.00 | 0.00 |
| ATOM | 7134 | HD2  | ARG | X | 471 | 25.805 | 17.353 | 33.546 | 0.00 | 0.00 |
| ATOM | 7135 | HD3  | ARG | X | 471 | 27.403 | 18.000 | 33.479 | 0.00 | 0.00 |
| ATOM | 7136 | NE   | ARG | X | 471 | 26.537 | 17.851 | 35.455 | 0.00 | 0.00 |
| ATOM | 7137 | HE   | ARG | X | 471 | 25.644 | 17.924 | 35.920 | 0.00 | 0.00 |
| ATOM | 7138 | CZ   | ARG | X | 471 | 27.632 | 17.642 | 36.155 | 0.00 | 0.00 |
| ATOM | 7139 | NH1  | ARG | X | 471 | 28.801 | 17.487 | 35.569 | 0.00 | 0.00 |
| ATOM | 7140 | HH11 | ARG | X | 471 | 28.741 | 17.411 | 34.563 | 0.00 | 0.00 |
| ATOM | 7141 | HH12 | ARG | X | 471 | 29.698 | 17.534 | 36.031 | 0.00 | 0.00 |
| ATOM | 7142 | NH2  | ARG | X | 471 | 27.618 | 17.544 | 37.513 | 0.00 | 0.00 |
| ATOM | 7143 | HH21 | ARG | X | 471 | 26.736 | 17.641 | 37.995 | 0.00 | 0.00 |
| ATOM | 7144 | HH22 | ARG | X | 471 | 28.433 | 17.646 | 38.101 | 0.00 | 0.00 |
| ATOM | 7145 | C    | ARG | X | 471 | 26.891 | 23.182 | 34.528 | 0.00 | 0.00 |
| ATOM | 7146 | O    | ARG | X | 471 | 26.079 | 23.508 | 35.341 | 0.00 | 0.00 |

|      |      |      |     |   |     |        |        |        |      |      |
|------|------|------|-----|---|-----|--------|--------|--------|------|------|
| ATOM | 7147 | N    | LEU | X | 472 | 28.092 | 23.798 | 34.363 | 0.00 | 0.00 |
| ATOM | 7148 | H    | LEU | X | 472 | 28.631 | 23.370 | 33.624 | 0.00 | 0.00 |
| ATOM | 7149 | CA   | LEU | X | 472 | 28.505 | 24.899 | 35.219 | 0.00 | 0.00 |
| ATOM | 7150 | HA   | LEU | X | 472 | 28.164 | 24.774 | 36.247 | 0.00 | 0.00 |
| ATOM | 7151 | CB   | LEU | X | 472 | 30.059 | 24.777 | 35.209 | 0.00 | 0.00 |
| ATOM | 7152 | HB2  | LEU | X | 472 | 30.386 | 24.856 | 34.173 | 0.00 | 0.00 |
| ATOM | 7153 | HB3  | LEU | X | 472 | 30.529 | 25.665 | 35.630 | 0.00 | 0.00 |
| ATOM | 7154 | CG   | LEU | X | 472 | 30.671 | 23.550 | 35.904 | 0.00 | 0.00 |
| ATOM | 7155 | HG   | LEU | X | 472 | 30.334 | 22.590 | 35.513 | 0.00 | 0.00 |
| ATOM | 7156 | CD1  | LEU | X | 472 | 32.190 | 23.506 | 35.513 | 0.00 | 0.00 |
| ATOM | 7157 | HD11 | LEU | X | 472 | 32.595 | 22.653 | 36.058 | 0.00 | 0.00 |
| ATOM | 7158 | HD12 | LEU | X | 472 | 32.776 | 24.403 | 35.714 | 0.00 | 0.00 |
| ATOM | 7159 | HD13 | LEU | X | 472 | 32.397 | 23.211 | 34.484 | 0.00 | 0.00 |
| ATOM | 7160 | CD2  | LEU | X | 472 | 30.406 | 23.659 | 37.383 | 0.00 | 0.00 |
| ATOM | 7161 | HD21 | LEU | X | 472 | 31.000 | 22.865 | 37.836 | 0.00 | 0.00 |
| ATOM | 7162 | HD22 | LEU | X | 472 | 30.666 | 24.670 | 37.696 | 0.00 | 0.00 |
| ATOM | 7163 | HD23 | LEU | X | 472 | 29.338 | 23.555 | 37.572 | 0.00 | 0.00 |
| ATOM | 7164 | C    | LEU | X | 472 | 28.039 | 26.303 | 34.693 | 0.00 | 0.00 |
| ATOM | 7165 | O    | LEU | X | 472 | 27.663 | 27.233 | 35.523 | 0.00 | 0.00 |
| ATOM | 7166 | N    | MET | X | 473 | 27.875 | 26.510 | 33.350 | 0.00 | 0.00 |
| ATOM | 7167 | H    | MET | X | 473 | 28.257 | 25.873 | 32.666 | 0.00 | 0.00 |
| ATOM | 7168 | CA   | MET | X | 473 | 27.168 | 27.651 | 32.755 | 0.00 | 0.00 |
| ATOM | 7169 | HA   | MET | X | 473 | 27.563 | 28.622 | 33.052 | 0.00 | 0.00 |
| ATOM | 7170 | CB   | MET | X | 473 | 27.177 | 27.532 | 31.163 | 0.00 | 0.00 |
| ATOM | 7171 | HB2  | MET | X | 473 | 26.794 | 26.555 | 30.869 | 0.00 | 0.00 |
| ATOM | 7172 | HB3  | MET | X | 473 | 26.473 | 28.313 | 30.876 | 0.00 | 0.00 |
| ATOM | 7173 | CG   | MET | X | 473 | 28.585 | 27.717 | 30.612 | 0.00 | 0.00 |
| ATOM | 7174 | HG2  | MET | X | 473 | 29.126 | 28.431 | 31.233 | 0.00 | 0.00 |
| ATOM | 7175 | HG3  | MET | X | 473 | 29.143 | 26.781 | 30.631 | 0.00 | 0.00 |
| ATOM | 7176 | SD   | MET | X | 473 | 28.475 | 28.245 | 28.895 | 0.00 | 0.00 |
| ATOM | 7177 | CE   | MET | X | 473 | 28.193 | 26.657 | 28.003 | 0.00 | 0.00 |
| ATOM | 7178 | HE1  | MET | X | 473 | 28.203 | 26.786 | 26.921 | 0.00 | 0.00 |
| ATOM | 7179 | HE2  | MET | X | 473 | 29.027 | 26.037 | 28.333 | 0.00 | 0.00 |
| ATOM | 7180 | HE3  | MET | X | 473 | 27.191 | 26.290 | 28.225 | 0.00 | 0.00 |
| ATOM | 7181 | C    | MET | X | 473 | 25.754 | 27.563 | 33.204 | 0.00 | 0.00 |
| ATOM | 7182 | O    | MET | X | 473 | 25.110 | 28.602 | 33.324 | 0.00 | 0.00 |
| ATOM | 7183 | N    | ARG | X | 474 | 25.150 | 26.393 | 33.351 | 0.00 | 0.00 |
| ATOM | 7184 | H    | ARG | X | 474 | 25.739 | 25.573 | 33.336 | 0.00 | 0.00 |
| ATOM | 7185 | CA   | ARG | X | 474 | 23.789 | 26.265 | 33.803 | 0.00 | 0.00 |
| ATOM | 7186 | HA   | ARG | X | 474 | 23.238 | 27.014 | 33.235 | 0.00 | 0.00 |
| ATOM | 7187 | CB   | ARG | X | 474 | 23.243 | 24.875 | 33.402 | 0.00 | 0.00 |
| ATOM | 7188 | HB2  | ARG | X | 474 | 23.360 | 24.823 | 32.320 | 0.00 | 0.00 |
| ATOM | 7189 | HB3  | ARG | X | 474 | 23.854 | 24.114 | 33.887 | 0.00 | 0.00 |
| ATOM | 7190 | CG   | ARG | X | 474 | 21.743 | 24.766 | 33.842 | 0.00 | 0.00 |
| ATOM | 7191 | HG2  | ARG | X | 474 | 21.388 | 23.737 | 33.797 | 0.00 | 0.00 |
| ATOM | 7192 | HG3  | ARG | X | 474 | 21.598 | 25.094 | 34.871 | 0.00 | 0.00 |
| ATOM | 7193 | CD   | ARG | X | 474 | 20.968 | 25.750 | 32.966 | 0.00 | 0.00 |
| ATOM | 7194 | HD2  | ARG | X | 474 | 21.082 | 26.793 | 33.262 | 0.00 | 0.00 |
| ATOM | 7195 | HD3  | ARG | X | 474 | 21.345 | 25.554 | 31.962 | 0.00 | 0.00 |
| ATOM | 7196 | NE   | ARG | X | 474 | 19.439 | 25.509 | 32.938 | 0.00 | 0.00 |
| ATOM | 7197 | HE   | ARG | X | 474 | 19.041 | 24.865 | 33.607 | 0.00 | 0.00 |
| ATOM | 7198 | CZ   | ARG | X | 474 | 18.613 | 26.227 | 32.339 | 0.00 | 0.00 |
| ATOM | 7199 | NH1  | ARG | X | 474 | 18.973 | 27.221 | 31.542 | 0.00 | 0.00 |
| ATOM | 7200 | HH11 | ARG | X | 474 | 19.930 | 27.434 | 31.299 | 0.00 | 0.00 |
| ATOM | 7201 | HH12 | ARG | X | 474 | 18.244 | 27.774 | 31.114 | 0.00 | 0.00 |
| ATOM | 7202 | NH2  | ARG | X | 474 | 17.332 | 26.059 | 32.522 | 0.00 | 0.00 |
| ATOM | 7203 | HH21 | ARG | X | 474 | 17.076 | 25.322 | 33.163 | 0.00 | 0.00 |
| ATOM | 7204 | HH22 | ARG | X | 474 | 16.638 | 26.666 | 32.110 | 0.00 | 0.00 |
| ATOM | 7205 | C    | ARG | X | 474 | 23.590 | 26.590 | 35.287 | 0.00 | 0.00 |
| ATOM | 7206 | O    | ARG | X | 474 | 22.739 | 27.418 | 35.620 | 0.00 | 0.00 |
| ATOM | 7207 | N    | TYR | X | 475 | 24.548 | 26.212 | 36.154 | 0.00 | 0.00 |
| ATOM | 7208 | H    | TYR | X | 475 | 25.204 | 25.568 | 35.737 | 0.00 | 0.00 |
| ATOM | 7209 | CA   | TYR | X | 475 | 24.516 | 26.552 | 37.569 | 0.00 | 0.00 |
| ATOM | 7210 | HA   | TYR | X | 475 | 23.616 | 26.114 | 38.000 | 0.00 | 0.00 |
| ATOM | 7211 | CB   | TYR | X | 475 | 25.694 | 25.779 | 38.248 | 0.00 | 0.00 |
| ATOM | 7212 | HB2  | TYR | X | 475 | 26.688 | 26.045 | 37.889 | 0.00 | 0.00 |
| ATOM | 7213 | HB3  | TYR | X | 475 | 25.905 | 26.163 | 39.246 | 0.00 | 0.00 |

|      |      |      |     |   |     |        |        |        |      |      |
|------|------|------|-----|---|-----|--------|--------|--------|------|------|
| ATOM | 7214 | CG   | TYR | X | 475 | 25.520 | 24.284 | 38.443 | 0.00 | 0.00 |
| ATOM | 7215 | CD1  | TYR | X | 475 | 24.303 | 23.595 | 38.349 | 0.00 | 0.00 |
| ATOM | 7216 | HD1  | TYR | X | 475 | 23.354 | 24.086 | 38.192 | 0.00 | 0.00 |
| ATOM | 7217 | CE1  | TYR | X | 475 | 24.187 | 22.224 | 38.354 | 0.00 | 0.00 |
| ATOM | 7218 | HE1  | TYR | X | 475 | 23.229 | 21.726 | 38.379 | 0.00 | 0.00 |
| ATOM | 7219 | CZ   | TYR | X | 475 | 25.340 | 21.452 | 38.417 | 0.00 | 0.00 |
| ATOM | 7220 | OH   | TYR | X | 475 | 25.328 | 20.093 | 38.423 | 0.00 | 0.00 |
| ATOM | 7221 | HH   | TYR | X | 475 | 24.409 | 19.857 | 38.277 | 0.00 | 0.00 |
| ATOM | 7222 | CE2  | TYR | X | 475 | 26.559 | 22.099 | 38.734 | 0.00 | 0.00 |
| ATOM | 7223 | HE2  | TYR | X | 475 | 27.428 | 21.472 | 38.871 | 0.00 | 0.00 |
| ATOM | 7224 | CD2  | TYR | X | 475 | 26.651 | 23.520 | 38.760 | 0.00 | 0.00 |
| ATOM | 7225 | HD2  | TYR | X | 475 | 27.556 | 23.989 | 39.119 | 0.00 | 0.00 |
| ATOM | 7226 | C    | TYR | X | 475 | 24.607 | 28.101 | 37.715 | 0.00 | 0.00 |
| ATOM | 7227 | O    | TYR | X | 475 | 23.656 | 28.734 | 38.175 | 0.00 | 0.00 |
| ATOM | 7228 | N    | TRP | X | 476 | 25.687 | 28.777 | 37.168 | 0.00 | 0.00 |
| ATOM | 7229 | H    | TRP | X | 476 | 26.402 | 28.289 | 36.649 | 0.00 | 0.00 |
| ATOM | 7230 | CA   | TRP | X | 476 | 25.919 | 30.267 | 37.251 | 0.00 | 0.00 |
| ATOM | 7231 | HA   | TRP | X | 476 | 26.181 | 30.584 | 38.260 | 0.00 | 0.00 |
| ATOM | 7232 | CB   | TRP | X | 476 | 27.159 | 30.627 | 36.387 | 0.00 | 0.00 |
| ATOM | 7233 | HB2  | TRP | X | 476 | 27.333 | 29.943 | 35.557 | 0.00 | 0.00 |
| ATOM | 7234 | HB3  | TRP | X | 476 | 27.008 | 31.667 | 36.096 | 0.00 | 0.00 |
| ATOM | 7235 | CG   | TRP | X | 476 | 28.443 | 30.670 | 37.113 | 0.00 | 0.00 |
| ATOM | 7236 | CD1  | TRP | X | 476 | 29.251 | 31.743 | 37.095 | 0.00 | 0.00 |
| ATOM | 7237 | HD1  | TRP | X | 476 | 29.004 | 32.689 | 36.638 | 0.00 | 0.00 |
| ATOM | 7238 | NE1  | TRP | X | 476 | 30.223 | 31.562 | 38.047 | 0.00 | 0.00 |
| ATOM | 7239 | HE1  | TRP | X | 476 | 31.054 | 32.133 | 38.086 | 0.00 | 0.00 |
| ATOM | 7240 | CE2  | TRP | X | 476 | 30.070 | 30.420 | 38.809 | 0.00 | 0.00 |
| ATOM | 7241 | CZ2  | TRP | X | 476 | 30.802 | 29.877 | 39.869 | 0.00 | 0.00 |
| ATOM | 7242 | HZ2  | TRP | X | 476 | 31.629 | 30.422 | 40.299 | 0.00 | 0.00 |
| ATOM | 7243 | CH2  | TRP | X | 476 | 30.566 | 28.506 | 40.158 | 0.00 | 0.00 |
| ATOM | 7244 | HH2  | TRP | X | 476 | 31.190 | 28.011 | 40.888 | 0.00 | 0.00 |
| ATOM | 7245 | CZ3  | TRP | X | 476 | 29.551 | 27.730 | 39.491 | 0.00 | 0.00 |
| ATOM | 7246 | HZ3  | TRP | X | 476 | 29.281 | 26.718 | 39.755 | 0.00 | 0.00 |
| ATOM | 7247 | CE3  | TRP | X | 476 | 28.793 | 28.350 | 38.480 | 0.00 | 0.00 |
| ATOM | 7248 | HE3  | TRP | X | 476 | 27.912 | 27.866 | 38.086 | 0.00 | 0.00 |
| ATOM | 7249 | CD2  | TRP | X | 476 | 29.076 | 29.708 | 38.064 | 0.00 | 0.00 |
| ATOM | 7250 | C    | TRP | X | 476 | 24.701 | 31.078 | 36.807 | 0.00 | 0.00 |
| ATOM | 7251 | O    | TRP | X | 476 | 24.278 | 31.954 | 37.543 | 0.00 | 0.00 |
| ATOM | 7252 | N    | ALA | X | 477 | 24.064 | 30.643 | 35.757 | 0.00 | 0.00 |
| ATOM | 7253 | H    | ALA | X | 477 | 24.456 | 29.874 | 35.233 | 0.00 | 0.00 |
| ATOM | 7254 | CA   | ALA | X | 477 | 22.917 | 31.275 | 35.139 | 0.00 | 0.00 |
| ATOM | 7255 | HA   | ALA | X | 477 | 23.135 | 32.343 | 35.104 | 0.00 | 0.00 |
| ATOM | 7256 | CB   | ALA | X | 477 | 22.780 | 30.777 | 33.687 | 0.00 | 0.00 |
| ATOM | 7257 | HB1  | ALA | X | 477 | 22.743 | 29.688 | 33.656 | 0.00 | 0.00 |
| ATOM | 7258 | HB2  | ALA | X | 477 | 23.672 | 31.057 | 33.126 | 0.00 | 0.00 |
| ATOM | 7259 | HB3  | ALA | X | 477 | 21.987 | 31.304 | 33.157 | 0.00 | 0.00 |
| ATOM | 7260 | C    | ALA | X | 477 | 21.608 | 31.069 | 36.006 | 0.00 | 0.00 |
| ATOM | 7261 | O    | ALA | X | 477 | 20.845 | 32.022 | 36.058 | 0.00 | 0.00 |
| ATOM | 7262 | N    | ASN | X | 478 | 21.337 | 29.862 | 36.519 | 0.00 | 0.00 |
| ATOM | 7263 | H    | ASN | X | 478 | 21.983 | 29.120 | 36.291 | 0.00 | 0.00 |
| ATOM | 7264 | CA   | ASN | X | 478 | 20.190 | 29.660 | 37.430 | 0.00 | 0.00 |
| ATOM | 7265 | HA   | ASN | X | 478 | 19.249 | 29.967 | 36.973 | 0.00 | 0.00 |
| ATOM | 7266 | CB   | ASN | X | 478 | 20.003 | 28.173 | 37.684 | 0.00 | 0.00 |
| ATOM | 7267 | HB2  | ASN | X | 478 | 20.937 | 27.677 | 37.946 | 0.00 | 0.00 |
| ATOM | 7268 | HB3  | ASN | X | 478 | 19.326 | 27.915 | 38.499 | 0.00 | 0.00 |
| ATOM | 7269 | CG   | ASN | X | 478 | 19.450 | 27.288 | 36.490 | 0.00 | 0.00 |
| ATOM | 7270 | OD1  | ASN | X | 478 | 18.736 | 27.762 | 35.620 | 0.00 | 0.00 |
| ATOM | 7271 | ND2  | ASN | X | 478 | 19.597 | 25.979 | 36.630 | 0.00 | 0.00 |
| ATOM | 7272 | HD21 | ASN | X | 478 | 19.107 | 25.313 | 36.049 | 0.00 | 0.00 |
| ATOM | 7273 | HD22 | ASN | X | 478 | 19.957 | 25.593 | 37.491 | 0.00 | 0.00 |
| ATOM | 7274 | C    | ASN | X | 478 | 20.313 | 30.328 | 38.795 | 0.00 | 0.00 |
| ATOM | 7275 | O    | ASN | X | 478 | 19.348 | 30.898 | 39.338 | 0.00 | 0.00 |
| ATOM | 7276 | N    | PHE | X | 479 | 21.547 | 30.485 | 39.318 | 0.00 | 0.00 |
| ATOM | 7277 | H    | PHE | X | 479 | 22.382 | 30.132 | 38.874 | 0.00 | 0.00 |
| ATOM | 7278 | CA   | PHE | X | 479 | 21.756 | 31.319 | 40.429 | 0.00 | 0.00 |
| ATOM | 7279 | HA   | PHE | X | 479 | 21.095 | 31.140 | 41.278 | 0.00 | 0.00 |
| ATOM | 7280 | CB   | PHE | X | 479 | 23.174 | 31.025 | 40.934 | 0.00 | 0.00 |

|      |      |      |     |   |     |        |        |        |      |      |
|------|------|------|-----|---|-----|--------|--------|--------|------|------|
| ATOM | 7281 | HB2  | PHE | X | 479 | 23.236 | 29.969 | 41.201 | 0.00 | 0.00 |
| ATOM | 7282 | HB3  | PHE | X | 479 | 23.886 | 31.309 | 40.159 | 0.00 | 0.00 |
| ATOM | 7283 | CG   | PHE | X | 479 | 23.535 | 31.828 | 42.194 | 0.00 | 0.00 |
| ATOM | 7284 | CD1  | PHE | X | 479 | 23.181 | 31.316 | 43.411 | 0.00 | 0.00 |
| ATOM | 7285 | HD1  | PHE | X | 479 | 22.678 | 30.361 | 43.382 | 0.00 | 0.00 |
| ATOM | 7286 | CE1  | PHE | X | 479 | 23.360 | 32.061 | 44.546 | 0.00 | 0.00 |
| ATOM | 7287 | HE1  | PHE | X | 479 | 23.032 | 31.695 | 45.508 | 0.00 | 0.00 |
| ATOM | 7288 | CZ   | PHE | X | 479 | 24.030 | 33.324 | 44.541 | 0.00 | 0.00 |
| ATOM | 7289 | HZ   | PHE | X | 479 | 24.209 | 33.823 | 45.482 | 0.00 | 0.00 |
| ATOM | 7290 | CE2  | PHE | X | 479 | 24.582 | 33.827 | 43.339 | 0.00 | 0.00 |
| ATOM | 7291 | HE2  | PHE | X | 479 | 25.046 | 34.802 | 43.373 | 0.00 | 0.00 |
| ATOM | 7292 | CD2  | PHE | X | 479 | 24.247 | 33.108 | 42.109 | 0.00 | 0.00 |
| ATOM | 7293 | HD2  | PHE | X | 479 | 24.570 | 33.597 | 41.202 | 0.00 | 0.00 |
| ATOM | 7294 | C    | PHE | X | 479 | 21.511 | 32.793 | 40.041 | 0.00 | 0.00 |
| ATOM | 7295 | O    | PHE | X | 479 | 20.944 | 33.508 | 40.830 | 0.00 | 0.00 |
| ATOM | 7296 | N    | ALA | X | 480 | 21.823 | 33.230 | 38.813 | 0.00 | 0.00 |
| ATOM | 7297 | H    | ALA | X | 480 | 22.382 | 32.688 | 38.170 | 0.00 | 0.00 |
| ATOM | 7298 | CA   | ALA | X | 480 | 21.531 | 34.595 | 38.330 | 0.00 | 0.00 |
| ATOM | 7299 | HA   | ALA | X | 480 | 21.961 | 35.286 | 39.054 | 0.00 | 0.00 |
| ATOM | 7300 | CB   | ALA | X | 480 | 22.384 | 34.841 | 37.059 | 0.00 | 0.00 |
| ATOM | 7301 | HB1  | ALA | X | 480 | 23.412 | 34.491 | 37.155 | 0.00 | 0.00 |
| ATOM | 7302 | HB2  | ALA | X | 480 | 22.409 | 35.856 | 36.662 | 0.00 | 0.00 |
| ATOM | 7303 | HB3  | ALA | X | 480 | 22.082 | 34.278 | 36.176 | 0.00 | 0.00 |
| ATOM | 7304 | C    | ALA | X | 480 | 20.033 | 34.857 | 38.275 | 0.00 | 0.00 |
| ATOM | 7305 | O    | ALA | X | 480 | 19.480 | 35.868 | 38.742 | 0.00 | 0.00 |
| ATOM | 7306 | N    | ARG | X | 481 | 19.266 | 33.849 | 37.791 | 0.00 | 0.00 |
| ATOM | 7307 | H    | ARG | X | 481 | 19.839 | 33.067 | 37.508 | 0.00 | 0.00 |
| ATOM | 7308 | CA   | ARG | X | 481 | 17.795 | 33.777 | 37.638 | 0.00 | 0.00 |
| ATOM | 7309 | HA   | ARG | X | 481 | 17.524 | 34.545 | 36.913 | 0.00 | 0.00 |
| ATOM | 7310 | CB   | ARG | X | 481 | 17.358 | 32.484 | 36.927 | 0.00 | 0.00 |
| ATOM | 7311 | HB2  | ARG | X | 481 | 17.895 | 31.679 | 37.429 | 0.00 | 0.00 |
| ATOM | 7312 | HB3  | ARG | X | 481 | 16.320 | 32.335 | 37.222 | 0.00 | 0.00 |
| ATOM | 7313 | CG   | ARG | X | 481 | 17.663 | 32.470 | 35.413 | 0.00 | 0.00 |
| ATOM | 7314 | HG2  | ARG | X | 481 | 17.019 | 33.192 | 34.912 | 0.00 | 0.00 |
| ATOM | 7315 | HG3  | ARG | X | 481 | 18.681 | 32.831 | 35.265 | 0.00 | 0.00 |
| ATOM | 7316 | CD   | ARG | X | 481 | 17.434 | 31.123 | 34.679 | 0.00 | 0.00 |
| ATOM | 7317 | HD2  | ARG | X | 481 | 17.907 | 30.286 | 35.193 | 0.00 | 0.00 |
| ATOM | 7318 | HD3  | ARG | X | 481 | 16.353 | 31.002 | 34.607 | 0.00 | 0.00 |
| ATOM | 7319 | NE   | ARG | X | 481 | 17.990 | 31.119 | 33.312 | 0.00 | 0.00 |
| ATOM | 7320 | HE   | ARG | X | 481 | 17.661 | 31.856 | 32.704 | 0.00 | 0.00 |
| ATOM | 7321 | CZ   | ARG | X | 481 | 19.072 | 30.458 | 32.856 | 0.00 | 0.00 |
| ATOM | 7322 | NH1  | ARG | X | 481 | 19.737 | 29.601 | 33.615 | 0.00 | 0.00 |
| ATOM | 7323 | HH11 | ARG | X | 481 | 19.394 | 29.278 | 34.508 | 0.00 | 0.00 |
| ATOM | 7324 | HH12 | ARG | X | 481 | 20.475 | 29.058 | 33.190 | 0.00 | 0.00 |
| ATOM | 7325 | NH2  | ARG | X | 481 | 19.442 | 30.631 | 31.630 | 0.00 | 0.00 |
| ATOM | 7326 | HH21 | ARG | X | 481 | 19.086 | 31.258 | 30.923 | 0.00 | 0.00 |
| ATOM | 7327 | HH22 | ARG | X | 481 | 20.348 | 30.226 | 31.440 | 0.00 | 0.00 |
| ATOM | 7328 | C    | ARG | X | 481 | 17.116 | 34.064 | 38.991 | 0.00 | 0.00 |
| ATOM | 7329 | O    | ARG | X | 481 | 16.396 | 35.074 | 39.014 | 0.00 | 0.00 |
| ATOM | 7330 | N    | THR | X | 482 | 17.332 | 33.253 | 40.038 | 0.00 | 0.00 |
| ATOM | 7331 | H    | THR | X | 482 | 17.947 | 32.478 | 39.834 | 0.00 | 0.00 |
| ATOM | 7332 | CA   | THR | X | 482 | 16.564 | 33.346 | 41.336 | 0.00 | 0.00 |
| ATOM | 7333 | HA   | THR | X | 482 | 16.022 | 34.284 | 41.455 | 0.00 | 0.00 |
| ATOM | 7334 | CB   | THR | X | 482 | 15.618 | 32.101 | 41.458 | 0.00 | 0.00 |
| ATOM | 7335 | HB   | THR | X | 482 | 15.154 | 32.094 | 42.444 | 0.00 | 0.00 |
| ATOM | 7336 | CG2  | THR | X | 482 | 14.394 | 32.126 | 40.549 | 0.00 | 0.00 |
| ATOM | 7337 | HG21 | THR | X | 482 | 13.832 | 33.060 | 40.548 | 0.00 | 0.00 |
| ATOM | 7338 | HG22 | THR | X | 482 | 13.708 | 31.343 | 40.871 | 0.00 | 0.00 |
| ATOM | 7339 | HG23 | THR | X | 482 | 14.739 | 31.911 | 39.538 | 0.00 | 0.00 |
| ATOM | 7340 | OG1  | THR | X | 482 | 16.279 | 30.872 | 41.268 | 0.00 | 0.00 |
| ATOM | 7341 | HG1  | THR | X | 482 | 15.658 | 30.227 | 41.613 | 0.00 | 0.00 |
| ATOM | 7342 | C    | THR | X | 482 | 17.446 | 33.138 | 42.589 | 0.00 | 0.00 |
| ATOM | 7343 | O    | THR | X | 482 | 17.072 | 33.527 | 43.712 | 0.00 | 0.00 |
| ATOM | 7344 | N    | GLY | X | 483 | 18.648 | 32.591 | 42.439 | 0.00 | 0.00 |
| ATOM | 7345 | H    | GLY | X | 483 | 19.008 | 32.362 | 41.524 | 0.00 | 0.00 |
| ATOM | 7346 | CA   | GLY | X | 483 | 19.511 | 32.196 | 43.594 | 0.00 | 0.00 |
| ATOM | 7347 | HA2  | GLY | X | 483 | 20.472 | 32.658 | 43.366 | 0.00 | 0.00 |

|      |      |      |     |   |     |        |        |        |      |      |
|------|------|------|-----|---|-----|--------|--------|--------|------|------|
| ATOM | 7348 | HA3  | GLY | X | 483 | 19.143 | 32.748 | 44.459 | 0.00 | 0.00 |
| ATOM | 7349 | C    | GLY | X | 483 | 19.576 | 30.684 | 43.922 | 0.00 | 0.00 |
| ATOM | 7350 | O    | GLY | X | 483 | 20.236 | 30.260 | 44.923 | 0.00 | 0.00 |
| ATOM | 7351 | N    | ASP | X | 484 | 18.920 | 29.837 | 43.130 | 0.00 | 0.00 |
| ATOM | 7352 | H    | ASP | X | 484 | 18.376 | 30.214 | 42.368 | 0.00 | 0.00 |
| ATOM | 7353 | CA   | ASP | X | 484 | 19.093 | 28.422 | 43.180 | 0.00 | 0.00 |
| ATOM | 7354 | HA   | ASP | X | 484 | 19.469 | 28.122 | 44.158 | 0.00 | 0.00 |
| ATOM | 7355 | CB   | ASP | X | 484 | 17.706 | 27.714 | 42.964 | 0.00 | 0.00 |
| ATOM | 7356 | HB2  | ASP | X | 484 | 17.272 | 28.235 | 42.110 | 0.00 | 0.00 |
| ATOM | 7357 | HB3  | ASP | X | 484 | 17.869 | 26.717 | 42.556 | 0.00 | 0.00 |
| ATOM | 7358 | CG   | ASP | X | 484 | 16.827 | 27.528 | 44.188 | 0.00 | 0.00 |
| ATOM | 7359 | OD1  | ASP | X | 484 | 16.887 | 26.432 | 44.862 | 0.00 | 0.00 |
| ATOM | 7360 | OD2  | ASP | X | 484 | 16.061 | 28.429 | 44.562 | 0.00 | 0.00 |
| ATOM | 7361 | C    | ASP | X | 484 | 20.060 | 27.976 | 42.111 | 0.00 | 0.00 |
| ATOM | 7362 | O    | ASP | X | 484 | 19.903 | 28.371 | 40.978 | 0.00 | 0.00 |
| ATOM | 7363 | N    | PRO | X | 485 | 21.099 | 27.074 | 42.378 | 0.00 | 0.00 |
| ATOM | 7364 | CD   | PRO | X | 485 | 21.546 | 26.585 | 43.664 | 0.00 | 0.00 |
| ATOM | 7365 | HD2  | PRO | X | 485 | 20.751 | 26.039 | 44.172 | 0.00 | 0.00 |
| ATOM | 7366 | HD3  | PRO | X | 485 | 21.873 | 27.427 | 44.276 | 0.00 | 0.00 |
| ATOM | 7367 | CG   | PRO | X | 485 | 22.705 | 25.570 | 43.442 | 0.00 | 0.00 |
| ATOM | 7368 | HG2  | PRO | X | 485 | 22.306 | 24.557 | 43.379 | 0.00 | 0.00 |
| ATOM | 7369 | HG3  | PRO | X | 485 | 23.450 | 25.638 | 44.234 | 0.00 | 0.00 |
| ATOM | 7370 | CB   | PRO | X | 485 | 23.201 | 25.861 | 42.014 | 0.00 | 0.00 |
| ATOM | 7371 | HB2  | PRO | X | 485 | 23.464 | 24.898 | 41.576 | 0.00 | 0.00 |
| ATOM | 7372 | HB3  | PRO | X | 485 | 23.981 | 26.622 | 42.033 | 0.00 | 0.00 |
| ATOM | 7373 | CA   | PRO | X | 485 | 21.949 | 26.485 | 41.315 | 0.00 | 0.00 |
| ATOM | 7374 | HA   | PRO | X | 485 | 22.266 | 27.284 | 40.644 | 0.00 | 0.00 |
| ATOM | 7375 | C    | PRO | X | 485 | 21.223 | 25.443 | 40.472 | 0.00 | 0.00 |
| ATOM | 7376 | O    | PRO | X | 485 | 21.672 | 25.065 | 39.424 | 0.00 | 0.00 |
| ATOM | 7377 | N    | ASN | X | 486 | 20.136 | 24.883 | 41.026 | 0.00 | 0.00 |
| ATOM | 7378 | H    | ASN | X | 486 | 19.847 | 25.143 | 41.958 | 0.00 | 0.00 |
| ATOM | 7379 | CA   | ASN | X | 486 | 19.321 | 23.890 | 40.320 | 0.00 | 0.00 |
| ATOM | 7380 | HA   | ASN | X | 486 | 19.900 | 23.346 | 39.574 | 0.00 | 0.00 |
| ATOM | 7381 | CB   | ASN | X | 486 | 18.719 | 22.853 | 41.313 | 0.00 | 0.00 |
| ATOM | 7382 | HB2  | ASN | X | 486 | 17.972 | 22.249 | 40.799 | 0.00 | 0.00 |
| ATOM | 7383 | HB3  | ASN | X | 486 | 19.590 | 22.249 | 41.568 | 0.00 | 0.00 |
| ATOM | 7384 | CG   | ASN | X | 486 | 18.130 | 23.500 | 42.564 | 0.00 | 0.00 |
| ATOM | 7385 | OD1  | ASN | X | 486 | 18.735 | 23.614 | 43.558 | 0.00 | 0.00 |
| ATOM | 7386 | ND2  | ASN | X | 486 | 16.878 | 23.925 | 42.552 | 0.00 | 0.00 |
| ATOM | 7387 | HD21 | ASN | X | 486 | 16.574 | 24.335 | 43.423 | 0.00 | 0.00 |
| ATOM | 7388 | HD22 | ASN | X | 486 | 16.406 | 24.009 | 41.663 | 0.00 | 0.00 |
| ATOM | 7389 | C    | ASN | X | 486 | 18.170 | 24.547 | 39.538 | 0.00 | 0.00 |
| ATOM | 7390 | O    | ASN | X | 486 | 17.857 | 25.734 | 39.624 | 0.00 | 0.00 |
| ATOM | 7391 | N    | GLU | X | 487 | 17.525 | 23.656 | 38.745 | 0.00 | 0.00 |
| ATOM | 7392 | H    | GLU | X | 487 | 17.924 | 22.760 | 38.505 | 0.00 | 0.00 |
| ATOM | 7393 | CA   | GLU | X | 487 | 16.213 | 23.910 | 38.137 | 0.00 | 0.00 |
| ATOM | 7394 | HA   | GLU | X | 487 | 16.256 | 24.799 | 37.508 | 0.00 | 0.00 |
| ATOM | 7395 | CB   | GLU | X | 487 | 15.866 | 22.775 | 37.100 | 0.00 | 0.00 |
| ATOM | 7396 | HB2  | GLU | X | 487 | 15.769 | 21.849 | 37.667 | 0.00 | 0.00 |
| ATOM | 7397 | HB3  | GLU | X | 487 | 14.893 | 22.884 | 36.621 | 0.00 | 0.00 |
| ATOM | 7398 | CG   | GLU | X | 487 | 16.931 | 22.525 | 36.043 | 0.00 | 0.00 |
| ATOM | 7399 | HG2  | GLU | X | 487 | 17.516 | 21.679 | 36.403 | 0.00 | 0.00 |
| ATOM | 7400 | HG3  | GLU | X | 487 | 16.315 | 22.121 | 35.240 | 0.00 | 0.00 |
| ATOM | 7401 | CD   | GLU | X | 487 | 17.684 | 23.652 | 35.405 | 0.00 | 0.00 |
| ATOM | 7402 | OE1  | GLU | X | 487 | 17.015 | 24.570 | 34.842 | 0.00 | 0.00 |
| ATOM | 7403 | OE2  | GLU | X | 487 | 18.957 | 23.624 | 35.369 | 0.00 | 0.00 |
| ATOM | 7404 | C    | GLU | X | 487 | 15.101 | 23.988 | 39.237 | 0.00 | 0.00 |
| ATOM | 7405 | O    | GLU | X | 487 | 15.127 | 23.280 | 40.246 | 0.00 | 0.00 |
| ATOM | 7406 | N    | PRO | X | 488 | 14.024 | 24.859 | 39.116 | 0.00 | 0.00 |
| ATOM | 7407 | CD   | PRO | X | 488 | 13.778 | 25.754 | 38.073 | 0.00 | 0.00 |
| ATOM | 7408 | HD2  | PRO | X | 488 | 13.216 | 25.258 | 37.281 | 0.00 | 0.00 |
| ATOM | 7409 | HD3  | PRO | X | 488 | 14.662 | 26.226 | 37.645 | 0.00 | 0.00 |
| ATOM | 7410 | CG   | PRO | X | 488 | 12.880 | 26.876 | 38.690 | 0.00 | 0.00 |
| ATOM | 7411 | HG2  | PRO | X | 488 | 12.207 | 27.455 | 38.057 | 0.00 | 0.00 |
| ATOM | 7412 | HG3  | PRO | X | 488 | 13.579 | 27.554 | 39.178 | 0.00 | 0.00 |
| ATOM | 7413 | CB   | PRO | X | 488 | 11.974 | 26.060 | 39.599 | 0.00 | 0.00 |
| ATOM | 7414 | HB2  | PRO | X | 488 | 11.222 | 25.449 | 39.100 | 0.00 | 0.00 |

|      |      |      |     |   |     |        |        |        |      |      |
|------|------|------|-----|---|-----|--------|--------|--------|------|------|
| ATOM | 7415 | HB3  | PRO | X | 488 | 11.426 | 26.505 | 40.429 | 0.00 | 0.00 |
| ATOM | 7416 | CA   | PRO | X | 488 | 12.999 | 24.958 | 40.114 | 0.00 | 0.00 |
| ATOM | 7417 | HA   | PRO | X | 488 | 13.280 | 25.339 | 41.096 | 0.00 | 0.00 |
| ATOM | 7418 | C    | PRO | X | 488 | 12.313 | 23.693 | 40.534 | 0.00 | 0.00 |
| ATOM | 7419 | O    | PRO | X | 488 | 12.062 | 23.443 | 41.750 | 0.00 | 0.00 |
| ATOM | 7420 | N    | ARG | X | 489 | 12.037 | 22.686 | 39.615 | 0.00 | 0.00 |
| ATOM | 7421 | H    | ARG | X | 489 | 12.282 | 22.937 | 38.667 | 0.00 | 0.00 |
| ATOM | 7422 | CA   | ARG | X | 489 | 11.485 | 21.326 | 39.908 | 0.00 | 0.00 |
| ATOM | 7423 | HA   | ARG | X | 489 | 10.577 | 21.381 | 40.508 | 0.00 | 0.00 |
| ATOM | 7424 | CB   | ARG | X | 489 | 11.163 | 20.548 | 38.636 | 0.00 | 0.00 |
| ATOM | 7425 | HB2  | ARG | X | 489 | 10.536 | 19.705 | 38.926 | 0.00 | 0.00 |
| ATOM | 7426 | HB3  | ARG | X | 489 | 10.519 | 21.076 | 37.934 | 0.00 | 0.00 |
| ATOM | 7427 | CG   | ARG | X | 489 | 12.517 | 20.284 | 37.930 | 0.00 | 0.00 |
| ATOM | 7428 | HG2  | ARG | X | 489 | 13.108 | 21.201 | 37.927 | 0.00 | 0.00 |
| ATOM | 7429 | HG3  | ARG | X | 489 | 13.171 | 19.469 | 38.240 | 0.00 | 0.00 |
| ATOM | 7430 | CD   | ARG | X | 489 | 12.066 | 19.908 | 36.494 | 0.00 | 0.00 |
| ATOM | 7431 | HD2  | ARG | X | 489 | 11.366 | 19.072 | 36.503 | 0.00 | 0.00 |
| ATOM | 7432 | HD3  | ARG | X | 489 | 11.473 | 20.718 | 36.070 | 0.00 | 0.00 |
| ATOM | 7433 | NE   | ARG | X | 489 | 13.164 | 19.590 | 35.556 | 0.00 | 0.00 |
| ATOM | 7434 | HE   | ARG | X | 489 | 13.474 | 18.640 | 35.700 | 0.00 | 0.00 |
| ATOM | 7435 | CZ   | ARG | X | 489 | 13.511 | 20.265 | 34.520 | 0.00 | 0.00 |
| ATOM | 7436 | NH1  | ARG | X | 489 | 14.429 | 19.794 | 33.753 | 0.00 | 0.00 |
| ATOM | 7437 | HH11 | ARG | X | 489 | 14.988 | 18.989 | 33.999 | 0.00 | 0.00 |
| ATOM | 7438 | HH12 | ARG | X | 489 | 14.608 | 20.301 | 32.899 | 0.00 | 0.00 |
| ATOM | 7439 | NH2  | ARG | X | 489 | 13.120 | 21.493 | 34.329 | 0.00 | 0.00 |
| ATOM | 7440 | HH21 | ARG | X | 489 | 12.420 | 21.925 | 34.916 | 0.00 | 0.00 |
| ATOM | 7441 | HH22 | ARG | X | 489 | 13.639 | 21.935 | 33.585 | 0.00 | 0.00 |
| ATOM | 7442 | C    | ARG | X | 489 | 12.407 | 20.444 | 40.711 | 0.00 | 0.00 |
| ATOM | 7443 | O    | ARG | X | 489 | 12.044 | 19.236 | 41.001 | 0.00 | 0.00 |
| ATOM | 7444 | N    | ASP | X | 490 | 13.680 | 20.872 | 40.931 | 0.00 | 0.00 |
| ATOM | 7445 | H    | ASP | X | 490 | 13.891 | 21.838 | 40.727 | 0.00 | 0.00 |
| ATOM | 7446 | CA   | ASP | X | 490 | 14.571 | 20.277 | 41.950 | 0.00 | 0.00 |
| ATOM | 7447 | HA   | ASP | X | 490 | 15.545 | 20.605 | 41.586 | 0.00 | 0.00 |
| ATOM | 7448 | CB   | ASP | X | 490 | 14.276 | 20.904 | 43.323 | 0.00 | 0.00 |
| ATOM | 7449 | HB2  | ASP | X | 490 | 15.135 | 20.753 | 43.977 | 0.00 | 0.00 |
| ATOM | 7450 | HB3  | ASP | X | 490 | 14.121 | 21.972 | 43.172 | 0.00 | 0.00 |
| ATOM | 7451 | CG   | ASP | X | 490 | 12.908 | 20.451 | 43.928 | 0.00 | 0.00 |
| ATOM | 7452 | OD1  | ASP | X | 490 | 12.925 | 19.786 | 45.021 | 0.00 | 0.00 |
| ATOM | 7453 | OD2  | ASP | X | 490 | 11.831 | 20.884 | 43.400 | 0.00 | 0.00 |
| ATOM | 7454 | C    | ASP | X | 490 | 14.642 | 18.723 | 41.796 | 0.00 | 0.00 |
| ATOM | 7455 | O    | ASP | X | 490 | 14.178 | 18.011 | 42.742 | 0.00 | 0.00 |
| ATOM | 7456 | N    | PRO | X | 491 | 15.043 | 18.184 | 40.632 | 0.00 | 0.00 |
| ATOM | 7457 | CD   | PRO | X | 491 | 15.786 | 18.876 | 39.555 | 0.00 | 0.00 |
| ATOM | 7458 | HD2  | PRO | X | 491 | 16.831 | 18.972 | 39.852 | 0.00 | 0.00 |
| ATOM | 7459 | HD3  | PRO | X | 491 | 15.390 | 19.872 | 39.358 | 0.00 | 0.00 |
| ATOM | 7460 | CG   | PRO | X | 491 | 15.817 | 18.030 | 38.265 | 0.00 | 0.00 |
| ATOM | 7461 | HG2  | PRO | X | 491 | 16.699 | 17.459 | 37.973 | 0.00 | 0.00 |
| ATOM | 7462 | HG3  | PRO | X | 491 | 15.599 | 18.633 | 37.384 | 0.00 | 0.00 |
| ATOM | 7463 | CB   | PRO | X | 491 | 14.764 | 16.974 | 38.552 | 0.00 | 0.00 |
| ATOM | 7464 | HB2  | PRO | X | 491 | 14.974 | 15.999 | 38.111 | 0.00 | 0.00 |
| ATOM | 7465 | HB3  | PRO | X | 491 | 13.835 | 17.326 | 38.104 | 0.00 | 0.00 |
| ATOM | 7466 | CA   | PRO | X | 491 | 14.697 | 16.873 | 40.150 | 0.00 | 0.00 |
| ATOM | 7467 | HA   | PRO | X | 491 | 13.753 | 16.535 | 40.579 | 0.00 | 0.00 |
| ATOM | 7468 | C    | PRO | X | 491 | 15.779 | 15.848 | 40.684 | 0.00 | 0.00 |
| ATOM | 7469 | O    | PRO | X | 491 | 16.811 | 16.238 | 41.241 | 0.00 | 0.00 |
| ATOM | 7470 | N    | LYS | X | 492 | 15.461 | 14.541 | 40.554 | 0.00 | 0.00 |
| ATOM | 7471 | H    | LYS | X | 492 | 14.558 | 14.310 | 40.165 | 0.00 | 0.00 |
| ATOM | 7472 | CA   | LYS | X | 492 | 15.991 | 13.520 | 41.518 | 0.00 | 0.00 |
| ATOM | 7473 | HA   | LYS | X | 492 | 15.898 | 14.013 | 42.486 | 0.00 | 0.00 |
| ATOM | 7474 | CB   | LYS | X | 492 | 15.085 | 12.313 | 41.408 | 0.00 | 0.00 |
| ATOM | 7475 | HB2  | LYS | X | 492 | 15.511 | 11.484 | 41.974 | 0.00 | 0.00 |
| ATOM | 7476 | HB3  | LYS | X | 492 | 14.121 | 12.688 | 41.753 | 0.00 | 0.00 |
| ATOM | 7477 | CG   | LYS | X | 492 | 15.080 | 11.701 | 39.961 | 0.00 | 0.00 |
| ATOM | 7478 | HG2  | LYS | X | 492 | 14.872 | 12.415 | 39.165 | 0.00 | 0.00 |
| ATOM | 7479 | HG3  | LYS | X | 492 | 16.033 | 11.176 | 39.891 | 0.00 | 0.00 |
| ATOM | 7480 | CD   | LYS | X | 492 | 13.987 | 10.644 | 39.934 | 0.00 | 0.00 |
| ATOM | 7481 | HD2  | LYS | X | 492 | 14.269 | 9.799  | 40.561 | 0.00 | 0.00 |

|      |      |      |     |   |     |        |        |        |      |      |
|------|------|------|-----|---|-----|--------|--------|--------|------|------|
| ATOM | 7482 | HD3  | LYS | X | 492 | 13.091 | 10.985 | 40.451 | 0.00 | 0.00 |
| ATOM | 7483 | CE   | LYS | X | 492 | 13.693 | 10.196 | 38.479 | 0.00 | 0.00 |
| ATOM | 7484 | HE2  | LYS | X | 492 | 13.276 | 11.017 | 37.896 | 0.00 | 0.00 |
| ATOM | 7485 | HE3  | LYS | X | 492 | 14.608 | 9.884  | 37.975 | 0.00 | 0.00 |
| ATOM | 7486 | NZ   | LYS | X | 492 | 12.607 | 9.163  | 38.486 | 0.00 | 0.00 |
| ATOM | 7487 | HZ1  | LYS | X | 492 | 11.760 | 9.356  | 39.001 | 0.00 | 0.00 |
| ATOM | 7488 | HZ2  | LYS | X | 492 | 12.373 | 8.748  | 37.595 | 0.00 | 0.00 |
| ATOM | 7489 | HZ3  | LYS | X | 492 | 12.988 | 8.433  | 39.071 | 0.00 | 0.00 |
| ATOM | 7490 | C    | LYS | X | 492 | 17.428 | 13.123 | 41.416 | 0.00 | 0.00 |
| ATOM | 7491 | O    | LYS | X | 492 | 17.949 | 12.325 | 42.156 | 0.00 | 0.00 |
| ATOM | 7492 | N    | ALA | X | 493 | 18.186 | 13.650 | 40.432 | 0.00 | 0.00 |
| ATOM | 7493 | H    | ALA | X | 493 | 17.652 | 14.124 | 39.718 | 0.00 | 0.00 |
| ATOM | 7494 | CA   | ALA | X | 493 | 19.646 | 13.680 | 40.453 | 0.00 | 0.00 |
| ATOM | 7495 | HA   | ALA | X | 493 | 19.994 | 12.661 | 40.286 | 0.00 | 0.00 |
| ATOM | 7496 | CB   | ALA | X | 493 | 20.114 | 14.540 | 39.285 | 0.00 | 0.00 |
| ATOM | 7497 | HB1  | ALA | X | 493 | 19.512 | 15.442 | 39.171 | 0.00 | 0.00 |
| ATOM | 7498 | HB2  | ALA | X | 493 | 19.965 | 13.934 | 38.391 | 0.00 | 0.00 |
| ATOM | 7499 | HB3  | ALA | X | 493 | 21.194 | 14.681 | 39.326 | 0.00 | 0.00 |
| ATOM | 7500 | C    | ALA | X | 493 | 20.174 | 14.411 | 41.848 | 0.00 | 0.00 |
| ATOM | 7501 | O    | ALA | X | 493 | 19.373 | 15.199 | 42.378 | 0.00 | 0.00 |
| ATOM | 7502 | N    | PRO | X | 494 | 21.471 | 14.381 | 42.201 | 0.00 | 0.00 |
| ATOM | 7503 | CD   | PRO | X | 494 | 22.413 | 13.372 | 41.739 | 0.00 | 0.00 |
| ATOM | 7504 | HD2  | PRO | X | 494 | 22.694 | 13.401 | 40.686 | 0.00 | 0.00 |
| ATOM | 7505 | HD3  | PRO | X | 494 | 22.204 | 12.352 | 42.061 | 0.00 | 0.00 |
| ATOM | 7506 | CG   | PRO | X | 494 | 23.733 | 13.733 | 42.412 | 0.00 | 0.00 |
| ATOM | 7507 | HG2  | PRO | X | 494 | 24.405 | 14.321 | 41.788 | 0.00 | 0.00 |
| ATOM | 7508 | HG3  | PRO | X | 494 | 24.265 | 12.842 | 42.747 | 0.00 | 0.00 |
| ATOM | 7509 | CB   | PRO | X | 494 | 23.433 | 14.587 | 43.573 | 0.00 | 0.00 |
| ATOM | 7510 | HB2  | PRO | X | 494 | 24.119 | 15.423 | 43.707 | 0.00 | 0.00 |
| ATOM | 7511 | HB3  | PRO | X | 494 | 23.416 | 14.023 | 44.505 | 0.00 | 0.00 |
| ATOM | 7512 | CA   | PRO | X | 494 | 22.047 | 15.207 | 43.291 | 0.00 | 0.00 |
| ATOM | 7513 | HA   | PRO | X | 494 | 21.377 | 15.242 | 44.150 | 0.00 | 0.00 |
| ATOM | 7514 | C    | PRO | X | 494 | 22.216 | 16.691 | 42.817 | 0.00 | 0.00 |
| ATOM | 7515 | O    | PRO | X | 494 | 22.550 | 16.976 | 41.670 | 0.00 | 0.00 |
| ATOM | 7516 | N    | GLN | X | 495 | 22.116 | 17.630 | 43.752 | 0.00 | 0.00 |
| ATOM | 7517 | H    | GLN | X | 495 | 21.846 | 17.419 | 44.702 | 0.00 | 0.00 |
| ATOM | 7518 | CA   | GLN | X | 495 | 22.193 | 19.063 | 43.558 | 0.00 | 0.00 |
| ATOM | 7519 | HA   | GLN | X | 495 | 22.602 | 19.199 | 42.557 | 0.00 | 0.00 |
| ATOM | 7520 | CB   | GLN | X | 495 | 20.788 | 19.681 | 43.616 | 0.00 | 0.00 |
| ATOM | 7521 | HB2  | GLN | X | 495 | 20.333 | 19.709 | 44.606 | 0.00 | 0.00 |
| ATOM | 7522 | HB3  | GLN | X | 495 | 20.862 | 20.721 | 43.300 | 0.00 | 0.00 |
| ATOM | 7523 | CG   | GLN | X | 495 | 19.666 | 18.963 | 42.788 | 0.00 | 0.00 |
| ATOM | 7524 | HG2  | GLN | X | 495 | 19.667 | 17.990 | 43.280 | 0.00 | 0.00 |
| ATOM | 7525 | HG3  | GLN | X | 495 | 18.707 | 19.472 | 42.884 | 0.00 | 0.00 |
| ATOM | 7526 | CD   | GLN | X | 495 | 20.051 | 18.884 | 41.302 | 0.00 | 0.00 |
| ATOM | 7527 | OE1  | GLN | X | 495 | 20.727 | 19.716 | 40.739 | 0.00 | 0.00 |
| ATOM | 7528 | NE2  | GLN | X | 495 | 19.595 | 17.869 | 40.624 | 0.00 | 0.00 |
| ATOM | 7529 | HE21 | GLN | X | 495 | 19.436 | 18.072 | 39.647 | 0.00 | 0.00 |
| ATOM | 7530 | HE22 | GLN | X | 495 | 19.126 | 17.052 | 40.988 | 0.00 | 0.00 |
| ATOM | 7531 | C    | GLN | X | 495 | 22.995 | 19.850 | 44.580 | 0.00 | 0.00 |
| ATOM | 7532 | O    | GLN | X | 495 | 23.131 | 19.419 | 45.675 | 0.00 | 0.00 |
| ATOM | 7533 | N    | TRP | X | 496 | 23.513 | 21.002 | 44.143 | 0.00 | 0.00 |
| ATOM | 7534 | H    | TRP | X | 496 | 23.400 | 21.270 | 43.176 | 0.00 | 0.00 |
| ATOM | 7535 | CA   | TRP | X | 496 | 24.418 | 21.808 | 44.957 | 0.00 | 0.00 |
| ATOM | 7536 | HA   | TRP | X | 496 | 25.165 | 21.132 | 45.372 | 0.00 | 0.00 |
| ATOM | 7537 | CB   | TRP | X | 496 | 25.161 | 22.727 | 43.967 | 0.00 | 0.00 |
| ATOM | 7538 | HB2  | TRP | X | 496 | 25.820 | 22.108 | 43.359 | 0.00 | 0.00 |
| ATOM | 7539 | HB3  | TRP | X | 496 | 24.535 | 23.262 | 43.252 | 0.00 | 0.00 |
| ATOM | 7540 | CG   | TRP | X | 496 | 26.083 | 23.832 | 44.531 | 0.00 | 0.00 |
| ATOM | 7541 | CD1  | TRP | X | 496 | 26.568 | 23.921 | 45.760 | 0.00 | 0.00 |
| ATOM | 7542 | HD1  | TRP | X | 496 | 26.339 | 23.202 | 46.532 | 0.00 | 0.00 |
| ATOM | 7543 | NE1  | TRP | X | 496 | 27.446 | 24.964 | 45.820 | 0.00 | 0.00 |
| ATOM | 7544 | HE1  | TRP | X | 496 | 28.126 | 25.010 | 46.566 | 0.00 | 0.00 |
| ATOM | 7545 | CE2  | TRP | X | 496 | 27.597 | 25.509 | 44.617 | 0.00 | 0.00 |
| ATOM | 7546 | CZ2  | TRP | X | 496 | 28.503 | 26.472 | 44.168 | 0.00 | 0.00 |
| ATOM | 7547 | HZ2  | TRP | X | 496 | 29.236 | 26.902 | 44.835 | 0.00 | 0.00 |
| ATOM | 7548 | CH2  | TRP | X | 496 | 28.432 | 26.942 | 42.857 | 0.00 | 0.00 |

|      |      |      |     |   |     |        |        |        |      |      |
|------|------|------|-----|---|-----|--------|--------|--------|------|------|
| ATOM | 7549 | HH2  | TRP | X | 496 | 29.095 | 27.699 | 42.464 | 0.00 | 0.00 |
| ATOM | 7550 | CZ3  | TRP | X | 496 | 27.618 | 26.301 | 41.934 | 0.00 | 0.00 |
| ATOM | 7551 | HZ3  | TRP | X | 496 | 27.509 | 26.710 | 40.940 | 0.00 | 0.00 |
| ATOM | 7552 | CE3  | TRP | X | 496 | 26.747 | 25.253 | 42.397 | 0.00 | 0.00 |
| ATOM | 7553 | HE3  | TRP | X | 496 | 26.002 | 24.910 | 41.696 | 0.00 | 0.00 |
| ATOM | 7554 | CD2  | TRP | X | 496 | 26.646 | 24.907 | 43.751 | 0.00 | 0.00 |
| ATOM | 7555 | C    | TRP | X | 496 | 23.682 | 22.454 | 46.095 | 0.00 | 0.00 |
| ATOM | 7556 | O    | TRP | X | 496 | 22.712 | 23.125 | 45.811 | 0.00 | 0.00 |
| ATOM | 7557 | N    | PRO | X | 497 | 23.985 | 22.167 | 47.379 | 0.00 | 0.00 |
| ATOM | 7558 | CD   | PRO | X | 497 | 24.967 | 21.198 | 47.923 | 0.00 | 0.00 |
| ATOM | 7559 | HD2  | PRO | X | 497 | 25.968 | 21.558 | 47.684 | 0.00 | 0.00 |
| ATOM | 7560 | HD3  | PRO | X | 497 | 24.766 | 20.228 | 47.470 | 0.00 | 0.00 |
| ATOM | 7561 | CG   | PRO | X | 497 | 24.751 | 21.100 | 49.370 | 0.00 | 0.00 |
| ATOM | 7562 | HG2  | PRO | X | 497 | 25.496 | 21.723 | 49.866 | 0.00 | 0.00 |
| ATOM | 7563 | HG3  | PRO | X | 497 | 24.763 | 20.080 | 49.754 | 0.00 | 0.00 |
| ATOM | 7564 | CB   | PRO | X | 497 | 23.412 | 21.806 | 49.606 | 0.00 | 0.00 |
| ATOM | 7565 | HB2  | PRO | X | 497 | 23.452 | 22.325 | 50.563 | 0.00 | 0.00 |
| ATOM | 7566 | HB3  | PRO | X | 497 | 22.619 | 21.060 | 49.642 | 0.00 | 0.00 |
| ATOM | 7567 | CA   | PRO | X | 497 | 23.259 | 22.813 | 48.468 | 0.00 | 0.00 |
| ATOM | 7568 | HA   | PRO | X | 497 | 22.183 | 22.955 | 48.371 | 0.00 | 0.00 |
| ATOM | 7569 | C    | PRO | X | 497 | 23.983 | 24.170 | 48.836 | 0.00 | 0.00 |
| ATOM | 7570 | O    | PRO | X | 497 | 25.139 | 24.424 | 48.456 | 0.00 | 0.00 |
| ATOM | 7571 | N    | PRO | X | 498 | 23.255 | 25.066 | 49.536 | 0.00 | 0.00 |
| ATOM | 7572 | CD   | PRO | X | 498 | 21.818 | 24.987 | 49.829 | 0.00 | 0.00 |
| ATOM | 7573 | HD2  | PRO | X | 498 | 21.618 | 23.973 | 50.176 | 0.00 | 0.00 |
| ATOM | 7574 | HD3  | PRO | X | 498 | 21.164 | 25.253 | 48.998 | 0.00 | 0.00 |
| ATOM | 7575 | CG   | PRO | X | 498 | 21.513 | 26.115 | 50.843 | 0.00 | 0.00 |
| ATOM | 7576 | HG2  | PRO | X | 498 | 21.695 | 25.655 | 51.814 | 0.00 | 0.00 |
| ATOM | 7577 | HG3  | PRO | X | 498 | 20.531 | 26.558 | 50.679 | 0.00 | 0.00 |
| ATOM | 7578 | CB   | PRO | X | 498 | 22.634 | 27.185 | 50.575 | 0.00 | 0.00 |
| ATOM | 7579 | HB2  | PRO | X | 498 | 22.872 | 27.765 | 51.467 | 0.00 | 0.00 |
| ATOM | 7580 | HB3  | PRO | X | 498 | 22.319 | 27.832 | 49.756 | 0.00 | 0.00 |
| ATOM | 7581 | CA   | PRO | X | 498 | 23.827 | 26.289 | 50.085 | 0.00 | 0.00 |
| ATOM | 7582 | HA   | PRO | X | 498 | 24.424 | 26.803 | 49.332 | 0.00 | 0.00 |
| ATOM | 7583 | C    | PRO | X | 498 | 24.891 | 25.931 | 51.177 | 0.00 | 0.00 |
| ATOM | 7584 | O    | PRO | X | 498 | 24.646 | 25.019 | 51.993 | 0.00 | 0.00 |
| ATOM | 7585 | N    | TYR | X | 499 | 25.966 | 26.738 | 51.371 | 0.00 | 0.00 |
| ATOM | 7586 | H    | TYR | X | 499 | 25.955 | 27.573 | 50.802 | 0.00 | 0.00 |
| ATOM | 7587 | CA   | TYR | X | 499 | 26.815 | 26.673 | 52.544 | 0.00 | 0.00 |
| ATOM | 7588 | HA   | TYR | X | 499 | 27.012 | 25.625 | 52.769 | 0.00 | 0.00 |
| ATOM | 7589 | CB   | TYR | X | 499 | 28.243 | 27.131 | 52.166 | 0.00 | 0.00 |
| ATOM | 7590 | HB2  | TYR | X | 499 | 28.505 | 26.640 | 51.229 | 0.00 | 0.00 |
| ATOM | 7591 | HB3  | TYR | X | 499 | 28.138 | 28.200 | 51.980 | 0.00 | 0.00 |
| ATOM | 7592 | CG   | TYR | X | 499 | 29.313 | 26.862 | 53.255 | 0.00 | 0.00 |
| ATOM | 7593 | CD1  | TYR | X | 499 | 29.567 | 27.731 | 54.271 | 0.00 | 0.00 |
| ATOM | 7594 | HD1  | TYR | X | 499 | 28.945 | 28.595 | 54.455 | 0.00 | 0.00 |
| ATOM | 7595 | CE1  | TYR | X | 499 | 30.709 | 27.672 | 55.056 | 0.00 | 0.00 |
| ATOM | 7596 | HE1  | TYR | X | 499 | 30.800 | 28.400 | 55.848 | 0.00 | 0.00 |
| ATOM | 7597 | CZ   | TYR | X | 499 | 31.583 | 26.638 | 54.983 | 0.00 | 0.00 |
| ATOM | 7598 | OH   | TYR | X | 499 | 32.654 | 26.526 | 55.868 | 0.00 | 0.00 |
| ATOM | 7599 | HH   | TYR | X | 499 | 32.795 | 27.354 | 56.333 | 0.00 | 0.00 |
| ATOM | 7600 | CE2  | TYR | X | 499 | 31.253 | 25.573 | 54.025 | 0.00 | 0.00 |
| ATOM | 7601 | HE2  | TYR | X | 499 | 31.736 | 24.608 | 53.983 | 0.00 | 0.00 |
| ATOM | 7602 | CD2  | TYR | X | 499 | 30.172 | 25.737 | 53.148 | 0.00 | 0.00 |
| ATOM | 7603 | HD2  | TYR | X | 499 | 30.083 | 24.958 | 52.405 | 0.00 | 0.00 |
| ATOM | 7604 | C    | TYR | X | 499 | 26.212 | 27.340 | 53.738 | 0.00 | 0.00 |
| ATOM | 7605 | O    | TYR | X | 499 | 25.612 | 28.419 | 53.644 | 0.00 | 0.00 |
| ATOM | 7606 | N    | THR | X | 500 | 26.463 | 26.694 | 54.914 | 0.00 | 0.00 |
| ATOM | 7607 | H    | THR | X | 500 | 26.813 | 25.768 | 54.712 | 0.00 | 0.00 |
| ATOM | 7608 | CA   | THR | X | 500 | 26.233 | 27.260 | 56.289 | 0.00 | 0.00 |
| ATOM | 7609 | HA   | THR | X | 500 | 26.280 | 28.344 | 56.184 | 0.00 | 0.00 |
| ATOM | 7610 | CB   | THR | X | 500 | 24.799 | 26.880 | 56.740 | 0.00 | 0.00 |
| ATOM | 7611 | HB   | THR | X | 500 | 24.133 | 27.160 | 55.924 | 0.00 | 0.00 |
| ATOM | 7612 | CG2  | THR | X | 500 | 24.579 | 25.379 | 57.113 | 0.00 | 0.00 |
| ATOM | 7613 | HG21 | THR | X | 500 | 25.046 | 25.330 | 58.097 | 0.00 | 0.00 |
| ATOM | 7614 | HG22 | THR | X | 500 | 25.172 | 24.818 | 56.390 | 0.00 | 0.00 |
| ATOM | 7615 | HG23 | THR | X | 500 | 23.514 | 25.145 | 57.136 | 0.00 | 0.00 |



|      |      |      |     |   |     |        |        |        |      |      |
|------|------|------|-----|---|-----|--------|--------|--------|------|------|
| ATOM | 7616 | OG1  | THR | X | 500 | 24.487 | 27.658 | 57.805 | 0.00 | 0.00 |
| ATOM | 7617 | HG1  | THR | X | 500 | 23.660 | 28.040 | 57.502 | 0.00 | 0.00 |
| ATOM | 7618 | C    | THR | X | 500 | 27.268 | 26.868 | 57.333 | 0.00 | 0.00 |
| ATOM | 7619 | O    | THR | X | 500 | 27.719 | 25.714 | 57.386 | 0.00 | 0.00 |
| ATOM | 7620 | N    | ALA | X | 501 | 27.662 | 27.784 | 58.262 | 0.00 | 0.00 |
| ATOM | 7621 | H    | ALA | X | 501 | 27.040 | 28.575 | 58.356 | 0.00 | 0.00 |
| ATOM | 7622 | CA   | ALA | X | 501 | 28.787 | 27.856 | 59.176 | 0.00 | 0.00 |
| ATOM | 7623 | HA   | ALA | X | 501 | 29.714 | 27.867 | 58.602 | 0.00 | 0.00 |
| ATOM | 7624 | CB   | ALA | X | 501 | 28.684 | 29.172 | 59.985 | 0.00 | 0.00 |
| ATOM | 7625 | HB1  | ALA | X | 501 | 29.654 | 29.619 | 60.205 | 0.00 | 0.00 |
| ATOM | 7626 | HB2  | ALA | X | 501 | 28.097 | 29.074 | 60.898 | 0.00 | 0.00 |
| ATOM | 7627 | HB3  | ALA | X | 501 | 28.255 | 29.974 | 59.384 | 0.00 | 0.00 |
| ATOM | 7628 | C    | ALA | X | 501 | 28.999 | 26.707 | 60.213 | 0.00 | 0.00 |
| ATOM | 7629 | O    | ALA | X | 501 | 30.187 | 26.403 | 60.438 | 0.00 | 0.00 |
| ATOM | 7630 | N    | GLY | X | 502 | 28.024 | 26.022 | 60.753 | 0.00 | 0.00 |
| ATOM | 7631 | H    | GLY | X | 502 | 27.087 | 26.338 | 60.548 | 0.00 | 0.00 |
| ATOM | 7632 | CA   | GLY | X | 502 | 28.271 | 24.863 | 61.616 | 0.00 | 0.00 |
| ATOM | 7633 | HA2  | GLY | X | 502 | 29.192 | 24.985 | 62.185 | 0.00 | 0.00 |
| ATOM | 7634 | HA3  | GLY | X | 502 | 27.465 | 24.698 | 62.332 | 0.00 | 0.00 |
| ATOM | 7635 | C    | GLY | X | 502 | 28.339 | 23.576 | 60.840 | 0.00 | 0.00 |
| ATOM | 7636 | O    | GLY | X | 502 | 29.065 | 22.683 | 61.276 | 0.00 | 0.00 |
| ATOM | 7637 | N    | ALA | X | 503 | 27.695 | 23.324 | 59.668 | 0.00 | 0.00 |
| ATOM | 7638 | H    | ALA | X | 503 | 27.133 | 24.047 | 59.241 | 0.00 | 0.00 |
| ATOM | 7639 | CA   | ALA | X | 503 | 27.682 | 22.026 | 58.947 | 0.00 | 0.00 |
| ATOM | 7640 | HA   | ALA | X | 503 | 27.847 | 21.191 | 59.628 | 0.00 | 0.00 |
| ATOM | 7641 | CB   | ALA | X | 503 | 26.231 | 21.853 | 58.333 | 0.00 | 0.00 |
| ATOM | 7642 | HB1  | ALA | X | 503 | 26.025 | 22.610 | 57.576 | 0.00 | 0.00 |
| ATOM | 7643 | HB2  | ALA | X | 503 | 25.592 | 21.972 | 59.208 | 0.00 | 0.00 |
| ATOM | 7644 | HB3  | ALA | X | 503 | 26.226 | 20.814 | 58.004 | 0.00 | 0.00 |
| ATOM | 7645 | C    | ALA | X | 503 | 28.816 | 21.975 | 57.926 | 0.00 | 0.00 |
| ATOM | 7646 | O    | ALA | X | 503 | 29.375 | 20.887 | 57.689 | 0.00 | 0.00 |
| ATOM | 7647 | N    | GLN | X | 504 | 29.154 | 23.192 | 57.351 | 0.00 | 0.00 |
| ATOM | 7648 | H    | GLN | X | 504 | 28.526 | 23.981 | 57.389 | 0.00 | 0.00 |
| ATOM | 7649 | CA   | GLN | X | 504 | 30.315 | 23.427 | 56.449 | 0.00 | 0.00 |
| ATOM | 7650 | HA   | GLN | X | 504 | 30.173 | 24.400 | 55.978 | 0.00 | 0.00 |
| ATOM | 7651 | CB   | GLN | X | 504 | 31.667 | 23.467 | 57.258 | 0.00 | 0.00 |
| ATOM | 7652 | HB2  | GLN | X | 504 | 31.855 | 22.482 | 57.685 | 0.00 | 0.00 |
| ATOM | 7653 | HB3  | GLN | X | 504 | 32.477 | 23.719 | 56.574 | 0.00 | 0.00 |
| ATOM | 7654 | CG   | GLN | X | 504 | 31.666 | 24.509 | 58.409 | 0.00 | 0.00 |
| ATOM | 7655 | HG2  | GLN | X | 504 | 31.274 | 25.488 | 58.135 | 0.00 | 0.00 |
| ATOM | 7656 | HG3  | GLN | X | 504 | 31.042 | 24.100 | 59.204 | 0.00 | 0.00 |
| ATOM | 7657 | CD   | GLN | X | 504 | 33.056 | 24.913 | 58.948 | 0.00 | 0.00 |
| ATOM | 7658 | OE1  | GLN | X | 504 | 34.128 | 24.488 | 58.470 | 0.00 | 0.00 |
| ATOM | 7659 | NE2  | GLN | X | 504 | 33.071 | 25.559 | 60.098 | 0.00 | 0.00 |
| ATOM | 7660 | HE21 | GLN | X | 504 | 33.902 | 25.759 | 60.636 | 0.00 | 0.00 |
| ATOM | 7661 | HE22 | GLN | X | 504 | 32.209 | 25.750 | 60.588 | 0.00 | 0.00 |
| ATOM | 7662 | C    | GLN | X | 504 | 30.274 | 22.469 | 55.214 | 0.00 | 0.00 |
| ATOM | 7663 | O    | GLN | X | 504 | 31.220 | 21.852 | 54.869 | 0.00 | 0.00 |
| ATOM | 7664 | N    | GLN | X | 505 | 29.072 | 22.295 | 54.672 | 0.00 | 0.00 |
| ATOM | 7665 | H    | GLN | X | 505 | 28.373 | 22.948 | 54.996 | 0.00 | 0.00 |
| ATOM | 7666 | CA   | GLN | X | 505 | 28.909 | 21.462 | 53.557 | 0.00 | 0.00 |
| ATOM | 7667 | HA   | GLN | X | 505 | 29.594 | 20.620 | 53.660 | 0.00 | 0.00 |
| ATOM | 7668 | CB   | GLN | X | 505 | 27.558 | 20.715 | 53.573 | 0.00 | 0.00 |
| ATOM | 7669 | HB2  | GLN | X | 505 | 26.664 | 21.279 | 53.306 | 0.00 | 0.00 |
| ATOM | 7670 | HB3  | GLN | X | 505 | 27.717 | 19.974 | 52.790 | 0.00 | 0.00 |
| ATOM | 7671 | CG   | GLN | X | 505 | 27.327 | 20.047 | 54.943 | 0.00 | 0.00 |
| ATOM | 7672 | HG2  | GLN | X | 505 | 28.179 | 19.518 | 55.371 | 0.00 | 0.00 |
| ATOM | 7673 | HG3  | GLN | X | 505 | 27.036 | 20.795 | 55.681 | 0.00 | 0.00 |
| ATOM | 7674 | CD   | GLN | X | 505 | 26.208 | 19.043 | 54.796 | 0.00 | 0.00 |
| ATOM | 7675 | OE1  | GLN | X | 505 | 26.461 | 17.935 | 54.433 | 0.00 | 0.00 |
| ATOM | 7676 | NE2  | GLN | X | 505 | 25.001 | 19.383 | 55.016 | 0.00 | 0.00 |
| ATOM | 7677 | HE21 | GLN | X | 505 | 24.381 | 18.593 | 55.125 | 0.00 | 0.00 |
| ATOM | 7678 | HE22 | GLN | X | 505 | 24.806 | 20.330 | 55.306 | 0.00 | 0.00 |
| ATOM | 7679 | C    | GLN | X | 505 | 28.906 | 22.196 | 52.212 | 0.00 | 0.00 |
| ATOM | 7680 | O    | GLN | X | 505 | 28.233 | 23.194 | 52.027 | 0.00 | 0.00 |
| ATOM | 7681 | N    | TYR | X | 506 | 29.728 | 21.673 | 51.298 | 0.00 | 0.00 |
| ATOM | 7682 | H    | TYR | X | 506 | 30.287 | 20.865 | 51.531 | 0.00 | 0.00 |

|      |      |      |     |   |     |        |        |        |      |      |
|------|------|------|-----|---|-----|--------|--------|--------|------|------|
| ATOM | 7683 | CA   | TYR | X | 506 | 30.063 | 22.342 | 50.004 | 0.00 | 0.00 |
| ATOM | 7684 | HA   | TYR | X | 506 | 29.264 | 23.057 | 49.811 | 0.00 | 0.00 |
| ATOM | 7685 | CB   | TYR | X | 506 | 31.318 | 23.094 | 50.264 | 0.00 | 0.00 |
| ATOM | 7686 | HB2  | TYR | X | 506 | 31.488 | 23.710 | 49.381 | 0.00 | 0.00 |
| ATOM | 7687 | HB3  | TYR | X | 506 | 31.243 | 23.646 | 51.201 | 0.00 | 0.00 |
| ATOM | 7688 | CG   | TYR | X | 506 | 32.494 | 22.226 | 50.339 | 0.00 | 0.00 |
| ATOM | 7689 | CD1  | TYR | X | 506 | 32.976 | 21.782 | 51.551 | 0.00 | 0.00 |
| ATOM | 7690 | HD1  | TYR | X | 506 | 32.437 | 21.913 | 52.477 | 0.00 | 0.00 |
| ATOM | 7691 | CE1  | TYR | X | 506 | 34.185 | 21.180 | 51.705 | 0.00 | 0.00 |
| ATOM | 7692 | HE1  | TYR | X | 506 | 34.462 | 20.761 | 52.662 | 0.00 | 0.00 |
| ATOM | 7693 | CZ   | TYR | X | 506 | 35.091 | 21.094 | 50.610 | 0.00 | 0.00 |
| ATOM | 7694 | OH   | TYR | X | 506 | 36.358 | 20.641 | 50.724 | 0.00 | 0.00 |
| ATOM | 7695 | HH   | TYR | X | 506 | 36.445 | 20.273 | 51.607 | 0.00 | 0.00 |
| ATOM | 7696 | CE2  | TYR | X | 506 | 34.607 | 21.503 | 49.343 | 0.00 | 0.00 |
| ATOM | 7697 | HE2  | TYR | X | 506 | 35.259 | 21.348 | 48.496 | 0.00 | 0.00 |
| ATOM | 7698 | CD2  | TYR | X | 506 | 33.316 | 22.088 | 49.203 | 0.00 | 0.00 |
| ATOM | 7699 | HD2  | TYR | X | 506 | 32.997 | 22.423 | 48.227 | 0.00 | 0.00 |
| ATOM | 7700 | C    | TYR | X | 506 | 30.228 | 21.244 | 48.893 | 0.00 | 0.00 |
| ATOM | 7701 | O    | TYR | X | 506 | 30.407 | 20.076 | 49.126 | 0.00 | 0.00 |
| ATOM | 7702 | N    | VAL | X | 507 | 30.211 | 21.704 | 47.634 | 0.00 | 0.00 |
| ATOM | 7703 | H    | VAL | X | 507 | 30.113 | 22.698 | 47.484 | 0.00 | 0.00 |
| ATOM | 7704 | CA   | VAL | X | 507 | 30.312 | 20.767 | 46.497 | 0.00 | 0.00 |
| ATOM | 7705 | HA   | VAL | X | 507 | 29.891 | 19.794 | 46.752 | 0.00 | 0.00 |
| ATOM | 7706 | CB   | VAL | X | 507 | 29.506 | 21.061 | 45.271 | 0.00 | 0.00 |
| ATOM | 7707 | HB   | VAL | X | 507 | 29.586 | 20.225 | 44.577 | 0.00 | 0.00 |
| ATOM | 7708 | CG1  | VAL | X | 507 | 28.077 | 21.175 | 45.668 | 0.00 | 0.00 |
| ATOM | 7709 | HG11 | VAL | X | 507 | 27.886 | 21.901 | 46.458 | 0.00 | 0.00 |
| ATOM | 7710 | HG12 | VAL | X | 507 | 27.363 | 21.395 | 44.874 | 0.00 | 0.00 |
| ATOM | 7711 | HG13 | VAL | X | 507 | 27.750 | 20.186 | 45.990 | 0.00 | 0.00 |
| ATOM | 7712 | CG2  | VAL | X | 507 | 30.045 | 22.366 | 44.576 | 0.00 | 0.00 |
| ATOM | 7713 | HG21 | VAL | X | 507 | 29.530 | 22.407 | 43.616 | 0.00 | 0.00 |
| ATOM | 7714 | HG22 | VAL | X | 507 | 31.080 | 22.457 | 44.248 | 0.00 | 0.00 |
| ATOM | 7715 | HG23 | VAL | X | 507 | 29.706 | 23.272 | 45.079 | 0.00 | 0.00 |
| ATOM | 7716 | C    | VAL | X | 507 | 31.735 | 20.512 | 46.084 | 0.00 | 0.00 |
| ATOM | 7717 | O    | VAL | X | 507 | 32.611 | 21.431 | 46.150 | 0.00 | 0.00 |
| ATOM | 7718 | N    | SER | X | 508 | 31.934 | 19.277 | 45.602 | 0.00 | 0.00 |
| ATOM | 7719 | H    | SER | X | 508 | 31.122 | 18.680 | 45.529 | 0.00 | 0.00 |
| ATOM | 7720 | CA   | SER | X | 508 | 33.132 | 19.099 | 44.762 | 0.00 | 0.00 |
| ATOM | 7721 | HA   | SER | X | 508 | 33.955 | 19.745 | 45.066 | 0.00 | 0.00 |
| ATOM | 7722 | CB   | SER | X | 508 | 33.686 | 17.693 | 45.019 | 0.00 | 0.00 |
| ATOM | 7723 | HB2  | SER | X | 508 | 34.570 | 17.560 | 44.394 | 0.00 | 0.00 |
| ATOM | 7724 | HB3  | SER | X | 508 | 34.129 | 17.580 | 46.008 | 0.00 | 0.00 |
| ATOM | 7725 | OG   | SER | X | 508 | 32.840 | 16.530 | 44.865 | 0.00 | 0.00 |
| ATOM | 7726 | HG   | SER | X | 508 | 32.044 | 16.672 | 45.382 | 0.00 | 0.00 |
| ATOM | 7727 | C    | SER | X | 508 | 32.620 | 19.169 | 43.284 | 0.00 | 0.00 |
| ATOM | 7728 | O    | SER | X | 508 | 31.454 | 18.970 | 43.001 | 0.00 | 0.00 |
| ATOM | 7729 | N    | LEU | X | 509 | 33.397 | 19.568 | 42.252 | 0.00 | 0.00 |
| ATOM | 7730 | H    | LEU | X | 509 | 34.237 | 20.002 | 42.608 | 0.00 | 0.00 |
| ATOM | 7731 | CA   | LEU | X | 509 | 33.041 | 19.836 | 40.847 | 0.00 | 0.00 |
| ATOM | 7732 | HA   | LEU | X | 509 | 31.978 | 19.597 | 40.804 | 0.00 | 0.00 |
| ATOM | 7733 | CB   | LEU | X | 509 | 33.079 | 21.331 | 40.450 | 0.00 | 0.00 |
| ATOM | 7734 | HB2  | LEU | X | 509 | 34.137 | 21.572 | 40.554 | 0.00 | 0.00 |
| ATOM | 7735 | HB3  | LEU | X | 509 | 32.850 | 21.551 | 39.408 | 0.00 | 0.00 |
| ATOM | 7736 | CG   | LEU | X | 509 | 32.155 | 22.264 | 41.199 | 0.00 | 0.00 |
| ATOM | 7737 | HG   | LEU | X | 509 | 32.361 | 22.265 | 42.269 | 0.00 | 0.00 |
| ATOM | 7738 | CD1  | LEU | X | 509 | 32.451 | 23.686 | 40.682 | 0.00 | 0.00 |
| ATOM | 7739 | HD11 | LEU | X | 509 | 32.669 | 23.849 | 39.626 | 0.00 | 0.00 |
| ATOM | 7740 | HD12 | LEU | X | 509 | 33.381 | 23.808 | 41.237 | 0.00 | 0.00 |
| ATOM | 7741 | HD13 | LEU | X | 509 | 31.729 | 24.415 | 41.051 | 0.00 | 0.00 |
| ATOM | 7742 | CD2  | LEU | X | 509 | 30.665 | 21.937 | 41.038 | 0.00 | 0.00 |
| ATOM | 7743 | HD21 | LEU | X | 509 | 30.556 | 21.459 | 40.064 | 0.00 | 0.00 |
| ATOM | 7744 | HD22 | LEU | X | 509 | 30.330 | 21.182 | 41.749 | 0.00 | 0.00 |
| ATOM | 7745 | HD23 | LEU | X | 509 | 30.048 | 22.836 | 41.054 | 0.00 | 0.00 |
| ATOM | 7746 | C    | LEU | X | 509 | 33.808 | 18.997 | 39.820 | 0.00 | 0.00 |
| ATOM | 7747 | O    | LEU | X | 509 | 35.012 | 18.857 | 39.801 | 0.00 | 0.00 |
| ATOM | 7748 | N    | ASP | X | 510 | 32.997 | 18.239 | 39.069 | 0.00 | 0.00 |
| ATOM | 7749 | H    | ASP | X | 510 | 31.992 | 18.318 | 39.132 | 0.00 | 0.00 |

|      |      |      |     |   |     |        |        |        |      |      |
|------|------|------|-----|---|-----|--------|--------|--------|------|------|
| ATOM | 7750 | CA   | ASP | X | 510 | 33.568 | 17.134 | 38.276 | 0.00 | 0.00 |
| ATOM | 7751 | HA   | ASP | X | 510 | 34.405 | 17.605 | 37.761 | 0.00 | 0.00 |
| ATOM | 7752 | CB   | ASP | X | 510 | 34.039 | 15.969 | 39.244 | 0.00 | 0.00 |
| ATOM | 7753 | HB2  | ASP | X | 510 | 34.558 | 16.412 | 40.094 | 0.00 | 0.00 |
| ATOM | 7754 | HB3  | ASP | X | 510 | 33.228 | 15.365 | 39.652 | 0.00 | 0.00 |
| ATOM | 7755 | CG   | ASP | X | 510 | 35.051 | 14.983 | 38.512 | 0.00 | 0.00 |
| ATOM | 7756 | OD1  | ASP | X | 510 | 35.713 | 15.388 | 37.565 | 0.00 | 0.00 |
| ATOM | 7757 | OD2  | ASP | X | 510 | 35.068 | 13.739 | 38.809 | 0.00 | 0.00 |
| ATOM | 7758 | C    | ASP | X | 510 | 32.685 | 16.613 | 37.142 | 0.00 | 0.00 |
| ATOM | 7759 | O    | ASP | X | 510 | 31.508 | 16.993 | 37.019 | 0.00 | 0.00 |
| ATOM | 7760 | N    | LEU | X | 511 | 33.300 | 15.786 | 36.300 | 0.00 | 0.00 |
| ATOM | 7761 | H    | LEU | X | 511 | 34.276 | 15.617 | 36.500 | 0.00 | 0.00 |
| ATOM | 7762 | CA   | LEU | X | 511 | 32.548 | 15.124 | 35.202 | 0.00 | 0.00 |
| ATOM | 7763 | HA   | LEU | X | 511 | 32.107 | 15.991 | 34.710 | 0.00 | 0.00 |
| ATOM | 7764 | CB   | LEU | X | 511 | 33.552 | 14.453 | 34.227 | 0.00 | 0.00 |
| ATOM | 7765 | HB2  | LEU | X | 511 | 33.902 | 13.510 | 34.647 | 0.00 | 0.00 |
| ATOM | 7766 | HB3  | LEU | X | 511 | 32.950 | 14.236 | 33.345 | 0.00 | 0.00 |
| ATOM | 7767 | CG   | LEU | X | 511 | 34.782 | 15.350 | 33.838 | 0.00 | 0.00 |
| ATOM | 7768 | HG   | LEU | X | 511 | 35.436 | 15.510 | 34.695 | 0.00 | 0.00 |
| ATOM | 7769 | CD1  | LEU | X | 511 | 35.675 | 14.601 | 32.811 | 0.00 | 0.00 |
| ATOM | 7770 | HD11 | LEU | X | 511 | 35.042 | 14.694 | 31.928 | 0.00 | 0.00 |
| ATOM | 7771 | HD12 | LEU | X | 511 | 35.723 | 13.537 | 33.040 | 0.00 | 0.00 |
| ATOM | 7772 | HD13 | LEU | X | 511 | 36.559 | 15.238 | 32.796 | 0.00 | 0.00 |
| ATOM | 7773 | CD2  | LEU | X | 511 | 34.416 | 16.644 | 33.217 | 0.00 | 0.00 |
| ATOM | 7774 | HD21 | LEU | X | 511 | 35.285 | 17.063 | 32.708 | 0.00 | 0.00 |
| ATOM | 7775 | HD22 | LEU | X | 511 | 33.702 | 16.425 | 32.423 | 0.00 | 0.00 |
| ATOM | 7776 | HD23 | LEU | X | 511 | 34.167 | 17.213 | 34.112 | 0.00 | 0.00 |
| ATOM | 7777 | C    | LEU | X | 511 | 31.426 | 14.106 | 35.602 | 0.00 | 0.00 |
| ATOM | 7778 | O    | LEU | X | 511 | 30.587 | 13.710 | 34.816 | 0.00 | 0.00 |
| ATOM | 7779 | N    | ARG | X | 512 | 31.365 | 13.816 | 36.889 | 0.00 | 0.00 |
| ATOM | 7780 | H    | ARG | X | 512 | 31.975 | 14.379 | 37.465 | 0.00 | 0.00 |
| ATOM | 7781 | CA   | ARG | X | 512 | 30.281 | 13.075 | 37.550 | 0.00 | 0.00 |
| ATOM | 7782 | HA   | ARG | X | 512 | 29.981 | 12.233 | 36.926 | 0.00 | 0.00 |
| ATOM | 7783 | CB   | ARG | X | 512 | 31.037 | 12.604 | 38.777 | 0.00 | 0.00 |
| ATOM | 7784 | HB2  | ARG | X | 512 | 31.415 | 13.472 | 39.316 | 0.00 | 0.00 |
| ATOM | 7785 | HB3  | ARG | X | 512 | 30.362 | 12.100 | 39.470 | 0.00 | 0.00 |
| ATOM | 7786 | CG   | ARG | X | 512 | 32.055 | 11.548 | 38.426 | 0.00 | 0.00 |
| ATOM | 7787 | HG2  | ARG | X | 512 | 31.584 | 10.633 | 38.067 | 0.00 | 0.00 |
| ATOM | 7788 | HG3  | ARG | X | 512 | 32.730 | 11.992 | 37.695 | 0.00 | 0.00 |
| ATOM | 7789 | CD   | ARG | X | 512 | 32.997 | 11.159 | 39.590 | 0.00 | 0.00 |
| ATOM | 7790 | HD2  | ARG | X | 512 | 33.710 | 11.973 | 39.717 | 0.00 | 0.00 |
| ATOM | 7791 | HD3  | ARG | X | 512 | 32.333 | 10.993 | 40.438 | 0.00 | 0.00 |
| ATOM | 7792 | NE   | ARG | X | 512 | 33.850 | 9.913  | 39.346 | 0.00 | 0.00 |
| ATOM | 7793 | HE   | ARG | X | 512 | 33.404 | 9.008  | 39.390 | 0.00 | 0.00 |
| ATOM | 7794 | CZ   | ARG | X | 512 | 34.932 | 9.895  | 38.603 | 0.00 | 0.00 |
| ATOM | 7795 | NH1  | ARG | X | 512 | 35.726 | 10.931 | 38.318 | 0.00 | 0.00 |
| ATOM | 7796 | HH11 | ARG | X | 512 | 35.558 | 11.876 | 38.632 | 0.00 | 0.00 |
| ATOM | 7797 | HH12 | ARG | X | 512 | 36.434 | 10.784 | 37.613 | 0.00 | 0.00 |
| ATOM | 7798 | NH2  | ARG | X | 512 | 35.187 | 8.790  | 37.931 | 0.00 | 0.00 |
| ATOM | 7799 | HH21 | ARG | X | 512 | 34.594 | 7.979  | 38.037 | 0.00 | 0.00 |
| ATOM | 7800 | HH22 | ARG | X | 512 | 35.879 | 8.800  | 37.195 | 0.00 | 0.00 |
| ATOM | 7801 | C    | ARG | X | 512 | 29.028 | 13.972 | 37.847 | 0.00 | 0.00 |
| ATOM | 7802 | O    | ARG | X | 512 | 29.212 | 15.198 | 37.808 | 0.00 | 0.00 |
| ATOM | 7803 | N    | PRO | X | 513 | 27.888 | 13.329 | 38.255 | 0.00 | 0.00 |
| ATOM | 7804 | CD   | PRO | X | 513 | 27.402 | 11.960 | 37.745 | 0.00 | 0.00 |
| ATOM | 7805 | HD2  | PRO | X | 513 | 27.922 | 11.099 | 38.166 | 0.00 | 0.00 |
| ATOM | 7806 | HD3  | PRO | X | 513 | 27.533 | 11.867 | 36.667 | 0.00 | 0.00 |
| ATOM | 7807 | CG   | PRO | X | 513 | 25.971 | 11.900 | 38.252 | 0.00 | 0.00 |
| ATOM | 7808 | HG2  | PRO | X | 513 | 25.568 | 10.914 | 38.480 | 0.00 | 0.00 |
| ATOM | 7809 | HG3  | PRO | X | 513 | 25.403 | 12.358 | 37.442 | 0.00 | 0.00 |
| ATOM | 7810 | CB   | PRO | X | 513 | 25.918 | 12.863 | 39.427 | 0.00 | 0.00 |
| ATOM | 7811 | HB2  | PRO | X | 513 | 26.280 | 12.393 | 40.340 | 0.00 | 0.00 |
| ATOM | 7812 | HB3  | PRO | X | 513 | 24.971 | 13.353 | 39.656 | 0.00 | 0.00 |
| ATOM | 7813 | CA   | PRO | X | 513 | 26.888 | 13.923 | 39.061 | 0.00 | 0.00 |
| ATOM | 7814 | HA   | PRO | X | 513 | 26.346 | 14.696 | 38.515 | 0.00 | 0.00 |
| ATOM | 7815 | C    | PRO | X | 513 | 27.576 | 14.514 | 40.346 | 0.00 | 0.00 |
| ATOM | 7816 | O    | PRO | X | 513 | 28.644 | 14.132 | 40.749 | 0.00 | 0.00 |

|      |      |      |     |   |     |        |        |        |      |      |
|------|------|------|-----|---|-----|--------|--------|--------|------|------|
| ATOM | 7817 | N    | LEU | X | 514 | 26.887 | 15.500 | 40.926 | 0.00 | 0.00 |
| ATOM | 7818 | H    | LEU | X | 514 | 26.093 | 15.926 | 40.470 | 0.00 | 0.00 |
| ATOM | 7819 | CA   | LEU | X | 514 | 27.291 | 16.247 | 42.087 | 0.00 | 0.00 |
| ATOM | 7820 | HA   | LEU | X | 514 | 28.222 | 16.737 | 41.801 | 0.00 | 0.00 |
| ATOM | 7821 | CB   | LEU | X | 514 | 26.217 | 17.367 | 42.293 | 0.00 | 0.00 |
| ATOM | 7822 | HB2  | LEU | X | 514 | 25.235 | 16.919 | 42.145 | 0.00 | 0.00 |
| ATOM | 7823 | HB3  | LEU | X | 514 | 26.291 | 17.650 | 43.343 | 0.00 | 0.00 |
| ATOM | 7824 | CG   | LEU | X | 514 | 26.382 | 18.707 | 41.482 | 0.00 | 0.00 |
| ATOM | 7825 | HG   | LEU | X | 514 | 26.534 | 18.391 | 40.450 | 0.00 | 0.00 |
| ATOM | 7826 | CD1  | LEU | X | 514 | 25.238 | 19.622 | 41.725 | 0.00 | 0.00 |
| ATOM | 7827 | HD11 | LEU | X | 514 | 25.340 | 20.536 | 41.140 | 0.00 | 0.00 |
| ATOM | 7828 | HD12 | LEU | X | 514 | 25.401 | 19.896 | 42.767 | 0.00 | 0.00 |
| ATOM | 7829 | HD13 | LEU | X | 514 | 24.289 | 19.143 | 41.482 | 0.00 | 0.00 |
| ATOM | 7830 | CD2  | LEU | X | 514 | 27.686 | 19.444 | 41.990 | 0.00 | 0.00 |
| ATOM | 7831 | HD21 | LEU | X | 514 | 27.813 | 19.442 | 43.072 | 0.00 | 0.00 |
| ATOM | 7832 | HD22 | LEU | X | 514 | 28.539 | 18.855 | 41.652 | 0.00 | 0.00 |
| ATOM | 7833 | HD23 | LEU | X | 514 | 27.725 | 20.403 | 41.474 | 0.00 | 0.00 |
| ATOM | 7834 | C    | LEU | X | 514 | 27.520 | 15.406 | 43.349 | 0.00 | 0.00 |
| ATOM | 7835 | O    | LEU | X | 514 | 26.565 | 15.012 | 43.993 | 0.00 | 0.00 |
| ATOM | 7836 | N    | GLU | X | 515 | 28.756 | 15.241 | 43.829 | 0.00 | 0.00 |
| ATOM | 7837 | H    | GLU | X | 515 | 29.484 | 15.766 | 43.367 | 0.00 | 0.00 |
| ATOM | 7838 | CA   | GLU | X | 515 | 29.030 | 14.792 | 45.173 | 0.00 | 0.00 |
| ATOM | 7839 | HA   | GLU | X | 515 | 28.150 | 14.352 | 45.642 | 0.00 | 0.00 |
| ATOM | 7840 | CB   | GLU | X | 515 | 30.209 | 13.775 | 45.108 | 0.00 | 0.00 |
| ATOM | 7841 | HB2  | GLU | X | 515 | 29.935 | 12.961 | 44.436 | 0.00 | 0.00 |
| ATOM | 7842 | HB3  | GLU | X | 515 | 31.092 | 14.192 | 44.623 | 0.00 | 0.00 |
| ATOM | 7843 | CG   | GLU | X | 515 | 30.621 | 13.112 | 46.442 | 0.00 | 0.00 |
| ATOM | 7844 | HG2  | GLU | X | 515 | 31.062 | 13.873 | 47.085 | 0.00 | 0.00 |
| ATOM | 7845 | HG3  | GLU | X | 515 | 29.761 | 12.676 | 46.951 | 0.00 | 0.00 |
| ATOM | 7846 | CD   | GLU | X | 515 | 31.603 | 12.016 | 46.115 | 0.00 | 0.00 |
| ATOM | 7847 | OE1  | GLU | X | 515 | 31.132 | 10.928 | 45.664 | 0.00 | 0.00 |
| ATOM | 7848 | OE2  | GLU | X | 515 | 32.792 | 12.303 | 46.179 | 0.00 | 0.00 |
| ATOM | 7849 | C    | GLU | X | 515 | 29.530 | 15.927 | 46.152 | 0.00 | 0.00 |
| ATOM | 7850 | O    | GLU | X | 515 | 30.417 | 16.659 | 45.781 | 0.00 | 0.00 |
| ATOM | 7851 | N    | VAL | X | 516 | 29.073 | 15.990 | 47.354 | 0.00 | 0.00 |
| ATOM | 7852 | H    | VAL | X | 516 | 28.385 | 15.290 | 47.594 | 0.00 | 0.00 |
| ATOM | 7853 | CA   | VAL | X | 516 | 29.315 | 16.951 | 48.358 | 0.00 | 0.00 |
| ATOM | 7854 | HA   | VAL | X | 516 | 29.623 | 17.911 | 47.942 | 0.00 | 0.00 |
| ATOM | 7855 | CB   | VAL | X | 516 | 28.027 | 17.220 | 49.190 | 0.00 | 0.00 |
| ATOM | 7856 | HB   | VAL | X | 516 | 27.573 | 16.252 | 49.403 | 0.00 | 0.00 |
| ATOM | 7857 | CG1  | VAL | X | 516 | 28.067 | 17.806 | 50.663 | 0.00 | 0.00 |
| ATOM | 7858 | HG11 | VAL | X | 516 | 27.067 | 17.727 | 51.089 | 0.00 | 0.00 |
| ATOM | 7859 | HG12 | VAL | X | 516 | 28.704 | 17.124 | 51.226 | 0.00 | 0.00 |
| ATOM | 7860 | HG13 | VAL | X | 516 | 28.404 | 18.842 | 50.639 | 0.00 | 0.00 |
| ATOM | 7861 | CG2  | VAL | X | 516 | 27.002 | 18.101 | 48.392 | 0.00 | 0.00 |
| ATOM | 7862 | HG21 | VAL | X | 516 | 26.047 | 18.214 | 48.905 | 0.00 | 0.00 |
| ATOM | 7863 | HG22 | VAL | X | 516 | 26.831 | 17.643 | 47.418 | 0.00 | 0.00 |
| ATOM | 7864 | HG23 | VAL | X | 516 | 27.431 | 19.098 | 48.285 | 0.00 | 0.00 |
| ATOM | 7865 | C    | VAL | X | 516 | 30.348 | 16.478 | 49.393 | 0.00 | 0.00 |
| ATOM | 7866 | O    | VAL | X | 516 | 30.555 | 15.253 | 49.651 | 0.00 | 0.00 |
| ATOM | 7867 | N    | ARG | X | 517 | 31.080 | 17.531 | 49.849 | 0.00 | 0.00 |
| ATOM | 7868 | H    | ARG | X | 517 | 30.764 | 18.436 | 49.531 | 0.00 | 0.00 |
| ATOM | 7869 | CA   | ARG | X | 517 | 32.156 | 17.492 | 50.810 | 0.00 | 0.00 |
| ATOM | 7870 | HA   | ARG | X | 517 | 32.317 | 16.454 | 51.101 | 0.00 | 0.00 |
| ATOM | 7871 | CB   | ARG | X | 517 | 33.443 | 17.829 | 50.069 | 0.00 | 0.00 |
| ATOM | 7872 | HB2  | ARG | X | 517 | 33.316 | 18.840 | 49.682 | 0.00 | 0.00 |
| ATOM | 7873 | HB3  | ARG | X | 517 | 34.255 | 17.753 | 50.792 | 0.00 | 0.00 |
| ATOM | 7874 | CG   | ARG | X | 517 | 33.867 | 16.965 | 48.812 | 0.00 | 0.00 |
| ATOM | 7875 | HG2  | ARG | X | 517 | 33.193 | 17.156 | 47.977 | 0.00 | 0.00 |
| ATOM | 7876 | HG3  | ARG | X | 517 | 34.806 | 17.464 | 48.575 | 0.00 | 0.00 |
| ATOM | 7877 | CD   | ARG | X | 517 | 34.064 | 15.445 | 48.979 | 0.00 | 0.00 |
| ATOM | 7878 | HD2  | ARG | X | 517 | 34.952 | 15.177 | 49.551 | 0.00 | 0.00 |
| ATOM | 7879 | HD3  | ARG | X | 517 | 33.225 | 15.073 | 49.567 | 0.00 | 0.00 |
| ATOM | 7880 | NE   | ARG | X | 517 | 34.128 | 14.802 | 47.616 | 0.00 | 0.00 |
| ATOM | 7881 | HE   | ARG | X | 517 | 33.337 | 14.216 | 47.387 | 0.00 | 0.00 |
| ATOM | 7882 | CZ   | ARG | X | 517 | 35.088 | 14.769 | 46.700 | 0.00 | 0.00 |
| ATOM | 7883 | NH1  | ARG | X | 517 | 36.168 | 15.566 | 46.786 | 0.00 | 0.00 |

|      |      |      |     |   |     |        |        |        |      |      |
|------|------|------|-----|---|-----|--------|--------|--------|------|------|
| ATOM | 7884 | HH11 | ARG | X | 517 | 36.353 | 16.154 | 47.586 | 0.00 | 0.00 |
| ATOM | 7885 | HH12 | ARG | X | 517 | 36.740 | 15.712 | 45.966 | 0.00 | 0.00 |
| ATOM | 7886 | NH2  | ARG | X | 517 | 34.875 | 13.989 | 45.644 | 0.00 | 0.00 |
| ATOM | 7887 | HH21 | ARG | X | 517 | 34.074 | 13.374 | 45.618 | 0.00 | 0.00 |
| ATOM | 7888 | HH22 | ARG | X | 517 | 35.419 | 13.977 | 44.794 | 0.00 | 0.00 |
| ATOM | 7889 | C    | ARG | X | 517 | 31.904 | 18.364 | 52.010 | 0.00 | 0.00 |
| ATOM | 7890 | O    | ARG | X | 517 | 31.033 | 19.216 | 52.079 | 0.00 | 0.00 |
| ATOM | 7891 | N    | ARG | X | 518 | 32.586 | 17.954 | 53.073 | 0.00 | 0.00 |
| ATOM | 7892 | H    | ARG | X | 518 | 33.224 | 17.179 | 52.964 | 0.00 | 0.00 |
| ATOM | 7893 | CA   | ARG | X | 518 | 32.284 | 18.493 | 54.460 | 0.00 | 0.00 |
| ATOM | 7894 | HA   | ARG | X | 518 | 31.663 | 19.389 | 54.471 | 0.00 | 0.00 |
| ATOM | 7895 | CB   | ARG | X | 518 | 31.366 | 17.503 | 55.158 | 0.00 | 0.00 |
| ATOM | 7896 | HB2  | ARG | X | 518 | 31.832 | 16.540 | 55.368 | 0.00 | 0.00 |
| ATOM | 7897 | HB3  | ARG | X | 518 | 30.909 | 17.942 | 56.045 | 0.00 | 0.00 |
| ATOM | 7898 | CG   | ARG | X | 518 | 30.101 | 17.117 | 54.358 | 0.00 | 0.00 |
| ATOM | 7899 | HG2  | ARG | X | 518 | 29.622 | 18.010 | 53.957 | 0.00 | 0.00 |
| ATOM | 7900 | HG3  | ARG | X | 518 | 30.433 | 16.514 | 53.512 | 0.00 | 0.00 |
| ATOM | 7901 | CD   | ARG | X | 518 | 29.108 | 16.232 | 55.048 | 0.00 | 0.00 |
| ATOM | 7902 | HD2  | ARG | X | 518 | 29.677 | 15.426 | 55.513 | 0.00 | 0.00 |
| ATOM | 7903 | HD3  | ARG | X | 518 | 28.606 | 16.675 | 55.907 | 0.00 | 0.00 |
| ATOM | 7904 | NE   | ARG | X | 518 | 28.119 | 15.717 | 54.172 | 0.00 | 0.00 |
| ATOM | 7905 | HE   | ARG | X | 518 | 27.276 | 16.270 | 54.095 | 0.00 | 0.00 |
| ATOM | 7906 | CZ   | ARG | X | 518 | 28.099 | 14.531 | 53.543 | 0.00 | 0.00 |
| ATOM | 7907 | NH1  | ARG | X | 518 | 29.054 | 13.592 | 53.711 | 0.00 | 0.00 |
| ATOM | 7908 | HH11 | ARG | X | 518 | 29.833 | 13.823 | 54.311 | 0.00 | 0.00 |
| ATOM | 7909 | HH12 | ARG | X | 518 | 29.167 | 12.856 | 53.029 | 0.00 | 0.00 |
| ATOM | 7910 | NH2  | ARG | X | 518 | 27.109 | 14.222 | 52.696 | 0.00 | 0.00 |
| ATOM | 7911 | HH21 | ARG | X | 518 | 26.288 | 14.783 | 52.518 | 0.00 | 0.00 |
| ATOM | 7912 | HH22 | ARG | X | 518 | 27.198 | 13.331 | 52.229 | 0.00 | 0.00 |
| ATOM | 7913 | C    | ARG | X | 518 | 33.423 | 18.840 | 55.315 | 0.00 | 0.00 |
| ATOM | 7914 | O    | ARG | X | 518 | 34.455 | 18.134 | 55.392 | 0.00 | 0.00 |
| ATOM | 7915 | N    | GLY | X | 519 | 33.289 | 20.040 | 55.930 | 0.00 | 0.00 |
| ATOM | 7916 | H    | GLY | X | 519 | 32.419 | 20.547 | 55.852 | 0.00 | 0.00 |
| ATOM | 7917 | CA   | GLY | X | 519 | 34.248 | 20.772 | 56.778 | 0.00 | 0.00 |
| ATOM | 7918 | HA2  | GLY | X | 519 | 33.733 | 21.520 | 57.382 | 0.00 | 0.00 |
| ATOM | 7919 | HA3  | GLY | X | 519 | 34.862 | 20.105 | 57.382 | 0.00 | 0.00 |
| ATOM | 7920 | C    | GLY | X | 519 | 35.267 | 21.547 | 55.903 | 0.00 | 0.00 |
| ATOM | 7921 | O    | GLY | X | 519 | 36.441 | 21.153 | 55.949 | 0.00 | 0.00 |
| ATOM | 7922 | N    | LEU | X | 520 | 34.783 | 22.453 | 55.043 | 0.00 | 0.00 |
| ATOM | 7923 | H    | LEU | X | 520 | 33.787 | 22.592 | 54.957 | 0.00 | 0.00 |
| ATOM | 7924 | CA   | LEU | X | 520 | 35.625 | 23.283 | 54.179 | 0.00 | 0.00 |
| ATOM | 7925 | HA   | LEU | X | 520 | 35.881 | 22.740 | 53.269 | 0.00 | 0.00 |
| ATOM | 7926 | CB   | LEU | X | 520 | 34.834 | 24.472 | 53.641 | 0.00 | 0.00 |
| ATOM | 7927 | HB2  | LEU | X | 520 | 33.860 | 24.137 | 53.285 | 0.00 | 0.00 |
| ATOM | 7928 | HB3  | LEU | X | 520 | 34.652 | 25.217 | 54.415 | 0.00 | 0.00 |
| ATOM | 7929 | CG   | LEU | X | 520 | 35.551 | 25.352 | 52.614 | 0.00 | 0.00 |
| ATOM | 7930 | HG   | LEU | X | 520 | 36.310 | 26.021 | 53.020 | 0.00 | 0.00 |
| ATOM | 7931 | CD1  | LEU | X | 520 | 36.163 | 24.604 | 51.389 | 0.00 | 0.00 |
| ATOM | 7932 | HD11 | LEU | X | 520 | 36.933 | 23.956 | 51.807 | 0.00 | 0.00 |
| ATOM | 7933 | HD12 | LEU | X | 520 | 36.623 | 25.201 | 50.602 | 0.00 | 0.00 |
| ATOM | 7934 | HD13 | LEU | X | 520 | 35.400 | 24.083 | 50.811 | 0.00 | 0.00 |
| ATOM | 7935 | CD2  | LEU | X | 520 | 34.506 | 26.290 | 51.939 | 0.00 | 0.00 |
| ATOM | 7936 | HD21 | LEU | X | 520 | 35.097 | 27.067 | 51.453 | 0.00 | 0.00 |
| ATOM | 7937 | HD22 | LEU | X | 520 | 33.932 | 25.788 | 51.161 | 0.00 | 0.00 |
| ATOM | 7938 | HD23 | LEU | X | 520 | 33.881 | 26.854 | 52.632 | 0.00 | 0.00 |
| ATOM | 7939 | C    | LEU | X | 520 | 36.970 | 23.775 | 54.783 | 0.00 | 0.00 |
| ATOM | 7940 | O    | LEU | X | 520 | 36.890 | 24.770 | 55.509 | 0.00 | 0.00 |
| ATOM | 7941 | N    | ARG | X | 521 | 38.060 | 23.129 | 54.432 | 0.00 | 0.00 |
| ATOM | 7942 | H    | ARG | X | 521 | 37.936 | 22.376 | 53.770 | 0.00 | 0.00 |
| ATOM | 7943 | CA   | ARG | X | 521 | 39.391 | 23.633 | 54.766 | 0.00 | 0.00 |
| ATOM | 7944 | HA   | ARG | X | 521 | 40.039 | 22.844 | 54.385 | 0.00 | 0.00 |
| ATOM | 7945 | CB   | ARG | X | 521 | 39.692 | 24.972 | 54.018 | 0.00 | 0.00 |
| ATOM | 7946 | HB2  | ARG | X | 521 | 39.107 | 25.039 | 53.100 | 0.00 | 0.00 |
| ATOM | 7947 | HB3  | ARG | X | 521 | 39.258 | 25.851 | 54.494 | 0.00 | 0.00 |
| ATOM | 7948 | CG   | ARG | X | 521 | 41.153 | 24.940 | 53.551 | 0.00 | 0.00 |
| ATOM | 7949 | HG2  | ARG | X | 521 | 41.458 | 25.928 | 53.205 | 0.00 | 0.00 |
| ATOM | 7950 | HG3  | ARG | X | 521 | 41.825 | 24.768 | 54.392 | 0.00 | 0.00 |

|      |      |      |     |   |     |        |        |        |      |      |
|------|------|------|-----|---|-----|--------|--------|--------|------|------|
| ATOM | 7951 | CD   | ARG | X | 521 | 41.430 | 23.890 | 52.434 | 0.00 | 0.00 |
| ATOM | 7952 | HD2  | ARG | X | 521 | 41.487 | 22.890 | 52.865 | 0.00 | 0.00 |
| ATOM | 7953 | HD3  | ARG | X | 521 | 40.604 | 23.911 | 51.723 | 0.00 | 0.00 |
| ATOM | 7954 | NE   | ARG | X | 521 | 42.693 | 24.161 | 51.756 | 0.00 | 0.00 |
| ATOM | 7955 | HE   | ARG | X | 521 | 43.321 | 24.922 | 51.973 | 0.00 | 0.00 |
| ATOM | 7956 | CZ   | ARG | X | 521 | 43.097 | 23.349 | 50.828 | 0.00 | 0.00 |
| ATOM | 7957 | NH1  | ARG | X | 521 | 42.314 | 22.508 | 50.231 | 0.00 | 0.00 |
| ATOM | 7958 | HH11 | ARG | X | 521 | 41.384 | 22.242 | 50.523 | 0.00 | 0.00 |
| ATOM | 7959 | HH12 | ARG | X | 521 | 42.684 | 22.083 | 49.394 | 0.00 | 0.00 |
| ATOM | 7960 | NH2  | ARG | X | 521 | 44.348 | 23.417 | 50.426 | 0.00 | 0.00 |
| ATOM | 7961 | HH21 | ARG | X | 521 | 44.908 | 24.161 | 50.817 | 0.00 | 0.00 |
| ATOM | 7962 | HH22 | ARG | X | 521 | 44.750 | 22.840 | 49.701 | 0.00 | 0.00 |
| ATOM | 7963 | C    | ARG | X | 521 | 39.772 | 23.739 | 56.249 | 0.00 | 0.00 |
| ATOM | 7964 | O    | ARG | X | 521 | 40.740 | 24.424 | 56.677 | 0.00 | 0.00 |
| ATOM | 7965 | N    | ALA | X | 522 | 38.923 | 23.262 | 57.141 | 0.00 | 0.00 |
| ATOM | 7966 | H    | ALA | X | 522 | 38.080 | 22.946 | 56.683 | 0.00 | 0.00 |
| ATOM | 7967 | CA   | ALA | X | 522 | 38.842 | 23.539 | 58.567 | 0.00 | 0.00 |
| ATOM | 7968 | HA   | ALA | X | 522 | 38.972 | 24.616 | 58.672 | 0.00 | 0.00 |
| ATOM | 7969 | CB   | ALA | X | 522 | 37.462 | 23.023 | 59.093 | 0.00 | 0.00 |
| ATOM | 7970 | HB1  | ALA | X | 522 | 37.317 | 23.413 | 60.101 | 0.00 | 0.00 |
| ATOM | 7971 | HB2  | ALA | X | 522 | 37.300 | 21.950 | 58.991 | 0.00 | 0.00 |
| ATOM | 7972 | HB3  | ALA | X | 522 | 36.715 | 23.358 | 58.374 | 0.00 | 0.00 |
| ATOM | 7973 | C    | ALA | X | 522 | 40.020 | 22.969 | 59.369 | 0.00 | 0.00 |
| ATOM | 7974 | O    | ALA | X | 522 | 40.162 | 23.217 | 60.591 | 0.00 | 0.00 |
| ATOM | 7975 | N    | GLN | X | 523 | 40.835 | 22.160 | 58.714 | 0.00 | 0.00 |
| ATOM | 7976 | H    | GLN | X | 523 | 40.564 | 21.823 | 57.801 | 0.00 | 0.00 |
| ATOM | 7977 | CA   | GLN | X | 523 | 42.155 | 21.718 | 59.273 | 0.00 | 0.00 |
| ATOM | 7978 | HA   | GLN | X | 523 | 41.944 | 21.457 | 60.310 | 0.00 | 0.00 |
| ATOM | 7979 | CB   | GLN | X | 523 | 42.682 | 20.486 | 58.580 | 0.00 | 0.00 |
| ATOM | 7980 | HB2  | GLN | X | 523 | 42.854 | 20.627 | 57.513 | 0.00 | 0.00 |
| ATOM | 7981 | HB3  | GLN | X | 523 | 43.718 | 20.405 | 58.910 | 0.00 | 0.00 |
| ATOM | 7982 | CG   | GLN | X | 523 | 41.999 | 19.146 | 58.829 | 0.00 | 0.00 |
| ATOM | 7983 | HG2  | GLN | X | 523 | 40.921 | 19.224 | 58.688 | 0.00 | 0.00 |
| ATOM | 7984 | HG3  | GLN | X | 523 | 42.419 | 18.394 | 58.160 | 0.00 | 0.00 |
| ATOM | 7985 | CD   | GLN | X | 523 | 42.222 | 18.599 | 60.215 | 0.00 | 0.00 |
| ATOM | 7986 | OE1  | GLN | X | 523 | 43.284 | 18.137 | 60.564 | 0.00 | 0.00 |
| ATOM | 7987 | NE2  | GLN | X | 523 | 41.320 | 18.793 | 61.063 | 0.00 | 0.00 |
| ATOM | 7988 | HE21 | GLN | X | 523 | 41.522 | 18.308 | 61.925 | 0.00 | 0.00 |
| ATOM | 7989 | HE22 | GLN | X | 523 | 40.397 | 19.120 | 60.818 | 0.00 | 0.00 |
| ATOM | 7990 | C    | GLN | X | 523 | 43.240 | 22.839 | 59.180 | 0.00 | 0.00 |
| ATOM | 7991 | O    | GLN | X | 523 | 43.930 | 23.042 | 60.178 | 0.00 | 0.00 |
| ATOM | 7992 | N    | ALA | X | 524 | 43.302 | 23.658 | 58.086 | 0.00 | 0.00 |
| ATOM | 7993 | H    | ALA | X | 524 | 42.717 | 23.473 | 57.284 | 0.00 | 0.00 |
| ATOM | 7994 | CA   | ALA | X | 524 | 44.135 | 24.851 | 58.048 | 0.00 | 0.00 |
| ATOM | 7995 | HA   | ALA | X | 524 | 45.032 | 24.690 | 58.646 | 0.00 | 0.00 |
| ATOM | 7996 | CB   | ALA | X | 524 | 44.638 | 25.231 | 56.670 | 0.00 | 0.00 |
| ATOM | 7997 | HB1  | ALA | X | 524 | 45.448 | 25.960 | 56.642 | 0.00 | 0.00 |
| ATOM | 7998 | HB2  | ALA | X | 524 | 43.828 | 25.754 | 56.161 | 0.00 | 0.00 |
| ATOM | 7999 | HB3  | ALA | X | 524 | 44.938 | 24.329 | 56.136 | 0.00 | 0.00 |
| ATOM | 8000 | C    | ALA | X | 524 | 43.479 | 26.071 | 58.781 | 0.00 | 0.00 |
| ATOM | 8001 | O    | ALA | X | 524 | 44.187 | 26.845 | 59.405 | 0.00 | 0.00 |
| ATOM | 8002 | N    | CYX | X | 525 | 42.151 | 26.158 | 58.750 | 0.00 | 0.00 |
| ATOM | 8003 | H    | CYX | X | 525 | 41.728 | 25.498 | 58.113 | 0.00 | 0.00 |
| ATOM | 8004 | CA   | CYX | X | 525 | 41.562 | 27.493 | 58.944 | 0.00 | 0.00 |
| ATOM | 8005 | HA   | CYX | X | 525 | 42.236 | 28.231 | 58.508 | 0.00 | 0.00 |
| ATOM | 8006 | CB   | CYX | X | 525 | 40.303 | 27.608 | 58.139 | 0.00 | 0.00 |
| ATOM | 8007 | HB2  | CYX | X | 525 | 39.729 | 26.761 | 58.515 | 0.00 | 0.00 |
| ATOM | 8008 | HB3  | CYX | X | 525 | 39.736 | 28.511 | 58.366 | 0.00 | 0.00 |
| ATOM | 8009 | SG   | CYX | X | 525 | 40.483 | 27.486 | 56.349 | 0.00 | 0.00 |
| ATOM | 8010 | C    | CYX | X | 525 | 41.327 | 27.949 | 60.407 | 0.00 | 0.00 |
| ATOM | 8011 | O    | CYX | X | 525 | 41.175 | 29.190 | 60.664 | 0.00 | 0.00 |
| ATOM | 8012 | N    | ALA | X | 526 | 41.333 | 26.946 | 61.318 | 0.00 | 0.00 |
| ATOM | 8013 | H    | ALA | X | 526 | 41.520 | 25.985 | 61.072 | 0.00 | 0.00 |
| ATOM | 8014 | CA   | ALA | X | 526 | 41.297 | 27.243 | 62.708 | 0.00 | 0.00 |
| ATOM | 8015 | HA   | ALA | X | 526 | 40.419 | 27.860 | 62.897 | 0.00 | 0.00 |
| ATOM | 8016 | CB   | ALA | X | 526 | 41.043 | 25.916 | 63.360 | 0.00 | 0.00 |
| ATOM | 8017 | HB1  | ALA | X | 526 | 40.077 | 25.558 | 63.004 | 0.00 | 0.00 |

|      |      |      |     |   |     |        |        |        |      |      |
|------|------|------|-----|---|-----|--------|--------|--------|------|------|
| ATOM | 8018 | HB2  | ALA | X | 526 | 40.989 | 26.041 | 64.442 | 0.00 | 0.00 |
| ATOM | 8019 | HB3  | ALA | X | 526 | 41.866 | 25.214 | 63.225 | 0.00 | 0.00 |
| ATOM | 8020 | C    | ALA | X | 526 | 42.462 | 28.062 | 63.107 | 0.00 | 0.00 |
| ATOM | 8021 | O    | ALA | X | 526 | 42.370 | 29.165 | 63.761 | 0.00 | 0.00 |
| ATOM | 8022 | N    | PHE | X | 527 | 43.616 | 27.625 | 62.635 | 0.00 | 0.00 |
| ATOM | 8023 | H    | PHE | X | 527 | 43.535 | 26.894 | 61.944 | 0.00 | 0.00 |
| ATOM | 8024 | CA   | PHE | X | 527 | 44.899 | 28.281 | 62.748 | 0.00 | 0.00 |
| ATOM | 8025 | HA   | PHE | X | 527 | 45.212 | 28.338 | 63.790 | 0.00 | 0.00 |
| ATOM | 8026 | CB   | PHE | X | 527 | 45.947 | 27.411 | 62.011 | 0.00 | 0.00 |
| ATOM | 8027 | HB2  | PHE | X | 527 | 45.892 | 26.401 | 62.419 | 0.00 | 0.00 |
| ATOM | 8028 | HB3  | PHE | X | 527 | 45.831 | 27.328 | 60.931 | 0.00 | 0.00 |
| ATOM | 8029 | CG   | PHE | X | 527 | 47.355 | 27.867 | 62.184 | 0.00 | 0.00 |
| ATOM | 8030 | CD1  | PHE | X | 527 | 48.014 | 27.695 | 63.421 | 0.00 | 0.00 |
| ATOM | 8031 | HD1  | PHE | X | 527 | 47.549 | 27.171 | 64.243 | 0.00 | 0.00 |
| ATOM | 8032 | CE1  | PHE | X | 527 | 49.288 | 28.126 | 63.560 | 0.00 | 0.00 |
| ATOM | 8033 | HE1  | PHE | X | 527 | 49.829 | 27.931 | 64.474 | 0.00 | 0.00 |
| ATOM | 8034 | CZ   | PHE | X | 527 | 49.972 | 28.752 | 62.504 | 0.00 | 0.00 |
| ATOM | 8035 | HZ   | PHE | X | 527 | 51.012 | 29.002 | 62.658 | 0.00 | 0.00 |
| ATOM | 8036 | CE2  | PHE | X | 527 | 49.356 | 28.956 | 61.212 | 0.00 | 0.00 |
| ATOM | 8037 | HE2  | PHE | X | 527 | 49.878 | 29.466 | 60.415 | 0.00 | 0.00 |
| ATOM | 8038 | CD2  | PHE | X | 527 | 48.043 | 28.476 | 61.074 | 0.00 | 0.00 |
| ATOM | 8039 | HD2  | PHE | X | 527 | 47.472 | 28.665 | 60.177 | 0.00 | 0.00 |
| ATOM | 8040 | C    | PHE | X | 527 | 44.981 | 29.687 | 62.129 | 0.00 | 0.00 |
| ATOM | 8041 | O    | PHE | X | 527 | 45.346 | 30.609 | 62.753 | 0.00 | 0.00 |
| ATOM | 8042 | N    | TRP | X | 528 | 44.425 | 29.888 | 60.946 | 0.00 | 0.00 |
| ATOM | 8043 | H    | TRP | X | 528 | 44.129 | 29.044 | 60.477 | 0.00 | 0.00 |
| ATOM | 8044 | CA   | TRP | X | 528 | 44.460 | 31.127 | 60.206 | 0.00 | 0.00 |
| ATOM | 8045 | HA   | TRP | X | 528 | 45.441 | 31.574 | 60.371 | 0.00 | 0.00 |
| ATOM | 8046 | CB   | TRP | X | 528 | 44.471 | 30.993 | 58.658 | 0.00 | 0.00 |
| ATOM | 8047 | HB2  | TRP | X | 528 | 43.568 | 30.491 | 58.310 | 0.00 | 0.00 |
| ATOM | 8048 | HB3  | TRP | X | 528 | 44.462 | 31.990 | 58.220 | 0.00 | 0.00 |
| ATOM | 8049 | CG   | TRP | X | 528 | 45.567 | 30.152 | 58.049 | 0.00 | 0.00 |
| ATOM | 8050 | CD1  | TRP | X | 528 | 45.384 | 29.010 | 57.368 | 0.00 | 0.00 |
| ATOM | 8051 | HD1  | TRP | X | 528 | 44.411 | 28.543 | 57.314 | 0.00 | 0.00 |
| ATOM | 8052 | NE1  | TRP | X | 528 | 46.568 | 28.540 | 56.769 | 0.00 | 0.00 |
| ATOM | 8053 | HE1  | TRP | X | 528 | 46.497 | 27.838 | 56.046 | 0.00 | 0.00 |
| ATOM | 8054 | CE2  | TRP | X | 528 | 47.595 | 29.466 | 56.997 | 0.00 | 0.00 |
| ATOM | 8055 | CZ2  | TRP | X | 528 | 48.942 | 29.597 | 56.606 | 0.00 | 0.00 |
| ATOM | 8056 | HZ2  | TRP | X | 528 | 49.329 | 28.788 | 56.005 | 0.00 | 0.00 |
| ATOM | 8057 | CH2  | TRP | X | 528 | 49.746 | 30.527 | 57.255 | 0.00 | 0.00 |
| ATOM | 8058 | HH2  | TRP | X | 528 | 50.742 | 30.677 | 56.864 | 0.00 | 0.00 |
| ATOM | 8059 | CZ3  | TRP | X | 528 | 49.208 | 31.447 | 58.134 | 0.00 | 0.00 |
| ATOM | 8060 | HZ3  | TRP | X | 528 | 49.713 | 32.378 | 58.348 | 0.00 | 0.00 |
| ATOM | 8061 | CE3  | TRP | X | 528 | 47.841 | 31.456 | 58.412 | 0.00 | 0.00 |
| ATOM | 8062 | HE3  | TRP | X | 528 | 47.311 | 32.306 | 58.814 | 0.00 | 0.00 |
| ATOM | 8063 | CD2  | TRP | X | 528 | 47.025 | 30.384 | 57.946 | 0.00 | 0.00 |
| ATOM | 8064 | C    | TRP | X | 528 | 43.455 | 32.158 | 60.753 | 0.00 | 0.00 |
| ATOM | 8065 | O    | TRP | X | 528 | 43.680 | 33.330 | 60.829 | 0.00 | 0.00 |
| ATOM | 8066 | N    | ASN | X | 529 | 42.245 | 31.648 | 61.056 | 0.00 | 0.00 |
| ATOM | 8067 | H    | ASN | X | 529 | 42.113 | 30.647 | 61.064 | 0.00 | 0.00 |
| ATOM | 8068 | CA   | ASN | X | 529 | 41.121 | 32.501 | 61.490 | 0.00 | 0.00 |
| ATOM | 8069 | HA   | ASN | X | 529 | 41.253 | 33.507 | 61.092 | 0.00 | 0.00 |
| ATOM | 8070 | CB   | ASN | X | 529 | 39.858 | 31.998 | 60.793 | 0.00 | 0.00 |
| ATOM | 8071 | HB2  | ASN | X | 529 | 39.511 | 31.084 | 61.277 | 0.00 | 0.00 |
| ATOM | 8072 | HB3  | ASN | X | 529 | 38.998 | 32.641 | 60.978 | 0.00 | 0.00 |
| ATOM | 8073 | CG   | ASN | X | 529 | 39.875 | 31.592 | 59.309 | 0.00 | 0.00 |
| ATOM | 8074 | OD1  | ASN | X | 529 | 40.766 | 31.859 | 58.593 | 0.00 | 0.00 |
| ATOM | 8075 | ND2  | ASN | X | 529 | 38.782 | 31.012 | 58.860 | 0.00 | 0.00 |
| ATOM | 8076 | HD21 | ASN | X | 529 | 38.676 | 30.744 | 57.892 | 0.00 | 0.00 |
| ATOM | 8077 | HD22 | ASN | X | 529 | 38.159 | 30.720 | 59.599 | 0.00 | 0.00 |
| ATOM | 8078 | C    | ASN | X | 529 | 40.864 | 32.761 | 63.039 | 0.00 | 0.00 |
| ATOM | 8079 | O    | ASN | X | 529 | 39.860 | 33.358 | 63.477 | 0.00 | 0.00 |
| ATOM | 8080 | N    | ARG | X | 530 | 41.839 | 32.263 | 63.830 | 0.00 | 0.00 |
| ATOM | 8081 | H    | ARG | X | 530 | 42.543 | 31.738 | 63.331 | 0.00 | 0.00 |
| ATOM | 8082 | CA   | ARG | X | 530 | 41.958 | 32.529 | 65.271 | 0.00 | 0.00 |
| ATOM | 8083 | HA   | ARG | X | 530 | 41.638 | 33.553 | 65.465 | 0.00 | 0.00 |
| ATOM | 8084 | CB   | ARG | X | 530 | 40.893 | 31.592 | 66.024 | 0.00 | 0.00 |

|      |      |      |     |   |     |        |        |        |      |      |
|------|------|------|-----|---|-----|--------|--------|--------|------|------|
| ATOM | 8085 | HB2  | ARG | X | 530 | 39.930 | 31.600 | 65.515 | 0.00 | 0.00 |
| ATOM | 8086 | HB3  | ARG | X | 530 | 41.274 | 30.571 | 66.014 | 0.00 | 0.00 |
| ATOM | 8087 | CG   | ARG | X | 530 | 40.583 | 32.014 | 67.447 | 0.00 | 0.00 |
| ATOM | 8088 | HG2  | ARG | X | 530 | 41.454 | 31.984 | 68.101 | 0.00 | 0.00 |
| ATOM | 8089 | HG3  | ARG | X | 530 | 40.271 | 33.054 | 67.354 | 0.00 | 0.00 |
| ATOM | 8090 | CD   | ARG | X | 530 | 39.457 | 31.140 | 68.144 | 0.00 | 0.00 |
| ATOM | 8091 | HD2  | ARG | X | 530 | 39.025 | 31.635 | 69.014 | 0.00 | 0.00 |
| ATOM | 8092 | HD3  | ARG | X | 530 | 38.689 | 31.034 | 67.378 | 0.00 | 0.00 |
| ATOM | 8093 | NE   | ARG | X | 530 | 39.941 | 29.786 | 68.520 | 0.00 | 0.00 |
| ATOM | 8094 | HE   | ARG | X | 530 | 40.857 | 29.503 | 68.199 | 0.00 | 0.00 |
| ATOM | 8095 | CZ   | ARG | X | 530 | 39.298 | 28.879 | 69.262 | 0.00 | 0.00 |
| ATOM | 8096 | NH1  | ARG | X | 530 | 38.052 | 29.146 | 69.668 | 0.00 | 0.00 |
| ATOM | 8097 | NH11 | ARG | X | 530 | 37.525 | 29.924 | 69.298 | 0.00 | 0.00 |
| ATOM | 8098 | NH12 | ARG | X | 530 | 37.427 | 28.395 | 69.924 | 0.00 | 0.00 |
| ATOM | 8099 | NH2  | ARG | X | 530 | 39.849 | 27.699 | 69.461 | 0.00 | 0.00 |
| ATOM | 8100 | NH21 | ARG | X | 530 | 40.626 | 27.203 | 69.048 | 0.00 | 0.00 |
| ATOM | 8101 | NH22 | ARG | X | 530 | 39.334 | 27.187 | 70.163 | 0.00 | 0.00 |
| ATOM | 8102 | C    | ARG | X | 530 | 43.336 | 32.369 | 65.906 | 0.00 | 0.00 |
| ATOM | 8103 | O    | ARG | X | 530 | 43.799 | 33.372 | 66.481 | 0.00 | 0.00 |
| ATOM | 8104 | N    | PHE | X | 531 | 44.113 | 31.259 | 65.741 | 0.00 | 0.00 |
| ATOM | 8105 | H    | PHE | X | 531 | 43.799 | 30.445 | 65.231 | 0.00 | 0.00 |
| ATOM | 8106 | CA   | PHE | X | 531 | 45.404 | 31.137 | 66.444 | 0.00 | 0.00 |
| ATOM | 8107 | HA   | PHE | X | 531 | 45.147 | 31.363 | 67.479 | 0.00 | 0.00 |
| ATOM | 8108 | CB   | PHE | X | 531 | 45.993 | 29.729 | 66.251 | 0.00 | 0.00 |
| ATOM | 8109 | HB2  | PHE | X | 531 | 45.242 | 28.947 | 66.360 | 0.00 | 0.00 |
| ATOM | 8110 | HB3  | PHE | X | 531 | 46.274 | 29.704 | 65.198 | 0.00 | 0.00 |
| ATOM | 8111 | CG   | PHE | X | 531 | 47.164 | 29.362 | 67.140 | 0.00 | 0.00 |
| ATOM | 8112 | CD1  | PHE | X | 531 | 48.486 | 29.358 | 66.641 | 0.00 | 0.00 |
| ATOM | 8113 | HD1  | PHE | X | 531 | 48.744 | 29.730 | 65.660 | 0.00 | 0.00 |
| ATOM | 8114 | CE1  | PHE | X | 531 | 49.582 | 28.972 | 67.465 | 0.00 | 0.00 |
| ATOM | 8115 | HE1  | PHE | X | 531 | 50.615 | 28.941 | 67.149 | 0.00 | 0.00 |
| ATOM | 8116 | CZ   | PHE | X | 531 | 49.372 | 28.700 | 68.819 | 0.00 | 0.00 |
| ATOM | 8117 | HZ   | PHE | X | 531 | 50.138 | 28.345 | 69.493 | 0.00 | 0.00 |
| ATOM | 8118 | CE2  | PHE | X | 531 | 48.073 | 28.767 | 69.396 | 0.00 | 0.00 |
| ATOM | 8119 | HE2  | PHE | X | 531 | 48.032 | 28.682 | 70.471 | 0.00 | 0.00 |
| ATOM | 8120 | CD2  | PHE | X | 531 | 46.976 | 29.127 | 68.546 | 0.00 | 0.00 |
| ATOM | 8121 | HD2  | PHE | X | 531 | 45.958 | 29.067 | 68.902 | 0.00 | 0.00 |
| ATOM | 8122 | C    | PHE | X | 531 | 46.526 | 32.032 | 65.920 | 0.00 | 0.00 |
| ATOM | 8123 | O    | PHE | X | 531 | 47.253 | 32.601 | 66.732 | 0.00 | 0.00 |
| ATOM | 8124 | N    | LEU | X | 532 | 46.746 | 32.150 | 64.606 | 0.00 | 0.00 |
| ATOM | 8125 | H    | LEU | X | 532 | 46.148 | 31.623 | 63.985 | 0.00 | 0.00 |
| ATOM | 8126 | CA   | LEU | X | 532 | 47.866 | 32.844 | 64.031 | 0.00 | 0.00 |
| ATOM | 8127 | HA   | LEU | X | 532 | 48.731 | 32.539 | 64.620 | 0.00 | 0.00 |
| ATOM | 8128 | CB   | LEU | X | 532 | 47.934 | 32.405 | 62.545 | 0.00 | 0.00 |
| ATOM | 8129 | HB2  | LEU | X | 532 | 47.831 | 31.325 | 62.448 | 0.00 | 0.00 |
| ATOM | 8130 | HB3  | LEU | X | 532 | 47.043 | 32.844 | 62.096 | 0.00 | 0.00 |
| ATOM | 8131 | CG   | LEU | X | 532 | 49.291 | 32.779 | 61.827 | 0.00 | 0.00 |
| ATOM | 8132 | HG   | LEU | X | 532 | 49.252 | 32.151 | 60.937 | 0.00 | 0.00 |
| ATOM | 8133 | CD1  | LEU | X | 532 | 49.325 | 34.207 | 61.226 | 0.00 | 0.00 |
| ATOM | 8134 | HD11 | LEU | X | 532 | 49.070 | 34.890 | 62.036 | 0.00 | 0.00 |
| ATOM | 8135 | HD12 | LEU | X | 532 | 48.726 | 34.238 | 60.316 | 0.00 | 0.00 |
| ATOM | 8136 | HD13 | LEU | X | 532 | 50.357 | 34.401 | 60.931 | 0.00 | 0.00 |
| ATOM | 8137 | CD2  | LEU | X | 532 | 50.591 | 32.467 | 62.577 | 0.00 | 0.00 |
| ATOM | 8138 | HD21 | LEU | X | 532 | 50.792 | 33.104 | 63.438 | 0.00 | 0.00 |
| ATOM | 8139 | HD22 | LEU | X | 532 | 50.349 | 31.492 | 63.000 | 0.00 | 0.00 |
| ATOM | 8140 | HD23 | LEU | X | 532 | 51.482 | 32.454 | 61.950 | 0.00 | 0.00 |
| ATOM | 8141 | C    | LEU | X | 532 | 47.836 | 34.369 | 64.355 | 0.00 | 0.00 |
| ATOM | 8142 | O    | LEU | X | 532 | 48.801 | 34.932 | 64.890 | 0.00 | 0.00 |
| ATOM | 8143 | N    | PRO | X | 533 | 46.738 | 35.140 | 64.044 | 0.00 | 0.00 |
| ATOM | 8144 | CD   | PRO | X | 533 | 45.450 | 34.695 | 63.418 | 0.00 | 0.00 |
| ATOM | 8145 | HD2  | PRO | X | 533 | 44.954 | 33.812 | 63.820 | 0.00 | 0.00 |
| ATOM | 8146 | HD3  | PRO | X | 533 | 45.600 | 34.664 | 62.339 | 0.00 | 0.00 |
| ATOM | 8147 | CG   | PRO | X | 533 | 44.461 | 35.857 | 63.769 | 0.00 | 0.00 |
| ATOM | 8148 | HG2  | PRO | X | 533 | 44.185 | 35.795 | 64.822 | 0.00 | 0.00 |
| ATOM | 8149 | HG3  | PRO | X | 533 | 43.691 | 35.945 | 63.003 | 0.00 | 0.00 |
| ATOM | 8150 | CB   | PRO | X | 533 | 45.372 | 37.101 | 63.724 | 0.00 | 0.00 |
| ATOM | 8151 | HB2  | PRO | X | 533 | 44.913 | 37.978 | 64.179 | 0.00 | 0.00 |



|      |      |      |     |   |     |        |        |        |      |      |
|------|------|------|-----|---|-----|--------|--------|--------|------|------|
| ATOM | 8152 | HB3  | PRO | X | 533 | 45.624 | 37.353 | 62.694 | 0.00 | 0.00 |
| ATOM | 8153 | CA   | PRO | X | 533 | 46.682 | 36.628 | 64.303 | 0.00 | 0.00 |
| ATOM | 8154 | HA   | PRO | X | 533 | 47.449 | 37.213 | 63.796 | 0.00 | 0.00 |
| ATOM | 8155 | C    | PRO | X | 533 | 46.776 | 36.917 | 65.782 | 0.00 | 0.00 |
| ATOM | 8156 | O    | PRO | X | 533 | 47.453 | 37.896 | 66.076 | 0.00 | 0.00 |
| ATOM | 8157 | N    | LYS | X | 534 | 46.356 | 36.048 | 66.713 | 0.00 | 0.00 |
| ATOM | 8158 | H    | LYS | X | 534 | 46.006 | 35.148 | 66.417 | 0.00 | 0.00 |
| ATOM | 8159 | CA   | LYS | X | 534 | 46.640 | 36.373 | 68.159 | 0.00 | 0.00 |
| ATOM | 8160 | HA   | LYS | X | 534 | 46.357 | 37.391 | 68.428 | 0.00 | 0.00 |
| ATOM | 8161 | CB   | LYS | X | 534 | 45.630 | 35.684 | 69.138 | 0.00 | 0.00 |
| ATOM | 8162 | HB2  | LYS | X | 534 | 45.755 | 34.602 | 69.103 | 0.00 | 0.00 |
| ATOM | 8163 | HB3  | LYS | X | 534 | 45.818 | 35.949 | 70.179 | 0.00 | 0.00 |
| ATOM | 8164 | CG   | LYS | X | 534 | 44.139 | 35.995 | 68.871 | 0.00 | 0.00 |
| ATOM | 8165 | HG2  | LYS | X | 534 | 44.047 | 37.075 | 68.985 | 0.00 | 0.00 |
| ATOM | 8166 | HG3  | LYS | X | 534 | 43.938 | 35.612 | 67.870 | 0.00 | 0.00 |
| ATOM | 8167 | CD   | LYS | X | 534 | 43.312 | 35.130 | 69.806 | 0.00 | 0.00 |
| ATOM | 8168 | HD2  | LYS | X | 534 | 43.648 | 34.095 | 69.746 | 0.00 | 0.00 |
| ATOM | 8169 | HD3  | LYS | X | 534 | 43.462 | 35.521 | 70.812 | 0.00 | 0.00 |
| ATOM | 8170 | CE   | LYS | X | 534 | 41.866 | 35.113 | 69.585 | 0.00 | 0.00 |
| ATOM | 8171 | HE2  | LYS | X | 534 | 41.477 | 36.111 | 69.790 | 0.00 | 0.00 |
| ATOM | 8172 | HE3  | LYS | X | 534 | 41.610 | 34.797 | 68.574 | 0.00 | 0.00 |
| ATOM | 8173 | NZ   | LYS | X | 534 | 41.312 | 34.353 | 70.692 | 0.00 | 0.00 |
| ATOM | 8174 | HZ1  | LYS | X | 534 | 41.539 | 34.847 | 71.543 | 0.00 | 0.00 |
| ATOM | 8175 | HZ2  | LYS | X | 534 | 40.305 | 34.279 | 70.718 | 0.00 | 0.00 |
| ATOM | 8176 | HZ3  | LYS | X | 534 | 41.803 | 33.483 | 70.842 | 0.00 | 0.00 |
| ATOM | 8177 | C    | LYS | X | 534 | 48.046 | 36.123 | 68.706 | 0.00 | 0.00 |
| ATOM | 8178 | O    | LYS | X | 534 | 48.515 | 36.778 | 69.615 | 0.00 | 0.00 |
| ATOM | 8179 | N    | LEU | X | 535 | 48.790 | 35.207 | 68.119 | 0.00 | 0.00 |
| ATOM | 8180 | H    | LEU | X | 535 | 48.371 | 34.750 | 67.322 | 0.00 | 0.00 |
| ATOM | 8181 | CA   | LEU | X | 535 | 50.215 | 35.128 | 68.340 | 0.00 | 0.00 |
| ATOM | 8182 | HA   | LEU | X | 535 | 50.556 | 34.957 | 69.361 | 0.00 | 0.00 |
| ATOM | 8183 | CB   | LEU | X | 535 | 50.638 | 33.958 | 67.448 | 0.00 | 0.00 |
| ATOM | 8184 | HB2  | LEU | X | 535 | 49.960 | 33.146 | 67.711 | 0.00 | 0.00 |
| ATOM | 8185 | HB3  | LEU | X | 535 | 50.530 | 34.231 | 66.399 | 0.00 | 0.00 |
| ATOM | 8186 | CG   | LEU | X | 535 | 52.064 | 33.339 | 67.659 | 0.00 | 0.00 |
| ATOM | 8187 | HG   | LEU | X | 535 | 52.176 | 32.935 | 68.666 | 0.00 | 0.00 |
| ATOM | 8188 | CD1  | LEU | X | 535 | 52.209 | 32.058 | 66.825 | 0.00 | 0.00 |
| ATOM | 8189 | HD11 | LEU | X | 535 | 53.213 | 31.635 | 66.875 | 0.00 | 0.00 |
| ATOM | 8190 | HD12 | LEU | X | 535 | 51.966 | 32.379 | 65.812 | 0.00 | 0.00 |
| ATOM | 8191 | HD13 | LEU | X | 535 | 51.469 | 31.321 | 67.135 | 0.00 | 0.00 |
| ATOM | 8192 | CD2  | LEU | X | 535 | 53.270 | 34.269 | 67.561 | 0.00 | 0.00 |
| ATOM | 8193 | HD21 | LEU | X | 535 | 52.996 | 34.946 | 66.752 | 0.00 | 0.00 |
| ATOM | 8194 | HD22 | LEU | X | 535 | 53.411 | 34.788 | 68.509 | 0.00 | 0.00 |
| ATOM | 8195 | HD23 | LEU | X | 535 | 54.225 | 33.804 | 67.317 | 0.00 | 0.00 |
| ATOM | 8196 | C    | LEU | X | 535 | 50.889 | 36.487 | 67.883 | 0.00 | 0.00 |
| ATOM | 8197 | O    | LEU | X | 535 | 51.751 | 37.081 | 68.551 | 0.00 | 0.00 |
| ATOM | 8198 | N    | LEU | X | 536 | 50.549 | 37.031 | 66.714 | 0.00 | 0.00 |
| ATOM | 8199 | H    | LEU | X | 536 | 50.001 | 36.391 | 66.158 | 0.00 | 0.00 |
| ATOM | 8200 | CA   | LEU | X | 536 | 51.091 | 38.308 | 66.056 | 0.00 | 0.00 |
| ATOM | 8201 | HA   | LEU | X | 536 | 52.181 | 38.305 | 66.081 | 0.00 | 0.00 |
| ATOM | 8202 | CB   | LEU | X | 536 | 50.704 | 38.408 | 64.545 | 0.00 | 0.00 |
| ATOM | 8203 | HB2  | LEU | X | 536 | 49.624 | 38.416 | 64.394 | 0.00 | 0.00 |
| ATOM | 8204 | HB3  | LEU | X | 536 | 51.195 | 39.217 | 64.004 | 0.00 | 0.00 |
| ATOM | 8205 | CG   | LEU | X | 536 | 51.141 | 37.098 | 63.762 | 0.00 | 0.00 |
| ATOM | 8206 | HG   | LEU | X | 536 | 50.856 | 36.190 | 64.292 | 0.00 | 0.00 |
| ATOM | 8207 | CD1  | LEU | X | 536 | 50.527 | 37.351 | 62.334 | 0.00 | 0.00 |
| ATOM | 8208 | HD11 | LEU | X | 536 | 49.528 | 36.917 | 62.358 | 0.00 | 0.00 |
| ATOM | 8209 | HD12 | LEU | X | 536 | 50.911 | 36.705 | 61.544 | 0.00 | 0.00 |
| ATOM | 8210 | HD13 | LEU | X | 536 | 50.465 | 38.402 | 62.054 | 0.00 | 0.00 |
| ATOM | 8211 | CD2  | LEU | X | 536 | 52.657 | 37.105 | 63.562 | 0.00 | 0.00 |
| ATOM | 8212 | HD21 | LEU | X | 536 | 53.145 | 36.480 | 62.814 | 0.00 | 0.00 |
| ATOM | 8213 | HD22 | LEU | X | 536 | 52.927 | 38.119 | 63.268 | 0.00 | 0.00 |
| ATOM | 8214 | HD23 | LEU | X | 536 | 53.134 | 36.933 | 64.527 | 0.00 | 0.00 |
| ATOM | 8215 | C    | LEU | X | 536 | 50.642 | 39.522 | 66.764 | 0.00 | 0.00 |
| ATOM | 8216 | O    | LEU | X | 536 | 51.220 | 40.568 | 66.625 | 0.00 | 0.00 |
| ATOM | 8217 | N    | SER | X | 537 | 49.765 | 39.374 | 67.698 | 0.00 | 0.00 |
| ATOM | 8218 | H    | SER | X | 537 | 49.185 | 38.558 | 67.832 | 0.00 | 0.00 |

|      |      |      |     |   |     |        |        |        |      |      |
|------|------|------|-----|---|-----|--------|--------|--------|------|------|
| ATOM | 8219 | CA   | SER | X | 537 | 49.428 | 40.396 | 68.743 | 0.00 | 0.00 |
| ATOM | 8220 | HA   | SER | X | 537 | 49.733 | 41.408 | 68.475 | 0.00 | 0.00 |
| ATOM | 8221 | CB   | SER | X | 537 | 47.911 | 40.455 | 68.973 | 0.00 | 0.00 |
| ATOM | 8222 | HB2  | SER | X | 537 | 47.572 | 39.528 | 69.434 | 0.00 | 0.00 |
| ATOM | 8223 | HB3  | SER | X | 537 | 47.603 | 41.313 | 69.570 | 0.00 | 0.00 |
| ATOM | 8224 | OG   | SER | X | 537 | 47.333 | 40.528 | 67.683 | 0.00 | 0.00 |
| ATOM | 8225 | HG   | SER | X | 537 | 47.312 | 41.452 | 67.421 | 0.00 | 0.00 |
| ATOM | 8226 | C    | SER | X | 537 | 50.218 | 40.236 | 70.045 | 0.00 | 0.00 |
| ATOM | 8227 | O    | SER | X | 537 | 50.197 | 41.102 | 70.853 | 0.00 | 0.00 |
| ATOM | 8228 | N    | ALA | X | 538 | 50.909 | 39.066 | 70.276 | 0.00 | 0.00 |
| ATOM | 8229 | H    | ALA | X | 538 | 50.786 | 38.327 | 69.599 | 0.00 | 0.00 |
| ATOM | 8230 | CA   | ALA | X | 538 | 51.876 | 38.798 | 71.369 | 0.00 | 0.00 |
| ATOM | 8231 | HA   | ALA | X | 538 | 51.906 | 39.511 | 72.194 | 0.00 | 0.00 |
| ATOM | 8232 | CB   | ALA | X | 538 | 51.439 | 37.472 | 71.990 | 0.00 | 0.00 |
| ATOM | 8233 | HB1  | ALA | X | 538 | 52.220 | 36.972 | 72.562 | 0.00 | 0.00 |
| ATOM | 8234 | HB2  | ALA | X | 538 | 51.132 | 36.752 | 71.231 | 0.00 | 0.00 |
| ATOM | 8235 | HB3  | ALA | X | 538 | 50.603 | 37.641 | 72.669 | 0.00 | 0.00 |
| ATOM | 8236 | C    | ALA | X | 538 | 53.328 | 38.848 | 70.899 | 0.00 | 0.00 |
| ATOM | 8237 | O    | ALA | X | 538 | 54.261 | 38.539 | 71.647 | 0.00 | 0.00 |
| ATOM | 8238 | N    | THR | X | 539 | 53.639 | 39.335 | 69.731 | 0.00 | 0.00 |
| ATOM | 8239 | H    | THR | X | 539 | 52.822 | 39.544 | 69.175 | 0.00 | 0.00 |
| ATOM | 8240 | CA   | THR | X | 539 | 54.940 | 39.602 | 69.156 | 0.00 | 0.00 |
| ATOM | 8241 | HA   | THR | X | 539 | 55.632 | 39.800 | 69.976 | 0.00 | 0.00 |
| ATOM | 8242 | CB   | THR | X | 539 | 55.435 | 38.514 | 68.264 | 0.00 | 0.00 |
| ATOM | 8243 | HB   | THR | X | 539 | 56.311 | 38.866 | 67.719 | 0.00 | 0.00 |
| ATOM | 8244 | CG2  | THR | X | 539 | 55.869 | 37.360 | 69.113 | 0.00 | 0.00 |
| ATOM | 8245 | HG21 | THR | X | 539 | 54.919 | 36.916 | 69.408 | 0.00 | 0.00 |
| ATOM | 8246 | HG22 | THR | X | 539 | 56.366 | 37.658 | 70.037 | 0.00 | 0.00 |
| ATOM | 8247 | HG23 | THR | X | 539 | 56.418 | 36.612 | 68.541 | 0.00 | 0.00 |
| ATOM | 8248 | OG1  | THR | X | 539 | 54.533 | 38.042 | 67.330 | 0.00 | 0.00 |
| ATOM | 8249 | HG1  | THR | X | 539 | 53.907 | 37.532 | 67.850 | 0.00 | 0.00 |
| ATOM | 8250 | C    | THR | X | 539 | 54.775 | 40.951 | 68.425 | 0.00 | 0.00 |
| ATOM | 8251 | O    | THR | X | 539 | 55.554 | 41.157 | 67.456 | 0.00 | 0.00 |
| ATOM | 8252 | OXT  | THR | X | 539 | 54.069 | 41.789 | 68.977 | 0.00 | 0.00 |

END

#-----  
# 1B41 Production MD Frame 0400  
#-----

| CRYST1 | 82.107 | 82.107 | 82.107 | 90.00 | 90.00 | 90.00  | P 1    | 1      |      |      |
|--------|--------|--------|--------|-------|-------|--------|--------|--------|------|------|
| ATOM   | 1      | N      | ASP    | X     | 1     | 17.332 | 46.732 | 11.384 | 0.00 | 0.00 |
| ATOM   | 2      | H1     | ASP    | X     | 1     | 17.369 | 46.548 | 10.392 | 0.00 | 0.00 |
| ATOM   | 3      | H2     | ASP    | X     | 1     | 16.664 | 46.099 | 11.799 | 0.00 | 0.00 |
| ATOM   | 4      | H3     | ASP    | X     | 1     | 18.208 | 46.480 | 11.820 | 0.00 | 0.00 |
| ATOM   | 5      | CA     | ASP    | X     | 1     | 16.936 | 48.129 | 11.544 | 0.00 | 0.00 |
| ATOM   | 6      | HA     | ASP    | X     | 1     | 17.688 | 48.784 | 11.104 | 0.00 | 0.00 |
| ATOM   | 7      | CB     | ASP    | X     | 1     | 15.475 | 48.448 | 10.975 | 0.00 | 0.00 |
| ATOM   | 8      | HB2    | ASP    | X     | 1     | 15.558 | 48.049 | 9.963  | 0.00 | 0.00 |
| ATOM   | 9      | HB3    | ASP    | X     | 1     | 14.706 | 47.837 | 11.448 | 0.00 | 0.00 |
| ATOM   | 10     | CG     | ASP    | X     | 1     | 15.241 | 49.926 | 10.926 | 0.00 | 0.00 |
| ATOM   | 11     | OD1    | ASP    | X     | 1     | 14.823 | 50.367 | 12.000 | 0.00 | 0.00 |
| ATOM   | 12     | OD2    | ASP    | X     | 1     | 15.604 | 50.639 | 9.938  | 0.00 | 0.00 |
| ATOM   | 13     | C      | ASP    | X     | 1     | 17.014 | 48.549 | 13.025 | 0.00 | 0.00 |
| ATOM   | 14     | O      | ASP    | X     | 1     | 18.082 | 49.033 | 13.404 | 0.00 | 0.00 |
| ATOM   | 15     | N      | ALA    | X     | 2     | 16.008 | 48.112 | 13.813 | 0.00 | 0.00 |
| ATOM   | 16     | H      | ALA    | X     | 2     | 15.216 | 47.636 | 13.405 | 0.00 | 0.00 |
| ATOM   | 17     | CA     | ALA    | X     | 2     | 16.004 | 48.408 | 15.262 | 0.00 | 0.00 |
| ATOM   | 18     | HA     | ALA    | X     | 2     | 16.303 | 49.451 | 15.369 | 0.00 | 0.00 |
| ATOM   | 19     | CB     | ALA    | X     | 2     | 14.545 | 48.282 | 15.636 | 0.00 | 0.00 |
| ATOM   | 20     | HB1    | ALA    | X     | 2     | 13.962 | 48.977 | 15.031 | 0.00 | 0.00 |
| ATOM   | 21     | HB2    | ALA    | X     | 2     | 14.350 | 48.502 | 16.686 | 0.00 | 0.00 |
| ATOM   | 22     | HB3    | ALA    | X     | 2     | 14.135 | 47.278 | 15.534 | 0.00 | 0.00 |
| ATOM   | 23     | C      | ALA    | X     | 2     | 16.931 | 47.532 | 16.119 | 0.00 | 0.00 |
| ATOM   | 24     | O      | ALA    | X     | 2     | 17.276 | 47.978 | 17.218 | 0.00 | 0.00 |

|      |    |      |     |   |   |        |        |        |      |      |
|------|----|------|-----|---|---|--------|--------|--------|------|------|
| ATOM | 25 | N    | GLU | X | 3 | 17.337 | 46.371 | 15.607 | 0.00 | 0.00 |
| ATOM | 26 | H    | GLU | X | 3 | 16.764 | 46.001 | 14.862 | 0.00 | 0.00 |
| ATOM | 27 | CA   | GLU | X | 3 | 18.194 | 45.378 | 16.313 | 0.00 | 0.00 |
| ATOM | 28 | HA   | GLU | X | 3 | 17.616 | 45.121 | 17.201 | 0.00 | 0.00 |
| ATOM | 29 | CB   | GLU | X | 3 | 18.361 | 44.121 | 15.454 | 0.00 | 0.00 |
| ATOM | 30 | HB2  | GLU | X | 3 | 18.937 | 44.383 | 14.566 | 0.00 | 0.00 |
| ATOM | 31 | HB3  | GLU | X | 3 | 18.988 | 43.378 | 15.946 | 0.00 | 0.00 |
| ATOM | 32 | CG   | GLU | X | 3 | 17.059 | 43.440 | 15.005 | 0.00 | 0.00 |
| ATOM | 33 | HG2  | GLU | X | 3 | 17.289 | 42.375 | 14.973 | 0.00 | 0.00 |
| ATOM | 34 | HG3  | GLU | X | 3 | 16.292 | 43.642 | 15.753 | 0.00 | 0.00 |
| ATOM | 35 | CD   | GLU | X | 3 | 16.847 | 43.801 | 13.502 | 0.00 | 0.00 |
| ATOM | 36 | OE1  | GLU | X | 3 | 16.545 | 45.031 | 13.187 | 0.00 | 0.00 |
| ATOM | 37 | OE2  | GLU | X | 3 | 16.618 | 42.918 | 12.631 | 0.00 | 0.00 |
| ATOM | 38 | C    | GLU | X | 3 | 19.533 | 45.907 | 16.890 | 0.00 | 0.00 |
| ATOM | 39 | O    | GLU | X | 3 | 19.988 | 45.345 | 17.947 | 0.00 | 0.00 |
| ATOM | 40 | N    | LEU | X | 4 | 20.224 | 46.836 | 16.232 | 0.00 | 0.00 |
| ATOM | 41 | H    | LEU | X | 4 | 20.024 | 46.940 | 15.247 | 0.00 | 0.00 |
| ATOM | 42 | CA   | LEU | X | 4 | 21.585 | 47.353 | 16.671 | 0.00 | 0.00 |
| ATOM | 43 | HA   | LEU | X | 4 | 21.851 | 46.858 | 17.605 | 0.00 | 0.00 |
| ATOM | 44 | CB   | LEU | X | 4 | 22.758 | 46.944 | 15.648 | 0.00 | 0.00 |
| ATOM | 45 | HB2  | LEU | X | 4 | 22.540 | 47.490 | 14.730 | 0.00 | 0.00 |
| ATOM | 46 | HB3  | LEU | X | 4 | 23.714 | 47.280 | 16.049 | 0.00 | 0.00 |
| ATOM | 47 | CG   | LEU | X | 4 | 22.881 | 45.395 | 15.302 | 0.00 | 0.00 |
| ATOM | 48 | HG   | LEU | X | 4 | 21.994 | 44.878 | 14.936 | 0.00 | 0.00 |
| ATOM | 49 | CD1  | LEU | X | 4 | 24.051 | 45.239 | 14.367 | 0.00 | 0.00 |
| ATOM | 50 | HD11 | LEU | X | 4 | 24.305 | 44.197 | 14.173 | 0.00 | 0.00 |
| ATOM | 51 | HD12 | LEU | X | 4 | 24.945 | 45.767 | 14.699 | 0.00 | 0.00 |
| ATOM | 52 | HD13 | LEU | X | 4 | 23.786 | 45.741 | 13.437 | 0.00 | 0.00 |
| ATOM | 53 | CD2  | LEU | X | 4 | 23.331 | 44.616 | 16.509 | 0.00 | 0.00 |
| ATOM | 54 | HD21 | LEU | X | 4 | 22.485 | 44.355 | 17.145 | 0.00 | 0.00 |
| ATOM | 55 | HD22 | LEU | X | 4 | 23.773 | 43.648 | 16.271 | 0.00 | 0.00 |
| ATOM | 56 | HD23 | LEU | X | 4 | 24.149 | 45.106 | 17.037 | 0.00 | 0.00 |
| ATOM | 57 | C    | LEU | X | 4 | 21.667 | 48.878 | 16.967 | 0.00 | 0.00 |
| ATOM | 58 | O    | LEU | X | 4 | 22.676 | 49.316 | 17.509 | 0.00 | 0.00 |
| ATOM | 59 | N    | LEU | X | 5 | 20.618 | 49.613 | 16.662 | 0.00 | 0.00 |
| ATOM | 60 | H    | LEU | X | 5 | 19.855 | 49.223 | 16.128 | 0.00 | 0.00 |
| ATOM | 61 | CA   | LEU | X | 5 | 20.410 | 51.011 | 17.266 | 0.00 | 0.00 |
| ATOM | 62 | HA   | LEU | X | 5 | 21.411 | 51.425 | 17.387 | 0.00 | 0.00 |
| ATOM | 63 | CB   | LEU | X | 5 | 19.574 | 51.884 | 16.237 | 0.00 | 0.00 |
| ATOM | 64 | HB2  | LEU | X | 5 | 19.862 | 51.543 | 15.243 | 0.00 | 0.00 |
| ATOM | 65 | HB3  | LEU | X | 5 | 18.564 | 51.507 | 16.397 | 0.00 | 0.00 |
| ATOM | 66 | CG   | LEU | X | 5 | 19.716 | 53.466 | 16.332 | 0.00 | 0.00 |
| ATOM | 67 | HG   | LEU | X | 5 | 19.076 | 53.887 | 15.557 | 0.00 | 0.00 |
| ATOM | 68 | CD1  | LEU | X | 5 | 19.286 | 54.013 | 17.672 | 0.00 | 0.00 |
| ATOM | 69 | HD11 | LEU | X | 5 | 18.396 | 53.506 | 18.047 | 0.00 | 0.00 |
| ATOM | 70 | HD12 | LEU | X | 5 | 18.998 | 55.054 | 17.522 | 0.00 | 0.00 |
| ATOM | 71 | HD13 | LEU | X | 5 | 20.158 | 53.925 | 18.319 | 0.00 | 0.00 |
| ATOM | 72 | CD2  | LEU | X | 5 | 21.168 | 53.810 | 15.861 | 0.00 | 0.00 |
| ATOM | 73 | HD21 | LEU | X | 5 | 21.214 | 54.850 | 15.538 | 0.00 | 0.00 |
| ATOM | 74 | HD22 | LEU | X | 5 | 21.769 | 53.614 | 16.749 | 0.00 | 0.00 |
| ATOM | 75 | HD23 | LEU | X | 5 | 21.355 | 53.023 | 15.131 | 0.00 | 0.00 |
| ATOM | 76 | C    | LEU | X | 5 | 19.774 | 51.001 | 18.702 | 0.00 | 0.00 |
| ATOM | 77 | O    | LEU | X | 5 | 18.672 | 50.478 | 18.838 | 0.00 | 0.00 |
| ATOM | 78 | N    | VAL | X | 6 | 20.393 | 51.509 | 19.748 | 0.00 | 0.00 |
| ATOM | 79 | H    | VAL | X | 6 | 21.314 | 51.856 | 19.522 | 0.00 | 0.00 |
| ATOM | 80 | CA   | VAL | X | 6 | 19.931 | 51.494 | 21.053 | 0.00 | 0.00 |
| ATOM | 81 | HA   | VAL | X | 6 | 18.885 | 51.280 | 20.834 | 0.00 | 0.00 |
| ATOM | 82 | CB   | VAL | X | 6 | 20.536 | 50.310 | 21.923 | 0.00 | 0.00 |
| ATOM | 83 | HB   | VAL | X | 6 | 20.192 | 49.359 | 21.515 | 0.00 | 0.00 |
| ATOM | 84 | CG1  | VAL | X | 6 | 22.146 | 50.164 | 21.963 | 0.00 | 0.00 |
| ATOM | 85 | HG11 | VAL | X | 6 | 22.442 | 49.857 | 20.959 | 0.00 | 0.00 |
| ATOM | 86 | HG12 | VAL | X | 6 | 22.560 | 51.142 | 22.206 | 0.00 | 0.00 |
| ATOM | 87 | HG13 | VAL | X | 6 | 22.403 | 49.382 | 22.678 | 0.00 | 0.00 |
| ATOM | 88 | CG2  | VAL | X | 6 | 19.976 | 50.295 | 23.358 | 0.00 | 0.00 |
| ATOM | 89 | HG21 | VAL | X | 6 | 20.238 | 51.169 | 23.954 | 0.00 | 0.00 |
| ATOM | 90 | HG22 | VAL | X | 6 | 20.251 | 49.396 | 23.910 | 0.00 | 0.00 |
| ATOM | 91 | HG23 | VAL | X | 6 | 18.902 | 50.414 | 23.217 | 0.00 | 0.00 |

|      |     |      |     |   |    |        |        |        |      |      |
|------|-----|------|-----|---|----|--------|--------|--------|------|------|
| ATOM | 92  | C    | VAL | X | 6  | 19.998 | 52.929 | 21.694 | 0.00 | 0.00 |
| ATOM | 93  | O    | VAL | X | 6  | 21.116 | 53.435 | 21.879 | 0.00 | 0.00 |
| ATOM | 94  | N    | THR | X | 7  | 18.804 | 53.471 | 21.938 | 0.00 | 0.00 |
| ATOM | 95  | H    | THR | X | 7  | 17.999 | 53.016 | 21.530 | 0.00 | 0.00 |
| ATOM | 96  | CA   | THR | X | 7  | 18.557 | 54.775 | 22.507 | 0.00 | 0.00 |
| ATOM | 97  | HA   | THR | X | 7  | 19.237 | 55.497 | 22.055 | 0.00 | 0.00 |
| ATOM | 98  | CB   | THR | X | 7  | 17.164 | 55.232 | 22.059 | 0.00 | 0.00 |
| ATOM | 99  | HB   | THR | X | 7  | 16.439 | 54.536 | 22.478 | 0.00 | 0.00 |
| ATOM | 100 | CG2  | THR | X | 7  | 16.803 | 56.559 | 22.729 | 0.00 | 0.00 |
| ATOM | 101 | HG21 | THR | X | 7  | 15.735 | 56.753 | 22.624 | 0.00 | 0.00 |
| ATOM | 102 | HG22 | THR | X | 7  | 17.383 | 57.418 | 22.391 | 0.00 | 0.00 |
| ATOM | 103 | HG23 | THR | X | 7  | 16.861 | 56.504 | 23.816 | 0.00 | 0.00 |
| ATOM | 104 | OG1  | THR | X | 7  | 17.081 | 55.302 | 20.665 | 0.00 | 0.00 |
| ATOM | 105 | HG1  | THR | X | 7  | 16.195 | 55.166 | 20.322 | 0.00 | 0.00 |
| ATOM | 106 | C    | THR | X | 7  | 18.736 | 54.713 | 24.056 | 0.00 | 0.00 |
| ATOM | 107 | O    | THR | X | 7  | 18.139 | 53.859 | 24.810 | 0.00 | 0.00 |
| ATOM | 108 | N    | VAL | X | 8  | 19.419 | 55.745 | 24.523 | 0.00 | 0.00 |
| ATOM | 109 | H    | VAL | X | 8  | 19.709 | 56.422 | 23.832 | 0.00 | 0.00 |
| ATOM | 110 | CA   | VAL | X | 8  | 19.711 | 56.024 | 25.926 | 0.00 | 0.00 |
| ATOM | 111 | HA   | VAL | X | 8  | 18.928 | 55.560 | 26.525 | 0.00 | 0.00 |
| ATOM | 112 | CB   | VAL | X | 8  | 21.128 | 55.503 | 26.417 | 0.00 | 0.00 |
| ATOM | 113 | HB   | VAL | X | 8  | 21.410 | 55.741 | 27.442 | 0.00 | 0.00 |
| ATOM | 114 | CG1  | VAL | X | 8  | 21.307 | 53.976 | 26.337 | 0.00 | 0.00 |
| ATOM | 115 | HG11 | VAL | X | 8  | 22.235 | 53.555 | 26.724 | 0.00 | 0.00 |
| ATOM | 116 | HG12 | VAL | X | 8  | 20.550 | 53.443 | 26.912 | 0.00 | 0.00 |
| ATOM | 117 | HG13 | VAL | X | 8  | 21.203 | 53.634 | 25.308 | 0.00 | 0.00 |
| ATOM | 118 | CG2  | VAL | X | 8  | 22.175 | 56.133 | 25.441 | 0.00 | 0.00 |
| ATOM | 119 | HG21 | VAL | X | 8  | 22.007 | 55.945 | 24.381 | 0.00 | 0.00 |
| ATOM | 120 | HG22 | VAL | X | 8  | 23.188 | 55.829 | 25.704 | 0.00 | 0.00 |
| ATOM | 121 | HG23 | VAL | X | 8  | 22.175 | 57.222 | 25.501 | 0.00 | 0.00 |
| ATOM | 122 | C    | VAL | X | 8  | 19.602 | 57.489 | 26.265 | 0.00 | 0.00 |
| ATOM | 123 | O    | VAL | X | 8  | 19.453 | 58.344 | 25.359 | 0.00 | 0.00 |
| ATOM | 124 | N    | ARG | X | 9  | 19.720 | 57.774 | 27.564 | 0.00 | 0.00 |
| ATOM | 125 | H    | ARG | X | 9  | 19.922 | 57.014 | 28.197 | 0.00 | 0.00 |
| ATOM | 126 | CA   | ARG | X | 9  | 19.587 | 59.205 | 28.056 | 0.00 | 0.00 |
| ATOM | 127 | HA   | ARG | X | 9  | 18.547 | 59.505 | 28.182 | 0.00 | 0.00 |
| ATOM | 128 | CB   | ARG | X | 9  | 20.048 | 59.256 | 29.563 | 0.00 | 0.00 |
| ATOM | 129 | HB2  | ARG | X | 9  | 19.231 | 58.792 | 30.115 | 0.00 | 0.00 |
| ATOM | 130 | HB3  | ARG | X | 9  | 20.934 | 58.634 | 29.694 | 0.00 | 0.00 |
| ATOM | 131 | CG   | ARG | X | 9  | 20.287 | 60.685 | 30.164 | 0.00 | 0.00 |
| ATOM | 132 | HG2  | ARG | X | 9  | 21.249 | 61.007 | 29.765 | 0.00 | 0.00 |
| ATOM | 133 | HG3  | ARG | X | 9  | 19.557 | 61.408 | 29.802 | 0.00 | 0.00 |
| ATOM | 134 | CD   | ARG | X | 9  | 20.366 | 60.801 | 31.708 | 0.00 | 0.00 |
| ATOM | 135 | HD2  | ARG | X | 9  | 19.379 | 60.589 | 32.120 | 0.00 | 0.00 |
| ATOM | 136 | HD3  | ARG | X | 9  | 21.085 | 60.045 | 32.024 | 0.00 | 0.00 |
| ATOM | 137 | NE   | ARG | X | 9  | 20.757 | 62.173 | 32.105 | 0.00 | 0.00 |
| ATOM | 138 | HE   | ARG | X | 9  | 20.502 | 62.847 | 31.397 | 0.00 | 0.00 |
| ATOM | 139 | CZ   | ARG | X | 9  | 21.401 | 62.570 | 33.176 | 0.00 | 0.00 |
| ATOM | 140 | NH1  | ARG | X | 9  | 21.792 | 61.749 | 34.170 | 0.00 | 0.00 |
| ATOM | 141 | HH11 | ARG | X | 9  | 21.604 | 60.759 | 34.101 | 0.00 | 0.00 |
| ATOM | 142 | HH12 | ARG | X | 9  | 22.285 | 62.065 | 34.992 | 0.00 | 0.00 |
| ATOM | 143 | NH2  | ARG | X | 9  | 21.753 | 63.817 | 33.092 | 0.00 | 0.00 |
| ATOM | 144 | HH21 | ARG | X | 9  | 21.519 | 64.409 | 32.307 | 0.00 | 0.00 |
| ATOM | 145 | HH22 | ARG | X | 9  | 22.409 | 64.260 | 33.719 | 0.00 | 0.00 |
| ATOM | 146 | C    | ARG | X | 9  | 20.327 | 60.287 | 27.216 | 0.00 | 0.00 |
| ATOM | 147 | O    | ARG | X | 9  | 19.703 | 61.305 | 26.849 | 0.00 | 0.00 |
| ATOM | 148 | N    | GLY | X | 10 | 21.555 | 60.113 | 26.786 | 0.00 | 0.00 |
| ATOM | 149 | H    | GLY | X | 10 | 21.929 | 59.219 | 27.071 | 0.00 | 0.00 |
| ATOM | 150 | CA   | GLY | X | 10 | 22.275 | 61.191 | 26.021 | 0.00 | 0.00 |
| ATOM | 151 | HA2  | GLY | X | 10 | 21.979 | 62.195 | 26.326 | 0.00 | 0.00 |
| ATOM | 152 | HA3  | GLY | X | 10 | 23.348 | 61.049 | 26.147 | 0.00 | 0.00 |
| ATOM | 153 | C    | GLY | X | 10 | 21.963 | 61.286 | 24.544 | 0.00 | 0.00 |
| ATOM | 154 | O    | GLY | X | 10 | 22.144 | 62.302 | 23.877 | 0.00 | 0.00 |
| ATOM | 155 | N    | GLY | X | 11 | 21.497 | 60.165 | 24.019 | 0.00 | 0.00 |
| ATOM | 156 | H    | GLY | X | 11 | 21.088 | 59.527 | 24.687 | 0.00 | 0.00 |
| ATOM | 157 | CA   | GLY | X | 11 | 20.967 | 60.006 | 22.647 | 0.00 | 0.00 |
| ATOM | 158 | HA2  | GLY | X | 11 | 19.961 | 60.414 | 22.551 | 0.00 | 0.00 |

|      |     |      |     |   |    |        |        |        |      |      |
|------|-----|------|-----|---|----|--------|--------|--------|------|------|
| ATOM | 159 | HA3  | GLY | X | 11 | 21.622 | 60.457 | 21.902 | 0.00 | 0.00 |
| ATOM | 160 | C    | GLY | X | 11 | 20.986 | 58.578 | 22.243 | 0.00 | 0.00 |
| ATOM | 161 | O    | GLY | X | 11 | 20.305 | 57.708 | 22.814 | 0.00 | 0.00 |
| ATOM | 162 | N    | ARG | X | 12 | 21.730 | 58.365 | 21.105 | 0.00 | 0.00 |
| ATOM | 163 | H    | ARG | X | 12 | 22.100 | 59.197 | 20.668 | 0.00 | 0.00 |
| ATOM | 164 | CA   | ARG | X | 12 | 21.528 | 57.220 | 20.177 | 0.00 | 0.00 |
| ATOM | 165 | HA   | ARG | X | 12 | 20.894 | 56.513 | 20.711 | 0.00 | 0.00 |
| ATOM | 166 | CB   | ARG | X | 12 | 20.730 | 57.794 | 18.943 | 0.00 | 0.00 |
| ATOM | 167 | HB2  | ARG | X | 12 | 21.144 | 58.652 | 18.414 | 0.00 | 0.00 |
| ATOM | 168 | HB3  | ARG | X | 12 | 20.712 | 57.028 | 18.168 | 0.00 | 0.00 |
| ATOM | 169 | CG   | ARG | X | 12 | 19.335 | 58.192 | 19.323 | 0.00 | 0.00 |
| ATOM | 170 | HG2  | ARG | X | 12 | 18.944 | 57.369 | 19.923 | 0.00 | 0.00 |
| ATOM | 171 | HG3  | ARG | X | 12 | 19.375 | 59.098 | 19.928 | 0.00 | 0.00 |
| ATOM | 172 | CD   | ARG | X | 12 | 18.551 | 58.518 | 18.080 | 0.00 | 0.00 |
| ATOM | 173 | HD2  | ARG | X | 12 | 19.169 | 58.904 | 17.269 | 0.00 | 0.00 |
| ATOM | 174 | HD3  | ARG | X | 12 | 18.167 | 57.563 | 17.721 | 0.00 | 0.00 |
| ATOM | 175 | NE   | ARG | X | 12 | 17.422 | 59.385 | 18.380 | 0.00 | 0.00 |
| ATOM | 176 | HE   | ARG | X | 12 | 17.237 | 59.457 | 19.370 | 0.00 | 0.00 |
| ATOM | 177 | CZ   | ARG | X | 12 | 16.550 | 59.868 | 17.546 | 0.00 | 0.00 |
| ATOM | 178 | NH1  | ARG | X | 12 | 16.601 | 59.851 | 16.231 | 0.00 | 0.00 |
| ATOM | 179 | HH11 | ARG | X | 12 | 17.352 | 59.398 | 15.730 | 0.00 | 0.00 |
| ATOM | 180 | HH12 | ARG | X | 12 | 15.938 | 60.406 | 15.709 | 0.00 | 0.00 |
| ATOM | 181 | NH2  | ARG | X | 12 | 15.550 | 60.473 | 18.163 | 0.00 | 0.00 |
| ATOM | 182 | HH21 | ARG | X | 12 | 15.417 | 60.526 | 19.163 | 0.00 | 0.00 |
| ATOM | 183 | HH22 | ARG | X | 12 | 14.809 | 60.981 | 17.703 | 0.00 | 0.00 |
| ATOM | 184 | C    | ARG | X | 12 | 22.813 | 56.511 | 19.760 | 0.00 | 0.00 |
| ATOM | 185 | O    | ARG | X | 12 | 23.598 | 57.116 | 18.969 | 0.00 | 0.00 |
| ATOM | 186 | N    | LEU | X | 13 | 22.929 | 55.235 | 20.147 | 0.00 | 0.00 |
| ATOM | 187 | H    | LEU | X | 13 | 22.206 | 54.882 | 20.758 | 0.00 | 0.00 |
| ATOM | 188 | CA   | LEU | X | 13 | 24.190 | 54.422 | 19.997 | 0.00 | 0.00 |
| ATOM | 189 | HA   | LEU | X | 13 | 24.901 | 55.081 | 19.499 | 0.00 | 0.00 |
| ATOM | 190 | CB   | LEU | X | 13 | 24.732 | 53.972 | 21.369 | 0.00 | 0.00 |
| ATOM | 191 | HB2  | LEU | X | 13 | 23.995 | 53.352 | 21.880 | 0.00 | 0.00 |
| ATOM | 192 | HB3  | LEU | X | 13 | 25.600 | 53.326 | 21.239 | 0.00 | 0.00 |
| ATOM | 193 | CG   | LEU | X | 13 | 25.030 | 55.193 | 22.383 | 0.00 | 0.00 |
| ATOM | 194 | HG   | LEU | X | 13 | 24.125 | 55.801 | 22.356 | 0.00 | 0.00 |
| ATOM | 195 | CD1  | LEU | X | 13 | 25.042 | 54.757 | 23.836 | 0.00 | 0.00 |
| ATOM | 196 | HD11 | LEU | X | 13 | 24.177 | 54.138 | 24.073 | 0.00 | 0.00 |
| ATOM | 197 | HD12 | LEU | X | 13 | 25.101 | 55.640 | 24.472 | 0.00 | 0.00 |
| ATOM | 198 | HD13 | LEU | X | 13 | 25.867 | 54.075 | 24.040 | 0.00 | 0.00 |
| ATOM | 199 | CD2  | LEU | X | 13 | 26.248 | 55.905 | 21.973 | 0.00 | 0.00 |
| ATOM | 200 | HD21 | LEU | X | 13 | 26.998 | 55.124 | 21.850 | 0.00 | 0.00 |
| ATOM | 201 | HD22 | LEU | X | 13 | 25.981 | 56.432 | 21.057 | 0.00 | 0.00 |
| ATOM | 202 | HD23 | LEU | X | 13 | 26.489 | 56.565 | 22.807 | 0.00 | 0.00 |
| ATOM | 203 | C    | LEU | X | 13 | 23.896 | 53.219 | 19.021 | 0.00 | 0.00 |
| ATOM | 204 | O    | LEU | X | 13 | 22.804 | 52.618 | 18.922 | 0.00 | 0.00 |
| ATOM | 205 | N    | ARG | X | 14 | 24.976 | 52.828 | 18.333 | 0.00 | 0.00 |
| ATOM | 206 | H    | ARG | X | 14 | 25.787 | 53.429 | 18.291 | 0.00 | 0.00 |
| ATOM | 207 | CA   | ARG | X | 14 | 24.949 | 51.736 | 17.386 | 0.00 | 0.00 |
| ATOM | 208 | HA   | ARG | X | 14 | 23.982 | 51.235 | 17.359 | 0.00 | 0.00 |
| ATOM | 209 | CB   | ARG | X | 14 | 25.256 | 52.227 | 15.983 | 0.00 | 0.00 |
| ATOM | 210 | HB2  | ARG | X | 14 | 24.567 | 53.009 | 15.664 | 0.00 | 0.00 |
| ATOM | 211 | HB3  | ARG | X | 14 | 26.170 | 52.819 | 16.013 | 0.00 | 0.00 |
| ATOM | 212 | CG   | ARG | X | 14 | 25.205 | 51.147 | 14.938 | 0.00 | 0.00 |
| ATOM | 213 | HG2  | ARG | X | 14 | 25.661 | 50.209 | 15.256 | 0.00 | 0.00 |
| ATOM | 214 | HG3  | ARG | X | 14 | 24.201 | 50.842 | 14.644 | 0.00 | 0.00 |
| ATOM | 215 | CD   | ARG | X | 14 | 25.978 | 51.648 | 13.732 | 0.00 | 0.00 |
| ATOM | 216 | HD2  | ARG | X | 14 | 25.618 | 52.546 | 13.231 | 0.00 | 0.00 |
| ATOM | 217 | HD3  | ARG | X | 14 | 26.946 | 51.939 | 14.140 | 0.00 | 0.00 |
| ATOM | 218 | NE   | ARG | X | 14 | 26.104 | 50.671 | 12.647 | 0.00 | 0.00 |
| ATOM | 219 | HE   | ARG | X | 14 | 27.018 | 50.250 | 12.565 | 0.00 | 0.00 |
| ATOM | 220 | CZ   | ARG | X | 14 | 25.189 | 50.302 | 11.805 | 0.00 | 0.00 |
| ATOM | 221 | NH1  | ARG | X | 14 | 23.965 | 50.800 | 11.772 | 0.00 | 0.00 |
| ATOM | 222 | HH11 | ARG | X | 14 | 23.663 | 51.509 | 12.425 | 0.00 | 0.00 |
| ATOM | 223 | HH12 | ARG | X | 14 | 23.378 | 50.725 | 10.953 | 0.00 | 0.00 |
| ATOM | 224 | NH2  | ARG | X | 14 | 25.462 | 49.459 | 10.797 | 0.00 | 0.00 |
| ATOM | 225 | HH21 | ARG | X | 14 | 26.349 | 48.989 | 10.687 | 0.00 | 0.00 |

|      |     |      |     |   |    |        |        |        |      |      |
|------|-----|------|-----|---|----|--------|--------|--------|------|------|
| ATOM | 226 | HH22 | ARG | X | 14 | 24.814 | 49.234 | 10.055 | 0.00 | 0.00 |
| ATOM | 227 | C    | ARG | X | 14 | 26.016 | 50.732 | 17.805 | 0.00 | 0.00 |
| ATOM | 228 | O    | ARG | X | 14 | 27.198 | 51.055 | 17.948 | 0.00 | 0.00 |
| ATOM | 229 | N    | GLY | X | 15 | 25.633 | 49.409 | 17.858 | 0.00 | 0.00 |
| ATOM | 230 | H    | GLY | X | 15 | 24.640 | 49.225 | 17.885 | 0.00 | 0.00 |
| ATOM | 231 | CA   | GLY | X | 15 | 26.554 | 48.267 | 18.237 | 0.00 | 0.00 |
| ATOM | 232 | HA2  | GLY | X | 15 | 27.486 | 48.564 | 18.720 | 0.00 | 0.00 |
| ATOM | 233 | HA3  | GLY | X | 15 | 25.983 | 47.579 | 18.860 | 0.00 | 0.00 |
| ATOM | 234 | C    | GLY | X | 15 | 26.921 | 47.392 | 17.062 | 0.00 | 0.00 |
| ATOM | 235 | O    | GLY | X | 15 | 27.112 | 47.869 | 15.943 | 0.00 | 0.00 |
| ATOM | 236 | N    | ILE | X | 16 | 27.151 | 46.076 | 17.364 | 0.00 | 0.00 |
| ATOM | 237 | H    | ILE | X | 16 | 27.006 | 45.639 | 18.263 | 0.00 | 0.00 |
| ATOM | 238 | CA   | ILE | X | 16 | 27.469 | 45.074 | 16.390 | 0.00 | 0.00 |
| ATOM | 239 | HA   | ILE | X | 16 | 27.032 | 45.316 | 15.421 | 0.00 | 0.00 |
| ATOM | 240 | CB   | ILE | X | 16 | 29.014 | 44.752 | 16.219 | 0.00 | 0.00 |
| ATOM | 241 | HB   | ILE | X | 16 | 29.041 | 43.986 | 15.444 | 0.00 | 0.00 |
| ATOM | 242 | CG2  | ILE | X | 16 | 29.726 | 45.945 | 15.781 | 0.00 | 0.00 |
| ATOM | 243 | HG21 | ILE | X | 16 | 30.069 | 46.531 | 16.634 | 0.00 | 0.00 |
| ATOM | 244 | HG22 | ILE | X | 16 | 29.162 | 46.546 | 15.068 | 0.00 | 0.00 |
| ATOM | 245 | HG23 | ILE | X | 16 | 30.586 | 45.556 | 15.235 | 0.00 | 0.00 |
| ATOM | 246 | CG1  | ILE | X | 16 | 29.651 | 44.089 | 17.514 | 0.00 | 0.00 |
| ATOM | 247 | HG12 | ILE | X | 16 | 29.497 | 44.898 | 18.228 | 0.00 | 0.00 |
| ATOM | 248 | HG13 | ILE | X | 16 | 29.187 | 43.199 | 17.940 | 0.00 | 0.00 |
| ATOM | 249 | CD1  | ILE | X | 16 | 31.144 | 43.688 | 17.399 | 0.00 | 0.00 |
| ATOM | 250 | HD11 | ILE | X | 16 | 31.518 | 43.189 | 18.293 | 0.00 | 0.00 |
| ATOM | 251 | HD12 | ILE | X | 16 | 31.801 | 44.536 | 17.205 | 0.00 | 0.00 |
| ATOM | 252 | HD13 | ILE | X | 16 | 31.172 | 42.892 | 16.654 | 0.00 | 0.00 |
| ATOM | 253 | C    | ILE | X | 16 | 26.709 | 43.754 | 16.772 | 0.00 | 0.00 |
| ATOM | 254 | O    | ILE | X | 16 | 26.322 | 43.567 | 17.933 | 0.00 | 0.00 |
| ATOM | 255 | N    | ARG | X | 17 | 26.606 | 42.833 | 15.804 | 0.00 | 0.00 |
| ATOM | 256 | H    | ARG | X | 17 | 26.769 | 43.180 | 14.869 | 0.00 | 0.00 |
| ATOM | 257 | CA   | ARG | X | 17 | 26.343 | 41.427 | 16.047 | 0.00 | 0.00 |
| ATOM | 258 | HA   | ARG | X | 17 | 25.744 | 41.364 | 16.955 | 0.00 | 0.00 |
| ATOM | 259 | CB   | ARG | X | 17 | 25.547 | 40.908 | 14.855 | 0.00 | 0.00 |
| ATOM | 260 | HB2  | ARG | X | 17 | 24.760 | 41.628 | 14.632 | 0.00 | 0.00 |
| ATOM | 261 | HB3  | ARG | X | 17 | 26.223 | 41.029 | 14.009 | 0.00 | 0.00 |
| ATOM | 262 | CG   | ARG | X | 17 | 24.958 | 39.478 | 14.942 | 0.00 | 0.00 |
| ATOM | 263 | HG2  | ARG | X | 17 | 25.848 | 38.854 | 15.024 | 0.00 | 0.00 |
| ATOM | 264 | HG3  | ARG | X | 17 | 24.320 | 39.401 | 15.822 | 0.00 | 0.00 |
| ATOM | 265 | CD   | ARG | X | 17 | 24.032 | 39.058 | 13.779 | 0.00 | 0.00 |
| ATOM | 266 | HD2  | ARG | X | 17 | 23.835 | 37.992 | 13.893 | 0.00 | 0.00 |
| ATOM | 267 | HD3  | ARG | X | 17 | 23.037 | 39.501 | 13.744 | 0.00 | 0.00 |
| ATOM | 268 | NE   | ARG | X | 17 | 24.684 | 39.109 | 12.492 | 0.00 | 0.00 |
| ATOM | 269 | HE   | ARG | X | 17 | 25.531 | 39.648 | 12.387 | 0.00 | 0.00 |
| ATOM | 270 | CZ   | ARG | X | 17 | 24.327 | 38.497 | 11.353 | 0.00 | 0.00 |
| ATOM | 271 | NH1  | ARG | X | 17 | 23.359 | 37.610 | 11.331 | 0.00 | 0.00 |
| ATOM | 272 | HH11 | ARG | X | 17 | 22.991 | 37.312 | 12.223 | 0.00 | 0.00 |
| ATOM | 273 | HH12 | ARG | X | 17 | 23.238 | 37.079 | 10.481 | 0.00 | 0.00 |
| ATOM | 274 | NH2  | ARG | X | 17 | 24.799 | 38.839 | 10.181 | 0.00 | 0.00 |
| ATOM | 275 | HH21 | ARG | X | 17 | 25.350 | 39.683 | 10.122 | 0.00 | 0.00 |
| ATOM | 276 | HH22 | ARG | X | 17 | 24.586 | 38.409 | 9.292  | 0.00 | 0.00 |
| ATOM | 277 | C    | ARG | X | 17 | 27.621 | 40.562 | 16.213 | 0.00 | 0.00 |
| ATOM | 278 | O    | ARG | X | 17 | 28.662 | 40.960 | 15.720 | 0.00 | 0.00 |
| ATOM | 279 | N    | LEU | X | 18 | 27.565 | 39.440 | 16.965 | 0.00 | 0.00 |
| ATOM | 280 | H    | LEU | X | 18 | 26.676 | 39.264 | 17.411 | 0.00 | 0.00 |
| ATOM | 281 | CA   | LEU | X | 18 | 28.582 | 38.443 | 17.214 | 0.00 | 0.00 |
| ATOM | 282 | HA   | LEU | X | 18 | 29.407 | 38.607 | 16.521 | 0.00 | 0.00 |
| ATOM | 283 | CB   | LEU | X | 18 | 29.187 | 38.576 | 18.613 | 0.00 | 0.00 |
| ATOM | 284 | HB2  | LEU | X | 18 | 28.302 | 38.432 | 19.232 | 0.00 | 0.00 |
| ATOM | 285 | HB3  | LEU | X | 18 | 29.934 | 37.786 | 18.694 | 0.00 | 0.00 |
| ATOM | 286 | CG   | LEU | X | 18 | 29.860 | 39.891 | 19.034 | 0.00 | 0.00 |
| ATOM | 287 | HG   | LEU | X | 18 | 29.234 | 40.729 | 18.726 | 0.00 | 0.00 |
| ATOM | 288 | CD1  | LEU | X | 18 | 30.238 | 39.829 | 20.550 | 0.00 | 0.00 |
| ATOM | 289 | HD11 | LEU | X | 18 | 29.376 | 39.621 | 21.184 | 0.00 | 0.00 |
| ATOM | 290 | HD12 | LEU | X | 18 | 30.656 | 40.789 | 20.855 | 0.00 | 0.00 |
| ATOM | 291 | HD13 | LEU | X | 18 | 31.005 | 39.080 | 20.745 | 0.00 | 0.00 |
| ATOM | 292 | CD2  | LEU | X | 18 | 31.159 | 40.058 | 18.256 | 0.00 | 0.00 |

|      |     |      |     |   |    |        |        |        |      |      |
|------|-----|------|-----|---|----|--------|--------|--------|------|------|
| ATOM | 293 | HD21 | LEU | X | 18 | 30.815 | 40.161 | 17.226 | 0.00 | 0.00 |
| ATOM | 294 | HD22 | LEU | X | 18 | 31.724 | 40.965 | 18.469 | 0.00 | 0.00 |
| ATOM | 295 | HD23 | LEU | X | 18 | 31.896 | 39.261 | 18.357 | 0.00 | 0.00 |
| ATOM | 296 | C    | LEU | X | 18 | 27.930 | 37.088 | 16.967 | 0.00 | 0.00 |
| ATOM | 297 | O    | LEU | X | 18 | 26.726 | 36.990 | 17.265 | 0.00 | 0.00 |
| ATOM | 298 | N    | LYS | X | 19 | 28.704 | 36.085 | 16.525 | 0.00 | 0.00 |
| ATOM | 299 | H    | LYS | X | 19 | 29.665 | 36.308 | 16.309 | 0.00 | 0.00 |
| ATOM | 300 | CA   | LYS | X | 19 | 28.208 | 34.714 | 16.173 | 0.00 | 0.00 |
| ATOM | 301 | HA   | LYS | X | 19 | 27.198 | 34.537 | 16.542 | 0.00 | 0.00 |
| ATOM | 302 | CB   | LYS | X | 19 | 28.227 | 34.527 | 14.654 | 0.00 | 0.00 |
| ATOM | 303 | HB2  | LYS | X | 19 | 29.285 | 34.603 | 14.403 | 0.00 | 0.00 |
| ATOM | 304 | HB3  | LYS | X | 19 | 27.907 | 33.523 | 14.377 | 0.00 | 0.00 |
| ATOM | 305 | CG   | LYS | X | 19 | 27.269 | 35.459 | 13.902 | 0.00 | 0.00 |
| ATOM | 306 | HG2  | LYS | X | 19 | 26.253 | 35.086 | 14.038 | 0.00 | 0.00 |
| ATOM | 307 | HG3  | LYS | X | 19 | 27.323 | 36.464 | 14.320 | 0.00 | 0.00 |
| ATOM | 308 | CD   | LYS | X | 19 | 27.623 | 35.364 | 12.402 | 0.00 | 0.00 |
| ATOM | 309 | HD2  | LYS | X | 19 | 28.639 | 35.723 | 12.237 | 0.00 | 0.00 |
| ATOM | 310 | HD3  | LYS | X | 19 | 27.533 | 34.293 | 12.222 | 0.00 | 0.00 |
| ATOM | 311 | CE   | LYS | X | 19 | 26.669 | 36.223 | 11.588 | 0.00 | 0.00 |
| ATOM | 312 | HE2  | LYS | X | 19 | 25.684 | 36.266 | 12.052 | 0.00 | 0.00 |
| ATOM | 313 | HE3  | LYS | X | 19 | 26.921 | 37.280 | 11.504 | 0.00 | 0.00 |
| ATOM | 314 | NZ   | LYS | X | 19 | 26.694 | 35.747 | 10.192 | 0.00 | 0.00 |
| ATOM | 315 | HZ1  | LYS | X | 19 | 26.291 | 36.323 | 9.466  | 0.00 | 0.00 |
| ATOM | 316 | HZ2  | LYS | X | 19 | 27.671 | 35.693 | 9.942  | 0.00 | 0.00 |
| ATOM | 317 | HZ3  | LYS | X | 19 | 26.333 | 34.813 | 10.055 | 0.00 | 0.00 |
| ATOM | 318 | C    | LYS | X | 19 | 29.071 | 33.687 | 17.006 | 0.00 | 0.00 |
| ATOM | 319 | O    | LYS | X | 19 | 30.307 | 33.697 | 16.953 | 0.00 | 0.00 |
| ATOM | 320 | N    | THR | X | 20 | 28.374 | 32.716 | 17.677 | 0.00 | 0.00 |
| ATOM | 321 | H    | THR | X | 20 | 27.368 | 32.794 | 17.720 | 0.00 | 0.00 |
| ATOM | 322 | CA   | THR | X | 20 | 28.932 | 31.660 | 18.536 | 0.00 | 0.00 |
| ATOM | 323 | HA   | THR | X | 20 | 29.969 | 31.467 | 18.261 | 0.00 | 0.00 |
| ATOM | 324 | CB   | THR | X | 20 | 28.922 | 32.104 | 20.070 | 0.00 | 0.00 |
| ATOM | 325 | HB   | THR | X | 20 | 28.540 | 31.281 | 20.674 | 0.00 | 0.00 |
| ATOM | 326 | CG2  | THR | X | 20 | 30.297 | 32.598 | 20.433 | 0.00 | 0.00 |
| ATOM | 327 | HG21 | THR | X | 20 | 30.174 | 33.096 | 21.396 | 0.00 | 0.00 |
| ATOM | 328 | HG22 | THR | X | 20 | 30.648 | 33.313 | 19.689 | 0.00 | 0.00 |
| ATOM | 329 | HG23 | THR | X | 20 | 30.905 | 31.700 | 20.539 | 0.00 | 0.00 |
| ATOM | 330 | OG1  | THR | X | 20 | 28.082 | 33.121 | 20.409 | 0.00 | 0.00 |
| ATOM | 331 | HG1  | THR | X | 20 | 27.250 | 32.879 | 19.994 | 0.00 | 0.00 |
| ATOM | 332 | C    | THR | X | 20 | 28.235 | 30.308 | 18.396 | 0.00 | 0.00 |
| ATOM | 333 | O    | THR | X | 20 | 27.033 | 30.321 | 18.063 | 0.00 | 0.00 |
| ATOM | 334 | N    | PRO | X | 21 | 28.842 | 29.120 | 18.807 | 0.00 | 0.00 |
| ATOM | 335 | CD   | PRO | X | 21 | 30.069 | 29.063 | 19.517 | 0.00 | 0.00 |
| ATOM | 336 | HD2  | PRO | X | 21 | 29.705 | 29.241 | 20.529 | 0.00 | 0.00 |
| ATOM | 337 | HD3  | PRO | X | 21 | 30.745 | 29.795 | 19.076 | 0.00 | 0.00 |
| ATOM | 338 | CG   | PRO | X | 21 | 30.435 | 27.630 | 19.408 | 0.00 | 0.00 |
| ATOM | 339 | HG2  | PRO | X | 21 | 30.990 | 27.345 | 20.302 | 0.00 | 0.00 |
| ATOM | 340 | HG3  | PRO | X | 21 | 30.904 | 27.352 | 18.464 | 0.00 | 0.00 |
| ATOM | 341 | CB   | PRO | X | 21 | 29.182 | 26.820 | 19.378 | 0.00 | 0.00 |
| ATOM | 342 | HB2  | PRO | X | 21 | 28.995 | 26.538 | 20.414 | 0.00 | 0.00 |
| ATOM | 343 | HB3  | PRO | X | 21 | 29.311 | 25.875 | 18.850 | 0.00 | 0.00 |
| ATOM | 344 | CA   | PRO | X | 21 | 28.229 | 27.802 | 18.701 | 0.00 | 0.00 |
| ATOM | 345 | HA   | PRO | X | 21 | 28.280 | 27.552 | 17.641 | 0.00 | 0.00 |
| ATOM | 346 | C    | PRO | X | 21 | 26.767 | 27.637 | 19.261 | 0.00 | 0.00 |
| ATOM | 347 | O    | PRO | X | 21 | 25.951 | 27.062 | 18.532 | 0.00 | 0.00 |
| ATOM | 348 | N    | GLY | X | 22 | 26.472 | 28.227 | 20.456 | 0.00 | 0.00 |
| ATOM | 349 | H    | GLY | X | 22 | 27.208 | 28.721 | 20.941 | 0.00 | 0.00 |
| ATOM | 350 | CA   | GLY | X | 22 | 25.135 | 28.158 | 21.097 | 0.00 | 0.00 |
| ATOM | 351 | HA2  | GLY | X | 22 | 24.607 | 27.232 | 20.871 | 0.00 | 0.00 |
| ATOM | 352 | HA3  | GLY | X | 22 | 25.163 | 28.178 | 22.186 | 0.00 | 0.00 |
| ATOM | 353 | C    | GLY | X | 22 | 24.248 | 29.269 | 20.677 | 0.00 | 0.00 |
| ATOM | 354 | O    | GLY | X | 22 | 23.218 | 29.426 | 21.344 | 0.00 | 0.00 |
| ATOM | 355 | N    | GLY | X | 23 | 24.552 | 30.037 | 19.652 | 0.00 | 0.00 |
| ATOM | 356 | H    | GLY | X | 23 | 25.451 | 30.047 | 19.192 | 0.00 | 0.00 |
| ATOM | 357 | CA   | GLY | X | 23 | 23.785 | 31.165 | 19.182 | 0.00 | 0.00 |
| ATOM | 358 | HA2  | GLY | X | 23 | 23.357 | 30.952 | 18.203 | 0.00 | 0.00 |
| ATOM | 359 | HA3  | GLY | X | 23 | 22.901 | 31.104 | 19.817 | 0.00 | 0.00 |

|      |     |      |     |   |    |        |        |        |      |      |
|------|-----|------|-----|---|----|--------|--------|--------|------|------|
| ATOM | 360 | C    | GLY | X | 23 | 24.392 | 32.586 | 19.158 | 0.00 | 0.00 |
| ATOM | 361 | O    | GLY | X | 23 | 25.476 | 32.775 | 19.740 | 0.00 | 0.00 |
| ATOM | 362 | N    | PRO | X | 24 | 23.762 | 33.549 | 18.465 | 0.00 | 0.00 |
| ATOM | 363 | CD   | PRO | X | 24 | 22.594 | 33.367 | 17.614 | 0.00 | 0.00 |
| ATOM | 364 | HD2  | PRO | X | 24 | 21.715 | 32.998 | 18.143 | 0.00 | 0.00 |
| ATOM | 365 | HD3  | PRO | X | 24 | 22.789 | 32.681 | 16.790 | 0.00 | 0.00 |
| ATOM | 366 | CG   | PRO | X | 24 | 22.319 | 34.701 | 16.915 | 0.00 | 0.00 |
| ATOM | 367 | HG2  | PRO | X | 24 | 21.634 | 35.264 | 17.549 | 0.00 | 0.00 |
| ATOM | 368 | HG3  | PRO | X | 24 | 21.903 | 34.637 | 15.909 | 0.00 | 0.00 |
| ATOM | 369 | CB   | PRO | X | 24 | 23.713 | 35.291 | 16.895 | 0.00 | 0.00 |
| ATOM | 370 | HB2  | PRO | X | 24 | 23.721 | 36.377 | 16.803 | 0.00 | 0.00 |
| ATOM | 371 | HB3  | PRO | X | 24 | 24.356 | 34.863 | 16.126 | 0.00 | 0.00 |
| ATOM | 372 | CA   | PRO | X | 24 | 24.330 | 34.858 | 18.221 | 0.00 | 0.00 |
| ATOM | 373 | HA   | PRO | X | 24 | 25.400 | 34.676 | 18.118 | 0.00 | 0.00 |
| ATOM | 374 | C    | PRO | X | 24 | 24.143 | 35.849 | 19.395 | 0.00 | 0.00 |
| ATOM | 375 | O    | PRO | X | 24 | 23.286 | 35.655 | 20.278 | 0.00 | 0.00 |
| ATOM | 376 | N    | VAL | X | 25 | 24.852 | 37.046 | 19.391 | 0.00 | 0.00 |
| ATOM | 377 | H    | VAL | X | 25 | 25.481 | 37.200 | 18.616 | 0.00 | 0.00 |
| ATOM | 378 | CA   | VAL | X | 25 | 24.954 | 38.057 | 20.493 | 0.00 | 0.00 |
| ATOM | 379 | HA   | VAL | X | 25 | 23.974 | 38.017 | 20.970 | 0.00 | 0.00 |
| ATOM | 380 | CB   | VAL | X | 25 | 26.124 | 37.824 | 21.479 | 0.00 | 0.00 |
| ATOM | 381 | HB   | VAL | X | 25 | 27.099 | 37.731 | 21.001 | 0.00 | 0.00 |
| ATOM | 382 | CG1  | VAL | X | 25 | 26.313 | 38.883 | 22.523 | 0.00 | 0.00 |
| ATOM | 383 | HG11 | VAL | X | 25 | 27.013 | 39.612 | 22.116 | 0.00 | 0.00 |
| ATOM | 384 | HG12 | VAL | X | 25 | 25.379 | 39.240 | 22.957 | 0.00 | 0.00 |
| ATOM | 385 | HG13 | VAL | X | 25 | 26.786 | 38.525 | 23.437 | 0.00 | 0.00 |
| ATOM | 386 | CG2  | VAL | X | 25 | 25.950 | 36.417 | 22.070 | 0.00 | 0.00 |
| ATOM | 387 | HG21 | VAL | X | 25 | 26.011 | 35.572 | 21.383 | 0.00 | 0.00 |
| ATOM | 388 | HG22 | VAL | X | 25 | 25.112 | 36.414 | 22.767 | 0.00 | 0.00 |
| ATOM | 389 | HG23 | VAL | X | 25 | 26.814 | 36.269 | 22.717 | 0.00 | 0.00 |
| ATOM | 390 | C    | VAL | X | 25 | 24.938 | 39.441 | 19.812 | 0.00 | 0.00 |
| ATOM | 391 | O    | VAL | X | 25 | 25.355 | 39.510 | 18.664 | 0.00 | 0.00 |
| ATOM | 392 | N    | SER | X | 26 | 24.518 | 40.472 | 20.506 | 0.00 | 0.00 |
| ATOM | 393 | H    | SER | X | 26 | 24.048 | 40.390 | 21.396 | 0.00 | 0.00 |
| ATOM | 394 | CA   | SER | X | 26 | 24.590 | 41.907 | 20.117 | 0.00 | 0.00 |
| ATOM | 395 | HA   | SER | X | 26 | 25.212 | 42.045 | 19.232 | 0.00 | 0.00 |
| ATOM | 396 | CB   | SER | X | 26 | 23.186 | 42.620 | 19.870 | 0.00 | 0.00 |
| ATOM | 397 | HB2  | SER | X | 26 | 23.277 | 43.672 | 19.599 | 0.00 | 0.00 |
| ATOM | 398 | HB3  | SER | X | 26 | 22.793 | 42.121 | 18.984 | 0.00 | 0.00 |
| ATOM | 399 | OG   | SER | X | 26 | 22.279 | 42.483 | 20.910 | 0.00 | 0.00 |
| ATOM | 400 | HG   | SER | X | 26 | 22.619 | 41.979 | 21.653 | 0.00 | 0.00 |
| ATOM | 401 | C    | SER | X | 26 | 25.373 | 42.676 | 21.180 | 0.00 | 0.00 |
| ATOM | 402 | O    | SER | X | 26 | 25.122 | 42.531 | 22.418 | 0.00 | 0.00 |
| ATOM | 403 | N    | ALA | X | 27 | 26.505 | 43.259 | 20.764 | 0.00 | 0.00 |
| ATOM | 404 | H    | ALA | X | 27 | 26.605 | 43.434 | 19.774 | 0.00 | 0.00 |
| ATOM | 405 | CA   | ALA | X | 27 | 27.560 | 43.892 | 21.568 | 0.00 | 0.00 |
| ATOM | 406 | HA   | ALA | X | 27 | 27.383 | 43.755 | 22.634 | 0.00 | 0.00 |
| ATOM | 407 | CB   | ALA | X | 27 | 28.843 | 43.077 | 21.396 | 0.00 | 0.00 |
| ATOM | 408 | HB1  | ALA | X | 27 | 29.267 | 43.161 | 20.396 | 0.00 | 0.00 |
| ATOM | 409 | HB2  | ALA | X | 27 | 28.686 | 41.999 | 21.429 | 0.00 | 0.00 |
| ATOM | 410 | HB3  | ALA | X | 27 | 29.504 | 43.391 | 22.204 | 0.00 | 0.00 |
| ATOM | 411 | C    | ALA | X | 27 | 27.614 | 45.367 | 21.285 | 0.00 | 0.00 |
| ATOM | 412 | O    | ALA | X | 27 | 27.374 | 45.805 | 20.209 | 0.00 | 0.00 |
| ATOM | 413 | N    | PHE | X | 28 | 28.047 | 46.168 | 22.291 | 0.00 | 0.00 |
| ATOM | 414 | H    | PHE | X | 28 | 28.077 | 45.808 | 23.234 | 0.00 | 0.00 |
| ATOM | 415 | CA   | PHE | X | 28 | 28.211 | 47.543 | 22.168 | 0.00 | 0.00 |
| ATOM | 416 | HA   | PHE | X | 28 | 28.484 | 47.748 | 21.133 | 0.00 | 0.00 |
| ATOM | 417 | CB   | PHE | X | 28 | 26.843 | 48.299 | 22.530 | 0.00 | 0.00 |
| ATOM | 418 | HB2  | PHE | X | 28 | 26.889 | 48.350 | 23.618 | 0.00 | 0.00 |
| ATOM | 419 | HB3  | PHE | X | 28 | 26.913 | 49.335 | 22.196 | 0.00 | 0.00 |
| ATOM | 420 | CG   | PHE | X | 28 | 25.546 | 47.658 | 21.920 | 0.00 | 0.00 |
| ATOM | 421 | CD1  | PHE | X | 28 | 25.042 | 46.432 | 22.370 | 0.00 | 0.00 |
| ATOM | 422 | HD1  | PHE | X | 28 | 25.535 | 45.957 | 23.205 | 0.00 | 0.00 |
| ATOM | 423 | CE1  | PHE | X | 28 | 23.894 | 45.824 | 21.807 | 0.00 | 0.00 |
| ATOM | 424 | HE1  | PHE | X | 28 | 23.561 | 44.866 | 22.178 | 0.00 | 0.00 |
| ATOM | 425 | CZ   | PHE | X | 28 | 23.178 | 46.449 | 20.751 | 0.00 | 0.00 |
| ATOM | 426 | HZ   | PHE | X | 28 | 22.300 | 45.968 | 20.347 | 0.00 | 0.00 |



|      |     |      |     |   |    |        |        |        |      |      |
|------|-----|------|-----|---|----|--------|--------|--------|------|------|
| ATOM | 427 | CE2  | PHE | X | 28 | 23.683 | 47.682 | 20.291 | 0.00 | 0.00 |
| ATOM | 428 | HE2  | PHE | X | 28 | 23.140 | 48.120 | 19.467 | 0.00 | 0.00 |
| ATOM | 429 | CD2  | PHE | X | 28 | 24.798 | 48.300 | 20.942 | 0.00 | 0.00 |
| ATOM | 430 | HD2  | PHE | X | 28 | 25.149 | 49.217 | 20.492 | 0.00 | 0.00 |
| ATOM | 431 | C    | PHE | X | 28 | 29.324 | 47.999 | 23.030 | 0.00 | 0.00 |
| ATOM | 432 | O    | PHE | X | 28 | 29.353 | 47.627 | 24.218 | 0.00 | 0.00 |
| ATOM | 433 | N    | LEU | X | 29 | 30.412 | 48.472 | 22.383 | 0.00 | 0.00 |
| ATOM | 434 | H    | LEU | X | 29 | 30.396 | 48.778 | 21.421 | 0.00 | 0.00 |
| ATOM | 435 | CA   | LEU | X | 29 | 31.763 | 48.498 | 22.942 | 0.00 | 0.00 |
| ATOM | 436 | HA   | LEU | X | 29 | 31.814 | 48.067 | 23.942 | 0.00 | 0.00 |
| ATOM | 437 | CB   | LEU | X | 29 | 32.606 | 47.579 | 22.066 | 0.00 | 0.00 |
| ATOM | 438 | HB2  | LEU | X | 29 | 32.641 | 48.143 | 21.133 | 0.00 | 0.00 |
| ATOM | 439 | HB3  | LEU | X | 29 | 33.577 | 47.502 | 22.556 | 0.00 | 0.00 |
| ATOM | 440 | CG   | LEU | X | 29 | 32.072 | 46.195 | 21.774 | 0.00 | 0.00 |
| ATOM | 441 | HG   | LEU | X | 29 | 31.106 | 46.306 | 21.280 | 0.00 | 0.00 |
| ATOM | 442 | CD1  | LEU | X | 29 | 32.985 | 45.402 | 20.789 | 0.00 | 0.00 |
| ATOM | 443 | HD11 | LEU | X | 29 | 32.497 | 44.448 | 20.591 | 0.00 | 0.00 |
| ATOM | 444 | HD12 | LEU | X | 29 | 33.995 | 45.283 | 21.180 | 0.00 | 0.00 |
| ATOM | 445 | HD13 | LEU | X | 29 | 33.207 | 45.937 | 19.865 | 0.00 | 0.00 |
| ATOM | 446 | CD2  | LEU | X | 29 | 31.800 | 45.404 | 23.044 | 0.00 | 0.00 |
| ATOM | 447 | HD21 | LEU | X | 29 | 32.608 | 45.569 | 23.756 | 0.00 | 0.00 |
| ATOM | 448 | HD22 | LEU | X | 29 | 30.827 | 45.654 | 23.466 | 0.00 | 0.00 |
| ATOM | 449 | HD23 | LEU | X | 29 | 31.760 | 44.337 | 22.824 | 0.00 | 0.00 |
| ATOM | 450 | C    | LEU | X | 29 | 32.242 | 49.936 | 22.902 | 0.00 | 0.00 |
| ATOM | 451 | O    | LEU | X | 29 | 31.735 | 50.715 | 22.091 | 0.00 | 0.00 |
| ATOM | 452 | N    | GLY | X | 30 | 33.062 | 50.334 | 23.901 | 0.00 | 0.00 |
| ATOM | 453 | H    | GLY | X | 30 | 33.326 | 49.715 | 24.654 | 0.00 | 0.00 |
| ATOM | 454 | CA   | GLY | X | 30 | 33.531 | 51.729 | 24.019 | 0.00 | 0.00 |
| ATOM | 455 | HA2  | GLY | X | 30 | 34.090 | 51.823 | 24.950 | 0.00 | 0.00 |
| ATOM | 456 | HA3  | GLY | X | 30 | 34.216 | 52.003 | 23.217 | 0.00 | 0.00 |
| ATOM | 457 | C    | GLY | X | 30 | 32.288 | 52.710 | 24.045 | 0.00 | 0.00 |
| ATOM | 458 | O    | GLY | X | 30 | 32.387 | 53.745 | 23.397 | 0.00 | 0.00 |
| ATOM | 459 | N    | ILE | X | 31 | 31.274 | 52.503 | 24.873 | 0.00 | 0.00 |
| ATOM | 460 | H    | ILE | X | 31 | 31.328 | 51.651 | 25.413 | 0.00 | 0.00 |
| ATOM | 461 | CA   | ILE | X | 31 | 30.304 | 53.534 | 25.249 | 0.00 | 0.00 |
| ATOM | 462 | HA   | ILE | X | 31 | 29.824 | 54.133 | 24.476 | 0.00 | 0.00 |
| ATOM | 463 | CB   | ILE | X | 31 | 29.124 | 52.790 | 25.933 | 0.00 | 0.00 |
| ATOM | 464 | HB   | ILE | X | 31 | 29.433 | 52.130 | 26.743 | 0.00 | 0.00 |
| ATOM | 465 | CG2  | ILE | X | 31 | 28.126 | 53.768 | 26.532 | 0.00 | 0.00 |
| ATOM | 466 | HG21 | ILE | X | 31 | 27.983 | 54.666 | 25.930 | 0.00 | 0.00 |
| ATOM | 467 | HG22 | ILE | X | 31 | 28.462 | 54.129 | 27.504 | 0.00 | 0.00 |
| ATOM | 468 | HG23 | ILE | X | 31 | 27.084 | 53.450 | 26.577 | 0.00 | 0.00 |
| ATOM | 469 | CG1  | ILE | X | 31 | 28.451 | 51.786 | 24.994 | 0.00 | 0.00 |
| ATOM | 470 | HG12 | ILE | X | 31 | 27.814 | 52.286 | 24.264 | 0.00 | 0.00 |
| ATOM | 471 | HG13 | ILE | X | 31 | 29.266 | 51.323 | 24.438 | 0.00 | 0.00 |
| ATOM | 472 | CD1  | ILE | X | 31 | 27.642 | 50.701 | 25.708 | 0.00 | 0.00 |
| ATOM | 473 | HD11 | ILE | X | 31 | 28.195 | 50.070 | 26.404 | 0.00 | 0.00 |
| ATOM | 474 | HD12 | ILE | X | 31 | 27.090 | 50.022 | 25.058 | 0.00 | 0.00 |
| ATOM | 475 | HD13 | ILE | X | 31 | 26.860 | 51.263 | 26.219 | 0.00 | 0.00 |
| ATOM | 476 | C    | ILE | X | 31 | 30.944 | 54.661 | 26.087 | 0.00 | 0.00 |
| ATOM | 477 | O    | ILE | X | 31 | 31.665 | 54.281 | 27.079 | 0.00 | 0.00 |
| ATOM | 478 | N    | PRO | X | 32 | 30.778 | 55.982 | 25.917 | 0.00 | 0.00 |
| ATOM | 479 | CD   | PRO | X | 32 | 30.305 | 56.619 | 24.707 | 0.00 | 0.00 |
| ATOM | 480 | HD2  | PRO | X | 32 | 29.233 | 56.591 | 24.509 | 0.00 | 0.00 |
| ATOM | 481 | HD3  | PRO | X | 32 | 30.837 | 56.327 | 23.801 | 0.00 | 0.00 |
| ATOM | 482 | CG   | PRO | X | 32 | 30.556 | 58.118 | 24.887 | 0.00 | 0.00 |
| ATOM | 483 | HG2  | PRO | X | 32 | 29.640 | 58.709 | 24.911 | 0.00 | 0.00 |
| ATOM | 484 | HG3  | PRO | X | 32 | 31.195 | 58.437 | 24.064 | 0.00 | 0.00 |
| ATOM | 485 | CB   | PRO | X | 32 | 31.344 | 58.356 | 26.206 | 0.00 | 0.00 |
| ATOM | 486 | HB2  | PRO | X | 32 | 30.809 | 59.107 | 26.788 | 0.00 | 0.00 |
| ATOM | 487 | HB3  | PRO | X | 32 | 32.389 | 58.601 | 26.017 | 0.00 | 0.00 |
| ATOM | 488 | CA   | PRO | X | 32 | 31.156 | 57.041 | 26.875 | 0.00 | 0.00 |
| ATOM | 489 | HA   | PRO | X | 32 | 32.027 | 56.707 | 27.439 | 0.00 | 0.00 |
| ATOM | 490 | C    | PRO | X | 32 | 30.043 | 57.047 | 27.900 | 0.00 | 0.00 |
| ATOM | 491 | O    | PRO | X | 32 | 28.893 | 56.747 | 27.556 | 0.00 | 0.00 |
| ATOM | 492 | N    | PHE | X | 33 | 30.384 | 57.462 | 29.114 | 0.00 | 0.00 |
| ATOM | 493 | H    | PHE | X | 33 | 31.362 | 57.425 | 29.366 | 0.00 | 0.00 |

|      |     |     |     |   |    |        |        |        |      |      |
|------|-----|-----|-----|---|----|--------|--------|--------|------|------|
| ATOM | 494 | CA  | PHE | X | 33 | 29.498 | 57.551 | 30.262 | 0.00 | 0.00 |
| ATOM | 495 | HA  | PHE | X | 33 | 28.454 | 57.719 | 29.998 | 0.00 | 0.00 |
| ATOM | 496 | CB  | PHE | X | 33 | 29.503 | 56.248 | 30.957 | 0.00 | 0.00 |
| ATOM | 497 | HB2 | PHE | X | 33 | 28.606 | 56.230 | 31.576 | 0.00 | 0.00 |
| ATOM | 498 | HB3 | PHE | X | 33 | 29.265 | 55.555 | 30.150 | 0.00 | 0.00 |
| ATOM | 499 | CG  | PHE | X | 33 | 30.648 | 55.892 | 31.829 | 0.00 | 0.00 |
| ATOM | 500 | CD1 | PHE | X | 33 | 30.802 | 56.411 | 33.169 | 0.00 | 0.00 |
| ATOM | 501 | HD1 | PHE | X | 33 | 29.949 | 56.834 | 33.679 | 0.00 | 0.00 |
| ATOM | 502 | CE1 | PHE | X | 33 | 31.872 | 55.944 | 34.015 | 0.00 | 0.00 |
| ATOM | 503 | HE1 | PHE | X | 33 | 31.946 | 56.187 | 35.064 | 0.00 | 0.00 |
| ATOM | 504 | CZ  | PHE | X | 33 | 32.775 | 55.019 | 33.488 | 0.00 | 0.00 |
| ATOM | 505 | HZ  | PHE | X | 33 | 33.493 | 54.536 | 34.135 | 0.00 | 0.00 |
| ATOM | 506 | CE2 | PHE | X | 33 | 32.696 | 54.660 | 32.171 | 0.00 | 0.00 |
| ATOM | 507 | HE2 | PHE | X | 33 | 33.475 | 54.054 | 31.734 | 0.00 | 0.00 |
| ATOM | 508 | CD2 | PHE | X | 33 | 31.696 | 55.148 | 31.344 | 0.00 | 0.00 |
| ATOM | 509 | HD2 | PHE | X | 33 | 31.769 | 54.844 | 30.310 | 0.00 | 0.00 |
| ATOM | 510 | C   | PHE | X | 33 | 30.010 | 58.782 | 31.159 | 0.00 | 0.00 |
| ATOM | 511 | O   | PHE | X | 33 | 29.180 | 59.233 | 31.921 | 0.00 | 0.00 |
| ATOM | 512 | N   | ALA | X | 34 | 31.287 | 59.233 | 31.111 | 0.00 | 0.00 |
| ATOM | 513 | H   | ALA | X | 34 | 31.921 | 58.802 | 30.454 | 0.00 | 0.00 |
| ATOM | 514 | CA  | ALA | X | 34 | 31.795 | 60.438 | 31.751 | 0.00 | 0.00 |
| ATOM | 515 | HA  | ALA | X | 34 | 31.021 | 60.979 | 32.295 | 0.00 | 0.00 |
| ATOM | 516 | CB  | ALA | X | 34 | 32.979 | 59.879 | 32.615 | 0.00 | 0.00 |
| ATOM | 517 | HB1 | ALA | X | 34 | 33.363 | 60.606 | 33.331 | 0.00 | 0.00 |
| ATOM | 518 | HB2 | ALA | X | 34 | 33.769 | 59.571 | 31.929 | 0.00 | 0.00 |
| ATOM | 519 | HB3 | ALA | X | 34 | 32.704 | 58.983 | 33.171 | 0.00 | 0.00 |
| ATOM | 520 | C   | ALA | X | 34 | 32.325 | 61.627 | 30.864 | 0.00 | 0.00 |
| ATOM | 521 | O   | ALA | X | 34 | 32.835 | 61.413 | 29.755 | 0.00 | 0.00 |
| ATOM | 522 | N   | GLU | X | 35 | 32.168 | 62.897 | 31.342 | 0.00 | 0.00 |
| ATOM | 523 | H   | GLU | X | 35 | 31.789 | 62.918 | 32.278 | 0.00 | 0.00 |
| ATOM | 524 | CA  | GLU | X | 35 | 32.964 | 64.056 | 30.822 | 0.00 | 0.00 |
| ATOM | 525 | HA  | GLU | X | 35 | 32.714 | 64.167 | 29.767 | 0.00 | 0.00 |
| ATOM | 526 | CB  | GLU | X | 35 | 32.663 | 65.363 | 31.562 | 0.00 | 0.00 |
| ATOM | 527 | HB2 | GLU | X | 35 | 32.653 | 65.222 | 32.642 | 0.00 | 0.00 |
| ATOM | 528 | HB3 | GLU | X | 35 | 33.428 | 66.124 | 31.407 | 0.00 | 0.00 |
| ATOM | 529 | CG  | GLU | X | 35 | 31.223 | 65.964 | 31.334 | 0.00 | 0.00 |
| ATOM | 530 | HG2 | GLU | X | 35 | 30.401 | 65.421 | 31.800 | 0.00 | 0.00 |
| ATOM | 531 | HG3 | GLU | X | 35 | 31.169 | 66.849 | 31.968 | 0.00 | 0.00 |
| ATOM | 532 | CD  | GLU | X | 35 | 30.951 | 66.187 | 29.866 | 0.00 | 0.00 |
| ATOM | 533 | OE1 | GLU | X | 35 | 30.498 | 65.188 | 29.165 | 0.00 | 0.00 |
| ATOM | 534 | OE2 | GLU | X | 35 | 31.086 | 67.312 | 29.360 | 0.00 | 0.00 |
| ATOM | 535 | C   | GLU | X | 35 | 34.492 | 63.873 | 30.934 | 0.00 | 0.00 |
| ATOM | 536 | O   | GLU | X | 35 | 34.993 | 63.375 | 31.953 | 0.00 | 0.00 |
| ATOM | 537 | N   | PRO | X | 36 | 35.261 | 64.504 | 30.057 | 0.00 | 0.00 |
| ATOM | 538 | CD  | PRO | X | 36 | 34.791 | 65.342 | 28.938 | 0.00 | 0.00 |
| ATOM | 539 | HD2 | PRO | X | 36 | 34.134 | 66.158 | 29.236 | 0.00 | 0.00 |
| ATOM | 540 | HD3 | PRO | X | 36 | 34.278 | 64.789 | 28.152 | 0.00 | 0.00 |
| ATOM | 541 | CG  | PRO | X | 36 | 36.024 | 66.042 | 28.421 | 0.00 | 0.00 |
| ATOM | 542 | HG2 | PRO | X | 36 | 35.919 | 67.125 | 28.474 | 0.00 | 0.00 |
| ATOM | 543 | HG3 | PRO | X | 36 | 35.995 | 65.699 | 27.387 | 0.00 | 0.00 |
| ATOM | 544 | CB  | PRO | X | 36 | 37.273 | 65.593 | 29.221 | 0.00 | 0.00 |
| ATOM | 545 | HB2 | PRO | X | 36 | 37.566 | 66.426 | 29.860 | 0.00 | 0.00 |
| ATOM | 546 | HB3 | PRO | X | 36 | 38.146 | 65.405 | 28.596 | 0.00 | 0.00 |
| ATOM | 547 | CA  | PRO | X | 36 | 36.769 | 64.424 | 29.973 | 0.00 | 0.00 |
| ATOM | 548 | HA  | PRO | X | 36 | 36.883 | 63.500 | 29.405 | 0.00 | 0.00 |
| ATOM | 549 | C   | PRO | X | 36 | 37.615 | 64.205 | 31.231 | 0.00 | 0.00 |
| ATOM | 550 | O   | PRO | X | 36 | 37.867 | 65.223 | 31.928 | 0.00 | 0.00 |
| ATOM | 551 | N   | PRO | X | 37 | 37.925 | 62.959 | 31.642 | 0.00 | 0.00 |
| ATOM | 552 | CD  | PRO | X | 37 | 37.685 | 61.760 | 30.889 | 0.00 | 0.00 |
| ATOM | 553 | HD2 | PRO | X | 37 | 38.037 | 61.945 | 29.874 | 0.00 | 0.00 |
| ATOM | 554 | HD3 | PRO | X | 37 | 36.609 | 61.671 | 31.037 | 0.00 | 0.00 |
| ATOM | 555 | CG  | PRO | X | 37 | 38.446 | 60.594 | 31.574 | 0.00 | 0.00 |
| ATOM | 556 | HG2 | PRO | X | 37 | 39.520 | 60.567 | 31.389 | 0.00 | 0.00 |
| ATOM | 557 | HG3 | PRO | X | 37 | 38.008 | 59.603 | 31.455 | 0.00 | 0.00 |
| ATOM | 558 | CB  | PRO | X | 37 | 38.192 | 61.058 | 33.041 | 0.00 | 0.00 |
| ATOM | 559 | HB2 | PRO | X | 37 | 38.941 | 60.514 | 33.616 | 0.00 | 0.00 |
| ATOM | 560 | HB3 | PRO | X | 37 | 37.148 | 60.887 | 33.305 | 0.00 | 0.00 |

|      |     |      |     |   |    |        |        |        |      |      |
|------|-----|------|-----|---|----|--------|--------|--------|------|------|
| ATOM | 561 | CA   | PRO | X | 37 | 38.418 | 62.634 | 32.961 | 0.00 | 0.00 |
| ATOM | 562 | HA   | PRO | X | 37 | 37.785 | 63.180 | 33.662 | 0.00 | 0.00 |
| ATOM | 563 | C    | PRO | X | 37 | 39.858 | 62.950 | 33.154 | 0.00 | 0.00 |
| ATOM | 564 | O    | PRO | X | 37 | 40.384 | 62.759 | 34.252 | 0.00 | 0.00 |
| ATOM | 565 | N    | MET | X | 38 | 40.572 | 63.388 | 32.098 | 0.00 | 0.00 |
| ATOM | 566 | H    | MET | X | 38 | 40.083 | 63.517 | 31.224 | 0.00 | 0.00 |
| ATOM | 567 | CA   | MET | X | 38 | 41.933 | 63.810 | 32.000 | 0.00 | 0.00 |
| ATOM | 568 | HA   | MET | X | 38 | 42.629 | 63.166 | 32.537 | 0.00 | 0.00 |
| ATOM | 569 | CB   | MET | X | 38 | 42.294 | 63.628 | 30.511 | 0.00 | 0.00 |
| ATOM | 570 | HB2  | MET | X | 38 | 43.329 | 63.871 | 30.273 | 0.00 | 0.00 |
| ATOM | 571 | HB3  | MET | X | 38 | 42.111 | 62.589 | 30.237 | 0.00 | 0.00 |
| ATOM | 572 | CG   | MET | X | 38 | 41.572 | 64.600 | 29.561 | 0.00 | 0.00 |
| ATOM | 573 | HG2  | MET | X | 38 | 40.520 | 64.327 | 29.479 | 0.00 | 0.00 |
| ATOM | 574 | HG3  | MET | X | 38 | 41.668 | 65.628 | 29.910 | 0.00 | 0.00 |
| ATOM | 575 | SD   | MET | X | 38 | 42.272 | 64.489 | 27.854 | 0.00 | 0.00 |
| ATOM | 576 | CE   | MET | X | 38 | 43.810 | 65.493 | 27.988 | 0.00 | 0.00 |
| ATOM | 577 | HE1  | MET | X | 38 | 44.543 | 64.966 | 28.599 | 0.00 | 0.00 |
| ATOM | 578 | HE2  | MET | X | 38 | 44.155 | 65.772 | 26.993 | 0.00 | 0.00 |
| ATOM | 579 | HE3  | MET | X | 38 | 43.582 | 66.378 | 28.582 | 0.00 | 0.00 |
| ATOM | 580 | C    | MET | X | 38 | 42.189 | 65.188 | 32.561 | 0.00 | 0.00 |
| ATOM | 581 | O    | MET | X | 38 | 41.375 | 66.158 | 32.515 | 0.00 | 0.00 |
| ATOM | 582 | N    | GLY | X | 39 | 43.393 | 65.357 | 33.067 | 0.00 | 0.00 |
| ATOM | 583 | H    | GLY | X | 39 | 43.924 | 64.504 | 33.165 | 0.00 | 0.00 |
| ATOM | 584 | CA   | GLY | X | 39 | 44.132 | 66.639 | 33.220 | 0.00 | 0.00 |
| ATOM | 585 | HA2  | GLY | X | 39 | 45.205 | 66.478 | 33.323 | 0.00 | 0.00 |
| ATOM | 586 | HA3  | GLY | X | 39 | 44.008 | 67.381 | 32.431 | 0.00 | 0.00 |
| ATOM | 587 | C    | GLY | X | 39 | 43.660 | 67.434 | 34.456 | 0.00 | 0.00 |
| ATOM | 588 | O    | GLY | X | 39 | 44.036 | 66.998 | 35.519 | 0.00 | 0.00 |
| ATOM | 589 | N    | PRO | X | 40 | 42.905 | 68.551 | 34.337 | 0.00 | 0.00 |
| ATOM | 590 | CD   | PRO | X | 40 | 42.702 | 69.265 | 33.183 | 0.00 | 0.00 |
| ATOM | 591 | HD2  | PRO | X | 40 | 41.966 | 68.804 | 32.524 | 0.00 | 0.00 |
| ATOM | 592 | HD3  | PRO | X | 40 | 43.570 | 69.588 | 32.608 | 0.00 | 0.00 |
| ATOM | 593 | CG   | PRO | X | 40 | 42.103 | 70.567 | 33.675 | 0.00 | 0.00 |
| ATOM | 594 | HG2  | PRO | X | 40 | 41.494 | 70.979 | 32.870 | 0.00 | 0.00 |
| ATOM | 595 | HG3  | PRO | X | 40 | 42.840 | 71.276 | 34.052 | 0.00 | 0.00 |
| ATOM | 596 | CB   | PRO | X | 40 | 41.246 | 70.040 | 34.769 | 0.00 | 0.00 |
| ATOM | 597 | HB2  | PRO | X | 40 | 40.366 | 69.486 | 34.442 | 0.00 | 0.00 |
| ATOM | 598 | HB3  | PRO | X | 40 | 40.860 | 70.887 | 35.337 | 0.00 | 0.00 |
| ATOM | 599 | CA   | PRO | X | 40 | 42.143 | 69.008 | 35.494 | 0.00 | 0.00 |
| ATOM | 600 | HA   | PRO | X | 40 | 42.826 | 69.520 | 36.172 | 0.00 | 0.00 |
| ATOM | 601 | C    | PRO | X | 40 | 41.338 | 67.953 | 36.318 | 0.00 | 0.00 |
| ATOM | 602 | O    | PRO | X | 40 | 41.450 | 67.983 | 37.477 | 0.00 | 0.00 |
| ATOM | 603 | N    | ARG | X | 41 | 40.671 | 67.016 | 35.637 | 0.00 | 0.00 |
| ATOM | 604 | H    | ARG | X | 41 | 40.694 | 67.016 | 34.627 | 0.00 | 0.00 |
| ATOM | 605 | CA   | ARG | X | 41 | 40.063 | 65.858 | 36.307 | 0.00 | 0.00 |
| ATOM | 606 | HA   | ARG | X | 41 | 39.639 | 66.244 | 37.234 | 0.00 | 0.00 |
| ATOM | 607 | CB   | ARG | X | 41 | 38.849 | 65.276 | 35.528 | 0.00 | 0.00 |
| ATOM | 608 | HB2  | ARG | X | 41 | 39.177 | 65.134 | 34.498 | 0.00 | 0.00 |
| ATOM | 609 | HB3  | ARG | X | 41 | 38.506 | 64.325 | 35.936 | 0.00 | 0.00 |
| ATOM | 610 | CG   | ARG | X | 41 | 37.675 | 66.310 | 35.401 | 0.00 | 0.00 |
| ATOM | 611 | HG2  | ARG | X | 41 | 37.373 | 66.609 | 36.405 | 0.00 | 0.00 |
| ATOM | 612 | HG3  | ARG | X | 41 | 37.961 | 67.116 | 34.725 | 0.00 | 0.00 |
| ATOM | 613 | CD   | ARG | X | 41 | 36.305 | 65.723 | 34.865 | 0.00 | 0.00 |
| ATOM | 614 | HD2  | ARG | X | 41 | 36.594 | 65.101 | 34.018 | 0.00 | 0.00 |
| ATOM | 615 | HD3  | ARG | X | 41 | 35.856 | 65.022 | 35.569 | 0.00 | 0.00 |
| ATOM | 616 | NE   | ARG | X | 41 | 35.349 | 66.805 | 34.531 | 0.00 | 0.00 |
| ATOM | 617 | HE   | ARG | X | 41 | 34.802 | 67.149 | 35.307 | 0.00 | 0.00 |
| ATOM | 618 | CZ   | ARG | X | 41 | 35.442 | 67.574 | 33.488 | 0.00 | 0.00 |
| ATOM | 619 | NH1  | ARG | X | 41 | 36.328 | 67.487 | 32.552 | 0.00 | 0.00 |
| ATOM | 620 | HH11 | ARG | X | 41 | 37.037 | 66.780 | 32.683 | 0.00 | 0.00 |
| ATOM | 621 | HH12 | ARG | X | 41 | 36.387 | 68.203 | 31.842 | 0.00 | 0.00 |
| ATOM | 622 | NH2  | ARG | X | 41 | 34.567 | 68.541 | 33.318 | 0.00 | 0.00 |
| ATOM | 623 | HH21 | ARG | X | 41 | 33.847 | 68.677 | 34.014 | 0.00 | 0.00 |
| ATOM | 624 | HH22 | ARG | X | 41 | 34.387 | 68.959 | 32.416 | 0.00 | 0.00 |
| ATOM | 625 | C    | ARG | X | 41 | 40.940 | 64.764 | 36.864 | 0.00 | 0.00 |
| ATOM | 626 | O    | ARG | X | 41 | 40.387 | 63.894 | 37.563 | 0.00 | 0.00 |
| ATOM | 627 | N    | ARG | X | 42 | 42.257 | 64.766 | 36.678 | 0.00 | 0.00 |

|      |     |      |     |   |    |        |        |        |      |      |
|------|-----|------|-----|---|----|--------|--------|--------|------|------|
| ATOM | 628 | H    | ARG | X | 42 | 42.657 | 65.626 | 36.330 | 0.00 | 0.00 |
| ATOM | 629 | CA   | ARG | X | 42 | 43.187 | 63.731 | 37.168 | 0.00 | 0.00 |
| ATOM | 630 | HA   | ARG | X | 42 | 42.723 | 62.779 | 36.910 | 0.00 | 0.00 |
| ATOM | 631 | CB   | ARG | X | 42 | 44.581 | 63.949 | 36.607 | 0.00 | 0.00 |
| ATOM | 632 | HB2  | ARG | X | 42 | 44.423 | 64.080 | 35.537 | 0.00 | 0.00 |
| ATOM | 633 | HB3  | ARG | X | 42 | 44.987 | 64.826 | 37.110 | 0.00 | 0.00 |
| ATOM | 634 | CG   | ARG | X | 42 | 45.517 | 62.807 | 36.910 | 0.00 | 0.00 |
| ATOM | 635 | HG2  | ARG | X | 42 | 45.499 | 62.678 | 37.993 | 0.00 | 0.00 |
| ATOM | 636 | HG3  | ARG | X | 42 | 45.148 | 61.935 | 36.371 | 0.00 | 0.00 |
| ATOM | 637 | CD   | ARG | X | 42 | 46.911 | 63.284 | 36.543 | 0.00 | 0.00 |
| ATOM | 638 | HD2  | ARG | X | 42 | 47.137 | 64.124 | 37.198 | 0.00 | 0.00 |
| ATOM | 639 | HD3  | ARG | X | 42 | 47.577 | 62.435 | 36.702 | 0.00 | 0.00 |
| ATOM | 640 | NE   | ARG | X | 42 | 46.997 | 63.748 | 35.141 | 0.00 | 0.00 |
| ATOM | 641 | HE   | ARG | X | 42 | 46.239 | 63.456 | 34.541 | 0.00 | 0.00 |
| ATOM | 642 | CZ   | ARG | X | 42 | 48.031 | 64.250 | 34.499 | 0.00 | 0.00 |
| ATOM | 643 | NH1  | ARG | X | 42 | 49.155 | 64.380 | 35.107 | 0.00 | 0.00 |
| ATOM | 644 | HH11 | ARG | X | 42 | 49.364 | 64.287 | 36.091 | 0.00 | 0.00 |
| ATOM | 645 | HH12 | ARG | X | 42 | 49.859 | 64.722 | 34.468 | 0.00 | 0.00 |
| ATOM | 646 | NH2  | ARG | X | 42 | 47.947 | 64.445 | 33.218 | 0.00 | 0.00 |
| ATOM | 647 | HH21 | ARG | X | 42 | 47.140 | 64.086 | 32.727 | 0.00 | 0.00 |
| ATOM | 648 | HH22 | ARG | X | 42 | 48.794 | 64.504 | 32.672 | 0.00 | 0.00 |
| ATOM | 649 | C    | ARG | X | 42 | 43.234 | 63.770 | 38.692 | 0.00 | 0.00 |
| ATOM | 650 | O    | ARG | X | 42 | 43.218 | 64.911 | 39.252 | 0.00 | 0.00 |
| ATOM | 651 | N    | PHE | X | 43 | 43.118 | 62.622 | 39.298 | 0.00 | 0.00 |
| ATOM | 652 | H    | PHE | X | 43 | 43.006 | 61.786 | 38.743 | 0.00 | 0.00 |
| ATOM | 653 | CA   | PHE | X | 43 | 43.060 | 62.496 | 40.809 | 0.00 | 0.00 |
| ATOM | 654 | HA   | PHE | X | 43 | 43.179 | 61.445 | 41.073 | 0.00 | 0.00 |
| ATOM | 655 | CB   | PHE | X | 43 | 44.175 | 63.248 | 41.542 | 0.00 | 0.00 |
| ATOM | 656 | HB2  | PHE | X | 43 | 43.841 | 64.280 | 41.647 | 0.00 | 0.00 |
| ATOM | 657 | HB3  | PHE | X | 43 | 44.147 | 62.844 | 42.554 | 0.00 | 0.00 |
| ATOM | 658 | CG   | PHE | X | 43 | 45.601 | 63.184 | 41.074 | 0.00 | 0.00 |
| ATOM | 659 | CD1  | PHE | X | 43 | 46.182 | 61.941 | 40.716 | 0.00 | 0.00 |
| ATOM | 660 | HD1  | PHE | X | 43 | 45.556 | 61.069 | 40.591 | 0.00 | 0.00 |
| ATOM | 661 | CE1  | PHE | X | 43 | 47.490 | 61.882 | 40.295 | 0.00 | 0.00 |
| ATOM | 662 | HE1  | PHE | X | 43 | 47.825 | 60.905 | 39.982 | 0.00 | 0.00 |
| ATOM | 663 | CZ   | PHE | X | 43 | 48.225 | 63.029 | 40.171 | 0.00 | 0.00 |
| ATOM | 664 | HZ   | PHE | X | 43 | 49.210 | 62.907 | 39.745 | 0.00 | 0.00 |
| ATOM | 665 | CE2  | PHE | X | 43 | 47.666 | 64.326 | 40.514 | 0.00 | 0.00 |
| ATOM | 666 | HE2  | PHE | X | 43 | 48.269 | 65.220 | 40.574 | 0.00 | 0.00 |
| ATOM | 667 | CD2  | PHE | X | 43 | 46.342 | 64.367 | 41.043 | 0.00 | 0.00 |
| ATOM | 668 | HD2  | PHE | X | 43 | 45.964 | 65.337 | 41.333 | 0.00 | 0.00 |
| ATOM | 669 | C    | PHE | X | 43 | 41.655 | 62.951 | 41.436 | 0.00 | 0.00 |
| ATOM | 670 | O    | PHE | X | 43 | 41.357 | 62.800 | 42.595 | 0.00 | 0.00 |
| ATOM | 671 | N    | LEU | X | 44 | 40.824 | 63.464 | 40.502 | 0.00 | 0.00 |
| ATOM | 672 | H    | LEU | X | 44 | 41.130 | 63.377 | 39.544 | 0.00 | 0.00 |
| ATOM | 673 | CA   | LEU | X | 44 | 39.527 | 64.055 | 40.855 | 0.00 | 0.00 |
| ATOM | 674 | HA   | LEU | X | 44 | 39.380 | 63.896 | 41.924 | 0.00 | 0.00 |
| ATOM | 675 | CB   | LEU | X | 44 | 39.461 | 65.572 | 40.496 | 0.00 | 0.00 |
| ATOM | 676 | HB2  | LEU | X | 44 | 39.947 | 65.707 | 39.530 | 0.00 | 0.00 |
| ATOM | 677 | HB3  | LEU | X | 44 | 38.469 | 65.994 | 40.336 | 0.00 | 0.00 |
| ATOM | 678 | CG   | LEU | X | 44 | 40.341 | 66.461 | 41.357 | 0.00 | 0.00 |
| ATOM | 679 | HG   | LEU | X | 44 | 41.333 | 66.020 | 41.453 | 0.00 | 0.00 |
| ATOM | 680 | CD1  | LEU | X | 44 | 40.475 | 67.917 | 40.744 | 0.00 | 0.00 |
| ATOM | 681 | HD11 | LEU | X | 44 | 41.287 | 68.441 | 41.248 | 0.00 | 0.00 |
| ATOM | 682 | HD12 | LEU | X | 44 | 39.524 | 68.440 | 40.849 | 0.00 | 0.00 |
| ATOM | 683 | HD13 | LEU | X | 44 | 40.810 | 67.930 | 39.707 | 0.00 | 0.00 |
| ATOM | 684 | CD2  | LEU | X | 44 | 39.783 | 66.694 | 42.786 | 0.00 | 0.00 |
| ATOM | 685 | HD21 | LEU | X | 44 | 40.451 | 67.422 | 43.245 | 0.00 | 0.00 |
| ATOM | 686 | HD22 | LEU | X | 44 | 38.841 | 67.209 | 42.600 | 0.00 | 0.00 |
| ATOM | 687 | HD23 | LEU | X | 44 | 39.670 | 65.798 | 43.397 | 0.00 | 0.00 |
| ATOM | 688 | C    | LEU | X | 44 | 38.331 | 63.339 | 40.323 | 0.00 | 0.00 |
| ATOM | 689 | O    | LEU | X | 44 | 38.430 | 62.632 | 39.379 | 0.00 | 0.00 |
| ATOM | 690 | N    | PRO | X | 45 | 37.115 | 63.400 | 40.890 | 0.00 | 0.00 |
| ATOM | 691 | CD   | PRO | X | 45 | 36.794 | 64.230 | 42.051 | 0.00 | 0.00 |
| ATOM | 692 | HD2  | PRO | X | 45 | 36.727 | 65.238 | 41.642 | 0.00 | 0.00 |
| ATOM | 693 | HD3  | PRO | X | 45 | 37.463 | 64.121 | 42.904 | 0.00 | 0.00 |
| ATOM | 694 | CG   | PRO | X | 45 | 35.316 | 63.855 | 42.444 | 0.00 | 0.00 |

|      |     |     |     |   |    |        |        |        |      |      |
|------|-----|-----|-----|---|----|--------|--------|--------|------|------|
| ATOM | 695 | HG2 | PRO | X | 45 | 34.796 | 64.701 | 42.892 | 0.00 | 0.00 |
| ATOM | 696 | HG3 | PRO | X | 45 | 35.351 | 63.104 | 43.234 | 0.00 | 0.00 |
| ATOM | 697 | CB  | PRO | X | 45 | 34.722 | 63.262 | 41.173 | 0.00 | 0.00 |
| ATOM | 698 | HB2 | PRO | X | 45 | 34.254 | 64.068 | 40.608 | 0.00 | 0.00 |
| ATOM | 699 | HB3 | PRO | X | 45 | 34.036 | 62.473 | 41.481 | 0.00 | 0.00 |
| ATOM | 700 | CA  | PRO | X | 45 | 35.895 | 62.660 | 40.375 | 0.00 | 0.00 |
| ATOM | 701 | HA  | PRO | X | 45 | 36.078 | 61.649 | 40.739 | 0.00 | 0.00 |
| ATOM | 702 | C   | PRO | X | 45 | 35.694 | 62.823 | 38.877 | 0.00 | 0.00 |
| ATOM | 703 | O   | PRO | X | 45 | 35.964 | 63.978 | 38.470 | 0.00 | 0.00 |
| ATOM | 704 | N   | PRO | X | 46 | 35.240 | 61.774 | 38.131 | 0.00 | 0.00 |
| ATOM | 705 | CD  | PRO | X | 46 | 34.897 | 60.458 | 38.731 | 0.00 | 0.00 |
| ATOM | 706 | HD2 | PRO | X | 46 | 34.249 | 60.535 | 39.605 | 0.00 | 0.00 |
| ATOM | 707 | HD3 | PRO | X | 46 | 35.802 | 59.994 | 39.123 | 0.00 | 0.00 |
| ATOM | 708 | CG  | PRO | X | 46 | 34.100 | 59.627 | 37.725 | 0.00 | 0.00 |
| ATOM | 709 | HG2 | PRO | X | 46 | 33.039 | 59.671 | 37.971 | 0.00 | 0.00 |
| ATOM | 710 | HG3 | PRO | X | 46 | 34.517 | 58.654 | 37.464 | 0.00 | 0.00 |
| ATOM | 711 | CB  | PRO | X | 46 | 34.430 | 60.427 | 36.443 | 0.00 | 0.00 |
| ATOM | 712 | HB2 | PRO | X | 46 | 33.702 | 60.306 | 35.641 | 0.00 | 0.00 |
| ATOM | 713 | HB3 | PRO | X | 46 | 35.394 | 60.118 | 36.039 | 0.00 | 0.00 |
| ATOM | 714 | CA  | PRO | X | 46 | 34.556 | 61.910 | 36.907 | 0.00 | 0.00 |
| ATOM | 715 | HA  | PRO | X | 46 | 35.141 | 62.427 | 36.146 | 0.00 | 0.00 |
| ATOM | 716 | C   | PRO | X | 46 | 33.223 | 62.630 | 37.171 | 0.00 | 0.00 |
| ATOM | 717 | O   | PRO | X | 46 | 32.757 | 62.786 | 38.280 | 0.00 | 0.00 |
| ATOM | 718 | N   | GLU | X | 47 | 32.531 | 63.066 | 36.150 | 0.00 | 0.00 |
| ATOM | 719 | H   | GLU | X | 47 | 32.882 | 62.848 | 35.228 | 0.00 | 0.00 |
| ATOM | 720 | CA  | GLU | X | 47 | 31.151 | 63.525 | 36.208 | 0.00 | 0.00 |
| ATOM | 721 | HA  | GLU | X | 47 | 30.684 | 63.010 | 37.047 | 0.00 | 0.00 |
| ATOM | 722 | CB  | GLU | X | 47 | 31.170 | 65.008 | 36.616 | 0.00 | 0.00 |
| ATOM | 723 | HB2 | GLU | X | 47 | 30.127 | 65.282 | 36.776 | 0.00 | 0.00 |
| ATOM | 724 | HB3 | GLU | X | 47 | 31.660 | 65.011 | 37.589 | 0.00 | 0.00 |
| ATOM | 725 | CG  | GLU | X | 47 | 31.852 | 65.900 | 35.562 | 0.00 | 0.00 |
| ATOM | 726 | HG2 | GLU | X | 47 | 32.831 | 65.486 | 35.321 | 0.00 | 0.00 |
| ATOM | 727 | HG3 | GLU | X | 47 | 31.270 | 65.832 | 34.643 | 0.00 | 0.00 |
| ATOM | 728 | CD  | GLU | X | 47 | 31.877 | 67.355 | 35.863 | 0.00 | 0.00 |
| ATOM | 729 | OE1 | GLU | X | 47 | 31.049 | 67.888 | 36.617 | 0.00 | 0.00 |
| ATOM | 730 | OE2 | GLU | X | 47 | 32.775 | 68.117 | 35.322 | 0.00 | 0.00 |
| ATOM | 731 | C   | GLU | X | 47 | 30.394 | 63.158 | 34.959 | 0.00 | 0.00 |
| ATOM | 732 | O   | GLU | X | 47 | 31.088 | 62.982 | 33.941 | 0.00 | 0.00 |
| ATOM | 733 | N   | PRO | X | 48 | 29.060 | 63.014 | 34.959 | 0.00 | 0.00 |
| ATOM | 734 | CD  | PRO | X | 48 | 28.144 | 63.196 | 36.117 | 0.00 | 0.00 |
| ATOM | 735 | HD2 | PRO | X | 48 | 28.254 | 64.235 | 36.427 | 0.00 | 0.00 |
| ATOM | 736 | HD3 | PRO | X | 48 | 28.332 | 62.412 | 36.850 | 0.00 | 0.00 |
| ATOM | 737 | CG  | PRO | X | 48 | 26.742 | 63.109 | 35.576 | 0.00 | 0.00 |
| ATOM | 738 | HG2 | PRO | X | 48 | 26.456 | 64.088 | 35.193 | 0.00 | 0.00 |
| ATOM | 739 | HG3 | PRO | X | 48 | 26.134 | 62.640 | 36.351 | 0.00 | 0.00 |
| ATOM | 740 | CB  | PRO | X | 48 | 27.036 | 62.084 | 34.477 | 0.00 | 0.00 |
| ATOM | 741 | HB2 | PRO | X | 48 | 26.349 | 62.240 | 33.646 | 0.00 | 0.00 |
| ATOM | 742 | HB3 | PRO | X | 48 | 27.004 | 61.078 | 34.896 | 0.00 | 0.00 |
| ATOM | 743 | CA  | PRO | X | 48 | 28.434 | 62.328 | 33.909 | 0.00 | 0.00 |
| ATOM | 744 | HA  | PRO | X | 48 | 28.939 | 61.362 | 33.897 | 0.00 | 0.00 |
| ATOM | 745 | C   | PRO | X | 48 | 28.518 | 63.005 | 32.534 | 0.00 | 0.00 |
| ATOM | 746 | O   | PRO | X | 48 | 28.459 | 64.225 | 32.481 | 0.00 | 0.00 |
| ATOM | 747 | N   | LYS | X | 49 | 28.558 | 62.186 | 31.531 | 0.00 | 0.00 |
| ATOM | 748 | H   | LYS | X | 49 | 28.523 | 61.184 | 31.653 | 0.00 | 0.00 |
| ATOM | 749 | CA  | LYS | X | 49 | 28.575 | 62.554 | 30.066 | 0.00 | 0.00 |
| ATOM | 750 | HA  | LYS | X | 49 | 29.572 | 62.957 | 29.883 | 0.00 | 0.00 |
| ATOM | 751 | CB  | LYS | X | 49 | 28.335 | 61.232 | 29.196 | 0.00 | 0.00 |
| ATOM | 752 | HB2 | LYS | X | 49 | 29.146 | 60.545 | 29.437 | 0.00 | 0.00 |
| ATOM | 753 | HB3 | LYS | X | 49 | 27.456 | 60.771 | 29.645 | 0.00 | 0.00 |
| ATOM | 754 | CG  | LYS | X | 49 | 28.224 | 61.413 | 27.668 | 0.00 | 0.00 |
| ATOM | 755 | HG2 | LYS | X | 49 | 28.047 | 60.430 | 27.232 | 0.00 | 0.00 |
| ATOM | 756 | HG3 | LYS | X | 49 | 27.279 | 61.955 | 27.638 | 0.00 | 0.00 |
| ATOM | 757 | CD  | LYS | X | 49 | 29.338 | 62.176 | 26.977 | 0.00 | 0.00 |
| ATOM | 758 | HD2 | LYS | X | 49 | 29.423 | 63.165 | 27.428 | 0.00 | 0.00 |
| ATOM | 759 | HD3 | LYS | X | 49 | 30.234 | 61.560 | 27.054 | 0.00 | 0.00 |
| ATOM | 760 | CE  | LYS | X | 49 | 28.936 | 62.285 | 25.472 | 0.00 | 0.00 |
| ATOM | 761 | HE2 | LYS | X | 49 | 28.709 | 61.305 | 25.053 | 0.00 | 0.00 |

|      |     |      |     |   |    |        |        |        |      |      |
|------|-----|------|-----|---|----|--------|--------|--------|------|------|
| ATOM | 762 | HE3  | LYS | X | 49 | 28.075 | 62.953 | 25.454 | 0.00 | 0.00 |
| ATOM | 763 | NZ   | LYS | X | 49 | 30.114 | 62.811 | 24.758 | 0.00 | 0.00 |
| ATOM | 764 | HZ1  | LYS | X | 49 | 30.727 | 62.046 | 24.517 | 0.00 | 0.00 |
| ATOM | 765 | HZ2  | LYS | X | 49 | 29.900 | 63.274 | 23.886 | 0.00 | 0.00 |
| ATOM | 766 | HZ3  | LYS | X | 49 | 30.636 | 63.428 | 25.364 | 0.00 | 0.00 |
| ATOM | 767 | C    | LYS | X | 49 | 27.480 | 63.591 | 29.782 | 0.00 | 0.00 |
| ATOM | 768 | O    | LYS | X | 49 | 26.318 | 63.374 | 30.086 | 0.00 | 0.00 |
| ATOM | 769 | N    | GLN | X | 50 | 27.764 | 64.766 | 29.173 | 0.00 | 0.00 |
| ATOM | 770 | H    | GLN | X | 50 | 28.740 | 64.996 | 29.051 | 0.00 | 0.00 |
| ATOM | 771 | CA   | GLN | X | 50 | 26.813 | 65.716 | 28.511 | 0.00 | 0.00 |
| ATOM | 772 | HA   | GLN | X | 50 | 26.045 | 65.953 | 29.247 | 0.00 | 0.00 |
| ATOM | 773 | CB   | GLN | X | 50 | 27.475 | 67.036 | 28.082 | 0.00 | 0.00 |
| ATOM | 774 | HB2  | GLN | X | 50 | 28.456 | 66.687 | 27.760 | 0.00 | 0.00 |
| ATOM | 775 | HB3  | GLN | X | 50 | 26.875 | 67.581 | 27.353 | 0.00 | 0.00 |
| ATOM | 776 | CG   | GLN | X | 50 | 27.698 | 68.002 | 29.246 | 0.00 | 0.00 |
| ATOM | 777 | HG2  | GLN | X | 50 | 26.722 | 68.173 | 29.699 | 0.00 | 0.00 |
| ATOM | 778 | HG3  | GLN | X | 50 | 28.464 | 67.616 | 29.919 | 0.00 | 0.00 |
| ATOM | 779 | CD   | GLN | X | 50 | 28.038 | 69.421 | 28.699 | 0.00 | 0.00 |
| ATOM | 780 | OE1  | GLN | X | 50 | 27.269 | 70.318 | 28.372 | 0.00 | 0.00 |
| ATOM | 781 | NE2  | GLN | X | 50 | 29.360 | 69.641 | 28.533 | 0.00 | 0.00 |
| ATOM | 782 | HE21 | GLN | X | 50 | 29.657 | 70.550 | 28.206 | 0.00 | 0.00 |
| ATOM | 783 | HE22 | GLN | X | 50 | 30.072 | 68.970 | 28.783 | 0.00 | 0.00 |
| ATOM | 784 | C    | GLN | X | 50 | 25.999 | 65.101 | 27.420 | 0.00 | 0.00 |
| ATOM | 785 | O    | GLN | X | 50 | 26.557 | 64.226 | 26.783 | 0.00 | 0.00 |
| ATOM | 786 | N    | PRO | X | 51 | 24.806 | 65.626 | 26.990 | 0.00 | 0.00 |
| ATOM | 787 | CD   | PRO | X | 51 | 24.029 | 66.752 | 27.539 | 0.00 | 0.00 |
| ATOM | 788 | HD2  | PRO | X | 51 | 24.502 | 67.732 | 27.600 | 0.00 | 0.00 |
| ATOM | 789 | HD3  | PRO | X | 51 | 23.717 | 66.438 | 28.535 | 0.00 | 0.00 |
| ATOM | 790 | CG   | PRO | X | 51 | 22.661 | 66.866 | 26.790 | 0.00 | 0.00 |
| ATOM | 791 | HG2  | PRO | X | 51 | 22.739 | 67.694 | 26.085 | 0.00 | 0.00 |
| ATOM | 792 | HG3  | PRO | X | 51 | 21.848 | 67.015 | 27.501 | 0.00 | 0.00 |
| ATOM | 793 | CB   | PRO | X | 51 | 22.591 | 65.587 | 25.948 | 0.00 | 0.00 |
| ATOM | 794 | HB2  | PRO | X | 51 | 22.087 | 65.748 | 24.996 | 0.00 | 0.00 |
| ATOM | 795 | HB3  | PRO | X | 51 | 22.137 | 64.728 | 26.443 | 0.00 | 0.00 |
| ATOM | 796 | CA   | PRO | X | 51 | 24.057 | 65.093 | 25.783 | 0.00 | 0.00 |
| ATOM | 797 | HA   | PRO | X | 51 | 23.961 | 64.007 | 25.813 | 0.00 | 0.00 |
| ATOM | 798 | C    | PRO | X | 51 | 24.726 | 65.543 | 24.507 | 0.00 | 0.00 |
| ATOM | 799 | O    | PRO | X | 51 | 25.758 | 66.288 | 24.594 | 0.00 | 0.00 |
| ATOM | 800 | N    | TRP | X | 52 | 24.292 | 65.071 | 23.327 | 0.00 | 0.00 |
| ATOM | 801 | H    | TRP | X | 52 | 23.438 | 64.536 | 23.269 | 0.00 | 0.00 |
| ATOM | 802 | CA   | TRP | X | 52 | 24.871 | 65.374 | 22.010 | 0.00 | 0.00 |
| ATOM | 803 | HA   | TRP | X | 52 | 25.314 | 66.369 | 21.956 | 0.00 | 0.00 |
| ATOM | 804 | CB   | TRP | X | 52 | 26.025 | 64.338 | 21.734 | 0.00 | 0.00 |
| ATOM | 805 | HB2  | TRP | X | 52 | 26.548 | 64.560 | 20.804 | 0.00 | 0.00 |
| ATOM | 806 | HB3  | TRP | X | 52 | 26.762 | 64.518 | 22.517 | 0.00 | 0.00 |
| ATOM | 807 | CG   | TRP | X | 52 | 25.507 | 62.901 | 21.679 | 0.00 | 0.00 |
| ATOM | 808 | CD1  | TRP | X | 52 | 25.173 | 62.271 | 20.562 | 0.00 | 0.00 |
| ATOM | 809 | HD1  | TRP | X | 52 | 25.154 | 62.618 | 19.539 | 0.00 | 0.00 |
| ATOM | 810 | NE1  | TRP | X | 52 | 24.891 | 60.902 | 20.800 | 0.00 | 0.00 |
| ATOM | 811 | HE1  | TRP | X | 52 | 24.492 | 60.229 | 20.161 | 0.00 | 0.00 |
| ATOM | 812 | CE2  | TRP | X | 52 | 24.993 | 60.662 | 22.215 | 0.00 | 0.00 |
| ATOM | 813 | CZ2  | TRP | X | 52 | 24.938 | 59.488 | 22.881 | 0.00 | 0.00 |
| ATOM | 814 | HZ2  | TRP | X | 52 | 24.549 | 58.589 | 22.424 | 0.00 | 0.00 |
| ATOM | 815 | CH2  | TRP | X | 52 | 25.038 | 59.603 | 24.294 | 0.00 | 0.00 |
| ATOM | 816 | HH2  | TRP | X | 52 | 25.031 | 58.697 | 24.881 | 0.00 | 0.00 |
| ATOM | 817 | CZ3  | TRP | X | 52 | 25.470 | 60.749 | 24.934 | 0.00 | 0.00 |
| ATOM | 818 | HZ3  | TRP | X | 52 | 25.697 | 60.691 | 25.989 | 0.00 | 0.00 |
| ATOM | 819 | CE3  | TRP | X | 52 | 25.585 | 61.968 | 24.176 | 0.00 | 0.00 |
| ATOM | 820 | HE3  | TRP | X | 52 | 25.967 | 62.898 | 24.569 | 0.00 | 0.00 |
| ATOM | 821 | CD2  | TRP | X | 52 | 25.350 | 61.880 | 22.766 | 0.00 | 0.00 |
| ATOM | 822 | C    | TRP | X | 52 | 23.812 | 65.341 | 20.974 | 0.00 | 0.00 |
| ATOM | 823 | O    | TRP | X | 52 | 22.799 | 64.692 | 21.205 | 0.00 | 0.00 |
| ATOM | 824 | N    | SER | X | 53 | 24.095 | 66.004 | 19.855 | 0.00 | 0.00 |
| ATOM | 825 | H    | SER | X | 53 | 24.944 | 66.547 | 19.777 | 0.00 | 0.00 |
| ATOM | 826 | CA   | SER | X | 53 | 23.359 | 65.709 | 18.594 | 0.00 | 0.00 |
| ATOM | 827 | HA   | SER | X | 53 | 22.334 | 65.387 | 18.777 | 0.00 | 0.00 |
| ATOM | 828 | CB   | SER | X | 53 | 23.219 | 66.950 | 17.663 | 0.00 | 0.00 |

|      |     |      |     |   |    |        |        |        |      |      |
|------|-----|------|-----|---|----|--------|--------|--------|------|------|
| ATOM | 829 | HB2  | SER | X | 53 | 24.148 | 67.259 | 17.184 | 0.00 | 0.00 |
| ATOM | 830 | HB3  | SER | X | 53 | 22.522 | 66.575 | 16.914 | 0.00 | 0.00 |
| ATOM | 831 | OG   | SER | X | 53 | 22.682 | 68.037 | 18.346 | 0.00 | 0.00 |
| ATOM | 832 | HG   | SER | X | 53 | 21.836 | 67.700 | 18.649 | 0.00 | 0.00 |
| ATOM | 833 | C    | SER | X | 53 | 24.094 | 64.616 | 17.762 | 0.00 | 0.00 |
| ATOM | 834 | O    | SER | X | 53 | 25.278 | 64.396 | 17.837 | 0.00 | 0.00 |
| ATOM | 835 | N    | GLY | X | 54 | 23.332 | 63.794 | 16.981 | 0.00 | 0.00 |
| ATOM | 836 | H    | GLY | X | 54 | 22.344 | 63.960 | 16.851 | 0.00 | 0.00 |
| ATOM | 837 | CA   | GLY | X | 54 | 23.883 | 62.746 | 16.115 | 0.00 | 0.00 |
| ATOM | 838 | HA2  | GLY | X | 54 | 23.376 | 62.783 | 15.150 | 0.00 | 0.00 |
| ATOM | 839 | HA3  | GLY | X | 54 | 24.944 | 62.965 | 15.993 | 0.00 | 0.00 |
| ATOM | 840 | C    | GLY | X | 54 | 23.888 | 61.350 | 16.728 | 0.00 | 0.00 |
| ATOM | 841 | O    | GLY | X | 54 | 23.958 | 61.123 | 17.940 | 0.00 | 0.00 |
| ATOM | 842 | N    | VAL | X | 55 | 23.864 | 60.352 | 15.900 | 0.00 | 0.00 |
| ATOM | 843 | H    | VAL | X | 55 | 23.766 | 60.473 | 14.902 | 0.00 | 0.00 |
| ATOM | 844 | CA   | VAL | X | 55 | 24.175 | 58.947 | 16.222 | 0.00 | 0.00 |
| ATOM | 845 | HA   | VAL | X | 55 | 23.687 | 58.766 | 17.180 | 0.00 | 0.00 |
| ATOM | 846 | CB   | VAL | X | 55 | 23.634 | 57.911 | 15.200 | 0.00 | 0.00 |
| ATOM | 847 | HB   | VAL | X | 55 | 24.003 | 58.130 | 14.198 | 0.00 | 0.00 |
| ATOM | 848 | CG1  | VAL | X | 55 | 24.069 | 56.481 | 15.554 | 0.00 | 0.00 |
| ATOM | 849 | HG11 | VAL | X | 55 | 25.148 | 56.367 | 15.659 | 0.00 | 0.00 |
| ATOM | 850 | HG12 | VAL | X | 55 | 23.577 | 56.239 | 16.495 | 0.00 | 0.00 |
| ATOM | 851 | HG13 | VAL | X | 55 | 23.774 | 55.843 | 14.721 | 0.00 | 0.00 |
| ATOM | 852 | CG2  | VAL | X | 55 | 22.150 | 57.892 | 14.960 | 0.00 | 0.00 |
| ATOM | 853 | HG21 | VAL | X | 55 | 21.952 | 57.215 | 14.129 | 0.00 | 0.00 |
| ATOM | 854 | HG22 | VAL | X | 55 | 21.819 | 58.866 | 14.599 | 0.00 | 0.00 |
| ATOM | 855 | HG23 | VAL | X | 55 | 21.650 | 57.509 | 15.849 | 0.00 | 0.00 |
| ATOM | 856 | C    | VAL | X | 55 | 25.678 | 58.881 | 16.519 | 0.00 | 0.00 |
| ATOM | 857 | O    | VAL | X | 55 | 26.522 | 59.365 | 15.721 | 0.00 | 0.00 |
| ATOM | 858 | N    | VAL | X | 56 | 25.976 | 58.223 | 17.715 | 0.00 | 0.00 |
| ATOM | 859 | H    | VAL | X | 56 | 25.241 | 57.924 | 18.340 | 0.00 | 0.00 |
| ATOM | 860 | CA   | VAL | X | 56 | 27.361 | 58.073 | 18.167 | 0.00 | 0.00 |
| ATOM | 861 | HA   | VAL | X | 56 | 27.944 | 58.598 | 17.410 | 0.00 | 0.00 |
| ATOM | 862 | CB   | VAL | X | 56 | 27.563 | 58.769 | 19.530 | 0.00 | 0.00 |
| ATOM | 863 | HB   | VAL | X | 56 | 26.674 | 58.510 | 20.105 | 0.00 | 0.00 |
| ATOM | 864 | CG1  | VAL | X | 56 | 28.840 | 58.545 | 20.418 | 0.00 | 0.00 |
| ATOM | 865 | HG11 | VAL | X | 56 | 28.901 | 57.497 | 20.710 | 0.00 | 0.00 |
| ATOM | 866 | HG12 | VAL | X | 56 | 29.682 | 58.984 | 19.884 | 0.00 | 0.00 |
| ATOM | 867 | HG13 | VAL | X | 56 | 28.761 | 59.123 | 21.339 | 0.00 | 0.00 |
| ATOM | 868 | CG2  | VAL | X | 56 | 27.571 | 60.299 | 19.241 | 0.00 | 0.00 |
| ATOM | 869 | HG21 | VAL | X | 56 | 26.679 | 60.468 | 18.637 | 0.00 | 0.00 |
| ATOM | 870 | HG22 | VAL | X | 56 | 28.471 | 60.569 | 18.690 | 0.00 | 0.00 |
| ATOM | 871 | HG23 | VAL | X | 56 | 27.515 | 60.891 | 20.154 | 0.00 | 0.00 |
| ATOM | 872 | C    | VAL | X | 56 | 27.808 | 56.623 | 18.234 | 0.00 | 0.00 |
| ATOM | 873 | O    | VAL | X | 56 | 27.051 | 55.643 | 18.438 | 0.00 | 0.00 |
| ATOM | 874 | N    | ASP | X | 57 | 29.088 | 56.381 | 18.017 | 0.00 | 0.00 |
| ATOM | 875 | H    | ASP | X | 57 | 29.729 | 57.159 | 17.951 | 0.00 | 0.00 |
| ATOM | 876 | CA   | ASP | X | 57 | 29.767 | 55.107 | 17.969 | 0.00 | 0.00 |
| ATOM | 877 | HA   | ASP | X | 57 | 29.121 | 54.511 | 17.325 | 0.00 | 0.00 |
| ATOM | 878 | CB   | ASP | X | 57 | 31.228 | 55.217 | 17.458 | 0.00 | 0.00 |
| ATOM | 879 | HB2  | ASP | X | 57 | 31.274 | 55.935 | 16.639 | 0.00 | 0.00 |
| ATOM | 880 | HB3  | ASP | X | 57 | 31.934 | 55.500 | 18.238 | 0.00 | 0.00 |
| ATOM | 881 | CG   | ASP | X | 57 | 31.843 | 54.018 | 16.800 | 0.00 | 0.00 |
| ATOM | 882 | OD1  | ASP | X | 57 | 33.068 | 54.105 | 16.620 | 0.00 | 0.00 |
| ATOM | 883 | OD2  | ASP | X | 57 | 31.144 | 53.119 | 16.294 | 0.00 | 0.00 |
| ATOM | 884 | C    | ASP | X | 57 | 29.766 | 54.341 | 19.283 | 0.00 | 0.00 |
| ATOM | 885 | O    | ASP | X | 57 | 30.255 | 54.791 | 20.322 | 0.00 | 0.00 |
| ATOM | 886 | N    | ALA | X | 58 | 29.417 | 53.054 | 19.131 | 0.00 | 0.00 |
| ATOM | 887 | H    | ALA | X | 58 | 28.984 | 52.794 | 18.256 | 0.00 | 0.00 |
| ATOM | 888 | CA   | ALA | X | 58 | 29.769 | 51.953 | 20.013 | 0.00 | 0.00 |
| ATOM | 889 | HA   | ALA | X | 58 | 30.682 | 52.225 | 20.542 | 0.00 | 0.00 |
| ATOM | 890 | CB   | ALA | X | 58 | 28.641 | 51.771 | 21.105 | 0.00 | 0.00 |
| ATOM | 891 | HB1  | ALA | X | 58 | 27.733 | 51.271 | 20.769 | 0.00 | 0.00 |
| ATOM | 892 | HB2  | ALA | X | 58 | 28.380 | 52.705 | 21.604 | 0.00 | 0.00 |
| ATOM | 893 | HB3  | ALA | X | 58 | 29.109 | 51.148 | 21.867 | 0.00 | 0.00 |
| ATOM | 894 | C    | ALA | X | 58 | 30.135 | 50.616 | 19.279 | 0.00 | 0.00 |
| ATOM | 895 | O    | ALA | X | 58 | 30.043 | 49.556 | 19.828 | 0.00 | 0.00 |

|      |     |      |     |   |    |        |        |        |      |      |
|------|-----|------|-----|---|----|--------|--------|--------|------|------|
| ATOM | 896 | N    | THR | X | 59 | 30.575 | 50.683 | 18.042 | 0.00 | 0.00 |
| ATOM | 897 | H    | THR | X | 59 | 30.525 | 51.576 | 17.572 | 0.00 | 0.00 |
| ATOM | 898 | CA   | THR | X | 59 | 30.943 | 49.490 | 17.210 | 0.00 | 0.00 |
| ATOM | 899 | HA   | THR | X | 59 | 30.211 | 48.718 | 17.448 | 0.00 | 0.00 |
| ATOM | 900 | CB   | THR | X | 59 | 30.934 | 49.767 | 15.703 | 0.00 | 0.00 |
| ATOM | 901 | HB   | THR | X | 59 | 31.155 | 48.826 | 15.198 | 0.00 | 0.00 |
| ATOM | 902 | CG2  | THR | X | 59 | 29.686 | 50.328 | 15.141 | 0.00 | 0.00 |
| ATOM | 903 | HG21 | THR | X | 59 | 29.281 | 51.190 | 15.672 | 0.00 | 0.00 |
| ATOM | 904 | HG22 | THR | X | 59 | 28.935 | 49.550 | 15.278 | 0.00 | 0.00 |
| ATOM | 905 | HG23 | THR | X | 59 | 29.930 | 50.441 | 14.085 | 0.00 | 0.00 |
| ATOM | 906 | OG1  | THR | X | 59 | 31.936 | 50.713 | 15.356 | 0.00 | 0.00 |
| ATOM | 907 | HG1  | THR | X | 59 | 31.682 | 51.601 | 15.617 | 0.00 | 0.00 |
| ATOM | 908 | C    | THR | X | 59 | 32.340 | 48.994 | 17.619 | 0.00 | 0.00 |
| ATOM | 909 | O    | THR | X | 59 | 32.817 | 48.097 | 16.979 | 0.00 | 0.00 |
| ATOM | 910 | N    | THR | X | 60 | 33.033 | 49.490 | 18.681 | 0.00 | 0.00 |
| ATOM | 911 | H    | THR | X | 60 | 32.631 | 50.179 | 19.300 | 0.00 | 0.00 |
| ATOM | 912 | CA   | THR | X | 60 | 34.471 | 49.473 | 18.736 | 0.00 | 0.00 |
| ATOM | 913 | HA   | THR | X | 60 | 34.797 | 48.438 | 18.634 | 0.00 | 0.00 |
| ATOM | 914 | CB   | THR | X | 60 | 35.093 | 50.391 | 17.605 | 0.00 | 0.00 |
| ATOM | 915 | HB   | THR | X | 60 | 34.525 | 50.317 | 16.678 | 0.00 | 0.00 |
| ATOM | 916 | CG2  | THR | X | 60 | 35.200 | 51.877 | 17.973 | 0.00 | 0.00 |
| ATOM | 917 | HG21 | THR | X | 60 | 36.013 | 52.159 | 18.642 | 0.00 | 0.00 |
| ATOM | 918 | HG22 | THR | X | 60 | 34.222 | 52.165 | 18.359 | 0.00 | 0.00 |
| ATOM | 919 | HG23 | THR | X | 60 | 35.371 | 52.407 | 17.036 | 0.00 | 0.00 |
| ATOM | 920 | OG1  | THR | X | 60 | 36.355 | 49.869 | 17.313 | 0.00 | 0.00 |
| ATOM | 921 | HG1  | THR | X | 60 | 36.653 | 50.191 | 16.459 | 0.00 | 0.00 |
| ATOM | 922 | C    | THR | X | 60 | 34.974 | 49.911 | 20.162 | 0.00 | 0.00 |
| ATOM | 923 | O    | THR | X | 60 | 34.213 | 50.682 | 20.759 | 0.00 | 0.00 |
| ATOM | 924 | N    | PHE | X | 61 | 36.171 | 49.501 | 20.589 | 0.00 | 0.00 |
| ATOM | 925 | H    | PHE | X | 61 | 36.721 | 48.846 | 20.052 | 0.00 | 0.00 |
| ATOM | 926 | CA   | PHE | X | 61 | 36.815 | 50.053 | 21.747 | 0.00 | 0.00 |
| ATOM | 927 | HA   | PHE | X | 61 | 36.014 | 50.340 | 22.429 | 0.00 | 0.00 |
| ATOM | 928 | CB   | PHE | X | 61 | 37.787 | 49.093 | 22.364 | 0.00 | 0.00 |
| ATOM | 929 | HB2  | PHE | X | 61 | 38.449 | 48.687 | 21.599 | 0.00 | 0.00 |
| ATOM | 930 | HB3  | PHE | X | 61 | 38.488 | 49.677 | 22.960 | 0.00 | 0.00 |
| ATOM | 931 | CG   | PHE | X | 61 | 37.084 | 47.913 | 23.082 | 0.00 | 0.00 |
| ATOM | 932 | CD1  | PHE | X | 61 | 36.978 | 48.043 | 24.496 | 0.00 | 0.00 |
| ATOM | 933 | HD1  | PHE | X | 61 | 37.327 | 48.923 | 25.017 | 0.00 | 0.00 |
| ATOM | 934 | CE1  | PHE | X | 61 | 36.382 | 47.009 | 25.254 | 0.00 | 0.00 |
| ATOM | 935 | HE1  | PHE | X | 61 | 36.324 | 47.063 | 26.331 | 0.00 | 0.00 |
| ATOM | 936 | CZ   | PHE | X | 61 | 36.060 | 45.754 | 24.677 | 0.00 | 0.00 |
| ATOM | 937 | HZ   | PHE | X | 61 | 35.751 | 44.959 | 25.339 | 0.00 | 0.00 |
| ATOM | 938 | CE2  | PHE | X | 61 | 36.094 | 45.638 | 23.301 | 0.00 | 0.00 |
| ATOM | 939 | HE2  | PHE | X | 61 | 35.826 | 44.738 | 22.768 | 0.00 | 0.00 |
| ATOM | 940 | CD2  | PHE | X | 61 | 36.632 | 46.713 | 22.492 | 0.00 | 0.00 |
| ATOM | 941 | HD2  | PHE | X | 61 | 36.681 | 46.590 | 21.420 | 0.00 | 0.00 |
| ATOM | 942 | C    | PHE | X | 61 | 37.543 | 51.307 | 21.335 | 0.00 | 0.00 |
| ATOM | 943 | O    | PHE | X | 61 | 38.366 | 51.259 | 20.426 | 0.00 | 0.00 |
| ATOM | 944 | N    | GLN | X | 62 | 37.563 | 52.344 | 22.206 | 0.00 | 0.00 |
| ATOM | 945 | H    | GLN | X | 62 | 37.138 | 52.242 | 23.117 | 0.00 | 0.00 |
| ATOM | 946 | CA   | GLN | X | 62 | 38.321 | 53.498 | 22.032 | 0.00 | 0.00 |
| ATOM | 947 | HA   | GLN | X | 62 | 38.464 | 53.649 | 20.962 | 0.00 | 0.00 |
| ATOM | 948 | CB   | GLN | X | 62 | 37.626 | 54.761 | 22.646 | 0.00 | 0.00 |
| ATOM | 949 | HB2  | GLN | X | 62 | 37.578 | 54.719 | 23.734 | 0.00 | 0.00 |
| ATOM | 950 | HB3  | GLN | X | 62 | 38.183 | 55.639 | 22.321 | 0.00 | 0.00 |
| ATOM | 951 | CG   | GLN | X | 62 | 36.217 | 54.984 | 22.046 | 0.00 | 0.00 |
| ATOM | 952 | HG2  | GLN | X | 62 | 35.538 | 54.208 | 22.399 | 0.00 | 0.00 |
| ATOM | 953 | HG3  | GLN | X | 62 | 35.943 | 55.866 | 22.625 | 0.00 | 0.00 |
| ATOM | 954 | CD   | GLN | X | 62 | 36.208 | 55.382 | 20.575 | 0.00 | 0.00 |
| ATOM | 955 | OE1  | GLN | X | 62 | 37.122 | 56.167 | 20.111 | 0.00 | 0.00 |
| ATOM | 956 | NE2  | GLN | X | 62 | 35.271 | 54.916 | 19.780 | 0.00 | 0.00 |
| ATOM | 957 | HE21 | GLN | X | 62 | 35.260 | 55.284 | 18.839 | 0.00 | 0.00 |
| ATOM | 958 | HE22 | GLN | X | 62 | 34.548 | 54.274 | 20.072 | 0.00 | 0.00 |
| ATOM | 959 | C    | GLN | X | 62 | 39.792 | 53.492 | 22.484 | 0.00 | 0.00 |
| ATOM | 960 | O    | GLN | X | 62 | 40.698 | 53.668 | 21.748 | 0.00 | 0.00 |
| ATOM | 961 | N    | SER | X | 63 | 39.979 | 53.143 | 23.715 | 0.00 | 0.00 |
| ATOM | 962 | H    | SER | X | 63 | 39.196 | 52.983 | 24.333 | 0.00 | 0.00 |



|      |      |      |     |   |    |        |        |        |      |      |
|------|------|------|-----|---|----|--------|--------|--------|------|------|
| ATOM | 963  | CA   | SER | X | 63 | 41.242 | 53.374 | 24.451 | 0.00 | 0.00 |
| ATOM | 964  | HA   | SER | X | 63 | 42.071 | 52.950 | 23.884 | 0.00 | 0.00 |
| ATOM | 965  | CB   | SER | X | 63 | 41.588 | 54.864 | 24.588 | 0.00 | 0.00 |
| ATOM | 966  | HB2  | SER | X | 63 | 42.595 | 54.852 | 25.006 | 0.00 | 0.00 |
| ATOM | 967  | HB3  | SER | X | 63 | 41.553 | 55.225 | 23.561 | 0.00 | 0.00 |
| ATOM | 968  | OG   | SER | X | 63 | 40.812 | 55.690 | 25.510 | 0.00 | 0.00 |
| ATOM | 969  | HG   | SER | X | 63 | 40.841 | 56.607 | 25.227 | 0.00 | 0.00 |
| ATOM | 970  | C    | SER | X | 63 | 41.258 | 52.687 | 25.777 | 0.00 | 0.00 |
| ATOM | 971  | O    | SER | X | 63 | 40.214 | 52.229 | 26.226 | 0.00 | 0.00 |
| ATOM | 972  | N    | VAL | X | 64 | 42.425 | 52.615 | 26.507 | 0.00 | 0.00 |
| ATOM | 973  | H    | VAL | X | 64 | 43.249 | 53.089 | 26.165 | 0.00 | 0.00 |
| ATOM | 974  | CA   | VAL | X | 64 | 42.402 | 52.171 | 27.931 | 0.00 | 0.00 |
| ATOM | 975  | HA   | VAL | X | 64 | 41.447 | 52.428 | 28.388 | 0.00 | 0.00 |
| ATOM | 976  | CB   | VAL | X | 64 | 42.592 | 50.684 | 28.099 | 0.00 | 0.00 |
| ATOM | 977  | HB   | VAL | X | 64 | 42.605 | 50.475 | 29.169 | 0.00 | 0.00 |
| ATOM | 978  | CG1  | VAL | X | 64 | 41.407 | 49.909 | 27.463 | 0.00 | 0.00 |
| ATOM | 979  | HG11 | VAL | X | 64 | 41.477 | 49.981 | 26.378 | 0.00 | 0.00 |
| ATOM | 980  | HG12 | VAL | X | 64 | 41.509 | 48.849 | 27.696 | 0.00 | 0.00 |
| ATOM | 981  | HG13 | VAL | X | 64 | 40.469 | 50.313 | 27.843 | 0.00 | 0.00 |
| ATOM | 982  | CG2  | VAL | X | 64 | 43.968 | 50.234 | 27.611 | 0.00 | 0.00 |
| ATOM | 983  | HG21 | VAL | X | 64 | 44.061 | 50.071 | 26.537 | 0.00 | 0.00 |
| ATOM | 984  | HG22 | VAL | X | 64 | 44.001 | 49.168 | 27.838 | 0.00 | 0.00 |
| ATOM | 985  | HG23 | VAL | X | 64 | 44.741 | 50.818 | 28.112 | 0.00 | 0.00 |
| ATOM | 986  | C    | VAL | X | 64 | 43.327 | 53.087 | 28.783 | 0.00 | 0.00 |
| ATOM | 987  | O    | VAL | X | 64 | 44.130 | 53.858 | 28.200 | 0.00 | 0.00 |
| ATOM | 988  | N    | CYX | X | 65 | 43.122 | 53.060 | 30.098 | 0.00 | 0.00 |
| ATOM | 989  | H    | CYX | X | 65 | 42.553 | 52.312 | 30.468 | 0.00 | 0.00 |
| ATOM | 990  | CA   | CYX | X | 65 | 43.905 | 54.015 | 30.969 | 0.00 | 0.00 |
| ATOM | 991  | HA   | CYX | X | 65 | 43.780 | 55.010 | 30.541 | 0.00 | 0.00 |
| ATOM | 992  | CB   | CYX | X | 65 | 43.293 | 54.104 | 32.354 | 0.00 | 0.00 |
| ATOM | 993  | HB2  | CYX | X | 65 | 43.566 | 53.186 | 32.874 | 0.00 | 0.00 |
| ATOM | 994  | HB3  | CYX | X | 65 | 43.726 | 54.969 | 32.855 | 0.00 | 0.00 |
| ATOM | 995  | SG   | CYX | X | 65 | 41.506 | 54.098 | 32.390 | 0.00 | 0.00 |
| ATOM | 996  | C    | CYX | X | 65 | 45.423 | 53.747 | 31.042 | 0.00 | 0.00 |
| ATOM | 997  | O    | CYX | X | 65 | 45.823 | 52.579 | 31.099 | 0.00 | 0.00 |
| ATOM | 998  | N    | TYR | X | 66 | 46.177 | 54.864 | 31.101 | 0.00 | 0.00 |
| ATOM | 999  | H    | TYR | X | 66 | 45.680 | 55.738 | 31.001 | 0.00 | 0.00 |
| ATOM | 1000 | CA   | TYR | X | 66 | 47.611 | 54.802 | 31.521 | 0.00 | 0.00 |
| ATOM | 1001 | HA   | TYR | X | 66 | 48.114 | 54.163 | 30.796 | 0.00 | 0.00 |
| ATOM | 1002 | CB   | TYR | X | 66 | 48.196 | 56.301 | 31.557 | 0.00 | 0.00 |
| ATOM | 1003 | HB2  | TYR | X | 66 | 47.416 | 57.021 | 31.805 | 0.00 | 0.00 |
| ATOM | 1004 | HB3  | TYR | X | 66 | 49.039 | 56.368 | 32.246 | 0.00 | 0.00 |
| ATOM | 1005 | CG   | TYR | X | 66 | 48.828 | 56.704 | 30.214 | 0.00 | 0.00 |
| ATOM | 1006 | CD1  | TYR | X | 66 | 48.230 | 57.676 | 29.351 | 0.00 | 0.00 |
| ATOM | 1007 | HD1  | TYR | X | 66 | 47.460 | 58.381 | 29.629 | 0.00 | 0.00 |
| ATOM | 1008 | CE1  | TYR | X | 66 | 48.818 | 57.903 | 28.103 | 0.00 | 0.00 |
| ATOM | 1009 | HE1  | TYR | X | 66 | 48.411 | 58.624 | 27.410 | 0.00 | 0.00 |
| ATOM | 1010 | CZ   | TYR | X | 66 | 49.902 | 57.186 | 27.598 | 0.00 | 0.00 |
| ATOM | 1011 | OH   | TYR | X | 66 | 50.462 | 57.497 | 26.398 | 0.00 | 0.00 |
| ATOM | 1012 | HH   | TYR | X | 66 | 50.160 | 58.325 | 26.017 | 0.00 | 0.00 |
| ATOM | 1013 | CE2  | TYR | X | 66 | 50.516 | 56.227 | 28.537 | 0.00 | 0.00 |
| ATOM | 1014 | HE2  | TYR | X | 66 | 51.356 | 55.674 | 28.142 | 0.00 | 0.00 |
| ATOM | 1015 | CD2  | TYR | X | 66 | 49.955 | 56.005 | 29.805 | 0.00 | 0.00 |
| ATOM | 1016 | HD2  | TYR | X | 66 | 50.478 | 55.348 | 30.484 | 0.00 | 0.00 |
| ATOM | 1017 | C    | TYR | X | 66 | 47.696 | 54.158 | 32.888 | 0.00 | 0.00 |
| ATOM | 1018 | O    | TYR | X | 66 | 46.827 | 54.335 | 33.799 | 0.00 | 0.00 |
| ATOM | 1019 | N    | GLN | X | 67 | 48.715 | 53.324 | 33.014 | 0.00 | 0.00 |
| ATOM | 1020 | H    | GLN | X | 67 | 49.262 | 53.117 | 32.191 | 0.00 | 0.00 |
| ATOM | 1021 | CA   | GLN | X | 67 | 48.849 | 52.364 | 34.102 | 0.00 | 0.00 |
| ATOM | 1022 | HA   | GLN | X | 67 | 48.609 | 52.798 | 35.072 | 0.00 | 0.00 |
| ATOM | 1023 | CB   | GLN | X | 67 | 47.818 | 51.238 | 33.842 | 0.00 | 0.00 |
| ATOM | 1024 | HB2  | GLN | X | 67 | 47.769 | 50.623 | 34.740 | 0.00 | 0.00 |
| ATOM | 1025 | HB3  | GLN | X | 67 | 46.837 | 51.693 | 33.705 | 0.00 | 0.00 |
| ATOM | 1026 | CG   | GLN | X | 67 | 47.974 | 50.255 | 32.662 | 0.00 | 0.00 |
| ATOM | 1027 | HG2  | GLN | X | 67 | 48.146 | 50.888 | 31.792 | 0.00 | 0.00 |
| ATOM | 1028 | HG3  | GLN | X | 67 | 48.896 | 49.748 | 32.947 | 0.00 | 0.00 |
| ATOM | 1029 | CD   | GLN | X | 67 | 46.861 | 49.252 | 32.618 | 0.00 | 0.00 |

|      |      |      |     |   |    |        |        |        |      |      |
|------|------|------|-----|---|----|--------|--------|--------|------|------|
| ATOM | 1030 | OE1  | GLN | X | 67 | 46.937 | 48.057 | 32.967 | 0.00 | 0.00 |
| ATOM | 1031 | NE2  | GLN | X | 67 | 45.739 | 49.571 | 31.935 | 0.00 | 0.00 |
| ATOM | 1032 | HE21 | GLN | X | 67 | 44.968 | 48.918 | 31.963 | 0.00 | 0.00 |
| ATOM | 1033 | HE22 | GLN | X | 67 | 45.602 | 50.500 | 31.562 | 0.00 | 0.00 |
| ATOM | 1034 | C    | GLN | X | 67 | 50.334 | 51.743 | 34.171 | 0.00 | 0.00 |
| ATOM | 1035 | O    | GLN | X | 67 | 51.139 | 52.013 | 33.225 | 0.00 | 0.00 |
| ATOM | 1036 | N    | TYR | X | 68 | 50.697 | 50.973 | 35.158 | 0.00 | 0.00 |
| ATOM | 1037 | H    | TYR | X | 68 | 50.040 | 50.909 | 35.923 | 0.00 | 0.00 |
| ATOM | 1038 | CA   | TYR | X | 68 | 52.040 | 50.338 | 35.288 | 0.00 | 0.00 |
| ATOM | 1039 | HA   | TYR | X | 68 | 52.715 | 51.062 | 34.832 | 0.00 | 0.00 |
| ATOM | 1040 | CB   | TYR | X | 68 | 52.466 | 50.048 | 36.678 | 0.00 | 0.00 |
| ATOM | 1041 | HB2  | TYR | X | 68 | 52.592 | 51.000 | 37.193 | 0.00 | 0.00 |
| ATOM | 1042 | HB3  | TYR | X | 68 | 51.664 | 49.577 | 37.247 | 0.00 | 0.00 |
| ATOM | 1043 | CG   | TYR | X | 68 | 53.775 | 49.220 | 36.683 | 0.00 | 0.00 |
| ATOM | 1044 | CD1  | TYR | X | 68 | 55.025 | 49.890 | 36.469 | 0.00 | 0.00 |
| ATOM | 1045 | HD1  | TYR | X | 68 | 55.000 | 50.923 | 36.154 | 0.00 | 0.00 |
| ATOM | 1046 | CE1  | TYR | X | 68 | 56.223 | 49.143 | 36.280 | 0.00 | 0.00 |
| ATOM | 1047 | HE1  | TYR | X | 68 | 57.118 | 49.641 | 35.935 | 0.00 | 0.00 |
| ATOM | 1048 | CZ   | TYR | X | 68 | 56.231 | 47.714 | 36.408 | 0.00 | 0.00 |
| ATOM | 1049 | OH   | TYR | X | 68 | 57.373 | 47.111 | 36.161 | 0.00 | 0.00 |
| ATOM | 1050 | HH   | TYR | X | 68 | 58.069 | 47.607 | 35.723 | 0.00 | 0.00 |
| ATOM | 1051 | CE2  | TYR | X | 68 | 54.980 | 47.061 | 36.513 | 0.00 | 0.00 |
| ATOM | 1052 | HE2  | TYR | X | 68 | 55.069 | 45.985 | 36.476 | 0.00 | 0.00 |
| ATOM | 1053 | CD2  | TYR | X | 68 | 53.809 | 47.744 | 36.811 | 0.00 | 0.00 |
| ATOM | 1054 | HD2  | TYR | X | 68 | 52.844 | 47.261 | 36.855 | 0.00 | 0.00 |
| ATOM | 1055 | C    | TYR | X | 68 | 52.116 | 49.191 | 34.297 | 0.00 | 0.00 |
| ATOM | 1056 | O    | TYR | X | 68 | 51.355 | 48.221 | 34.449 | 0.00 | 0.00 |
| ATOM | 1057 | N    | VAL | X | 69 | 53.015 | 49.176 | 33.336 | 0.00 | 0.00 |
| ATOM | 1058 | H    | VAL | X | 69 | 53.655 | 49.958 | 33.368 | 0.00 | 0.00 |
| ATOM | 1059 | CA   | VAL | X | 69 | 53.187 | 48.162 | 32.295 | 0.00 | 0.00 |
| ATOM | 1060 | HA   | VAL | X | 69 | 52.212 | 47.676 | 32.316 | 0.00 | 0.00 |
| ATOM | 1061 | CB   | VAL | X | 69 | 53.249 | 48.863 | 30.894 | 0.00 | 0.00 |
| ATOM | 1062 | HB   | VAL | X | 69 | 54.118 | 49.521 | 30.860 | 0.00 | 0.00 |
| ATOM | 1063 | CG1  | VAL | X | 69 | 53.559 | 47.860 | 29.780 | 0.00 | 0.00 |
| ATOM | 1064 | HG11 | VAL | X | 69 | 52.907 | 47.022 | 30.027 | 0.00 | 0.00 |
| ATOM | 1065 | HG12 | VAL | X | 69 | 53.210 | 48.250 | 28.824 | 0.00 | 0.00 |
| ATOM | 1066 | HG13 | VAL | X | 69 | 54.612 | 47.609 | 29.655 | 0.00 | 0.00 |
| ATOM | 1067 | CG2  | VAL | X | 69 | 51.941 | 49.560 | 30.479 | 0.00 | 0.00 |
| ATOM | 1068 | HG21 | VAL | X | 69 | 51.137 | 48.846 | 30.300 | 0.00 | 0.00 |
| ATOM | 1069 | HG22 | VAL | X | 69 | 52.121 | 50.175 | 29.597 | 0.00 | 0.00 |
| ATOM | 1070 | HG23 | VAL | X | 69 | 51.595 | 50.270 | 31.231 | 0.00 | 0.00 |
| ATOM | 1071 | C    | VAL | X | 69 | 54.415 | 47.287 | 32.559 | 0.00 | 0.00 |
| ATOM | 1072 | O    | VAL | X | 69 | 55.485 | 47.790 | 32.800 | 0.00 | 0.00 |
| ATOM | 1073 | N    | ASP | X | 70 | 54.193 | 45.951 | 32.499 | 0.00 | 0.00 |
| ATOM | 1074 | H    | ASP | X | 70 | 53.294 | 45.614 | 32.184 | 0.00 | 0.00 |
| ATOM | 1075 | CA   | ASP | X | 70 | 55.147 | 44.902 | 32.922 | 0.00 | 0.00 |
| ATOM | 1076 | HA   | ASP | X | 70 | 55.564 | 45.211 | 33.881 | 0.00 | 0.00 |
| ATOM | 1077 | CB   | ASP | X | 70 | 54.508 | 43.516 | 33.014 | 0.00 | 0.00 |
| ATOM | 1078 | HB2  | ASP | X | 70 | 53.485 | 43.709 | 33.338 | 0.00 | 0.00 |
| ATOM | 1079 | HB3  | ASP | X | 70 | 54.440 | 42.994 | 32.060 | 0.00 | 0.00 |
| ATOM | 1080 | CG   | ASP | X | 70 | 55.316 | 42.725 | 34.024 | 0.00 | 0.00 |
| ATOM | 1081 | OD1  | ASP | X | 70 | 56.301 | 41.988 | 33.684 | 0.00 | 0.00 |
| ATOM | 1082 | OD2  | ASP | X | 70 | 54.938 | 42.755 | 35.213 | 0.00 | 0.00 |
| ATOM | 1083 | C    | ASP | X | 70 | 56.450 | 44.915 | 32.116 | 0.00 | 0.00 |
| ATOM | 1084 | O    | ASP | X | 70 | 56.421 | 45.023 | 30.885 | 0.00 | 0.00 |
| ATOM | 1085 | N    | THR | X | 71 | 57.633 | 44.769 | 32.826 | 0.00 | 0.00 |
| ATOM | 1086 | H    | THR | X | 71 | 57.533 | 44.619 | 33.819 | 0.00 | 0.00 |
| ATOM | 1087 | CA   | THR | X | 71 | 59.074 | 44.832 | 32.409 | 0.00 | 0.00 |
| ATOM | 1088 | HA   | THR | X | 71 | 59.234 | 44.932 | 31.335 | 0.00 | 0.00 |
| ATOM | 1089 | CB   | THR | X | 71 | 59.673 | 46.115 | 33.067 | 0.00 | 0.00 |
| ATOM | 1090 | HB   | THR | X | 71 | 60.724 | 46.109 | 32.780 | 0.00 | 0.00 |
| ATOM | 1091 | CG2  | THR | X | 71 | 58.969 | 47.378 | 32.564 | 0.00 | 0.00 |
| ATOM | 1092 | HG21 | THR | X | 71 | 59.687 | 48.198 | 32.559 | 0.00 | 0.00 |
| ATOM | 1093 | HG22 | THR | X | 71 | 58.088 | 47.592 | 33.170 | 0.00 | 0.00 |
| ATOM | 1094 | HG23 | THR | X | 71 | 58.604 | 47.339 | 31.538 | 0.00 | 0.00 |
| ATOM | 1095 | OG1  | THR | X | 71 | 59.647 | 45.988 | 34.394 | 0.00 | 0.00 |
| ATOM | 1096 | HG1  | THR | X | 71 | 59.821 | 46.863 | 34.750 | 0.00 | 0.00 |

|      |      |      |     |   |    |        |        |        |      |      |
|------|------|------|-----|---|----|--------|--------|--------|------|------|
| ATOM | 1097 | C    | THR | X | 71 | 59.957 | 43.644 | 32.792 | 0.00 | 0.00 |
| ATOM | 1098 | O    | THR | X | 71 | 61.158 | 43.632 | 32.450 | 0.00 | 0.00 |
| ATOM | 1099 | N    | LEU | X | 72 | 59.359 | 42.696 | 33.524 | 0.00 | 0.00 |
| ATOM | 1100 | H    | LEU | X | 72 | 58.387 | 42.751 | 33.797 | 0.00 | 0.00 |
| ATOM | 1101 | CA   | LEU | X | 72 | 59.936 | 41.451 | 33.958 | 0.00 | 0.00 |
| ATOM | 1102 | HA   | LEU | X | 72 | 61.018 | 41.578 | 33.963 | 0.00 | 0.00 |
| ATOM | 1103 | CB   | LEU | X | 72 | 59.525 | 41.142 | 35.415 | 0.00 | 0.00 |
| ATOM | 1104 | HB2  | LEU | X | 72 | 59.329 | 42.021 | 36.029 | 0.00 | 0.00 |
| ATOM | 1105 | HB3  | LEU | X | 72 | 58.515 | 40.750 | 35.296 | 0.00 | 0.00 |
| ATOM | 1106 | CG   | LEU | X | 72 | 60.393 | 40.090 | 36.103 | 0.00 | 0.00 |
| ATOM | 1107 | HG   | LEU | X | 72 | 60.429 | 39.286 | 35.367 | 0.00 | 0.00 |
| ATOM | 1108 | CD1  | LEU | X | 72 | 61.754 | 40.716 | 36.365 | 0.00 | 0.00 |
| ATOM | 1109 | HD11 | LEU | X | 72 | 61.646 | 41.606 | 36.985 | 0.00 | 0.00 |
| ATOM | 1110 | HD12 | LEU | X | 72 | 62.292 | 41.074 | 35.487 | 0.00 | 0.00 |
| ATOM | 1111 | HD13 | LEU | X | 72 | 62.399 | 40.042 | 36.928 | 0.00 | 0.00 |
| ATOM | 1112 | CD2  | LEU | X | 72 | 59.743 | 39.564 | 37.449 | 0.00 | 0.00 |
| ATOM | 1113 | HD21 | LEU | X | 72 | 59.444 | 40.370 | 38.119 | 0.00 | 0.00 |
| ATOM | 1114 | HD22 | LEU | X | 72 | 58.796 | 39.101 | 37.170 | 0.00 | 0.00 |
| ATOM | 1115 | HD23 | LEU | X | 72 | 60.326 | 38.808 | 37.974 | 0.00 | 0.00 |
| ATOM | 1116 | C    | LEU | X | 72 | 59.588 | 40.272 | 33.020 | 0.00 | 0.00 |
| ATOM | 1117 | O    | LEU | X | 72 | 60.561 | 39.581 | 32.651 | 0.00 | 0.00 |
| ATOM | 1118 | N    | TYR | X | 73 | 58.341 | 40.050 | 32.672 | 0.00 | 0.00 |
| ATOM | 1119 | H    | TYR | X | 73 | 57.684 | 40.794 | 32.859 | 0.00 | 0.00 |
| ATOM | 1120 | CA   | TYR | X | 73 | 57.934 | 39.080 | 31.685 | 0.00 | 0.00 |
| ATOM | 1121 | HA   | TYR | X | 73 | 58.829 | 38.605 | 31.284 | 0.00 | 0.00 |
| ATOM | 1122 | CB   | TYR | X | 73 | 57.075 | 38.025 | 32.421 | 0.00 | 0.00 |
| ATOM | 1123 | HB2  | TYR | X | 73 | 56.214 | 38.555 | 32.828 | 0.00 | 0.00 |
| ATOM | 1124 | HB3  | TYR | X | 73 | 56.717 | 37.184 | 31.827 | 0.00 | 0.00 |
| ATOM | 1125 | CG   | TYR | X | 73 | 57.813 | 37.393 | 33.535 | 0.00 | 0.00 |
| ATOM | 1126 | CD1  | TYR | X | 73 | 58.871 | 36.459 | 33.240 | 0.00 | 0.00 |
| ATOM | 1127 | HD1  | TYR | X | 73 | 59.189 | 36.340 | 32.214 | 0.00 | 0.00 |
| ATOM | 1128 | CE1  | TYR | X | 73 | 59.372 | 35.589 | 34.258 | 0.00 | 0.00 |
| ATOM | 1129 | HE1  | TYR | X | 73 | 60.199 | 34.940 | 34.007 | 0.00 | 0.00 |
| ATOM | 1130 | CZ   | TYR | X | 73 | 58.906 | 35.726 | 35.592 | 0.00 | 0.00 |
| ATOM | 1131 | OH   | TYR | X | 73 | 59.378 | 34.975 | 36.603 | 0.00 | 0.00 |
| ATOM | 1132 | HH   | TYR | X | 73 | 58.921 | 35.110 | 37.436 | 0.00 | 0.00 |
| ATOM | 1133 | CE2  | TYR | X | 73 | 57.921 | 36.683 | 35.930 | 0.00 | 0.00 |
| ATOM | 1134 | HE2  | TYR | X | 73 | 57.503 | 36.675 | 36.926 | 0.00 | 0.00 |
| ATOM | 1135 | CD2  | TYR | X | 73 | 57.376 | 37.491 | 34.862 | 0.00 | 0.00 |
| ATOM | 1136 | HD2  | TYR | X | 73 | 56.591 | 38.204 | 35.067 | 0.00 | 0.00 |
| ATOM | 1137 | C    | TYR | X | 73 | 57.175 | 39.562 | 30.469 | 0.00 | 0.00 |
| ATOM | 1138 | O    | TYR | X | 73 | 56.099 | 39.051 | 30.142 | 0.00 | 0.00 |
| ATOM | 1139 | N    | PRO | X | 74 | 57.525 | 40.709 | 29.812 | 0.00 | 0.00 |
| ATOM | 1140 | CD   | PRO | X | 74 | 58.862 | 41.401 | 29.922 | 0.00 | 0.00 |
| ATOM | 1141 | HD2  | PRO | X | 74 | 59.677 | 40.677 | 29.908 | 0.00 | 0.00 |
| ATOM | 1142 | HD3  | PRO | X | 74 | 58.868 | 41.962 | 30.856 | 0.00 | 0.00 |
| ATOM | 1143 | CG   | PRO | X | 74 | 59.055 | 42.289 | 28.733 | 0.00 | 0.00 |
| ATOM | 1144 | HG2  | PRO | X | 74 | 59.458 | 41.731 | 27.889 | 0.00 | 0.00 |
| ATOM | 1145 | HG3  | PRO | X | 74 | 59.803 | 43.036 | 28.996 | 0.00 | 0.00 |
| ATOM | 1146 | CB   | PRO | X | 74 | 57.634 | 42.739 | 28.577 | 0.00 | 0.00 |
| ATOM | 1147 | HB2  | PRO | X | 74 | 57.480 | 43.266 | 27.636 | 0.00 | 0.00 |
| ATOM | 1148 | HB3  | PRO | X | 74 | 57.415 | 43.440 | 29.382 | 0.00 | 0.00 |
| ATOM | 1149 | CA   | PRO | X | 74 | 56.819 | 41.448 | 28.754 | 0.00 | 0.00 |
| ATOM | 1150 | HA   | PRO | X | 74 | 55.906 | 41.868 | 29.175 | 0.00 | 0.00 |
| ATOM | 1151 | C    | PRO | X | 74 | 56.605 | 40.541 | 27.482 | 0.00 | 0.00 |
| ATOM | 1152 | O    | PRO | X | 74 | 57.526 | 39.880 | 27.091 | 0.00 | 0.00 |
| ATOM | 1153 | N    | GLY | X | 75 | 55.366 | 40.479 | 26.985 | 0.00 | 0.00 |
| ATOM | 1154 | H    | GLY | X | 75 | 54.597 | 41.006 | 27.373 | 0.00 | 0.00 |
| ATOM | 1155 | CA   | GLY | X | 75 | 55.020 | 39.682 | 25.840 | 0.00 | 0.00 |
| ATOM | 1156 | HA2  | GLY | X | 75 | 54.072 | 40.040 | 25.438 | 0.00 | 0.00 |
| ATOM | 1157 | HA3  | GLY | X | 75 | 55.706 | 39.782 | 24.999 | 0.00 | 0.00 |
| ATOM | 1158 | C    | GLY | X | 75 | 54.952 | 38.078 | 26.041 | 0.00 | 0.00 |
| ATOM | 1159 | O    | GLY | X | 75 | 54.650 | 37.337 | 25.151 | 0.00 | 0.00 |
| ATOM | 1160 | N    | PHE | X | 76 | 55.199 | 37.672 | 27.329 | 0.00 | 0.00 |
| ATOM | 1161 | H    | PHE | X | 76 | 55.328 | 38.275 | 28.129 | 0.00 | 0.00 |
| ATOM | 1162 | CA   | PHE | X | 76 | 54.994 | 36.289 | 27.723 | 0.00 | 0.00 |
| ATOM | 1163 | HA   | PHE | X | 76 | 55.486 | 35.620 | 27.017 | 0.00 | 0.00 |

|      |      |      |     |   |    |        |        |        |      |      |
|------|------|------|-----|---|----|--------|--------|--------|------|------|
| ATOM | 1164 | CB   | PHE | X | 76 | 55.587 | 35.981 | 29.170 | 0.00 | 0.00 |
| ATOM | 1165 | HB2  | PHE | X | 76 | 56.670 | 35.874 | 29.101 | 0.00 | 0.00 |
| ATOM | 1166 | HB3  | PHE | X | 76 | 55.243 | 36.780 | 29.828 | 0.00 | 0.00 |
| ATOM | 1167 | CG   | PHE | X | 76 | 55.164 | 34.636 | 29.750 | 0.00 | 0.00 |
| ATOM | 1168 | CD1  | PHE | X | 76 | 55.499 | 33.455 | 29.108 | 0.00 | 0.00 |
| ATOM | 1169 | HD1  | PHE | X | 76 | 56.184 | 33.416 | 28.274 | 0.00 | 0.00 |
| ATOM | 1170 | CE1  | PHE | X | 76 | 55.190 | 32.216 | 29.612 | 0.00 | 0.00 |
| ATOM | 1171 | HE1  | PHE | X | 76 | 55.501 | 31.305 | 29.122 | 0.00 | 0.00 |
| ATOM | 1172 | CZ   | PHE | X | 76 | 54.381 | 32.176 | 30.801 | 0.00 | 0.00 |
| ATOM | 1173 | HZ   | PHE | X | 76 | 54.101 | 31.254 | 31.289 | 0.00 | 0.00 |
| ATOM | 1174 | CE2  | PHE | X | 76 | 53.923 | 33.388 | 31.349 | 0.00 | 0.00 |
| ATOM | 1175 | HE2  | PHE | X | 76 | 53.219 | 33.260 | 32.158 | 0.00 | 0.00 |
| ATOM | 1176 | CD2  | PHE | X | 76 | 54.348 | 34.622 | 30.894 | 0.00 | 0.00 |
| ATOM | 1177 | HD2  | PHE | X | 76 | 54.046 | 35.546 | 31.366 | 0.00 | 0.00 |
| ATOM | 1178 | C    | PHE | X | 76 | 53.501 | 35.984 | 27.682 | 0.00 | 0.00 |
| ATOM | 1179 | O    | PHE | X | 76 | 52.575 | 36.674 | 28.020 | 0.00 | 0.00 |
| ATOM | 1180 | N    | GLU | X | 77 | 53.276 | 34.785 | 27.203 | 0.00 | 0.00 |
| ATOM | 1181 | H    | GLU | X | 77 | 54.066 | 34.189 | 27.001 | 0.00 | 0.00 |
| ATOM | 1182 | CA   | GLU | X | 77 | 51.954 | 34.207 | 26.986 | 0.00 | 0.00 |
| ATOM | 1183 | HA   | GLU | X | 77 | 51.449 | 34.714 | 26.164 | 0.00 | 0.00 |
| ATOM | 1184 | CB   | GLU | X | 77 | 52.291 | 32.718 | 26.697 | 0.00 | 0.00 |
| ATOM | 1185 | HB2  | GLU | X | 77 | 53.305 | 32.607 | 26.311 | 0.00 | 0.00 |
| ATOM | 1186 | HB3  | GLU | X | 77 | 52.273 | 32.202 | 27.657 | 0.00 | 0.00 |
| ATOM | 1187 | CG   | GLU | X | 77 | 51.204 | 32.020 | 25.835 | 0.00 | 0.00 |
| ATOM | 1188 | HG2  | GLU | X | 77 | 50.275 | 32.483 | 26.168 | 0.00 | 0.00 |
| ATOM | 1189 | HG3  | GLU | X | 77 | 51.441 | 32.260 | 24.798 | 0.00 | 0.00 |
| ATOM | 1190 | CD   | GLU | X | 77 | 51.065 | 30.472 | 25.824 | 0.00 | 0.00 |
| ATOM | 1191 | OE1  | GLU | X | 77 | 50.823 | 29.954 | 26.968 | 0.00 | 0.00 |
| ATOM | 1192 | OE2  | GLU | X | 77 | 51.161 | 29.804 | 24.763 | 0.00 | 0.00 |
| ATOM | 1193 | C    | GLU | X | 77 | 50.964 | 34.339 | 28.143 | 0.00 | 0.00 |
| ATOM | 1194 | O    | GLU | X | 77 | 49.750 | 34.480 | 27.816 | 0.00 | 0.00 |
| ATOM | 1195 | N    | GLY | X | 78 | 51.379 | 34.292 | 29.406 | 0.00 | 0.00 |
| ATOM | 1196 | H    | GLY | X | 78 | 52.354 | 34.073 | 29.558 | 0.00 | 0.00 |
| ATOM | 1197 | CA   | GLY | X | 78 | 50.510 | 34.447 | 30.627 | 0.00 | 0.00 |
| ATOM | 1198 | HA2  | GLY | X | 78 | 49.503 | 34.102 | 30.389 | 0.00 | 0.00 |
| ATOM | 1199 | HA3  | GLY | X | 78 | 50.925 | 33.917 | 31.484 | 0.00 | 0.00 |
| ATOM | 1200 | C    | GLY | X | 78 | 50.455 | 35.888 | 31.202 | 0.00 | 0.00 |
| ATOM | 1201 | O    | GLY | X | 78 | 49.948 | 35.985 | 32.297 | 0.00 | 0.00 |
| ATOM | 1202 | N    | THR | X | 79 | 51.050 | 36.889 | 30.559 | 0.00 | 0.00 |
| ATOM | 1203 | H    | THR | X | 79 | 51.345 | 36.733 | 29.606 | 0.00 | 0.00 |
| ATOM | 1204 | CA   | THR | X | 79 | 51.356 | 38.270 | 31.107 | 0.00 | 0.00 |
| ATOM | 1205 | HA   | THR | X | 79 | 50.701 | 38.338 | 31.976 | 0.00 | 0.00 |
| ATOM | 1206 | CB   | THR | X | 79 | 52.834 | 38.428 | 31.508 | 0.00 | 0.00 |
| ATOM | 1207 | HB   | THR | X | 79 | 53.517 | 38.047 | 30.749 | 0.00 | 0.00 |
| ATOM | 1208 | CG2  | THR | X | 79 | 53.245 | 39.860 | 31.940 | 0.00 | 0.00 |
| ATOM | 1209 | HG21 | THR | X | 79 | 53.138 | 40.573 | 31.122 | 0.00 | 0.00 |
| ATOM | 1210 | HG22 | THR | X | 79 | 54.316 | 39.773 | 32.122 | 0.00 | 0.00 |
| ATOM | 1211 | HG23 | THR | X | 79 | 52.726 | 40.173 | 32.846 | 0.00 | 0.00 |
| ATOM | 1212 | OG1  | THR | X | 79 | 53.008 | 37.654 | 32.640 | 0.00 | 0.00 |
| ATOM | 1213 | HG1  | THR | X | 79 | 52.258 | 37.819 | 33.217 | 0.00 | 0.00 |
| ATOM | 1214 | C    | THR | X | 79 | 50.760 | 39.284 | 30.153 | 0.00 | 0.00 |
| ATOM | 1215 | O    | THR | X | 79 | 50.012 | 40.142 | 30.560 | 0.00 | 0.00 |
| ATOM | 1216 | N    | GLU | X | 80 | 51.069 | 39.071 | 28.912 | 0.00 | 0.00 |
| ATOM | 1217 | H    | GLU | X | 80 | 51.662 | 38.291 | 28.667 | 0.00 | 0.00 |
| ATOM | 1218 | CA   | GLU | X | 80 | 50.479 | 39.752 | 27.786 | 0.00 | 0.00 |
| ATOM | 1219 | HA   | GLU | X | 80 | 50.758 | 40.805 | 27.829 | 0.00 | 0.00 |
| ATOM | 1220 | CB   | GLU | X | 80 | 51.134 | 39.147 | 26.481 | 0.00 | 0.00 |
| ATOM | 1221 | HB2  | GLU | X | 80 | 52.213 | 39.017 | 26.564 | 0.00 | 0.00 |
| ATOM | 1222 | HB3  | GLU | X | 80 | 50.733 | 38.138 | 26.387 | 0.00 | 0.00 |
| ATOM | 1223 | CG   | GLU | X | 80 | 51.059 | 39.961 | 25.181 | 0.00 | 0.00 |
| ATOM | 1224 | HG2  | GLU | X | 80 | 49.997 | 39.891 | 24.945 | 0.00 | 0.00 |
| ATOM | 1225 | HG3  | GLU | X | 80 | 51.238 | 41.011 | 25.412 | 0.00 | 0.00 |
| ATOM | 1226 | CD   | GLU | X | 80 | 51.883 | 39.491 | 23.997 | 0.00 | 0.00 |
| ATOM | 1227 | OE1  | GLU | X | 80 | 51.825 | 38.288 | 23.641 | 0.00 | 0.00 |
| ATOM | 1228 | OE2  | GLU | X | 80 | 52.540 | 40.354 | 23.283 | 0.00 | 0.00 |
| ATOM | 1229 | C    | GLU | X | 80 | 48.936 | 39.780 | 27.828 | 0.00 | 0.00 |
| ATOM | 1230 | O    | GLU | X | 80 | 48.375 | 40.805 | 27.578 | 0.00 | 0.00 |

|      |      |      |     |   |    |        |        |        |      |      |
|------|------|------|-----|---|----|--------|--------|--------|------|------|
| ATOM | 1231 | N    | MET | X | 81 | 48.346 | 38.643 | 28.156 | 0.00 | 0.00 |
| ATOM | 1232 | H    | MET | X | 81 | 48.901 | 37.799 | 28.165 | 0.00 | 0.00 |
| ATOM | 1233 | CA   | MET | X | 81 | 46.906 | 38.518 | 28.350 | 0.00 | 0.00 |
| ATOM | 1234 | HA   | MET | X | 81 | 46.279 | 38.818 | 27.510 | 0.00 | 0.00 |
| ATOM | 1235 | CB   | MET | X | 81 | 46.609 | 36.979 | 28.522 | 0.00 | 0.00 |
| ATOM | 1236 | HB2  | MET | X | 81 | 45.544 | 36.888 | 28.309 | 0.00 | 0.00 |
| ATOM | 1237 | HB3  | MET | X | 81 | 47.119 | 36.403 | 27.750 | 0.00 | 0.00 |
| ATOM | 1238 | CG   | MET | X | 81 | 47.086 | 36.441 | 29.870 | 0.00 | 0.00 |
| ATOM | 1239 | HG2  | MET | X | 81 | 48.141 | 36.677 | 30.010 | 0.00 | 0.00 |
| ATOM | 1240 | HG3  | MET | X | 81 | 46.533 | 37.048 | 30.588 | 0.00 | 0.00 |
| ATOM | 1241 | SD   | MET | X | 81 | 46.859 | 34.618 | 30.065 | 0.00 | 0.00 |
| ATOM | 1242 | CE   | MET | X | 81 | 45.073 | 34.643 | 30.519 | 0.00 | 0.00 |
| ATOM | 1243 | HE1  | MET | X | 81 | 44.804 | 33.831 | 31.195 | 0.00 | 0.00 |
| ATOM | 1244 | HE2  | MET | X | 81 | 44.923 | 35.577 | 31.059 | 0.00 | 0.00 |
| ATOM | 1245 | HE3  | MET | X | 81 | 44.469 | 34.684 | 29.613 | 0.00 | 0.00 |
| ATOM | 1246 | C    | MET | X | 81 | 46.332 | 39.416 | 29.427 | 0.00 | 0.00 |
| ATOM | 1247 | O    | MET | X | 81 | 45.132 | 39.543 | 29.540 | 0.00 | 0.00 |
| ATOM | 1248 | N    | TRP | X | 82 | 47.140 | 39.928 | 30.346 | 0.00 | 0.00 |
| ATOM | 1249 | H    | TRP | X | 82 | 48.133 | 39.806 | 30.207 | 0.00 | 0.00 |
| ATOM | 1250 | CA   | TRP | X | 82 | 46.789 | 40.972 | 31.435 | 0.00 | 0.00 |
| ATOM | 1251 | HA   | TRP | X | 82 | 45.700 | 40.980 | 31.455 | 0.00 | 0.00 |
| ATOM | 1252 | CB   | TRP | X | 82 | 47.376 | 40.663 | 32.840 | 0.00 | 0.00 |
| ATOM | 1253 | HB2  | TRP | X | 82 | 48.415 | 40.988 | 32.807 | 0.00 | 0.00 |
| ATOM | 1254 | HB3  | TRP | X | 82 | 46.850 | 41.226 | 33.611 | 0.00 | 0.00 |
| ATOM | 1255 | CG   | TRP | X | 82 | 47.261 | 39.208 | 33.190 | 0.00 | 0.00 |
| ATOM | 1256 | CD1  | TRP | X | 82 | 48.323 | 38.395 | 33.546 | 0.00 | 0.00 |
| ATOM | 1257 | HD1  | TRP | X | 82 | 49.376 | 38.617 | 33.631 | 0.00 | 0.00 |
| ATOM | 1258 | NE1  | TRP | X | 82 | 47.853 | 37.120 | 33.632 | 0.00 | 0.00 |
| ATOM | 1259 | HE1  | TRP | X | 82 | 48.426 | 36.302 | 33.783 | 0.00 | 0.00 |
| ATOM | 1260 | CE2  | TRP | X | 82 | 46.440 | 37.108 | 33.572 | 0.00 | 0.00 |
| ATOM | 1261 | CZ2  | TRP | X | 82 | 45.480 | 36.057 | 33.719 | 0.00 | 0.00 |
| ATOM | 1262 | HZ2  | TRP | X | 82 | 45.858 | 35.078 | 33.974 | 0.00 | 0.00 |
| ATOM | 1263 | CH2  | TRP | X | 82 | 44.155 | 36.333 | 33.591 | 0.00 | 0.00 |
| ATOM | 1264 | HH2  | TRP | X | 82 | 43.385 | 35.578 | 33.646 | 0.00 | 0.00 |
| ATOM | 1265 | CZ3  | TRP | X | 82 | 43.699 | 37.646 | 33.219 | 0.00 | 0.00 |
| ATOM | 1266 | HZ3  | TRP | X | 82 | 42.682 | 37.896 | 32.954 | 0.00 | 0.00 |
| ATOM | 1267 | CE3  | TRP | X | 82 | 44.677 | 38.651 | 32.953 | 0.00 | 0.00 |
| ATOM | 1268 | HE3  | TRP | X | 82 | 44.367 | 39.615 | 32.576 | 0.00 | 0.00 |
| ATOM | 1269 | CD2  | TRP | X | 82 | 46.029 | 38.426 | 33.178 | 0.00 | 0.00 |
| ATOM | 1270 | C    | TRP | X | 82 | 47.028 | 42.443 | 31.152 | 0.00 | 0.00 |
| ATOM | 1271 | O    | TRP | X | 82 | 46.641 | 43.351 | 31.841 | 0.00 | 0.00 |
| ATOM | 1272 | N    | ASN | X | 83 | 47.905 | 42.701 | 30.121 | 0.00 | 0.00 |
| ATOM | 1273 | H    | ASN | X | 83 | 48.185 | 41.870 | 29.620 | 0.00 | 0.00 |
| ATOM | 1274 | CA   | ASN | X | 83 | 48.452 | 44.040 | 29.781 | 0.00 | 0.00 |
| ATOM | 1275 | HA   | ASN | X | 83 | 48.354 | 44.769 | 30.586 | 0.00 | 0.00 |
| ATOM | 1276 | CB   | ASN | X | 83 | 49.994 | 43.855 | 29.476 | 0.00 | 0.00 |
| ATOM | 1277 | HB2  | ASN | X | 83 | 50.284 | 42.959 | 28.928 | 0.00 | 0.00 |
| ATOM | 1278 | HB3  | ASN | X | 83 | 50.290 | 44.705 | 28.860 | 0.00 | 0.00 |
| ATOM | 1279 | CG   | ASN | X | 83 | 50.954 | 44.009 | 30.715 | 0.00 | 0.00 |
| ATOM | 1280 | OD1  | ASN | X | 83 | 51.498 | 45.053 | 30.959 | 0.00 | 0.00 |
| ATOM | 1281 | ND2  | ASN | X | 83 | 51.116 | 42.945 | 31.492 | 0.00 | 0.00 |
| ATOM | 1282 | HD21 | ASN | X | 83 | 51.712 | 42.973 | 32.306 | 0.00 | 0.00 |
| ATOM | 1283 | HD22 | ASN | X | 83 | 50.613 | 42.078 | 31.366 | 0.00 | 0.00 |
| ATOM | 1284 | C    | ASN | X | 83 | 47.651 | 44.715 | 28.622 | 0.00 | 0.00 |
| ATOM | 1285 | O    | ASN | X | 83 | 47.094 | 44.010 | 27.771 | 0.00 | 0.00 |
| ATOM | 1286 | N    | PRO | X | 84 | 47.652 | 46.080 | 28.535 | 0.00 | 0.00 |
| ATOM | 1287 | CD   | PRO | X | 84 | 48.480 | 47.006 | 29.317 | 0.00 | 0.00 |
| ATOM | 1288 | HD2  | PRO | X | 84 | 49.564 | 46.896 | 29.314 | 0.00 | 0.00 |
| ATOM | 1289 | HD3  | PRO | X | 84 | 48.239 | 47.014 | 30.380 | 0.00 | 0.00 |
| ATOM | 1290 | CG   | PRO | X | 84 | 48.271 | 48.355 | 28.709 | 0.00 | 0.00 |
| ATOM | 1291 | HG2  | PRO | X | 84 | 48.844 | 48.367 | 27.782 | 0.00 | 0.00 |
| ATOM | 1292 | HG3  | PRO | X | 84 | 48.489 | 49.094 | 29.480 | 0.00 | 0.00 |
| ATOM | 1293 | CB   | PRO | X | 84 | 46.817 | 48.290 | 28.279 | 0.00 | 0.00 |
| ATOM | 1294 | HB2  | PRO | X | 84 | 46.590 | 48.861 | 27.379 | 0.00 | 0.00 |
| ATOM | 1295 | HB3  | PRO | X | 84 | 46.182 | 48.558 | 29.124 | 0.00 | 0.00 |
| ATOM | 1296 | CA   | PRO | X | 84 | 46.661 | 46.842 | 27.804 | 0.00 | 0.00 |
| ATOM | 1297 | HA   | PRO | X | 84 | 45.611 | 46.609 | 27.976 | 0.00 | 0.00 |

|      |      |      |     |   |    |        |        |        |      |      |
|------|------|------|-----|---|----|--------|--------|--------|------|------|
| ATOM | 1298 | C    | PRO | X | 84 | 46.832 | 46.665 | 26.290 | 0.00 | 0.00 |
| ATOM | 1299 | O    | PRO | X | 84 | 47.676 | 47.267 | 25.667 | 0.00 | 0.00 |
| ATOM | 1300 | N    | ASN | X | 85 | 45.989 | 45.783 | 25.690 | 0.00 | 0.00 |
| ATOM | 1301 | H    | ASN | X | 85 | 45.360 | 45.272 | 26.294 | 0.00 | 0.00 |
| ATOM | 1302 | CA   | ASN | X | 85 | 46.019 | 45.383 | 24.266 | 0.00 | 0.00 |
| ATOM | 1303 | HA   | ASN | X | 85 | 47.061 | 45.217 | 23.996 | 0.00 | 0.00 |
| ATOM | 1304 | CB   | ASN | X | 85 | 45.206 | 44.104 | 24.185 | 0.00 | 0.00 |
| ATOM | 1305 | HB2  | ASN | X | 85 | 45.285 | 43.680 | 23.184 | 0.00 | 0.00 |
| ATOM | 1306 | HB3  | ASN | X | 85 | 45.654 | 43.400 | 24.886 | 0.00 | 0.00 |
| ATOM | 1307 | CG   | ASN | X | 85 | 43.718 | 44.268 | 24.464 | 0.00 | 0.00 |
| ATOM | 1308 | OD1  | ASN | X | 85 | 43.223 | 45.235 | 24.930 | 0.00 | 0.00 |
| ATOM | 1309 | ND2  | ASN | X | 85 | 42.977 | 43.264 | 24.025 | 0.00 | 0.00 |
| ATOM | 1310 | HD21 | ASN | X | 85 | 41.968 | 43.287 | 24.016 | 0.00 | 0.00 |
| ATOM | 1311 | HD22 | ASN | X | 85 | 43.444 | 42.442 | 23.670 | 0.00 | 0.00 |
| ATOM | 1312 | C    | ASN | X | 85 | 45.441 | 46.449 | 23.334 | 0.00 | 0.00 |
| ATOM | 1313 | O    | ASN | X | 85 | 45.094 | 46.225 | 22.191 | 0.00 | 0.00 |
| ATOM | 1314 | N    | ARG | X | 86 | 45.176 | 47.640 | 23.853 | 0.00 | 0.00 |
| ATOM | 1315 | H    | ARG | X | 86 | 45.351 | 47.848 | 24.826 | 0.00 | 0.00 |
| ATOM | 1316 | CA   | ARG | X | 86 | 44.561 | 48.753 | 23.063 | 0.00 | 0.00 |
| ATOM | 1317 | HA   | ARG | X | 86 | 44.717 | 48.556 | 22.002 | 0.00 | 0.00 |
| ATOM | 1318 | CB   | ARG | X | 86 | 43.113 | 48.841 | 23.455 | 0.00 | 0.00 |
| ATOM | 1319 | HB2  | ARG | X | 86 | 43.100 | 48.576 | 24.512 | 0.00 | 0.00 |
| ATOM | 1320 | HB3  | ARG | X | 86 | 42.672 | 49.819 | 23.266 | 0.00 | 0.00 |
| ATOM | 1321 | CG   | ARG | X | 86 | 42.149 | 47.798 | 22.752 | 0.00 | 0.00 |
| ATOM | 1322 | HG2  | ARG | X | 86 | 42.292 | 46.848 | 23.267 | 0.00 | 0.00 |
| ATOM | 1323 | HG3  | ARG | X | 86 | 41.144 | 48.095 | 23.053 | 0.00 | 0.00 |
| ATOM | 1324 | CD   | ARG | X | 86 | 42.136 | 47.630 | 21.228 | 0.00 | 0.00 |
| ATOM | 1325 | HD2  | ARG | X | 86 | 41.923 | 48.635 | 20.864 | 0.00 | 0.00 |
| ATOM | 1326 | HD3  | ARG | X | 86 | 43.097 | 47.292 | 20.839 | 0.00 | 0.00 |
| ATOM | 1327 | NE   | ARG | X | 86 | 41.251 | 46.536 | 20.756 | 0.00 | 0.00 |
| ATOM | 1328 | HE   | ARG | X | 86 | 40.379 | 46.764 | 20.300 | 0.00 | 0.00 |
| ATOM | 1329 | CZ   | ARG | X | 86 | 41.618 | 45.270 | 20.636 | 0.00 | 0.00 |
| ATOM | 1330 | NH1  | ARG | X | 86 | 42.838 | 44.878 | 21.090 | 0.00 | 0.00 |
| ATOM | 1331 | HH11 | ARG | X | 86 | 43.422 | 45.581 | 21.521 | 0.00 | 0.00 |
| ATOM | 1332 | HH12 | ARG | X | 86 | 43.176 | 43.927 | 21.142 | 0.00 | 0.00 |
| ATOM | 1333 | NH2  | ARG | X | 86 | 40.868 | 44.377 | 20.018 | 0.00 | 0.00 |
| ATOM | 1334 | HH21 | ARG | X | 86 | 39.987 | 44.730 | 19.673 | 0.00 | 0.00 |
| ATOM | 1335 | HH22 | ARG | X | 86 | 41.136 | 43.403 | 20.012 | 0.00 | 0.00 |
| ATOM | 1336 | C    | ARG | X | 86 | 45.355 | 50.075 | 23.472 | 0.00 | 0.00 |
| ATOM | 1337 | O    | ARG | X | 86 | 46.020 | 50.109 | 24.524 | 0.00 | 0.00 |
| ATOM | 1338 | N    | GLU | X | 87 | 45.103 | 51.125 | 22.823 | 0.00 | 0.00 |
| ATOM | 1339 | H    | GLU | X | 87 | 44.439 | 51.094 | 22.062 | 0.00 | 0.00 |
| ATOM | 1340 | CA   | GLU | X | 87 | 45.750 | 52.449 | 22.937 | 0.00 | 0.00 |
| ATOM | 1341 | HA   | GLU | X | 87 | 46.788 | 52.392 | 22.609 | 0.00 | 0.00 |
| ATOM | 1342 | CB   | GLU | X | 87 | 45.026 | 53.395 | 21.881 | 0.00 | 0.00 |
| ATOM | 1343 | HB2  | GLU | X | 87 | 44.873 | 52.938 | 20.904 | 0.00 | 0.00 |
| ATOM | 1344 | HB3  | GLU | X | 87 | 44.069 | 53.621 | 22.351 | 0.00 | 0.00 |
| ATOM | 1345 | CG   | GLU | X | 87 | 45.756 | 54.762 | 21.659 | 0.00 | 0.00 |
| ATOM | 1346 | HG2  | GLU | X | 87 | 46.102 | 54.973 | 22.671 | 0.00 | 0.00 |
| ATOM | 1347 | HG3  | GLU | X | 87 | 46.581 | 54.491 | 21.001 | 0.00 | 0.00 |
| ATOM | 1348 | CD   | GLU | X | 87 | 44.936 | 55.812 | 21.139 | 0.00 | 0.00 |
| ATOM | 1349 | OE1  | GLU | X | 87 | 44.787 | 55.932 | 19.920 | 0.00 | 0.00 |
| ATOM | 1350 | OE2  | GLU | X | 87 | 44.305 | 56.499 | 22.001 | 0.00 | 0.00 |
| ATOM | 1351 | C    | GLU | X | 87 | 45.731 | 52.923 | 24.350 | 0.00 | 0.00 |
| ATOM | 1352 | O    | GLU | X | 87 | 44.679 | 53.077 | 24.959 | 0.00 | 0.00 |
| ATOM | 1353 | N    | LEU | X | 88 | 46.889 | 53.220 | 24.986 | 0.00 | 0.00 |
| ATOM | 1354 | H    | LEU | X | 88 | 47.764 | 53.155 | 24.486 | 0.00 | 0.00 |
| ATOM | 1355 | CA   | LEU | X | 88 | 46.960 | 53.949 | 26.188 | 0.00 | 0.00 |
| ATOM | 1356 | HA   | LEU | X | 88 | 46.420 | 53.349 | 26.919 | 0.00 | 0.00 |
| ATOM | 1357 | CB   | LEU | X | 88 | 48.450 | 53.997 | 26.789 | 0.00 | 0.00 |
| ATOM | 1358 | HB2  | LEU | X | 88 | 49.032 | 54.559 | 26.059 | 0.00 | 0.00 |
| ATOM | 1359 | HB3  | LEU | X | 88 | 48.326 | 54.535 | 27.728 | 0.00 | 0.00 |
| ATOM | 1360 | CG   | LEU | X | 88 | 49.066 | 52.615 | 27.069 | 0.00 | 0.00 |
| ATOM | 1361 | HG   | LEU | X | 88 | 49.040 | 52.127 | 26.095 | 0.00 | 0.00 |
| ATOM | 1362 | CD1  | LEU | X | 88 | 50.575 | 52.878 | 27.379 | 0.00 | 0.00 |
| ATOM | 1363 | HD11 | LEU | X | 88 | 51.134 | 53.371 | 26.584 | 0.00 | 0.00 |
| ATOM | 1364 | HD12 | LEU | X | 88 | 51.010 | 51.898 | 27.578 | 0.00 | 0.00 |

|      |      |      |     |   |    |        |        |        |      |      |
|------|------|------|-----|---|----|--------|--------|--------|------|------|
| ATOM | 1365 | HD13 | LEU | X | 88 | 50.640 | 53.545 | 28.239 | 0.00 | 0.00 |
| ATOM | 1366 | CD2  | LEU | X | 88 | 48.389 | 51.750 | 28.093 | 0.00 | 0.00 |
| ATOM | 1367 | HD21 | LEU | X | 88 | 49.099 | 50.964 | 28.349 | 0.00 | 0.00 |
| ATOM | 1368 | HD22 | LEU | X | 88 | 48.259 | 52.391 | 28.964 | 0.00 | 0.00 |
| ATOM | 1369 | HD23 | LEU | X | 88 | 47.407 | 51.427 | 27.747 | 0.00 | 0.00 |
| ATOM | 1370 | C    | LEU | X | 88 | 46.416 | 55.420 | 26.047 | 0.00 | 0.00 |
| ATOM | 1371 | O    | LEU | X | 88 | 46.785 | 56.110 | 25.082 | 0.00 | 0.00 |
| ATOM | 1372 | N    | SER | X | 89 | 45.659 | 55.965 | 27.019 | 0.00 | 0.00 |
| ATOM | 1373 | H    | SER | X | 89 | 45.465 | 55.400 | 27.833 | 0.00 | 0.00 |
| ATOM | 1374 | CA   | SER | X | 89 | 45.102 | 57.299 | 27.129 | 0.00 | 0.00 |
| ATOM | 1375 | HA   | SER | X | 89 | 45.773 | 57.997 | 26.628 | 0.00 | 0.00 |
| ATOM | 1376 | CB   | SER | X | 89 | 43.784 | 57.289 | 26.374 | 0.00 | 0.00 |
| ATOM | 1377 | HB2  | SER | X | 89 | 43.858 | 56.800 | 25.403 | 0.00 | 0.00 |
| ATOM | 1378 | HB3  | SER | X | 89 | 43.010 | 56.769 | 26.939 | 0.00 | 0.00 |
| ATOM | 1379 | OG   | SER | X | 89 | 43.333 | 58.543 | 26.156 | 0.00 | 0.00 |
| ATOM | 1380 | HG   | SER | X | 89 | 43.229 | 58.533 | 25.202 | 0.00 | 0.00 |
| ATOM | 1381 | C    | SER | X | 89 | 44.815 | 57.633 | 28.556 | 0.00 | 0.00 |
| ATOM | 1382 | O    | SER | X | 89 | 44.828 | 56.842 | 29.483 | 0.00 | 0.00 |
| ATOM | 1383 | N    | GLU | X | 90 | 44.698 | 58.930 | 28.889 | 0.00 | 0.00 |
| ATOM | 1384 | H    | GLU | X | 90 | 44.727 | 59.628 | 28.159 | 0.00 | 0.00 |
| ATOM | 1385 | CA   | GLU | X | 90 | 44.160 | 59.482 | 30.098 | 0.00 | 0.00 |
| ATOM | 1386 | HA   | GLU | X | 90 | 44.174 | 58.799 | 30.947 | 0.00 | 0.00 |
| ATOM | 1387 | CB   | GLU | X | 90 | 44.950 | 60.743 | 30.502 | 0.00 | 0.00 |
| ATOM | 1388 | HB2  | GLU | X | 90 | 45.999 | 60.523 | 30.308 | 0.00 | 0.00 |
| ATOM | 1389 | HB3  | GLU | X | 90 | 44.638 | 61.606 | 29.914 | 0.00 | 0.00 |
| ATOM | 1390 | CG   | GLU | X | 90 | 44.690 | 61.088 | 31.959 | 0.00 | 0.00 |
| ATOM | 1391 | HG2  | GLU | X | 90 | 43.634 | 61.179 | 32.213 | 0.00 | 0.00 |
| ATOM | 1392 | HG3  | GLU | X | 90 | 45.093 | 60.281 | 32.570 | 0.00 | 0.00 |
| ATOM | 1393 | CD   | GLU | X | 90 | 45.449 | 62.360 | 32.376 | 0.00 | 0.00 |
| ATOM | 1394 | OE1  | GLU | X | 90 | 44.964 | 63.094 | 33.264 | 0.00 | 0.00 |
| ATOM | 1395 | OE2  | GLU | X | 90 | 46.566 | 62.584 | 31.839 | 0.00 | 0.00 |
| ATOM | 1396 | C    | GLU | X | 90 | 42.654 | 59.823 | 29.950 | 0.00 | 0.00 |
| ATOM | 1397 | O    | GLU | X | 90 | 41.788 | 59.889 | 30.859 | 0.00 | 0.00 |
| ATOM | 1398 | N    | ASP | X | 91 | 42.157 | 59.899 | 28.657 | 0.00 | 0.00 |
| ATOM | 1399 | H    | ASP | X | 91 | 42.744 | 59.634 | 27.879 | 0.00 | 0.00 |
| ATOM | 1400 | CA   | ASP | X | 91 | 40.754 | 60.201 | 28.284 | 0.00 | 0.00 |
| ATOM | 1401 | HA   | ASP | X | 91 | 40.400 | 60.929 | 29.014 | 0.00 | 0.00 |
| ATOM | 1402 | CB   | ASP | X | 91 | 40.666 | 60.817 | 26.858 | 0.00 | 0.00 |
| ATOM | 1403 | HB2  | ASP | X | 91 | 41.266 | 61.724 | 26.936 | 0.00 | 0.00 |
| ATOM | 1404 | HB3  | ASP | X | 91 | 40.985 | 60.077 | 26.124 | 0.00 | 0.00 |
| ATOM | 1405 | CG   | ASP | X | 91 | 39.293 | 61.277 | 26.438 | 0.00 | 0.00 |
| ATOM | 1406 | OD1  | ASP | X | 91 | 38.978 | 61.074 | 25.232 | 0.00 | 0.00 |
| ATOM | 1407 | OD2  | ASP | X | 91 | 38.535 | 61.969 | 27.213 | 0.00 | 0.00 |
| ATOM | 1408 | C    | ASP | X | 91 | 39.873 | 58.886 | 28.430 | 0.00 | 0.00 |
| ATOM | 1409 | O    | ASP | X | 91 | 39.060 | 58.558 | 27.611 | 0.00 | 0.00 |
| ATOM | 1410 | N    | CYX | X | 92 | 40.218 | 57.988 | 29.352 | 0.00 | 0.00 |
| ATOM | 1411 | H    | CYX | X | 92 | 40.992 | 58.297 | 29.923 | 0.00 | 0.00 |
| ATOM | 1412 | CA   | CYX | X | 92 | 39.976 | 56.539 | 29.260 | 0.00 | 0.00 |
| ATOM | 1413 | HA   | CYX | X | 92 | 39.979 | 56.357 | 28.186 | 0.00 | 0.00 |
| ATOM | 1414 | CB   | CYX | X | 92 | 41.069 | 55.758 | 29.959 | 0.00 | 0.00 |
| ATOM | 1415 | HB2  | CYX | X | 92 | 40.899 | 54.709 | 29.717 | 0.00 | 0.00 |
| ATOM | 1416 | HB3  | CYX | X | 92 | 42.092 | 55.897 | 29.612 | 0.00 | 0.00 |
| ATOM | 1417 | SG   | CYX | X | 92 | 40.930 | 55.921 | 31.770 | 0.00 | 0.00 |
| ATOM | 1418 | C    | CYX | X | 92 | 38.626 | 55.974 | 29.699 | 0.00 | 0.00 |
| ATOM | 1419 | O    | CYX | X | 92 | 38.552 | 54.746 | 29.620 | 0.00 | 0.00 |
| ATOM | 1420 | N    | LEU | X | 93 | 37.623 | 56.800 | 30.155 | 0.00 | 0.00 |
| ATOM | 1421 | H    | LEU | X | 93 | 37.586 | 57.804 | 30.257 | 0.00 | 0.00 |
| ATOM | 1422 | CA   | LEU | X | 93 | 36.377 | 56.163 | 30.708 | 0.00 | 0.00 |
| ATOM | 1423 | HA   | LEU | X | 93 | 36.696 | 55.275 | 31.254 | 0.00 | 0.00 |
| ATOM | 1424 | CB   | LEU | X | 93 | 35.849 | 57.093 | 31.776 | 0.00 | 0.00 |
| ATOM | 1425 | HB2  | LEU | X | 93 | 35.599 | 58.051 | 31.320 | 0.00 | 0.00 |
| ATOM | 1426 | HB3  | LEU | X | 93 | 34.886 | 56.715 | 32.120 | 0.00 | 0.00 |
| ATOM | 1427 | CG   | LEU | X | 93 | 36.775 | 57.250 | 33.088 | 0.00 | 0.00 |
| ATOM | 1428 | HG   | LEU | X | 93 | 37.634 | 57.891 | 32.887 | 0.00 | 0.00 |
| ATOM | 1429 | CD1  | LEU | X | 93 | 35.988 | 58.031 | 34.130 | 0.00 | 0.00 |
| ATOM | 1430 | HD11 | LEU | X | 93 | 36.690 | 58.259 | 34.932 | 0.00 | 0.00 |
| ATOM | 1431 | HD12 | LEU | X | 93 | 35.171 | 57.436 | 34.536 | 0.00 | 0.00 |

|      |      |      |     |   |    |        |        |        |      |      |
|------|------|------|-----|---|----|--------|--------|--------|------|------|
| ATOM | 1432 | HD13 | LEU | X | 93 | 35.715 | 58.958 | 33.624 | 0.00 | 0.00 |
| ATOM | 1433 | CD2  | LEU | X | 93 | 37.226 | 55.875 | 33.695 | 0.00 | 0.00 |
| ATOM | 1434 | HD21 | LEU | X | 93 | 36.398 | 55.167 | 33.686 | 0.00 | 0.00 |
| ATOM | 1435 | HD22 | LEU | X | 93 | 38.068 | 55.408 | 33.183 | 0.00 | 0.00 |
| ATOM | 1436 | HD23 | LEU | X | 93 | 37.562 | 55.901 | 34.732 | 0.00 | 0.00 |
| ATOM | 1437 | C    | LEU | X | 93 | 35.425 | 55.674 | 29.538 | 0.00 | 0.00 |
| ATOM | 1438 | O    | LEU | X | 93 | 34.887 | 56.388 | 28.753 | 0.00 | 0.00 |
| ATOM | 1439 | N    | TYR | X | 94 | 35.197 | 54.404 | 29.519 | 0.00 | 0.00 |
| ATOM | 1440 | H    | TYR | X | 94 | 35.661 | 53.804 | 30.186 | 0.00 | 0.00 |
| ATOM | 1441 | CA   | TYR | X | 94 | 34.241 | 53.682 | 28.632 | 0.00 | 0.00 |
| ATOM | 1442 | HA   | TYR | X | 94 | 33.357 | 54.289 | 28.436 | 0.00 | 0.00 |
| ATOM | 1443 | CB   | TYR | X | 94 | 34.898 | 53.185 | 27.400 | 0.00 | 0.00 |
| ATOM | 1444 | HB2  | TYR | X | 94 | 35.763 | 52.567 | 27.641 | 0.00 | 0.00 |
| ATOM | 1445 | HB3  | TYR | X | 94 | 34.152 | 52.622 | 26.838 | 0.00 | 0.00 |
| ATOM | 1446 | CG   | TYR | X | 94 | 35.404 | 54.376 | 26.592 | 0.00 | 0.00 |
| ATOM | 1447 | CD1  | TYR | X | 94 | 34.522 | 55.190 | 25.848 | 0.00 | 0.00 |
| ATOM | 1448 | HD1  | TYR | X | 94 | 33.518 | 54.909 | 25.568 | 0.00 | 0.00 |
| ATOM | 1449 | CE1  | TYR | X | 94 | 35.065 | 56.217 | 25.108 | 0.00 | 0.00 |
| ATOM | 1450 | HE1  | TYR | X | 94 | 34.401 | 56.701 | 24.408 | 0.00 | 0.00 |
| ATOM | 1451 | CZ   | TYR | X | 94 | 36.410 | 56.588 | 25.177 | 0.00 | 0.00 |
| ATOM | 1452 | OH   | TYR | X | 94 | 36.908 | 57.613 | 24.464 | 0.00 | 0.00 |
| ATOM | 1453 | HH   | TYR | X | 94 | 37.867 | 57.596 | 24.459 | 0.00 | 0.00 |
| ATOM | 1454 | CE2  | TYR | X | 94 | 37.233 | 55.899 | 26.096 | 0.00 | 0.00 |
| ATOM | 1455 | HE2  | TYR | X | 94 | 38.243 | 56.261 | 26.226 | 0.00 | 0.00 |
| ATOM | 1456 | CD2  | TYR | X | 94 | 36.804 | 54.734 | 26.762 | 0.00 | 0.00 |
| ATOM | 1457 | HD2  | TYR | X | 94 | 37.368 | 54.182 | 27.499 | 0.00 | 0.00 |
| ATOM | 1458 | C    | TYR | X | 94 | 33.621 | 52.494 | 29.369 | 0.00 | 0.00 |
| ATOM | 1459 | O    | TYR | X | 94 | 34.281 | 52.000 | 30.272 | 0.00 | 0.00 |
| ATOM | 1460 | N    | LEU | X | 95 | 32.397 | 52.133 | 29.016 | 0.00 | 0.00 |
| ATOM | 1461 | H    | LEU | X | 95 | 32.035 | 52.736 | 28.292 | 0.00 | 0.00 |
| ATOM | 1462 | CA   | LEU | X | 95 | 31.773 | 50.914 | 29.460 | 0.00 | 0.00 |
| ATOM | 1463 | HA   | LEU | X | 95 | 32.519 | 50.312 | 29.979 | 0.00 | 0.00 |
| ATOM | 1464 | CB   | LEU | X | 95 | 30.644 | 51.132 | 30.506 | 0.00 | 0.00 |
| ATOM | 1465 | HB2  | LEU | X | 95 | 30.289 | 50.173 | 30.884 | 0.00 | 0.00 |
| ATOM | 1466 | HB3  | LEU | X | 95 | 31.130 | 51.532 | 31.397 | 0.00 | 0.00 |
| ATOM | 1467 | CG   | LEU | X | 95 | 29.450 | 51.959 | 30.096 | 0.00 | 0.00 |
| ATOM | 1468 | HG   | LEU | X | 95 | 29.719 | 52.725 | 29.369 | 0.00 | 0.00 |
| ATOM | 1469 | CD1  | LEU | X | 95 | 28.386 | 51.035 | 29.462 | 0.00 | 0.00 |
| ATOM | 1470 | HD11 | LEU | X | 95 | 27.524 | 51.598 | 29.102 | 0.00 | 0.00 |
| ATOM | 1471 | HD12 | LEU | X | 95 | 28.002 | 50.293 | 30.161 | 0.00 | 0.00 |
| ATOM | 1472 | HD13 | LEU | X | 95 | 28.708 | 50.428 | 28.616 | 0.00 | 0.00 |
| ATOM | 1473 | CD2  | LEU | X | 95 | 28.924 | 52.818 | 31.294 | 0.00 | 0.00 |
| ATOM | 1474 | HD21 | LEU | X | 95 | 28.564 | 52.237 | 32.143 | 0.00 | 0.00 |
| ATOM | 1475 | HD22 | LEU | X | 95 | 29.743 | 53.405 | 31.711 | 0.00 | 0.00 |
| ATOM | 1476 | HD23 | LEU | X | 95 | 28.109 | 53.485 | 31.014 | 0.00 | 0.00 |
| ATOM | 1477 | C    | LEU | X | 95 | 31.321 | 50.153 | 28.238 | 0.00 | 0.00 |
| ATOM | 1478 | O    | LEU | X | 95 | 31.389 | 50.628 | 27.127 | 0.00 | 0.00 |
| ATOM | 1479 | N    | ASN | X | 96 | 30.927 | 48.859 | 28.416 | 0.00 | 0.00 |
| ATOM | 1480 | H    | ASN | X | 96 | 31.032 | 48.475 | 29.345 | 0.00 | 0.00 |
| ATOM | 1481 | CA   | ASN | X | 96 | 30.693 | 47.896 | 27.385 | 0.00 | 0.00 |
| ATOM | 1482 | HA   | ASN | X | 96 | 30.461 | 48.470 | 26.488 | 0.00 | 0.00 |
| ATOM | 1483 | CB   | ASN | X | 96 | 31.919 | 47.058 | 27.220 | 0.00 | 0.00 |
| ATOM | 1484 | HB2  | ASN | X | 96 | 31.975 | 46.487 | 28.146 | 0.00 | 0.00 |
| ATOM | 1485 | HB3  | ASN | X | 96 | 31.776 | 46.356 | 26.399 | 0.00 | 0.00 |
| ATOM | 1486 | CG   | ASN | X | 96 | 33.245 | 47.875 | 27.014 | 0.00 | 0.00 |
| ATOM | 1487 | OD1  | ASN | X | 96 | 33.562 | 48.331 | 25.911 | 0.00 | 0.00 |
| ATOM | 1488 | ND2  | ASN | X | 96 | 34.111 | 48.040 | 28.012 | 0.00 | 0.00 |
| ATOM | 1489 | HD21 | ASN | X | 96 | 34.933 | 48.611 | 27.873 | 0.00 | 0.00 |
| ATOM | 1490 | HD22 | ASN | X | 96 | 33.892 | 47.618 | 28.902 | 0.00 | 0.00 |
| ATOM | 1491 | C    | ASN | X | 96 | 29.525 | 46.944 | 27.807 | 0.00 | 0.00 |
| ATOM | 1492 | O    | ASN | X | 96 | 29.437 | 46.691 | 28.982 | 0.00 | 0.00 |
| ATOM | 1493 | N    | VAL | X | 97 | 28.715 | 46.462 | 26.878 | 0.00 | 0.00 |
| ATOM | 1494 | H    | VAL | X | 97 | 28.923 | 46.720 | 25.924 | 0.00 | 0.00 |
| ATOM | 1495 | CA   | VAL | X | 97 | 27.438 | 45.857 | 27.096 | 0.00 | 0.00 |
| ATOM | 1496 | HA   | VAL | X | 97 | 27.453 | 45.518 | 28.131 | 0.00 | 0.00 |
| ATOM | 1497 | CB   | VAL | X | 97 | 26.181 | 46.745 | 27.073 | 0.00 | 0.00 |
| ATOM | 1498 | HB   | VAL | X | 97 | 26.007 | 47.231 | 26.114 | 0.00 | 0.00 |



|      |      |      |     |   |     |        |        |        |      |      |
|------|------|------|-----|---|-----|--------|--------|--------|------|------|
| ATOM | 1499 | CG1  | VAL | X | 97  | 24.884 | 45.884 | 27.409 | 0.00 | 0.00 |
| ATOM | 1500 | HG11 | VAL | X | 97  | 25.025 | 45.172 | 28.222 | 0.00 | 0.00 |
| ATOM | 1501 | HG12 | VAL | X | 97  | 24.098 | 46.555 | 27.756 | 0.00 | 0.00 |
| ATOM | 1502 | HG13 | VAL | X | 97  | 24.615 | 45.351 | 26.498 | 0.00 | 0.00 |
| ATOM | 1503 | CG2  | VAL | X | 97  | 26.168 | 48.032 | 27.947 | 0.00 | 0.00 |
| ATOM | 1504 | HG21 | VAL | X | 97  | 27.035 | 48.612 | 27.632 | 0.00 | 0.00 |
| ATOM | 1505 | HG22 | VAL | X | 97  | 26.231 | 47.748 | 28.997 | 0.00 | 0.00 |
| ATOM | 1506 | HG23 | VAL | X | 97  | 25.281 | 48.647 | 27.791 | 0.00 | 0.00 |
| ATOM | 1507 | C    | VAL | X | 97  | 27.340 | 44.667 | 26.100 | 0.00 | 0.00 |
| ATOM | 1508 | O    | VAL | X | 97  | 27.692 | 44.890 | 24.960 | 0.00 | 0.00 |
| ATOM | 1509 | N    | TRP | X | 98  | 26.846 | 43.517 | 26.541 | 0.00 | 0.00 |
| ATOM | 1510 | H    | TRP | X | 98  | 26.731 | 43.451 | 27.542 | 0.00 | 0.00 |
| ATOM | 1511 | CA   | TRP | X | 98  | 26.734 | 42.374 | 25.672 | 0.00 | 0.00 |
| ATOM | 1512 | HA   | TRP | X | 98  | 26.696 | 42.607 | 24.608 | 0.00 | 0.00 |
| ATOM | 1513 | CB   | TRP | X | 98  | 27.896 | 41.413 | 25.817 | 0.00 | 0.00 |
| ATOM | 1514 | HB2  | TRP | X | 98  | 28.044 | 40.981 | 26.807 | 0.00 | 0.00 |
| ATOM | 1515 | HB3  | TRP | X | 98  | 27.640 | 40.501 | 25.276 | 0.00 | 0.00 |
| ATOM | 1516 | CG   | TRP | X | 98  | 29.220 | 41.676 | 25.294 | 0.00 | 0.00 |
| ATOM | 1517 | CD1  | TRP | X | 98  | 29.672 | 41.255 | 24.143 | 0.00 | 0.00 |
| ATOM | 1518 | HD1  | TRP | X | 98  | 29.101 | 40.665 | 23.442 | 0.00 | 0.00 |
| ATOM | 1519 | NE1  | TRP | X | 98  | 31.033 | 41.481 | 23.993 | 0.00 | 0.00 |
| ATOM | 1520 | HE1  | TRP | X | 98  | 31.651 | 41.135 | 23.274 | 0.00 | 0.00 |
| ATOM | 1521 | CE2  | TRP | X | 98  | 31.467 | 42.321 | 25.048 | 0.00 | 0.00 |
| ATOM | 1522 | CZ2  | TRP | X | 98  | 32.709 | 42.857 | 25.476 | 0.00 | 0.00 |
| ATOM | 1523 | HZ2  | TRP | X | 98  | 33.569 | 42.861 | 24.822 | 0.00 | 0.00 |
| ATOM | 1524 | CH2  | TRP | X | 98  | 32.798 | 43.457 | 26.661 | 0.00 | 0.00 |
| ATOM | 1525 | HH2  | TRP | X | 98  | 33.753 | 43.897 | 26.905 | 0.00 | 0.00 |
| ATOM | 1526 | CZ3  | TRP | X | 98  | 31.691 | 43.601 | 27.482 | 0.00 | 0.00 |
| ATOM | 1527 | HZ3  | TRP | X | 98  | 31.762 | 44.109 | 28.433 | 0.00 | 0.00 |
| ATOM | 1528 | CE3  | TRP | X | 98  | 30.401 | 43.102 | 27.099 | 0.00 | 0.00 |
| ATOM | 1529 | HE3  | TRP | X | 98  | 29.563 | 43.118 | 27.781 | 0.00 | 0.00 |
| ATOM | 1530 | CD2  | TRP | X | 98  | 30.293 | 42.514 | 25.861 | 0.00 | 0.00 |
| ATOM | 1531 | C    | TRP | X | 98  | 25.454 | 41.597 | 26.018 | 0.00 | 0.00 |
| ATOM | 1532 | O    | TRP | X | 98  | 25.228 | 41.285 | 27.193 | 0.00 | 0.00 |
| ATOM | 1533 | N    | THR | X | 99  | 24.539 | 41.435 | 25.039 | 0.00 | 0.00 |
| ATOM | 1534 | H    | THR | X | 99  | 24.759 | 41.636 | 24.074 | 0.00 | 0.00 |
| ATOM | 1535 | CA   | THR | X | 99  | 23.190 | 40.985 | 25.338 | 0.00 | 0.00 |
| ATOM | 1536 | HA   | THR | X | 99  | 23.174 | 40.312 | 26.195 | 0.00 | 0.00 |
| ATOM | 1537 | CB   | THR | X | 99  | 22.293 | 42.236 | 25.672 | 0.00 | 0.00 |
| ATOM | 1538 | HB   | THR | X | 99  | 22.693 | 42.741 | 26.551 | 0.00 | 0.00 |
| ATOM | 1539 | CG2  | THR | X | 99  | 22.243 | 43.321 | 24.593 | 0.00 | 0.00 |
| ATOM | 1540 | HG21 | THR | X | 99  | 21.608 | 44.150 | 24.904 | 0.00 | 0.00 |
| ATOM | 1541 | HG22 | THR | X | 99  | 21.748 | 42.926 | 23.705 | 0.00 | 0.00 |
| ATOM | 1542 | HG23 | THR | X | 99  | 23.213 | 43.789 | 24.423 | 0.00 | 0.00 |
| ATOM | 1543 | OG1  | THR | X | 99  | 20.990 | 42.013 | 26.079 | 0.00 | 0.00 |
| ATOM | 1544 | HG1  | THR | X | 99  | 20.691 | 42.738 | 26.633 | 0.00 | 0.00 |
| ATOM | 1545 | C    | THR | X | 99  | 22.656 | 40.237 | 24.012 | 0.00 | 0.00 |
| ATOM | 1546 | O    | THR | X | 99  | 22.996 | 40.639 | 22.870 | 0.00 | 0.00 |
| ATOM | 1547 | N    | PRO | X | 100 | 21.993 | 39.069 | 24.134 | 0.00 | 0.00 |
| ATOM | 1548 | CD   | PRO | X | 100 | 21.238 | 38.621 | 25.274 | 0.00 | 0.00 |
| ATOM | 1549 | HD2  | PRO | X | 100 | 20.617 | 39.425 | 25.669 | 0.00 | 0.00 |
| ATOM | 1550 | HD3  | PRO | X | 100 | 21.718 | 38.127 | 26.119 | 0.00 | 0.00 |
| ATOM | 1551 | CG   | PRO | X | 100 | 20.269 | 37.575 | 24.668 | 0.00 | 0.00 |
| ATOM | 1552 | HG2  | PRO | X | 100 | 19.455 | 38.074 | 24.142 | 0.00 | 0.00 |
| ATOM | 1553 | HG3  | PRO | X | 100 | 19.825 | 36.972 | 25.460 | 0.00 | 0.00 |
| ATOM | 1554 | CB   | PRO | X | 100 | 21.047 | 36.885 | 23.541 | 0.00 | 0.00 |
| ATOM | 1555 | HB2  | PRO | X | 100 | 20.342 | 36.543 | 22.783 | 0.00 | 0.00 |
| ATOM | 1556 | HB3  | PRO | X | 100 | 21.713 | 36.128 | 23.955 | 0.00 | 0.00 |
| ATOM | 1557 | CA   | PRO | X | 100 | 21.853 | 38.042 | 23.003 | 0.00 | 0.00 |
| ATOM | 1558 | HA   | PRO | X | 100 | 22.813 | 37.732 | 22.590 | 0.00 | 0.00 |
| ATOM | 1559 | C    | PRO | X | 100 | 21.068 | 38.708 | 21.778 | 0.00 | 0.00 |
| ATOM | 1560 | O    | PRO | X | 100 | 20.208 | 39.608 | 21.919 | 0.00 | 0.00 |
| ATOM | 1561 | N    | TYR | X | 101 | 21.405 | 38.261 | 20.497 | 0.00 | 0.00 |
| ATOM | 1562 | H    | TYR | X | 101 | 22.052 | 37.485 | 20.481 | 0.00 | 0.00 |
| ATOM | 1563 | CA   | TYR | X | 101 | 20.671 | 38.745 | 19.259 | 0.00 | 0.00 |
| ATOM | 1564 | HA   | TYR | X | 101 | 20.444 | 39.790 | 19.470 | 0.00 | 0.00 |
| ATOM | 1565 | CB   | TYR | X | 101 | 21.732 | 38.751 | 18.185 | 0.00 | 0.00 |

|      |      |      |     |   |     |        |        |        |      |      |
|------|------|------|-----|---|-----|--------|--------|--------|------|------|
| ATOM | 1566 | HB2  | TYR | X | 101 | 22.581 | 39.305 | 18.585 | 0.00 | 0.00 |
| ATOM | 1567 | HB3  | TYR | X | 101 | 21.955 | 37.700 | 18.003 | 0.00 | 0.00 |
| ATOM | 1568 | CG   | TYR | X | 101 | 21.346 | 39.360 | 16.837 | 0.00 | 0.00 |
| ATOM | 1569 | CD1  | TYR | X | 101 | 20.443 | 38.687 | 15.960 | 0.00 | 0.00 |
| ATOM | 1570 | HD1  | TYR | X | 101 | 20.159 | 37.680 | 16.228 | 0.00 | 0.00 |
| ATOM | 1571 | CE1  | TYR | X | 101 | 19.971 | 39.393 | 14.802 | 0.00 | 0.00 |
| ATOM | 1572 | HE1  | TYR | X | 101 | 19.314 | 38.965 | 14.059 | 0.00 | 0.00 |
| ATOM | 1573 | CZ   | TYR | X | 101 | 20.438 | 40.702 | 14.551 | 0.00 | 0.00 |
| ATOM | 1574 | OH   | TYR | X | 101 | 19.986 | 41.369 | 13.417 | 0.00 | 0.00 |
| ATOM | 1575 | HH   | TYR | X | 101 | 19.206 | 40.908 | 13.102 | 0.00 | 0.00 |
| ATOM | 1576 | CE2  | TYR | X | 101 | 21.462 | 41.270 | 15.327 | 0.00 | 0.00 |
| ATOM | 1577 | HE2  | TYR | X | 101 | 22.032 | 42.141 | 15.038 | 0.00 | 0.00 |
| ATOM | 1578 | CD2  | TYR | X | 101 | 21.878 | 40.621 | 16.493 | 0.00 | 0.00 |
| ATOM | 1579 | HD2  | TYR | X | 101 | 22.668 | 41.070 | 17.076 | 0.00 | 0.00 |
| ATOM | 1580 | C    | TYR | X | 101 | 19.370 | 37.973 | 18.908 | 0.00 | 0.00 |
| ATOM | 1581 | O    | TYR | X | 101 | 19.335 | 36.767 | 18.884 | 0.00 | 0.00 |
| ATOM | 1582 | N    | PRO | X | 102 | 18.384 | 38.669 | 18.414 | 0.00 | 0.00 |
| ATOM | 1583 | CD   | PRO | X | 102 | 17.150 | 38.005 | 18.018 | 0.00 | 0.00 |
| ATOM | 1584 | HD2  | PRO | X | 102 | 16.712 | 37.532 | 18.897 | 0.00 | 0.00 |
| ATOM | 1585 | HD3  | PRO | X | 102 | 17.476 | 37.372 | 17.192 | 0.00 | 0.00 |
| ATOM | 1586 | CG   | PRO | X | 102 | 16.135 | 39.029 | 17.664 | 0.00 | 0.00 |
| ATOM | 1587 | HG2  | PRO | X | 102 | 15.494 | 39.456 | 18.435 | 0.00 | 0.00 |
| ATOM | 1588 | HG3  | PRO | X | 102 | 15.421 | 38.687 | 16.915 | 0.00 | 0.00 |
| ATOM | 1589 | CB   | PRO | X | 102 | 17.013 | 40.278 | 17.355 | 0.00 | 0.00 |
| ATOM | 1590 | HB2  | PRO | X | 102 | 16.529 | 41.248 | 17.465 | 0.00 | 0.00 |
| ATOM | 1591 | HB3  | PRO | X | 102 | 17.332 | 40.123 | 16.325 | 0.00 | 0.00 |
| ATOM | 1592 | CA   | PRO | X | 102 | 18.271 | 40.115 | 18.234 | 0.00 | 0.00 |
| ATOM | 1593 | HA   | PRO | X | 102 | 19.193 | 40.482 | 17.783 | 0.00 | 0.00 |
| ATOM | 1594 | C    | PRO | X | 102 | 18.021 | 40.818 | 19.665 | 0.00 | 0.00 |
| ATOM | 1595 | O    | PRO | X | 102 | 17.280 | 40.271 | 20.435 | 0.00 | 0.00 |
| ATOM | 1596 | N    | ARG | X | 103 | 18.552 | 42.083 | 19.849 | 0.00 | 0.00 |
| ATOM | 1597 | H    | ARG | X | 103 | 19.033 | 42.490 | 19.060 | 0.00 | 0.00 |
| ATOM | 1598 | CA   | ARG | X | 103 | 18.667 | 42.746 | 21.171 | 0.00 | 0.00 |
| ATOM | 1599 | HA   | ARG | X | 103 | 19.478 | 42.297 | 21.744 | 0.00 | 0.00 |
| ATOM | 1600 | CB   | ARG | X | 103 | 19.132 | 44.275 | 21.007 | 0.00 | 0.00 |
| ATOM | 1601 | HB2  | ARG | X | 103 | 20.019 | 44.240 | 20.375 | 0.00 | 0.00 |
| ATOM | 1602 | HB3  | ARG | X | 103 | 18.312 | 44.716 | 20.439 | 0.00 | 0.00 |
| ATOM | 1603 | CG   | ARG | X | 103 | 19.521 | 45.009 | 22.309 | 0.00 | 0.00 |
| ATOM | 1604 | HG2  | ARG | X | 103 | 18.760 | 44.723 | 23.036 | 0.00 | 0.00 |
| ATOM | 1605 | HG3  | ARG | X | 103 | 20.499 | 44.678 | 22.659 | 0.00 | 0.00 |
| ATOM | 1606 | CD   | ARG | X | 103 | 19.628 | 46.509 | 22.182 | 0.00 | 0.00 |
| ATOM | 1607 | HD2  | ARG | X | 103 | 20.213 | 46.867 | 23.029 | 0.00 | 0.00 |
| ATOM | 1608 | HD3  | ARG | X | 103 | 20.125 | 46.742 | 21.240 | 0.00 | 0.00 |
| ATOM | 1609 | NE   | ARG | X | 103 | 18.272 | 47.064 | 22.243 | 0.00 | 0.00 |
| ATOM | 1610 | HE   | ARG | X | 103 | 17.823 | 47.339 | 23.105 | 0.00 | 0.00 |
| ATOM | 1611 | CZ   | ARG | X | 103 | 17.670 | 47.551 | 21.130 | 0.00 | 0.00 |
| ATOM | 1612 | NH1  | ARG | X | 103 | 18.185 | 47.610 | 19.952 | 0.00 | 0.00 |
| ATOM | 1613 | HH11 | ARG | X | 103 | 19.133 | 47.322 | 19.754 | 0.00 | 0.00 |
| ATOM | 1614 | HH12 | ARG | X | 103 | 17.633 | 48.014 | 19.210 | 0.00 | 0.00 |
| ATOM | 1615 | NH2  | ARG | X | 103 | 16.448 | 48.023 | 21.277 | 0.00 | 0.00 |
| ATOM | 1616 | HH21 | ARG | X | 103 | 15.969 | 48.042 | 22.166 | 0.00 | 0.00 |
| ATOM | 1617 | HH22 | ARG | X | 103 | 16.093 | 48.663 | 20.580 | 0.00 | 0.00 |
| ATOM | 1618 | C    | ARG | X | 103 | 17.342 | 42.722 | 21.868 | 0.00 | 0.00 |
| ATOM | 1619 | O    | ARG | X | 103 | 16.328 | 43.104 | 21.190 | 0.00 | 0.00 |
| ATOM | 1620 | N    | PRO | X | 104 | 17.199 | 42.195 | 23.149 | 0.00 | 0.00 |
| ATOM | 1621 | CD   | PRO | X | 104 | 18.121 | 41.192 | 23.703 | 0.00 | 0.00 |
| ATOM | 1622 | HD2  | PRO | X | 104 | 19.116 | 41.564 | 23.950 | 0.00 | 0.00 |
| ATOM | 1623 | HD3  | PRO | X | 104 | 18.327 | 40.374 | 23.013 | 0.00 | 0.00 |
| ATOM | 1624 | CG   | PRO | X | 104 | 17.428 | 40.653 | 24.896 | 0.00 | 0.00 |
| ATOM | 1625 | HG2  | PRO | X | 104 | 17.679 | 41.235 | 25.784 | 0.00 | 0.00 |
| ATOM | 1626 | HG3  | PRO | X | 104 | 17.729 | 39.631 | 25.124 | 0.00 | 0.00 |
| ATOM | 1627 | CB   | PRO | X | 104 | 15.922 | 40.759 | 24.558 | 0.00 | 0.00 |
| ATOM | 1628 | HB2  | PRO | X | 104 | 15.283 | 40.838 | 25.438 | 0.00 | 0.00 |
| ATOM | 1629 | HB3  | PRO | X | 104 | 15.609 | 39.888 | 23.981 | 0.00 | 0.00 |
| ATOM | 1630 | CA   | PRO | X | 104 | 15.821 | 41.984 | 23.666 | 0.00 | 0.00 |
| ATOM | 1631 | HA   | PRO | X | 104 | 15.164 | 41.767 | 22.824 | 0.00 | 0.00 |
| ATOM | 1632 | C    | PRO | X | 104 | 15.250 | 43.208 | 24.385 | 0.00 | 0.00 |

|      |      |      |     |   |     |        |        |        |      |      |
|------|------|------|-----|---|-----|--------|--------|--------|------|------|
| ATOM | 1633 | O    | PRO | X | 104 | 16.020 | 44.136 | 24.603 | 0.00 | 0.00 |
| ATOM | 1634 | N    | THR | X | 105 | 13.946 | 43.298 | 24.671 | 0.00 | 0.00 |
| ATOM | 1635 | H    | THR | X | 105 | 13.407 | 42.479 | 24.430 | 0.00 | 0.00 |
| ATOM | 1636 | CA   | THR | X | 105 | 13.245 | 44.447 | 25.198 | 0.00 | 0.00 |
| ATOM | 1637 | HA   | THR | X | 105 | 13.857 | 45.320 | 24.971 | 0.00 | 0.00 |
| ATOM | 1638 | CB   | THR | X | 105 | 11.969 | 44.467 | 24.381 | 0.00 | 0.00 |
| ATOM | 1639 | HB   | THR | X | 105 | 11.323 | 45.249 | 24.782 | 0.00 | 0.00 |
| ATOM | 1640 | CG2  | THR | X | 105 | 12.294 | 44.755 | 22.904 | 0.00 | 0.00 |
| ATOM | 1641 | HG21 | THR | X | 105 | 11.396 | 45.060 | 22.366 | 0.00 | 0.00 |
| ATOM | 1642 | HG22 | THR | X | 105 | 12.792 | 43.923 | 22.407 | 0.00 | 0.00 |
| ATOM | 1643 | HG23 | THR | X | 105 | 12.988 | 45.594 | 22.939 | 0.00 | 0.00 |
| ATOM | 1644 | OG1  | THR | X | 105 | 11.336 | 43.200 | 24.335 | 0.00 | 0.00 |
| ATOM | 1645 | HG1  | THR | X | 105 | 10.503 | 43.236 | 24.810 | 0.00 | 0.00 |
| ATOM | 1646 | C    | THR | X | 105 | 12.994 | 44.331 | 26.741 | 0.00 | 0.00 |
| ATOM | 1647 | O    | THR | X | 105 | 13.273 | 45.228 | 27.568 | 0.00 | 0.00 |
| ATOM | 1648 | N    | SER | X | 106 | 12.534 | 43.124 | 27.092 | 0.00 | 0.00 |
| ATOM | 1649 | H    | SER | X | 106 | 12.440 | 42.422 | 26.372 | 0.00 | 0.00 |
| ATOM | 1650 | CA   | SER | X | 106 | 11.924 | 42.784 | 28.377 | 0.00 | 0.00 |
| ATOM | 1651 | HA   | SER | X | 106 | 11.382 | 43.621 | 28.817 | 0.00 | 0.00 |
| ATOM | 1652 | CB   | SER | X | 106 | 10.804 | 41.794 | 28.099 | 0.00 | 0.00 |
| ATOM | 1653 | HB2  | SER | X | 106 | 10.137 | 41.714 | 28.957 | 0.00 | 0.00 |
| ATOM | 1654 | HB3  | SER | X | 106 | 10.117 | 42.018 | 27.282 | 0.00 | 0.00 |
| ATOM | 1655 | OG   | SER | X | 106 | 11.184 | 40.487 | 27.891 | 0.00 | 0.00 |
| ATOM | 1656 | HG   | SER | X | 106 | 11.277 | 40.103 | 28.766 | 0.00 | 0.00 |
| ATOM | 1657 | C    | SER | X | 106 | 12.988 | 42.306 | 29.417 | 0.00 | 0.00 |
| ATOM | 1658 | O    | SER | X | 106 | 13.807 | 41.441 | 29.118 | 0.00 | 0.00 |
| ATOM | 1659 | N    | PRO | X | 107 | 12.916 | 42.721 | 30.639 | 0.00 | 0.00 |
| ATOM | 1660 | CD   | PRO | X | 107 | 11.842 | 43.314 | 31.329 | 0.00 | 0.00 |
| ATOM | 1661 | HD2  | PRO | X | 107 | 10.941 | 42.941 | 30.843 | 0.00 | 0.00 |
| ATOM | 1662 | HD3  | PRO | X | 107 | 11.675 | 44.370 | 31.114 | 0.00 | 0.00 |
| ATOM | 1663 | CG   | PRO | X | 107 | 11.918 | 43.013 | 32.787 | 0.00 | 0.00 |
| ATOM | 1664 | HG2  | PRO | X | 107 | 11.434 | 42.040 | 32.867 | 0.00 | 0.00 |
| ATOM | 1665 | HG3  | PRO | X | 107 | 11.443 | 43.784 | 33.394 | 0.00 | 0.00 |
| ATOM | 1666 | CB   | PRO | X | 107 | 13.450 | 42.893 | 33.020 | 0.00 | 0.00 |
| ATOM | 1667 | HB2  | PRO | X | 107 | 13.675 | 42.177 | 33.811 | 0.00 | 0.00 |
| ATOM | 1668 | HB3  | PRO | X | 107 | 13.861 | 43.891 | 33.177 | 0.00 | 0.00 |
| ATOM | 1669 | CA   | PRO | X | 107 | 13.967 | 42.453 | 31.661 | 0.00 | 0.00 |
| ATOM | 1670 | HA   | PRO | X | 107 | 14.841 | 43.026 | 31.351 | 0.00 | 0.00 |
| ATOM | 1671 | C    | PRO | X | 107 | 14.359 | 40.987 | 31.799 | 0.00 | 0.00 |
| ATOM | 1672 | O    | PRO | X | 107 | 13.608 | 40.023 | 31.735 | 0.00 | 0.00 |
| ATOM | 1673 | N    | THR | X | 108 | 15.676 | 40.840 | 32.036 | 0.00 | 0.00 |
| ATOM | 1674 | H    | THR | X | 108 | 16.344 | 41.578 | 31.865 | 0.00 | 0.00 |
| ATOM | 1675 | CA   | THR | X | 108 | 16.310 | 39.656 | 32.665 | 0.00 | 0.00 |
| ATOM | 1676 | HA   | THR | X | 108 | 15.597 | 39.249 | 33.381 | 0.00 | 0.00 |
| ATOM | 1677 | CB   | THR | X | 108 | 16.598 | 38.544 | 31.571 | 0.00 | 0.00 |
| ATOM | 1678 | HB   | THR | X | 108 | 15.841 | 38.525 | 30.787 | 0.00 | 0.00 |
| ATOM | 1679 | CG2  | THR | X | 108 | 17.924 | 38.612 | 30.920 | 0.00 | 0.00 |
| ATOM | 1680 | HG21 | THR | X | 108 | 18.812 | 38.339 | 31.491 | 0.00 | 0.00 |
| ATOM | 1681 | HG22 | THR | X | 108 | 18.114 | 39.601 | 30.503 | 0.00 | 0.00 |
| ATOM | 1682 | HG23 | THR | X | 108 | 17.803 | 37.886 | 30.116 | 0.00 | 0.00 |
| ATOM | 1683 | OG1  | THR | X | 108 | 16.470 | 37.263 | 32.076 | 0.00 | 0.00 |
| ATOM | 1684 | HG1  | THR | X | 108 | 16.695 | 36.785 | 31.275 | 0.00 | 0.00 |
| ATOM | 1685 | C    | THR | X | 108 | 17.576 | 40.145 | 33.354 | 0.00 | 0.00 |
| ATOM | 1686 | O    | THR | X | 108 | 18.099 | 41.166 | 32.840 | 0.00 | 0.00 |
| ATOM | 1687 | N    | PRO | X | 109 | 18.052 | 39.527 | 34.490 | 0.00 | 0.00 |
| ATOM | 1688 | CD   | PRO | X | 109 | 17.695 | 38.212 | 34.859 | 0.00 | 0.00 |
| ATOM | 1689 | HD2  | PRO | X | 109 | 18.175 | 37.516 | 34.172 | 0.00 | 0.00 |
| ATOM | 1690 | HD3  | PRO | X | 109 | 16.618 | 38.070 | 34.763 | 0.00 | 0.00 |
| ATOM | 1691 | CG   | PRO | X | 109 | 18.159 | 38.009 | 36.266 | 0.00 | 0.00 |
| ATOM | 1692 | HG2  | PRO | X | 109 | 18.197 | 36.952 | 36.530 | 0.00 | 0.00 |
| ATOM | 1693 | HG3  | PRO | X | 109 | 17.470 | 38.467 | 36.976 | 0.00 | 0.00 |
| ATOM | 1694 | CB   | PRO | X | 109 | 19.427 | 38.783 | 36.238 | 0.00 | 0.00 |
| ATOM | 1695 | HB2  | PRO | X | 109 | 20.288 | 38.233 | 35.860 | 0.00 | 0.00 |
| ATOM | 1696 | HB3  | PRO | X | 109 | 19.603 | 39.112 | 37.262 | 0.00 | 0.00 |
| ATOM | 1697 | CA   | PRO | X | 109 | 19.120 | 39.942 | 35.330 | 0.00 | 0.00 |
| ATOM | 1698 | HA   | PRO | X | 109 | 18.694 | 40.766 | 35.903 | 0.00 | 0.00 |
| ATOM | 1699 | C    | PRO | X | 109 | 20.336 | 40.463 | 34.617 | 0.00 | 0.00 |

|      |      |      |     |   |     |        |        |        |      |      |
|------|------|------|-----|---|-----|--------|--------|--------|------|------|
| ATOM | 1700 | O    | PRO | X | 109 | 20.617 | 40.186 | 33.496 | 0.00 | 0.00 |
| ATOM | 1701 | N    | VAL | X | 110 | 21.262 | 41.074 | 35.361 | 0.00 | 0.00 |
| ATOM | 1702 | H    | VAL | X | 110 | 20.943 | 41.212 | 36.310 | 0.00 | 0.00 |
| ATOM | 1703 | CA   | VAL | X | 110 | 22.447 | 41.800 | 34.862 | 0.00 | 0.00 |
| ATOM | 1704 | HA   | VAL | X | 110 | 22.572 | 41.491 | 33.824 | 0.00 | 0.00 |
| ATOM | 1705 | CB   | VAL | X | 110 | 22.170 | 43.248 | 35.004 | 0.00 | 0.00 |
| ATOM | 1706 | HB   | VAL | X | 110 | 21.489 | 43.489 | 35.820 | 0.00 | 0.00 |
| ATOM | 1707 | CG1  | VAL | X | 110 | 23.323 | 44.203 | 34.957 | 0.00 | 0.00 |
| ATOM | 1708 | HG11 | VAL | X | 110 | 23.799 | 44.331 | 33.985 | 0.00 | 0.00 |
| ATOM | 1709 | HG12 | VAL | X | 110 | 22.949 | 45.220 | 35.070 | 0.00 | 0.00 |
| ATOM | 1710 | HG13 | VAL | X | 110 | 24.009 | 43.961 | 35.769 | 0.00 | 0.00 |
| ATOM | 1711 | CG2  | VAL | X | 110 | 21.375 | 43.788 | 33.771 | 0.00 | 0.00 |
| ATOM | 1712 | HG21 | VAL | X | 110 | 20.472 | 43.179 | 33.814 | 0.00 | 0.00 |
| ATOM | 1713 | HG22 | VAL | X | 110 | 21.844 | 43.658 | 32.796 | 0.00 | 0.00 |
| ATOM | 1714 | HG23 | VAL | X | 110 | 21.084 | 44.827 | 33.926 | 0.00 | 0.00 |
| ATOM | 1715 | C    | VAL | X | 110 | 23.703 | 41.381 | 35.601 | 0.00 | 0.00 |
| ATOM | 1716 | O    | VAL | X | 110 | 23.750 | 41.189 | 36.849 | 0.00 | 0.00 |
| ATOM | 1717 | N    | LEU | X | 111 | 24.814 | 41.204 | 34.866 | 0.00 | 0.00 |
| ATOM | 1718 | H    | LEU | X | 111 | 24.731 | 41.513 | 33.908 | 0.00 | 0.00 |
| ATOM | 1719 | CA   | LEU | X | 111 | 26.157 | 40.904 | 35.474 | 0.00 | 0.00 |
| ATOM | 1720 | HA   | LEU | X | 111 | 26.050 | 40.794 | 36.553 | 0.00 | 0.00 |
| ATOM | 1721 | CB   | LEU | X | 111 | 26.538 | 39.519 | 35.068 | 0.00 | 0.00 |
| ATOM | 1722 | HB2  | LEU | X | 111 | 26.176 | 39.370 | 34.051 | 0.00 | 0.00 |
| ATOM | 1723 | HB3  | LEU | X | 111 | 27.625 | 39.456 | 35.036 | 0.00 | 0.00 |
| ATOM | 1724 | CG   | LEU | X | 111 | 25.960 | 38.407 | 35.870 | 0.00 | 0.00 |
| ATOM | 1725 | HG   | LEU | X | 111 | 24.901 | 38.585 | 36.059 | 0.00 | 0.00 |
| ATOM | 1726 | CD1  | LEU | X | 111 | 25.933 | 37.106 | 35.068 | 0.00 | 0.00 |
| ATOM | 1727 | HD11 | LEU | X | 111 | 26.830 | 36.695 | 34.605 | 0.00 | 0.00 |
| ATOM | 1728 | HD12 | LEU | X | 111 | 25.194 | 37.259 | 34.282 | 0.00 | 0.00 |
| ATOM | 1729 | HD13 | LEU | X | 111 | 25.523 | 36.310 | 35.690 | 0.00 | 0.00 |
| ATOM | 1730 | CD2  | LEU | X | 111 | 26.717 | 38.082 | 37.161 | 0.00 | 0.00 |
| ATOM | 1731 | HD21 | LEU | X | 111 | 26.282 | 37.319 | 37.808 | 0.00 | 0.00 |
| ATOM | 1732 | HD22 | LEU | X | 111 | 27.628 | 37.624 | 36.774 | 0.00 | 0.00 |
| ATOM | 1733 | HD23 | LEU | X | 111 | 26.977 | 38.934 | 37.789 | 0.00 | 0.00 |
| ATOM | 1734 | C    | LEU | X | 111 | 27.097 | 42.007 | 35.098 | 0.00 | 0.00 |
| ATOM | 1735 | O    | LEU | X | 111 | 27.366 | 42.307 | 33.943 | 0.00 | 0.00 |
| ATOM | 1736 | N    | VAL | X | 112 | 27.504 | 42.723 | 36.163 | 0.00 | 0.00 |
| ATOM | 1737 | H    | VAL | X | 112 | 27.121 | 42.543 | 37.081 | 0.00 | 0.00 |
| ATOM | 1738 | CA   | VAL | X | 112 | 28.452 | 43.808 | 36.047 | 0.00 | 0.00 |
| ATOM | 1739 | HA   | VAL | X | 112 | 28.437 | 44.125 | 35.004 | 0.00 | 0.00 |
| ATOM | 1740 | CB   | VAL | X | 112 | 28.149 | 45.066 | 36.986 | 0.00 | 0.00 |
| ATOM | 1741 | HB   | VAL | X | 112 | 28.165 | 44.736 | 38.024 | 0.00 | 0.00 |
| ATOM | 1742 | CG1  | VAL | X | 112 | 29.191 | 46.172 | 36.641 | 0.00 | 0.00 |
| ATOM | 1743 | HG11 | VAL | X | 112 | 28.882 | 47.084 | 37.150 | 0.00 | 0.00 |
| ATOM | 1744 | HG12 | VAL | X | 112 | 30.076 | 45.899 | 37.215 | 0.00 | 0.00 |
| ATOM | 1745 | HG13 | VAL | X | 112 | 29.500 | 46.206 | 35.596 | 0.00 | 0.00 |
| ATOM | 1746 | CG2  | VAL | X | 112 | 26.731 | 45.646 | 36.574 | 0.00 | 0.00 |
| ATOM | 1747 | HG21 | VAL | X | 112 | 26.652 | 46.682 | 36.905 | 0.00 | 0.00 |
| ATOM | 1748 | HG22 | VAL | X | 112 | 25.871 | 45.000 | 36.749 | 0.00 | 0.00 |
| ATOM | 1749 | HG23 | VAL | X | 112 | 26.879 | 45.570 | 35.497 | 0.00 | 0.00 |
| ATOM | 1750 | C    | VAL | X | 112 | 29.800 | 43.220 | 36.493 | 0.00 | 0.00 |
| ATOM | 1751 | O    | VAL | X | 112 | 30.150 | 42.931 | 37.650 | 0.00 | 0.00 |
| ATOM | 1752 | N    | TRP | X | 113 | 30.749 | 43.186 | 35.530 | 0.00 | 0.00 |
| ATOM | 1753 | H    | TRP | X | 113 | 30.562 | 43.470 | 34.579 | 0.00 | 0.00 |
| ATOM | 1754 | CA   | TRP | X | 113 | 32.094 | 42.704 | 35.769 | 0.00 | 0.00 |
| ATOM | 1755 | HA   | TRP | X | 113 | 32.045 | 42.032 | 36.626 | 0.00 | 0.00 |
| ATOM | 1756 | CB   | TRP | X | 113 | 32.765 | 42.149 | 34.479 | 0.00 | 0.00 |
| ATOM | 1757 | HB2  | TRP | X | 113 | 32.181 | 41.332 | 34.056 | 0.00 | 0.00 |
| ATOM | 1758 | HB3  | TRP | X | 113 | 32.739 | 42.871 | 33.663 | 0.00 | 0.00 |
| ATOM | 1759 | CG   | TRP | X | 113 | 34.112 | 41.645 | 34.608 | 0.00 | 0.00 |
| ATOM | 1760 | CD1  | TRP | X | 113 | 35.180 | 42.046 | 33.850 | 0.00 | 0.00 |
| ATOM | 1761 | HD1  | TRP | X | 113 | 35.156 | 42.761 | 33.041 | 0.00 | 0.00 |
| ATOM | 1762 | NE1  | TRP | X | 113 | 36.267 | 41.354 | 34.288 | 0.00 | 0.00 |
| ATOM | 1763 | HE1  | TRP | X | 113 | 37.177 | 41.507 | 33.878 | 0.00 | 0.00 |
| ATOM | 1764 | CE2  | TRP | X | 113 | 35.991 | 40.509 | 35.224 | 0.00 | 0.00 |
| ATOM | 1765 | CZ2  | TRP | X | 113 | 36.766 | 39.629 | 35.986 | 0.00 | 0.00 |
| ATOM | 1766 | HZ2  | TRP | X | 113 | 37.843 | 39.654 | 35.912 | 0.00 | 0.00 |

|      |      |      |     |   |     |        |        |        |      |      |
|------|------|------|-----|---|-----|--------|--------|--------|------|------|
| ATOM | 1767 | CH2  | TRP | X | 113 | 36.167 | 38.718 | 36.840 | 0.00 | 0.00 |
| ATOM | 1768 | HH2  | TRP | X | 113 | 36.781 | 37.999 | 37.362 | 0.00 | 0.00 |
| ATOM | 1769 | CZ3  | TRP | X | 113 | 34.737 | 38.808 | 37.112 | 0.00 | 0.00 |
| ATOM | 1770 | HZ3  | TRP | X | 113 | 34.228 | 38.139 | 37.790 | 0.00 | 0.00 |
| ATOM | 1771 | CE3  | TRP | X | 113 | 34.009 | 39.813 | 36.397 | 0.00 | 0.00 |
| ATOM | 1772 | HE3  | TRP | X | 113 | 32.932 | 39.735 | 36.421 | 0.00 | 0.00 |
| ATOM | 1773 | CD2  | TRP | X | 113 | 34.617 | 40.659 | 35.474 | 0.00 | 0.00 |
| ATOM | 1774 | C    | TRP | X | 113 | 33.051 | 43.771 | 36.370 | 0.00 | 0.00 |
| ATOM | 1775 | O    | TRP | X | 113 | 32.875 | 44.907 | 35.905 | 0.00 | 0.00 |
| ATOM | 1776 | N    | ILE | X | 114 | 33.938 | 43.553 | 37.359 | 0.00 | 0.00 |
| ATOM | 1777 | H    | ILE | X | 114 | 33.788 | 42.661 | 37.807 | 0.00 | 0.00 |
| ATOM | 1778 | CA   | ILE | X | 114 | 35.092 | 44.340 | 37.770 | 0.00 | 0.00 |
| ATOM | 1779 | HA   | ILE | X | 114 | 35.312 | 45.165 | 37.093 | 0.00 | 0.00 |
| ATOM | 1780 | CB   | ILE | X | 114 | 34.851 | 44.901 | 39.268 | 0.00 | 0.00 |
| ATOM | 1781 | HB   | ILE | X | 114 | 34.827 | 44.003 | 39.886 | 0.00 | 0.00 |
| ATOM | 1782 | CG2  | ILE | X | 114 | 35.970 | 45.930 | 39.499 | 0.00 | 0.00 |
| ATOM | 1783 | HG21 | ILE | X | 114 | 36.865 | 45.307 | 39.507 | 0.00 | 0.00 |
| ATOM | 1784 | HG22 | ILE | X | 114 | 36.059 | 46.209 | 40.549 | 0.00 | 0.00 |
| ATOM | 1785 | HG23 | ILE | X | 114 | 35.944 | 46.790 | 38.830 | 0.00 | 0.00 |
| ATOM | 1786 | CG1  | ILE | X | 114 | 33.545 | 45.729 | 39.346 | 0.00 | 0.00 |
| ATOM | 1787 | HG12 | ILE | X | 114 | 33.448 | 46.382 | 38.479 | 0.00 | 0.00 |
| ATOM | 1788 | HG13 | ILE | X | 114 | 32.711 | 45.036 | 39.455 | 0.00 | 0.00 |
| ATOM | 1789 | CD1  | ILE | X | 114 | 33.400 | 46.617 | 40.552 | 0.00 | 0.00 |
| ATOM | 1790 | HD11 | ILE | X | 114 | 32.345 | 46.892 | 40.551 | 0.00 | 0.00 |
| ATOM | 1791 | HD12 | ILE | X | 114 | 33.897 | 47.581 | 40.445 | 0.00 | 0.00 |
| ATOM | 1792 | HD13 | ILE | X | 114 | 33.716 | 46.045 | 41.425 | 0.00 | 0.00 |
| ATOM | 1793 | C    | ILE | X | 114 | 36.305 | 43.421 | 37.863 | 0.00 | 0.00 |
| ATOM | 1794 | O    | ILE | X | 114 | 36.161 | 42.474 | 38.559 | 0.00 | 0.00 |
| ATOM | 1795 | N    | TYR | X | 115 | 37.366 | 43.793 | 37.124 | 0.00 | 0.00 |
| ATOM | 1796 | H    | TYR | X | 115 | 37.382 | 44.725 | 36.736 | 0.00 | 0.00 |
| ATOM | 1797 | CA   | TYR | X | 115 | 38.611 | 42.964 | 37.135 | 0.00 | 0.00 |
| ATOM | 1798 | HA   | TYR | X | 115 | 38.294 | 41.946 | 37.363 | 0.00 | 0.00 |
| ATOM | 1799 | CB   | TYR | X | 115 | 39.252 | 43.031 | 35.726 | 0.00 | 0.00 |
| ATOM | 1800 | HB2  | TYR | X | 115 | 40.277 | 42.717 | 35.924 | 0.00 | 0.00 |
| ATOM | 1801 | HB3  | TYR | X | 115 | 38.734 | 42.350 | 35.051 | 0.00 | 0.00 |
| ATOM | 1802 | CG   | TYR | X | 115 | 39.179 | 44.318 | 34.942 | 0.00 | 0.00 |
| ATOM | 1803 | CD1  | TYR | X | 115 | 40.131 | 45.299 | 35.252 | 0.00 | 0.00 |
| ATOM | 1804 | HD1  | TYR | X | 115 | 40.871 | 44.989 | 35.974 | 0.00 | 0.00 |
| ATOM | 1805 | CE1  | TYR | X | 115 | 40.096 | 46.608 | 34.700 | 0.00 | 0.00 |
| ATOM | 1806 | HE1  | TYR | X | 115 | 40.848 | 47.322 | 35.003 | 0.00 | 0.00 |
| ATOM | 1807 | CZ   | TYR | X | 115 | 38.961 | 46.950 | 33.875 | 0.00 | 0.00 |
| ATOM | 1808 | OH   | TYR | X | 115 | 38.711 | 48.216 | 33.514 | 0.00 | 0.00 |
| ATOM | 1809 | HH   | TYR | X | 115 | 37.796 | 48.347 | 33.254 | 0.00 | 0.00 |
| ATOM | 1810 | CE2  | TYR | X | 115 | 38.002 | 45.919 | 33.577 | 0.00 | 0.00 |
| ATOM | 1811 | HE2  | TYR | X | 115 | 37.120 | 46.193 | 33.019 | 0.00 | 0.00 |
| ATOM | 1812 | CD2  | TYR | X | 115 | 38.176 | 44.628 | 34.063 | 0.00 | 0.00 |
| ATOM | 1813 | HD2  | TYR | X | 115 | 37.392 | 43.945 | 33.773 | 0.00 | 0.00 |
| ATOM | 1814 | C    | TYR | X | 115 | 39.616 | 43.345 | 38.239 | 0.00 | 0.00 |
| ATOM | 1815 | O    | TYR | X | 115 | 39.554 | 44.420 | 38.830 | 0.00 | 0.00 |
| ATOM | 1816 | N    | GLY | X | 116 | 40.599 | 42.484 | 38.427 | 0.00 | 0.00 |
| ATOM | 1817 | H    | GLY | X | 116 | 40.620 | 41.643 | 37.868 | 0.00 | 0.00 |
| ATOM | 1818 | CA   | GLY | X | 116 | 41.732 | 42.626 | 39.292 | 0.00 | 0.00 |
| ATOM | 1819 | HA2  | GLY | X | 116 | 41.409 | 43.008 | 40.260 | 0.00 | 0.00 |
| ATOM | 1820 | HA3  | GLY | X | 116 | 42.174 | 41.653 | 39.504 | 0.00 | 0.00 |
| ATOM | 1821 | C    | GLY | X | 116 | 42.802 | 43.591 | 38.748 | 0.00 | 0.00 |
| ATOM | 1822 | O    | GLY | X | 116 | 42.623 | 44.246 | 37.737 | 0.00 | 0.00 |
| ATOM | 1823 | N    | GLY | X | 117 | 43.940 | 43.558 | 39.422 | 0.00 | 0.00 |
| ATOM | 1824 | H    | GLY | X | 117 | 43.914 | 43.052 | 40.296 | 0.00 | 0.00 |
| ATOM | 1825 | CA   | GLY | X | 117 | 45.185 | 44.179 | 38.937 | 0.00 | 0.00 |
| ATOM | 1826 | HA2  | GLY | X | 117 | 45.798 | 43.391 | 38.502 | 0.00 | 0.00 |
| ATOM | 1827 | HA3  | GLY | X | 117 | 45.016 | 44.934 | 38.169 | 0.00 | 0.00 |
| ATOM | 1828 | C    | GLY | X | 117 | 45.995 | 44.901 | 40.003 | 0.00 | 0.00 |
| ATOM | 1829 | O    | GLY | X | 117 | 46.960 | 45.601 | 39.676 | 0.00 | 0.00 |
| ATOM | 1830 | N    | GLY | X | 118 | 45.752 | 44.570 | 41.257 | 0.00 | 0.00 |
| ATOM | 1831 | H    | GLY | X | 118 | 45.072 | 43.878 | 41.538 | 0.00 | 0.00 |
| ATOM | 1832 | CA   | GLY | X | 118 | 46.378 | 45.223 | 42.390 | 0.00 | 0.00 |
| ATOM | 1833 | HA2  | GLY | X | 118 | 46.126 | 44.737 | 43.333 | 0.00 | 0.00 |

|      |      |     |     |   |     |        |        |        |      |      |
|------|------|-----|-----|---|-----|--------|--------|--------|------|------|
| ATOM | 1834 | HA3 | GLY | X | 118 | 47.454 | 45.192 | 42.221 | 0.00 | 0.00 |
| ATOM | 1835 | C   | GLY | X | 118 | 45.909 | 46.714 | 42.579 | 0.00 | 0.00 |
| ATOM | 1836 | O   | GLY | X | 118 | 46.479 | 47.324 | 43.457 | 0.00 | 0.00 |
| ATOM | 1837 | N   | PHE | X | 119 | 44.948 | 47.192 | 41.819 | 0.00 | 0.00 |
| ATOM | 1838 | H   | PHE | X | 119 | 44.453 | 46.510 | 41.263 | 0.00 | 0.00 |
| ATOM | 1839 | CA  | PHE | X | 119 | 44.651 | 48.626 | 41.550 | 0.00 | 0.00 |
| ATOM | 1840 | HA  | PHE | X | 119 | 43.825 | 48.623 | 40.838 | 0.00 | 0.00 |
| ATOM | 1841 | CB  | PHE | X | 119 | 44.236 | 49.305 | 42.831 | 0.00 | 0.00 |
| ATOM | 1842 | HB2 | PHE | X | 119 | 45.135 | 49.272 | 43.446 | 0.00 | 0.00 |
| ATOM | 1843 | HB3 | PHE | X | 119 | 44.166 | 50.380 | 42.664 | 0.00 | 0.00 |
| ATOM | 1844 | CG  | PHE | X | 119 | 43.106 | 48.658 | 43.619 | 0.00 | 0.00 |
| ATOM | 1845 | CD1 | PHE | X | 119 | 41.776 | 48.989 | 43.304 | 0.00 | 0.00 |
| ATOM | 1846 | HD1 | PHE | X | 119 | 41.565 | 49.535 | 42.397 | 0.00 | 0.00 |
| ATOM | 1847 | CE1 | PHE | X | 119 | 40.728 | 48.427 | 44.047 | 0.00 | 0.00 |
| ATOM | 1848 | HE1 | PHE | X | 119 | 39.724 | 48.682 | 43.742 | 0.00 | 0.00 |
| ATOM | 1849 | CZ  | PHE | X | 119 | 41.055 | 47.728 | 45.196 | 0.00 | 0.00 |
| ATOM | 1850 | HZ  | PHE | X | 119 | 40.323 | 47.493 | 45.954 | 0.00 | 0.00 |
| ATOM | 1851 | CE2 | PHE | X | 119 | 42.391 | 47.368 | 45.523 | 0.00 | 0.00 |
| ATOM | 1852 | HE2 | PHE | X | 119 | 42.659 | 46.894 | 46.455 | 0.00 | 0.00 |
| ATOM | 1853 | CD2 | PHE | X | 119 | 43.419 | 47.848 | 44.699 | 0.00 | 0.00 |
| ATOM | 1854 | HD2 | PHE | X | 119 | 44.436 | 47.675 | 45.020 | 0.00 | 0.00 |
| ATOM | 1855 | C   | PHE | X | 119 | 45.721 | 49.423 | 40.817 | 0.00 | 0.00 |
| ATOM | 1856 | O   | PHE | X | 119 | 45.480 | 50.509 | 40.417 | 0.00 | 0.00 |
| ATOM | 1857 | N   | TYR | X | 120 | 46.867 | 48.838 | 40.581 | 0.00 | 0.00 |
| ATOM | 1858 | H   | TYR | X | 120 | 47.084 | 47.941 | 40.991 | 0.00 | 0.00 |
| ATOM | 1859 | CA  | TYR | X | 120 | 47.952 | 49.471 | 39.740 | 0.00 | 0.00 |
| ATOM | 1860 | HA  | TYR | X | 120 | 47.952 | 50.550 | 39.890 | 0.00 | 0.00 |
| ATOM | 1861 | CB  | TYR | X | 120 | 49.294 | 48.948 | 40.242 | 0.00 | 0.00 |
| ATOM | 1862 | HB2 | TYR | X | 120 | 50.018 | 49.614 | 39.772 | 0.00 | 0.00 |
| ATOM | 1863 | HB3 | TYR | X | 120 | 49.443 | 48.990 | 41.321 | 0.00 | 0.00 |
| ATOM | 1864 | CG  | TYR | X | 120 | 49.615 | 47.525 | 39.969 | 0.00 | 0.00 |
| ATOM | 1865 | CD1 | TYR | X | 120 | 50.213 | 47.176 | 38.727 | 0.00 | 0.00 |
| ATOM | 1866 | HD1 | TYR | X | 120 | 50.386 | 47.880 | 37.926 | 0.00 | 0.00 |
| ATOM | 1867 | CE1 | TYR | X | 120 | 50.677 | 45.890 | 38.446 | 0.00 | 0.00 |
| ATOM | 1868 | HE1 | TYR | X | 120 | 51.180 | 45.690 | 37.511 | 0.00 | 0.00 |
| ATOM | 1869 | CZ  | TYR | X | 120 | 50.558 | 44.894 | 39.435 | 0.00 | 0.00 |
| ATOM | 1870 | OH  | TYR | X | 120 | 50.824 | 43.611 | 39.136 | 0.00 | 0.00 |
| ATOM | 1871 | HH  | TYR | X | 120 | 51.402 | 43.572 | 38.370 | 0.00 | 0.00 |
| ATOM | 1872 | CE2 | TYR | X | 120 | 49.936 | 45.137 | 40.713 | 0.00 | 0.00 |
| ATOM | 1873 | HE2 | TYR | X | 120 | 49.767 | 44.266 | 41.328 | 0.00 | 0.00 |
| ATOM | 1874 | CD2 | TYR | X | 120 | 49.578 | 46.514 | 40.920 | 0.00 | 0.00 |
| ATOM | 1875 | HD2 | TYR | X | 120 | 49.115 | 46.753 | 41.866 | 0.00 | 0.00 |
| ATOM | 1876 | C   | TYR | X | 120 | 47.755 | 49.189 | 38.240 | 0.00 | 0.00 |
| ATOM | 1877 | O   | TYR | X | 120 | 48.575 | 49.739 | 37.420 | 0.00 | 0.00 |
| ATOM | 1878 | N   | SER | X | 121 | 46.876 | 48.302 | 37.886 | 0.00 | 0.00 |
| ATOM | 1879 | H   | SER | X | 121 | 46.253 | 47.899 | 38.571 | 0.00 | 0.00 |
| ATOM | 1880 | CA  | SER | X | 121 | 46.665 | 47.859 | 36.461 | 0.00 | 0.00 |
| ATOM | 1881 | HA  | SER | X | 121 | 46.565 | 48.755 | 35.849 | 0.00 | 0.00 |
| ATOM | 1882 | CB  | SER | X | 121 | 47.766 | 46.828 | 36.010 | 0.00 | 0.00 |
| ATOM | 1883 | HB2 | SER | X | 121 | 47.598 | 46.645 | 34.948 | 0.00 | 0.00 |
| ATOM | 1884 | HB3 | SER | X | 121 | 48.693 | 47.402 | 36.011 | 0.00 | 0.00 |
| ATOM | 1885 | OG  | SER | X | 121 | 47.816 | 45.712 | 36.854 | 0.00 | 0.00 |
| ATOM | 1886 | HG  | SER | X | 121 | 47.788 | 45.953 | 37.783 | 0.00 | 0.00 |
| ATOM | 1887 | C   | SER | X | 121 | 45.256 | 47.087 | 36.236 | 0.00 | 0.00 |
| ATOM | 1888 | O   | SER | X | 121 | 44.521 | 46.839 | 37.179 | 0.00 | 0.00 |
| ATOM | 1889 | N   | GLY | X | 122 | 44.918 | 46.865 | 34.913 | 0.00 | 0.00 |
| ATOM | 1890 | H   | GLY | X | 122 | 45.658 | 47.104 | 34.268 | 0.00 | 0.00 |
| ATOM | 1891 | CA  | GLY | X | 122 | 43.701 | 46.367 | 34.341 | 0.00 | 0.00 |
| ATOM | 1892 | HA2 | GLY | X | 122 | 43.974 | 45.364 | 34.014 | 0.00 | 0.00 |
| ATOM | 1893 | HA3 | GLY | X | 122 | 43.001 | 46.318 | 35.175 | 0.00 | 0.00 |
| ATOM | 1894 | C   | GLY | X | 122 | 43.205 | 46.996 | 33.071 | 0.00 | 0.00 |
| ATOM | 1895 | O   | GLY | X | 122 | 43.472 | 48.141 | 32.825 | 0.00 | 0.00 |
| ATOM | 1896 | N   | ALA | X | 123 | 42.324 | 46.343 | 32.303 | 0.00 | 0.00 |
| ATOM | 1897 | H   | ALA | X | 123 | 42.167 | 45.401 | 32.631 | 0.00 | 0.00 |
| ATOM | 1898 | CA  | ALA | X | 123 | 41.707 | 46.913 | 31.077 | 0.00 | 0.00 |
| ATOM | 1899 | HA  | ALA | X | 123 | 41.401 | 47.931 | 31.318 | 0.00 | 0.00 |
| ATOM | 1900 | CB  | ALA | X | 123 | 42.728 | 46.857 | 29.987 | 0.00 | 0.00 |

|      |      |      |     |   |     |        |        |        |      |      |
|------|------|------|-----|---|-----|--------|--------|--------|------|------|
| ATOM | 1901 | HB1  | ALA | X | 123 | 42.142 | 46.951 | 29.073 | 0.00 | 0.00 |
| ATOM | 1902 | HB2  | ALA | X | 123 | 43.314 | 45.938 | 30.001 | 0.00 | 0.00 |
| ATOM | 1903 | HB3  | ALA | X | 123 | 43.481 | 47.636 | 30.111 | 0.00 | 0.00 |
| ATOM | 1904 | C    | ALA | X | 123 | 40.404 | 46.193 | 30.655 | 0.00 | 0.00 |
| ATOM | 1905 | O    | ALA | X | 123 | 40.313 | 44.961 | 30.740 | 0.00 | 0.00 |
| ATOM | 1906 | N    | SER | X | 124 | 39.421 | 46.955 | 30.062 | 0.00 | 0.00 |
| ATOM | 1907 | H    | SER | X | 124 | 39.445 | 47.959 | 29.959 | 0.00 | 0.00 |
| ATOM | 1908 | CA   | SER | X | 124 | 38.177 | 46.192 | 29.724 | 0.00 | 0.00 |
| ATOM | 1909 | HA   | SER | X | 124 | 37.950 | 45.373 | 30.406 | 0.00 | 0.00 |
| ATOM | 1910 | CB   | SER | X | 124 | 36.984 | 47.180 | 29.748 | 0.00 | 0.00 |
| ATOM | 1911 | HB2  | SER | X | 124 | 36.181 | 46.560 | 29.350 | 0.00 | 0.00 |
| ATOM | 1912 | HB3  | SER | X | 124 | 36.909 | 47.601 | 30.751 | 0.00 | 0.00 |
| ATOM | 1913 | OG   | SER | X | 124 | 37.074 | 48.291 | 28.869 | 0.00 | 0.00 |
| ATOM | 1914 | HG   | SER | X | 124 | 37.472 | 48.905 | 29.490 | 0.00 | 0.00 |
| ATOM | 1915 | C    | SER | X | 124 | 38.247 | 45.488 | 28.345 | 0.00 | 0.00 |
| ATOM | 1916 | O    | SER | X | 124 | 37.610 | 44.495 | 28.137 | 0.00 | 0.00 |
| ATOM | 1917 | N    | SER | X | 125 | 39.106 | 45.928 | 27.454 | 0.00 | 0.00 |
| ATOM | 1918 | H    | SER | X | 125 | 39.640 | 46.766 | 27.634 | 0.00 | 0.00 |
| ATOM | 1919 | CA   | SER | X | 125 | 39.298 | 45.371 | 26.106 | 0.00 | 0.00 |
| ATOM | 1920 | HA   | SER | X | 125 | 38.289 | 45.182 | 25.739 | 0.00 | 0.00 |
| ATOM | 1921 | CB   | SER | X | 125 | 40.047 | 46.424 | 25.358 | 0.00 | 0.00 |
| ATOM | 1922 | HB2  | SER | X | 125 | 40.351 | 46.081 | 24.369 | 0.00 | 0.00 |
| ATOM | 1923 | HB3  | SER | X | 125 | 39.502 | 47.350 | 25.170 | 0.00 | 0.00 |
| ATOM | 1924 | OG   | SER | X | 125 | 41.204 | 46.758 | 26.128 | 0.00 | 0.00 |
| ATOM | 1925 | HG   | SER | X | 125 | 41.927 | 46.180 | 25.876 | 0.00 | 0.00 |
| ATOM | 1926 | C    | SER | X | 125 | 40.083 | 44.044 | 25.901 | 0.00 | 0.00 |
| ATOM | 1927 | O    | SER | X | 125 | 40.296 | 43.646 | 24.738 | 0.00 | 0.00 |
| ATOM | 1928 | N    | LEU | X | 126 | 40.495 | 43.478 | 27.044 | 0.00 | 0.00 |
| ATOM | 1929 | H    | LEU | X | 126 | 39.987 | 43.802 | 27.855 | 0.00 | 0.00 |
| ATOM | 1930 | CA   | LEU | X | 126 | 41.203 | 42.226 | 27.171 | 0.00 | 0.00 |
| ATOM | 1931 | HA   | LEU | X | 126 | 42.075 | 42.343 | 26.528 | 0.00 | 0.00 |
| ATOM | 1932 | CB   | LEU | X | 126 | 41.741 | 41.968 | 28.569 | 0.00 | 0.00 |
| ATOM | 1933 | HB2  | LEU | X | 126 | 40.895 | 41.804 | 29.236 | 0.00 | 0.00 |
| ATOM | 1934 | HB3  | LEU | X | 126 | 42.361 | 41.071 | 28.554 | 0.00 | 0.00 |
| ATOM | 1935 | CG   | LEU | X | 126 | 42.649 | 43.032 | 29.113 | 0.00 | 0.00 |
| ATOM | 1936 | HG   | LEU | X | 126 | 42.068 | 43.933 | 28.918 | 0.00 | 0.00 |
| ATOM | 1937 | CD1  | LEU | X | 126 | 42.933 | 42.837 | 30.613 | 0.00 | 0.00 |
| ATOM | 1938 | HD11 | LEU | X | 126 | 43.320 | 41.822 | 30.708 | 0.00 | 0.00 |
| ATOM | 1939 | HD12 | LEU | X | 126 | 42.055 | 42.946 | 31.250 | 0.00 | 0.00 |
| ATOM | 1940 | HD13 | LEU | X | 126 | 43.666 | 43.567 | 30.955 | 0.00 | 0.00 |
| ATOM | 1941 | CD2  | LEU | X | 126 | 44.003 | 43.262 | 28.416 | 0.00 | 0.00 |
| ATOM | 1942 | HD21 | LEU | X | 126 | 43.838 | 43.469 | 27.358 | 0.00 | 0.00 |
| ATOM | 1943 | HD22 | LEU | X | 126 | 44.413 | 44.217 | 28.744 | 0.00 | 0.00 |
| ATOM | 1944 | HD23 | LEU | X | 126 | 44.576 | 42.354 | 28.606 | 0.00 | 0.00 |
| ATOM | 1945 | C    | LEU | X | 126 | 40.317 | 41.098 | 26.574 | 0.00 | 0.00 |
| ATOM | 1946 | O    | LEU | X | 126 | 39.121 | 40.915 | 26.853 | 0.00 | 0.00 |
| ATOM | 1947 | N    | ASP | X | 127 | 40.999 | 40.141 | 25.931 | 0.00 | 0.00 |
| ATOM | 1948 | H    | ASP | X | 127 | 42.005 | 40.190 | 25.853 | 0.00 | 0.00 |
| ATOM | 1949 | CA   | ASP | X | 127 | 40.303 | 38.991 | 25.333 | 0.00 | 0.00 |
| ATOM | 1950 | HA   | ASP | X | 127 | 39.539 | 39.398 | 24.671 | 0.00 | 0.00 |
| ATOM | 1951 | CB   | ASP | X | 127 | 41.395 | 38.343 | 24.347 | 0.00 | 0.00 |
| ATOM | 1952 | HB2  | ASP | X | 127 | 41.312 | 38.902 | 23.415 | 0.00 | 0.00 |
| ATOM | 1953 | HB3  | ASP | X | 127 | 42.405 | 38.575 | 24.683 | 0.00 | 0.00 |
| ATOM | 1954 | CG   | ASP | X | 127 | 41.002 | 36.921 | 24.024 | 0.00 | 0.00 |
| ATOM | 1955 | OD1  | ASP | X | 127 | 41.627 | 36.061 | 24.686 | 0.00 | 0.00 |
| ATOM | 1956 | OD2  | ASP | X | 127 | 40.150 | 36.747 | 23.119 | 0.00 | 0.00 |
| ATOM | 1957 | C    | ASP | X | 127 | 39.713 | 38.006 | 26.312 | 0.00 | 0.00 |
| ATOM | 1958 | O    | ASP | X | 127 | 38.805 | 37.290 | 25.958 | 0.00 | 0.00 |
| ATOM | 1959 | N    | VAL | X | 128 | 40.314 | 37.885 | 27.509 | 0.00 | 0.00 |
| ATOM | 1960 | H    | VAL | X | 128 | 41.078 | 38.522 | 27.684 | 0.00 | 0.00 |
| ATOM | 1961 | CA   | VAL | X | 128 | 39.743 | 36.898 | 28.499 | 0.00 | 0.00 |
| ATOM | 1962 | HA   | VAL | X | 128 | 39.341 | 36.026 | 27.982 | 0.00 | 0.00 |
| ATOM | 1963 | CB   | VAL | X | 128 | 40.830 | 36.427 | 29.503 | 0.00 | 0.00 |
| ATOM | 1964 | HB   | VAL | X | 128 | 41.719 | 36.087 | 28.971 | 0.00 | 0.00 |
| ATOM | 1965 | CG1  | VAL | X | 128 | 41.258 | 37.631 | 30.348 | 0.00 | 0.00 |
| ATOM | 1966 | HG11 | VAL | X | 128 | 41.549 | 38.475 | 29.722 | 0.00 | 0.00 |
| ATOM | 1967 | HG12 | VAL | X | 128 | 40.481 | 37.979 | 31.029 | 0.00 | 0.00 |

|      |      |      |     |   |     |        |        |        |      |      |
|------|------|------|-----|---|-----|--------|--------|--------|------|------|
| ATOM | 1968 | HG13 | VAL | X | 128 | 42.194 | 37.390 | 30.852 | 0.00 | 0.00 |
| ATOM | 1969 | CG2  | VAL | X | 128 | 40.412 | 35.265 | 30.472 | 0.00 | 0.00 |
| ATOM | 1970 | HG21 | VAL | X | 128 | 41.273 | 34.910 | 31.039 | 0.00 | 0.00 |
| ATOM | 1971 | HG22 | VAL | X | 128 | 39.957 | 34.503 | 29.838 | 0.00 | 0.00 |
| ATOM | 1972 | HG23 | VAL | X | 128 | 39.802 | 35.667 | 31.281 | 0.00 | 0.00 |
| ATOM | 1973 | C    | VAL | X | 128 | 38.523 | 37.478 | 29.273 | 0.00 | 0.00 |
| ATOM | 1974 | O    | VAL | X | 128 | 37.811 | 36.703 | 29.932 | 0.00 | 0.00 |
| ATOM | 1975 | N    | TYR | X | 129 | 38.151 | 38.787 | 29.177 | 0.00 | 0.00 |
| ATOM | 1976 | H    | TYR | X | 129 | 38.700 | 39.358 | 28.550 | 0.00 | 0.00 |
| ATOM | 1977 | CA   | TYR | X | 129 | 36.899 | 39.245 | 29.740 | 0.00 | 0.00 |
| ATOM | 1978 | HA   | TYR | X | 129 | 36.444 | 38.476 | 30.364 | 0.00 | 0.00 |
| ATOM | 1979 | CB   | TYR | X | 129 | 37.201 | 40.568 | 30.523 | 0.00 | 0.00 |
| ATOM | 1980 | HB2  | TYR | X | 129 | 37.545 | 41.234 | 29.731 | 0.00 | 0.00 |
| ATOM | 1981 | HB3  | TYR | X | 129 | 36.306 | 40.918 | 31.036 | 0.00 | 0.00 |
| ATOM | 1982 | CG   | TYR | X | 129 | 38.241 | 40.527 | 31.695 | 0.00 | 0.00 |
| ATOM | 1983 | CD1  | TYR | X | 129 | 38.330 | 39.415 | 32.568 | 0.00 | 0.00 |
| ATOM | 1984 | HD1  | TYR | X | 129 | 37.689 | 38.548 | 32.502 | 0.00 | 0.00 |
| ATOM | 1985 | CE1  | TYR | X | 129 | 39.293 | 39.492 | 33.604 | 0.00 | 0.00 |
| ATOM | 1986 | HE1  | TYR | X | 129 | 39.296 | 38.671 | 34.306 | 0.00 | 0.00 |
| ATOM | 1987 | CZ   | TYR | X | 129 | 40.168 | 40.592 | 33.738 | 0.00 | 0.00 |
| ATOM | 1988 | OH   | TYR | X | 129 | 41.134 | 40.743 | 34.664 | 0.00 | 0.00 |
| ATOM | 1989 | HH   | TYR | X | 129 | 41.011 | 40.147 | 35.407 | 0.00 | 0.00 |
| ATOM | 1990 | CE2  | TYR | X | 129 | 40.091 | 41.656 | 32.844 | 0.00 | 0.00 |
| ATOM | 1991 | HE2  | TYR | X | 129 | 40.790 | 42.474 | 32.942 | 0.00 | 0.00 |
| ATOM | 1992 | CD2  | TYR | X | 129 | 39.061 | 41.641 | 31.852 | 0.00 | 0.00 |
| ATOM | 1993 | HD2  | TYR | X | 129 | 38.920 | 42.490 | 31.200 | 0.00 | 0.00 |
| ATOM | 1994 | C    | TYR | X | 129 | 35.798 | 39.460 | 28.711 | 0.00 | 0.00 |
| ATOM | 1995 | O    | TYR | X | 129 | 35.013 | 40.461 | 28.785 | 0.00 | 0.00 |
| ATOM | 1996 | N    | ASP | X | 130 | 35.746 | 38.717 | 27.615 | 0.00 | 0.00 |
| ATOM | 1997 | H    | ASP | X | 130 | 36.345 | 37.905 | 27.661 | 0.00 | 0.00 |
| ATOM | 1998 | CA   | ASP | X | 130 | 34.787 | 38.893 | 26.556 | 0.00 | 0.00 |
| ATOM | 1999 | HA   | ASP | X | 130 | 34.869 | 39.959 | 26.347 | 0.00 | 0.00 |
| ATOM | 2000 | CB   | ASP | X | 130 | 35.317 | 38.123 | 25.293 | 0.00 | 0.00 |
| ATOM | 2001 | HB2  | ASP | X | 130 | 36.376 | 38.283 | 25.095 | 0.00 | 0.00 |
| ATOM | 2002 | HB3  | ASP | X | 130 | 34.979 | 37.093 | 25.409 | 0.00 | 0.00 |
| ATOM | 2003 | CG   | ASP | X | 130 | 34.416 | 38.776 | 24.152 | 0.00 | 0.00 |
| ATOM | 2004 | OD1  | ASP | X | 130 | 33.257 | 38.383 | 23.908 | 0.00 | 0.00 |
| ATOM | 2005 | OD2  | ASP | X | 130 | 35.035 | 39.613 | 23.406 | 0.00 | 0.00 |
| ATOM | 2006 | C    | ASP | X | 130 | 33.323 | 38.366 | 26.849 | 0.00 | 0.00 |
| ATOM | 2007 | O    | ASP | X | 130 | 33.192 | 37.275 | 27.361 | 0.00 | 0.00 |
| ATOM | 2008 | N    | GLY | X | 131 | 32.180 | 39.083 | 26.757 | 0.00 | 0.00 |
| ATOM | 2009 | H    | GLY | X | 131 | 32.296 | 40.008 | 26.367 | 0.00 | 0.00 |
| ATOM | 2010 | CA   | GLY | X | 131 | 30.807 | 38.746 | 27.176 | 0.00 | 0.00 |
| ATOM | 2011 | HA2  | GLY | X | 131 | 30.794 | 38.725 | 28.266 | 0.00 | 0.00 |
| ATOM | 2012 | HA3  | GLY | X | 131 | 30.124 | 39.579 | 27.014 | 0.00 | 0.00 |
| ATOM | 2013 | C    | GLY | X | 131 | 30.134 | 37.669 | 26.386 | 0.00 | 0.00 |
| ATOM | 2014 | O    | GLY | X | 131 | 29.225 | 37.094 | 26.937 | 0.00 | 0.00 |
| ATOM | 2015 | N    | ARG | X | 132 | 30.521 | 37.432 | 25.097 | 0.00 | 0.00 |
| ATOM | 2016 | H    | ARG | X | 132 | 31.291 | 38.005 | 24.782 | 0.00 | 0.00 |
| ATOM | 2017 | CA   | ARG | X | 132 | 29.751 | 36.705 | 24.115 | 0.00 | 0.00 |
| ATOM | 2018 | HA   | ARG | X | 132 | 28.818 | 37.222 | 23.890 | 0.00 | 0.00 |
| ATOM | 2019 | CB   | ARG | X | 132 | 30.360 | 36.640 | 22.727 | 0.00 | 0.00 |
| ATOM | 2020 | HB2  | ARG | X | 132 | 29.556 | 36.525 | 22.000 | 0.00 | 0.00 |
| ATOM | 2021 | HB3  | ARG | X | 132 | 30.682 | 37.669 | 22.567 | 0.00 | 0.00 |
| ATOM | 2022 | CG   | ARG | X | 132 | 31.532 | 35.640 | 22.516 | 0.00 | 0.00 |
| ATOM | 2023 | HG2  | ARG | X | 132 | 32.163 | 35.691 | 23.403 | 0.00 | 0.00 |
| ATOM | 2024 | HG3  | ARG | X | 132 | 31.143 | 34.622 | 22.505 | 0.00 | 0.00 |
| ATOM | 2025 | CD   | ARG | X | 132 | 32.379 | 35.851 | 21.221 | 0.00 | 0.00 |
| ATOM | 2026 | HD2  | ARG | X | 132 | 33.142 | 35.095 | 21.037 | 0.00 | 0.00 |
| ATOM | 2027 | HD3  | ARG | X | 132 | 31.746 | 35.849 | 20.333 | 0.00 | 0.00 |
| ATOM | 2028 | NE   | ARG | X | 132 | 33.042 | 37.187 | 21.318 | 0.00 | 0.00 |
| ATOM | 2029 | HE   | ARG | X | 132 | 33.010 | 37.636 | 22.222 | 0.00 | 0.00 |
| ATOM | 2030 | CZ   | ARG | X | 132 | 33.943 | 37.706 | 20.498 | 0.00 | 0.00 |
| ATOM | 2031 | NH1  | ARG | X | 132 | 34.001 | 37.434 | 19.218 | 0.00 | 0.00 |
| ATOM | 2032 | HH11 | ARG | X | 132 | 33.279 | 36.825 | 18.861 | 0.00 | 0.00 |
| ATOM | 2033 | HH12 | ARG | X | 132 | 34.781 | 37.752 | 18.660 | 0.00 | 0.00 |
| ATOM | 2034 | NH2  | ARG | X | 132 | 34.704 | 38.662 | 20.826 | 0.00 | 0.00 |



|      |      |      |     |   |     |        |        |        |      |      |
|------|------|------|-----|---|-----|--------|--------|--------|------|------|
| ATOM | 2035 | HH21 | ARG | X | 132 | 34.684 | 38.926 | 21.801 | 0.00 | 0.00 |
| ATOM | 2036 | HH22 | ARG | X | 132 | 35.270 | 39.117 | 20.124 | 0.00 | 0.00 |
| ATOM | 2037 | C    | ARG | X | 132 | 29.431 | 35.240 | 24.534 | 0.00 | 0.00 |
| ATOM | 2038 | O    | ARG | X | 132 | 28.321 | 34.836 | 24.240 | 0.00 | 0.00 |
| ATOM | 2039 | N    | PHE | X | 133 | 30.319 | 34.540 | 25.223 | 0.00 | 0.00 |
| ATOM | 2040 | H    | PHE | X | 133 | 31.147 | 34.988 | 25.590 | 0.00 | 0.00 |
| ATOM | 2041 | CA   | PHE | X | 133 | 30.152 | 33.129 | 25.513 | 0.00 | 0.00 |
| ATOM | 2042 | HA   | PHE | X | 133 | 29.622 | 32.700 | 24.662 | 0.00 | 0.00 |
| ATOM | 2043 | CB   | PHE | X | 133 | 31.576 | 32.490 | 25.611 | 0.00 | 0.00 |
| ATOM | 2044 | HB2  | PHE | X | 133 | 31.993 | 32.916 | 26.524 | 0.00 | 0.00 |
| ATOM | 2045 | HB3  | PHE | X | 133 | 31.496 | 31.403 | 25.627 | 0.00 | 0.00 |
| ATOM | 2046 | CG   | PHE | X | 133 | 32.578 | 32.725 | 24.442 | 0.00 | 0.00 |
| ATOM | 2047 | CD1  | PHE | X | 133 | 33.561 | 33.688 | 24.548 | 0.00 | 0.00 |
| ATOM | 2048 | HD1  | PHE | X | 133 | 33.623 | 34.256 | 25.465 | 0.00 | 0.00 |
| ATOM | 2049 | CE1  | PHE | X | 133 | 34.447 | 33.901 | 23.463 | 0.00 | 0.00 |
| ATOM | 2050 | HE1  | PHE | X | 133 | 35.139 | 34.731 | 23.456 | 0.00 | 0.00 |
| ATOM | 2051 | CZ   | PHE | X | 133 | 34.223 | 33.118 | 22.290 | 0.00 | 0.00 |
| ATOM | 2052 | HZ   | PHE | X | 133 | 34.707 | 33.505 | 21.406 | 0.00 | 0.00 |
| ATOM | 2053 | CE2  | PHE | X | 133 | 33.174 | 32.150 | 22.176 | 0.00 | 0.00 |
| ATOM | 2054 | HE2  | PHE | X | 133 | 32.896 | 31.612 | 21.282 | 0.00 | 0.00 |
| ATOM | 2055 | CD2  | PHE | X | 133 | 32.347 | 32.007 | 23.300 | 0.00 | 0.00 |
| ATOM | 2056 | HD2  | PHE | X | 133 | 31.498 | 31.343 | 23.367 | 0.00 | 0.00 |
| ATOM | 2057 | C    | PHE | X | 133 | 29.217 | 32.892 | 26.729 | 0.00 | 0.00 |
| ATOM | 2058 | O    | PHE | X | 133 | 28.233 | 32.161 | 26.682 | 0.00 | 0.00 |
| ATOM | 2059 | N    | LEU | X | 134 | 29.351 | 33.754 | 27.669 | 0.00 | 0.00 |
| ATOM | 2060 | H    | LEU | X | 134 | 30.071 | 34.452 | 27.545 | 0.00 | 0.00 |
| ATOM | 2061 | CA   | LEU | X | 134 | 28.553 | 33.880 | 28.854 | 0.00 | 0.00 |
| ATOM | 2062 | HA   | LEU | X | 134 | 28.564 | 32.932 | 29.391 | 0.00 | 0.00 |
| ATOM | 2063 | CB   | LEU | X | 134 | 29.134 | 34.965 | 29.734 | 0.00 | 0.00 |
| ATOM | 2064 | HB2  | LEU | X | 134 | 30.145 | 34.581 | 29.871 | 0.00 | 0.00 |
| ATOM | 2065 | HB3  | LEU | X | 134 | 29.165 | 35.846 | 29.094 | 0.00 | 0.00 |
| ATOM | 2066 | CG   | LEU | X | 134 | 28.451 | 35.175 | 31.119 | 0.00 | 0.00 |
| ATOM | 2067 | HG   | LEU | X | 134 | 27.542 | 35.747 | 30.931 | 0.00 | 0.00 |
| ATOM | 2068 | CD1  | LEU | X | 134 | 28.154 | 33.869 | 31.923 | 0.00 | 0.00 |
| ATOM | 2069 | HD11 | LEU | X | 134 | 27.874 | 34.171 | 32.932 | 0.00 | 0.00 |
| ATOM | 2070 | HD12 | LEU | X | 134 | 29.063 | 33.273 | 31.993 | 0.00 | 0.00 |
| ATOM | 2071 | HD13 | LEU | X | 134 | 27.366 | 33.319 | 31.408 | 0.00 | 0.00 |
| ATOM | 2072 | CD2  | LEU | X | 134 | 29.350 | 36.084 | 31.955 | 0.00 | 0.00 |
| ATOM | 2073 | HD21 | LEU | X | 134 | 29.766 | 36.958 | 31.454 | 0.00 | 0.00 |
| ATOM | 2074 | HD22 | LEU | X | 134 | 28.819 | 36.442 | 32.837 | 0.00 | 0.00 |
| ATOM | 2075 | HD23 | LEU | X | 134 | 30.201 | 35.440 | 32.176 | 0.00 | 0.00 |
| ATOM | 2076 | C    | LEU | X | 134 | 27.106 | 34.258 | 28.428 | 0.00 | 0.00 |
| ATOM | 2077 | O    | LEU | X | 134 | 26.192 | 33.585 | 28.935 | 0.00 | 0.00 |
| ATOM | 2078 | N    | VAL | X | 135 | 26.907 | 35.250 | 27.594 | 0.00 | 0.00 |
| ATOM | 2079 | H    | VAL | X | 135 | 27.793 | 35.697 | 27.406 | 0.00 | 0.00 |
| ATOM | 2080 | CA   | VAL | X | 135 | 25.616 | 35.737 | 27.162 | 0.00 | 0.00 |
| ATOM | 2081 | HA   | VAL | X | 135 | 25.077 | 35.826 | 28.105 | 0.00 | 0.00 |
| ATOM | 2082 | CB   | VAL | X | 135 | 25.810 | 37.142 | 26.530 | 0.00 | 0.00 |
| ATOM | 2083 | HB   | VAL | X | 135 | 26.642 | 37.111 | 25.828 | 0.00 | 0.00 |
| ATOM | 2084 | CG1  | VAL | X | 135 | 24.539 | 37.569 | 25.695 | 0.00 | 0.00 |
| ATOM | 2085 | HG11 | VAL | X | 135 | 24.632 | 38.597 | 25.345 | 0.00 | 0.00 |
| ATOM | 2086 | HG12 | VAL | X | 135 | 24.358 | 36.897 | 24.856 | 0.00 | 0.00 |
| ATOM | 2087 | HG13 | VAL | X | 135 | 23.684 | 37.688 | 26.361 | 0.00 | 0.00 |
| ATOM | 2088 | CG2  | VAL | X | 135 | 26.207 | 38.094 | 27.603 | 0.00 | 0.00 |
| ATOM | 2089 | HG21 | VAL | X | 135 | 25.329 | 38.668 | 27.900 | 0.00 | 0.00 |
| ATOM | 2090 | HG22 | VAL | X | 135 | 27.011 | 38.748 | 27.266 | 0.00 | 0.00 |
| ATOM | 2091 | HG23 | VAL | X | 135 | 26.551 | 37.586 | 28.504 | 0.00 | 0.00 |
| ATOM | 2092 | C    | VAL | X | 135 | 24.967 | 34.730 | 26.223 | 0.00 | 0.00 |
| ATOM | 2093 | O    | VAL | X | 135 | 23.744 | 34.556 | 26.229 | 0.00 | 0.00 |
| ATOM | 2094 | N    | GLN | X | 136 | 25.602 | 34.086 | 25.285 | 0.00 | 0.00 |
| ATOM | 2095 | H    | GLN | X | 136 | 26.571 | 34.293 | 25.094 | 0.00 | 0.00 |
| ATOM | 2096 | CA   | GLN | X | 136 | 25.135 | 32.991 | 24.420 | 0.00 | 0.00 |
| ATOM | 2097 | HA   | GLN | X | 136 | 24.250 | 33.246 | 23.836 | 0.00 | 0.00 |
| ATOM | 2098 | CB   | GLN | X | 136 | 26.293 | 32.516 | 23.548 | 0.00 | 0.00 |
| ATOM | 2099 | HB2  | GLN | X | 136 | 26.598 | 33.326 | 22.885 | 0.00 | 0.00 |
| ATOM | 2100 | HB3  | GLN | X | 136 | 27.182 | 32.315 | 24.146 | 0.00 | 0.00 |
| ATOM | 2101 | CG   | GLN | X | 136 | 26.105 | 31.255 | 22.634 | 0.00 | 0.00 |

|      |      |      |     |   |     |        |        |        |      |      |
|------|------|------|-----|---|-----|--------|--------|--------|------|------|
| ATOM | 2102 | HG2  | GLN | X | 136 | 25.052 | 30.985 | 22.554 | 0.00 | 0.00 |
| ATOM | 2103 | HG3  | GLN | X | 136 | 26.519 | 31.541 | 21.667 | 0.00 | 0.00 |
| ATOM | 2104 | CD   | GLN | X | 136 | 27.007 | 30.108 | 23.170 | 0.00 | 0.00 |
| ATOM | 2105 | OE1  | GLN | X | 136 | 28.081 | 29.781 | 22.637 | 0.00 | 0.00 |
| ATOM | 2106 | NE2  | GLN | X | 136 | 26.617 | 29.429 | 24.198 | 0.00 | 0.00 |
| ATOM | 2107 | HE21 | GLN | X | 136 | 27.209 | 28.680 | 24.526 | 0.00 | 0.00 |
| ATOM | 2108 | HE22 | GLN | X | 136 | 25.730 | 29.702 | 24.597 | 0.00 | 0.00 |
| ATOM | 2109 | C    | GLN | X | 136 | 24.708 | 31.776 | 25.237 | 0.00 | 0.00 |
| ATOM | 2110 | O    | GLN | X | 136 | 23.704 | 31.221 | 24.773 | 0.00 | 0.00 |
| ATOM | 2111 | N    | ALA | X | 137 | 25.300 | 31.453 | 26.423 | 0.00 | 0.00 |
| ATOM | 2112 | H    | ALA | X | 137 | 26.083 | 32.022 | 26.712 | 0.00 | 0.00 |
| ATOM | 2113 | CA   | ALA | X | 137 | 24.856 | 30.352 | 27.302 | 0.00 | 0.00 |
| ATOM | 2114 | HA   | ALA | X | 137 | 24.569 | 29.543 | 26.630 | 0.00 | 0.00 |
| ATOM | 2115 | CB   | ALA | X | 137 | 26.166 | 29.964 | 28.072 | 0.00 | 0.00 |
| ATOM | 2116 | HB1  | ALA | X | 137 | 26.675 | 30.828 | 28.499 | 0.00 | 0.00 |
| ATOM | 2117 | HB2  | ALA | X | 137 | 26.789 | 29.462 | 27.332 | 0.00 | 0.00 |
| ATOM | 2118 | HB3  | ALA | X | 137 | 25.963 | 29.184 | 28.806 | 0.00 | 0.00 |
| ATOM | 2119 | C    | ALA | X | 137 | 23.698 | 30.681 | 28.260 | 0.00 | 0.00 |
| ATOM | 2120 | O    | ALA | X | 137 | 22.841 | 29.826 | 28.522 | 0.00 | 0.00 |
| ATOM | 2121 | N    | GLU | X | 138 | 23.673 | 31.884 | 28.899 | 0.00 | 0.00 |
| ATOM | 2122 | H    | GLU | X | 138 | 24.431 | 32.532 | 28.739 | 0.00 | 0.00 |
| ATOM | 2123 | CA   | GLU | X | 138 | 22.770 | 32.175 | 30.033 | 0.00 | 0.00 |
| ATOM | 2124 | HA   | GLU | X | 138 | 21.990 | 31.432 | 30.201 | 0.00 | 0.00 |
| ATOM | 2125 | CB   | GLU | X | 138 | 23.644 | 32.307 | 31.330 | 0.00 | 0.00 |
| ATOM | 2126 | HB2  | GLU | X | 138 | 24.414 | 33.078 | 31.300 | 0.00 | 0.00 |
| ATOM | 2127 | HB3  | GLU | X | 138 | 22.898 | 32.549 | 32.086 | 0.00 | 0.00 |
| ATOM | 2128 | CG   | GLU | X | 138 | 24.392 | 30.961 | 31.682 | 0.00 | 0.00 |
| ATOM | 2129 | HG2  | GLU | X | 138 | 25.036 | 30.696 | 30.843 | 0.00 | 0.00 |
| ATOM | 2130 | HG3  | GLU | X | 138 | 24.997 | 31.004 | 32.588 | 0.00 | 0.00 |
| ATOM | 2131 | CD   | GLU | X | 138 | 23.430 | 29.704 | 31.826 | 0.00 | 0.00 |
| ATOM | 2132 | OE1  | GLU | X | 138 | 22.423 | 29.967 | 32.421 | 0.00 | 0.00 |
| ATOM | 2133 | OE2  | GLU | X | 138 | 23.674 | 28.618 | 31.396 | 0.00 | 0.00 |
| ATOM | 2134 | C    | GLU | X | 138 | 21.967 | 33.496 | 29.973 | 0.00 | 0.00 |
| ATOM | 2135 | O    | GLU | X | 138 | 20.976 | 33.592 | 30.629 | 0.00 | 0.00 |
| ATOM | 2136 | N    | ARG | X | 139 | 22.221 | 34.331 | 28.961 | 0.00 | 0.00 |
| ATOM | 2137 | H    | ARG | X | 139 | 22.994 | 34.070 | 28.365 | 0.00 | 0.00 |
| ATOM | 2138 | CA   | ARG | X | 139 | 21.374 | 35.447 | 28.515 | 0.00 | 0.00 |
| ATOM | 2139 | HA   | ARG | X | 139 | 21.938 | 35.976 | 27.747 | 0.00 | 0.00 |
| ATOM | 2140 | CB   | ARG | X | 139 | 19.983 | 34.887 | 28.073 | 0.00 | 0.00 |
| ATOM | 2141 | HB2  | ARG | X | 139 | 19.555 | 34.286 | 28.875 | 0.00 | 0.00 |
| ATOM | 2142 | HB3  | ARG | X | 139 | 19.315 | 35.729 | 27.893 | 0.00 | 0.00 |
| ATOM | 2143 | CG   | ARG | X | 139 | 20.001 | 34.057 | 26.760 | 0.00 | 0.00 |
| ATOM | 2144 | HG2  | ARG | X | 139 | 20.511 | 34.612 | 25.972 | 0.00 | 0.00 |
| ATOM | 2145 | HG3  | ARG | X | 139 | 20.642 | 33.208 | 26.998 | 0.00 | 0.00 |
| ATOM | 2146 | CD   | ARG | X | 139 | 18.647 | 33.578 | 26.213 | 0.00 | 0.00 |
| ATOM | 2147 | HD2  | ARG | X | 139 | 18.780 | 32.841 | 25.422 | 0.00 | 0.00 |
| ATOM | 2148 | HD3  | ARG | X | 139 | 18.118 | 33.090 | 27.031 | 0.00 | 0.00 |
| ATOM | 2149 | NE   | ARG | X | 139 | 17.867 | 34.769 | 25.788 | 0.00 | 0.00 |
| ATOM | 2150 | HE   | ARG | X | 139 | 17.299 | 35.207 | 26.499 | 0.00 | 0.00 |
| ATOM | 2151 | CZ   | ARG | X | 139 | 17.657 | 35.209 | 24.571 | 0.00 | 0.00 |
| ATOM | 2152 | NH1  | ARG | X | 139 | 18.144 | 34.670 | 23.460 | 0.00 | 0.00 |
| ATOM | 2153 | HH11 | ARG | X | 139 | 18.502 | 33.726 | 23.466 | 0.00 | 0.00 |
| ATOM | 2154 | HH12 | ARG | X | 139 | 18.060 | 35.062 | 22.533 | 0.00 | 0.00 |
| ATOM | 2155 | NH2  | ARG | X | 139 | 16.996 | 36.352 | 24.527 | 0.00 | 0.00 |
| ATOM | 2156 | HH21 | ARG | X | 139 | 17.063 | 36.955 | 25.334 | 0.00 | 0.00 |
| ATOM | 2157 | HH22 | ARG | X | 139 | 16.861 | 36.865 | 23.668 | 0.00 | 0.00 |
| ATOM | 2158 | C    | ARG | X | 139 | 21.030 | 36.578 | 29.612 | 0.00 | 0.00 |
| ATOM | 2159 | O    | ARG | X | 139 | 20.539 | 37.629 | 29.241 | 0.00 | 0.00 |
| ATOM | 2160 | N    | THR | X | 140 | 21.545 | 36.433 | 30.812 | 0.00 | 0.00 |
| ATOM | 2161 | H    | THR | X | 140 | 21.893 | 35.512 | 31.036 | 0.00 | 0.00 |
| ATOM | 2162 | CA   | THR | X | 140 | 21.894 | 37.498 | 31.710 | 0.00 | 0.00 |
| ATOM | 2163 | HA   | THR | X | 140 | 20.942 | 37.960 | 31.970 | 0.00 | 0.00 |
| ATOM | 2164 | CB   | THR | X | 140 | 22.622 | 36.951 | 32.938 | 0.00 | 0.00 |
| ATOM | 2165 | HB   | THR | X | 140 | 22.934 | 37.808 | 33.536 | 0.00 | 0.00 |
| ATOM | 2166 | CG2  | THR | X | 140 | 21.706 | 36.128 | 33.791 | 0.00 | 0.00 |
| ATOM | 2167 | HG21 | THR | X | 140 | 20.700 | 36.548 | 33.763 | 0.00 | 0.00 |
| ATOM | 2168 | HG22 | THR | X | 140 | 21.850 | 36.203 | 34.869 | 0.00 | 0.00 |

|      |      |      |     |   |     |        |        |        |      |      |
|------|------|------|-----|---|-----|--------|--------|--------|------|------|
| ATOM | 2169 | HG23 | THR | X | 140 | 21.825 | 35.082 | 33.508 | 0.00 | 0.00 |
| ATOM | 2170 | OG1  | THR | X | 140 | 23.766 | 36.164 | 32.616 | 0.00 | 0.00 |
| ATOM | 2171 | HG1  | THR | X | 140 | 24.259 | 36.654 | 31.954 | 0.00 | 0.00 |
| ATOM | 2172 | C    | THR | X | 140 | 22.686 | 38.488 | 30.833 | 0.00 | 0.00 |
| ATOM | 2173 | O    | THR | X | 140 | 23.614 | 38.099 | 30.040 | 0.00 | 0.00 |
| ATOM | 2174 | N    | VAL | X | 141 | 22.416 | 39.756 | 31.082 | 0.00 | 0.00 |
| ATOM | 2175 | H    | VAL | X | 141 | 21.573 | 39.893 | 31.620 | 0.00 | 0.00 |
| ATOM | 2176 | CA   | VAL | X | 141 | 23.109 | 40.839 | 30.349 | 0.00 | 0.00 |
| ATOM | 2177 | HA   | VAL | X | 141 | 23.306 | 40.589 | 29.306 | 0.00 | 0.00 |
| ATOM | 2178 | CB   | VAL | X | 141 | 22.292 | 42.174 | 30.278 | 0.00 | 0.00 |
| ATOM | 2179 | HB   | VAL | X | 141 | 21.988 | 42.739 | 31.160 | 0.00 | 0.00 |
| ATOM | 2180 | CG1  | VAL | X | 141 | 23.079 | 43.204 | 29.351 | 0.00 | 0.00 |
| ATOM | 2181 | HG11 | VAL | X | 141 | 22.565 | 44.163 | 29.300 | 0.00 | 0.00 |
| ATOM | 2182 | HG12 | VAL | X | 141 | 24.066 | 43.446 | 29.745 | 0.00 | 0.00 |
| ATOM | 2183 | HG13 | VAL | X | 141 | 23.289 | 42.761 | 28.377 | 0.00 | 0.00 |
| ATOM | 2184 | CG2  | VAL | X | 141 | 20.971 | 41.871 | 29.665 | 0.00 | 0.00 |
| ATOM | 2185 | HG21 | VAL | X | 141 | 20.480 | 41.030 | 30.154 | 0.00 | 0.00 |
| ATOM | 2186 | HG22 | VAL | X | 141 | 21.111 | 41.446 | 28.672 | 0.00 | 0.00 |
| ATOM | 2187 | HG23 | VAL | X | 141 | 20.266 | 42.702 | 29.701 | 0.00 | 0.00 |
| ATOM | 2188 | C    | VAL | X | 141 | 24.509 | 41.181 | 30.940 | 0.00 | 0.00 |
| ATOM | 2189 | O    | VAL | X | 141 | 24.682 | 41.759 | 32.029 | 0.00 | 0.00 |
| ATOM | 2190 | N    | LEU | X | 142 | 25.563 | 40.917 | 30.207 | 0.00 | 0.00 |
| ATOM | 2191 | H    | LEU | X | 142 | 25.426 | 40.528 | 29.285 | 0.00 | 0.00 |
| ATOM | 2192 | CA   | LEU | X | 142 | 26.997 | 41.163 | 30.597 | 0.00 | 0.00 |
| ATOM | 2193 | HA   | LEU | X | 142 | 27.021 | 41.071 | 31.683 | 0.00 | 0.00 |
| ATOM | 2194 | CB   | LEU | X | 142 | 27.922 | 40.049 | 30.089 | 0.00 | 0.00 |
| ATOM | 2195 | HB2  | LEU | X | 142 | 27.588 | 39.057 | 30.393 | 0.00 | 0.00 |
| ATOM | 2196 | HB3  | LEU | X | 142 | 28.024 | 40.186 | 29.012 | 0.00 | 0.00 |
| ATOM | 2197 | CG   | LEU | X | 142 | 29.372 | 39.928 | 30.691 | 0.00 | 0.00 |
| ATOM | 2198 | HG   | LEU | X | 142 | 29.813 | 39.005 | 30.316 | 0.00 | 0.00 |
| ATOM | 2199 | CD1  | LEU | X | 142 | 30.358 | 41.052 | 30.329 | 0.00 | 0.00 |
| ATOM | 2200 | HD11 | LEU | X | 142 | 31.268 | 40.836 | 30.890 | 0.00 | 0.00 |
| ATOM | 2201 | HD12 | LEU | X | 142 | 29.962 | 42.024 | 30.624 | 0.00 | 0.00 |
| ATOM | 2202 | HD13 | LEU | X | 142 | 30.392 | 41.049 | 29.240 | 0.00 | 0.00 |
| ATOM | 2203 | CD2  | LEU | X | 142 | 29.355 | 39.885 | 32.189 | 0.00 | 0.00 |
| ATOM | 2204 | HD21 | LEU | X | 142 | 29.035 | 40.812 | 32.666 | 0.00 | 0.00 |
| ATOM | 2205 | HD22 | LEU | X | 142 | 28.652 | 39.068 | 32.350 | 0.00 | 0.00 |
| ATOM | 2206 | HD23 | LEU | X | 142 | 30.310 | 39.486 | 32.531 | 0.00 | 0.00 |
| ATOM | 2207 | C    | LEU | X | 142 | 27.331 | 42.594 | 30.269 | 0.00 | 0.00 |
| ATOM | 2208 | O    | LEU | X | 142 | 27.401 | 43.019 | 29.154 | 0.00 | 0.00 |
| ATOM | 2209 | N    | VAL | X | 143 | 27.768 | 43.365 | 31.336 | 0.00 | 0.00 |
| ATOM | 2210 | H    | VAL | X | 143 | 27.550 | 43.037 | 32.266 | 0.00 | 0.00 |
| ATOM | 2211 | CA   | VAL | X | 143 | 28.302 | 44.708 | 31.273 | 0.00 | 0.00 |
| ATOM | 2212 | HA   | VAL | X | 143 | 28.311 | 45.147 | 30.275 | 0.00 | 0.00 |
| ATOM | 2213 | CB   | VAL | X | 143 | 27.486 | 45.762 | 32.090 | 0.00 | 0.00 |
| ATOM | 2214 | HB   | VAL | X | 143 | 27.597 | 45.403 | 33.114 | 0.00 | 0.00 |
| ATOM | 2215 | CG1  | VAL | X | 143 | 27.993 | 47.214 | 31.948 | 0.00 | 0.00 |
| ATOM | 2216 | HG11 | VAL | X | 143 | 27.981 | 47.567 | 30.916 | 0.00 | 0.00 |
| ATOM | 2217 | HG12 | VAL | X | 143 | 27.332 | 47.954 | 32.400 | 0.00 | 0.00 |
| ATOM | 2218 | HG13 | VAL | X | 143 | 28.968 | 47.354 | 32.414 | 0.00 | 0.00 |
| ATOM | 2219 | CG2  | VAL | X | 143 | 25.969 | 45.721 | 31.788 | 0.00 | 0.00 |
| ATOM | 2220 | HG21 | VAL | X | 143 | 25.445 | 46.441 | 32.416 | 0.00 | 0.00 |
| ATOM | 2221 | HG22 | VAL | X | 143 | 25.710 | 44.690 | 32.029 | 0.00 | 0.00 |
| ATOM | 2222 | HG23 | VAL | X | 143 | 25.787 | 45.924 | 30.733 | 0.00 | 0.00 |
| ATOM | 2223 | C    | VAL | X | 143 | 29.798 | 44.659 | 31.786 | 0.00 | 0.00 |
| ATOM | 2224 | O    | VAL | X | 143 | 30.122 | 43.784 | 32.583 | 0.00 | 0.00 |
| ATOM | 2225 | N    | SER | X | 144 | 30.626 | 45.516 | 31.341 | 0.00 | 0.00 |
| ATOM | 2226 | H    | SER | X | 144 | 30.322 | 45.978 | 30.496 | 0.00 | 0.00 |
| ATOM | 2227 | CA   | SER | X | 144 | 32.003 | 45.701 | 31.792 | 0.00 | 0.00 |
| ATOM | 2228 | HA   | SER | X | 144 | 32.234 | 45.426 | 32.821 | 0.00 | 0.00 |
| ATOM | 2229 | CB   | SER | X | 144 | 32.929 | 44.802 | 30.974 | 0.00 | 0.00 |
| ATOM | 2230 | HB2  | SER | X | 144 | 32.481 | 43.814 | 31.075 | 0.00 | 0.00 |
| ATOM | 2231 | HB3  | SER | X | 144 | 32.936 | 45.200 | 29.959 | 0.00 | 0.00 |
| ATOM | 2232 | OG   | SER | X | 144 | 34.213 | 44.807 | 31.525 | 0.00 | 0.00 |
| ATOM | 2233 | HG   | SER | X | 144 | 34.714 | 44.116 | 31.085 | 0.00 | 0.00 |
| ATOM | 2234 | C    | SER | X | 144 | 32.490 | 47.111 | 31.587 | 0.00 | 0.00 |
| ATOM | 2235 | O    | SER | X | 144 | 32.184 | 47.759 | 30.549 | 0.00 | 0.00 |

|      |      |      |     |   |     |        |        |        |      |      |
|------|------|------|-----|---|-----|--------|--------|--------|------|------|
| ATOM | 2236 | N    | MET | X | 145 | 33.472 | 47.610 | 32.429 | 0.00 | 0.00 |
| ATOM | 2237 | H    | MET | X | 145 | 33.792 | 46.942 | 33.116 | 0.00 | 0.00 |
| ATOM | 2238 | CA   | MET | X | 145 | 33.896 | 49.006 | 32.556 | 0.00 | 0.00 |
| ATOM | 2239 | HA   | MET | X | 145 | 33.514 | 49.495 | 31.660 | 0.00 | 0.00 |
| ATOM | 2240 | CB   | MET | X | 145 | 33.246 | 49.701 | 33.750 | 0.00 | 0.00 |
| ATOM | 2241 | HB2  | MET | X | 145 | 33.605 | 50.729 | 33.799 | 0.00 | 0.00 |
| ATOM | 2242 | HB3  | MET | X | 145 | 32.170 | 49.690 | 33.574 | 0.00 | 0.00 |
| ATOM | 2243 | CG   | MET | X | 145 | 33.492 | 48.930 | 35.066 | 0.00 | 0.00 |
| ATOM | 2244 | HG2  | MET | X | 145 | 33.140 | 47.900 | 35.007 | 0.00 | 0.00 |
| ATOM | 2245 | HG3  | MET | X | 145 | 34.565 | 48.777 | 35.184 | 0.00 | 0.00 |
| ATOM | 2246 | SD   | MET | X | 145 | 32.788 | 49.670 | 36.590 | 0.00 | 0.00 |
| ATOM | 2247 | CE   | MET | X | 145 | 31.089 | 49.282 | 36.331 | 0.00 | 0.00 |
| ATOM | 2248 | HE1  | MET | X | 145 | 30.495 | 49.617 | 37.181 | 0.00 | 0.00 |
| ATOM | 2249 | HE2  | MET | X | 145 | 30.753 | 49.809 | 35.438 | 0.00 | 0.00 |
| ATOM | 2250 | HE3  | MET | X | 145 | 31.087 | 48.237 | 36.020 | 0.00 | 0.00 |
| ATOM | 2251 | C    | MET | X | 145 | 35.426 | 49.256 | 32.655 | 0.00 | 0.00 |
| ATOM | 2252 | O    | MET | X | 145 | 36.130 | 48.356 | 33.153 | 0.00 | 0.00 |
| ATOM | 2253 | N    | ASN | X | 146 | 35.834 | 50.466 | 32.209 | 0.00 | 0.00 |
| ATOM | 2254 | H    | ASN | X | 146 | 35.182 | 51.100 | 31.769 | 0.00 | 0.00 |
| ATOM | 2255 | CA   | ASN | X | 146 | 37.149 | 51.063 | 32.588 | 0.00 | 0.00 |
| ATOM | 2256 | HA   | ASN | X | 146 | 37.909 | 50.315 | 32.812 | 0.00 | 0.00 |
| ATOM | 2257 | CB   | ASN | X | 146 | 37.767 | 51.911 | 31.436 | 0.00 | 0.00 |
| ATOM | 2258 | HB2  | ASN | X | 146 | 36.998 | 52.457 | 30.891 | 0.00 | 0.00 |
| ATOM | 2259 | HB3  | ASN | X | 146 | 38.447 | 52.694 | 31.771 | 0.00 | 0.00 |
| ATOM | 2260 | CG   | ASN | X | 146 | 38.479 | 51.118 | 30.394 | 0.00 | 0.00 |
| ATOM | 2261 | OD1  | ASN | X | 146 | 38.537 | 49.896 | 30.429 | 0.00 | 0.00 |
| ATOM | 2262 | ND2  | ASN | X | 146 | 39.151 | 51.804 | 29.467 | 0.00 | 0.00 |
| ATOM | 2263 | HD21 | ASN | X | 146 | 39.615 | 51.357 | 28.689 | 0.00 | 0.00 |
| ATOM | 2264 | HD22 | ASN | X | 146 | 39.131 | 52.813 | 29.446 | 0.00 | 0.00 |
| ATOM | 2265 | C    | ASN | X | 146 | 37.047 | 51.929 | 33.845 | 0.00 | 0.00 |
| ATOM | 2266 | O    | ASN | X | 146 | 35.955 | 52.304 | 34.304 | 0.00 | 0.00 |
| ATOM | 2267 | N    | TYR | X | 147 | 38.211 | 52.175 | 34.409 | 0.00 | 0.00 |
| ATOM | 2268 | H    | TYR | X | 147 | 39.027 | 51.722 | 34.024 | 0.00 | 0.00 |
| ATOM | 2269 | CA   | TYR | X | 147 | 38.383 | 52.974 | 35.575 | 0.00 | 0.00 |
| ATOM | 2270 | HA   | TYR | X | 147 | 37.809 | 53.884 | 35.400 | 0.00 | 0.00 |
| ATOM | 2271 | CB   | TYR | X | 147 | 37.855 | 52.262 | 36.813 | 0.00 | 0.00 |
| ATOM | 2272 | HB2  | TYR | X | 147 | 38.196 | 52.876 | 37.646 | 0.00 | 0.00 |
| ATOM | 2273 | HB3  | TYR | X | 147 | 36.788 | 52.438 | 36.949 | 0.00 | 0.00 |
| ATOM | 2274 | CG   | TYR | X | 147 | 37.957 | 50.704 | 37.050 | 0.00 | 0.00 |
| ATOM | 2275 | CD1  | TYR | X | 147 | 36.999 | 49.855 | 36.557 | 0.00 | 0.00 |
| ATOM | 2276 | HD1  | TYR | X | 147 | 36.048 | 50.176 | 36.160 | 0.00 | 0.00 |
| ATOM | 2277 | CE1  | TYR | X | 147 | 37.155 | 48.464 | 36.699 | 0.00 | 0.00 |
| ATOM | 2278 | HE1  | TYR | X | 147 | 36.397 | 47.756 | 36.395 | 0.00 | 0.00 |
| ATOM | 2279 | CZ   | TYR | X | 147 | 38.369 | 47.941 | 37.182 | 0.00 | 0.00 |
| ATOM | 2280 | OH   | TYR | X | 147 | 38.476 | 46.609 | 37.390 | 0.00 | 0.00 |
| ATOM | 2281 | HH   | TYR | X | 147 | 39.321 | 46.315 | 37.739 | 0.00 | 0.00 |
| ATOM | 2282 | CE2  | TYR | X | 147 | 39.351 | 48.810 | 37.580 | 0.00 | 0.00 |
| ATOM | 2283 | HE2  | TYR | X | 147 | 40.179 | 48.314 | 38.065 | 0.00 | 0.00 |
| ATOM | 2284 | CD2  | TYR | X | 147 | 39.185 | 50.230 | 37.579 | 0.00 | 0.00 |
| ATOM | 2285 | HD2  | TYR | X | 147 | 40.024 | 50.850 | 37.860 | 0.00 | 0.00 |
| ATOM | 2286 | C    | TYR | X | 147 | 39.878 | 53.383 | 35.720 | 0.00 | 0.00 |
| ATOM | 2287 | O    | TYR | X | 147 | 40.834 | 52.581 | 35.466 | 0.00 | 0.00 |
| ATOM | 2288 | N    | ARG | X | 148 | 40.085 | 54.540 | 36.314 | 0.00 | 0.00 |
| ATOM | 2289 | H    | ARG | X | 148 | 39.315 | 55.100 | 36.653 | 0.00 | 0.00 |
| ATOM | 2290 | CA   | ARG | X | 148 | 41.424 | 55.073 | 36.427 | 0.00 | 0.00 |
| ATOM | 2291 | HA   | ARG | X | 148 | 41.830 | 54.763 | 35.464 | 0.00 | 0.00 |
| ATOM | 2292 | CB   | ARG | X | 148 | 41.362 | 56.581 | 36.429 | 0.00 | 0.00 |
| ATOM | 2293 | HB2  | ARG | X | 148 | 40.793 | 56.988 | 37.265 | 0.00 | 0.00 |
| ATOM | 2294 | HB3  | ARG | X | 148 | 42.414 | 56.837 | 36.555 | 0.00 | 0.00 |
| ATOM | 2295 | CG   | ARG | X | 148 | 40.815 | 57.186 | 35.094 | 0.00 | 0.00 |
| ATOM | 2296 | HG2  | ARG | X | 148 | 41.569 | 57.229 | 34.308 | 0.00 | 0.00 |
| ATOM | 2297 | HG3  | ARG | X | 148 | 40.030 | 56.563 | 34.666 | 0.00 | 0.00 |
| ATOM | 2298 | CD   | ARG | X | 148 | 40.380 | 58.674 | 35.222 | 0.00 | 0.00 |
| ATOM | 2299 | HD2  | ARG | X | 148 | 41.289 | 59.174 | 35.557 | 0.00 | 0.00 |
| ATOM | 2300 | HD3  | ARG | X | 148 | 40.125 | 59.070 | 34.240 | 0.00 | 0.00 |
| ATOM | 2301 | NE   | ARG | X | 148 | 39.359 | 58.847 | 36.218 | 0.00 | 0.00 |
| ATOM | 2302 | HE   | ARG | X | 148 | 38.972 | 58.051 | 36.703 | 0.00 | 0.00 |

|      |      |      |     |   |     |        |        |        |      |      |
|------|------|------|-----|---|-----|--------|--------|--------|------|------|
| ATOM | 2303 | CZ   | ARG | X | 148 | 39.147 | 60.009 | 36.905 | 0.00 | 0.00 |
| ATOM | 2304 | NH1  | ARG | X | 148 | 39.743 | 61.092 | 36.592 | 0.00 | 0.00 |
| ATOM | 2305 | HH11 | ARG | X | 148 | 40.165 | 61.266 | 35.691 | 0.00 | 0.00 |
| ATOM | 2306 | HH12 | ARG | X | 148 | 39.380 | 61.966 | 36.945 | 0.00 | 0.00 |
| ATOM | 2307 | NH2  | ARG | X | 148 | 38.352 | 59.906 | 37.938 | 0.00 | 0.00 |
| ATOM | 2308 | HH21 | ARG | X | 148 | 37.721 | 59.123 | 38.039 | 0.00 | 0.00 |
| ATOM | 2309 | HH22 | ARG | X | 148 | 38.072 | 60.642 | 38.570 | 0.00 | 0.00 |
| ATOM | 2310 | C    | ARG | X | 148 | 42.237 | 54.430 | 37.545 | 0.00 | 0.00 |
| ATOM | 2311 | O    | ARG | X | 148 | 42.163 | 54.846 | 38.676 | 0.00 | 0.00 |
| ATOM | 2312 | N    | VAL | X | 149 | 42.862 | 53.331 | 37.227 | 0.00 | 0.00 |
| ATOM | 2313 | H    | VAL | X | 149 | 42.758 | 53.104 | 36.248 | 0.00 | 0.00 |
| ATOM | 2314 | CA   | VAL | X | 149 | 43.881 | 52.485 | 37.979 | 0.00 | 0.00 |
| ATOM | 2315 | HA   | VAL | X | 149 | 43.453 | 52.316 | 38.967 | 0.00 | 0.00 |
| ATOM | 2316 | CB   | VAL | X | 149 | 44.064 | 51.104 | 37.341 | 0.00 | 0.00 |
| ATOM | 2317 | HB   | VAL | X | 149 | 44.898 | 50.708 | 37.919 | 0.00 | 0.00 |
| ATOM | 2318 | CG1  | VAL | X | 149 | 42.869 | 50.232 | 37.539 | 0.00 | 0.00 |
| ATOM | 2319 | HG11 | VAL | X | 149 | 42.507 | 50.187 | 38.566 | 0.00 | 0.00 |
| ATOM | 2320 | HG12 | VAL | X | 149 | 42.026 | 50.672 | 37.006 | 0.00 | 0.00 |
| ATOM | 2321 | HG13 | VAL | X | 149 | 43.091 | 49.209 | 37.235 | 0.00 | 0.00 |
| ATOM | 2322 | CG2  | VAL | X | 149 | 44.376 | 51.024 | 35.831 | 0.00 | 0.00 |
| ATOM | 2323 | HG21 | VAL | X | 149 | 45.281 | 51.567 | 35.560 | 0.00 | 0.00 |
| ATOM | 2324 | HG22 | VAL | X | 149 | 43.512 | 51.453 | 35.322 | 0.00 | 0.00 |
| ATOM | 2325 | HG23 | VAL | X | 149 | 44.576 | 49.998 | 35.523 | 0.00 | 0.00 |
| ATOM | 2326 | C    | VAL | X | 149 | 45.179 | 53.301 | 38.133 | 0.00 | 0.00 |
| ATOM | 2327 | O    | VAL | X | 149 | 45.445 | 54.259 | 37.414 | 0.00 | 0.00 |
| ATOM | 2328 | N    | GLY | X | 150 | 46.035 | 53.055 | 39.093 | 0.00 | 0.00 |
| ATOM | 2329 | H    | GLY | X | 150 | 45.926 | 52.233 | 39.670 | 0.00 | 0.00 |
| ATOM | 2330 | CA   | GLY | X | 150 | 47.237 | 53.937 | 39.391 | 0.00 | 0.00 |
| ATOM | 2331 | HA2  | GLY | X | 150 | 47.950 | 53.337 | 39.956 | 0.00 | 0.00 |
| ATOM | 2332 | HA3  | GLY | X | 150 | 47.614 | 54.187 | 38.399 | 0.00 | 0.00 |
| ATOM | 2333 | C    | GLY | X | 150 | 47.013 | 55.260 | 40.071 | 0.00 | 0.00 |
| ATOM | 2334 | O    | GLY | X | 150 | 45.933 | 55.571 | 40.530 | 0.00 | 0.00 |
| ATOM | 2335 | N    | ALA | X | 151 | 48.015 | 56.089 | 39.995 | 0.00 | 0.00 |
| ATOM | 2336 | H    | ALA | X | 151 | 48.929 | 55.692 | 39.828 | 0.00 | 0.00 |
| ATOM | 2337 | CA   | ALA | X | 151 | 48.041 | 57.515 | 40.450 | 0.00 | 0.00 |
| ATOM | 2338 | HA   | ALA | X | 151 | 48.186 | 57.470 | 41.529 | 0.00 | 0.00 |
| ATOM | 2339 | CB   | ALA | X | 151 | 49.297 | 58.145 | 39.912 | 0.00 | 0.00 |
| ATOM | 2340 | HB1  | ALA | X | 151 | 50.174 | 57.842 | 40.483 | 0.00 | 0.00 |
| ATOM | 2341 | HB2  | ALA | X | 151 | 49.324 | 59.232 | 39.993 | 0.00 | 0.00 |
| ATOM | 2342 | HB3  | ALA | X | 151 | 49.623 | 57.931 | 38.894 | 0.00 | 0.00 |
| ATOM | 2343 | C    | ALA | X | 151 | 46.755 | 58.300 | 40.061 | 0.00 | 0.00 |
| ATOM | 2344 | O    | ALA | X | 151 | 46.140 | 58.904 | 40.973 | 0.00 | 0.00 |
| ATOM | 2345 | N    | PHE | X | 152 | 46.394 | 58.158 | 38.811 | 0.00 | 0.00 |
| ATOM | 2346 | H    | PHE | X | 152 | 47.004 | 57.786 | 38.097 | 0.00 | 0.00 |
| ATOM | 2347 | CA   | PHE | X | 152 | 45.219 | 58.819 | 38.164 | 0.00 | 0.00 |
| ATOM | 2348 | HA   | PHE | X | 152 | 45.509 | 59.869 | 38.159 | 0.00 | 0.00 |
| ATOM | 2349 | CB   | PHE | X | 152 | 45.114 | 58.318 | 36.694 | 0.00 | 0.00 |
| ATOM | 2350 | HB2  | PHE | X | 152 | 44.766 | 57.294 | 36.557 | 0.00 | 0.00 |
| ATOM | 2351 | HB3  | PHE | X | 152 | 44.425 | 58.968 | 36.154 | 0.00 | 0.00 |
| ATOM | 2352 | CG   | PHE | X | 152 | 46.412 | 58.453 | 35.883 | 0.00 | 0.00 |
| ATOM | 2353 | CD1  | PHE | X | 152 | 47.186 | 57.346 | 35.745 | 0.00 | 0.00 |
| ATOM | 2354 | HD1  | PHE | X | 152 | 46.914 | 56.358 | 36.084 | 0.00 | 0.00 |
| ATOM | 2355 | CE1  | PHE | X | 152 | 48.442 | 57.446 | 35.033 | 0.00 | 0.00 |
| ATOM | 2356 | HE1  | PHE | X | 152 | 49.106 | 56.607 | 34.886 | 0.00 | 0.00 |
| ATOM | 2357 | CZ   | PHE | X | 152 | 48.906 | 58.647 | 34.497 | 0.00 | 0.00 |
| ATOM | 2358 | HZ   | PHE | X | 152 | 49.918 | 58.672 | 34.121 | 0.00 | 0.00 |
| ATOM | 2359 | CE2  | PHE | X | 152 | 48.086 | 59.765 | 34.615 | 0.00 | 0.00 |
| ATOM | 2360 | HE2  | PHE | X | 152 | 48.326 | 60.665 | 34.068 | 0.00 | 0.00 |
| ATOM | 2361 | CD2  | PHE | X | 152 | 46.803 | 59.684 | 35.300 | 0.00 | 0.00 |
| ATOM | 2362 | HD2  | PHE | X | 152 | 46.148 | 60.542 | 35.335 | 0.00 | 0.00 |
| ATOM | 2363 | C    | PHE | X | 152 | 43.910 | 58.679 | 38.994 | 0.00 | 0.00 |
| ATOM | 2364 | O    | PHE | X | 152 | 43.119 | 59.578 | 38.884 | 0.00 | 0.00 |
| ATOM | 2365 | N    | GLY | X | 153 | 43.818 | 57.567 | 39.746 | 0.00 | 0.00 |
| ATOM | 2366 | H    | GLY | X | 153 | 44.620 | 56.953 | 39.747 | 0.00 | 0.00 |
| ATOM | 2367 | CA   | GLY | X | 153 | 42.759 | 57.266 | 40.675 | 0.00 | 0.00 |
| ATOM | 2368 | HA2  | GLY | X | 153 | 41.849 | 57.833 | 40.480 | 0.00 | 0.00 |
| ATOM | 2369 | HA3  | GLY | X | 153 | 42.492 | 56.211 | 40.613 | 0.00 | 0.00 |

|      |      |      |     |   |     |        |        |        |      |      |
|------|------|------|-----|---|-----|--------|--------|--------|------|------|
| ATOM | 2370 | C    | GLY | X | 153 | 43.065 | 57.418 | 42.160 | 0.00 | 0.00 |
| ATOM | 2371 | O    | GLY | X | 153 | 42.090 | 57.576 | 42.862 | 0.00 | 0.00 |
| ATOM | 2372 | N    | PHE | X | 154 | 44.271 | 57.179 | 42.672 | 0.00 | 0.00 |
| ATOM | 2373 | H    | PHE | X | 154 | 44.972 | 56.793 | 42.057 | 0.00 | 0.00 |
| ATOM | 2374 | CA   | PHE | X | 154 | 44.519 | 56.732 | 44.050 | 0.00 | 0.00 |
| ATOM | 2375 | HA   | PHE | X | 154 | 43.616 | 56.965 | 44.614 | 0.00 | 0.00 |
| ATOM | 2376 | CB   | PHE | X | 154 | 44.675 | 55.189 | 44.108 | 0.00 | 0.00 |
| ATOM | 2377 | HB2  | PHE | X | 154 | 45.577 | 54.898 | 43.570 | 0.00 | 0.00 |
| ATOM | 2378 | HB3  | PHE | X | 154 | 44.666 | 54.841 | 45.141 | 0.00 | 0.00 |
| ATOM | 2379 | CG   | PHE | X | 154 | 43.500 | 54.485 | 43.565 | 0.00 | 0.00 |
| ATOM | 2380 | CD1  | PHE | X | 154 | 43.603 | 53.869 | 42.297 | 0.00 | 0.00 |
| ATOM | 2381 | HD1  | PHE | X | 154 | 44.499 | 53.976 | 41.702 | 0.00 | 0.00 |
| ATOM | 2382 | CE1  | PHE | X | 154 | 42.462 | 53.122 | 41.849 | 0.00 | 0.00 |
| ATOM | 2383 | HE1  | PHE | X | 154 | 42.529 | 52.593 | 40.909 | 0.00 | 0.00 |
| ATOM | 2384 | CZ   | PHE | X | 154 | 41.307 | 52.936 | 42.699 | 0.00 | 0.00 |
| ATOM | 2385 | HZ   | PHE | X | 154 | 40.454 | 52.361 | 42.370 | 0.00 | 0.00 |
| ATOM | 2386 | CE2  | PHE | X | 154 | 41.312 | 53.510 | 43.992 | 0.00 | 0.00 |
| ATOM | 2387 | HE2  | PHE | X | 154 | 40.442 | 53.414 | 44.625 | 0.00 | 0.00 |
| ATOM | 2388 | CD2  | PHE | X | 154 | 42.427 | 54.280 | 44.439 | 0.00 | 0.00 |
| ATOM | 2389 | HD2  | PHE | X | 154 | 42.338 | 54.698 | 45.430 | 0.00 | 0.00 |
| ATOM | 2390 | C    | PHE | X | 154 | 45.727 | 57.472 | 44.635 | 0.00 | 0.00 |
| ATOM | 2391 | O    | PHE | X | 154 | 46.006 | 57.289 | 45.779 | 0.00 | 0.00 |
| ATOM | 2392 | N    | LEU | X | 155 | 46.429 | 58.319 | 43.909 | 0.00 | 0.00 |
| ATOM | 2393 | H    | LEU | X | 155 | 46.069 | 58.479 | 42.979 | 0.00 | 0.00 |
| ATOM | 2394 | CA   | LEU | X | 155 | 47.255 | 59.366 | 44.520 | 0.00 | 0.00 |
| ATOM | 2395 | HA   | LEU | X | 155 | 47.870 | 58.764 | 45.190 | 0.00 | 0.00 |
| ATOM | 2396 | CB   | LEU | X | 155 | 48.096 | 60.130 | 43.455 | 0.00 | 0.00 |
| ATOM | 2397 | HB2  | LEU | X | 155 | 48.245 | 59.536 | 42.554 | 0.00 | 0.00 |
| ATOM | 2398 | HB3  | LEU | X | 155 | 47.376 | 60.852 | 43.069 | 0.00 | 0.00 |
| ATOM | 2399 | CG   | LEU | X | 155 | 49.340 | 60.829 | 43.963 | 0.00 | 0.00 |
| ATOM | 2400 | HG   | LEU | X | 155 | 49.712 | 60.449 | 44.914 | 0.00 | 0.00 |
| ATOM | 2401 | CD1  | LEU | X | 155 | 50.463 | 60.336 | 43.032 | 0.00 | 0.00 |
| ATOM | 2402 | HD11 | LEU | X | 155 | 50.145 | 60.506 | 42.004 | 0.00 | 0.00 |
| ATOM | 2403 | HD12 | LEU | X | 155 | 50.535 | 59.254 | 43.148 | 0.00 | 0.00 |
| ATOM | 2404 | HD13 | LEU | X | 155 | 51.395 | 60.831 | 43.304 | 0.00 | 0.00 |
| ATOM | 2405 | CD2  | LEU | X | 155 | 49.227 | 62.316 | 43.901 | 0.00 | 0.00 |
| ATOM | 2406 | HD21 | LEU | X | 155 | 48.743 | 62.640 | 44.822 | 0.00 | 0.00 |
| ATOM | 2407 | HD22 | LEU | X | 155 | 50.223 | 62.755 | 43.846 | 0.00 | 0.00 |
| ATOM | 2408 | HD23 | LEU | X | 155 | 48.689 | 62.667 | 43.020 | 0.00 | 0.00 |
| ATOM | 2409 | C    | LEU | X | 155 | 46.289 | 60.243 | 45.400 | 0.00 | 0.00 |
| ATOM | 2410 | O    | LEU | X | 155 | 45.232 | 60.723 | 44.983 | 0.00 | 0.00 |
| ATOM | 2411 | N    | ALA | X | 156 | 46.692 | 60.455 | 46.718 | 0.00 | 0.00 |
| ATOM | 2412 | H    | ALA | X | 156 | 47.538 | 60.052 | 47.094 | 0.00 | 0.00 |
| ATOM | 2413 | CA   | ALA | X | 156 | 45.874 | 61.213 | 47.714 | 0.00 | 0.00 |
| ATOM | 2414 | HA   | ALA | X | 156 | 45.163 | 61.860 | 47.200 | 0.00 | 0.00 |
| ATOM | 2415 | CB   | ALA | X | 156 | 45.165 | 60.179 | 48.571 | 0.00 | 0.00 |
| ATOM | 2416 | HB1  | ALA | X | 156 | 45.915 | 59.517 | 49.006 | 0.00 | 0.00 |
| ATOM | 2417 | HB2  | ALA | X | 156 | 44.539 | 59.518 | 47.972 | 0.00 | 0.00 |
| ATOM | 2418 | HB3  | ALA | X | 156 | 44.673 | 60.655 | 49.419 | 0.00 | 0.00 |
| ATOM | 2419 | C    | ALA | X | 156 | 46.817 | 62.009 | 48.510 | 0.00 | 0.00 |
| ATOM | 2420 | O    | ALA | X | 156 | 47.929 | 61.587 | 48.889 | 0.00 | 0.00 |
| ATOM | 2421 | N    | LEU | X | 157 | 46.368 | 63.219 | 48.781 | 0.00 | 0.00 |
| ATOM | 2422 | H    | LEU | X | 157 | 45.422 | 63.339 | 48.448 | 0.00 | 0.00 |
| ATOM | 2423 | CA   | LEU | X | 157 | 46.873 | 64.117 | 49.862 | 0.00 | 0.00 |
| ATOM | 2424 | HA   | LEU | X | 157 | 47.677 | 63.616 | 50.401 | 0.00 | 0.00 |
| ATOM | 2425 | CB   | LEU | X | 157 | 47.390 | 65.439 | 49.196 | 0.00 | 0.00 |
| ATOM | 2426 | HB2  | LEU | X | 157 | 46.550 | 65.787 | 48.594 | 0.00 | 0.00 |
| ATOM | 2427 | HB3  | LEU | X | 157 | 47.377 | 66.170 | 50.004 | 0.00 | 0.00 |
| ATOM | 2428 | CG   | LEU | X | 157 | 48.697 | 65.443 | 48.410 | 0.00 | 0.00 |
| ATOM | 2429 | HG   | LEU | X | 157 | 48.560 | 64.737 | 47.591 | 0.00 | 0.00 |
| ATOM | 2430 | CD1  | LEU | X | 157 | 49.091 | 66.859 | 48.005 | 0.00 | 0.00 |
| ATOM | 2431 | HD11 | LEU | X | 157 | 49.912 | 66.712 | 47.304 | 0.00 | 0.00 |
| ATOM | 2432 | HD12 | LEU | X | 157 | 49.579 | 67.480 | 48.757 | 0.00 | 0.00 |
| ATOM | 2433 | HD13 | LEU | X | 157 | 48.216 | 67.318 | 47.545 | 0.00 | 0.00 |
| ATOM | 2434 | CD2  | LEU | X | 157 | 49.833 | 64.753 | 49.229 | 0.00 | 0.00 |
| ATOM | 2435 | HD21 | LEU | X | 157 | 50.074 | 65.200 | 50.193 | 0.00 | 0.00 |
| ATOM | 2436 | HD22 | LEU | X | 157 | 49.538 | 63.725 | 49.436 | 0.00 | 0.00 |

|      |      |      |     |   |     |        |        |        |      |      |
|------|------|------|-----|---|-----|--------|--------|--------|------|------|
| ATOM | 2437 | HD23 | LEU | X | 157 | 50.709 | 64.688 | 48.583 | 0.00 | 0.00 |
| ATOM | 2438 | C    | LEU | X | 157 | 45.767 | 64.274 | 50.959 | 0.00 | 0.00 |
| ATOM | 2439 | O    | LEU | X | 157 | 44.824 | 65.050 | 50.698 | 0.00 | 0.00 |
| ATOM | 2440 | N    | PRO | X | 158 | 45.799 | 63.401 | 51.999 | 0.00 | 0.00 |
| ATOM | 2441 | CD   | PRO | X | 158 | 46.821 | 62.477 | 52.509 | 0.00 | 0.00 |
| ATOM | 2442 | HD2  | PRO | X | 158 | 47.669 | 62.919 | 53.033 | 0.00 | 0.00 |
| ATOM | 2443 | HD3  | PRO | X | 158 | 47.265 | 61.910 | 51.691 | 0.00 | 0.00 |
| ATOM | 2444 | CG   | PRO | X | 158 | 46.167 | 61.481 | 53.459 | 0.00 | 0.00 |
| ATOM | 2445 | HG2  | PRO | X | 158 | 46.861 | 61.252 | 54.267 | 0.00 | 0.00 |
| ATOM | 2446 | HG3  | PRO | X | 158 | 45.862 | 60.573 | 52.939 | 0.00 | 0.00 |
| ATOM | 2447 | CB   | PRO | X | 158 | 44.828 | 62.150 | 53.791 | 0.00 | 0.00 |
| ATOM | 2448 | HB2  | PRO | X | 158 | 44.881 | 62.612 | 54.776 | 0.00 | 0.00 |
| ATOM | 2449 | HB3  | PRO | X | 158 | 44.061 | 61.392 | 53.948 | 0.00 | 0.00 |
| ATOM | 2450 | CA   | PRO | X | 158 | 44.570 | 63.224 | 52.716 | 0.00 | 0.00 |
| ATOM | 2451 | HA   | PRO | X | 158 | 43.705 | 63.022 | 52.084 | 0.00 | 0.00 |
| ATOM | 2452 | C    | PRO | X | 158 | 44.210 | 64.532 | 53.425 | 0.00 | 0.00 |
| ATOM | 2453 | O    | PRO | X | 158 | 45.081 | 65.219 | 53.894 | 0.00 | 0.00 |
| ATOM | 2454 | N    | GLY | X | 159 | 42.909 | 64.826 | 53.489 | 0.00 | 0.00 |
| ATOM | 2455 | H    | GLY | X | 159 | 42.247 | 64.188 | 53.071 | 0.00 | 0.00 |
| ATOM | 2456 | CA   | GLY | X | 159 | 42.366 | 66.139 | 54.019 | 0.00 | 0.00 |
| ATOM | 2457 | HA2  | GLY | X | 159 | 41.358 | 65.916 | 54.369 | 0.00 | 0.00 |
| ATOM | 2458 | HA3  | GLY | X | 159 | 43.033 | 66.633 | 54.725 | 0.00 | 0.00 |
| ATOM | 2459 | C    | GLY | X | 159 | 42.212 | 67.232 | 52.937 | 0.00 | 0.00 |
| ATOM | 2460 | O    | GLY | X | 159 | 41.418 | 68.099 | 53.070 | 0.00 | 0.00 |
| ATOM | 2461 | N    | SER | X | 160 | 43.096 | 67.137 | 51.923 | 0.00 | 0.00 |
| ATOM | 2462 | H    | SER | X | 160 | 43.721 | 66.343 | 51.918 | 0.00 | 0.00 |
| ATOM | 2463 | CA   | SER | X | 160 | 43.048 | 68.080 | 50.761 | 0.00 | 0.00 |
| ATOM | 2464 | HA   | SER | X | 160 | 42.904 | 69.084 | 51.161 | 0.00 | 0.00 |
| ATOM | 2465 | CB   | SER | X | 160 | 44.307 | 68.083 | 49.884 | 0.00 | 0.00 |
| ATOM | 2466 | HB2  | SER | X | 160 | 44.340 | 68.993 | 49.285 | 0.00 | 0.00 |
| ATOM | 2467 | HB3  | SER | X | 160 | 45.170 | 68.134 | 50.549 | 0.00 | 0.00 |
| ATOM | 2468 | OG   | SER | X | 160 | 44.378 | 66.993 | 48.979 | 0.00 | 0.00 |
| ATOM | 2469 | HG   | SER | X | 160 | 44.451 | 66.154 | 49.439 | 0.00 | 0.00 |
| ATOM | 2470 | C    | SER | X | 160 | 41.826 | 68.089 | 49.856 | 0.00 | 0.00 |
| ATOM | 2471 | O    | SER | X | 160 | 41.129 | 67.101 | 49.843 | 0.00 | 0.00 |
| ATOM | 2472 | N    | ARG | X | 161 | 41.441 | 69.167 | 49.176 | 0.00 | 0.00 |
| ATOM | 2473 | H    | ARG | X | 161 | 41.931 | 70.037 | 49.327 | 0.00 | 0.00 |
| ATOM | 2474 | CA   | ARG | X | 161 | 40.599 | 69.182 | 47.947 | 0.00 | 0.00 |
| ATOM | 2475 | HA   | ARG | X | 161 | 39.849 | 68.396 | 48.030 | 0.00 | 0.00 |
| ATOM | 2476 | CB   | ARG | X | 161 | 39.883 | 70.607 | 47.950 | 0.00 | 0.00 |
| ATOM | 2477 | HB2  | ARG | X | 161 | 40.604 | 71.388 | 48.195 | 0.00 | 0.00 |
| ATOM | 2478 | HB3  | ARG | X | 161 | 39.537 | 70.902 | 46.960 | 0.00 | 0.00 |
| ATOM | 2479 | CG   | ARG | X | 161 | 38.707 | 70.745 | 48.951 | 0.00 | 0.00 |
| ATOM | 2480 | HG2  | ARG | X | 161 | 37.939 | 70.132 | 48.480 | 0.00 | 0.00 |
| ATOM | 2481 | HG3  | ARG | X | 161 | 39.016 | 70.343 | 49.916 | 0.00 | 0.00 |
| ATOM | 2482 | CD   | ARG | X | 161 | 38.328 | 72.274 | 49.111 | 0.00 | 0.00 |
| ATOM | 2483 | HD2  | ARG | X | 161 | 37.771 | 72.512 | 50.017 | 0.00 | 0.00 |
| ATOM | 2484 | HD3  | ARG | X | 161 | 39.280 | 72.793 | 49.224 | 0.00 | 0.00 |
| ATOM | 2485 | NE   | ARG | X | 161 | 37.593 | 72.843 | 47.947 | 0.00 | 0.00 |
| ATOM | 2486 | HE   | ARG | X | 161 | 37.252 | 72.173 | 47.273 | 0.00 | 0.00 |
| ATOM | 2487 | CZ   | ARG | X | 161 | 37.140 | 74.071 | 47.806 | 0.00 | 0.00 |
| ATOM | 2488 | NH1  | ARG | X | 161 | 37.542 | 75.071 | 48.577 | 0.00 | 0.00 |
| ATOM | 2489 | HH11 | ARG | X | 161 | 38.262 | 74.878 | 49.259 | 0.00 | 0.00 |
| ATOM | 2490 | HH12 | ARG | X | 161 | 37.111 | 75.983 | 48.621 | 0.00 | 0.00 |
| ATOM | 2491 | NH2  | ARG | X | 161 | 36.204 | 74.281 | 46.948 | 0.00 | 0.00 |
| ATOM | 2492 | HH21 | ARG | X | 161 | 35.956 | 73.540 | 46.307 | 0.00 | 0.00 |
| ATOM | 2493 | HH22 | ARG | X | 161 | 35.818 | 75.185 | 46.718 | 0.00 | 0.00 |
| ATOM | 2494 | C    | ARG | X | 161 | 41.449 | 68.992 | 46.643 | 0.00 | 0.00 |
| ATOM | 2495 | O    | ARG | X | 161 | 40.863 | 68.926 | 45.559 | 0.00 | 0.00 |
| ATOM | 2496 | N    | GLU | X | 162 | 42.758 | 68.957 | 46.796 | 0.00 | 0.00 |
| ATOM | 2497 | H    | GLU | X | 162 | 43.103 | 69.126 | 47.730 | 0.00 | 0.00 |
| ATOM | 2498 | CA   | GLU | X | 162 | 43.753 | 68.880 | 45.644 | 0.00 | 0.00 |
| ATOM | 2499 | HA   | GLU | X | 162 | 43.381 | 69.464 | 44.803 | 0.00 | 0.00 |
| ATOM | 2500 | CB   | GLU | X | 162 | 44.989 | 69.470 | 46.227 | 0.00 | 0.00 |
| ATOM | 2501 | HB2  | GLU | X | 162 | 45.227 | 68.966 | 47.163 | 0.00 | 0.00 |
| ATOM | 2502 | HB3  | GLU | X | 162 | 45.760 | 69.272 | 45.482 | 0.00 | 0.00 |
| ATOM | 2503 | CG   | GLU | X | 162 | 44.920 | 71.038 | 46.506 | 0.00 | 0.00 |

|      |      |      |     |   |     |        |        |        |      |      |
|------|------|------|-----|---|-----|--------|--------|--------|------|------|
| ATOM | 2504 | HG2  | GLU | X | 162 | 45.817 | 71.501 | 46.918 | 0.00 | 0.00 |
| ATOM | 2505 | HG3  | GLU | X | 162 | 44.699 | 71.511 | 45.548 | 0.00 | 0.00 |
| ATOM | 2506 | CD   | GLU | X | 162 | 43.901 | 71.651 | 47.465 | 0.00 | 0.00 |
| ATOM | 2507 | OE1  | GLU | X | 162 | 43.301 | 72.655 | 47.098 | 0.00 | 0.00 |
| ATOM | 2508 | OE2  | GLU | X | 162 | 43.887 | 71.201 | 48.632 | 0.00 | 0.00 |
| ATOM | 2509 | C    | GLU | X | 162 | 43.880 | 67.443 | 45.139 | 0.00 | 0.00 |
| ATOM | 2510 | O    | GLU | X | 162 | 43.623 | 67.199 | 43.963 | 0.00 | 0.00 |
| ATOM | 2511 | N    | ALA | X | 163 | 44.236 | 66.435 | 46.002 | 0.00 | 0.00 |
| ATOM | 2512 | H    | ALA | X | 163 | 44.315 | 66.728 | 46.965 | 0.00 | 0.00 |
| ATOM | 2513 | CA   | ALA | X | 163 | 43.934 | 65.125 | 45.678 | 0.00 | 0.00 |
| ATOM | 2514 | HA   | ALA | X | 163 | 43.348 | 65.012 | 44.766 | 0.00 | 0.00 |
| ATOM | 2515 | CB   | ALA | X | 163 | 45.322 | 64.431 | 45.465 | 0.00 | 0.00 |
| ATOM | 2516 | HB1  | ALA | X | 163 | 45.035 | 63.416 | 45.191 | 0.00 | 0.00 |
| ATOM | 2517 | HB2  | ALA | X | 163 | 45.920 | 64.474 | 46.375 | 0.00 | 0.00 |
| ATOM | 2518 | HB3  | ALA | X | 163 | 45.769 | 64.890 | 44.583 | 0.00 | 0.00 |
| ATOM | 2519 | C    | ALA | X | 163 | 43.127 | 64.473 | 46.855 | 0.00 | 0.00 |
| ATOM | 2520 | O    | ALA | X | 163 | 43.811 | 64.012 | 47.757 | 0.00 | 0.00 |
| ATOM | 2521 | N    | PRO | X | 164 | 41.779 | 64.467 | 46.792 | 0.00 | 0.00 |
| ATOM | 2522 | CD   | PRO | X | 164 | 41.010 | 65.042 | 45.829 | 0.00 | 0.00 |
| ATOM | 2523 | HD2  | PRO | X | 164 | 40.924 | 64.415 | 44.943 | 0.00 | 0.00 |
| ATOM | 2524 | HD3  | PRO | X | 164 | 41.413 | 66.023 | 45.576 | 0.00 | 0.00 |
| ATOM | 2525 | CG   | PRO | X | 164 | 39.582 | 65.139 | 46.401 | 0.00 | 0.00 |
| ATOM | 2526 | HG2  | PRO | X | 164 | 38.838 | 65.287 | 45.619 | 0.00 | 0.00 |
| ATOM | 2527 | HG3  | PRO | X | 164 | 39.463 | 65.965 | 47.102 | 0.00 | 0.00 |
| ATOM | 2528 | CB   | PRO | X | 164 | 39.491 | 63.916 | 47.245 | 0.00 | 0.00 |
| ATOM | 2529 | HB2  | PRO | X | 164 | 39.144 | 63.130 | 46.575 | 0.00 | 0.00 |
| ATOM | 2530 | HB3  | PRO | X | 164 | 38.856 | 63.941 | 48.130 | 0.00 | 0.00 |
| ATOM | 2531 | CA   | PRO | X | 164 | 40.941 | 63.654 | 47.682 | 0.00 | 0.00 |
| ATOM | 2532 | HA   | PRO | X | 164 | 40.971 | 64.003 | 48.714 | 0.00 | 0.00 |
| ATOM | 2533 | C    | PRO | X | 164 | 41.242 | 62.103 | 47.613 | 0.00 | 0.00 |
| ATOM | 2534 | O    | PRO | X | 164 | 41.344 | 61.406 | 48.653 | 0.00 | 0.00 |
| ATOM | 2535 | N    | GLY | X | 165 | 41.518 | 61.617 | 46.401 | 0.00 | 0.00 |
| ATOM | 2536 | H    | GLY | X | 165 | 41.409 | 62.188 | 45.575 | 0.00 | 0.00 |
| ATOM | 2537 | CA   | GLY | X | 165 | 41.773 | 60.174 | 46.221 | 0.00 | 0.00 |
| ATOM | 2538 | HA2  | GLY | X | 165 | 42.373 | 60.110 | 45.313 | 0.00 | 0.00 |
| ATOM | 2539 | HA3  | GLY | X | 165 | 42.419 | 59.835 | 47.031 | 0.00 | 0.00 |
| ATOM | 2540 | C    | GLY | X | 165 | 40.517 | 59.181 | 46.155 | 0.00 | 0.00 |
| ATOM | 2541 | O    | GLY | X | 165 | 39.341 | 59.625 | 46.074 | 0.00 | 0.00 |
| ATOM | 2542 | N    | ASN | X | 166 | 40.847 | 57.881 | 46.007 | 0.00 | 0.00 |
| ATOM | 2543 | H    | ASN | X | 166 | 41.818 | 57.602 | 46.002 | 0.00 | 0.00 |
| ATOM | 2544 | CA   | ASN | X | 166 | 39.887 | 56.764 | 45.827 | 0.00 | 0.00 |
| ATOM | 2545 | HA   | ASN | X | 166 | 40.532 | 55.886 | 45.780 | 0.00 | 0.00 |
| ATOM | 2546 | CB   | ASN | X | 166 | 39.005 | 56.587 | 47.064 | 0.00 | 0.00 |
| ATOM | 2547 | HB2  | ASN | X | 166 | 38.412 | 57.480 | 47.262 | 0.00 | 0.00 |
| ATOM | 2548 | HB3  | ASN | X | 166 | 38.295 | 55.789 | 46.849 | 0.00 | 0.00 |
| ATOM | 2549 | CG   | ASN | X | 166 | 39.693 | 56.287 | 48.362 | 0.00 | 0.00 |
| ATOM | 2550 | OD1  | ASN | X | 166 | 40.830 | 56.031 | 48.359 | 0.00 | 0.00 |
| ATOM | 2551 | ND2  | ASN | X | 166 | 38.916 | 56.218 | 49.445 | 0.00 | 0.00 |
| ATOM | 2552 | HD21 | ASN | X | 166 | 39.416 | 56.033 | 50.303 | 0.00 | 0.00 |
| ATOM | 2553 | HD22 | ASN | X | 166 | 37.963 | 56.539 | 49.532 | 0.00 | 0.00 |
| ATOM | 2554 | C    | ASN | X | 166 | 39.022 | 56.947 | 44.591 | 0.00 | 0.00 |
| ATOM | 2555 | O    | ASN | X | 166 | 38.016 | 56.218 | 44.461 | 0.00 | 0.00 |
| ATOM | 2556 | N    | VAL | X | 167 | 39.290 | 57.872 | 43.675 | 0.00 | 0.00 |
| ATOM | 2557 | H    | VAL | X | 167 | 40.061 | 58.492 | 43.878 | 0.00 | 0.00 |
| ATOM | 2558 | CA   | VAL | X | 167 | 38.340 | 58.308 | 42.582 | 0.00 | 0.00 |
| ATOM | 2559 | HA   | VAL | X | 167 | 37.372 | 58.388 | 43.075 | 0.00 | 0.00 |
| ATOM | 2560 | CB   | VAL | X | 167 | 38.569 | 59.662 | 41.924 | 0.00 | 0.00 |
| ATOM | 2561 | HB   | VAL | X | 167 | 37.635 | 59.869 | 41.401 | 0.00 | 0.00 |
| ATOM | 2562 | CG1  | VAL | X | 167 | 38.671 | 60.729 | 42.976 | 0.00 | 0.00 |
| ATOM | 2563 | HG11 | VAL | X | 167 | 37.917 | 60.599 | 43.752 | 0.00 | 0.00 |
| ATOM | 2564 | HG12 | VAL | X | 167 | 39.693 | 60.752 | 43.353 | 0.00 | 0.00 |
| ATOM | 2565 | HG13 | VAL | X | 167 | 38.488 | 61.689 | 42.492 | 0.00 | 0.00 |
| ATOM | 2566 | CG2  | VAL | X | 167 | 39.802 | 59.692 | 41.157 | 0.00 | 0.00 |
| ATOM | 2567 | HG21 | VAL | X | 167 | 39.634 | 58.998 | 40.333 | 0.00 | 0.00 |
| ATOM | 2568 | HG22 | VAL | X | 167 | 40.580 | 59.346 | 41.837 | 0.00 | 0.00 |
| ATOM | 2569 | HG23 | VAL | X | 167 | 40.057 | 60.653 | 40.712 | 0.00 | 0.00 |
| ATOM | 2570 | C    | VAL | X | 167 | 38.212 | 57.164 | 41.575 | 0.00 | 0.00 |



|      |      |      |     |   |     |        |        |        |      |      |
|------|------|------|-----|---|-----|--------|--------|--------|------|------|
| ATOM | 2571 | O    | VAL | X | 167 | 37.232 | 57.206 | 40.864 | 0.00 | 0.00 |
| ATOM | 2572 | N    | GLY | X | 168 | 39.158 | 56.191 | 41.468 | 0.00 | 0.00 |
| ATOM | 2573 | H    | GLY | X | 168 | 39.817 | 56.167 | 42.233 | 0.00 | 0.00 |
| ATOM | 2574 | CA   | GLY | X | 168 | 38.936 | 55.037 | 40.523 | 0.00 | 0.00 |
| ATOM | 2575 | HA2  | GLY | X | 168 | 38.600 | 55.450 | 39.572 | 0.00 | 0.00 |
| ATOM | 2576 | HA3  | GLY | X | 168 | 39.904 | 54.559 | 40.365 | 0.00 | 0.00 |
| ATOM | 2577 | C    | GLY | X | 168 | 37.815 | 54.124 | 41.028 | 0.00 | 0.00 |
| ATOM | 2578 | O    | GLY | X | 168 | 37.360 | 53.219 | 40.362 | 0.00 | 0.00 |
| ATOM | 2579 | N    | LEU | X | 169 | 37.364 | 54.298 | 42.280 | 0.00 | 0.00 |
| ATOM | 2580 | H    | LEU | X | 169 | 37.785 | 55.091 | 42.743 | 0.00 | 0.00 |
| ATOM | 2581 | CA   | LEU | X | 169 | 36.062 | 53.819 | 42.827 | 0.00 | 0.00 |
| ATOM | 2582 | HA   | LEU | X | 169 | 35.825 | 52.860 | 42.367 | 0.00 | 0.00 |
| ATOM | 2583 | CB   | LEU | X | 169 | 36.230 | 53.461 | 44.259 | 0.00 | 0.00 |
| ATOM | 2584 | HB2  | LEU | X | 169 | 36.397 | 54.412 | 44.765 | 0.00 | 0.00 |
| ATOM | 2585 | HB3  | LEU | X | 169 | 35.327 | 52.959 | 44.606 | 0.00 | 0.00 |
| ATOM | 2586 | CG   | LEU | X | 169 | 37.320 | 52.412 | 44.643 | 0.00 | 0.00 |
| ATOM | 2587 | HG   | LEU | X | 169 | 38.270 | 52.738 | 44.220 | 0.00 | 0.00 |
| ATOM | 2588 | CD1  | LEU | X | 169 | 37.345 | 52.465 | 46.194 | 0.00 | 0.00 |
| ATOM | 2589 | HD11 | LEU | X | 169 | 37.487 | 53.459 | 46.616 | 0.00 | 0.00 |
| ATOM | 2590 | HD12 | LEU | X | 169 | 38.247 | 52.023 | 46.619 | 0.00 | 0.00 |
| ATOM | 2591 | HD13 | LEU | X | 169 | 36.447 | 51.970 | 46.564 | 0.00 | 0.00 |
| ATOM | 2592 | CD2  | LEU | X | 169 | 37.158 | 50.958 | 44.140 | 0.00 | 0.00 |
| ATOM | 2593 | HD21 | LEU | X | 169 | 37.506 | 50.923 | 43.108 | 0.00 | 0.00 |
| ATOM | 2594 | HD22 | LEU | X | 169 | 37.818 | 50.295 | 44.700 | 0.00 | 0.00 |
| ATOM | 2595 | HD23 | LEU | X | 169 | 36.124 | 50.618 | 44.199 | 0.00 | 0.00 |
| ATOM | 2596 | C    | LEU | X | 169 | 34.903 | 54.727 | 42.547 | 0.00 | 0.00 |
| ATOM | 2597 | O    | LEU | X | 169 | 33.798 | 54.198 | 42.263 | 0.00 | 0.00 |
| ATOM | 2598 | N    | LEU | X | 170 | 35.069 | 56.086 | 42.621 | 0.00 | 0.00 |
| ATOM | 2599 | H    | LEU | X | 170 | 35.987 | 56.440 | 42.850 | 0.00 | 0.00 |
| ATOM | 2600 | CA   | LEU | X | 170 | 33.944 | 56.933 | 42.070 | 0.00 | 0.00 |
| ATOM | 2601 | HA   | LEU | X | 170 | 32.977 | 56.846 | 42.566 | 0.00 | 0.00 |
| ATOM | 2602 | CB   | LEU | X | 170 | 34.331 | 58.437 | 42.149 | 0.00 | 0.00 |
| ATOM | 2603 | HB2  | LEU | X | 170 | 35.219 | 58.684 | 41.568 | 0.00 | 0.00 |
| ATOM | 2604 | HB3  | LEU | X | 170 | 33.493 | 58.922 | 41.648 | 0.00 | 0.00 |
| ATOM | 2605 | CG   | LEU | X | 170 | 34.502 | 58.965 | 43.658 | 0.00 | 0.00 |
| ATOM | 2606 | HG   | LEU | X | 170 | 35.424 | 58.577 | 44.090 | 0.00 | 0.00 |
| ATOM | 2607 | CD1  | LEU | X | 170 | 34.561 | 60.498 | 43.421 | 0.00 | 0.00 |
| ATOM | 2608 | HD11 | LEU | X | 170 | 35.438 | 60.823 | 42.862 | 0.00 | 0.00 |
| ATOM | 2609 | HD12 | LEU | X | 170 | 34.471 | 60.949 | 44.409 | 0.00 | 0.00 |
| ATOM | 2610 | HD13 | LEU | X | 170 | 33.647 | 60.876 | 42.962 | 0.00 | 0.00 |
| ATOM | 2611 | CD2  | LEU | X | 170 | 33.402 | 58.662 | 44.643 | 0.00 | 0.00 |
| ATOM | 2612 | HD21 | LEU | X | 170 | 32.966 | 57.663 | 44.670 | 0.00 | 0.00 |
| ATOM | 2613 | HD22 | LEU | X | 170 | 33.706 | 58.923 | 45.656 | 0.00 | 0.00 |
| ATOM | 2614 | HD23 | LEU | X | 170 | 32.565 | 59.315 | 44.396 | 0.00 | 0.00 |
| ATOM | 2615 | C    | LEU | X | 170 | 33.607 | 56.695 | 40.615 | 0.00 | 0.00 |
| ATOM | 2616 | O    | LEU | X | 170 | 32.425 | 56.778 | 40.225 | 0.00 | 0.00 |
| ATOM | 2617 | N    | ASP | X | 171 | 34.663 | 56.297 | 39.813 | 0.00 | 0.00 |
| ATOM | 2618 | H    | ASP | X | 171 | 35.617 | 56.397 | 40.131 | 0.00 | 0.00 |
| ATOM | 2619 | CA   | ASP | X | 171 | 34.453 | 55.906 | 38.401 | 0.00 | 0.00 |
| ATOM | 2620 | HA   | ASP | X | 171 | 34.007 | 56.701 | 37.804 | 0.00 | 0.00 |
| ATOM | 2621 | CB   | ASP | X | 171 | 35.833 | 55.508 | 37.680 | 0.00 | 0.00 |
| ATOM | 2622 | HB2  | ASP | X | 171 | 36.256 | 54.650 | 38.202 | 0.00 | 0.00 |
| ATOM | 2623 | HB3  | ASP | X | 171 | 35.619 | 55.250 | 36.643 | 0.00 | 0.00 |
| ATOM | 2624 | CG   | ASP | X | 171 | 36.916 | 56.601 | 37.606 | 0.00 | 0.00 |
| ATOM | 2625 | OD1  | ASP | X | 171 | 36.701 | 57.670 | 38.220 | 0.00 | 0.00 |
| ATOM | 2626 | OD2  | ASP | X | 171 | 37.973 | 56.308 | 37.061 | 0.00 | 0.00 |
| ATOM | 2627 | C    | ASP | X | 171 | 33.570 | 54.694 | 38.314 | 0.00 | 0.00 |
| ATOM | 2628 | O    | ASP | X | 171 | 32.609 | 54.590 | 37.540 | 0.00 | 0.00 |
| ATOM | 2629 | N    | GLN | X | 172 | 33.778 | 53.676 | 39.174 | 0.00 | 0.00 |
| ATOM | 2630 | H    | GLN | X | 172 | 34.460 | 53.778 | 39.912 | 0.00 | 0.00 |
| ATOM | 2631 | CA   | GLN | X | 172 | 33.074 | 52.439 | 39.180 | 0.00 | 0.00 |
| ATOM | 2632 | HA   | GLN | X | 172 | 32.914 | 52.127 | 38.148 | 0.00 | 0.00 |
| ATOM | 2633 | CB   | GLN | X | 172 | 33.799 | 51.421 | 40.087 | 0.00 | 0.00 |
| ATOM | 2634 | HB2  | GLN | X | 172 | 34.034 | 51.933 | 41.020 | 0.00 | 0.00 |
| ATOM | 2635 | HB3  | GLN | X | 172 | 33.124 | 50.604 | 40.342 | 0.00 | 0.00 |
| ATOM | 2636 | CG   | GLN | X | 172 | 35.065 | 50.890 | 39.451 | 0.00 | 0.00 |
| ATOM | 2637 | HG2  | GLN | X | 172 | 34.787 | 50.196 | 38.658 | 0.00 | 0.00 |

|      |      |      |     |   |     |        |        |        |      |      |
|------|------|------|-----|---|-----|--------|--------|--------|------|------|
| ATOM | 2638 | HG3  | GLN | X | 172 | 35.601 | 51.773 | 39.102 | 0.00 | 0.00 |
| ATOM | 2639 | CD   | GLN | X | 172 | 35.858 | 50.063 | 40.507 | 0.00 | 0.00 |
| ATOM | 2640 | OE1  | GLN | X | 172 | 35.611 | 50.112 | 41.718 | 0.00 | 0.00 |
| ATOM | 2641 | NE2  | GLN | X | 172 | 36.790 | 49.258 | 40.101 | 0.00 | 0.00 |
| ATOM | 2642 | HE21 | GLN | X | 172 | 37.266 | 48.765 | 40.843 | 0.00 | 0.00 |
| ATOM | 2643 | HE22 | GLN | X | 172 | 36.986 | 49.230 | 39.110 | 0.00 | 0.00 |
| ATOM | 2644 | C    | GLN | X | 172 | 31.627 | 52.624 | 39.786 | 0.00 | 0.00 |
| ATOM | 2645 | O    | GLN | X | 172 | 30.672 | 52.126 | 39.176 | 0.00 | 0.00 |
| ATOM | 2646 | N    | ARG | X | 173 | 31.458 | 53.492 | 40.784 | 0.00 | 0.00 |
| ATOM | 2647 | H    | ARG | X | 173 | 32.309 | 53.856 | 41.188 | 0.00 | 0.00 |
| ATOM | 2648 | CA   | ARG | X | 173 | 30.157 | 54.099 | 41.108 | 0.00 | 0.00 |
| ATOM | 2649 | HA   | ARG | X | 173 | 29.472 | 53.337 | 41.480 | 0.00 | 0.00 |
| ATOM | 2650 | CB   | ARG | X | 173 | 30.312 | 55.077 | 42.311 | 0.00 | 0.00 |
| ATOM | 2651 | HB2  | ARG | X | 173 | 31.019 | 54.779 | 43.085 | 0.00 | 0.00 |
| ATOM | 2652 | HB3  | ARG | X | 173 | 30.739 | 55.956 | 41.828 | 0.00 | 0.00 |
| ATOM | 2653 | CG   | ARG | X | 173 | 28.995 | 55.547 | 42.955 | 0.00 | 0.00 |
| ATOM | 2654 | HG2  | ARG | X | 173 | 28.439 | 56.240 | 42.323 | 0.00 | 0.00 |
| ATOM | 2655 | HG3  | ARG | X | 173 | 28.244 | 54.760 | 43.032 | 0.00 | 0.00 |
| ATOM | 2656 | CD   | ARG | X | 173 | 29.184 | 56.339 | 44.285 | 0.00 | 0.00 |
| ATOM | 2657 | HD2  | ARG | X | 173 | 29.871 | 57.185 | 44.261 | 0.00 | 0.00 |
| ATOM | 2658 | HD3  | ARG | X | 173 | 28.201 | 56.677 | 44.612 | 0.00 | 0.00 |
| ATOM | 2659 | NE   | ARG | X | 173 | 29.655 | 55.364 | 45.354 | 0.00 | 0.00 |
| ATOM | 2660 | HE   | ARG | X | 173 | 29.148 | 54.507 | 45.523 | 0.00 | 0.00 |
| ATOM | 2661 | CZ   | ARG | X | 173 | 30.410 | 55.738 | 46.422 | 0.00 | 0.00 |
| ATOM | 2662 | NH1  | ARG | X | 173 | 30.883 | 56.944 | 46.640 | 0.00 | 0.00 |
| ATOM | 2663 | HH11 | ARG | X | 173 | 30.717 | 57.727 | 46.025 | 0.00 | 0.00 |
| ATOM | 2664 | HH12 | ARG | X | 173 | 31.428 | 57.168 | 47.461 | 0.00 | 0.00 |
| ATOM | 2665 | NH2  | ARG | X | 173 | 30.610 | 54.922 | 47.394 | 0.00 | 0.00 |
| ATOM | 2666 | HH21 | ARG | X | 173 | 30.386 | 53.941 | 47.310 | 0.00 | 0.00 |
| ATOM | 2667 | HH22 | ARG | X | 173 | 31.077 | 55.201 | 48.245 | 0.00 | 0.00 |
| ATOM | 2668 | C    | ARG | X | 173 | 29.396 | 54.760 | 39.934 | 0.00 | 0.00 |
| ATOM | 2669 | O    | ARG | X | 173 | 28.181 | 54.624 | 39.839 | 0.00 | 0.00 |
| ATOM | 2670 | N    | LEU | X | 174 | 30.100 | 55.492 | 39.080 | 0.00 | 0.00 |
| ATOM | 2671 | H    | LEU | X | 174 | 31.097 | 55.529 | 39.237 | 0.00 | 0.00 |
| ATOM | 2672 | CA   | LEU | X | 174 | 29.523 | 56.250 | 37.960 | 0.00 | 0.00 |
| ATOM | 2673 | HA   | LEU | X | 174 | 28.728 | 56.762 | 38.503 | 0.00 | 0.00 |
| ATOM | 2674 | CB   | LEU | X | 174 | 30.421 | 57.367 | 37.557 | 0.00 | 0.00 |
| ATOM | 2675 | HB2  | LEU | X | 174 | 30.750 | 57.943 | 38.422 | 0.00 | 0.00 |
| ATOM | 2676 | HB3  | LEU | X | 174 | 31.252 | 56.866 | 37.059 | 0.00 | 0.00 |
| ATOM | 2677 | CG   | LEU | X | 174 | 29.778 | 58.334 | 36.529 | 0.00 | 0.00 |
| ATOM | 2678 | HG   | LEU | X | 174 | 29.535 | 57.758 | 35.636 | 0.00 | 0.00 |
| ATOM | 2679 | CD1  | LEU | X | 174 | 28.589 | 59.070 | 37.175 | 0.00 | 0.00 |
| ATOM | 2680 | HD11 | LEU | X | 174 | 27.845 | 58.399 | 37.604 | 0.00 | 0.00 |
| ATOM | 2681 | HD12 | LEU | X | 174 | 28.128 | 59.608 | 36.346 | 0.00 | 0.00 |
| ATOM | 2682 | HD13 | LEU | X | 174 | 28.759 | 59.851 | 37.916 | 0.00 | 0.00 |
| ATOM | 2683 | CD2  | LEU | X | 174 | 30.754 | 59.479 | 36.151 | 0.00 | 0.00 |
| ATOM | 2684 | HD21 | LEU | X | 174 | 31.746 | 59.118 | 35.881 | 0.00 | 0.00 |
| ATOM | 2685 | HD22 | LEU | X | 174 | 30.354 | 59.997 | 35.280 | 0.00 | 0.00 |
| ATOM | 2686 | HD23 | LEU | X | 174 | 30.825 | 60.187 | 36.977 | 0.00 | 0.00 |
| ATOM | 2687 | C    | LEU | X | 174 | 28.960 | 55.367 | 36.824 | 0.00 | 0.00 |
| ATOM | 2688 | O    | LEU | X | 174 | 27.957 | 55.604 | 36.133 | 0.00 | 0.00 |
| ATOM | 2689 | N    | ALA | X | 175 | 29.594 | 54.182 | 36.669 | 0.00 | 0.00 |
| ATOM | 2690 | H    | ALA | X | 175 | 30.529 | 54.040 | 37.024 | 0.00 | 0.00 |
| ATOM | 2691 | CA   | ALA | X | 175 | 29.104 | 53.171 | 35.691 | 0.00 | 0.00 |
| ATOM | 2692 | HA   | ALA | X | 175 | 28.733 | 53.535 | 34.733 | 0.00 | 0.00 |
| ATOM | 2693 | CB   | ALA | X | 175 | 30.276 | 52.357 | 35.234 | 0.00 | 0.00 |
| ATOM | 2694 | HB1  | ALA | X | 175 | 30.645 | 51.832 | 36.115 | 0.00 | 0.00 |
| ATOM | 2695 | HB2  | ALA | X | 175 | 31.048 | 53.057 | 34.916 | 0.00 | 0.00 |
| ATOM | 2696 | HB3  | ALA | X | 175 | 29.962 | 51.748 | 34.386 | 0.00 | 0.00 |
| ATOM | 2697 | C    | ALA | X | 175 | 27.991 | 52.329 | 36.365 | 0.00 | 0.00 |
| ATOM | 2698 | O    | ALA | X | 175 | 26.960 | 52.128 | 35.746 | 0.00 | 0.00 |
| ATOM | 2699 | N    | LEU | X | 176 | 27.988 | 52.005 | 37.667 | 0.00 | 0.00 |
| ATOM | 2700 | H    | LEU | X | 176 | 28.823 | 52.268 | 38.171 | 0.00 | 0.00 |
| ATOM | 2701 | CA   | LEU | X | 176 | 26.747 | 51.471 | 38.317 | 0.00 | 0.00 |
| ATOM | 2702 | HA   | LEU | X | 176 | 26.497 | 50.540 | 37.808 | 0.00 | 0.00 |
| ATOM | 2703 | CB   | LEU | X | 176 | 27.150 | 51.091 | 39.752 | 0.00 | 0.00 |
| ATOM | 2704 | HB2  | LEU | X | 176 | 27.613 | 51.955 | 40.230 | 0.00 | 0.00 |

|      |      |      |     |   |     |        |        |        |      |      |
|------|------|------|-----|---|-----|--------|--------|--------|------|------|
| ATOM | 2705 | HB3  | LEU | X | 176 | 26.223 | 50.865 | 40.277 | 0.00 | 0.00 |
| ATOM | 2706 | CG   | LEU | X | 176 | 28.078 | 49.887 | 39.953 | 0.00 | 0.00 |
| ATOM | 2707 | HG   | LEU | X | 176 | 28.934 | 49.983 | 39.286 | 0.00 | 0.00 |
| ATOM | 2708 | CD1  | LEU | X | 176 | 28.562 | 49.839 | 41.450 | 0.00 | 0.00 |
| ATOM | 2709 | HD11 | LEU | X | 176 | 27.684 | 49.678 | 42.075 | 0.00 | 0.00 |
| ATOM | 2710 | HD12 | LEU | X | 176 | 29.039 | 50.776 | 41.737 | 0.00 | 0.00 |
| ATOM | 2711 | HD13 | LEU | X | 176 | 29.360 | 49.102 | 41.529 | 0.00 | 0.00 |
| ATOM | 2712 | CD2  | LEU | X | 176 | 27.290 | 48.583 | 39.528 | 0.00 | 0.00 |
| ATOM | 2713 | HD21 | LEU | X | 176 | 26.847 | 48.716 | 38.541 | 0.00 | 0.00 |
| ATOM | 2714 | HD22 | LEU | X | 176 | 28.086 | 47.840 | 39.489 | 0.00 | 0.00 |
| ATOM | 2715 | HD23 | LEU | X | 176 | 26.530 | 48.387 | 40.285 | 0.00 | 0.00 |
| ATOM | 2716 | C    | LEU | X | 176 | 25.558 | 52.385 | 38.330 | 0.00 | 0.00 |
| ATOM | 2717 | O    | LEU | X | 176 | 24.496 | 51.926 | 37.982 | 0.00 | 0.00 |
| ATOM | 2718 | N    | GLN | X | 177 | 25.772 | 53.719 | 38.470 | 0.00 | 0.00 |
| ATOM | 2719 | H    | GLN | X | 177 | 26.643 | 54.049 | 38.859 | 0.00 | 0.00 |
| ATOM | 2720 | CA   | GLN | X | 177 | 24.819 | 54.753 | 37.982 | 0.00 | 0.00 |
| ATOM | 2721 | HA   | GLN | X | 177 | 23.901 | 54.640 | 38.559 | 0.00 | 0.00 |
| ATOM | 2722 | CB   | GLN | X | 177 | 25.254 | 56.207 | 38.291 | 0.00 | 0.00 |
| ATOM | 2723 | HB2  | GLN | X | 177 | 26.276 | 56.322 | 37.927 | 0.00 | 0.00 |
| ATOM | 2724 | HB3  | GLN | X | 177 | 24.646 | 56.910 | 37.722 | 0.00 | 0.00 |
| ATOM | 2725 | CG   | GLN | X | 177 | 25.096 | 56.408 | 39.780 | 0.00 | 0.00 |
| ATOM | 2726 | HG2  | GLN | X | 177 | 24.070 | 56.368 | 40.147 | 0.00 | 0.00 |
| ATOM | 2727 | HG3  | GLN | X | 177 | 25.733 | 55.681 | 40.284 | 0.00 | 0.00 |
| ATOM | 2728 | CD   | GLN | X | 177 | 25.584 | 57.770 | 40.171 | 0.00 | 0.00 |
| ATOM | 2729 | OE1  | GLN | X | 177 | 26.444 | 58.322 | 39.567 | 0.00 | 0.00 |
| ATOM | 2730 | NE2  | GLN | X | 177 | 25.041 | 58.499 | 41.126 | 0.00 | 0.00 |
| ATOM | 2731 | HE21 | GLN | X | 177 | 25.248 | 59.477 | 41.272 | 0.00 | 0.00 |
| ATOM | 2732 | HE22 | GLN | X | 177 | 24.190 | 58.127 | 41.523 | 0.00 | 0.00 |
| ATOM | 2733 | C    | GLN | X | 177 | 24.387 | 54.533 | 36.534 | 0.00 | 0.00 |
| ATOM | 2734 | O    | GLN | X | 177 | 23.178 | 54.496 | 36.438 | 0.00 | 0.00 |
| ATOM | 2735 | N    | TRP | X | 178 | 25.210 | 54.493 | 35.538 | 0.00 | 0.00 |
| ATOM | 2736 | H    | TRP | X | 178 | 26.187 | 54.373 | 35.767 | 0.00 | 0.00 |
| ATOM | 2737 | CA   | TRP | X | 178 | 24.731 | 54.261 | 34.183 | 0.00 | 0.00 |
| ATOM | 2738 | HA   | TRP | X | 178 | 24.092 | 55.092 | 33.887 | 0.00 | 0.00 |
| ATOM | 2739 | CB   | TRP | X | 178 | 25.909 | 54.330 | 33.263 | 0.00 | 0.00 |
| ATOM | 2740 | HB2  | TRP | X | 178 | 26.508 | 55.190 | 33.563 | 0.00 | 0.00 |
| ATOM | 2741 | HB3  | TRP | X | 178 | 26.674 | 53.569 | 33.424 | 0.00 | 0.00 |
| ATOM | 2742 | CG   | TRP | X | 178 | 25.553 | 54.532 | 31.844 | 0.00 | 0.00 |
| ATOM | 2743 | CD1  | TRP | X | 178 | 25.679 | 55.713 | 31.260 | 0.00 | 0.00 |
| ATOM | 2744 | HD1  | TRP | X | 178 | 25.974 | 56.662 | 31.682 | 0.00 | 0.00 |
| ATOM | 2745 | NE1  | TRP | X | 178 | 25.224 | 55.645 | 29.950 | 0.00 | 0.00 |
| ATOM | 2746 | HE1  | TRP | X | 178 | 25.129 | 56.445 | 29.341 | 0.00 | 0.00 |
| ATOM | 2747 | CE2  | TRP | X | 178 | 24.986 | 54.411 | 29.568 | 0.00 | 0.00 |
| ATOM | 2748 | CZ2  | TRP | X | 178 | 24.698 | 53.871 | 28.335 | 0.00 | 0.00 |
| ATOM | 2749 | HZ2  | TRP | X | 178 | 24.588 | 54.551 | 27.504 | 0.00 | 0.00 |
| ATOM | 2750 | CH2  | TRP | X | 178 | 24.661 | 52.477 | 28.323 | 0.00 | 0.00 |
| ATOM | 2751 | HH2  | TRP | X | 178 | 24.462 | 51.957 | 27.397 | 0.00 | 0.00 |
| ATOM | 2752 | CZ3  | TRP | X | 178 | 24.787 | 51.699 | 29.445 | 0.00 | 0.00 |
| ATOM | 2753 | HZ3  | TRP | X | 178 | 24.694 | 50.624 | 29.393 | 0.00 | 0.00 |
| ATOM | 2754 | CE3  | TRP | X | 178 | 25.018 | 52.291 | 30.672 | 0.00 | 0.00 |
| ATOM | 2755 | HE3  | TRP | X | 178 | 25.209 | 51.599 | 31.479 | 0.00 | 0.00 |
| ATOM | 2756 | CD2  | TRP | X | 178 | 25.157 | 53.652 | 30.764 | 0.00 | 0.00 |
| ATOM | 2757 | C    | TRP | X | 178 | 23.950 | 52.996 | 34.074 | 0.00 | 0.00 |
| ATOM | 2758 | O    | TRP | X | 178 | 22.948 | 53.015 | 33.391 | 0.00 | 0.00 |
| ATOM | 2759 | N    | VAL | X | 179 | 24.409 | 51.898 | 34.553 | 0.00 | 0.00 |
| ATOM | 2760 | H    | VAL | X | 179 | 25.285 | 52.009 | 35.043 | 0.00 | 0.00 |
| ATOM | 2761 | CA   | VAL | X | 179 | 23.686 | 50.591 | 34.569 | 0.00 | 0.00 |
| ATOM | 2762 | HA   | VAL | X | 179 | 23.607 | 50.238 | 33.541 | 0.00 | 0.00 |
| ATOM | 2763 | CB   | VAL | X | 179 | 24.450 | 49.460 | 35.344 | 0.00 | 0.00 |
| ATOM | 2764 | HB   | VAL | X | 179 | 24.636 | 49.860 | 36.341 | 0.00 | 0.00 |
| ATOM | 2765 | CG1  | VAL | X | 179 | 23.565 | 48.229 | 35.595 | 0.00 | 0.00 |
| ATOM | 2766 | HG11 | VAL | X | 179 | 23.175 | 47.886 | 34.636 | 0.00 | 0.00 |
| ATOM | 2767 | HG12 | VAL | X | 179 | 24.120 | 47.358 | 35.943 | 0.00 | 0.00 |
| ATOM | 2768 | HG13 | VAL | X | 179 | 22.793 | 48.410 | 36.342 | 0.00 | 0.00 |
| ATOM | 2769 | CG2  | VAL | X | 179 | 25.708 | 49.060 | 34.574 | 0.00 | 0.00 |
| ATOM | 2770 | HG21 | VAL | X | 179 | 26.220 | 48.267 | 35.118 | 0.00 | 0.00 |
| ATOM | 2771 | HG22 | VAL | X | 179 | 26.391 | 49.905 | 34.658 | 0.00 | 0.00 |

|      |      |      |     |   |     |        |        |        |      |      |
|------|------|------|-----|---|-----|--------|--------|--------|------|------|
| ATOM | 2772 | HG23 | VAL | X | 179 | 25.489 | 48.805 | 33.537 | 0.00 | 0.00 |
| ATOM | 2773 | C    | VAL | X | 179 | 22.268 | 50.872 | 35.036 | 0.00 | 0.00 |
| ATOM | 2774 | O    | VAL | X | 179 | 21.428 | 50.641 | 34.232 | 0.00 | 0.00 |
| ATOM | 2775 | N    | GLN | X | 180 | 22.093 | 51.379 | 36.287 | 0.00 | 0.00 |
| ATOM | 2776 | H    | GLN | X | 180 | 22.950 | 51.443 | 36.817 | 0.00 | 0.00 |
| ATOM | 2777 | CA   | GLN | X | 180 | 20.822 | 51.734 | 36.876 | 0.00 | 0.00 |
| ATOM | 2778 | HA   | GLN | X | 180 | 20.292 | 50.787 | 36.979 | 0.00 | 0.00 |
| ATOM | 2779 | CB   | GLN | X | 180 | 20.952 | 52.225 | 38.301 | 0.00 | 0.00 |
| ATOM | 2780 | HB2  | GLN | X | 180 | 21.789 | 52.909 | 38.449 | 0.00 | 0.00 |
| ATOM | 2781 | HB3  | GLN | X | 180 | 20.103 | 52.875 | 38.513 | 0.00 | 0.00 |
| ATOM | 2782 | CG   | GLN | X | 180 | 20.948 | 51.184 | 39.358 | 0.00 | 0.00 |
| ATOM | 2783 | HG2  | GLN | X | 180 | 21.836 | 50.585 | 39.156 | 0.00 | 0.00 |
| ATOM | 2784 | HG3  | GLN | X | 180 | 21.006 | 51.527 | 40.391 | 0.00 | 0.00 |
| ATOM | 2785 | CD   | GLN | X | 180 | 19.726 | 50.204 | 39.407 | 0.00 | 0.00 |
| ATOM | 2786 | OE1  | GLN | X | 180 | 18.691 | 50.473 | 38.857 | 0.00 | 0.00 |
| ATOM | 2787 | NE2  | GLN | X | 180 | 19.798 | 49.077 | 40.003 | 0.00 | 0.00 |
| ATOM | 2788 | HE21 | GLN | X | 180 | 18.932 | 48.562 | 39.940 | 0.00 | 0.00 |
| ATOM | 2789 | HE22 | GLN | X | 180 | 20.611 | 48.648 | 40.422 | 0.00 | 0.00 |
| ATOM | 2790 | C    | GLN | X | 180 | 19.972 | 52.689 | 35.990 | 0.00 | 0.00 |
| ATOM | 2791 | O    | GLN | X | 180 | 18.775 | 52.384 | 35.914 | 0.00 | 0.00 |
| ATOM | 2792 | N    | GLU | X | 181 | 20.501 | 53.724 | 35.368 | 0.00 | 0.00 |
| ATOM | 2793 | H    | GLU | X | 181 | 21.494 | 53.901 | 35.413 | 0.00 | 0.00 |
| ATOM | 2794 | CA   | GLU | X | 181 | 19.651 | 54.547 | 34.464 | 0.00 | 0.00 |
| ATOM | 2795 | HA   | GLU | X | 181 | 18.743 | 54.706 | 35.046 | 0.00 | 0.00 |
| ATOM | 2796 | CB   | GLU | X | 181 | 20.391 | 55.820 | 34.184 | 0.00 | 0.00 |
| ATOM | 2797 | HB2  | GLU | X | 181 | 21.460 | 55.608 | 34.220 | 0.00 | 0.00 |
| ATOM | 2798 | HB3  | GLU | X | 181 | 20.221 | 56.119 | 33.150 | 0.00 | 0.00 |
| ATOM | 2799 | CG   | GLU | X | 181 | 19.903 | 56.969 | 35.121 | 0.00 | 0.00 |
| ATOM | 2800 | HG2  | GLU | X | 181 | 18.913 | 57.250 | 34.763 | 0.00 | 0.00 |
| ATOM | 2801 | HG3  | GLU | X | 181 | 19.917 | 56.581 | 36.140 | 0.00 | 0.00 |
| ATOM | 2802 | CD   | GLU | X | 181 | 20.851 | 58.115 | 35.138 | 0.00 | 0.00 |
| ATOM | 2803 | OE1  | GLU | X | 181 | 21.689 | 58.241 | 36.074 | 0.00 | 0.00 |
| ATOM | 2804 | OE2  | GLU | X | 181 | 20.760 | 58.962 | 34.152 | 0.00 | 0.00 |
| ATOM | 2805 | C    | GLU | X | 181 | 19.316 | 53.959 | 33.138 | 0.00 | 0.00 |
| ATOM | 2806 | O    | GLU | X | 181 | 18.144 | 54.133 | 32.696 | 0.00 | 0.00 |
| ATOM | 2807 | N    | ASN | X | 182 | 20.186 | 53.134 | 32.498 | 0.00 | 0.00 |
| ATOM | 2808 | H    | ASN | X | 182 | 21.096 | 53.089 | 32.933 | 0.00 | 0.00 |
| ATOM | 2809 | CA   | ASN | X | 182 | 20.076 | 52.867 | 30.994 | 0.00 | 0.00 |
| ATOM | 2810 | HA   | ASN | X | 182 | 19.174 | 53.377 | 30.656 | 0.00 | 0.00 |
| ATOM | 2811 | CB   | ASN | X | 182 | 21.206 | 53.446 | 30.240 | 0.00 | 0.00 |
| ATOM | 2812 | HB2  | ASN | X | 182 | 22.132 | 53.237 | 30.775 | 0.00 | 0.00 |
| ATOM | 2813 | HB3  | ASN | X | 182 | 21.229 | 53.019 | 29.237 | 0.00 | 0.00 |
| ATOM | 2814 | CG   | ASN | X | 182 | 21.108 | 54.987 | 30.256 | 0.00 | 0.00 |
| ATOM | 2815 | OD1  | ASN | X | 182 | 20.148 | 55.559 | 29.747 | 0.00 | 0.00 |
| ATOM | 2816 | ND2  | ASN | X | 182 | 22.108 | 55.544 | 30.856 | 0.00 | 0.00 |
| ATOM | 2817 | HD21 | ASN | X | 182 | 21.968 | 56.493 | 31.172 | 0.00 | 0.00 |
| ATOM | 2818 | HD22 | ASN | X | 182 | 22.940 | 55.003 | 31.046 | 0.00 | 0.00 |
| ATOM | 2819 | C    | ASN | X | 182 | 19.908 | 51.344 | 30.630 | 0.00 | 0.00 |
| ATOM | 2820 | O    | ASN | X | 182 | 19.566 | 50.956 | 29.538 | 0.00 | 0.00 |
| ATOM | 2821 | N    | VAL | X | 183 | 20.354 | 50.415 | 31.512 | 0.00 | 0.00 |
| ATOM | 2822 | H    | VAL | X | 183 | 20.575 | 50.751 | 32.438 | 0.00 | 0.00 |
| ATOM | 2823 | CA   | VAL | X | 183 | 20.494 | 48.980 | 31.119 | 0.00 | 0.00 |
| ATOM | 2824 | HA   | VAL | X | 183 | 21.209 | 49.077 | 30.303 | 0.00 | 0.00 |
| ATOM | 2825 | CB   | VAL | X | 183 | 21.170 | 48.152 | 32.228 | 0.00 | 0.00 |
| ATOM | 2826 | HB   | VAL | X | 183 | 22.062 | 48.687 | 32.553 | 0.00 | 0.00 |
| ATOM | 2827 | CG1  | VAL | X | 183 | 20.245 | 47.875 | 33.471 | 0.00 | 0.00 |
| ATOM | 2828 | HG11 | VAL | X | 183 | 19.678 | 48.731 | 33.835 | 0.00 | 0.00 |
| ATOM | 2829 | HG12 | VAL | X | 183 | 19.538 | 47.077 | 33.245 | 0.00 | 0.00 |
| ATOM | 2830 | HG13 | VAL | X | 183 | 20.881 | 47.625 | 34.320 | 0.00 | 0.00 |
| ATOM | 2831 | CG2  | VAL | X | 183 | 21.685 | 46.822 | 31.695 | 0.00 | 0.00 |
| ATOM | 2832 | HG21 | VAL | X | 183 | 22.382 | 46.368 | 32.400 | 0.00 | 0.00 |
| ATOM | 2833 | HG22 | VAL | X | 183 | 22.184 | 47.105 | 30.769 | 0.00 | 0.00 |
| ATOM | 2834 | HG23 | VAL | X | 183 | 20.885 | 46.086 | 31.615 | 0.00 | 0.00 |
| ATOM | 2835 | C    | VAL | X | 183 | 19.240 | 48.302 | 30.614 | 0.00 | 0.00 |
| ATOM | 2836 | O    | VAL | X | 183 | 19.220 | 47.335 | 29.801 | 0.00 | 0.00 |
| ATOM | 2837 | N    | ALA | X | 184 | 18.119 | 48.880 | 31.014 | 0.00 | 0.00 |
| ATOM | 2838 | H    | ALA | X | 184 | 18.159 | 49.489 | 31.819 | 0.00 | 0.00 |

|      |      |     |     |   |     |        |        |        |      |      |
|------|------|-----|-----|---|-----|--------|--------|--------|------|------|
| ATOM | 2839 | CA  | ALA | X | 184 | 16.802 | 48.511 | 30.539 | 0.00 | 0.00 |
| ATOM | 2840 | HA  | ALA | X | 184 | 16.577 | 47.506 | 30.898 | 0.00 | 0.00 |
| ATOM | 2841 | CB  | ALA | X | 184 | 15.756 | 49.384 | 31.217 | 0.00 | 0.00 |
| ATOM | 2842 | HB1 | ALA | X | 184 | 15.710 | 49.171 | 32.285 | 0.00 | 0.00 |
| ATOM | 2843 | HB2 | ALA | X | 184 | 14.778 | 49.267 | 30.750 | 0.00 | 0.00 |
| ATOM | 2844 | HB3 | ALA | X | 184 | 15.967 | 50.430 | 30.998 | 0.00 | 0.00 |
| ATOM | 2845 | C   | ALA | X | 184 | 16.612 | 48.591 | 29.008 | 0.00 | 0.00 |
| ATOM | 2846 | O   | ALA | X | 184 | 15.920 | 47.744 | 28.464 | 0.00 | 0.00 |
| ATOM | 2847 | N   | ALA | X | 185 | 17.298 | 49.518 | 28.322 | 0.00 | 0.00 |
| ATOM | 2848 | H   | ALA | X | 185 | 17.768 | 50.235 | 28.856 | 0.00 | 0.00 |
| ATOM | 2849 | CA  | ALA | X | 185 | 17.309 | 49.594 | 26.848 | 0.00 | 0.00 |
| ATOM | 2850 | HA  | ALA | X | 185 | 16.274 | 49.593 | 26.504 | 0.00 | 0.00 |
| ATOM | 2851 | CB  | ALA | X | 185 | 17.876 | 51.013 | 26.610 | 0.00 | 0.00 |
| ATOM | 2852 | HB1 | ALA | X | 185 | 17.168 | 51.665 | 27.122 | 0.00 | 0.00 |
| ATOM | 2853 | HB2 | ALA | X | 185 | 17.879 | 51.233 | 25.543 | 0.00 | 0.00 |
| ATOM | 2854 | HB3 | ALA | X | 185 | 18.861 | 51.204 | 27.035 | 0.00 | 0.00 |
| ATOM | 2855 | C   | ALA | X | 185 | 18.084 | 48.489 | 26.198 | 0.00 | 0.00 |
| ATOM | 2856 | O   | ALA | X | 185 | 17.881 | 48.179 | 25.022 | 0.00 | 0.00 |
| ATOM | 2857 | N   | PHE | X | 186 | 18.899 | 47.674 | 27.018 | 0.00 | 0.00 |
| ATOM | 2858 | H   | PHE | X | 186 | 19.020 | 48.041 | 27.951 | 0.00 | 0.00 |
| ATOM | 2859 | CA  | PHE | X | 186 | 19.644 | 46.475 | 26.656 | 0.00 | 0.00 |
| ATOM | 2860 | HA  | PHE | X | 186 | 19.628 | 46.352 | 25.573 | 0.00 | 0.00 |
| ATOM | 2861 | CB  | PHE | X | 186 | 21.063 | 46.651 | 27.263 | 0.00 | 0.00 |
| ATOM | 2862 | HB2 | PHE | X | 186 | 20.943 | 46.594 | 28.344 | 0.00 | 0.00 |
| ATOM | 2863 | HB3 | PHE | X | 186 | 21.716 | 45.795 | 27.091 | 0.00 | 0.00 |
| ATOM | 2864 | CG  | PHE | X | 186 | 21.797 | 47.866 | 26.757 | 0.00 | 0.00 |
| ATOM | 2865 | CD1 | PHE | X | 186 | 21.568 | 49.166 | 27.363 | 0.00 | 0.00 |
| ATOM | 2866 | HD1 | PHE | X | 186 | 20.745 | 49.389 | 28.026 | 0.00 | 0.00 |
| ATOM | 2867 | CE1 | PHE | X | 186 | 22.384 | 50.234 | 26.863 | 0.00 | 0.00 |
| ATOM | 2868 | HE1 | PHE | X | 186 | 22.252 | 51.242 | 27.227 | 0.00 | 0.00 |
| ATOM | 2869 | CZ  | PHE | X | 186 | 23.363 | 50.036 | 25.880 | 0.00 | 0.00 |
| ATOM | 2870 | HZ  | PHE | X | 186 | 23.919 | 50.892 | 25.526 | 0.00 | 0.00 |
| ATOM | 2871 | CE2 | PHE | X | 186 | 23.669 | 48.780 | 25.301 | 0.00 | 0.00 |
| ATOM | 2872 | HE2 | PHE | X | 186 | 24.350 | 48.697 | 24.467 | 0.00 | 0.00 |
| ATOM | 2873 | CD2 | PHE | X | 186 | 22.859 | 47.682 | 25.773 | 0.00 | 0.00 |
| ATOM | 2874 | HD2 | PHE | X | 186 | 22.902 | 46.674 | 25.387 | 0.00 | 0.00 |
| ATOM | 2875 | C   | PHE | X | 186 | 18.943 | 45.170 | 27.189 | 0.00 | 0.00 |
| ATOM | 2876 | O   | PHE | X | 186 | 19.580 | 44.129 | 27.313 | 0.00 | 0.00 |
| ATOM | 2877 | N   | GLY | X | 187 | 17.681 | 45.230 | 27.561 | 0.00 | 0.00 |
| ATOM | 2878 | H   | GLY | X | 187 | 17.290 | 46.162 | 27.570 | 0.00 | 0.00 |
| ATOM | 2879 | CA  | GLY | X | 187 | 16.866 | 44.103 | 28.083 | 0.00 | 0.00 |
| ATOM | 2880 | HA2 | GLY | X | 187 | 15.893 | 44.593 | 28.074 | 0.00 | 0.00 |
| ATOM | 2881 | HA3 | GLY | X | 187 | 16.797 | 43.216 | 27.453 | 0.00 | 0.00 |
| ATOM | 2882 | C   | GLY | X | 187 | 17.338 | 43.712 | 29.482 | 0.00 | 0.00 |
| ATOM | 2883 | O   | GLY | X | 187 | 16.869 | 42.697 | 29.982 | 0.00 | 0.00 |
| ATOM | 2884 | N   | GLY | X | 188 | 18.178 | 44.530 | 30.181 | 0.00 | 0.00 |
| ATOM | 2885 | H   | GLY | X | 188 | 18.433 | 45.418 | 29.773 | 0.00 | 0.00 |
| ATOM | 2886 | CA  | GLY | X | 188 | 18.509 | 44.256 | 31.575 | 0.00 | 0.00 |
| ATOM | 2887 | HA2 | GLY | X | 188 | 18.951 | 43.263 | 31.656 | 0.00 | 0.00 |
| ATOM | 2888 | HA3 | GLY | X | 188 | 19.183 | 44.961 | 32.061 | 0.00 | 0.00 |
| ATOM | 2889 | C   | GLY | X | 188 | 17.304 | 44.496 | 32.550 | 0.00 | 0.00 |
| ATOM | 2890 | O   | GLY | X | 188 | 16.355 | 45.259 | 32.307 | 0.00 | 0.00 |
| ATOM | 2891 | N   | ASP | X | 189 | 17.430 | 43.919 | 33.750 | 0.00 | 0.00 |
| ATOM | 2892 | H   | ASP | X | 189 | 18.134 | 43.202 | 33.856 | 0.00 | 0.00 |
| ATOM | 2893 | CA  | ASP | X | 189 | 16.573 | 44.086 | 34.911 | 0.00 | 0.00 |
| ATOM | 2894 | HA  | ASP | X | 189 | 15.641 | 44.559 | 34.604 | 0.00 | 0.00 |
| ATOM | 2895 | CB  | ASP | X | 189 | 16.167 | 42.696 | 35.581 | 0.00 | 0.00 |
| ATOM | 2896 | HB2 | ASP | X | 189 | 15.796 | 42.028 | 34.803 | 0.00 | 0.00 |
| ATOM | 2897 | HB3 | ASP | X | 189 | 17.063 | 42.182 | 35.927 | 0.00 | 0.00 |
| ATOM | 2898 | CG  | ASP | X | 189 | 15.127 | 42.742 | 36.804 | 0.00 | 0.00 |
| ATOM | 2899 | OD1 | ASP | X | 189 | 14.937 | 41.721 | 37.556 | 0.00 | 0.00 |
| ATOM | 2900 | OD2 | ASP | X | 189 | 14.692 | 43.903 | 37.073 | 0.00 | 0.00 |
| ATOM | 2901 | C   | ASP | X | 189 | 17.187 | 44.974 | 36.041 | 0.00 | 0.00 |
| ATOM | 2902 | O   | ASP | X | 189 | 18.019 | 44.539 | 36.787 | 0.00 | 0.00 |
| ATOM | 2903 | N   | PRO | X | 190 | 16.645 | 46.204 | 36.229 | 0.00 | 0.00 |
| ATOM | 2904 | CD  | PRO | X | 190 | 15.706 | 46.926 | 35.358 | 0.00 | 0.00 |
| ATOM | 2905 | HD2 | PRO | X | 190 | 14.659 | 46.623 | 35.386 | 0.00 | 0.00 |

|      |      |      |     |   |     |        |        |        |      |      |
|------|------|------|-----|---|-----|--------|--------|--------|------|------|
| ATOM | 2906 | HD3  | PRO | X | 190 | 15.934 | 46.727 | 34.311 | 0.00 | 0.00 |
| ATOM | 2907 | CG   | PRO | X | 190 | 15.806 | 48.433 | 35.760 | 0.00 | 0.00 |
| ATOM | 2908 | HG2  | PRO | X | 190 | 14.948 | 49.101 | 35.689 | 0.00 | 0.00 |
| ATOM | 2909 | HG3  | PRO | X | 190 | 16.602 | 48.897 | 35.177 | 0.00 | 0.00 |
| ATOM | 2910 | CB   | PRO | X | 190 | 16.188 | 48.357 | 37.203 | 0.00 | 0.00 |
| ATOM | 2911 | HB2  | PRO | X | 190 | 15.279 | 48.258 | 37.796 | 0.00 | 0.00 |
| ATOM | 2912 | HB3  | PRO | X | 190 | 16.773 | 49.202 | 37.567 | 0.00 | 0.00 |
| ATOM | 2913 | CA   | PRO | X | 190 | 17.055 | 47.125 | 37.363 | 0.00 | 0.00 |
| ATOM | 2914 | HA   | PRO | X | 190 | 18.099 | 47.385 | 37.184 | 0.00 | 0.00 |
| ATOM | 2915 | C    | PRO | X | 190 | 16.931 | 46.538 | 38.755 | 0.00 | 0.00 |
| ATOM | 2916 | O    | PRO | X | 190 | 17.492 | 47.149 | 39.685 | 0.00 | 0.00 |
| ATOM | 2917 | N    | THR | X | 191 | 16.251 | 45.373 | 38.993 | 0.00 | 0.00 |
| ATOM | 2918 | H    | THR | X | 191 | 15.888 | 44.919 | 38.167 | 0.00 | 0.00 |
| ATOM | 2919 | CA   | THR | X | 191 | 16.063 | 44.679 | 40.269 | 0.00 | 0.00 |
| ATOM | 2920 | HA   | THR | X | 191 | 16.316 | 45.352 | 41.088 | 0.00 | 0.00 |
| ATOM | 2921 | CB   | THR | X | 191 | 14.593 | 44.405 | 40.555 | 0.00 | 0.00 |
| ATOM | 2922 | HB   | THR | X | 191 | 14.496 | 44.024 | 41.572 | 0.00 | 0.00 |
| ATOM | 2923 | CG2  | THR | X | 191 | 13.683 | 45.663 | 40.458 | 0.00 | 0.00 |
| ATOM | 2924 | HG21 | THR | X | 191 | 14.277 | 46.458 | 40.907 | 0.00 | 0.00 |
| ATOM | 2925 | HG22 | THR | X | 191 | 12.818 | 45.388 | 41.062 | 0.00 | 0.00 |
| ATOM | 2926 | HG23 | THR | X | 191 | 13.248 | 45.815 | 39.470 | 0.00 | 0.00 |
| ATOM | 2927 | OG1  | THR | X | 191 | 14.065 | 43.356 | 39.803 | 0.00 | 0.00 |
| ATOM | 2928 | HG1  | THR | X | 191 | 14.527 | 43.398 | 38.962 | 0.00 | 0.00 |
| ATOM | 2929 | C    | THR | X | 191 | 16.884 | 43.466 | 40.553 | 0.00 | 0.00 |
| ATOM | 2930 | O    | THR | X | 191 | 16.854 | 42.948 | 41.649 | 0.00 | 0.00 |
| ATOM | 2931 | N    | SER | X | 192 | 17.656 | 43.012 | 39.541 | 0.00 | 0.00 |
| ATOM | 2932 | H    | SER | X | 192 | 17.821 | 43.591 | 38.730 | 0.00 | 0.00 |
| ATOM | 2933 | CA   | SER | X | 192 | 18.414 | 41.775 | 39.689 | 0.00 | 0.00 |
| ATOM | 2934 | HA   | SER | X | 192 | 18.556 | 41.682 | 40.766 | 0.00 | 0.00 |
| ATOM | 2935 | CB   | SER | X | 192 | 17.558 | 40.594 | 39.102 | 0.00 | 0.00 |
| ATOM | 2936 | HB2  | SER | X | 192 | 17.589 | 40.515 | 38.016 | 0.00 | 0.00 |
| ATOM | 2937 | HB3  | SER | X | 192 | 17.908 | 39.608 | 39.409 | 0.00 | 0.00 |
| ATOM | 2938 | OG   | SER | X | 192 | 16.228 | 40.527 | 39.591 | 0.00 | 0.00 |
| ATOM | 2939 | HG   | SER | X | 192 | 15.729 | 41.173 | 39.085 | 0.00 | 0.00 |
| ATOM | 2940 | C    | SER | X | 192 | 19.851 | 41.956 | 39.116 | 0.00 | 0.00 |
| ATOM | 2941 | O    | SER | X | 192 | 20.271 | 41.086 | 38.334 | 0.00 | 0.00 |
| ATOM | 2942 | N    | VAL | X | 193 | 20.436 | 43.104 | 39.431 | 0.00 | 0.00 |
| ATOM | 2943 | H    | VAL | X | 193 | 19.972 | 43.684 | 40.116 | 0.00 | 0.00 |
| ATOM | 2944 | CA   | VAL | X | 193 | 21.856 | 43.451 | 39.094 | 0.00 | 0.00 |
| ATOM | 2945 | HA   | VAL | X | 193 | 21.979 | 43.179 | 38.045 | 0.00 | 0.00 |
| ATOM | 2946 | CB   | VAL | X | 193 | 21.983 | 45.017 | 39.184 | 0.00 | 0.00 |
| ATOM | 2947 | HB   | VAL | X | 193 | 21.730 | 45.360 | 40.187 | 0.00 | 0.00 |
| ATOM | 2948 | CG1  | VAL | X | 193 | 23.300 | 45.636 | 38.819 | 0.00 | 0.00 |
| ATOM | 2949 | HG11 | VAL | X | 193 | 24.107 | 45.350 | 39.493 | 0.00 | 0.00 |
| ATOM | 2950 | HG12 | VAL | X | 193 | 23.526 | 45.412 | 37.776 | 0.00 | 0.00 |
| ATOM | 2951 | HG13 | VAL | X | 193 | 23.249 | 46.723 | 38.872 | 0.00 | 0.00 |
| ATOM | 2952 | CG2  | VAL | X | 193 | 20.957 | 45.766 | 38.259 | 0.00 | 0.00 |
| ATOM | 2953 | HG21 | VAL | X | 193 | 20.985 | 46.823 | 38.522 | 0.00 | 0.00 |
| ATOM | 2954 | HG22 | VAL | X | 193 | 19.999 | 45.387 | 38.616 | 0.00 | 0.00 |
| ATOM | 2955 | HG23 | VAL | X | 193 | 21.039 | 45.592 | 37.186 | 0.00 | 0.00 |
| ATOM | 2956 | C    | VAL | X | 193 | 22.813 | 42.795 | 40.109 | 0.00 | 0.00 |
| ATOM | 2957 | O    | VAL | X | 193 | 22.557 | 42.902 | 41.312 | 0.00 | 0.00 |
| ATOM | 2958 | N    | THR | X | 194 | 23.872 | 42.179 | 39.517 | 0.00 | 0.00 |
| ATOM | 2959 | H    | THR | X | 194 | 23.877 | 42.175 | 38.507 | 0.00 | 0.00 |
| ATOM | 2960 | CA   | THR | X | 194 | 24.881 | 41.399 | 40.235 | 0.00 | 0.00 |
| ATOM | 2961 | HA   | THR | X | 194 | 24.740 | 41.554 | 41.304 | 0.00 | 0.00 |
| ATOM | 2962 | CB   | THR | X | 194 | 24.682 | 39.950 | 39.893 | 0.00 | 0.00 |
| ATOM | 2963 | HB   | THR | X | 194 | 24.855 | 39.770 | 38.832 | 0.00 | 0.00 |
| ATOM | 2964 | CG2  | THR | X | 194 | 25.689 | 39.094 | 40.700 | 0.00 | 0.00 |
| ATOM | 2965 | HG21 | THR | X | 194 | 25.803 | 39.329 | 41.759 | 0.00 | 0.00 |
| ATOM | 2966 | HG22 | THR | X | 194 | 26.662 | 39.200 | 40.221 | 0.00 | 0.00 |
| ATOM | 2967 | HG23 | THR | X | 194 | 25.366 | 38.054 | 40.637 | 0.00 | 0.00 |
| ATOM | 2968 | OG1  | THR | X | 194 | 23.408 | 39.575 | 40.281 | 0.00 | 0.00 |
| ATOM | 2969 | HG1  | THR | X | 194 | 22.808 | 39.922 | 39.616 | 0.00 | 0.00 |
| ATOM | 2970 | C    | THR | X | 194 | 26.249 | 41.932 | 39.870 | 0.00 | 0.00 |
| ATOM | 2971 | O    | THR | X | 194 | 26.544 | 42.171 | 38.691 | 0.00 | 0.00 |
| ATOM | 2972 | N    | LEU | X | 195 | 27.150 | 42.046 | 40.798 | 0.00 | 0.00 |

|      |      |      |     |   |     |        |        |        |      |      |
|------|------|------|-----|---|-----|--------|--------|--------|------|------|
| ATOM | 2973 | H    | LEU | X | 195 | 26.967 | 41.630 | 41.700 | 0.00 | 0.00 |
| ATOM | 2974 | CA   | LEU | X | 195 | 28.515 | 42.407 | 40.569 | 0.00 | 0.00 |
| ATOM | 2975 | HA   | LEU | X | 195 | 28.671 | 42.782 | 39.557 | 0.00 | 0.00 |
| ATOM | 2976 | CB   | LEU | X | 195 | 29.018 | 43.467 | 41.548 | 0.00 | 0.00 |
| ATOM | 2977 | HB2  | LEU | X | 195 | 29.375 | 43.021 | 42.476 | 0.00 | 0.00 |
| ATOM | 2978 | HB3  | LEU | X | 195 | 29.977 | 43.820 | 41.168 | 0.00 | 0.00 |
| ATOM | 2979 | CG   | LEU | X | 195 | 28.043 | 44.628 | 41.906 | 0.00 | 0.00 |
| ATOM | 2980 | HG   | LEU | X | 195 | 27.211 | 44.265 | 42.509 | 0.00 | 0.00 |
| ATOM | 2981 | CD1  | LEU | X | 195 | 28.971 | 45.490 | 42.822 | 0.00 | 0.00 |
| ATOM | 2982 | HD11 | LEU | X | 195 | 29.020 | 45.006 | 43.798 | 0.00 | 0.00 |
| ATOM | 2983 | HD12 | LEU | X | 195 | 28.624 | 46.502 | 43.030 | 0.00 | 0.00 |
| ATOM | 2984 | HD13 | LEU | X | 195 | 29.953 | 45.618 | 42.369 | 0.00 | 0.00 |
| ATOM | 2985 | CD2  | LEU | X | 195 | 27.506 | 45.465 | 40.753 | 0.00 | 0.00 |
| ATOM | 2986 | HD21 | LEU | X | 195 | 26.874 | 44.810 | 40.154 | 0.00 | 0.00 |
| ATOM | 2987 | HD22 | LEU | X | 195 | 27.081 | 46.419 | 41.065 | 0.00 | 0.00 |
| ATOM | 2988 | HD23 | LEU | X | 195 | 28.384 | 45.739 | 40.167 | 0.00 | 0.00 |
| ATOM | 2989 | C    | LEU | X | 195 | 29.354 | 41.130 | 40.783 | 0.00 | 0.00 |
| ATOM | 2990 | O    | LEU | X | 195 | 29.353 | 40.513 | 41.807 | 0.00 | 0.00 |
| ATOM | 2991 | N    | PHE | X | 196 | 30.195 | 40.762 | 39.772 | 0.00 | 0.00 |
| ATOM | 2992 | H    | PHE | X | 196 | 30.228 | 41.402 | 38.990 | 0.00 | 0.00 |
| ATOM | 2993 | CA   | PHE | X | 196 | 31.311 | 39.793 | 39.941 | 0.00 | 0.00 |
| ATOM | 2994 | HA   | PHE | X | 196 | 31.360 | 39.482 | 40.984 | 0.00 | 0.00 |
| ATOM | 2995 | CB   | PHE | X | 196 | 30.919 | 38.506 | 39.214 | 0.00 | 0.00 |
| ATOM | 2996 | HB2  | PHE | X | 196 | 31.429 | 37.726 | 39.780 | 0.00 | 0.00 |
| ATOM | 2997 | HB3  | PHE | X | 196 | 29.894 | 38.176 | 39.385 | 0.00 | 0.00 |
| ATOM | 2998 | CG   | PHE | X | 196 | 31.104 | 38.387 | 37.737 | 0.00 | 0.00 |
| ATOM | 2999 | CD1  | PHE | X | 196 | 30.310 | 39.248 | 36.899 | 0.00 | 0.00 |
| ATOM | 3000 | HD1  | PHE | X | 196 | 29.725 | 40.060 | 37.303 | 0.00 | 0.00 |
| ATOM | 3001 | CE1  | PHE | X | 196 | 30.309 | 39.007 | 35.521 | 0.00 | 0.00 |
| ATOM | 3002 | HE1  | PHE | X | 196 | 29.720 | 39.593 | 34.832 | 0.00 | 0.00 |
| ATOM | 3003 | CZ   | PHE | X | 196 | 31.029 | 37.958 | 34.998 | 0.00 | 0.00 |
| ATOM | 3004 | HZ   | PHE | X | 196 | 31.122 | 37.661 | 33.964 | 0.00 | 0.00 |
| ATOM | 3005 | CE2  | PHE | X | 196 | 31.782 | 37.117 | 35.838 | 0.00 | 0.00 |
| ATOM | 3006 | HE2  | PHE | X | 196 | 32.357 | 36.322 | 35.388 | 0.00 | 0.00 |
| ATOM | 3007 | CD2  | PHE | X | 196 | 31.830 | 37.321 | 37.208 | 0.00 | 0.00 |
| ATOM | 3008 | HD2  | PHE | X | 196 | 32.323 | 36.629 | 37.874 | 0.00 | 0.00 |
| ATOM | 3009 | C    | PHE | X | 196 | 32.758 | 40.333 | 39.578 | 0.00 | 0.00 |
| ATOM | 3010 | O    | PHE | X | 196 | 32.882 | 41.232 | 38.723 | 0.00 | 0.00 |
| ATOM | 3011 | N    | GLY | X | 197 | 33.701 | 39.843 | 40.337 | 0.00 | 0.00 |
| ATOM | 3012 | H    | GLY | X | 197 | 33.456 | 39.108 | 40.985 | 0.00 | 0.00 |
| ATOM | 3013 | CA   | GLY | X | 197 | 35.144 | 40.182 | 40.145 | 0.00 | 0.00 |
| ATOM | 3014 | HA2  | GLY | X | 197 | 35.387 | 40.442 | 39.115 | 0.00 | 0.00 |
| ATOM | 3015 | HA3  | GLY | X | 197 | 35.342 | 41.127 | 40.650 | 0.00 | 0.00 |
| ATOM | 3016 | C    | GLY | X | 197 | 36.115 | 39.193 | 40.601 | 0.00 | 0.00 |
| ATOM | 3017 | O    | GLY | X | 197 | 35.704 | 38.279 | 41.365 | 0.00 | 0.00 |
| ATOM | 3018 | N    | GLU | X | 198 | 37.389 | 39.526 | 40.311 | 0.00 | 0.00 |
| ATOM | 3019 | H    | GLU | X | 198 | 37.523 | 40.386 | 39.799 | 0.00 | 0.00 |
| ATOM | 3020 | CA   | GLU | X | 198 | 38.478 | 38.745 | 40.835 | 0.00 | 0.00 |
| ATOM | 3021 | HA   | GLU | X | 198 | 38.084 | 38.076 | 41.600 | 0.00 | 0.00 |
| ATOM | 3022 | CB   | GLU | X | 198 | 39.054 | 37.882 | 39.723 | 0.00 | 0.00 |
| ATOM | 3023 | HB2  | GLU | X | 198 | 39.895 | 37.284 | 40.073 | 0.00 | 0.00 |
| ATOM | 3024 | HB3  | GLU | X | 198 | 38.233 | 37.176 | 39.596 | 0.00 | 0.00 |
| ATOM | 3025 | CG   | GLU | X | 198 | 39.489 | 38.461 | 38.423 | 0.00 | 0.00 |
| ATOM | 3026 | HG2  | GLU | X | 198 | 39.380 | 37.730 | 37.622 | 0.00 | 0.00 |
| ATOM | 3027 | HG3  | GLU | X | 198 | 38.791 | 39.244 | 38.128 | 0.00 | 0.00 |
| ATOM | 3028 | CD   | GLU | X | 198 | 40.913 | 39.023 | 38.373 | 0.00 | 0.00 |
| ATOM | 3029 | OE1  | GLU | X | 198 | 41.137 | 39.651 | 37.318 | 0.00 | 0.00 |
| ATOM | 3030 | OE2  | GLU | X | 198 | 41.719 | 38.860 | 39.271 | 0.00 | 0.00 |
| ATOM | 3031 | C    | GLU | X | 198 | 39.404 | 39.741 | 41.433 | 0.00 | 0.00 |
| ATOM | 3032 | O    | GLU | X | 198 | 39.632 | 40.809 | 40.868 | 0.00 | 0.00 |
| ATOM | 3033 | N    | XA1 | X | 199 | 40.130 | 39.273 | 42.456 | 0.00 | 0.00 |
| ATOM | 3034 | CA   | XA1 | X | 199 | 41.270 | 39.928 | 43.139 | 0.00 | 0.00 |
| ATOM | 3035 | C    | XA1 | X | 199 | 41.013 | 41.391 | 43.442 | 0.00 | 0.00 |
| ATOM | 3036 | O    | XA1 | X | 199 | 40.219 | 41.651 | 44.326 | 0.00 | 0.00 |
| ATOM | 3037 | CB   | XA1 | X | 199 | 42.581 | 39.735 | 42.286 | 0.00 | 0.00 |
| ATOM | 3038 | OG   | XA1 | X | 199 | 43.679 | 40.187 | 43.148 | 0.00 | 0.00 |
| ATOM | 3039 | P1   | XA1 | X | 199 | 44.849 | 40.905 | 42.405 | 0.00 | 0.00 |

|      |      |      |     |   |     |        |        |        |      |      |
|------|------|------|-----|---|-----|--------|--------|--------|------|------|
| ATOM | 3040 | O1   | XA1 | X | 199 | 44.421 | 42.145 | 41.771 | 0.00 | 0.00 |
| ATOM | 3041 | O2   | XA1 | X | 199 | 45.757 | 40.224 | 41.450 | 0.00 | 0.00 |
| ATOM | 3042 | C1   | XA1 | X | 199 | 45.737 | 41.491 | 43.843 | 0.00 | 0.00 |
| ATOM | 3043 | H    | XA1 | X | 199 | 39.760 | 38.458 | 42.925 | 0.00 | 0.00 |
| ATOM | 3044 | HA   | XA1 | X | 199 | 41.520 | 39.369 | 44.041 | 0.00 | 0.00 |
| ATOM | 3045 | HB2  | XA1 | X | 199 | 42.825 | 38.681 | 42.133 | 0.00 | 0.00 |
| ATOM | 3046 | HB3  | XA1 | X | 199 | 42.627 | 40.341 | 41.378 | 0.00 | 0.00 |
| ATOM | 3047 | H11  | XA1 | X | 199 | 45.026 | 41.762 | 44.626 | 0.00 | 0.00 |
| ATOM | 3048 | H12  | XA1 | X | 199 | 46.377 | 40.679 | 44.196 | 0.00 | 0.00 |
| ATOM | 3049 | H13  | XA1 | X | 199 | 46.420 | 42.263 | 43.481 | 0.00 | 0.00 |
| ATOM | 3050 | N    | ALA | X | 200 | 41.593 | 42.350 | 42.802 | 0.00 | 0.00 |
| ATOM | 3051 | H    | ALA | X | 200 | 42.393 | 42.108 | 42.236 | 0.00 | 0.00 |
| ATOM | 3052 | CA   | ALA | X | 200 | 41.359 | 43.788 | 43.207 | 0.00 | 0.00 |
| ATOM | 3053 | HA   | ALA | X | 200 | 41.308 | 43.806 | 44.296 | 0.00 | 0.00 |
| ATOM | 3054 | CB   | ALA | X | 200 | 42.516 | 44.656 | 42.680 | 0.00 | 0.00 |
| ATOM | 3055 | HB1  | ALA | X | 200 | 42.223 | 45.675 | 42.931 | 0.00 | 0.00 |
| ATOM | 3056 | HB2  | ALA | X | 200 | 42.520 | 44.640 | 41.590 | 0.00 | 0.00 |
| ATOM | 3057 | HB3  | ALA | X | 200 | 43.438 | 44.416 | 43.208 | 0.00 | 0.00 |
| ATOM | 3058 | C    | ALA | X | 200 | 40.000 | 44.381 | 42.752 | 0.00 | 0.00 |
| ATOM | 3059 | O    | ALA | X | 200 | 39.520 | 45.368 | 43.235 | 0.00 | 0.00 |
| ATOM | 3060 | N    | GLY | X | 201 | 39.349 | 43.529 | 41.950 | 0.00 | 0.00 |
| ATOM | 3061 | H    | GLY | X | 201 | 39.785 | 42.691 | 41.592 | 0.00 | 0.00 |
| ATOM | 3062 | CA   | GLY | X | 201 | 38.017 | 43.849 | 41.605 | 0.00 | 0.00 |
| ATOM | 3063 | HA2  | GLY | X | 201 | 37.700 | 44.890 | 41.653 | 0.00 | 0.00 |
| ATOM | 3064 | HA3  | GLY | X | 201 | 37.765 | 43.486 | 40.609 | 0.00 | 0.00 |
| ATOM | 3065 | C    | GLY | X | 201 | 37.034 | 43.173 | 42.529 | 0.00 | 0.00 |
| ATOM | 3066 | O    | GLY | X | 201 | 36.040 | 43.707 | 42.856 | 0.00 | 0.00 |
| ATOM | 3067 | N    | ALA | X | 202 | 37.377 | 42.003 | 43.075 | 0.00 | 0.00 |
| ATOM | 3068 | H    | ALA | X | 202 | 38.260 | 41.581 | 42.828 | 0.00 | 0.00 |
| ATOM | 3069 | CA   | ALA | X | 202 | 36.644 | 41.438 | 44.242 | 0.00 | 0.00 |
| ATOM | 3070 | HA   | ALA | X | 202 | 35.603 | 41.588 | 43.956 | 0.00 | 0.00 |
| ATOM | 3071 | CB   | ALA | X | 202 | 37.044 | 39.905 | 44.318 | 0.00 | 0.00 |
| ATOM | 3072 | HB1  | ALA | X | 202 | 36.849 | 39.469 | 43.339 | 0.00 | 0.00 |
| ATOM | 3073 | HB2  | ALA | X | 202 | 36.433 | 39.398 | 45.065 | 0.00 | 0.00 |
| ATOM | 3074 | HB3  | ALA | X | 202 | 38.091 | 39.854 | 44.616 | 0.00 | 0.00 |
| ATOM | 3075 | C    | ALA | X | 202 | 36.903 | 42.202 | 45.526 | 0.00 | 0.00 |
| ATOM | 3076 | O    | ALA | X | 202 | 35.995 | 42.219 | 46.360 | 0.00 | 0.00 |
| ATOM | 3077 | N    | ALA | X | 203 | 38.007 | 42.918 | 45.694 | 0.00 | 0.00 |
| ATOM | 3078 | H    | ALA | X | 203 | 38.813 | 42.707 | 45.123 | 0.00 | 0.00 |
| ATOM | 3079 | CA   | ALA | X | 203 | 38.146 | 43.980 | 46.721 | 0.00 | 0.00 |
| ATOM | 3080 | HA   | ALA | X | 203 | 37.746 | 43.612 | 47.666 | 0.00 | 0.00 |
| ATOM | 3081 | CB   | ALA | X | 203 | 39.625 | 44.490 | 46.905 | 0.00 | 0.00 |
| ATOM | 3082 | HB1  | ALA | X | 203 | 39.894 | 45.105 | 46.046 | 0.00 | 0.00 |
| ATOM | 3083 | HB2  | ALA | X | 203 | 40.369 | 43.702 | 47.023 | 0.00 | 0.00 |
| ATOM | 3084 | HB3  | ALA | X | 203 | 39.655 | 45.183 | 47.745 | 0.00 | 0.00 |
| ATOM | 3085 | C    | ALA | X | 203 | 37.186 | 45.187 | 46.309 | 0.00 | 0.00 |
| ATOM | 3086 | O    | ALA | X | 203 | 36.432 | 45.588 | 47.186 | 0.00 | 0.00 |
| ATOM | 3087 | N    | SER | X | 204 | 37.166 | 45.648 | 45.076 | 0.00 | 0.00 |
| ATOM | 3088 | H    | SER | X | 204 | 37.881 | 45.339 | 44.434 | 0.00 | 0.00 |
| ATOM | 3089 | CA   | SER | X | 204 | 36.158 | 46.655 | 44.622 | 0.00 | 0.00 |
| ATOM | 3090 | HA   | SER | X | 204 | 36.307 | 47.582 | 45.176 | 0.00 | 0.00 |
| ATOM | 3091 | CB   | SER | X | 204 | 36.233 | 46.953 | 43.129 | 0.00 | 0.00 |
| ATOM | 3092 | HB2  | SER | X | 204 | 36.066 | 45.965 | 42.698 | 0.00 | 0.00 |
| ATOM | 3093 | HB3  | SER | X | 204 | 35.437 | 47.637 | 42.835 | 0.00 | 0.00 |
| ATOM | 3094 | OG   | SER | X | 204 | 37.458 | 47.435 | 42.748 | 0.00 | 0.00 |
| ATOM | 3095 | HG   | SER | X | 204 | 38.203 | 46.865 | 42.949 | 0.00 | 0.00 |
| ATOM | 3096 | C    | SER | X | 204 | 34.671 | 46.290 | 44.843 | 0.00 | 0.00 |
| ATOM | 3097 | O    | SER | X | 204 | 33.938 | 47.009 | 45.469 | 0.00 | 0.00 |
| ATOM | 3098 | N    | VAL | X | 205 | 34.137 | 45.105 | 44.392 | 0.00 | 0.00 |
| ATOM | 3099 | H    | VAL | X | 205 | 34.689 | 44.542 | 43.761 | 0.00 | 0.00 |
| ATOM | 3100 | CA   | VAL | X | 205 | 32.785 | 44.565 | 44.707 | 0.00 | 0.00 |
| ATOM | 3101 | HA   | VAL | X | 205 | 32.012 | 45.115 | 44.171 | 0.00 | 0.00 |
| ATOM | 3102 | CB   | VAL | X | 205 | 32.712 | 43.145 | 44.109 | 0.00 | 0.00 |
| ATOM | 3103 | HB   | VAL | X | 205 | 33.559 | 42.566 | 44.477 | 0.00 | 0.00 |
| ATOM | 3104 | CG1  | VAL | X | 205 | 31.382 | 42.480 | 44.439 | 0.00 | 0.00 |
| ATOM | 3105 | HG11 | VAL | X | 205 | 30.624 | 43.259 | 44.352 | 0.00 | 0.00 |
| ATOM | 3106 | HG12 | VAL | X | 205 | 31.089 | 41.627 | 43.827 | 0.00 | 0.00 |



|      |      |      |     |   |     |        |        |        |      |      |
|------|------|------|-----|---|-----|--------|--------|--------|------|------|
| ATOM | 3107 | HG13 | VAL | X | 205 | 31.476 | 42.115 | 45.462 | 0.00 | 0.00 |
| ATOM | 3108 | CG2  | VAL | X | 205 | 32.757 | 43.153 | 42.583 | 0.00 | 0.00 |
| ATOM | 3109 | HG21 | VAL | X | 205 | 33.787 | 43.229 | 42.236 | 0.00 | 0.00 |
| ATOM | 3110 | HG22 | VAL | X | 205 | 32.278 | 44.077 | 42.258 | 0.00 | 0.00 |
| ATOM | 3111 | HG23 | VAL | X | 205 | 32.326 | 42.245 | 42.161 | 0.00 | 0.00 |
| ATOM | 3112 | C    | VAL | X | 205 | 32.559 | 44.683 | 46.218 | 0.00 | 0.00 |
| ATOM | 3113 | O    | VAL | X | 205 | 31.521 | 45.136 | 46.688 | 0.00 | 0.00 |
| ATOM | 3114 | N    | GLY | X | 206 | 33.595 | 44.278 | 47.042 | 0.00 | 0.00 |
| ATOM | 3115 | H    | GLY | X | 206 | 34.458 | 43.962 | 46.622 | 0.00 | 0.00 |
| ATOM | 3116 | CA   | GLY | X | 206 | 33.505 | 44.362 | 48.496 | 0.00 | 0.00 |
| ATOM | 3117 | HA2  | GLY | X | 206 | 32.601 | 43.839 | 48.811 | 0.00 | 0.00 |
| ATOM | 3118 | HA3  | GLY | X | 206 | 34.424 | 43.943 | 48.907 | 0.00 | 0.00 |
| ATOM | 3119 | C    | GLY | X | 206 | 33.392 | 45.747 | 49.062 | 0.00 | 0.00 |
| ATOM | 3120 | O    | GLY | X | 206 | 32.459 | 45.995 | 49.831 | 0.00 | 0.00 |
| ATOM | 3121 | N    | MET | X | 207 | 34.232 | 46.721 | 48.625 | 0.00 | 0.00 |
| ATOM | 3122 | H    | MET | X | 207 | 34.848 | 46.524 | 47.850 | 0.00 | 0.00 |
| ATOM | 3123 | CA   | MET | X | 207 | 34.109 | 48.111 | 49.131 | 0.00 | 0.00 |
| ATOM | 3124 | HA   | MET | X | 207 | 34.264 | 48.132 | 50.210 | 0.00 | 0.00 |
| ATOM | 3125 | CB   | MET | X | 207 | 35.287 | 48.889 | 48.687 | 0.00 | 0.00 |
| ATOM | 3126 | HB2  | MET | X | 207 | 35.306 | 48.863 | 47.597 | 0.00 | 0.00 |
| ATOM | 3127 | HB3  | MET | X | 207 | 35.239 | 49.933 | 48.998 | 0.00 | 0.00 |
| ATOM | 3128 | CG   | MET | X | 207 | 36.577 | 48.367 | 49.342 | 0.00 | 0.00 |
| ATOM | 3129 | HG2  | MET | X | 207 | 36.394 | 48.422 | 50.415 | 0.00 | 0.00 |
| ATOM | 3130 | HG3  | MET | X | 207 | 36.805 | 47.363 | 48.984 | 0.00 | 0.00 |
| ATOM | 3131 | SD   | MET | X | 207 | 37.947 | 49.484 | 49.016 | 0.00 | 0.00 |
| ATOM | 3132 | CE   | MET | X | 207 | 39.224 | 48.580 | 50.012 | 0.00 | 0.00 |
| ATOM | 3133 | HE1  | MET | X | 207 | 38.901 | 48.407 | 51.038 | 0.00 | 0.00 |
| ATOM | 3134 | HE2  | MET | X | 207 | 39.531 | 47.656 | 49.522 | 0.00 | 0.00 |
| ATOM | 3135 | HE3  | MET | X | 207 | 40.142 | 49.166 | 49.959 | 0.00 | 0.00 |
| ATOM | 3136 | C    | MET | X | 207 | 32.815 | 48.812 | 48.700 | 0.00 | 0.00 |
| ATOM | 3137 | O    | MET | X | 207 | 32.131 | 49.417 | 49.572 | 0.00 | 0.00 |
| ATOM | 3138 | N    | HIE | X | 208 | 32.281 | 48.450 | 47.478 | 0.00 | 0.00 |
| ATOM | 3139 | H    | HIE | X | 208 | 32.966 | 48.014 | 46.878 | 0.00 | 0.00 |
| ATOM | 3140 | CA   | HIE | X | 208 | 30.942 | 48.876 | 46.991 | 0.00 | 0.00 |
| ATOM | 3141 | HA   | HIE | X | 208 | 31.013 | 49.962 | 47.045 | 0.00 | 0.00 |
| ATOM | 3142 | CB   | HIE | X | 208 | 30.796 | 48.588 | 45.490 | 0.00 | 0.00 |
| ATOM | 3143 | HB2  | HIE | X | 208 | 31.268 | 47.639 | 45.234 | 0.00 | 0.00 |
| ATOM | 3144 | HB3  | HIE | X | 208 | 29.722 | 48.670 | 45.325 | 0.00 | 0.00 |
| ATOM | 3145 | CG   | HIE | X | 208 | 31.531 | 49.498 | 44.557 | 0.00 | 0.00 |
| ATOM | 3146 | ND1  | HIE | X | 208 | 31.545 | 50.909 | 44.596 | 0.00 | 0.00 |
| ATOM | 3147 | CE1  | HIE | X | 208 | 32.424 | 51.286 | 43.652 | 0.00 | 0.00 |
| ATOM | 3148 | HE1  | HIE | X | 208 | 32.661 | 52.289 | 43.328 | 0.00 | 0.00 |
| ATOM | 3149 | NE2  | HIE | X | 208 | 33.085 | 50.245 | 43.135 | 0.00 | 0.00 |
| ATOM | 3150 | HE2  | HIE | X | 208 | 33.794 | 50.349 | 42.423 | 0.00 | 0.00 |
| ATOM | 3151 | CD2  | HIE | X | 208 | 32.479 | 49.104 | 43.589 | 0.00 | 0.00 |
| ATOM | 3152 | HD2  | HIE | X | 208 | 32.720 | 48.082 | 43.335 | 0.00 | 0.00 |
| ATOM | 3153 | C    | HIE | X | 208 | 29.725 | 48.381 | 47.833 | 0.00 | 0.00 |
| ATOM | 3154 | O    | HIE | X | 208 | 28.624 | 48.893 | 47.644 | 0.00 | 0.00 |
| ATOM | 3155 | N    | LEU | X | 209 | 29.920 | 47.411 | 48.712 | 0.00 | 0.00 |
| ATOM | 3156 | H    | LEU | X | 209 | 30.865 | 47.061 | 48.786 | 0.00 | 0.00 |
| ATOM | 3157 | CA   | LEU | X | 209 | 28.875 | 46.762 | 49.610 | 0.00 | 0.00 |
| ATOM | 3158 | HA   | LEU | X | 209 | 27.869 | 46.973 | 49.246 | 0.00 | 0.00 |
| ATOM | 3159 | CB   | LEU | X | 209 | 29.163 | 45.195 | 49.614 | 0.00 | 0.00 |
| ATOM | 3160 | HB2  | LEU | X | 209 | 29.189 | 44.743 | 48.623 | 0.00 | 0.00 |
| ATOM | 3161 | HB3  | LEU | X | 209 | 30.216 | 45.039 | 49.848 | 0.00 | 0.00 |
| ATOM | 3162 | CG   | LEU | X | 209 | 28.340 | 44.301 | 50.575 | 0.00 | 0.00 |
| ATOM | 3163 | HG   | LEU | X | 209 | 28.549 | 44.508 | 51.624 | 0.00 | 0.00 |
| ATOM | 3164 | CD1  | LEU | X | 209 | 26.844 | 44.361 | 50.320 | 0.00 | 0.00 |
| ATOM | 3165 | HD11 | LEU | X | 209 | 26.258 | 43.690 | 50.949 | 0.00 | 0.00 |
| ATOM | 3166 | HD12 | LEU | X | 209 | 26.564 | 44.111 | 49.296 | 0.00 | 0.00 |
| ATOM | 3167 | HD13 | LEU | X | 209 | 26.482 | 45.372 | 50.507 | 0.00 | 0.00 |
| ATOM | 3168 | CD2  | LEU | X | 209 | 28.770 | 42.817 | 50.423 | 0.00 | 0.00 |
| ATOM | 3169 | HD21 | LEU | X | 209 | 29.747 | 42.680 | 50.887 | 0.00 | 0.00 |
| ATOM | 3170 | HD22 | LEU | X | 209 | 28.047 | 42.177 | 50.929 | 0.00 | 0.00 |
| ATOM | 3171 | HD23 | LEU | X | 209 | 28.730 | 42.571 | 49.362 | 0.00 | 0.00 |
| ATOM | 3172 | C    | LEU | X | 209 | 29.053 | 47.316 | 51.063 | 0.00 | 0.00 |
| ATOM | 3173 | O    | LEU | X | 209 | 28.051 | 47.590 | 51.723 | 0.00 | 0.00 |

|      |      |      |     |   |     |        |        |        |      |      |
|------|------|------|-----|---|-----|--------|--------|--------|------|------|
| ATOM | 3174 | N    | LEU | X | 210 | 30.288 | 47.738 | 51.497 | 0.00 | 0.00 |
| ATOM | 3175 | H    | LEU | X | 210 | 31.072 | 47.563 | 50.884 | 0.00 | 0.00 |
| ATOM | 3176 | CA   | LEU | X | 210 | 30.432 | 48.481 | 52.744 | 0.00 | 0.00 |
| ATOM | 3177 | HA   | LEU | X | 210 | 29.847 | 48.063 | 53.563 | 0.00 | 0.00 |
| ATOM | 3178 | CB   | LEU | X | 210 | 31.952 | 48.472 | 53.063 | 0.00 | 0.00 |
| ATOM | 3179 | HB2  | LEU | X | 210 | 32.444 | 49.154 | 52.370 | 0.00 | 0.00 |
| ATOM | 3180 | HB3  | LEU | X | 210 | 32.110 | 48.940 | 54.035 | 0.00 | 0.00 |
| ATOM | 3181 | CG   | LEU | X | 210 | 32.757 | 47.133 | 53.107 | 0.00 | 0.00 |
| ATOM | 3182 | HG   | LEU | X | 210 | 32.813 | 46.652 | 52.130 | 0.00 | 0.00 |
| ATOM | 3183 | CD1  | LEU | X | 210 | 34.207 | 47.632 | 53.383 | 0.00 | 0.00 |
| ATOM | 3184 | HD11 | LEU | X | 210 | 34.456 | 48.442 | 52.697 | 0.00 | 0.00 |
| ATOM | 3185 | HD12 | LEU | X | 210 | 34.884 | 46.866 | 53.005 | 0.00 | 0.00 |
| ATOM | 3186 | HD13 | LEU | X | 210 | 34.378 | 47.870 | 54.433 | 0.00 | 0.00 |
| ATOM | 3187 | CD2  | LEU | X | 210 | 32.251 | 46.033 | 54.071 | 0.00 | 0.00 |
| ATOM | 3188 | HD21 | LEU | X | 210 | 31.283 | 45.640 | 53.761 | 0.00 | 0.00 |
| ATOM | 3189 | HD22 | LEU | X | 210 | 32.997 | 45.238 | 54.072 | 0.00 | 0.00 |
| ATOM | 3190 | HD23 | LEU | X | 210 | 32.235 | 46.532 | 55.040 | 0.00 | 0.00 |
| ATOM | 3191 | C    | LEU | X | 210 | 29.985 | 49.984 | 52.616 | 0.00 | 0.00 |
| ATOM | 3192 | O    | LEU | X | 210 | 29.218 | 50.498 | 53.454 | 0.00 | 0.00 |
| ATOM | 3193 | N    | SER | X | 211 | 30.342 | 50.628 | 51.477 | 0.00 | 0.00 |
| ATOM | 3194 | H    | SER | X | 211 | 30.950 | 50.105 | 50.863 | 0.00 | 0.00 |
| ATOM | 3195 | CA   | SER | X | 211 | 29.949 | 51.958 | 51.205 | 0.00 | 0.00 |
| ATOM | 3196 | HA   | SER | X | 211 | 29.994 | 52.599 | 52.086 | 0.00 | 0.00 |
| ATOM | 3197 | CB   | SER | X | 211 | 30.908 | 52.596 | 50.186 | 0.00 | 0.00 |
| ATOM | 3198 | HB2  | SER | X | 211 | 31.942 | 52.495 | 50.516 | 0.00 | 0.00 |
| ATOM | 3199 | HB3  | SER | X | 211 | 30.784 | 52.115 | 49.216 | 0.00 | 0.00 |
| ATOM | 3200 | OG   | SER | X | 211 | 30.632 | 54.010 | 50.127 | 0.00 | 0.00 |
| ATOM | 3201 | HG   | SER | X | 211 | 30.740 | 54.327 | 51.027 | 0.00 | 0.00 |
| ATOM | 3202 | C    | SER | X | 211 | 28.538 | 52.113 | 50.667 | 0.00 | 0.00 |
| ATOM | 3203 | O    | SER | X | 211 | 28.248 | 51.738 | 49.532 | 0.00 | 0.00 |
| ATOM | 3204 | N    | PRO | X | 212 | 27.646 | 52.813 | 51.410 | 0.00 | 0.00 |
| ATOM | 3205 | CD   | PRO | X | 212 | 27.772 | 53.430 | 52.758 | 0.00 | 0.00 |
| ATOM | 3206 | HD2  | PRO | X | 212 | 28.308 | 54.352 | 52.533 | 0.00 | 0.00 |
| ATOM | 3207 | HD3  | PRO | X | 212 | 28.406 | 52.827 | 53.409 | 0.00 | 0.00 |
| ATOM | 3208 | CG   | PRO | X | 212 | 26.373 | 53.600 | 53.396 | 0.00 | 0.00 |
| ATOM | 3209 | HG2  | PRO | X | 212 | 26.377 | 54.613 | 53.799 | 0.00 | 0.00 |
| ATOM | 3210 | HG3  | PRO | X | 212 | 26.170 | 52.718 | 54.004 | 0.00 | 0.00 |
| ATOM | 3211 | CB   | PRO | X | 212 | 25.441 | 53.406 | 52.229 | 0.00 | 0.00 |
| ATOM | 3212 | HB2  | PRO | X | 212 | 25.062 | 54.343 | 51.820 | 0.00 | 0.00 |
| ATOM | 3213 | HB3  | PRO | X | 212 | 24.587 | 52.786 | 52.502 | 0.00 | 0.00 |
| ATOM | 3214 | CA   | PRO | X | 212 | 26.170 | 52.778 | 51.068 | 0.00 | 0.00 |
| ATOM | 3215 | HA   | PRO | X | 212 | 26.000 | 51.703 | 51.132 | 0.00 | 0.00 |
| ATOM | 3216 | C    | PRO | X | 212 | 25.751 | 53.373 | 49.676 | 0.00 | 0.00 |
| ATOM | 3217 | O    | PRO | X | 212 | 24.807 | 52.913 | 49.024 | 0.00 | 0.00 |
| ATOM | 3218 | N    | PRO | X | 213 | 26.382 | 54.492 | 49.252 | 0.00 | 0.00 |
| ATOM | 3219 | CD   | PRO | X | 213 | 27.283 | 55.383 | 50.038 | 0.00 | 0.00 |
| ATOM | 3220 | HD2  | PRO | X | 213 | 28.295 | 54.980 | 50.000 | 0.00 | 0.00 |
| ATOM | 3221 | HD3  | PRO | X | 213 | 26.856 | 55.520 | 51.032 | 0.00 | 0.00 |
| ATOM | 3222 | CG   | PRO | X | 213 | 27.469 | 56.722 | 49.340 | 0.00 | 0.00 |
| ATOM | 3223 | HG2  | PRO | X | 213 | 28.523 | 56.992 | 49.407 | 0.00 | 0.00 |
| ATOM | 3224 | HG3  | PRO | X | 213 | 26.827 | 57.559 | 49.614 | 0.00 | 0.00 |
| ATOM | 3225 | CB   | PRO | X | 213 | 27.084 | 56.329 | 47.908 | 0.00 | 0.00 |
| ATOM | 3226 | HB2  | PRO | X | 213 | 27.965 | 55.959 | 47.384 | 0.00 | 0.00 |
| ATOM | 3227 | HB3  | PRO | X | 213 | 26.554 | 57.089 | 47.335 | 0.00 | 0.00 |
| ATOM | 3228 | CA   | PRO | X | 213 | 26.139 | 55.110 | 47.970 | 0.00 | 0.00 |
| ATOM | 3229 | HA   | PRO | X | 213 | 25.180 | 55.614 | 48.090 | 0.00 | 0.00 |
| ATOM | 3230 | C    | PRO | X | 213 | 26.279 | 54.256 | 46.728 | 0.00 | 0.00 |
| ATOM | 3231 | O    | PRO | X | 213 | 25.628 | 54.577 | 45.792 | 0.00 | 0.00 |
| ATOM | 3232 | N    | SER | X | 214 | 27.098 | 53.210 | 46.771 | 0.00 | 0.00 |
| ATOM | 3233 | H    | SER | X | 214 | 27.587 | 52.936 | 47.611 | 0.00 | 0.00 |
| ATOM | 3234 | CA   | SER | X | 214 | 27.096 | 52.180 | 45.730 | 0.00 | 0.00 |
| ATOM | 3235 | HA   | SER | X | 214 | 26.810 | 52.692 | 44.811 | 0.00 | 0.00 |
| ATOM | 3236 | CB   | SER | X | 214 | 28.473 | 51.619 | 45.455 | 0.00 | 0.00 |
| ATOM | 3237 | HB2  | SER | X | 214 | 28.867 | 50.951 | 46.221 | 0.00 | 0.00 |
| ATOM | 3238 | HB3  | SER | X | 214 | 28.457 | 51.096 | 44.500 | 0.00 | 0.00 |
| ATOM | 3239 | OG   | SER | X | 214 | 29.491 | 52.612 | 45.418 | 0.00 | 0.00 |
| ATOM | 3240 | HG   | SER | X | 214 | 30.354 | 52.205 | 45.312 | 0.00 | 0.00 |

|      |      |      |     |   |     |        |        |        |      |      |
|------|------|------|-----|---|-----|--------|--------|--------|------|------|
| ATOM | 3241 | C    | SER | X | 214 | 25.983 | 51.173 | 46.025 | 0.00 | 0.00 |
| ATOM | 3242 | O    | SER | X | 214 | 25.226 | 50.747 | 45.154 | 0.00 | 0.00 |
| ATOM | 3243 | N    | ARG | X | 215 | 25.948 | 50.707 | 47.300 | 0.00 | 0.00 |
| ATOM | 3244 | H    | ARG | X | 215 | 26.646 | 51.017 | 47.962 | 0.00 | 0.00 |
| ATOM | 3245 | CA   | ARG | X | 215 | 25.039 | 49.629 | 47.791 | 0.00 | 0.00 |
| ATOM | 3246 | HA   | ARG | X | 215 | 25.410 | 48.710 | 47.339 | 0.00 | 0.00 |
| ATOM | 3247 | CB   | ARG | X | 215 | 25.135 | 49.513 | 49.286 | 0.00 | 0.00 |
| ATOM | 3248 | HB2  | ARG | X | 215 | 26.188 | 49.583 | 49.558 | 0.00 | 0.00 |
| ATOM | 3249 | HB3  | ARG | X | 215 | 24.669 | 50.375 | 49.763 | 0.00 | 0.00 |
| ATOM | 3250 | CG   | ARG | X | 215 | 24.466 | 48.256 | 49.827 | 0.00 | 0.00 |
| ATOM | 3251 | HG2  | ARG | X | 215 | 23.415 | 48.293 | 49.543 | 0.00 | 0.00 |
| ATOM | 3252 | HG3  | ARG | X | 215 | 24.835 | 47.395 | 49.270 | 0.00 | 0.00 |
| ATOM | 3253 | CD   | ARG | X | 215 | 24.712 | 48.150 | 51.351 | 0.00 | 0.00 |
| ATOM | 3254 | HD2  | ARG | X | 215 | 25.602 | 47.530 | 51.457 | 0.00 | 0.00 |
| ATOM | 3255 | HD3  | ARG | X | 215 | 24.830 | 49.137 | 51.800 | 0.00 | 0.00 |
| ATOM | 3256 | NE   | ARG | X | 215 | 23.603 | 47.481 | 52.082 | 0.00 | 0.00 |
| ATOM | 3257 | HE   | ARG | X | 215 | 22.653 | 47.512 | 51.741 | 0.00 | 0.00 |
| ATOM | 3258 | CZ   | ARG | X | 215 | 23.764 | 46.685 | 53.154 | 0.00 | 0.00 |
| ATOM | 3259 | NH1  | ARG | X | 215 | 24.940 | 46.694 | 53.876 | 0.00 | 0.00 |
| ATOM | 3260 | HH11 | ARG | X | 215 | 25.750 | 47.253 | 53.648 | 0.00 | 0.00 |
| ATOM | 3261 | HH12 | ARG | X | 215 | 24.891 | 46.100 | 54.691 | 0.00 | 0.00 |
| ATOM | 3262 | NH2  | ARG | X | 215 | 22.740 | 45.931 | 53.474 | 0.00 | 0.00 |
| ATOM | 3263 | HH21 | ARG | X | 215 | 21.961 | 45.787 | 52.847 | 0.00 | 0.00 |
| ATOM | 3264 | HH22 | ARG | X | 215 | 22.712 | 45.368 | 54.311 | 0.00 | 0.00 |
| ATOM | 3265 | C    | ARG | X | 215 | 23.598 | 49.745 | 47.344 | 0.00 | 0.00 |
| ATOM | 3266 | O    | ARG | X | 215 | 22.905 | 48.727 | 47.253 | 0.00 | 0.00 |
| ATOM | 3267 | N    | GLY | X | 216 | 23.088 | 50.967 | 47.032 | 0.00 | 0.00 |
| ATOM | 3268 | H    | GLY | X | 216 | 23.584 | 51.839 | 47.150 | 0.00 | 0.00 |
| ATOM | 3269 | CA   | GLY | X | 216 | 21.663 | 51.121 | 46.511 | 0.00 | 0.00 |
| ATOM | 3270 | HA2  | GLY | X | 216 | 20.915 | 50.453 | 46.939 | 0.00 | 0.00 |
| ATOM | 3271 | HA3  | GLY | X | 216 | 21.403 | 52.179 | 46.501 | 0.00 | 0.00 |
| ATOM | 3272 | C    | GLY | X | 216 | 21.553 | 50.723 | 44.997 | 0.00 | 0.00 |
| ATOM | 3273 | O    | GLY | X | 216 | 20.433 | 50.764 | 44.472 | 0.00 | 0.00 |
| ATOM | 3274 | N    | LEU | X | 217 | 22.600 | 50.432 | 44.289 | 0.00 | 0.00 |
| ATOM | 3275 | H    | LEU | X | 217 | 23.506 | 50.337 | 44.723 | 0.00 | 0.00 |
| ATOM | 3276 | CA   | LEU | X | 217 | 22.589 | 50.311 | 42.850 | 0.00 | 0.00 |
| ATOM | 3277 | HA   | LEU | X | 217 | 21.827 | 50.795 | 42.239 | 0.00 | 0.00 |
| ATOM | 3278 | CB   | LEU | X | 217 | 23.868 | 50.964 | 42.332 | 0.00 | 0.00 |
| ATOM | 3279 | HB2  | LEU | X | 217 | 24.787 | 50.477 | 42.656 | 0.00 | 0.00 |
| ATOM | 3280 | HB3  | LEU | X | 217 | 24.013 | 50.791 | 41.266 | 0.00 | 0.00 |
| ATOM | 3281 | CG   | LEU | X | 217 | 23.958 | 52.444 | 42.713 | 0.00 | 0.00 |
| ATOM | 3282 | HG   | LEU | X | 217 | 23.987 | 52.554 | 43.797 | 0.00 | 0.00 |
| ATOM | 3283 | CD1  | LEU | X | 217 | 25.290 | 52.993 | 42.257 | 0.00 | 0.00 |
| ATOM | 3284 | HD11 | LEU | X | 217 | 26.085 | 52.410 | 42.721 | 0.00 | 0.00 |
| ATOM | 3285 | HD12 | LEU | X | 217 | 25.325 | 54.070 | 42.423 | 0.00 | 0.00 |
| ATOM | 3286 | HD13 | LEU | X | 217 | 25.337 | 52.890 | 41.173 | 0.00 | 0.00 |
| ATOM | 3287 | CD2  | LEU | X | 217 | 22.906 | 53.205 | 41.929 | 0.00 | 0.00 |
| ATOM | 3288 | HD21 | LEU | X | 217 | 22.951 | 54.286 | 42.062 | 0.00 | 0.00 |
| ATOM | 3289 | HD22 | LEU | X | 217 | 22.937 | 53.008 | 40.857 | 0.00 | 0.00 |
| ATOM | 3290 | HD23 | LEU | X | 217 | 21.908 | 52.885 | 42.227 | 0.00 | 0.00 |
| ATOM | 3291 | C    | LEU | X | 217 | 22.565 | 48.793 | 42.465 | 0.00 | 0.00 |
| ATOM | 3292 | O    | LEU | X | 217 | 22.281 | 48.570 | 41.306 | 0.00 | 0.00 |
| ATOM | 3293 | N    | PHE | X | 218 | 22.818 | 47.824 | 43.361 | 0.00 | 0.00 |
| ATOM | 3294 | H    | PHE | X | 218 | 22.959 | 48.038 | 44.337 | 0.00 | 0.00 |
| ATOM | 3295 | CA   | PHE | X | 218 | 22.845 | 46.422 | 43.061 | 0.00 | 0.00 |
| ATOM | 3296 | HA   | PHE | X | 218 | 22.195 | 46.202 | 42.214 | 0.00 | 0.00 |
| ATOM | 3297 | CB   | PHE | X | 218 | 24.307 | 46.126 | 42.663 | 0.00 | 0.00 |
| ATOM | 3298 | HB2  | PHE | X | 218 | 24.251 | 45.101 | 42.296 | 0.00 | 0.00 |
| ATOM | 3299 | HB3  | PHE | X | 218 | 24.539 | 46.703 | 41.768 | 0.00 | 0.00 |
| ATOM | 3300 | CG   | PHE | X | 218 | 25.375 | 46.188 | 43.751 | 0.00 | 0.00 |
| ATOM | 3301 | CD1  | PHE | X | 218 | 25.999 | 47.411 | 44.131 | 0.00 | 0.00 |
| ATOM | 3302 | HD1  | PHE | X | 218 | 25.831 | 48.394 | 43.718 | 0.00 | 0.00 |
| ATOM | 3303 | CE1  | PHE | X | 218 | 26.773 | 47.422 | 45.272 | 0.00 | 0.00 |
| ATOM | 3304 | HE1  | PHE | X | 218 | 27.210 | 48.324 | 45.673 | 0.00 | 0.00 |
| ATOM | 3305 | CZ   | PHE | X | 218 | 27.153 | 46.210 | 45.880 | 0.00 | 0.00 |
| ATOM | 3306 | HZ   | PHE | X | 218 | 27.806 | 46.228 | 46.740 | 0.00 | 0.00 |
| ATOM | 3307 | CE2  | PHE | X | 218 | 26.601 | 45.022 | 45.476 | 0.00 | 0.00 |

|      |      |      |     |   |     |        |        |        |      |      |
|------|------|------|-----|---|-----|--------|--------|--------|------|------|
| ATOM | 3308 | HE2  | PHE | X | 218 | 26.950 | 44.132 | 45.978 | 0.00 | 0.00 |
| ATOM | 3309 | CD2  | PHE | X | 218 | 25.715 | 44.991 | 44.411 | 0.00 | 0.00 |
| ATOM | 3310 | HD2  | PHE | X | 218 | 25.267 | 44.071 | 44.066 | 0.00 | 0.00 |
| ATOM | 3311 | C    | PHE | X | 218 | 22.330 | 45.654 | 44.240 | 0.00 | 0.00 |
| ATOM | 3312 | O    | PHE | X | 218 | 22.364 | 46.142 | 45.387 | 0.00 | 0.00 |
| ATOM | 3313 | N    | HIE | X | 219 | 22.106 | 44.347 | 43.994 | 0.00 | 0.00 |
| ATOM | 3314 | H    | HIE | X | 219 | 22.015 | 44.085 | 43.023 | 0.00 | 0.00 |
| ATOM | 3315 | CA   | HIE | X | 219 | 21.363 | 43.381 | 44.855 | 0.00 | 0.00 |
| ATOM | 3316 | HA   | HIE | X | 219 | 21.090 | 43.882 | 45.784 | 0.00 | 0.00 |
| ATOM | 3317 | CB   | HIE | X | 219 | 20.141 | 42.962 | 43.963 | 0.00 | 0.00 |
| ATOM | 3318 | HB2  | HIE | X | 219 | 20.469 | 42.484 | 43.040 | 0.00 | 0.00 |
| ATOM | 3319 | HB3  | HIE | X | 219 | 19.327 | 42.427 | 44.450 | 0.00 | 0.00 |
| ATOM | 3320 | CG   | HIE | X | 219 | 19.518 | 44.194 | 43.299 | 0.00 | 0.00 |
| ATOM | 3321 | ND1  | HIE | X | 219 | 19.793 | 44.567 | 41.935 | 0.00 | 0.00 |
| ATOM | 3322 | CE1  | HIE | X | 219 | 19.299 | 45.857 | 41.864 | 0.00 | 0.00 |
| ATOM | 3323 | HE1  | HIE | X | 219 | 19.629 | 46.584 | 41.136 | 0.00 | 0.00 |
| ATOM | 3324 | NE2  | HIE | X | 219 | 18.890 | 46.293 | 43.079 | 0.00 | 0.00 |
| ATOM | 3325 | HE2  | HIE | X | 219 | 18.775 | 47.243 | 43.404 | 0.00 | 0.00 |
| ATOM | 3326 | CD2  | HIE | X | 219 | 19.007 | 45.242 | 43.994 | 0.00 | 0.00 |
| ATOM | 3327 | HD2  | HIE | X | 219 | 18.770 | 45.244 | 45.047 | 0.00 | 0.00 |
| ATOM | 3328 | C    | HIE | X | 219 | 22.222 | 42.192 | 45.293 | 0.00 | 0.00 |
| ATOM | 3329 | O    | HIE | X | 219 | 22.095 | 41.716 | 46.377 | 0.00 | 0.00 |
| ATOM | 3330 | N    | ARG | X | 220 | 23.072 | 41.805 | 44.373 | 0.00 | 0.00 |
| ATOM | 3331 | H    | ARG | X | 220 | 23.078 | 42.338 | 43.515 | 0.00 | 0.00 |
| ATOM | 3332 | CA   | ARG | X | 220 | 23.942 | 40.653 | 44.610 | 0.00 | 0.00 |
| ATOM | 3333 | HA   | ARG | X | 220 | 23.918 | 40.518 | 45.691 | 0.00 | 0.00 |
| ATOM | 3334 | CB   | ARG | X | 220 | 23.356 | 39.417 | 43.862 | 0.00 | 0.00 |
| ATOM | 3335 | HB2  | ARG | X | 220 | 23.374 | 39.588 | 42.785 | 0.00 | 0.00 |
| ATOM | 3336 | HB3  | ARG | X | 220 | 24.094 | 38.615 | 43.893 | 0.00 | 0.00 |
| ATOM | 3337 | CG   | ARG | X | 220 | 22.011 | 38.916 | 44.308 | 0.00 | 0.00 |
| ATOM | 3338 | HG2  | ARG | X | 220 | 22.188 | 38.580 | 45.330 | 0.00 | 0.00 |
| ATOM | 3339 | HG3  | ARG | X | 220 | 21.357 | 39.787 | 44.322 | 0.00 | 0.00 |
| ATOM | 3340 | CD   | ARG | X | 220 | 21.496 | 37.638 | 43.623 | 0.00 | 0.00 |
| ATOM | 3341 | HD2  | ARG | X | 220 | 21.548 | 37.689 | 42.536 | 0.00 | 0.00 |
| ATOM | 3342 | HD3  | ARG | X | 220 | 21.996 | 36.738 | 43.982 | 0.00 | 0.00 |
| ATOM | 3343 | NE   | ARG | X | 220 | 20.176 | 37.335 | 44.065 | 0.00 | 0.00 |
| ATOM | 3344 | HE   | ARG | X | 220 | 19.948 | 37.064 | 45.011 | 0.00 | 0.00 |
| ATOM | 3345 | CZ   | ARG | X | 220 | 19.066 | 37.385 | 43.370 | 0.00 | 0.00 |
| ATOM | 3346 | NH1  | ARG | X | 220 | 19.077 | 37.671 | 42.112 | 0.00 | 0.00 |
| ATOM | 3347 | HH11 | ARG | X | 220 | 19.939 | 37.857 | 41.619 | 0.00 | 0.00 |
| ATOM | 3348 | HH12 | ARG | X | 220 | 18.254 | 37.561 | 41.537 | 0.00 | 0.00 |
| ATOM | 3349 | NH2  | ARG | X | 220 | 17.847 | 37.172 | 43.914 | 0.00 | 0.00 |
| ATOM | 3350 | HH21 | ARG | X | 220 | 17.788 | 36.726 | 44.819 | 0.00 | 0.00 |
| ATOM | 3351 | HH22 | ARG | X | 220 | 16.962 | 37.326 | 43.454 | 0.00 | 0.00 |
| ATOM | 3352 | C    | ARG | X | 220 | 25.407 | 40.882 | 44.367 | 0.00 | 0.00 |
| ATOM | 3353 | O    | ARG | X | 220 | 25.696 | 41.709 | 43.534 | 0.00 | 0.00 |
| ATOM | 3354 | N    | ALA | X | 221 | 26.252 | 40.125 | 45.053 | 0.00 | 0.00 |
| ATOM | 3355 | H    | ALA | X | 221 | 25.806 | 39.374 | 45.560 | 0.00 | 0.00 |
| ATOM | 3356 | CA   | ALA | X | 221 | 27.714 | 40.314 | 44.923 | 0.00 | 0.00 |
| ATOM | 3357 | HA   | ALA | X | 221 | 27.941 | 40.870 | 44.013 | 0.00 | 0.00 |
| ATOM | 3358 | CB   | ALA | X | 221 | 28.347 | 41.030 | 46.165 | 0.00 | 0.00 |
| ATOM | 3359 | HB1  | ALA | X | 221 | 27.954 | 40.506 | 47.036 | 0.00 | 0.00 |
| ATOM | 3360 | HB2  | ALA | X | 221 | 28.099 | 42.078 | 46.335 | 0.00 | 0.00 |
| ATOM | 3361 | HB3  | ALA | X | 221 | 29.395 | 40.943 | 45.876 | 0.00 | 0.00 |
| ATOM | 3362 | C    | ALA | X | 221 | 28.348 | 38.895 | 44.793 | 0.00 | 0.00 |
| ATOM | 3363 | O    | ALA | X | 221 | 27.949 | 37.971 | 45.455 | 0.00 | 0.00 |
| ATOM | 3364 | N    | VAL | X | 222 | 29.332 | 38.725 | 43.864 | 0.00 | 0.00 |
| ATOM | 3365 | H    | VAL | X | 222 | 29.629 | 39.527 | 43.328 | 0.00 | 0.00 |
| ATOM | 3366 | CA   | VAL | X | 222 | 30.259 | 37.552 | 43.862 | 0.00 | 0.00 |
| ATOM | 3367 | HA   | VAL | X | 222 | 29.982 | 36.854 | 44.652 | 0.00 | 0.00 |
| ATOM | 3368 | CB   | VAL | X | 222 | 30.150 | 36.849 | 42.457 | 0.00 | 0.00 |
| ATOM | 3369 | HB   | VAL | X | 222 | 30.264 | 37.670 | 41.750 | 0.00 | 0.00 |
| ATOM | 3370 | CG1  | VAL | X | 222 | 31.220 | 35.770 | 42.144 | 0.00 | 0.00 |
| ATOM | 3371 | HG11 | VAL | X | 222 | 31.238 | 34.957 | 42.870 | 0.00 | 0.00 |
| ATOM | 3372 | HG12 | VAL | X | 222 | 30.977 | 35.504 | 41.115 | 0.00 | 0.00 |
| ATOM | 3373 | HG13 | VAL | X | 222 | 32.198 | 36.249 | 42.183 | 0.00 | 0.00 |
| ATOM | 3374 | CG2  | VAL | X | 222 | 28.688 | 36.387 | 42.261 | 0.00 | 0.00 |

|      |      |      |     |   |     |        |        |        |      |      |
|------|------|------|-----|---|-----|--------|--------|--------|------|------|
| ATOM | 3375 | HG21 | VAL | X | 222 | 28.357 | 35.847 | 43.148 | 0.00 | 0.00 |
| ATOM | 3376 | HG22 | VAL | X | 222 | 28.565 | 35.787 | 41.360 | 0.00 | 0.00 |
| ATOM | 3377 | HG23 | VAL | X | 222 | 28.007 | 37.235 | 42.186 | 0.00 | 0.00 |
| ATOM | 3378 | C    | VAL | X | 222 | 31.675 | 37.992 | 44.097 | 0.00 | 0.00 |
| ATOM | 3379 | O    | VAL | X | 222 | 32.111 | 38.926 | 43.433 | 0.00 | 0.00 |
| ATOM | 3380 | N    | LEU | X | 223 | 32.401 | 37.298 | 45.026 | 0.00 | 0.00 |
| ATOM | 3381 | H    | LEU | X | 223 | 32.033 | 36.432 | 45.393 | 0.00 | 0.00 |
| ATOM | 3382 | CA   | LEU | X | 223 | 33.862 | 37.513 | 45.248 | 0.00 | 0.00 |
| ATOM | 3383 | HA   | LEU | X | 223 | 34.147 | 38.325 | 44.578 | 0.00 | 0.00 |
| ATOM | 3384 | CB   | LEU | X | 223 | 34.200 | 38.035 | 46.657 | 0.00 | 0.00 |
| ATOM | 3385 | HB2  | LEU | X | 223 | 33.939 | 37.329 | 47.445 | 0.00 | 0.00 |
| ATOM | 3386 | HB3  | LEU | X | 223 | 35.263 | 38.276 | 46.619 | 0.00 | 0.00 |
| ATOM | 3387 | CG   | LEU | X | 223 | 33.482 | 39.322 | 47.139 | 0.00 | 0.00 |
| ATOM | 3388 | HG   | LEU | X | 223 | 33.449 | 39.948 | 46.247 | 0.00 | 0.00 |
| ATOM | 3389 | CD1  | LEU | X | 223 | 32.109 | 39.177 | 47.778 | 0.00 | 0.00 |
| ATOM | 3390 | HD11 | LEU | X | 223 | 31.724 | 40.114 | 48.179 | 0.00 | 0.00 |
| ATOM | 3391 | HD12 | LEU | X | 223 | 32.181 | 38.444 | 48.582 | 0.00 | 0.00 |
| ATOM | 3392 | HD13 | LEU | X | 223 | 31.408 | 38.787 | 47.039 | 0.00 | 0.00 |
| ATOM | 3393 | CD2  | LEU | X | 223 | 34.508 | 39.970 | 48.142 | 0.00 | 0.00 |
| ATOM | 3394 | HD21 | LEU | X | 223 | 34.527 | 39.417 | 49.082 | 0.00 | 0.00 |
| ATOM | 3395 | HD22 | LEU | X | 223 | 35.498 | 40.104 | 47.706 | 0.00 | 0.00 |
| ATOM | 3396 | HD23 | LEU | X | 223 | 34.148 | 40.994 | 48.237 | 0.00 | 0.00 |
| ATOM | 3397 | C    | LEU | X | 223 | 34.715 | 36.381 | 44.808 | 0.00 | 0.00 |
| ATOM | 3398 | O    | LEU | X | 223 | 34.344 | 35.221 | 45.003 | 0.00 | 0.00 |
| ATOM | 3399 | N    | GLN | X | 224 | 35.816 | 36.670 | 44.096 | 0.00 | 0.00 |
| ATOM | 3400 | H    | GLN | X | 224 | 36.125 | 37.610 | 43.894 | 0.00 | 0.00 |
| ATOM | 3401 | CA   | GLN | X | 224 | 36.752 | 35.576 | 43.712 | 0.00 | 0.00 |
| ATOM | 3402 | HA   | GLN | X | 224 | 36.654 | 34.674 | 44.316 | 0.00 | 0.00 |
| ATOM | 3403 | CB   | GLN | X | 224 | 36.523 | 35.050 | 42.226 | 0.00 | 0.00 |
| ATOM | 3404 | HB2  | GLN | X | 224 | 36.800 | 35.864 | 41.555 | 0.00 | 0.00 |
| ATOM | 3405 | HB3  | GLN | X | 224 | 37.158 | 34.177 | 42.078 | 0.00 | 0.00 |
| ATOM | 3406 | CG   | GLN | X | 224 | 35.104 | 34.547 | 41.964 | 0.00 | 0.00 |
| ATOM | 3407 | HG2  | GLN | X | 224 | 34.849 | 33.898 | 42.801 | 0.00 | 0.00 |
| ATOM | 3408 | HG3  | GLN | X | 224 | 34.441 | 35.411 | 42.024 | 0.00 | 0.00 |
| ATOM | 3409 | CD   | GLN | X | 224 | 34.908 | 34.035 | 40.575 | 0.00 | 0.00 |
| ATOM | 3410 | OE1  | GLN | X | 224 | 34.080 | 34.506 | 39.734 | 0.00 | 0.00 |
| ATOM | 3411 | NE2  | GLN | X | 224 | 35.582 | 33.053 | 40.101 | 0.00 | 0.00 |
| ATOM | 3412 | HE21 | GLN | X | 224 | 35.377 | 32.825 | 39.139 | 0.00 | 0.00 |
| ATOM | 3413 | HE22 | GLN | X | 224 | 36.449 | 32.795 | 40.550 | 0.00 | 0.00 |
| ATOM | 3414 | C    | GLN | X | 224 | 38.181 | 36.000 | 43.983 | 0.00 | 0.00 |
| ATOM | 3415 | O    | GLN | X | 224 | 38.533 | 37.156 | 43.664 | 0.00 | 0.00 |
| ATOM | 3416 | N    | SER | X | 225 | 39.022 | 35.136 | 44.556 | 0.00 | 0.00 |
| ATOM | 3417 | H    | SER | X | 225 | 38.703 | 34.216 | 44.824 | 0.00 | 0.00 |
| ATOM | 3418 | CA   | SER | X | 225 | 40.465 | 35.500 | 44.693 | 0.00 | 0.00 |
| ATOM | 3419 | HA   | SER | X | 225 | 40.901 | 34.786 | 45.392 | 0.00 | 0.00 |
| ATOM | 3420 | CB   | SER | X | 225 | 41.208 | 35.320 | 43.346 | 0.00 | 0.00 |
| ATOM | 3421 | HB2  | SER | X | 225 | 40.751 | 35.854 | 42.513 | 0.00 | 0.00 |
| ATOM | 3422 | HB3  | SER | X | 225 | 42.099 | 35.945 | 43.401 | 0.00 | 0.00 |
| ATOM | 3423 | OG   | SER | X | 225 | 41.471 | 33.977 | 42.920 | 0.00 | 0.00 |
| ATOM | 3424 | HG   | SER | X | 225 | 41.749 | 33.461 | 43.680 | 0.00 | 0.00 |
| ATOM | 3425 | C    | SER | X | 225 | 40.933 | 36.847 | 45.377 | 0.00 | 0.00 |
| ATOM | 3426 | O    | SER | X | 225 | 42.122 | 37.174 | 45.577 | 0.00 | 0.00 |
| ATOM | 3427 | N    | GLY | X | 226 | 40.008 | 37.516 | 45.964 | 0.00 | 0.00 |
| ATOM | 3428 | H    | GLY | X | 226 | 39.018 | 37.351 | 45.847 | 0.00 | 0.00 |
| ATOM | 3429 | CA   | GLY | X | 226 | 40.365 | 38.608 | 46.871 | 0.00 | 0.00 |
| ATOM | 3430 | HA2  | GLY | X | 226 | 41.171 | 38.245 | 47.510 | 0.00 | 0.00 |
| ATOM | 3431 | HA3  | GLY | X | 226 | 40.726 | 39.434 | 46.258 | 0.00 | 0.00 |
| ATOM | 3432 | C    | GLY | X | 226 | 39.188 | 39.057 | 47.782 | 0.00 | 0.00 |
| ATOM | 3433 | O    | GLY | X | 226 | 38.022 | 39.082 | 47.307 | 0.00 | 0.00 |
| ATOM | 3434 | N    | ALA | X | 227 | 39.531 | 39.356 | 49.080 | 0.00 | 0.00 |
| ATOM | 3435 | H    | ALA | X | 227 | 40.469 | 39.138 | 49.385 | 0.00 | 0.00 |
| ATOM | 3436 | CA   | ALA | X | 227 | 38.588 | 40.116 | 49.950 | 0.00 | 0.00 |
| ATOM | 3437 | HA   | ALA | X | 227 | 37.585 | 40.006 | 49.538 | 0.00 | 0.00 |
| ATOM | 3438 | CB   | ALA | X | 227 | 38.501 | 39.269 | 51.311 | 0.00 | 0.00 |
| ATOM | 3439 | HB1  | ALA | X | 227 | 38.261 | 38.263 | 50.968 | 0.00 | 0.00 |
| ATOM | 3440 | HB2  | ALA | X | 227 | 37.635 | 39.493 | 51.933 | 0.00 | 0.00 |
| ATOM | 3441 | HB3  | ALA | X | 227 | 39.478 | 39.360 | 51.785 | 0.00 | 0.00 |

|      |      |      |     |   |     |        |        |        |      |      |
|------|------|------|-----|---|-----|--------|--------|--------|------|------|
| ATOM | 3442 | C    | ALA | X | 227 | 39.066 | 41.603 | 50.067 | 0.00 | 0.00 |
| ATOM | 3443 | O    | ALA | X | 227 | 40.230 | 41.908 | 49.891 | 0.00 | 0.00 |
| ATOM | 3444 | N    | PRO | X | 228 | 38.119 | 42.548 | 50.287 | 0.00 | 0.00 |
| ATOM | 3445 | CD   | PRO | X | 228 | 36.723 | 42.235 | 50.587 | 0.00 | 0.00 |
| ATOM | 3446 | HD2  | PRO | X | 228 | 36.597 | 41.450 | 51.332 | 0.00 | 0.00 |
| ATOM | 3447 | HD3  | PRO | X | 228 | 36.201 | 42.004 | 49.658 | 0.00 | 0.00 |
| ATOM | 3448 | CG   | PRO | X | 228 | 36.104 | 43.517 | 51.269 | 0.00 | 0.00 |
| ATOM | 3449 | HG2  | PRO | X | 228 | 36.313 | 43.463 | 52.337 | 0.00 | 0.00 |
| ATOM | 3450 | HG3  | PRO | X | 228 | 35.057 | 43.728 | 51.052 | 0.00 | 0.00 |
| ATOM | 3451 | CB   | PRO | X | 228 | 36.966 | 44.571 | 50.622 | 0.00 | 0.00 |
| ATOM | 3452 | HB2  | PRO | X | 228 | 37.100 | 45.535 | 51.113 | 0.00 | 0.00 |
| ATOM | 3453 | HB3  | PRO | X | 228 | 36.602 | 44.693 | 49.602 | 0.00 | 0.00 |
| ATOM | 3454 | CA   | PRO | X | 228 | 38.339 | 43.971 | 50.482 | 0.00 | 0.00 |
| ATOM | 3455 | HA   | PRO | X | 228 | 38.911 | 44.317 | 49.621 | 0.00 | 0.00 |
| ATOM | 3456 | C    | PRO | X | 228 | 39.265 | 44.270 | 51.659 | 0.00 | 0.00 |
| ATOM | 3457 | O    | PRO | X | 228 | 40.017 | 45.173 | 51.626 | 0.00 | 0.00 |
| ATOM | 3458 | N    | ASN | X | 229 | 39.174 | 43.509 | 52.741 | 0.00 | 0.00 |
| ATOM | 3459 | H    | ASN | X | 229 | 38.432 | 42.824 | 52.721 | 0.00 | 0.00 |
| ATOM | 3460 | CA   | ASN | X | 229 | 40.051 | 43.525 | 53.868 | 0.00 | 0.00 |
| ATOM | 3461 | HA   | ASN | X | 229 | 40.324 | 44.552 | 54.110 | 0.00 | 0.00 |
| ATOM | 3462 | CB   | ASN | X | 229 | 39.303 | 42.905 | 55.077 | 0.00 | 0.00 |
| ATOM | 3463 | HB2  | ASN | X | 229 | 39.953 | 42.760 | 55.939 | 0.00 | 0.00 |
| ATOM | 3464 | HB3  | ASN | X | 229 | 38.636 | 43.683 | 55.448 | 0.00 | 0.00 |
| ATOM | 3465 | CG   | ASN | X | 229 | 38.577 | 41.582 | 54.774 | 0.00 | 0.00 |
| ATOM | 3466 | OD1  | ASN | X | 229 | 37.618 | 41.465 | 54.035 | 0.00 | 0.00 |
| ATOM | 3467 | ND2  | ASN | X | 229 | 39.091 | 40.480 | 55.308 | 0.00 | 0.00 |
| ATOM | 3468 | HD21 | ASN | X | 229 | 38.699 | 39.613 | 54.969 | 0.00 | 0.00 |
| ATOM | 3469 | HD22 | ASN | X | 229 | 39.906 | 40.561 | 55.899 | 0.00 | 0.00 |
| ATOM | 3470 | C    | ASN | X | 229 | 41.341 | 42.788 | 53.720 | 0.00 | 0.00 |
| ATOM | 3471 | O    | ASN | X | 229 | 42.108 | 42.852 | 54.652 | 0.00 | 0.00 |
| ATOM | 3472 | N    | GLY | X | 230 | 41.732 | 42.449 | 52.479 | 0.00 | 0.00 |
| ATOM | 3473 | H    | GLY | X | 230 | 41.104 | 42.445 | 51.687 | 0.00 | 0.00 |
| ATOM | 3474 | CA   | GLY | X | 230 | 43.120 | 42.037 | 52.085 | 0.00 | 0.00 |
| ATOM | 3475 | HA2  | GLY | X | 230 | 43.326 | 41.084 | 52.573 | 0.00 | 0.00 |
| ATOM | 3476 | HA3  | GLY | X | 230 | 43.213 | 42.160 | 51.006 | 0.00 | 0.00 |
| ATOM | 3477 | C    | GLY | X | 230 | 44.130 | 43.026 | 52.596 | 0.00 | 0.00 |
| ATOM | 3478 | O    | GLY | X | 230 | 43.866 | 44.194 | 52.313 | 0.00 | 0.00 |
| ATOM | 3479 | N    | PRO | X | 231 | 45.299 | 42.625 | 53.160 | 0.00 | 0.00 |
| ATOM | 3480 | CD   | PRO | X | 231 | 45.681 | 41.297 | 53.549 | 0.00 | 0.00 |
| ATOM | 3481 | HD2  | PRO | X | 231 | 45.933 | 40.667 | 52.696 | 0.00 | 0.00 |
| ATOM | 3482 | HD3  | PRO | X | 231 | 44.881 | 40.736 | 54.032 | 0.00 | 0.00 |
| ATOM | 3483 | CG   | PRO | X | 231 | 46.872 | 41.361 | 54.539 | 0.00 | 0.00 |
| ATOM | 3484 | HG2  | PRO | X | 231 | 47.669 | 40.695 | 54.208 | 0.00 | 0.00 |
| ATOM | 3485 | HG3  | PRO | X | 231 | 46.511 | 41.146 | 55.544 | 0.00 | 0.00 |
| ATOM | 3486 | CB   | PRO | X | 231 | 47.347 | 42.816 | 54.333 | 0.00 | 0.00 |
| ATOM | 3487 | HB2  | PRO | X | 231 | 48.175 | 42.735 | 53.629 | 0.00 | 0.00 |
| ATOM | 3488 | HB3  | PRO | X | 231 | 47.794 | 43.226 | 55.238 | 0.00 | 0.00 |
| ATOM | 3489 | CA   | PRO | X | 231 | 46.231 | 43.546 | 53.697 | 0.00 | 0.00 |
| ATOM | 3490 | HA   | PRO | X | 231 | 45.789 | 44.199 | 54.449 | 0.00 | 0.00 |
| ATOM | 3491 | C    | PRO | X | 231 | 46.740 | 44.464 | 52.629 | 0.00 | 0.00 |
| ATOM | 3492 | O    | PRO | X | 231 | 47.199 | 45.601 | 52.829 | 0.00 | 0.00 |
| ATOM | 3493 | N    | TRP | X | 232 | 46.680 | 43.994 | 51.346 | 0.00 | 0.00 |
| ATOM | 3494 | H    | TRP | X | 232 | 46.404 | 43.044 | 51.142 | 0.00 | 0.00 |
| ATOM | 3495 | CA   | TRP | X | 232 | 47.105 | 44.710 | 50.188 | 0.00 | 0.00 |
| ATOM | 3496 | HA   | TRP | X | 232 | 48.011 | 45.259 | 50.446 | 0.00 | 0.00 |
| ATOM | 3497 | CB   | TRP | X | 232 | 47.517 | 43.662 | 49.117 | 0.00 | 0.00 |
| ATOM | 3498 | HB2  | TRP | X | 232 | 47.817 | 44.164 | 48.197 | 0.00 | 0.00 |
| ATOM | 3499 | HB3  | TRP | X | 232 | 48.398 | 43.102 | 49.431 | 0.00 | 0.00 |
| ATOM | 3500 | CG   | TRP | X | 232 | 46.447 | 42.656 | 48.894 | 0.00 | 0.00 |
| ATOM | 3501 | CD1  | TRP | X | 232 | 46.325 | 41.518 | 49.630 | 0.00 | 0.00 |
| ATOM | 3502 | HD1  | TRP | X | 232 | 46.954 | 41.267 | 50.472 | 0.00 | 0.00 |
| ATOM | 3503 | NE1  | TRP | X | 232 | 45.217 | 40.830 | 49.120 | 0.00 | 0.00 |
| ATOM | 3504 | HE1  | TRP | X | 232 | 45.085 | 39.893 | 49.471 | 0.00 | 0.00 |
| ATOM | 3505 | CE2  | TRP | X | 232 | 44.667 | 41.420 | 48.065 | 0.00 | 0.00 |
| ATOM | 3506 | CZ2  | TRP | X | 232 | 43.591 | 41.043 | 47.234 | 0.00 | 0.00 |
| ATOM | 3507 | HZ2  | TRP | X | 232 | 43.092 | 40.087 | 47.293 | 0.00 | 0.00 |
| ATOM | 3508 | CH2  | TRP | X | 232 | 43.100 | 41.956 | 46.315 | 0.00 | 0.00 |

|      |      |      |     |   |     |        |        |        |      |      |
|------|------|------|-----|---|-----|--------|--------|--------|------|------|
| ATOM | 3509 | HH2  | TRP | X | 232 | 42.390 | 41.610 | 45.578 | 0.00 | 0.00 |
| ATOM | 3510 | CZ3  | TRP | X | 232 | 43.715 | 43.267 | 46.307 | 0.00 | 0.00 |
| ATOM | 3511 | HZ3  | TRP | X | 232 | 43.317 | 44.011 | 45.634 | 0.00 | 0.00 |
| ATOM | 3512 | CE3  | TRP | X | 232 | 44.851 | 43.549 | 46.997 | 0.00 | 0.00 |
| ATOM | 3513 | HE3  | TRP | X | 232 | 45.279 | 44.531 | 46.861 | 0.00 | 0.00 |
| ATOM | 3514 | CD2  | TRP | X | 232 | 45.373 | 42.614 | 47.884 | 0.00 | 0.00 |
| ATOM | 3515 | C    | TRP | X | 232 | 46.113 | 45.713 | 49.640 | 0.00 | 0.00 |
| ATOM | 3516 | O    | TRP | X | 232 | 46.391 | 46.523 | 48.701 | 0.00 | 0.00 |
| ATOM | 3517 | N    | ALA | X | 233 | 44.915 | 45.661 | 50.193 | 0.00 | 0.00 |
| ATOM | 3518 | H    | ALA | X | 233 | 44.714 | 44.932 | 50.864 | 0.00 | 0.00 |
| ATOM | 3519 | CA   | ALA | X | 233 | 43.669 | 46.219 | 49.551 | 0.00 | 0.00 |
| ATOM | 3520 | HA   | ALA | X | 233 | 43.806 | 46.428 | 48.490 | 0.00 | 0.00 |
| ATOM | 3521 | CB   | ALA | X | 233 | 42.483 | 45.163 | 49.552 | 0.00 | 0.00 |
| ATOM | 3522 | HB1  | ALA | X | 233 | 42.700 | 44.285 | 48.943 | 0.00 | 0.00 |
| ATOM | 3523 | HB2  | ALA | X | 233 | 41.553 | 45.653 | 49.268 | 0.00 | 0.00 |
| ATOM | 3524 | HB3  | ALA | X | 233 | 42.334 | 44.950 | 50.611 | 0.00 | 0.00 |
| ATOM | 3525 | C    | ALA | X | 233 | 43.299 | 47.565 | 50.175 | 0.00 | 0.00 |
| ATOM | 3526 | O    | ALA | X | 233 | 42.433 | 48.277 | 49.632 | 0.00 | 0.00 |
| ATOM | 3527 | N    | THR | X | 234 | 44.070 | 47.995 | 51.218 | 0.00 | 0.00 |
| ATOM | 3528 | H    | THR | X | 234 | 44.856 | 47.424 | 51.493 | 0.00 | 0.00 |
| ATOM | 3529 | CA   | THR | X | 234 | 43.964 | 49.400 | 51.736 | 0.00 | 0.00 |
| ATOM | 3530 | HA   | THR | X | 234 | 43.606 | 50.013 | 50.909 | 0.00 | 0.00 |
| ATOM | 3531 | CB   | THR | X | 234 | 43.008 | 49.581 | 52.876 | 0.00 | 0.00 |
| ATOM | 3532 | HB   | THR | X | 234 | 43.415 | 50.416 | 53.446 | 0.00 | 0.00 |
| ATOM | 3533 | CG2  | THR | X | 234 | 41.561 | 49.887 | 52.441 | 0.00 | 0.00 |
| ATOM | 3534 | HG21 | THR | X | 234 | 41.553 | 50.466 | 51.518 | 0.00 | 0.00 |
| ATOM | 3535 | HG22 | THR | X | 234 | 40.956 | 50.335 | 53.230 | 0.00 | 0.00 |
| ATOM | 3536 | HG23 | THR | X | 234 | 41.056 | 48.943 | 52.234 | 0.00 | 0.00 |
| ATOM | 3537 | OG1  | THR | X | 234 | 42.982 | 48.520 | 53.770 | 0.00 | 0.00 |
| ATOM | 3538 | HG1  | THR | X | 234 | 42.596 | 47.778 | 53.299 | 0.00 | 0.00 |
| ATOM | 3539 | C    | THR | X | 234 | 45.400 | 49.919 | 52.112 | 0.00 | 0.00 |
| ATOM | 3540 | O    | THR | X | 234 | 46.346 | 49.192 | 52.033 | 0.00 | 0.00 |
| ATOM | 3541 | N    | VAL | X | 235 | 45.394 | 51.225 | 52.207 | 0.00 | 0.00 |
| ATOM | 3542 | H    | VAL | X | 235 | 44.650 | 51.764 | 51.788 | 0.00 | 0.00 |
| ATOM | 3543 | CA   | VAL | X | 235 | 46.544 | 51.984 | 52.666 | 0.00 | 0.00 |
| ATOM | 3544 | HA   | VAL | X | 235 | 47.136 | 51.262 | 53.228 | 0.00 | 0.00 |
| ATOM | 3545 | CB   | VAL | X | 235 | 47.453 | 52.436 | 51.493 | 0.00 | 0.00 |
| ATOM | 3546 | HB   | VAL | X | 235 | 47.787 | 51.632 | 50.837 | 0.00 | 0.00 |
| ATOM | 3547 | CG1  | VAL | X | 235 | 46.751 | 53.440 | 50.534 | 0.00 | 0.00 |
| ATOM | 3548 | HG11 | VAL | X | 235 | 47.161 | 53.531 | 49.529 | 0.00 | 0.00 |
| ATOM | 3549 | HG12 | VAL | X | 235 | 45.701 | 53.219 | 50.341 | 0.00 | 0.00 |
| ATOM | 3550 | HG13 | VAL | X | 235 | 46.810 | 54.458 | 50.918 | 0.00 | 0.00 |
| ATOM | 3551 | CG2  | VAL | X | 235 | 48.757 | 52.988 | 51.967 | 0.00 | 0.00 |
| ATOM | 3552 | HG21 | VAL | X | 235 | 48.560 | 54.011 | 52.289 | 0.00 | 0.00 |
| ATOM | 3553 | HG22 | VAL | X | 235 | 49.471 | 53.044 | 51.145 | 0.00 | 0.00 |
| ATOM | 3554 | HG23 | VAL | X | 235 | 49.213 | 52.480 | 52.817 | 0.00 | 0.00 |
| ATOM | 3555 | C    | VAL | X | 235 | 46.103 | 53.178 | 53.561 | 0.00 | 0.00 |
| ATOM | 3556 | O    | VAL | X | 235 | 44.990 | 53.773 | 53.464 | 0.00 | 0.00 |
| ATOM | 3557 | N    | GLY | X | 236 | 46.965 | 53.430 | 54.579 | 0.00 | 0.00 |
| ATOM | 3558 | H    | GLY | X | 236 | 47.785 | 52.872 | 54.770 | 0.00 | 0.00 |
| ATOM | 3559 | CA   | GLY | X | 236 | 46.800 | 54.514 | 55.613 | 0.00 | 0.00 |
| ATOM | 3560 | HA2  | GLY | X | 236 | 45.752 | 54.513 | 55.911 | 0.00 | 0.00 |
| ATOM | 3561 | HA3  | GLY | X | 236 | 47.380 | 54.257 | 56.499 | 0.00 | 0.00 |
| ATOM | 3562 | C    | GLY | X | 236 | 47.351 | 55.914 | 55.178 | 0.00 | 0.00 |
| ATOM | 3563 | O    | GLY | X | 236 | 48.122 | 56.084 | 54.222 | 0.00 | 0.00 |
| ATOM | 3564 | N    | MET | X | 237 | 46.909 | 56.916 | 55.931 | 0.00 | 0.00 |
| ATOM | 3565 | H    | MET | X | 237 | 46.466 | 56.702 | 56.813 | 0.00 | 0.00 |
| ATOM | 3566 | CA   | MET | X | 237 | 47.084 | 58.316 | 55.559 | 0.00 | 0.00 |
| ATOM | 3567 | HA   | MET | X | 237 | 46.579 | 58.353 | 54.594 | 0.00 | 0.00 |
| ATOM | 3568 | CB   | MET | X | 237 | 46.303 | 59.191 | 56.575 | 0.00 | 0.00 |
| ATOM | 3569 | HB2  | MET | X | 237 | 46.591 | 58.980 | 57.604 | 0.00 | 0.00 |
| ATOM | 3570 | HB3  | MET | X | 237 | 46.779 | 60.165 | 56.686 | 0.00 | 0.00 |
| ATOM | 3571 | CG   | MET | X | 237 | 44.810 | 59.133 | 56.438 | 0.00 | 0.00 |
| ATOM | 3572 | HG2  | MET | X | 237 | 44.637 | 59.399 | 55.395 | 0.00 | 0.00 |
| ATOM | 3573 | HG3  | MET | X | 237 | 44.353 | 58.149 | 56.545 | 0.00 | 0.00 |
| ATOM | 3574 | SD   | MET | X | 237 | 43.932 | 60.302 | 57.614 | 0.00 | 0.00 |
| ATOM | 3575 | CE   | MET | X | 237 | 42.326 | 60.463 | 56.799 | 0.00 | 0.00 |

|      |      |      |     |   |     |        |        |        |      |      |
|------|------|------|-----|---|-----|--------|--------|--------|------|------|
| ATOM | 3576 | HE1  | MET | X | 237 | 42.579 | 60.813 | 55.799 | 0.00 | 0.00 |
| ATOM | 3577 | HE2  | MET | X | 237 | 42.014 | 59.422 | 56.706 | 0.00 | 0.00 |
| ATOM | 3578 | HE3  | MET | X | 237 | 41.624 | 61.105 | 57.332 | 0.00 | 0.00 |
| ATOM | 3579 | C    | MET | X | 237 | 48.581 | 58.876 | 55.502 | 0.00 | 0.00 |
| ATOM | 3580 | O    | MET | X | 237 | 48.817 | 59.675 | 54.596 | 0.00 | 0.00 |
| ATOM | 3581 | N    | GLY | X | 238 | 49.523 | 58.381 | 56.362 | 0.00 | 0.00 |
| ATOM | 3582 | H    | GLY | X | 238 | 49.243 | 57.741 | 57.092 | 0.00 | 0.00 |
| ATOM | 3583 | CA   | GLY | X | 238 | 50.992 | 58.769 | 56.404 | 0.00 | 0.00 |
| ATOM | 3584 | HA2  | GLY | X | 238 | 51.183 | 59.840 | 56.479 | 0.00 | 0.00 |
| ATOM | 3585 | HA3  | GLY | X | 238 | 51.392 | 58.231 | 57.263 | 0.00 | 0.00 |
| ATOM | 3586 | C    | GLY | X | 238 | 51.577 | 58.264 | 55.099 | 0.00 | 0.00 |
| ATOM | 3587 | O    | GLY | X | 238 | 52.118 | 59.052 | 54.272 | 0.00 | 0.00 |
| ATOM | 3588 | N    | GLU | X | 239 | 51.359 | 57.000 | 54.754 | 0.00 | 0.00 |
| ATOM | 3589 | H    | GLU | X | 239 | 51.010 | 56.376 | 55.468 | 0.00 | 0.00 |
| ATOM | 3590 | CA   | GLU | X | 239 | 51.842 | 56.425 | 53.485 | 0.00 | 0.00 |
| ATOM | 3591 | HA   | GLU | X | 239 | 52.916 | 56.595 | 53.404 | 0.00 | 0.00 |
| ATOM | 3592 | CB   | GLU | X | 239 | 51.705 | 54.826 | 53.389 | 0.00 | 0.00 |
| ATOM | 3593 | HB2  | GLU | X | 239 | 50.722 | 54.589 | 53.798 | 0.00 | 0.00 |
| ATOM | 3594 | HB3  | GLU | X | 239 | 51.759 | 54.464 | 52.362 | 0.00 | 0.00 |
| ATOM | 3595 | CG   | GLU | X | 239 | 52.775 | 54.021 | 54.086 | 0.00 | 0.00 |
| ATOM | 3596 | HG2  | GLU | X | 239 | 52.866 | 54.367 | 55.115 | 0.00 | 0.00 |
| ATOM | 3597 | HG3  | GLU | X | 239 | 52.468 | 52.975 | 54.067 | 0.00 | 0.00 |
| ATOM | 3598 | CD   | GLU | X | 239 | 54.153 | 54.189 | 53.464 | 0.00 | 0.00 |
| ATOM | 3599 | OE1  | GLU | X | 239 | 54.246 | 53.744 | 52.270 | 0.00 | 0.00 |
| ATOM | 3600 | OE2  | GLU | X | 239 | 54.948 | 54.975 | 54.025 | 0.00 | 0.00 |
| ATOM | 3601 | C    | GLU | X | 239 | 51.348 | 57.079 | 52.211 | 0.00 | 0.00 |
| ATOM | 3602 | O    | GLU | X | 239 | 52.216 | 57.365 | 51.401 | 0.00 | 0.00 |
| ATOM | 3603 | N    | ALA | X | 240 | 50.027 | 57.362 | 52.067 | 0.00 | 0.00 |
| ATOM | 3604 | H    | ALA | X | 240 | 49.349 | 56.902 | 52.657 | 0.00 | 0.00 |
| ATOM | 3605 | CA   | ALA | X | 240 | 49.564 | 58.180 | 50.971 | 0.00 | 0.00 |
| ATOM | 3606 | HA   | ALA | X | 240 | 49.764 | 57.693 | 50.017 | 0.00 | 0.00 |
| ATOM | 3607 | CB   | ALA | X | 240 | 48.093 | 58.390 | 51.153 | 0.00 | 0.00 |
| ATOM | 3608 | HB1  | ALA | X | 240 | 47.807 | 58.940 | 52.050 | 0.00 | 0.00 |
| ATOM | 3609 | HB2  | ALA | X | 240 | 47.601 | 57.418 | 51.153 | 0.00 | 0.00 |
| ATOM | 3610 | HB3  | ALA | X | 240 | 47.778 | 58.842 | 50.213 | 0.00 | 0.00 |
| ATOM | 3611 | C    | ALA | X | 240 | 50.373 | 59.500 | 50.758 | 0.00 | 0.00 |
| ATOM | 3612 | O    | ALA | X | 240 | 51.018 | 59.697 | 49.709 | 0.00 | 0.00 |
| ATOM | 3613 | N    | ARG | X | 241 | 50.395 | 60.279 | 51.817 | 0.00 | 0.00 |
| ATOM | 3614 | H    | ARG | X | 241 | 49.840 | 59.928 | 52.585 | 0.00 | 0.00 |
| ATOM | 3615 | CA   | ARG | X | 241 | 50.927 | 61.645 | 51.829 | 0.00 | 0.00 |
| ATOM | 3616 | HA   | ARG | X | 241 | 50.491 | 62.236 | 51.024 | 0.00 | 0.00 |
| ATOM | 3617 | CB   | ARG | X | 241 | 50.823 | 62.249 | 53.199 | 0.00 | 0.00 |
| ATOM | 3618 | HB2  | ARG | X | 241 | 49.840 | 61.938 | 53.554 | 0.00 | 0.00 |
| ATOM | 3619 | HB3  | ARG | X | 241 | 51.611 | 61.868 | 53.850 | 0.00 | 0.00 |
| ATOM | 3620 | CG   | ARG | X | 241 | 50.683 | 63.821 | 53.156 | 0.00 | 0.00 |
| ATOM | 3621 | HG2  | ARG | X | 241 | 51.557 | 64.271 | 52.685 | 0.00 | 0.00 |
| ATOM | 3622 | HG3  | ARG | X | 241 | 49.792 | 64.054 | 52.572 | 0.00 | 0.00 |
| ATOM | 3623 | CD   | ARG | X | 241 | 50.491 | 64.524 | 54.467 | 0.00 | 0.00 |
| ATOM | 3624 | HD2  | ARG | X | 241 | 51.396 | 64.524 | 55.074 | 0.00 | 0.00 |
| ATOM | 3625 | HD3  | ARG | X | 241 | 50.258 | 65.529 | 54.114 | 0.00 | 0.00 |
| ATOM | 3626 | NE   | ARG | X | 241 | 49.359 | 64.032 | 55.338 | 0.00 | 0.00 |
| ATOM | 3627 | HE   | ARG | X | 241 | 48.444 | 64.405 | 55.127 | 0.00 | 0.00 |
| ATOM | 3628 | CZ   | ARG | X | 241 | 49.419 | 63.154 | 56.293 | 0.00 | 0.00 |
| ATOM | 3629 | NH1  | ARG | X | 241 | 50.521 | 62.615 | 56.693 | 0.00 | 0.00 |
| ATOM | 3630 | HH11 | ARG | X | 241 | 51.398 | 62.912 | 56.288 | 0.00 | 0.00 |
| ATOM | 3631 | HH12 | ARG | X | 241 | 50.535 | 61.947 | 57.450 | 0.00 | 0.00 |
| ATOM | 3632 | NH2  | ARG | X | 241 | 48.343 | 62.821 | 56.926 | 0.00 | 0.00 |
| ATOM | 3633 | HH21 | ARG | X | 241 | 47.546 | 63.438 | 56.866 | 0.00 | 0.00 |
| ATOM | 3634 | HH22 | ARG | X | 241 | 48.438 | 62.180 | 57.700 | 0.00 | 0.00 |
| ATOM | 3635 | C    | ARG | X | 241 | 52.406 | 61.568 | 51.442 | 0.00 | 0.00 |
| ATOM | 3636 | O    | ARG | X | 241 | 52.918 | 62.408 | 50.701 | 0.00 | 0.00 |
| ATOM | 3637 | N    | ARG | X | 242 | 53.164 | 60.691 | 52.071 | 0.00 | 0.00 |
| ATOM | 3638 | H    | ARG | X | 242 | 52.768 | 60.128 | 52.810 | 0.00 | 0.00 |
| ATOM | 3639 | CA   | ARG | X | 242 | 54.545 | 60.342 | 51.708 | 0.00 | 0.00 |
| ATOM | 3640 | HA   | ARG | X | 242 | 55.207 | 61.163 | 51.984 | 0.00 | 0.00 |
| ATOM | 3641 | CB   | ARG | X | 242 | 55.088 | 59.108 | 52.557 | 0.00 | 0.00 |
| ATOM | 3642 | HB2  | ARG | X | 242 | 54.815 | 59.424 | 53.564 | 0.00 | 0.00 |



|      |      |      |     |   |     |        |        |        |      |      |
|------|------|------|-----|---|-----|--------|--------|--------|------|------|
| ATOM | 3643 | HB3  | ARG | X | 242 | 54.588 | 58.180 | 52.280 | 0.00 | 0.00 |
| ATOM | 3644 | CG   | ARG | X | 242 | 56.620 | 58.864 | 52.365 | 0.00 | 0.00 |
| ATOM | 3645 | HG2  | ARG | X | 242 | 56.795 | 58.729 | 51.297 | 0.00 | 0.00 |
| ATOM | 3646 | HG3  | ARG | X | 242 | 57.154 | 59.763 | 52.672 | 0.00 | 0.00 |
| ATOM | 3647 | CD   | ARG | X | 242 | 57.238 | 57.740 | 53.312 | 0.00 | 0.00 |
| ATOM | 3648 | HD2  | ARG | X | 242 | 58.293 | 58.014 | 53.343 | 0.00 | 0.00 |
| ATOM | 3649 | HD3  | ARG | X | 242 | 56.763 | 57.948 | 54.271 | 0.00 | 0.00 |
| ATOM | 3650 | NE   | ARG | X | 242 | 56.859 | 56.441 | 52.659 | 0.00 | 0.00 |
| ATOM | 3651 | HE   | ARG | X | 242 | 56.063 | 55.932 | 53.017 | 0.00 | 0.00 |
| ATOM | 3652 | CZ   | ARG | X | 242 | 57.471 | 55.741 | 51.724 | 0.00 | 0.00 |
| ATOM | 3653 | NH1  | ARG | X | 242 | 58.631 | 56.104 | 51.160 | 0.00 | 0.00 |
| ATOM | 3654 | HH11 | ARG | X | 242 | 59.240 | 56.711 | 51.689 | 0.00 | 0.00 |
| ATOM | 3655 | HH12 | ARG | X | 242 | 59.064 | 55.575 | 50.416 | 0.00 | 0.00 |
| ATOM | 3656 | NH2  | ARG | X | 242 | 56.878 | 54.625 | 51.277 | 0.00 | 0.00 |
| ATOM | 3657 | HH21 | ARG | X | 242 | 56.018 | 54.364 | 51.737 | 0.00 | 0.00 |
| ATOM | 3658 | HH22 | ARG | X | 242 | 57.150 | 54.271 | 50.370 | 0.00 | 0.00 |
| ATOM | 3659 | C    | ARG | X | 242 | 54.608 | 60.082 | 50.221 | 0.00 | 0.00 |
| ATOM | 3660 | O    | ARG | X | 242 | 55.236 | 60.848 | 49.504 | 0.00 | 0.00 |
| ATOM | 3661 | N    | ARG | X | 243 | 54.077 | 58.932 | 49.711 | 0.00 | 0.00 |
| ATOM | 3662 | H    | ARG | X | 243 | 53.573 | 58.356 | 50.371 | 0.00 | 0.00 |
| ATOM | 3663 | CA   | ARG | X | 243 | 54.392 | 58.434 | 48.348 | 0.00 | 0.00 |
| ATOM | 3664 | HA   | ARG | X | 243 | 55.447 | 58.179 | 48.246 | 0.00 | 0.00 |
| ATOM | 3665 | CB   | ARG | X | 243 | 53.611 | 57.189 | 47.944 | 0.00 | 0.00 |
| ATOM | 3666 | HB2  | ARG | X | 243 | 52.532 | 57.300 | 48.050 | 0.00 | 0.00 |
| ATOM | 3667 | HB3  | ARG | X | 243 | 53.727 | 57.141 | 46.861 | 0.00 | 0.00 |
| ATOM | 3668 | CG   | ARG | X | 243 | 54.111 | 55.970 | 48.768 | 0.00 | 0.00 |
| ATOM | 3669 | HG2  | ARG | X | 243 | 55.124 | 55.750 | 48.431 | 0.00 | 0.00 |
| ATOM | 3670 | HG3  | ARG | X | 243 | 54.112 | 56.296 | 49.807 | 0.00 | 0.00 |
| ATOM | 3671 | CD   | ARG | X | 243 | 53.303 | 54.686 | 48.516 | 0.00 | 0.00 |
| ATOM | 3672 | HD2  | ARG | X | 243 | 52.235 | 54.891 | 48.435 | 0.00 | 0.00 |
| ATOM | 3673 | HD3  | ARG | X | 243 | 53.428 | 54.237 | 47.530 | 0.00 | 0.00 |
| ATOM | 3674 | NE   | ARG | X | 243 | 53.494 | 53.678 | 49.577 | 0.00 | 0.00 |
| ATOM | 3675 | HE   | ARG | X | 243 | 53.973 | 53.963 | 50.419 | 0.00 | 0.00 |
| ATOM | 3676 | CZ   | ARG | X | 243 | 52.705 | 52.599 | 49.779 | 0.00 | 0.00 |
| ATOM | 3677 | NH1  | ARG | X | 243 | 51.920 | 52.118 | 48.824 | 0.00 | 0.00 |
| ATOM | 3678 | HH11 | ARG | X | 243 | 51.864 | 52.518 | 47.898 | 0.00 | 0.00 |
| ATOM | 3679 | HH12 | ARG | X | 243 | 51.474 | 51.217 | 48.922 | 0.00 | 0.00 |
| ATOM | 3680 | NH2  | ARG | X | 243 | 52.738 | 51.960 | 50.919 | 0.00 | 0.00 |
| ATOM | 3681 | HH21 | ARG | X | 243 | 53.246 | 52.313 | 51.717 | 0.00 | 0.00 |
| ATOM | 3682 | HH22 | ARG | X | 243 | 52.133 | 51.164 | 51.058 | 0.00 | 0.00 |
| ATOM | 3683 | C    | ARG | X | 243 | 54.075 | 59.571 | 47.278 | 0.00 | 0.00 |
| ATOM | 3684 | O    | ARG | X | 243 | 54.855 | 59.833 | 46.342 | 0.00 | 0.00 |
| ATOM | 3685 | N    | ALA | X | 244 | 52.989 | 60.403 | 47.480 | 0.00 | 0.00 |
| ATOM | 3686 | H    | ALA | X | 244 | 52.370 | 60.216 | 48.256 | 0.00 | 0.00 |
| ATOM | 3687 | CA   | ALA | X | 244 | 52.631 | 61.610 | 46.715 | 0.00 | 0.00 |
| ATOM | 3688 | HA   | ALA | X | 244 | 52.893 | 61.339 | 45.692 | 0.00 | 0.00 |
| ATOM | 3689 | CB   | ALA | X | 244 | 51.216 | 62.012 | 47.159 | 0.00 | 0.00 |
| ATOM | 3690 | HB1  | ALA | X | 244 | 50.532 | 61.166 | 47.096 | 0.00 | 0.00 |
| ATOM | 3691 | HB2  | ALA | X | 244 | 50.855 | 62.772 | 46.465 | 0.00 | 0.00 |
| ATOM | 3692 | HB3  | ALA | X | 244 | 51.235 | 62.300 | 48.210 | 0.00 | 0.00 |
| ATOM | 3693 | C    | ALA | X | 244 | 53.530 | 62.870 | 46.940 | 0.00 | 0.00 |
| ATOM | 3694 | O    | ALA | X | 244 | 53.841 | 63.625 | 45.991 | 0.00 | 0.00 |
| ATOM | 3695 | N    | THR | X | 245 | 54.079 | 63.095 | 48.160 | 0.00 | 0.00 |
| ATOM | 3696 | H    | THR | X | 245 | 53.967 | 62.417 | 48.901 | 0.00 | 0.00 |
| ATOM | 3697 | CA   | THR | X | 245 | 55.066 | 64.140 | 48.369 | 0.00 | 0.00 |
| ATOM | 3698 | HA   | THR | X | 245 | 54.707 | 64.960 | 47.747 | 0.00 | 0.00 |
| ATOM | 3699 | CB   | THR | X | 245 | 55.203 | 64.635 | 49.785 | 0.00 | 0.00 |
| ATOM | 3700 | HB   | THR | X | 245 | 55.676 | 63.900 | 50.436 | 0.00 | 0.00 |
| ATOM | 3701 | CG2  | THR | X | 245 | 56.134 | 65.885 | 49.919 | 0.00 | 0.00 |
| ATOM | 3702 | HG21 | THR | X | 245 | 56.183 | 66.206 | 50.960 | 0.00 | 0.00 |
| ATOM | 3703 | HG22 | THR | X | 245 | 55.927 | 66.769 | 49.316 | 0.00 | 0.00 |
| ATOM | 3704 | HG23 | THR | X | 245 | 57.123 | 65.497 | 49.680 | 0.00 | 0.00 |
| ATOM | 3705 | OG1  | THR | X | 245 | 53.916 | 65.032 | 50.216 | 0.00 | 0.00 |
| ATOM | 3706 | HG1  | THR | X | 245 | 53.469 | 64.182 | 50.224 | 0.00 | 0.00 |
| ATOM | 3707 | C    | THR | X | 245 | 56.381 | 63.755 | 47.674 | 0.00 | 0.00 |
| ATOM | 3708 | O    | THR | X | 245 | 57.083 | 64.636 | 47.136 | 0.00 | 0.00 |
| ATOM | 3709 | N    | GLN | X | 246 | 56.852 | 62.520 | 47.845 | 0.00 | 0.00 |

|      |      |      |     |   |     |        |        |        |      |      |
|------|------|------|-----|---|-----|--------|--------|--------|------|------|
| ATOM | 3710 | H    | GLN | X | 246 | 56.350 | 61.844 | 48.402 | 0.00 | 0.00 |
| ATOM | 3711 | CA   | GLN | X | 246 | 58.096 | 62.013 | 47.265 | 0.00 | 0.00 |
| ATOM | 3712 | HA   | GLN | X | 246 | 58.905 | 62.733 | 47.395 | 0.00 | 0.00 |
| ATOM | 3713 | CB   | GLN | X | 246 | 58.539 | 60.628 | 47.916 | 0.00 | 0.00 |
| ATOM | 3714 | HB2  | GLN | X | 246 | 58.444 | 60.679 | 49.001 | 0.00 | 0.00 |
| ATOM | 3715 | HB3  | GLN | X | 246 | 57.827 | 59.885 | 47.556 | 0.00 | 0.00 |
| ATOM | 3716 | CG   | GLN | X | 246 | 60.019 | 60.337 | 47.586 | 0.00 | 0.00 |
| ATOM | 3717 | HG2  | GLN | X | 246 | 60.250 | 60.446 | 46.527 | 0.00 | 0.00 |
| ATOM | 3718 | HG3  | GLN | X | 246 | 60.638 | 61.047 | 48.134 | 0.00 | 0.00 |
| ATOM | 3719 | CD   | GLN | X | 246 | 60.568 | 58.893 | 47.991 | 0.00 | 0.00 |
| ATOM | 3720 | OE1  | GLN | X | 246 | 59.778 | 58.010 | 48.408 | 0.00 | 0.00 |
| ATOM | 3721 | NE2  | GLN | X | 246 | 61.823 | 58.568 | 47.870 | 0.00 | 0.00 |
| ATOM | 3722 | HE21 | GLN | X | 246 | 62.065 | 57.611 | 48.083 | 0.00 | 0.00 |
| ATOM | 3723 | HE22 | GLN | X | 246 | 62.482 | 59.182 | 47.412 | 0.00 | 0.00 |
| ATOM | 3724 | C    | GLN | X | 246 | 58.023 | 61.911 | 45.741 | 0.00 | 0.00 |
| ATOM | 3725 | O    | GLN | X | 246 | 58.909 | 62.418 | 45.088 | 0.00 | 0.00 |
| ATOM | 3726 | N    | LEU | X | 247 | 57.015 | 61.411 | 45.118 | 0.00 | 0.00 |
| ATOM | 3727 | H    | LEU | X | 247 | 56.269 | 61.036 | 45.687 | 0.00 | 0.00 |
| ATOM | 3728 | CA   | LEU | X | 247 | 56.814 | 61.356 | 43.602 | 0.00 | 0.00 |
| ATOM | 3729 | HA   | LEU | X | 247 | 57.675 | 60.809 | 43.218 | 0.00 | 0.00 |
| ATOM | 3730 | CB   | LEU | X | 247 | 55.459 | 60.711 | 43.331 | 0.00 | 0.00 |
| ATOM | 3731 | HB2  | LEU | X | 247 | 55.523 | 59.798 | 43.923 | 0.00 | 0.00 |
| ATOM | 3732 | HB3  | LEU | X | 247 | 54.652 | 61.398 | 43.585 | 0.00 | 0.00 |
| ATOM | 3733 | CG   | LEU | X | 247 | 55.194 | 60.105 | 41.957 | 0.00 | 0.00 |
| ATOM | 3734 | HG   | LEU | X | 247 | 55.974 | 59.388 | 41.702 | 0.00 | 0.00 |
| ATOM | 3735 | CD1  | LEU | X | 247 | 53.892 | 59.310 | 41.998 | 0.00 | 0.00 |
| ATOM | 3736 | HD11 | LEU | X | 247 | 53.877 | 58.804 | 41.033 | 0.00 | 0.00 |
| ATOM | 3737 | HD12 | LEU | X | 247 | 53.080 | 60.036 | 41.978 | 0.00 | 0.00 |
| ATOM | 3738 | HD13 | LEU | X | 247 | 53.974 | 58.579 | 42.803 | 0.00 | 0.00 |
| ATOM | 3739 | CD2  | LEU | X | 247 | 55.210 | 61.102 | 40.771 | 0.00 | 0.00 |
| ATOM | 3740 | HD21 | LEU | X | 247 | 54.569 | 61.919 | 41.101 | 0.00 | 0.00 |
| ATOM | 3741 | HD22 | LEU | X | 247 | 56.210 | 61.477 | 40.549 | 0.00 | 0.00 |
| ATOM | 3742 | HD23 | LEU | X | 247 | 54.774 | 60.624 | 39.894 | 0.00 | 0.00 |
| ATOM | 3743 | C    | LEU | X | 247 | 56.808 | 62.791 | 43.100 | 0.00 | 0.00 |
| ATOM | 3744 | O    | LEU | X | 247 | 57.387 | 63.083 | 42.039 | 0.00 | 0.00 |
| ATOM | 3745 | N    | ALA | X | 248 | 56.122 | 63.698 | 43.864 | 0.00 | 0.00 |
| ATOM | 3746 | H    | ALA | X | 248 | 55.694 | 63.379 | 44.722 | 0.00 | 0.00 |
| ATOM | 3747 | CA   | ALA | X | 248 | 56.138 | 65.202 | 43.561 | 0.00 | 0.00 |
| ATOM | 3748 | HA   | ALA | X | 248 | 55.787 | 65.321 | 42.536 | 0.00 | 0.00 |
| ATOM | 3749 | CB   | ALA | X | 248 | 55.124 | 65.806 | 44.537 | 0.00 | 0.00 |
| ATOM | 3750 | HB1  | ALA | X | 248 | 55.544 | 65.720 | 45.539 | 0.00 | 0.00 |
| ATOM | 3751 | HB2  | ALA | X | 248 | 54.149 | 65.324 | 44.455 | 0.00 | 0.00 |
| ATOM | 3752 | HB3  | ALA | X | 248 | 54.896 | 66.817 | 44.198 | 0.00 | 0.00 |
| ATOM | 3753 | C    | ALA | X | 248 | 57.532 | 65.874 | 43.688 | 0.00 | 0.00 |
| ATOM | 3754 | O    | ALA | X | 248 | 57.900 | 66.540 | 42.732 | 0.00 | 0.00 |
| ATOM | 3755 | N    | HIE | X | 249 | 58.281 | 65.667 | 44.734 | 0.00 | 0.00 |
| ATOM | 3756 | H    | HIE | X | 249 | 57.896 | 65.128 | 45.496 | 0.00 | 0.00 |
| ATOM | 3757 | CA   | HIE | X | 249 | 59.654 | 65.967 | 44.823 | 0.00 | 0.00 |
| ATOM | 3758 | HA   | HIE | X | 249 | 59.740 | 67.054 | 44.820 | 0.00 | 0.00 |
| ATOM | 3759 | CB   | HIE | X | 249 | 60.141 | 65.345 | 46.212 | 0.00 | 0.00 |
| ATOM | 3760 | HB2  | HIE | X | 249 | 59.506 | 65.622 | 47.053 | 0.00 | 0.00 |
| ATOM | 3761 | HB3  | HIE | X | 249 | 60.092 | 64.262 | 46.096 | 0.00 | 0.00 |
| ATOM | 3762 | CG   | HIE | X | 249 | 61.585 | 65.859 | 46.503 | 0.00 | 0.00 |
| ATOM | 3763 | ND1  | HIE | X | 249 | 62.785 | 65.173 | 46.334 | 0.00 | 0.00 |
| ATOM | 3764 | CE1  | HIE | X | 249 | 63.751 | 65.936 | 46.831 | 0.00 | 0.00 |
| ATOM | 3765 | HE1  | HIE | X | 249 | 64.795 | 65.666 | 46.877 | 0.00 | 0.00 |
| ATOM | 3766 | NE2  | HIE | X | 249 | 63.238 | 67.108 | 47.350 | 0.00 | 0.00 |
| ATOM | 3767 | HE2  | HIE | X | 249 | 63.599 | 67.695 | 48.089 | 0.00 | 0.00 |
| ATOM | 3768 | CD2  | HIE | X | 249 | 61.870 | 67.043 | 47.066 | 0.00 | 0.00 |
| ATOM | 3769 | HD2  | HIE | X | 249 | 61.143 | 67.804 | 47.311 | 0.00 | 0.00 |
| ATOM | 3770 | C    | HIE | X | 249 | 60.558 | 65.408 | 43.715 | 0.00 | 0.00 |
| ATOM | 3771 | O    | HIE | X | 249 | 61.311 | 66.218 | 43.182 | 0.00 | 0.00 |
| ATOM | 3772 | N    | LEU | X | 250 | 60.410 | 64.137 | 43.331 | 0.00 | 0.00 |
| ATOM | 3773 | H    | LEU | X | 250 | 59.827 | 63.501 | 43.856 | 0.00 | 0.00 |
| ATOM | 3774 | CA   | LEU | X | 250 | 61.068 | 63.587 | 42.086 | 0.00 | 0.00 |
| ATOM | 3775 | HA   | LEU | X | 250 | 62.137 | 63.781 | 42.168 | 0.00 | 0.00 |
| ATOM | 3776 | CB   | LEU | X | 250 | 60.895 | 62.064 | 42.104 | 0.00 | 0.00 |

|      |      |      |     |   |     |        |        |        |      |      |
|------|------|------|-----|---|-----|--------|--------|--------|------|------|
| ATOM | 3777 | HB2  | LEU | X | 250 | 59.838 | 61.869 | 42.287 | 0.00 | 0.00 |
| ATOM | 3778 | HB3  | LEU | X | 250 | 61.016 | 61.555 | 41.148 | 0.00 | 0.00 |
| ATOM | 3779 | CG   | LEU | X | 250 | 61.600 | 61.233 | 43.121 | 0.00 | 0.00 |
| ATOM | 3780 | HG   | LEU | X | 250 | 61.362 | 61.683 | 44.085 | 0.00 | 0.00 |
| ATOM | 3781 | CD1  | LEU | X | 250 | 61.132 | 59.777 | 43.174 | 0.00 | 0.00 |
| ATOM | 3782 | HD11 | LEU | X | 250 | 61.503 | 59.222 | 42.312 | 0.00 | 0.00 |
| ATOM | 3783 | HD12 | LEU | X | 250 | 60.052 | 59.644 | 43.116 | 0.00 | 0.00 |
| ATOM | 3784 | HD13 | LEU | X | 250 | 61.507 | 59.309 | 44.084 | 0.00 | 0.00 |
| ATOM | 3785 | CD2  | LEU | X | 250 | 63.130 | 61.312 | 42.939 | 0.00 | 0.00 |
| ATOM | 3786 | HD21 | LEU | X | 250 | 63.464 | 60.780 | 42.048 | 0.00 | 0.00 |
| ATOM | 3787 | HD22 | LEU | X | 250 | 63.441 | 62.335 | 42.726 | 0.00 | 0.00 |
| ATOM | 3788 | HD23 | LEU | X | 250 | 63.585 | 61.097 | 43.906 | 0.00 | 0.00 |
| ATOM | 3789 | C    | LEU | X | 250 | 60.630 | 64.139 | 40.742 | 0.00 | 0.00 |
| ATOM | 3790 | O    | LEU | X | 250 | 61.556 | 64.602 | 40.131 | 0.00 | 0.00 |
| ATOM | 3791 | N    | VAL | X | 251 | 59.395 | 64.178 | 40.256 | 0.00 | 0.00 |
| ATOM | 3792 | H    | VAL | X | 251 | 58.685 | 63.898 | 40.918 | 0.00 | 0.00 |
| ATOM | 3793 | CA   | VAL | X | 251 | 58.984 | 64.674 | 38.884 | 0.00 | 0.00 |
| ATOM | 3794 | HA   | VAL | X | 251 | 59.718 | 64.391 | 38.130 | 0.00 | 0.00 |
| ATOM | 3795 | CB   | VAL | X | 251 | 57.682 | 63.938 | 38.398 | 0.00 | 0.00 |
| ATOM | 3796 | HB   | VAL | X | 251 | 57.688 | 62.930 | 38.813 | 0.00 | 0.00 |
| ATOM | 3797 | CG1  | VAL | X | 251 | 56.478 | 64.675 | 38.963 | 0.00 | 0.00 |
| ATOM | 3798 | HG11 | VAL | X | 251 | 56.576 | 64.942 | 40.016 | 0.00 | 0.00 |
| ATOM | 3799 | HG12 | VAL | X | 251 | 56.495 | 65.615 | 38.411 | 0.00 | 0.00 |
| ATOM | 3800 | HG13 | VAL | X | 251 | 55.551 | 64.134 | 38.772 | 0.00 | 0.00 |
| ATOM | 3801 | CG2  | VAL | X | 251 | 57.671 | 63.768 | 36.866 | 0.00 | 0.00 |
| ATOM | 3802 | HG21 | VAL | X | 251 | 58.695 | 63.611 | 36.528 | 0.00 | 0.00 |
| ATOM | 3803 | HG22 | VAL | X | 251 | 57.439 | 64.721 | 36.390 | 0.00 | 0.00 |
| ATOM | 3804 | HG23 | VAL | X | 251 | 56.999 | 62.958 | 36.581 | 0.00 | 0.00 |
| ATOM | 3805 | C    | VAL | X | 251 | 59.091 | 66.201 | 38.756 | 0.00 | 0.00 |
| ATOM | 3806 | O    | VAL | X | 251 | 58.831 | 66.677 | 37.667 | 0.00 | 0.00 |
| ATOM | 3807 | N    | GLY | X | 252 | 59.520 | 66.981 | 39.749 | 0.00 | 0.00 |
| ATOM | 3808 | H    | GLY | X | 252 | 59.553 | 66.589 | 40.679 | 0.00 | 0.00 |
| ATOM | 3809 | CA   | GLY | X | 252 | 59.843 | 68.399 | 39.683 | 0.00 | 0.00 |
| ATOM | 3810 | HA2  | GLY | X | 252 | 60.561 | 68.600 | 40.479 | 0.00 | 0.00 |
| ATOM | 3811 | HA3  | GLY | X | 252 | 60.336 | 68.694 | 38.757 | 0.00 | 0.00 |
| ATOM | 3812 | C    | GLY | X | 252 | 58.597 | 69.230 | 39.870 | 0.00 | 0.00 |
| ATOM | 3813 | O    | GLY | X | 252 | 58.317 | 70.216 | 39.197 | 0.00 | 0.00 |
| ATOM | 3814 | N    | CYX | X | 253 | 57.774 | 68.885 | 40.884 | 0.00 | 0.00 |
| ATOM | 3815 | H    | CYX | X | 253 | 57.942 | 67.937 | 41.189 | 0.00 | 0.00 |
| ATOM | 3816 | CA   | CYX | X | 253 | 56.577 | 69.533 | 41.411 | 0.00 | 0.00 |
| ATOM | 3817 | HA   | CYX | X | 253 | 56.461 | 70.512 | 40.946 | 0.00 | 0.00 |
| ATOM | 3818 | CB   | CYX | X | 253 | 55.333 | 68.717 | 41.004 | 0.00 | 0.00 |
| ATOM | 3819 | HB2  | CYX | X | 253 | 55.561 | 67.707 | 41.345 | 0.00 | 0.00 |
| ATOM | 3820 | HB3  | CYX | X | 253 | 54.398 | 69.004 | 41.486 | 0.00 | 0.00 |
| ATOM | 3821 | SG   | CYX | X | 253 | 54.969 | 68.391 | 39.290 | 0.00 | 0.00 |
| ATOM | 3822 | C    | CYX | X | 253 | 56.532 | 69.895 | 42.892 | 0.00 | 0.00 |
| ATOM | 3823 | O    | CYX | X | 253 | 55.957 | 69.215 | 43.753 | 0.00 | 0.00 |
| ATOM | 3824 | N    | PRO | X | 254 | 57.339 | 70.899 | 43.238 | 0.00 | 0.00 |
| ATOM | 3825 | CD   | PRO | X | 254 | 57.298 | 71.641 | 44.540 | 0.00 | 0.00 |
| ATOM | 3826 | HD2  | PRO | X | 254 | 57.351 | 70.890 | 45.328 | 0.00 | 0.00 |
| ATOM | 3827 | HD3  | PRO | X | 254 | 56.364 | 72.148 | 44.782 | 0.00 | 0.00 |
| ATOM | 3828 | CG   | PRO | X | 254 | 58.376 | 72.692 | 44.517 | 0.00 | 0.00 |
| ATOM | 3829 | HG2  | PRO | X | 254 | 59.320 | 72.257 | 44.843 | 0.00 | 0.00 |
| ATOM | 3830 | HG3  | PRO | X | 254 | 57.911 | 73.573 | 44.960 | 0.00 | 0.00 |
| ATOM | 3831 | CB   | PRO | X | 254 | 58.466 | 72.971 | 43.063 | 0.00 | 0.00 |
| ATOM | 3832 | HB2  | PRO | X | 254 | 59.429 | 73.426 | 42.829 | 0.00 | 0.00 |
| ATOM | 3833 | HB3  | PRO | X | 254 | 57.636 | 73.596 | 42.735 | 0.00 | 0.00 |
| ATOM | 3834 | CA   | PRO | X | 254 | 58.330 | 71.580 | 42.428 | 0.00 | 0.00 |
| ATOM | 3835 | HA   | PRO | X | 254 | 57.998 | 71.716 | 41.399 | 0.00 | 0.00 |
| ATOM | 3836 | C    | PRO | X | 254 | 59.656 | 70.765 | 42.508 | 0.00 | 0.00 |
| ATOM | 3837 | O    | PRO | X | 254 | 59.813 | 69.847 | 43.350 | 0.00 | 0.00 |
| ATOM | 3838 | N    | PRO | X | 255 | 60.624 | 70.988 | 41.621 | 0.00 | 0.00 |
| ATOM | 3839 | CD   | PRO | X | 255 | 60.588 | 71.991 | 40.618 | 0.00 | 0.00 |
| ATOM | 3840 | HD2  | PRO | X | 255 | 60.850 | 72.944 | 41.080 | 0.00 | 0.00 |
| ATOM | 3841 | HD3  | PRO | X | 255 | 59.619 | 72.125 | 40.138 | 0.00 | 0.00 |
| ATOM | 3842 | CG   | PRO | X | 255 | 61.789 | 71.624 | 39.758 | 0.00 | 0.00 |
| ATOM | 3843 | HG2  | PRO | X | 255 | 62.193 | 72.498 | 39.248 | 0.00 | 0.00 |

|      |      |      |     |   |     |        |        |        |      |      |
|------|------|------|-----|---|-----|--------|--------|--------|------|------|
| ATOM | 3844 | HG3  | PRO | X | 255 | 61.588 | 70.891 | 38.977 | 0.00 | 0.00 |
| ATOM | 3845 | CB   | PRO | X | 255 | 62.835 | 71.130 | 40.723 | 0.00 | 0.00 |
| ATOM | 3846 | HB2  | PRO | X | 255 | 63.493 | 71.921 | 41.084 | 0.00 | 0.00 |
| ATOM | 3847 | HB3  | PRO | X | 255 | 63.391 | 70.320 | 40.250 | 0.00 | 0.00 |
| ATOM | 3848 | CA   | PRO | X | 255 | 62.037 | 70.689 | 41.943 | 0.00 | 0.00 |
| ATOM | 3849 | HA   | PRO | X | 255 | 62.128 | 69.610 | 42.073 | 0.00 | 0.00 |
| ATOM | 3850 | C    | PRO | X | 255 | 62.438 | 71.386 | 43.272 | 0.00 | 0.00 |
| ATOM | 3851 | O    | PRO | X | 255 | 62.321 | 72.622 | 43.309 | 0.00 | 0.00 |
| ATOM | 3852 | N    | GLY | X | 256 | 62.915 | 70.693 | 44.285 | 0.00 | 0.00 |
| ATOM | 3853 | H    | GLY | X | 256 | 62.868 | 69.687 | 44.213 | 0.00 | 0.00 |
| ATOM | 3854 | CA   | GLY | X | 256 | 63.345 | 71.212 | 45.606 | 0.00 | 0.00 |
| ATOM | 3855 | HA2  | GLY | X | 256 | 64.036 | 70.486 | 46.035 | 0.00 | 0.00 |
| ATOM | 3856 | HA3  | GLY | X | 256 | 63.740 | 72.219 | 45.468 | 0.00 | 0.00 |
| ATOM | 3857 | C    | GLY | X | 256 | 62.176 | 71.342 | 46.519 | 0.00 | 0.00 |
| ATOM | 3858 | O    | GLY | X | 256 | 62.149 | 72.233 | 47.370 | 0.00 | 0.00 |
| ATOM | 3859 | N    | GLY | X | 257 | 61.113 | 70.564 | 46.341 | 0.00 | 0.00 |
| ATOM | 3860 | H    | GLY | X | 257 | 61.139 | 69.927 | 45.558 | 0.00 | 0.00 |
| ATOM | 3861 | CA   | GLY | X | 257 | 59.802 | 70.552 | 47.085 | 0.00 | 0.00 |
| ATOM | 3862 | HA2  | GLY | X | 257 | 59.299 | 71.519 | 47.050 | 0.00 | 0.00 |
| ATOM | 3863 | HA3  | GLY | X | 257 | 59.246 | 69.728 | 46.638 | 0.00 | 0.00 |
| ATOM | 3864 | C    | GLY | X | 257 | 59.966 | 70.126 | 48.551 | 0.00 | 0.00 |
| ATOM | 3865 | O    | GLY | X | 257 | 60.903 | 69.410 | 48.882 | 0.00 | 0.00 |
| ATOM | 3866 | N    | THR | X | 258 | 58.980 | 70.501 | 49.438 | 0.00 | 0.00 |
| ATOM | 3867 | H    | THR | X | 258 | 58.228 | 71.124 | 49.182 | 0.00 | 0.00 |
| ATOM | 3868 | CA   | THR | X | 258 | 59.164 | 70.542 | 50.871 | 0.00 | 0.00 |
| ATOM | 3869 | HA   | THR | X | 258 | 59.915 | 69.799 | 51.138 | 0.00 | 0.00 |
| ATOM | 3870 | CB   | THR | X | 258 | 59.541 | 71.981 | 51.286 | 0.00 | 0.00 |
| ATOM | 3871 | HB   | THR | X | 258 | 59.311 | 72.002 | 52.352 | 0.00 | 0.00 |
| ATOM | 3872 | CG2  | THR | X | 258 | 61.080 | 72.300 | 51.008 | 0.00 | 0.00 |
| ATOM | 3873 | HG21 | THR | X | 258 | 61.646 | 71.826 | 51.810 | 0.00 | 0.00 |
| ATOM | 3874 | HG22 | THR | X | 258 | 61.099 | 73.367 | 51.229 | 0.00 | 0.00 |
| ATOM | 3875 | HG23 | THR | X | 258 | 61.407 | 71.966 | 50.023 | 0.00 | 0.00 |
| ATOM | 3876 | OG1  | THR | X | 258 | 58.620 | 72.821 | 50.608 | 0.00 | 0.00 |
| ATOM | 3877 | HG1  | THR | X | 258 | 58.837 | 73.705 | 50.916 | 0.00 | 0.00 |
| ATOM | 3878 | C    | THR | X | 258 | 57.910 | 70.217 | 51.565 | 0.00 | 0.00 |
| ATOM | 3879 | O    | THR | X | 258 | 58.041 | 69.683 | 52.681 | 0.00 | 0.00 |
| ATOM | 3880 | N    | GLY | X | 259 | 56.724 | 70.238 | 50.902 | 0.00 | 0.00 |
| ATOM | 3881 | H    | GLY | X | 259 | 56.720 | 70.302 | 49.894 | 0.00 | 0.00 |
| ATOM | 3882 | CA   | GLY | X | 259 | 55.441 | 70.130 | 51.552 | 0.00 | 0.00 |
| ATOM | 3883 | HA2  | GLY | X | 259 | 54.638 | 69.580 | 51.062 | 0.00 | 0.00 |
| ATOM | 3884 | HA3  | GLY | X | 259 | 55.615 | 69.458 | 52.393 | 0.00 | 0.00 |
| ATOM | 3885 | C    | GLY | X | 259 | 54.725 | 71.371 | 52.169 | 0.00 | 0.00 |
| ATOM | 3886 | O    | GLY | X | 259 | 54.060 | 71.247 | 53.219 | 0.00 | 0.00 |
| ATOM | 3887 | N    | GLY | X | 260 | 54.974 | 72.562 | 51.630 | 0.00 | 0.00 |
| ATOM | 3888 | H    | GLY | X | 260 | 55.617 | 72.554 | 50.850 | 0.00 | 0.00 |
| ATOM | 3889 | CA   | GLY | X | 260 | 54.536 | 73.923 | 52.110 | 0.00 | 0.00 |
| ATOM | 3890 | HA2  | GLY | X | 260 | 54.240 | 73.955 | 53.159 | 0.00 | 0.00 |
| ATOM | 3891 | HA3  | GLY | X | 260 | 55.311 | 74.643 | 51.845 | 0.00 | 0.00 |
| ATOM | 3892 | C    | GLY | X | 260 | 53.367 | 74.532 | 51.354 | 0.00 | 0.00 |
| ATOM | 3893 | O    | GLY | X | 260 | 53.054 | 75.676 | 51.692 | 0.00 | 0.00 |
| ATOM | 3894 | N    | ASN | X | 261 | 52.820 | 73.780 | 50.357 | 0.00 | 0.00 |
| ATOM | 3895 | H    | ASN | X | 261 | 53.221 | 72.887 | 50.110 | 0.00 | 0.00 |
| ATOM | 3896 | CA   | ASN | X | 261 | 51.574 | 74.004 | 49.709 | 0.00 | 0.00 |
| ATOM | 3897 | HA   | ASN | X | 261 | 50.851 | 74.090 | 50.519 | 0.00 | 0.00 |
| ATOM | 3898 | CB   | ASN | X | 261 | 51.680 | 75.324 | 48.921 | 0.00 | 0.00 |
| ATOM | 3899 | HB2  | ASN | X | 261 | 52.007 | 76.168 | 49.529 | 0.00 | 0.00 |
| ATOM | 3900 | HB3  | ASN | X | 261 | 52.493 | 75.193 | 48.206 | 0.00 | 0.00 |
| ATOM | 3901 | CG   | ASN | X | 261 | 50.385 | 75.631 | 48.205 | 0.00 | 0.00 |
| ATOM | 3902 | OD1  | ASN | X | 261 | 50.106 | 75.292 | 47.054 | 0.00 | 0.00 |
| ATOM | 3903 | ND2  | ASN | X | 261 | 49.496 | 76.405 | 48.804 | 0.00 | 0.00 |
| ATOM | 3904 | HD21 | ASN | X | 261 | 48.733 | 76.750 | 48.240 | 0.00 | 0.00 |
| ATOM | 3905 | HD22 | ASN | X | 261 | 49.693 | 76.783 | 49.720 | 0.00 | 0.00 |
| ATOM | 3906 | C    | ASN | X | 261 | 51.022 | 72.903 | 48.799 | 0.00 | 0.00 |
| ATOM | 3907 | O    | ASN | X | 261 | 51.647 | 72.511 | 47.850 | 0.00 | 0.00 |
| ATOM | 3908 | N    | ASP | X | 262 | 49.748 | 72.444 | 48.960 | 0.00 | 0.00 |
| ATOM | 3909 | H    | ASP | X | 262 | 49.251 | 72.739 | 49.788 | 0.00 | 0.00 |
| ATOM | 3910 | CA   | ASP | X | 262 | 49.202 | 71.335 | 48.174 | 0.00 | 0.00 |

|      |      |      |     |   |     |        |        |        |      |      |
|------|------|------|-----|---|-----|--------|--------|--------|------|------|
| ATOM | 3911 | HA   | ASP | X | 262 | 49.922 | 70.520 | 48.102 | 0.00 | 0.00 |
| ATOM | 3912 | CB   | ASP | X | 262 | 48.062 | 70.679 | 48.829 | 0.00 | 0.00 |
| ATOM | 3913 | HB2  | ASP | X | 262 | 47.246 | 71.402 | 48.840 | 0.00 | 0.00 |
| ATOM | 3914 | HB3  | ASP | X | 262 | 47.640 | 69.865 | 48.240 | 0.00 | 0.00 |
| ATOM | 3915 | CG   | ASP | X | 262 | 48.324 | 70.222 | 50.285 | 0.00 | 0.00 |
| ATOM | 3916 | OD1  | ASP | X | 262 | 47.430 | 70.309 | 51.128 | 0.00 | 0.00 |
| ATOM | 3917 | OD2  | ASP | X | 262 | 49.491 | 69.824 | 50.597 | 0.00 | 0.00 |
| ATOM | 3918 | C    | ASP | X | 262 | 48.698 | 71.797 | 46.830 | 0.00 | 0.00 |
| ATOM | 3919 | O    | ASP | X | 262 | 48.633 | 70.954 | 45.890 | 0.00 | 0.00 |
| ATOM | 3920 | N    | THR | X | 263 | 48.203 | 73.035 | 46.687 | 0.00 | 0.00 |
| ATOM | 3921 | H    | THR | X | 263 | 48.326 | 73.702 | 47.435 | 0.00 | 0.00 |
| ATOM | 3922 | CA   | THR | X | 263 | 47.655 | 73.585 | 45.376 | 0.00 | 0.00 |
| ATOM | 3923 | HA   | THR | X | 263 | 46.857 | 72.966 | 44.966 | 0.00 | 0.00 |
| ATOM | 3924 | CB   | THR | X | 263 | 47.033 | 75.012 | 45.526 | 0.00 | 0.00 |
| ATOM | 3925 | HB   | THR | X | 263 | 47.821 | 75.634 | 45.953 | 0.00 | 0.00 |
| ATOM | 3926 | CG2  | THR | X | 263 | 46.473 | 75.653 | 44.308 | 0.00 | 0.00 |
| ATOM | 3927 | HG21 | THR | X | 263 | 45.994 | 76.583 | 44.615 | 0.00 | 0.00 |
| ATOM | 3928 | HG22 | THR | X | 263 | 45.827 | 74.901 | 43.855 | 0.00 | 0.00 |
| ATOM | 3929 | HG23 | THR | X | 263 | 47.212 | 76.021 | 43.597 | 0.00 | 0.00 |
| ATOM | 3930 | OG1  | THR | X | 263 | 45.867 | 74.915 | 46.380 | 0.00 | 0.00 |
| ATOM | 3931 | HG1  | THR | X | 263 | 45.517 | 75.772 | 46.632 | 0.00 | 0.00 |
| ATOM | 3932 | C    | THR | X | 263 | 48.746 | 73.537 | 44.319 | 0.00 | 0.00 |
| ATOM | 3933 | O    | THR | X | 263 | 48.676 | 72.817 | 43.370 | 0.00 | 0.00 |
| ATOM | 3934 | N    | GLU | X | 264 | 49.813 | 74.404 | 44.484 | 0.00 | 0.00 |
| ATOM | 3935 | H    | GLU | X | 264 | 49.862 | 74.960 | 45.326 | 0.00 | 0.00 |
| ATOM | 3936 | CA   | GLU | X | 264 | 51.047 | 74.582 | 43.696 | 0.00 | 0.00 |
| ATOM | 3937 | HA   | GLU | X | 264 | 50.726 | 74.952 | 42.722 | 0.00 | 0.00 |
| ATOM | 3938 | CB   | GLU | X | 264 | 52.046 | 75.494 | 44.390 | 0.00 | 0.00 |
| ATOM | 3939 | HB2  | GLU | X | 264 | 51.981 | 75.319 | 45.464 | 0.00 | 0.00 |
| ATOM | 3940 | HB3  | GLU | X | 264 | 53.077 | 75.350 | 44.067 | 0.00 | 0.00 |
| ATOM | 3941 | CG   | GLU | X | 264 | 51.645 | 77.019 | 44.331 | 0.00 | 0.00 |
| ATOM | 3942 | HG2  | GLU | X | 264 | 50.661 | 77.179 | 44.773 | 0.00 | 0.00 |
| ATOM | 3943 | HG3  | GLU | X | 264 | 52.346 | 77.635 | 44.894 | 0.00 | 0.00 |
| ATOM | 3944 | CD   | GLU | X | 264 | 51.716 | 77.598 | 42.920 | 0.00 | 0.00 |
| ATOM | 3945 | OE1  | GLU | X | 264 | 52.620 | 77.431 | 42.163 | 0.00 | 0.00 |
| ATOM | 3946 | OE2  | GLU | X | 264 | 50.802 | 78.291 | 42.473 | 0.00 | 0.00 |
| ATOM | 3947 | C    | GLU | X | 264 | 51.723 | 73.237 | 43.499 | 0.00 | 0.00 |
| ATOM | 3948 | O    | GLU | X | 264 | 52.096 | 73.047 | 42.329 | 0.00 | 0.00 |
| ATOM | 3949 | N    | LEU | X | 265 | 51.941 | 72.335 | 44.547 | 0.00 | 0.00 |
| ATOM | 3950 | H    | LEU | X | 265 | 51.695 | 72.606 | 45.488 | 0.00 | 0.00 |
| ATOM | 3951 | CA   | LEU | X | 265 | 52.309 | 70.928 | 44.244 | 0.00 | 0.00 |
| ATOM | 3952 | HA   | LEU | X | 265 | 53.255 | 70.953 | 43.703 | 0.00 | 0.00 |
| ATOM | 3953 | CB   | LEU | X | 265 | 52.399 | 70.196 | 45.589 | 0.00 | 0.00 |
| ATOM | 3954 | HB2  | LEU | X | 265 | 53.039 | 70.767 | 46.261 | 0.00 | 0.00 |
| ATOM | 3955 | HB3  | LEU | X | 265 | 51.447 | 70.199 | 46.119 | 0.00 | 0.00 |
| ATOM | 3956 | CG   | LEU | X | 265 | 52.930 | 68.669 | 45.726 | 0.00 | 0.00 |
| ATOM | 3957 | HG   | LEU | X | 265 | 53.974 | 68.572 | 45.426 | 0.00 | 0.00 |
| ATOM | 3958 | CD1  | LEU | X | 265 | 52.997 | 68.122 | 47.145 | 0.00 | 0.00 |
| ATOM | 3959 | HD11 | LEU | X | 265 | 53.137 | 67.042 | 47.127 | 0.00 | 0.00 |
| ATOM | 3960 | HD12 | LEU | X | 265 | 52.082 | 68.375 | 47.681 | 0.00 | 0.00 |
| ATOM | 3961 | HD13 | LEU | X | 265 | 53.832 | 68.637 | 47.621 | 0.00 | 0.00 |
| ATOM | 3962 | CD2  | LEU | X | 265 | 52.178 | 67.621 | 44.868 | 0.00 | 0.00 |
| ATOM | 3963 | HD21 | LEU | X | 265 | 51.120 | 67.869 | 44.951 | 0.00 | 0.00 |
| ATOM | 3964 | HD22 | LEU | X | 265 | 52.539 | 67.612 | 43.839 | 0.00 | 0.00 |
| ATOM | 3965 | HD23 | LEU | X | 265 | 52.282 | 66.591 | 45.207 | 0.00 | 0.00 |
| ATOM | 3966 | C    | LEU | X | 265 | 51.322 | 70.376 | 43.175 | 0.00 | 0.00 |
| ATOM | 3967 | O    | LEU | X | 265 | 51.783 | 69.953 | 42.101 | 0.00 | 0.00 |
| ATOM | 3968 | N    | VAL | X | 266 | 50.040 | 70.210 | 43.515 | 0.00 | 0.00 |
| ATOM | 3969 | H    | VAL | X | 266 | 49.603 | 70.476 | 44.386 | 0.00 | 0.00 |
| ATOM | 3970 | CA   | VAL | X | 266 | 49.222 | 69.265 | 42.762 | 0.00 | 0.00 |
| ATOM | 3971 | HA   | VAL | X | 266 | 49.755 | 68.333 | 42.577 | 0.00 | 0.00 |
| ATOM | 3972 | CB   | VAL | X | 266 | 47.955 | 68.866 | 43.594 | 0.00 | 0.00 |
| ATOM | 3973 | HB   | VAL | X | 266 | 47.438 | 69.762 | 43.936 | 0.00 | 0.00 |
| ATOM | 3974 | CG1  | VAL | X | 266 | 46.900 | 68.153 | 42.610 | 0.00 | 0.00 |
| ATOM | 3975 | HG11 | VAL | X | 266 | 47.453 | 67.367 | 42.096 | 0.00 | 0.00 |
| ATOM | 3976 | HG12 | VAL | X | 266 | 46.176 | 67.578 | 43.187 | 0.00 | 0.00 |
| ATOM | 3977 | HG13 | VAL | X | 266 | 46.383 | 68.775 | 41.879 | 0.00 | 0.00 |

|      |      |      |     |   |     |        |        |        |      |      |
|------|------|------|-----|---|-----|--------|--------|--------|------|------|
| ATOM | 3978 | CG2  | VAL | X | 266 | 48.210 | 67.955 | 44.739 | 0.00 | 0.00 |
| ATOM | 3979 | HG21 | VAL | X | 266 | 47.276 | 67.550 | 45.130 | 0.00 | 0.00 |
| ATOM | 3980 | HG22 | VAL | X | 266 | 48.941 | 68.382 | 45.426 | 0.00 | 0.00 |
| ATOM | 3981 | HG23 | VAL | X | 266 | 48.730 | 67.069 | 44.375 | 0.00 | 0.00 |
| ATOM | 3982 | C    | VAL | X | 266 | 48.880 | 69.784 | 41.418 | 0.00 | 0.00 |
| ATOM | 3983 | O    | VAL | X | 266 | 48.758 | 68.961 | 40.565 | 0.00 | 0.00 |
| ATOM | 3984 | N    | ALA | X | 267 | 48.935 | 71.070 | 41.162 | 0.00 | 0.00 |
| ATOM | 3985 | H    | ALA | X | 267 | 48.996 | 71.722 | 41.931 | 0.00 | 0.00 |
| ATOM | 3986 | CA   | ALA | X | 267 | 48.687 | 71.722 | 39.840 | 0.00 | 0.00 |
| ATOM | 3987 | HA   | ALA | X | 267 | 47.722 | 71.479 | 39.395 | 0.00 | 0.00 |
| ATOM | 3988 | CB   | ALA | X | 267 | 48.694 | 73.205 | 40.095 | 0.00 | 0.00 |
| ATOM | 3989 | HB1  | ALA | X | 267 | 47.875 | 73.498 | 40.752 | 0.00 | 0.00 |
| ATOM | 3990 | HB2  | ALA | X | 267 | 48.703 | 73.646 | 39.098 | 0.00 | 0.00 |
| ATOM | 3991 | HB3  | ALA | X | 267 | 49.620 | 73.579 | 40.533 | 0.00 | 0.00 |
| ATOM | 3992 | C    | ALA | X | 267 | 49.653 | 71.260 | 38.765 | 0.00 | 0.00 |
| ATOM | 3993 | O    | ALA | X | 267 | 49.401 | 70.837 | 37.571 | 0.00 | 0.00 |
| ATOM | 3994 | N    | CYX | X | 268 | 50.925 | 71.295 | 39.155 | 0.00 | 0.00 |
| ATOM | 3995 | H    | CYX | X | 268 | 51.017 | 71.645 | 40.098 | 0.00 | 0.00 |
| ATOM | 3996 | CA   | CYX | X | 268 | 52.012 | 70.761 | 38.434 | 0.00 | 0.00 |
| ATOM | 3997 | HA   | CYX | X | 268 | 51.959 | 71.218 | 37.446 | 0.00 | 0.00 |
| ATOM | 3998 | CB   | CYX | X | 268 | 53.276 | 71.160 | 39.220 | 0.00 | 0.00 |
| ATOM | 3999 | HB2  | CYX | X | 268 | 53.383 | 72.242 | 39.156 | 0.00 | 0.00 |
| ATOM | 4000 | HB3  | CYX | X | 268 | 53.116 | 70.821 | 40.244 | 0.00 | 0.00 |
| ATOM | 4001 | SG   | CYX | X | 268 | 54.905 | 70.355 | 38.720 | 0.00 | 0.00 |
| ATOM | 4002 | C    | CYX | X | 268 | 51.876 | 69.263 | 38.211 | 0.00 | 0.00 |
| ATOM | 4003 | O    | CYX | X | 268 | 52.098 | 68.724 | 37.133 | 0.00 | 0.00 |
| ATOM | 4004 | N    | LEU | X | 269 | 51.479 | 68.530 | 39.179 | 0.00 | 0.00 |
| ATOM | 4005 | H    | LEU | X | 269 | 51.322 | 68.989 | 40.065 | 0.00 | 0.00 |
| ATOM | 4006 | CA   | LEU | X | 269 | 51.338 | 67.067 | 39.146 | 0.00 | 0.00 |
| ATOM | 4007 | HA   | LEU | X | 269 | 52.281 | 66.767 | 38.689 | 0.00 | 0.00 |
| ATOM | 4008 | CB   | LEU | X | 269 | 51.198 | 66.580 | 40.611 | 0.00 | 0.00 |
| ATOM | 4009 | HB2  | LEU | X | 269 | 52.008 | 67.046 | 41.172 | 0.00 | 0.00 |
| ATOM | 4010 | HB3  | LEU | X | 269 | 50.230 | 66.861 | 41.027 | 0.00 | 0.00 |
| ATOM | 4011 | CG   | LEU | X | 269 | 51.403 | 65.031 | 40.555 | 0.00 | 0.00 |
| ATOM | 4012 | HG   | LEU | X | 269 | 50.794 | 64.649 | 39.736 | 0.00 | 0.00 |
| ATOM | 4013 | CD1  | LEU | X | 269 | 52.830 | 64.709 | 40.210 | 0.00 | 0.00 |
| ATOM | 4014 | HD11 | LEU | X | 269 | 53.073 | 63.647 | 40.259 | 0.00 | 0.00 |
| ATOM | 4015 | HD12 | LEU | X | 269 | 53.459 | 65.298 | 40.877 | 0.00 | 0.00 |
| ATOM | 4016 | HD13 | LEU | X | 269 | 53.002 | 65.017 | 39.179 | 0.00 | 0.00 |
| ATOM | 4017 | CD2  | LEU | X | 269 | 51.032 | 64.245 | 41.868 | 0.00 | 0.00 |
| ATOM | 4018 | HD21 | LEU | X | 269 | 51.080 | 63.173 | 41.677 | 0.00 | 0.00 |
| ATOM | 4019 | HD22 | LEU | X | 269 | 51.668 | 64.522 | 42.709 | 0.00 | 0.00 |
| ATOM | 4020 | HD23 | LEU | X | 269 | 50.027 | 64.512 | 42.192 | 0.00 | 0.00 |
| ATOM | 4021 | C    | LEU | X | 269 | 50.212 | 66.673 | 38.173 | 0.00 | 0.00 |
| ATOM | 4022 | O    | LEU | X | 269 | 50.341 | 65.665 | 37.474 | 0.00 | 0.00 |
| ATOM | 4023 | N    | ARG | X | 270 | 49.147 | 67.542 | 37.974 | 0.00 | 0.00 |
| ATOM | 4024 | H    | ARG | X | 270 | 49.143 | 68.405 | 38.499 | 0.00 | 0.00 |
| ATOM | 4025 | CA   | ARG | X | 270 | 48.112 | 67.372 | 36.959 | 0.00 | 0.00 |
| ATOM | 4026 | HA   | ARG | X | 270 | 47.813 | 66.327 | 36.876 | 0.00 | 0.00 |
| ATOM | 4027 | CB   | ARG | X | 270 | 46.866 | 68.227 | 37.277 | 0.00 | 0.00 |
| ATOM | 4028 | HB2  | ARG | X | 270 | 47.192 | 69.225 | 37.571 | 0.00 | 0.00 |
| ATOM | 4029 | HB3  | ARG | X | 270 | 46.162 | 68.282 | 36.447 | 0.00 | 0.00 |
| ATOM | 4030 | CG   | ARG | X | 270 | 46.176 | 67.694 | 38.458 | 0.00 | 0.00 |
| ATOM | 4031 | HG2  | ARG | X | 270 | 46.267 | 66.621 | 38.628 | 0.00 | 0.00 |
| ATOM | 4032 | HG3  | ARG | X | 270 | 46.606 | 68.086 | 39.380 | 0.00 | 0.00 |
| ATOM | 4033 | CD   | ARG | X | 270 | 44.762 | 68.193 | 38.424 | 0.00 | 0.00 |
| ATOM | 4034 | HD2  | ARG | X | 270 | 44.701 | 69.007 | 37.702 | 0.00 | 0.00 |
| ATOM | 4035 | HD3  | ARG | X | 270 | 44.104 | 67.364 | 38.162 | 0.00 | 0.00 |
| ATOM | 4036 | NE   | ARG | X | 270 | 44.358 | 68.870 | 39.665 | 0.00 | 0.00 |
| ATOM | 4037 | HE   | ARG | X | 270 | 44.328 | 69.879 | 39.625 | 0.00 | 0.00 |
| ATOM | 4038 | CZ   | ARG | X | 270 | 43.954 | 68.273 | 40.751 | 0.00 | 0.00 |
| ATOM | 4039 | NH1  | ARG | X | 270 | 43.800 | 67.005 | 40.835 | 0.00 | 0.00 |
| ATOM | 4040 | HH11 | ARG | X | 270 | 43.826 | 66.334 | 40.080 | 0.00 | 0.00 |
| ATOM | 4041 | HH12 | ARG | X | 270 | 43.581 | 66.619 | 41.743 | 0.00 | 0.00 |
| ATOM | 4042 | NH2  | ARG | X | 270 | 43.745 | 68.969 | 41.846 | 0.00 | 0.00 |
| ATOM | 4043 | HH21 | ARG | X | 270 | 44.095 | 69.917 | 41.827 | 0.00 | 0.00 |
| ATOM | 4044 | HH22 | ARG | X | 270 | 43.352 | 68.464 | 42.626 | 0.00 | 0.00 |

|      |      |      |     |   |     |        |        |        |      |      |
|------|------|------|-----|---|-----|--------|--------|--------|------|------|
| ATOM | 4045 | C    | ARG | X | 270 | 48.647 | 67.676 | 35.517 | 0.00 | 0.00 |
| ATOM | 4046 | O    | ARG | X | 270 | 47.964 | 67.291 | 34.624 | 0.00 | 0.00 |
| ATOM | 4047 | N    | THR | X | 271 | 49.753 | 68.430 | 35.366 | 0.00 | 0.00 |
| ATOM | 4048 | H    | THR | X | 271 | 50.351 | 68.662 | 36.145 | 0.00 | 0.00 |
| ATOM | 4049 | CA   | THR | X | 271 | 50.274 | 68.899 | 34.109 | 0.00 | 0.00 |
| ATOM | 4050 | HA   | THR | X | 271 | 49.492 | 68.628 | 33.400 | 0.00 | 0.00 |
| ATOM | 4051 | CB   | THR | X | 271 | 50.382 | 70.364 | 34.234 | 0.00 | 0.00 |
| ATOM | 4052 | HB   | THR | X | 271 | 50.968 | 70.568 | 35.130 | 0.00 | 0.00 |
| ATOM | 4053 | CG2  | THR | X | 271 | 51.035 | 71.258 | 33.150 | 0.00 | 0.00 |
| ATOM | 4054 | HG21 | THR | X | 271 | 50.646 | 70.987 | 32.168 | 0.00 | 0.00 |
| ATOM | 4055 | HG22 | THR | X | 271 | 52.108 | 71.069 | 33.154 | 0.00 | 0.00 |
| ATOM | 4056 | HG23 | THR | X | 271 | 50.854 | 72.310 | 33.371 | 0.00 | 0.00 |
| ATOM | 4057 | OG1  | THR | X | 271 | 49.078 | 70.879 | 34.452 | 0.00 | 0.00 |
| ATOM | 4058 | HG1  | THR | X | 271 | 49.377 | 71.531 | 35.090 | 0.00 | 0.00 |
| ATOM | 4059 | C    | THR | X | 271 | 51.464 | 68.170 | 33.450 | 0.00 | 0.00 |
| ATOM | 4060 | O    | THR | X | 271 | 51.479 | 67.970 | 32.267 | 0.00 | 0.00 |
| ATOM | 4061 | N    | ARG | X | 272 | 52.433 | 67.667 | 34.257 | 0.00 | 0.00 |
| ATOM | 4062 | H    | ARG | X | 272 | 52.339 | 67.838 | 35.248 | 0.00 | 0.00 |
| ATOM | 4063 | CA   | ARG | X | 272 | 53.243 | 66.502 | 33.939 | 0.00 | 0.00 |
| ATOM | 4064 | HA   | ARG | X | 272 | 54.127 | 66.718 | 33.339 | 0.00 | 0.00 |
| ATOM | 4065 | CB   | ARG | X | 272 | 53.738 | 65.865 | 35.317 | 0.00 | 0.00 |
| ATOM | 4066 | HB2  | ARG | X | 272 | 53.103 | 66.080 | 36.177 | 0.00 | 0.00 |
| ATOM | 4067 | HB3  | ARG | X | 272 | 53.660 | 64.779 | 35.267 | 0.00 | 0.00 |
| ATOM | 4068 | CG   | ARG | X | 272 | 55.199 | 66.253 | 35.649 | 0.00 | 0.00 |
| ATOM | 4069 | HG2  | ARG | X | 272 | 55.358 | 65.813 | 36.633 | 0.00 | 0.00 |
| ATOM | 4070 | HG3  | ARG | X | 272 | 55.791 | 65.692 | 34.926 | 0.00 | 0.00 |
| ATOM | 4071 | CD   | ARG | X | 272 | 55.556 | 67.740 | 35.630 | 0.00 | 0.00 |
| ATOM | 4072 | HD2  | ARG | X | 272 | 55.218 | 68.100 | 34.658 | 0.00 | 0.00 |
| ATOM | 4073 | HD3  | ARG | X | 272 | 55.038 | 68.195 | 36.474 | 0.00 | 0.00 |
| ATOM | 4074 | NE   | ARG | X | 272 | 56.935 | 68.068 | 35.713 | 0.00 | 0.00 |
| ATOM | 4075 | HE   | ARG | X | 272 | 57.539 | 67.308 | 35.989 | 0.00 | 0.00 |
| ATOM | 4076 | CZ   | ARG | X | 272 | 57.446 | 69.261 | 35.970 | 0.00 | 0.00 |
| ATOM | 4077 | NH1  | ARG | X | 272 | 56.780 | 70.366 | 35.728 | 0.00 | 0.00 |
| ATOM | 4078 | HH11 | ARG | X | 272 | 55.798 | 70.484 | 35.526 | 0.00 | 0.00 |
| ATOM | 4079 | HH12 | ARG | X | 272 | 57.319 | 71.220 | 35.746 | 0.00 | 0.00 |
| ATOM | 4080 | NH2  | ARG | X | 272 | 58.698 | 69.298 | 36.305 | 0.00 | 0.00 |
| ATOM | 4081 | HH21 | ARG | X | 272 | 59.237 | 68.444 | 36.336 | 0.00 | 0.00 |
| ATOM | 4082 | HH22 | ARG | X | 272 | 59.166 | 70.178 | 36.469 | 0.00 | 0.00 |
| ATOM | 4083 | C    | ARG | X | 272 | 52.421 | 65.429 | 33.171 | 0.00 | 0.00 |
| ATOM | 4084 | O    | ARG | X | 272 | 51.427 | 64.929 | 33.754 | 0.00 | 0.00 |
| ATOM | 4085 | N    | PRO | X | 273 | 52.862 | 65.090 | 31.951 | 0.00 | 0.00 |
| ATOM | 4086 | CD   | PRO | X | 273 | 53.969 | 65.566 | 31.178 | 0.00 | 0.00 |
| ATOM | 4087 | HD2  | PRO | X | 273 | 54.904 | 65.500 | 31.734 | 0.00 | 0.00 |
| ATOM | 4088 | HD3  | PRO | X | 273 | 53.915 | 66.556 | 30.725 | 0.00 | 0.00 |
| ATOM | 4089 | CG   | PRO | X | 273 | 54.076 | 64.672 | 29.908 | 0.00 | 0.00 |
| ATOM | 4090 | HG2  | PRO | X | 273 | 54.733 | 63.861 | 30.224 | 0.00 | 0.00 |
| ATOM | 4091 | HG3  | PRO | X | 273 | 54.491 | 65.131 | 29.010 | 0.00 | 0.00 |
| ATOM | 4092 | CB   | PRO | X | 273 | 52.624 | 64.107 | 29.803 | 0.00 | 0.00 |
| ATOM | 4093 | HB2  | PRO | X | 273 | 52.574 | 63.089 | 29.419 | 0.00 | 0.00 |
| ATOM | 4094 | HB3  | PRO | X | 273 | 52.054 | 64.802 | 29.186 | 0.00 | 0.00 |
| ATOM | 4095 | CA   | PRO | X | 273 | 52.133 | 64.053 | 31.255 | 0.00 | 0.00 |
| ATOM | 4096 | HA   | PRO | X | 273 | 51.126 | 64.448 | 31.119 | 0.00 | 0.00 |
| ATOM | 4097 | C    | PRO | X | 273 | 52.080 | 62.667 | 31.948 | 0.00 | 0.00 |
| ATOM | 4098 | O    | PRO | X | 273 | 52.847 | 62.443 | 32.882 | 0.00 | 0.00 |
| ATOM | 4099 | N    | ALA | X | 274 | 51.252 | 61.748 | 31.430 | 0.00 | 0.00 |
| ATOM | 4100 | H    | ALA | X | 274 | 50.793 | 62.073 | 30.592 | 0.00 | 0.00 |
| ATOM | 4101 | CA   | ALA | X | 274 | 50.768 | 60.550 | 32.045 | 0.00 | 0.00 |
| ATOM | 4102 | HA   | ALA | X | 274 | 50.603 | 60.823 | 33.088 | 0.00 | 0.00 |
| ATOM | 4103 | CB   | ALA | X | 274 | 49.537 | 60.114 | 31.323 | 0.00 | 0.00 |
| ATOM | 4104 | HB1  | ALA | X | 274 | 49.822 | 59.857 | 30.302 | 0.00 | 0.00 |
| ATOM | 4105 | HB2  | ALA | X | 274 | 48.774 | 60.891 | 31.342 | 0.00 | 0.00 |
| ATOM | 4106 | HB3  | ALA | X | 274 | 49.171 | 59.221 | 31.829 | 0.00 | 0.00 |
| ATOM | 4107 | C    | ALA | X | 274 | 51.905 | 59.465 | 32.187 | 0.00 | 0.00 |
| ATOM | 4108 | O    | ALA | X | 274 | 52.171 | 59.093 | 33.323 | 0.00 | 0.00 |
| ATOM | 4109 | N    | GLN | X | 275 | 52.637 | 59.095 | 31.121 | 0.00 | 0.00 |
| ATOM | 4110 | H    | GLN | X | 275 | 52.357 | 59.448 | 30.217 | 0.00 | 0.00 |
| ATOM | 4111 | CA   | GLN | X | 275 | 53.691 | 58.102 | 31.153 | 0.00 | 0.00 |

|      |      |      |     |   |     |        |        |        |      |      |
|------|------|------|-----|---|-----|--------|--------|--------|------|------|
| ATOM | 4112 | HA   | GLN | X | 275 | 53.265 | 57.159 | 31.496 | 0.00 | 0.00 |
| ATOM | 4113 | CB   | GLN | X | 275 | 54.235 | 57.743 | 29.699 | 0.00 | 0.00 |
| ATOM | 4114 | HB2  | GLN | X | 275 | 53.335 | 57.704 | 29.086 | 0.00 | 0.00 |
| ATOM | 4115 | HB3  | GLN | X | 275 | 55.005 | 58.432 | 29.353 | 0.00 | 0.00 |
| ATOM | 4116 | CG   | GLN | X | 275 | 54.775 | 56.325 | 29.754 | 0.00 | 0.00 |
| ATOM | 4117 | HG2  | GLN | X | 275 | 55.452 | 56.191 | 30.598 | 0.00 | 0.00 |
| ATOM | 4118 | HG3  | GLN | X | 275 | 53.881 | 55.738 | 29.966 | 0.00 | 0.00 |
| ATOM | 4119 | CD   | GLN | X | 275 | 55.538 | 56.045 | 28.402 | 0.00 | 0.00 |
| ATOM | 4120 | OE1  | GLN | X | 275 | 55.740 | 56.790 | 27.499 | 0.00 | 0.00 |
| ATOM | 4121 | NE2  | GLN | X | 275 | 56.097 | 54.900 | 28.388 | 0.00 | 0.00 |
| ATOM | 4122 | HE21 | GLN | X | 275 | 56.439 | 54.597 | 27.487 | 0.00 | 0.00 |
| ATOM | 4123 | HE22 | GLN | X | 275 | 55.847 | 54.303 | 29.164 | 0.00 | 0.00 |
| ATOM | 4124 | C    | GLN | X | 275 | 54.764 | 58.410 | 32.172 | 0.00 | 0.00 |
| ATOM | 4125 | O    | GLN | X | 275 | 55.104 | 57.524 | 33.000 | 0.00 | 0.00 |
| ATOM | 4126 | N    | VAL | X | 276 | 55.254 | 59.596 | 32.404 | 0.00 | 0.00 |
| ATOM | 4127 | H    | VAL | X | 276 | 54.996 | 60.242 | 31.672 | 0.00 | 0.00 |
| ATOM | 4128 | CA   | VAL | X | 276 | 56.199 | 60.026 | 33.446 | 0.00 | 0.00 |
| ATOM | 4129 | HA   | VAL | X | 276 | 56.860 | 59.160 | 33.434 | 0.00 | 0.00 |
| ATOM | 4130 | CB   | VAL | X | 276 | 57.164 | 61.168 | 33.056 | 0.00 | 0.00 |
| ATOM | 4131 | HB   | VAL | X | 276 | 57.441 | 61.053 | 32.008 | 0.00 | 0.00 |
| ATOM | 4132 | CG1  | VAL | X | 276 | 56.443 | 62.557 | 33.090 | 0.00 | 0.00 |
| ATOM | 4133 | HG11 | VAL | X | 276 | 56.029 | 62.734 | 34.083 | 0.00 | 0.00 |
| ATOM | 4134 | HG12 | VAL | X | 276 | 57.218 | 63.318 | 32.994 | 0.00 | 0.00 |
| ATOM | 4135 | HG13 | VAL | X | 276 | 55.589 | 62.637 | 32.418 | 0.00 | 0.00 |
| ATOM | 4136 | CG2  | VAL | X | 276 | 58.520 | 61.078 | 33.793 | 0.00 | 0.00 |
| ATOM | 4137 | HG21 | VAL | X | 276 | 58.368 | 61.356 | 34.836 | 0.00 | 0.00 |
| ATOM | 4138 | HG22 | VAL | X | 276 | 59.240 | 61.694 | 33.255 | 0.00 | 0.00 |
| ATOM | 4139 | HG23 | VAL | X | 276 | 58.927 | 60.067 | 33.765 | 0.00 | 0.00 |
| ATOM | 4140 | C    | VAL | X | 276 | 55.620 | 60.261 | 34.870 | 0.00 | 0.00 |
| ATOM | 4141 | O    | VAL | X | 276 | 56.422 | 60.207 | 35.773 | 0.00 | 0.00 |
| ATOM | 4142 | N    | LEU | X | 277 | 54.319 | 60.504 | 35.042 | 0.00 | 0.00 |
| ATOM | 4143 | H    | LEU | X | 277 | 53.704 | 60.478 | 34.241 | 0.00 | 0.00 |
| ATOM | 4144 | CA   | LEU | X | 277 | 53.741 | 60.391 | 36.368 | 0.00 | 0.00 |
| ATOM | 4145 | HA   | LEU | X | 277 | 54.302 | 61.048 | 37.032 | 0.00 | 0.00 |
| ATOM | 4146 | CB   | LEU | X | 277 | 52.322 | 60.974 | 36.192 | 0.00 | 0.00 |
| ATOM | 4147 | HB2  | LEU | X | 277 | 52.439 | 62.057 | 36.160 | 0.00 | 0.00 |
| ATOM | 4148 | HB3  | LEU | X | 277 | 51.980 | 60.591 | 35.230 | 0.00 | 0.00 |
| ATOM | 4149 | CG   | LEU | X | 277 | 51.229 | 60.638 | 37.239 | 0.00 | 0.00 |
| ATOM | 4150 | HG   | LEU | X | 277 | 50.890 | 59.616 | 37.070 | 0.00 | 0.00 |
| ATOM | 4151 | CD1  | LEU | X | 277 | 51.703 | 60.845 | 38.619 | 0.00 | 0.00 |
| ATOM | 4152 | HD11 | LEU | X | 277 | 52.605 | 60.313 | 38.924 | 0.00 | 0.00 |
| ATOM | 4153 | HD12 | LEU | X | 277 | 50.950 | 60.606 | 39.370 | 0.00 | 0.00 |
| ATOM | 4154 | HD13 | LEU | X | 277 | 52.005 | 61.878 | 38.794 | 0.00 | 0.00 |
| ATOM | 4155 | CD2  | LEU | X | 277 | 50.011 | 61.603 | 36.884 | 0.00 | 0.00 |
| ATOM | 4156 | HD21 | LEU | X | 277 | 50.311 | 62.619 | 37.138 | 0.00 | 0.00 |
| ATOM | 4157 | HD22 | LEU | X | 277 | 49.758 | 61.484 | 35.830 | 0.00 | 0.00 |
| ATOM | 4158 | HD23 | LEU | X | 277 | 49.155 | 61.225 | 37.442 | 0.00 | 0.00 |
| ATOM | 4159 | C    | LEU | X | 277 | 53.880 | 58.943 | 36.919 | 0.00 | 0.00 |
| ATOM | 4160 | O    | LEU | X | 277 | 54.240 | 58.767 | 38.054 | 0.00 | 0.00 |
| ATOM | 4161 | N    | VAL | X | 278 | 53.762 | 57.995 | 36.000 | 0.00 | 0.00 |
| ATOM | 4162 | H    | VAL | X | 278 | 53.591 | 58.270 | 35.044 | 0.00 | 0.00 |
| ATOM | 4163 | CA   | VAL | X | 278 | 53.850 | 56.572 | 36.300 | 0.00 | 0.00 |
| ATOM | 4164 | HA   | VAL | X | 278 | 53.453 | 56.402 | 37.301 | 0.00 | 0.00 |
| ATOM | 4165 | CB   | VAL | X | 278 | 53.101 | 55.647 | 35.290 | 0.00 | 0.00 |
| ATOM | 4166 | HB   | VAL | X | 278 | 53.557 | 55.795 | 34.311 | 0.00 | 0.00 |
| ATOM | 4167 | CG1  | VAL | X | 278 | 53.231 | 54.158 | 35.514 | 0.00 | 0.00 |
| ATOM | 4168 | HG11 | VAL | X | 278 | 52.541 | 53.618 | 34.867 | 0.00 | 0.00 |
| ATOM | 4169 | HG12 | VAL | X | 278 | 54.247 | 53.812 | 35.322 | 0.00 | 0.00 |
| ATOM | 4170 | HG13 | VAL | X | 278 | 52.935 | 53.933 | 36.539 | 0.00 | 0.00 |
| ATOM | 4171 | CG2  | VAL | X | 278 | 51.588 | 55.937 | 35.092 | 0.00 | 0.00 |
| ATOM | 4172 | HG21 | VAL | X | 278 | 51.075 | 55.973 | 36.053 | 0.00 | 0.00 |
| ATOM | 4173 | HG22 | VAL | X | 278 | 51.106 | 55.224 | 34.424 | 0.00 | 0.00 |
| ATOM | 4174 | HG23 | VAL | X | 278 | 51.439 | 56.911 | 34.624 | 0.00 | 0.00 |
| ATOM | 4175 | C    | VAL | X | 278 | 55.342 | 56.082 | 36.425 | 0.00 | 0.00 |
| ATOM | 4176 | O    | VAL | X | 278 | 55.543 | 55.141 | 37.254 | 0.00 | 0.00 |
| ATOM | 4177 | N    | ASN | X | 279 | 56.301 | 56.665 | 35.658 | 0.00 | 0.00 |
| ATOM | 4178 | H    | ASN | X | 279 | 56.036 | 57.446 | 35.075 | 0.00 | 0.00 |



|      |      |      |     |   |     |        |        |        |      |      |
|------|------|------|-----|---|-----|--------|--------|--------|------|------|
| ATOM | 4179 | CA   | ASN | X | 279 | 57.687 | 56.293 | 35.684 | 0.00 | 0.00 |
| ATOM | 4180 | HA   | ASN | X | 279 | 57.715 | 55.233 | 35.433 | 0.00 | 0.00 |
| ATOM | 4181 | CB   | ASN | X | 279 | 58.529 | 57.038 | 34.637 | 0.00 | 0.00 |
| ATOM | 4182 | HB2  | ASN | X | 279 | 58.185 | 56.919 | 33.609 | 0.00 | 0.00 |
| ATOM | 4183 | HB3  | ASN | X | 279 | 58.618 | 58.068 | 34.983 | 0.00 | 0.00 |
| ATOM | 4184 | CG   | ASN | X | 279 | 60.032 | 56.523 | 34.560 | 0.00 | 0.00 |
| ATOM | 4185 | OD1  | ASN | X | 279 | 60.955 | 57.237 | 34.695 | 0.00 | 0.00 |
| ATOM | 4186 | ND2  | ASN | X | 279 | 60.255 | 55.158 | 34.512 | 0.00 | 0.00 |
| ATOM | 4187 | HD21 | ASN | X | 279 | 61.216 | 54.935 | 34.293 | 0.00 | 0.00 |
| ATOM | 4188 | HD22 | ASN | X | 279 | 59.545 | 54.545 | 34.138 | 0.00 | 0.00 |
| ATOM | 4189 | C    | ASN | X | 279 | 58.255 | 56.545 | 37.096 | 0.00 | 0.00 |
| ATOM | 4190 | O    | ASN | X | 279 | 59.004 | 55.748 | 37.556 | 0.00 | 0.00 |
| ATOM | 4191 | N    | HIE | X | 280 | 57.772 | 57.601 | 37.797 | 0.00 | 0.00 |
| ATOM | 4192 | H    | HIE | X | 280 | 57.292 | 58.339 | 37.300 | 0.00 | 0.00 |
| ATOM | 4193 | CA   | HIE | X | 280 | 58.165 | 57.823 | 39.196 | 0.00 | 0.00 |
| ATOM | 4194 | HA   | HIE | X | 280 | 59.159 | 57.403 | 39.349 | 0.00 | 0.00 |
| ATOM | 4195 | CB   | HIE | X | 280 | 58.259 | 59.386 | 39.408 | 0.00 | 0.00 |
| ATOM | 4196 | HB2  | HIE | X | 280 | 57.329 | 59.873 | 39.114 | 0.00 | 0.00 |
| ATOM | 4197 | HB3  | HIE | X | 280 | 58.573 | 59.582 | 40.433 | 0.00 | 0.00 |
| ATOM | 4198 | CG   | HIE | X | 280 | 59.399 | 59.905 | 38.635 | 0.00 | 0.00 |
| ATOM | 4199 | ND1  | HIE | X | 280 | 60.696 | 59.759 | 39.027 | 0.00 | 0.00 |
| ATOM | 4200 | CE1  | HIE | X | 280 | 61.436 | 60.440 | 38.124 | 0.00 | 0.00 |
| ATOM | 4201 | HE1  | HIE | X | 280 | 62.479 | 60.702 | 38.215 | 0.00 | 0.00 |
| ATOM | 4202 | NE2  | HIE | X | 280 | 60.657 | 60.924 | 37.193 | 0.00 | 0.00 |
| ATOM | 4203 | HE2  | HIE | X | 280 | 60.989 | 61.366 | 36.348 | 0.00 | 0.00 |
| ATOM | 4204 | CD2  | HIE | X | 280 | 59.406 | 60.511 | 37.457 | 0.00 | 0.00 |
| ATOM | 4205 | HD2  | HIE | X | 280 | 58.600 | 60.817 | 36.807 | 0.00 | 0.00 |
| ATOM | 4206 | C    | HIE | X | 280 | 57.140 | 57.091 | 40.135 | 0.00 | 0.00 |
| ATOM | 4207 | O    | HIE | X | 280 | 57.464 | 56.786 | 41.306 | 0.00 | 0.00 |
| ATOM | 4208 | N    | GLU | X | 281 | 55.843 | 56.841 | 39.758 | 0.00 | 0.00 |
| ATOM | 4209 | H    | GLU | X | 281 | 55.527 | 57.165 | 38.855 | 0.00 | 0.00 |
| ATOM | 4210 | CA   | GLU | X | 281 | 54.963 | 56.068 | 40.670 | 0.00 | 0.00 |
| ATOM | 4211 | HA   | GLU | X | 281 | 54.644 | 56.596 | 41.568 | 0.00 | 0.00 |
| ATOM | 4212 | CB   | GLU | X | 281 | 53.635 | 55.787 | 39.900 | 0.00 | 0.00 |
| ATOM | 4213 | HB2  | GLU | X | 281 | 53.384 | 56.686 | 39.336 | 0.00 | 0.00 |
| ATOM | 4214 | HB3  | GLU | X | 281 | 53.798 | 54.990 | 39.174 | 0.00 | 0.00 |
| ATOM | 4215 | CG   | GLU | X | 281 | 52.439 | 55.420 | 40.789 | 0.00 | 0.00 |
| ATOM | 4216 | HG2  | GLU | X | 281 | 52.711 | 54.941 | 41.729 | 0.00 | 0.00 |
| ATOM | 4217 | HG3  | GLU | X | 281 | 52.065 | 56.352 | 41.212 | 0.00 | 0.00 |
| ATOM | 4218 | CD   | GLU | X | 281 | 51.339 | 54.624 | 40.088 | 0.00 | 0.00 |
| ATOM | 4219 | OE1  | GLU | X | 281 | 50.710 | 55.153 | 39.136 | 0.00 | 0.00 |
| ATOM | 4220 | OE2  | GLU | X | 281 | 51.085 | 53.500 | 40.669 | 0.00 | 0.00 |
| ATOM | 4221 | C    | GLU | X | 281 | 55.535 | 54.649 | 41.146 | 0.00 | 0.00 |
| ATOM | 4222 | O    | GLU | X | 281 | 55.703 | 54.476 | 42.342 | 0.00 | 0.00 |
| ATOM | 4223 | N    | TRP | X | 282 | 55.956 | 53.801 | 40.172 | 0.00 | 0.00 |
| ATOM | 4224 | H    | TRP | X | 282 | 55.640 | 54.104 | 39.262 | 0.00 | 0.00 |
| ATOM | 4225 | CA   | TRP | X | 282 | 56.700 | 52.609 | 40.409 | 0.00 | 0.00 |
| ATOM | 4226 | HA   | TRP | X | 282 | 56.181 | 52.135 | 41.242 | 0.00 | 0.00 |
| ATOM | 4227 | CB   | TRP | X | 282 | 56.562 | 51.558 | 39.263 | 0.00 | 0.00 |
| ATOM | 4228 | HB2  | TRP | X | 282 | 56.506 | 52.124 | 38.333 | 0.00 | 0.00 |
| ATOM | 4229 | HB3  | TRP | X | 282 | 57.363 | 50.819 | 39.251 | 0.00 | 0.00 |
| ATOM | 4230 | CG   | TRP | X | 282 | 55.240 | 50.808 | 39.466 | 0.00 | 0.00 |
| ATOM | 4231 | CD1  | TRP | X | 282 | 54.014 | 51.299 | 39.600 | 0.00 | 0.00 |
| ATOM | 4232 | HD1  | TRP | X | 282 | 53.802 | 52.348 | 39.452 | 0.00 | 0.00 |
| ATOM | 4233 | NE1  | TRP | X | 282 | 53.117 | 50.340 | 40.084 | 0.00 | 0.00 |
| ATOM | 4234 | HE1  | TRP | X | 282 | 52.136 | 50.508 | 40.254 | 0.00 | 0.00 |
| ATOM | 4235 | CE2  | TRP | X | 282 | 53.739 | 49.093 | 40.082 | 0.00 | 0.00 |
| ATOM | 4236 | CZ2  | TRP | X | 282 | 53.210 | 47.778 | 40.215 | 0.00 | 0.00 |
| ATOM | 4237 | HZ2  | TRP | X | 282 | 52.142 | 47.614 | 40.225 | 0.00 | 0.00 |
| ATOM | 4238 | CH2  | TRP | X | 282 | 54.057 | 46.723 | 40.231 | 0.00 | 0.00 |
| ATOM | 4239 | HH2  | TRP | X | 282 | 53.632 | 45.741 | 40.377 | 0.00 | 0.00 |
| ATOM | 4240 | CZ3  | TRP | X | 282 | 55.445 | 46.931 | 40.096 | 0.00 | 0.00 |
| ATOM | 4241 | HZ3  | TRP | X | 282 | 56.161 | 46.124 | 40.123 | 0.00 | 0.00 |
| ATOM | 4242 | CE3  | TRP | X | 282 | 55.977 | 48.235 | 39.932 | 0.00 | 0.00 |
| ATOM | 4243 | HE3  | TRP | X | 282 | 57.033 | 48.461 | 39.944 | 0.00 | 0.00 |
| ATOM | 4244 | CD2  | TRP | X | 282 | 55.073 | 49.381 | 39.788 | 0.00 | 0.00 |
| ATOM | 4245 | C    | TRP | X | 282 | 58.121 | 52.759 | 40.999 | 0.00 | 0.00 |

|      |      |      |     |   |     |        |        |        |      |      |
|------|------|------|-----|---|-----|--------|--------|--------|------|------|
| ATOM | 4246 | O    | TRP | X | 282 | 58.769 | 51.782 | 41.275 | 0.00 | 0.00 |
| ATOM | 4247 | N    | HIE | X | 283 | 58.580 | 53.988 | 41.223 | 0.00 | 0.00 |
| ATOM | 4248 | H    | HIE | X | 283 | 58.064 | 54.795 | 40.902 | 0.00 | 0.00 |
| ATOM | 4249 | CA   | HIE | X | 283 | 59.765 | 54.330 | 42.042 | 0.00 | 0.00 |
| ATOM | 4250 | HA   | HIE | X | 283 | 60.379 | 53.437 | 42.158 | 0.00 | 0.00 |
| ATOM | 4251 | CB   | HIE | X | 283 | 60.477 | 55.519 | 41.487 | 0.00 | 0.00 |
| ATOM | 4252 | HB2  | HIE | X | 283 | 60.471 | 55.556 | 40.398 | 0.00 | 0.00 |
| ATOM | 4253 | HB3  | HIE | X | 283 | 59.944 | 56.433 | 41.752 | 0.00 | 0.00 |
| ATOM | 4254 | CG   | HIE | X | 283 | 61.935 | 55.652 | 41.949 | 0.00 | 0.00 |
| ATOM | 4255 | ND1  | HIE | X | 283 | 62.427 | 56.066 | 43.232 | 0.00 | 0.00 |
| ATOM | 4256 | CE1  | HIE | X | 283 | 63.727 | 56.477 | 43.062 | 0.00 | 0.00 |
| ATOM | 4257 | HE1  | HIE | X | 283 | 64.322 | 57.018 | 43.784 | 0.00 | 0.00 |
| ATOM | 4258 | NE2  | HIE | X | 283 | 64.098 | 56.201 | 41.827 | 0.00 | 0.00 |
| ATOM | 4259 | HE2  | HIE | X | 283 | 65.047 | 56.336 | 41.509 | 0.00 | 0.00 |
| ATOM | 4260 | CD2  | HIE | X | 283 | 63.008 | 55.768 | 41.101 | 0.00 | 0.00 |
| ATOM | 4261 | HD2  | HIE | X | 283 | 63.034 | 55.758 | 40.021 | 0.00 | 0.00 |
| ATOM | 4262 | C    | HIE | X | 283 | 59.309 | 54.571 | 43.447 | 0.00 | 0.00 |
| ATOM | 4263 | O    | HIE | X | 283 | 59.907 | 54.042 | 44.349 | 0.00 | 0.00 |
| ATOM | 4264 | N    | VAL | X | 284 | 58.109 | 55.142 | 43.690 | 0.00 | 0.00 |
| ATOM | 4265 | H    | VAL | X | 284 | 57.553 | 55.334 | 42.869 | 0.00 | 0.00 |
| ATOM | 4266 | CA   | VAL | X | 284 | 57.559 | 55.258 | 45.121 | 0.00 | 0.00 |
| ATOM | 4267 | HA   | VAL | X | 284 | 58.434 | 55.306 | 45.770 | 0.00 | 0.00 |
| ATOM | 4268 | CB   | VAL | X | 284 | 56.869 | 56.548 | 45.480 | 0.00 | 0.00 |
| ATOM | 4269 | HB   | VAL | X | 284 | 56.594 | 56.547 | 46.535 | 0.00 | 0.00 |
| ATOM | 4270 | CG1  | VAL | X | 284 | 57.804 | 57.688 | 45.350 | 0.00 | 0.00 |
| ATOM | 4271 | HG11 | VAL | X | 284 | 58.204 | 57.681 | 44.336 | 0.00 | 0.00 |
| ATOM | 4272 | HG12 | VAL | X | 284 | 57.269 | 58.628 | 45.481 | 0.00 | 0.00 |
| ATOM | 4273 | HG13 | VAL | X | 284 | 58.574 | 57.566 | 46.112 | 0.00 | 0.00 |
| ATOM | 4274 | CG2  | VAL | X | 284 | 55.518 | 56.816 | 44.823 | 0.00 | 0.00 |
| ATOM | 4275 | HG21 | VAL | X | 284 | 55.027 | 57.762 | 45.050 | 0.00 | 0.00 |
| ATOM | 4276 | HG22 | VAL | X | 284 | 54.861 | 55.965 | 45.003 | 0.00 | 0.00 |
| ATOM | 4277 | HG23 | VAL | X | 284 | 55.767 | 56.880 | 43.764 | 0.00 | 0.00 |
| ATOM | 4278 | C    | VAL | X | 284 | 56.788 | 53.976 | 45.482 | 0.00 | 0.00 |
| ATOM | 4279 | O    | VAL | X | 284 | 56.000 | 54.032 | 46.412 | 0.00 | 0.00 |
| ATOM | 4280 | N    | LEU | X | 285 | 57.068 | 52.899 | 44.688 | 0.00 | 0.00 |
| ATOM | 4281 | H    | LEU | X | 285 | 57.594 | 53.106 | 43.851 | 0.00 | 0.00 |
| ATOM | 4282 | CA   | LEU | X | 285 | 56.727 | 51.580 | 45.231 | 0.00 | 0.00 |
| ATOM | 4283 | HA   | LEU | X | 285 | 55.652 | 51.686 | 45.374 | 0.00 | 0.00 |
| ATOM | 4284 | CB   | LEU | X | 285 | 57.156 | 50.500 | 44.228 | 0.00 | 0.00 |
| ATOM | 4285 | HB2  | LEU | X | 285 | 57.073 | 51.012 | 43.269 | 0.00 | 0.00 |
| ATOM | 4286 | HB3  | LEU | X | 285 | 58.197 | 50.299 | 44.483 | 0.00 | 0.00 |
| ATOM | 4287 | CG   | LEU | X | 285 | 56.373 | 49.215 | 44.209 | 0.00 | 0.00 |
| ATOM | 4288 | HG   | LEU | X | 285 | 56.151 | 48.948 | 45.242 | 0.00 | 0.00 |
| ATOM | 4289 | CD1  | LEU | X | 285 | 54.975 | 49.420 | 43.562 | 0.00 | 0.00 |
| ATOM | 4290 | HD11 | LEU | X | 285 | 54.319 | 50.219 | 43.906 | 0.00 | 0.00 |
| ATOM | 4291 | HD12 | LEU | X | 285 | 54.402 | 48.500 | 43.674 | 0.00 | 0.00 |
| ATOM | 4292 | HD13 | LEU | X | 285 | 55.248 | 49.502 | 42.510 | 0.00 | 0.00 |
| ATOM | 4293 | CD2  | LEU | X | 285 | 57.207 | 48.099 | 43.605 | 0.00 | 0.00 |
| ATOM | 4294 | HD21 | LEU | X | 285 | 57.666 | 48.487 | 42.695 | 0.00 | 0.00 |
| ATOM | 4295 | HD22 | LEU | X | 285 | 58.035 | 47.805 | 44.250 | 0.00 | 0.00 |
| ATOM | 4296 | HD23 | LEU | X | 285 | 56.620 | 47.196 | 43.438 | 0.00 | 0.00 |
| ATOM | 4297 | C    | LEU | X | 285 | 57.344 | 51.347 | 46.645 | 0.00 | 0.00 |
| ATOM | 4298 | O    | LEU | X | 285 | 58.477 | 51.710 | 46.871 | 0.00 | 0.00 |
| ATOM | 4299 | N    | PRO | X | 286 | 56.647 | 50.808 | 47.650 | 0.00 | 0.00 |
| ATOM | 4300 | CD   | PRO | X | 286 | 55.216 | 50.462 | 47.632 | 0.00 | 0.00 |
| ATOM | 4301 | HD2  | PRO | X | 286 | 54.922 | 50.035 | 46.673 | 0.00 | 0.00 |
| ATOM | 4302 | HD3  | PRO | X | 286 | 54.661 | 51.395 | 47.725 | 0.00 | 0.00 |
| ATOM | 4303 | CG   | PRO | X | 286 | 55.057 | 49.454 | 48.755 | 0.00 | 0.00 |
| ATOM | 4304 | HG2  | PRO | X | 286 | 55.130 | 48.481 | 48.269 | 0.00 | 0.00 |
| ATOM | 4305 | HG3  | PRO | X | 286 | 54.118 | 49.482 | 49.307 | 0.00 | 0.00 |
| ATOM | 4306 | CB   | PRO | X | 286 | 56.201 | 49.681 | 49.695 | 0.00 | 0.00 |
| ATOM | 4307 | HB2  | PRO | X | 286 | 56.462 | 48.727 | 50.152 | 0.00 | 0.00 |
| ATOM | 4308 | HB3  | PRO | X | 286 | 55.871 | 50.514 | 50.315 | 0.00 | 0.00 |
| ATOM | 4309 | CA   | PRO | X | 286 | 57.374 | 50.151 | 48.736 | 0.00 | 0.00 |
| ATOM | 4310 | HA   | PRO | X | 286 | 58.105 | 50.801 | 49.215 | 0.00 | 0.00 |
| ATOM | 4311 | C    | PRO | X | 286 | 58.161 | 48.965 | 48.361 | 0.00 | 0.00 |
| ATOM | 4312 | O    | PRO | X | 286 | 58.064 | 48.386 | 47.249 | 0.00 | 0.00 |

|      |      |      |     |   |     |        |        |        |      |      |
|------|------|------|-----|---|-----|--------|--------|--------|------|------|
| ATOM | 4313 | N    | GLN | X | 287 | 59.028 | 48.569 | 49.293 | 0.00 | 0.00 |
| ATOM | 4314 | H    | GLN | X | 287 | 58.929 | 48.986 | 50.208 | 0.00 | 0.00 |
| ATOM | 4315 | CA   | GLN | X | 287 | 60.329 | 47.862 | 48.969 | 0.00 | 0.00 |
| ATOM | 4316 | HA   | GLN | X | 287 | 60.334 | 47.500 | 47.941 | 0.00 | 0.00 |
| ATOM | 4317 | CB   | GLN | X | 287 | 61.498 | 48.828 | 49.317 | 0.00 | 0.00 |
| ATOM | 4318 | HB2  | GLN | X | 287 | 61.364 | 49.019 | 50.382 | 0.00 | 0.00 |
| ATOM | 4319 | HB3  | GLN | X | 287 | 62.458 | 48.355 | 49.108 | 0.00 | 0.00 |
| ATOM | 4320 | CG   | GLN | X | 287 | 61.407 | 50.142 | 48.591 | 0.00 | 0.00 |
| ATOM | 4321 | HG2  | GLN | X | 287 | 60.399 | 50.534 | 48.725 | 0.00 | 0.00 |
| ATOM | 4322 | HG3  | GLN | X | 287 | 62.155 | 50.744 | 49.106 | 0.00 | 0.00 |
| ATOM | 4323 | CD   | GLN | X | 287 | 61.877 | 49.982 | 47.154 | 0.00 | 0.00 |
| ATOM | 4324 | OE1  | GLN | X | 287 | 63.008 | 49.559 | 46.861 | 0.00 | 0.00 |
| ATOM | 4325 | NE2  | GLN | X | 287 | 61.008 | 50.204 | 46.177 | 0.00 | 0.00 |
| ATOM | 4326 | HE21 | GLN | X | 287 | 61.341 | 50.078 | 45.232 | 0.00 | 0.00 |
| ATOM | 4327 | HE22 | GLN | X | 287 | 60.070 | 50.577 | 46.214 | 0.00 | 0.00 |
| ATOM | 4328 | C    | GLN | X | 287 | 60.485 | 46.582 | 49.775 | 0.00 | 0.00 |
| ATOM | 4329 | O    | GLN | X | 287 | 59.835 | 46.516 | 50.823 | 0.00 | 0.00 |
| ATOM | 4330 | N    | GLU | X | 288 | 61.381 | 45.644 | 49.439 | 0.00 | 0.00 |
| ATOM | 4331 | H    | GLU | X | 288 | 61.939 | 45.779 | 48.608 | 0.00 | 0.00 |
| ATOM | 4332 | CA   | GLU | X | 288 | 61.598 | 44.313 | 50.054 | 0.00 | 0.00 |
| ATOM | 4333 | HA   | GLU | X | 288 | 62.058 | 43.750 | 49.241 | 0.00 | 0.00 |
| ATOM | 4334 | CB   | GLU | X | 288 | 62.427 | 44.262 | 51.286 | 0.00 | 0.00 |
| ATOM | 4335 | HB2  | GLU | X | 288 | 62.017 | 44.831 | 52.120 | 0.00 | 0.00 |
| ATOM | 4336 | HB3  | GLU | X | 288 | 62.473 | 43.238 | 51.656 | 0.00 | 0.00 |
| ATOM | 4337 | CG   | GLU | X | 288 | 63.830 | 44.846 | 51.053 | 0.00 | 0.00 |
| ATOM | 4338 | HG2  | GLU | X | 288 | 64.280 | 44.256 | 50.255 | 0.00 | 0.00 |
| ATOM | 4339 | HG3  | GLU | X | 288 | 63.755 | 45.905 | 50.805 | 0.00 | 0.00 |
| ATOM | 4340 | CD   | GLU | X | 288 | 64.837 | 44.688 | 52.219 | 0.00 | 0.00 |
| ATOM | 4341 | OE1  | GLU | X | 288 | 64.609 | 45.306 | 53.288 | 0.00 | 0.00 |
| ATOM | 4342 | OE2  | GLU | X | 288 | 65.808 | 43.931 | 52.067 | 0.00 | 0.00 |
| ATOM | 4343 | C    | GLU | X | 288 | 60.238 | 43.616 | 50.273 | 0.00 | 0.00 |
| ATOM | 4344 | O    | GLU | X | 288 | 60.120 | 42.754 | 51.123 | 0.00 | 0.00 |
| ATOM | 4345 | N    | SER | X | 289 | 59.058 | 43.875 | 49.636 | 0.00 | 0.00 |
| ATOM | 4346 | H    | SER | X | 289 | 59.021 | 44.601 | 48.935 | 0.00 | 0.00 |
| ATOM | 4347 | CA   | SER | X | 289 | 57.771 | 43.274 | 50.016 | 0.00 | 0.00 |
| ATOM | 4348 | HA   | SER | X | 289 | 57.859 | 42.557 | 50.832 | 0.00 | 0.00 |
| ATOM | 4349 | CB   | SER | X | 289 | 56.871 | 44.350 | 50.566 | 0.00 | 0.00 |
| ATOM | 4350 | HB2  | SER | X | 289 | 56.478 | 45.062 | 49.839 | 0.00 | 0.00 |
| ATOM | 4351 | HB3  | SER | X | 289 | 55.992 | 43.953 | 51.074 | 0.00 | 0.00 |
| ATOM | 4352 | OG   | SER | X | 289 | 57.552 | 45.090 | 51.468 | 0.00 | 0.00 |
| ATOM | 4353 | HG   | SER | X | 289 | 58.452 | 45.078 | 51.133 | 0.00 | 0.00 |
| ATOM | 4354 | C    | SER | X | 289 | 56.951 | 42.630 | 48.901 | 0.00 | 0.00 |
| ATOM | 4355 | O    | SER | X | 289 | 56.451 | 43.236 | 47.971 | 0.00 | 0.00 |
| ATOM | 4356 | N    | VAL | X | 290 | 56.799 | 41.308 | 49.016 | 0.00 | 0.00 |
| ATOM | 4357 | H    | VAL | X | 290 | 57.058 | 40.786 | 49.841 | 0.00 | 0.00 |
| ATOM | 4358 | CA   | VAL | X | 290 | 55.796 | 40.605 | 48.269 | 0.00 | 0.00 |
| ATOM | 4359 | HA   | VAL | X | 290 | 56.057 | 40.645 | 47.212 | 0.00 | 0.00 |
| ATOM | 4360 | CB   | VAL | X | 290 | 55.677 | 39.087 | 48.643 | 0.00 | 0.00 |
| ATOM | 4361 | HB   | VAL | X | 290 | 55.439 | 38.985 | 49.702 | 0.00 | 0.00 |
| ATOM | 4362 | CG1  | VAL | X | 290 | 54.644 | 38.301 | 47.853 | 0.00 | 0.00 |
| ATOM | 4363 | HG11 | VAL | X | 290 | 54.510 | 38.750 | 46.869 | 0.00 | 0.00 |
| ATOM | 4364 | HG12 | VAL | X | 290 | 55.040 | 37.302 | 47.670 | 0.00 | 0.00 |
| ATOM | 4365 | HG13 | VAL | X | 290 | 53.700 | 38.163 | 48.380 | 0.00 | 0.00 |
| ATOM | 4366 | CG2  | VAL | X | 290 | 57.065 | 38.397 | 48.512 | 0.00 | 0.00 |
| ATOM | 4367 | HG21 | VAL | X | 290 | 56.931 | 37.415 | 48.964 | 0.00 | 0.00 |
| ATOM | 4368 | HG22 | VAL | X | 290 | 57.855 | 38.874 | 49.093 | 0.00 | 0.00 |
| ATOM | 4369 | HG23 | VAL | X | 290 | 57.315 | 38.412 | 47.451 | 0.00 | 0.00 |
| ATOM | 4370 | C    | VAL | X | 290 | 54.354 | 41.200 | 48.582 | 0.00 | 0.00 |
| ATOM | 4371 | O    | VAL | X | 290 | 54.016 | 41.463 | 49.758 | 0.00 | 0.00 |
| ATOM | 4372 | N    | PHE | X | 291 | 53.440 | 41.370 | 47.538 | 0.00 | 0.00 |
| ATOM | 4373 | H    | PHE | X | 291 | 53.771 | 41.064 | 46.633 | 0.00 | 0.00 |
| ATOM | 4374 | CA   | PHE | X | 291 | 52.047 | 41.697 | 47.589 | 0.00 | 0.00 |
| ATOM | 4375 | HA   | PHE | X | 291 | 51.669 | 41.751 | 46.567 | 0.00 | 0.00 |
| ATOM | 4376 | CB   | PHE | X | 291 | 51.270 | 40.621 | 48.418 | 0.00 | 0.00 |
| ATOM | 4377 | HB2  | PHE | X | 291 | 51.916 | 39.743 | 48.412 | 0.00 | 0.00 |
| ATOM | 4378 | HB3  | PHE | X | 291 | 51.095 | 40.910 | 49.454 | 0.00 | 0.00 |
| ATOM | 4379 | CG   | PHE | X | 291 | 49.954 | 40.118 | 47.883 | 0.00 | 0.00 |

|      |      |      |     |   |     |        |        |        |      |      |
|------|------|------|-----|---|-----|--------|--------|--------|------|------|
| ATOM | 4380 | CD1  | PHE | X | 291 | 49.074 | 41.025 | 47.212 | 0.00 | 0.00 |
| ATOM | 4381 | HD1  | PHE | X | 291 | 49.370 | 42.035 | 46.969 | 0.00 | 0.00 |
| ATOM | 4382 | CE1  | PHE | X | 291 | 47.839 | 40.524 | 46.774 | 0.00 | 0.00 |
| ATOM | 4383 | HE1  | PHE | X | 291 | 47.221 | 41.235 | 46.245 | 0.00 | 0.00 |
| ATOM | 4384 | CZ   | PHE | X | 291 | 47.435 | 39.198 | 47.032 | 0.00 | 0.00 |
| ATOM | 4385 | HZ   | PHE | X | 291 | 46.545 | 38.822 | 46.550 | 0.00 | 0.00 |
| ATOM | 4386 | CE2  | PHE | X | 291 | 48.345 | 38.300 | 47.671 | 0.00 | 0.00 |
| ATOM | 4387 | HE2  | PHE | X | 291 | 48.021 | 37.293 | 47.887 | 0.00 | 0.00 |
| ATOM | 4388 | CD2  | PHE | X | 291 | 49.608 | 38.790 | 48.058 | 0.00 | 0.00 |
| ATOM | 4389 | HD2  | PHE | X | 291 | 50.127 | 38.148 | 48.754 | 0.00 | 0.00 |
| ATOM | 4390 | C    | PHE | X | 291 | 51.841 | 43.136 | 48.095 | 0.00 | 0.00 |
| ATOM | 4391 | O    | PHE | X | 291 | 50.755 | 43.420 | 48.556 | 0.00 | 0.00 |
| ATOM | 4392 | N    | ARG | X | 292 | 52.769 | 44.063 | 47.996 | 0.00 | 0.00 |
| ATOM | 4393 | H    | ARG | X | 292 | 53.633 | 43.807 | 47.541 | 0.00 | 0.00 |
| ATOM | 4394 | CA   | ARG | X | 292 | 52.426 | 45.458 | 48.081 | 0.00 | 0.00 |
| ATOM | 4395 | HA   | ARG | X | 292 | 51.448 | 45.555 | 48.553 | 0.00 | 0.00 |
| ATOM | 4396 | CB   | ARG | X | 292 | 53.479 | 46.114 | 48.993 | 0.00 | 0.00 |
| ATOM | 4397 | HB2  | ARG | X | 292 | 54.440 | 45.961 | 48.503 | 0.00 | 0.00 |
| ATOM | 4398 | HB3  | ARG | X | 292 | 53.396 | 47.201 | 48.982 | 0.00 | 0.00 |
| ATOM | 4399 | CG   | ARG | X | 292 | 53.471 | 45.679 | 50.496 | 0.00 | 0.00 |
| ATOM | 4400 | HG2  | ARG | X | 292 | 53.766 | 44.682 | 50.822 | 0.00 | 0.00 |
| ATOM | 4401 | HG3  | ARG | X | 292 | 54.215 | 46.353 | 50.920 | 0.00 | 0.00 |
| ATOM | 4402 | CD   | ARG | X | 292 | 52.225 | 46.026 | 51.320 | 0.00 | 0.00 |
| ATOM | 4403 | HD2  | ARG | X | 292 | 52.508 | 46.127 | 52.368 | 0.00 | 0.00 |
| ATOM | 4404 | HD3  | ARG | X | 292 | 51.950 | 47.028 | 50.991 | 0.00 | 0.00 |
| ATOM | 4405 | NE   | ARG | X | 292 | 51.193 | 45.005 | 51.024 | 0.00 | 0.00 |
| ATOM | 4406 | HE   | ARG | X | 292 | 50.853 | 44.936 | 50.075 | 0.00 | 0.00 |
| ATOM | 4407 | CZ   | ARG | X | 292 | 50.783 | 44.096 | 51.880 | 0.00 | 0.00 |
| ATOM | 4408 | NH1  | ARG | X | 292 | 50.816 | 44.267 | 53.170 | 0.00 | 0.00 |
| ATOM | 4409 | HH11 | ARG | X | 292 | 50.942 | 45.189 | 53.562 | 0.00 | 0.00 |
| ATOM | 4410 | HH12 | ARG | X | 292 | 50.369 | 43.567 | 53.744 | 0.00 | 0.00 |
| ATOM | 4411 | NH2  | ARG | X | 292 | 50.381 | 42.883 | 51.516 | 0.00 | 0.00 |
| ATOM | 4412 | HH21 | ARG | X | 292 | 50.151 | 42.797 | 50.537 | 0.00 | 0.00 |
| ATOM | 4413 | HH22 | ARG | X | 292 | 50.169 | 42.136 | 52.162 | 0.00 | 0.00 |
| ATOM | 4414 | C    | ARG | X | 292 | 52.370 | 46.041 | 46.709 | 0.00 | 0.00 |
| ATOM | 4415 | O    | ARG | X | 292 | 53.171 | 45.712 | 45.813 | 0.00 | 0.00 |
| ATOM | 4416 | N    | PHE | X | 293 | 51.583 | 47.138 | 46.545 | 0.00 | 0.00 |
| ATOM | 4417 | H    | PHE | X | 293 | 50.939 | 47.331 | 47.298 | 0.00 | 0.00 |
| ATOM | 4418 | CA   | PHE | X | 293 | 51.454 | 47.927 | 45.337 | 0.00 | 0.00 |
| ATOM | 4419 | HA   | PHE | X | 293 | 52.264 | 47.682 | 44.650 | 0.00 | 0.00 |
| ATOM | 4420 | CB   | PHE | X | 293 | 50.189 | 47.610 | 44.662 | 0.00 | 0.00 |
| ATOM | 4421 | HB2  | PHE | X | 293 | 49.347 | 48.097 | 45.153 | 0.00 | 0.00 |
| ATOM | 4422 | HB3  | PHE | X | 293 | 50.220 | 48.127 | 43.703 | 0.00 | 0.00 |
| ATOM | 4423 | CG   | PHE | X | 293 | 49.884 | 46.090 | 44.471 | 0.00 | 0.00 |
| ATOM | 4424 | CD1  | PHE | X | 293 | 50.774 | 45.181 | 43.832 | 0.00 | 0.00 |
| ATOM | 4425 | HD1  | PHE | X | 293 | 51.664 | 45.593 | 43.381 | 0.00 | 0.00 |
| ATOM | 4426 | CE1  | PHE | X | 293 | 50.576 | 43.787 | 43.780 | 0.00 | 0.00 |
| ATOM | 4427 | HE1  | PHE | X | 293 | 51.297 | 43.123 | 43.327 | 0.00 | 0.00 |
| ATOM | 4428 | CZ   | PHE | X | 293 | 49.362 | 43.304 | 44.294 | 0.00 | 0.00 |
| ATOM | 4429 | HZ   | PHE | X | 293 | 49.188 | 42.240 | 44.354 | 0.00 | 0.00 |
| ATOM | 4430 | CE2  | PHE | X | 293 | 48.431 | 44.186 | 44.884 | 0.00 | 0.00 |
| ATOM | 4431 | HE2  | PHE | X | 293 | 47.551 | 43.688 | 45.264 | 0.00 | 0.00 |
| ATOM | 4432 | CD2  | PHE | X | 293 | 48.666 | 45.602 | 44.912 | 0.00 | 0.00 |
| ATOM | 4433 | HD2  | PHE | X | 293 | 47.909 | 46.233 | 45.352 | 0.00 | 0.00 |
| ATOM | 4434 | C    | PHE | X | 293 | 51.651 | 49.480 | 45.621 | 0.00 | 0.00 |
| ATOM | 4435 | O    | PHE | X | 293 | 51.957 | 49.975 | 46.737 | 0.00 | 0.00 |
| ATOM | 4436 | N    | SER | X | 294 | 51.567 | 50.318 | 44.603 | 0.00 | 0.00 |
| ATOM | 4437 | H    | SER | X | 294 | 51.289 | 49.912 | 43.721 | 0.00 | 0.00 |
| ATOM | 4438 | CA   | SER | X | 294 | 51.916 | 51.735 | 44.653 | 0.00 | 0.00 |
| ATOM | 4439 | HA   | SER | X | 294 | 52.885 | 51.840 | 45.140 | 0.00 | 0.00 |
| ATOM | 4440 | CB   | SER | X | 294 | 52.175 | 52.187 | 43.122 | 0.00 | 0.00 |
| ATOM | 4441 | HB2  | SER | X | 294 | 52.074 | 53.272 | 43.173 | 0.00 | 0.00 |
| ATOM | 4442 | HB3  | SER | X | 294 | 53.155 | 51.937 | 42.716 | 0.00 | 0.00 |
| ATOM | 4443 | OG   | SER | X | 294 | 51.175 | 51.639 | 42.311 | 0.00 | 0.00 |
| ATOM | 4444 | HG   | SER | X | 294 | 51.130 | 52.292 | 41.608 | 0.00 | 0.00 |
| ATOM | 4445 | C    | SER | X | 294 | 50.910 | 52.653 | 45.332 | 0.00 | 0.00 |
| ATOM | 4446 | O    | SER | X | 294 | 51.200 | 53.235 | 46.340 | 0.00 | 0.00 |

|      |      |      |     |   |     |        |        |        |      |      |
|------|------|------|-----|---|-----|--------|--------|--------|------|------|
| ATOM | 4447 | N    | PHE | X | 295 | 49.743 | 52.634 | 44.719 | 0.00 | 0.00 |
| ATOM | 4448 | H    | PHE | X | 295 | 49.687 | 52.171 | 43.823 | 0.00 | 0.00 |
| ATOM | 4449 | CA   | PHE | X | 295 | 48.517 | 53.459 | 45.040 | 0.00 | 0.00 |
| ATOM | 4450 | HA   | PHE | X | 295 | 48.642 | 53.915 | 46.022 | 0.00 | 0.00 |
| ATOM | 4451 | CB   | PHE | X | 295 | 48.599 | 54.731 | 44.151 | 0.00 | 0.00 |
| ATOM | 4452 | HB2  | PHE | X | 295 | 49.003 | 54.501 | 43.165 | 0.00 | 0.00 |
| ATOM | 4453 | HB3  | PHE | X | 295 | 47.584 | 55.110 | 44.031 | 0.00 | 0.00 |
| ATOM | 4454 | CG   | PHE | X | 295 | 49.519 | 55.815 | 44.800 | 0.00 | 0.00 |
| ATOM | 4455 | CD1  | PHE | X | 295 | 49.159 | 56.532 | 45.972 | 0.00 | 0.00 |
| ATOM | 4456 | HD1  | PHE | X | 295 | 48.213 | 56.322 | 46.449 | 0.00 | 0.00 |
| ATOM | 4457 | CE1  | PHE | X | 295 | 50.000 | 57.529 | 46.545 | 0.00 | 0.00 |
| ATOM | 4458 | HE1  | PHE | X | 295 | 49.703 | 57.980 | 47.480 | 0.00 | 0.00 |
| ATOM | 4459 | CZ   | PHE | X | 295 | 51.165 | 57.864 | 45.786 | 0.00 | 0.00 |
| ATOM | 4460 | HZ   | PHE | X | 295 | 51.936 | 58.507 | 46.182 | 0.00 | 0.00 |
| ATOM | 4461 | CE2  | PHE | X | 295 | 51.501 | 57.164 | 44.619 | 0.00 | 0.00 |
| ATOM | 4462 | HE2  | PHE | X | 295 | 52.416 | 57.307 | 44.064 | 0.00 | 0.00 |
| ATOM | 4463 | CD2  | PHE | X | 295 | 50.687 | 56.115 | 44.159 | 0.00 | 0.00 |
| ATOM | 4464 | HD2  | PHE | X | 295 | 50.969 | 55.512 | 43.309 | 0.00 | 0.00 |
| ATOM | 4465 | C    | PHE | X | 295 | 47.304 | 52.536 | 44.982 | 0.00 | 0.00 |
| ATOM | 4466 | O    | PHE | X | 295 | 46.912 | 51.984 | 43.973 | 0.00 | 0.00 |
| ATOM | 4467 | N    | VAL | X | 296 | 46.754 | 52.392 | 46.180 | 0.00 | 0.00 |
| ATOM | 4468 | H    | VAL | X | 296 | 47.242 | 52.681 | 47.015 | 0.00 | 0.00 |
| ATOM | 4469 | CA   | VAL | X | 296 | 45.546 | 51.541 | 46.415 | 0.00 | 0.00 |
| ATOM | 4470 | HA   | VAL | X | 296 | 45.035 | 51.364 | 45.469 | 0.00 | 0.00 |
| ATOM | 4471 | CB   | VAL | X | 296 | 45.934 | 50.111 | 46.925 | 0.00 | 0.00 |
| ATOM | 4472 | HB   | VAL | X | 296 | 45.052 | 49.517 | 46.686 | 0.00 | 0.00 |
| ATOM | 4473 | CG1  | VAL | X | 296 | 47.111 | 49.424 | 46.215 | 0.00 | 0.00 |
| ATOM | 4474 | HG11 | VAL | X | 296 | 46.789 | 49.285 | 45.183 | 0.00 | 0.00 |
| ATOM | 4475 | HG12 | VAL | X | 296 | 47.957 | 50.099 | 46.347 | 0.00 | 0.00 |
| ATOM | 4476 | HG13 | VAL | X | 296 | 47.379 | 48.431 | 46.576 | 0.00 | 0.00 |
| ATOM | 4477 | CG2  | VAL | X | 296 | 46.128 | 50.114 | 48.379 | 0.00 | 0.00 |
| ATOM | 4478 | HG21 | VAL | X | 296 | 45.214 | 50.389 | 48.906 | 0.00 | 0.00 |
| ATOM | 4479 | HG22 | VAL | X | 296 | 46.991 | 50.715 | 48.666 | 0.00 | 0.00 |
| ATOM | 4480 | HG23 | VAL | X | 296 | 46.437 | 49.092 | 48.596 | 0.00 | 0.00 |
| ATOM | 4481 | C    | VAL | X | 296 | 44.541 | 52.288 | 47.356 | 0.00 | 0.00 |
| ATOM | 4482 | O    | VAL | X | 296 | 44.962 | 53.297 | 47.927 | 0.00 | 0.00 |
| ATOM | 4483 | N    | PRO | X | 297 | 43.285 | 51.812 | 47.484 | 0.00 | 0.00 |
| ATOM | 4484 | CD   | PRO | X | 297 | 42.655 | 50.609 | 46.898 | 0.00 | 0.00 |
| ATOM | 4485 | HD2  | PRO | X | 297 | 42.978 | 49.718 | 47.437 | 0.00 | 0.00 |
| ATOM | 4486 | HD3  | PRO | X | 297 | 42.817 | 50.549 | 45.822 | 0.00 | 0.00 |
| ATOM | 4487 | CG   | PRO | X | 297 | 41.133 | 50.688 | 47.224 | 0.00 | 0.00 |
| ATOM | 4488 | HG2  | PRO | X | 297 | 40.742 | 49.673 | 47.276 | 0.00 | 0.00 |
| ATOM | 4489 | HG3  | PRO | X | 297 | 40.589 | 51.142 | 46.396 | 0.00 | 0.00 |
| ATOM | 4490 | CB   | PRO | X | 297 | 41.190 | 51.479 | 48.478 | 0.00 | 0.00 |
| ATOM | 4491 | HB2  | PRO | X | 297 | 41.529 | 50.856 | 49.306 | 0.00 | 0.00 |
| ATOM | 4492 | HB3  | PRO | X | 297 | 40.198 | 51.899 | 48.645 | 0.00 | 0.00 |
| ATOM | 4493 | CA   | PRO | X | 297 | 42.274 | 52.530 | 48.250 | 0.00 | 0.00 |
| ATOM | 4494 | HA   | PRO | X | 297 | 41.760 | 53.354 | 47.753 | 0.00 | 0.00 |
| ATOM | 4495 | C    | PRO | X | 297 | 42.802 | 53.068 | 49.626 | 0.00 | 0.00 |
| ATOM | 4496 | O    | PRO | X | 297 | 43.361 | 52.358 | 50.456 | 0.00 | 0.00 |
| ATOM | 4497 | N    | VAL | X | 298 | 42.499 | 54.303 | 49.895 | 0.00 | 0.00 |
| ATOM | 4498 | H    | VAL | X | 298 | 41.985 | 54.848 | 49.219 | 0.00 | 0.00 |
| ATOM | 4499 | CA   | VAL | X | 298 | 42.856 | 54.956 | 51.149 | 0.00 | 0.00 |
| ATOM | 4500 | HA   | VAL | X | 298 | 43.763 | 54.534 | 51.582 | 0.00 | 0.00 |
| ATOM | 4501 | CB   | VAL | X | 298 | 43.137 | 56.445 | 50.844 | 0.00 | 0.00 |
| ATOM | 4502 | HB   | VAL | X | 298 | 42.232 | 57.053 | 50.834 | 0.00 | 0.00 |
| ATOM | 4503 | CG1  | VAL | X | 298 | 44.022 | 56.884 | 52.074 | 0.00 | 0.00 |
| ATOM | 4504 | HG11 | VAL | X | 298 | 44.522 | 57.828 | 51.856 | 0.00 | 0.00 |
| ATOM | 4505 | HG12 | VAL | X | 298 | 43.378 | 57.128 | 52.919 | 0.00 | 0.00 |
| ATOM | 4506 | HG13 | VAL | X | 298 | 44.757 | 56.149 | 52.404 | 0.00 | 0.00 |
| ATOM | 4507 | CG2  | VAL | X | 298 | 44.038 | 56.620 | 49.604 | 0.00 | 0.00 |
| ATOM | 4508 | HG21 | VAL | X | 298 | 44.876 | 55.947 | 49.783 | 0.00 | 0.00 |
| ATOM | 4509 | HG22 | VAL | X | 298 | 44.390 | 57.636 | 49.427 | 0.00 | 0.00 |
| ATOM | 4510 | HG23 | VAL | X | 298 | 43.447 | 56.304 | 48.744 | 0.00 | 0.00 |
| ATOM | 4511 | C    | VAL | X | 298 | 41.785 | 54.781 | 52.214 | 0.00 | 0.00 |
| ATOM | 4512 | O    | VAL | X | 298 | 40.557 | 54.977 | 51.990 | 0.00 | 0.00 |
| ATOM | 4513 | N    | VAL | X | 299 | 42.206 | 54.679 | 53.488 | 0.00 | 0.00 |

|      |      |      |     |   |     |        |        |        |      |      |
|------|------|------|-----|---|-----|--------|--------|--------|------|------|
| ATOM | 4514 | H    | VAL | X | 299 | 43.202 | 54.619 | 53.644 | 0.00 | 0.00 |
| ATOM | 4515 | CA   | VAL | X | 299 | 41.307 | 54.922 | 54.627 | 0.00 | 0.00 |
| ATOM | 4516 | HA   | VAL | X | 299 | 40.314 | 54.549 | 54.378 | 0.00 | 0.00 |
| ATOM | 4517 | CB   | VAL | X | 299 | 41.896 | 54.152 | 55.868 | 0.00 | 0.00 |
| ATOM | 4518 | HB   | VAL | X | 299 | 42.860 | 54.543 | 56.195 | 0.00 | 0.00 |
| ATOM | 4519 | CG1  | VAL | X | 299 | 40.946 | 54.440 | 57.082 | 0.00 | 0.00 |
| ATOM | 4520 | HG11 | VAL | X | 299 | 41.277 | 53.870 | 57.950 | 0.00 | 0.00 |
| ATOM | 4521 | HG12 | VAL | X | 299 | 40.827 | 55.481 | 57.381 | 0.00 | 0.00 |
| ATOM | 4522 | HG13 | VAL | X | 299 | 39.943 | 54.077 | 56.862 | 0.00 | 0.00 |
| ATOM | 4523 | CG2  | VAL | X | 299 | 42.002 | 52.652 | 55.591 | 0.00 | 0.00 |
| ATOM | 4524 | HG21 | VAL | X | 299 | 42.137 | 52.073 | 56.504 | 0.00 | 0.00 |
| ATOM | 4525 | HG22 | VAL | X | 299 | 42.855 | 52.385 | 54.967 | 0.00 | 0.00 |
| ATOM | 4526 | HG23 | VAL | X | 299 | 41.122 | 52.238 | 55.098 | 0.00 | 0.00 |
| ATOM | 4527 | C    | VAL | X | 299 | 41.122 | 56.478 | 54.786 | 0.00 | 0.00 |
| ATOM | 4528 | O    | VAL | X | 299 | 42.022 | 57.096 | 55.381 | 0.00 | 0.00 |
| ATOM | 4529 | N    | ASP | X | 300 | 40.057 | 57.007 | 54.202 | 0.00 | 0.00 |
| ATOM | 4530 | H    | ASP | X | 300 | 39.454 | 56.331 | 53.756 | 0.00 | 0.00 |
| ATOM | 4531 | CA   | ASP | X | 300 | 39.933 | 58.453 | 54.044 | 0.00 | 0.00 |
| ATOM | 4532 | HA   | ASP | X | 300 | 40.826 | 58.894 | 54.486 | 0.00 | 0.00 |
| ATOM | 4533 | CB   | ASP | X | 300 | 39.887 | 58.800 | 52.536 | 0.00 | 0.00 |
| ATOM | 4534 | HB2  | ASP | X | 300 | 40.088 | 59.869 | 52.466 | 0.00 | 0.00 |
| ATOM | 4535 | HB3  | ASP | X | 300 | 40.706 | 58.302 | 52.018 | 0.00 | 0.00 |
| ATOM | 4536 | CG   | ASP | X | 300 | 38.529 | 58.519 | 51.882 | 0.00 | 0.00 |
| ATOM | 4537 | OD1  | ASP | X | 300 | 37.776 | 57.611 | 52.273 | 0.00 | 0.00 |
| ATOM | 4538 | OD2  | ASP | X | 300 | 38.191 | 59.287 | 50.980 | 0.00 | 0.00 |
| ATOM | 4539 | C    | ASP | X | 300 | 38.860 | 59.081 | 54.827 | 0.00 | 0.00 |
| ATOM | 4540 | O    | ASP | X | 300 | 38.890 | 60.308 | 54.871 | 0.00 | 0.00 |
| ATOM | 4541 | N    | GLY | X | 301 | 38.013 | 58.265 | 55.491 | 0.00 | 0.00 |
| ATOM | 4542 | H    | GLY | X | 301 | 38.047 | 57.263 | 55.369 | 0.00 | 0.00 |
| ATOM | 4543 | CA   | GLY | X | 301 | 36.892 | 58.763 | 56.252 | 0.00 | 0.00 |
| ATOM | 4544 | HA2  | GLY | X | 301 | 36.541 | 57.856 | 56.744 | 0.00 | 0.00 |
| ATOM | 4545 | HA3  | GLY | X | 301 | 37.371 | 59.500 | 56.896 | 0.00 | 0.00 |
| ATOM | 4546 | C    | GLY | X | 301 | 35.725 | 59.283 | 55.342 | 0.00 | 0.00 |
| ATOM | 4547 | O    | GLY | X | 301 | 34.754 | 59.862 | 55.856 | 0.00 | 0.00 |
| ATOM | 4548 | N    | ASP | X | 302 | 35.750 | 59.165 | 53.967 | 0.00 | 0.00 |
| ATOM | 4549 | H    | ASP | X | 302 | 36.502 | 58.602 | 53.595 | 0.00 | 0.00 |
| ATOM | 4550 | CA   | ASP | X | 302 | 34.702 | 59.650 | 53.090 | 0.00 | 0.00 |
| ATOM | 4551 | HA   | ASP | X | 302 | 33.935 | 60.193 | 53.642 | 0.00 | 0.00 |
| ATOM | 4552 | CB   | ASP | X | 302 | 35.223 | 60.774 | 52.211 | 0.00 | 0.00 |
| ATOM | 4553 | HB2  | ASP | X | 302 | 35.455 | 61.662 | 52.799 | 0.00 | 0.00 |
| ATOM | 4554 | HB3  | ASP | X | 302 | 36.201 | 60.513 | 51.805 | 0.00 | 0.00 |
| ATOM | 4555 | CG   | ASP | X | 302 | 34.184 | 61.193 | 51.134 | 0.00 | 0.00 |
| ATOM | 4556 | OD1  | ASP | X | 302 | 34.316 | 60.827 | 49.953 | 0.00 | 0.00 |
| ATOM | 4557 | OD2  | ASP | X | 302 | 33.259 | 62.017 | 51.444 | 0.00 | 0.00 |
| ATOM | 4558 | C    | ASP | X | 302 | 34.120 | 58.475 | 52.237 | 0.00 | 0.00 |
| ATOM | 4559 | O    | ASP | X | 302 | 32.901 | 58.249 | 52.131 | 0.00 | 0.00 |
| ATOM | 4560 | N    | PHE | X | 303 | 35.040 | 57.668 | 51.668 | 0.00 | 0.00 |
| ATOM | 4561 | H    | PHE | X | 303 | 36.007 | 57.957 | 51.632 | 0.00 | 0.00 |
| ATOM | 4562 | CA   | PHE | X | 303 | 34.732 | 56.387 | 51.166 | 0.00 | 0.00 |
| ATOM | 4563 | HA   | PHE | X | 303 | 33.669 | 56.261 | 50.961 | 0.00 | 0.00 |
| ATOM | 4564 | CB   | PHE | X | 303 | 35.632 | 56.092 | 49.952 | 0.00 | 0.00 |
| ATOM | 4565 | HB2  | PHE | X | 303 | 35.929 | 57.019 | 49.461 | 0.00 | 0.00 |
| ATOM | 4566 | HB3  | PHE | X | 303 | 36.503 | 55.526 | 50.283 | 0.00 | 0.00 |
| ATOM | 4567 | CG   | PHE | X | 303 | 34.918 | 55.179 | 48.910 | 0.00 | 0.00 |
| ATOM | 4568 | CD1  | PHE | X | 303 | 34.763 | 53.769 | 49.149 | 0.00 | 0.00 |
| ATOM | 4569 | HD1  | PHE | X | 303 | 35.098 | 53.477 | 50.134 | 0.00 | 0.00 |
| ATOM | 4570 | CE1  | PHE | X | 303 | 34.143 | 52.907 | 48.145 | 0.00 | 0.00 |
| ATOM | 4571 | HE1  | PHE | X | 303 | 34.053 | 51.842 | 48.302 | 0.00 | 0.00 |
| ATOM | 4572 | CZ   | PHE | X | 303 | 33.847 | 53.548 | 46.924 | 0.00 | 0.00 |
| ATOM | 4573 | HZ   | PHE | X | 303 | 33.407 | 52.989 | 46.112 | 0.00 | 0.00 |
| ATOM | 4574 | CE2  | PHE | X | 303 | 34.066 | 54.867 | 46.659 | 0.00 | 0.00 |
| ATOM | 4575 | HE2  | PHE | X | 303 | 33.765 | 55.386 | 45.761 | 0.00 | 0.00 |
| ATOM | 4576 | CD2  | PHE | X | 303 | 34.551 | 55.704 | 47.705 | 0.00 | 0.00 |
| ATOM | 4577 | HD2  | PHE | X | 303 | 34.659 | 56.773 | 47.592 | 0.00 | 0.00 |
| ATOM | 4578 | C    | PHE | X | 303 | 34.920 | 55.382 | 52.245 | 0.00 | 0.00 |
| ATOM | 4579 | O    | PHE | X | 303 | 34.044 | 54.554 | 52.505 | 0.00 | 0.00 |
| ATOM | 4580 | N    | LEU | X | 304 | 36.041 | 55.460 | 52.974 | 0.00 | 0.00 |

|      |      |      |     |   |     |        |        |        |      |      |
|------|------|------|-----|---|-----|--------|--------|--------|------|------|
| ATOM | 4581 | H    | LEU | X | 304 | 36.645 | 56.186 | 52.614 | 0.00 | 0.00 |
| ATOM | 4582 | CA   | LEU | X | 304 | 36.485 | 54.389 | 53.911 | 0.00 | 0.00 |
| ATOM | 4583 | HA   | LEU | X | 304 | 35.704 | 53.636 | 54.011 | 0.00 | 0.00 |
| ATOM | 4584 | CB   | LEU | X | 304 | 37.754 | 53.728 | 53.483 | 0.00 | 0.00 |
| ATOM | 4585 | HB2  | LEU | X | 304 | 38.476 | 54.499 | 53.213 | 0.00 | 0.00 |
| ATOM | 4586 | HB3  | LEU | X | 304 | 37.997 | 52.994 | 54.251 | 0.00 | 0.00 |
| ATOM | 4587 | CG   | LEU | X | 304 | 37.714 | 52.875 | 52.239 | 0.00 | 0.00 |
| ATOM | 4588 | HG   | LEU | X | 304 | 37.612 | 53.512 | 51.361 | 0.00 | 0.00 |
| ATOM | 4589 | CD1  | LEU | X | 304 | 39.030 | 52.068 | 52.105 | 0.00 | 0.00 |
| ATOM | 4590 | HD11 | LEU | X | 304 | 38.971 | 51.501 | 51.176 | 0.00 | 0.00 |
| ATOM | 4591 | HD12 | LEU | X | 304 | 39.186 | 51.473 | 53.005 | 0.00 | 0.00 |
| ATOM | 4592 | HD13 | LEU | X | 304 | 39.852 | 52.774 | 51.984 | 0.00 | 0.00 |
| ATOM | 4593 | CD2  | LEU | X | 304 | 36.641 | 51.789 | 52.316 | 0.00 | 0.00 |
| ATOM | 4594 | HD21 | LEU | X | 304 | 36.727 | 51.355 | 53.313 | 0.00 | 0.00 |
| ATOM | 4595 | HD22 | LEU | X | 304 | 35.662 | 52.253 | 52.197 | 0.00 | 0.00 |
| ATOM | 4596 | HD23 | LEU | X | 304 | 36.859 | 51.037 | 51.558 | 0.00 | 0.00 |
| ATOM | 4597 | C    | LEU | X | 304 | 36.573 | 54.907 | 55.304 | 0.00 | 0.00 |
| ATOM | 4598 | O    | LEU | X | 304 | 37.582 | 55.441 | 55.706 | 0.00 | 0.00 |
| ATOM | 4599 | N    | SER | X | 305 | 35.536 | 54.734 | 56.174 | 0.00 | 0.00 |
| ATOM | 4600 | H    | SER | X | 305 | 34.744 | 54.243 | 55.784 | 0.00 | 0.00 |
| ATOM | 4601 | CA   | SER | X | 305 | 35.405 | 55.188 | 57.554 | 0.00 | 0.00 |
| ATOM | 4602 | HA   | SER | X | 305 | 35.451 | 56.277 | 57.570 | 0.00 | 0.00 |
| ATOM | 4603 | CB   | SER | X | 305 | 33.981 | 54.876 | 58.103 | 0.00 | 0.00 |
| ATOM | 4604 | HB2  | SER | X | 305 | 34.044 | 53.790 | 58.042 | 0.00 | 0.00 |
| ATOM | 4605 | HB3  | SER | X | 305 | 33.860 | 55.059 | 59.170 | 0.00 | 0.00 |
| ATOM | 4606 | OG   | SER | X | 305 | 32.841 | 55.382 | 57.423 | 0.00 | 0.00 |
| ATOM | 4607 | HG   | SER | X | 305 | 32.991 | 55.106 | 56.516 | 0.00 | 0.00 |
| ATOM | 4608 | C    | SER | X | 305 | 36.407 | 54.766 | 58.611 | 0.00 | 0.00 |
| ATOM | 4609 | O    | SER | X | 305 | 36.592 | 55.475 | 59.597 | 0.00 | 0.00 |
| ATOM | 4610 | N    | ASP | X | 306 | 36.994 | 53.622 | 58.331 | 0.00 | 0.00 |
| ATOM | 4611 | H    | ASP | X | 306 | 36.865 | 53.312 | 57.378 | 0.00 | 0.00 |
| ATOM | 4612 | CA   | ASP | X | 306 | 37.949 | 52.826 | 59.180 | 0.00 | 0.00 |
| ATOM | 4613 | HA   | ASP | X | 306 | 38.651 | 53.520 | 59.643 | 0.00 | 0.00 |
| ATOM | 4614 | CB   | ASP | X | 306 | 37.195 | 52.223 | 60.409 | 0.00 | 0.00 |
| ATOM | 4615 | HB2  | ASP | X | 306 | 36.429 | 52.934 | 60.716 | 0.00 | 0.00 |
| ATOM | 4616 | HB3  | ASP | X | 306 | 36.692 | 51.318 | 60.067 | 0.00 | 0.00 |
| ATOM | 4617 | CG   | ASP | X | 306 | 38.038 | 51.869 | 61.585 | 0.00 | 0.00 |
| ATOM | 4618 | OD1  | ASP | X | 306 | 39.261 | 51.648 | 61.482 | 0.00 | 0.00 |
| ATOM | 4619 | OD2  | ASP | X | 306 | 37.476 | 51.752 | 62.702 | 0.00 | 0.00 |
| ATOM | 4620 | C    | ASP | X | 306 | 38.696 | 51.733 | 58.329 | 0.00 | 0.00 |
| ATOM | 4621 | O    | ASP | X | 306 | 38.407 | 51.475 | 57.164 | 0.00 | 0.00 |
| ATOM | 4622 | N    | THR | X | 307 | 39.564 | 50.972 | 59.031 | 0.00 | 0.00 |
| ATOM | 4623 | H    | THR | X | 307 | 39.784 | 51.138 | 60.003 | 0.00 | 0.00 |
| ATOM | 4624 | CA   | THR | X | 307 | 40.241 | 49.842 | 58.412 | 0.00 | 0.00 |
| ATOM | 4625 | HA   | THR | X | 307 | 40.560 | 50.179 | 57.426 | 0.00 | 0.00 |
| ATOM | 4626 | CB   | THR | X | 307 | 41.475 | 49.302 | 59.295 | 0.00 | 0.00 |
| ATOM | 4627 | HB   | THR | X | 307 | 41.843 | 48.370 | 58.866 | 0.00 | 0.00 |
| ATOM | 4628 | CG2  | THR | X | 307 | 42.527 | 50.374 | 59.377 | 0.00 | 0.00 |
| ATOM | 4629 | HG21 | THR | X | 307 | 42.169 | 51.163 | 60.038 | 0.00 | 0.00 |
| ATOM | 4630 | HG22 | THR | X | 307 | 42.873 | 50.748 | 58.414 | 0.00 | 0.00 |
| ATOM | 4631 | HG23 | THR | X | 307 | 43.425 | 49.901 | 59.777 | 0.00 | 0.00 |
| ATOM | 4632 | OG1  | THR | X | 307 | 40.954 | 48.979 | 60.562 | 0.00 | 0.00 |
| ATOM | 4633 | HG1  | THR | X | 307 | 40.147 | 48.486 | 60.393 | 0.00 | 0.00 |
| ATOM | 4634 | C    | THR | X | 307 | 39.214 | 48.647 | 58.177 | 0.00 | 0.00 |
| ATOM | 4635 | O    | THR | X | 307 | 38.505 | 48.370 | 59.151 | 0.00 | 0.00 |
| ATOM | 4636 | N    | PRO | X | 308 | 39.173 | 48.064 | 56.998 | 0.00 | 0.00 |
| ATOM | 4637 | CD   | PRO | X | 308 | 40.052 | 48.311 | 55.852 | 0.00 | 0.00 |
| ATOM | 4638 | HD2  | PRO | X | 308 | 41.072 | 48.183 | 56.215 | 0.00 | 0.00 |
| ATOM | 4639 | HD3  | PRO | X | 308 | 40.033 | 49.330 | 55.464 | 0.00 | 0.00 |
| ATOM | 4640 | CG   | PRO | X | 308 | 39.632 | 47.269 | 54.825 | 0.00 | 0.00 |
| ATOM | 4641 | HG2  | PRO | X | 308 | 39.954 | 46.246 | 55.021 | 0.00 | 0.00 |
| ATOM | 4642 | HG3  | PRO | X | 308 | 39.950 | 47.585 | 53.831 | 0.00 | 0.00 |
| ATOM | 4643 | CB   | PRO | X | 308 | 38.139 | 47.241 | 54.944 | 0.00 | 0.00 |
| ATOM | 4644 | HB2  | PRO | X | 308 | 37.581 | 46.378 | 54.580 | 0.00 | 0.00 |
| ATOM | 4645 | HB3  | PRO | X | 308 | 37.770 | 48.180 | 54.532 | 0.00 | 0.00 |
| ATOM | 4646 | CA   | PRO | X | 308 | 37.999 | 47.363 | 56.457 | 0.00 | 0.00 |
| ATOM | 4647 | HA   | PRO | X | 308 | 37.267 | 48.163 | 56.569 | 0.00 | 0.00 |

|      |      |      |     |   |     |        |        |        |      |      |
|------|------|------|-----|---|-----|--------|--------|--------|------|------|
| ATOM | 4648 | C    | PRO | X | 308 | 37.539 | 46.075 | 57.112 | 0.00 | 0.00 |
| ATOM | 4649 | O    | PRO | X | 308 | 36.333 | 45.799 | 57.018 | 0.00 | 0.00 |
| ATOM | 4650 | N    | GLU | X | 309 | 38.346 | 45.336 | 57.867 | 0.00 | 0.00 |
| ATOM | 4651 | H    | GLU | X | 309 | 39.299 | 45.588 | 58.087 | 0.00 | 0.00 |
| ATOM | 4652 | CA   | GLU | X | 309 | 37.874 | 44.161 | 58.655 | 0.00 | 0.00 |
| ATOM | 4653 | HA   | GLU | X | 309 | 37.250 | 43.681 | 57.901 | 0.00 | 0.00 |
| ATOM | 4654 | CB   | GLU | X | 309 | 39.033 | 43.252 | 59.013 | 0.00 | 0.00 |
| ATOM | 4655 | HB2  | GLU | X | 309 | 39.715 | 43.263 | 58.163 | 0.00 | 0.00 |
| ATOM | 4656 | HB3  | GLU | X | 309 | 39.488 | 43.738 | 59.876 | 0.00 | 0.00 |
| ATOM | 4657 | CG   | GLU | X | 309 | 38.694 | 41.821 | 59.303 | 0.00 | 0.00 |
| ATOM | 4658 | HG2  | GLU | X | 309 | 37.662 | 41.835 | 59.654 | 0.00 | 0.00 |
| ATOM | 4659 | HG3  | GLU | X | 309 | 38.829 | 41.335 | 58.337 | 0.00 | 0.00 |
| ATOM | 4660 | CD   | GLU | X | 309 | 39.783 | 41.193 | 60.137 | 0.00 | 0.00 |
| ATOM | 4661 | OE1  | GLU | X | 309 | 39.578 | 41.076 | 61.415 | 0.00 | 0.00 |
| ATOM | 4662 | OE2  | GLU | X | 309 | 40.898 | 40.870 | 59.671 | 0.00 | 0.00 |
| ATOM | 4663 | C    | GLU | X | 309 | 37.029 | 44.614 | 59.896 | 0.00 | 0.00 |
| ATOM | 4664 | O    | GLU | X | 309 | 36.226 | 43.811 | 60.384 | 0.00 | 0.00 |
| ATOM | 4665 | N    | ALA | X | 310 | 37.124 | 45.916 | 60.287 | 0.00 | 0.00 |
| ATOM | 4666 | H    | ALA | X | 310 | 37.759 | 46.507 | 59.770 | 0.00 | 0.00 |
| ATOM | 4667 | CA   | ALA | X | 310 | 36.315 | 46.548 | 61.303 | 0.00 | 0.00 |
| ATOM | 4668 | HA   | ALA | X | 310 | 36.079 | 45.820 | 62.079 | 0.00 | 0.00 |
| ATOM | 4669 | CB   | ALA | X | 310 | 37.188 | 47.603 | 62.010 | 0.00 | 0.00 |
| ATOM | 4670 | HB1  | ALA | X | 310 | 36.861 | 47.912 | 63.003 | 0.00 | 0.00 |
| ATOM | 4671 | HB2  | ALA | X | 310 | 37.271 | 48.474 | 61.360 | 0.00 | 0.00 |
| ATOM | 4672 | HB3  | ALA | X | 310 | 38.169 | 47.136 | 62.106 | 0.00 | 0.00 |
| ATOM | 4673 | C    | ALA | X | 310 | 34.965 | 47.013 | 60.684 | 0.00 | 0.00 |
| ATOM | 4674 | O    | ALA | X | 310 | 33.927 | 46.838 | 61.345 | 0.00 | 0.00 |
| ATOM | 4675 | N    | LEU | X | 311 | 34.987 | 47.488 | 59.421 | 0.00 | 0.00 |
| ATOM | 4676 | H    | LEU | X | 311 | 35.887 | 47.628 | 58.983 | 0.00 | 0.00 |
| ATOM | 4677 | CA   | LEU | X | 311 | 33.754 | 47.932 | 58.783 | 0.00 | 0.00 |
| ATOM | 4678 | HA   | LEU | X | 311 | 33.221 | 48.562 | 59.496 | 0.00 | 0.00 |
| ATOM | 4679 | CB   | LEU | X | 311 | 34.097 | 48.721 | 57.547 | 0.00 | 0.00 |
| ATOM | 4680 | HB2  | LEU | X | 311 | 34.600 | 47.993 | 56.911 | 0.00 | 0.00 |
| ATOM | 4681 | HB3  | LEU | X | 311 | 33.146 | 48.938 | 57.061 | 0.00 | 0.00 |
| ATOM | 4682 | CG   | LEU | X | 311 | 35.002 | 49.916 | 57.805 | 0.00 | 0.00 |
| ATOM | 4683 | HG   | LEU | X | 311 | 35.985 | 49.717 | 58.232 | 0.00 | 0.00 |
| ATOM | 4684 | CD1  | LEU | X | 311 | 35.268 | 50.647 | 56.427 | 0.00 | 0.00 |
| ATOM | 4685 | HD11 | LEU | X | 311 | 35.538 | 51.671 | 56.685 | 0.00 | 0.00 |
| ATOM | 4686 | HD12 | LEU | X | 311 | 34.305 | 50.677 | 55.916 | 0.00 | 0.00 |
| ATOM | 4687 | HD13 | LEU | X | 311 | 36.055 | 50.270 | 55.774 | 0.00 | 0.00 |
| ATOM | 4688 | CD2  | LEU | X | 311 | 34.206 | 50.880 | 58.723 | 0.00 | 0.00 |
| ATOM | 4689 | HD21 | LEU | X | 311 | 34.782 | 51.797 | 58.841 | 0.00 | 0.00 |
| ATOM | 4690 | HD22 | LEU | X | 311 | 33.156 | 51.003 | 58.458 | 0.00 | 0.00 |
| ATOM | 4691 | HD23 | LEU | X | 311 | 34.142 | 50.477 | 59.734 | 0.00 | 0.00 |
| ATOM | 4692 | C    | LEU | X | 311 | 32.723 | 46.786 | 58.476 | 0.00 | 0.00 |
| ATOM | 4693 | O    | LEU | X | 311 | 31.530 | 47.140 | 58.560 | 0.00 | 0.00 |
| ATOM | 4694 | N    | ILE | X | 312 | 33.108 | 45.544 | 58.163 | 0.00 | 0.00 |
| ATOM | 4695 | H    | ILE | X | 312 | 34.080 | 45.326 | 57.996 | 0.00 | 0.00 |
| ATOM | 4696 | CA   | ILE | X | 312 | 32.090 | 44.458 | 58.098 | 0.00 | 0.00 |
| ATOM | 4697 | HA   | ILE | X | 312 | 31.358 | 44.664 | 57.316 | 0.00 | 0.00 |
| ATOM | 4698 | CB   | ILE | X | 312 | 32.580 | 43.080 | 57.742 | 0.00 | 0.00 |
| ATOM | 4699 | HB   | ILE | X | 312 | 32.992 | 42.630 | 58.646 | 0.00 | 0.00 |
| ATOM | 4700 | CG2  | ILE | X | 312 | 31.528 | 42.226 | 57.173 | 0.00 | 0.00 |
| ATOM | 4701 | HG21 | ILE | X | 312 | 31.766 | 41.214 | 56.847 | 0.00 | 0.00 |
| ATOM | 4702 | HG22 | ILE | X | 312 | 31.040 | 42.746 | 56.349 | 0.00 | 0.00 |
| ATOM | 4703 | HG23 | ILE | X | 312 | 30.795 | 42.223 | 57.980 | 0.00 | 0.00 |
| ATOM | 4704 | CG1  | ILE | X | 312 | 33.735 | 43.003 | 56.708 | 0.00 | 0.00 |
| ATOM | 4705 | HG12 | ILE | X | 312 | 33.426 | 43.295 | 55.704 | 0.00 | 0.00 |
| ATOM | 4706 | HG13 | ILE | X | 312 | 34.431 | 43.799 | 56.973 | 0.00 | 0.00 |
| ATOM | 4707 | CD1  | ILE | X | 312 | 34.526 | 41.705 | 56.764 | 0.00 | 0.00 |
| ATOM | 4708 | HD11 | ILE | X | 312 | 35.144 | 41.704 | 55.866 | 0.00 | 0.00 |
| ATOM | 4709 | HD12 | ILE | X | 312 | 33.855 | 40.851 | 56.677 | 0.00 | 0.00 |
| ATOM | 4710 | HD13 | ILE | X | 312 | 35.161 | 41.637 | 57.647 | 0.00 | 0.00 |
| ATOM | 4711 | C    | ILE | X | 312 | 31.285 | 44.319 | 59.359 | 0.00 | 0.00 |
| ATOM | 4712 | O    | ILE | X | 312 | 30.087 | 44.489 | 59.363 | 0.00 | 0.00 |
| ATOM | 4713 | N    | ASN | X | 313 | 31.973 | 44.358 | 60.492 | 0.00 | 0.00 |
| ATOM | 4714 | H    | ASN | X | 313 | 32.978 | 44.455 | 60.466 | 0.00 | 0.00 |



|      |      |      |     |   |     |        |        |        |      |      |
|------|------|------|-----|---|-----|--------|--------|--------|------|------|
| ATOM | 4715 | CA   | ASN | X | 313 | 31.483 | 44.183 | 61.846 | 0.00 | 0.00 |
| ATOM | 4716 | HA   | ASN | X | 313 | 30.644 | 43.496 | 61.957 | 0.00 | 0.00 |
| ATOM | 4717 | CB   | ASN | X | 313 | 32.757 | 43.754 | 62.729 | 0.00 | 0.00 |
| ATOM | 4718 | HB2  | ASN | X | 313 | 33.151 | 42.786 | 62.418 | 0.00 | 0.00 |
| ATOM | 4719 | HB3  | ASN | X | 313 | 33.452 | 44.555 | 62.479 | 0.00 | 0.00 |
| ATOM | 4720 | CG   | ASN | X | 313 | 32.654 | 43.790 | 64.207 | 0.00 | 0.00 |
| ATOM | 4721 | OD1  | ASN | X | 313 | 33.072 | 44.828 | 64.833 | 0.00 | 0.00 |
| ATOM | 4722 | ND2  | ASN | X | 313 | 32.021 | 42.833 | 64.821 | 0.00 | 0.00 |
| ATOM | 4723 | HD21 | ASN | X | 313 | 31.877 | 42.911 | 65.817 | 0.00 | 0.00 |
| ATOM | 4724 | HD22 | ASN | X | 313 | 31.719 | 42.009 | 64.322 | 0.00 | 0.00 |
| ATOM | 4725 | C    | ASN | X | 313 | 30.862 | 45.438 | 62.475 | 0.00 | 0.00 |
| ATOM | 4726 | O    | ASN | X | 313 | 30.153 | 45.425 | 63.516 | 0.00 | 0.00 |
| ATOM | 4727 | N    | ALA | X | 314 | 31.048 | 46.597 | 61.794 | 0.00 | 0.00 |
| ATOM | 4728 | H    | ALA | X | 314 | 31.779 | 46.640 | 61.099 | 0.00 | 0.00 |
| ATOM | 4729 | CA   | ALA | X | 314 | 30.173 | 47.764 | 62.031 | 0.00 | 0.00 |
| ATOM | 4730 | HA   | ALA | X | 314 | 29.745 | 47.624 | 63.024 | 0.00 | 0.00 |
| ATOM | 4731 | CB   | ALA | X | 314 | 31.055 | 49.038 | 61.985 | 0.00 | 0.00 |
| ATOM | 4732 | HB1  | ALA | X | 314 | 31.430 | 49.218 | 60.977 | 0.00 | 0.00 |
| ATOM | 4733 | HB2  | ALA | X | 314 | 31.942 | 48.896 | 62.603 | 0.00 | 0.00 |
| ATOM | 4734 | HB3  | ALA | X | 314 | 30.464 | 49.869 | 62.370 | 0.00 | 0.00 |
| ATOM | 4735 | C    | ALA | X | 314 | 28.980 | 47.808 | 61.129 | 0.00 | 0.00 |
| ATOM | 4736 | O    | ALA | X | 314 | 28.011 | 48.492 | 61.507 | 0.00 | 0.00 |
| ATOM | 4737 | N    | GLY | X | 315 | 28.875 | 46.918 | 60.116 | 0.00 | 0.00 |
| ATOM | 4738 | H    | GLY | X | 315 | 29.705 | 46.355 | 59.999 | 0.00 | 0.00 |
| ATOM | 4739 | CA   | GLY | X | 315 | 27.867 | 46.831 | 59.199 | 0.00 | 0.00 |
| ATOM | 4740 | HA2  | GLY | X | 315 | 27.378 | 47.797 | 59.323 | 0.00 | 0.00 |
| ATOM | 4741 | HA3  | GLY | X | 315 | 28.203 | 46.756 | 58.165 | 0.00 | 0.00 |
| ATOM | 4742 | C    | GLY | X | 315 | 26.786 | 45.812 | 59.473 | 0.00 | 0.00 |
| ATOM | 4743 | O    | GLY | X | 315 | 26.533 | 45.406 | 60.626 | 0.00 | 0.00 |
| ATOM | 4744 | N    | ASP | X | 316 | 26.026 | 45.503 | 58.441 | 0.00 | 0.00 |
| ATOM | 4745 | H    | ASP | X | 316 | 26.296 | 45.782 | 57.509 | 0.00 | 0.00 |
| ATOM | 4746 | CA   | ASP | X | 316 | 24.833 | 44.597 | 58.503 | 0.00 | 0.00 |
| ATOM | 4747 | HA   | ASP | X | 316 | 25.035 | 43.717 | 59.114 | 0.00 | 0.00 |
| ATOM | 4748 | CB   | ASP | X | 316 | 23.639 | 45.444 | 59.035 | 0.00 | 0.00 |
| ATOM | 4749 | HB2  | ASP | X | 316 | 23.848 | 45.711 | 60.071 | 0.00 | 0.00 |
| ATOM | 4750 | HB3  | ASP | X | 316 | 23.499 | 46.370 | 58.476 | 0.00 | 0.00 |
| ATOM | 4751 | CG   | ASP | X | 316 | 22.286 | 44.788 | 58.887 | 0.00 | 0.00 |
| ATOM | 4752 | OD1  | ASP | X | 316 | 22.207 | 43.546 | 58.770 | 0.00 | 0.00 |
| ATOM | 4753 | OD2  | ASP | X | 316 | 21.245 | 45.505 | 58.897 | 0.00 | 0.00 |
| ATOM | 4754 | C    | ASP | X | 316 | 24.644 | 44.273 | 56.997 | 0.00 | 0.00 |
| ATOM | 4755 | O    | ASP | X | 316 | 24.626 | 45.120 | 56.114 | 0.00 | 0.00 |
| ATOM | 4756 | N    | PHE | X | 317 | 24.329 | 42.936 | 56.737 | 0.00 | 0.00 |
| ATOM | 4757 | H    | PHE | X | 317 | 24.331 | 42.260 | 57.488 | 0.00 | 0.00 |
| ATOM | 4758 | CA   | PHE | X | 317 | 24.141 | 42.429 | 55.393 | 0.00 | 0.00 |
| ATOM | 4759 | HA   | PHE | X | 317 | 24.005 | 43.271 | 54.713 | 0.00 | 0.00 |
| ATOM | 4760 | CB   | PHE | X | 317 | 25.434 | 41.731 | 54.974 | 0.00 | 0.00 |
| ATOM | 4761 | HB2  | PHE | X | 317 | 25.606 | 40.879 | 55.632 | 0.00 | 0.00 |
| ATOM | 4762 | HB3  | PHE | X | 317 | 25.330 | 41.244 | 54.005 | 0.00 | 0.00 |
| ATOM | 4763 | CG   | PHE | X | 317 | 26.572 | 42.710 | 54.876 | 0.00 | 0.00 |
| ATOM | 4764 | CD1  | PHE | X | 317 | 26.557 | 43.752 | 53.878 | 0.00 | 0.00 |
| ATOM | 4765 | HD1  | PHE | X | 317 | 25.856 | 43.665 | 53.062 | 0.00 | 0.00 |
| ATOM | 4766 | CE1  | PHE | X | 317 | 27.482 | 44.819 | 53.943 | 0.00 | 0.00 |
| ATOM | 4767 | HE1  | PHE | X | 317 | 27.548 | 45.651 | 53.258 | 0.00 | 0.00 |
| ATOM | 4768 | CZ   | PHE | X | 317 | 28.389 | 44.887 | 55.077 | 0.00 | 0.00 |
| ATOM | 4769 | HZ   | PHE | X | 317 | 29.022 | 45.757 | 55.170 | 0.00 | 0.00 |
| ATOM | 4770 | CE2  | PHE | X | 317 | 28.474 | 43.875 | 56.024 | 0.00 | 0.00 |
| ATOM | 4771 | HE2  | PHE | X | 317 | 29.079 | 43.944 | 56.916 | 0.00 | 0.00 |
| ATOM | 4772 | CD2  | PHE | X | 317 | 27.531 | 42.774 | 55.913 | 0.00 | 0.00 |
| ATOM | 4773 | HD2  | PHE | X | 317 | 27.593 | 42.024 | 56.687 | 0.00 | 0.00 |
| ATOM | 4774 | C    | PHE | X | 317 | 22.955 | 41.467 | 55.367 | 0.00 | 0.00 |
| ATOM | 4775 | O    | PHE | X | 317 | 22.952 | 40.530 | 54.567 | 0.00 | 0.00 |
| ATOM | 4776 | N    | HIE | X | 318 | 21.989 | 41.645 | 56.303 | 0.00 | 0.00 |
| ATOM | 4777 | H    | HIE | X | 318 | 22.136 | 42.412 | 56.943 | 0.00 | 0.00 |
| ATOM | 4778 | CA   | HIE | X | 318 | 20.956 | 40.656 | 56.491 | 0.00 | 0.00 |
| ATOM | 4779 | HA   | HIE | X | 318 | 21.477 | 39.737 | 56.761 | 0.00 | 0.00 |
| ATOM | 4780 | CB   | HIE | X | 318 | 20.054 | 41.147 | 57.667 | 0.00 | 0.00 |
| ATOM | 4781 | HB2  | HIE | X | 318 | 20.578 | 41.316 | 58.608 | 0.00 | 0.00 |

|      |      |      |     |   |     |        |        |        |      |      |
|------|------|------|-----|---|-----|--------|--------|--------|------|------|
| ATOM | 4782 | HB3  | HIE | X | 318 | 19.603 | 42.078 | 57.323 | 0.00 | 0.00 |
| ATOM | 4783 | CG   | HIE | X | 318 | 18.872 | 40.241 | 57.881 | 0.00 | 0.00 |
| ATOM | 4784 | ND1  | HIE | X | 318 | 19.063 | 38.881 | 58.106 | 0.00 | 0.00 |
| ATOM | 4785 | CE1  | HIE | X | 318 | 17.824 | 38.279 | 58.048 | 0.00 | 0.00 |
| ATOM | 4786 | HE1  | HIE | X | 318 | 17.617 | 37.221 | 58.119 | 0.00 | 0.00 |
| ATOM | 4787 | NE2  | HIE | X | 318 | 16.947 | 39.177 | 57.731 | 0.00 | 0.00 |
| ATOM | 4788 | HE2  | HIE | X | 318 | 15.971 | 38.988 | 57.557 | 0.00 | 0.00 |
| ATOM | 4789 | CD2  | HIE | X | 318 | 17.567 | 40.413 | 57.522 | 0.00 | 0.00 |
| ATOM | 4790 | HD2  | HIE | X | 318 | 17.126 | 41.350 | 57.214 | 0.00 | 0.00 |
| ATOM | 4791 | C    | HIE | X | 318 | 20.039 | 40.381 | 55.265 | 0.00 | 0.00 |
| ATOM | 4792 | O    | HIE | X | 318 | 19.540 | 41.346 | 54.649 | 0.00 | 0.00 |
| ATOM | 4793 | N    | GLY | X | 319 | 19.931 | 39.088 | 54.995 | 0.00 | 0.00 |
| ATOM | 4794 | H    | GLY | X | 319 | 20.446 | 38.411 | 55.539 | 0.00 | 0.00 |
| ATOM | 4795 | CA   | GLY | X | 319 | 19.150 | 38.463 | 53.944 | 0.00 | 0.00 |
| ATOM | 4796 | HA2  | GLY | X | 319 | 19.310 | 37.396 | 54.100 | 0.00 | 0.00 |
| ATOM | 4797 | HA3  | GLY | X | 319 | 18.114 | 38.787 | 54.046 | 0.00 | 0.00 |
| ATOM | 4798 | C    | GLY | X | 319 | 19.738 | 38.597 | 52.555 | 0.00 | 0.00 |
| ATOM | 4799 | O    | GLY | X | 319 | 19.077 | 38.194 | 51.609 | 0.00 | 0.00 |
| ATOM | 4800 | N    | LEU | X | 320 | 20.933 | 39.166 | 52.397 | 0.00 | 0.00 |
| ATOM | 4801 | H    | LEU | X | 320 | 21.502 | 39.537 | 53.144 | 0.00 | 0.00 |
| ATOM | 4802 | CA   | LEU | X | 320 | 21.637 | 39.097 | 51.081 | 0.00 | 0.00 |
| ATOM | 4803 | HA   | LEU | X | 320 | 20.958 | 39.537 | 50.350 | 0.00 | 0.00 |
| ATOM | 4804 | CB   | LEU | X | 320 | 22.828 | 40.104 | 51.157 | 0.00 | 0.00 |
| ATOM | 4805 | HB2  | LEU | X | 320 | 23.290 | 39.828 | 52.105 | 0.00 | 0.00 |
| ATOM | 4806 | HB3  | LEU | X | 320 | 23.554 | 39.823 | 50.395 | 0.00 | 0.00 |
| ATOM | 4807 | CG   | LEU | X | 320 | 22.470 | 41.566 | 51.163 | 0.00 | 0.00 |
| ATOM | 4808 | HG   | LEU | X | 320 | 21.798 | 41.745 | 52.002 | 0.00 | 0.00 |
| ATOM | 4809 | CD1  | LEU | X | 320 | 23.767 | 42.371 | 51.339 | 0.00 | 0.00 |
| ATOM | 4810 | HD11 | LEU | X | 320 | 24.078 | 42.113 | 52.351 | 0.00 | 0.00 |
| ATOM | 4811 | HD12 | LEU | X | 320 | 23.693 | 43.458 | 51.369 | 0.00 | 0.00 |
| ATOM | 4812 | HD13 | LEU | X | 320 | 24.466 | 42.149 | 50.534 | 0.00 | 0.00 |
| ATOM | 4813 | CD2  | LEU | X | 320 | 21.756 | 41.929 | 49.829 | 0.00 | 0.00 |
| ATOM | 4814 | HD21 | LEU | X | 320 | 22.308 | 41.479 | 49.003 | 0.00 | 0.00 |
| ATOM | 4815 | HD22 | LEU | X | 320 | 20.680 | 41.762 | 49.851 | 0.00 | 0.00 |
| ATOM | 4816 | HD23 | LEU | X | 320 | 21.811 | 43.012 | 49.715 | 0.00 | 0.00 |
| ATOM | 4817 | C    | LEU | X | 320 | 21.950 | 37.661 | 50.808 | 0.00 | 0.00 |
| ATOM | 4818 | O    | LEU | X | 320 | 22.232 | 36.924 | 51.774 | 0.00 | 0.00 |
| ATOM | 4819 | N    | GLN | X | 321 | 22.158 | 37.348 | 49.588 | 0.00 | 0.00 |
| ATOM | 4820 | H    | GLN | X | 321 | 21.941 | 38.037 | 48.883 | 0.00 | 0.00 |
| ATOM | 4821 | CA   | GLN | X | 321 | 22.954 | 36.205 | 49.185 | 0.00 | 0.00 |
| ATOM | 4822 | HA   | GLN | X | 321 | 22.911 | 35.496 | 50.012 | 0.00 | 0.00 |
| ATOM | 4823 | CB   | GLN | X | 321 | 22.279 | 35.510 | 47.942 | 0.00 | 0.00 |
| ATOM | 4824 | HB2  | GLN | X | 321 | 22.293 | 36.091 | 47.020 | 0.00 | 0.00 |
| ATOM | 4825 | HB3  | GLN | X | 321 | 22.802 | 34.606 | 47.630 | 0.00 | 0.00 |
| ATOM | 4826 | CG   | GLN | X | 321 | 20.847 | 35.119 | 48.256 | 0.00 | 0.00 |
| ATOM | 4827 | HG2  | GLN | X | 321 | 20.561 | 34.206 | 47.733 | 0.00 | 0.00 |
| ATOM | 4828 | HG3  | GLN | X | 321 | 20.678 | 34.789 | 49.281 | 0.00 | 0.00 |
| ATOM | 4829 | CD   | GLN | X | 321 | 19.845 | 36.159 | 47.833 | 0.00 | 0.00 |
| ATOM | 4830 | OE1  | GLN | X | 321 | 19.632 | 36.378 | 46.683 | 0.00 | 0.00 |
| ATOM | 4831 | NE2  | GLN | X | 321 | 19.082 | 36.778 | 48.714 | 0.00 | 0.00 |
| ATOM | 4832 | HE21 | GLN | X | 321 | 18.352 | 37.263 | 48.211 | 0.00 | 0.00 |
| ATOM | 4833 | HE22 | GLN | X | 321 | 18.878 | 36.472 | 49.654 | 0.00 | 0.00 |
| ATOM | 4834 | C    | GLN | X | 321 | 24.338 | 36.674 | 48.821 | 0.00 | 0.00 |
| ATOM | 4835 | O    | GLN | X | 321 | 24.543 | 37.676 | 48.092 | 0.00 | 0.00 |
| ATOM | 4836 | N    | VAL | X | 322 | 25.437 | 36.020 | 49.226 | 0.00 | 0.00 |
| ATOM | 4837 | H    | VAL | X | 322 | 25.304 | 35.236 | 49.849 | 0.00 | 0.00 |
| ATOM | 4838 | CA   | VAL | X | 322 | 26.845 | 36.221 | 48.847 | 0.00 | 0.00 |
| ATOM | 4839 | HA   | VAL | X | 322 | 26.839 | 36.900 | 47.994 | 0.00 | 0.00 |
| ATOM | 4840 | CB   | VAL | X | 322 | 27.758 | 36.879 | 49.972 | 0.00 | 0.00 |
| ATOM | 4841 | HB   | VAL | X | 322 | 27.805 | 36.187 | 50.812 | 0.00 | 0.00 |
| ATOM | 4842 | CG1  | VAL | X | 322 | 29.141 | 37.021 | 49.431 | 0.00 | 0.00 |
| ATOM | 4843 | HG11 | VAL | X | 322 | 29.582 | 36.038 | 49.265 | 0.00 | 0.00 |
| ATOM | 4844 | HG12 | VAL | X | 322 | 29.110 | 37.597 | 48.506 | 0.00 | 0.00 |
| ATOM | 4845 | HG13 | VAL | X | 322 | 29.739 | 37.575 | 50.153 | 0.00 | 0.00 |
| ATOM | 4846 | CG2  | VAL | X | 322 | 27.106 | 38.190 | 50.434 | 0.00 | 0.00 |
| ATOM | 4847 | HG21 | VAL | X | 322 | 27.742 | 38.659 | 51.184 | 0.00 | 0.00 |
| ATOM | 4848 | HG22 | VAL | X | 322 | 26.106 | 38.128 | 50.862 | 0.00 | 0.00 |

|      |      |      |     |   |     |        |        |        |      |      |
|------|------|------|-----|---|-----|--------|--------|--------|------|------|
| ATOM | 4849 | HG23 | VAL | X | 322 | 27.159 | 38.850 | 49.568 | 0.00 | 0.00 |
| ATOM | 4850 | C    | VAL | X | 322 | 27.431 | 34.875 | 48.353 | 0.00 | 0.00 |
| ATOM | 4851 | O    | VAL | X | 322 | 27.181 | 33.815 | 48.924 | 0.00 | 0.00 |
| ATOM | 4852 | N    | LEU | X | 323 | 28.152 | 34.883 | 47.200 | 0.00 | 0.00 |
| ATOM | 4853 | H    | LEU | X | 323 | 28.135 | 35.737 | 46.662 | 0.00 | 0.00 |
| ATOM | 4854 | CA   | LEU | X | 323 | 28.993 | 33.745 | 46.862 | 0.00 | 0.00 |
| ATOM | 4855 | HA   | LEU | X | 323 | 28.897 | 32.882 | 47.520 | 0.00 | 0.00 |
| ATOM | 4856 | CB   | LEU | X | 323 | 28.632 | 33.303 | 45.459 | 0.00 | 0.00 |
| ATOM | 4857 | HB2  | LEU | X | 323 | 27.544 | 33.248 | 45.493 | 0.00 | 0.00 |
| ATOM | 4858 | HB3  | LEU | X | 323 | 28.949 | 34.119 | 44.809 | 0.00 | 0.00 |
| ATOM | 4859 | CG   | LEU | X | 323 | 29.217 | 32.020 | 44.810 | 0.00 | 0.00 |
| ATOM | 4860 | HG   | LEU | X | 323 | 29.095 | 31.248 | 45.571 | 0.00 | 0.00 |
| ATOM | 4861 | CD1  | LEU | X | 323 | 28.352 | 31.640 | 43.617 | 0.00 | 0.00 |
| ATOM | 4862 | HD11 | LEU | X | 323 | 28.540 | 32.316 | 42.783 | 0.00 | 0.00 |
| ATOM | 4863 | HD12 | LEU | X | 323 | 27.266 | 31.631 | 43.710 | 0.00 | 0.00 |
| ATOM | 4864 | HD13 | LEU | X | 323 | 28.716 | 30.656 | 43.321 | 0.00 | 0.00 |
| ATOM | 4865 | CD2  | LEU | X | 323 | 30.697 | 32.129 | 44.271 | 0.00 | 0.00 |
| ATOM | 4866 | HD21 | LEU | X | 323 | 31.019 | 31.164 | 43.882 | 0.00 | 0.00 |
| ATOM | 4867 | HD22 | LEU | X | 323 | 30.766 | 32.836 | 43.444 | 0.00 | 0.00 |
| ATOM | 4868 | HD23 | LEU | X | 323 | 31.385 | 32.325 | 45.094 | 0.00 | 0.00 |
| ATOM | 4869 | C    | LEU | X | 323 | 30.471 | 34.211 | 46.863 | 0.00 | 0.00 |
| ATOM | 4870 | O    | LEU | X | 323 | 30.791 | 35.257 | 46.347 | 0.00 | 0.00 |
| ATOM | 4871 | N    | VAL | X | 324 | 31.325 | 33.419 | 47.529 | 0.00 | 0.00 |
| ATOM | 4872 | H    | VAL | X | 324 | 30.982 | 32.539 | 47.887 | 0.00 | 0.00 |
| ATOM | 4873 | CA   | VAL | X | 324 | 32.782 | 33.712 | 47.720 | 0.00 | 0.00 |
| ATOM | 4874 | HA   | VAL | X | 324 | 33.066 | 34.494 | 47.017 | 0.00 | 0.00 |
| ATOM | 4875 | CB   | VAL | X | 324 | 33.192 | 34.172 | 49.153 | 0.00 | 0.00 |
| ATOM | 4876 | HB   | VAL | X | 324 | 34.220 | 34.520 | 49.048 | 0.00 | 0.00 |
| ATOM | 4877 | CG1  | VAL | X | 324 | 32.391 | 35.399 | 49.605 | 0.00 | 0.00 |
| ATOM | 4878 | HG11 | VAL | X | 324 | 31.430 | 35.104 | 50.026 | 0.00 | 0.00 |
| ATOM | 4879 | HG12 | VAL | X | 324 | 32.964 | 35.928 | 50.366 | 0.00 | 0.00 |
| ATOM | 4880 | HG13 | VAL | X | 324 | 32.184 | 36.168 | 48.860 | 0.00 | 0.00 |
| ATOM | 4881 | CG2  | VAL | X | 324 | 33.050 | 33.130 | 50.286 | 0.00 | 0.00 |
| ATOM | 4882 | HG21 | VAL | X | 324 | 33.404 | 33.487 | 51.254 | 0.00 | 0.00 |
| ATOM | 4883 | HG22 | VAL | X | 324 | 33.638 | 32.263 | 49.986 | 0.00 | 0.00 |
| ATOM | 4884 | HG23 | VAL | X | 324 | 32.044 | 32.712 | 50.323 | 0.00 | 0.00 |
| ATOM | 4885 | C    | VAL | X | 324 | 33.655 | 32.535 | 47.379 | 0.00 | 0.00 |
| ATOM | 4886 | O    | VAL | X | 324 | 33.079 | 31.375 | 47.331 | 0.00 | 0.00 |
| ATOM | 4887 | N    | GLY | X | 325 | 34.999 | 32.686 | 47.163 | 0.00 | 0.00 |
| ATOM | 4888 | H    | GLY | X | 325 | 35.422 | 33.603 | 47.146 | 0.00 | 0.00 |
| ATOM | 4889 | CA   | GLY | X | 325 | 35.901 | 31.507 | 47.054 | 0.00 | 0.00 |
| ATOM | 4890 | HA2  | GLY | X | 325 | 36.040 | 31.185 | 48.087 | 0.00 | 0.00 |
| ATOM | 4891 | HA3  | GLY | X | 325 | 35.365 | 30.712 | 46.535 | 0.00 | 0.00 |
| ATOM | 4892 | C    | GLY | X | 325 | 37.213 | 31.704 | 46.371 | 0.00 | 0.00 |
| ATOM | 4893 | O    | GLY | X | 325 | 37.404 | 32.768 | 45.780 | 0.00 | 0.00 |
| ATOM | 4894 | N    | VAL | X | 326 | 38.061 | 30.677 | 46.400 | 0.00 | 0.00 |
| ATOM | 4895 | H    | VAL | X | 326 | 37.648 | 29.777 | 46.604 | 0.00 | 0.00 |
| ATOM | 4896 | CA   | VAL | X | 326 | 39.483 | 30.839 | 46.028 | 0.00 | 0.00 |
| ATOM | 4897 | HA   | VAL | X | 326 | 39.637 | 31.651 | 45.317 | 0.00 | 0.00 |
| ATOM | 4898 | CB   | VAL | X | 326 | 40.367 | 30.965 | 47.278 | 0.00 | 0.00 |
| ATOM | 4899 | HB   | VAL | X | 326 | 41.439 | 30.912 | 47.090 | 0.00 | 0.00 |
| ATOM | 4900 | CG1  | VAL | X | 326 | 40.227 | 32.386 | 47.845 | 0.00 | 0.00 |
| ATOM | 4901 | HG11 | VAL | X | 326 | 40.774 | 33.079 | 47.205 | 0.00 | 0.00 |
| ATOM | 4902 | HG12 | VAL | X | 326 | 39.177 | 32.639 | 47.987 | 0.00 | 0.00 |
| ATOM | 4903 | HG13 | VAL | X | 326 | 40.699 | 32.437 | 48.827 | 0.00 | 0.00 |
| ATOM | 4904 | CG2  | VAL | X | 326 | 40.123 | 29.967 | 48.455 | 0.00 | 0.00 |
| ATOM | 4905 | HG21 | VAL | X | 326 | 41.029 | 30.060 | 49.054 | 0.00 | 0.00 |
| ATOM | 4906 | HG22 | VAL | X | 326 | 39.932 | 28.937 | 48.151 | 0.00 | 0.00 |
| ATOM | 4907 | HG23 | VAL | X | 326 | 39.314 | 30.387 | 49.053 | 0.00 | 0.00 |
| ATOM | 4908 | C    | VAL | X | 326 | 39.949 | 29.629 | 45.240 | 0.00 | 0.00 |
| ATOM | 4909 | O    | VAL | X | 326 | 39.302 | 28.597 | 45.216 | 0.00 | 0.00 |
| ATOM | 4910 | N    | VAL | X | 327 | 41.134 | 29.788 | 44.602 | 0.00 | 0.00 |
| ATOM | 4911 | H    | VAL | X | 327 | 41.494 | 30.725 | 44.488 | 0.00 | 0.00 |
| ATOM | 4912 | CA   | VAL | X | 327 | 41.782 | 28.613 | 43.965 | 0.00 | 0.00 |
| ATOM | 4913 | HA   | VAL | X | 327 | 40.956 | 27.916 | 43.821 | 0.00 | 0.00 |
| ATOM | 4914 | CB   | VAL | X | 327 | 42.395 | 28.986 | 42.571 | 0.00 | 0.00 |
| ATOM | 4915 | HB   | VAL | X | 327 | 42.726 | 28.034 | 42.155 | 0.00 | 0.00 |

|      |      |      |     |   |     |        |        |        |      |      |
|------|------|------|-----|---|-----|--------|--------|--------|------|------|
| ATOM | 4916 | CG1  | VAL | X | 327 | 41.340 | 29.636 | 41.708 | 0.00 | 0.00 |
| ATOM | 4917 | HG11 | VAL | X | 327 | 41.616 | 29.588 | 40.654 | 0.00 | 0.00 |
| ATOM | 4918 | HG12 | VAL | X | 327 | 40.426 | 29.056 | 41.837 | 0.00 | 0.00 |
| ATOM | 4919 | HG13 | VAL | X | 327 | 41.099 | 30.648 | 42.033 | 0.00 | 0.00 |
| ATOM | 4920 | CG2  | VAL | X | 327 | 43.629 | 29.888 | 42.742 | 0.00 | 0.00 |
| ATOM | 4921 | HG21 | VAL | X | 327 | 44.256 | 29.721 | 41.866 | 0.00 | 0.00 |
| ATOM | 4922 | HG22 | VAL | X | 327 | 44.125 | 29.715 | 43.697 | 0.00 | 0.00 |
| ATOM | 4923 | HG23 | VAL | X | 327 | 43.247 | 30.909 | 42.747 | 0.00 | 0.00 |
| ATOM | 4924 | C    | VAL | X | 327 | 42.821 | 27.994 | 44.895 | 0.00 | 0.00 |
| ATOM | 4925 | O    | VAL | X | 327 | 42.962 | 28.294 | 46.064 | 0.00 | 0.00 |
| ATOM | 4926 | N    | LYS | X | 328 | 43.565 | 26.979 | 44.421 | 0.00 | 0.00 |
| ATOM | 4927 | H    | LYS | X | 328 | 43.509 | 26.835 | 43.423 | 0.00 | 0.00 |
| ATOM | 4928 | CA   | LYS | X | 328 | 44.387 | 26.133 | 45.354 | 0.00 | 0.00 |
| ATOM | 4929 | HA   | LYS | X | 328 | 43.834 | 25.980 | 46.281 | 0.00 | 0.00 |
| ATOM | 4930 | CB   | LYS | X | 328 | 44.607 | 24.722 | 44.739 | 0.00 | 0.00 |
| ATOM | 4931 | HB2  | LYS | X | 328 | 43.597 | 24.334 | 44.609 | 0.00 | 0.00 |
| ATOM | 4932 | HB3  | LYS | X | 328 | 45.097 | 24.980 | 43.800 | 0.00 | 0.00 |
| ATOM | 4933 | CG   | LYS | X | 328 | 45.446 | 23.825 | 45.559 | 0.00 | 0.00 |
| ATOM | 4934 | HG2  | LYS | X | 328 | 46.419 | 24.316 | 45.578 | 0.00 | 0.00 |
| ATOM | 4935 | HG3  | LYS | X | 328 | 45.273 | 23.949 | 46.628 | 0.00 | 0.00 |
| ATOM | 4936 | CD   | LYS | X | 328 | 45.572 | 22.300 | 45.144 | 0.00 | 0.00 |
| ATOM | 4937 | HD2  | LYS | X | 328 | 46.247 | 21.795 | 45.835 | 0.00 | 0.00 |
| ATOM | 4938 | HD3  | LYS | X | 328 | 44.616 | 21.776 | 45.121 | 0.00 | 0.00 |
| ATOM | 4939 | CE   | LYS | X | 328 | 46.207 | 22.214 | 43.706 | 0.00 | 0.00 |
| ATOM | 4940 | HE2  | LYS | X | 328 | 46.319 | 21.161 | 43.449 | 0.00 | 0.00 |
| ATOM | 4941 | HE3  | LYS | X | 328 | 45.504 | 22.724 | 43.047 | 0.00 | 0.00 |
| ATOM | 4942 | NZ   | LYS | X | 328 | 47.623 | 22.645 | 43.691 | 0.00 | 0.00 |
| ATOM | 4943 | HZ1  | LYS | X | 328 | 47.695 | 23.649 | 43.766 | 0.00 | 0.00 |
| ATOM | 4944 | HZ2  | LYS | X | 328 | 48.229 | 22.118 | 44.304 | 0.00 | 0.00 |
| ATOM | 4945 | HZ3  | LYS | X | 328 | 48.006 | 22.304 | 42.821 | 0.00 | 0.00 |
| ATOM | 4946 | C    | LYS | X | 328 | 45.715 | 26.858 | 45.711 | 0.00 | 0.00 |
| ATOM | 4947 | O    | LYS | X | 328 | 46.174 | 26.711 | 46.848 | 0.00 | 0.00 |
| ATOM | 4948 | N    | ASP | X | 329 | 46.276 | 27.729 | 44.875 | 0.00 | 0.00 |
| ATOM | 4949 | H    | ASP | X | 329 | 45.869 | 27.837 | 43.956 | 0.00 | 0.00 |
| ATOM | 4950 | CA   | ASP | X | 329 | 47.581 | 28.313 | 45.122 | 0.00 | 0.00 |
| ATOM | 4951 | HA   | ASP | X | 329 | 47.842 | 28.185 | 46.173 | 0.00 | 0.00 |
| ATOM | 4952 | CB   | ASP | X | 329 | 48.696 | 27.582 | 44.255 | 0.00 | 0.00 |
| ATOM | 4953 | HB2  | ASP | X | 329 | 48.476 | 27.792 | 43.208 | 0.00 | 0.00 |
| ATOM | 4954 | HB3  | ASP | X | 329 | 49.639 | 27.998 | 44.609 | 0.00 | 0.00 |
| ATOM | 4955 | CG   | ASP | X | 329 | 48.689 | 26.058 | 44.510 | 0.00 | 0.00 |
| ATOM | 4956 | OD1  | ASP | X | 329 | 49.502 | 25.512 | 45.291 | 0.00 | 0.00 |
| ATOM | 4957 | OD2  | ASP | X | 329 | 47.948 | 25.382 | 43.769 | 0.00 | 0.00 |
| ATOM | 4958 | C    | ASP | X | 329 | 47.448 | 29.832 | 44.986 | 0.00 | 0.00 |
| ATOM | 4959 | O    | ASP | X | 329 | 48.082 | 30.421 | 44.070 | 0.00 | 0.00 |
| ATOM | 4960 | N    | GLU | X | 330 | 46.555 | 30.467 | 45.825 | 0.00 | 0.00 |
| ATOM | 4961 | H    | GLU | X | 330 | 46.088 | 29.867 | 46.490 | 0.00 | 0.00 |
| ATOM | 4962 | CA   | GLU | X | 330 | 46.381 | 31.874 | 45.806 | 0.00 | 0.00 |
| ATOM | 4963 | HA   | GLU | X | 330 | 46.073 | 32.165 | 44.803 | 0.00 | 0.00 |
| ATOM | 4964 | CB   | GLU | X | 330 | 45.356 | 32.277 | 46.893 | 0.00 | 0.00 |
| ATOM | 4965 | HB2  | GLU | X | 330 | 45.656 | 31.831 | 47.841 | 0.00 | 0.00 |
| ATOM | 4966 | HB3  | GLU | X | 330 | 45.391 | 33.353 | 47.065 | 0.00 | 0.00 |
| ATOM | 4967 | CG   | GLU | X | 330 | 43.957 | 31.835 | 46.502 | 0.00 | 0.00 |
| ATOM | 4968 | HG2  | GLU | X | 330 | 44.014 | 30.761 | 46.328 | 0.00 | 0.00 |
| ATOM | 4969 | HG3  | GLU | X | 330 | 43.376 | 31.967 | 47.415 | 0.00 | 0.00 |
| ATOM | 4970 | CD   | GLU | X | 330 | 43.382 | 32.568 | 45.268 | 0.00 | 0.00 |
| ATOM | 4971 | OE1  | GLU | X | 330 | 43.963 | 33.589 | 44.798 | 0.00 | 0.00 |
| ATOM | 4972 | OE2  | GLU | X | 330 | 42.248 | 32.197 | 44.809 | 0.00 | 0.00 |
| ATOM | 4973 | C    | GLU | X | 330 | 47.639 | 32.743 | 46.135 | 0.00 | 0.00 |
| ATOM | 4974 | O    | GLU | X | 330 | 47.593 | 33.980 | 45.936 | 0.00 | 0.00 |
| ATOM | 4975 | N    | GLY | X | 331 | 48.721 | 32.109 | 46.594 | 0.00 | 0.00 |
| ATOM | 4976 | H    | GLY | X | 331 | 48.599 | 31.165 | 46.933 | 0.00 | 0.00 |
| ATOM | 4977 | CA   | GLY | X | 331 | 49.974 | 32.734 | 46.865 | 0.00 | 0.00 |
| ATOM | 4978 | HA2  | GLY | X | 331 | 49.794 | 33.798 | 47.018 | 0.00 | 0.00 |
| ATOM | 4979 | HA3  | GLY | X | 331 | 50.445 | 32.225 | 47.706 | 0.00 | 0.00 |
| ATOM | 4980 | C    | GLY | X | 331 | 51.164 | 32.571 | 45.822 | 0.00 | 0.00 |
| ATOM | 4981 | O    | GLY | X | 331 | 51.998 | 33.452 | 45.671 | 0.00 | 0.00 |
| ATOM | 4982 | N    | SER | X | 332 | 51.127 | 31.545 | 44.949 | 0.00 | 0.00 |

|      |      |      |     |   |     |        |        |        |      |      |
|------|------|------|-----|---|-----|--------|--------|--------|------|------|
| ATOM | 4983 | H    | SER | X | 332 | 50.220 | 31.126 | 44.800 | 0.00 | 0.00 |
| ATOM | 4984 | CA   | SER | X | 332 | 52.202 | 31.121 | 44.029 | 0.00 | 0.00 |
| ATOM | 4985 | HA   | SER | X | 332 | 53.139 | 31.025 | 44.577 | 0.00 | 0.00 |
| ATOM | 4986 | CB   | SER | X | 332 | 51.880 | 29.680 | 43.449 | 0.00 | 0.00 |
| ATOM | 4987 | HB2  | SER | X | 332 | 52.707 | 29.141 | 42.986 | 0.00 | 0.00 |
| ATOM | 4988 | HB3  | SER | X | 332 | 51.552 | 29.022 | 44.254 | 0.00 | 0.00 |
| ATOM | 4989 | OG   | SER | X | 332 | 50.825 | 29.701 | 42.536 | 0.00 | 0.00 |
| ATOM | 4990 | HG   | SER | X | 332 | 50.682 | 28.760 | 42.405 | 0.00 | 0.00 |
| ATOM | 4991 | C    | SER | X | 332 | 52.614 | 32.210 | 42.922 | 0.00 | 0.00 |
| ATOM | 4992 | O    | SER | X | 332 | 53.754 | 32.305 | 42.472 | 0.00 | 0.00 |
| ATOM | 4993 | N    | TYR | X | 333 | 51.553 | 32.994 | 42.602 | 0.00 | 0.00 |
| ATOM | 4994 | H    | TYR | X | 333 | 50.658 | 32.708 | 42.971 | 0.00 | 0.00 |
| ATOM | 4995 | CA   | TYR | X | 333 | 51.685 | 33.981 | 41.496 | 0.00 | 0.00 |
| ATOM | 4996 | HA   | TYR | X | 333 | 51.944 | 33.416 | 40.600 | 0.00 | 0.00 |
| ATOM | 4997 | CB   | TYR | X | 333 | 50.347 | 34.609 | 41.169 | 0.00 | 0.00 |
| ATOM | 4998 | HB2  | TYR | X | 333 | 49.686 | 33.982 | 40.571 | 0.00 | 0.00 |
| ATOM | 4999 | HB3  | TYR | X | 333 | 49.948 | 34.973 | 42.116 | 0.00 | 0.00 |
| ATOM | 5000 | CG   | TYR | X | 333 | 50.470 | 35.862 | 40.274 | 0.00 | 0.00 |
| ATOM | 5001 | CD1  | TYR | X | 333 | 50.521 | 35.721 | 38.911 | 0.00 | 0.00 |
| ATOM | 5002 | HD1  | TYR | X | 333 | 50.692 | 34.705 | 38.587 | 0.00 | 0.00 |
| ATOM | 5003 | CE1  | TYR | X | 333 | 50.622 | 36.772 | 38.059 | 0.00 | 0.00 |
| ATOM | 5004 | HE1  | TYR | X | 333 | 50.662 | 36.569 | 36.999 | 0.00 | 0.00 |
| ATOM | 5005 | CZ   | TYR | X | 333 | 50.580 | 38.095 | 38.499 | 0.00 | 0.00 |
| ATOM | 5006 | OH   | TYR | X | 333 | 50.752 | 39.184 | 37.646 | 0.00 | 0.00 |
| ATOM | 5007 | HH   | TYR | X | 333 | 50.932 | 38.849 | 36.764 | 0.00 | 0.00 |
| ATOM | 5008 | CE2  | TYR | X | 333 | 50.609 | 38.292 | 39.916 | 0.00 | 0.00 |
| ATOM | 5009 | HE2  | TYR | X | 333 | 50.623 | 39.315 | 40.262 | 0.00 | 0.00 |
| ATOM | 5010 | CD2  | TYR | X | 333 | 50.483 | 37.168 | 40.790 | 0.00 | 0.00 |
| ATOM | 5011 | HD2  | TYR | X | 333 | 50.496 | 37.274 | 41.864 | 0.00 | 0.00 |
| ATOM | 5012 | C    | TYR | X | 333 | 52.668 | 35.069 | 41.959 | 0.00 | 0.00 |
| ATOM | 5013 | O    | TYR | X | 333 | 53.464 | 35.487 | 41.120 | 0.00 | 0.00 |
| ATOM | 5014 | N    | PHE | X | 334 | 52.679 | 35.540 | 43.200 | 0.00 | 0.00 |
| ATOM | 5015 | H    | PHE | X | 334 | 52.132 | 35.204 | 43.980 | 0.00 | 0.00 |
| ATOM | 5016 | CA   | PHE | X | 334 | 53.513 | 36.784 | 43.511 | 0.00 | 0.00 |
| ATOM | 5017 | HA   | PHE | X | 334 | 53.556 | 37.407 | 42.617 | 0.00 | 0.00 |
| ATOM | 5018 | CB   | PHE | X | 334 | 52.898 | 37.478 | 44.731 | 0.00 | 0.00 |
| ATOM | 5019 | HB2  | PHE | X | 334 | 53.080 | 36.939 | 45.661 | 0.00 | 0.00 |
| ATOM | 5020 | HB3  | PHE | X | 334 | 53.405 | 38.427 | 44.906 | 0.00 | 0.00 |
| ATOM | 5021 | CG   | PHE | X | 334 | 51.372 | 37.809 | 44.570 | 0.00 | 0.00 |
| ATOM | 5022 | CD1  | PHE | X | 334 | 50.422 | 36.777 | 44.689 | 0.00 | 0.00 |
| ATOM | 5023 | HD1  | PHE | X | 334 | 50.703 | 35.779 | 44.989 | 0.00 | 0.00 |
| ATOM | 5024 | CE1  | PHE | X | 334 | 49.042 | 37.078 | 44.513 | 0.00 | 0.00 |
| ATOM | 5025 | HE1  | PHE | X | 334 | 48.338 | 36.265 | 44.619 | 0.00 | 0.00 |
| ATOM | 5026 | CZ   | PHE | X | 334 | 48.691 | 38.330 | 43.989 | 0.00 | 0.00 |
| ATOM | 5027 | HZ   | PHE | X | 334 | 47.685 | 38.501 | 43.635 | 0.00 | 0.00 |
| ATOM | 5028 | CE2  | PHE | X | 334 | 49.620 | 39.392 | 43.864 | 0.00 | 0.00 |
| ATOM | 5029 | HE2  | PHE | X | 334 | 49.321 | 40.324 | 43.410 | 0.00 | 0.00 |
| ATOM | 5030 | CD2  | PHE | X | 334 | 50.949 | 39.152 | 44.171 | 0.00 | 0.00 |
| ATOM | 5031 | HD2  | PHE | X | 334 | 51.717 | 39.908 | 44.106 | 0.00 | 0.00 |
| ATOM | 5032 | C    | PHE | X | 334 | 54.959 | 36.382 | 43.803 | 0.00 | 0.00 |
| ATOM | 5033 | O    | PHE | X | 334 | 55.835 | 37.209 | 43.630 | 0.00 | 0.00 |
| ATOM | 5034 | N    | LEU | X | 335 | 55.266 | 35.100 | 44.137 | 0.00 | 0.00 |
| ATOM | 5035 | H    | LEU | X | 335 | 54.516 | 34.439 | 44.280 | 0.00 | 0.00 |
| ATOM | 5036 | CA   | LEU | X | 335 | 56.644 | 34.613 | 44.260 | 0.00 | 0.00 |
| ATOM | 5037 | HA   | LEU | X | 335 | 57.154 | 35.307 | 44.929 | 0.00 | 0.00 |
| ATOM | 5038 | CB   | LEU | X | 335 | 56.676 | 33.217 | 44.921 | 0.00 | 0.00 |
| ATOM | 5039 | HB2  | LEU | X | 335 | 56.549 | 32.486 | 44.123 | 0.00 | 0.00 |
| ATOM | 5040 | HB3  | LEU | X | 335 | 57.653 | 33.138 | 45.397 | 0.00 | 0.00 |
| ATOM | 5041 | CG   | LEU | X | 335 | 55.630 | 32.976 | 46.011 | 0.00 | 0.00 |
| ATOM | 5042 | HG   | LEU | X | 335 | 54.626 | 33.228 | 45.668 | 0.00 | 0.00 |
| ATOM | 5043 | CD1  | LEU | X | 335 | 55.644 | 31.500 | 46.471 | 0.00 | 0.00 |
| ATOM | 5044 | HD11 | LEU | X | 335 | 55.830 | 30.825 | 45.636 | 0.00 | 0.00 |
| ATOM | 5045 | HD12 | LEU | X | 335 | 54.703 | 31.329 | 46.994 | 0.00 | 0.00 |
| ATOM | 5046 | HD13 | LEU | X | 335 | 56.528 | 31.284 | 47.071 | 0.00 | 0.00 |
| ATOM | 5047 | CD2  | LEU | X | 335 | 55.914 | 33.899 | 47.212 | 0.00 | 0.00 |
| ATOM | 5048 | HD21 | LEU | X | 335 | 56.918 | 33.668 | 47.568 | 0.00 | 0.00 |
| ATOM | 5049 | HD22 | LEU | X | 335 | 55.819 | 34.919 | 46.839 | 0.00 | 0.00 |

|      |      |      |     |   |     |        |        |        |      |      |
|------|------|------|-----|---|-----|--------|--------|--------|------|------|
| ATOM | 5050 | HD23 | LEU | X | 335 | 55.212 | 33.825 | 48.042 | 0.00 | 0.00 |
| ATOM | 5051 | C    | LEU | X | 335 | 57.511 | 34.674 | 43.052 | 0.00 | 0.00 |
| ATOM | 5052 | O    | LEU | X | 335 | 58.558 | 35.355 | 42.978 | 0.00 | 0.00 |
| ATOM | 5053 | N    | VAL | X | 336 | 56.994 | 34.178 | 41.925 | 0.00 | 0.00 |
| ATOM | 5054 | H    | VAL | X | 336 | 56.014 | 33.937 | 41.906 | 0.00 | 0.00 |
| ATOM | 5055 | CA   | VAL | X | 336 | 57.676 | 34.293 | 40.691 | 0.00 | 0.00 |
| ATOM | 5056 | HA   | VAL | X | 336 | 58.627 | 33.811 | 40.922 | 0.00 | 0.00 |
| ATOM | 5057 | CB   | VAL | X | 336 | 56.935 | 33.604 | 39.529 | 0.00 | 0.00 |
| ATOM | 5058 | HB   | VAL | X | 336 | 57.597 | 33.838 | 38.695 | 0.00 | 0.00 |
| ATOM | 5059 | CG1  | VAL | X | 336 | 57.139 | 32.079 | 39.819 | 0.00 | 0.00 |
| ATOM | 5060 | HG11 | VAL | X | 336 | 56.788 | 31.557 | 38.929 | 0.00 | 0.00 |
| ATOM | 5061 | HG12 | VAL | X | 336 | 58.164 | 31.749 | 39.987 | 0.00 | 0.00 |
| ATOM | 5062 | HG13 | VAL | X | 336 | 56.610 | 31.668 | 40.679 | 0.00 | 0.00 |
| ATOM | 5063 | CG2  | VAL | X | 336 | 55.504 | 34.020 | 39.051 | 0.00 | 0.00 |
| ATOM | 5064 | HG21 | VAL | X | 336 | 54.725 | 33.727 | 39.755 | 0.00 | 0.00 |
| ATOM | 5065 | HG22 | VAL | X | 336 | 55.199 | 33.553 | 38.114 | 0.00 | 0.00 |
| ATOM | 5066 | HG23 | VAL | X | 336 | 55.452 | 35.104 | 38.953 | 0.00 | 0.00 |
| ATOM | 5067 | C    | VAL | X | 336 | 58.022 | 35.733 | 40.182 | 0.00 | 0.00 |
| ATOM | 5068 | O    | VAL | X | 336 | 58.813 | 35.905 | 39.311 | 0.00 | 0.00 |
| ATOM | 5069 | N    | TYR | X | 337 | 57.245 | 36.691 | 40.651 | 0.00 | 0.00 |
| ATOM | 5070 | H    | TYR | X | 337 | 56.513 | 36.474 | 41.312 | 0.00 | 0.00 |
| ATOM | 5071 | CA   | TYR | X | 337 | 57.375 | 38.144 | 40.384 | 0.00 | 0.00 |
| ATOM | 5072 | HA   | TYR | X | 337 | 57.828 | 38.434 | 39.436 | 0.00 | 0.00 |
| ATOM | 5073 | CB   | TYR | X | 337 | 55.953 | 38.704 | 40.529 | 0.00 | 0.00 |
| ATOM | 5074 | HB2  | TYR | X | 337 | 55.294 | 37.937 | 40.936 | 0.00 | 0.00 |
| ATOM | 5075 | HB3  | TYR | X | 337 | 55.796 | 39.576 | 41.164 | 0.00 | 0.00 |
| ATOM | 5076 | CG   | TYR | X | 337 | 55.442 | 39.036 | 39.172 | 0.00 | 0.00 |
| ATOM | 5077 | CD1  | TYR | X | 337 | 56.010 | 40.131 | 38.557 | 0.00 | 0.00 |
| ATOM | 5078 | HD1  | TYR | X | 337 | 56.754 | 40.731 | 39.060 | 0.00 | 0.00 |
| ATOM | 5079 | CE1  | TYR | X | 337 | 55.802 | 40.427 | 37.227 | 0.00 | 0.00 |
| ATOM | 5080 | HE1  | TYR | X | 337 | 56.223 | 41.264 | 36.689 | 0.00 | 0.00 |
| ATOM | 5081 | CZ   | TYR | X | 337 | 54.980 | 39.509 | 36.506 | 0.00 | 0.00 |
| ATOM | 5082 | OH   | TYR | X | 337 | 54.606 | 39.752 | 35.191 | 0.00 | 0.00 |
| ATOM | 5083 | HH   | TYR | X | 337 | 54.859 | 40.659 | 35.001 | 0.00 | 0.00 |
| ATOM | 5084 | CE2  | TYR | X | 337 | 54.333 | 38.442 | 37.147 | 0.00 | 0.00 |
| ATOM | 5085 | HE2  | TYR | X | 337 | 53.637 | 37.847 | 36.574 | 0.00 | 0.00 |
| ATOM | 5086 | CD2  | TYR | X | 337 | 54.463 | 38.295 | 38.523 | 0.00 | 0.00 |
| ATOM | 5087 | HD2  | TYR | X | 337 | 54.092 | 37.379 | 38.958 | 0.00 | 0.00 |
| ATOM | 5088 | C    | TYR | X | 337 | 58.316 | 38.879 | 41.384 | 0.00 | 0.00 |
| ATOM | 5089 | O    | TYR | X | 337 | 59.075 | 39.691 | 40.880 | 0.00 | 0.00 |
| ATOM | 5090 | N    | GLY | X | 338 | 58.462 | 38.414 | 42.638 | 0.00 | 0.00 |
| ATOM | 5091 | H    | GLY | X | 338 | 57.694 | 37.786 | 42.827 | 0.00 | 0.00 |
| ATOM | 5092 | CA   | GLY | X | 338 | 58.973 | 39.211 | 43.774 | 0.00 | 0.00 |
| ATOM | 5093 | HA2  | GLY | X | 338 | 59.437 | 40.157 | 43.496 | 0.00 | 0.00 |
| ATOM | 5094 | HA3  | GLY | X | 338 | 58.154 | 39.254 | 44.492 | 0.00 | 0.00 |
| ATOM | 5095 | C    | GLY | X | 338 | 59.972 | 38.532 | 44.691 | 0.00 | 0.00 |
| ATOM | 5096 | O    | GLY | X | 338 | 60.950 | 39.196 | 45.078 | 0.00 | 0.00 |
| ATOM | 5097 | N    | ALA | X | 339 | 59.820 | 37.273 | 45.116 | 0.00 | 0.00 |
| ATOM | 5098 | H    | ALA | X | 339 | 59.075 | 36.724 | 44.713 | 0.00 | 0.00 |
| ATOM | 5099 | CA   | ALA | X | 339 | 60.586 | 36.567 | 46.151 | 0.00 | 0.00 |
| ATOM | 5100 | HA   | ALA | X | 339 | 60.559 | 37.221 | 47.022 | 0.00 | 0.00 |
| ATOM | 5101 | CB   | ALA | X | 339 | 59.764 | 35.341 | 46.583 | 0.00 | 0.00 |
| ATOM | 5102 | HB1  | ALA | X | 339 | 60.300 | 34.795 | 47.360 | 0.00 | 0.00 |
| ATOM | 5103 | HB2  | ALA | X | 339 | 59.575 | 34.615 | 45.792 | 0.00 | 0.00 |
| ATOM | 5104 | HB3  | ALA | X | 339 | 58.831 | 35.682 | 47.032 | 0.00 | 0.00 |
| ATOM | 5105 | C    | ALA | X | 339 | 61.994 | 36.133 | 45.732 | 0.00 | 0.00 |
| ATOM | 5106 | O    | ALA | X | 339 | 62.083 | 35.592 | 44.587 | 0.00 | 0.00 |
| ATOM | 5107 | N    | PRO | X | 340 | 63.001 | 36.129 | 46.648 | 0.00 | 0.00 |
| ATOM | 5108 | CD   | PRO | X | 340 | 63.002 | 36.812 | 47.944 | 0.00 | 0.00 |
| ATOM | 5109 | HD2  | PRO | X | 340 | 62.531 | 36.179 | 48.696 | 0.00 | 0.00 |
| ATOM | 5110 | HD3  | PRO | X | 340 | 62.459 | 37.757 | 47.941 | 0.00 | 0.00 |
| ATOM | 5111 | CG   | PRO | X | 340 | 64.472 | 37.039 | 48.351 | 0.00 | 0.00 |
| ATOM | 5112 | HG2  | PRO | X | 340 | 64.723 | 37.182 | 49.402 | 0.00 | 0.00 |
| ATOM | 5113 | HG3  | PRO | X | 340 | 64.734 | 37.926 | 47.774 | 0.00 | 0.00 |
| ATOM | 5114 | CB   | PRO | X | 340 | 65.161 | 35.831 | 47.677 | 0.00 | 0.00 |
| ATOM | 5115 | HB2  | PRO | X | 340 | 65.092 | 35.039 | 48.423 | 0.00 | 0.00 |
| ATOM | 5116 | HB3  | PRO | X | 340 | 66.227 | 36.026 | 47.558 | 0.00 | 0.00 |

|      |      |     |     |   |     |        |        |        |      |      |
|------|------|-----|-----|---|-----|--------|--------|--------|------|------|
| ATOM | 5117 | CA  | PRO | X | 340 | 64.375 | 35.624 | 46.347 | 0.00 | 0.00 |
| ATOM | 5118 | HA  | PRO | X | 340 | 64.757 | 36.211 | 45.512 | 0.00 | 0.00 |
| ATOM | 5119 | C   | PRO | X | 340 | 64.390 | 34.158 | 45.914 | 0.00 | 0.00 |
| ATOM | 5120 | O   | PRO | X | 340 | 63.784 | 33.323 | 46.532 | 0.00 | 0.00 |
| ATOM | 5121 | N   | GLY | X | 341 | 65.150 | 33.872 | 44.831 | 0.00 | 0.00 |
| ATOM | 5122 | H   | GLY | X | 341 | 65.715 | 34.588 | 44.396 | 0.00 | 0.00 |
| ATOM | 5123 | CA  | GLY | X | 341 | 65.346 | 32.549 | 44.342 | 0.00 | 0.00 |
| ATOM | 5124 | HA2 | GLY | X | 341 | 66.281 | 32.541 | 43.781 | 0.00 | 0.00 |
| ATOM | 5125 | HA3 | GLY | X | 341 | 65.417 | 31.801 | 45.131 | 0.00 | 0.00 |
| ATOM | 5126 | C   | GLY | X | 341 | 64.286 | 32.045 | 43.346 | 0.00 | 0.00 |
| ATOM | 5127 | O   | GLY | X | 341 | 64.602 | 31.245 | 42.502 | 0.00 | 0.00 |
| ATOM | 5128 | N   | PHE | X | 342 | 63.035 | 32.550 | 43.476 | 0.00 | 0.00 |
| ATOM | 5129 | H   | PHE | X | 342 | 62.900 | 33.289 | 44.150 | 0.00 | 0.00 |
| ATOM | 5130 | CA  | PHE | X | 342 | 61.984 | 32.223 | 42.488 | 0.00 | 0.00 |
| ATOM | 5131 | HA  | PHE | X | 342 | 62.020 | 31.152 | 42.287 | 0.00 | 0.00 |
| ATOM | 5132 | CB  | PHE | X | 342 | 60.580 | 32.476 | 43.028 | 0.00 | 0.00 |
| ATOM | 5133 | HB2 | PHE | X | 342 | 60.535 | 33.508 | 43.376 | 0.00 | 0.00 |
| ATOM | 5134 | HB3 | PHE | X | 342 | 59.939 | 32.341 | 42.157 | 0.00 | 0.00 |
| ATOM | 5135 | CG  | PHE | X | 342 | 60.266 | 31.525 | 44.166 | 0.00 | 0.00 |
| ATOM | 5136 | CD1 | PHE | X | 342 | 59.352 | 30.495 | 43.952 | 0.00 | 0.00 |
| ATOM | 5137 | HD1 | PHE | X | 342 | 58.976 | 30.336 | 42.952 | 0.00 | 0.00 |
| ATOM | 5138 | CE1 | PHE | X | 342 | 58.981 | 29.632 | 45.038 | 0.00 | 0.00 |
| ATOM | 5139 | HE1 | PHE | X | 342 | 58.117 | 29.015 | 44.837 | 0.00 | 0.00 |
| ATOM | 5140 | CZ  | PHE | X | 342 | 59.496 | 29.811 | 46.296 | 0.00 | 0.00 |
| ATOM | 5141 | HZ  | PHE | X | 342 | 59.066 | 29.124 | 47.010 | 0.00 | 0.00 |
| ATOM | 5142 | CE2 | PHE | X | 342 | 60.478 | 30.776 | 46.549 | 0.00 | 0.00 |
| ATOM | 5143 | HE2 | PHE | X | 342 | 60.916 | 30.885 | 47.529 | 0.00 | 0.00 |
| ATOM | 5144 | CD2 | PHE | X | 342 | 60.790 | 31.672 | 45.481 | 0.00 | 0.00 |
| ATOM | 5145 | HD2 | PHE | X | 342 | 61.475 | 32.474 | 45.712 | 0.00 | 0.00 |
| ATOM | 5146 | C   | PHE | X | 342 | 62.188 | 32.835 | 41.106 | 0.00 | 0.00 |
| ATOM | 5147 | O   | PHE | X | 342 | 62.755 | 33.935 | 41.058 | 0.00 | 0.00 |
| ATOM | 5148 | N   | SER | X | 343 | 61.609 | 32.312 | 40.018 | 0.00 | 0.00 |
| ATOM | 5149 | H   | SER | X | 343 | 61.281 | 31.381 | 40.228 | 0.00 | 0.00 |
| ATOM | 5150 | CA  | SER | X | 343 | 61.334 | 32.774 | 38.626 | 0.00 | 0.00 |
| ATOM | 5151 | HA  | SER | X | 343 | 60.669 | 33.638 | 38.646 | 0.00 | 0.00 |
| ATOM | 5152 | CB  | SER | X | 343 | 62.569 | 33.230 | 37.863 | 0.00 | 0.00 |
| ATOM | 5153 | HB2 | SER | X | 343 | 62.955 | 34.189 | 38.209 | 0.00 | 0.00 |
| ATOM | 5154 | HB3 | SER | X | 343 | 63.411 | 32.619 | 38.189 | 0.00 | 0.00 |
| ATOM | 5155 | OG  | SER | X | 343 | 62.388 | 33.281 | 36.455 | 0.00 | 0.00 |
| ATOM | 5156 | HG  | SER | X | 343 | 62.343 | 34.214 | 36.233 | 0.00 | 0.00 |
| ATOM | 5157 | C   | SER | X | 343 | 60.558 | 31.712 | 37.920 | 0.00 | 0.00 |
| ATOM | 5158 | O   | SER | X | 343 | 60.775 | 30.504 | 38.133 | 0.00 | 0.00 |
| ATOM | 5159 | N   | LYS | X | 344 | 59.546 | 32.055 | 37.058 | 0.00 | 0.00 |
| ATOM | 5160 | H   | LYS | X | 344 | 59.481 | 33.043 | 36.862 | 0.00 | 0.00 |
| ATOM | 5161 | CA  | LYS | X | 344 | 58.926 | 31.094 | 36.173 | 0.00 | 0.00 |
| ATOM | 5162 | HA  | LYS | X | 344 | 58.381 | 30.404 | 36.816 | 0.00 | 0.00 |
| ATOM | 5163 | CB  | LYS | X | 344 | 57.814 | 31.828 | 35.341 | 0.00 | 0.00 |
| ATOM | 5164 | HB2 | LYS | X | 344 | 57.148 | 31.030 | 35.012 | 0.00 | 0.00 |
| ATOM | 5165 | HB3 | LYS | X | 344 | 57.226 | 32.442 | 36.023 | 0.00 | 0.00 |
| ATOM | 5166 | CG  | LYS | X | 344 | 58.253 | 32.617 | 34.109 | 0.00 | 0.00 |
| ATOM | 5167 | HG2 | LYS | X | 344 | 57.852 | 33.616 | 34.278 | 0.00 | 0.00 |
| ATOM | 5168 | HG3 | LYS | X | 344 | 59.338 | 32.644 | 34.010 | 0.00 | 0.00 |
| ATOM | 5169 | CD  | LYS | X | 344 | 57.578 | 32.154 | 32.852 | 0.00 | 0.00 |
| ATOM | 5170 | HD2 | LYS | X | 344 | 57.594 | 31.070 | 32.740 | 0.00 | 0.00 |
| ATOM | 5171 | HD3 | LYS | X | 344 | 56.525 | 32.409 | 32.975 | 0.00 | 0.00 |
| ATOM | 5172 | CE  | LYS | X | 344 | 58.099 | 32.985 | 31.659 | 0.00 | 0.00 |
| ATOM | 5173 | HE2 | LYS | X | 344 | 57.426 | 33.109 | 30.810 | 0.00 | 0.00 |
| ATOM | 5174 | HE3 | LYS | X | 344 | 58.399 | 33.930 | 32.112 | 0.00 | 0.00 |
| ATOM | 5175 | NZ  | LYS | X | 344 | 59.378 | 32.522 | 31.106 | 0.00 | 0.00 |
| ATOM | 5176 | HZ1 | LYS | X | 344 | 59.529 | 33.160 | 30.338 | 0.00 | 0.00 |
| ATOM | 5177 | HZ2 | LYS | X | 344 | 60.121 | 32.590 | 31.786 | 0.00 | 0.00 |
| ATOM | 5178 | HZ3 | LYS | X | 344 | 59.342 | 31.580 | 30.743 | 0.00 | 0.00 |
| ATOM | 5179 | C   | LYS | X | 344 | 59.909 | 30.334 | 35.166 | 0.00 | 0.00 |
| ATOM | 5180 | O   | LYS | X | 344 | 59.499 | 29.285 | 34.729 | 0.00 | 0.00 |
| ATOM | 5181 | N   | ASP | X | 345 | 61.071 | 30.890 | 34.877 | 0.00 | 0.00 |
| ATOM | 5182 | H   | ASP | X | 345 | 61.204 | 31.806 | 35.281 | 0.00 | 0.00 |
| ATOM | 5183 | CA  | ASP | X | 345 | 62.162 | 30.229 | 34.119 | 0.00 | 0.00 |

|      |      |      |     |   |     |        |        |        |      |      |
|------|------|------|-----|---|-----|--------|--------|--------|------|------|
| ATOM | 5184 | HA   | ASP | X | 345 | 61.746 | 29.669 | 33.282 | 0.00 | 0.00 |
| ATOM | 5185 | CB   | ASP | X | 345 | 63.072 | 31.362 | 33.566 | 0.00 | 0.00 |
| ATOM | 5186 | HB2  | ASP | X | 345 | 63.444 | 32.053 | 34.322 | 0.00 | 0.00 |
| ATOM | 5187 | HB3  | ASP | X | 345 | 63.978 | 30.949 | 33.122 | 0.00 | 0.00 |
| ATOM | 5188 | CG   | ASP | X | 345 | 62.363 | 32.115 | 32.441 | 0.00 | 0.00 |
| ATOM | 5189 | OD1  | ASP | X | 345 | 61.510 | 33.003 | 32.826 | 0.00 | 0.00 |
| ATOM | 5190 | OD2  | ASP | X | 345 | 62.575 | 31.714 | 31.305 | 0.00 | 0.00 |
| ATOM | 5191 | C    | ASP | X | 345 | 63.047 | 29.319 | 34.949 | 0.00 | 0.00 |
| ATOM | 5192 | O    | ASP | X | 345 | 63.854 | 28.629 | 34.306 | 0.00 | 0.00 |
| ATOM | 5193 | N    | ASN | X | 346 | 62.827 | 29.300 | 36.260 | 0.00 | 0.00 |
| ATOM | 5194 | H    | ASN | X | 346 | 61.931 | 29.586 | 36.629 | 0.00 | 0.00 |
| ATOM | 5195 | CA   | ASN | X | 346 | 63.693 | 28.678 | 37.233 | 0.00 | 0.00 |
| ATOM | 5196 | HA   | ASN | X | 346 | 64.646 | 28.356 | 36.815 | 0.00 | 0.00 |
| ATOM | 5197 | CB   | ASN | X | 346 | 64.008 | 29.787 | 38.255 | 0.00 | 0.00 |
| ATOM | 5198 | HB2  | ASN | X | 346 | 64.260 | 30.739 | 37.788 | 0.00 | 0.00 |
| ATOM | 5199 | HB3  | ASN | X | 346 | 63.145 | 29.847 | 38.919 | 0.00 | 0.00 |
| ATOM | 5200 | CG   | ASN | X | 346 | 65.287 | 29.490 | 39.151 | 0.00 | 0.00 |
| ATOM | 5201 | OD1  | ASN | X | 346 | 65.243 | 28.800 | 40.121 | 0.00 | 0.00 |
| ATOM | 5202 | ND2  | ASN | X | 346 | 66.445 | 30.060 | 38.813 | 0.00 | 0.00 |
| ATOM | 5203 | HD21 | ASN | X | 346 | 67.271 | 29.603 | 39.172 | 0.00 | 0.00 |
| ATOM | 5204 | HD22 | ASN | X | 346 | 66.548 | 30.515 | 37.917 | 0.00 | 0.00 |
| ATOM | 5205 | C    | ASN | X | 346 | 63.008 | 27.506 | 37.905 | 0.00 | 0.00 |
| ATOM | 5206 | O    | ASN | X | 346 | 61.754 | 27.498 | 37.929 | 0.00 | 0.00 |
| ATOM | 5207 | N    | GLU | X | 347 | 63.734 | 26.620 | 38.591 | 0.00 | 0.00 |
| ATOM | 5208 | H    | GLU | X | 347 | 64.741 | 26.614 | 38.515 | 0.00 | 0.00 |
| ATOM | 5209 | CA   | GLU | X | 347 | 63.168 | 25.573 | 39.398 | 0.00 | 0.00 |
| ATOM | 5210 | HA   | GLU | X | 347 | 62.308 | 25.120 | 38.906 | 0.00 | 0.00 |
| ATOM | 5211 | CB   | GLU | X | 347 | 64.105 | 24.370 | 39.605 | 0.00 | 0.00 |
| ATOM | 5212 | HB2  | GLU | X | 347 | 65.021 | 24.869 | 39.920 | 0.00 | 0.00 |
| ATOM | 5213 | HB3  | GLU | X | 347 | 63.743 | 23.763 | 40.435 | 0.00 | 0.00 |
| ATOM | 5214 | CG   | GLU | X | 347 | 64.426 | 23.666 | 38.268 | 0.00 | 0.00 |
| ATOM | 5215 | HG2  | GLU | X | 347 | 63.455 | 23.450 | 37.822 | 0.00 | 0.00 |
| ATOM | 5216 | HG3  | GLU | X | 347 | 64.903 | 24.431 | 37.656 | 0.00 | 0.00 |
| ATOM | 5217 | CD   | GLU | X | 347 | 65.354 | 22.404 | 38.422 | 0.00 | 0.00 |
| ATOM | 5218 | OE1  | GLU | X | 347 | 64.917 | 21.239 | 38.581 | 0.00 | 0.00 |
| ATOM | 5219 | OE2  | GLU | X | 347 | 66.566 | 22.534 | 38.366 | 0.00 | 0.00 |
| ATOM | 5220 | C    | GLU | X | 347 | 62.740 | 26.062 | 40.817 | 0.00 | 0.00 |
| ATOM | 5221 | O    | GLU | X | 347 | 61.857 | 25.453 | 41.422 | 0.00 | 0.00 |
| ATOM | 5222 | N    | SER | X | 348 | 63.356 | 27.067 | 41.325 | 0.00 | 0.00 |
| ATOM | 5223 | H    | SER | X | 348 | 63.974 | 27.681 | 40.813 | 0.00 | 0.00 |
| ATOM | 5224 | CA   | SER | X | 348 | 63.030 | 27.676 | 42.651 | 0.00 | 0.00 |
| ATOM | 5225 | HA   | SER | X | 348 | 63.739 | 28.478 | 42.855 | 0.00 | 0.00 |
| ATOM | 5226 | CB   | SER | X | 348 | 61.732 | 28.490 | 42.620 | 0.00 | 0.00 |
| ATOM | 5227 | HB2  | SER | X | 348 | 60.912 | 27.771 | 42.615 | 0.00 | 0.00 |
| ATOM | 5228 | HB3  | SER | X | 348 | 61.675 | 29.212 | 43.435 | 0.00 | 0.00 |
| ATOM | 5229 | OG   | SER | X | 348 | 61.601 | 29.026 | 41.280 | 0.00 | 0.00 |
| ATOM | 5230 | HG   | SER | X | 348 | 61.539 | 28.292 | 40.665 | 0.00 | 0.00 |
| ATOM | 5231 | C    | SER | X | 348 | 63.333 | 26.662 | 43.835 | 0.00 | 0.00 |
| ATOM | 5232 | O    | SER | X | 348 | 62.589 | 26.772 | 44.776 | 0.00 | 0.00 |
| ATOM | 5233 | N    | LEU | X | 349 | 64.371 | 25.792 | 43.680 | 0.00 | 0.00 |
| ATOM | 5234 | H    | LEU | X | 349 | 64.824 | 25.742 | 42.778 | 0.00 | 0.00 |
| ATOM | 5235 | CA   | LEU | X | 349 | 64.780 | 24.946 | 44.834 | 0.00 | 0.00 |
| ATOM | 5236 | HA   | LEU | X | 349 | 63.876 | 24.531 | 45.280 | 0.00 | 0.00 |
| ATOM | 5237 | CB   | LEU | X | 349 | 65.667 | 23.890 | 44.202 | 0.00 | 0.00 |
| ATOM | 5238 | HB2  | LEU | X | 349 | 66.477 | 24.371 | 43.653 | 0.00 | 0.00 |
| ATOM | 5239 | HB3  | LEU | X | 349 | 66.161 | 23.315 | 44.986 | 0.00 | 0.00 |
| ATOM | 5240 | CG   | LEU | X | 349 | 64.940 | 22.875 | 43.282 | 0.00 | 0.00 |
| ATOM | 5241 | HG   | LEU | X | 349 | 64.498 | 23.446 | 42.466 | 0.00 | 0.00 |
| ATOM | 5242 | CD1  | LEU | X | 349 | 66.084 | 22.110 | 42.561 | 0.00 | 0.00 |
| ATOM | 5243 | HD11 | LEU | X | 349 | 66.869 | 22.710 | 42.102 | 0.00 | 0.00 |
| ATOM | 5244 | HD12 | LEU | X | 349 | 65.769 | 21.361 | 41.835 | 0.00 | 0.00 |
| ATOM | 5245 | HD13 | LEU | X | 349 | 66.531 | 21.437 | 43.293 | 0.00 | 0.00 |
| ATOM | 5246 | CD2  | LEU | X | 349 | 63.935 | 22.012 | 43.982 | 0.00 | 0.00 |
| ATOM | 5247 | HD21 | LEU | X | 349 | 64.342 | 21.480 | 44.842 | 0.00 | 0.00 |
| ATOM | 5248 | HD22 | LEU | X | 349 | 63.205 | 22.745 | 44.327 | 0.00 | 0.00 |
| ATOM | 5249 | HD23 | LEU | X | 349 | 63.447 | 21.272 | 43.349 | 0.00 | 0.00 |
| ATOM | 5250 | C    | LEU | X | 349 | 65.473 | 25.742 | 45.919 | 0.00 | 0.00 |



|      |      |      |     |   |     |        |        |        |      |      |
|------|------|------|-----|---|-----|--------|--------|--------|------|------|
| ATOM | 5251 | O    | LEU | X | 349 | 66.668 | 25.877 | 45.787 | 0.00 | 0.00 |
| ATOM | 5252 | N    | ILE | X | 350 | 64.748 | 26.334 | 46.886 | 0.00 | 0.00 |
| ATOM | 5253 | H    | ILE | X | 350 | 63.759 | 26.312 | 46.678 | 0.00 | 0.00 |
| ATOM | 5254 | CA   | ILE | X | 350 | 65.370 | 27.232 | 47.941 | 0.00 | 0.00 |
| ATOM | 5255 | HA   | ILE | X | 350 | 66.145 | 27.789 | 47.413 | 0.00 | 0.00 |
| ATOM | 5256 | CB   | ILE | X | 350 | 64.334 | 28.281 | 48.473 | 0.00 | 0.00 |
| ATOM | 5257 | HB   | ILE | X | 350 | 64.645 | 28.745 | 49.409 | 0.00 | 0.00 |
| ATOM | 5258 | CG2  | ILE | X | 350 | 64.263 | 29.595 | 47.515 | 0.00 | 0.00 |
| ATOM | 5259 | HG21 | ILE | X | 350 | 65.240 | 30.074 | 47.445 | 0.00 | 0.00 |
| ATOM | 5260 | HG22 | ILE | X | 350 | 63.605 | 30.324 | 47.989 | 0.00 | 0.00 |
| ATOM | 5261 | HG23 | ILE | X | 350 | 63.915 | 29.347 | 46.513 | 0.00 | 0.00 |
| ATOM | 5262 | CG1  | ILE | X | 350 | 62.890 | 27.748 | 48.629 | 0.00 | 0.00 |
| ATOM | 5263 | HG12 | ILE | X | 350 | 62.317 | 28.075 | 47.761 | 0.00 | 0.00 |
| ATOM | 5264 | HG13 | ILE | X | 350 | 62.883 | 26.659 | 48.578 | 0.00 | 0.00 |
| ATOM | 5265 | CD1  | ILE | X | 350 | 62.240 | 28.277 | 49.920 | 0.00 | 0.00 |
| ATOM | 5266 | HD11 | ILE | X | 350 | 62.771 | 27.866 | 50.778 | 0.00 | 0.00 |
| ATOM | 5267 | HD12 | ILE | X | 350 | 61.177 | 28.041 | 49.977 | 0.00 | 0.00 |
| ATOM | 5268 | HD13 | ILE | X | 350 | 62.321 | 29.364 | 49.911 | 0.00 | 0.00 |
| ATOM | 5269 | C    | ILE | X | 350 | 65.984 | 26.462 | 49.148 | 0.00 | 0.00 |
| ATOM | 5270 | O    | ILE | X | 350 | 65.786 | 25.224 | 49.325 | 0.00 | 0.00 |
| ATOM | 5271 | N    | SER | X | 351 | 66.857 | 27.147 | 49.980 | 0.00 | 0.00 |
| ATOM | 5272 | H    | SER | X | 351 | 67.019 | 28.106 | 49.707 | 0.00 | 0.00 |
| ATOM | 5273 | CA   | SER | X | 351 | 67.587 | 26.644 | 51.185 | 0.00 | 0.00 |
| ATOM | 5274 | HA   | SER | X | 351 | 67.708 | 25.570 | 51.044 | 0.00 | 0.00 |
| ATOM | 5275 | CB   | SER | X | 351 | 68.915 | 27.364 | 51.328 | 0.00 | 0.00 |
| ATOM | 5276 | HB2  | SER | X | 351 | 69.563 | 26.761 | 51.964 | 0.00 | 0.00 |
| ATOM | 5277 | HB3  | SER | X | 351 | 69.424 | 27.481 | 50.372 | 0.00 | 0.00 |
| ATOM | 5278 | OG   | SER | X | 351 | 68.770 | 28.585 | 51.916 | 0.00 | 0.00 |
| ATOM | 5279 | HG   | SER | X | 351 | 69.255 | 29.147 | 51.307 | 0.00 | 0.00 |
| ATOM | 5280 | C    | SER | X | 351 | 66.628 | 26.898 | 52.433 | 0.00 | 0.00 |
| ATOM | 5281 | O    | SER | X | 351 | 65.647 | 27.715 | 52.352 | 0.00 | 0.00 |
| ATOM | 5282 | N    | ARG | X | 352 | 67.057 | 26.400 | 53.654 | 0.00 | 0.00 |
| ATOM | 5283 | H    | ARG | X | 352 | 67.951 | 25.947 | 53.779 | 0.00 | 0.00 |
| ATOM | 5284 | CA   | ARG | X | 352 | 66.416 | 26.888 | 54.926 | 0.00 | 0.00 |
| ATOM | 5285 | HA   | ARG | X | 352 | 65.345 | 26.785 | 54.751 | 0.00 | 0.00 |
| ATOM | 5286 | CB   | ARG | X | 352 | 66.682 | 25.965 | 56.154 | 0.00 | 0.00 |
| ATOM | 5287 | HB2  | ARG | X | 352 | 66.643 | 24.926 | 55.828 | 0.00 | 0.00 |
| ATOM | 5288 | HB3  | ARG | X | 352 | 67.706 | 26.122 | 56.492 | 0.00 | 0.00 |
| ATOM | 5289 | CG   | ARG | X | 352 | 65.643 | 26.129 | 57.325 | 0.00 | 0.00 |
| ATOM | 5290 | HG2  | ARG | X | 352 | 65.429 | 27.140 | 57.672 | 0.00 | 0.00 |
| ATOM | 5291 | HG3  | ARG | X | 352 | 64.685 | 25.873 | 56.871 | 0.00 | 0.00 |
| ATOM | 5292 | CD   | ARG | X | 352 | 65.895 | 25.106 | 58.492 | 0.00 | 0.00 |
| ATOM | 5293 | HD2  | ARG | X | 352 | 65.927 | 24.074 | 58.144 | 0.00 | 0.00 |
| ATOM | 5294 | HD3  | ARG | X | 352 | 66.894 | 25.242 | 58.907 | 0.00 | 0.00 |
| ATOM | 5295 | NE   | ARG | X | 352 | 64.919 | 25.248 | 59.554 | 0.00 | 0.00 |
| ATOM | 5296 | HE   | ARG | X | 352 | 65.299 | 25.611 | 60.416 | 0.00 | 0.00 |
| ATOM | 5297 | CZ   | ARG | X | 352 | 63.640 | 25.368 | 59.354 | 0.00 | 0.00 |
| ATOM | 5298 | NH1  | ARG | X | 352 | 63.018 | 24.701 | 58.428 | 0.00 | 0.00 |
| ATOM | 5299 | HH11 | ARG | X | 352 | 63.585 | 24.255 | 57.721 | 0.00 | 0.00 |
| ATOM | 5300 | HH12 | ARG | X | 352 | 62.035 | 24.808 | 58.225 | 0.00 | 0.00 |
| ATOM | 5301 | NH2  | ARG | X | 352 | 62.835 | 25.990 | 60.177 | 0.00 | 0.00 |
| ATOM | 5302 | HH21 | ARG | X | 352 | 63.227 | 26.145 | 61.095 | 0.00 | 0.00 |
| ATOM | 5303 | HH22 | ARG | X | 352 | 61.857 | 26.200 | 60.035 | 0.00 | 0.00 |
| ATOM | 5304 | C    | ARG | X | 352 | 66.589 | 28.306 | 55.306 | 0.00 | 0.00 |
| ATOM | 5305 | O    | ARG | X | 352 | 65.616 | 28.925 | 55.836 | 0.00 | 0.00 |
| ATOM | 5306 | N    | ALA | X | 353 | 67.770 | 28.853 | 55.010 | 0.00 | 0.00 |
| ATOM | 5307 | H    | ALA | X | 353 | 68.478 | 28.447 | 54.415 | 0.00 | 0.00 |
| ATOM | 5308 | CA   | ALA | X | 353 | 67.905 | 30.302 | 55.179 | 0.00 | 0.00 |
| ATOM | 5309 | HA   | ALA | X | 353 | 67.353 | 30.491 | 56.099 | 0.00 | 0.00 |
| ATOM | 5310 | CB   | ALA | X | 353 | 69.346 | 30.702 | 55.440 | 0.00 | 0.00 |
| ATOM | 5311 | HB1  | ALA | X | 353 | 69.774 | 30.669 | 54.438 | 0.00 | 0.00 |
| ATOM | 5312 | HB2  | ALA | X | 353 | 69.880 | 30.031 | 56.112 | 0.00 | 0.00 |
| ATOM | 5313 | HB3  | ALA | X | 353 | 69.466 | 31.714 | 55.828 | 0.00 | 0.00 |
| ATOM | 5314 | C    | ALA | X | 353 | 67.164 | 31.184 | 54.110 | 0.00 | 0.00 |
| ATOM | 5315 | O    | ALA | X | 353 | 66.800 | 32.355 | 54.431 | 0.00 | 0.00 |
| ATOM | 5316 | N    | GLU | X | 354 | 67.005 | 30.708 | 52.926 | 0.00 | 0.00 |
| ATOM | 5317 | H    | GLU | X | 354 | 67.467 | 29.835 | 52.713 | 0.00 | 0.00 |

|      |      |      |     |   |     |        |        |        |      |      |
|------|------|------|-----|---|-----|--------|--------|--------|------|------|
| ATOM | 5318 | CA   | GLU | X | 354 | 66.260 | 31.399 | 51.843 | 0.00 | 0.00 |
| ATOM | 5319 | HA   | GLU | X | 354 | 66.649 | 32.415 | 51.917 | 0.00 | 0.00 |
| ATOM | 5320 | CB   | GLU | X | 354 | 66.548 | 30.770 | 50.493 | 0.00 | 0.00 |
| ATOM | 5321 | HB2  | GLU | X | 354 | 66.560 | 29.683 | 50.570 | 0.00 | 0.00 |
| ATOM | 5322 | HB3  | GLU | X | 354 | 65.796 | 30.851 | 49.708 | 0.00 | 0.00 |
| ATOM | 5323 | CG   | GLU | X | 354 | 67.963 | 31.205 | 50.041 | 0.00 | 0.00 |
| ATOM | 5324 | HG2  | GLU | X | 354 | 67.801 | 32.001 | 49.315 | 0.00 | 0.00 |
| ATOM | 5325 | HG3  | GLU | X | 354 | 68.613 | 31.526 | 50.855 | 0.00 | 0.00 |
| ATOM | 5326 | CD   | GLU | X | 354 | 68.723 | 30.240 | 49.157 | 0.00 | 0.00 |
| ATOM | 5327 | OE1  | GLU | X | 354 | 68.111 | 29.314 | 48.625 | 0.00 | 0.00 |
| ATOM | 5328 | OE2  | GLU | X | 354 | 69.989 | 30.389 | 49.156 | 0.00 | 0.00 |
| ATOM | 5329 | C    | GLU | X | 354 | 64.746 | 31.333 | 52.111 | 0.00 | 0.00 |
| ATOM | 5330 | O    | GLU | X | 354 | 64.084 | 32.282 | 51.739 | 0.00 | 0.00 |
| ATOM | 5331 | N    | PHE | X | 355 | 64.227 | 30.312 | 52.858 | 0.00 | 0.00 |
| ATOM | 5332 | H    | PHE | X | 355 | 64.895 | 29.567 | 52.995 | 0.00 | 0.00 |
| ATOM | 5333 | CA   | PHE | X | 355 | 62.870 | 30.205 | 53.501 | 0.00 | 0.00 |
| ATOM | 5334 | HA   | PHE | X | 355 | 62.088 | 30.395 | 52.766 | 0.00 | 0.00 |
| ATOM | 5335 | CB   | PHE | X | 355 | 62.599 | 28.783 | 54.009 | 0.00 | 0.00 |
| ATOM | 5336 | HB2  | PHE | X | 355 | 62.906 | 28.093 | 53.223 | 0.00 | 0.00 |
| ATOM | 5337 | HB3  | PHE | X | 355 | 63.274 | 28.533 | 54.828 | 0.00 | 0.00 |
| ATOM | 5338 | CG   | PHE | X | 355 | 61.154 | 28.482 | 54.538 | 0.00 | 0.00 |
| ATOM | 5339 | CD1  | PHE | X | 355 | 60.004 | 28.736 | 53.718 | 0.00 | 0.00 |
| ATOM | 5340 | HD1  | PHE | X | 355 | 60.250 | 28.977 | 52.694 | 0.00 | 0.00 |
| ATOM | 5341 | CE1  | PHE | X | 355 | 58.730 | 28.670 | 54.284 | 0.00 | 0.00 |
| ATOM | 5342 | HE1  | PHE | X | 355 | 57.888 | 28.960 | 53.672 | 0.00 | 0.00 |
| ATOM | 5343 | CZ   | PHE | X | 355 | 58.567 | 28.294 | 55.636 | 0.00 | 0.00 |
| ATOM | 5344 | HZ   | PHE | X | 355 | 57.592 | 28.139 | 56.074 | 0.00 | 0.00 |
| ATOM | 5345 | CE2  | PHE | X | 355 | 59.638 | 27.946 | 56.351 | 0.00 | 0.00 |
| ATOM | 5346 | HE2  | PHE | X | 355 | 59.500 | 27.514 | 57.331 | 0.00 | 0.00 |
| ATOM | 5347 | CD2  | PHE | X | 355 | 60.986 | 28.170 | 55.905 | 0.00 | 0.00 |
| ATOM | 5348 | HD2  | PHE | X | 355 | 61.784 | 27.951 | 56.599 | 0.00 | 0.00 |
| ATOM | 5349 | C    | PHE | X | 355 | 62.699 | 31.310 | 54.637 | 0.00 | 0.00 |
| ATOM | 5350 | O    | PHE | X | 355 | 61.623 | 31.929 | 54.740 | 0.00 | 0.00 |
| ATOM | 5351 | N    | LEU | X | 356 | 63.795 | 31.651 | 55.304 | 0.00 | 0.00 |
| ATOM | 5352 | H    | LEU | X | 356 | 64.599 | 31.058 | 55.154 | 0.00 | 0.00 |
| ATOM | 5353 | CA   | LEU | X | 356 | 63.867 | 32.656 | 56.370 | 0.00 | 0.00 |
| ATOM | 5354 | HA   | LEU | X | 356 | 62.995 | 32.446 | 56.990 | 0.00 | 0.00 |
| ATOM | 5355 | CB   | LEU | X | 356 | 65.162 | 32.712 | 57.279 | 0.00 | 0.00 |
| ATOM | 5356 | HB2  | LEU | X | 356 | 65.198 | 31.713 | 57.713 | 0.00 | 0.00 |
| ATOM | 5357 | HB3  | LEU | X | 356 | 66.044 | 32.887 | 56.663 | 0.00 | 0.00 |
| ATOM | 5358 | CG   | LEU | X | 356 | 65.131 | 33.624 | 58.534 | 0.00 | 0.00 |
| ATOM | 5359 | HG   | LEU | X | 356 | 65.883 | 33.346 | 59.273 | 0.00 | 0.00 |
| ATOM | 5360 | CD1  | LEU | X | 356 | 65.383 | 35.066 | 58.158 | 0.00 | 0.00 |
| ATOM | 5361 | HD11 | LEU | X | 356 | 66.325 | 35.151 | 57.615 | 0.00 | 0.00 |
| ATOM | 5362 | HD12 | LEU | X | 356 | 65.531 | 35.639 | 59.073 | 0.00 | 0.00 |
| ATOM | 5363 | HD13 | LEU | X | 356 | 64.579 | 35.508 | 57.570 | 0.00 | 0.00 |
| ATOM | 5364 | CD2  | LEU | X | 356 | 63.796 | 33.587 | 59.290 | 0.00 | 0.00 |
| ATOM | 5365 | HD21 | LEU | X | 356 | 62.991 | 33.871 | 58.612 | 0.00 | 0.00 |
| ATOM | 5366 | HD22 | LEU | X | 356 | 63.655 | 32.580 | 59.683 | 0.00 | 0.00 |
| ATOM | 5367 | HD23 | LEU | X | 356 | 63.879 | 34.191 | 60.194 | 0.00 | 0.00 |
| ATOM | 5368 | C    | LEU | X | 356 | 63.654 | 34.032 | 55.776 | 0.00 | 0.00 |
| ATOM | 5369 | O    | LEU | X | 356 | 62.694 | 34.770 | 56.074 | 0.00 | 0.00 |
| ATOM | 5370 | N    | ALA | X | 357 | 64.453 | 34.288 | 54.757 | 0.00 | 0.00 |
| ATOM | 5371 | H    | ALA | X | 357 | 65.200 | 33.673 | 54.469 | 0.00 | 0.00 |
| ATOM | 5372 | CA   | ALA | X | 357 | 64.236 | 35.548 | 53.931 | 0.00 | 0.00 |
| ATOM | 5373 | HA   | ALA | X | 357 | 64.049 | 36.412 | 54.569 | 0.00 | 0.00 |
| ATOM | 5374 | CB   | ALA | X | 357 | 65.528 | 35.832 | 53.109 | 0.00 | 0.00 |
| ATOM | 5375 | HB1  | ALA | X | 357 | 65.917 | 34.850 | 52.837 | 0.00 | 0.00 |
| ATOM | 5376 | HB2  | ALA | X | 357 | 66.213 | 36.442 | 53.698 | 0.00 | 0.00 |
| ATOM | 5377 | HB3  | ALA | X | 357 | 65.389 | 36.504 | 52.263 | 0.00 | 0.00 |
| ATOM | 5378 | C    | ALA | X | 357 | 62.867 | 35.592 | 53.314 | 0.00 | 0.00 |
| ATOM | 5379 | O    | ALA | X | 357 | 62.122 | 36.577 | 53.367 | 0.00 | 0.00 |
| ATOM | 5380 | N    | GLY | X | 358 | 62.477 | 34.407 | 52.751 | 0.00 | 0.00 |
| ATOM | 5381 | H    | GLY | X | 358 | 63.208 | 33.711 | 52.775 | 0.00 | 0.00 |
| ATOM | 5382 | CA   | GLY | X | 358 | 61.101 | 34.047 | 52.179 | 0.00 | 0.00 |
| ATOM | 5383 | HA2  | GLY | X | 358 | 61.124 | 34.287 | 51.116 | 0.00 | 0.00 |
| ATOM | 5384 | HA3  | GLY | X | 358 | 61.011 | 32.966 | 52.285 | 0.00 | 0.00 |

|      |      |      |     |   |     |        |        |        |      |      |
|------|------|------|-----|---|-----|--------|--------|--------|------|------|
| ATOM | 5385 | C    | GLY | X | 358 | 59.859 | 34.577 | 52.898 | 0.00 | 0.00 |
| ATOM | 5386 | O    | GLY | X | 358 | 59.067 | 35.292 | 52.318 | 0.00 | 0.00 |
| ATOM | 5387 | N    | VAL | X | 359 | 59.846 | 34.303 | 54.194 | 0.00 | 0.00 |
| ATOM | 5388 | H    | VAL | X | 359 | 60.470 | 33.614 | 54.591 | 0.00 | 0.00 |
| ATOM | 5389 | CA   | VAL | X | 359 | 58.853 | 34.820 | 55.165 | 0.00 | 0.00 |
| ATOM | 5390 | HA   | VAL | X | 359 | 57.859 | 34.726 | 54.727 | 0.00 | 0.00 |
| ATOM | 5391 | CB   | VAL | X | 359 | 58.808 | 34.057 | 56.477 | 0.00 | 0.00 |
| ATOM | 5392 | HB   | VAL | X | 359 | 59.801 | 33.964 | 56.918 | 0.00 | 0.00 |
| ATOM | 5393 | CG1  | VAL | X | 359 | 57.856 | 34.629 | 57.504 | 0.00 | 0.00 |
| ATOM | 5394 | HG11 | VAL | X | 359 | 58.242 | 35.560 | 57.918 | 0.00 | 0.00 |
| ATOM | 5395 | HG12 | VAL | X | 359 | 56.876 | 34.816 | 57.066 | 0.00 | 0.00 |
| ATOM | 5396 | HG13 | VAL | X | 359 | 57.833 | 33.969 | 58.371 | 0.00 | 0.00 |
| ATOM | 5397 | CG2  | VAL | X | 359 | 58.234 | 32.631 | 56.167 | 0.00 | 0.00 |
| ATOM | 5398 | HG21 | VAL | X | 359 | 57.236 | 32.859 | 55.790 | 0.00 | 0.00 |
| ATOM | 5399 | HG22 | VAL | X | 359 | 57.990 | 32.039 | 57.049 | 0.00 | 0.00 |
| ATOM | 5400 | HG23 | VAL | X | 359 | 58.772 | 32.159 | 55.345 | 0.00 | 0.00 |
| ATOM | 5401 | C    | VAL | X | 359 | 59.040 | 36.275 | 55.400 | 0.00 | 0.00 |
| ATOM | 5402 | O    | VAL | X | 359 | 58.068 | 37.008 | 55.340 | 0.00 | 0.00 |
| ATOM | 5403 | N    | ARG | X | 360 | 60.286 | 36.792 | 55.523 | 0.00 | 0.00 |
| ATOM | 5404 | H    | ARG | X | 360 | 61.102 | 36.198 | 55.473 | 0.00 | 0.00 |
| ATOM | 5405 | CA   | ARG | X | 360 | 60.480 | 38.227 | 55.871 | 0.00 | 0.00 |
| ATOM | 5406 | HA   | ARG | X | 360 | 59.895 | 38.458 | 56.762 | 0.00 | 0.00 |
| ATOM | 5407 | CB   | ARG | X | 360 | 61.873 | 38.641 | 56.292 | 0.00 | 0.00 |
| ATOM | 5408 | HB2  | ARG | X | 360 | 62.675 | 38.234 | 55.677 | 0.00 | 0.00 |
| ATOM | 5409 | HB3  | ARG | X | 360 | 61.918 | 39.721 | 56.148 | 0.00 | 0.00 |
| ATOM | 5410 | CG   | ARG | X | 360 | 62.144 | 38.326 | 57.780 | 0.00 | 0.00 |
| ATOM | 5411 | HG2  | ARG | X | 360 | 61.287 | 38.486 | 58.434 | 0.00 | 0.00 |
| ATOM | 5412 | HG3  | ARG | X | 360 | 62.466 | 37.286 | 57.812 | 0.00 | 0.00 |
| ATOM | 5413 | CD   | ARG | X | 360 | 63.260 | 39.306 | 58.349 | 0.00 | 0.00 |
| ATOM | 5414 | HD2  | ARG | X | 360 | 62.919 | 40.319 | 58.136 | 0.00 | 0.00 |
| ATOM | 5415 | HD3  | ARG | X | 360 | 63.402 | 39.212 | 59.426 | 0.00 | 0.00 |
| ATOM | 5416 | NE   | ARG | X | 360 | 64.527 | 38.940 | 57.703 | 0.00 | 0.00 |
| ATOM | 5417 | HE   | ARG | X | 360 | 64.588 | 39.058 | 56.702 | 0.00 | 0.00 |
| ATOM | 5418 | CZ   | ARG | X | 360 | 65.651 | 38.382 | 58.130 | 0.00 | 0.00 |
| ATOM | 5419 | NH1  | ARG | X | 360 | 65.930 | 38.029 | 59.397 | 0.00 | 0.00 |
| ATOM | 5420 | HH11 | ARG | X | 360 | 65.302 | 38.088 | 60.186 | 0.00 | 0.00 |
| ATOM | 5421 | HH12 | ARG | X | 360 | 66.823 | 37.612 | 59.617 | 0.00 | 0.00 |
| ATOM | 5422 | NH2  | ARG | X | 360 | 66.635 | 38.201 | 57.254 | 0.00 | 0.00 |
| ATOM | 5423 | HH21 | ARG | X | 360 | 66.465 | 38.322 | 56.266 | 0.00 | 0.00 |
| ATOM | 5424 | HH22 | ARG | X | 360 | 67.532 | 37.850 | 57.557 | 0.00 | 0.00 |
| ATOM | 5425 | C    | ARG | X | 360 | 60.032 | 39.104 | 54.691 | 0.00 | 0.00 |
| ATOM | 5426 | O    | ARG | X | 360 | 59.369 | 40.109 | 54.883 | 0.00 | 0.00 |
| ATOM | 5427 | N    | VAL | X | 361 | 60.219 | 38.665 | 53.462 | 0.00 | 0.00 |
| ATOM | 5428 | H    | VAL | X | 361 | 60.781 | 37.844 | 53.288 | 0.00 | 0.00 |
| ATOM | 5429 | CA   | VAL | X | 361 | 59.604 | 39.375 | 52.243 | 0.00 | 0.00 |
| ATOM | 5430 | HA   | VAL | X | 361 | 59.617 | 40.439 | 52.479 | 0.00 | 0.00 |
| ATOM | 5431 | CB   | VAL | X | 361 | 60.429 | 39.388 | 50.914 | 0.00 | 0.00 |
| ATOM | 5432 | HB   | VAL | X | 361 | 60.084 | 40.139 | 50.203 | 0.00 | 0.00 |
| ATOM | 5433 | CG1  | VAL | X | 361 | 61.908 | 39.674 | 51.163 | 0.00 | 0.00 |
| ATOM | 5434 | HG11 | VAL | X | 361 | 62.144 | 40.668 | 51.543 | 0.00 | 0.00 |
| ATOM | 5435 | HG12 | VAL | X | 361 | 62.359 | 38.926 | 51.815 | 0.00 | 0.00 |
| ATOM | 5436 | HG13 | VAL | X | 361 | 62.508 | 39.709 | 50.254 | 0.00 | 0.00 |
| ATOM | 5437 | CG2  | VAL | X | 361 | 60.370 | 37.999 | 50.207 | 0.00 | 0.00 |
| ATOM | 5438 | HG21 | VAL | X | 361 | 60.974 | 37.293 | 50.776 | 0.00 | 0.00 |
| ATOM | 5439 | HG22 | VAL | X | 361 | 60.726 | 38.010 | 49.176 | 0.00 | 0.00 |
| ATOM | 5440 | HG23 | VAL | X | 361 | 59.363 | 37.584 | 50.241 | 0.00 | 0.00 |
| ATOM | 5441 | C    | VAL | X | 361 | 58.098 | 39.036 | 52.001 | 0.00 | 0.00 |
| ATOM | 5442 | O    | VAL | X | 361 | 57.319 | 39.815 | 51.469 | 0.00 | 0.00 |
| ATOM | 5443 | N    | GLY | X | 362 | 57.635 | 37.832 | 52.408 | 0.00 | 0.00 |
| ATOM | 5444 | H    | GLY | X | 362 | 58.359 | 37.193 | 52.704 | 0.00 | 0.00 |
| ATOM | 5445 | CA   | GLY | X | 362 | 56.340 | 37.325 | 52.127 | 0.00 | 0.00 |
| ATOM | 5446 | HA2  | GLY | X | 362 | 56.098 | 37.360 | 51.064 | 0.00 | 0.00 |
| ATOM | 5447 | HA3  | GLY | X | 362 | 56.300 | 36.265 | 52.379 | 0.00 | 0.00 |
| ATOM | 5448 | C    | GLY | X | 362 | 55.299 | 37.852 | 52.959 | 0.00 | 0.00 |
| ATOM | 5449 | O    | GLY | X | 362 | 54.178 | 38.063 | 52.510 | 0.00 | 0.00 |
| ATOM | 5450 | N    | VAL | X | 363 | 55.513 | 37.995 | 54.327 | 0.00 | 0.00 |
| ATOM | 5451 | H    | VAL | X | 363 | 56.418 | 37.700 | 54.664 | 0.00 | 0.00 |

|      |      |      |     |   |     |        |        |        |      |      |
|------|------|------|-----|---|-----|--------|--------|--------|------|------|
| ATOM | 5452 | CA   | VAL | X | 363 | 54.646 | 38.792 | 55.228 | 0.00 | 0.00 |
| ATOM | 5453 | HA   | VAL | X | 363 | 53.614 | 38.855 | 54.882 | 0.00 | 0.00 |
| ATOM | 5454 | CB   | VAL | X | 363 | 54.618 | 37.989 | 56.598 | 0.00 | 0.00 |
| ATOM | 5455 | HB   | VAL | X | 363 | 55.666 | 37.896 | 56.885 | 0.00 | 0.00 |
| ATOM | 5456 | CG1  | VAL | X | 363 | 53.848 | 38.589 | 57.820 | 0.00 | 0.00 |
| ATOM | 5457 | HG11 | VAL | X | 363 | 52.839 | 38.919 | 57.572 | 0.00 | 0.00 |
| ATOM | 5458 | HG12 | VAL | X | 363 | 53.714 | 37.932 | 58.679 | 0.00 | 0.00 |
| ATOM | 5459 | HG13 | VAL | X | 363 | 54.420 | 39.448 | 58.171 | 0.00 | 0.00 |
| ATOM | 5460 | CG2  | VAL | X | 363 | 54.213 | 36.556 | 56.372 | 0.00 | 0.00 |
| ATOM | 5461 | HG21 | VAL | X | 363 | 54.967 | 35.992 | 55.822 | 0.00 | 0.00 |
| ATOM | 5462 | HG22 | VAL | X | 363 | 53.280 | 36.453 | 55.819 | 0.00 | 0.00 |
| ATOM | 5463 | HG23 | VAL | X | 363 | 54.087 | 36.114 | 57.360 | 0.00 | 0.00 |
| ATOM | 5464 | C    | VAL | X | 363 | 55.331 | 40.183 | 55.478 | 0.00 | 0.00 |
| ATOM | 5465 | O    | VAL | X | 363 | 56.282 | 40.216 | 56.294 | 0.00 | 0.00 |
| ATOM | 5466 | N    | PRO | X | 364 | 54.936 | 41.283 | 54.803 | 0.00 | 0.00 |
| ATOM | 5467 | CD   | PRO | X | 364 | 54.123 | 41.321 | 53.577 | 0.00 | 0.00 |
| ATOM | 5468 | HD2  | PRO | X | 364 | 53.137 | 40.904 | 53.783 | 0.00 | 0.00 |
| ATOM | 5469 | HD3  | PRO | X | 364 | 54.618 | 40.673 | 52.853 | 0.00 | 0.00 |
| ATOM | 5470 | CG   | PRO | X | 364 | 54.176 | 42.736 | 52.960 | 0.00 | 0.00 |
| ATOM | 5471 | HG2  | PRO | X | 364 | 53.196 | 43.007 | 52.567 | 0.00 | 0.00 |
| ATOM | 5472 | HG3  | PRO | X | 364 | 54.957 | 42.763 | 52.200 | 0.00 | 0.00 |
| ATOM | 5473 | CB   | PRO | X | 364 | 54.456 | 43.598 | 54.172 | 0.00 | 0.00 |
| ATOM | 5474 | HB2  | PRO | X | 364 | 53.556 | 43.944 | 54.679 | 0.00 | 0.00 |
| ATOM | 5475 | HB3  | PRO | X | 364 | 55.021 | 44.470 | 53.840 | 0.00 | 0.00 |
| ATOM | 5476 | CA   | PRO | X | 364 | 55.358 | 42.740 | 54.988 | 0.00 | 0.00 |
| ATOM | 5477 | HA   | PRO | X | 364 | 56.345 | 42.845 | 54.536 | 0.00 | 0.00 |
| ATOM | 5478 | C    | PRO | X | 364 | 55.315 | 43.229 | 56.496 | 0.00 | 0.00 |
| ATOM | 5479 | O    | PRO | X | 364 | 54.338 | 42.965 | 57.283 | 0.00 | 0.00 |
| ATOM | 5480 | N    | GLN | X | 365 | 56.452 | 43.777 | 56.867 | 0.00 | 0.00 |
| ATOM | 5481 | H    | GLN | X | 365 | 57.107 | 43.887 | 56.106 | 0.00 | 0.00 |
| ATOM | 5482 | CA   | GLN | X | 365 | 56.908 | 44.473 | 58.099 | 0.00 | 0.00 |
| ATOM | 5483 | HA   | GLN | X | 365 | 57.971 | 44.660 | 57.944 | 0.00 | 0.00 |
| ATOM | 5484 | CB   | GLN | X | 365 | 56.110 | 45.783 | 58.164 | 0.00 | 0.00 |
| ATOM | 5485 | HB2  | GLN | X | 365 | 56.238 | 46.267 | 57.196 | 0.00 | 0.00 |
| ATOM | 5486 | HB3  | GLN | X | 365 | 55.056 | 45.565 | 58.332 | 0.00 | 0.00 |
| ATOM | 5487 | CG   | GLN | X | 365 | 56.525 | 46.794 | 59.207 | 0.00 | 0.00 |
| ATOM | 5488 | HG2  | GLN | X | 365 | 56.452 | 46.345 | 60.197 | 0.00 | 0.00 |
| ATOM | 5489 | HG3  | GLN | X | 365 | 57.589 | 46.961 | 59.039 | 0.00 | 0.00 |
| ATOM | 5490 | CD   | GLN | X | 365 | 55.782 | 48.133 | 59.190 | 0.00 | 0.00 |
| ATOM | 5491 | OE1  | GLN | X | 365 | 54.638 | 48.213 | 58.828 | 0.00 | 0.00 |
| ATOM | 5492 | NE2  | GLN | X | 365 | 56.315 | 49.239 | 59.685 | 0.00 | 0.00 |
| ATOM | 5493 | HE21 | GLN | X | 365 | 55.907 | 50.137 | 59.471 | 0.00 | 0.00 |
| ATOM | 5494 | HE22 | GLN | X | 365 | 57.230 | 49.233 | 60.113 | 0.00 | 0.00 |
| ATOM | 5495 | C    | GLN | X | 365 | 56.872 | 43.567 | 59.350 | 0.00 | 0.00 |
| ATOM | 5496 | O    | GLN | X | 365 | 56.811 | 44.037 | 60.490 | 0.00 | 0.00 |
| ATOM | 5497 | N    | VAL | X | 366 | 56.989 | 42.227 | 59.227 | 0.00 | 0.00 |
| ATOM | 5498 | H    | VAL | X | 366 | 56.927 | 41.827 | 58.301 | 0.00 | 0.00 |
| ATOM | 5499 | CA   | VAL | X | 366 | 57.259 | 41.246 | 60.300 | 0.00 | 0.00 |
| ATOM | 5500 | HA   | VAL | X | 366 | 56.443 | 41.301 | 61.020 | 0.00 | 0.00 |
| ATOM | 5501 | CB   | VAL | X | 366 | 57.217 | 39.793 | 59.797 | 0.00 | 0.00 |
| ATOM | 5502 | HB   | VAL | X | 366 | 56.405 | 39.735 | 59.071 | 0.00 | 0.00 |
| ATOM | 5503 | CG1  | VAL | X | 366 | 58.416 | 39.356 | 58.954 | 0.00 | 0.00 |
| ATOM | 5504 | HG11 | VAL | X | 366 | 58.105 | 38.528 | 58.318 | 0.00 | 0.00 |
| ATOM | 5505 | HG12 | VAL | X | 366 | 58.608 | 40.181 | 58.268 | 0.00 | 0.00 |
| ATOM | 5506 | HG13 | VAL | X | 366 | 59.226 | 39.182 | 59.663 | 0.00 | 0.00 |
| ATOM | 5507 | CG2  | VAL | X | 366 | 56.912 | 38.837 | 60.941 | 0.00 | 0.00 |
| ATOM | 5508 | HG21 | VAL | X | 366 | 56.049 | 39.182 | 61.511 | 0.00 | 0.00 |
| ATOM | 5509 | HG22 | VAL | X | 366 | 57.754 | 38.688 | 61.616 | 0.00 | 0.00 |
| ATOM | 5510 | HG23 | VAL | X | 366 | 56.700 | 37.839 | 60.559 | 0.00 | 0.00 |
| ATOM | 5511 | C    | VAL | X | 366 | 58.512 | 41.547 | 61.175 | 0.00 | 0.00 |
| ATOM | 5512 | O    | VAL | X | 366 | 59.519 | 42.021 | 60.652 | 0.00 | 0.00 |
| ATOM | 5513 | N    | SER | X | 367 | 58.465 | 41.406 | 62.547 | 0.00 | 0.00 |
| ATOM | 5514 | H    | SER | X | 367 | 57.541 | 41.376 | 62.954 | 0.00 | 0.00 |
| ATOM | 5515 | CA   | SER | X | 367 | 59.682 | 41.532 | 63.377 | 0.00 | 0.00 |
| ATOM | 5516 | HA   | SER | X | 367 | 60.333 | 42.345 | 63.058 | 0.00 | 0.00 |
| ATOM | 5517 | CB   | SER | X | 367 | 59.395 | 41.949 | 64.862 | 0.00 | 0.00 |
| ATOM | 5518 | HB2  | SER | X | 367 | 58.707 | 41.232 | 65.312 | 0.00 | 0.00 |

|      |      |      |     |   |     |        |        |        |      |      |
|------|------|------|-----|---|-----|--------|--------|--------|------|------|
| ATOM | 5519 | HB3  | SER | X | 367 | 60.334 | 41.882 | 65.411 | 0.00 | 0.00 |
| ATOM | 5520 | OG   | SER | X | 367 | 58.940 | 43.286 | 64.976 | 0.00 | 0.00 |
| ATOM | 5521 | HG   | SER | X | 367 | 58.681 | 43.456 | 65.885 | 0.00 | 0.00 |
| ATOM | 5522 | C    | SER | X | 367 | 60.380 | 40.206 | 63.374 | 0.00 | 0.00 |
| ATOM | 5523 | O    | SER | X | 367 | 59.803 | 39.195 | 62.983 | 0.00 | 0.00 |
| ATOM | 5524 | N    | ASP | X | 368 | 61.567 | 40.181 | 63.983 | 0.00 | 0.00 |
| ATOM | 5525 | H    | ASP | X | 368 | 61.887 | 41.020 | 64.447 | 0.00 | 0.00 |
| ATOM | 5526 | CA   | ASP | X | 368 | 62.533 | 39.061 | 63.756 | 0.00 | 0.00 |
| ATOM | 5527 | HA   | ASP | X | 368 | 62.494 | 38.871 | 62.683 | 0.00 | 0.00 |
| ATOM | 5528 | CB   | ASP | X | 368 | 63.951 | 39.330 | 64.311 | 0.00 | 0.00 |
| ATOM | 5529 | HB2  | ASP | X | 368 | 64.290 | 40.366 | 64.268 | 0.00 | 0.00 |
| ATOM | 5530 | HB3  | ASP | X | 368 | 63.822 | 39.256 | 65.391 | 0.00 | 0.00 |
| ATOM | 5531 | CG   | ASP | X | 368 | 65.044 | 38.419 | 63.843 | 0.00 | 0.00 |
| ATOM | 5532 | OD1  | ASP | X | 368 | 65.551 | 37.511 | 64.559 | 0.00 | 0.00 |
| ATOM | 5533 | OD2  | ASP | X | 368 | 65.414 | 38.695 | 62.669 | 0.00 | 0.00 |
| ATOM | 5534 | C    | ASP | X | 368 | 61.961 | 37.804 | 64.372 | 0.00 | 0.00 |
| ATOM | 5535 | O    | ASP | X | 368 | 61.923 | 36.731 | 63.802 | 0.00 | 0.00 |
| ATOM | 5536 | N    | LEU | X | 369 | 61.623 | 37.815 | 65.640 | 0.00 | 0.00 |
| ATOM | 5537 | H    | LEU | X | 369 | 61.836 | 38.620 | 66.213 | 0.00 | 0.00 |
| ATOM | 5538 | CA   | LEU | X | 369 | 61.005 | 36.706 | 66.383 | 0.00 | 0.00 |
| ATOM | 5539 | HA   | LEU | X | 369 | 61.732 | 35.895 | 66.334 | 0.00 | 0.00 |
| ATOM | 5540 | CB   | LEU | X | 369 | 60.835 | 37.105 | 67.864 | 0.00 | 0.00 |
| ATOM | 5541 | HB2  | LEU | X | 369 | 61.801 | 37.203 | 68.361 | 0.00 | 0.00 |
| ATOM | 5542 | HB3  | LEU | X | 369 | 60.326 | 38.069 | 67.859 | 0.00 | 0.00 |
| ATOM | 5543 | CG   | LEU | X | 369 | 60.031 | 36.125 | 68.706 | 0.00 | 0.00 |
| ATOM | 5544 | HG   | LEU | X | 369 | 59.098 | 35.900 | 68.190 | 0.00 | 0.00 |
| ATOM | 5545 | CD1  | LEU | X | 369 | 60.839 | 34.859 | 68.969 | 0.00 | 0.00 |
| ATOM | 5546 | HD11 | LEU | X | 369 | 61.713 | 35.244 | 69.494 | 0.00 | 0.00 |
| ATOM | 5547 | HD12 | LEU | X | 369 | 61.107 | 34.369 | 68.032 | 0.00 | 0.00 |
| ATOM | 5548 | HD13 | LEU | X | 369 | 60.443 | 34.180 | 69.724 | 0.00 | 0.00 |
| ATOM | 5549 | CD2  | LEU | X | 369 | 59.737 | 36.848 | 70.044 | 0.00 | 0.00 |
| ATOM | 5550 | HD21 | LEU | X | 369 | 59.225 | 37.807 | 69.963 | 0.00 | 0.00 |
| ATOM | 5551 | HD22 | LEU | X | 369 | 59.055 | 36.214 | 70.609 | 0.00 | 0.00 |
| ATOM | 5552 | HD23 | LEU | X | 369 | 60.736 | 36.983 | 70.459 | 0.00 | 0.00 |
| ATOM | 5553 | C    | LEU | X | 369 | 59.711 | 36.198 | 65.724 | 0.00 | 0.00 |
| ATOM | 5554 | O    | LEU | X | 369 | 59.409 | 34.999 | 65.709 | 0.00 | 0.00 |
| ATOM | 5555 | N    | ALA | X | 370 | 58.934 | 37.142 | 65.151 | 0.00 | 0.00 |
| ATOM | 5556 | H    | ALA | X | 370 | 59.273 | 38.065 | 64.921 | 0.00 | 0.00 |
| ATOM | 5557 | CA   | ALA | X | 370 | 57.672 | 36.748 | 64.481 | 0.00 | 0.00 |
| ATOM | 5558 | HA   | ALA | X | 370 | 57.088 | 35.987 | 64.999 | 0.00 | 0.00 |
| ATOM | 5559 | CB   | ALA | X | 370 | 56.835 | 38.069 | 64.406 | 0.00 | 0.00 |
| ATOM | 5560 | HB1  | ALA | X | 370 | 55.906 | 37.793 | 63.908 | 0.00 | 0.00 |
| ATOM | 5561 | HB2  | ALA | X | 370 | 57.308 | 38.825 | 63.779 | 0.00 | 0.00 |
| ATOM | 5562 | HB3  | ALA | X | 370 | 56.672 | 38.440 | 65.418 | 0.00 | 0.00 |
| ATOM | 5563 | C    | ALA | X | 370 | 57.951 | 36.045 | 63.143 | 0.00 | 0.00 |
| ATOM | 5564 | O    | ALA | X | 370 | 57.259 | 35.097 | 62.864 | 0.00 | 0.00 |
| ATOM | 5565 | N    | ALA | X | 371 | 58.988 | 36.375 | 62.383 | 0.00 | 0.00 |
| ATOM | 5566 | H    | ALA | X | 371 | 59.539 | 37.163 | 62.692 | 0.00 | 0.00 |
| ATOM | 5567 | CA   | ALA | X | 371 | 59.407 | 35.624 | 61.231 | 0.00 | 0.00 |
| ATOM | 5568 | HA   | ALA | X | 371 | 58.588 | 35.574 | 60.514 | 0.00 | 0.00 |
| ATOM | 5569 | CB   | ALA | X | 371 | 60.637 | 36.386 | 60.673 | 0.00 | 0.00 |
| ATOM | 5570 | HB1  | ALA | X | 371 | 60.500 | 37.461 | 60.790 | 0.00 | 0.00 |
| ATOM | 5571 | HB2  | ALA | X | 371 | 60.643 | 36.123 | 59.615 | 0.00 | 0.00 |
| ATOM | 5572 | HB3  | ALA | X | 371 | 61.542 | 35.969 | 61.116 | 0.00 | 0.00 |
| ATOM | 5573 | C    | ALA | X | 371 | 59.890 | 34.215 | 61.584 | 0.00 | 0.00 |
| ATOM | 5574 | O    | ALA | X | 371 | 59.466 | 33.246 | 60.955 | 0.00 | 0.00 |
| ATOM | 5575 | N    | GLU | X | 372 | 60.617 | 34.086 | 62.723 | 0.00 | 0.00 |
| ATOM | 5576 | H    | GLU | X | 372 | 60.790 | 34.931 | 63.248 | 0.00 | 0.00 |
| ATOM | 5577 | CA   | GLU | X | 372 | 61.096 | 32.770 | 63.134 | 0.00 | 0.00 |
| ATOM | 5578 | HA   | GLU | X | 372 | 61.372 | 32.174 | 62.264 | 0.00 | 0.00 |
| ATOM | 5579 | CB   | GLU | X | 372 | 62.269 | 32.863 | 64.089 | 0.00 | 0.00 |
| ATOM | 5580 | HB2  | GLU | X | 372 | 62.064 | 33.654 | 64.809 | 0.00 | 0.00 |
| ATOM | 5581 | HB3  | GLU | X | 372 | 62.237 | 31.876 | 64.552 | 0.00 | 0.00 |
| ATOM | 5582 | CG   | GLU | X | 372 | 63.537 | 33.223 | 63.369 | 0.00 | 0.00 |
| ATOM | 5583 | HG2  | GLU | X | 372 | 63.622 | 32.721 | 62.406 | 0.00 | 0.00 |
| ATOM | 5584 | HG3  | GLU | X | 372 | 63.443 | 34.261 | 63.048 | 0.00 | 0.00 |
| ATOM | 5585 | CD   | GLU | X | 372 | 64.717 | 32.901 | 64.218 | 0.00 | 0.00 |

|      |      |      |     |   |     |        |        |        |      |      |
|------|------|------|-----|---|-----|--------|--------|--------|------|------|
| ATOM | 5586 | OE1  | GLU | X | 372 | 65.426 | 31.905 | 63.932 | 0.00 | 0.00 |
| ATOM | 5587 | OE2  | GLU | X | 372 | 64.858 | 33.544 | 65.290 | 0.00 | 0.00 |
| ATOM | 5588 | C    | GLU | X | 372 | 59.956 | 31.981 | 63.796 | 0.00 | 0.00 |
| ATOM | 5589 | O    | GLU | X | 372 | 59.876 | 30.775 | 63.675 | 0.00 | 0.00 |
| ATOM | 5590 | N    | ALA | X | 373 | 58.911 | 32.596 | 64.361 | 0.00 | 0.00 |
| ATOM | 5591 | H    | ALA | X | 373 | 58.957 | 33.580 | 64.583 | 0.00 | 0.00 |
| ATOM | 5592 | CA   | ALA | X | 373 | 57.740 | 31.933 | 64.864 | 0.00 | 0.00 |
| ATOM | 5593 | HA   | ALA | X | 373 | 58.015 | 31.051 | 65.442 | 0.00 | 0.00 |
| ATOM | 5594 | CB   | ALA | X | 373 | 56.811 | 32.842 | 65.751 | 0.00 | 0.00 |
| ATOM | 5595 | HB1  | ALA | X | 373 | 56.670 | 33.796 | 65.241 | 0.00 | 0.00 |
| ATOM | 5596 | HB2  | ALA | X | 373 | 57.374 | 33.099 | 66.647 | 0.00 | 0.00 |
| ATOM | 5597 | HB3  | ALA | X | 373 | 55.841 | 32.435 | 66.037 | 0.00 | 0.00 |
| ATOM | 5598 | C    | ALA | X | 373 | 56.868 | 31.484 | 63.622 | 0.00 | 0.00 |
| ATOM | 5599 | O    | ALA | X | 373 | 56.397 | 30.353 | 63.562 | 0.00 | 0.00 |
| ATOM | 5600 | N    | VAL | X | 374 | 56.762 | 32.348 | 62.542 | 0.00 | 0.00 |
| ATOM | 5601 | H    | VAL | X | 374 | 57.224 | 33.225 | 62.740 | 0.00 | 0.00 |
| ATOM | 5602 | CA   | VAL | X | 374 | 56.057 | 31.961 | 61.296 | 0.00 | 0.00 |
| ATOM | 5603 | HA   | VAL | X | 374 | 55.083 | 31.565 | 61.587 | 0.00 | 0.00 |
| ATOM | 5604 | CB   | VAL | X | 374 | 55.778 | 33.224 | 60.449 | 0.00 | 0.00 |
| ATOM | 5605 | HB   | VAL | X | 374 | 56.713 | 33.782 | 60.396 | 0.00 | 0.00 |
| ATOM | 5606 | CG1  | VAL | X | 374 | 55.191 | 32.942 | 59.026 | 0.00 | 0.00 |
| ATOM | 5607 | HG11 | VAL | X | 374 | 54.168 | 32.576 | 59.112 | 0.00 | 0.00 |
| ATOM | 5608 | HG12 | VAL | X | 374 | 55.059 | 33.875 | 58.478 | 0.00 | 0.00 |
| ATOM | 5609 | HG13 | VAL | X | 374 | 55.697 | 32.176 | 58.439 | 0.00 | 0.00 |
| ATOM | 5610 | CG2  | VAL | X | 374 | 54.815 | 34.138 | 61.150 | 0.00 | 0.00 |
| ATOM | 5611 | HG21 | VAL | X | 374 | 53.901 | 33.603 | 61.410 | 0.00 | 0.00 |
| ATOM | 5612 | HG22 | VAL | X | 374 | 54.716 | 35.066 | 60.587 | 0.00 | 0.00 |
| ATOM | 5613 | HG23 | VAL | X | 374 | 55.261 | 34.396 | 62.111 | 0.00 | 0.00 |
| ATOM | 5614 | C    | VAL | X | 374 | 56.779 | 30.884 | 60.563 | 0.00 | 0.00 |
| ATOM | 5615 | O    | VAL | X | 374 | 56.158 | 29.907 | 60.173 | 0.00 | 0.00 |
| ATOM | 5616 | N    | VAL | X | 375 | 58.066 | 30.999 | 60.390 | 0.00 | 0.00 |
| ATOM | 5617 | H    | VAL | X | 375 | 58.494 | 31.908 | 60.493 | 0.00 | 0.00 |
| ATOM | 5618 | CA   | VAL | X | 375 | 58.906 | 30.030 | 59.832 | 0.00 | 0.00 |
| ATOM | 5619 | HA   | VAL | X | 375 | 58.528 | 29.856 | 58.824 | 0.00 | 0.00 |
| ATOM | 5620 | CB   | VAL | X | 375 | 60.386 | 30.551 | 59.702 | 0.00 | 0.00 |
| ATOM | 5621 | HB   | VAL | X | 375 | 60.515 | 31.053 | 60.660 | 0.00 | 0.00 |
| ATOM | 5622 | CG1  | VAL | X | 375 | 61.590 | 29.586 | 59.416 | 0.00 | 0.00 |
| ATOM | 5623 | HG11 | VAL | X | 375 | 61.637 | 28.764 | 60.130 | 0.00 | 0.00 |
| ATOM | 5624 | HG12 | VAL | X | 375 | 61.495 | 29.135 | 58.428 | 0.00 | 0.00 |
| ATOM | 5625 | HG13 | VAL | X | 375 | 62.539 | 30.121 | 59.416 | 0.00 | 0.00 |
| ATOM | 5626 | CG2  | VAL | X | 375 | 60.561 | 31.640 | 58.639 | 0.00 | 0.00 |
| ATOM | 5627 | HG21 | VAL | X | 375 | 59.733 | 32.349 | 58.632 | 0.00 | 0.00 |
| ATOM | 5628 | HG22 | VAL | X | 375 | 60.476 | 31.176 | 57.657 | 0.00 | 0.00 |
| ATOM | 5629 | HG23 | VAL | X | 375 | 61.485 | 32.201 | 58.780 | 0.00 | 0.00 |
| ATOM | 5630 | C    | VAL | X | 375 | 58.753 | 28.725 | 60.594 | 0.00 | 0.00 |
| ATOM | 5631 | O    | VAL | X | 375 | 58.691 | 27.721 | 59.916 | 0.00 | 0.00 |
| ATOM | 5632 | N    | LEU | X | 376 | 58.870 | 28.635 | 61.921 | 0.00 | 0.00 |
| ATOM | 5633 | H    | LEU | X | 376 | 58.857 | 29.487 | 62.464 | 0.00 | 0.00 |
| ATOM | 5634 | CA   | LEU | X | 376 | 58.648 | 27.421 | 62.729 | 0.00 | 0.00 |
| ATOM | 5635 | HA   | LEU | X | 376 | 59.405 | 26.692 | 62.442 | 0.00 | 0.00 |
| ATOM | 5636 | CB   | LEU | X | 376 | 58.812 | 27.800 | 64.219 | 0.00 | 0.00 |
| ATOM | 5637 | HB2  | LEU | X | 376 | 59.860 | 27.970 | 64.463 | 0.00 | 0.00 |
| ATOM | 5638 | HB3  | LEU | X | 376 | 58.250 | 28.694 | 64.490 | 0.00 | 0.00 |
| ATOM | 5639 | CG   | LEU | X | 376 | 58.160 | 26.749 | 65.190 | 0.00 | 0.00 |
| ATOM | 5640 | HG   | LEU | X | 376 | 57.126 | 26.612 | 64.874 | 0.00 | 0.00 |
| ATOM | 5641 | CD1  | LEU | X | 376 | 58.914 | 25.447 | 65.198 | 0.00 | 0.00 |
| ATOM | 5642 | HD11 | LEU | X | 376 | 60.003 | 25.488 | 65.212 | 0.00 | 0.00 |
| ATOM | 5643 | HD12 | LEU | X | 376 | 58.594 | 24.834 | 64.355 | 0.00 | 0.00 |
| ATOM | 5644 | HD13 | LEU | X | 376 | 58.631 | 24.876 | 66.083 | 0.00 | 0.00 |
| ATOM | 5645 | CD2  | LEU | X | 376 | 58.133 | 27.284 | 66.620 | 0.00 | 0.00 |
| ATOM | 5646 | HD21 | LEU | X | 376 | 59.144 | 27.368 | 67.017 | 0.00 | 0.00 |
| ATOM | 5647 | HD22 | LEU | X | 376 | 57.654 | 28.263 | 66.588 | 0.00 | 0.00 |
| ATOM | 5648 | HD23 | LEU | X | 376 | 57.655 | 26.515 | 67.226 | 0.00 | 0.00 |
| ATOM | 5649 | C    | LEU | X | 376 | 57.297 | 26.766 | 62.444 | 0.00 | 0.00 |
| ATOM | 5650 | O    | LEU | X | 376 | 57.186 | 25.601 | 61.991 | 0.00 | 0.00 |
| ATOM | 5651 | N    | HIE | X | 377 | 56.230 | 27.538 | 62.593 | 0.00 | 0.00 |
| ATOM | 5652 | H    | HIE | X | 377 | 56.342 | 28.470 | 62.965 | 0.00 | 0.00 |

|      |      |      |     |   |     |        |        |        |      |      |
|------|------|------|-----|---|-----|--------|--------|--------|------|------|
| ATOM | 5653 | CA   | HIE | X | 377 | 54.862 | 27.189 | 62.325 | 0.00 | 0.00 |
| ATOM | 5654 | HA   | HIE | X | 377 | 54.643 | 26.277 | 62.881 | 0.00 | 0.00 |
| ATOM | 5655 | CB   | HIE | X | 377 | 53.980 | 28.282 | 62.868 | 0.00 | 0.00 |
| ATOM | 5656 | HB2  | HIE | X | 377 | 54.453 | 28.618 | 63.791 | 0.00 | 0.00 |
| ATOM | 5657 | HB3  | HIE | X | 377 | 53.898 | 29.082 | 62.132 | 0.00 | 0.00 |
| ATOM | 5658 | CG   | HIE | X | 377 | 52.602 | 27.769 | 63.092 | 0.00 | 0.00 |
| ATOM | 5659 | ND1  | HIE | X | 377 | 52.200 | 27.253 | 64.334 | 0.00 | 0.00 |
| ATOM | 5660 | CE1  | HIE | X | 377 | 50.941 | 26.958 | 64.135 | 0.00 | 0.00 |
| ATOM | 5661 | HE1  | HIE | X | 377 | 50.243 | 26.545 | 64.848 | 0.00 | 0.00 |
| ATOM | 5662 | NE2  | HIE | X | 377 | 50.493 | 27.290 | 62.881 | 0.00 | 0.00 |
| ATOM | 5663 | HE2  | HIE | X | 377 | 49.573 | 27.093 | 62.515 | 0.00 | 0.00 |
| ATOM | 5664 | CD2  | HIE | X | 377 | 51.527 | 27.839 | 62.192 | 0.00 | 0.00 |
| ATOM | 5665 | HD2  | HIE | X | 377 | 51.502 | 28.304 | 61.217 | 0.00 | 0.00 |
| ATOM | 5666 | C    | HIE | X | 377 | 54.484 | 26.771 | 60.879 | 0.00 | 0.00 |
| ATOM | 5667 | O    | HIE | X | 377 | 53.534 | 26.019 | 60.704 | 0.00 | 0.00 |
| ATOM | 5668 | N    | TYR | X | 378 | 55.256 | 27.170 | 59.878 | 0.00 | 0.00 |
| ATOM | 5669 | H    | TYR | X | 378 | 55.774 | 28.004 | 60.114 | 0.00 | 0.00 |
| ATOM | 5670 | CA   | TYR | X | 378 | 55.168 | 26.630 | 58.487 | 0.00 | 0.00 |
| ATOM | 5671 | HA   | TYR | X | 378 | 54.212 | 26.107 | 58.498 | 0.00 | 0.00 |
| ATOM | 5672 | CB   | TYR | X | 378 | 55.039 | 27.755 | 57.490 | 0.00 | 0.00 |
| ATOM | 5673 | HB2  | TYR | X | 378 | 55.522 | 28.723 | 57.624 | 0.00 | 0.00 |
| ATOM | 5674 | HB3  | TYR | X | 378 | 55.251 | 27.385 | 56.486 | 0.00 | 0.00 |
| ATOM | 5675 | CG   | TYR | X | 378 | 53.588 | 28.175 | 57.370 | 0.00 | 0.00 |
| ATOM | 5676 | CD1  | TYR | X | 378 | 52.754 | 27.591 | 56.365 | 0.00 | 0.00 |
| ATOM | 5677 | HD1  | TYR | X | 378 | 53.274 | 27.000 | 55.626 | 0.00 | 0.00 |
| ATOM | 5678 | CE1  | TYR | X | 378 | 51.435 | 28.016 | 56.203 | 0.00 | 0.00 |
| ATOM | 5679 | HE1  | TYR | X | 378 | 50.833 | 27.549 | 55.438 | 0.00 | 0.00 |
| ATOM | 5680 | CZ   | TYR | X | 378 | 50.838 | 28.977 | 57.071 | 0.00 | 0.00 |
| ATOM | 5681 | OH   | TYR | X | 378 | 49.532 | 29.281 | 56.855 | 0.00 | 0.00 |
| ATOM | 5682 | HH   | TYR | X | 378 | 49.149 | 28.896 | 56.064 | 0.00 | 0.00 |
| ATOM | 5683 | CE2  | TYR | X | 378 | 51.626 | 29.493 | 58.154 | 0.00 | 0.00 |
| ATOM | 5684 | HE2  | TYR | X | 378 | 51.255 | 30.179 | 58.901 | 0.00 | 0.00 |
| ATOM | 5685 | CD2  | TYR | X | 378 | 52.979 | 29.145 | 58.237 | 0.00 | 0.00 |
| ATOM | 5686 | HD2  | TYR | X | 378 | 53.651 | 29.535 | 58.987 | 0.00 | 0.00 |
| ATOM | 5687 | C    | TYR | X | 378 | 56.212 | 25.637 | 57.977 | 0.00 | 0.00 |
| ATOM | 5688 | O    | TYR | X | 378 | 56.090 | 24.994 | 56.866 | 0.00 | 0.00 |
| ATOM | 5689 | N    | THR | X | 379 | 57.187 | 25.353 | 58.823 | 0.00 | 0.00 |
| ATOM | 5690 | H    | THR | X | 379 | 57.064 | 25.774 | 59.732 | 0.00 | 0.00 |
| ATOM | 5691 | CA   | THR | X | 379 | 58.040 | 24.158 | 58.656 | 0.00 | 0.00 |
| ATOM | 5692 | HA   | THR | X | 379 | 58.185 | 24.078 | 57.579 | 0.00 | 0.00 |
| ATOM | 5693 | CB   | THR | X | 379 | 59.389 | 24.295 | 59.452 | 0.00 | 0.00 |
| ATOM | 5694 | HB   | THR | X | 379 | 59.200 | 24.387 | 60.522 | 0.00 | 0.00 |
| ATOM | 5695 | CG2  | THR | X | 379 | 60.424 | 23.146 | 59.284 | 0.00 | 0.00 |
| ATOM | 5696 | HG21 | THR | X | 379 | 60.092 | 22.197 | 59.705 | 0.00 | 0.00 |
| ATOM | 5697 | HG22 | THR | X | 379 | 61.316 | 23.365 | 59.871 | 0.00 | 0.00 |
| ATOM | 5698 | HG23 | THR | X | 379 | 60.734 | 23.018 | 58.247 | 0.00 | 0.00 |
| ATOM | 5699 | OG1  | THR | X | 379 | 60.041 | 25.401 | 58.956 | 0.00 | 0.00 |
| ATOM | 5700 | HG1  | THR | X | 379 | 59.623 | 26.191 | 59.307 | 0.00 | 0.00 |
| ATOM | 5701 | C    | THR | X | 379 | 57.329 | 22.937 | 59.103 | 0.00 | 0.00 |
| ATOM | 5702 | O    | THR | X | 379 | 56.800 | 22.735 | 60.186 | 0.00 | 0.00 |
| ATOM | 5703 | N    | ASP | X | 380 | 57.507 | 21.897 | 58.314 | 0.00 | 0.00 |
| ATOM | 5704 | H    | ASP | X | 380 | 58.056 | 22.026 | 57.476 | 0.00 | 0.00 |
| ATOM | 5705 | CA   | ASP | X | 380 | 57.266 | 20.459 | 58.490 | 0.00 | 0.00 |
| ATOM | 5706 | HA   | ASP | X | 380 | 56.678 | 20.487 | 59.408 | 0.00 | 0.00 |
| ATOM | 5707 | CB   | ASP | X | 380 | 56.590 | 19.862 | 57.282 | 0.00 | 0.00 |
| ATOM | 5708 | HB2  | ASP | X | 380 | 55.616 | 20.337 | 57.168 | 0.00 | 0.00 |
| ATOM | 5709 | HB3  | ASP | X | 380 | 57.152 | 20.155 | 56.396 | 0.00 | 0.00 |
| ATOM | 5710 | CG   | ASP | X | 380 | 56.458 | 18.316 | 57.280 | 0.00 | 0.00 |
| ATOM | 5711 | OD1  | ASP | X | 380 | 56.619 | 17.718 | 58.361 | 0.00 | 0.00 |
| ATOM | 5712 | OD2  | ASP | X | 380 | 56.254 | 17.764 | 56.196 | 0.00 | 0.00 |
| ATOM | 5713 | C    | ASP | X | 380 | 58.589 | 19.798 | 58.788 | 0.00 | 0.00 |
| ATOM | 5714 | O    | ASP | X | 380 | 59.465 | 19.747 | 57.933 | 0.00 | 0.00 |
| ATOM | 5715 | N    | TRP | X | 381 | 58.786 | 19.345 | 60.043 | 0.00 | 0.00 |
| ATOM | 5716 | H    | TRP | X | 381 | 57.965 | 19.327 | 60.631 | 0.00 | 0.00 |
| ATOM | 5717 | CA   | TRP | X | 381 | 60.067 | 19.248 | 60.711 | 0.00 | 0.00 |
| ATOM | 5718 | HA   | TRP | X | 381 | 60.682 | 20.065 | 60.335 | 0.00 | 0.00 |
| ATOM | 5719 | CB   | TRP | X | 381 | 59.792 | 19.506 | 62.193 | 0.00 | 0.00 |

|      |      |      |     |   |     |        |        |        |      |      |
|------|------|------|-----|---|-----|--------|--------|--------|------|------|
| ATOM | 5720 | HB2  | TRP | X | 381 | 58.795 | 19.104 | 62.375 | 0.00 | 0.00 |
| ATOM | 5721 | HB3  | TRP | X | 381 | 60.505 | 18.917 | 62.770 | 0.00 | 0.00 |
| ATOM | 5722 | CG   | TRP | X | 381 | 59.759 | 20.936 | 62.435 | 0.00 | 0.00 |
| ATOM | 5723 | CD1  | TRP | X | 381 | 58.637 | 21.675 | 62.512 | 0.00 | 0.00 |
| ATOM | 5724 | HD1  | TRP | X | 381 | 57.593 | 21.400 | 62.476 | 0.00 | 0.00 |
| ATOM | 5725 | NE1  | TRP | X | 381 | 59.007 | 22.972 | 62.691 | 0.00 | 0.00 |
| ATOM | 5726 | HE1  | TRP | X | 381 | 58.398 | 23.775 | 62.752 | 0.00 | 0.00 |
| ATOM | 5727 | CE2  | TRP | X | 381 | 60.354 | 23.181 | 62.795 | 0.00 | 0.00 |
| ATOM | 5728 | CZ2  | TRP | X | 381 | 61.190 | 24.291 | 62.930 | 0.00 | 0.00 |
| ATOM | 5729 | HZ2  | TRP | X | 381 | 60.861 | 25.282 | 63.204 | 0.00 | 0.00 |
| ATOM | 5730 | CH2  | TRP | X | 381 | 62.602 | 24.167 | 62.805 | 0.00 | 0.00 |
| ATOM | 5731 | HH2  | TRP | X | 381 | 63.327 | 24.913 | 63.094 | 0.00 | 0.00 |
| ATOM | 5732 | CZ3  | TRP | X | 381 | 63.170 | 22.908 | 62.458 | 0.00 | 0.00 |
| ATOM | 5733 | HZ3  | TRP | X | 381 | 64.232 | 22.769 | 62.325 | 0.00 | 0.00 |
| ATOM | 5734 | CE3  | TRP | X | 381 | 62.313 | 21.792 | 62.335 | 0.00 | 0.00 |
| ATOM | 5735 | HE3  | TRP | X | 381 | 62.673 | 20.816 | 62.043 | 0.00 | 0.00 |
| ATOM | 5736 | CD2  | TRP | X | 381 | 60.898 | 21.871 | 62.551 | 0.00 | 0.00 |
| ATOM | 5737 | C    | TRP | X | 381 | 60.734 | 17.893 | 60.663 | 0.00 | 0.00 |
| ATOM | 5738 | O    | TRP | X | 381 | 61.819 | 17.673 | 61.121 | 0.00 | 0.00 |
| ATOM | 5739 | N    | LEU | X | 382 | 60.078 | 16.959 | 59.976 | 0.00 | 0.00 |
| ATOM | 5740 | H    | LEU | X | 382 | 59.211 | 17.254 | 59.549 | 0.00 | 0.00 |
| ATOM | 5741 | CA   | LEU | X | 382 | 60.691 | 15.694 | 59.556 | 0.00 | 0.00 |
| ATOM | 5742 | HA   | LEU | X | 382 | 61.229 | 15.314 | 60.425 | 0.00 | 0.00 |
| ATOM | 5743 | CB   | LEU | X | 382 | 59.504 | 14.663 | 59.170 | 0.00 | 0.00 |
| ATOM | 5744 | HB2  | LEU | X | 382 | 58.792 | 14.654 | 59.996 | 0.00 | 0.00 |
| ATOM | 5745 | HB3  | LEU | X | 382 | 58.928 | 14.994 | 58.306 | 0.00 | 0.00 |
| ATOM | 5746 | CG   | LEU | X | 382 | 60.080 | 13.320 | 58.966 | 0.00 | 0.00 |
| ATOM | 5747 | HG   | LEU | X | 382 | 60.986 | 13.265 | 58.363 | 0.00 | 0.00 |
| ATOM | 5748 | CD1  | LEU | X | 382 | 60.671 | 12.683 | 60.208 | 0.00 | 0.00 |
| ATOM | 5749 | HD11 | LEU | X | 382 | 61.666 | 13.043 | 60.469 | 0.00 | 0.00 |
| ATOM | 5750 | HD12 | LEU | X | 382 | 60.638 | 11.616 | 59.987 | 0.00 | 0.00 |
| ATOM | 5751 | HD13 | LEU | X | 382 | 59.970 | 12.764 | 61.038 | 0.00 | 0.00 |
| ATOM | 5752 | CD2  | LEU | X | 382 | 58.974 | 12.392 | 58.337 | 0.00 | 0.00 |
| ATOM | 5753 | HD21 | LEU | X | 382 | 59.386 | 11.620 | 57.687 | 0.00 | 0.00 |
| ATOM | 5754 | HD22 | LEU | X | 382 | 58.395 | 11.978 | 59.163 | 0.00 | 0.00 |
| ATOM | 5755 | HD23 | LEU | X | 382 | 58.169 | 12.904 | 57.810 | 0.00 | 0.00 |
| ATOM | 5756 | C    | LEU | X | 382 | 61.617 | 15.981 | 58.313 | 0.00 | 0.00 |
| ATOM | 5757 | O    | LEU | X | 382 | 62.505 | 15.190 | 57.982 | 0.00 | 0.00 |
| ATOM | 5758 | N    | HIE | X | 383 | 61.323 | 17.058 | 57.606 | 0.00 | 0.00 |
| ATOM | 5759 | H    | HIE | X | 383 | 60.592 | 17.669 | 57.942 | 0.00 | 0.00 |
| ATOM | 5760 | CA   | HIE | X | 383 | 61.995 | 17.510 | 56.443 | 0.00 | 0.00 |
| ATOM | 5761 | HA   | HIE | X | 383 | 63.006 | 17.105 | 56.404 | 0.00 | 0.00 |
| ATOM | 5762 | CB   | HIE | X | 383 | 61.109 | 17.097 | 55.257 | 0.00 | 0.00 |
| ATOM | 5763 | HB2  | HIE | X | 383 | 60.114 | 17.521 | 55.396 | 0.00 | 0.00 |
| ATOM | 5764 | HB3  | HIE | X | 383 | 61.597 | 17.585 | 54.413 | 0.00 | 0.00 |
| ATOM | 5765 | CG   | HIE | X | 383 | 61.134 | 15.576 | 55.051 | 0.00 | 0.00 |
| ATOM | 5766 | ND1  | HIE | X | 383 | 62.259 | 14.913 | 54.516 | 0.00 | 0.00 |
| ATOM | 5767 | CE1  | HIE | X | 383 | 61.994 | 13.616 | 54.621 | 0.00 | 0.00 |
| ATOM | 5768 | HE1  | HIE | X | 383 | 62.637 | 12.782 | 54.385 | 0.00 | 0.00 |
| ATOM | 5769 | NE2  | HIE | X | 383 | 60.789 | 13.429 | 55.197 | 0.00 | 0.00 |
| ATOM | 5770 | HE2  | HIE | X | 383 | 60.448 | 12.527 | 55.496 | 0.00 | 0.00 |
| ATOM | 5771 | CD2  | HIE | X | 383 | 60.183 | 14.655 | 55.495 | 0.00 | 0.00 |
| ATOM | 5772 | HD2  | HIE | X | 383 | 59.223 | 14.779 | 55.975 | 0.00 | 0.00 |
| ATOM | 5773 | C    | HIE | X | 383 | 62.256 | 19.013 | 56.381 | 0.00 | 0.00 |
| ATOM | 5774 | O    | HIE | X | 383 | 61.667 | 19.692 | 55.550 | 0.00 | 0.00 |
| ATOM | 5775 | N    | PRO | X | 384 | 63.145 | 19.523 | 57.294 | 0.00 | 0.00 |
| ATOM | 5776 | CD   | PRO | X | 384 | 63.793 | 18.741 | 58.380 | 0.00 | 0.00 |
| ATOM | 5777 | HD2  | PRO | X | 384 | 64.407 | 17.903 | 58.050 | 0.00 | 0.00 |
| ATOM | 5778 | HD3  | PRO | X | 384 | 63.155 | 18.469 | 59.221 | 0.00 | 0.00 |
| ATOM | 5779 | CG   | PRO | X | 384 | 64.811 | 19.731 | 58.931 | 0.00 | 0.00 |
| ATOM | 5780 | HG2  | PRO | X | 384 | 65.632 | 19.855 | 58.224 | 0.00 | 0.00 |
| ATOM | 5781 | HG3  | PRO | X | 384 | 65.007 | 19.480 | 59.974 | 0.00 | 0.00 |
| ATOM | 5782 | CB   | PRO | X | 384 | 64.089 | 20.999 | 58.964 | 0.00 | 0.00 |
| ATOM | 5783 | HB2  | PRO | X | 384 | 64.854 | 21.765 | 59.093 | 0.00 | 0.00 |
| ATOM | 5784 | HB3  | PRO | X | 384 | 63.314 | 21.069 | 59.727 | 0.00 | 0.00 |
| ATOM | 5785 | CA   | PRO | X | 384 | 63.404 | 20.957 | 57.543 | 0.00 | 0.00 |
| ATOM | 5786 | HA   | PRO | X | 384 | 62.442 | 21.464 | 57.619 | 0.00 | 0.00 |



|      |      |     |     |   |     |        |        |        |      |      |
|------|------|-----|-----|---|-----|--------|--------|--------|------|------|
| ATOM | 5787 | C   | PRO | X | 384 | 64.147 | 21.687 | 56.479 | 0.00 | 0.00 |
| ATOM | 5788 | O   | PRO | X | 384 | 64.024 | 22.917 | 56.432 | 0.00 | 0.00 |
| ATOM | 5789 | N   | GLU | X | 385 | 64.995 | 21.097 | 55.676 | 0.00 | 0.00 |
| ATOM | 5790 | H   | GLU | X | 385 | 65.113 | 20.095 | 55.714 | 0.00 | 0.00 |
| ATOM | 5791 | CA  | GLU | X | 385 | 65.761 | 21.694 | 54.541 | 0.00 | 0.00 |
| ATOM | 5792 | HA  | GLU | X | 385 | 65.511 | 22.754 | 54.570 | 0.00 | 0.00 |
| ATOM | 5793 | CB  | GLU | X | 385 | 67.270 | 21.530 | 54.822 | 0.00 | 0.00 |
| ATOM | 5794 | HB2 | GLU | X | 385 | 67.393 | 20.449 | 54.744 | 0.00 | 0.00 |
| ATOM | 5795 | HB3 | GLU | X | 385 | 67.845 | 21.923 | 53.983 | 0.00 | 0.00 |
| ATOM | 5796 | CG  | GLU | X | 385 | 67.858 | 22.109 | 56.154 | 0.00 | 0.00 |
| ATOM | 5797 | HG2 | GLU | X | 385 | 67.864 | 23.197 | 56.090 | 0.00 | 0.00 |
| ATOM | 5798 | HG3 | GLU | X | 385 | 67.341 | 21.686 | 57.015 | 0.00 | 0.00 |
| ATOM | 5799 | CD  | GLU | X | 385 | 69.287 | 21.695 | 56.175 | 0.00 | 0.00 |
| ATOM | 5800 | OE1 | GLU | X | 385 | 70.135 | 22.538 | 56.014 | 0.00 | 0.00 |
| ATOM | 5801 | OE2 | GLU | X | 385 | 69.649 | 20.548 | 56.585 | 0.00 | 0.00 |
| ATOM | 5802 | C   | GLU | X | 385 | 65.335 | 21.201 | 53.132 | 0.00 | 0.00 |
| ATOM | 5803 | O   | GLU | X | 385 | 66.120 | 21.447 | 52.211 | 0.00 | 0.00 |
| ATOM | 5804 | N   | ASP | X | 386 | 64.199 | 20.480 | 53.033 | 0.00 | 0.00 |
| ATOM | 5805 | H   | ASP | X | 386 | 63.595 | 20.303 | 53.823 | 0.00 | 0.00 |
| ATOM | 5806 | CA  | ASP | X | 386 | 63.874 | 19.809 | 51.773 | 0.00 | 0.00 |
| ATOM | 5807 | HA  | ASP | X | 386 | 64.741 | 19.267 | 51.395 | 0.00 | 0.00 |
| ATOM | 5808 | CB  | ASP | X | 386 | 62.753 | 18.871 | 52.114 | 0.00 | 0.00 |
| ATOM | 5809 | HB2 | ASP | X | 386 | 63.240 | 18.038 | 52.619 | 0.00 | 0.00 |
| ATOM | 5810 | HB3 | ASP | X | 386 | 62.158 | 19.277 | 52.933 | 0.00 | 0.00 |
| ATOM | 5811 | CG  | ASP | X | 386 | 61.967 | 18.215 | 51.003 | 0.00 | 0.00 |
| ATOM | 5812 | OD1 | ASP | X | 386 | 62.174 | 18.410 | 49.781 | 0.00 | 0.00 |
| ATOM | 5813 | OD2 | ASP | X | 386 | 61.134 | 17.303 | 51.338 | 0.00 | 0.00 |
| ATOM | 5814 | C   | ASP | X | 386 | 63.364 | 20.883 | 50.741 | 0.00 | 0.00 |
| ATOM | 5815 | O   | ASP | X | 386 | 62.450 | 21.629 | 51.050 | 0.00 | 0.00 |
| ATOM | 5816 | N   | PRO | X | 387 | 64.048 | 21.043 | 49.575 | 0.00 | 0.00 |
| ATOM | 5817 | CD  | PRO | X | 387 | 64.958 | 20.051 | 48.986 | 0.00 | 0.00 |
| ATOM | 5818 | HD2 | PRO | X | 387 | 64.659 | 19.003 | 48.999 | 0.00 | 0.00 |
| ATOM | 5819 | HD3 | PRO | X | 387 | 65.955 | 20.159 | 49.412 | 0.00 | 0.00 |
| ATOM | 5820 | CG  | PRO | X | 387 | 65.043 | 20.438 | 47.503 | 0.00 | 0.00 |
| ATOM | 5821 | HG2 | PRO | X | 387 | 64.178 | 20.202 | 46.885 | 0.00 | 0.00 |
| ATOM | 5822 | HG3 | PRO | X | 387 | 65.921 | 20.038 | 46.996 | 0.00 | 0.00 |
| ATOM | 5823 | CB  | PRO | X | 387 | 65.091 | 21.974 | 47.704 | 0.00 | 0.00 |
| ATOM | 5824 | HB2 | PRO | X | 387 | 64.818 | 22.441 | 46.758 | 0.00 | 0.00 |
| ATOM | 5825 | HB3 | PRO | X | 387 | 66.056 | 22.282 | 48.108 | 0.00 | 0.00 |
| ATOM | 5826 | CA  | PRO | X | 387 | 64.030 | 22.240 | 48.766 | 0.00 | 0.00 |
| ATOM | 5827 | HA  | PRO | X | 387 | 64.177 | 22.994 | 49.539 | 0.00 | 0.00 |
| ATOM | 5828 | C   | PRO | X | 387 | 62.604 | 22.347 | 48.128 | 0.00 | 0.00 |
| ATOM | 5829 | O   | PRO | X | 387 | 62.114 | 23.484 | 48.241 | 0.00 | 0.00 |
| ATOM | 5830 | N   | ALA | X | 388 | 61.945 | 21.291 | 47.674 | 0.00 | 0.00 |
| ATOM | 5831 | H   | ALA | X | 388 | 62.406 | 20.400 | 47.799 | 0.00 | 0.00 |
| ATOM | 5832 | CA  | ALA | X | 388 | 60.642 | 21.397 | 46.978 | 0.00 | 0.00 |
| ATOM | 5833 | HA  | ALA | X | 388 | 60.656 | 22.203 | 46.245 | 0.00 | 0.00 |
| ATOM | 5834 | CB  | ALA | X | 388 | 60.448 | 20.017 | 46.311 | 0.00 | 0.00 |
| ATOM | 5835 | HB1 | ALA | X | 388 | 59.518 | 19.986 | 45.744 | 0.00 | 0.00 |
| ATOM | 5836 | HB2 | ALA | X | 388 | 60.333 | 19.249 | 47.076 | 0.00 | 0.00 |
| ATOM | 5837 | HB3 | ALA | X | 388 | 61.238 | 19.666 | 45.647 | 0.00 | 0.00 |
| ATOM | 5838 | C   | ALA | X | 388 | 59.587 | 21.809 | 47.981 | 0.00 | 0.00 |
| ATOM | 5839 | O   | ALA | X | 388 | 58.775 | 22.737 | 47.763 | 0.00 | 0.00 |
| ATOM | 5840 | N   | ARG | X | 389 | 59.549 | 21.102 | 49.159 | 0.00 | 0.00 |
| ATOM | 5841 | H   | ARG | X | 389 | 60.273 | 20.400 | 49.227 | 0.00 | 0.00 |
| ATOM | 5842 | CA  | ARG | X | 389 | 58.663 | 21.220 | 50.327 | 0.00 | 0.00 |
| ATOM | 5843 | HA  | ARG | X | 389 | 57.629 | 21.031 | 50.040 | 0.00 | 0.00 |
| ATOM | 5844 | CB  | ARG | X | 389 | 58.941 | 20.091 | 51.336 | 0.00 | 0.00 |
| ATOM | 5845 | HB2 | ARG | X | 389 | 58.697 | 19.223 | 50.724 | 0.00 | 0.00 |
| ATOM | 5846 | HB3 | ARG | X | 389 | 59.988 | 20.143 | 51.637 | 0.00 | 0.00 |
| ATOM | 5847 | CG  | ARG | X | 389 | 57.998 | 20.032 | 52.533 | 0.00 | 0.00 |
| ATOM | 5848 | HG2 | ARG | X | 389 | 57.890 | 21.044 | 52.923 | 0.00 | 0.00 |
| ATOM | 5849 | HG3 | ARG | X | 389 | 57.052 | 19.571 | 52.247 | 0.00 | 0.00 |
| ATOM | 5850 | CD  | ARG | X | 389 | 58.495 | 19.092 | 53.615 | 0.00 | 0.00 |
| ATOM | 5851 | HD2 | ARG | X | 389 | 59.348 | 19.569 | 54.100 | 0.00 | 0.00 |
| ATOM | 5852 | HD3 | ARG | X | 389 | 57.684 | 19.003 | 54.337 | 0.00 | 0.00 |
| ATOM | 5853 | NE  | ARG | X | 389 | 58.828 | 17.780 | 53.083 | 0.00 | 0.00 |

|      |      |      |     |   |     |        |        |        |      |      |
|------|------|------|-----|---|-----|--------|--------|--------|------|------|
| ATOM | 5854 | HE   | ARG | X | 389 | 59.671 | 17.701 | 52.532 | 0.00 | 0.00 |
| ATOM | 5855 | CZ   | ARG | X | 389 | 58.289 | 16.612 | 53.238 | 0.00 | 0.00 |
| ATOM | 5856 | NH1  | ARG | X | 389 | 57.231 | 16.376 | 53.995 | 0.00 | 0.00 |
| ATOM | 5857 | HH11 | ARG | X | 389 | 56.832 | 17.139 | 54.522 | 0.00 | 0.00 |
| ATOM | 5858 | HH12 | ARG | X | 389 | 56.727 | 15.506 | 54.090 | 0.00 | 0.00 |
| ATOM | 5859 | NH2  | ARG | X | 389 | 58.887 | 15.641 | 52.618 | 0.00 | 0.00 |
| ATOM | 5860 | HH21 | ARG | X | 389 | 59.632 | 15.846 | 51.968 | 0.00 | 0.00 |
| ATOM | 5861 | HH22 | ARG | X | 389 | 58.621 | 14.686 | 52.809 | 0.00 | 0.00 |
| ATOM | 5862 | C    | ARG | X | 389 | 58.691 | 22.598 | 51.011 | 0.00 | 0.00 |
| ATOM | 5863 | O    | ARG | X | 389 | 57.622 | 23.235 | 51.198 | 0.00 | 0.00 |
| ATOM | 5864 | N    | LEU | X | 390 | 59.934 | 23.198 | 51.073 | 0.00 | 0.00 |
| ATOM | 5865 | H    | LEU | X | 390 | 60.709 | 22.684 | 50.679 | 0.00 | 0.00 |
| ATOM | 5866 | CA   | LEU | X | 390 | 60.045 | 24.553 | 51.615 | 0.00 | 0.00 |
| ATOM | 5867 | HA   | LEU | X | 390 | 59.528 | 24.509 | 52.573 | 0.00 | 0.00 |
| ATOM | 5868 | CB   | LEU | X | 390 | 61.463 | 24.888 | 51.941 | 0.00 | 0.00 |
| ATOM | 5869 | HB2  | LEU | X | 390 | 62.064 | 24.595 | 51.081 | 0.00 | 0.00 |
| ATOM | 5870 | HB3  | LEU | X | 390 | 61.524 | 25.970 | 52.053 | 0.00 | 0.00 |
| ATOM | 5871 | CG   | LEU | X | 390 | 62.162 | 24.269 | 53.168 | 0.00 | 0.00 |
| ATOM | 5872 | HG   | LEU | X | 390 | 62.322 | 23.213 | 52.952 | 0.00 | 0.00 |
| ATOM | 5873 | CD1  | LEU | X | 390 | 63.526 | 24.918 | 53.359 | 0.00 | 0.00 |
| ATOM | 5874 | HD11 | LEU | X | 390 | 63.995 | 24.536 | 54.265 | 0.00 | 0.00 |
| ATOM | 5875 | HD12 | LEU | X | 390 | 63.412 | 25.966 | 53.638 | 0.00 | 0.00 |
| ATOM | 5876 | HD13 | LEU | X | 390 | 64.120 | 24.661 | 52.482 | 0.00 | 0.00 |
| ATOM | 5877 | CD2  | LEU | X | 390 | 61.351 | 24.457 | 54.456 | 0.00 | 0.00 |
| ATOM | 5878 | HD21 | LEU | X | 390 | 61.756 | 23.942 | 55.327 | 0.00 | 0.00 |
| ATOM | 5879 | HD22 | LEU | X | 390 | 61.276 | 25.535 | 54.603 | 0.00 | 0.00 |
| ATOM | 5880 | HD23 | LEU | X | 390 | 60.302 | 24.167 | 54.402 | 0.00 | 0.00 |
| ATOM | 5881 | C    | LEU | X | 390 | 59.469 | 25.600 | 50.608 | 0.00 | 0.00 |
| ATOM | 5882 | O    | LEU | X | 390 | 58.576 | 26.367 | 50.923 | 0.00 | 0.00 |
| ATOM | 5883 | N    | ARG | X | 391 | 59.804 | 25.442 | 49.285 | 0.00 | 0.00 |
| ATOM | 5884 | H    | ARG | X | 391 | 60.377 | 24.624 | 49.131 | 0.00 | 0.00 |
| ATOM | 5885 | CA   | ARG | X | 391 | 59.269 | 26.273 | 48.174 | 0.00 | 0.00 |
| ATOM | 5886 | HA   | ARG | X | 391 | 59.499 | 27.310 | 48.420 | 0.00 | 0.00 |
| ATOM | 5887 | CB   | ARG | X | 391 | 60.002 | 25.887 | 46.879 | 0.00 | 0.00 |
| ATOM | 5888 | HB2  | ARG | X | 391 | 61.046 | 26.173 | 47.002 | 0.00 | 0.00 |
| ATOM | 5889 | HB3  | ARG | X | 391 | 59.968 | 24.801 | 46.792 | 0.00 | 0.00 |
| ATOM | 5890 | CG   | ARG | X | 391 | 59.299 | 26.489 | 45.566 | 0.00 | 0.00 |
| ATOM | 5891 | HG2  | ARG | X | 391 | 58.260 | 26.751 | 45.763 | 0.00 | 0.00 |
| ATOM | 5892 | HG3  | ARG | X | 391 | 59.917 | 27.337 | 45.273 | 0.00 | 0.00 |
| ATOM | 5893 | CD   | ARG | X | 391 | 59.225 | 25.638 | 44.271 | 0.00 | 0.00 |
| ATOM | 5894 | HD2  | ARG | X | 391 | 58.814 | 26.167 | 43.411 | 0.00 | 0.00 |
| ATOM | 5895 | HD3  | ARG | X | 391 | 60.253 | 25.376 | 44.022 | 0.00 | 0.00 |
| ATOM | 5896 | NE   | ARG | X | 391 | 58.516 | 24.270 | 44.414 | 0.00 | 0.00 |
| ATOM | 5897 | HE   | ARG | X | 391 | 59.060 | 23.463 | 44.147 | 0.00 | 0.00 |
| ATOM | 5898 | CZ   | ARG | X | 391 | 57.260 | 24.070 | 44.782 | 0.00 | 0.00 |
| ATOM | 5899 | NH1  | ARG | X | 391 | 56.427 | 25.084 | 44.964 | 0.00 | 0.00 |
| ATOM | 5900 | HH11 | ARG | X | 391 | 56.656 | 26.026 | 44.679 | 0.00 | 0.00 |
| ATOM | 5901 | HH12 | ARG | X | 391 | 55.489 | 24.876 | 45.274 | 0.00 | 0.00 |
| ATOM | 5902 | NH2  | ARG | X | 391 | 56.691 | 22.855 | 44.735 | 0.00 | 0.00 |
| ATOM | 5903 | HH21 | ARG | X | 391 | 57.101 | 21.942 | 44.600 | 0.00 | 0.00 |
| ATOM | 5904 | HH22 | ARG | X | 391 | 55.694 | 22.787 | 44.879 | 0.00 | 0.00 |
| ATOM | 5905 | C    | ARG | X | 391 | 57.717 | 26.179 | 48.099 | 0.00 | 0.00 |
| ATOM | 5906 | O    | ARG | X | 391 | 57.100 | 27.219 | 47.796 | 0.00 | 0.00 |
| ATOM | 5907 | N    | GLU | X | 392 | 57.113 | 25.041 | 48.424 | 0.00 | 0.00 |
| ATOM | 5908 | H    | GLU | X | 392 | 57.676 | 24.208 | 48.519 | 0.00 | 0.00 |
| ATOM | 5909 | CA   | GLU | X | 392 | 55.638 | 24.974 | 48.467 | 0.00 | 0.00 |
| ATOM | 5910 | HA   | GLU | X | 392 | 55.242 | 25.313 | 47.509 | 0.00 | 0.00 |
| ATOM | 5911 | CB   | GLU | X | 392 | 55.249 | 23.440 | 48.415 | 0.00 | 0.00 |
| ATOM | 5912 | HB2  | GLU | X | 392 | 55.852 | 22.801 | 47.771 | 0.00 | 0.00 |
| ATOM | 5913 | HB3  | GLU | X | 392 | 55.467 | 23.032 | 49.401 | 0.00 | 0.00 |
| ATOM | 5914 | CG   | GLU | X | 392 | 53.784 | 23.182 | 47.997 | 0.00 | 0.00 |
| ATOM | 5915 | HG2  | GLU | X | 392 | 53.562 | 22.195 | 48.403 | 0.00 | 0.00 |
| ATOM | 5916 | HG3  | GLU | X | 392 | 53.075 | 23.930 | 48.353 | 0.00 | 0.00 |
| ATOM | 5917 | CD   | GLU | X | 392 | 53.652 | 23.173 | 46.573 | 0.00 | 0.00 |
| ATOM | 5918 | OE1  | GLU | X | 392 | 53.601 | 22.035 | 46.024 | 0.00 | 0.00 |
| ATOM | 5919 | OE2  | GLU | X | 392 | 53.801 | 24.214 | 45.867 | 0.00 | 0.00 |
| ATOM | 5920 | C    | GLU | X | 392 | 54.984 | 25.694 | 49.674 | 0.00 | 0.00 |

|      |      |      |     |   |     |        |        |        |      |      |
|------|------|------|-----|---|-----|--------|--------|--------|------|------|
| ATOM | 5921 | O    | GLU | X | 392 | 53.824 | 26.115 | 49.555 | 0.00 | 0.00 |
| ATOM | 5922 | N    | ALA | X | 393 | 55.723 | 25.805 | 50.812 | 0.00 | 0.00 |
| ATOM | 5923 | H    | ALA | X | 393 | 56.636 | 25.378 | 50.881 | 0.00 | 0.00 |
| ATOM | 5924 | CA   | ALA | X | 393 | 55.087 | 26.300 | 51.995 | 0.00 | 0.00 |
| ATOM | 5925 | HA   | ALA | X | 393 | 54.071 | 25.920 | 52.105 | 0.00 | 0.00 |
| ATOM | 5926 | CB   | ALA | X | 393 | 55.909 | 25.894 | 53.230 | 0.00 | 0.00 |
| ATOM | 5927 | HB1  | ALA | X | 393 | 56.248 | 24.859 | 53.183 | 0.00 | 0.00 |
| ATOM | 5928 | HB2  | ALA | X | 393 | 55.262 | 26.118 | 54.079 | 0.00 | 0.00 |
| ATOM | 5929 | HB3  | ALA | X | 393 | 56.772 | 26.529 | 53.428 | 0.00 | 0.00 |
| ATOM | 5930 | C    | ALA | X | 393 | 55.032 | 27.856 | 52.043 | 0.00 | 0.00 |
| ATOM | 5931 | O    | ALA | X | 393 | 54.154 | 28.396 | 52.676 | 0.00 | 0.00 |
| ATOM | 5932 | N    | LEU | X | 394 | 55.908 | 28.549 | 51.271 | 0.00 | 0.00 |
| ATOM | 5933 | H    | LEU | X | 394 | 56.520 | 27.994 | 50.690 | 0.00 | 0.00 |
| ATOM | 5934 | CA   | LEU | X | 394 | 55.851 | 30.020 | 51.052 | 0.00 | 0.00 |
| ATOM | 5935 | HA   | LEU | X | 394 | 55.880 | 30.547 | 52.006 | 0.00 | 0.00 |
| ATOM | 5936 | CB   | LEU | X | 394 | 57.176 | 30.459 | 50.397 | 0.00 | 0.00 |
| ATOM | 5937 | HB2  | LEU | X | 394 | 58.020 | 30.100 | 50.987 | 0.00 | 0.00 |
| ATOM | 5938 | HB3  | LEU | X | 394 | 57.174 | 29.974 | 49.421 | 0.00 | 0.00 |
| ATOM | 5939 | CG   | LEU | X | 394 | 57.277 | 31.981 | 50.175 | 0.00 | 0.00 |
| ATOM | 5940 | HG   | LEU | X | 394 | 56.440 | 32.330 | 49.569 | 0.00 | 0.00 |
| ATOM | 5941 | CD1  | LEU | X | 394 | 57.274 | 32.722 | 51.506 | 0.00 | 0.00 |
| ATOM | 5942 | HD11 | LEU | X | 394 | 57.946 | 32.363 | 52.286 | 0.00 | 0.00 |
| ATOM | 5943 | HD12 | LEU | X | 394 | 56.269 | 32.711 | 51.928 | 0.00 | 0.00 |
| ATOM | 5944 | HD13 | LEU | X | 394 | 57.455 | 33.790 | 51.382 | 0.00 | 0.00 |
| ATOM | 5945 | CD2  | LEU | X | 394 | 58.600 | 32.340 | 49.434 | 0.00 | 0.00 |
| ATOM | 5946 | HD21 | LEU | X | 394 | 58.595 | 31.822 | 48.475 | 0.00 | 0.00 |
| ATOM | 5947 | HD22 | LEU | X | 394 | 58.774 | 33.380 | 49.158 | 0.00 | 0.00 |
| ATOM | 5948 | HD23 | LEU | X | 394 | 59.491 | 32.065 | 49.999 | 0.00 | 0.00 |
| ATOM | 5949 | C    | LEU | X | 394 | 54.626 | 30.463 | 50.238 | 0.00 | 0.00 |
| ATOM | 5950 | O    | LEU | X | 394 | 54.055 | 31.458 | 50.661 | 0.00 | 0.00 |
| ATOM | 5951 | N    | SER | X | 395 | 54.218 | 29.786 | 49.210 | 0.00 | 0.00 |
| ATOM | 5952 | H    | SER | X | 395 | 54.722 | 28.940 | 48.985 | 0.00 | 0.00 |
| ATOM | 5953 | CA   | SER | X | 395 | 52.905 | 30.002 | 48.542 | 0.00 | 0.00 |
| ATOM | 5954 | HA   | SER | X | 395 | 52.770 | 30.989 | 48.099 | 0.00 | 0.00 |
| ATOM | 5955 | CB   | SER | X | 395 | 52.616 | 28.911 | 47.475 | 0.00 | 0.00 |
| ATOM | 5956 | HB2  | SER | X | 395 | 52.237 | 28.016 | 47.968 | 0.00 | 0.00 |
| ATOM | 5957 | HB3  | SER | X | 395 | 51.665 | 29.272 | 47.081 | 0.00 | 0.00 |
| ATOM | 5958 | OG   | SER | X | 395 | 53.544 | 28.619 | 46.507 | 0.00 | 0.00 |
| ATOM | 5959 | HG   | SER | X | 395 | 53.224 | 27.877 | 45.988 | 0.00 | 0.00 |
| ATOM | 5960 | C    | SER | X | 395 | 51.739 | 29.833 | 49.569 | 0.00 | 0.00 |
| ATOM | 5961 | O    | SER | X | 395 | 50.690 | 30.511 | 49.469 | 0.00 | 0.00 |
| ATOM | 5962 | N    | ASP | X | 396 | 51.907 | 29.007 | 50.615 | 0.00 | 0.00 |
| ATOM | 5963 | H    | ASP | X | 396 | 52.786 | 28.511 | 50.618 | 0.00 | 0.00 |
| ATOM | 5964 | CA   | ASP | X | 396 | 50.762 | 28.783 | 51.567 | 0.00 | 0.00 |
| ATOM | 5965 | HA   | ASP | X | 396 | 49.855 | 28.848 | 50.966 | 0.00 | 0.00 |
| ATOM | 5966 | CB   | ASP | X | 396 | 50.931 | 27.469 | 52.263 | 0.00 | 0.00 |
| ATOM | 5967 | HB2  | ASP | X | 396 | 51.993 | 27.221 | 52.246 | 0.00 | 0.00 |
| ATOM | 5968 | HB3  | ASP | X | 396 | 50.540 | 27.585 | 53.274 | 0.00 | 0.00 |
| ATOM | 5969 | CG   | ASP | X | 396 | 50.253 | 26.193 | 51.694 | 0.00 | 0.00 |
| ATOM | 5970 | OD1  | ASP | X | 396 | 50.801 | 25.079 | 51.715 | 0.00 | 0.00 |
| ATOM | 5971 | OD2  | ASP | X | 396 | 49.051 | 26.185 | 51.372 | 0.00 | 0.00 |
| ATOM | 5972 | C    | ASP | X | 396 | 50.698 | 29.960 | 52.525 | 0.00 | 0.00 |
| ATOM | 5973 | O    | ASP | X | 396 | 49.687 | 30.657 | 52.631 | 0.00 | 0.00 |
| ATOM | 5974 | N    | VAL | X | 397 | 51.816 | 30.287 | 53.170 | 0.00 | 0.00 |
| ATOM | 5975 | H    | VAL | X | 397 | 52.506 | 29.558 | 53.276 | 0.00 | 0.00 |
| ATOM | 5976 | CA   | VAL | X | 397 | 52.085 | 31.531 | 53.973 | 0.00 | 0.00 |
| ATOM | 5977 | HA   | VAL | X | 397 | 51.577 | 31.450 | 54.934 | 0.00 | 0.00 |
| ATOM | 5978 | CB   | VAL | X | 397 | 53.528 | 31.712 | 54.320 | 0.00 | 0.00 |
| ATOM | 5979 | HB   | VAL | X | 397 | 54.098 | 31.587 | 53.399 | 0.00 | 0.00 |
| ATOM | 5980 | CG1  | VAL | X | 397 | 53.854 | 33.174 | 54.774 | 0.00 | 0.00 |
| ATOM | 5981 | HG11 | VAL | X | 397 | 53.791 | 33.878 | 53.944 | 0.00 | 0.00 |
| ATOM | 5982 | HG12 | VAL | X | 397 | 53.201 | 33.549 | 55.562 | 0.00 | 0.00 |
| ATOM | 5983 | HG13 | VAL | X | 397 | 54.889 | 33.103 | 55.110 | 0.00 | 0.00 |
| ATOM | 5984 | CG2  | VAL | X | 397 | 54.011 | 30.595 | 55.277 | 0.00 | 0.00 |
| ATOM | 5985 | HG21 | VAL | X | 397 | 53.968 | 29.616 | 54.800 | 0.00 | 0.00 |
| ATOM | 5986 | HG22 | VAL | X | 397 | 53.352 | 30.630 | 56.145 | 0.00 | 0.00 |
| ATOM | 5987 | HG23 | VAL | X | 397 | 55.064 | 30.727 | 55.528 | 0.00 | 0.00 |

|      |      |      |     |   |     |        |        |        |      |      |
|------|------|------|-----|---|-----|--------|--------|--------|------|------|
| ATOM | 5988 | C    | VAL | X | 397 | 51.574 | 32.773 | 53.202 | 0.00 | 0.00 |
| ATOM | 5989 | O    | VAL | X | 397 | 50.868 | 33.601 | 53.744 | 0.00 | 0.00 |
| ATOM | 5990 | N    | VAL | X | 398 | 51.863 | 32.925 | 51.875 | 0.00 | 0.00 |
| ATOM | 5991 | H    | VAL | X | 398 | 52.400 | 32.199 | 51.423 | 0.00 | 0.00 |
| ATOM | 5992 | CA   | VAL | X | 398 | 51.456 | 34.188 | 51.155 | 0.00 | 0.00 |
| ATOM | 5993 | HA   | VAL | X | 398 | 51.593 | 34.973 | 51.899 | 0.00 | 0.00 |
| ATOM | 5994 | CB   | VAL | X | 398 | 52.431 | 34.538 | 49.952 | 0.00 | 0.00 |
| ATOM | 5995 | HB   | VAL | X | 398 | 52.694 | 33.713 | 49.290 | 0.00 | 0.00 |
| ATOM | 5996 | CG1  | VAL | X | 398 | 51.844 | 35.596 | 49.058 | 0.00 | 0.00 |
| ATOM | 5997 | HG11 | VAL | X | 398 | 50.933 | 35.193 | 48.617 | 0.00 | 0.00 |
| ATOM | 5998 | HG12 | VAL | X | 398 | 51.735 | 36.559 | 49.557 | 0.00 | 0.00 |
| ATOM | 5999 | HG13 | VAL | X | 398 | 52.552 | 35.756 | 48.244 | 0.00 | 0.00 |
| ATOM | 6000 | CG2  | VAL | X | 398 | 53.731 | 35.036 | 50.614 | 0.00 | 0.00 |
| ATOM | 6001 | HG21 | VAL | X | 398 | 54.487 | 35.078 | 49.830 | 0.00 | 0.00 |
| ATOM | 6002 | HG22 | VAL | X | 398 | 53.991 | 34.303 | 51.378 | 0.00 | 0.00 |
| ATOM | 6003 | HG23 | VAL | X | 398 | 53.651 | 35.963 | 51.181 | 0.00 | 0.00 |
| ATOM | 6004 | C    | VAL | X | 398 | 50.005 | 34.249 | 50.835 | 0.00 | 0.00 |
| ATOM | 6005 | O    | VAL | X | 398 | 49.356 | 35.232 | 51.203 | 0.00 | 0.00 |
| ATOM | 6006 | N    | GLY | X | 399 | 49.451 | 33.256 | 50.237 | 0.00 | 0.00 |
| ATOM | 6007 | H    | GLY | X | 399 | 50.061 | 32.454 | 50.177 | 0.00 | 0.00 |
| ATOM | 6008 | CA   | GLY | X | 399 | 48.049 | 33.070 | 49.914 | 0.00 | 0.00 |
| ATOM | 6009 | HA2  | GLY | X | 399 | 47.606 | 33.765 | 49.200 | 0.00 | 0.00 |
| ATOM | 6010 | HA3  | GLY | X | 399 | 48.060 | 32.131 | 49.362 | 0.00 | 0.00 |
| ATOM | 6011 | C    | GLY | X | 399 | 47.119 | 33.194 | 51.101 | 0.00 | 0.00 |
| ATOM | 6012 | O    | GLY | X | 399 | 46.037 | 33.868 | 51.076 | 0.00 | 0.00 |
| ATOM | 6013 | N    | ASP | X | 400 | 47.622 | 32.786 | 52.246 | 0.00 | 0.00 |
| ATOM | 6014 | H    | ASP | X | 400 | 48.457 | 32.219 | 52.197 | 0.00 | 0.00 |
| ATOM | 6015 | CA   | ASP | X | 400 | 46.800 | 32.656 | 53.484 | 0.00 | 0.00 |
| ATOM | 6016 | HA   | ASP | X | 400 | 45.851 | 32.189 | 53.222 | 0.00 | 0.00 |
| ATOM | 6017 | CB   | ASP | X | 400 | 47.282 | 31.719 | 54.637 | 0.00 | 0.00 |
| ATOM | 6018 | HB2  | ASP | X | 400 | 48.320 | 31.958 | 54.870 | 0.00 | 0.00 |
| ATOM | 6019 | HB3  | ASP | X | 400 | 46.591 | 31.897 | 55.461 | 0.00 | 0.00 |
| ATOM | 6020 | CG   | ASP | X | 400 | 47.046 | 30.253 | 54.422 | 0.00 | 0.00 |
| ATOM | 6021 | OD1  | ASP | X | 400 | 46.187 | 29.923 | 53.540 | 0.00 | 0.00 |
| ATOM | 6022 | OD2  | ASP | X | 400 | 47.641 | 29.498 | 55.115 | 0.00 | 0.00 |
| ATOM | 6023 | C    | ASP | X | 400 | 46.437 | 34.069 | 54.026 | 0.00 | 0.00 |
| ATOM | 6024 | O    | ASP | X | 400 | 45.299 | 34.570 | 53.926 | 0.00 | 0.00 |
| ATOM | 6025 | N    | HIE | X | 401 | 47.483 | 34.739 | 54.515 | 0.00 | 0.00 |
| ATOM | 6026 | H    | HIE | X | 401 | 48.390 | 34.313 | 54.385 | 0.00 | 0.00 |
| ATOM | 6027 | CA   | HIE | X | 401 | 47.421 | 36.094 | 55.120 | 0.00 | 0.00 |
| ATOM | 6028 | HA   | HIE | X | 401 | 46.910 | 36.135 | 56.082 | 0.00 | 0.00 |
| ATOM | 6029 | CB   | HIE | X | 401 | 48.820 | 36.538 | 55.482 | 0.00 | 0.00 |
| ATOM | 6030 | HB2  | HIE | X | 401 | 49.299 | 35.735 | 56.043 | 0.00 | 0.00 |
| ATOM | 6031 | HB3  | HIE | X | 401 | 49.368 | 36.658 | 54.547 | 0.00 | 0.00 |
| ATOM | 6032 | CG   | HIE | X | 401 | 48.757 | 37.762 | 56.308 | 0.00 | 0.00 |
| ATOM | 6033 | ND1  | HIE | X | 401 | 48.133 | 37.728 | 57.557 | 0.00 | 0.00 |
| ATOM | 6034 | CE1  | HIE | X | 401 | 48.379 | 38.912 | 58.176 | 0.00 | 0.00 |
| ATOM | 6035 | HE1  | HIE | X | 401 | 47.958 | 39.233 | 59.117 | 0.00 | 0.00 |
| ATOM | 6036 | NE2  | HIE | X | 401 | 49.163 | 39.665 | 57.342 | 0.00 | 0.00 |
| ATOM | 6037 | HE2  | HIE | X | 401 | 49.498 | 40.590 | 57.570 | 0.00 | 0.00 |
| ATOM | 6038 | CD2  | HIE | X | 401 | 49.443 | 38.952 | 56.213 | 0.00 | 0.00 |
| ATOM | 6039 | HD2  | HIE | X | 401 | 50.170 | 39.188 | 55.450 | 0.00 | 0.00 |
| ATOM | 6040 | C    | HIE | X | 401 | 46.782 | 37.111 | 54.155 | 0.00 | 0.00 |
| ATOM | 6041 | O    | HIE | X | 401 | 46.070 | 38.065 | 54.574 | 0.00 | 0.00 |
| ATOM | 6042 | N    | ASN | X | 402 | 46.999 | 36.918 | 52.858 | 0.00 | 0.00 |
| ATOM | 6043 | H    | ASN | X | 402 | 47.565 | 36.161 | 52.501 | 0.00 | 0.00 |
| ATOM | 6044 | CA   | ASN | X | 402 | 46.506 | 37.873 | 51.882 | 0.00 | 0.00 |
| ATOM | 6045 | HA   | ASN | X | 402 | 46.402 | 38.838 | 52.377 | 0.00 | 0.00 |
| ATOM | 6046 | CB   | ASN | X | 402 | 47.623 | 38.082 | 50.816 | 0.00 | 0.00 |
| ATOM | 6047 | HB2  | ASN | X | 402 | 47.792 | 37.185 | 50.220 | 0.00 | 0.00 |
| ATOM | 6048 | HB3  | ASN | X | 402 | 47.343 | 38.861 | 50.106 | 0.00 | 0.00 |
| ATOM | 6049 | CG   | ASN | X | 402 | 48.873 | 38.690 | 51.489 | 0.00 | 0.00 |
| ATOM | 6050 | OD1  | ASN | X | 402 | 48.869 | 39.862 | 51.817 | 0.00 | 0.00 |
| ATOM | 6051 | ND2  | ASN | X | 402 | 49.901 | 37.912 | 51.824 | 0.00 | 0.00 |
| ATOM | 6052 | HD21 | ASN | X | 402 | 50.582 | 38.360 | 52.420 | 0.00 | 0.00 |
| ATOM | 6053 | HD22 | ASN | X | 402 | 49.864 | 36.929 | 51.593 | 0.00 | 0.00 |
| ATOM | 6054 | C    | ASN | X | 402 | 45.220 | 37.602 | 51.188 | 0.00 | 0.00 |

|      |      |      |     |   |     |        |        |        |      |      |
|------|------|------|-----|---|-----|--------|--------|--------|------|------|
| ATOM | 6055 | O    | ASN | X | 402 | 44.573 | 38.500 | 50.723 | 0.00 | 0.00 |
| ATOM | 6056 | N    | VAL | X | 403 | 44.735 | 36.333 | 51.183 | 0.00 | 0.00 |
| ATOM | 6057 | H    | VAL | X | 403 | 45.342 | 35.613 | 51.548 | 0.00 | 0.00 |
| ATOM | 6058 | CA   | VAL | X | 403 | 43.574 | 35.930 | 50.350 | 0.00 | 0.00 |
| ATOM | 6059 | HA   | VAL | X | 403 | 42.923 | 36.792 | 50.207 | 0.00 | 0.00 |
| ATOM | 6060 | CB   | VAL | X | 403 | 43.948 | 35.363 | 48.949 | 0.00 | 0.00 |
| ATOM | 6061 | HB   | VAL | X | 403 | 44.613 | 34.507 | 49.059 | 0.00 | 0.00 |
| ATOM | 6062 | CG1  | VAL | X | 403 | 42.659 | 34.933 | 48.235 | 0.00 | 0.00 |
| ATOM | 6063 | HG11 | VAL | X | 403 | 42.839 | 34.785 | 47.171 | 0.00 | 0.00 |
| ATOM | 6064 | HG12 | VAL | X | 403 | 42.239 | 34.054 | 48.725 | 0.00 | 0.00 |
| ATOM | 6065 | HG13 | VAL | X | 403 | 41.921 | 35.734 | 48.287 | 0.00 | 0.00 |
| ATOM | 6066 | CG2  | VAL | X | 403 | 44.571 | 36.508 | 48.171 | 0.00 | 0.00 |
| ATOM | 6067 | HG21 | VAL | X | 403 | 44.649 | 36.335 | 47.098 | 0.00 | 0.00 |
| ATOM | 6068 | HG22 | VAL | X | 403 | 45.554 | 36.658 | 48.619 | 0.00 | 0.00 |
| ATOM | 6069 | HG23 | VAL | X | 403 | 43.929 | 37.385 | 48.257 | 0.00 | 0.00 |
| ATOM | 6070 | C    | VAL | X | 403 | 42.678 | 34.929 | 51.169 | 0.00 | 0.00 |
| ATOM | 6071 | O    | VAL | X | 403 | 41.533 | 35.322 | 51.349 | 0.00 | 0.00 |
| ATOM | 6072 | N    | VAL | X | 404 | 43.192 | 33.730 | 51.452 | 0.00 | 0.00 |
| ATOM | 6073 | H    | VAL | X | 404 | 44.182 | 33.529 | 51.444 | 0.00 | 0.00 |
| ATOM | 6074 | CA   | VAL | X | 404 | 42.297 | 32.648 | 51.983 | 0.00 | 0.00 |
| ATOM | 6075 | HA   | VAL | X | 404 | 41.481 | 32.478 | 51.281 | 0.00 | 0.00 |
| ATOM | 6076 | CB   | VAL | X | 404 | 43.049 | 31.255 | 52.126 | 0.00 | 0.00 |
| ATOM | 6077 | HB   | VAL | X | 404 | 43.873 | 31.200 | 52.838 | 0.00 | 0.00 |
| ATOM | 6078 | CG1  | VAL | X | 404 | 41.859 | 30.251 | 52.539 | 0.00 | 0.00 |
| ATOM | 6079 | HG11 | VAL | X | 404 | 41.534 | 30.501 | 53.550 | 0.00 | 0.00 |
| ATOM | 6080 | HG12 | VAL | X | 404 | 41.077 | 30.274 | 51.780 | 0.00 | 0.00 |
| ATOM | 6081 | HG13 | VAL | X | 404 | 42.242 | 29.233 | 52.477 | 0.00 | 0.00 |
| ATOM | 6082 | CG2  | VAL | X | 404 | 43.657 | 30.892 | 50.811 | 0.00 | 0.00 |
| ATOM | 6083 | HG21 | VAL | X | 404 | 44.429 | 31.576 | 50.458 | 0.00 | 0.00 |
| ATOM | 6084 | HG22 | VAL | X | 404 | 42.802 | 30.853 | 50.136 | 0.00 | 0.00 |
| ATOM | 6085 | HG23 | VAL | X | 404 | 44.096 | 29.897 | 50.887 | 0.00 | 0.00 |
| ATOM | 6086 | C    | VAL | X | 404 | 41.657 | 33.112 | 53.364 | 0.00 | 0.00 |
| ATOM | 6087 | O    | VAL | X | 404 | 40.541 | 32.818 | 53.665 | 0.00 | 0.00 |
| ATOM | 6088 | N    | CYX | X | 405 | 42.500 | 33.653 | 54.173 | 0.00 | 0.00 |
| ATOM | 6089 | H    | CYX | X | 405 | 43.461 | 33.844 | 53.927 | 0.00 | 0.00 |
| ATOM | 6090 | CA   | CYX | X | 405 | 42.166 | 34.013 | 55.588 | 0.00 | 0.00 |
| ATOM | 6091 | HA   | CYX | X | 405 | 41.445 | 33.272 | 55.935 | 0.00 | 0.00 |
| ATOM | 6092 | CB   | CYX | X | 405 | 43.305 | 33.914 | 56.624 | 0.00 | 0.00 |
| ATOM | 6093 | HB2  | CYX | X | 405 | 44.078 | 34.554 | 56.199 | 0.00 | 0.00 |
| ATOM | 6094 | HB3  | CYX | X | 405 | 42.937 | 34.178 | 57.615 | 0.00 | 0.00 |
| ATOM | 6095 | SG   | CYX | X | 405 | 43.977 | 32.240 | 56.752 | 0.00 | 0.00 |
| ATOM | 6096 | C    | CYX | X | 405 | 41.293 | 35.292 | 55.627 | 0.00 | 0.00 |
| ATOM | 6097 | O    | CYX | X | 405 | 40.261 | 35.280 | 56.267 | 0.00 | 0.00 |
| ATOM | 6098 | N    | PRO | X | 406 | 41.592 | 36.310 | 54.839 | 0.00 | 0.00 |
| ATOM | 6099 | CD   | PRO | X | 406 | 42.927 | 36.689 | 54.429 | 0.00 | 0.00 |
| ATOM | 6100 | HD2  | PRO | X | 406 | 43.231 | 36.057 | 53.594 | 0.00 | 0.00 |
| ATOM | 6101 | HD3  | PRO | X | 406 | 43.624 | 36.701 | 55.268 | 0.00 | 0.00 |
| ATOM | 6102 | CG   | PRO | X | 406 | 42.708 | 38.145 | 53.813 | 0.00 | 0.00 |
| ATOM | 6103 | HG2  | PRO | X | 406 | 43.426 | 38.290 | 53.005 | 0.00 | 0.00 |
| ATOM | 6104 | HG3  | PRO | X | 406 | 43.007 | 38.907 | 54.533 | 0.00 | 0.00 |
| ATOM | 6105 | CB   | PRO | X | 406 | 41.242 | 38.228 | 53.439 | 0.00 | 0.00 |
| ATOM | 6106 | HB2  | PRO | X | 406 | 41.046 | 37.843 | 52.439 | 0.00 | 0.00 |
| ATOM | 6107 | HB3  | PRO | X | 406 | 40.956 | 39.268 | 53.598 | 0.00 | 0.00 |
| ATOM | 6108 | CA   | PRO | X | 406 | 40.607 | 37.379 | 54.500 | 0.00 | 0.00 |
| ATOM | 6109 | HA   | PRO | X | 406 | 40.426 | 37.858 | 55.462 | 0.00 | 0.00 |
| ATOM | 6110 | C    | PRO | X | 406 | 39.324 | 36.817 | 53.966 | 0.00 | 0.00 |
| ATOM | 6111 | O    | PRO | X | 406 | 38.269 | 37.306 | 54.362 | 0.00 | 0.00 |
| ATOM | 6112 | N    | VAL | X | 407 | 39.277 | 35.865 | 52.940 | 0.00 | 0.00 |
| ATOM | 6113 | H    | VAL | X | 407 | 40.109 | 35.525 | 52.480 | 0.00 | 0.00 |
| ATOM | 6114 | CA   | VAL | X | 407 | 37.991 | 35.275 | 52.542 | 0.00 | 0.00 |
| ATOM | 6115 | HA   | VAL | X | 407 | 37.315 | 36.099 | 52.317 | 0.00 | 0.00 |
| ATOM | 6116 | CB   | VAL | X | 407 | 38.054 | 34.502 | 51.212 | 0.00 | 0.00 |
| ATOM | 6117 | HB   | VAL | X | 407 | 38.689 | 33.623 | 51.333 | 0.00 | 0.00 |
| ATOM | 6118 | CG1  | VAL | X | 407 | 36.659 | 33.936 | 50.844 | 0.00 | 0.00 |
| ATOM | 6119 | HG11 | VAL | X | 407 | 36.288 | 33.271 | 51.624 | 0.00 | 0.00 |
| ATOM | 6120 | HG12 | VAL | X | 407 | 35.927 | 34.742 | 50.862 | 0.00 | 0.00 |
| ATOM | 6121 | HG13 | VAL | X | 407 | 36.732 | 33.300 | 49.961 | 0.00 | 0.00 |

|      |      |      |     |   |     |        |        |        |      |      |
|------|------|------|-----|---|-----|--------|--------|--------|------|------|
| ATOM | 6122 | CG2  | VAL | X | 407 | 38.531 | 35.412 | 50.079 | 0.00 | 0.00 |
| ATOM | 6123 | HG21 | VAL | X | 407 | 39.352 | 36.036 | 50.433 | 0.00 | 0.00 |
| ATOM | 6124 | HG22 | VAL | X | 407 | 37.696 | 36.105 | 49.985 | 0.00 | 0.00 |
| ATOM | 6125 | HG23 | VAL | X | 407 | 38.642 | 34.827 | 49.166 | 0.00 | 0.00 |
| ATOM | 6126 | C    | VAL | X | 407 | 37.240 | 34.500 | 53.616 | 0.00 | 0.00 |
| ATOM | 6127 | O    | VAL | X | 407 | 36.040 | 34.771 | 53.711 | 0.00 | 0.00 |
| ATOM | 6128 | N    | ALA | X | 408 | 37.925 | 33.760 | 54.501 | 0.00 | 0.00 |
| ATOM | 6129 | H    | ALA | X | 408 | 38.923 | 33.654 | 54.388 | 0.00 | 0.00 |
| ATOM | 6130 | CA   | ALA | X | 408 | 37.268 | 33.017 | 55.636 | 0.00 | 0.00 |
| ATOM | 6131 | HA   | ALA | X | 408 | 36.457 | 32.360 | 55.323 | 0.00 | 0.00 |
| ATOM | 6132 | CB   | ALA | X | 408 | 38.434 | 32.140 | 56.177 | 0.00 | 0.00 |
| ATOM | 6133 | HB1  | ALA | X | 408 | 38.628 | 31.451 | 55.355 | 0.00 | 0.00 |
| ATOM | 6134 | HB2  | ALA | X | 408 | 38.143 | 31.678 | 57.120 | 0.00 | 0.00 |
| ATOM | 6135 | HB3  | ALA | X | 408 | 39.283 | 32.811 | 56.309 | 0.00 | 0.00 |
| ATOM | 6136 | C    | ALA | X | 408 | 36.688 | 33.903 | 56.722 | 0.00 | 0.00 |
| ATOM | 6137 | O    | ALA | X | 408 | 35.589 | 33.670 | 57.281 | 0.00 | 0.00 |
| ATOM | 6138 | N    | GLN | X | 409 | 37.386 | 35.025 | 56.989 | 0.00 | 0.00 |
| ATOM | 6139 | H    | GLN | X | 409 | 38.256 | 35.143 | 56.490 | 0.00 | 0.00 |
| ATOM | 6140 | CA   | GLN | X | 409 | 36.943 | 36.113 | 57.877 | 0.00 | 0.00 |
| ATOM | 6141 | HA   | GLN | X | 409 | 36.639 | 35.637 | 58.810 | 0.00 | 0.00 |
| ATOM | 6142 | CB   | GLN | X | 409 | 38.114 | 37.145 | 58.064 | 0.00 | 0.00 |
| ATOM | 6143 | HB2  | GLN | X | 409 | 39.052 | 36.718 | 58.417 | 0.00 | 0.00 |
| ATOM | 6144 | HB3  | GLN | X | 409 | 38.267 | 37.696 | 57.136 | 0.00 | 0.00 |
| ATOM | 6145 | CG   | GLN | X | 409 | 37.834 | 38.188 | 59.173 | 0.00 | 0.00 |
| ATOM | 6146 | HG2  | GLN | X | 409 | 38.613 | 38.920 | 58.960 | 0.00 | 0.00 |
| ATOM | 6147 | HG3  | GLN | X | 409 | 36.884 | 38.711 | 59.068 | 0.00 | 0.00 |
| ATOM | 6148 | CD   | GLN | X | 409 | 37.967 | 37.726 | 60.610 | 0.00 | 0.00 |
| ATOM | 6149 | OE1  | GLN | X | 409 | 37.641 | 36.603 | 61.008 | 0.00 | 0.00 |
| ATOM | 6150 | NE2  | GLN | X | 409 | 38.424 | 38.480 | 61.582 | 0.00 | 0.00 |
| ATOM | 6151 | HE21 | GLN | X | 409 | 38.344 | 38.175 | 62.541 | 0.00 | 0.00 |
| ATOM | 6152 | HE22 | GLN | X | 409 | 38.662 | 39.459 | 61.511 | 0.00 | 0.00 |
| ATOM | 6153 | C    | GLN | X | 409 | 35.761 | 36.851 | 57.299 | 0.00 | 0.00 |
| ATOM | 6154 | O    | GLN | X | 409 | 34.918 | 37.311 | 58.083 | 0.00 | 0.00 |
| ATOM | 6155 | N    | LEU | X | 410 | 35.681 | 36.982 | 56.003 | 0.00 | 0.00 |
| ATOM | 6156 | H    | LEU | X | 410 | 36.349 | 36.463 | 55.452 | 0.00 | 0.00 |
| ATOM | 6157 | CA   | LEU | X | 410 | 34.590 | 37.695 | 55.302 | 0.00 | 0.00 |
| ATOM | 6158 | HA   | LEU | X | 410 | 34.407 | 38.657 | 55.780 | 0.00 | 0.00 |
| ATOM | 6159 | CB   | LEU | X | 410 | 35.051 | 38.057 | 53.877 | 0.00 | 0.00 |
| ATOM | 6160 | HB2  | LEU | X | 410 | 35.849 | 38.785 | 54.019 | 0.00 | 0.00 |
| ATOM | 6161 | HB3  | LEU | X | 410 | 35.466 | 37.189 | 53.364 | 0.00 | 0.00 |
| ATOM | 6162 | CG   | LEU | X | 410 | 33.870 | 38.573 | 52.995 | 0.00 | 0.00 |
| ATOM | 6163 | HG   | LEU | X | 410 | 33.030 | 37.892 | 52.857 | 0.00 | 0.00 |
| ATOM | 6164 | CD1  | LEU | X | 410 | 33.388 | 39.931 | 53.596 | 0.00 | 0.00 |
| ATOM | 6165 | HD11 | LEU | X | 410 | 32.729 | 40.474 | 52.919 | 0.00 | 0.00 |
| ATOM | 6166 | HD12 | LEU | X | 410 | 34.297 | 40.525 | 53.693 | 0.00 | 0.00 |
| ATOM | 6167 | HD13 | LEU | X | 410 | 32.873 | 39.716 | 54.533 | 0.00 | 0.00 |
| ATOM | 6168 | CD2  | LEU | X | 410 | 34.345 | 38.844 | 51.662 | 0.00 | 0.00 |
| ATOM | 6169 | HD21 | LEU | X | 410 | 33.493 | 39.103 | 51.033 | 0.00 | 0.00 |
| ATOM | 6170 | HD22 | LEU | X | 410 | 35.098 | 39.628 | 51.588 | 0.00 | 0.00 |
| ATOM | 6171 | HD23 | LEU | X | 410 | 34.809 | 37.948 | 51.248 | 0.00 | 0.00 |
| ATOM | 6172 | C    | LEU | X | 410 | 33.374 | 36.812 | 55.382 | 0.00 | 0.00 |
| ATOM | 6173 | O    | LEU | X | 410 | 32.359 | 37.182 | 55.916 | 0.00 | 0.00 |
| ATOM | 6174 | N    | ALA | X | 411 | 33.437 | 35.509 | 55.007 | 0.00 | 0.00 |
| ATOM | 6175 | H    | ALA | X | 411 | 34.248 | 35.207 | 54.486 | 0.00 | 0.00 |
| ATOM | 6176 | CA   | ALA | X | 411 | 32.369 | 34.441 | 55.119 | 0.00 | 0.00 |
| ATOM | 6177 | HA   | ALA | X | 411 | 31.496 | 34.816 | 54.585 | 0.00 | 0.00 |
| ATOM | 6178 | CB   | ALA | X | 411 | 32.859 | 33.138 | 54.544 | 0.00 | 0.00 |
| ATOM | 6179 | HB1  | ALA | X | 411 | 32.113 | 32.345 | 54.603 | 0.00 | 0.00 |
| ATOM | 6180 | HB2  | ALA | X | 411 | 33.731 | 32.814 | 55.112 | 0.00 | 0.00 |
| ATOM | 6181 | HB3  | ALA | X | 411 | 33.198 | 33.216 | 53.511 | 0.00 | 0.00 |
| ATOM | 6182 | C    | ALA | X | 411 | 31.848 | 34.248 | 56.633 | 0.00 | 0.00 |
| ATOM | 6183 | O    | ALA | X | 411 | 30.616 | 34.241 | 56.834 | 0.00 | 0.00 |
| ATOM | 6184 | N    | GLY | X | 412 | 32.699 | 34.185 | 57.626 | 0.00 | 0.00 |
| ATOM | 6185 | H    | GLY | X | 412 | 33.677 | 34.108 | 57.387 | 0.00 | 0.00 |
| ATOM | 6186 | CA   | GLY | X | 412 | 32.401 | 34.287 | 59.000 | 0.00 | 0.00 |
| ATOM | 6187 | HA2  | GLY | X | 412 | 32.076 | 33.320 | 59.383 | 0.00 | 0.00 |
| ATOM | 6188 | HA3  | GLY | X | 412 | 33.371 | 34.487 | 59.454 | 0.00 | 0.00 |

|      |      |      |     |   |     |        |        |        |      |      |
|------|------|------|-----|---|-----|--------|--------|--------|------|------|
| ATOM | 6189 | C    | GLY | X | 412 | 31.566 | 35.445 | 59.404 | 0.00 | 0.00 |
| ATOM | 6190 | O    | GLY | X | 412 | 30.493 | 35.206 | 59.949 | 0.00 | 0.00 |
| ATOM | 6191 | N    | ARG | X | 413 | 31.931 | 36.639 | 59.012 | 0.00 | 0.00 |
| ATOM | 6192 | H    | ARG | X | 413 | 32.863 | 36.717 | 58.631 | 0.00 | 0.00 |
| ATOM | 6193 | CA   | ARG | X | 413 | 31.249 | 37.876 | 59.475 | 0.00 | 0.00 |
| ATOM | 6194 | HA   | ARG | X | 413 | 30.947 | 37.933 | 60.521 | 0.00 | 0.00 |
| ATOM | 6195 | CB   | ARG | X | 413 | 32.080 | 39.107 | 59.133 | 0.00 | 0.00 |
| ATOM | 6196 | HB2  | ARG | X | 413 | 32.348 | 38.996 | 58.083 | 0.00 | 0.00 |
| ATOM | 6197 | HB3  | ARG | X | 413 | 31.574 | 40.068 | 59.225 | 0.00 | 0.00 |
| ATOM | 6198 | CG   | ARG | X | 413 | 33.386 | 39.279 | 59.996 | 0.00 | 0.00 |
| ATOM | 6199 | HG2  | ARG | X | 413 | 33.941 | 38.342 | 59.961 | 0.00 | 0.00 |
| ATOM | 6200 | HG3  | ARG | X | 413 | 33.872 | 40.182 | 59.626 | 0.00 | 0.00 |
| ATOM | 6201 | CD   | ARG | X | 413 | 33.042 | 39.679 | 61.481 | 0.00 | 0.00 |
| ATOM | 6202 | HD2  | ARG | X | 413 | 32.526 | 40.637 | 61.549 | 0.00 | 0.00 |
| ATOM | 6203 | HD3  | ARG | X | 413 | 32.330 | 38.927 | 61.819 | 0.00 | 0.00 |
| ATOM | 6204 | NE   | ARG | X | 413 | 34.289 | 39.652 | 62.228 | 0.00 | 0.00 |
| ATOM | 6205 | HE   | ARG | X | 413 | 34.620 | 40.592 | 62.390 | 0.00 | 0.00 |
| ATOM | 6206 | CZ   | ARG | X | 413 | 34.878 | 38.629 | 62.885 | 0.00 | 0.00 |
| ATOM | 6207 | NH1  | ARG | X | 413 | 34.469 | 37.408 | 62.949 | 0.00 | 0.00 |
| ATOM | 6208 | HH11 | ARG | X | 413 | 33.539 | 37.246 | 62.590 | 0.00 | 0.00 |
| ATOM | 6209 | HH12 | ARG | X | 413 | 34.798 | 36.753 | 63.644 | 0.00 | 0.00 |
| ATOM | 6210 | NH2  | ARG | X | 413 | 35.999 | 38.868 | 63.529 | 0.00 | 0.00 |
| ATOM | 6211 | HH21 | ARG | X | 413 | 36.446 | 39.774 | 63.509 | 0.00 | 0.00 |
| ATOM | 6212 | HH22 | ARG | X | 413 | 36.502 | 38.062 | 63.871 | 0.00 | 0.00 |
| ATOM | 6213 | C    | ARG | X | 413 | 29.880 | 37.890 | 58.738 | 0.00 | 0.00 |
| ATOM | 6214 | O    | ARG | X | 413 | 28.890 | 38.244 | 59.349 | 0.00 | 0.00 |
| ATOM | 6215 | N    | LEU | X | 414 | 29.835 | 37.694 | 57.459 | 0.00 | 0.00 |
| ATOM | 6216 | H    | LEU | X | 414 | 30.766 | 37.644 | 57.071 | 0.00 | 0.00 |
| ATOM | 6217 | CA   | LEU | X | 414 | 28.526 | 37.598 | 56.743 | 0.00 | 0.00 |
| ATOM | 6218 | HA   | LEU | X | 414 | 27.954 | 38.508 | 56.925 | 0.00 | 0.00 |
| ATOM | 6219 | CB   | LEU | X | 414 | 28.812 | 37.264 | 55.232 | 0.00 | 0.00 |
| ATOM | 6220 | HB2  | LEU | X | 414 | 29.291 | 36.286 | 55.173 | 0.00 | 0.00 |
| ATOM | 6221 | HB3  | LEU | X | 414 | 27.859 | 37.189 | 54.708 | 0.00 | 0.00 |
| ATOM | 6222 | CG   | LEU | X | 414 | 29.606 | 38.388 | 54.549 | 0.00 | 0.00 |
| ATOM | 6223 | HG   | LEU | X | 414 | 30.498 | 38.667 | 55.109 | 0.00 | 0.00 |
| ATOM | 6224 | CD1  | LEU | X | 414 | 29.998 | 37.823 | 53.230 | 0.00 | 0.00 |
| ATOM | 6225 | HD11 | LEU | X | 414 | 30.644 | 38.483 | 52.652 | 0.00 | 0.00 |
| ATOM | 6226 | HD12 | LEU | X | 414 | 29.185 | 37.727 | 52.511 | 0.00 | 0.00 |
| ATOM | 6227 | HD13 | LEU | X | 414 | 30.620 | 36.930 | 53.285 | 0.00 | 0.00 |
| ATOM | 6228 | CD2  | LEU | X | 414 | 28.649 | 39.583 | 54.356 | 0.00 | 0.00 |
| ATOM | 6229 | HD21 | LEU | X | 414 | 28.614 | 40.097 | 55.316 | 0.00 | 0.00 |
| ATOM | 6230 | HD22 | LEU | X | 414 | 29.205 | 40.203 | 53.652 | 0.00 | 0.00 |
| ATOM | 6231 | HD23 | LEU | X | 414 | 27.653 | 39.294 | 54.022 | 0.00 | 0.00 |
| ATOM | 6232 | C    | LEU | X | 414 | 27.484 | 36.656 | 57.274 | 0.00 | 0.00 |
| ATOM | 6233 | O    | LEU | X | 414 | 26.400 | 37.051 | 57.514 | 0.00 | 0.00 |
| ATOM | 6234 | N    | ALA | X | 415 | 27.823 | 35.390 | 57.481 | 0.00 | 0.00 |
| ATOM | 6235 | H    | ALA | X | 415 | 28.755 | 35.051 | 57.291 | 0.00 | 0.00 |
| ATOM | 6236 | CA   | ALA | X | 415 | 26.904 | 34.402 | 58.020 | 0.00 | 0.00 |
| ATOM | 6237 | HA   | ALA | X | 415 | 25.957 | 34.290 | 57.492 | 0.00 | 0.00 |
| ATOM | 6238 | CB   | ALA | X | 415 | 27.658 | 33.029 | 58.054 | 0.00 | 0.00 |
| ATOM | 6239 | HB1  | ALA | X | 415 | 27.690 | 32.562 | 57.070 | 0.00 | 0.00 |
| ATOM | 6240 | HB2  | ALA | X | 415 | 27.142 | 32.453 | 58.822 | 0.00 | 0.00 |
| ATOM | 6241 | HB3  | ALA | X | 415 | 28.692 | 32.966 | 58.392 | 0.00 | 0.00 |
| ATOM | 6242 | C    | ALA | X | 415 | 26.482 | 34.829 | 59.456 | 0.00 | 0.00 |
| ATOM | 6243 | O    | ALA | X | 415 | 25.295 | 34.853 | 59.802 | 0.00 | 0.00 |
| ATOM | 6244 | N    | ALA | X | 416 | 27.459 | 35.287 | 60.264 | 0.00 | 0.00 |
| ATOM | 6245 | H    | ALA | X | 416 | 28.420 | 35.122 | 59.999 | 0.00 | 0.00 |
| ATOM | 6246 | CA   | ALA | X | 416 | 27.052 | 35.848 | 61.556 | 0.00 | 0.00 |
| ATOM | 6247 | HA   | ALA | X | 416 | 26.426 | 35.092 | 62.028 | 0.00 | 0.00 |
| ATOM | 6248 | CB   | ALA | X | 416 | 28.358 | 36.078 | 62.443 | 0.00 | 0.00 |
| ATOM | 6249 | HB1  | ALA | X | 416 | 29.004 | 36.738 | 61.864 | 0.00 | 0.00 |
| ATOM | 6250 | HB2  | ALA | X | 416 | 28.829 | 35.100 | 62.535 | 0.00 | 0.00 |
| ATOM | 6251 | HB3  | ALA | X | 416 | 28.202 | 36.545 | 63.416 | 0.00 | 0.00 |
| ATOM | 6252 | C    | ALA | X | 416 | 26.114 | 37.121 | 61.561 | 0.00 | 0.00 |
| ATOM | 6253 | O    | ALA | X | 416 | 25.437 | 37.409 | 62.526 | 0.00 | 0.00 |
| ATOM | 6254 | N    | GLN | X | 417 | 26.121 | 37.889 | 60.463 | 0.00 | 0.00 |
| ATOM | 6255 | H    | GLN | X | 417 | 26.688 | 37.590 | 59.683 | 0.00 | 0.00 |

|      |      |      |     |   |     |        |        |        |      |      |
|------|------|------|-----|---|-----|--------|--------|--------|------|------|
| ATOM | 6256 | CA   | GLN | X | 417 | 25.401 | 39.159 | 60.228 | 0.00 | 0.00 |
| ATOM | 6257 | HA   | GLN | X | 417 | 25.038 | 39.541 | 61.182 | 0.00 | 0.00 |
| ATOM | 6258 | CB   | GLN | X | 417 | 26.357 | 40.262 | 59.769 | 0.00 | 0.00 |
| ATOM | 6259 | HB2  | GLN | X | 417 | 26.925 | 39.983 | 58.881 | 0.00 | 0.00 |
| ATOM | 6260 | HB3  | GLN | X | 417 | 25.888 | 41.214 | 59.523 | 0.00 | 0.00 |
| ATOM | 6261 | CG   | GLN | X | 417 | 27.415 | 40.540 | 60.838 | 0.00 | 0.00 |
| ATOM | 6262 | HG2  | GLN | X | 417 | 26.889 | 40.919 | 61.715 | 0.00 | 0.00 |
| ATOM | 6263 | HG3  | GLN | X | 417 | 27.958 | 39.655 | 61.169 | 0.00 | 0.00 |
| ATOM | 6264 | CD   | GLN | X | 417 | 28.416 | 41.650 | 60.512 | 0.00 | 0.00 |
| ATOM | 6265 | OE1  | GLN | X | 417 | 29.623 | 41.427 | 60.520 | 0.00 | 0.00 |
| ATOM | 6266 | NE2  | GLN | X | 417 | 28.015 | 42.847 | 60.169 | 0.00 | 0.00 |
| ATOM | 6267 | HE21 | GLN | X | 417 | 28.702 | 43.509 | 59.837 | 0.00 | 0.00 |
| ATOM | 6268 | HE22 | GLN | X | 417 | 27.038 | 43.027 | 59.989 | 0.00 | 0.00 |
| ATOM | 6269 | C    | GLN | X | 417 | 24.164 | 38.989 | 59.312 | 0.00 | 0.00 |
| ATOM | 6270 | O    | GLN | X | 417 | 23.770 | 39.917 | 58.623 | 0.00 | 0.00 |
| ATOM | 6271 | N    | GLY | X | 418 | 23.668 | 37.729 | 59.170 | 0.00 | 0.00 |
| ATOM | 6272 | H    | GLY | X | 418 | 24.141 | 37.051 | 59.750 | 0.00 | 0.00 |
| ATOM | 6273 | CA   | GLY | X | 418 | 22.406 | 37.331 | 58.690 | 0.00 | 0.00 |
| ATOM | 6274 | HA2  | GLY | X | 418 | 22.147 | 36.469 | 59.305 | 0.00 | 0.00 |
| ATOM | 6275 | HA3  | GLY | X | 418 | 21.595 | 38.024 | 58.915 | 0.00 | 0.00 |
| ATOM | 6276 | C    | GLY | X | 418 | 22.334 | 37.062 | 57.158 | 0.00 | 0.00 |
| ATOM | 6277 | O    | GLY | X | 418 | 21.247 | 37.016 | 56.585 | 0.00 | 0.00 |
| ATOM | 6278 | N    | ALA | X | 419 | 23.468 | 37.064 | 56.497 | 0.00 | 0.00 |
| ATOM | 6279 | H    | ALA | X | 419 | 24.289 | 37.099 | 57.084 | 0.00 | 0.00 |
| ATOM | 6280 | CA   | ALA | X | 419 | 23.559 | 36.792 | 55.050 | 0.00 | 0.00 |
| ATOM | 6281 | HA   | ALA | X | 419 | 22.816 | 37.319 | 54.451 | 0.00 | 0.00 |
| ATOM | 6282 | CB   | ALA | X | 419 | 24.863 | 37.354 | 54.420 | 0.00 | 0.00 |
| ATOM | 6283 | HB1  | ALA | X | 419 | 24.987 | 38.390 | 54.737 | 0.00 | 0.00 |
| ATOM | 6284 | HB2  | ALA | X | 419 | 24.882 | 37.239 | 53.336 | 0.00 | 0.00 |
| ATOM | 6285 | HB3  | ALA | X | 419 | 25.579 | 36.592 | 54.725 | 0.00 | 0.00 |
| ATOM | 6286 | C    | ALA | X | 419 | 23.468 | 35.305 | 54.836 | 0.00 | 0.00 |
| ATOM | 6287 | O    | ALA | X | 419 | 23.789 | 34.538 | 55.767 | 0.00 | 0.00 |
| ATOM | 6288 | N    | ARG | X | 420 | 23.095 | 34.861 | 53.628 | 0.00 | 0.00 |
| ATOM | 6289 | H    | ARG | X | 420 | 22.911 | 35.657 | 53.035 | 0.00 | 0.00 |
| ATOM | 6290 | CA   | ARG | X | 420 | 23.230 | 33.474 | 53.144 | 0.00 | 0.00 |
| ATOM | 6291 | HA   | ARG | X | 420 | 23.448 | 32.845 | 54.007 | 0.00 | 0.00 |
| ATOM | 6292 | CB   | ARG | X | 420 | 21.963 | 32.834 | 52.483 | 0.00 | 0.00 |
| ATOM | 6293 | HB2  | ARG | X | 420 | 21.183 | 32.745 | 53.240 | 0.00 | 0.00 |
| ATOM | 6294 | HB3  | ARG | X | 420 | 21.551 | 33.435 | 51.672 | 0.00 | 0.00 |
| ATOM | 6295 | CG   | ARG | X | 420 | 22.150 | 31.340 | 51.908 | 0.00 | 0.00 |
| ATOM | 6296 | HG2  | ARG | X | 420 | 23.036 | 31.344 | 51.272 | 0.00 | 0.00 |
| ATOM | 6297 | HG3  | ARG | X | 420 | 22.190 | 30.634 | 52.737 | 0.00 | 0.00 |
| ATOM | 6298 | CD   | ARG | X | 420 | 20.913 | 31.128 | 51.151 | 0.00 | 0.00 |
| ATOM | 6299 | HD2  | ARG | X | 420 | 20.745 | 31.938 | 50.441 | 0.00 | 0.00 |
| ATOM | 6300 | HD3  | ARG | X | 420 | 20.988 | 30.174 | 50.629 | 0.00 | 0.00 |
| ATOM | 6301 | NE   | ARG | X | 420 | 19.738 | 30.926 | 52.062 | 0.00 | 0.00 |
| ATOM | 6302 | HE   | ARG | X | 420 | 19.865 | 31.137 | 53.042 | 0.00 | 0.00 |
| ATOM | 6303 | CZ   | ARG | X | 420 | 18.467 | 30.494 | 51.666 | 0.00 | 0.00 |
| ATOM | 6304 | NH1  | ARG | X | 420 | 18.263 | 29.972 | 50.481 | 0.00 | 0.00 |
| ATOM | 6305 | HH11 | ARG | X | 420 | 18.858 | 30.121 | 49.679 | 0.00 | 0.00 |
| ATOM | 6306 | HH12 | ARG | X | 420 | 17.443 | 29.421 | 50.272 | 0.00 | 0.00 |
| ATOM | 6307 | NH2  | ARG | X | 420 | 17.440 | 30.335 | 52.480 | 0.00 | 0.00 |
| ATOM | 6308 | HH21 | ARG | X | 420 | 17.477 | 30.449 | 53.483 | 0.00 | 0.00 |
| ATOM | 6309 | HH22 | ARG | X | 420 | 16.489 | 30.280 | 52.145 | 0.00 | 0.00 |
| ATOM | 6310 | C    | ARG | X | 420 | 24.475 | 33.391 | 52.263 | 0.00 | 0.00 |
| ATOM | 6311 | O    | ARG | X | 420 | 24.415 | 33.861 | 51.138 | 0.00 | 0.00 |
| ATOM | 6312 | N    | VAL | X | 421 | 25.528 | 32.691 | 52.708 | 0.00 | 0.00 |
| ATOM | 6313 | H    | VAL | X | 421 | 25.424 | 32.273 | 53.622 | 0.00 | 0.00 |
| ATOM | 6314 | CA   | VAL | X | 421 | 26.884 | 32.644 | 52.124 | 0.00 | 0.00 |
| ATOM | 6315 | HA   | VAL | X | 421 | 26.993 | 33.374 | 51.322 | 0.00 | 0.00 |
| ATOM | 6316 | CB   | VAL | X | 421 | 28.004 | 32.990 | 53.176 | 0.00 | 0.00 |
| ATOM | 6317 | HB   | VAL | X | 421 | 28.094 | 32.131 | 53.842 | 0.00 | 0.00 |
| ATOM | 6318 | CG1  | VAL | X | 421 | 29.401 | 33.137 | 52.558 | 0.00 | 0.00 |
| ATOM | 6319 | HG11 | VAL | X | 421 | 29.553 | 34.053 | 51.987 | 0.00 | 0.00 |
| ATOM | 6320 | HG12 | VAL | X | 421 | 30.120 | 33.265 | 53.367 | 0.00 | 0.00 |
| ATOM | 6321 | HG13 | VAL | X | 421 | 29.668 | 32.224 | 52.027 | 0.00 | 0.00 |
| ATOM | 6322 | CG2  | VAL | X | 421 | 27.808 | 34.223 | 54.080 | 0.00 | 0.00 |



|      |      |      |     |   |     |        |        |        |      |      |
|------|------|------|-----|---|-----|--------|--------|--------|------|------|
| ATOM | 6323 | HG21 | VAL | X | 421 | 26.811 | 34.244 | 54.520 | 0.00 | 0.00 |
| ATOM | 6324 | HG22 | VAL | X | 421 | 28.026 | 35.158 | 53.564 | 0.00 | 0.00 |
| ATOM | 6325 | HG23 | VAL | X | 421 | 28.481 | 34.106 | 54.930 | 0.00 | 0.00 |
| ATOM | 6326 | C    | VAL | X | 421 | 27.103 | 31.197 | 51.532 | 0.00 | 0.00 |
| ATOM | 6327 | O    | VAL | X | 421 | 26.855 | 30.253 | 52.220 | 0.00 | 0.00 |
| ATOM | 6328 | N    | TYR | X | 422 | 27.581 | 31.154 | 50.276 | 0.00 | 0.00 |
| ATOM | 6329 | H    | TYR | X | 422 | 27.624 | 32.030 | 49.774 | 0.00 | 0.00 |
| ATOM | 6330 | CA   | TYR | X | 422 | 28.151 | 29.922 | 49.689 | 0.00 | 0.00 |
| ATOM | 6331 | HA   | TYR | X | 422 | 27.938 | 29.072 | 50.337 | 0.00 | 0.00 |
| ATOM | 6332 | CB   | TYR | X | 422 | 27.489 | 29.672 | 48.333 | 0.00 | 0.00 |
| ATOM | 6333 | HB2  | TYR | X | 422 | 27.825 | 30.353 | 47.551 | 0.00 | 0.00 |
| ATOM | 6334 | HB3  | TYR | X | 422 | 27.880 | 28.717 | 47.982 | 0.00 | 0.00 |
| ATOM | 6335 | CG   | TYR | X | 422 | 26.037 | 29.382 | 48.255 | 0.00 | 0.00 |
| ATOM | 6336 | CD1  | TYR | X | 422 | 25.440 | 28.157 | 48.379 | 0.00 | 0.00 |
| ATOM | 6337 | HD1  | TYR | X | 422 | 26.004 | 27.261 | 48.594 | 0.00 | 0.00 |
| ATOM | 6338 | CE1  | TYR | X | 422 | 24.041 | 28.023 | 48.487 | 0.00 | 0.00 |
| ATOM | 6339 | HE1  | TYR | X | 422 | 23.625 | 27.042 | 48.664 | 0.00 | 0.00 |
| ATOM | 6340 | CZ   | TYR | X | 422 | 23.189 | 29.103 | 48.391 | 0.00 | 0.00 |
| ATOM | 6341 | OH   | TYR | X | 422 | 21.875 | 28.984 | 48.555 | 0.00 | 0.00 |
| ATOM | 6342 | HH   | TYR | X | 422 | 21.662 | 28.061 | 48.398 | 0.00 | 0.00 |
| ATOM | 6343 | CE2  | TYR | X | 422 | 23.789 | 30.373 | 48.136 | 0.00 | 0.00 |
| ATOM | 6344 | HE2  | TYR | X | 422 | 23.140 | 31.219 | 47.966 | 0.00 | 0.00 |
| ATOM | 6345 | CD2  | TYR | X | 422 | 25.227 | 30.518 | 48.047 | 0.00 | 0.00 |
| ATOM | 6346 | HD2  | TYR | X | 422 | 25.734 | 31.465 | 47.931 | 0.00 | 0.00 |
| ATOM | 6347 | C    | TYR | X | 422 | 29.716 | 30.102 | 49.502 | 0.00 | 0.00 |
| ATOM | 6348 | O    | TYR | X | 422 | 30.069 | 31.239 | 49.127 | 0.00 | 0.00 |
| ATOM | 6349 | N    | ALA | X | 423 | 30.489 | 29.076 | 49.649 | 0.00 | 0.00 |
| ATOM | 6350 | H    | ALA | X | 423 | 30.124 | 28.216 | 50.032 | 0.00 | 0.00 |
| ATOM | 6351 | CA   | ALA | X | 423 | 31.954 | 29.147 | 49.474 | 0.00 | 0.00 |
| ATOM | 6352 | HA   | ALA | X | 423 | 32.081 | 29.947 | 48.744 | 0.00 | 0.00 |
| ATOM | 6353 | CB   | ALA | X | 423 | 32.734 | 29.365 | 50.832 | 0.00 | 0.00 |
| ATOM | 6354 | HB1  | ALA | X | 423 | 32.167 | 30.129 | 51.365 | 0.00 | 0.00 |
| ATOM | 6355 | HB2  | ALA | X | 423 | 33.768 | 29.599 | 50.582 | 0.00 | 0.00 |
| ATOM | 6356 | HB3  | ALA | X | 423 | 32.712 | 28.386 | 51.310 | 0.00 | 0.00 |
| ATOM | 6357 | C    | ALA | X | 423 | 32.533 | 27.928 | 48.788 | 0.00 | 0.00 |
| ATOM | 6358 | O    | ALA | X | 423 | 32.100 | 26.807 | 49.060 | 0.00 | 0.00 |
| ATOM | 6359 | N    | TYR | X | 424 | 33.404 | 28.173 | 47.817 | 0.00 | 0.00 |
| ATOM | 6360 | H    | TYR | X | 424 | 33.739 | 29.116 | 47.681 | 0.00 | 0.00 |
| ATOM | 6361 | CA   | TYR | X | 424 | 34.088 | 27.149 | 47.049 | 0.00 | 0.00 |
| ATOM | 6362 | HA   | TYR | X | 424 | 33.852 | 26.155 | 47.429 | 0.00 | 0.00 |
| ATOM | 6363 | CB   | TYR | X | 424 | 33.631 | 27.258 | 45.569 | 0.00 | 0.00 |
| ATOM | 6364 | HB2  | TYR | X | 424 | 33.899 | 26.312 | 45.098 | 0.00 | 0.00 |
| ATOM | 6365 | HB3  | TYR | X | 424 | 32.555 | 27.338 | 45.413 | 0.00 | 0.00 |
| ATOM | 6366 | CG   | TYR | X | 424 | 34.267 | 28.421 | 44.913 | 0.00 | 0.00 |
| ATOM | 6367 | CD1  | TYR | X | 424 | 35.532 | 28.357 | 44.338 | 0.00 | 0.00 |
| ATOM | 6368 | HD1  | TYR | X | 424 | 36.110 | 27.445 | 44.321 | 0.00 | 0.00 |
| ATOM | 6369 | CE1  | TYR | X | 424 | 36.094 | 29.443 | 43.705 | 0.00 | 0.00 |
| ATOM | 6370 | HE1  | TYR | X | 424 | 37.033 | 29.390 | 43.174 | 0.00 | 0.00 |
| ATOM | 6371 | CZ   | TYR | X | 424 | 35.413 | 30.653 | 43.594 | 0.00 | 0.00 |
| ATOM | 6372 | OH   | TYR | X | 424 | 35.879 | 31.548 | 42.775 | 0.00 | 0.00 |
| ATOM | 6373 | HH   | TYR | X | 424 | 36.747 | 31.333 | 42.425 | 0.00 | 0.00 |
| ATOM | 6374 | CE2  | TYR | X | 424 | 34.104 | 30.776 | 44.109 | 0.00 | 0.00 |
| ATOM | 6375 | HE2  | TYR | X | 424 | 33.550 | 31.696 | 43.989 | 0.00 | 0.00 |
| ATOM | 6376 | CD2  | TYR | X | 424 | 33.588 | 29.667 | 44.791 | 0.00 | 0.00 |
| ATOM | 6377 | HD2  | TYR | X | 424 | 32.591 | 29.772 | 45.193 | 0.00 | 0.00 |
| ATOM | 6378 | C    | TYR | X | 424 | 35.615 | 27.264 | 47.204 | 0.00 | 0.00 |
| ATOM | 6379 | O    | TYR | X | 424 | 36.251 | 28.270 | 47.563 | 0.00 | 0.00 |
| ATOM | 6380 | N    | VAL | X | 425 | 36.231 | 26.147 | 46.878 | 0.00 | 0.00 |
| ATOM | 6381 | H    | VAL | X | 425 | 35.664 | 25.312 | 46.825 | 0.00 | 0.00 |
| ATOM | 6382 | CA   | VAL | X | 425 | 37.637 | 26.045 | 46.496 | 0.00 | 0.00 |
| ATOM | 6383 | HA   | VAL | X | 425 | 38.049 | 27.030 | 46.279 | 0.00 | 0.00 |
| ATOM | 6384 | CB   | VAL | X | 425 | 38.449 | 25.355 | 47.677 | 0.00 | 0.00 |
| ATOM | 6385 | HB   | VAL | X | 425 | 38.130 | 24.320 | 47.801 | 0.00 | 0.00 |
| ATOM | 6386 | CG1  | VAL | X | 425 | 39.949 | 25.174 | 47.422 | 0.00 | 0.00 |
| ATOM | 6387 | HG11 | VAL | X | 425 | 40.399 | 26.125 | 47.139 | 0.00 | 0.00 |
| ATOM | 6388 | HG12 | VAL | X | 425 | 40.370 | 24.936 | 48.399 | 0.00 | 0.00 |
| ATOM | 6389 | HG13 | VAL | X | 425 | 39.887 | 24.442 | 46.617 | 0.00 | 0.00 |

|      |      |      |     |   |     |        |        |        |      |      |
|------|------|------|-----|---|-----|--------|--------|--------|------|------|
| ATOM | 6390 | CG2  | VAL | X | 425 | 38.273 | 26.191 | 49.045 | 0.00 | 0.00 |
| ATOM | 6391 | HG21 | VAL | X | 425 | 37.234 | 26.196 | 49.377 | 0.00 | 0.00 |
| ATOM | 6392 | HG22 | VAL | X | 425 | 38.509 | 27.225 | 48.793 | 0.00 | 0.00 |
| ATOM | 6393 | HG23 | VAL | X | 425 | 38.936 | 25.893 | 49.857 | 0.00 | 0.00 |
| ATOM | 6394 | C    | VAL | X | 425 | 37.723 | 25.317 | 45.078 | 0.00 | 0.00 |
| ATOM | 6395 | O    | VAL | X | 425 | 36.893 | 24.443 | 44.771 | 0.00 | 0.00 |
| ATOM | 6396 | N    | PHE | X | 426 | 38.775 | 25.621 | 44.302 | 0.00 | 0.00 |
| ATOM | 6397 | H    | PHE | X | 426 | 39.495 | 26.216 | 44.687 | 0.00 | 0.00 |
| ATOM | 6398 | CA   | PHE | X | 426 | 38.949 | 25.137 | 42.960 | 0.00 | 0.00 |
| ATOM | 6399 | HA   | PHE | X | 426 | 38.190 | 24.382 | 42.753 | 0.00 | 0.00 |
| ATOM | 6400 | CB   | PHE | X | 426 | 38.752 | 26.256 | 41.928 | 0.00 | 0.00 |
| ATOM | 6401 | HB2  | PHE | X | 426 | 37.717 | 26.596 | 41.954 | 0.00 | 0.00 |
| ATOM | 6402 | HB3  | PHE | X | 426 | 39.263 | 27.144 | 42.299 | 0.00 | 0.00 |
| ATOM | 6403 | CG   | PHE | X | 426 | 39.086 | 26.009 | 40.487 | 0.00 | 0.00 |
| ATOM | 6404 | CD1  | PHE | X | 426 | 38.088 | 25.556 | 39.508 | 0.00 | 0.00 |
| ATOM | 6405 | HD1  | PHE | X | 426 | 37.066 | 25.389 | 39.815 | 0.00 | 0.00 |
| ATOM | 6406 | CE1  | PHE | X | 426 | 38.426 | 25.594 | 38.166 | 0.00 | 0.00 |
| ATOM | 6407 | HE1  | PHE | X | 426 | 37.671 | 25.290 | 37.455 | 0.00 | 0.00 |
| ATOM | 6408 | CZ   | PHE | X | 426 | 39.703 | 25.795 | 37.734 | 0.00 | 0.00 |
| ATOM | 6409 | HZ   | PHE | X | 426 | 39.888 | 25.915 | 36.677 | 0.00 | 0.00 |
| ATOM | 6410 | CE2  | PHE | X | 426 | 40.737 | 26.230 | 38.647 | 0.00 | 0.00 |
| ATOM | 6411 | HE2  | PHE | X | 426 | 41.702 | 26.522 | 38.259 | 0.00 | 0.00 |
| ATOM | 6412 | CD2  | PHE | X | 426 | 40.363 | 26.392 | 39.994 | 0.00 | 0.00 |
| ATOM | 6413 | HD2  | PHE | X | 426 | 41.158 | 26.688 | 40.662 | 0.00 | 0.00 |
| ATOM | 6414 | C    | PHE | X | 426 | 40.296 | 24.508 | 42.835 | 0.00 | 0.00 |
| ATOM | 6415 | O    | PHE | X | 426 | 41.319 | 25.055 | 43.269 | 0.00 | 0.00 |
| ATOM | 6416 | N    | GLU | X | 427 | 40.276 | 23.268 | 42.355 | 0.00 | 0.00 |
| ATOM | 6417 | H    | GLU | X | 427 | 39.418 | 22.841 | 42.037 | 0.00 | 0.00 |
| ATOM | 6418 | CA   | GLU | X | 427 | 41.480 | 22.407 | 42.327 | 0.00 | 0.00 |
| ATOM | 6419 | HA   | GLU | X | 427 | 42.334 | 23.005 | 42.645 | 0.00 | 0.00 |
| ATOM | 6420 | CB   | GLU | X | 427 | 41.264 | 21.405 | 43.436 | 0.00 | 0.00 |
| ATOM | 6421 | HB2  | GLU | X | 427 | 42.244 | 20.940 | 43.543 | 0.00 | 0.00 |
| ATOM | 6422 | HB3  | GLU | X | 427 | 41.042 | 21.988 | 44.331 | 0.00 | 0.00 |
| ATOM | 6423 | CG   | GLU | X | 427 | 40.166 | 20.323 | 43.329 | 0.00 | 0.00 |
| ATOM | 6424 | HG2  | GLU | X | 427 | 39.241 | 20.894 | 43.410 | 0.00 | 0.00 |
| ATOM | 6425 | HG3  | GLU | X | 427 | 40.084 | 19.833 | 42.358 | 0.00 | 0.00 |
| ATOM | 6426 | CD   | GLU | X | 427 | 40.299 | 19.237 | 44.492 | 0.00 | 0.00 |
| ATOM | 6427 | OE1  | GLU | X | 427 | 40.383 | 19.616 | 45.628 | 0.00 | 0.00 |
| ATOM | 6428 | OE2  | GLU | X | 427 | 40.398 | 18.006 | 44.235 | 0.00 | 0.00 |
| ATOM | 6429 | C    | GLU | X | 427 | 41.809 | 21.605 | 40.983 | 0.00 | 0.00 |
| ATOM | 6430 | O    | GLU | X | 427 | 42.756 | 20.811 | 40.930 | 0.00 | 0.00 |
| ATOM | 6431 | N    | HIE | X | 428 | 41.150 | 21.884 | 39.861 | 0.00 | 0.00 |
| ATOM | 6432 | H    | HIE | X | 428 | 40.457 | 22.617 | 39.919 | 0.00 | 0.00 |
| ATOM | 6433 | CA   | HIE | X | 428 | 41.433 | 21.332 | 38.564 | 0.00 | 0.00 |
| ATOM | 6434 | HA   | HIE | X | 428 | 41.763 | 20.308 | 38.739 | 0.00 | 0.00 |
| ATOM | 6435 | CB   | HIE | X | 428 | 40.124 | 21.285 | 37.646 | 0.00 | 0.00 |
| ATOM | 6436 | HB2  | HIE | X | 428 | 39.468 | 20.509 | 38.041 | 0.00 | 0.00 |
| ATOM | 6437 | HB3  | HIE | X | 428 | 39.596 | 22.227 | 37.797 | 0.00 | 0.00 |
| ATOM | 6438 | CG   | HIE | X | 428 | 40.498 | 21.005 | 36.220 | 0.00 | 0.00 |
| ATOM | 6439 | ND1  | HIE | X | 428 | 41.350 | 20.003 | 35.766 | 0.00 | 0.00 |
| ATOM | 6440 | CE1  | HIE | X | 428 | 41.488 | 20.178 | 34.496 | 0.00 | 0.00 |
| ATOM | 6441 | HE1  | HIE | X | 428 | 42.136 | 19.501 | 33.959 | 0.00 | 0.00 |
| ATOM | 6442 | NE2  | HIE | X | 428 | 40.809 | 21.243 | 34.051 | 0.00 | 0.00 |
| ATOM | 6443 | HE2  | HIE | X | 428 | 40.828 | 21.525 | 33.081 | 0.00 | 0.00 |
| ATOM | 6444 | CD2  | HIE | X | 428 | 40.182 | 21.788 | 35.152 | 0.00 | 0.00 |
| ATOM | 6445 | HD2  | HIE | X | 428 | 39.678 | 22.743 | 35.125 | 0.00 | 0.00 |
| ATOM | 6446 | C    | HIE | X | 428 | 42.603 | 22.170 | 37.960 | 0.00 | 0.00 |
| ATOM | 6447 | O    | HIE | X | 428 | 42.419 | 23.342 | 37.587 | 0.00 | 0.00 |
| ATOM | 6448 | N    | ARG | X | 429 | 43.780 | 21.629 | 37.683 | 0.00 | 0.00 |
| ATOM | 6449 | H    | ARG | X | 429 | 43.966 | 20.652 | 37.858 | 0.00 | 0.00 |
| ATOM | 6450 | CA   | ARG | X | 429 | 44.775 | 22.290 | 36.889 | 0.00 | 0.00 |
| ATOM | 6451 | HA   | ARG | X | 429 | 44.865 | 23.338 | 37.178 | 0.00 | 0.00 |
| ATOM | 6452 | CB   | ARG | X | 429 | 46.166 | 21.752 | 37.177 | 0.00 | 0.00 |
| ATOM | 6453 | HB2  | ARG | X | 429 | 46.301 | 21.705 | 38.258 | 0.00 | 0.00 |
| ATOM | 6454 | HB3  | ARG | X | 429 | 46.435 | 20.764 | 36.803 | 0.00 | 0.00 |
| ATOM | 6455 | CG   | ARG | X | 429 | 47.237 | 22.822 | 36.750 | 0.00 | 0.00 |
| ATOM | 6456 | HG2  | ARG | X | 429 | 47.208 | 22.926 | 35.666 | 0.00 | 0.00 |

|      |      |      |     |   |     |        |        |        |      |      |
|------|------|------|-----|---|-----|--------|--------|--------|------|------|
| ATOM | 6457 | HG3  | ARG | X | 429 | 47.017 | 23.751 | 37.276 | 0.00 | 0.00 |
| ATOM | 6458 | CD   | ARG | X | 429 | 48.628 | 22.343 | 37.227 | 0.00 | 0.00 |
| ATOM | 6459 | HD2  | ARG | X | 429 | 48.679 | 22.302 | 38.315 | 0.00 | 0.00 |
| ATOM | 6460 | HD3  | ARG | X | 429 | 48.776 | 21.338 | 36.833 | 0.00 | 0.00 |
| ATOM | 6461 | NE   | ARG | X | 429 | 49.652 | 23.375 | 36.724 | 0.00 | 0.00 |
| ATOM | 6462 | HE   | ARG | X | 429 | 49.902 | 24.020 | 37.460 | 0.00 | 0.00 |
| ATOM | 6463 | CZ   | ARG | X | 429 | 50.095 | 23.606 | 35.548 | 0.00 | 0.00 |
| ATOM | 6464 | NH1  | ARG | X | 429 | 49.680 | 22.883 | 34.526 | 0.00 | 0.00 |
| ATOM | 6465 | HH11 | ARG | X | 429 | 48.990 | 22.162 | 34.682 | 0.00 | 0.00 |
| ATOM | 6466 | HH12 | ARG | X | 429 | 50.143 | 23.082 | 33.650 | 0.00 | 0.00 |
| ATOM | 6467 | NH2  | ARG | X | 429 | 50.969 | 24.504 | 35.314 | 0.00 | 0.00 |
| ATOM | 6468 | HH21 | ARG | X | 429 | 51.184 | 25.251 | 35.959 | 0.00 | 0.00 |
| ATOM | 6469 | HH22 | ARG | X | 429 | 51.053 | 24.796 | 34.350 | 0.00 | 0.00 |
| ATOM | 6470 | C    | ARG | X | 429 | 44.569 | 22.161 | 35.365 | 0.00 | 0.00 |
| ATOM | 6471 | O    | ARG | X | 429 | 44.608 | 21.068 | 34.822 | 0.00 | 0.00 |
| ATOM | 6472 | N    | ALA | X | 430 | 44.201 | 23.276 | 34.740 | 0.00 | 0.00 |
| ATOM | 6473 | H    | ALA | X | 430 | 44.032 | 24.057 | 35.359 | 0.00 | 0.00 |
| ATOM | 6474 | CA   | ALA | X | 430 | 43.696 | 23.348 | 33.328 | 0.00 | 0.00 |
| ATOM | 6475 | HA   | ALA | X | 430 | 42.818 | 22.721 | 33.169 | 0.00 | 0.00 |
| ATOM | 6476 | CB   | ALA | X | 430 | 43.271 | 24.791 | 33.041 | 0.00 | 0.00 |
| ATOM | 6477 | HB1  | ALA | X | 430 | 42.315 | 24.882 | 33.555 | 0.00 | 0.00 |
| ATOM | 6478 | HB2  | ALA | X | 430 | 43.202 | 24.952 | 31.965 | 0.00 | 0.00 |
| ATOM | 6479 | HB3  | ALA | X | 430 | 44.038 | 25.440 | 33.465 | 0.00 | 0.00 |
| ATOM | 6480 | C    | ALA | X | 430 | 44.792 | 22.870 | 32.320 | 0.00 | 0.00 |
| ATOM | 6481 | O    | ALA | X | 430 | 45.975 | 23.178 | 32.370 | 0.00 | 0.00 |
| ATOM | 6482 | N    | SER | X | 431 | 44.244 | 22.305 | 31.218 | 0.00 | 0.00 |
| ATOM | 6483 | H    | SER | X | 431 | 43.292 | 21.971 | 31.251 | 0.00 | 0.00 |
| ATOM | 6484 | CA   | SER | X | 431 | 45.003 | 22.017 | 29.996 | 0.00 | 0.00 |
| ATOM | 6485 | HA   | SER | X | 431 | 45.846 | 21.367 | 30.229 | 0.00 | 0.00 |
| ATOM | 6486 | CB   | SER | X | 431 | 44.125 | 21.219 | 28.924 | 0.00 | 0.00 |
| ATOM | 6487 | HB2  | SER | X | 431 | 44.633 | 21.050 | 27.974 | 0.00 | 0.00 |
| ATOM | 6488 | HB3  | SER | X | 431 | 43.969 | 20.242 | 29.381 | 0.00 | 0.00 |
| ATOM | 6489 | OG   | SER | X | 431 | 42.944 | 21.959 | 28.603 | 0.00 | 0.00 |
| ATOM | 6490 | HG   | SER | X | 431 | 42.184 | 21.517 | 28.989 | 0.00 | 0.00 |
| ATOM | 6491 | C    | SER | X | 431 | 45.571 | 23.269 | 29.227 | 0.00 | 0.00 |
| ATOM | 6492 | O    | SER | X | 431 | 46.465 | 23.132 | 28.321 | 0.00 | 0.00 |
| ATOM | 6493 | N    | THR | X | 432 | 45.168 | 24.533 | 29.505 | 0.00 | 0.00 |
| ATOM | 6494 | H    | THR | X | 432 | 44.361 | 24.592 | 30.111 | 0.00 | 0.00 |
| ATOM | 6495 | CA   | THR | X | 432 | 45.617 | 25.785 | 28.772 | 0.00 | 0.00 |
| ATOM | 6496 | HA   | THR | X | 432 | 46.537 | 25.507 | 28.257 | 0.00 | 0.00 |
| ATOM | 6497 | CB   | THR | X | 432 | 44.509 | 26.201 | 27.763 | 0.00 | 0.00 |
| ATOM | 6498 | HB   | THR | X | 432 | 43.749 | 26.750 | 28.320 | 0.00 | 0.00 |
| ATOM | 6499 | CG2  | THR | X | 432 | 45.085 | 27.067 | 26.602 | 0.00 | 0.00 |
| ATOM | 6500 | HG21 | THR | X | 432 | 44.287 | 27.630 | 26.117 | 0.00 | 0.00 |
| ATOM | 6501 | HG22 | THR | X | 432 | 45.693 | 26.588 | 25.835 | 0.00 | 0.00 |
| ATOM | 6502 | HG23 | THR | X | 432 | 45.745 | 27.889 | 26.880 | 0.00 | 0.00 |
| ATOM | 6503 | OG1  | THR | X | 432 | 43.844 | 25.094 | 27.230 | 0.00 | 0.00 |
| ATOM | 6504 | HG1  | THR | X | 432 | 43.351 | 24.516 | 27.818 | 0.00 | 0.00 |
| ATOM | 6505 | C    | THR | X | 432 | 46.007 | 26.917 | 29.726 | 0.00 | 0.00 |
| ATOM | 6506 | O    | THR | X | 432 | 45.362 | 27.997 | 29.712 | 0.00 | 0.00 |
| ATOM | 6507 | N    | LEU | X | 433 | 47.016 | 26.702 | 30.538 | 0.00 | 0.00 |
| ATOM | 6508 | H    | LEU | X | 433 | 47.464 | 25.805 | 30.415 | 0.00 | 0.00 |
| ATOM | 6509 | CA   | LEU | X | 433 | 47.657 | 27.599 | 31.545 | 0.00 | 0.00 |
| ATOM | 6510 | HA   | LEU | X | 433 | 47.122 | 28.536 | 31.388 | 0.00 | 0.00 |
| ATOM | 6511 | CB   | LEU | X | 433 | 47.441 | 26.985 | 32.966 | 0.00 | 0.00 |
| ATOM | 6512 | HB2  | LEU | X | 433 | 46.380 | 26.961 | 33.215 | 0.00 | 0.00 |
| ATOM | 6513 | HB3  | LEU | X | 433 | 47.765 | 25.945 | 32.997 | 0.00 | 0.00 |
| ATOM | 6514 | CG   | LEU | X | 433 | 48.147 | 27.668 | 34.127 | 0.00 | 0.00 |
| ATOM | 6515 | HG   | LEU | X | 433 | 49.217 | 27.683 | 33.918 | 0.00 | 0.00 |
| ATOM | 6516 | CD1  | LEU | X | 433 | 47.651 | 29.132 | 34.309 | 0.00 | 0.00 |
| ATOM | 6517 | HD11 | LEU | X | 433 | 47.762 | 29.654 | 33.358 | 0.00 | 0.00 |
| ATOM | 6518 | HD12 | LEU | X | 433 | 48.317 | 29.696 | 34.964 | 0.00 | 0.00 |
| ATOM | 6519 | HD13 | LEU | X | 433 | 46.630 | 29.028 | 34.674 | 0.00 | 0.00 |
| ATOM | 6520 | CD2  | LEU | X | 433 | 47.958 | 26.788 | 35.396 | 0.00 | 0.00 |
| ATOM | 6521 | HD21 | LEU | X | 433 | 46.896 | 26.680 | 35.617 | 0.00 | 0.00 |
| ATOM | 6522 | HD22 | LEU | X | 433 | 48.495 | 25.851 | 35.246 | 0.00 | 0.00 |
| ATOM | 6523 | HD23 | LEU | X | 433 | 48.472 | 27.175 | 36.277 | 0.00 | 0.00 |

|      |      |      |     |   |     |        |        |        |      |      |
|------|------|------|-----|---|-----|--------|--------|--------|------|------|
| ATOM | 6524 | C    | LEU | X | 433 | 49.151 | 27.771 | 31.142 | 0.00 | 0.00 |
| ATOM | 6525 | O    | LEU | X | 433 | 49.783 | 26.792 | 30.777 | 0.00 | 0.00 |
| ATOM | 6526 | N    | SER | X | 434 | 49.748 | 28.950 | 31.221 | 0.00 | 0.00 |
| ATOM | 6527 | H    | SER | X | 434 | 49.144 | 29.753 | 31.324 | 0.00 | 0.00 |
| ATOM | 6528 | CA   | SER | X | 434 | 51.079 | 29.250 | 30.676 | 0.00 | 0.00 |
| ATOM | 6529 | HA   | SER | X | 434 | 51.194 | 28.426 | 29.972 | 0.00 | 0.00 |
| ATOM | 6530 | CB   | SER | X | 434 | 51.109 | 30.653 | 30.122 | 0.00 | 0.00 |
| ATOM | 6531 | HB2  | SER | X | 434 | 50.997 | 31.451 | 30.855 | 0.00 | 0.00 |
| ATOM | 6532 | HB3  | SER | X | 434 | 52.053 | 30.749 | 29.586 | 0.00 | 0.00 |
| ATOM | 6533 | OG   | SER | X | 434 | 50.023 | 30.919 | 29.268 | 0.00 | 0.00 |
| ATOM | 6534 | HG   | SER | X | 434 | 50.273 | 30.646 | 28.383 | 0.00 | 0.00 |
| ATOM | 6535 | C    | SER | X | 434 | 52.214 | 29.122 | 31.779 | 0.00 | 0.00 |
| ATOM | 6536 | O    | SER | X | 434 | 53.396 | 28.963 | 31.442 | 0.00 | 0.00 |
| ATOM | 6537 | N    | TRP | X | 435 | 51.871 | 29.332 | 33.024 | 0.00 | 0.00 |
| ATOM | 6538 | H    | TRP | X | 435 | 50.893 | 29.577 | 33.086 | 0.00 | 0.00 |
| ATOM | 6539 | CA   | TRP | X | 435 | 52.732 | 29.337 | 34.203 | 0.00 | 0.00 |
| ATOM | 6540 | HA   | TRP | X | 435 | 53.619 | 29.944 | 34.018 | 0.00 | 0.00 |
| ATOM | 6541 | CB   | TRP | X | 435 | 52.034 | 29.999 | 35.372 | 0.00 | 0.00 |
| ATOM | 6542 | HB2  | TRP | X | 435 | 51.114 | 29.453 | 35.579 | 0.00 | 0.00 |
| ATOM | 6543 | HB3  | TRP | X | 435 | 52.632 | 29.961 | 36.283 | 0.00 | 0.00 |
| ATOM | 6544 | CG   | TRP | X | 435 | 51.684 | 31.445 | 35.175 | 0.00 | 0.00 |
| ATOM | 6545 | CD1  | TRP | X | 435 | 50.494 | 31.975 | 34.779 | 0.00 | 0.00 |
| ATOM | 6546 | HD1  | TRP | X | 435 | 49.567 | 31.425 | 34.835 | 0.00 | 0.00 |
| ATOM | 6547 | NE1  | TRP | X | 435 | 50.652 | 33.324 | 34.483 | 0.00 | 0.00 |
| ATOM | 6548 | HE1  | TRP | X | 435 | 49.893 | 33.928 | 34.199 | 0.00 | 0.00 |
| ATOM | 6549 | CE2  | TRP | X | 435 | 51.939 | 33.730 | 34.626 | 0.00 | 0.00 |
| ATOM | 6550 | CZ2  | TRP | X | 435 | 52.565 | 34.977 | 34.609 | 0.00 | 0.00 |
| ATOM | 6551 | HZ2  | TRP | X | 435 | 51.925 | 35.817 | 34.381 | 0.00 | 0.00 |
| ATOM | 6552 | CH2  | TRP | X | 435 | 53.974 | 35.114 | 34.779 | 0.00 | 0.00 |
| ATOM | 6553 | HH2  | TRP | X | 435 | 54.429 | 36.041 | 34.464 | 0.00 | 0.00 |
| ATOM | 6554 | CZ3  | TRP | X | 435 | 54.670 | 33.928 | 35.185 | 0.00 | 0.00 |
| ATOM | 6555 | HZ3  | TRP | X | 435 | 55.717 | 34.045 | 35.421 | 0.00 | 0.00 |
| ATOM | 6556 | CE3  | TRP | X | 435 | 53.966 | 32.775 | 35.495 | 0.00 | 0.00 |
| ATOM | 6557 | HE3  | TRP | X | 435 | 54.568 | 31.966 | 35.881 | 0.00 | 0.00 |
| ATOM | 6558 | CD2  | TRP | X | 435 | 52.616 | 32.587 | 35.163 | 0.00 | 0.00 |
| ATOM | 6559 | C    | TRP | X | 435 | 53.166 | 27.883 | 34.569 | 0.00 | 0.00 |
| ATOM | 6560 | O    | TRP | X | 435 | 52.365 | 26.886 | 34.381 | 0.00 | 0.00 |
| ATOM | 6561 | N    | PRO | X | 436 | 54.398 | 27.689 | 35.124 | 0.00 | 0.00 |
| ATOM | 6562 | CD   | PRO | X | 436 | 55.450 | 28.662 | 35.253 | 0.00 | 0.00 |
| ATOM | 6563 | HD2  | PRO | X | 436 | 55.210 | 29.405 | 36.013 | 0.00 | 0.00 |
| ATOM | 6564 | HD3  | PRO | X | 436 | 55.702 | 29.199 | 34.339 | 0.00 | 0.00 |
| ATOM | 6565 | CG   | PRO | X | 436 | 56.730 | 27.910 | 35.603 | 0.00 | 0.00 |
| ATOM | 6566 | HG2  | PRO | X | 436 | 57.414 | 28.504 | 36.209 | 0.00 | 0.00 |
| ATOM | 6567 | HG3  | PRO | X | 436 | 57.248 | 27.483 | 34.744 | 0.00 | 0.00 |
| ATOM | 6568 | CB   | PRO | X | 436 | 56.146 | 26.787 | 36.398 | 0.00 | 0.00 |
| ATOM | 6569 | HB2  | PRO | X | 436 | 55.902 | 27.123 | 37.405 | 0.00 | 0.00 |
| ATOM | 6570 | HB3  | PRO | X | 436 | 56.822 | 25.942 | 36.529 | 0.00 | 0.00 |
| ATOM | 6571 | CA   | PRO | X | 436 | 54.934 | 26.414 | 35.529 | 0.00 | 0.00 |
| ATOM | 6572 | HA   | PRO | X | 436 | 55.355 | 25.848 | 34.698 | 0.00 | 0.00 |
| ATOM | 6573 | C    | PRO | X | 436 | 53.970 | 25.496 | 36.371 | 0.00 | 0.00 |
| ATOM | 6574 | O    | PRO | X | 436 | 53.012 | 25.982 | 37.014 | 0.00 | 0.00 |
| ATOM | 6575 | N    | LEU | X | 437 | 54.189 | 24.123 | 36.304 | 0.00 | 0.00 |
| ATOM | 6576 | H    | LEU | X | 437 | 55.088 | 23.839 | 35.943 | 0.00 | 0.00 |
| ATOM | 6577 | CA   | LEU | X | 437 | 53.472 | 23.109 | 37.045 | 0.00 | 0.00 |
| ATOM | 6578 | HA   | LEU | X | 437 | 52.452 | 23.261 | 36.694 | 0.00 | 0.00 |
| ATOM | 6579 | CB   | LEU | X | 437 | 53.959 | 21.724 | 36.574 | 0.00 | 0.00 |
| ATOM | 6580 | HB2  | LEU | X | 437 | 54.039 | 21.702 | 35.487 | 0.00 | 0.00 |
| ATOM | 6581 | HB3  | LEU | X | 437 | 55.020 | 21.553 | 36.752 | 0.00 | 0.00 |
| ATOM | 6582 | CG   | LEU | X | 437 | 53.174 | 20.465 | 37.055 | 0.00 | 0.00 |
| ATOM | 6583 | HG   | LEU | X | 437 | 53.326 | 20.276 | 38.118 | 0.00 | 0.00 |
| ATOM | 6584 | CD1  | LEU | X | 437 | 51.679 | 20.744 | 36.871 | 0.00 | 0.00 |
| ATOM | 6585 | HD11 | LEU | X | 437 | 51.350 | 21.605 | 37.454 | 0.00 | 0.00 |
| ATOM | 6586 | HD12 | LEU | X | 437 | 51.129 | 19.940 | 37.358 | 0.00 | 0.00 |
| ATOM | 6587 | HD13 | LEU | X | 437 | 51.496 | 20.957 | 35.817 | 0.00 | 0.00 |
| ATOM | 6588 | CD2  | LEU | X | 437 | 53.577 | 19.314 | 36.154 | 0.00 | 0.00 |
| ATOM | 6589 | HD21 | LEU | X | 437 | 53.329 | 19.367 | 35.094 | 0.00 | 0.00 |
| ATOM | 6590 | HD22 | LEU | X | 437 | 54.621 | 19.124 | 36.402 | 0.00 | 0.00 |

|      |      |      |     |   |     |        |        |        |      |      |
|------|------|------|-----|---|-----|--------|--------|--------|------|------|
| ATOM | 6591 | HD23 | LEU | X | 437 | 53.248 | 18.355 | 36.555 | 0.00 | 0.00 |
| ATOM | 6592 | C    | LEU | X | 437 | 53.588 | 23.242 | 38.566 | 0.00 | 0.00 |
| ATOM | 6593 | O    | LEU | X | 437 | 52.626 | 23.043 | 39.257 | 0.00 | 0.00 |
| ATOM | 6594 | N    | TRP | X | 438 | 54.768 | 23.576 | 39.086 | 0.00 | 0.00 |
| ATOM | 6595 | H    | TRP | X | 438 | 55.504 | 23.841 | 38.447 | 0.00 | 0.00 |
| ATOM | 6596 | CA   | TRP | X | 438 | 54.979 | 23.626 | 40.569 | 0.00 | 0.00 |
| ATOM | 6597 | HA   | TRP | X | 438 | 54.572 | 22.751 | 41.076 | 0.00 | 0.00 |
| ATOM | 6598 | CB   | TRP | X | 438 | 56.487 | 23.541 | 40.805 | 0.00 | 0.00 |
| ATOM | 6599 | HB2  | TRP | X | 438 | 56.722 | 23.563 | 41.869 | 0.00 | 0.00 |
| ATOM | 6600 | HB3  | TRP | X | 438 | 56.757 | 22.548 | 40.444 | 0.00 | 0.00 |
| ATOM | 6601 | CG   | TRP | X | 438 | 57.431 | 24.463 | 40.181 | 0.00 | 0.00 |
| ATOM | 6602 | CD1  | TRP | X | 438 | 58.265 | 24.176 | 39.161 | 0.00 | 0.00 |
| ATOM | 6603 | HD1  | TRP | X | 438 | 58.464 | 23.159 | 38.856 | 0.00 | 0.00 |
| ATOM | 6604 | NE1  | TRP | X | 438 | 59.105 | 25.272 | 38.892 | 0.00 | 0.00 |
| ATOM | 6605 | HE1  | TRP | X | 438 | 59.877 | 25.253 | 38.242 | 0.00 | 0.00 |
| ATOM | 6606 | CE2  | TRP | X | 438 | 58.671 | 26.384 | 39.610 | 0.00 | 0.00 |
| ATOM | 6607 | CZ2  | TRP | X | 438 | 58.882 | 27.738 | 39.449 | 0.00 | 0.00 |
| ATOM | 6608 | HZ2  | TRP | X | 438 | 59.491 | 28.077 | 38.624 | 0.00 | 0.00 |
| ATOM | 6609 | CH2  | TRP | X | 438 | 58.434 | 28.621 | 40.460 | 0.00 | 0.00 |
| ATOM | 6610 | HH2  | TRP | X | 438 | 58.912 | 29.586 | 40.538 | 0.00 | 0.00 |
| ATOM | 6611 | CZ3  | TRP | X | 438 | 57.658 | 28.160 | 41.522 | 0.00 | 0.00 |
| ATOM | 6612 | HZ3  | TRP | X | 438 | 57.493 | 28.917 | 42.275 | 0.00 | 0.00 |
| ATOM | 6613 | CE3  | TRP | X | 438 | 57.187 | 26.817 | 41.540 | 0.00 | 0.00 |
| ATOM | 6614 | HE3  | TRP | X | 438 | 56.505 | 26.438 | 42.286 | 0.00 | 0.00 |
| ATOM | 6615 | CD2  | TRP | X | 438 | 57.648 | 25.896 | 40.558 | 0.00 | 0.00 |
| ATOM | 6616 | C    | TRP | X | 438 | 54.402 | 24.857 | 41.226 | 0.00 | 0.00 |
| ATOM | 6617 | O    | TRP | X | 438 | 54.375 | 24.731 | 42.452 | 0.00 | 0.00 |
| ATOM | 6618 | N    | MET | X | 439 | 53.816 | 25.705 | 40.489 | 0.00 | 0.00 |
| ATOM | 6619 | H    | MET | X | 439 | 53.683 | 25.341 | 39.556 | 0.00 | 0.00 |
| ATOM | 6620 | CA   | MET | X | 439 | 52.914 | 26.831 | 40.847 | 0.00 | 0.00 |
| ATOM | 6621 | HA   | MET | X | 439 | 53.174 | 27.193 | 41.841 | 0.00 | 0.00 |
| ATOM | 6622 | CB   | MET | X | 439 | 53.029 | 28.093 | 39.954 | 0.00 | 0.00 |
| ATOM | 6623 | HB2  | MET | X | 439 | 52.635 | 27.714 | 39.011 | 0.00 | 0.00 |
| ATOM | 6624 | HB3  | MET | X | 439 | 52.345 | 28.895 | 40.231 | 0.00 | 0.00 |
| ATOM | 6625 | CG   | MET | X | 439 | 54.426 | 28.590 | 39.730 | 0.00 | 0.00 |
| ATOM | 6626 | HG2  | MET | X | 439 | 54.832 | 28.888 | 40.696 | 0.00 | 0.00 |
| ATOM | 6627 | HD3  | MET | X | 439 | 55.077 | 27.766 | 39.436 | 0.00 | 0.00 |
| ATOM | 6628 | SD   | MET | X | 439 | 54.747 | 29.755 | 38.441 | 0.00 | 0.00 |
| ATOM | 6629 | CE   | MET | X | 439 | 53.564 | 31.061 | 38.898 | 0.00 | 0.00 |
| ATOM | 6630 | HE1  | MET | X | 439 | 53.616 | 31.370 | 39.942 | 0.00 | 0.00 |
| ATOM | 6631 | HE2  | MET | X | 439 | 53.702 | 31.869 | 38.179 | 0.00 | 0.00 |
| ATOM | 6632 | HE3  | MET | X | 439 | 52.536 | 30.727 | 38.757 | 0.00 | 0.00 |
| ATOM | 6633 | C    | MET | X | 439 | 51.469 | 26.316 | 40.981 | 0.00 | 0.00 |
| ATOM | 6634 | O    | MET | X | 439 | 50.650 | 27.093 | 41.361 | 0.00 | 0.00 |
| ATOM | 6635 | N    | GLY | X | 440 | 51.139 | 25.066 | 40.669 | 0.00 | 0.00 |
| ATOM | 6636 | H    | GLY | X | 440 | 51.913 | 24.513 | 40.331 | 0.00 | 0.00 |
| ATOM | 6637 | CA   | GLY | X | 440 | 49.903 | 24.351 | 41.054 | 0.00 | 0.00 |
| ATOM | 6638 | HA2  | GLY | X | 440 | 50.019 | 23.321 | 40.715 | 0.00 | 0.00 |
| ATOM | 6639 | HA3  | GLY | X | 440 | 49.787 | 24.339 | 42.137 | 0.00 | 0.00 |
| ATOM | 6640 | C    | GLY | X | 440 | 48.809 | 24.954 | 40.236 | 0.00 | 0.00 |
| ATOM | 6641 | O    | GLY | X | 440 | 48.886 | 25.080 | 39.001 | 0.00 | 0.00 |
| ATOM | 6642 | N    | VAL | X | 441 | 47.871 | 25.418 | 40.979 | 0.00 | 0.00 |
| ATOM | 6643 | H    | VAL | X | 441 | 47.944 | 25.365 | 41.985 | 0.00 | 0.00 |
| ATOM | 6644 | CA   | VAL | X | 441 | 46.717 | 26.168 | 40.395 | 0.00 | 0.00 |
| ATOM | 6645 | HA   | VAL | X | 441 | 46.730 | 26.180 | 39.305 | 0.00 | 0.00 |
| ATOM | 6646 | CB   | VAL | X | 441 | 45.296 | 25.603 | 40.544 | 0.00 | 0.00 |
| ATOM | 6647 | HB   | VAL | X | 441 | 44.893 | 25.746 | 41.546 | 0.00 | 0.00 |
| ATOM | 6648 | CG1  | VAL | X | 441 | 44.320 | 26.298 | 39.536 | 0.00 | 0.00 |
| ATOM | 6649 | HG11 | VAL | X | 441 | 43.457 | 25.646 | 39.397 | 0.00 | 0.00 |
| ATOM | 6650 | HG12 | VAL | X | 441 | 44.005 | 27.245 | 39.974 | 0.00 | 0.00 |
| ATOM | 6651 | HG13 | VAL | X | 441 | 44.791 | 26.467 | 38.567 | 0.00 | 0.00 |
| ATOM | 6652 | CG2  | VAL | X | 441 | 45.207 | 24.144 | 40.234 | 0.00 | 0.00 |
| ATOM | 6653 | HG21 | VAL | X | 441 | 44.184 | 23.791 | 40.098 | 0.00 | 0.00 |
| ATOM | 6654 | HG22 | VAL | X | 441 | 45.587 | 23.590 | 41.093 | 0.00 | 0.00 |
| ATOM | 6655 | HG23 | VAL | X | 441 | 45.658 | 23.797 | 39.305 | 0.00 | 0.00 |
| ATOM | 6656 | C    | VAL | X | 441 | 46.787 | 27.607 | 41.027 | 0.00 | 0.00 |
| ATOM | 6657 | O    | VAL | X | 441 | 46.257 | 27.733 | 42.088 | 0.00 | 0.00 |

|      |      |     |     |   |     |        |        |        |      |      |
|------|------|-----|-----|---|-----|--------|--------|--------|------|------|
| ATOM | 6658 | N   | PRO | X | 442 | 47.488 | 28.617 | 40.375 | 0.00 | 0.00 |
| ATOM | 6659 | CD  | PRO | X | 442 | 48.166 | 28.493 | 39.046 | 0.00 | 0.00 |
| ATOM | 6660 | HD2 | PRO | X | 442 | 47.478 | 28.019 | 38.346 | 0.00 | 0.00 |
| ATOM | 6661 | HD3 | PRO | X | 442 | 49.084 | 27.930 | 39.215 | 0.00 | 0.00 |
| ATOM | 6662 | CG  | PRO | X | 442 | 48.572 | 29.805 | 38.529 | 0.00 | 0.00 |
| ATOM | 6663 | HG2 | PRO | X | 442 | 47.735 | 30.261 | 37.999 | 0.00 | 0.00 |
| ATOM | 6664 | HG3 | PRO | X | 442 | 49.432 | 29.667 | 37.875 | 0.00 | 0.00 |
| ATOM | 6665 | CB  | PRO | X | 442 | 48.827 | 30.540 | 39.798 | 0.00 | 0.00 |
| ATOM | 6666 | HB2 | PRO | X | 442 | 48.690 | 31.619 | 39.720 | 0.00 | 0.00 |
| ATOM | 6667 | HB3 | PRO | X | 442 | 49.755 | 30.296 | 40.314 | 0.00 | 0.00 |
| ATOM | 6668 | CA  | PRO | X | 442 | 47.785 | 29.949 | 40.794 | 0.00 | 0.00 |
| ATOM | 6669 | HA  | PRO | X | 442 | 48.081 | 29.930 | 41.843 | 0.00 | 0.00 |
| ATOM | 6670 | C   | PRO | X | 442 | 46.531 | 30.768 | 40.812 | 0.00 | 0.00 |
| ATOM | 6671 | O   | PRO | X | 442 | 45.704 | 30.774 | 39.882 | 0.00 | 0.00 |
| ATOM | 6672 | N   | HIP | X | 443 | 46.558 | 31.675 | 41.783 | 0.00 | 0.00 |
| ATOM | 6673 | H   | HIP | X | 443 | 47.256 | 31.587 | 42.507 | 0.00 | 0.00 |
| ATOM | 6674 | CA  | HIP | X | 443 | 45.772 | 32.932 | 42.029 | 0.00 | 0.00 |
| ATOM | 6675 | HA  | HIP | X | 443 | 45.078 | 32.659 | 42.825 | 0.00 | 0.00 |
| ATOM | 6676 | CB  | HIP | X | 443 | 46.783 | 33.946 | 42.523 | 0.00 | 0.00 |
| ATOM | 6677 | HB2 | HIP | X | 443 | 47.293 | 33.529 | 43.391 | 0.00 | 0.00 |
| ATOM | 6678 | HB3 | HIP | X | 443 | 47.578 | 34.089 | 41.792 | 0.00 | 0.00 |
| ATOM | 6679 | CG  | HIP | X | 443 | 46.179 | 35.336 | 42.792 | 0.00 | 0.00 |
| ATOM | 6680 | ND1 | HIP | X | 443 | 45.160 | 35.640 | 43.700 | 0.00 | 0.00 |
| ATOM | 6681 | HD1 | HIP | X | 443 | 44.703 | 34.956 | 44.286 | 0.00 | 0.00 |
| ATOM | 6682 | CE1 | HIP | X | 443 | 44.844 | 36.967 | 43.481 | 0.00 | 0.00 |
| ATOM | 6683 | HE1 | HIP | X | 443 | 44.234 | 37.565 | 44.143 | 0.00 | 0.00 |
| ATOM | 6684 | NE2 | HIP | X | 443 | 45.573 | 37.435 | 42.499 | 0.00 | 0.00 |
| ATOM | 6685 | HE2 | HIP | X | 443 | 45.537 | 38.322 | 42.017 | 0.00 | 0.00 |
| ATOM | 6686 | CD2 | HIP | X | 443 | 46.427 | 36.471 | 42.103 | 0.00 | 0.00 |
| ATOM | 6687 | HD2 | HIP | X | 443 | 47.166 | 36.602 | 41.327 | 0.00 | 0.00 |
| ATOM | 6688 | C   | HIP | X | 443 | 45.065 | 33.427 | 40.737 | 0.00 | 0.00 |
| ATOM | 6689 | O   | HIP | X | 443 | 45.692 | 34.083 | 39.930 | 0.00 | 0.00 |
| ATOM | 6690 | N   | GLY | X | 444 | 43.736 | 33.226 | 40.719 | 0.00 | 0.00 |
| ATOM | 6691 | H   | GLY | X | 444 | 43.145 | 32.844 | 41.444 | 0.00 | 0.00 |
| ATOM | 6692 | CA  | GLY | X | 444 | 42.947 | 33.958 | 39.701 | 0.00 | 0.00 |
| ATOM | 6693 | HA2 | GLY | X | 444 | 41.887 | 33.942 | 39.951 | 0.00 | 0.00 |
| ATOM | 6694 | HA3 | GLY | X | 444 | 43.231 | 35.010 | 39.676 | 0.00 | 0.00 |
| ATOM | 6695 | C   | GLY | X | 444 | 43.032 | 33.426 | 38.275 | 0.00 | 0.00 |
| ATOM | 6696 | O   | GLY | X | 444 | 43.351 | 34.097 | 37.337 | 0.00 | 0.00 |
| ATOM | 6697 | N   | TYR | X | 445 | 42.656 | 32.138 | 38.075 | 0.00 | 0.00 |
| ATOM | 6698 | H   | TYR | X | 445 | 42.233 | 31.677 | 38.868 | 0.00 | 0.00 |
| ATOM | 6699 | CA  | TYR | X | 445 | 42.692 | 31.359 | 36.839 | 0.00 | 0.00 |
| ATOM | 6700 | HA  | TYR | X | 445 | 42.699 | 32.068 | 36.011 | 0.00 | 0.00 |
| ATOM | 6701 | CB  | TYR | X | 445 | 44.063 | 30.758 | 36.662 | 0.00 | 0.00 |
| ATOM | 6702 | HB2 | TYR | X | 445 | 44.471 | 30.493 | 37.638 | 0.00 | 0.00 |
| ATOM | 6703 | HB3 | TYR | X | 445 | 43.921 | 29.803 | 36.157 | 0.00 | 0.00 |
| ATOM | 6704 | CG  | TYR | X | 445 | 45.143 | 31.427 | 35.831 | 0.00 | 0.00 |
| ATOM | 6705 | CD1 | TYR | X | 445 | 44.987 | 31.381 | 34.459 | 0.00 | 0.00 |
| ATOM | 6706 | HD1 | TYR | X | 445 | 44.076 | 30.973 | 34.046 | 0.00 | 0.00 |
| ATOM | 6707 | CE1 | TYR | X | 445 | 45.938 | 31.926 | 33.532 | 0.00 | 0.00 |
| ATOM | 6708 | HE1 | TYR | X | 445 | 45.920 | 31.899 | 32.453 | 0.00 | 0.00 |
| ATOM | 6709 | CZ  | TYR | X | 445 | 47.029 | 32.610 | 34.065 | 0.00 | 0.00 |
| ATOM | 6710 | OH  | TYR | X | 445 | 47.974 | 33.233 | 33.295 | 0.00 | 0.00 |
| ATOM | 6711 | HH  | TYR | X | 445 | 48.040 | 32.983 | 32.371 | 0.00 | 0.00 |
| ATOM | 6712 | CE2 | TYR | X | 445 | 47.136 | 32.815 | 35.447 | 0.00 | 0.00 |
| ATOM | 6713 | HE2 | TYR | X | 445 | 48.035 | 33.311 | 35.783 | 0.00 | 0.00 |
| ATOM | 6714 | CD2 | TYR | X | 445 | 46.227 | 32.145 | 36.340 | 0.00 | 0.00 |
| ATOM | 6715 | HD2 | TYR | X | 445 | 46.313 | 32.261 | 37.410 | 0.00 | 0.00 |
| ATOM | 6716 | C   | TYR | X | 445 | 41.464 | 30.507 | 36.547 | 0.00 | 0.00 |
| ATOM | 6717 | O   | TYR | X | 445 | 41.317 | 30.054 | 35.418 | 0.00 | 0.00 |
| ATOM | 6718 | N   | GLU | X | 446 | 40.581 | 30.323 | 37.491 | 0.00 | 0.00 |
| ATOM | 6719 | H   | GLU | X | 446 | 40.588 | 30.826 | 38.367 | 0.00 | 0.00 |
| ATOM | 6720 | CA  | GLU | X | 446 | 39.326 | 29.693 | 37.258 | 0.00 | 0.00 |
| ATOM | 6721 | HA  | GLU | X | 446 | 39.499 | 28.881 | 36.553 | 0.00 | 0.00 |
| ATOM | 6722 | CB  | GLU | X | 446 | 38.729 | 29.154 | 38.607 | 0.00 | 0.00 |
| ATOM | 6723 | HB2 | GLU | X | 446 | 38.061 | 28.323 | 38.380 | 0.00 | 0.00 |
| ATOM | 6724 | HB3 | GLU | X | 446 | 39.524 | 28.813 | 39.270 | 0.00 | 0.00 |

|      |      |      |     |   |     |        |        |        |      |      |
|------|------|------|-----|---|-----|--------|--------|--------|------|------|
| ATOM | 6725 | CG   | GLU | X | 446 | 37.783 | 30.051 | 39.375 | 0.00 | 0.00 |
| ATOM | 6726 | HG2  | GLU | X | 446 | 36.945 | 30.464 | 38.815 | 0.00 | 0.00 |
| ATOM | 6727 | HG3  | GLU | X | 446 | 37.468 | 29.309 | 40.108 | 0.00 | 0.00 |
| ATOM | 6728 | CD   | GLU | X | 446 | 38.509 | 31.167 | 40.084 | 0.00 | 0.00 |
| ATOM | 6729 | OE1  | GLU | X | 446 | 39.503 | 31.727 | 39.500 | 0.00 | 0.00 |
| ATOM | 6730 | OE2  | GLU | X | 446 | 38.005 | 31.661 | 41.082 | 0.00 | 0.00 |
| ATOM | 6731 | C    | GLU | X | 446 | 38.374 | 30.685 | 36.524 | 0.00 | 0.00 |
| ATOM | 6732 | O    | GLU | X | 446 | 37.453 | 30.132 | 35.844 | 0.00 | 0.00 |
| ATOM | 6733 | N    | ILE | X | 447 | 38.542 | 32.030 | 36.475 | 0.00 | 0.00 |
| ATOM | 6734 | H    | ILE | X | 447 | 39.210 | 32.492 | 37.075 | 0.00 | 0.00 |
| ATOM | 6735 | CA   | ILE | X | 447 | 37.600 | 32.896 | 35.925 | 0.00 | 0.00 |
| ATOM | 6736 | HA   | ILE | X | 447 | 36.649 | 32.674 | 36.410 | 0.00 | 0.00 |
| ATOM | 6737 | CB   | ILE | X | 447 | 38.059 | 34.330 | 36.250 | 0.00 | 0.00 |
| ATOM | 6738 | HB   | ILE | X | 447 | 37.181 | 34.848 | 35.864 | 0.00 | 0.00 |
| ATOM | 6739 | CG2  | ILE | X | 447 | 38.135 | 34.546 | 37.785 | 0.00 | 0.00 |
| ATOM | 6740 | HG21 | ILE | X | 447 | 37.299 | 33.979 | 38.195 | 0.00 | 0.00 |
| ATOM | 6741 | HG22 | ILE | X | 447 | 37.964 | 35.599 | 38.009 | 0.00 | 0.00 |
| ATOM | 6742 | HG23 | ILE | X | 447 | 39.045 | 34.138 | 38.223 | 0.00 | 0.00 |
| ATOM | 6743 | CG1  | ILE | X | 447 | 39.198 | 34.889 | 35.359 | 0.00 | 0.00 |
| ATOM | 6744 | HG12 | ILE | X | 447 | 39.055 | 34.503 | 34.349 | 0.00 | 0.00 |
| ATOM | 6745 | HG13 | ILE | X | 447 | 38.932 | 35.930 | 35.180 | 0.00 | 0.00 |
| ATOM | 6746 | CD1  | ILE | X | 447 | 40.651 | 34.660 | 35.893 | 0.00 | 0.00 |
| ATOM | 6747 | HD11 | ILE | X | 447 | 40.915 | 33.610 | 35.767 | 0.00 | 0.00 |
| ATOM | 6748 | HD12 | ILE | X | 447 | 40.740 | 34.981 | 36.931 | 0.00 | 0.00 |
| ATOM | 6749 | HD13 | ILE | X | 447 | 41.309 | 35.278 | 35.281 | 0.00 | 0.00 |
| ATOM | 6750 | C    | ILE | X | 447 | 37.317 | 32.615 | 34.414 | 0.00 | 0.00 |
| ATOM | 6751 | O    | ILE | X | 447 | 36.290 | 32.900 | 33.822 | 0.00 | 0.00 |
| ATOM | 6752 | N    | GLU | X | 448 | 38.300 | 31.890 | 33.739 | 0.00 | 0.00 |
| ATOM | 6753 | H    | GLU | X | 448 | 39.033 | 31.475 | 34.295 | 0.00 | 0.00 |
| ATOM | 6754 | CA   | GLU | X | 448 | 38.234 | 31.575 | 32.306 | 0.00 | 0.00 |
| ATOM | 6755 | HA   | GLU | X | 448 | 37.950 | 32.414 | 31.670 | 0.00 | 0.00 |
| ATOM | 6756 | CB   | GLU | X | 448 | 39.641 | 31.017 | 31.804 | 0.00 | 0.00 |
| ATOM | 6757 | HB2  | GLU | X | 448 | 39.968 | 30.146 | 32.372 | 0.00 | 0.00 |
| ATOM | 6758 | HB3  | GLU | X | 448 | 39.484 | 30.743 | 30.760 | 0.00 | 0.00 |
| ATOM | 6759 | CG   | GLU | X | 448 | 40.806 | 31.933 | 31.949 | 0.00 | 0.00 |
| ATOM | 6760 | HG2  | GLU | X | 448 | 40.444 | 32.917 | 31.652 | 0.00 | 0.00 |
| ATOM | 6761 | HG3  | GLU | X | 448 | 41.117 | 31.998 | 32.991 | 0.00 | 0.00 |
| ATOM | 6762 | CD   | GLU | X | 448 | 41.999 | 31.356 | 31.172 | 0.00 | 0.00 |
| ATOM | 6763 | OE1  | GLU | X | 448 | 42.755 | 30.612 | 31.832 | 0.00 | 0.00 |
| ATOM | 6764 | OE2  | GLU | X | 448 | 42.154 | 31.592 | 29.953 | 0.00 | 0.00 |
| ATOM | 6765 | C    | GLU | X | 448 | 37.114 | 30.575 | 32.053 | 0.00 | 0.00 |
| ATOM | 6766 | O    | GLU | X | 448 | 36.539 | 30.544 | 30.958 | 0.00 | 0.00 |
| ATOM | 6767 | N    | PHE | X | 449 | 36.665 | 29.826 | 33.025 | 0.00 | 0.00 |
| ATOM | 6768 | H    | PHE | X | 449 | 37.068 | 29.969 | 33.940 | 0.00 | 0.00 |
| ATOM | 6769 | CA   | PHE | X | 449 | 35.547 | 28.903 | 33.100 | 0.00 | 0.00 |
| ATOM | 6770 | HA   | PHE | X | 449 | 35.561 | 28.333 | 32.171 | 0.00 | 0.00 |
| ATOM | 6771 | CB   | PHE | X | 449 | 35.883 | 27.836 | 34.140 | 0.00 | 0.00 |
| ATOM | 6772 | HB2  | PHE | X | 449 | 35.993 | 28.330 | 35.106 | 0.00 | 0.00 |
| ATOM | 6773 | HB3  | PHE | X | 449 | 34.988 | 27.248 | 34.341 | 0.00 | 0.00 |
| ATOM | 6774 | CG   | PHE | X | 449 | 37.029 | 26.856 | 33.703 | 0.00 | 0.00 |
| ATOM | 6775 | CD1  | PHE | X | 449 | 38.383 | 27.297 | 33.600 | 0.00 | 0.00 |
| ATOM | 6776 | HD1  | PHE | X | 449 | 38.726 | 28.293 | 33.837 | 0.00 | 0.00 |
| ATOM | 6777 | CE1  | PHE | X | 449 | 39.320 | 26.429 | 33.154 | 0.00 | 0.00 |
| ATOM | 6778 | HE1  | PHE | X | 449 | 40.325 | 26.807 | 33.037 | 0.00 | 0.00 |
| ATOM | 6779 | CZ   | PHE | X | 449 | 39.072 | 25.088 | 32.896 | 0.00 | 0.00 |
| ATOM | 6780 | HZ   | PHE | X | 449 | 39.888 | 24.409 | 32.696 | 0.00 | 0.00 |
| ATOM | 6781 | CE2  | PHE | X | 449 | 37.750 | 24.633 | 33.020 | 0.00 | 0.00 |
| ATOM | 6782 | HE2  | PHE | X | 449 | 37.559 | 23.582 | 32.858 | 0.00 | 0.00 |
| ATOM | 6783 | CD2  | PHE | X | 449 | 36.689 | 25.543 | 33.367 | 0.00 | 0.00 |
| ATOM | 6784 | HD2  | PHE | X | 449 | 35.666 | 25.200 | 33.404 | 0.00 | 0.00 |
| ATOM | 6785 | C    | PHE | X | 449 | 34.240 | 29.622 | 33.332 | 0.00 | 0.00 |
| ATOM | 6786 | O    | PHE | X | 449 | 33.207 | 29.082 | 33.005 | 0.00 | 0.00 |
| ATOM | 6787 | N    | ILE | X | 450 | 34.255 | 30.796 | 33.952 | 0.00 | 0.00 |
| ATOM | 6788 | H    | ILE | X | 450 | 35.144 | 31.177 | 34.241 | 0.00 | 0.00 |
| ATOM | 6789 | CA   | ILE | X | 450 | 33.083 | 31.649 | 34.160 | 0.00 | 0.00 |
| ATOM | 6790 | HA   | ILE | X | 450 | 32.146 | 31.118 | 34.331 | 0.00 | 0.00 |
| ATOM | 6791 | CB   | ILE | X | 450 | 33.319 | 32.598 | 35.376 | 0.00 | 0.00 |

|      |      |      |     |   |     |        |        |        |      |      |
|------|------|------|-----|---|-----|--------|--------|--------|------|------|
| ATOM | 6792 | HB   | ILE | X | 450 | 34.199 | 33.202 | 35.157 | 0.00 | 0.00 |
| ATOM | 6793 | CG2  | ILE | X | 450 | 32.176 | 33.541 | 35.866 | 0.00 | 0.00 |
| ATOM | 6794 | HG21 | ILE | X | 450 | 31.963 | 34.213 | 35.035 | 0.00 | 0.00 |
| ATOM | 6795 | HG22 | ILE | X | 450 | 32.607 | 34.296 | 36.523 | 0.00 | 0.00 |
| ATOM | 6796 | HG23 | ILE | X | 450 | 31.359 | 32.951 | 36.282 | 0.00 | 0.00 |
| ATOM | 6797 | CG1  | ILE | X | 450 | 33.582 | 31.792 | 36.639 | 0.00 | 0.00 |
| ATOM | 6798 | HG12 | ILE | X | 450 | 34.520 | 31.251 | 36.508 | 0.00 | 0.00 |
| ATOM | 6799 | HG13 | ILE | X | 450 | 33.651 | 32.463 | 37.495 | 0.00 | 0.00 |
| ATOM | 6800 | CD1  | ILE | X | 450 | 32.541 | 30.739 | 37.054 | 0.00 | 0.00 |
| ATOM | 6801 | HD11 | ILE | X | 450 | 31.696 | 31.170 | 37.591 | 0.00 | 0.00 |
| ATOM | 6802 | HD12 | ILE | X | 450 | 33.018 | 30.085 | 37.784 | 0.00 | 0.00 |
| ATOM | 6803 | HD13 | ILE | X | 450 | 32.324 | 30.177 | 36.146 | 0.00 | 0.00 |
| ATOM | 6804 | C    | ILE | X | 450 | 32.775 | 32.554 | 32.940 | 0.00 | 0.00 |
| ATOM | 6805 | O    | ILE | X | 450 | 31.599 | 32.615 | 32.542 | 0.00 | 0.00 |
| ATOM | 6806 | N    | PHE | X | 451 | 33.809 | 33.030 | 32.200 | 0.00 | 0.00 |
| ATOM | 6807 | H    | PHE | X | 451 | 34.745 | 33.044 | 32.578 | 0.00 | 0.00 |
| ATOM | 6808 | CA   | PHE | X | 451 | 33.664 | 33.674 | 30.895 | 0.00 | 0.00 |
| ATOM | 6809 | HA   | PHE | X | 451 | 32.764 | 34.284 | 30.815 | 0.00 | 0.00 |
| ATOM | 6810 | CB   | PHE | X | 451 | 34.811 | 34.699 | 30.694 | 0.00 | 0.00 |
| ATOM | 6811 | HB2  | PHE | X | 451 | 35.739 | 34.179 | 30.929 | 0.00 | 0.00 |
| ATOM | 6812 | HB3  | PHE | X | 451 | 34.906 | 34.829 | 29.616 | 0.00 | 0.00 |
| ATOM | 6813 | CG   | PHE | X | 451 | 34.694 | 36.052 | 31.491 | 0.00 | 0.00 |
| ATOM | 6814 | CD1  | PHE | X | 451 | 35.134 | 36.193 | 32.809 | 0.00 | 0.00 |
| ATOM | 6815 | HD1  | PHE | X | 451 | 35.652 | 35.397 | 33.323 | 0.00 | 0.00 |
| ATOM | 6816 | CE1  | PHE | X | 451 | 34.939 | 37.468 | 33.365 | 0.00 | 0.00 |
| ATOM | 6817 | HE1  | PHE | X | 451 | 35.360 | 37.705 | 34.331 | 0.00 | 0.00 |
| ATOM | 6818 | CZ   | PHE | X | 451 | 34.248 | 38.499 | 32.644 | 0.00 | 0.00 |
| ATOM | 6819 | HZ   | PHE | X | 451 | 34.221 | 39.499 | 33.054 | 0.00 | 0.00 |
| ATOM | 6820 | CE2  | PHE | X | 451 | 33.719 | 38.321 | 31.399 | 0.00 | 0.00 |
| ATOM | 6821 | HE2  | PHE | X | 451 | 32.990 | 38.996 | 30.974 | 0.00 | 0.00 |
| ATOM | 6822 | CD2  | PHE | X | 451 | 33.871 | 37.058 | 30.837 | 0.00 | 0.00 |
| ATOM | 6823 | HD2  | PHE | X | 451 | 33.376 | 36.890 | 29.892 | 0.00 | 0.00 |
| ATOM | 6824 | C    | PHE | X | 451 | 33.553 | 32.619 | 29.762 | 0.00 | 0.00 |
| ATOM | 6825 | O    | PHE | X | 451 | 33.545 | 32.967 | 28.569 | 0.00 | 0.00 |
| ATOM | 6826 | N    | GLY | X | 452 | 33.334 | 31.317 | 30.074 | 0.00 | 0.00 |
| ATOM | 6827 | H    | GLY | X | 452 | 32.883 | 31.225 | 30.973 | 0.00 | 0.00 |
| ATOM | 6828 | CA   | GLY | X | 452 | 33.071 | 30.254 | 29.163 | 0.00 | 0.00 |
| ATOM | 6829 | HA2  | GLY | X | 452 | 33.013 | 29.270 | 29.627 | 0.00 | 0.00 |
| ATOM | 6830 | HA3  | GLY | X | 452 | 32.155 | 30.448 | 28.606 | 0.00 | 0.00 |
| ATOM | 6831 | C    | GLY | X | 452 | 34.144 | 30.252 | 28.031 | 0.00 | 0.00 |
| ATOM | 6832 | O    | GLY | X | 452 | 33.789 | 29.761 | 26.915 | 0.00 | 0.00 |
| ATOM | 6833 | N    | ILE | X | 453 | 35.393 | 30.632 | 28.319 | 0.00 | 0.00 |
| ATOM | 6834 | H    | ILE | X | 453 | 35.609 | 30.791 | 29.293 | 0.00 | 0.00 |
| ATOM | 6835 | CA   | ILE | X | 453 | 36.528 | 30.485 | 27.414 | 0.00 | 0.00 |
| ATOM | 6836 | HA   | ILE | X | 453 | 36.201 | 31.142 | 26.607 | 0.00 | 0.00 |
| ATOM | 6837 | CB   | ILE | X | 453 | 37.872 | 31.009 | 28.111 | 0.00 | 0.00 |
| ATOM | 6838 | HB   | ILE | X | 453 | 38.051 | 30.387 | 28.988 | 0.00 | 0.00 |
| ATOM | 6839 | CG2  | ILE | X | 453 | 38.987 | 30.840 | 27.164 | 0.00 | 0.00 |
| ATOM | 6840 | HG21 | ILE | X | 453 | 39.015 | 31.532 | 26.323 | 0.00 | 0.00 |
| ATOM | 6841 | HG22 | ILE | X | 453 | 39.141 | 29.815 | 26.825 | 0.00 | 0.00 |
| ATOM | 6842 | HG23 | ILE | X | 453 | 39.880 | 31.072 | 27.744 | 0.00 | 0.00 |
| ATOM | 6843 | CG1  | ILE | X | 453 | 37.861 | 32.396 | 28.759 | 0.00 | 0.00 |
| ATOM | 6844 | HG12 | ILE | X | 453 | 37.096 | 32.343 | 29.533 | 0.00 | 0.00 |
| ATOM | 6845 | HG13 | ILE | X | 453 | 38.799 | 32.692 | 29.229 | 0.00 | 0.00 |
| ATOM | 6846 | CD1  | ILE | X | 453 | 37.513 | 33.541 | 27.787 | 0.00 | 0.00 |
| ATOM | 6847 | HD11 | ILE | X | 453 | 36.593 | 33.377 | 27.226 | 0.00 | 0.00 |
| ATOM | 6848 | HD12 | ILE | X | 453 | 38.301 | 33.546 | 27.034 | 0.00 | 0.00 |
| ATOM | 6849 | HD13 | ILE | X | 453 | 37.432 | 34.496 | 28.305 | 0.00 | 0.00 |
| ATOM | 6850 | C    | ILE | X | 453 | 36.689 | 29.101 | 26.827 | 0.00 | 0.00 |
| ATOM | 6851 | O    | ILE | X | 453 | 36.729 | 29.049 | 25.616 | 0.00 | 0.00 |
| ATOM | 6852 | N    | PRO | X | 454 | 36.707 | 27.973 | 27.571 | 0.00 | 0.00 |
| ATOM | 6853 | CD   | PRO | X | 454 | 36.747 | 27.865 | 29.063 | 0.00 | 0.00 |
| ATOM | 6854 | HD2  | PRO | X | 454 | 35.833 | 28.166 | 29.574 | 0.00 | 0.00 |
| ATOM | 6855 | HD3  | PRO | X | 454 | 37.613 | 28.450 | 29.373 | 0.00 | 0.00 |
| ATOM | 6856 | CG   | PRO | X | 454 | 36.937 | 26.364 | 29.419 | 0.00 | 0.00 |
| ATOM | 6857 | HG2  | PRO | X | 454 | 36.491 | 26.120 | 30.383 | 0.00 | 0.00 |
| ATOM | 6858 | HG3  | PRO | X | 454 | 37.999 | 26.138 | 29.516 | 0.00 | 0.00 |



|      |      |      |     |   |     |        |        |        |      |      |
|------|------|------|-----|---|-----|--------|--------|--------|------|------|
| ATOM | 6859 | CB   | PRO | X | 454 | 36.441 | 25.603 | 28.213 | 0.00 | 0.00 |
| ATOM | 6860 | HB2  | PRO | X | 454 | 35.358 | 25.503 | 28.282 | 0.00 | 0.00 |
| ATOM | 6861 | HB3  | PRO | X | 454 | 36.897 | 24.620 | 28.091 | 0.00 | 0.00 |
| ATOM | 6862 | CA   | PRO | X | 454 | 36.672 | 26.613 | 27.009 | 0.00 | 0.00 |
| ATOM | 6863 | HA   | PRO | X | 454 | 37.708 | 26.495 | 26.693 | 0.00 | 0.00 |
| ATOM | 6864 | C    | PRO | X | 454 | 35.756 | 26.260 | 25.842 | 0.00 | 0.00 |
| ATOM | 6865 | O    | PRO | X | 454 | 36.108 | 25.295 | 25.168 | 0.00 | 0.00 |
| ATOM | 6866 | N    | LEU | X | 455 | 34.673 | 27.021 | 25.592 | 0.00 | 0.00 |
| ATOM | 6867 | H    | LEU | X | 455 | 34.582 | 27.897 | 26.087 | 0.00 | 0.00 |
| ATOM | 6868 | CA   | LEU | X | 455 | 33.479 | 26.460 | 24.855 | 0.00 | 0.00 |
| ATOM | 6869 | HA   | LEU | X | 455 | 33.439 | 25.395 | 25.082 | 0.00 | 0.00 |
| ATOM | 6870 | CB   | LEU | X | 455 | 32.209 | 27.005 | 25.544 | 0.00 | 0.00 |
| ATOM | 6871 | HB2  | LEU | X | 455 | 32.039 | 28.013 | 25.167 | 0.00 | 0.00 |
| ATOM | 6872 | HB3  | LEU | X | 455 | 31.344 | 26.493 | 25.121 | 0.00 | 0.00 |
| ATOM | 6873 | CG   | LEU | X | 455 | 32.183 | 26.833 | 27.107 | 0.00 | 0.00 |
| ATOM | 6874 | HG   | LEU | X | 455 | 33.025 | 27.239 | 27.668 | 0.00 | 0.00 |
| ATOM | 6875 | CD1  | LEU | X | 455 | 30.880 | 27.509 | 27.515 | 0.00 | 0.00 |
| ATOM | 6876 | HD11 | LEU | X | 455 | 30.714 | 27.347 | 28.580 | 0.00 | 0.00 |
| ATOM | 6877 | HD12 | LEU | X | 455 | 30.026 | 27.197 | 26.914 | 0.00 | 0.00 |
| ATOM | 6878 | HD13 | LEU | X | 455 | 31.059 | 28.582 | 27.436 | 0.00 | 0.00 |
| ATOM | 6879 | CD2  | LEU | X | 455 | 32.149 | 25.333 | 27.355 | 0.00 | 0.00 |
| ATOM | 6880 | HD21 | LEU | X | 455 | 31.340 | 25.017 | 26.696 | 0.00 | 0.00 |
| ATOM | 6881 | HD22 | LEU | X | 455 | 33.164 | 24.966 | 27.207 | 0.00 | 0.00 |
| ATOM | 6882 | HD23 | LEU | X | 455 | 31.921 | 25.017 | 28.373 | 0.00 | 0.00 |
| ATOM | 6883 | C    | LEU | X | 455 | 33.390 | 26.586 | 23.319 | 0.00 | 0.00 |
| ATOM | 6884 | O    | LEU | X | 455 | 32.284 | 26.645 | 22.812 | 0.00 | 0.00 |
| ATOM | 6885 | N    | ASP | X | 456 | 34.551 | 26.688 | 22.636 | 0.00 | 0.00 |
| ATOM | 6886 | H    | ASP | X | 456 | 35.430 | 26.449 | 23.072 | 0.00 | 0.00 |
| ATOM | 6887 | CA   | ASP | X | 456 | 34.601 | 26.752 | 21.153 | 0.00 | 0.00 |
| ATOM | 6888 | HA   | ASP | X | 456 | 33.630 | 26.668 | 20.665 | 0.00 | 0.00 |
| ATOM | 6889 | CB   | ASP | X | 456 | 35.241 | 28.103 | 20.735 | 0.00 | 0.00 |
| ATOM | 6890 | HB2  | ASP | X | 456 | 34.657 | 28.951 | 21.092 | 0.00 | 0.00 |
| ATOM | 6891 | HB3  | ASP | X | 456 | 36.229 | 28.096 | 21.194 | 0.00 | 0.00 |
| ATOM | 6892 | CG   | ASP | X | 456 | 35.208 | 28.228 | 19.210 | 0.00 | 0.00 |
| ATOM | 6893 | OD1  | ASP | X | 456 | 36.078 | 27.698 | 18.489 | 0.00 | 0.00 |
| ATOM | 6894 | OD2  | ASP | X | 456 | 34.188 | 28.791 | 18.697 | 0.00 | 0.00 |
| ATOM | 6895 | C    | ASP | X | 456 | 35.523 | 25.517 | 20.622 | 0.00 | 0.00 |
| ATOM | 6896 | O    | ASP | X | 456 | 36.546 | 25.208 | 21.257 | 0.00 | 0.00 |
| ATOM | 6897 | N    | PRO | X | 457 | 35.083 | 24.808 | 19.548 | 0.00 | 0.00 |
| ATOM | 6898 | CD   | PRO | X | 457 | 33.778 | 24.856 | 18.933 | 0.00 | 0.00 |
| ATOM | 6899 | HD2  | PRO | X | 457 | 33.809 | 25.560 | 18.101 | 0.00 | 0.00 |
| ATOM | 6900 | HD3  | PRO | X | 457 | 32.996 | 25.160 | 19.628 | 0.00 | 0.00 |
| ATOM | 6901 | CG   | PRO | X | 457 | 33.568 | 23.484 | 18.367 | 0.00 | 0.00 |
| ATOM | 6902 | HG2  | PRO | X | 457 | 32.813 | 23.441 | 17.582 | 0.00 | 0.00 |
| ATOM | 6903 | HG3  | PRO | X | 457 | 33.204 | 22.939 | 19.238 | 0.00 | 0.00 |
| ATOM | 6904 | CB   | PRO | X | 457 | 34.962 | 23.007 | 17.977 | 0.00 | 0.00 |
| ATOM | 6905 | HB2  | PRO | X | 457 | 35.324 | 23.416 | 17.034 | 0.00 | 0.00 |
| ATOM | 6906 | HB3  | PRO | X | 457 | 35.103 | 21.930 | 18.072 | 0.00 | 0.00 |
| ATOM | 6907 | CA   | PRO | X | 457 | 35.802 | 23.623 | 19.038 | 0.00 | 0.00 |
| ATOM | 6908 | HA   | PRO | X | 457 | 35.837 | 22.936 | 19.884 | 0.00 | 0.00 |
| ATOM | 6909 | C    | PRO | X | 457 | 37.299 | 23.894 | 18.542 | 0.00 | 0.00 |
| ATOM | 6910 | O    | PRO | X | 457 | 38.100 | 22.972 | 18.467 | 0.00 | 0.00 |
| ATOM | 6911 | N    | SER | X | 458 | 37.703 | 25.137 | 18.313 | 0.00 | 0.00 |
| ATOM | 6912 | H    | SER | X | 458 | 37.011 | 25.847 | 18.505 | 0.00 | 0.00 |
| ATOM | 6913 | CA   | SER | X | 458 | 39.087 | 25.488 | 17.926 | 0.00 | 0.00 |
| ATOM | 6914 | HA   | SER | X | 458 | 39.421 | 24.754 | 17.192 | 0.00 | 0.00 |
| ATOM | 6915 | CB   | SER | X | 458 | 39.077 | 26.918 | 17.342 | 0.00 | 0.00 |
| ATOM | 6916 | HB2  | SER | X | 458 | 40.083 | 27.066 | 16.949 | 0.00 | 0.00 |
| ATOM | 6917 | HB3  | SER | X | 458 | 38.401 | 27.030 | 16.495 | 0.00 | 0.00 |
| ATOM | 6918 | OG   | SER | X | 458 | 38.673 | 27.864 | 18.331 | 0.00 | 0.00 |
| ATOM | 6919 | HG   | SER | X | 458 | 37.734 | 27.683 | 18.414 | 0.00 | 0.00 |
| ATOM | 6920 | C    | SER | X | 458 | 40.141 | 25.366 | 19.048 | 0.00 | 0.00 |
| ATOM | 6921 | O    | SER | X | 458 | 41.340 | 25.262 | 18.799 | 0.00 | 0.00 |
| ATOM | 6922 | N    | ARG | X | 459 | 39.693 | 25.450 | 20.285 | 0.00 | 0.00 |
| ATOM | 6923 | H    | ARG | X | 459 | 38.693 | 25.465 | 20.428 | 0.00 | 0.00 |
| ATOM | 6924 | CA   | ARG | X | 459 | 40.443 | 25.636 | 21.520 | 0.00 | 0.00 |
| ATOM | 6925 | HA   | ARG | X | 459 | 41.147 | 26.464 | 21.435 | 0.00 | 0.00 |

|      |      |      |     |   |     |        |        |        |      |      |
|------|------|------|-----|---|-----|--------|--------|--------|------|------|
| ATOM | 6926 | CB   | ARG | X | 459 | 39.450 | 25.899 | 22.746 | 0.00 | 0.00 |
| ATOM | 6927 | HB2  | ARG | X | 459 | 38.766 | 25.054 | 22.826 | 0.00 | 0.00 |
| ATOM | 6928 | HB3  | ARG | X | 459 | 39.902 | 25.938 | 23.738 | 0.00 | 0.00 |
| ATOM | 6929 | CG   | ARG | X | 459 | 38.676 | 27.191 | 22.460 | 0.00 | 0.00 |
| ATOM | 6930 | HG2  | ARG | X | 459 | 38.241 | 27.275 | 21.464 | 0.00 | 0.00 |
| ATOM | 6931 | HG3  | ARG | X | 459 | 37.776 | 27.306 | 23.065 | 0.00 | 0.00 |
| ATOM | 6932 | CD   | ARG | X | 459 | 39.504 | 28.521 | 22.423 | 0.00 | 0.00 |
| ATOM | 6933 | HD2  | ARG | X | 459 | 40.132 | 28.492 | 23.314 | 0.00 | 0.00 |
| ATOM | 6934 | HD3  | ARG | X | 459 | 40.156 | 28.569 | 21.551 | 0.00 | 0.00 |
| ATOM | 6935 | NE   | ARG | X | 459 | 38.686 | 29.839 | 22.436 | 0.00 | 0.00 |
| ATOM | 6936 | HE   | ARG | X | 459 | 37.705 | 29.730 | 22.650 | 0.00 | 0.00 |
| ATOM | 6937 | CZ   | ARG | X | 459 | 39.207 | 31.033 | 22.660 | 0.00 | 0.00 |
| ATOM | 6938 | NH1  | ARG | X | 459 | 40.517 | 31.171 | 22.550 | 0.00 | 0.00 |
| ATOM | 6939 | HH11 | ARG | X | 459 | 40.982 | 30.360 | 22.169 | 0.00 | 0.00 |
| ATOM | 6940 | HH12 | ARG | X | 459 | 40.996 | 31.998 | 22.877 | 0.00 | 0.00 |
| ATOM | 6941 | NH2  | ARG | X | 459 | 38.526 | 32.103 | 22.864 | 0.00 | 0.00 |
| ATOM | 6942 | HH21 | ARG | X | 459 | 37.549 | 31.925 | 23.049 | 0.00 | 0.00 |
| ATOM | 6943 | HH22 | ARG | X | 459 | 38.885 | 33.043 | 22.772 | 0.00 | 0.00 |
| ATOM | 6944 | C    | ARG | X | 459 | 41.275 | 24.396 | 21.994 | 0.00 | 0.00 |
| ATOM | 6945 | O    | ARG | X | 459 | 40.904 | 23.262 | 21.691 | 0.00 | 0.00 |
| ATOM | 6946 | N    | ASN | X | 460 | 42.404 | 24.599 | 22.652 | 0.00 | 0.00 |
| ATOM | 6947 | H    | ASN | X | 460 | 42.542 | 25.574 | 22.875 | 0.00 | 0.00 |
| ATOM | 6948 | CA   | ASN | X | 460 | 43.169 | 23.562 | 23.336 | 0.00 | 0.00 |
| ATOM | 6949 | HA   | ASN | X | 460 | 43.381 | 22.838 | 22.549 | 0.00 | 0.00 |
| ATOM | 6950 | CB   | ASN | X | 460 | 44.575 | 24.122 | 23.812 | 0.00 | 0.00 |
| ATOM | 6951 | HB2  | ASN | X | 460 | 45.107 | 24.588 | 22.983 | 0.00 | 0.00 |
| ATOM | 6952 | HB3  | ASN | X | 460 | 44.309 | 24.905 | 24.522 | 0.00 | 0.00 |
| ATOM | 6953 | CG   | ASN | X | 460 | 45.414 | 23.100 | 24.415 | 0.00 | 0.00 |
| ATOM | 6954 | OD1  | ASN | X | 460 | 45.857 | 22.157 | 23.710 | 0.00 | 0.00 |
| ATOM | 6955 | ND2  | ASN | X | 460 | 45.674 | 23.212 | 25.707 | 0.00 | 0.00 |
| ATOM | 6956 | HD21 | ASN | X | 460 | 46.169 | 22.455 | 26.157 | 0.00 | 0.00 |
| ATOM | 6957 | HD22 | ASN | X | 460 | 45.301 | 23.974 | 26.255 | 0.00 | 0.00 |
| ATOM | 6958 | C    | ASN | X | 460 | 42.380 | 22.830 | 24.485 | 0.00 | 0.00 |
| ATOM | 6959 | O    | ASN | X | 460 | 42.626 | 21.641 | 24.645 | 0.00 | 0.00 |
| ATOM | 6960 | N    | TYR | X | 461 | 41.510 | 23.646 | 25.226 | 0.00 | 0.00 |
| ATOM | 6961 | H    | TYR | X | 461 | 41.486 | 24.585 | 24.856 | 0.00 | 0.00 |
| ATOM | 6962 | CA   | TYR | X | 461 | 40.609 | 23.197 | 26.286 | 0.00 | 0.00 |
| ATOM | 6963 | HA   | TYR | X | 461 | 41.053 | 22.991 | 27.260 | 0.00 | 0.00 |
| ATOM | 6964 | CB   | TYR | X | 461 | 39.640 | 24.294 | 26.646 | 0.00 | 0.00 |
| ATOM | 6965 | HB2  | TYR | X | 461 | 39.372 | 24.747 | 25.691 | 0.00 | 0.00 |
| ATOM | 6966 | HB3  | TYR | X | 461 | 38.762 | 23.789 | 27.050 | 0.00 | 0.00 |
| ATOM | 6967 | CG   | TYR | X | 461 | 40.189 | 25.372 | 27.697 | 0.00 | 0.00 |
| ATOM | 6968 | CD1  | TYR | X | 461 | 40.191 | 26.739 | 27.320 | 0.00 | 0.00 |
| ATOM | 6969 | HD1  | TYR | X | 461 | 39.851 | 27.003 | 26.329 | 0.00 | 0.00 |
| ATOM | 6970 | CE1  | TYR | X | 461 | 40.604 | 27.651 | 28.286 | 0.00 | 0.00 |
| ATOM | 6971 | HE1  | TYR | X | 461 | 40.593 | 28.725 | 28.175 | 0.00 | 0.00 |
| ATOM | 6972 | CZ   | TYR | X | 461 | 40.846 | 27.207 | 29.687 | 0.00 | 0.00 |
| ATOM | 6973 | OH   | TYR | X | 461 | 41.094 | 28.205 | 30.578 | 0.00 | 0.00 |
| ATOM | 6974 | HH   | TYR | X | 461 | 41.300 | 27.870 | 31.453 | 0.00 | 0.00 |
| ATOM | 6975 | CE2  | TYR | X | 461 | 40.900 | 25.870 | 29.954 | 0.00 | 0.00 |
| ATOM | 6976 | HE2  | TYR | X | 461 | 41.255 | 25.569 | 30.928 | 0.00 | 0.00 |
| ATOM | 6977 | CD2  | TYR | X | 461 | 40.581 | 24.986 | 28.970 | 0.00 | 0.00 |
| ATOM | 6978 | HD2  | TYR | X | 461 | 40.582 | 23.929 | 29.192 | 0.00 | 0.00 |
| ATOM | 6979 | C    | TYR | X | 461 | 39.818 | 21.985 | 25.786 | 0.00 | 0.00 |
| ATOM | 6980 | O    | TYR | X | 461 | 39.097 | 21.980 | 24.780 | 0.00 | 0.00 |
| ATOM | 6981 | N    | THR | X | 462 | 39.765 | 20.921 | 26.542 | 0.00 | 0.00 |
| ATOM | 6982 | H    | THR | X | 462 | 40.137 | 21.113 | 27.461 | 0.00 | 0.00 |
| ATOM | 6983 | CA   | THR | X | 462 | 39.492 | 19.488 | 26.261 | 0.00 | 0.00 |
| ATOM | 6984 | HA   | THR | X | 462 | 39.705 | 19.379 | 25.198 | 0.00 | 0.00 |
| ATOM | 6985 | CB   | THR | X | 462 | 40.302 | 18.492 | 27.065 | 0.00 | 0.00 |
| ATOM | 6986 | HB   | THR | X | 462 | 39.952 | 17.483 | 26.847 | 0.00 | 0.00 |
| ATOM | 6987 | CG2  | THR | X | 462 | 41.781 | 18.632 | 26.646 | 0.00 | 0.00 |
| ATOM | 6988 | HG21 | THR | X | 462 | 41.903 | 18.618 | 25.563 | 0.00 | 0.00 |
| ATOM | 6989 | HG22 | THR | X | 462 | 42.411 | 17.904 | 27.158 | 0.00 | 0.00 |
| ATOM | 6990 | HG23 | THR | X | 462 | 42.183 | 19.582 | 26.997 | 0.00 | 0.00 |
| ATOM | 6991 | OG1  | THR | X | 462 | 40.112 | 18.671 | 28.399 | 0.00 | 0.00 |
| ATOM | 6992 | HG1  | THR | X | 462 | 40.325 | 19.594 | 28.556 | 0.00 | 0.00 |

|      |      |     |     |   |     |        |        |        |      |      |
|------|------|-----|-----|---|-----|--------|--------|--------|------|------|
| ATOM | 6993 | C   | THR | X | 462 | 37.963 | 19.234 | 26.366 | 0.00 | 0.00 |
| ATOM | 6994 | O   | THR | X | 462 | 37.291 | 19.977 | 26.993 | 0.00 | 0.00 |
| ATOM | 6995 | N   | ALA | X | 463 | 37.443 | 18.144 | 25.843 | 0.00 | 0.00 |
| ATOM | 6996 | H   | ALA | X | 463 | 37.986 | 17.563 | 25.220 | 0.00 | 0.00 |
| ATOM | 6997 | CA  | ALA | X | 463 | 36.052 | 17.738 | 25.846 | 0.00 | 0.00 |
| ATOM | 6998 | HA  | ALA | X | 463 | 35.573 | 18.463 | 25.188 | 0.00 | 0.00 |
| ATOM | 6999 | CB  | ALA | X | 463 | 35.886 | 16.374 | 25.162 | 0.00 | 0.00 |
| ATOM | 7000 | HB1 | ALA | X | 463 | 34.859 | 16.228 | 24.828 | 0.00 | 0.00 |
| ATOM | 7001 | HB2 | ALA | X | 463 | 36.087 | 15.514 | 25.801 | 0.00 | 0.00 |
| ATOM | 7002 | HB3 | ALA | X | 463 | 36.520 | 16.322 | 24.277 | 0.00 | 0.00 |
| ATOM | 7003 | C   | ALA | X | 463 | 35.409 | 17.960 | 27.197 | 0.00 | 0.00 |
| ATOM | 7004 | O   | ALA | X | 463 | 34.349 | 18.560 | 27.326 | 0.00 | 0.00 |
| ATOM | 7005 | N   | GLU | X | 464 | 36.038 | 17.382 | 28.213 | 0.00 | 0.00 |
| ATOM | 7006 | H   | GLU | X | 464 | 36.863 | 16.811 | 28.100 | 0.00 | 0.00 |
| ATOM | 7007 | CA  | GLU | X | 464 | 35.517 | 17.402 | 29.585 | 0.00 | 0.00 |
| ATOM | 7008 | HA  | GLU | X | 464 | 34.442 | 17.226 | 29.545 | 0.00 | 0.00 |
| ATOM | 7009 | CB  | GLU | X | 464 | 36.123 | 16.249 | 30.404 | 0.00 | 0.00 |
| ATOM | 7010 | HB2 | GLU | X | 464 | 35.466 | 16.377 | 31.265 | 0.00 | 0.00 |
| ATOM | 7011 | HB3 | GLU | X | 464 | 35.952 | 15.250 | 30.005 | 0.00 | 0.00 |
| ATOM | 7012 | CG  | GLU | X | 464 | 37.648 | 16.355 | 30.782 | 0.00 | 0.00 |
| ATOM | 7013 | HG2 | GLU | X | 464 | 37.965 | 17.389 | 30.644 | 0.00 | 0.00 |
| ATOM | 7014 | HG3 | GLU | X | 464 | 37.772 | 16.029 | 31.815 | 0.00 | 0.00 |
| ATOM | 7015 | CD  | GLU | X | 464 | 38.520 | 15.467 | 29.881 | 0.00 | 0.00 |
| ATOM | 7016 | OE1 | GLU | X | 464 | 38.289 | 15.677 | 28.656 | 0.00 | 0.00 |
| ATOM | 7017 | OE2 | GLU | X | 464 | 39.446 | 14.718 | 30.286 | 0.00 | 0.00 |
| ATOM | 7018 | C   | GLU | X | 464 | 35.588 | 18.830 | 30.299 | 0.00 | 0.00 |
| ATOM | 7019 | O   | GLU | X | 464 | 34.715 | 19.068 | 31.136 | 0.00 | 0.00 |
| ATOM | 7020 | N   | GLU | X | 465 | 36.466 | 19.735 | 29.865 | 0.00 | 0.00 |
| ATOM | 7021 | H   | GLU | X | 465 | 36.956 | 19.587 | 28.995 | 0.00 | 0.00 |
| ATOM | 7022 | CA  | GLU | X | 465 | 36.643 | 21.029 | 30.525 | 0.00 | 0.00 |
| ATOM | 7023 | HA  | GLU | X | 465 | 36.527 | 20.933 | 31.604 | 0.00 | 0.00 |
| ATOM | 7024 | CB  | GLU | X | 465 | 38.014 | 21.573 | 30.158 | 0.00 | 0.00 |
| ATOM | 7025 | HB2 | GLU | X | 465 | 38.174 | 21.228 | 29.136 | 0.00 | 0.00 |
| ATOM | 7026 | HB3 | GLU | X | 465 | 37.979 | 22.661 | 30.108 | 0.00 | 0.00 |
| ATOM | 7027 | CG  | GLU | X | 465 | 39.175 | 21.082 | 31.051 | 0.00 | 0.00 |
| ATOM | 7028 | HG2 | GLU | X | 465 | 39.208 | 21.717 | 31.936 | 0.00 | 0.00 |
| ATOM | 7029 | HG3 | GLU | X | 465 | 39.066 | 20.045 | 31.369 | 0.00 | 0.00 |
| ATOM | 7030 | CD  | GLU | X | 465 | 40.535 | 21.335 | 30.366 | 0.00 | 0.00 |
| ATOM | 7031 | OE1 | GLU | X | 465 | 40.662 | 21.137 | 29.173 | 0.00 | 0.00 |
| ATOM | 7032 | OE2 | GLU | X | 465 | 41.474 | 21.798 | 31.047 | 0.00 | 0.00 |
| ATOM | 7033 | C   | GLU | X | 465 | 35.520 | 21.895 | 30.001 | 0.00 | 0.00 |
| ATOM | 7034 | O   | GLU | X | 465 | 34.995 | 22.793 | 30.693 | 0.00 | 0.00 |
| ATOM | 7035 | N   | LYS | X | 466 | 34.894 | 21.555 | 28.847 | 0.00 | 0.00 |
| ATOM | 7036 | H   | LYS | X | 466 | 35.154 | 20.754 | 28.289 | 0.00 | 0.00 |
| ATOM | 7037 | CA  | LYS | X | 466 | 33.766 | 22.371 | 28.338 | 0.00 | 0.00 |
| ATOM | 7038 | HA  | LYS | X | 466 | 34.034 | 23.425 | 28.419 | 0.00 | 0.00 |
| ATOM | 7039 | CB  | LYS | X | 466 | 33.498 | 22.099 | 26.896 | 0.00 | 0.00 |
| ATOM | 7040 | HB2 | LYS | X | 466 | 33.243 | 21.057 | 26.700 | 0.00 | 0.00 |
| ATOM | 7041 | HB3 | LYS | X | 466 | 32.589 | 22.551 | 26.497 | 0.00 | 0.00 |
| ATOM | 7042 | CG  | LYS | X | 466 | 34.700 | 22.428 | 25.986 | 0.00 | 0.00 |
| ATOM | 7043 | HG2 | LYS | X | 466 | 34.778 | 23.512 | 25.901 | 0.00 | 0.00 |
| ATOM | 7044 | HG3 | LYS | X | 466 | 35.594 | 21.972 | 26.412 | 0.00 | 0.00 |
| ATOM | 7045 | CD  | LYS | X | 466 | 34.553 | 21.784 | 24.639 | 0.00 | 0.00 |
| ATOM | 7046 | HD2 | LYS | X | 466 | 34.317 | 20.724 | 24.736 | 0.00 | 0.00 |
| ATOM | 7047 | HD3 | LYS | X | 466 | 33.709 | 22.236 | 24.119 | 0.00 | 0.00 |
| ATOM | 7048 | CE  | LYS | X | 466 | 35.737 | 22.005 | 23.764 | 0.00 | 0.00 |
| ATOM | 7049 | HE2 | LYS | X | 466 | 35.978 | 23.059 | 23.627 | 0.00 | 0.00 |
| ATOM | 7050 | HE3 | LYS | X | 466 | 36.648 | 21.579 | 24.184 | 0.00 | 0.00 |
| ATOM | 7051 | NZ  | LYS | X | 466 | 35.570 | 21.477 | 22.368 | 0.00 | 0.00 |
| ATOM | 7052 | HZ1 | LYS | X | 466 | 36.329 | 21.784 | 21.776 | 0.00 | 0.00 |
| ATOM | 7053 | HZ2 | LYS | X | 466 | 35.678 | 20.473 | 22.380 | 0.00 | 0.00 |
| ATOM | 7054 | HZ3 | LYS | X | 466 | 34.669 | 21.768 | 22.017 | 0.00 | 0.00 |
| ATOM | 7055 | C   | LYS | X | 466 | 32.560 | 22.071 | 29.206 | 0.00 | 0.00 |
| ATOM | 7056 | O   | LYS | X | 466 | 31.744 | 22.960 | 29.564 | 0.00 | 0.00 |
| ATOM | 7057 | N   | ILE | X | 467 | 32.449 | 20.869 | 29.747 | 0.00 | 0.00 |
| ATOM | 7058 | H   | ILE | X | 467 | 33.193 | 20.199 | 29.618 | 0.00 | 0.00 |
| ATOM | 7059 | CA  | ILE | X | 467 | 31.325 | 20.416 | 30.623 | 0.00 | 0.00 |

|      |      |      |     |   |     |        |        |        |      |      |
|------|------|------|-----|---|-----|--------|--------|--------|------|------|
| ATOM | 7060 | HA   | ILE | X | 467 | 30.367 | 20.646 | 30.158 | 0.00 | 0.00 |
| ATOM | 7061 | CB   | ILE | X | 467 | 31.299 | 18.859 | 30.822 | 0.00 | 0.00 |
| ATOM | 7062 | HB   | ILE | X | 467 | 32.189 | 18.534 | 31.360 | 0.00 | 0.00 |
| ATOM | 7063 | CG2  | ILE | X | 467 | 30.083 | 18.392 | 31.637 | 0.00 | 0.00 |
| ATOM | 7064 | HG21 | ILE | X | 467 | 29.136 | 18.704 | 31.196 | 0.00 | 0.00 |
| ATOM | 7065 | HG22 | ILE | X | 467 | 30.079 | 18.778 | 32.656 | 0.00 | 0.00 |
| ATOM | 7066 | HG23 | ILE | X | 467 | 29.987 | 17.306 | 31.620 | 0.00 | 0.00 |
| ATOM | 7067 | CG1  | ILE | X | 467 | 31.392 | 18.075 | 29.453 | 0.00 | 0.00 |
| ATOM | 7068 | HG12 | ILE | X | 467 | 32.443 | 18.094 | 29.164 | 0.00 | 0.00 |
| ATOM | 7069 | HG13 | ILE | X | 467 | 31.052 | 17.072 | 29.708 | 0.00 | 0.00 |
| ATOM | 7070 | CD1  | ILE | X | 467 | 30.583 | 18.646 | 28.279 | 0.00 | 0.00 |
| ATOM | 7071 | HD11 | ILE | X | 467 | 30.565 | 17.967 | 27.426 | 0.00 | 0.00 |
| ATOM | 7072 | HD12 | ILE | X | 467 | 31.116 | 19.530 | 27.928 | 0.00 | 0.00 |
| ATOM | 7073 | HD13 | ILE | X | 467 | 29.538 | 18.859 | 28.503 | 0.00 | 0.00 |
| ATOM | 7074 | C    | ILE | X | 467 | 31.378 | 21.071 | 32.007 | 0.00 | 0.00 |
| ATOM | 7075 | O    | ILE | X | 467 | 30.446 | 21.706 | 32.419 | 0.00 | 0.00 |
| ATOM | 7076 | N    | PHE | X | 468 | 32.527 | 21.000 | 32.670 | 0.00 | 0.00 |
| ATOM | 7077 | H    | PHE | X | 468 | 33.201 | 20.459 | 32.147 | 0.00 | 0.00 |
| ATOM | 7078 | CA   | PHE | X | 468 | 32.912 | 21.733 | 33.859 | 0.00 | 0.00 |
| ATOM | 7079 | HA   | PHE | X | 468 | 32.324 | 21.281 | 34.658 | 0.00 | 0.00 |
| ATOM | 7080 | CB   | PHE | X | 468 | 34.366 | 21.560 | 34.139 | 0.00 | 0.00 |
| ATOM | 7081 | HB2  | PHE | X | 468 | 34.629 | 20.509 | 34.023 | 0.00 | 0.00 |
| ATOM | 7082 | HB3  | PHE | X | 468 | 34.874 | 21.962 | 33.263 | 0.00 | 0.00 |
| ATOM | 7083 | CG   | PHE | X | 468 | 34.930 | 22.088 | 35.449 | 0.00 | 0.00 |
| ATOM | 7084 | CD1  | PHE | X | 468 | 34.072 | 22.205 | 36.533 | 0.00 | 0.00 |
| ATOM | 7085 | HD1  | PHE | X | 468 | 33.029 | 21.927 | 36.567 | 0.00 | 0.00 |
| ATOM | 7086 | CE1  | PHE | X | 468 | 34.584 | 22.597 | 37.787 | 0.00 | 0.00 |
| ATOM | 7087 | HE1  | PHE | X | 468 | 34.002 | 22.728 | 38.688 | 0.00 | 0.00 |
| ATOM | 7088 | CZ   | PHE | X | 468 | 35.952 | 22.920 | 37.841 | 0.00 | 0.00 |
| ATOM | 7089 | HZ   | PHE | X | 468 | 36.482 | 23.206 | 38.737 | 0.00 | 0.00 |
| ATOM | 7090 | CE2  | PHE | X | 468 | 36.780 | 22.833 | 36.732 | 0.00 | 0.00 |
| ATOM | 7091 | HE2  | PHE | X | 468 | 37.825 | 23.096 | 36.805 | 0.00 | 0.00 |
| ATOM | 7092 | CD2  | PHE | X | 468 | 36.244 | 22.482 | 35.509 | 0.00 | 0.00 |
| ATOM | 7093 | HD2  | PHE | X | 468 | 36.971 | 22.421 | 34.712 | 0.00 | 0.00 |
| ATOM | 7094 | C    | PHE | X | 468 | 32.585 | 23.234 | 33.765 | 0.00 | 0.00 |
| ATOM | 7095 | O    | PHE | X | 468 | 31.880 | 23.850 | 34.552 | 0.00 | 0.00 |
| ATOM | 7096 | N    | ALA | X | 469 | 32.974 | 23.850 | 32.644 | 0.00 | 0.00 |
| ATOM | 7097 | H    | ALA | X | 469 | 33.449 | 23.342 | 31.912 | 0.00 | 0.00 |
| ATOM | 7098 | CA   | ALA | X | 469 | 32.757 | 25.218 | 32.348 | 0.00 | 0.00 |
| ATOM | 7099 | HA   | ALA | X | 469 | 33.096 | 25.963 | 33.067 | 0.00 | 0.00 |
| ATOM | 7100 | CB   | ALA | X | 469 | 33.384 | 25.499 | 31.030 | 0.00 | 0.00 |
| ATOM | 7101 | HB1  | ALA | X | 469 | 33.348 | 26.562 | 30.790 | 0.00 | 0.00 |
| ATOM | 7102 | HB2  | ALA | X | 469 | 32.895 | 24.892 | 30.269 | 0.00 | 0.00 |
| ATOM | 7103 | HB3  | ALA | X | 469 | 34.466 | 25.386 | 31.102 | 0.00 | 0.00 |
| ATOM | 7104 | C    | ALA | X | 469 | 31.195 | 25.592 | 32.377 | 0.00 | 0.00 |
| ATOM | 7105 | O    | ALA | X | 469 | 30.833 | 26.514 | 33.042 | 0.00 | 0.00 |
| ATOM | 7106 | N    | GLN | X | 470 | 30.306 | 24.894 | 31.637 | 0.00 | 0.00 |
| ATOM | 7107 | H    | GLN | X | 470 | 30.693 | 24.152 | 31.071 | 0.00 | 0.00 |
| ATOM | 7108 | CA   | GLN | X | 470 | 28.904 | 25.168 | 31.484 | 0.00 | 0.00 |
| ATOM | 7109 | HA   | GLN | X | 470 | 28.748 | 26.216 | 31.229 | 0.00 | 0.00 |
| ATOM | 7110 | CB   | GLN | X | 470 | 28.322 | 24.280 | 30.367 | 0.00 | 0.00 |
| ATOM | 7111 | HB2  | GLN | X | 470 | 28.725 | 23.268 | 30.410 | 0.00 | 0.00 |
| ATOM | 7112 | HB3  | GLN | X | 470 | 27.237 | 24.298 | 30.466 | 0.00 | 0.00 |
| ATOM | 7113 | CG   | GLN | X | 470 | 28.659 | 24.719 | 28.919 | 0.00 | 0.00 |
| ATOM | 7114 | HG2  | GLN | X | 470 | 28.473 | 25.772 | 28.709 | 0.00 | 0.00 |
| ATOM | 7115 | HG3  | GLN | X | 470 | 29.743 | 24.634 | 28.845 | 0.00 | 0.00 |
| ATOM | 7116 | CD   | GLN | X | 470 | 28.041 | 23.905 | 27.785 | 0.00 | 0.00 |
| ATOM | 7117 | OE1  | GLN | X | 470 | 28.668 | 23.064 | 27.165 | 0.00 | 0.00 |
| ATOM | 7118 | NE2  | GLN | X | 470 | 26.750 | 24.038 | 27.578 | 0.00 | 0.00 |
| ATOM | 7119 | HE21 | GLN | X | 470 | 26.296 | 23.337 | 27.011 | 0.00 | 0.00 |
| ATOM | 7120 | HE22 | GLN | X | 470 | 26.166 | 24.675 | 28.100 | 0.00 | 0.00 |
| ATOM | 7121 | C    | GLN | X | 470 | 28.054 | 25.020 | 32.774 | 0.00 | 0.00 |
| ATOM | 7122 | O    | GLN | X | 470 | 27.062 | 25.754 | 32.856 | 0.00 | 0.00 |
| ATOM | 7123 | N    | ARG | X | 471 | 28.458 | 24.125 | 33.713 | 0.00 | 0.00 |
| ATOM | 7124 | H    | ARG | X | 471 | 29.244 | 23.532 | 33.491 | 0.00 | 0.00 |
| ATOM | 7125 | CA   | ARG | X | 471 | 27.888 | 23.999 | 35.123 | 0.00 | 0.00 |
| ATOM | 7126 | HA   | ARG | X | 471 | 26.877 | 24.391 | 35.022 | 0.00 | 0.00 |

|      |      |      |     |   |     |        |        |        |      |      |
|------|------|------|-----|---|-----|--------|--------|--------|------|------|
| ATOM | 7127 | CB   | ARG | X | 471 | 28.088 | 22.581 | 35.618 | 0.00 | 0.00 |
| ATOM | 7128 | HB2  | ARG | X | 471 | 27.689 | 22.585 | 36.632 | 0.00 | 0.00 |
| ATOM | 7129 | HB3  | ARG | X | 471 | 27.476 | 21.907 | 35.019 | 0.00 | 0.00 |
| ATOM | 7130 | CG   | ARG | X | 471 | 29.505 | 22.114 | 35.755 | 0.00 | 0.00 |
| ATOM | 7131 | HG2  | ARG | X | 471 | 29.939 | 22.174 | 34.757 | 0.00 | 0.00 |
| ATOM | 7132 | HG3  | ARG | X | 471 | 30.011 | 22.758 | 36.475 | 0.00 | 0.00 |
| ATOM | 7133 | CD   | ARG | X | 471 | 29.574 | 20.679 | 36.218 | 0.00 | 0.00 |
| ATOM | 7134 | HD2  | ARG | X | 471 | 28.805 | 20.121 | 35.684 | 0.00 | 0.00 |
| ATOM | 7135 | HD3  | ARG | X | 471 | 30.568 | 20.279 | 36.021 | 0.00 | 0.00 |
| ATOM | 7136 | NE   | ARG | X | 471 | 29.406 | 20.644 | 37.686 | 0.00 | 0.00 |
| ATOM | 7137 | HE   | ARG | X | 471 | 28.443 | 20.620 | 37.990 | 0.00 | 0.00 |
| ATOM | 7138 | CZ   | ARG | X | 471 | 30.345 | 20.504 | 38.562 | 0.00 | 0.00 |
| ATOM | 7139 | NH1  | ARG | X | 471 | 31.594 | 20.459 | 38.282 | 0.00 | 0.00 |
| ATOM | 7140 | HH11 | ARG | X | 471 | 31.989 | 20.275 | 37.371 | 0.00 | 0.00 |
| ATOM | 7141 | HH12 | ARG | X | 471 | 32.279 | 20.300 | 39.008 | 0.00 | 0.00 |
| ATOM | 7142 | NH2  | ARG | X | 471 | 30.012 | 20.439 | 39.822 | 0.00 | 0.00 |
| ATOM | 7143 | HH21 | ARG | X | 471 | 29.071 | 20.595 | 40.156 | 0.00 | 0.00 |
| ATOM | 7144 | HH22 | ARG | X | 471 | 30.724 | 20.175 | 40.488 | 0.00 | 0.00 |
| ATOM | 7145 | C    | ARG | X | 471 | 28.537 | 25.084 | 36.098 | 0.00 | 0.00 |
| ATOM | 7146 | O    | ARG | X | 471 | 27.745 | 25.641 | 36.832 | 0.00 | 0.00 |
| ATOM | 7147 | N    | LEU | X | 472 | 29.790 | 25.524 | 35.942 | 0.00 | 0.00 |
| ATOM | 7148 | H    | LEU | X | 472 | 30.442 | 25.060 | 35.325 | 0.00 | 0.00 |
| ATOM | 7149 | CA   | LEU | X | 472 | 30.366 | 26.683 | 36.679 | 0.00 | 0.00 |
| ATOM | 7150 | HA   | LEU | X | 472 | 30.136 | 26.372 | 37.698 | 0.00 | 0.00 |
| ATOM | 7151 | CB   | LEU | X | 472 | 31.840 | 26.811 | 36.475 | 0.00 | 0.00 |
| ATOM | 7152 | HB2  | LEU | X | 472 | 31.983 | 27.112 | 35.438 | 0.00 | 0.00 |
| ATOM | 7153 | HB3  | LEU | X | 472 | 32.095 | 27.744 | 36.979 | 0.00 | 0.00 |
| ATOM | 7154 | CG   | LEU | X | 472 | 32.724 | 25.708 | 37.171 | 0.00 | 0.00 |
| ATOM | 7155 | HG   | LEU | X | 472 | 32.370 | 24.740 | 36.815 | 0.00 | 0.00 |
| ATOM | 7156 | CD1  | LEU | X | 472 | 34.185 | 25.881 | 36.652 | 0.00 | 0.00 |
| ATOM | 7157 | HD11 | LEU | X | 472 | 34.361 | 25.302 | 35.745 | 0.00 | 0.00 |
| ATOM | 7158 | HD12 | LEU | X | 472 | 34.901 | 25.425 | 37.335 | 0.00 | 0.00 |
| ATOM | 7159 | HD13 | LEU | X | 472 | 34.314 | 26.930 | 36.388 | 0.00 | 0.00 |
| ATOM | 7160 | CD2  | LEU | X | 472 | 32.639 | 25.569 | 38.712 | 0.00 | 0.00 |
| ATOM | 7161 | HD21 | LEU | X | 472 | 33.245 | 24.704 | 38.982 | 0.00 | 0.00 |
| ATOM | 7162 | HD22 | LEU | X | 472 | 32.932 | 26.517 | 39.162 | 0.00 | 0.00 |
| ATOM | 7163 | HD23 | LEU | X | 472 | 31.622 | 25.375 | 39.054 | 0.00 | 0.00 |
| ATOM | 7164 | C    | LEU | X | 472 | 29.636 | 28.022 | 36.324 | 0.00 | 0.00 |
| ATOM | 7165 | O    | LEU | X | 472 | 29.130 | 28.686 | 37.197 | 0.00 | 0.00 |
| ATOM | 7166 | N    | MET | X | 473 | 29.476 | 28.206 | 35.002 | 0.00 | 0.00 |
| ATOM | 7167 | H    | MET | X | 473 | 29.983 | 27.578 | 34.395 | 0.00 | 0.00 |
| ATOM | 7168 | CA   | MET | X | 473 | 28.678 | 29.362 | 34.494 | 0.00 | 0.00 |
| ATOM | 7169 | HA   | MET | X | 473 | 29.200 | 30.260 | 34.827 | 0.00 | 0.00 |
| ATOM | 7170 | CB   | MET | X | 473 | 28.614 | 29.288 | 32.988 | 0.00 | 0.00 |
| ATOM | 7171 | HB2  | MET | X | 473 | 28.182 | 28.376 | 32.577 | 0.00 | 0.00 |
| ATOM | 7172 | HB3  | MET | X | 473 | 28.032 | 30.150 | 32.662 | 0.00 | 0.00 |
| ATOM | 7173 | CG   | MET | X | 473 | 29.973 | 29.519 | 32.288 | 0.00 | 0.00 |
| ATOM | 7174 | HG2  | MET | X | 473 | 30.235 | 30.574 | 32.365 | 0.00 | 0.00 |
| ATOM | 7175 | HG3  | MET | X | 473 | 30.775 | 29.014 | 32.827 | 0.00 | 0.00 |
| ATOM | 7176 | SD   | MET | X | 473 | 29.907 | 29.110 | 30.605 | 0.00 | 0.00 |
| ATOM | 7177 | CE   | MET | X | 473 | 28.922 | 30.519 | 30.072 | 0.00 | 0.00 |
| ATOM | 7178 | HE1  | MET | X | 473 | 28.633 | 30.419 | 29.025 | 0.00 | 0.00 |
| ATOM | 7179 | HE2  | MET | X | 473 | 27.970 | 30.735 | 30.557 | 0.00 | 0.00 |
| ATOM | 7180 | HE3  | MET | X | 473 | 29.623 | 31.331 | 30.266 | 0.00 | 0.00 |
| ATOM | 7181 | C    | MET | X | 473 | 27.281 | 29.306 | 35.036 | 0.00 | 0.00 |
| ATOM | 7182 | O    | MET | X | 473 | 26.786 | 30.387 | 35.485 | 0.00 | 0.00 |
| ATOM | 7183 | N    | ARG | X | 474 | 26.635 | 28.153 | 34.969 | 0.00 | 0.00 |
| ATOM | 7184 | H    | ARG | X | 474 | 27.123 | 27.333 | 34.637 | 0.00 | 0.00 |
| ATOM | 7185 | CA   | ARG | X | 474 | 25.266 | 27.969 | 35.414 | 0.00 | 0.00 |
| ATOM | 7186 | HA   | ARG | X | 474 | 24.660 | 28.689 | 34.864 | 0.00 | 0.00 |
| ATOM | 7187 | CB   | ARG | X | 474 | 24.772 | 26.552 | 34.954 | 0.00 | 0.00 |
| ATOM | 7188 | HB2  | ARG | X | 474 | 25.061 | 26.376 | 33.918 | 0.00 | 0.00 |
| ATOM | 7189 | HB3  | ARG | X | 474 | 25.111 | 25.820 | 35.687 | 0.00 | 0.00 |
| ATOM | 7190 | CG   | ARG | X | 474 | 23.208 | 26.483 | 34.977 | 0.00 | 0.00 |
| ATOM | 7191 | HG2  | ARG | X | 474 | 22.964 | 25.436 | 34.794 | 0.00 | 0.00 |
| ATOM | 7192 | HG3  | ARG | X | 474 | 22.809 | 26.552 | 35.989 | 0.00 | 0.00 |
| ATOM | 7193 | CD   | ARG | X | 474 | 22.422 | 27.447 | 34.099 | 0.00 | 0.00 |

|      |      |      |     |   |     |        |        |        |      |      |
|------|------|------|-----|---|-----|--------|--------|--------|------|------|
| ATOM | 7194 | HD2  | ARG | X | 474 | 22.572 | 28.485 | 34.395 | 0.00 | 0.00 |
| ATOM | 7195 | HD3  | ARG | X | 474 | 22.692 | 27.306 | 33.052 | 0.00 | 0.00 |
| ATOM | 7196 | NE   | ARG | X | 474 | 20.967 | 27.196 | 34.145 | 0.00 | 0.00 |
| ATOM | 7197 | HE   | ARG | X | 474 | 20.542 | 26.720 | 34.929 | 0.00 | 0.00 |
| ATOM | 7198 | CZ   | ARG | X | 474 | 20.088 | 27.451 | 33.225 | 0.00 | 0.00 |
| ATOM | 7199 | NH1  | ARG | X | 474 | 20.326 | 28.151 | 32.156 | 0.00 | 0.00 |
| ATOM | 7200 | HH11 | ARG | X | 474 | 21.193 | 28.648 | 32.009 | 0.00 | 0.00 |
| ATOM | 7201 | HH12 | ARG | X | 474 | 19.583 | 28.252 | 31.480 | 0.00 | 0.00 |
| ATOM | 7202 | NH2  | ARG | X | 474 | 18.874 | 27.047 | 33.441 | 0.00 | 0.00 |
| ATOM | 7203 | HH21 | ARG | X | 474 | 18.698 | 26.384 | 34.182 | 0.00 | 0.00 |
| ATOM | 7204 | HH22 | ARG | X | 474 | 18.093 | 27.235 | 32.829 | 0.00 | 0.00 |
| ATOM | 7205 | C    | ARG | X | 474 | 25.066 | 28.188 | 36.899 | 0.00 | 0.00 |
| ATOM | 7206 | O    | ARG | X | 474 | 24.075 | 28.732 | 37.278 | 0.00 | 0.00 |
| ATOM | 7207 | N    | TYR | X | 475 | 26.015 | 27.892 | 37.784 | 0.00 | 0.00 |
| ATOM | 7208 | H    | TYR | X | 475 | 26.886 | 27.493 | 37.464 | 0.00 | 0.00 |
| ATOM | 7209 | CA   | TYR | X | 475 | 25.995 | 28.220 | 39.180 | 0.00 | 0.00 |
| ATOM | 7210 | HA   | TYR | X | 475 | 24.989 | 27.909 | 39.463 | 0.00 | 0.00 |
| ATOM | 7211 | CB   | TYR | X | 475 | 27.130 | 27.454 | 39.834 | 0.00 | 0.00 |
| ATOM | 7212 | HB2  | TYR | X | 475 | 28.080 | 27.761 | 39.395 | 0.00 | 0.00 |
| ATOM | 7213 | HB3  | TYR | X | 475 | 27.166 | 27.713 | 40.892 | 0.00 | 0.00 |
| ATOM | 7214 | CG   | TYR | X | 475 | 27.113 | 25.950 | 39.834 | 0.00 | 0.00 |
| ATOM | 7215 | CD1  | TYR | X | 475 | 25.942 | 25.208 | 39.909 | 0.00 | 0.00 |
| ATOM | 7216 | HD1  | TYR | X | 475 | 24.954 | 25.642 | 39.871 | 0.00 | 0.00 |
| ATOM | 7217 | CE1  | TYR | X | 475 | 26.067 | 23.817 | 40.059 | 0.00 | 0.00 |
| ATOM | 7218 | HE1  | TYR | X | 475 | 25.149 | 23.249 | 40.061 | 0.00 | 0.00 |
| ATOM | 7219 | CZ   | TYR | X | 475 | 27.314 | 23.135 | 40.192 | 0.00 | 0.00 |
| ATOM | 7220 | OH   | TYR | X | 475 | 27.295 | 21.800 | 40.320 | 0.00 | 0.00 |
| ATOM | 7221 | HH   | TYR | X | 475 | 26.402 | 21.515 | 40.522 | 0.00 | 0.00 |
| ATOM | 7222 | CE2  | TYR | X | 475 | 28.502 | 23.933 | 39.992 | 0.00 | 0.00 |
| ATOM | 7223 | HE2  | TYR | X | 475 | 29.510 | 23.555 | 40.086 | 0.00 | 0.00 |
| ATOM | 7224 | CD2  | TYR | X | 475 | 28.356 | 25.302 | 39.823 | 0.00 | 0.00 |
| ATOM | 7225 | HD2  | TYR | X | 475 | 29.262 | 25.837 | 39.582 | 0.00 | 0.00 |
| ATOM | 7226 | C    | TYR | X | 475 | 26.072 | 29.825 | 39.397 | 0.00 | 0.00 |
| ATOM | 7227 | O    | TYR | X | 475 | 25.304 | 30.317 | 40.155 | 0.00 | 0.00 |
| ATOM | 7228 | N    | TRP | X | 476 | 26.876 | 30.606 | 38.674 | 0.00 | 0.00 |
| ATOM | 7229 | H    | TRP | X | 476 | 27.631 | 30.222 | 38.124 | 0.00 | 0.00 |
| ATOM | 7230 | CA   | TRP | X | 476 | 26.970 | 32.081 | 38.921 | 0.00 | 0.00 |
| ATOM | 7231 | HA   | TRP | X | 476 | 26.918 | 32.361 | 39.973 | 0.00 | 0.00 |
| ATOM | 7232 | CB   | TRP | X | 476 | 28.213 | 32.612 | 38.332 | 0.00 | 0.00 |
| ATOM | 7233 | HB2  | TRP | X | 476 | 28.264 | 32.281 | 37.295 | 0.00 | 0.00 |
| ATOM | 7234 | HB3  | TRP | X | 476 | 27.920 | 33.655 | 38.218 | 0.00 | 0.00 |
| ATOM | 7235 | CG   | TRP | X | 476 | 29.523 | 32.573 | 39.061 | 0.00 | 0.00 |
| ATOM | 7236 | CD1  | TRP | X | 476 | 30.449 | 33.644 | 39.002 | 0.00 | 0.00 |
| ATOM | 7237 | HD1  | TRP | X | 476 | 30.258 | 34.484 | 38.351 | 0.00 | 0.00 |
| ATOM | 7238 | NE1  | TRP | X | 476 | 31.641 | 33.195 | 39.562 | 0.00 | 0.00 |
| ATOM | 7239 | HE1  | TRP | X | 476 | 32.490 | 33.741 | 39.519 | 0.00 | 0.00 |
| ATOM | 7240 | CE2  | TRP | X | 476 | 31.452 | 31.981 | 40.171 | 0.00 | 0.00 |
| ATOM | 7241 | CZ2  | TRP | X | 476 | 32.362 | 31.169 | 40.993 | 0.00 | 0.00 |
| ATOM | 7242 | HZ2  | TRP | X | 476 | 33.320 | 31.583 | 41.268 | 0.00 | 0.00 |
| ATOM | 7243 | CH2  | TRP | X | 476 | 31.970 | 29.872 | 41.345 | 0.00 | 0.00 |
| ATOM | 7244 | HH2  | TRP | X | 476 | 32.688 | 29.295 | 41.909 | 0.00 | 0.00 |
| ATOM | 7245 | CZ3  | TRP | X | 476 | 30.678 | 29.391 | 40.903 | 0.00 | 0.00 |
| ATOM | 7246 | HZ3  | TRP | X | 476 | 30.439 | 28.353 | 41.084 | 0.00 | 0.00 |
| ATOM | 7247 | CE3  | TRP | X | 476 | 29.842 | 30.148 | 40.076 | 0.00 | 0.00 |
| ATOM | 7248 | HE3  | TRP | X | 476 | 28.888 | 29.762 | 39.750 | 0.00 | 0.00 |
| ATOM | 7249 | CD2  | TRP | X | 476 | 30.171 | 31.508 | 39.775 | 0.00 | 0.00 |
| ATOM | 7250 | C    | TRP | X | 476 | 25.726 | 32.695 | 38.258 | 0.00 | 0.00 |
| ATOM | 7251 | O    | TRP | X | 476 | 25.061 | 33.465 | 38.894 | 0.00 | 0.00 |
| ATOM | 7252 | N    | ALA | X | 477 | 25.258 | 32.287 | 37.096 | 0.00 | 0.00 |
| ATOM | 7253 | H    | ALA | X | 477 | 25.816 | 31.604 | 36.604 | 0.00 | 0.00 |
| ATOM | 7254 | CA   | ALA | X | 477 | 23.904 | 32.707 | 36.570 | 0.00 | 0.00 |
| ATOM | 7255 | HA   | ALA | X | 477 | 23.953 | 33.773 | 36.347 | 0.00 | 0.00 |
| ATOM | 7256 | CB   | ALA | X | 477 | 23.695 | 32.093 | 35.184 | 0.00 | 0.00 |
| ATOM | 7257 | HB1  | ALA | X | 477 | 23.477 | 31.083 | 35.529 | 0.00 | 0.00 |
| ATOM | 7258 | HB2  | ALA | X | 477 | 24.661 | 32.014 | 34.684 | 0.00 | 0.00 |
| ATOM | 7259 | HB3  | ALA | X | 477 | 22.799 | 32.453 | 34.680 | 0.00 | 0.00 |
| ATOM | 7260 | C    | ALA | X | 477 | 22.710 | 32.365 | 37.414 | 0.00 | 0.00 |

|      |      |      |     |   |     |        |        |        |      |      |
|------|------|------|-----|---|-----|--------|--------|--------|------|------|
| ATOM | 7261 | O    | ALA | X | 477 | 21.726 | 33.125 | 37.501 | 0.00 | 0.00 |
| ATOM | 7262 | N    | ASN | X | 478 | 22.676 | 31.176 | 38.068 | 0.00 | 0.00 |
| ATOM | 7263 | H    | ASN | X | 478 | 23.267 | 30.409 | 37.782 | 0.00 | 0.00 |
| ATOM | 7264 | CA   | ASN | X | 478 | 21.545 | 30.864 | 38.960 | 0.00 | 0.00 |
| ATOM | 7265 | HA   | ASN | X | 478 | 20.686 | 31.133 | 38.345 | 0.00 | 0.00 |
| ATOM | 7266 | CB   | ASN | X | 478 | 21.545 | 29.345 | 39.173 | 0.00 | 0.00 |
| ATOM | 7267 | HB2  | ASN | X | 478 | 22.413 | 28.949 | 39.700 | 0.00 | 0.00 |
| ATOM | 7268 | HB3  | ASN | X | 478 | 20.794 | 29.028 | 39.895 | 0.00 | 0.00 |
| ATOM | 7269 | CG   | ASN | X | 478 | 21.189 | 28.442 | 38.000 | 0.00 | 0.00 |
| ATOM | 7270 | OD1  | ASN | X | 478 | 20.607 | 28.933 | 37.019 | 0.00 | 0.00 |
| ATOM | 7271 | ND2  | ASN | X | 478 | 21.239 | 27.162 | 38.245 | 0.00 | 0.00 |
| ATOM | 7272 | HD21 | ASN | X | 478 | 20.769 | 26.504 | 37.640 | 0.00 | 0.00 |
| ATOM | 7273 | HD22 | ASN | X | 478 | 21.715 | 26.806 | 39.062 | 0.00 | 0.00 |
| ATOM | 7274 | C    | ASN | X | 478 | 21.511 | 31.661 | 40.313 | 0.00 | 0.00 |
| ATOM | 7275 | O    | ASN | X | 478 | 20.467 | 32.281 | 40.658 | 0.00 | 0.00 |
| ATOM | 7276 | N    | PHE | X | 479 | 22.644 | 31.741 | 41.024 | 0.00 | 0.00 |
| ATOM | 7277 | H    | PHE | X | 479 | 23.393 | 31.116 | 40.767 | 0.00 | 0.00 |
| ATOM | 7278 | CA   | PHE | X | 479 | 22.897 | 32.685 | 42.093 | 0.00 | 0.00 |
| ATOM | 7279 | HA   | PHE | X | 479 | 22.265 | 32.520 | 42.966 | 0.00 | 0.00 |
| ATOM | 7280 | CB   | PHE | X | 479 | 24.388 | 32.603 | 42.511 | 0.00 | 0.00 |
| ATOM | 7281 | HB2  | PHE | X | 479 | 24.578 | 31.668 | 43.037 | 0.00 | 0.00 |
| ATOM | 7282 | HB3  | PHE | X | 479 | 25.084 | 32.590 | 41.672 | 0.00 | 0.00 |
| ATOM | 7283 | CG   | PHE | X | 479 | 24.736 | 33.807 | 43.399 | 0.00 | 0.00 |
| ATOM | 7284 | CD1  | PHE | X | 479 | 24.675 | 33.611 | 44.794 | 0.00 | 0.00 |
| ATOM | 7285 | HD1  | PHE | X | 479 | 24.356 | 32.643 | 45.153 | 0.00 | 0.00 |
| ATOM | 7286 | CE1  | PHE | X | 479 | 25.120 | 34.675 | 45.657 | 0.00 | 0.00 |
| ATOM | 7287 | HE1  | PHE | X | 479 | 25.042 | 34.594 | 46.731 | 0.00 | 0.00 |
| ATOM | 7288 | CZ   | PHE | X | 479 | 25.476 | 35.920 | 45.069 | 0.00 | 0.00 |
| ATOM | 7289 | HZ   | PHE | X | 479 | 25.812 | 36.750 | 45.674 | 0.00 | 0.00 |
| ATOM | 7290 | CE2  | PHE | X | 479 | 25.556 | 35.997 | 43.718 | 0.00 | 0.00 |
| ATOM | 7291 | HE2  | PHE | X | 479 | 25.987 | 36.915 | 43.347 | 0.00 | 0.00 |
| ATOM | 7292 | CD2  | PHE | X | 479 | 25.273 | 34.957 | 42.837 | 0.00 | 0.00 |
| ATOM | 7293 | HD2  | PHE | X | 479 | 25.464 | 35.008 | 41.775 | 0.00 | 0.00 |
| ATOM | 7294 | C    | PHE | X | 479 | 22.495 | 34.128 | 41.606 | 0.00 | 0.00 |
| ATOM | 7295 | O    | PHE | X | 479 | 21.916 | 34.916 | 42.377 | 0.00 | 0.00 |
| ATOM | 7296 | N    | ALA | X | 480 | 22.842 | 34.613 | 40.423 | 0.00 | 0.00 |
| ATOM | 7297 | H    | ALA | X | 480 | 23.442 | 34.052 | 39.835 | 0.00 | 0.00 |
| ATOM | 7298 | CA   | ALA | X | 480 | 22.503 | 35.985 | 39.991 | 0.00 | 0.00 |
| ATOM | 7299 | HA   | ALA | X | 480 | 22.764 | 36.714 | 40.759 | 0.00 | 0.00 |
| ATOM | 7300 | CB   | ALA | X | 480 | 23.391 | 36.419 | 38.757 | 0.00 | 0.00 |
| ATOM | 7301 | HB1  | ALA | X | 480 | 23.209 | 37.457 | 38.476 | 0.00 | 0.00 |
| ATOM | 7302 | HB2  | ALA | X | 480 | 23.306 | 35.718 | 37.927 | 0.00 | 0.00 |
| ATOM | 7303 | HB3  | ALA | X | 480 | 24.405 | 36.426 | 39.154 | 0.00 | 0.00 |
| ATOM | 7304 | C    | ALA | X | 480 | 21.003 | 36.155 | 39.617 | 0.00 | 0.00 |
| ATOM | 7305 | O    | ALA | X | 480 | 20.433 | 37.219 | 39.869 | 0.00 | 0.00 |
| ATOM | 7306 | N    | ARG | X | 481 | 20.385 | 35.066 | 39.207 | 0.00 | 0.00 |
| ATOM | 7307 | H    | ARG | X | 481 | 20.946 | 34.232 | 39.106 | 0.00 | 0.00 |
| ATOM | 7308 | CA   | ARG | X | 481 | 18.916 | 34.992 | 38.966 | 0.00 | 0.00 |
| ATOM | 7309 | HA   | ARG | X | 481 | 18.640 | 35.887 | 38.408 | 0.00 | 0.00 |
| ATOM | 7310 | CB   | ARG | X | 481 | 18.504 | 33.799 | 38.060 | 0.00 | 0.00 |
| ATOM | 7311 | HB2  | ARG | X | 481 | 19.143 | 32.976 | 38.379 | 0.00 | 0.00 |
| ATOM | 7312 | HB3  | ARG | X | 481 | 17.468 | 33.487 | 38.195 | 0.00 | 0.00 |
| ATOM | 7313 | CG   | ARG | X | 481 | 18.772 | 33.940 | 36.534 | 0.00 | 0.00 |
| ATOM | 7314 | HG2  | ARG | X | 481 | 17.994 | 34.575 | 36.111 | 0.00 | 0.00 |
| ATOM | 7315 | HG3  | ARG | X | 481 | 19.752 | 34.377 | 36.341 | 0.00 | 0.00 |
| ATOM | 7316 | CD   | ARG | X | 481 | 18.785 | 32.528 | 35.915 | 0.00 | 0.00 |
| ATOM | 7317 | HD2  | ARG | X | 481 | 19.469 | 31.974 | 36.557 | 0.00 | 0.00 |
| ATOM | 7318 | HD3  | ARG | X | 481 | 17.808 | 32.049 | 35.976 | 0.00 | 0.00 |
| ATOM | 7319 | NE   | ARG | X | 481 | 19.266 | 32.530 | 34.514 | 0.00 | 0.00 |
| ATOM | 7320 | HE   | ARG | X | 481 | 18.832 | 33.222 | 33.920 | 0.00 | 0.00 |
| ATOM | 7321 | CZ   | ARG | X | 481 | 20.078 | 31.573 | 34.003 | 0.00 | 0.00 |
| ATOM | 7322 | NH1  | ARG | X | 481 | 20.625 | 30.538 | 34.636 | 0.00 | 0.00 |
| ATOM | 7323 | HH11 | ARG | X | 481 | 20.655 | 30.530 | 35.645 | 0.00 | 0.00 |
| ATOM | 7324 | HH12 | ARG | X | 481 | 21.274 | 30.016 | 34.065 | 0.00 | 0.00 |
| ATOM | 7325 | NH2  | ARG | X | 481 | 20.271 | 31.667 | 32.678 | 0.00 | 0.00 |
| ATOM | 7326 | HH21 | ARG | X | 481 | 19.803 | 32.404 | 32.170 | 0.00 | 0.00 |
| ATOM | 7327 | HH22 | ARG | X | 481 | 20.915 | 31.023 | 32.241 | 0.00 | 0.00 |

|      |      |      |     |   |     |        |        |        |      |      |
|------|------|------|-----|---|-----|--------|--------|--------|------|------|
| ATOM | 7328 | C    | ARG | X | 481 | 18.077 | 35.043 | 40.231 | 0.00 | 0.00 |
| ATOM | 7329 | O    | ARG | X | 481 | 17.266 | 35.973 | 40.418 | 0.00 | 0.00 |
| ATOM | 7330 | N    | THR | X | 482 | 18.211 | 34.032 | 41.082 | 0.00 | 0.00 |
| ATOM | 7331 | H    | THR | X | 482 | 18.966 | 33.388 | 40.895 | 0.00 | 0.00 |
| ATOM | 7332 | CA   | THR | X | 482 | 17.328 | 33.767 | 42.258 | 0.00 | 0.00 |
| ATOM | 7333 | HA   | THR | X | 482 | 16.498 | 34.471 | 42.315 | 0.00 | 0.00 |
| ATOM | 7334 | CB   | THR | X | 482 | 16.822 | 32.304 | 42.208 | 0.00 | 0.00 |
| ATOM | 7335 | HB   | THR | X | 482 | 16.206 | 32.129 | 43.089 | 0.00 | 0.00 |
| ATOM | 7336 | CG2  | THR | X | 482 | 16.042 | 31.987 | 40.910 | 0.00 | 0.00 |
| ATOM | 7337 | HG21 | THR | X | 482 | 15.222 | 32.699 | 40.819 | 0.00 | 0.00 |
| ATOM | 7338 | HG22 | THR | X | 482 | 15.665 | 30.964 | 40.921 | 0.00 | 0.00 |
| ATOM | 7339 | HG23 | THR | X | 482 | 16.617 | 32.042 | 39.985 | 0.00 | 0.00 |
| ATOM | 7340 | OG1  | THR | X | 482 | 17.922 | 31.532 | 42.084 | 0.00 | 0.00 |
| ATOM | 7341 | HG1  | THR | X | 482 | 17.778 | 30.661 | 41.706 | 0.00 | 0.00 |
| ATOM | 7342 | C    | THR | X | 482 | 18.057 | 33.919 | 43.586 | 0.00 | 0.00 |
| ATOM | 7343 | O    | THR | X | 482 | 17.405 | 33.866 | 44.625 | 0.00 | 0.00 |
| ATOM | 7344 | N    | GLY | X | 483 | 19.370 | 34.024 | 43.626 | 0.00 | 0.00 |
| ATOM | 7345 | H    | GLY | X | 483 | 19.797 | 34.136 | 42.717 | 0.00 | 0.00 |
| ATOM | 7346 | CA   | GLY | X | 483 | 20.231 | 33.868 | 44.826 | 0.00 | 0.00 |
| ATOM | 7347 | HA2  | GLY | X | 483 | 21.168 | 34.413 | 44.707 | 0.00 | 0.00 |
| ATOM | 7348 | HA3  | GLY | X | 483 | 19.628 | 34.185 | 45.677 | 0.00 | 0.00 |
| ATOM | 7349 | C    | GLY | X | 483 | 20.613 | 32.410 | 45.143 | 0.00 | 0.00 |
| ATOM | 7350 | O    | GLY | X | 483 | 21.356 | 32.136 | 46.126 | 0.00 | 0.00 |
| ATOM | 7351 | N    | ASP | X | 484 | 20.098 | 31.414 | 44.363 | 0.00 | 0.00 |
| ATOM | 7352 | H    | ASP | X | 484 | 19.382 | 31.665 | 43.697 | 0.00 | 0.00 |
| ATOM | 7353 | CA   | ASP | X | 484 | 20.319 | 29.964 | 44.613 | 0.00 | 0.00 |
| ATOM | 7354 | HA   | ASP | X | 484 | 20.853 | 29.777 | 45.544 | 0.00 | 0.00 |
| ATOM | 7355 | CB   | ASP | X | 484 | 18.954 | 29.337 | 44.748 | 0.00 | 0.00 |
| ATOM | 7356 | HB2  | ASP | X | 484 | 18.402 | 29.765 | 45.585 | 0.00 | 0.00 |
| ATOM | 7357 | HB3  | ASP | X | 484 | 18.312 | 29.501 | 43.882 | 0.00 | 0.00 |
| ATOM | 7358 | CG   | ASP | X | 484 | 18.976 | 27.856 | 45.065 | 0.00 | 0.00 |
| ATOM | 7359 | OD1  | ASP | X | 484 | 17.896 | 27.189 | 45.008 | 0.00 | 0.00 |
| ATOM | 7360 | OD2  | ASP | X | 484 | 20.073 | 27.254 | 45.121 | 0.00 | 0.00 |
| ATOM | 7361 | C    | ASP | X | 484 | 21.089 | 29.392 | 43.448 | 0.00 | 0.00 |
| ATOM | 7362 | O    | ASP | X | 484 | 20.574 | 29.358 | 42.311 | 0.00 | 0.00 |
| ATOM | 7363 | N    | PRO | X | 485 | 22.301 | 28.813 | 43.677 | 0.00 | 0.00 |
| ATOM | 7364 | CD   | PRO | X | 485 | 23.057 | 28.892 | 44.892 | 0.00 | 0.00 |
| ATOM | 7365 | HD2  | PRO | X | 485 | 22.805 | 27.997 | 45.461 | 0.00 | 0.00 |
| ATOM | 7366 | HD3  | PRO | X | 485 | 22.906 | 29.841 | 45.408 | 0.00 | 0.00 |
| ATOM | 7367 | CG   | PRO | X | 485 | 24.537 | 28.762 | 44.493 | 0.00 | 0.00 |
| ATOM | 7368 | HG2  | PRO | X | 485 | 25.157 | 28.238 | 45.220 | 0.00 | 0.00 |
| ATOM | 7369 | HG3  | PRO | X | 485 | 24.927 | 29.749 | 44.244 | 0.00 | 0.00 |
| ATOM | 7370 | CB   | PRO | X | 485 | 24.424 | 27.830 | 43.354 | 0.00 | 0.00 |
| ATOM | 7371 | HB2  | PRO | X | 485 | 24.346 | 26.844 | 43.811 | 0.00 | 0.00 |
| ATOM | 7372 | HB3  | PRO | X | 485 | 25.320 | 27.939 | 42.743 | 0.00 | 0.00 |
| ATOM | 7373 | CA   | PRO | X | 485 | 23.130 | 28.258 | 42.626 | 0.00 | 0.00 |
| ATOM | 7374 | HA   | PRO | X | 485 | 23.454 | 29.069 | 41.973 | 0.00 | 0.00 |
| ATOM | 7375 | C    | PRO | X | 485 | 22.519 | 27.021 | 41.860 | 0.00 | 0.00 |
| ATOM | 7376 | O    | PRO | X | 485 | 22.921 | 26.697 | 40.709 | 0.00 | 0.00 |
| ATOM | 7377 | N    | ASN | X | 486 | 21.619 | 26.315 | 42.511 | 0.00 | 0.00 |
| ATOM | 7378 | H    | ASN | X | 486 | 21.238 | 26.693 | 43.367 | 0.00 | 0.00 |
| ATOM | 7379 | CA   | ASN | X | 486 | 20.865 | 25.226 | 42.026 | 0.00 | 0.00 |
| ATOM | 7380 | HA   | ASN | X | 486 | 21.555 | 24.555 | 41.515 | 0.00 | 0.00 |
| ATOM | 7381 | CB   | ASN | X | 486 | 20.438 | 24.531 | 43.298 | 0.00 | 0.00 |
| ATOM | 7382 | HB2  | ASN | X | 486 | 21.290 | 24.227 | 43.907 | 0.00 | 0.00 |
| ATOM | 7383 | HB3  | ASN | X | 486 | 19.686 | 25.086 | 43.858 | 0.00 | 0.00 |
| ATOM | 7384 | CG   | ASN | X | 486 | 19.730 | 23.180 | 43.008 | 0.00 | 0.00 |
| ATOM | 7385 | OD1  | ASN | X | 486 | 19.746 | 22.588 | 41.946 | 0.00 | 0.00 |
| ATOM | 7386 | ND2  | ASN | X | 486 | 19.081 | 22.611 | 43.975 | 0.00 | 0.00 |
| ATOM | 7387 | HD21 | ASN | X | 486 | 18.816 | 21.642 | 43.874 | 0.00 | 0.00 |
| ATOM | 7388 | HD22 | ASN | X | 486 | 19.027 | 22.988 | 44.911 | 0.00 | 0.00 |
| ATOM | 7389 | C    | ASN | X | 486 | 19.803 | 25.592 | 41.000 | 0.00 | 0.00 |
| ATOM | 7390 | O    | ASN | X | 486 | 19.144 | 26.617 | 41.189 | 0.00 | 0.00 |
| ATOM | 7391 | N    | GLU | X | 487 | 19.529 | 24.715 | 40.028 | 0.00 | 0.00 |
| ATOM | 7392 | H    | GLU | X | 487 | 20.035 | 23.842 | 39.991 | 0.00 | 0.00 |
| ATOM | 7393 | CA   | GLU | X | 487 | 18.417 | 24.928 | 39.094 | 0.00 | 0.00 |
| ATOM | 7394 | HA   | GLU | X | 487 | 18.577 | 25.809 | 38.472 | 0.00 | 0.00 |



|      |      |      |     |   |     |        |        |        |      |      |
|------|------|------|-----|---|-----|--------|--------|--------|------|------|
| ATOM | 7395 | CB   | GLU | X | 487 | 18.340 | 23.763 | 38.161 | 0.00 | 0.00 |
| ATOM | 7396 | HB2  | GLU | X | 487 | 18.311 | 22.844 | 38.747 | 0.00 | 0.00 |
| ATOM | 7397 | HB3  | GLU | X | 487 | 17.351 | 23.792 | 37.705 | 0.00 | 0.00 |
| ATOM | 7398 | CG   | GLU | X | 487 | 19.385 | 23.640 | 37.057 | 0.00 | 0.00 |
| ATOM | 7399 | HG2  | GLU | X | 487 | 20.378 | 23.849 | 37.457 | 0.00 | 0.00 |
| ATOM | 7400 | HG3  | GLU | X | 487 | 19.317 | 22.723 | 36.472 | 0.00 | 0.00 |
| ATOM | 7401 | CD   | GLU | X | 487 | 19.178 | 24.764 | 36.082 | 0.00 | 0.00 |
| ATOM | 7402 | OE1  | GLU | X | 487 | 18.549 | 24.585 | 35.063 | 0.00 | 0.00 |
| ATOM | 7403 | OE2  | GLU | X | 487 | 19.659 | 25.896 | 36.428 | 0.00 | 0.00 |
| ATOM | 7404 | C    | GLU | X | 487 | 17.075 | 25.017 | 39.877 | 0.00 | 0.00 |
| ATOM | 7405 | O    | GLU | X | 487 | 16.803 | 24.260 | 40.767 | 0.00 | 0.00 |
| ATOM | 7406 | N    | PRO | X | 488 | 16.090 | 25.854 | 39.451 | 0.00 | 0.00 |
| ATOM | 7407 | CD   | PRO | X | 488 | 16.245 | 26.859 | 38.467 | 0.00 | 0.00 |
| ATOM | 7408 | HD2  | PRO | X | 488 | 16.336 | 26.361 | 37.502 | 0.00 | 0.00 |
| ATOM | 7409 | HD3  | PRO | X | 488 | 17.136 | 27.444 | 38.696 | 0.00 | 0.00 |
| ATOM | 7410 | CG   | PRO | X | 488 | 15.045 | 27.832 | 38.643 | 0.00 | 0.00 |
| ATOM | 7411 | HG2  | PRO | X | 488 | 14.602 | 28.121 | 37.690 | 0.00 | 0.00 |
| ATOM | 7412 | HG3  | PRO | X | 488 | 15.372 | 28.757 | 39.119 | 0.00 | 0.00 |
| ATOM | 7413 | CB   | PRO | X | 488 | 14.002 | 27.066 | 39.483 | 0.00 | 0.00 |
| ATOM | 7414 | HB2  | PRO | X | 488 | 13.168 | 26.731 | 38.867 | 0.00 | 0.00 |
| ATOM | 7415 | HB3  | PRO | X | 488 | 13.680 | 27.660 | 40.339 | 0.00 | 0.00 |
| ATOM | 7416 | CA   | PRO | X | 488 | 14.795 | 25.891 | 40.072 | 0.00 | 0.00 |
| ATOM | 7417 | HA   | PRO | X | 488 | 15.072 | 26.134 | 41.097 | 0.00 | 0.00 |
| ATOM | 7418 | C    | PRO | X | 488 | 14.041 | 24.542 | 39.945 | 0.00 | 0.00 |
| ATOM | 7419 | O    | PRO | X | 488 | 13.201 | 24.297 | 40.880 | 0.00 | 0.00 |
| ATOM | 7420 | N    | ARG | X | 489 | 14.233 | 23.767 | 38.884 | 0.00 | 0.00 |
| ATOM | 7421 | H    | ARG | X | 489 | 14.941 | 24.080 | 38.236 | 0.00 | 0.00 |
| ATOM | 7422 | CA   | ARG | X | 489 | 13.472 | 22.456 | 38.714 | 0.00 | 0.00 |
| ATOM | 7423 | HA   | ARG | X | 489 | 12.424 | 22.716 | 38.560 | 0.00 | 0.00 |
| ATOM | 7424 | CB   | ARG | X | 489 | 13.929 | 21.688 | 37.402 | 0.00 | 0.00 |
| ATOM | 7425 | HB2  | ARG | X | 489 | 13.339 | 20.773 | 37.348 | 0.00 | 0.00 |
| ATOM | 7426 | HB3  | ARG | X | 489 | 13.796 | 22.363 | 36.556 | 0.00 | 0.00 |
| ATOM | 7427 | CG   | ARG | X | 489 | 15.354 | 21.268 | 37.368 | 0.00 | 0.00 |
| ATOM | 7428 | HG2  | ARG | X | 489 | 15.919 | 22.149 | 37.064 | 0.00 | 0.00 |
| ATOM | 7429 | HG3  | ARG | X | 489 | 15.678 | 21.030 | 38.381 | 0.00 | 0.00 |
| ATOM | 7430 | CD   | ARG | X | 489 | 15.509 | 20.091 | 36.391 | 0.00 | 0.00 |
| ATOM | 7431 | HD2  | ARG | X | 489 | 14.960 | 20.112 | 35.450 | 0.00 | 0.00 |
| ATOM | 7432 | HD3  | ARG | X | 489 | 16.554 | 20.117 | 36.082 | 0.00 | 0.00 |
| ATOM | 7433 | NE   | ARG | X | 489 | 15.371 | 18.851 | 37.093 | 0.00 | 0.00 |
| ATOM | 7434 | HE   | ARG | X | 489 | 14.426 | 18.556 | 37.296 | 0.00 | 0.00 |
| ATOM | 7435 | CZ   | ARG | X | 489 | 16.300 | 17.844 | 37.150 | 0.00 | 0.00 |
| ATOM | 7436 | NH1  | ARG | X | 489 | 15.940 | 16.660 | 37.473 | 0.00 | 0.00 |
| ATOM | 7437 | HH11 | ARG | X | 489 | 14.966 | 16.409 | 37.572 | 0.00 | 0.00 |
| ATOM | 7438 | HH12 | ARG | X | 489 | 16.687 | 15.988 | 37.373 | 0.00 | 0.00 |
| ATOM | 7439 | NH2  | ARG | X | 489 | 17.622 | 18.012 | 36.900 | 0.00 | 0.00 |
| ATOM | 7440 | HH21 | ARG | X | 489 | 18.042 | 18.862 | 36.550 | 0.00 | 0.00 |
| ATOM | 7441 | HH22 | ARG | X | 489 | 18.153 | 17.163 | 36.768 | 0.00 | 0.00 |
| ATOM | 7442 | C    | ARG | X | 489 | 13.571 | 21.456 | 39.868 | 0.00 | 0.00 |
| ATOM | 7443 | O    | ARG | X | 489 | 12.752 | 20.582 | 39.971 | 0.00 | 0.00 |
| ATOM | 7444 | N    | ASP | X | 490 | 14.609 | 21.514 | 40.759 | 0.00 | 0.00 |
| ATOM | 7445 | H    | ASP | X | 490 | 15.289 | 22.243 | 40.598 | 0.00 | 0.00 |
| ATOM | 7446 | CA   | ASP | X | 490 | 14.953 | 20.530 | 41.778 | 0.00 | 0.00 |
| ATOM | 7447 | HA   | ASP | X | 490 | 15.698 | 21.041 | 42.388 | 0.00 | 0.00 |
| ATOM | 7448 | CB   | ASP | X | 490 | 13.797 | 20.225 | 42.758 | 0.00 | 0.00 |
| ATOM | 7449 | HB2  | ASP | X | 490 | 13.446 | 21.171 | 43.170 | 0.00 | 0.00 |
| ATOM | 7450 | HB3  | ASP | X | 490 | 12.903 | 19.839 | 42.267 | 0.00 | 0.00 |
| ATOM | 7451 | CG   | ASP | X | 490 | 14.032 | 19.343 | 43.929 | 0.00 | 0.00 |
| ATOM | 7452 | OD1  | ASP | X | 490 | 13.097 | 18.603 | 44.422 | 0.00 | 0.00 |
| ATOM | 7453 | OD2  | ASP | X | 490 | 15.135 | 19.488 | 44.510 | 0.00 | 0.00 |
| ATOM | 7454 | C    | ASP | X | 490 | 15.609 | 19.256 | 41.302 | 0.00 | 0.00 |
| ATOM | 7455 | O    | ASP | X | 490 | 15.091 | 18.112 | 41.351 | 0.00 | 0.00 |
| ATOM | 7456 | N    | PRO | X | 491 | 16.933 | 19.393 | 40.934 | 0.00 | 0.00 |
| ATOM | 7457 | CD   | PRO | X | 491 | 17.647 | 20.619 | 40.618 | 0.00 | 0.00 |
| ATOM | 7458 | HD2  | PRO | X | 491 | 18.023 | 20.913 | 41.598 | 0.00 | 0.00 |
| ATOM | 7459 | HD3  | PRO | X | 491 | 17.019 | 21.406 | 40.199 | 0.00 | 0.00 |
| ATOM | 7460 | CG   | PRO | X | 491 | 18.860 | 20.302 | 39.699 | 0.00 | 0.00 |
| ATOM | 7461 | HG2  | PRO | X | 491 | 19.713 | 20.980 | 39.743 | 0.00 | 0.00 |

|      |      |     |     |   |     |        |        |        |      |      |
|------|------|-----|-----|---|-----|--------|--------|--------|------|------|
| ATOM | 7462 | HG3 | PRO | X | 491 | 18.503 | 20.030 | 38.706 | 0.00 | 0.00 |
| ATOM | 7463 | CB  | PRO | X | 491 | 19.168 | 18.896 | 40.265 | 0.00 | 0.00 |
| ATOM | 7464 | HB2 | PRO | X | 491 | 19.719 | 18.865 | 41.206 | 0.00 | 0.00 |
| ATOM | 7465 | HB3 | PRO | X | 491 | 19.673 | 18.357 | 39.464 | 0.00 | 0.00 |
| ATOM | 7466 | CA  | PRO | X | 491 | 17.831 | 18.280 | 40.599 | 0.00 | 0.00 |
| ATOM | 7467 | HA  | PRO | X | 491 | 17.438 | 17.829 | 39.687 | 0.00 | 0.00 |
| ATOM | 7468 | C   | PRO | X | 491 | 18.075 | 17.258 | 41.733 | 0.00 | 0.00 |
| ATOM | 7469 | O   | PRO | X | 491 | 18.043 | 17.636 | 42.891 | 0.00 | 0.00 |
| ATOM | 7470 | N   | LYS | X | 492 | 18.274 | 15.953 | 41.391 | 0.00 | 0.00 |
| ATOM | 7471 | H   | LYS | X | 492 | 18.163 | 15.567 | 40.464 | 0.00 | 0.00 |
| ATOM | 7472 | CA  | LYS | X | 492 | 18.783 | 14.969 | 42.432 | 0.00 | 0.00 |
| ATOM | 7473 | HA  | LYS | X | 492 | 18.630 | 15.382 | 43.429 | 0.00 | 0.00 |
| ATOM | 7474 | CB  | LYS | X | 492 | 17.855 | 13.704 | 42.461 | 0.00 | 0.00 |
| ATOM | 7475 | HB2 | LYS | X | 492 | 18.176 | 13.109 | 43.315 | 0.00 | 0.00 |
| ATOM | 7476 | HB3 | LYS | X | 492 | 16.809 | 13.980 | 42.596 | 0.00 | 0.00 |
| ATOM | 7477 | CG  | LYS | X | 492 | 18.054 | 12.830 | 41.160 | 0.00 | 0.00 |
| ATOM | 7478 | HG2 | LYS | X | 492 | 17.458 | 13.160 | 40.309 | 0.00 | 0.00 |
| ATOM | 7479 | HG3 | LYS | X | 492 | 19.100 | 12.799 | 40.856 | 0.00 | 0.00 |
| ATOM | 7480 | CD  | LYS | X | 492 | 17.524 | 11.400 | 41.322 | 0.00 | 0.00 |
| ATOM | 7481 | HD2 | LYS | X | 492 | 18.139 | 10.777 | 41.971 | 0.00 | 0.00 |
| ATOM | 7482 | HD3 | LYS | X | 492 | 16.478 | 11.351 | 41.626 | 0.00 | 0.00 |
| ATOM | 7483 | CE  | LYS | X | 492 | 17.471 | 10.810 | 39.951 | 0.00 | 0.00 |
| ATOM | 7484 | HE2 | LYS | X | 492 | 16.940 | 9.858  | 39.934 | 0.00 | 0.00 |
| ATOM | 7485 | HE3 | LYS | X | 492 | 17.123 | 11.541 | 39.221 | 0.00 | 0.00 |
| ATOM | 7486 | NZ  | LYS | X | 492 | 18.835 | 10.528 | 39.565 | 0.00 | 0.00 |
| ATOM | 7487 | HZ1 | LYS | X | 492 | 19.432 | 11.327 | 39.725 | 0.00 | 0.00 |
| ATOM | 7488 | HZ2 | LYS | X | 492 | 19.196 | 9.718  | 40.048 | 0.00 | 0.00 |
| ATOM | 7489 | HZ3 | LYS | X | 492 | 18.894 | 10.366 | 38.569 | 0.00 | 0.00 |
| ATOM | 7490 | C   | LYS | X | 492 | 20.345 | 14.705 | 42.387 | 0.00 | 0.00 |
| ATOM | 7491 | O   | LYS | X | 492 | 20.892 | 14.075 | 43.290 | 0.00 | 0.00 |
| ATOM | 7492 | N   | ALA | X | 493 | 21.058 | 15.160 | 41.413 | 0.00 | 0.00 |
| ATOM | 7493 | H   | ALA | X | 493 | 20.511 | 15.517 | 40.643 | 0.00 | 0.00 |
| ATOM | 7494 | CA  | ALA | X | 493 | 22.535 | 15.423 | 41.381 | 0.00 | 0.00 |
| ATOM | 7495 | HA  | ALA | X | 493 | 23.130 | 14.555 | 41.665 | 0.00 | 0.00 |
| ATOM | 7496 | CB  | ALA | X | 493 | 22.902 | 15.869 | 39.994 | 0.00 | 0.00 |
| ATOM | 7497 | HB1 | ALA | X | 493 | 23.956 | 16.103 | 39.846 | 0.00 | 0.00 |
| ATOM | 7498 | HB2 | ALA | X | 493 | 22.346 | 16.758 | 39.694 | 0.00 | 0.00 |
| ATOM | 7499 | HB3 | ALA | X | 493 | 22.864 | 15.003 | 39.333 | 0.00 | 0.00 |
| ATOM | 7500 | C   | ALA | X | 493 | 23.003 | 16.440 | 42.456 | 0.00 | 0.00 |
| ATOM | 7501 | O   | ALA | X | 493 | 22.222 | 17.390 | 42.736 | 0.00 | 0.00 |
| ATOM | 7502 | N   | PRO | X | 494 | 24.184 | 16.294 | 43.144 | 0.00 | 0.00 |
| ATOM | 7503 | CD  | PRO | X | 494 | 25.364 | 15.568 | 42.752 | 0.00 | 0.00 |
| ATOM | 7504 | HD2 | PRO | X | 494 | 25.569 | 15.757 | 41.698 | 0.00 | 0.00 |
| ATOM | 7505 | HD3 | PRO | X | 494 | 25.216 | 14.516 | 42.995 | 0.00 | 0.00 |
| ATOM | 7506 | CG  | PRO | X | 494 | 26.478 | 16.109 | 43.581 | 0.00 | 0.00 |
| ATOM | 7507 | HG2 | PRO | X | 494 | 26.977 | 16.956 | 43.111 | 0.00 | 0.00 |
| ATOM | 7508 | HG3 | PRO | X | 494 | 27.323 | 15.459 | 43.806 | 0.00 | 0.00 |
| ATOM | 7509 | CB  | PRO | X | 494 | 25.845 | 16.595 | 44.796 | 0.00 | 0.00 |
| ATOM | 7510 | HB2 | PRO | X | 494 | 26.426 | 17.426 | 45.195 | 0.00 | 0.00 |
| ATOM | 7511 | HB3 | PRO | X | 494 | 25.839 | 15.737 | 45.469 | 0.00 | 0.00 |
| ATOM | 7512 | CA  | PRO | X | 494 | 24.452 | 17.021 | 44.366 | 0.00 | 0.00 |
| ATOM | 7513 | HA  | PRO | X | 494 | 23.761 | 16.777 | 45.173 | 0.00 | 0.00 |
| ATOM | 7514 | C   | PRO | X | 494 | 24.502 | 18.563 | 44.214 | 0.00 | 0.00 |
| ATOM | 7515 | O   | PRO | X | 494 | 24.859 | 19.169 | 43.124 | 0.00 | 0.00 |
| ATOM | 7516 | N   | GLN | X | 495 | 24.211 | 19.263 | 45.348 | 0.00 | 0.00 |
| ATOM | 7517 | H   | GLN | X | 495 | 24.157 | 18.758 | 46.220 | 0.00 | 0.00 |
| ATOM | 7518 | CA  | GLN | X | 495 | 24.134 | 20.732 | 45.373 | 0.00 | 0.00 |
| ATOM | 7519 | HA  | GLN | X | 495 | 24.572 | 21.238 | 44.512 | 0.00 | 0.00 |
| ATOM | 7520 | CB  | GLN | X | 495 | 22.610 | 21.111 | 45.233 | 0.00 | 0.00 |
| ATOM | 7521 | HB2 | GLN | X | 495 | 22.125 | 20.790 | 46.154 | 0.00 | 0.00 |
| ATOM | 7522 | HB3 | GLN | X | 495 | 22.488 | 22.178 | 45.045 | 0.00 | 0.00 |
| ATOM | 7523 | CG  | GLN | X | 495 | 21.856 | 20.426 | 44.072 | 0.00 | 0.00 |
| ATOM | 7524 | HG2 | GLN | X | 495 | 21.881 | 19.341 | 44.165 | 0.00 | 0.00 |
| ATOM | 7525 | HG3 | GLN | X | 495 | 20.783 | 20.586 | 44.172 | 0.00 | 0.00 |
| ATOM | 7526 | CD  | GLN | X | 495 | 22.287 | 20.790 | 42.657 | 0.00 | 0.00 |
| ATOM | 7527 | OE1 | GLN | X | 495 | 22.918 | 21.870 | 42.457 | 0.00 | 0.00 |
| ATOM | 7528 | NE2 | GLN | X | 495 | 22.211 | 19.887 | 41.678 | 0.00 | 0.00 |

|      |      |      |     |   |     |        |        |        |      |      |
|------|------|------|-----|---|-----|--------|--------|--------|------|------|
| ATOM | 7529 | HE21 | GLN | X | 495 | 22.573 | 20.201 | 40.789 | 0.00 | 0.00 |
| ATOM | 7530 | HE22 | GLN | X | 495 | 21.869 | 18.960 | 41.886 | 0.00 | 0.00 |
| ATOM | 7531 | C    | GLN | X | 495 | 24.874 | 21.328 | 46.573 | 0.00 | 0.00 |
| ATOM | 7532 | O    | GLN | X | 495 | 25.138 | 20.734 | 47.593 | 0.00 | 0.00 |
| ATOM | 7533 | N    | TRP | X | 496 | 25.178 | 22.596 | 46.507 | 0.00 | 0.00 |
| ATOM | 7534 | H    | TRP | X | 496 | 24.755 | 23.054 | 45.712 | 0.00 | 0.00 |
| ATOM | 7535 | CA   | TRP | X | 496 | 26.040 | 23.418 | 47.367 | 0.00 | 0.00 |
| ATOM | 7536 | HA   | TRP | X | 496 | 26.930 | 22.790 | 47.373 | 0.00 | 0.00 |
| ATOM | 7537 | CB   | TRP | X | 496 | 26.187 | 24.704 | 46.610 | 0.00 | 0.00 |
| ATOM | 7538 | HB2  | TRP | X | 496 | 26.096 | 24.452 | 45.553 | 0.00 | 0.00 |
| ATOM | 7539 | HB3  | TRP | X | 496 | 25.286 | 25.306 | 46.732 | 0.00 | 0.00 |
| ATOM | 7540 | CG   | TRP | X | 496 | 27.430 | 25.469 | 46.759 | 0.00 | 0.00 |
| ATOM | 7541 | CD1  | TRP | X | 496 | 28.087 | 25.736 | 47.868 | 0.00 | 0.00 |
| ATOM | 7542 | HD1  | TRP | X | 496 | 27.810 | 25.325 | 48.828 | 0.00 | 0.00 |
| ATOM | 7543 | NE1  | TRP | X | 496 | 29.172 | 26.559 | 47.671 | 0.00 | 0.00 |
| ATOM | 7544 | HE1  | TRP | X | 496 | 29.907 | 26.807 | 48.319 | 0.00 | 0.00 |
| ATOM | 7545 | CE2  | TRP | X | 496 | 29.178 | 26.862 | 46.365 | 0.00 | 0.00 |
| ATOM | 7546 | CZ2  | TRP | X | 496 | 29.939 | 27.857 | 45.679 | 0.00 | 0.00 |
| ATOM | 7547 | HZ2  | TRP | X | 496 | 30.657 | 28.452 | 46.225 | 0.00 | 0.00 |
| ATOM | 7548 | CH2  | TRP | X | 496 | 29.774 | 27.993 | 44.233 | 0.00 | 0.00 |
| ATOM | 7549 | HH2  | TRP | X | 496 | 30.403 | 28.691 | 43.699 | 0.00 | 0.00 |
| ATOM | 7550 | CZ3  | TRP | X | 496 | 28.848 | 27.218 | 43.585 | 0.00 | 0.00 |
| ATOM | 7551 | HZ3  | TRP | X | 496 | 28.641 | 27.254 | 42.526 | 0.00 | 0.00 |
| ATOM | 7552 | CE3  | TRP | X | 496 | 28.001 | 26.328 | 44.283 | 0.00 | 0.00 |
| ATOM | 7553 | HE3  | TRP | X | 496 | 27.252 | 25.748 | 43.763 | 0.00 | 0.00 |
| ATOM | 7554 | CD2  | TRP | X | 496 | 28.161 | 26.137 | 45.711 | 0.00 | 0.00 |
| ATOM | 7555 | C    | TRP | X | 496 | 25.389 | 23.623 | 48.764 | 0.00 | 0.00 |
| ATOM | 7556 | O    | TRP | X | 496 | 24.297 | 24.174 | 48.746 | 0.00 | 0.00 |
| ATOM | 7557 | N    | PRO | X | 497 | 25.966 | 23.273 | 49.965 | 0.00 | 0.00 |
| ATOM | 7558 | CD   | PRO | X | 497 | 27.253 | 22.601 | 49.997 | 0.00 | 0.00 |
| ATOM | 7559 | HD2  | PRO | X | 497 | 28.088 | 23.119 | 49.524 | 0.00 | 0.00 |
| ATOM | 7560 | HD3  | PRO | X | 497 | 27.150 | 21.663 | 49.451 | 0.00 | 0.00 |
| ATOM | 7561 | CG   | PRO | X | 497 | 27.558 | 22.269 | 51.449 | 0.00 | 0.00 |
| ATOM | 7562 | HG2  | PRO | X | 497 | 28.361 | 22.898 | 51.835 | 0.00 | 0.00 |
| ATOM | 7563 | HG3  | PRO | X | 497 | 27.865 | 21.237 | 51.623 | 0.00 | 0.00 |
| ATOM | 7564 | CB   | PRO | X | 497 | 26.194 | 22.383 | 52.145 | 0.00 | 0.00 |
| ATOM | 7565 | HB2  | PRO | X | 497 | 26.311 | 22.734 | 53.170 | 0.00 | 0.00 |
| ATOM | 7566 | HB3  | PRO | X | 497 | 25.627 | 21.452 | 52.151 | 0.00 | 0.00 |
| ATOM | 7567 | CA   | PRO | X | 497 | 25.556 | 23.484 | 51.305 | 0.00 | 0.00 |
| ATOM | 7568 | HA   | PRO | X | 497 | 24.468 | 23.508 | 51.380 | 0.00 | 0.00 |
| ATOM | 7569 | C    | PRO | X | 497 | 25.943 | 24.858 | 51.735 | 0.00 | 0.00 |
| ATOM | 7570 | O    | PRO | X | 497 | 27.042 | 25.343 | 51.377 | 0.00 | 0.00 |
| ATOM | 7571 | N    | PRO | X | 498 | 25.158 | 25.591 | 52.556 | 0.00 | 0.00 |
| ATOM | 7572 | CD   | PRO | X | 498 | 23.755 | 25.348 | 52.909 | 0.00 | 0.00 |
| ATOM | 7573 | HD2  | PRO | X | 498 | 23.672 | 24.510 | 53.600 | 0.00 | 0.00 |
| ATOM | 7574 | HD3  | PRO | X | 498 | 23.084 | 25.175 | 52.067 | 0.00 | 0.00 |
| ATOM | 7575 | CG   | PRO | X | 498 | 23.269 | 26.576 | 53.575 | 0.00 | 0.00 |
| ATOM | 7576 | HG2  | PRO | X | 498 | 23.406 | 26.466 | 54.650 | 0.00 | 0.00 |
| ATOM | 7577 | HG3  | PRO | X | 498 | 22.256 | 26.807 | 53.246 | 0.00 | 0.00 |
| ATOM | 7578 | CB   | PRO | X | 498 | 24.186 | 27.722 | 53.095 | 0.00 | 0.00 |
| ATOM | 7579 | HB2  | PRO | X | 498 | 24.427 | 28.356 | 53.948 | 0.00 | 0.00 |
| ATOM | 7580 | HB3  | PRO | X | 498 | 23.825 | 28.303 | 52.246 | 0.00 | 0.00 |
| ATOM | 7581 | CA   | PRO | X | 498 | 25.482 | 26.983 | 52.775 | 0.00 | 0.00 |
| ATOM | 7582 | HA   | PRO | X | 498 | 25.923 | 27.477 | 51.909 | 0.00 | 0.00 |
| ATOM | 7583 | C    | PRO | X | 498 | 26.450 | 27.079 | 54.016 | 0.00 | 0.00 |
| ATOM | 7584 | O    | PRO | X | 498 | 26.195 | 26.325 | 55.004 | 0.00 | 0.00 |
| ATOM | 7585 | N    | TYR | X | 499 | 27.468 | 27.937 | 53.795 | 0.00 | 0.00 |
| ATOM | 7586 | H    | TYR | X | 499 | 27.466 | 28.514 | 52.966 | 0.00 | 0.00 |
| ATOM | 7587 | CA   | TYR | X | 499 | 28.524 | 28.096 | 54.797 | 0.00 | 0.00 |
| ATOM | 7588 | HA   | TYR | X | 499 | 29.025 | 27.149 | 55.001 | 0.00 | 0.00 |
| ATOM | 7589 | CB   | TYR | X | 499 | 29.545 | 29.070 | 54.242 | 0.00 | 0.00 |
| ATOM | 7590 | HB2  | TYR | X | 499 | 29.810 | 28.681 | 53.259 | 0.00 | 0.00 |
| ATOM | 7591 | HB3  | TYR | X | 499 | 29.095 | 30.050 | 54.084 | 0.00 | 0.00 |
| ATOM | 7592 | CG   | TYR | X | 499 | 30.875 | 29.254 | 55.044 | 0.00 | 0.00 |
| ATOM | 7593 | CD1  | TYR | X | 499 | 30.985 | 30.114 | 56.089 | 0.00 | 0.00 |
| ATOM | 7594 | HD1  | TYR | X | 499 | 30.067 | 30.610 | 56.367 | 0.00 | 0.00 |
| ATOM | 7595 | CE1  | TYR | X | 499 | 32.208 | 30.321 | 56.764 | 0.00 | 0.00 |

|      |      |      |     |   |     |        |        |        |      |      |
|------|------|------|-----|---|-----|--------|--------|--------|------|------|
| ATOM | 7596 | HE1  | TYR | X | 499 | 32.212 | 31.075 | 57.538 | 0.00 | 0.00 |
| ATOM | 7597 | CZ   | TYR | X | 499 | 33.339 | 29.630 | 56.351 | 0.00 | 0.00 |
| ATOM | 7598 | OH   | TYR | X | 499 | 34.546 | 29.954 | 56.853 | 0.00 | 0.00 |
| ATOM | 7599 | HH   | TYR | X | 499 | 34.405 | 30.584 | 57.563 | 0.00 | 0.00 |
| ATOM | 7600 | CE2  | TYR | X | 499 | 33.258 | 28.642 | 55.358 | 0.00 | 0.00 |
| ATOM | 7601 | HE2  | TYR | X | 499 | 34.055 | 27.967 | 55.083 | 0.00 | 0.00 |
| ATOM | 7602 | CD2  | TYR | X | 499 | 31.995 | 28.448 | 54.694 | 0.00 | 0.00 |
| ATOM | 7603 | HD2  | TYR | X | 499 | 31.904 | 27.684 | 53.936 | 0.00 | 0.00 |
| ATOM | 7604 | C    | TYR | X | 499 | 28.000 | 28.703 | 56.096 | 0.00 | 0.00 |
| ATOM | 7605 | O    | TYR | X | 499 | 27.384 | 29.783 | 56.093 | 0.00 | 0.00 |
| ATOM | 7606 | N    | THR | X | 500 | 28.279 | 28.054 | 57.183 | 0.00 | 0.00 |
| ATOM | 7607 | H    | THR | X | 500 | 28.830 | 27.223 | 57.024 | 0.00 | 0.00 |
| ATOM | 7608 | CA   | THR | X | 500 | 27.910 | 28.441 | 58.607 | 0.00 | 0.00 |
| ATOM | 7609 | HA   | THR | X | 500 | 27.397 | 29.402 | 58.594 | 0.00 | 0.00 |
| ATOM | 7610 | CB   | THR | X | 500 | 26.982 | 27.511 | 59.313 | 0.00 | 0.00 |
| ATOM | 7611 | HB   | THR | X | 500 | 26.910 | 27.891 | 60.332 | 0.00 | 0.00 |
| ATOM | 7612 | CG2  | THR | X | 500 | 25.547 | 27.511 | 58.893 | 0.00 | 0.00 |
| ATOM | 7613 | HG21 | THR | X | 500 | 25.243 | 26.513 | 58.578 | 0.00 | 0.00 |
| ATOM | 7614 | HG22 | THR | X | 500 | 25.316 | 28.359 | 58.248 | 0.00 | 0.00 |
| ATOM | 7615 | HG23 | THR | X | 500 | 24.960 | 27.632 | 59.803 | 0.00 | 0.00 |
| ATOM | 7616 | OG1  | THR | X | 500 | 27.460 | 26.212 | 59.202 | 0.00 | 0.00 |
| ATOM | 7617 | HG1  | THR | X | 500 | 26.956 | 25.606 | 59.751 | 0.00 | 0.00 |
| ATOM | 7618 | C    | THR | X | 500 | 29.188 | 28.692 | 59.399 | 0.00 | 0.00 |
| ATOM | 7619 | O    | THR | X | 500 | 30.115 | 27.954 | 59.213 | 0.00 | 0.00 |
| ATOM | 7620 | N    | ALA | X | 501 | 29.258 | 29.685 | 60.306 | 0.00 | 0.00 |
| ATOM | 7621 | H    | ALA | X | 501 | 28.450 | 30.242 | 60.544 | 0.00 | 0.00 |
| ATOM | 7622 | CA   | ALA | X | 501 | 30.526 | 30.071 | 60.866 | 0.00 | 0.00 |
| ATOM | 7623 | HA   | ALA | X | 501 | 31.260 | 30.251 | 60.081 | 0.00 | 0.00 |
| ATOM | 7624 | CB   | ALA | X | 501 | 30.194 | 31.409 | 61.583 | 0.00 | 0.00 |
| ATOM | 7625 | HB1  | ALA | X | 501 | 31.102 | 31.840 | 62.005 | 0.00 | 0.00 |
| ATOM | 7626 | HB2  | ALA | X | 501 | 29.434 | 31.221 | 62.341 | 0.00 | 0.00 |
| ATOM | 7627 | HB3  | ALA | X | 501 | 29.727 | 32.153 | 60.938 | 0.00 | 0.00 |
| ATOM | 7628 | C    | ALA | X | 501 | 31.093 | 29.134 | 61.919 | 0.00 | 0.00 |
| ATOM | 7629 | O    | ALA | X | 501 | 32.345 | 29.111 | 62.011 | 0.00 | 0.00 |
| ATOM | 7630 | N    | GLY | X | 502 | 30.373 | 28.223 | 62.582 | 0.00 | 0.00 |
| ATOM | 7631 | H    | GLY | X | 502 | 29.385 | 28.322 | 62.399 | 0.00 | 0.00 |
| ATOM | 7632 | CA   | GLY | X | 502 | 30.773 | 27.230 | 63.569 | 0.00 | 0.00 |
| ATOM | 7633 | HA2  | GLY | X | 502 | 31.463 | 27.666 | 64.291 | 0.00 | 0.00 |
| ATOM | 7634 | HA3  | GLY | X | 502 | 29.878 | 26.962 | 64.131 | 0.00 | 0.00 |
| ATOM | 7635 | C    | GLY | X | 502 | 31.346 | 25.955 | 62.964 | 0.00 | 0.00 |
| ATOM | 7636 | O    | GLY | X | 502 | 31.807 | 25.083 | 63.750 | 0.00 | 0.00 |
| ATOM | 7637 | N    | ALA | X | 503 | 31.264 | 25.788 | 61.626 | 0.00 | 0.00 |
| ATOM | 7638 | H    | ALA | X | 503 | 31.051 | 26.625 | 61.102 | 0.00 | 0.00 |
| ATOM | 7639 | CA   | ALA | X | 503 | 31.264 | 24.433 | 60.915 | 0.00 | 0.00 |
| ATOM | 7640 | HA   | ALA | X | 503 | 31.958 | 23.682 | 61.291 | 0.00 | 0.00 |
| ATOM | 7641 | CB   | ALA | X | 503 | 29.852 | 23.838 | 61.003 | 0.00 | 0.00 |
| ATOM | 7642 | HB1  | ALA | X | 503 | 29.765 | 22.930 | 60.405 | 0.00 | 0.00 |
| ATOM | 7643 | HB2  | ALA | X | 503 | 29.073 | 24.507 | 60.637 | 0.00 | 0.00 |
| ATOM | 7644 | HB3  | ALA | X | 503 | 29.611 | 23.584 | 62.035 | 0.00 | 0.00 |
| ATOM | 7645 | C    | ALA | X | 503 | 31.796 | 24.546 | 59.426 | 0.00 | 0.00 |
| ATOM | 7646 | O    | ALA | X | 503 | 32.403 | 23.536 | 59.015 | 0.00 | 0.00 |
| ATOM | 7647 | N    | GLN | X | 504 | 31.617 | 25.644 | 58.738 | 0.00 | 0.00 |
| ATOM | 7648 | H    | GLN | X | 504 | 30.900 | 26.289 | 59.036 | 0.00 | 0.00 |
| ATOM | 7649 | CA   | GLN | X | 504 | 32.551 | 26.245 | 57.735 | 0.00 | 0.00 |
| ATOM | 7650 | HA   | GLN | X | 504 | 32.126 | 27.178 | 57.366 | 0.00 | 0.00 |
| ATOM | 7651 | CB   | GLN | X | 504 | 33.856 | 26.726 | 58.330 | 0.00 | 0.00 |
| ATOM | 7652 | HB2  | GLN | X | 504 | 34.447 | 25.861 | 58.629 | 0.00 | 0.00 |
| ATOM | 7653 | HB3  | GLN | X | 504 | 34.491 | 27.153 | 57.554 | 0.00 | 0.00 |
| ATOM | 7654 | CG   | GLN | X | 504 | 33.697 | 27.768 | 59.547 | 0.00 | 0.00 |
| ATOM | 7655 | HG2  | GLN | X | 504 | 32.896 | 28.491 | 59.398 | 0.00 | 0.00 |
| ATOM | 7656 | HG3  | GLN | X | 504 | 33.445 | 27.193 | 60.438 | 0.00 | 0.00 |
| ATOM | 7657 | CD   | GLN | X | 504 | 34.984 | 28.559 | 59.757 | 0.00 | 0.00 |
| ATOM | 7658 | OE1  | GLN | X | 504 | 34.972 | 29.834 | 59.779 | 0.00 | 0.00 |
| ATOM | 7659 | NE2  | GLN | X | 504 | 36.115 | 27.965 | 60.070 | 0.00 | 0.00 |
| ATOM | 7660 | HE21 | GLN | X | 504 | 36.864 | 28.627 | 60.208 | 0.00 | 0.00 |
| ATOM | 7661 | HE22 | GLN | X | 504 | 36.103 | 26.983 | 60.306 | 0.00 | 0.00 |
| ATOM | 7662 | C    | GLN | X | 504 | 32.800 | 25.363 | 56.458 | 0.00 | 0.00 |

|      |      |      |     |   |     |        |        |        |      |      |
|------|------|------|-----|---|-----|--------|--------|--------|------|------|
| ATOM | 7663 | O    | GLN | X | 504 | 33.942 | 25.296 | 55.901 | 0.00 | 0.00 |
| ATOM | 7664 | N    | GLN | X | 505 | 31.871 | 24.601 | 55.975 | 0.00 | 0.00 |
| ATOM | 7665 | H    | GLN | X | 505 | 30.948 | 24.943 | 56.201 | 0.00 | 0.00 |
| ATOM | 7666 | CA   | GLN | X | 505 | 31.923 | 23.660 | 54.883 | 0.00 | 0.00 |
| ATOM | 7667 | HA   | GLN | X | 505 | 32.896 | 23.177 | 54.790 | 0.00 | 0.00 |
| ATOM | 7668 | CB   | GLN | X | 505 | 30.749 | 22.710 | 55.033 | 0.00 | 0.00 |
| ATOM | 7669 | HB2  | GLN | X | 505 | 29.785 | 23.175 | 54.823 | 0.00 | 0.00 |
| ATOM | 7670 | HB3  | GLN | X | 505 | 30.861 | 22.148 | 54.106 | 0.00 | 0.00 |
| ATOM | 7671 | CG   | GLN | X | 505 | 30.861 | 21.785 | 56.248 | 0.00 | 0.00 |
| ATOM | 7672 | HG2  | GLN | X | 505 | 31.905 | 21.476 | 56.290 | 0.00 | 0.00 |
| ATOM | 7673 | HG3  | GLN | X | 505 | 30.523 | 22.287 | 57.155 | 0.00 | 0.00 |
| ATOM | 7674 | CD   | GLN | X | 505 | 29.927 | 20.598 | 56.110 | 0.00 | 0.00 |
| ATOM | 7675 | OE1  | GLN | X | 505 | 29.542 | 20.146 | 55.007 | 0.00 | 0.00 |
| ATOM | 7676 | NE2  | GLN | X | 505 | 29.759 | 19.905 | 57.188 | 0.00 | 0.00 |
| ATOM | 7677 | HE21 | GLN | X | 505 | 29.381 | 18.980 | 57.042 | 0.00 | 0.00 |
| ATOM | 7678 | HE22 | GLN | X | 505 | 29.999 | 20.149 | 58.138 | 0.00 | 0.00 |
| ATOM | 7679 | C    | GLN | X | 505 | 31.785 | 24.425 | 53.495 | 0.00 | 0.00 |
| ATOM | 7680 | O    | GLN | X | 505 | 30.888 | 25.228 | 53.397 | 0.00 | 0.00 |
| ATOM | 7681 | N    | TYR | X | 506 | 32.616 | 24.021 | 52.561 | 0.00 | 0.00 |
| ATOM | 7682 | H    | TYR | X | 506 | 33.214 | 23.241 | 52.791 | 0.00 | 0.00 |
| ATOM | 7683 | CA   | TYR | X | 506 | 32.716 | 24.574 | 51.247 | 0.00 | 0.00 |
| ATOM | 7684 | HA   | TYR | X | 506 | 31.878 | 25.216 | 50.977 | 0.00 | 0.00 |
| ATOM | 7685 | CB   | TYR | X | 506 | 34.007 | 25.360 | 51.190 | 0.00 | 0.00 |
| ATOM | 7686 | HB2  | TYR | X | 506 | 34.059 | 25.822 | 50.205 | 0.00 | 0.00 |
| ATOM | 7687 | HB3  | TYR | X | 506 | 34.064 | 26.200 | 51.883 | 0.00 | 0.00 |
| ATOM | 7688 | CG   | TYR | X | 506 | 35.255 | 24.472 | 51.515 | 0.00 | 0.00 |
| ATOM | 7689 | CD1  | TYR | X | 506 | 35.679 | 24.235 | 52.822 | 0.00 | 0.00 |
| ATOM | 7690 | HD1  | TYR | X | 506 | 35.143 | 24.634 | 53.670 | 0.00 | 0.00 |
| ATOM | 7691 | CE1  | TYR | X | 506 | 36.799 | 23.429 | 53.043 | 0.00 | 0.00 |
| ATOM | 7692 | HE1  | TYR | X | 506 | 37.035 | 23.195 | 54.071 | 0.00 | 0.00 |
| ATOM | 7693 | CZ   | TYR | X | 506 | 37.554 | 22.951 | 51.911 | 0.00 | 0.00 |
| ATOM | 7694 | OH   | TYR | X | 506 | 38.681 | 22.160 | 52.099 | 0.00 | 0.00 |
| ATOM | 7695 | HH   | TYR | X | 506 | 38.874 | 21.918 | 53.007 | 0.00 | 0.00 |
| ATOM | 7696 | CE2  | TYR | X | 506 | 37.171 | 23.267 | 50.654 | 0.00 | 0.00 |
| ATOM | 7697 | HE2  | TYR | X | 506 | 37.746 | 22.841 | 49.845 | 0.00 | 0.00 |
| ATOM | 7698 | CD2  | TYR | X | 506 | 36.007 | 24.024 | 50.421 | 0.00 | 0.00 |
| ATOM | 7699 | HD2  | TYR | X | 506 | 35.619 | 24.154 | 49.422 | 0.00 | 0.00 |
| ATOM | 7700 | C    | TYR | X | 506 | 32.767 | 23.485 | 50.234 | 0.00 | 0.00 |
| ATOM | 7701 | O    | TYR | X | 506 | 33.278 | 22.362 | 50.460 | 0.00 | 0.00 |
| ATOM | 7702 | N    | VAL | X | 507 | 32.465 | 23.773 | 48.981 | 0.00 | 0.00 |
| ATOM | 7703 | H    | VAL | X | 507 | 32.156 | 24.728 | 48.867 | 0.00 | 0.00 |
| ATOM | 7704 | CA   | VAL | X | 507 | 32.537 | 22.830 | 47.852 | 0.00 | 0.00 |
| ATOM | 7705 | HA   | VAL | X | 507 | 32.409 | 21.792 | 48.161 | 0.00 | 0.00 |
| ATOM | 7706 | CB   | VAL | X | 507 | 31.390 | 23.139 | 46.850 | 0.00 | 0.00 |
| ATOM | 7707 | HB   | VAL | X | 507 | 31.472 | 22.448 | 46.011 | 0.00 | 0.00 |
| ATOM | 7708 | CG1  | VAL | X | 507 | 30.065 | 22.845 | 47.585 | 0.00 | 0.00 |
| ATOM | 7709 | HG11 | VAL | X | 507 | 29.207 | 23.167 | 46.995 | 0.00 | 0.00 |
| ATOM | 7710 | HG12 | VAL | X | 507 | 29.970 | 21.780 | 47.793 | 0.00 | 0.00 |
| ATOM | 7711 | HG13 | VAL | X | 507 | 29.894 | 23.452 | 48.474 | 0.00 | 0.00 |
| ATOM | 7712 | CG2  | VAL | X | 507 | 31.512 | 24.507 | 46.148 | 0.00 | 0.00 |
| ATOM | 7713 | HG21 | VAL | X | 507 | 30.684 | 24.752 | 45.483 | 0.00 | 0.00 |
| ATOM | 7714 | HG22 | VAL | X | 507 | 32.461 | 24.503 | 45.611 | 0.00 | 0.00 |
| ATOM | 7715 | HG23 | VAL | X | 507 | 31.599 | 25.312 | 46.878 | 0.00 | 0.00 |
| ATOM | 7716 | C    | VAL | X | 507 | 33.937 | 22.808 | 47.239 | 0.00 | 0.00 |
| ATOM | 7717 | O    | VAL | X | 507 | 34.614 | 23.796 | 47.085 | 0.00 | 0.00 |
| ATOM | 7718 | N    | SER | X | 508 | 34.331 | 21.631 | 46.699 | 0.00 | 0.00 |
| ATOM | 7719 | H    | SER | X | 508 | 33.728 | 20.828 | 46.805 | 0.00 | 0.00 |
| ATOM | 7720 | CA   | SER | X | 508 | 35.424 | 21.567 | 45.740 | 0.00 | 0.00 |
| ATOM | 7721 | HA   | SER | X | 508 | 36.137 | 22.380 | 45.880 | 0.00 | 0.00 |
| ATOM | 7722 | CB   | SER | X | 508 | 36.180 | 20.225 | 45.975 | 0.00 | 0.00 |
| ATOM | 7723 | HB2  | SER | X | 508 | 36.881 | 20.059 | 45.157 | 0.00 | 0.00 |
| ATOM | 7724 | HB3  | SER | X | 508 | 36.744 | 20.315 | 46.903 | 0.00 | 0.00 |
| ATOM | 7725 | OG   | SER | X | 508 | 35.323 | 19.041 | 45.909 | 0.00 | 0.00 |
| ATOM | 7726 | HG   | SER | X | 508 | 34.576 | 19.165 | 46.498 | 0.00 | 0.00 |
| ATOM | 7727 | C    | SER | X | 508 | 34.851 | 21.638 | 44.360 | 0.00 | 0.00 |
| ATOM | 7728 | O    | SER | X | 508 | 33.751 | 21.088 | 44.141 | 0.00 | 0.00 |
| ATOM | 7729 | N    | LEU | X | 509 | 35.596 | 22.342 | 43.464 | 0.00 | 0.00 |

|      |      |      |     |   |     |        |        |        |      |      |
|------|------|------|-----|---|-----|--------|--------|--------|------|------|
| ATOM | 7730 | H    | LEU | X | 509 | 36.439 | 22.823 | 43.745 | 0.00 | 0.00 |
| ATOM | 7731 | CA   | LEU | X | 509 | 35.158 | 22.395 | 42.041 | 0.00 | 0.00 |
| ATOM | 7732 | HA   | LEU | X | 509 | 34.208 | 21.897 | 41.847 | 0.00 | 0.00 |
| ATOM | 7733 | CB   | LEU | X | 509 | 35.002 | 23.887 | 41.748 | 0.00 | 0.00 |
| ATOM | 7734 | HB2  | LEU | X | 509 | 35.966 | 24.375 | 41.889 | 0.00 | 0.00 |
| ATOM | 7735 | HB3  | LEU | X | 509 | 34.853 | 23.989 | 40.673 | 0.00 | 0.00 |
| ATOM | 7736 | CG   | LEU | X | 509 | 33.897 | 24.673 | 42.489 | 0.00 | 0.00 |
| ATOM | 7737 | HG   | LEU | X | 509 | 34.163 | 24.598 | 43.543 | 0.00 | 0.00 |
| ATOM | 7738 | CD1  | LEU | X | 509 | 33.860 | 26.191 | 42.110 | 0.00 | 0.00 |
| ATOM | 7739 | HD11 | LEU | X | 509 | 33.449 | 26.317 | 41.108 | 0.00 | 0.00 |
| ATOM | 7740 | HD12 | LEU | X | 509 | 34.827 | 26.692 | 42.139 | 0.00 | 0.00 |
| ATOM | 7741 | HD13 | LEU | X | 509 | 33.128 | 26.756 | 42.686 | 0.00 | 0.00 |
| ATOM | 7742 | CD2  | LEU | X | 509 | 32.468 | 24.097 | 42.188 | 0.00 | 0.00 |
| ATOM | 7743 | HD21 | LEU | X | 509 | 31.716 | 24.869 | 42.352 | 0.00 | 0.00 |
| ATOM | 7744 | HD22 | LEU | X | 509 | 32.434 | 23.686 | 41.179 | 0.00 | 0.00 |
| ATOM | 7745 | HD23 | LEU | X | 509 | 32.395 | 23.262 | 42.885 | 0.00 | 0.00 |
| ATOM | 7746 | C    | LEU | X | 509 | 36.159 | 21.722 | 41.112 | 0.00 | 0.00 |
| ATOM | 7747 | O    | LEU | X | 509 | 37.272 | 22.140 | 40.990 | 0.00 | 0.00 |
| ATOM | 7748 | N    | ASP | X | 510 | 35.733 | 20.686 | 40.374 | 0.00 | 0.00 |
| ATOM | 7749 | H    | ASP | X | 510 | 34.760 | 20.498 | 40.565 | 0.00 | 0.00 |
| ATOM | 7750 | CA   | ASP | X | 510 | 36.584 | 19.709 | 39.691 | 0.00 | 0.00 |
| ATOM | 7751 | HA   | ASP | X | 510 | 37.414 | 20.267 | 39.256 | 0.00 | 0.00 |
| ATOM | 7752 | CB   | ASP | X | 510 | 37.092 | 18.641 | 40.643 | 0.00 | 0.00 |
| ATOM | 7753 | HB2  | ASP | X | 510 | 37.334 | 19.098 | 41.603 | 0.00 | 0.00 |
| ATOM | 7754 | HB3  | ASP | X | 510 | 36.258 | 17.970 | 40.850 | 0.00 | 0.00 |
| ATOM | 7755 | CG   | ASP | X | 510 | 38.225 | 17.765 | 40.195 | 0.00 | 0.00 |
| ATOM | 7756 | OD1  | ASP | X | 510 | 38.466 | 16.724 | 40.815 | 0.00 | 0.00 |
| ATOM | 7757 | OD2  | ASP | X | 510 | 38.963 | 18.099 | 39.285 | 0.00 | 0.00 |
| ATOM | 7758 | C    | ASP | X | 510 | 35.854 | 19.101 | 38.463 | 0.00 | 0.00 |
| ATOM | 7759 | O    | ASP | X | 510 | 34.619 | 19.207 | 38.273 | 0.00 | 0.00 |
| ATOM | 7760 | N    | LEU | X | 511 | 36.598 | 18.258 | 37.703 | 0.00 | 0.00 |
| ATOM | 7761 | H    | LEU | X | 511 | 37.591 | 18.231 | 37.888 | 0.00 | 0.00 |
| ATOM | 7762 | CA   | LEU | X | 511 | 36.048 | 17.422 | 36.623 | 0.00 | 0.00 |
| ATOM | 7763 | HA   | LEU | X | 511 | 35.355 | 17.985 | 35.999 | 0.00 | 0.00 |
| ATOM | 7764 | CB   | LEU | X | 511 | 37.211 | 16.990 | 35.711 | 0.00 | 0.00 |
| ATOM | 7765 | HB2  | LEU | X | 511 | 37.934 | 16.494 | 36.359 | 0.00 | 0.00 |
| ATOM | 7766 | HB3  | LEU | X | 511 | 36.900 | 16.229 | 34.994 | 0.00 | 0.00 |
| ATOM | 7767 | CG   | LEU | X | 511 | 37.915 | 18.080 | 34.895 | 0.00 | 0.00 |
| ATOM | 7768 | HG   | LEU | X | 511 | 38.117 | 18.894 | 35.590 | 0.00 | 0.00 |
| ATOM | 7769 | CD1  | LEU | X | 511 | 39.271 | 17.577 | 34.331 | 0.00 | 0.00 |
| ATOM | 7770 | HD11 | LEU | X | 511 | 39.019 | 16.647 | 33.823 | 0.00 | 0.00 |
| ATOM | 7771 | HD12 | LEU | X | 511 | 39.908 | 17.406 | 35.199 | 0.00 | 0.00 |
| ATOM | 7772 | HD13 | LEU | X | 511 | 39.815 | 18.231 | 33.650 | 0.00 | 0.00 |
| ATOM | 7773 | CD2  | LEU | X | 511 | 37.109 | 18.544 | 33.682 | 0.00 | 0.00 |
| ATOM | 7774 | HD21 | LEU | X | 511 | 36.225 | 19.022 | 34.105 | 0.00 | 0.00 |
| ATOM | 7775 | HD22 | LEU | X | 511 | 37.735 | 19.211 | 33.088 | 0.00 | 0.00 |
| ATOM | 7776 | HD23 | LEU | X | 511 | 36.765 | 17.679 | 33.116 | 0.00 | 0.00 |
| ATOM | 7777 | C    | LEU | X | 511 | 35.260 | 16.189 | 37.157 | 0.00 | 0.00 |
| ATOM | 7778 | O    | LEU | X | 511 | 35.375 | 15.067 | 36.556 | 0.00 | 0.00 |
| ATOM | 7779 | N    | ARG | X | 512 | 34.534 | 16.362 | 38.309 | 0.00 | 0.00 |
| ATOM | 7780 | H    | ARG | X | 512 | 34.546 | 17.325 | 38.612 | 0.00 | 0.00 |
| ATOM | 7781 | CA   | ARG | X | 512 | 33.541 | 15.541 | 38.924 | 0.00 | 0.00 |
| ATOM | 7782 | HA   | ARG | X | 512 | 33.302 | 14.668 | 38.317 | 0.00 | 0.00 |
| ATOM | 7783 | CB   | ARG | X | 512 | 34.202 | 15.036 | 40.217 | 0.00 | 0.00 |
| ATOM | 7784 | HB2  | ARG | X | 512 | 34.471 | 15.922 | 40.792 | 0.00 | 0.00 |
| ATOM | 7785 | HB3  | ARG | X | 512 | 33.480 | 14.355 | 40.667 | 0.00 | 0.00 |
| ATOM | 7786 | CG   | ARG | X | 512 | 35.435 | 14.196 | 39.830 | 0.00 | 0.00 |
| ATOM | 7787 | HG2  | ARG | X | 512 | 35.136 | 13.433 | 39.111 | 0.00 | 0.00 |
| ATOM | 7788 | HG3  | ARG | X | 512 | 36.207 | 14.862 | 39.445 | 0.00 | 0.00 |
| ATOM | 7789 | CD   | ARG | X | 512 | 36.033 | 13.413 | 41.027 | 0.00 | 0.00 |
| ATOM | 7790 | HD2  | ARG | X | 512 | 36.314 | 14.093 | 41.831 | 0.00 | 0.00 |
| ATOM | 7791 | HD3  | ARG | X | 512 | 35.210 | 12.786 | 41.371 | 0.00 | 0.00 |
| ATOM | 7792 | NE   | ARG | X | 512 | 37.183 | 12.582 | 40.743 | 0.00 | 0.00 |
| ATOM | 7793 | HE   | ARG | X | 512 | 37.616 | 12.702 | 39.838 | 0.00 | 0.00 |
| ATOM | 7794 | CZ   | ARG | X | 512 | 37.765 | 11.671 | 41.526 | 0.00 | 0.00 |
| ATOM | 7795 | NH1  | ARG | X | 512 | 37.432 | 11.430 | 42.729 | 0.00 | 0.00 |
| ATOM | 7796 | HH11 | ARG | X | 512 | 36.653 | 11.911 | 43.155 | 0.00 | 0.00 |

|      |      |      |     |   |     |        |        |        |      |      |
|------|------|------|-----|---|-----|--------|--------|--------|------|------|
| ATOM | 7797 | HH12 | ARG | X | 512 | 37.714 | 10.527 | 43.083 | 0.00 | 0.00 |
| ATOM | 7798 | NH2  | ARG | X | 512 | 38.789 | 11.059 | 41.018 | 0.00 | 0.00 |
| ATOM | 7799 | HH21 | ARG | X | 512 | 39.162 | 11.386 | 40.139 | 0.00 | 0.00 |
| ATOM | 7800 | HH22 | ARG | X | 512 | 39.256 | 10.420 | 41.646 | 0.00 | 0.00 |
| ATOM | 7801 | C    | ARG | X | 512 | 32.287 | 16.377 | 39.280 | 0.00 | 0.00 |
| ATOM | 7802 | O    | ARG | X | 512 | 32.459 | 17.625 | 39.317 | 0.00 | 0.00 |
| ATOM | 7803 | N    | PRO | X | 513 | 31.105 | 15.830 | 39.611 | 0.00 | 0.00 |
| ATOM | 7804 | CD   | PRO | X | 513 | 30.705 | 14.451 | 39.243 | 0.00 | 0.00 |
| ATOM | 7805 | HD2  | PRO | X | 513 | 31.221 | 13.784 | 39.934 | 0.00 | 0.00 |
| ATOM | 7806 | HD3  | PRO | X | 513 | 30.884 | 14.267 | 38.183 | 0.00 | 0.00 |
| ATOM | 7807 | CG   | PRO | X | 513 | 29.180 | 14.391 | 39.516 | 0.00 | 0.00 |
| ATOM | 7808 | HG2  | PRO | X | 513 | 28.885 | 13.475 | 40.029 | 0.00 | 0.00 |
| ATOM | 7809 | HG3  | PRO | X | 513 | 28.697 | 14.530 | 38.549 | 0.00 | 0.00 |
| ATOM | 7810 | CB   | PRO | X | 513 | 28.935 | 15.582 | 40.520 | 0.00 | 0.00 |
| ATOM | 7811 | HB2  | PRO | X | 513 | 29.096 | 15.098 | 41.483 | 0.00 | 0.00 |
| ATOM | 7812 | HB3  | PRO | X | 513 | 27.916 | 15.969 | 40.512 | 0.00 | 0.00 |
| ATOM | 7813 | CA   | PRO | X | 513 | 30.035 | 16.593 | 40.276 | 0.00 | 0.00 |
| ATOM | 7814 | HA   | PRO | X | 513 | 29.624 | 17.394 | 39.661 | 0.00 | 0.00 |
| ATOM | 7815 | C    | PRO | X | 513 | 30.558 | 17.091 | 41.634 | 0.00 | 0.00 |
| ATOM | 7816 | O    | PRO | X | 513 | 31.657 | 16.718 | 42.103 | 0.00 | 0.00 |
| ATOM | 7817 | N    | LEU | X | 514 | 29.719 | 17.940 | 42.274 | 0.00 | 0.00 |
| ATOM | 7818 | H    | LEU | X | 514 | 28.752 | 18.076 | 42.017 | 0.00 | 0.00 |
| ATOM | 7819 | CA   | LEU | X | 514 | 30.194 | 18.584 | 43.535 | 0.00 | 0.00 |
| ATOM | 7820 | HA   | LEU | X | 514 | 31.102 | 19.140 | 43.302 | 0.00 | 0.00 |
| ATOM | 7821 | CB   | LEU | X | 514 | 29.115 | 19.538 | 44.054 | 0.00 | 0.00 |
| ATOM | 7822 | HB2  | LEU | X | 514 | 28.224 | 18.948 | 44.268 | 0.00 | 0.00 |
| ATOM | 7823 | HB3  | LEU | X | 514 | 29.312 | 19.893 | 45.066 | 0.00 | 0.00 |
| ATOM | 7824 | CG   | LEU | X | 514 | 28.677 | 20.750 | 43.249 | 0.00 | 0.00 |
| ATOM | 7825 | HG   | LEU | X | 514 | 28.373 | 20.430 | 42.252 | 0.00 | 0.00 |
| ATOM | 7826 | CD1  | LEU | X | 514 | 27.509 | 21.320 | 44.025 | 0.00 | 0.00 |
| ATOM | 7827 | HD11 | LEU | X | 514 | 27.147 | 22.103 | 43.359 | 0.00 | 0.00 |
| ATOM | 7828 | HD12 | LEU | X | 514 | 27.771 | 21.649 | 45.031 | 0.00 | 0.00 |
| ATOM | 7829 | HD13 | LEU | X | 514 | 26.771 | 20.524 | 44.126 | 0.00 | 0.00 |
| ATOM | 7830 | CD2  | LEU | X | 514 | 29.847 | 21.733 | 43.036 | 0.00 | 0.00 |
| ATOM | 7831 | HD21 | LEU | X | 514 | 30.668 | 21.096 | 42.709 | 0.00 | 0.00 |
| ATOM | 7832 | HD22 | LEU | X | 514 | 29.520 | 22.549 | 42.392 | 0.00 | 0.00 |
| ATOM | 7833 | HD23 | LEU | X | 514 | 30.067 | 22.109 | 44.035 | 0.00 | 0.00 |
| ATOM | 7834 | C    | LEU | X | 514 | 30.531 | 17.528 | 44.627 | 0.00 | 0.00 |
| ATOM | 7835 | O    | LEU | X | 514 | 29.606 | 16.853 | 45.170 | 0.00 | 0.00 |
| ATOM | 7836 | N    | GLU | X | 515 | 31.816 | 17.403 | 44.981 | 0.00 | 0.00 |
| ATOM | 7837 | H    | GLU | X | 515 | 32.468 | 17.967 | 44.453 | 0.00 | 0.00 |
| ATOM | 7838 | CA   | GLU | X | 515 | 32.174 | 16.830 | 46.274 | 0.00 | 0.00 |
| ATOM | 7839 | HA   | GLU | X | 515 | 31.460 | 16.064 | 46.577 | 0.00 | 0.00 |
| ATOM | 7840 | CB   | GLU | X | 515 | 33.618 | 16.162 | 46.096 | 0.00 | 0.00 |
| ATOM | 7841 | HB2  | GLU | X | 515 | 33.453 | 15.336 | 45.405 | 0.00 | 0.00 |
| ATOM | 7842 | HB3  | GLU | X | 515 | 34.371 | 16.851 | 45.714 | 0.00 | 0.00 |
| ATOM | 7843 | CG   | GLU | X | 515 | 33.867 | 15.505 | 47.436 | 0.00 | 0.00 |
| ATOM | 7844 | HG2  | GLU | X | 515 | 33.932 | 16.248 | 48.231 | 0.00 | 0.00 |
| ATOM | 7845 | HG3  | GLU | X | 515 | 33.199 | 14.729 | 47.809 | 0.00 | 0.00 |
| ATOM | 7846 | CD   | GLU | X | 515 | 35.287 | 14.815 | 47.394 | 0.00 | 0.00 |
| ATOM | 7847 | OE1  | GLU | X | 515 | 35.403 | 13.725 | 48.054 | 0.00 | 0.00 |
| ATOM | 7848 | OE2  | GLU | X | 515 | 36.143 | 15.432 | 46.808 | 0.00 | 0.00 |
| ATOM | 7849 | C    | GLU | X | 515 | 32.185 | 18.019 | 47.249 | 0.00 | 0.00 |
| ATOM | 7850 | O    | GLU | X | 515 | 32.765 | 19.044 | 46.919 | 0.00 | 0.00 |
| ATOM | 7851 | N    | VAL | X | 516 | 31.654 | 17.970 | 48.498 | 0.00 | 0.00 |
| ATOM | 7852 | H    | VAL | X | 516 | 31.222 | 17.105 | 48.791 | 0.00 | 0.00 |
| ATOM | 7853 | CA   | VAL | X | 516 | 31.759 | 19.018 | 49.620 | 0.00 | 0.00 |
| ATOM | 7854 | HA   | VAL | X | 516 | 31.881 | 20.032 | 49.240 | 0.00 | 0.00 |
| ATOM | 7855 | CB   | VAL | X | 516 | 30.419 | 19.070 | 50.435 | 0.00 | 0.00 |
| ATOM | 7856 | HB   | VAL | X | 516 | 30.274 | 18.055 | 50.804 | 0.00 | 0.00 |
| ATOM | 7857 | CG1  | VAL | X | 516 | 30.391 | 19.968 | 51.661 | 0.00 | 0.00 |
| ATOM | 7858 | HG11 | VAL | X | 516 | 31.161 | 19.719 | 52.390 | 0.00 | 0.00 |
| ATOM | 7859 | HG12 | VAL | X | 516 | 30.412 | 21.014 | 51.354 | 0.00 | 0.00 |
| ATOM | 7860 | HG13 | VAL | X | 516 | 29.445 | 19.758 | 52.161 | 0.00 | 0.00 |
| ATOM | 7861 | CG2  | VAL | X | 516 | 29.187 | 19.346 | 49.553 | 0.00 | 0.00 |
| ATOM | 7862 | HG21 | VAL | X | 516 | 28.323 | 19.525 | 50.194 | 0.00 | 0.00 |
| ATOM | 7863 | HG22 | VAL | X | 516 | 28.965 | 18.483 | 48.925 | 0.00 | 0.00 |

|      |      |      |     |   |     |        |        |        |      |      |
|------|------|------|-----|---|-----|--------|--------|--------|------|------|
| ATOM | 7864 | HG23 | VAL | X | 516 | 29.433 | 20.256 | 49.007 | 0.00 | 0.00 |
| ATOM | 7865 | C    | VAL | X | 516 | 32.930 | 18.601 | 50.548 | 0.00 | 0.00 |
| ATOM | 7866 | O    | VAL | X | 516 | 33.119 | 17.404 | 50.827 | 0.00 | 0.00 |
| ATOM | 7867 | N    | ARG | X | 517 | 33.574 | 19.593 | 51.127 | 0.00 | 0.00 |
| ATOM | 7868 | H    | ARG | X | 517 | 33.394 | 20.539 | 50.821 | 0.00 | 0.00 |
| ATOM | 7869 | CA   | ARG | X | 517 | 34.755 | 19.552 | 52.035 | 0.00 | 0.00 |
| ATOM | 7870 | HA   | ARG | X | 517 | 34.930 | 18.502 | 52.272 | 0.00 | 0.00 |
| ATOM | 7871 | CB   | ARG | X | 517 | 35.921 | 20.138 | 51.271 | 0.00 | 0.00 |
| ATOM | 7872 | HB2  | ARG | X | 517 | 35.643 | 21.171 | 51.061 | 0.00 | 0.00 |
| ATOM | 7873 | HB3  | ARG | X | 517 | 36.755 | 20.027 | 51.964 | 0.00 | 0.00 |
| ATOM | 7874 | CG   | ARG | X | 517 | 36.295 | 19.477 | 49.938 | 0.00 | 0.00 |
| ATOM | 7875 | HG2  | ARG | X | 517 | 35.401 | 19.386 | 49.320 | 0.00 | 0.00 |
| ATOM | 7876 | HG3  | ARG | X | 517 | 36.920 | 20.223 | 49.448 | 0.00 | 0.00 |
| ATOM | 7877 | CD   | ARG | X | 517 | 36.910 | 18.090 | 49.936 | 0.00 | 0.00 |
| ATOM | 7878 | HD2  | ARG | X | 517 | 37.881 | 18.217 | 50.416 | 0.00 | 0.00 |
| ATOM | 7879 | HD3  | ARG | X | 517 | 36.186 | 17.472 | 50.468 | 0.00 | 0.00 |
| ATOM | 7880 | NE   | ARG | X | 517 | 37.217 | 17.553 | 48.588 | 0.00 | 0.00 |
| ATOM | 7881 | HE   | ARG | X | 517 | 36.543 | 16.961 | 48.125 | 0.00 | 0.00 |
| ATOM | 7882 | CZ   | ARG | X | 517 | 38.244 | 17.836 | 47.803 | 0.00 | 0.00 |
| ATOM | 7883 | NH1  | ARG | X | 517 | 39.121 | 18.769 | 48.184 | 0.00 | 0.00 |
| ATOM | 7884 | HH11 | ARG | X | 517 | 39.129 | 19.132 | 49.126 | 0.00 | 0.00 |
| ATOM | 7885 | HH12 | ARG | X | 517 | 39.717 | 19.164 | 47.470 | 0.00 | 0.00 |
| ATOM | 7886 | NH2  | ARG | X | 517 | 38.220 | 17.276 | 46.676 | 0.00 | 0.00 |
| ATOM | 7887 | HH21 | ARG | X | 517 | 37.531 | 16.556 | 46.511 | 0.00 | 0.00 |
| ATOM | 7888 | HH22 | ARG | X | 517 | 38.982 | 17.421 | 46.028 | 0.00 | 0.00 |
| ATOM | 7889 | C    | ARG | X | 517 | 34.516 | 20.375 | 53.341 | 0.00 | 0.00 |
| ATOM | 7890 | O    | ARG | X | 517 | 33.806 | 21.386 | 53.286 | 0.00 | 0.00 |
| ATOM | 7891 | N    | ARG | X | 518 | 35.066 | 20.011 | 54.477 | 0.00 | 0.00 |
| ATOM | 7892 | H    | ARG | X | 518 | 35.724 | 19.248 | 54.415 | 0.00 | 0.00 |
| ATOM | 7893 | CA   | ARG | X | 518 | 34.832 | 20.568 | 55.773 | 0.00 | 0.00 |
| ATOM | 7894 | HA   | ARG | X | 518 | 33.869 | 21.070 | 55.682 | 0.00 | 0.00 |
| ATOM | 7895 | CB   | ARG | X | 518 | 34.663 | 19.349 | 56.760 | 0.00 | 0.00 |
| ATOM | 7896 | HB2  | ARG | X | 518 | 35.495 | 18.663 | 56.603 | 0.00 | 0.00 |
| ATOM | 7897 | HB3  | ARG | X | 518 | 34.718 | 19.596 | 57.821 | 0.00 | 0.00 |
| ATOM | 7898 | CG   | ARG | X | 518 | 33.402 | 18.512 | 56.600 | 0.00 | 0.00 |
| ATOM | 7899 | HG2  | ARG | X | 518 | 33.276 | 18.033 | 57.571 | 0.00 | 0.00 |
| ATOM | 7900 | HG3  | ARG | X | 518 | 32.558 | 19.183 | 56.444 | 0.00 | 0.00 |
| ATOM | 7901 | CD   | ARG | X | 518 | 33.354 | 17.475 | 55.521 | 0.00 | 0.00 |
| ATOM | 7902 | HD2  | ARG | X | 518 | 33.424 | 18.058 | 54.603 | 0.00 | 0.00 |
| ATOM | 7903 | HD3  | ARG | X | 518 | 34.137 | 16.735 | 55.686 | 0.00 | 0.00 |
| ATOM | 7904 | NE   | ARG | X | 518 | 32.073 | 16.785 | 55.475 | 0.00 | 0.00 |
| ATOM | 7905 | HE   | ARG | X | 518 | 31.640 | 16.693 | 56.383 | 0.00 | 0.00 |
| ATOM | 7906 | CZ   | ARG | X | 518 | 31.637 | 15.998 | 54.509 | 0.00 | 0.00 |
| ATOM | 7907 | NH1  | ARG | X | 518 | 32.276 | 15.982 | 53.426 | 0.00 | 0.00 |
| ATOM | 7908 | HH11 | ARG | X | 518 | 33.170 | 16.449 | 53.372 | 0.00 | 0.00 |
| ATOM | 7909 | HH12 | ARG | X | 518 | 32.007 | 15.294 | 52.737 | 0.00 | 0.00 |
| ATOM | 7910 | NH2  | ARG | X | 518 | 30.466 | 15.345 | 54.664 | 0.00 | 0.00 |
| ATOM | 7911 | HH21 | ARG | X | 518 | 29.768 | 15.547 | 55.366 | 0.00 | 0.00 |
| ATOM | 7912 | HH22 | ARG | X | 518 | 30.161 | 14.713 | 53.937 | 0.00 | 0.00 |
| ATOM | 7913 | C    | ARG | X | 518 | 35.890 | 21.562 | 56.239 | 0.00 | 0.00 |
| ATOM | 7914 | O    | ARG | X | 518 | 37.091 | 21.271 | 56.083 | 0.00 | 0.00 |
| ATOM | 7915 | N    | GLY | X | 519 | 35.502 | 22.634 | 56.822 | 0.00 | 0.00 |
| ATOM | 7916 | H    | GLY | X | 519 | 34.498 | 22.708 | 56.910 | 0.00 | 0.00 |
| ATOM | 7917 | CA   | GLY | X | 519 | 36.300 | 23.603 | 57.578 | 0.00 | 0.00 |
| ATOM | 7918 | HA2  | GLY | X | 519 | 35.650 | 24.205 | 58.213 | 0.00 | 0.00 |
| ATOM | 7919 | HA3  | GLY | X | 519 | 36.933 | 23.004 | 58.231 | 0.00 | 0.00 |
| ATOM | 7920 | C    | GLY | X | 519 | 37.333 | 24.492 | 56.788 | 0.00 | 0.00 |
| ATOM | 7921 | O    | GLY | X | 519 | 38.509 | 24.249 | 57.016 | 0.00 | 0.00 |
| ATOM | 7922 | N    | LEU | X | 520 | 36.829 | 25.464 | 56.045 | 0.00 | 0.00 |
| ATOM | 7923 | H    | LEU | X | 520 | 35.832 | 25.627 | 56.056 | 0.00 | 0.00 |
| ATOM | 7924 | CA   | LEU | X | 520 | 37.599 | 26.362 | 55.217 | 0.00 | 0.00 |
| ATOM | 7925 | HA   | LEU | X | 520 | 37.974 | 25.818 | 54.351 | 0.00 | 0.00 |
| ATOM | 7926 | CB   | LEU | X | 520 | 36.672 | 27.482 | 54.655 | 0.00 | 0.00 |
| ATOM | 7927 | HB2  | LEU | X | 520 | 35.800 | 27.056 | 54.158 | 0.00 | 0.00 |
| ATOM | 7928 | HB3  | LEU | X | 520 | 36.386 | 28.100 | 55.506 | 0.00 | 0.00 |
| ATOM | 7929 | CG   | LEU | X | 520 | 37.374 | 28.409 | 53.597 | 0.00 | 0.00 |
| ATOM | 7930 | HG   | LEU | X | 520 | 38.232 | 28.812 | 54.135 | 0.00 | 0.00 |



|      |      |      |     |   |     |        |        |        |      |      |
|------|------|------|-----|---|-----|--------|--------|--------|------|------|
| ATOM | 7931 | CD1  | LEU | X | 520 | 37.826 | 27.699 | 52.344 | 0.00 | 0.00 |
| ATOM | 7932 | HD11 | LEU | X | 520 | 38.714 | 27.079 | 52.459 | 0.00 | 0.00 |
| ATOM | 7933 | HD12 | LEU | X | 520 | 38.095 | 28.366 | 51.525 | 0.00 | 0.00 |
| ATOM | 7934 | HD13 | LEU | X | 520 | 37.015 | 27.103 | 51.924 | 0.00 | 0.00 |
| ATOM | 7935 | CD2  | LEU | X | 520 | 36.313 | 29.541 | 53.342 | 0.00 | 0.00 |
| ATOM | 7936 | HD21 | LEU | X | 520 | 36.669 | 30.178 | 52.533 | 0.00 | 0.00 |
| ATOM | 7937 | HD22 | LEU | X | 520 | 35.414 | 29.022 | 53.008 | 0.00 | 0.00 |
| ATOM | 7938 | HD23 | LEU | X | 520 | 36.155 | 30.123 | 54.250 | 0.00 | 0.00 |
| ATOM | 7939 | C    | LEU | X | 520 | 38.832 | 26.891 | 55.927 | 0.00 | 0.00 |
| ATOM | 7940 | O    | LEU | X | 520 | 38.764 | 27.865 | 56.694 | 0.00 | 0.00 |
| ATOM | 7941 | N    | ARG | X | 521 | 39.993 | 26.243 | 55.693 | 0.00 | 0.00 |
| ATOM | 7942 | H    | ARG | X | 521 | 40.010 | 25.383 | 55.163 | 0.00 | 0.00 |
| ATOM | 7943 | CA   | ARG | X | 521 | 41.310 | 26.688 | 56.187 | 0.00 | 0.00 |
| ATOM | 7944 | HA   | ARG | X | 521 | 41.950 | 25.815 | 56.055 | 0.00 | 0.00 |
| ATOM | 7945 | CB   | ARG | X | 521 | 41.776 | 27.879 | 55.302 | 0.00 | 0.00 |
| ATOM | 7946 | HB2  | ARG | X | 521 | 41.407 | 27.498 | 54.350 | 0.00 | 0.00 |
| ATOM | 7947 | HB3  | ARG | X | 521 | 41.287 | 28.839 | 55.467 | 0.00 | 0.00 |
| ATOM | 7948 | CG   | ARG | X | 521 | 43.272 | 28.054 | 55.181 | 0.00 | 0.00 |
| ATOM | 7949 | HG2  | ARG | X | 521 | 43.362 | 28.957 | 54.577 | 0.00 | 0.00 |
| ATOM | 7950 | HG3  | ARG | X | 521 | 43.631 | 28.354 | 56.165 | 0.00 | 0.00 |
| ATOM | 7951 | CD   | ARG | X | 521 | 43.995 | 26.913 | 54.553 | 0.00 | 0.00 |
| ATOM | 7952 | HD2  | ARG | X | 521 | 43.808 | 26.068 | 55.217 | 0.00 | 0.00 |
| ATOM | 7953 | HD3  | ARG | X | 521 | 43.483 | 26.799 | 53.598 | 0.00 | 0.00 |
| ATOM | 7954 | NE   | ARG | X | 521 | 45.404 | 27.285 | 54.261 | 0.00 | 0.00 |
| ATOM | 7955 | HE   | ARG | X | 521 | 45.629 | 28.265 | 54.350 | 0.00 | 0.00 |
| ATOM | 7956 | CZ   | ARG | X | 521 | 46.288 | 26.590 | 53.639 | 0.00 | 0.00 |
| ATOM | 7957 | NH1  | ARG | X | 521 | 46.075 | 25.347 | 53.349 | 0.00 | 0.00 |
| ATOM | 7958 | HH11 | ARG | X | 521 | 45.260 | 24.841 | 53.662 | 0.00 | 0.00 |
| ATOM | 7959 | HH12 | ARG | X | 521 | 46.794 | 24.809 | 52.885 | 0.00 | 0.00 |
| ATOM | 7960 | NH2  | ARG | X | 521 | 47.440 | 27.141 | 53.308 | 0.00 | 0.00 |
| ATOM | 7961 | HH21 | ARG | X | 521 | 47.668 | 28.020 | 53.750 | 0.00 | 0.00 |
| ATOM | 7962 | HH22 | ARG | X | 521 | 48.156 | 26.704 | 52.745 | 0.00 | 0.00 |
| ATOM | 7963 | C    | ARG | X | 521 | 41.313 | 26.920 | 57.706 | 0.00 | 0.00 |
| ATOM | 7964 | O    | ARG | X | 521 | 41.930 | 27.782 | 58.279 | 0.00 | 0.00 |
| ATOM | 7965 | N    | ALA | X | 522 | 40.414 | 26.185 | 58.407 | 0.00 | 0.00 |
| ATOM | 7966 | H    | ALA | X | 522 | 39.668 | 25.794 | 57.851 | 0.00 | 0.00 |
| ATOM | 7967 | CA   | ALA | X | 522 | 40.059 | 26.516 | 59.785 | 0.00 | 0.00 |
| ATOM | 7968 | HA   | ALA | X | 522 | 39.623 | 27.515 | 59.780 | 0.00 | 0.00 |
| ATOM | 7969 | CB   | ALA | X | 522 | 38.874 | 25.612 | 60.199 | 0.00 | 0.00 |
| ATOM | 7970 | HB1  | ALA | X | 522 | 38.193 | 25.389 | 59.377 | 0.00 | 0.00 |
| ATOM | 7971 | HB2  | ALA | X | 522 | 38.294 | 25.941 | 61.061 | 0.00 | 0.00 |
| ATOM | 7972 | HB3  | ALA | X | 522 | 39.250 | 24.654 | 60.560 | 0.00 | 0.00 |
| ATOM | 7973 | C    | ALA | X | 522 | 41.239 | 26.616 | 60.752 | 0.00 | 0.00 |
| ATOM | 7974 | O    | ALA | X | 522 | 41.295 | 27.594 | 61.573 | 0.00 | 0.00 |
| ATOM | 7975 | N    | GLN | X | 523 | 42.139 | 25.634 | 60.703 | 0.00 | 0.00 |
| ATOM | 7976 | H    | GLN | X | 523 | 42.035 | 24.938 | 59.978 | 0.00 | 0.00 |
| ATOM | 7977 | CA   | GLN | X | 523 | 43.282 | 25.543 | 61.576 | 0.00 | 0.00 |
| ATOM | 7978 | HA   | GLN | X | 523 | 43.060 | 25.764 | 62.620 | 0.00 | 0.00 |
| ATOM | 7979 | CB   | GLN | X | 523 | 43.781 | 24.080 | 61.577 | 0.00 | 0.00 |
| ATOM | 7980 | HB2  | GLN | X | 523 | 42.885 | 23.490 | 61.773 | 0.00 | 0.00 |
| ATOM | 7981 | HB3  | GLN | X | 523 | 44.109 | 23.862 | 60.561 | 0.00 | 0.00 |
| ATOM | 7982 | CG   | GLN | X | 523 | 44.973 | 23.640 | 62.430 | 0.00 | 0.00 |
| ATOM | 7983 | HG2  | GLN | X | 523 | 45.347 | 22.696 | 62.031 | 0.00 | 0.00 |
| ATOM | 7984 | HG3  | GLN | X | 523 | 45.767 | 24.332 | 62.150 | 0.00 | 0.00 |
| ATOM | 7985 | CD   | GLN | X | 523 | 44.712 | 23.523 | 63.947 | 0.00 | 0.00 |
| ATOM | 7986 | OE1  | GLN | X | 523 | 43.772 | 24.110 | 64.504 | 0.00 | 0.00 |
| ATOM | 7987 | NE2  | GLN | X | 523 | 45.482 | 22.757 | 64.689 | 0.00 | 0.00 |
| ATOM | 7988 | HE21 | GLN | X | 523 | 45.372 | 22.665 | 65.689 | 0.00 | 0.00 |
| ATOM | 7989 | HE22 | GLN | X | 523 | 46.413 | 22.652 | 64.310 | 0.00 | 0.00 |
| ATOM | 7990 | C    | GLN | X | 523 | 44.377 | 26.473 | 61.096 | 0.00 | 0.00 |
| ATOM | 7991 | O    | GLN | X | 523 | 45.114 | 26.959 | 61.987 | 0.00 | 0.00 |
| ATOM | 7992 | N    | ALA | X | 524 | 44.593 | 26.794 | 59.857 | 0.00 | 0.00 |
| ATOM | 7993 | H    | ALA | X | 524 | 44.020 | 26.317 | 59.176 | 0.00 | 0.00 |
| ATOM | 7994 | CA   | ALA | X | 524 | 45.668 | 27.630 | 59.385 | 0.00 | 0.00 |
| ATOM | 7995 | HA   | ALA | X | 524 | 46.568 | 27.562 | 59.995 | 0.00 | 0.00 |
| ATOM | 7996 | CB   | ALA | X | 524 | 46.067 | 27.191 | 57.972 | 0.00 | 0.00 |
| ATOM | 7997 | HB1  | ALA | X | 524 | 46.304 | 26.127 | 57.988 | 0.00 | 0.00 |

|      |      |     |     |   |     |        |        |        |      |      |
|------|------|-----|-----|---|-----|--------|--------|--------|------|------|
| ATOM | 7998 | HB2 | ALA | X | 524 | 46.855 | 27.737 | 57.454 | 0.00 | 0.00 |
| ATOM | 7999 | HB3 | ALA | X | 524 | 45.156 | 27.299 | 57.384 | 0.00 | 0.00 |
| ATOM | 8000 | C   | ALA | X | 524 | 45.210 | 29.109 | 59.474 | 0.00 | 0.00 |
| ATOM | 8001 | O   | ALA | X | 524 | 46.033 | 29.977 | 59.716 | 0.00 | 0.00 |
| ATOM | 8002 | N   | CYX | X | 525 | 43.939 | 29.390 | 59.264 | 0.00 | 0.00 |
| ATOM | 8003 | H   | CYX | X | 525 | 43.339 | 28.616 | 59.018 | 0.00 | 0.00 |
| ATOM | 8004 | CA  | CYX | X | 525 | 43.398 | 30.728 | 59.416 | 0.00 | 0.00 |
| ATOM | 8005 | HA  | CYX | X | 525 | 44.152 | 31.474 | 59.168 | 0.00 | 0.00 |
| ATOM | 8006 | CB  | CYX | X | 525 | 42.166 | 30.958 | 58.600 | 0.00 | 0.00 |
| ATOM | 8007 | HB2 | CYX | X | 525 | 41.534 | 30.114 | 58.878 | 0.00 | 0.00 |
| ATOM | 8008 | HB3 | CYX | X | 525 | 41.713 | 31.898 | 58.916 | 0.00 | 0.00 |
| ATOM | 8009 | SG  | CYX | X | 525 | 42.373 | 30.978 | 56.863 | 0.00 | 0.00 |
| ATOM | 8010 | C   | CYX | X | 525 | 43.054 | 31.180 | 60.892 | 0.00 | 0.00 |
| ATOM | 8011 | O   | CYX | X | 525 | 43.135 | 32.375 | 61.191 | 0.00 | 0.00 |
| ATOM | 8012 | N   | ALA | X | 526 | 43.025 | 30.201 | 61.826 | 0.00 | 0.00 |
| ATOM | 8013 | H   | ALA | X | 526 | 43.056 | 29.230 | 61.548 | 0.00 | 0.00 |
| ATOM | 8014 | CA  | ALA | X | 526 | 43.010 | 30.587 | 63.224 | 0.00 | 0.00 |
| ATOM | 8015 | HA  | ALA | X | 526 | 42.375 | 31.435 | 63.480 | 0.00 | 0.00 |
| ATOM | 8016 | CB  | ALA | X | 526 | 42.572 | 29.405 | 64.078 | 0.00 | 0.00 |
| ATOM | 8017 | HB1 | ALA | X | 526 | 42.689 | 29.546 | 65.153 | 0.00 | 0.00 |
| ATOM | 8018 | HB2 | ALA | X | 526 | 43.239 | 28.578 | 63.833 | 0.00 | 0.00 |
| ATOM | 8019 | HB3 | ALA | X | 526 | 41.507 | 29.271 | 63.888 | 0.00 | 0.00 |
| ATOM | 8020 | C   | ALA | X | 526 | 44.395 | 31.130 | 63.756 | 0.00 | 0.00 |
| ATOM | 8021 | O   | ALA | X | 526 | 44.485 | 31.960 | 64.665 | 0.00 | 0.00 |
| ATOM | 8022 | N   | PHE | X | 527 | 45.500 | 30.673 | 63.102 | 0.00 | 0.00 |
| ATOM | 8023 | H   | PHE | X | 527 | 45.426 | 29.890 | 62.468 | 0.00 | 0.00 |
| ATOM | 8024 | CA  | PHE | X | 527 | 46.752 | 31.393 | 63.366 | 0.00 | 0.00 |
| ATOM | 8025 | HA  | PHE | X | 527 | 46.964 | 31.462 | 64.433 | 0.00 | 0.00 |
| ATOM | 8026 | CB  | PHE | X | 527 | 47.838 | 30.599 | 62.579 | 0.00 | 0.00 |
| ATOM | 8027 | HB2 | PHE | X | 527 | 47.842 | 29.538 | 62.828 | 0.00 | 0.00 |
| ATOM | 8028 | HB3 | PHE | X | 527 | 47.502 | 30.529 | 61.545 | 0.00 | 0.00 |
| ATOM | 8029 | CG  | PHE | X | 527 | 49.264 | 31.137 | 62.771 | 0.00 | 0.00 |
| ATOM | 8030 | CD1 | PHE | X | 527 | 49.864 | 31.071 | 64.045 | 0.00 | 0.00 |
| ATOM | 8031 | HD1 | PHE | X | 527 | 49.327 | 30.705 | 64.908 | 0.00 | 0.00 |
| ATOM | 8032 | CE1 | PHE | X | 527 | 51.179 | 31.548 | 64.174 | 0.00 | 0.00 |
| ATOM | 8033 | HE1 | PHE | X | 527 | 51.704 | 31.538 | 65.117 | 0.00 | 0.00 |
| ATOM | 8034 | CZ  | PHE | X | 527 | 51.842 | 32.077 | 63.098 | 0.00 | 0.00 |
| ATOM | 8035 | HZ  | PHE | X | 527 | 52.843 | 32.475 | 63.181 | 0.00 | 0.00 |
| ATOM | 8036 | CE2 | PHE | X | 527 | 51.282 | 32.083 | 61.835 | 0.00 | 0.00 |
| ATOM | 8037 | HE2 | PHE | X | 527 | 51.731 | 32.528 | 60.959 | 0.00 | 0.00 |
| ATOM | 8038 | CD2 | PHE | X | 527 | 49.970 | 31.691 | 61.716 | 0.00 | 0.00 |
| ATOM | 8039 | HD2 | PHE | X | 527 | 49.457 | 31.708 | 60.765 | 0.00 | 0.00 |
| ATOM | 8040 | C   | PHE | X | 527 | 46.613 | 32.837 | 62.848 | 0.00 | 0.00 |
| ATOM | 8041 | O   | PHE | X | 527 | 46.602 | 33.837 | 63.606 | 0.00 | 0.00 |
| ATOM | 8042 | N   | TRP | X | 528 | 46.464 | 33.050 | 61.513 | 0.00 | 0.00 |
| ATOM | 8043 | H   | TRP | X | 528 | 46.378 | 32.259 | 60.890 | 0.00 | 0.00 |
| ATOM | 8044 | CA  | TRP | X | 528 | 46.381 | 34.373 | 60.851 | 0.00 | 0.00 |
| ATOM | 8045 | HA  | TRP | X | 528 | 47.256 | 34.897 | 61.237 | 0.00 | 0.00 |
| ATOM | 8046 | CB  | TRP | X | 528 | 46.365 | 34.205 | 59.300 | 0.00 | 0.00 |
| ATOM | 8047 | HB2 | TRP | X | 528 | 45.464 | 33.818 | 58.824 | 0.00 | 0.00 |
| ATOM | 8048 | HB3 | TRP | X | 528 | 46.458 | 35.197 | 58.857 | 0.00 | 0.00 |
| ATOM | 8049 | CG  | TRP | X | 528 | 47.565 | 33.426 | 58.706 | 0.00 | 0.00 |
| ATOM | 8050 | CD1 | TRP | X | 528 | 47.512 | 32.154 | 58.152 | 0.00 | 0.00 |
| ATOM | 8051 | HD1 | TRP | X | 528 | 46.592 | 31.600 | 58.039 | 0.00 | 0.00 |
| ATOM | 8052 | NE1 | TRP | X | 528 | 48.767 | 31.815 | 57.666 | 0.00 | 0.00 |
| ATOM | 8053 | HE1 | TRP | X | 528 | 48.951 | 30.943 | 57.191 | 0.00 | 0.00 |
| ATOM | 8054 | CE2 | TRP | X | 528 | 49.698 | 32.779 | 57.963 | 0.00 | 0.00 |
| ATOM | 8055 | CZ2 | TRP | X | 528 | 51.078 | 32.826 | 57.859 | 0.00 | 0.00 |
| ATOM | 8056 | HZ2 | TRP | X | 528 | 51.571 | 31.991 | 57.385 | 0.00 | 0.00 |
| ATOM | 8057 | CH2 | TRP | X | 528 | 51.783 | 33.961 | 58.193 | 0.00 | 0.00 |
| ATOM | 8058 | HH2 | TRP | X | 528 | 52.847 | 34.036 | 58.021 | 0.00 | 0.00 |
| ATOM | 8059 | CZ3 | TRP | X | 528 | 51.073 | 35.032 | 58.749 | 0.00 | 0.00 |
| ATOM | 8060 | HZ3 | TRP | X | 528 | 51.572 | 35.923 | 59.100 | 0.00 | 0.00 |
| ATOM | 8061 | CE3 | TRP | X | 528 | 49.655 | 34.972 | 58.946 | 0.00 | 0.00 |
| ATOM | 8062 | HE3 | TRP | X | 528 | 49.177 | 35.848 | 59.359 | 0.00 | 0.00 |
| ATOM | 8063 | CD2 | TRP | X | 528 | 48.962 | 33.854 | 58.582 | 0.00 | 0.00 |
| ATOM | 8064 | C   | TRP | X | 528 | 45.284 | 35.299 | 61.298 | 0.00 | 0.00 |

|      |      |      |     |   |     |        |        |        |      |      |
|------|------|------|-----|---|-----|--------|--------|--------|------|------|
| ATOM | 8065 | O    | TRP | X | 528 | 45.479 | 36.464 | 61.137 | 0.00 | 0.00 |
| ATOM | 8066 | N    | ASN | X | 529 | 44.250 | 34.779 | 61.907 | 0.00 | 0.00 |
| ATOM | 8067 | H    | ASN | X | 529 | 44.059 | 33.787 | 61.918 | 0.00 | 0.00 |
| ATOM | 8068 | CA   | ASN | X | 529 | 43.128 | 35.646 | 62.300 | 0.00 | 0.00 |
| ATOM | 8069 | HA   | ASN | X | 529 | 43.351 | 36.626 | 61.877 | 0.00 | 0.00 |
| ATOM | 8070 | CB   | ASN | X | 529 | 41.795 | 35.150 | 61.757 | 0.00 | 0.00 |
| ATOM | 8071 | HB2  | ASN | X | 529 | 41.633 | 34.132 | 62.114 | 0.00 | 0.00 |
| ATOM | 8072 | HB3  | ASN | X | 529 | 40.995 | 35.775 | 62.154 | 0.00 | 0.00 |
| ATOM | 8073 | CG   | ASN | X | 529 | 41.641 | 35.166 | 60.258 | 0.00 | 0.00 |
| ATOM | 8074 | OD1  | ASN | X | 529 | 42.499 | 35.521 | 59.427 | 0.00 | 0.00 |
| ATOM | 8075 | ND2  | ASN | X | 529 | 40.468 | 34.828 | 59.801 | 0.00 | 0.00 |
| ATOM | 8076 | HD21 | ASN | X | 529 | 40.381 | 34.618 | 58.817 | 0.00 | 0.00 |
| ATOM | 8077 | HD22 | ASN | X | 529 | 39.803 | 34.358 | 60.400 | 0.00 | 0.00 |
| ATOM | 8078 | C    | ASN | X | 529 | 42.939 | 35.744 | 63.806 | 0.00 | 0.00 |
| ATOM | 8079 | O    | ASN | X | 529 | 41.998 | 36.426 | 64.212 | 0.00 | 0.00 |
| ATOM | 8080 | N    | ARG | X | 530 | 43.747 | 35.082 | 64.645 | 0.00 | 0.00 |
| ATOM | 8081 | H    | ARG | X | 530 | 44.481 | 34.476 | 64.309 | 0.00 | 0.00 |
| ATOM | 8082 | CA   | ARG | X | 530 | 43.572 | 35.334 | 66.089 | 0.00 | 0.00 |
| ATOM | 8083 | HA   | ARG | X | 530 | 43.226 | 36.359 | 66.222 | 0.00 | 0.00 |
| ATOM | 8084 | CB   | ARG | X | 530 | 42.512 | 34.358 | 66.603 | 0.00 | 0.00 |
| ATOM | 8085 | HB2  | ARG | X | 530 | 41.524 | 34.646 | 66.243 | 0.00 | 0.00 |
| ATOM | 8086 | HB3  | ARG | X | 530 | 42.589 | 33.448 | 66.007 | 0.00 | 0.00 |
| ATOM | 8087 | CG   | ARG | X | 530 | 42.429 | 34.157 | 68.123 | 0.00 | 0.00 |
| ATOM | 8088 | HG2  | ARG | X | 530 | 43.166 | 33.402 | 68.400 | 0.00 | 0.00 |
| ATOM | 8089 | HG3  | ARG | X | 530 | 42.779 | 35.066 | 68.612 | 0.00 | 0.00 |
| ATOM | 8090 | CD   | ARG | X | 530 | 41.064 | 33.634 | 68.661 | 0.00 | 0.00 |
| ATOM | 8091 | HD2  | ARG | X | 530 | 41.037 | 33.438 | 69.733 | 0.00 | 0.00 |
| ATOM | 8092 | HD3  | ARG | X | 530 | 40.344 | 34.439 | 68.510 | 0.00 | 0.00 |
| ATOM | 8093 | NE   | ARG | X | 530 | 40.635 | 32.335 | 68.011 | 0.00 | 0.00 |
| ATOM | 8094 | HE   | ARG | X | 530 | 39.921 | 32.471 | 67.310 | 0.00 | 0.00 |
| ATOM | 8095 | CZ   | ARG | X | 530 | 41.176 | 31.140 | 68.087 | 0.00 | 0.00 |
| ATOM | 8096 | NH1  | ARG | X | 530 | 42.064 | 30.775 | 69.059 | 0.00 | 0.00 |
| ATOM | 8097 | HH11 | ARG | X | 530 | 42.489 | 31.484 | 69.640 | 0.00 | 0.00 |
| ATOM | 8098 | HH12 | ARG | X | 530 | 42.383 | 29.834 | 69.242 | 0.00 | 0.00 |
| ATOM | 8099 | NH2  | ARG | X | 530 | 40.821 | 30.223 | 67.235 | 0.00 | 0.00 |
| ATOM | 8100 | HH21 | ARG | X | 530 | 40.081 | 30.245 | 66.549 | 0.00 | 0.00 |
| ATOM | 8101 | HH22 | ARG | X | 530 | 41.090 | 29.262 | 67.396 | 0.00 | 0.00 |
| ATOM | 8102 | C    | ARG | X | 530 | 44.934 | 35.337 | 66.745 | 0.00 | 0.00 |
| ATOM | 8103 | O    | ARG | X | 530 | 45.337 | 36.311 | 67.361 | 0.00 | 0.00 |
| ATOM | 8104 | N    | PHE | X | 531 | 45.661 | 34.220 | 66.560 | 0.00 | 0.00 |
| ATOM | 8105 | H    | PHE | X | 531 | 45.366 | 33.543 | 65.872 | 0.00 | 0.00 |
| ATOM | 8106 | CA   | PHE | X | 531 | 47.027 | 34.072 | 67.164 | 0.00 | 0.00 |
| ATOM | 8107 | HA   | PHE | X | 531 | 46.872 | 34.392 | 68.194 | 0.00 | 0.00 |
| ATOM | 8108 | CB   | PHE | X | 531 | 47.517 | 32.698 | 67.230 | 0.00 | 0.00 |
| ATOM | 8109 | HB2  | PHE | X | 531 | 46.697 | 32.032 | 67.496 | 0.00 | 0.00 |
| ATOM | 8110 | HB3  | PHE | X | 531 | 47.694 | 32.351 | 66.212 | 0.00 | 0.00 |
| ATOM | 8111 | CG   | PHE | X | 531 | 48.701 | 32.497 | 68.172 | 0.00 | 0.00 |
| ATOM | 8112 | CD1  | PHE | X | 531 | 49.969 | 32.316 | 67.602 | 0.00 | 0.00 |
| ATOM | 8113 | HD1  | PHE | X | 531 | 50.044 | 32.227 | 66.528 | 0.00 | 0.00 |
| ATOM | 8114 | CE1  | PHE | X | 531 | 51.099 | 32.142 | 68.488 | 0.00 | 0.00 |
| ATOM | 8115 | HE1  | PHE | X | 531 | 52.021 | 31.848 | 68.010 | 0.00 | 0.00 |
| ATOM | 8116 | CZ   | PHE | X | 531 | 50.915 | 32.020 | 69.877 | 0.00 | 0.00 |
| ATOM | 8117 | HZ   | PHE | X | 531 | 51.758 | 31.946 | 70.548 | 0.00 | 0.00 |
| ATOM | 8118 | CE2  | PHE | X | 531 | 49.629 | 32.315 | 70.355 | 0.00 | 0.00 |
| ATOM | 8119 | HE2  | PHE | X | 531 | 49.450 | 32.451 | 71.412 | 0.00 | 0.00 |
| ATOM | 8120 | CD2  | PHE | X | 531 | 48.526 | 32.494 | 69.542 | 0.00 | 0.00 |
| ATOM | 8121 | HD2  | PHE | X | 531 | 47.536 | 32.763 | 69.881 | 0.00 | 0.00 |
| ATOM | 8122 | C    | PHE | X | 531 | 48.155 | 34.938 | 66.725 | 0.00 | 0.00 |
| ATOM | 8123 | O    | PHE | X | 531 | 48.684 | 35.730 | 67.504 | 0.00 | 0.00 |
| ATOM | 8124 | N    | LEU | X | 532 | 48.550 | 34.803 | 65.459 | 0.00 | 0.00 |
| ATOM | 8125 | H    | LEU | X | 532 | 48.120 | 34.078 | 64.902 | 0.00 | 0.00 |
| ATOM | 8126 | CA   | LEU | X | 532 | 49.489 | 35.675 | 64.778 | 0.00 | 0.00 |
| ATOM | 8127 | HA   | LEU | X | 532 | 50.426 | 35.476 | 65.298 | 0.00 | 0.00 |
| ATOM | 8128 | CB   | LEU | X | 532 | 49.577 | 35.254 | 63.315 | 0.00 | 0.00 |
| ATOM | 8129 | HB2  | LEU | X | 532 | 49.658 | 34.170 | 63.238 | 0.00 | 0.00 |
| ATOM | 8130 | HB3  | LEU | X | 532 | 48.703 | 35.510 | 62.715 | 0.00 | 0.00 |
| ATOM | 8131 | CG   | LEU | X | 532 | 50.834 | 35.716 | 62.532 | 0.00 | 0.00 |

|      |      |      |     |   |     |        |        |        |      |      |
|------|------|------|-----|---|-----|--------|--------|--------|------|------|
| ATOM | 8132 | HG   | LEU | X | 532 | 50.928 | 34.966 | 61.748 | 0.00 | 0.00 |
| ATOM | 8133 | CD1  | LEU | X | 532 | 50.766 | 37.077 | 61.801 | 0.00 | 0.00 |
| ATOM | 8134 | HD11 | LEU | X | 532 | 50.090 | 37.041 | 60.947 | 0.00 | 0.00 |
| ATOM | 8135 | HD12 | LEU | X | 532 | 51.729 | 37.357 | 61.374 | 0.00 | 0.00 |
| ATOM | 8136 | HD13 | LEU | X | 532 | 50.335 | 37.817 | 62.475 | 0.00 | 0.00 |
| ATOM | 8137 | CD2  | LEU | X | 532 | 52.173 | 35.741 | 63.358 | 0.00 | 0.00 |
| ATOM | 8138 | HD21 | LEU | X | 532 | 52.220 | 34.954 | 64.111 | 0.00 | 0.00 |
| ATOM | 8139 | HD22 | LEU | X | 532 | 53.025 | 35.893 | 62.696 | 0.00 | 0.00 |
| ATOM | 8140 | HD23 | LEU | X | 532 | 52.079 | 36.608 | 64.013 | 0.00 | 0.00 |
| ATOM | 8141 | C    | LEU | X | 532 | 49.206 | 37.159 | 64.886 | 0.00 | 0.00 |
| ATOM | 8142 | O    | LEU | X | 532 | 50.131 | 37.869 | 65.356 | 0.00 | 0.00 |
| ATOM | 8143 | N    | PRO | X | 533 | 47.982 | 37.723 | 64.634 | 0.00 | 0.00 |
| ATOM | 8144 | CD   | PRO | X | 533 | 46.804 | 37.060 | 64.040 | 0.00 | 0.00 |
| ATOM | 8145 | HD2  | PRO | X | 533 | 46.430 | 36.358 | 64.785 | 0.00 | 0.00 |
| ATOM | 8146 | HD3  | PRO | X | 533 | 46.963 | 36.542 | 63.094 | 0.00 | 0.00 |
| ATOM | 8147 | CG   | PRO | X | 533 | 45.863 | 38.148 | 63.726 | 0.00 | 0.00 |
| ATOM | 8148 | HG2  | PRO | X | 533 | 44.818 | 37.839 | 63.759 | 0.00 | 0.00 |
| ATOM | 8149 | HG3  | PRO | X | 533 | 46.132 | 38.491 | 62.727 | 0.00 | 0.00 |
| ATOM | 8150 | CB   | PRO | X | 533 | 46.073 | 39.119 | 64.849 | 0.00 | 0.00 |
| ATOM | 8151 | HB2  | PRO | X | 533 | 45.650 | 38.637 | 65.730 | 0.00 | 0.00 |
| ATOM | 8152 | HB3  | PRO | X | 533 | 45.687 | 40.075 | 64.494 | 0.00 | 0.00 |
| ATOM | 8153 | CA   | PRO | X | 533 | 47.576 | 39.065 | 65.015 | 0.00 | 0.00 |
| ATOM | 8154 | HA   | PRO | X | 533 | 47.956 | 39.779 | 64.284 | 0.00 | 0.00 |
| ATOM | 8155 | C    | PRO | X | 533 | 48.026 | 39.581 | 66.423 | 0.00 | 0.00 |
| ATOM | 8156 | O    | PRO | X | 533 | 48.543 | 40.680 | 66.481 | 0.00 | 0.00 |
| ATOM | 8157 | N    | LYS | X | 534 | 47.905 | 38.819 | 67.531 | 0.00 | 0.00 |
| ATOM | 8158 | H    | LYS | X | 534 | 47.284 | 38.029 | 67.429 | 0.00 | 0.00 |
| ATOM | 8159 | CA   | LYS | X | 534 | 48.469 | 39.184 | 68.874 | 0.00 | 0.00 |
| ATOM | 8160 | HA   | LYS | X | 534 | 48.227 | 40.241 | 68.981 | 0.00 | 0.00 |
| ATOM | 8161 | CB   | LYS | X | 534 | 47.660 | 38.426 | 69.998 | 0.00 | 0.00 |
| ATOM | 8162 | HB2  | LYS | X | 534 | 47.737 | 37.360 | 69.784 | 0.00 | 0.00 |
| ATOM | 8163 | HB3  | LYS | X | 534 | 48.128 | 38.656 | 70.955 | 0.00 | 0.00 |
| ATOM | 8164 | CG   | LYS | X | 534 | 46.172 | 38.880 | 70.011 | 0.00 | 0.00 |
| ATOM | 8165 | HG2  | LYS | X | 534 | 46.260 | 39.966 | 70.049 | 0.00 | 0.00 |
| ATOM | 8166 | HG3  | LYS | X | 534 | 45.740 | 38.670 | 69.033 | 0.00 | 0.00 |
| ATOM | 8167 | CD   | LYS | X | 534 | 45.392 | 38.193 | 71.153 | 0.00 | 0.00 |
| ATOM | 8168 | HD2  | LYS | X | 534 | 44.912 | 37.381 | 70.607 | 0.00 | 0.00 |
| ATOM | 8169 | HD3  | LYS | X | 534 | 45.997 | 37.761 | 71.950 | 0.00 | 0.00 |
| ATOM | 8170 | CE   | LYS | X | 534 | 44.227 | 38.983 | 71.630 | 0.00 | 0.00 |
| ATOM | 8171 | HE2  | LYS | X | 534 | 44.560 | 40.009 | 71.786 | 0.00 | 0.00 |
| ATOM | 8172 | HE3  | LYS | X | 534 | 43.480 | 38.980 | 70.837 | 0.00 | 0.00 |
| ATOM | 8173 | NZ   | LYS | X | 534 | 43.601 | 38.379 | 72.839 | 0.00 | 0.00 |
| ATOM | 8174 | HZ1  | LYS | X | 534 | 42.900 | 38.988 | 73.236 | 0.00 | 0.00 |
| ATOM | 8175 | HZ2  | LYS | X | 534 | 43.123 | 37.523 | 72.599 | 0.00 | 0.00 |
| ATOM | 8176 | HZ3  | LYS | X | 534 | 44.324 | 38.116 | 73.493 | 0.00 | 0.00 |
| ATOM | 8177 | C    | LYS | X | 534 | 49.964 | 38.881 | 69.070 | 0.00 | 0.00 |
| ATOM | 8178 | O    | LYS | X | 534 | 50.447 | 39.474 | 70.006 | 0.00 | 0.00 |
| ATOM | 8179 | N    | LEU | X | 535 | 50.689 | 38.146 | 68.221 | 0.00 | 0.00 |
| ATOM | 8180 | H    | LEU | X | 535 | 50.239 | 37.767 | 67.400 | 0.00 | 0.00 |
| ATOM | 8181 | CA   | LEU | X | 535 | 52.165 | 38.105 | 68.257 | 0.00 | 0.00 |
| ATOM | 8182 | HA   | LEU | X | 535 | 52.499 | 38.102 | 69.295 | 0.00 | 0.00 |
| ATOM | 8183 | CB   | LEU | X | 535 | 52.553 | 36.813 | 67.517 | 0.00 | 0.00 |
| ATOM | 8184 | HB2  | LEU | X | 535 | 52.028 | 35.965 | 67.958 | 0.00 | 0.00 |
| ATOM | 8185 | HB3  | LEU | X | 535 | 52.284 | 36.913 | 66.466 | 0.00 | 0.00 |
| ATOM | 8186 | CG   | LEU | X | 535 | 54.083 | 36.518 | 67.655 | 0.00 | 0.00 |
| ATOM | 8187 | HG   | LEU | X | 535 | 54.709 | 37.392 | 67.472 | 0.00 | 0.00 |
| ATOM | 8188 | CD1  | LEU | X | 535 | 54.521 | 35.995 | 69.053 | 0.00 | 0.00 |
| ATOM | 8189 | HD11 | LEU | X | 535 | 54.627 | 36.781 | 69.801 | 0.00 | 0.00 |
| ATOM | 8190 | HD12 | LEU | X | 535 | 55.486 | 35.537 | 68.833 | 0.00 | 0.00 |
| ATOM | 8191 | HD13 | LEU | X | 535 | 53.857 | 35.142 | 69.195 | 0.00 | 0.00 |
| ATOM | 8192 | CD2  | LEU | X | 535 | 54.506 | 35.551 | 66.587 | 0.00 | 0.00 |
| ATOM | 8193 | HD21 | LEU | X | 535 | 53.902 | 34.644 | 66.608 | 0.00 | 0.00 |
| ATOM | 8194 | HD22 | LEU | X | 535 | 54.344 | 36.006 | 65.610 | 0.00 | 0.00 |
| ATOM | 8195 | HD23 | LEU | X | 535 | 55.530 | 35.198 | 66.710 | 0.00 | 0.00 |
| ATOM | 8196 | C    | LEU | X | 535 | 52.815 | 39.283 | 67.629 | 0.00 | 0.00 |
| ATOM | 8197 | O    | LEU | X | 535 | 53.791 | 39.926 | 68.086 | 0.00 | 0.00 |
| ATOM | 8198 | N    | LEU | X | 536 | 52.153 | 39.749 | 66.566 | 0.00 | 0.00 |

|      |      |      |     |   |     |        |        |        |      |      |
|------|------|------|-----|---|-----|--------|--------|--------|------|------|
| ATOM | 8199 | H    | LEU | X | 536 | 51.296 | 39.301 | 66.275 | 0.00 | 0.00 |
| ATOM | 8200 | CA   | LEU | X | 536 | 52.516 | 41.107 | 66.007 | 0.00 | 0.00 |
| ATOM | 8201 | HA   | LEU | X | 536 | 53.536 | 41.022 | 65.630 | 0.00 | 0.00 |
| ATOM | 8202 | CB   | LEU | X | 536 | 51.712 | 41.554 | 64.766 | 0.00 | 0.00 |
| ATOM | 8203 | HB2  | LEU | X | 536 | 50.663 | 41.655 | 65.042 | 0.00 | 0.00 |
| ATOM | 8204 | HB3  | LEU | X | 536 | 51.964 | 42.515 | 64.318 | 0.00 | 0.00 |
| ATOM | 8205 | CG   | LEU | X | 536 | 51.662 | 40.478 | 63.669 | 0.00 | 0.00 |
| ATOM | 8206 | HG   | LEU | X | 536 | 51.116 | 39.595 | 64.000 | 0.00 | 0.00 |
| ATOM | 8207 | CD1  | LEU | X | 536 | 50.859 | 41.059 | 62.532 | 0.00 | 0.00 |
| ATOM | 8208 | HD11 | LEU | X | 536 | 51.288 | 42.008 | 62.209 | 0.00 | 0.00 |
| ATOM | 8209 | HD12 | LEU | X | 536 | 49.877 | 41.170 | 62.992 | 0.00 | 0.00 |
| ATOM | 8210 | HD13 | LEU | X | 536 | 50.754 | 40.344 | 61.716 | 0.00 | 0.00 |
| ATOM | 8211 | CD2  | LEU | X | 536 | 53.041 | 40.049 | 63.177 | 0.00 | 0.00 |
| ATOM | 8212 | HD21 | LEU | X | 536 | 53.024 | 39.582 | 62.192 | 0.00 | 0.00 |
| ATOM | 8213 | HD22 | LEU | X | 536 | 53.589 | 40.951 | 62.904 | 0.00 | 0.00 |
| ATOM | 8214 | HD23 | LEU | X | 536 | 53.545 | 39.402 | 63.896 | 0.00 | 0.00 |
| ATOM | 8215 | C    | LEU | X | 536 | 52.484 | 42.234 | 66.993 | 0.00 | 0.00 |
| ATOM | 8216 | O    | LEU | X | 536 | 53.473 | 43.000 | 67.071 | 0.00 | 0.00 |
| ATOM | 8217 | N    | SER | X | 537 | 51.387 | 42.245 | 67.789 | 0.00 | 0.00 |
| ATOM | 8218 | H    | SER | X | 537 | 50.541 | 41.738 | 67.573 | 0.00 | 0.00 |
| ATOM | 8219 | CA   | SER | X | 537 | 51.230 | 43.108 | 68.988 | 0.00 | 0.00 |
| ATOM | 8220 | HA   | SER | X | 537 | 51.314 | 44.129 | 68.615 | 0.00 | 0.00 |
| ATOM | 8221 | CB   | SER | X | 537 | 49.867 | 42.904 | 69.657 | 0.00 | 0.00 |
| ATOM | 8222 | HB2  | SER | X | 537 | 49.783 | 41.924 | 70.126 | 0.00 | 0.00 |
| ATOM | 8223 | HB3  | SER | X | 537 | 49.748 | 43.688 | 70.405 | 0.00 | 0.00 |
| ATOM | 8224 | OG   | SER | X | 537 | 48.906 | 43.002 | 68.638 | 0.00 | 0.00 |
| ATOM | 8225 | HG   | SER | X | 537 | 48.014 | 42.900 | 68.978 | 0.00 | 0.00 |
| ATOM | 8226 | C    | SER | X | 537 | 52.342 | 42.987 | 69.980 | 0.00 | 0.00 |
| ATOM | 8227 | O    | SER | X | 537 | 52.755 | 43.996 | 70.612 | 0.00 | 0.00 |
| ATOM | 8228 | N    | ALA | X | 538 | 52.901 | 41.761 | 70.148 | 0.00 | 0.00 |
| ATOM | 8229 | H    | ALA | X | 538 | 52.603 | 40.978 | 69.585 | 0.00 | 0.00 |
| ATOM | 8230 | CA   | ALA | X | 538 | 53.945 | 41.536 | 71.127 | 0.00 | 0.00 |
| ATOM | 8231 | HA   | ALA | X | 538 | 53.684 | 42.058 | 72.046 | 0.00 | 0.00 |
| ATOM | 8232 | CB   | ALA | X | 538 | 53.939 | 39.979 | 71.225 | 0.00 | 0.00 |
| ATOM | 8233 | HB1  | ALA | X | 538 | 54.369 | 39.831 | 72.216 | 0.00 | 0.00 |
| ATOM | 8234 | HB2  | ALA | X | 538 | 54.535 | 39.516 | 70.439 | 0.00 | 0.00 |
| ATOM | 8235 | HB3  | ALA | X | 538 | 52.965 | 39.525 | 71.407 | 0.00 | 0.00 |
| ATOM | 8236 | C    | ALA | X | 538 | 55.311 | 42.023 | 70.613 | 0.00 | 0.00 |
| ATOM | 8237 | O    | ALA | X | 538 | 56.149 | 42.424 | 71.445 | 0.00 | 0.00 |
| ATOM | 8238 | N    | THR | X | 539 | 55.563 | 41.892 | 69.318 | 0.00 | 0.00 |
| ATOM | 8239 | H    | THR | X | 539 | 54.824 | 41.487 | 68.761 | 0.00 | 0.00 |
| ATOM | 8240 | CA   | THR | X | 539 | 56.921 | 41.936 | 68.807 | 0.00 | 0.00 |
| ATOM | 8241 | HA   | THR | X | 539 | 57.642 | 41.850 | 69.620 | 0.00 | 0.00 |
| ATOM | 8242 | CB   | THR | X | 539 | 57.290 | 40.829 | 67.769 | 0.00 | 0.00 |
| ATOM | 8243 | HB   | THR | X | 539 | 58.218 | 41.163 | 67.306 | 0.00 | 0.00 |
| ATOM | 8244 | CG2  | THR | X | 539 | 57.480 | 39.486 | 68.552 | 0.00 | 0.00 |
| ATOM | 8245 | HG21 | THR | X | 539 | 56.473 | 39.197 | 68.854 | 0.00 | 0.00 |
| ATOM | 8246 | HG22 | THR | X | 539 | 58.205 | 39.669 | 69.345 | 0.00 | 0.00 |
| ATOM | 8247 | HG23 | THR | X | 539 | 57.860 | 38.636 | 67.986 | 0.00 | 0.00 |
| ATOM | 8248 | OG1  | THR | X | 539 | 56.284 | 40.780 | 66.831 | 0.00 | 0.00 |
| ATOM | 8249 | HG1  | THR | X | 539 | 55.517 | 40.409 | 67.273 | 0.00 | 0.00 |
| ATOM | 8250 | C    | THR | X | 539 | 57.299 | 43.248 | 68.146 | 0.00 | 0.00 |
| ATOM | 8251 | O    | THR | X | 539 | 56.476 | 43.853 | 67.495 | 0.00 | 0.00 |
| ATOM | 8252 | OXT  | THR | X | 539 | 58.463 | 43.599 | 68.201 | 0.00 | 0.00 |

END

#-----  
# 1B41 Production MD Frame 0600  
#-----

|        |        |        |        |       |       |        |        |        |      |      |
|--------|--------|--------|--------|-------|-------|--------|--------|--------|------|------|
| CRYST1 | 82.095 | 82.095 | 82.095 | 90.00 | 90.00 | 90.00  | P 1    | 1      |      |      |
| ATOM   | 1      | N      | ASP    | X     | 1     | 15.931 | 46.367 | 12.497 | 0.00 | 0.00 |
| ATOM   | 2      | H1     | ASP    | X     | 1     | 14.931 | 46.419 | 12.366 | 0.00 | 0.00 |
| ATOM   | 3      | H2     | ASP    | X     | 1     | 16.067 | 45.486 | 12.972 | 0.00 | 0.00 |
| ATOM   | 4      | H3     | ASP    | X     | 1     | 16.470 | 46.338 | 11.643 | 0.00 | 0.00 |

|      |    |      |     |   |   |        |        |        |      |      |
|------|----|------|-----|---|---|--------|--------|--------|------|------|
| ATOM | 5  | CA   | ASP | X | 1 | 16.471 | 47.420 | 13.298 | 0.00 | 0.00 |
| ATOM | 6  | HA   | ASP | X | 1 | 17.530 | 47.341 | 13.055 | 0.00 | 0.00 |
| ATOM | 7  | CB   | ASP | X | 1 | 16.012 | 48.768 | 12.752 | 0.00 | 0.00 |
| ATOM | 8  | HB2  | ASP | X | 1 | 16.091 | 48.796 | 11.666 | 0.00 | 0.00 |
| ATOM | 9  | HB3  | ASP | X | 1 | 14.956 | 48.966 | 12.938 | 0.00 | 0.00 |
| ATOM | 10 | CG   | ASP | X | 1 | 16.729 | 49.961 | 13.363 | 0.00 | 0.00 |
| ATOM | 11 | OD1  | ASP | X | 1 | 17.934 | 49.964 | 13.332 | 0.00 | 0.00 |
| ATOM | 12 | OD2  | ASP | X | 1 | 15.984 | 50.859 | 13.767 | 0.00 | 0.00 |
| ATOM | 13 | C    | ASP | X | 1 | 16.198 | 47.315 | 14.808 | 0.00 | 0.00 |
| ATOM | 14 | O    | ASP | X | 1 | 17.067 | 47.788 | 15.559 | 0.00 | 0.00 |
| ATOM | 15 | N    | ALA | X | 2 | 15.091 | 46.808 | 15.240 | 0.00 | 0.00 |
| ATOM | 16 | H    | ALA | X | 2 | 14.419 | 46.491 | 14.556 | 0.00 | 0.00 |
| ATOM | 17 | CA   | ALA | X | 2 | 14.624 | 46.773 | 16.662 | 0.00 | 0.00 |
| ATOM | 18 | HA   | ALA | X | 2 | 14.724 | 47.761 | 17.111 | 0.00 | 0.00 |
| ATOM | 19 | CB   | ALA | X | 2 | 13.145 | 46.403 | 16.552 | 0.00 | 0.00 |
| ATOM | 20 | HB1  | ALA | X | 2 | 12.794 | 45.942 | 17.475 | 0.00 | 0.00 |
| ATOM | 21 | HB2  | ALA | X | 2 | 13.091 | 45.636 | 15.779 | 0.00 | 0.00 |
| ATOM | 22 | HB3  | ALA | X | 2 | 12.490 | 47.252 | 16.358 | 0.00 | 0.00 |
| ATOM | 23 | C    | ALA | X | 2 | 15.498 | 45.838 | 17.502 | 0.00 | 0.00 |
| ATOM | 24 | O    | ALA | X | 2 | 15.522 | 46.025 | 18.760 | 0.00 | 0.00 |
| ATOM | 25 | N    | GLU | X | 3 | 16.277 | 44.933 | 16.885 | 0.00 | 0.00 |
| ATOM | 26 | H    | GLU | X | 3 | 16.193 | 44.788 | 15.889 | 0.00 | 0.00 |
| ATOM | 27 | CA   | GLU | X | 3 | 17.302 | 44.117 | 17.558 | 0.00 | 0.00 |
| ATOM | 28 | HA   | GLU | X | 3 | 16.836 | 43.557 | 18.369 | 0.00 | 0.00 |
| ATOM | 29 | CB   | GLU | X | 3 | 18.187 | 43.225 | 16.659 | 0.00 | 0.00 |
| ATOM | 30 | HB2  | GLU | X | 3 | 18.792 | 43.882 | 16.034 | 0.00 | 0.00 |
| ATOM | 31 | HB3  | GLU | X | 3 | 18.753 | 42.557 | 17.308 | 0.00 | 0.00 |
| ATOM | 32 | CG   | GLU | X | 3 | 17.205 | 42.444 | 15.713 | 0.00 | 0.00 |
| ATOM | 33 | HG2  | GLU | X | 3 | 17.573 | 41.434 | 15.532 | 0.00 | 0.00 |
| ATOM | 34 | HG3  | GLU | X | 3 | 16.246 | 42.239 | 16.189 | 0.00 | 0.00 |
| ATOM | 35 | CD   | GLU | X | 3 | 16.996 | 43.079 | 14.353 | 0.00 | 0.00 |
| ATOM | 36 | OE1  | GLU | X | 3 | 16.866 | 44.313 | 14.240 | 0.00 | 0.00 |
| ATOM | 37 | OE2  | GLU | X | 3 | 16.992 | 42.395 | 13.324 | 0.00 | 0.00 |
| ATOM | 38 | C    | GLU | X | 3 | 18.332 | 45.106 | 18.246 | 0.00 | 0.00 |
| ATOM | 39 | O    | GLU | X | 3 | 18.668 | 45.097 | 19.455 | 0.00 | 0.00 |
| ATOM | 40 | N    | LEU | X | 4 | 18.872 | 46.098 | 17.458 | 0.00 | 0.00 |
| ATOM | 41 | H    | LEU | X | 4 | 18.461 | 46.269 | 16.551 | 0.00 | 0.00 |
| ATOM | 42 | CA   | LEU | X | 4 | 20.040 | 46.904 | 17.823 | 0.00 | 0.00 |
| ATOM | 43 | HA   | LEU | X | 4 | 20.438 | 46.402 | 18.705 | 0.00 | 0.00 |
| ATOM | 44 | CB   | LEU | X | 4 | 21.226 | 46.745 | 16.781 | 0.00 | 0.00 |
| ATOM | 45 | HB2  | LEU | X | 4 | 21.104 | 47.378 | 15.902 | 0.00 | 0.00 |
| ATOM | 46 | HB3  | LEU | X | 4 | 22.063 | 47.215 | 17.295 | 0.00 | 0.00 |
| ATOM | 47 | CG   | LEU | X | 4 | 21.562 | 45.347 | 16.324 | 0.00 | 0.00 |
| ATOM | 48 | HG   | LEU | X | 4 | 20.671 | 44.892 | 15.889 | 0.00 | 0.00 |
| ATOM | 49 | CD1  | LEU | X | 4 | 22.599 | 45.354 | 15.193 | 0.00 | 0.00 |
| ATOM | 50 | HD11 | LEU | X | 4 | 22.120 | 45.621 | 14.251 | 0.00 | 0.00 |
| ATOM | 51 | HD12 | LEU | X | 4 | 23.052 | 44.371 | 15.066 | 0.00 | 0.00 |
| ATOM | 52 | HD13 | LEU | X | 4 | 23.334 | 46.085 | 15.531 | 0.00 | 0.00 |
| ATOM | 53 | CD2  | LEU | X | 4 | 21.966 | 44.534 | 17.510 | 0.00 | 0.00 |
| ATOM | 54 | HD21 | LEU | X | 4 | 22.817 | 44.979 | 18.024 | 0.00 | 0.00 |
| ATOM | 55 | HD22 | LEU | X | 4 | 21.130 | 44.486 | 18.208 | 0.00 | 0.00 |
| ATOM | 56 | HD23 | LEU | X | 4 | 22.181 | 43.501 | 17.234 | 0.00 | 0.00 |
| ATOM | 57 | C    | LEU | X | 4 | 19.827 | 48.310 | 18.178 | 0.00 | 0.00 |
| ATOM | 58 | O    | LEU | X | 4 | 20.493 | 48.892 | 19.044 | 0.00 | 0.00 |
| ATOM | 59 | N    | LEU | X | 5 | 18.658 | 48.854 | 17.825 | 0.00 | 0.00 |
| ATOM | 60 | H    | LEU | X | 5 | 18.138 | 48.371 | 17.106 | 0.00 | 0.00 |
| ATOM | 61 | CA   | LEU | X | 5 | 18.154 | 50.164 | 18.364 | 0.00 | 0.00 |
| ATOM | 62 | HA   | LEU | X | 5 | 19.060 | 50.706 | 18.636 | 0.00 | 0.00 |
| ATOM | 63 | CB   | LEU | X | 5 | 17.274 | 50.856 | 17.302 | 0.00 | 0.00 |
| ATOM | 64 | HB2  | LEU | X | 5 | 17.836 | 50.731 | 16.377 | 0.00 | 0.00 |
| ATOM | 65 | HB3  | LEU | X | 5 | 16.338 | 50.321 | 17.140 | 0.00 | 0.00 |
| ATOM | 66 | CG   | LEU | X | 5 | 16.888 | 52.373 | 17.449 | 0.00 | 0.00 |
| ATOM | 67 | HG   | LEU | X | 5 | 16.609 | 52.827 | 16.498 | 0.00 | 0.00 |
| ATOM | 68 | CD1  | LEU | X | 5 | 15.689 | 52.620 | 18.387 | 0.00 | 0.00 |
| ATOM | 69 | HD11 | LEU | X | 5 | 15.897 | 52.694 | 19.454 | 0.00 | 0.00 |
| ATOM | 70 | HD12 | LEU | X | 5 | 15.003 | 51.809 | 18.144 | 0.00 | 0.00 |
| ATOM | 71 | HD13 | LEU | X | 5 | 15.248 | 53.548 | 18.023 | 0.00 | 0.00 |

|      |     |      |     |   |   |        |        |        |      |      |
|------|-----|------|-----|---|---|--------|--------|--------|------|------|
| ATOM | 72  | CD2  | LEU | X | 5 | 18.152 | 53.125 | 17.897 | 0.00 | 0.00 |
| ATOM | 73  | HD21 | LEU | X | 5 | 17.971 | 54.193 | 17.771 | 0.00 | 0.00 |
| ATOM | 74  | HD22 | LEU | X | 5 | 18.533 | 52.957 | 18.904 | 0.00 | 0.00 |
| ATOM | 75  | HD23 | LEU | X | 5 | 18.965 | 52.854 | 17.223 | 0.00 | 0.00 |
| ATOM | 76  | C    | LEU | X | 5 | 17.322 | 49.915 | 19.668 | 0.00 | 0.00 |
| ATOM | 77  | O    | LEU | X | 5 | 16.213 | 49.346 | 19.627 | 0.00 | 0.00 |
| ATOM | 78  | N    | VAL | X | 6 | 17.861 | 50.530 | 20.824 | 0.00 | 0.00 |
| ATOM | 79  | H    | VAL | X | 6 | 18.763 | 50.978 | 20.750 | 0.00 | 0.00 |
| ATOM | 80  | CA   | VAL | X | 6 | 17.222 | 50.654 | 22.149 | 0.00 | 0.00 |
| ATOM | 81  | HA   | VAL | X | 6 | 16.328 | 50.030 | 22.117 | 0.00 | 0.00 |
| ATOM | 82  | CB   | VAL | X | 6 | 18.091 | 49.876 | 23.236 | 0.00 | 0.00 |
| ATOM | 83  | HB   | VAL | X | 6 | 18.405 | 48.955 | 22.744 | 0.00 | 0.00 |
| ATOM | 84  | CG1  | VAL | X | 6 | 19.405 | 50.694 | 23.455 | 0.00 | 0.00 |
| ATOM | 85  | HG11 | VAL | X | 6 | 20.140 | 50.044 | 23.929 | 0.00 | 0.00 |
| ATOM | 86  | HG12 | VAL | X | 6 | 19.985 | 50.858 | 22.548 | 0.00 | 0.00 |
| ATOM | 87  | HG13 | VAL | X | 6 | 19.255 | 51.642 | 23.972 | 0.00 | 0.00 |
| ATOM | 88  | CG2  | VAL | X | 6 | 17.383 | 49.687 | 24.515 | 0.00 | 0.00 |
| ATOM | 89  | HG21 | VAL | X | 6 | 17.461 | 50.589 | 25.123 | 0.00 | 0.00 |
| ATOM | 90  | HG22 | VAL | X | 6 | 17.836 | 48.952 | 25.179 | 0.00 | 0.00 |
| ATOM | 91  | HG23 | VAL | X | 6 | 16.340 | 49.465 | 24.292 | 0.00 | 0.00 |
| ATOM | 92  | C    | VAL | X | 6 | 16.989 | 52.080 | 22.450 | 0.00 | 0.00 |
| ATOM | 93  | O    | VAL | X | 6 | 17.750 | 52.981 | 22.068 | 0.00 | 0.00 |
| ATOM | 94  | N    | THR | X | 7 | 15.976 | 52.372 | 23.249 | 0.00 | 0.00 |
| ATOM | 95  | H    | THR | X | 7 | 15.345 | 51.613 | 23.462 | 0.00 | 0.00 |
| ATOM | 96  | CA   | THR | X | 7 | 15.548 | 53.707 | 23.811 | 0.00 | 0.00 |
| ATOM | 97  | HA   | THR | X | 7 | 16.090 | 54.523 | 23.333 | 0.00 | 0.00 |
| ATOM | 98  | CB   | THR | X | 7 | 14.127 | 53.888 | 23.445 | 0.00 | 0.00 |
| ATOM | 99  | HB   | THR | X | 7 | 13.453 | 53.122 | 23.828 | 0.00 | 0.00 |
| ATOM | 100 | CG2  | THR | X | 7 | 13.487 | 55.181 | 23.974 | 0.00 | 0.00 |
| ATOM | 101 | HG21 | THR | X | 7 | 13.945 | 56.027 | 23.462 | 0.00 | 0.00 |
| ATOM | 102 | HG22 | THR | X | 7 | 13.656 | 55.221 | 25.050 | 0.00 | 0.00 |
| ATOM | 103 | HG23 | THR | X | 7 | 12.447 | 55.261 | 23.658 | 0.00 | 0.00 |
| ATOM | 104 | OG1  | THR | X | 7 | 13.944 | 53.954 | 22.008 | 0.00 | 0.00 |
| ATOM | 105 | HG1  | THR | X | 7 | 14.009 | 53.041 | 21.717 | 0.00 | 0.00 |
| ATOM | 106 | C    | THR | X | 7 | 15.865 | 53.771 | 25.333 | 0.00 | 0.00 |
| ATOM | 107 | O    | THR | X | 7 | 15.033 | 53.186 | 26.058 | 0.00 | 0.00 |
| ATOM | 108 | N    | VAL | X | 8 | 16.932 | 54.399 | 25.764 | 0.00 | 0.00 |
| ATOM | 109 | H    | VAL | X | 8 | 17.476 | 54.985 | 25.147 | 0.00 | 0.00 |
| ATOM | 110 | CA   | VAL | X | 8 | 17.130 | 54.504 | 27.242 | 0.00 | 0.00 |
| ATOM | 111 | HA   | VAL | X | 8 | 16.616 | 53.736 | 27.820 | 0.00 | 0.00 |
| ATOM | 112 | CB   | VAL | X | 8 | 18.649 | 54.321 | 27.647 | 0.00 | 0.00 |
| ATOM | 113 | HB   | VAL | X | 8 | 18.707 | 54.424 | 28.731 | 0.00 | 0.00 |
| ATOM | 114 | CG1  | VAL | X | 8 | 18.993 | 52.913 | 27.224 | 0.00 | 0.00 |
| ATOM | 115 | HG11 | VAL | X | 8 | 19.853 | 52.612 | 27.822 | 0.00 | 0.00 |
| ATOM | 116 | HG12 | VAL | X | 8 | 18.136 | 52.256 | 27.376 | 0.00 | 0.00 |
| ATOM | 117 | HG13 | VAL | X | 8 | 19.217 | 52.936 | 26.158 | 0.00 | 0.00 |
| ATOM | 118 | CG2  | VAL | X | 8 | 19.691 | 55.366 | 27.062 | 0.00 | 0.00 |
| ATOM | 119 | HG21 | VAL | X | 8 | 20.717 | 55.193 | 27.386 | 0.00 | 0.00 |
| ATOM | 120 | HG22 | VAL | X | 8 | 19.357 | 56.379 | 27.290 | 0.00 | 0.00 |
| ATOM | 121 | HG23 | VAL | X | 8 | 19.841 | 55.156 | 26.004 | 0.00 | 0.00 |
| ATOM | 122 | C    | VAL | X | 8 | 16.604 | 55.802 | 27.776 | 0.00 | 0.00 |
| ATOM | 123 | O    | VAL | X | 8 | 15.953 | 56.540 | 27.035 | 0.00 | 0.00 |
| ATOM | 124 | N    | ARG | X | 9 | 16.730 | 55.981 | 29.086 | 0.00 | 0.00 |
| ATOM | 125 | H    | ARG | X | 9 | 17.132 | 55.182 | 29.555 | 0.00 | 0.00 |
| ATOM | 126 | CA   | ARG | X | 9 | 16.174 | 57.155 | 29.815 | 0.00 | 0.00 |
| ATOM | 127 | HA   | ARG | X | 9 | 15.085 | 57.107 | 29.789 | 0.00 | 0.00 |
| ATOM | 128 | CB   | ARG | X | 9 | 16.511 | 57.158 | 31.312 | 0.00 | 0.00 |
| ATOM | 129 | HB2  | ARG | X | 9 | 16.413 | 56.136 | 31.678 | 0.00 | 0.00 |
| ATOM | 130 | HB3  | ARG | X | 9 | 17.582 | 57.269 | 31.477 | 0.00 | 0.00 |
| ATOM | 131 | CG   | ARG | X | 9 | 15.692 | 58.181 | 32.107 | 0.00 | 0.00 |
| ATOM | 132 | HG2  | ARG | X | 9 | 16.048 | 59.149 | 31.755 | 0.00 | 0.00 |
| ATOM | 133 | HG3  | ARG | X | 9 | 14.622 | 58.005 | 31.996 | 0.00 | 0.00 |
| ATOM | 134 | CD   | ARG | X | 9 | 15.941 | 58.099 | 33.589 | 0.00 | 0.00 |
| ATOM | 135 | HD2  | ARG | X | 9 | 15.413 | 57.199 | 33.903 | 0.00 | 0.00 |
| ATOM | 136 | HD3  | ARG | X | 9 | 16.976 | 57.830 | 33.803 | 0.00 | 0.00 |
| ATOM | 137 | NE   | ARG | X | 9 | 15.546 | 59.186 | 34.410 | 0.00 | 0.00 |
| ATOM | 138 | HE   | ARG | X | 9 | 15.947 | 60.092 | 34.214 | 0.00 | 0.00 |

|      |     |      |     |   |    |        |        |        |      |      |
|------|-----|------|-----|---|----|--------|--------|--------|------|------|
| ATOM | 139 | CZ   | ARG | X | 9  | 14.571 | 59.237 | 35.318 | 0.00 | 0.00 |
| ATOM | 140 | NH1  | ARG | X | 9  | 14.012 | 58.136 | 35.861 | 0.00 | 0.00 |
| ATOM | 141 | HH11 | ARG | X | 9  | 14.328 | 57.210 | 35.614 | 0.00 | 0.00 |
| ATOM | 142 | HH12 | ARG | X | 9  | 13.296 | 58.148 | 36.574 | 0.00 | 0.00 |
| ATOM | 143 | NH2  | ARG | X | 9  | 14.086 | 60.374 | 35.706 | 0.00 | 0.00 |
| ATOM | 144 | HH21 | ARG | X | 9  | 14.278 | 61.220 | 35.189 | 0.00 | 0.00 |
| ATOM | 145 | HH22 | ARG | X | 9  | 13.158 | 60.369 | 36.104 | 0.00 | 0.00 |
| ATOM | 146 | C    | ARG | X | 9  | 16.585 | 58.492 | 29.115 | 0.00 | 0.00 |
| ATOM | 147 | O    | ARG | X | 9  | 15.735 | 59.363 | 28.927 | 0.00 | 0.00 |
| ATOM | 148 | N    | GLY | X | 10 | 17.882 | 58.643 | 28.760 | 0.00 | 0.00 |
| ATOM | 149 | H    | GLY | X | 10 | 18.539 | 57.938 | 29.062 | 0.00 | 0.00 |
| ATOM | 150 | CA   | GLY | X | 10 | 18.367 | 59.931 | 28.208 | 0.00 | 0.00 |
| ATOM | 151 | HA2  | GLY | X | 10 | 17.750 | 60.793 | 28.459 | 0.00 | 0.00 |
| ATOM | 152 | HA3  | GLY | X | 10 | 19.396 | 60.010 | 28.560 | 0.00 | 0.00 |
| ATOM | 153 | C    | GLY | X | 10 | 18.366 | 60.057 | 26.726 | 0.00 | 0.00 |
| ATOM | 154 | O    | GLY | X | 10 | 18.634 | 61.173 | 26.223 | 0.00 | 0.00 |
| ATOM | 155 | N    | GLY | X | 11 | 18.034 | 58.972 | 26.015 | 0.00 | 0.00 |
| ATOM | 156 | H    | GLY | X | 11 | 17.936 | 58.116 | 26.543 | 0.00 | 0.00 |
| ATOM | 157 | CA   | GLY | X | 11 | 17.751 | 58.967 | 24.542 | 0.00 | 0.00 |
| ATOM | 158 | HA2  | GLY | X | 11 | 16.769 | 59.369 | 24.293 | 0.00 | 0.00 |
| ATOM | 159 | HA3  | GLY | X | 11 | 18.557 | 59.600 | 24.173 | 0.00 | 0.00 |
| ATOM | 160 | C    | GLY | X | 11 | 17.935 | 57.581 | 23.866 | 0.00 | 0.00 |
| ATOM | 161 | O    | GLY | X | 11 | 17.884 | 56.527 | 24.526 | 0.00 | 0.00 |
| ATOM | 162 | N    | ARG | X | 12 | 18.198 | 57.580 | 22.498 | 0.00 | 0.00 |
| ATOM | 163 | H    | ARG | X | 12 | 18.391 | 58.462 | 22.047 | 0.00 | 0.00 |
| ATOM | 164 | CA   | ARG | X | 12 | 18.256 | 56.283 | 21.665 | 0.00 | 0.00 |
| ATOM | 165 | HA   | ARG | X | 12 | 17.899 | 55.447 | 22.268 | 0.00 | 0.00 |
| ATOM | 166 | CB   | ARG | X | 12 | 17.337 | 56.481 | 20.397 | 0.00 | 0.00 |
| ATOM | 167 | HB2  | ARG | X | 12 | 17.606 | 57.430 | 19.934 | 0.00 | 0.00 |
| ATOM | 168 | HB3  | ARG | X | 12 | 17.370 | 55.619 | 19.730 | 0.00 | 0.00 |
| ATOM | 169 | CG   | ARG | X | 12 | 15.872 | 56.583 | 20.779 | 0.00 | 0.00 |
| ATOM | 170 | HG2  | ARG | X | 12 | 15.698 | 55.610 | 21.239 | 0.00 | 0.00 |
| ATOM | 171 | HG3  | ARG | X | 12 | 15.706 | 57.376 | 21.508 | 0.00 | 0.00 |
| ATOM | 172 | CD   | ARG | X | 12 | 15.011 | 56.751 | 19.473 | 0.00 | 0.00 |
| ATOM | 173 | HD2  | ARG | X | 12 | 15.099 | 55.842 | 18.878 | 0.00 | 0.00 |
| ATOM | 174 | HD3  | ARG | X | 12 | 13.961 | 56.910 | 19.715 | 0.00 | 0.00 |
| ATOM | 175 | NE   | ARG | X | 12 | 15.482 | 57.847 | 18.552 | 0.00 | 0.00 |
| ATOM | 176 | HE   | ARG | X | 12 | 15.729 | 58.775 | 18.865 | 0.00 | 0.00 |
| ATOM | 177 | CZ   | ARG | X | 12 | 15.446 | 57.810 | 17.219 | 0.00 | 0.00 |
| ATOM | 178 | NH1  | ARG | X | 12 | 15.057 | 56.760 | 16.528 | 0.00 | 0.00 |
| ATOM | 179 | HH11 | ARG | X | 12 | 14.539 | 56.050 | 17.026 | 0.00 | 0.00 |
| ATOM | 180 | HH12 | ARG | X | 12 | 14.803 | 56.900 | 15.561 | 0.00 | 0.00 |
| ATOM | 181 | NH2  | ARG | X | 12 | 15.696 | 58.904 | 16.502 | 0.00 | 0.00 |
| ATOM | 182 | HH21 | ARG | X | 12 | 15.765 | 59.788 | 16.985 | 0.00 | 0.00 |
| ATOM | 183 | HH22 | ARG | X | 12 | 15.542 | 58.966 | 15.505 | 0.00 | 0.00 |
| ATOM | 184 | C    | ARG | X | 12 | 19.727 | 55.890 | 21.406 | 0.00 | 0.00 |
| ATOM | 185 | O    | ARG | X | 12 | 20.540 | 56.769 | 21.132 | 0.00 | 0.00 |
| ATOM | 186 | N    | LEU | X | 13 | 19.950 | 54.621 | 21.357 | 0.00 | 0.00 |
| ATOM | 187 | H    | LEU | X | 13 | 19.185 | 54.018 | 21.626 | 0.00 | 0.00 |
| ATOM | 188 | CA   | LEU | X | 13 | 21.295 | 54.026 | 21.220 | 0.00 | 0.00 |
| ATOM | 189 | HA   | LEU | X | 13 | 22.048 | 54.740 | 20.888 | 0.00 | 0.00 |
| ATOM | 190 | CB   | LEU | X | 13 | 21.943 | 53.647 | 22.687 | 0.00 | 0.00 |
| ATOM | 191 | HB2  | LEU | X | 13 | 21.277 | 52.954 | 23.202 | 0.00 | 0.00 |
| ATOM | 192 | HB3  | LEU | X | 13 | 22.916 | 53.216 | 22.450 | 0.00 | 0.00 |
| ATOM | 193 | CG   | LEU | X | 13 | 22.151 | 54.745 | 23.822 | 0.00 | 0.00 |
| ATOM | 194 | HG   | LEU | X | 13 | 21.165 | 55.128 | 24.085 | 0.00 | 0.00 |
| ATOM | 195 | CD1  | LEU | X | 13 | 22.668 | 53.938 | 25.093 | 0.00 | 0.00 |
| ATOM | 196 | HD11 | LEU | X | 13 | 22.040 | 53.060 | 25.243 | 0.00 | 0.00 |
| ATOM | 197 | HD12 | LEU | X | 13 | 22.583 | 54.488 | 26.030 | 0.00 | 0.00 |
| ATOM | 198 | HD13 | LEU | X | 13 | 23.708 | 53.679 | 24.893 | 0.00 | 0.00 |
| ATOM | 199 | CD2  | LEU | X | 13 | 23.067 | 55.916 | 23.384 | 0.00 | 0.00 |
| ATOM | 200 | HD21 | LEU | X | 13 | 22.989 | 56.731 | 24.104 | 0.00 | 0.00 |
| ATOM | 201 | HD22 | LEU | X | 13 | 24.077 | 55.526 | 23.261 | 0.00 | 0.00 |
| ATOM | 202 | HD23 | LEU | X | 13 | 22.754 | 56.327 | 22.424 | 0.00 | 0.00 |
| ATOM | 203 | C    | LEU | X | 13 | 21.256 | 52.794 | 20.331 | 0.00 | 0.00 |
| ATOM | 204 | O    | LEU | X | 13 | 20.326 | 52.052 | 20.352 | 0.00 | 0.00 |
| ATOM | 205 | N    | ARG | X | 14 | 22.381 | 52.648 | 19.584 | 0.00 | 0.00 |



|      |     |      |     |   |    |        |        |        |      |      |
|------|-----|------|-----|---|----|--------|--------|--------|------|------|
| ATOM | 206 | H    | ARG | X | 14 | 23.048 | 53.406 | 19.606 | 0.00 | 0.00 |
| ATOM | 207 | CA   | ARG | X | 14 | 22.512 | 51.549 | 18.606 | 0.00 | 0.00 |
| ATOM | 208 | HA   | ARG | X | 14 | 21.765 | 50.773 | 18.774 | 0.00 | 0.00 |
| ATOM | 209 | CB   | ARG | X | 14 | 22.166 | 52.039 | 17.152 | 0.00 | 0.00 |
| ATOM | 210 | HB2  | ARG | X | 14 | 21.297 | 52.696 | 17.172 | 0.00 | 0.00 |
| ATOM | 211 | HB3  | ARG | X | 14 | 23.019 | 52.653 | 16.865 | 0.00 | 0.00 |
| ATOM | 212 | CG   | ARG | X | 14 | 21.935 | 50.876 | 16.185 | 0.00 | 0.00 |
| ATOM | 213 | HG2  | ARG | X | 14 | 22.909 | 50.393 | 16.110 | 0.00 | 0.00 |
| ATOM | 214 | HG3  | ARG | X | 14 | 21.392 | 49.981 | 16.487 | 0.00 | 0.00 |
| ATOM | 215 | CD   | ARG | X | 14 | 21.595 | 51.335 | 14.734 | 0.00 | 0.00 |
| ATOM | 216 | HD2  | ARG | X | 14 | 22.182 | 52.232 | 14.535 | 0.00 | 0.00 |
| ATOM | 217 | HD3  | ARG | X | 14 | 21.929 | 50.607 | 13.995 | 0.00 | 0.00 |
| ATOM | 218 | NE   | ARG | X | 14 | 20.205 | 51.638 | 14.631 | 0.00 | 0.00 |
| ATOM | 219 | HE   | ARG | X | 14 | 19.570 | 50.878 | 14.830 | 0.00 | 0.00 |
| ATOM | 220 | CZ   | ARG | X | 14 | 19.602 | 52.759 | 14.374 | 0.00 | 0.00 |
| ATOM | 221 | NH1  | ARG | X | 14 | 20.278 | 53.853 | 14.295 | 0.00 | 0.00 |
| ATOM | 222 | HH11 | ARG | X | 14 | 21.276 | 53.733 | 14.392 | 0.00 | 0.00 |
| ATOM | 223 | HH12 | ARG | X | 14 | 19.783 | 54.729 | 14.210 | 0.00 | 0.00 |
| ATOM | 224 | NH2  | ARG | X | 14 | 18.314 | 52.870 | 14.267 | 0.00 | 0.00 |
| ATOM | 225 | HH21 | ARG | X | 14 | 17.786 | 52.013 | 14.355 | 0.00 | 0.00 |
| ATOM | 226 | HH22 | ARG | X | 14 | 17.787 | 53.710 | 14.080 | 0.00 | 0.00 |
| ATOM | 227 | C    | ARG | X | 14 | 23.802 | 50.708 | 18.679 | 0.00 | 0.00 |
| ATOM | 228 | O    | ARG | X | 14 | 24.924 | 51.253 | 18.399 | 0.00 | 0.00 |
| ATOM | 229 | N    | GLY | X | 15 | 23.662 | 49.433 | 18.996 | 0.00 | 0.00 |
| ATOM | 230 | H    | GLY | X | 15 | 22.733 | 49.049 | 19.095 | 0.00 | 0.00 |
| ATOM | 231 | CA   | GLY | X | 15 | 24.666 | 48.424 | 19.113 | 0.00 | 0.00 |
| ATOM | 232 | HA2  | GLY | X | 15 | 25.645 | 48.841 | 19.352 | 0.00 | 0.00 |
| ATOM | 233 | HA3  | GLY | X | 15 | 24.462 | 47.808 | 19.989 | 0.00 | 0.00 |
| ATOM | 234 | C    | GLY | X | 15 | 24.884 | 47.602 | 17.852 | 0.00 | 0.00 |
| ATOM | 235 | O    | GLY | X | 15 | 24.463 | 48.035 | 16.784 | 0.00 | 0.00 |
| ATOM | 236 | N    | ILE | X | 16 | 25.427 | 46.378 | 17.976 | 0.00 | 0.00 |
| ATOM | 237 | H    | ILE | X | 16 | 25.631 | 46.079 | 18.919 | 0.00 | 0.00 |
| ATOM | 238 | CA   | ILE | X | 16 | 25.740 | 45.439 | 16.853 | 0.00 | 0.00 |
| ATOM | 239 | HA   | ILE | X | 16 | 25.268 | 45.820 | 15.948 | 0.00 | 0.00 |
| ATOM | 240 | CB   | ILE | X | 16 | 27.206 | 45.489 | 16.528 | 0.00 | 0.00 |
| ATOM | 241 | HB   | ILE | X | 16 | 27.431 | 44.668 | 15.846 | 0.00 | 0.00 |
| ATOM | 242 | CG2  | ILE | X | 16 | 27.606 | 46.866 | 15.829 | 0.00 | 0.00 |
| ATOM | 243 | HG21 | ILE | X | 16 | 27.719 | 47.583 | 16.642 | 0.00 | 0.00 |
| ATOM | 244 | HG22 | ILE | X | 16 | 26.773 | 47.210 | 15.216 | 0.00 | 0.00 |
| ATOM | 245 | HG23 | ILE | X | 16 | 28.572 | 46.778 | 15.332 | 0.00 | 0.00 |
| ATOM | 246 | CG1  | ILE | X | 16 | 28.054 | 45.195 | 17.802 | 0.00 | 0.00 |
| ATOM | 247 | HG12 | ILE | X | 16 | 28.015 | 45.925 | 18.611 | 0.00 | 0.00 |
| ATOM | 248 | HG13 | ILE | X | 16 | 27.642 | 44.279 | 18.224 | 0.00 | 0.00 |
| ATOM | 249 | CD1  | ILE | X | 16 | 29.450 | 44.890 | 17.649 | 0.00 | 0.00 |
| ATOM | 250 | HD11 | ILE | X | 16 | 30.004 | 45.672 | 17.129 | 0.00 | 0.00 |
| ATOM | 251 | HD12 | ILE | X | 16 | 29.604 | 44.016 | 17.016 | 0.00 | 0.00 |
| ATOM | 252 | HD13 | ILE | X | 16 | 29.917 | 44.809 | 18.630 | 0.00 | 0.00 |
| ATOM | 253 | C    | ILE | X | 16 | 25.369 | 43.924 | 17.098 | 0.00 | 0.00 |
| ATOM | 254 | O    | ILE | X | 16 | 25.111 | 43.574 | 18.237 | 0.00 | 0.00 |
| ATOM | 255 | N    | ARG | X | 17 | 25.297 | 43.080 | 16.039 | 0.00 | 0.00 |
| ATOM | 256 | H    | ARG | X | 17 | 25.392 | 43.419 | 15.092 | 0.00 | 0.00 |
| ATOM | 257 | CA   | ARG | X | 17 | 25.176 | 41.606 | 16.214 | 0.00 | 0.00 |
| ATOM | 258 | HA   | ARG | X | 17 | 24.556 | 41.366 | 17.077 | 0.00 | 0.00 |
| ATOM | 259 | CB   | ARG | X | 17 | 24.603 | 41.032 | 14.923 | 0.00 | 0.00 |
| ATOM | 260 | HB2  | ARG | X | 17 | 23.714 | 41.589 | 14.626 | 0.00 | 0.00 |
| ATOM | 261 | HB3  | ARG | X | 17 | 25.310 | 41.159 | 14.103 | 0.00 | 0.00 |
| ATOM | 262 | CG   | ARG | X | 17 | 24.218 | 39.515 | 15.126 | 0.00 | 0.00 |
| ATOM | 263 | HG2  | ARG | X | 17 | 25.099 | 38.901 | 15.312 | 0.00 | 0.00 |
| ATOM | 264 | HG3  | ARG | X | 17 | 23.484 | 39.405 | 15.924 | 0.00 | 0.00 |
| ATOM | 265 | CD   | ARG | X | 17 | 23.592 | 38.953 | 13.825 | 0.00 | 0.00 |
| ATOM | 266 | HD2  | ARG | X | 17 | 23.393 | 37.881 | 13.850 | 0.00 | 0.00 |
| ATOM | 267 | HD3  | ARG | X | 17 | 22.647 | 39.481 | 13.700 | 0.00 | 0.00 |
| ATOM | 268 | NE   | ARG | X | 17 | 24.477 | 39.128 | 12.690 | 0.00 | 0.00 |
| ATOM | 269 | HE   | ARG | X | 17 | 25.471 | 39.142 | 12.873 | 0.00 | 0.00 |
| ATOM | 270 | CZ   | ARG | X | 17 | 24.232 | 38.961 | 11.394 | 0.00 | 0.00 |
| ATOM | 271 | NH1  | ARG | X | 17 | 23.065 | 38.581 | 11.028 | 0.00 | 0.00 |
| ATOM | 272 | HH11 | ARG | X | 17 | 22.373 | 38.454 | 11.753 | 0.00 | 0.00 |

|      |     |      |     |   |    |        |        |        |      |      |
|------|-----|------|-----|---|----|--------|--------|--------|------|------|
| ATOM | 273 | HH12 | ARG | X | 17 | 22.821 | 38.225 | 10.114 | 0.00 | 0.00 |
| ATOM | 274 | NH2  | ARG | X | 17 | 25.161 | 39.055 | 10.489 | 0.00 | 0.00 |
| ATOM | 275 | HH21 | ARG | X | 17 | 26.043 | 39.470 | 10.754 | 0.00 | 0.00 |
| ATOM | 276 | HH22 | ARG | X | 17 | 24.896 | 38.844 | 9.538  | 0.00 | 0.00 |
| ATOM | 277 | C    | ARG | X | 17 | 26.552 | 40.982 | 16.455 | 0.00 | 0.00 |
| ATOM | 278 | O    | ARG | X | 17 | 27.508 | 41.253 | 15.745 | 0.00 | 0.00 |
| ATOM | 279 | N    | LEU | X | 18 | 26.699 | 40.053 | 17.392 | 0.00 | 0.00 |
| ATOM | 280 | H    | LEU | X | 18 | 25.945 | 40.004 | 18.062 | 0.00 | 0.00 |
| ATOM | 281 | CA   | LEU | X | 18 | 27.727 | 39.071 | 17.486 | 0.00 | 0.00 |
| ATOM | 282 | HA   | LEU | X | 18 | 28.535 | 39.293 | 16.788 | 0.00 | 0.00 |
| ATOM | 283 | CB   | LEU | X | 18 | 28.369 | 39.051 | 18.888 | 0.00 | 0.00 |
| ATOM | 284 | HB2  | LEU | X | 18 | 27.647 | 38.578 | 19.553 | 0.00 | 0.00 |
| ATOM | 285 | HB3  | LEU | X | 18 | 29.259 | 38.433 | 19.008 | 0.00 | 0.00 |
| ATOM | 286 | CG   | LEU | X | 18 | 28.797 | 40.389 | 19.478 | 0.00 | 0.00 |
| ATOM | 287 | HG   | LEU | X | 18 | 27.990 | 41.122 | 19.465 | 0.00 | 0.00 |
| ATOM | 288 | CD1  | LEU | X | 18 | 29.153 | 40.262 | 20.900 | 0.00 | 0.00 |
| ATOM | 289 | HD11 | LEU | X | 18 | 29.934 | 40.967 | 21.184 | 0.00 | 0.00 |
| ATOM | 290 | HD12 | LEU | X | 18 | 29.604 | 39.278 | 21.026 | 0.00 | 0.00 |
| ATOM | 291 | HD13 | LEU | X | 18 | 28.211 | 40.404 | 21.430 | 0.00 | 0.00 |
| ATOM | 292 | CD2  | LEU | X | 18 | 29.947 | 40.986 | 18.683 | 0.00 | 0.00 |
| ATOM | 293 | HD21 | LEU | X | 18 | 30.247 | 41.892 | 19.209 | 0.00 | 0.00 |
| ATOM | 294 | HD22 | LEU | X | 18 | 30.726 | 40.223 | 18.650 | 0.00 | 0.00 |
| ATOM | 295 | HD23 | LEU | X | 18 | 29.593 | 41.242 | 17.684 | 0.00 | 0.00 |
| ATOM | 296 | C    | LEU | X | 18 | 27.168 | 37.732 | 17.164 | 0.00 | 0.00 |
| ATOM | 297 | O    | LEU | X | 18 | 26.014 | 37.459 | 17.548 | 0.00 | 0.00 |
| ATOM | 298 | N    | LYS | X | 19 | 27.953 | 36.880 | 16.508 | 0.00 | 0.00 |
| ATOM | 299 | H    | LYS | X | 19 | 28.916 | 37.122 | 16.319 | 0.00 | 0.00 |
| ATOM | 300 | CA   | LYS | X | 19 | 27.632 | 35.481 | 16.223 | 0.00 | 0.00 |
| ATOM | 301 | HA   | LYS | X | 19 | 26.548 | 35.360 | 16.246 | 0.00 | 0.00 |
| ATOM | 302 | CB   | LYS | X | 19 | 28.043 | 35.168 | 14.733 | 0.00 | 0.00 |
| ATOM | 303 | HB2  | LYS | X | 19 | 29.129 | 35.120 | 14.653 | 0.00 | 0.00 |
| ATOM | 304 | HB3  | LYS | X | 19 | 27.747 | 34.141 | 14.519 | 0.00 | 0.00 |
| ATOM | 305 | CG   | LYS | X | 19 | 27.472 | 35.996 | 13.630 | 0.00 | 0.00 |
| ATOM | 306 | HG2  | LYS | X | 19 | 26.383 | 36.044 | 13.642 | 0.00 | 0.00 |
| ATOM | 307 | HG3  | LYS | X | 19 | 27.831 | 36.994 | 13.883 | 0.00 | 0.00 |
| ATOM | 308 | CD   | LYS | X | 19 | 27.903 | 35.524 | 12.202 | 0.00 | 0.00 |
| ATOM | 309 | HD2  | LYS | X | 19 | 28.983 | 35.668 | 12.219 | 0.00 | 0.00 |
| ATOM | 310 | HD3  | LYS | X | 19 | 27.680 | 34.461 | 12.113 | 0.00 | 0.00 |
| ATOM | 311 | CE   | LYS | X | 19 | 27.315 | 36.306 | 11.036 | 0.00 | 0.00 |
| ATOM | 312 | HE2  | LYS | X | 19 | 27.155 | 37.333 | 11.365 | 0.00 | 0.00 |
| ATOM | 313 | HE3  | LYS | X | 19 | 28.064 | 36.400 | 10.250 | 0.00 | 0.00 |
| ATOM | 314 | NZ   | LYS | X | 19 | 26.045 | 35.852 | 10.480 | 0.00 | 0.00 |
| ATOM | 315 | HZ1  | LYS | X | 19 | 25.766 | 36.373 | 9.661  | 0.00 | 0.00 |
| ATOM | 316 | HZ2  | LYS | X | 19 | 26.046 | 34.850 | 10.350 | 0.00 | 0.00 |
| ATOM | 317 | HZ3  | LYS | X | 19 | 25.355 | 35.978 | 11.206 | 0.00 | 0.00 |
| ATOM | 318 | C    | LYS | X | 19 | 28.194 | 34.400 | 17.186 | 0.00 | 0.00 |
| ATOM | 319 | O    | LYS | X | 19 | 29.217 | 34.589 | 17.815 | 0.00 | 0.00 |
| ATOM | 320 | N    | THR | X | 20 | 27.348 | 33.359 | 17.496 | 0.00 | 0.00 |
| ATOM | 321 | H    | THR | X | 20 | 26.506 | 33.187 | 16.965 | 0.00 | 0.00 |
| ATOM | 322 | CA   | THR | X | 20 | 27.724 | 32.204 | 18.353 | 0.00 | 0.00 |
| ATOM | 323 | HA   | THR | X | 20 | 28.766 | 31.990 | 18.113 | 0.00 | 0.00 |
| ATOM | 324 | CB   | THR | X | 20 | 27.650 | 32.454 | 19.903 | 0.00 | 0.00 |
| ATOM | 325 | HB   | THR | X | 20 | 27.287 | 31.585 | 20.451 | 0.00 | 0.00 |
| ATOM | 326 | CG2  | THR | X | 20 | 29.146 | 32.567 | 20.392 | 0.00 | 0.00 |
| ATOM | 327 | HG21 | THR | X | 20 | 29.827 | 31.756 | 20.132 | 0.00 | 0.00 |
| ATOM | 328 | HG22 | THR | X | 20 | 29.018 | 32.598 | 21.474 | 0.00 | 0.00 |
| ATOM | 329 | HG23 | THR | X | 20 | 29.595 | 33.485 | 20.012 | 0.00 | 0.00 |
| ATOM | 330 | OG1  | THR | X | 20 | 26.914 | 33.584 | 20.211 | 0.00 | 0.00 |
| ATOM | 331 | HG1  | THR | X | 20 | 25.961 | 33.493 | 20.152 | 0.00 | 0.00 |
| ATOM | 332 | C    | THR | X | 20 | 26.949 | 30.978 | 17.936 | 0.00 | 0.00 |
| ATOM | 333 | O    | THR | X | 20 | 25.807 | 31.124 | 17.585 | 0.00 | 0.00 |
| ATOM | 334 | N    | PRO | X | 21 | 27.454 | 29.726 | 17.986 | 0.00 | 0.00 |
| ATOM | 335 | CD   | PRO | X | 21 | 28.668 | 29.339 | 18.661 | 0.00 | 0.00 |
| ATOM | 336 | HD2  | PRO | X | 21 | 28.763 | 29.816 | 19.636 | 0.00 | 0.00 |
| ATOM | 337 | HD3  | PRO | X | 21 | 29.489 | 29.616 | 17.999 | 0.00 | 0.00 |
| ATOM | 338 | CG   | PRO | X | 21 | 28.612 | 27.894 | 18.893 | 0.00 | 0.00 |
| ATOM | 339 | HG2  | PRO | X | 21 | 28.177 | 27.488 | 19.807 | 0.00 | 0.00 |

|      |     |      |     |   |    |        |        |        |      |      |
|------|-----|------|-----|---|----|--------|--------|--------|------|------|
| ATOM | 340 | HG3  | PRO | X | 21 | 29.627 | 27.532 | 18.729 | 0.00 | 0.00 |
| ATOM | 341 | CB   | PRO | X | 21 | 27.786 | 27.375 | 17.710 | 0.00 | 0.00 |
| ATOM | 342 | HB2  | PRO | X | 21 | 27.258 | 26.437 | 17.877 | 0.00 | 0.00 |
| ATOM | 343 | HB3  | PRO | X | 21 | 28.519 | 27.194 | 16.924 | 0.00 | 0.00 |
| ATOM | 344 | CA   | PRO | X | 21 | 26.836 | 28.576 | 17.415 | 0.00 | 0.00 |
| ATOM | 345 | HA   | PRO | X | 21 | 26.878 | 28.740 | 16.338 | 0.00 | 0.00 |
| ATOM | 346 | C    | PRO | X | 21 | 25.380 | 28.302 | 17.832 | 0.00 | 0.00 |
| ATOM | 347 | O    | PRO | X | 21 | 24.636 | 28.003 | 16.887 | 0.00 | 0.00 |
| ATOM | 348 | N    | GLY | X | 22 | 25.009 | 28.357 | 19.070 | 0.00 | 0.00 |
| ATOM | 349 | H    | GLY | X | 22 | 25.617 | 28.747 | 19.776 | 0.00 | 0.00 |
| ATOM | 350 | CA   | GLY | X | 22 | 23.600 | 28.131 | 19.529 | 0.00 | 0.00 |
| ATOM | 351 | HA2  | GLY | X | 22 | 23.062 | 27.513 | 18.810 | 0.00 | 0.00 |
| ATOM | 352 | HA3  | GLY | X | 22 | 23.591 | 27.632 | 20.498 | 0.00 | 0.00 |
| ATOM | 353 | C    | GLY | X | 22 | 22.706 | 29.379 | 19.596 | 0.00 | 0.00 |
| ATOM | 354 | O    | GLY | X | 22 | 21.684 | 29.348 | 20.287 | 0.00 | 0.00 |
| ATOM | 355 | N    | GLY | X | 23 | 22.992 | 30.386 | 18.760 | 0.00 | 0.00 |
| ATOM | 356 | H    | GLY | X | 23 | 23.845 | 30.284 | 18.228 | 0.00 | 0.00 |
| ATOM | 357 | CA   | GLY | X | 23 | 22.248 | 31.682 | 18.710 | 0.00 | 0.00 |
| ATOM | 358 | HA2  | GLY | X | 23 | 21.666 | 31.691 | 17.788 | 0.00 | 0.00 |
| ATOM | 359 | HA3  | GLY | X | 23 | 21.608 | 31.825 | 19.580 | 0.00 | 0.00 |
| ATOM | 360 | C    | GLY | X | 23 | 23.174 | 32.933 | 18.740 | 0.00 | 0.00 |
| ATOM | 361 | O    | GLY | X | 23 | 24.107 | 32.969 | 19.490 | 0.00 | 0.00 |
| ATOM | 362 | N    | PRO | X | 24 | 22.865 | 33.917 | 17.909 | 0.00 | 0.00 |
| ATOM | 363 | CD   | PRO | X | 24 | 21.633 | 34.201 | 17.118 | 0.00 | 0.00 |
| ATOM | 364 | HD2  | PRO | X | 24 | 20.712 | 34.009 | 17.669 | 0.00 | 0.00 |
| ATOM | 365 | HD3  | PRO | X | 24 | 21.594 | 33.563 | 16.235 | 0.00 | 0.00 |
| ATOM | 366 | CG   | PRO | X | 24 | 21.586 | 35.667 | 16.774 | 0.00 | 0.00 |
| ATOM | 367 | HG2  | PRO | X | 24 | 21.160 | 36.163 | 17.647 | 0.00 | 0.00 |
| ATOM | 368 | HG3  | PRO | X | 24 | 21.020 | 35.929 | 15.880 | 0.00 | 0.00 |
| ATOM | 369 | CB   | PRO | X | 24 | 23.144 | 35.986 | 16.792 | 0.00 | 0.00 |
| ATOM | 370 | HB2  | PRO | X | 24 | 23.339 | 37.025 | 17.056 | 0.00 | 0.00 |
| ATOM | 371 | HB3  | PRO | X | 24 | 23.603 | 35.610 | 15.877 | 0.00 | 0.00 |
| ATOM | 372 | CA   | PRO | X | 24 | 23.648 | 35.194 | 18.013 | 0.00 | 0.00 |
| ATOM | 373 | HA   | PRO | X | 24 | 24.725 | 35.169 | 17.850 | 0.00 | 0.00 |
| ATOM | 374 | C    | PRO | X | 24 | 23.348 | 35.993 | 19.315 | 0.00 | 0.00 |
| ATOM | 375 | O    | PRO | X | 24 | 22.543 | 35.623 | 20.129 | 0.00 | 0.00 |
| ATOM | 376 | N    | VAL | X | 25 | 24.031 | 37.162 | 19.337 | 0.00 | 0.00 |
| ATOM | 377 | H    | VAL | X | 25 | 24.586 | 37.434 | 18.538 | 0.00 | 0.00 |
| ATOM | 378 | CA   | VAL | X | 25 | 23.949 | 38.102 | 20.519 | 0.00 | 0.00 |
| ATOM | 379 | HA   | VAL | X | 25 | 23.077 | 37.996 | 21.165 | 0.00 | 0.00 |
| ATOM | 380 | CB   | VAL | X | 25 | 25.209 | 37.881 | 21.405 | 0.00 | 0.00 |
| ATOM | 381 | HB   | VAL | X | 25 | 26.076 | 37.997 | 20.755 | 0.00 | 0.00 |
| ATOM | 382 | CG1  | VAL | X | 25 | 25.241 | 38.833 | 22.590 | 0.00 | 0.00 |
| ATOM | 383 | HG11 | VAL | X | 25 | 25.939 | 38.463 | 23.341 | 0.00 | 0.00 |
| ATOM | 384 | HG12 | VAL | X | 25 | 25.598 | 39.827 | 22.321 | 0.00 | 0.00 |
| ATOM | 385 | HG13 | VAL | X | 25 | 24.370 | 38.857 | 23.246 | 0.00 | 0.00 |
| ATOM | 386 | CG2  | VAL | X | 25 | 25.171 | 36.447 | 22.003 | 0.00 | 0.00 |
| ATOM | 387 | HG21 | VAL | X | 25 | 24.190 | 36.274 | 22.445 | 0.00 | 0.00 |
| ATOM | 388 | HG22 | VAL | X | 25 | 25.982 | 36.364 | 22.727 | 0.00 | 0.00 |
| ATOM | 389 | HG23 | VAL | X | 25 | 25.308 | 35.648 | 21.274 | 0.00 | 0.00 |
| ATOM | 390 | C    | VAL | X | 25 | 23.962 | 39.570 | 20.116 | 0.00 | 0.00 |
| ATOM | 391 | O    | VAL | X | 25 | 24.468 | 39.935 | 19.071 | 0.00 | 0.00 |
| ATOM | 392 | N    | SER | X | 26 | 23.365 | 40.421 | 20.970 | 0.00 | 0.00 |
| ATOM | 393 | H    | SER | X | 26 | 22.837 | 40.034 | 21.740 | 0.00 | 0.00 |
| ATOM | 394 | CA   | SER | X | 26 | 23.298 | 41.885 | 20.798 | 0.00 | 0.00 |
| ATOM | 395 | HA   | SER | X | 26 | 23.644 | 42.122 | 19.792 | 0.00 | 0.00 |
| ATOM | 396 | CB   | SER | X | 26 | 21.933 | 42.474 | 21.217 | 0.00 | 0.00 |
| ATOM | 397 | HB2  | SER | X | 26 | 21.770 | 42.510 | 22.294 | 0.00 | 0.00 |
| ATOM | 398 | HB3  | SER | X | 26 | 21.815 | 43.438 | 20.721 | 0.00 | 0.00 |
| ATOM | 399 | OG   | SER | X | 26 | 20.828 | 41.772 | 20.807 | 0.00 | 0.00 |
| ATOM | 400 | HG   | SER | X | 26 | 20.584 | 41.270 | 21.588 | 0.00 | 0.00 |
| ATOM | 401 | C    | SER | X | 26 | 24.382 | 42.514 | 21.655 | 0.00 | 0.00 |
| ATOM | 402 | O    | SER | X | 26 | 24.479 | 42.127 | 22.812 | 0.00 | 0.00 |
| ATOM | 403 | N    | ALA | X | 27 | 25.231 | 43.427 | 21.218 | 0.00 | 0.00 |
| ATOM | 404 | H    | ALA | X | 27 | 25.216 | 43.596 | 20.223 | 0.00 | 0.00 |
| ATOM | 405 | CA   | ALA | X | 27 | 26.292 | 44.000 | 21.970 | 0.00 | 0.00 |
| ATOM | 406 | HA   | ALA | X | 27 | 26.222 | 43.919 | 23.055 | 0.00 | 0.00 |

|      |     |      |     |   |    |        |        |        |      |      |
|------|-----|------|-----|---|----|--------|--------|--------|------|------|
| ATOM | 407 | CB   | ALA | X | 27 | 27.630 | 43.466 | 21.504 | 0.00 | 0.00 |
| ATOM | 408 | HB1  | ALA | X | 27 | 27.618 | 42.387 | 21.657 | 0.00 | 0.00 |
| ATOM | 409 | HB2  | ALA | X | 27 | 28.443 | 43.926 | 22.067 | 0.00 | 0.00 |
| ATOM | 410 | HB3  | ALA | X | 27 | 27.624 | 43.699 | 20.439 | 0.00 | 0.00 |
| ATOM | 411 | C    | ALA | X | 27 | 26.308 | 45.558 | 21.784 | 0.00 | 0.00 |
| ATOM | 412 | O    | ALA | X | 27 | 26.233 | 46.087 | 20.680 | 0.00 | 0.00 |
| ATOM | 413 | N    | PHE | X | 28 | 26.402 | 46.272 | 22.883 | 0.00 | 0.00 |
| ATOM | 414 | H    | PHE | X | 28 | 26.550 | 45.806 | 23.767 | 0.00 | 0.00 |
| ATOM | 415 | CA   | PHE | X | 28 | 26.291 | 47.730 | 22.878 | 0.00 | 0.00 |
| ATOM | 416 | HA   | PHE | X | 28 | 26.291 | 48.231 | 21.910 | 0.00 | 0.00 |
| ATOM | 417 | CB   | PHE | X | 28 | 25.013 | 48.089 | 23.563 | 0.00 | 0.00 |
| ATOM | 418 | HB2  | PHE | X | 28 | 24.861 | 47.697 | 24.569 | 0.00 | 0.00 |
| ATOM | 419 | HB3  | PHE | X | 28 | 24.933 | 49.171 | 23.667 | 0.00 | 0.00 |
| ATOM | 420 | CG   | PHE | X | 28 | 23.704 | 47.587 | 22.901 | 0.00 | 0.00 |
| ATOM | 421 | CD1  | PHE | X | 28 | 23.160 | 46.348 | 23.098 | 0.00 | 0.00 |
| ATOM | 422 | HD1  | PHE | X | 28 | 23.653 | 45.619 | 23.725 | 0.00 | 0.00 |
| ATOM | 423 | CE1  | PHE | X | 28 | 21.823 | 46.077 | 22.635 | 0.00 | 0.00 |
| ATOM | 424 | HE1  | PHE | X | 28 | 21.421 | 45.093 | 22.825 | 0.00 | 0.00 |
| ATOM | 425 | CZ   | PHE | X | 28 | 21.066 | 47.020 | 21.975 | 0.00 | 0.00 |
| ATOM | 426 | HZ   | PHE | X | 28 | 20.026 | 46.786 | 21.804 | 0.00 | 0.00 |
| ATOM | 427 | CE2  | PHE | X | 28 | 21.625 | 48.322 | 21.814 | 0.00 | 0.00 |
| ATOM | 428 | HE2  | PHE | X | 28 | 21.124 | 49.176 | 21.383 | 0.00 | 0.00 |
| ATOM | 429 | CD2  | PHE | X | 28 | 22.913 | 48.586 | 22.228 | 0.00 | 0.00 |
| ATOM | 430 | HD2  | PHE | X | 28 | 23.320 | 49.577 | 22.088 | 0.00 | 0.00 |
| ATOM | 431 | C    | PHE | X | 28 | 27.551 | 48.187 | 23.692 | 0.00 | 0.00 |
| ATOM | 432 | O    | PHE | X | 28 | 27.528 | 47.917 | 24.921 | 0.00 | 0.00 |
| ATOM | 433 | N    | LEU | X | 29 | 28.552 | 48.821 | 23.020 | 0.00 | 0.00 |
| ATOM | 434 | H    | LEU | X | 29 | 28.310 | 49.107 | 22.083 | 0.00 | 0.00 |
| ATOM | 435 | CA   | LEU | X | 29 | 29.905 | 49.124 | 23.562 | 0.00 | 0.00 |
| ATOM | 436 | HA   | LEU | X | 29 | 29.973 | 48.702 | 24.565 | 0.00 | 0.00 |
| ATOM | 437 | CB   | LEU | X | 29 | 30.980 | 48.451 | 22.658 | 0.00 | 0.00 |
| ATOM | 438 | HB2  | LEU | X | 29 | 31.064 | 49.163 | 21.838 | 0.00 | 0.00 |
| ATOM | 439 | HB3  | LEU | X | 29 | 31.920 | 48.505 | 23.207 | 0.00 | 0.00 |
| ATOM | 440 | CG   | LEU | X | 29 | 30.799 | 46.973 | 22.186 | 0.00 | 0.00 |
| ATOM | 441 | HG   | LEU | X | 29 | 29.858 | 46.937 | 21.637 | 0.00 | 0.00 |
| ATOM | 442 | CD1  | LEU | X | 29 | 31.847 | 46.610 | 21.219 | 0.00 | 0.00 |
| ATOM | 443 | HD11 | LEU | X | 29 | 31.492 | 45.768 | 20.625 | 0.00 | 0.00 |
| ATOM | 444 | HD12 | LEU | X | 29 | 32.695 | 46.362 | 21.859 | 0.00 | 0.00 |
| ATOM | 445 | HD13 | LEU | X | 29 | 32.080 | 47.395 | 20.499 | 0.00 | 0.00 |
| ATOM | 446 | CD2  | LEU | X | 29 | 30.869 | 45.877 | 23.280 | 0.00 | 0.00 |
| ATOM | 447 | HD21 | LEU | X | 29 | 31.505 | 46.245 | 24.085 | 0.00 | 0.00 |
| ATOM | 448 | HD22 | LEU | X | 29 | 29.846 | 45.720 | 23.622 | 0.00 | 0.00 |
| ATOM | 449 | HD23 | LEU | X | 29 | 31.238 | 44.921 | 22.911 | 0.00 | 0.00 |
| ATOM | 450 | C    | LEU | X | 29 | 30.141 | 50.625 | 23.730 | 0.00 | 0.00 |
| ATOM | 451 | O    | LEU | X | 29 | 29.638 | 51.434 | 22.968 | 0.00 | 0.00 |
| ATOM | 452 | N    | GLY | X | 30 | 30.824 | 51.066 | 24.811 | 0.00 | 0.00 |
| ATOM | 453 | H    | GLY | X | 30 | 31.045 | 50.349 | 25.487 | 0.00 | 0.00 |
| ATOM | 454 | CA   | GLY | X | 30 | 31.269 | 52.446 | 24.991 | 0.00 | 0.00 |
| ATOM | 455 | HA2  | GLY | X | 30 | 31.973 | 52.476 | 25.823 | 0.00 | 0.00 |
| ATOM | 456 | HA3  | GLY | X | 30 | 31.769 | 52.831 | 24.103 | 0.00 | 0.00 |
| ATOM | 457 | C    | GLY | X | 30 | 30.194 | 53.515 | 25.315 | 0.00 | 0.00 |
| ATOM | 458 | O    | GLY | X | 30 | 30.195 | 54.614 | 24.706 | 0.00 | 0.00 |
| ATOM | 459 | N    | ILE | X | 31 | 29.284 | 53.193 | 26.193 | 0.00 | 0.00 |
| ATOM | 460 | H    | ILE | X | 31 | 29.587 | 52.427 | 26.778 | 0.00 | 0.00 |
| ATOM | 461 | CA   | ILE | X | 31 | 28.179 | 54.012 | 26.685 | 0.00 | 0.00 |
| ATOM | 462 | HA   | ILE | X | 31 | 27.841 | 54.646 | 25.866 | 0.00 | 0.00 |
| ATOM | 463 | CB   | ILE | X | 31 | 26.988 | 53.044 | 27.091 | 0.00 | 0.00 |
| ATOM | 464 | HB   | ILE | X | 31 | 27.405 | 52.422 | 27.883 | 0.00 | 0.00 |
| ATOM | 465 | CG2  | ILE | X | 31 | 25.757 | 53.897 | 27.547 | 0.00 | 0.00 |
| ATOM | 466 | HG21 | ILE | X | 31 | 26.055 | 54.536 | 28.379 | 0.00 | 0.00 |
| ATOM | 467 | HG22 | ILE | X | 31 | 24.853 | 53.299 | 27.657 | 0.00 | 0.00 |
| ATOM | 468 | HG23 | ILE | X | 31 | 25.545 | 54.659 | 26.797 | 0.00 | 0.00 |
| ATOM | 469 | CG1  | ILE | X | 31 | 26.492 | 52.143 | 25.834 | 0.00 | 0.00 |
| ATOM | 470 | HG12 | ILE | X | 31 | 25.779 | 52.722 | 25.247 | 0.00 | 0.00 |
| ATOM | 471 | HG13 | ILE | X | 31 | 27.351 | 51.918 | 25.201 | 0.00 | 0.00 |
| ATOM | 472 | CD1  | ILE | X | 31 | 25.727 | 50.835 | 26.227 | 0.00 | 0.00 |
| ATOM | 473 | HD11 | ILE | X | 31 | 26.446 | 50.080 | 26.545 | 0.00 | 0.00 |

|      |     |      |     |   |    |        |        |        |      |      |
|------|-----|------|-----|---|----|--------|--------|--------|------|------|
| ATOM | 474 | HD12 | ILE | X | 31 | 25.080 | 50.547 | 25.399 | 0.00 | 0.00 |
| ATOM | 475 | HD13 | ILE | X | 31 | 25.133 | 51.037 | 27.119 | 0.00 | 0.00 |
| ATOM | 476 | C    | ILE | X | 31 | 28.696 | 54.841 | 27.830 | 0.00 | 0.00 |
| ATOM | 477 | O    | ILE | X | 31 | 29.157 | 54.284 | 28.859 | 0.00 | 0.00 |
| ATOM | 478 | N    | PRO | X | 32 | 28.649 | 56.212 | 27.835 | 0.00 | 0.00 |
| ATOM | 479 | CD   | PRO | X | 32 | 28.365 | 57.044 | 26.649 | 0.00 | 0.00 |
| ATOM | 480 | HD2  | PRO | X | 32 | 27.442 | 56.762 | 26.142 | 0.00 | 0.00 |
| ATOM | 481 | HD3  | PRO | X | 32 | 29.168 | 56.945 | 25.918 | 0.00 | 0.00 |
| ATOM | 482 | CG   | PRO | X | 32 | 28.396 | 58.423 | 27.210 | 0.00 | 0.00 |
| ATOM | 483 | HG2  | PRO | X | 32 | 27.421 | 58.833 | 27.474 | 0.00 | 0.00 |
| ATOM | 484 | HG3  | PRO | X | 32 | 28.707 | 59.083 | 26.400 | 0.00 | 0.00 |
| ATOM | 485 | CB   | PRO | X | 32 | 29.393 | 58.343 | 28.372 | 0.00 | 0.00 |
| ATOM | 486 | HB2  | PRO | X | 32 | 29.263 | 59.226 | 28.998 | 0.00 | 0.00 |
| ATOM | 487 | HB3  | PRO | X | 32 | 30.425 | 58.248 | 28.036 | 0.00 | 0.00 |
| ATOM | 488 | CA   | PRO | X | 32 | 29.099 | 57.018 | 28.994 | 0.00 | 0.00 |
| ATOM | 489 | HA   | PRO | X | 32 | 29.981 | 56.616 | 29.493 | 0.00 | 0.00 |
| ATOM | 490 | C    | PRO | X | 32 | 27.979 | 57.123 | 30.011 | 0.00 | 0.00 |
| ATOM | 491 | O    | PRO | X | 32 | 26.938 | 57.687 | 29.703 | 0.00 | 0.00 |
| ATOM | 492 | N    | PHE | X | 33 | 28.304 | 56.813 | 31.292 | 0.00 | 0.00 |
| ATOM | 493 | H    | PHE | X | 33 | 29.239 | 56.452 | 31.415 | 0.00 | 0.00 |
| ATOM | 494 | CA   | PHE | X | 33 | 27.373 | 56.888 | 32.383 | 0.00 | 0.00 |
| ATOM | 495 | HA   | PHE | X | 33 | 26.405 | 57.083 | 31.920 | 0.00 | 0.00 |
| ATOM | 496 | CB   | PHE | X | 33 | 27.310 | 55.570 | 33.184 | 0.00 | 0.00 |
| ATOM | 497 | HB2  | PHE | X | 33 | 26.486 | 55.710 | 33.883 | 0.00 | 0.00 |
| ATOM | 498 | HB3  | PHE | X | 33 | 27.075 | 54.754 | 32.501 | 0.00 | 0.00 |
| ATOM | 499 | CG   | PHE | X | 33 | 28.596 | 55.251 | 33.947 | 0.00 | 0.00 |
| ATOM | 500 | CD1  | PHE | X | 33 | 28.860 | 56.016 | 35.128 | 0.00 | 0.00 |
| ATOM | 501 | HD1  | PHE | X | 33 | 28.154 | 56.723 | 35.540 | 0.00 | 0.00 |
| ATOM | 502 | CE1  | PHE | X | 33 | 30.033 | 55.772 | 35.841 | 0.00 | 0.00 |
| ATOM | 503 | HE1  | PHE | X | 33 | 30.249 | 56.349 | 36.728 | 0.00 | 0.00 |
| ATOM | 504 | CZ   | PHE | X | 33 | 30.940 | 54.814 | 35.405 | 0.00 | 0.00 |
| ATOM | 505 | HZ   | PHE | X | 33 | 31.865 | 54.590 | 35.915 | 0.00 | 0.00 |
| ATOM | 506 | CE2  | PHE | X | 33 | 30.700 | 54.109 | 34.212 | 0.00 | 0.00 |
| ATOM | 507 | HE2  | PHE | X | 33 | 31.319 | 53.290 | 33.876 | 0.00 | 0.00 |
| ATOM | 508 | CD2  | PHE | X | 33 | 29.542 | 54.364 | 33.428 | 0.00 | 0.00 |
| ATOM | 509 | HD2  | PHE | X | 33 | 29.235 | 53.705 | 32.629 | 0.00 | 0.00 |
| ATOM | 510 | C    | PHE | X | 33 | 27.545 | 58.129 | 33.316 | 0.00 | 0.00 |
| ATOM | 511 | O    | PHE | X | 33 | 26.836 | 58.297 | 34.281 | 0.00 | 0.00 |
| ATOM | 512 | N    | ALA | X | 34 | 28.399 | 59.032 | 32.851 | 0.00 | 0.00 |
| ATOM | 513 | H    | ALA | X | 34 | 28.948 | 58.844 | 32.024 | 0.00 | 0.00 |
| ATOM | 514 | CA   | ALA | X | 34 | 28.886 | 60.104 | 33.714 | 0.00 | 0.00 |
| ATOM | 515 | HA   | ALA | X | 34 | 28.098 | 60.488 | 34.362 | 0.00 | 0.00 |
| ATOM | 516 | CB   | ALA | X | 34 | 29.970 | 59.572 | 34.663 | 0.00 | 0.00 |
| ATOM | 517 | HB1  | ALA | X | 34 | 30.339 | 60.317 | 35.368 | 0.00 | 0.00 |
| ATOM | 518 | HB2  | ALA | X | 34 | 30.807 | 59.137 | 34.116 | 0.00 | 0.00 |
| ATOM | 519 | HB3  | ALA | X | 34 | 29.594 | 58.770 | 35.298 | 0.00 | 0.00 |
| ATOM | 520 | C    | ALA | X | 34 | 29.407 | 61.259 | 32.886 | 0.00 | 0.00 |
| ATOM | 521 | O    | ALA | X | 34 | 29.831 | 60.936 | 31.770 | 0.00 | 0.00 |
| ATOM | 522 | N    | GLU | X | 35 | 29.306 | 62.478 | 33.411 | 0.00 | 0.00 |
| ATOM | 523 | H    | GLU | X | 35 | 28.824 | 62.588 | 34.292 | 0.00 | 0.00 |
| ATOM | 524 | CA   | GLU | X | 35 | 30.171 | 63.639 | 33.005 | 0.00 | 0.00 |
| ATOM | 525 | HA   | GLU | X | 35 | 29.985 | 63.815 | 31.946 | 0.00 | 0.00 |
| ATOM | 526 | CB   | GLU | X | 35 | 29.761 | 64.869 | 33.733 | 0.00 | 0.00 |
| ATOM | 527 | HB2  | GLU | X | 35 | 29.912 | 64.676 | 34.795 | 0.00 | 0.00 |
| ATOM | 528 | HB3  | GLU | X | 35 | 30.384 | 65.729 | 33.486 | 0.00 | 0.00 |
| ATOM | 529 | CG   | GLU | X | 35 | 28.234 | 65.230 | 33.485 | 0.00 | 0.00 |
| ATOM | 530 | HG2  | GLU | X | 35 | 27.640 | 64.323 | 33.590 | 0.00 | 0.00 |
| ATOM | 531 | HG3  | GLU | X | 35 | 27.922 | 66.023 | 34.165 | 0.00 | 0.00 |
| ATOM | 532 | CD   | GLU | X | 35 | 27.970 | 65.735 | 32.105 | 0.00 | 0.00 |
| ATOM | 533 | OE1  | GLU | X | 35 | 27.058 | 65.154 | 31.485 | 0.00 | 0.00 |
| ATOM | 534 | OE2  | GLU | X | 35 | 28.759 | 66.550 | 31.560 | 0.00 | 0.00 |
| ATOM | 535 | C    | GLU | X | 35 | 31.558 | 63.344 | 33.370 | 0.00 | 0.00 |
| ATOM | 536 | O    | GLU | X | 35 | 31.763 | 62.847 | 34.520 | 0.00 | 0.00 |
| ATOM | 537 | N    | PRO | X | 36 | 32.529 | 63.485 | 32.462 | 0.00 | 0.00 |
| ATOM | 538 | CD   | PRO | X | 36 | 32.407 | 64.027 | 31.121 | 0.00 | 0.00 |
| ATOM | 539 | HD2  | PRO | X | 36 | 32.071 | 65.062 | 31.175 | 0.00 | 0.00 |
| ATOM | 540 | HD3  | PRO | X | 36 | 31.687 | 63.347 | 30.666 | 0.00 | 0.00 |

|      |     |     |     |   |    |        |        |        |      |      |
|------|-----|-----|-----|---|----|--------|--------|--------|------|------|
| ATOM | 541 | CG  | PRO | X | 36 | 33.747 | 63.896 | 30.423 | 0.00 | 0.00 |
| ATOM | 542 | HG2 | PRO | X | 36 | 34.274 | 64.841 | 30.559 | 0.00 | 0.00 |
| ATOM | 543 | HG3 | PRO | X | 36 | 33.699 | 63.735 | 29.346 | 0.00 | 0.00 |
| ATOM | 544 | CB  | PRO | X | 36 | 34.389 | 62.746 | 31.145 | 0.00 | 0.00 |
| ATOM | 545 | HB2 | PRO | X | 36 | 35.475 | 62.719 | 31.060 | 0.00 | 0.00 |
| ATOM | 546 | HB3 | PRO | X | 36 | 33.973 | 61.882 | 30.628 | 0.00 | 0.00 |
| ATOM | 547 | CA  | PRO | X | 36 | 33.822 | 62.858 | 32.559 | 0.00 | 0.00 |
| ATOM | 548 | HA  | PRO | X | 36 | 33.545 | 61.890 | 32.977 | 0.00 | 0.00 |
| ATOM | 549 | C   | PRO | X | 36 | 34.793 | 63.600 | 33.567 | 0.00 | 0.00 |
| ATOM | 550 | O   | PRO | X | 36 | 34.614 | 64.727 | 33.942 | 0.00 | 0.00 |
| ATOM | 551 | N   | PRO | X | 37 | 35.711 | 62.752 | 34.070 | 0.00 | 0.00 |
| ATOM | 552 | CD  | PRO | X | 37 | 35.849 | 61.314 | 33.853 | 0.00 | 0.00 |
| ATOM | 553 | HD2 | PRO | X | 37 | 36.328 | 61.219 | 32.879 | 0.00 | 0.00 |
| ATOM | 554 | HD3 | PRO | X | 37 | 34.884 | 60.806 | 33.855 | 0.00 | 0.00 |
| ATOM | 555 | CG  | PRO | X | 37 | 36.639 | 60.768 | 34.983 | 0.00 | 0.00 |
| ATOM | 556 | HG2 | PRO | X | 37 | 37.699 | 60.641 | 34.761 | 0.00 | 0.00 |
| ATOM | 557 | HG3 | PRO | X | 37 | 36.344 | 59.734 | 35.160 | 0.00 | 0.00 |
| ATOM | 558 | CB  | PRO | X | 37 | 36.380 | 61.759 | 36.132 | 0.00 | 0.00 |
| ATOM | 559 | HB2 | PRO | X | 37 | 37.094 | 61.669 | 36.951 | 0.00 | 0.00 |
| ATOM | 560 | HB3 | PRO | X | 37 | 35.368 | 61.555 | 36.479 | 0.00 | 0.00 |
| ATOM | 561 | CA  | PRO | X | 37 | 36.471 | 62.995 | 35.320 | 0.00 | 0.00 |
| ATOM | 562 | HA  | PRO | X | 37 | 35.986 | 63.839 | 35.810 | 0.00 | 0.00 |
| ATOM | 563 | C   | PRO | X | 37 | 37.949 | 63.431 | 35.186 | 0.00 | 0.00 |
| ATOM | 564 | O   | PRO | X | 37 | 38.809 | 63.201 | 35.986 | 0.00 | 0.00 |
| ATOM | 565 | N   | MET | X | 38 | 38.245 | 64.021 | 33.994 | 0.00 | 0.00 |
| ATOM | 566 | H   | MET | X | 38 | 37.530 | 64.193 | 33.302 | 0.00 | 0.00 |
| ATOM | 567 | CA  | MET | X | 38 | 39.586 | 64.400 | 33.569 | 0.00 | 0.00 |
| ATOM | 568 | HA  | MET | X | 38 | 40.312 | 63.638 | 33.856 | 0.00 | 0.00 |
| ATOM | 569 | CB  | MET | X | 38 | 39.665 | 64.518 | 31.983 | 0.00 | 0.00 |
| ATOM | 570 | HB2 | MET | X | 38 | 40.704 | 64.634 | 31.674 | 0.00 | 0.00 |
| ATOM | 571 | HB3 | MET | X | 38 | 39.436 | 63.537 | 31.567 | 0.00 | 0.00 |
| ATOM | 572 | CG  | MET | X | 38 | 38.699 | 65.551 | 31.327 | 0.00 | 0.00 |
| ATOM | 573 | HG2 | MET | X | 38 | 38.844 | 66.381 | 32.018 | 0.00 | 0.00 |
| ATOM | 574 | HG3 | MET | X | 38 | 38.987 | 65.832 | 30.315 | 0.00 | 0.00 |
| ATOM | 575 | SD  | MET | X | 38 | 36.932 | 65.155 | 31.374 | 0.00 | 0.00 |
| ATOM | 576 | CE  | MET | X | 38 | 36.340 | 66.456 | 30.291 | 0.00 | 0.00 |
| ATOM | 577 | HE1 | MET | X | 38 | 35.257 | 66.537 | 30.200 | 0.00 | 0.00 |
| ATOM | 578 | HE2 | MET | X | 38 | 36.645 | 67.452 | 30.611 | 0.00 | 0.00 |
| ATOM | 579 | HE3 | MET | X | 38 | 36.672 | 66.264 | 29.271 | 0.00 | 0.00 |
| ATOM | 580 | C   | MET | X | 38 | 40.063 | 65.587 | 34.407 | 0.00 | 0.00 |
| ATOM | 581 | O   | MET | X | 38 | 39.259 | 66.415 | 34.844 | 0.00 | 0.00 |
| ATOM | 582 | N   | GLY | X | 39 | 41.391 | 65.725 | 34.564 | 0.00 | 0.00 |
| ATOM | 583 | H   | GLY | X | 39 | 42.026 | 65.001 | 34.259 | 0.00 | 0.00 |
| ATOM | 584 | CA  | GLY | X | 39 | 42.097 | 66.900 | 35.163 | 0.00 | 0.00 |
| ATOM | 585 | HA2 | GLY | X | 39 | 43.095 | 66.549 | 35.424 | 0.00 | 0.00 |
| ATOM | 586 | HA3 | GLY | X | 39 | 42.039 | 67.608 | 34.336 | 0.00 | 0.00 |
| ATOM | 587 | C   | GLY | X | 39 | 41.401 | 67.572 | 36.382 | 0.00 | 0.00 |
| ATOM | 588 | O   | GLY | X | 39 | 41.658 | 67.132 | 37.498 | 0.00 | 0.00 |
| ATOM | 589 | N   | PRO | X | 40 | 40.644 | 68.646 | 36.200 | 0.00 | 0.00 |
| ATOM | 590 | CD  | PRO | X | 40 | 40.407 | 69.371 | 34.946 | 0.00 | 0.00 |
| ATOM | 591 | HD2 | PRO | X | 40 | 39.677 | 68.805 | 34.367 | 0.00 | 0.00 |
| ATOM | 592 | HD3 | PRO | X | 40 | 41.313 | 69.685 | 34.427 | 0.00 | 0.00 |
| ATOM | 593 | CG  | PRO | X | 40 | 39.679 | 70.660 | 35.387 | 0.00 | 0.00 |
| ATOM | 594 | HG2 | PRO | X | 40 | 39.123 | 71.040 | 34.530 | 0.00 | 0.00 |
| ATOM | 595 | HG3 | PRO | X | 40 | 40.398 | 71.373 | 35.790 | 0.00 | 0.00 |
| ATOM | 596 | CB  | PRO | X | 40 | 38.859 | 70.191 | 36.598 | 0.00 | 0.00 |
| ATOM | 597 | HB2 | PRO | X | 40 | 38.050 | 69.675 | 36.081 | 0.00 | 0.00 |
| ATOM | 598 | HB3 | PRO | X | 40 | 38.547 | 71.092 | 37.127 | 0.00 | 0.00 |
| ATOM | 599 | CA  | PRO | X | 40 | 39.874 | 69.238 | 37.274 | 0.00 | 0.00 |
| ATOM | 600 | HA  | PRO | X | 40 | 40.620 | 69.807 | 37.829 | 0.00 | 0.00 |
| ATOM | 601 | C   | PRO | X | 40 | 39.100 | 68.252 | 38.135 | 0.00 | 0.00 |
| ATOM | 602 | O   | PRO | X | 40 | 39.065 | 68.350 | 39.352 | 0.00 | 0.00 |
| ATOM | 603 | N   | ARG | X | 41 | 38.448 | 67.245 | 37.588 | 0.00 | 0.00 |
| ATOM | 604 | H   | ARG | X | 41 | 38.646 | 66.996 | 36.629 | 0.00 | 0.00 |
| ATOM | 605 | CA  | ARG | X | 41 | 37.764 | 66.281 | 38.450 | 0.00 | 0.00 |
| ATOM | 606 | HA  | ARG | X | 41 | 37.398 | 66.688 | 39.393 | 0.00 | 0.00 |
| ATOM | 607 | CB  | ARG | X | 41 | 36.527 | 65.705 | 37.718 | 0.00 | 0.00 |

|      |     |      |     |   |    |        |        |        |      |      |
|------|-----|------|-----|---|----|--------|--------|--------|------|------|
| ATOM | 608 | HB2  | ARG | X | 41 | 36.828 | 65.697 | 36.670 | 0.00 | 0.00 |
| ATOM | 609 | HB3  | ARG | X | 41 | 36.311 | 64.703 | 38.090 | 0.00 | 0.00 |
| ATOM | 610 | CG   | ARG | X | 41 | 35.226 | 66.578 | 37.730 | 0.00 | 0.00 |
| ATOM | 611 | HG2  | ARG | X | 41 | 34.743 | 66.399 | 38.691 | 0.00 | 0.00 |
| ATOM | 612 | HG3  | ARG | X | 41 | 35.382 | 67.655 | 37.663 | 0.00 | 0.00 |
| ATOM | 613 | CD   | ARG | X | 41 | 34.219 | 66.098 | 36.668 | 0.00 | 0.00 |
| ATOM | 614 | HD2  | ARG | X | 41 | 34.779 | 66.222 | 35.741 | 0.00 | 0.00 |
| ATOM | 615 | HD3  | ARG | X | 41 | 33.896 | 65.062 | 36.772 | 0.00 | 0.00 |
| ATOM | 616 | NE   | ARG | X | 41 | 33.063 | 66.947 | 36.610 | 0.00 | 0.00 |
| ATOM | 617 | HE   | ARG | X | 41 | 32.723 | 67.416 | 37.437 | 0.00 | 0.00 |
| ATOM | 618 | CZ   | ARG | X | 41 | 32.442 | 67.325 | 35.484 | 0.00 | 0.00 |
| ATOM | 619 | NH1  | ARG | X | 41 | 32.742 | 66.956 | 34.229 | 0.00 | 0.00 |
| ATOM | 620 | HH11 | ARG | X | 41 | 33.526 | 66.341 | 34.064 | 0.00 | 0.00 |
| ATOM | 621 | HH12 | ARG | X | 41 | 32.371 | 67.304 | 33.357 | 0.00 | 0.00 |
| ATOM | 622 | NH2  | ARG | X | 41 | 31.335 | 68.050 | 35.622 | 0.00 | 0.00 |
| ATOM | 623 | HH21 | ARG | X | 41 | 31.026 | 68.400 | 36.518 | 0.00 | 0.00 |
| ATOM | 624 | HH22 | ARG | X | 41 | 30.798 | 68.294 | 34.802 | 0.00 | 0.00 |
| ATOM | 625 | C    | ARG | X | 41 | 38.666 | 65.160 | 38.848 | 0.00 | 0.00 |
| ATOM | 626 | O    | ARG | X | 41 | 38.214 | 64.156 | 39.466 | 0.00 | 0.00 |
| ATOM | 627 | N    | ARG | X | 42 | 39.887 | 65.160 | 38.392 | 0.00 | 0.00 |
| ATOM | 628 | H    | ARG | X | 42 | 40.274 | 65.969 | 37.926 | 0.00 | 0.00 |
| ATOM | 629 | CA   | ARG | X | 42 | 40.854 | 64.060 | 38.747 | 0.00 | 0.00 |
| ATOM | 630 | HA   | ARG | X | 42 | 40.437 | 63.090 | 38.475 | 0.00 | 0.00 |
| ATOM | 631 | CB   | ARG | X | 42 | 42.222 | 64.160 | 38.026 | 0.00 | 0.00 |
| ATOM | 632 | HB2  | ARG | X | 42 | 42.075 | 64.483 | 36.995 | 0.00 | 0.00 |
| ATOM | 633 | HB3  | ARG | X | 42 | 42.782 | 64.894 | 38.606 | 0.00 | 0.00 |
| ATOM | 634 | CG   | ARG | X | 42 | 42.958 | 62.862 | 38.145 | 0.00 | 0.00 |
| ATOM | 635 | HG2  | ARG | X | 42 | 42.711 | 62.394 | 39.098 | 0.00 | 0.00 |
| ATOM | 636 | HG3  | ARG | X | 42 | 42.617 | 62.156 | 37.388 | 0.00 | 0.00 |
| ATOM | 637 | CD   | ARG | X | 42 | 44.455 | 63.009 | 37.894 | 0.00 | 0.00 |
| ATOM | 638 | HD2  | ARG | X | 42 | 44.887 | 63.704 | 38.615 | 0.00 | 0.00 |
| ATOM | 639 | HD3  | ARG | X | 42 | 44.829 | 62.028 | 38.187 | 0.00 | 0.00 |
| ATOM | 640 | NE   | ARG | X | 42 | 44.778 | 63.555 | 36.536 | 0.00 | 0.00 |
| ATOM | 641 | HE   | ARG | X | 42 | 44.044 | 63.478 | 35.847 | 0.00 | 0.00 |
| ATOM | 642 | CZ   | ARG | X | 42 | 45.850 | 64.181 | 36.075 | 0.00 | 0.00 |
| ATOM | 643 | NH1  | ARG | X | 42 | 46.890 | 64.459 | 36.817 | 0.00 | 0.00 |
| ATOM | 644 | HH11 | ARG | X | 42 | 46.817 | 64.583 | 37.817 | 0.00 | 0.00 |
| ATOM | 645 | HH12 | ARG | X | 42 | 47.704 | 64.776 | 36.310 | 0.00 | 0.00 |
| ATOM | 646 | NH2  | ARG | X | 42 | 45.924 | 64.341 | 34.758 | 0.00 | 0.00 |
| ATOM | 647 | HH21 | ARG | X | 42 | 45.209 | 63.917 | 34.186 | 0.00 | 0.00 |
| ATOM | 648 | HH22 | ARG | X | 42 | 46.554 | 64.920 | 34.221 | 0.00 | 0.00 |
| ATOM | 649 | C    | ARG | X | 42 | 41.083 | 64.006 | 40.248 | 0.00 | 0.00 |
| ATOM | 650 | O    | ARG | X | 42 | 41.410 | 65.023 | 40.825 | 0.00 | 0.00 |
| ATOM | 651 | N    | PHE | X | 43 | 40.803 | 62.839 | 40.807 | 0.00 | 0.00 |
| ATOM | 652 | H    | PHE | X | 43 | 40.536 | 62.098 | 40.174 | 0.00 | 0.00 |
| ATOM | 653 | CA   | PHE | X | 43 | 40.827 | 62.508 | 42.209 | 0.00 | 0.00 |
| ATOM | 654 | HA   | PHE | X | 43 | 40.903 | 61.422 | 42.266 | 0.00 | 0.00 |
| ATOM | 655 | CB   | PHE | X | 43 | 41.894 | 63.218 | 43.092 | 0.00 | 0.00 |
| ATOM | 656 | HB2  | PHE | X | 43 | 41.535 | 64.234 | 43.261 | 0.00 | 0.00 |
| ATOM | 657 | HB3  | PHE | X | 43 | 42.074 | 62.727 | 44.048 | 0.00 | 0.00 |
| ATOM | 658 | CG   | PHE | X | 43 | 43.296 | 63.290 | 42.394 | 0.00 | 0.00 |
| ATOM | 659 | CD1  | PHE | X | 43 | 43.807 | 62.138 | 41.799 | 0.00 | 0.00 |
| ATOM | 660 | HD1  | PHE | X | 43 | 43.216 | 61.237 | 41.732 | 0.00 | 0.00 |
| ATOM | 661 | CE1  | PHE | X | 43 | 45.015 | 62.106 | 41.091 | 0.00 | 0.00 |
| ATOM | 662 | HE1  | PHE | X | 43 | 45.365 | 61.151 | 40.727 | 0.00 | 0.00 |
| ATOM | 663 | CZ   | PHE | X | 43 | 45.684 | 63.278 | 40.902 | 0.00 | 0.00 |
| ATOM | 664 | HZ   | PHE | X | 43 | 46.567 | 63.323 | 40.282 | 0.00 | 0.00 |
| ATOM | 665 | CE2  | PHE | X | 43 | 45.316 | 64.406 | 41.630 | 0.00 | 0.00 |
| ATOM | 666 | HE2  | PHE | X | 43 | 45.883 | 65.323 | 41.566 | 0.00 | 0.00 |
| ATOM | 667 | CD2  | PHE | X | 43 | 44.119 | 64.419 | 42.404 | 0.00 | 0.00 |
| ATOM | 668 | HD2  | PHE | X | 43 | 43.940 | 65.215 | 43.111 | 0.00 | 0.00 |
| ATOM | 669 | C    | PHE | X | 43 | 39.417 | 62.681 | 42.933 | 0.00 | 0.00 |
| ATOM | 670 | O    | PHE | X | 43 | 39.173 | 62.307 | 44.017 | 0.00 | 0.00 |
| ATOM | 671 | N    | LEU | X | 44 | 38.523 | 63.394 | 42.276 | 0.00 | 0.00 |
| ATOM | 672 | H    | LEU | X | 44 | 38.660 | 63.684 | 41.318 | 0.00 | 0.00 |
| ATOM | 673 | CA   | LEU | X | 44 | 37.263 | 63.858 | 42.879 | 0.00 | 0.00 |
| ATOM | 674 | HA   | LEU | X | 44 | 37.155 | 63.589 | 43.930 | 0.00 | 0.00 |

|      |     |      |     |   |    |        |        |        |      |      |
|------|-----|------|-----|---|----|--------|--------|--------|------|------|
| ATOM | 675 | CB   | LEU | X | 44 | 37.288 | 65.405 | 42.773 | 0.00 | 0.00 |
| ATOM | 676 | HB2  | LEU | X | 44 | 37.625 | 65.589 | 41.753 | 0.00 | 0.00 |
| ATOM | 677 | HB3  | LEU | X | 44 | 36.272 | 65.709 | 43.025 | 0.00 | 0.00 |
| ATOM | 678 | CG   | LEU | X | 44 | 38.218 | 66.035 | 43.806 | 0.00 | 0.00 |
| ATOM | 679 | HG   | LEU | X | 44 | 39.190 | 65.558 | 43.684 | 0.00 | 0.00 |
| ATOM | 680 | CD1  | LEU | X | 44 | 38.420 | 67.520 | 43.379 | 0.00 | 0.00 |
| ATOM | 681 | HD11 | LEU | X | 44 | 39.230 | 67.929 | 43.983 | 0.00 | 0.00 |
| ATOM | 682 | HD12 | LEU | X | 44 | 37.485 | 68.040 | 43.591 | 0.00 | 0.00 |
| ATOM | 683 | HD13 | LEU | X | 44 | 38.679 | 67.632 | 42.326 | 0.00 | 0.00 |
| ATOM | 684 | CD2  | LEU | X | 44 | 37.655 | 65.973 | 45.277 | 0.00 | 0.00 |
| ATOM | 685 | HD21 | LEU | X | 44 | 36.597 | 66.224 | 45.359 | 0.00 | 0.00 |
| ATOM | 686 | HD22 | LEU | X | 44 | 37.676 | 64.934 | 45.608 | 0.00 | 0.00 |
| ATOM | 687 | HD23 | LEU | X | 44 | 38.246 | 66.603 | 45.942 | 0.00 | 0.00 |
| ATOM | 688 | C    | LEU | X | 44 | 35.957 | 63.331 | 42.229 | 0.00 | 0.00 |
| ATOM | 689 | O    | LEU | X | 44 | 36.008 | 62.781 | 41.091 | 0.00 | 0.00 |
| ATOM | 690 | N    | PRO | X | 45 | 34.758 | 63.455 | 42.905 | 0.00 | 0.00 |
| ATOM | 691 | CD   | PRO | X | 45 | 34.587 | 64.049 | 44.200 | 0.00 | 0.00 |
| ATOM | 692 | HD2  | PRO | X | 45 | 34.628 | 65.137 | 44.154 | 0.00 | 0.00 |
| ATOM | 693 | HD3  | PRO | X | 45 | 35.256 | 63.711 | 44.991 | 0.00 | 0.00 |
| ATOM | 694 | CG   | PRO | X | 45 | 33.213 | 63.761 | 44.762 | 0.00 | 0.00 |
| ATOM | 695 | HG2  | PRO | X | 45 | 32.875 | 64.603 | 45.366 | 0.00 | 0.00 |
| ATOM | 696 | HG3  | PRO | X | 45 | 33.269 | 62.868 | 45.384 | 0.00 | 0.00 |
| ATOM | 697 | CB   | PRO | X | 45 | 32.494 | 63.624 | 43.422 | 0.00 | 0.00 |
| ATOM | 698 | HB2  | PRO | X | 45 | 32.358 | 64.661 | 43.116 | 0.00 | 0.00 |
| ATOM | 699 | HB3  | PRO | X | 45 | 31.512 | 63.166 | 43.534 | 0.00 | 0.00 |
| ATOM | 700 | CA   | PRO | X | 45 | 33.460 | 62.875 | 42.490 | 0.00 | 0.00 |
| ATOM | 701 | HA   | PRO | X | 45 | 33.473 | 61.838 | 42.827 | 0.00 | 0.00 |
| ATOM | 702 | C    | PRO | X | 45 | 33.066 | 63.108 | 41.047 | 0.00 | 0.00 |
| ATOM | 703 | O    | PRO | X | 45 | 33.244 | 64.170 | 40.368 | 0.00 | 0.00 |
| ATOM | 704 | N    | PRO | X | 46 | 32.309 | 62.119 | 40.496 | 0.00 | 0.00 |
| ATOM | 705 | CD   | PRO | X | 46 | 32.151 | 60.785 | 41.035 | 0.00 | 0.00 |
| ATOM | 706 | HD2  | PRO | X | 46 | 31.720 | 60.828 | 42.035 | 0.00 | 0.00 |
| ATOM | 707 | HD3  | PRO | X | 46 | 33.100 | 60.248 | 41.003 | 0.00 | 0.00 |
| ATOM | 708 | CG   | PRO | X | 46 | 31.243 | 60.010 | 40.002 | 0.00 | 0.00 |
| ATOM | 709 | HG2  | PRO | X | 46 | 30.178 | 60.084 | 40.223 | 0.00 | 0.00 |
| ATOM | 710 | HG3  | PRO | X | 46 | 31.627 | 59.017 | 39.767 | 0.00 | 0.00 |
| ATOM | 711 | CB   | PRO | X | 46 | 31.456 | 60.832 | 38.765 | 0.00 | 0.00 |
| ATOM | 712 | HB2  | PRO | X | 46 | 30.742 | 60.611 | 37.971 | 0.00 | 0.00 |
| ATOM | 713 | HB3  | PRO | X | 46 | 32.436 | 60.547 | 38.384 | 0.00 | 0.00 |
| ATOM | 714 | CA   | PRO | X | 46 | 31.578 | 62.327 | 39.210 | 0.00 | 0.00 |
| ATOM | 715 | HA   | PRO | X | 46 | 32.184 | 62.841 | 38.464 | 0.00 | 0.00 |
| ATOM | 716 | C    | PRO | X | 46 | 30.222 | 62.949 | 39.256 | 0.00 | 0.00 |
| ATOM | 717 | O    | PRO | X | 46 | 29.738 | 63.257 | 40.337 | 0.00 | 0.00 |
| ATOM | 718 | N    | GLU | X | 47 | 29.461 | 63.110 | 38.092 | 0.00 | 0.00 |
| ATOM | 719 | H    | GLU | X | 47 | 29.915 | 62.882 | 37.218 | 0.00 | 0.00 |
| ATOM | 720 | CA   | GLU | X | 47 | 27.972 | 63.265 | 38.081 | 0.00 | 0.00 |
| ATOM | 721 | HA   | GLU | X | 47 | 27.568 | 62.747 | 38.951 | 0.00 | 0.00 |
| ATOM | 722 | CB   | GLU | X | 47 | 27.661 | 64.783 | 38.315 | 0.00 | 0.00 |
| ATOM | 723 | HB2  | GLU | X | 47 | 26.724 | 64.820 | 38.870 | 0.00 | 0.00 |
| ATOM | 724 | HB3  | GLU | X | 47 | 28.495 | 65.191 | 38.886 | 0.00 | 0.00 |
| ATOM | 725 | CG   | GLU | X | 47 | 27.534 | 65.578 | 37.063 | 0.00 | 0.00 |
| ATOM | 726 | HG2  | GLU | X | 47 | 28.411 | 65.245 | 36.508 | 0.00 | 0.00 |
| ATOM | 727 | HG3  | GLU | X | 47 | 26.610 | 65.343 | 36.535 | 0.00 | 0.00 |
| ATOM | 728 | CD   | GLU | X | 47 | 27.518 | 67.076 | 37.293 | 0.00 | 0.00 |
| ATOM | 729 | OE1  | GLU | X | 47 | 28.545 | 67.828 | 37.310 | 0.00 | 0.00 |
| ATOM | 730 | OE2  | GLU | X | 47 | 26.388 | 67.546 | 37.459 | 0.00 | 0.00 |
| ATOM | 731 | C    | GLU | X | 47 | 27.325 | 62.677 | 36.820 | 0.00 | 0.00 |
| ATOM | 732 | O    | GLU | X | 47 | 28.041 | 62.292 | 35.877 | 0.00 | 0.00 |
| ATOM | 733 | N    | PRO | X | 48 | 25.984 | 62.450 | 36.874 | 0.00 | 0.00 |
| ATOM | 734 | CD   | PRO | X | 48 | 25.101 | 62.558 | 38.068 | 0.00 | 0.00 |
| ATOM | 735 | HD2  | PRO | X | 48 | 24.892 | 63.614 | 38.238 | 0.00 | 0.00 |
| ATOM | 736 | HD3  | PRO | X | 48 | 25.376 | 62.163 | 39.046 | 0.00 | 0.00 |
| ATOM | 737 | CG   | PRO | X | 48 | 23.767 | 61.882 | 37.732 | 0.00 | 0.00 |
| ATOM | 738 | HG2  | PRO | X | 48 | 22.945 | 62.497 | 38.099 | 0.00 | 0.00 |
| ATOM | 739 | HG3  | PRO | X | 48 | 23.808 | 60.879 | 38.158 | 0.00 | 0.00 |
| ATOM | 740 | CB   | PRO | X | 48 | 23.749 | 61.762 | 36.221 | 0.00 | 0.00 |
| ATOM | 741 | HB2  | PRO | X | 48 | 23.226 | 62.604 | 35.767 | 0.00 | 0.00 |



|      |     |      |     |   |    |        |        |        |      |      |
|------|-----|------|-----|---|----|--------|--------|--------|------|------|
| ATOM | 742 | HB3  | PRO | X | 48 | 23.291 | 60.878 | 35.777 | 0.00 | 0.00 |
| ATOM | 743 | CA   | PRO | X | 48 | 25.204 | 61.822 | 35.803 | 0.00 | 0.00 |
| ATOM | 744 | HA   | PRO | X | 48 | 25.570 | 60.799 | 35.709 | 0.00 | 0.00 |
| ATOM | 745 | C    | PRO | X | 48 | 25.449 | 62.579 | 34.487 | 0.00 | 0.00 |
| ATOM | 746 | O    | PRO | X | 48 | 25.502 | 63.840 | 34.433 | 0.00 | 0.00 |
| ATOM | 747 | N    | LYS | X | 49 | 25.317 | 61.815 | 33.425 | 0.00 | 0.00 |
| ATOM | 748 | H    | LYS | X | 49 | 25.107 | 60.835 | 33.546 | 0.00 | 0.00 |
| ATOM | 749 | CA   | LYS | X | 49 | 25.439 | 62.271 | 32.016 | 0.00 | 0.00 |
| ATOM | 750 | HA   | LYS | X | 49 | 26.314 | 62.902 | 31.862 | 0.00 | 0.00 |
| ATOM | 751 | CB   | LYS | X | 49 | 25.567 | 61.026 | 31.221 | 0.00 | 0.00 |
| ATOM | 752 | HB2  | LYS | X | 49 | 26.271 | 60.340 | 31.692 | 0.00 | 0.00 |
| ATOM | 753 | HB3  | LYS | X | 49 | 24.546 | 60.647 | 31.187 | 0.00 | 0.00 |
| ATOM | 754 | CG   | LYS | X | 49 | 26.189 | 61.421 | 29.840 | 0.00 | 0.00 |
| ATOM | 755 | HG2  | LYS | X | 49 | 26.064 | 60.530 | 29.224 | 0.00 | 0.00 |
| ATOM | 756 | HG3  | LYS | X | 49 | 25.563 | 62.218 | 29.440 | 0.00 | 0.00 |
| ATOM | 757 | CD   | LYS | X | 49 | 27.712 | 61.810 | 29.795 | 0.00 | 0.00 |
| ATOM | 758 | HD2  | LYS | X | 49 | 28.009 | 62.647 | 30.427 | 0.00 | 0.00 |
| ATOM | 759 | HD3  | LYS | X | 49 | 28.205 | 60.868 | 30.036 | 0.00 | 0.00 |
| ATOM | 760 | CE   | LYS | X | 49 | 28.035 | 62.199 | 28.339 | 0.00 | 0.00 |
| ATOM | 761 | HE2  | LYS | X | 49 | 27.960 | 61.321 | 27.698 | 0.00 | 0.00 |
| ATOM | 762 | HE3  | LYS | X | 49 | 27.264 | 62.885 | 27.987 | 0.00 | 0.00 |
| ATOM | 763 | NZ   | LYS | X | 49 | 29.370 | 62.802 | 28.296 | 0.00 | 0.00 |
| ATOM | 764 | HZ1  | LYS | X | 49 | 30.051 | 62.156 | 28.669 | 0.00 | 0.00 |
| ATOM | 765 | HZ2  | LYS | X | 49 | 29.663 | 63.083 | 27.371 | 0.00 | 0.00 |
| ATOM | 766 | HZ3  | LYS | X | 49 | 29.329 | 63.604 | 28.909 | 0.00 | 0.00 |
| ATOM | 767 | C    | LYS | X | 49 | 24.184 | 63.068 | 31.583 | 0.00 | 0.00 |
| ATOM | 768 | O    | LYS | X | 49 | 23.096 | 62.547 | 31.646 | 0.00 | 0.00 |
| ATOM | 769 | N    | GLN | X | 50 | 24.408 | 64.324 | 31.120 | 0.00 | 0.00 |
| ATOM | 770 | H    | GLN | X | 50 | 25.370 | 64.614 | 31.023 | 0.00 | 0.00 |
| ATOM | 771 | CA   | GLN | X | 50 | 23.357 | 65.025 | 30.423 | 0.00 | 0.00 |
| ATOM | 772 | HA   | GLN | X | 50 | 22.506 | 64.942 | 31.099 | 0.00 | 0.00 |
| ATOM | 773 | CB   | GLN | X | 50 | 23.851 | 66.492 | 30.242 | 0.00 | 0.00 |
| ATOM | 774 | HB2  | GLN | X | 50 | 24.524 | 66.563 | 29.387 | 0.00 | 0.00 |
| ATOM | 775 | HB3  | GLN | X | 50 | 22.901 | 66.931 | 29.938 | 0.00 | 0.00 |
| ATOM | 776 | CG   | GLN | X | 50 | 24.578 | 67.179 | 31.494 | 0.00 | 0.00 |
| ATOM | 777 | HG2  | GLN | X | 50 | 24.241 | 66.672 | 32.398 | 0.00 | 0.00 |
| ATOM | 778 | HG3  | GLN | X | 50 | 25.653 | 67.096 | 31.339 | 0.00 | 0.00 |
| ATOM | 779 | CD   | GLN | X | 50 | 24.168 | 68.657 | 31.674 | 0.00 | 0.00 |
| ATOM | 780 | OE1  | GLN | X | 50 | 24.367 | 69.393 | 30.756 | 0.00 | 0.00 |
| ATOM | 781 | NE2  | GLN | X | 50 | 23.944 | 69.126 | 32.885 | 0.00 | 0.00 |
| ATOM | 782 | HE21 | GLN | X | 50 | 24.164 | 70.109 | 32.951 | 0.00 | 0.00 |
| ATOM | 783 | HE22 | GLN | X | 50 | 24.233 | 68.420 | 33.547 | 0.00 | 0.00 |
| ATOM | 784 | C    | GLN | X | 50 | 22.988 | 64.361 | 29.071 | 0.00 | 0.00 |
| ATOM | 785 | O    | GLN | X | 50 | 23.789 | 63.566 | 28.569 | 0.00 | 0.00 |
| ATOM | 786 | N    | PRO | X | 51 | 21.744 | 64.669 | 28.529 | 0.00 | 0.00 |
| ATOM | 787 | CD   | PRO | X | 51 | 20.820 | 65.655 | 29.053 | 0.00 | 0.00 |
| ATOM | 788 | HD2  | PRO | X | 51 | 21.168 | 66.653 | 28.786 | 0.00 | 0.00 |
| ATOM | 789 | HD3  | PRO | X | 51 | 20.560 | 65.444 | 30.091 | 0.00 | 0.00 |
| ATOM | 790 | CG   | PRO | X | 51 | 19.447 | 65.398 | 28.268 | 0.00 | 0.00 |
| ATOM | 791 | HG2  | PRO | X | 51 | 19.385 | 66.173 | 27.505 | 0.00 | 0.00 |
| ATOM | 792 | HG3  | PRO | X | 51 | 18.550 | 65.360 | 28.886 | 0.00 | 0.00 |
| ATOM | 793 | CB   | PRO | X | 51 | 19.624 | 63.999 | 27.742 | 0.00 | 0.00 |
| ATOM | 794 | HB2  | PRO | X | 51 | 19.035 | 63.893 | 26.831 | 0.00 | 0.00 |
| ATOM | 795 | HB3  | PRO | X | 51 | 19.306 | 63.334 | 28.545 | 0.00 | 0.00 |
| ATOM | 796 | CA   | PRO | X | 51 | 21.129 | 63.906 | 27.465 | 0.00 | 0.00 |
| ATOM | 797 | HA   | PRO | X | 51 | 21.423 | 62.858 | 27.524 | 0.00 | 0.00 |
| ATOM | 798 | C    | PRO | X | 51 | 21.398 | 64.335 | 26.029 | 0.00 | 0.00 |
| ATOM | 799 | O    | PRO | X | 51 | 22.045 | 65.410 | 25.803 | 0.00 | 0.00 |
| ATOM | 800 | N    | TRP | X | 52 | 20.884 | 63.558 | 25.053 | 0.00 | 0.00 |
| ATOM | 801 | H    | TRP | X | 52 | 20.307 | 62.743 | 25.204 | 0.00 | 0.00 |
| ATOM | 802 | CA   | TRP | X | 52 | 21.132 | 63.834 | 23.598 | 0.00 | 0.00 |
| ATOM | 803 | HA   | TRP | X | 52 | 21.593 | 64.792 | 23.355 | 0.00 | 0.00 |
| ATOM | 804 | CB   | TRP | X | 52 | 22.096 | 62.717 | 23.157 | 0.00 | 0.00 |
| ATOM | 805 | HB2  | TRP | X | 52 | 22.344 | 62.910 | 22.113 | 0.00 | 0.00 |
| ATOM | 806 | HB3  | TRP | X | 52 | 23.016 | 62.824 | 23.732 | 0.00 | 0.00 |
| ATOM | 807 | CG   | TRP | X | 52 | 21.662 | 61.266 | 23.354 | 0.00 | 0.00 |
| ATOM | 808 | CD1  | TRP | X | 52 | 21.214 | 60.418 | 22.346 | 0.00 | 0.00 |

|      |     |      |     |   |    |        |        |        |      |      |
|------|-----|------|-----|---|----|--------|--------|--------|------|------|
| ATOM | 809 | HD1  | TRP | X | 52 | 21.161 | 60.681 | 21.299 | 0.00 | 0.00 |
| ATOM | 810 | NE1  | TRP | X | 52 | 20.924 | 59.148 | 22.865 | 0.00 | 0.00 |
| ATOM | 811 | HE1  | TRP | X | 52 | 20.551 | 58.390 | 22.312 | 0.00 | 0.00 |
| ATOM | 812 | CE2  | TRP | X | 52 | 21.120 | 59.079 | 24.215 | 0.00 | 0.00 |
| ATOM | 813 | CZ2  | TRP | X | 52 | 20.918 | 58.079 | 25.182 | 0.00 | 0.00 |
| ATOM | 814 | HZ2  | TRP | X | 52 | 20.365 | 57.196 | 24.895 | 0.00 | 0.00 |
| ATOM | 815 | CH2  | TRP | X | 52 | 21.296 | 58.308 | 26.534 | 0.00 | 0.00 |
| ATOM | 816 | HH2  | TRP | X | 52 | 21.161 | 57.540 | 27.281 | 0.00 | 0.00 |
| ATOM | 817 | CZ3  | TRP | X | 52 | 21.807 | 59.596 | 26.865 | 0.00 | 0.00 |
| ATOM | 818 | HZ3  | TRP | X | 52 | 22.114 | 59.879 | 27.861 | 0.00 | 0.00 |
| ATOM | 819 | CE3  | TRP | X | 52 | 21.969 | 60.596 | 25.850 | 0.00 | 0.00 |
| ATOM | 820 | HE3  | TRP | X | 52 | 22.502 | 61.505 | 26.085 | 0.00 | 0.00 |
| ATOM | 821 | CD2  | TRP | X | 52 | 21.609 | 60.382 | 24.543 | 0.00 | 0.00 |
| ATOM | 822 | C    | TRP | X | 52 | 19.907 | 63.643 | 22.693 | 0.00 | 0.00 |
| ATOM | 823 | O    | TRP | X | 52 | 18.972 | 62.899 | 23.102 | 0.00 | 0.00 |
| ATOM | 824 | N    | SER | X | 53 | 19.881 | 64.397 | 21.636 | 0.00 | 0.00 |
| ATOM | 825 | H    | SER | X | 53 | 20.573 | 65.132 | 21.609 | 0.00 | 0.00 |
| ATOM | 826 | CA   | SER | X | 53 | 18.807 | 64.218 | 20.688 | 0.00 | 0.00 |
| ATOM | 827 | HA   | SER | X | 53 | 18.090 | 63.462 | 21.008 | 0.00 | 0.00 |
| ATOM | 828 | CB   | SER | X | 53 | 18.208 | 65.609 | 20.239 | 0.00 | 0.00 |
| ATOM | 829 | HB2  | SER | X | 53 | 17.704 | 65.431 | 19.290 | 0.00 | 0.00 |
| ATOM | 830 | HB3  | SER | X | 53 | 17.529 | 66.060 | 20.963 | 0.00 | 0.00 |
| ATOM | 831 | OG   | SER | X | 53 | 19.197 | 66.545 | 19.956 | 0.00 | 0.00 |
| ATOM | 832 | HG   | SER | X | 53 | 18.737 | 67.266 | 19.520 | 0.00 | 0.00 |
| ATOM | 833 | C    | SER | X | 53 | 19.379 | 63.490 | 19.434 | 0.00 | 0.00 |
| ATOM | 834 | O    | SER | X | 53 | 20.596 | 63.361 | 19.247 | 0.00 | 0.00 |
| ATOM | 835 | N    | GLY | X | 54 | 18.548 | 62.847 | 18.655 | 0.00 | 0.00 |
| ATOM | 836 | H    | GLY | X | 54 | 17.589 | 63.158 | 18.597 | 0.00 | 0.00 |
| ATOM | 837 | CA   | GLY | X | 54 | 18.880 | 61.774 | 17.736 | 0.00 | 0.00 |
| ATOM | 838 | HA2  | GLY | X | 54 | 18.041 | 61.473 | 17.109 | 0.00 | 0.00 |
| ATOM | 839 | HA3  | GLY | X | 54 | 19.748 | 62.116 | 17.173 | 0.00 | 0.00 |
| ATOM | 840 | C    | GLY | X | 54 | 19.293 | 60.472 | 18.331 | 0.00 | 0.00 |
| ATOM | 841 | O    | GLY | X | 54 | 18.929 | 60.110 | 19.420 | 0.00 | 0.00 |
| ATOM | 842 | N    | VAL | X | 55 | 20.051 | 59.649 | 17.612 | 0.00 | 0.00 |
| ATOM | 843 | H    | VAL | X | 55 | 20.196 | 59.870 | 16.637 | 0.00 | 0.00 |
| ATOM | 844 | CA   | VAL | X | 55 | 20.654 | 58.352 | 18.073 | 0.00 | 0.00 |
| ATOM | 845 | HA   | VAL | X | 55 | 20.279 | 58.153 | 19.077 | 0.00 | 0.00 |
| ATOM | 846 | CB   | VAL | X | 55 | 20.351 | 57.107 | 17.140 | 0.00 | 0.00 |
| ATOM | 847 | HB   | VAL | X | 55 | 20.912 | 57.309 | 16.227 | 0.00 | 0.00 |
| ATOM | 848 | CG1  | VAL | X | 55 | 20.813 | 55.768 | 17.718 | 0.00 | 0.00 |
| ATOM | 849 | HG11 | VAL | X | 55 | 20.356 | 55.523 | 18.676 | 0.00 | 0.00 |
| ATOM | 850 | HG12 | VAL | X | 55 | 20.600 | 55.033 | 16.941 | 0.00 | 0.00 |
| ATOM | 851 | HG13 | VAL | X | 55 | 21.900 | 55.776 | 17.801 | 0.00 | 0.00 |
| ATOM | 852 | CG2  | VAL | X | 55 | 18.857 | 57.003 | 16.905 | 0.00 | 0.00 |
| ATOM | 853 | HG21 | VAL | X | 55 | 18.636 | 57.889 | 16.310 | 0.00 | 0.00 |
| ATOM | 854 | HG22 | VAL | X | 55 | 18.308 | 57.151 | 17.835 | 0.00 | 0.00 |
| ATOM | 855 | HG23 | VAL | X | 55 | 18.606 | 56.010 | 16.532 | 0.00 | 0.00 |
| ATOM | 856 | C    | VAL | X | 55 | 22.188 | 58.604 | 18.235 | 0.00 | 0.00 |
| ATOM | 857 | O    | VAL | X | 55 | 22.822 | 59.050 | 17.330 | 0.00 | 0.00 |
| ATOM | 858 | N    | VAL | X | 56 | 22.650 | 58.128 | 19.468 | 0.00 | 0.00 |
| ATOM | 859 | H    | VAL | X | 56 | 22.052 | 57.676 | 20.145 | 0.00 | 0.00 |
| ATOM | 860 | CA   | VAL | X | 56 | 24.208 | 58.140 | 19.694 | 0.00 | 0.00 |
| ATOM | 861 | HA   | VAL | X | 56 | 24.676 | 58.776 | 18.942 | 0.00 | 0.00 |
| ATOM | 862 | CB   | VAL | X | 56 | 24.595 | 58.750 | 21.083 | 0.00 | 0.00 |
| ATOM | 863 | HB   | VAL | X | 56 | 23.872 | 58.346 | 21.791 | 0.00 | 0.00 |
| ATOM | 864 | CG1  | VAL | X | 56 | 26.042 | 58.464 | 21.478 | 0.00 | 0.00 |
| ATOM | 865 | HG11 | VAL | X | 56 | 26.240 | 57.397 | 21.575 | 0.00 | 0.00 |
| ATOM | 866 | HG12 | VAL | X | 56 | 26.707 | 58.913 | 20.740 | 0.00 | 0.00 |
| ATOM | 867 | HG13 | VAL | X | 56 | 26.128 | 58.900 | 22.473 | 0.00 | 0.00 |
| ATOM | 868 | CG2  | VAL | X | 56 | 24.320 | 60.299 | 20.984 | 0.00 | 0.00 |
| ATOM | 869 | HG21 | VAL | X | 56 | 23.279 | 60.394 | 20.676 | 0.00 | 0.00 |
| ATOM | 870 | HG22 | VAL | X | 56 | 24.972 | 60.652 | 20.186 | 0.00 | 0.00 |
| ATOM | 871 | HG23 | VAL | X | 56 | 24.516 | 60.874 | 21.889 | 0.00 | 0.00 |
| ATOM | 872 | C    | VAL | X | 56 | 24.600 | 56.682 | 19.581 | 0.00 | 0.00 |
| ATOM | 873 | O    | VAL | X | 56 | 24.064 | 55.705 | 20.116 | 0.00 | 0.00 |
| ATOM | 874 | N    | ASP | X | 57 | 25.663 | 56.446 | 18.809 | 0.00 | 0.00 |
| ATOM | 875 | H    | ASP | X | 57 | 26.182 | 57.240 | 18.462 | 0.00 | 0.00 |

|      |     |      |     |   |    |        |        |        |      |      |
|------|-----|------|-----|---|----|--------|--------|--------|------|------|
| ATOM | 876 | CA   | ASP | X | 57 | 26.236 | 55.151 | 18.410 | 0.00 | 0.00 |
| ATOM | 877 | HA   | ASP | X | 57 | 25.425 | 54.513 | 18.060 | 0.00 | 0.00 |
| ATOM | 878 | CB   | ASP | X | 57 | 27.200 | 55.282 | 17.274 | 0.00 | 0.00 |
| ATOM | 879 | HB2  | ASP | X | 57 | 26.687 | 55.799 | 16.464 | 0.00 | 0.00 |
| ATOM | 880 | HB3  | ASP | X | 57 | 27.914 | 55.954 | 17.751 | 0.00 | 0.00 |
| ATOM | 881 | CG   | ASP | X | 57 | 27.780 | 53.976 | 16.705 | 0.00 | 0.00 |
| ATOM | 882 | OD1  | ASP | X | 57 | 27.274 | 53.524 | 15.711 | 0.00 | 0.00 |
| ATOM | 883 | OD2  | ASP | X | 57 | 28.679 | 53.402 | 17.352 | 0.00 | 0.00 |
| ATOM | 884 | C    | ASP | X | 57 | 26.791 | 54.307 | 19.598 | 0.00 | 0.00 |
| ATOM | 885 | O    | ASP | X | 57 | 27.383 | 54.932 | 20.524 | 0.00 | 0.00 |
| ATOM | 886 | N    | ALA | X | 58 | 26.643 | 52.963 | 19.594 | 0.00 | 0.00 |
| ATOM | 887 | H    | ALA | X | 58 | 26.078 | 52.618 | 18.831 | 0.00 | 0.00 |
| ATOM | 888 | CA   | ALA | X | 58 | 27.108 | 52.113 | 20.736 | 0.00 | 0.00 |
| ATOM | 889 | HA   | ALA | X | 58 | 27.907 | 52.506 | 21.365 | 0.00 | 0.00 |
| ATOM | 890 | CB   | ALA | X | 58 | 25.940 | 51.720 | 21.636 | 0.00 | 0.00 |
| ATOM | 891 | HB1  | ALA | X | 58 | 26.058 | 50.930 | 22.377 | 0.00 | 0.00 |
| ATOM | 892 | HB2  | ALA | X | 58 | 24.987 | 51.624 | 21.115 | 0.00 | 0.00 |
| ATOM | 893 | HB3  | ALA | X | 58 | 25.807 | 52.575 | 22.299 | 0.00 | 0.00 |
| ATOM | 894 | C    | ALA | X | 58 | 27.831 | 50.860 | 20.189 | 0.00 | 0.00 |
| ATOM | 895 | O    | ALA | X | 58 | 27.435 | 49.711 | 20.507 | 0.00 | 0.00 |
| ATOM | 896 | N    | THR | X | 59 | 28.847 | 51.039 | 19.328 | 0.00 | 0.00 |
| ATOM | 897 | H    | THR | X | 59 | 28.902 | 51.983 | 18.973 | 0.00 | 0.00 |
| ATOM | 898 | CA   | THR | X | 59 | 29.429 | 49.902 | 18.550 | 0.00 | 0.00 |
| ATOM | 899 | HA   | THR | X | 59 | 28.891 | 49.027 | 18.912 | 0.00 | 0.00 |
| ATOM | 900 | CB   | THR | X | 59 | 29.165 | 50.130 | 17.021 | 0.00 | 0.00 |
| ATOM | 901 | HB   | THR | X | 59 | 29.544 | 49.295 | 16.432 | 0.00 | 0.00 |
| ATOM | 902 | CG2  | THR | X | 59 | 27.703 | 50.279 | 16.857 | 0.00 | 0.00 |
| ATOM | 903 | HG21 | THR | X | 59 | 27.497 | 50.032 | 15.816 | 0.00 | 0.00 |
| ATOM | 904 | HG22 | THR | X | 59 | 27.361 | 51.248 | 17.223 | 0.00 | 0.00 |
| ATOM | 905 | HG23 | THR | X | 59 | 27.130 | 49.613 | 17.501 | 0.00 | 0.00 |
| ATOM | 906 | OG1  | THR | X | 59 | 29.766 | 51.237 | 16.467 | 0.00 | 0.00 |
| ATOM | 907 | HG1  | THR | X | 59 | 29.123 | 51.923 | 16.664 | 0.00 | 0.00 |
| ATOM | 908 | C    | THR | X | 59 | 30.950 | 49.535 | 18.682 | 0.00 | 0.00 |
| ATOM | 909 | O    | THR | X | 59 | 31.518 | 48.590 | 18.080 | 0.00 | 0.00 |
| ATOM | 910 | N    | THR | X | 60 | 31.641 | 50.242 | 19.597 | 0.00 | 0.00 |
| ATOM | 911 | H    | THR | X | 60 | 31.176 | 50.914 | 20.191 | 0.00 | 0.00 |
| ATOM | 912 | CA   | THR | X | 60 | 33.100 | 50.163 | 19.792 | 0.00 | 0.00 |
| ATOM | 913 | HA   | THR | X | 60 | 33.373 | 49.134 | 20.027 | 0.00 | 0.00 |
| ATOM | 914 | CB   | THR | X | 60 | 33.841 | 50.719 | 18.538 | 0.00 | 0.00 |
| ATOM | 915 | HB   | THR | X | 60 | 33.537 | 50.145 | 17.663 | 0.00 | 0.00 |
| ATOM | 916 | CG2  | THR | X | 60 | 33.505 | 52.215 | 18.204 | 0.00 | 0.00 |
| ATOM | 917 | HG21 | THR | X | 60 | 33.887 | 52.505 | 17.225 | 0.00 | 0.00 |
| ATOM | 918 | HG22 | THR | X | 60 | 33.901 | 52.860 | 18.990 | 0.00 | 0.00 |
| ATOM | 919 | HG23 | THR | X | 60 | 32.454 | 52.500 | 18.162 | 0.00 | 0.00 |
| ATOM | 920 | OG1  | THR | X | 60 | 35.248 | 50.584 | 18.681 | 0.00 | 0.00 |
| ATOM | 921 | HG1  | THR | X | 60 | 35.438 | 49.669 | 18.464 | 0.00 | 0.00 |
| ATOM | 922 | C    | THR | X | 60 | 33.461 | 50.832 | 21.117 | 0.00 | 0.00 |
| ATOM | 923 | O    | THR | X | 60 | 32.726 | 51.694 | 21.604 | 0.00 | 0.00 |
| ATOM | 924 | N    | PHE | X | 61 | 34.671 | 50.564 | 21.679 | 0.00 | 0.00 |
| ATOM | 925 | H    | PHE | X | 61 | 35.291 | 49.824 | 21.382 | 0.00 | 0.00 |
| ATOM | 926 | CA   | PHE | X | 61 | 35.259 | 51.447 | 22.700 | 0.00 | 0.00 |
| ATOM | 927 | HA   | PHE | X | 61 | 34.387 | 51.812 | 23.244 | 0.00 | 0.00 |
| ATOM | 928 | CB   | PHE | X | 61 | 36.237 | 50.764 | 23.573 | 0.00 | 0.00 |
| ATOM | 929 | HB2  | PHE | X | 61 | 37.013 | 50.222 | 23.033 | 0.00 | 0.00 |
| ATOM | 930 | HB3  | PHE | X | 61 | 36.867 | 51.473 | 24.110 | 0.00 | 0.00 |
| ATOM | 931 | CG   | PHE | X | 61 | 35.754 | 49.758 | 24.575 | 0.00 | 0.00 |
| ATOM | 932 | CD1  | PHE | X | 61 | 35.783 | 50.037 | 25.961 | 0.00 | 0.00 |
| ATOM | 933 | HD1  | PHE | X | 61 | 36.156 | 50.991 | 26.303 | 0.00 | 0.00 |
| ATOM | 934 | CE1  | PHE | X | 61 | 35.280 | 49.110 | 26.867 | 0.00 | 0.00 |
| ATOM | 935 | HE1  | PHE | X | 61 | 35.259 | 49.254 | 27.937 | 0.00 | 0.00 |
| ATOM | 936 | CZ   | PHE | X | 61 | 34.775 | 47.886 | 26.413 | 0.00 | 0.00 |
| ATOM | 937 | HZ   | PHE | X | 61 | 34.403 | 47.172 | 27.133 | 0.00 | 0.00 |
| ATOM | 938 | CE2  | PHE | X | 61 | 34.923 | 47.517 | 25.074 | 0.00 | 0.00 |
| ATOM | 939 | HE2  | PHE | X | 61 | 34.572 | 46.542 | 24.769 | 0.00 | 0.00 |
| ATOM | 940 | CD2  | PHE | X | 61 | 35.310 | 48.494 | 24.092 | 0.00 | 0.00 |
| ATOM | 941 | HD2  | PHE | X | 61 | 35.373 | 48.259 | 23.040 | 0.00 | 0.00 |
| ATOM | 942 | C    | PHE | X | 61 | 35.974 | 52.711 | 22.144 | 0.00 | 0.00 |

|      |      |      |     |   |    |        |        |        |      |      |
|------|------|------|-----|---|----|--------|--------|--------|------|------|
| ATOM | 943  | O    | PHE | X | 61 | 36.605 | 52.646 | 21.095 | 0.00 | 0.00 |
| ATOM | 944  | N    | GLN | X | 62 | 36.155 | 53.762 | 22.960 | 0.00 | 0.00 |
| ATOM | 945  | H    | GLN | X | 62 | 35.716 | 53.704 | 23.867 | 0.00 | 0.00 |
| ATOM | 946  | CA   | GLN | X | 62 | 36.839 | 54.981 | 22.610 | 0.00 | 0.00 |
| ATOM | 947  | HA   | GLN | X | 62 | 37.112 | 55.006 | 21.555 | 0.00 | 0.00 |
| ATOM | 948  | CB   | GLN | X | 62 | 36.019 | 56.229 | 22.887 | 0.00 | 0.00 |
| ATOM | 949  | HB2  | GLN | X | 62 | 35.829 | 56.306 | 23.958 | 0.00 | 0.00 |
| ATOM | 950  | HB3  | GLN | X | 62 | 36.482 | 57.160 | 22.561 | 0.00 | 0.00 |
| ATOM | 951  | CG   | GLN | X | 62 | 34.579 | 56.143 | 22.298 | 0.00 | 0.00 |
| ATOM | 952  | HG2  | GLN | X | 62 | 34.067 | 55.451 | 22.966 | 0.00 | 0.00 |
| ATOM | 953  | HG3  | GLN | X | 62 | 34.097 | 57.106 | 22.463 | 0.00 | 0.00 |
| ATOM | 954  | CD   | GLN | X | 62 | 34.411 | 55.676 | 20.862 | 0.00 | 0.00 |
| ATOM | 955  | OE1  | GLN | X | 62 | 35.373 | 55.650 | 20.092 | 0.00 | 0.00 |
| ATOM | 956  | NE2  | GLN | X | 62 | 33.192 | 55.272 | 20.394 | 0.00 | 0.00 |
| ATOM | 957  | HE21 | GLN | X | 62 | 33.229 | 54.663 | 19.589 | 0.00 | 0.00 |
| ATOM | 958  | HE22 | GLN | X | 62 | 32.335 | 55.578 | 20.831 | 0.00 | 0.00 |
| ATOM | 959  | C    | GLN | X | 62 | 38.120 | 54.972 | 23.452 | 0.00 | 0.00 |
| ATOM | 960  | O    | GLN | X | 62 | 39.180 | 55.336 | 22.944 | 0.00 | 0.00 |
| ATOM | 961  | N    | SER | X | 63 | 38.049 | 54.602 | 24.754 | 0.00 | 0.00 |
| ATOM | 962  | H    | SER | X | 63 | 37.279 | 53.992 | 24.992 | 0.00 | 0.00 |
| ATOM | 963  | CA   | SER | X | 63 | 39.124 | 54.657 | 25.750 | 0.00 | 0.00 |
| ATOM | 964  | HA   | SER | X | 63 | 40.054 | 54.276 | 25.327 | 0.00 | 0.00 |
| ATOM | 965  | CB   | SER | X | 63 | 39.382 | 56.113 | 26.114 | 0.00 | 0.00 |
| ATOM | 966  | HB2  | SER | X | 63 | 40.340 | 56.193 | 26.628 | 0.00 | 0.00 |
| ATOM | 967  | HB3  | SER | X | 63 | 39.524 | 56.716 | 25.217 | 0.00 | 0.00 |
| ATOM | 968  | OG   | SER | X | 63 | 38.267 | 56.684 | 26.799 | 0.00 | 0.00 |
| ATOM | 969  | HG   | SER | X | 63 | 38.315 | 57.638 | 26.899 | 0.00 | 0.00 |
| ATOM | 970  | C    | SER | X | 63 | 38.886 | 53.813 | 27.032 | 0.00 | 0.00 |
| ATOM | 971  | O    | SER | X | 63 | 37.822 | 53.232 | 27.262 | 0.00 | 0.00 |
| ATOM | 972  | N    | VAL | X | 64 | 39.946 | 53.507 | 27.790 | 0.00 | 0.00 |
| ATOM | 973  | H    | VAL | X | 64 | 40.830 | 53.885 | 27.479 | 0.00 | 0.00 |
| ATOM | 974  | CA   | VAL | X | 64 | 39.944 | 52.886 | 29.125 | 0.00 | 0.00 |
| ATOM | 975  | HA   | VAL | X | 64 | 38.985 | 53.097 | 29.599 | 0.00 | 0.00 |
| ATOM | 976  | CB   | VAL | X | 64 | 40.212 | 51.380 | 29.126 | 0.00 | 0.00 |
| ATOM | 977  | HB   | VAL | X | 64 | 40.342 | 51.123 | 30.178 | 0.00 | 0.00 |
| ATOM | 978  | CG1  | VAL | X | 64 | 38.995 | 50.678 | 28.534 | 0.00 | 0.00 |
| ATOM | 979  | HG11 | VAL | X | 64 | 38.982 | 50.782 | 27.449 | 0.00 | 0.00 |
| ATOM | 980  | HG12 | VAL | X | 64 | 38.982 | 49.604 | 28.724 | 0.00 | 0.00 |
| ATOM | 981  | HG13 | VAL | X | 64 | 38.094 | 50.986 | 29.064 | 0.00 | 0.00 |
| ATOM | 982  | CG2  | VAL | X | 64 | 41.454 | 50.857 | 28.475 | 0.00 | 0.00 |
| ATOM | 983  | HG21 | VAL | X | 64 | 41.486 | 51.338 | 27.498 | 0.00 | 0.00 |
| ATOM | 984  | HG22 | VAL | X | 64 | 41.389 | 49.785 | 28.288 | 0.00 | 0.00 |
| ATOM | 985  | HG23 | VAL | X | 64 | 42.333 | 51.025 | 29.097 | 0.00 | 0.00 |
| ATOM | 986  | C    | VAL | X | 64 | 41.030 | 53.607 | 29.939 | 0.00 | 0.00 |
| ATOM | 987  | O    | VAL | X | 64 | 41.945 | 54.266 | 29.411 | 0.00 | 0.00 |
| ATOM | 988  | N    | CYX | X | 65 | 40.881 | 53.523 | 31.289 | 0.00 | 0.00 |
| ATOM | 989  | H    | CYX | X | 65 | 40.091 | 52.968 | 31.585 | 0.00 | 0.00 |
| ATOM | 990  | CA   | CYX | X | 65 | 41.593 | 54.347 | 32.346 | 0.00 | 0.00 |
| ATOM | 991  | HA   | CYX | X | 65 | 41.426 | 55.359 | 31.978 | 0.00 | 0.00 |
| ATOM | 992  | CB   | CYX | X | 65 | 41.055 | 54.028 | 33.758 | 0.00 | 0.00 |
| ATOM | 993  | HB2  | CYX | X | 65 | 41.197 | 52.970 | 33.982 | 0.00 | 0.00 |
| ATOM | 994  | HB3  | CYX | X | 65 | 41.647 | 54.650 | 34.430 | 0.00 | 0.00 |
| ATOM | 995  | SG   | CYX | X | 65 | 39.281 | 54.429 | 34.028 | 0.00 | 0.00 |
| ATOM | 996  | C    | CYX | X | 65 | 43.129 | 54.249 | 32.274 | 0.00 | 0.00 |
| ATOM | 997  | O    | CYX | X | 65 | 43.750 | 53.223 | 32.126 | 0.00 | 0.00 |
| ATOM | 998  | N    | TYR | X | 66 | 43.735 | 55.362 | 32.566 | 0.00 | 0.00 |
| ATOM | 999  | H    | TYR | X | 66 | 43.156 | 56.188 | 32.617 | 0.00 | 0.00 |
| ATOM | 1000 | CA   | TYR | X | 66 | 45.190 | 55.464 | 32.694 | 0.00 | 0.00 |
| ATOM | 1001 | HA   | TYR | X | 66 | 45.695 | 55.017 | 31.837 | 0.00 | 0.00 |
| ATOM | 1002 | CB   | TYR | X | 66 | 45.654 | 56.917 | 32.919 | 0.00 | 0.00 |
| ATOM | 1003 | HB2  | TYR | X | 66 | 44.764 | 57.437 | 33.272 | 0.00 | 0.00 |
| ATOM | 1004 | HB3  | TYR | X | 66 | 46.438 | 56.884 | 33.675 | 0.00 | 0.00 |
| ATOM | 1005 | CG   | TYR | X | 66 | 46.289 | 57.499 | 31.613 | 0.00 | 0.00 |
| ATOM | 1006 | CD1  | TYR | X | 66 | 45.531 | 58.150 | 30.593 | 0.00 | 0.00 |
| ATOM | 1007 | HD1  | TYR | X | 66 | 44.453 | 58.176 | 30.542 | 0.00 | 0.00 |
| ATOM | 1008 | CE1  | TYR | X | 66 | 46.244 | 58.793 | 29.568 | 0.00 | 0.00 |
| ATOM | 1009 | HE1  | TYR | X | 66 | 45.644 | 59.384 | 28.892 | 0.00 | 0.00 |

|      |      |      |     |   |    |        |        |        |      |      |
|------|------|------|-----|---|----|--------|--------|--------|------|------|
| ATOM | 1010 | CZ   | TYR | X | 66 | 47.617 | 58.749 | 29.423 | 0.00 | 0.00 |
| ATOM | 1011 | OH   | TYR | X | 66 | 48.219 | 59.261 | 28.321 | 0.00 | 0.00 |
| ATOM | 1012 | HH   | TYR | X | 66 | 47.618 | 59.736 | 27.742 | 0.00 | 0.00 |
| ATOM | 1013 | CE2  | TYR | X | 66 | 48.377 | 57.946 | 30.323 | 0.00 | 0.00 |
| ATOM | 1014 | HE2  | TYR | X | 66 | 49.442 | 57.769 | 30.315 | 0.00 | 0.00 |
| ATOM | 1015 | CD2  | TYR | X | 66 | 47.701 | 57.452 | 31.462 | 0.00 | 0.00 |
| ATOM | 1016 | HD2  | TYR | X | 66 | 48.209 | 56.864 | 32.212 | 0.00 | 0.00 |
| ATOM | 1017 | C    | TYR | X | 66 | 45.771 | 54.579 | 33.882 | 0.00 | 0.00 |
| ATOM | 1018 | O    | TYR | X | 66 | 45.256 | 54.681 | 34.967 | 0.00 | 0.00 |
| ATOM | 1019 | N    | GLN | X | 67 | 46.791 | 53.842 | 33.522 | 0.00 | 0.00 |
| ATOM | 1020 | H    | GLN | X | 67 | 47.142 | 54.024 | 32.592 | 0.00 | 0.00 |
| ATOM | 1021 | CA   | GLN | X | 67 | 47.293 | 52.722 | 34.347 | 0.00 | 0.00 |
| ATOM | 1022 | HA   | GLN | X | 67 | 47.394 | 52.969 | 35.403 | 0.00 | 0.00 |
| ATOM | 1023 | CB   | GLN | X | 67 | 46.246 | 51.603 | 34.410 | 0.00 | 0.00 |
| ATOM | 1024 | HB2  | GLN | X | 67 | 46.541 | 50.910 | 35.198 | 0.00 | 0.00 |
| ATOM | 1025 | HB3  | GLN | X | 67 | 45.267 | 52.011 | 34.661 | 0.00 | 0.00 |
| ATOM | 1026 | CG   | GLN | X | 67 | 46.183 | 50.682 | 33.127 | 0.00 | 0.00 |
| ATOM | 1027 | HG2  | GLN | X | 67 | 46.249 | 51.280 | 32.218 | 0.00 | 0.00 |
| ATOM | 1028 | HG3  | GLN | X | 67 | 47.014 | 49.987 | 33.242 | 0.00 | 0.00 |
| ATOM | 1029 | CD   | GLN | X | 67 | 44.896 | 49.871 | 32.973 | 0.00 | 0.00 |
| ATOM | 1030 | OE1  | GLN | X | 67 | 44.941 | 48.652 | 33.021 | 0.00 | 0.00 |
| ATOM | 1031 | NE2  | GLN | X | 67 | 43.769 | 50.506 | 32.599 | 0.00 | 0.00 |
| ATOM | 1032 | HE21 | GLN | X | 67 | 42.886 | 50.030 | 32.476 | 0.00 | 0.00 |
| ATOM | 1033 | HE22 | GLN | X | 67 | 43.804 | 51.500 | 32.424 | 0.00 | 0.00 |
| ATOM | 1034 | C    | GLN | X | 67 | 48.718 | 52.169 | 33.958 | 0.00 | 0.00 |
| ATOM | 1035 | O    | GLN | X | 67 | 49.107 | 52.199 | 32.826 | 0.00 | 0.00 |
| ATOM | 1036 | N    | TYR | X | 68 | 49.502 | 51.690 | 34.928 | 0.00 | 0.00 |
| ATOM | 1037 | H    | TYR | X | 68 | 49.355 | 52.035 | 35.865 | 0.00 | 0.00 |
| ATOM | 1038 | CA   | TYR | X | 68 | 50.728 | 50.929 | 34.774 | 0.00 | 0.00 |
| ATOM | 1039 | HA   | TYR | X | 68 | 51.442 | 51.521 | 34.201 | 0.00 | 0.00 |
| ATOM | 1040 | CB   | TYR | X | 68 | 51.304 | 50.639 | 36.132 | 0.00 | 0.00 |
| ATOM | 1041 | HB2  | TYR | X | 68 | 51.259 | 51.563 | 36.709 | 0.00 | 0.00 |
| ATOM | 1042 | HB3  | TYR | X | 68 | 50.656 | 50.014 | 36.746 | 0.00 | 0.00 |
| ATOM | 1043 | CG   | TYR | X | 68 | 52.632 | 49.849 | 36.176 | 0.00 | 0.00 |
| ATOM | 1044 | CD1  | TYR | X | 68 | 53.785 | 50.546 | 35.905 | 0.00 | 0.00 |
| ATOM | 1045 | HD1  | TYR | X | 68 | 53.727 | 51.615 | 35.760 | 0.00 | 0.00 |
| ATOM | 1046 | CE1  | TYR | X | 68 | 55.002 | 49.836 | 35.776 | 0.00 | 0.00 |
| ATOM | 1047 | HE1  | TYR | X | 68 | 55.939 | 50.339 | 35.592 | 0.00 | 0.00 |
| ATOM | 1048 | CZ   | TYR | X | 68 | 55.034 | 48.449 | 35.993 | 0.00 | 0.00 |
| ATOM | 1049 | OH   | TYR | X | 68 | 56.201 | 47.810 | 35.792 | 0.00 | 0.00 |
| ATOM | 1050 | HH   | TYR | X | 68 | 56.914 | 48.409 | 35.558 | 0.00 | 0.00 |
| ATOM | 1051 | CE2  | TYR | X | 68 | 53.909 | 47.773 | 36.463 | 0.00 | 0.00 |
| ATOM | 1052 | HE2  | TYR | X | 68 | 53.890 | 46.715 | 36.681 | 0.00 | 0.00 |
| ATOM | 1053 | CD2  | TYR | X | 68 | 52.672 | 48.466 | 36.528 | 0.00 | 0.00 |
| ATOM | 1054 | HD2  | TYR | X | 68 | 51.774 | 47.923 | 36.784 | 0.00 | 0.00 |
| ATOM | 1055 | C    | TYR | X | 68 | 50.466 | 49.610 | 34.035 | 0.00 | 0.00 |
| ATOM | 1056 | O    | TYR | X | 68 | 49.520 | 48.794 | 34.316 | 0.00 | 0.00 |
| ATOM | 1057 | N    | VAL | X | 69 | 51.374 | 49.299 | 33.144 | 0.00 | 0.00 |
| ATOM | 1058 | H    | VAL | X | 69 | 52.174 | 49.913 | 33.095 | 0.00 | 0.00 |
| ATOM | 1059 | CA   | VAL | X | 69 | 51.350 | 48.053 | 32.288 | 0.00 | 0.00 |
| ATOM | 1060 | HA   | VAL | X | 69 | 50.420 | 47.501 | 32.420 | 0.00 | 0.00 |
| ATOM | 1061 | CB   | VAL | X | 69 | 51.419 | 48.565 | 30.788 | 0.00 | 0.00 |
| ATOM | 1062 | HB   | VAL | X | 69 | 52.367 | 49.096 | 30.703 | 0.00 | 0.00 |
| ATOM | 1063 | CG1  | VAL | X | 69 | 51.442 | 47.460 | 29.746 | 0.00 | 0.00 |
| ATOM | 1064 | HG11 | VAL | X | 69 | 51.695 | 47.832 | 28.753 | 0.00 | 0.00 |
| ATOM | 1065 | HG12 | VAL | X | 69 | 52.106 | 46.667 | 30.091 | 0.00 | 0.00 |
| ATOM | 1066 | HG13 | VAL | X | 69 | 50.440 | 47.032 | 29.745 | 0.00 | 0.00 |
| ATOM | 1067 | CG2  | VAL | X | 69 | 50.234 | 49.543 | 30.526 | 0.00 | 0.00 |
| ATOM | 1068 | HG21 | VAL | X | 69 | 50.488 | 50.488 | 31.007 | 0.00 | 0.00 |
| ATOM | 1069 | HG22 | VAL | X | 69 | 49.288 | 49.172 | 30.919 | 0.00 | 0.00 |
| ATOM | 1070 | HG23 | VAL | X | 69 | 50.145 | 49.687 | 29.449 | 0.00 | 0.00 |
| ATOM | 1071 | C    | VAL | X | 69 | 52.577 | 47.219 | 32.657 | 0.00 | 0.00 |
| ATOM | 1072 | O    | VAL | X | 69 | 53.573 | 47.782 | 33.144 | 0.00 | 0.00 |
| ATOM | 1073 | N    | ASP | X | 70 | 52.443 | 45.928 | 32.465 | 0.00 | 0.00 |
| ATOM | 1074 | H    | ASP | X | 70 | 51.551 | 45.604 | 32.121 | 0.00 | 0.00 |
| ATOM | 1075 | CA   | ASP | X | 70 | 53.469 | 44.924 | 32.816 | 0.00 | 0.00 |
| ATOM | 1076 | HA   | ASP | X | 70 | 53.669 | 45.181 | 33.856 | 0.00 | 0.00 |

|      |      |      |     |   |    |        |        |        |      |      |
|------|------|------|-----|---|----|--------|--------|--------|------|------|
| ATOM | 1077 | CB   | ASP | X | 70 | 52.949 | 43.510 | 32.722 | 0.00 | 0.00 |
| ATOM | 1078 | HB2  | ASP | X | 70 | 52.139 | 43.461 | 33.449 | 0.00 | 0.00 |
| ATOM | 1079 | HB3  | ASP | X | 70 | 52.591 | 43.327 | 31.709 | 0.00 | 0.00 |
| ATOM | 1080 | CG   | ASP | X | 70 | 54.117 | 42.487 | 33.196 | 0.00 | 0.00 |
| ATOM | 1081 | OD1  | ASP | X | 70 | 55.065 | 42.886 | 33.877 | 0.00 | 0.00 |
| ATOM | 1082 | OD2  | ASP | X | 70 | 53.973 | 41.299 | 32.880 | 0.00 | 0.00 |
| ATOM | 1083 | C    | ASP | X | 70 | 54.749 | 45.128 | 31.923 | 0.00 | 0.00 |
| ATOM | 1084 | O    | ASP | X | 70 | 54.646 | 44.757 | 30.706 | 0.00 | 0.00 |
| ATOM | 1085 | N    | THR | X | 71 | 55.769 | 45.702 | 32.537 | 0.00 | 0.00 |
| ATOM | 1086 | H    | THR | X | 71 | 55.698 | 45.763 | 33.543 | 0.00 | 0.00 |
| ATOM | 1087 | CA   | THR | X | 71 | 57.109 | 45.781 | 31.975 | 0.00 | 0.00 |
| ATOM | 1088 | HA   | THR | X | 71 | 57.166 | 45.580 | 30.905 | 0.00 | 0.00 |
| ATOM | 1089 | CB   | THR | X | 71 | 57.717 | 47.218 | 32.087 | 0.00 | 0.00 |
| ATOM | 1090 | HB   | THR | X | 71 | 58.639 | 47.354 | 31.522 | 0.00 | 0.00 |
| ATOM | 1091 | CG2  | THR | X | 71 | 56.769 | 48.343 | 31.475 | 0.00 | 0.00 |
| ATOM | 1092 | HG21 | THR | X | 71 | 56.812 | 48.285 | 30.388 | 0.00 | 0.00 |
| ATOM | 1093 | HG22 | THR | X | 71 | 57.126 | 49.352 | 31.683 | 0.00 | 0.00 |
| ATOM | 1094 | HG23 | THR | X | 71 | 55.737 | 48.335 | 31.826 | 0.00 | 0.00 |
| ATOM | 1095 | OG1  | THR | X | 71 | 57.917 | 47.518 | 33.400 | 0.00 | 0.00 |
| ATOM | 1096 | HG1  | THR | X | 71 | 58.321 | 48.384 | 33.491 | 0.00 | 0.00 |
| ATOM | 1097 | C    | THR | X | 71 | 58.147 | 44.776 | 32.540 | 0.00 | 0.00 |
| ATOM | 1098 | O    | THR | X | 71 | 59.345 | 44.875 | 32.174 | 0.00 | 0.00 |
| ATOM | 1099 | N    | LEU | X | 72 | 57.757 | 43.829 | 33.387 | 0.00 | 0.00 |
| ATOM | 1100 | H    | LEU | X | 72 | 56.767 | 43.747 | 33.567 | 0.00 | 0.00 |
| ATOM | 1101 | CA   | LEU | X | 72 | 58.529 | 42.702 | 33.833 | 0.00 | 0.00 |
| ATOM | 1102 | HA   | LEU | X | 72 | 59.563 | 43.026 | 33.956 | 0.00 | 0.00 |
| ATOM | 1103 | CB   | LEU | X | 72 | 58.065 | 42.278 | 35.281 | 0.00 | 0.00 |
| ATOM | 1104 | HB2  | LEU | X | 72 | 57.865 | 43.146 | 35.909 | 0.00 | 0.00 |
| ATOM | 1105 | HB3  | LEU | X | 72 | 57.189 | 41.657 | 35.094 | 0.00 | 0.00 |
| ATOM | 1106 | CG   | LEU | X | 72 | 59.187 | 41.480 | 35.998 | 0.00 | 0.00 |
| ATOM | 1107 | HG   | LEU | X | 72 | 59.608 | 40.827 | 35.233 | 0.00 | 0.00 |
| ATOM | 1108 | CD1  | LEU | X | 72 | 60.323 | 42.270 | 36.718 | 0.00 | 0.00 |
| ATOM | 1109 | HD11 | LEU | X | 72 | 60.826 | 43.001 | 36.085 | 0.00 | 0.00 |
| ATOM | 1110 | HD12 | LEU | X | 72 | 61.056 | 41.726 | 37.313 | 0.00 | 0.00 |
| ATOM | 1111 | HD13 | LEU | X | 72 | 59.722 | 42.827 | 37.436 | 0.00 | 0.00 |
| ATOM | 1112 | CD2  | LEU | X | 72 | 58.623 | 40.504 | 37.003 | 0.00 | 0.00 |
| ATOM | 1113 | HD21 | LEU | X | 72 | 58.156 | 39.637 | 36.535 | 0.00 | 0.00 |
| ATOM | 1114 | HD22 | LEU | X | 72 | 59.393 | 40.056 | 37.632 | 0.00 | 0.00 |
| ATOM | 1115 | HD23 | LEU | X | 72 | 57.858 | 41.005 | 37.596 | 0.00 | 0.00 |
| ATOM | 1116 | C    | LEU | X | 72 | 58.597 | 41.522 | 32.872 | 0.00 | 0.00 |
| ATOM | 1117 | O    | LEU | X | 72 | 59.640 | 41.112 | 32.382 | 0.00 | 0.00 |
| ATOM | 1118 | N    | TYR | X | 73 | 57.376 | 41.128 | 32.450 | 0.00 | 0.00 |
| ATOM | 1119 | H    | TYR | X | 73 | 56.583 | 41.575 | 32.888 | 0.00 | 0.00 |
| ATOM | 1120 | CA   | TYR | X | 73 | 57.168 | 40.076 | 31.409 | 0.00 | 0.00 |
| ATOM | 1121 | HA   | TYR | X | 73 | 58.122 | 39.637 | 31.118 | 0.00 | 0.00 |
| ATOM | 1122 | CB   | TYR | X | 73 | 56.437 | 38.914 | 32.054 | 0.00 | 0.00 |
| ATOM | 1123 | HB2  | TYR | X | 73 | 55.454 | 39.272 | 32.360 | 0.00 | 0.00 |
| ATOM | 1124 | HB3  | TYR | X | 73 | 56.438 | 38.121 | 31.305 | 0.00 | 0.00 |
| ATOM | 1125 | CG   | TYR | X | 73 | 57.185 | 38.320 | 33.185 | 0.00 | 0.00 |
| ATOM | 1126 | CD1  | TYR | X | 73 | 58.397 | 37.587 | 33.051 | 0.00 | 0.00 |
| ATOM | 1127 | HD1  | TYR | X | 73 | 59.041 | 37.670 | 32.188 | 0.00 | 0.00 |
| ATOM | 1128 | CE1  | TYR | X | 73 | 58.999 | 36.923 | 34.099 | 0.00 | 0.00 |
| ATOM | 1129 | HE1  | TYR | X | 73 | 59.992 | 36.527 | 33.954 | 0.00 | 0.00 |
| ATOM | 1130 | CZ   | TYR | X | 73 | 58.459 | 36.973 | 35.343 | 0.00 | 0.00 |
| ATOM | 1131 | OH   | TYR | X | 73 | 59.171 | 36.506 | 36.361 | 0.00 | 0.00 |
| ATOM | 1132 | HH   | TYR | X | 73 | 58.718 | 36.598 | 37.202 | 0.00 | 0.00 |
| ATOM | 1133 | CE2  | TYR | X | 73 | 57.185 | 37.617 | 35.576 | 0.00 | 0.00 |
| ATOM | 1134 | HE2  | TYR | X | 73 | 56.684 | 37.412 | 36.510 | 0.00 | 0.00 |
| ATOM | 1135 | CD2  | TYR | X | 73 | 56.550 | 38.175 | 34.448 | 0.00 | 0.00 |
| ATOM | 1136 | HD2  | TYR | X | 73 | 55.540 | 38.549 | 34.520 | 0.00 | 0.00 |
| ATOM | 1137 | C    | TYR | X | 73 | 56.394 | 40.561 | 30.170 | 0.00 | 0.00 |
| ATOM | 1138 | O    | TYR | X | 73 | 55.360 | 40.022 | 29.704 | 0.00 | 0.00 |
| ATOM | 1139 | N    | PRO | X | 74 | 56.794 | 41.689 | 29.501 | 0.00 | 0.00 |
| ATOM | 1140 | CD   | PRO | X | 74 | 58.023 | 42.355 | 29.716 | 0.00 | 0.00 |
| ATOM | 1141 | HD2  | PRO | X | 74 | 58.843 | 41.691 | 29.992 | 0.00 | 0.00 |
| ATOM | 1142 | HD3  | PRO | X | 74 | 57.997 | 42.969 | 30.616 | 0.00 | 0.00 |
| ATOM | 1143 | CG   | PRO | X | 74 | 58.346 | 43.102 | 28.434 | 0.00 | 0.00 |

|      |      |      |     |   |    |        |        |        |      |      |
|------|------|------|-----|---|----|--------|--------|--------|------|------|
| ATOM | 1144 | HG2  | PRO | X | 74 | 58.787 | 42.457 | 27.674 | 0.00 | 0.00 |
| ATOM | 1145 | HG3  | PRO | X | 74 | 59.009 | 43.930 | 28.684 | 0.00 | 0.00 |
| ATOM | 1146 | CB   | PRO | X | 74 | 56.928 | 43.594 | 28.173 | 0.00 | 0.00 |
| ATOM | 1147 | HB2  | PRO | X | 74 | 56.792 | 43.992 | 27.168 | 0.00 | 0.00 |
| ATOM | 1148 | HB3  | PRO | X | 74 | 56.560 | 44.348 | 28.869 | 0.00 | 0.00 |
| ATOM | 1149 | CA   | PRO | X | 74 | 56.091 | 42.420 | 28.460 | 0.00 | 0.00 |
| ATOM | 1150 | HA   | PRO | X | 74 | 55.121 | 42.805 | 28.774 | 0.00 | 0.00 |
| ATOM | 1151 | C    | PRO | X | 74 | 55.932 | 41.543 | 27.202 | 0.00 | 0.00 |
| ATOM | 1152 | O    | PRO | X | 74 | 56.921 | 40.991 | 26.692 | 0.00 | 0.00 |
| ATOM | 1153 | N    | GLY | X | 75 | 54.674 | 41.550 | 26.637 | 0.00 | 0.00 |
| ATOM | 1154 | H    | GLY | X | 75 | 54.002 | 42.029 | 27.219 | 0.00 | 0.00 |
| ATOM | 1155 | CA   | GLY | X | 75 | 54.247 | 40.986 | 25.359 | 0.00 | 0.00 |
| ATOM | 1156 | HA2  | GLY | X | 75 | 53.204 | 41.240 | 25.169 | 0.00 | 0.00 |
| ATOM | 1157 | HA3  | GLY | X | 75 | 54.891 | 41.290 | 24.533 | 0.00 | 0.00 |
| ATOM | 1158 | C    | GLY | X | 75 | 54.175 | 39.465 | 25.213 | 0.00 | 0.00 |
| ATOM | 1159 | O    | GLY | X | 75 | 53.615 | 38.938 | 24.254 | 0.00 | 0.00 |
| ATOM | 1160 | N    | PHE | X | 76 | 54.590 | 38.790 | 26.251 | 0.00 | 0.00 |
| ATOM | 1161 | H    | PHE | X | 76 | 55.059 | 39.269 | 27.007 | 0.00 | 0.00 |
| ATOM | 1162 | CA   | PHE | X | 76 | 54.311 | 37.410 | 26.510 | 0.00 | 0.00 |
| ATOM | 1163 | HA   | PHE | X | 76 | 54.620 | 36.913 | 25.590 | 0.00 | 0.00 |
| ATOM | 1164 | CB   | PHE | X | 76 | 55.135 | 36.866 | 27.693 | 0.00 | 0.00 |
| ATOM | 1165 | HB2  | PHE | X | 76 | 56.031 | 36.331 | 27.378 | 0.00 | 0.00 |
| ATOM | 1166 | HB3  | PHE | X | 76 | 55.624 | 37.708 | 28.183 | 0.00 | 0.00 |
| ATOM | 1167 | CG   | PHE | X | 76 | 54.462 | 36.074 | 28.824 | 0.00 | 0.00 |
| ATOM | 1168 | CD1  | PHE | X | 76 | 54.121 | 34.698 | 28.790 | 0.00 | 0.00 |
| ATOM | 1169 | HD1  | PHE | X | 76 | 54.309 | 34.026 | 27.966 | 0.00 | 0.00 |
| ATOM | 1170 | CE1  | PHE | X | 76 | 53.412 | 34.159 | 29.834 | 0.00 | 0.00 |
| ATOM | 1171 | HE1  | PHE | X | 76 | 53.155 | 33.110 | 29.821 | 0.00 | 0.00 |
| ATOM | 1172 | CZ   | PHE | X | 76 | 53.145 | 34.848 | 30.996 | 0.00 | 0.00 |
| ATOM | 1173 | HZ   | PHE | X | 76 | 52.590 | 34.407 | 31.810 | 0.00 | 0.00 |
| ATOM | 1174 | CE2  | PHE | X | 76 | 53.469 | 36.155 | 31.038 | 0.00 | 0.00 |
| ATOM | 1175 | HE2  | PHE | X | 76 | 53.210 | 36.739 | 31.908 | 0.00 | 0.00 |
| ATOM | 1176 | CD2  | PHE | X | 76 | 54.096 | 36.798 | 29.956 | 0.00 | 0.00 |
| ATOM | 1177 | HD2  | PHE | X | 76 | 54.365 | 37.838 | 30.069 | 0.00 | 0.00 |
| ATOM | 1178 | C    | PHE | X | 76 | 52.828 | 37.090 | 26.776 | 0.00 | 0.00 |
| ATOM | 1179 | O    | PHE | X | 76 | 52.187 | 37.975 | 27.286 | 0.00 | 0.00 |
| ATOM | 1180 | N    | GLU | X | 77 | 52.331 | 35.984 | 26.363 | 0.00 | 0.00 |
| ATOM | 1181 | H    | GLU | X | 77 | 52.943 | 35.354 | 25.864 | 0.00 | 0.00 |
| ATOM | 1182 | CA   | GLU | X | 77 | 50.914 | 35.623 | 26.170 | 0.00 | 0.00 |
| ATOM | 1183 | HA   | GLU | X | 77 | 50.437 | 36.335 | 25.498 | 0.00 | 0.00 |
| ATOM | 1184 | CB   | GLU | X | 77 | 50.931 | 34.265 | 25.532 | 0.00 | 0.00 |
| ATOM | 1185 | HB2  | GLU | X | 77 | 51.592 | 33.560 | 26.036 | 0.00 | 0.00 |
| ATOM | 1186 | HB3  | GLU | X | 77 | 49.932 | 33.842 | 25.632 | 0.00 | 0.00 |
| ATOM | 1187 | CG   | GLU | X | 77 | 51.191 | 34.255 | 24.027 | 0.00 | 0.00 |
| ATOM | 1188 | HG2  | GLU | X | 77 | 50.487 | 34.988 | 23.634 | 0.00 | 0.00 |
| ATOM | 1189 | HG3  | GLU | X | 77 | 52.179 | 34.640 | 23.774 | 0.00 | 0.00 |
| ATOM | 1190 | CD   | GLU | X | 77 | 50.985 | 32.827 | 23.497 | 0.00 | 0.00 |
| ATOM | 1191 | OE1  | GLU | X | 77 | 49.848 | 32.280 | 23.638 | 0.00 | 0.00 |
| ATOM | 1192 | OE2  | GLU | X | 77 | 51.936 | 32.373 | 22.894 | 0.00 | 0.00 |
| ATOM | 1193 | C    | GLU | X | 77 | 50.036 | 35.828 | 27.463 | 0.00 | 0.00 |
| ATOM | 1194 | O    | GLU | X | 77 | 48.854 | 36.219 | 27.394 | 0.00 | 0.00 |
| ATOM | 1195 | N    | GLY | X | 78 | 50.618 | 35.607 | 28.680 | 0.00 | 0.00 |
| ATOM | 1196 | H    | GLY | X | 78 | 51.558 | 35.236 | 28.685 | 0.00 | 0.00 |
| ATOM | 1197 | CA   | GLY | X | 78 | 49.933 | 35.699 | 29.986 | 0.00 | 0.00 |
| ATOM | 1198 | HA2  | GLY | X | 78 | 48.869 | 35.475 | 29.914 | 0.00 | 0.00 |
| ATOM | 1199 | HA3  | GLY | X | 78 | 50.485 | 35.139 | 30.741 | 0.00 | 0.00 |
| ATOM | 1200 | C    | GLY | X | 78 | 50.079 | 37.082 | 30.642 | 0.00 | 0.00 |
| ATOM | 1201 | O    | GLY | X | 78 | 49.576 | 37.330 | 31.715 | 0.00 | 0.00 |
| ATOM | 1202 | N    | THR | X | 79 | 50.742 | 37.995 | 29.903 | 0.00 | 0.00 |
| ATOM | 1203 | H    | THR | X | 79 | 51.050 | 37.750 | 28.973 | 0.00 | 0.00 |
| ATOM | 1204 | CA   | THR | X | 79 | 50.786 | 39.394 | 30.177 | 0.00 | 0.00 |
| ATOM | 1205 | HA   | THR | X | 79 | 50.384 | 39.614 | 31.166 | 0.00 | 0.00 |
| ATOM | 1206 | CB   | THR | X | 79 | 52.275 | 39.757 | 30.248 | 0.00 | 0.00 |
| ATOM | 1207 | HB   | THR | X | 79 | 52.880 | 39.112 | 29.610 | 0.00 | 0.00 |
| ATOM | 1208 | CG2  | THR | X | 79 | 52.433 | 41.172 | 29.819 | 0.00 | 0.00 |
| ATOM | 1209 | HG21 | THR | X | 79 | 52.338 | 41.219 | 28.734 | 0.00 | 0.00 |
| ATOM | 1210 | HG22 | THR | X | 79 | 53.465 | 41.447 | 30.035 | 0.00 | 0.00 |

|      |      |      |     |   |    |        |        |        |      |      |
|------|------|------|-----|---|----|--------|--------|--------|------|------|
| ATOM | 1211 | HG23 | THR | X | 79 | 51.809 | 41.790 | 30.465 | 0.00 | 0.00 |
| ATOM | 1212 | OG1  | THR | X | 79 | 52.669 | 39.513 | 31.559 | 0.00 | 0.00 |
| ATOM | 1213 | HG1  | THR | X | 79 | 53.103 | 40.268 | 31.963 | 0.00 | 0.00 |
| ATOM | 1214 | C    | THR | X | 79 | 49.898 | 40.189 | 29.291 | 0.00 | 0.00 |
| ATOM | 1215 | O    | THR | X | 79 | 49.140 | 41.012 | 29.724 | 0.00 | 0.00 |
| ATOM | 1216 | N    | GLU | X | 80 | 50.040 | 39.825 | 28.000 | 0.00 | 0.00 |
| ATOM | 1217 | H    | GLU | X | 80 | 50.727 | 39.134 | 27.732 | 0.00 | 0.00 |
| ATOM | 1218 | CA   | GLU | X | 80 | 49.299 | 40.297 | 26.821 | 0.00 | 0.00 |
| ATOM | 1219 | HA   | GLU | X | 80 | 49.371 | 41.382 | 26.884 | 0.00 | 0.00 |
| ATOM | 1220 | CB   | GLU | X | 80 | 49.975 | 39.776 | 25.570 | 0.00 | 0.00 |
| ATOM | 1221 | HB2  | GLU | X | 80 | 51.031 | 40.048 | 25.566 | 0.00 | 0.00 |
| ATOM | 1222 | HB3  | GLU | X | 80 | 49.801 | 38.702 | 25.509 | 0.00 | 0.00 |
| ATOM | 1223 | CG   | GLU | X | 80 | 49.343 | 40.387 | 24.306 | 0.00 | 0.00 |
| ATOM | 1224 | HG2  | GLU | X | 80 | 48.311 | 40.076 | 24.144 | 0.00 | 0.00 |
| ATOM | 1225 | HG3  | GLU | X | 80 | 49.405 | 41.471 | 24.397 | 0.00 | 0.00 |
| ATOM | 1226 | CD   | GLU | X | 80 | 50.126 | 40.038 | 23.047 | 0.00 | 0.00 |
| ATOM | 1227 | OE1  | GLU | X | 80 | 51.112 | 40.735 | 22.764 | 0.00 | 0.00 |
| ATOM | 1228 | OE2  | GLU | X | 80 | 49.827 | 39.041 | 22.313 | 0.00 | 0.00 |
| ATOM | 1229 | C    | GLU | X | 80 | 47.783 | 40.073 | 26.705 | 0.00 | 0.00 |
| ATOM | 1230 | O    | GLU | X | 80 | 47.187 | 40.983 | 26.086 | 0.00 | 0.00 |
| ATOM | 1231 | N    | MET | X | 81 | 47.151 | 39.185 | 27.484 | 0.00 | 0.00 |
| ATOM | 1232 | H    | MET | X | 81 | 47.755 | 38.543 | 27.977 | 0.00 | 0.00 |
| ATOM | 1233 | CA   | MET | X | 81 | 45.697 | 39.252 | 27.672 | 0.00 | 0.00 |
| ATOM | 1234 | HA   | MET | X | 81 | 45.220 | 39.383 | 26.700 | 0.00 | 0.00 |
| ATOM | 1235 | CB   | MET | X | 81 | 45.185 | 37.907 | 28.275 | 0.00 | 0.00 |
| ATOM | 1236 | HB2  | MET | X | 81 | 44.106 | 38.025 | 28.366 | 0.00 | 0.00 |
| ATOM | 1237 | HB3  | MET | X | 81 | 45.427 | 37.149 | 27.529 | 0.00 | 0.00 |
| ATOM | 1238 | CG   | MET | X | 81 | 45.838 | 37.479 | 29.593 | 0.00 | 0.00 |
| ATOM | 1239 | HG2  | MET | X | 81 | 46.889 | 37.251 | 29.414 | 0.00 | 0.00 |
| ATOM | 1240 | HG3  | MET | X | 81 | 45.782 | 38.283 | 30.328 | 0.00 | 0.00 |
| ATOM | 1241 | SD   | MET | X | 81 | 45.194 | 36.040 | 30.426 | 0.00 | 0.00 |
| ATOM | 1242 | CE   | MET | X | 81 | 43.392 | 36.328 | 30.416 | 0.00 | 0.00 |
| ATOM | 1243 | HE1  | MET | X | 81 | 42.991 | 35.588 | 31.108 | 0.00 | 0.00 |
| ATOM | 1244 | HE2  | MET | X | 81 | 43.071 | 37.312 | 30.757 | 0.00 | 0.00 |
| ATOM | 1245 | HE3  | MET | X | 81 | 43.072 | 36.201 | 29.381 | 0.00 | 0.00 |
| ATOM | 1246 | C    | MET | X | 81 | 45.129 | 40.420 | 28.502 | 0.00 | 0.00 |
| ATOM | 1247 | O    | MET | X | 81 | 44.021 | 40.904 | 28.310 | 0.00 | 0.00 |
| ATOM | 1248 | N    | TRP | X | 82 | 45.877 | 40.919 | 29.475 | 0.00 | 0.00 |
| ATOM | 1249 | H    | TRP | X | 82 | 46.812 | 40.575 | 29.641 | 0.00 | 0.00 |
| ATOM | 1250 | CA   | TRP | X | 82 | 45.591 | 42.028 | 30.342 | 0.00 | 0.00 |
| ATOM | 1251 | HA   | TRP | X | 82 | 44.515 | 42.046 | 30.513 | 0.00 | 0.00 |
| ATOM | 1252 | CB   | TRP | X | 82 | 46.286 | 41.685 | 31.640 | 0.00 | 0.00 |
| ATOM | 1253 | HB2  | TRP | X | 82 | 47.359 | 41.855 | 31.552 | 0.00 | 0.00 |
| ATOM | 1254 | HB3  | TRP | X | 82 | 45.872 | 42.348 | 32.400 | 0.00 | 0.00 |
| ATOM | 1255 | CG   | TRP | X | 82 | 46.046 | 40.344 | 32.198 | 0.00 | 0.00 |
| ATOM | 1256 | CD1  | TRP | X | 82 | 47.009 | 39.417 | 32.461 | 0.00 | 0.00 |
| ATOM | 1257 | HD1  | TRP | X | 82 | 48.073 | 39.455 | 32.279 | 0.00 | 0.00 |
| ATOM | 1258 | NE1  | TRP | X | 82 | 46.430 | 38.364 | 33.114 | 0.00 | 0.00 |
| ATOM | 1259 | HE1  | TRP | X | 82 | 46.982 | 37.657 | 33.579 | 0.00 | 0.00 |
| ATOM | 1260 | CE2  | TRP | X | 82 | 45.001 | 38.460 | 33.119 | 0.00 | 0.00 |
| ATOM | 1261 | CZ2  | TRP | X | 82 | 43.978 | 37.546 | 33.502 | 0.00 | 0.00 |
| ATOM | 1262 | HZ2  | TRP | X | 82 | 44.151 | 36.590 | 33.974 | 0.00 | 0.00 |
| ATOM | 1263 | CH2  | TRP | X | 82 | 42.631 | 38.028 | 33.334 | 0.00 | 0.00 |
| ATOM | 1264 | HH2  | TRP | X | 82 | 41.835 | 37.429 | 33.749 | 0.00 | 0.00 |
| ATOM | 1265 | CZ3  | TRP | X | 82 | 42.385 | 39.266 | 32.773 | 0.00 | 0.00 |
| ATOM | 1266 | HZ3  | TRP | X | 82 | 41.390 | 39.684 | 32.757 | 0.00 | 0.00 |
| ATOM | 1267 | CE3  | TRP | X | 82 | 43.458 | 40.100 | 32.442 | 0.00 | 0.00 |
| ATOM | 1268 | HE3  | TRP | X | 82 | 43.285 | 41.142 | 32.217 | 0.00 | 0.00 |
| ATOM | 1269 | CD2  | TRP | X | 82 | 44.793 | 39.728 | 32.478 | 0.00 | 0.00 |
| ATOM | 1270 | C    | TRP | X | 82 | 46.090 | 43.412 | 29.828 | 0.00 | 0.00 |
| ATOM | 1271 | O    | TRP | X | 82 | 45.627 | 44.443 | 30.368 | 0.00 | 0.00 |
| ATOM | 1272 | N    | ASN | X | 83 | 46.915 | 43.451 | 28.725 | 0.00 | 0.00 |
| ATOM | 1273 | H    | ASN | X | 83 | 47.248 | 42.564 | 28.375 | 0.00 | 0.00 |
| ATOM | 1274 | CA   | ASN | X | 83 | 47.510 | 44.720 | 28.101 | 0.00 | 0.00 |
| ATOM | 1275 | HA   | ASN | X | 83 | 47.989 | 45.280 | 28.904 | 0.00 | 0.00 |
| ATOM | 1276 | CB   | ASN | X | 83 | 48.407 | 44.244 | 26.974 | 0.00 | 0.00 |
| ATOM | 1277 | HB2  | ASN | X | 83 | 48.959 | 43.383 | 27.351 | 0.00 | 0.00 |



|      |      |      |     |   |    |        |        |        |      |      |
|------|------|------|-----|---|----|--------|--------|--------|------|------|
| ATOM | 1278 | HB3  | ASN | X | 83 | 47.819 | 43.973 | 26.098 | 0.00 | 0.00 |
| ATOM | 1279 | CG   | ASN | X | 83 | 49.421 | 45.348 | 26.642 | 0.00 | 0.00 |
| ATOM | 1280 | OD1  | ASN | X | 83 | 49.322 | 46.079 | 25.666 | 0.00 | 0.00 |
| ATOM | 1281 | ND2  | ASN | X | 83 | 50.483 | 45.539 | 27.446 | 0.00 | 0.00 |
| ATOM | 1282 | HD21 | ASN | X | 83 | 51.096 | 46.334 | 27.333 | 0.00 | 0.00 |
| ATOM | 1283 | HD22 | ASN | X | 83 | 50.560 | 45.017 | 28.308 | 0.00 | 0.00 |
| ATOM | 1284 | C    | ASN | X | 83 | 46.470 | 45.649 | 27.489 | 0.00 | 0.00 |
| ATOM | 1285 | O    | ASN | X | 83 | 45.416 | 45.152 | 27.112 | 0.00 | 0.00 |
| ATOM | 1286 | N    | PRO | X | 84 | 46.672 | 47.011 | 27.509 | 0.00 | 0.00 |
| ATOM | 1287 | CD   | PRO | X | 84 | 47.774 | 47.815 | 28.096 | 0.00 | 0.00 |
| ATOM | 1288 | HD2  | PRO | X | 84 | 48.724 | 47.524 | 27.647 | 0.00 | 0.00 |
| ATOM | 1289 | HD3  | PRO | X | 84 | 47.781 | 47.836 | 29.186 | 0.00 | 0.00 |
| ATOM | 1290 | CG   | PRO | X | 84 | 47.514 | 49.225 | 27.587 | 0.00 | 0.00 |
| ATOM | 1291 | HG2  | PRO | X | 84 | 47.895 | 49.365 | 26.575 | 0.00 | 0.00 |
| ATOM | 1292 | HG3  | PRO | X | 84 | 47.906 | 49.937 | 28.314 | 0.00 | 0.00 |
| ATOM | 1293 | CB   | PRO | X | 84 | 45.982 | 49.320 | 27.468 | 0.00 | 0.00 |
| ATOM | 1294 | HB2  | PRO | X | 84 | 45.649 | 50.183 | 26.892 | 0.00 | 0.00 |
| ATOM | 1295 | HB3  | PRO | X | 84 | 45.468 | 49.460 | 28.419 | 0.00 | 0.00 |
| ATOM | 1296 | CA   | PRO | X | 84 | 45.632 | 47.885 | 26.923 | 0.00 | 0.00 |
| ATOM | 1297 | HA   | PRO | X | 84 | 44.688 | 47.770 | 27.455 | 0.00 | 0.00 |
| ATOM | 1298 | C    | PRO | X | 84 | 45.481 | 47.874 | 25.420 | 0.00 | 0.00 |
| ATOM | 1299 | O    | PRO | X | 84 | 46.237 | 48.525 | 24.690 | 0.00 | 0.00 |
| ATOM | 1300 | N    | ASN | X | 85 | 44.443 | 47.141 | 24.988 | 0.00 | 0.00 |
| ATOM | 1301 | H    | ASN | X | 85 | 43.806 | 46.701 | 25.637 | 0.00 | 0.00 |
| ATOM | 1302 | CA   | ASN | X | 85 | 43.991 | 46.946 | 23.596 | 0.00 | 0.00 |
| ATOM | 1303 | HA   | ASN | X | 85 | 44.915 | 46.755 | 23.050 | 0.00 | 0.00 |
| ATOM | 1304 | CB   | ASN | X | 85 | 43.009 | 45.753 | 23.577 | 0.00 | 0.00 |
| ATOM | 1305 | HB2  | ASN | X | 85 | 42.736 | 45.687 | 22.524 | 0.00 | 0.00 |
| ATOM | 1306 | HB3  | ASN | X | 85 | 43.509 | 44.870 | 23.976 | 0.00 | 0.00 |
| ATOM | 1307 | CG   | ASN | X | 85 | 41.743 | 45.887 | 24.377 | 0.00 | 0.00 |
| ATOM | 1308 | OD1  | ASN | X | 85 | 41.563 | 46.689 | 25.274 | 0.00 | 0.00 |
| ATOM | 1309 | ND2  | ASN | X | 85 | 40.908 | 44.831 | 24.300 | 0.00 | 0.00 |
| ATOM | 1310 | HD21 | ASN | X | 85 | 40.113 | 44.828 | 24.924 | 0.00 | 0.00 |
| ATOM | 1311 | HD22 | ASN | X | 85 | 41.156 | 44.057 | 23.701 | 0.00 | 0.00 |
| ATOM | 1312 | C    | ASN | X | 85 | 43.349 | 48.186 | 22.986 | 0.00 | 0.00 |
| ATOM | 1313 | O    | ASN | X | 85 | 43.108 | 48.239 | 21.758 | 0.00 | 0.00 |
| ATOM | 1314 | N    | ARG | X | 86 | 43.165 | 49.236 | 23.816 | 0.00 | 0.00 |
| ATOM | 1315 | H    | ARG | X | 86 | 43.358 | 49.219 | 24.807 | 0.00 | 0.00 |
| ATOM | 1316 | CA   | ARG | X | 86 | 42.519 | 50.495 | 23.423 | 0.00 | 0.00 |
| ATOM | 1317 | HA   | ARG | X | 86 | 42.345 | 50.534 | 22.347 | 0.00 | 0.00 |
| ATOM | 1318 | CB   | ARG | X | 86 | 41.061 | 50.400 | 23.919 | 0.00 | 0.00 |
| ATOM | 1319 | HB2  | ARG | X | 86 | 41.080 | 50.240 | 24.997 | 0.00 | 0.00 |
| ATOM | 1320 | HB3  | ARG | X | 86 | 40.533 | 51.325 | 23.686 | 0.00 | 0.00 |
| ATOM | 1321 | CG   | ARG | X | 86 | 40.164 | 49.254 | 23.408 | 0.00 | 0.00 |
| ATOM | 1322 | HG2  | ARG | X | 86 | 40.573 | 48.255 | 23.561 | 0.00 | 0.00 |
| ATOM | 1323 | HG3  | ARG | X | 86 | 39.229 | 49.245 | 23.969 | 0.00 | 0.00 |
| ATOM | 1324 | CD   | ARG | X | 86 | 39.831 | 49.352 | 21.865 | 0.00 | 0.00 |
| ATOM | 1325 | HD2  | ARG | X | 86 | 39.181 | 50.225 | 21.798 | 0.00 | 0.00 |
| ATOM | 1326 | HD3  | ARG | X | 86 | 40.696 | 49.665 | 21.280 | 0.00 | 0.00 |
| ATOM | 1327 | NE   | ARG | X | 86 | 39.179 | 48.064 | 21.396 | 0.00 | 0.00 |
| ATOM | 1328 | HE   | ARG | X | 86 | 38.314 | 47.796 | 21.843 | 0.00 | 0.00 |
| ATOM | 1329 | CZ   | ARG | X | 86 | 39.658 | 47.305 | 20.428 | 0.00 | 0.00 |
| ATOM | 1330 | NH1  | ARG | X | 86 | 40.878 | 47.537 | 19.951 | 0.00 | 0.00 |
| ATOM | 1331 | HH11 | ARG | X | 86 | 41.504 | 48.209 | 20.372 | 0.00 | 0.00 |
| ATOM | 1332 | HH12 | ARG | X | 86 | 41.134 | 47.077 | 19.089 | 0.00 | 0.00 |
| ATOM | 1333 | NH2  | ARG | X | 86 | 38.908 | 46.312 | 19.919 | 0.00 | 0.00 |
| ATOM | 1334 | HH21 | ARG | X | 86 | 38.027 | 46.114 | 20.371 | 0.00 | 0.00 |
| ATOM | 1335 | HH22 | ARG | X | 86 | 39.348 | 45.604 | 19.349 | 0.00 | 0.00 |
| ATOM | 1336 | C    | ARG | X | 86 | 43.226 | 51.785 | 23.961 | 0.00 | 0.00 |
| ATOM | 1337 | O    | ARG | X | 86 | 44.275 | 51.676 | 24.586 | 0.00 | 0.00 |
| ATOM | 1338 | N    | GLU | X | 87 | 42.755 | 52.988 | 23.669 | 0.00 | 0.00 |
| ATOM | 1339 | H    | GLU | X | 87 | 42.057 | 52.962 | 22.940 | 0.00 | 0.00 |
| ATOM | 1340 | CA   | GLU | X | 87 | 43.411 | 54.276 | 23.985 | 0.00 | 0.00 |
| ATOM | 1341 | HA   | GLU | X | 87 | 44.473 | 54.208 | 23.753 | 0.00 | 0.00 |
| ATOM | 1342 | CB   | GLU | X | 87 | 42.767 | 55.416 | 23.144 | 0.00 | 0.00 |
| ATOM | 1343 | HB2  | GLU | X | 87 | 42.860 | 55.192 | 22.081 | 0.00 | 0.00 |
| ATOM | 1344 | HB3  | GLU | X | 87 | 41.712 | 55.455 | 23.416 | 0.00 | 0.00 |

|      |      |      |     |   |    |        |        |        |      |      |
|------|------|------|-----|---|----|--------|--------|--------|------|------|
| ATOM | 1345 | CG   | GLU | X | 87 | 43.382 | 56.753 | 23.475 | 0.00 | 0.00 |
| ATOM | 1346 | HG2  | GLU | X | 87 | 42.936 | 57.237 | 24.344 | 0.00 | 0.00 |
| ATOM | 1347 | HG3  | GLU | X | 87 | 44.419 | 56.589 | 23.769 | 0.00 | 0.00 |
| ATOM | 1348 | CD   | GLU | X | 87 | 43.392 | 57.716 | 22.311 | 0.00 | 0.00 |
| ATOM | 1349 | OE1  | GLU | X | 87 | 42.306 | 58.101 | 21.873 | 0.00 | 0.00 |
| ATOM | 1350 | OE2  | GLU | X | 87 | 44.473 | 58.008 | 21.732 | 0.00 | 0.00 |
| ATOM | 1351 | C    | GLU | X | 87 | 43.348 | 54.524 | 25.542 | 0.00 | 0.00 |
| ATOM | 1352 | O    | GLU | X | 87 | 42.294 | 54.289 | 26.105 | 0.00 | 0.00 |
| ATOM | 1353 | N    | LEU | X | 88 | 44.493 | 54.800 | 26.164 | 0.00 | 0.00 |
| ATOM | 1354 | H    | LEU | X | 88 | 45.322 | 54.898 | 25.596 | 0.00 | 0.00 |
| ATOM | 1355 | CA   | LEU | X | 88 | 44.563 | 55.186 | 27.550 | 0.00 | 0.00 |
| ATOM | 1356 | HA   | LEU | X | 88 | 43.859 | 54.629 | 28.168 | 0.00 | 0.00 |
| ATOM | 1357 | CB   | LEU | X | 88 | 46.010 | 54.958 | 28.123 | 0.00 | 0.00 |
| ATOM | 1358 | HB2  | LEU | X | 88 | 46.615 | 55.538 | 27.426 | 0.00 | 0.00 |
| ATOM | 1359 | HB3  | LEU | X | 88 | 46.135 | 55.358 | 29.129 | 0.00 | 0.00 |
| ATOM | 1360 | CG   | LEU | X | 88 | 46.517 | 53.521 | 28.146 | 0.00 | 0.00 |
| ATOM | 1361 | HG   | LEU | X | 88 | 46.433 | 53.007 | 27.189 | 0.00 | 0.00 |
| ATOM | 1362 | CD1  | LEU | X | 88 | 47.976 | 53.528 | 28.528 | 0.00 | 0.00 |
| ATOM | 1363 | HD11 | LEU | X | 88 | 48.006 | 53.631 | 29.612 | 0.00 | 0.00 |
| ATOM | 1364 | HD12 | LEU | X | 88 | 48.550 | 54.260 | 27.959 | 0.00 | 0.00 |
| ATOM | 1365 | HD13 | LEU | X | 88 | 48.452 | 52.568 | 28.328 | 0.00 | 0.00 |
| ATOM | 1366 | CD2  | LEU | X | 88 | 45.652 | 52.779 | 29.182 | 0.00 | 0.00 |
| ATOM | 1367 | HD21 | LEU | X | 88 | 45.568 | 51.725 | 28.916 | 0.00 | 0.00 |
| ATOM | 1368 | HD22 | LEU | X | 88 | 45.979 | 52.869 | 30.218 | 0.00 | 0.00 |
| ATOM | 1369 | HD23 | LEU | X | 88 | 44.575 | 52.906 | 29.073 | 0.00 | 0.00 |
| ATOM | 1370 | C    | LEU | X | 88 | 44.108 | 56.603 | 27.620 | 0.00 | 0.00 |
| ATOM | 1371 | O    | LEU | X | 88 | 44.690 | 57.439 | 26.954 | 0.00 | 0.00 |
| ATOM | 1372 | N    | SER | X | 89 | 43.060 | 56.815 | 28.390 | 0.00 | 0.00 |
| ATOM | 1373 | H    | SER | X | 89 | 42.701 | 56.098 | 29.004 | 0.00 | 0.00 |
| ATOM | 1374 | CA   | SER | X | 89 | 42.544 | 58.175 | 28.561 | 0.00 | 0.00 |
| ATOM | 1375 | HA   | SER | X | 89 | 43.285 | 58.926 | 28.289 | 0.00 | 0.00 |
| ATOM | 1376 | CB   | SER | X | 89 | 41.427 | 58.480 | 27.554 | 0.00 | 0.00 |
| ATOM | 1377 | HB2  | SER | X | 89 | 41.830 | 58.149 | 26.597 | 0.00 | 0.00 |
| ATOM | 1378 | HB3  | SER | X | 89 | 40.634 | 57.828 | 27.921 | 0.00 | 0.00 |
| ATOM | 1379 | OG   | SER | X | 89 | 40.934 | 59.839 | 27.575 | 0.00 | 0.00 |
| ATOM | 1380 | HG   | SER | X | 89 | 40.138 | 59.780 | 27.041 | 0.00 | 0.00 |
| ATOM | 1381 | C    | SER | X | 89 | 42.023 | 58.361 | 30.004 | 0.00 | 0.00 |
| ATOM | 1382 | O    | SER | X | 89 | 41.743 | 57.382 | 30.710 | 0.00 | 0.00 |
| ATOM | 1383 | N    | GLU | X | 90 | 41.701 | 59.612 | 30.383 | 0.00 | 0.00 |
| ATOM | 1384 | H    | GLU | X | 90 | 41.919 | 60.279 | 29.656 | 0.00 | 0.00 |
| ATOM | 1385 | CA   | GLU | X | 90 | 41.079 | 59.968 | 31.620 | 0.00 | 0.00 |
| ATOM | 1386 | HA   | GLU | X | 90 | 41.243 | 59.195 | 32.371 | 0.00 | 0.00 |
| ATOM | 1387 | CB   | GLU | X | 90 | 41.583 | 61.334 | 32.067 | 0.00 | 0.00 |
| ATOM | 1388 | HB2  | GLU | X | 90 | 41.488 | 62.085 | 31.283 | 0.00 | 0.00 |
| ATOM | 1389 | HB3  | GLU | X | 90 | 41.082 | 61.750 | 32.941 | 0.00 | 0.00 |
| ATOM | 1390 | CG   | GLU | X | 90 | 43.085 | 61.262 | 32.360 | 0.00 | 0.00 |
| ATOM | 1391 | HG2  | GLU | X | 90 | 43.091 | 60.489 | 33.128 | 0.00 | 0.00 |
| ATOM | 1392 | HG3  | GLU | X | 90 | 43.727 | 60.938 | 31.541 | 0.00 | 0.00 |
| ATOM | 1393 | CD   | GLU | X | 90 | 43.626 | 62.553 | 33.082 | 0.00 | 0.00 |
| ATOM | 1394 | OE1  | GLU | X | 90 | 43.429 | 62.747 | 34.303 | 0.00 | 0.00 |
| ATOM | 1395 | OE2  | GLU | X | 90 | 44.298 | 63.431 | 32.479 | 0.00 | 0.00 |
| ATOM | 1396 | C    | GLU | X | 90 | 39.527 | 60.119 | 31.406 | 0.00 | 0.00 |
| ATOM | 1397 | O    | GLU | X | 90 | 38.809 | 60.307 | 32.407 | 0.00 | 0.00 |
| ATOM | 1398 | N    | ASP | X | 91 | 39.028 | 60.048 | 30.134 | 0.00 | 0.00 |
| ATOM | 1399 | H    | ASP | X | 91 | 39.692 | 59.935 | 29.381 | 0.00 | 0.00 |
| ATOM | 1400 | CA   | ASP | X | 91 | 37.571 | 60.144 | 29.809 | 0.00 | 0.00 |
| ATOM | 1401 | HA   | ASP | X | 91 | 37.242 | 60.750 | 30.654 | 0.00 | 0.00 |
| ATOM | 1402 | CB   | ASP | X | 91 | 37.413 | 60.936 | 28.461 | 0.00 | 0.00 |
| ATOM | 1403 | HB2  | ASP | X | 91 | 36.484 | 61.503 | 28.526 | 0.00 | 0.00 |
| ATOM | 1404 | HB3  | ASP | X | 91 | 38.206 | 61.683 | 28.480 | 0.00 | 0.00 |
| ATOM | 1405 | CG   | ASP | X | 91 | 37.545 | 60.231 | 27.174 | 0.00 | 0.00 |
| ATOM | 1406 | OD1  | ASP | X | 91 | 38.428 | 59.399 | 26.960 | 0.00 | 0.00 |
| ATOM | 1407 | OD2  | ASP | X | 91 | 36.619 | 60.247 | 26.230 | 0.00 | 0.00 |
| ATOM | 1408 | C    | ASP | X | 91 | 36.838 | 58.774 | 29.963 | 0.00 | 0.00 |
| ATOM | 1409 | O    | ASP | X | 91 | 35.895 | 58.514 | 29.248 | 0.00 | 0.00 |
| ATOM | 1410 | N    | CYX | X | 92 | 37.331 | 57.953 | 30.898 | 0.00 | 0.00 |
| ATOM | 1411 | H    | CYX | X | 92 | 38.077 | 58.281 | 31.495 | 0.00 | 0.00 |

|      |      |      |     |   |    |        |        |        |      |      |
|------|------|------|-----|---|----|--------|--------|--------|------|------|
| ATOM | 1412 | CA   | CYX | X | 92 | 37.210 | 56.500 | 30.837 | 0.00 | 0.00 |
| ATOM | 1413 | HA   | CYX | X | 92 | 37.056 | 56.209 | 29.798 | 0.00 | 0.00 |
| ATOM | 1414 | CB   | CYX | X | 92 | 38.512 | 55.930 | 31.407 | 0.00 | 0.00 |
| ATOM | 1415 | HB2  | CYX | X | 92 | 38.563 | 54.866 | 31.176 | 0.00 | 0.00 |
| ATOM | 1416 | HB3  | CYX | X | 92 | 39.303 | 56.337 | 30.777 | 0.00 | 0.00 |
| ATOM | 1417 | SG   | CYX | X | 92 | 39.047 | 56.287 | 33.073 | 0.00 | 0.00 |
| ATOM | 1418 | C    | CYX | X | 92 | 35.934 | 55.910 | 31.495 | 0.00 | 0.00 |
| ATOM | 1419 | O    | CYX | X | 92 | 35.834 | 54.687 | 31.604 | 0.00 | 0.00 |
| ATOM | 1420 | N    | LEU | X | 93 | 35.001 | 56.741 | 31.941 | 0.00 | 0.00 |
| ATOM | 1421 | H    | LEU | X | 93 | 35.273 | 57.712 | 32.001 | 0.00 | 0.00 |
| ATOM | 1422 | CA   | LEU | X | 93 | 33.745 | 56.313 | 32.514 | 0.00 | 0.00 |
| ATOM | 1423 | HA   | LEU | X | 93 | 33.913 | 55.449 | 33.158 | 0.00 | 0.00 |
| ATOM | 1424 | CB   | LEU | X | 93 | 33.096 | 57.449 | 33.339 | 0.00 | 0.00 |
| ATOM | 1425 | HB2  | LEU | X | 93 | 32.640 | 58.229 | 32.729 | 0.00 | 0.00 |
| ATOM | 1426 | HB3  | LEU | X | 93 | 32.228 | 57.058 | 33.869 | 0.00 | 0.00 |
| ATOM | 1427 | CG   | LEU | X | 93 | 34.049 | 58.130 | 34.324 | 0.00 | 0.00 |
| ATOM | 1428 | HG   | LEU | X | 93 | 34.794 | 58.747 | 33.822 | 0.00 | 0.00 |
| ATOM | 1429 | CD1  | LEU | X | 93 | 33.242 | 59.043 | 35.286 | 0.00 | 0.00 |
| ATOM | 1430 | HD11 | LEU | X | 93 | 33.859 | 59.419 | 36.102 | 0.00 | 0.00 |
| ATOM | 1431 | HD12 | LEU | X | 93 | 32.366 | 58.498 | 35.638 | 0.00 | 0.00 |
| ATOM | 1432 | HD13 | LEU | X | 93 | 32.879 | 59.939 | 34.782 | 0.00 | 0.00 |
| ATOM | 1433 | CD2  | LEU | X | 93 | 34.892 | 57.096 | 35.163 | 0.00 | 0.00 |
| ATOM | 1434 | HD21 | LEU | X | 93 | 34.308 | 56.333 | 35.679 | 0.00 | 0.00 |
| ATOM | 1435 | HD22 | LEU | X | 93 | 35.596 | 56.526 | 34.557 | 0.00 | 0.00 |
| ATOM | 1436 | HD23 | LEU | X | 93 | 35.530 | 57.617 | 35.877 | 0.00 | 0.00 |
| ATOM | 1437 | C    | LEU | X | 93 | 32.826 | 55.843 | 31.334 | 0.00 | 0.00 |
| ATOM | 1438 | O    | LEU | X | 93 | 32.333 | 56.637 | 30.587 | 0.00 | 0.00 |
| ATOM | 1439 | N    | TYR | X | 94 | 32.613 | 54.488 | 31.286 | 0.00 | 0.00 |
| ATOM | 1440 | H    | TYR | X | 94 | 32.971 | 53.963 | 32.071 | 0.00 | 0.00 |
| ATOM | 1441 | CA   | TYR | X | 94 | 31.863 | 53.785 | 30.307 | 0.00 | 0.00 |
| ATOM | 1442 | HA   | TYR | X | 94 | 30.910 | 54.250 | 30.057 | 0.00 | 0.00 |
| ATOM | 1443 | CB   | TYR | X | 94 | 32.593 | 53.563 | 28.923 | 0.00 | 0.00 |
| ATOM | 1444 | HB2  | TYR | X | 94 | 33.408 | 52.853 | 29.064 | 0.00 | 0.00 |
| ATOM | 1445 | HB3  | TYR | X | 94 | 31.969 | 52.924 | 28.299 | 0.00 | 0.00 |
| ATOM | 1446 | CG   | TYR | X | 94 | 33.090 | 54.724 | 28.168 | 0.00 | 0.00 |
| ATOM | 1447 | CD1  | TYR | X | 94 | 32.242 | 55.432 | 27.283 | 0.00 | 0.00 |
| ATOM | 1448 | HD1  | TYR | X | 94 | 31.236 | 55.061 | 27.153 | 0.00 | 0.00 |
| ATOM | 1449 | CE1  | TYR | X | 94 | 32.673 | 56.563 | 26.551 | 0.00 | 0.00 |
| ATOM | 1450 | HE1  | TYR | X | 94 | 32.058 | 57.018 | 25.788 | 0.00 | 0.00 |
| ATOM | 1451 | CZ   | TYR | X | 94 | 34.004 | 56.933 | 26.791 | 0.00 | 0.00 |
| ATOM | 1452 | OH   | TYR | X | 94 | 34.460 | 58.063 | 26.159 | 0.00 | 0.00 |
| ATOM | 1453 | HH   | TYR | X | 94 | 35.367 | 58.336 | 26.311 | 0.00 | 0.00 |
| ATOM | 1454 | CE2  | TYR | X | 94 | 34.908 | 56.240 | 27.706 | 0.00 | 0.00 |
| ATOM | 1455 | HE2  | TYR | X | 94 | 35.923 | 56.563 | 27.884 | 0.00 | 0.00 |
| ATOM | 1456 | CD2  | TYR | X | 94 | 34.384 | 55.206 | 28.416 | 0.00 | 0.00 |
| ATOM | 1457 | HD2  | TYR | X | 94 | 34.930 | 54.674 | 29.181 | 0.00 | 0.00 |
| ATOM | 1458 | C    | TYR | X | 94 | 31.317 | 52.446 | 30.827 | 0.00 | 0.00 |
| ATOM | 1459 | O    | TYR | X | 94 | 31.834 | 51.847 | 31.803 | 0.00 | 0.00 |
| ATOM | 1460 | N    | LEU | X | 95 | 30.265 | 51.953 | 30.127 | 0.00 | 0.00 |
| ATOM | 1461 | H    | LEU | X | 95 | 29.891 | 52.513 | 29.374 | 0.00 | 0.00 |
| ATOM | 1462 | CA   | LEU | X | 95 | 29.843 | 50.543 | 30.326 | 0.00 | 0.00 |
| ATOM | 1463 | HA   | LEU | X | 95 | 30.789 | 50.076 | 30.600 | 0.00 | 0.00 |
| ATOM | 1464 | CB   | LEU | X | 95 | 28.849 | 50.420 | 31.515 | 0.00 | 0.00 |
| ATOM | 1465 | HB2  | LEU | X | 95 | 28.846 | 49.397 | 31.891 | 0.00 | 0.00 |
| ATOM | 1466 | HB3  | LEU | X | 95 | 29.234 | 51.001 | 32.352 | 0.00 | 0.00 |
| ATOM | 1467 | CG   | LEU | X | 95 | 27.324 | 50.624 | 31.186 | 0.00 | 0.00 |
| ATOM | 1468 | HG   | LEU | X | 95 | 27.065 | 49.986 | 30.341 | 0.00 | 0.00 |
| ATOM | 1469 | CD1  | LEU | X | 95 | 26.581 | 50.357 | 32.499 | 0.00 | 0.00 |
| ATOM | 1470 | HD11 | LEU | X | 95 | 26.820 | 49.313 | 32.704 | 0.00 | 0.00 |
| ATOM | 1471 | HD12 | LEU | X | 95 | 25.495 | 50.443 | 32.473 | 0.00 | 0.00 |
| ATOM | 1472 | HD13 | LEU | X | 95 | 27.002 | 50.828 | 33.388 | 0.00 | 0.00 |
| ATOM | 1473 | CD2  | LEU | X | 95 | 27.026 | 52.139 | 30.894 | 0.00 | 0.00 |
| ATOM | 1474 | HD21 | LEU | X | 95 | 25.981 | 52.273 | 30.614 | 0.00 | 0.00 |
| ATOM | 1475 | HD22 | LEU | X | 95 | 27.194 | 52.790 | 31.752 | 0.00 | 0.00 |
| ATOM | 1476 | HD23 | LEU | X | 95 | 27.611 | 52.425 | 30.020 | 0.00 | 0.00 |
| ATOM | 1477 | C    | LEU | X | 95 | 29.472 | 49.995 | 28.963 | 0.00 | 0.00 |
| ATOM | 1478 | O    | LEU | X | 95 | 29.367 | 50.615 | 27.910 | 0.00 | 0.00 |

|      |      |      |     |   |    |        |        |        |      |      |
|------|------|------|-----|---|----|--------|--------|--------|------|------|
| ATOM | 1479 | N    | ASN | X | 96 | 29.359 | 48.666 | 28.955 | 0.00 | 0.00 |
| ATOM | 1480 | H    | ASN | X | 96 | 29.439 | 48.211 | 29.853 | 0.00 | 0.00 |
| ATOM | 1481 | CA   | ASN | X | 96 | 29.025 | 47.827 | 27.809 | 0.00 | 0.00 |
| ATOM | 1482 | HA   | ASN | X | 96 | 28.706 | 48.509 | 27.020 | 0.00 | 0.00 |
| ATOM | 1483 | CB   | ASN | X | 96 | 30.298 | 47.175 | 27.347 | 0.00 | 0.00 |
| ATOM | 1484 | HB2  | ASN | X | 96 | 30.441 | 46.300 | 27.981 | 0.00 | 0.00 |
| ATOM | 1485 | HB3  | ASN | X | 96 | 30.201 | 46.853 | 26.310 | 0.00 | 0.00 |
| ATOM | 1486 | CG   | ASN | X | 96 | 31.529 | 48.079 | 27.383 | 0.00 | 0.00 |
| ATOM | 1487 | OD1  | ASN | X | 96 | 31.813 | 48.813 | 26.462 | 0.00 | 0.00 |
| ATOM | 1488 | ND2  | ASN | X | 96 | 32.331 | 48.174 | 28.503 | 0.00 | 0.00 |
| ATOM | 1489 | HD21 | ASN | X | 96 | 33.200 | 48.665 | 28.352 | 0.00 | 0.00 |
| ATOM | 1490 | HD22 | ASN | X | 96 | 32.148 | 47.739 | 29.397 | 0.00 | 0.00 |
| ATOM | 1491 | C    | ASN | X | 96 | 27.919 | 46.881 | 28.252 | 0.00 | 0.00 |
| ATOM | 1492 | O    | ASN | X | 96 | 27.884 | 46.581 | 29.437 | 0.00 | 0.00 |
| ATOM | 1493 | N    | VAL | X | 97 | 27.044 | 46.434 | 27.325 | 0.00 | 0.00 |
| ATOM | 1494 | H    | VAL | X | 97 | 27.247 | 46.761 | 26.391 | 0.00 | 0.00 |
| ATOM | 1495 | CA   | VAL | X | 97 | 25.973 | 45.430 | 27.452 | 0.00 | 0.00 |
| ATOM | 1496 | HA   | VAL | X | 97 | 25.986 | 44.915 | 28.413 | 0.00 | 0.00 |
| ATOM | 1497 | CB   | VAL | X | 97 | 24.552 | 46.044 | 27.309 | 0.00 | 0.00 |
| ATOM | 1498 | HB   | VAL | X | 97 | 24.422 | 46.297 | 26.256 | 0.00 | 0.00 |
| ATOM | 1499 | CG1  | VAL | X | 97 | 23.343 | 45.204 | 27.864 | 0.00 | 0.00 |
| ATOM | 1500 | HG11 | VAL | X | 97 | 23.564 | 45.079 | 28.924 | 0.00 | 0.00 |
| ATOM | 1501 | HG12 | VAL | X | 97 | 22.434 | 45.796 | 27.753 | 0.00 | 0.00 |
| ATOM | 1502 | HG13 | VAL | X | 97 | 23.358 | 44.321 | 27.224 | 0.00 | 0.00 |
| ATOM | 1503 | CG2  | VAL | X | 97 | 24.491 | 47.419 | 28.088 | 0.00 | 0.00 |
| ATOM | 1504 | HG21 | VAL | X | 97 | 24.884 | 48.317 | 27.611 | 0.00 | 0.00 |
| ATOM | 1505 | HG22 | VAL | X | 97 | 24.672 | 47.228 | 29.145 | 0.00 | 0.00 |
| ATOM | 1506 | HG23 | VAL | X | 97 | 23.467 | 47.791 | 28.081 | 0.00 | 0.00 |
| ATOM | 1507 | C    | VAL | X | 97 | 26.187 | 44.322 | 26.395 | 0.00 | 0.00 |
| ATOM | 1508 | O    | VAL | X | 97 | 26.522 | 44.535 | 25.293 | 0.00 | 0.00 |
| ATOM | 1509 | N    | TRP | X | 98 | 25.927 | 43.054 | 26.826 | 0.00 | 0.00 |
| ATOM | 1510 | H    | TRP | X | 98 | 25.836 | 42.915 | 27.822 | 0.00 | 0.00 |
| ATOM | 1511 | CA   | TRP | X | 98 | 25.563 | 41.857 | 26.012 | 0.00 | 0.00 |
| ATOM | 1512 | HA   | TRP | X | 98 | 25.463 | 42.110 | 24.957 | 0.00 | 0.00 |
| ATOM | 1513 | CB   | TRP | X | 98 | 26.596 | 40.678 | 26.188 | 0.00 | 0.00 |
| ATOM | 1514 | HB2  | TRP | X | 98 | 26.814 | 40.519 | 27.244 | 0.00 | 0.00 |
| ATOM | 1515 | HB3  | TRP | X | 98 | 26.254 | 39.716 | 25.805 | 0.00 | 0.00 |
| ATOM | 1516 | CG   | TRP | X | 98 | 27.890 | 40.887 | 25.593 | 0.00 | 0.00 |
| ATOM | 1517 | CD1  | TRP | X | 98 | 28.326 | 40.273 | 24.501 | 0.00 | 0.00 |
| ATOM | 1518 | HD1  | TRP | X | 98 | 27.780 | 39.467 | 24.032 | 0.00 | 0.00 |
| ATOM | 1519 | NE1  | TRP | X | 98 | 29.695 | 40.536 | 24.402 | 0.00 | 0.00 |
| ATOM | 1520 | HE1  | TRP | X | 98 | 30.360 | 40.034 | 23.831 | 0.00 | 0.00 |
| ATOM | 1521 | CE2  | TRP | X | 98 | 30.108 | 41.455 | 25.325 | 0.00 | 0.00 |
| ATOM | 1522 | CZ2  | TRP | X | 98 | 31.340 | 41.977 | 25.692 | 0.00 | 0.00 |
| ATOM | 1523 | HZ2  | TRP | X | 98 | 32.225 | 41.748 | 25.116 | 0.00 | 0.00 |
| ATOM | 1524 | CH2  | TRP | X | 98 | 31.541 | 42.830 | 26.784 | 0.00 | 0.00 |
| ATOM | 1525 | HH2  | TRP | X | 98 | 32.558 | 43.088 | 27.043 | 0.00 | 0.00 |
| ATOM | 1526 | CZ3  | TRP | X | 98 | 30.415 | 43.165 | 27.494 | 0.00 | 0.00 |
| ATOM | 1527 | HZ3  | TRP | X | 98 | 30.418 | 43.836 | 28.340 | 0.00 | 0.00 |
| ATOM | 1528 | CE3  | TRP | X | 98 | 29.148 | 42.570 | 27.200 | 0.00 | 0.00 |
| ATOM | 1529 | HE3  | TRP | X | 98 | 28.341 | 42.734 | 27.898 | 0.00 | 0.00 |
| ATOM | 1530 | CD2  | TRP | X | 98 | 29.001 | 41.721 | 26.088 | 0.00 | 0.00 |
| ATOM | 1531 | C    | TRP | X | 98 | 24.265 | 41.350 | 26.456 | 0.00 | 0.00 |
| ATOM | 1532 | O    | TRP | X | 98 | 24.053 | 41.349 | 27.678 | 0.00 | 0.00 |
| ATOM | 1533 | N    | THR | X | 99 | 23.371 | 41.042 | 25.509 | 0.00 | 0.00 |
| ATOM | 1534 | H    | THR | X | 99 | 23.680 | 41.078 | 24.548 | 0.00 | 0.00 |
| ATOM | 1535 | CA   | THR | X | 99 | 22.026 | 40.620 | 25.754 | 0.00 | 0.00 |
| ATOM | 1536 | HA   | THR | X | 99 | 21.962 | 39.932 | 26.596 | 0.00 | 0.00 |
| ATOM | 1537 | CB   | THR | X | 99 | 20.993 | 41.713 | 26.015 | 0.00 | 0.00 |
| ATOM | 1538 | HB   | THR | X | 99 | 21.271 | 42.224 | 26.936 | 0.00 | 0.00 |
| ATOM | 1539 | CG2  | THR | X | 99 | 20.937 | 42.700 | 24.738 | 0.00 | 0.00 |
| ATOM | 1540 | HG21 | THR | X | 99 | 20.377 | 43.615 | 24.927 | 0.00 | 0.00 |
| ATOM | 1541 | HG22 | THR | X | 99 | 20.273 | 42.275 | 23.985 | 0.00 | 0.00 |
| ATOM | 1542 | HG23 | THR | X | 99 | 21.870 | 43.106 | 24.347 | 0.00 | 0.00 |
| ATOM | 1543 | OG1  | THR | X | 99 | 19.646 | 41.319 | 26.055 | 0.00 | 0.00 |
| ATOM | 1544 | HG1  | THR | X | 99 | 19.027 | 42.043 | 25.933 | 0.00 | 0.00 |
| ATOM | 1545 | C    | THR | X | 99 | 21.589 | 39.801 | 24.467 | 0.00 | 0.00 |

|      |      |     |     |   |     |        |        |        |      |      |
|------|------|-----|-----|---|-----|--------|--------|--------|------|------|
| ATOM | 1546 | O   | THR | X | 99  | 22.152 | 40.039 | 23.407 | 0.00 | 0.00 |
| ATOM | 1547 | N   | PRO | X | 100 | 20.769 | 38.741 | 24.487 | 0.00 | 0.00 |
| ATOM | 1548 | CD  | PRO | X | 100 | 20.155 | 38.078 | 25.602 | 0.00 | 0.00 |
| ATOM | 1549 | HD2 | PRO | X | 100 | 19.271 | 38.691 | 25.777 | 0.00 | 0.00 |
| ATOM | 1550 | HD3 | PRO | X | 100 | 20.683 | 38.002 | 26.552 | 0.00 | 0.00 |
| ATOM | 1551 | CG  | PRO | X | 100 | 19.812 | 36.682 | 25.095 | 0.00 | 0.00 |
| ATOM | 1552 | HG2 | PRO | X | 100 | 18.950 | 36.212 | 25.568 | 0.00 | 0.00 |
| ATOM | 1553 | HG3 | PRO | X | 100 | 20.648 | 35.994 | 25.220 | 0.00 | 0.00 |
| ATOM | 1554 | CB  | PRO | X | 100 | 19.616 | 36.891 | 23.625 | 0.00 | 0.00 |
| ATOM | 1555 | HB2 | PRO | X | 100 | 18.579 | 37.205 | 23.505 | 0.00 | 0.00 |
| ATOM | 1556 | HB3 | PRO | X | 100 | 19.860 | 35.989 | 23.063 | 0.00 | 0.00 |
| ATOM | 1557 | CA  | PRO | X | 100 | 20.464 | 38.035 | 23.182 | 0.00 | 0.00 |
| ATOM | 1558 | HA  | PRO | X | 100 | 21.349 | 37.465 | 22.901 | 0.00 | 0.00 |
| ATOM | 1559 | C   | PRO | X | 100 | 19.888 | 38.786 | 21.975 | 0.00 | 0.00 |
| ATOM | 1560 | O   | PRO | X | 100 | 19.210 | 39.785 | 22.255 | 0.00 | 0.00 |
| ATOM | 1561 | N   | TYR | X | 101 | 20.048 | 38.322 | 20.749 | 0.00 | 0.00 |
| ATOM | 1562 | H   | TYR | X | 101 | 20.621 | 37.500 | 20.625 | 0.00 | 0.00 |
| ATOM | 1563 | CA  | TYR | X | 101 | 19.559 | 38.991 | 19.544 | 0.00 | 0.00 |
| ATOM | 1564 | HA  | TYR | X | 101 | 19.231 | 40.012 | 19.737 | 0.00 | 0.00 |
| ATOM | 1565 | CB  | TYR | X | 101 | 20.808 | 39.039 | 18.586 | 0.00 | 0.00 |
| ATOM | 1566 | HB2 | TYR | X | 101 | 21.579 | 39.627 | 19.085 | 0.00 | 0.00 |
| ATOM | 1567 | HB3 | TYR | X | 101 | 21.244 | 38.065 | 18.362 | 0.00 | 0.00 |
| ATOM | 1568 | CG  | TYR | X | 101 | 20.569 | 39.616 | 17.203 | 0.00 | 0.00 |
| ATOM | 1569 | CD1 | TYR | X | 101 | 20.067 | 38.727 | 16.191 | 0.00 | 0.00 |
| ATOM | 1570 | HD1 | TYR | X | 101 | 19.902 | 37.676 | 16.382 | 0.00 | 0.00 |
| ATOM | 1571 | CE1 | TYR | X | 101 | 19.856 | 39.225 | 14.878 | 0.00 | 0.00 |
| ATOM | 1572 | HE1 | TYR | X | 101 | 19.474 | 38.598 | 14.086 | 0.00 | 0.00 |
| ATOM | 1573 | CZ  | TYR | X | 101 | 20.105 | 40.607 | 14.580 | 0.00 | 0.00 |
| ATOM | 1574 | OH  | TYR | X | 101 | 19.907 | 41.056 | 13.359 | 0.00 | 0.00 |
| ATOM | 1575 | HH  | TYR | X | 101 | 19.483 | 40.403 | 12.797 | 0.00 | 0.00 |
| ATOM | 1576 | CE2 | TYR | X | 101 | 20.645 | 41.465 | 15.617 | 0.00 | 0.00 |
| ATOM | 1577 | HE2 | TYR | X | 101 | 20.828 | 42.515 | 15.442 | 0.00 | 0.00 |
| ATOM | 1578 | CD2 | TYR | X | 101 | 20.927 | 40.913 | 16.886 | 0.00 | 0.00 |
| ATOM | 1579 | HD2 | TYR | X | 101 | 21.231 | 41.530 | 17.718 | 0.00 | 0.00 |
| ATOM | 1580 | C   | TYR | X | 101 | 18.496 | 38.061 | 18.927 | 0.00 | 0.00 |
| ATOM | 1581 | O   | TYR | X | 101 | 18.821 | 36.964 | 18.521 | 0.00 | 0.00 |
| ATOM | 1582 | N   | PRO | X | 102 | 17.189 | 38.498 | 18.863 | 0.00 | 0.00 |
| ATOM | 1583 | CD  | PRO | X | 102 | 16.204 | 37.617 | 18.252 | 0.00 | 0.00 |
| ATOM | 1584 | HD2 | PRO | X | 102 | 16.175 | 36.606 | 18.659 | 0.00 | 0.00 |
| ATOM | 1585 | HD3 | PRO | X | 102 | 16.428 | 37.544 | 17.187 | 0.00 | 0.00 |
| ATOM | 1586 | CG  | PRO | X | 102 | 14.845 | 38.288 | 18.584 | 0.00 | 0.00 |
| ATOM | 1587 | HG2 | PRO | X | 102 | 14.501 | 37.978 | 19.570 | 0.00 | 0.00 |
| ATOM | 1588 | HG3 | PRO | X | 102 | 14.087 | 38.012 | 17.851 | 0.00 | 0.00 |
| ATOM | 1589 | CB  | PRO | X | 102 | 15.126 | 39.778 | 18.665 | 0.00 | 0.00 |
| ATOM | 1590 | HB2 | PRO | X | 102 | 14.317 | 40.348 | 19.120 | 0.00 | 0.00 |
| ATOM | 1591 | HB3 | PRO | X | 102 | 15.106 | 40.075 | 17.616 | 0.00 | 0.00 |
| ATOM | 1592 | CA  | PRO | X | 102 | 16.580 | 39.772 | 19.324 | 0.00 | 0.00 |
| ATOM | 1593 | HA  | PRO | X | 102 | 17.118 | 40.620 | 18.900 | 0.00 | 0.00 |
| ATOM | 1594 | C   | PRO | X | 102 | 16.433 | 39.840 | 20.864 | 0.00 | 0.00 |
| ATOM | 1595 | O   | PRO | X | 102 | 16.638 | 38.816 | 21.525 | 0.00 | 0.00 |
| ATOM | 1596 | N   | ARG | X | 103 | 16.188 | 41.072 | 21.437 | 0.00 | 0.00 |
| ATOM | 1597 | H   | ARG | X | 103 | 16.099 | 41.860 | 20.812 | 0.00 | 0.00 |
| ATOM | 1598 | CA  | ARG | X | 103 | 16.380 | 41.306 | 22.869 | 0.00 | 0.00 |
| ATOM | 1599 | HA  | ARG | X | 103 | 17.286 | 40.744 | 23.097 | 0.00 | 0.00 |
| ATOM | 1600 | CB  | ARG | X | 103 | 16.400 | 42.814 | 23.152 | 0.00 | 0.00 |
| ATOM | 1601 | HB2 | ARG | X | 103 | 15.464 | 43.304 | 22.885 | 0.00 | 0.00 |
| ATOM | 1602 | HB3 | ARG | X | 103 | 16.508 | 42.989 | 24.223 | 0.00 | 0.00 |
| ATOM | 1603 | CG  | ARG | X | 103 | 17.567 | 43.612 | 22.588 | 0.00 | 0.00 |
| ATOM | 1604 | HG2 | ARG | X | 103 | 18.537 | 43.121 | 22.668 | 0.00 | 0.00 |
| ATOM | 1605 | HG3 | ARG | X | 103 | 17.487 | 43.643 | 21.502 | 0.00 | 0.00 |
| ATOM | 1606 | CD  | ARG | X | 103 | 17.658 | 45.053 | 23.180 | 0.00 | 0.00 |
| ATOM | 1607 | HD2 | ARG | X | 103 | 17.910 | 44.833 | 24.217 | 0.00 | 0.00 |
| ATOM | 1608 | HD3 | ARG | X | 103 | 18.496 | 45.579 | 22.722 | 0.00 | 0.00 |
| ATOM | 1609 | NE  | ARG | X | 103 | 16.425 | 45.836 | 23.024 | 0.00 | 0.00 |
| ATOM | 1610 | HE  | ARG | X | 103 | 15.871 | 45.910 | 23.865 | 0.00 | 0.00 |
| ATOM | 1611 | CZ  | ARG | X | 103 | 16.194 | 46.552 | 21.925 | 0.00 | 0.00 |
| ATOM | 1612 | NH1 | ARG | X | 103 | 17.036 | 46.666 | 20.957 | 0.00 | 0.00 |

|      |      |      |     |   |     |        |        |        |      |      |
|------|------|------|-----|---|-----|--------|--------|--------|------|------|
| ATOM | 1613 | HH11 | ARG | X | 103 | 17.828 | 46.053 | 20.825 | 0.00 | 0.00 |
| ATOM | 1614 | HH12 | ARG | X | 103 | 16.808 | 47.329 | 20.230 | 0.00 | 0.00 |
| ATOM | 1615 | NH2  | ARG | X | 103 | 15.066 | 47.272 | 21.829 | 0.00 | 0.00 |
| ATOM | 1616 | HH21 | ARG | X | 103 | 14.493 | 47.251 | 22.661 | 0.00 | 0.00 |
| ATOM | 1617 | HH22 | ARG | X | 103 | 14.873 | 47.978 | 21.133 | 0.00 | 0.00 |
| ATOM | 1618 | C    | ARG | X | 103 | 15.179 | 40.732 | 23.664 | 0.00 | 0.00 |
| ATOM | 1619 | O    | ARG | X | 103 | 14.014 | 40.907 | 23.300 | 0.00 | 0.00 |
| ATOM | 1620 | N    | PRO | X | 104 | 15.449 | 40.292 | 24.928 | 0.00 | 0.00 |
| ATOM | 1621 | CD   | PRO | X | 104 | 16.746 | 40.182 | 25.534 | 0.00 | 0.00 |
| ATOM | 1622 | HD2  | PRO | X | 104 | 16.981 | 41.182 | 25.898 | 0.00 | 0.00 |
| ATOM | 1623 | HD3  | PRO | X | 104 | 17.527 | 39.880 | 24.836 | 0.00 | 0.00 |
| ATOM | 1624 | CG   | PRO | X | 104 | 16.694 | 39.064 | 26.580 | 0.00 | 0.00 |
| ATOM | 1625 | HG2  | PRO | X | 104 | 17.402 | 39.143 | 27.405 | 0.00 | 0.00 |
| ATOM | 1626 | HG3  | PRO | X | 104 | 16.696 | 38.083 | 26.104 | 0.00 | 0.00 |
| ATOM | 1627 | CB   | PRO | X | 104 | 15.239 | 39.313 | 27.082 | 0.00 | 0.00 |
| ATOM | 1628 | HB2  | PRO | X | 104 | 15.258 | 40.133 | 27.800 | 0.00 | 0.00 |
| ATOM | 1629 | HB3  | PRO | X | 104 | 14.804 | 38.526 | 27.697 | 0.00 | 0.00 |
| ATOM | 1630 | CA   | PRO | X | 104 | 14.480 | 39.740 | 25.887 | 0.00 | 0.00 |
| ATOM | 1631 | HA   | PRO | X | 104 | 14.050 | 38.835 | 25.457 | 0.00 | 0.00 |
| ATOM | 1632 | C    | PRO | X | 104 | 13.354 | 40.767 | 26.213 | 0.00 | 0.00 |
| ATOM | 1633 | O    | PRO | X | 104 | 13.478 | 41.991 | 26.175 | 0.00 | 0.00 |
| ATOM | 1634 | N    | THR | X | 105 | 12.194 | 40.153 | 26.508 | 0.00 | 0.00 |
| ATOM | 1635 | H    | THR | X | 105 | 12.090 | 39.164 | 26.329 | 0.00 | 0.00 |
| ATOM | 1636 | CA   | THR | X | 105 | 10.994 | 40.936 | 26.719 | 0.00 | 0.00 |
| ATOM | 1637 | HA   | THR | X | 105 | 11.117 | 41.989 | 26.971 | 0.00 | 0.00 |
| ATOM | 1638 | CB   | THR | X | 105 | 10.081 | 40.900 | 25.508 | 0.00 | 0.00 |
| ATOM | 1639 | HB   | THR | X | 105 | 9.068  | 40.824 | 25.903 | 0.00 | 0.00 |
| ATOM | 1640 | CG2  | THR | X | 105 | 10.193 | 42.209 | 24.580 | 0.00 | 0.00 |
| ATOM | 1641 | HG21 | THR | X | 105 | 9.815  | 43.027 | 25.194 | 0.00 | 0.00 |
| ATOM | 1642 | HG22 | THR | X | 105 | 9.375  | 42.142 | 23.863 | 0.00 | 0.00 |
| ATOM | 1643 | HG23 | THR | X | 105 | 11.186 | 42.326 | 24.146 | 0.00 | 0.00 |
| ATOM | 1644 | OG1  | THR | X | 105 | 10.299 | 39.701 | 24.803 | 0.00 | 0.00 |
| ATOM | 1645 | HG1  | THR | X | 105 | 10.356 | 39.923 | 23.871 | 0.00 | 0.00 |
| ATOM | 1646 | C    | THR | X | 105 | 10.316 | 40.350 | 27.914 | 0.00 | 0.00 |
| ATOM | 1647 | O    | THR | X | 105 | 9.673  | 41.158 | 28.644 | 0.00 | 0.00 |
| ATOM | 1648 | N    | SER | X | 106 | 10.419 | 39.071 | 28.268 | 0.00 | 0.00 |
| ATOM | 1649 | H    | SER | X | 106 | 11.001 | 38.511 | 27.661 | 0.00 | 0.00 |
| ATOM | 1650 | CA   | SER | X | 106 | 10.042 | 38.623 | 29.577 | 0.00 | 0.00 |
| ATOM | 1651 | HA   | SER | X | 106 | 9.329  | 39.317 | 30.022 | 0.00 | 0.00 |
| ATOM | 1652 | CB   | SER | X | 106 | 9.496  | 37.163 | 29.521 | 0.00 | 0.00 |
| ATOM | 1653 | HB2  | SER | X | 106 | 9.772  | 36.648 | 30.441 | 0.00 | 0.00 |
| ATOM | 1654 | HB3  | SER | X | 106 | 8.413  | 37.141 | 29.397 | 0.00 | 0.00 |
| ATOM | 1655 | OG   | SER | X | 106 | 10.075 | 36.336 | 28.527 | 0.00 | 0.00 |
| ATOM | 1656 | HG   | SER | X | 106 | 9.830  | 36.728 | 27.685 | 0.00 | 0.00 |
| ATOM | 1657 | C    | SER | X | 106 | 11.281 | 38.600 | 30.474 | 0.00 | 0.00 |
| ATOM | 1658 | O    | SER | X | 106 | 12.369 | 38.599 | 29.964 | 0.00 | 0.00 |
| ATOM | 1659 | N    | PRO | X | 107 | 11.273 | 38.666 | 31.743 | 0.00 | 0.00 |
| ATOM | 1660 | CD   | PRO | X | 107 | 10.044 | 38.665 | 32.573 | 0.00 | 0.00 |
| ATOM | 1661 | HD2  | PRO | X | 107 | 9.325  | 37.883 | 32.328 | 0.00 | 0.00 |
| ATOM | 1662 | HD3  | PRO | X | 107 | 9.559  | 39.634 | 32.459 | 0.00 | 0.00 |
| ATOM | 1663 | CG   | PRO | X | 107 | 10.487 | 38.703 | 33.987 | 0.00 | 0.00 |
| ATOM | 1664 | HG2  | PRO | X | 107 | 10.554 | 37.700 | 34.408 | 0.00 | 0.00 |
| ATOM | 1665 | HG3  | PRO | X | 107 | 9.773  | 39.214 | 34.633 | 0.00 | 0.00 |
| ATOM | 1666 | CB   | PRO | X | 107 | 11.887 | 39.414 | 33.939 | 0.00 | 0.00 |
| ATOM | 1667 | HB2  | PRO | X | 107 | 12.550 | 39.034 | 34.716 | 0.00 | 0.00 |
| ATOM | 1668 | HB3  | PRO | X | 107 | 11.787 | 40.493 | 34.056 | 0.00 | 0.00 |
| ATOM | 1669 | CA   | PRO | X | 107 | 12.402 | 38.932 | 32.630 | 0.00 | 0.00 |
| ATOM | 1670 | HA   | PRO | X | 107 | 12.915 | 39.799 | 32.215 | 0.00 | 0.00 |
| ATOM | 1671 | C    | PRO | X | 107 | 13.425 | 37.733 | 32.744 | 0.00 | 0.00 |
| ATOM | 1672 | O    | PRO | X | 107 | 13.163 | 36.614 | 32.706 | 0.00 | 0.00 |
| ATOM | 1673 | N    | THR | X | 108 | 14.657 | 38.205 | 33.067 | 0.00 | 0.00 |
| ATOM | 1674 | H    | THR | X | 108 | 14.731 | 39.197 | 33.244 | 0.00 | 0.00 |
| ATOM | 1675 | CA   | THR | X | 108 | 15.991 | 37.453 | 33.150 | 0.00 | 0.00 |
| ATOM | 1676 | HA   | THR | X | 108 | 15.833 | 36.461 | 33.573 | 0.00 | 0.00 |
| ATOM | 1677 | CB   | THR | X | 108 | 16.480 | 37.110 | 31.748 | 0.00 | 0.00 |
| ATOM | 1678 | HB   | THR | X | 108 | 15.761 | 36.434 | 31.286 | 0.00 | 0.00 |
| ATOM | 1679 | CG2  | THR | X | 108 | 16.670 | 38.359 | 30.863 | 0.00 | 0.00 |

|      |      |      |     |   |     |        |        |        |      |      |
|------|------|------|-----|---|-----|--------|--------|--------|------|------|
| ATOM | 1680 | HG21 | THR | X | 108 | 15.634 | 38.678 | 30.742 | 0.00 | 0.00 |
| ATOM | 1681 | HG22 | THR | X | 108 | 17.072 | 38.043 | 29.901 | 0.00 | 0.00 |
| ATOM | 1682 | HG23 | THR | X | 108 | 17.337 | 39.114 | 31.278 | 0.00 | 0.00 |
| ATOM | 1683 | OG1  | THR | X | 108 | 17.789 | 36.525 | 31.815 | 0.00 | 0.00 |
| ATOM | 1684 | HG1  | THR | X | 108 | 18.408 | 36.971 | 31.233 | 0.00 | 0.00 |
| ATOM | 1685 | C    | THR | X | 108 | 17.029 | 38.140 | 34.059 | 0.00 | 0.00 |
| ATOM | 1686 | O    | THR | X | 108 | 17.143 | 39.343 | 33.962 | 0.00 | 0.00 |
| ATOM | 1687 | N    | PRO | X | 109 | 17.615 | 37.408 | 35.041 | 0.00 | 0.00 |
| ATOM | 1688 | CD   | PRO | X | 109 | 17.217 | 36.051 | 35.533 | 0.00 | 0.00 |
| ATOM | 1689 | HD2  | PRO | X | 109 | 17.526 | 35.305 | 34.801 | 0.00 | 0.00 |
| ATOM | 1690 | HD3  | PRO | X | 109 | 16.128 | 36.001 | 35.512 | 0.00 | 0.00 |
| ATOM | 1691 | CG   | PRO | X | 109 | 17.921 | 35.888 | 36.935 | 0.00 | 0.00 |
| ATOM | 1692 | HG2  | PRO | X | 109 | 18.112 | 34.822 | 37.057 | 0.00 | 0.00 |
| ATOM | 1693 | HG3  | PRO | X | 109 | 17.324 | 36.280 | 37.759 | 0.00 | 0.00 |
| ATOM | 1694 | CB   | PRO | X | 109 | 19.085 | 36.816 | 36.796 | 0.00 | 0.00 |
| ATOM | 1695 | HB2  | PRO | X | 109 | 19.874 | 36.398 | 36.170 | 0.00 | 0.00 |
| ATOM | 1696 | HB3  | PRO | X | 109 | 19.570 | 37.127 | 37.721 | 0.00 | 0.00 |
| ATOM | 1697 | CA   | PRO | X | 109 | 18.598 | 37.920 | 35.913 | 0.00 | 0.00 |
| ATOM | 1698 | HA   | PRO | X | 109 | 18.232 | 38.661 | 36.624 | 0.00 | 0.00 |
| ATOM | 1699 | C    | PRO | X | 109 | 19.714 | 38.654 | 35.201 | 0.00 | 0.00 |
| ATOM | 1700 | O    | PRO | X | 109 | 20.055 | 38.304 | 34.066 | 0.00 | 0.00 |
| ATOM | 1701 | N    | VAL | X | 110 | 20.200 | 39.693 | 35.887 | 0.00 | 0.00 |
| ATOM | 1702 | H    | VAL | X | 110 | 19.813 | 39.914 | 36.793 | 0.00 | 0.00 |
| ATOM | 1703 | CA   | VAL | X | 110 | 21.229 | 40.602 | 35.416 | 0.00 | 0.00 |
| ATOM | 1704 | HA   | VAL | X | 110 | 21.238 | 40.378 | 34.350 | 0.00 | 0.00 |
| ATOM | 1705 | CB   | VAL | X | 110 | 20.924 | 42.124 | 35.457 | 0.00 | 0.00 |
| ATOM | 1706 | HB   | VAL | X | 110 | 20.982 | 42.396 | 36.510 | 0.00 | 0.00 |
| ATOM | 1707 | CG1  | VAL | X | 110 | 21.912 | 42.907 | 34.591 | 0.00 | 0.00 |
| ATOM | 1708 | HG11 | VAL | X | 110 | 21.855 | 43.972 | 34.818 | 0.00 | 0.00 |
| ATOM | 1709 | HG12 | VAL | X | 110 | 22.940 | 42.633 | 34.829 | 0.00 | 0.00 |
| ATOM | 1710 | HG13 | VAL | X | 110 | 21.920 | 42.637 | 33.535 | 0.00 | 0.00 |
| ATOM | 1711 | CG2  | VAL | X | 110 | 19.512 | 42.451 | 34.986 | 0.00 | 0.00 |
| ATOM | 1712 | HG21 | VAL | X | 110 | 18.815 | 41.963 | 35.668 | 0.00 | 0.00 |
| ATOM | 1713 | HG22 | VAL | X | 110 | 19.412 | 42.030 | 33.986 | 0.00 | 0.00 |
| ATOM | 1714 | HG23 | VAL | X | 110 | 19.352 | 43.525 | 34.890 | 0.00 | 0.00 |
| ATOM | 1715 | C    | VAL | X | 110 | 22.510 | 40.219 | 36.090 | 0.00 | 0.00 |
| ATOM | 1716 | O    | VAL | X | 110 | 22.576 | 40.115 | 37.316 | 0.00 | 0.00 |
| ATOM | 1717 | N    | LEU | X | 111 | 23.583 | 39.986 | 35.287 | 0.00 | 0.00 |
| ATOM | 1718 | H    | LEU | X | 111 | 23.444 | 39.987 | 34.287 | 0.00 | 0.00 |
| ATOM | 1719 | CA   | LEU | X | 111 | 24.950 | 39.811 | 35.824 | 0.00 | 0.00 |
| ATOM | 1720 | HA   | LEU | X | 111 | 24.897 | 39.689 | 36.906 | 0.00 | 0.00 |
| ATOM | 1721 | CB   | LEU | X | 111 | 25.597 | 38.551 | 35.086 | 0.00 | 0.00 |
| ATOM | 1722 | HB2  | LEU | X | 111 | 25.580 | 38.714 | 34.008 | 0.00 | 0.00 |
| ATOM | 1723 | HB3  | LEU | X | 111 | 26.669 | 38.657 | 35.255 | 0.00 | 0.00 |
| ATOM | 1724 | CG   | LEU | X | 111 | 25.088 | 37.141 | 35.465 | 0.00 | 0.00 |
| ATOM | 1725 | HG   | LEU | X | 111 | 24.006 | 37.137 | 35.335 | 0.00 | 0.00 |
| ATOM | 1726 | CD1  | LEU | X | 111 | 25.750 | 36.135 | 34.535 | 0.00 | 0.00 |
| ATOM | 1727 | HD11 | LEU | X | 111 | 25.490 | 36.447 | 33.523 | 0.00 | 0.00 |
| ATOM | 1728 | HD12 | LEU | X | 111 | 25.459 | 35.108 | 34.759 | 0.00 | 0.00 |
| ATOM | 1729 | HD13 | LEU | X | 111 | 26.831 | 36.055 | 34.652 | 0.00 | 0.00 |
| ATOM | 1730 | CD2  | LEU | X | 111 | 25.489 | 36.849 | 36.992 | 0.00 | 0.00 |
| ATOM | 1731 | HD21 | LEU | X | 111 | 25.079 | 35.904 | 37.349 | 0.00 | 0.00 |
| ATOM | 1732 | HD22 | LEU | X | 111 | 26.560 | 36.839 | 37.193 | 0.00 | 0.00 |
| ATOM | 1733 | HD23 | LEU | X | 111 | 25.128 | 37.619 | 37.675 | 0.00 | 0.00 |
| ATOM | 1734 | C    | LEU | X | 111 | 25.758 | 41.096 | 35.534 | 0.00 | 0.00 |
| ATOM | 1735 | O    | LEU | X | 111 | 25.847 | 41.521 | 34.378 | 0.00 | 0.00 |
| ATOM | 1736 | N    | VAL | X | 112 | 26.354 | 41.713 | 36.538 | 0.00 | 0.00 |
| ATOM | 1737 | H    | VAL | X | 112 | 26.215 | 41.339 | 37.466 | 0.00 | 0.00 |
| ATOM | 1738 | CA   | VAL | X | 112 | 27.004 | 43.051 | 36.469 | 0.00 | 0.00 |
| ATOM | 1739 | HA   | VAL | X | 112 | 27.030 | 43.361 | 35.425 | 0.00 | 0.00 |
| ATOM | 1740 | CB   | VAL | X | 112 | 26.296 | 44.146 | 37.322 | 0.00 | 0.00 |
| ATOM | 1741 | HB   | VAL | X | 112 | 26.159 | 43.855 | 38.363 | 0.00 | 0.00 |
| ATOM | 1742 | CG1  | VAL | X | 112 | 27.177 | 45.485 | 37.210 | 0.00 | 0.00 |
| ATOM | 1743 | HG11 | VAL | X | 112 | 28.253 | 45.326 | 37.282 | 0.00 | 0.00 |
| ATOM | 1744 | HG12 | VAL | X | 112 | 26.970 | 46.123 | 36.351 | 0.00 | 0.00 |
| ATOM | 1745 | HG13 | VAL | X | 112 | 26.969 | 46.089 | 38.093 | 0.00 | 0.00 |
| ATOM | 1746 | CG2  | VAL | X | 112 | 24.872 | 44.466 | 36.817 | 0.00 | 0.00 |

|      |      |      |     |   |     |        |        |        |      |      |
|------|------|------|-----|---|-----|--------|--------|--------|------|------|
| ATOM | 1747 | HG21 | VAL | X | 112 | 25.007 | 44.831 | 35.799 | 0.00 | 0.00 |
| ATOM | 1748 | HG22 | VAL | X | 112 | 24.554 | 45.314 | 37.424 | 0.00 | 0.00 |
| ATOM | 1749 | HG23 | VAL | X | 112 | 24.186 | 43.628 | 36.935 | 0.00 | 0.00 |
| ATOM | 1750 | C    | VAL | X | 112 | 28.507 | 42.778 | 36.772 | 0.00 | 0.00 |
| ATOM | 1751 | O    | VAL | X | 112 | 28.798 | 42.599 | 37.917 | 0.00 | 0.00 |
| ATOM | 1752 | N    | TRP | X | 113 | 29.411 | 42.791 | 35.775 | 0.00 | 0.00 |
| ATOM | 1753 | H    | TRP | X | 113 | 28.990 | 42.879 | 34.861 | 0.00 | 0.00 |
| ATOM | 1754 | CA   | TRP | X | 113 | 30.842 | 42.501 | 35.911 | 0.00 | 0.00 |
| ATOM | 1755 | HA   | TRP | X | 113 | 30.826 | 41.736 | 36.688 | 0.00 | 0.00 |
| ATOM | 1756 | CB   | TRP | X | 113 | 31.166 | 41.796 | 34.608 | 0.00 | 0.00 |
| ATOM | 1757 | HB2  | TRP | X | 113 | 30.406 | 41.028 | 34.460 | 0.00 | 0.00 |
| ATOM | 1758 | HB3  | TRP | X | 113 | 31.064 | 42.522 | 33.802 | 0.00 | 0.00 |
| ATOM | 1759 | CG   | TRP | X | 113 | 32.515 | 41.272 | 34.555 | 0.00 | 0.00 |
| ATOM | 1760 | CD1  | TRP | X | 113 | 33.575 | 41.732 | 33.881 | 0.00 | 0.00 |
| ATOM | 1761 | HD1  | TRP | X | 113 | 33.562 | 42.604 | 33.245 | 0.00 | 0.00 |
| ATOM | 1762 | NE1  | TRP | X | 113 | 34.678 | 40.956 | 34.145 | 0.00 | 0.00 |
| ATOM | 1763 | HE1  | TRP | X | 113 | 35.599 | 41.158 | 33.782 | 0.00 | 0.00 |
| ATOM | 1764 | CE2  | TRP | X | 113 | 34.381 | 40.020 | 35.028 | 0.00 | 0.00 |
| ATOM | 1765 | CZ2  | TRP | X | 113 | 35.227 | 39.041 | 35.659 | 0.00 | 0.00 |
| ATOM | 1766 | HZ2  | TRP | X | 113 | 36.282 | 39.020 | 35.430 | 0.00 | 0.00 |
| ATOM | 1767 | CH2  | TRP | X | 113 | 34.637 | 38.254 | 36.695 | 0.00 | 0.00 |
| ATOM | 1768 | HH2  | TRP | X | 113 | 35.195 | 37.516 | 37.252 | 0.00 | 0.00 |
| ATOM | 1769 | CZ3  | TRP | X | 113 | 33.227 | 38.380 | 37.009 | 0.00 | 0.00 |
| ATOM | 1770 | HZ3  | TRP | X | 113 | 32.897 | 37.985 | 37.959 | 0.00 | 0.00 |
| ATOM | 1771 | CE3  | TRP | X | 113 | 32.455 | 39.260 | 36.277 | 0.00 | 0.00 |
| ATOM | 1772 | HE3  | TRP | X | 113 | 31.417 | 39.397 | 36.545 | 0.00 | 0.00 |
| ATOM | 1773 | CD2  | TRP | X | 113 | 33.047 | 40.139 | 35.355 | 0.00 | 0.00 |
| ATOM | 1774 | C    | TRP | X | 113 | 31.818 | 43.695 | 36.247 | 0.00 | 0.00 |
| ATOM | 1775 | O    | TRP | X | 113 | 31.771 | 44.698 | 35.578 | 0.00 | 0.00 |
| ATOM | 1776 | N    | ILE | X | 114 | 32.561 | 43.458 | 37.288 | 0.00 | 0.00 |
| ATOM | 1777 | H    | ILE | X | 114 | 32.545 | 42.511 | 37.640 | 0.00 | 0.00 |
| ATOM | 1778 | CA   | ILE | X | 114 | 33.535 | 44.344 | 37.913 | 0.00 | 0.00 |
| ATOM | 1779 | HA   | ILE | X | 114 | 33.643 | 45.200 | 37.247 | 0.00 | 0.00 |
| ATOM | 1780 | CB   | ILE | X | 114 | 32.796 | 44.878 | 39.135 | 0.00 | 0.00 |
| ATOM | 1781 | HB   | ILE | X | 114 | 32.722 | 43.985 | 39.756 | 0.00 | 0.00 |
| ATOM | 1782 | CG2  | ILE | X | 114 | 33.603 | 45.910 | 39.967 | 0.00 | 0.00 |
| ATOM | 1783 | HG21 | ILE | X | 114 | 33.696 | 46.867 | 39.453 | 0.00 | 0.00 |
| ATOM | 1784 | HG22 | ILE | X | 114 | 34.477 | 45.402 | 40.375 | 0.00 | 0.00 |
| ATOM | 1785 | HG23 | ILE | X | 114 | 33.005 | 46.129 | 40.851 | 0.00 | 0.00 |
| ATOM | 1786 | CG1  | ILE | X | 114 | 31.425 | 45.524 | 38.885 | 0.00 | 0.00 |
| ATOM | 1787 | HG12 | ILE | X | 114 | 31.567 | 46.195 | 38.038 | 0.00 | 0.00 |
| ATOM | 1788 | HG13 | ILE | X | 114 | 30.761 | 44.710 | 38.595 | 0.00 | 0.00 |
| ATOM | 1789 | CD1  | ILE | X | 114 | 30.619 | 46.268 | 39.970 | 0.00 | 0.00 |
| ATOM | 1790 | HD11 | ILE | X | 114 | 29.605 | 46.447 | 39.611 | 0.00 | 0.00 |
| ATOM | 1791 | HD12 | ILE | X | 114 | 31.033 | 47.265 | 40.122 | 0.00 | 0.00 |
| ATOM | 1792 | HD13 | ILE | X | 114 | 30.595 | 45.761 | 40.935 | 0.00 | 0.00 |
| ATOM | 1793 | C    | ILE | X | 114 | 34.926 | 43.703 | 38.108 | 0.00 | 0.00 |
| ATOM | 1794 | O    | ILE | X | 114 | 34.936 | 42.512 | 38.540 | 0.00 | 0.00 |
| ATOM | 1795 | N    | TYR | X | 115 | 35.963 | 44.233 | 37.454 | 0.00 | 0.00 |
| ATOM | 1796 | H    | TYR | X | 115 | 36.030 | 45.209 | 37.201 | 0.00 | 0.00 |
| ATOM | 1797 | CA   | TYR | X | 115 | 37.152 | 43.432 | 37.082 | 0.00 | 0.00 |
| ATOM | 1798 | HA   | TYR | X | 115 | 36.909 | 42.373 | 37.165 | 0.00 | 0.00 |
| ATOM | 1799 | CB   | TYR | X | 115 | 37.553 | 43.879 | 35.739 | 0.00 | 0.00 |
| ATOM | 1800 | HB2  | TYR | X | 115 | 38.480 | 43.390 | 35.441 | 0.00 | 0.00 |
| ATOM | 1801 | HB3  | TYR | X | 115 | 36.920 | 43.338 | 35.036 | 0.00 | 0.00 |
| ATOM | 1802 | CG   | TYR | X | 115 | 37.606 | 45.352 | 35.451 | 0.00 | 0.00 |
| ATOM | 1803 | CD1  | TYR | X | 115 | 38.561 | 46.196 | 36.126 | 0.00 | 0.00 |
| ATOM | 1804 | HD1  | TYR | X | 115 | 39.105 | 45.791 | 36.967 | 0.00 | 0.00 |
| ATOM | 1805 | CE1  | TYR | X | 115 | 38.683 | 47.545 | 35.767 | 0.00 | 0.00 |
| ATOM | 1806 | HE1  | TYR | X | 115 | 39.337 | 48.210 | 36.311 | 0.00 | 0.00 |
| ATOM | 1807 | CZ   | TYR | X | 115 | 37.858 | 48.047 | 34.723 | 0.00 | 0.00 |
| ATOM | 1808 | OH   | TYR | X | 115 | 37.937 | 49.344 | 34.424 | 0.00 | 0.00 |
| ATOM | 1809 | HH   | TYR | X | 115 | 37.474 | 49.549 | 33.608 | 0.00 | 0.00 |
| ATOM | 1810 | CE2  | TYR | X | 115 | 36.873 | 47.201 | 34.111 | 0.00 | 0.00 |
| ATOM | 1811 | HE2  | TYR | X | 115 | 36.180 | 47.675 | 33.432 | 0.00 | 0.00 |
| ATOM | 1812 | CD2  | TYR | X | 115 | 36.812 | 45.856 | 34.493 | 0.00 | 0.00 |
| ATOM | 1813 | HD2  | TYR | X | 115 | 36.129 | 45.177 | 34.006 | 0.00 | 0.00 |



|      |      |     |     |   |     |        |        |        |      |      |
|------|------|-----|-----|---|-----|--------|--------|--------|------|------|
| ATOM | 1814 | C   | TYR | X | 115 | 38.269 | 43.504 | 38.129 | 0.00 | 0.00 |
| ATOM | 1815 | O   | TYR | X | 115 | 38.235 | 44.422 | 38.948 | 0.00 | 0.00 |
| ATOM | 1816 | N   | GLY | X | 116 | 39.257 | 42.576 | 38.067 | 0.00 | 0.00 |
| ATOM | 1817 | H   | GLY | X | 116 | 39.159 | 41.813 | 37.413 | 0.00 | 0.00 |
| ATOM | 1818 | CA  | GLY | X | 116 | 40.540 | 42.755 | 38.690 | 0.00 | 0.00 |
| ATOM | 1819 | HA2 | GLY | X | 116 | 40.440 | 43.139 | 39.705 | 0.00 | 0.00 |
| ATOM | 1820 | HA3 | GLY | X | 116 | 40.834 | 41.706 | 38.718 | 0.00 | 0.00 |
| ATOM | 1821 | C   | GLY | X | 116 | 41.557 | 43.592 | 37.934 | 0.00 | 0.00 |
| ATOM | 1822 | O   | GLY | X | 116 | 41.141 | 44.412 | 37.094 | 0.00 | 0.00 |
| ATOM | 1823 | N   | GLY | X | 117 | 42.737 | 43.403 | 38.405 | 0.00 | 0.00 |
| ATOM | 1824 | H   | GLY | X | 117 | 42.776 | 42.692 | 39.121 | 0.00 | 0.00 |
| ATOM | 1825 | CA  | GLY | X | 117 | 43.923 | 44.194 | 38.087 | 0.00 | 0.00 |
| ATOM | 1826 | HA2 | GLY | X | 117 | 44.687 | 43.423 | 37.989 | 0.00 | 0.00 |
| ATOM | 1827 | HA3 | GLY | X | 117 | 43.777 | 44.674 | 37.119 | 0.00 | 0.00 |
| ATOM | 1828 | C   | GLY | X | 117 | 44.496 | 45.037 | 39.175 | 0.00 | 0.00 |
| ATOM | 1829 | O   | GLY | X | 117 | 45.318 | 45.921 | 38.818 | 0.00 | 0.00 |
| ATOM | 1830 | N   | GLY | X | 118 | 44.271 | 44.689 | 40.413 | 0.00 | 0.00 |
| ATOM | 1831 | H   | GLY | X | 118 | 43.590 | 43.955 | 40.547 | 0.00 | 0.00 |
| ATOM | 1832 | CA  | GLY | X | 118 | 44.915 | 45.107 | 41.603 | 0.00 | 0.00 |
| ATOM | 1833 | HA2 | GLY | X | 118 | 44.457 | 44.550 | 42.420 | 0.00 | 0.00 |
| ATOM | 1834 | HA3 | GLY | X | 118 | 45.993 | 44.961 | 41.533 | 0.00 | 0.00 |
| ATOM | 1835 | C   | GLY | X | 118 | 44.736 | 46.557 | 41.995 | 0.00 | 0.00 |
| ATOM | 1836 | O   | GLY | X | 118 | 45.594 | 47.129 | 42.663 | 0.00 | 0.00 |
| ATOM | 1837 | N   | PHE | X | 119 | 43.572 | 47.123 | 41.659 | 0.00 | 0.00 |
| ATOM | 1838 | H   | PHE | X | 119 | 43.039 | 46.584 | 40.992 | 0.00 | 0.00 |
| ATOM | 1839 | CA  | PHE | X | 119 | 43.172 | 48.567 | 41.869 | 0.00 | 0.00 |
| ATOM | 1840 | HA  | PHE | X | 119 | 42.210 | 48.731 | 41.383 | 0.00 | 0.00 |
| ATOM | 1841 | CB  | PHE | X | 119 | 43.042 | 49.009 | 43.365 | 0.00 | 0.00 |
| ATOM | 1842 | HB2 | PHE | X | 119 | 43.985 | 48.720 | 43.829 | 0.00 | 0.00 |
| ATOM | 1843 | HB3 | PHE | X | 119 | 42.944 | 50.087 | 43.491 | 0.00 | 0.00 |
| ATOM | 1844 | CG  | PHE | X | 119 | 41.814 | 48.310 | 44.049 | 0.00 | 0.00 |
| ATOM | 1845 | CD1 | PHE | X | 119 | 40.503 | 48.721 | 43.699 | 0.00 | 0.00 |
| ATOM | 1846 | HD1 | PHE | X | 119 | 40.380 | 49.319 | 42.808 | 0.00 | 0.00 |
| ATOM | 1847 | CE1 | PHE | X | 119 | 39.405 | 48.179 | 44.412 | 0.00 | 0.00 |
| ATOM | 1848 | HE1 | PHE | X | 119 | 38.462 | 48.541 | 44.030 | 0.00 | 0.00 |
| ATOM | 1849 | CZ  | PHE | X | 119 | 39.647 | 47.254 | 45.472 | 0.00 | 0.00 |
| ATOM | 1850 | HZ  | PHE | X | 119 | 38.830 | 46.930 | 46.099 | 0.00 | 0.00 |
| ATOM | 1851 | CE2 | PHE | X | 119 | 40.922 | 46.795 | 45.761 | 0.00 | 0.00 |
| ATOM | 1852 | HE2 | PHE | X | 119 | 41.065 | 45.931 | 46.393 | 0.00 | 0.00 |
| ATOM | 1853 | CD2 | PHE | X | 119 | 42.012 | 47.323 | 45.084 | 0.00 | 0.00 |
| ATOM | 1854 | HD2 | PHE | X | 119 | 42.999 | 47.004 | 45.386 | 0.00 | 0.00 |
| ATOM | 1855 | C   | PHE | X | 119 | 44.057 | 49.618 | 41.170 | 0.00 | 0.00 |
| ATOM | 1856 | O   | PHE | X | 119 | 43.545 | 50.659 | 40.862 | 0.00 | 0.00 |
| ATOM | 1857 | N   | TYR | X | 120 | 45.337 | 49.324 | 40.829 | 0.00 | 0.00 |
| ATOM | 1858 | H   | TYR | X | 120 | 45.758 | 48.466 | 41.154 | 0.00 | 0.00 |
| ATOM | 1859 | CA  | TYR | X | 120 | 46.182 | 50.142 | 39.967 | 0.00 | 0.00 |
| ATOM | 1860 | HA  | TYR | X | 120 | 46.146 | 51.174 | 40.317 | 0.00 | 0.00 |
| ATOM | 1861 | CB  | TYR | X | 120 | 47.629 | 49.690 | 40.063 | 0.00 | 0.00 |
| ATOM | 1862 | HB2 | TYR | X | 120 | 48.298 | 50.416 | 39.601 | 0.00 | 0.00 |
| ATOM | 1863 | HB3 | TYR | X | 120 | 47.856 | 49.734 | 41.129 | 0.00 | 0.00 |
| ATOM | 1864 | CG  | TYR | X | 120 | 48.058 | 48.396 | 39.462 | 0.00 | 0.00 |
| ATOM | 1865 | CD1 | TYR | X | 120 | 48.765 | 48.400 | 38.246 | 0.00 | 0.00 |
| ATOM | 1866 | HD1 | TYR | X | 120 | 48.941 | 49.366 | 37.796 | 0.00 | 0.00 |
| ATOM | 1867 | CE1 | TYR | X | 120 | 49.253 | 47.201 | 37.740 | 0.00 | 0.00 |
| ATOM | 1868 | HE1 | TYR | X | 120 | 49.711 | 47.303 | 36.767 | 0.00 | 0.00 |
| ATOM | 1869 | CZ  | TYR | X | 120 | 49.146 | 46.031 | 38.496 | 0.00 | 0.00 |
| ATOM | 1870 | OH  | TYR | X | 120 | 49.624 | 44.860 | 37.979 | 0.00 | 0.00 |
| ATOM | 1871 | HH  | TYR | X | 120 | 49.922 | 44.919 | 37.069 | 0.00 | 0.00 |
| ATOM | 1872 | CE2 | TYR | X | 120 | 48.391 | 46.004 | 39.646 | 0.00 | 0.00 |
| ATOM | 1873 | HE2 | TYR | X | 120 | 48.202 | 45.127 | 40.247 | 0.00 | 0.00 |
| ATOM | 1874 | CD2 | TYR | X | 120 | 47.917 | 47.214 | 40.223 | 0.00 | 0.00 |
| ATOM | 1875 | HD2 | TYR | X | 120 | 47.510 | 47.211 | 41.224 | 0.00 | 0.00 |
| ATOM | 1876 | C   | TYR | X | 120 | 45.879 | 50.086 | 38.478 | 0.00 | 0.00 |
| ATOM | 1877 | O   | TYR | X | 120 | 46.311 | 50.948 | 37.709 | 0.00 | 0.00 |
| ATOM | 1878 | N   | SER | X | 121 | 45.202 | 49.029 | 37.963 | 0.00 | 0.00 |
| ATOM | 1879 | H   | SER | X | 121 | 44.856 | 48.349 | 38.625 | 0.00 | 0.00 |
| ATOM | 1880 | CA  | SER | X | 121 | 44.910 | 48.736 | 36.536 | 0.00 | 0.00 |

|      |      |      |     |   |     |        |        |        |      |      |
|------|------|------|-----|---|-----|--------|--------|--------|------|------|
| ATOM | 1881 | HA   | SER | X | 121 | 44.729 | 49.634 | 35.945 | 0.00 | 0.00 |
| ATOM | 1882 | CB   | SER | X | 121 | 46.199 | 48.055 | 36.014 | 0.00 | 0.00 |
| ATOM | 1883 | HB2  | SER | X | 121 | 46.199 | 48.079 | 34.924 | 0.00 | 0.00 |
| ATOM | 1884 | HB3  | SER | X | 121 | 47.138 | 48.506 | 36.336 | 0.00 | 0.00 |
| ATOM | 1885 | OG   | SER | X | 121 | 46.232 | 46.593 | 36.249 | 0.00 | 0.00 |
| ATOM | 1886 | HG   | SER | X | 121 | 46.173 | 46.359 | 37.178 | 0.00 | 0.00 |
| ATOM | 1887 | C    | SER | X | 121 | 43.684 | 47.929 | 36.354 | 0.00 | 0.00 |
| ATOM | 1888 | O    | SER | X | 121 | 43.258 | 47.375 | 37.348 | 0.00 | 0.00 |
| ATOM | 1889 | N    | GLY | X | 122 | 43.205 | 47.725 | 35.141 | 0.00 | 0.00 |
| ATOM | 1890 | H    | GLY | X | 122 | 43.758 | 48.036 | 34.355 | 0.00 | 0.00 |
| ATOM | 1891 | CA   | GLY | X | 122 | 41.969 | 47.072 | 34.832 | 0.00 | 0.00 |
| ATOM | 1892 | HA2  | GLY | X | 122 | 42.184 | 46.041 | 34.553 | 0.00 | 0.00 |
| ATOM | 1893 | HA3  | GLY | X | 122 | 41.391 | 47.094 | 35.755 | 0.00 | 0.00 |
| ATOM | 1894 | C    | GLY | X | 122 | 41.213 | 47.794 | 33.661 | 0.00 | 0.00 |
| ATOM | 1895 | O    | GLY | X | 122 | 41.361 | 48.994 | 33.479 | 0.00 | 0.00 |
| ATOM | 1896 | N    | ALA | X | 123 | 40.412 | 47.028 | 32.819 | 0.00 | 0.00 |
| ATOM | 1897 | H    | ALA | X | 123 | 40.173 | 46.069 | 33.027 | 0.00 | 0.00 |
| ATOM | 1898 | CA   | ALA | X | 123 | 39.751 | 47.618 | 31.608 | 0.00 | 0.00 |
| ATOM | 1899 | HA   | ALA | X | 123 | 39.334 | 48.593 | 31.861 | 0.00 | 0.00 |
| ATOM | 1900 | CB   | ALA | X | 123 | 40.840 | 47.817 | 30.527 | 0.00 | 0.00 |
| ATOM | 1901 | HB1  | ALA | X | 123 | 41.194 | 48.831 | 30.711 | 0.00 | 0.00 |
| ATOM | 1902 | HB2  | ALA | X | 123 | 40.479 | 47.741 | 29.501 | 0.00 | 0.00 |
| ATOM | 1903 | HB3  | ALA | X | 123 | 41.611 | 47.068 | 30.704 | 0.00 | 0.00 |
| ATOM | 1904 | C    | ALA | X | 123 | 38.614 | 46.721 | 31.044 | 0.00 | 0.00 |
| ATOM | 1905 | O    | ALA | X | 123 | 38.895 | 45.634 | 30.586 | 0.00 | 0.00 |
| ATOM | 1906 | N    | SER | X | 124 | 37.318 | 47.148 | 30.945 | 0.00 | 0.00 |
| ATOM | 1907 | H    | SER | X | 124 | 37.093 | 48.067 | 31.299 | 0.00 | 0.00 |
| ATOM | 1908 | CA   | SER | X | 124 | 36.192 | 46.265 | 30.618 | 0.00 | 0.00 |
| ATOM | 1909 | HA   | SER | X | 124 | 36.267 | 45.424 | 31.308 | 0.00 | 0.00 |
| ATOM | 1910 | CB   | SER | X | 124 | 34.814 | 46.937 | 30.888 | 0.00 | 0.00 |
| ATOM | 1911 | HB2  | SER | X | 124 | 34.180 | 46.926 | 30.001 | 0.00 | 0.00 |
| ATOM | 1912 | HB3  | SER | X | 124 | 34.298 | 46.417 | 31.695 | 0.00 | 0.00 |
| ATOM | 1913 | OG   | SER | X | 124 | 34.849 | 48.337 | 31.105 | 0.00 | 0.00 |
| ATOM | 1914 | HG   | SER | X | 124 | 34.658 | 48.558 | 32.020 | 0.00 | 0.00 |
| ATOM | 1915 | C    | SER | X | 124 | 36.243 | 45.788 | 29.105 | 0.00 | 0.00 |
| ATOM | 1916 | O    | SER | X | 124 | 35.583 | 44.835 | 28.715 | 0.00 | 0.00 |
| ATOM | 1917 | N    | SER | X | 125 | 37.106 | 46.400 | 28.266 | 0.00 | 0.00 |
| ATOM | 1918 | H    | SER | X | 125 | 37.775 | 47.043 | 28.664 | 0.00 | 0.00 |
| ATOM | 1919 | CA   | SER | X | 125 | 37.360 | 46.011 | 26.902 | 0.00 | 0.00 |
| ATOM | 1920 | HA   | SER | X | 125 | 36.410 | 46.058 | 26.370 | 0.00 | 0.00 |
| ATOM | 1921 | CB   | SER | X | 125 | 38.172 | 47.058 | 26.213 | 0.00 | 0.00 |
| ATOM | 1922 | HB2  | SER | X | 125 | 38.495 | 46.792 | 25.207 | 0.00 | 0.00 |
| ATOM | 1923 | HB3  | SER | X | 125 | 37.600 | 47.950 | 25.957 | 0.00 | 0.00 |
| ATOM | 1924 | OG   | SER | X | 125 | 39.371 | 47.355 | 26.826 | 0.00 | 0.00 |
| ATOM | 1925 | HG   | SER | X | 125 | 40.044 | 46.869 | 26.344 | 0.00 | 0.00 |
| ATOM | 1926 | C    | SER | X | 125 | 38.156 | 44.634 | 26.816 | 0.00 | 0.00 |
| ATOM | 1927 | O    | SER | X | 125 | 38.279 | 44.006 | 25.750 | 0.00 | 0.00 |
| ATOM | 1928 | N    | LEU | X | 126 | 38.720 | 44.137 | 27.914 | 0.00 | 0.00 |
| ATOM | 1929 | H    | LEU | X | 126 | 38.501 | 44.620 | 28.774 | 0.00 | 0.00 |
| ATOM | 1930 | CA   | LEU | X | 126 | 39.647 | 42.914 | 27.945 | 0.00 | 0.00 |
| ATOM | 1931 | HA   | LEU | X | 126 | 40.346 | 43.060 | 27.121 | 0.00 | 0.00 |
| ATOM | 1932 | CB   | LEU | X | 126 | 40.422 | 42.743 | 29.307 | 0.00 | 0.00 |
| ATOM | 1933 | HB2  | LEU | X | 126 | 39.666 | 42.572 | 30.074 | 0.00 | 0.00 |
| ATOM | 1934 | HB3  | LEU | X | 126 | 41.026 | 41.847 | 29.165 | 0.00 | 0.00 |
| ATOM | 1935 | CG   | LEU | X | 126 | 41.344 | 43.922 | 29.753 | 0.00 | 0.00 |
| ATOM | 1936 | HG   | LEU | X | 126 | 40.885 | 44.911 | 29.764 | 0.00 | 0.00 |
| ATOM | 1937 | CD1  | LEU | X | 126 | 41.822 | 43.782 | 31.187 | 0.00 | 0.00 |
| ATOM | 1938 | HD11 | LEU | X | 126 | 40.969 | 43.909 | 31.853 | 0.00 | 0.00 |
| ATOM | 1939 | HD12 | LEU | X | 126 | 42.459 | 44.629 | 31.445 | 0.00 | 0.00 |
| ATOM | 1940 | HD13 | LEU | X | 126 | 42.454 | 42.906 | 31.334 | 0.00 | 0.00 |
| ATOM | 1941 | CD2  | LEU | X | 126 | 42.691 | 43.954 | 28.883 | 0.00 | 0.00 |
| ATOM | 1942 | HD21 | LEU | X | 126 | 43.315 | 43.076 | 29.048 | 0.00 | 0.00 |
| ATOM | 1943 | HD22 | LEU | X | 126 | 42.471 | 43.938 | 27.816 | 0.00 | 0.00 |
| ATOM | 1944 | HD23 | LEU | X | 126 | 43.345 | 44.791 | 29.128 | 0.00 | 0.00 |
| ATOM | 1945 | C    | LEU | X | 126 | 38.728 | 41.746 | 27.474 | 0.00 | 0.00 |
| ATOM | 1946 | O    | LEU | X | 126 | 37.813 | 41.355 | 28.158 | 0.00 | 0.00 |
| ATOM | 1947 | N    | ASP | X | 127 | 39.162 | 41.175 | 26.344 | 0.00 | 0.00 |

|      |      |      |     |   |     |        |        |        |      |      |
|------|------|------|-----|---|-----|--------|--------|--------|------|------|
| ATOM | 1948 | H    | ASP | X | 127 | 39.963 | 41.539 | 25.848 | 0.00 | 0.00 |
| ATOM | 1949 | CA   | ASP | X | 127 | 38.377 | 40.251 | 25.627 | 0.00 | 0.00 |
| ATOM | 1950 | HA   | ASP | X | 127 | 37.408 | 40.737 | 25.513 | 0.00 | 0.00 |
| ATOM | 1951 | CB   | ASP | X | 127 | 38.944 | 40.032 | 24.192 | 0.00 | 0.00 |
| ATOM | 1952 | HB2  | ASP | X | 127 | 38.216 | 39.628 | 23.489 | 0.00 | 0.00 |
| ATOM | 1953 | HB3  | ASP | X | 127 | 39.271 | 40.988 | 23.785 | 0.00 | 0.00 |
| ATOM | 1954 | CG   | ASP | X | 127 | 40.220 | 39.159 | 24.102 | 0.00 | 0.00 |
| ATOM | 1955 | OD1  | ASP | X | 127 | 41.211 | 39.787 | 23.723 | 0.00 | 0.00 |
| ATOM | 1956 | OD2  | ASP | X | 127 | 40.196 | 37.921 | 24.316 | 0.00 | 0.00 |
| ATOM | 1957 | C    | ASP | X | 127 | 38.136 | 38.866 | 26.413 | 0.00 | 0.00 |
| ATOM | 1958 | O    | ASP | X | 127 | 37.234 | 38.112 | 26.066 | 0.00 | 0.00 |
| ATOM | 1959 | N    | VAL | X | 128 | 38.904 | 38.675 | 27.508 | 0.00 | 0.00 |
| ATOM | 1960 | H    | VAL | X | 128 | 39.653 | 39.280 | 27.813 | 0.00 | 0.00 |
| ATOM | 1961 | CA   | VAL | X | 128 | 38.722 | 37.473 | 28.419 | 0.00 | 0.00 |
| ATOM | 1962 | HA   | VAL | X | 128 | 38.680 | 36.608 | 27.756 | 0.00 | 0.00 |
| ATOM | 1963 | CB   | VAL | X | 128 | 39.943 | 37.320 | 29.363 | 0.00 | 0.00 |
| ATOM | 1964 | HB   | VAL | X | 128 | 40.822 | 37.398 | 28.723 | 0.00 | 0.00 |
| ATOM | 1965 | CG1  | VAL | X | 128 | 40.097 | 38.557 | 30.285 | 0.00 | 0.00 |
| ATOM | 1966 | HG11 | VAL | X | 128 | 41.146 | 38.684 | 30.552 | 0.00 | 0.00 |
| ATOM | 1967 | HG12 | VAL | X | 128 | 39.764 | 39.500 | 29.849 | 0.00 | 0.00 |
| ATOM | 1968 | HG13 | VAL | X | 128 | 39.569 | 38.368 | 31.219 | 0.00 | 0.00 |
| ATOM | 1969 | CG2  | VAL | X | 128 | 39.874 | 36.031 | 30.116 | 0.00 | 0.00 |
| ATOM | 1970 | HG21 | VAL | X | 128 | 40.855 | 35.742 | 30.495 | 0.00 | 0.00 |
| ATOM | 1971 | HG22 | VAL | X | 128 | 39.681 | 35.221 | 29.412 | 0.00 | 0.00 |
| ATOM | 1972 | HG23 | VAL | X | 128 | 39.178 | 35.956 | 30.951 | 0.00 | 0.00 |
| ATOM | 1973 | C    | VAL | X | 128 | 37.363 | 37.474 | 29.163 | 0.00 | 0.00 |
| ATOM | 1974 | O    | VAL | X | 128 | 36.909 | 36.451 | 29.535 | 0.00 | 0.00 |
| ATOM | 1975 | N    | TYR | X | 129 | 36.768 | 38.643 | 29.391 | 0.00 | 0.00 |
| ATOM | 1976 | H    | TYR | X | 129 | 37.302 | 39.496 | 29.299 | 0.00 | 0.00 |
| ATOM | 1977 | CA   | TYR | X | 129 | 35.475 | 38.921 | 30.009 | 0.00 | 0.00 |
| ATOM | 1978 | HA   | TYR | X | 129 | 35.168 | 38.154 | 30.719 | 0.00 | 0.00 |
| ATOM | 1979 | CB   | TYR | X | 129 | 35.557 | 40.270 | 30.797 | 0.00 | 0.00 |
| ATOM | 1980 | HB2  | TYR | X | 129 | 35.555 | 41.113 | 30.105 | 0.00 | 0.00 |
| ATOM | 1981 | HB3  | TYR | X | 129 | 34.700 | 40.375 | 31.462 | 0.00 | 0.00 |
| ATOM | 1982 | CG   | TYR | X | 129 | 36.730 | 40.452 | 31.688 | 0.00 | 0.00 |
| ATOM | 1983 | CD1  | TYR | X | 129 | 37.270 | 39.541 | 32.589 | 0.00 | 0.00 |
| ATOM | 1984 | HD1  | TYR | X | 129 | 36.732 | 38.605 | 32.614 | 0.00 | 0.00 |
| ATOM | 1985 | CE1  | TYR | X | 129 | 38.268 | 39.789 | 33.531 | 0.00 | 0.00 |
| ATOM | 1986 | HE1  | TYR | X | 129 | 38.647 | 39.032 | 34.201 | 0.00 | 0.00 |
| ATOM | 1987 | CZ   | TYR | X | 129 | 38.866 | 41.097 | 33.539 | 0.00 | 0.00 |
| ATOM | 1988 | OH   | TYR | X | 129 | 39.855 | 41.309 | 34.505 | 0.00 | 0.00 |
| ATOM | 1989 | HH   | TYR | X | 129 | 39.855 | 40.713 | 35.257 | 0.00 | 0.00 |
| ATOM | 1990 | CE2  | TYR | X | 129 | 38.554 | 41.982 | 32.466 | 0.00 | 0.00 |
| ATOM | 1991 | HE2  | TYR | X | 129 | 39.048 | 42.941 | 32.505 | 0.00 | 0.00 |
| ATOM | 1992 | CD2  | TYR | X | 129 | 37.452 | 41.672 | 31.584 | 0.00 | 0.00 |
| ATOM | 1993 | HD2  | TYR | X | 129 | 37.163 | 42.310 | 30.762 | 0.00 | 0.00 |
| ATOM | 1994 | C    | TYR | X | 129 | 34.304 | 39.063 | 29.024 | 0.00 | 0.00 |
| ATOM | 1995 | O    | TYR | X | 129 | 33.204 | 39.318 | 29.431 | 0.00 | 0.00 |
| ATOM | 1996 | N    | ASP | X | 130 | 34.532 | 38.918 | 27.706 | 0.00 | 0.00 |
| ATOM | 1997 | H    | ASP | X | 130 | 35.495 | 38.926 | 27.401 | 0.00 | 0.00 |
| ATOM | 1998 | CA   | ASP | X | 130 | 33.452 | 38.958 | 26.675 | 0.00 | 0.00 |
| ATOM | 1999 | HA   | ASP | X | 130 | 33.019 | 39.956 | 26.744 | 0.00 | 0.00 |
| ATOM | 2000 | CB   | ASP | X | 130 | 33.937 | 38.768 | 25.250 | 0.00 | 0.00 |
| ATOM | 2001 | HB2  | ASP | X | 130 | 34.710 | 39.522 | 25.105 | 0.00 | 0.00 |
| ATOM | 2002 | HB3  | ASP | X | 130 | 34.298 | 37.747 | 25.124 | 0.00 | 0.00 |
| ATOM | 2003 | CG   | ASP | X | 130 | 32.874 | 39.203 | 24.181 | 0.00 | 0.00 |
| ATOM | 2004 | OD1  | ASP | X | 130 | 31.819 | 38.524 | 24.111 | 0.00 | 0.00 |
| ATOM | 2005 | OD2  | ASP | X | 130 | 33.094 | 40.012 | 23.336 | 0.00 | 0.00 |
| ATOM | 2006 | C    | ASP | X | 130 | 32.290 | 37.970 | 26.906 | 0.00 | 0.00 |
| ATOM | 2007 | O    | ASP | X | 130 | 32.640 | 36.820 | 27.134 | 0.00 | 0.00 |
| ATOM | 2008 | N    | GLY | X | 131 | 31.083 | 38.453 | 27.007 | 0.00 | 0.00 |
| ATOM | 2009 | H    | GLY | X | 131 | 30.959 | 39.403 | 26.689 | 0.00 | 0.00 |
| ATOM | 2010 | CA   | GLY | X | 131 | 29.885 | 37.886 | 27.562 | 0.00 | 0.00 |
| ATOM | 2011 | HA2  | GLY | X | 131 | 30.234 | 37.132 | 28.267 | 0.00 | 0.00 |
| ATOM | 2012 | HA3  | GLY | X | 131 | 29.419 | 38.709 | 28.104 | 0.00 | 0.00 |
| ATOM | 2013 | C    | GLY | X | 131 | 28.896 | 37.197 | 26.613 | 0.00 | 0.00 |
| ATOM | 2014 | O    | GLY | X | 131 | 27.906 | 36.623 | 27.069 | 0.00 | 0.00 |

|      |      |      |     |   |     |        |        |        |      |      |
|------|------|------|-----|---|-----|--------|--------|--------|------|------|
| ATOM | 2015 | N    | ARG | X | 132 | 29.275 | 37.045 | 25.267 | 0.00 | 0.00 |
| ATOM | 2016 | H    | ARG | X | 132 | 30.212 | 37.339 | 25.031 | 0.00 | 0.00 |
| ATOM | 2017 | CA   | ARG | X | 132 | 28.568 | 36.381 | 24.189 | 0.00 | 0.00 |
| ATOM | 2018 | HA   | ARG | X | 132 | 27.616 | 36.886 | 24.025 | 0.00 | 0.00 |
| ATOM | 2019 | CB   | ARG | X | 132 | 29.233 | 36.618 | 22.868 | 0.00 | 0.00 |
| ATOM | 2020 | HB2  | ARG | X | 132 | 28.533 | 36.570 | 22.034 | 0.00 | 0.00 |
| ATOM | 2021 | HB3  | ARG | X | 132 | 29.563 | 37.653 | 22.772 | 0.00 | 0.00 |
| ATOM | 2022 | CG   | ARG | X | 132 | 30.490 | 35.808 | 22.587 | 0.00 | 0.00 |
| ATOM | 2023 | HG2  | ARG | X | 132 | 31.092 | 36.021 | 23.471 | 0.00 | 0.00 |
| ATOM | 2024 | HG3  | ARG | X | 132 | 30.297 | 34.755 | 22.385 | 0.00 | 0.00 |
| ATOM | 2025 | CD   | ARG | X | 132 | 31.316 | 36.281 | 21.337 | 0.00 | 0.00 |
| ATOM | 2026 | HD2  | ARG | X | 132 | 32.035 | 35.493 | 21.110 | 0.00 | 0.00 |
| ATOM | 2027 | HD3  | ARG | X | 132 | 30.646 | 36.360 | 20.481 | 0.00 | 0.00 |
| ATOM | 2028 | NE   | ARG | X | 132 | 32.014 | 37.527 | 21.485 | 0.00 | 0.00 |
| ATOM | 2029 | HE   | ARG | X | 132 | 31.956 | 38.079 | 22.329 | 0.00 | 0.00 |
| ATOM | 2030 | CZ   | ARG | X | 132 | 32.772 | 38.071 | 20.488 | 0.00 | 0.00 |
| ATOM | 2031 | NH1  | ARG | X | 132 | 32.858 | 37.657 | 19.185 | 0.00 | 0.00 |
| ATOM | 2032 | HH11 | ARG | X | 132 | 32.458 | 36.757 | 18.965 | 0.00 | 0.00 |
| ATOM | 2033 | HH12 | ARG | X | 132 | 33.478 | 38.218 | 18.618 | 0.00 | 0.00 |
| ATOM | 2034 | NH2  | ARG | X | 132 | 33.372 | 39.194 | 20.650 | 0.00 | 0.00 |
| ATOM | 2035 | HH21 | ARG | X | 132 | 33.390 | 39.618 | 21.567 | 0.00 | 0.00 |
| ATOM | 2036 | HH22 | ARG | X | 132 | 33.903 | 39.704 | 19.958 | 0.00 | 0.00 |
| ATOM | 2037 | C    | ARG | X | 132 | 28.273 | 34.951 | 24.583 | 0.00 | 0.00 |
| ATOM | 2038 | O    | ARG | X | 132 | 27.166 | 34.465 | 24.474 | 0.00 | 0.00 |
| ATOM | 2039 | N    | PHE | X | 133 | 29.267 | 34.137 | 24.979 | 0.00 | 0.00 |
| ATOM | 2040 | H    | PHE | X | 133 | 30.166 | 34.545 | 25.194 | 0.00 | 0.00 |
| ATOM | 2041 | CA   | PHE | X | 133 | 29.132 | 32.704 | 25.155 | 0.00 | 0.00 |
| ATOM | 2042 | HA   | PHE | X | 133 | 28.714 | 32.280 | 24.241 | 0.00 | 0.00 |
| ATOM | 2043 | CB   | PHE | X | 133 | 30.411 | 31.933 | 25.226 | 0.00 | 0.00 |
| ATOM | 2044 | HB2  | PHE | X | 133 | 31.106 | 32.487 | 25.858 | 0.00 | 0.00 |
| ATOM | 2045 | HB3  | PHE | X | 133 | 30.205 | 30.953 | 25.658 | 0.00 | 0.00 |
| ATOM | 2046 | CG   | PHE | X | 133 | 31.051 | 31.733 | 23.831 | 0.00 | 0.00 |
| ATOM | 2047 | CD1  | PHE | X | 133 | 31.991 | 32.716 | 23.359 | 0.00 | 0.00 |
| ATOM | 2048 | HD1  | PHE | X | 133 | 32.299 | 33.524 | 24.006 | 0.00 | 0.00 |
| ATOM | 2049 | CE1  | PHE | X | 133 | 32.529 | 32.611 | 22.064 | 0.00 | 0.00 |
| ATOM | 2050 | HE1  | PHE | X | 133 | 33.185 | 33.365 | 21.655 | 0.00 | 0.00 |
| ATOM | 2051 | CZ   | PHE | X | 133 | 32.314 | 31.446 | 21.288 | 0.00 | 0.00 |
| ATOM | 2052 | HZ   | PHE | X | 133 | 32.853 | 31.307 | 20.363 | 0.00 | 0.00 |
| ATOM | 2053 | CE2  | PHE | X | 133 | 31.502 | 30.372 | 21.807 | 0.00 | 0.00 |
| ATOM | 2054 | HE2  | PHE | X | 133 | 31.371 | 29.469 | 21.229 | 0.00 | 0.00 |
| ATOM | 2055 | CD2  | PHE | X | 133 | 30.810 | 30.589 | 23.030 | 0.00 | 0.00 |
| ATOM | 2056 | HD2  | PHE | X | 133 | 30.085 | 29.850 | 23.340 | 0.00 | 0.00 |
| ATOM | 2057 | C    | PHE | X | 133 | 28.243 | 32.311 | 26.381 | 0.00 | 0.00 |
| ATOM | 2058 | O    | PHE | X | 133 | 27.370 | 31.453 | 26.236 | 0.00 | 0.00 |
| ATOM | 2059 | N    | LEU | X | 134 | 28.352 | 33.154 | 27.403 | 0.00 | 0.00 |
| ATOM | 2060 | H    | LEU | X | 134 | 29.072 | 33.859 | 27.343 | 0.00 | 0.00 |
| ATOM | 2061 | CA   | LEU | X | 134 | 27.466 | 33.022 | 28.568 | 0.00 | 0.00 |
| ATOM | 2062 | HA   | LEU | X | 134 | 27.598 | 31.957 | 28.759 | 0.00 | 0.00 |
| ATOM | 2063 | CB   | LEU | X | 134 | 28.019 | 33.793 | 29.778 | 0.00 | 0.00 |
| ATOM | 2064 | HB2  | LEU | X | 134 | 29.089 | 33.600 | 29.857 | 0.00 | 0.00 |
| ATOM | 2065 | HB3  | LEU | X | 134 | 27.989 | 34.815 | 29.399 | 0.00 | 0.00 |
| ATOM | 2066 | CG   | LEU | X | 134 | 27.347 | 33.627 | 31.099 | 0.00 | 0.00 |
| ATOM | 2067 | HG   | LEU | X | 134 | 26.318 | 33.974 | 30.997 | 0.00 | 0.00 |
| ATOM | 2068 | CD1  | LEU | X | 134 | 27.323 | 32.148 | 31.587 | 0.00 | 0.00 |
| ATOM | 2069 | HD11 | LEU | X | 134 | 27.085 | 32.132 | 32.651 | 0.00 | 0.00 |
| ATOM | 2070 | HD12 | LEU | X | 134 | 28.353 | 31.802 | 31.504 | 0.00 | 0.00 |
| ATOM | 2071 | HD13 | LEU | X | 134 | 26.576 | 31.507 | 31.118 | 0.00 | 0.00 |
| ATOM | 2072 | CD2  | LEU | X | 134 | 28.027 | 34.497 | 32.126 | 0.00 | 0.00 |
| ATOM | 2073 | HD21 | LEU | X | 134 | 28.094 | 35.530 | 31.784 | 0.00 | 0.00 |
| ATOM | 2074 | HD22 | LEU | X | 134 | 27.493 | 34.445 | 33.075 | 0.00 | 0.00 |
| ATOM | 2075 | HD23 | LEU | X | 134 | 29.070 | 34.188 | 32.188 | 0.00 | 0.00 |
| ATOM | 2076 | C    | LEU | X | 134 | 25.959 | 33.403 | 28.335 | 0.00 | 0.00 |
| ATOM | 2077 | O    | LEU | X | 134 | 25.071 | 32.755 | 28.844 | 0.00 | 0.00 |
| ATOM | 2078 | N    | VAL | X | 135 | 25.769 | 34.393 | 27.484 | 0.00 | 0.00 |
| ATOM | 2079 | H    | VAL | X | 135 | 26.576 | 34.916 | 27.172 | 0.00 | 0.00 |
| ATOM | 2080 | CA   | VAL | X | 135 | 24.465 | 35.039 | 27.145 | 0.00 | 0.00 |
| ATOM | 2081 | HA   | VAL | X | 135 | 23.794 | 35.086 | 28.003 | 0.00 | 0.00 |

|      |      |      |     |   |     |        |        |        |      |      |
|------|------|------|-----|---|-----|--------|--------|--------|------|------|
| ATOM | 2082 | CB   | VAL | X | 135 | 24.702 | 36.517 | 26.498 | 0.00 | 0.00 |
| ATOM | 2083 | HB   | VAL | X | 135 | 25.573 | 36.444 | 25.848 | 0.00 | 0.00 |
| ATOM | 2084 | CG1  | VAL | X | 135 | 23.492 | 36.997 | 25.740 | 0.00 | 0.00 |
| ATOM | 2085 | HG11 | VAL | X | 135 | 23.333 | 36.552 | 24.757 | 0.00 | 0.00 |
| ATOM | 2086 | HG12 | VAL | X | 135 | 22.612 | 36.853 | 26.366 | 0.00 | 0.00 |
| ATOM | 2087 | HG13 | VAL | X | 135 | 23.540 | 38.028 | 25.388 | 0.00 | 0.00 |
| ATOM | 2088 | CG2  | VAL | X | 135 | 24.990 | 37.451 | 27.684 | 0.00 | 0.00 |
| ATOM | 2089 | HG21 | VAL | X | 135 | 25.301 | 38.436 | 27.336 | 0.00 | 0.00 |
| ATOM | 2090 | HG22 | VAL | X | 135 | 25.804 | 37.196 | 28.361 | 0.00 | 0.00 |
| ATOM | 2091 | HG23 | VAL | X | 135 | 24.180 | 37.348 | 28.406 | 0.00 | 0.00 |
| ATOM | 2092 | C    | VAL | X | 135 | 23.723 | 34.150 | 26.174 | 0.00 | 0.00 |
| ATOM | 2093 | O    | VAL | X | 135 | 22.476 | 34.141 | 26.215 | 0.00 | 0.00 |
| ATOM | 2094 | N    | GLN | X | 136 | 24.466 | 33.300 | 25.412 | 0.00 | 0.00 |
| ATOM | 2095 | H    | GLN | X | 136 | 25.475 | 33.327 | 25.445 | 0.00 | 0.00 |
| ATOM | 2096 | CA   | GLN | X | 136 | 23.942 | 32.245 | 24.495 | 0.00 | 0.00 |
| ATOM | 2097 | HA   | GLN | X | 136 | 22.985 | 32.632 | 24.146 | 0.00 | 0.00 |
| ATOM | 2098 | CB   | GLN | X | 136 | 24.872 | 32.028 | 23.306 | 0.00 | 0.00 |
| ATOM | 2099 | HB2  | GLN | X | 136 | 24.892 | 33.029 | 22.875 | 0.00 | 0.00 |
| ATOM | 2100 | HB3  | GLN | X | 136 | 25.877 | 31.745 | 23.617 | 0.00 | 0.00 |
| ATOM | 2101 | CG   | GLN | X | 136 | 24.441 | 31.038 | 22.250 | 0.00 | 0.00 |
| ATOM | 2102 | HG2  | GLN | X | 136 | 23.366 | 30.860 | 22.282 | 0.00 | 0.00 |
| ATOM | 2103 | HG3  | GLN | X | 136 | 24.784 | 31.428 | 21.292 | 0.00 | 0.00 |
| ATOM | 2104 | CD   | GLN | X | 136 | 25.085 | 29.632 | 22.372 | 0.00 | 0.00 |
| ATOM | 2105 | OE1  | GLN | X | 136 | 26.095 | 29.318 | 21.716 | 0.00 | 0.00 |
| ATOM | 2106 | NE2  | GLN | X | 136 | 24.669 | 28.685 | 23.261 | 0.00 | 0.00 |
| ATOM | 2107 | HE21 | GLN | X | 136 | 25.222 | 27.840 | 23.255 | 0.00 | 0.00 |
| ATOM | 2108 | HE22 | GLN | X | 136 | 23.930 | 28.927 | 23.905 | 0.00 | 0.00 |
| ATOM | 2109 | C    | GLN | X | 136 | 23.606 | 30.869 | 25.211 | 0.00 | 0.00 |
| ATOM | 2110 | O    | GLN | X | 136 | 22.759 | 30.180 | 24.695 | 0.00 | 0.00 |
| ATOM | 2111 | N    | ALA | X | 137 | 24.236 | 30.623 | 26.336 | 0.00 | 0.00 |
| ATOM | 2112 | H    | ALA | X | 137 | 24.823 | 31.354 | 26.711 | 0.00 | 0.00 |
| ATOM | 2113 | CA   | ALA | X | 137 | 24.102 | 29.542 | 27.254 | 0.00 | 0.00 |
| ATOM | 2114 | HA   | ALA | X | 137 | 23.974 | 28.615 | 26.696 | 0.00 | 0.00 |
| ATOM | 2115 | CB   | ALA | X | 137 | 25.394 | 29.492 | 28.061 | 0.00 | 0.00 |
| ATOM | 2116 | HB1  | ALA | X | 137 | 25.388 | 28.679 | 28.787 | 0.00 | 0.00 |
| ATOM | 2117 | HB2  | ALA | X | 137 | 25.563 | 30.410 | 28.624 | 0.00 | 0.00 |
| ATOM | 2118 | HB3  | ALA | X | 137 | 26.228 | 29.356 | 27.372 | 0.00 | 0.00 |
| ATOM | 2119 | C    | ALA | X | 137 | 22.819 | 29.764 | 28.111 | 0.00 | 0.00 |
| ATOM | 2120 | O    | ALA | X | 137 | 21.933 | 28.896 | 28.123 | 0.00 | 0.00 |
| ATOM | 2121 | N    | GLU | X | 138 | 22.753 | 30.934 | 28.770 | 0.00 | 0.00 |
| ATOM | 2122 | H    | GLU | X | 138 | 23.580 | 31.509 | 28.703 | 0.00 | 0.00 |
| ATOM | 2123 | CA   | GLU | X | 138 | 21.837 | 31.105 | 29.854 | 0.00 | 0.00 |
| ATOM | 2124 | HA   | GLU | X | 138 | 21.210 | 30.217 | 29.934 | 0.00 | 0.00 |
| ATOM | 2125 | CB   | GLU | X | 138 | 22.697 | 31.120 | 31.179 | 0.00 | 0.00 |
| ATOM | 2126 | HB2  | GLU | X | 138 | 23.311 | 32.013 | 31.060 | 0.00 | 0.00 |
| ATOM | 2127 | HB3  | GLU | X | 138 | 21.980 | 31.259 | 31.988 | 0.00 | 0.00 |
| ATOM | 2128 | CG   | GLU | X | 138 | 23.436 | 29.794 | 31.554 | 0.00 | 0.00 |
| ATOM | 2129 | HG2  | GLU | X | 138 | 24.054 | 29.469 | 30.717 | 0.00 | 0.00 |
| ATOM | 2130 | HG3  | GLU | X | 138 | 24.140 | 29.891 | 32.380 | 0.00 | 0.00 |
| ATOM | 2131 | CD   | GLU | X | 138 | 22.502 | 28.686 | 31.786 | 0.00 | 0.00 |
| ATOM | 2132 | OE1  | GLU | X | 138 | 21.624 | 28.788 | 32.658 | 0.00 | 0.00 |
| ATOM | 2133 | OE2  | GLU | X | 138 | 22.576 | 27.747 | 30.985 | 0.00 | 0.00 |
| ATOM | 2134 | C    | GLU | X | 138 | 20.963 | 32.398 | 29.867 | 0.00 | 0.00 |
| ATOM | 2135 | O    | GLU | X | 138 | 20.044 | 32.535 | 30.691 | 0.00 | 0.00 |
| ATOM | 2136 | N    | ARG | X | 139 | 21.266 | 33.468 | 29.092 | 0.00 | 0.00 |
| ATOM | 2137 | H    | ARG | X | 139 | 22.154 | 33.486 | 28.610 | 0.00 | 0.00 |
| ATOM | 2138 | CA   | ARG | X | 139 | 20.388 | 34.615 | 28.739 | 0.00 | 0.00 |
| ATOM | 2139 | HA   | ARG | X | 139 | 21.001 | 35.168 | 28.027 | 0.00 | 0.00 |
| ATOM | 2140 | CB   | ARG | X | 139 | 18.980 | 34.295 | 28.121 | 0.00 | 0.00 |
| ATOM | 2141 | HB2  | ARG | X | 139 | 18.265 | 34.113 | 28.923 | 0.00 | 0.00 |
| ATOM | 2142 | HB3  | ARG | X | 139 | 18.799 | 35.257 | 27.640 | 0.00 | 0.00 |
| ATOM | 2143 | CG   | ARG | X | 139 | 18.961 | 33.266 | 27.054 | 0.00 | 0.00 |
| ATOM | 2144 | HG2  | ARG | X | 139 | 19.452 | 33.765 | 26.220 | 0.00 | 0.00 |
| ATOM | 2145 | HG3  | ARG | X | 139 | 19.549 | 32.358 | 27.189 | 0.00 | 0.00 |
| ATOM | 2146 | CD   | ARG | X | 139 | 17.473 | 32.951 | 26.672 | 0.00 | 0.00 |
| ATOM | 2147 | HD2  | ARG | X | 139 | 17.525 | 32.437 | 25.712 | 0.00 | 0.00 |
| ATOM | 2148 | HD3  | ARG | X | 139 | 17.221 | 32.333 | 27.534 | 0.00 | 0.00 |

|      |      |      |     |   |     |        |        |        |      |      |
|------|------|------|-----|---|-----|--------|--------|--------|------|------|
| ATOM | 2149 | NE   | ARG | X | 139 | 16.612 | 34.112 | 26.566 | 0.00 | 0.00 |
| ATOM | 2150 | HE   | ARG | X | 139 | 16.036 | 34.374 | 27.353 | 0.00 | 0.00 |
| ATOM | 2151 | CZ   | ARG | X | 139 | 16.468 | 34.800 | 25.369 | 0.00 | 0.00 |
| ATOM | 2152 | NH1  | ARG | X | 139 | 17.236 | 34.676 | 24.313 | 0.00 | 0.00 |
| ATOM | 2153 | HH11 | ARG | X | 139 | 18.029 | 34.050 | 24.308 | 0.00 | 0.00 |
| ATOM | 2154 | HH12 | ARG | X | 139 | 17.088 | 35.111 | 23.414 | 0.00 | 0.00 |
| ATOM | 2155 | NH2  | ARG | X | 139 | 15.425 | 35.608 | 25.146 | 0.00 | 0.00 |
| ATOM | 2156 | HH21 | ARG | X | 139 | 14.721 | 35.636 | 25.870 | 0.00 | 0.00 |
| ATOM | 2157 | HH22 | ARG | X | 139 | 15.284 | 35.946 | 24.205 | 0.00 | 0.00 |
| ATOM | 2158 | C    | ARG | X | 139 | 20.273 | 35.687 | 29.829 | 0.00 | 0.00 |
| ATOM | 2159 | O    | ARG | X | 139 | 19.609 | 36.754 | 29.704 | 0.00 | 0.00 |
| ATOM | 2160 | N    | THR | X | 140 | 20.931 | 35.351 | 30.961 | 0.00 | 0.00 |
| ATOM | 2161 | H    | THR | X | 140 | 21.187 | 34.378 | 31.055 | 0.00 | 0.00 |
| ATOM | 2162 | CA   | THR | X | 140 | 21.309 | 36.190 | 32.112 | 0.00 | 0.00 |
| ATOM | 2163 | HA   | THR | X | 140 | 20.394 | 36.602 | 32.536 | 0.00 | 0.00 |
| ATOM | 2164 | CB   | THR | X | 140 | 22.037 | 35.464 | 33.270 | 0.00 | 0.00 |
| ATOM | 2165 | HB   | THR | X | 140 | 22.432 | 36.190 | 33.981 | 0.00 | 0.00 |
| ATOM | 2166 | CG2  | THR | X | 140 | 21.227 | 34.314 | 33.876 | 0.00 | 0.00 |
| ATOM | 2167 | HG21 | THR | X | 140 | 21.036 | 33.484 | 33.196 | 0.00 | 0.00 |
| ATOM | 2168 | HG22 | THR | X | 140 | 20.307 | 34.823 | 34.163 | 0.00 | 0.00 |
| ATOM | 2169 | HG23 | THR | X | 140 | 21.785 | 33.963 | 34.744 | 0.00 | 0.00 |
| ATOM | 2170 | OG1  | THR | X | 140 | 23.196 | 34.946 | 32.653 | 0.00 | 0.00 |
| ATOM | 2171 | HG1  | THR | X | 140 | 23.556 | 35.761 | 32.296 | 0.00 | 0.00 |
| ATOM | 2172 | C    | THR | X | 140 | 22.075 | 37.424 | 31.642 | 0.00 | 0.00 |
| ATOM | 2173 | O    | THR | X | 140 | 23.267 | 37.302 | 31.381 | 0.00 | 0.00 |
| ATOM | 2174 | N    | VAL | X | 141 | 21.478 | 38.596 | 31.639 | 0.00 | 0.00 |
| ATOM | 2175 | H    | VAL | X | 141 | 20.588 | 38.737 | 32.093 | 0.00 | 0.00 |
| ATOM | 2176 | CA   | VAL | X | 141 | 22.050 | 39.767 | 30.965 | 0.00 | 0.00 |
| ATOM | 2177 | HA   | VAL | X | 141 | 22.263 | 39.332 | 29.989 | 0.00 | 0.00 |
| ATOM | 2178 | CB   | VAL | X | 141 | 20.938 | 40.906 | 30.826 | 0.00 | 0.00 |
| ATOM | 2179 | HB   | VAL | X | 141 | 20.425 | 41.213 | 31.738 | 0.00 | 0.00 |
| ATOM | 2180 | CG1  | VAL | X | 141 | 21.517 | 42.094 | 30.135 | 0.00 | 0.00 |
| ATOM | 2181 | HG11 | VAL | X | 141 | 20.708 | 42.821 | 30.073 | 0.00 | 0.00 |
| ATOM | 2182 | HG12 | VAL | X | 141 | 22.388 | 42.414 | 30.708 | 0.00 | 0.00 |
| ATOM | 2183 | HG13 | VAL | X | 141 | 21.837 | 41.759 | 29.149 | 0.00 | 0.00 |
| ATOM | 2184 | CG2  | VAL | X | 141 | 19.801 | 40.290 | 29.992 | 0.00 | 0.00 |
| ATOM | 2185 | HG21 | VAL | X | 141 | 19.351 | 39.426 | 30.480 | 0.00 | 0.00 |
| ATOM | 2186 | HG22 | VAL | X | 141 | 20.199 | 39.839 | 29.083 | 0.00 | 0.00 |
| ATOM | 2187 | HG23 | VAL | X | 141 | 19.176 | 41.088 | 29.590 | 0.00 | 0.00 |
| ATOM | 2188 | C    | VAL | X | 141 | 23.392 | 40.336 | 31.516 | 0.00 | 0.00 |
| ATOM | 2189 | O    | VAL | X | 141 | 23.482 | 40.750 | 32.668 | 0.00 | 0.00 |
| ATOM | 2190 | N    | LEU | X | 142 | 24.500 | 40.181 | 30.774 | 0.00 | 0.00 |
| ATOM | 2191 | H    | LEU | X | 142 | 24.362 | 40.262 | 29.777 | 0.00 | 0.00 |
| ATOM | 2192 | CA   | LEU | X | 142 | 25.899 | 40.479 | 31.124 | 0.00 | 0.00 |
| ATOM | 2193 | HA   | LEU | X | 142 | 26.058 | 40.422 | 32.201 | 0.00 | 0.00 |
| ATOM | 2194 | CB   | LEU | X | 142 | 26.879 | 39.445 | 30.495 | 0.00 | 0.00 |
| ATOM | 2195 | HB2  | LEU | X | 142 | 26.597 | 38.440 | 30.808 | 0.00 | 0.00 |
| ATOM | 2196 | HB3  | LEU | X | 142 | 26.906 | 39.504 | 29.407 | 0.00 | 0.00 |
| ATOM | 2197 | CG   | LEU | X | 142 | 28.280 | 39.450 | 31.033 | 0.00 | 0.00 |
| ATOM | 2198 | HG   | LEU | X | 142 | 28.683 | 38.551 | 30.567 | 0.00 | 0.00 |
| ATOM | 2199 | CD1  | LEU | X | 142 | 29.237 | 40.560 | 30.542 | 0.00 | 0.00 |
| ATOM | 2200 | HD11 | LEU | X | 142 | 29.018 | 41.453 | 31.128 | 0.00 | 0.00 |
| ATOM | 2201 | HD12 | LEU | X | 142 | 29.181 | 40.629 | 29.456 | 0.00 | 0.00 |
| ATOM | 2202 | HD13 | LEU | X | 142 | 30.223 | 40.182 | 30.815 | 0.00 | 0.00 |
| ATOM | 2203 | CD2  | LEU | X | 142 | 28.415 | 39.290 | 32.514 | 0.00 | 0.00 |
| ATOM | 2204 | HD21 | LEU | X | 142 | 29.464 | 39.311 | 32.806 | 0.00 | 0.00 |
| ATOM | 2205 | HD22 | LEU | X | 142 | 27.913 | 40.017 | 33.152 | 0.00 | 0.00 |
| ATOM | 2206 | HD23 | LEU | X | 142 | 27.980 | 38.367 | 32.897 | 0.00 | 0.00 |
| ATOM | 2207 | C    | LEU | X | 142 | 26.333 | 41.954 | 30.803 | 0.00 | 0.00 |
| ATOM | 2208 | O    | LEU | X | 142 | 26.587 | 42.337 | 29.674 | 0.00 | 0.00 |
| ATOM | 2209 | N    | VAL | X | 143 | 26.357 | 42.771 | 31.830 | 0.00 | 0.00 |
| ATOM | 2210 | H    | VAL | X | 143 | 26.118 | 42.381 | 32.730 | 0.00 | 0.00 |
| ATOM | 2211 | CA   | VAL | X | 143 | 26.919 | 44.129 | 31.845 | 0.00 | 0.00 |
| ATOM | 2212 | HA   | VAL | X | 143 | 26.694 | 44.587 | 30.882 | 0.00 | 0.00 |
| ATOM | 2213 | CB   | VAL | X | 143 | 26.108 | 45.036 | 32.784 | 0.00 | 0.00 |
| ATOM | 2214 | HB   | VAL | X | 143 | 26.064 | 44.466 | 33.712 | 0.00 | 0.00 |
| ATOM | 2215 | CG1  | VAL | X | 143 | 26.801 | 46.410 | 33.043 | 0.00 | 0.00 |

|      |      |      |     |   |     |        |        |        |      |      |
|------|------|------|-----|---|-----|--------|--------|--------|------|------|
| ATOM | 2216 | HG11 | VAL | X | 143 | 26.242 | 46.998 | 33.770 | 0.00 | 0.00 |
| ATOM | 2217 | HG12 | VAL | X | 143 | 27.768 | 46.164 | 33.482 | 0.00 | 0.00 |
| ATOM | 2218 | HG13 | VAL | X | 143 | 26.915 | 46.987 | 32.125 | 0.00 | 0.00 |
| ATOM | 2219 | CG2  | VAL | X | 143 | 24.658 | 45.226 | 32.471 | 0.00 | 0.00 |
| ATOM | 2220 | HG21 | VAL | X | 143 | 24.147 | 45.733 | 33.289 | 0.00 | 0.00 |
| ATOM | 2221 | HG22 | VAL | X | 143 | 24.115 | 44.288 | 32.357 | 0.00 | 0.00 |
| ATOM | 2222 | HG23 | VAL | X | 143 | 24.459 | 45.888 | 31.628 | 0.00 | 0.00 |
| ATOM | 2223 | C    | VAL | X | 143 | 28.327 | 44.153 | 32.205 | 0.00 | 0.00 |
| ATOM | 2224 | O    | VAL | X | 143 | 28.856 | 43.392 | 33.066 | 0.00 | 0.00 |
| ATOM | 2225 | N    | SER | X | 144 | 29.158 | 44.998 | 31.602 | 0.00 | 0.00 |
| ATOM | 2226 | H    | SER | X | 144 | 28.726 | 45.700 | 31.018 | 0.00 | 0.00 |
| ATOM | 2227 | CA   | SER | X | 144 | 30.601 | 45.264 | 31.903 | 0.00 | 0.00 |
| ATOM | 2228 | HA   | SER | X | 144 | 30.798 | 44.724 | 32.830 | 0.00 | 0.00 |
| ATOM | 2229 | CB   | SER | X | 144 | 31.381 | 44.638 | 30.772 | 0.00 | 0.00 |
| ATOM | 2230 | HB2  | SER | X | 144 | 31.053 | 43.614 | 30.595 | 0.00 | 0.00 |
| ATOM | 2231 | HB3  | SER | X | 144 | 31.323 | 45.196 | 29.838 | 0.00 | 0.00 |
| ATOM | 2232 | OG   | SER | X | 144 | 32.703 | 44.382 | 31.060 | 0.00 | 0.00 |
| ATOM | 2233 | HG   | SER | X | 144 | 32.875 | 43.573 | 30.572 | 0.00 | 0.00 |
| ATOM | 2234 | C    | SER | X | 144 | 30.884 | 46.753 | 32.126 | 0.00 | 0.00 |
| ATOM | 2235 | O    | SER | X | 144 | 30.509 | 47.565 | 31.226 | 0.00 | 0.00 |
| ATOM | 2236 | N    | MET | X | 145 | 31.518 | 47.131 | 33.245 | 0.00 | 0.00 |
| ATOM | 2237 | H    | MET | X | 145 | 31.666 | 46.380 | 33.904 | 0.00 | 0.00 |
| ATOM | 2238 | CA   | MET | X | 145 | 31.691 | 48.605 | 33.521 | 0.00 | 0.00 |
| ATOM | 2239 | HA   | MET | X | 145 | 31.379 | 49.181 | 32.650 | 0.00 | 0.00 |
| ATOM | 2240 | CB   | MET | X | 145 | 30.769 | 48.984 | 34.698 | 0.00 | 0.00 |
| ATOM | 2241 | HB2  | MET | X | 145 | 30.956 | 50.058 | 34.708 | 0.00 | 0.00 |
| ATOM | 2242 | HB3  | MET | X | 145 | 29.721 | 48.813 | 34.453 | 0.00 | 0.00 |
| ATOM | 2243 | CG   | MET | X | 145 | 31.249 | 48.282 | 36.049 | 0.00 | 0.00 |
| ATOM | 2244 | HG2  | MET | X | 145 | 30.889 | 47.259 | 35.941 | 0.00 | 0.00 |
| ATOM | 2245 | HG3  | MET | X | 145 | 32.337 | 48.230 | 36.087 | 0.00 | 0.00 |
| ATOM | 2246 | SD   | MET | X | 145 | 30.573 | 48.966 | 37.596 | 0.00 | 0.00 |
| ATOM | 2247 | CE   | MET | X | 145 | 28.783 | 48.900 | 37.509 | 0.00 | 0.00 |
| ATOM | 2248 | HE1  | MET | X | 145 | 28.313 | 47.936 | 37.316 | 0.00 | 0.00 |
| ATOM | 2249 | HE2  | MET | X | 145 | 28.450 | 49.323 | 38.457 | 0.00 | 0.00 |
| ATOM | 2250 | HE3  | MET | X | 145 | 28.466 | 49.496 | 36.654 | 0.00 | 0.00 |
| ATOM | 2251 | C    | MET | X | 145 | 33.094 | 49.127 | 33.807 | 0.00 | 0.00 |
| ATOM | 2252 | O    | MET | X | 145 | 33.887 | 48.284 | 34.113 | 0.00 | 0.00 |
| ATOM | 2253 | N    | ASN | X | 146 | 33.424 | 50.431 | 33.685 | 0.00 | 0.00 |
| ATOM | 2254 | H    | ASN | X | 146 | 32.742 | 51.106 | 33.370 | 0.00 | 0.00 |
| ATOM | 2255 | CA   | ASN | X | 146 | 34.753 | 51.039 | 33.729 | 0.00 | 0.00 |
| ATOM | 2256 | HA   | ASN | X | 146 | 35.532 | 50.394 | 34.136 | 0.00 | 0.00 |
| ATOM | 2257 | CB   | ASN | X | 146 | 35.095 | 51.408 | 32.292 | 0.00 | 0.00 |
| ATOM | 2258 | HB2  | ASN | X | 146 | 34.600 | 50.795 | 31.539 | 0.00 | 0.00 |
| ATOM | 2259 | HB3  | ASN | X | 146 | 34.818 | 52.456 | 32.178 | 0.00 | 0.00 |
| ATOM | 2260 | CG   | ASN | X | 146 | 36.615 | 51.345 | 32.030 | 0.00 | 0.00 |
| ATOM | 2261 | OD1  | ASN | X | 146 | 37.138 | 50.249 | 31.997 | 0.00 | 0.00 |
| ATOM | 2262 | ND2  | ASN | X | 146 | 37.273 | 52.442 | 32.086 | 0.00 | 0.00 |
| ATOM | 2263 | HD21 | ASN | X | 146 | 38.281 | 52.415 | 32.031 | 0.00 | 0.00 |
| ATOM | 2264 | HD22 | ASN | X | 146 | 36.854 | 53.356 | 32.189 | 0.00 | 0.00 |
| ATOM | 2265 | C    | ASN | X | 146 | 34.811 | 52.273 | 34.664 | 0.00 | 0.00 |
| ATOM | 2266 | O    | ASN | X | 146 | 33.918 | 53.099 | 34.746 | 0.00 | 0.00 |
| ATOM | 2267 | N    | TYR | X | 147 | 35.904 | 52.355 | 35.352 | 0.00 | 0.00 |
| ATOM | 2268 | H    | TYR | X | 147 | 36.639 | 51.717 | 35.082 | 0.00 | 0.00 |
| ATOM | 2269 | CA   | TYR | X | 147 | 36.081 | 53.254 | 36.596 | 0.00 | 0.00 |
| ATOM | 2270 | HA   | TYR | X | 147 | 35.616 | 54.196 | 36.306 | 0.00 | 0.00 |
| ATOM | 2271 | CB   | TYR | X | 147 | 35.417 | 52.617 | 37.804 | 0.00 | 0.00 |
| ATOM | 2272 | HB2  | TYR | X | 147 | 35.705 | 53.131 | 38.720 | 0.00 | 0.00 |
| ATOM | 2273 | HB3  | TYR | X | 147 | 34.346 | 52.746 | 37.646 | 0.00 | 0.00 |
| ATOM | 2274 | CG   | TYR | X | 147 | 35.667 | 51.183 | 38.058 | 0.00 | 0.00 |
| ATOM | 2275 | CD1  | TYR | X | 147 | 34.803 | 50.216 | 37.500 | 0.00 | 0.00 |
| ATOM | 2276 | HD1  | TYR | X | 147 | 34.011 | 50.680 | 36.932 | 0.00 | 0.00 |
| ATOM | 2277 | CE1  | TYR | X | 147 | 35.111 | 48.894 | 37.584 | 0.00 | 0.00 |
| ATOM | 2278 | HE1  | TYR | X | 147 | 34.397 | 48.138 | 37.292 | 0.00 | 0.00 |
| ATOM | 2279 | CZ   | TYR | X | 147 | 36.295 | 48.390 | 38.196 | 0.00 | 0.00 |
| ATOM | 2280 | OH   | TYR | X | 147 | 36.400 | 47.043 | 38.413 | 0.00 | 0.00 |
| ATOM | 2281 | HH   | TYR | X | 147 | 37.280 | 46.842 | 38.737 | 0.00 | 0.00 |
| ATOM | 2282 | CE2  | TYR | X | 147 | 37.158 | 49.390 | 38.738 | 0.00 | 0.00 |

|      |      |      |     |   |     |        |        |        |      |      |
|------|------|------|-----|---|-----|--------|--------|--------|------|------|
| ATOM | 2283 | HE2  | TYR | X | 147 | 38.071 | 49.081 | 39.225 | 0.00 | 0.00 |
| ATOM | 2284 | CD2  | TYR | X | 147 | 36.848 | 50.757 | 38.638 | 0.00 | 0.00 |
| ATOM | 2285 | HD2  | TYR | X | 147 | 37.510 | 51.467 | 39.112 | 0.00 | 0.00 |
| ATOM | 2286 | C    | TYR | X | 147 | 37.586 | 53.565 | 36.904 | 0.00 | 0.00 |
| ATOM | 2287 | O    | TYR | X | 147 | 38.447 | 52.783 | 36.625 | 0.00 | 0.00 |
| ATOM | 2288 | N    | ARG | X | 148 | 37.819 | 54.631 | 37.590 | 0.00 | 0.00 |
| ATOM | 2289 | H    | ARG | X | 148 | 37.037 | 55.220 | 37.839 | 0.00 | 0.00 |
| ATOM | 2290 | CA   | ARG | X | 148 | 39.139 | 55.246 | 37.899 | 0.00 | 0.00 |
| ATOM | 2291 | HA   | ARG | X | 148 | 39.739 | 55.283 | 36.989 | 0.00 | 0.00 |
| ATOM | 2292 | CB   | ARG | X | 148 | 38.863 | 56.662 | 38.421 | 0.00 | 0.00 |
| ATOM | 2293 | HB2  | ARG | X | 148 | 37.975 | 56.625 | 39.053 | 0.00 | 0.00 |
| ATOM | 2294 | HB3  | ARG | X | 148 | 39.739 | 57.068 | 38.928 | 0.00 | 0.00 |
| ATOM | 2295 | CG   | ARG | X | 148 | 38.714 | 57.566 | 37.250 | 0.00 | 0.00 |
| ATOM | 2296 | HG2  | ARG | X | 148 | 39.569 | 57.680 | 36.583 | 0.00 | 0.00 |
| ATOM | 2297 | HG3  | ARG | X | 148 | 37.805 | 57.294 | 36.715 | 0.00 | 0.00 |
| ATOM | 2298 | CD   | ARG | X | 148 | 38.420 | 58.992 | 37.827 | 0.00 | 0.00 |
| ATOM | 2299 | HD2  | ARG | X | 148 | 39.240 | 59.329 | 38.461 | 0.00 | 0.00 |
| ATOM | 2300 | HD3  | ARG | X | 148 | 38.337 | 59.555 | 36.897 | 0.00 | 0.00 |
| ATOM | 2301 | NE   | ARG | X | 148 | 37.125 | 59.041 | 38.466 | 0.00 | 0.00 |
| ATOM | 2302 | HE   | ARG | X | 148 | 36.441 | 58.326 | 38.265 | 0.00 | 0.00 |
| ATOM | 2303 | CZ   | ARG | X | 148 | 36.826 | 60.070 | 39.308 | 0.00 | 0.00 |
| ATOM | 2304 | NH1  | ARG | X | 148 | 37.641 | 61.042 | 39.726 | 0.00 | 0.00 |
| ATOM | 2305 | HH11 | ARG | X | 148 | 38.635 | 60.968 | 39.567 | 0.00 | 0.00 |
| ATOM | 2306 | HH12 | ARG | X | 148 | 37.287 | 61.802 | 40.289 | 0.00 | 0.00 |
| ATOM | 2307 | NH2  | ARG | X | 148 | 35.570 | 60.200 | 39.728 | 0.00 | 0.00 |
| ATOM | 2308 | HH21 | ARG | X | 148 | 35.016 | 59.367 | 39.589 | 0.00 | 0.00 |
| ATOM | 2309 | HH22 | ARG | X | 148 | 35.160 | 60.940 | 40.280 | 0.00 | 0.00 |
| ATOM | 2310 | C    | ARG | X | 148 | 40.005 | 54.472 | 38.906 | 0.00 | 0.00 |
| ATOM | 2311 | O    | ARG | X | 148 | 40.219 | 54.829 | 40.094 | 0.00 | 0.00 |
| ATOM | 2312 | N    | VAL | X | 149 | 40.725 | 53.518 | 38.258 | 0.00 | 0.00 |
| ATOM | 2313 | H    | VAL | X | 149 | 40.454 | 53.232 | 37.328 | 0.00 | 0.00 |
| ATOM | 2314 | CA   | VAL | X | 149 | 41.865 | 52.707 | 38.813 | 0.00 | 0.00 |
| ATOM | 2315 | HA   | VAL | X | 149 | 41.455 | 52.537 | 39.808 | 0.00 | 0.00 |
| ATOM | 2316 | CB   | VAL | X | 149 | 42.246 | 51.533 | 37.956 | 0.00 | 0.00 |
| ATOM | 2317 | HB   | VAL | X | 149 | 43.122 | 51.015 | 38.345 | 0.00 | 0.00 |
| ATOM | 2318 | CG1  | VAL | X | 149 | 41.054 | 50.530 | 37.921 | 0.00 | 0.00 |
| ATOM | 2319 | HG11 | VAL | X | 149 | 40.911 | 50.147 | 38.932 | 0.00 | 0.00 |
| ATOM | 2320 | HG12 | VAL | X | 149 | 40.204 | 51.057 | 37.488 | 0.00 | 0.00 |
| ATOM | 2321 | HG13 | VAL | X | 149 | 41.387 | 49.740 | 37.249 | 0.00 | 0.00 |
| ATOM | 2322 | CG2  | VAL | X | 149 | 42.577 | 51.863 | 36.492 | 0.00 | 0.00 |
| ATOM | 2323 | HG21 | VAL | X | 149 | 43.369 | 52.610 | 36.438 | 0.00 | 0.00 |
| ATOM | 2324 | HG22 | VAL | X | 149 | 41.627 | 52.168 | 36.051 | 0.00 | 0.00 |
| ATOM | 2325 | HG23 | VAL | X | 149 | 42.793 | 50.974 | 35.899 | 0.00 | 0.00 |
| ATOM | 2326 | C    | VAL | X | 149 | 43.127 | 53.600 | 39.037 | 0.00 | 0.00 |
| ATOM | 2327 | O    | VAL | X | 149 | 43.127 | 54.697 | 38.608 | 0.00 | 0.00 |
| ATOM | 2328 | N    | GLY | X | 150 | 44.111 | 53.086 | 39.736 | 0.00 | 0.00 |
| ATOM | 2329 | H    | GLY | X | 150 | 44.137 | 52.151 | 40.118 | 0.00 | 0.00 |
| ATOM | 2330 | CA   | GLY | X | 150 | 45.285 | 53.897 | 40.130 | 0.00 | 0.00 |
| ATOM | 2331 | HA2  | GLY | X | 150 | 45.880 | 53.366 | 40.874 | 0.00 | 0.00 |
| ATOM | 2332 | HA3  | GLY | X | 150 | 45.815 | 54.184 | 39.222 | 0.00 | 0.00 |
| ATOM | 2333 | C    | GLY | X | 150 | 44.945 | 55.226 | 40.812 | 0.00 | 0.00 |
| ATOM | 2334 | O    | GLY | X | 150 | 43.891 | 55.408 | 41.467 | 0.00 | 0.00 |
| ATOM | 2335 | N    | ALA | X | 151 | 45.926 | 56.142 | 40.624 | 0.00 | 0.00 |
| ATOM | 2336 | H    | ALA | X | 151 | 46.739 | 55.817 | 40.121 | 0.00 | 0.00 |
| ATOM | 2337 | CA   | ALA | X | 151 | 45.845 | 57.455 | 41.241 | 0.00 | 0.00 |
| ATOM | 2338 | HA   | ALA | X | 151 | 45.999 | 57.303 | 42.309 | 0.00 | 0.00 |
| ATOM | 2339 | CB   | ALA | X | 151 | 46.987 | 58.339 | 40.733 | 0.00 | 0.00 |
| ATOM | 2340 | HB1  | ALA | X | 151 | 46.812 | 59.389 | 40.965 | 0.00 | 0.00 |
| ATOM | 2341 | HB2  | ALA | X | 151 | 47.099 | 58.195 | 39.658 | 0.00 | 0.00 |
| ATOM | 2342 | HB3  | ALA | X | 151 | 47.857 | 57.968 | 41.276 | 0.00 | 0.00 |
| ATOM | 2343 | C    | ALA | X | 151 | 44.476 | 58.121 | 40.916 | 0.00 | 0.00 |
| ATOM | 2344 | O    | ALA | X | 151 | 44.036 | 58.862 | 41.731 | 0.00 | 0.00 |
| ATOM | 2345 | N    | PHE | X | 152 | 43.855 | 57.926 | 39.754 | 0.00 | 0.00 |
| ATOM | 2346 | H    | PHE | X | 152 | 44.204 | 57.213 | 39.131 | 0.00 | 0.00 |
| ATOM | 2347 | CA   | PHE | X | 152 | 42.811 | 58.844 | 39.264 | 0.00 | 0.00 |
| ATOM | 2348 | HA   | PHE | X | 152 | 43.242 | 59.840 | 39.369 | 0.00 | 0.00 |
| ATOM | 2349 | CB   | PHE | X | 152 | 42.525 | 58.643 | 37.770 | 0.00 | 0.00 |



|      |      |      |     |   |     |        |        |        |      |      |
|------|------|------|-----|---|-----|--------|--------|--------|------|------|
| ATOM | 2350 | HB2  | PHE | X | 152 | 42.072 | 57.656 | 37.683 | 0.00 | 0.00 |
| ATOM | 2351 | HB3  | PHE | X | 152 | 41.752 | 59.282 | 37.343 | 0.00 | 0.00 |
| ATOM | 2352 | CG   | PHE | X | 152 | 43.812 | 58.662 | 36.862 | 0.00 | 0.00 |
| ATOM | 2353 | CD1  | PHE | X | 152 | 44.743 | 57.611 | 36.971 | 0.00 | 0.00 |
| ATOM | 2354 | HD1  | PHE | X | 152 | 44.539 | 56.726 | 37.556 | 0.00 | 0.00 |
| ATOM | 2355 | CE1  | PHE | X | 152 | 46.058 | 57.743 | 36.439 | 0.00 | 0.00 |
| ATOM | 2356 | HE1  | PHE | X | 152 | 46.824 | 57.041 | 36.737 | 0.00 | 0.00 |
| ATOM | 2357 | CZ   | PHE | X | 152 | 46.367 | 58.880 | 35.638 | 0.00 | 0.00 |
| ATOM | 2358 | HZ   | PHE | X | 152 | 47.274 | 58.937 | 35.055 | 0.00 | 0.00 |
| ATOM | 2359 | CE2  | PHE | X | 152 | 45.400 | 59.894 | 35.489 | 0.00 | 0.00 |
| ATOM | 2360 | HE2  | PHE | X | 152 | 45.642 | 60.794 | 34.943 | 0.00 | 0.00 |
| ATOM | 2361 | CD2  | PHE | X | 152 | 44.094 | 59.778 | 36.047 | 0.00 | 0.00 |
| ATOM | 2362 | HD2  | PHE | X | 152 | 43.364 | 60.555 | 35.869 | 0.00 | 0.00 |
| ATOM | 2363 | C    | PHE | X | 152 | 41.574 | 58.869 | 40.172 | 0.00 | 0.00 |
| ATOM | 2364 | O    | PHE | X | 152 | 40.795 | 59.819 | 40.126 | 0.00 | 0.00 |
| ATOM | 2365 | N    | GLY | X | 153 | 41.275 | 57.795 | 40.891 | 0.00 | 0.00 |
| ATOM | 2366 | H    | GLY | X | 153 | 41.799 | 56.953 | 40.695 | 0.00 | 0.00 |
| ATOM | 2367 | CA   | GLY | X | 153 | 40.227 | 57.743 | 41.850 | 0.00 | 0.00 |
| ATOM | 2368 | HA2  | GLY | X | 153 | 39.947 | 58.774 | 42.068 | 0.00 | 0.00 |
| ATOM | 2369 | HA3  | GLY | X | 153 | 39.349 | 57.242 | 41.442 | 0.00 | 0.00 |
| ATOM | 2370 | C    | GLY | X | 153 | 40.561 | 57.136 | 43.208 | 0.00 | 0.00 |
| ATOM | 2371 | O    | GLY | X | 153 | 39.739 | 57.260 | 44.181 | 0.00 | 0.00 |
| ATOM | 2372 | N    | PHE | X | 154 | 41.719 | 56.489 | 43.329 | 0.00 | 0.00 |
| ATOM | 2373 | H    | PHE | X | 154 | 42.240 | 56.137 | 42.538 | 0.00 | 0.00 |
| ATOM | 2374 | CA   | PHE | X | 154 | 42.198 | 56.061 | 44.585 | 0.00 | 0.00 |
| ATOM | 2375 | HA   | PHE | X | 154 | 41.367 | 56.084 | 45.291 | 0.00 | 0.00 |
| ATOM | 2376 | CB   | PHE | X | 154 | 42.506 | 54.538 | 44.340 | 0.00 | 0.00 |
| ATOM | 2377 | HB2  | PHE | X | 154 | 43.168 | 54.414 | 43.483 | 0.00 | 0.00 |
| ATOM | 2378 | HB3  | PHE | X | 154 | 42.923 | 54.160 | 45.274 | 0.00 | 0.00 |
| ATOM | 2379 | CG   | PHE | X | 154 | 41.281 | 53.723 | 44.034 | 0.00 | 0.00 |
| ATOM | 2380 | CD1  | PHE | X | 154 | 41.146 | 53.124 | 42.735 | 0.00 | 0.00 |
| ATOM | 2381 | HD1  | PHE | X | 154 | 41.913 | 53.303 | 41.996 | 0.00 | 0.00 |
| ATOM | 2382 | CE1  | PHE | X | 154 | 39.996 | 52.390 | 42.431 | 0.00 | 0.00 |
| ATOM | 2383 | HE1  | PHE | X | 154 | 39.835 | 51.866 | 41.501 | 0.00 | 0.00 |
| ATOM | 2384 | CZ   | PHE | X | 154 | 38.961 | 52.214 | 43.365 | 0.00 | 0.00 |
| ATOM | 2385 | HZ   | PHE | X | 154 | 38.156 | 51.528 | 43.146 | 0.00 | 0.00 |
| ATOM | 2386 | CE2  | PHE | X | 154 | 39.048 | 52.808 | 44.620 | 0.00 | 0.00 |
| ATOM | 2387 | HE2  | PHE | X | 154 | 38.312 | 52.669 | 45.397 | 0.00 | 0.00 |
| ATOM | 2388 | CD2  | PHE | X | 154 | 40.212 | 53.522 | 44.926 | 0.00 | 0.00 |
| ATOM | 2389 | HD2  | PHE | X | 154 | 40.401 | 53.920 | 45.912 | 0.00 | 0.00 |
| ATOM | 2390 | C    | PHE | X | 154 | 43.375 | 56.799 | 45.196 | 0.00 | 0.00 |
| ATOM | 2391 | O    | PHE | X | 154 | 43.740 | 56.500 | 46.362 | 0.00 | 0.00 |
| ATOM | 2392 | N    | LEU | X | 155 | 43.884 | 57.902 | 44.574 | 0.00 | 0.00 |
| ATOM | 2393 | H    | LEU | X | 155 | 43.727 | 57.967 | 43.578 | 0.00 | 0.00 |
| ATOM | 2394 | CA   | LEU | X | 155 | 44.727 | 58.860 | 45.261 | 0.00 | 0.00 |
| ATOM | 2395 | HA   | LEU | X | 155 | 45.458 | 58.241 | 45.781 | 0.00 | 0.00 |
| ATOM | 2396 | CB   | LEU | X | 155 | 45.438 | 59.798 | 44.179 | 0.00 | 0.00 |
| ATOM | 2397 | HB2  | LEU | X | 155 | 45.842 | 59.199 | 43.363 | 0.00 | 0.00 |
| ATOM | 2398 | HB3  | LEU | X | 155 | 44.682 | 60.450 | 43.741 | 0.00 | 0.00 |
| ATOM | 2399 | CG   | LEU | X | 155 | 46.693 | 60.443 | 44.735 | 0.00 | 0.00 |
| ATOM | 2400 | HG   | LEU | X | 155 | 47.182 | 59.816 | 45.480 | 0.00 | 0.00 |
| ATOM | 2401 | CD1  | LEU | X | 155 | 47.711 | 60.626 | 43.541 | 0.00 | 0.00 |
| ATOM | 2402 | HD11 | LEU | X | 155 | 47.294 | 61.320 | 42.810 | 0.00 | 0.00 |
| ATOM | 2403 | HD12 | LEU | X | 155 | 47.969 | 59.683 | 43.060 | 0.00 | 0.00 |
| ATOM | 2404 | HD13 | LEU | X | 155 | 48.661 | 60.963 | 43.956 | 0.00 | 0.00 |
| ATOM | 2405 | CD2  | LEU | X | 155 | 46.361 | 61.759 | 45.368 | 0.00 | 0.00 |
| ATOM | 2406 | HD21 | LEU | X | 155 | 45.557 | 62.355 | 44.937 | 0.00 | 0.00 |
| ATOM | 2407 | HD22 | LEU | X | 155 | 46.136 | 61.677 | 46.432 | 0.00 | 0.00 |
| ATOM | 2408 | HD23 | LEU | X | 155 | 47.297 | 62.314 | 45.306 | 0.00 | 0.00 |
| ATOM | 2409 | C    | LEU | X | 155 | 43.920 | 59.742 | 46.222 | 0.00 | 0.00 |
| ATOM | 2410 | O    | LEU | X | 155 | 42.904 | 60.364 | 45.856 | 0.00 | 0.00 |
| ATOM | 2411 | N    | ALA | X | 156 | 44.357 | 59.775 | 47.449 | 0.00 | 0.00 |
| ATOM | 2412 | H    | ALA | X | 156 | 45.247 | 59.327 | 47.618 | 0.00 | 0.00 |
| ATOM | 2413 | CA   | ALA | X | 156 | 43.614 | 60.408 | 48.598 | 0.00 | 0.00 |
| ATOM | 2414 | HA   | ALA | X | 156 | 42.928 | 61.150 | 48.189 | 0.00 | 0.00 |
| ATOM | 2415 | CB   | ALA | X | 156 | 42.948 | 59.360 | 49.384 | 0.00 | 0.00 |
| ATOM | 2416 | HB1  | ALA | X | 156 | 42.490 | 58.641 | 48.705 | 0.00 | 0.00 |

|      |      |      |     |   |     |        |        |        |      |      |
|------|------|------|-----|---|-----|--------|--------|--------|------|------|
| ATOM | 2417 | HB2  | ALA | X | 156 | 42.257 | 59.690 | 50.159 | 0.00 | 0.00 |
| ATOM | 2418 | HB3  | ALA | X | 156 | 43.737 | 58.696 | 49.738 | 0.00 | 0.00 |
| ATOM | 2419 | C    | ALA | X | 156 | 44.607 | 61.170 | 49.469 | 0.00 | 0.00 |
| ATOM | 2420 | O    | ALA | X | 156 | 45.694 | 60.646 | 49.713 | 0.00 | 0.00 |
| ATOM | 2421 | N    | LEU | X | 157 | 44.310 | 62.405 | 49.849 | 0.00 | 0.00 |
| ATOM | 2422 | H    | LEU | X | 157 | 43.464 | 62.826 | 49.492 | 0.00 | 0.00 |
| ATOM | 2423 | CA   | LEU | X | 157 | 45.040 | 63.297 | 50.778 | 0.00 | 0.00 |
| ATOM | 2424 | HA   | LEU | X | 157 | 45.892 | 62.690 | 51.083 | 0.00 | 0.00 |
| ATOM | 2425 | CB   | LEU | X | 157 | 45.536 | 64.495 | 50.030 | 0.00 | 0.00 |
| ATOM | 2426 | HB2  | LEU | X | 157 | 45.668 | 64.294 | 48.967 | 0.00 | 0.00 |
| ATOM | 2427 | HB3  | LEU | X | 157 | 44.673 | 65.161 | 50.015 | 0.00 | 0.00 |
| ATOM | 2428 | CG   | LEU | X | 157 | 46.666 | 65.267 | 50.679 | 0.00 | 0.00 |
| ATOM | 2429 | HG   | LEU | X | 157 | 46.442 | 65.441 | 51.731 | 0.00 | 0.00 |
| ATOM | 2430 | CD1  | LEU | X | 157 | 48.059 | 64.579 | 50.509 | 0.00 | 0.00 |
| ATOM | 2431 | HD11 | LEU | X | 157 | 48.531 | 64.554 | 49.527 | 0.00 | 0.00 |
| ATOM | 2432 | HD12 | LEU | X | 157 | 48.018 | 63.556 | 50.882 | 0.00 | 0.00 |
| ATOM | 2433 | HD13 | LEU | X | 157 | 48.715 | 65.148 | 51.169 | 0.00 | 0.00 |
| ATOM | 2434 | CD2  | LEU | X | 157 | 46.830 | 66.656 | 49.938 | 0.00 | 0.00 |
| ATOM | 2435 | HD21 | LEU | X | 157 | 47.419 | 67.297 | 50.595 | 0.00 | 0.00 |
| ATOM | 2436 | HD22 | LEU | X | 157 | 47.361 | 66.569 | 48.990 | 0.00 | 0.00 |
| ATOM | 2437 | HD23 | LEU | X | 157 | 45.860 | 67.148 | 49.875 | 0.00 | 0.00 |
| ATOM | 2438 | C    | LEU | X | 157 | 44.027 | 63.568 | 51.928 | 0.00 | 0.00 |
| ATOM | 2439 | O    | LEU | X | 157 | 43.540 | 64.697 | 52.066 | 0.00 | 0.00 |
| ATOM | 2440 | N    | PRO | X | 158 | 43.724 | 62.609 | 52.821 | 0.00 | 0.00 |
| ATOM | 2441 | CD   | PRO | X | 158 | 44.263 | 61.270 | 52.908 | 0.00 | 0.00 |
| ATOM | 2442 | HD2  | PRO | X | 158 | 45.349 | 61.174 | 52.882 | 0.00 | 0.00 |
| ATOM | 2443 | HD3  | PRO | X | 158 | 43.902 | 60.701 | 52.051 | 0.00 | 0.00 |
| ATOM | 2444 | CG   | PRO | X | 158 | 43.683 | 60.642 | 54.197 | 0.00 | 0.00 |
| ATOM | 2445 | HG2  | PRO | X | 158 | 44.270 | 60.870 | 55.086 | 0.00 | 0.00 |
| ATOM | 2446 | HG3  | PRO | X | 158 | 43.494 | 59.574 | 54.089 | 0.00 | 0.00 |
| ATOM | 2447 | CB   | PRO | X | 158 | 42.273 | 61.320 | 54.314 | 0.00 | 0.00 |
| ATOM | 2448 | HB2  | PRO | X | 158 | 41.792 | 61.293 | 55.291 | 0.00 | 0.00 |
| ATOM | 2449 | HB3  | PRO | X | 158 | 41.493 | 60.909 | 53.674 | 0.00 | 0.00 |
| ATOM | 2450 | CA   | PRO | X | 158 | 42.614 | 62.706 | 53.840 | 0.00 | 0.00 |
| ATOM | 2451 | HA   | PRO | X | 158 | 41.789 | 63.113 | 53.254 | 0.00 | 0.00 |
| ATOM | 2452 | C    | PRO | X | 158 | 42.886 | 63.675 | 54.989 | 0.00 | 0.00 |
| ATOM | 2453 | O    | PRO | X | 158 | 43.970 | 63.774 | 55.590 | 0.00 | 0.00 |
| ATOM | 2454 | N    | GLY | X | 159 | 41.847 | 64.468 | 55.243 | 0.00 | 0.00 |
| ATOM | 2455 | H    | GLY | X | 159 | 40.920 | 64.244 | 54.911 | 0.00 | 0.00 |
| ATOM | 2456 | CA   | GLY | X | 159 | 41.904 | 65.713 | 55.936 | 0.00 | 0.00 |
| ATOM | 2457 | HA2  | GLY | X | 159 | 41.133 | 65.830 | 56.698 | 0.00 | 0.00 |
| ATOM | 2458 | HA3  | GLY | X | 159 | 42.902 | 65.813 | 56.361 | 0.00 | 0.00 |
| ATOM | 2459 | C    | GLY | X | 159 | 41.898 | 66.894 | 55.027 | 0.00 | 0.00 |
| ATOM | 2460 | O    | GLY | X | 159 | 41.507 | 67.966 | 55.484 | 0.00 | 0.00 |
| ATOM | 2461 | N    | SER | X | 160 | 42.227 | 66.859 | 53.726 | 0.00 | 0.00 |
| ATOM | 2462 | H    | SER | X | 160 | 42.662 | 66.024 | 53.360 | 0.00 | 0.00 |
| ATOM | 2463 | CA   | SER | X | 160 | 42.124 | 67.980 | 52.704 | 0.00 | 0.00 |
| ATOM | 2464 | HA   | SER | X | 160 | 42.661 | 68.847 | 53.090 | 0.00 | 0.00 |
| ATOM | 2465 | CB   | SER | X | 160 | 42.950 | 67.621 | 51.438 | 0.00 | 0.00 |
| ATOM | 2466 | HB2  | SER | X | 160 | 43.212 | 68.495 | 50.842 | 0.00 | 0.00 |
| ATOM | 2467 | HB3  | SER | X | 160 | 43.911 | 67.222 | 51.763 | 0.00 | 0.00 |
| ATOM | 2468 | OG   | SER | X | 160 | 42.343 | 66.672 | 50.640 | 0.00 | 0.00 |
| ATOM | 2469 | HG   | SER | X | 160 | 42.722 | 65.833 | 50.911 | 0.00 | 0.00 |
| ATOM | 2470 | C    | SER | X | 160 | 40.645 | 68.349 | 52.307 | 0.00 | 0.00 |
| ATOM | 2471 | O    | SER | X | 160 | 39.695 | 67.721 | 52.807 | 0.00 | 0.00 |
| ATOM | 2472 | N    | ARG | X | 161 | 40.426 | 69.378 | 51.447 | 0.00 | 0.00 |
| ATOM | 2473 | H    | ARG | X | 161 | 41.252 | 69.792 | 51.039 | 0.00 | 0.00 |
| ATOM | 2474 | CA   | ARG | X | 161 | 39.153 | 69.659 | 50.691 | 0.00 | 0.00 |
| ATOM | 2475 | HA   | ARG | X | 161 | 38.391 | 68.995 | 51.100 | 0.00 | 0.00 |
| ATOM | 2476 | CB   | ARG | X | 161 | 38.655 | 71.100 | 50.824 | 0.00 | 0.00 |
| ATOM | 2477 | HB2  | ARG | X | 161 | 39.579 | 71.660 | 50.675 | 0.00 | 0.00 |
| ATOM | 2478 | HB3  | ARG | X | 161 | 37.928 | 71.263 | 50.029 | 0.00 | 0.00 |
| ATOM | 2479 | CG   | ARG | X | 161 | 37.979 | 71.576 | 52.075 | 0.00 | 0.00 |
| ATOM | 2480 | HG2  | ARG | X | 161 | 37.609 | 72.599 | 52.133 | 0.00 | 0.00 |
| ATOM | 2481 | HG3  | ARG | X | 161 | 37.124 | 70.918 | 52.234 | 0.00 | 0.00 |
| ATOM | 2482 | CD   | ARG | X | 161 | 38.720 | 71.498 | 53.486 | 0.00 | 0.00 |
| ATOM | 2483 | HD2  | ARG | X | 161 | 38.043 | 71.906 | 54.238 | 0.00 | 0.00 |

|      |      |      |     |   |     |        |        |        |      |      |
|------|------|------|-----|---|-----|--------|--------|--------|------|------|
| ATOM | 2484 | HD3  | ARG | X | 161 | 38.705 | 70.466 | 53.834 | 0.00 | 0.00 |
| ATOM | 2485 | NE   | ARG | X | 161 | 40.018 | 72.208 | 53.389 | 0.00 | 0.00 |
| ATOM | 2486 | HE   | ARG | X | 161 | 40.757 | 71.722 | 52.902 | 0.00 | 0.00 |
| ATOM | 2487 | CZ   | ARG | X | 161 | 40.220 | 73.329 | 54.034 | 0.00 | 0.00 |
| ATOM | 2488 | NH1  | ARG | X | 161 | 39.295 | 73.976 | 54.693 | 0.00 | 0.00 |
| ATOM | 2489 | HH11 | ARG | X | 161 | 38.303 | 73.802 | 54.610 | 0.00 | 0.00 |
| ATOM | 2490 | HH12 | ARG | X | 161 | 39.507 | 74.906 | 55.022 | 0.00 | 0.00 |
| ATOM | 2491 | NH2  | ARG | X | 161 | 41.378 | 73.917 | 54.011 | 0.00 | 0.00 |
| ATOM | 2492 | HH21 | ARG | X | 161 | 42.234 | 73.443 | 53.760 | 0.00 | 0.00 |
| ATOM | 2493 | HH22 | ARG | X | 161 | 41.468 | 74.825 | 54.445 | 0.00 | 0.00 |
| ATOM | 2494 | C    | ARG | X | 161 | 39.357 | 69.234 | 49.140 | 0.00 | 0.00 |
| ATOM | 2495 | O    | ARG | X | 161 | 38.453 | 69.258 | 48.326 | 0.00 | 0.00 |
| ATOM | 2496 | N    | GLU | X | 162 | 40.528 | 68.844 | 48.731 | 0.00 | 0.00 |
| ATOM | 2497 | H    | GLU | X | 162 | 41.282 | 68.929 | 49.398 | 0.00 | 0.00 |
| ATOM | 2498 | CA   | GLU | X | 162 | 40.980 | 68.571 | 47.382 | 0.00 | 0.00 |
| ATOM | 2499 | HA   | GLU | X | 162 | 40.430 | 69.225 | 46.706 | 0.00 | 0.00 |
| ATOM | 2500 | CB   | GLU | X | 162 | 42.468 | 69.040 | 47.295 | 0.00 | 0.00 |
| ATOM | 2501 | HB2  | GLU | X | 162 | 42.980 | 68.693 | 48.192 | 0.00 | 0.00 |
| ATOM | 2502 | HB3  | GLU | X | 162 | 42.918 | 68.568 | 46.422 | 0.00 | 0.00 |
| ATOM | 2503 | CG   | GLU | X | 162 | 42.667 | 70.592 | 47.176 | 0.00 | 0.00 |
| ATOM | 2504 | HG2  | GLU | X | 162 | 43.690 | 70.753 | 46.835 | 0.00 | 0.00 |
| ATOM | 2505 | HG3  | GLU | X | 162 | 42.030 | 71.030 | 46.408 | 0.00 | 0.00 |
| ATOM | 2506 | CD   | GLU | X | 162 | 42.459 | 71.318 | 48.475 | 0.00 | 0.00 |
| ATOM | 2507 | OE1  | GLU | X | 162 | 42.505 | 72.581 | 48.513 | 0.00 | 0.00 |
| ATOM | 2508 | OE2  | GLU | X | 162 | 42.435 | 70.740 | 49.606 | 0.00 | 0.00 |
| ATOM | 2509 | C    | GLU | X | 162 | 40.830 | 67.075 | 46.934 | 0.00 | 0.00 |
| ATOM | 2510 | O    | GLU | X | 162 | 40.734 | 66.802 | 45.733 | 0.00 | 0.00 |
| ATOM | 2511 | N    | ALA | X | 163 | 40.935 | 66.122 | 47.903 | 0.00 | 0.00 |
| ATOM | 2512 | H    | ALA | X | 163 | 40.952 | 66.524 | 48.829 | 0.00 | 0.00 |
| ATOM | 2513 | CA   | ALA | X | 163 | 40.838 | 64.683 | 47.570 | 0.00 | 0.00 |
| ATOM | 2514 | HA   | ALA | X | 163 | 40.183 | 64.525 | 46.714 | 0.00 | 0.00 |
| ATOM | 2515 | CB   | ALA | X | 163 | 42.263 | 64.252 | 47.087 | 0.00 | 0.00 |
| ATOM | 2516 | HB1  | ALA | X | 163 | 42.376 | 64.580 | 46.054 | 0.00 | 0.00 |
| ATOM | 2517 | HB2  | ALA | X | 163 | 42.309 | 63.166 | 47.177 | 0.00 | 0.00 |
| ATOM | 2518 | HB3  | ALA | X | 163 | 43.134 | 64.630 | 47.621 | 0.00 | 0.00 |
| ATOM | 2519 | C    | ALA | X | 163 | 40.413 | 63.915 | 48.810 | 0.00 | 0.00 |
| ATOM | 2520 | O    | ALA | X | 163 | 41.339 | 63.673 | 49.679 | 0.00 | 0.00 |
| ATOM | 2521 | N    | PRO | X | 164 | 39.157 | 63.380 | 48.861 | 0.00 | 0.00 |
| ATOM | 2522 | CD   | PRO | X | 164 | 38.024 | 63.683 | 47.950 | 0.00 | 0.00 |
| ATOM | 2523 | HD2  | PRO | X | 164 | 38.378 | 63.367 | 46.969 | 0.00 | 0.00 |
| ATOM | 2524 | HD3  | PRO | X | 164 | 37.712 | 64.725 | 47.867 | 0.00 | 0.00 |
| ATOM | 2525 | CG   | PRO | X | 164 | 36.881 | 62.804 | 48.448 | 0.00 | 0.00 |
| ATOM | 2526 | HG2  | PRO | X | 164 | 36.862 | 61.813 | 47.992 | 0.00 | 0.00 |
| ATOM | 2527 | HG3  | PRO | X | 164 | 35.989 | 63.406 | 48.276 | 0.00 | 0.00 |
| ATOM | 2528 | CB   | PRO | X | 164 | 37.252 | 62.588 | 49.916 | 0.00 | 0.00 |
| ATOM | 2529 | HB2  | PRO | X | 164 | 36.648 | 61.837 | 50.424 | 0.00 | 0.00 |
| ATOM | 2530 | HB3  | PRO | X | 164 | 37.054 | 63.489 | 50.497 | 0.00 | 0.00 |
| ATOM | 2531 | CA   | PRO | X | 164 | 38.774 | 62.504 | 49.934 | 0.00 | 0.00 |
| ATOM | 2532 | HA   | PRO | X | 164 | 39.113 | 63.072 | 50.800 | 0.00 | 0.00 |
| ATOM | 2533 | C    | PRO | X | 164 | 39.390 | 61.112 | 49.816 | 0.00 | 0.00 |
| ATOM | 2534 | O    | PRO | X | 164 | 39.818 | 60.582 | 50.871 | 0.00 | 0.00 |
| ATOM | 2535 | N    | GLY | X | 165 | 39.361 | 60.539 | 48.557 | 0.00 | 0.00 |
| ATOM | 2536 | H    | GLY | X | 165 | 38.947 | 61.120 | 47.842 | 0.00 | 0.00 |
| ATOM | 2537 | CA   | GLY | X | 165 | 39.827 | 59.226 | 48.163 | 0.00 | 0.00 |
| ATOM | 2538 | HA2  | GLY | X | 165 | 40.382 | 59.329 | 47.231 | 0.00 | 0.00 |
| ATOM | 2539 | HA3  | GLY | X | 165 | 40.324 | 58.625 | 48.925 | 0.00 | 0.00 |
| ATOM | 2540 | C    | GLY | X | 165 | 38.587 | 58.443 | 47.703 | 0.00 | 0.00 |
| ATOM | 2541 | O    | GLY | X | 165 | 37.467 | 58.948 | 47.734 | 0.00 | 0.00 |
| ATOM | 2542 | N    | ASN | X | 166 | 38.821 | 57.283 | 47.157 | 0.00 | 0.00 |
| ATOM | 2543 | H    | ASN | X | 166 | 39.785 | 57.063 | 46.953 | 0.00 | 0.00 |
| ATOM | 2544 | CA   | ASN | X | 166 | 37.788 | 56.233 | 46.894 | 0.00 | 0.00 |
| ATOM | 2545 | HA   | ASN | X | 166 | 38.195 | 55.256 | 46.633 | 0.00 | 0.00 |
| ATOM | 2546 | CB   | ASN | X | 166 | 36.939 | 55.943 | 48.137 | 0.00 | 0.00 |
| ATOM | 2547 | HB2  | ASN | X | 166 | 36.522 | 56.871 | 48.526 | 0.00 | 0.00 |
| ATOM | 2548 | HB3  | ASN | X | 166 | 36.148 | 55.260 | 47.828 | 0.00 | 0.00 |
| ATOM | 2549 | CG   | ASN | X | 166 | 37.853 | 55.327 | 49.185 | 0.00 | 0.00 |
| ATOM | 2550 | OD1  | ASN | X | 166 | 38.596 | 54.380 | 48.924 | 0.00 | 0.00 |

|      |      |      |     |   |     |        |        |        |      |      |
|------|------|------|-----|---|-----|--------|--------|--------|------|------|
| ATOM | 2551 | ND2  | ASN | X | 166 | 37.753 | 55.899 | 50.359 | 0.00 | 0.00 |
| ATOM | 2552 | HD21 | ASN | X | 166 | 38.177 | 55.529 | 51.198 | 0.00 | 0.00 |
| ATOM | 2553 | HD22 | ASN | X | 166 | 37.156 | 56.704 | 50.486 | 0.00 | 0.00 |
| ATOM | 2554 | C    | ASN | X | 166 | 36.901 | 56.496 | 45.669 | 0.00 | 0.00 |
| ATOM | 2555 | O    | ASN | X | 166 | 35.986 | 55.671 | 45.397 | 0.00 | 0.00 |
| ATOM | 2556 | N    | VAL | X | 167 | 37.029 | 57.633 | 45.005 | 0.00 | 0.00 |
| ATOM | 2557 | H    | VAL | X | 167 | 37.749 | 58.256 | 45.344 | 0.00 | 0.00 |
| ATOM | 2558 | CA   | VAL | X | 167 | 36.068 | 58.047 | 43.977 | 0.00 | 0.00 |
| ATOM | 2559 | HA   | VAL | X | 167 | 35.110 | 57.927 | 44.483 | 0.00 | 0.00 |
| ATOM | 2560 | CB   | VAL | X | 167 | 36.135 | 59.502 | 43.486 | 0.00 | 0.00 |
| ATOM | 2561 | HB   | VAL | X | 167 | 35.269 | 59.575 | 42.829 | 0.00 | 0.00 |
| ATOM | 2562 | CG1  | VAL | X | 167 | 35.827 | 60.426 | 44.747 | 0.00 | 0.00 |
| ATOM | 2563 | HG11 | VAL | X | 167 | 34.957 | 60.130 | 45.333 | 0.00 | 0.00 |
| ATOM | 2564 | HG12 | VAL | X | 167 | 36.677 | 60.440 | 45.428 | 0.00 | 0.00 |
| ATOM | 2565 | HG13 | VAL | X | 167 | 35.840 | 61.466 | 44.421 | 0.00 | 0.00 |
| ATOM | 2566 | CG2  | VAL | X | 167 | 37.528 | 59.861 | 42.802 | 0.00 | 0.00 |
| ATOM | 2567 | HG21 | VAL | X | 167 | 37.558 | 60.944 | 42.688 | 0.00 | 0.00 |
| ATOM | 2568 | HG22 | VAL | X | 167 | 37.623 | 59.288 | 41.879 | 0.00 | 0.00 |
| ATOM | 2569 | HG23 | VAL | X | 167 | 38.347 | 59.602 | 43.473 | 0.00 | 0.00 |
| ATOM | 2570 | C    | VAL | X | 167 | 35.898 | 57.093 | 42.853 | 0.00 | 0.00 |
| ATOM | 2571 | O    | VAL | X | 167 | 34.824 | 57.110 | 42.257 | 0.00 | 0.00 |
| ATOM | 2572 | N    | GLY | X | 168 | 36.837 | 56.163 | 42.594 | 0.00 | 0.00 |
| ATOM | 2573 | H    | GLY | X | 168 | 37.594 | 56.065 | 43.255 | 0.00 | 0.00 |
| ATOM | 2574 | CA   | GLY | X | 168 | 36.670 | 55.005 | 41.703 | 0.00 | 0.00 |
| ATOM | 2575 | HA2  | GLY | X | 168 | 36.265 | 55.396 | 40.770 | 0.00 | 0.00 |
| ATOM | 2576 | HA3  | GLY | X | 168 | 37.628 | 54.502 | 41.567 | 0.00 | 0.00 |
| ATOM | 2577 | C    | GLY | X | 168 | 35.716 | 53.877 | 42.081 | 0.00 | 0.00 |
| ATOM | 2578 | O    | GLY | X | 168 | 35.469 | 52.970 | 41.252 | 0.00 | 0.00 |
| ATOM | 2579 | N    | LEU | X | 169 | 35.073 | 53.970 | 43.229 | 0.00 | 0.00 |
| ATOM | 2580 | H    | LEU | X | 169 | 35.425 | 54.705 | 43.827 | 0.00 | 0.00 |
| ATOM | 2581 | CA   | LEU | X | 169 | 33.924 | 53.187 | 43.658 | 0.00 | 0.00 |
| ATOM | 2582 | HA   | LEU | X | 169 | 33.800 | 52.369 | 42.948 | 0.00 | 0.00 |
| ATOM | 2583 | CB   | LEU | X | 169 | 34.164 | 52.688 | 45.140 | 0.00 | 0.00 |
| ATOM | 2584 | HB2  | LEU | X | 169 | 34.411 | 53.516 | 45.803 | 0.00 | 0.00 |
| ATOM | 2585 | HB3  | LEU | X | 169 | 33.197 | 52.315 | 45.477 | 0.00 | 0.00 |
| ATOM | 2586 | CG   | LEU | X | 169 | 35.251 | 51.576 | 45.202 | 0.00 | 0.00 |
| ATOM | 2587 | HG   | LEU | X | 169 | 36.071 | 51.952 | 44.590 | 0.00 | 0.00 |
| ATOM | 2588 | CD1  | LEU | X | 169 | 35.797 | 51.506 | 46.612 | 0.00 | 0.00 |
| ATOM | 2589 | HD11 | LEU | X | 169 | 36.196 | 52.460 | 46.957 | 0.00 | 0.00 |
| ATOM | 2590 | HD12 | LEU | X | 169 | 36.724 | 50.932 | 46.611 | 0.00 | 0.00 |
| ATOM | 2591 | HD13 | LEU | X | 169 | 35.037 | 51.064 | 47.256 | 0.00 | 0.00 |
| ATOM | 2592 | CD2  | LEU | X | 169 | 34.787 | 50.305 | 44.611 | 0.00 | 0.00 |
| ATOM | 2593 | HD21 | LEU | X | 169 | 33.836 | 50.009 | 45.054 | 0.00 | 0.00 |
| ATOM | 2594 | HD22 | LEU | X | 169 | 34.824 | 50.398 | 43.525 | 0.00 | 0.00 |
| ATOM | 2595 | HD23 | LEU | X | 169 | 35.464 | 49.473 | 44.805 | 0.00 | 0.00 |
| ATOM | 2596 | C    | LEU | X | 169 | 32.651 | 54.048 | 43.498 | 0.00 | 0.00 |
| ATOM | 2597 | O    | LEU | X | 169 | 31.561 | 53.511 | 43.555 | 0.00 | 0.00 |
| ATOM | 2598 | N    | LEU | X | 170 | 32.808 | 55.361 | 43.425 | 0.00 | 0.00 |
| ATOM | 2599 | H    | LEU | X | 170 | 33.717 | 55.711 | 43.157 | 0.00 | 0.00 |
| ATOM | 2600 | CA   | LEU | X | 170 | 31.647 | 56.279 | 43.197 | 0.00 | 0.00 |
| ATOM | 2601 | HA   | LEU | X | 170 | 30.793 | 55.911 | 43.765 | 0.00 | 0.00 |
| ATOM | 2602 | CB   | LEU | X | 170 | 31.874 | 57.723 | 43.733 | 0.00 | 0.00 |
| ATOM | 2603 | HB2  | LEU | X | 170 | 32.893 | 58.094 | 43.631 | 0.00 | 0.00 |
| ATOM | 2604 | HB3  | LEU | X | 170 | 31.207 | 58.435 | 43.246 | 0.00 | 0.00 |
| ATOM | 2605 | CG   | LEU | X | 170 | 31.526 | 57.783 | 45.256 | 0.00 | 0.00 |
| ATOM | 2606 | HG   | LEU | X | 170 | 31.599 | 56.804 | 45.729 | 0.00 | 0.00 |
| ATOM | 2607 | CD1  | LEU | X | 170 | 32.552 | 58.595 | 46.046 | 0.00 | 0.00 |
| ATOM | 2608 | HD11 | LEU | X | 170 | 33.440 | 57.965 | 46.095 | 0.00 | 0.00 |
| ATOM | 2609 | HD12 | LEU | X | 170 | 32.222 | 58.648 | 47.084 | 0.00 | 0.00 |
| ATOM | 2610 | HD13 | LEU | X | 170 | 32.665 | 59.622 | 45.696 | 0.00 | 0.00 |
| ATOM | 2611 | CD2  | LEU | X | 170 | 30.101 | 58.176 | 45.424 | 0.00 | 0.00 |
| ATOM | 2612 | HD21 | LEU | X | 170 | 29.892 | 58.280 | 46.488 | 0.00 | 0.00 |
| ATOM | 2613 | HD22 | LEU | X | 170 | 29.950 | 59.179 | 45.024 | 0.00 | 0.00 |
| ATOM | 2614 | HD23 | LEU | X | 170 | 29.469 | 57.391 | 45.009 | 0.00 | 0.00 |
| ATOM | 2615 | C    | LEU | X | 170 | 31.289 | 56.285 | 41.730 | 0.00 | 0.00 |
| ATOM | 2616 | O    | LEU | X | 170 | 30.116 | 56.326 | 41.407 | 0.00 | 0.00 |
| ATOM | 2617 | N    | ASP | X | 171 | 32.235 | 56.119 | 40.787 | 0.00 | 0.00 |

|      |      |      |     |   |     |        |        |        |      |      |
|------|------|------|-----|---|-----|--------|--------|--------|------|------|
| ATOM | 2618 | H    | ASP | X | 171 | 33.173 | 56.379 | 41.060 | 0.00 | 0.00 |
| ATOM | 2619 | CA   | ASP | X | 171 | 31.988 | 55.878 | 39.372 | 0.00 | 0.00 |
| ATOM | 2620 | HA   | ASP | X | 171 | 31.509 | 56.785 | 39.005 | 0.00 | 0.00 |
| ATOM | 2621 | CB   | ASP | X | 171 | 33.360 | 55.635 | 38.718 | 0.00 | 0.00 |
| ATOM | 2622 | HB2  | ASP | X | 171 | 33.785 | 54.750 | 39.191 | 0.00 | 0.00 |
| ATOM | 2623 | HB3  | ASP | X | 171 | 33.247 | 55.267 | 37.698 | 0.00 | 0.00 |
| ATOM | 2624 | CG   | ASP | X | 171 | 34.450 | 56.758 | 38.737 | 0.00 | 0.00 |
| ATOM | 2625 | OD1  | ASP | X | 171 | 34.095 | 57.918 | 39.107 | 0.00 | 0.00 |
| ATOM | 2626 | OD2  | ASP | X | 171 | 35.677 | 56.463 | 38.414 | 0.00 | 0.00 |
| ATOM | 2627 | C    | ASP | X | 171 | 31.056 | 54.608 | 39.254 | 0.00 | 0.00 |
| ATOM | 2628 | O    | ASP | X | 171 | 30.150 | 54.482 | 38.414 | 0.00 | 0.00 |
| ATOM | 2629 | N    | GLN | X | 172 | 31.263 | 53.577 | 40.150 | 0.00 | 0.00 |
| ATOM | 2630 | H    | GLN | X | 172 | 31.925 | 53.748 | 40.892 | 0.00 | 0.00 |
| ATOM | 2631 | CA   | GLN | X | 172 | 30.571 | 52.314 | 40.046 | 0.00 | 0.00 |
| ATOM | 2632 | HA   | GLN | X | 172 | 30.522 | 51.989 | 39.006 | 0.00 | 0.00 |
| ATOM | 2633 | CB   | GLN | X | 172 | 31.255 | 51.281 | 40.933 | 0.00 | 0.00 |
| ATOM | 2634 | HB2  | GLN | X | 172 | 31.300 | 51.472 | 42.005 | 0.00 | 0.00 |
| ATOM | 2635 | HB3  | GLN | X | 172 | 30.583 | 50.426 | 41.000 | 0.00 | 0.00 |
| ATOM | 2636 | CG   | GLN | X | 172 | 32.707 | 50.937 | 40.382 | 0.00 | 0.00 |
| ATOM | 2637 | HG2  | GLN | X | 172 | 32.607 | 50.578 | 39.358 | 0.00 | 0.00 |
| ATOM | 2638 | HG3  | GLN | X | 172 | 33.277 | 51.865 | 40.341 | 0.00 | 0.00 |
| ATOM | 2639 | CD   | GLN | X | 172 | 33.447 | 49.839 | 41.196 | 0.00 | 0.00 |
| ATOM | 2640 | OE1  | GLN | X | 172 | 32.981 | 49.304 | 42.187 | 0.00 | 0.00 |
| ATOM | 2641 | NE2  | GLN | X | 172 | 34.593 | 49.393 | 40.699 | 0.00 | 0.00 |
| ATOM | 2642 | HE21 | GLN | X | 172 | 35.087 | 48.659 | 41.186 | 0.00 | 0.00 |
| ATOM | 2643 | HE22 | GLN | X | 172 | 35.028 | 49.827 | 39.897 | 0.00 | 0.00 |
| ATOM | 2644 | C    | GLN | X | 172 | 29.097 | 52.501 | 40.541 | 0.00 | 0.00 |
| ATOM | 2645 | O    | GLN | X | 172 | 28.202 | 51.871 | 39.943 | 0.00 | 0.00 |
| ATOM | 2646 | N    | ARG | X | 173 | 28.868 | 53.232 | 41.603 | 0.00 | 0.00 |
| ATOM | 2647 | H    | ARG | X | 173 | 29.697 | 53.582 | 42.061 | 0.00 | 0.00 |
| ATOM | 2648 | CA   | ARG | X | 173 | 27.545 | 53.530 | 42.059 | 0.00 | 0.00 |
| ATOM | 2649 | HA   | ARG | X | 173 | 26.945 | 52.629 | 42.187 | 0.00 | 0.00 |
| ATOM | 2650 | CB   | ARG | X | 173 | 27.643 | 54.122 | 43.498 | 0.00 | 0.00 |
| ATOM | 2651 | HB2  | ARG | X | 173 | 28.179 | 53.353 | 44.054 | 0.00 | 0.00 |
| ATOM | 2652 | HB3  | ARG | X | 173 | 28.209 | 55.053 | 43.493 | 0.00 | 0.00 |
| ATOM | 2653 | CG   | ARG | X | 173 | 26.276 | 54.483 | 44.105 | 0.00 | 0.00 |
| ATOM | 2654 | HG2  | ARG | X | 173 | 25.860 | 55.301 | 43.519 | 0.00 | 0.00 |
| ATOM | 2655 | HG3  | ARG | X | 173 | 25.548 | 53.674 | 44.056 | 0.00 | 0.00 |
| ATOM | 2656 | CD   | ARG | X | 173 | 26.430 | 55.026 | 45.570 | 0.00 | 0.00 |
| ATOM | 2657 | HD2  | ARG | X | 173 | 27.093 | 55.889 | 45.506 | 0.00 | 0.00 |
| ATOM | 2658 | HD3  | ARG | X | 173 | 25.456 | 55.307 | 45.972 | 0.00 | 0.00 |
| ATOM | 2659 | NE   | ARG | X | 173 | 27.068 | 54.042 | 46.475 | 0.00 | 0.00 |
| ATOM | 2660 | HE   | ARG | X | 173 | 26.891 | 53.119 | 46.104 | 0.00 | 0.00 |
| ATOM | 2661 | CZ   | ARG | X | 173 | 27.634 | 54.193 | 47.640 | 0.00 | 0.00 |
| ATOM | 2662 | NH1  | ARG | X | 173 | 27.744 | 55.406 | 48.146 | 0.00 | 0.00 |
| ATOM | 2663 | HH11 | ARG | X | 173 | 27.422 | 56.259 | 47.710 | 0.00 | 0.00 |
| ATOM | 2664 | HH12 | ARG | X | 173 | 28.158 | 55.566 | 49.054 | 0.00 | 0.00 |
| ATOM | 2665 | NH2  | ARG | X | 173 | 27.998 | 53.139 | 48.330 | 0.00 | 0.00 |
| ATOM | 2666 | HH21 | ARG | X | 173 | 27.882 | 52.202 | 47.971 | 0.00 | 0.00 |
| ATOM | 2667 | HH22 | ARG | X | 173 | 28.382 | 53.280 | 49.254 | 0.00 | 0.00 |
| ATOM | 2668 | C    | ARG | X | 173 | 26.729 | 54.342 | 41.060 | 0.00 | 0.00 |
| ATOM | 2669 | O    | ARG | X | 173 | 25.498 | 54.070 | 40.853 | 0.00 | 0.00 |
| ATOM | 2670 | N    | LEU | X | 174 | 27.231 | 55.380 | 40.362 | 0.00 | 0.00 |
| ATOM | 2671 | H    | LEU | X | 174 | 28.168 | 55.685 | 40.583 | 0.00 | 0.00 |
| ATOM | 2672 | CA   | LEU | X | 174 | 26.540 | 55.958 | 39.176 | 0.00 | 0.00 |
| ATOM | 2673 | HA   | LEU | X | 174 | 25.582 | 56.426 | 39.400 | 0.00 | 0.00 |
| ATOM | 2674 | CB   | LEU | X | 174 | 27.427 | 56.981 | 38.458 | 0.00 | 0.00 |
| ATOM | 2675 | HB2  | LEU | X | 174 | 28.410 | 56.556 | 38.257 | 0.00 | 0.00 |
| ATOM | 2676 | HB3  | LEU | X | 174 | 26.928 | 57.223 | 37.519 | 0.00 | 0.00 |
| ATOM | 2677 | CG   | LEU | X | 174 | 27.678 | 58.378 | 39.067 | 0.00 | 0.00 |
| ATOM | 2678 | HG   | LEU | X | 174 | 28.349 | 58.223 | 39.912 | 0.00 | 0.00 |
| ATOM | 2679 | CD1  | LEU | X | 174 | 28.232 | 59.361 | 38.067 | 0.00 | 0.00 |
| ATOM | 2680 | HD11 | LEU | X | 174 | 28.289 | 60.285 | 38.642 | 0.00 | 0.00 |
| ATOM | 2681 | HD12 | LEU | X | 174 | 27.513 | 59.461 | 37.254 | 0.00 | 0.00 |
| ATOM | 2682 | HD13 | LEU | X | 174 | 29.156 | 59.007 | 37.611 | 0.00 | 0.00 |
| ATOM | 2683 | CD2  | LEU | X | 174 | 26.396 | 59.025 | 39.638 | 0.00 | 0.00 |
| ATOM | 2684 | HD21 | LEU | X | 174 | 26.584 | 60.070 | 39.884 | 0.00 | 0.00 |

|      |      |      |     |   |     |        |        |        |      |      |
|------|------|------|-----|---|-----|--------|--------|--------|------|------|
| ATOM | 2685 | HD22 | LEU | X | 174 | 25.578 | 59.116 | 38.923 | 0.00 | 0.00 |
| ATOM | 2686 | HD23 | LEU | X | 174 | 26.104 | 58.469 | 40.528 | 0.00 | 0.00 |
| ATOM | 2687 | C    | LEU | X | 174 | 26.166 | 54.886 | 38.176 | 0.00 | 0.00 |
| ATOM | 2688 | O    | LEU | X | 174 | 25.091 | 55.038 | 37.586 | 0.00 | 0.00 |
| ATOM | 2689 | N    | ALA | X | 175 | 26.974 | 53.862 | 37.928 | 0.00 | 0.00 |
| ATOM | 2690 | H    | ALA | X | 175 | 27.718 | 53.739 | 38.600 | 0.00 | 0.00 |
| ATOM | 2691 | CA   | ALA | X | 175 | 26.717 | 52.924 | 36.944 | 0.00 | 0.00 |
| ATOM | 2692 | HA   | ALA | X | 175 | 26.170 | 53.379 | 36.119 | 0.00 | 0.00 |
| ATOM | 2693 | CB   | ALA | X | 175 | 28.062 | 52.364 | 36.532 | 0.00 | 0.00 |
| ATOM | 2694 | HB1  | ALA | X | 175 | 28.603 | 52.027 | 37.417 | 0.00 | 0.00 |
| ATOM | 2695 | HB2  | ALA | X | 175 | 28.687 | 53.119 | 36.056 | 0.00 | 0.00 |
| ATOM | 2696 | HB3  | ALA | X | 175 | 27.901 | 51.582 | 35.789 | 0.00 | 0.00 |
| ATOM | 2697 | C    | ALA | X | 175 | 25.715 | 51.849 | 37.500 | 0.00 | 0.00 |
| ATOM | 2698 | O    | ALA | X | 175 | 24.719 | 51.484 | 36.802 | 0.00 | 0.00 |
| ATOM | 2699 | N    | LEU | X | 176 | 25.688 | 51.438 | 38.764 | 0.00 | 0.00 |
| ATOM | 2700 | H    | LEU | X | 176 | 26.493 | 51.579 | 39.358 | 0.00 | 0.00 |
| ATOM | 2701 | CA   | LEU | X | 176 | 24.549 | 50.707 | 39.354 | 0.00 | 0.00 |
| ATOM | 2702 | HA   | LEU | X | 176 | 24.384 | 49.830 | 38.727 | 0.00 | 0.00 |
| ATOM | 2703 | CB   | LEU | X | 176 | 24.841 | 50.268 | 40.843 | 0.00 | 0.00 |
| ATOM | 2704 | HB2  | LEU | X | 176 | 24.970 | 51.134 | 41.493 | 0.00 | 0.00 |
| ATOM | 2705 | HB3  | LEU | X | 176 | 23.969 | 49.692 | 41.153 | 0.00 | 0.00 |
| ATOM | 2706 | CG   | LEU | X | 176 | 26.081 | 49.344 | 41.072 | 0.00 | 0.00 |
| ATOM | 2707 | HG   | LEU | X | 176 | 27.047 | 49.806 | 40.865 | 0.00 | 0.00 |
| ATOM | 2708 | CD1  | LEU | X | 176 | 26.091 | 48.923 | 42.543 | 0.00 | 0.00 |
| ATOM | 2709 | HD11 | LEU | X | 176 | 26.868 | 48.180 | 42.721 | 0.00 | 0.00 |
| ATOM | 2710 | HD12 | LEU | X | 176 | 25.125 | 48.594 | 42.925 | 0.00 | 0.00 |
| ATOM | 2711 | HD13 | LEU | X | 176 | 26.405 | 49.763 | 43.164 | 0.00 | 0.00 |
| ATOM | 2712 | CD2  | LEU | X | 176 | 25.914 | 48.091 | 40.180 | 0.00 | 0.00 |
| ATOM | 2713 | HD21 | LEU | X | 176 | 26.528 | 47.217 | 40.397 | 0.00 | 0.00 |
| ATOM | 2714 | HD22 | LEU | X | 176 | 24.900 | 47.708 | 40.069 | 0.00 | 0.00 |
| ATOM | 2715 | HD23 | LEU | X | 176 | 26.212 | 48.351 | 39.164 | 0.00 | 0.00 |
| ATOM | 2716 | C    | LEU | X | 176 | 23.228 | 51.492 | 39.358 | 0.00 | 0.00 |
| ATOM | 2717 | O    | LEU | X | 176 | 22.227 | 50.926 | 38.951 | 0.00 | 0.00 |
| ATOM | 2718 | N    | GLN | X | 177 | 23.232 | 52.779 | 39.658 | 0.00 | 0.00 |
| ATOM | 2719 | H    | GLN | X | 177 | 24.149 | 53.190 | 39.757 | 0.00 | 0.00 |
| ATOM | 2720 | CA   | GLN | X | 177 | 22.059 | 53.667 | 39.478 | 0.00 | 0.00 |
| ATOM | 2721 | HA   | GLN | X | 177 | 21.203 | 53.246 | 40.004 | 0.00 | 0.00 |
| ATOM | 2722 | CB   | GLN | X | 177 | 22.180 | 55.109 | 39.963 | 0.00 | 0.00 |
| ATOM | 2723 | HB2  | GLN | X | 177 | 23.039 | 55.547 | 39.455 | 0.00 | 0.00 |
| ATOM | 2724 | HB3  | GLN | X | 177 | 21.347 | 55.772 | 39.730 | 0.00 | 0.00 |
| ATOM | 2725 | CG   | GLN | X | 177 | 22.355 | 55.346 | 41.516 | 0.00 | 0.00 |
| ATOM | 2726 | HG2  | GLN | X | 177 | 21.571 | 54.829 | 42.069 | 0.00 | 0.00 |
| ATOM | 2727 | HG3  | GLN | X | 177 | 23.350 | 55.002 | 41.798 | 0.00 | 0.00 |
| ATOM | 2728 | CD   | GLN | X | 177 | 22.300 | 56.826 | 41.881 | 0.00 | 0.00 |
| ATOM | 2729 | OE1  | GLN | X | 177 | 22.960 | 57.644 | 41.251 | 0.00 | 0.00 |
| ATOM | 2730 | NE2  | GLN | X | 177 | 21.561 | 57.267 | 42.867 | 0.00 | 0.00 |
| ATOM | 2731 | HE21 | GLN | X | 177 | 21.447 | 58.271 | 42.860 | 0.00 | 0.00 |
| ATOM | 2732 | HE22 | GLN | X | 177 | 20.949 | 56.690 | 43.426 | 0.00 | 0.00 |
| ATOM | 2733 | C    | GLN | X | 177 | 21.581 | 53.557 | 38.030 | 0.00 | 0.00 |
| ATOM | 2734 | O    | GLN | X | 177 | 20.396 | 53.358 | 37.750 | 0.00 | 0.00 |
| ATOM | 2735 | N    | TRP | X | 178 | 22.515 | 53.766 | 37.103 | 0.00 | 0.00 |
| ATOM | 2736 | H    | TRP | X | 178 | 23.427 | 53.990 | 37.475 | 0.00 | 0.00 |
| ATOM | 2737 | CA   | TRP | X | 178 | 22.258 | 53.663 | 35.642 | 0.00 | 0.00 |
| ATOM | 2738 | HA   | TRP | X | 178 | 21.571 | 54.494 | 35.486 | 0.00 | 0.00 |
| ATOM | 2739 | CB   | TRP | X | 178 | 23.555 | 54.096 | 34.862 | 0.00 | 0.00 |
| ATOM | 2740 | HB2  | TRP | X | 178 | 23.954 | 55.007 | 35.309 | 0.00 | 0.00 |
| ATOM | 2741 | HB3  | TRP | X | 178 | 24.335 | 53.336 | 34.920 | 0.00 | 0.00 |
| ATOM | 2742 | CG   | TRP | X | 178 | 23.335 | 54.426 | 33.444 | 0.00 | 0.00 |
| ATOM | 2743 | CD1  | TRP | X | 178 | 23.423 | 55.672 | 32.975 | 0.00 | 0.00 |
| ATOM | 2744 | HD1  | TRP | X | 178 | 23.718 | 56.528 | 33.564 | 0.00 | 0.00 |
| ATOM | 2745 | NE1  | TRP | X | 178 | 23.228 | 55.655 | 31.611 | 0.00 | 0.00 |
| ATOM | 2746 | HE1  | TRP | X | 178 | 23.346 | 56.470 | 31.025 | 0.00 | 0.00 |
| ATOM | 2747 | CE2  | TRP | X | 178 | 22.950 | 54.404 | 31.178 | 0.00 | 0.00 |
| ATOM | 2748 | CZ2  | TRP | X | 178 | 22.719 | 53.930 | 29.909 | 0.00 | 0.00 |
| ATOM | 2749 | HZ2  | TRP | X | 178 | 22.750 | 54.579 | 29.047 | 0.00 | 0.00 |
| ATOM | 2750 | CH2  | TRP | X | 178 | 22.672 | 52.544 | 29.744 | 0.00 | 0.00 |
| ATOM | 2751 | HH2  | TRP | X | 178 | 22.597 | 52.197 | 28.724 | 0.00 | 0.00 |

|      |      |      |     |   |     |        |        |        |      |      |
|------|------|------|-----|---|-----|--------|--------|--------|------|------|
| ATOM | 2752 | CZ3  | TRP | X | 178 | 22.926 | 51.633 | 30.830 | 0.00 | 0.00 |
| ATOM | 2753 | HZ3  | TRP | X | 178 | 22.909 | 50.578 | 30.602 | 0.00 | 0.00 |
| ATOM | 2754 | CE3  | TRP | X | 178 | 23.153 | 52.175 | 32.091 | 0.00 | 0.00 |
| ATOM | 2755 | HE3  | TRP | X | 178 | 23.276 | 51.504 | 32.928 | 0.00 | 0.00 |
| ATOM | 2756 | CD2  | TRP | X | 178 | 23.064 | 53.540 | 32.296 | 0.00 | 0.00 |
| ATOM | 2757 | C    | TRP | X | 178 | 21.711 | 52.314 | 35.174 | 0.00 | 0.00 |
| ATOM | 2758 | O    | TRP | X | 178 | 20.763 | 52.251 | 34.432 | 0.00 | 0.00 |
| ATOM | 2759 | N    | VAL | X | 179 | 22.177 | 51.210 | 35.751 | 0.00 | 0.00 |
| ATOM | 2760 | H    | VAL | X | 179 | 22.814 | 51.347 | 36.522 | 0.00 | 0.00 |
| ATOM | 2761 | CA   | VAL | X | 179 | 21.720 | 49.862 | 35.485 | 0.00 | 0.00 |
| ATOM | 2762 | HA   | VAL | X | 179 | 21.758 | 49.698 | 34.408 | 0.00 | 0.00 |
| ATOM | 2763 | CB   | VAL | X | 179 | 22.753 | 48.908 | 36.072 | 0.00 | 0.00 |
| ATOM | 2764 | HB   | VAL | X | 179 | 23.077 | 49.186 | 37.075 | 0.00 | 0.00 |
| ATOM | 2765 | CG1  | VAL | X | 179 | 22.199 | 47.452 | 36.227 | 0.00 | 0.00 |
| ATOM | 2766 | HG11 | VAL | X | 179 | 21.851 | 47.057 | 35.273 | 0.00 | 0.00 |
| ATOM | 2767 | HG12 | VAL | X | 179 | 23.009 | 46.771 | 36.490 | 0.00 | 0.00 |
| ATOM | 2768 | HG13 | VAL | X | 179 | 21.440 | 47.366 | 37.004 | 0.00 | 0.00 |
| ATOM | 2769 | CG2  | VAL | X | 179 | 24.115 | 48.830 | 35.269 | 0.00 | 0.00 |
| ATOM | 2770 | HG21 | VAL | X | 179 | 24.788 | 48.268 | 35.917 | 0.00 | 0.00 |
| ATOM | 2771 | HG22 | VAL | X | 179 | 24.425 | 49.843 | 35.013 | 0.00 | 0.00 |
| ATOM | 2772 | HG23 | VAL | X | 179 | 23.989 | 48.420 | 34.267 | 0.00 | 0.00 |
| ATOM | 2773 | C    | VAL | X | 179 | 20.334 | 49.694 | 36.007 | 0.00 | 0.00 |
| ATOM | 2774 | O    | VAL | X | 179 | 19.491 | 49.206 | 35.229 | 0.00 | 0.00 |
| ATOM | 2775 | N    | GLN | X | 180 | 20.034 | 50.042 | 37.264 | 0.00 | 0.00 |
| ATOM | 2776 | H    | GLN | X | 180 | 20.735 | 50.346 | 37.924 | 0.00 | 0.00 |
| ATOM | 2777 | CA   | GLN | X | 180 | 18.695 | 49.800 | 37.803 | 0.00 | 0.00 |
| ATOM | 2778 | HA   | GLN | X | 180 | 18.502 | 48.739 | 37.640 | 0.00 | 0.00 |
| ATOM | 2779 | CB   | GLN | X | 180 | 18.689 | 50.231 | 39.315 | 0.00 | 0.00 |
| ATOM | 2780 | HB2  | GLN | X | 180 | 19.358 | 51.074 | 39.485 | 0.00 | 0.00 |
| ATOM | 2781 | HB3  | GLN | X | 180 | 17.712 | 50.578 | 39.650 | 0.00 | 0.00 |
| ATOM | 2782 | CG   | GLN | X | 180 | 19.139 | 49.027 | 40.203 | 0.00 | 0.00 |
| ATOM | 2783 | HG2  | GLN | X | 180 | 20.114 | 48.678 | 39.865 | 0.00 | 0.00 |
| ATOM | 2784 | HG3  | GLN | X | 180 | 19.213 | 49.347 | 41.243 | 0.00 | 0.00 |
| ATOM | 2785 | CD   | GLN | X | 180 | 18.107 | 47.850 | 40.177 | 0.00 | 0.00 |
| ATOM | 2786 | OE1  | GLN | X | 180 | 17.160 | 47.802 | 39.376 | 0.00 | 0.00 |
| ATOM | 2787 | NE2  | GLN | X | 180 | 18.303 | 46.805 | 40.961 | 0.00 | 0.00 |
| ATOM | 2788 | HE21 | GLN | X | 180 | 17.574 | 46.108 | 41.006 | 0.00 | 0.00 |
| ATOM | 2789 | HE22 | GLN | X | 180 | 19.031 | 46.971 | 41.641 | 0.00 | 0.00 |
| ATOM | 2790 | C    | GLN | X | 180 | 17.637 | 50.634 | 37.049 | 0.00 | 0.00 |
| ATOM | 2791 | O    | GLN | X | 180 | 16.436 | 50.206 | 36.971 | 0.00 | 0.00 |
| ATOM | 2792 | N    | GLU | X | 181 | 18.046 | 51.775 | 36.543 | 0.00 | 0.00 |
| ATOM | 2793 | H    | GLU | X | 181 | 18.963 | 52.148 | 36.744 | 0.00 | 0.00 |
| ATOM | 2794 | CA   | GLU | X | 181 | 17.308 | 52.670 | 35.712 | 0.00 | 0.00 |
| ATOM | 2795 | HA   | GLU | X | 181 | 16.363 | 52.694 | 36.254 | 0.00 | 0.00 |
| ATOM | 2796 | CB   | GLU | X | 181 | 17.961 | 54.063 | 35.531 | 0.00 | 0.00 |
| ATOM | 2797 | HB2  | GLU | X | 181 | 18.396 | 54.519 | 36.421 | 0.00 | 0.00 |
| ATOM | 2798 | HB3  | GLU | X | 181 | 18.716 | 53.982 | 34.750 | 0.00 | 0.00 |
| ATOM | 2799 | CG   | GLU | X | 181 | 16.948 | 55.077 | 34.972 | 0.00 | 0.00 |
| ATOM | 2800 | HG2  | GLU | X | 181 | 17.586 | 55.898 | 34.645 | 0.00 | 0.00 |
| ATOM | 2801 | HG3  | GLU | X | 181 | 16.273 | 54.788 | 34.166 | 0.00 | 0.00 |
| ATOM | 2802 | CD   | GLU | X | 181 | 16.058 | 55.695 | 36.042 | 0.00 | 0.00 |
| ATOM | 2803 | OE1  | GLU | X | 181 | 14.817 | 55.579 | 35.963 | 0.00 | 0.00 |
| ATOM | 2804 | OE2  | GLU | X | 181 | 16.607 | 56.287 | 36.995 | 0.00 | 0.00 |
| ATOM | 2805 | C    | GLU | X | 181 | 17.093 | 52.078 | 34.318 | 0.00 | 0.00 |
| ATOM | 2806 | O    | GLU | X | 181 | 15.987 | 52.176 | 33.808 | 0.00 | 0.00 |
| ATOM | 2807 | N    | ASN | X | 182 | 18.128 | 51.585 | 33.560 | 0.00 | 0.00 |
| ATOM | 2808 | H    | ASN | X | 182 | 19.033 | 51.678 | 33.999 | 0.00 | 0.00 |
| ATOM | 2809 | CA   | ASN | X | 182 | 18.100 | 51.398 | 32.093 | 0.00 | 0.00 |
| ATOM | 2810 | HA   | ASN | X | 182 | 17.096 | 51.727 | 31.822 | 0.00 | 0.00 |
| ATOM | 2811 | CB   | ASN | X | 182 | 19.158 | 52.285 | 31.367 | 0.00 | 0.00 |
| ATOM | 2812 | HB2  | ASN | X | 182 | 20.129 | 52.039 | 31.796 | 0.00 | 0.00 |
| ATOM | 2813 | HB3  | ASN | X | 182 | 19.115 | 52.131 | 30.289 | 0.00 | 0.00 |
| ATOM | 2814 | CG   | ASN | X | 182 | 18.893 | 53.765 | 31.616 | 0.00 | 0.00 |
| ATOM | 2815 | OD1  | ASN | X | 182 | 17.849 | 54.218 | 31.202 | 0.00 | 0.00 |
| ATOM | 2816 | ND2  | ASN | X | 182 | 19.788 | 54.476 | 32.380 | 0.00 | 0.00 |
| ATOM | 2817 | HD21 | ASN | X | 182 | 19.566 | 55.436 | 32.602 | 0.00 | 0.00 |
| ATOM | 2818 | HD22 | ASN | X | 182 | 20.664 | 54.124 | 32.740 | 0.00 | 0.00 |

|      |      |      |     |   |     |        |        |        |      |      |
|------|------|------|-----|---|-----|--------|--------|--------|------|------|
| ATOM | 2819 | C    | ASN | X | 182 | 18.135 | 49.980 | 31.534 | 0.00 | 0.00 |
| ATOM | 2820 | O    | ASN | X | 182 | 17.743 | 49.759 | 30.398 | 0.00 | 0.00 |
| ATOM | 2821 | N    | VAL | X | 183 | 18.520 | 49.046 | 32.372 | 0.00 | 0.00 |
| ATOM | 2822 | H    | VAL | X | 183 | 18.797 | 49.299 | 33.310 | 0.00 | 0.00 |
| ATOM | 2823 | CA   | VAL | X | 183 | 18.920 | 47.679 | 31.885 | 0.00 | 0.00 |
| ATOM | 2824 | HA   | VAL | X | 183 | 19.688 | 47.854 | 31.132 | 0.00 | 0.00 |
| ATOM | 2825 | CB   | VAL | X | 183 | 19.456 | 46.755 | 33.083 | 0.00 | 0.00 |
| ATOM | 2826 | HB   | VAL | X | 183 | 20.212 | 47.322 | 33.625 | 0.00 | 0.00 |
| ATOM | 2827 | CG1  | VAL | X | 183 | 18.404 | 46.302 | 34.128 | 0.00 | 0.00 |
| ATOM | 2828 | HG11 | VAL | X | 183 | 17.896 | 47.158 | 34.573 | 0.00 | 0.00 |
| ATOM | 2829 | HG12 | VAL | X | 183 | 17.689 | 45.539 | 33.820 | 0.00 | 0.00 |
| ATOM | 2830 | HG13 | VAL | X | 183 | 19.009 | 45.922 | 34.952 | 0.00 | 0.00 |
| ATOM | 2831 | CG2  | VAL | X | 183 | 20.145 | 45.528 | 32.527 | 0.00 | 0.00 |
| ATOM | 2832 | HG21 | VAL | X | 183 | 20.875 | 45.835 | 31.778 | 0.00 | 0.00 |
| ATOM | 2833 | HG22 | VAL | X | 183 | 19.429 | 44.803 | 32.141 | 0.00 | 0.00 |
| ATOM | 2834 | HG23 | VAL | X | 183 | 20.642 | 45.075 | 33.385 | 0.00 | 0.00 |
| ATOM | 2835 | C    | VAL | X | 183 | 17.828 | 46.870 | 31.263 | 0.00 | 0.00 |
| ATOM | 2836 | O    | VAL | X | 183 | 18.009 | 46.088 | 30.281 | 0.00 | 0.00 |
| ATOM | 2837 | N    | ALA | X | 184 | 16.628 | 47.104 | 31.813 | 0.00 | 0.00 |
| ATOM | 2838 | H    | ALA | X | 184 | 16.563 | 47.815 | 32.527 | 0.00 | 0.00 |
| ATOM | 2839 | CA   | ALA | X | 184 | 15.345 | 46.521 | 31.400 | 0.00 | 0.00 |
| ATOM | 2840 | HA   | ALA | X | 184 | 15.520 | 45.446 | 31.345 | 0.00 | 0.00 |
| ATOM | 2841 | CB   | ALA | X | 184 | 14.267 | 46.998 | 32.283 | 0.00 | 0.00 |
| ATOM | 2842 | HB1  | ALA | X | 184 | 13.349 | 46.768 | 31.740 | 0.00 | 0.00 |
| ATOM | 2843 | HB2  | ALA | X | 184 | 14.387 | 48.061 | 32.493 | 0.00 | 0.00 |
| ATOM | 2844 | HB3  | ALA | X | 184 | 14.329 | 46.445 | 33.220 | 0.00 | 0.00 |
| ATOM | 2845 | C    | ALA | X | 184 | 15.111 | 46.781 | 29.889 | 0.00 | 0.00 |
| ATOM | 2846 | O    | ALA | X | 184 | 14.788 | 45.834 | 29.212 | 0.00 | 0.00 |
| ATOM | 2847 | N    | ALA | X | 185 | 15.499 | 47.936 | 29.310 | 0.00 | 0.00 |
| ATOM | 2848 | H    | ALA | X | 185 | 15.955 | 48.611 | 29.907 | 0.00 | 0.00 |
| ATOM | 2849 | CA   | ALA | X | 185 | 15.447 | 48.270 | 27.886 | 0.00 | 0.00 |
| ATOM | 2850 | HA   | ALA | X | 185 | 14.415 | 48.132 | 27.565 | 0.00 | 0.00 |
| ATOM | 2851 | CB   | ALA | X | 185 | 15.828 | 49.670 | 27.730 | 0.00 | 0.00 |
| ATOM | 2852 | HB1  | ALA | X | 185 | 15.343 | 50.362 | 28.419 | 0.00 | 0.00 |
| ATOM | 2853 | HB2  | ALA | X | 185 | 15.540 | 50.034 | 26.743 | 0.00 | 0.00 |
| ATOM | 2854 | HB3  | ALA | X | 185 | 16.899 | 49.792 | 27.892 | 0.00 | 0.00 |
| ATOM | 2855 | C    | ALA | X | 185 | 16.235 | 47.244 | 27.032 | 0.00 | 0.00 |
| ATOM | 2856 | O    | ALA | X | 185 | 15.826 | 46.726 | 26.011 | 0.00 | 0.00 |
| ATOM | 2857 | N    | PHE | X | 186 | 17.507 | 46.909 | 27.470 | 0.00 | 0.00 |
| ATOM | 2858 | H    | PHE | X | 186 | 17.797 | 47.320 | 28.345 | 0.00 | 0.00 |
| ATOM | 2859 | CA   | PHE | X | 186 | 18.302 | 45.880 | 26.819 | 0.00 | 0.00 |
| ATOM | 2860 | HA   | PHE | X | 186 | 18.328 | 46.028 | 25.739 | 0.00 | 0.00 |
| ATOM | 2861 | CB   | PHE | X | 186 | 19.762 | 46.136 | 27.329 | 0.00 | 0.00 |
| ATOM | 2862 | HB2  | PHE | X | 186 | 19.908 | 45.658 | 28.298 | 0.00 | 0.00 |
| ATOM | 2863 | HB3  | PHE | X | 186 | 20.340 | 45.515 | 26.646 | 0.00 | 0.00 |
| ATOM | 2864 | CG   | PHE | X | 186 | 20.280 | 47.616 | 27.206 | 0.00 | 0.00 |
| ATOM | 2865 | CD1  | PHE | X | 186 | 20.023 | 48.563 | 28.198 | 0.00 | 0.00 |
| ATOM | 2866 | HD1  | PHE | X | 186 | 19.367 | 48.405 | 29.042 | 0.00 | 0.00 |
| ATOM | 2867 | CE1  | PHE | X | 186 | 20.529 | 49.882 | 28.103 | 0.00 | 0.00 |
| ATOM | 2868 | HE1  | PHE | X | 186 | 20.366 | 50.607 | 28.886 | 0.00 | 0.00 |
| ATOM | 2869 | CZ   | PHE | X | 186 | 21.252 | 50.304 | 26.966 | 0.00 | 0.00 |
| ATOM | 2870 | HZ   | PHE | X | 186 | 21.625 | 51.318 | 26.969 | 0.00 | 0.00 |
| ATOM | 2871 | CE2  | PHE | X | 186 | 21.583 | 49.348 | 26.020 | 0.00 | 0.00 |
| ATOM | 2872 | HE2  | PHE | X | 186 | 22.269 | 49.562 | 25.214 | 0.00 | 0.00 |
| ATOM | 2873 | CD2  | PHE | X | 186 | 21.066 | 48.047 | 26.142 | 0.00 | 0.00 |
| ATOM | 2874 | HD2  | PHE | X | 186 | 21.326 | 47.385 | 25.329 | 0.00 | 0.00 |
| ATOM | 2875 | C    | PHE | X | 186 | 17.860 | 44.446 | 27.098 | 0.00 | 0.00 |
| ATOM | 2876 | O    | PHE | X | 186 | 18.303 | 43.496 | 26.433 | 0.00 | 0.00 |
| ATOM | 2877 | N    | GLY | X | 187 | 16.910 | 44.192 | 27.999 | 0.00 | 0.00 |
| ATOM | 2878 | H    | GLY | X | 187 | 16.629 | 45.017 | 28.509 | 0.00 | 0.00 |
| ATOM | 2879 | CA   | GLY | X | 187 | 16.127 | 43.001 | 28.203 | 0.00 | 0.00 |
| ATOM | 2880 | HA2  | GLY | X | 187 | 15.107 | 43.166 | 27.854 | 0.00 | 0.00 |
| ATOM | 2881 | HA3  | GLY | X | 187 | 16.489 | 42.256 | 27.495 | 0.00 | 0.00 |
| ATOM | 2882 | C    | GLY | X | 187 | 16.082 | 42.377 | 29.604 | 0.00 | 0.00 |
| ATOM | 2883 | O    | GLY | X | 187 | 15.617 | 41.258 | 29.866 | 0.00 | 0.00 |
| ATOM | 2884 | N    | GLY | X | 188 | 16.625 | 43.124 | 30.548 | 0.00 | 0.00 |
| ATOM | 2885 | H    | GLY | X | 188 | 16.879 | 44.070 | 30.301 | 0.00 | 0.00 |



|      |      |      |     |   |     |        |        |        |      |      |
|------|------|------|-----|---|-----|--------|--------|--------|------|------|
| ATOM | 2886 | CA   | GLY | X | 188 | 16.836 | 42.652 | 31.916 | 0.00 | 0.00 |
| ATOM | 2887 | HA2  | GLY | X | 188 | 17.122 | 41.610 | 31.772 | 0.00 | 0.00 |
| ATOM | 2888 | HA3  | GLY | X | 188 | 17.684 | 43.156 | 32.379 | 0.00 | 0.00 |
| ATOM | 2889 | C    | GLY | X | 188 | 15.719 | 42.665 | 32.939 | 0.00 | 0.00 |
| ATOM | 2890 | O    | GLY | X | 188 | 14.689 | 43.293 | 32.709 | 0.00 | 0.00 |
| ATOM | 2891 | N    | ASP | X | 189 | 15.924 | 42.191 | 34.165 | 0.00 | 0.00 |
| ATOM | 2892 | H    | ASP | X | 189 | 16.850 | 41.802 | 34.269 | 0.00 | 0.00 |
| ATOM | 2893 | CA   | ASP | X | 189 | 14.989 | 42.143 | 35.331 | 0.00 | 0.00 |
| ATOM | 2894 | HA   | ASP | X | 189 | 14.033 | 42.446 | 34.904 | 0.00 | 0.00 |
| ATOM | 2895 | CB   | ASP | X | 189 | 14.853 | 40.729 | 35.705 | 0.00 | 0.00 |
| ATOM | 2896 | HB2  | ASP | X | 189 | 14.413 | 40.135 | 34.904 | 0.00 | 0.00 |
| ATOM | 2897 | HB3  | ASP | X | 189 | 15.860 | 40.342 | 35.861 | 0.00 | 0.00 |
| ATOM | 2898 | CG   | ASP | X | 189 | 14.069 | 40.438 | 37.041 | 0.00 | 0.00 |
| ATOM | 2899 | OD1  | ASP | X | 189 | 14.056 | 39.316 | 37.566 | 0.00 | 0.00 |
| ATOM | 2900 | OD2  | ASP | X | 189 | 13.422 | 41.343 | 37.608 | 0.00 | 0.00 |
| ATOM | 2901 | C    | ASP | X | 189 | 15.514 | 43.016 | 36.513 | 0.00 | 0.00 |
| ATOM | 2902 | O    | ASP | X | 189 | 16.380 | 42.558 | 37.238 | 0.00 | 0.00 |
| ATOM | 2903 | N    | PRO | X | 190 | 14.880 | 44.231 | 36.773 | 0.00 | 0.00 |
| ATOM | 2904 | CD   | PRO | X | 190 | 13.908 | 44.850 | 35.811 | 0.00 | 0.00 |
| ATOM | 2905 | HD2  | PRO | X | 190 | 12.920 | 44.397 | 35.904 | 0.00 | 0.00 |
| ATOM | 2906 | HD3  | PRO | X | 190 | 14.303 | 44.780 | 34.797 | 0.00 | 0.00 |
| ATOM | 2907 | CG   | PRO | X | 190 | 13.950 | 46.325 | 36.292 | 0.00 | 0.00 |
| ATOM | 2908 | HG2  | PRO | X | 190 | 12.982 | 46.788 | 36.098 | 0.00 | 0.00 |
| ATOM | 2909 | HG3  | PRO | X | 190 | 14.797 | 46.730 | 35.738 | 0.00 | 0.00 |
| ATOM | 2910 | CB   | PRO | X | 190 | 14.267 | 46.319 | 37.797 | 0.00 | 0.00 |
| ATOM | 2911 | HB2  | PRO | X | 190 | 13.347 | 46.211 | 38.372 | 0.00 | 0.00 |
| ATOM | 2912 | HB3  | PRO | X | 190 | 14.747 | 47.226 | 38.164 | 0.00 | 0.00 |
| ATOM | 2913 | CA   | PRO | X | 190 | 15.174 | 45.078 | 37.949 | 0.00 | 0.00 |
| ATOM | 2914 | HA   | PRO | X | 190 | 16.172 | 45.511 | 37.879 | 0.00 | 0.00 |
| ATOM | 2915 | C    | PRO | X | 190 | 15.153 | 44.412 | 39.342 | 0.00 | 0.00 |
| ATOM | 2916 | O    | PRO | X | 190 | 15.693 | 44.966 | 40.260 | 0.00 | 0.00 |
| ATOM | 2917 | N    | THR | X | 191 | 14.456 | 43.292 | 39.430 | 0.00 | 0.00 |
| ATOM | 2918 | H    | THR | X | 191 | 13.825 | 42.981 | 38.705 | 0.00 | 0.00 |
| ATOM | 2919 | CA   | THR | X | 191 | 14.377 | 42.579 | 40.737 | 0.00 | 0.00 |
| ATOM | 2920 | HA   | THR | X | 191 | 14.664 | 43.212 | 41.576 | 0.00 | 0.00 |
| ATOM | 2921 | CB   | THR | X | 191 | 12.968 | 42.023 | 41.056 | 0.00 | 0.00 |
| ATOM | 2922 | HB   | THR | X | 191 | 12.987 | 41.712 | 42.100 | 0.00 | 0.00 |
| ATOM | 2923 | CG2  | THR | X | 191 | 11.843 | 43.041 | 40.864 | 0.00 | 0.00 |
| ATOM | 2924 | HG21 | THR | X | 191 | 11.821 | 43.191 | 39.785 | 0.00 | 0.00 |
| ATOM | 2925 | HG22 | THR | X | 191 | 12.033 | 44.060 | 41.202 | 0.00 | 0.00 |
| ATOM | 2926 | HG23 | THR | X | 191 | 10.862 | 42.647 | 41.130 | 0.00 | 0.00 |
| ATOM | 2927 | OG1  | THR | X | 191 | 12.753 | 40.935 | 40.235 | 0.00 | 0.00 |
| ATOM | 2928 | HG1  | THR | X | 191 | 12.857 | 41.172 | 39.311 | 0.00 | 0.00 |
| ATOM | 2929 | C    | THR | X | 191 | 15.398 | 41.392 | 40.824 | 0.00 | 0.00 |
| ATOM | 2930 | O    | THR | X | 191 | 15.337 | 40.664 | 41.845 | 0.00 | 0.00 |
| ATOM | 2931 | N    | SER | X | 192 | 16.343 | 41.159 | 39.888 | 0.00 | 0.00 |
| ATOM | 2932 | H    | SER | X | 192 | 16.351 | 41.716 | 39.046 | 0.00 | 0.00 |
| ATOM | 2933 | CA   | SER | X | 192 | 17.310 | 40.137 | 39.886 | 0.00 | 0.00 |
| ATOM | 2934 | HA   | SER | X | 192 | 17.464 | 39.707 | 40.875 | 0.00 | 0.00 |
| ATOM | 2935 | CB   | SER | X | 192 | 16.792 | 38.846 | 39.040 | 0.00 | 0.00 |
| ATOM | 2936 | HB2  | SER | X | 192 | 16.600 | 39.230 | 38.039 | 0.00 | 0.00 |
| ATOM | 2937 | HB3  | SER | X | 192 | 17.673 | 38.212 | 38.939 | 0.00 | 0.00 |
| ATOM | 2938 | OG   | SER | X | 192 | 15.579 | 38.261 | 39.425 | 0.00 | 0.00 |
| ATOM | 2939 | HG   | SER | X | 192 | 14.892 | 38.775 | 38.995 | 0.00 | 0.00 |
| ATOM | 2940 | C    | SER | X | 192 | 18.620 | 40.709 | 39.347 | 0.00 | 0.00 |
| ATOM | 2941 | O    | SER | X | 192 | 19.150 | 40.222 | 38.343 | 0.00 | 0.00 |
| ATOM | 2942 | N    | VAL | X | 193 | 19.311 | 41.533 | 40.065 | 0.00 | 0.00 |
| ATOM | 2943 | H    | VAL | X | 193 | 18.913 | 41.836 | 40.943 | 0.00 | 0.00 |
| ATOM | 2944 | CA   | VAL | X | 193 | 20.679 | 41.960 | 39.817 | 0.00 | 0.00 |
| ATOM | 2945 | HA   | VAL | X | 193 | 21.004 | 41.754 | 38.797 | 0.00 | 0.00 |
| ATOM | 2946 | CB   | VAL | X | 193 | 20.861 | 43.488 | 39.933 | 0.00 | 0.00 |
| ATOM | 2947 | HB   | VAL | X | 193 | 20.723 | 43.741 | 40.984 | 0.00 | 0.00 |
| ATOM | 2948 | CG1  | VAL | X | 193 | 22.329 | 43.966 | 39.573 | 0.00 | 0.00 |
| ATOM | 2949 | HG11 | VAL | X | 193 | 23.007 | 43.437 | 40.242 | 0.00 | 0.00 |
| ATOM | 2950 | HG12 | VAL | X | 193 | 22.513 | 43.733 | 38.525 | 0.00 | 0.00 |
| ATOM | 2951 | HG13 | VAL | X | 193 | 22.522 | 45.028 | 39.728 | 0.00 | 0.00 |
| ATOM | 2952 | CG2  | VAL | X | 193 | 19.905 | 44.273 | 39.067 | 0.00 | 0.00 |

|      |      |      |     |   |     |        |        |        |      |      |
|------|------|------|-----|---|-----|--------|--------|--------|------|------|
| ATOM | 2953 | HG21 | VAL | X | 193 | 18.905 | 44.064 | 39.446 | 0.00 | 0.00 |
| ATOM | 2954 | HG22 | VAL | X | 193 | 19.983 | 43.924 | 38.037 | 0.00 | 0.00 |
| ATOM | 2955 | HG23 | VAL | X | 193 | 20.113 | 45.344 | 39.075 | 0.00 | 0.00 |
| ATOM | 2956 | C    | VAL | X | 193 | 21.716 | 41.344 | 40.731 | 0.00 | 0.00 |
| ATOM | 2957 | O    | VAL | X | 193 | 21.611 | 41.565 | 41.959 | 0.00 | 0.00 |
| ATOM | 2958 | N    | THR | X | 194 | 22.598 | 40.526 | 40.157 | 0.00 | 0.00 |
| ATOM | 2959 | H    | THR | X | 194 | 22.515 | 40.254 | 39.188 | 0.00 | 0.00 |
| ATOM | 2960 | CA   | THR | X | 194 | 23.778 | 39.911 | 40.748 | 0.00 | 0.00 |
| ATOM | 2961 | HA   | THR | X | 194 | 23.724 | 39.963 | 41.835 | 0.00 | 0.00 |
| ATOM | 2962 | CB   | THR | X | 194 | 23.878 | 38.390 | 40.459 | 0.00 | 0.00 |
| ATOM | 2963 | HB   | THR | X | 194 | 23.565 | 38.113 | 39.452 | 0.00 | 0.00 |
| ATOM | 2964 | CG2  | THR | X | 194 | 25.170 | 37.675 | 40.959 | 0.00 | 0.00 |
| ATOM | 2965 | HG21 | THR | X | 194 | 25.072 | 36.597 | 40.834 | 0.00 | 0.00 |
| ATOM | 2966 | HG22 | THR | X | 194 | 25.287 | 37.988 | 41.996 | 0.00 | 0.00 |
| ATOM | 2967 | HG23 | THR | X | 194 | 25.984 | 38.093 | 40.366 | 0.00 | 0.00 |
| ATOM | 2968 | OG1  | THR | X | 194 | 22.930 | 37.670 | 41.273 | 0.00 | 0.00 |
| ATOM | 2969 | HG1  | THR | X | 194 | 22.067 | 37.875 | 40.906 | 0.00 | 0.00 |
| ATOM | 2970 | C    | THR | X | 194 | 25.093 | 40.673 | 40.333 | 0.00 | 0.00 |
| ATOM | 2971 | O    | THR | X | 194 | 25.439 | 40.596 | 39.119 | 0.00 | 0.00 |
| ATOM | 2972 | N    | LEU | X | 195 | 25.725 | 41.328 | 41.263 | 0.00 | 0.00 |
| ATOM | 2973 | H    | LEU | X | 195 | 25.278 | 41.376 | 42.167 | 0.00 | 0.00 |
| ATOM | 2974 | CA   | LEU | X | 195 | 27.024 | 41.946 | 41.113 | 0.00 | 0.00 |
| ATOM | 2975 | HA   | LEU | X | 195 | 27.068 | 42.457 | 40.151 | 0.00 | 0.00 |
| ATOM | 2976 | CB   | LEU | X | 195 | 27.331 | 42.870 | 42.281 | 0.00 | 0.00 |
| ATOM | 2977 | HB2  | LEU | X | 195 | 27.460 | 42.355 | 43.233 | 0.00 | 0.00 |
| ATOM | 2978 | HB3  | LEU | X | 195 | 28.280 | 43.307 | 41.970 | 0.00 | 0.00 |
| ATOM | 2979 | CG   | LEU | X | 195 | 26.407 | 44.055 | 42.651 | 0.00 | 0.00 |
| ATOM | 2980 | HG   | LEU | X | 195 | 25.445 | 43.714 | 43.032 | 0.00 | 0.00 |
| ATOM | 2981 | CD1  | LEU | X | 195 | 27.253 | 45.018 | 43.527 | 0.00 | 0.00 |
| ATOM | 2982 | HD11 | LEU | X | 195 | 26.698 | 45.950 | 43.636 | 0.00 | 0.00 |
| ATOM | 2983 | HD12 | LEU | X | 195 | 28.084 | 45.371 | 42.917 | 0.00 | 0.00 |
| ATOM | 2984 | HD13 | LEU | X | 195 | 27.531 | 44.635 | 44.509 | 0.00 | 0.00 |
| ATOM | 2985 | CD2  | LEU | X | 195 | 26.124 | 44.752 | 41.297 | 0.00 | 0.00 |
| ATOM | 2986 | HD21 | LEU | X | 195 | 25.398 | 44.204 | 40.696 | 0.00 | 0.00 |
| ATOM | 2987 | HD22 | LEU | X | 195 | 25.578 | 45.679 | 41.470 | 0.00 | 0.00 |
| ATOM | 2988 | HD23 | LEU | X | 195 | 27.008 | 44.935 | 40.685 | 0.00 | 0.00 |
| ATOM | 2989 | C    | LEU | X | 195 | 28.062 | 40.794 | 41.096 | 0.00 | 0.00 |
| ATOM | 2990 | O    | LEU | X | 195 | 28.054 | 39.943 | 41.967 | 0.00 | 0.00 |
| ATOM | 2991 | N    | PHE | X | 196 | 28.915 | 40.819 | 40.085 | 0.00 | 0.00 |
| ATOM | 2992 | H    | PHE | X | 196 | 28.953 | 41.707 | 39.606 | 0.00 | 0.00 |
| ATOM | 2993 | CA   | PHE | X | 196 | 29.835 | 39.735 | 39.722 | 0.00 | 0.00 |
| ATOM | 2994 | HA   | PHE | X | 196 | 29.838 | 39.026 | 40.549 | 0.00 | 0.00 |
| ATOM | 2995 | CB   | PHE | X | 196 | 29.142 | 39.097 | 38.524 | 0.00 | 0.00 |
| ATOM | 2996 | HB2  | PHE | X | 196 | 28.111 | 38.877 | 38.801 | 0.00 | 0.00 |
| ATOM | 2997 | HB3  | PHE | X | 196 | 29.067 | 39.882 | 37.772 | 0.00 | 0.00 |
| ATOM | 2998 | CG   | PHE | X | 196 | 29.750 | 37.849 | 37.900 | 0.00 | 0.00 |
| ATOM | 2999 | CD1  | PHE | X | 196 | 29.358 | 37.458 | 36.596 | 0.00 | 0.00 |
| ATOM | 3000 | HD1  | PHE | X | 196 | 28.699 | 38.117 | 36.050 | 0.00 | 0.00 |
| ATOM | 3001 | CE1  | PHE | X | 196 | 29.890 | 36.296 | 36.005 | 0.00 | 0.00 |
| ATOM | 3002 | HE1  | PHE | X | 196 | 29.570 | 35.999 | 35.018 | 0.00 | 0.00 |
| ATOM | 3003 | CZ   | PHE | X | 196 | 30.772 | 35.516 | 36.663 | 0.00 | 0.00 |
| ATOM | 3004 | HZ   | PHE | X | 196 | 31.191 | 34.569 | 36.357 | 0.00 | 0.00 |
| ATOM | 3005 | CE2  | PHE | X | 196 | 31.128 | 35.810 | 38.020 | 0.00 | 0.00 |
| ATOM | 3006 | HE2  | PHE | X | 196 | 31.716 | 35.157 | 38.648 | 0.00 | 0.00 |
| ATOM | 3007 | CD2  | PHE | X | 196 | 30.635 | 37.019 | 38.581 | 0.00 | 0.00 |
| ATOM | 3008 | HD2  | PHE | X | 196 | 30.895 | 37.256 | 39.602 | 0.00 | 0.00 |
| ATOM | 3009 | C    | PHE | X | 196 | 31.245 | 40.316 | 39.558 | 0.00 | 0.00 |
| ATOM | 3010 | O    | PHE | X | 196 | 31.386 | 41.448 | 39.067 | 0.00 | 0.00 |
| ATOM | 3011 | N    | GLY | X | 197 | 32.252 | 39.576 | 40.062 | 0.00 | 0.00 |
| ATOM | 3012 | H    | GLY | X | 197 | 32.097 | 38.717 | 40.570 | 0.00 | 0.00 |
| ATOM | 3013 | CA   | GLY | X | 197 | 33.578 | 40.183 | 39.950 | 0.00 | 0.00 |
| ATOM | 3014 | HA2  | GLY | X | 197 | 33.837 | 40.339 | 38.903 | 0.00 | 0.00 |
| ATOM | 3015 | HA3  | GLY | X | 197 | 33.607 | 41.096 | 40.544 | 0.00 | 0.00 |
| ATOM | 3016 | C    | GLY | X | 197 | 34.665 | 39.280 | 40.467 | 0.00 | 0.00 |
| ATOM | 3017 | O    | GLY | X | 197 | 34.410 | 38.196 | 41.155 | 0.00 | 0.00 |
| ATOM | 3018 | N    | GLU | X | 198 | 35.952 | 39.609 | 40.152 | 0.00 | 0.00 |
| ATOM | 3019 | H    | GLU | X | 198 | 36.130 | 40.429 | 39.591 | 0.00 | 0.00 |

|      |      |     |     |   |     |        |        |        |      |      |
|------|------|-----|-----|---|-----|--------|--------|--------|------|------|
| ATOM | 3020 | CA  | GLU | X | 198 | 37.122 | 38.769 | 40.456 | 0.00 | 0.00 |
| ATOM | 3021 | HA  | GLU | X | 198 | 36.935 | 37.984 | 41.189 | 0.00 | 0.00 |
| ATOM | 3022 | CB  | GLU | X | 198 | 37.688 | 37.965 | 39.300 | 0.00 | 0.00 |
| ATOM | 3023 | HB2 | GLU | X | 198 | 38.632 | 37.490 | 39.568 | 0.00 | 0.00 |
| ATOM | 3024 | HB3 | GLU | X | 198 | 36.997 | 37.148 | 39.093 | 0.00 | 0.00 |
| ATOM | 3025 | CG  | GLU | X | 198 | 38.009 | 38.756 | 38.056 | 0.00 | 0.00 |
| ATOM | 3026 | HG2 | GLU | X | 198 | 37.941 | 38.128 | 37.168 | 0.00 | 0.00 |
| ATOM | 3027 | HG3 | GLU | X | 198 | 37.260 | 39.542 | 37.958 | 0.00 | 0.00 |
| ATOM | 3028 | CD  | GLU | X | 198 | 39.313 | 39.471 | 37.947 | 0.00 | 0.00 |
| ATOM | 3029 | OE1 | GLU | X | 198 | 39.436 | 40.131 | 36.927 | 0.00 | 0.00 |
| ATOM | 3030 | OE2 | GLU | X | 198 | 40.181 | 39.174 | 38.795 | 0.00 | 0.00 |
| ATOM | 3031 | C   | GLU | X | 198 | 38.206 | 39.727 | 41.033 | 0.00 | 0.00 |
| ATOM | 3032 | O   | GLU | X | 198 | 38.244 | 40.849 | 40.639 | 0.00 | 0.00 |
| ATOM | 3033 | N   | XA1 | X | 199 | 38.893 | 39.191 | 42.093 | 0.00 | 0.00 |
| ATOM | 3034 | CA  | XA1 | X | 199 | 40.127 | 39.940 | 42.551 | 0.00 | 0.00 |
| ATOM | 3035 | C   | XA1 | X | 199 | 39.877 | 41.394 | 43.120 | 0.00 | 0.00 |
| ATOM | 3036 | O   | XA1 | X | 199 | 39.194 | 41.653 | 44.138 | 0.00 | 0.00 |
| ATOM | 3037 | CB  | XA1 | X | 199 | 41.355 | 39.898 | 41.552 | 0.00 | 0.00 |
| ATOM | 3038 | OG  | XA1 | X | 199 | 42.493 | 40.236 | 42.297 | 0.00 | 0.00 |
| ATOM | 3039 | P1  | XA1 | X | 199 | 43.603 | 41.312 | 41.721 | 0.00 | 0.00 |
| ATOM | 3040 | O1  | XA1 | X | 199 | 42.925 | 42.462 | 41.091 | 0.00 | 0.00 |
| ATOM | 3041 | O2  | XA1 | X | 199 | 44.600 | 40.569 | 40.929 | 0.00 | 0.00 |
| ATOM | 3042 | C1  | XA1 | X | 199 | 44.308 | 41.743 | 43.262 | 0.00 | 0.00 |
| ATOM | 3043 | H   | XA1 | X | 199 | 38.756 | 38.203 | 42.254 | 0.00 | 0.00 |
| ATOM | 3044 | HA  | XA1 | X | 199 | 40.497 | 39.331 | 43.376 | 0.00 | 0.00 |
| ATOM | 3045 | HB2 | XA1 | X | 199 | 41.430 | 38.897 | 41.119 | 0.00 | 0.00 |
| ATOM | 3046 | HB3 | XA1 | X | 199 | 41.161 | 40.513 | 40.670 | 0.00 | 0.00 |
| ATOM | 3047 | H11 | XA1 | X | 199 | 43.470 | 42.280 | 43.713 | 0.00 | 0.00 |
| ATOM | 3048 | H12 | XA1 | X | 199 | 44.666 | 40.881 | 43.829 | 0.00 | 0.00 |
| ATOM | 3049 | H13 | XA1 | X | 199 | 45.139 | 42.430 | 43.093 | 0.00 | 0.00 |
| ATOM | 3050 | N   | ALA | X | 200 | 40.367 | 42.520 | 42.474 | 0.00 | 0.00 |
| ATOM | 3051 | H   | ALA | X | 200 | 40.931 | 42.452 | 41.639 | 0.00 | 0.00 |
| ATOM | 3052 | CA  | ALA | X | 200 | 39.916 | 43.911 | 42.752 | 0.00 | 0.00 |
| ATOM | 3053 | HA  | ALA | X | 200 | 40.114 | 44.001 | 43.820 | 0.00 | 0.00 |
| ATOM | 3054 | CB  | ALA | X | 200 | 40.757 | 44.875 | 41.953 | 0.00 | 0.00 |
| ATOM | 3055 | HB1 | ALA | X | 200 | 40.596 | 45.839 | 42.435 | 0.00 | 0.00 |
| ATOM | 3056 | HB2 | ALA | X | 200 | 40.390 | 44.867 | 40.926 | 0.00 | 0.00 |
| ATOM | 3057 | HB3 | ALA | X | 200 | 41.804 | 44.682 | 42.186 | 0.00 | 0.00 |
| ATOM | 3058 | C   | ALA | X | 200 | 38.367 | 44.176 | 42.491 | 0.00 | 0.00 |
| ATOM | 3059 | O   | ALA | X | 200 | 37.781 | 45.037 | 43.144 | 0.00 | 0.00 |
| ATOM | 3060 | N   | GLY | X | 201 | 37.785 | 43.316 | 41.655 | 0.00 | 0.00 |
| ATOM | 3061 | H   | GLY | X | 201 | 38.392 | 42.707 | 41.125 | 0.00 | 0.00 |
| ATOM | 3062 | CA  | GLY | X | 201 | 36.319 | 43.326 | 41.442 | 0.00 | 0.00 |
| ATOM | 3063 | HA2 | GLY | X | 201 | 36.029 | 44.374 | 41.520 | 0.00 | 0.00 |
| ATOM | 3064 | HA3 | GLY | X | 201 | 36.174 | 42.869 | 40.463 | 0.00 | 0.00 |
| ATOM | 3065 | C   | GLY | X | 201 | 35.622 | 42.590 | 42.475 | 0.00 | 0.00 |
| ATOM | 3066 | O   | GLY | X | 201 | 34.662 | 43.045 | 43.088 | 0.00 | 0.00 |
| ATOM | 3067 | N   | ALA | X | 202 | 36.219 | 41.478 | 42.925 | 0.00 | 0.00 |
| ATOM | 3068 | H   | ALA | X | 202 | 37.147 | 41.279 | 42.578 | 0.00 | 0.00 |
| ATOM | 3069 | CA  | ALA | X | 202 | 35.684 | 40.752 | 44.027 | 0.00 | 0.00 |
| ATOM | 3070 | HA  | ALA | X | 202 | 34.610 | 40.654 | 43.869 | 0.00 | 0.00 |
| ATOM | 3071 | CB  | ALA | X | 202 | 36.249 | 39.342 | 44.126 | 0.00 | 0.00 |
| ATOM | 3072 | HB1 | ALA | X | 202 | 36.043 | 38.781 | 43.215 | 0.00 | 0.00 |
| ATOM | 3073 | HB2 | ALA | X | 202 | 35.947 | 38.821 | 45.035 | 0.00 | 0.00 |
| ATOM | 3074 | HB3 | ALA | X | 202 | 37.325 | 39.494 | 44.211 | 0.00 | 0.00 |
| ATOM | 3075 | C   | ALA | X | 202 | 35.743 | 41.431 | 45.363 | 0.00 | 0.00 |
| ATOM | 3076 | O   | ALA | X | 202 | 34.931 | 41.224 | 46.230 | 0.00 | 0.00 |
| ATOM | 3077 | N   | ALA | X | 203 | 36.796 | 42.214 | 45.558 | 0.00 | 0.00 |
| ATOM | 3078 | H   | ALA | X | 203 | 37.509 | 42.230 | 44.843 | 0.00 | 0.00 |
| ATOM | 3079 | CA  | ALA | X | 203 | 36.858 | 43.140 | 46.673 | 0.00 | 0.00 |
| ATOM | 3080 | HA  | ALA | X | 203 | 36.578 | 42.513 | 47.519 | 0.00 | 0.00 |
| ATOM | 3081 | CB  | ALA | X | 203 | 38.226 | 43.778 | 46.761 | 0.00 | 0.00 |
| ATOM | 3082 | HB1 | ALA | X | 203 | 38.364 | 44.391 | 45.870 | 0.00 | 0.00 |
| ATOM | 3083 | HB2 | ALA | X | 203 | 38.895 | 42.923 | 46.855 | 0.00 | 0.00 |
| ATOM | 3084 | HB3 | ALA | X | 203 | 38.193 | 44.429 | 47.635 | 0.00 | 0.00 |
| ATOM | 3085 | C   | ALA | X | 203 | 35.782 | 44.240 | 46.509 | 0.00 | 0.00 |
| ATOM | 3086 | O   | ALA | X | 203 | 34.932 | 44.461 | 47.375 | 0.00 | 0.00 |

|      |      |      |     |   |     |        |        |        |      |      |
|------|------|------|-----|---|-----|--------|--------|--------|------|------|
| ATOM | 3087 | N    | SER | X | 204 | 35.668 | 44.925 | 45.331 | 0.00 | 0.00 |
| ATOM | 3088 | H    | SER | X | 204 | 36.379 | 44.734 | 44.640 | 0.00 | 0.00 |
| ATOM | 3089 | CA   | SER | X | 204 | 34.741 | 45.985 | 44.995 | 0.00 | 0.00 |
| ATOM | 3090 | HA   | SER | X | 204 | 34.872 | 46.788 | 45.720 | 0.00 | 0.00 |
| ATOM | 3091 | CB   | SER | X | 204 | 34.976 | 46.596 | 43.573 | 0.00 | 0.00 |
| ATOM | 3092 | HB2  | SER | X | 204 | 34.816 | 45.913 | 42.739 | 0.00 | 0.00 |
| ATOM | 3093 | HB3  | SER | X | 204 | 34.198 | 47.326 | 43.351 | 0.00 | 0.00 |
| ATOM | 3094 | OG   | SER | X | 204 | 36.180 | 47.302 | 43.439 | 0.00 | 0.00 |
| ATOM | 3095 | HG   | SER | X | 204 | 36.819 | 46.701 | 43.049 | 0.00 | 0.00 |
| ATOM | 3096 | C    | SER | X | 204 | 33.289 | 45.628 | 45.198 | 0.00 | 0.00 |
| ATOM | 3097 | O    | SER | X | 204 | 32.543 | 46.412 | 45.744 | 0.00 | 0.00 |
| ATOM | 3098 | N    | VAL | X | 205 | 32.866 | 44.501 | 44.723 | 0.00 | 0.00 |
| ATOM | 3099 | H    | VAL | X | 205 | 33.606 | 43.952 | 44.310 | 0.00 | 0.00 |
| ATOM | 3100 | CA   | VAL | X | 205 | 31.472 | 43.988 | 44.855 | 0.00 | 0.00 |
| ATOM | 3101 | HA   | VAL | X | 205 | 30.721 | 44.696 | 44.503 | 0.00 | 0.00 |
| ATOM | 3102 | CB   | VAL | X | 205 | 31.301 | 42.783 | 43.967 | 0.00 | 0.00 |
| ATOM | 3103 | HB   | VAL | X | 205 | 32.081 | 42.036 | 44.112 | 0.00 | 0.00 |
| ATOM | 3104 | CG1  | VAL | X | 205 | 30.008 | 42.049 | 44.258 | 0.00 | 0.00 |
| ATOM | 3105 | HG11 | VAL | X | 205 | 29.197 | 42.770 | 44.364 | 0.00 | 0.00 |
| ATOM | 3106 | HG12 | VAL | X | 205 | 29.790 | 41.255 | 43.544 | 0.00 | 0.00 |
| ATOM | 3107 | HG13 | VAL | X | 205 | 30.162 | 41.637 | 45.255 | 0.00 | 0.00 |
| ATOM | 3108 | CG2  | VAL | X | 205 | 31.271 | 43.353 | 42.548 | 0.00 | 0.00 |
| ATOM | 3109 | HG21 | VAL | X | 205 | 30.600 | 44.204 | 42.430 | 0.00 | 0.00 |
| ATOM | 3110 | HG22 | VAL | X | 205 | 31.017 | 42.596 | 41.806 | 0.00 | 0.00 |
| ATOM | 3111 | HG23 | VAL | X | 205 | 32.271 | 43.656 | 42.236 | 0.00 | 0.00 |
| ATOM | 3112 | C    | VAL | X | 205 | 31.150 | 43.766 | 46.301 | 0.00 | 0.00 |
| ATOM | 3113 | O    | VAL | X | 205 | 29.979 | 43.862 | 46.703 | 0.00 | 0.00 |
| ATOM | 3114 | N    | GLY | X | 206 | 32.215 | 43.408 | 47.071 | 0.00 | 0.00 |
| ATOM | 3115 | H    | GLY | X | 206 | 33.120 | 43.551 | 46.646 | 0.00 | 0.00 |
| ATOM | 3116 | CA   | GLY | X | 206 | 32.159 | 43.322 | 48.530 | 0.00 | 0.00 |
| ATOM | 3117 | HA2  | GLY | X | 206 | 31.313 | 42.668 | 48.741 | 0.00 | 0.00 |
| ATOM | 3118 | HA3  | GLY | X | 206 | 33.074 | 42.996 | 49.025 | 0.00 | 0.00 |
| ATOM | 3119 | C    | GLY | X | 206 | 31.997 | 44.689 | 49.192 | 0.00 | 0.00 |
| ATOM | 3120 | O    | GLY | X | 206 | 31.371 | 44.859 | 50.232 | 0.00 | 0.00 |
| ATOM | 3121 | N    | MET | X | 207 | 32.620 | 45.765 | 48.617 | 0.00 | 0.00 |
| ATOM | 3122 | H    | MET | X | 207 | 33.448 | 45.609 | 48.060 | 0.00 | 0.00 |
| ATOM | 3123 | CA   | MET | X | 207 | 32.363 | 47.183 | 49.032 | 0.00 | 0.00 |
| ATOM | 3124 | HA   | MET | X | 207 | 32.564 | 47.262 | 50.100 | 0.00 | 0.00 |
| ATOM | 3125 | CB   | MET | X | 207 | 33.271 | 48.120 | 48.291 | 0.00 | 0.00 |
| ATOM | 3126 | HB2  | MET | X | 207 | 33.116 | 48.118 | 47.212 | 0.00 | 0.00 |
| ATOM | 3127 | HB3  | MET | X | 207 | 33.080 | 49.147 | 48.604 | 0.00 | 0.00 |
| ATOM | 3128 | CG   | MET | X | 207 | 34.810 | 47.913 | 48.506 | 0.00 | 0.00 |
| ATOM | 3129 | HG2  | MET | X | 207 | 35.136 | 46.968 | 48.070 | 0.00 | 0.00 |
| ATOM | 3130 | HG3  | MET | X | 207 | 35.410 | 48.711 | 48.067 | 0.00 | 0.00 |
| ATOM | 3131 | SD   | MET | X | 207 | 35.332 | 47.717 | 50.205 | 0.00 | 0.00 |
| ATOM | 3132 | CE   | MET | X | 207 | 37.105 | 47.675 | 50.008 | 0.00 | 0.00 |
| ATOM | 3133 | HE1  | MET | X | 207 | 37.256 | 46.753 | 49.446 | 0.00 | 0.00 |
| ATOM | 3134 | HE2  | MET | X | 207 | 37.299 | 48.517 | 49.344 | 0.00 | 0.00 |
| ATOM | 3135 | HE3  | MET | X | 207 | 37.648 | 47.736 | 50.951 | 0.00 | 0.00 |
| ATOM | 3136 | C    | MET | X | 207 | 30.971 | 47.575 | 48.834 | 0.00 | 0.00 |
| ATOM | 3137 | O    | MET | X | 207 | 30.388 | 48.305 | 49.672 | 0.00 | 0.00 |
| ATOM | 3138 | N    | HIE | X | 208 | 30.234 | 47.181 | 47.800 | 0.00 | 0.00 |
| ATOM | 3139 | H    | HIE | X | 208 | 30.731 | 46.633 | 47.113 | 0.00 | 0.00 |
| ATOM | 3140 | CA   | HIE | X | 208 | 28.859 | 47.442 | 47.420 | 0.00 | 0.00 |
| ATOM | 3141 | HA   | HIE | X | 208 | 28.758 | 48.510 | 47.618 | 0.00 | 0.00 |
| ATOM | 3142 | CB   | HIE | X | 208 | 28.715 | 47.203 | 45.969 | 0.00 | 0.00 |
| ATOM | 3143 | HB2  | HIE | X | 208 | 28.961 | 46.180 | 45.683 | 0.00 | 0.00 |
| ATOM | 3144 | HB3  | HIE | X | 208 | 27.694 | 47.397 | 45.640 | 0.00 | 0.00 |
| ATOM | 3145 | CG   | HIE | X | 208 | 29.511 | 48.137 | 45.074 | 0.00 | 0.00 |
| ATOM | 3146 | ND1  | HIE | X | 208 | 29.759 | 49.506 | 45.377 | 0.00 | 0.00 |
| ATOM | 3147 | CE1  | HIE | X | 208 | 30.405 | 49.914 | 44.311 | 0.00 | 0.00 |
| ATOM | 3148 | HE1  | HIE | X | 208 | 30.881 | 50.876 | 44.189 | 0.00 | 0.00 |
| ATOM | 3149 | NE2  | HIE | X | 208 | 30.649 | 48.938 | 43.404 | 0.00 | 0.00 |
| ATOM | 3150 | HE2  | HIE | X | 208 | 31.332 | 49.067 | 42.672 | 0.00 | 0.00 |
| ATOM | 3151 | CD2  | HIE | X | 208 | 29.973 | 47.811 | 43.846 | 0.00 | 0.00 |
| ATOM | 3152 | HD2  | HIE | X | 208 | 29.926 | 46.824 | 43.411 | 0.00 | 0.00 |
| ATOM | 3153 | C    | HIE | X | 208 | 27.774 | 46.697 | 48.329 | 0.00 | 0.00 |

|      |      |      |     |   |     |        |        |        |      |      |
|------|------|------|-----|---|-----|--------|--------|--------|------|------|
| ATOM | 3154 | O    | HIE | X | 208 | 26.666 | 47.234 | 48.674 | 0.00 | 0.00 |
| ATOM | 3155 | N    | LEU | X | 209 | 28.191 | 45.485 | 48.720 | 0.00 | 0.00 |
| ATOM | 3156 | H    | LEU | X | 209 | 29.146 | 45.268 | 48.475 | 0.00 | 0.00 |
| ATOM | 3157 | CA   | LEU | X | 209 | 27.522 | 44.725 | 49.701 | 0.00 | 0.00 |
| ATOM | 3158 | HA   | LEU | X | 209 | 26.456 | 44.592 | 49.518 | 0.00 | 0.00 |
| ATOM | 3159 | CB   | LEU | X | 209 | 28.191 | 43.301 | 49.774 | 0.00 | 0.00 |
| ATOM | 3160 | HB2  | LEU | X | 209 | 28.256 | 42.837 | 48.789 | 0.00 | 0.00 |
| ATOM | 3161 | HB3  | LEU | X | 209 | 29.207 | 43.457 | 50.136 | 0.00 | 0.00 |
| ATOM | 3162 | CG   | LEU | X | 209 | 27.451 | 42.341 | 50.625 | 0.00 | 0.00 |
| ATOM | 3163 | HG   | LEU | X | 209 | 27.232 | 42.883 | 51.546 | 0.00 | 0.00 |
| ATOM | 3164 | CD1  | LEU | X | 209 | 26.117 | 41.881 | 50.051 | 0.00 | 0.00 |
| ATOM | 3165 | HD11 | LEU | X | 209 | 26.101 | 41.353 | 49.098 | 0.00 | 0.00 |
| ATOM | 3166 | HD12 | LEU | X | 209 | 25.358 | 42.660 | 49.983 | 0.00 | 0.00 |
| ATOM | 3167 | HD13 | LEU | X | 209 | 25.602 | 41.266 | 50.790 | 0.00 | 0.00 |
| ATOM | 3168 | CD2  | LEU | X | 209 | 28.243 | 41.063 | 50.839 | 0.00 | 0.00 |
| ATOM | 3169 | HD21 | LEU | X | 209 | 29.213 | 41.169 | 51.324 | 0.00 | 0.00 |
| ATOM | 3170 | HD22 | LEU | X | 209 | 27.649 | 40.366 | 51.430 | 0.00 | 0.00 |
| ATOM | 3171 | HD23 | LEU | X | 209 | 28.438 | 40.542 | 49.901 | 0.00 | 0.00 |
| ATOM | 3172 | C    | LEU | X | 209 | 27.646 | 45.429 | 51.122 | 0.00 | 0.00 |
| ATOM | 3173 | O    | LEU | X | 209 | 26.644 | 45.471 | 51.841 | 0.00 | 0.00 |
| ATOM | 3174 | N    | LEU | X | 210 | 28.845 | 45.805 | 51.499 | 0.00 | 0.00 |
| ATOM | 3175 | H    | LEU | X | 210 | 29.633 | 45.558 | 50.918 | 0.00 | 0.00 |
| ATOM | 3176 | CA   | LEU | X | 210 | 29.087 | 46.527 | 52.778 | 0.00 | 0.00 |
| ATOM | 3177 | HA   | LEU | X | 210 | 28.589 | 45.865 | 53.487 | 0.00 | 0.00 |
| ATOM | 3178 | CB   | LEU | X | 210 | 30.564 | 46.443 | 53.121 | 0.00 | 0.00 |
| ATOM | 3179 | HB2  | LEU | X | 210 | 30.938 | 45.442 | 52.907 | 0.00 | 0.00 |
| ATOM | 3180 | HB3  | LEU | X | 210 | 31.028 | 47.159 | 52.443 | 0.00 | 0.00 |
| ATOM | 3181 | CG   | LEU | X | 210 | 30.872 | 46.807 | 54.616 | 0.00 | 0.00 |
| ATOM | 3182 | HG   | LEU | X | 210 | 30.470 | 47.803 | 54.803 | 0.00 | 0.00 |
| ATOM | 3183 | CD1  | LEU | X | 210 | 30.119 | 45.882 | 55.643 | 0.00 | 0.00 |
| ATOM | 3184 | HD11 | LEU | X | 210 | 30.452 | 44.860 | 55.465 | 0.00 | 0.00 |
| ATOM | 3185 | HD12 | LEU | X | 210 | 29.047 | 46.015 | 55.494 | 0.00 | 0.00 |
| ATOM | 3186 | HD13 | LEU | X | 210 | 30.430 | 45.974 | 56.684 | 0.00 | 0.00 |
| ATOM | 3187 | CD2  | LEU | X | 210 | 32.390 | 46.605 | 54.911 | 0.00 | 0.00 |
| ATOM | 3188 | HD21 | LEU | X | 210 | 32.793 | 45.641 | 54.603 | 0.00 | 0.00 |
| ATOM | 3189 | HD22 | LEU | X | 210 | 32.917 | 47.288 | 54.245 | 0.00 | 0.00 |
| ATOM | 3190 | HD23 | LEU | X | 210 | 32.678 | 46.877 | 55.927 | 0.00 | 0.00 |
| ATOM | 3191 | C    | LEU | X | 210 | 28.384 | 47.934 | 52.717 | 0.00 | 0.00 |
| ATOM | 3192 | O    | LEU | X | 210 | 27.439 | 48.193 | 53.504 | 0.00 | 0.00 |
| ATOM | 3193 | N    | SER | X | 211 | 28.852 | 48.831 | 51.824 | 0.00 | 0.00 |
| ATOM | 3194 | H    | SER | X | 211 | 29.558 | 48.581 | 51.146 | 0.00 | 0.00 |
| ATOM | 3195 | CA   | SER | X | 211 | 28.329 | 50.234 | 51.789 | 0.00 | 0.00 |
| ATOM | 3196 | HA   | SER | X | 211 | 28.546 | 50.574 | 52.802 | 0.00 | 0.00 |
| ATOM | 3197 | CB   | SER | X | 211 | 29.192 | 50.944 | 50.809 | 0.00 | 0.00 |
| ATOM | 3198 | HB2  | SER | X | 211 | 30.227 | 50.695 | 51.041 | 0.00 | 0.00 |
| ATOM | 3199 | HB3  | SER | X | 211 | 29.000 | 50.551 | 49.810 | 0.00 | 0.00 |
| ATOM | 3200 | OG   | SER | X | 211 | 28.986 | 52.386 | 50.826 | 0.00 | 0.00 |
| ATOM | 3201 | HG   | SER | X | 211 | 29.308 | 52.749 | 51.655 | 0.00 | 0.00 |
| ATOM | 3202 | C    | SER | X | 211 | 26.839 | 50.265 | 51.426 | 0.00 | 0.00 |
| ATOM | 3203 | O    | SER | X | 211 | 26.520 | 49.973 | 50.286 | 0.00 | 0.00 |
| ATOM | 3204 | N    | PRO | X | 212 | 26.019 | 50.574 | 52.449 | 0.00 | 0.00 |
| ATOM | 3205 | CD   | PRO | X | 212 | 26.420 | 51.172 | 53.730 | 0.00 | 0.00 |
| ATOM | 3206 | HD2  | PRO | X | 212 | 27.009 | 52.075 | 53.576 | 0.00 | 0.00 |
| ATOM | 3207 | HD3  | PRO | X | 212 | 27.042 | 50.629 | 54.442 | 0.00 | 0.00 |
| ATOM | 3208 | CG   | PRO | X | 212 | 25.185 | 51.594 | 54.491 | 0.00 | 0.00 |
| ATOM | 3209 | HG2  | PRO | X | 212 | 25.132 | 52.681 | 54.434 | 0.00 | 0.00 |
| ATOM | 3210 | HG3  | PRO | X | 212 | 25.274 | 51.255 | 55.523 | 0.00 | 0.00 |
| ATOM | 3211 | CB   | PRO | X | 212 | 24.024 | 50.966 | 53.772 | 0.00 | 0.00 |
| ATOM | 3212 | HB2  | PRO | X | 212 | 23.145 | 51.597 | 53.643 | 0.00 | 0.00 |
| ATOM | 3213 | HB3  | PRO | X | 212 | 23.669 | 50.149 | 54.401 | 0.00 | 0.00 |
| ATOM | 3214 | CA   | PRO | X | 212 | 24.533 | 50.491 | 52.385 | 0.00 | 0.00 |
| ATOM | 3215 | HA   | PRO | X | 212 | 24.287 | 49.430 | 52.416 | 0.00 | 0.00 |
| ATOM | 3216 | C    | PRO | X | 212 | 23.914 | 51.293 | 51.214 | 0.00 | 0.00 |
| ATOM | 3217 | O    | PRO | X | 212 | 23.002 | 50.697 | 50.670 | 0.00 | 0.00 |
| ATOM | 3218 | N    | PRO | X | 213 | 24.315 | 52.538 | 50.839 | 0.00 | 0.00 |
| ATOM | 3219 | CD   | PRO | X | 213 | 25.249 | 53.449 | 51.457 | 0.00 | 0.00 |
| ATOM | 3220 | HD2  | PRO | X | 213 | 26.281 | 53.145 | 51.287 | 0.00 | 0.00 |

|      |      |      |     |   |     |        |        |        |      |      |
|------|------|------|-----|---|-----|--------|--------|--------|------|------|
| ATOM | 3221 | HD3  | PRO | X | 213 | 24.886 | 53.422 | 52.485 | 0.00 | 0.00 |
| ATOM | 3222 | CG   | PRO | X | 213 | 24.963 | 54.847 | 50.858 | 0.00 | 0.00 |
| ATOM | 3223 | HG2  | PRO | X | 213 | 25.914 | 55.379 | 50.853 | 0.00 | 0.00 |
| ATOM | 3224 | HG3  | PRO | X | 213 | 24.122 | 55.402 | 51.273 | 0.00 | 0.00 |
| ATOM | 3225 | CB   | PRO | X | 213 | 24.539 | 54.539 | 49.488 | 0.00 | 0.00 |
| ATOM | 3226 | HB2  | PRO | X | 213 | 25.347 | 54.386 | 48.772 | 0.00 | 0.00 |
| ATOM | 3227 | HB3  | PRO | X | 213 | 23.894 | 55.307 | 49.060 | 0.00 | 0.00 |
| ATOM | 3228 | CA   | PRO | X | 213 | 23.733 | 53.218 | 49.691 | 0.00 | 0.00 |
| ATOM | 3229 | HA   | PRO | X | 213 | 22.675 | 53.440 | 49.831 | 0.00 | 0.00 |
| ATOM | 3230 | C    | PRO | X | 213 | 23.924 | 52.406 | 48.330 | 0.00 | 0.00 |
| ATOM | 3231 | O    | PRO | X | 213 | 23.111 | 52.522 | 47.417 | 0.00 | 0.00 |
| ATOM | 3232 | N    | SER | X | 214 | 24.905 | 51.451 | 48.270 | 0.00 | 0.00 |
| ATOM | 3233 | H    | SER | X | 214 | 25.483 | 51.279 | 49.080 | 0.00 | 0.00 |
| ATOM | 3234 | CA   | SER | X | 214 | 25.108 | 50.422 | 47.248 | 0.00 | 0.00 |
| ATOM | 3235 | HA   | SER | X | 214 | 24.781 | 50.867 | 46.308 | 0.00 | 0.00 |
| ATOM | 3236 | CB   | SER | X | 214 | 26.560 | 49.858 | 47.077 | 0.00 | 0.00 |
| ATOM | 3237 | HB2  | SER | X | 214 | 26.954 | 49.459 | 48.011 | 0.00 | 0.00 |
| ATOM | 3238 | HB3  | SER | X | 214 | 26.419 | 48.992 | 46.431 | 0.00 | 0.00 |
| ATOM | 3239 | OG   | SER | X | 214 | 27.373 | 50.798 | 46.517 | 0.00 | 0.00 |
| ATOM | 3240 | HG   | SER | X | 214 | 28.072 | 50.388 | 46.002 | 0.00 | 0.00 |
| ATOM | 3241 | C    | SER | X | 214 | 24.267 | 49.199 | 47.592 | 0.00 | 0.00 |
| ATOM | 3242 | O    | SER | X | 214 | 23.893 | 48.414 | 46.689 | 0.00 | 0.00 |
| ATOM | 3243 | N    | ARG | X | 215 | 24.055 | 48.855 | 48.818 | 0.00 | 0.00 |
| ATOM | 3244 | H    | ARG | X | 215 | 24.394 | 49.501 | 49.517 | 0.00 | 0.00 |
| ATOM | 3245 | CA   | ARG | X | 215 | 23.242 | 47.698 | 49.338 | 0.00 | 0.00 |
| ATOM | 3246 | HA   | ARG | X | 215 | 23.564 | 46.757 | 48.894 | 0.00 | 0.00 |
| ATOM | 3247 | CB   | ARG | X | 215 | 23.327 | 47.463 | 50.860 | 0.00 | 0.00 |
| ATOM | 3248 | HB2  | ARG | X | 215 | 24.367 | 47.578 | 51.163 | 0.00 | 0.00 |
| ATOM | 3249 | HB3  | ARG | X | 215 | 22.781 | 48.247 | 51.385 | 0.00 | 0.00 |
| ATOM | 3250 | CG   | ARG | X | 215 | 22.675 | 46.103 | 51.240 | 0.00 | 0.00 |
| ATOM | 3251 | HG2  | ARG | X | 215 | 21.599 | 46.273 | 51.211 | 0.00 | 0.00 |
| ATOM | 3252 | HG3  | ARG | X | 215 | 22.988 | 45.312 | 50.559 | 0.00 | 0.00 |
| ATOM | 3253 | CD   | ARG | X | 215 | 23.177 | 45.638 | 52.592 | 0.00 | 0.00 |
| ATOM | 3254 | HD2  | ARG | X | 215 | 24.155 | 45.199 | 52.397 | 0.00 | 0.00 |
| ATOM | 3255 | HD3  | ARG | X | 215 | 23.368 | 46.428 | 53.318 | 0.00 | 0.00 |
| ATOM | 3256 | NE   | ARG | X | 215 | 22.240 | 44.687 | 53.179 | 0.00 | 0.00 |
| ATOM | 3257 | HE   | ARG | X | 215 | 21.337 | 44.568 | 52.741 | 0.00 | 0.00 |
| ATOM | 3258 | CZ   | ARG | X | 215 | 22.290 | 44.157 | 54.382 | 0.00 | 0.00 |
| ATOM | 3259 | NH1  | ARG | X | 215 | 23.482 | 44.035 | 54.969 | 0.00 | 0.00 |
| ATOM | 3260 | HH11 | ARG | X | 215 | 24.300 | 44.407 | 54.508 | 0.00 | 0.00 |
| ATOM | 3261 | HH12 | ARG | X | 215 | 23.559 | 43.654 | 55.902 | 0.00 | 0.00 |
| ATOM | 3262 | NH2  | ARG | X | 215 | 21.190 | 43.805 | 54.980 | 0.00 | 0.00 |
| ATOM | 3263 | HH21 | ARG | X | 215 | 20.304 | 43.836 | 54.496 | 0.00 | 0.00 |
| ATOM | 3264 | HH22 | ARG | X | 215 | 21.125 | 43.592 | 55.965 | 0.00 | 0.00 |
| ATOM | 3265 | C    | ARG | X | 215 | 21.813 | 47.816 | 48.826 | 0.00 | 0.00 |
| ATOM | 3266 | O    | ARG | X | 215 | 21.112 | 46.820 | 48.596 | 0.00 | 0.00 |
| ATOM | 3267 | N    | GLY | X | 216 | 21.382 | 49.078 | 48.619 | 0.00 | 0.00 |
| ATOM | 3268 | H    | GLY | X | 216 | 22.041 | 49.747 | 48.992 | 0.00 | 0.00 |
| ATOM | 3269 | CA   | GLY | X | 216 | 20.122 | 49.533 | 48.064 | 0.00 | 0.00 |
| ATOM | 3270 | HA2  | GLY | X | 216 | 19.232 | 49.096 | 48.517 | 0.00 | 0.00 |
| ATOM | 3271 | HA3  | GLY | X | 216 | 20.007 | 50.604 | 48.236 | 0.00 | 0.00 |
| ATOM | 3272 | C    | GLY | X | 216 | 19.984 | 49.333 | 46.519 | 0.00 | 0.00 |
| ATOM | 3273 | O    | GLY | X | 216 | 18.928 | 49.667 | 45.988 | 0.00 | 0.00 |
| ATOM | 3274 | N    | LEU | X | 217 | 21.060 | 48.842 | 45.794 | 0.00 | 0.00 |
| ATOM | 3275 | H    | LEU | X | 217 | 21.870 | 48.517 | 46.303 | 0.00 | 0.00 |
| ATOM | 3276 | CA   | LEU | X | 217 | 21.057 | 48.877 | 44.349 | 0.00 | 0.00 |
| ATOM | 3277 | HA   | LEU | X | 217 | 20.151 | 49.411 | 44.060 | 0.00 | 0.00 |
| ATOM | 3278 | CB   | LEU | X | 217 | 22.201 | 49.718 | 43.888 | 0.00 | 0.00 |
| ATOM | 3279 | HB2  | LEU | X | 217 | 23.163 | 49.226 | 44.031 | 0.00 | 0.00 |
| ATOM | 3280 | HB3  | LEU | X | 217 | 22.102 | 49.879 | 42.815 | 0.00 | 0.00 |
| ATOM | 3281 | CG   | LEU | X | 217 | 22.261 | 51.197 | 44.428 | 0.00 | 0.00 |
| ATOM | 3282 | HG   | LEU | X | 217 | 22.237 | 51.124 | 45.515 | 0.00 | 0.00 |
| ATOM | 3283 | CD1  | LEU | X | 217 | 23.629 | 51.812 | 44.083 | 0.00 | 0.00 |
| ATOM | 3284 | HD11 | LEU | X | 217 | 23.797 | 52.599 | 44.818 | 0.00 | 0.00 |
| ATOM | 3285 | HD12 | LEU | X | 217 | 23.631 | 52.069 | 43.024 | 0.00 | 0.00 |
| ATOM | 3286 | HD13 | LEU | X | 217 | 24.425 | 51.073 | 44.172 | 0.00 | 0.00 |
| ATOM | 3287 | CD2  | LEU | X | 217 | 21.165 | 52.084 | 43.939 | 0.00 | 0.00 |

|      |      |      |     |   |     |        |        |        |      |      |
|------|------|------|-----|---|-----|--------|--------|--------|------|------|
| ATOM | 3288 | HD21 | LEU | X | 217 | 21.032 | 52.262 | 42.872 | 0.00 | 0.00 |
| ATOM | 3289 | HD22 | LEU | X | 217 | 20.255 | 51.578 | 44.265 | 0.00 | 0.00 |
| ATOM | 3290 | HD23 | LEU | X | 217 | 21.209 | 52.992 | 44.540 | 0.00 | 0.00 |
| ATOM | 3291 | C    | LEU | X | 217 | 20.993 | 47.486 | 43.630 | 0.00 | 0.00 |
| ATOM | 3292 | O    | LEU | X | 217 | 20.636 | 47.449 | 42.485 | 0.00 | 0.00 |
| ATOM | 3293 | N    | PHE | X | 218 | 21.371 | 46.464 | 44.393 | 0.00 | 0.00 |
| ATOM | 3294 | H    | PHE | X | 218 | 21.350 | 46.526 | 45.401 | 0.00 | 0.00 |
| ATOM | 3295 | CA   | PHE | X | 218 | 21.345 | 45.000 | 43.874 | 0.00 | 0.00 |
| ATOM | 3296 | HA   | PHE | X | 218 | 20.609 | 44.989 | 43.070 | 0.00 | 0.00 |
| ATOM | 3297 | CB   | PHE | X | 218 | 22.749 | 44.730 | 43.367 | 0.00 | 0.00 |
| ATOM | 3298 | HB2  | PHE | X | 218 | 22.760 | 43.876 | 42.690 | 0.00 | 0.00 |
| ATOM | 3299 | HB3  | PHE | X | 218 | 23.048 | 45.592 | 42.771 | 0.00 | 0.00 |
| ATOM | 3300 | CG   | PHE | X | 218 | 23.709 | 44.549 | 44.495 | 0.00 | 0.00 |
| ATOM | 3301 | CD1  | PHE | X | 218 | 24.215 | 45.694 | 45.073 | 0.00 | 0.00 |
| ATOM | 3302 | HD1  | PHE | X | 218 | 23.883 | 46.688 | 44.813 | 0.00 | 0.00 |
| ATOM | 3303 | CE1  | PHE | X | 218 | 25.215 | 45.517 | 46.124 | 0.00 | 0.00 |
| ATOM | 3304 | HE1  | PHE | X | 218 | 25.578 | 46.464 | 46.494 | 0.00 | 0.00 |
| ATOM | 3305 | CZ   | PHE | X | 218 | 25.652 | 44.296 | 46.554 | 0.00 | 0.00 |
| ATOM | 3306 | HZ   | PHE | X | 218 | 26.204 | 44.128 | 47.467 | 0.00 | 0.00 |
| ATOM | 3307 | CE2  | PHE | X | 218 | 24.991 | 43.192 | 46.040 | 0.00 | 0.00 |
| ATOM | 3308 | HE2  | PHE | X | 218 | 25.200 | 42.188 | 46.379 | 0.00 | 0.00 |
| ATOM | 3309 | CD2  | PHE | X | 218 | 23.992 | 43.285 | 45.049 | 0.00 | 0.00 |
| ATOM | 3310 | HD2  | PHE | X | 218 | 23.567 | 42.400 | 44.600 | 0.00 | 0.00 |
| ATOM | 3311 | C    | PHE | X | 218 | 20.913 | 44.002 | 44.987 | 0.00 | 0.00 |
| ATOM | 3312 | O    | PHE | X | 218 | 20.626 | 44.439 | 46.084 | 0.00 | 0.00 |
| ATOM | 3313 | N    | HIE | X | 219 | 20.876 | 42.727 | 44.691 | 0.00 | 0.00 |
| ATOM | 3314 | H    | HIE | X | 219 | 21.175 | 42.481 | 43.758 | 0.00 | 0.00 |
| ATOM | 3315 | CA   | HIE | X | 219 | 20.180 | 41.670 | 45.385 | 0.00 | 0.00 |
| ATOM | 3316 | HA   | HIE | X | 219 | 19.772 | 41.950 | 46.357 | 0.00 | 0.00 |
| ATOM | 3317 | CB   | HIE | X | 219 | 19.031 | 41.126 | 44.437 | 0.00 | 0.00 |
| ATOM | 3318 | HB2  | HIE | X | 219 | 19.485 | 40.580 | 43.610 | 0.00 | 0.00 |
| ATOM | 3319 | HB3  | HIE | X | 219 | 18.314 | 40.569 | 45.039 | 0.00 | 0.00 |
| ATOM | 3320 | CG   | HIE | X | 219 | 18.192 | 42.298 | 43.852 | 0.00 | 0.00 |
| ATOM | 3321 | ND1  | HIE | X | 219 | 18.377 | 42.703 | 42.536 | 0.00 | 0.00 |
| ATOM | 3322 | CE1  | HIE | X | 219 | 17.657 | 43.763 | 42.328 | 0.00 | 0.00 |
| ATOM | 3323 | HE1  | HIE | X | 219 | 17.700 | 44.396 | 41.454 | 0.00 | 0.00 |
| ATOM | 3324 | NE2  | HIE | X | 219 | 16.818 | 43.850 | 43.404 | 0.00 | 0.00 |
| ATOM | 3325 | HE2  | HIE | X | 219 | 15.982 | 44.417 | 43.382 | 0.00 | 0.00 |
| ATOM | 3326 | CD2  | HIE | X | 219 | 17.214 | 43.021 | 44.386 | 0.00 | 0.00 |
| ATOM | 3327 | HD2  | HIE | X | 219 | 16.937 | 43.084 | 45.428 | 0.00 | 0.00 |
| ATOM | 3328 | C    | HIE | X | 219 | 21.030 | 40.424 | 45.751 | 0.00 | 0.00 |
| ATOM | 3329 | O    | HIE | X | 219 | 20.654 | 39.755 | 46.712 | 0.00 | 0.00 |
| ATOM | 3330 | N    | ARG | X | 220 | 22.169 | 40.177 | 45.144 | 0.00 | 0.00 |
| ATOM | 3331 | H    | ARG | X | 220 | 22.497 | 40.912 | 44.534 | 0.00 | 0.00 |
| ATOM | 3332 | CA   | ARG | X | 220 | 23.061 | 39.098 | 45.398 | 0.00 | 0.00 |
| ATOM | 3333 | HA   | ARG | X | 220 | 23.107 | 38.910 | 46.471 | 0.00 | 0.00 |
| ATOM | 3334 | CB   | ARG | X | 220 | 22.697 | 37.790 | 44.711 | 0.00 | 0.00 |
| ATOM | 3335 | HB2  | ARG | X | 220 | 22.837 | 37.874 | 43.634 | 0.00 | 0.00 |
| ATOM | 3336 | HB3  | ARG | X | 220 | 23.388 | 37.051 | 45.118 | 0.00 | 0.00 |
| ATOM | 3337 | CG   | ARG | X | 220 | 21.219 | 37.320 | 44.904 | 0.00 | 0.00 |
| ATOM | 3338 | HG2  | ARG | X | 220 | 21.141 | 36.998 | 45.942 | 0.00 | 0.00 |
| ATOM | 3339 | HG3  | ARG | X | 220 | 20.532 | 38.121 | 44.628 | 0.00 | 0.00 |
| ATOM | 3340 | CD   | ARG | X | 220 | 20.864 | 36.129 | 43.990 | 0.00 | 0.00 |
| ATOM | 3341 | HD2  | ARG | X | 220 | 20.816 | 36.468 | 42.956 | 0.00 | 0.00 |
| ATOM | 3342 | HD3  | ARG | X | 220 | 21.618 | 35.359 | 44.155 | 0.00 | 0.00 |
| ATOM | 3343 | NE   | ARG | X | 220 | 19.538 | 35.623 | 44.430 | 0.00 | 0.00 |
| ATOM | 3344 | HE   | ARG | X | 220 | 19.398 | 35.378 | 45.400 | 0.00 | 0.00 |
| ATOM | 3345 | CZ   | ARG | X | 220 | 18.388 | 35.651 | 43.782 | 0.00 | 0.00 |
| ATOM | 3346 | NH1  | ARG | X | 220 | 18.267 | 35.967 | 42.517 | 0.00 | 0.00 |
| ATOM | 3347 | HH11 | ARG | X | 220 | 19.056 | 36.065 | 41.894 | 0.00 | 0.00 |
| ATOM | 3348 | HH12 | ARG | X | 220 | 17.372 | 35.768 | 42.094 | 0.00 | 0.00 |
| ATOM | 3349 | NH2  | ARG | X | 220 | 17.269 | 35.384 | 44.410 | 0.00 | 0.00 |
| ATOM | 3350 | HH21 | ARG | X | 220 | 17.276 | 35.292 | 45.416 | 0.00 | 0.00 |
| ATOM | 3351 | HH22 | ARG | X | 220 | 16.393 | 35.207 | 43.938 | 0.00 | 0.00 |
| ATOM | 3352 | C    | ARG | X | 220 | 24.534 | 39.494 | 44.959 | 0.00 | 0.00 |
| ATOM | 3353 | O    | ARG | X | 220 | 24.749 | 40.349 | 44.075 | 0.00 | 0.00 |
| ATOM | 3354 | N    | ALA | X | 221 | 25.619 | 38.869 | 45.454 | 0.00 | 0.00 |

|      |      |      |     |   |     |        |        |        |      |      |
|------|------|------|-----|---|-----|--------|--------|--------|------|------|
| ATOM | 3355 | H    | ALA | X | 221 | 25.508 | 38.182 | 46.185 | 0.00 | 0.00 |
| ATOM | 3356 | CA   | ALA | X | 221 | 26.902 | 39.019 | 44.900 | 0.00 | 0.00 |
| ATOM | 3357 | HA   | ALA | X | 221 | 26.920 | 39.648 | 44.010 | 0.00 | 0.00 |
| ATOM | 3358 | CB   | ALA | X | 221 | 27.695 | 39.751 | 46.020 | 0.00 | 0.00 |
| ATOM | 3359 | HB1  | ALA | X | 221 | 28.730 | 39.895 | 45.708 | 0.00 | 0.00 |
| ATOM | 3360 | HB2  | ALA | X | 221 | 27.724 | 39.233 | 46.978 | 0.00 | 0.00 |
| ATOM | 3361 | HB3  | ALA | X | 221 | 27.257 | 40.727 | 46.228 | 0.00 | 0.00 |
| ATOM | 3362 | C    | ALA | X | 221 | 27.543 | 37.642 | 44.574 | 0.00 | 0.00 |
| ATOM | 3363 | O    | ALA | X | 221 | 27.164 | 36.565 | 45.010 | 0.00 | 0.00 |
| ATOM | 3364 | N    | VAL | X | 222 | 28.490 | 37.735 | 43.618 | 0.00 | 0.00 |
| ATOM | 3365 | H    | VAL | X | 222 | 28.660 | 38.640 | 43.204 | 0.00 | 0.00 |
| ATOM | 3366 | CA   | VAL | X | 222 | 29.463 | 36.607 | 43.267 | 0.00 | 0.00 |
| ATOM | 3367 | HA   | VAL | X | 222 | 29.341 | 35.743 | 43.920 | 0.00 | 0.00 |
| ATOM | 3368 | CB   | VAL | X | 222 | 29.272 | 36.104 | 41.852 | 0.00 | 0.00 |
| ATOM | 3369 | HB   | VAL | X | 222 | 29.396 | 36.879 | 41.096 | 0.00 | 0.00 |
| ATOM | 3370 | CG1  | VAL | X | 222 | 30.403 | 35.113 | 41.555 | 0.00 | 0.00 |
| ATOM | 3371 | HG11 | VAL | X | 222 | 30.077 | 34.394 | 40.804 | 0.00 | 0.00 |
| ATOM | 3372 | HG12 | VAL | X | 222 | 31.295 | 35.562 | 41.121 | 0.00 | 0.00 |
| ATOM | 3373 | HG13 | VAL | X | 222 | 30.632 | 34.580 | 42.478 | 0.00 | 0.00 |
| ATOM | 3374 | CG2  | VAL | X | 222 | 28.027 | 35.354 | 41.655 | 0.00 | 0.00 |
| ATOM | 3375 | HG21 | VAL | X | 222 | 27.892 | 34.509 | 42.329 | 0.00 | 0.00 |
| ATOM | 3376 | HG22 | VAL | X | 222 | 27.971 | 34.918 | 40.658 | 0.00 | 0.00 |
| ATOM | 3377 | HG23 | VAL | X | 222 | 27.185 | 36.036 | 41.783 | 0.00 | 0.00 |
| ATOM | 3378 | C    | VAL | X | 222 | 30.920 | 37.102 | 43.386 | 0.00 | 0.00 |
| ATOM | 3379 | O    | VAL | X | 222 | 31.241 | 38.094 | 42.757 | 0.00 | 0.00 |
| ATOM | 3380 | N    | LEU | X | 223 | 31.752 | 36.490 | 44.277 | 0.00 | 0.00 |
| ATOM | 3381 | H    | LEU | X | 223 | 31.382 | 35.762 | 44.872 | 0.00 | 0.00 |
| ATOM | 3382 | CA   | LEU | X | 223 | 33.140 | 36.952 | 44.574 | 0.00 | 0.00 |
| ATOM | 3383 | HA   | LEU | X | 223 | 33.359 | 37.731 | 43.844 | 0.00 | 0.00 |
| ATOM | 3384 | CB   | LEU | X | 223 | 33.281 | 37.470 | 46.027 | 0.00 | 0.00 |
| ATOM | 3385 | HB2  | LEU | X | 223 | 32.854 | 36.710 | 46.680 | 0.00 | 0.00 |
| ATOM | 3386 | HB3  | LEU | X | 223 | 34.330 | 37.350 | 46.297 | 0.00 | 0.00 |
| ATOM | 3387 | CG   | LEU | X | 223 | 32.664 | 38.779 | 46.591 | 0.00 | 0.00 |
| ATOM | 3388 | HG   | LEU | X | 223 | 32.800 | 39.552 | 45.835 | 0.00 | 0.00 |
| ATOM | 3389 | CD1  | LEU | X | 223 | 31.085 | 38.552 | 46.529 | 0.00 | 0.00 |
| ATOM | 3390 | HD11 | LEU | X | 223 | 30.789 | 37.638 | 47.042 | 0.00 | 0.00 |
| ATOM | 3391 | HD12 | LEU | X | 223 | 30.731 | 38.403 | 45.509 | 0.00 | 0.00 |
| ATOM | 3392 | HD13 | LEU | X | 223 | 30.609 | 39.450 | 46.922 | 0.00 | 0.00 |
| ATOM | 3393 | CD2  | LEU | X | 223 | 33.194 | 39.239 | 47.931 | 0.00 | 0.00 |
| ATOM | 3394 | HD21 | LEU | X | 223 | 34.271 | 39.286 | 48.095 | 0.00 | 0.00 |
| ATOM | 3395 | HD22 | LEU | X | 223 | 32.843 | 40.228 | 48.225 | 0.00 | 0.00 |
| ATOM | 3396 | HD23 | LEU | X | 223 | 32.824 | 38.628 | 48.754 | 0.00 | 0.00 |
| ATOM | 3397 | C    | LEU | X | 223 | 34.163 | 35.909 | 44.231 | 0.00 | 0.00 |
| ATOM | 3398 | O    | LEU | X | 223 | 34.070 | 34.799 | 44.849 | 0.00 | 0.00 |
| ATOM | 3399 | N    | GLN | X | 224 | 35.183 | 36.233 | 43.433 | 0.00 | 0.00 |
| ATOM | 3400 | H    | GLN | X | 224 | 35.125 | 37.072 | 42.873 | 0.00 | 0.00 |
| ATOM | 3401 | CA   | GLN | X | 224 | 36.177 | 35.130 | 43.052 | 0.00 | 0.00 |
| ATOM | 3402 | HA   | GLN | X | 224 | 35.986 | 34.285 | 43.714 | 0.00 | 0.00 |
| ATOM | 3403 | CB   | GLN | X | 224 | 35.921 | 34.710 | 41.600 | 0.00 | 0.00 |
| ATOM | 3404 | HB2  | GLN | X | 224 | 36.084 | 35.618 | 41.020 | 0.00 | 0.00 |
| ATOM | 3405 | HB3  | GLN | X | 224 | 36.651 | 33.954 | 41.311 | 0.00 | 0.00 |
| ATOM | 3406 | CG   | GLN | X | 224 | 34.539 | 34.124 | 41.330 | 0.00 | 0.00 |
| ATOM | 3407 | HG2  | GLN | X | 224 | 34.274 | 33.337 | 42.037 | 0.00 | 0.00 |
| ATOM | 3408 | HG3  | GLN | X | 224 | 33.848 | 34.962 | 41.431 | 0.00 | 0.00 |
| ATOM | 3409 | CD   | GLN | X | 224 | 34.527 | 33.613 | 39.913 | 0.00 | 0.00 |
| ATOM | 3410 | OE1  | GLN | X | 224 | 33.511 | 33.618 | 39.296 | 0.00 | 0.00 |
| ATOM | 3411 | NE2  | GLN | X | 224 | 35.540 | 32.942 | 39.337 | 0.00 | 0.00 |
| ATOM | 3412 | HE21 | GLN | X | 224 | 35.343 | 32.406 | 38.503 | 0.00 | 0.00 |
| ATOM | 3413 | HE22 | GLN | X | 224 | 36.446 | 32.911 | 39.781 | 0.00 | 0.00 |
| ATOM | 3414 | C    | GLN | X | 224 | 37.588 | 35.637 | 43.339 | 0.00 | 0.00 |
| ATOM | 3415 | O    | GLN | X | 224 | 37.937 | 36.803 | 43.068 | 0.00 | 0.00 |
| ATOM | 3416 | N    | SER | X | 225 | 38.419 | 34.852 | 44.053 | 0.00 | 0.00 |
| ATOM | 3417 | H    | SER | X | 225 | 38.055 | 33.954 | 44.337 | 0.00 | 0.00 |
| ATOM | 3418 | CA   | SER | X | 225 | 39.820 | 35.234 | 44.282 | 0.00 | 0.00 |
| ATOM | 3419 | HA   | SER | X | 225 | 40.241 | 34.511 | 44.980 | 0.00 | 0.00 |
| ATOM | 3420 | CB   | SER | X | 225 | 40.667 | 35.287 | 42.947 | 0.00 | 0.00 |
| ATOM | 3421 | HB2  | SER | X | 225 | 40.176 | 35.884 | 42.179 | 0.00 | 0.00 |



|      |      |      |     |   |     |        |        |        |      |      |
|------|------|------|-----|---|-----|--------|--------|--------|------|------|
| ATOM | 3422 | HB3  | SER | X | 225 | 41.695 | 35.586 | 43.154 | 0.00 | 0.00 |
| ATOM | 3423 | OG   | SER | X | 225 | 40.758 | 33.979 | 42.431 | 0.00 | 0.00 |
| ATOM | 3424 | HG   | SER | X | 225 | 41.055 | 33.426 | 43.157 | 0.00 | 0.00 |
| ATOM | 3425 | C    | SER | X | 225 | 40.039 | 36.538 | 45.015 | 0.00 | 0.00 |
| ATOM | 3426 | O    | SER | X | 225 | 41.076 | 37.126 | 44.908 | 0.00 | 0.00 |
| ATOM | 3427 | N    | GLY | X | 226 | 39.010 | 37.016 | 45.718 | 0.00 | 0.00 |
| ATOM | 3428 | H    | GLY | X | 226 | 38.143 | 36.504 | 45.646 | 0.00 | 0.00 |
| ATOM | 3429 | CA   | GLY | X | 226 | 39.080 | 38.282 | 46.416 | 0.00 | 0.00 |
| ATOM | 3430 | HA2  | GLY | X | 226 | 40.055 | 38.489 | 46.857 | 0.00 | 0.00 |
| ATOM | 3431 | HA3  | GLY | X | 226 | 39.020 | 39.130 | 45.734 | 0.00 | 0.00 |
| ATOM | 3432 | C    | GLY | X | 226 | 37.941 | 38.536 | 47.476 | 0.00 | 0.00 |
| ATOM | 3433 | O    | GLY | X | 226 | 36.868 | 37.991 | 47.412 | 0.00 | 0.00 |
| ATOM | 3434 | N    | ALA | X | 227 | 38.333 | 39.390 | 48.496 | 0.00 | 0.00 |
| ATOM | 3435 | H    | ALA | X | 227 | 39.181 | 39.937 | 48.466 | 0.00 | 0.00 |
| ATOM | 3436 | CA   | ALA | X | 227 | 37.470 | 39.629 | 49.676 | 0.00 | 0.00 |
| ATOM | 3437 | HA   | ALA | X | 227 | 36.428 | 39.584 | 49.358 | 0.00 | 0.00 |
| ATOM | 3438 | CB   | ALA | X | 227 | 37.875 | 38.583 | 50.763 | 0.00 | 0.00 |
| ATOM | 3439 | HB1  | ALA | X | 227 | 37.244 | 38.542 | 51.651 | 0.00 | 0.00 |
| ATOM | 3440 | HB2  | ALA | X | 227 | 38.853 | 38.818 | 51.184 | 0.00 | 0.00 |
| ATOM | 3441 | HB3  | ALA | X | 227 | 37.843 | 37.533 | 50.470 | 0.00 | 0.00 |
| ATOM | 3442 | C    | ALA | X | 227 | 37.544 | 41.109 | 50.113 | 0.00 | 0.00 |
| ATOM | 3443 | O    | ALA | X | 227 | 38.712 | 41.552 | 50.180 | 0.00 | 0.00 |
| ATOM | 3444 | N    | PRO | X | 228 | 36.522 | 41.895 | 50.494 | 0.00 | 0.00 |
| ATOM | 3445 | CD   | PRO | X | 228 | 35.108 | 41.501 | 50.577 | 0.00 | 0.00 |
| ATOM | 3446 | HD2  | PRO | X | 228 | 35.004 | 40.482 | 50.950 | 0.00 | 0.00 |
| ATOM | 3447 | HD3  | PRO | X | 228 | 34.576 | 41.682 | 49.643 | 0.00 | 0.00 |
| ATOM | 3448 | CG   | PRO | X | 228 | 34.611 | 42.340 | 51.666 | 0.00 | 0.00 |
| ATOM | 3449 | HG2  | PRO | X | 228 | 34.929 | 41.979 | 52.644 | 0.00 | 0.00 |
| ATOM | 3450 | HG3  | PRO | X | 228 | 33.533 | 42.501 | 51.647 | 0.00 | 0.00 |
| ATOM | 3451 | CB   | PRO | X | 228 | 35.288 | 43.713 | 51.352 | 0.00 | 0.00 |
| ATOM | 3452 | HB2  | PRO | X | 228 | 35.249 | 44.397 | 52.200 | 0.00 | 0.00 |
| ATOM | 3453 | HB3  | PRO | X | 228 | 34.779 | 44.176 | 50.506 | 0.00 | 0.00 |
| ATOM | 3454 | CA   | PRO | X | 228 | 36.655 | 43.304 | 50.947 | 0.00 | 0.00 |
| ATOM | 3455 | HA   | PRO | X | 228 | 36.954 | 43.966 | 50.133 | 0.00 | 0.00 |
| ATOM | 3456 | C    | PRO | X | 228 | 37.562 | 43.472 | 52.213 | 0.00 | 0.00 |
| ATOM | 3457 | O    | PRO | X | 228 | 38.215 | 44.451 | 52.464 | 0.00 | 0.00 |
| ATOM | 3458 | N    | ASN | X | 229 | 37.581 | 42.420 | 53.030 | 0.00 | 0.00 |
| ATOM | 3459 | H    | ASN | X | 229 | 36.905 | 41.703 | 52.809 | 0.00 | 0.00 |
| ATOM | 3460 | CA   | ASN | X | 229 | 38.310 | 42.384 | 54.296 | 0.00 | 0.00 |
| ATOM | 3461 | HA   | ASN | X | 229 | 38.249 | 43.365 | 54.768 | 0.00 | 0.00 |
| ATOM | 3462 | CB   | ASN | X | 229 | 37.570 | 41.484 | 55.244 | 0.00 | 0.00 |
| ATOM | 3463 | HB2  | ASN | X | 229 | 38.181 | 41.458 | 56.146 | 0.00 | 0.00 |
| ATOM | 3464 | HB3  | ASN | X | 229 | 36.601 | 41.963 | 55.380 | 0.00 | 0.00 |
| ATOM | 3465 | CG   | ASN | X | 229 | 37.268 | 40.072 | 54.784 | 0.00 | 0.00 |
| ATOM | 3466 | OD1  | ASN | X | 229 | 36.740 | 39.831 | 53.720 | 0.00 | 0.00 |
| ATOM | 3467 | ND2  | ASN | X | 229 | 37.639 | 39.058 | 55.552 | 0.00 | 0.00 |
| ATOM | 3468 | HD21 | ASN | X | 229 | 37.410 | 38.131 | 55.221 | 0.00 | 0.00 |
| ATOM | 3469 | HD22 | ASN | X | 229 | 38.262 | 39.182 | 56.337 | 0.00 | 0.00 |
| ATOM | 3470 | C    | ASN | X | 229 | 39.735 | 41.951 | 54.085 | 0.00 | 0.00 |
| ATOM | 3471 | O    | ASN | X | 229 | 40.516 | 41.860 | 55.041 | 0.00 | 0.00 |
| ATOM | 3472 | N    | GLY | X | 230 | 40.219 | 41.689 | 52.845 | 0.00 | 0.00 |
| ATOM | 3473 | H    | GLY | X | 230 | 39.594 | 41.751 | 52.054 | 0.00 | 0.00 |
| ATOM | 3474 | CA   | GLY | X | 230 | 41.644 | 41.325 | 52.658 | 0.00 | 0.00 |
| ATOM | 3475 | HA2  | GLY | X | 230 | 41.838 | 40.436 | 53.259 | 0.00 | 0.00 |
| ATOM | 3476 | HA3  | GLY | X | 230 | 41.913 | 41.021 | 51.647 | 0.00 | 0.00 |
| ATOM | 3477 | C    | GLY | X | 230 | 42.662 | 42.480 | 53.063 | 0.00 | 0.00 |
| ATOM | 3478 | O    | GLY | X | 230 | 42.407 | 43.649 | 52.760 | 0.00 | 0.00 |
| ATOM | 3479 | N    | PRO | X | 231 | 43.776 | 42.094 | 53.736 | 0.00 | 0.00 |
| ATOM | 3480 | CD   | PRO | X | 231 | 44.293 | 40.763 | 53.931 | 0.00 | 0.00 |
| ATOM | 3481 | HD2  | PRO | X | 231 | 44.387 | 40.209 | 52.997 | 0.00 | 0.00 |
| ATOM | 3482 | HD3  | PRO | X | 231 | 43.590 | 40.260 | 54.595 | 0.00 | 0.00 |
| ATOM | 3483 | CG   | PRO | X | 231 | 45.691 | 40.917 | 54.608 | 0.00 | 0.00 |
| ATOM | 3484 | HG2  | PRO | X | 231 | 46.510 | 40.847 | 53.892 | 0.00 | 0.00 |
| ATOM | 3485 | HG3  | PRO | X | 231 | 45.919 | 40.138 | 55.336 | 0.00 | 0.00 |
| ATOM | 3486 | CB   | PRO | X | 231 | 45.693 | 42.322 | 55.131 | 0.00 | 0.00 |
| ATOM | 3487 | HB2  | PRO | X | 231 | 46.660 | 42.823 | 55.162 | 0.00 | 0.00 |
| ATOM | 3488 | HB3  | PRO | X | 231 | 45.244 | 42.309 | 56.124 | 0.00 | 0.00 |

|      |      |      |     |   |     |        |        |        |      |      |
|------|------|------|-----|---|-----|--------|--------|--------|------|------|
| ATOM | 3489 | CA   | PRO | X | 231 | 44.764 | 43.083 | 54.136 | 0.00 | 0.00 |
| ATOM | 3490 | HA   | PRO | X | 231 | 44.232 | 43.894 | 54.633 | 0.00 | 0.00 |
| ATOM | 3491 | C    | PRO | X | 231 | 45.542 | 43.786 | 52.987 | 0.00 | 0.00 |
| ATOM | 3492 | O    | PRO | X | 231 | 45.971 | 44.939 | 53.162 | 0.00 | 0.00 |
| ATOM | 3493 | N    | TRP | X | 232 | 45.682 | 43.195 | 51.832 | 0.00 | 0.00 |
| ATOM | 3494 | H    | TRP | X | 232 | 45.429 | 42.230 | 51.673 | 0.00 | 0.00 |
| ATOM | 3495 | CA   | TRP | X | 232 | 45.956 | 43.928 | 50.637 | 0.00 | 0.00 |
| ATOM | 3496 | HA   | TRP | X | 232 | 46.827 | 44.583 | 50.671 | 0.00 | 0.00 |
| ATOM | 3497 | CB   | TRP | X | 232 | 46.352 | 42.943 | 49.565 | 0.00 | 0.00 |
| ATOM | 3498 | HB2  | TRP | X | 232 | 46.831 | 43.461 | 48.734 | 0.00 | 0.00 |
| ATOM | 3499 | HB3  | TRP | X | 232 | 47.078 | 42.267 | 50.016 | 0.00 | 0.00 |
| ATOM | 3500 | CG   | TRP | X | 232 | 45.262 | 42.052 | 49.084 | 0.00 | 0.00 |
| ATOM | 3501 | CD1  | TRP | X | 232 | 44.985 | 40.855 | 49.593 | 0.00 | 0.00 |
| ATOM | 3502 | HD1  | TRP | X | 232 | 45.440 | 40.416 | 50.469 | 0.00 | 0.00 |
| ATOM | 3503 | NE1  | TRP | X | 232 | 43.878 | 40.350 | 48.975 | 0.00 | 0.00 |
| ATOM | 3504 | HE1  | TRP | X | 232 | 43.413 | 39.523 | 49.322 | 0.00 | 0.00 |
| ATOM | 3505 | CE2  | TRP | X | 232 | 43.363 | 41.179 | 47.962 | 0.00 | 0.00 |
| ATOM | 3506 | CZ2  | TRP | X | 232 | 42.207 | 41.152 | 47.087 | 0.00 | 0.00 |
| ATOM | 3507 | HZ2  | TRP | X | 232 | 41.620 | 40.245 | 47.077 | 0.00 | 0.00 |
| ATOM | 3508 | CH2  | TRP | X | 232 | 42.018 | 42.253 | 46.240 | 0.00 | 0.00 |
| ATOM | 3509 | HH2  | TRP | X | 232 | 41.259 | 42.321 | 45.474 | 0.00 | 0.00 |
| ATOM | 3510 | CZ3  | TRP | X | 232 | 43.005 | 43.324 | 46.175 | 0.00 | 0.00 |
| ATOM | 3511 | HZ3  | TRP | X | 232 | 42.776 | 44.143 | 45.509 | 0.00 | 0.00 |
| ATOM | 3512 | CE3  | TRP | X | 232 | 44.081 | 43.286 | 47.093 | 0.00 | 0.00 |
| ATOM | 3513 | HE3  | TRP | X | 232 | 44.640 | 44.210 | 47.089 | 0.00 | 0.00 |
| ATOM | 3514 | CD2  | TRP | X | 232 | 44.349 | 42.206 | 47.995 | 0.00 | 0.00 |
| ATOM | 3515 | C    | TRP | X | 232 | 44.877 | 44.872 | 50.086 | 0.00 | 0.00 |
| ATOM | 3516 | O    | TRP | X | 232 | 45.285 | 45.843 | 49.441 | 0.00 | 0.00 |
| ATOM | 3517 | N    | ALA | X | 233 | 43.534 | 44.674 | 50.291 | 0.00 | 0.00 |
| ATOM | 3518 | H    | ALA | X | 233 | 43.331 | 43.915 | 50.925 | 0.00 | 0.00 |
| ATOM | 3519 | CA   | ALA | X | 233 | 42.395 | 45.362 | 49.682 | 0.00 | 0.00 |
| ATOM | 3520 | HA   | ALA | X | 233 | 42.575 | 45.589 | 48.631 | 0.00 | 0.00 |
| ATOM | 3521 | CB   | ALA | X | 233 | 41.100 | 44.393 | 49.796 | 0.00 | 0.00 |
| ATOM | 3522 | HB1  | ALA | X | 233 | 40.828 | 44.312 | 50.848 | 0.00 | 0.00 |
| ATOM | 3523 | HB2  | ALA | X | 233 | 41.199 | 43.451 | 49.256 | 0.00 | 0.00 |
| ATOM | 3524 | HB3  | ALA | X | 233 | 40.358 | 45.007 | 49.287 | 0.00 | 0.00 |
| ATOM | 3525 | C    | ALA | X | 233 | 42.066 | 46.765 | 50.278 | 0.00 | 0.00 |
| ATOM | 3526 | O    | ALA | X | 233 | 41.158 | 47.354 | 49.701 | 0.00 | 0.00 |
| ATOM | 3527 | N    | THR | X | 234 | 42.724 | 47.253 | 51.361 | 0.00 | 0.00 |
| ATOM | 3528 | H    | THR | X | 234 | 43.299 | 46.698 | 51.979 | 0.00 | 0.00 |
| ATOM | 3529 | CA   | THR | X | 234 | 42.436 | 48.592 | 51.851 | 0.00 | 0.00 |
| ATOM | 3530 | HA   | THR | X | 234 | 41.950 | 49.129 | 51.036 | 0.00 | 0.00 |
| ATOM | 3531 | CB   | THR | X | 234 | 41.443 | 48.586 | 53.012 | 0.00 | 0.00 |
| ATOM | 3532 | HB   | THR | X | 234 | 41.247 | 49.599 | 53.363 | 0.00 | 0.00 |
| ATOM | 3533 | CG2  | THR | X | 234 | 40.045 | 48.094 | 52.473 | 0.00 | 0.00 |
| ATOM | 3534 | HG21 | THR | X | 234 | 39.816 | 48.842 | 51.713 | 0.00 | 0.00 |
| ATOM | 3535 | HG22 | THR | X | 234 | 39.342 | 48.199 | 53.299 | 0.00 | 0.00 |
| ATOM | 3536 | HG23 | THR | X | 234 | 40.044 | 47.069 | 52.101 | 0.00 | 0.00 |
| ATOM | 3537 | OG1  | THR | X | 234 | 41.853 | 47.814 | 54.198 | 0.00 | 0.00 |
| ATOM | 3538 | HG1  | THR | X | 234 | 42.751 | 48.120 | 54.345 | 0.00 | 0.00 |
| ATOM | 3539 | C    | THR | X | 234 | 43.770 | 49.284 | 52.266 | 0.00 | 0.00 |
| ATOM | 3540 | O    | THR | X | 234 | 44.804 | 48.555 | 52.470 | 0.00 | 0.00 |
| ATOM | 3541 | N    | VAL | X | 235 | 43.752 | 50.592 | 52.493 | 0.00 | 0.00 |
| ATOM | 3542 | H    | VAL | X | 235 | 42.998 | 51.126 | 52.086 | 0.00 | 0.00 |
| ATOM | 3543 | CA   | VAL | X | 235 | 44.821 | 51.422 | 53.175 | 0.00 | 0.00 |
| ATOM | 3544 | HA   | VAL | X | 235 | 45.393 | 50.668 | 53.717 | 0.00 | 0.00 |
| ATOM | 3545 | CB   | VAL | X | 235 | 45.652 | 52.152 | 52.099 | 0.00 | 0.00 |
| ATOM | 3546 | HB   | VAL | X | 235 | 46.064 | 51.491 | 51.337 | 0.00 | 0.00 |
| ATOM | 3547 | CG1  | VAL | X | 235 | 44.921 | 53.220 | 51.197 | 0.00 | 0.00 |
| ATOM | 3548 | HG11 | VAL | X | 235 | 44.567 | 54.016 | 51.852 | 0.00 | 0.00 |
| ATOM | 3549 | HG12 | VAL | X | 235 | 45.608 | 53.629 | 50.455 | 0.00 | 0.00 |
| ATOM | 3550 | HG13 | VAL | X | 235 | 44.092 | 52.766 | 50.656 | 0.00 | 0.00 |
| ATOM | 3551 | CG2  | VAL | X | 235 | 46.889 | 52.864 | 52.671 | 0.00 | 0.00 |
| ATOM | 3552 | HG21 | VAL | X | 235 | 46.549 | 53.702 | 53.281 | 0.00 | 0.00 |
| ATOM | 3553 | HG22 | VAL | X | 235 | 47.522 | 53.297 | 51.896 | 0.00 | 0.00 |
| ATOM | 3554 | HG23 | VAL | X | 235 | 47.363 | 52.164 | 53.359 | 0.00 | 0.00 |
| ATOM | 3555 | C    | VAL | X | 235 | 44.193 | 52.531 | 54.175 | 0.00 | 0.00 |

|      |      |     |     |   |     |        |        |        |      |      |
|------|------|-----|-----|---|-----|--------|--------|--------|------|------|
| ATOM | 3556 | O   | VAL | X | 235 | 43.080 | 53.036 | 54.085 | 0.00 | 0.00 |
| ATOM | 3557 | N   | GLY | X | 236 | 44.909 | 52.766 | 55.313 | 0.00 | 0.00 |
| ATOM | 3558 | H   | GLY | X | 236 | 45.860 | 52.425 | 55.340 | 0.00 | 0.00 |
| ATOM | 3559 | CA  | GLY | X | 236 | 44.524 | 53.787 | 56.287 | 0.00 | 0.00 |
| ATOM | 3560 | HA2 | GLY | X | 236 | 43.463 | 53.657 | 56.502 | 0.00 | 0.00 |
| ATOM | 3561 | HA3 | GLY | X | 236 | 45.002 | 53.573 | 57.243 | 0.00 | 0.00 |
| ATOM | 3562 | C   | GLY | X | 236 | 44.776 | 55.174 | 55.813 | 0.00 | 0.00 |
| ATOM | 3563 | O   | GLY | X | 236 | 45.688 | 55.395 | 54.994 | 0.00 | 0.00 |
| ATOM | 3564 | N   | MET | X | 237 | 44.091 | 56.224 | 56.372 | 0.00 | 0.00 |
| ATOM | 3565 | H   | MET | X | 237 | 43.506 | 55.980 | 57.158 | 0.00 | 0.00 |
| ATOM | 3566 | CA  | MET | X | 237 | 44.389 | 57.650 | 56.176 | 0.00 | 0.00 |
| ATOM | 3567 | HA  | MET | X | 237 | 43.908 | 57.989 | 55.259 | 0.00 | 0.00 |
| ATOM | 3568 | CB  | MET | X | 237 | 43.789 | 58.525 | 57.354 | 0.00 | 0.00 |
| ATOM | 3569 | HB2 | MET | X | 237 | 44.306 | 58.409 | 58.306 | 0.00 | 0.00 |
| ATOM | 3570 | HB3 | MET | X | 237 | 44.154 | 59.530 | 57.141 | 0.00 | 0.00 |
| ATOM | 3571 | CG  | MET | X | 237 | 42.279 | 58.459 | 57.572 | 0.00 | 0.00 |
| ATOM | 3572 | HG2 | MET | X | 237 | 41.631 | 58.276 | 56.715 | 0.00 | 0.00 |
| ATOM | 3573 | HG3 | MET | X | 237 | 42.033 | 57.647 | 58.256 | 0.00 | 0.00 |
| ATOM | 3574 | SD  | MET | X | 237 | 41.704 | 59.961 | 58.403 | 0.00 | 0.00 |
| ATOM | 3575 | CE  | MET | X | 237 | 42.634 | 59.789 | 59.923 | 0.00 | 0.00 |
| ATOM | 3576 | HE1 | MET | X | 237 | 42.532 | 60.734 | 60.458 | 0.00 | 0.00 |
| ATOM | 3577 | HE2 | MET | X | 237 | 42.309 | 58.945 | 60.531 | 0.00 | 0.00 |
| ATOM | 3578 | HE3 | MET | X | 237 | 43.711 | 59.724 | 59.766 | 0.00 | 0.00 |
| ATOM | 3579 | C   | MET | X | 237 | 45.869 | 57.936 | 56.127 | 0.00 | 0.00 |
| ATOM | 3580 | O   | MET | X | 237 | 46.147 | 58.781 | 55.280 | 0.00 | 0.00 |
| ATOM | 3581 | N   | GLY | X | 238 | 46.737 | 57.372 | 56.986 | 0.00 | 0.00 |
| ATOM | 3582 | H   | GLY | X | 238 | 46.351 | 56.838 | 57.752 | 0.00 | 0.00 |
| ATOM | 3583 | CA  | GLY | X | 238 | 48.186 | 57.597 | 56.920 | 0.00 | 0.00 |
| ATOM | 3584 | HA2 | GLY | X | 238 | 48.260 | 58.662 | 57.139 | 0.00 | 0.00 |
| ATOM | 3585 | HA3 | GLY | X | 238 | 48.770 | 56.936 | 57.560 | 0.00 | 0.00 |
| ATOM | 3586 | C   | GLY | X | 238 | 48.798 | 57.404 | 55.508 | 0.00 | 0.00 |
| ATOM | 3587 | O   | GLY | X | 238 | 49.278 | 58.390 | 54.923 | 0.00 | 0.00 |
| ATOM | 3588 | N   | GLU | X | 239 | 48.951 | 56.125 | 55.007 | 0.00 | 0.00 |
| ATOM | 3589 | H   | GLU | X | 239 | 48.436 | 55.402 | 55.489 | 0.00 | 0.00 |
| ATOM | 3590 | CA  | GLU | X | 239 | 49.712 | 55.811 | 53.772 | 0.00 | 0.00 |
| ATOM | 3591 | HA  | GLU | X | 239 | 50.707 | 56.250 | 53.846 | 0.00 | 0.00 |
| ATOM | 3592 | CB  | GLU | X | 239 | 49.958 | 54.290 | 53.604 | 0.00 | 0.00 |
| ATOM | 3593 | HB2 | GLU | X | 239 | 49.127 | 53.730 | 54.033 | 0.00 | 0.00 |
| ATOM | 3594 | HB3 | GLU | X | 239 | 50.230 | 54.045 | 52.577 | 0.00 | 0.00 |
| ATOM | 3595 | CG  | GLU | X | 239 | 51.081 | 53.635 | 54.365 | 0.00 | 0.00 |
| ATOM | 3596 | HG2 | GLU | X | 239 | 50.788 | 53.732 | 55.411 | 0.00 | 0.00 |
| ATOM | 3597 | HG3 | GLU | X | 239 | 51.157 | 52.559 | 54.211 | 0.00 | 0.00 |
| ATOM | 3598 | CD  | GLU | X | 239 | 52.403 | 54.236 | 54.119 | 0.00 | 0.00 |
| ATOM | 3599 | OE1 | GLU | X | 239 | 53.089 | 53.781 | 53.191 | 0.00 | 0.00 |
| ATOM | 3600 | OE2 | GLU | X | 239 | 52.819 | 55.129 | 54.917 | 0.00 | 0.00 |
| ATOM | 3601 | C   | GLU | X | 239 | 49.139 | 56.355 | 52.424 | 0.00 | 0.00 |
| ATOM | 3602 | O   | GLU | X | 239 | 49.895 | 56.737 | 51.525 | 0.00 | 0.00 |
| ATOM | 3603 | N   | ALA | X | 240 | 47.815 | 56.399 | 52.408 | 0.00 | 0.00 |
| ATOM | 3604 | H   | ALA | X | 240 | 47.339 | 56.019 | 53.214 | 0.00 | 0.00 |
| ATOM | 3605 | CA  | ALA | X | 240 | 47.093 | 57.256 | 51.398 | 0.00 | 0.00 |
| ATOM | 3606 | HA  | ALA | X | 240 | 47.114 | 56.866 | 50.381 | 0.00 | 0.00 |
| ATOM | 3607 | CB  | ALA | X | 240 | 45.650 | 57.319 | 51.956 | 0.00 | 0.00 |
| ATOM | 3608 | HB1 | ALA | X | 240 | 45.636 | 57.797 | 52.936 | 0.00 | 0.00 |
| ATOM | 3609 | HB2 | ALA | X | 240 | 45.316 | 56.284 | 52.021 | 0.00 | 0.00 |
| ATOM | 3610 | HB3 | ALA | X | 240 | 45.003 | 57.873 | 51.276 | 0.00 | 0.00 |
| ATOM | 3611 | C   | ALA | X | 240 | 47.764 | 58.711 | 51.349 | 0.00 | 0.00 |
| ATOM | 3612 | O   | ALA | X | 240 | 48.253 | 59.138 | 50.257 | 0.00 | 0.00 |
| ATOM | 3613 | N   | ARG | X | 241 | 47.696 | 59.437 | 52.530 | 0.00 | 0.00 |
| ATOM | 3614 | H   | ARG | X | 241 | 47.093 | 59.099 | 53.267 | 0.00 | 0.00 |
| ATOM | 3615 | CA  | ARG | X | 241 | 48.231 | 60.878 | 52.657 | 0.00 | 0.00 |
| ATOM | 3616 | HA  | ARG | X | 241 | 47.646 | 61.503 | 51.982 | 0.00 | 0.00 |
| ATOM | 3617 | CB  | ARG | X | 241 | 48.014 | 61.465 | 54.064 | 0.00 | 0.00 |
| ATOM | 3618 | HB2 | ARG | X | 241 | 47.094 | 61.068 | 54.494 | 0.00 | 0.00 |
| ATOM | 3619 | HB3 | ARG | X | 241 | 48.777 | 61.110 | 54.757 | 0.00 | 0.00 |
| ATOM | 3620 | CG  | ARG | X | 241 | 48.024 | 63.025 | 54.132 | 0.00 | 0.00 |
| ATOM | 3621 | HG2 | ARG | X | 241 | 48.979 | 63.400 | 53.763 | 0.00 | 0.00 |
| ATOM | 3622 | HG3 | ARG | X | 241 | 47.227 | 63.403 | 53.492 | 0.00 | 0.00 |

|      |      |      |     |   |     |        |        |        |      |      |
|------|------|------|-----|---|-----|--------|--------|--------|------|------|
| ATOM | 3623 | CD   | ARG | X | 241 | 47.956 | 63.555 | 55.614 | 0.00 | 0.00 |
| ATOM | 3624 | HD2  | ARG | X | 241 | 48.804 | 63.085 | 56.110 | 0.00 | 0.00 |
| ATOM | 3625 | HD3  | ARG | X | 241 | 48.050 | 64.641 | 55.641 | 0.00 | 0.00 |
| ATOM | 3626 | NE   | ARG | X | 241 | 46.688 | 63.231 | 56.235 | 0.00 | 0.00 |
| ATOM | 3627 | HE   | ARG | X | 241 | 45.847 | 63.790 | 56.196 | 0.00 | 0.00 |
| ATOM | 3628 | CZ   | ARG | X | 241 | 46.505 | 62.272 | 57.130 | 0.00 | 0.00 |
| ATOM | 3629 | NH1  | ARG | X | 241 | 47.525 | 61.590 | 57.657 | 0.00 | 0.00 |
| ATOM | 3630 | HH11 | ARG | X | 241 | 48.467 | 61.785 | 57.350 | 0.00 | 0.00 |
| ATOM | 3631 | HH12 | ARG | X | 241 | 47.253 | 60.955 | 58.394 | 0.00 | 0.00 |
| ATOM | 3632 | NH2  | ARG | X | 241 | 45.225 | 62.081 | 57.549 | 0.00 | 0.00 |
| ATOM | 3633 | HH21 | ARG | X | 241 | 44.465 | 62.505 | 57.036 | 0.00 | 0.00 |
| ATOM | 3634 | HH22 | ARG | X | 241 | 45.113 | 61.577 | 58.417 | 0.00 | 0.00 |
| ATOM | 3635 | C    | ARG | X | 241 | 49.714 | 61.029 | 52.193 | 0.00 | 0.00 |
| ATOM | 3636 | O    | ARG | X | 241 | 50.161 | 61.874 | 51.437 | 0.00 | 0.00 |
| ATOM | 3637 | N    | ARG | X | 242 | 50.609 | 60.187 | 52.764 | 0.00 | 0.00 |
| ATOM | 3638 | H    | ARG | X | 242 | 50.275 | 59.497 | 53.422 | 0.00 | 0.00 |
| ATOM | 3639 | CA   | ARG | X | 242 | 52.046 | 60.075 | 52.520 | 0.00 | 0.00 |
| ATOM | 3640 | HA   | ARG | X | 242 | 52.464 | 61.078 | 52.610 | 0.00 | 0.00 |
| ATOM | 3641 | CB   | ARG | X | 242 | 52.745 | 59.166 | 53.523 | 0.00 | 0.00 |
| ATOM | 3642 | HB2  | ARG | X | 242 | 52.326 | 59.462 | 54.485 | 0.00 | 0.00 |
| ATOM | 3643 | HB3  | ARG | X | 242 | 52.620 | 58.100 | 53.331 | 0.00 | 0.00 |
| ATOM | 3644 | CG   | ARG | X | 242 | 54.204 | 59.501 | 53.564 | 0.00 | 0.00 |
| ATOM | 3645 | HG2  | ARG | X | 242 | 54.712 | 59.720 | 52.626 | 0.00 | 0.00 |
| ATOM | 3646 | HG3  | ARG | X | 242 | 54.321 | 60.365 | 54.219 | 0.00 | 0.00 |
| ATOM | 3647 | CD   | ARG | X | 242 | 54.956 | 58.291 | 54.252 | 0.00 | 0.00 |
| ATOM | 3648 | HD2  | ARG | X | 242 | 56.000 | 58.603 | 54.277 | 0.00 | 0.00 |
| ATOM | 3649 | HD3  | ARG | X | 242 | 54.505 | 58.274 | 55.245 | 0.00 | 0.00 |
| ATOM | 3650 | NE   | ARG | X | 242 | 54.783 | 57.033 | 53.596 | 0.00 | 0.00 |
| ATOM | 3651 | HE   | ARG | X | 242 | 54.348 | 56.289 | 54.122 | 0.00 | 0.00 |
| ATOM | 3652 | CZ   | ARG | X | 242 | 55.194 | 56.690 | 52.331 | 0.00 | 0.00 |
| ATOM | 3653 | NH1  | ARG | X | 242 | 55.947 | 57.500 | 51.627 | 0.00 | 0.00 |
| ATOM | 3654 | HH11 | ARG | X | 242 | 56.230 | 58.391 | 52.010 | 0.00 | 0.00 |
| ATOM | 3655 | HH12 | ARG | X | 242 | 56.335 | 57.139 | 50.768 | 0.00 | 0.00 |
| ATOM | 3656 | NH2  | ARG | X | 242 | 54.826 | 55.598 | 51.750 | 0.00 | 0.00 |
| ATOM | 3657 | HH21 | ARG | X | 242 | 54.227 | 54.956 | 52.249 | 0.00 | 0.00 |
| ATOM | 3658 | HH22 | ARG | X | 242 | 55.054 | 55.497 | 50.772 | 0.00 | 0.00 |
| ATOM | 3659 | C    | ARG | X | 242 | 52.449 | 59.697 | 51.083 | 0.00 | 0.00 |
| ATOM | 3660 | O    | ARG | X | 242 | 53.232 | 60.461 | 50.557 | 0.00 | 0.00 |
| ATOM | 3661 | N    | ARG | X | 243 | 51.886 | 58.702 | 50.487 | 0.00 | 0.00 |
| ATOM | 3662 | H    | ARG | X | 243 | 51.103 | 58.265 | 50.952 | 0.00 | 0.00 |
| ATOM | 3663 | CA   | ARG | X | 243 | 52.098 | 58.362 | 49.098 | 0.00 | 0.00 |
| ATOM | 3664 | HA   | ARG | X | 243 | 53.161 | 58.136 | 49.009 | 0.00 | 0.00 |
| ATOM | 3665 | CB   | ARG | X | 243 | 51.385 | 57.026 | 48.729 | 0.00 | 0.00 |
| ATOM | 3666 | HB2  | ARG | X | 243 | 50.352 | 57.095 | 49.073 | 0.00 | 0.00 |
| ATOM | 3667 | HB3  | ARG | X | 243 | 51.460 | 56.947 | 47.645 | 0.00 | 0.00 |
| ATOM | 3668 | CG   | ARG | X | 243 | 52.093 | 55.905 | 49.458 | 0.00 | 0.00 |
| ATOM | 3669 | HG2  | ARG | X | 243 | 53.141 | 55.857 | 49.161 | 0.00 | 0.00 |
| ATOM | 3670 | HG3  | ARG | X | 243 | 52.169 | 56.054 | 50.535 | 0.00 | 0.00 |
| ATOM | 3671 | CD   | ARG | X | 243 | 51.410 | 54.598 | 49.121 | 0.00 | 0.00 |
| ATOM | 3672 | HD2  | ARG | X | 243 | 50.354 | 54.837 | 49.243 | 0.00 | 0.00 |
| ATOM | 3673 | HD3  | ARG | X | 243 | 51.555 | 54.211 | 48.112 | 0.00 | 0.00 |
| ATOM | 3674 | NE   | ARG | X | 243 | 51.689 | 53.504 | 50.090 | 0.00 | 0.00 |
| ATOM | 3675 | HE   | ARG | X | 243 | 52.534 | 53.644 | 50.626 | 0.00 | 0.00 |
| ATOM | 3676 | CZ   | ARG | X | 243 | 50.999 | 52.361 | 50.157 | 0.00 | 0.00 |
| ATOM | 3677 | NH1  | ARG | X | 243 | 50.101 | 51.974 | 49.276 | 0.00 | 0.00 |
| ATOM | 3678 | HH11 | ARG | X | 243 | 49.924 | 52.522 | 48.446 | 0.00 | 0.00 |
| ATOM | 3679 | HH12 | ARG | X | 243 | 49.555 | 51.128 | 49.354 | 0.00 | 0.00 |
| ATOM | 3680 | NH2  | ARG | X | 243 | 51.275 | 51.735 | 51.242 | 0.00 | 0.00 |
| ATOM | 3681 | HH21 | ARG | X | 243 | 51.962 | 52.131 | 51.869 | 0.00 | 0.00 |
| ATOM | 3682 | HH22 | ARG | X | 243 | 50.930 | 50.849 | 51.582 | 0.00 | 0.00 |
| ATOM | 3683 | C    | ARG | X | 243 | 51.705 | 59.467 | 48.116 | 0.00 | 0.00 |
| ATOM | 3684 | O    | ARG | X | 243 | 52.427 | 59.855 | 47.272 | 0.00 | 0.00 |
| ATOM | 3685 | N    | ALA | X | 244 | 50.474 | 60.060 | 48.293 | 0.00 | 0.00 |
| ATOM | 3686 | H    | ALA | X | 244 | 49.889 | 59.850 | 49.089 | 0.00 | 0.00 |
| ATOM | 3687 | CA   | ALA | X | 244 | 49.978 | 61.141 | 47.464 | 0.00 | 0.00 |
| ATOM | 3688 | HA   | ALA | X | 244 | 49.900 | 60.814 | 46.427 | 0.00 | 0.00 |
| ATOM | 3689 | CB   | ALA | X | 244 | 48.575 | 61.594 | 47.941 | 0.00 | 0.00 |

|      |      |      |     |   |     |        |        |        |      |      |
|------|------|------|-----|---|-----|--------|--------|--------|------|------|
| ATOM | 3690 | HB1  | ALA | X | 244 | 48.128 | 62.362 | 47.310 | 0.00 | 0.00 |
| ATOM | 3691 | HB2  | ALA | X | 244 | 48.565 | 61.805 | 49.011 | 0.00 | 0.00 |
| ATOM | 3692 | HB3  | ALA | X | 244 | 47.932 | 60.714 | 47.973 | 0.00 | 0.00 |
| ATOM | 3693 | C    | ALA | X | 244 | 50.974 | 62.396 | 47.506 | 0.00 | 0.00 |
| ATOM | 3694 | O    | ALA | X | 244 | 51.315 | 62.968 | 46.444 | 0.00 | 0.00 |
| ATOM | 3695 | N    | THR | X | 245 | 51.511 | 62.653 | 48.673 | 0.00 | 0.00 |
| ATOM | 3696 | H    | THR | X | 245 | 51.124 | 62.077 | 49.406 | 0.00 | 0.00 |
| ATOM | 3697 | CA   | THR | X | 245 | 52.495 | 63.643 | 49.080 | 0.00 | 0.00 |
| ATOM | 3698 | HA   | THR | X | 245 | 52.146 | 64.606 | 48.707 | 0.00 | 0.00 |
| ATOM | 3699 | CB   | THR | X | 245 | 52.713 | 63.767 | 50.605 | 0.00 | 0.00 |
| ATOM | 3700 | HB   | THR | X | 245 | 53.003 | 62.795 | 51.003 | 0.00 | 0.00 |
| ATOM | 3701 | CG2  | THR | X | 245 | 53.893 | 64.712 | 50.955 | 0.00 | 0.00 |
| ATOM | 3702 | HG21 | THR | X | 245 | 53.729 | 65.682 | 50.484 | 0.00 | 0.00 |
| ATOM | 3703 | HG22 | THR | X | 245 | 54.821 | 64.244 | 50.627 | 0.00 | 0.00 |
| ATOM | 3704 | HG23 | THR | X | 245 | 53.824 | 64.882 | 52.030 | 0.00 | 0.00 |
| ATOM | 3705 | OG1  | THR | X | 245 | 51.588 | 64.334 | 51.333 | 0.00 | 0.00 |
| ATOM | 3706 | HG1  | THR | X | 245 | 50.908 | 63.658 | 51.378 | 0.00 | 0.00 |
| ATOM | 3707 | C    | THR | X | 245 | 53.862 | 63.299 | 48.418 | 0.00 | 0.00 |
| ATOM | 3708 | O    | THR | X | 245 | 54.438 | 64.093 | 47.650 | 0.00 | 0.00 |
| ATOM | 3709 | N    | GLN | X | 246 | 54.444 | 62.101 | 48.657 | 0.00 | 0.00 |
| ATOM | 3710 | H    | GLN | X | 246 | 54.185 | 61.665 | 49.531 | 0.00 | 0.00 |
| ATOM | 3711 | CA   | GLN | X | 246 | 55.661 | 61.625 | 48.023 | 0.00 | 0.00 |
| ATOM | 3712 | HA   | GLN | X | 246 | 56.493 | 62.248 | 48.351 | 0.00 | 0.00 |
| ATOM | 3713 | CB   | GLN | X | 246 | 55.947 | 60.206 | 48.507 | 0.00 | 0.00 |
| ATOM | 3714 | HB2  | GLN | X | 246 | 55.910 | 60.176 | 49.596 | 0.00 | 0.00 |
| ATOM | 3715 | HB3  | GLN | X | 246 | 55.148 | 59.560 | 48.143 | 0.00 | 0.00 |
| ATOM | 3716 | CG   | GLN | X | 246 | 57.362 | 59.803 | 48.216 | 0.00 | 0.00 |
| ATOM | 3717 | HG2  | GLN | X | 246 | 57.525 | 60.041 | 47.165 | 0.00 | 0.00 |
| ATOM | 3718 | HG3  | GLN | X | 246 | 58.042 | 60.504 | 48.699 | 0.00 | 0.00 |
| ATOM | 3719 | CD   | GLN | X | 246 | 57.604 | 58.375 | 48.469 | 0.00 | 0.00 |
| ATOM | 3720 | OE1  | GLN | X | 246 | 56.814 | 57.540 | 48.891 | 0.00 | 0.00 |
| ATOM | 3721 | NE2  | GLN | X | 246 | 58.830 | 58.049 | 48.182 | 0.00 | 0.00 |
| ATOM | 3722 | HE21 | GLN | X | 246 | 59.134 | 57.088 | 48.114 | 0.00 | 0.00 |
| ATOM | 3723 | HE22 | GLN | X | 246 | 59.557 | 58.737 | 48.050 | 0.00 | 0.00 |
| ATOM | 3724 | C    | GLN | X | 246 | 55.541 | 61.717 | 46.545 | 0.00 | 0.00 |
| ATOM | 3725 | O    | GLN | X | 246 | 56.518 | 62.147 | 45.987 | 0.00 | 0.00 |
| ATOM | 3726 | N    | LEU | X | 247 | 54.441 | 61.274 | 45.926 | 0.00 | 0.00 |
| ATOM | 3727 | H    | LEU | X | 247 | 53.652 | 61.044 | 46.513 | 0.00 | 0.00 |
| ATOM | 3728 | CA   | LEU | X | 247 | 54.269 | 61.325 | 44.462 | 0.00 | 0.00 |
| ATOM | 3729 | HA   | LEU | X | 247 | 55.138 | 60.764 | 44.118 | 0.00 | 0.00 |
| ATOM | 3730 | CB   | LEU | X | 247 | 52.887 | 60.779 | 43.935 | 0.00 | 0.00 |
| ATOM | 3731 | HB2  | LEU | X | 247 | 52.613 | 59.922 | 44.550 | 0.00 | 0.00 |
| ATOM | 3732 | HB3  | LEU | X | 247 | 52.067 | 61.480 | 44.092 | 0.00 | 0.00 |
| ATOM | 3733 | CG   | LEU | X | 247 | 52.796 | 60.329 | 42.531 | 0.00 | 0.00 |
| ATOM | 3734 | HG   | LEU | X | 247 | 53.365 | 59.410 | 42.393 | 0.00 | 0.00 |
| ATOM | 3735 | CD1  | LEU | X | 247 | 51.360 | 59.758 | 42.127 | 0.00 | 0.00 |
| ATOM | 3736 | HD11 | LEU | X | 247 | 50.676 | 60.579 | 41.914 | 0.00 | 0.00 |
| ATOM | 3737 | HD12 | LEU | X | 247 | 50.956 | 59.092 | 42.890 | 0.00 | 0.00 |
| ATOM | 3738 | HD13 | LEU | X | 247 | 51.457 | 59.176 | 41.210 | 0.00 | 0.00 |
| ATOM | 3739 | CD2  | LEU | X | 247 | 53.374 | 61.358 | 41.557 | 0.00 | 0.00 |
| ATOM | 3740 | HD21 | LEU | X | 247 | 54.443 | 61.246 | 41.374 | 0.00 | 0.00 |
| ATOM | 3741 | HD22 | LEU | X | 247 | 53.005 | 61.186 | 40.546 | 0.00 | 0.00 |
| ATOM | 3742 | HD23 | LEU | X | 247 | 53.072 | 62.378 | 41.795 | 0.00 | 0.00 |
| ATOM | 3743 | C    | LEU | X | 247 | 54.533 | 62.758 | 43.996 | 0.00 | 0.00 |
| ATOM | 3744 | O    | LEU | X | 247 | 55.337 | 62.995 | 43.128 | 0.00 | 0.00 |
| ATOM | 3745 | N    | ALA | X | 248 | 53.899 | 63.794 | 44.580 | 0.00 | 0.00 |
| ATOM | 3746 | H    | ALA | X | 248 | 53.148 | 63.508 | 45.192 | 0.00 | 0.00 |
| ATOM | 3747 | CA   | ALA | X | 248 | 53.988 | 65.246 | 44.323 | 0.00 | 0.00 |
| ATOM | 3748 | HA   | ALA | X | 248 | 53.754 | 65.394 | 43.269 | 0.00 | 0.00 |
| ATOM | 3749 | CB   | ALA | X | 248 | 52.871 | 65.946 | 45.132 | 0.00 | 0.00 |
| ATOM | 3750 | HB1  | ALA | X | 248 | 53.078 | 65.882 | 46.200 | 0.00 | 0.00 |
| ATOM | 3751 | HB2  | ALA | X | 248 | 51.993 | 65.348 | 44.885 | 0.00 | 0.00 |
| ATOM | 3752 | HB3  | ALA | X | 248 | 52.714 | 66.981 | 44.827 | 0.00 | 0.00 |
| ATOM | 3753 | C    | ALA | X | 248 | 55.411 | 65.752 | 44.624 | 0.00 | 0.00 |
| ATOM | 3754 | O    | ALA | X | 248 | 55.934 | 66.610 | 43.976 | 0.00 | 0.00 |
| ATOM | 3755 | N    | HIE | X | 249 | 56.090 | 65.209 | 45.715 | 0.00 | 0.00 |
| ATOM | 3756 | H    | HIE | X | 249 | 55.588 | 64.511 | 46.246 | 0.00 | 0.00 |

|      |      |      |     |   |     |        |        |        |      |      |
|------|------|------|-----|---|-----|--------|--------|--------|------|------|
| ATOM | 3757 | CA   | HIE | X | 249 | 57.517 | 65.508 | 46.010 | 0.00 | 0.00 |
| ATOM | 3758 | HA   | HIE | X | 249 | 57.573 | 66.595 | 46.069 | 0.00 | 0.00 |
| ATOM | 3759 | CB   | HIE | X | 249 | 57.925 | 64.948 | 47.390 | 0.00 | 0.00 |
| ATOM | 3760 | HB2  | HIE | X | 249 | 57.475 | 65.677 | 48.064 | 0.00 | 0.00 |
| ATOM | 3761 | HB3  | HIE | X | 249 | 57.480 | 63.962 | 47.527 | 0.00 | 0.00 |
| ATOM | 3762 | CG   | HIE | X | 249 | 59.429 | 64.952 | 47.678 | 0.00 | 0.00 |
| ATOM | 3763 | ND1  | HIE | X | 249 | 60.183 | 66.072 | 47.560 | 0.00 | 0.00 |
| ATOM | 3764 | CE1  | HIE | X | 249 | 61.450 | 65.641 | 47.753 | 0.00 | 0.00 |
| ATOM | 3765 | HE1  | HIE | X | 249 | 62.332 | 66.249 | 47.892 | 0.00 | 0.00 |
| ATOM | 3766 | NE2  | HIE | X | 249 | 61.550 | 64.342 | 47.988 | 0.00 | 0.00 |
| ATOM | 3767 | HE2  | HIE | X | 249 | 62.397 | 63.799 | 48.071 | 0.00 | 0.00 |
| ATOM | 3768 | CD2  | HIE | X | 249 | 60.306 | 63.879 | 47.865 | 0.00 | 0.00 |
| ATOM | 3769 | HD2  | HIE | X | 249 | 59.865 | 62.899 | 47.974 | 0.00 | 0.00 |
| ATOM | 3770 | C    | HIE | X | 249 | 58.435 | 65.058 | 44.875 | 0.00 | 0.00 |
| ATOM | 3771 | O    | HIE | X | 249 | 59.245 | 65.836 | 44.361 | 0.00 | 0.00 |
| ATOM | 3772 | N    | LEU | X | 250 | 58.217 | 63.792 | 44.360 | 0.00 | 0.00 |
| ATOM | 3773 | H    | LEU | X | 250 | 57.488 | 63.211 | 44.748 | 0.00 | 0.00 |
| ATOM | 3774 | CA   | LEU | X | 250 | 58.884 | 63.239 | 43.161 | 0.00 | 0.00 |
| ATOM | 3775 | HA   | LEU | X | 250 | 59.971 | 63.263 | 43.236 | 0.00 | 0.00 |
| ATOM | 3776 | CB   | LEU | X | 250 | 58.303 | 61.844 | 42.910 | 0.00 | 0.00 |
| ATOM | 3777 | HB2  | LEU | X | 250 | 57.222 | 61.842 | 43.046 | 0.00 | 0.00 |
| ATOM | 3778 | HB3  | LEU | X | 250 | 58.536 | 61.440 | 41.924 | 0.00 | 0.00 |
| ATOM | 3779 | CG   | LEU | X | 250 | 58.854 | 60.817 | 43.911 | 0.00 | 0.00 |
| ATOM | 3780 | HG   | LEU | X | 250 | 58.869 | 61.187 | 44.936 | 0.00 | 0.00 |
| ATOM | 3781 | CD1  | LEU | X | 250 | 57.916 | 59.577 | 43.970 | 0.00 | 0.00 |
| ATOM | 3782 | HD11 | LEU | X | 250 | 56.974 | 59.886 | 44.423 | 0.00 | 0.00 |
| ATOM | 3783 | HD12 | LEU | X | 250 | 58.309 | 58.726 | 44.526 | 0.00 | 0.00 |
| ATOM | 3784 | HD13 | LEU | X | 250 | 57.737 | 59.211 | 42.959 | 0.00 | 0.00 |
| ATOM | 3785 | CD2  | LEU | X | 250 | 60.292 | 60.493 | 43.754 | 0.00 | 0.00 |
| ATOM | 3786 | HD21 | LEU | X | 250 | 60.643 | 60.720 | 42.747 | 0.00 | 0.00 |
| ATOM | 3787 | HD22 | LEU | X | 250 | 60.770 | 61.000 | 44.592 | 0.00 | 0.00 |
| ATOM | 3788 | HD23 | LEU | X | 250 | 60.423 | 59.426 | 43.933 | 0.00 | 0.00 |
| ATOM | 3789 | C    | LEU | X | 250 | 58.554 | 64.150 | 41.936 | 0.00 | 0.00 |
| ATOM | 3790 | O    | LEU | X | 250 | 59.498 | 64.435 | 41.281 | 0.00 | 0.00 |
| ATOM | 3791 | N    | VAL | X | 251 | 57.293 | 64.468 | 41.576 | 0.00 | 0.00 |
| ATOM | 3792 | H    | VAL | X | 251 | 56.666 | 64.132 | 42.292 | 0.00 | 0.00 |
| ATOM | 3793 | CA   | VAL | X | 251 | 56.824 | 65.083 | 40.321 | 0.00 | 0.00 |
| ATOM | 3794 | HA   | VAL | X | 251 | 57.348 | 64.682 | 39.454 | 0.00 | 0.00 |
| ATOM | 3795 | CB   | VAL | X | 251 | 55.341 | 64.928 | 39.974 | 0.00 | 0.00 |
| ATOM | 3796 | HB   | VAL | X | 251 | 55.020 | 63.990 | 40.428 | 0.00 | 0.00 |
| ATOM | 3797 | CG1  | VAL | X | 251 | 54.456 | 65.986 | 40.573 | 0.00 | 0.00 |
| ATOM | 3798 | HG11 | VAL | X | 251 | 54.803 | 66.226 | 41.578 | 0.00 | 0.00 |
| ATOM | 3799 | HG12 | VAL | X | 251 | 54.639 | 66.876 | 39.970 | 0.00 | 0.00 |
| ATOM | 3800 | HG13 | VAL | X | 251 | 53.409 | 65.686 | 40.626 | 0.00 | 0.00 |
| ATOM | 3801 | CG2  | VAL | X | 251 | 54.968 | 64.741 | 38.457 | 0.00 | 0.00 |
| ATOM | 3802 | HG21 | VAL | X | 251 | 55.408 | 65.596 | 37.944 | 0.00 | 0.00 |
| ATOM | 3803 | HG22 | VAL | X | 251 | 53.909 | 64.812 | 38.208 | 0.00 | 0.00 |
| ATOM | 3804 | HG23 | VAL | X | 251 | 55.463 | 63.813 | 38.168 | 0.00 | 0.00 |
| ATOM | 3805 | C    | VAL | X | 251 | 57.246 | 66.545 | 40.285 | 0.00 | 0.00 |
| ATOM | 3806 | O    | VAL | X | 251 | 57.362 | 67.196 | 39.262 | 0.00 | 0.00 |
| ATOM | 3807 | N    | GLY | X | 252 | 57.512 | 67.193 | 41.390 | 0.00 | 0.00 |
| ATOM | 3808 | H    | GLY | X | 252 | 57.505 | 66.622 | 42.223 | 0.00 | 0.00 |
| ATOM | 3809 | CA   | GLY | X | 252 | 57.779 | 68.655 | 41.647 | 0.00 | 0.00 |
| ATOM | 3810 | HA2  | GLY | X | 252 | 58.226 | 68.852 | 42.622 | 0.00 | 0.00 |
| ATOM | 3811 | HA3  | GLY | X | 252 | 58.214 | 69.188 | 40.802 | 0.00 | 0.00 |
| ATOM | 3812 | C    | GLY | X | 252 | 56.468 | 69.447 | 41.661 | 0.00 | 0.00 |
| ATOM | 3813 | O    | GLY | X | 252 | 56.245 | 70.304 | 40.824 | 0.00 | 0.00 |
| ATOM | 3814 | N    | CYX | X | 253 | 55.603 | 69.196 | 42.635 | 0.00 | 0.00 |
| ATOM | 3815 | H    | CYX | X | 253 | 55.933 | 68.541 | 43.330 | 0.00 | 0.00 |
| ATOM | 3816 | CA   | CYX | X | 253 | 54.316 | 69.958 | 42.827 | 0.00 | 0.00 |
| ATOM | 3817 | HA   | CYX | X | 253 | 54.340 | 70.758 | 42.087 | 0.00 | 0.00 |
| ATOM | 3818 | CB   | CYX | X | 253 | 53.171 | 69.067 | 42.389 | 0.00 | 0.00 |
| ATOM | 3819 | HB2  | CYX | X | 253 | 53.560 | 68.051 | 42.453 | 0.00 | 0.00 |
| ATOM | 3820 | HB3  | CYX | X | 253 | 52.345 | 69.177 | 43.091 | 0.00 | 0.00 |
| ATOM | 3821 | SG   | CYX | X | 253 | 52.639 | 69.235 | 40.709 | 0.00 | 0.00 |
| ATOM | 3822 | C    | CYX | X | 253 | 54.077 | 70.519 | 44.233 | 0.00 | 0.00 |
| ATOM | 3823 | O    | CYX | X | 253 | 53.599 | 69.803 | 45.148 | 0.00 | 0.00 |

|      |      |      |     |   |     |        |        |        |      |      |
|------|------|------|-----|---|-----|--------|--------|--------|------|------|
| ATOM | 3824 | N    | PRO | X | 254 | 54.285 | 71.852 | 44.419 | 0.00 | 0.00 |
| ATOM | 3825 | CD   | PRO | X | 254 | 53.928 | 72.525 | 45.711 | 0.00 | 0.00 |
| ATOM | 3826 | HD2  | PRO | X | 254 | 54.331 | 71.939 | 46.538 | 0.00 | 0.00 |
| ATOM | 3827 | HD3  | PRO | X | 254 | 52.839 | 72.546 | 45.749 | 0.00 | 0.00 |
| ATOM | 3828 | CG   | PRO | X | 254 | 54.551 | 73.915 | 45.539 | 0.00 | 0.00 |
| ATOM | 3829 | HG2  | PRO | X | 254 | 55.476 | 73.994 | 46.111 | 0.00 | 0.00 |
| ATOM | 3830 | HG3  | PRO | X | 254 | 53.896 | 74.630 | 46.036 | 0.00 | 0.00 |
| ATOM | 3831 | CB   | PRO | X | 254 | 54.788 | 74.224 | 44.091 | 0.00 | 0.00 |
| ATOM | 3832 | HB2  | PRO | X | 254 | 55.641 | 74.896 | 43.996 | 0.00 | 0.00 |
| ATOM | 3833 | HB3  | PRO | X | 254 | 53.834 | 74.633 | 43.758 | 0.00 | 0.00 |
| ATOM | 3834 | CA   | PRO | X | 254 | 54.984 | 72.760 | 43.471 | 0.00 | 0.00 |
| ATOM | 3835 | HA   | PRO | X | 254 | 54.567 | 72.685 | 42.467 | 0.00 | 0.00 |
| ATOM | 3836 | C    | PRO | X | 254 | 56.490 | 72.486 | 43.384 | 0.00 | 0.00 |
| ATOM | 3837 | O    | PRO | X | 254 | 57.049 | 71.523 | 44.001 | 0.00 | 0.00 |
| ATOM | 3838 | N    | PRO | X | 255 | 57.217 | 73.151 | 42.456 | 0.00 | 0.00 |
| ATOM | 3839 | CD   | PRO | X | 255 | 56.705 | 73.964 | 41.357 | 0.00 | 0.00 |
| ATOM | 3840 | HD2  | PRO | X | 255 | 55.920 | 74.652 | 41.668 | 0.00 | 0.00 |
| ATOM | 3841 | HD3  | PRO | X | 255 | 56.355 | 73.246 | 40.615 | 0.00 | 0.00 |
| ATOM | 3842 | CG   | PRO | X | 255 | 57.928 | 74.651 | 40.738 | 0.00 | 0.00 |
| ATOM | 3843 | HG2  | PRO | X | 255 | 58.109 | 75.556 | 41.318 | 0.00 | 0.00 |
| ATOM | 3844 | HG3  | PRO | X | 255 | 57.770 | 74.880 | 39.684 | 0.00 | 0.00 |
| ATOM | 3845 | CB   | PRO | X | 255 | 59.016 | 73.625 | 41.053 | 0.00 | 0.00 |
| ATOM | 3846 | HB2  | PRO | X | 255 | 60.011 | 74.070 | 41.048 | 0.00 | 0.00 |
| ATOM | 3847 | HB3  | PRO | X | 255 | 58.970 | 72.897 | 40.243 | 0.00 | 0.00 |
| ATOM | 3848 | CA   | PRO | X | 255 | 58.679 | 73.003 | 42.387 | 0.00 | 0.00 |
| ATOM | 3849 | HA   | PRO | X | 255 | 59.035 | 71.975 | 42.459 | 0.00 | 0.00 |
| ATOM | 3850 | C    | PRO | X | 255 | 59.323 | 73.752 | 43.577 | 0.00 | 0.00 |
| ATOM | 3851 | O    | PRO | X | 255 | 58.888 | 74.797 | 43.973 | 0.00 | 0.00 |
| ATOM | 3852 | N    | GLY | X | 256 | 60.237 | 73.025 | 44.212 | 0.00 | 0.00 |
| ATOM | 3853 | H    | GLY | X | 256 | 60.485 | 72.072 | 43.987 | 0.00 | 0.00 |
| ATOM | 3854 | CA   | GLY | X | 256 | 60.807 | 73.429 | 45.461 | 0.00 | 0.00 |
| ATOM | 3855 | HA2  | GLY | X | 256 | 61.802 | 73.031 | 45.663 | 0.00 | 0.00 |
| ATOM | 3856 | HA3  | GLY | X | 256 | 60.915 | 74.502 | 45.616 | 0.00 | 0.00 |
| ATOM | 3857 | C    | GLY | X | 256 | 59.939 | 72.931 | 46.606 | 0.00 | 0.00 |
| ATOM | 3858 | O    | GLY | X | 256 | 60.231 | 73.316 | 47.815 | 0.00 | 0.00 |
| ATOM | 3859 | N    | GLY | X | 257 | 58.921 | 72.127 | 46.247 | 0.00 | 0.00 |
| ATOM | 3860 | H    | GLY | X | 257 | 58.889 | 71.905 | 45.262 | 0.00 | 0.00 |
| ATOM | 3861 | CA   | GLY | X | 257 | 57.841 | 71.551 | 47.012 | 0.00 | 0.00 |
| ATOM | 3862 | HA2  | GLY | X | 257 | 57.412 | 72.257 | 47.722 | 0.00 | 0.00 |
| ATOM | 3863 | HA3  | GLY | X | 257 | 56.992 | 71.243 | 46.401 | 0.00 | 0.00 |
| ATOM | 3864 | C    | GLY | X | 257 | 58.218 | 70.225 | 47.854 | 0.00 | 0.00 |
| ATOM | 3865 | O    | GLY | X | 257 | 58.926 | 69.360 | 47.314 | 0.00 | 0.00 |
| ATOM | 3866 | N    | THR | X | 258 | 57.774 | 70.110 | 49.101 | 0.00 | 0.00 |
| ATOM | 3867 | H    | THR | X | 258 | 57.196 | 70.837 | 49.498 | 0.00 | 0.00 |
| ATOM | 3868 | CA   | THR | X | 258 | 58.129 | 69.003 | 50.049 | 0.00 | 0.00 |
| ATOM | 3869 | HA   | THR | X | 258 | 58.661 | 68.215 | 49.516 | 0.00 | 0.00 |
| ATOM | 3870 | CB   | THR | X | 258 | 59.088 | 69.610 | 51.106 | 0.00 | 0.00 |
| ATOM | 3871 | HB   | THR | X | 258 | 59.219 | 68.791 | 51.813 | 0.00 | 0.00 |
| ATOM | 3872 | CG2  | THR | X | 258 | 60.463 | 70.018 | 50.598 | 0.00 | 0.00 |
| ATOM | 3873 | HG21 | THR | X | 258 | 61.258 | 69.869 | 51.328 | 0.00 | 0.00 |
| ATOM | 3874 | HG22 | THR | X | 258 | 60.488 | 71.067 | 50.304 | 0.00 | 0.00 |
| ATOM | 3875 | HG23 | THR | X | 258 | 60.635 | 69.429 | 49.697 | 0.00 | 0.00 |
| ATOM | 3876 | OG1  | THR | X | 258 | 58.461 | 70.761 | 51.636 | 0.00 | 0.00 |
| ATOM | 3877 | HG1  | THR | X | 258 | 58.937 | 71.064 | 52.413 | 0.00 | 0.00 |
| ATOM | 3878 | C    | THR | X | 258 | 56.878 | 68.319 | 50.537 | 0.00 | 0.00 |
| ATOM | 3879 | O    | THR | X | 258 | 56.560 | 67.218 | 50.193 | 0.00 | 0.00 |
| ATOM | 3880 | N    | GLY | X | 259 | 56.020 | 68.987 | 51.340 | 0.00 | 0.00 |
| ATOM | 3881 | H    | GLY | X | 259 | 56.381 | 69.832 | 51.760 | 0.00 | 0.00 |
| ATOM | 3882 | CA   | GLY | X | 259 | 54.750 | 68.396 | 51.889 | 0.00 | 0.00 |
| ATOM | 3883 | HA2  | GLY | X | 259 | 54.211 | 67.980 | 51.038 | 0.00 | 0.00 |
| ATOM | 3884 | HA3  | GLY | X | 259 | 55.110 | 67.671 | 52.619 | 0.00 | 0.00 |
| ATOM | 3885 | C    | GLY | X | 259 | 53.836 | 69.409 | 52.555 | 0.00 | 0.00 |
| ATOM | 3886 | O    | GLY | X | 259 | 53.364 | 69.252 | 53.696 | 0.00 | 0.00 |
| ATOM | 3887 | N    | GLY | X | 260 | 53.691 | 70.510 | 51.791 | 0.00 | 0.00 |
| ATOM | 3888 | H    | GLY | X | 260 | 54.128 | 70.552 | 50.881 | 0.00 | 0.00 |
| ATOM | 3889 | CA   | GLY | X | 260 | 53.073 | 71.783 | 52.132 | 0.00 | 0.00 |
| ATOM | 3890 | HA2  | GLY | X | 260 | 53.261 | 72.040 | 53.174 | 0.00 | 0.00 |

|      |      |      |     |   |     |        |        |        |      |      |
|------|------|------|-----|---|-----|--------|--------|--------|------|------|
| ATOM | 3891 | HA3  | GLY | X | 260 | 53.531 | 72.516 | 51.467 | 0.00 | 0.00 |
| ATOM | 3892 | C    | GLY | X | 260 | 51.537 | 71.895 | 52.004 | 0.00 | 0.00 |
| ATOM | 3893 | O    | GLY | X | 260 | 50.743 | 71.073 | 52.382 | 0.00 | 0.00 |
| ATOM | 3894 | N    | ASN | X | 261 | 51.091 | 73.047 | 51.498 | 0.00 | 0.00 |
| ATOM | 3895 | H    | ASN | X | 261 | 51.776 | 73.785 | 51.417 | 0.00 | 0.00 |
| ATOM | 3896 | CA   | ASN | X | 261 | 49.675 | 73.400 | 51.287 | 0.00 | 0.00 |
| ATOM | 3897 | HA   | ASN | X | 261 | 49.254 | 73.296 | 52.287 | 0.00 | 0.00 |
| ATOM | 3898 | CB   | ASN | X | 261 | 49.479 | 74.883 | 50.845 | 0.00 | 0.00 |
| ATOM | 3899 | HB2  | ASN | X | 261 | 49.832 | 75.530 | 51.648 | 0.00 | 0.00 |
| ATOM | 3900 | HB3  | ASN | X | 261 | 50.251 | 75.137 | 50.120 | 0.00 | 0.00 |
| ATOM | 3901 | CG   | ASN | X | 261 | 48.124 | 75.187 | 50.255 | 0.00 | 0.00 |
| ATOM | 3902 | OD1  | ASN | X | 261 | 47.921 | 75.458 | 49.076 | 0.00 | 0.00 |
| ATOM | 3903 | ND2  | ASN | X | 261 | 47.120 | 75.237 | 51.095 | 0.00 | 0.00 |
| ATOM | 3904 | HD21 | ASN | X | 261 | 46.270 | 75.718 | 50.838 | 0.00 | 0.00 |
| ATOM | 3905 | HD22 | ASN | X | 261 | 47.279 | 75.057 | 52.076 | 0.00 | 0.00 |
| ATOM | 3906 | C    | ASN | X | 261 | 48.967 | 72.410 | 50.307 | 0.00 | 0.00 |
| ATOM | 3907 | O    | ASN | X | 261 | 49.348 | 72.361 | 49.097 | 0.00 | 0.00 |
| ATOM | 3908 | N    | ASP | X | 262 | 47.786 | 71.826 | 50.673 | 0.00 | 0.00 |
| ATOM | 3909 | H    | ASP | X | 262 | 47.523 | 72.006 | 51.631 | 0.00 | 0.00 |
| ATOM | 3910 | CA   | ASP | X | 262 | 47.008 | 70.839 | 49.903 | 0.00 | 0.00 |
| ATOM | 3911 | HA   | ASP | X | 262 | 47.642 | 69.954 | 49.843 | 0.00 | 0.00 |
| ATOM | 3912 | CB   | ASP | X | 262 | 45.755 | 70.412 | 50.684 | 0.00 | 0.00 |
| ATOM | 3913 | HB2  | ASP | X | 262 | 45.305 | 71.378 | 50.912 | 0.00 | 0.00 |
| ATOM | 3914 | HB3  | ASP | X | 262 | 45.116 | 69.787 | 50.060 | 0.00 | 0.00 |
| ATOM | 3915 | CG   | ASP | X | 262 | 45.959 | 69.755 | 52.055 | 0.00 | 0.00 |
| ATOM | 3916 | OD1  | ASP | X | 262 | 44.947 | 69.590 | 52.784 | 0.00 | 0.00 |
| ATOM | 3917 | OD2  | ASP | X | 262 | 47.078 | 69.476 | 52.558 | 0.00 | 0.00 |
| ATOM | 3918 | C    | ASP | X | 262 | 46.509 | 71.275 | 48.490 | 0.00 | 0.00 |
| ATOM | 3919 | O    | ASP | X | 262 | 46.565 | 70.503 | 47.570 | 0.00 | 0.00 |
| ATOM | 3920 | N    | THR | X | 263 | 46.155 | 72.540 | 48.362 | 0.00 | 0.00 |
| ATOM | 3921 | H    | THR | X | 263 | 46.318 | 73.133 | 49.163 | 0.00 | 0.00 |
| ATOM | 3922 | CA   | THR | X | 263 | 45.740 | 73.163 | 47.091 | 0.00 | 0.00 |
| ATOM | 3923 | HA   | THR | X | 263 | 45.028 | 72.498 | 46.603 | 0.00 | 0.00 |
| ATOM | 3924 | CB   | THR | X | 263 | 45.036 | 74.553 | 47.304 | 0.00 | 0.00 |
| ATOM | 3925 | HB   | THR | X | 263 | 45.756 | 75.353 | 47.475 | 0.00 | 0.00 |
| ATOM | 3926 | CG2  | THR | X | 263 | 44.100 | 74.898 | 46.119 | 0.00 | 0.00 |
| ATOM | 3927 | HG21 | THR | X | 263 | 44.726 | 74.923 | 45.227 | 0.00 | 0.00 |
| ATOM | 3928 | HG22 | THR | X | 263 | 43.651 | 75.874 | 46.305 | 0.00 | 0.00 |
| ATOM | 3929 | HG23 | THR | X | 263 | 43.343 | 74.115 | 46.109 | 0.00 | 0.00 |
| ATOM | 3930 | OG1  | THR | X | 263 | 44.286 | 74.397 | 48.462 | 0.00 | 0.00 |
| ATOM | 3931 | HG1  | THR | X | 263 | 43.693 | 73.649 | 48.360 | 0.00 | 0.00 |
| ATOM | 3932 | C    | THR | X | 263 | 46.952 | 73.306 | 46.113 | 0.00 | 0.00 |
| ATOM | 3933 | O    | THR | X | 263 | 47.003 | 72.650 | 45.045 | 0.00 | 0.00 |
| ATOM | 3934 | N    | GLU | X | 264 | 47.944 | 73.989 | 46.630 | 0.00 | 0.00 |
| ATOM | 3935 | H    | GLU | X | 264 | 47.865 | 74.426 | 47.537 | 0.00 | 0.00 |
| ATOM | 3936 | CA   | GLU | X | 264 | 49.207 | 74.133 | 45.864 | 0.00 | 0.00 |
| ATOM | 3937 | HA   | GLU | X | 264 | 48.934 | 74.626 | 44.931 | 0.00 | 0.00 |
| ATOM | 3938 | CB   | GLU | X | 264 | 50.210 | 75.005 | 46.580 | 0.00 | 0.00 |
| ATOM | 3939 | HB2  | GLU | X | 264 | 50.249 | 74.830 | 47.656 | 0.00 | 0.00 |
| ATOM | 3940 | HB3  | GLU | X | 264 | 51.123 | 74.628 | 46.119 | 0.00 | 0.00 |
| ATOM | 3941 | CG   | GLU | X | 264 | 49.974 | 76.468 | 46.241 | 0.00 | 0.00 |
| ATOM | 3942 | HG2  | GLU | X | 264 | 48.897 | 76.594 | 46.359 | 0.00 | 0.00 |
| ATOM | 3943 | HG3  | GLU | X | 264 | 50.391 | 77.091 | 47.033 | 0.00 | 0.00 |
| ATOM | 3944 | CD   | GLU | X | 264 | 50.596 | 76.858 | 44.959 | 0.00 | 0.00 |
| ATOM | 3945 | OE1  | GLU | X | 264 | 49.862 | 76.874 | 43.958 | 0.00 | 0.00 |
| ATOM | 3946 | OE2  | GLU | X | 264 | 51.773 | 77.187 | 44.866 | 0.00 | 0.00 |
| ATOM | 3947 | C    | GLU | X | 264 | 49.870 | 72.752 | 45.527 | 0.00 | 0.00 |
| ATOM | 3948 | O    | GLU | X | 264 | 50.658 | 72.667 | 44.488 | 0.00 | 0.00 |
| ATOM | 3949 | N    | LEU | X | 265 | 49.616 | 71.711 | 46.284 | 0.00 | 0.00 |
| ATOM | 3950 | H    | LEU | X | 265 | 49.265 | 71.864 | 47.219 | 0.00 | 0.00 |
| ATOM | 3951 | CA   | LEU | X | 265 | 50.030 | 70.368 | 45.977 | 0.00 | 0.00 |
| ATOM | 3952 | HA   | LEU | X | 265 | 51.014 | 70.359 | 45.508 | 0.00 | 0.00 |
| ATOM | 3953 | CB   | LEU | X | 265 | 50.091 | 69.585 | 47.268 | 0.00 | 0.00 |
| ATOM | 3954 | HB2  | LEU | X | 265 | 50.563 | 70.285 | 47.958 | 0.00 | 0.00 |
| ATOM | 3955 | HB3  | LEU | X | 265 | 49.084 | 69.439 | 47.659 | 0.00 | 0.00 |
| ATOM | 3956 | CG   | LEU | X | 265 | 50.723 | 68.227 | 47.311 | 0.00 | 0.00 |
| ATOM | 3957 | HG   | LEU | X | 265 | 51.652 | 68.366 | 46.758 | 0.00 | 0.00 |



|      |      |      |     |   |     |        |        |        |      |      |
|------|------|------|-----|---|-----|--------|--------|--------|------|------|
| ATOM | 3958 | CD1  | LEU | X | 265 | 50.977 | 67.641 | 48.681 | 0.00 | 0.00 |
| ATOM | 3959 | HD11 | LEU | X | 265 | 51.589 | 66.763 | 48.473 | 0.00 | 0.00 |
| ATOM | 3960 | HD12 | LEU | X | 265 | 50.069 | 67.387 | 49.226 | 0.00 | 0.00 |
| ATOM | 3961 | HD13 | LEU | X | 265 | 51.561 | 68.311 | 49.313 | 0.00 | 0.00 |
| ATOM | 3962 | CD2  | LEU | X | 265 | 49.984 | 67.130 | 46.578 | 0.00 | 0.00 |
| ATOM | 3963 | HD21 | LEU | X | 265 | 49.992 | 67.298 | 45.501 | 0.00 | 0.00 |
| ATOM | 3964 | HD22 | LEU | X | 265 | 50.390 | 66.123 | 46.675 | 0.00 | 0.00 |
| ATOM | 3965 | HD23 | LEU | X | 265 | 48.913 | 67.201 | 46.766 | 0.00 | 0.00 |
| ATOM | 3966 | C    | LEU | X | 265 | 49.071 | 69.730 | 44.948 | 0.00 | 0.00 |
| ATOM | 3967 | O    | LEU | X | 265 | 49.429 | 69.476 | 43.810 | 0.00 | 0.00 |
| ATOM | 3968 | N    | VAL | X | 266 | 47.802 | 69.455 | 45.257 | 0.00 | 0.00 |
| ATOM | 3969 | H    | VAL | X | 266 | 47.560 | 69.783 | 46.181 | 0.00 | 0.00 |
| ATOM | 3970 | CA   | VAL | X | 266 | 46.723 | 68.742 | 44.507 | 0.00 | 0.00 |
| ATOM | 3971 | HA   | VAL | X | 266 | 47.206 | 67.825 | 44.171 | 0.00 | 0.00 |
| ATOM | 3972 | CB   | VAL | X | 266 | 45.555 | 68.283 | 45.420 | 0.00 | 0.00 |
| ATOM | 3973 | HB   | VAL | X | 266 | 45.009 | 69.187 | 45.689 | 0.00 | 0.00 |
| ATOM | 3974 | CG1  | VAL | X | 266 | 44.617 | 67.365 | 44.560 | 0.00 | 0.00 |
| ATOM | 3975 | HG11 | VAL | X | 266 | 44.072 | 67.822 | 43.734 | 0.00 | 0.00 |
| ATOM | 3976 | HG12 | VAL | X | 266 | 45.264 | 66.671 | 44.023 | 0.00 | 0.00 |
| ATOM | 3977 | HG13 | VAL | X | 266 | 43.977 | 66.722 | 45.164 | 0.00 | 0.00 |
| ATOM | 3978 | CG2  | VAL | X | 266 | 46.058 | 67.521 | 46.617 | 0.00 | 0.00 |
| ATOM | 3979 | HG21 | VAL | X | 266 | 46.763 | 68.131 | 47.182 | 0.00 | 0.00 |
| ATOM | 3980 | HG22 | VAL | X | 266 | 46.527 | 66.553 | 46.441 | 0.00 | 0.00 |
| ATOM | 3981 | HG23 | VAL | X | 266 | 45.161 | 67.244 | 47.171 | 0.00 | 0.00 |
| ATOM | 3982 | C    | VAL | X | 266 | 46.184 | 69.431 | 43.295 | 0.00 | 0.00 |
| ATOM | 3983 | O    | VAL | X | 266 | 45.990 | 68.698 | 42.360 | 0.00 | 0.00 |
| ATOM | 3984 | N    | ALA | X | 267 | 46.032 | 70.779 | 43.291 | 0.00 | 0.00 |
| ATOM | 3985 | H    | ALA | X | 267 | 46.243 | 71.276 | 44.144 | 0.00 | 0.00 |
| ATOM | 3986 | CA   | ALA | X | 267 | 45.764 | 71.481 | 42.001 | 0.00 | 0.00 |
| ATOM | 3987 | HA   | ALA | X | 267 | 44.889 | 71.037 | 41.526 | 0.00 | 0.00 |
| ATOM | 3988 | CB   | ALA | X | 267 | 45.609 | 72.999 | 42.166 | 0.00 | 0.00 |
| ATOM | 3989 | HB1  | ALA | X | 267 | 46.614 | 73.364 | 42.376 | 0.00 | 0.00 |
| ATOM | 3990 | HB2  | ALA | X | 267 | 44.874 | 73.288 | 42.917 | 0.00 | 0.00 |
| ATOM | 3991 | HB3  | ALA | X | 267 | 45.354 | 73.431 | 41.199 | 0.00 | 0.00 |
| ATOM | 3992 | C    | ALA | X | 267 | 46.922 | 71.139 | 41.042 | 0.00 | 0.00 |
| ATOM | 3993 | O    | ALA | X | 267 | 46.721 | 70.836 | 39.811 | 0.00 | 0.00 |
| ATOM | 3994 | N    | CYX | X | 268 | 48.205 | 71.092 | 41.546 | 0.00 | 0.00 |
| ATOM | 3995 | H    | CYX | X | 268 | 48.389 | 71.259 | 42.525 | 0.00 | 0.00 |
| ATOM | 3996 | CA   | CYX | X | 268 | 49.342 | 70.891 | 40.668 | 0.00 | 0.00 |
| ATOM | 3997 | HA   | CYX | X | 268 | 49.231 | 71.493 | 39.766 | 0.00 | 0.00 |
| ATOM | 3998 | CB   | CYX | X | 268 | 50.589 | 71.385 | 41.422 | 0.00 | 0.00 |
| ATOM | 3999 | HB2  | CYX | X | 268 | 50.494 | 72.470 | 41.467 | 0.00 | 0.00 |
| ATOM | 4000 | HB3  | CYX | X | 268 | 50.732 | 70.875 | 42.374 | 0.00 | 0.00 |
| ATOM | 4001 | SG   | CYX | X | 268 | 52.139 | 71.248 | 40.500 | 0.00 | 0.00 |
| ATOM | 4002 | C    | CYX | X | 268 | 49.399 | 69.450 | 40.212 | 0.00 | 0.00 |
| ATOM | 4003 | O    | CYX | X | 268 | 49.694 | 69.231 | 39.035 | 0.00 | 0.00 |
| ATOM | 4004 | N    | LEU | X | 269 | 49.045 | 68.498 | 41.116 | 0.00 | 0.00 |
| ATOM | 4005 | H    | LEU | X | 269 | 48.942 | 68.719 | 42.096 | 0.00 | 0.00 |
| ATOM | 4006 | CA   | LEU | X | 269 | 48.846 | 67.042 | 40.750 | 0.00 | 0.00 |
| ATOM | 4007 | HA   | LEU | X | 269 | 49.789 | 66.844 | 40.241 | 0.00 | 0.00 |
| ATOM | 4008 | CB   | LEU | X | 269 | 48.685 | 66.217 | 42.138 | 0.00 | 0.00 |
| ATOM | 4009 | HB2  | LEU | X | 269 | 49.237 | 66.732 | 42.924 | 0.00 | 0.00 |
| ATOM | 4010 | HB3  | LEU | X | 269 | 47.670 | 66.419 | 42.481 | 0.00 | 0.00 |
| ATOM | 4011 | CG   | LEU | X | 269 | 49.061 | 64.710 | 42.130 | 0.00 | 0.00 |
| ATOM | 4012 | HG   | LEU | X | 269 | 48.381 | 64.185 | 41.459 | 0.00 | 0.00 |
| ATOM | 4013 | CD1  | LEU | X | 269 | 50.488 | 64.414 | 41.638 | 0.00 | 0.00 |
| ATOM | 4014 | HD11 | LEU | X | 269 | 50.612 | 64.661 | 40.583 | 0.00 | 0.00 |
| ATOM | 4015 | HD12 | LEU | X | 269 | 50.743 | 63.367 | 41.804 | 0.00 | 0.00 |
| ATOM | 4016 | HD13 | LEU | X | 269 | 51.192 | 64.958 | 42.267 | 0.00 | 0.00 |
| ATOM | 4017 | CD2  | LEU | X | 269 | 48.842 | 64.167 | 43.512 | 0.00 | 0.00 |
| ATOM | 4018 | HD21 | LEU | X | 269 | 47.793 | 64.362 | 43.733 | 0.00 | 0.00 |
| ATOM | 4019 | HD22 | LEU | X | 269 | 48.893 | 63.080 | 43.443 | 0.00 | 0.00 |
| ATOM | 4020 | HD23 | LEU | X | 269 | 49.538 | 64.754 | 44.112 | 0.00 | 0.00 |
| ATOM | 4021 | C    | LEU | X | 269 | 47.676 | 66.812 | 39.824 | 0.00 | 0.00 |
| ATOM | 4022 | O    | LEU | X | 269 | 47.654 | 65.833 | 39.138 | 0.00 | 0.00 |
| ATOM | 4023 | N    | ARG | X | 270 | 46.656 | 67.659 | 39.727 | 0.00 | 0.00 |
| ATOM | 4024 | H    | ARG | X | 270 | 46.607 | 68.385 | 40.427 | 0.00 | 0.00 |

|      |      |      |     |   |     |        |        |        |      |      |
|------|------|------|-----|---|-----|--------|--------|--------|------|------|
| ATOM | 4025 | CA   | ARG | X | 270 | 45.668 | 67.737 | 38.679 | 0.00 | 0.00 |
| ATOM | 4026 | HA   | ARG | X | 270 | 45.250 | 66.740 | 38.542 | 0.00 | 0.00 |
| ATOM | 4027 | CB   | ARG | X | 270 | 44.374 | 68.566 | 39.198 | 0.00 | 0.00 |
| ATOM | 4028 | HB2  | ARG | X | 270 | 44.578 | 69.505 | 39.713 | 0.00 | 0.00 |
| ATOM | 4029 | HB3  | ARG | X | 270 | 43.853 | 68.920 | 38.309 | 0.00 | 0.00 |
| ATOM | 4030 | CG   | ARG | X | 270 | 43.439 | 67.744 | 40.097 | 0.00 | 0.00 |
| ATOM | 4031 | HG2  | ARG | X | 270 | 43.222 | 66.828 | 39.547 | 0.00 | 0.00 |
| ATOM | 4032 | HG3  | ARG | X | 270 | 43.804 | 67.438 | 41.078 | 0.00 | 0.00 |
| ATOM | 4033 | CD   | ARG | X | 270 | 42.069 | 68.370 | 40.334 | 0.00 | 0.00 |
| ATOM | 4034 | HD2  | ARG | X | 270 | 41.852 | 69.207 | 39.670 | 0.00 | 0.00 |
| ATOM | 4035 | HD3  | ARG | X | 270 | 41.336 | 67.568 | 40.242 | 0.00 | 0.00 |
| ATOM | 4036 | NE   | ARG | X | 270 | 42.035 | 69.072 | 41.643 | 0.00 | 0.00 |
| ATOM | 4037 | HE   | ARG | X | 270 | 42.150 | 70.070 | 41.750 | 0.00 | 0.00 |
| ATOM | 4038 | CZ   | ARG | X | 270 | 41.698 | 68.423 | 42.765 | 0.00 | 0.00 |
| ATOM | 4039 | NH1  | ARG | X | 270 | 41.563 | 67.082 | 42.877 | 0.00 | 0.00 |
| ATOM | 4040 | HH11 | ARG | X | 270 | 41.783 | 66.466 | 42.107 | 0.00 | 0.00 |
| ATOM | 4041 | HH12 | ARG | X | 270 | 41.272 | 66.656 | 43.745 | 0.00 | 0.00 |
| ATOM | 4042 | NH2  | ARG | X | 270 | 41.529 | 69.088 | 43.919 | 0.00 | 0.00 |
| ATOM | 4043 | HH21 | ARG | X | 270 | 41.485 | 70.097 | 43.928 | 0.00 | 0.00 |
| ATOM | 4044 | HH22 | ARG | X | 270 | 41.358 | 68.579 | 44.775 | 0.00 | 0.00 |
| ATOM | 4045 | C    | ARG | X | 270 | 46.259 | 68.103 | 37.272 | 0.00 | 0.00 |
| ATOM | 4046 | O    | ARG | X | 270 | 45.791 | 67.563 | 36.265 | 0.00 | 0.00 |
| ATOM | 4047 | N    | THR | X | 271 | 47.081 | 69.187 | 37.281 | 0.00 | 0.00 |
| ATOM | 4048 | H    | THR | X | 271 | 47.229 | 69.654 | 38.164 | 0.00 | 0.00 |
| ATOM | 4049 | CA   | THR | X | 271 | 47.752 | 69.746 | 36.151 | 0.00 | 0.00 |
| ATOM | 4050 | HA   | THR | X | 271 | 46.998 | 69.959 | 35.394 | 0.00 | 0.00 |
| ATOM | 4051 | CB   | THR | X | 271 | 48.560 | 71.003 | 36.562 | 0.00 | 0.00 |
| ATOM | 4052 | HB   | THR | X | 271 | 49.235 | 70.775 | 37.387 | 0.00 | 0.00 |
| ATOM | 4053 | CG2  | THR | X | 271 | 49.416 | 71.605 | 35.417 | 0.00 | 0.00 |
| ATOM | 4054 | HG21 | THR | X | 271 | 49.755 | 72.615 | 35.648 | 0.00 | 0.00 |
| ATOM | 4055 | HG22 | THR | X | 271 | 48.659 | 71.804 | 34.659 | 0.00 | 0.00 |
| ATOM | 4056 | HG23 | THR | X | 271 | 50.199 | 70.876 | 35.208 | 0.00 | 0.00 |
| ATOM | 4057 | OG1  | THR | X | 271 | 47.581 | 71.995 | 36.753 | 0.00 | 0.00 |
| ATOM | 4058 | HG1  | THR | X | 271 | 47.959 | 72.690 | 37.297 | 0.00 | 0.00 |
| ATOM | 4059 | C    | THR | X | 271 | 48.699 | 68.781 | 35.419 | 0.00 | 0.00 |
| ATOM | 4060 | O    | THR | X | 271 | 48.588 | 68.696 | 34.200 | 0.00 | 0.00 |
| ATOM | 4061 | N    | ARG | X | 272 | 49.576 | 68.084 | 36.137 | 0.00 | 0.00 |
| ATOM | 4062 | H    | ARG | X | 272 | 49.687 | 68.375 | 37.098 | 0.00 | 0.00 |
| ATOM | 4063 | CA   | ARG | X | 272 | 50.565 | 67.171 | 35.643 | 0.00 | 0.00 |
| ATOM | 4064 | HA   | ARG | X | 272 | 51.183 | 67.857 | 35.062 | 0.00 | 0.00 |
| ATOM | 4065 | CB   | ARG | X | 272 | 51.336 | 66.608 | 36.811 | 0.00 | 0.00 |
| ATOM | 4066 | HB2  | ARG | X | 272 | 50.637 | 66.117 | 37.489 | 0.00 | 0.00 |
| ATOM | 4067 | HB3  | ARG | X | 272 | 51.978 | 65.809 | 36.441 | 0.00 | 0.00 |
| ATOM | 4068 | CG   | ARG | X | 272 | 52.225 | 67.661 | 37.522 | 0.00 | 0.00 |
| ATOM | 4069 | HG2  | ARG | X | 272 | 51.667 | 68.563 | 37.774 | 0.00 | 0.00 |
| ATOM | 4070 | HG3  | ARG | X | 272 | 52.663 | 67.291 | 38.449 | 0.00 | 0.00 |
| ATOM | 4071 | CD   | ARG | X | 272 | 53.356 | 68.231 | 36.664 | 0.00 | 0.00 |
| ATOM | 4072 | HD2  | ARG | X | 272 | 54.086 | 67.453 | 36.440 | 0.00 | 0.00 |
| ATOM | 4073 | HD3  | ARG | X | 272 | 52.881 | 68.574 | 35.746 | 0.00 | 0.00 |
| ATOM | 4074 | NE   | ARG | X | 272 | 54.106 | 69.306 | 37.370 | 0.00 | 0.00 |
| ATOM | 4075 | HE   | ARG | X | 272 | 54.909 | 68.983 | 37.891 | 0.00 | 0.00 |
| ATOM | 4076 | CZ   | ARG | X | 272 | 53.864 | 70.611 | 37.497 | 0.00 | 0.00 |
| ATOM | 4077 | NH1  | ARG | X | 272 | 52.904 | 71.118 | 36.795 | 0.00 | 0.00 |
| ATOM | 4078 | HH11 | ARG | X | 272 | 52.599 | 70.634 | 35.962 | 0.00 | 0.00 |
| ATOM | 4079 | HH12 | ARG | X | 272 | 52.681 | 72.099 | 36.872 | 0.00 | 0.00 |
| ATOM | 4080 | NH2  | ARG | X | 272 | 54.537 | 71.354 | 38.309 | 0.00 | 0.00 |
| ATOM | 4081 | HH21 | ARG | X | 272 | 55.376 | 71.140 | 38.830 | 0.00 | 0.00 |
| ATOM | 4082 | HH22 | ARG | X | 272 | 54.329 | 72.343 | 38.321 | 0.00 | 0.00 |
| ATOM | 4083 | C    | ARG | X | 272 | 49.979 | 66.029 | 34.732 | 0.00 | 0.00 |
| ATOM | 4084 | O    | ARG | X | 272 | 48.975 | 65.449 | 35.143 | 0.00 | 0.00 |
| ATOM | 4085 | N    | PRO | X | 273 | 50.557 | 65.795 | 33.506 | 0.00 | 0.00 |
| ATOM | 4086 | CD   | PRO | X | 273 | 51.478 | 66.685 | 32.781 | 0.00 | 0.00 |
| ATOM | 4087 | HD2  | PRO | X | 273 | 52.258 | 67.024 | 33.463 | 0.00 | 0.00 |
| ATOM | 4088 | HD3  | PRO | X | 273 | 51.008 | 67.533 | 32.282 | 0.00 | 0.00 |
| ATOM | 4089 | CG   | PRO | X | 273 | 52.090 | 65.833 | 31.650 | 0.00 | 0.00 |
| ATOM | 4090 | HG2  | PRO | X | 273 | 52.857 | 65.201 | 32.097 | 0.00 | 0.00 |
| ATOM | 4091 | HG3  | PRO | X | 273 | 52.470 | 66.449 | 30.835 | 0.00 | 0.00 |

|      |      |      |     |   |     |        |        |        |      |      |
|------|------|------|-----|---|-----|--------|--------|--------|------|------|
| ATOM | 4092 | CB   | PRO | X | 273 | 50.792 | 65.066 | 31.225 | 0.00 | 0.00 |
| ATOM | 4093 | HB2  | PRO | X | 273 | 50.936 | 64.149 | 30.654 | 0.00 | 0.00 |
| ATOM | 4094 | HB3  | PRO | X | 273 | 50.069 | 65.730 | 30.752 | 0.00 | 0.00 |
| ATOM | 4095 | CA   | PRO | X | 273 | 49.968 | 64.841 | 32.555 | 0.00 | 0.00 |
| ATOM | 4096 | HA   | PRO | X | 273 | 48.952 | 65.217 | 32.431 | 0.00 | 0.00 |
| ATOM | 4097 | C    | PRO | X | 273 | 49.955 | 63.343 | 33.096 | 0.00 | 0.00 |
| ATOM | 4098 | O    | PRO | X | 273 | 50.701 | 62.931 | 33.990 | 0.00 | 0.00 |
| ATOM | 4099 | N    | ALA | X | 274 | 48.990 | 62.551 | 32.603 | 0.00 | 0.00 |
| ATOM | 4100 | H    | ALA | X | 274 | 48.414 | 62.952 | 31.877 | 0.00 | 0.00 |
| ATOM | 4101 | CA   | ALA | X | 274 | 48.620 | 61.321 | 33.263 | 0.00 | 0.00 |
| ATOM | 4102 | HA   | ALA | X | 274 | 48.405 | 61.669 | 34.274 | 0.00 | 0.00 |
| ATOM | 4103 | CB   | ALA | X | 274 | 47.298 | 60.839 | 32.538 | 0.00 | 0.00 |
| ATOM | 4104 | HB1  | ALA | X | 274 | 46.919 | 59.872 | 32.870 | 0.00 | 0.00 |
| ATOM | 4105 | HB2  | ALA | X | 274 | 47.552 | 60.889 | 31.480 | 0.00 | 0.00 |
| ATOM | 4106 | HB3  | ALA | X | 274 | 46.597 | 61.650 | 32.735 | 0.00 | 0.00 |
| ATOM | 4107 | C    | ALA | X | 274 | 49.755 | 60.294 | 33.247 | 0.00 | 0.00 |
| ATOM | 4108 | O    | ALA | X | 274 | 49.798 | 59.468 | 34.162 | 0.00 | 0.00 |
| ATOM | 4109 | N    | GLN | X | 275 | 50.610 | 60.223 | 32.213 | 0.00 | 0.00 |
| ATOM | 4110 | H    | GLN | X | 275 | 50.357 | 60.702 | 31.361 | 0.00 | 0.00 |
| ATOM | 4111 | CA   | GLN | X | 275 | 51.673 | 59.314 | 31.970 | 0.00 | 0.00 |
| ATOM | 4112 | HA   | GLN | X | 275 | 51.253 | 58.311 | 32.038 | 0.00 | 0.00 |
| ATOM | 4113 | CB   | GLN | X | 275 | 52.185 | 59.393 | 30.533 | 0.00 | 0.00 |
| ATOM | 4114 | HB2  | GLN | X | 275 | 51.407 | 59.240 | 29.785 | 0.00 | 0.00 |
| ATOM | 4115 | HB3  | GLN | X | 275 | 52.503 | 60.424 | 30.385 | 0.00 | 0.00 |
| ATOM | 4116 | CG   | GLN | X | 275 | 53.388 | 58.515 | 30.240 | 0.00 | 0.00 |
| ATOM | 4117 | HG2  | GLN | X | 275 | 54.248 | 58.899 | 30.789 | 0.00 | 0.00 |
| ATOM | 4118 | HG3  | GLN | X | 275 | 53.181 | 57.475 | 30.496 | 0.00 | 0.00 |
| ATOM | 4119 | CD   | GLN | X | 275 | 53.798 | 58.637 | 28.746 | 0.00 | 0.00 |
| ATOM | 4120 | OE1  | GLN | X | 275 | 54.658 | 59.382 | 28.344 | 0.00 | 0.00 |
| ATOM | 4121 | NE2  | GLN | X | 275 | 53.206 | 58.008 | 27.773 | 0.00 | 0.00 |
| ATOM | 4122 | HE21 | GLN | X | 275 | 53.417 | 58.235 | 26.812 | 0.00 | 0.00 |
| ATOM | 4123 | HE22 | GLN | X | 275 | 52.449 | 57.367 | 27.962 | 0.00 | 0.00 |
| ATOM | 4124 | C    | GLN | X | 275 | 52.673 | 59.413 | 33.175 | 0.00 | 0.00 |
| ATOM | 4125 | O    | GLN | X | 275 | 53.046 | 58.452 | 33.818 | 0.00 | 0.00 |
| ATOM | 4126 | N    | VAL | X | 276 | 53.188 | 60.625 | 33.448 | 0.00 | 0.00 |
| ATOM | 4127 | H    | VAL | X | 276 | 53.008 | 61.453 | 32.898 | 0.00 | 0.00 |
| ATOM | 4128 | CA   | VAL | X | 276 | 54.133 | 60.816 | 34.599 | 0.00 | 0.00 |
| ATOM | 4129 | HA   | VAL | X | 276 | 54.836 | 59.997 | 34.446 | 0.00 | 0.00 |
| ATOM | 4130 | CB   | VAL | X | 276 | 55.037 | 62.064 | 34.380 | 0.00 | 0.00 |
| ATOM | 4131 | HB   | VAL | X | 276 | 55.500 | 62.019 | 33.394 | 0.00 | 0.00 |
| ATOM | 4132 | CG1  | VAL | X | 276 | 54.270 | 63.423 | 34.555 | 0.00 | 0.00 |
| ATOM | 4133 | HG11 | VAL | X | 276 | 53.422 | 63.549 | 33.883 | 0.00 | 0.00 |
| ATOM | 4134 | HG12 | VAL | X | 276 | 53.877 | 63.581 | 35.560 | 0.00 | 0.00 |
| ATOM | 4135 | HG13 | VAL | X | 276 | 54.952 | 64.219 | 34.255 | 0.00 | 0.00 |
| ATOM | 4136 | CG2  | VAL | X | 276 | 56.205 | 61.963 | 35.366 | 0.00 | 0.00 |
| ATOM | 4137 | HG21 | VAL | X | 276 | 56.954 | 62.688 | 35.045 | 0.00 | 0.00 |
| ATOM | 4138 | HG22 | VAL | X | 276 | 56.675 | 60.980 | 35.364 | 0.00 | 0.00 |
| ATOM | 4139 | HG23 | VAL | X | 276 | 55.926 | 62.189 | 36.395 | 0.00 | 0.00 |
| ATOM | 4140 | C    | VAL | X | 276 | 53.572 | 60.679 | 36.011 | 0.00 | 0.00 |
| ATOM | 4141 | O    | VAL | X | 276 | 54.347 | 60.384 | 36.926 | 0.00 | 0.00 |
| ATOM | 4142 | N    | LEU | X | 277 | 52.239 | 60.825 | 36.204 | 0.00 | 0.00 |
| ATOM | 4143 | H    | LEU | X | 277 | 51.651 | 61.184 | 35.466 | 0.00 | 0.00 |
| ATOM | 4144 | CA   | LEU | X | 277 | 51.511 | 60.440 | 37.436 | 0.00 | 0.00 |
| ATOM | 4145 | HA   | LEU | X | 277 | 52.127 | 60.854 | 38.234 | 0.00 | 0.00 |
| ATOM | 4146 | CB   | LEU | X | 277 | 50.136 | 61.070 | 37.307 | 0.00 | 0.00 |
| ATOM | 4147 | HB2  | LEU | X | 277 | 50.295 | 62.144 | 37.204 | 0.00 | 0.00 |
| ATOM | 4148 | HB3  | LEU | X | 277 | 49.732 | 60.656 | 36.384 | 0.00 | 0.00 |
| ATOM | 4149 | CG   | LEU | X | 277 | 49.095 | 60.913 | 38.434 | 0.00 | 0.00 |
| ATOM | 4150 | HG   | LEU | X | 277 | 49.011 | 59.863 | 38.713 | 0.00 | 0.00 |
| ATOM | 4151 | CD1  | LEU | X | 277 | 49.487 | 61.744 | 39.624 | 0.00 | 0.00 |
| ATOM | 4152 | HD11 | LEU | X | 277 | 50.513 | 61.490 | 39.891 | 0.00 | 0.00 |
| ATOM | 4153 | HD12 | LEU | X | 277 | 48.792 | 61.507 | 40.429 | 0.00 | 0.00 |
| ATOM | 4154 | HD13 | LEU | X | 277 | 49.595 | 62.809 | 39.417 | 0.00 | 0.00 |
| ATOM | 4155 | CD2  | LEU | X | 277 | 47.747 | 61.414 | 37.909 | 0.00 | 0.00 |
| ATOM | 4156 | HD21 | LEU | X | 277 | 47.141 | 61.566 | 38.803 | 0.00 | 0.00 |
| ATOM | 4157 | HD22 | LEU | X | 277 | 47.871 | 62.295 | 37.279 | 0.00 | 0.00 |
| ATOM | 4158 | HD23 | LEU | X | 277 | 47.256 | 60.545 | 37.471 | 0.00 | 0.00 |

|      |      |      |     |   |     |        |        |        |      |      |
|------|------|------|-----|---|-----|--------|--------|--------|------|------|
| ATOM | 4159 | C    | LEU | X | 277 | 51.510 | 58.856 | 37.649 | 0.00 | 0.00 |
| ATOM | 4160 | O    | LEU | X | 277 | 51.874 | 58.400 | 38.691 | 0.00 | 0.00 |
| ATOM | 4161 | N    | VAL | X | 278 | 51.284 | 58.127 | 36.526 | 0.00 | 0.00 |
| ATOM | 4162 | H    | VAL | X | 278 | 50.905 | 58.586 | 35.710 | 0.00 | 0.00 |
| ATOM | 4163 | CA   | VAL | X | 278 | 51.488 | 56.617 | 36.418 | 0.00 | 0.00 |
| ATOM | 4164 | HA   | VAL | X | 278 | 50.891 | 56.215 | 37.236 | 0.00 | 0.00 |
| ATOM | 4165 | CB   | VAL | X | 278 | 50.939 | 55.916 | 35.185 | 0.00 | 0.00 |
| ATOM | 4166 | HB   | VAL | X | 278 | 51.500 | 56.239 | 34.308 | 0.00 | 0.00 |
| ATOM | 4167 | CG1  | VAL | X | 278 | 51.189 | 54.381 | 35.246 | 0.00 | 0.00 |
| ATOM | 4168 | HG11 | VAL | X | 278 | 50.874 | 53.948 | 36.196 | 0.00 | 0.00 |
| ATOM | 4169 | HG12 | VAL | X | 278 | 50.653 | 53.902 | 34.426 | 0.00 | 0.00 |
| ATOM | 4170 | HG13 | VAL | X | 278 | 52.244 | 54.155 | 35.092 | 0.00 | 0.00 |
| ATOM | 4171 | CG2  | VAL | X | 278 | 49.453 | 56.065 | 34.957 | 0.00 | 0.00 |
| ATOM | 4172 | HG21 | VAL | X | 278 | 49.209 | 55.822 | 33.923 | 0.00 | 0.00 |
| ATOM | 4173 | HG22 | VAL | X | 278 | 49.210 | 57.095 | 35.218 | 0.00 | 0.00 |
| ATOM | 4174 | HG23 | VAL | X | 278 | 48.990 | 55.333 | 35.619 | 0.00 | 0.00 |
| ATOM | 4175 | C    | VAL | X | 278 | 52.992 | 56.291 | 36.653 | 0.00 | 0.00 |
| ATOM | 4176 | O    | VAL | X | 278 | 53.197 | 55.337 | 37.422 | 0.00 | 0.00 |
| ATOM | 4177 | N    | ASN | X | 279 | 54.005 | 56.905 | 36.020 | 0.00 | 0.00 |
| ATOM | 4178 | H    | ASN | X | 279 | 53.770 | 57.703 | 35.446 | 0.00 | 0.00 |
| ATOM | 4179 | CA   | ASN | X | 279 | 55.415 | 56.610 | 36.209 | 0.00 | 0.00 |
| ATOM | 4180 | HA   | ASN | X | 279 | 55.594 | 55.588 | 35.873 | 0.00 | 0.00 |
| ATOM | 4181 | CB   | ASN | X | 279 | 56.234 | 57.589 | 35.359 | 0.00 | 0.00 |
| ATOM | 4182 | HB2  | ASN | X | 279 | 55.929 | 57.568 | 34.313 | 0.00 | 0.00 |
| ATOM | 4183 | HB3  | ASN | X | 279 | 56.061 | 58.584 | 35.769 | 0.00 | 0.00 |
| ATOM | 4184 | CG   | ASN | X | 279 | 57.757 | 57.263 | 35.590 | 0.00 | 0.00 |
| ATOM | 4185 | OD1  | ASN | X | 279 | 58.181 | 56.149 | 35.269 | 0.00 | 0.00 |
| ATOM | 4186 | ND2  | ASN | X | 279 | 58.551 | 58.149 | 36.042 | 0.00 | 0.00 |
| ATOM | 4187 | HD21 | ASN | X | 279 | 59.512 | 57.893 | 36.216 | 0.00 | 0.00 |
| ATOM | 4188 | HD22 | ASN | X | 279 | 58.163 | 59.026 | 36.359 | 0.00 | 0.00 |
| ATOM | 4189 | C    | ASN | X | 279 | 55.875 | 56.665 | 37.675 | 0.00 | 0.00 |
| ATOM | 4190 | O    | ASN | X | 279 | 56.663 | 55.826 | 38.163 | 0.00 | 0.00 |
| ATOM | 4191 | N    | HIE | X | 280 | 55.346 | 57.641 | 38.421 | 0.00 | 0.00 |
| ATOM | 4192 | H    | HIE | X | 280 | 54.808 | 58.397 | 38.022 | 0.00 | 0.00 |
| ATOM | 4193 | CA   | HIE | X | 280 | 55.566 | 57.726 | 39.859 | 0.00 | 0.00 |
| ATOM | 4194 | HA   | HIE | X | 280 | 56.598 | 57.390 | 39.969 | 0.00 | 0.00 |
| ATOM | 4195 | CB   | HIE | X | 280 | 55.664 | 59.199 | 40.228 | 0.00 | 0.00 |
| ATOM | 4196 | HB2  | HIE | X | 280 | 54.745 | 59.721 | 39.964 | 0.00 | 0.00 |
| ATOM | 4197 | HB3  | HIE | X | 280 | 55.603 | 59.266 | 41.314 | 0.00 | 0.00 |
| ATOM | 4198 | CG   | HIE | X | 280 | 56.849 | 59.976 | 39.692 | 0.00 | 0.00 |
| ATOM | 4199 | ND1  | HIE | X | 280 | 58.287 | 59.788 | 39.736 | 0.00 | 0.00 |
| ATOM | 4200 | CE1  | HIE | X | 280 | 58.799 | 60.857 | 39.138 | 0.00 | 0.00 |
| ATOM | 4201 | HE1  | HIE | X | 280 | 59.853 | 61.084 | 39.083 | 0.00 | 0.00 |
| ATOM | 4202 | NE2  | HIE | X | 280 | 57.839 | 61.625 | 38.603 | 0.00 | 0.00 |
| ATOM | 4203 | HE2  | HIE | X | 280 | 57.968 | 62.486 | 38.090 | 0.00 | 0.00 |
| ATOM | 4204 | CD2  | HIE | X | 280 | 56.617 | 61.024 | 38.861 | 0.00 | 0.00 |
| ATOM | 4205 | HD2  | HIE | X | 280 | 55.704 | 61.584 | 38.721 | 0.00 | 0.00 |
| ATOM | 4206 | C    | HIE | X | 280 | 54.565 | 57.000 | 40.771 | 0.00 | 0.00 |
| ATOM | 4207 | O    | HIE | X | 280 | 54.784 | 56.924 | 41.933 | 0.00 | 0.00 |
| ATOM | 4208 | N    | GLU | X | 281 | 53.532 | 56.416 | 40.248 | 0.00 | 0.00 |
| ATOM | 4209 | H    | GLU | X | 281 | 53.217 | 56.645 | 39.316 | 0.00 | 0.00 |
| ATOM | 4210 | CA   | GLU | X | 281 | 52.587 | 55.633 | 40.974 | 0.00 | 0.00 |
| ATOM | 4211 | HA   | GLU | X | 281 | 52.139 | 56.259 | 41.746 | 0.00 | 0.00 |
| ATOM | 4212 | CB   | GLU | X | 281 | 51.419 | 55.331 | 40.023 | 0.00 | 0.00 |
| ATOM | 4213 | HB2  | GLU | X | 281 | 50.926 | 56.222 | 39.633 | 0.00 | 0.00 |
| ATOM | 4214 | HB3  | GLU | X | 281 | 51.667 | 54.733 | 39.146 | 0.00 | 0.00 |
| ATOM | 4215 | CG   | GLU | X | 281 | 50.356 | 54.561 | 40.909 | 0.00 | 0.00 |
| ATOM | 4216 | HG2  | GLU | X | 281 | 50.667 | 53.537 | 41.111 | 0.00 | 0.00 |
| ATOM | 4217 | HG3  | GLU | X | 281 | 50.390 | 55.010 | 41.901 | 0.00 | 0.00 |
| ATOM | 4218 | CD   | GLU | X | 281 | 48.900 | 54.540 | 40.603 | 0.00 | 0.00 |
| ATOM | 4219 | OE1  | GLU | X | 281 | 48.358 | 55.450 | 39.836 | 0.00 | 0.00 |
| ATOM | 4220 | OE2  | GLU | X | 281 | 48.249 | 53.675 | 41.199 | 0.00 | 0.00 |
| ATOM | 4221 | C    | GLU | X | 281 | 53.283 | 54.379 | 41.430 | 0.00 | 0.00 |
| ATOM | 4222 | O    | GLU | X | 281 | 53.403 | 54.168 | 42.634 | 0.00 | 0.00 |
| ATOM | 4223 | N    | TRP | X | 282 | 53.711 | 53.535 | 40.514 | 0.00 | 0.00 |
| ATOM | 4224 | H    | TRP | X | 282 | 53.640 | 53.803 | 39.543 | 0.00 | 0.00 |
| ATOM | 4225 | CA   | TRP | X | 282 | 54.453 | 52.335 | 40.923 | 0.00 | 0.00 |

|      |      |      |     |   |     |        |        |        |      |      |
|------|------|------|-----|---|-----|--------|--------|--------|------|------|
| ATOM | 4226 | HA   | TRP | X | 282 | 53.852 | 51.896 | 41.719 | 0.00 | 0.00 |
| ATOM | 4227 | CB   | TRP | X | 282 | 54.495 | 51.438 | 39.721 | 0.00 | 0.00 |
| ATOM | 4228 | HB2  | TRP | X | 282 | 54.548 | 52.039 | 38.813 | 0.00 | 0.00 |
| ATOM | 4229 | HB3  | TRP | X | 282 | 55.467 | 50.946 | 39.722 | 0.00 | 0.00 |
| ATOM | 4230 | CG   | TRP | X | 282 | 53.344 | 50.473 | 39.707 | 0.00 | 0.00 |
| ATOM | 4231 | CD1  | TRP | X | 282 | 52.017 | 50.722 | 39.524 | 0.00 | 0.00 |
| ATOM | 4232 | HD1  | TRP | X | 282 | 51.587 | 51.696 | 39.339 | 0.00 | 0.00 |
| ATOM | 4233 | NE1  | TRP | X | 282 | 51.302 | 49.548 | 39.719 | 0.00 | 0.00 |
| ATOM | 4234 | HE1  | TRP | X | 282 | 50.304 | 49.511 | 39.566 | 0.00 | 0.00 |
| ATOM | 4235 | CE2  | TRP | X | 282 | 52.104 | 48.532 | 40.142 | 0.00 | 0.00 |
| ATOM | 4236 | CZ2  | TRP | X | 282 | 51.851 | 47.247 | 40.710 | 0.00 | 0.00 |
| ATOM | 4237 | HZ2  | TRP | X | 282 | 50.857 | 46.825 | 40.686 | 0.00 | 0.00 |
| ATOM | 4238 | CH2  | TRP | X | 282 | 52.951 | 46.511 | 41.144 | 0.00 | 0.00 |
| ATOM | 4239 | HH2  | TRP | X | 282 | 52.785 | 45.540 | 41.586 | 0.00 | 0.00 |
| ATOM | 4240 | CZ3  | TRP | X | 282 | 54.216 | 46.970 | 40.966 | 0.00 | 0.00 |
| ATOM | 4241 | HZ3  | TRP | X | 282 | 55.110 | 46.419 | 41.215 | 0.00 | 0.00 |
| ATOM | 4242 | CE3  | TRP | X | 282 | 54.475 | 48.165 | 40.297 | 0.00 | 0.00 |
| ATOM | 4243 | HE3  | TRP | X | 282 | 55.501 | 48.481 | 40.182 | 0.00 | 0.00 |
| ATOM | 4244 | CD2  | TRP | X | 282 | 53.422 | 49.032 | 40.016 | 0.00 | 0.00 |
| ATOM | 4245 | C    | TRP | X | 282 | 55.775 | 52.741 | 41.609 | 0.00 | 0.00 |
| ATOM | 4246 | O    | TRP | X | 282 | 56.437 | 51.894 | 42.215 | 0.00 | 0.00 |
| ATOM | 4247 | N    | HIE | X | 283 | 56.232 | 53.997 | 41.561 | 0.00 | 0.00 |
| ATOM | 4248 | H    | HIE | X | 283 | 55.807 | 54.636 | 40.904 | 0.00 | 0.00 |
| ATOM | 4249 | CA   | HIE | X | 283 | 57.372 | 54.440 | 42.341 | 0.00 | 0.00 |
| ATOM | 4250 | HA   | HIE | X | 283 | 58.084 | 53.615 | 42.320 | 0.00 | 0.00 |
| ATOM | 4251 | CB   | HIE | X | 283 | 57.959 | 55.674 | 41.787 | 0.00 | 0.00 |
| ATOM | 4252 | HB2  | HIE | X | 283 | 57.735 | 55.638 | 40.721 | 0.00 | 0.00 |
| ATOM | 4253 | HB3  | HIE | X | 283 | 57.468 | 56.509 | 42.288 | 0.00 | 0.00 |
| ATOM | 4254 | CG   | HIE | X | 283 | 59.515 | 55.852 | 42.028 | 0.00 | 0.00 |
| ATOM | 4255 | ND1  | HIE | X | 283 | 60.470 | 54.787 | 42.236 | 0.00 | 0.00 |
| ATOM | 4256 | CE1  | HIE | X | 283 | 61.593 | 55.488 | 42.532 | 0.00 | 0.00 |
| ATOM | 4257 | HE1  | HIE | X | 283 | 62.571 | 55.068 | 42.714 | 0.00 | 0.00 |
| ATOM | 4258 | NE2  | HIE | X | 283 | 61.405 | 56.842 | 42.534 | 0.00 | 0.00 |
| ATOM | 4259 | HE2  | HIE | X | 283 | 62.068 | 57.589 | 42.679 | 0.00 | 0.00 |
| ATOM | 4260 | CD2  | HIE | X | 283 | 60.089 | 57.036 | 42.256 | 0.00 | 0.00 |
| ATOM | 4261 | HD2  | HIE | X | 283 | 59.723 | 58.051 | 42.210 | 0.00 | 0.00 |
| ATOM | 4262 | C    | HIE | X | 283 | 56.965 | 54.660 | 43.829 | 0.00 | 0.00 |
| ATOM | 4263 | O    | HIE | X | 283 | 57.804 | 54.379 | 44.686 | 0.00 | 0.00 |
| ATOM | 4264 | N    | VAL | X | 284 | 55.740 | 55.067 | 44.210 | 0.00 | 0.00 |
| ATOM | 4265 | H    | VAL | X | 284 | 55.120 | 55.356 | 43.466 | 0.00 | 0.00 |
| ATOM | 4266 | CA   | VAL | X | 284 | 55.107 | 54.971 | 45.563 | 0.00 | 0.00 |
| ATOM | 4267 | HA   | VAL | X | 284 | 55.874 | 55.153 | 46.316 | 0.00 | 0.00 |
| ATOM | 4268 | CB   | VAL | X | 284 | 54.129 | 56.172 | 45.762 | 0.00 | 0.00 |
| ATOM | 4269 | HB   | VAL | X | 284 | 53.782 | 56.059 | 46.789 | 0.00 | 0.00 |
| ATOM | 4270 | CG1  | VAL | X | 284 | 54.915 | 57.474 | 45.771 | 0.00 | 0.00 |
| ATOM | 4271 | HG11 | VAL | X | 284 | 55.678 | 57.392 | 46.545 | 0.00 | 0.00 |
| ATOM | 4272 | HG12 | VAL | X | 284 | 55.367 | 57.616 | 44.789 | 0.00 | 0.00 |
| ATOM | 4273 | HG13 | VAL | X | 284 | 54.323 | 58.350 | 46.035 | 0.00 | 0.00 |
| ATOM | 4274 | CG2  | VAL | X | 284 | 52.983 | 56.208 | 44.797 | 0.00 | 0.00 |
| ATOM | 4275 | HG21 | VAL | X | 284 | 52.565 | 55.202 | 44.756 | 0.00 | 0.00 |
| ATOM | 4276 | HG22 | VAL | X | 284 | 53.217 | 56.649 | 43.828 | 0.00 | 0.00 |
| ATOM | 4277 | HG23 | VAL | X | 284 | 52.248 | 56.969 | 45.060 | 0.00 | 0.00 |
| ATOM | 4278 | C    | VAL | X | 284 | 54.532 | 53.625 | 45.958 | 0.00 | 0.00 |
| ATOM | 4279 | O    | VAL | X | 284 | 53.588 | 53.486 | 46.779 | 0.00 | 0.00 |
| ATOM | 4280 | N    | LEU | X | 285 | 55.115 | 52.537 | 45.493 | 0.00 | 0.00 |
| ATOM | 4281 | H    | LEU | X | 285 | 56.022 | 52.758 | 45.108 | 0.00 | 0.00 |
| ATOM | 4282 | CA   | LEU | X | 285 | 54.700 | 51.154 | 45.752 | 0.00 | 0.00 |
| ATOM | 4283 | HA   | LEU | X | 285 | 53.625 | 50.976 | 45.776 | 0.00 | 0.00 |
| ATOM | 4284 | CB   | LEU | X | 285 | 55.405 | 50.298 | 44.672 | 0.00 | 0.00 |
| ATOM | 4285 | HB2  | LEU | X | 285 | 55.034 | 50.802 | 43.779 | 0.00 | 0.00 |
| ATOM | 4286 | HB3  | LEU | X | 285 | 56.493 | 50.304 | 44.736 | 0.00 | 0.00 |
| ATOM | 4287 | CG   | LEU | X | 285 | 54.971 | 48.834 | 44.609 | 0.00 | 0.00 |
| ATOM | 4288 | HG   | LEU | X | 285 | 54.931 | 48.430 | 45.621 | 0.00 | 0.00 |
| ATOM | 4289 | CD1  | LEU | X | 285 | 53.503 | 48.701 | 44.040 | 0.00 | 0.00 |
| ATOM | 4290 | HD11 | LEU | X | 285 | 53.150 | 47.670 | 43.997 | 0.00 | 0.00 |
| ATOM | 4291 | HD12 | LEU | X | 285 | 53.586 | 49.106 | 43.032 | 0.00 | 0.00 |
| ATOM | 4292 | HD13 | LEU | X | 285 | 52.757 | 49.247 | 44.617 | 0.00 | 0.00 |

|      |      |      |     |   |     |        |        |        |      |      |
|------|------|------|-----|---|-----|--------|--------|--------|------|------|
| ATOM | 4293 | CD2  | LEU | X | 285 | 56.036 | 47.998 | 43.741 | 0.00 | 0.00 |
| ATOM | 4294 | HD21 | LEU | X | 285 | 56.093 | 48.480 | 42.766 | 0.00 | 0.00 |
| ATOM | 4295 | HD22 | LEU | X | 285 | 57.022 | 47.990 | 44.206 | 0.00 | 0.00 |
| ATOM | 4296 | HD23 | LEU | X | 285 | 55.693 | 46.964 | 43.693 | 0.00 | 0.00 |
| ATOM | 4297 | C    | LEU | X | 285 | 55.267 | 50.698 | 47.108 | 0.00 | 0.00 |
| ATOM | 4298 | O    | LEU | X | 285 | 56.394 | 51.131 | 47.418 | 0.00 | 0.00 |
| ATOM | 4299 | N    | PRO | X | 286 | 54.564 | 49.822 | 47.871 | 0.00 | 0.00 |
| ATOM | 4300 | CD   | PRO | X | 286 | 53.127 | 49.727 | 47.940 | 0.00 | 0.00 |
| ATOM | 4301 | HD2  | PRO | X | 286 | 52.756 | 49.132 | 47.106 | 0.00 | 0.00 |
| ATOM | 4302 | HD3  | PRO | X | 286 | 52.758 | 50.751 | 47.867 | 0.00 | 0.00 |
| ATOM | 4303 | CG   | PRO | X | 286 | 52.763 | 49.018 | 49.289 | 0.00 | 0.00 |
| ATOM | 4304 | HG2  | PRO | X | 286 | 51.914 | 48.336 | 49.302 | 0.00 | 0.00 |
| ATOM | 4305 | HG3  | PRO | X | 286 | 52.736 | 49.827 | 50.018 | 0.00 | 0.00 |
| ATOM | 4306 | CB   | PRO | X | 286 | 54.072 | 48.240 | 49.587 | 0.00 | 0.00 |
| ATOM | 4307 | HB2  | PRO | X | 286 | 54.093 | 47.267 | 49.094 | 0.00 | 0.00 |
| ATOM | 4308 | HB3  | PRO | X | 286 | 54.314 | 48.122 | 50.643 | 0.00 | 0.00 |
| ATOM | 4309 | CA   | PRO | X | 286 | 55.109 | 49.153 | 48.993 | 0.00 | 0.00 |
| ATOM | 4310 | HA   | PRO | X | 286 | 55.494 | 49.826 | 49.759 | 0.00 | 0.00 |
| ATOM | 4311 | C    | PRO | X | 286 | 56.379 | 48.290 | 48.596 | 0.00 | 0.00 |
| ATOM | 4312 | O    | PRO | X | 286 | 56.418 | 47.826 | 47.433 | 0.00 | 0.00 |
| ATOM | 4313 | N    | GLN | X | 287 | 57.320 | 48.027 | 49.472 | 0.00 | 0.00 |
| ATOM | 4314 | H    | GLN | X | 287 | 57.111 | 48.387 | 50.392 | 0.00 | 0.00 |
| ATOM | 4315 | CA   | GLN | X | 287 | 58.523 | 47.295 | 49.219 | 0.00 | 0.00 |
| ATOM | 4316 | HA   | GLN | X | 287 | 58.417 | 46.779 | 48.265 | 0.00 | 0.00 |
| ATOM | 4317 | CB   | GLN | X | 287 | 59.730 | 48.236 | 49.172 | 0.00 | 0.00 |
| ATOM | 4318 | HB2  | GLN | X | 287 | 59.836 | 48.699 | 50.153 | 0.00 | 0.00 |
| ATOM | 4319 | HB3  | GLN | X | 287 | 60.692 | 47.742 | 49.034 | 0.00 | 0.00 |
| ATOM | 4320 | CG   | GLN | X | 287 | 59.566 | 49.356 | 48.087 | 0.00 | 0.00 |
| ATOM | 4321 | HG2  | GLN | X | 287 | 58.799 | 50.074 | 48.378 | 0.00 | 0.00 |
| ATOM | 4322 | HG3  | GLN | X | 287 | 60.469 | 49.944 | 48.247 | 0.00 | 0.00 |
| ATOM | 4323 | CD   | GLN | X | 287 | 59.476 | 48.929 | 46.588 | 0.00 | 0.00 |
| ATOM | 4324 | OE1  | GLN | X | 287 | 59.849 | 47.823 | 46.213 | 0.00 | 0.00 |
| ATOM | 4325 | NE2  | GLN | X | 287 | 58.901 | 49.842 | 45.804 | 0.00 | 0.00 |
| ATOM | 4326 | HE21 | GLN | X | 287 | 58.849 | 49.566 | 44.834 | 0.00 | 0.00 |
| ATOM | 4327 | HE22 | GLN | X | 287 | 58.576 | 50.741 | 46.129 | 0.00 | 0.00 |
| ATOM | 4328 | C    | GLN | X | 287 | 58.662 | 46.202 | 50.229 | 0.00 | 0.00 |
| ATOM | 4329 | O    | GLN | X | 287 | 57.947 | 46.257 | 51.242 | 0.00 | 0.00 |
| ATOM | 4330 | N    | GLU | X | 288 | 59.540 | 45.175 | 49.942 | 0.00 | 0.00 |
| ATOM | 4331 | H    | GLU | X | 288 | 59.949 | 45.149 | 49.019 | 0.00 | 0.00 |
| ATOM | 4332 | CA   | GLU | X | 288 | 59.593 | 43.867 | 50.697 | 0.00 | 0.00 |
| ATOM | 4333 | HA   | GLU | X | 288 | 59.896 | 43.061 | 50.028 | 0.00 | 0.00 |
| ATOM | 4334 | CB   | GLU | X | 288 | 60.621 | 43.911 | 51.827 | 0.00 | 0.00 |
| ATOM | 4335 | HB2  | GLU | X | 288 | 60.352 | 44.732 | 52.492 | 0.00 | 0.00 |
| ATOM | 4336 | HB3  | GLU | X | 288 | 60.564 | 42.930 | 52.299 | 0.00 | 0.00 |
| ATOM | 4337 | CG   | GLU | X | 288 | 61.995 | 44.320 | 51.360 | 0.00 | 0.00 |
| ATOM | 4338 | HG2  | GLU | X | 288 | 62.283 | 43.901 | 50.395 | 0.00 | 0.00 |
| ATOM | 4339 | HG3  | GLU | X | 288 | 61.953 | 45.384 | 51.125 | 0.00 | 0.00 |
| ATOM | 4340 | CD   | GLU | X | 288 | 63.082 | 44.042 | 52.406 | 0.00 | 0.00 |
| ATOM | 4341 | OE1  | GLU | X | 288 | 63.455 | 42.899 | 52.754 | 0.00 | 0.00 |
| ATOM | 4342 | OE2  | GLU | X | 288 | 63.588 | 45.016 | 52.988 | 0.00 | 0.00 |
| ATOM | 4343 | C    | GLU | X | 288 | 58.166 | 43.418 | 51.170 | 0.00 | 0.00 |
| ATOM | 4344 | O    | GLU | X | 288 | 57.895 | 43.175 | 52.344 | 0.00 | 0.00 |
| ATOM | 4345 | N    | SER | X | 289 | 57.225 | 43.564 | 50.291 | 0.00 | 0.00 |
| ATOM | 4346 | H    | SER | X | 289 | 57.599 | 43.837 | 49.393 | 0.00 | 0.00 |
| ATOM | 4347 | CA   | SER | X | 289 | 55.750 | 43.424 | 50.448 | 0.00 | 0.00 |
| ATOM | 4348 | HA   | SER | X | 289 | 55.459 | 42.806 | 51.297 | 0.00 | 0.00 |
| ATOM | 4349 | CB   | SER | X | 289 | 55.095 | 44.827 | 50.629 | 0.00 | 0.00 |
| ATOM | 4350 | HB2  | SER | X | 289 | 55.299 | 45.375 | 49.710 | 0.00 | 0.00 |
| ATOM | 4351 | HB3  | SER | X | 289 | 54.015 | 44.702 | 50.710 | 0.00 | 0.00 |
| ATOM | 4352 | OG   | SER | X | 289 | 55.609 | 45.488 | 51.785 | 0.00 | 0.00 |
| ATOM | 4353 | HG   | SER | X | 289 | 56.512 | 45.774 | 51.629 | 0.00 | 0.00 |
| ATOM | 4354 | C    | SER | X | 289 | 55.108 | 42.895 | 49.191 | 0.00 | 0.00 |
| ATOM | 4355 | O    | SER | X | 289 | 54.570 | 43.631 | 48.344 | 0.00 | 0.00 |
| ATOM | 4356 | N    | VAL | X | 290 | 55.229 | 41.633 | 48.867 | 0.00 | 0.00 |
| ATOM | 4357 | H    | VAL | X | 290 | 55.825 | 40.958 | 49.326 | 0.00 | 0.00 |
| ATOM | 4358 | CA   | VAL | X | 290 | 54.609 | 40.886 | 47.819 | 0.00 | 0.00 |
| ATOM | 4359 | HA   | VAL | X | 290 | 54.846 | 41.402 | 46.889 | 0.00 | 0.00 |

|      |      |      |     |   |     |        |        |        |      |      |
|------|------|------|-----|---|-----|--------|--------|--------|------|------|
| ATOM | 4360 | CB   | VAL | X | 290 | 55.178 | 39.462 | 47.610 | 0.00 | 0.00 |
| ATOM | 4361 | HB   | VAL | X | 290 | 55.002 | 38.916 | 48.536 | 0.00 | 0.00 |
| ATOM | 4362 | CG1  | VAL | X | 290 | 54.496 | 38.670 | 46.541 | 0.00 | 0.00 |
| ATOM | 4363 | HG11 | VAL | X | 290 | 54.509 | 39.075 | 45.529 | 0.00 | 0.00 |
| ATOM | 4364 | HG12 | VAL | X | 290 | 54.981 | 37.694 | 46.563 | 0.00 | 0.00 |
| ATOM | 4365 | HG13 | VAL | X | 290 | 53.433 | 38.561 | 46.760 | 0.00 | 0.00 |
| ATOM | 4366 | CG2  | VAL | X | 290 | 56.698 | 39.469 | 47.354 | 0.00 | 0.00 |
| ATOM | 4367 | HG21 | VAL | X | 290 | 57.089 | 38.457 | 47.463 | 0.00 | 0.00 |
| ATOM | 4368 | HG22 | VAL | X | 290 | 57.184 | 40.216 | 47.981 | 0.00 | 0.00 |
| ATOM | 4369 | HG23 | VAL | X | 290 | 56.821 | 39.656 | 46.287 | 0.00 | 0.00 |
| ATOM | 4370 | C    | VAL | X | 290 | 53.055 | 40.877 | 47.907 | 0.00 | 0.00 |
| ATOM | 4371 | O    | VAL | X | 290 | 52.490 | 40.644 | 48.934 | 0.00 | 0.00 |
| ATOM | 4372 | N    | PHE | X | 291 | 52.330 | 41.157 | 46.841 | 0.00 | 0.00 |
| ATOM | 4373 | H    | PHE | X | 291 | 52.931 | 41.273 | 46.038 | 0.00 | 0.00 |
| ATOM | 4374 | CA   | PHE | X | 291 | 50.874 | 41.144 | 46.639 | 0.00 | 0.00 |
| ATOM | 4375 | HA   | PHE | X | 291 | 50.703 | 41.094 | 45.563 | 0.00 | 0.00 |
| ATOM | 4376 | CB   | PHE | X | 291 | 50.200 | 39.879 | 47.193 | 0.00 | 0.00 |
| ATOM | 4377 | HB2  | PHE | X | 291 | 51.000 | 39.150 | 47.062 | 0.00 | 0.00 |
| ATOM | 4378 | HB3  | PHE | X | 291 | 50.120 | 40.107 | 48.256 | 0.00 | 0.00 |
| ATOM | 4379 | CG   | PHE | X | 291 | 48.809 | 39.429 | 46.710 | 0.00 | 0.00 |
| ATOM | 4380 | CD1  | PHE | X | 291 | 47.832 | 40.355 | 46.286 | 0.00 | 0.00 |
| ATOM | 4381 | HD1  | PHE | X | 291 | 48.042 | 41.399 | 46.107 | 0.00 | 0.00 |
| ATOM | 4382 | CE1  | PHE | X | 291 | 46.545 | 39.943 | 45.927 | 0.00 | 0.00 |
| ATOM | 4383 | HE1  | PHE | X | 291 | 45.792 | 40.620 | 45.551 | 0.00 | 0.00 |
| ATOM | 4384 | CZ   | PHE | X | 291 | 46.234 | 38.586 | 46.162 | 0.00 | 0.00 |
| ATOM | 4385 | HZ   | PHE | X | 291 | 45.199 | 38.282 | 46.110 | 0.00 | 0.00 |
| ATOM | 4386 | CE2  | PHE | X | 291 | 47.268 | 37.640 | 46.560 | 0.00 | 0.00 |
| ATOM | 4387 | HE2  | PHE | X | 291 | 46.935 | 36.620 | 46.681 | 0.00 | 0.00 |
| ATOM | 4388 | CD2  | PHE | X | 291 | 48.512 | 38.097 | 46.934 | 0.00 | 0.00 |
| ATOM | 4389 | HD2  | PHE | X | 291 | 49.327 | 37.484 | 47.289 | 0.00 | 0.00 |
| ATOM | 4390 | C    | PHE | X | 291 | 50.280 | 42.456 | 47.223 | 0.00 | 0.00 |
| ATOM | 4391 | O    | PHE | X | 291 | 49.274 | 42.393 | 47.899 | 0.00 | 0.00 |
| ATOM | 4392 | N    | ARG | X | 292 | 50.859 | 43.599 | 46.895 | 0.00 | 0.00 |
| ATOM | 4393 | H    | ARG | X | 292 | 51.626 | 43.531 | 46.241 | 0.00 | 0.00 |
| ATOM | 4394 | CA   | ARG | X | 292 | 50.568 | 44.993 | 47.389 | 0.00 | 0.00 |
| ATOM | 4395 | HA   | ARG | X | 292 | 49.505 | 45.051 | 47.625 | 0.00 | 0.00 |
| ATOM | 4396 | CB   | ARG | X | 292 | 51.420 | 45.453 | 48.539 | 0.00 | 0.00 |
| ATOM | 4397 | HB2  | ARG | X | 292 | 52.423 | 45.529 | 48.119 | 0.00 | 0.00 |
| ATOM | 4398 | HB3  | ARG | X | 292 | 51.153 | 46.473 | 48.814 | 0.00 | 0.00 |
| ATOM | 4399 | CG   | ARG | X | 292 | 51.174 | 44.641 | 49.836 | 0.00 | 0.00 |
| ATOM | 4400 | HG2  | ARG | X | 292 | 51.365 | 43.595 | 49.597 | 0.00 | 0.00 |
| ATOM | 4401 | HG3  | ARG | X | 292 | 51.920 | 44.914 | 50.582 | 0.00 | 0.00 |
| ATOM | 4402 | CD   | ARG | X | 292 | 49.719 | 44.810 | 50.367 | 0.00 | 0.00 |
| ATOM | 4403 | HD2  | ARG | X | 292 | 49.800 | 45.510 | 51.199 | 0.00 | 0.00 |
| ATOM | 4404 | HD3  | ARG | X | 292 | 48.976 | 45.069 | 49.613 | 0.00 | 0.00 |
| ATOM | 4405 | NE   | ARG | X | 292 | 49.340 | 43.513 | 50.945 | 0.00 | 0.00 |
| ATOM | 4406 | HE   | ARG | X | 292 | 49.642 | 42.709 | 50.414 | 0.00 | 0.00 |
| ATOM | 4407 | CZ   | ARG | X | 292 | 49.220 | 43.223 | 52.268 | 0.00 | 0.00 |
| ATOM | 4408 | NH1  | ARG | X | 292 | 49.321 | 44.071 | 53.236 | 0.00 | 0.00 |
| ATOM | 4409 | HH11 | ARG | X | 292 | 49.374 | 45.072 | 53.114 | 0.00 | 0.00 |
| ATOM | 4410 | HH12 | ARG | X | 292 | 49.376 | 43.826 | 54.214 | 0.00 | 0.00 |
| ATOM | 4411 | NH2  | ARG | X | 292 | 48.903 | 41.999 | 52.605 | 0.00 | 0.00 |
| ATOM | 4412 | HH21 | ARG | X | 292 | 48.670 | 41.279 | 51.936 | 0.00 | 0.00 |
| ATOM | 4413 | HH22 | ARG | X | 292 | 48.815 | 41.756 | 53.581 | 0.00 | 0.00 |
| ATOM | 4414 | C    | ARG | X | 292 | 50.709 | 46.033 | 46.292 | 0.00 | 0.00 |
| ATOM | 4415 | O    | ARG | X | 292 | 51.527 | 45.831 | 45.370 | 0.00 | 0.00 |
| ATOM | 4416 | N    | PHE | X | 293 | 49.888 | 47.116 | 46.322 | 0.00 | 0.00 |
| ATOM | 4417 | H    | PHE | X | 293 | 49.339 | 47.285 | 47.152 | 0.00 | 0.00 |
| ATOM | 4418 | CA   | PHE | X | 293 | 49.550 | 47.910 | 45.171 | 0.00 | 0.00 |
| ATOM | 4419 | HA   | PHE | X | 293 | 50.398 | 47.745 | 44.506 | 0.00 | 0.00 |
| ATOM | 4420 | CB   | PHE | X | 293 | 48.316 | 47.496 | 44.432 | 0.00 | 0.00 |
| ATOM | 4421 | HB2  | PHE | X | 293 | 47.390 | 47.858 | 44.878 | 0.00 | 0.00 |
| ATOM | 4422 | HB3  | PHE | X | 293 | 48.364 | 48.010 | 43.472 | 0.00 | 0.00 |
| ATOM | 4423 | CG   | PHE | X | 293 | 48.198 | 46.075 | 44.126 | 0.00 | 0.00 |
| ATOM | 4424 | CD1  | PHE | X | 293 | 49.248 | 45.441 | 43.420 | 0.00 | 0.00 |
| ATOM | 4425 | HD1  | PHE | X | 293 | 49.983 | 46.032 | 42.894 | 0.00 | 0.00 |
| ATOM | 4426 | CE1  | PHE | X | 293 | 49.245 | 44.017 | 43.251 | 0.00 | 0.00 |

|      |      |      |     |   |     |        |        |        |      |      |
|------|------|------|-----|---|-----|--------|--------|--------|------|------|
| ATOM | 4427 | HE1  | PHE | X | 293 | 50.071 | 43.480 | 42.809 | 0.00 | 0.00 |
| ATOM | 4428 | CZ   | PHE | X | 293 | 48.190 | 43.294 | 43.817 | 0.00 | 0.00 |
| ATOM | 4429 | HZ   | PHE | X | 293 | 48.178 | 42.216 | 43.752 | 0.00 | 0.00 |
| ATOM | 4430 | CE2  | PHE | X | 293 | 47.186 | 43.956 | 44.652 | 0.00 | 0.00 |
| ATOM | 4431 | HE2  | PHE | X | 293 | 46.446 | 43.399 | 45.207 | 0.00 | 0.00 |
| ATOM | 4432 | CD2  | PHE | X | 293 | 47.154 | 45.364 | 44.752 | 0.00 | 0.00 |
| ATOM | 4433 | HD2  | PHE | X | 293 | 46.363 | 45.881 | 45.276 | 0.00 | 0.00 |
| ATOM | 4434 | C    | PHE | X | 293 | 49.781 | 49.397 | 45.503 | 0.00 | 0.00 |
| ATOM | 4435 | O    | PHE | X | 293 | 50.184 | 49.754 | 46.633 | 0.00 | 0.00 |
| ATOM | 4436 | N    | SER | X | 294 | 49.683 | 50.249 | 44.534 | 0.00 | 0.00 |
| ATOM | 4437 | H    | SER | X | 294 | 49.434 | 49.857 | 43.637 | 0.00 | 0.00 |
| ATOM | 4438 | CA   | SER | X | 294 | 50.112 | 51.651 | 44.673 | 0.00 | 0.00 |
| ATOM | 4439 | HA   | SER | X | 294 | 51.040 | 51.654 | 45.243 | 0.00 | 0.00 |
| ATOM | 4440 | CB   | SER | X | 294 | 50.419 | 52.133 | 43.319 | 0.00 | 0.00 |
| ATOM | 4441 | HB2  | SER | X | 294 | 50.389 | 53.222 | 43.309 | 0.00 | 0.00 |
| ATOM | 4442 | HB3  | SER | X | 294 | 51.464 | 51.843 | 43.206 | 0.00 | 0.00 |
| ATOM | 4443 | OG   | SER | X | 294 | 49.641 | 51.577 | 42.229 | 0.00 | 0.00 |
| ATOM | 4444 | HG   | SER | X | 294 | 49.142 | 52.343 | 41.936 | 0.00 | 0.00 |
| ATOM | 4445 | C    | SER | X | 294 | 49.053 | 52.427 | 45.518 | 0.00 | 0.00 |
| ATOM | 4446 | O    | SER | X | 294 | 49.441 | 52.965 | 46.517 | 0.00 | 0.00 |
| ATOM | 4447 | N    | PHE | X | 295 | 47.854 | 52.459 | 44.981 | 0.00 | 0.00 |
| ATOM | 4448 | H    | PHE | X | 295 | 47.748 | 51.991 | 44.092 | 0.00 | 0.00 |
| ATOM | 4449 | CA   | PHE | X | 295 | 46.657 | 53.115 | 45.526 | 0.00 | 0.00 |
| ATOM | 4450 | HA   | PHE | X | 295 | 46.819 | 53.274 | 46.592 | 0.00 | 0.00 |
| ATOM | 4451 | CB   | PHE | X | 295 | 46.499 | 54.464 | 44.758 | 0.00 | 0.00 |
| ATOM | 4452 | HB2  | PHE | X | 295 | 46.503 | 54.266 | 43.687 | 0.00 | 0.00 |
| ATOM | 4453 | HB3  | PHE | X | 295 | 45.502 | 54.869 | 44.937 | 0.00 | 0.00 |
| ATOM | 4454 | CG   | PHE | X | 295 | 47.593 | 55.428 | 45.111 | 0.00 | 0.00 |
| ATOM | 4455 | CD1  | PHE | X | 295 | 47.632 | 56.061 | 46.337 | 0.00 | 0.00 |
| ATOM | 4456 | HD1  | PHE | X | 295 | 47.087 | 55.682 | 47.189 | 0.00 | 0.00 |
| ATOM | 4457 | CE1  | PHE | X | 295 | 48.555 | 57.074 | 46.554 | 0.00 | 0.00 |
| ATOM | 4458 | HE1  | PHE | X | 295 | 48.642 | 57.477 | 47.552 | 0.00 | 0.00 |
| ATOM | 4459 | CZ   | PHE | X | 295 | 49.372 | 57.486 | 45.536 | 0.00 | 0.00 |
| ATOM | 4460 | HZ   | PHE | X | 295 | 50.175 | 58.165 | 45.782 | 0.00 | 0.00 |
| ATOM | 4461 | CE2  | PHE | X | 295 | 49.376 | 56.855 | 44.299 | 0.00 | 0.00 |
| ATOM | 4462 | HE2  | PHE | X | 295 | 50.085 | 56.983 | 43.495 | 0.00 | 0.00 |
| ATOM | 4463 | CD2  | PHE | X | 295 | 48.447 | 55.845 | 44.109 | 0.00 | 0.00 |
| ATOM | 4464 | HD2  | PHE | X | 295 | 48.343 | 55.308 | 43.177 | 0.00 | 0.00 |
| ATOM | 4465 | C    | PHE | X | 295 | 45.404 | 52.191 | 45.435 | 0.00 | 0.00 |
| ATOM | 4466 | O    | PHE | X | 295 | 45.029 | 51.719 | 44.391 | 0.00 | 0.00 |
| ATOM | 4467 | N    | VAL | X | 296 | 44.827 | 51.951 | 46.577 | 0.00 | 0.00 |
| ATOM | 4468 | H    | VAL | X | 296 | 45.087 | 52.637 | 47.271 | 0.00 | 0.00 |
| ATOM | 4469 | CA   | VAL | X | 296 | 43.750 | 50.946 | 46.808 | 0.00 | 0.00 |
| ATOM | 4470 | HA   | VAL | X | 296 | 43.431 | 50.635 | 45.813 | 0.00 | 0.00 |
| ATOM | 4471 | CB   | VAL | X | 296 | 44.377 | 49.732 | 47.517 | 0.00 | 0.00 |
| ATOM | 4472 | HB   | VAL | X | 296 | 43.473 | 49.123 | 47.504 | 0.00 | 0.00 |
| ATOM | 4473 | CG1  | VAL | X | 296 | 45.586 | 49.198 | 46.682 | 0.00 | 0.00 |
| ATOM | 4474 | HG11 | VAL | X | 296 | 46.548 | 49.445 | 47.133 | 0.00 | 0.00 |
| ATOM | 4475 | HG12 | VAL | X | 296 | 45.462 | 48.117 | 46.617 | 0.00 | 0.00 |
| ATOM | 4476 | HG13 | VAL | X | 296 | 45.508 | 49.513 | 45.642 | 0.00 | 0.00 |
| ATOM | 4477 | CG2  | VAL | X | 296 | 44.759 | 50.018 | 48.977 | 0.00 | 0.00 |
| ATOM | 4478 | HG21 | VAL | X | 296 | 45.245 | 49.108 | 49.329 | 0.00 | 0.00 |
| ATOM | 4479 | HG22 | VAL | X | 296 | 44.001 | 50.398 | 49.661 | 0.00 | 0.00 |
| ATOM | 4480 | HG23 | VAL | X | 296 | 45.633 | 50.668 | 49.031 | 0.00 | 0.00 |
| ATOM | 4481 | C    | VAL | X | 296 | 42.564 | 51.605 | 47.636 | 0.00 | 0.00 |
| ATOM | 4482 | O    | VAL | X | 296 | 42.683 | 52.865 | 47.814 | 0.00 | 0.00 |
| ATOM | 4483 | N    | PRO | X | 297 | 41.501 | 50.890 | 47.938 | 0.00 | 0.00 |
| ATOM | 4484 | CD   | PRO | X | 297 | 41.022 | 49.698 | 47.288 | 0.00 | 0.00 |
| ATOM | 4485 | HD2  | PRO | X | 297 | 41.516 | 48.761 | 47.545 | 0.00 | 0.00 |
| ATOM | 4486 | HD3  | PRO | X | 297 | 41.130 | 49.872 | 46.217 | 0.00 | 0.00 |
| ATOM | 4487 | CG   | PRO | X | 297 | 39.515 | 49.639 | 47.688 | 0.00 | 0.00 |
| ATOM | 4488 | HG2  | PRO | X | 297 | 39.219 | 48.637 | 47.996 | 0.00 | 0.00 |
| ATOM | 4489 | HG3  | PRO | X | 297 | 38.999 | 49.997 | 46.797 | 0.00 | 0.00 |
| ATOM | 4490 | CB   | PRO | X | 297 | 39.285 | 50.593 | 48.866 | 0.00 | 0.00 |
| ATOM | 4491 | HB2  | PRO | X | 297 | 39.254 | 49.976 | 49.764 | 0.00 | 0.00 |
| ATOM | 4492 | HB3  | PRO | X | 297 | 38.321 | 51.099 | 48.808 | 0.00 | 0.00 |
| ATOM | 4493 | CA   | PRO | X | 297 | 40.466 | 51.545 | 48.760 | 0.00 | 0.00 |



|      |      |      |     |   |     |        |        |        |      |      |
|------|------|------|-----|---|-----|--------|--------|--------|------|------|
| ATOM | 4494 | HA   | PRO | X | 297 | 40.213 | 52.448 | 48.203 | 0.00 | 0.00 |
| ATOM | 4495 | C    | PRO | X | 297 | 40.919 | 52.032 | 50.146 | 0.00 | 0.00 |
| ATOM | 4496 | O    | PRO | X | 297 | 41.699 | 51.434 | 50.782 | 0.00 | 0.00 |
| ATOM | 4497 | N    | VAL | X | 298 | 40.452 | 53.209 | 50.556 | 0.00 | 0.00 |
| ATOM | 4498 | H    | VAL | X | 298 | 39.706 | 53.648 | 50.037 | 0.00 | 0.00 |
| ATOM | 4499 | CA   | VAL | X | 298 | 40.951 | 54.006 | 51.664 | 0.00 | 0.00 |
| ATOM | 4500 | HA   | VAL | X | 298 | 41.881 | 53.604 | 52.066 | 0.00 | 0.00 |
| ATOM | 4501 | CB   | VAL | X | 298 | 41.386 | 55.458 | 51.244 | 0.00 | 0.00 |
| ATOM | 4502 | HB   | VAL | X | 298 | 40.475 | 55.997 | 50.983 | 0.00 | 0.00 |
| ATOM | 4503 | CG1  | VAL | X | 298 | 42.043 | 56.301 | 52.392 | 0.00 | 0.00 |
| ATOM | 4504 | HG11 | VAL | X | 298 | 42.448 | 57.199 | 51.924 | 0.00 | 0.00 |
| ATOM | 4505 | HG12 | VAL | X | 298 | 41.299 | 56.586 | 53.137 | 0.00 | 0.00 |
| ATOM | 4506 | HG13 | VAL | X | 298 | 42.822 | 55.790 | 52.958 | 0.00 | 0.00 |
| ATOM | 4507 | CG2  | VAL | X | 298 | 42.199 | 55.577 | 49.984 | 0.00 | 0.00 |
| ATOM | 4508 | HG21 | VAL | X | 298 | 41.644 | 55.046 | 49.211 | 0.00 | 0.00 |
| ATOM | 4509 | HG22 | VAL | X | 298 | 43.091 | 54.964 | 50.107 | 0.00 | 0.00 |
| ATOM | 4510 | HG23 | VAL | X | 298 | 42.369 | 56.594 | 49.632 | 0.00 | 0.00 |
| ATOM | 4511 | C    | VAL | X | 298 | 39.905 | 53.996 | 52.855 | 0.00 | 0.00 |
| ATOM | 4512 | O    | VAL | X | 298 | 38.689 | 54.229 | 52.608 | 0.00 | 0.00 |
| ATOM | 4513 | N    | VAL | X | 299 | 40.294 | 53.754 | 54.108 | 0.00 | 0.00 |
| ATOM | 4514 | H    | VAL | X | 299 | 41.233 | 53.415 | 54.263 | 0.00 | 0.00 |
| ATOM | 4515 | CA   | VAL | X | 299 | 39.557 | 53.959 | 55.354 | 0.00 | 0.00 |
| ATOM | 4516 | HA   | VAL | X | 299 | 38.533 | 53.645 | 55.149 | 0.00 | 0.00 |
| ATOM | 4517 | CB   | VAL | X | 299 | 40.051 | 53.039 | 56.538 | 0.00 | 0.00 |
| ATOM | 4518 | HB   | VAL | X | 299 | 41.053 | 53.302 | 56.875 | 0.00 | 0.00 |
| ATOM | 4519 | CG1  | VAL | X | 299 | 39.096 | 53.045 | 57.703 | 0.00 | 0.00 |
| ATOM | 4520 | HG11 | VAL | X | 299 | 38.132 | 52.701 | 57.329 | 0.00 | 0.00 |
| ATOM | 4521 | HG12 | VAL | X | 299 | 39.451 | 52.360 | 58.472 | 0.00 | 0.00 |
| ATOM | 4522 | HG13 | VAL | X | 299 | 38.944 | 54.039 | 58.123 | 0.00 | 0.00 |
| ATOM | 4523 | CG2  | VAL | X | 299 | 40.121 | 51.576 | 56.091 | 0.00 | 0.00 |
| ATOM | 4524 | HG21 | VAL | X | 299 | 39.145 | 51.117 | 55.935 | 0.00 | 0.00 |
| ATOM | 4525 | HG22 | VAL | X | 299 | 40.808 | 50.988 | 56.700 | 0.00 | 0.00 |
| ATOM | 4526 | HG23 | VAL | X | 299 | 40.585 | 51.560 | 55.105 | 0.00 | 0.00 |
| ATOM | 4527 | C    | VAL | X | 299 | 39.580 | 55.468 | 55.608 | 0.00 | 0.00 |
| ATOM | 4528 | O    | VAL | X | 299 | 40.373 | 55.889 | 56.402 | 0.00 | 0.00 |
| ATOM | 4529 | N    | ASP | X | 300 | 38.697 | 56.235 | 54.869 | 0.00 | 0.00 |
| ATOM | 4530 | H    | ASP | X | 300 | 38.192 | 55.630 | 54.237 | 0.00 | 0.00 |
| ATOM | 4531 | CA   | ASP | X | 300 | 38.700 | 57.705 | 54.650 | 0.00 | 0.00 |
| ATOM | 4532 | HA   | ASP | X | 300 | 39.709 | 58.043 | 54.888 | 0.00 | 0.00 |
| ATOM | 4533 | CB   | ASP | X | 300 | 38.271 | 57.941 | 53.243 | 0.00 | 0.00 |
| ATOM | 4534 | HB2  | ASP | X | 300 | 38.554 | 58.972 | 53.031 | 0.00 | 0.00 |
| ATOM | 4535 | HB3  | ASP | X | 300 | 38.850 | 57.396 | 52.498 | 0.00 | 0.00 |
| ATOM | 4536 | CG   | ASP | X | 300 | 36.722 | 57.722 | 52.902 | 0.00 | 0.00 |
| ATOM | 4537 | OD1  | ASP | X | 300 | 36.058 | 56.879 | 53.564 | 0.00 | 0.00 |
| ATOM | 4538 | OD2  | ASP | X | 300 | 36.237 | 58.361 | 51.961 | 0.00 | 0.00 |
| ATOM | 4539 | C    | ASP | X | 300 | 37.876 | 58.591 | 55.648 | 0.00 | 0.00 |
| ATOM | 4540 | O    | ASP | X | 300 | 38.202 | 59.738 | 55.805 | 0.00 | 0.00 |
| ATOM | 4541 | N    | GLY | X | 301 | 36.824 | 58.007 | 56.277 | 0.00 | 0.00 |
| ATOM | 4542 | H    | GLY | X | 301 | 36.689 | 57.062 | 55.948 | 0.00 | 0.00 |
| ATOM | 4543 | CA   | GLY | X | 301 | 35.905 | 58.561 | 57.279 | 0.00 | 0.00 |
| ATOM | 4544 | HA2  | GLY | X | 301 | 35.784 | 57.980 | 58.193 | 0.00 | 0.00 |
| ATOM | 4545 | HA3  | GLY | X | 301 | 36.308 | 59.525 | 57.590 | 0.00 | 0.00 |
| ATOM | 4546 | C    | GLY | X | 301 | 34.485 | 58.720 | 56.740 | 0.00 | 0.00 |
| ATOM | 4547 | O    | GLY | X | 301 | 33.643 | 59.313 | 57.425 | 0.00 | 0.00 |
| ATOM | 4548 | N    | ASP | X | 302 | 34.210 | 58.295 | 55.541 | 0.00 | 0.00 |
| ATOM | 4549 | H    | ASP | X | 302 | 34.945 | 57.912 | 54.964 | 0.00 | 0.00 |
| ATOM | 4550 | CA   | ASP | X | 302 | 32.838 | 58.465 | 54.915 | 0.00 | 0.00 |
| ATOM | 4551 | HA   | ASP | X | 302 | 32.003 | 58.713 | 55.570 | 0.00 | 0.00 |
| ATOM | 4552 | CB   | ASP | X | 302 | 32.907 | 59.709 | 53.991 | 0.00 | 0.00 |
| ATOM | 4553 | HB2  | ASP | X | 302 | 33.335 | 60.470 | 54.643 | 0.00 | 0.00 |
| ATOM | 4554 | HB3  | ASP | X | 302 | 33.669 | 59.529 | 53.233 | 0.00 | 0.00 |
| ATOM | 4555 | CG   | ASP | X | 302 | 31.615 | 60.131 | 53.227 | 0.00 | 0.00 |
| ATOM | 4556 | OD1  | ASP | X | 302 | 31.743 | 61.154 | 52.543 | 0.00 | 0.00 |
| ATOM | 4557 | OD2  | ASP | X | 302 | 30.545 | 59.467 | 53.283 | 0.00 | 0.00 |
| ATOM | 4558 | C    | ASP | X | 302 | 32.560 | 57.222 | 54.077 | 0.00 | 0.00 |
| ATOM | 4559 | O    | ASP | X | 302 | 31.554 | 56.549 | 54.338 | 0.00 | 0.00 |
| ATOM | 4560 | N    | PHE | X | 303 | 33.322 | 56.744 | 53.089 | 0.00 | 0.00 |

|      |      |      |     |   |     |        |        |        |      |      |
|------|------|------|-----|---|-----|--------|--------|--------|------|------|
| ATOM | 4561 | H    | PHE | X | 303 | 34.256 | 57.125 | 53.034 | 0.00 | 0.00 |
| ATOM | 4562 | CA   | PHE | X | 303 | 33.162 | 55.477 | 52.320 | 0.00 | 0.00 |
| ATOM | 4563 | HA   | PHE | X | 303 | 32.161 | 55.521 | 51.891 | 0.00 | 0.00 |
| ATOM | 4564 | CB   | PHE | X | 303 | 34.097 | 55.521 | 51.036 | 0.00 | 0.00 |
| ATOM | 4565 | HB2  | PHE | X | 303 | 34.261 | 56.576 | 50.815 | 0.00 | 0.00 |
| ATOM | 4566 | HB3  | PHE | X | 303 | 35.071 | 55.071 | 51.227 | 0.00 | 0.00 |
| ATOM | 4567 | CG   | PHE | X | 303 | 33.460 | 54.765 | 49.906 | 0.00 | 0.00 |
| ATOM | 4568 | CD1  | PHE | X | 303 | 33.701 | 53.416 | 49.809 | 0.00 | 0.00 |
| ATOM | 4569 | HD1  | PHE | X | 303 | 34.414 | 52.940 | 50.466 | 0.00 | 0.00 |
| ATOM | 4570 | CE1  | PHE | X | 303 | 33.054 | 52.712 | 48.795 | 0.00 | 0.00 |
| ATOM | 4571 | HE1  | PHE | X | 303 | 33.193 | 51.652 | 48.641 | 0.00 | 0.00 |
| ATOM | 4572 | CZ   | PHE | X | 303 | 32.034 | 53.295 | 48.017 | 0.00 | 0.00 |
| ATOM | 4573 | HZ   | PHE | X | 303 | 31.431 | 52.663 | 47.383 | 0.00 | 0.00 |
| ATOM | 4574 | CE2  | PHE | X | 303 | 31.884 | 54.654 | 48.088 | 0.00 | 0.00 |
| ATOM | 4575 | HE2  | PHE | X | 303 | 31.146 | 55.129 | 47.459 | 0.00 | 0.00 |
| ATOM | 4576 | CD2  | PHE | X | 303 | 32.658 | 55.438 | 49.014 | 0.00 | 0.00 |
| ATOM | 4577 | HD2  | PHE | X | 303 | 32.393 | 56.465 | 49.220 | 0.00 | 0.00 |
| ATOM | 4578 | C    | PHE | X | 303 | 33.419 | 54.305 | 53.257 | 0.00 | 0.00 |
| ATOM | 4579 | O    | PHE | X | 303 | 32.657 | 53.352 | 53.193 | 0.00 | 0.00 |
| ATOM | 4580 | N    | LEU | X | 304 | 34.500 | 54.367 | 54.012 | 0.00 | 0.00 |
| ATOM | 4581 | H    | LEU | X | 304 | 35.058 | 55.197 | 53.876 | 0.00 | 0.00 |
| ATOM | 4582 | CA   | LEU | X | 304 | 34.690 | 53.366 | 55.131 | 0.00 | 0.00 |
| ATOM | 4583 | HA   | LEU | X | 304 | 33.835 | 52.697 | 55.233 | 0.00 | 0.00 |
| ATOM | 4584 | CB   | LEU | X | 304 | 35.890 | 52.482 | 54.727 | 0.00 | 0.00 |
| ATOM | 4585 | HB2  | LEU | X | 304 | 36.609 | 53.230 | 54.392 | 0.00 | 0.00 |
| ATOM | 4586 | HB3  | LEU | X | 304 | 36.236 | 52.014 | 55.649 | 0.00 | 0.00 |
| ATOM | 4587 | CG   | LEU | X | 304 | 35.726 | 51.490 | 53.569 | 0.00 | 0.00 |
| ATOM | 4588 | HG   | LEU | X | 304 | 35.267 | 51.983 | 52.712 | 0.00 | 0.00 |
| ATOM | 4589 | CD1  | LEU | X | 304 | 37.056 | 50.920 | 53.245 | 0.00 | 0.00 |
| ATOM | 4590 | HD11 | LEU | X | 304 | 37.805 | 51.655 | 52.949 | 0.00 | 0.00 |
| ATOM | 4591 | HD12 | LEU | X | 304 | 36.967 | 50.105 | 52.528 | 0.00 | 0.00 |
| ATOM | 4592 | HD13 | LEU | X | 304 | 37.508 | 50.365 | 54.068 | 0.00 | 0.00 |
| ATOM | 4593 | CD2  | LEU | X | 304 | 34.620 | 50.435 | 53.854 | 0.00 | 0.00 |
| ATOM | 4594 | HD21 | LEU | X | 304 | 33.702 | 51.013 | 53.746 | 0.00 | 0.00 |
| ATOM | 4595 | HD22 | LEU | X | 304 | 34.608 | 49.562 | 53.202 | 0.00 | 0.00 |
| ATOM | 4596 | HD23 | LEU | X | 304 | 34.669 | 50.084 | 54.885 | 0.00 | 0.00 |
| ATOM | 4597 | C    | LEU | X | 304 | 34.865 | 54.161 | 56.437 | 0.00 | 0.00 |
| ATOM | 4598 | O    | LEU | X | 304 | 35.715 | 55.066 | 56.560 | 0.00 | 0.00 |
| ATOM | 4599 | N    | SER | X | 305 | 34.001 | 53.906 | 57.363 | 0.00 | 0.00 |
| ATOM | 4600 | H    | SER | X | 305 | 33.314 | 53.230 | 57.061 | 0.00 | 0.00 |
| ATOM | 4601 | CA   | SER | X | 305 | 34.045 | 54.521 | 58.692 | 0.00 | 0.00 |
| ATOM | 4602 | HA   | SER | X | 305 | 34.362 | 55.553 | 58.545 | 0.00 | 0.00 |
| ATOM | 4603 | CB   | SER | X | 305 | 32.641 | 54.515 | 59.284 | 0.00 | 0.00 |
| ATOM | 4604 | HB2  | SER | X | 305 | 32.785 | 54.964 | 60.267 | 0.00 | 0.00 |
| ATOM | 4605 | HB3  | SER | X | 305 | 31.925 | 55.115 | 58.723 | 0.00 | 0.00 |
| ATOM | 4606 | OG   | SER | X | 305 | 32.220 | 53.184 | 59.448 | 0.00 | 0.00 |
| ATOM | 4607 | HG   | SER | X | 305 | 31.893 | 52.946 | 58.577 | 0.00 | 0.00 |
| ATOM | 4608 | C    | SER | X | 305 | 35.169 | 53.971 | 59.582 | 0.00 | 0.00 |
| ATOM | 4609 | O    | SER | X | 305 | 35.902 | 54.789 | 60.207 | 0.00 | 0.00 |
| ATOM | 4610 | N    | ASP | X | 306 | 35.361 | 52.616 | 59.649 | 0.00 | 0.00 |
| ATOM | 4611 | H    | ASP | X | 306 | 34.643 | 52.100 | 59.162 | 0.00 | 0.00 |
| ATOM | 4612 | CA   | ASP | X | 306 | 36.503 | 51.833 | 60.070 | 0.00 | 0.00 |
| ATOM | 4613 | HA   | ASP | X | 306 | 37.324 | 52.519 | 60.276 | 0.00 | 0.00 |
| ATOM | 4614 | CB   | ASP | X | 306 | 36.132 | 51.222 | 61.447 | 0.00 | 0.00 |
| ATOM | 4615 | HB2  | ASP | X | 306 | 35.571 | 51.955 | 62.028 | 0.00 | 0.00 |
| ATOM | 4616 | HB3  | ASP | X | 306 | 35.596 | 50.280 | 61.330 | 0.00 | 0.00 |
| ATOM | 4617 | CG   | ASP | X | 306 | 37.337 | 51.025 | 62.408 | 0.00 | 0.00 |
| ATOM | 4618 | OD1  | ASP | X | 306 | 37.309 | 51.439 | 63.616 | 0.00 | 0.00 |
| ATOM | 4619 | OD2  | ASP | X | 306 | 38.368 | 50.429 | 61.972 | 0.00 | 0.00 |
| ATOM | 4620 | C    | ASP | X | 306 | 36.941 | 50.789 | 58.978 | 0.00 | 0.00 |
| ATOM | 4621 | O    | ASP | X | 306 | 36.307 | 50.530 | 57.942 | 0.00 | 0.00 |
| ATOM | 4622 | N    | THR | X | 307 | 37.993 | 50.034 | 59.302 | 0.00 | 0.00 |
| ATOM | 4623 | H    | THR | X | 307 | 38.388 | 50.187 | 60.219 | 0.00 | 0.00 |
| ATOM | 4624 | CA   | THR | X | 307 | 38.540 | 48.996 | 58.443 | 0.00 | 0.00 |
| ATOM | 4625 | HA   | THR | X | 307 | 38.737 | 49.411 | 57.454 | 0.00 | 0.00 |
| ATOM | 4626 | CB   | THR | X | 307 | 39.879 | 48.548 | 59.057 | 0.00 | 0.00 |
| ATOM | 4627 | HB   | THR | X | 307 | 39.551 | 48.093 | 59.991 | 0.00 | 0.00 |

|      |      |      |     |   |     |        |        |        |      |      |
|------|------|------|-----|---|-----|--------|--------|--------|------|------|
| ATOM | 4628 | CG2  | THR | X | 307 | 40.654 | 47.472 | 58.303 | 0.00 | 0.00 |
| ATOM | 4629 | HG21 | THR | X | 307 | 41.610 | 47.232 | 58.769 | 0.00 | 0.00 |
| ATOM | 4630 | HG22 | THR | X | 307 | 40.682 | 47.858 | 57.284 | 0.00 | 0.00 |
| ATOM | 4631 | HG23 | THR | X | 307 | 40.047 | 46.573 | 58.403 | 0.00 | 0.00 |
| ATOM | 4632 | OG1  | THR | X | 307 | 40.721 | 49.656 | 59.205 | 0.00 | 0.00 |
| ATOM | 4633 | HG1  | THR | X | 307 | 41.555 | 49.341 | 59.560 | 0.00 | 0.00 |
| ATOM | 4634 | C    | THR | X | 307 | 37.629 | 47.766 | 58.419 | 0.00 | 0.00 |
| ATOM | 4635 | O    | THR | X | 307 | 37.207 | 47.213 | 59.377 | 0.00 | 0.00 |
| ATOM | 4636 | N    | PRO | X | 308 | 37.253 | 47.336 | 57.186 | 0.00 | 0.00 |
| ATOM | 4637 | CD   | PRO | X | 308 | 37.966 | 47.573 | 55.937 | 0.00 | 0.00 |
| ATOM | 4638 | HD2  | PRO | X | 308 | 39.033 | 47.361 | 56.006 | 0.00 | 0.00 |
| ATOM | 4639 | HD3  | PRO | X | 308 | 37.795 | 48.598 | 55.605 | 0.00 | 0.00 |
| ATOM | 4640 | CG   | PRO | X | 308 | 37.238 | 46.543 | 55.040 | 0.00 | 0.00 |
| ATOM | 4641 | HG2  | PRO | X | 308 | 37.627 | 45.535 | 55.177 | 0.00 | 0.00 |
| ATOM | 4642 | HG3  | PRO | X | 308 | 37.362 | 46.814 | 53.991 | 0.00 | 0.00 |
| ATOM | 4643 | CB   | PRO | X | 308 | 35.824 | 46.538 | 55.503 | 0.00 | 0.00 |
| ATOM | 4644 | HB2  | PRO | X | 308 | 35.364 | 45.576 | 55.279 | 0.00 | 0.00 |
| ATOM | 4645 | HB3  | PRO | X | 308 | 35.198 | 47.356 | 55.147 | 0.00 | 0.00 |
| ATOM | 4646 | CA   | PRO | X | 308 | 35.962 | 46.703 | 56.959 | 0.00 | 0.00 |
| ATOM | 4647 | HA   | PRO | X | 308 | 35.273 | 47.501 | 57.237 | 0.00 | 0.00 |
| ATOM | 4648 | C    | PRO | X | 308 | 35.717 | 45.354 | 57.728 | 0.00 | 0.00 |
| ATOM | 4649 | O    | PRO | X | 308 | 34.576 | 45.211 | 58.133 | 0.00 | 0.00 |
| ATOM | 4650 | N    | GLU | X | 309 | 36.683 | 44.574 | 58.174 | 0.00 | 0.00 |
| ATOM | 4651 | H    | GLU | X | 309 | 37.597 | 44.812 | 57.816 | 0.00 | 0.00 |
| ATOM | 4652 | CA   | GLU | X | 309 | 36.405 | 43.422 | 59.028 | 0.00 | 0.00 |
| ATOM | 4653 | HA   | GLU | X | 309 | 35.635 | 42.822 | 58.544 | 0.00 | 0.00 |
| ATOM | 4654 | CB   | GLU | X | 309 | 37.729 | 42.567 | 59.308 | 0.00 | 0.00 |
| ATOM | 4655 | HB2  | GLU | X | 309 | 38.247 | 42.429 | 58.359 | 0.00 | 0.00 |
| ATOM | 4656 | HB3  | GLU | X | 309 | 38.516 | 43.129 | 59.811 | 0.00 | 0.00 |
| ATOM | 4657 | CG   | GLU | X | 309 | 37.546 | 41.249 | 60.051 | 0.00 | 0.00 |
| ATOM | 4658 | HG2  | GLU | X | 309 | 37.092 | 41.505 | 61.008 | 0.00 | 0.00 |
| ATOM | 4659 | HG3  | GLU | X | 309 | 36.894 | 40.570 | 59.501 | 0.00 | 0.00 |
| ATOM | 4660 | CD   | GLU | X | 309 | 38.764 | 40.385 | 60.352 | 0.00 | 0.00 |
| ATOM | 4661 | OE1  | GLU | X | 309 | 38.763 | 39.793 | 61.383 | 0.00 | 0.00 |
| ATOM | 4662 | OE2  | GLU | X | 309 | 39.694 | 40.443 | 59.569 | 0.00 | 0.00 |
| ATOM | 4663 | C    | GLU | X | 309 | 35.838 | 43.765 | 60.422 | 0.00 | 0.00 |
| ATOM | 4664 | O    | GLU | X | 309 | 35.106 | 42.893 | 60.934 | 0.00 | 0.00 |
| ATOM | 4665 | N    | ALA | X | 310 | 35.946 | 44.998 | 60.916 | 0.00 | 0.00 |
| ATOM | 4666 | H    | ALA | X | 310 | 36.621 | 45.613 | 60.484 | 0.00 | 0.00 |
| ATOM | 4667 | CA   | ALA | X | 310 | 35.133 | 45.363 | 62.075 | 0.00 | 0.00 |
| ATOM | 4668 | HA   | ALA | X | 310 | 35.271 | 44.638 | 62.877 | 0.00 | 0.00 |
| ATOM | 4669 | CB   | ALA | X | 310 | 35.745 | 46.687 | 62.501 | 0.00 | 0.00 |
| ATOM | 4670 | HB1  | ALA | X | 310 | 35.850 | 47.350 | 61.643 | 0.00 | 0.00 |
| ATOM | 4671 | HB2  | ALA | X | 310 | 36.722 | 46.503 | 62.947 | 0.00 | 0.00 |
| ATOM | 4672 | HB3  | ALA | X | 310 | 35.156 | 47.187 | 63.270 | 0.00 | 0.00 |
| ATOM | 4673 | C    | ALA | X | 310 | 33.629 | 45.637 | 61.900 | 0.00 | 0.00 |
| ATOM | 4674 | O    | ALA | X | 310 | 32.828 | 45.373 | 62.759 | 0.00 | 0.00 |
| ATOM | 4675 | N    | LEU | X | 311 | 33.318 | 46.157 | 60.666 | 0.00 | 0.00 |
| ATOM | 4676 | H    | LEU | X | 311 | 34.106 | 46.577 | 60.194 | 0.00 | 0.00 |
| ATOM | 4677 | CA   | LEU | X | 311 | 31.947 | 46.432 | 60.258 | 0.00 | 0.00 |
| ATOM | 4678 | HA   | LEU | X | 311 | 31.370 | 46.822 | 61.097 | 0.00 | 0.00 |
| ATOM | 4679 | CB   | LEU | X | 311 | 32.078 | 47.418 | 59.065 | 0.00 | 0.00 |
| ATOM | 4680 | HB2  | LEU | X | 311 | 32.520 | 46.887 | 58.222 | 0.00 | 0.00 |
| ATOM | 4681 | HB3  | LEU | X | 311 | 31.058 | 47.736 | 58.849 | 0.00 | 0.00 |
| ATOM | 4682 | CG   | LEU | X | 311 | 32.956 | 48.743 | 59.203 | 0.00 | 0.00 |
| ATOM | 4683 | HG   | LEU | X | 311 | 34.001 | 48.510 | 59.408 | 0.00 | 0.00 |
| ATOM | 4684 | CD1  | LEU | X | 311 | 32.723 | 49.465 | 57.919 | 0.00 | 0.00 |
| ATOM | 4685 | HD11 | LEU | X | 311 | 33.355 | 50.353 | 57.929 | 0.00 | 0.00 |
| ATOM | 4686 | HD12 | LEU | X | 311 | 31.674 | 49.681 | 57.717 | 0.00 | 0.00 |
| ATOM | 4687 | HD13 | LEU | X | 311 | 33.091 | 48.866 | 57.086 | 0.00 | 0.00 |
| ATOM | 4688 | CD2  | LEU | X | 311 | 32.515 | 49.637 | 60.374 | 0.00 | 0.00 |
| ATOM | 4689 | HD21 | LEU | X | 311 | 31.439 | 49.807 | 60.331 | 0.00 | 0.00 |
| ATOM | 4690 | HD22 | LEU | X | 311 | 32.822 | 49.108 | 61.276 | 0.00 | 0.00 |
| ATOM | 4691 | HD23 | LEU | X | 311 | 32.975 | 50.615 | 60.516 | 0.00 | 0.00 |
| ATOM | 4692 | C    | LEU | X | 311 | 31.375 | 45.074 | 59.807 | 0.00 | 0.00 |
| ATOM | 4693 | O    | LEU | X | 311 | 30.166 | 44.941 | 59.995 | 0.00 | 0.00 |
| ATOM | 4694 | N    | ILE | X | 312 | 32.057 | 44.077 | 59.260 | 0.00 | 0.00 |

|      |      |      |     |   |     |        |        |        |      |      |
|------|------|------|-----|---|-----|--------|--------|--------|------|------|
| ATOM | 4695 | H    | ILE | X | 312 | 33.023 | 44.270 | 59.039 | 0.00 | 0.00 |
| ATOM | 4696 | CA   | ILE | X | 312 | 31.537 | 42.719 | 58.989 | 0.00 | 0.00 |
| ATOM | 4697 | HA   | ILE | X | 312 | 30.529 | 42.800 | 58.583 | 0.00 | 0.00 |
| ATOM | 4698 | CB   | ILE | X | 312 | 32.356 | 42.065 | 57.839 | 0.00 | 0.00 |
| ATOM | 4699 | HB   | ILE | X | 312 | 33.372 | 42.013 | 58.233 | 0.00 | 0.00 |
| ATOM | 4700 | CG2  | ILE | X | 312 | 31.835 | 40.647 | 57.487 | 0.00 | 0.00 |
| ATOM | 4701 | HG21 | ILE | X | 312 | 31.183 | 40.301 | 58.288 | 0.00 | 0.00 |
| ATOM | 4702 | HG22 | ILE | X | 312 | 32.652 | 39.936 | 57.359 | 0.00 | 0.00 |
| ATOM | 4703 | HG23 | ILE | X | 312 | 31.314 | 40.665 | 56.529 | 0.00 | 0.00 |
| ATOM | 4704 | CG1  | ILE | X | 312 | 32.484 | 43.001 | 56.549 | 0.00 | 0.00 |
| ATOM | 4705 | HG12 | ILE | X | 312 | 31.512 | 43.003 | 56.055 | 0.00 | 0.00 |
| ATOM | 4706 | HG13 | ILE | X | 312 | 32.649 | 44.037 | 56.846 | 0.00 | 0.00 |
| ATOM | 4707 | CD1  | ILE | X | 312 | 33.594 | 42.442 | 55.545 | 0.00 | 0.00 |
| ATOM | 4708 | HD11 | ILE | X | 312 | 33.597 | 43.226 | 54.788 | 0.00 | 0.00 |
| ATOM | 4709 | HD12 | ILE | X | 312 | 33.383 | 41.496 | 55.046 | 0.00 | 0.00 |
| ATOM | 4710 | HD13 | ILE | X | 312 | 34.500 | 42.404 | 56.150 | 0.00 | 0.00 |
| ATOM | 4711 | C    | ILE | X | 312 | 31.493 | 41.874 | 60.272 | 0.00 | 0.00 |
| ATOM | 4712 | O    | ILE | X | 312 | 30.549 | 41.109 | 60.470 | 0.00 | 0.00 |
| ATOM | 4713 | N    | ASN | X | 313 | 32.336 | 42.176 | 61.308 | 0.00 | 0.00 |
| ATOM | 4714 | H    | ASN | X | 313 | 33.130 | 42.776 | 61.135 | 0.00 | 0.00 |
| ATOM | 4715 | CA   | ASN | X | 313 | 32.133 | 41.721 | 62.667 | 0.00 | 0.00 |
| ATOM | 4716 | HA   | ASN | X | 313 | 32.030 | 40.637 | 62.727 | 0.00 | 0.00 |
| ATOM | 4717 | CB   | ASN | X | 313 | 33.281 | 42.104 | 63.573 | 0.00 | 0.00 |
| ATOM | 4718 | HB2  | ASN | X | 313 | 34.075 | 41.406 | 63.308 | 0.00 | 0.00 |
| ATOM | 4719 | HB3  | ASN | X | 313 | 33.620 | 43.139 | 63.524 | 0.00 | 0.00 |
| ATOM | 4720 | CG   | ASN | X | 313 | 33.046 | 41.885 | 65.096 | 0.00 | 0.00 |
| ATOM | 4721 | OD1  | ASN | X | 313 | 32.735 | 40.761 | 65.453 | 0.00 | 0.00 |
| ATOM | 4722 | ND2  | ASN | X | 313 | 33.376 | 42.729 | 65.981 | 0.00 | 0.00 |
| ATOM | 4723 | HD21 | ASN | X | 313 | 33.159 | 42.460 | 66.930 | 0.00 | 0.00 |
| ATOM | 4724 | HD22 | ASN | X | 313 | 33.532 | 43.703 | 65.762 | 0.00 | 0.00 |
| ATOM | 4725 | C    | ASN | X | 313 | 30.847 | 42.188 | 63.376 | 0.00 | 0.00 |
| ATOM | 4726 | O    | ASN | X | 313 | 30.245 | 41.478 | 64.164 | 0.00 | 0.00 |
| ATOM | 4727 | N    | ALA | X | 314 | 30.504 | 43.464 | 63.113 | 0.00 | 0.00 |
| ATOM | 4728 | H    | ALA | X | 314 | 31.125 | 44.004 | 62.528 | 0.00 | 0.00 |
| ATOM | 4729 | CA   | ALA | X | 314 | 29.337 | 44.116 | 63.659 | 0.00 | 0.00 |
| ATOM | 4730 | HA   | ALA | X | 314 | 28.904 | 43.571 | 64.498 | 0.00 | 0.00 |
| ATOM | 4731 | CB   | ALA | X | 314 | 29.730 | 45.511 | 64.127 | 0.00 | 0.00 |
| ATOM | 4732 | HB1  | ALA | X | 314 | 28.903 | 46.093 | 64.535 | 0.00 | 0.00 |
| ATOM | 4733 | HB2  | ALA | X | 314 | 30.168 | 46.116 | 63.333 | 0.00 | 0.00 |
| ATOM | 4734 | HB3  | ALA | X | 314 | 30.530 | 45.335 | 64.846 | 0.00 | 0.00 |
| ATOM | 4735 | C    | ALA | X | 314 | 28.187 | 44.188 | 62.623 | 0.00 | 0.00 |
| ATOM | 4736 | O    | ALA | X | 314 | 27.320 | 45.024 | 62.737 | 0.00 | 0.00 |
| ATOM | 4737 | N    | GLY | X | 315 | 28.247 | 43.453 | 61.496 | 0.00 | 0.00 |
| ATOM | 4738 | H    | GLY | X | 315 | 29.051 | 42.841 | 61.495 | 0.00 | 0.00 |
| ATOM | 4739 | CA   | GLY | X | 315 | 27.246 | 43.454 | 60.447 | 0.00 | 0.00 |
| ATOM | 4740 | HA2  | GLY | X | 315 | 26.737 | 44.415 | 60.367 | 0.00 | 0.00 |
| ATOM | 4741 | HA3  | GLY | X | 315 | 27.743 | 43.135 | 59.531 | 0.00 | 0.00 |
| ATOM | 4742 | C    | GLY | X | 315 | 26.096 | 42.397 | 60.569 | 0.00 | 0.00 |
| ATOM | 4743 | O    | GLY | X | 315 | 26.170 | 41.395 | 61.257 | 0.00 | 0.00 |
| ATOM | 4744 | N    | ASP | X | 316 | 25.045 | 42.780 | 59.875 | 0.00 | 0.00 |
| ATOM | 4745 | H    | ASP | X | 316 | 25.031 | 43.616 | 59.308 | 0.00 | 0.00 |
| ATOM | 4746 | CA   | ASP | X | 316 | 23.868 | 41.942 | 59.630 | 0.00 | 0.00 |
| ATOM | 4747 | HA   | ASP | X | 316 | 23.886 | 40.996 | 60.173 | 0.00 | 0.00 |
| ATOM | 4748 | CB   | ASP | X | 316 | 22.627 | 42.680 | 60.221 | 0.00 | 0.00 |
| ATOM | 4749 | HB2  | ASP | X | 316 | 22.959 | 43.215 | 61.110 | 0.00 | 0.00 |
| ATOM | 4750 | HB3  | ASP | X | 316 | 22.227 | 43.325 | 59.439 | 0.00 | 0.00 |
| ATOM | 4751 | CG   | ASP | X | 316 | 21.416 | 41.779 | 60.531 | 0.00 | 0.00 |
| ATOM | 4752 | OD1  | ASP | X | 316 | 20.743 | 41.338 | 59.584 | 0.00 | 0.00 |
| ATOM | 4753 | OD2  | ASP | X | 316 | 21.042 | 41.650 | 61.728 | 0.00 | 0.00 |
| ATOM | 4754 | C    | ASP | X | 316 | 23.712 | 41.695 | 58.079 | 0.00 | 0.00 |
| ATOM | 4755 | O    | ASP | X | 316 | 23.999 | 42.646 | 57.328 | 0.00 | 0.00 |
| ATOM | 4756 | N    | PHE | X | 317 | 23.321 | 40.494 | 57.757 | 0.00 | 0.00 |
| ATOM | 4757 | H    | PHE | X | 317 | 23.189 | 39.835 | 58.511 | 0.00 | 0.00 |
| ATOM | 4758 | CA   | PHE | X | 317 | 23.171 | 39.970 | 56.421 | 0.00 | 0.00 |
| ATOM | 4759 | HA   | PHE | X | 317 | 23.408 | 40.794 | 55.748 | 0.00 | 0.00 |
| ATOM | 4760 | CB   | PHE | X | 317 | 24.308 | 38.998 | 56.312 | 0.00 | 0.00 |
| ATOM | 4761 | HB2  | PHE | X | 317 | 24.262 | 38.237 | 57.091 | 0.00 | 0.00 |

|      |      |      |     |   |     |        |        |        |      |      |
|------|------|------|-----|---|-----|--------|--------|--------|------|------|
| ATOM | 4762 | HB3  | PHE | X | 317 | 24.275 | 38.491 | 55.348 | 0.00 | 0.00 |
| ATOM | 4763 | CG   | PHE | X | 317 | 25.682 | 39.720 | 56.400 | 0.00 | 0.00 |
| ATOM | 4764 | CD1  | PHE | X | 317 | 26.182 | 40.399 | 55.235 | 0.00 | 0.00 |
| ATOM | 4765 | HD1  | PHE | X | 317 | 25.703 | 40.307 | 54.271 | 0.00 | 0.00 |
| ATOM | 4766 | CE1  | PHE | X | 317 | 27.452 | 41.048 | 55.310 | 0.00 | 0.00 |
| ATOM | 4767 | HE1  | PHE | X | 317 | 27.869 | 41.469 | 54.407 | 0.00 | 0.00 |
| ATOM | 4768 | CZ   | PHE | X | 317 | 28.132 | 41.143 | 56.531 | 0.00 | 0.00 |
| ATOM | 4769 | HZ   | PHE | X | 317 | 29.142 | 41.518 | 56.602 | 0.00 | 0.00 |
| ATOM | 4770 | CE2  | PHE | X | 317 | 27.570 | 40.592 | 57.673 | 0.00 | 0.00 |
| ATOM | 4771 | HE2  | PHE | X | 317 | 28.010 | 40.599 | 58.659 | 0.00 | 0.00 |
| ATOM | 4772 | CD2  | PHE | X | 317 | 26.354 | 39.882 | 57.632 | 0.00 | 0.00 |
| ATOM | 4773 | HD2  | PHE | X | 317 | 25.935 | 39.422 | 58.515 | 0.00 | 0.00 |
| ATOM | 4774 | C    | PHE | X | 317 | 21.841 | 39.369 | 56.098 | 0.00 | 0.00 |
| ATOM | 4775 | O    | PHE | X | 317 | 21.684 | 38.621 | 55.212 | 0.00 | 0.00 |
| ATOM | 4776 | N    | HIE | X | 318 | 20.784 | 39.668 | 56.880 | 0.00 | 0.00 |
| ATOM | 4777 | H    | HIE | X | 318 | 21.051 | 40.194 | 57.699 | 0.00 | 0.00 |
| ATOM | 4778 | CA   | HIE | X | 318 | 19.444 | 39.159 | 56.783 | 0.00 | 0.00 |
| ATOM | 4779 | HA   | HIE | X | 318 | 19.650 | 38.089 | 56.768 | 0.00 | 0.00 |
| ATOM | 4780 | CB   | HIE | X | 318 | 18.669 | 39.385 | 58.030 | 0.00 | 0.00 |
| ATOM | 4781 | HB2  | HIE | X | 318 | 19.227 | 38.810 | 58.770 | 0.00 | 0.00 |
| ATOM | 4782 | HB3  | HIE | X | 318 | 18.593 | 40.409 | 58.394 | 0.00 | 0.00 |
| ATOM | 4783 | CG   | HIE | X | 318 | 17.256 | 38.797 | 57.986 | 0.00 | 0.00 |
| ATOM | 4784 | ND1  | HIE | X | 318 | 16.835 | 37.656 | 57.258 | 0.00 | 0.00 |
| ATOM | 4785 | CE1  | HIE | X | 318 | 15.589 | 37.355 | 57.624 | 0.00 | 0.00 |
| ATOM | 4786 | HE1  | HIE | X | 318 | 15.017 | 36.520 | 57.249 | 0.00 | 0.00 |
| ATOM | 4787 | NE2  | HIE | X | 318 | 15.193 | 38.244 | 58.511 | 0.00 | 0.00 |
| ATOM | 4788 | HE2  | HIE | X | 318 | 14.275 | 38.253 | 58.932 | 0.00 | 0.00 |
| ATOM | 4789 | CD2  | HIE | X | 318 | 16.237 | 39.074 | 58.848 | 0.00 | 0.00 |
| ATOM | 4790 | HD2  | HIE | X | 318 | 16.332 | 39.869 | 59.573 | 0.00 | 0.00 |
| ATOM | 4791 | C    | HIE | X | 318 | 18.803 | 39.435 | 55.448 | 0.00 | 0.00 |
| ATOM | 4792 | O    | HIE | X | 318 | 18.553 | 40.583 | 55.130 | 0.00 | 0.00 |
| ATOM | 4793 | N    | GLY | X | 319 | 18.499 | 38.410 | 54.598 | 0.00 | 0.00 |
| ATOM | 4794 | H    | GLY | X | 319 | 18.726 | 37.458 | 54.850 | 0.00 | 0.00 |
| ATOM | 4795 | CA   | GLY | X | 319 | 17.957 | 38.621 | 53.274 | 0.00 | 0.00 |
| ATOM | 4796 | HA2  | GLY | X | 319 | 17.451 | 37.663 | 53.155 | 0.00 | 0.00 |
| ATOM | 4797 | HA3  | GLY | X | 319 | 17.308 | 39.484 | 53.122 | 0.00 | 0.00 |
| ATOM | 4798 | C    | GLY | X | 319 | 18.891 | 38.588 | 52.109 | 0.00 | 0.00 |
| ATOM | 4799 | O    | GLY | X | 319 | 18.578 | 39.095 | 51.048 | 0.00 | 0.00 |
| ATOM | 4800 | N    | LEU | X | 320 | 20.093 | 38.020 | 52.262 | 0.00 | 0.00 |
| ATOM | 4801 | H    | LEU | X | 320 | 20.278 | 37.526 | 53.123 | 0.00 | 0.00 |
| ATOM | 4802 | CA   | LEU | X | 320 | 21.182 | 38.072 | 51.229 | 0.00 | 0.00 |
| ATOM | 4803 | HA   | LEU | X | 320 | 20.744 | 38.529 | 50.341 | 0.00 | 0.00 |
| ATOM | 4804 | CB   | LEU | X | 320 | 22.328 | 38.939 | 51.670 | 0.00 | 0.00 |
| ATOM | 4805 | HB2  | LEU | X | 320 | 22.593 | 38.831 | 52.722 | 0.00 | 0.00 |
| ATOM | 4806 | HB3  | LEU | X | 320 | 23.194 | 38.745 | 51.037 | 0.00 | 0.00 |
| ATOM | 4807 | CG   | LEU | X | 320 | 22.067 | 40.497 | 51.493 | 0.00 | 0.00 |
| ATOM | 4808 | HG   | LEU | X | 320 | 21.068 | 40.689 | 51.886 | 0.00 | 0.00 |
| ATOM | 4809 | CD1  | LEU | X | 320 | 23.021 | 41.292 | 52.308 | 0.00 | 0.00 |
| ATOM | 4810 | HD11 | LEU | X | 320 | 22.772 | 41.234 | 53.368 | 0.00 | 0.00 |
| ATOM | 4811 | HD12 | LEU | X | 320 | 22.945 | 42.357 | 52.093 | 0.00 | 0.00 |
| ATOM | 4812 | HD13 | LEU | X | 320 | 24.017 | 40.890 | 52.119 | 0.00 | 0.00 |
| ATOM | 4813 | CD2  | LEU | X | 320 | 22.129 | 40.989 | 50.084 | 0.00 | 0.00 |
| ATOM | 4814 | HD21 | LEU | X | 320 | 21.695 | 40.334 | 49.328 | 0.00 | 0.00 |
| ATOM | 4815 | HD22 | LEU | X | 320 | 21.683 | 41.976 | 49.959 | 0.00 | 0.00 |
| ATOM | 4816 | HD23 | LEU | X | 320 | 23.168 | 41.067 | 49.764 | 0.00 | 0.00 |
| ATOM | 4817 | C    | LEU | X | 320 | 21.655 | 36.658 | 50.908 | 0.00 | 0.00 |
| ATOM | 4818 | O    | LEU | X | 320 | 21.868 | 35.920 | 51.888 | 0.00 | 0.00 |
| ATOM | 4819 | N    | GLN | X | 321 | 21.958 | 36.305 | 49.701 | 0.00 | 0.00 |
| ATOM | 4820 | H    | GLN | X | 321 | 21.892 | 36.952 | 48.928 | 0.00 | 0.00 |
| ATOM | 4821 | CA   | GLN | X | 321 | 22.673 | 35.186 | 49.191 | 0.00 | 0.00 |
| ATOM | 4822 | HA   | GLN | X | 321 | 22.893 | 34.578 | 50.068 | 0.00 | 0.00 |
| ATOM | 4823 | CB   | GLN | X | 321 | 21.732 | 34.420 | 48.190 | 0.00 | 0.00 |
| ATOM | 4824 | HB2  | GLN | X | 321 | 21.673 | 35.014 | 47.277 | 0.00 | 0.00 |
| ATOM | 4825 | HB3  | GLN | X | 321 | 22.162 | 33.463 | 47.896 | 0.00 | 0.00 |
| ATOM | 4826 | CG   | GLN | X | 321 | 20.297 | 34.075 | 48.631 | 0.00 | 0.00 |
| ATOM | 4827 | HG2  | GLN | X | 321 | 19.901 | 33.235 | 48.061 | 0.00 | 0.00 |
| ATOM | 4828 | HG3  | GLN | X | 321 | 20.327 | 33.704 | 49.656 | 0.00 | 0.00 |

|      |      |      |     |   |     |        |        |        |      |      |
|------|------|------|-----|---|-----|--------|--------|--------|------|------|
| ATOM | 4829 | CD   | GLN | X | 321 | 19.260 | 35.248 | 48.417 | 0.00 | 0.00 |
| ATOM | 4830 | OE1  | GLN | X | 321 | 19.183 | 35.786 | 47.358 | 0.00 | 0.00 |
| ATOM | 4831 | NE2  | GLN | X | 321 | 18.527 | 35.643 | 49.440 | 0.00 | 0.00 |
| ATOM | 4832 | HE21 | GLN | X | 321 | 17.736 | 36.254 | 49.290 | 0.00 | 0.00 |
| ATOM | 4833 | HE22 | GLN | X | 321 | 18.631 | 35.262 | 50.369 | 0.00 | 0.00 |
| ATOM | 4834 | C    | GLN | X | 321 | 24.080 | 35.719 | 48.656 | 0.00 | 0.00 |
| ATOM | 4835 | O    | GLN | X | 321 | 24.100 | 36.774 | 48.027 | 0.00 | 0.00 |
| ATOM | 4836 | N    | VAL | X | 322 | 25.152 | 34.988 | 48.865 | 0.00 | 0.00 |
| ATOM | 4837 | H    | VAL | X | 322 | 25.106 | 34.142 | 49.414 | 0.00 | 0.00 |
| ATOM | 4838 | CA   | VAL | X | 322 | 26.451 | 35.393 | 48.353 | 0.00 | 0.00 |
| ATOM | 4839 | HA   | VAL | X | 322 | 26.376 | 36.031 | 47.472 | 0.00 | 0.00 |
| ATOM | 4840 | CB   | VAL | X | 322 | 27.223 | 36.185 | 49.386 | 0.00 | 0.00 |
| ATOM | 4841 | HB   | VAL | X | 322 | 27.528 | 35.549 | 50.217 | 0.00 | 0.00 |
| ATOM | 4842 | CG1  | VAL | X | 322 | 28.559 | 36.642 | 48.765 | 0.00 | 0.00 |
| ATOM | 4843 | HG11 | VAL | X | 322 | 28.426 | 37.046 | 47.762 | 0.00 | 0.00 |
| ATOM | 4844 | HG12 | VAL | X | 322 | 29.150 | 37.254 | 49.446 | 0.00 | 0.00 |
| ATOM | 4845 | HG13 | VAL | X | 322 | 29.165 | 35.737 | 48.717 | 0.00 | 0.00 |
| ATOM | 4846 | CG2  | VAL | X | 322 | 26.567 | 37.451 | 49.999 | 0.00 | 0.00 |
| ATOM | 4847 | HG21 | VAL | X | 322 | 27.304 | 38.114 | 50.453 | 0.00 | 0.00 |
| ATOM | 4848 | HG22 | VAL | X | 322 | 25.883 | 37.202 | 50.810 | 0.00 | 0.00 |
| ATOM | 4849 | HG23 | VAL | X | 322 | 26.007 | 37.951 | 49.209 | 0.00 | 0.00 |
| ATOM | 4850 | C    | VAL | X | 322 | 27.241 | 34.123 | 47.967 | 0.00 | 0.00 |
| ATOM | 4851 | O    | VAL | X | 322 | 27.306 | 33.120 | 48.764 | 0.00 | 0.00 |
| ATOM | 4852 | N    | LEU | X | 323 | 27.680 | 34.075 | 46.736 | 0.00 | 0.00 |
| ATOM | 4853 | H    | LEU | X | 323 | 27.548 | 34.930 | 46.213 | 0.00 | 0.00 |
| ATOM | 4854 | CA   | LEU | X | 323 | 28.495 | 33.044 | 46.151 | 0.00 | 0.00 |
| ATOM | 4855 | HA   | LEU | X | 323 | 28.420 | 32.132 | 46.744 | 0.00 | 0.00 |
| ATOM | 4856 | CB   | LEU | X | 323 | 28.112 | 32.611 | 44.768 | 0.00 | 0.00 |
| ATOM | 4857 | HB2  | LEU | X | 323 | 27.033 | 32.660 | 44.624 | 0.00 | 0.00 |
| ATOM | 4858 | HB3  | LEU | X | 323 | 28.523 | 33.385 | 44.121 | 0.00 | 0.00 |
| ATOM | 4859 | CG   | LEU | X | 323 | 28.646 | 31.174 | 44.277 | 0.00 | 0.00 |
| ATOM | 4860 | HG   | LEU | X | 323 | 28.637 | 30.435 | 45.078 | 0.00 | 0.00 |
| ATOM | 4861 | CD1  | LEU | X | 323 | 27.802 | 30.658 | 43.068 | 0.00 | 0.00 |
| ATOM | 4862 | HD11 | LEU | X | 323 | 26.947 | 30.053 | 43.371 | 0.00 | 0.00 |
| ATOM | 4863 | HD12 | LEU | X | 323 | 28.361 | 30.010 | 42.393 | 0.00 | 0.00 |
| ATOM | 4864 | HD13 | LEU | X | 323 | 27.392 | 31.495 | 42.504 | 0.00 | 0.00 |
| ATOM | 4865 | CD2  | LEU | X | 323 | 30.175 | 31.081 | 43.874 | 0.00 | 0.00 |
| ATOM | 4866 | HD21 | LEU | X | 323 | 30.299 | 30.120 | 43.375 | 0.00 | 0.00 |
| ATOM | 4867 | HD22 | LEU | X | 323 | 30.408 | 31.744 | 43.041 | 0.00 | 0.00 |
| ATOM | 4868 | HD23 | LEU | X | 323 | 30.840 | 31.169 | 44.733 | 0.00 | 0.00 |
| ATOM | 4869 | C    | LEU | X | 323 | 29.908 | 33.588 | 46.368 | 0.00 | 0.00 |
| ATOM | 4870 | O    | LEU | X | 323 | 30.151 | 34.824 | 46.202 | 0.00 | 0.00 |
| ATOM | 4871 | N    | VAL | X | 324 | 30.827 | 32.813 | 46.968 | 0.00 | 0.00 |
| ATOM | 4872 | H    | VAL | X | 324 | 30.668 | 31.816 | 47.005 | 0.00 | 0.00 |
| ATOM | 4873 | CA   | VAL | X | 324 | 32.212 | 33.251 | 47.335 | 0.00 | 0.00 |
| ATOM | 4874 | HA   | VAL | X | 324 | 32.514 | 34.190 | 46.871 | 0.00 | 0.00 |
| ATOM | 4875 | CB   | VAL | X | 324 | 32.508 | 33.457 | 48.834 | 0.00 | 0.00 |
| ATOM | 4876 | HB   | VAL | X | 324 | 33.553 | 33.768 | 48.846 | 0.00 | 0.00 |
| ATOM | 4877 | CG1  | VAL | X | 324 | 31.725 | 34.515 | 49.514 | 0.00 | 0.00 |
| ATOM | 4878 | HG11 | VAL | X | 324 | 30.669 | 34.258 | 49.591 | 0.00 | 0.00 |
| ATOM | 4879 | HG12 | VAL | X | 324 | 32.193 | 34.650 | 50.489 | 0.00 | 0.00 |
| ATOM | 4880 | HG13 | VAL | X | 324 | 31.800 | 35.456 | 48.970 | 0.00 | 0.00 |
| ATOM | 4881 | CG2  | VAL | X | 324 | 32.256 | 32.092 | 49.564 | 0.00 | 0.00 |
| ATOM | 4882 | HG21 | VAL | X | 324 | 31.231 | 31.740 | 49.445 | 0.00 | 0.00 |
| ATOM | 4883 | HG22 | VAL | X | 324 | 32.392 | 32.276 | 50.630 | 0.00 | 0.00 |
| ATOM | 4884 | HG23 | VAL | X | 324 | 32.919 | 31.304 | 49.206 | 0.00 | 0.00 |
| ATOM | 4885 | C    | VAL | X | 324 | 33.063 | 32.053 | 46.748 | 0.00 | 0.00 |
| ATOM | 4886 | O    | VAL | X | 324 | 32.651 | 30.914 | 46.670 | 0.00 | 0.00 |
| ATOM | 4887 | N    | GLY | X | 325 | 34.342 | 32.372 | 46.473 | 0.00 | 0.00 |
| ATOM | 4888 | H    | GLY | X | 325 | 34.750 | 33.296 | 46.443 | 0.00 | 0.00 |
| ATOM | 4889 | CA   | GLY | X | 325 | 35.311 | 31.361 | 46.301 | 0.00 | 0.00 |
| ATOM | 4890 | HA2  | GLY | X | 325 | 35.686 | 31.067 | 47.282 | 0.00 | 0.00 |
| ATOM | 4891 | HA3  | GLY | X | 325 | 34.929 | 30.485 | 45.777 | 0.00 | 0.00 |
| ATOM | 4892 | C    | GLY | X | 325 | 36.560 | 31.761 | 45.521 | 0.00 | 0.00 |
| ATOM | 4893 | O    | GLY | X | 325 | 36.872 | 32.985 | 45.442 | 0.00 | 0.00 |
| ATOM | 4894 | N    | VAL | X | 326 | 37.377 | 30.775 | 45.163 | 0.00 | 0.00 |
| ATOM | 4895 | H    | VAL | X | 326 | 37.065 | 29.878 | 45.508 | 0.00 | 0.00 |

|      |      |      |     |   |     |        |        |        |      |      |
|------|------|------|-----|---|-----|--------|--------|--------|------|------|
| ATOM | 4896 | CA   | VAL | X | 326 | 38.806 | 30.951 | 44.955 | 0.00 | 0.00 |
| ATOM | 4897 | HA   | VAL | X | 326 | 39.004 | 31.890 | 44.439 | 0.00 | 0.00 |
| ATOM | 4898 | CB   | VAL | X | 326 | 39.671 | 31.019 | 46.319 | 0.00 | 0.00 |
| ATOM | 4899 | HB   | VAL | X | 326 | 40.741 | 31.014 | 46.112 | 0.00 | 0.00 |
| ATOM | 4900 | CG1  | VAL | X | 326 | 39.210 | 32.091 | 47.247 | 0.00 | 0.00 |
| ATOM | 4901 | HG11 | VAL | X | 326 | 39.033 | 33.106 | 46.890 | 0.00 | 0.00 |
| ATOM | 4902 | HG12 | VAL | X | 326 | 38.236 | 31.756 | 47.603 | 0.00 | 0.00 |
| ATOM | 4903 | HG13 | VAL | X | 326 | 39.910 | 32.049 | 48.082 | 0.00 | 0.00 |
| ATOM | 4904 | CG2  | VAL | X | 326 | 39.398 | 29.764 | 47.138 | 0.00 | 0.00 |
| ATOM | 4905 | HG21 | VAL | X | 326 | 38.331 | 29.717 | 47.360 | 0.00 | 0.00 |
| ATOM | 4906 | HG22 | VAL | X | 326 | 39.843 | 29.735 | 48.133 | 0.00 | 0.00 |
| ATOM | 4907 | HG23 | VAL | X | 326 | 39.709 | 28.868 | 46.602 | 0.00 | 0.00 |
| ATOM | 4908 | C    | VAL | X | 326 | 39.355 | 29.821 | 44.083 | 0.00 | 0.00 |
| ATOM | 4909 | O    | VAL | X | 326 | 38.742 | 28.727 | 43.900 | 0.00 | 0.00 |
| ATOM | 4910 | N    | VAL | X | 327 | 40.531 | 30.107 | 43.560 | 0.00 | 0.00 |
| ATOM | 4911 | H    | VAL | X | 327 | 40.927 | 30.996 | 43.830 | 0.00 | 0.00 |
| ATOM | 4912 | CA   | VAL | X | 327 | 41.347 | 29.172 | 42.782 | 0.00 | 0.00 |
| ATOM | 4913 | HA   | VAL | X | 327 | 40.662 | 28.460 | 42.321 | 0.00 | 0.00 |
| ATOM | 4914 | CB   | VAL | X | 327 | 42.125 | 29.726 | 41.580 | 0.00 | 0.00 |
| ATOM | 4915 | HB   | VAL | X | 327 | 42.738 | 28.996 | 41.052 | 0.00 | 0.00 |
| ATOM | 4916 | CG1  | VAL | X | 327 | 41.095 | 30.328 | 40.566 | 0.00 | 0.00 |
| ATOM | 4917 | HG11 | VAL | X | 327 | 40.228 | 29.720 | 40.306 | 0.00 | 0.00 |
| ATOM | 4918 | HG12 | VAL | X | 327 | 40.679 | 31.284 | 40.882 | 0.00 | 0.00 |
| ATOM | 4919 | HG13 | VAL | X | 327 | 41.567 | 30.416 | 39.587 | 0.00 | 0.00 |
| ATOM | 4920 | CG2  | VAL | X | 327 | 43.162 | 30.782 | 42.025 | 0.00 | 0.00 |
| ATOM | 4921 | HG21 | VAL | X | 327 | 43.648 | 30.951 | 41.065 | 0.00 | 0.00 |
| ATOM | 4922 | HG22 | VAL | X | 327 | 43.920 | 30.360 | 42.685 | 0.00 | 0.00 |
| ATOM | 4923 | HG23 | VAL | X | 327 | 42.626 | 31.648 | 42.413 | 0.00 | 0.00 |
| ATOM | 4924 | C    | VAL | X | 327 | 42.240 | 28.361 | 43.667 | 0.00 | 0.00 |
| ATOM | 4925 | O    | VAL | X | 327 | 42.316 | 28.555 | 44.919 | 0.00 | 0.00 |
| ATOM | 4926 | N    | LYS | X | 328 | 42.852 | 27.368 | 43.012 | 0.00 | 0.00 |
| ATOM | 4927 | H    | LYS | X | 328 | 42.727 | 27.301 | 42.012 | 0.00 | 0.00 |
| ATOM | 4928 | CA   | LYS | X | 328 | 43.878 | 26.583 | 43.614 | 0.00 | 0.00 |
| ATOM | 4929 | HA   | LYS | X | 328 | 43.353 | 26.300 | 44.527 | 0.00 | 0.00 |
| ATOM | 4930 | CB   | LYS | X | 328 | 43.888 | 25.174 | 42.944 | 0.00 | 0.00 |
| ATOM | 4931 | HB2  | LYS | X | 328 | 42.910 | 24.703 | 43.037 | 0.00 | 0.00 |
| ATOM | 4932 | HB3  | LYS | X | 328 | 44.222 | 25.242 | 41.908 | 0.00 | 0.00 |
| ATOM | 4933 | CG   | LYS | X | 328 | 44.813 | 24.262 | 43.743 | 0.00 | 0.00 |
| ATOM | 4934 | HG2  | LYS | X | 328 | 45.859 | 24.561 | 43.811 | 0.00 | 0.00 |
| ATOM | 4935 | HG3  | LYS | X | 328 | 44.407 | 24.133 | 44.746 | 0.00 | 0.00 |
| ATOM | 4936 | CD   | LYS | X | 328 | 44.787 | 22.928 | 43.000 | 0.00 | 0.00 |
| ATOM | 4937 | HD2  | LYS | X | 328 | 45.164 | 22.172 | 43.688 | 0.00 | 0.00 |
| ATOM | 4938 | HD3  | LYS | X | 328 | 43.778 | 22.645 | 42.697 | 0.00 | 0.00 |
| ATOM | 4939 | CE   | LYS | X | 328 | 45.655 | 22.782 | 41.741 | 0.00 | 0.00 |
| ATOM | 4940 | HE2  | LYS | X | 328 | 45.539 | 21.777 | 41.334 | 0.00 | 0.00 |
| ATOM | 4941 | HE3  | LYS | X | 328 | 45.330 | 23.553 | 41.042 | 0.00 | 0.00 |
| ATOM | 4942 | NZ   | LYS | X | 328 | 47.096 | 22.957 | 42.116 | 0.00 | 0.00 |
| ATOM | 4943 | HZ1  | LYS | X | 328 | 47.327 | 23.939 | 42.175 | 0.00 | 0.00 |
| ATOM | 4944 | HZ2  | LYS | X | 328 | 47.267 | 22.508 | 43.005 | 0.00 | 0.00 |
| ATOM | 4945 | HZ3  | LYS | X | 328 | 47.701 | 22.492 | 41.455 | 0.00 | 0.00 |
| ATOM | 4946 | C    | LYS | X | 328 | 45.298 | 27.227 | 43.952 | 0.00 | 0.00 |
| ATOM | 4947 | O    | LYS | X | 328 | 45.846 | 26.852 | 45.044 | 0.00 | 0.00 |
| ATOM | 4948 | N    | ASP | X | 329 | 45.763 | 28.220 | 43.218 | 0.00 | 0.00 |
| ATOM | 4949 | H    | ASP | X | 329 | 45.151 | 28.542 | 42.481 | 0.00 | 0.00 |
| ATOM | 4950 | CA   | ASP | X | 329 | 47.055 | 28.798 | 43.378 | 0.00 | 0.00 |
| ATOM | 4951 | HA   | ASP | X | 329 | 47.413 | 28.401 | 44.328 | 0.00 | 0.00 |
| ATOM | 4952 | CB   | ASP | X | 329 | 48.013 | 28.275 | 42.349 | 0.00 | 0.00 |
| ATOM | 4953 | HB2  | ASP | X | 329 | 47.703 | 28.693 | 41.391 | 0.00 | 0.00 |
| ATOM | 4954 | HB3  | ASP | X | 329 | 49.029 | 28.653 | 42.459 | 0.00 | 0.00 |
| ATOM | 4955 | CG   | ASP | X | 329 | 48.056 | 26.703 | 42.295 | 0.00 | 0.00 |
| ATOM | 4956 | OD1  | ASP | X | 329 | 49.006 | 26.140 | 42.912 | 0.00 | 0.00 |
| ATOM | 4957 | OD2  | ASP | X | 329 | 47.183 | 26.069 | 41.704 | 0.00 | 0.00 |
| ATOM | 4958 | C    | ASP | X | 329 | 46.987 | 30.325 | 43.515 | 0.00 | 0.00 |
| ATOM | 4959 | O    | ASP | X | 329 | 47.733 | 30.979 | 42.761 | 0.00 | 0.00 |
| ATOM | 4960 | N    | GLU | X | 330 | 46.157 | 30.911 | 44.418 | 0.00 | 0.00 |
| ATOM | 4961 | H    | GLU | X | 330 | 45.563 | 30.330 | 44.993 | 0.00 | 0.00 |
| ATOM | 4962 | CA   | GLU | X | 330 | 45.865 | 32.347 | 44.583 | 0.00 | 0.00 |

|      |      |     |     |   |     |        |        |        |      |      |
|------|------|-----|-----|---|-----|--------|--------|--------|------|------|
| ATOM | 4963 | HA  | GLU | X | 330 | 45.501 | 32.671 | 43.608 | 0.00 | 0.00 |
| ATOM | 4964 | CB  | GLU | X | 330 | 44.874 | 32.436 | 45.732 | 0.00 | 0.00 |
| ATOM | 4965 | HB2 | GLU | X | 330 | 45.229 | 31.850 | 46.581 | 0.00 | 0.00 |
| ATOM | 4966 | HB3 | GLU | X | 330 | 44.733 | 33.429 | 46.157 | 0.00 | 0.00 |
| ATOM | 4967 | CG  | GLU | X | 330 | 43.461 | 31.909 | 45.488 | 0.00 | 0.00 |
| ATOM | 4968 | HG2 | GLU | X | 330 | 43.511 | 30.920 | 45.034 | 0.00 | 0.00 |
| ATOM | 4969 | HG3 | GLU | X | 330 | 42.924 | 31.891 | 46.436 | 0.00 | 0.00 |
| ATOM | 4970 | CD  | GLU | X | 330 | 42.672 | 32.873 | 44.584 | 0.00 | 0.00 |
| ATOM | 4971 | OE1 | GLU | X | 330 | 43.279 | 33.804 | 44.017 | 0.00 | 0.00 |
| ATOM | 4972 | OE2 | GLU | X | 330 | 41.500 | 32.636 | 44.426 | 0.00 | 0.00 |
| ATOM | 4973 | C   | GLU | X | 330 | 47.185 | 33.103 | 44.992 | 0.00 | 0.00 |
| ATOM | 4974 | O   | GLU | X | 330 | 47.236 | 34.283 | 44.674 | 0.00 | 0.00 |
| ATOM | 4975 | N   | GLY | X | 331 | 48.189 | 32.463 | 45.563 | 0.00 | 0.00 |
| ATOM | 4976 | H   | GLY | X | 331 | 48.120 | 31.455 | 45.567 | 0.00 | 0.00 |
| ATOM | 4977 | CA  | GLY | X | 331 | 49.500 | 33.119 | 45.750 | 0.00 | 0.00 |
| ATOM | 4978 | HA2 | GLY | X | 331 | 49.291 | 34.186 | 45.823 | 0.00 | 0.00 |
| ATOM | 4979 | HA3 | GLY | X | 331 | 49.828 | 32.765 | 46.728 | 0.00 | 0.00 |
| ATOM | 4980 | C   | GLY | X | 331 | 50.579 | 32.839 | 44.763 | 0.00 | 0.00 |
| ATOM | 4981 | O   | GLY | X | 331 | 51.646 | 33.478 | 44.881 | 0.00 | 0.00 |
| ATOM | 4982 | N   | SER | X | 332 | 50.444 | 31.824 | 43.907 | 0.00 | 0.00 |
| ATOM | 4983 | H   | SER | X | 332 | 49.598 | 31.282 | 44.005 | 0.00 | 0.00 |
| ATOM | 4984 | CA  | SER | X | 332 | 51.499 | 31.457 | 42.933 | 0.00 | 0.00 |
| ATOM | 4985 | HA  | SER | X | 332 | 52.416 | 31.158 | 43.440 | 0.00 | 0.00 |
| ATOM | 4986 | CB  | SER | X | 332 | 50.994 | 30.271 | 42.157 | 0.00 | 0.00 |
| ATOM | 4987 | HB2 | SER | X | 332 | 50.836 | 29.492 | 42.903 | 0.00 | 0.00 |
| ATOM | 4988 | HB3 | SER | X | 332 | 50.030 | 30.604 | 41.773 | 0.00 | 0.00 |
| ATOM | 4989 | OG  | SER | X | 332 | 51.793 | 29.743 | 41.068 | 0.00 | 0.00 |
| ATOM | 4990 | HG  | SER | X | 332 | 51.269 | 29.012 | 40.735 | 0.00 | 0.00 |
| ATOM | 4991 | C   | SER | X | 332 | 51.843 | 32.633 | 41.922 | 0.00 | 0.00 |
| ATOM | 4992 | O   | SER | X | 332 | 53.017 | 33.010 | 41.705 | 0.00 | 0.00 |
| ATOM | 4993 | N   | TYR | X | 333 | 50.822 | 33.312 | 41.380 | 0.00 | 0.00 |
| ATOM | 4994 | H   | TYR | X | 333 | 49.916 | 32.912 | 41.576 | 0.00 | 0.00 |
| ATOM | 4995 | CA  | TYR | X | 333 | 51.033 | 34.543 | 40.483 | 0.00 | 0.00 |
| ATOM | 4996 | HA  | TYR | X | 333 | 51.344 | 34.173 | 39.506 | 0.00 | 0.00 |
| ATOM | 4997 | CB  | TYR | X | 333 | 49.608 | 35.109 | 40.253 | 0.00 | 0.00 |
| ATOM | 4998 | HB2 | TYR | X | 333 | 48.984 | 34.250 | 40.004 | 0.00 | 0.00 |
| ATOM | 4999 | HB3 | TYR | X | 333 | 49.357 | 35.529 | 41.228 | 0.00 | 0.00 |
| ATOM | 5000 | CG  | TYR | X | 333 | 49.417 | 36.194 | 39.166 | 0.00 | 0.00 |
| ATOM | 5001 | CD1 | TYR | X | 333 | 49.338 | 35.923 | 37.719 | 0.00 | 0.00 |
| ATOM | 5002 | HD1 | TYR | X | 333 | 49.753 | 34.987 | 37.376 | 0.00 | 0.00 |
| ATOM | 5003 | CE1 | TYR | X | 333 | 48.964 | 36.895 | 36.837 | 0.00 | 0.00 |
| ATOM | 5004 | HE1 | TYR | X | 333 | 48.980 | 36.666 | 35.782 | 0.00 | 0.00 |
| ATOM | 5005 | CZ  | TYR | X | 333 | 48.533 | 38.142 | 37.318 | 0.00 | 0.00 |
| ATOM | 5006 | OH  | TYR | X | 333 | 48.035 | 39.063 | 36.447 | 0.00 | 0.00 |
| ATOM | 5007 | HH  | TYR | X | 333 | 48.173 | 38.794 | 35.536 | 0.00 | 0.00 |
| ATOM | 5008 | CE2 | TYR | X | 333 | 48.497 | 38.405 | 38.736 | 0.00 | 0.00 |
| ATOM | 5009 | HE2 | TYR | X | 333 | 48.090 | 39.271 | 39.235 | 0.00 | 0.00 |
| ATOM | 5010 | CD2 | TYR | X | 333 | 48.971 | 37.441 | 39.623 | 0.00 | 0.00 |
| ATOM | 5011 | HD2 | TYR | X | 333 | 48.985 | 37.717 | 40.667 | 0.00 | 0.00 |
| ATOM | 5012 | C   | TYR | X | 333 | 52.022 | 35.616 | 40.956 | 0.00 | 0.00 |
| ATOM | 5013 | O   | TYR | X | 333 | 52.858 | 36.089 | 40.260 | 0.00 | 0.00 |
| ATOM | 5014 | N   | PHE | X | 334 | 51.905 | 35.948 | 42.253 | 0.00 | 0.00 |
| ATOM | 5015 | H   | PHE | X | 334 | 51.222 | 35.543 | 42.877 | 0.00 | 0.00 |
| ATOM | 5016 | CA  | PHE | X | 334 | 52.669 | 37.121 | 42.836 | 0.00 | 0.00 |
| ATOM | 5017 | HA  | PHE | X | 334 | 52.711 | 37.904 | 42.079 | 0.00 | 0.00 |
| ATOM | 5018 | CB  | PHE | X | 334 | 51.830 | 37.631 | 43.969 | 0.00 | 0.00 |
| ATOM | 5019 | HB2 | PHE | X | 334 | 52.013 | 36.925 | 44.779 | 0.00 | 0.00 |
| ATOM | 5020 | HB3 | PHE | X | 334 | 52.278 | 38.538 | 44.377 | 0.00 | 0.00 |
| ATOM | 5021 | CG  | PHE | X | 334 | 50.447 | 38.063 | 43.700 | 0.00 | 0.00 |
| ATOM | 5022 | CD1 | PHE | X | 334 | 49.416 | 37.209 | 43.912 | 0.00 | 0.00 |
| ATOM | 5023 | HD1 | PHE | X | 334 | 49.526 | 36.277 | 44.446 | 0.00 | 0.00 |
| ATOM | 5024 | CE1 | PHE | X | 334 | 48.097 | 37.595 | 43.545 | 0.00 | 0.00 |
| ATOM | 5025 | HE1 | PHE | X | 334 | 47.267 | 36.984 | 43.867 | 0.00 | 0.00 |
| ATOM | 5026 | CZ  | PHE | X | 334 | 47.888 | 38.855 | 42.878 | 0.00 | 0.00 |
| ATOM | 5027 | HZ  | PHE | X | 334 | 46.870 | 39.124 | 42.637 | 0.00 | 0.00 |
| ATOM | 5028 | CE2 | PHE | X | 334 | 48.980 | 39.693 | 42.656 | 0.00 | 0.00 |
| ATOM | 5029 | HE2 | PHE | X | 334 | 48.758 | 40.543 | 42.027 | 0.00 | 0.00 |



|      |      |      |     |   |     |        |        |        |      |      |
|------|------|------|-----|---|-----|--------|--------|--------|------|------|
| ATOM | 5030 | CD2  | PHE | X | 334 | 50.265 | 39.269 | 42.969 | 0.00 | 0.00 |
| ATOM | 5031 | HD2  | PHE | X | 334 | 51.117 | 39.863 | 42.672 | 0.00 | 0.00 |
| ATOM | 5032 | C    | PHE | X | 334 | 54.105 | 36.832 | 43.235 | 0.00 | 0.00 |
| ATOM | 5033 | O    | PHE | X | 334 | 54.909 | 37.720 | 43.224 | 0.00 | 0.00 |
| ATOM | 5034 | N    | LEU | X | 335 | 54.376 | 35.588 | 43.427 | 0.00 | 0.00 |
| ATOM | 5035 | H    | LEU | X | 335 | 53.572 | 34.992 | 43.288 | 0.00 | 0.00 |
| ATOM | 5036 | CA   | LEU | X | 335 | 55.768 | 35.117 | 43.540 | 0.00 | 0.00 |
| ATOM | 5037 | HA   | LEU | X | 335 | 56.206 | 35.748 | 44.314 | 0.00 | 0.00 |
| ATOM | 5038 | CB   | LEU | X | 335 | 55.863 | 33.664 | 43.926 | 0.00 | 0.00 |
| ATOM | 5039 | HB2  | LEU | X | 335 | 55.394 | 33.093 | 43.124 | 0.00 | 0.00 |
| ATOM | 5040 | HB3  | LEU | X | 335 | 56.929 | 33.439 | 43.936 | 0.00 | 0.00 |
| ATOM | 5041 | CG   | LEU | X | 335 | 55.350 | 33.435 | 45.376 | 0.00 | 0.00 |
| ATOM | 5042 | HG   | LEU | X | 335 | 54.295 | 33.691 | 45.472 | 0.00 | 0.00 |
| ATOM | 5043 | CD1  | LEU | X | 335 | 55.437 | 31.953 | 45.664 | 0.00 | 0.00 |
| ATOM | 5044 | HD11 | LEU | X | 335 | 55.025 | 31.821 | 46.664 | 0.00 | 0.00 |
| ATOM | 5045 | HD12 | LEU | X | 335 | 56.449 | 31.550 | 45.701 | 0.00 | 0.00 |
| ATOM | 5046 | HD13 | LEU | X | 335 | 54.776 | 31.530 | 44.908 | 0.00 | 0.00 |
| ATOM | 5047 | CD2  | LEU | X | 335 | 56.329 | 34.085 | 46.355 | 0.00 | 0.00 |
| ATOM | 5048 | HD21 | LEU | X | 335 | 57.344 | 33.744 | 46.149 | 0.00 | 0.00 |
| ATOM | 5049 | HD22 | LEU | X | 335 | 56.272 | 35.173 | 46.382 | 0.00 | 0.00 |
| ATOM | 5050 | HD23 | LEU | X | 335 | 55.956 | 33.726 | 47.314 | 0.00 | 0.00 |
| ATOM | 5051 | C    | LEU | X | 335 | 56.608 | 35.385 | 42.303 | 0.00 | 0.00 |
| ATOM | 5052 | O    | LEU | X | 335 | 57.627 | 36.068 | 42.475 | 0.00 | 0.00 |
| ATOM | 5053 | N    | VAL | X | 336 | 56.271 | 34.886 | 41.103 | 0.00 | 0.00 |
| ATOM | 5054 | H    | VAL | X | 336 | 55.441 | 34.310 | 41.104 | 0.00 | 0.00 |
| ATOM | 5055 | CA   | VAL | X | 336 | 56.987 | 35.215 | 39.855 | 0.00 | 0.00 |
| ATOM | 5056 | HA   | VAL | X | 336 | 57.974 | 34.812 | 40.085 | 0.00 | 0.00 |
| ATOM | 5057 | CB   | VAL | X | 336 | 56.529 | 34.425 | 38.600 | 0.00 | 0.00 |
| ATOM | 5058 | HB   | VAL | X | 336 | 57.204 | 34.796 | 37.829 | 0.00 | 0.00 |
| ATOM | 5059 | CG1  | VAL | X | 336 | 56.770 | 32.934 | 38.784 | 0.00 | 0.00 |
| ATOM | 5060 | HG11 | VAL | X | 336 | 56.359 | 32.455 | 37.895 | 0.00 | 0.00 |
| ATOM | 5061 | HG12 | VAL | X | 336 | 57.798 | 32.621 | 38.970 | 0.00 | 0.00 |
| ATOM | 5062 | HG13 | VAL | X | 336 | 56.259 | 32.496 | 39.641 | 0.00 | 0.00 |
| ATOM | 5063 | CG2  | VAL | X | 336 | 55.015 | 34.697 | 38.147 | 0.00 | 0.00 |
| ATOM | 5064 | HG21 | VAL | X | 336 | 54.775 | 35.759 | 38.098 | 0.00 | 0.00 |
| ATOM | 5065 | HG22 | VAL | X | 336 | 54.341 | 34.249 | 38.877 | 0.00 | 0.00 |
| ATOM | 5066 | HG23 | VAL | X | 336 | 54.749 | 34.255 | 37.187 | 0.00 | 0.00 |
| ATOM | 5067 | C    | VAL | X | 336 | 56.927 | 36.736 | 39.513 | 0.00 | 0.00 |
| ATOM | 5068 | O    | VAL | X | 336 | 57.865 | 37.147 | 38.791 | 0.00 | 0.00 |
| ATOM | 5069 | N    | TYR | X | 337 | 55.949 | 37.543 | 40.053 | 0.00 | 0.00 |
| ATOM | 5070 | H    | TYR | X | 337 | 55.129 | 37.136 | 40.479 | 0.00 | 0.00 |
| ATOM | 5071 | CA   | TYR | X | 337 | 55.978 | 38.951 | 39.828 | 0.00 | 0.00 |
| ATOM | 5072 | HA   | TYR | X | 337 | 56.454 | 39.021 | 38.850 | 0.00 | 0.00 |
| ATOM | 5073 | CB   | TYR | X | 337 | 54.505 | 39.363 | 39.673 | 0.00 | 0.00 |
| ATOM | 5074 | HB2  | TYR | X | 337 | 53.840 | 38.781 | 40.311 | 0.00 | 0.00 |
| ATOM | 5075 | HB3  | TYR | X | 337 | 54.410 | 40.419 | 39.925 | 0.00 | 0.00 |
| ATOM | 5076 | CG   | TYR | X | 337 | 53.952 | 39.241 | 38.217 | 0.00 | 0.00 |
| ATOM | 5077 | CD1  | TYR | X | 337 | 54.519 | 40.029 | 37.229 | 0.00 | 0.00 |
| ATOM | 5078 | HD1  | TYR | X | 337 | 55.415 | 40.615 | 37.375 | 0.00 | 0.00 |
| ATOM | 5079 | CE1  | TYR | X | 337 | 53.917 | 40.032 | 35.959 | 0.00 | 0.00 |
| ATOM | 5080 | HE1  | TYR | X | 337 | 54.398 | 40.497 | 35.112 | 0.00 | 0.00 |
| ATOM | 5081 | CZ   | TYR | X | 337 | 52.794 | 39.310 | 35.634 | 0.00 | 0.00 |
| ATOM | 5082 | OH   | TYR | X | 337 | 52.350 | 39.400 | 34.375 | 0.00 | 0.00 |
| ATOM | 5083 | HH   | TYR | X | 337 | 52.840 | 40.080 | 33.908 | 0.00 | 0.00 |
| ATOM | 5084 | CE2  | TYR | X | 337 | 52.264 | 38.473 | 36.639 | 0.00 | 0.00 |
| ATOM | 5085 | HE2  | TYR | X | 337 | 51.393 | 37.900 | 36.355 | 0.00 | 0.00 |
| ATOM | 5086 | CD2  | TYR | X | 337 | 52.766 | 38.512 | 37.978 | 0.00 | 0.00 |
| ATOM | 5087 | HD2  | TYR | X | 337 | 52.173 | 38.133 | 38.798 | 0.00 | 0.00 |
| ATOM | 5088 | C    | TYR | X | 337 | 56.686 | 39.755 | 40.855 | 0.00 | 0.00 |
| ATOM | 5089 | O    | TYR | X | 337 | 56.766 | 40.946 | 40.744 | 0.00 | 0.00 |
| ATOM | 5090 | N    | GLY | X | 338 | 57.151 | 39.157 | 41.958 | 0.00 | 0.00 |
| ATOM | 5091 | H    | GLY | X | 338 | 57.057 | 38.162 | 42.106 | 0.00 | 0.00 |
| ATOM | 5092 | CA   | GLY | X | 338 | 57.626 | 39.934 | 43.048 | 0.00 | 0.00 |
| ATOM | 5093 | HA2  | GLY | X | 338 | 58.142 | 40.772 | 42.579 | 0.00 | 0.00 |
| ATOM | 5094 | HA3  | GLY | X | 338 | 56.764 | 40.312 | 43.598 | 0.00 | 0.00 |
| ATOM | 5095 | C    | GLY | X | 338 | 58.567 | 39.333 | 44.110 | 0.00 | 0.00 |
| ATOM | 5096 | O    | GLY | X | 338 | 59.172 | 40.103 | 44.784 | 0.00 | 0.00 |

|      |      |     |     |   |     |        |        |        |      |      |
|------|------|-----|-----|---|-----|--------|--------|--------|------|------|
| ATOM | 5097 | N   | ALA | X | 339 | 58.829 | 38.050 | 44.217 | 0.00 | 0.00 |
| ATOM | 5098 | H   | ALA | X | 339 | 58.369 | 37.432 | 43.564 | 0.00 | 0.00 |
| ATOM | 5099 | CA  | ALA | X | 339 | 59.796 | 37.445 | 45.167 | 0.00 | 0.00 |
| ATOM | 5100 | HA  | ALA | X | 339 | 59.991 | 38.077 | 46.033 | 0.00 | 0.00 |
| ATOM | 5101 | CB  | ALA | X | 339 | 59.045 | 36.322 | 45.832 | 0.00 | 0.00 |
| ATOM | 5102 | HB1 | ALA | X | 339 | 58.994 | 35.490 | 45.130 | 0.00 | 0.00 |
| ATOM | 5103 | HB2 | ALA | X | 339 | 57.996 | 36.589 | 45.958 | 0.00 | 0.00 |
| ATOM | 5104 | HB3 | ALA | X | 339 | 59.566 | 35.983 | 46.727 | 0.00 | 0.00 |
| ATOM | 5105 | C   | ALA | X | 339 | 61.214 | 37.044 | 44.568 | 0.00 | 0.00 |
| ATOM | 5106 | O   | ALA | X | 339 | 61.275 | 36.681 | 43.404 | 0.00 | 0.00 |
| ATOM | 5107 | N   | PRO | X | 340 | 62.293 | 36.900 | 45.418 | 0.00 | 0.00 |
| ATOM | 5108 | CD  | PRO | X | 340 | 62.350 | 37.376 | 46.861 | 0.00 | 0.00 |
| ATOM | 5109 | HD2 | PRO | X | 340 | 61.870 | 36.648 | 47.515 | 0.00 | 0.00 |
| ATOM | 5110 | HD3 | PRO | X | 340 | 61.793 | 38.293 | 47.054 | 0.00 | 0.00 |
| ATOM | 5111 | CG  | PRO | X | 340 | 63.784 | 37.500 | 47.219 | 0.00 | 0.00 |
| ATOM | 5112 | HG2 | PRO | X | 340 | 64.027 | 37.247 | 48.250 | 0.00 | 0.00 |
| ATOM | 5113 | HG3 | PRO | X | 340 | 64.124 | 38.496 | 46.935 | 0.00 | 0.00 |
| ATOM | 5114 | CB  | PRO | X | 340 | 64.461 | 36.454 | 46.304 | 0.00 | 0.00 |
| ATOM | 5115 | HB2 | PRO | X | 340 | 64.278 | 35.471 | 46.737 | 0.00 | 0.00 |
| ATOM | 5116 | HB3 | PRO | X | 340 | 65.525 | 36.649 | 46.168 | 0.00 | 0.00 |
| ATOM | 5117 | CA  | PRO | X | 340 | 63.641 | 36.473 | 45.001 | 0.00 | 0.00 |
| ATOM | 5118 | HA  | PRO | X | 340 | 64.109 | 37.223 | 44.363 | 0.00 | 0.00 |
| ATOM | 5119 | C   | PRO | X | 340 | 63.638 | 35.057 | 44.382 | 0.00 | 0.00 |
| ATOM | 5120 | O   | PRO | X | 340 | 63.085 | 34.098 | 44.912 | 0.00 | 0.00 |
| ATOM | 5121 | N   | GLY | X | 341 | 64.323 | 34.911 | 43.241 | 0.00 | 0.00 |
| ATOM | 5122 | H   | GLY | X | 341 | 64.848 | 35.721 | 42.944 | 0.00 | 0.00 |
| ATOM | 5123 | CA  | GLY | X | 341 | 64.570 | 33.617 | 42.551 | 0.00 | 0.00 |
| ATOM | 5124 | HA2 | GLY | X | 341 | 65.464 | 33.754 | 41.943 | 0.00 | 0.00 |
| ATOM | 5125 | HA3 | GLY | X | 341 | 64.801 | 32.835 | 43.275 | 0.00 | 0.00 |
| ATOM | 5126 | C   | GLY | X | 341 | 63.434 | 33.089 | 41.661 | 0.00 | 0.00 |
| ATOM | 5127 | O   | GLY | X | 341 | 63.641 | 32.419 | 40.561 | 0.00 | 0.00 |
| ATOM | 5128 | N   | PHE | X | 342 | 62.185 | 33.457 | 41.996 | 0.00 | 0.00 |
| ATOM | 5129 | H   | PHE | X | 342 | 62.094 | 33.998 | 42.844 | 0.00 | 0.00 |
| ATOM | 5130 | CA  | PHE | X | 342 | 61.053 | 32.942 | 41.159 | 0.00 | 0.00 |
| ATOM | 5131 | HA  | PHE | X | 342 | 61.162 | 31.872 | 40.977 | 0.00 | 0.00 |
| ATOM | 5132 | CB  | PHE | X | 342 | 59.756 | 33.303 | 41.805 | 0.00 | 0.00 |
| ATOM | 5133 | HB2 | PHE | X | 342 | 59.739 | 34.365 | 42.048 | 0.00 | 0.00 |
| ATOM | 5134 | HB3 | PHE | X | 342 | 58.905 | 33.094 | 41.156 | 0.00 | 0.00 |
| ATOM | 5135 | CG  | PHE | X | 342 | 59.489 | 32.564 | 43.063 | 0.00 | 0.00 |
| ATOM | 5136 | CD1 | PHE | X | 342 | 58.688 | 31.393 | 43.085 | 0.00 | 0.00 |
| ATOM | 5137 | HD1 | PHE | X | 342 | 58.145 | 31.155 | 42.182 | 0.00 | 0.00 |
| ATOM | 5138 | CE1 | PHE | X | 342 | 58.579 | 30.600 | 44.228 | 0.00 | 0.00 |
| ATOM | 5139 | HE1 | PHE | X | 342 | 57.950 | 29.724 | 44.179 | 0.00 | 0.00 |
| ATOM | 5140 | CZ  | PHE | X | 342 | 59.210 | 31.038 | 45.404 | 0.00 | 0.00 |
| ATOM | 5141 | HZ  | PHE | X | 342 | 59.125 | 30.496 | 46.335 | 0.00 | 0.00 |
| ATOM | 5142 | CE2 | PHE | X | 342 | 59.892 | 32.223 | 45.450 | 0.00 | 0.00 |
| ATOM | 5143 | HE2 | PHE | X | 342 | 60.403 | 32.604 | 46.321 | 0.00 | 0.00 |
| ATOM | 5144 | CD2 | PHE | X | 342 | 60.005 | 32.983 | 44.285 | 0.00 | 0.00 |
| ATOM | 5145 | HD2 | PHE | X | 342 | 60.615 | 33.865 | 44.418 | 0.00 | 0.00 |
| ATOM | 5146 | C   | PHE | X | 342 | 61.066 | 33.719 | 39.832 | 0.00 | 0.00 |
| ATOM | 5147 | O   | PHE | X | 342 | 61.421 | 34.905 | 39.794 | 0.00 | 0.00 |
| ATOM | 5148 | N   | SER | X | 343 | 60.444 | 33.034 | 38.810 | 0.00 | 0.00 |
| ATOM | 5149 | H   | SER | X | 343 | 60.134 | 32.122 | 39.112 | 0.00 | 0.00 |
| ATOM | 5150 | CA  | SER | X | 343 | 60.402 | 33.403 | 37.381 | 0.00 | 0.00 |
| ATOM | 5151 | HA  | SER | X | 343 | 59.695 | 34.227 | 37.288 | 0.00 | 0.00 |
| ATOM | 5152 | CB  | SER | X | 343 | 61.732 | 33.701 | 36.733 | 0.00 | 0.00 |
| ATOM | 5153 | HB2 | SER | X | 343 | 62.385 | 34.107 | 37.505 | 0.00 | 0.00 |
| ATOM | 5154 | HB3 | SER | X | 343 | 62.236 | 32.833 | 36.310 | 0.00 | 0.00 |
| ATOM | 5155 | OG  | SER | X | 343 | 61.610 | 34.660 | 35.729 | 0.00 | 0.00 |
| ATOM | 5156 | HG  | SER | X | 343 | 62.444 | 35.133 | 35.778 | 0.00 | 0.00 |
| ATOM | 5157 | C   | SER | X | 343 | 59.676 | 32.321 | 36.615 | 0.00 | 0.00 |
| ATOM | 5158 | O   | SER | X | 343 | 59.866 | 31.130 | 36.806 | 0.00 | 0.00 |
| ATOM | 5159 | N   | LYS | X | 344 | 58.748 | 32.689 | 35.711 | 0.00 | 0.00 |
| ATOM | 5160 | H   | LYS | X | 344 | 58.803 | 33.667 | 35.463 | 0.00 | 0.00 |
| ATOM | 5161 | CA  | LYS | X | 344 | 57.838 | 31.869 | 34.982 | 0.00 | 0.00 |
| ATOM | 5162 | HA  | LYS | X | 344 | 57.448 | 31.291 | 35.820 | 0.00 | 0.00 |
| ATOM | 5163 | CB  | LYS | X | 344 | 56.749 | 32.735 | 34.363 | 0.00 | 0.00 |

|      |      |      |     |   |     |        |        |        |      |      |
|------|------|------|-----|---|-----|--------|--------|--------|------|------|
| ATOM | 5164 | HB2  | LYS | X | 344 | 56.018 | 32.106 | 33.855 | 0.00 | 0.00 |
| ATOM | 5165 | HB3  | LYS | X | 344 | 56.340 | 33.377 | 35.143 | 0.00 | 0.00 |
| ATOM | 5166 | CG   | LYS | X | 344 | 57.329 | 33.560 | 33.211 | 0.00 | 0.00 |
| ATOM | 5167 | HG2  | LYS | X | 344 | 58.039 | 34.248 | 33.670 | 0.00 | 0.00 |
| ATOM | 5168 | HG3  | LYS | X | 344 | 57.843 | 32.879 | 32.532 | 0.00 | 0.00 |
| ATOM | 5169 | CD   | LYS | X | 344 | 56.306 | 34.331 | 32.435 | 0.00 | 0.00 |
| ATOM | 5170 | HD2  | LYS | X | 344 | 55.542 | 33.600 | 32.172 | 0.00 | 0.00 |
| ATOM | 5171 | HD3  | LYS | X | 344 | 55.935 | 35.119 | 33.090 | 0.00 | 0.00 |
| ATOM | 5172 | CE   | LYS | X | 344 | 56.737 | 34.982 | 31.106 | 0.00 | 0.00 |
| ATOM | 5173 | HE2  | LYS | X | 344 | 55.928 | 35.485 | 30.576 | 0.00 | 0.00 |
| ATOM | 5174 | HE3  | LYS | X | 344 | 57.449 | 35.753 | 31.401 | 0.00 | 0.00 |
| ATOM | 5175 | NZ   | LYS | X | 344 | 57.488 | 34.094 | 30.119 | 0.00 | 0.00 |
| ATOM | 5176 | HZ1  | LYS | X | 344 | 58.154 | 33.504 | 30.596 | 0.00 | 0.00 |
| ATOM | 5177 | HZ2  | LYS | X | 344 | 56.898 | 33.417 | 29.657 | 0.00 | 0.00 |
| ATOM | 5178 | HZ3  | LYS | X | 344 | 58.012 | 34.625 | 29.437 | 0.00 | 0.00 |
| ATOM | 5179 | C    | LYS | X | 344 | 58.471 | 30.888 | 33.956 | 0.00 | 0.00 |
| ATOM | 5180 | O    | LYS | X | 344 | 57.841 | 29.920 | 33.476 | 0.00 | 0.00 |
| ATOM | 5181 | N    | ASP | X | 345 | 59.781 | 31.168 | 33.688 | 0.00 | 0.00 |
| ATOM | 5182 | H    | ASP | X | 345 | 60.161 | 31.974 | 34.162 | 0.00 | 0.00 |
| ATOM | 5183 | CA   | ASP | X | 345 | 60.774 | 30.453 | 32.818 | 0.00 | 0.00 |
| ATOM | 5184 | HA   | ASP | X | 345 | 60.174 | 29.685 | 32.330 | 0.00 | 0.00 |
| ATOM | 5185 | CB   | ASP | X | 345 | 61.268 | 31.457 | 31.704 | 0.00 | 0.00 |
| ATOM | 5186 | HB2  | ASP | X | 345 | 61.722 | 32.342 | 32.151 | 0.00 | 0.00 |
| ATOM | 5187 | HB3  | ASP | X | 345 | 62.011 | 31.049 | 31.019 | 0.00 | 0.00 |
| ATOM | 5188 | CG   | ASP | X | 345 | 60.073 | 31.988 | 30.839 | 0.00 | 0.00 |
| ATOM | 5189 | OD1  | ASP | X | 345 | 59.215 | 31.193 | 30.383 | 0.00 | 0.00 |
| ATOM | 5190 | OD2  | ASP | X | 345 | 59.899 | 33.208 | 30.752 | 0.00 | 0.00 |
| ATOM | 5191 | C    | ASP | X | 345 | 61.885 | 29.704 | 33.529 | 0.00 | 0.00 |
| ATOM | 5192 | O    | ASP | X | 345 | 62.921 | 29.401 | 32.928 | 0.00 | 0.00 |
| ATOM | 5193 | N    | ASN | X | 346 | 61.655 | 29.465 | 34.850 | 0.00 | 0.00 |
| ATOM | 5194 | H    | ASN | X | 346 | 60.729 | 29.615 | 35.224 | 0.00 | 0.00 |
| ATOM | 5195 | CA   | ASN | X | 346 | 62.508 | 28.782 | 35.782 | 0.00 | 0.00 |
| ATOM | 5196 | HA   | ASN | X | 346 | 63.172 | 28.122 | 35.225 | 0.00 | 0.00 |
| ATOM | 5197 | CB   | ASN | X | 346 | 63.323 | 29.795 | 36.588 | 0.00 | 0.00 |
| ATOM | 5198 | HB2  | ASN | X | 346 | 63.755 | 30.526 | 35.904 | 0.00 | 0.00 |
| ATOM | 5199 | HB3  | ASN | X | 346 | 62.693 | 30.303 | 37.318 | 0.00 | 0.00 |
| ATOM | 5200 | CG   | ASN | X | 346 | 64.415 | 29.000 | 37.288 | 0.00 | 0.00 |
| ATOM | 5201 | OD1  | ASN | X | 346 | 64.236 | 28.523 | 38.381 | 0.00 | 0.00 |
| ATOM | 5202 | ND2  | ASN | X | 346 | 65.585 | 28.793 | 36.726 | 0.00 | 0.00 |
| ATOM | 5203 | HD21 | ASN | X | 346 | 66.293 | 28.377 | 37.313 | 0.00 | 0.00 |
| ATOM | 5204 | HD22 | ASN | X | 346 | 65.736 | 29.235 | 35.830 | 0.00 | 0.00 |
| ATOM | 5205 | C    | ASN | X | 346 | 61.655 | 27.986 | 36.714 | 0.00 | 0.00 |
| ATOM | 5206 | O    | ASN | X | 346 | 60.688 | 28.488 | 37.263 | 0.00 | 0.00 |
| ATOM | 5207 | N    | GLU | X | 347 | 62.015 | 26.787 | 37.037 | 0.00 | 0.00 |
| ATOM | 5208 | H    | GLU | X | 347 | 62.845 | 26.452 | 36.570 | 0.00 | 0.00 |
| ATOM | 5209 | CA   | GLU | X | 347 | 61.319 | 25.821 | 38.011 | 0.00 | 0.00 |
| ATOM | 5210 | HA   | GLU | X | 347 | 60.259 | 25.924 | 37.778 | 0.00 | 0.00 |
| ATOM | 5211 | CB   | GLU | X | 347 | 61.803 | 24.362 | 37.914 | 0.00 | 0.00 |
| ATOM | 5212 | HB2  | GLU | X | 347 | 62.879 | 24.394 | 38.086 | 0.00 | 0.00 |
| ATOM | 5213 | HB3  | GLU | X | 347 | 61.343 | 23.652 | 38.600 | 0.00 | 0.00 |
| ATOM | 5214 | CG   | GLU | X | 347 | 61.528 | 23.787 | 36.538 | 0.00 | 0.00 |
| ATOM | 5215 | HG2  | GLU | X | 347 | 60.447 | 23.743 | 36.411 | 0.00 | 0.00 |
| ATOM | 5216 | HG3  | GLU | X | 347 | 61.952 | 24.357 | 35.712 | 0.00 | 0.00 |
| ATOM | 5217 | CD   | GLU | X | 347 | 62.239 | 22.427 | 36.462 | 0.00 | 0.00 |
| ATOM | 5218 | OE1  | GLU | X | 347 | 63.409 | 22.254 | 36.049 | 0.00 | 0.00 |
| ATOM | 5219 | OE2  | GLU | X | 347 | 61.557 | 21.448 | 36.808 | 0.00 | 0.00 |
| ATOM | 5220 | C    | GLU | X | 347 | 61.324 | 26.237 | 39.532 | 0.00 | 0.00 |
| ATOM | 5221 | O    | GLU | X | 347 | 60.581 | 25.625 | 40.310 | 0.00 | 0.00 |
| ATOM | 5222 | N    | SER | X | 348 | 62.059 | 27.296 | 39.842 | 0.00 | 0.00 |
| ATOM | 5223 | H    | SER | X | 348 | 62.562 | 27.681 | 39.055 | 0.00 | 0.00 |
| ATOM | 5224 | CA   | SER | X | 348 | 61.776 | 28.131 | 41.051 | 0.00 | 0.00 |
| ATOM | 5225 | HA   | SER | X | 348 | 62.569 | 28.878 | 41.014 | 0.00 | 0.00 |
| ATOM | 5226 | CB   | SER | X | 348 | 60.521 | 28.988 | 40.886 | 0.00 | 0.00 |
| ATOM | 5227 | HB2  | SER | X | 348 | 59.669 | 28.310 | 40.936 | 0.00 | 0.00 |
| ATOM | 5228 | HB3  | SER | X | 348 | 60.467 | 29.610 | 41.780 | 0.00 | 0.00 |
| ATOM | 5229 | OG   | SER | X | 348 | 60.410 | 29.707 | 39.735 | 0.00 | 0.00 |
| ATOM | 5230 | HG   | SER | X | 348 | 60.286 | 29.101 | 39.001 | 0.00 | 0.00 |

|      |      |      |     |   |     |        |        |        |      |      |
|------|------|------|-----|---|-----|--------|--------|--------|------|------|
| ATOM | 5231 | C    | SER | X | 348 | 61.861 | 27.522 | 42.486 | 0.00 | 0.00 |
| ATOM | 5232 | O    | SER | X | 348 | 61.265 | 28.049 | 43.465 | 0.00 | 0.00 |
| ATOM | 5233 | N    | LEU | X | 349 | 62.601 | 26.394 | 42.581 | 0.00 | 0.00 |
| ATOM | 5234 | H    | LEU | X | 349 | 63.007 | 26.033 | 41.730 | 0.00 | 0.00 |
| ATOM | 5235 | CA   | LEU | X | 349 | 62.734 | 25.538 | 43.746 | 0.00 | 0.00 |
| ATOM | 5236 | HA   | LEU | X | 349 | 61.736 | 25.495 | 44.183 | 0.00 | 0.00 |
| ATOM | 5237 | CB   | LEU | X | 349 | 63.275 | 24.227 | 43.241 | 0.00 | 0.00 |
| ATOM | 5238 | HB2  | LEU | X | 349 | 64.082 | 24.478 | 42.553 | 0.00 | 0.00 |
| ATOM | 5239 | HB3  | LEU | X | 349 | 63.590 | 23.521 | 44.009 | 0.00 | 0.00 |
| ATOM | 5240 | CG   | LEU | X | 349 | 62.235 | 23.425 | 42.333 | 0.00 | 0.00 |
| ATOM | 5241 | HG   | LEU | X | 349 | 62.180 | 23.968 | 41.390 | 0.00 | 0.00 |
| ATOM | 5242 | CD1  | LEU | X | 349 | 62.847 | 22.049 | 41.987 | 0.00 | 0.00 |
| ATOM | 5243 | HD11 | LEU | X | 349 | 62.975 | 21.408 | 42.860 | 0.00 | 0.00 |
| ATOM | 5244 | HD12 | LEU | X | 349 | 63.831 | 22.166 | 41.532 | 0.00 | 0.00 |
| ATOM | 5245 | HD13 | LEU | X | 349 | 62.324 | 21.589 | 41.149 | 0.00 | 0.00 |
| ATOM | 5246 | CD2  | LEU | X | 349 | 60.971 | 23.123 | 43.115 | 0.00 | 0.00 |
| ATOM | 5247 | HD21 | LEU | X | 349 | 60.279 | 22.513 | 42.534 | 0.00 | 0.00 |
| ATOM | 5248 | HD22 | LEU | X | 349 | 61.061 | 22.716 | 44.122 | 0.00 | 0.00 |
| ATOM | 5249 | HD23 | LEU | X | 349 | 60.501 | 24.101 | 43.219 | 0.00 | 0.00 |
| ATOM | 5250 | C    | LEU | X | 349 | 63.675 | 26.160 | 44.810 | 0.00 | 0.00 |
| ATOM | 5251 | O    | LEU | X | 349 | 64.564 | 26.937 | 44.483 | 0.00 | 0.00 |
| ATOM | 5252 | N    | ILE | X | 350 | 63.505 | 25.878 | 46.086 | 0.00 | 0.00 |
| ATOM | 5253 | H    | ILE | X | 350 | 62.808 | 25.215 | 46.394 | 0.00 | 0.00 |
| ATOM | 5254 | CA   | ILE | X | 350 | 64.138 | 26.654 | 47.192 | 0.00 | 0.00 |
| ATOM | 5255 | HA   | ILE | X | 350 | 64.923 | 27.286 | 46.778 | 0.00 | 0.00 |
| ATOM | 5256 | CB   | ILE | X | 350 | 63.033 | 27.599 | 47.747 | 0.00 | 0.00 |
| ATOM | 5257 | HB   | ILE | X | 350 | 63.592 | 28.027 | 48.579 | 0.00 | 0.00 |
| ATOM | 5258 | CG2  | ILE | X | 350 | 62.726 | 28.796 | 46.796 | 0.00 | 0.00 |
| ATOM | 5259 | HG21 | ILE | X | 350 | 62.022 | 28.396 | 46.066 | 0.00 | 0.00 |
| ATOM | 5260 | HG22 | ILE | X | 350 | 63.596 | 29.160 | 46.250 | 0.00 | 0.00 |
| ATOM | 5261 | HG23 | ILE | X | 350 | 62.362 | 29.569 | 47.473 | 0.00 | 0.00 |
| ATOM | 5262 | CG1  | ILE | X | 350 | 61.799 | 26.979 | 48.188 | 0.00 | 0.00 |
| ATOM | 5263 | HG12 | ILE | X | 350 | 61.242 | 26.572 | 47.345 | 0.00 | 0.00 |
| ATOM | 5264 | HG13 | ILE | X | 350 | 62.115 | 26.157 | 48.830 | 0.00 | 0.00 |
| ATOM | 5265 | CD1  | ILE | X | 350 | 60.889 | 27.966 | 48.880 | 0.00 | 0.00 |
| ATOM | 5266 | HD11 | ILE | X | 350 | 61.404 | 28.418 | 49.727 | 0.00 | 0.00 |
| ATOM | 5267 | HD12 | ILE | X | 350 | 60.041 | 27.430 | 49.304 | 0.00 | 0.00 |
| ATOM | 5268 | HD13 | ILE | X | 350 | 60.499 | 28.749 | 48.230 | 0.00 | 0.00 |
| ATOM | 5269 | C    | ILE | X | 350 | 64.660 | 25.778 | 48.331 | 0.00 | 0.00 |
| ATOM | 5270 | O    | ILE | X | 350 | 64.202 | 24.646 | 48.510 | 0.00 | 0.00 |
| ATOM | 5271 | N    | SER | X | 351 | 65.577 | 26.328 | 49.158 | 0.00 | 0.00 |
| ATOM | 5272 | H    | SER | X | 351 | 66.025 | 27.188 | 48.878 | 0.00 | 0.00 |
| ATOM | 5273 | CA   | SER | X | 351 | 65.909 | 25.799 | 50.485 | 0.00 | 0.00 |
| ATOM | 5274 | HA   | SER | X | 351 | 65.820 | 24.713 | 50.466 | 0.00 | 0.00 |
| ATOM | 5275 | CB   | SER | X | 351 | 67.419 | 26.058 | 50.843 | 0.00 | 0.00 |
| ATOM | 5276 | HB2  | SER | X | 351 | 67.604 | 25.615 | 51.821 | 0.00 | 0.00 |
| ATOM | 5277 | HB3  | SER | X | 351 | 68.133 | 25.470 | 50.266 | 0.00 | 0.00 |
| ATOM | 5278 | OG   | SER | X | 351 | 67.662 | 27.480 | 50.888 | 0.00 | 0.00 |
| ATOM | 5279 | HG   | SER | X | 351 | 67.662 | 27.843 | 49.999 | 0.00 | 0.00 |
| ATOM | 5280 | C    | SER | X | 351 | 64.981 | 26.387 | 51.546 | 0.00 | 0.00 |
| ATOM | 5281 | O    | SER | X | 351 | 64.426 | 27.499 | 51.276 | 0.00 | 0.00 |
| ATOM | 5282 | N    | ARG | X | 352 | 64.846 | 25.781 | 52.748 | 0.00 | 0.00 |
| ATOM | 5283 | H    | ARG | X | 352 | 65.190 | 24.832 | 52.781 | 0.00 | 0.00 |
| ATOM | 5284 | CA   | ARG | X | 352 | 64.082 | 26.297 | 53.942 | 0.00 | 0.00 |
| ATOM | 5285 | HA   | ARG | X | 352 | 62.996 | 26.344 | 53.860 | 0.00 | 0.00 |
| ATOM | 5286 | CB   | ARG | X | 352 | 64.223 | 25.264 | 55.044 | 0.00 | 0.00 |
| ATOM | 5287 | HB2  | ARG | X | 352 | 63.779 | 24.350 | 54.649 | 0.00 | 0.00 |
| ATOM | 5288 | HB3  | ARG | X | 352 | 65.291 | 25.159 | 55.232 | 0.00 | 0.00 |
| ATOM | 5289 | CG   | ARG | X | 352 | 63.380 | 25.583 | 56.262 | 0.00 | 0.00 |
| ATOM | 5290 | HG2  | ARG | X | 352 | 63.668 | 26.540 | 56.697 | 0.00 | 0.00 |
| ATOM | 5291 | HG3  | ARG | X | 352 | 62.346 | 25.625 | 55.923 | 0.00 | 0.00 |
| ATOM | 5292 | CD   | ARG | X | 352 | 63.386 | 24.411 | 57.280 | 0.00 | 0.00 |
| ATOM | 5293 | HD2  | ARG | X | 352 | 62.956 | 23.520 | 56.823 | 0.00 | 0.00 |
| ATOM | 5294 | HD3  | ARG | X | 352 | 64.412 | 24.148 | 57.536 | 0.00 | 0.00 |
| ATOM | 5295 | NE   | ARG | X | 352 | 62.517 | 24.583 | 58.483 | 0.00 | 0.00 |
| ATOM | 5296 | HE   | ARG | X | 352 | 62.936 | 24.952 | 59.324 | 0.00 | 0.00 |
| ATOM | 5297 | CZ   | ARG | X | 352 | 61.280 | 24.308 | 58.599 | 0.00 | 0.00 |

|      |      |      |     |   |     |        |        |        |      |      |
|------|------|------|-----|---|-----|--------|--------|--------|------|------|
| ATOM | 5298 | NH1  | ARG | X | 352 | 60.566 | 23.769 | 57.670 | 0.00 | 0.00 |
| ATOM | 5299 | HH11 | ARG | X | 352 | 60.860 | 23.537 | 56.731 | 0.00 | 0.00 |
| ATOM | 5300 | HH12 | ARG | X | 352 | 59.636 | 23.421 | 57.854 | 0.00 | 0.00 |
| ATOM | 5301 | NH2  | ARG | X | 352 | 60.620 | 24.557 | 59.751 | 0.00 | 0.00 |
| ATOM | 5302 | HH21 | ARG | X | 352 | 61.113 | 25.134 | 60.417 | 0.00 | 0.00 |
| ATOM | 5303 | HH22 | ARG | X | 352 | 59.639 | 24.319 | 59.787 | 0.00 | 0.00 |
| ATOM | 5304 | C    | ARG | X | 352 | 64.508 | 27.726 | 54.412 | 0.00 | 0.00 |
| ATOM | 5305 | O    | ARG | X | 352 | 63.712 | 28.552 | 54.911 | 0.00 | 0.00 |
| ATOM | 5306 | N    | ALA | X | 353 | 65.856 | 27.981 | 54.122 | 0.00 | 0.00 |
| ATOM | 5307 | H    | ALA | X | 353 | 66.318 | 27.227 | 53.635 | 0.00 | 0.00 |
| ATOM | 5308 | CA   | ALA | X | 353 | 66.537 | 29.304 | 54.196 | 0.00 | 0.00 |
| ATOM | 5309 | HA   | ALA | X | 353 | 66.187 | 29.737 | 55.133 | 0.00 | 0.00 |
| ATOM | 5310 | CB   | ALA | X | 353 | 68.101 | 29.285 | 54.222 | 0.00 | 0.00 |
| ATOM | 5311 | HB1  | ALA | X | 353 | 68.253 | 28.494 | 54.957 | 0.00 | 0.00 |
| ATOM | 5312 | HB2  | ALA | X | 353 | 68.509 | 30.248 | 54.529 | 0.00 | 0.00 |
| ATOM | 5313 | HB3  | ALA | X | 353 | 68.612 | 28.959 | 53.316 | 0.00 | 0.00 |
| ATOM | 5314 | C    | ALA | X | 353 | 66.049 | 30.408 | 53.215 | 0.00 | 0.00 |
| ATOM | 5315 | O    | ALA | X | 353 | 65.962 | 31.607 | 53.554 | 0.00 | 0.00 |
| ATOM | 5316 | N    | GLU | X | 354 | 65.526 | 29.968 | 52.079 | 0.00 | 0.00 |
| ATOM | 5317 | H    | GLU | X | 354 | 65.514 | 28.960 | 52.016 | 0.00 | 0.00 |
| ATOM | 5318 | CA   | GLU | X | 354 | 64.896 | 30.813 | 51.033 | 0.00 | 0.00 |
| ATOM | 5319 | HA   | GLU | X | 354 | 65.281 | 31.825 | 51.159 | 0.00 | 0.00 |
| ATOM | 5320 | CB   | GLU | X | 354 | 65.206 | 30.292 | 49.701 | 0.00 | 0.00 |
| ATOM | 5321 | HB2  | GLU | X | 354 | 64.945 | 29.237 | 49.792 | 0.00 | 0.00 |
| ATOM | 5322 | HB3  | GLU | X | 354 | 64.557 | 30.673 | 48.913 | 0.00 | 0.00 |
| ATOM | 5323 | CG   | GLU | X | 354 | 66.651 | 30.516 | 49.265 | 0.00 | 0.00 |
| ATOM | 5324 | HG2  | GLU | X | 354 | 66.642 | 31.562 | 48.959 | 0.00 | 0.00 |
| ATOM | 5325 | HG3  | GLU | X | 354 | 67.287 | 30.362 | 50.137 | 0.00 | 0.00 |
| ATOM | 5326 | CD   | GLU | X | 354 | 67.077 | 29.542 | 48.125 | 0.00 | 0.00 |
| ATOM | 5327 | OE1  | GLU | X | 354 | 67.112 | 30.010 | 46.956 | 0.00 | 0.00 |
| ATOM | 5328 | OE2  | GLU | X | 354 | 67.183 | 28.349 | 48.340 | 0.00 | 0.00 |
| ATOM | 5329 | C    | GLU | X | 354 | 63.355 | 30.930 | 51.243 | 0.00 | 0.00 |
| ATOM | 5330 | O    | GLU | X | 354 | 62.805 | 31.909 | 50.908 | 0.00 | 0.00 |
| ATOM | 5331 | N    | PHE | X | 355 | 62.764 | 29.963 | 52.002 | 0.00 | 0.00 |
| ATOM | 5332 | H    | PHE | X | 355 | 63.197 | 29.063 | 52.154 | 0.00 | 0.00 |
| ATOM | 5333 | CA   | PHE | X | 355 | 61.393 | 30.053 | 52.532 | 0.00 | 0.00 |
| ATOM | 5334 | HA   | PHE | X | 355 | 60.734 | 30.264 | 51.689 | 0.00 | 0.00 |
| ATOM | 5335 | CB   | PHE | X | 355 | 61.016 | 28.631 | 52.904 | 0.00 | 0.00 |
| ATOM | 5336 | HB2  | PHE | X | 355 | 61.068 | 28.025 | 52.000 | 0.00 | 0.00 |
| ATOM | 5337 | HB3  | PHE | X | 355 | 61.663 | 28.128 | 53.623 | 0.00 | 0.00 |
| ATOM | 5338 | CG   | PHE | X | 355 | 59.560 | 28.573 | 53.243 | 0.00 | 0.00 |
| ATOM | 5339 | CD1  | PHE | X | 355 | 58.490 | 29.103 | 52.409 | 0.00 | 0.00 |
| ATOM | 5340 | HD1  | PHE | X | 355 | 58.693 | 29.716 | 51.543 | 0.00 | 0.00 |
| ATOM | 5341 | CE1  | PHE | X | 355 | 57.168 | 28.852 | 52.784 | 0.00 | 0.00 |
| ATOM | 5342 | HE1  | PHE | X | 355 | 56.302 | 29.264 | 52.286 | 0.00 | 0.00 |
| ATOM | 5343 | CZ   | PHE | X | 355 | 56.915 | 28.112 | 53.886 | 0.00 | 0.00 |
| ATOM | 5344 | HZ   | PHE | X | 355 | 55.901 | 27.787 | 54.067 | 0.00 | 0.00 |
| ATOM | 5345 | CE2  | PHE | X | 355 | 57.919 | 27.677 | 54.744 | 0.00 | 0.00 |
| ATOM | 5346 | HE2  | PHE | X | 355 | 57.626 | 27.140 | 55.633 | 0.00 | 0.00 |
| ATOM | 5347 | CD2  | PHE | X | 355 | 59.281 | 27.940 | 54.448 | 0.00 | 0.00 |
| ATOM | 5348 | HD2  | PHE | X | 355 | 60.034 | 27.598 | 55.142 | 0.00 | 0.00 |
| ATOM | 5349 | C    | PHE | X | 355 | 61.260 | 31.050 | 53.579 | 0.00 | 0.00 |
| ATOM | 5350 | O    | PHE | X | 355 | 60.476 | 31.950 | 53.435 | 0.00 | 0.00 |
| ATOM | 5351 | N    | LEU | X | 356 | 62.150 | 31.009 | 54.610 | 0.00 | 0.00 |
| ATOM | 5352 | H    | LEU | X | 356 | 62.815 | 30.250 | 54.666 | 0.00 | 0.00 |
| ATOM | 5353 | CA   | LEU | X | 356 | 62.243 | 32.129 | 55.565 | 0.00 | 0.00 |
| ATOM | 5354 | HA   | LEU | X | 356 | 61.423 | 32.163 | 56.283 | 0.00 | 0.00 |
| ATOM | 5355 | CB   | LEU | X | 356 | 63.492 | 31.955 | 56.427 | 0.00 | 0.00 |
| ATOM | 5356 | HB2  | LEU | X | 356 | 63.543 | 30.971 | 56.893 | 0.00 | 0.00 |
| ATOM | 5357 | HB3  | LEU | X | 356 | 64.314 | 31.981 | 55.711 | 0.00 | 0.00 |
| ATOM | 5358 | CG   | LEU | X | 356 | 63.695 | 33.025 | 57.493 | 0.00 | 0.00 |
| ATOM | 5359 | HG   | LEU | X | 356 | 63.692 | 34.044 | 57.104 | 0.00 | 0.00 |
| ATOM | 5360 | CD1  | LEU | X | 356 | 62.596 | 32.944 | 58.571 | 0.00 | 0.00 |
| ATOM | 5361 | HD11 | LEU | X | 356 | 62.622 | 32.007 | 59.128 | 0.00 | 0.00 |
| ATOM | 5362 | HD12 | LEU | X | 356 | 61.616 | 32.982 | 58.095 | 0.00 | 0.00 |
| ATOM | 5363 | HD13 | LEU | X | 356 | 62.803 | 33.766 | 59.256 | 0.00 | 0.00 |
| ATOM | 5364 | CD2  | LEU | X | 356 | 65.007 | 32.773 | 58.165 | 0.00 | 0.00 |

|      |      |      |     |   |     |        |        |        |      |      |
|------|------|------|-----|---|-----|--------|--------|--------|------|------|
| ATOM | 5365 | HD21 | LEU | X | 356 | 65.796 | 32.788 | 57.413 | 0.00 | 0.00 |
| ATOM | 5366 | HD22 | LEU | X | 356 | 65.158 | 33.428 | 59.024 | 0.00 | 0.00 |
| ATOM | 5367 | HD23 | LEU | X | 356 | 65.064 | 31.749 | 58.534 | 0.00 | 0.00 |
| ATOM | 5368 | C    | LEU | X | 356 | 62.207 | 33.470 | 54.801 | 0.00 | 0.00 |
| ATOM | 5369 | O    | LEU | X | 356 | 61.404 | 34.359 | 55.108 | 0.00 | 0.00 |
| ATOM | 5370 | N    | ALA | X | 357 | 63.168 | 33.663 | 53.844 | 0.00 | 0.00 |
| ATOM | 5371 | H    | ALA | X | 357 | 63.724 | 32.854 | 53.606 | 0.00 | 0.00 |
| ATOM | 5372 | CA   | ALA | X | 357 | 63.340 | 34.966 | 53.104 | 0.00 | 0.00 |
| ATOM | 5373 | HA   | ALA | X | 357 | 63.594 | 35.790 | 53.770 | 0.00 | 0.00 |
| ATOM | 5374 | CB   | ALA | X | 357 | 64.498 | 34.762 | 52.111 | 0.00 | 0.00 |
| ATOM | 5375 | HB1  | ALA | X | 357 | 64.360 | 33.981 | 51.363 | 0.00 | 0.00 |
| ATOM | 5376 | HB2  | ALA | X | 357 | 65.426 | 34.616 | 52.664 | 0.00 | 0.00 |
| ATOM | 5377 | HB3  | ALA | X | 357 | 64.624 | 35.724 | 51.616 | 0.00 | 0.00 |
| ATOM | 5378 | C    | ALA | X | 357 | 61.974 | 35.300 | 52.305 | 0.00 | 0.00 |
| ATOM | 5379 | O    | ALA | X | 357 | 61.386 | 36.417 | 52.402 | 0.00 | 0.00 |
| ATOM | 5380 | N    | GLY | X | 358 | 61.479 | 34.269 | 51.522 | 0.00 | 0.00 |
| ATOM | 5381 | H    | GLY | X | 358 | 62.072 | 33.482 | 51.298 | 0.00 | 0.00 |
| ATOM | 5382 | CA   | GLY | X | 358 | 60.216 | 34.290 | 50.733 | 0.00 | 0.00 |
| ATOM | 5383 | HA2  | GLY | X | 358 | 60.299 | 35.007 | 49.916 | 0.00 | 0.00 |
| ATOM | 5384 | HA3  | GLY | X | 358 | 60.029 | 33.302 | 50.312 | 0.00 | 0.00 |
| ATOM | 5385 | C    | GLY | X | 358 | 59.015 | 34.626 | 51.603 | 0.00 | 0.00 |
| ATOM | 5386 | O    | GLY | X | 358 | 58.187 | 35.462 | 51.183 | 0.00 | 0.00 |
| ATOM | 5387 | N    | VAL | X | 359 | 58.987 | 34.108 | 52.850 | 0.00 | 0.00 |
| ATOM | 5388 | H    | VAL | X | 359 | 59.688 | 33.428 | 53.107 | 0.00 | 0.00 |
| ATOM | 5389 | CA   | VAL | X | 359 | 58.031 | 34.639 | 53.872 | 0.00 | 0.00 |
| ATOM | 5390 | HA   | VAL | X | 359 | 57.032 | 34.580 | 53.440 | 0.00 | 0.00 |
| ATOM | 5391 | CB   | VAL | X | 359 | 57.991 | 33.731 | 55.122 | 0.00 | 0.00 |
| ATOM | 5392 | HB   | VAL | X | 359 | 59.036 | 33.659 | 55.424 | 0.00 | 0.00 |
| ATOM | 5393 | CG1  | VAL | X | 359 | 57.109 | 34.316 | 56.202 | 0.00 | 0.00 |
| ATOM | 5394 | HG11 | VAL | X | 359 | 57.298 | 35.359 | 56.454 | 0.00 | 0.00 |
| ATOM | 5395 | HG12 | VAL | X | 359 | 56.084 | 34.253 | 55.838 | 0.00 | 0.00 |
| ATOM | 5396 | HG13 | VAL | X | 359 | 57.171 | 33.800 | 57.160 | 0.00 | 0.00 |
| ATOM | 5397 | CG2  | VAL | X | 359 | 57.541 | 32.306 | 54.767 | 0.00 | 0.00 |
| ATOM | 5398 | HG21 | VAL | X | 359 | 57.621 | 31.674 | 55.652 | 0.00 | 0.00 |
| ATOM | 5399 | HG22 | VAL | X | 359 | 58.121 | 31.920 | 53.930 | 0.00 | 0.00 |
| ATOM | 5400 | HG23 | VAL | X | 359 | 56.515 | 32.401 | 54.410 | 0.00 | 0.00 |
| ATOM | 5401 | C    | VAL | X | 359 | 58.329 | 36.137 | 54.129 | 0.00 | 0.00 |
| ATOM | 5402 | O    | VAL | X | 359 | 57.430 | 36.919 | 53.965 | 0.00 | 0.00 |
| ATOM | 5403 | N    | ARG | X | 360 | 59.549 | 36.534 | 54.530 | 0.00 | 0.00 |
| ATOM | 5404 | H    | ARG | X | 360 | 60.323 | 35.896 | 54.653 | 0.00 | 0.00 |
| ATOM | 5405 | CA   | ARG | X | 360 | 59.938 | 37.912 | 54.921 | 0.00 | 0.00 |
| ATOM | 5406 | HA   | ARG | X | 360 | 59.329 | 38.123 | 55.801 | 0.00 | 0.00 |
| ATOM | 5407 | CB   | ARG | X | 360 | 61.435 | 37.945 | 55.288 | 0.00 | 0.00 |
| ATOM | 5408 | HB2  | ARG | X | 360 | 61.994 | 37.258 | 54.654 | 0.00 | 0.00 |
| ATOM | 5409 | HB3  | ARG | X | 360 | 61.645 | 39.006 | 55.150 | 0.00 | 0.00 |
| ATOM | 5410 | CG   | ARG | X | 360 | 61.700 | 37.608 | 56.769 | 0.00 | 0.00 |
| ATOM | 5411 | HG2  | ARG | X | 360 | 61.118 | 38.232 | 57.448 | 0.00 | 0.00 |
| ATOM | 5412 | HG3  | ARG | X | 360 | 61.409 | 36.572 | 56.940 | 0.00 | 0.00 |
| ATOM | 5413 | CD   | ARG | X | 360 | 63.185 | 37.729 | 57.181 | 0.00 | 0.00 |
| ATOM | 5414 | HD2  | ARG | X | 360 | 63.349 | 38.803 | 57.099 | 0.00 | 0.00 |
| ATOM | 5415 | HD3  | ARG | X | 360 | 63.226 | 37.342 | 58.199 | 0.00 | 0.00 |
| ATOM | 5416 | NE   | ARG | X | 360 | 64.070 | 36.966 | 56.281 | 0.00 | 0.00 |
| ATOM | 5417 | HE   | ARG | X | 360 | 63.849 | 37.038 | 55.298 | 0.00 | 0.00 |
| ATOM | 5418 | CZ   | ARG | X | 360 | 65.222 | 36.353 | 56.514 | 0.00 | 0.00 |
| ATOM | 5419 | NH1  | ARG | X | 360 | 65.767 | 36.157 | 57.717 | 0.00 | 0.00 |
| ATOM | 5420 | HH11 | ARG | X | 360 | 65.327 | 36.557 | 58.533 | 0.00 | 0.00 |
| ATOM | 5421 | HH12 | ARG | X | 360 | 66.770 | 36.040 | 57.748 | 0.00 | 0.00 |
| ATOM | 5422 | NH2  | ARG | X | 360 | 65.979 | 35.988 | 55.453 | 0.00 | 0.00 |
| ATOM | 5423 | HH21 | ARG | X | 360 | 65.581 | 36.064 | 54.528 | 0.00 | 0.00 |
| ATOM | 5424 | HH22 | ARG | X | 360 | 66.624 | 35.226 | 55.604 | 0.00 | 0.00 |
| ATOM | 5425 | C    | ARG | X | 360 | 59.506 | 38.984 | 53.934 | 0.00 | 0.00 |
| ATOM | 5426 | O    | ARG | X | 360 | 59.414 | 40.195 | 54.293 | 0.00 | 0.00 |
| ATOM | 5427 | N    | VAL | X | 361 | 59.292 | 38.627 | 52.616 | 0.00 | 0.00 |
| ATOM | 5428 | H    | VAL | X | 361 | 59.543 | 37.705 | 52.288 | 0.00 | 0.00 |
| ATOM | 5429 | CA   | VAL | X | 361 | 58.651 | 39.383 | 51.539 | 0.00 | 0.00 |
| ATOM | 5430 | HA   | VAL | X | 361 | 58.810 | 40.423 | 51.822 | 0.00 | 0.00 |
| ATOM | 5431 | CB   | VAL | X | 361 | 59.430 | 39.370 | 50.141 | 0.00 | 0.00 |

|      |      |      |     |   |     |        |        |        |      |      |
|------|------|------|-----|---|-----|--------|--------|--------|------|------|
| ATOM | 5432 | HB   | VAL | X | 361 | 58.964 | 40.071 | 49.449 | 0.00 | 0.00 |
| ATOM | 5433 | CG1  | VAL | X | 361 | 60.846 | 39.894 | 50.266 | 0.00 | 0.00 |
| ATOM | 5434 | HG11 | VAL | X | 361 | 61.349 | 39.200 | 50.939 | 0.00 | 0.00 |
| ATOM | 5435 | HG12 | VAL | X | 361 | 61.249 | 39.910 | 49.254 | 0.00 | 0.00 |
| ATOM | 5436 | HG13 | VAL | X | 361 | 60.902 | 40.940 | 50.571 | 0.00 | 0.00 |
| ATOM | 5437 | CG2  | VAL | X | 361 | 59.400 | 38.003 | 49.452 | 0.00 | 0.00 |
| ATOM | 5438 | HG21 | VAL | X | 361 | 58.366 | 37.670 | 49.543 | 0.00 | 0.00 |
| ATOM | 5439 | HG22 | VAL | X | 361 | 60.115 | 37.289 | 49.860 | 0.00 | 0.00 |
| ATOM | 5440 | HG23 | VAL | X | 361 | 59.463 | 38.188 | 48.380 | 0.00 | 0.00 |
| ATOM | 5441 | C    | VAL | X | 361 | 57.100 | 39.097 | 51.348 | 0.00 | 0.00 |
| ATOM | 5442 | O    | VAL | X | 361 | 56.328 | 39.999 | 51.037 | 0.00 | 0.00 |
| ATOM | 5443 | N    | GLY | X | 362 | 56.719 | 37.772 | 51.445 | 0.00 | 0.00 |
| ATOM | 5444 | H    | GLY | X | 362 | 57.443 | 37.137 | 51.750 | 0.00 | 0.00 |
| ATOM | 5445 | CA   | GLY | X | 362 | 55.491 | 37.218 | 50.999 | 0.00 | 0.00 |
| ATOM | 5446 | HA2  | GLY | X | 362 | 55.120 | 37.547 | 50.029 | 0.00 | 0.00 |
| ATOM | 5447 | HA3  | GLY | X | 362 | 55.671 | 36.150 | 50.873 | 0.00 | 0.00 |
| ATOM | 5448 | C    | GLY | X | 362 | 54.383 | 37.338 | 52.007 | 0.00 | 0.00 |
| ATOM | 5449 | O    | GLY | X | 362 | 53.197 | 37.219 | 51.667 | 0.00 | 0.00 |
| ATOM | 5450 | N    | VAL | X | 363 | 54.803 | 37.657 | 53.229 | 0.00 | 0.00 |
| ATOM | 5451 | H    | VAL | X | 363 | 55.788 | 37.620 | 53.450 | 0.00 | 0.00 |
| ATOM | 5452 | CA   | VAL | X | 363 | 53.938 | 38.262 | 54.216 | 0.00 | 0.00 |
| ATOM | 5453 | HA   | VAL | X | 363 | 52.919 | 38.226 | 53.830 | 0.00 | 0.00 |
| ATOM | 5454 | CB   | VAL | X | 363 | 53.930 | 37.472 | 55.549 | 0.00 | 0.00 |
| ATOM | 5455 | HB   | VAL | X | 363 | 54.870 | 37.593 | 56.086 | 0.00 | 0.00 |
| ATOM | 5456 | CG1  | VAL | X | 363 | 52.775 | 38.043 | 56.442 | 0.00 | 0.00 |
| ATOM | 5457 | HG11 | VAL | X | 363 | 52.945 | 39.099 | 56.649 | 0.00 | 0.00 |
| ATOM | 5458 | HG12 | VAL | X | 363 | 51.911 | 37.939 | 55.785 | 0.00 | 0.00 |
| ATOM | 5459 | HG13 | VAL | X | 363 | 52.676 | 37.506 | 57.385 | 0.00 | 0.00 |
| ATOM | 5460 | CG2  | VAL | X | 363 | 53.517 | 35.946 | 55.484 | 0.00 | 0.00 |
| ATOM | 5461 | HG21 | VAL | X | 363 | 52.514 | 35.798 | 55.084 | 0.00 | 0.00 |
| ATOM | 5462 | HG22 | VAL | X | 363 | 53.679 | 35.573 | 56.495 | 0.00 | 0.00 |
| ATOM | 5463 | HG23 | VAL | X | 363 | 54.297 | 35.397 | 54.955 | 0.00 | 0.00 |
| ATOM | 5464 | C    | VAL | X | 363 | 54.442 | 39.711 | 54.438 | 0.00 | 0.00 |
| ATOM | 5465 | O    | VAL | X | 363 | 55.555 | 39.952 | 54.942 | 0.00 | 0.00 |
| ATOM | 5466 | N    | PRO | X | 364 | 53.742 | 40.718 | 53.916 | 0.00 | 0.00 |
| ATOM | 5467 | CD   | PRO | X | 364 | 52.650 | 40.653 | 52.910 | 0.00 | 0.00 |
| ATOM | 5468 | HD2  | PRO | X | 364 | 51.736 | 40.438 | 53.463 | 0.00 | 0.00 |
| ATOM | 5469 | HD3  | PRO | X | 364 | 52.754 | 39.942 | 52.090 | 0.00 | 0.00 |
| ATOM | 5470 | CG   | PRO | X | 364 | 52.501 | 42.019 | 52.243 | 0.00 | 0.00 |
| ATOM | 5471 | HG2  | PRO | X | 364 | 51.448 | 42.100 | 51.972 | 0.00 | 0.00 |
| ATOM | 5472 | HG3  | PRO | X | 364 | 53.127 | 42.088 | 51.353 | 0.00 | 0.00 |
| ATOM | 5473 | CB   | PRO | X | 364 | 52.944 | 42.939 | 53.338 | 0.00 | 0.00 |
| ATOM | 5474 | HB2  | PRO | X | 364 | 52.075 | 43.098 | 53.976 | 0.00 | 0.00 |
| ATOM | 5475 | HB3  | PRO | X | 364 | 53.289 | 43.919 | 53.008 | 0.00 | 0.00 |
| ATOM | 5476 | CA   | PRO | X | 364 | 53.987 | 42.134 | 54.200 | 0.00 | 0.00 |
| ATOM | 5477 | HA   | PRO | X | 364 | 54.990 | 42.349 | 53.833 | 0.00 | 0.00 |
| ATOM | 5478 | C    | PRO | X | 364 | 53.995 | 42.535 | 55.676 | 0.00 | 0.00 |
| ATOM | 5479 | O    | PRO | X | 364 | 53.308 | 41.913 | 56.497 | 0.00 | 0.00 |
| ATOM | 5480 | N    | GLN | X | 365 | 54.767 | 43.595 | 56.021 | 0.00 | 0.00 |
| ATOM | 5481 | H    | GLN | X | 365 | 55.352 | 44.009 | 55.309 | 0.00 | 0.00 |
| ATOM | 5482 | CA   | GLN | X | 365 | 54.846 | 44.150 | 57.359 | 0.00 | 0.00 |
| ATOM | 5483 | HA   | GLN | X | 365 | 55.308 | 45.116 | 57.156 | 0.00 | 0.00 |
| ATOM | 5484 | CB   | GLN | X | 365 | 53.473 | 44.369 | 57.942 | 0.00 | 0.00 |
| ATOM | 5485 | HB2  | GLN | X | 365 | 52.715 | 44.409 | 57.159 | 0.00 | 0.00 |
| ATOM | 5486 | HB3  | GLN | X | 365 | 53.207 | 43.649 | 58.716 | 0.00 | 0.00 |
| ATOM | 5487 | CG   | GLN | X | 365 | 53.173 | 45.610 | 58.760 | 0.00 | 0.00 |
| ATOM | 5488 | HG2  | GLN | X | 365 | 53.702 | 45.555 | 59.711 | 0.00 | 0.00 |
| ATOM | 5489 | HG3  | GLN | X | 365 | 53.574 | 46.495 | 58.267 | 0.00 | 0.00 |
| ATOM | 5490 | CD   | GLN | X | 365 | 51.644 | 45.776 | 59.058 | 0.00 | 0.00 |
| ATOM | 5491 | OE1  | GLN | X | 365 | 51.296 | 45.758 | 60.213 | 0.00 | 0.00 |
| ATOM | 5492 | NE2  | GLN | X | 365 | 50.739 | 46.036 | 58.158 | 0.00 | 0.00 |
| ATOM | 5493 | HE21 | GLN | X | 365 | 49.759 | 46.141 | 58.379 | 0.00 | 0.00 |
| ATOM | 5494 | HE22 | GLN | X | 365 | 51.123 | 46.233 | 57.245 | 0.00 | 0.00 |
| ATOM | 5495 | C    | GLN | X | 365 | 55.700 | 43.374 | 58.389 | 0.00 | 0.00 |
| ATOM | 5496 | O    | GLN | X | 365 | 56.053 | 43.913 | 59.389 | 0.00 | 0.00 |
| ATOM | 5497 | N    | VAL | X | 366 | 56.050 | 42.151 | 58.142 | 0.00 | 0.00 |
| ATOM | 5498 | H    | VAL | X | 366 | 55.696 | 41.739 | 57.290 | 0.00 | 0.00 |

|      |      |      |     |   |     |        |        |        |      |      |
|------|------|------|-----|---|-----|--------|--------|--------|------|------|
| ATOM | 5499 | CA   | VAL | X | 366 | 56.555 | 41.147 | 59.117 | 0.00 | 0.00 |
| ATOM | 5500 | HA   | VAL | X | 366 | 55.854 | 41.274 | 59.943 | 0.00 | 0.00 |
| ATOM | 5501 | CB   | VAL | X | 366 | 56.322 | 39.717 | 58.574 | 0.00 | 0.00 |
| ATOM | 5502 | HB   | VAL | X | 366 | 55.380 | 39.678 | 58.027 | 0.00 | 0.00 |
| ATOM | 5503 | CG1  | VAL | X | 366 | 57.372 | 39.342 | 57.523 | 0.00 | 0.00 |
| ATOM | 5504 | HG11 | VAL | X | 366 | 58.249 | 38.901 | 57.998 | 0.00 | 0.00 |
| ATOM | 5505 | HG12 | VAL | X | 366 | 56.969 | 38.586 | 56.849 | 0.00 | 0.00 |
| ATOM | 5506 | HG13 | VAL | X | 366 | 57.736 | 40.168 | 56.913 | 0.00 | 0.00 |
| ATOM | 5507 | CG2  | VAL | X | 366 | 56.225 | 38.536 | 59.562 | 0.00 | 0.00 |
| ATOM | 5508 | HG21 | VAL | X | 366 | 55.250 | 38.400 | 60.029 | 0.00 | 0.00 |
| ATOM | 5509 | HG22 | VAL | X | 366 | 56.916 | 38.764 | 60.374 | 0.00 | 0.00 |
| ATOM | 5510 | HG23 | VAL | X | 366 | 56.537 | 37.572 | 59.161 | 0.00 | 0.00 |
| ATOM | 5511 | C    | VAL | X | 366 | 57.976 | 41.321 | 59.690 | 0.00 | 0.00 |
| ATOM | 5512 | O    | VAL | X | 366 | 58.952 | 41.640 | 58.996 | 0.00 | 0.00 |
| ATOM | 5513 | N    | SER | X | 367 | 58.122 | 41.166 | 61.002 | 0.00 | 0.00 |
| ATOM | 5514 | H    | SER | X | 367 | 57.454 | 40.736 | 61.626 | 0.00 | 0.00 |
| ATOM | 5515 | CA   | SER | X | 367 | 59.419 | 41.096 | 61.729 | 0.00 | 0.00 |
| ATOM | 5516 | HA   | SER | X | 367 | 60.029 | 41.873 | 61.267 | 0.00 | 0.00 |
| ATOM | 5517 | CB   | SER | X | 367 | 59.223 | 41.465 | 63.174 | 0.00 | 0.00 |
| ATOM | 5518 | HB2  | SER | X | 367 | 60.136 | 41.244 | 63.728 | 0.00 | 0.00 |
| ATOM | 5519 | HB3  | SER | X | 367 | 59.001 | 42.532 | 63.170 | 0.00 | 0.00 |
| ATOM | 5520 | OG   | SER | X | 367 | 58.088 | 40.839 | 63.789 | 0.00 | 0.00 |
| ATOM | 5521 | HG   | SER | X | 367 | 57.669 | 41.452 | 64.398 | 0.00 | 0.00 |
| ATOM | 5522 | C    | SER | X | 367 | 60.109 | 39.713 | 61.562 | 0.00 | 0.00 |
| ATOM | 5523 | O    | SER | X | 367 | 59.488 | 38.630 | 61.456 | 0.00 | 0.00 |
| ATOM | 5524 | N    | ASP | X | 368 | 61.450 | 39.728 | 61.468 | 0.00 | 0.00 |
| ATOM | 5525 | H    | ASP | X | 368 | 61.870 | 40.646 | 61.481 | 0.00 | 0.00 |
| ATOM | 5526 | CA   | ASP | X | 368 | 62.255 | 38.514 | 61.281 | 0.00 | 0.00 |
| ATOM | 5527 | HA   | ASP | X | 368 | 62.033 | 38.128 | 60.286 | 0.00 | 0.00 |
| ATOM | 5528 | CB   | ASP | X | 368 | 63.763 | 38.873 | 61.416 | 0.00 | 0.00 |
| ATOM | 5529 | HB2  | ASP | X | 368 | 64.005 | 39.693 | 60.739 | 0.00 | 0.00 |
| ATOM | 5530 | HB3  | ASP | X | 368 | 64.011 | 39.150 | 62.440 | 0.00 | 0.00 |
| ATOM | 5531 | CG   | ASP | X | 368 | 64.613 | 37.635 | 61.121 | 0.00 | 0.00 |
| ATOM | 5532 | OD1  | ASP | X | 368 | 65.186 | 37.124 | 62.121 | 0.00 | 0.00 |
| ATOM | 5533 | OD2  | ASP | X | 368 | 64.823 | 37.339 | 59.952 | 0.00 | 0.00 |
| ATOM | 5534 | C    | ASP | X | 368 | 61.961 | 37.333 | 62.246 | 0.00 | 0.00 |
| ATOM | 5535 | O    | ASP | X | 368 | 61.908 | 36.185 | 61.750 | 0.00 | 0.00 |
| ATOM | 5536 | N    | LEU | X | 369 | 61.621 | 37.594 | 63.547 | 0.00 | 0.00 |
| ATOM | 5537 | H    | LEU | X | 369 | 61.743 | 38.498 | 63.981 | 0.00 | 0.00 |
| ATOM | 5538 | CA   | LEU | X | 369 | 61.241 | 36.521 | 64.492 | 0.00 | 0.00 |
| ATOM | 5539 | HA   | LEU | X | 369 | 61.808 | 35.612 | 64.290 | 0.00 | 0.00 |
| ATOM | 5540 | CB   | LEU | X | 369 | 61.462 | 37.034 | 65.941 | 0.00 | 0.00 |
| ATOM | 5541 | HB2  | LEU | X | 369 | 62.451 | 37.475 | 66.063 | 0.00 | 0.00 |
| ATOM | 5542 | HB3  | LEU | X | 369 | 60.721 | 37.801 | 66.167 | 0.00 | 0.00 |
| ATOM | 5543 | CG   | LEU | X | 369 | 61.350 | 35.963 | 67.033 | 0.00 | 0.00 |
| ATOM | 5544 | HG   | LEU | X | 369 | 60.462 | 35.429 | 66.693 | 0.00 | 0.00 |
| ATOM | 5545 | CD1  | LEU | X | 369 | 62.546 | 34.913 | 66.906 | 0.00 | 0.00 |
| ATOM | 5546 | HD11 | LEU | X | 369 | 62.423 | 34.147 | 67.672 | 0.00 | 0.00 |
| ATOM | 5547 | HD12 | LEU | X | 369 | 63.510 | 35.328 | 67.200 | 0.00 | 0.00 |
| ATOM | 5548 | HD13 | LEU | X | 369 | 62.561 | 34.645 | 65.850 | 0.00 | 0.00 |
| ATOM | 5549 | CD2  | LEU | X | 369 | 61.300 | 36.404 | 68.542 | 0.00 | 0.00 |
| ATOM | 5550 | HD21 | LEU | X | 369 | 62.076 | 37.135 | 68.772 | 0.00 | 0.00 |
| ATOM | 5551 | HD22 | LEU | X | 369 | 60.322 | 36.832 | 68.761 | 0.00 | 0.00 |
| ATOM | 5552 | HD23 | LEU | X | 369 | 61.288 | 35.504 | 69.157 | 0.00 | 0.00 |
| ATOM | 5553 | C    | LEU | X | 369 | 59.726 | 36.050 | 64.408 | 0.00 | 0.00 |
| ATOM | 5554 | O    | LEU | X | 369 | 59.443 | 34.907 | 64.636 | 0.00 | 0.00 |
| ATOM | 5555 | N    | ALA | X | 370 | 58.861 | 36.933 | 63.928 | 0.00 | 0.00 |
| ATOM | 5556 | H    | ALA | X | 370 | 59.236 | 37.817 | 63.615 | 0.00 | 0.00 |
| ATOM | 5557 | CA   | ALA | X | 370 | 57.535 | 36.481 | 63.515 | 0.00 | 0.00 |
| ATOM | 5558 | HA   | ALA | X | 370 | 57.147 | 35.820 | 64.291 | 0.00 | 0.00 |
| ATOM | 5559 | CB   | ALA | X | 370 | 56.700 | 37.754 | 63.319 | 0.00 | 0.00 |
| ATOM | 5560 | HB1  | ALA | X | 370 | 55.807 | 37.494 | 62.752 | 0.00 | 0.00 |
| ATOM | 5561 | HB2  | ALA | X | 370 | 57.278 | 38.479 | 62.746 | 0.00 | 0.00 |
| ATOM | 5562 | HB3  | ALA | X | 370 | 56.518 | 38.160 | 64.314 | 0.00 | 0.00 |
| ATOM | 5563 | C    | ALA | X | 370 | 57.492 | 35.674 | 62.175 | 0.00 | 0.00 |
| ATOM | 5564 | O    | ALA | X | 370 | 56.815 | 34.694 | 61.995 | 0.00 | 0.00 |
| ATOM | 5565 | N    | ALA | X | 371 | 58.439 | 35.969 | 61.245 | 0.00 | 0.00 |



|      |      |      |     |   |     |        |        |        |      |      |
|------|------|------|-----|---|-----|--------|--------|--------|------|------|
| ATOM | 5566 | H    | ALA | X | 371 | 58.983 | 36.800 | 61.430 | 0.00 | 0.00 |
| ATOM | 5567 | CA   | ALA | X | 371 | 58.600 | 35.166 | 59.963 | 0.00 | 0.00 |
| ATOM | 5568 | HA   | ALA | X | 371 | 57.599 | 35.010 | 59.560 | 0.00 | 0.00 |
| ATOM | 5569 | CB   | ALA | X | 371 | 59.603 | 35.874 | 59.072 | 0.00 | 0.00 |
| ATOM | 5570 | HB1  | ALA | X | 371 | 60.595 | 35.950 | 59.518 | 0.00 | 0.00 |
| ATOM | 5571 | HB2  | ALA | X | 371 | 59.303 | 36.873 | 58.756 | 0.00 | 0.00 |
| ATOM | 5572 | HB3  | ALA | X | 371 | 59.680 | 35.324 | 58.134 | 0.00 | 0.00 |
| ATOM | 5573 | C    | ALA | X | 371 | 59.185 | 33.802 | 60.395 | 0.00 | 0.00 |
| ATOM | 5574 | O    | ALA | X | 371 | 58.728 | 32.726 | 59.913 | 0.00 | 0.00 |
| ATOM | 5575 | N    | GLU | X | 372 | 60.075 | 33.713 | 61.453 | 0.00 | 0.00 |
| ATOM | 5576 | H    | GLU | X | 372 | 60.451 | 34.523 | 61.925 | 0.00 | 0.00 |
| ATOM | 5577 | CA   | GLU | X | 372 | 60.446 | 32.360 | 61.933 | 0.00 | 0.00 |
| ATOM | 5578 | HA   | GLU | X | 372 | 60.865 | 31.777 | 61.113 | 0.00 | 0.00 |
| ATOM | 5579 | CB   | GLU | X | 372 | 61.524 | 32.441 | 63.055 | 0.00 | 0.00 |
| ATOM | 5580 | HB2  | GLU | X | 372 | 61.208 | 33.214 | 63.756 | 0.00 | 0.00 |
| ATOM | 5581 | HB3  | GLU | X | 372 | 61.538 | 31.451 | 63.511 | 0.00 | 0.00 |
| ATOM | 5582 | CG   | GLU | X | 372 | 62.875 | 32.804 | 62.534 | 0.00 | 0.00 |
| ATOM | 5583 | HG2  | GLU | X | 372 | 63.103 | 32.137 | 61.702 | 0.00 | 0.00 |
| ATOM | 5584 | HG3  | GLU | X | 372 | 62.972 | 33.831 | 62.184 | 0.00 | 0.00 |
| ATOM | 5585 | CD   | GLU | X | 372 | 63.919 | 32.510 | 63.612 | 0.00 | 0.00 |
| ATOM | 5586 | OE1  | GLU | X | 372 | 64.856 | 33.283 | 63.808 | 0.00 | 0.00 |
| ATOM | 5587 | OE2  | GLU | X | 372 | 63.760 | 31.455 | 64.339 | 0.00 | 0.00 |
| ATOM | 5588 | C    | GLU | X | 372 | 59.187 | 31.556 | 62.327 | 0.00 | 0.00 |
| ATOM | 5589 | O    | GLU | X | 372 | 59.062 | 30.426 | 62.028 | 0.00 | 0.00 |
| ATOM | 5590 | N    | ALA | X | 373 | 58.244 | 32.183 | 63.022 | 0.00 | 0.00 |
| ATOM | 5591 | H    | ALA | X | 373 | 58.274 | 33.133 | 63.364 | 0.00 | 0.00 |
| ATOM | 5592 | CA   | ALA | X | 373 | 57.063 | 31.396 | 63.409 | 0.00 | 0.00 |
| ATOM | 5593 | HA   | ALA | X | 373 | 57.287 | 30.482 | 63.960 | 0.00 | 0.00 |
| ATOM | 5594 | CB   | ALA | X | 373 | 56.279 | 32.303 | 64.384 | 0.00 | 0.00 |
| ATOM | 5595 | HB1  | ALA | X | 373 | 56.028 | 33.292 | 63.999 | 0.00 | 0.00 |
| ATOM | 5596 | HB2  | ALA | X | 373 | 56.908 | 32.351 | 65.272 | 0.00 | 0.00 |
| ATOM | 5597 | HB3  | ALA | X | 373 | 55.369 | 31.810 | 64.727 | 0.00 | 0.00 |
| ATOM | 5598 | C    | ALA | X | 373 | 56.146 | 30.965 | 62.254 | 0.00 | 0.00 |
| ATOM | 5599 | O    | ALA | X | 373 | 55.444 | 29.963 | 62.358 | 0.00 | 0.00 |
| ATOM | 5600 | N    | VAL | X | 374 | 56.115 | 31.742 | 61.120 | 0.00 | 0.00 |
| ATOM | 5601 | H    | VAL | X | 374 | 56.400 | 32.705 | 61.222 | 0.00 | 0.00 |
| ATOM | 5602 | CA   | VAL | X | 374 | 55.302 | 31.406 | 59.896 | 0.00 | 0.00 |
| ATOM | 5603 | HA   | VAL | X | 374 | 54.267 | 31.154 | 60.130 | 0.00 | 0.00 |
| ATOM | 5604 | CB   | VAL | X | 374 | 55.174 | 32.531 | 58.858 | 0.00 | 0.00 |
| ATOM | 5605 | HB   | VAL | X | 374 | 56.146 | 33.015 | 58.766 | 0.00 | 0.00 |
| ATOM | 5606 | CG1  | VAL | X | 374 | 54.707 | 32.160 | 57.460 | 0.00 | 0.00 |
| ATOM | 5607 | HG11 | VAL | X | 374 | 53.818 | 31.536 | 57.365 | 0.00 | 0.00 |
| ATOM | 5608 | HG12 | VAL | X | 374 | 54.568 | 33.093 | 56.915 | 0.00 | 0.00 |
| ATOM | 5609 | HG13 | VAL | X | 374 | 55.525 | 31.640 | 56.963 | 0.00 | 0.00 |
| ATOM | 5610 | CG2  | VAL | X | 374 | 54.405 | 33.662 | 59.472 | 0.00 | 0.00 |
| ATOM | 5611 | HG21 | VAL | X | 374 | 54.209 | 34.413 | 58.707 | 0.00 | 0.00 |
| ATOM | 5612 | HG22 | VAL | X | 374 | 54.762 | 33.925 | 60.468 | 0.00 | 0.00 |
| ATOM | 5613 | HG23 | VAL | X | 374 | 53.414 | 33.301 | 59.749 | 0.00 | 0.00 |
| ATOM | 5614 | C    | VAL | X | 374 | 56.003 | 30.192 | 59.291 | 0.00 | 0.00 |
| ATOM | 5615 | O    | VAL | X | 374 | 55.282 | 29.245 | 58.896 | 0.00 | 0.00 |
| ATOM | 5616 | N    | VAL | X | 375 | 57.315 | 30.197 | 59.207 | 0.00 | 0.00 |
| ATOM | 5617 | H    | VAL | X | 375 | 57.757 | 31.062 | 59.485 | 0.00 | 0.00 |
| ATOM | 5618 | CA   | VAL | X | 375 | 58.104 | 29.040 | 58.649 | 0.00 | 0.00 |
| ATOM | 5619 | HA   | VAL | X | 375 | 57.799 | 28.758 | 57.642 | 0.00 | 0.00 |
| ATOM | 5620 | CB   | VAL | X | 375 | 59.669 | 29.239 | 58.676 | 0.00 | 0.00 |
| ATOM | 5621 | HB   | VAL | X | 375 | 59.947 | 29.385 | 59.720 | 0.00 | 0.00 |
| ATOM | 5622 | CG1  | VAL | X | 375 | 60.419 | 27.939 | 58.377 | 0.00 | 0.00 |
| ATOM | 5623 | HG11 | VAL | X | 375 | 61.507 | 28.003 | 58.374 | 0.00 | 0.00 |
| ATOM | 5624 | HG12 | VAL | X | 375 | 60.269 | 27.258 | 59.215 | 0.00 | 0.00 |
| ATOM | 5625 | HG13 | VAL | X | 375 | 60.006 | 27.438 | 57.502 | 0.00 | 0.00 |
| ATOM | 5626 | CG2  | VAL | X | 375 | 60.054 | 30.316 | 57.780 | 0.00 | 0.00 |
| ATOM | 5627 | HG21 | VAL | X | 375 | 59.730 | 29.890 | 56.830 | 0.00 | 0.00 |
| ATOM | 5628 | HG22 | VAL | X | 375 | 61.131 | 30.486 | 57.796 | 0.00 | 0.00 |
| ATOM | 5629 | HG23 | VAL | X | 375 | 59.654 | 31.303 | 58.012 | 0.00 | 0.00 |
| ATOM | 5630 | C    | VAL | X | 375 | 57.662 | 27.832 | 59.380 | 0.00 | 0.00 |
| ATOM | 5631 | O    | VAL | X | 375 | 57.369 | 26.784 | 58.788 | 0.00 | 0.00 |
| ATOM | 5632 | N    | LEU | X | 376 | 57.659 | 27.919 | 60.718 | 0.00 | 0.00 |

|      |      |      |     |   |     |        |        |        |      |      |
|------|------|------|-----|---|-----|--------|--------|--------|------|------|
| ATOM | 5633 | H    | LEU | X | 376 | 57.881 | 28.856 | 61.023 | 0.00 | 0.00 |
| ATOM | 5634 | CA   | LEU | X | 376 | 57.239 | 26.853 | 61.641 | 0.00 | 0.00 |
| ATOM | 5635 | HA   | LEU | X | 376 | 57.969 | 26.077 | 61.406 | 0.00 | 0.00 |
| ATOM | 5636 | CB   | LEU | X | 376 | 57.507 | 27.329 | 63.149 | 0.00 | 0.00 |
| ATOM | 5637 | HB2  | LEU | X | 376 | 58.420 | 27.914 | 63.252 | 0.00 | 0.00 |
| ATOM | 5638 | HB3  | LEU | X | 376 | 56.661 | 27.978 | 63.376 | 0.00 | 0.00 |
| ATOM | 5639 | CG   | LEU | X | 376 | 57.579 | 26.120 | 64.133 | 0.00 | 0.00 |
| ATOM | 5640 | HG   | LEU | X | 376 | 56.751 | 25.458 | 63.880 | 0.00 | 0.00 |
| ATOM | 5641 | CD1  | LEU | X | 376 | 58.858 | 25.230 | 63.945 | 0.00 | 0.00 |
| ATOM | 5642 | HD11 | LEU | X | 376 | 58.912 | 24.800 | 62.945 | 0.00 | 0.00 |
| ATOM | 5643 | HD12 | LEU | X | 376 | 58.863 | 24.443 | 64.699 | 0.00 | 0.00 |
| ATOM | 5644 | HD13 | LEU | X | 376 | 59.784 | 25.798 | 64.039 | 0.00 | 0.00 |
| ATOM | 5645 | CD2  | LEU | X | 376 | 57.519 | 26.635 | 65.578 | 0.00 | 0.00 |
| ATOM | 5646 | HD21 | LEU | X | 376 | 58.512 | 26.883 | 65.953 | 0.00 | 0.00 |
| ATOM | 5647 | HD22 | LEU | X | 376 | 56.858 | 27.500 | 65.537 | 0.00 | 0.00 |
| ATOM | 5648 | HD23 | LEU | X | 376 | 57.028 | 25.932 | 66.251 | 0.00 | 0.00 |
| ATOM | 5649 | C    | LEU | X | 376 | 55.817 | 26.298 | 61.506 | 0.00 | 0.00 |
| ATOM | 5650 | O    | LEU | X | 376 | 55.614 | 25.118 | 61.386 | 0.00 | 0.00 |
| ATOM | 5651 | N    | HIE | X | 377 | 54.790 | 27.146 | 61.375 | 0.00 | 0.00 |
| ATOM | 5652 | H    | HIE | X | 377 | 55.006 | 28.129 | 61.465 | 0.00 | 0.00 |
| ATOM | 5653 | CA   | HIE | X | 377 | 53.364 | 26.787 | 61.174 | 0.00 | 0.00 |
| ATOM | 5654 | HA   | HIE | X | 377 | 53.029 | 26.150 | 61.992 | 0.00 | 0.00 |
| ATOM | 5655 | CB   | HIE | X | 377 | 52.523 | 28.107 | 61.074 | 0.00 | 0.00 |
| ATOM | 5656 | HB2  | HIE | X | 377 | 52.572 | 28.617 | 62.036 | 0.00 | 0.00 |
| ATOM | 5657 | HB3  | HIE | X | 377 | 52.868 | 28.722 | 60.243 | 0.00 | 0.00 |
| ATOM | 5658 | CG   | HIE | X | 377 | 51.091 | 27.654 | 60.770 | 0.00 | 0.00 |
| ATOM | 5659 | ND1  | HIE | X | 377 | 50.464 | 26.620 | 61.416 | 0.00 | 0.00 |
| ATOM | 5660 | CE1  | HIE | X | 377 | 49.198 | 26.757 | 60.999 | 0.00 | 0.00 |
| ATOM | 5661 | HE1  | HIE | X | 377 | 48.384 | 26.167 | 61.392 | 0.00 | 0.00 |
| ATOM | 5662 | NE2  | HIE | X | 377 | 48.995 | 27.802 | 60.169 | 0.00 | 0.00 |
| ATOM | 5663 | HE2  | HIE | X | 377 | 48.127 | 28.289 | 60.000 | 0.00 | 0.00 |
| ATOM | 5664 | CD2  | HIE | X | 377 | 50.203 | 28.441 | 60.055 | 0.00 | 0.00 |
| ATOM | 5665 | HD2  | HIE | X | 377 | 50.367 | 29.445 | 59.694 | 0.00 | 0.00 |
| ATOM | 5666 | C    | HIE | X | 377 | 53.165 | 25.898 | 59.928 | 0.00 | 0.00 |
| ATOM | 5667 | O    | HIE | X | 377 | 52.431 | 24.910 | 59.936 | 0.00 | 0.00 |
| ATOM | 5668 | N    | TYR | X | 378 | 53.754 | 26.244 | 58.811 | 0.00 | 0.00 |
| ATOM | 5669 | H    | TYR | X | 378 | 54.377 | 27.038 | 58.765 | 0.00 | 0.00 |
| ATOM | 5670 | CA   | TYR | X | 378 | 53.594 | 25.617 | 57.503 | 0.00 | 0.00 |
| ATOM | 5671 | HA   | TYR | X | 378 | 52.589 | 25.199 | 57.450 | 0.00 | 0.00 |
| ATOM | 5672 | CB   | TYR | X | 378 | 53.616 | 26.783 | 56.451 | 0.00 | 0.00 |
| ATOM | 5673 | HB2  | TYR | X | 378 | 54.472 | 27.427 | 56.654 | 0.00 | 0.00 |
| ATOM | 5674 | HB3  | TYR | X | 378 | 53.924 | 26.417 | 55.471 | 0.00 | 0.00 |
| ATOM | 5675 | CG   | TYR | X | 378 | 52.302 | 27.546 | 56.312 | 0.00 | 0.00 |
| ATOM | 5676 | CD1  | TYR | X | 378 | 51.447 | 27.145 | 55.257 | 0.00 | 0.00 |
| ATOM | 5677 | HD1  | TYR | X | 378 | 51.799 | 26.344 | 54.623 | 0.00 | 0.00 |
| ATOM | 5678 | CE1  | TYR | X | 378 | 50.233 | 27.805 | 55.066 | 0.00 | 0.00 |
| ATOM | 5679 | HE1  | TYR | X | 378 | 49.608 | 27.589 | 54.212 | 0.00 | 0.00 |
| ATOM | 5680 | CZ   | TYR | X | 378 | 49.901 | 28.804 | 55.964 | 0.00 | 0.00 |
| ATOM | 5681 | OH   | TYR | X | 378 | 48.793 | 29.542 | 55.749 | 0.00 | 0.00 |
| ATOM | 5682 | HH   | TYR | X | 378 | 48.254 | 29.074 | 55.108 | 0.00 | 0.00 |
| ATOM | 5683 | CE2  | TYR | X | 378 | 50.795 | 29.219 | 57.013 | 0.00 | 0.00 |
| ATOM | 5684 | HE2  | TYR | X | 378 | 50.588 | 30.135 | 57.547 | 0.00 | 0.00 |
| ATOM | 5685 | CD2  | TYR | X | 378 | 51.990 | 28.550 | 57.193 | 0.00 | 0.00 |
| ATOM | 5686 | HD2  | TYR | X | 378 | 52.600 | 28.905 | 58.010 | 0.00 | 0.00 |
| ATOM | 5687 | C    | TYR | X | 378 | 54.546 | 24.456 | 57.310 | 0.00 | 0.00 |
| ATOM | 5688 | O    | TYR | X | 378 | 54.421 | 23.843 | 56.226 | 0.00 | 0.00 |
| ATOM | 5689 | N    | THR | X | 379 | 55.291 | 24.033 | 58.342 | 0.00 | 0.00 |
| ATOM | 5690 | H    | THR | X | 379 | 55.255 | 24.575 | 59.193 | 0.00 | 0.00 |
| ATOM | 5691 | CA   | THR | X | 379 | 56.172 | 22.904 | 58.252 | 0.00 | 0.00 |
| ATOM | 5692 | HA   | THR | X | 379 | 56.665 | 22.931 | 57.280 | 0.00 | 0.00 |
| ATOM | 5693 | CB   | THR | X | 379 | 57.223 | 22.947 | 59.362 | 0.00 | 0.00 |
| ATOM | 5694 | HB   | THR | X | 379 | 56.560 | 22.994 | 60.227 | 0.00 | 0.00 |
| ATOM | 5695 | CG2  | THR | X | 379 | 58.256 | 21.788 | 59.273 | 0.00 | 0.00 |
| ATOM | 5696 | HG21 | THR | X | 379 | 58.845 | 21.952 | 58.371 | 0.00 | 0.00 |
| ATOM | 5697 | HG22 | THR | X | 379 | 57.822 | 20.788 | 59.311 | 0.00 | 0.00 |
| ATOM | 5698 | HG23 | THR | X | 379 | 58.973 | 21.846 | 60.092 | 0.00 | 0.00 |
| ATOM | 5699 | OG1  | THR | X | 379 | 57.946 | 24.104 | 59.275 | 0.00 | 0.00 |

|      |      |      |     |   |     |        |        |        |      |      |
|------|------|------|-----|---|-----|--------|--------|--------|------|------|
| ATOM | 5700 | HG1  | THR | X | 379 | 57.316 | 24.727 | 58.906 | 0.00 | 0.00 |
| ATOM | 5701 | C    | THR | X | 379 | 55.374 | 21.628 | 58.221 | 0.00 | 0.00 |
| ATOM | 5702 | O    | THR | X | 379 | 54.556 | 21.414 | 59.093 | 0.00 | 0.00 |
| ATOM | 5703 | N    | ASP | X | 380 | 55.648 | 20.880 | 57.192 | 0.00 | 0.00 |
| ATOM | 5704 | H    | ASP | X | 380 | 56.261 | 21.280 | 56.496 | 0.00 | 0.00 |
| ATOM | 5705 | CA   | ASP | X | 380 | 55.367 | 19.474 | 57.085 | 0.00 | 0.00 |
| ATOM | 5706 | HA   | ASP | X | 380 | 54.428 | 19.201 | 57.567 | 0.00 | 0.00 |
| ATOM | 5707 | CB   | ASP | X | 380 | 55.119 | 19.027 | 55.629 | 0.00 | 0.00 |
| ATOM | 5708 | HB2  | ASP | X | 380 | 54.366 | 19.678 | 55.187 | 0.00 | 0.00 |
| ATOM | 5709 | HB3  | ASP | X | 380 | 56.037 | 19.169 | 55.059 | 0.00 | 0.00 |
| ATOM | 5710 | CG   | ASP | X | 380 | 54.732 | 17.560 | 55.523 | 0.00 | 0.00 |
| ATOM | 5711 | OD1  | ASP | X | 380 | 53.474 | 17.298 | 55.342 | 0.00 | 0.00 |
| ATOM | 5712 | OD2  | ASP | X | 380 | 55.628 | 16.696 | 55.639 | 0.00 | 0.00 |
| ATOM | 5713 | C    | ASP | X | 380 | 56.502 | 18.796 | 57.796 | 0.00 | 0.00 |
| ATOM | 5714 | O    | ASP | X | 380 | 57.635 | 18.900 | 57.344 | 0.00 | 0.00 |
| ATOM | 5715 | N    | TRP | X | 381 | 56.247 | 18.021 | 58.883 | 0.00 | 0.00 |
| ATOM | 5716 | H    | TRP | X | 381 | 55.314 | 17.880 | 59.244 | 0.00 | 0.00 |
| ATOM | 5717 | CA   | TRP | X | 381 | 57.248 | 17.399 | 59.700 | 0.00 | 0.00 |
| ATOM | 5718 | HA   | TRP | X | 381 | 58.090 | 18.089 | 59.758 | 0.00 | 0.00 |
| ATOM | 5719 | CB   | TRP | X | 381 | 56.800 | 17.332 | 61.194 | 0.00 | 0.00 |
| ATOM | 5720 | HB2  | TRP | X | 381 | 55.785 | 16.936 | 61.229 | 0.00 | 0.00 |
| ATOM | 5721 | HB3  | TRP | X | 381 | 57.471 | 16.670 | 61.742 | 0.00 | 0.00 |
| ATOM | 5722 | CG   | TRP | X | 381 | 56.746 | 18.700 | 61.785 | 0.00 | 0.00 |
| ATOM | 5723 | CD1  | TRP | X | 381 | 55.589 | 19.390 | 62.000 | 0.00 | 0.00 |
| ATOM | 5724 | HD1  | TRP | X | 381 | 54.647 | 19.020 | 61.625 | 0.00 | 0.00 |
| ATOM | 5725 | NE1  | TRP | X | 381 | 55.808 | 20.624 | 62.539 | 0.00 | 0.00 |
| ATOM | 5726 | HE1  | TRP | X | 381 | 55.070 | 21.301 | 62.672 | 0.00 | 0.00 |
| ATOM | 5727 | CE2  | TRP | X | 381 | 57.192 | 20.856 | 62.755 | 0.00 | 0.00 |
| ATOM | 5728 | CZ2  | TRP | X | 381 | 57.986 | 21.881 | 63.207 | 0.00 | 0.00 |
| ATOM | 5729 | HZ2  | TRP | X | 381 | 57.515 | 22.818 | 63.467 | 0.00 | 0.00 |
| ATOM | 5730 | CH2  | TRP | X | 381 | 59.374 | 21.814 | 63.229 | 0.00 | 0.00 |
| ATOM | 5731 | HH2  | TRP | X | 381 | 60.010 | 22.672 | 63.385 | 0.00 | 0.00 |
| ATOM | 5732 | CZ3  | TRP | X | 381 | 59.956 | 20.575 | 62.938 | 0.00 | 0.00 |
| ATOM | 5733 | HZ3  | TRP | X | 381 | 61.013 | 20.367 | 63.013 | 0.00 | 0.00 |
| ATOM | 5734 | CE3  | TRP | X | 381 | 59.187 | 19.513 | 62.436 | 0.00 | 0.00 |
| ATOM | 5735 | HE3  | TRP | X | 381 | 59.682 | 18.608 | 62.117 | 0.00 | 0.00 |
| ATOM | 5736 | CD2  | TRP | X | 381 | 57.790 | 19.619 | 62.208 | 0.00 | 0.00 |
| ATOM | 5737 | C    | TRP | X | 381 | 57.830 | 16.067 | 59.153 | 0.00 | 0.00 |
| ATOM | 5738 | O    | TRP | X | 381 | 59.027 | 15.859 | 59.499 | 0.00 | 0.00 |
| ATOM | 5739 | N    | LEU | X | 382 | 57.141 | 15.320 | 58.338 | 0.00 | 0.00 |
| ATOM | 5740 | H    | LEU | X | 382 | 56.262 | 15.718 | 58.040 | 0.00 | 0.00 |
| ATOM | 5741 | CA   | LEU | X | 382 | 57.841 | 14.336 | 57.445 | 0.00 | 0.00 |
| ATOM | 5742 | HA   | LEU | X | 382 | 58.438 | 13.719 | 58.117 | 0.00 | 0.00 |
| ATOM | 5743 | CB   | LEU | X | 382 | 56.713 | 13.361 | 56.931 | 0.00 | 0.00 |
| ATOM | 5744 | HB2  | LEU | X | 382 | 56.112 | 12.996 | 57.763 | 0.00 | 0.00 |
| ATOM | 5745 | HB3  | LEU | X | 382 | 55.968 | 13.773 | 56.250 | 0.00 | 0.00 |
| ATOM | 5746 | CG   | LEU | X | 382 | 57.421 | 12.206 | 56.123 | 0.00 | 0.00 |
| ATOM | 5747 | HG   | LEU | X | 382 | 58.031 | 12.647 | 55.335 | 0.00 | 0.00 |
| ATOM | 5748 | CD1  | LEU | X | 382 | 58.290 | 11.321 | 56.899 | 0.00 | 0.00 |
| ATOM | 5749 | HD11 | LEU | X | 382 | 58.962 | 12.006 | 57.416 | 0.00 | 0.00 |
| ATOM | 5750 | HD12 | LEU | X | 382 | 58.891 | 10.619 | 56.320 | 0.00 | 0.00 |
| ATOM | 5751 | HD13 | LEU | X | 382 | 57.662 | 10.788 | 57.613 | 0.00 | 0.00 |
| ATOM | 5752 | CD2  | LEU | X | 382 | 56.390 | 11.316 | 55.429 | 0.00 | 0.00 |
| ATOM | 5753 | HD21 | LEU | X | 382 | 56.707 | 10.328 | 55.095 | 0.00 | 0.00 |
| ATOM | 5754 | HD22 | LEU | X | 382 | 55.509 | 11.203 | 56.061 | 0.00 | 0.00 |
| ATOM | 5755 | HD23 | LEU | X | 382 | 56.097 | 11.804 | 54.500 | 0.00 | 0.00 |
| ATOM | 5756 | C    | LEU | X | 382 | 58.774 | 15.012 | 56.464 | 0.00 | 0.00 |
| ATOM | 5757 | O    | LEU | X | 382 | 59.933 | 14.500 | 56.299 | 0.00 | 0.00 |
| ATOM | 5758 | N    | HIE | X | 383 | 58.435 | 16.204 | 55.949 | 0.00 | 0.00 |
| ATOM | 5759 | H    | HIE | X | 383 | 57.503 | 16.494 | 56.207 | 0.00 | 0.00 |
| ATOM | 5760 | CA   | HIE | X | 383 | 59.050 | 16.885 | 54.819 | 0.00 | 0.00 |
| ATOM | 5761 | HA   | HIE | X | 383 | 59.940 | 16.301 | 54.584 | 0.00 | 0.00 |
| ATOM | 5762 | CB   | HIE | X | 383 | 58.179 | 16.564 | 53.636 | 0.00 | 0.00 |
| ATOM | 5763 | HB2  | HIE | X | 383 | 57.167 | 16.933 | 53.803 | 0.00 | 0.00 |
| ATOM | 5764 | HB3  | HIE | X | 383 | 58.601 | 17.012 | 52.736 | 0.00 | 0.00 |
| ATOM | 5765 | CG   | HIE | X | 383 | 58.062 | 15.107 | 53.371 | 0.00 | 0.00 |
| ATOM | 5766 | ND1  | HIE | X | 383 | 59.144 | 14.303 | 53.179 | 0.00 | 0.00 |

|      |      |     |     |   |     |        |        |        |      |      |
|------|------|-----|-----|---|-----|--------|--------|--------|------|------|
| ATOM | 5767 | CE1 | HIE | X | 383 | 58.688 | 13.100 | 52.906 | 0.00 | 0.00 |
| ATOM | 5768 | HE1 | HIE | X | 383 | 59.313 | 12.229 | 52.776 | 0.00 | 0.00 |
| ATOM | 5769 | NE2 | HIE | X | 383 | 57.369 | 13.114 | 52.865 | 0.00 | 0.00 |
| ATOM | 5770 | HE2 | HIE | X | 383 | 56.757 | 12.317 | 52.772 | 0.00 | 0.00 |
| ATOM | 5771 | CD2 | HIE | X | 383 | 56.933 | 14.334 | 53.219 | 0.00 | 0.00 |
| ATOM | 5772 | HD2 | HIE | X | 383 | 55.891 | 14.569 | 53.379 | 0.00 | 0.00 |
| ATOM | 5773 | C   | HIE | X | 383 | 59.462 | 18.336 | 55.038 | 0.00 | 0.00 |
| ATOM | 5774 | O   | HIE | X | 383 | 58.943 | 19.190 | 54.283 | 0.00 | 0.00 |
| ATOM | 5775 | N   | PRO | X | 384 | 60.291 | 18.642 | 56.029 | 0.00 | 0.00 |
| ATOM | 5776 | CD  | PRO | X | 384 | 61.018 | 17.715 | 57.000 | 0.00 | 0.00 |
| ATOM | 5777 | HD2 | PRO | X | 384 | 61.370 | 16.769 | 56.591 | 0.00 | 0.00 |
| ATOM | 5778 | HD3 | PRO | X | 384 | 60.198 | 17.453 | 57.669 | 0.00 | 0.00 |
| ATOM | 5779 | CG  | PRO | X | 384 | 61.931 | 18.690 | 57.830 | 0.00 | 0.00 |
| ATOM | 5780 | HG2 | PRO | X | 384 | 62.851 | 18.857 | 57.269 | 0.00 | 0.00 |
| ATOM | 5781 | HG3 | PRO | X | 384 | 62.136 | 18.339 | 58.841 | 0.00 | 0.00 |
| ATOM | 5782 | CB  | PRO | X | 384 | 61.209 | 20.026 | 57.836 | 0.00 | 0.00 |
| ATOM | 5783 | HB2 | PRO | X | 384 | 61.845 | 20.893 | 58.019 | 0.00 | 0.00 |
| ATOM | 5784 | HB3 | PRO | X | 384 | 60.426 | 20.118 | 58.589 | 0.00 | 0.00 |
| ATOM | 5785 | CA  | PRO | X | 384 | 60.610 | 20.036 | 56.449 | 0.00 | 0.00 |
| ATOM | 5786 | HA  | PRO | X | 384 | 59.678 | 20.599 | 56.495 | 0.00 | 0.00 |
| ATOM | 5787 | C   | PRO | X | 384 | 61.511 | 20.885 | 55.489 | 0.00 | 0.00 |
| ATOM | 5788 | O   | PRO | X | 384 | 61.433 | 22.084 | 55.509 | 0.00 | 0.00 |
| ATOM | 5789 | N   | GLU | X | 385 | 62.183 | 20.316 | 54.482 | 0.00 | 0.00 |
| ATOM | 5790 | H   | GLU | X | 385 | 62.011 | 19.352 | 54.236 | 0.00 | 0.00 |
| ATOM | 5791 | CA  | GLU | X | 385 | 63.173 | 20.986 | 53.644 | 0.00 | 0.00 |
| ATOM | 5792 | HA  | GLU | X | 385 | 63.077 | 22.058 | 53.820 | 0.00 | 0.00 |
| ATOM | 5793 | CB  | GLU | X | 385 | 64.537 | 20.562 | 54.137 | 0.00 | 0.00 |
| ATOM | 5794 | HB2 | GLU | X | 385 | 64.775 | 19.498 | 54.162 | 0.00 | 0.00 |
| ATOM | 5795 | HB3 | GLU | X | 385 | 65.252 | 20.891 | 53.383 | 0.00 | 0.00 |
| ATOM | 5796 | CG  | GLU | X | 385 | 64.996 | 21.236 | 55.476 | 0.00 | 0.00 |
| ATOM | 5797 | HG2 | GLU | X | 385 | 64.689 | 22.282 | 55.498 | 0.00 | 0.00 |
| ATOM | 5798 | HG3 | GLU | X | 385 | 64.410 | 20.890 | 56.328 | 0.00 | 0.00 |
| ATOM | 5799 | CD  | GLU | X | 385 | 66.490 | 21.191 | 55.812 | 0.00 | 0.00 |
| ATOM | 5800 | OE1 | GLU | X | 385 | 67.230 | 21.637 | 54.922 | 0.00 | 0.00 |
| ATOM | 5801 | OE2 | GLU | X | 385 | 66.891 | 20.729 | 56.919 | 0.00 | 0.00 |
| ATOM | 5802 | C   | GLU | X | 385 | 62.913 | 20.791 | 52.125 | 0.00 | 0.00 |
| ATOM | 5803 | O   | GLU | X | 385 | 63.606 | 21.399 | 51.296 | 0.00 | 0.00 |
| ATOM | 5804 | N   | ASP | X | 386 | 61.782 | 20.118 | 51.783 | 0.00 | 0.00 |
| ATOM | 5805 | H   | ASP | X | 386 | 61.183 | 19.684 | 52.471 | 0.00 | 0.00 |
| ATOM | 5806 | CA  | ASP | X | 386 | 61.656 | 19.579 | 50.388 | 0.00 | 0.00 |
| ATOM | 5807 | HA  | ASP | X | 386 | 62.614 | 19.126 | 50.132 | 0.00 | 0.00 |
| ATOM | 5808 | CB  | ASP | X | 386 | 60.590 | 18.449 | 50.408 | 0.00 | 0.00 |
| ATOM | 5809 | HB2 | ASP | X | 386 | 60.976 | 17.751 | 51.151 | 0.00 | 0.00 |
| ATOM | 5810 | HB3 | ASP | X | 386 | 59.626 | 18.845 | 50.726 | 0.00 | 0.00 |
| ATOM | 5811 | CG  | ASP | X | 386 | 60.420 | 17.775 | 49.039 | 0.00 | 0.00 |
| ATOM | 5812 | OD1 | ASP | X | 386 | 59.899 | 18.417 | 48.050 | 0.00 | 0.00 |
| ATOM | 5813 | OD2 | ASP | X | 386 | 60.470 | 16.498 | 48.945 | 0.00 | 0.00 |
| ATOM | 5814 | C   | ASP | X | 386 | 61.474 | 20.738 | 49.413 | 0.00 | 0.00 |
| ATOM | 5815 | O   | ASP | X | 386 | 60.529 | 21.502 | 49.645 | 0.00 | 0.00 |
| ATOM | 5816 | N   | PRO | X | 387 | 62.176 | 20.911 | 48.291 | 0.00 | 0.00 |
| ATOM | 5817 | CD  | PRO | X | 387 | 63.074 | 19.919 | 47.794 | 0.00 | 0.00 |
| ATOM | 5818 | HD2 | PRO | X | 387 | 62.686 | 18.902 | 47.843 | 0.00 | 0.00 |
| ATOM | 5819 | HD3 | PRO | X | 387 | 64.005 | 19.868 | 48.357 | 0.00 | 0.00 |
| ATOM | 5820 | CG  | PRO | X | 387 | 63.425 | 20.300 | 46.352 | 0.00 | 0.00 |
| ATOM | 5821 | HG2 | PRO | X | 387 | 62.717 | 20.025 | 45.570 | 0.00 | 0.00 |
| ATOM | 5822 | HG3 | PRO | X | 387 | 64.439 | 20.013 | 46.072 | 0.00 | 0.00 |
| ATOM | 5823 | CB  | PRO | X | 387 | 63.363 | 21.789 | 46.434 | 0.00 | 0.00 |
| ATOM | 5824 | HB2 | PRO | X | 387 | 63.069 | 22.242 | 45.487 | 0.00 | 0.00 |
| ATOM | 5825 | HB3 | PRO | X | 387 | 64.289 | 22.266 | 46.757 | 0.00 | 0.00 |
| ATOM | 5826 | CA  | PRO | X | 387 | 62.220 | 22.070 | 47.419 | 0.00 | 0.00 |
| ATOM | 5827 | HA  | PRO | X | 387 | 62.456 | 22.931 | 48.044 | 0.00 | 0.00 |
| ATOM | 5828 | C   | PRO | X | 387 | 60.950 | 22.307 | 46.647 | 0.00 | 0.00 |
| ATOM | 5829 | O   | PRO | X | 387 | 60.502 | 23.462 | 46.535 | 0.00 | 0.00 |
| ATOM | 5830 | N   | ALA | X | 388 | 60.139 | 21.269 | 46.298 | 0.00 | 0.00 |
| ATOM | 5831 | H   | ALA | X | 388 | 60.349 | 20.349 | 46.659 | 0.00 | 0.00 |
| ATOM | 5832 | CA  | ALA | X | 388 | 58.858 | 21.570 | 45.620 | 0.00 | 0.00 |
| ATOM | 5833 | HA  | ALA | X | 388 | 58.924 | 22.460 | 44.994 | 0.00 | 0.00 |

|      |      |      |     |   |     |        |        |        |      |      |
|------|------|------|-----|---|-----|--------|--------|--------|------|------|
| ATOM | 5834 | CB   | ALA | X | 388 | 58.651 | 20.468 | 44.637 | 0.00 | 0.00 |
| ATOM | 5835 | HB1  | ALA | X | 388 | 59.556 | 20.376 | 44.036 | 0.00 | 0.00 |
| ATOM | 5836 | HB2  | ALA | X | 388 | 57.865 | 20.610 | 43.894 | 0.00 | 0.00 |
| ATOM | 5837 | HB3  | ALA | X | 388 | 58.378 | 19.502 | 45.064 | 0.00 | 0.00 |
| ATOM | 5838 | C    | ALA | X | 388 | 57.646 | 21.660 | 46.566 | 0.00 | 0.00 |
| ATOM | 5839 | O    | ALA | X | 388 | 56.644 | 22.364 | 46.372 | 0.00 | 0.00 |
| ATOM | 5840 | N    | ARG | X | 389 | 57.761 | 20.912 | 47.693 | 0.00 | 0.00 |
| ATOM | 5841 | H    | ARG | X | 389 | 58.661 | 20.457 | 47.753 | 0.00 | 0.00 |
| ATOM | 5842 | CA   | ARG | X | 389 | 56.777 | 20.998 | 48.795 | 0.00 | 0.00 |
| ATOM | 5843 | HA   | ARG | X | 389 | 55.798 | 20.814 | 48.354 | 0.00 | 0.00 |
| ATOM | 5844 | CB   | ARG | X | 389 | 57.140 | 19.921 | 49.825 | 0.00 | 0.00 |
| ATOM | 5845 | HB2  | ARG | X | 389 | 57.297 | 18.993 | 49.275 | 0.00 | 0.00 |
| ATOM | 5846 | HB3  | ARG | X | 389 | 58.081 | 20.194 | 50.302 | 0.00 | 0.00 |
| ATOM | 5847 | CG   | ARG | X | 389 | 56.080 | 19.866 | 50.898 | 0.00 | 0.00 |
| ATOM | 5848 | HG2  | ARG | X | 389 | 56.085 | 20.705 | 51.593 | 0.00 | 0.00 |
| ATOM | 5849 | HG3  | ARG | X | 389 | 55.053 | 19.680 | 50.583 | 0.00 | 0.00 |
| ATOM | 5850 | CD   | ARG | X | 389 | 56.301 | 18.750 | 51.929 | 0.00 | 0.00 |
| ATOM | 5851 | HD2  | ARG | X | 389 | 57.360 | 18.783 | 52.187 | 0.00 | 0.00 |
| ATOM | 5852 | HD3  | ARG | X | 389 | 55.705 | 18.929 | 52.824 | 0.00 | 0.00 |
| ATOM | 5853 | NE   | ARG | X | 389 | 56.049 | 17.450 | 51.426 | 0.00 | 0.00 |
| ATOM | 5854 | HE   | ARG | X | 389 | 56.849 | 17.031 | 50.974 | 0.00 | 0.00 |
| ATOM | 5855 | CZ   | ARG | X | 389 | 54.965 | 16.719 | 51.595 | 0.00 | 0.00 |
| ATOM | 5856 | NH1  | ARG | X | 389 | 53.943 | 17.092 | 52.314 | 0.00 | 0.00 |
| ATOM | 5857 | HH11 | ARG | X | 389 | 53.930 | 18.025 | 52.702 | 0.00 | 0.00 |
| ATOM | 5858 | HH12 | ARG | X | 389 | 53.145 | 16.473 | 52.326 | 0.00 | 0.00 |
| ATOM | 5859 | NH2  | ARG | X | 389 | 55.020 | 15.466 | 51.054 | 0.00 | 0.00 |
| ATOM | 5860 | HH21 | ARG | X | 389 | 55.826 | 15.171 | 50.522 | 0.00 | 0.00 |
| ATOM | 5861 | HH22 | ARG | X | 389 | 54.166 | 14.940 | 50.936 | 0.00 | 0.00 |
| ATOM | 5862 | C    | ARG | X | 389 | 56.879 | 22.488 | 49.336 | 0.00 | 0.00 |
| ATOM | 5863 | O    | ARG | X | 389 | 55.887 | 23.199 | 49.444 | 0.00 | 0.00 |
| ATOM | 5864 | N    | LEU | X | 390 | 58.054 | 22.944 | 49.718 | 0.00 | 0.00 |
| ATOM | 5865 | H    | LEU | X | 390 | 58.794 | 22.277 | 49.883 | 0.00 | 0.00 |
| ATOM | 5866 | CA   | LEU | X | 390 | 58.254 | 24.340 | 50.196 | 0.00 | 0.00 |
| ATOM | 5867 | HA   | LEU | X | 390 | 57.863 | 24.436 | 51.209 | 0.00 | 0.00 |
| ATOM | 5868 | CB   | LEU | X | 390 | 59.748 | 24.562 | 50.383 | 0.00 | 0.00 |
| ATOM | 5869 | HB2  | LEU | X | 390 | 60.283 | 24.160 | 49.523 | 0.00 | 0.00 |
| ATOM | 5870 | HB3  | LEU | X | 390 | 59.887 | 25.638 | 50.484 | 0.00 | 0.00 |
| ATOM | 5871 | CG   | LEU | X | 390 | 60.501 | 23.982 | 51.575 | 0.00 | 0.00 |
| ATOM | 5872 | HG   | LEU | X | 390 | 60.238 | 22.943 | 51.773 | 0.00 | 0.00 |
| ATOM | 5873 | CD1  | LEU | X | 390 | 62.051 | 24.189 | 51.417 | 0.00 | 0.00 |
| ATOM | 5874 | HD11 | LEU | X | 390 | 62.182 | 25.257 | 51.243 | 0.00 | 0.00 |
| ATOM | 5875 | HD12 | LEU | X | 390 | 62.431 | 23.819 | 50.465 | 0.00 | 0.00 |
| ATOM | 5876 | HD13 | LEU | X | 390 | 62.657 | 23.840 | 52.253 | 0.00 | 0.00 |
| ATOM | 5877 | CD2  | LEU | X | 390 | 60.169 | 24.698 | 52.850 | 0.00 | 0.00 |
| ATOM | 5878 | HD21 | LEU | X | 390 | 59.090 | 24.840 | 52.914 | 0.00 | 0.00 |
| ATOM | 5879 | HD22 | LEU | X | 390 | 60.616 | 24.149 | 53.679 | 0.00 | 0.00 |
| ATOM | 5880 | HD23 | LEU | X | 390 | 60.533 | 25.718 | 52.729 | 0.00 | 0.00 |
| ATOM | 5881 | C    | LEU | X | 390 | 57.781 | 25.316 | 49.070 | 0.00 | 0.00 |
| ATOM | 5882 | O    | LEU | X | 390 | 57.074 | 26.232 | 49.374 | 0.00 | 0.00 |
| ATOM | 5883 | N    | ARG | X | 391 | 58.006 | 25.084 | 47.809 | 0.00 | 0.00 |
| ATOM | 5884 | H    | ARG | X | 391 | 58.542 | 24.257 | 47.589 | 0.00 | 0.00 |
| ATOM | 5885 | CA   | ARG | X | 391 | 57.596 | 25.986 | 46.774 | 0.00 | 0.00 |
| ATOM | 5886 | HA   | ARG | X | 391 | 57.838 | 27.006 | 47.074 | 0.00 | 0.00 |
| ATOM | 5887 | CB   | ARG | X | 391 | 58.372 | 25.664 | 45.461 | 0.00 | 0.00 |
| ATOM | 5888 | HB2  | ARG | X | 391 | 59.434 | 25.548 | 45.674 | 0.00 | 0.00 |
| ATOM | 5889 | HB3  | ARG | X | 391 | 57.844 | 24.783 | 45.098 | 0.00 | 0.00 |
| ATOM | 5890 | CG   | ARG | X | 391 | 58.212 | 26.776 | 44.346 | 0.00 | 0.00 |
| ATOM | 5891 | HG2  | ARG | X | 391 | 57.214 | 27.207 | 44.427 | 0.00 | 0.00 |
| ATOM | 5892 | HG3  | ARG | X | 391 | 58.918 | 27.602 | 44.433 | 0.00 | 0.00 |
| ATOM | 5893 | CD   | ARG | X | 391 | 58.389 | 26.180 | 42.920 | 0.00 | 0.00 |
| ATOM | 5894 | HD2  | ARG | X | 391 | 58.020 | 26.931 | 42.221 | 0.00 | 0.00 |
| ATOM | 5895 | HD3  | ARG | X | 391 | 59.415 | 25.915 | 42.667 | 0.00 | 0.00 |
| ATOM | 5896 | NE   | ARG | X | 391 | 57.565 | 25.028 | 42.643 | 0.00 | 0.00 |
| ATOM | 5897 | HE   | ARG | X | 391 | 58.093 | 24.302 | 42.181 | 0.00 | 0.00 |
| ATOM | 5898 | CZ   | ARG | X | 391 | 56.255 | 24.798 | 42.801 | 0.00 | 0.00 |
| ATOM | 5899 | NH1  | ARG | X | 391 | 55.383 | 25.650 | 43.217 | 0.00 | 0.00 |
| ATOM | 5900 | HH11 | ARG | X | 391 | 55.613 | 26.565 | 43.577 | 0.00 | 0.00 |

|      |      |      |     |   |     |        |        |        |      |      |
|------|------|------|-----|---|-----|--------|--------|--------|------|------|
| ATOM | 5901 | HH12 | ARG | X | 391 | 54.459 | 25.245 | 43.270 | 0.00 | 0.00 |
| ATOM | 5902 | NH2  | ARG | X | 391 | 55.772 | 23.591 | 42.603 | 0.00 | 0.00 |
| ATOM | 5903 | HH21 | ARG | X | 391 | 56.380 | 22.839 | 42.312 | 0.00 | 0.00 |
| ATOM | 5904 | HH22 | ARG | X | 391 | 54.860 | 23.332 | 42.952 | 0.00 | 0.00 |
| ATOM | 5905 | C    | ARG | X | 391 | 56.043 | 26.036 | 46.579 | 0.00 | 0.00 |
| ATOM | 5906 | O    | ARG | X | 391 | 55.574 | 27.097 | 46.276 | 0.00 | 0.00 |
| ATOM | 5907 | N    | GLU | X | 392 | 55.343 | 24.942 | 46.773 | 0.00 | 0.00 |
| ATOM | 5908 | H    | GLU | X | 392 | 55.825 | 24.055 | 46.776 | 0.00 | 0.00 |
| ATOM | 5909 | CA   | GLU | X | 392 | 53.867 | 24.912 | 46.869 | 0.00 | 0.00 |
| ATOM | 5910 | HA   | GLU | X | 392 | 53.501 | 25.555 | 46.069 | 0.00 | 0.00 |
| ATOM | 5911 | CB   | GLU | X | 392 | 53.291 | 23.502 | 46.841 | 0.00 | 0.00 |
| ATOM | 5912 | HB2  | GLU | X | 392 | 53.765 | 22.977 | 47.671 | 0.00 | 0.00 |
| ATOM | 5913 | HB3  | GLU | X | 392 | 52.211 | 23.603 | 46.949 | 0.00 | 0.00 |
| ATOM | 5914 | CG   | GLU | X | 392 | 53.364 | 22.689 | 45.531 | 0.00 | 0.00 |
| ATOM | 5915 | HG2  | GLU | X | 392 | 54.393 | 22.673 | 45.171 | 0.00 | 0.00 |
| ATOM | 5916 | HG3  | GLU | X | 392 | 52.984 | 21.695 | 45.770 | 0.00 | 0.00 |
| ATOM | 5917 | CD   | GLU | X | 392 | 52.553 | 23.375 | 44.391 | 0.00 | 0.00 |
| ATOM | 5918 | OE1  | GLU | X | 392 | 51.454 | 22.956 | 44.160 | 0.00 | 0.00 |
| ATOM | 5919 | OE2  | GLU | X | 392 | 53.133 | 24.182 | 43.647 | 0.00 | 0.00 |
| ATOM | 5920 | C    | GLU | X | 392 | 53.474 | 25.550 | 48.207 | 0.00 | 0.00 |
| ATOM | 5921 | O    | GLU | X | 392 | 52.388 | 26.133 | 48.308 | 0.00 | 0.00 |
| ATOM | 5922 | N    | ALA | X | 393 | 54.239 | 25.443 | 49.362 | 0.00 | 0.00 |
| ATOM | 5923 | H    | ALA | X | 393 | 55.087 | 24.898 | 49.304 | 0.00 | 0.00 |
| ATOM | 5924 | CA   | ALA | X | 393 | 53.826 | 26.039 | 50.660 | 0.00 | 0.00 |
| ATOM | 5925 | HA   | ALA | X | 393 | 52.755 | 25.868 | 50.770 | 0.00 | 0.00 |
| ATOM | 5926 | CB   | ALA | X | 393 | 54.532 | 25.210 | 51.795 | 0.00 | 0.00 |
| ATOM | 5927 | HB1  | ALA | X | 393 | 54.086 | 25.517 | 52.741 | 0.00 | 0.00 |
| ATOM | 5928 | HB2  | ALA | X | 393 | 55.612 | 25.355 | 51.834 | 0.00 | 0.00 |
| ATOM | 5929 | HB3  | ALA | X | 393 | 54.372 | 24.132 | 51.820 | 0.00 | 0.00 |
| ATOM | 5930 | C    | ALA | X | 393 | 53.991 | 27.544 | 50.739 | 0.00 | 0.00 |
| ATOM | 5931 | O    | ALA | X | 393 | 53.160 | 28.204 | 51.348 | 0.00 | 0.00 |
| ATOM | 5932 | N    | LEU | X | 394 | 54.905 | 28.122 | 49.931 | 0.00 | 0.00 |
| ATOM | 5933 | H    | LEU | X | 394 | 55.631 | 27.554 | 49.518 | 0.00 | 0.00 |
| ATOM | 5934 | CA   | LEU | X | 394 | 54.912 | 29.598 | 49.670 | 0.00 | 0.00 |
| ATOM | 5935 | HA   | LEU | X | 394 | 54.691 | 29.983 | 50.666 | 0.00 | 0.00 |
| ATOM | 5936 | CB   | LEU | X | 394 | 56.368 | 30.012 | 49.301 | 0.00 | 0.00 |
| ATOM | 5937 | HB2  | LEU | X | 394 | 57.109 | 29.395 | 49.808 | 0.00 | 0.00 |
| ATOM | 5938 | HB3  | LEU | X | 394 | 56.491 | 29.866 | 48.227 | 0.00 | 0.00 |
| ATOM | 5939 | CG   | LEU | X | 394 | 56.509 | 31.518 | 49.502 | 0.00 | 0.00 |
| ATOM | 5940 | HG   | LEU | X | 394 | 55.555 | 31.843 | 49.088 | 0.00 | 0.00 |
| ATOM | 5941 | CD1  | LEU | X | 394 | 56.426 | 32.063 | 50.971 | 0.00 | 0.00 |
| ATOM | 5942 | HD11 | LEU | X | 394 | 57.301 | 31.922 | 51.606 | 0.00 | 0.00 |
| ATOM | 5943 | HD12 | LEU | X | 394 | 55.491 | 31.682 | 51.380 | 0.00 | 0.00 |
| ATOM | 5944 | HD13 | LEU | X | 394 | 56.383 | 33.144 | 51.105 | 0.00 | 0.00 |
| ATOM | 5945 | CD2  | LEU | X | 394 | 57.711 | 32.110 | 48.771 | 0.00 | 0.00 |
| ATOM | 5946 | HD21 | LEU | X | 394 | 57.748 | 33.196 | 48.850 | 0.00 | 0.00 |
| ATOM | 5947 | HD22 | LEU | X | 394 | 58.618 | 31.751 | 49.258 | 0.00 | 0.00 |
| ATOM | 5948 | HD23 | LEU | X | 394 | 57.765 | 31.742 | 47.746 | 0.00 | 0.00 |
| ATOM | 5949 | C    | LEU | X | 394 | 53.760 | 30.047 | 48.743 | 0.00 | 0.00 |
| ATOM | 5950 | O    | LEU | X | 394 | 53.222 | 31.068 | 48.949 | 0.00 | 0.00 |
| ATOM | 5951 | N    | SER | X | 395 | 53.413 | 29.202 | 47.839 | 0.00 | 0.00 |
| ATOM | 5952 | H    | SER | X | 395 | 53.922 | 28.346 | 47.672 | 0.00 | 0.00 |
| ATOM | 5953 | CA   | SER | X | 395 | 52.099 | 29.405 | 47.186 | 0.00 | 0.00 |
| ATOM | 5954 | HA   | SER | X | 395 | 52.134 | 30.379 | 46.698 | 0.00 | 0.00 |
| ATOM | 5955 | CB   | SER | X | 395 | 52.013 | 28.363 | 46.089 | 0.00 | 0.00 |
| ATOM | 5956 | HB2  | SER | X | 395 | 52.218 | 27.345 | 46.421 | 0.00 | 0.00 |
| ATOM | 5957 | HB3  | SER | X | 395 | 50.965 | 28.400 | 45.789 | 0.00 | 0.00 |
| ATOM | 5958 | OG   | SER | X | 395 | 52.799 | 28.604 | 44.978 | 0.00 | 0.00 |
| ATOM | 5959 | HG   | SER | X | 395 | 52.569 | 27.910 | 44.355 | 0.00 | 0.00 |
| ATOM | 5960 | C    | SER | X | 395 | 50.933 | 29.445 | 48.177 | 0.00 | 0.00 |
| ATOM | 5961 | O    | SER | X | 395 | 50.162 | 30.450 | 48.070 | 0.00 | 0.00 |
| ATOM | 5962 | N    | ASP | X | 396 | 50.896 | 28.453 | 49.080 | 0.00 | 0.00 |
| ATOM | 5963 | H    | ASP | X | 396 | 51.483 | 27.637 | 48.983 | 0.00 | 0.00 |
| ATOM | 5964 | CA   | ASP | X | 396 | 49.873 | 28.430 | 50.188 | 0.00 | 0.00 |
| ATOM | 5965 | HA   | ASP | X | 396 | 48.887 | 28.473 | 49.724 | 0.00 | 0.00 |
| ATOM | 5966 | CB   | ASP | X | 396 | 49.978 | 27.179 | 51.079 | 0.00 | 0.00 |
| ATOM | 5967 | HB2  | ASP | X | 396 | 51.031 | 26.973 | 51.271 | 0.00 | 0.00 |

|      |      |      |     |   |     |        |        |        |      |      |
|------|------|------|-----|---|-----|--------|--------|--------|------|------|
| ATOM | 5968 | HB3  | ASP | X | 396 | 49.426 | 27.299 | 52.011 | 0.00 | 0.00 |
| ATOM | 5969 | CG   | ASP | X | 396 | 49.490 | 25.903 | 50.403 | 0.00 | 0.00 |
| ATOM | 5970 | OD1  | ASP | X | 396 | 49.768 | 24.806 | 50.920 | 0.00 | 0.00 |
| ATOM | 5971 | OD2  | ASP | X | 396 | 48.915 | 25.876 | 49.250 | 0.00 | 0.00 |
| ATOM | 5972 | C    | ASP | X | 396 | 49.880 | 29.685 | 51.040 | 0.00 | 0.00 |
| ATOM | 5973 | O    | ASP | X | 396 | 48.967 | 30.451 | 50.969 | 0.00 | 0.00 |
| ATOM | 5974 | N    | VAL | X | 397 | 51.003 | 29.926 | 51.750 | 0.00 | 0.00 |
| ATOM | 5975 | H    | VAL | X | 397 | 51.749 | 29.247 | 51.689 | 0.00 | 0.00 |
| ATOM | 5976 | CA   | VAL | X | 397 | 51.270 | 31.125 | 52.538 | 0.00 | 0.00 |
| ATOM | 5977 | HA   | VAL | X | 397 | 50.641 | 31.153 | 53.428 | 0.00 | 0.00 |
| ATOM | 5978 | CB   | VAL | X | 397 | 52.799 | 31.167 | 53.087 | 0.00 | 0.00 |
| ATOM | 5979 | HB   | VAL | X | 397 | 53.506 | 31.038 | 52.267 | 0.00 | 0.00 |
| ATOM | 5980 | CG1  | VAL | X | 397 | 53.144 | 32.487 | 53.852 | 0.00 | 0.00 |
| ATOM | 5981 | HG11 | VAL | X | 397 | 52.996 | 33.378 | 53.241 | 0.00 | 0.00 |
| ATOM | 5982 | HG12 | VAL | X | 397 | 52.345 | 32.595 | 54.586 | 0.00 | 0.00 |
| ATOM | 5983 | HG13 | VAL | X | 397 | 54.134 | 32.467 | 54.306 | 0.00 | 0.00 |
| ATOM | 5984 | CG2  | VAL | X | 397 | 52.991 | 29.979 | 54.086 | 0.00 | 0.00 |
| ATOM | 5985 | HG21 | VAL | X | 397 | 52.559 | 29.057 | 53.697 | 0.00 | 0.00 |
| ATOM | 5986 | HG22 | VAL | X | 397 | 52.546 | 30.366 | 55.003 | 0.00 | 0.00 |
| ATOM | 5987 | HG23 | VAL | X | 397 | 54.065 | 29.874 | 54.245 | 0.00 | 0.00 |
| ATOM | 5988 | C    | VAL | X | 397 | 50.923 | 32.432 | 51.787 | 0.00 | 0.00 |
| ATOM | 5989 | O    | VAL | X | 397 | 50.233 | 33.196 | 52.451 | 0.00 | 0.00 |
| ATOM | 5990 | N    | VAL | X | 398 | 51.501 | 32.679 | 50.604 | 0.00 | 0.00 |
| ATOM | 5991 | H    | VAL | X | 398 | 52.118 | 32.007 | 50.172 | 0.00 | 0.00 |
| ATOM | 5992 | CA   | VAL | X | 398 | 51.250 | 33.953 | 49.949 | 0.00 | 0.00 |
| ATOM | 5993 | HA   | VAL | X | 398 | 51.456 | 34.669 | 50.745 | 0.00 | 0.00 |
| ATOM | 5994 | CB   | VAL | X | 398 | 52.229 | 34.371 | 48.799 | 0.00 | 0.00 |
| ATOM | 5995 | HB   | VAL | X | 398 | 52.166 | 33.453 | 48.215 | 0.00 | 0.00 |
| ATOM | 5996 | CG1  | VAL | X | 398 | 51.910 | 35.605 | 48.007 | 0.00 | 0.00 |
| ATOM | 5997 | HG11 | VAL | X | 398 | 52.008 | 36.454 | 48.684 | 0.00 | 0.00 |
| ATOM | 5998 | HG12 | VAL | X | 398 | 52.613 | 35.628 | 47.173 | 0.00 | 0.00 |
| ATOM | 5999 | HG13 | VAL | X | 398 | 50.904 | 35.556 | 47.592 | 0.00 | 0.00 |
| ATOM | 6000 | CG2  | VAL | X | 398 | 53.674 | 34.429 | 49.374 | 0.00 | 0.00 |
| ATOM | 6001 | HG21 | VAL | X | 398 | 53.936 | 33.465 | 49.809 | 0.00 | 0.00 |
| ATOM | 6002 | HG22 | VAL | X | 398 | 53.663 | 35.132 | 50.207 | 0.00 | 0.00 |
| ATOM | 6003 | HG23 | VAL | X | 398 | 54.448 | 34.644 | 48.638 | 0.00 | 0.00 |
| ATOM | 6004 | C    | VAL | X | 398 | 49.798 | 34.137 | 49.559 | 0.00 | 0.00 |
| ATOM | 6005 | O    | VAL | X | 398 | 49.362 | 35.307 | 49.582 | 0.00 | 0.00 |
| ATOM | 6006 | N    | GLY | X | 399 | 49.037 | 33.053 | 49.309 | 0.00 | 0.00 |
| ATOM | 6007 | H    | GLY | X | 399 | 49.487 | 32.184 | 49.059 | 0.00 | 0.00 |
| ATOM | 6008 | CA   | GLY | X | 399 | 47.612 | 33.229 | 48.968 | 0.00 | 0.00 |
| ATOM | 6009 | HA2  | GLY | X | 399 | 47.411 | 34.047 | 48.277 | 0.00 | 0.00 |
| ATOM | 6010 | HA3  | GLY | X | 399 | 47.253 | 32.319 | 48.489 | 0.00 | 0.00 |
| ATOM | 6011 | C    | GLY | X | 399 | 46.710 | 33.306 | 50.198 | 0.00 | 0.00 |
| ATOM | 6012 | O    | GLY | X | 399 | 45.569 | 33.720 | 50.031 | 0.00 | 0.00 |
| ATOM | 6013 | N    | ASP | X | 400 | 47.081 | 32.751 | 51.305 | 0.00 | 0.00 |
| ATOM | 6014 | H    | ASP | X | 400 | 48.010 | 32.353 | 51.305 | 0.00 | 0.00 |
| ATOM | 6015 | CA   | ASP | X | 400 | 46.146 | 32.444 | 52.467 | 0.00 | 0.00 |
| ATOM | 6016 | HA   | ASP | X | 400 | 45.274 | 31.919 | 52.076 | 0.00 | 0.00 |
| ATOM | 6017 | CB   | ASP | X | 400 | 46.899 | 31.437 | 53.378 | 0.00 | 0.00 |
| ATOM | 6018 | HB2  | ASP | X | 400 | 47.958 | 31.696 | 53.367 | 0.00 | 0.00 |
| ATOM | 6019 | HB3  | ASP | X | 400 | 46.595 | 31.471 | 54.424 | 0.00 | 0.00 |
| ATOM | 6020 | CG   | ASP | X | 400 | 46.633 | 29.982 | 52.926 | 0.00 | 0.00 |
| ATOM | 6021 | OD1  | ASP | X | 400 | 45.874 | 29.706 | 51.948 | 0.00 | 0.00 |
| ATOM | 6022 | OD2  | ASP | X | 400 | 47.085 | 29.051 | 53.689 | 0.00 | 0.00 |
| ATOM | 6023 | C    | ASP | X | 400 | 45.729 | 33.644 | 53.228 | 0.00 | 0.00 |
| ATOM | 6024 | O    | ASP | X | 400 | 44.605 | 34.100 | 53.172 | 0.00 | 0.00 |
| ATOM | 6025 | N    | HIE | X | 401 | 46.807 | 34.257 | 53.806 | 0.00 | 0.00 |
| ATOM | 6026 | H    | HIE | X | 401 | 47.712 | 33.811 | 53.834 | 0.00 | 0.00 |
| ATOM | 6027 | CA   | HIE | X | 401 | 46.647 | 35.527 | 54.517 | 0.00 | 0.00 |
| ATOM | 6028 | HA   | HIE | X | 401 | 45.857 | 35.299 | 55.233 | 0.00 | 0.00 |
| ATOM | 6029 | CB   | HIE | X | 401 | 47.913 | 35.987 | 55.270 | 0.00 | 0.00 |
| ATOM | 6030 | HB2  | HIE | X | 401 | 47.773 | 36.729 | 56.056 | 0.00 | 0.00 |
| ATOM | 6031 | HB3  | HIE | X | 401 | 48.409 | 35.155 | 55.770 | 0.00 | 0.00 |
| ATOM | 6032 | CG   | HIE | X | 401 | 48.930 | 36.532 | 54.353 | 0.00 | 0.00 |
| ATOM | 6033 | ND1  | HIE | X | 401 | 48.879 | 37.792 | 53.775 | 0.00 | 0.00 |
| ATOM | 6034 | CE1  | HIE | X | 401 | 50.034 | 37.805 | 52.978 | 0.00 | 0.00 |

|      |      |      |     |   |     |        |        |        |      |      |
|------|------|------|-----|---|-----|--------|--------|--------|------|------|
| ATOM | 6035 | HE1  | HIE | X | 401 | 50.197 | 38.420 | 52.105 | 0.00 | 0.00 |
| ATOM | 6036 | NE2  | HIE | X | 401 | 50.797 | 36.718 | 53.235 | 0.00 | 0.00 |
| ATOM | 6037 | HE2  | HIE | X | 401 | 51.678 | 36.453 | 52.816 | 0.00 | 0.00 |
| ATOM | 6038 | CD2  | HIE | X | 401 | 50.078 | 35.870 | 54.010 | 0.00 | 0.00 |
| ATOM | 6039 | HD2  | HIE | X | 401 | 50.419 | 34.968 | 54.496 | 0.00 | 0.00 |
| ATOM | 6040 | C    | HIE | X | 401 | 46.092 | 36.668 | 53.664 | 0.00 | 0.00 |
| ATOM | 6041 | O    | HIE | X | 401 | 45.518 | 37.575 | 54.268 | 0.00 | 0.00 |
| ATOM | 6042 | N    | ASN | X | 402 | 46.263 | 36.631 | 52.275 | 0.00 | 0.00 |
| ATOM | 6043 | H    | ASN | X | 402 | 46.989 | 36.040 | 51.895 | 0.00 | 0.00 |
| ATOM | 6044 | CA   | ASN | X | 402 | 45.761 | 37.652 | 51.385 | 0.00 | 0.00 |
| ATOM | 6045 | HA   | ASN | X | 402 | 45.659 | 38.621 | 51.874 | 0.00 | 0.00 |
| ATOM | 6046 | CB   | ASN | X | 402 | 46.601 | 37.859 | 50.149 | 0.00 | 0.00 |
| ATOM | 6047 | HB2  | ASN | X | 402 | 46.797 | 36.852 | 49.780 | 0.00 | 0.00 |
| ATOM | 6048 | HB3  | ASN | X | 402 | 46.004 | 38.419 | 49.429 | 0.00 | 0.00 |
| ATOM | 6049 | CG   | ASN | X | 402 | 47.916 | 38.670 | 50.361 | 0.00 | 0.00 |
| ATOM | 6050 | OD1  | ASN | X | 402 | 47.921 | 39.835 | 50.744 | 0.00 | 0.00 |
| ATOM | 6051 | ND2  | ASN | X | 402 | 49.002 | 38.065 | 49.978 | 0.00 | 0.00 |
| ATOM | 6052 | HD21 | ASN | X | 402 | 49.851 | 38.541 | 50.245 | 0.00 | 0.00 |
| ATOM | 6053 | HD22 | ASN | X | 402 | 48.977 | 37.065 | 49.838 | 0.00 | 0.00 |
| ATOM | 6054 | C    | ASN | X | 402 | 44.326 | 37.235 | 50.875 | 0.00 | 0.00 |
| ATOM | 6055 | O    | ASN | X | 402 | 43.398 | 38.050 | 50.851 | 0.00 | 0.00 |
| ATOM | 6056 | N    | VAL | X | 403 | 44.104 | 36.021 | 50.441 | 0.00 | 0.00 |
| ATOM | 6057 | H    | VAL | X | 403 | 44.770 | 35.276 | 50.587 | 0.00 | 0.00 |
| ATOM | 6058 | CA   | VAL | X | 403 | 42.811 | 35.593 | 49.845 | 0.00 | 0.00 |
| ATOM | 6059 | HA   | VAL | X | 403 | 42.126 | 36.439 | 49.891 | 0.00 | 0.00 |
| ATOM | 6060 | CB   | VAL | X | 403 | 42.959 | 35.129 | 48.377 | 0.00 | 0.00 |
| ATOM | 6061 | HB   | VAL | X | 403 | 43.571 | 34.229 | 48.439 | 0.00 | 0.00 |
| ATOM | 6062 | CG1  | VAL | X | 403 | 41.579 | 34.899 | 47.728 | 0.00 | 0.00 |
| ATOM | 6063 | HG11 | VAL | X | 403 | 41.069 | 34.154 | 48.339 | 0.00 | 0.00 |
| ATOM | 6064 | HG12 | VAL | X | 403 | 40.941 | 35.782 | 47.707 | 0.00 | 0.00 |
| ATOM | 6065 | HG13 | VAL | X | 403 | 41.680 | 34.425 | 46.752 | 0.00 | 0.00 |
| ATOM | 6066 | CG2  | VAL | X | 403 | 43.768 | 36.191 | 47.552 | 0.00 | 0.00 |
| ATOM | 6067 | HG21 | VAL | X | 403 | 43.061 | 37.017 | 47.631 | 0.00 | 0.00 |
| ATOM | 6068 | HG22 | VAL | X | 403 | 43.910 | 35.773 | 46.555 | 0.00 | 0.00 |
| ATOM | 6069 | HG23 | VAL | X | 403 | 44.716 | 36.560 | 47.943 | 0.00 | 0.00 |
| ATOM | 6070 | C    | VAL | X | 403 | 42.079 | 34.628 | 50.733 | 0.00 | 0.00 |
| ATOM | 6071 | O    | VAL | X | 403 | 40.983 | 34.948 | 51.233 | 0.00 | 0.00 |
| ATOM | 6072 | N    | VAL | X | 404 | 42.548 | 33.362 | 50.855 | 0.00 | 0.00 |
| ATOM | 6073 | H    | VAL | X | 404 | 43.442 | 33.169 | 50.426 | 0.00 | 0.00 |
| ATOM | 6074 | CA   | VAL | X | 404 | 41.665 | 32.315 | 51.347 | 0.00 | 0.00 |
| ATOM | 6075 | HA   | VAL | X | 404 | 40.730 | 32.388 | 50.791 | 0.00 | 0.00 |
| ATOM | 6076 | CB   | VAL | X | 404 | 42.156 | 30.898 | 51.071 | 0.00 | 0.00 |
| ATOM | 6077 | HB   | VAL | X | 404 | 43.016 | 30.677 | 51.703 | 0.00 | 0.00 |
| ATOM | 6078 | CG1  | VAL | X | 404 | 41.184 | 29.837 | 51.522 | 0.00 | 0.00 |
| ATOM | 6079 | HG11 | VAL | X | 404 | 40.861 | 30.044 | 52.542 | 0.00 | 0.00 |
| ATOM | 6080 | HG12 | VAL | X | 404 | 40.319 | 29.869 | 50.859 | 0.00 | 0.00 |
| ATOM | 6081 | HG13 | VAL | X | 404 | 41.726 | 28.892 | 51.477 | 0.00 | 0.00 |
| ATOM | 6082 | CG2  | VAL | X | 404 | 42.598 | 30.653 | 49.641 | 0.00 | 0.00 |
| ATOM | 6083 | HG21 | VAL | X | 404 | 41.719 | 30.700 | 48.999 | 0.00 | 0.00 |
| ATOM | 6084 | HG22 | VAL | X | 404 | 43.001 | 29.642 | 49.574 | 0.00 | 0.00 |
| ATOM | 6085 | HG23 | VAL | X | 404 | 43.399 | 31.344 | 49.377 | 0.00 | 0.00 |
| ATOM | 6086 | C    | VAL | X | 404 | 41.226 | 32.574 | 52.780 | 0.00 | 0.00 |
| ATOM | 6087 | O    | VAL | X | 404 | 40.068 | 32.602 | 53.016 | 0.00 | 0.00 |
| ATOM | 6088 | N    | CYX | X | 405 | 42.139 | 32.994 | 53.642 | 0.00 | 0.00 |
| ATOM | 6089 | H    | CYX | X | 405 | 43.119 | 33.083 | 53.415 | 0.00 | 0.00 |
| ATOM | 6090 | CA   | CYX | X | 405 | 41.791 | 33.359 | 55.056 | 0.00 | 0.00 |
| ATOM | 6091 | HA   | CYX | X | 405 | 41.175 | 32.620 | 55.568 | 0.00 | 0.00 |
| ATOM | 6092 | CB   | CYX | X | 405 | 43.010 | 33.532 | 55.913 | 0.00 | 0.00 |
| ATOM | 6093 | HB2  | CYX | X | 405 | 43.624 | 34.320 | 55.477 | 0.00 | 0.00 |
| ATOM | 6094 | HB3  | CYX | X | 405 | 42.678 | 33.830 | 56.907 | 0.00 | 0.00 |
| ATOM | 6095 | SG   | CYX | X | 405 | 43.952 | 31.948 | 56.032 | 0.00 | 0.00 |
| ATOM | 6096 | C    | CYX | X | 405 | 40.756 | 34.488 | 55.080 | 0.00 | 0.00 |
| ATOM | 6097 | O    | CYX | X | 405 | 39.751 | 34.337 | 55.725 | 0.00 | 0.00 |
| ATOM | 6098 | N    | PRO | X | 406 | 40.971 | 35.642 | 54.500 | 0.00 | 0.00 |
| ATOM | 6099 | CD   | PRO | X | 406 | 42.282 | 36.170 | 54.099 | 0.00 | 0.00 |
| ATOM | 6100 | HD2  | PRO | X | 406 | 42.617 | 35.736 | 53.157 | 0.00 | 0.00 |
| ATOM | 6101 | HD3  | PRO | X | 406 | 43.065 | 35.962 | 54.829 | 0.00 | 0.00 |



|      |      |      |     |   |     |        |        |        |      |      |
|------|------|------|-----|---|-----|--------|--------|--------|------|------|
| ATOM | 6102 | CG   | PRO | X | 406 | 42.094 | 37.668 | 53.973 | 0.00 | 0.00 |
| ATOM | 6103 | HG2  | PRO | X | 406 | 42.825 | 38.077 | 53.275 | 0.00 | 0.00 |
| ATOM | 6104 | HG3  | PRO | X | 406 | 42.288 | 38.118 | 54.946 | 0.00 | 0.00 |
| ATOM | 6105 | CB   | PRO | X | 406 | 40.628 | 37.785 | 53.453 | 0.00 | 0.00 |
| ATOM | 6106 | HB2  | PRO | X | 406 | 40.608 | 37.616 | 52.376 | 0.00 | 0.00 |
| ATOM | 6107 | HB3  | PRO | X | 406 | 40.215 | 38.769 | 53.677 | 0.00 | 0.00 |
| ATOM | 6108 | CA   | PRO | X | 406 | 39.964 | 36.724 | 54.303 | 0.00 | 0.00 |
| ATOM | 6109 | HA   | PRO | X | 406 | 39.849 | 37.014 | 55.347 | 0.00 | 0.00 |
| ATOM | 6110 | C    | PRO | X | 406 | 38.666 | 36.266 | 53.748 | 0.00 | 0.00 |
| ATOM | 6111 | O    | PRO | X | 406 | 37.632 | 36.705 | 54.313 | 0.00 | 0.00 |
| ATOM | 6112 | N    | VAL | X | 407 | 38.622 | 35.519 | 52.639 | 0.00 | 0.00 |
| ATOM | 6113 | H    | VAL | X | 407 | 39.438 | 35.211 | 52.130 | 0.00 | 0.00 |
| ATOM | 6114 | CA   | VAL | X | 407 | 37.401 | 35.149 | 51.971 | 0.00 | 0.00 |
| ATOM | 6115 | HA   | VAL | X | 407 | 36.801 | 36.058 | 51.949 | 0.00 | 0.00 |
| ATOM | 6116 | CB   | VAL | X | 407 | 37.662 | 34.703 | 50.462 | 0.00 | 0.00 |
| ATOM | 6117 | HB   | VAL | X | 407 | 38.509 | 35.302 | 50.127 | 0.00 | 0.00 |
| ATOM | 6118 | CG1  | VAL | X | 407 | 37.950 | 33.223 | 50.482 | 0.00 | 0.00 |
| ATOM | 6119 | HG11 | VAL | X | 407 | 38.932 | 33.196 | 50.955 | 0.00 | 0.00 |
| ATOM | 6120 | HG12 | VAL | X | 407 | 37.237 | 32.629 | 51.053 | 0.00 | 0.00 |
| ATOM | 6121 | HG13 | VAL | X | 407 | 37.988 | 32.767 | 49.492 | 0.00 | 0.00 |
| ATOM | 6122 | CG2  | VAL | X | 407 | 36.437 | 35.057 | 49.557 | 0.00 | 0.00 |
| ATOM | 6123 | HG21 | VAL | X | 407 | 36.419 | 36.146 | 49.508 | 0.00 | 0.00 |
| ATOM | 6124 | HG22 | VAL | X | 407 | 35.465 | 34.658 | 49.847 | 0.00 | 0.00 |
| ATOM | 6125 | HG23 | VAL | X | 407 | 36.527 | 34.745 | 48.517 | 0.00 | 0.00 |
| ATOM | 6126 | C    | VAL | X | 407 | 36.526 | 34.220 | 52.803 | 0.00 | 0.00 |
| ATOM | 6127 | O    | VAL | X | 407 | 35.307 | 34.152 | 52.662 | 0.00 | 0.00 |
| ATOM | 6128 | N    | ALA | X | 408 | 37.197 | 33.477 | 53.725 | 0.00 | 0.00 |
| ATOM | 6129 | H    | ALA | X | 408 | 38.194 | 33.630 | 53.777 | 0.00 | 0.00 |
| ATOM | 6130 | CA   | ALA | X | 408 | 36.660 | 32.504 | 54.681 | 0.00 | 0.00 |
| ATOM | 6131 | HA   | ALA | X | 408 | 35.685 | 32.274 | 54.252 | 0.00 | 0.00 |
| ATOM | 6132 | CB   | ALA | X | 408 | 37.644 | 31.320 | 54.708 | 0.00 | 0.00 |
| ATOM | 6133 | HB1  | ALA | X | 408 | 37.985 | 31.076 | 53.702 | 0.00 | 0.00 |
| ATOM | 6134 | HB2  | ALA | X | 408 | 37.082 | 30.491 | 55.140 | 0.00 | 0.00 |
| ATOM | 6135 | HB3  | ALA | X | 408 | 38.472 | 31.486 | 55.397 | 0.00 | 0.00 |
| ATOM | 6136 | C    | ALA | X | 408 | 36.315 | 33.012 | 56.113 | 0.00 | 0.00 |
| ATOM | 6137 | O    | ALA | X | 408 | 35.356 | 32.557 | 56.734 | 0.00 | 0.00 |
| ATOM | 6138 | N    | GLN | X | 409 | 37.043 | 33.965 | 56.601 | 0.00 | 0.00 |
| ATOM | 6139 | H    | GLN | X | 409 | 37.812 | 34.216 | 55.996 | 0.00 | 0.00 |
| ATOM | 6140 | CA   | GLN | X | 409 | 36.681 | 34.875 | 57.685 | 0.00 | 0.00 |
| ATOM | 6141 | HA   | GLN | X | 409 | 36.423 | 34.330 | 58.593 | 0.00 | 0.00 |
| ATOM | 6142 | CB   | GLN | X | 409 | 37.873 | 35.812 | 57.957 | 0.00 | 0.00 |
| ATOM | 6143 | HB2  | GLN | X | 409 | 38.734 | 35.225 | 58.277 | 0.00 | 0.00 |
| ATOM | 6144 | HB3  | GLN | X | 409 | 38.257 | 36.215 | 57.020 | 0.00 | 0.00 |
| ATOM | 6145 | CG   | GLN | X | 409 | 37.607 | 36.914 | 58.953 | 0.00 | 0.00 |
| ATOM | 6146 | HG2  | GLN | X | 409 | 38.479 | 37.565 | 59.012 | 0.00 | 0.00 |
| ATOM | 6147 | HG3  | GLN | X | 409 | 36.835 | 37.559 | 58.535 | 0.00 | 0.00 |
| ATOM | 6148 | CD   | GLN | X | 409 | 37.378 | 36.424 | 60.390 | 0.00 | 0.00 |
| ATOM | 6149 | OE1  | GLN | X | 409 | 36.891 | 35.310 | 60.581 | 0.00 | 0.00 |
| ATOM | 6150 | NE2  | GLN | X | 409 | 37.788 | 37.150 | 61.421 | 0.00 | 0.00 |
| ATOM | 6151 | HE21 | GLN | X | 409 | 37.773 | 36.642 | 62.294 | 0.00 | 0.00 |
| ATOM | 6152 | HE22 | GLN | X | 409 | 38.222 | 38.046 | 61.249 | 0.00 | 0.00 |
| ATOM | 6153 | C    | GLN | X | 409 | 35.360 | 35.496 | 57.288 | 0.00 | 0.00 |
| ATOM | 6154 | O    | GLN | X | 409 | 34.409 | 35.327 | 58.071 | 0.00 | 0.00 |
| ATOM | 6155 | N    | LEU | X | 410 | 35.246 | 36.097 | 56.120 | 0.00 | 0.00 |
| ATOM | 6156 | H    | LEU | X | 410 | 36.112 | 36.120 | 55.600 | 0.00 | 0.00 |
| ATOM | 6157 | CA   | LEU | X | 410 | 34.046 | 36.616 | 55.407 | 0.00 | 0.00 |
| ATOM | 6158 | HA   | LEU | X | 410 | 33.724 | 37.539 | 55.889 | 0.00 | 0.00 |
| ATOM | 6159 | CB   | LEU | X | 410 | 34.509 | 37.038 | 54.055 | 0.00 | 0.00 |
| ATOM | 6160 | HB2  | LEU | X | 410 | 35.124 | 37.913 | 54.265 | 0.00 | 0.00 |
| ATOM | 6161 | HB3  | LEU | X | 410 | 35.200 | 36.325 | 53.604 | 0.00 | 0.00 |
| ATOM | 6162 | CG   | LEU | X | 410 | 33.467 | 37.336 | 52.976 | 0.00 | 0.00 |
| ATOM | 6163 | HG   | LEU | X | 410 | 32.853 | 36.452 | 52.806 | 0.00 | 0.00 |
| ATOM | 6164 | CD1  | LEU | X | 410 | 32.668 | 38.478 | 53.395 | 0.00 | 0.00 |
| ATOM | 6165 | HD11 | LEU | X | 410 | 32.150 | 38.335 | 54.343 | 0.00 | 0.00 |
| ATOM | 6166 | HD12 | LEU | X | 410 | 31.802 | 38.652 | 52.755 | 0.00 | 0.00 |
| ATOM | 6167 | HD13 | LEU | X | 410 | 33.231 | 39.410 | 53.455 | 0.00 | 0.00 |
| ATOM | 6168 | CD2  | LEU | X | 410 | 34.302 | 37.690 | 51.712 | 0.00 | 0.00 |

|      |      |      |     |   |     |        |        |        |      |      |
|------|------|------|-----|---|-----|--------|--------|--------|------|------|
| ATOM | 6169 | HD21 | LEU | X | 410 | 33.803 | 38.227 | 50.905 | 0.00 | 0.00 |
| ATOM | 6170 | HD22 | LEU | X | 410 | 35.056 | 38.407 | 52.036 | 0.00 | 0.00 |
| ATOM | 6171 | HD23 | LEU | X | 410 | 34.849 | 36.804 | 51.389 | 0.00 | 0.00 |
| ATOM | 6172 | C    | LEU | X | 410 | 32.868 | 35.565 | 55.324 | 0.00 | 0.00 |
| ATOM | 6173 | O    | LEU | X | 410 | 31.753 | 35.889 | 55.743 | 0.00 | 0.00 |
| ATOM | 6174 | N    | ALA | X | 411 | 33.130 | 34.349 | 54.810 | 0.00 | 0.00 |
| ATOM | 6175 | H    | ALA | X | 411 | 34.050 | 34.282 | 54.400 | 0.00 | 0.00 |
| ATOM | 6176 | CA   | ALA | X | 411 | 32.145 | 33.270 | 54.625 | 0.00 | 0.00 |
| ATOM | 6177 | HA   | ALA | X | 411 | 31.326 | 33.559 | 53.967 | 0.00 | 0.00 |
| ATOM | 6178 | CB   | ALA | X | 411 | 32.861 | 32.000 | 54.163 | 0.00 | 0.00 |
| ATOM | 6179 | HB1  | ALA | X | 411 | 32.257 | 31.158 | 53.825 | 0.00 | 0.00 |
| ATOM | 6180 | HB2  | ALA | X | 411 | 33.582 | 31.707 | 54.926 | 0.00 | 0.00 |
| ATOM | 6181 | HB3  | ALA | X | 411 | 33.469 | 32.318 | 53.316 | 0.00 | 0.00 |
| ATOM | 6182 | C    | ALA | X | 411 | 31.369 | 32.921 | 55.960 | 0.00 | 0.00 |
| ATOM | 6183 | O    | ALA | X | 411 | 30.103 | 32.858 | 55.944 | 0.00 | 0.00 |
| ATOM | 6184 | N    | GLY | X | 412 | 32.078 | 32.956 | 57.117 | 0.00 | 0.00 |
| ATOM | 6185 | H    | GLY | X | 412 | 33.033 | 33.275 | 57.186 | 0.00 | 0.00 |
| ATOM | 6186 | CA   | GLY | X | 412 | 31.560 | 32.615 | 58.415 | 0.00 | 0.00 |
| ATOM | 6187 | HA2  | GLY | X | 412 | 31.053 | 31.650 | 58.427 | 0.00 | 0.00 |
| ATOM | 6188 | HA3  | GLY | X | 412 | 32.350 | 32.551 | 59.164 | 0.00 | 0.00 |
| ATOM | 6189 | C    | GLY | X | 412 | 30.753 | 33.738 | 58.960 | 0.00 | 0.00 |
| ATOM | 6190 | O    | GLY | X | 412 | 29.587 | 33.495 | 59.303 | 0.00 | 0.00 |
| ATOM | 6191 | N    | ARG | X | 413 | 31.336 | 34.907 | 58.862 | 0.00 | 0.00 |
| ATOM | 6192 | H    | ARG | X | 413 | 32.196 | 34.957 | 58.335 | 0.00 | 0.00 |
| ATOM | 6193 | CA   | ARG | X | 413 | 30.678 | 36.094 | 59.207 | 0.00 | 0.00 |
| ATOM | 6194 | HA   | ARG | X | 413 | 30.529 | 36.077 | 60.287 | 0.00 | 0.00 |
| ATOM | 6195 | CB   | ARG | X | 413 | 31.483 | 37.332 | 58.816 | 0.00 | 0.00 |
| ATOM | 6196 | HB2  | ARG | X | 413 | 31.809 | 37.336 | 57.776 | 0.00 | 0.00 |
| ATOM | 6197 | HB3  | ARG | X | 413 | 30.792 | 38.169 | 58.912 | 0.00 | 0.00 |
| ATOM | 6198 | CG   | ARG | X | 413 | 32.633 | 37.705 | 59.740 | 0.00 | 0.00 |
| ATOM | 6199 | HG2  | ARG | X | 413 | 33.429 | 36.995 | 59.517 | 0.00 | 0.00 |
| ATOM | 6200 | HG3  | ARG | X | 413 | 32.888 | 38.739 | 59.507 | 0.00 | 0.00 |
| ATOM | 6201 | CD   | ARG | X | 413 | 32.347 | 37.504 | 61.271 | 0.00 | 0.00 |
| ATOM | 6202 | HD2  | ARG | X | 413 | 31.361 | 37.940 | 61.429 | 0.00 | 0.00 |
| ATOM | 6203 | HD3  | ARG | X | 413 | 32.202 | 36.448 | 61.499 | 0.00 | 0.00 |
| ATOM | 6204 | NE   | ARG | X | 413 | 33.552 | 37.803 | 62.046 | 0.00 | 0.00 |
| ATOM | 6205 | HE   | ARG | X | 413 | 34.296 | 38.284 | 61.560 | 0.00 | 0.00 |
| ATOM | 6206 | CZ   | ARG | X | 413 | 33.563 | 37.714 | 63.364 | 0.00 | 0.00 |
| ATOM | 6207 | NH1  | ARG | X | 413 | 32.466 | 37.491 | 64.058 | 0.00 | 0.00 |
| ATOM | 6208 | HH11 | ARG | X | 413 | 31.543 | 37.616 | 63.667 | 0.00 | 0.00 |
| ATOM | 6209 | HH12 | ARG | X | 413 | 32.606 | 37.372 | 65.052 | 0.00 | 0.00 |
| ATOM | 6210 | NH2  | ARG | X | 413 | 34.633 | 37.932 | 64.024 | 0.00 | 0.00 |
| ATOM | 6211 | HH21 | ARG | X | 413 | 35.517 | 38.106 | 63.567 | 0.00 | 0.00 |
| ATOM | 6212 | HH22 | ARG | X | 413 | 34.593 | 37.904 | 65.033 | 0.00 | 0.00 |
| ATOM | 6213 | C    | ARG | X | 413 | 29.348 | 36.167 | 58.559 | 0.00 | 0.00 |
| ATOM | 6214 | O    | ARG | X | 413 | 28.327 | 36.414 | 59.192 | 0.00 | 0.00 |
| ATOM | 6215 | N    | LEU | X | 414 | 29.275 | 36.021 | 57.168 | 0.00 | 0.00 |
| ATOM | 6216 | H    | LEU | X | 414 | 30.165 | 35.890 | 56.708 | 0.00 | 0.00 |
| ATOM | 6217 | CA   | LEU | X | 414 | 28.144 | 36.086 | 56.325 | 0.00 | 0.00 |
| ATOM | 6218 | HA   | LEU | X | 414 | 27.607 | 37.031 | 56.415 | 0.00 | 0.00 |
| ATOM | 6219 | CB   | LEU | X | 414 | 28.612 | 35.884 | 54.832 | 0.00 | 0.00 |
| ATOM | 6220 | HB2  | LEU | X | 414 | 29.268 | 35.017 | 54.759 | 0.00 | 0.00 |
| ATOM | 6221 | HB3  | LEU | X | 414 | 27.715 | 35.752 | 54.228 | 0.00 | 0.00 |
| ATOM | 6222 | CG   | LEU | X | 414 | 29.349 | 36.956 | 54.064 | 0.00 | 0.00 |
| ATOM | 6223 | HG   | LEU | X | 414 | 30.280 | 37.248 | 54.550 | 0.00 | 0.00 |
| ATOM | 6224 | CD1  | LEU | X | 414 | 29.607 | 36.486 | 52.676 | 0.00 | 0.00 |
| ATOM | 6225 | HD11 | LEU | X | 414 | 30.294 | 37.189 | 52.204 | 0.00 | 0.00 |
| ATOM | 6226 | HD12 | LEU | X | 414 | 28.693 | 36.412 | 52.087 | 0.00 | 0.00 |
| ATOM | 6227 | HD13 | LEU | X | 414 | 30.139 | 35.537 | 52.740 | 0.00 | 0.00 |
| ATOM | 6228 | CD2  | LEU | X | 414 | 28.547 | 38.253 | 54.103 | 0.00 | 0.00 |
| ATOM | 6229 | HD21 | LEU | X | 414 | 28.376 | 38.720 | 55.073 | 0.00 | 0.00 |
| ATOM | 6230 | HD22 | LEU | X | 414 | 28.929 | 38.982 | 53.388 | 0.00 | 0.00 |
| ATOM | 6231 | HD23 | LEU | X | 414 | 27.516 | 38.075 | 53.797 | 0.00 | 0.00 |
| ATOM | 6232 | C    | LEU | X | 414 | 27.076 | 35.146 | 56.788 | 0.00 | 0.00 |
| ATOM | 6233 | O    | LEU | X | 414 | 25.961 | 35.599 | 56.970 | 0.00 | 0.00 |
| ATOM | 6234 | N    | ALA | X | 415 | 27.402 | 33.856 | 56.925 | 0.00 | 0.00 |
| ATOM | 6235 | H    | ALA | X | 415 | 28.297 | 33.473 | 56.655 | 0.00 | 0.00 |

|      |      |      |     |   |     |        |        |        |      |      |
|------|------|------|-----|---|-----|--------|--------|--------|------|------|
| ATOM | 6236 | CA   | ALA | X | 415 | 26.401 | 32.882 | 57.230 | 0.00 | 0.00 |
| ATOM | 6237 | HA   | ALA | X | 415 | 25.574 | 32.930 | 56.521 | 0.00 | 0.00 |
| ATOM | 6238 | CB   | ALA | X | 415 | 27.052 | 31.478 | 57.103 | 0.00 | 0.00 |
| ATOM | 6239 | HB1  | ALA | X | 415 | 27.387 | 31.279 | 56.085 | 0.00 | 0.00 |
| ATOM | 6240 | HB2  | ALA | X | 415 | 26.201 | 30.809 | 57.234 | 0.00 | 0.00 |
| ATOM | 6241 | HB3  | ALA | X | 415 | 27.950 | 31.311 | 57.698 | 0.00 | 0.00 |
| ATOM | 6242 | C    | ALA | X | 415 | 25.869 | 33.056 | 58.680 | 0.00 | 0.00 |
| ATOM | 6243 | O    | ALA | X | 415 | 24.651 | 33.083 | 58.887 | 0.00 | 0.00 |
| ATOM | 6244 | N    | ALA | X | 416 | 26.659 | 33.340 | 59.676 | 0.00 | 0.00 |
| ATOM | 6245 | H    | ALA | X | 416 | 27.622 | 33.113 | 59.474 | 0.00 | 0.00 |
| ATOM | 6246 | CA   | ALA | X | 416 | 26.314 | 33.383 | 61.083 | 0.00 | 0.00 |
| ATOM | 6247 | HA   | ALA | X | 416 | 25.571 | 32.650 | 61.398 | 0.00 | 0.00 |
| ATOM | 6248 | CB   | ALA | X | 416 | 27.629 | 33.208 | 61.956 | 0.00 | 0.00 |
| ATOM | 6249 | HB1  | ALA | X | 416 | 28.059 | 32.236 | 61.713 | 0.00 | 0.00 |
| ATOM | 6250 | HB2  | ALA | X | 416 | 27.527 | 33.357 | 63.031 | 0.00 | 0.00 |
| ATOM | 6251 | HB3  | ALA | X | 416 | 28.333 | 34.016 | 61.755 | 0.00 | 0.00 |
| ATOM | 6252 | C    | ALA | X | 416 | 25.529 | 34.625 | 61.447 | 0.00 | 0.00 |
| ATOM | 6253 | O    | ALA | X | 416 | 24.949 | 34.636 | 62.537 | 0.00 | 0.00 |
| ATOM | 6254 | N    | GLN | X | 417 | 25.295 | 35.604 | 60.532 | 0.00 | 0.00 |
| ATOM | 6255 | H    | GLN | X | 417 | 25.648 | 35.405 | 59.606 | 0.00 | 0.00 |
| ATOM | 6256 | CA   | GLN | X | 417 | 24.654 | 36.829 | 60.721 | 0.00 | 0.00 |
| ATOM | 6257 | HA   | GLN | X | 417 | 24.072 | 36.708 | 61.634 | 0.00 | 0.00 |
| ATOM | 6258 | CB   | GLN | X | 417 | 25.782 | 37.914 | 60.782 | 0.00 | 0.00 |
| ATOM | 6259 | HB2  | GLN | X | 417 | 26.366 | 37.875 | 59.863 | 0.00 | 0.00 |
| ATOM | 6260 | HB3  | GLN | X | 417 | 25.317 | 38.900 | 60.781 | 0.00 | 0.00 |
| ATOM | 6261 | CG   | GLN | X | 417 | 26.722 | 37.844 | 62.035 | 0.00 | 0.00 |
| ATOM | 6262 | HG2  | GLN | X | 417 | 26.220 | 37.839 | 63.003 | 0.00 | 0.00 |
| ATOM | 6263 | HG3  | GLN | X | 417 | 27.285 | 36.913 | 61.970 | 0.00 | 0.00 |
| ATOM | 6264 | CD   | GLN | X | 417 | 27.750 | 38.976 | 62.084 | 0.00 | 0.00 |
| ATOM | 6265 | OE1  | GLN | X | 417 | 27.980 | 39.666 | 63.074 | 0.00 | 0.00 |
| ATOM | 6266 | NE2  | GLN | X | 417 | 28.518 | 39.222 | 61.024 | 0.00 | 0.00 |
| ATOM | 6267 | HE21 | GLN | X | 417 | 29.252 | 39.908 | 61.130 | 0.00 | 0.00 |
| ATOM | 6268 | HE22 | GLN | X | 417 | 28.270 | 38.851 | 60.119 | 0.00 | 0.00 |
| ATOM | 6269 | C    | GLN | X | 417 | 23.543 | 37.179 | 59.650 | 0.00 | 0.00 |
| ATOM | 6270 | O    | GLN | X | 417 | 22.938 | 38.254 | 59.675 | 0.00 | 0.00 |
| ATOM | 6271 | N    | GLY | X | 418 | 23.349 | 36.321 | 58.690 | 0.00 | 0.00 |
| ATOM | 6272 | H    | GLY | X | 418 | 23.918 | 35.490 | 58.755 | 0.00 | 0.00 |
| ATOM | 6273 | CA   | GLY | X | 418 | 22.053 | 36.271 | 58.017 | 0.00 | 0.00 |
| ATOM | 6274 | HA2  | GLY | X | 418 | 21.329 | 35.612 | 58.495 | 0.00 | 0.00 |
| ATOM | 6275 | HA3  | GLY | X | 418 | 21.548 | 37.231 | 58.122 | 0.00 | 0.00 |
| ATOM | 6276 | C    | GLY | X | 418 | 22.084 | 35.908 | 56.541 | 0.00 | 0.00 |
| ATOM | 6277 | O    | GLY | X | 418 | 21.025 | 35.651 | 55.992 | 0.00 | 0.00 |
| ATOM | 6278 | N    | ALA | X | 419 | 23.260 | 35.720 | 55.929 | 0.00 | 0.00 |
| ATOM | 6279 | H    | ALA | X | 419 | 24.078 | 35.972 | 56.464 | 0.00 | 0.00 |
| ATOM | 6280 | CA   | ALA | X | 419 | 23.430 | 35.448 | 54.482 | 0.00 | 0.00 |
| ATOM | 6281 | HA   | ALA | X | 419 | 22.711 | 35.982 | 53.861 | 0.00 | 0.00 |
| ATOM | 6282 | CB   | ALA | X | 419 | 24.820 | 35.926 | 53.999 | 0.00 | 0.00 |
| ATOM | 6283 | HB1  | ALA | X | 419 | 25.546 | 35.324 | 54.545 | 0.00 | 0.00 |
| ATOM | 6284 | HB2  | ALA | X | 419 | 24.970 | 36.994 | 54.156 | 0.00 | 0.00 |
| ATOM | 6285 | HB3  | ALA | X | 419 | 24.889 | 35.713 | 52.933 | 0.00 | 0.00 |
| ATOM | 6286 | C    | ALA | X | 419 | 23.199 | 33.878 | 54.250 | 0.00 | 0.00 |
| ATOM | 6287 | O    | ALA | X | 419 | 23.628 | 33.026 | 55.058 | 0.00 | 0.00 |
| ATOM | 6288 | N    | ARG | X | 420 | 22.710 | 33.559 | 53.020 | 0.00 | 0.00 |
| ATOM | 6289 | H    | ARG | X | 420 | 22.353 | 34.223 | 52.348 | 0.00 | 0.00 |
| ATOM | 6290 | CA   | ARG | X | 420 | 22.917 | 32.207 | 52.446 | 0.00 | 0.00 |
| ATOM | 6291 | HA   | ARG | X | 420 | 22.945 | 31.479 | 53.257 | 0.00 | 0.00 |
| ATOM | 6292 | CB   | ARG | X | 420 | 21.742 | 31.873 | 51.592 | 0.00 | 0.00 |
| ATOM | 6293 | HB2  | ARG | X | 420 | 20.833 | 32.111 | 52.146 | 0.00 | 0.00 |
| ATOM | 6294 | HB3  | ARG | X | 420 | 21.706 | 32.423 | 50.652 | 0.00 | 0.00 |
| ATOM | 6295 | CG   | ARG | X | 420 | 21.713 | 30.358 | 51.203 | 0.00 | 0.00 |
| ATOM | 6296 | HG2  | ARG | X | 420 | 20.917 | 30.294 | 50.461 | 0.00 | 0.00 |
| ATOM | 6297 | HG3  | ARG | X | 420 | 22.605 | 30.128 | 50.620 | 0.00 | 0.00 |
| ATOM | 6298 | CD   | ARG | X | 420 | 21.487 | 29.424 | 52.405 | 0.00 | 0.00 |
| ATOM | 6299 | HD2  | ARG | X | 420 | 22.322 | 29.126 | 53.039 | 0.00 | 0.00 |
| ATOM | 6300 | HD3  | ARG | X | 420 | 20.806 | 29.983 | 53.048 | 0.00 | 0.00 |
| ATOM | 6301 | NE   | ARG | X | 420 | 20.878 | 28.161 | 51.947 | 0.00 | 0.00 |
| ATOM | 6302 | HE   | ARG | X | 420 | 20.791 | 28.018 | 50.951 | 0.00 | 0.00 |

|      |      |      |     |   |     |        |        |        |      |      |
|------|------|------|-----|---|-----|--------|--------|--------|------|------|
| ATOM | 6303 | CZ   | ARG | X | 420 | 20.538 | 27.242 | 52.810 | 0.00 | 0.00 |
| ATOM | 6304 | NH1  | ARG | X | 420 | 20.484 | 27.373 | 54.150 | 0.00 | 0.00 |
| ATOM | 6305 | HH11 | ARG | X | 420 | 20.895 | 28.162 | 54.628 | 0.00 | 0.00 |
| ATOM | 6306 | HH12 | ARG | X | 420 | 20.123 | 26.596 | 54.684 | 0.00 | 0.00 |
| ATOM | 6307 | NH2  | ARG | X | 420 | 20.060 | 26.155 | 52.310 | 0.00 | 0.00 |
| ATOM | 6308 | HH21 | ARG | X | 420 | 20.128 | 26.041 | 51.308 | 0.00 | 0.00 |
| ATOM | 6309 | HH22 | ARG | X | 420 | 19.868 | 25.387 | 52.937 | 0.00 | 0.00 |
| ATOM | 6310 | C    | ARG | X | 420 | 24.230 | 32.108 | 51.681 | 0.00 | 0.00 |
| ATOM | 6311 | O    | ARG | X | 420 | 24.323 | 32.668 | 50.573 | 0.00 | 0.00 |
| ATOM | 6312 | N    | VAL | X | 421 | 25.334 | 31.492 | 52.121 | 0.00 | 0.00 |
| ATOM | 6313 | H    | VAL | X | 421 | 25.128 | 30.922 | 52.928 | 0.00 | 0.00 |
| ATOM | 6314 | CA   | VAL | X | 421 | 26.745 | 31.437 | 51.573 | 0.00 | 0.00 |
| ATOM | 6315 | HA   | VAL | X | 421 | 26.798 | 32.377 | 51.024 | 0.00 | 0.00 |
| ATOM | 6316 | CB   | VAL | X | 421 | 27.695 | 31.604 | 52.771 | 0.00 | 0.00 |
| ATOM | 6317 | HB   | VAL | X | 421 | 27.566 | 30.770 | 53.461 | 0.00 | 0.00 |
| ATOM | 6318 | CG1  | VAL | X | 421 | 29.193 | 31.686 | 52.296 | 0.00 | 0.00 |
| ATOM | 6319 | HG11 | VAL | X | 421 | 29.340 | 32.573 | 51.680 | 0.00 | 0.00 |
| ATOM | 6320 | HG12 | VAL | X | 421 | 29.891 | 31.818 | 53.123 | 0.00 | 0.00 |
| ATOM | 6321 | HG13 | VAL | X | 421 | 29.549 | 30.764 | 51.836 | 0.00 | 0.00 |
| ATOM | 6322 | CG2  | VAL | X | 421 | 27.360 | 32.896 | 53.680 | 0.00 | 0.00 |
| ATOM | 6323 | HG21 | VAL | X | 421 | 26.511 | 32.671 | 54.325 | 0.00 | 0.00 |
| ATOM | 6324 | HG22 | VAL | X | 421 | 27.079 | 33.729 | 53.035 | 0.00 | 0.00 |
| ATOM | 6325 | HG23 | VAL | X | 421 | 28.174 | 33.139 | 54.363 | 0.00 | 0.00 |
| ATOM | 6326 | C    | VAL | X | 421 | 26.952 | 30.114 | 50.749 | 0.00 | 0.00 |
| ATOM | 6327 | O    | VAL | X | 421 | 26.598 | 29.083 | 51.260 | 0.00 | 0.00 |
| ATOM | 6328 | N    | TYR | X | 422 | 27.604 | 30.205 | 49.564 | 0.00 | 0.00 |
| ATOM | 6329 | H    | TYR | X | 422 | 27.996 | 31.112 | 49.353 | 0.00 | 0.00 |
| ATOM | 6330 | CA   | TYR | X | 422 | 28.070 | 29.087 | 48.721 | 0.00 | 0.00 |
| ATOM | 6331 | HA   | TYR | X | 422 | 27.926 | 28.180 | 49.308 | 0.00 | 0.00 |
| ATOM | 6332 | CB   | TYR | X | 422 | 27.163 | 29.029 | 47.494 | 0.00 | 0.00 |
| ATOM | 6333 | HB2  | TYR | X | 422 | 27.204 | 29.969 | 46.945 | 0.00 | 0.00 |
| ATOM | 6334 | HB3  | TYR | X | 422 | 27.417 | 28.191 | 46.846 | 0.00 | 0.00 |
| ATOM | 6335 | CG   | TYR | X | 422 | 25.633 | 28.903 | 47.881 | 0.00 | 0.00 |
| ATOM | 6336 | CD1  | TYR | X | 422 | 25.134 | 27.583 | 48.083 | 0.00 | 0.00 |
| ATOM | 6337 | HD1  | TYR | X | 422 | 25.901 | 26.830 | 48.193 | 0.00 | 0.00 |
| ATOM | 6338 | CE1  | TYR | X | 422 | 23.806 | 27.332 | 48.349 | 0.00 | 0.00 |
| ATOM | 6339 | HE1  | TYR | X | 422 | 23.467 | 26.308 | 48.389 | 0.00 | 0.00 |
| ATOM | 6340 | CZ   | TYR | X | 422 | 22.913 | 28.416 | 48.320 | 0.00 | 0.00 |
| ATOM | 6341 | OH   | TYR | X | 422 | 21.601 | 28.189 | 48.546 | 0.00 | 0.00 |
| ATOM | 6342 | HH   | TYR | X | 422 | 21.471 | 27.278 | 48.820 | 0.00 | 0.00 |
| ATOM | 6343 | CE2  | TYR | X | 422 | 23.394 | 29.768 | 48.072 | 0.00 | 0.00 |
| ATOM | 6344 | HE2  | TYR | X | 422 | 22.646 | 30.536 | 48.198 | 0.00 | 0.00 |
| ATOM | 6345 | CD2  | TYR | X | 422 | 24.748 | 30.000 | 47.848 | 0.00 | 0.00 |
| ATOM | 6346 | HD2  | TYR | X | 422 | 25.079 | 30.983 | 47.546 | 0.00 | 0.00 |
| ATOM | 6347 | C    | TYR | X | 422 | 29.548 | 29.246 | 48.290 | 0.00 | 0.00 |
| ATOM | 6348 | O    | TYR | X | 422 | 30.063 | 30.271 | 47.769 | 0.00 | 0.00 |
| ATOM | 6349 | N    | ALA | X | 423 | 30.259 | 28.149 | 48.591 | 0.00 | 0.00 |
| ATOM | 6350 | H    | ALA | X | 423 | 29.960 | 27.400 | 49.199 | 0.00 | 0.00 |
| ATOM | 6351 | CA   | ALA | X | 423 | 31.723 | 28.127 | 48.545 | 0.00 | 0.00 |
| ATOM | 6352 | HA   | ALA | X | 423 | 32.123 | 29.108 | 48.289 | 0.00 | 0.00 |
| ATOM | 6353 | CB   | ALA | X | 423 | 32.132 | 27.900 | 50.038 | 0.00 | 0.00 |
| ATOM | 6354 | HB1  | ALA | X | 423 | 31.653 | 28.629 | 50.692 | 0.00 | 0.00 |
| ATOM | 6355 | HB2  | ALA | X | 423 | 33.220 | 27.943 | 50.090 | 0.00 | 0.00 |
| ATOM | 6356 | HB3  | ALA | X | 423 | 31.645 | 27.020 | 50.457 | 0.00 | 0.00 |
| ATOM | 6357 | C    | ALA | X | 423 | 32.387 | 27.103 | 47.619 | 0.00 | 0.00 |
| ATOM | 6358 | O    | ALA | X | 423 | 31.891 | 25.947 | 47.553 | 0.00 | 0.00 |
| ATOM | 6359 | N    | TYR | X | 424 | 33.450 | 27.433 | 46.926 | 0.00 | 0.00 |
| ATOM | 6360 | H    | TYR | X | 424 | 33.852 | 28.352 | 47.044 | 0.00 | 0.00 |
| ATOM | 6361 | CA   | TYR | X | 424 | 34.306 | 26.498 | 46.174 | 0.00 | 0.00 |
| ATOM | 6362 | HA   | TYR | X | 424 | 34.194 | 25.556 | 46.711 | 0.00 | 0.00 |
| ATOM | 6363 | CB   | TYR | X | 424 | 33.920 | 26.475 | 44.663 | 0.00 | 0.00 |
| ATOM | 6364 | HB2  | TYR | X | 424 | 34.186 | 25.494 | 44.268 | 0.00 | 0.00 |
| ATOM | 6365 | HB3  | TYR | X | 424 | 32.830 | 26.484 | 44.661 | 0.00 | 0.00 |
| ATOM | 6366 | CG   | TYR | X | 424 | 34.356 | 27.701 | 43.821 | 0.00 | 0.00 |
| ATOM | 6367 | CD1  | TYR | X | 424 | 35.575 | 27.679 | 43.048 | 0.00 | 0.00 |
| ATOM | 6368 | HD1  | TYR | X | 424 | 36.173 | 26.786 | 42.941 | 0.00 | 0.00 |
| ATOM | 6369 | CE1  | TYR | X | 424 | 35.880 | 28.856 | 42.396 | 0.00 | 0.00 |

|      |      |      |     |   |     |        |        |        |      |      |
|------|------|------|-----|---|-----|--------|--------|--------|------|------|
| ATOM | 6370 | HE1  | TYR | X | 424 | 36.815 | 28.904 | 41.858 | 0.00 | 0.00 |
| ATOM | 6371 | CZ   | TYR | X | 424 | 35.179 | 30.035 | 42.558 | 0.00 | 0.00 |
| ATOM | 6372 | OH   | TYR | X | 424 | 35.620 | 31.201 | 42.017 | 0.00 | 0.00 |
| ATOM | 6373 | HH   | TYR | X | 424 | 36.464 | 31.106 | 41.568 | 0.00 | 0.00 |
| ATOM | 6374 | CE2  | TYR | X | 424 | 33.958 | 30.052 | 43.264 | 0.00 | 0.00 |
| ATOM | 6375 | HE2  | TYR | X | 424 | 33.353 | 30.943 | 43.179 | 0.00 | 0.00 |
| ATOM | 6376 | CD2  | TYR | X | 424 | 33.529 | 28.862 | 43.867 | 0.00 | 0.00 |
| ATOM | 6377 | HD2  | TYR | X | 424 | 32.597 | 28.834 | 44.412 | 0.00 | 0.00 |
| ATOM | 6378 | C    | TYR | X | 424 | 35.842 | 26.730 | 46.287 | 0.00 | 0.00 |
| ATOM | 6379 | O    | TYR | X | 424 | 36.261 | 27.859 | 46.651 | 0.00 | 0.00 |
| ATOM | 6380 | N    | VAL | X | 425 | 36.566 | 25.699 | 45.838 | 0.00 | 0.00 |
| ATOM | 6381 | H    | VAL | X | 425 | 36.013 | 24.865 | 45.705 | 0.00 | 0.00 |
| ATOM | 6382 | CA   | VAL | X | 425 | 37.963 | 25.796 | 45.399 | 0.00 | 0.00 |
| ATOM | 6383 | HA   | VAL | X | 425 | 38.112 | 26.863 | 45.236 | 0.00 | 0.00 |
| ATOM | 6384 | CB   | VAL | X | 425 | 38.971 | 25.256 | 46.508 | 0.00 | 0.00 |
| ATOM | 6385 | HB   | VAL | X | 425 | 38.830 | 24.178 | 46.588 | 0.00 | 0.00 |
| ATOM | 6386 | CG1  | VAL | X | 425 | 40.353 | 25.607 | 46.037 | 0.00 | 0.00 |
| ATOM | 6387 | HG11 | VAL | X | 425 | 40.562 | 26.676 | 46.092 | 0.00 | 0.00 |
| ATOM | 6388 | HG12 | VAL | X | 425 | 41.015 | 25.135 | 46.763 | 0.00 | 0.00 |
| ATOM | 6389 | HG13 | VAL | X | 425 | 40.592 | 25.226 | 45.044 | 0.00 | 0.00 |
| ATOM | 6390 | CG2  | VAL | X | 425 | 38.737 | 25.917 | 47.894 | 0.00 | 0.00 |
| ATOM | 6391 | HG21 | VAL | X | 425 | 37.712 | 25.742 | 48.222 | 0.00 | 0.00 |
| ATOM | 6392 | HG22 | VAL | X | 425 | 38.734 | 27.003 | 47.801 | 0.00 | 0.00 |
| ATOM | 6393 | HG23 | VAL | X | 425 | 39.517 | 25.579 | 48.576 | 0.00 | 0.00 |
| ATOM | 6394 | C    | VAL | X | 425 | 38.149 | 24.949 | 44.102 | 0.00 | 0.00 |
| ATOM | 6395 | O    | VAL | X | 425 | 37.710 | 23.846 | 44.022 | 0.00 | 0.00 |
| ATOM | 6396 | N    | PHE | X | 426 | 38.646 | 25.591 | 43.070 | 0.00 | 0.00 |
| ATOM | 6397 | H    | PHE | X | 426 | 38.831 | 26.573 | 43.216 | 0.00 | 0.00 |
| ATOM | 6398 | CA   | PHE | X | 426 | 38.805 | 24.923 | 41.765 | 0.00 | 0.00 |
| ATOM | 6399 | HA   | PHE | X | 426 | 37.877 | 24.442 | 41.454 | 0.00 | 0.00 |
| ATOM | 6400 | CB   | PHE | X | 426 | 39.093 | 25.966 | 40.681 | 0.00 | 0.00 |
| ATOM | 6401 | HB2  | PHE | X | 426 | 38.641 | 26.937 | 40.884 | 0.00 | 0.00 |
| ATOM | 6402 | HB3  | PHE | X | 426 | 40.142 | 26.259 | 40.719 | 0.00 | 0.00 |
| ATOM | 6403 | CG   | PHE | X | 426 | 38.734 | 25.627 | 39.278 | 0.00 | 0.00 |
| ATOM | 6404 | CD1  | PHE | X | 426 | 37.378 | 25.748 | 39.023 | 0.00 | 0.00 |
| ATOM | 6405 | HD1  | PHE | X | 426 | 36.712 | 25.937 | 39.853 | 0.00 | 0.00 |
| ATOM | 6406 | CE1  | PHE | X | 426 | 36.900 | 25.665 | 37.746 | 0.00 | 0.00 |
| ATOM | 6407 | HE1  | PHE | X | 426 | 35.847 | 25.785 | 37.541 | 0.00 | 0.00 |
| ATOM | 6408 | CZ   | PHE | X | 426 | 37.842 | 25.603 | 36.636 | 0.00 | 0.00 |
| ATOM | 6409 | HZ   | PHE | X | 426 | 37.516 | 25.650 | 35.607 | 0.00 | 0.00 |
| ATOM | 6410 | CE2  | PHE | X | 426 | 39.181 | 25.502 | 36.850 | 0.00 | 0.00 |
| ATOM | 6411 | HE2  | PHE | X | 426 | 39.908 | 25.648 | 36.064 | 0.00 | 0.00 |
| ATOM | 6412 | CD2  | PHE | X | 426 | 39.612 | 25.500 | 38.219 | 0.00 | 0.00 |
| ATOM | 6413 | HD2  | PHE | X | 426 | 40.674 | 25.551 | 38.409 | 0.00 | 0.00 |
| ATOM | 6414 | C    | PHE | X | 426 | 39.876 | 23.809 | 41.709 | 0.00 | 0.00 |
| ATOM | 6415 | O    | PHE | X | 426 | 40.768 | 23.863 | 42.525 | 0.00 | 0.00 |
| ATOM | 6416 | N    | GLU | X | 427 | 39.895 | 23.028 | 40.687 | 0.00 | 0.00 |
| ATOM | 6417 | H    | GLU | X | 427 | 39.147 | 23.132 | 40.017 | 0.00 | 0.00 |
| ATOM | 6418 | CA   | GLU | X | 427 | 40.680 | 21.814 | 40.682 | 0.00 | 0.00 |
| ATOM | 6419 | HA   | GLU | X | 427 | 41.525 | 22.091 | 41.313 | 0.00 | 0.00 |
| ATOM | 6420 | CB   | GLU | X | 427 | 39.949 | 20.829 | 41.625 | 0.00 | 0.00 |
| ATOM | 6421 | HB2  | GLU | X | 427 | 39.684 | 21.373 | 42.531 | 0.00 | 0.00 |
| ATOM | 6422 | HB3  | GLU | X | 427 | 38.964 | 20.511 | 41.284 | 0.00 | 0.00 |
| ATOM | 6423 | CG   | GLU | X | 427 | 40.891 | 19.671 | 42.045 | 0.00 | 0.00 |
| ATOM | 6424 | HG2  | GLU | X | 427 | 40.649 | 18.867 | 41.350 | 0.00 | 0.00 |
| ATOM | 6425 | HG3  | GLU | X | 427 | 41.952 | 19.919 | 42.007 | 0.00 | 0.00 |
| ATOM | 6426 | CD   | GLU | X | 427 | 40.579 | 19.216 | 43.424 | 0.00 | 0.00 |
| ATOM | 6427 | OE1  | GLU | X | 427 | 41.291 | 19.643 | 44.344 | 0.00 | 0.00 |
| ATOM | 6428 | OE2  | GLU | X | 427 | 39.779 | 18.240 | 43.621 | 0.00 | 0.00 |
| ATOM | 6429 | C    | GLU | X | 427 | 41.088 | 21.358 | 39.348 | 0.00 | 0.00 |
| ATOM | 6430 | O    | GLU | X | 427 | 42.246 | 21.015 | 39.217 | 0.00 | 0.00 |
| ATOM | 6431 | N    | HIE | X | 428 | 40.236 | 21.430 | 38.351 | 0.00 | 0.00 |
| ATOM | 6432 | H    | HIE | X | 428 | 39.299 | 21.640 | 38.665 | 0.00 | 0.00 |
| ATOM | 6433 | CA   | HIE | X | 428 | 40.656 | 21.150 | 36.967 | 0.00 | 0.00 |
| ATOM | 6434 | HA   | HIE | X | 428 | 41.156 | 20.192 | 36.822 | 0.00 | 0.00 |
| ATOM | 6435 | CB   | HIE | X | 428 | 39.424 | 21.236 | 36.048 | 0.00 | 0.00 |
| ATOM | 6436 | HB2  | HIE | X | 428 | 38.701 | 20.556 | 36.498 | 0.00 | 0.00 |

|      |      |      |     |   |     |        |        |        |      |      |
|------|------|------|-----|---|-----|--------|--------|--------|------|------|
| ATOM | 6437 | HB3  | HIE | X | 428 | 39.035 | 22.245 | 35.913 | 0.00 | 0.00 |
| ATOM | 6438 | CG   | HIE | X | 428 | 39.735 | 20.860 | 34.603 | 0.00 | 0.00 |
| ATOM | 6439 | ND1  | HIE | X | 428 | 40.373 | 19.664 | 34.239 | 0.00 | 0.00 |
| ATOM | 6440 | CE1  | HIE | X | 428 | 40.676 | 19.845 | 32.949 | 0.00 | 0.00 |
| ATOM | 6441 | HE1  | HIE | X | 428 | 41.336 | 19.218 | 32.367 | 0.00 | 0.00 |
| ATOM | 6442 | NE2  | HIE | X | 428 | 40.468 | 21.116 | 32.566 | 0.00 | 0.00 |
| ATOM | 6443 | HE2  | HIE | X | 428 | 40.792 | 21.461 | 31.675 | 0.00 | 0.00 |
| ATOM | 6444 | CD2  | HIE | X | 428 | 39.920 | 21.777 | 33.604 | 0.00 | 0.00 |
| ATOM | 6445 | HD2  | HIE | X | 428 | 39.660 | 22.825 | 33.616 | 0.00 | 0.00 |
| ATOM | 6446 | C    | HIE | X | 428 | 41.825 | 22.119 | 36.512 | 0.00 | 0.00 |
| ATOM | 6447 | O    | HIE | X | 428 | 41.726 | 23.296 | 36.710 | 0.00 | 0.00 |
| ATOM | 6448 | N    | ARG | X | 429 | 42.856 | 21.651 | 35.754 | 0.00 | 0.00 |
| ATOM | 6449 | H    | ARG | X | 429 | 42.805 | 20.696 | 35.428 | 0.00 | 0.00 |
| ATOM | 6450 | CA   | ARG | X | 429 | 43.768 | 22.507 | 35.014 | 0.00 | 0.00 |
| ATOM | 6451 | HA   | ARG | X | 429 | 43.731 | 23.533 | 35.380 | 0.00 | 0.00 |
| ATOM | 6452 | CB   | ARG | X | 429 | 45.210 | 22.129 | 35.388 | 0.00 | 0.00 |
| ATOM | 6453 | HB2  | ARG | X | 429 | 45.411 | 22.386 | 36.428 | 0.00 | 0.00 |
| ATOM | 6454 | HB3  | ARG | X | 429 | 45.378 | 21.082 | 35.135 | 0.00 | 0.00 |
| ATOM | 6455 | CG   | ARG | X | 429 | 46.266 | 22.873 | 34.538 | 0.00 | 0.00 |
| ATOM | 6456 | HG2  | ARG | X | 429 | 46.294 | 22.350 | 33.583 | 0.00 | 0.00 |
| ATOM | 6457 | HG3  | ARG | X | 429 | 45.964 | 23.916 | 34.440 | 0.00 | 0.00 |
| ATOM | 6458 | CD   | ARG | X | 429 | 47.642 | 22.808 | 35.182 | 0.00 | 0.00 |
| ATOM | 6459 | HD2  | ARG | X | 429 | 47.522 | 23.042 | 36.239 | 0.00 | 0.00 |
| ATOM | 6460 | HD3  | ARG | X | 429 | 48.027 | 21.791 | 35.106 | 0.00 | 0.00 |
| ATOM | 6461 | NE   | ARG | X | 429 | 48.522 | 23.856 | 34.724 | 0.00 | 0.00 |
| ATOM | 6462 | HE   | ARG | X | 429 | 48.571 | 24.649 | 35.348 | 0.00 | 0.00 |
| ATOM | 6463 | CZ   | ARG | X | 429 | 49.092 | 23.876 | 33.572 | 0.00 | 0.00 |
| ATOM | 6464 | NH1  | ARG | X | 429 | 48.929 | 22.886 | 32.748 | 0.00 | 0.00 |
| ATOM | 6465 | HH11 | ARG | X | 429 | 48.484 | 22.019 | 33.013 | 0.00 | 0.00 |
| ATOM | 6466 | HH12 | ARG | X | 429 | 49.166 | 22.956 | 31.769 | 0.00 | 0.00 |
| ATOM | 6467 | NH2  | ARG | X | 429 | 49.690 | 24.929 | 33.189 | 0.00 | 0.00 |
| ATOM | 6468 | HH21 | ARG | X | 429 | 49.781 | 25.749 | 33.770 | 0.00 | 0.00 |
| ATOM | 6469 | HH22 | ARG | X | 429 | 50.173 | 25.028 | 32.307 | 0.00 | 0.00 |
| ATOM | 6470 | C    | ARG | X | 429 | 43.556 | 22.406 | 33.491 | 0.00 | 0.00 |
| ATOM | 6471 | O    | ARG | X | 429 | 43.541 | 21.267 | 33.034 | 0.00 | 0.00 |
| ATOM | 6472 | N    | ALA | X | 430 | 43.340 | 23.549 | 32.852 | 0.00 | 0.00 |
| ATOM | 6473 | H    | ALA | X | 430 | 43.228 | 24.426 | 33.341 | 0.00 | 0.00 |
| ATOM | 6474 | CA   | ALA | X | 430 | 43.016 | 23.558 | 31.431 | 0.00 | 0.00 |
| ATOM | 6475 | HA   | ALA | X | 430 | 42.155 | 22.896 | 31.344 | 0.00 | 0.00 |
| ATOM | 6476 | CB   | ALA | X | 430 | 42.467 | 24.969 | 31.065 | 0.00 | 0.00 |
| ATOM | 6477 | HB1  | ALA | X | 430 | 41.532 | 25.119 | 31.604 | 0.00 | 0.00 |
| ATOM | 6478 | HB2  | ALA | X | 430 | 42.102 | 24.943 | 30.038 | 0.00 | 0.00 |
| ATOM | 6479 | HB3  | ALA | X | 430 | 43.168 | 25.770 | 31.297 | 0.00 | 0.00 |
| ATOM | 6480 | C    | ALA | X | 430 | 44.112 | 23.111 | 30.444 | 0.00 | 0.00 |
| ATOM | 6481 | O    | ALA | X | 430 | 45.346 | 23.205 | 30.719 | 0.00 | 0.00 |
| ATOM | 6482 | N    | SER | X | 431 | 43.684 | 22.521 | 29.335 | 0.00 | 0.00 |
| ATOM | 6483 | H    | SER | X | 431 | 42.722 | 22.214 | 29.348 | 0.00 | 0.00 |
| ATOM | 6484 | CA   | SER | X | 431 | 44.494 | 22.206 | 28.162 | 0.00 | 0.00 |
| ATOM | 6485 | HA   | SER | X | 431 | 45.420 | 21.722 | 28.476 | 0.00 | 0.00 |
| ATOM | 6486 | CB   | SER | X | 431 | 43.762 | 21.334 | 27.140 | 0.00 | 0.00 |
| ATOM | 6487 | HB2  | SER | X | 431 | 44.459 | 21.014 | 26.366 | 0.00 | 0.00 |
| ATOM | 6488 | HB3  | SER | X | 431 | 43.291 | 20.495 | 27.652 | 0.00 | 0.00 |
| ATOM | 6489 | OG   | SER | X | 431 | 42.678 | 22.009 | 26.528 | 0.00 | 0.00 |
| ATOM | 6490 | HG   | SER | X | 431 | 41.838 | 21.863 | 26.968 | 0.00 | 0.00 |
| ATOM | 6491 | C    | SER | X | 431 | 45.112 | 23.357 | 27.368 | 0.00 | 0.00 |
| ATOM | 6492 | O    | SER | X | 431 | 45.836 | 23.170 | 26.401 | 0.00 | 0.00 |
| ATOM | 6493 | N    | THR | X | 432 | 44.909 | 24.628 | 27.726 | 0.00 | 0.00 |
| ATOM | 6494 | H    | THR | X | 432 | 44.251 | 24.807 | 28.471 | 0.00 | 0.00 |
| ATOM | 6495 | CA   | THR | X | 432 | 45.780 | 25.772 | 27.357 | 0.00 | 0.00 |
| ATOM | 6496 | HA   | THR | X | 432 | 46.771 | 25.347 | 27.198 | 0.00 | 0.00 |
| ATOM | 6497 | CB   | THR | X | 432 | 45.276 | 26.446 | 26.071 | 0.00 | 0.00 |
| ATOM | 6498 | HB   | THR | X | 432 | 44.263 | 26.829 | 26.198 | 0.00 | 0.00 |
| ATOM | 6499 | CG2  | THR | X | 432 | 46.173 | 27.615 | 25.521 | 0.00 | 0.00 |
| ATOM | 6500 | HG21 | THR | X | 432 | 46.108 | 28.545 | 26.087 | 0.00 | 0.00 |
| ATOM | 6501 | HG22 | THR | X | 432 | 45.743 | 27.971 | 24.585 | 0.00 | 0.00 |
| ATOM | 6502 | HG23 | THR | X | 432 | 47.206 | 27.273 | 25.456 | 0.00 | 0.00 |
| ATOM | 6503 | OG1  | THR | X | 432 | 45.152 | 25.487 | 25.042 | 0.00 | 0.00 |

|      |      |      |     |   |     |        |        |        |      |      |
|------|------|------|-----|---|-----|--------|--------|--------|------|------|
| ATOM | 6504 | HG1  | THR | X | 432 | 45.072 | 24.650 | 25.505 | 0.00 | 0.00 |
| ATOM | 6505 | C    | THR | X | 432 | 45.875 | 26.759 | 28.492 | 0.00 | 0.00 |
| ATOM | 6506 | O    | THR | X | 432 | 44.857 | 27.337 | 28.872 | 0.00 | 0.00 |
| ATOM | 6507 | N    | LEU | X | 433 | 47.129 | 27.007 | 28.962 | 0.00 | 0.00 |
| ATOM | 6508 | H    | LEU | X | 433 | 47.956 | 26.527 | 28.636 | 0.00 | 0.00 |
| ATOM | 6509 | CA   | LEU | X | 433 | 47.562 | 28.113 | 29.888 | 0.00 | 0.00 |
| ATOM | 6510 | HA   | LEU | X | 433 | 46.908 | 28.975 | 30.021 | 0.00 | 0.00 |
| ATOM | 6511 | CB   | LEU | X | 433 | 47.489 | 27.513 | 31.334 | 0.00 | 0.00 |
| ATOM | 6512 | HB2  | LEU | X | 433 | 46.653 | 26.816 | 31.385 | 0.00 | 0.00 |
| ATOM | 6513 | HB3  | LEU | X | 433 | 48.457 | 27.051 | 31.532 | 0.00 | 0.00 |
| ATOM | 6514 | CG   | LEU | X | 433 | 47.092 | 28.469 | 32.484 | 0.00 | 0.00 |
| ATOM | 6515 | HG   | LEU | X | 433 | 47.825 | 29.275 | 32.539 | 0.00 | 0.00 |
| ATOM | 6516 | CD1  | LEU | X | 433 | 45.649 | 28.891 | 32.271 | 0.00 | 0.00 |
| ATOM | 6517 | HD11 | LEU | X | 433 | 45.571 | 29.773 | 31.635 | 0.00 | 0.00 |
| ATOM | 6518 | HD12 | LEU | X | 433 | 45.107 | 29.188 | 33.169 | 0.00 | 0.00 |
| ATOM | 6519 | HD13 | LEU | X | 433 | 45.077 | 28.019 | 31.955 | 0.00 | 0.00 |
| ATOM | 6520 | CD2  | LEU | X | 433 | 47.212 | 27.817 | 33.805 | 0.00 | 0.00 |
| ATOM | 6521 | HD21 | LEU | X | 433 | 48.226 | 27.423 | 33.878 | 0.00 | 0.00 |
| ATOM | 6522 | HD22 | LEU | X | 433 | 47.136 | 28.547 | 34.611 | 0.00 | 0.00 |
| ATOM | 6523 | HD23 | LEU | X | 433 | 46.526 | 26.977 | 33.917 | 0.00 | 0.00 |
| ATOM | 6524 | C    | LEU | X | 433 | 48.986 | 28.659 | 29.523 | 0.00 | 0.00 |
| ATOM | 6525 | O    | LEU | X | 433 | 49.925 | 27.904 | 29.330 | 0.00 | 0.00 |
| ATOM | 6526 | N    | SER | X | 434 | 49.126 | 29.950 | 29.435 | 0.00 | 0.00 |
| ATOM | 6527 | H    | SER | X | 434 | 48.270 | 30.460 | 29.600 | 0.00 | 0.00 |
| ATOM | 6528 | CA   | SER | X | 434 | 50.460 | 30.563 | 29.205 | 0.00 | 0.00 |
| ATOM | 6529 | HA   | SER | X | 434 | 50.824 | 30.138 | 28.270 | 0.00 | 0.00 |
| ATOM | 6530 | CB   | SER | X | 434 | 50.305 | 32.068 | 28.952 | 0.00 | 0.00 |
| ATOM | 6531 | HB2  | SER | X | 434 | 49.993 | 32.534 | 29.887 | 0.00 | 0.00 |
| ATOM | 6532 | HB3  | SER | X | 434 | 51.271 | 32.505 | 28.701 | 0.00 | 0.00 |
| ATOM | 6533 | OG   | SER | X | 434 | 49.320 | 32.322 | 27.902 | 0.00 | 0.00 |
| ATOM | 6534 | HG   | SER | X | 434 | 49.588 | 31.768 | 27.164 | 0.00 | 0.00 |
| ATOM | 6535 | C    | SER | X | 434 | 51.514 | 30.163 | 30.271 | 0.00 | 0.00 |
| ATOM | 6536 | O    | SER | X | 434 | 52.740 | 30.230 | 30.007 | 0.00 | 0.00 |
| ATOM | 6537 | N    | TRP | X | 435 | 51.094 | 29.815 | 31.496 | 0.00 | 0.00 |
| ATOM | 6538 | H    | TRP | X | 435 | 50.138 | 29.548 | 31.683 | 0.00 | 0.00 |
| ATOM | 6539 | CA   | TRP | X | 435 | 52.017 | 29.586 | 32.650 | 0.00 | 0.00 |
| ATOM | 6540 | HA   | TRP | X | 435 | 53.003 | 30.028 | 32.509 | 0.00 | 0.00 |
| ATOM | 6541 | CB   | TRP | X | 435 | 51.354 | 30.126 | 33.911 | 0.00 | 0.00 |
| ATOM | 6542 | HB2  | TRP | X | 435 | 50.547 | 29.436 | 34.160 | 0.00 | 0.00 |
| ATOM | 6543 | HB3  | TRP | X | 435 | 52.125 | 30.165 | 34.680 | 0.00 | 0.00 |
| ATOM | 6544 | CG   | TRP | X | 435 | 50.842 | 31.522 | 33.800 | 0.00 | 0.00 |
| ATOM | 6545 | CD1  | TRP | X | 435 | 49.564 | 31.768 | 33.393 | 0.00 | 0.00 |
| ATOM | 6546 | HD1  | TRP | X | 435 | 48.870 | 31.020 | 33.037 | 0.00 | 0.00 |
| ATOM | 6547 | NE1  | TRP | X | 435 | 49.330 | 33.107 | 33.353 | 0.00 | 0.00 |
| ATOM | 6548 | HE1  | TRP | X | 435 | 48.377 | 33.423 | 33.238 | 0.00 | 0.00 |
| ATOM | 6549 | CE2  | TRP | X | 435 | 50.418 | 33.875 | 33.722 | 0.00 | 0.00 |
| ATOM | 6550 | CZ2  | TRP | X | 435 | 50.576 | 35.220 | 34.006 | 0.00 | 0.00 |
| ATOM | 6551 | HZ2  | TRP | X | 435 | 49.787 | 35.922 | 33.782 | 0.00 | 0.00 |
| ATOM | 6552 | CH2  | TRP | X | 435 | 51.827 | 35.672 | 34.467 | 0.00 | 0.00 |
| ATOM | 6553 | HH2  | TRP | X | 435 | 52.038 | 36.729 | 34.533 | 0.00 | 0.00 |
| ATOM | 6554 | CZ3  | TRP | X | 435 | 52.881 | 34.806 | 34.660 | 0.00 | 0.00 |
| ATOM | 6555 | HZ3  | TRP | X | 435 | 53.829 | 35.125 | 35.068 | 0.00 | 0.00 |
| ATOM | 6556 | CE3  | TRP | X | 435 | 52.619 | 33.455 | 34.524 | 0.00 | 0.00 |
| ATOM | 6557 | HE3  | TRP | X | 435 | 53.379 | 32.723 | 34.752 | 0.00 | 0.00 |
| ATOM | 6558 | CD2  | TRP | X | 435 | 51.424 | 32.886 | 34.058 | 0.00 | 0.00 |
| ATOM | 6559 | C    | TRP | X | 435 | 52.233 | 28.064 | 32.861 | 0.00 | 0.00 |
| ATOM | 6560 | O    | TRP | X | 435 | 51.210 | 27.332 | 32.767 | 0.00 | 0.00 |
| ATOM | 6561 | N    | PRO | X | 436 | 53.423 | 27.644 | 33.365 | 0.00 | 0.00 |
| ATOM | 6562 | CD   | PRO | X | 436 | 54.500 | 28.445 | 33.970 | 0.00 | 0.00 |
| ATOM | 6563 | HD2  | PRO | X | 436 | 54.027 | 29.180 | 34.622 | 0.00 | 0.00 |
| ATOM | 6564 | HD3  | PRO | X | 436 | 55.035 | 28.883 | 33.128 | 0.00 | 0.00 |
| ATOM | 6565 | CG   | PRO | X | 436 | 55.417 | 27.479 | 34.675 | 0.00 | 0.00 |
| ATOM | 6566 | HG2  | PRO | X | 436 | 55.037 | 27.176 | 35.651 | 0.00 | 0.00 |
| ATOM | 6567 | HG3  | PRO | X | 436 | 56.427 | 27.882 | 34.745 | 0.00 | 0.00 |
| ATOM | 6568 | CB   | PRO | X | 436 | 55.264 | 26.247 | 33.728 | 0.00 | 0.00 |
| ATOM | 6569 | HB2  | PRO | X | 436 | 55.610 | 25.299 | 34.140 | 0.00 | 0.00 |
| ATOM | 6570 | HB3  | PRO | X | 436 | 55.865 | 26.428 | 32.836 | 0.00 | 0.00 |

|      |      |      |     |   |     |        |        |        |      |      |
|------|------|------|-----|---|-----|--------|--------|--------|------|------|
| ATOM | 6571 | CA   | PRO | X | 436 | 53.795 | 26.215 | 33.399 | 0.00 | 0.00 |
| ATOM | 6572 | HA   | PRO | X | 436 | 53.602 | 25.710 | 32.453 | 0.00 | 0.00 |
| ATOM | 6573 | C    | PRO | X | 436 | 53.064 | 25.398 | 34.534 | 0.00 | 0.00 |
| ATOM | 6574 | O    | PRO | X | 436 | 52.690 | 26.007 | 35.551 | 0.00 | 0.00 |
| ATOM | 6575 | N    | LEU | X | 437 | 52.883 | 24.101 | 34.273 | 0.00 | 0.00 |
| ATOM | 6576 | H    | LEU | X | 437 | 53.360 | 23.865 | 33.415 | 0.00 | 0.00 |
| ATOM | 6577 | CA   | LEU | X | 437 | 52.131 | 23.172 | 35.139 | 0.00 | 0.00 |
| ATOM | 6578 | HA   | LEU | X | 437 | 51.078 | 23.336 | 34.910 | 0.00 | 0.00 |
| ATOM | 6579 | CB   | LEU | X | 437 | 52.427 | 21.778 | 34.514 | 0.00 | 0.00 |
| ATOM | 6580 | HB2  | LEU | X | 437 | 52.223 | 21.735 | 33.444 | 0.00 | 0.00 |
| ATOM | 6581 | HB3  | LEU | X | 437 | 53.504 | 21.631 | 34.437 | 0.00 | 0.00 |
| ATOM | 6582 | CG   | LEU | X | 437 | 51.949 | 20.619 | 35.343 | 0.00 | 0.00 |
| ATOM | 6583 | HG   | LEU | X | 437 | 52.408 | 20.658 | 36.331 | 0.00 | 0.00 |
| ATOM | 6584 | CD1  | LEU | X | 437 | 50.436 | 20.641 | 35.600 | 0.00 | 0.00 |
| ATOM | 6585 | HD11 | LEU | X | 437 | 50.232 | 21.585 | 36.105 | 0.00 | 0.00 |
| ATOM | 6586 | HD12 | LEU | X | 437 | 50.233 | 19.818 | 36.285 | 0.00 | 0.00 |
| ATOM | 6587 | HD13 | LEU | X | 437 | 49.828 | 20.492 | 34.708 | 0.00 | 0.00 |
| ATOM | 6588 | CD2  | LEU | X | 437 | 52.192 | 19.241 | 34.632 | 0.00 | 0.00 |
| ATOM | 6589 | HD21 | LEU | X | 437 | 53.267 | 19.067 | 34.579 | 0.00 | 0.00 |
| ATOM | 6590 | HD22 | LEU | X | 437 | 51.874 | 18.424 | 35.280 | 0.00 | 0.00 |
| ATOM | 6591 | HD23 | LEU | X | 437 | 51.798 | 18.986 | 33.648 | 0.00 | 0.00 |
| ATOM | 6592 | C    | LEU | X | 437 | 52.466 | 23.290 | 36.630 | 0.00 | 0.00 |
| ATOM | 6593 | O    | LEU | X | 437 | 51.530 | 23.345 | 37.430 | 0.00 | 0.00 |
| ATOM | 6594 | N    | TRP | X | 438 | 53.723 | 23.571 | 36.956 | 0.00 | 0.00 |
| ATOM | 6595 | H    | TRP | X | 438 | 54.397 | 23.544 | 36.205 | 0.00 | 0.00 |
| ATOM | 6596 | CA   | TRP | X | 438 | 54.105 | 23.734 | 38.429 | 0.00 | 0.00 |
| ATOM | 6597 | HA   | TRP | X | 438 | 53.519 | 22.924 | 38.864 | 0.00 | 0.00 |
| ATOM | 6598 | CB   | TRP | X | 438 | 55.657 | 23.646 | 38.637 | 0.00 | 0.00 |
| ATOM | 6599 | HB2  | TRP | X | 438 | 55.880 | 23.536 | 39.698 | 0.00 | 0.00 |
| ATOM | 6600 | HB3  | TRP | X | 438 | 56.056 | 22.766 | 38.133 | 0.00 | 0.00 |
| ATOM | 6601 | CG   | TRP | X | 438 | 56.407 | 24.834 | 38.075 | 0.00 | 0.00 |
| ATOM | 6602 | CD1  | TRP | X | 438 | 56.983 | 24.858 | 36.856 | 0.00 | 0.00 |
| ATOM | 6603 | HD1  | TRP | X | 438 | 56.849 | 24.105 | 36.093 | 0.00 | 0.00 |
| ATOM | 6604 | NE1  | TRP | X | 438 | 57.529 | 26.101 | 36.578 | 0.00 | 0.00 |
| ATOM | 6605 | HE1  | TRP | X | 438 | 58.019 | 26.339 | 35.727 | 0.00 | 0.00 |
| ATOM | 6606 | CE2  | TRP | X | 438 | 57.290 | 26.974 | 37.620 | 0.00 | 0.00 |
| ATOM | 6607 | CZ2  | TRP | X | 438 | 57.650 | 28.299 | 37.865 | 0.00 | 0.00 |
| ATOM | 6608 | HZ2  | TRP | X | 438 | 57.939 | 28.946 | 37.050 | 0.00 | 0.00 |
| ATOM | 6609 | CH2  | TRP | X | 438 | 57.416 | 28.896 | 39.076 | 0.00 | 0.00 |
| ATOM | 6610 | HH2  | TRP | X | 438 | 57.654 | 29.946 | 39.161 | 0.00 | 0.00 |
| ATOM | 6611 | CZ3  | TRP | X | 438 | 56.684 | 28.180 | 40.030 | 0.00 | 0.00 |
| ATOM | 6612 | HZ3  | TRP | X | 438 | 56.598 | 28.688 | 40.979 | 0.00 | 0.00 |
| ATOM | 6613 | CE3  | TRP | X | 438 | 56.298 | 26.839 | 39.851 | 0.00 | 0.00 |
| ATOM | 6614 | HE3  | TRP | X | 438 | 55.698 | 26.225 | 40.506 | 0.00 | 0.00 |
| ATOM | 6615 | CD2  | TRP | X | 438 | 56.656 | 26.166 | 38.645 | 0.00 | 0.00 |
| ATOM | 6616 | C    | TRP | X | 438 | 53.611 | 25.023 | 39.112 | 0.00 | 0.00 |
| ATOM | 6617 | O    | TRP | X | 438 | 53.574 | 25.044 | 40.356 | 0.00 | 0.00 |
| ATOM | 6618 | N    | MET | X | 439 | 53.218 | 26.072 | 38.394 | 0.00 | 0.00 |
| ATOM | 6619 | H    | MET | X | 439 | 53.378 | 26.061 | 37.397 | 0.00 | 0.00 |
| ATOM | 6620 | CA   | MET | X | 439 | 52.322 | 27.190 | 38.861 | 0.00 | 0.00 |
| ATOM | 6621 | HA   | MET | X | 439 | 52.788 | 27.411 | 39.821 | 0.00 | 0.00 |
| ATOM | 6622 | CB   | MET | X | 439 | 52.448 | 28.434 | 37.939 | 0.00 | 0.00 |
| ATOM | 6623 | HB2  | MET | X | 439 | 52.107 | 28.095 | 36.960 | 0.00 | 0.00 |
| ATOM | 6624 | HB3  | MET | X | 439 | 51.791 | 29.241 | 38.261 | 0.00 | 0.00 |
| ATOM | 6625 | CG   | MET | X | 439 | 53.797 | 29.061 | 37.781 | 0.00 | 0.00 |
| ATOM | 6626 | HG2  | MET | X | 439 | 54.125 | 29.306 | 38.791 | 0.00 | 0.00 |
| ATOM | 6627 | HG3  | MET | X | 439 | 54.546 | 28.393 | 37.357 | 0.00 | 0.00 |
| ATOM | 6628 | SD   | MET | X | 439 | 53.868 | 30.507 | 36.700 | 0.00 | 0.00 |
| ATOM | 6629 | CE   | MET | X | 439 | 52.762 | 31.707 | 37.629 | 0.00 | 0.00 |
| ATOM | 6630 | HE1  | MET | X | 439 | 51.697 | 31.475 | 37.605 | 0.00 | 0.00 |
| ATOM | 6631 | HE2  | MET | X | 439 | 53.111 | 31.671 | 38.662 | 0.00 | 0.00 |
| ATOM | 6632 | HE3  | MET | X | 439 | 52.828 | 32.725 | 37.247 | 0.00 | 0.00 |
| ATOM | 6633 | C    | MET | X | 439 | 50.882 | 26.914 | 39.179 | 0.00 | 0.00 |
| ATOM | 6634 | O    | MET | X | 439 | 50.271 | 27.679 | 39.940 | 0.00 | 0.00 |
| ATOM | 6635 | N    | GLY | X | 440 | 50.356 | 25.776 | 38.581 | 0.00 | 0.00 |
| ATOM | 6636 | H    | GLY | X | 440 | 50.901 | 25.283 | 37.888 | 0.00 | 0.00 |
| ATOM | 6637 | CA   | GLY | X | 440 | 49.159 | 24.986 | 38.844 | 0.00 | 0.00 |



|      |      |      |     |   |     |        |        |        |      |      |
|------|------|------|-----|---|-----|--------|--------|--------|------|------|
| ATOM | 6638 | HA2  | GLY | X | 440 | 49.234 | 23.956 | 38.496 | 0.00 | 0.00 |
| ATOM | 6639 | HA3  | GLY | X | 440 | 49.080 | 24.996 | 39.931 | 0.00 | 0.00 |
| ATOM | 6640 | C    | GLY | X | 440 | 47.952 | 25.585 | 38.185 | 0.00 | 0.00 |
| ATOM | 6641 | O    | GLY | X | 440 | 47.715 | 25.438 | 36.976 | 0.00 | 0.00 |
| ATOM | 6642 | N    | VAL | X | 441 | 47.123 | 26.341 | 38.949 | 0.00 | 0.00 |
| ATOM | 6643 | H    | VAL | X | 441 | 47.211 | 26.349 | 39.955 | 0.00 | 0.00 |
| ATOM | 6644 | CA   | VAL | X | 441 | 45.888 | 26.982 | 38.503 | 0.00 | 0.00 |
| ATOM | 6645 | HA   | VAL | X | 441 | 45.848 | 27.238 | 37.445 | 0.00 | 0.00 |
| ATOM | 6646 | CB   | VAL | X | 441 | 44.550 | 26.153 | 38.780 | 0.00 | 0.00 |
| ATOM | 6647 | HB   | VAL | X | 441 | 44.301 | 26.072 | 39.838 | 0.00 | 0.00 |
| ATOM | 6648 | CG1  | VAL | X | 441 | 43.339 | 26.972 | 38.153 | 0.00 | 0.00 |
| ATOM | 6649 | HG11 | VAL | X | 441 | 42.437 | 26.378 | 38.304 | 0.00 | 0.00 |
| ATOM | 6650 | HG12 | VAL | X | 441 | 43.256 | 27.988 | 38.537 | 0.00 | 0.00 |
| ATOM | 6651 | HG13 | VAL | X | 441 | 43.603 | 26.949 | 37.095 | 0.00 | 0.00 |
| ATOM | 6652 | CG2  | VAL | X | 441 | 44.538 | 24.660 | 38.312 | 0.00 | 0.00 |
| ATOM | 6653 | HG21 | VAL | X | 441 | 45.268 | 24.185 | 38.968 | 0.00 | 0.00 |
| ATOM | 6654 | HG22 | VAL | X | 441 | 44.802 | 24.674 | 37.255 | 0.00 | 0.00 |
| ATOM | 6655 | HG23 | VAL | X | 441 | 43.563 | 24.195 | 38.454 | 0.00 | 0.00 |
| ATOM | 6656 | C    | VAL | X | 441 | 45.770 | 28.332 | 39.230 | 0.00 | 0.00 |
| ATOM | 6657 | O    | VAL | X | 441 | 45.170 | 28.469 | 40.329 | 0.00 | 0.00 |
| ATOM | 6658 | N    | PRO | X | 442 | 46.452 | 29.297 | 38.637 | 0.00 | 0.00 |
| ATOM | 6659 | CD   | PRO | X | 442 | 47.105 | 29.311 | 37.324 | 0.00 | 0.00 |
| ATOM | 6660 | HD2  | PRO | X | 442 | 46.429 | 29.191 | 36.477 | 0.00 | 0.00 |
| ATOM | 6661 | HD3  | PRO | X | 442 | 47.884 | 28.550 | 37.373 | 0.00 | 0.00 |
| ATOM | 6662 | CG   | PRO | X | 442 | 47.793 | 30.594 | 37.125 | 0.00 | 0.00 |
| ATOM | 6663 | HG2  | PRO | X | 442 | 47.343 | 31.343 | 36.474 | 0.00 | 0.00 |
| ATOM | 6664 | HG3  | PRO | X | 442 | 48.782 | 30.244 | 36.830 | 0.00 | 0.00 |
| ATOM | 6665 | CB   | PRO | X | 442 | 47.938 | 31.168 | 38.558 | 0.00 | 0.00 |
| ATOM | 6666 | HB2  | PRO | X | 442 | 47.953 | 32.257 | 38.619 | 0.00 | 0.00 |
| ATOM | 6667 | HB3  | PRO | X | 442 | 48.899 | 30.855 | 38.967 | 0.00 | 0.00 |
| ATOM | 6668 | CA   | PRO | X | 442 | 46.753 | 30.593 | 39.346 | 0.00 | 0.00 |
| ATOM | 6669 | HA   | PRO | X | 442 | 47.115 | 30.431 | 40.361 | 0.00 | 0.00 |
| ATOM | 6670 | C    | PRO | X | 442 | 45.584 | 31.564 | 39.462 | 0.00 | 0.00 |
| ATOM | 6671 | O    | PRO | X | 442 | 44.592 | 31.554 | 38.737 | 0.00 | 0.00 |
| ATOM | 6672 | N    | HIP | X | 443 | 45.719 | 32.436 | 40.499 | 0.00 | 0.00 |
| ATOM | 6673 | H    | HIP | X | 443 | 46.495 | 32.223 | 41.109 | 0.00 | 0.00 |
| ATOM | 6674 | CA   | HIP | X | 443 | 44.811 | 33.513 | 40.901 | 0.00 | 0.00 |
| ATOM | 6675 | HA   | HIP | X | 443 | 44.119 | 33.216 | 41.688 | 0.00 | 0.00 |
| ATOM | 6676 | CB   | HIP | X | 443 | 45.755 | 34.645 | 41.407 | 0.00 | 0.00 |
| ATOM | 6677 | HB2  | HIP | X | 443 | 46.430 | 34.262 | 42.173 | 0.00 | 0.00 |
| ATOM | 6678 | HB3  | HIP | X | 443 | 46.339 | 34.889 | 40.519 | 0.00 | 0.00 |
| ATOM | 6679 | CG   | HIP | X | 443 | 45.219 | 35.853 | 41.961 | 0.00 | 0.00 |
| ATOM | 6680 | ND1  | HIP | X | 443 | 44.261 | 36.038 | 43.011 | 0.00 | 0.00 |
| ATOM | 6681 | HD1  | HIP | X | 443 | 44.140 | 35.384 | 43.771 | 0.00 | 0.00 |
| ATOM | 6682 | CE1  | HIP | X | 443 | 43.882 | 37.318 | 42.936 | 0.00 | 0.00 |
| ATOM | 6683 | HE1  | HIP | X | 443 | 43.233 | 37.819 | 43.638 | 0.00 | 0.00 |
| ATOM | 6684 | NE2  | HIP | X | 443 | 44.541 | 37.955 | 41.946 | 0.00 | 0.00 |
| ATOM | 6685 | HE2  | HIP | X | 443 | 44.539 | 38.955 | 41.804 | 0.00 | 0.00 |
| ATOM | 6686 | CD2  | HIP | X | 443 | 45.374 | 37.010 | 41.320 | 0.00 | 0.00 |
| ATOM | 6687 | HD2  | HIP | X | 443 | 46.046 | 37.130 | 40.482 | 0.00 | 0.00 |
| ATOM | 6688 | C    | HIP | X | 443 | 43.926 | 34.093 | 39.733 | 0.00 | 0.00 |
| ATOM | 6689 | O    | HIP | X | 443 | 44.433 | 34.698 | 38.798 | 0.00 | 0.00 |
| ATOM | 6690 | N    | GLY | X | 444 | 42.683 | 33.563 | 39.815 | 0.00 | 0.00 |
| ATOM | 6691 | H    | GLY | X | 444 | 42.393 | 33.038 | 40.627 | 0.00 | 0.00 |
| ATOM | 6692 | CA   | GLY | X | 444 | 41.536 | 34.047 | 39.021 | 0.00 | 0.00 |
| ATOM | 6693 | HA2  | GLY | X | 444 | 40.670 | 33.770 | 39.621 | 0.00 | 0.00 |
| ATOM | 6694 | HA3  | GLY | X | 444 | 41.543 | 35.114 | 38.797 | 0.00 | 0.00 |
| ATOM | 6695 | C    | GLY | X | 444 | 41.384 | 33.435 | 37.566 | 0.00 | 0.00 |
| ATOM | 6696 | O    | GLY | X | 444 | 40.692 | 33.931 | 36.767 | 0.00 | 0.00 |
| ATOM | 6697 | N    | TYR | X | 445 | 42.054 | 32.256 | 37.331 | 0.00 | 0.00 |
| ATOM | 6698 | H    | TYR | X | 445 | 42.744 | 31.921 | 37.989 | 0.00 | 0.00 |
| ATOM | 6699 | CA   | TYR | X | 445 | 42.146 | 31.663 | 35.969 | 0.00 | 0.00 |
| ATOM | 6700 | HA   | TYR | X | 445 | 42.068 | 32.473 | 35.244 | 0.00 | 0.00 |
| ATOM | 6701 | CB   | TYR | X | 445 | 43.613 | 31.125 | 35.798 | 0.00 | 0.00 |
| ATOM | 6702 | HB2  | TYR | X | 445 | 44.123 | 30.732 | 36.678 | 0.00 | 0.00 |
| ATOM | 6703 | HB3  | TYR | X | 445 | 43.751 | 30.363 | 35.031 | 0.00 | 0.00 |
| ATOM | 6704 | CG   | TYR | X | 445 | 44.497 | 32.200 | 35.164 | 0.00 | 0.00 |

|      |      |      |     |   |     |        |        |        |      |      |
|------|------|------|-----|---|-----|--------|--------|--------|------|------|
| ATOM | 6705 | CD1  | TYR | X | 445 | 44.896 | 32.122 | 33.804 | 0.00 | 0.00 |
| ATOM | 6706 | HD1  | TYR | X | 445 | 44.493 | 31.318 | 33.206 | 0.00 | 0.00 |
| ATOM | 6707 | CE1  | TYR | X | 445 | 45.550 | 33.230 | 33.158 | 0.00 | 0.00 |
| ATOM | 6708 | HE1  | TYR | X | 445 | 45.795 | 33.186 | 32.107 | 0.00 | 0.00 |
| ATOM | 6709 | CZ   | TYR | X | 445 | 45.922 | 34.335 | 33.970 | 0.00 | 0.00 |
| ATOM | 6710 | OH   | TYR | X | 445 | 46.522 | 35.426 | 33.408 | 0.00 | 0.00 |
| ATOM | 6711 | HH   | TYR | X | 445 | 46.312 | 35.621 | 32.491 | 0.00 | 0.00 |
| ATOM | 6712 | CE2  | TYR | X | 445 | 45.656 | 34.305 | 35.319 | 0.00 | 0.00 |
| ATOM | 6713 | HE2  | TYR | X | 445 | 46.000 | 35.186 | 35.840 | 0.00 | 0.00 |
| ATOM | 6714 | CD2  | TYR | X | 445 | 44.940 | 33.272 | 35.929 | 0.00 | 0.00 |
| ATOM | 6715 | HD2  | TYR | X | 445 | 44.866 | 33.383 | 37.000 | 0.00 | 0.00 |
| ATOM | 6716 | C    | TYR | X | 445 | 40.972 | 30.660 | 35.732 | 0.00 | 0.00 |
| ATOM | 6717 | O    | TYR | X | 445 | 41.053 | 29.915 | 34.698 | 0.00 | 0.00 |
| ATOM | 6718 | N    | GLU | X | 446 | 40.063 | 30.525 | 36.634 | 0.00 | 0.00 |
| ATOM | 6719 | H    | GLU | X | 446 | 40.131 | 31.211 | 37.372 | 0.00 | 0.00 |
| ATOM | 6720 | CA   | GLU | X | 446 | 38.895 | 29.736 | 36.519 | 0.00 | 0.00 |
| ATOM | 6721 | HA   | GLU | X | 446 | 39.188 | 28.906 | 35.877 | 0.00 | 0.00 |
| ATOM | 6722 | CB   | GLU | X | 446 | 38.412 | 29.205 | 37.888 | 0.00 | 0.00 |
| ATOM | 6723 | HB2  | GLU | X | 446 | 38.036 | 28.185 | 37.805 | 0.00 | 0.00 |
| ATOM | 6724 | HB3  | GLU | X | 446 | 39.293 | 29.034 | 38.506 | 0.00 | 0.00 |
| ATOM | 6725 | CG   | GLU | X | 446 | 37.351 | 29.965 | 38.716 | 0.00 | 0.00 |
| ATOM | 6726 | HG2  | GLU | X | 446 | 36.464 | 30.179 | 38.119 | 0.00 | 0.00 |
| ATOM | 6727 | HG3  | GLU | X | 446 | 37.080 | 29.310 | 39.544 | 0.00 | 0.00 |
| ATOM | 6728 | CD   | GLU | X | 446 | 37.998 | 31.230 | 39.308 | 0.00 | 0.00 |
| ATOM | 6729 | OE1  | GLU | X | 446 | 38.717 | 31.975 | 38.602 | 0.00 | 0.00 |
| ATOM | 6730 | OE2  | GLU | X | 446 | 37.789 | 31.429 | 40.523 | 0.00 | 0.00 |
| ATOM | 6731 | C    | GLU | X | 446 | 37.803 | 30.442 | 35.675 | 0.00 | 0.00 |
| ATOM | 6732 | O    | GLU | X | 446 | 36.955 | 29.770 | 35.059 | 0.00 | 0.00 |
| ATOM | 6733 | N    | ILE | X | 447 | 37.753 | 31.753 | 35.600 | 0.00 | 0.00 |
| ATOM | 6734 | H    | ILE | X | 447 | 38.356 | 32.288 | 36.208 | 0.00 | 0.00 |
| ATOM | 6735 | CA   | ILE | X | 447 | 36.732 | 32.509 | 34.797 | 0.00 | 0.00 |
| ATOM | 6736 | HA   | ILE | X | 447 | 35.710 | 32.281 | 35.099 | 0.00 | 0.00 |
| ATOM | 6737 | CB   | ILE | X | 447 | 36.832 | 34.085 | 35.040 | 0.00 | 0.00 |
| ATOM | 6738 | HB   | ILE | X | 447 | 35.960 | 34.497 | 34.533 | 0.00 | 0.00 |
| ATOM | 6739 | CG2  | ILE | X | 447 | 36.665 | 34.368 | 36.591 | 0.00 | 0.00 |
| ATOM | 6740 | HG21 | ILE | X | 447 | 37.507 | 34.084 | 37.221 | 0.00 | 0.00 |
| ATOM | 6741 | HG22 | ILE | X | 447 | 35.784 | 33.811 | 36.909 | 0.00 | 0.00 |
| ATOM | 6742 | HG23 | ILE | X | 447 | 36.416 | 35.426 | 36.683 | 0.00 | 0.00 |
| ATOM | 6743 | CG1  | ILE | X | 447 | 38.030 | 34.566 | 34.276 | 0.00 | 0.00 |
| ATOM | 6744 | HG12 | ILE | X | 447 | 38.942 | 34.007 | 34.486 | 0.00 | 0.00 |
| ATOM | 6745 | HG13 | ILE | X | 447 | 38.059 | 34.517 | 33.187 | 0.00 | 0.00 |
| ATOM | 6746 | CD1  | ILE | X | 447 | 38.469 | 36.029 | 34.518 | 0.00 | 0.00 |
| ATOM | 6747 | HD11 | ILE | X | 447 | 38.994 | 36.313 | 33.607 | 0.00 | 0.00 |
| ATOM | 6748 | HD12 | ILE | X | 447 | 39.111 | 36.075 | 35.398 | 0.00 | 0.00 |
| ATOM | 6749 | HD13 | ILE | X | 447 | 37.657 | 36.750 | 34.616 | 0.00 | 0.00 |
| ATOM | 6750 | C    | ILE | X | 447 | 36.706 | 32.183 | 33.273 | 0.00 | 0.00 |
| ATOM | 6751 | O    | ILE | X | 447 | 35.687 | 32.587 | 32.667 | 0.00 | 0.00 |
| ATOM | 6752 | N    | GLU | X | 448 | 37.727 | 31.448 | 32.772 | 0.00 | 0.00 |
| ATOM | 6753 | H    | GLU | X | 448 | 38.396 | 31.113 | 33.451 | 0.00 | 0.00 |
| ATOM | 6754 | CA   | GLU | X | 448 | 37.783 | 31.006 | 31.393 | 0.00 | 0.00 |
| ATOM | 6755 | HA   | GLU | X | 448 | 37.624 | 31.878 | 30.758 | 0.00 | 0.00 |
| ATOM | 6756 | CB   | GLU | X | 448 | 39.116 | 30.261 | 31.045 | 0.00 | 0.00 |
| ATOM | 6757 | HB2  | GLU | X | 448 | 39.257 | 29.267 | 31.470 | 0.00 | 0.00 |
| ATOM | 6758 | HB3  | GLU | X | 448 | 39.108 | 30.165 | 29.959 | 0.00 | 0.00 |
| ATOM | 6759 | CG   | GLU | X | 448 | 40.283 | 31.174 | 31.382 | 0.00 | 0.00 |
| ATOM | 6760 | HG2  | GLU | X | 448 | 39.980 | 32.199 | 31.168 | 0.00 | 0.00 |
| ATOM | 6761 | HG3  | GLU | X | 448 | 40.525 | 31.103 | 32.442 | 0.00 | 0.00 |
| ATOM | 6762 | CD   | GLU | X | 448 | 41.416 | 30.806 | 30.529 | 0.00 | 0.00 |
| ATOM | 6763 | OE1  | GLU | X | 448 | 42.025 | 29.703 | 30.574 | 0.00 | 0.00 |
| ATOM | 6764 | OE2  | GLU | X | 448 | 41.743 | 31.667 | 29.640 | 0.00 | 0.00 |
| ATOM | 6765 | C    | GLU | X | 448 | 36.609 | 30.113 | 31.094 | 0.00 | 0.00 |
| ATOM | 6766 | O    | GLU | X | 448 | 36.142 | 30.272 | 29.994 | 0.00 | 0.00 |
| ATOM | 6767 | N    | PHE | X | 449 | 36.176 | 29.303 | 32.071 | 0.00 | 0.00 |
| ATOM | 6768 | H    | PHE | X | 449 | 36.659 | 29.341 | 32.957 | 0.00 | 0.00 |
| ATOM | 6769 | CA   | PHE | X | 449 | 35.040 | 28.442 | 32.018 | 0.00 | 0.00 |
| ATOM | 6770 | HA   | PHE | X | 449 | 34.887 | 28.077 | 31.002 | 0.00 | 0.00 |
| ATOM | 6771 | CB   | PHE | X | 449 | 35.319 | 27.229 | 32.924 | 0.00 | 0.00 |

|      |      |      |     |   |     |        |        |        |      |      |
|------|------|------|-----|---|-----|--------|--------|--------|------|------|
| ATOM | 6772 | HB2  | PHE | X | 449 | 35.569 | 27.519 | 33.945 | 0.00 | 0.00 |
| ATOM | 6773 | HB3  | PHE | X | 449 | 34.402 | 26.646 | 33.013 | 0.00 | 0.00 |
| ATOM | 6774 | CG   | PHE | X | 449 | 36.369 | 26.270 | 32.455 | 0.00 | 0.00 |
| ATOM | 6775 | CD1  | PHE | X | 449 | 37.704 | 26.712 | 32.417 | 0.00 | 0.00 |
| ATOM | 6776 | HD1  | PHE | X | 449 | 38.010 | 27.623 | 32.909 | 0.00 | 0.00 |
| ATOM | 6777 | CE1  | PHE | X | 449 | 38.667 | 26.045 | 31.662 | 0.00 | 0.00 |
| ATOM | 6778 | HE1  | PHE | X | 449 | 39.641 | 26.512 | 31.654 | 0.00 | 0.00 |
| ATOM | 6779 | CZ   | PHE | X | 449 | 38.341 | 24.906 | 30.975 | 0.00 | 0.00 |
| ATOM | 6780 | HZ   | PHE | X | 449 | 39.027 | 24.229 | 30.488 | 0.00 | 0.00 |
| ATOM | 6781 | CE2  | PHE | X | 449 | 37.031 | 24.423 | 31.067 | 0.00 | 0.00 |
| ATOM | 6782 | HE2  | PHE | X | 449 | 36.807 | 23.526 | 30.510 | 0.00 | 0.00 |
| ATOM | 6783 | CD2  | PHE | X | 449 | 35.991 | 25.083 | 31.805 | 0.00 | 0.00 |
| ATOM | 6784 | HD2  | PHE | X | 449 | 35.000 | 24.654 | 31.809 | 0.00 | 0.00 |
| ATOM | 6785 | C    | PHE | X | 449 | 33.673 | 29.057 | 32.345 | 0.00 | 0.00 |
| ATOM | 6786 | O    | PHE | X | 449 | 32.677 | 28.570 | 31.798 | 0.00 | 0.00 |
| ATOM | 6787 | N    | ILE | X | 450 | 33.596 | 30.174 | 33.135 | 0.00 | 0.00 |
| ATOM | 6788 | H    | ILE | X | 450 | 34.404 | 30.409 | 33.694 | 0.00 | 0.00 |
| ATOM | 6789 | CA   | ILE | X | 450 | 32.256 | 30.892 | 33.196 | 0.00 | 0.00 |
| ATOM | 6790 | HA   | ILE | X | 450 | 31.441 | 30.168 | 33.193 | 0.00 | 0.00 |
| ATOM | 6791 | CB   | ILE | X | 450 | 31.927 | 31.600 | 34.510 | 0.00 | 0.00 |
| ATOM | 6792 | HB   | ILE | X | 450 | 32.617 | 32.444 | 34.545 | 0.00 | 0.00 |
| ATOM | 6793 | CG2  | ILE | X | 450 | 30.476 | 32.019 | 34.604 | 0.00 | 0.00 |
| ATOM | 6794 | HG21 | ILE | X | 450 | 30.255 | 32.384 | 35.607 | 0.00 | 0.00 |
| ATOM | 6795 | HG22 | ILE | X | 450 | 29.768 | 31.305 | 34.184 | 0.00 | 0.00 |
| ATOM | 6796 | HG23 | ILE | X | 450 | 30.336 | 32.937 | 34.034 | 0.00 | 0.00 |
| ATOM | 6797 | CG1  | ILE | X | 450 | 32.166 | 30.709 | 35.773 | 0.00 | 0.00 |
| ATOM | 6798 | HG12 | ILE | X | 450 | 33.154 | 30.286 | 35.589 | 0.00 | 0.00 |
| ATOM | 6799 | HG13 | ILE | X | 450 | 32.318 | 31.382 | 36.617 | 0.00 | 0.00 |
| ATOM | 6800 | CD1  | ILE | X | 450 | 31.233 | 29.528 | 36.072 | 0.00 | 0.00 |
| ATOM | 6801 | HD11 | ILE | X | 450 | 31.603 | 29.170 | 37.034 | 0.00 | 0.00 |
| ATOM | 6802 | HD12 | ILE | X | 450 | 31.399 | 28.804 | 35.274 | 0.00 | 0.00 |
| ATOM | 6803 | HD13 | ILE | X | 450 | 30.199 | 29.833 | 36.233 | 0.00 | 0.00 |
| ATOM | 6804 | C    | ILE | X | 450 | 32.078 | 31.741 | 31.937 | 0.00 | 0.00 |
| ATOM | 6805 | O    | ILE | X | 450 | 31.047 | 31.543 | 31.293 | 0.00 | 0.00 |
| ATOM | 6806 | N    | PHE | X | 451 | 33.037 | 32.591 | 31.524 | 0.00 | 0.00 |
| ATOM | 6807 | H    | PHE | X | 451 | 33.888 | 32.612 | 32.068 | 0.00 | 0.00 |
| ATOM | 6808 | CA   | PHE | X | 451 | 32.966 | 33.305 | 30.253 | 0.00 | 0.00 |
| ATOM | 6809 | HA   | PHE | X | 451 | 31.995 | 33.798 | 30.290 | 0.00 | 0.00 |
| ATOM | 6810 | CB   | PHE | X | 451 | 34.033 | 34.425 | 30.209 | 0.00 | 0.00 |
| ATOM | 6811 | HB2  | PHE | X | 451 | 35.020 | 34.046 | 30.474 | 0.00 | 0.00 |
| ATOM | 6812 | HB3  | PHE | X | 451 | 34.196 | 34.864 | 29.224 | 0.00 | 0.00 |
| ATOM | 6813 | CG   | PHE | X | 451 | 33.563 | 35.574 | 31.113 | 0.00 | 0.00 |
| ATOM | 6814 | CD1  | PHE | X | 451 | 33.894 | 35.655 | 32.480 | 0.00 | 0.00 |
| ATOM | 6815 | HD1  | PHE | X | 451 | 34.572 | 35.002 | 33.010 | 0.00 | 0.00 |
| ATOM | 6816 | CE1  | PHE | X | 451 | 33.343 | 36.758 | 33.202 | 0.00 | 0.00 |
| ATOM | 6817 | HE1  | PHE | X | 451 | 33.542 | 36.841 | 34.260 | 0.00 | 0.00 |
| ATOM | 6818 | CZ   | PHE | X | 451 | 32.453 | 37.675 | 32.664 | 0.00 | 0.00 |
| ATOM | 6819 | HZ   | PHE | X | 451 | 32.135 | 38.501 | 33.283 | 0.00 | 0.00 |
| ATOM | 6820 | CE2  | PHE | X | 451 | 32.027 | 37.451 | 31.285 | 0.00 | 0.00 |
| ATOM | 6821 | HE2  | PHE | X | 451 | 31.453 | 38.197 | 30.756 | 0.00 | 0.00 |
| ATOM | 6822 | CD2  | PHE | X | 451 | 32.619 | 36.391 | 30.538 | 0.00 | 0.00 |
| ATOM | 6823 | HD2  | PHE | X | 451 | 32.163 | 36.267 | 29.567 | 0.00 | 0.00 |
| ATOM | 6824 | C    | PHE | X | 451 | 32.920 | 32.437 | 28.980 | 0.00 | 0.00 |
| ATOM | 6825 | O    | PHE | X | 451 | 32.862 | 32.986 | 27.907 | 0.00 | 0.00 |
| ATOM | 6826 | N    | GLY | X | 452 | 33.060 | 31.108 | 29.190 | 0.00 | 0.00 |
| ATOM | 6827 | H    | GLY | X | 452 | 33.090 | 30.745 | 30.132 | 0.00 | 0.00 |
| ATOM | 6828 | CA   | GLY | X | 452 | 32.746 | 30.205 | 28.071 | 0.00 | 0.00 |
| ATOM | 6829 | HA2  | GLY | X | 452 | 32.485 | 29.242 | 28.508 | 0.00 | 0.00 |
| ATOM | 6830 | HA3  | GLY | X | 452 | 31.829 | 30.521 | 27.573 | 0.00 | 0.00 |
| ATOM | 6831 | C    | GLY | X | 452 | 33.954 | 30.144 | 27.035 | 0.00 | 0.00 |
| ATOM | 6832 | O    | GLY | X | 452 | 33.639 | 29.906 | 25.852 | 0.00 | 0.00 |
| ATOM | 6833 | N    | ILE | X | 453 | 35.187 | 30.375 | 27.450 | 0.00 | 0.00 |
| ATOM | 6834 | H    | ILE | X | 453 | 35.285 | 30.470 | 28.451 | 0.00 | 0.00 |
| ATOM | 6835 | CA   | ILE | X | 453 | 36.397 | 30.354 | 26.569 | 0.00 | 0.00 |
| ATOM | 6836 | HA   | ILE | X | 453 | 36.256 | 31.128 | 25.815 | 0.00 | 0.00 |
| ATOM | 6837 | CB   | ILE | X | 453 | 37.684 | 30.792 | 27.316 | 0.00 | 0.00 |
| ATOM | 6838 | HB   | ILE | X | 453 | 37.633 | 30.210 | 28.235 | 0.00 | 0.00 |

|      |      |      |     |   |     |        |        |        |      |      |
|------|------|------|-----|---|-----|--------|--------|--------|------|------|
| ATOM | 6839 | CG2  | ILE | X | 453 | 39.056 | 30.356 | 26.800 | 0.00 | 0.00 |
| ATOM | 6840 | HG21 | ILE | X | 453 | 39.255 | 29.286 | 26.850 | 0.00 | 0.00 |
| ATOM | 6841 | HG22 | ILE | X | 453 | 39.825 | 30.854 | 27.390 | 0.00 | 0.00 |
| ATOM | 6842 | HG23 | ILE | X | 453 | 39.266 | 30.666 | 25.776 | 0.00 | 0.00 |
| ATOM | 6843 | CG1  | ILE | X | 453 | 37.724 | 32.268 | 27.645 | 0.00 | 0.00 |
| ATOM | 6844 | HG12 | ILE | X | 453 | 36.808 | 32.525 | 28.177 | 0.00 | 0.00 |
| ATOM | 6845 | HG13 | ILE | X | 453 | 38.514 | 32.440 | 28.376 | 0.00 | 0.00 |
| ATOM | 6846 | CD1  | ILE | X | 453 | 37.829 | 33.281 | 26.531 | 0.00 | 0.00 |
| ATOM | 6847 | HD11 | ILE | X | 453 | 36.947 | 33.189 | 25.897 | 0.00 | 0.00 |
| ATOM | 6848 | HD12 | ILE | X | 453 | 38.788 | 33.230 | 26.016 | 0.00 | 0.00 |
| ATOM | 6849 | HD13 | ILE | X | 453 | 37.841 | 34.254 | 27.023 | 0.00 | 0.00 |
| ATOM | 6850 | C    | ILE | X | 453 | 36.668 | 29.059 | 25.813 | 0.00 | 0.00 |
| ATOM | 6851 | O    | ILE | X | 453 | 37.023 | 29.171 | 24.651 | 0.00 | 0.00 |
| ATOM | 6852 | N    | PRO | X | 454 | 36.458 | 27.806 | 26.372 | 0.00 | 0.00 |
| ATOM | 6853 | CD   | PRO | X | 454 | 36.253 | 27.627 | 27.854 | 0.00 | 0.00 |
| ATOM | 6854 | HD2  | PRO | X | 454 | 35.181 | 27.589 | 28.047 | 0.00 | 0.00 |
| ATOM | 6855 | HD3  | PRO | X | 454 | 36.728 | 28.390 | 28.471 | 0.00 | 0.00 |
| ATOM | 6856 | CG   | PRO | X | 454 | 36.864 | 26.313 | 28.158 | 0.00 | 0.00 |
| ATOM | 6857 | HG2  | PRO | X | 454 | 36.286 | 25.876 | 28.972 | 0.00 | 0.00 |
| ATOM | 6858 | HG3  | PRO | X | 454 | 37.951 | 26.298 | 28.086 | 0.00 | 0.00 |
| ATOM | 6859 | CB   | PRO | X | 454 | 36.392 | 25.539 | 26.868 | 0.00 | 0.00 |
| ATOM | 6860 | HB2  | PRO | X | 454 | 35.342 | 25.326 | 27.067 | 0.00 | 0.00 |
| ATOM | 6861 | HB3  | PRO | X | 454 | 37.033 | 24.675 | 26.695 | 0.00 | 0.00 |
| ATOM | 6862 | CA   | PRO | X | 454 | 36.596 | 26.510 | 25.750 | 0.00 | 0.00 |
| ATOM | 6863 | HA   | PRO | X | 454 | 37.624 | 26.449 | 25.392 | 0.00 | 0.00 |
| ATOM | 6864 | C    | PRO | X | 454 | 35.516 | 26.228 | 24.644 | 0.00 | 0.00 |
| ATOM | 6865 | O    | PRO | X | 454 | 35.723 | 25.345 | 23.762 | 0.00 | 0.00 |
| ATOM | 6866 | N    | LEU | X | 455 | 34.338 | 26.872 | 24.704 | 0.00 | 0.00 |
| ATOM | 6867 | H    | LEU | X | 455 | 34.330 | 27.724 | 25.247 | 0.00 | 0.00 |
| ATOM | 6868 | CA   | LEU | X | 455 | 33.116 | 26.684 | 23.906 | 0.00 | 0.00 |
| ATOM | 6869 | HA   | LEU | X | 455 | 32.967 | 25.612 | 23.776 | 0.00 | 0.00 |
| ATOM | 6870 | CB   | LEU | X | 455 | 31.895 | 27.374 | 24.663 | 0.00 | 0.00 |
| ATOM | 6871 | HB2  | LEU | X | 455 | 32.176 | 28.423 | 24.760 | 0.00 | 0.00 |
| ATOM | 6872 | HB3  | LEU | X | 455 | 31.051 | 27.178 | 24.002 | 0.00 | 0.00 |
| ATOM | 6873 | CG   | LEU | X | 455 | 31.552 | 26.956 | 26.137 | 0.00 | 0.00 |
| ATOM | 6874 | HG   | LEU | X | 455 | 32.392 | 27.257 | 26.763 | 0.00 | 0.00 |
| ATOM | 6875 | CD1  | LEU | X | 455 | 30.254 | 27.638 | 26.507 | 0.00 | 0.00 |
| ATOM | 6876 | HD11 | LEU | X | 455 | 30.384 | 28.718 | 26.438 | 0.00 | 0.00 |
| ATOM | 6877 | HD12 | LEU | X | 455 | 29.882 | 27.411 | 27.506 | 0.00 | 0.00 |
| ATOM | 6878 | HD13 | LEU | X | 455 | 29.547 | 27.339 | 25.733 | 0.00 | 0.00 |
| ATOM | 6879 | CD2  | LEU | X | 455 | 31.307 | 25.402 | 26.152 | 0.00 | 0.00 |
| ATOM | 6880 | HD21 | LEU | X | 455 | 30.777 | 24.938 | 25.319 | 0.00 | 0.00 |
| ATOM | 6881 | HD22 | LEU | X | 455 | 32.287 | 24.930 | 26.082 | 0.00 | 0.00 |
| ATOM | 6882 | HD23 | LEU | X | 455 | 30.813 | 25.044 | 27.056 | 0.00 | 0.00 |
| ATOM | 6883 | C    | LEU | X | 455 | 33.406 | 27.180 | 22.376 | 0.00 | 0.00 |
| ATOM | 6884 | O    | LEU | X | 455 | 32.658 | 26.873 | 21.530 | 0.00 | 0.00 |
| ATOM | 6885 | N    | ASP | X | 456 | 34.426 | 28.043 | 22.078 | 0.00 | 0.00 |
| ATOM | 6886 | H    | ASP | X | 456 | 35.152 | 28.179 | 22.768 | 0.00 | 0.00 |
| ATOM | 6887 | CA   | ASP | X | 456 | 34.766 | 28.507 | 20.737 | 0.00 | 0.00 |
| ATOM | 6888 | HA   | ASP | X | 456 | 33.801 | 28.778 | 20.308 | 0.00 | 0.00 |
| ATOM | 6889 | CB   | ASP | X | 456 | 35.681 | 29.681 | 20.794 | 0.00 | 0.00 |
| ATOM | 6890 | HB2  | ASP | X | 456 | 35.148 | 30.456 | 21.344 | 0.00 | 0.00 |
| ATOM | 6891 | HB3  | ASP | X | 456 | 36.533 | 29.382 | 21.404 | 0.00 | 0.00 |
| ATOM | 6892 | CG   | ASP | X | 456 | 36.103 | 30.094 | 19.313 | 0.00 | 0.00 |
| ATOM | 6893 | OD1  | ASP | X | 456 | 37.336 | 30.020 | 19.038 | 0.00 | 0.00 |
| ATOM | 6894 | OD2  | ASP | X | 456 | 35.229 | 30.458 | 18.481 | 0.00 | 0.00 |
| ATOM | 6895 | C    | ASP | X | 456 | 35.331 | 27.338 | 19.853 | 0.00 | 0.00 |
| ATOM | 6896 | O    | ASP | X | 456 | 36.369 | 26.748 | 20.227 | 0.00 | 0.00 |
| ATOM | 6897 | N    | PRO | X | 457 | 34.733 | 27.010 | 18.681 | 0.00 | 0.00 |
| ATOM | 6898 | CD   | PRO | X | 457 | 33.450 | 27.573 | 18.258 | 0.00 | 0.00 |
| ATOM | 6899 | HD2  | PRO | X | 457 | 33.614 | 28.553 | 17.810 | 0.00 | 0.00 |
| ATOM | 6900 | HD3  | PRO | X | 457 | 32.666 | 27.555 | 19.015 | 0.00 | 0.00 |
| ATOM | 6901 | CG   | PRO | X | 457 | 32.957 | 26.609 | 17.132 | 0.00 | 0.00 |
| ATOM | 6902 | HG2  | PRO | X | 457 | 32.209 | 27.050 | 16.473 | 0.00 | 0.00 |
| ATOM | 6903 | HG3  | PRO | X | 457 | 32.642 | 25.669 | 17.586 | 0.00 | 0.00 |
| ATOM | 6904 | CB   | PRO | X | 457 | 34.325 | 26.320 | 16.484 | 0.00 | 0.00 |
| ATOM | 6905 | HB2  | PRO | X | 457 | 34.643 | 27.155 | 15.860 | 0.00 | 0.00 |

|      |      |      |     |   |     |        |        |        |      |      |
|------|------|------|-----|---|-----|--------|--------|--------|------|------|
| ATOM | 6906 | HB3  | PRO | X | 457 | 34.260 | 25.405 | 15.895 | 0.00 | 0.00 |
| ATOM | 6907 | CA   | PRO | X | 457 | 35.231 | 26.033 | 17.660 | 0.00 | 0.00 |
| ATOM | 6908 | HA   | PRO | X | 457 | 35.117 | 24.998 | 17.982 | 0.00 | 0.00 |
| ATOM | 6909 | C    | PRO | X | 457 | 36.745 | 26.124 | 17.271 | 0.00 | 0.00 |
| ATOM | 6910 | O    | PRO | X | 457 | 37.260 | 25.150 | 16.810 | 0.00 | 0.00 |
| ATOM | 6911 | N    | SER | X | 458 | 37.355 | 27.310 | 17.478 | 0.00 | 0.00 |
| ATOM | 6912 | H    | SER | X | 458 | 36.884 | 28.111 | 17.873 | 0.00 | 0.00 |
| ATOM | 6913 | CA   | SER | X | 458 | 38.722 | 27.487 | 16.948 | 0.00 | 0.00 |
| ATOM | 6914 | HA   | SER | X | 458 | 38.773 | 26.786 | 16.115 | 0.00 | 0.00 |
| ATOM | 6915 | CB   | SER | X | 458 | 39.062 | 28.815 | 16.384 | 0.00 | 0.00 |
| ATOM | 6916 | HB2  | SER | X | 458 | 39.851 | 28.772 | 15.633 | 0.00 | 0.00 |
| ATOM | 6917 | HB3  | SER | X | 458 | 38.171 | 29.105 | 15.826 | 0.00 | 0.00 |
| ATOM | 6918 | OG   | SER | X | 458 | 39.358 | 29.765 | 17.415 | 0.00 | 0.00 |
| ATOM | 6919 | HG   | SER | X | 458 | 38.570 | 29.791 | 17.964 | 0.00 | 0.00 |
| ATOM | 6920 | C    | SER | X | 458 | 39.812 | 27.032 | 17.895 | 0.00 | 0.00 |
| ATOM | 6921 | O    | SER | X | 458 | 40.937 | 26.777 | 17.423 | 0.00 | 0.00 |
| ATOM | 6922 | N    | ARG | X | 459 | 39.522 | 27.009 | 19.198 | 0.00 | 0.00 |
| ATOM | 6923 | H    | ARG | X | 459 | 38.620 | 27.418 | 19.394 | 0.00 | 0.00 |
| ATOM | 6924 | CA   | ARG | X | 459 | 40.589 | 26.821 | 20.218 | 0.00 | 0.00 |
| ATOM | 6925 | HA   | ARG | X | 459 | 41.455 | 27.263 | 19.724 | 0.00 | 0.00 |
| ATOM | 6926 | CB   | ARG | X | 459 | 40.223 | 27.558 | 21.505 | 0.00 | 0.00 |
| ATOM | 6927 | HB2  | ARG | X | 459 | 39.455 | 27.050 | 22.089 | 0.00 | 0.00 |
| ATOM | 6928 | HB3  | ARG | X | 459 | 41.082 | 27.701 | 22.160 | 0.00 | 0.00 |
| ATOM | 6929 | CG   | ARG | X | 459 | 39.725 | 28.987 | 21.285 | 0.00 | 0.00 |
| ATOM | 6930 | HG2  | ARG | X | 459 | 40.398 | 29.432 | 20.552 | 0.00 | 0.00 |
| ATOM | 6931 | HG3  | ARG | X | 459 | 38.701 | 28.924 | 20.917 | 0.00 | 0.00 |
| ATOM | 6932 | CD   | ARG | X | 459 | 39.862 | 29.756 | 22.623 | 0.00 | 0.00 |
| ATOM | 6933 | HD2  | ARG | X | 459 | 39.780 | 28.997 | 23.402 | 0.00 | 0.00 |
| ATOM | 6934 | HD3  | ARG | X | 459 | 40.792 | 30.318 | 22.708 | 0.00 | 0.00 |
| ATOM | 6935 | NE   | ARG | X | 459 | 38.783 | 30.705 | 22.862 | 0.00 | 0.00 |
| ATOM | 6936 | HE   | ARG | X | 459 | 38.090 | 30.413 | 23.536 | 0.00 | 0.00 |
| ATOM | 6937 | CZ   | ARG | X | 459 | 38.891 | 32.039 | 22.547 | 0.00 | 0.00 |
| ATOM | 6938 | NH1  | ARG | X | 459 | 39.776 | 32.624 | 21.870 | 0.00 | 0.00 |
| ATOM | 6939 | HH11 | ARG | X | 459 | 40.500 | 32.054 | 21.457 | 0.00 | 0.00 |
| ATOM | 6940 | HH12 | ARG | X | 459 | 39.723 | 33.628 | 21.773 | 0.00 | 0.00 |
| ATOM | 6941 | NH2  | ARG | X | 459 | 37.796 | 32.780 | 22.770 | 0.00 | 0.00 |
| ATOM | 6942 | HH21 | ARG | X | 459 | 36.959 | 32.419 | 23.207 | 0.00 | 0.00 |
| ATOM | 6943 | HH22 | ARG | X | 459 | 37.754 | 33.744 | 22.473 | 0.00 | 0.00 |
| ATOM | 6944 | C    | ARG | X | 459 | 40.863 | 25.360 | 20.597 | 0.00 | 0.00 |
| ATOM | 6945 | O    | ARG | X | 459 | 40.019 | 24.452 | 20.326 | 0.00 | 0.00 |
| ATOM | 6946 | N    | ASN | X | 460 | 42.029 | 25.150 | 21.261 | 0.00 | 0.00 |
| ATOM | 6947 | H    | ASN | X | 460 | 42.589 | 25.956 | 21.500 | 0.00 | 0.00 |
| ATOM | 6948 | CA   | ASN | X | 460 | 42.489 | 23.798 | 21.529 | 0.00 | 0.00 |
| ATOM | 6949 | HA   | ASN | X | 460 | 42.500 | 23.186 | 20.627 | 0.00 | 0.00 |
| ATOM | 6950 | CB   | ASN | X | 460 | 43.999 | 23.873 | 21.932 | 0.00 | 0.00 |
| ATOM | 6951 | HB2  | ASN | X | 460 | 44.499 | 24.570 | 21.260 | 0.00 | 0.00 |
| ATOM | 6952 | HB3  | ASN | X | 460 | 44.062 | 24.176 | 22.978 | 0.00 | 0.00 |
| ATOM | 6953 | CG   | ASN | X | 460 | 44.746 | 22.563 | 21.849 | 0.00 | 0.00 |
| ATOM | 6954 | OD1  | ASN | X | 460 | 45.051 | 22.065 | 20.736 | 0.00 | 0.00 |
| ATOM | 6955 | ND2  | ASN | X | 460 | 45.347 | 22.111 | 22.926 | 0.00 | 0.00 |
| ATOM | 6956 | HD21 | ASN | X | 460 | 46.004 | 21.348 | 22.858 | 0.00 | 0.00 |
| ATOM | 6957 | HD22 | ASN | X | 460 | 45.209 | 22.649 | 23.769 | 0.00 | 0.00 |
| ATOM | 6958 | C    | ASN | X | 460 | 41.788 | 22.987 | 22.603 | 0.00 | 0.00 |
| ATOM | 6959 | O    | ASN | X | 460 | 42.245 | 21.896 | 22.966 | 0.00 | 0.00 |
| ATOM | 6960 | N    | TYR | X | 461 | 40.720 | 23.536 | 23.239 | 0.00 | 0.00 |
| ATOM | 6961 | H    | TYR | X | 461 | 40.293 | 24.423 | 23.012 | 0.00 | 0.00 |
| ATOM | 6962 | CA   | TYR | X | 461 | 39.955 | 22.897 | 24.369 | 0.00 | 0.00 |
| ATOM | 6963 | HA   | TYR | X | 461 | 40.698 | 22.578 | 25.100 | 0.00 | 0.00 |
| ATOM | 6964 | CB   | TYR | X | 461 | 39.108 | 23.946 | 24.963 | 0.00 | 0.00 |
| ATOM | 6965 | HB2  | TYR | X | 461 | 38.415 | 24.360 | 24.230 | 0.00 | 0.00 |
| ATOM | 6966 | HB3  | TYR | X | 461 | 38.398 | 23.455 | 25.627 | 0.00 | 0.00 |
| ATOM | 6967 | CG   | TYR | X | 461 | 39.873 | 25.031 | 25.808 | 0.00 | 0.00 |
| ATOM | 6968 | CD1  | TYR | X | 461 | 40.392 | 26.165 | 25.113 | 0.00 | 0.00 |
| ATOM | 6969 | HD1  | TYR | X | 461 | 40.369 | 26.129 | 24.034 | 0.00 | 0.00 |
| ATOM | 6970 | CE1  | TYR | X | 461 | 40.905 | 27.301 | 25.825 | 0.00 | 0.00 |
| ATOM | 6971 | HE1  | TYR | X | 461 | 41.494 | 28.024 | 25.281 | 0.00 | 0.00 |
| ATOM | 6972 | CZ   | TYR | X | 461 | 40.919 | 27.302 | 27.242 | 0.00 | 0.00 |

|      |      |      |     |   |     |        |        |        |      |      |
|------|------|------|-----|---|-----|--------|--------|--------|------|------|
| ATOM | 6973 | OH   | TYR | X | 461 | 41.481 | 28.375 | 27.827 | 0.00 | 0.00 |
| ATOM | 6974 | HH   | TYR | X | 461 | 41.506 | 28.407 | 28.786 | 0.00 | 0.00 |
| ATOM | 6975 | CE2  | TYR | X | 461 | 40.422 | 26.157 | 27.899 | 0.00 | 0.00 |
| ATOM | 6976 | HE2  | TYR | X | 461 | 40.389 | 26.158 | 28.978 | 0.00 | 0.00 |
| ATOM | 6977 | CD2  | TYR | X | 461 | 39.891 | 25.057 | 27.226 | 0.00 | 0.00 |
| ATOM | 6978 | HD2  | TYR | X | 461 | 39.341 | 24.323 | 27.796 | 0.00 | 0.00 |
| ATOM | 6979 | C    | TYR | X | 461 | 39.221 | 21.695 | 23.962 | 0.00 | 0.00 |
| ATOM | 6980 | O    | TYR | X | 461 | 38.637 | 21.579 | 22.883 | 0.00 | 0.00 |
| ATOM | 6981 | N    | THR | X | 462 | 39.153 | 20.669 | 24.856 | 0.00 | 0.00 |
| ATOM | 6982 | H    | THR | X | 462 | 39.479 | 20.900 | 25.784 | 0.00 | 0.00 |
| ATOM | 6983 | CA   | THR | X | 462 | 38.630 | 19.298 | 24.621 | 0.00 | 0.00 |
| ATOM | 6984 | HA   | THR | X | 462 | 38.889 | 18.987 | 23.609 | 0.00 | 0.00 |
| ATOM | 6985 | CB   | THR | X | 462 | 39.226 | 18.276 | 25.616 | 0.00 | 0.00 |
| ATOM | 6986 | HB   | THR | X | 462 | 38.700 | 17.342 | 25.421 | 0.00 | 0.00 |
| ATOM | 6987 | CG2  | THR | X | 462 | 40.744 | 18.075 | 25.345 | 0.00 | 0.00 |
| ATOM | 6988 | HG21 | THR | X | 462 | 41.350 | 18.980 | 25.317 | 0.00 | 0.00 |
| ATOM | 6989 | HG22 | THR | X | 462 | 40.966 | 17.520 | 24.433 | 0.00 | 0.00 |
| ATOM | 6990 | HG23 | THR | X | 462 | 41.160 | 17.552 | 26.206 | 0.00 | 0.00 |
| ATOM | 6991 | OG1  | THR | X | 462 | 39.056 | 18.658 | 26.943 | 0.00 | 0.00 |
| ATOM | 6992 | HG1  | THR | X | 462 | 39.764 | 19.304 | 26.986 | 0.00 | 0.00 |
| ATOM | 6993 | C    | THR | X | 462 | 37.075 | 19.339 | 24.736 | 0.00 | 0.00 |
| ATOM | 6994 | O    | THR | X | 462 | 36.592 | 20.170 | 25.471 | 0.00 | 0.00 |
| ATOM | 6995 | N    | ALA | X | 463 | 36.458 | 18.343 | 24.166 | 0.00 | 0.00 |
| ATOM | 6996 | H    | ALA | X | 463 | 37.015 | 17.694 | 23.627 | 0.00 | 0.00 |
| ATOM | 6997 | CA   | ALA | X | 463 | 35.077 | 17.920 | 24.295 | 0.00 | 0.00 |
| ATOM | 6998 | HA   | ALA | X | 463 | 34.460 | 18.634 | 23.751 | 0.00 | 0.00 |
| ATOM | 6999 | CB   | ALA | X | 463 | 34.975 | 16.518 | 23.648 | 0.00 | 0.00 |
| ATOM | 7000 | HB1  | ALA | X | 463 | 34.026 | 16.116 | 24.002 | 0.00 | 0.00 |
| ATOM | 7001 | HB2  | ALA | X | 463 | 35.819 | 15.855 | 23.836 | 0.00 | 0.00 |
| ATOM | 7002 | HB3  | ALA | X | 463 | 34.869 | 16.713 | 22.581 | 0.00 | 0.00 |
| ATOM | 7003 | C    | ALA | X | 463 | 34.532 | 17.821 | 25.748 | 0.00 | 0.00 |
| ATOM | 7004 | O    | ALA | X | 463 | 33.469 | 18.266 | 26.024 | 0.00 | 0.00 |
| ATOM | 7005 | N    | GLU | X | 464 | 35.291 | 17.322 | 26.703 | 0.00 | 0.00 |
| ATOM | 7006 | H    | GLU | X | 464 | 36.066 | 16.733 | 26.435 | 0.00 | 0.00 |
| ATOM | 7007 | CA   | GLU | X | 464 | 34.940 | 17.378 | 28.134 | 0.00 | 0.00 |
| ATOM | 7008 | HA   | GLU | X | 464 | 33.871 | 17.164 | 28.134 | 0.00 | 0.00 |
| ATOM | 7009 | CB   | GLU | X | 464 | 35.705 | 16.246 | 28.944 | 0.00 | 0.00 |
| ATOM | 7010 | HB2  | GLU | X | 464 | 35.263 | 16.149 | 29.936 | 0.00 | 0.00 |
| ATOM | 7011 | HB3  | GLU | X | 464 | 35.363 | 15.279 | 28.575 | 0.00 | 0.00 |
| ATOM | 7012 | CG   | GLU | X | 464 | 37.275 | 16.235 | 28.807 | 0.00 | 0.00 |
| ATOM | 7013 | HG2  | GLU | X | 464 | 37.574 | 17.267 | 28.623 | 0.00 | 0.00 |
| ATOM | 7014 | HG3  | GLU | X | 464 | 37.705 | 15.792 | 29.705 | 0.00 | 0.00 |
| ATOM | 7015 | CD   | GLU | X | 464 | 37.694 | 15.230 | 27.673 | 0.00 | 0.00 |
| ATOM | 7016 | OE1  | GLU | X | 464 | 37.200 | 15.440 | 26.537 | 0.00 | 0.00 |
| ATOM | 7017 | OE2  | GLU | X | 464 | 38.502 | 14.333 | 27.874 | 0.00 | 0.00 |
| ATOM | 7018 | C    | GLU | X | 464 | 35.148 | 18.750 | 28.885 | 0.00 | 0.00 |
| ATOM | 7019 | O    | GLU | X | 464 | 34.562 | 18.945 | 29.959 | 0.00 | 0.00 |
| ATOM | 7020 | N    | GLU | X | 465 | 35.975 | 19.648 | 28.340 | 0.00 | 0.00 |
| ATOM | 7021 | H    | GLU | X | 465 | 36.340 | 19.468 | 27.416 | 0.00 | 0.00 |
| ATOM | 7022 | CA   | GLU | X | 465 | 36.104 | 21.048 | 28.905 | 0.00 | 0.00 |
| ATOM | 7023 | HA   | GLU | X | 465 | 36.080 | 21.107 | 29.993 | 0.00 | 0.00 |
| ATOM | 7024 | CB   | GLU | X | 465 | 37.467 | 21.719 | 28.478 | 0.00 | 0.00 |
| ATOM | 7025 | HB2  | GLU | X | 465 | 37.639 | 21.547 | 27.416 | 0.00 | 0.00 |
| ATOM | 7026 | HB3  | GLU | X | 465 | 37.431 | 22.773 | 28.753 | 0.00 | 0.00 |
| ATOM | 7027 | CG   | GLU | X | 465 | 38.641 | 21.185 | 29.339 | 0.00 | 0.00 |
| ATOM | 7028 | HG2  | GLU | X | 465 | 38.605 | 21.663 | 30.318 | 0.00 | 0.00 |
| ATOM | 7029 | HG3  | GLU | X | 465 | 38.638 | 20.099 | 29.431 | 0.00 | 0.00 |
| ATOM | 7030 | CD   | GLU | X | 465 | 40.079 | 21.404 | 28.762 | 0.00 | 0.00 |
| ATOM | 7031 | OE1  | GLU | X | 465 | 40.267 | 21.447 | 27.517 | 0.00 | 0.00 |
| ATOM | 7032 | OE2  | GLU | X | 465 | 40.995 | 21.652 | 29.565 | 0.00 | 0.00 |
| ATOM | 7033 | C    | GLU | X | 465 | 34.954 | 21.925 | 28.357 | 0.00 | 0.00 |
| ATOM | 7034 | O    | GLU | X | 465 | 34.435 | 22.868 | 28.955 | 0.00 | 0.00 |
| ATOM | 7035 | N    | LYS | X | 466 | 34.372 | 21.472 | 27.240 | 0.00 | 0.00 |
| ATOM | 7036 | H    | LYS | X | 466 | 34.729 | 20.644 | 26.784 | 0.00 | 0.00 |
| ATOM | 7037 | CA   | LYS | X | 466 | 33.210 | 22.126 | 26.653 | 0.00 | 0.00 |
| ATOM | 7038 | HA   | LYS | X | 466 | 33.410 | 23.189 | 26.785 | 0.00 | 0.00 |
| ATOM | 7039 | CB   | LYS | X | 466 | 33.074 | 21.731 | 25.194 | 0.00 | 0.00 |

|      |      |      |     |   |     |        |        |        |      |      |
|------|------|------|-----|---|-----|--------|--------|--------|------|------|
| ATOM | 7040 | HB2  | LYS | X | 466 | 33.167 | 20.653 | 25.068 | 0.00 | 0.00 |
| ATOM | 7041 | HB3  | LYS | X | 466 | 32.090 | 21.845 | 24.739 | 0.00 | 0.00 |
| ATOM | 7042 | CG   | LYS | X | 466 | 34.192 | 22.465 | 24.411 | 0.00 | 0.00 |
| ATOM | 7043 | HG2  | LYS | X | 466 | 33.975 | 23.532 | 24.362 | 0.00 | 0.00 |
| ATOM | 7044 | HG3  | LYS | X | 466 | 35.142 | 22.485 | 24.945 | 0.00 | 0.00 |
| ATOM | 7045 | CD   | LYS | X | 466 | 34.263 | 21.995 | 22.934 | 0.00 | 0.00 |
| ATOM | 7046 | HD2  | LYS | X | 466 | 34.462 | 20.924 | 22.976 | 0.00 | 0.00 |
| ATOM | 7047 | HD3  | LYS | X | 466 | 33.336 | 22.056 | 22.363 | 0.00 | 0.00 |
| ATOM | 7048 | CE   | LYS | X | 466 | 35.393 | 22.597 | 22.140 | 0.00 | 0.00 |
| ATOM | 7049 | HE2  | LYS | X | 466 | 35.538 | 23.645 | 22.401 | 0.00 | 0.00 |
| ATOM | 7050 | HE3  | LYS | X | 466 | 36.361 | 22.166 | 22.397 | 0.00 | 0.00 |
| ATOM | 7051 | NZ   | LYS | X | 466 | 35.129 | 22.606 | 20.708 | 0.00 | 0.00 |
| ATOM | 7052 | HZ1  | LYS | X | 466 | 34.962 | 21.667 | 20.376 | 0.00 | 0.00 |
| ATOM | 7053 | HZ2  | LYS | X | 466 | 34.302 | 23.181 | 20.630 | 0.00 | 0.00 |
| ATOM | 7054 | HZ3  | LYS | X | 466 | 35.947 | 22.956 | 20.230 | 0.00 | 0.00 |
| ATOM | 7055 | C    | LYS | X | 466 | 31.898 | 21.715 | 27.425 | 0.00 | 0.00 |
| ATOM | 7056 | O    | LYS | X | 466 | 30.906 | 22.463 | 27.447 | 0.00 | 0.00 |
| ATOM | 7057 | N    | ILE | X | 467 | 31.911 | 20.501 | 27.920 | 0.00 | 0.00 |
| ATOM | 7058 | H    | ILE | X | 467 | 32.793 | 20.045 | 27.734 | 0.00 | 0.00 |
| ATOM | 7059 | CA   | ILE | X | 467 | 30.882 | 19.895 | 28.787 | 0.00 | 0.00 |
| ATOM | 7060 | HA   | ILE | X | 467 | 29.842 | 19.982 | 28.474 | 0.00 | 0.00 |
| ATOM | 7061 | CB   | ILE | X | 467 | 31.017 | 18.318 | 28.946 | 0.00 | 0.00 |
| ATOM | 7062 | HB   | ILE | X | 467 | 32.031 | 17.947 | 29.093 | 0.00 | 0.00 |
| ATOM | 7063 | CG2  | ILE | X | 467 | 30.061 | 17.829 | 30.104 | 0.00 | 0.00 |
| ATOM | 7064 | HG21 | ILE | X | 467 | 30.439 | 17.982 | 31.115 | 0.00 | 0.00 |
| ATOM | 7065 | HG22 | ILE | X | 467 | 29.917 | 16.751 | 30.024 | 0.00 | 0.00 |
| ATOM | 7066 | HG23 | ILE | X | 467 | 29.053 | 18.221 | 29.973 | 0.00 | 0.00 |
| ATOM | 7067 | CG1  | ILE | X | 467 | 30.599 | 17.759 | 27.628 | 0.00 | 0.00 |
| ATOM | 7068 | HG12 | ILE | X | 467 | 31.136 | 18.356 | 26.892 | 0.00 | 0.00 |
| ATOM | 7069 | HG13 | ILE | X | 467 | 31.025 | 16.761 | 27.524 | 0.00 | 0.00 |
| ATOM | 7070 | CD1  | ILE | X | 467 | 29.089 | 17.712 | 27.173 | 0.00 | 0.00 |
| ATOM | 7071 | HD11 | ILE | X | 467 | 29.117 | 17.300 | 26.164 | 0.00 | 0.00 |
| ATOM | 7072 | HD12 | ILE | X | 467 | 28.665 | 18.716 | 27.166 | 0.00 | 0.00 |
| ATOM | 7073 | HD13 | ILE | X | 467 | 28.503 | 17.063 | 27.824 | 0.00 | 0.00 |
| ATOM | 7074 | C    | ILE | X | 467 | 30.955 | 20.505 | 30.224 | 0.00 | 0.00 |
| ATOM | 7075 | O    | ILE | X | 467 | 29.886 | 20.682 | 30.825 | 0.00 | 0.00 |
| ATOM | 7076 | N    | PHE | X | 468 | 32.125 | 20.716 | 30.786 | 0.00 | 0.00 |
| ATOM | 7077 | H    | PHE | X | 468 | 32.904 | 20.473 | 30.191 | 0.00 | 0.00 |
| ATOM | 7078 | CA   | PHE | X | 468 | 32.422 | 21.215 | 32.132 | 0.00 | 0.00 |
| ATOM | 7079 | HA   | PHE | X | 468 | 31.634 | 20.828 | 32.778 | 0.00 | 0.00 |
| ATOM | 7080 | CB   | PHE | X | 468 | 33.803 | 20.753 | 32.512 | 0.00 | 0.00 |
| ATOM | 7081 | HB2  | PHE | X | 468 | 33.702 | 19.677 | 32.658 | 0.00 | 0.00 |
| ATOM | 7082 | HB3  | PHE | X | 468 | 34.490 | 20.964 | 31.693 | 0.00 | 0.00 |
| ATOM | 7083 | CG   | PHE | X | 468 | 34.373 | 21.297 | 33.825 | 0.00 | 0.00 |
| ATOM | 7084 | CD1  | PHE | X | 468 | 33.983 | 20.814 | 35.057 | 0.00 | 0.00 |
| ATOM | 7085 | HD1  | PHE | X | 468 | 33.170 | 20.115 | 35.185 | 0.00 | 0.00 |
| ATOM | 7086 | CE1  | PHE | X | 468 | 34.489 | 21.406 | 36.203 | 0.00 | 0.00 |
| ATOM | 7087 | HE1  | PHE | X | 468 | 34.210 | 21.139 | 37.212 | 0.00 | 0.00 |
| ATOM | 7088 | CZ   | PHE | X | 468 | 35.619 | 22.186 | 36.168 | 0.00 | 0.00 |
| ATOM | 7089 | HZ   | PHE | X | 468 | 36.066 | 22.451 | 37.114 | 0.00 | 0.00 |
| ATOM | 7090 | CE2  | PHE | X | 468 | 36.192 | 22.605 | 34.926 | 0.00 | 0.00 |
| ATOM | 7091 | HE2  | PHE | X | 468 | 37.076 | 23.213 | 34.803 | 0.00 | 0.00 |
| ATOM | 7092 | CD2  | PHE | X | 468 | 35.447 | 22.231 | 33.788 | 0.00 | 0.00 |
| ATOM | 7093 | HD2  | PHE | X | 468 | 35.728 | 22.568 | 32.802 | 0.00 | 0.00 |
| ATOM | 7094 | C    | PHE | X | 468 | 32.198 | 22.726 | 32.080 | 0.00 | 0.00 |
| ATOM | 7095 | O    | PHE | X | 468 | 31.703 | 23.287 | 33.054 | 0.00 | 0.00 |
| ATOM | 7096 | N    | ALA | X | 469 | 32.574 | 23.505 | 31.021 | 0.00 | 0.00 |
| ATOM | 7097 | H    | ALA | X | 469 | 33.011 | 23.081 | 30.215 | 0.00 | 0.00 |
| ATOM | 7098 | CA   | ALA | X | 469 | 32.246 | 24.910 | 30.912 | 0.00 | 0.00 |
| ATOM | 7099 | HA   | ALA | X | 469 | 32.602 | 25.452 | 31.788 | 0.00 | 0.00 |
| ATOM | 7100 | CB   | ALA | X | 469 | 32.835 | 25.620 | 29.677 | 0.00 | 0.00 |
| ATOM | 7101 | HB1  | ALA | X | 469 | 32.575 | 24.966 | 28.845 | 0.00 | 0.00 |
| ATOM | 7102 | HB2  | ALA | X | 469 | 33.909 | 25.583 | 29.854 | 0.00 | 0.00 |
| ATOM | 7103 | HB3  | ALA | X | 469 | 32.454 | 26.626 | 29.501 | 0.00 | 0.00 |
| ATOM | 7104 | C    | ALA | X | 469 | 30.730 | 25.025 | 30.892 | 0.00 | 0.00 |
| ATOM | 7105 | O    | ALA | X | 469 | 30.238 | 25.804 | 31.719 | 0.00 | 0.00 |
| ATOM | 7106 | N    | GLN | X | 470 | 29.917 | 24.275 | 30.071 | 0.00 | 0.00 |

|      |      |      |     |   |     |        |        |        |      |      |
|------|------|------|-----|---|-----|--------|--------|--------|------|------|
| ATOM | 7107 | H    | GLN | X | 470 | 30.386 | 23.614 | 29.469 | 0.00 | 0.00 |
| ATOM | 7108 | CA   | GLN | X | 470 | 28.419 | 24.255 | 30.164 | 0.00 | 0.00 |
| ATOM | 7109 | HA   | GLN | X | 470 | 28.013 | 25.236 | 29.916 | 0.00 | 0.00 |
| ATOM | 7110 | CB   | GLN | X | 470 | 27.846 | 23.199 | 29.271 | 0.00 | 0.00 |
| ATOM | 7111 | HB2  | GLN | X | 470 | 28.652 | 22.491 | 29.081 | 0.00 | 0.00 |
| ATOM | 7112 | HB3  | GLN | X | 470 | 26.995 | 22.712 | 29.747 | 0.00 | 0.00 |
| ATOM | 7113 | CG   | GLN | X | 470 | 27.358 | 23.740 | 27.925 | 0.00 | 0.00 |
| ATOM | 7114 | HG2  | GLN | X | 470 | 26.481 | 24.357 | 28.123 | 0.00 | 0.00 |
| ATOM | 7115 | HG3  | GLN | X | 470 | 28.096 | 24.347 | 27.401 | 0.00 | 0.00 |
| ATOM | 7116 | CD   | GLN | X | 470 | 26.955 | 22.654 | 27.014 | 0.00 | 0.00 |
| ATOM | 7117 | OE1  | GLN | X | 470 | 27.416 | 21.501 | 27.119 | 0.00 | 0.00 |
| ATOM | 7118 | NE2  | GLN | X | 470 | 25.922 | 22.882 | 26.212 | 0.00 | 0.00 |
| ATOM | 7119 | HE21 | GLN | X | 470 | 25.444 | 22.155 | 25.699 | 0.00 | 0.00 |
| ATOM | 7120 | HE22 | GLN | X | 470 | 25.529 | 23.813 | 26.211 | 0.00 | 0.00 |
| ATOM | 7121 | C    | GLN | X | 470 | 27.883 | 24.107 | 31.609 | 0.00 | 0.00 |
| ATOM | 7122 | O    | GLN | X | 470 | 26.857 | 24.742 | 32.040 | 0.00 | 0.00 |
| ATOM | 7123 | N    | ARG | X | 471 | 28.539 | 23.274 | 32.399 | 0.00 | 0.00 |
| ATOM | 7124 | H    | ARG | X | 471 | 29.296 | 22.827 | 31.902 | 0.00 | 0.00 |
| ATOM | 7125 | CA   | ARG | X | 471 | 28.077 | 22.833 | 33.719 | 0.00 | 0.00 |
| ATOM | 7126 | HA   | ARG | X | 471 | 26.997 | 22.683 | 33.742 | 0.00 | 0.00 |
| ATOM | 7127 | CB   | ARG | X | 471 | 28.753 | 21.498 | 34.074 | 0.00 | 0.00 |
| ATOM | 7128 | HB2  | ARG | X | 471 | 28.398 | 20.749 | 33.365 | 0.00 | 0.00 |
| ATOM | 7129 | HB3  | ARG | X | 471 | 29.834 | 21.540 | 33.944 | 0.00 | 0.00 |
| ATOM | 7130 | CG   | ARG | X | 471 | 28.388 | 20.997 | 35.488 | 0.00 | 0.00 |
| ATOM | 7131 | HG2  | ARG | X | 471 | 28.672 | 21.710 | 36.262 | 0.00 | 0.00 |
| ATOM | 7132 | HG3  | ARG | X | 471 | 27.325 | 20.776 | 35.589 | 0.00 | 0.00 |
| ATOM | 7133 | CD   | ARG | X | 471 | 29.145 | 19.688 | 35.612 | 0.00 | 0.00 |
| ATOM | 7134 | HD2  | ARG | X | 471 | 28.666 | 18.845 | 35.113 | 0.00 | 0.00 |
| ATOM | 7135 | HD3  | ARG | X | 471 | 30.078 | 19.835 | 35.068 | 0.00 | 0.00 |
| ATOM | 7136 | NE   | ARG | X | 471 | 29.444 | 19.366 | 37.018 | 0.00 | 0.00 |
| ATOM | 7137 | HE   | ARG | X | 471 | 28.784 | 19.545 | 37.761 | 0.00 | 0.00 |
| ATOM | 7138 | CZ   | ARG | X | 471 | 30.569 | 18.857 | 37.582 | 0.00 | 0.00 |
| ATOM | 7139 | NH1  | ARG | X | 471 | 31.603 | 18.531 | 36.891 | 0.00 | 0.00 |
| ATOM | 7140 | HH11 | ARG | X | 471 | 31.528 | 18.556 | 35.884 | 0.00 | 0.00 |
| ATOM | 7141 | HH12 | ARG | X | 471 | 32.442 | 18.143 | 37.300 | 0.00 | 0.00 |
| ATOM | 7142 | NH2  | ARG | X | 471 | 30.607 | 18.659 | 38.862 | 0.00 | 0.00 |
| ATOM | 7143 | HH21 | ARG | X | 471 | 29.728 | 18.402 | 39.287 | 0.00 | 0.00 |
| ATOM | 7144 | HH22 | ARG | X | 471 | 31.464 | 18.360 | 39.303 | 0.00 | 0.00 |
| ATOM | 7145 | C    | ARG | X | 471 | 28.376 | 23.852 | 34.840 | 0.00 | 0.00 |
| ATOM | 7146 | O    | ARG | X | 471 | 27.608 | 24.041 | 35.753 | 0.00 | 0.00 |
| ATOM | 7147 | N    | LEU | X | 472 | 29.543 | 24.453 | 34.821 | 0.00 | 0.00 |
| ATOM | 7148 | H    | LEU | X | 472 | 30.001 | 24.342 | 33.928 | 0.00 | 0.00 |
| ATOM | 7149 | CA   | LEU | X | 472 | 29.993 | 25.548 | 35.747 | 0.00 | 0.00 |
| ATOM | 7150 | HA   | LEU | X | 472 | 29.882 | 25.359 | 36.814 | 0.00 | 0.00 |
| ATOM | 7151 | CB   | LEU | X | 472 | 31.467 | 25.955 | 35.498 | 0.00 | 0.00 |
| ATOM | 7152 | HB2  | LEU | X | 472 | 31.588 | 26.213 | 34.446 | 0.00 | 0.00 |
| ATOM | 7153 | HB3  | LEU | X | 472 | 31.573 | 26.906 | 36.018 | 0.00 | 0.00 |
| ATOM | 7154 | CG   | LEU | X | 472 | 32.481 | 24.970 | 35.989 | 0.00 | 0.00 |
| ATOM | 7155 | HG   | LEU | X | 472 | 32.642 | 24.189 | 35.246 | 0.00 | 0.00 |
| ATOM | 7156 | CD1  | LEU | X | 472 | 33.719 | 25.714 | 35.907 | 0.00 | 0.00 |
| ATOM | 7157 | HD11 | LEU | X | 472 | 33.721 | 26.456 | 36.706 | 0.00 | 0.00 |
| ATOM | 7158 | HD12 | LEU | X | 472 | 33.773 | 26.223 | 34.944 | 0.00 | 0.00 |
| ATOM | 7159 | HD13 | LEU | X | 472 | 34.597 | 25.068 | 35.907 | 0.00 | 0.00 |
| ATOM | 7160 | CD2  | LEU | X | 472 | 32.345 | 24.263 | 37.299 | 0.00 | 0.00 |
| ATOM | 7161 | HD21 | LEU | X | 472 | 32.157 | 24.999 | 38.079 | 0.00 | 0.00 |
| ATOM | 7162 | HD22 | LEU | X | 472 | 31.408 | 23.707 | 37.266 | 0.00 | 0.00 |
| ATOM | 7163 | HD23 | LEU | X | 472 | 33.200 | 23.614 | 37.491 | 0.00 | 0.00 |
| ATOM | 7164 | C    | LEU | X | 472 | 29.123 | 26.749 | 35.576 | 0.00 | 0.00 |
| ATOM | 7165 | O    | LEU | X | 472 | 28.509 | 27.269 | 36.466 | 0.00 | 0.00 |
| ATOM | 7166 | N    | MET | X | 473 | 29.025 | 27.255 | 34.281 | 0.00 | 0.00 |
| ATOM | 7167 | H    | MET | X | 473 | 29.527 | 26.807 | 33.527 | 0.00 | 0.00 |
| ATOM | 7168 | CA   | MET | X | 473 | 27.918 | 28.227 | 33.833 | 0.00 | 0.00 |
| ATOM | 7169 | HA   | MET | X | 473 | 28.327 | 29.230 | 33.959 | 0.00 | 0.00 |
| ATOM | 7170 | CB   | MET | X | 473 | 27.632 | 28.006 | 32.382 | 0.00 | 0.00 |
| ATOM | 7171 | HB2  | MET | X | 473 | 27.570 | 26.954 | 32.105 | 0.00 | 0.00 |
| ATOM | 7172 | HB3  | MET | X | 473 | 26.686 | 28.482 | 32.125 | 0.00 | 0.00 |
| ATOM | 7173 | CG   | MET | X | 473 | 28.638 | 28.760 | 31.571 | 0.00 | 0.00 |



|      |      |      |     |   |     |        |        |        |      |      |
|------|------|------|-----|---|-----|--------|--------|--------|------|------|
| ATOM | 7174 | HG2  | MET | X | 473 | 28.711 | 29.808 | 31.861 | 0.00 | 0.00 |
| ATOM | 7175 | HG3  | MET | X | 473 | 29.561 | 28.205 | 31.740 | 0.00 | 0.00 |
| ATOM | 7176 | SD   | MET | X | 473 | 28.150 | 28.672 | 29.823 | 0.00 | 0.00 |
| ATOM | 7177 | CE   | MET | X | 473 | 29.364 | 29.859 | 29.228 | 0.00 | 0.00 |
| ATOM | 7178 | HE1  | MET | X | 473 | 30.367 | 29.539 | 29.507 | 0.00 | 0.00 |
| ATOM | 7179 | HE2  | MET | X | 473 | 29.262 | 30.023 | 28.155 | 0.00 | 0.00 |
| ATOM | 7180 | HE3  | MET | X | 473 | 29.268 | 30.841 | 29.692 | 0.00 | 0.00 |
| ATOM | 7181 | C    | MET | X | 473 | 26.602 | 28.073 | 34.571 | 0.00 | 0.00 |
| ATOM | 7182 | O    | MET | X | 473 | 26.083 | 29.016 | 35.135 | 0.00 | 0.00 |
| ATOM | 7183 | N    | ARG | X | 474 | 26.023 | 26.832 | 34.535 | 0.00 | 0.00 |
| ATOM | 7184 | H    | ARG | X | 474 | 26.389 | 26.184 | 33.853 | 0.00 | 0.00 |
| ATOM | 7185 | CA   | ARG | X | 474 | 24.739 | 26.514 | 35.167 | 0.00 | 0.00 |
| ATOM | 7186 | HA   | ARG | X | 474 | 24.042 | 27.279 | 34.826 | 0.00 | 0.00 |
| ATOM | 7187 | CB   | ARG | X | 474 | 24.274 | 25.178 | 34.625 | 0.00 | 0.00 |
| ATOM | 7188 | HB2  | ARG | X | 474 | 24.519 | 25.108 | 33.565 | 0.00 | 0.00 |
| ATOM | 7189 | HB3  | ARG | X | 474 | 24.812 | 24.365 | 35.111 | 0.00 | 0.00 |
| ATOM | 7190 | CG   | ARG | X | 474 | 22.857 | 24.797 | 34.708 | 0.00 | 0.00 |
| ATOM | 7191 | HG2  | ARG | X | 474 | 22.685 | 23.877 | 34.150 | 0.00 | 0.00 |
| ATOM | 7192 | HG3  | ARG | X | 474 | 22.604 | 24.614 | 35.753 | 0.00 | 0.00 |
| ATOM | 7193 | CD   | ARG | X | 474 | 21.899 | 25.859 | 34.121 | 0.00 | 0.00 |
| ATOM | 7194 | HD2  | ARG | X | 474 | 21.969 | 26.854 | 34.560 | 0.00 | 0.00 |
| ATOM | 7195 | HD3  | ARG | X | 474 | 22.073 | 25.956 | 33.050 | 0.00 | 0.00 |
| ATOM | 7196 | NE   | ARG | X | 474 | 20.495 | 25.360 | 34.291 | 0.00 | 0.00 |
| ATOM | 7197 | HE   | ARG | X | 474 | 20.359 | 24.573 | 34.908 | 0.00 | 0.00 |
| ATOM | 7198 | CZ   | ARG | X | 474 | 19.448 | 25.707 | 33.559 | 0.00 | 0.00 |
| ATOM | 7199 | NH1  | ARG | X | 474 | 19.446 | 26.814 | 32.828 | 0.00 | 0.00 |
| ATOM | 7200 | HH11 | ARG | X | 474 | 20.192 | 27.492 | 32.886 | 0.00 | 0.00 |
| ATOM | 7201 | HH12 | ARG | X | 474 | 18.597 | 27.103 | 32.364 | 0.00 | 0.00 |
| ATOM | 7202 | NH2  | ARG | X | 474 | 18.397 | 24.932 | 33.549 | 0.00 | 0.00 |
| ATOM | 7203 | HH21 | ARG | X | 474 | 18.391 | 24.100 | 34.121 | 0.00 | 0.00 |
| ATOM | 7204 | HH22 | ARG | X | 474 | 17.766 | 25.030 | 32.767 | 0.00 | 0.00 |
| ATOM | 7205 | C    | ARG | X | 474 | 24.767 | 26.579 | 36.671 | 0.00 | 0.00 |
| ATOM | 7206 | O    | ARG | X | 474 | 23.723 | 26.734 | 37.279 | 0.00 | 0.00 |
| ATOM | 7207 | N    | TYR | X | 475 | 25.844 | 26.444 | 37.415 | 0.00 | 0.00 |
| ATOM | 7208 | H    | TYR | X | 475 | 26.719 | 26.125 | 37.023 | 0.00 | 0.00 |
| ATOM | 7209 | CA   | TYR | X | 475 | 25.888 | 26.762 | 38.858 | 0.00 | 0.00 |
| ATOM | 7210 | HA   | TYR | X | 475 | 25.022 | 26.392 | 39.407 | 0.00 | 0.00 |
| ATOM | 7211 | CB   | TYR | X | 475 | 27.122 | 26.213 | 39.454 | 0.00 | 0.00 |
| ATOM | 7212 | HB2  | TYR | X | 475 | 27.930 | 26.719 | 38.926 | 0.00 | 0.00 |
| ATOM | 7213 | HB3  | TYR | X | 475 | 27.035 | 26.516 | 40.497 | 0.00 | 0.00 |
| ATOM | 7214 | CG   | TYR | X | 475 | 27.192 | 24.688 | 39.433 | 0.00 | 0.00 |
| ATOM | 7215 | CD1  | TYR | X | 475 | 26.132 | 23.776 | 39.800 | 0.00 | 0.00 |
| ATOM | 7216 | HD1  | TYR | X | 475 | 25.168 | 24.181 | 40.071 | 0.00 | 0.00 |
| ATOM | 7217 | CE1  | TYR | X | 475 | 26.366 | 22.409 | 39.796 | 0.00 | 0.00 |
| ATOM | 7218 | HE1  | TYR | X | 475 | 25.532 | 21.769 | 40.044 | 0.00 | 0.00 |
| ATOM | 7219 | CZ   | TYR | X | 475 | 27.647 | 21.852 | 39.435 | 0.00 | 0.00 |
| ATOM | 7220 | OH   | TYR | X | 475 | 27.797 | 20.537 | 39.460 | 0.00 | 0.00 |
| ATOM | 7221 | HH   | TYR | X | 475 | 26.956 | 20.082 | 39.550 | 0.00 | 0.00 |
| ATOM | 7222 | CE2  | TYR | X | 475 | 28.730 | 22.787 | 39.283 | 0.00 | 0.00 |
| ATOM | 7223 | HE2  | TYR | X | 475 | 29.745 | 22.420 | 39.252 | 0.00 | 0.00 |
| ATOM | 7224 | CD2  | TYR | X | 475 | 28.499 | 24.172 | 39.257 | 0.00 | 0.00 |
| ATOM | 7225 | HD2  | TYR | X | 475 | 29.341 | 24.829 | 39.097 | 0.00 | 0.00 |
| ATOM | 7226 | C    | TYR | X | 475 | 25.833 | 28.293 | 39.163 | 0.00 | 0.00 |
| ATOM | 7227 | O    | TYR | X | 475 | 24.900 | 28.707 | 39.861 | 0.00 | 0.00 |
| ATOM | 7228 | N    | TRP | X | 476 | 26.666 | 29.089 | 38.544 | 0.00 | 0.00 |
| ATOM | 7229 | H    | TRP | X | 476 | 27.381 | 28.661 | 37.974 | 0.00 | 0.00 |
| ATOM | 7230 | CA   | TRP | X | 476 | 26.613 | 30.567 | 38.714 | 0.00 | 0.00 |
| ATOM | 7231 | HA   | TRP | X | 476 | 26.801 | 30.777 | 39.767 | 0.00 | 0.00 |
| ATOM | 7232 | CB   | TRP | X | 476 | 27.794 | 31.300 | 38.016 | 0.00 | 0.00 |
| ATOM | 7233 | HB2  | TRP | X | 476 | 27.909 | 30.860 | 37.025 | 0.00 | 0.00 |
| ATOM | 7234 | HB3  | TRP | X | 476 | 27.466 | 32.332 | 37.893 | 0.00 | 0.00 |
| ATOM | 7235 | CG   | TRP | X | 476 | 29.081 | 31.481 | 38.688 | 0.00 | 0.00 |
| ATOM | 7236 | CD1  | TRP | X | 476 | 29.716 | 32.655 | 38.720 | 0.00 | 0.00 |
| ATOM | 7237 | HD1  | TRP | X | 476 | 29.508 | 33.597 | 38.234 | 0.00 | 0.00 |
| ATOM | 7238 | NE1  | TRP | X | 476 | 30.986 | 32.429 | 39.177 | 0.00 | 0.00 |
| ATOM | 7239 | HE1  | TRP | X | 476 | 31.739 | 33.090 | 39.306 | 0.00 | 0.00 |
| ATOM | 7240 | CE2  | TRP | X | 476 | 31.248 | 31.151 | 39.518 | 0.00 | 0.00 |

|      |      |      |     |   |     |        |        |        |      |      |
|------|------|------|-----|---|-----|--------|--------|--------|------|------|
| ATOM | 7241 | CZ2  | TRP | X | 476 | 32.355 | 30.486 | 40.100 | 0.00 | 0.00 |
| ATOM | 7242 | HZ2  | TRP | X | 476 | 33.277 | 30.980 | 40.371 | 0.00 | 0.00 |
| ATOM | 7243 | CH2  | TRP | X | 476 | 32.186 | 29.091 | 40.395 | 0.00 | 0.00 |
| ATOM | 7244 | HH2  | TRP | X | 476 | 32.973 | 28.447 | 40.759 | 0.00 | 0.00 |
| ATOM | 7245 | CZ3  | TRP | X | 476 | 30.973 | 28.453 | 40.160 | 0.00 | 0.00 |
| ATOM | 7246 | HZ3  | TRP | X | 476 | 30.923 | 27.388 | 40.328 | 0.00 | 0.00 |
| ATOM | 7247 | CE3  | TRP | X | 476 | 29.903 | 29.133 | 39.521 | 0.00 | 0.00 |
| ATOM | 7248 | HE3  | TRP | X | 476 | 29.015 | 28.560 | 39.300 | 0.00 | 0.00 |
| ATOM | 7249 | CD2  | TRP | X | 476 | 30.002 | 30.492 | 39.256 | 0.00 | 0.00 |
| ATOM | 7250 | C    | TRP | X | 476 | 25.220 | 31.190 | 38.215 | 0.00 | 0.00 |
| ATOM | 7251 | O    | TRP | X | 476 | 24.530 | 32.033 | 38.931 | 0.00 | 0.00 |
| ATOM | 7252 | N    | ALA | X | 477 | 24.751 | 30.778 | 36.964 | 0.00 | 0.00 |
| ATOM | 7253 | H    | ALA | X | 477 | 25.283 | 30.141 | 36.387 | 0.00 | 0.00 |
| ATOM | 7254 | CA   | ALA | X | 477 | 23.376 | 31.115 | 36.429 | 0.00 | 0.00 |
| ATOM | 7255 | HA   | ALA | X | 477 | 23.356 | 32.201 | 36.517 | 0.00 | 0.00 |
| ATOM | 7256 | CB   | ALA | X | 477 | 23.265 | 30.614 | 34.989 | 0.00 | 0.00 |
| ATOM | 7257 | HB1  | ALA | X | 477 | 23.220 | 29.535 | 34.847 | 0.00 | 0.00 |
| ATOM | 7258 | HB2  | ALA | X | 477 | 24.143 | 30.968 | 34.449 | 0.00 | 0.00 |
| ATOM | 7259 | HB3  | ALA | X | 477 | 22.328 | 31.010 | 34.598 | 0.00 | 0.00 |
| ATOM | 7260 | C    | ALA | X | 477 | 22.217 | 30.712 | 37.356 | 0.00 | 0.00 |
| ATOM | 7261 | O    | ALA | X | 477 | 21.441 | 31.594 | 37.580 | 0.00 | 0.00 |
| ATOM | 7262 | N    | ASN | X | 478 | 22.060 | 29.483 | 37.892 | 0.00 | 0.00 |
| ATOM | 7263 | H    | ASN | X | 478 | 22.804 | 28.893 | 37.546 | 0.00 | 0.00 |
| ATOM | 7264 | CA   | ASN | X | 478 | 21.077 | 29.004 | 38.819 | 0.00 | 0.00 |
| ATOM | 7265 | HA   | ASN | X | 478 | 20.086 | 29.067 | 38.369 | 0.00 | 0.00 |
| ATOM | 7266 | CB   | ASN | X | 478 | 21.240 | 27.504 | 39.198 | 0.00 | 0.00 |
| ATOM | 7267 | HB2  | ASN | X | 478 | 22.278 | 27.176 | 39.260 | 0.00 | 0.00 |
| ATOM | 7268 | HB3  | ASN | X | 478 | 20.627 | 27.123 | 40.015 | 0.00 | 0.00 |
| ATOM | 7269 | CG   | ASN | X | 478 | 20.677 | 26.710 | 38.042 | 0.00 | 0.00 |
| ATOM | 7270 | OD1  | ASN | X | 478 | 19.897 | 27.174 | 37.180 | 0.00 | 0.00 |
| ATOM | 7271 | ND2  | ASN | X | 478 | 20.938 | 25.431 | 38.040 | 0.00 | 0.00 |
| ATOM | 7272 | HD21 | ASN | X | 478 | 20.485 | 24.877 | 37.327 | 0.00 | 0.00 |
| ATOM | 7273 | HD22 | ASN | X | 478 | 21.673 | 25.123 | 38.661 | 0.00 | 0.00 |
| ATOM | 7274 | C    | ASN | X | 478 | 21.074 | 29.901 | 40.064 | 0.00 | 0.00 |
| ATOM | 7275 | O    | ASN | X | 478 | 20.028 | 30.530 | 40.459 | 0.00 | 0.00 |
| ATOM | 7276 | N    | PHE | X | 479 | 22.260 | 30.198 | 40.655 | 0.00 | 0.00 |
| ATOM | 7277 | H    | PHE | X | 479 | 23.142 | 29.781 | 40.396 | 0.00 | 0.00 |
| ATOM | 7278 | CA   | PHE | X | 479 | 22.338 | 31.215 | 41.817 | 0.00 | 0.00 |
| ATOM | 7279 | HA   | PHE | X | 479 | 21.838 | 30.779 | 42.682 | 0.00 | 0.00 |
| ATOM | 7280 | CB   | PHE | X | 479 | 23.779 | 31.263 | 42.284 | 0.00 | 0.00 |
| ATOM | 7281 | HB2  | PHE | X | 479 | 23.960 | 30.247 | 42.635 | 0.00 | 0.00 |
| ATOM | 7282 | HB3  | PHE | X | 479 | 24.262 | 31.471 | 41.330 | 0.00 | 0.00 |
| ATOM | 7283 | CG   | PHE | X | 479 | 24.036 | 32.278 | 43.315 | 0.00 | 0.00 |
| ATOM | 7284 | CD1  | PHE | X | 479 | 23.654 | 32.002 | 44.646 | 0.00 | 0.00 |
| ATOM | 7285 | HD1  | PHE | X | 479 | 23.196 | 31.078 | 44.968 | 0.00 | 0.00 |
| ATOM | 7286 | CE1  | PHE | X | 479 | 23.964 | 32.950 | 45.644 | 0.00 | 0.00 |
| ATOM | 7287 | HE1  | PHE | X | 479 | 23.794 | 32.705 | 46.682 | 0.00 | 0.00 |
| ATOM | 7288 | CZ   | PHE | X | 479 | 24.458 | 34.239 | 45.234 | 0.00 | 0.00 |
| ATOM | 7289 | HZ   | PHE | X | 479 | 24.856 | 35.014 | 45.874 | 0.00 | 0.00 |
| ATOM | 7290 | CE2  | PHE | X | 479 | 24.753 | 34.517 | 43.876 | 0.00 | 0.00 |
| ATOM | 7291 | HE2  | PHE | X | 479 | 25.140 | 35.471 | 43.550 | 0.00 | 0.00 |
| ATOM | 7292 | CD2  | PHE | X | 479 | 24.494 | 33.555 | 42.883 | 0.00 | 0.00 |
| ATOM | 7293 | HD2  | PHE | X | 479 | 24.768 | 33.737 | 41.854 | 0.00 | 0.00 |
| ATOM | 7294 | C    | PHE | X | 479 | 21.788 | 32.659 | 41.498 | 0.00 | 0.00 |
| ATOM | 7295 | O    | PHE | X | 479 | 21.068 | 33.204 | 42.295 | 0.00 | 0.00 |
| ATOM | 7296 | N    | ALA | X | 480 | 22.020 | 33.146 | 40.296 | 0.00 | 0.00 |
| ATOM | 7297 | H    | ALA | X | 480 | 22.470 | 32.595 | 39.579 | 0.00 | 0.00 |
| ATOM | 7298 | CA   | ALA | X | 480 | 21.542 | 34.451 | 39.877 | 0.00 | 0.00 |
| ATOM | 7299 | HA   | ALA | X | 480 | 21.864 | 35.141 | 40.657 | 0.00 | 0.00 |
| ATOM | 7300 | CB   | ALA | X | 480 | 22.392 | 34.819 | 38.627 | 0.00 | 0.00 |
| ATOM | 7301 | HB1  | ALA | X | 480 | 23.370 | 34.337 | 38.610 | 0.00 | 0.00 |
| ATOM | 7302 | HB2  | ALA | X | 480 | 22.470 | 35.900 | 38.512 | 0.00 | 0.00 |
| ATOM | 7303 | HB3  | ALA | X | 480 | 21.758 | 34.503 | 37.799 | 0.00 | 0.00 |
| ATOM | 7304 | C    | ALA | X | 480 | 20.029 | 34.573 | 39.695 | 0.00 | 0.00 |
| ATOM | 7305 | O    | ALA | X | 480 | 19.495 | 35.662 | 39.963 | 0.00 | 0.00 |
| ATOM | 7306 | N    | ARG | X | 481 | 19.429 | 33.434 | 39.394 | 0.00 | 0.00 |
| ATOM | 7307 | H    | ARG | X | 481 | 20.127 | 32.720 | 39.246 | 0.00 | 0.00 |

|      |      |      |     |   |     |        |        |        |      |      |
|------|------|------|-----|---|-----|--------|--------|--------|------|------|
| ATOM | 7308 | CA   | ARG | X | 481 | 18.012 | 33.253 | 39.419 | 0.00 | 0.00 |
| ATOM | 7309 | HA   | ARG | X | 481 | 17.514 | 34.148 | 39.047 | 0.00 | 0.00 |
| ATOM | 7310 | CB   | ARG | X | 481 | 17.541 | 32.107 | 38.507 | 0.00 | 0.00 |
| ATOM | 7311 | HB2  | ARG | X | 481 | 17.918 | 31.182 | 38.943 | 0.00 | 0.00 |
| ATOM | 7312 | HB3  | ARG | X | 481 | 16.457 | 32.044 | 38.406 | 0.00 | 0.00 |
| ATOM | 7313 | CG   | ARG | X | 481 | 18.012 | 32.195 | 37.038 | 0.00 | 0.00 |
| ATOM | 7314 | HG2  | ARG | X | 481 | 17.388 | 32.938 | 36.541 | 0.00 | 0.00 |
| ATOM | 7315 | HG3  | ARG | X | 481 | 19.062 | 32.475 | 36.946 | 0.00 | 0.00 |
| ATOM | 7316 | CD   | ARG | X | 481 | 18.018 | 30.903 | 36.344 | 0.00 | 0.00 |
| ATOM | 7317 | HD2  | ARG | X | 481 | 18.723 | 30.187 | 36.765 | 0.00 | 0.00 |
| ATOM | 7318 | HD3  | ARG | X | 481 | 16.983 | 30.565 | 36.391 | 0.00 | 0.00 |
| ATOM | 7319 | NE   | ARG | X | 481 | 18.357 | 31.082 | 34.932 | 0.00 | 0.00 |
| ATOM | 7320 | HE   | ARG | X | 481 | 18.057 | 31.940 | 34.492 | 0.00 | 0.00 |
| ATOM | 7321 | CZ   | ARG | X | 481 | 19.307 | 30.452 | 34.278 | 0.00 | 0.00 |
| ATOM | 7322 | NH1  | ARG | X | 481 | 19.959 | 29.453 | 34.844 | 0.00 | 0.00 |
| ATOM | 7323 | HH11 | ARG | X | 481 | 19.711 | 29.012 | 35.718 | 0.00 | 0.00 |
| ATOM | 7324 | HH12 | ARG | X | 481 | 20.709 | 29.104 | 34.264 | 0.00 | 0.00 |
| ATOM | 7325 | NH2  | ARG | X | 481 | 19.737 | 30.893 | 33.094 | 0.00 | 0.00 |
| ATOM | 7326 | HH21 | ARG | X | 481 | 19.173 | 31.536 | 32.557 | 0.00 | 0.00 |
| ATOM | 7327 | HH22 | ARG | X | 481 | 20.335 | 30.249 | 32.597 | 0.00 | 0.00 |
| ATOM | 7328 | C    | ARG | X | 481 | 17.422 | 33.089 | 40.832 | 0.00 | 0.00 |
| ATOM | 7329 | O    | ARG | X | 481 | 16.794 | 33.990 | 41.377 | 0.00 | 0.00 |
| ATOM | 7330 | N    | THR | X | 482 | 17.735 | 32.024 | 41.491 | 0.00 | 0.00 |
| ATOM | 7331 | H    | THR | X | 482 | 18.422 | 31.430 | 41.049 | 0.00 | 0.00 |
| ATOM | 7332 | CA   | THR | X | 482 | 17.002 | 31.545 | 42.694 | 0.00 | 0.00 |
| ATOM | 7333 | HA   | THR | X | 482 | 16.123 | 32.186 | 42.761 | 0.00 | 0.00 |
| ATOM | 7334 | CB   | THR | X | 482 | 16.585 | 30.065 | 42.568 | 0.00 | 0.00 |
| ATOM | 7335 | HB   | THR | X | 482 | 16.087 | 29.787 | 43.497 | 0.00 | 0.00 |
| ATOM | 7336 | CG2  | THR | X | 482 | 15.630 | 29.871 | 41.399 | 0.00 | 0.00 |
| ATOM | 7337 | HG21 | THR | X | 482 | 15.259 | 30.755 | 40.881 | 0.00 | 0.00 |
| ATOM | 7338 | HG22 | THR | X | 482 | 14.771 | 29.339 | 41.808 | 0.00 | 0.00 |
| ATOM | 7339 | HG23 | THR | X | 482 | 16.119 | 29.379 | 40.558 | 0.00 | 0.00 |
| ATOM | 7340 | OG1  | THR | X | 482 | 17.654 | 29.164 | 42.265 | 0.00 | 0.00 |
| ATOM | 7341 | HG1  | THR | X | 482 | 17.695 | 29.140 | 41.306 | 0.00 | 0.00 |
| ATOM | 7342 | C    | THR | X | 482 | 17.709 | 31.825 | 44.038 | 0.00 | 0.00 |
| ATOM | 7343 | O    | THR | X | 482 | 17.220 | 31.529 | 45.059 | 0.00 | 0.00 |
| ATOM | 7344 | N    | GLY | X | 483 | 18.945 | 32.371 | 43.962 | 0.00 | 0.00 |
| ATOM | 7345 | H    | GLY | X | 483 | 19.388 | 32.554 | 43.073 | 0.00 | 0.00 |
| ATOM | 7346 | CA   | GLY | X | 483 | 19.850 | 32.557 | 45.080 | 0.00 | 0.00 |
| ATOM | 7347 | HA2  | GLY | X | 483 | 20.644 | 33.271 | 44.858 | 0.00 | 0.00 |
| ATOM | 7348 | HA3  | GLY | X | 483 | 19.170 | 32.975 | 45.822 | 0.00 | 0.00 |
| ATOM | 7349 | C    | GLY | X | 483 | 20.368 | 31.257 | 45.551 | 0.00 | 0.00 |
| ATOM | 7350 | O    | GLY | X | 483 | 20.633 | 31.117 | 46.704 | 0.00 | 0.00 |
| ATOM | 7351 | N    | ASP | X | 484 | 20.452 | 30.232 | 44.688 | 0.00 | 0.00 |
| ATOM | 7352 | H    | ASP | X | 484 | 20.081 | 30.385 | 43.761 | 0.00 | 0.00 |
| ATOM | 7353 | CA   | ASP | X | 484 | 20.880 | 28.811 | 44.923 | 0.00 | 0.00 |
| ATOM | 7354 | HA   | ASP | X | 484 | 21.703 | 28.842 | 45.636 | 0.00 | 0.00 |
| ATOM | 7355 | CB   | ASP | X | 484 | 19.601 | 28.094 | 45.458 | 0.00 | 0.00 |
| ATOM | 7356 | HB2  | ASP | X | 484 | 19.039 | 28.718 | 46.154 | 0.00 | 0.00 |
| ATOM | 7357 | HB3  | ASP | X | 484 | 18.889 | 27.904 | 44.655 | 0.00 | 0.00 |
| ATOM | 7358 | CG   | ASP | X | 484 | 19.884 | 26.660 | 45.926 | 0.00 | 0.00 |
| ATOM | 7359 | OD1  | ASP | X | 484 | 19.560 | 26.361 | 47.091 | 0.00 | 0.00 |
| ATOM | 7360 | OD2  | ASP | X | 484 | 20.347 | 25.875 | 45.068 | 0.00 | 0.00 |
| ATOM | 7361 | C    | ASP | X | 484 | 21.390 | 28.137 | 43.693 | 0.00 | 0.00 |
| ATOM | 7362 | O    | ASP | X | 484 | 20.774 | 28.256 | 42.641 | 0.00 | 0.00 |
| ATOM | 7363 | N    | PRO | X | 485 | 22.517 | 27.414 | 43.690 | 0.00 | 0.00 |
| ATOM | 7364 | CD   | PRO | X | 485 | 23.536 | 27.476 | 44.718 | 0.00 | 0.00 |
| ATOM | 7365 | HD2  | PRO | X | 485 | 23.533 | 26.639 | 45.416 | 0.00 | 0.00 |
| ATOM | 7366 | HD3  | PRO | X | 485 | 23.451 | 28.366 | 45.341 | 0.00 | 0.00 |
| ATOM | 7367 | CG   | PRO | X | 485 | 24.900 | 27.483 | 44.033 | 0.00 | 0.00 |
| ATOM | 7368 | HG2  | PRO | X | 485 | 25.685 | 27.138 | 44.706 | 0.00 | 0.00 |
| ATOM | 7369 | HG3  | PRO | X | 485 | 25.095 | 28.404 | 43.485 | 0.00 | 0.00 |
| ATOM | 7370 | CB   | PRO | X | 485 | 24.607 | 26.439 | 42.990 | 0.00 | 0.00 |
| ATOM | 7371 | HB2  | PRO | X | 485 | 24.585 | 25.420 | 43.378 | 0.00 | 0.00 |
| ATOM | 7372 | HB3  | PRO | X | 485 | 25.286 | 26.538 | 42.143 | 0.00 | 0.00 |
| ATOM | 7373 | CA   | PRO | X | 485 | 23.171 | 26.812 | 42.546 | 0.00 | 0.00 |
| ATOM | 7374 | HA   | PRO | X | 485 | 23.254 | 27.586 | 41.783 | 0.00 | 0.00 |

|      |      |      |     |   |     |        |        |        |      |      |
|------|------|------|-----|---|-----|--------|--------|--------|------|------|
| ATOM | 7375 | C    | PRO | X | 485 | 22.391 | 25.609 | 41.927 | 0.00 | 0.00 |
| ATOM | 7376 | O    | PRO | X | 485 | 22.961 | 25.102 | 41.024 | 0.00 | 0.00 |
| ATOM | 7377 | N    | ASN | X | 486 | 21.231 | 25.212 | 42.333 | 0.00 | 0.00 |
| ATOM | 7378 | H    | ASN | X | 486 | 20.804 | 25.689 | 43.113 | 0.00 | 0.00 |
| ATOM | 7379 | CA   | ASN | X | 486 | 20.553 | 23.955 | 41.991 | 0.00 | 0.00 |
| ATOM | 7380 | HA   | ASN | X | 486 | 21.344 | 23.291 | 41.642 | 0.00 | 0.00 |
| ATOM | 7381 | CB   | ASN | X | 486 | 20.095 | 23.362 | 43.313 | 0.00 | 0.00 |
| ATOM | 7382 | HB2  | ASN | X | 486 | 20.901 | 23.379 | 44.047 | 0.00 | 0.00 |
| ATOM | 7383 | HB3  | ASN | X | 486 | 19.252 | 23.985 | 43.611 | 0.00 | 0.00 |
| ATOM | 7384 | CG   | ASN | X | 486 | 19.667 | 21.900 | 43.296 | 0.00 | 0.00 |
| ATOM | 7385 | OD1  | ASN | X | 486 | 19.630 | 21.187 | 42.290 | 0.00 | 0.00 |
| ATOM | 7386 | ND2  | ASN | X | 486 | 19.384 | 21.360 | 44.466 | 0.00 | 0.00 |
| ATOM | 7387 | HD21 | ASN | X | 486 | 19.065 | 20.405 | 44.383 | 0.00 | 0.00 |
| ATOM | 7388 | HD22 | ASN | X | 486 | 19.150 | 21.901 | 45.286 | 0.00 | 0.00 |
| ATOM | 7389 | C    | ASN | X | 486 | 19.389 | 24.171 | 41.009 | 0.00 | 0.00 |
| ATOM | 7390 | O    | ASN | X | 486 | 18.702 | 25.235 | 41.062 | 0.00 | 0.00 |
| ATOM | 7391 | N    | GLU | X | 487 | 19.013 | 23.203 | 40.153 | 0.00 | 0.00 |
| ATOM | 7392 | H    | GLU | X | 487 | 19.566 | 22.358 | 40.146 | 0.00 | 0.00 |
| ATOM | 7393 | CA   | GLU | X | 487 | 17.751 | 23.284 | 39.404 | 0.00 | 0.00 |
| ATOM | 7394 | HA   | GLU | X | 487 | 17.799 | 24.231 | 38.867 | 0.00 | 0.00 |
| ATOM | 7395 | CB   | GLU | X | 487 | 17.581 | 22.076 | 38.492 | 0.00 | 0.00 |
| ATOM | 7396 | HB2  | GLU | X | 487 | 17.602 | 21.241 | 39.192 | 0.00 | 0.00 |
| ATOM | 7397 | HB3  | GLU | X | 487 | 16.569 | 22.145 | 38.093 | 0.00 | 0.00 |
| ATOM | 7398 | CG   | GLU | X | 487 | 18.477 | 21.657 | 37.283 | 0.00 | 0.00 |
| ATOM | 7399 | HG2  | GLU | X | 487 | 19.405 | 21.309 | 37.736 | 0.00 | 0.00 |
| ATOM | 7400 | HG3  | GLU | X | 487 | 18.133 | 20.728 | 36.830 | 0.00 | 0.00 |
| ATOM | 7401 | CD   | GLU | X | 487 | 18.825 | 22.750 | 36.266 | 0.00 | 0.00 |
| ATOM | 7402 | OE1  | GLU | X | 487 | 17.899 | 23.291 | 35.650 | 0.00 | 0.00 |
| ATOM | 7403 | OE2  | GLU | X | 487 | 20.015 | 22.989 | 36.020 | 0.00 | 0.00 |
| ATOM | 7404 | C    | GLU | X | 487 | 16.583 | 23.266 | 40.477 | 0.00 | 0.00 |
| ATOM | 7405 | O    | GLU | X | 487 | 16.598 | 22.292 | 41.245 | 0.00 | 0.00 |
| ATOM | 7406 | N    | PRO | X | 488 | 15.598 | 24.161 | 40.336 | 0.00 | 0.00 |
| ATOM | 7407 | CD   | PRO | X | 488 | 15.625 | 25.373 | 39.467 | 0.00 | 0.00 |
| ATOM | 7408 | HD2  | PRO | X | 488 | 15.575 | 24.948 | 38.464 | 0.00 | 0.00 |
| ATOM | 7409 | HD3  | PRO | X | 488 | 16.564 | 25.908 | 39.604 | 0.00 | 0.00 |
| ATOM | 7410 | CG   | PRO | X | 488 | 14.444 | 26.198 | 39.905 | 0.00 | 0.00 |
| ATOM | 7411 | HG2  | PRO | X | 488 | 14.121 | 26.845 | 39.090 | 0.00 | 0.00 |
| ATOM | 7412 | HG3  | PRO | X | 488 | 14.759 | 26.825 | 40.739 | 0.00 | 0.00 |
| ATOM | 7413 | CB   | PRO | X | 488 | 13.501 | 25.134 | 40.510 | 0.00 | 0.00 |
| ATOM | 7414 | HB2  | PRO | X | 488 | 12.980 | 24.641 | 39.689 | 0.00 | 0.00 |
| ATOM | 7415 | HB3  | PRO | X | 488 | 12.829 | 25.530 | 41.271 | 0.00 | 0.00 |
| ATOM | 7416 | CA   | PRO | X | 488 | 14.456 | 24.089 | 41.119 | 0.00 | 0.00 |
| ATOM | 7417 | HA   | PRO | X | 488 | 14.667 | 24.577 | 42.071 | 0.00 | 0.00 |
| ATOM | 7418 | C    | PRO | X | 488 | 13.872 | 22.688 | 41.403 | 0.00 | 0.00 |
| ATOM | 7419 | O    | PRO | X | 488 | 13.431 | 22.496 | 42.545 | 0.00 | 0.00 |
| ATOM | 7420 | N    | ARG | X | 489 | 13.936 | 21.710 | 40.456 | 0.00 | 0.00 |
| ATOM | 7421 | H    | ARG | X | 489 | 14.241 | 21.990 | 39.535 | 0.00 | 0.00 |
| ATOM | 7422 | CA   | ARG | X | 489 | 13.463 | 20.301 | 40.617 | 0.00 | 0.00 |
| ATOM | 7423 | HA   | ARG | X | 489 | 12.483 | 20.356 | 41.091 | 0.00 | 0.00 |
| ATOM | 7424 | CB   | ARG | X | 489 | 13.496 | 19.529 | 39.259 | 0.00 | 0.00 |
| ATOM | 7425 | HB2  | ARG | X | 489 | 13.259 | 18.482 | 39.448 | 0.00 | 0.00 |
| ATOM | 7426 | HB3  | ARG | X | 489 | 12.701 | 19.976 | 38.662 | 0.00 | 0.00 |
| ATOM | 7427 | CG   | ARG | X | 489 | 14.808 | 19.488 | 38.476 | 0.00 | 0.00 |
| ATOM | 7428 | HG2  | ARG | X | 489 | 15.218 | 20.497 | 38.453 | 0.00 | 0.00 |
| ATOM | 7429 | HG3  | ARG | X | 489 | 15.560 | 18.824 | 38.902 | 0.00 | 0.00 |
| ATOM | 7430 | CD   | ARG | X | 489 | 14.539 | 19.099 | 37.016 | 0.00 | 0.00 |
| ATOM | 7431 | HD2  | ARG | X | 489 | 14.166 | 18.075 | 37.031 | 0.00 | 0.00 |
| ATOM | 7432 | HD3  | ARG | X | 489 | 13.812 | 19.816 | 36.634 | 0.00 | 0.00 |
| ATOM | 7433 | NE   | ARG | X | 489 | 15.690 | 19.312 | 36.159 | 0.00 | 0.00 |
| ATOM | 7434 | HE   | ARG | X | 489 | 15.579 | 20.045 | 35.474 | 0.00 | 0.00 |
| ATOM | 7435 | CZ   | ARG | X | 489 | 16.567 | 18.343 | 35.866 | 0.00 | 0.00 |
| ATOM | 7436 | NH1  | ARG | X | 489 | 17.430 | 18.502 | 34.918 | 0.00 | 0.00 |
| ATOM | 7437 | HH11 | ARG | X | 489 | 17.457 | 19.373 | 34.407 | 0.00 | 0.00 |
| ATOM | 7438 | HH12 | ARG | X | 489 | 18.146 | 17.812 | 34.743 | 0.00 | 0.00 |
| ATOM | 7439 | NH2  | ARG | X | 489 | 16.634 | 17.253 | 36.624 | 0.00 | 0.00 |
| ATOM | 7440 | HH21 | ARG | X | 489 | 15.865 | 17.103 | 37.262 | 0.00 | 0.00 |
| ATOM | 7441 | HH22 | ARG | X | 489 | 17.313 | 16.539 | 36.404 | 0.00 | 0.00 |

|      |      |     |     |   |     |        |        |        |      |      |
|------|------|-----|-----|---|-----|--------|--------|--------|------|------|
| ATOM | 7442 | C   | ARG | X | 489 | 14.187 | 19.431 | 41.676 | 0.00 | 0.00 |
| ATOM | 7443 | O   | ARG | X | 489 | 13.491 | 18.564 | 42.150 | 0.00 | 0.00 |
| ATOM | 7444 | N   | ASP | X | 490 | 15.477 | 19.618 | 41.877 | 0.00 | 0.00 |
| ATOM | 7445 | H   | ASP | X | 490 | 15.855 | 20.324 | 41.262 | 0.00 | 0.00 |
| ATOM | 7446 | CA  | ASP | X | 490 | 16.387 | 18.703 | 42.580 | 0.00 | 0.00 |
| ATOM | 7447 | HA  | ASP | X | 490 | 17.271 | 19.331 | 42.697 | 0.00 | 0.00 |
| ATOM | 7448 | CB  | ASP | X | 490 | 15.954 | 18.533 | 43.980 | 0.00 | 0.00 |
| ATOM | 7449 | HB2 | ASP | X | 490 | 15.483 | 19.453 | 44.328 | 0.00 | 0.00 |
| ATOM | 7450 | HB3 | ASP | X | 490 | 15.271 | 17.684 | 43.971 | 0.00 | 0.00 |
| ATOM | 7451 | CG  | ASP | X | 490 | 17.042 | 18.223 | 44.926 | 0.00 | 0.00 |
| ATOM | 7452 | OD1 | ASP | X | 490 | 17.092 | 17.056 | 45.348 | 0.00 | 0.00 |
| ATOM | 7453 | OD2 | ASP | X | 490 | 17.805 | 19.131 | 45.293 | 0.00 | 0.00 |
| ATOM | 7454 | C   | ASP | X | 490 | 16.695 | 17.496 | 41.765 | 0.00 | 0.00 |
| ATOM | 7455 | O   | ASP | X | 490 | 15.940 | 16.549 | 41.845 | 0.00 | 0.00 |
| ATOM | 7456 | N   | PRO | X | 491 | 17.777 | 17.426 | 40.906 | 0.00 | 0.00 |
| ATOM | 7457 | CD  | PRO | X | 491 | 18.676 | 18.579 | 40.694 | 0.00 | 0.00 |
| ATOM | 7458 | HD2 | PRO | X | 491 | 19.621 | 18.445 | 41.221 | 0.00 | 0.00 |
| ATOM | 7459 | HD3 | PRO | X | 491 | 18.254 | 19.541 | 40.984 | 0.00 | 0.00 |
| ATOM | 7460 | CG  | PRO | X | 491 | 18.868 | 18.590 | 39.197 | 0.00 | 0.00 |
| ATOM | 7461 | HG2 | PRO | X | 491 | 19.805 | 19.075 | 38.927 | 0.00 | 0.00 |
| ATOM | 7462 | HG3 | PRO | X | 491 | 17.966 | 19.000 | 38.741 | 0.00 | 0.00 |
| ATOM | 7463 | CB  | PRO | X | 491 | 18.972 | 17.045 | 38.937 | 0.00 | 0.00 |
| ATOM | 7464 | HB2 | PRO | X | 491 | 20.036 | 16.832 | 39.042 | 0.00 | 0.00 |
| ATOM | 7465 | HB3 | PRO | X | 491 | 18.721 | 16.770 | 37.913 | 0.00 | 0.00 |
| ATOM | 7466 | CA  | PRO | X | 491 | 18.162 | 16.321 | 39.991 | 0.00 | 0.00 |
| ATOM | 7467 | HA  | PRO | X | 491 | 17.223 | 15.951 | 39.580 | 0.00 | 0.00 |
| ATOM | 7468 | C   | PRO | X | 491 | 18.984 | 15.249 | 40.761 | 0.00 | 0.00 |
| ATOM | 7469 | O   | PRO | X | 491 | 19.718 | 15.557 | 41.718 | 0.00 | 0.00 |
| ATOM | 7470 | N   | LYS | X | 492 | 18.927 | 13.967 | 40.375 | 0.00 | 0.00 |
| ATOM | 7471 | H   | LYS | X | 492 | 18.463 | 13.813 | 39.491 | 0.00 | 0.00 |
| ATOM | 7472 | CA  | LYS | X | 492 | 19.779 | 12.888 | 40.932 | 0.00 | 0.00 |
| ATOM | 7473 | HA  | LYS | X | 492 | 19.466 | 12.703 | 41.959 | 0.00 | 0.00 |
| ATOM | 7474 | CB  | LYS | X | 492 | 19.338 | 11.554 | 40.226 | 0.00 | 0.00 |
| ATOM | 7475 | HB2 | LYS | X | 492 | 19.820 | 10.707 | 40.715 | 0.00 | 0.00 |
| ATOM | 7476 | HB3 | LYS | X | 492 | 18.293 | 11.407 | 40.503 | 0.00 | 0.00 |
| ATOM | 7477 | CG  | LYS | X | 492 | 19.588 | 11.520 | 38.693 | 0.00 | 0.00 |
| ATOM | 7478 | HG2 | LYS | X | 492 | 19.398 | 12.480 | 38.213 | 0.00 | 0.00 |
| ATOM | 7479 | HG3 | LYS | X | 492 | 20.605 | 11.179 | 38.495 | 0.00 | 0.00 |
| ATOM | 7480 | CD  | LYS | X | 492 | 18.731 | 10.462 | 37.977 | 0.00 | 0.00 |
| ATOM | 7481 | HD2 | LYS | X | 492 | 18.766 | 9.516  | 38.519 | 0.00 | 0.00 |
| ATOM | 7482 | HD3 | LYS | X | 492 | 17.688 | 10.771 | 38.048 | 0.00 | 0.00 |
| ATOM | 7483 | CE  | LYS | X | 492 | 19.092 | 10.117 | 36.569 | 0.00 | 0.00 |
| ATOM | 7484 | HE2 | LYS | X | 492 | 20.175 | 10.159 | 36.451 | 0.00 | 0.00 |
| ATOM | 7485 | HE3 | LYS | X | 492 | 18.725 | 9.116  | 36.342 | 0.00 | 0.00 |
| ATOM | 7486 | NZ  | LYS | X | 492 | 18.473 | 11.029 | 35.641 | 0.00 | 0.00 |
| ATOM | 7487 | HZ1 | LYS | X | 492 | 18.993 | 11.009 | 34.775 | 0.00 | 0.00 |
| ATOM | 7488 | HZ2 | LYS | X | 492 | 17.499 | 10.780 | 35.551 | 0.00 | 0.00 |
| ATOM | 7489 | HZ3 | LYS | X | 492 | 18.508 | 11.983 | 35.969 | 0.00 | 0.00 |
| ATOM | 7490 | C   | LYS | X | 492 | 21.289 | 12.971 | 41.065 | 0.00 | 0.00 |
| ATOM | 7491 | O   | LYS | X | 492 | 21.932 | 12.234 | 41.857 | 0.00 | 0.00 |
| ATOM | 7492 | N   | ALA | X | 493 | 21.965 | 13.844 | 40.362 | 0.00 | 0.00 |
| ATOM | 7493 | H   | ALA | X | 493 | 21.392 | 14.413 | 39.756 | 0.00 | 0.00 |
| ATOM | 7494 | CA  | ALA | X | 493 | 23.416 | 14.136 | 40.565 | 0.00 | 0.00 |
| ATOM | 7495 | HA  | ALA | X | 493 | 24.127 | 13.322 | 40.423 | 0.00 | 0.00 |
| ATOM | 7496 | CB  | ALA | X | 493 | 23.827 | 15.107 | 39.500 | 0.00 | 0.00 |
| ATOM | 7497 | HB1 | ALA | X | 493 | 24.055 | 14.585 | 38.571 | 0.00 | 0.00 |
| ATOM | 7498 | HB2 | ALA | X | 493 | 24.774 | 15.554 | 39.803 | 0.00 | 0.00 |
| ATOM | 7499 | HB3 | ALA | X | 493 | 23.117 | 15.881 | 39.209 | 0.00 | 0.00 |
| ATOM | 7500 | C   | ALA | X | 493 | 23.666 | 14.808 | 41.926 | 0.00 | 0.00 |
| ATOM | 7501 | O   | ALA | X | 493 | 22.701 | 15.299 | 42.507 | 0.00 | 0.00 |
| ATOM | 7502 | N   | PRO | X | 494 | 24.863 | 14.845 | 42.559 | 0.00 | 0.00 |
| ATOM | 7503 | CD  | PRO | X | 494 | 26.099 | 14.209 | 42.089 | 0.00 | 0.00 |
| ATOM | 7504 | HD2 | PRO | X | 494 | 26.162 | 14.326 | 41.007 | 0.00 | 0.00 |
| ATOM | 7505 | HD3 | PRO | X | 494 | 26.190 | 13.167 | 42.396 | 0.00 | 0.00 |
| ATOM | 7506 | CG  | PRO | X | 494 | 27.304 | 14.920 | 42.692 | 0.00 | 0.00 |
| ATOM | 7507 | HG2 | PRO | X | 494 | 27.498 | 15.782 | 42.054 | 0.00 | 0.00 |
| ATOM | 7508 | HG3 | PRO | X | 494 | 28.192 | 14.299 | 42.814 | 0.00 | 0.00 |

|      |      |      |     |   |     |        |        |        |      |      |
|------|------|------|-----|---|-----|--------|--------|--------|------|------|
| ATOM | 7509 | CB   | PRO | X | 494 | 26.733 | 15.390 | 43.995 | 0.00 | 0.00 |
| ATOM | 7510 | HB2  | PRO | X | 494 | 27.333 | 16.205 | 44.401 | 0.00 | 0.00 |
| ATOM | 7511 | HB3  | PRO | X | 494 | 26.608 | 14.556 | 44.685 | 0.00 | 0.00 |
| ATOM | 7512 | CA   | PRO | X | 494 | 25.313 | 15.663 | 43.686 | 0.00 | 0.00 |
| ATOM | 7513 | HA   | PRO | X | 494 | 24.774 | 15.455 | 44.610 | 0.00 | 0.00 |
| ATOM | 7514 | C    | PRO | X | 494 | 25.055 | 17.202 | 43.452 | 0.00 | 0.00 |
| ATOM | 7515 | O    | PRO | X | 494 | 25.231 | 17.698 | 42.372 | 0.00 | 0.00 |
| ATOM | 7516 | N    | GLN | X | 495 | 24.853 | 17.879 | 44.545 | 0.00 | 0.00 |
| ATOM | 7517 | H    | GLN | X | 495 | 24.818 | 17.413 | 45.440 | 0.00 | 0.00 |
| ATOM | 7518 | CA   | GLN | X | 495 | 24.594 | 19.278 | 44.592 | 0.00 | 0.00 |
| ATOM | 7519 | HA   | GLN | X | 495 | 25.012 | 19.631 | 43.650 | 0.00 | 0.00 |
| ATOM | 7520 | CB   | GLN | X | 495 | 23.022 | 19.459 | 44.705 | 0.00 | 0.00 |
| ATOM | 7521 | HB2  | GLN | X | 495 | 22.733 | 19.357 | 45.751 | 0.00 | 0.00 |
| ATOM | 7522 | HB3  | GLN | X | 495 | 22.787 | 20.489 | 44.434 | 0.00 | 0.00 |
| ATOM | 7523 | CG   | GLN | X | 495 | 22.091 | 18.588 | 43.735 | 0.00 | 0.00 |
| ATOM | 7524 | HG2  | GLN | X | 495 | 22.163 | 17.518 | 43.927 | 0.00 | 0.00 |
| ATOM | 7525 | HG3  | GLN | X | 495 | 21.063 | 18.862 | 43.973 | 0.00 | 0.00 |
| ATOM | 7526 | CD   | GLN | X | 495 | 22.423 | 18.863 | 42.273 | 0.00 | 0.00 |
| ATOM | 7527 | OE1  | GLN | X | 495 | 22.601 | 19.914 | 41.767 | 0.00 | 0.00 |
| ATOM | 7528 | NE2  | GLN | X | 495 | 22.268 | 17.872 | 41.452 | 0.00 | 0.00 |
| ATOM | 7529 | HE21 | GLN | X | 495 | 22.415 | 18.029 | 40.465 | 0.00 | 0.00 |
| ATOM | 7530 | HE22 | GLN | X | 495 | 21.813 | 17.020 | 41.749 | 0.00 | 0.00 |
| ATOM | 7531 | C    | GLN | X | 495 | 25.440 | 19.930 | 45.687 | 0.00 | 0.00 |
| ATOM | 7532 | O    | GLN | X | 495 | 26.067 | 19.321 | 46.608 | 0.00 | 0.00 |
| ATOM | 7533 | N    | TRP | X | 496 | 25.568 | 21.227 | 45.519 | 0.00 | 0.00 |
| ATOM | 7534 | H    | TRP | X | 496 | 25.070 | 21.611 | 44.729 | 0.00 | 0.00 |
| ATOM | 7535 | CA   | TRP | X | 496 | 26.363 | 22.162 | 46.269 | 0.00 | 0.00 |
| ATOM | 7536 | HA   | TRP | X | 496 | 27.360 | 21.780 | 46.486 | 0.00 | 0.00 |
| ATOM | 7537 | CB   | TRP | X | 496 | 26.506 | 23.429 | 45.347 | 0.00 | 0.00 |
| ATOM | 7538 | HB2  | TRP | X | 496 | 26.711 | 22.994 | 44.369 | 0.00 | 0.00 |
| ATOM | 7539 | HB3  | TRP | X | 496 | 25.591 | 24.017 | 45.287 | 0.00 | 0.00 |
| ATOM | 7540 | CG   | TRP | X | 496 | 27.690 | 24.380 | 45.585 | 0.00 | 0.00 |
| ATOM | 7541 | CD1  | TRP | X | 496 | 28.178 | 24.672 | 46.821 | 0.00 | 0.00 |
| ATOM | 7542 | HD1  | TRP | X | 496 | 27.879 | 24.164 | 47.725 | 0.00 | 0.00 |
| ATOM | 7543 | NE1  | TRP | X | 496 | 29.113 | 25.751 | 46.741 | 0.00 | 0.00 |
| ATOM | 7544 | HE1  | TRP | X | 496 | 29.584 | 26.139 | 47.546 | 0.00 | 0.00 |
| ATOM | 7545 | CE2  | TRP | X | 496 | 29.189 | 26.136 | 45.440 | 0.00 | 0.00 |
| ATOM | 7546 | CZ2  | TRP | X | 496 | 29.825 | 27.157 | 44.768 | 0.00 | 0.00 |
| ATOM | 7547 | HZ2  | TRP | X | 496 | 30.399 | 27.933 | 45.252 | 0.00 | 0.00 |
| ATOM | 7548 | CH2  | TRP | X | 496 | 29.649 | 27.217 | 43.343 | 0.00 | 0.00 |
| ATOM | 7549 | HH2  | TRP | X | 496 | 30.263 | 27.968 | 42.867 | 0.00 | 0.00 |
| ATOM | 7550 | CZ3  | TRP | X | 496 | 28.901 | 26.311 | 42.585 | 0.00 | 0.00 |
| ATOM | 7551 | HZ3  | TRP | X | 496 | 28.988 | 26.297 | 41.509 | 0.00 | 0.00 |
| ATOM | 7552 | CE3  | TRP | X | 496 | 28.256 | 25.262 | 43.303 | 0.00 | 0.00 |
| ATOM | 7553 | HE3  | TRP | X | 496 | 27.508 | 24.674 | 42.790 | 0.00 | 0.00 |
| ATOM | 7554 | CD2  | TRP | X | 496 | 28.395 | 25.186 | 44.686 | 0.00 | 0.00 |
| ATOM | 7555 | C    | TRP | X | 496 | 25.593 | 22.496 | 47.600 | 0.00 | 0.00 |
| ATOM | 7556 | O    | TRP | X | 496 | 24.491 | 23.122 | 47.424 | 0.00 | 0.00 |
| ATOM | 7557 | N    | PRO | X | 497 | 26.007 | 22.160 | 48.819 | 0.00 | 0.00 |
| ATOM | 7558 | CD   | PRO | X | 497 | 27.164 | 21.248 | 49.047 | 0.00 | 0.00 |
| ATOM | 7559 | HD2  | PRO | X | 497 | 28.154 | 21.521 | 48.682 | 0.00 | 0.00 |
| ATOM | 7560 | HD3  | PRO | X | 497 | 27.126 | 20.299 | 48.512 | 0.00 | 0.00 |
| ATOM | 7561 | CG   | PRO | X | 497 | 27.250 | 21.044 | 50.505 | 0.00 | 0.00 |
| ATOM | 7562 | HG2  | PRO | X | 497 | 27.935 | 21.769 | 50.945 | 0.00 | 0.00 |
| ATOM | 7563 | HG3  | PRO | X | 497 | 27.450 | 20.071 | 50.954 | 0.00 | 0.00 |
| ATOM | 7564 | CB   | PRO | X | 497 | 25.905 | 21.536 | 51.058 | 0.00 | 0.00 |
| ATOM | 7565 | HB2  | PRO | X | 497 | 26.117 | 21.917 | 52.057 | 0.00 | 0.00 |
| ATOM | 7566 | HB3  | PRO | X | 497 | 25.254 | 20.663 | 51.091 | 0.00 | 0.00 |
| ATOM | 7567 | CA   | PRO | X | 497 | 25.413 | 22.579 | 50.072 | 0.00 | 0.00 |
| ATOM | 7568 | HA   | PRO | X | 497 | 24.346 | 22.356 | 50.063 | 0.00 | 0.00 |
| ATOM | 7569 | C    | PRO | X | 497 | 25.847 | 23.978 | 50.419 | 0.00 | 0.00 |
| ATOM | 7570 | O    | PRO | X | 497 | 26.877 | 24.455 | 49.929 | 0.00 | 0.00 |
| ATOM | 7571 | N    | PRO | X | 498 | 25.029 | 24.694 | 51.285 | 0.00 | 0.00 |
| ATOM | 7572 | CD   | PRO | X | 498 | 23.807 | 24.186 | 51.888 | 0.00 | 0.00 |
| ATOM | 7573 | HD2  | PRO | X | 498 | 23.879 | 23.160 | 52.248 | 0.00 | 0.00 |
| ATOM | 7574 | HD3  | PRO | X | 498 | 23.035 | 24.242 | 51.120 | 0.00 | 0.00 |
| ATOM | 7575 | CG   | PRO | X | 498 | 23.499 | 25.184 | 53.060 | 0.00 | 0.00 |

|      |      |      |     |   |     |        |        |        |      |      |
|------|------|------|-----|---|-----|--------|--------|--------|------|------|
| ATOM | 7576 | HG2  | PRO | X | 498 | 23.878 | 24.716 | 53.969 | 0.00 | 0.00 |
| ATOM | 7577 | HG3  | PRO | X | 498 | 22.453 | 25.458 | 53.203 | 0.00 | 0.00 |
| ATOM | 7578 | CB   | PRO | X | 498 | 24.258 | 26.510 | 52.745 | 0.00 | 0.00 |
| ATOM | 7579 | HB2  | PRO | X | 498 | 24.663 | 27.020 | 53.618 | 0.00 | 0.00 |
| ATOM | 7580 | HB3  | PRO | X | 498 | 23.544 | 27.232 | 52.350 | 0.00 | 0.00 |
| ATOM | 7581 | CA   | PRO | X | 498 | 25.362 | 25.980 | 51.858 | 0.00 | 0.00 |
| ATOM | 7582 | HA   | PRO | X | 498 | 25.582 | 26.732 | 51.100 | 0.00 | 0.00 |
| ATOM | 7583 | C    | PRO | X | 498 | 26.647 | 25.835 | 52.725 | 0.00 | 0.00 |
| ATOM | 7584 | O    | PRO | X | 498 | 26.829 | 24.800 | 53.432 | 0.00 | 0.00 |
| ATOM | 7585 | N    | TYR | X | 499 | 27.487 | 26.898 | 52.833 | 0.00 | 0.00 |
| ATOM | 7586 | H    | TYR | X | 499 | 27.415 | 27.676 | 52.194 | 0.00 | 0.00 |
| ATOM | 7587 | CA   | TYR | X | 499 | 28.509 | 27.031 | 53.895 | 0.00 | 0.00 |
| ATOM | 7588 | HA   | TYR | X | 499 | 28.922 | 26.060 | 54.166 | 0.00 | 0.00 |
| ATOM | 7589 | CB   | TYR | X | 499 | 29.589 | 27.899 | 53.270 | 0.00 | 0.00 |
| ATOM | 7590 | HB2  | TYR | X | 499 | 29.924 | 27.310 | 52.416 | 0.00 | 0.00 |
| ATOM | 7591 | HB3  | TYR | X | 499 | 29.201 | 28.823 | 52.840 | 0.00 | 0.00 |
| ATOM | 7592 | CG   | TYR | X | 499 | 30.800 | 28.215 | 54.119 | 0.00 | 0.00 |
| ATOM | 7593 | CD1  | TYR | X | 499 | 30.813 | 29.081 | 55.245 | 0.00 | 0.00 |
| ATOM | 7594 | HD1  | TYR | X | 499 | 29.964 | 29.680 | 55.538 | 0.00 | 0.00 |
| ATOM | 7595 | CE1  | TYR | X | 499 | 31.880 | 29.078 | 56.172 | 0.00 | 0.00 |
| ATOM | 7596 | HE1  | TYR | X | 499 | 31.910 | 29.722 | 57.038 | 0.00 | 0.00 |
| ATOM | 7597 | CZ   | TYR | X | 499 | 33.067 | 28.323 | 55.870 | 0.00 | 0.00 |
| ATOM | 7598 | OH   | TYR | X | 499 | 34.154 | 28.353 | 56.691 | 0.00 | 0.00 |
| ATOM | 7599 | HH   | TYR | X | 499 | 33.943 | 28.764 | 57.532 | 0.00 | 0.00 |
| ATOM | 7600 | CE2  | TYR | X | 499 | 33.064 | 27.426 | 54.765 | 0.00 | 0.00 |
| ATOM | 7601 | HE2  | TYR | X | 499 | 33.843 | 26.694 | 54.608 | 0.00 | 0.00 |
| ATOM | 7602 | CD2  | TYR | X | 499 | 31.964 | 27.440 | 53.864 | 0.00 | 0.00 |
| ATOM | 7603 | HD2  | TYR | X | 499 | 31.986 | 26.768 | 53.018 | 0.00 | 0.00 |
| ATOM | 7604 | C    | TYR | X | 499 | 27.954 | 27.635 | 55.196 | 0.00 | 0.00 |
| ATOM | 7605 | O    | TYR | X | 499 | 27.250 | 28.670 | 55.134 | 0.00 | 0.00 |
| ATOM | 7606 | N    | THR | X | 500 | 28.209 | 27.053 | 56.276 | 0.00 | 0.00 |
| ATOM | 7607 | H    | THR | X | 500 | 28.692 | 26.185 | 56.095 | 0.00 | 0.00 |
| ATOM | 7608 | CA   | THR | X | 500 | 27.762 | 27.327 | 57.615 | 0.00 | 0.00 |
| ATOM | 7609 | HA   | THR | X | 500 | 27.357 | 28.335 | 57.703 | 0.00 | 0.00 |
| ATOM | 7610 | CB   | THR | X | 500 | 26.633 | 26.320 | 58.002 | 0.00 | 0.00 |
| ATOM | 7611 | HB   | THR | X | 500 | 26.259 | 26.457 | 59.017 | 0.00 | 0.00 |
| ATOM | 7612 | CG2  | THR | X | 500 | 25.368 | 26.399 | 57.171 | 0.00 | 0.00 |
| ATOM | 7613 | HG21 | THR | X | 500 | 24.683 | 25.599 | 57.452 | 0.00 | 0.00 |
| ATOM | 7614 | HG22 | THR | X | 500 | 25.507 | 26.292 | 56.095 | 0.00 | 0.00 |
| ATOM | 7615 | HG23 | THR | X | 500 | 24.940 | 27.377 | 57.390 | 0.00 | 0.00 |
| ATOM | 7616 | OG1  | THR | X | 500 | 27.185 | 25.037 | 57.844 | 0.00 | 0.00 |
| ATOM | 7617 | HG1  | THR | X | 500 | 26.673 | 24.337 | 58.256 | 0.00 | 0.00 |
| ATOM | 7618 | C    | THR | X | 500 | 28.936 | 27.229 | 58.540 | 0.00 | 0.00 |
| ATOM | 7619 | O    | THR | X | 500 | 29.886 | 26.500 | 58.351 | 0.00 | 0.00 |
| ATOM | 7620 | N    | ALA | X | 501 | 28.966 | 28.122 | 59.545 | 0.00 | 0.00 |
| ATOM | 7621 | H    | ALA | X | 501 | 28.106 | 28.615 | 59.740 | 0.00 | 0.00 |
| ATOM | 7622 | CA   | ALA | X | 501 | 30.007 | 28.027 | 60.496 | 0.00 | 0.00 |
| ATOM | 7623 | HA   | ALA | X | 501 | 30.906 | 28.294 | 59.942 | 0.00 | 0.00 |
| ATOM | 7624 | CB   | ALA | X | 501 | 29.841 | 29.242 | 61.462 | 0.00 | 0.00 |
| ATOM | 7625 | HB1  | ALA | X | 501 | 30.065 | 30.132 | 60.873 | 0.00 | 0.00 |
| ATOM | 7626 | HB2  | ALA | X | 501 | 30.621 | 29.219 | 62.223 | 0.00 | 0.00 |
| ATOM | 7627 | HB3  | ALA | X | 501 | 28.912 | 29.304 | 62.029 | 0.00 | 0.00 |
| ATOM | 7628 | C    | ALA | X | 501 | 30.231 | 26.731 | 61.251 | 0.00 | 0.00 |
| ATOM | 7629 | O    | ALA | X | 501 | 31.348 | 26.469 | 61.733 | 0.00 | 0.00 |
| ATOM | 7630 | N    | GLY | X | 502 | 29.180 | 25.877 | 61.481 | 0.00 | 0.00 |
| ATOM | 7631 | H    | GLY | X | 502 | 28.337 | 26.204 | 61.032 | 0.00 | 0.00 |
| ATOM | 7632 | CA   | GLY | X | 502 | 29.231 | 24.505 | 62.017 | 0.00 | 0.00 |
| ATOM | 7633 | HA2  | GLY | X | 502 | 29.772 | 24.581 | 62.959 | 0.00 | 0.00 |
| ATOM | 7634 | HA3  | GLY | X | 502 | 28.209 | 24.156 | 62.167 | 0.00 | 0.00 |
| ATOM | 7635 | C    | GLY | X | 502 | 29.991 | 23.570 | 61.028 | 0.00 | 0.00 |
| ATOM | 7636 | O    | GLY | X | 502 | 31.145 | 23.172 | 61.194 | 0.00 | 0.00 |
| ATOM | 7637 | N    | ALA | X | 503 | 29.365 | 23.153 | 59.960 | 0.00 | 0.00 |
| ATOM | 7638 | H    | ALA | X | 503 | 28.359 | 23.217 | 59.887 | 0.00 | 0.00 |
| ATOM | 7639 | CA   | ALA | X | 503 | 29.929 | 22.120 | 59.066 | 0.00 | 0.00 |
| ATOM | 7640 | HA   | ALA | X | 503 | 30.295 | 21.293 | 59.674 | 0.00 | 0.00 |
| ATOM | 7641 | CB   | ALA | X | 503 | 28.772 | 21.492 | 58.283 | 0.00 | 0.00 |
| ATOM | 7642 | HB1  | ALA | X | 503 | 28.351 | 22.205 | 57.574 | 0.00 | 0.00 |

|      |      |      |     |   |     |        |        |        |      |      |
|------|------|------|-----|---|-----|--------|--------|--------|------|------|
| ATOM | 7643 | HB2  | ALA | X | 503 | 27.987 | 20.968 | 58.829 | 0.00 | 0.00 |
| ATOM | 7644 | HB3  | ALA | X | 503 | 29.192 | 20.689 | 57.678 | 0.00 | 0.00 |
| ATOM | 7645 | C    | ALA | X | 503 | 31.020 | 22.629 | 58.140 | 0.00 | 0.00 |
| ATOM | 7646 | O    | ALA | X | 503 | 31.929 | 21.922 | 57.809 | 0.00 | 0.00 |
| ATOM | 7647 | N    | GLN | X | 504 | 30.879 | 23.887 | 57.729 | 0.00 | 0.00 |
| ATOM | 7648 | H    | GLN | X | 504 | 29.998 | 24.268 | 58.043 | 0.00 | 0.00 |
| ATOM | 7649 | CA   | GLN | X | 504 | 31.827 | 24.704 | 56.895 | 0.00 | 0.00 |
| ATOM | 7650 | HA   | GLN | X | 504 | 31.310 | 25.638 | 56.673 | 0.00 | 0.00 |
| ATOM | 7651 | CB   | GLN | X | 504 | 33.173 | 25.102 | 57.578 | 0.00 | 0.00 |
| ATOM | 7652 | HB2  | GLN | X | 504 | 33.493 | 24.159 | 58.020 | 0.00 | 0.00 |
| ATOM | 7653 | HB3  | GLN | X | 504 | 33.856 | 25.574 | 56.872 | 0.00 | 0.00 |
| ATOM | 7654 | CG   | GLN | X | 504 | 33.024 | 26.037 | 58.699 | 0.00 | 0.00 |
| ATOM | 7655 | HG2  | GLN | X | 504 | 32.616 | 26.994 | 58.374 | 0.00 | 0.00 |
| ATOM | 7656 | HG3  | GLN | X | 504 | 32.288 | 25.644 | 59.400 | 0.00 | 0.00 |
| ATOM | 7657 | CD   | GLN | X | 504 | 34.236 | 26.384 | 59.539 | 0.00 | 0.00 |
| ATOM | 7658 | OE1  | GLN | X | 504 | 35.364 | 26.092 | 59.179 | 0.00 | 0.00 |
| ATOM | 7659 | NE2  | GLN | X | 504 | 33.974 | 26.915 | 60.712 | 0.00 | 0.00 |
| ATOM | 7660 | HE21 | GLN | X | 504 | 34.758 | 27.251 | 61.253 | 0.00 | 0.00 |
| ATOM | 7661 | HE22 | GLN | X | 504 | 33.020 | 26.878 | 61.041 | 0.00 | 0.00 |
| ATOM | 7662 | C    | GLN | X | 504 | 32.040 | 24.073 | 55.455 | 0.00 | 0.00 |
| ATOM | 7663 | O    | GLN | X | 504 | 33.130 | 23.512 | 55.186 | 0.00 | 0.00 |
| ATOM | 7664 | N    | GLN | X | 505 | 30.985 | 23.878 | 54.651 | 0.00 | 0.00 |
| ATOM | 7665 | H    | GLN | X | 505 | 30.123 | 24.036 | 55.153 | 0.00 | 0.00 |
| ATOM | 7666 | CA   | GLN | X | 505 | 31.020 | 23.132 | 53.398 | 0.00 | 0.00 |
| ATOM | 7667 | HA   | GLN | X | 505 | 31.872 | 22.456 | 53.469 | 0.00 | 0.00 |
| ATOM | 7668 | CB   | GLN | X | 505 | 29.754 | 22.235 | 53.316 | 0.00 | 0.00 |
| ATOM | 7669 | HB2  | GLN | X | 505 | 28.908 | 22.869 | 53.048 | 0.00 | 0.00 |
| ATOM | 7670 | HB3  | GLN | X | 505 | 29.958 | 21.545 | 52.497 | 0.00 | 0.00 |
| ATOM | 7671 | CG   | GLN | X | 505 | 29.544 | 21.241 | 54.456 | 0.00 | 0.00 |
| ATOM | 7672 | HG2  | GLN | X | 505 | 30.297 | 20.457 | 54.535 | 0.00 | 0.00 |
| ATOM | 7673 | HG3  | GLN | X | 505 | 29.645 | 21.822 | 55.373 | 0.00 | 0.00 |
| ATOM | 7674 | CD   | GLN | X | 505 | 28.210 | 20.603 | 54.458 | 0.00 | 0.00 |
| ATOM | 7675 | OE1  | GLN | X | 505 | 28.081 | 19.486 | 54.011 | 0.00 | 0.00 |
| ATOM | 7676 | NE2  | GLN | X | 505 | 27.131 | 21.308 | 54.710 | 0.00 | 0.00 |
| ATOM | 7677 | HE21 | GLN | X | 505 | 26.266 | 20.792 | 54.788 | 0.00 | 0.00 |
| ATOM | 7678 | HE22 | GLN | X | 505 | 27.279 | 22.262 | 55.009 | 0.00 | 0.00 |
| ATOM | 7679 | C    | GLN | X | 505 | 31.399 | 23.883 | 52.162 | 0.00 | 0.00 |
| ATOM | 7680 | O    | GLN | X | 505 | 30.818 | 24.909 | 51.806 | 0.00 | 0.00 |
| ATOM | 7681 | N    | TYR | X | 506 | 32.397 | 23.375 | 51.422 | 0.00 | 0.00 |
| ATOM | 7682 | H    | TYR | X | 506 | 32.899 | 22.534 | 51.669 | 0.00 | 0.00 |
| ATOM | 7683 | CA   | TYR | X | 506 | 32.853 | 24.017 | 50.142 | 0.00 | 0.00 |
| ATOM | 7684 | HA   | TYR | X | 506 | 32.113 | 24.662 | 49.668 | 0.00 | 0.00 |
| ATOM | 7685 | CB   | TYR | X | 506 | 34.064 | 24.904 | 50.381 | 0.00 | 0.00 |
| ATOM | 7686 | HB2  | TYR | X | 506 | 34.188 | 25.567 | 49.524 | 0.00 | 0.00 |
| ATOM | 7687 | HB3  | TYR | X | 506 | 33.960 | 25.463 | 51.311 | 0.00 | 0.00 |
| ATOM | 7688 | CG   | TYR | X | 506 | 35.307 | 24.114 | 50.620 | 0.00 | 0.00 |
| ATOM | 7689 | CD1  | TYR | X | 506 | 35.691 | 23.717 | 51.943 | 0.00 | 0.00 |
| ATOM | 7690 | HD1  | TYR | X | 506 | 35.061 | 24.092 | 52.736 | 0.00 | 0.00 |
| ATOM | 7691 | CE1  | TYR | X | 506 | 36.867 | 22.958 | 52.108 | 0.00 | 0.00 |
| ATOM | 7692 | HE1  | TYR | X | 506 | 37.118 | 22.601 | 53.096 | 0.00 | 0.00 |
| ATOM | 7693 | CZ   | TYR | X | 506 | 37.685 | 22.677 | 51.020 | 0.00 | 0.00 |
| ATOM | 7694 | OH   | TYR | X | 506 | 38.850 | 21.992 | 51.176 | 0.00 | 0.00 |
| ATOM | 7695 | HH   | TYR | X | 506 | 38.863 | 21.493 | 51.997 | 0.00 | 0.00 |
| ATOM | 7696 | CE2  | TYR | X | 506 | 37.322 | 23.047 | 49.694 | 0.00 | 0.00 |
| ATOM | 7697 | HE2  | TYR | X | 506 | 37.954 | 22.718 | 48.882 | 0.00 | 0.00 |
| ATOM | 7698 | CD2  | TYR | X | 506 | 36.132 | 23.769 | 49.541 | 0.00 | 0.00 |
| ATOM | 7699 | HD2  | TYR | X | 506 | 35.919 | 24.215 | 48.580 | 0.00 | 0.00 |
| ATOM | 7700 | C    | TYR | X | 506 | 33.175 | 22.995 | 49.076 | 0.00 | 0.00 |
| ATOM | 7701 | O    | TYR | X | 506 | 33.594 | 21.842 | 49.277 | 0.00 | 0.00 |
| ATOM | 7702 | N    | VAL | X | 507 | 32.995 | 23.307 | 47.829 | 0.00 | 0.00 |
| ATOM | 7703 | H    | VAL | X | 507 | 32.559 | 24.175 | 47.550 | 0.00 | 0.00 |
| ATOM | 7704 | CA   | VAL | X | 507 | 33.036 | 22.382 | 46.742 | 0.00 | 0.00 |
| ATOM | 7705 | HA   | VAL | X | 507 | 32.906 | 21.390 | 47.174 | 0.00 | 0.00 |
| ATOM | 7706 | CB   | VAL | X | 507 | 31.861 | 22.317 | 45.759 | 0.00 | 0.00 |
| ATOM | 7707 | HB   | VAL | X | 507 | 31.988 | 21.423 | 45.149 | 0.00 | 0.00 |
| ATOM | 7708 | CG1  | VAL | X | 507 | 30.659 | 21.982 | 46.586 | 0.00 | 0.00 |
| ATOM | 7709 | HG11 | VAL | X | 507 | 29.736 | 22.344 | 46.133 | 0.00 | 0.00 |



|      |      |      |     |   |     |        |        |        |      |      |
|------|------|------|-----|---|-----|--------|--------|--------|------|------|
| ATOM | 7710 | HG12 | VAL | X | 507 | 30.617 | 20.893 | 46.577 | 0.00 | 0.00 |
| ATOM | 7711 | HG13 | VAL | X | 507 | 30.688 | 22.327 | 47.619 | 0.00 | 0.00 |
| ATOM | 7712 | CG2  | VAL | X | 507 | 31.655 | 23.625 | 44.980 | 0.00 | 0.00 |
| ATOM | 7713 | HG21 | VAL | X | 507 | 32.491 | 23.877 | 44.328 | 0.00 | 0.00 |
| ATOM | 7714 | HG22 | VAL | X | 507 | 31.312 | 24.482 | 45.560 | 0.00 | 0.00 |
| ATOM | 7715 | HG23 | VAL | X | 507 | 30.780 | 23.358 | 44.387 | 0.00 | 0.00 |
| ATOM | 7716 | C    | VAL | X | 507 | 34.392 | 22.260 | 45.994 | 0.00 | 0.00 |
| ATOM | 7717 | O    | VAL | X | 507 | 35.097 | 23.270 | 45.818 | 0.00 | 0.00 |
| ATOM | 7718 | N    | SER | X | 508 | 34.703 | 21.081 | 45.467 | 0.00 | 0.00 |
| ATOM | 7719 | H    | SER | X | 508 | 34.184 | 20.273 | 45.779 | 0.00 | 0.00 |
| ATOM | 7720 | CA   | SER | X | 508 | 35.898 | 20.940 | 44.611 | 0.00 | 0.00 |
| ATOM | 7721 | HA   | SER | X | 508 | 36.530 | 21.828 | 44.620 | 0.00 | 0.00 |
| ATOM | 7722 | CB   | SER | X | 508 | 36.809 | 19.873 | 45.220 | 0.00 | 0.00 |
| ATOM | 7723 | HB2  | SER | X | 508 | 37.649 | 19.740 | 44.538 | 0.00 | 0.00 |
| ATOM | 7724 | HB3  | SER | X | 508 | 37.248 | 20.178 | 46.170 | 0.00 | 0.00 |
| ATOM | 7725 | OG   | SER | X | 508 | 36.258 | 18.596 | 45.484 | 0.00 | 0.00 |
| ATOM | 7726 | HG   | SER | X | 508 | 35.564 | 18.688 | 46.140 | 0.00 | 0.00 |
| ATOM | 7727 | C    | SER | X | 508 | 35.535 | 20.694 | 43.159 | 0.00 | 0.00 |
| ATOM | 7728 | O    | SER | X | 508 | 34.783 | 19.769 | 42.820 | 0.00 | 0.00 |
| ATOM | 7729 | N    | LEU | X | 509 | 35.968 | 21.730 | 42.310 | 0.00 | 0.00 |
| ATOM | 7730 | H    | LEU | X | 509 | 36.612 | 22.432 | 42.645 | 0.00 | 0.00 |
| ATOM | 7731 | CA   | LEU | X | 509 | 35.463 | 21.843 | 40.943 | 0.00 | 0.00 |
| ATOM | 7732 | HA   | LEU | X | 509 | 34.547 | 21.255 | 40.998 | 0.00 | 0.00 |
| ATOM | 7733 | CB   | LEU | X | 509 | 35.130 | 23.269 | 40.518 | 0.00 | 0.00 |
| ATOM | 7734 | HB2  | LEU | X | 509 | 36.062 | 23.835 | 40.514 | 0.00 | 0.00 |
| ATOM | 7735 | HB3  | LEU | X | 509 | 34.760 | 23.229 | 39.494 | 0.00 | 0.00 |
| ATOM | 7736 | CG   | LEU | X | 509 | 34.059 | 24.052 | 41.303 | 0.00 | 0.00 |
| ATOM | 7737 | HG   | LEU | X | 509 | 34.438 | 24.171 | 42.318 | 0.00 | 0.00 |
| ATOM | 7738 | CD1  | LEU | X | 509 | 33.815 | 25.417 | 40.608 | 0.00 | 0.00 |
| ATOM | 7739 | HD11 | LEU | X | 509 | 34.183 | 25.495 | 39.585 | 0.00 | 0.00 |
| ATOM | 7740 | HD12 | LEU | X | 509 | 34.277 | 26.198 | 41.212 | 0.00 | 0.00 |
| ATOM | 7741 | HD13 | LEU | X | 509 | 32.780 | 25.671 | 40.376 | 0.00 | 0.00 |
| ATOM | 7742 | CD2  | LEU | X | 509 | 32.745 | 23.237 | 41.402 | 0.00 | 0.00 |
| ATOM | 7743 | HD21 | LEU | X | 509 | 32.806 | 22.410 | 42.109 | 0.00 | 0.00 |
| ATOM | 7744 | HD22 | LEU | X | 509 | 31.898 | 23.846 | 41.718 | 0.00 | 0.00 |
| ATOM | 7745 | HD23 | LEU | X | 509 | 32.488 | 22.732 | 40.471 | 0.00 | 0.00 |
| ATOM | 7746 | C    | LEU | X | 509 | 36.450 | 21.130 | 39.936 | 0.00 | 0.00 |
| ATOM | 7747 | O    | LEU | X | 509 | 37.423 | 21.696 | 39.413 | 0.00 | 0.00 |
| ATOM | 7748 | N    | ASP | X | 510 | 36.087 | 19.861 | 39.649 | 0.00 | 0.00 |
| ATOM | 7749 | H    | ASP | X | 510 | 35.330 | 19.412 | 40.145 | 0.00 | 0.00 |
| ATOM | 7750 | CA   | ASP | X | 510 | 36.645 | 18.871 | 38.662 | 0.00 | 0.00 |
| ATOM | 7751 | HA   | ASP | X | 510 | 37.451 | 19.344 | 38.102 | 0.00 | 0.00 |
| ATOM | 7752 | CB   | ASP | X | 510 | 37.259 | 17.783 | 39.455 | 0.00 | 0.00 |
| ATOM | 7753 | HB2  | ASP | X | 510 | 38.085 | 18.286 | 39.958 | 0.00 | 0.00 |
| ATOM | 7754 | HB3  | ASP | X | 510 | 36.493 | 17.477 | 40.168 | 0.00 | 0.00 |
| ATOM | 7755 | CG   | ASP | X | 510 | 37.790 | 16.602 | 38.570 | 0.00 | 0.00 |
| ATOM | 7756 | OD1  | ASP | X | 510 | 37.395 | 15.429 | 38.867 | 0.00 | 0.00 |
| ATOM | 7757 | OD2  | ASP | X | 510 | 38.619 | 16.849 | 37.739 | 0.00 | 0.00 |
| ATOM | 7758 | C    | ASP | X | 510 | 35.603 | 18.382 | 37.693 | 0.00 | 0.00 |
| ATOM | 7759 | O    | ASP | X | 510 | 34.357 | 18.515 | 37.936 | 0.00 | 0.00 |
| ATOM | 7760 | N    | LEU | X | 511 | 36.079 | 17.793 | 36.578 | 0.00 | 0.00 |
| ATOM | 7761 | H    | LEU | X | 511 | 37.083 | 17.715 | 36.511 | 0.00 | 0.00 |
| ATOM | 7762 | CA   | LEU | X | 511 | 35.325 | 17.240 | 35.471 | 0.00 | 0.00 |
| ATOM | 7763 | HA   | LEU | X | 511 | 34.816 | 18.042 | 34.937 | 0.00 | 0.00 |
| ATOM | 7764 | CB   | LEU | X | 511 | 36.329 | 16.479 | 34.478 | 0.00 | 0.00 |
| ATOM | 7765 | HB2  | LEU | X | 511 | 36.709 | 15.598 | 34.996 | 0.00 | 0.00 |
| ATOM | 7766 | HB3  | LEU | X | 511 | 35.748 | 16.027 | 33.674 | 0.00 | 0.00 |
| ATOM | 7767 | CG   | LEU | X | 511 | 37.419 | 17.380 | 33.847 | 0.00 | 0.00 |
| ATOM | 7768 | HG   | LEU | X | 511 | 38.066 | 17.742 | 34.646 | 0.00 | 0.00 |
| ATOM | 7769 | CD1  | LEU | X | 511 | 38.163 | 16.381 | 32.914 | 0.00 | 0.00 |
| ATOM | 7770 | HD11 | LEU | X | 511 | 37.516 | 15.989 | 32.129 | 0.00 | 0.00 |
| ATOM | 7771 | HD12 | LEU | X | 511 | 38.562 | 15.546 | 33.491 | 0.00 | 0.00 |
| ATOM | 7772 | HD13 | LEU | X | 511 | 38.932 | 16.887 | 32.330 | 0.00 | 0.00 |
| ATOM | 7773 | CD2  | LEU | X | 511 | 36.761 | 18.572 | 33.135 | 0.00 | 0.00 |
| ATOM | 7774 | HD21 | LEU | X | 511 | 36.425 | 19.199 | 33.961 | 0.00 | 0.00 |
| ATOM | 7775 | HD22 | LEU | X | 511 | 37.526 | 19.146 | 32.611 | 0.00 | 0.00 |
| ATOM | 7776 | HD23 | LEU | X | 511 | 36.063 | 18.356 | 32.327 | 0.00 | 0.00 |

|      |      |      |     |   |     |        |        |        |      |      |
|------|------|------|-----|---|-----|--------|--------|--------|------|------|
| ATOM | 7777 | C    | LEU | X | 511 | 34.227 | 16.235 | 35.925 | 0.00 | 0.00 |
| ATOM | 7778 | O    | LEU | X | 511 | 33.245 | 16.068 | 35.135 | 0.00 | 0.00 |
| ATOM | 7779 | N    | ARG | X | 512 | 34.455 | 15.656 | 37.159 | 0.00 | 0.00 |
| ATOM | 7780 | H    | ARG | X | 512 | 35.308 | 15.726 | 37.696 | 0.00 | 0.00 |
| ATOM | 7781 | CA   | ARG | X | 512 | 33.586 | 14.607 | 37.812 | 0.00 | 0.00 |
| ATOM | 7782 | HA   | ARG | X | 512 | 33.007 | 14.102 | 37.039 | 0.00 | 0.00 |
| ATOM | 7783 | CB   | ARG | X | 512 | 34.367 | 13.608 | 38.599 | 0.00 | 0.00 |
| ATOM | 7784 | HB2  | ARG | X | 512 | 34.847 | 14.207 | 39.373 | 0.00 | 0.00 |
| ATOM | 7785 | HB3  | ARG | X | 512 | 33.674 | 12.877 | 39.014 | 0.00 | 0.00 |
| ATOM | 7786 | CG   | ARG | X | 512 | 35.497 | 12.948 | 37.775 | 0.00 | 0.00 |
| ATOM | 7787 | HG2  | ARG | X | 512 | 35.020 | 12.319 | 37.024 | 0.00 | 0.00 |
| ATOM | 7788 | HG3  | ARG | X | 512 | 36.145 | 13.766 | 37.458 | 0.00 | 0.00 |
| ATOM | 7789 | CD   | ARG | X | 512 | 36.426 | 12.041 | 38.711 | 0.00 | 0.00 |
| ATOM | 7790 | HD2  | ARG | X | 512 | 36.962 | 12.714 | 39.380 | 0.00 | 0.00 |
| ATOM | 7791 | HD3  | ARG | X | 512 | 35.897 | 11.222 | 39.198 | 0.00 | 0.00 |
| ATOM | 7792 | NE   | ARG | X | 512 | 37.430 | 11.572 | 37.822 | 0.00 | 0.00 |
| ATOM | 7793 | HE   | ARG | X | 512 | 37.235 | 10.647 | 37.469 | 0.00 | 0.00 |
| ATOM | 7794 | CZ   | ARG | X | 512 | 38.463 | 12.200 | 37.353 | 0.00 | 0.00 |
| ATOM | 7795 | NH1  | ARG | X | 512 | 38.775 | 13.462 | 37.649 | 0.00 | 0.00 |
| ATOM | 7796 | HH11 | ARG | X | 512 | 38.059 | 13.955 | 38.164 | 0.00 | 0.00 |
| ATOM | 7797 | HH12 | ARG | X | 512 | 39.691 | 13.807 | 37.401 | 0.00 | 0.00 |
| ATOM | 7798 | NH2  | ARG | X | 512 | 39.222 | 11.579 | 36.433 | 0.00 | 0.00 |
| ATOM | 7799 | HH21 | ARG | X | 512 | 39.231 | 10.573 | 36.335 | 0.00 | 0.00 |
| ATOM | 7800 | HH22 | ARG | X | 512 | 39.896 | 12.118 | 35.908 | 0.00 | 0.00 |
| ATOM | 7801 | C    | ARG | X | 512 | 32.530 | 15.351 | 38.588 | 0.00 | 0.00 |
| ATOM | 7802 | O    | ARG | X | 512 | 32.741 | 16.571 | 38.940 | 0.00 | 0.00 |
| ATOM | 7803 | N    | PRO | X | 513 | 31.448 | 14.633 | 38.916 | 0.00 | 0.00 |
| ATOM | 7804 | CD   | PRO | X | 513 | 30.867 | 13.327 | 38.451 | 0.00 | 0.00 |
| ATOM | 7805 | HD2  | PRO | X | 513 | 31.178 | 12.535 | 39.133 | 0.00 | 0.00 |
| ATOM | 7806 | HD3  | PRO | X | 513 | 31.138 | 13.011 | 37.443 | 0.00 | 0.00 |
| ATOM | 7807 | CG   | PRO | X | 513 | 29.358 | 13.511 | 38.544 | 0.00 | 0.00 |
| ATOM | 7808 | HG2  | PRO | X | 513 | 28.923 | 12.516 | 38.637 | 0.00 | 0.00 |
| ATOM | 7809 | HG3  | PRO | X | 513 | 28.881 | 13.893 | 37.641 | 0.00 | 0.00 |
| ATOM | 7810 | CB   | PRO | X | 513 | 29.214 | 14.405 | 39.820 | 0.00 | 0.00 |
| ATOM | 7811 | HB2  | PRO | X | 513 | 29.289 | 13.714 | 40.660 | 0.00 | 0.00 |
| ATOM | 7812 | HB3  | PRO | X | 513 | 28.283 | 14.972 | 39.822 | 0.00 | 0.00 |
| ATOM | 7813 | CA   | PRO | X | 513 | 30.394 | 15.299 | 39.718 | 0.00 | 0.00 |
| ATOM | 7814 | HA   | PRO | X | 513 | 30.130 | 16.281 | 39.326 | 0.00 | 0.00 |
| ATOM | 7815 | C    | PRO | X | 513 | 30.939 | 15.712 | 41.135 | 0.00 | 0.00 |
| ATOM | 7816 | O    | PRO | X | 513 | 31.957 | 15.210 | 41.523 | 0.00 | 0.00 |
| ATOM | 7817 | N    | LEU | X | 514 | 30.216 | 16.528 | 41.876 | 0.00 | 0.00 |
| ATOM | 7818 | H    | LEU | X | 514 | 29.284 | 16.657 | 41.507 | 0.00 | 0.00 |
| ATOM | 7819 | CA   | LEU | X | 514 | 30.783 | 17.360 | 42.866 | 0.00 | 0.00 |
| ATOM | 7820 | HA   | LEU | X | 514 | 31.631 | 17.868 | 42.408 | 0.00 | 0.00 |
| ATOM | 7821 | CB   | LEU | X | 514 | 29.740 | 18.374 | 43.363 | 0.00 | 0.00 |
| ATOM | 7822 | HB2  | LEU | X | 514 | 28.853 | 17.881 | 43.760 | 0.00 | 0.00 |
| ATOM | 7823 | HB3  | LEU | X | 514 | 30.210 | 18.886 | 44.202 | 0.00 | 0.00 |
| ATOM | 7824 | CG   | LEU | X | 514 | 29.205 | 19.467 | 42.419 | 0.00 | 0.00 |
| ATOM | 7825 | HG   | LEU | X | 514 | 28.822 | 19.013 | 41.505 | 0.00 | 0.00 |
| ATOM | 7826 | CD1  | LEU | X | 514 | 28.032 | 20.186 | 43.057 | 0.00 | 0.00 |
| ATOM | 7827 | HD11 | LEU | X | 514 | 28.426 | 20.973 | 43.701 | 0.00 | 0.00 |
| ATOM | 7828 | HD12 | LEU | X | 514 | 27.313 | 19.469 | 43.452 | 0.00 | 0.00 |
| ATOM | 7829 | HD13 | LEU | X | 514 | 27.436 | 20.710 | 42.309 | 0.00 | 0.00 |
| ATOM | 7830 | CD2  | LEU | X | 514 | 30.289 | 20.491 | 42.119 | 0.00 | 0.00 |
| ATOM | 7831 | HD21 | LEU | X | 514 | 29.919 | 21.467 | 41.802 | 0.00 | 0.00 |
| ATOM | 7832 | HD22 | LEU | X | 514 | 30.926 | 20.696 | 42.979 | 0.00 | 0.00 |
| ATOM | 7833 | HD23 | LEU | X | 514 | 31.066 | 20.073 | 41.479 | 0.00 | 0.00 |
| ATOM | 7834 | C    | LEU | X | 514 | 31.294 | 16.570 | 44.093 | 0.00 | 0.00 |
| ATOM | 7835 | O    | LEU | X | 514 | 30.481 | 15.964 | 44.857 | 0.00 | 0.00 |
| ATOM | 7836 | N    | GLU | X | 515 | 32.625 | 16.526 | 44.321 | 0.00 | 0.00 |
| ATOM | 7837 | H    | GLU | X | 515 | 33.152 | 17.041 | 43.631 | 0.00 | 0.00 |
| ATOM | 7838 | CA   | GLU | X | 515 | 33.246 | 16.314 | 45.668 | 0.00 | 0.00 |
| ATOM | 7839 | HA   | GLU | X | 515 | 32.622 | 15.487 | 46.009 | 0.00 | 0.00 |
| ATOM | 7840 | CB   | GLU | X | 515 | 34.649 | 15.628 | 45.646 | 0.00 | 0.00 |
| ATOM | 7841 | HB2  | GLU | X | 515 | 34.524 | 14.646 | 45.190 | 0.00 | 0.00 |
| ATOM | 7842 | HB3  | GLU | X | 515 | 35.280 | 16.258 | 45.019 | 0.00 | 0.00 |
| ATOM | 7843 | CG   | GLU | X | 515 | 35.236 | 15.570 | 47.079 | 0.00 | 0.00 |

|      |      |      |     |   |     |        |        |        |      |      |
|------|------|------|-----|---|-----|--------|--------|--------|------|------|
| ATOM | 7844 | HG2  | GLU | X | 515 | 35.305 | 16.614 | 47.385 | 0.00 | 0.00 |
| ATOM | 7845 | HG3  | GLU | X | 515 | 34.597 | 14.984 | 47.739 | 0.00 | 0.00 |
| ATOM | 7846 | CD   | GLU | X | 515 | 36.731 | 15.038 | 47.014 | 0.00 | 0.00 |
| ATOM | 7847 | OE1  | GLU | X | 515 | 37.637 | 15.874 | 47.062 | 0.00 | 0.00 |
| ATOM | 7848 | OE2  | GLU | X | 515 | 36.938 | 13.820 | 47.103 | 0.00 | 0.00 |
| ATOM | 7849 | C    | GLU | X | 515 | 33.081 | 17.467 | 46.694 | 0.00 | 0.00 |
| ATOM | 7850 | O    | GLU | X | 515 | 33.735 | 18.493 | 46.544 | 0.00 | 0.00 |
| ATOM | 7851 | N    | VAL | X | 516 | 32.377 | 17.235 | 47.825 | 0.00 | 0.00 |
| ATOM | 7852 | H    | VAL | X | 516 | 32.142 | 16.290 | 48.091 | 0.00 | 0.00 |
| ATOM | 7853 | CA   | VAL | X | 516 | 32.130 | 18.195 | 48.903 | 0.00 | 0.00 |
| ATOM | 7854 | HA   | VAL | X | 516 | 32.208 | 19.229 | 48.567 | 0.00 | 0.00 |
| ATOM | 7855 | CB   | VAL | X | 516 | 30.713 | 18.024 | 49.628 | 0.00 | 0.00 |
| ATOM | 7856 | HB   | VAL | X | 516 | 30.529 | 17.031 | 50.038 | 0.00 | 0.00 |
| ATOM | 7857 | CG1  | VAL | X | 516 | 30.532 | 19.000 | 50.738 | 0.00 | 0.00 |
| ATOM | 7858 | HG11 | VAL | X | 516 | 29.490 | 19.091 | 51.045 | 0.00 | 0.00 |
| ATOM | 7859 | HG12 | VAL | X | 516 | 31.122 | 18.730 | 51.614 | 0.00 | 0.00 |
| ATOM | 7860 | HG13 | VAL | X | 516 | 30.812 | 20.002 | 50.413 | 0.00 | 0.00 |
| ATOM | 7861 | CG2  | VAL | X | 516 | 29.521 | 18.203 | 48.673 | 0.00 | 0.00 |
| ATOM | 7862 | HG21 | VAL | X | 516 | 28.696 | 17.918 | 49.325 | 0.00 | 0.00 |
| ATOM | 7863 | HG22 | VAL | X | 516 | 29.524 | 17.404 | 47.931 | 0.00 | 0.00 |
| ATOM | 7864 | HG23 | VAL | X | 516 | 29.508 | 19.166 | 48.162 | 0.00 | 0.00 |
| ATOM | 7865 | C    | VAL | X | 516 | 33.229 | 18.025 | 49.937 | 0.00 | 0.00 |
| ATOM | 7866 | O    | VAL | X | 516 | 33.532 | 16.887 | 50.275 | 0.00 | 0.00 |
| ATOM | 7867 | N    | ARG | X | 517 | 33.791 | 19.132 | 50.473 | 0.00 | 0.00 |
| ATOM | 7868 | H    | ARG | X | 517 | 33.432 | 20.031 | 50.186 | 0.00 | 0.00 |
| ATOM | 7869 | CA   | ARG | X | 517 | 34.832 | 19.166 | 51.495 | 0.00 | 0.00 |
| ATOM | 7870 | HA   | ARG | X | 517 | 34.884 | 18.149 | 51.883 | 0.00 | 0.00 |
| ATOM | 7871 | CB   | ARG | X | 517 | 36.176 | 19.620 | 50.938 | 0.00 | 0.00 |
| ATOM | 7872 | HB2  | ARG | X | 517 | 36.039 | 20.615 | 50.513 | 0.00 | 0.00 |
| ATOM | 7873 | HB3  | ARG | X | 517 | 36.767 | 19.617 | 51.854 | 0.00 | 0.00 |
| ATOM | 7874 | CG   | ARG | X | 517 | 36.748 | 18.823 | 49.790 | 0.00 | 0.00 |
| ATOM | 7875 | HG2  | ARG | X | 517 | 36.971 | 17.827 | 50.174 | 0.00 | 0.00 |
| ATOM | 7876 | HG3  | ARG | X | 517 | 36.012 | 18.727 | 48.993 | 0.00 | 0.00 |
| ATOM | 7877 | CD   | ARG | X | 517 | 38.092 | 19.361 | 49.271 | 0.00 | 0.00 |
| ATOM | 7878 | HD2  | ARG | X | 517 | 37.903 | 20.283 | 48.722 | 0.00 | 0.00 |
| ATOM | 7879 | HD3  | ARG | X | 517 | 38.845 | 19.445 | 50.054 | 0.00 | 0.00 |
| ATOM | 7880 | NE   | ARG | X | 517 | 38.662 | 18.406 | 48.360 | 0.00 | 0.00 |
| ATOM | 7881 | HE   | ARG | X | 517 | 38.166 | 17.527 | 48.323 | 0.00 | 0.00 |
| ATOM | 7882 | CZ   | ARG | X | 517 | 39.448 | 18.631 | 47.313 | 0.00 | 0.00 |
| ATOM | 7883 | NH1  | ARG | X | 517 | 40.205 | 19.712 | 47.327 | 0.00 | 0.00 |
| ATOM | 7884 | HH11 | ARG | X | 517 | 40.075 | 20.457 | 47.996 | 0.00 | 0.00 |
| ATOM | 7885 | HH12 | ARG | X | 517 | 40.863 | 19.843 | 46.572 | 0.00 | 0.00 |
| ATOM | 7886 | NH2  | ARG | X | 517 | 39.746 | 17.725 | 46.416 | 0.00 | 0.00 |
| ATOM | 7887 | HH21 | ARG | X | 517 | 39.256 | 16.848 | 46.525 | 0.00 | 0.00 |
| ATOM | 7888 | HH22 | ARG | X | 517 | 39.968 | 18.056 | 45.488 | 0.00 | 0.00 |
| ATOM | 7889 | C    | ARG | X | 517 | 34.500 | 20.046 | 52.655 | 0.00 | 0.00 |
| ATOM | 7890 | O    | ARG | X | 517 | 34.002 | 21.139 | 52.434 | 0.00 | 0.00 |
| ATOM | 7891 | N    | ARG | X | 518 | 34.792 | 19.708 | 53.948 | 0.00 | 0.00 |
| ATOM | 7892 | H    | ARG | X | 518 | 35.223 | 18.805 | 54.086 | 0.00 | 0.00 |
| ATOM | 7893 | CA   | ARG | X | 518 | 34.412 | 20.487 | 55.114 | 0.00 | 0.00 |
| ATOM | 7894 | HA   | ARG | X | 518 | 33.600 | 21.116 | 54.749 | 0.00 | 0.00 |
| ATOM | 7895 | CB   | ARG | X | 518 | 33.897 | 19.649 | 56.287 | 0.00 | 0.00 |
| ATOM | 7896 | HB2  | ARG | X | 518 | 34.487 | 18.736 | 56.359 | 0.00 | 0.00 |
| ATOM | 7897 | HB3  | ARG | X | 518 | 33.925 | 20.193 | 57.231 | 0.00 | 0.00 |
| ATOM | 7898 | CG   | ARG | X | 518 | 32.439 | 19.257 | 56.039 | 0.00 | 0.00 |
| ATOM | 7899 | HG2  | ARG | X | 518 | 31.791 | 20.112 | 56.228 | 0.00 | 0.00 |
| ATOM | 7900 | HG3  | ARG | X | 518 | 32.241 | 19.121 | 54.976 | 0.00 | 0.00 |
| ATOM | 7901 | CD   | ARG | X | 518 | 31.970 | 18.049 | 56.842 | 0.00 | 0.00 |
| ATOM | 7902 | HD2  | ARG | X | 518 | 32.764 | 17.319 | 56.687 | 0.00 | 0.00 |
| ATOM | 7903 | HD3  | ARG | X | 518 | 31.764 | 18.405 | 57.852 | 0.00 | 0.00 |
| ATOM | 7904 | NE   | ARG | X | 518 | 30.772 | 17.439 | 56.267 | 0.00 | 0.00 |
| ATOM | 7905 | HE   | ARG | X | 518 | 29.924 | 17.846 | 56.636 | 0.00 | 0.00 |
| ATOM | 7906 | CZ   | ARG | X | 518 | 30.569 | 16.625 | 55.260 | 0.00 | 0.00 |
| ATOM | 7907 | NH1  | ARG | X | 518 | 31.445 | 15.982 | 54.540 | 0.00 | 0.00 |
| ATOM | 7908 | HH11 | ARG | X | 518 | 32.410 | 15.847 | 54.806 | 0.00 | 0.00 |
| ATOM | 7909 | HH12 | ARG | X | 518 | 31.068 | 15.782 | 53.625 | 0.00 | 0.00 |
| ATOM | 7910 | NH2  | ARG | X | 518 | 29.343 | 16.425 | 54.924 | 0.00 | 0.00 |

|      |      |      |     |   |     |        |        |        |      |      |
|------|------|------|-----|---|-----|--------|--------|--------|------|------|
| ATOM | 7911 | HH21 | ARG | X | 518 | 28.595 | 16.783 | 55.501 | 0.00 | 0.00 |
| ATOM | 7912 | HH22 | ARG | X | 518 | 29.116 | 15.908 | 54.087 | 0.00 | 0.00 |
| ATOM | 7913 | C    | ARG | X | 518 | 35.645 | 21.343 | 55.533 | 0.00 | 0.00 |
| ATOM | 7914 | O    | ARG | X | 518 | 36.830 | 20.967 | 55.331 | 0.00 | 0.00 |
| ATOM | 7915 | N    | GLY | X | 519 | 35.427 | 22.485 | 56.215 | 0.00 | 0.00 |
| ATOM | 7916 | H    | GLY | X | 519 | 34.491 | 22.861 | 56.174 | 0.00 | 0.00 |
| ATOM | 7917 | CA   | GLY | X | 519 | 36.454 | 23.100 | 56.981 | 0.00 | 0.00 |
| ATOM | 7918 | HA2  | GLY | X | 519 | 35.879 | 23.683 | 57.700 | 0.00 | 0.00 |
| ATOM | 7919 | HA3  | GLY | X | 519 | 37.042 | 22.366 | 57.531 | 0.00 | 0.00 |
| ATOM | 7920 | C    | GLY | X | 519 | 37.421 | 24.076 | 56.373 | 0.00 | 0.00 |
| ATOM | 7921 | O    | GLY | X | 519 | 38.520 | 24.281 | 56.939 | 0.00 | 0.00 |
| ATOM | 7922 | N    | LEU | X | 520 | 37.061 | 24.681 | 55.254 | 0.00 | 0.00 |
| ATOM | 7923 | H    | LEU | X | 520 | 36.172 | 24.438 | 54.842 | 0.00 | 0.00 |
| ATOM | 7924 | CA   | LEU | X | 520 | 37.849 | 25.603 | 54.405 | 0.00 | 0.00 |
| ATOM | 7925 | HA   | LEU | X | 520 | 38.234 | 25.035 | 53.558 | 0.00 | 0.00 |
| ATOM | 7926 | CB   | LEU | X | 520 | 36.806 | 26.617 | 53.831 | 0.00 | 0.00 |
| ATOM | 7927 | HB2  | LEU | X | 520 | 35.981 | 26.037 | 53.417 | 0.00 | 0.00 |
| ATOM | 7928 | HB3  | LEU | X | 520 | 36.383 | 27.221 | 54.634 | 0.00 | 0.00 |
| ATOM | 7929 | CG   | LEU | X | 520 | 37.290 | 27.597 | 52.788 | 0.00 | 0.00 |
| ATOM | 7930 | HG   | LEU | X | 520 | 37.931 | 28.272 | 53.355 | 0.00 | 0.00 |
| ATOM | 7931 | CD1  | LEU | X | 520 | 37.965 | 26.939 | 51.538 | 0.00 | 0.00 |
| ATOM | 7932 | HD11 | LEU | X | 520 | 38.874 | 26.417 | 51.837 | 0.00 | 0.00 |
| ATOM | 7933 | HD12 | LEU | X | 520 | 38.377 | 27.719 | 50.899 | 0.00 | 0.00 |
| ATOM | 7934 | HD13 | LEU | X | 520 | 37.249 | 26.460 | 50.869 | 0.00 | 0.00 |
| ATOM | 7935 | CD2  | LEU | X | 520 | 36.079 | 28.433 | 52.407 | 0.00 | 0.00 |
| ATOM | 7936 | HD21 | LEU | X | 520 | 35.551 | 28.876 | 53.252 | 0.00 | 0.00 |
| ATOM | 7937 | HD22 | LEU | X | 520 | 36.422 | 29.265 | 51.792 | 0.00 | 0.00 |
| ATOM | 7938 | HD23 | LEU | X | 520 | 35.380 | 27.906 | 51.757 | 0.00 | 0.00 |
| ATOM | 7939 | C    | LEU | X | 520 | 39.110 | 26.240 | 55.114 | 0.00 | 0.00 |
| ATOM | 7940 | O    | LEU | X | 520 | 39.030 | 27.284 | 55.752 | 0.00 | 0.00 |
| ATOM | 7941 | N    | ARG | X | 521 | 40.273 | 25.635 | 54.882 | 0.00 | 0.00 |
| ATOM | 7942 | H    | ARG | X | 521 | 40.205 | 24.697 | 54.514 | 0.00 | 0.00 |
| ATOM | 7943 | CA   | ARG | X | 521 | 41.623 | 26.170 | 55.184 | 0.00 | 0.00 |
| ATOM | 7944 | HA   | ARG | X | 521 | 42.357 | 25.377 | 55.044 | 0.00 | 0.00 |
| ATOM | 7945 | CB   | ARG | X | 521 | 41.918 | 27.329 | 54.233 | 0.00 | 0.00 |
| ATOM | 7946 | HB2  | ARG | X | 521 | 41.244 | 27.289 | 53.377 | 0.00 | 0.00 |
| ATOM | 7947 | HB3  | ARG | X | 521 | 41.427 | 28.193 | 54.681 | 0.00 | 0.00 |
| ATOM | 7948 | CG   | ARG | X | 521 | 43.364 | 27.569 | 53.856 | 0.00 | 0.00 |
| ATOM | 7949 | HG2  | ARG | X | 521 | 43.466 | 28.485 | 53.274 | 0.00 | 0.00 |
| ATOM | 7950 | HG3  | ARG | X | 521 | 44.048 | 27.624 | 54.704 | 0.00 | 0.00 |
| ATOM | 7951 | CD   | ARG | X | 521 | 43.919 | 26.430 | 52.947 | 0.00 | 0.00 |
| ATOM | 7952 | HD2  | ARG | X | 521 | 44.171 | 25.494 | 53.445 | 0.00 | 0.00 |
| ATOM | 7953 | HD3  | ARG | X | 521 | 43.168 | 26.173 | 52.199 | 0.00 | 0.00 |
| ATOM | 7954 | NE   | ARG | X | 521 | 44.995 | 26.981 | 52.118 | 0.00 | 0.00 |
| ATOM | 7955 | HE   | ARG | X | 521 | 45.066 | 27.983 | 52.010 | 0.00 | 0.00 |
| ATOM | 7956 | CZ   | ARG | X | 521 | 45.646 | 26.258 | 51.225 | 0.00 | 0.00 |
| ATOM | 7957 | NH1  | ARG | X | 521 | 45.691 | 24.919 | 51.288 | 0.00 | 0.00 |
| ATOM | 7958 | HH11 | ARG | X | 521 | 45.112 | 24.413 | 51.942 | 0.00 | 0.00 |
| ATOM | 7959 | HH12 | ARG | X | 521 | 46.340 | 24.380 | 50.732 | 0.00 | 0.00 |
| ATOM | 7960 | NH2  | ARG | X | 521 | 46.238 | 26.936 | 50.274 | 0.00 | 0.00 |
| ATOM | 7961 | HH21 | ARG | X | 521 | 46.256 | 27.938 | 50.147 | 0.00 | 0.00 |
| ATOM | 7962 | HH22 | ARG | X | 521 | 46.759 | 26.382 | 49.610 | 0.00 | 0.00 |
| ATOM | 7963 | C    | ARG | X | 521 | 41.857 | 26.516 | 56.634 | 0.00 | 0.00 |
| ATOM | 7964 | O    | ARG | X | 521 | 42.864 | 27.112 | 56.972 | 0.00 | 0.00 |
| ATOM | 7965 | N    | ALA | X | 522 | 40.940 | 26.191 | 57.572 | 0.00 | 0.00 |
| ATOM | 7966 | H    | ALA | X | 522 | 40.171 | 25.644 | 57.213 | 0.00 | 0.00 |
| ATOM | 7967 | CA   | ALA | X | 522 | 40.898 | 26.709 | 58.954 | 0.00 | 0.00 |
| ATOM | 7968 | HA   | ALA | X | 522 | 41.029 | 27.783 | 58.818 | 0.00 | 0.00 |
| ATOM | 7969 | CB   | ALA | X | 522 | 39.478 | 26.356 | 59.479 | 0.00 | 0.00 |
| ATOM | 7970 | HB1  | ALA | X | 522 | 38.770 | 26.505 | 58.665 | 0.00 | 0.00 |
| ATOM | 7971 | HB2  | ALA | X | 522 | 39.219 | 26.910 | 60.382 | 0.00 | 0.00 |
| ATOM | 7972 | HB3  | ALA | X | 522 | 39.287 | 25.295 | 59.635 | 0.00 | 0.00 |
| ATOM | 7973 | C    | ALA | X | 522 | 42.019 | 26.162 | 59.894 | 0.00 | 0.00 |
| ATOM | 7974 | O    | ALA | X | 522 | 42.557 | 26.957 | 60.708 | 0.00 | 0.00 |
| ATOM | 7975 | N    | GLN | X | 523 | 42.524 | 24.965 | 59.743 | 0.00 | 0.00 |
| ATOM | 7976 | H    | GLN | X | 523 | 42.068 | 24.313 | 59.120 | 0.00 | 0.00 |
| ATOM | 7977 | CA   | GLN | X | 523 | 43.806 | 24.446 | 60.280 | 0.00 | 0.00 |

|      |      |      |     |   |     |        |        |        |      |      |
|------|------|------|-----|---|-----|--------|--------|--------|------|------|
| ATOM | 7978 | HA   | GLN | X | 523 | 43.695 | 24.542 | 61.360 | 0.00 | 0.00 |
| ATOM | 7979 | CB   | GLN | X | 523 | 43.954 | 22.948 | 60.005 | 0.00 | 0.00 |
| ATOM | 7980 | HB2  | GLN | X | 523 | 44.236 | 22.868 | 58.955 | 0.00 | 0.00 |
| ATOM | 7981 | HB3  | GLN | X | 523 | 44.802 | 22.566 | 60.572 | 0.00 | 0.00 |
| ATOM | 7982 | CG   | GLN | X | 523 | 42.740 | 22.101 | 60.381 | 0.00 | 0.00 |
| ATOM | 7983 | HG2  | GLN | X | 523 | 42.425 | 22.244 | 61.415 | 0.00 | 0.00 |
| ATOM | 7984 | HG3  | GLN | X | 523 | 41.942 | 22.502 | 59.755 | 0.00 | 0.00 |
| ATOM | 7985 | CD   | GLN | X | 523 | 42.972 | 20.624 | 60.016 | 0.00 | 0.00 |
| ATOM | 7986 | OE1  | GLN | X | 523 | 43.953 | 20.161 | 59.384 | 0.00 | 0.00 |
| ATOM | 7987 | NE2  | GLN | X | 523 | 42.122 | 19.753 | 60.504 | 0.00 | 0.00 |
| ATOM | 7988 | HE21 | GLN | X | 523 | 42.290 | 18.769 | 60.355 | 0.00 | 0.00 |
| ATOM | 7989 | HE22 | GLN | X | 523 | 41.255 | 20.005 | 60.955 | 0.00 | 0.00 |
| ATOM | 7990 | C    | GLN | X | 523 | 45.063 | 25.203 | 59.788 | 0.00 | 0.00 |
| ATOM | 7991 | O    | GLN | X | 523 | 46.189 | 24.835 | 60.159 | 0.00 | 0.00 |
| ATOM | 7992 | N    | ALA | X | 524 | 44.907 | 26.312 | 59.035 | 0.00 | 0.00 |
| ATOM | 7993 | H    | ALA | X | 524 | 44.019 | 26.540 | 58.612 | 0.00 | 0.00 |
| ATOM | 7994 | CA   | ALA | X | 524 | 46.047 | 27.208 | 58.768 | 0.00 | 0.00 |
| ATOM | 7995 | HA   | ALA | X | 524 | 46.959 | 26.877 | 59.263 | 0.00 | 0.00 |
| ATOM | 7996 | CB   | ALA | X | 524 | 46.428 | 27.067 | 57.326 | 0.00 | 0.00 |
| ATOM | 7997 | HB1  | ALA | X | 524 | 47.335 | 27.616 | 57.073 | 0.00 | 0.00 |
| ATOM | 7998 | HB2  | ALA | X | 524 | 45.635 | 27.485 | 56.705 | 0.00 | 0.00 |
| ATOM | 7999 | HB3  | ALA | X | 524 | 46.606 | 26.005 | 57.159 | 0.00 | 0.00 |
| ATOM | 8000 | C    | ALA | X | 524 | 45.650 | 28.688 | 59.111 | 0.00 | 0.00 |
| ATOM | 8001 | O    | ALA | X | 524 | 46.484 | 29.451 | 59.613 | 0.00 | 0.00 |
| ATOM | 8002 | N    | CYX | X | 525 | 44.395 | 29.110 | 58.930 | 0.00 | 0.00 |
| ATOM | 8003 | H    | CYX | X | 525 | 43.736 | 28.427 | 58.585 | 0.00 | 0.00 |
| ATOM | 8004 | CA   | CYX | X | 525 | 43.903 | 30.504 | 59.042 | 0.00 | 0.00 |
| ATOM | 8005 | HA   | CYX | X | 525 | 44.651 | 31.225 | 58.714 | 0.00 | 0.00 |
| ATOM | 8006 | CB   | CYX | X | 525 | 42.551 | 30.609 | 58.310 | 0.00 | 0.00 |
| ATOM | 8007 | HB2  | CYX | X | 525 | 41.743 | 29.951 | 58.626 | 0.00 | 0.00 |
| ATOM | 8008 | HB3  | CYX | X | 525 | 42.196 | 31.630 | 58.454 | 0.00 | 0.00 |
| ATOM | 8009 | SG   | CYX | X | 525 | 42.714 | 30.435 | 56.523 | 0.00 | 0.00 |
| ATOM | 8010 | C    | CYX | X | 525 | 43.717 | 30.973 | 60.454 | 0.00 | 0.00 |
| ATOM | 8011 | O    | CYX | X | 525 | 43.616 | 32.215 | 60.711 | 0.00 | 0.00 |
| ATOM | 8012 | N    | ALA | X | 526 | 43.597 | 30.089 | 61.464 | 0.00 | 0.00 |
| ATOM | 8013 | H    | ALA | X | 526 | 43.380 | 29.139 | 61.199 | 0.00 | 0.00 |
| ATOM | 8014 | CA   | ALA | X | 526 | 43.443 | 30.482 | 62.905 | 0.00 | 0.00 |
| ATOM | 8015 | HA   | ALA | X | 526 | 42.507 | 31.037 | 62.965 | 0.00 | 0.00 |
| ATOM | 8016 | CB   | ALA | X | 526 | 43.280 | 29.226 | 63.699 | 0.00 | 0.00 |
| ATOM | 8017 | HB1  | ALA | X | 526 | 42.476 | 28.617 | 63.289 | 0.00 | 0.00 |
| ATOM | 8018 | HB2  | ALA | X | 526 | 43.001 | 29.504 | 64.716 | 0.00 | 0.00 |
| ATOM | 8019 | HB3  | ALA | X | 526 | 44.217 | 28.671 | 63.744 | 0.00 | 0.00 |
| ATOM | 8020 | C    | ALA | X | 526 | 44.666 | 31.321 | 63.365 | 0.00 | 0.00 |
| ATOM | 8021 | O    | ALA | X | 526 | 44.588 | 32.218 | 64.128 | 0.00 | 0.00 |
| ATOM | 8022 | N    | PHE | X | 527 | 45.841 | 31.028 | 62.793 | 0.00 | 0.00 |
| ATOM | 8023 | H    | PHE | X | 527 | 45.864 | 30.116 | 62.360 | 0.00 | 0.00 |
| ATOM | 8024 | CA   | PHE | X | 527 | 46.995 | 31.881 | 62.949 | 0.00 | 0.00 |
| ATOM | 8025 | HA   | PHE | X | 527 | 47.274 | 31.861 | 64.003 | 0.00 | 0.00 |
| ATOM | 8026 | CB   | PHE | X | 527 | 48.120 | 31.289 | 62.104 | 0.00 | 0.00 |
| ATOM | 8027 | HB2  | PHE | X | 527 | 48.230 | 30.257 | 62.435 | 0.00 | 0.00 |
| ATOM | 8028 | HB3  | PHE | X | 527 | 47.897 | 31.239 | 61.039 | 0.00 | 0.00 |
| ATOM | 8029 | CG   | PHE | X | 527 | 49.507 | 31.923 | 62.405 | 0.00 | 0.00 |
| ATOM | 8030 | CD1  | PHE | X | 527 | 50.150 | 31.666 | 63.601 | 0.00 | 0.00 |
| ATOM | 8031 | HD1  | PHE | X | 527 | 49.635 | 31.044 | 64.318 | 0.00 | 0.00 |
| ATOM | 8032 | CE1  | PHE | X | 527 | 51.419 | 32.178 | 63.801 | 0.00 | 0.00 |
| ATOM | 8033 | HE1  | PHE | X | 527 | 51.820 | 31.893 | 64.762 | 0.00 | 0.00 |
| ATOM | 8034 | CZ   | PHE | X | 527 | 51.977 | 33.064 | 62.866 | 0.00 | 0.00 |
| ATOM | 8035 | HZ   | PHE | X | 527 | 52.920 | 33.545 | 63.080 | 0.00 | 0.00 |
| ATOM | 8036 | CE2  | PHE | X | 527 | 51.334 | 33.296 | 61.661 | 0.00 | 0.00 |
| ATOM | 8037 | HE2  | PHE | X | 527 | 51.642 | 34.058 | 60.960 | 0.00 | 0.00 |
| ATOM | 8038 | CD2  | PHE | X | 527 | 50.107 | 32.675 | 61.437 | 0.00 | 0.00 |
| ATOM | 8039 | HD2  | PHE | X | 527 | 49.620 | 32.810 | 60.482 | 0.00 | 0.00 |
| ATOM | 8040 | C    | PHE | X | 527 | 46.690 | 33.240 | 62.487 | 0.00 | 0.00 |
| ATOM | 8041 | O    | PHE | X | 527 | 46.744 | 34.162 | 63.296 | 0.00 | 0.00 |
| ATOM | 8042 | N    | TRP | X | 528 | 46.410 | 33.491 | 61.199 | 0.00 | 0.00 |
| ATOM | 8043 | H    | TRP | X | 528 | 46.539 | 32.664 | 60.634 | 0.00 | 0.00 |
| ATOM | 8044 | CA   | TRP | X | 528 | 46.130 | 34.825 | 60.570 | 0.00 | 0.00 |

|      |      |      |     |   |     |        |        |        |      |      |
|------|------|------|-----|---|-----|--------|--------|--------|------|------|
| ATOM | 8045 | HA   | TRP | X | 528 | 47.028 | 35.419 | 60.735 | 0.00 | 0.00 |
| ATOM | 8046 | CB   | TRP | X | 528 | 45.997 | 34.636 | 59.035 | 0.00 | 0.00 |
| ATOM | 8047 | HB2  | TRP | X | 528 | 45.051 | 34.148 | 58.797 | 0.00 | 0.00 |
| ATOM | 8048 | HB3  | TRP | X | 528 | 45.922 | 35.622 | 58.577 | 0.00 | 0.00 |
| ATOM | 8049 | CG   | TRP | X | 528 | 47.128 | 33.880 | 58.367 | 0.00 | 0.00 |
| ATOM | 8050 | CD1  | TRP | X | 528 | 47.105 | 32.702 | 57.685 | 0.00 | 0.00 |
| ATOM | 8051 | HD1  | TRP | X | 528 | 46.304 | 32.044 | 57.382 | 0.00 | 0.00 |
| ATOM | 8052 | NE1  | TRP | X | 528 | 48.346 | 32.402 | 57.292 | 0.00 | 0.00 |
| ATOM | 8053 | HE1  | TRP | X | 528 | 48.565 | 31.553 | 56.790 | 0.00 | 0.00 |
| ATOM | 8054 | CE2  | TRP | X | 528 | 49.263 | 33.343 | 57.541 | 0.00 | 0.00 |
| ATOM | 8055 | CZ2  | TRP | X | 528 | 50.644 | 33.391 | 57.334 | 0.00 | 0.00 |
| ATOM | 8056 | HZ2  | TRP | X | 528 | 51.181 | 32.564 | 56.894 | 0.00 | 0.00 |
| ATOM | 8057 | CH2  | TRP | X | 528 | 51.300 | 34.581 | 57.749 | 0.00 | 0.00 |
| ATOM | 8058 | HH2  | TRP | X | 528 | 52.365 | 34.618 | 57.576 | 0.00 | 0.00 |
| ATOM | 8059 | CZ3  | TRP | X | 528 | 50.597 | 35.579 | 58.484 | 0.00 | 0.00 |
| ATOM | 8060 | HZ3  | TRP | X | 528 | 51.053 | 36.428 | 58.972 | 0.00 | 0.00 |
| ATOM | 8061 | CE3  | TRP | X | 528 | 49.234 | 35.476 | 58.669 | 0.00 | 0.00 |
| ATOM | 8062 | HE3  | TRP | X | 528 | 48.780 | 36.180 | 59.350 | 0.00 | 0.00 |
| ATOM | 8063 | CD2  | TRP | X | 528 | 48.531 | 34.337 | 58.266 | 0.00 | 0.00 |
| ATOM | 8064 | C    | TRP | X | 528 | 44.933 | 35.636 | 61.081 | 0.00 | 0.00 |
| ATOM | 8065 | O    | TRP | X | 528 | 45.075 | 36.874 | 61.118 | 0.00 | 0.00 |
| ATOM | 8066 | N    | ASN | X | 529 | 43.869 | 35.001 | 61.552 | 0.00 | 0.00 |
| ATOM | 8067 | H    | ASN | X | 529 | 43.841 | 34.000 | 61.422 | 0.00 | 0.00 |
| ATOM | 8068 | CA   | ASN | X | 529 | 42.618 | 35.629 | 61.938 | 0.00 | 0.00 |
| ATOM | 8069 | HA   | ASN | X | 529 | 42.389 | 36.492 | 61.312 | 0.00 | 0.00 |
| ATOM | 8070 | CB   | ASN | X | 529 | 41.372 | 34.699 | 61.747 | 0.00 | 0.00 |
| ATOM | 8071 | HB2  | ASN | X | 529 | 41.565 | 33.754 | 62.254 | 0.00 | 0.00 |
| ATOM | 8072 | HB3  | ASN | X | 529 | 40.542 | 35.152 | 62.288 | 0.00 | 0.00 |
| ATOM | 8073 | CG   | ASN | X | 529 | 41.013 | 34.413 | 60.280 | 0.00 | 0.00 |
| ATOM | 8074 | OD1  | ASN | X | 529 | 41.391 | 35.110 | 59.375 | 0.00 | 0.00 |
| ATOM | 8075 | ND2  | ASN | X | 529 | 40.289 | 33.372 | 59.974 | 0.00 | 0.00 |
| ATOM | 8076 | HD21 | ASN | X | 529 | 40.046 | 33.130 | 59.024 | 0.00 | 0.00 |
| ATOM | 8077 | HD22 | ASN | X | 529 | 39.935 | 32.817 | 60.740 | 0.00 | 0.00 |
| ATOM | 8078 | C    | ASN | X | 529 | 42.696 | 36.164 | 63.421 | 0.00 | 0.00 |
| ATOM | 8079 | O    | ASN | X | 529 | 42.178 | 37.203 | 63.817 | 0.00 | 0.00 |
| ATOM | 8080 | N    | ARG | X | 530 | 43.502 | 35.492 | 64.262 | 0.00 | 0.00 |
| ATOM | 8081 | H    | ARG | X | 530 | 43.988 | 34.667 | 63.941 | 0.00 | 0.00 |
| ATOM | 8082 | CA   | ARG | X | 530 | 43.554 | 35.826 | 65.757 | 0.00 | 0.00 |
| ATOM | 8083 | HA   | ARG | X | 530 | 43.043 | 36.771 | 65.940 | 0.00 | 0.00 |
| ATOM | 8084 | CB   | ARG | X | 530 | 42.682 | 34.730 | 66.456 | 0.00 | 0.00 |
| ATOM | 8085 | HB2  | ARG | X | 530 | 43.119 | 33.732 | 66.491 | 0.00 | 0.00 |
| ATOM | 8086 | HB3  | ARG | X | 530 | 42.746 | 35.020 | 67.505 | 0.00 | 0.00 |
| ATOM | 8087 | CG   | ARG | X | 530 | 41.273 | 34.514 | 65.812 | 0.00 | 0.00 |
| ATOM | 8088 | HG2  | ARG | X | 530 | 40.751 | 35.448 | 65.606 | 0.00 | 0.00 |
| ATOM | 8089 | HG3  | ARG | X | 530 | 41.414 | 34.080 | 64.822 | 0.00 | 0.00 |
| ATOM | 8090 | CD   | ARG | X | 530 | 40.389 | 33.586 | 66.655 | 0.00 | 0.00 |
| ATOM | 8091 | HD2  | ARG | X | 530 | 40.087 | 34.049 | 67.595 | 0.00 | 0.00 |
| ATOM | 8092 | HD3  | ARG | X | 530 | 39.500 | 33.557 | 66.025 | 0.00 | 0.00 |
| ATOM | 8093 | NE   | ARG | X | 530 | 41.014 | 32.262 | 66.857 | 0.00 | 0.00 |
| ATOM | 8094 | HE   | ARG | X | 530 | 42.020 | 32.262 | 66.945 | 0.00 | 0.00 |
| ATOM | 8095 | CZ   | ARG | X | 530 | 40.370 | 31.163 | 66.735 | 0.00 | 0.00 |
| ATOM | 8096 | NH1  | ARG | X | 530 | 39.087 | 31.178 | 66.506 | 0.00 | 0.00 |
| ATOM | 8097 | HH11 | ARG | X | 530 | 38.544 | 32.021 | 66.626 | 0.00 | 0.00 |
| ATOM | 8098 | HH12 | ARG | X | 530 | 38.480 | 30.371 | 66.485 | 0.00 | 0.00 |
| ATOM | 8099 | NH2  | ARG | X | 530 | 41.188 | 30.124 | 66.658 | 0.00 | 0.00 |
| ATOM | 8100 | HH21 | ARG | X | 530 | 42.121 | 30.272 | 67.015 | 0.00 | 0.00 |
| ATOM | 8101 | HH22 | ARG | X | 530 | 41.005 | 29.305 | 66.096 | 0.00 | 0.00 |
| ATOM | 8102 | C    | ARG | X | 530 | 44.949 | 36.006 | 66.321 | 0.00 | 0.00 |
| ATOM | 8103 | O    | ARG | X | 530 | 45.325 | 37.019 | 66.845 | 0.00 | 0.00 |
| ATOM | 8104 | N    | PHE | X | 531 | 45.682 | 34.891 | 66.418 | 0.00 | 0.00 |
| ATOM | 8105 | H    | PHE | X | 531 | 45.237 | 34.082 | 66.008 | 0.00 | 0.00 |
| ATOM | 8106 | CA   | PHE | X | 531 | 46.996 | 34.797 | 67.219 | 0.00 | 0.00 |
| ATOM | 8107 | HA   | PHE | X | 531 | 46.724 | 35.156 | 68.212 | 0.00 | 0.00 |
| ATOM | 8108 | CB   | PHE | X | 531 | 47.450 | 33.344 | 67.222 | 0.00 | 0.00 |
| ATOM | 8109 | HB2  | PHE | X | 531 | 46.719 | 32.658 | 67.651 | 0.00 | 0.00 |
| ATOM | 8110 | HB3  | PHE | X | 531 | 47.612 | 33.037 | 66.188 | 0.00 | 0.00 |
| ATOM | 8111 | CG   | PHE | X | 531 | 48.766 | 33.117 | 67.963 | 0.00 | 0.00 |

|      |      |      |     |   |     |        |        |        |      |      |
|------|------|------|-----|---|-----|--------|--------|--------|------|------|
| ATOM | 8112 | CD1  | PHE | X | 531 | 49.857 | 32.707 | 67.263 | 0.00 | 0.00 |
| ATOM | 8113 | HD1  | PHE | X | 531 | 49.766 | 32.658 | 66.188 | 0.00 | 0.00 |
| ATOM | 8114 | CE1  | PHE | X | 531 | 51.112 | 32.589 | 67.945 | 0.00 | 0.00 |
| ATOM | 8115 | HE1  | PHE | X | 531 | 52.009 | 32.364 | 67.387 | 0.00 | 0.00 |
| ATOM | 8116 | CZ   | PHE | X | 531 | 51.205 | 32.841 | 69.303 | 0.00 | 0.00 |
| ATOM | 8117 | HZ   | PHE | X | 531 | 52.183 | 32.888 | 69.757 | 0.00 | 0.00 |
| ATOM | 8118 | CE2  | PHE | X | 531 | 50.007 | 33.050 | 70.065 | 0.00 | 0.00 |
| ATOM | 8119 | HE2  | PHE | X | 531 | 49.924 | 33.273 | 71.119 | 0.00 | 0.00 |
| ATOM | 8120 | CD2  | PHE | X | 531 | 48.756 | 33.185 | 69.371 | 0.00 | 0.00 |
| ATOM | 8121 | HD2  | PHE | X | 531 | 47.795 | 33.210 | 69.863 | 0.00 | 0.00 |
| ATOM | 8122 | C    | PHE | X | 531 | 48.136 | 35.675 | 66.555 | 0.00 | 0.00 |
| ATOM | 8123 | O    | PHE | X | 531 | 48.999 | 36.223 | 67.249 | 0.00 | 0.00 |
| ATOM | 8124 | N    | LEU | X | 532 | 48.185 | 35.832 | 65.212 | 0.00 | 0.00 |
| ATOM | 8125 | H    | LEU | X | 532 | 47.441 | 35.421 | 64.665 | 0.00 | 0.00 |
| ATOM | 8126 | CA   | LEU | X | 532 | 49.195 | 36.484 | 64.509 | 0.00 | 0.00 |
| ATOM | 8127 | HA   | LEU | X | 532 | 50.070 | 36.029 | 64.973 | 0.00 | 0.00 |
| ATOM | 8128 | CB   | LEU | X | 532 | 49.128 | 36.093 | 63.029 | 0.00 | 0.00 |
| ATOM | 8129 | HB2  | LEU | X | 532 | 49.220 | 35.014 | 62.909 | 0.00 | 0.00 |
| ATOM | 8130 | HB3  | LEU | X | 532 | 48.147 | 36.357 | 62.633 | 0.00 | 0.00 |
| ATOM | 8131 | CG   | LEU | X | 532 | 50.245 | 36.660 | 62.122 | 0.00 | 0.00 |
| ATOM | 8132 | HG   | LEU | X | 532 | 50.434 | 36.024 | 61.258 | 0.00 | 0.00 |
| ATOM | 8133 | CD1  | LEU | X | 532 | 49.805 | 37.928 | 61.451 | 0.00 | 0.00 |
| ATOM | 8134 | HD11 | LEU | X | 532 | 50.504 | 38.155 | 60.646 | 0.00 | 0.00 |
| ATOM | 8135 | HD12 | LEU | X | 532 | 49.761 | 38.672 | 62.246 | 0.00 | 0.00 |
| ATOM | 8136 | HD13 | LEU | X | 532 | 48.815 | 37.859 | 61.001 | 0.00 | 0.00 |
| ATOM | 8137 | CD2  | LEU | X | 532 | 51.657 | 36.728 | 62.826 | 0.00 | 0.00 |
| ATOM | 8138 | HD21 | LEU | X | 532 | 52.025 | 35.765 | 63.180 | 0.00 | 0.00 |
| ATOM | 8139 | HD22 | LEU | X | 532 | 52.348 | 36.991 | 62.025 | 0.00 | 0.00 |
| ATOM | 8140 | HD23 | LEU | X | 532 | 51.773 | 37.536 | 63.548 | 0.00 | 0.00 |
| ATOM | 8141 | C    | LEU | X | 532 | 49.136 | 37.951 | 64.830 | 0.00 | 0.00 |
| ATOM | 8142 | O    | LEU | X | 532 | 50.199 | 38.426 | 65.137 | 0.00 | 0.00 |
| ATOM | 8143 | N    | PRO | X | 533 | 48.025 | 38.711 | 64.717 | 0.00 | 0.00 |
| ATOM | 8144 | CD   | PRO | X | 533 | 46.718 | 38.346 | 64.036 | 0.00 | 0.00 |
| ATOM | 8145 | HD2  | PRO | X | 533 | 46.228 | 37.468 | 64.457 | 0.00 | 0.00 |
| ATOM | 8146 | HD3  | PRO | X | 533 | 46.860 | 38.013 | 63.008 | 0.00 | 0.00 |
| ATOM | 8147 | CG   | PRO | X | 533 | 45.955 | 39.644 | 63.990 | 0.00 | 0.00 |
| ATOM | 8148 | HG2  | PRO | X | 533 | 44.879 | 39.476 | 64.029 | 0.00 | 0.00 |
| ATOM | 8149 | HG3  | PRO | X | 533 | 46.128 | 40.163 | 63.047 | 0.00 | 0.00 |
| ATOM | 8150 | CB   | PRO | X | 533 | 46.369 | 40.362 | 65.255 | 0.00 | 0.00 |
| ATOM | 8151 | HB2  | PRO | X | 533 | 45.781 | 40.019 | 66.106 | 0.00 | 0.00 |
| ATOM | 8152 | HB3  | PRO | X | 533 | 46.225 | 41.442 | 65.211 | 0.00 | 0.00 |
| ATOM | 8153 | CA   | PRO | X | 533 | 47.831 | 40.043 | 65.251 | 0.00 | 0.00 |
| ATOM | 8154 | HA   | PRO | X | 533 | 48.271 | 40.796 | 64.598 | 0.00 | 0.00 |
| ATOM | 8155 | C    | PRO | X | 533 | 48.401 | 40.271 | 66.610 | 0.00 | 0.00 |
| ATOM | 8156 | O    | PRO | X | 533 | 49.153 | 41.231 | 66.767 | 0.00 | 0.00 |
| ATOM | 8157 | N    | LYS | X | 534 | 48.163 | 39.355 | 67.518 | 0.00 | 0.00 |
| ATOM | 8158 | H    | LYS | X | 534 | 47.489 | 38.625 | 67.334 | 0.00 | 0.00 |
| ATOM | 8159 | CA   | LYS | X | 534 | 48.656 | 39.433 | 68.905 | 0.00 | 0.00 |
| ATOM | 8160 | HA   | LYS | X | 534 | 48.513 | 40.462 | 69.235 | 0.00 | 0.00 |
| ATOM | 8161 | CB   | LYS | X | 534 | 47.845 | 38.442 | 69.895 | 0.00 | 0.00 |
| ATOM | 8162 | HB2  | LYS | X | 534 | 47.928 | 37.463 | 69.423 | 0.00 | 0.00 |
| ATOM | 8163 | HB3  | LYS | X | 534 | 48.451 | 38.413 | 70.801 | 0.00 | 0.00 |
| ATOM | 8164 | CG   | LYS | X | 534 | 46.374 | 38.923 | 70.172 | 0.00 | 0.00 |
| ATOM | 8165 | HG2  | LYS | X | 534 | 46.415 | 39.993 | 70.374 | 0.00 | 0.00 |
| ATOM | 8166 | HG3  | LYS | X | 534 | 45.827 | 38.898 | 69.229 | 0.00 | 0.00 |
| ATOM | 8167 | CD   | LYS | X | 534 | 45.494 | 38.114 | 71.138 | 0.00 | 0.00 |
| ATOM | 8168 | HD2  | LYS | X | 534 | 44.486 | 38.530 | 71.114 | 0.00 | 0.00 |
| ATOM | 8169 | HD3  | LYS | X | 534 | 45.501 | 37.054 | 70.882 | 0.00 | 0.00 |
| ATOM | 8170 | CE   | LYS | X | 534 | 45.929 | 38.279 | 72.576 | 0.00 | 0.00 |
| ATOM | 8171 | HE2  | LYS | X | 534 | 46.988 | 38.019 | 72.570 | 0.00 | 0.00 |
| ATOM | 8172 | HE3  | LYS | X | 534 | 45.905 | 39.335 | 72.843 | 0.00 | 0.00 |
| ATOM | 8173 | NZ   | LYS | X | 534 | 45.232 | 37.338 | 73.495 | 0.00 | 0.00 |
| ATOM | 8174 | HZ1  | LYS | X | 534 | 45.477 | 37.557 | 74.450 | 0.00 | 0.00 |
| ATOM | 8175 | HZ2  | LYS | X | 534 | 44.239 | 37.449 | 73.344 | 0.00 | 0.00 |
| ATOM | 8176 | HZ3  | LYS | X | 534 | 45.509 | 36.382 | 73.322 | 0.00 | 0.00 |
| ATOM | 8177 | C    | LYS | X | 534 | 50.119 | 39.154 | 69.043 | 0.00 | 0.00 |
| ATOM | 8178 | O    | LYS | X | 534 | 50.740 | 39.626 | 69.996 | 0.00 | 0.00 |

|      |      |      |     |   |     |        |        |        |      |      |
|------|------|------|-----|---|-----|--------|--------|--------|------|------|
| ATOM | 8179 | N    | LEU | X | 535 | 50.778 | 38.416 | 68.048 | 0.00 | 0.00 |
| ATOM | 8180 | H    | LEU | X | 535 | 50.215 | 37.901 | 67.386 | 0.00 | 0.00 |
| ATOM | 8181 | CA   | LEU | X | 535 | 52.206 | 38.171 | 67.988 | 0.00 | 0.00 |
| ATOM | 8182 | HA   | LEU | X | 535 | 52.500 | 37.953 | 69.015 | 0.00 | 0.00 |
| ATOM | 8183 | CB   | LEU | X | 535 | 52.635 | 36.964 | 67.038 | 0.00 | 0.00 |
| ATOM | 8184 | HB2  | LEU | X | 535 | 52.182 | 36.105 | 67.533 | 0.00 | 0.00 |
| ATOM | 8185 | HB3  | LEU | X | 535 | 52.096 | 37.035 | 66.093 | 0.00 | 0.00 |
| ATOM | 8186 | CG   | LEU | X | 535 | 54.143 | 36.745 | 66.825 | 0.00 | 0.00 |
| ATOM | 8187 | HG   | LEU | X | 535 | 54.644 | 37.560 | 66.302 | 0.00 | 0.00 |
| ATOM | 8188 | CD1  | LEU | X | 535 | 54.727 | 36.409 | 68.191 | 0.00 | 0.00 |
| ATOM | 8189 | HD11 | LEU | X | 535 | 54.657 | 37.287 | 68.833 | 0.00 | 0.00 |
| ATOM | 8190 | HD12 | LEU | X | 535 | 55.778 | 36.138 | 68.101 | 0.00 | 0.00 |
| ATOM | 8191 | HD13 | LEU | X | 535 | 54.367 | 35.600 | 68.826 | 0.00 | 0.00 |
| ATOM | 8192 | CD2  | LEU | X | 535 | 54.183 | 35.565 | 65.873 | 0.00 | 0.00 |
| ATOM | 8193 | HD21 | LEU | X | 535 | 53.415 | 34.848 | 66.165 | 0.00 | 0.00 |
| ATOM | 8194 | HD22 | LEU | X | 535 | 54.111 | 35.800 | 64.811 | 0.00 | 0.00 |
| ATOM | 8195 | HD23 | LEU | X | 535 | 55.139 | 35.070 | 65.702 | 0.00 | 0.00 |
| ATOM | 8196 | C    | LEU | X | 535 | 52.887 | 39.428 | 67.529 | 0.00 | 0.00 |
| ATOM | 8197 | O    | LEU | X | 535 | 53.752 | 39.980 | 68.159 | 0.00 | 0.00 |
| ATOM | 8198 | N    | LEU | X | 536 | 52.517 | 39.956 | 66.338 | 0.00 | 0.00 |
| ATOM | 8199 | H    | LEU | X | 536 | 51.789 | 39.463 | 65.840 | 0.00 | 0.00 |
| ATOM | 8200 | CA   | LEU | X | 536 | 53.132 | 41.139 | 65.733 | 0.00 | 0.00 |
| ATOM | 8201 | HA   | LEU | X | 536 | 54.219 | 41.066 | 65.706 | 0.00 | 0.00 |
| ATOM | 8202 | CB   | LEU | X | 536 | 52.556 | 41.216 | 64.282 | 0.00 | 0.00 |
| ATOM | 8203 | HB2  | LEU | X | 536 | 51.507 | 40.927 | 64.350 | 0.00 | 0.00 |
| ATOM | 8204 | HB3  | LEU | X | 536 | 52.639 | 42.240 | 63.919 | 0.00 | 0.00 |
| ATOM | 8205 | CG   | LEU | X | 536 | 53.361 | 40.285 | 63.316 | 0.00 | 0.00 |
| ATOM | 8206 | HG   | LEU | X | 536 | 53.533 | 39.294 | 63.737 | 0.00 | 0.00 |
| ATOM | 8207 | CD1  | LEU | X | 536 | 52.695 | 40.221 | 61.928 | 0.00 | 0.00 |
| ATOM | 8208 | HD11 | LEU | X | 536 | 51.697 | 39.787 | 61.985 | 0.00 | 0.00 |
| ATOM | 8209 | HD12 | LEU | X | 536 | 53.244 | 39.490 | 61.334 | 0.00 | 0.00 |
| ATOM | 8210 | HD13 | LEU | X | 536 | 52.613 | 41.163 | 61.385 | 0.00 | 0.00 |
| ATOM | 8211 | CD2  | LEU | X | 536 | 54.740 | 40.989 | 63.051 | 0.00 | 0.00 |
| ATOM | 8212 | HD21 | LEU | X | 536 | 55.459 | 40.350 | 62.538 | 0.00 | 0.00 |
| ATOM | 8213 | HD22 | LEU | X | 536 | 54.557 | 41.845 | 62.401 | 0.00 | 0.00 |
| ATOM | 8214 | HD23 | LEU | X | 536 | 55.247 | 41.303 | 63.963 | 0.00 | 0.00 |
| ATOM | 8215 | C    | LEU | X | 536 | 52.962 | 42.422 | 66.510 | 0.00 | 0.00 |
| ATOM | 8216 | O    | LEU | X | 536 | 53.768 | 43.308 | 66.533 | 0.00 | 0.00 |
| ATOM | 8217 | N    | SER | X | 537 | 51.887 | 42.535 | 67.319 | 0.00 | 0.00 |
| ATOM | 8218 | H    | SER | X | 537 | 51.069 | 41.967 | 67.150 | 0.00 | 0.00 |
| ATOM | 8219 | CA   | SER | X | 537 | 51.755 | 43.592 | 68.322 | 0.00 | 0.00 |
| ATOM | 8220 | HA   | SER | X | 537 | 52.008 | 44.587 | 67.953 | 0.00 | 0.00 |
| ATOM | 8221 | CB   | SER | X | 537 | 50.273 | 43.738 | 68.662 | 0.00 | 0.00 |
| ATOM | 8222 | HB2  | SER | X | 537 | 50.013 | 44.649 | 69.202 | 0.00 | 0.00 |
| ATOM | 8223 | HB3  | SER | X | 537 | 49.745 | 43.716 | 67.708 | 0.00 | 0.00 |
| ATOM | 8224 | OG   | SER | X | 537 | 49.903 | 42.702 | 69.502 | 0.00 | 0.00 |
| ATOM | 8225 | HG   | SER | X | 537 | 49.016 | 42.838 | 69.842 | 0.00 | 0.00 |
| ATOM | 8226 | C    | SER | X | 537 | 52.674 | 43.479 | 69.560 | 0.00 | 0.00 |
| ATOM | 8227 | O    | SER | X | 537 | 53.027 | 44.422 | 70.279 | 0.00 | 0.00 |
| ATOM | 8228 | N    | ALA | X | 538 | 53.185 | 42.285 | 69.757 | 0.00 | 0.00 |
| ATOM | 8229 | H    | ALA | X | 538 | 52.847 | 41.580 | 69.117 | 0.00 | 0.00 |
| ATOM | 8230 | CA   | ALA | X | 538 | 54.163 | 42.004 | 70.805 | 0.00 | 0.00 |
| ATOM | 8231 | HA   | ALA | X | 538 | 54.219 | 42.844 | 71.498 | 0.00 | 0.00 |
| ATOM | 8232 | CB   | ALA | X | 538 | 53.733 | 40.770 | 71.576 | 0.00 | 0.00 |
| ATOM | 8233 | HB1  | ALA | X | 538 | 54.105 | 39.859 | 71.106 | 0.00 | 0.00 |
| ATOM | 8234 | HB2  | ALA | X | 538 | 52.651 | 40.781 | 71.705 | 0.00 | 0.00 |
| ATOM | 8235 | HB3  | ALA | X | 538 | 54.187 | 40.723 | 72.566 | 0.00 | 0.00 |
| ATOM | 8236 | C    | ALA | X | 538 | 55.605 | 41.872 | 70.233 | 0.00 | 0.00 |
| ATOM | 8237 | O    | ALA | X | 538 | 56.482 | 41.741 | 71.024 | 0.00 | 0.00 |
| ATOM | 8238 | N    | THR | X | 539 | 55.751 | 41.908 | 68.889 | 0.00 | 0.00 |
| ATOM | 8239 | H    | THR | X | 539 | 54.896 | 41.873 | 68.353 | 0.00 | 0.00 |
| ATOM | 8240 | CA   | THR | X | 539 | 56.984 | 41.585 | 68.145 | 0.00 | 0.00 |
| ATOM | 8241 | HA   | THR | X | 539 | 57.842 | 41.444 | 68.804 | 0.00 | 0.00 |
| ATOM | 8242 | CB   | THR | X | 539 | 56.875 | 40.178 | 67.470 | 0.00 | 0.00 |
| ATOM | 8243 | HB   | THR | X | 539 | 56.264 | 40.139 | 66.569 | 0.00 | 0.00 |
| ATOM | 8244 | CG2  | THR | X | 539 | 58.212 | 39.534 | 67.055 | 0.00 | 0.00 |
| ATOM | 8245 | HG21 | THR | X | 539 | 58.773 | 39.175 | 67.917 | 0.00 | 0.00 |



|      |      |      |     |   |     |        |        |        |      |      |
|------|------|------|-----|---|-----|--------|--------|--------|------|------|
| ATOM | 8246 | HG22 | THR | X | 539 | 58.886 | 40.203 | 66.521 | 0.00 | 0.00 |
| ATOM | 8247 | HG23 | THR | X | 539 | 57.972 | 38.706 | 66.388 | 0.00 | 0.00 |
| ATOM | 8248 | OG1  | THR | X | 539 | 56.275 | 39.215 | 68.351 | 0.00 | 0.00 |
| ATOM | 8249 | HG1  | THR | X | 539 | 55.391 | 39.580 | 68.431 | 0.00 | 0.00 |
| ATOM | 8250 | C    | THR | X | 539 | 57.379 | 42.570 | 67.064 | 0.00 | 0.00 |
| ATOM | 8251 | O    | THR | X | 539 | 57.207 | 42.373 | 65.870 | 0.00 | 0.00 |
| ATOM | 8252 | OXT  | THR | X | 539 | 57.943 | 43.549 | 67.477 | 0.00 | 0.00 |

END

#-----  
# 1B41 Production MD Frame 0800  
#-----

| CRYST1 | 82.129 | 82.129 | 82.129 | 90.00 | 90.00 | 90.00  | P 1    |        | 1    |      |
|--------|--------|--------|--------|-------|-------|--------|--------|--------|------|------|
| ATOM   | 1      | N      | ASP    | X     | 1     | 20.285 | 44.497 | 9.737  | 0.00 | 0.00 |
| ATOM   | 2      | H1     | ASP    | X     | 1     | 21.287 | 44.389 | 9.680  | 0.00 | 0.00 |
| ATOM   | 3      | H2     | ASP    | X     | 1     | 19.973 | 44.377 | 8.784  | 0.00 | 0.00 |
| ATOM   | 4      | H3     | ASP    | X     | 1     | 19.855 | 43.747 | 10.260 | 0.00 | 0.00 |
| ATOM   | 5      | CA     | ASP    | X     | 1     | 20.193 | 45.861 | 10.221 | 0.00 | 0.00 |
| ATOM   | 6      | HA     | ASP    | X     | 1     | 21.268 | 46.034 | 10.273 | 0.00 | 0.00 |
| ATOM   | 7      | CB     | ASP    | X     | 1     | 19.551 | 46.907 | 9.330  | 0.00 | 0.00 |
| ATOM   | 8      | HB2    | ASP    | X     | 1     | 19.989 | 46.928 | 8.332  | 0.00 | 0.00 |
| ATOM   | 9      | HB3    | ASP    | X     | 1     | 18.495 | 46.639 | 9.292  | 0.00 | 0.00 |
| ATOM   | 10     | CG     | ASP    | X     | 1     | 19.785 | 48.301 | 9.789  | 0.00 | 0.00 |
| ATOM   | 11     | OD1    | ASP    | X     | 1     | 18.807 | 49.056 | 9.743  | 0.00 | 0.00 |
| ATOM   | 12     | OD2    | ASP    | X     | 1     | 20.899 | 48.634 | 10.296 | 0.00 | 0.00 |
| ATOM   | 13     | C      | ASP    | X     | 1     | 19.677 | 45.988 | 11.641 | 0.00 | 0.00 |
| ATOM   | 14     | O      | ASP    | X     | 1     | 20.489 | 46.395 | 12.511 | 0.00 | 0.00 |
| ATOM   | 15     | N      | ALA    | X     | 2     | 18.470 | 45.701 | 11.910 | 0.00 | 0.00 |
| ATOM   | 16     | H      | ALA    | X     | 2     | 17.742 | 45.454 | 11.255 | 0.00 | 0.00 |
| ATOM   | 17     | CA     | ALA    | X     | 2     | 17.992 | 45.921 | 13.342 | 0.00 | 0.00 |
| ATOM   | 18     | HA     | ALA    | X     | 2     | 18.233 | 46.899 | 13.759 | 0.00 | 0.00 |
| ATOM   | 19     | CB     | ALA    | X     | 2     | 16.546 | 45.586 | 13.307 | 0.00 | 0.00 |
| ATOM   | 20     | HB1    | ALA    | X     | 2     | 16.436 | 44.572 | 12.924 | 0.00 | 0.00 |
| ATOM   | 21     | HB2    | ALA    | X     | 2     | 16.130 | 46.290 | 12.588 | 0.00 | 0.00 |
| ATOM   | 22     | HB3    | ALA    | X     | 2     | 16.033 | 45.590 | 14.269 | 0.00 | 0.00 |
| ATOM   | 23     | C      | ALA    | X     | 2     | 18.817 | 45.004 | 14.412 | 0.00 | 0.00 |
| ATOM   | 24     | O      | ALA    | X     | 2     | 18.727 | 45.354 | 15.614 | 0.00 | 0.00 |
| ATOM   | 25     | N      | GLU    | X     | 3     | 19.640 | 43.983 | 13.986 | 0.00 | 0.00 |
| ATOM   | 26     | H      | GLU    | X     | 3     | 19.572 | 43.805 | 12.994 | 0.00 | 0.00 |
| ATOM   | 27     | CA     | GLU    | X     | 3     | 20.308 | 43.086 | 14.842 | 0.00 | 0.00 |
| ATOM   | 28     | HA     | GLU    | X     | 3     | 19.616 | 42.765 | 15.620 | 0.00 | 0.00 |
| ATOM   | 29     | CB     | GLU    | X     | 3     | 20.584 | 41.808 | 13.991 | 0.00 | 0.00 |
| ATOM   | 30     | HB2    | GLU    | X     | 3     | 21.272 | 41.990 | 13.165 | 0.00 | 0.00 |
| ATOM   | 31     | HB3    | GLU    | X     | 3     | 21.083 | 41.183 | 14.732 | 0.00 | 0.00 |
| ATOM   | 32     | CG     | GLU    | X     | 3     | 19.252 | 41.197 | 13.494 | 0.00 | 0.00 |
| ATOM   | 33     | HG2    | GLU    | X     | 3     | 19.228 | 40.110 | 13.575 | 0.00 | 0.00 |
| ATOM   | 34     | HG3    | GLU    | X     | 3     | 18.456 | 41.574 | 14.136 | 0.00 | 0.00 |
| ATOM   | 35     | CD     | GLU    | X     | 3     | 18.908 | 41.523 | 12.048 | 0.00 | 0.00 |
| ATOM   | 36     | OE1    | GLU    | X     | 3     | 18.324 | 40.752 | 11.260 | 0.00 | 0.00 |
| ATOM   | 37     | OE2    | GLU    | X     | 3     | 19.168 | 42.626 | 11.602 | 0.00 | 0.00 |
| ATOM   | 38     | C      | GLU    | X     | 3     | 21.540 | 43.717 | 15.507 | 0.00 | 0.00 |
| ATOM   | 39     | O      | GLU    | X     | 3     | 21.804 | 43.479 | 16.735 | 0.00 | 0.00 |
| ATOM   | 40     | N      | LEU    | X     | 4     | 22.201 | 44.522 | 14.675 | 0.00 | 0.00 |
| ATOM   | 41     | H      | LEU    | X     | 4     | 21.828 | 44.560 | 13.738 | 0.00 | 0.00 |
| ATOM   | 42     | CA     | LEU    | X     | 4     | 23.439 | 45.255 | 14.966 | 0.00 | 0.00 |
| ATOM   | 43     | HA     | LEU    | X     | 4     | 23.991 | 44.904 | 15.839 | 0.00 | 0.00 |
| ATOM   | 44     | CB     | LEU    | X     | 4     | 24.430 | 45.012 | 13.865 | 0.00 | 0.00 |
| ATOM   | 45     | HB2    | LEU    | X     | 4     | 24.028 | 45.348 | 12.909 | 0.00 | 0.00 |
| ATOM   | 46     | HB3    | LEU    | X     | 4     | 25.398 | 45.479 | 14.042 | 0.00 | 0.00 |
| ATOM   | 47     | CG     | LEU    | X     | 4     | 24.757 | 43.551 | 13.532 | 0.00 | 0.00 |
| ATOM   | 48     | HG     | LEU    | X     | 4     | 23.916 | 43.080 | 13.024 | 0.00 | 0.00 |
| ATOM   | 49     | CD1    | LEU    | X     | 4     | 25.801 | 43.560 | 12.397 | 0.00 | 0.00 |
| ATOM   | 50     | HD11   | LEU    | X     | 4     | 26.749 | 44.079 | 12.540 | 0.00 | 0.00 |
| ATOM   | 51     | HD12   | LEU    | X     | 4     | 25.449 | 44.095 | 11.515 | 0.00 | 0.00 |

|      |     |      |     |   |   |        |        |        |      |      |
|------|-----|------|-----|---|---|--------|--------|--------|------|------|
| ATOM | 52  | HD13 | LEU | X | 4 | 26.084 | 42.539 | 12.140 | 0.00 | 0.00 |
| ATOM | 53  | CD2  | LEU | X | 4 | 25.184 | 42.571 | 14.617 | 0.00 | 0.00 |
| ATOM | 54  | HD21 | LEU | X | 4 | 26.109 | 42.893 | 15.094 | 0.00 | 0.00 |
| ATOM | 55  | HD22 | LEU | X | 4 | 24.449 | 42.694 | 15.413 | 0.00 | 0.00 |
| ATOM | 56  | HD23 | LEU | X | 4 | 25.230 | 41.536 | 14.277 | 0.00 | 0.00 |
| ATOM | 57  | C    | LEU | X | 4 | 23.270 | 46.733 | 15.186 | 0.00 | 0.00 |
| ATOM | 58  | O    | LEU | X | 4 | 24.215 | 47.434 | 15.586 | 0.00 | 0.00 |
| ATOM | 59  | N    | LEU | X | 5 | 22.115 | 47.300 | 14.921 | 0.00 | 0.00 |
| ATOM | 60  | H    | LEU | X | 5 | 21.508 | 46.739 | 14.340 | 0.00 | 0.00 |
| ATOM | 61  | CA   | LEU | X | 5 | 21.652 | 48.697 | 15.226 | 0.00 | 0.00 |
| ATOM | 62  | HA   | LEU | X | 5 | 22.527 | 49.346 | 15.194 | 0.00 | 0.00 |
| ATOM | 63  | CB   | LEU | X | 5 | 20.663 | 49.200 | 14.236 | 0.00 | 0.00 |
| ATOM | 64  | HB2  | LEU | X | 5 | 21.086 | 49.248 | 13.233 | 0.00 | 0.00 |
| ATOM | 65  | HB3  | LEU | X | 5 | 19.796 | 48.540 | 14.187 | 0.00 | 0.00 |
| ATOM | 66  | CG   | LEU | X | 5 | 20.204 | 50.621 | 14.460 | 0.00 | 0.00 |
| ATOM | 67  | HG   | LEU | X | 5 | 19.783 | 51.065 | 13.558 | 0.00 | 0.00 |
| ATOM | 68  | CD1  | LEU | X | 5 | 19.081 | 50.711 | 15.495 | 0.00 | 0.00 |
| ATOM | 69  | HD11 | LEU | X | 5 | 18.476 | 51.561 | 15.178 | 0.00 | 0.00 |
| ATOM | 70  | HD12 | LEU | X | 5 | 19.337 | 50.694 | 16.554 | 0.00 | 0.00 |
| ATOM | 71  | HD13 | LEU | X | 5 | 18.353 | 49.927 | 15.286 | 0.00 | 0.00 |
| ATOM | 72  | CD2  | LEU | X | 5 | 21.199 | 51.707 | 14.863 | 0.00 | 0.00 |
| ATOM | 73  | HD21 | LEU | X | 5 | 22.059 | 51.688 | 14.194 | 0.00 | 0.00 |
| ATOM | 74  | HD22 | LEU | X | 5 | 20.810 | 52.723 | 14.799 | 0.00 | 0.00 |
| ATOM | 75  | HD23 | LEU | X | 5 | 21.629 | 51.549 | 15.852 | 0.00 | 0.00 |
| ATOM | 76  | C    | LEU | X | 5 | 21.159 | 48.699 | 16.641 | 0.00 | 0.00 |
| ATOM | 77  | O    | LEU | X | 5 | 20.307 | 47.902 | 16.941 | 0.00 | 0.00 |
| ATOM | 78  | N    | VAL | X | 6 | 21.675 | 49.528 | 17.575 | 0.00 | 0.00 |
| ATOM | 79  | H    | VAL | X | 6 | 22.384 | 50.174 | 17.258 | 0.00 | 0.00 |
| ATOM | 80  | CA   | VAL | X | 6 | 21.115 | 49.731 | 18.960 | 0.00 | 0.00 |
| ATOM | 81  | HA   | VAL | X | 6 | 20.149 | 49.228 | 19.002 | 0.00 | 0.00 |
| ATOM | 82  | CB   | VAL | X | 6 | 21.965 | 49.057 | 19.991 | 0.00 | 0.00 |
| ATOM | 83  | HB   | VAL | X | 6 | 22.178 | 48.087 | 19.541 | 0.00 | 0.00 |
| ATOM | 84  | CG1  | VAL | X | 6 | 23.250 | 49.790 | 20.131 | 0.00 | 0.00 |
| ATOM | 85  | HG11 | VAL | X | 6 | 23.774 | 49.291 | 20.946 | 0.00 | 0.00 |
| ATOM | 86  | HG12 | VAL | X | 6 | 23.739 | 49.790 | 19.157 | 0.00 | 0.00 |
| ATOM | 87  | HG13 | VAL | X | 6 | 23.075 | 50.819 | 20.447 | 0.00 | 0.00 |
| ATOM | 88  | CG2  | VAL | X | 6 | 21.254 | 48.803 | 21.323 | 0.00 | 0.00 |
| ATOM | 89  | HG21 | VAL | X | 6 | 20.403 | 48.122 | 21.287 | 0.00 | 0.00 |
| ATOM | 90  | HG22 | VAL | X | 6 | 20.773 | 49.733 | 21.627 | 0.00 | 0.00 |
| ATOM | 91  | HG23 | VAL | X | 6 | 21.911 | 48.399 | 22.092 | 0.00 | 0.00 |
| ATOM | 92  | C    | VAL | X | 6 | 20.700 | 51.246 | 19.248 | 0.00 | 0.00 |
| ATOM | 93  | O    | VAL | X | 6 | 21.328 | 52.161 | 18.669 | 0.00 | 0.00 |
| ATOM | 94  | N    | THR | X | 7 | 19.581 | 51.423 | 20.008 | 0.00 | 0.00 |
| ATOM | 95  | H    | THR | X | 7 | 19.063 | 50.572 | 20.169 | 0.00 | 0.00 |
| ATOM | 96  | CA   | THR | X | 7 | 19.160 | 52.762 | 20.613 | 0.00 | 0.00 |
| ATOM | 97  | HA   | THR | X | 7 | 19.733 | 53.568 | 20.154 | 0.00 | 0.00 |
| ATOM | 98  | CB   | THR | X | 7 | 17.656 | 53.016 | 20.422 | 0.00 | 0.00 |
| ATOM | 99  | HB   | THR | X | 7 | 17.166 | 52.349 | 21.131 | 0.00 | 0.00 |
| ATOM | 100 | CG2  | THR | X | 7 | 17.299 | 54.449 | 20.703 | 0.00 | 0.00 |
| ATOM | 101 | HG21 | THR | X | 7 | 17.321 | 54.588 | 21.784 | 0.00 | 0.00 |
| ATOM | 102 | HG22 | THR | X | 7 | 16.289 | 54.683 | 20.366 | 0.00 | 0.00 |
| ATOM | 103 | HG23 | THR | X | 7 | 18.039 | 55.193 | 20.407 | 0.00 | 0.00 |
| ATOM | 104 | OG1  | THR | X | 7 | 17.144 | 52.736 | 19.162 | 0.00 | 0.00 |
| ATOM | 105 | HG1  | THR | X | 7 | 17.025 | 51.785 | 19.109 | 0.00 | 0.00 |
| ATOM | 106 | C    | THR | X | 7 | 19.392 | 52.734 | 22.103 | 0.00 | 0.00 |
| ATOM | 107 | O    | THR | X | 7 | 18.955 | 51.792 | 22.843 | 0.00 | 0.00 |
| ATOM | 108 | N    | VAL | X | 8 | 20.060 | 53.664 | 22.684 | 0.00 | 0.00 |
| ATOM | 109 | H    | VAL | X | 8 | 20.326 | 54.468 | 22.133 | 0.00 | 0.00 |
| ATOM | 110 | CA   | VAL | X | 8 | 20.242 | 53.822 | 24.141 | 0.00 | 0.00 |
| ATOM | 111 | HA   | VAL | X | 8 | 19.394 | 53.335 | 24.621 | 0.00 | 0.00 |
| ATOM | 112 | CB   | VAL | X | 8 | 21.664 | 53.431 | 24.550 | 0.00 | 0.00 |
| ATOM | 113 | HB   | VAL | X | 8 | 21.810 | 53.650 | 25.608 | 0.00 | 0.00 |
| ATOM | 114 | CG1  | VAL | X | 8 | 21.731 | 51.908 | 24.577 | 0.00 | 0.00 |
| ATOM | 115 | HG11 | VAL | X | 8 | 21.053 | 51.474 | 25.313 | 0.00 | 0.00 |
| ATOM | 116 | HG12 | VAL | X | 8 | 21.621 | 51.449 | 23.595 | 0.00 | 0.00 |
| ATOM | 117 | HG13 | VAL | X | 8 | 22.726 | 51.546 | 24.834 | 0.00 | 0.00 |
| ATOM | 118 | CG2  | VAL | X | 8 | 22.784 | 53.951 | 23.665 | 0.00 | 0.00 |

|      |     |      |     |   |    |        |        |        |      |      |
|------|-----|------|-----|---|----|--------|--------|--------|------|------|
| ATOM | 119 | HG21 | VAL | X | 8  | 23.694 | 53.592 | 24.145 | 0.00 | 0.00 |
| ATOM | 120 | HG22 | VAL | X | 8  | 22.691 | 55.030 | 23.785 | 0.00 | 0.00 |
| ATOM | 121 | HG23 | VAL | X | 8  | 22.672 | 53.695 | 22.611 | 0.00 | 0.00 |
| ATOM | 122 | C    | VAL | X | 8  | 19.984 | 55.223 | 24.565 | 0.00 | 0.00 |
| ATOM | 123 | O    | VAL | X | 8  | 19.720 | 56.062 | 23.737 | 0.00 | 0.00 |
| ATOM | 124 | N    | ARG | X | 9  | 19.936 | 55.508 | 25.876 | 0.00 | 0.00 |
| ATOM | 125 | H    | ARG | X | 9  | 20.286 | 54.841 | 26.549 | 0.00 | 0.00 |
| ATOM | 126 | CA   | ARG | X | 9  | 19.390 | 56.761 | 26.466 | 0.00 | 0.00 |
| ATOM | 127 | HA   | ARG | X | 9  | 18.341 | 56.745 | 26.173 | 0.00 | 0.00 |
| ATOM | 128 | CB   | ARG | X | 9  | 19.491 | 56.648 | 27.952 | 0.00 | 0.00 |
| ATOM | 129 | HB2  | ARG | X | 9  | 19.126 | 55.674 | 28.279 | 0.00 | 0.00 |
| ATOM | 130 | HB3  | ARG | X | 9  | 20.478 | 56.867 | 28.359 | 0.00 | 0.00 |
| ATOM | 131 | CG   | ARG | X | 9  | 18.548 | 57.642 | 28.635 | 0.00 | 0.00 |
| ATOM | 132 | HG2  | ARG | X | 9  | 19.002 | 58.633 | 28.595 | 0.00 | 0.00 |
| ATOM | 133 | HG3  | ARG | X | 9  | 17.545 | 57.575 | 28.214 | 0.00 | 0.00 |
| ATOM | 134 | CD   | ARG | X | 9  | 18.437 | 57.303 | 30.110 | 0.00 | 0.00 |
| ATOM | 135 | HD2  | ARG | X | 9  | 17.724 | 56.480 | 30.148 | 0.00 | 0.00 |
| ATOM | 136 | HD3  | ARG | X | 9  | 19.421 | 57.015 | 30.480 | 0.00 | 0.00 |
| ATOM | 137 | NE   | ARG | X | 9  | 18.012 | 58.517 | 30.813 | 0.00 | 0.00 |
| ATOM | 138 | HE   | ARG | X | 9  | 18.119 | 59.381 | 30.301 | 0.00 | 0.00 |
| ATOM | 139 | CZ   | ARG | X | 9  | 17.414 | 58.731 | 31.965 | 0.00 | 0.00 |
| ATOM | 140 | NH1  | ARG | X | 9  | 17.173 | 57.739 | 32.836 | 0.00 | 0.00 |
| ATOM | 141 | HH11 | ARG | X | 9  | 17.475 | 56.802 | 32.613 | 0.00 | 0.00 |
| ATOM | 142 | HH12 | ARG | X | 9  | 16.969 | 57.871 | 33.816 | 0.00 | 0.00 |
| ATOM | 143 | NH2  | ARG | X | 9  | 17.089 | 59.864 | 32.338 | 0.00 | 0.00 |
| ATOM | 144 | HH21 | ARG | X | 9  | 17.382 | 60.673 | 31.808 | 0.00 | 0.00 |
| ATOM | 145 | HH22 | ARG | X | 9  | 16.437 | 59.948 | 33.104 | 0.00 | 0.00 |
| ATOM | 146 | C    | ARG | X | 9  | 19.992 | 58.060 | 25.903 | 0.00 | 0.00 |
| ATOM | 147 | O    | ARG | X | 9  | 19.316 | 59.067 | 25.939 | 0.00 | 0.00 |
| ATOM | 148 | N    | GLY | X | 10 | 21.225 | 57.988 | 25.330 | 0.00 | 0.00 |
| ATOM | 149 | H    | GLY | X | 10 | 21.692 | 57.111 | 25.152 | 0.00 | 0.00 |
| ATOM | 150 | CA   | GLY | X | 10 | 21.847 | 59.080 | 24.645 | 0.00 | 0.00 |
| ATOM | 151 | HA2  | GLY | X | 10 | 21.399 | 60.054 | 24.841 | 0.00 | 0.00 |
| ATOM | 152 | HA3  | GLY | X | 10 | 22.858 | 59.076 | 25.054 | 0.00 | 0.00 |
| ATOM | 153 | C    | GLY | X | 10 | 22.028 | 59.075 | 23.153 | 0.00 | 0.00 |
| ATOM | 154 | O    | GLY | X | 10 | 22.568 | 60.031 | 22.584 | 0.00 | 0.00 |
| ATOM | 155 | N    | GLY | X | 11 | 21.486 | 58.025 | 22.474 | 0.00 | 0.00 |
| ATOM | 156 | H    | GLY | X | 11 | 20.969 | 57.308 | 22.963 | 0.00 | 0.00 |
| ATOM | 157 | CA   | GLY | X | 11 | 21.464 | 57.988 | 20.969 | 0.00 | 0.00 |
| ATOM | 158 | HA2  | GLY | X | 11 | 20.493 | 58.420 | 20.727 | 0.00 | 0.00 |
| ATOM | 159 | HA3  | GLY | X | 11 | 22.307 | 58.562 | 20.586 | 0.00 | 0.00 |
| ATOM | 160 | C    | GLY | X | 11 | 21.534 | 56.588 | 20.386 | 0.00 | 0.00 |
| ATOM | 161 | O    | GLY | X | 11 | 21.221 | 55.608 | 20.981 | 0.00 | 0.00 |
| ATOM | 162 | N    | ARG | X | 12 | 21.890 | 56.562 | 19.107 | 0.00 | 0.00 |
| ATOM | 163 | H    | ARG | X | 12 | 22.142 | 57.409 | 18.619 | 0.00 | 0.00 |
| ATOM | 164 | CA   | ARG | X | 12 | 21.988 | 55.340 | 18.380 | 0.00 | 0.00 |
| ATOM | 165 | HA   | ARG | X | 12 | 21.406 | 54.641 | 18.980 | 0.00 | 0.00 |
| ATOM | 166 | CB   | ARG | X | 12 | 21.227 | 55.377 | 17.049 | 0.00 | 0.00 |
| ATOM | 167 | HB2  | ARG | X | 12 | 21.440 | 56.300 | 16.510 | 0.00 | 0.00 |
| ATOM | 168 | HB3  | ARG | X | 12 | 21.553 | 54.647 | 16.308 | 0.00 | 0.00 |
| ATOM | 169 | CG   | ARG | X | 12 | 19.673 | 55.400 | 17.317 | 0.00 | 0.00 |
| ATOM | 170 | HG2  | ARG | X | 12 | 19.463 | 54.678 | 18.106 | 0.00 | 0.00 |
| ATOM | 171 | HG3  | ARG | X | 12 | 19.291 | 56.407 | 17.488 | 0.00 | 0.00 |
| ATOM | 172 | CD   | ARG | X | 12 | 18.906 | 54.718 | 16.106 | 0.00 | 0.00 |
| ATOM | 173 | HD2  | ARG | X | 12 | 19.143 | 53.660 | 15.989 | 0.00 | 0.00 |
| ATOM | 174 | HD3  | ARG | X | 12 | 17.837 | 54.751 | 16.312 | 0.00 | 0.00 |
| ATOM | 175 | NE   | ARG | X | 12 | 19.205 | 55.369 | 14.870 | 0.00 | 0.00 |
| ATOM | 176 | HE   | ARG | X | 12 | 19.803 | 56.182 | 14.889 | 0.00 | 0.00 |
| ATOM | 177 | CZ   | ARG | X | 12 | 18.544 | 55.194 | 13.719 | 0.00 | 0.00 |
| ATOM | 178 | NH1  | ARG | X | 12 | 17.593 | 54.362 | 13.426 | 0.00 | 0.00 |
| ATOM | 179 | HH11 | ARG | X | 12 | 17.167 | 53.800 | 14.149 | 0.00 | 0.00 |
| ATOM | 180 | HH12 | ARG | X | 12 | 17.290 | 54.437 | 12.466 | 0.00 | 0.00 |
| ATOM | 181 | NH2  | ARG | X | 12 | 18.832 | 56.009 | 12.717 | 0.00 | 0.00 |
| ATOM | 182 | HH21 | ARG | X | 12 | 19.575 | 56.694 | 12.715 | 0.00 | 0.00 |
| ATOM | 183 | HH22 | ARG | X | 12 | 18.430 | 55.919 | 11.794 | 0.00 | 0.00 |
| ATOM | 184 | C    | ARG | X | 12 | 23.546 | 54.873 | 18.314 | 0.00 | 0.00 |
| ATOM | 185 | O    | ARG | X | 12 | 24.425 | 55.724 | 18.228 | 0.00 | 0.00 |

|      |     |      |     |   |    |        |        |        |      |      |
|------|-----|------|-----|---|----|--------|--------|--------|------|------|
| ATOM | 186 | N    | LEU | X | 13 | 23.719 | 53.561 | 18.388 | 0.00 | 0.00 |
| ATOM | 187 | H    | LEU | X | 13 | 22.884 | 52.993 | 18.408 | 0.00 | 0.00 |
| ATOM | 188 | CA   | LEU | X | 13 | 25.022 | 52.853 | 18.351 | 0.00 | 0.00 |
| ATOM | 189 | HA   | LEU | X | 13 | 25.737 | 53.542 | 17.901 | 0.00 | 0.00 |
| ATOM | 190 | CB   | LEU | X | 13 | 25.668 | 52.287 | 19.655 | 0.00 | 0.00 |
| ATOM | 191 | HB2  | LEU | X | 13 | 24.964 | 51.544 | 20.032 | 0.00 | 0.00 |
| ATOM | 192 | HB3  | LEU | X | 13 | 26.683 | 51.926 | 19.491 | 0.00 | 0.00 |
| ATOM | 193 | CG   | LEU | X | 13 | 25.793 | 53.306 | 20.754 | 0.00 | 0.00 |
| ATOM | 194 | HG   | LEU | X | 13 | 24.811 | 53.758 | 20.889 | 0.00 | 0.00 |
| ATOM | 195 | CD1  | LEU | X | 13 | 26.230 | 52.553 | 22.072 | 0.00 | 0.00 |
| ATOM | 196 | HD11 | LEU | X | 13 | 27.214 | 52.130 | 21.868 | 0.00 | 0.00 |
| ATOM | 197 | HD12 | LEU | X | 13 | 25.502 | 51.771 | 22.290 | 0.00 | 0.00 |
| ATOM | 198 | HD13 | LEU | X | 13 | 26.303 | 53.162 | 22.974 | 0.00 | 0.00 |
| ATOM | 199 | CD2  | LEU | X | 13 | 26.854 | 54.392 | 20.429 | 0.00 | 0.00 |
| ATOM | 200 | HD21 | LEU | X | 13 | 26.647 | 55.274 | 21.034 | 0.00 | 0.00 |
| ATOM | 201 | HD22 | LEU | X | 13 | 27.915 | 54.148 | 20.477 | 0.00 | 0.00 |
| ATOM | 202 | HD23 | LEU | X | 13 | 26.678 | 54.698 | 19.397 | 0.00 | 0.00 |
| ATOM | 203 | C    | LEU | X | 13 | 24.925 | 51.752 | 17.328 | 0.00 | 0.00 |
| ATOM | 204 | O    | LEU | X | 13 | 23.850 | 51.182 | 16.957 | 0.00 | 0.00 |
| ATOM | 205 | N    | ARG | X | 14 | 26.069 | 51.401 | 16.777 | 0.00 | 0.00 |
| ATOM | 206 | H    | ARG | X | 14 | 26.893 | 51.946 | 16.987 | 0.00 | 0.00 |
| ATOM | 207 | CA   | ARG | X | 14 | 26.239 | 50.344 | 15.741 | 0.00 | 0.00 |
| ATOM | 208 | HA   | ARG | X | 14 | 25.302 | 49.799 | 15.631 | 0.00 | 0.00 |
| ATOM | 209 | CB   | ARG | X | 14 | 26.687 | 50.960 | 14.422 | 0.00 | 0.00 |
| ATOM | 210 | HB2  | ARG | X | 14 | 25.858 | 51.565 | 14.054 | 0.00 | 0.00 |
| ATOM | 211 | HB3  | ARG | X | 14 | 27.554 | 51.600 | 14.583 | 0.00 | 0.00 |
| ATOM | 212 | CG   | ARG | X | 14 | 26.913 | 50.061 | 13.210 | 0.00 | 0.00 |
| ATOM | 213 | HG2  | ARG | X | 14 | 27.620 | 49.256 | 13.408 | 0.00 | 0.00 |
| ATOM | 214 | HG3  | ARG | X | 14 | 25.957 | 49.672 | 12.857 | 0.00 | 0.00 |
| ATOM | 215 | CD   | ARG | X | 14 | 27.488 | 50.892 | 12.052 | 0.00 | 0.00 |
| ATOM | 216 | HD2  | ARG | X | 14 | 28.376 | 51.383 | 12.449 | 0.00 | 0.00 |
| ATOM | 217 | HD3  | ARG | X | 14 | 27.664 | 50.213 | 11.218 | 0.00 | 0.00 |
| ATOM | 218 | NE   | ARG | X | 14 | 26.450 | 51.828 | 11.563 | 0.00 | 0.00 |
| ATOM | 219 | HE   | ARG | X | 14 | 25.488 | 51.519 | 11.552 | 0.00 | 0.00 |
| ATOM | 220 | CZ   | ARG | X | 14 | 26.564 | 53.150 | 11.392 | 0.00 | 0.00 |
| ATOM | 221 | NH1  | ARG | X | 14 | 27.721 | 53.756 | 11.602 | 0.00 | 0.00 |
| ATOM | 222 | NH11 | ARG | X | 14 | 28.494 | 53.131 | 11.779 | 0.00 | 0.00 |
| ATOM | 223 | NH12 | ARG | X | 14 | 27.803 | 54.744 | 11.408 | 0.00 | 0.00 |
| ATOM | 224 | NH2  | ARG | X | 14 | 25.603 | 53.913 | 10.942 | 0.00 | 0.00 |
| ATOM | 225 | NH21 | ARG | X | 14 | 24.716 | 53.459 | 10.779 | 0.00 | 0.00 |
| ATOM | 226 | NH22 | ARG | X | 14 | 25.865 | 54.825 | 10.596 | 0.00 | 0.00 |
| ATOM | 227 | C    | ARG | X | 14 | 27.332 | 49.331 | 16.198 | 0.00 | 0.00 |
| ATOM | 228 | O    | ARG | X | 14 | 28.474 | 49.731 | 16.332 | 0.00 | 0.00 |
| ATOM | 229 | N    | GLY | X | 15 | 27.118 | 47.994 | 16.173 | 0.00 | 0.00 |
| ATOM | 230 | H    | GLY | X | 15 | 26.162 | 47.710 | 16.012 | 0.00 | 0.00 |
| ATOM | 231 | CA   | GLY | X | 15 | 28.033 | 46.898 | 16.535 | 0.00 | 0.00 |
| ATOM | 232 | HA2  | GLY | X | 15 | 28.954 | 47.265 | 16.989 | 0.00 | 0.00 |
| ATOM | 233 | HA3  | GLY | X | 15 | 27.498 | 46.177 | 17.153 | 0.00 | 0.00 |
| ATOM | 234 | C    | GLY | X | 15 | 28.374 | 46.040 | 15.267 | 0.00 | 0.00 |
| ATOM | 235 | O    | GLY | X | 15 | 28.390 | 46.576 | 14.123 | 0.00 | 0.00 |
| ATOM | 236 | N    | ILE | X | 16 | 28.858 | 44.840 | 15.467 | 0.00 | 0.00 |
| ATOM | 237 | H    | ILE | X | 16 | 28.688 | 44.529 | 16.412 | 0.00 | 0.00 |
| ATOM | 238 | CA   | ILE | X | 16 | 29.300 | 43.788 | 14.501 | 0.00 | 0.00 |
| ATOM | 239 | HA   | ILE | X | 16 | 28.987 | 44.074 | 13.497 | 0.00 | 0.00 |
| ATOM | 240 | CB   | ILE | X | 16 | 30.840 | 43.752 | 14.562 | 0.00 | 0.00 |
| ATOM | 241 | HB   | ILE | X | 16 | 31.124 | 42.845 | 14.028 | 0.00 | 0.00 |
| ATOM | 242 | CG2  | ILE | X | 16 | 31.355 | 45.000 | 13.794 | 0.00 | 0.00 |
| ATOM | 243 | HG21 | ILE | X | 16 | 32.393 | 45.164 | 14.083 | 0.00 | 0.00 |
| ATOM | 244 | HG22 | ILE | X | 16 | 30.917 | 45.957 | 14.077 | 0.00 | 0.00 |
| ATOM | 245 | HG23 | ILE | X | 16 | 31.226 | 44.956 | 12.712 | 0.00 | 0.00 |
| ATOM | 246 | CG1  | ILE | X | 16 | 31.333 | 43.779 | 16.025 | 0.00 | 0.00 |
| ATOM | 247 | HG12 | ILE | X | 16 | 31.316 | 44.790 | 16.431 | 0.00 | 0.00 |
| ATOM | 248 | HG13 | ILE | X | 16 | 30.762 | 43.112 | 16.671 | 0.00 | 0.00 |
| ATOM | 249 | CD1  | ILE | X | 16 | 32.821 | 43.260 | 15.908 | 0.00 | 0.00 |
| ATOM | 250 | HD11 | ILE | X | 16 | 32.951 | 42.317 | 15.377 | 0.00 | 0.00 |
| ATOM | 251 | HD12 | ILE | X | 16 | 33.177 | 43.084 | 16.923 | 0.00 | 0.00 |
| ATOM | 252 | HD13 | ILE | X | 16 | 33.372 | 44.083 | 15.452 | 0.00 | 0.00 |

|      |     |      |     |   |    |        |        |        |      |      |
|------|-----|------|-----|---|----|--------|--------|--------|------|------|
| ATOM | 253 | C    | ILE | X | 16 | 28.705 | 42.402 | 14.818 | 0.00 | 0.00 |
| ATOM | 254 | O    | ILE | X | 16 | 28.486 | 42.015 | 15.992 | 0.00 | 0.00 |
| ATOM | 255 | N    | ARG | X | 17 | 28.556 | 41.602 | 13.767 | 0.00 | 0.00 |
| ATOM | 256 | H    | ARG | X | 17 | 28.598 | 42.043 | 12.859 | 0.00 | 0.00 |
| ATOM | 257 | CA   | ARG | X | 17 | 28.433 | 40.140 | 13.920 | 0.00 | 0.00 |
| ATOM | 258 | HA   | ARG | X | 17 | 27.704 | 39.819 | 14.664 | 0.00 | 0.00 |
| ATOM | 259 | CB   | ARG | X | 17 | 27.985 | 39.621 | 12.495 | 0.00 | 0.00 |
| ATOM | 260 | HB2  | ARG | X | 17 | 27.186 | 40.252 | 12.105 | 0.00 | 0.00 |
| ATOM | 261 | HB3  | ARG | X | 17 | 28.849 | 39.875 | 11.881 | 0.00 | 0.00 |
| ATOM | 262 | CG   | ARG | X | 17 | 27.664 | 38.122 | 12.249 | 0.00 | 0.00 |
| ATOM | 263 | HG2  | ARG | X | 17 | 28.686 | 37.742 | 12.254 | 0.00 | 0.00 |
| ATOM | 264 | HG3  | ARG | X | 17 | 27.227 | 37.653 | 13.131 | 0.00 | 0.00 |
| ATOM | 265 | CD   | ARG | X | 17 | 26.971 | 37.797 | 10.949 | 0.00 | 0.00 |
| ATOM | 266 | HD2  | ARG | X | 17 | 26.054 | 38.385 | 10.969 | 0.00 | 0.00 |
| ATOM | 267 | HD3  | ARG | X | 17 | 27.538 | 38.150 | 10.087 | 0.00 | 0.00 |
| ATOM | 268 | NE   | ARG | X | 17 | 26.697 | 36.349 | 10.801 | 0.00 | 0.00 |
| ATOM | 269 | HE   | ARG | X | 17 | 25.867 | 35.899 | 11.161 | 0.00 | 0.00 |
| ATOM | 270 | CZ   | ARG | X | 17 | 27.552 | 35.575 | 10.132 | 0.00 | 0.00 |
| ATOM | 271 | NH1  | ARG | X | 17 | 28.726 | 36.032 | 9.656  | 0.00 | 0.00 |
| ATOM | 272 | HH11 | ARG | X | 17 | 28.938 | 37.012 | 9.775  | 0.00 | 0.00 |
| ATOM | 273 | HH12 | ARG | X | 17 | 29.273 | 35.473 | 9.018  | 0.00 | 0.00 |
| ATOM | 274 | NH2  | ARG | X | 17 | 27.245 | 34.329 | 9.911  | 0.00 | 0.00 |
| ATOM | 275 | HH21 | ARG | X | 17 | 26.399 | 33.901 | 10.260 | 0.00 | 0.00 |
| ATOM | 276 | HH22 | ARG | X | 17 | 27.896 | 33.697 | 9.466  | 0.00 | 0.00 |
| ATOM | 277 | C    | ARG | X | 17 | 29.801 | 39.471 | 14.248 | 0.00 | 0.00 |
| ATOM | 278 | O    | ARG | X | 17 | 30.832 | 39.776 | 13.704 | 0.00 | 0.00 |
| ATOM | 279 | N    | LEU | X | 18 | 29.721 | 38.533 | 15.221 | 0.00 | 0.00 |
| ATOM | 280 | H    | LEU | X | 18 | 28.814 | 38.484 | 15.664 | 0.00 | 0.00 |
| ATOM | 281 | CA   | LEU | X | 18 | 30.750 | 37.560 | 15.604 | 0.00 | 0.00 |
| ATOM | 282 | HA   | LEU | X | 18 | 31.594 | 37.813 | 14.961 | 0.00 | 0.00 |
| ATOM | 283 | CB   | LEU | X | 18 | 31.052 | 37.728 | 17.064 | 0.00 | 0.00 |
| ATOM | 284 | HB2  | LEU | X | 18 | 30.101 | 37.683 | 17.594 | 0.00 | 0.00 |
| ATOM | 285 | HB3  | LEU | X | 18 | 31.817 | 36.997 | 17.325 | 0.00 | 0.00 |
| ATOM | 286 | CG   | LEU | X | 18 | 31.668 | 39.117 | 17.425 | 0.00 | 0.00 |
| ATOM | 287 | HG   | LEU | X | 18 | 31.091 | 39.969 | 17.064 | 0.00 | 0.00 |
| ATOM | 288 | CD1  | LEU | X | 18 | 31.917 | 39.108 | 18.951 | 0.00 | 0.00 |
| ATOM | 289 | HD11 | LEU | X | 18 | 32.208 | 40.114 | 19.253 | 0.00 | 0.00 |
| ATOM | 290 | HD12 | LEU | X | 18 | 32.721 | 38.441 | 19.265 | 0.00 | 0.00 |
| ATOM | 291 | HD13 | LEU | X | 18 | 31.079 | 38.703 | 19.519 | 0.00 | 0.00 |
| ATOM | 292 | CD2  | LEU | X | 18 | 33.059 | 39.316 | 16.796 | 0.00 | 0.00 |
| ATOM | 293 | HD21 | LEU | X | 18 | 33.381 | 40.316 | 17.084 | 0.00 | 0.00 |
| ATOM | 294 | HD22 | LEU | X | 18 | 33.691 | 38.440 | 16.943 | 0.00 | 0.00 |
| ATOM | 295 | HD23 | LEU | X | 18 | 33.063 | 39.294 | 15.707 | 0.00 | 0.00 |
| ATOM | 296 | C    | LEU | X | 18 | 30.245 | 36.163 | 15.292 | 0.00 | 0.00 |
| ATOM | 297 | O    | LEU | X | 18 | 29.095 | 35.910 | 15.578 | 0.00 | 0.00 |
| ATOM | 298 | N    | LYS | X | 19 | 30.934 | 35.323 | 14.588 | 0.00 | 0.00 |
| ATOM | 299 | H    | LYS | X | 19 | 31.783 | 35.662 | 14.159 | 0.00 | 0.00 |
| ATOM | 300 | CA   | LYS | X | 19 | 30.501 | 33.929 | 14.269 | 0.00 | 0.00 |
| ATOM | 301 | HA   | LYS | X | 19 | 29.440 | 33.832 | 14.036 | 0.00 | 0.00 |
| ATOM | 302 | CB   | LYS | X | 19 | 31.190 | 33.402 | 12.998 | 0.00 | 0.00 |
| ATOM | 303 | HB2  | LYS | X | 19 | 32.240 | 33.286 | 13.266 | 0.00 | 0.00 |
| ATOM | 304 | HB3  | LYS | X | 19 | 30.745 | 32.414 | 12.881 | 0.00 | 0.00 |
| ATOM | 305 | CG   | LYS | X | 19 | 30.958 | 34.255 | 11.678 | 0.00 | 0.00 |
| ATOM | 306 | HG2  | LYS | X | 19 | 29.908 | 34.371 | 11.409 | 0.00 | 0.00 |
| ATOM | 307 | HG3  | LYS | X | 19 | 31.460 | 35.221 | 11.725 | 0.00 | 0.00 |
| ATOM | 308 | CD   | LYS | X | 19 | 31.590 | 33.634 | 10.465 | 0.00 | 0.00 |
| ATOM | 309 | HD2  | LYS | X | 19 | 31.505 | 34.317 | 9.620  | 0.00 | 0.00 |
| ATOM | 310 | HD3  | LYS | X | 19 | 32.664 | 33.611 | 10.651 | 0.00 | 0.00 |
| ATOM | 311 | CE   | LYS | X | 19 | 31.114 | 32.304 | 9.896  | 0.00 | 0.00 |
| ATOM | 312 | HE2  | LYS | X | 19 | 30.943 | 31.533 | 10.647 | 0.00 | 0.00 |
| ATOM | 313 | HE3  | LYS | X | 19 | 30.161 | 32.496 | 9.403  | 0.00 | 0.00 |
| ATOM | 314 | NZ   | LYS | X | 19 | 32.032 | 31.740 | 8.891  | 0.00 | 0.00 |
| ATOM | 315 | HZ1  | LYS | X | 19 | 32.007 | 32.381 | 8.111  | 0.00 | 0.00 |
| ATOM | 316 | HZ2  | LYS | X | 19 | 32.968 | 31.713 | 9.269  | 0.00 | 0.00 |
| ATOM | 317 | HZ3  | LYS | X | 19 | 31.739 | 30.827 | 8.573  | 0.00 | 0.00 |
| ATOM | 318 | C    | LYS | X | 19 | 30.950 | 32.933 | 15.370 | 0.00 | 0.00 |
| ATOM | 319 | O    | LYS | X | 19 | 31.923 | 33.240 | 16.144 | 0.00 | 0.00 |

|      |     |      |     |   |    |        |        |        |      |      |
|------|-----|------|-----|---|----|--------|--------|--------|------|------|
| ATOM | 320 | N    | THR | X | 20 | 30.157 | 31.863 | 15.569 | 0.00 | 0.00 |
| ATOM | 321 | H    | THR | X | 20 | 29.359 | 31.704 | 14.971 | 0.00 | 0.00 |
| ATOM | 322 | CA   | THR | X | 20 | 30.415 | 30.663 | 16.449 | 0.00 | 0.00 |
| ATOM | 323 | HA   | THR | X | 20 | 31.486 | 30.460 | 16.436 | 0.00 | 0.00 |
| ATOM | 324 | CB   | THR | X | 20 | 29.906 | 30.957 | 17.841 | 0.00 | 0.00 |
| ATOM | 325 | HB   | THR | X | 20 | 29.475 | 30.005 | 18.150 | 0.00 | 0.00 |
| ATOM | 326 | CG2  | THR | X | 20 | 31.006 | 31.305 | 18.829 | 0.00 | 0.00 |
| ATOM | 327 | HG21 | THR | X | 20 | 30.580 | 31.952 | 19.595 | 0.00 | 0.00 |
| ATOM | 328 | HG22 | THR | X | 20 | 31.685 | 31.972 | 18.297 | 0.00 | 0.00 |
| ATOM | 329 | HG23 | THR | X | 20 | 31.468 | 30.406 | 19.237 | 0.00 | 0.00 |
| ATOM | 330 | OG1  | THR | X | 20 | 28.959 | 31.943 | 17.901 | 0.00 | 0.00 |
| ATOM | 331 | HG1  | THR | X | 20 | 28.266 | 31.654 | 17.301 | 0.00 | 0.00 |
| ATOM | 332 | C    | THR | X | 20 | 29.723 | 29.419 | 15.878 | 0.00 | 0.00 |
| ATOM | 333 | O    | THR | X | 20 | 28.664 | 29.553 | 15.216 | 0.00 | 0.00 |
| ATOM | 334 | N    | PRO | X | 21 | 30.165 | 28.183 | 16.214 | 0.00 | 0.00 |
| ATOM | 335 | CD   | PRO | X | 21 | 31.344 | 27.923 | 16.992 | 0.00 | 0.00 |
| ATOM | 336 | HD2  | PRO | X | 21 | 31.080 | 27.843 | 18.046 | 0.00 | 0.00 |
| ATOM | 337 | HD3  | PRO | X | 21 | 32.059 | 28.743 | 16.929 | 0.00 | 0.00 |
| ATOM | 338 | CG   | PRO | X | 21 | 31.931 | 26.554 | 16.479 | 0.00 | 0.00 |
| ATOM | 339 | HG2  | PRO | X | 21 | 32.619 | 26.079 | 17.178 | 0.00 | 0.00 |
| ATOM | 340 | HG3  | PRO | X | 21 | 32.356 | 26.613 | 15.477 | 0.00 | 0.00 |
| ATOM | 341 | CB   | PRO | X | 21 | 30.630 | 25.801 | 16.395 | 0.00 | 0.00 |
| ATOM | 342 | HB2  | PRO | X | 21 | 30.294 | 25.537 | 17.397 | 0.00 | 0.00 |
| ATOM | 343 | HB3  | PRO | X | 21 | 30.783 | 24.953 | 15.727 | 0.00 | 0.00 |
| ATOM | 344 | CA   | PRO | X | 21 | 29.657 | 26.867 | 15.754 | 0.00 | 0.00 |
| ATOM | 345 | HA   | PRO | X | 21 | 29.627 | 26.868 | 14.664 | 0.00 | 0.00 |
| ATOM | 346 | C    | PRO | X | 21 | 28.230 | 26.516 | 16.126 | 0.00 | 0.00 |
| ATOM | 347 | O    | PRO | X | 21 | 27.579 | 25.784 | 15.398 | 0.00 | 0.00 |
| ATOM | 348 | N    | GLY | X | 22 | 27.604 | 27.103 | 17.200 | 0.00 | 0.00 |
| ATOM | 349 | H    | GLY | X | 22 | 28.119 | 27.721 | 17.811 | 0.00 | 0.00 |
| ATOM | 350 | CA   | GLY | X | 22 | 26.128 | 26.866 | 17.549 | 0.00 | 0.00 |
| ATOM | 351 | HA2  | GLY | X | 22 | 25.904 | 25.949 | 17.004 | 0.00 | 0.00 |
| ATOM | 352 | HA3  | GLY | X | 22 | 25.906 | 26.749 | 18.610 | 0.00 | 0.00 |
| ATOM | 353 | C    | GLY | X | 22 | 25.076 | 27.900 | 17.040 | 0.00 | 0.00 |
| ATOM | 354 | O    | GLY | X | 22 | 23.889 | 27.808 | 17.155 | 0.00 | 0.00 |
| ATOM | 355 | N    | GLY | X | 23 | 25.635 | 28.978 | 16.404 | 0.00 | 0.00 |
| ATOM | 356 | H    | GLY | X | 23 | 26.597 | 28.880 | 16.112 | 0.00 | 0.00 |
| ATOM | 357 | CA   | GLY | X | 23 | 24.891 | 30.118 | 15.930 | 0.00 | 0.00 |
| ATOM | 358 | HA2  | GLY | X | 23 | 24.753 | 30.131 | 14.849 | 0.00 | 0.00 |
| ATOM | 359 | HA3  | GLY | X | 23 | 23.898 | 30.163 | 16.377 | 0.00 | 0.00 |
| ATOM | 360 | C    | GLY | X | 23 | 25.659 | 31.482 | 16.228 | 0.00 | 0.00 |
| ATOM | 361 | O    | GLY | X | 23 | 26.389 | 31.561 | 17.199 | 0.00 | 0.00 |
| ATOM | 362 | N    | PRO | X | 24 | 25.451 | 32.519 | 15.380 | 0.00 | 0.00 |
| ATOM | 363 | CD   | PRO | X | 24 | 24.524 | 32.466 | 14.240 | 0.00 | 0.00 |
| ATOM | 364 | HD2  | PRO | X | 24 | 23.529 | 32.201 | 14.597 | 0.00 | 0.00 |
| ATOM | 365 | HD3  | PRO | X | 24 | 24.901 | 31.745 | 13.515 | 0.00 | 0.00 |
| ATOM | 366 | CG   | PRO | X | 24 | 24.439 | 33.917 | 13.818 | 0.00 | 0.00 |
| ATOM | 367 | HG2  | PRO | X | 24 | 23.720 | 34.475 | 14.417 | 0.00 | 0.00 |
| ATOM | 368 | HG3  | PRO | X | 24 | 24.137 | 34.009 | 12.774 | 0.00 | 0.00 |
| ATOM | 369 | CB   | PRO | X | 24 | 25.843 | 34.502 | 14.113 | 0.00 | 0.00 |
| ATOM | 370 | HB2  | PRO | X | 24 | 25.979 | 35.575 | 14.243 | 0.00 | 0.00 |
| ATOM | 371 | HB3  | PRO | X | 24 | 26.570 | 34.188 | 13.363 | 0.00 | 0.00 |
| ATOM | 372 | CA   | PRO | X | 24 | 26.147 | 33.819 | 15.394 | 0.00 | 0.00 |
| ATOM | 373 | HA   | PRO | X | 24 | 27.203 | 33.547 | 15.391 | 0.00 | 0.00 |
| ATOM | 374 | C    | PRO | X | 24 | 25.798 | 34.687 | 16.693 | 0.00 | 0.00 |
| ATOM | 375 | O    | PRO | X | 24 | 24.845 | 34.514 | 17.410 | 0.00 | 0.00 |
| ATOM | 376 | N    | VAL | X | 25 | 26.740 | 35.602 | 16.963 | 0.00 | 0.00 |
| ATOM | 377 | H    | VAL | X | 25 | 27.569 | 35.586 | 16.387 | 0.00 | 0.00 |
| ATOM | 378 | CA   | VAL | X | 25 | 26.729 | 36.500 | 18.172 | 0.00 | 0.00 |
| ATOM | 379 | HA   | VAL | X | 25 | 25.777 | 36.340 | 18.677 | 0.00 | 0.00 |
| ATOM | 380 | CB   | VAL | X | 25 | 27.884 | 36.136 | 19.175 | 0.00 | 0.00 |
| ATOM | 381 | HB   | VAL | X | 25 | 28.742 | 35.805 | 18.590 | 0.00 | 0.00 |
| ATOM | 382 | CG1  | VAL | X | 25 | 28.232 | 37.236 | 20.249 | 0.00 | 0.00 |
| ATOM | 383 | HG11 | VAL | X | 25 | 27.350 | 37.783 | 20.583 | 0.00 | 0.00 |
| ATOM | 384 | HG12 | VAL | X | 25 | 28.855 | 36.949 | 21.096 | 0.00 | 0.00 |
| ATOM | 385 | HG13 | VAL | X | 25 | 28.916 | 37.835 | 19.648 | 0.00 | 0.00 |
| ATOM | 386 | CG2  | VAL | X | 25 | 27.368 | 34.888 | 19.954 | 0.00 | 0.00 |

|      |     |      |     |   |    |        |        |        |      |      |
|------|-----|------|-----|---|----|--------|--------|--------|------|------|
| ATOM | 387 | HG21 | VAL | X | 25 | 26.419 | 35.161 | 20.415 | 0.00 | 0.00 |
| ATOM | 388 | HG22 | VAL | X | 25 | 28.027 | 34.528 | 20.744 | 0.00 | 0.00 |
| ATOM | 389 | HG23 | VAL | X | 25 | 27.183 | 34.092 | 19.232 | 0.00 | 0.00 |
| ATOM | 390 | C    | VAL | X | 25 | 26.782 | 37.948 | 17.761 | 0.00 | 0.00 |
| ATOM | 391 | O    | VAL | X | 25 | 27.691 | 38.230 | 17.019 | 0.00 | 0.00 |
| ATOM | 392 | N    | SER | X | 26 | 25.869 | 38.807 | 18.217 | 0.00 | 0.00 |
| ATOM | 393 | H    | SER | X | 26 | 25.292 | 38.511 | 18.991 | 0.00 | 0.00 |
| ATOM | 394 | CA   | SER | X | 26 | 25.938 | 40.272 | 17.980 | 0.00 | 0.00 |
| ATOM | 395 | HA   | SER | X | 26 | 26.316 | 40.585 | 17.006 | 0.00 | 0.00 |
| ATOM | 396 | CB   | SER | X | 26 | 24.500 | 40.775 | 18.003 | 0.00 | 0.00 |
| ATOM | 397 | HB2  | SER | X | 26 | 24.025 | 40.458 | 17.074 | 0.00 | 0.00 |
| ATOM | 398 | HB3  | SER | X | 26 | 24.021 | 40.302 | 18.860 | 0.00 | 0.00 |
| ATOM | 399 | OG   | SER | X | 26 | 24.385 | 42.185 | 18.037 | 0.00 | 0.00 |
| ATOM | 400 | HG   | SER | X | 26 | 23.552 | 42.518 | 17.695 | 0.00 | 0.00 |
| ATOM | 401 | C    | SER | X | 26 | 26.847 | 40.838 | 19.139 | 0.00 | 0.00 |
| ATOM | 402 | O    | SER | X | 26 | 26.702 | 40.406 | 20.290 | 0.00 | 0.00 |
| ATOM | 403 | N    | ALA | X | 27 | 27.675 | 41.899 | 18.868 | 0.00 | 0.00 |
| ATOM | 404 | H    | ALA | X | 27 | 27.763 | 42.275 | 17.934 | 0.00 | 0.00 |
| ATOM | 405 | CA   | ALA | X | 27 | 28.616 | 42.483 | 19.735 | 0.00 | 0.00 |
| ATOM | 406 | HA   | ALA | X | 27 | 28.262 | 42.470 | 20.766 | 0.00 | 0.00 |
| ATOM | 407 | CB   | ALA | X | 27 | 29.853 | 41.608 | 19.553 | 0.00 | 0.00 |
| ATOM | 408 | HB1  | ALA | X | 27 | 30.662 | 41.864 | 20.237 | 0.00 | 0.00 |
| ATOM | 409 | HB2  | ALA | X | 27 | 30.272 | 41.623 | 18.547 | 0.00 | 0.00 |
| ATOM | 410 | HB3  | ALA | X | 27 | 29.598 | 40.588 | 19.839 | 0.00 | 0.00 |
| ATOM | 411 | C    | ALA | X | 27 | 28.830 | 43.973 | 19.350 | 0.00 | 0.00 |
| ATOM | 412 | O    | ALA | X | 27 | 29.034 | 44.367 | 18.223 | 0.00 | 0.00 |
| ATOM | 413 | N    | PHE | X | 28 | 28.780 | 44.804 | 20.412 | 0.00 | 0.00 |
| ATOM | 414 | H    | PHE | X | 28 | 28.775 | 44.265 | 21.266 | 0.00 | 0.00 |
| ATOM | 415 | CA   | PHE | X | 28 | 29.083 | 46.244 | 20.582 | 0.00 | 0.00 |
| ATOM | 416 | HA   | PHE | X | 28 | 29.351 | 46.592 | 19.585 | 0.00 | 0.00 |
| ATOM | 417 | CB   | PHE | X | 28 | 27.808 | 46.892 | 21.182 | 0.00 | 0.00 |
| ATOM | 418 | HB2  | PHE | X | 28 | 27.695 | 46.450 | 22.172 | 0.00 | 0.00 |
| ATOM | 419 | HB3  | PHE | X | 28 | 27.872 | 47.969 | 21.337 | 0.00 | 0.00 |
| ATOM | 420 | CG   | PHE | X | 28 | 26.566 | 46.564 | 20.268 | 0.00 | 0.00 |
| ATOM | 421 | CD1  | PHE | X | 28 | 25.843 | 45.289 | 20.375 | 0.00 | 0.00 |
| ATOM | 422 | HD1  | PHE | X | 28 | 26.270 | 44.571 | 21.060 | 0.00 | 0.00 |
| ATOM | 423 | CE1  | PHE | X | 28 | 24.709 | 45.021 | 19.671 | 0.00 | 0.00 |
| ATOM | 424 | HE1  | PHE | X | 28 | 24.197 | 44.070 | 19.707 | 0.00 | 0.00 |
| ATOM | 425 | CZ   | PHE | X | 28 | 24.177 | 45.951 | 18.787 | 0.00 | 0.00 |
| ATOM | 426 | HZ   | PHE | X | 28 | 23.244 | 45.767 | 18.274 | 0.00 | 0.00 |
| ATOM | 427 | CE2  | PHE | X | 28 | 24.796 | 47.217 | 18.740 | 0.00 | 0.00 |
| ATOM | 428 | HE2  | PHE | X | 28 | 24.412 | 47.891 | 17.989 | 0.00 | 0.00 |
| ATOM | 429 | CD2  | PHE | X | 28 | 26.040 | 47.490 | 19.352 | 0.00 | 0.00 |
| ATOM | 430 | HD2  | PHE | X | 28 | 26.613 | 48.377 | 19.126 | 0.00 | 0.00 |
| ATOM | 431 | C    | PHE | X | 28 | 30.266 | 46.420 | 21.501 | 0.00 | 0.00 |
| ATOM | 432 | O    | PHE | X | 28 | 30.420 | 45.733 | 22.506 | 0.00 | 0.00 |
| ATOM | 433 | N    | LEU | X | 29 | 31.225 | 47.139 | 20.957 | 0.00 | 0.00 |
| ATOM | 434 | H    | LEU | X | 29 | 31.049 | 47.746 | 20.170 | 0.00 | 0.00 |
| ATOM | 435 | CA   | LEU | X | 29 | 32.520 | 47.276 | 21.635 | 0.00 | 0.00 |
| ATOM | 436 | HA   | LEU | X | 29 | 32.518 | 46.814 | 22.622 | 0.00 | 0.00 |
| ATOM | 437 | CB   | LEU | X | 29 | 33.532 | 46.711 | 20.720 | 0.00 | 0.00 |
| ATOM | 438 | HB2  | LEU | X | 29 | 33.661 | 47.192 | 19.750 | 0.00 | 0.00 |
| ATOM | 439 | HB3  | LEU | X | 29 | 34.472 | 46.901 | 21.237 | 0.00 | 0.00 |
| ATOM | 440 | CG   | LEU | X | 29 | 33.345 | 45.188 | 20.474 | 0.00 | 0.00 |
| ATOM | 441 | HG   | LEU | X | 29 | 32.470 | 44.927 | 19.879 | 0.00 | 0.00 |
| ATOM | 442 | CD1  | LEU | X | 29 | 34.620 | 44.744 | 19.674 | 0.00 | 0.00 |
| ATOM | 443 | HD11 | LEU | X | 29 | 34.735 | 45.285 | 18.734 | 0.00 | 0.00 |
| ATOM | 444 | HD12 | LEU | X | 29 | 34.596 | 43.670 | 19.492 | 0.00 | 0.00 |
| ATOM | 445 | HD13 | LEU | X | 29 | 35.495 | 44.860 | 20.312 | 0.00 | 0.00 |
| ATOM | 446 | CD2  | LEU | X | 29 | 33.296 | 44.488 | 21.833 | 0.00 | 0.00 |
| ATOM | 447 | HD21 | LEU | X | 29 | 33.089 | 43.422 | 21.736 | 0.00 | 0.00 |
| ATOM | 448 | HD22 | LEU | X | 29 | 34.234 | 44.646 | 22.365 | 0.00 | 0.00 |
| ATOM | 449 | HD23 | LEU | X | 29 | 32.447 | 44.817 | 22.433 | 0.00 | 0.00 |
| ATOM | 450 | C    | LEU | X | 29 | 32.770 | 48.775 | 21.759 | 0.00 | 0.00 |
| ATOM | 451 | O    | LEU | X | 29 | 32.361 | 49.531 | 20.868 | 0.00 | 0.00 |
| ATOM | 452 | N    | GLY | X | 30 | 33.344 | 49.285 | 22.822 | 0.00 | 0.00 |
| ATOM | 453 | H    | GLY | X | 30 | 33.589 | 48.710 | 23.616 | 0.00 | 0.00 |

|      |     |      |     |   |    |        |        |        |      |      |
|------|-----|------|-----|---|----|--------|--------|--------|------|------|
| ATOM | 454 | CA   | GLY | X | 30 | 33.748 | 50.727 | 22.862 | 0.00 | 0.00 |
| ATOM | 455 | HA2  | GLY | X | 30 | 34.272 | 50.909 | 23.801 | 0.00 | 0.00 |
| ATOM | 456 | HA3  | GLY | X | 30 | 34.422 | 50.962 | 22.038 | 0.00 | 0.00 |
| ATOM | 457 | C    | GLY | X | 30 | 32.551 | 51.673 | 22.825 | 0.00 | 0.00 |
| ATOM | 458 | O    | GLY | X | 30 | 32.629 | 52.728 | 22.190 | 0.00 | 0.00 |
| ATOM | 459 | N    | ILE | X | 31 | 31.577 | 51.364 | 23.636 | 0.00 | 0.00 |
| ATOM | 460 | H    | ILE | X | 31 | 31.539 | 50.562 | 24.247 | 0.00 | 0.00 |
| ATOM | 461 | CA   | ILE | X | 31 | 30.738 | 52.386 | 24.181 | 0.00 | 0.00 |
| ATOM | 462 | HA   | ILE | X | 31 | 30.362 | 52.986 | 23.352 | 0.00 | 0.00 |
| ATOM | 463 | CB   | ILE | X | 31 | 29.527 | 51.709 | 24.918 | 0.00 | 0.00 |
| ATOM | 464 | HB   | ILE | X | 31 | 29.774 | 51.241 | 25.871 | 0.00 | 0.00 |
| ATOM | 465 | CG2  | ILE | X | 31 | 28.509 | 52.788 | 25.381 | 0.00 | 0.00 |
| ATOM | 466 | HG21 | ILE | X | 31 | 27.722 | 52.304 | 25.959 | 0.00 | 0.00 |
| ATOM | 467 | HG22 | ILE | X | 31 | 28.021 | 53.278 | 24.538 | 0.00 | 0.00 |
| ATOM | 468 | HG23 | ILE | X | 31 | 29.019 | 53.459 | 26.072 | 0.00 | 0.00 |
| ATOM | 469 | CG1  | ILE | X | 31 | 28.720 | 50.586 | 24.115 | 0.00 | 0.00 |
| ATOM | 470 | HG12 | ILE | X | 31 | 27.703 | 50.545 | 24.504 | 0.00 | 0.00 |
| ATOM | 471 | HG13 | ILE | X | 31 | 28.791 | 50.727 | 23.036 | 0.00 | 0.00 |
| ATOM | 472 | CD1  | ILE | X | 31 | 29.258 | 49.133 | 24.244 | 0.00 | 0.00 |
| ATOM | 473 | HD11 | ILE | X | 31 | 30.263 | 48.907 | 23.889 | 0.00 | 0.00 |
| ATOM | 474 | HD12 | ILE | X | 31 | 28.484 | 48.550 | 23.744 | 0.00 | 0.00 |
| ATOM | 475 | HD13 | ILE | X | 31 | 29.118 | 48.888 | 25.297 | 0.00 | 0.00 |
| ATOM | 476 | C    | ILE | X | 31 | 31.484 | 53.230 | 25.218 | 0.00 | 0.00 |
| ATOM | 477 | O    | ILE | X | 31 | 31.906 | 52.703 | 26.231 | 0.00 | 0.00 |
| ATOM | 478 | N    | PRO | X | 32 | 31.462 | 54.512 | 25.105 | 0.00 | 0.00 |
| ATOM | 479 | CD   | PRO | X | 32 | 31.242 | 55.257 | 23.865 | 0.00 | 0.00 |
| ATOM | 480 | HD2  | PRO | X | 32 | 30.244 | 55.078 | 23.464 | 0.00 | 0.00 |
| ATOM | 481 | HD3  | PRO | X | 32 | 31.925 | 54.946 | 23.074 | 0.00 | 0.00 |
| ATOM | 482 | CG   | PRO | X | 32 | 31.542 | 56.773 | 24.224 | 0.00 | 0.00 |
| ATOM | 483 | HG2  | PRO | X | 32 | 30.542 | 57.100 | 24.509 | 0.00 | 0.00 |
| ATOM | 484 | HG3  | PRO | X | 32 | 32.000 | 57.315 | 23.397 | 0.00 | 0.00 |
| ATOM | 485 | CB   | PRO | X | 32 | 32.587 | 56.594 | 25.380 | 0.00 | 0.00 |
| ATOM | 486 | HB2  | PRO | X | 32 | 32.413 | 57.422 | 26.066 | 0.00 | 0.00 |
| ATOM | 487 | HB3  | PRO | X | 32 | 33.645 | 56.482 | 25.139 | 0.00 | 0.00 |
| ATOM | 488 | CA   | PRO | X | 32 | 32.043 | 55.376 | 26.106 | 0.00 | 0.00 |
| ATOM | 489 | HA   | PRO | X | 32 | 32.891 | 54.969 | 26.657 | 0.00 | 0.00 |
| ATOM | 490 | C    | PRO | X | 32 | 30.920 | 55.655 | 27.170 | 0.00 | 0.00 |
| ATOM | 491 | O    | PRO | X | 32 | 29.991 | 56.330 | 26.877 | 0.00 | 0.00 |
| ATOM | 492 | N    | PHE | X | 33 | 30.911 | 55.160 | 28.374 | 0.00 | 0.00 |
| ATOM | 493 | H    | PHE | X | 33 | 31.701 | 54.563 | 28.573 | 0.00 | 0.00 |
| ATOM | 494 | CA   | PHE | X | 33 | 29.919 | 55.511 | 29.435 | 0.00 | 0.00 |
| ATOM | 495 | HA   | PHE | X | 33 | 28.957 | 55.642 | 28.939 | 0.00 | 0.00 |
| ATOM | 496 | CB   | PHE | X | 33 | 29.868 | 54.330 | 30.382 | 0.00 | 0.00 |
| ATOM | 497 | HB2  | PHE | X | 33 | 29.042 | 54.522 | 31.067 | 0.00 | 0.00 |
| ATOM | 498 | HB3  | PHE | X | 33 | 29.473 | 53.459 | 29.859 | 0.00 | 0.00 |
| ATOM | 499 | CG   | PHE | X | 33 | 31.153 | 54.078 | 31.241 | 0.00 | 0.00 |
| ATOM | 500 | CD1  | PHE | X | 33 | 31.351 | 54.753 | 32.451 | 0.00 | 0.00 |
| ATOM | 501 | HD1  | PHE | X | 33 | 30.730 | 55.542 | 32.849 | 0.00 | 0.00 |
| ATOM | 502 | CE1  | PHE | X | 33 | 32.604 | 54.468 | 33.132 | 0.00 | 0.00 |
| ATOM | 503 | HE1  | PHE | X | 33 | 32.894 | 54.894 | 34.081 | 0.00 | 0.00 |
| ATOM | 504 | CZ   | PHE | X | 33 | 33.517 | 53.532 | 32.628 | 0.00 | 0.00 |
| ATOM | 505 | HZ   | PHE | X | 33 | 34.412 | 53.346 | 33.204 | 0.00 | 0.00 |
| ATOM | 506 | CE2  | PHE | X | 33 | 33.177 | 52.734 | 31.551 | 0.00 | 0.00 |
| ATOM | 507 | HE2  | PHE | X | 33 | 33.805 | 51.902 | 31.269 | 0.00 | 0.00 |
| ATOM | 508 | CD2  | PHE | X | 33 | 32.016 | 53.015 | 30.859 | 0.00 | 0.00 |
| ATOM | 509 | HD2  | PHE | X | 33 | 31.750 | 52.366 | 30.037 | 0.00 | 0.00 |
| ATOM | 510 | C    | PHE | X | 33 | 30.218 | 56.831 | 30.056 | 0.00 | 0.00 |
| ATOM | 511 | O    | PHE | X | 33 | 29.492 | 57.217 | 30.986 | 0.00 | 0.00 |
| ATOM | 512 | N    | ALA | X | 34 | 31.283 | 57.541 | 29.698 | 0.00 | 0.00 |
| ATOM | 513 | H    | ALA | X | 34 | 31.729 | 57.274 | 28.832 | 0.00 | 0.00 |
| ATOM | 514 | CA   | ALA | X | 34 | 31.878 | 58.682 | 30.400 | 0.00 | 0.00 |
| ATOM | 515 | HA   | ALA | X | 34 | 31.206 | 59.253 | 31.042 | 0.00 | 0.00 |
| ATOM | 516 | CB   | ALA | X | 34 | 32.888 | 58.105 | 31.397 | 0.00 | 0.00 |
| ATOM | 517 | HB1  | ALA | X | 34 | 33.360 | 58.776 | 32.115 | 0.00 | 0.00 |
| ATOM | 518 | HB2  | ALA | X | 34 | 33.724 | 57.646 | 30.868 | 0.00 | 0.00 |
| ATOM | 519 | HB3  | ALA | X | 34 | 32.453 | 57.243 | 31.903 | 0.00 | 0.00 |
| ATOM | 520 | C    | ALA | X | 34 | 32.651 | 59.659 | 29.466 | 0.00 | 0.00 |



|      |     |     |     |   |    |        |        |        |      |      |
|------|-----|-----|-----|---|----|--------|--------|--------|------|------|
| ATOM | 521 | O   | ALA | X | 34 | 33.122 | 59.266 | 28.370 | 0.00 | 0.00 |
| ATOM | 522 | N   | GLU | X | 35 | 32.869 | 60.910 | 29.893 | 0.00 | 0.00 |
| ATOM | 523 | H   | GLU | X | 35 | 32.537 | 61.168 | 30.812 | 0.00 | 0.00 |
| ATOM | 524 | CA  | GLU | X | 35 | 33.779 | 61.802 | 29.282 | 0.00 | 0.00 |
| ATOM | 525 | HA  | GLU | X | 35 | 33.628 | 61.626 | 28.217 | 0.00 | 0.00 |
| ATOM | 526 | CB  | GLU | X | 35 | 33.579 | 63.218 | 29.878 | 0.00 | 0.00 |
| ATOM | 527 | HB2 | GLU | X | 35 | 33.717 | 63.095 | 30.952 | 0.00 | 0.00 |
| ATOM | 528 | HB3 | GLU | X | 35 | 34.344 | 63.944 | 29.606 | 0.00 | 0.00 |
| ATOM | 529 | CG  | GLU | X | 35 | 32.170 | 63.764 | 29.663 | 0.00 | 0.00 |
| ATOM | 530 | HG2 | GLU | X | 35 | 31.369 | 63.155 | 30.084 | 0.00 | 0.00 |
| ATOM | 531 | HG3 | GLU | X | 35 | 32.108 | 64.636 | 30.314 | 0.00 | 0.00 |
| ATOM | 532 | CD  | GLU | X | 35 | 31.829 | 64.169 | 28.243 | 0.00 | 0.00 |
| ATOM | 533 | OE1 | GLU | X | 35 | 31.032 | 63.497 | 27.558 | 0.00 | 0.00 |
| ATOM | 534 | OE2 | GLU | X | 35 | 32.156 | 65.333 | 27.787 | 0.00 | 0.00 |
| ATOM | 535 | C   | GLU | X | 35 | 35.262 | 61.375 | 29.561 | 0.00 | 0.00 |
| ATOM | 536 | O   | GLU | X | 35 | 35.619 | 60.541 | 30.481 | 0.00 | 0.00 |
| ATOM | 537 | N   | PRO | X | 36 | 36.178 | 61.892 | 28.756 | 0.00 | 0.00 |
| ATOM | 538 | CD  | PRO | X | 36 | 35.975 | 62.704 | 27.553 | 0.00 | 0.00 |
| ATOM | 539 | HD2 | PRO | X | 36 | 35.471 | 63.663 | 27.673 | 0.00 | 0.00 |
| ATOM | 540 | HD3 | PRO | X | 36 | 35.482 | 62.102 | 26.789 | 0.00 | 0.00 |
| ATOM | 541 | CG  | PRO | X | 36 | 37.445 | 63.036 | 27.024 | 0.00 | 0.00 |
| ATOM | 542 | HG2 | PRO | X | 36 | 37.764 | 63.938 | 27.546 | 0.00 | 0.00 |
| ATOM | 543 | HG3 | PRO | X | 36 | 37.478 | 63.203 | 25.947 | 0.00 | 0.00 |
| ATOM | 544 | CB  | PRO | X | 36 | 38.184 | 61.781 | 27.446 | 0.00 | 0.00 |
| ATOM | 545 | HB2 | PRO | X | 36 | 39.251 | 61.949 | 27.595 | 0.00 | 0.00 |
| ATOM | 546 | HB3 | PRO | X | 36 | 38.029 | 61.124 | 26.590 | 0.00 | 0.00 |
| ATOM | 547 | CA  | PRO | X | 36 | 37.584 | 61.357 | 28.724 | 0.00 | 0.00 |
| ATOM | 548 | HA  | PRO | X | 36 | 37.562 | 60.270 | 28.643 | 0.00 | 0.00 |
| ATOM | 549 | C   | PRO | X | 36 | 38.441 | 61.853 | 30.001 | 0.00 | 0.00 |
| ATOM | 550 | O   | PRO | X | 36 | 38.495 | 63.045 | 30.183 | 0.00 | 0.00 |
| ATOM | 551 | N   | PRO | X | 37 | 39.128 | 60.983 | 30.824 | 0.00 | 0.00 |
| ATOM | 552 | CD  | PRO | X | 37 | 38.992 | 59.523 | 30.764 | 0.00 | 0.00 |
| ATOM | 553 | HD2 | PRO | X | 37 | 39.637 | 59.126 | 29.980 | 0.00 | 0.00 |
| ATOM | 554 | HD3 | PRO | X | 37 | 37.957 | 59.186 | 30.695 | 0.00 | 0.00 |
| ATOM | 555 | CG  | PRO | X | 37 | 39.566 | 59.053 | 32.139 | 0.00 | 0.00 |
| ATOM | 556 | HG2 | PRO | X | 37 | 39.974 | 58.042 | 32.129 | 0.00 | 0.00 |
| ATOM | 557 | HG3 | PRO | X | 37 | 38.839 | 59.152 | 32.945 | 0.00 | 0.00 |
| ATOM | 558 | CB  | PRO | X | 37 | 40.619 | 60.123 | 32.357 | 0.00 | 0.00 |
| ATOM | 559 | HB2 | PRO | X | 37 | 41.582 | 59.984 | 31.864 | 0.00 | 0.00 |
| ATOM | 560 | HB3 | PRO | X | 37 | 40.752 | 60.322 | 33.420 | 0.00 | 0.00 |
| ATOM | 561 | CA  | PRO | X | 37 | 39.958 | 61.377 | 31.860 | 0.00 | 0.00 |
| ATOM | 562 | HA  | PRO | X | 37 | 39.367 | 61.906 | 32.609 | 0.00 | 0.00 |
| ATOM | 563 | C   | PRO | X | 37 | 41.105 | 62.270 | 31.430 | 0.00 | 0.00 |
| ATOM | 564 | O   | PRO | X | 37 | 41.726 | 62.838 | 32.378 | 0.00 | 0.00 |
| ATOM | 565 | N   | MET | X | 38 | 41.378 | 62.456 | 30.149 | 0.00 | 0.00 |
| ATOM | 566 | H   | MET | X | 38 | 40.772 | 62.046 | 29.452 | 0.00 | 0.00 |
| ATOM | 567 | CA  | MET | X | 38 | 42.709 | 62.968 | 29.727 | 0.00 | 0.00 |
| ATOM | 568 | HA  | MET | X | 38 | 43.459 | 62.279 | 30.113 | 0.00 | 0.00 |
| ATOM | 569 | CB  | MET | X | 38 | 42.794 | 62.833 | 28.172 | 0.00 | 0.00 |
| ATOM | 570 | HB2 | MET | X | 38 | 43.819 | 62.860 | 27.802 | 0.00 | 0.00 |
| ATOM | 571 | HB3 | MET | X | 38 | 42.512 | 61.789 | 28.035 | 0.00 | 0.00 |
| ATOM | 572 | CG  | MET | X | 38 | 41.830 | 63.609 | 27.311 | 0.00 | 0.00 |
| ATOM | 573 | HG2 | MET | X | 38 | 40.860 | 63.676 | 27.804 | 0.00 | 0.00 |
| ATOM | 574 | HG3 | MET | X | 38 | 42.165 | 64.642 | 27.218 | 0.00 | 0.00 |
| ATOM | 575 | SD  | MET | X | 38 | 41.707 | 62.874 | 25.632 | 0.00 | 0.00 |
| ATOM | 576 | CE  | MET | X | 38 | 40.602 | 63.943 | 24.650 | 0.00 | 0.00 |
| ATOM | 577 | HE1 | MET | X | 38 | 40.135 | 64.692 | 25.290 | 0.00 | 0.00 |
| ATOM | 578 | HE2 | MET | X | 38 | 41.289 | 64.458 | 23.979 | 0.00 | 0.00 |
| ATOM | 579 | HE3 | MET | X | 38 | 39.924 | 63.330 | 24.055 | 0.00 | 0.00 |
| ATOM | 580 | C   | MET | X | 38 | 43.042 | 64.402 | 30.252 | 0.00 | 0.00 |
| ATOM | 581 | O   | MET | X | 38 | 42.286 | 65.342 | 29.920 | 0.00 | 0.00 |
| ATOM | 582 | N   | GLY | X | 39 | 44.143 | 64.527 | 30.986 | 0.00 | 0.00 |
| ATOM | 583 | H   | GLY | X | 39 | 44.578 | 63.629 | 31.142 | 0.00 | 0.00 |
| ATOM | 584 | CA  | GLY | X | 39 | 44.713 | 65.832 | 31.376 | 0.00 | 0.00 |
| ATOM | 585 | HA2 | GLY | X | 39 | 45.785 | 65.705 | 31.528 | 0.00 | 0.00 |
| ATOM | 586 | HA3 | GLY | X | 39 | 44.591 | 66.534 | 30.552 | 0.00 | 0.00 |
| ATOM | 587 | C   | GLY | X | 39 | 44.172 | 66.241 | 32.746 | 0.00 | 0.00 |

|      |     |      |     |   |    |        |        |        |      |      |
|------|-----|------|-----|---|----|--------|--------|--------|------|------|
| ATOM | 588 | O    | GLY | X | 39 | 44.625 | 65.649 | 33.712 | 0.00 | 0.00 |
| ATOM | 589 | N    | PRO | X | 40 | 43.284 | 67.301 | 32.912 | 0.00 | 0.00 |
| ATOM | 590 | CD   | PRO | X | 40 | 42.904 | 68.229 | 31.841 | 0.00 | 0.00 |
| ATOM | 591 | HD2  | PRO | X | 40 | 42.084 | 67.818 | 31.252 | 0.00 | 0.00 |
| ATOM | 592 | HD3  | PRO | X | 40 | 43.725 | 68.276 | 31.126 | 0.00 | 0.00 |
| ATOM | 593 | CG   | PRO | X | 40 | 42.553 | 69.541 | 32.501 | 0.00 | 0.00 |
| ATOM | 594 | HG2  | PRO | X | 40 | 41.734 | 70.034 | 31.978 | 0.00 | 0.00 |
| ATOM | 595 | HG3  | PRO | X | 40 | 43.485 | 70.101 | 32.581 | 0.00 | 0.00 |
| ATOM | 596 | CB   | PRO | X | 40 | 42.080 | 69.061 | 33.859 | 0.00 | 0.00 |
| ATOM | 597 | HB2  | PRO | X | 40 | 40.996 | 68.960 | 33.807 | 0.00 | 0.00 |
| ATOM | 598 | HB3  | PRO | X | 40 | 42.396 | 69.794 | 34.602 | 0.00 | 0.00 |
| ATOM | 599 | CA   | PRO | X | 40 | 42.755 | 67.794 | 34.234 | 0.00 | 0.00 |
| ATOM | 600 | HA   | PRO | X | 40 | 43.603 | 68.149 | 34.820 | 0.00 | 0.00 |
| ATOM | 601 | C    | PRO | X | 40 | 41.849 | 66.822 | 34.943 | 0.00 | 0.00 |
| ATOM | 602 | O    | PRO | X | 40 | 41.683 | 67.038 | 36.155 | 0.00 | 0.00 |
| ATOM | 603 | N    | ARG | X | 41 | 41.154 | 65.980 | 34.193 | 0.00 | 0.00 |
| ATOM | 604 | H    | ARG | X | 41 | 41.369 | 65.991 | 33.206 | 0.00 | 0.00 |
| ATOM | 605 | CA   | ARG | X | 41 | 40.146 | 64.952 | 34.591 | 0.00 | 0.00 |
| ATOM | 606 | HA   | ARG | X | 41 | 39.540 | 65.398 | 35.379 | 0.00 | 0.00 |
| ATOM | 607 | CB   | ARG | X | 41 | 39.253 | 64.690 | 33.409 | 0.00 | 0.00 |
| ATOM | 608 | HB2  | ARG | X | 41 | 39.798 | 64.619 | 32.468 | 0.00 | 0.00 |
| ATOM | 609 | HB3  | ARG | X | 41 | 38.809 | 63.696 | 33.470 | 0.00 | 0.00 |
| ATOM | 610 | CG   | ARG | X | 41 | 38.075 | 65.654 | 33.409 | 0.00 | 0.00 |
| ATOM | 611 | HG2  | ARG | X | 41 | 37.586 | 65.444 | 34.361 | 0.00 | 0.00 |
| ATOM | 612 | HG3  | ARG | X | 41 | 38.406 | 66.686 | 33.297 | 0.00 | 0.00 |
| ATOM | 613 | CD   | ARG | X | 41 | 37.072 | 65.224 | 32.255 | 0.00 | 0.00 |
| ATOM | 614 | HD2  | ARG | X | 41 | 37.588 | 65.165 | 31.297 | 0.00 | 0.00 |
| ATOM | 615 | HD3  | ARG | X | 41 | 36.856 | 64.168 | 32.416 | 0.00 | 0.00 |
| ATOM | 616 | NE   | ARG | X | 41 | 35.807 | 65.912 | 32.106 | 0.00 | 0.00 |
| ATOM | 617 | HE   | ARG | X | 41 | 35.173 | 65.775 | 32.879 | 0.00 | 0.00 |
| ATOM | 618 | CZ   | ARG | X | 41 | 35.530 | 66.774 | 31.103 | 0.00 | 0.00 |
| ATOM | 619 | NH1  | ARG | X | 41 | 36.433 | 67.289 | 30.320 | 0.00 | 0.00 |
| ATOM | 620 | HH11 | ARG | X | 41 | 37.407 | 67.060 | 30.453 | 0.00 | 0.00 |
| ATOM | 621 | HH12 | ARG | X | 41 | 36.193 | 67.943 | 29.589 | 0.00 | 0.00 |
| ATOM | 622 | NH2  | ARG | X | 41 | 34.306 | 67.005 | 30.808 | 0.00 | 0.00 |
| ATOM | 623 | HH21 | ARG | X | 41 | 33.545 | 66.713 | 31.405 | 0.00 | 0.00 |
| ATOM | 624 | HH22 | ARG | X | 41 | 34.075 | 67.438 | 29.925 | 0.00 | 0.00 |
| ATOM | 625 | C    | ARG | X | 41 | 40.818 | 63.657 | 35.103 | 0.00 | 0.00 |
| ATOM | 626 | O    | ARG | X | 41 | 40.197 | 62.694 | 35.584 | 0.00 | 0.00 |
| ATOM | 627 | N    | ARG | X | 42 | 42.164 | 63.662 | 35.093 | 0.00 | 0.00 |
| ATOM | 628 | H    | ARG | X | 42 | 42.688 | 64.315 | 34.528 | 0.00 | 0.00 |
| ATOM | 629 | CA   | ARG | X | 42 | 43.030 | 62.651 | 35.677 | 0.00 | 0.00 |
| ATOM | 630 | HA   | ARG | X | 42 | 42.738 | 61.651 | 35.356 | 0.00 | 0.00 |
| ATOM | 631 | CB   | ARG | X | 42 | 44.420 | 62.905 | 35.077 | 0.00 | 0.00 |
| ATOM | 632 | HB2  | ARG | X | 42 | 44.272 | 63.061 | 34.009 | 0.00 | 0.00 |
| ATOM | 633 | HB3  | ARG | X | 42 | 44.861 | 63.819 | 35.474 | 0.00 | 0.00 |
| ATOM | 634 | CG   | ARG | X | 42 | 45.445 | 61.821 | 35.330 | 0.00 | 0.00 |
| ATOM | 635 | HG2  | ARG | X | 42 | 45.512 | 61.643 | 36.403 | 0.00 | 0.00 |
| ATOM | 636 | HG3  | ARG | X | 42 | 45.184 | 60.910 | 34.791 | 0.00 | 0.00 |
| ATOM | 637 | CD   | ARG | X | 42 | 46.904 | 62.277 | 34.935 | 0.00 | 0.00 |
| ATOM | 638 | HD2  | ARG | X | 42 | 47.113 | 63.173 | 35.520 | 0.00 | 0.00 |
| ATOM | 639 | HD3  | ARG | X | 42 | 47.573 | 61.434 | 35.104 | 0.00 | 0.00 |
| ATOM | 640 | NE   | ARG | X | 42 | 46.950 | 62.695 | 33.533 | 0.00 | 0.00 |
| ATOM | 641 | HE   | ARG | X | 42 | 46.199 | 62.413 | 32.919 | 0.00 | 0.00 |
| ATOM | 642 | CZ   | ARG | X | 42 | 48.028 | 63.214 | 32.978 | 0.00 | 0.00 |
| ATOM | 643 | NH1  | ARG | X | 42 | 49.050 | 63.600 | 33.681 | 0.00 | 0.00 |
| ATOM | 644 | HH11 | ARG | X | 42 | 49.117 | 63.517 | 34.686 | 0.00 | 0.00 |
| ATOM | 645 | HH12 | ARG | X | 42 | 49.806 | 64.051 | 33.186 | 0.00 | 0.00 |
| ATOM | 646 | NH2  | ARG | X | 42 | 48.039 | 63.352 | 31.631 | 0.00 | 0.00 |
| ATOM | 647 | HH21 | ARG | X | 42 | 47.419 | 62.851 | 31.011 | 0.00 | 0.00 |
| ATOM | 648 | HH22 | ARG | X | 42 | 48.758 | 63.944 | 31.241 | 0.00 | 0.00 |
| ATOM | 649 | C    | ARG | X | 42 | 43.051 | 62.718 | 37.179 | 0.00 | 0.00 |
| ATOM | 650 | O    | ARG | X | 42 | 43.104 | 63.849 | 37.624 | 0.00 | 0.00 |
| ATOM | 651 | N    | PHE | X | 43 | 43.017 | 61.608 | 37.919 | 0.00 | 0.00 |
| ATOM | 652 | H    | PHE | X | 43 | 42.864 | 60.760 | 37.393 | 0.00 | 0.00 |
| ATOM | 653 | CA   | PHE | X | 43 | 42.988 | 61.430 | 39.393 | 0.00 | 0.00 |
| ATOM | 654 | HA   | PHE | X | 43 | 43.157 | 60.402 | 39.715 | 0.00 | 0.00 |

|      |     |      |     |   |    |        |        |        |      |      |
|------|-----|------|-----|---|----|--------|--------|--------|------|------|
| ATOM | 655 | CB   | PHE | X | 43 | 44.126 | 62.217 | 40.052 | 0.00 | 0.00 |
| ATOM | 656 | HB2  | PHE | X | 43 | 43.917 | 63.277 | 39.904 | 0.00 | 0.00 |
| ATOM | 657 | HB3  | PHE | X | 43 | 44.002 | 62.139 | 41.132 | 0.00 | 0.00 |
| ATOM | 658 | CG   | PHE | X | 43 | 45.596 | 61.932 | 39.547 | 0.00 | 0.00 |
| ATOM | 659 | CD1  | PHE | X | 43 | 46.101 | 60.598 | 39.437 | 0.00 | 0.00 |
| ATOM | 660 | HD1  | PHE | X | 43 | 45.510 | 59.741 | 39.723 | 0.00 | 0.00 |
| ATOM | 661 | CE1  | PHE | X | 43 | 47.364 | 60.362 | 38.979 | 0.00 | 0.00 |
| ATOM | 662 | HE1  | PHE | X | 43 | 47.729 | 59.345 | 38.976 | 0.00 | 0.00 |
| ATOM | 663 | CZ   | PHE | X | 43 | 48.234 | 61.471 | 38.707 | 0.00 | 0.00 |
| ATOM | 664 | HZ   | PHE | X | 43 | 49.239 | 61.229 | 38.393 | 0.00 | 0.00 |
| ATOM | 665 | CE2  | PHE | X | 43 | 47.744 | 62.725 | 38.771 | 0.00 | 0.00 |
| ATOM | 666 | HE2  | PHE | X | 43 | 48.384 | 63.540 | 38.466 | 0.00 | 0.00 |
| ATOM | 667 | CD2  | PHE | X | 43 | 46.434 | 62.976 | 39.201 | 0.00 | 0.00 |
| ATOM | 668 | HD2  | PHE | X | 43 | 46.120 | 64.002 | 39.318 | 0.00 | 0.00 |
| ATOM | 669 | C    | PHE | X | 43 | 41.628 | 61.776 | 40.010 | 0.00 | 0.00 |
| ATOM | 670 | O    | PHE | X | 43 | 41.437 | 61.618 | 41.215 | 0.00 | 0.00 |
| ATOM | 671 | N    | LEU | X | 44 | 40.643 | 62.295 | 39.268 | 0.00 | 0.00 |
| ATOM | 672 | H    | LEU | X | 44 | 40.784 | 62.462 | 38.282 | 0.00 | 0.00 |
| ATOM | 673 | CA   | LEU | X | 44 | 39.330 | 62.696 | 39.728 | 0.00 | 0.00 |
| ATOM | 674 | HA   | LEU | X | 44 | 39.329 | 62.805 | 40.813 | 0.00 | 0.00 |
| ATOM | 675 | CB   | LEU | X | 44 | 38.933 | 64.041 | 39.072 | 0.00 | 0.00 |
| ATOM | 676 | HB2  | LEU | X | 44 | 38.921 | 63.867 | 37.996 | 0.00 | 0.00 |
| ATOM | 677 | HB3  | LEU | X | 44 | 37.898 | 64.299 | 39.295 | 0.00 | 0.00 |
| ATOM | 678 | CG   | LEU | X | 44 | 39.868 | 65.289 | 39.310 | 0.00 | 0.00 |
| ATOM | 679 | HG   | LEU | X | 44 | 40.884 | 65.070 | 38.981 | 0.00 | 0.00 |
| ATOM | 680 | CD1  | LEU | X | 44 | 39.263 | 66.547 | 38.652 | 0.00 | 0.00 |
| ATOM | 681 | HD11 | LEU | X | 44 | 39.857 | 67.425 | 38.901 | 0.00 | 0.00 |
| ATOM | 682 | HD12 | LEU | X | 44 | 38.270 | 66.604 | 39.098 | 0.00 | 0.00 |
| ATOM | 683 | HD13 | LEU | X | 44 | 39.095 | 66.446 | 37.579 | 0.00 | 0.00 |
| ATOM | 684 | CD2  | LEU | X | 44 | 39.873 | 65.661 | 40.791 | 0.00 | 0.00 |
| ATOM | 685 | HD21 | LEU | X | 44 | 40.456 | 64.882 | 41.282 | 0.00 | 0.00 |
| ATOM | 686 | HD22 | LEU | X | 44 | 40.329 | 66.633 | 40.979 | 0.00 | 0.00 |
| ATOM | 687 | HD23 | LEU | X | 44 | 38.880 | 65.581 | 41.234 | 0.00 | 0.00 |
| ATOM | 688 | C    | LEU | X | 44 | 38.295 | 61.623 | 39.323 | 0.00 | 0.00 |
| ATOM | 689 | O    | LEU | X | 44 | 38.534 | 60.843 | 38.422 | 0.00 | 0.00 |
| ATOM | 690 | N    | PRO | X | 45 | 37.138 | 61.609 | 39.980 | 0.00 | 0.00 |
| ATOM | 691 | CD   | PRO | X | 45 | 36.941 | 62.181 | 41.350 | 0.00 | 0.00 |
| ATOM | 692 | HD2  | PRO | X | 45 | 36.712 | 63.245 | 41.286 | 0.00 | 0.00 |
| ATOM | 693 | HD3  | PRO | X | 45 | 37.768 | 62.041 | 42.046 | 0.00 | 0.00 |
| ATOM | 694 | CG   | PRO | X | 45 | 35.761 | 61.487 | 41.942 | 0.00 | 0.00 |
| ATOM | 695 | HG2  | PRO | X | 45 | 35.242 | 62.248 | 42.525 | 0.00 | 0.00 |
| ATOM | 696 | HG3  | PRO | X | 45 | 36.043 | 60.677 | 42.614 | 0.00 | 0.00 |
| ATOM | 697 | CB   | PRO | X | 45 | 34.925 | 61.033 | 40.729 | 0.00 | 0.00 |
| ATOM | 698 | HB2  | PRO | X | 45 | 34.284 | 61.812 | 40.315 | 0.00 | 0.00 |
| ATOM | 699 | HB3  | PRO | X | 45 | 34.339 | 60.128 | 40.890 | 0.00 | 0.00 |
| ATOM | 700 | CA   | PRO | X | 45 | 36.001 | 60.773 | 39.631 | 0.00 | 0.00 |
| ATOM | 701 | HA   | PRO | X | 45 | 36.353 | 59.754 | 39.792 | 0.00 | 0.00 |
| ATOM | 702 | C    | PRO | X | 45 | 35.458 | 60.938 | 38.159 | 0.00 | 0.00 |
| ATOM | 703 | O    | PRO | X | 45 | 35.422 | 62.056 | 37.702 | 0.00 | 0.00 |
| ATOM | 704 | N    | PRO | X | 46 | 34.932 | 59.861 | 37.533 | 0.00 | 0.00 |
| ATOM | 705 | CD   | PRO | X | 46 | 34.847 | 58.443 | 38.005 | 0.00 | 0.00 |
| ATOM | 706 | HD2  | PRO | X | 46 | 34.324 | 58.312 | 38.952 | 0.00 | 0.00 |
| ATOM | 707 | HD3  | PRO | X | 46 | 35.833 | 58.013 | 38.186 | 0.00 | 0.00 |
| ATOM | 708 | CG   | PRO | X | 46 | 34.051 | 57.780 | 36.892 | 0.00 | 0.00 |
| ATOM | 709 | HG2  | PRO | X | 46 | 33.010 | 58.023 | 37.106 | 0.00 | 0.00 |
| ATOM | 710 | HG3  | PRO | X | 46 | 34.263 | 56.719 | 36.766 | 0.00 | 0.00 |
| ATOM | 711 | CB   | PRO | X | 46 | 34.446 | 58.553 | 35.671 | 0.00 | 0.00 |
| ATOM | 712 | HB2  | PRO | X | 46 | 33.783 | 58.452 | 34.812 | 0.00 | 0.00 |
| ATOM | 713 | HB3  | PRO | X | 46 | 35.457 | 58.314 | 35.341 | 0.00 | 0.00 |
| ATOM | 714 | CA   | PRO | X | 46 | 34.431 | 60.007 | 36.185 | 0.00 | 0.00 |
| ATOM | 715 | HA   | PRO | X | 46 | 35.110 | 60.624 | 35.597 | 0.00 | 0.00 |
| ATOM | 716 | C    | PRO | X | 46 | 33.001 | 60.505 | 36.176 | 0.00 | 0.00 |
| ATOM | 717 | O    | PRO | X | 46 | 32.261 | 60.468 | 37.163 | 0.00 | 0.00 |
| ATOM | 718 | N    | GLU | X | 47 | 32.535 | 60.994 | 34.979 | 0.00 | 0.00 |
| ATOM | 719 | H    | GLU | X | 47 | 33.175 | 61.000 | 34.198 | 0.00 | 0.00 |
| ATOM | 720 | CA   | GLU | X | 47 | 31.232 | 61.687 | 34.729 | 0.00 | 0.00 |
| ATOM | 721 | HA   | GLU | X | 47 | 30.529 | 61.308 | 35.471 | 0.00 | 0.00 |

|      |     |      |     |   |    |        |        |        |      |      |
|------|-----|------|-----|---|----|--------|--------|--------|------|------|
| ATOM | 722 | CB   | GLU | X | 47 | 31.355 | 63.218 | 34.807 | 0.00 | 0.00 |
| ATOM | 723 | HB2  | GLU | X | 47 | 30.356 | 63.655 | 34.811 | 0.00 | 0.00 |
| ATOM | 724 | HB3  | GLU | X | 47 | 31.678 | 63.351 | 35.839 | 0.00 | 0.00 |
| ATOM | 725 | CG   | GLU | X | 47 | 32.367 | 63.813 | 33.785 | 0.00 | 0.00 |
| ATOM | 726 | HG2  | GLU | X | 47 | 33.294 | 63.241 | 33.745 | 0.00 | 0.00 |
| ATOM | 727 | HG3  | GLU | X | 47 | 31.876 | 63.796 | 32.812 | 0.00 | 0.00 |
| ATOM | 728 | CD   | GLU | X | 47 | 32.527 | 65.254 | 34.132 | 0.00 | 0.00 |
| ATOM | 729 | OE1  | GLU | X | 47 | 33.656 | 65.734 | 34.068 | 0.00 | 0.00 |
| ATOM | 730 | OE2  | GLU | X | 47 | 31.543 | 65.965 | 34.524 | 0.00 | 0.00 |
| ATOM | 731 | C    | GLU | X | 47 | 30.681 | 61.235 | 33.367 | 0.00 | 0.00 |
| ATOM | 732 | O    | GLU | X | 47 | 31.457 | 61.127 | 32.452 | 0.00 | 0.00 |
| ATOM | 733 | N    | PRO | X | 48 | 29.369 | 61.001 | 33.263 | 0.00 | 0.00 |
| ATOM | 734 | CD   | PRO | X | 48 | 28.343 | 61.483 | 34.184 | 0.00 | 0.00 |
| ATOM | 735 | HD2  | PRO | X | 48 | 28.337 | 62.536 | 34.464 | 0.00 | 0.00 |
| ATOM | 736 | HD3  | PRO | X | 48 | 28.504 | 60.918 | 35.102 | 0.00 | 0.00 |
| ATOM | 737 | CG   | PRO | X | 48 | 27.065 | 61.137 | 33.477 | 0.00 | 0.00 |
| ATOM | 738 | HG2  | PRO | X | 48 | 26.729 | 61.938 | 32.818 | 0.00 | 0.00 |
| ATOM | 739 | HG3  | PRO | X | 48 | 26.310 | 60.957 | 34.242 | 0.00 | 0.00 |
| ATOM | 740 | CB   | PRO | X | 48 | 27.358 | 59.888 | 32.623 | 0.00 | 0.00 |
| ATOM | 741 | HB2  | PRO | X | 48 | 26.615 | 59.900 | 31.826 | 0.00 | 0.00 |
| ATOM | 742 | HB3  | PRO | X | 48 | 27.282 | 59.017 | 33.274 | 0.00 | 0.00 |
| ATOM | 743 | CA   | PRO | X | 48 | 28.811 | 60.274 | 32.215 | 0.00 | 0.00 |
| ATOM | 744 | HA   | PRO | X | 48 | 29.217 | 59.265 | 32.140 | 0.00 | 0.00 |
| ATOM | 745 | C    | PRO | X | 48 | 28.851 | 60.975 | 30.843 | 0.00 | 0.00 |
| ATOM | 746 | O    | PRO | X | 48 | 29.211 | 62.192 | 30.745 | 0.00 | 0.00 |
| ATOM | 747 | N    | LYS | X | 49 | 28.596 | 60.181 | 29.830 | 0.00 | 0.00 |
| ATOM | 748 | H    | LYS | X | 49 | 28.301 | 59.224 | 29.967 | 0.00 | 0.00 |
| ATOM | 749 | CA   | LYS | X | 49 | 28.798 | 60.677 | 28.451 | 0.00 | 0.00 |
| ATOM | 750 | HA   | LYS | X | 49 | 29.761 | 61.187 | 28.446 | 0.00 | 0.00 |
| ATOM | 751 | CB   | LYS | X | 49 | 28.963 | 59.384 | 27.624 | 0.00 | 0.00 |
| ATOM | 752 | HB2  | LYS | X | 49 | 29.975 | 59.020 | 27.804 | 0.00 | 0.00 |
| ATOM | 753 | HB3  | LYS | X | 49 | 28.210 | 58.670 | 27.958 | 0.00 | 0.00 |
| ATOM | 754 | CG   | LYS | X | 49 | 28.863 | 59.569 | 26.098 | 0.00 | 0.00 |
| ATOM | 755 | HG2  | LYS | X | 49 | 28.741 | 58.583 | 25.650 | 0.00 | 0.00 |
| ATOM | 756 | HG3  | LYS | X | 49 | 27.997 | 60.156 | 25.792 | 0.00 | 0.00 |
| ATOM | 757 | CD   | LYS | X | 49 | 30.164 | 60.206 | 25.536 | 0.00 | 0.00 |
| ATOM | 758 | HD2  | LYS | X | 49 | 30.293 | 61.237 | 25.868 | 0.00 | 0.00 |
| ATOM | 759 | HD3  | LYS | X | 49 | 31.077 | 59.678 | 25.807 | 0.00 | 0.00 |
| ATOM | 760 | CE   | LYS | X | 49 | 29.849 | 60.427 | 24.067 | 0.00 | 0.00 |
| ATOM | 761 | HE2  | LYS | X | 49 | 29.493 | 59.506 | 23.606 | 0.00 | 0.00 |
| ATOM | 762 | HE3  | LYS | X | 49 | 29.020 | 61.130 | 23.975 | 0.00 | 0.00 |
| ATOM | 763 | NZ   | LYS | X | 49 | 31.098 | 60.889 | 23.419 | 0.00 | 0.00 |
| ATOM | 764 | HZ1  | LYS | X | 49 | 31.146 | 61.867 | 23.171 | 0.00 | 0.00 |
| ATOM | 765 | HZ2  | LYS | X | 49 | 31.962 | 60.535 | 23.803 | 0.00 | 0.00 |
| ATOM | 766 | HZ3  | LYS | X | 49 | 31.128 | 60.533 | 22.474 | 0.00 | 0.00 |
| ATOM | 767 | C    | LYS | X | 49 | 27.686 | 61.554 | 27.982 | 0.00 | 0.00 |
| ATOM | 768 | O    | LYS | X | 49 | 26.508 | 61.183 | 28.018 | 0.00 | 0.00 |
| ATOM | 769 | N    | GLN | X | 50 | 28.054 | 62.734 | 27.516 | 0.00 | 0.00 |
| ATOM | 770 | H    | GLN | X | 50 | 29.015 | 63.044 | 27.490 | 0.00 | 0.00 |
| ATOM | 771 | CA   | GLN | X | 50 | 27.009 | 63.676 | 27.046 | 0.00 | 0.00 |
| ATOM | 772 | HA   | GLN | X | 50 | 26.267 | 63.848 | 27.825 | 0.00 | 0.00 |
| ATOM | 773 | CB   | GLN | X | 50 | 27.744 | 64.996 | 26.701 | 0.00 | 0.00 |
| ATOM | 774 | HB2  | GLN | X | 50 | 28.597 | 64.794 | 26.053 | 0.00 | 0.00 |
| ATOM | 775 | HB3  | GLN | X | 50 | 27.037 | 65.620 | 26.154 | 0.00 | 0.00 |
| ATOM | 776 | CG   | GLN | X | 50 | 28.214 | 65.756 | 27.898 | 0.00 | 0.00 |
| ATOM | 777 | HG2  | GLN | X | 50 | 27.327 | 65.969 | 28.495 | 0.00 | 0.00 |
| ATOM | 778 | HG3  | GLN | X | 50 | 28.853 | 65.160 | 28.549 | 0.00 | 0.00 |
| ATOM | 779 | CD   | GLN | X | 50 | 28.839 | 67.042 | 27.508 | 0.00 | 0.00 |
| ATOM | 780 | OE1  | GLN | X | 50 | 28.147 | 68.043 | 27.314 | 0.00 | 0.00 |
| ATOM | 781 | NE2  | GLN | X | 50 | 30.139 | 67.075 | 27.384 | 0.00 | 0.00 |
| ATOM | 782 | HE21 | GLN | X | 50 | 30.558 | 67.946 | 27.093 | 0.00 | 0.00 |
| ATOM | 783 | HE22 | GLN | X | 50 | 30.854 | 66.400 | 27.617 | 0.00 | 0.00 |
| ATOM | 784 | C    | GLN | X | 50 | 26.345 | 63.087 | 25.804 | 0.00 | 0.00 |
| ATOM | 785 | O    | GLN | X | 50 | 26.953 | 62.411 | 24.955 | 0.00 | 0.00 |
| ATOM | 786 | N    | PRO | X | 51 | 24.996 | 63.340 | 25.614 | 0.00 | 0.00 |
| ATOM | 787 | CD   | PRO | X | 51 | 24.195 | 64.191 | 26.467 | 0.00 | 0.00 |
| ATOM | 788 | HD2  | PRO | X | 51 | 24.663 | 65.175 | 26.480 | 0.00 | 0.00 |

|      |     |      |     |   |    |        |        |        |      |      |
|------|-----|------|-----|---|----|--------|--------|--------|------|------|
| ATOM | 789 | HD3  | PRO | X | 51 | 23.986 | 63.678 | 27.406 | 0.00 | 0.00 |
| ATOM | 790 | CG   | PRO | X | 51 | 22.878 | 64.387 | 25.747 | 0.00 | 0.00 |
| ATOM | 791 | HG2  | PRO | X | 51 | 23.015 | 65.176 | 25.008 | 0.00 | 0.00 |
| ATOM | 792 | HG3  | PRO | X | 51 | 22.008 | 64.590 | 26.371 | 0.00 | 0.00 |
| ATOM | 793 | CB   | PRO | X | 51 | 22.621 | 63.107 | 24.919 | 0.00 | 0.00 |
| ATOM | 794 | HB2  | PRO | X | 51 | 22.185 | 63.321 | 23.943 | 0.00 | 0.00 |
| ATOM | 795 | HB3  | PRO | X | 51 | 22.174 | 62.324 | 25.532 | 0.00 | 0.00 |
| ATOM | 796 | CA   | PRO | X | 51 | 24.046 | 62.729 | 24.583 | 0.00 | 0.00 |
| ATOM | 797 | HA   | PRO | X | 51 | 24.188 | 61.650 | 24.517 | 0.00 | 0.00 |
| ATOM | 798 | C    | PRO | X | 51 | 24.481 | 63.313 | 23.215 | 0.00 | 0.00 |
| ATOM | 799 | O    | PRO | X | 51 | 24.437 | 64.505 | 22.997 | 0.00 | 0.00 |
| ATOM | 800 | N    | TRP | X | 52 | 24.744 | 62.394 | 22.247 | 0.00 | 0.00 |
| ATOM | 801 | H    | TRP | X | 52 | 24.732 | 61.427 | 22.538 | 0.00 | 0.00 |
| ATOM | 802 | CA   | TRP | X | 52 | 25.295 | 62.761 | 20.926 | 0.00 | 0.00 |
| ATOM | 803 | HA   | TRP | X | 52 | 25.888 | 63.673 | 20.999 | 0.00 | 0.00 |
| ATOM | 804 | CB   | TRP | X | 52 | 26.326 | 61.630 | 20.699 | 0.00 | 0.00 |
| ATOM | 805 | HB2  | TRP | X | 52 | 26.849 | 61.776 | 19.754 | 0.00 | 0.00 |
| ATOM | 806 | HB3  | TRP | X | 52 | 27.182 | 61.712 | 21.369 | 0.00 | 0.00 |
| ATOM | 807 | CG   | TRP | X | 52 | 25.798 | 60.211 | 20.575 | 0.00 | 0.00 |
| ATOM | 808 | CD1  | TRP | X | 52 | 25.351 | 59.646 | 19.480 | 0.00 | 0.00 |
| ATOM | 809 | HD1  | TRP | X | 52 | 25.237 | 60.152 | 18.533 | 0.00 | 0.00 |
| ATOM | 810 | NE1  | TRP | X | 52 | 24.980 | 58.305 | 19.774 | 0.00 | 0.00 |
| ATOM | 811 | HE1  | TRP | X | 52 | 24.723 | 57.624 | 19.074 | 0.00 | 0.00 |
| ATOM | 812 | CE2  | TRP | X | 52 | 24.955 | 58.028 | 21.088 | 0.00 | 0.00 |
| ATOM | 813 | CZ2  | TRP | X | 52 | 24.535 | 56.920 | 21.843 | 0.00 | 0.00 |
| ATOM | 814 | HZ2  | TRP | X | 52 | 24.137 | 56.068 | 21.313 | 0.00 | 0.00 |
| ATOM | 815 | CH2  | TRP | X | 52 | 24.730 | 56.928 | 23.220 | 0.00 | 0.00 |
| ATOM | 816 | HH2  | TRP | X | 52 | 24.570 | 55.985 | 23.721 | 0.00 | 0.00 |
| ATOM | 817 | CZ3  | TRP | X | 52 | 25.220 | 58.086 | 23.844 | 0.00 | 0.00 |
| ATOM | 818 | HZ3  | TRP | X | 52 | 25.402 | 58.208 | 24.902 | 0.00 | 0.00 |
| ATOM | 819 | CE3  | TRP | X | 52 | 25.482 | 59.275 | 23.094 | 0.00 | 0.00 |
| ATOM | 820 | HE3  | TRP | X | 52 | 25.831 | 60.154 | 23.616 | 0.00 | 0.00 |
| ATOM | 821 | CD2  | TRP | X | 52 | 25.478 | 59.256 | 21.670 | 0.00 | 0.00 |
| ATOM | 822 | C    | TRP | X | 52 | 24.287 | 62.925 | 19.690 | 0.00 | 0.00 |
| ATOM | 823 | O    | TRP | X | 52 | 23.141 | 62.499 | 19.763 | 0.00 | 0.00 |
| ATOM | 824 | N    | SER | X | 53 | 24.754 | 63.368 | 18.495 | 0.00 | 0.00 |
| ATOM | 825 | H    | SER | X | 53 | 25.716 | 63.664 | 18.407 | 0.00 | 0.00 |
| ATOM | 826 | CA   | SER | X | 53 | 23.899 | 63.306 | 17.258 | 0.00 | 0.00 |
| ATOM | 827 | HA   | SER | X | 53 | 22.847 | 63.543 | 17.417 | 0.00 | 0.00 |
| ATOM | 828 | CB   | SER | X | 53 | 24.497 | 64.359 | 16.260 | 0.00 | 0.00 |
| ATOM | 829 | HB2  | SER | X | 53 | 25.338 | 63.890 | 15.749 | 0.00 | 0.00 |
| ATOM | 830 | HB3  | SER | X | 53 | 23.847 | 64.604 | 15.420 | 0.00 | 0.00 |
| ATOM | 831 | OG   | SER | X | 53 | 25.039 | 65.553 | 16.903 | 0.00 | 0.00 |
| ATOM | 832 | HG   | SER | X | 53 | 24.342 | 66.083 | 17.297 | 0.00 | 0.00 |
| ATOM | 833 | C    | SER | X | 53 | 23.914 | 61.891 | 16.603 | 0.00 | 0.00 |
| ATOM | 834 | O    | SER | X | 53 | 24.917 | 61.280 | 16.351 | 0.00 | 0.00 |
| ATOM | 835 | N    | GLY | X | 54 | 22.732 | 61.440 | 16.132 | 0.00 | 0.00 |
| ATOM | 836 | H    | GLY | X | 54 | 21.889 | 61.924 | 16.403 | 0.00 | 0.00 |
| ATOM | 837 | CA   | GLY | X | 54 | 22.541 | 60.213 | 15.271 | 0.00 | 0.00 |
| ATOM | 838 | HA2  | GLY | X | 54 | 21.505 | 60.110 | 14.950 | 0.00 | 0.00 |
| ATOM | 839 | HA3  | GLY | X | 54 | 23.118 | 60.487 | 14.388 | 0.00 | 0.00 |
| ATOM | 840 | C    | GLY | X | 54 | 23.139 | 58.887 | 15.676 | 0.00 | 0.00 |
| ATOM | 841 | O    | GLY | X | 54 | 23.261 | 58.648 | 16.894 | 0.00 | 0.00 |
| ATOM | 842 | N    | VAL | X | 55 | 23.571 | 58.129 | 14.738 | 0.00 | 0.00 |
| ATOM | 843 | H    | VAL | X | 55 | 23.497 | 58.432 | 13.777 | 0.00 | 0.00 |
| ATOM | 844 | CA   | VAL | X | 55 | 24.292 | 56.861 | 14.960 | 0.00 | 0.00 |
| ATOM | 845 | HA   | VAL | X | 55 | 23.909 | 56.432 | 15.886 | 0.00 | 0.00 |
| ATOM | 846 | CB   | VAL | X | 55 | 23.930 | 55.831 | 13.798 | 0.00 | 0.00 |
| ATOM | 847 | HB   | VAL | X | 55 | 24.464 | 56.104 | 12.888 | 0.00 | 0.00 |
| ATOM | 848 | CG1  | VAL | X | 55 | 24.487 | 54.434 | 14.213 | 0.00 | 0.00 |
| ATOM | 849 | HG11 | VAL | X | 55 | 24.251 | 54.089 | 15.219 | 0.00 | 0.00 |
| ATOM | 850 | HG12 | VAL | X | 55 | 24.151 | 53.632 | 13.555 | 0.00 | 0.00 |
| ATOM | 851 | HG13 | VAL | X | 55 | 25.571 | 54.553 | 14.190 | 0.00 | 0.00 |
| ATOM | 852 | CG2  | VAL | X | 55 | 22.422 | 55.788 | 13.574 | 0.00 | 0.00 |
| ATOM | 853 | HG21 | VAL | X | 55 | 22.108 | 55.080 | 12.807 | 0.00 | 0.00 |
| ATOM | 854 | HG22 | VAL | X | 55 | 22.004 | 56.684 | 13.116 | 0.00 | 0.00 |
| ATOM | 855 | HG23 | VAL | X | 55 | 21.899 | 55.526 | 14.494 | 0.00 | 0.00 |

|      |     |      |     |   |    |        |        |        |      |      |
|------|-----|------|-----|---|----|--------|--------|--------|------|------|
| ATOM | 856 | C    | VAL | X | 55 | 25.756 | 57.148 | 15.000 | 0.00 | 0.00 |
| ATOM | 857 | O    | VAL | X | 55 | 26.431 | 57.613 | 14.074 | 0.00 | 0.00 |
| ATOM | 858 | N    | VAL | X | 56 | 26.285 | 56.886 | 16.213 | 0.00 | 0.00 |
| ATOM | 859 | H    | VAL | X | 56 | 25.645 | 56.581 | 16.932 | 0.00 | 0.00 |
| ATOM | 860 | CA   | VAL | X | 56 | 27.752 | 56.776 | 16.497 | 0.00 | 0.00 |
| ATOM | 861 | HA   | VAL | X | 56 | 28.226 | 57.418 | 15.754 | 0.00 | 0.00 |
| ATOM | 862 | CB   | VAL | X | 56 | 28.160 | 57.409 | 17.769 | 0.00 | 0.00 |
| ATOM | 863 | HB   | VAL | X | 56 | 27.520 | 57.016 | 18.559 | 0.00 | 0.00 |
| ATOM | 864 | CG1  | VAL | X | 56 | 29.645 | 57.180 | 18.198 | 0.00 | 0.00 |
| ATOM | 865 | HG11 | VAL | X | 56 | 30.355 | 57.147 | 17.371 | 0.00 | 0.00 |
| ATOM | 866 | HG12 | VAL | X | 56 | 29.887 | 57.938 | 18.943 | 0.00 | 0.00 |
| ATOM | 867 | HG13 | VAL | X | 56 | 29.681 | 56.236 | 18.742 | 0.00 | 0.00 |
| ATOM | 868 | CG2  | VAL | X | 56 | 27.967 | 58.992 | 17.678 | 0.00 | 0.00 |
| ATOM | 869 | HG21 | VAL | X | 56 | 27.051 | 59.281 | 17.163 | 0.00 | 0.00 |
| ATOM | 870 | HG22 | VAL | X | 56 | 28.850 | 59.394 | 17.180 | 0.00 | 0.00 |
| ATOM | 871 | HG23 | VAL | X | 56 | 27.964 | 59.440 | 18.671 | 0.00 | 0.00 |
| ATOM | 872 | C    | VAL | X | 56 | 28.229 | 55.337 | 16.341 | 0.00 | 0.00 |
| ATOM | 873 | O    | VAL | X | 56 | 27.516 | 54.448 | 16.818 | 0.00 | 0.00 |
| ATOM | 874 | N    | ASP | X | 57 | 29.436 | 55.147 | 15.751 | 0.00 | 0.00 |
| ATOM | 875 | H    | ASP | X | 57 | 30.036 | 55.900 | 15.448 | 0.00 | 0.00 |
| ATOM | 876 | CA   | ASP | X | 57 | 30.107 | 53.872 | 15.677 | 0.00 | 0.00 |
| ATOM | 877 | HA   | ASP | X | 57 | 29.452 | 53.210 | 15.112 | 0.00 | 0.00 |
| ATOM | 878 | CB   | ASP | X | 57 | 31.411 | 54.100 | 14.899 | 0.00 | 0.00 |
| ATOM | 879 | HB2  | ASP | X | 57 | 31.219 | 54.558 | 13.929 | 0.00 | 0.00 |
| ATOM | 880 | HB3  | ASP | X | 57 | 32.083 | 54.792 | 15.406 | 0.00 | 0.00 |
| ATOM | 881 | CG   | ASP | X | 57 | 32.138 | 52.710 | 14.564 | 0.00 | 0.00 |
| ATOM | 882 | OD1  | ASP | X | 57 | 32.213 | 52.289 | 13.389 | 0.00 | 0.00 |
| ATOM | 883 | OD2  | ASP | X | 57 | 32.637 | 52.046 | 15.556 | 0.00 | 0.00 |
| ATOM | 884 | C    | ASP | X | 57 | 30.364 | 53.192 | 17.014 | 0.00 | 0.00 |
| ATOM | 885 | O    | ASP | X | 57 | 30.613 | 53.828 | 18.050 | 0.00 | 0.00 |
| ATOM | 886 | N    | ALA | X | 58 | 30.209 | 51.881 | 17.038 | 0.00 | 0.00 |
| ATOM | 887 | H    | ALA | X | 58 | 29.842 | 51.476 | 16.189 | 0.00 | 0.00 |
| ATOM | 888 | CA   | ALA | X | 58 | 30.495 | 51.058 | 18.234 | 0.00 | 0.00 |
| ATOM | 889 | HA   | ALA | X | 58 | 31.326 | 51.532 | 18.756 | 0.00 | 0.00 |
| ATOM | 890 | CB   | ALA | X | 58 | 29.287 | 51.081 | 19.148 | 0.00 | 0.00 |
| ATOM | 891 | HB1  | ALA | X | 58 | 29.553 | 50.755 | 20.154 | 0.00 | 0.00 |
| ATOM | 892 | HB2  | ALA | X | 58 | 28.484 | 50.453 | 18.763 | 0.00 | 0.00 |
| ATOM | 893 | HB3  | ALA | X | 58 | 28.897 | 52.097 | 19.213 | 0.00 | 0.00 |
| ATOM | 894 | C    | ALA | X | 58 | 31.050 | 49.696 | 17.845 | 0.00 | 0.00 |
| ATOM | 895 | O    | ALA | X | 58 | 30.788 | 48.668 | 18.529 | 0.00 | 0.00 |
| ATOM | 896 | N    | THR | X | 59 | 31.816 | 49.595 | 16.808 | 0.00 | 0.00 |
| ATOM | 897 | H    | THR | X | 59 | 32.041 | 50.469 | 16.354 | 0.00 | 0.00 |
| ATOM | 898 | CA   | THR | X | 59 | 32.222 | 48.368 | 16.120 | 0.00 | 0.00 |
| ATOM | 899 | HA   | THR | X | 59 | 31.521 | 47.549 | 16.281 | 0.00 | 0.00 |
| ATOM | 900 | CB   | THR | X | 59 | 32.203 | 48.586 | 14.596 | 0.00 | 0.00 |
| ATOM | 901 | HB   | THR | X | 59 | 32.496 | 47.651 | 14.119 | 0.00 | 0.00 |
| ATOM | 902 | CG2  | THR | X | 59 | 30.875 | 49.016 | 13.958 | 0.00 | 0.00 |
| ATOM | 903 | HG21 | THR | X | 59 | 30.088 | 48.321 | 14.249 | 0.00 | 0.00 |
| ATOM | 904 | HG22 | THR | X | 59 | 30.987 | 49.027 | 12.874 | 0.00 | 0.00 |
| ATOM | 905 | HG23 | THR | X | 59 | 30.603 | 49.985 | 14.374 | 0.00 | 0.00 |
| ATOM | 906 | OG1  | THR | X | 59 | 33.053 | 49.594 | 14.220 | 0.00 | 0.00 |
| ATOM | 907 | HG1  | THR | X | 59 | 32.639 | 50.457 | 14.147 | 0.00 | 0.00 |
| ATOM | 908 | C    | THR | X | 59 | 33.549 | 47.876 | 16.528 | 0.00 | 0.00 |
| ATOM | 909 | O    | THR | X | 59 | 33.978 | 46.758 | 16.220 | 0.00 | 0.00 |
| ATOM | 910 | N    | THR | X | 60 | 34.357 | 48.662 | 17.314 | 0.00 | 0.00 |
| ATOM | 911 | H    | THR | X | 60 | 33.969 | 49.547 | 17.606 | 0.00 | 0.00 |
| ATOM | 912 | CA   | THR | X | 60 | 35.769 | 48.366 | 17.568 | 0.00 | 0.00 |
| ATOM | 913 | HA   | THR | X | 60 | 35.934 | 47.291 | 17.640 | 0.00 | 0.00 |
| ATOM | 914 | CB   | THR | X | 60 | 36.624 | 48.772 | 16.388 | 0.00 | 0.00 |
| ATOM | 915 | HB   | THR | X | 60 | 36.161 | 48.295 | 15.524 | 0.00 | 0.00 |
| ATOM | 916 | CG2  | THR | X | 60 | 36.751 | 50.232 | 16.143 | 0.00 | 0.00 |
| ATOM | 917 | HG21 | THR | X | 60 | 36.858 | 50.763 | 17.089 | 0.00 | 0.00 |
| ATOM | 918 | HG22 | THR | X | 60 | 35.841 | 50.531 | 15.621 | 0.00 | 0.00 |
| ATOM | 919 | HG23 | THR | X | 60 | 37.587 | 50.279 | 15.446 | 0.00 | 0.00 |
| ATOM | 920 | OG1  | THR | X | 60 | 37.872 | 48.288 | 16.682 | 0.00 | 0.00 |
| ATOM | 921 | HG1  | THR | X | 60 | 38.431 | 48.635 | 15.982 | 0.00 | 0.00 |
| ATOM | 922 | C    | THR | X | 60 | 36.317 | 49.002 | 18.913 | 0.00 | 0.00 |

|      |     |      |     |   |    |        |        |        |      |      |
|------|-----|------|-----|---|----|--------|--------|--------|------|------|
| ATOM | 923 | O    | THR | X | 60 | 35.964 | 50.139 | 19.266 | 0.00 | 0.00 |
| ATOM | 924 | N    | PHE | X | 61 | 37.222 | 48.288 | 19.542 | 0.00 | 0.00 |
| ATOM | 925 | H    | PHE | X | 61 | 37.418 | 47.325 | 19.307 | 0.00 | 0.00 |
| ATOM | 926 | CA   | PHE | X | 61 | 38.084 | 48.848 | 20.561 | 0.00 | 0.00 |
| ATOM | 927 | HA   | PHE | X | 61 | 37.437 | 49.158 | 21.381 | 0.00 | 0.00 |
| ATOM | 928 | CB   | PHE | X | 61 | 39.057 | 47.718 | 21.128 | 0.00 | 0.00 |
| ATOM | 929 | HB2  | PHE | X | 61 | 39.800 | 47.527 | 20.354 | 0.00 | 0.00 |
| ATOM | 930 | HB3  | PHE | X | 61 | 39.558 | 48.071 | 22.030 | 0.00 | 0.00 |
| ATOM | 931 | CG   | PHE | X | 61 | 38.467 | 46.414 | 21.532 | 0.00 | 0.00 |
| ATOM | 932 | CD1  | PHE | X | 61 | 37.655 | 46.416 | 22.649 | 0.00 | 0.00 |
| ATOM | 933 | HD1  | PHE | X | 61 | 37.427 | 47.271 | 23.269 | 0.00 | 0.00 |
| ATOM | 934 | CE1  | PHE | X | 61 | 37.235 | 45.105 | 23.096 | 0.00 | 0.00 |
| ATOM | 935 | HE1  | PHE | X | 61 | 36.856 | 44.950 | 24.096 | 0.00 | 0.00 |
| ATOM | 936 | CZ   | PHE | X | 61 | 37.563 | 44.036 | 22.302 | 0.00 | 0.00 |
| ATOM | 937 | HZ   | PHE | X | 61 | 37.255 | 43.041 | 22.590 | 0.00 | 0.00 |
| ATOM | 938 | CE2  | PHE | X | 61 | 38.279 | 44.082 | 21.117 | 0.00 | 0.00 |
| ATOM | 939 | HE2  | PHE | X | 61 | 38.510 | 43.153 | 20.617 | 0.00 | 0.00 |
| ATOM | 940 | CD2  | PHE | X | 61 | 38.808 | 45.298 | 20.705 | 0.00 | 0.00 |
| ATOM | 941 | HD2  | PHE | X | 61 | 39.459 | 45.340 | 19.843 | 0.00 | 0.00 |
| ATOM | 942 | C    | PHE | X | 61 | 38.824 | 50.088 | 20.042 | 0.00 | 0.00 |
| ATOM | 943 | O    | PHE | X | 61 | 39.717 | 49.880 | 19.218 | 0.00 | 0.00 |
| ATOM | 944 | N    | GLN | X | 62 | 38.568 | 51.272 | 20.617 | 0.00 | 0.00 |
| ATOM | 945 | H    | GLN | X | 62 | 37.994 | 51.264 | 21.448 | 0.00 | 0.00 |
| ATOM | 946 | CA   | GLN | X | 62 | 39.141 | 52.548 | 20.158 | 0.00 | 0.00 |
| ATOM | 947 | HA   | GLN | X | 62 | 39.400 | 52.443 | 19.105 | 0.00 | 0.00 |
| ATOM | 948 | CB   | GLN | X | 62 | 38.029 | 53.634 | 20.245 | 0.00 | 0.00 |
| ATOM | 949 | HB2  | GLN | X | 62 | 37.656 | 53.568 | 21.267 | 0.00 | 0.00 |
| ATOM | 950 | HB3  | GLN | X | 62 | 38.530 | 54.572 | 20.008 | 0.00 | 0.00 |
| ATOM | 951 | CG   | GLN | X | 62 | 36.855 | 53.477 | 19.296 | 0.00 | 0.00 |
| ATOM | 952 | HG2  | GLN | X | 62 | 37.201 | 53.375 | 18.267 | 0.00 | 0.00 |
| ATOM | 953 | HG3  | GLN | X | 62 | 36.285 | 52.589 | 19.569 | 0.00 | 0.00 |
| ATOM | 954 | CD   | GLN | X | 62 | 35.833 | 54.639 | 19.341 | 0.00 | 0.00 |
| ATOM | 955 | OE1  | GLN | X | 62 | 36.139 | 55.716 | 18.796 | 0.00 | 0.00 |
| ATOM | 956 | NE2  | GLN | X | 62 | 34.780 | 54.513 | 20.108 | 0.00 | 0.00 |
| ATOM | 957 | HE21 | GLN | X | 62 | 34.147 | 55.299 | 20.153 | 0.00 | 0.00 |
| ATOM | 958 | HE22 | GLN | X | 62 | 34.507 | 53.569 | 20.342 | 0.00 | 0.00 |
| ATOM | 959 | C    | GLN | X | 62 | 40.407 | 52.932 | 20.924 | 0.00 | 0.00 |
| ATOM | 960 | O    | GLN | X | 62 | 41.069 | 53.816 | 20.415 | 0.00 | 0.00 |
| ATOM | 961 | N    | SER | X | 63 | 40.765 | 52.220 | 22.046 | 0.00 | 0.00 |
| ATOM | 962 | H    | SER | X | 63 | 40.081 | 51.534 | 22.331 | 0.00 | 0.00 |
| ATOM | 963 | CA   | SER | X | 63 | 41.947 | 52.295 | 22.908 | 0.00 | 0.00 |
| ATOM | 964 | HA   | SER | X | 63 | 42.837 | 52.009 | 22.348 | 0.00 | 0.00 |
| ATOM | 965 | CB   | SER | X | 63 | 42.387 | 53.743 | 23.304 | 0.00 | 0.00 |
| ATOM | 966 | HB2  | SER | X | 63 | 43.145 | 53.659 | 24.083 | 0.00 | 0.00 |
| ATOM | 967 | HB3  | SER | X | 63 | 42.673 | 54.326 | 22.428 | 0.00 | 0.00 |
| ATOM | 968 | OG   | SER | X | 63 | 41.234 | 54.409 | 23.844 | 0.00 | 0.00 |
| ATOM | 969 | HG   | SER | X | 63 | 41.456 | 55.321 | 24.044 | 0.00 | 0.00 |
| ATOM | 970 | C    | SER | X | 63 | 41.807 | 51.239 | 24.016 | 0.00 | 0.00 |
| ATOM | 971 | O    | SER | X | 63 | 40.763 | 50.592 | 24.183 | 0.00 | 0.00 |
| ATOM | 972 | N    | VAL | X | 64 | 42.843 | 51.231 | 24.835 | 0.00 | 0.00 |
| ATOM | 973 | H    | VAL | X | 64 | 43.683 | 51.660 | 24.474 | 0.00 | 0.00 |
| ATOM | 974 | CA   | VAL | X | 64 | 42.980 | 50.753 | 26.222 | 0.00 | 0.00 |
| ATOM | 975 | HA   | VAL | X | 64 | 41.966 | 50.762 | 26.620 | 0.00 | 0.00 |
| ATOM | 976 | CB   | VAL | X | 64 | 43.522 | 49.296 | 26.314 | 0.00 | 0.00 |
| ATOM | 977 | HB   | VAL | X | 64 | 43.678 | 48.997 | 27.351 | 0.00 | 0.00 |
| ATOM | 978 | CG1  | VAL | X | 64 | 42.658 | 48.208 | 25.740 | 0.00 | 0.00 |
| ATOM | 979 | HG11 | VAL | X | 64 | 41.684 | 48.095 | 26.217 | 0.00 | 0.00 |
| ATOM | 980 | HG12 | VAL | X | 64 | 42.485 | 48.513 | 24.708 | 0.00 | 0.00 |
| ATOM | 981 | HG13 | VAL | X | 64 | 43.210 | 47.268 | 25.756 | 0.00 | 0.00 |
| ATOM | 982 | CG2  | VAL | X | 64 | 44.935 | 49.178 | 25.634 | 0.00 | 0.00 |
| ATOM | 983 | HG21 | VAL | X | 64 | 44.880 | 49.252 | 24.547 | 0.00 | 0.00 |
| ATOM | 984 | HG22 | VAL | X | 64 | 45.359 | 48.193 | 25.829 | 0.00 | 0.00 |
| ATOM | 985 | HG23 | VAL | X | 64 | 45.689 | 49.905 | 25.935 | 0.00 | 0.00 |
| ATOM | 986 | C    | VAL | X | 64 | 43.804 | 51.711 | 27.112 | 0.00 | 0.00 |
| ATOM | 987 | O    | VAL | X | 64 | 44.231 | 52.787 | 26.695 | 0.00 | 0.00 |
| ATOM | 988 | N    | CYX | X | 65 | 43.795 | 51.432 | 28.432 | 0.00 | 0.00 |
| ATOM | 989 | H    | CYX | X | 65 | 43.296 | 50.608 | 28.735 | 0.00 | 0.00 |

|      |      |      |     |   |    |        |        |        |      |      |
|------|------|------|-----|---|----|--------|--------|--------|------|------|
| ATOM | 990  | CA   | CYX | X | 65 | 44.558 | 52.310 | 29.332 | 0.00 | 0.00 |
| ATOM | 991  | HA   | CYX | X | 65 | 44.163 | 53.317 | 29.195 | 0.00 | 0.00 |
| ATOM | 992  | CB   | CYX | X | 65 | 44.078 | 51.948 | 30.741 | 0.00 | 0.00 |
| ATOM | 993  | HB2  | CYX | X | 65 | 44.332 | 50.926 | 31.022 | 0.00 | 0.00 |
| ATOM | 994  | HB3  | CYX | X | 65 | 44.649 | 52.577 | 31.424 | 0.00 | 0.00 |
| ATOM | 995  | SG   | CYX | X | 65 | 42.285 | 52.186 | 31.058 | 0.00 | 0.00 |
| ATOM | 996  | C    | CYX | X | 65 | 46.061 | 52.272 | 29.261 | 0.00 | 0.00 |
| ATOM | 997  | O    | CYX | X | 65 | 46.580 | 51.170 | 29.013 | 0.00 | 0.00 |
| ATOM | 998  | N    | TYR | X | 66 | 46.692 | 53.371 | 29.565 | 0.00 | 0.00 |
| ATOM | 999  | H    | TYR | X | 66 | 46.246 | 54.270 | 29.449 | 0.00 | 0.00 |
| ATOM | 1000 | CA   | TYR | X | 66 | 48.092 | 53.336 | 30.165 | 0.00 | 0.00 |
| ATOM | 1001 | HA   | TYR | X | 66 | 48.652 | 52.934 | 29.320 | 0.00 | 0.00 |
| ATOM | 1002 | CB   | TYR | X | 66 | 48.558 | 54.721 | 30.479 | 0.00 | 0.00 |
| ATOM | 1003 | HB2  | TYR | X | 66 | 47.861 | 55.182 | 31.180 | 0.00 | 0.00 |
| ATOM | 1004 | HB3  | TYR | X | 66 | 49.582 | 54.676 | 30.848 | 0.00 | 0.00 |
| ATOM | 1005 | CG   | TYR | X | 66 | 48.709 | 55.490 | 29.188 | 0.00 | 0.00 |
| ATOM | 1006 | CD1  | TYR | X | 66 | 47.949 | 56.667 | 28.987 | 0.00 | 0.00 |
| ATOM | 1007 | HD1  | TYR | X | 66 | 47.169 | 56.890 | 29.700 | 0.00 | 0.00 |
| ATOM | 1008 | CE1  | TYR | X | 66 | 48.246 | 57.513 | 27.837 | 0.00 | 0.00 |
| ATOM | 1009 | HE1  | TYR | X | 66 | 47.592 | 58.345 | 27.620 | 0.00 | 0.00 |
| ATOM | 1010 | CZ   | TYR | X | 66 | 49.392 | 57.279 | 27.052 | 0.00 | 0.00 |
| ATOM | 1011 | OH   | TYR | X | 66 | 49.798 | 58.131 | 26.134 | 0.00 | 0.00 |
| ATOM | 1012 | HH   | TYR | X | 66 | 49.227 | 58.901 | 26.094 | 0.00 | 0.00 |
| ATOM | 1013 | CE2  | TYR | X | 66 | 50.109 | 56.078 | 27.273 | 0.00 | 0.00 |
| ATOM | 1014 | HE2  | TYR | X | 66 | 50.981 | 55.844 | 26.682 | 0.00 | 0.00 |
| ATOM | 1015 | CD2  | TYR | X | 66 | 49.776 | 55.211 | 28.329 | 0.00 | 0.00 |
| ATOM | 1016 | HD2  | TYR | X | 66 | 50.443 | 54.395 | 28.567 | 0.00 | 0.00 |
| ATOM | 1017 | C    | TYR | X | 66 | 48.296 | 52.297 | 31.340 | 0.00 | 0.00 |
| ATOM | 1018 | O    | TYR | X | 66 | 47.432 | 52.057 | 32.196 | 0.00 | 0.00 |
| ATOM | 1019 | N    | GLN | X | 67 | 49.480 | 51.646 | 31.413 | 0.00 | 0.00 |
| ATOM | 1020 | H    | GLN | X | 67 | 50.101 | 51.812 | 30.634 | 0.00 | 0.00 |
| ATOM | 1021 | CA   | GLN | X | 67 | 49.768 | 50.603 | 32.379 | 0.00 | 0.00 |
| ATOM | 1022 | HA   | GLN | X | 67 | 49.658 | 51.067 | 33.359 | 0.00 | 0.00 |
| ATOM | 1023 | CB   | GLN | X | 67 | 48.822 | 49.364 | 32.242 | 0.00 | 0.00 |
| ATOM | 1024 | HB2  | GLN | X | 67 | 48.952 | 48.693 | 33.092 | 0.00 | 0.00 |
| ATOM | 1025 | HB3  | GLN | X | 67 | 47.885 | 49.824 | 32.556 | 0.00 | 0.00 |
| ATOM | 1026 | CG   | GLN | X | 67 | 48.876 | 48.695 | 30.871 | 0.00 | 0.00 |
| ATOM | 1027 | HG2  | GLN | X | 67 | 48.913 | 49.459 | 30.094 | 0.00 | 0.00 |
| ATOM | 1028 | HG3  | GLN | X | 67 | 49.784 | 48.091 | 30.849 | 0.00 | 0.00 |
| ATOM | 1029 | CD   | GLN | X | 67 | 47.636 | 47.875 | 30.542 | 0.00 | 0.00 |
| ATOM | 1030 | OE1  | GLN | X | 67 | 47.645 | 46.662 | 30.811 | 0.00 | 0.00 |
| ATOM | 1031 | NE2  | GLN | X | 67 | 46.554 | 48.486 | 30.054 | 0.00 | 0.00 |
| ATOM | 1032 | HE21 | GLN | X | 67 | 45.694 | 48.022 | 30.309 | 0.00 | 0.00 |
| ATOM | 1033 | HE22 | GLN | X | 67 | 46.512 | 49.478 | 29.865 | 0.00 | 0.00 |
| ATOM | 1034 | C    | GLN | X | 67 | 51.230 | 50.010 | 32.338 | 0.00 | 0.00 |
| ATOM | 1035 | O    | GLN | X | 67 | 51.943 | 50.414 | 31.403 | 0.00 | 0.00 |
| ATOM | 1036 | N    | TYR | X | 68 | 51.625 | 49.074 | 33.238 | 0.00 | 0.00 |
| ATOM | 1037 | H    | TYR | X | 68 | 51.164 | 48.911 | 34.122 | 0.00 | 0.00 |
| ATOM | 1038 | CA   | TYR | X | 68 | 52.865 | 48.385 | 33.011 | 0.00 | 0.00 |
| ATOM | 1039 | HA   | TYR | X | 68 | 53.665 | 49.011 | 32.616 | 0.00 | 0.00 |
| ATOM | 1040 | CB   | TYR | X | 68 | 53.400 | 47.903 | 34.421 | 0.00 | 0.00 |
| ATOM | 1041 | HB2  | TYR | X | 68 | 53.475 | 48.804 | 35.029 | 0.00 | 0.00 |
| ATOM | 1042 | HB3  | TYR | X | 68 | 52.699 | 47.295 | 34.992 | 0.00 | 0.00 |
| ATOM | 1043 | CG   | TYR | X | 68 | 54.678 | 47.141 | 34.431 | 0.00 | 0.00 |
| ATOM | 1044 | CD1  | TYR | X | 68 | 56.003 | 47.781 | 34.259 | 0.00 | 0.00 |
| ATOM | 1045 | HD1  | TYR | X | 68 | 56.202 | 48.828 | 34.435 | 0.00 | 0.00 |
| ATOM | 1046 | CE1  | TYR | X | 68 | 57.133 | 46.976 | 34.153 | 0.00 | 0.00 |
| ATOM | 1047 | HE1  | TYR | X | 68 | 58.089 | 47.470 | 34.241 | 0.00 | 0.00 |
| ATOM | 1048 | CZ   | TYR | X | 68 | 57.034 | 45.604 | 33.933 | 0.00 | 0.00 |
| ATOM | 1049 | OH   | TYR | X | 68 | 58.187 | 44.914 | 33.855 | 0.00 | 0.00 |
| ATOM | 1050 | HH   | TYR | X | 68 | 58.943 | 45.463 | 34.072 | 0.00 | 0.00 |
| ATOM | 1051 | CE2  | TYR | X | 68 | 55.761 | 44.964 | 34.104 | 0.00 | 0.00 |
| ATOM | 1052 | HE2  | TYR | X | 68 | 55.765 | 43.885 | 34.141 | 0.00 | 0.00 |
| ATOM | 1053 | CD2  | TYR | X | 68 | 54.574 | 45.762 | 34.260 | 0.00 | 0.00 |
| ATOM | 1054 | HD2  | TYR | X | 68 | 53.634 | 45.256 | 34.423 | 0.00 | 0.00 |
| ATOM | 1055 | C    | TYR | X | 68 | 52.583 | 47.145 | 32.067 | 0.00 | 0.00 |
| ATOM | 1056 | O    | TYR | X | 68 | 51.540 | 46.463 | 32.141 | 0.00 | 0.00 |



|      |      |      |     |   |    |        |        |        |      |      |
|------|------|------|-----|---|----|--------|--------|--------|------|------|
| ATOM | 1057 | N    | VAL | X | 69 | 53.650 | 46.794 | 31.344 | 0.00 | 0.00 |
| ATOM | 1058 | H    | VAL | X | 69 | 54.524 | 47.301 | 31.336 | 0.00 | 0.00 |
| ATOM | 1059 | CA   | VAL | X | 69 | 53.689 | 45.706 | 30.314 | 0.00 | 0.00 |
| ATOM | 1060 | HA   | VAL | X | 69 | 52.853 | 45.041 | 30.529 | 0.00 | 0.00 |
| ATOM | 1061 | CB   | VAL | X | 69 | 53.619 | 46.290 | 28.883 | 0.00 | 0.00 |
| ATOM | 1062 | HB   | VAL | X | 69 | 54.343 | 47.101 | 28.808 | 0.00 | 0.00 |
| ATOM | 1063 | CG1  | VAL | X | 69 | 53.611 | 45.197 | 27.774 | 0.00 | 0.00 |
| ATOM | 1064 | HG11 | VAL | X | 69 | 53.408 | 45.605 | 26.784 | 0.00 | 0.00 |
| ATOM | 1065 | HG12 | VAL | X | 69 | 54.622 | 44.791 | 27.770 | 0.00 | 0.00 |
| ATOM | 1066 | HG13 | VAL | X | 69 | 52.889 | 44.413 | 28.003 | 0.00 | 0.00 |
| ATOM | 1067 | CG2  | VAL | X | 69 | 52.280 | 47.023 | 28.687 | 0.00 | 0.00 |
| ATOM | 1068 | HG21 | VAL | X | 69 | 52.414 | 48.030 | 29.083 | 0.00 | 0.00 |
| ATOM | 1069 | HG22 | VAL | X | 69 | 51.479 | 46.530 | 29.238 | 0.00 | 0.00 |
| ATOM | 1070 | HG23 | VAL | X | 69 | 52.060 | 47.229 | 27.640 | 0.00 | 0.00 |
| ATOM | 1071 | C    | VAL | X | 69 | 54.972 | 44.889 | 30.534 | 0.00 | 0.00 |
| ATOM | 1072 | O    | VAL | X | 69 | 56.041 | 45.510 | 30.409 | 0.00 | 0.00 |
| ATOM | 1073 | N    | ASP | X | 70 | 54.810 | 43.575 | 30.585 | 0.00 | 0.00 |
| ATOM | 1074 | H    | ASP | X | 70 | 53.849 | 43.268 | 30.535 | 0.00 | 0.00 |
| ATOM | 1075 | CA   | ASP | X | 70 | 55.885 | 42.622 | 30.829 | 0.00 | 0.00 |
| ATOM | 1076 | HA   | ASP | X | 70 | 56.144 | 42.713 | 31.883 | 0.00 | 0.00 |
| ATOM | 1077 | CB   | ASP | X | 70 | 55.415 | 41.163 | 30.684 | 0.00 | 0.00 |
| ATOM | 1078 | HB2  | ASP | X | 70 | 54.397 | 41.123 | 31.072 | 0.00 | 0.00 |
| ATOM | 1079 | HB3  | ASP | X | 70 | 55.387 | 40.837 | 29.644 | 0.00 | 0.00 |
| ATOM | 1080 | CG   | ASP | X | 70 | 56.331 | 40.178 | 31.528 | 0.00 | 0.00 |
| ATOM | 1081 | OD1  | ASP | X | 70 | 57.576 | 40.184 | 31.481 | 0.00 | 0.00 |
| ATOM | 1082 | OD2  | ASP | X | 70 | 55.657 | 39.284 | 32.007 | 0.00 | 0.00 |
| ATOM | 1083 | C    | ASP | X | 70 | 57.197 | 42.796 | 29.931 | 0.00 | 0.00 |
| ATOM | 1084 | O    | ASP | X | 70 | 57.024 | 42.648 | 28.694 | 0.00 | 0.00 |
| ATOM | 1085 | N    | THR | X | 71 | 58.411 | 43.211 | 30.397 | 0.00 | 0.00 |
| ATOM | 1086 | H    | THR | X | 71 | 58.537 | 43.283 | 31.397 | 0.00 | 0.00 |
| ATOM | 1087 | CA   | THR | X | 71 | 59.694 | 43.128 | 29.667 | 0.00 | 0.00 |
| ATOM | 1088 | HA   | THR | X | 71 | 59.543 | 43.108 | 28.588 | 0.00 | 0.00 |
| ATOM | 1089 | CB   | THR | X | 71 | 60.512 | 44.375 | 30.049 | 0.00 | 0.00 |
| ATOM | 1090 | HB   | THR | X | 71 | 61.472 | 44.329 | 29.536 | 0.00 | 0.00 |
| ATOM | 1091 | CG2  | THR | X | 71 | 59.745 | 45.567 | 29.513 | 0.00 | 0.00 |
| ATOM | 1092 | HG21 | THR | X | 71 | 58.806 | 45.712 | 30.048 | 0.00 | 0.00 |
| ATOM | 1093 | HG22 | THR | X | 71 | 59.595 | 45.430 | 28.442 | 0.00 | 0.00 |
| ATOM | 1094 | HG23 | THR | X | 71 | 60.304 | 46.488 | 29.676 | 0.00 | 0.00 |
| ATOM | 1095 | OG1  | THR | X | 71 | 60.629 | 44.356 | 31.478 | 0.00 | 0.00 |
| ATOM | 1096 | HG1  | THR | X | 71 | 61.389 | 43.806 | 31.680 | 0.00 | 0.00 |
| ATOM | 1097 | C    | THR | X | 71 | 60.452 | 41.838 | 29.907 | 0.00 | 0.00 |
| ATOM | 1098 | O    | THR | X | 71 | 61.442 | 41.625 | 29.244 | 0.00 | 0.00 |
| ATOM | 1099 | N    | LEU | X | 72 | 60.150 | 41.047 | 30.910 | 0.00 | 0.00 |
| ATOM | 1100 | H    | LEU | X | 72 | 59.209 | 41.136 | 31.266 | 0.00 | 0.00 |
| ATOM | 1101 | CA   | LEU | X | 72 | 60.943 | 39.896 | 31.394 | 0.00 | 0.00 |
| ATOM | 1102 | HA   | LEU | X | 72 | 62.012 | 40.112 | 31.385 | 0.00 | 0.00 |
| ATOM | 1103 | CB   | LEU | X | 72 | 60.432 | 39.571 | 32.797 | 0.00 | 0.00 |
| ATOM | 1104 | HB2  | LEU | X | 72 | 60.368 | 40.510 | 33.347 | 0.00 | 0.00 |
| ATOM | 1105 | HB3  | LEU | X | 72 | 59.466 | 39.072 | 32.731 | 0.00 | 0.00 |
| ATOM | 1106 | CG   | LEU | X | 72 | 61.478 | 38.737 | 33.564 | 0.00 | 0.00 |
| ATOM | 1107 | HG   | LEU | X | 72 | 61.568 | 37.744 | 33.125 | 0.00 | 0.00 |
| ATOM | 1108 | CD1  | LEU | X | 72 | 62.857 | 39.400 | 33.618 | 0.00 | 0.00 |
| ATOM | 1109 | HD11 | LEU | X | 72 | 63.346 | 39.355 | 32.645 | 0.00 | 0.00 |
| ATOM | 1110 | HD12 | LEU | X | 72 | 63.396 | 38.782 | 34.335 | 0.00 | 0.00 |
| ATOM | 1111 | HD13 | LEU | X | 72 | 62.797 | 40.407 | 34.030 | 0.00 | 0.00 |
| ATOM | 1112 | CD2  | LEU | X | 72 | 60.891 | 38.666 | 34.984 | 0.00 | 0.00 |
| ATOM | 1113 | HD21 | LEU | X | 72 | 60.723 | 39.643 | 35.437 | 0.00 | 0.00 |
| ATOM | 1114 | HD22 | LEU | X | 72 | 59.879 | 38.282 | 34.854 | 0.00 | 0.00 |
| ATOM | 1115 | HD23 | LEU | X | 72 | 61.494 | 38.076 | 35.673 | 0.00 | 0.00 |
| ATOM | 1116 | C    | LEU | X | 72 | 60.824 | 38.773 | 30.324 | 0.00 | 0.00 |
| ATOM | 1117 | O    | LEU | X | 72 | 61.805 | 38.189 | 29.894 | 0.00 | 0.00 |
| ATOM | 1118 | N    | TYR | X | 73 | 59.566 | 38.516 | 30.007 | 0.00 | 0.00 |
| ATOM | 1119 | H    | TYR | X | 73 | 59.028 | 38.844 | 30.796 | 0.00 | 0.00 |
| ATOM | 1120 | CA   | TYR | X | 73 | 59.129 | 37.377 | 29.177 | 0.00 | 0.00 |
| ATOM | 1121 | HA   | TYR | X | 73 | 59.967 | 36.977 | 28.606 | 0.00 | 0.00 |
| ATOM | 1122 | CB   | TYR | X | 73 | 58.555 | 36.223 | 30.046 | 0.00 | 0.00 |
| ATOM | 1123 | HB2  | TYR | X | 73 | 57.604 | 36.569 | 30.449 | 0.00 | 0.00 |

|      |      |     |     |   |    |        |        |        |      |      |
|------|------|-----|-----|---|----|--------|--------|--------|------|------|
| ATOM | 1124 | HB3 | TYR | X | 73 | 58.498 | 35.396 | 29.338 | 0.00 | 0.00 |
| ATOM | 1125 | CG  | TYR | X | 73 | 59.402 | 35.829 | 31.219 | 0.00 | 0.00 |
| ATOM | 1126 | CD1 | TYR | X | 73 | 60.740 | 35.648 | 31.115 | 0.00 | 0.00 |
| ATOM | 1127 | HD1 | TYR | X | 73 | 61.221 | 35.692 | 30.149 | 0.00 | 0.00 |
| ATOM | 1128 | CE1 | TYR | X | 73 | 61.556 | 35.298 | 32.228 | 0.00 | 0.00 |
| ATOM | 1129 | HE1 | TYR | X | 73 | 62.548 | 34.884 | 32.123 | 0.00 | 0.00 |
| ATOM | 1130 | CZ  | TYR | X | 73 | 60.960 | 35.259 | 33.490 | 0.00 | 0.00 |
| ATOM | 1131 | OH  | TYR | X | 73 | 61.719 | 34.847 | 34.513 | 0.00 | 0.00 |
| ATOM | 1132 | HH  | TYR | X | 73 | 61.235 | 35.054 | 35.315 | 0.00 | 0.00 |
| ATOM | 1133 | CE2 | TYR | X | 73 | 59.611 | 35.617 | 33.656 | 0.00 | 0.00 |
| ATOM | 1134 | HE2 | TYR | X | 73 | 59.176 | 35.614 | 34.645 | 0.00 | 0.00 |
| ATOM | 1135 | CD2 | TYR | X | 73 | 58.873 | 35.849 | 32.519 | 0.00 | 0.00 |
| ATOM | 1136 | HD2 | TYR | X | 73 | 57.838 | 36.144 | 32.602 | 0.00 | 0.00 |
| ATOM | 1137 | C   | TYR | X | 73 | 58.221 | 37.885 | 28.024 | 0.00 | 0.00 |
| ATOM | 1138 | O   | TYR | X | 73 | 57.410 | 37.022 | 27.611 | 0.00 | 0.00 |
| ATOM | 1139 | N   | PRO | X | 74 | 58.457 | 39.060 | 27.403 | 0.00 | 0.00 |
| ATOM | 1140 | CD  | PRO | X | 74 | 59.389 | 40.125 | 27.665 | 0.00 | 0.00 |
| ATOM | 1141 | HD2 | PRO | X | 74 | 60.382 | 39.844 | 28.018 | 0.00 | 0.00 |
| ATOM | 1142 | HD3 | PRO | X | 74 | 58.901 | 40.768 | 28.397 | 0.00 | 0.00 |
| ATOM | 1143 | CG  | PRO | X | 74 | 59.491 | 41.005 | 26.414 | 0.00 | 0.00 |
| ATOM | 1144 | HG2 | PRO | X | 74 | 60.131 | 40.507 | 25.686 | 0.00 | 0.00 |
| ATOM | 1145 | HG3 | PRO | X | 74 | 59.829 | 42.020 | 26.619 | 0.00 | 0.00 |
| ATOM | 1146 | CB  | PRO | X | 74 | 58.108 | 40.866 | 25.827 | 0.00 | 0.00 |
| ATOM | 1147 | HB2 | PRO | X | 74 | 58.134 | 41.076 | 24.757 | 0.00 | 0.00 |
| ATOM | 1148 | HB3 | PRO | X | 74 | 57.449 | 41.582 | 26.318 | 0.00 | 0.00 |
| ATOM | 1149 | CA  | PRO | X | 74 | 57.732 | 39.413 | 26.130 | 0.00 | 0.00 |
| ATOM | 1150 | HA  | PRO | X | 74 | 56.688 | 39.212 | 26.371 | 0.00 | 0.00 |
| ATOM | 1151 | C   | PRO | X | 74 | 58.123 | 38.447 | 25.026 | 0.00 | 0.00 |
| ATOM | 1152 | O   | PRO | X | 74 | 59.271 | 37.900 | 25.050 | 0.00 | 0.00 |
| ATOM | 1153 | N   | GLY | X | 75 | 57.212 | 38.082 | 24.066 | 0.00 | 0.00 |
| ATOM | 1154 | H   | GLY | X | 75 | 56.435 | 38.699 | 23.882 | 0.00 | 0.00 |
| ATOM | 1155 | CA  | GLY | X | 75 | 57.468 | 37.126 | 23.059 | 0.00 | 0.00 |
| ATOM | 1156 | HA2 | GLY | X | 75 | 56.656 | 37.341 | 22.365 | 0.00 | 0.00 |
| ATOM | 1157 | HA3 | GLY | X | 75 | 58.484 | 37.269 | 22.691 | 0.00 | 0.00 |
| ATOM | 1158 | C   | GLY | X | 75 | 57.276 | 35.639 | 23.402 | 0.00 | 0.00 |
| ATOM | 1159 | O   | GLY | X | 75 | 57.289 | 34.808 | 22.512 | 0.00 | 0.00 |
| ATOM | 1160 | N   | PHE | X | 76 | 57.085 | 35.305 | 24.735 | 0.00 | 0.00 |
| ATOM | 1161 | H   | PHE | X | 76 | 57.163 | 36.105 | 25.347 | 0.00 | 0.00 |
| ATOM | 1162 | CA  | PHE | X | 76 | 56.653 | 34.032 | 25.234 | 0.00 | 0.00 |
| ATOM | 1163 | HA  | PHE | X | 76 | 56.957 | 33.242 | 24.548 | 0.00 | 0.00 |
| ATOM | 1164 | CB  | PHE | X | 76 | 57.303 | 33.821 | 26.677 | 0.00 | 0.00 |
| ATOM | 1165 | HB2 | PHE | X | 76 | 58.388 | 33.868 | 26.576 | 0.00 | 0.00 |
| ATOM | 1166 | HB3 | PHE | X | 76 | 57.105 | 34.682 | 27.315 | 0.00 | 0.00 |
| ATOM | 1167 | CG  | PHE | X | 76 | 56.882 | 32.560 | 27.494 | 0.00 | 0.00 |
| ATOM | 1168 | CD1 | PHE | X | 76 | 56.835 | 31.308 | 26.830 | 0.00 | 0.00 |
| ATOM | 1169 | HD1 | PHE | X | 76 | 57.160 | 31.285 | 25.801 | 0.00 | 0.00 |
| ATOM | 1170 | CE1 | PHE | X | 76 | 56.315 | 30.215 | 27.472 | 0.00 | 0.00 |
| ATOM | 1171 | HE1 | PHE | X | 76 | 56.204 | 29.340 | 26.848 | 0.00 | 0.00 |
| ATOM | 1172 | CZ  | PHE | X | 76 | 55.811 | 30.341 | 28.776 | 0.00 | 0.00 |
| ATOM | 1173 | HZ  | PHE | X | 76 | 55.405 | 29.479 | 29.283 | 0.00 | 0.00 |
| ATOM | 1174 | CE2 | PHE | X | 76 | 55.784 | 31.588 | 29.389 | 0.00 | 0.00 |
| ATOM | 1175 | HE2 | PHE | X | 76 | 55.529 | 31.547 | 30.438 | 0.00 | 0.00 |
| ATOM | 1176 | CD2 | PHE | X | 76 | 56.451 | 32.636 | 28.811 | 0.00 | 0.00 |
| ATOM | 1177 | HD2 | PHE | X | 76 | 56.388 | 33.505 | 29.449 | 0.00 | 0.00 |
| ATOM | 1178 | C   | PHE | X | 76 | 55.094 | 33.940 | 25.306 | 0.00 | 0.00 |
| ATOM | 1179 | O   | PHE | X | 76 | 54.516 | 34.838 | 25.868 | 0.00 | 0.00 |
| ATOM | 1180 | N   | GLU | X | 77 | 54.518 | 32.875 | 24.753 | 0.00 | 0.00 |
| ATOM | 1181 | H   | GLU | X | 77 | 55.074 | 32.130 | 24.357 | 0.00 | 0.00 |
| ATOM | 1182 | CA  | GLU | X | 77 | 53.000 | 32.796 | 24.718 | 0.00 | 0.00 |
| ATOM | 1183 | HA  | GLU | X | 77 | 52.643 | 33.630 | 24.114 | 0.00 | 0.00 |
| ATOM | 1184 | CB  | GLU | X | 77 | 52.597 | 31.468 | 24.184 | 0.00 | 0.00 |
| ATOM | 1185 | HB2 | GLU | X | 77 | 53.087 | 30.794 | 24.885 | 0.00 | 0.00 |
| ATOM | 1186 | HB3 | GLU | X | 77 | 51.519 | 31.307 | 24.161 | 0.00 | 0.00 |
| ATOM | 1187 | CG  | GLU | X | 77 | 53.153 | 31.068 | 22.777 | 0.00 | 0.00 |
| ATOM | 1188 | HG2 | GLU | X | 77 | 54.229 | 31.237 | 22.742 | 0.00 | 0.00 |
| ATOM | 1189 | HG3 | GLU | X | 77 | 52.989 | 30.004 | 22.608 | 0.00 | 0.00 |
| ATOM | 1190 | CD  | GLU | X | 77 | 52.568 | 31.999 | 21.734 | 0.00 | 0.00 |

|      |      |      |     |   |    |        |        |        |      |      |
|------|------|------|-----|---|----|--------|--------|--------|------|------|
| ATOM | 1191 | OE1  | GLU | X | 77 | 51.344 | 31.975 | 21.374 | 0.00 | 0.00 |
| ATOM | 1192 | OE2  | GLU | X | 77 | 53.206 | 33.002 | 21.352 | 0.00 | 0.00 |
| ATOM | 1193 | C    | GLU | X | 77 | 52.324 | 32.975 | 26.123 | 0.00 | 0.00 |
| ATOM | 1194 | O    | GLU | X | 77 | 51.349 | 33.689 | 26.229 | 0.00 | 0.00 |
| ATOM | 1195 | N    | GLY | X | 78 | 52.927 | 32.396 | 27.171 | 0.00 | 0.00 |
| ATOM | 1196 | H    | GLY | X | 78 | 53.872 | 32.114 | 26.953 | 0.00 | 0.00 |
| ATOM | 1197 | CA   | GLY | X | 78 | 52.454 | 32.455 | 28.564 | 0.00 | 0.00 |
| ATOM | 1198 | HA2  | GLY | X | 78 | 51.452 | 32.030 | 28.625 | 0.00 | 0.00 |
| ATOM | 1199 | HA3  | GLY | X | 78 | 53.166 | 31.828 | 29.100 | 0.00 | 0.00 |
| ATOM | 1200 | C    | GLY | X | 78 | 52.459 | 33.801 | 29.211 | 0.00 | 0.00 |
| ATOM | 1201 | O    | GLY | X | 78 | 51.811 | 34.109 | 30.219 | 0.00 | 0.00 |
| ATOM | 1202 | N    | THR | X | 79 | 53.029 | 34.827 | 28.587 | 0.00 | 0.00 |
| ATOM | 1203 | H    | THR | X | 79 | 53.541 | 34.546 | 27.763 | 0.00 | 0.00 |
| ATOM | 1204 | CA   | THR | X | 79 | 53.054 | 36.291 | 28.930 | 0.00 | 0.00 |
| ATOM | 1205 | HA   | THR | X | 79 | 52.481 | 36.610 | 29.801 | 0.00 | 0.00 |
| ATOM | 1206 | CB   | THR | X | 79 | 54.464 | 36.673 | 29.088 | 0.00 | 0.00 |
| ATOM | 1207 | HB   | THR | X | 79 | 55.075 | 36.365 | 28.239 | 0.00 | 0.00 |
| ATOM | 1208 | CG2  | THR | X | 79 | 54.774 | 38.151 | 29.237 | 0.00 | 0.00 |
| ATOM | 1209 | HG21 | THR | X | 79 | 54.653 | 38.612 | 28.257 | 0.00 | 0.00 |
| ATOM | 1210 | HG22 | THR | X | 79 | 55.764 | 38.306 | 29.665 | 0.00 | 0.00 |
| ATOM | 1211 | HG23 | THR | X | 79 | 54.133 | 38.685 | 29.938 | 0.00 | 0.00 |
| ATOM | 1212 | OG1  | THR | X | 79 | 54.904 | 35.870 | 30.181 | 0.00 | 0.00 |
| ATOM | 1213 | HG1  | THR | X | 79 | 55.557 | 36.350 | 30.696 | 0.00 | 0.00 |
| ATOM | 1214 | C    | THR | X | 79 | 52.371 | 37.219 | 27.858 | 0.00 | 0.00 |
| ATOM | 1215 | O    | THR | X | 79 | 51.608 | 38.075 | 28.334 | 0.00 | 0.00 |
| ATOM | 1216 | N    | GLU | X | 80 | 52.541 | 37.034 | 26.572 | 0.00 | 0.00 |
| ATOM | 1217 | H    | GLU | X | 80 | 53.170 | 36.272 | 26.363 | 0.00 | 0.00 |
| ATOM | 1218 | CA   | GLU | X | 80 | 51.969 | 37.732 | 25.435 | 0.00 | 0.00 |
| ATOM | 1219 | HA   | GLU | X | 80 | 52.058 | 38.806 | 25.600 | 0.00 | 0.00 |
| ATOM | 1220 | CB   | GLU | X | 80 | 52.869 | 37.405 | 24.207 | 0.00 | 0.00 |
| ATOM | 1221 | HB2  | GLU | X | 80 | 53.913 | 37.319 | 24.508 | 0.00 | 0.00 |
| ATOM | 1222 | HB3  | GLU | X | 80 | 52.662 | 36.461 | 23.703 | 0.00 | 0.00 |
| ATOM | 1223 | CG   | GLU | X | 80 | 52.799 | 38.529 | 23.152 | 0.00 | 0.00 |
| ATOM | 1224 | HG2  | GLU | X | 80 | 51.823 | 38.543 | 22.668 | 0.00 | 0.00 |
| ATOM | 1225 | HG3  | GLU | X | 80 | 53.090 | 39.476 | 23.606 | 0.00 | 0.00 |
| ATOM | 1226 | CD   | GLU | X | 80 | 53.811 | 38.155 | 22.012 | 0.00 | 0.00 |
| ATOM | 1227 | OE1  | GLU | X | 80 | 54.743 | 38.943 | 21.666 | 0.00 | 0.00 |
| ATOM | 1228 | OE2  | GLU | X | 80 | 53.535 | 37.151 | 21.347 | 0.00 | 0.00 |
| ATOM | 1229 | C    | GLU | X | 80 | 50.438 | 37.495 | 25.174 | 0.00 | 0.00 |
| ATOM | 1230 | O    | GLU | X | 80 | 49.813 | 38.362 | 24.565 | 0.00 | 0.00 |
| ATOM | 1231 | N    | MET | X | 81 | 49.850 | 36.399 | 25.650 | 0.00 | 0.00 |
| ATOM | 1232 | H    | MET | X | 81 | 50.428 | 35.620 | 25.931 | 0.00 | 0.00 |
| ATOM | 1233 | CA   | MET | X | 81 | 48.427 | 36.371 | 25.901 | 0.00 | 0.00 |
| ATOM | 1234 | HA   | MET | X | 81 | 47.944 | 36.334 | 24.925 | 0.00 | 0.00 |
| ATOM | 1235 | CB   | MET | X | 81 | 48.039 | 35.062 | 26.566 | 0.00 | 0.00 |
| ATOM | 1236 | HB2  | MET | X | 81 | 46.956 | 35.177 | 26.626 | 0.00 | 0.00 |
| ATOM | 1237 | HB3  | MET | X | 81 | 48.261 | 34.200 | 25.938 | 0.00 | 0.00 |
| ATOM | 1238 | CG   | MET | X | 81 | 48.506 | 34.646 | 27.956 | 0.00 | 0.00 |
| ATOM | 1239 | HG2  | MET | X | 81 | 49.593 | 34.730 | 27.919 | 0.00 | 0.00 |
| ATOM | 1240 | HG3  | MET | X | 81 | 48.065 | 35.353 | 28.658 | 0.00 | 0.00 |
| ATOM | 1241 | SD   | MET | X | 81 | 48.007 | 32.957 | 28.240 | 0.00 | 0.00 |
| ATOM | 1242 | CE   | MET | X | 81 | 46.270 | 33.368 | 28.755 | 0.00 | 0.00 |
| ATOM | 1243 | HE1  | MET | X | 81 | 45.798 | 33.940 | 27.955 | 0.00 | 0.00 |
| ATOM | 1244 | HE2  | MET | X | 81 | 45.749 | 32.426 | 28.924 | 0.00 | 0.00 |
| ATOM | 1245 | HE3  | MET | X | 81 | 46.165 | 33.858 | 29.723 | 0.00 | 0.00 |
| ATOM | 1246 | C    | MET | X | 81 | 47.870 | 37.560 | 26.669 | 0.00 | 0.00 |
| ATOM | 1247 | O    | MET | X | 81 | 46.795 | 37.955 | 26.315 | 0.00 | 0.00 |
| ATOM | 1248 | N    | TRP | X | 82 | 48.655 | 38.104 | 27.567 | 0.00 | 0.00 |
| ATOM | 1249 | H    | TRP | X | 82 | 49.538 | 37.639 | 27.726 | 0.00 | 0.00 |
| ATOM | 1250 | CA   | TRP | X | 82 | 48.277 | 39.278 | 28.352 | 0.00 | 0.00 |
| ATOM | 1251 | HA   | TRP | X | 82 | 47.192 | 39.387 | 28.330 | 0.00 | 0.00 |
| ATOM | 1252 | CB   | TRP | X | 82 | 48.669 | 39.097 | 29.854 | 0.00 | 0.00 |
| ATOM | 1253 | HB2  | TRP | X | 82 | 49.630 | 39.573 | 30.049 | 0.00 | 0.00 |
| ATOM | 1254 | HB3  | TRP | X | 82 | 47.972 | 39.728 | 30.405 | 0.00 | 0.00 |
| ATOM | 1255 | CG   | TRP | X | 82 | 48.573 | 37.752 | 30.520 | 0.00 | 0.00 |
| ATOM | 1256 | CD1  | TRP | X | 82 | 49.535 | 36.881 | 30.777 | 0.00 | 0.00 |
| ATOM | 1257 | HD1  | TRP | X | 82 | 50.584 | 37.049 | 30.585 | 0.00 | 0.00 |

|      |      |      |     |   |    |        |        |        |      |      |
|------|------|------|-----|---|----|--------|--------|--------|------|------|
| ATOM | 1258 | NE1  | TRP | X | 82 | 49.048 | 35.775 | 31.368 | 0.00 | 0.00 |
| ATOM | 1259 | HE1  | TRP | X | 82 | 49.542 | 34.977 | 31.742 | 0.00 | 0.00 |
| ATOM | 1260 | CE2  | TRP | X | 82 | 47.671 | 35.756 | 31.374 | 0.00 | 0.00 |
| ATOM | 1261 | CZ2  | TRP | X | 82 | 46.689 | 34.864 | 31.798 | 0.00 | 0.00 |
| ATOM | 1262 | HZ2  | TRP | X | 82 | 46.933 | 33.862 | 32.117 | 0.00 | 0.00 |
| ATOM | 1263 | CH2  | TRP | X | 82 | 45.381 | 35.254 | 31.762 | 0.00 | 0.00 |
| ATOM | 1264 | HH2  | TRP | X | 82 | 44.592 | 34.575 | 32.050 | 0.00 | 0.00 |
| ATOM | 1265 | CZ3  | TRP | X | 82 | 45.000 | 36.553 | 31.405 | 0.00 | 0.00 |
| ATOM | 1266 | HZ3  | TRP | X | 82 | 43.985 | 36.917 | 31.461 | 0.00 | 0.00 |
| ATOM | 1267 | CE3  | TRP | X | 82 | 46.029 | 37.426 | 30.920 | 0.00 | 0.00 |
| ATOM | 1268 | HE3  | TRP | X | 82 | 45.760 | 38.422 | 30.601 | 0.00 | 0.00 |
| ATOM | 1269 | CD2  | TRP | X | 82 | 47.394 | 37.097 | 30.947 | 0.00 | 0.00 |
| ATOM | 1270 | C    | TRP | X | 82 | 48.878 | 40.568 | 27.760 | 0.00 | 0.00 |
| ATOM | 1271 | O    | TRP | X | 82 | 48.629 | 41.623 | 28.333 | 0.00 | 0.00 |
| ATOM | 1272 | N    | ASN | X | 83 | 49.570 | 40.592 | 26.657 | 0.00 | 0.00 |
| ATOM | 1273 | H    | ASN | X | 83 | 49.759 | 39.809 | 26.047 | 0.00 | 0.00 |
| ATOM | 1274 | CA   | ASN | X | 83 | 50.099 | 41.879 | 26.099 | 0.00 | 0.00 |
| ATOM | 1275 | HA   | ASN | X | 83 | 50.681 | 42.379 | 26.873 | 0.00 | 0.00 |
| ATOM | 1276 | CB   | ASN | X | 83 | 51.139 | 41.607 | 25.013 | 0.00 | 0.00 |
| ATOM | 1277 | HB2  | ASN | X | 83 | 51.824 | 40.834 | 25.360 | 0.00 | 0.00 |
| ATOM | 1278 | HB3  | ASN | X | 83 | 50.632 | 41.216 | 24.131 | 0.00 | 0.00 |
| ATOM | 1279 | CG   | ASN | X | 83 | 51.918 | 42.933 | 24.659 | 0.00 | 0.00 |
| ATOM | 1280 | OD1  | ASN | X | 83 | 51.445 | 43.758 | 23.880 | 0.00 | 0.00 |
| ATOM | 1281 | ND2  | ASN | X | 83 | 53.024 | 43.091 | 25.222 | 0.00 | 0.00 |
| ATOM | 1282 | HD21 | ASN | X | 83 | 53.566 | 43.919 | 25.019 | 0.00 | 0.00 |
| ATOM | 1283 | HD22 | ASN | X | 83 | 53.273 | 42.353 | 25.864 | 0.00 | 0.00 |
| ATOM | 1284 | C    | ASN | X | 83 | 48.997 | 42.700 | 25.546 | 0.00 | 0.00 |
| ATOM | 1285 | O    | ASN | X | 83 | 48.193 | 42.069 | 24.809 | 0.00 | 0.00 |
| ATOM | 1286 | N    | PRO | X | 84 | 48.999 | 44.050 | 25.753 | 0.00 | 0.00 |
| ATOM | 1287 | CD   | PRO | X | 84 | 49.814 | 44.762 | 26.715 | 0.00 | 0.00 |
| ATOM | 1288 | HD2  | PRO | X | 84 | 50.740 | 45.159 | 26.299 | 0.00 | 0.00 |
| ATOM | 1289 | HD3  | PRO | X | 84 | 49.967 | 44.082 | 27.553 | 0.00 | 0.00 |
| ATOM | 1290 | CG   | PRO | X | 84 | 48.925 | 45.941 | 27.273 | 0.00 | 0.00 |
| ATOM | 1291 | HG2  | PRO | X | 84 | 49.542 | 46.732 | 27.700 | 0.00 | 0.00 |
| ATOM | 1292 | HG3  | PRO | X | 84 | 48.321 | 45.665 | 28.138 | 0.00 | 0.00 |
| ATOM | 1293 | CB   | PRO | X | 84 | 48.228 | 46.333 | 25.973 | 0.00 | 0.00 |
| ATOM | 1294 | HB2  | PRO | X | 84 | 48.920 | 46.931 | 25.380 | 0.00 | 0.00 |
| ATOM | 1295 | HB3  | PRO | X | 84 | 47.288 | 46.857 | 26.145 | 0.00 | 0.00 |
| ATOM | 1296 | CA   | PRO | X | 84 | 47.962 | 44.999 | 25.283 | 0.00 | 0.00 |
| ATOM | 1297 | HA   | PRO | X | 84 | 46.991 | 44.606 | 25.583 | 0.00 | 0.00 |
| ATOM | 1298 | C    | PRO | X | 84 | 47.944 | 45.005 | 23.732 | 0.00 | 0.00 |
| ATOM | 1299 | O    | PRO | X | 84 | 48.838 | 45.667 | 23.189 | 0.00 | 0.00 |
| ATOM | 1300 | N    | ASN | X | 85 | 46.941 | 44.413 | 23.175 | 0.00 | 0.00 |
| ATOM | 1301 | H    | ASN | X | 85 | 46.371 | 43.914 | 23.842 | 0.00 | 0.00 |
| ATOM | 1302 | CA   | ASN | X | 85 | 46.567 | 44.311 | 21.818 | 0.00 | 0.00 |
| ATOM | 1303 | HA   | ASN | X | 85 | 47.481 | 43.999 | 21.312 | 0.00 | 0.00 |
| ATOM | 1304 | CB   | ASN | X | 85 | 45.704 | 43.075 | 21.607 | 0.00 | 0.00 |
| ATOM | 1305 | HB2  | ASN | X | 85 | 45.636 | 42.803 | 20.553 | 0.00 | 0.00 |
| ATOM | 1306 | HB3  | ASN | X | 85 | 46.221 | 42.257 | 22.109 | 0.00 | 0.00 |
| ATOM | 1307 | CG   | ASN | X | 85 | 44.330 | 43.010 | 22.196 | 0.00 | 0.00 |
| ATOM | 1308 | OD1  | ASN | X | 85 | 43.830 | 43.901 | 22.870 | 0.00 | 0.00 |
| ATOM | 1309 | ND2  | ASN | X | 85 | 43.699 | 41.917 | 21.938 | 0.00 | 0.00 |
| ATOM | 1310 | HD21 | ASN | X | 85 | 42.753 | 41.930 | 22.291 | 0.00 | 0.00 |
| ATOM | 1311 | HD22 | ASN | X | 85 | 44.215 | 41.172 | 21.492 | 0.00 | 0.00 |
| ATOM | 1312 | C    | ASN | X | 85 | 45.998 | 45.579 | 21.182 | 0.00 | 0.00 |
| ATOM | 1313 | O    | ASN | X | 85 | 45.451 | 45.460 | 20.066 | 0.00 | 0.00 |
| ATOM | 1314 | N    | ARG | X | 86 | 45.833 | 46.683 | 21.874 | 0.00 | 0.00 |
| ATOM | 1315 | H    | ARG | X | 86 | 46.316 | 46.722 | 22.760 | 0.00 | 0.00 |
| ATOM | 1316 | CA   | ARG | X | 86 | 45.279 | 47.995 | 21.392 | 0.00 | 0.00 |
| ATOM | 1317 | HA   | ARG | X | 86 | 45.424 | 47.922 | 20.314 | 0.00 | 0.00 |
| ATOM | 1318 | CB   | ARG | X | 86 | 43.787 | 48.093 | 21.923 | 0.00 | 0.00 |
| ATOM | 1319 | HB2  | ARG | X | 86 | 43.890 | 47.811 | 22.971 | 0.00 | 0.00 |
| ATOM | 1320 | HB3  | ARG | X | 86 | 43.414 | 49.108 | 21.783 | 0.00 | 0.00 |
| ATOM | 1321 | CG   | ARG | X | 86 | 42.877 | 47.146 | 21.209 | 0.00 | 0.00 |
| ATOM | 1322 | HG2  | ARG | X | 86 | 43.349 | 46.166 | 21.134 | 0.00 | 0.00 |
| ATOM | 1323 | HG3  | ARG | X | 86 | 41.967 | 47.086 | 21.806 | 0.00 | 0.00 |
| ATOM | 1324 | CD   | ARG | X | 86 | 42.628 | 47.620 | 19.791 | 0.00 | 0.00 |

|      |      |      |     |   |    |        |        |        |      |      |
|------|------|------|-----|---|----|--------|--------|--------|------|------|
| ATOM | 1325 | HD2  | ARG | X | 86 | 41.843 | 48.375 | 19.742 | 0.00 | 0.00 |
| ATOM | 1326 | HD3  | ARG | X | 86 | 43.471 | 48.219 | 19.445 | 0.00 | 0.00 |
| ATOM | 1327 | NE   | ARG | X | 86 | 42.367 | 46.506 | 18.874 | 0.00 | 0.00 |
| ATOM | 1328 | HE   | ARG | X | 86 | 42.930 | 45.674 | 18.980 | 0.00 | 0.00 |
| ATOM | 1329 | CZ   | ARG | X | 86 | 41.485 | 46.513 | 17.903 | 0.00 | 0.00 |
| ATOM | 1330 | NH1  | ARG | X | 86 | 40.656 | 47.499 | 17.607 | 0.00 | 0.00 |
| ATOM | 1331 | HH11 | ARG | X | 86 | 40.519 | 48.255 | 18.263 | 0.00 | 0.00 |
| ATOM | 1332 | HH12 | ARG | X | 86 | 39.981 | 47.360 | 16.870 | 0.00 | 0.00 |
| ATOM | 1333 | NH2  | ARG | X | 86 | 41.527 | 45.511 | 17.049 | 0.00 | 0.00 |
| ATOM | 1334 | HH21 | ARG | X | 86 | 42.070 | 44.707 | 17.327 | 0.00 | 0.00 |
| ATOM | 1335 | HH22 | ARG | X | 86 | 40.744 | 45.307 | 16.444 | 0.00 | 0.00 |
| ATOM | 1336 | C    | ARG | X | 86 | 46.193 | 49.142 | 21.810 | 0.00 | 0.00 |
| ATOM | 1337 | O    | ARG | X | 86 | 47.086 | 48.964 | 22.621 | 0.00 | 0.00 |
| ATOM | 1338 | N    | GLU | X | 87 | 45.861 | 50.376 | 21.517 | 0.00 | 0.00 |
| ATOM | 1339 | H    | GLU | X | 87 | 45.019 | 50.411 | 20.960 | 0.00 | 0.00 |
| ATOM | 1340 | CA   | GLU | X | 87 | 46.586 | 51.605 | 21.838 | 0.00 | 0.00 |
| ATOM | 1341 | HA   | GLU | X | 87 | 47.642 | 51.458 | 21.612 | 0.00 | 0.00 |
| ATOM | 1342 | CB   | GLU | X | 87 | 46.168 | 52.698 | 20.882 | 0.00 | 0.00 |
| ATOM | 1343 | HB2  | GLU | X | 87 | 46.439 | 52.377 | 19.876 | 0.00 | 0.00 |
| ATOM | 1344 | HB3  | GLU | X | 87 | 45.080 | 52.755 | 20.857 | 0.00 | 0.00 |
| ATOM | 1345 | CG   | GLU | X | 87 | 46.915 | 54.052 | 21.219 | 0.00 | 0.00 |
| ATOM | 1346 | HG2  | GLU | X | 87 | 46.375 | 54.480 | 22.063 | 0.00 | 0.00 |
| ATOM | 1347 | HG3  | GLU | X | 87 | 47.992 | 53.888 | 21.186 | 0.00 | 0.00 |
| ATOM | 1348 | CD   | GLU | X | 87 | 46.652 | 55.077 | 20.069 | 0.00 | 0.00 |
| ATOM | 1349 | OE1  | GLU | X | 87 | 45.510 | 55.658 | 19.942 | 0.00 | 0.00 |
| ATOM | 1350 | OE2  | GLU | X | 87 | 47.518 | 55.223 | 19.191 | 0.00 | 0.00 |
| ATOM | 1351 | C    | GLU | X | 87 | 46.362 | 52.034 | 23.285 | 0.00 | 0.00 |
| ATOM | 1352 | O    | GLU | X | 87 | 45.224 | 52.084 | 23.703 | 0.00 | 0.00 |
| ATOM | 1353 | N    | LEU | X | 88 | 47.443 | 52.102 | 24.072 | 0.00 | 0.00 |
| ATOM | 1354 | H    | LEU | X | 88 | 48.355 | 51.975 | 23.658 | 0.00 | 0.00 |
| ATOM | 1355 | CA   | LEU | X | 88 | 47.454 | 52.692 | 25.378 | 0.00 | 0.00 |
| ATOM | 1356 | HA   | LEU | X | 88 | 46.703 | 52.211 | 26.005 | 0.00 | 0.00 |
| ATOM | 1357 | CB   | LEU | X | 88 | 48.795 | 52.431 | 26.055 | 0.00 | 0.00 |
| ATOM | 1358 | HB2  | LEU | X | 88 | 49.409 | 53.267 | 25.719 | 0.00 | 0.00 |
| ATOM | 1359 | HB3  | LEU | X | 88 | 48.599 | 52.560 | 27.120 | 0.00 | 0.00 |
| ATOM | 1360 | CG   | LEU | X | 88 | 49.599 | 51.186 | 25.773 | 0.00 | 0.00 |
| ATOM | 1361 | HG   | LEU | X | 88 | 50.123 | 51.237 | 24.818 | 0.00 | 0.00 |
| ATOM | 1362 | CD1  | LEU | X | 88 | 50.733 | 51.103 | 26.794 | 0.00 | 0.00 |
| ATOM | 1363 | HD11 | LEU | X | 88 | 51.452 | 51.911 | 26.658 | 0.00 | 0.00 |
| ATOM | 1364 | HD12 | LEU | X | 88 | 51.370 | 50.239 | 26.604 | 0.00 | 0.00 |
| ATOM | 1365 | HD13 | LEU | X | 88 | 50.366 | 51.242 | 27.811 | 0.00 | 0.00 |
| ATOM | 1366 | CD2  | LEU | X | 88 | 48.729 | 49.970 | 25.926 | 0.00 | 0.00 |
| ATOM | 1367 | HD21 | LEU | X | 88 | 47.919 | 50.094 | 26.645 | 0.00 | 0.00 |
| ATOM | 1368 | HD22 | LEU | X | 88 | 48.295 | 49.844 | 24.934 | 0.00 | 0.00 |
| ATOM | 1369 | HD23 | LEU | X | 88 | 49.320 | 49.130 | 26.291 | 0.00 | 0.00 |
| ATOM | 1370 | C    | LEU | X | 88 | 47.054 | 54.184 | 25.385 | 0.00 | 0.00 |
| ATOM | 1371 | O    | LEU | X | 88 | 47.504 | 54.830 | 24.458 | 0.00 | 0.00 |
| ATOM | 1372 | N    | SER | X | 89 | 46.305 | 54.685 | 26.353 | 0.00 | 0.00 |
| ATOM | 1373 | H    | SER | X | 89 | 45.837 | 54.033 | 26.966 | 0.00 | 0.00 |
| ATOM | 1374 | CA   | SER | X | 89 | 45.694 | 56.018 | 26.322 | 0.00 | 0.00 |
| ATOM | 1375 | HA   | SER | X | 89 | 46.371 | 56.820 | 26.026 | 0.00 | 0.00 |
| ATOM | 1376 | CB   | SER | X | 89 | 44.585 | 55.864 | 25.310 | 0.00 | 0.00 |
| ATOM | 1377 | HB2  | SER | X | 89 | 45.011 | 55.310 | 24.474 | 0.00 | 0.00 |
| ATOM | 1378 | HB3  | SER | X | 89 | 43.748 | 55.382 | 25.814 | 0.00 | 0.00 |
| ATOM | 1379 | OG   | SER | X | 89 | 44.182 | 57.226 | 25.071 | 0.00 | 0.00 |
| ATOM | 1380 | HG   | SER | X | 89 | 43.266 | 57.222 | 24.783 | 0.00 | 0.00 |
| ATOM | 1381 | C    | SER | X | 89 | 45.063 | 56.425 | 27.671 | 0.00 | 0.00 |
| ATOM | 1382 | O    | SER | X | 89 | 44.832 | 55.525 | 28.482 | 0.00 | 0.00 |
| ATOM | 1383 | N    | GLU | X | 90 | 44.809 | 57.717 | 27.880 | 0.00 | 0.00 |
| ATOM | 1384 | H    | GLU | X | 90 | 45.152 | 58.330 | 27.154 | 0.00 | 0.00 |
| ATOM | 1385 | CA   | GLU | X | 90 | 44.048 | 58.256 | 29.051 | 0.00 | 0.00 |
| ATOM | 1386 | HA   | GLU | X | 90 | 44.284 | 57.645 | 29.922 | 0.00 | 0.00 |
| ATOM | 1387 | CB   | GLU | X | 90 | 44.434 | 59.710 | 29.346 | 0.00 | 0.00 |
| ATOM | 1388 | HB2  | GLU | X | 90 | 44.492 | 60.267 | 28.410 | 0.00 | 0.00 |
| ATOM | 1389 | HB3  | GLU | X | 90 | 43.788 | 60.160 | 30.100 | 0.00 | 0.00 |
| ATOM | 1390 | CG   | GLU | X | 90 | 45.790 | 59.881 | 29.977 | 0.00 | 0.00 |
| ATOM | 1391 | HG2  | GLU | X | 90 | 45.724 | 59.394 | 30.950 | 0.00 | 0.00 |

|      |      |      |     |   |    |        |        |        |      |      |
|------|------|------|-----|---|----|--------|--------|--------|------|------|
| ATOM | 1392 | HG3  | GLU | X | 90 | 46.534 | 59.475 | 29.292 | 0.00 | 0.00 |
| ATOM | 1393 | CD   | GLU | X | 90 | 46.104 | 61.354 | 30.204 | 0.00 | 0.00 |
| ATOM | 1394 | OE1  | GLU | X | 90 | 45.727 | 61.901 | 31.242 | 0.00 | 0.00 |
| ATOM | 1395 | OE2  | GLU | X | 90 | 46.688 | 61.882 | 29.262 | 0.00 | 0.00 |
| ATOM | 1396 | C    | GLU | X | 90 | 42.553 | 58.206 | 28.929 | 0.00 | 0.00 |
| ATOM | 1397 | O    | GLU | X | 90 | 41.847 | 58.001 | 29.908 | 0.00 | 0.00 |
| ATOM | 1398 | N    | ASP | X | 91 | 42.084 | 58.307 | 27.651 | 0.00 | 0.00 |
| ATOM | 1399 | H    | ASP | X | 91 | 42.776 | 58.390 | 26.919 | 0.00 | 0.00 |
| ATOM | 1400 | CA   | ASP | X | 91 | 40.705 | 58.266 | 27.297 | 0.00 | 0.00 |
| ATOM | 1401 | HA   | ASP | X | 91 | 40.348 | 59.130 | 27.857 | 0.00 | 0.00 |
| ATOM | 1402 | CB   | ASP | X | 91 | 40.509 | 58.864 | 25.846 | 0.00 | 0.00 |
| ATOM | 1403 | HB2  | ASP | X | 91 | 39.468 | 59.178 | 25.768 | 0.00 | 0.00 |
| ATOM | 1404 | HB3  | ASP | X | 91 | 41.119 | 59.760 | 25.731 | 0.00 | 0.00 |
| ATOM | 1405 | CG   | ASP | X | 91 | 40.746 | 57.937 | 24.689 | 0.00 | 0.00 |
| ATOM | 1406 | OD1  | ASP | X | 91 | 41.648 | 57.076 | 24.711 | 0.00 | 0.00 |
| ATOM | 1407 | OD2  | ASP | X | 91 | 40.122 | 58.165 | 23.603 | 0.00 | 0.00 |
| ATOM | 1408 | C    | ASP | X | 91 | 39.906 | 56.987 | 27.587 | 0.00 | 0.00 |
| ATOM | 1409 | O    | ASP | X | 91 | 38.781 | 56.905 | 27.137 | 0.00 | 0.00 |
| ATOM | 1410 | N    | CYX | X | 92 | 40.489 | 55.985 | 28.274 | 0.00 | 0.00 |
| ATOM | 1411 | H    | CYX | X | 92 | 41.276 | 56.259 | 28.847 | 0.00 | 0.00 |
| ATOM | 1412 | CA   | CYX | X | 92 | 40.307 | 54.571 | 28.178 | 0.00 | 0.00 |
| ATOM | 1413 | HA   | CYX | X | 92 | 40.110 | 54.338 | 27.132 | 0.00 | 0.00 |
| ATOM | 1414 | CB   | CYX | X | 92 | 41.602 | 53.888 | 28.672 | 0.00 | 0.00 |
| ATOM | 1415 | HB2  | CYX | X | 92 | 41.579 | 52.829 | 28.416 | 0.00 | 0.00 |
| ATOM | 1416 | HB3  | CYX | X | 92 | 42.453 | 54.328 | 28.152 | 0.00 | 0.00 |
| ATOM | 1417 | SG   | CYX | X | 92 | 41.761 | 54.034 | 30.413 | 0.00 | 0.00 |
| ATOM | 1418 | C    | CYX | X | 92 | 39.032 | 53.977 | 28.863 | 0.00 | 0.00 |
| ATOM | 1419 | O    | CYX | X | 92 | 38.977 | 52.775 | 29.090 | 0.00 | 0.00 |
| ATOM | 1420 | N    | LEU | X | 93 | 38.076 | 54.808 | 29.198 | 0.00 | 0.00 |
| ATOM | 1421 | H    | LEU | X | 93 | 38.099 | 55.775 | 28.906 | 0.00 | 0.00 |
| ATOM | 1422 | CA   | LEU | X | 93 | 36.857 | 54.364 | 29.847 | 0.00 | 0.00 |
| ATOM | 1423 | HA   | LEU | X | 93 | 37.055 | 53.581 | 30.579 | 0.00 | 0.00 |
| ATOM | 1424 | CB   | LEU | X | 93 | 36.198 | 55.487 | 30.616 | 0.00 | 0.00 |
| ATOM | 1425 | HB2  | LEU | X | 93 | 35.749 | 56.151 | 29.877 | 0.00 | 0.00 |
| ATOM | 1426 | HB3  | LEU | X | 93 | 35.353 | 55.108 | 31.190 | 0.00 | 0.00 |
| ATOM | 1427 | CG   | LEU | X | 93 | 37.061 | 56.302 | 31.546 | 0.00 | 0.00 |
| ATOM | 1428 | HG   | LEU | X | 93 | 37.760 | 56.869 | 30.930 | 0.00 | 0.00 |
| ATOM | 1429 | CD1  | LEU | X | 93 | 36.230 | 57.396 | 32.260 | 0.00 | 0.00 |
| ATOM | 1430 | HD11 | LEU | X | 93 | 36.998 | 57.913 | 32.836 | 0.00 | 0.00 |
| ATOM | 1431 | HD12 | LEU | X | 93 | 35.446 | 56.948 | 32.871 | 0.00 | 0.00 |
| ATOM | 1432 | HD13 | LEU | X | 93 | 35.768 | 58.108 | 31.576 | 0.00 | 0.00 |
| ATOM | 1433 | CD2  | LEU | X | 93 | 37.860 | 55.483 | 32.554 | 0.00 | 0.00 |
| ATOM | 1434 | HD21 | LEU | X | 93 | 37.143 | 54.880 | 33.112 | 0.00 | 0.00 |
| ATOM | 1435 | HD22 | LEU | X | 93 | 38.575 | 54.849 | 32.029 | 0.00 | 0.00 |
| ATOM | 1436 | HD23 | LEU | X | 93 | 38.434 | 56.143 | 33.205 | 0.00 | 0.00 |
| ATOM | 1437 | C    | LEU | X | 93 | 35.855 | 53.813 | 28.790 | 0.00 | 0.00 |
| ATOM | 1438 | O    | LEU | X | 93 | 35.438 | 54.554 | 27.881 | 0.00 | 0.00 |
| ATOM | 1439 | N    | TYR | X | 94 | 35.490 | 52.542 | 28.842 | 0.00 | 0.00 |
| ATOM | 1440 | H    | TYR | X | 94 | 35.768 | 51.874 | 29.547 | 0.00 | 0.00 |
| ATOM | 1441 | CA   | TYR | X | 94 | 34.557 | 51.986 | 27.856 | 0.00 | 0.00 |
| ATOM | 1442 | HA   | TYR | X | 94 | 33.981 | 52.789 | 27.395 | 0.00 | 0.00 |
| ATOM | 1443 | CB   | TYR | X | 94 | 35.252 | 51.484 | 26.597 | 0.00 | 0.00 |
| ATOM | 1444 | HB2  | TYR | X | 94 | 35.822 | 50.571 | 26.767 | 0.00 | 0.00 |
| ATOM | 1445 | HB3  | TYR | X | 94 | 34.465 | 51.163 | 25.915 | 0.00 | 0.00 |
| ATOM | 1446 | CG   | TYR | X | 94 | 36.099 | 52.428 | 25.762 | 0.00 | 0.00 |
| ATOM | 1447 | CD1  | TYR | X | 94 | 35.544 | 53.426 | 24.897 | 0.00 | 0.00 |
| ATOM | 1448 | HD1  | TYR | X | 94 | 34.476 | 53.555 | 24.798 | 0.00 | 0.00 |
| ATOM | 1449 | CE1  | TYR | X | 94 | 36.379 | 54.298 | 24.213 | 0.00 | 0.00 |
| ATOM | 1450 | HE1  | TYR | X | 94 | 35.943 | 55.077 | 23.603 | 0.00 | 0.00 |
| ATOM | 1451 | CZ   | TYR | X | 94 | 37.788 | 54.198 | 24.291 | 0.00 | 0.00 |
| ATOM | 1452 | OH   | TYR | X | 94 | 38.616 | 54.876 | 23.429 | 0.00 | 0.00 |
| ATOM | 1453 | HH   | TYR | X | 94 | 39.552 | 54.709 | 23.558 | 0.00 | 0.00 |
| ATOM | 1454 | CE2  | TYR | X | 94 | 38.328 | 53.231 | 25.129 | 0.00 | 0.00 |
| ATOM | 1455 | HE2  | TYR | X | 94 | 39.392 | 53.048 | 25.162 | 0.00 | 0.00 |
| ATOM | 1456 | CD2  | TYR | X | 94 | 37.486 | 52.446 | 25.889 | 0.00 | 0.00 |
| ATOM | 1457 | HD2  | TYR | X | 94 | 37.916 | 51.688 | 26.526 | 0.00 | 0.00 |
| ATOM | 1458 | C    | TYR | X | 94 | 33.720 | 50.820 | 28.447 | 0.00 | 0.00 |

|      |      |      |     |   |    |        |        |        |      |      |
|------|------|------|-----|---|----|--------|--------|--------|------|------|
| ATOM | 1459 | O    | TYR | X | 94 | 34.161 | 50.027 | 29.295 | 0.00 | 0.00 |
| ATOM | 1460 | N    | LEU | X | 95 | 32.572 | 50.575 | 27.828 | 0.00 | 0.00 |
| ATOM | 1461 | H    | LEU | X | 95 | 32.232 | 51.327 | 27.246 | 0.00 | 0.00 |
| ATOM | 1462 | CA   | LEU | X | 95 | 31.823 | 49.314 | 27.904 | 0.00 | 0.00 |
| ATOM | 1463 | HA   | LEU | X | 95 | 32.289 | 48.675 | 28.655 | 0.00 | 0.00 |
| ATOM | 1464 | CB   | LEU | X | 95 | 30.429 | 49.566 | 28.314 | 0.00 | 0.00 |
| ATOM | 1465 | HB2  | LEU | X | 95 | 30.315 | 50.561 | 28.742 | 0.00 | 0.00 |
| ATOM | 1466 | HB3  | LEU | X | 95 | 29.862 | 49.482 | 27.386 | 0.00 | 0.00 |
| ATOM | 1467 | CG   | LEU | X | 95 | 29.851 | 48.552 | 29.333 | 0.00 | 0.00 |
| ATOM | 1468 | HG   | LEU | X | 95 | 30.211 | 47.531 | 29.203 | 0.00 | 0.00 |
| ATOM | 1469 | CD1  | LEU | X | 95 | 30.242 | 48.994 | 30.742 | 0.00 | 0.00 |
| ATOM | 1470 | HD11 | LEU | X | 95 | 29.539 | 49.682 | 31.211 | 0.00 | 0.00 |
| ATOM | 1471 | HD12 | LEU | X | 95 | 31.254 | 49.398 | 30.761 | 0.00 | 0.00 |
| ATOM | 1472 | HD13 | LEU | X | 95 | 30.231 | 48.054 | 31.294 | 0.00 | 0.00 |
| ATOM | 1473 | CD2  | LEU | X | 95 | 28.305 | 48.593 | 29.171 | 0.00 | 0.00 |
| ATOM | 1474 | HD21 | LEU | X | 95 | 27.983 | 49.629 | 29.280 | 0.00 | 0.00 |
| ATOM | 1475 | HD22 | LEU | X | 95 | 27.971 | 48.287 | 28.180 | 0.00 | 0.00 |
| ATOM | 1476 | HD23 | LEU | X | 95 | 27.666 | 48.163 | 29.942 | 0.00 | 0.00 |
| ATOM | 1477 | C    | LEU | X | 95 | 31.951 | 48.543 | 26.530 | 0.00 | 0.00 |
| ATOM | 1478 | O    | LEU | X | 95 | 32.022 | 49.159 | 25.500 | 0.00 | 0.00 |
| ATOM | 1479 | N    | ASN | X | 96 | 31.872 | 47.219 | 26.603 | 0.00 | 0.00 |
| ATOM | 1480 | H    | ASN | X | 96 | 31.831 | 46.903 | 27.562 | 0.00 | 0.00 |
| ATOM | 1481 | CA   | ASN | X | 96 | 31.767 | 46.209 | 25.622 | 0.00 | 0.00 |
| ATOM | 1482 | HA   | ASN | X | 96 | 31.586 | 46.768 | 24.704 | 0.00 | 0.00 |
| ATOM | 1483 | CB   | ASN | X | 96 | 33.132 | 45.434 | 25.588 | 0.00 | 0.00 |
| ATOM | 1484 | HB2  | ASN | X | 96 | 33.207 | 44.911 | 26.541 | 0.00 | 0.00 |
| ATOM | 1485 | HB3  | ASN | X | 96 | 33.149 | 44.895 | 24.640 | 0.00 | 0.00 |
| ATOM | 1486 | CG   | ASN | X | 96 | 34.280 | 46.457 | 25.422 | 0.00 | 0.00 |
| ATOM | 1487 | OD1  | ASN | X | 96 | 34.466 | 46.986 | 24.309 | 0.00 | 0.00 |
| ATOM | 1488 | ND2  | ASN | X | 96 | 35.046 | 46.732 | 26.529 | 0.00 | 0.00 |
| ATOM | 1489 | HD21 | ASN | X | 96 | 35.729 | 47.467 | 26.413 | 0.00 | 0.00 |
| ATOM | 1490 | HD22 | ASN | X | 96 | 34.782 | 46.380 | 27.438 | 0.00 | 0.00 |
| ATOM | 1491 | C    | ASN | X | 96 | 30.576 | 45.269 | 26.024 | 0.00 | 0.00 |
| ATOM | 1492 | O    | ASN | X | 96 | 30.352 | 44.856 | 27.112 | 0.00 | 0.00 |
| ATOM | 1493 | N    | VAL | X | 97 | 29.764 | 44.767 | 25.059 | 0.00 | 0.00 |
| ATOM | 1494 | H    | VAL | X | 97 | 29.873 | 45.022 | 24.088 | 0.00 | 0.00 |
| ATOM | 1495 | CA   | VAL | X | 97 | 28.704 | 43.735 | 25.299 | 0.00 | 0.00 |
| ATOM | 1496 | HA   | VAL | X | 97 | 28.838 | 43.303 | 26.291 | 0.00 | 0.00 |
| ATOM | 1497 | CB   | VAL | X | 97 | 27.237 | 44.378 | 25.354 | 0.00 | 0.00 |
| ATOM | 1498 | HB   | VAL | X | 97 | 26.881 | 44.623 | 24.353 | 0.00 | 0.00 |
| ATOM | 1499 | CG1  | VAL | X | 97 | 26.193 | 43.433 | 25.983 | 0.00 | 0.00 |
| ATOM | 1500 | HG11 | VAL | X | 97 | 26.040 | 42.492 | 25.454 | 0.00 | 0.00 |
| ATOM | 1501 | HG12 | VAL | X | 97 | 26.433 | 43.250 | 27.031 | 0.00 | 0.00 |
| ATOM | 1502 | HG13 | VAL | X | 97 | 25.218 | 43.920 | 25.973 | 0.00 | 0.00 |
| ATOM | 1503 | CG2  | VAL | X | 97 | 27.237 | 45.536 | 26.291 | 0.00 | 0.00 |
| ATOM | 1504 | HG21 | VAL | X | 97 | 27.841 | 46.386 | 25.970 | 0.00 | 0.00 |
| ATOM | 1505 | HG22 | VAL | X | 97 | 27.691 | 45.244 | 27.238 | 0.00 | 0.00 |
| ATOM | 1506 | HG23 | VAL | X | 97 | 26.219 | 45.880 | 26.475 | 0.00 | 0.00 |
| ATOM | 1507 | C    | VAL | X | 97 | 28.647 | 42.672 | 24.240 | 0.00 | 0.00 |
| ATOM | 1508 | O    | VAL | X | 97 | 28.827 | 42.961 | 23.076 | 0.00 | 0.00 |
| ATOM | 1509 | N    | TRP | X | 98 | 28.523 | 41.369 | 24.568 | 0.00 | 0.00 |
| ATOM | 1510 | H    | TRP | X | 98 | 28.515 | 41.147 | 25.553 | 0.00 | 0.00 |
| ATOM | 1511 | CA   | TRP | X | 98 | 28.150 | 40.220 | 23.715 | 0.00 | 0.00 |
| ATOM | 1512 | HA   | TRP | X | 98 | 28.167 | 40.475 | 22.656 | 0.00 | 0.00 |
| ATOM | 1513 | CB   | TRP | X | 98 | 29.070 | 39.079 | 23.951 | 0.00 | 0.00 |
| ATOM | 1514 | HB2  | TRP | X | 98 | 28.912 | 38.693 | 24.958 | 0.00 | 0.00 |
| ATOM | 1515 | HB3  | TRP | X | 98 | 28.797 | 38.270 | 23.274 | 0.00 | 0.00 |
| ATOM | 1516 | CG   | TRP | X | 98 | 30.479 | 39.318 | 23.712 | 0.00 | 0.00 |
| ATOM | 1517 | CD1  | TRP | X | 98 | 31.204 | 38.655 | 22.764 | 0.00 | 0.00 |
| ATOM | 1518 | HD1  | TRP | X | 98 | 30.849 | 37.792 | 22.221 | 0.00 | 0.00 |
| ATOM | 1519 | NE1  | TRP | X | 98 | 32.472 | 39.092 | 22.768 | 0.00 | 0.00 |
| ATOM | 1520 | HE1  | TRP | X | 98 | 33.234 | 38.630 | 22.292 | 0.00 | 0.00 |
| ATOM | 1521 | CE2  | TRP | X | 98 | 32.662 | 40.243 | 23.577 | 0.00 | 0.00 |
| ATOM | 1522 | CZ2  | TRP | X | 98 | 33.782 | 40.891 | 24.078 | 0.00 | 0.00 |
| ATOM | 1523 | HZ2  | TRP | X | 98 | 34.755 | 40.636 | 23.685 | 0.00 | 0.00 |
| ATOM | 1524 | CH2  | TRP | X | 98 | 33.746 | 41.619 | 25.284 | 0.00 | 0.00 |
| ATOM | 1525 | HH2  | TRP | X | 98 | 34.667 | 41.961 | 25.733 | 0.00 | 0.00 |

|      |      |      |     |   |     |        |        |        |      |      |
|------|------|------|-----|---|-----|--------|--------|--------|------|------|
| ATOM | 1526 | CZ3  | TRP | X | 98  | 32.498 | 41.784 | 25.955 | 0.00 | 0.00 |
| ATOM | 1527 | HZ3  | TRP | X | 98  | 32.430 | 42.400 | 26.840 | 0.00 | 0.00 |
| ATOM | 1528 | CE3  | TRP | X | 98  | 31.409 | 41.133 | 25.418 | 0.00 | 0.00 |
| ATOM | 1529 | HE3  | TRP | X | 98  | 30.504 | 41.139 | 26.006 | 0.00 | 0.00 |
| ATOM | 1530 | CD2  | TRP | X | 98  | 31.455 | 40.300 | 24.251 | 0.00 | 0.00 |
| ATOM | 1531 | C    | TRP | X | 98  | 26.706 | 39.756 | 23.945 | 0.00 | 0.00 |
| ATOM | 1532 | O    | TRP | X | 98  | 26.357 | 39.481 | 25.038 | 0.00 | 0.00 |
| ATOM | 1533 | N    | THR | X | 99  | 25.893 | 39.554 | 22.878 | 0.00 | 0.00 |
| ATOM | 1534 | H    | THR | X | 99  | 26.252 | 39.608 | 21.936 | 0.00 | 0.00 |
| ATOM | 1535 | CA   | THR | X | 99  | 24.500 | 39.121 | 23.027 | 0.00 | 0.00 |
| ATOM | 1536 | HA   | THR | X | 99  | 24.399 | 38.576 | 23.965 | 0.00 | 0.00 |
| ATOM | 1537 | CB   | THR | X | 99  | 23.578 | 40.341 | 22.992 | 0.00 | 0.00 |
| ATOM | 1538 | HB   | THR | X | 99  | 23.971 | 41.009 | 23.758 | 0.00 | 0.00 |
| ATOM | 1539 | CG2  | THR | X | 99  | 23.429 | 41.213 | 21.796 | 0.00 | 0.00 |
| ATOM | 1540 | HG21 | THR | X | 99  | 23.022 | 40.638 | 20.965 | 0.00 | 0.00 |
| ATOM | 1541 | HG22 | THR | X | 99  | 24.393 | 41.607 | 21.474 | 0.00 | 0.00 |
| ATOM | 1542 | HG23 | THR | X | 99  | 22.756 | 42.012 | 22.105 | 0.00 | 0.00 |
| ATOM | 1543 | OG1  | THR | X | 99  | 22.300 | 39.840 | 23.292 | 0.00 | 0.00 |
| ATOM | 1544 | HG1  | THR | X | 99  | 21.678 | 40.529 | 23.537 | 0.00 | 0.00 |
| ATOM | 1545 | C    | THR | X | 99  | 24.261 | 38.123 | 21.921 | 0.00 | 0.00 |
| ATOM | 1546 | O    | THR | X | 99  | 24.907 | 38.250 | 20.863 | 0.00 | 0.00 |
| ATOM | 1547 | N    | PRO | X | 100 | 23.313 | 37.132 | 22.019 | 0.00 | 0.00 |
| ATOM | 1548 | CD   | PRO | X | 100 | 22.394 | 36.764 | 23.053 | 0.00 | 0.00 |
| ATOM | 1549 | HD2  | PRO | X | 100 | 21.579 | 37.475 | 23.190 | 0.00 | 0.00 |
| ATOM | 1550 | HD3  | PRO | X | 100 | 22.840 | 36.512 | 24.015 | 0.00 | 0.00 |
| ATOM | 1551 | CG   | PRO | X | 100 | 21.573 | 35.576 | 22.578 | 0.00 | 0.00 |
| ATOM | 1552 | HG2  | PRO | X | 100 | 20.675 | 35.961 | 22.095 | 0.00 | 0.00 |
| ATOM | 1553 | HG3  | PRO | X | 100 | 21.396 | 34.901 | 23.415 | 0.00 | 0.00 |
| ATOM | 1554 | CB   | PRO | X | 100 | 22.450 | 35.037 | 21.484 | 0.00 | 0.00 |
| ATOM | 1555 | HB2  | PRO | X | 100 | 21.776 | 34.641 | 20.724 | 0.00 | 0.00 |
| ATOM | 1556 | HB3  | PRO | X | 100 | 23.138 | 34.269 | 21.838 | 0.00 | 0.00 |
| ATOM | 1557 | CA   | PRO | X | 100 | 23.163 | 36.231 | 20.902 | 0.00 | 0.00 |
| ATOM | 1558 | HA   | PRO | X | 100 | 24.169 | 36.030 | 20.532 | 0.00 | 0.00 |
| ATOM | 1559 | C    | PRO | X | 100 | 22.435 | 36.891 | 19.716 | 0.00 | 0.00 |
| ATOM | 1560 | O    | PRO | X | 100 | 21.533 | 37.720 | 19.936 | 0.00 | 0.00 |
| ATOM | 1561 | N    | TYR | X | 101 | 22.742 | 36.476 | 18.489 | 0.00 | 0.00 |
| ATOM | 1562 | H    | TYR | X | 101 | 23.443 | 35.777 | 18.290 | 0.00 | 0.00 |
| ATOM | 1563 | CA   | TYR | X | 101 | 22.149 | 37.077 | 17.283 | 0.00 | 0.00 |
| ATOM | 1564 | HA   | TYR | X | 101 | 21.742 | 38.060 | 17.523 | 0.00 | 0.00 |
| ATOM | 1565 | CB   | TYR | X | 101 | 23.253 | 37.273 | 16.261 | 0.00 | 0.00 |
| ATOM | 1566 | HB2  | TYR | X | 101 | 23.962 | 37.981 | 16.691 | 0.00 | 0.00 |
| ATOM | 1567 | HB3  | TYR | X | 101 | 23.808 | 36.340 | 16.168 | 0.00 | 0.00 |
| ATOM | 1568 | CG   | TYR | X | 101 | 22.888 | 37.704 | 14.861 | 0.00 | 0.00 |
| ATOM | 1569 | CD1  | TYR | X | 101 | 22.306 | 36.836 | 13.888 | 0.00 | 0.00 |
| ATOM | 1570 | HD1  | TYR | X | 101 | 21.886 | 35.863 | 14.096 | 0.00 | 0.00 |
| ATOM | 1571 | CE1  | TYR | X | 101 | 22.147 | 37.429 | 12.575 | 0.00 | 0.00 |
| ATOM | 1572 | HE1  | TYR | X | 101 | 21.603 | 36.850 | 11.843 | 0.00 | 0.00 |
| ATOM | 1573 | CZ   | TYR | X | 101 | 22.739 | 38.638 | 12.145 | 0.00 | 0.00 |
| ATOM | 1574 | OH   | TYR | X | 101 | 22.506 | 39.182 | 10.934 | 0.00 | 0.00 |
| ATOM | 1575 | HH   | TYR | X | 101 | 22.038 | 38.651 | 10.285 | 0.00 | 0.00 |
| ATOM | 1576 | CE2  | TYR | X | 101 | 23.419 | 39.410 | 13.144 | 0.00 | 0.00 |
| ATOM | 1577 | HE2  | TYR | X | 101 | 23.586 | 40.453 | 12.921 | 0.00 | 0.00 |
| ATOM | 1578 | CD2  | TYR | X | 101 | 23.490 | 38.956 | 14.476 | 0.00 | 0.00 |
| ATOM | 1579 | HD2  | TYR | X | 101 | 24.070 | 39.614 | 15.106 | 0.00 | 0.00 |
| ATOM | 1580 | C    | TYR | X | 101 | 21.043 | 36.143 | 16.775 | 0.00 | 0.00 |
| ATOM | 1581 | O    | TYR | X | 101 | 21.361 | 34.958 | 16.564 | 0.00 | 0.00 |
| ATOM | 1582 | N    | PRO | X | 102 | 19.797 | 36.632 | 16.454 | 0.00 | 0.00 |
| ATOM | 1583 | CD   | PRO | X | 102 | 18.895 | 35.802 | 15.667 | 0.00 | 0.00 |
| ATOM | 1584 | HD2  | PRO | X | 102 | 18.837 | 34.780 | 16.041 | 0.00 | 0.00 |
| ATOM | 1585 | HD3  | PRO | X | 102 | 19.253 | 35.713 | 14.641 | 0.00 | 0.00 |
| ATOM | 1586 | CG   | PRO | X | 102 | 17.535 | 36.509 | 15.748 | 0.00 | 0.00 |
| ATOM | 1587 | HG2  | PRO | X | 102 | 17.131 | 36.277 | 16.733 | 0.00 | 0.00 |
| ATOM | 1588 | HG3  | PRO | X | 102 | 16.854 | 36.272 | 14.930 | 0.00 | 0.00 |
| ATOM | 1589 | CB   | PRO | X | 102 | 17.985 | 38.003 | 15.636 | 0.00 | 0.00 |
| ATOM | 1590 | HB2  | PRO | X | 102 | 17.221 | 38.670 | 16.037 | 0.00 | 0.00 |
| ATOM | 1591 | HB3  | PRO | X | 102 | 18.284 | 38.339 | 14.643 | 0.00 | 0.00 |
| ATOM | 1592 | CA   | PRO | X | 102 | 19.248 | 37.953 | 16.570 | 0.00 | 0.00 |



|      |      |      |     |   |     |        |        |        |      |      |
|------|------|------|-----|---|-----|--------|--------|--------|------|------|
| ATOM | 1593 | HA   | PRO | X | 102 | 19.923 | 38.731 | 16.212 | 0.00 | 0.00 |
| ATOM | 1594 | C    | PRO | X | 102 | 18.911 | 38.309 | 17.993 | 0.00 | 0.00 |
| ATOM | 1595 | O    | PRO | X | 102 | 18.543 | 37.449 | 18.789 | 0.00 | 0.00 |
| ATOM | 1596 | N    | ARG | X | 103 | 18.995 | 39.560 | 18.389 | 0.00 | 0.00 |
| ATOM | 1597 | H    | ARG | X | 103 | 19.078 | 40.282 | 17.687 | 0.00 | 0.00 |
| ATOM | 1598 | CA   | ARG | X | 103 | 19.006 | 39.998 | 19.813 | 0.00 | 0.00 |
| ATOM | 1599 | HA   | ARG | X | 103 | 19.791 | 39.371 | 20.236 | 0.00 | 0.00 |
| ATOM | 1600 | CB   | ARG | X | 103 | 19.242 | 41.505 | 19.995 | 0.00 | 0.00 |
| ATOM | 1601 | HB2  | ARG | X | 103 | 18.355 | 42.059 | 19.688 | 0.00 | 0.00 |
| ATOM | 1602 | HB3  | ARG | X | 103 | 19.477 | 41.609 | 21.055 | 0.00 | 0.00 |
| ATOM | 1603 | CG   | ARG | X | 103 | 20.498 | 41.968 | 19.251 | 0.00 | 0.00 |
| ATOM | 1604 | HG2  | ARG | X | 103 | 21.290 | 41.234 | 19.099 | 0.00 | 0.00 |
| ATOM | 1605 | HG3  | ARG | X | 103 | 20.129 | 42.369 | 18.307 | 0.00 | 0.00 |
| ATOM | 1606 | CD   | ARG | X | 103 | 20.977 | 43.304 | 19.950 | 0.00 | 0.00 |
| ATOM | 1607 | HD2  | ARG | X | 103 | 21.380 | 43.026 | 20.924 | 0.00 | 0.00 |
| ATOM | 1608 | HD3  | ARG | X | 103 | 21.804 | 43.752 | 19.400 | 0.00 | 0.00 |
| ATOM | 1609 | NE   | ARG | X | 103 | 19.899 | 44.321 | 20.157 | 0.00 | 0.00 |
| ATOM | 1610 | HE   | ARG | X | 103 | 19.345 | 44.359 | 21.000 | 0.00 | 0.00 |
| ATOM | 1611 | CZ   | ARG | X | 103 | 19.590 | 45.323 | 19.355 | 0.00 | 0.00 |
| ATOM | 1612 | NH1  | ARG | X | 103 | 19.939 | 45.251 | 18.077 | 0.00 | 0.00 |
| ATOM | 1613 | HH11 | ARG | X | 103 | 20.492 | 44.464 | 17.769 | 0.00 | 0.00 |
| ATOM | 1614 | HH12 | ARG | X | 103 | 19.797 | 46.026 | 17.446 | 0.00 | 0.00 |
| ATOM | 1615 | NH2  | ARG | X | 103 | 18.862 | 46.303 | 19.786 | 0.00 | 0.00 |
| ATOM | 1616 | HH21 | ARG | X | 103 | 18.583 | 46.302 | 20.757 | 0.00 | 0.00 |
| ATOM | 1617 | HH22 | ARG | X | 103 | 18.539 | 46.967 | 19.097 | 0.00 | 0.00 |
| ATOM | 1618 | C    | ARG | X | 103 | 17.784 | 39.549 | 20.484 | 0.00 | 0.00 |
| ATOM | 1619 | O    | ARG | X | 103 | 16.696 | 39.819 | 19.914 | 0.00 | 0.00 |
| ATOM | 1620 | N    | PRO | X | 104 | 17.795 | 38.770 | 21.645 | 0.00 | 0.00 |
| ATOM | 1621 | CD   | PRO | X | 104 | 19.029 | 38.465 | 22.392 | 0.00 | 0.00 |
| ATOM | 1622 | HD2  | PRO | X | 104 | 19.648 | 39.340 | 22.590 | 0.00 | 0.00 |
| ATOM | 1623 | HD3  | PRO | X | 104 | 19.567 | 37.743 | 21.778 | 0.00 | 0.00 |
| ATOM | 1624 | CG   | PRO | X | 104 | 18.526 | 37.785 | 23.693 | 0.00 | 0.00 |
| ATOM | 1625 | HG2  | PRO | X | 104 | 18.305 | 38.561 | 24.426 | 0.00 | 0.00 |
| ATOM | 1626 | HG3  | PRO | X | 104 | 19.227 | 37.078 | 24.136 | 0.00 | 0.00 |
| ATOM | 1627 | CB   | PRO | X | 104 | 17.150 | 37.149 | 23.269 | 0.00 | 0.00 |
| ATOM | 1628 | HB2  | PRO | X | 104 | 16.479 | 36.935 | 24.101 | 0.00 | 0.00 |
| ATOM | 1629 | HB3  | PRO | X | 104 | 17.288 | 36.147 | 22.863 | 0.00 | 0.00 |
| ATOM | 1630 | CA   | PRO | X | 104 | 16.631 | 38.237 | 22.281 | 0.00 | 0.00 |
| ATOM | 1631 | HA   | PRO | X | 104 | 15.997 | 37.704 | 21.573 | 0.00 | 0.00 |
| ATOM | 1632 | C    | PRO | X | 104 | 15.781 | 39.255 | 23.023 | 0.00 | 0.00 |
| ATOM | 1633 | O    | PRO | X | 104 | 16.177 | 40.422 | 23.201 | 0.00 | 0.00 |
| ATOM | 1634 | N    | THR | X | 105 | 14.569 | 38.810 | 23.464 | 0.00 | 0.00 |
| ATOM | 1635 | H    | THR | X | 105 | 14.273 | 37.882 | 23.195 | 0.00 | 0.00 |
| ATOM | 1636 | CA   | THR | X | 105 | 13.511 | 39.659 | 23.968 | 0.00 | 0.00 |
| ATOM | 1637 | HA   | THR | X | 105 | 13.886 | 40.659 | 24.187 | 0.00 | 0.00 |
| ATOM | 1638 | CB   | THR | X | 105 | 12.360 | 39.856 | 22.965 | 0.00 | 0.00 |
| ATOM | 1639 | HB   | THR | X | 105 | 11.591 | 40.470 | 23.434 | 0.00 | 0.00 |
| ATOM | 1640 | CG2  | THR | X | 105 | 12.792 | 40.565 | 21.733 | 0.00 | 0.00 |
| ATOM | 1641 | HG21 | THR | X | 105 | 12.983 | 41.594 | 22.036 | 0.00 | 0.00 |
| ATOM | 1642 | HG22 | THR | X | 105 | 11.943 | 40.494 | 21.053 | 0.00 | 0.00 |
| ATOM | 1643 | HG23 | THR | X | 105 | 13.656 | 40.145 | 21.217 | 0.00 | 0.00 |
| ATOM | 1644 | OG1  | THR | X | 105 | 11.814 | 38.599 | 22.561 | 0.00 | 0.00 |
| ATOM | 1645 | HG1  | THR | X | 105 | 12.293 | 38.162 | 21.854 | 0.00 | 0.00 |
| ATOM | 1646 | C    | THR | X | 105 | 12.956 | 39.132 | 25.286 | 0.00 | 0.00 |
| ATOM | 1647 | O    | THR | X | 105 | 12.533 | 39.917 | 26.138 | 0.00 | 0.00 |
| ATOM | 1648 | N    | SER | X | 106 | 12.945 | 37.813 | 25.554 | 0.00 | 0.00 |
| ATOM | 1649 | H    | SER | X | 106 | 13.478 | 37.248 | 24.909 | 0.00 | 0.00 |
| ATOM | 1650 | CA   | SER | X | 106 | 12.502 | 37.253 | 26.860 | 0.00 | 0.00 |
| ATOM | 1651 | HA   | SER | X | 106 | 11.612 | 37.748 | 27.251 | 0.00 | 0.00 |
| ATOM | 1652 | CB   | SER | X | 106 | 12.197 | 35.735 | 26.768 | 0.00 | 0.00 |
| ATOM | 1653 | HB2  | SER | X | 106 | 13.125 | 35.306 | 26.389 | 0.00 | 0.00 |
| ATOM | 1654 | HB3  | SER | X | 106 | 12.004 | 35.433 | 27.798 | 0.00 | 0.00 |
| ATOM | 1655 | OG   | SER | X | 106 | 11.091 | 35.400 | 25.980 | 0.00 | 0.00 |
| ATOM | 1656 | HG   | SER | X | 106 | 10.286 | 35.777 | 26.343 | 0.00 | 0.00 |
| ATOM | 1657 | C    | SER | X | 106 | 13.588 | 37.498 | 27.869 | 0.00 | 0.00 |
| ATOM | 1658 | O    | SER | X | 106 | 14.782 | 37.468 | 27.509 | 0.00 | 0.00 |
| ATOM | 1659 | N    | PRO | X | 107 | 13.389 | 37.595 | 29.185 | 0.00 | 0.00 |

|      |      |      |     |   |     |        |        |        |      |      |
|------|------|------|-----|---|-----|--------|--------|--------|------|------|
| ATOM | 1660 | CD   | PRO | X | 107 | 12.058 | 37.550 | 29.878 | 0.00 | 0.00 |
| ATOM | 1661 | HD2  | PRO | X | 107 | 11.634 | 36.548 | 29.943 | 0.00 | 0.00 |
| ATOM | 1662 | HD3  | PRO | X | 107 | 11.368 | 38.130 | 29.266 | 0.00 | 0.00 |
| ATOM | 1663 | CG   | PRO | X | 107 | 12.262 | 38.146 | 31.197 | 0.00 | 0.00 |
| ATOM | 1664 | HG2  | PRO | X | 107 | 11.474 | 37.975 | 31.930 | 0.00 | 0.00 |
| ATOM | 1665 | HG3  | PRO | X | 107 | 12.304 | 39.228 | 31.071 | 0.00 | 0.00 |
| ATOM | 1666 | CB   | PRO | X | 107 | 13.608 | 37.612 | 31.568 | 0.00 | 0.00 |
| ATOM | 1667 | HB2  | PRO | X | 107 | 13.425 | 36.551 | 31.739 | 0.00 | 0.00 |
| ATOM | 1668 | HB3  | PRO | X | 107 | 14.162 | 38.080 | 32.383 | 0.00 | 0.00 |
| ATOM | 1669 | CA   | PRO | X | 107 | 14.375 | 37.703 | 30.261 | 0.00 | 0.00 |
| ATOM | 1670 | HA   | PRO | X | 107 | 14.814 | 38.683 | 30.076 | 0.00 | 0.00 |
| ATOM | 1671 | C    | PRO | X | 107 | 15.516 | 36.711 | 30.302 | 0.00 | 0.00 |
| ATOM | 1672 | O    | PRO | X | 107 | 15.378 | 35.562 | 29.834 | 0.00 | 0.00 |
| ATOM | 1673 | N    | THR | X | 108 | 16.719 | 37.090 | 30.756 | 0.00 | 0.00 |
| ATOM | 1674 | H    | THR | X | 108 | 16.687 | 38.058 | 31.043 | 0.00 | 0.00 |
| ATOM | 1675 | CA   | THR | X | 108 | 18.003 | 36.357 | 30.648 | 0.00 | 0.00 |
| ATOM | 1676 | HA   | THR | X | 108 | 17.826 | 35.391 | 31.122 | 0.00 | 0.00 |
| ATOM | 1677 | CB   | THR | X | 108 | 18.335 | 36.080 | 29.169 | 0.00 | 0.00 |
| ATOM | 1678 | HB   | THR | X | 108 | 17.648 | 35.351 | 28.740 | 0.00 | 0.00 |
| ATOM | 1679 | CG2  | THR | X | 108 | 18.349 | 37.364 | 28.298 | 0.00 | 0.00 |
| ATOM | 1680 | HG21 | THR | X | 108 | 17.476 | 38.001 | 28.439 | 0.00 | 0.00 |
| ATOM | 1681 | HG22 | THR | X | 108 | 18.403 | 37.017 | 27.266 | 0.00 | 0.00 |
| ATOM | 1682 | HG23 | THR | X | 108 | 19.232 | 37.924 | 28.607 | 0.00 | 0.00 |
| ATOM | 1683 | OG1  | THR | X | 108 | 19.509 | 35.337 | 29.004 | 0.00 | 0.00 |
| ATOM | 1684 | HG1  | THR | X | 108 | 19.847 | 35.286 | 28.107 | 0.00 | 0.00 |
| ATOM | 1685 | C    | THR | X | 108 | 19.111 | 37.103 | 31.400 | 0.00 | 0.00 |
| ATOM | 1686 | O    | THR | X | 108 | 18.947 | 38.310 | 31.567 | 0.00 | 0.00 |
| ATOM | 1687 | N    | PRO | X | 109 | 20.050 | 36.362 | 32.095 | 0.00 | 0.00 |
| ATOM | 1688 | CD   | PRO | X | 109 | 20.305 | 34.917 | 31.994 | 0.00 | 0.00 |
| ATOM | 1689 | HD2  | PRO | X | 109 | 20.993 | 34.834 | 31.153 | 0.00 | 0.00 |
| ATOM | 1690 | HD3  | PRO | X | 109 | 19.350 | 34.414 | 31.839 | 0.00 | 0.00 |
| ATOM | 1691 | CG   | PRO | X | 109 | 21.055 | 34.504 | 33.308 | 0.00 | 0.00 |
| ATOM | 1692 | HG2  | PRO | X | 109 | 21.632 | 33.588 | 33.181 | 0.00 | 0.00 |
| ATOM | 1693 | HG3  | PRO | X | 109 | 20.371 | 34.559 | 34.154 | 0.00 | 0.00 |
| ATOM | 1694 | CB   | PRO | X | 109 | 21.954 | 35.709 | 33.500 | 0.00 | 0.00 |
| ATOM | 1695 | HB2  | PRO | X | 109 | 22.878 | 35.563 | 32.941 | 0.00 | 0.00 |
| ATOM | 1696 | HB3  | PRO | X | 109 | 22.249 | 35.899 | 34.532 | 0.00 | 0.00 |
| ATOM | 1697 | CA   | PRO | X | 109 | 21.053 | 36.869 | 33.055 | 0.00 | 0.00 |
| ATOM | 1698 | HA   | PRO | X | 109 | 20.552 | 37.378 | 33.878 | 0.00 | 0.00 |
| ATOM | 1699 | C    | PRO | X | 109 | 22.004 | 37.886 | 32.390 | 0.00 | 0.00 |
| ATOM | 1700 | O    | PRO | X | 109 | 22.193 | 37.890 | 31.170 | 0.00 | 0.00 |
| ATOM | 1701 | N    | VAL | X | 110 | 22.518 | 38.740 | 33.235 | 0.00 | 0.00 |
| ATOM | 1702 | H    | VAL | X | 110 | 22.116 | 38.731 | 34.162 | 0.00 | 0.00 |
| ATOM | 1703 | CA   | VAL | X | 110 | 23.683 | 39.675 | 32.876 | 0.00 | 0.00 |
| ATOM | 1704 | HA   | VAL | X | 110 | 23.881 | 39.452 | 31.827 | 0.00 | 0.00 |
| ATOM | 1705 | CB   | VAL | X | 110 | 23.284 | 41.202 | 32.911 | 0.00 | 0.00 |
| ATOM | 1706 | HB   | VAL | X | 110 | 22.954 | 41.444 | 33.921 | 0.00 | 0.00 |
| ATOM | 1707 | CG1  | VAL | X | 110 | 24.526 | 42.082 | 32.572 | 0.00 | 0.00 |
| ATOM | 1708 | HG11 | VAL | X | 110 | 24.691 | 41.891 | 31.512 | 0.00 | 0.00 |
| ATOM | 1709 | HG12 | VAL | X | 110 | 24.226 | 43.128 | 32.649 | 0.00 | 0.00 |
| ATOM | 1710 | HG13 | VAL | X | 110 | 25.451 | 41.852 | 33.101 | 0.00 | 0.00 |
| ATOM | 1711 | CG2  | VAL | X | 110 | 22.169 | 41.522 | 32.009 | 0.00 | 0.00 |
| ATOM | 1712 | HG21 | VAL | X | 110 | 22.522 | 41.419 | 30.982 | 0.00 | 0.00 |
| ATOM | 1713 | HG22 | VAL | X | 110 | 21.743 | 42.511 | 32.174 | 0.00 | 0.00 |
| ATOM | 1714 | HG23 | VAL | X | 110 | 21.311 | 40.872 | 32.179 | 0.00 | 0.00 |
| ATOM | 1715 | C    | VAL | X | 110 | 24.940 | 39.313 | 33.660 | 0.00 | 0.00 |
| ATOM | 1716 | O    | VAL | X | 110 | 24.952 | 39.384 | 34.852 | 0.00 | 0.00 |
| ATOM | 1717 | N    | LEU | X | 111 | 25.981 | 38.980 | 32.953 | 0.00 | 0.00 |
| ATOM | 1718 | H    | LEU | X | 111 | 25.950 | 38.884 | 31.948 | 0.00 | 0.00 |
| ATOM | 1719 | CA   | LEU | X | 111 | 27.282 | 38.863 | 33.545 | 0.00 | 0.00 |
| ATOM | 1720 | HA   | LEU | X | 111 | 27.262 | 38.767 | 34.630 | 0.00 | 0.00 |
| ATOM | 1721 | CB   | LEU | X | 111 | 28.060 | 37.649 | 32.989 | 0.00 | 0.00 |
| ATOM | 1722 | HB2  | LEU | X | 111 | 28.092 | 37.713 | 31.901 | 0.00 | 0.00 |
| ATOM | 1723 | HB3  | LEU | X | 111 | 29.128 | 37.690 | 33.205 | 0.00 | 0.00 |
| ATOM | 1724 | CG   | LEU | X | 111 | 27.394 | 36.282 | 33.470 | 0.00 | 0.00 |
| ATOM | 1725 | HG   | LEU | X | 111 | 26.829 | 36.476 | 34.382 | 0.00 | 0.00 |
| ATOM | 1726 | CD1  | LEU | X | 111 | 26.474 | 35.702 | 32.388 | 0.00 | 0.00 |

|      |      |      |     |   |     |        |        |        |      |      |
|------|------|------|-----|---|-----|--------|--------|--------|------|------|
| ATOM | 1727 | HD11 | LEU | X | 111 | 27.107 | 35.322 | 31.587 | 0.00 | 0.00 |
| ATOM | 1728 | HD12 | LEU | X | 111 | 25.813 | 36.369 | 31.834 | 0.00 | 0.00 |
| ATOM | 1729 | HD13 | LEU | X | 111 | 25.868 | 34.853 | 32.705 | 0.00 | 0.00 |
| ATOM | 1730 | CD2  | LEU | X | 111 | 28.501 | 35.290 | 33.859 | 0.00 | 0.00 |
| ATOM | 1731 | HD21 | LEU | X | 111 | 29.204 | 35.183 | 33.033 | 0.00 | 0.00 |
| ATOM | 1732 | HD22 | LEU | X | 111 | 29.083 | 35.635 | 34.713 | 0.00 | 0.00 |
| ATOM | 1733 | HD23 | LEU | X | 111 | 28.023 | 34.347 | 34.128 | 0.00 | 0.00 |
| ATOM | 1734 | C    | LEU | X | 111 | 28.120 | 40.111 | 33.179 | 0.00 | 0.00 |
| ATOM | 1735 | O    | LEU | X | 111 | 28.206 | 40.415 | 32.018 | 0.00 | 0.00 |
| ATOM | 1736 | N    | VAL | X | 112 | 28.732 | 40.690 | 34.207 | 0.00 | 0.00 |
| ATOM | 1737 | H    | VAL | X | 112 | 28.471 | 40.419 | 35.144 | 0.00 | 0.00 |
| ATOM | 1738 | CA   | VAL | X | 112 | 29.562 | 41.906 | 34.173 | 0.00 | 0.00 |
| ATOM | 1739 | HA   | VAL | X | 112 | 29.540 | 42.248 | 33.138 | 0.00 | 0.00 |
| ATOM | 1740 | CB   | VAL | X | 112 | 28.994 | 43.119 | 35.030 | 0.00 | 0.00 |
| ATOM | 1741 | HB   | VAL | X | 112 | 28.468 | 42.745 | 35.908 | 0.00 | 0.00 |
| ATOM | 1742 | CG1  | VAL | X | 112 | 30.053 | 44.173 | 35.448 | 0.00 | 0.00 |
| ATOM | 1743 | HG11 | VAL | X | 112 | 29.459 | 44.980 | 35.877 | 0.00 | 0.00 |
| ATOM | 1744 | HG12 | VAL | X | 112 | 30.747 | 43.719 | 36.155 | 0.00 | 0.00 |
| ATOM | 1745 | HG13 | VAL | X | 112 | 30.517 | 44.640 | 34.580 | 0.00 | 0.00 |
| ATOM | 1746 | CG2  | VAL | X | 112 | 27.974 | 43.848 | 34.173 | 0.00 | 0.00 |
| ATOM | 1747 | HG21 | VAL | X | 112 | 27.507 | 44.660 | 34.730 | 0.00 | 0.00 |
| ATOM | 1748 | HG22 | VAL | X | 112 | 27.280 | 43.116 | 33.761 | 0.00 | 0.00 |
| ATOM | 1749 | HG23 | VAL | X | 112 | 28.569 | 44.377 | 33.428 | 0.00 | 0.00 |
| ATOM | 1750 | C    | VAL | X | 112 | 30.912 | 41.507 | 34.667 | 0.00 | 0.00 |
| ATOM | 1751 | O    | VAL | X | 112 | 31.043 | 41.256 | 35.817 | 0.00 | 0.00 |
| ATOM | 1752 | N    | TRP | X | 113 | 31.856 | 41.413 | 33.718 | 0.00 | 0.00 |
| ATOM | 1753 | H    | TRP | X | 113 | 31.635 | 41.663 | 32.764 | 0.00 | 0.00 |
| ATOM | 1754 | CA   | TRP | X | 113 | 33.210 | 40.951 | 33.879 | 0.00 | 0.00 |
| ATOM | 1755 | HA   | TRP | X | 113 | 33.273 | 40.186 | 34.653 | 0.00 | 0.00 |
| ATOM | 1756 | CB   | TRP | X | 113 | 33.763 | 40.411 | 32.554 | 0.00 | 0.00 |
| ATOM | 1757 | HB2  | TRP | X | 113 | 33.088 | 39.584 | 32.333 | 0.00 | 0.00 |
| ATOM | 1758 | HB3  | TRP | X | 113 | 33.646 | 41.179 | 31.790 | 0.00 | 0.00 |
| ATOM | 1759 | CG   | TRP | X | 113 | 35.216 | 39.905 | 32.599 | 0.00 | 0.00 |
| ATOM | 1760 | CD1  | TRP | X | 113 | 36.334 | 40.581 | 32.118 | 0.00 | 0.00 |
| ATOM | 1761 | HD1  | TRP | X | 113 | 36.447 | 41.471 | 31.518 | 0.00 | 0.00 |
| ATOM | 1762 | NE1  | TRP | X | 113 | 37.453 | 39.893 | 32.443 | 0.00 | 0.00 |
| ATOM | 1763 | HE1  | TRP | X | 113 | 38.393 | 40.242 | 32.321 | 0.00 | 0.00 |
| ATOM | 1764 | CE2  | TRP | X | 113 | 37.203 | 38.809 | 33.227 | 0.00 | 0.00 |
| ATOM | 1765 | CZ2  | TRP | X | 113 | 38.020 | 37.727 | 33.672 | 0.00 | 0.00 |
| ATOM | 1766 | HZ2  | TRP | X | 113 | 39.043 | 37.627 | 33.341 | 0.00 | 0.00 |
| ATOM | 1767 | CH2  | TRP | X | 113 | 37.393 | 36.734 | 34.444 | 0.00 | 0.00 |
| ATOM | 1768 | HH2  | TRP | X | 113 | 37.948 | 35.935 | 34.913 | 0.00 | 0.00 |
| ATOM | 1769 | CZ3  | TRP | X | 113 | 36.022 | 36.898 | 34.820 | 0.00 | 0.00 |
| ATOM | 1770 | HZ3  | TRP | X | 113 | 35.495 | 36.259 | 35.514 | 0.00 | 0.00 |
| ATOM | 1771 | CE3  | TRP | X | 113 | 35.214 | 37.926 | 34.296 | 0.00 | 0.00 |
| ATOM | 1772 | HE3  | TRP | X | 113 | 34.162 | 37.962 | 34.541 | 0.00 | 0.00 |
| ATOM | 1773 | CD2  | TRP | X | 113 | 35.763 | 38.814 | 33.368 | 0.00 | 0.00 |
| ATOM | 1774 | C    | TRP | X | 113 | 34.075 | 42.156 | 34.259 | 0.00 | 0.00 |
| ATOM | 1775 | O    | TRP | X | 113 | 33.864 | 43.273 | 33.750 | 0.00 | 0.00 |
| ATOM | 1776 | N    | ILE | X | 114 | 34.995 | 41.919 | 35.131 | 0.00 | 0.00 |
| ATOM | 1777 | H    | ILE | X | 114 | 34.966 | 40.988 | 35.522 | 0.00 | 0.00 |
| ATOM | 1778 | CA   | ILE | X | 114 | 36.106 | 42.770 | 35.590 | 0.00 | 0.00 |
| ATOM | 1779 | HA   | ILE | X | 114 | 36.182 | 43.745 | 35.108 | 0.00 | 0.00 |
| ATOM | 1780 | CB   | ILE | X | 114 | 35.771 | 43.076 | 37.096 | 0.00 | 0.00 |
| ATOM | 1781 | HB   | ILE | X | 114 | 35.781 | 42.170 | 37.702 | 0.00 | 0.00 |
| ATOM | 1782 | CG2  | ILE | X | 114 | 36.756 | 44.127 | 37.601 | 0.00 | 0.00 |
| ATOM | 1783 | HG21 | ILE | X | 114 | 36.508 | 45.091 | 37.156 | 0.00 | 0.00 |
| ATOM | 1784 | HG22 | ILE | X | 114 | 37.791 | 43.865 | 37.379 | 0.00 | 0.00 |
| ATOM | 1785 | HG23 | ILE | X | 114 | 36.570 | 44.317 | 38.658 | 0.00 | 0.00 |
| ATOM | 1786 | CG1  | ILE | X | 114 | 34.310 | 43.680 | 37.254 | 0.00 | 0.00 |
| ATOM | 1787 | HG12 | ILE | X | 114 | 34.183 | 44.473 | 36.517 | 0.00 | 0.00 |
| ATOM | 1788 | HG13 | ILE | X | 114 | 33.668 | 42.830 | 37.022 | 0.00 | 0.00 |
| ATOM | 1789 | CD1  | ILE | X | 114 | 33.887 | 44.186 | 38.661 | 0.00 | 0.00 |
| ATOM | 1790 | HD11 | ILE | X | 114 | 34.394 | 43.579 | 39.411 | 0.00 | 0.00 |
| ATOM | 1791 | HD12 | ILE | X | 114 | 32.841 | 43.964 | 38.870 | 0.00 | 0.00 |
| ATOM | 1792 | HD13 | ILE | X | 114 | 34.177 | 45.224 | 38.820 | 0.00 | 0.00 |
| ATOM | 1793 | C    | ILE | X | 114 | 37.402 | 41.982 | 35.486 | 0.00 | 0.00 |

|      |      |     |     |   |     |        |        |        |      |      |
|------|------|-----|-----|---|-----|--------|--------|--------|------|------|
| ATOM | 1794 | O   | ILE | X | 114 | 37.373 | 40.859 | 35.820 | 0.00 | 0.00 |
| ATOM | 1795 | N   | TYR | X | 115 | 38.509 | 42.558 | 35.011 | 0.00 | 0.00 |
| ATOM | 1796 | H   | TYR | X | 115 | 38.469 | 43.547 | 34.810 | 0.00 | 0.00 |
| ATOM | 1797 | CA  | TYR | X | 115 | 39.792 | 41.802 | 34.721 | 0.00 | 0.00 |
| ATOM | 1798 | HA  | TYR | X | 115 | 39.717 | 40.717 | 34.655 | 0.00 | 0.00 |
| ATOM | 1799 | CB  | TYR | X | 115 | 40.352 | 42.223 | 33.312 | 0.00 | 0.00 |
| ATOM | 1800 | HB2 | TYR | X | 115 | 41.367 | 41.832 | 33.240 | 0.00 | 0.00 |
| ATOM | 1801 | HB3 | TYR | X | 115 | 39.705 | 41.785 | 32.552 | 0.00 | 0.00 |
| ATOM | 1802 | CG  | TYR | X | 115 | 40.401 | 43.777 | 33.121 | 0.00 | 0.00 |
| ATOM | 1803 | CD1 | TYR | X | 115 | 41.369 | 44.586 | 33.674 | 0.00 | 0.00 |
| ATOM | 1804 | HD1 | TYR | X | 115 | 42.065 | 44.135 | 34.364 | 0.00 | 0.00 |
| ATOM | 1805 | CE1 | TYR | X | 115 | 41.477 | 45.972 | 33.404 | 0.00 | 0.00 |
| ATOM | 1806 | HE1 | TYR | X | 115 | 42.265 | 46.540 | 33.876 | 0.00 | 0.00 |
| ATOM | 1807 | CZ  | TYR | X | 115 | 40.535 | 46.579 | 32.550 | 0.00 | 0.00 |
| ATOM | 1808 | OH  | TYR | X | 115 | 40.493 | 47.964 | 32.465 | 0.00 | 0.00 |
| ATOM | 1809 | HH  | TYR | X | 115 | 41.223 | 48.405 | 32.907 | 0.00 | 0.00 |
| ATOM | 1810 | CE2 | TYR | X | 115 | 39.578 | 45.796 | 31.943 | 0.00 | 0.00 |
| ATOM | 1811 | HE2 | TYR | X | 115 | 38.931 | 46.230 | 31.195 | 0.00 | 0.00 |
| ATOM | 1812 | CD2 | TYR | X | 115 | 39.564 | 44.372 | 32.190 | 0.00 | 0.00 |
| ATOM | 1813 | HD2 | TYR | X | 115 | 38.743 | 43.862 | 31.709 | 0.00 | 0.00 |
| ATOM | 1814 | C   | TYR | X | 115 | 40.815 | 41.988 | 35.885 | 0.00 | 0.00 |
| ATOM | 1815 | O   | TYR | X | 115 | 40.958 | 43.009 | 36.549 | 0.00 | 0.00 |
| ATOM | 1816 | N   | GLY | X | 116 | 41.659 | 40.969 | 36.130 | 0.00 | 0.00 |
| ATOM | 1817 | H   | GLY | X | 116 | 41.478 | 40.113 | 35.626 | 0.00 | 0.00 |
| ATOM | 1818 | CA  | GLY | X | 116 | 42.843 | 41.059 | 36.939 | 0.00 | 0.00 |
| ATOM | 1819 | HA2 | GLY | X | 116 | 42.708 | 41.566 | 37.894 | 0.00 | 0.00 |
| ATOM | 1820 | HA3 | GLY | X | 116 | 43.240 | 40.050 | 37.052 | 0.00 | 0.00 |
| ATOM | 1821 | C   | GLY | X | 116 | 44.004 | 41.826 | 36.247 | 0.00 | 0.00 |
| ATOM | 1822 | O   | GLY | X | 116 | 43.780 | 42.470 | 35.206 | 0.00 | 0.00 |
| ATOM | 1823 | N   | GLY | X | 117 | 45.144 | 41.671 | 36.891 | 0.00 | 0.00 |
| ATOM | 1824 | H   | GLY | X | 117 | 45.136 | 40.941 | 37.589 | 0.00 | 0.00 |
| ATOM | 1825 | CA  | GLY | X | 117 | 46.443 | 42.319 | 36.569 | 0.00 | 0.00 |
| ATOM | 1826 | HA2 | GLY | X | 117 | 47.132 | 41.534 | 36.257 | 0.00 | 0.00 |
| ATOM | 1827 | HA3 | GLY | X | 117 | 46.191 | 42.997 | 35.754 | 0.00 | 0.00 |
| ATOM | 1828 | C   | GLY | X | 117 | 47.135 | 43.118 | 37.624 | 0.00 | 0.00 |
| ATOM | 1829 | O   | GLY | X | 117 | 47.802 | 44.165 | 37.355 | 0.00 | 0.00 |
| ATOM | 1830 | N   | GLY | X | 118 | 46.707 | 42.882 | 38.858 | 0.00 | 0.00 |
| ATOM | 1831 | H   | GLY | X | 118 | 46.223 | 42.018 | 39.054 | 0.00 | 0.00 |
| ATOM | 1832 | CA  | GLY | X | 118 | 47.118 | 43.621 | 39.997 | 0.00 | 0.00 |
| ATOM | 1833 | HA2 | GLY | X | 118 | 46.804 | 43.088 | 40.894 | 0.00 | 0.00 |
| ATOM | 1834 | HA3 | GLY | X | 118 | 48.205 | 43.709 | 39.994 | 0.00 | 0.00 |
| ATOM | 1835 | C   | GLY | X | 118 | 46.703 | 45.106 | 40.216 | 0.00 | 0.00 |
| ATOM | 1836 | O   | GLY | X | 118 | 47.402 | 45.837 | 40.915 | 0.00 | 0.00 |
| ATOM | 1837 | N   | PHE | X | 119 | 45.710 | 45.593 | 39.522 | 0.00 | 0.00 |
| ATOM | 1838 | H   | PHE | X | 119 | 45.310 | 44.970 | 38.834 | 0.00 | 0.00 |
| ATOM | 1839 | CA  | PHE | X | 119 | 45.247 | 46.980 | 39.583 | 0.00 | 0.00 |
| ATOM | 1840 | HA  | PHE | X | 119 | 44.347 | 47.037 | 38.970 | 0.00 | 0.00 |
| ATOM | 1841 | CB  | PHE | X | 119 | 44.893 | 47.469 | 41.034 | 0.00 | 0.00 |
| ATOM | 1842 | HB2 | PHE | X | 119 | 45.671 | 47.257 | 41.769 | 0.00 | 0.00 |
| ATOM | 1843 | HB3 | PHE | X | 119 | 44.723 | 48.545 | 41.002 | 0.00 | 0.00 |
| ATOM | 1844 | CG  | PHE | X | 119 | 43.673 | 46.857 | 41.730 | 0.00 | 0.00 |
| ATOM | 1845 | CD1 | PHE | X | 119 | 42.444 | 47.349 | 41.297 | 0.00 | 0.00 |
| ATOM | 1846 | HD1 | PHE | X | 119 | 42.399 | 48.062 | 40.487 | 0.00 | 0.00 |
| ATOM | 1847 | CE1 | PHE | X | 119 | 41.231 | 46.863 | 41.813 | 0.00 | 0.00 |
| ATOM | 1848 | HE1 | PHE | X | 119 | 40.271 | 47.243 | 41.495 | 0.00 | 0.00 |
| ATOM | 1849 | CZ  | PHE | X | 119 | 41.274 | 45.909 | 42.847 | 0.00 | 0.00 |
| ATOM | 1850 | HZ  | PHE | X | 119 | 40.345 | 45.549 | 43.263 | 0.00 | 0.00 |
| ATOM | 1851 | CE2 | PHE | X | 119 | 42.532 | 45.430 | 43.300 | 0.00 | 0.00 |
| ATOM | 1852 | HE2 | PHE | X | 119 | 42.490 | 44.786 | 44.166 | 0.00 | 0.00 |
| ATOM | 1853 | CD2 | PHE | X | 119 | 43.728 | 45.899 | 42.747 | 0.00 | 0.00 |
| ATOM | 1854 | HD2 | PHE | X | 119 | 44.674 | 45.463 | 43.032 | 0.00 | 0.00 |
| ATOM | 1855 | C   | PHE | X | 119 | 46.207 | 47.992 | 38.906 | 0.00 | 0.00 |
| ATOM | 1856 | O   | PHE | X | 119 | 45.806 | 49.070 | 38.381 | 0.00 | 0.00 |
| ATOM | 1857 | N   | TYR | X | 120 | 47.477 | 47.742 | 38.923 | 0.00 | 0.00 |
| ATOM | 1858 | H   | TYR | X | 120 | 47.787 | 46.964 | 39.487 | 0.00 | 0.00 |
| ATOM | 1859 | CA  | TYR | X | 120 | 48.533 | 48.490 | 38.110 | 0.00 | 0.00 |
| ATOM | 1860 | HA  | TYR | X | 120 | 48.261 | 49.545 | 38.128 | 0.00 | 0.00 |

|      |      |     |     |   |     |        |        |        |      |      |
|------|------|-----|-----|---|-----|--------|--------|--------|------|------|
| ATOM | 1861 | CB  | TYR | X | 120 | 49.829 | 48.289 | 38.826 | 0.00 | 0.00 |
| ATOM | 1862 | HB2 | TYR | X | 120 | 50.472 | 49.114 | 38.518 | 0.00 | 0.00 |
| ATOM | 1863 | HB3 | TYR | X | 120 | 49.630 | 48.286 | 39.897 | 0.00 | 0.00 |
| ATOM | 1864 | CG  | TYR | X | 120 | 50.685 | 47.055 | 38.556 | 0.00 | 0.00 |
| ATOM | 1865 | CD1 | TYR | X | 120 | 52.068 | 47.108 | 38.239 | 0.00 | 0.00 |
| ATOM | 1866 | HD1 | TYR | X | 120 | 52.643 | 48.019 | 38.157 | 0.00 | 0.00 |
| ATOM | 1867 | CE1 | TYR | X | 120 | 52.833 | 45.927 | 37.913 | 0.00 | 0.00 |
| ATOM | 1868 | HE1 | TYR | X | 120 | 53.895 | 46.021 | 37.737 | 0.00 | 0.00 |
| ATOM | 1869 | CZ  | TYR | X | 120 | 52.193 | 44.632 | 37.912 | 0.00 | 0.00 |
| ATOM | 1870 | OH  | TYR | X | 120 | 52.874 | 43.518 | 37.779 | 0.00 | 0.00 |
| ATOM | 1871 | HH  | TYR | X | 120 | 53.804 | 43.658 | 37.586 | 0.00 | 0.00 |
| ATOM | 1872 | CE2 | TYR | X | 120 | 50.818 | 44.607 | 38.269 | 0.00 | 0.00 |
| ATOM | 1873 | HE2 | TYR | X | 120 | 50.280 | 43.673 | 38.347 | 0.00 | 0.00 |
| ATOM | 1874 | CD2 | TYR | X | 120 | 50.088 | 45.793 | 38.580 | 0.00 | 0.00 |
| ATOM | 1875 | HD2 | TYR | X | 120 | 49.063 | 45.555 | 38.824 | 0.00 | 0.00 |
| ATOM | 1876 | C   | TYR | X | 120 | 48.570 | 48.111 | 36.625 | 0.00 | 0.00 |
| ATOM | 1877 | O   | TYR | X | 120 | 49.253 | 48.805 | 35.859 | 0.00 | 0.00 |
| ATOM | 1878 | N   | SER | X | 121 | 47.825 | 47.013 | 36.154 | 0.00 | 0.00 |
| ATOM | 1879 | H   | SER | X | 121 | 47.464 | 46.406 | 36.877 | 0.00 | 0.00 |
| ATOM | 1880 | CA  | SER | X | 121 | 47.658 | 46.611 | 34.776 | 0.00 | 0.00 |
| ATOM | 1881 | HA  | SER | X | 121 | 47.488 | 47.513 | 34.188 | 0.00 | 0.00 |
| ATOM | 1882 | CB  | SER | X | 121 | 48.939 | 45.882 | 34.271 | 0.00 | 0.00 |
| ATOM | 1883 | HB2 | SER | X | 121 | 48.936 | 45.779 | 33.186 | 0.00 | 0.00 |
| ATOM | 1884 | HB3 | SER | X | 121 | 49.760 | 46.573 | 34.463 | 0.00 | 0.00 |
| ATOM | 1885 | OG  | SER | X | 121 | 49.172 | 44.682 | 35.051 | 0.00 | 0.00 |
| ATOM | 1886 | HG  | SER | X | 121 | 48.643 | 44.822 | 35.839 | 0.00 | 0.00 |
| ATOM | 1887 | C   | SER | X | 121 | 46.425 | 45.663 | 34.532 | 0.00 | 0.00 |
| ATOM | 1888 | O   | SER | X | 121 | 45.709 | 45.298 | 35.471 | 0.00 | 0.00 |
| ATOM | 1889 | N   | GLY | X | 122 | 46.170 | 45.350 | 33.218 | 0.00 | 0.00 |
| ATOM | 1890 | H   | GLY | X | 122 | 46.732 | 45.678 | 32.446 | 0.00 | 0.00 |
| ATOM | 1891 | CA  | GLY | X | 122 | 44.983 | 44.645 | 32.708 | 0.00 | 0.00 |
| ATOM | 1892 | HA2 | GLY | X | 122 | 45.243 | 43.795 | 32.078 | 0.00 | 0.00 |
| ATOM | 1893 | HA3 | GLY | X | 122 | 44.285 | 44.374 | 33.501 | 0.00 | 0.00 |
| ATOM | 1894 | C   | GLY | X | 122 | 44.291 | 45.601 | 31.709 | 0.00 | 0.00 |
| ATOM | 1895 | O   | GLY | X | 122 | 44.538 | 46.768 | 31.612 | 0.00 | 0.00 |
| ATOM | 1896 | N   | ALA | X | 123 | 43.286 | 45.081 | 31.020 | 0.00 | 0.00 |
| ATOM | 1897 | H   | ALA | X | 123 | 43.032 | 44.136 | 31.270 | 0.00 | 0.00 |
| ATOM | 1898 | CA  | ALA | X | 123 | 42.541 | 45.675 | 29.912 | 0.00 | 0.00 |
| ATOM | 1899 | HA  | ALA | X | 123 | 41.898 | 46.457 | 30.316 | 0.00 | 0.00 |
| ATOM | 1900 | CB  | ALA | X | 123 | 43.455 | 46.254 | 28.926 | 0.00 | 0.00 |
| ATOM | 1901 | HB1 | ALA | X | 123 | 42.778 | 46.801 | 28.269 | 0.00 | 0.00 |
| ATOM | 1902 | HB2 | ALA | X | 123 | 44.017 | 45.601 | 28.258 | 0.00 | 0.00 |
| ATOM | 1903 | HB3 | ALA | X | 123 | 44.143 | 47.016 | 29.293 | 0.00 | 0.00 |
| ATOM | 1904 | C   | ALA | X | 123 | 41.673 | 44.629 | 29.207 | 0.00 | 0.00 |
| ATOM | 1905 | O   | ALA | X | 123 | 42.032 | 43.432 | 29.163 | 0.00 | 0.00 |
| ATOM | 1906 | N   | SER | X | 124 | 40.504 | 44.954 | 28.652 | 0.00 | 0.00 |
| ATOM | 1907 | H   | SER | X | 124 | 40.210 | 45.920 | 28.695 | 0.00 | 0.00 |
| ATOM | 1908 | CA  | SER | X | 124 | 39.479 | 43.969 | 28.255 | 0.00 | 0.00 |
| ATOM | 1909 | HA  | SER | X | 124 | 39.709 | 43.017 | 28.732 | 0.00 | 0.00 |
| ATOM | 1910 | CB  | SER | X | 124 | 38.110 | 44.360 | 28.719 | 0.00 | 0.00 |
| ATOM | 1911 | HB2 | SER | X | 124 | 37.353 | 43.687 | 28.314 | 0.00 | 0.00 |
| ATOM | 1912 | HB3 | SER | X | 124 | 38.009 | 44.353 | 29.804 | 0.00 | 0.00 |
| ATOM | 1913 | OG  | SER | X | 124 | 37.752 | 45.717 | 28.322 | 0.00 | 0.00 |
| ATOM | 1914 | HG  | SER | X | 124 | 37.277 | 45.946 | 29.124 | 0.00 | 0.00 |
| ATOM | 1915 | C   | SER | X | 124 | 39.420 | 43.581 | 26.783 | 0.00 | 0.00 |
| ATOM | 1916 | O   | SER | X | 124 | 38.676 | 42.720 | 26.305 | 0.00 | 0.00 |
| ATOM | 1917 | N   | SER | X | 125 | 40.158 | 44.285 | 25.868 | 0.00 | 0.00 |
| ATOM | 1918 | H   | SER | X | 125 | 40.573 | 45.098 | 26.301 | 0.00 | 0.00 |
| ATOM | 1919 | CA  | SER | X | 125 | 40.265 | 44.026 | 24.420 | 0.00 | 0.00 |
| ATOM | 1920 | HA  | SER | X | 125 | 39.256 | 43.785 | 24.087 | 0.00 | 0.00 |
| ATOM | 1921 | CB  | SER | X | 125 | 40.926 | 45.243 | 23.749 | 0.00 | 0.00 |
| ATOM | 1922 | HB2 | SER | X | 125 | 40.844 | 45.058 | 22.678 | 0.00 | 0.00 |
| ATOM | 1923 | HB3 | SER | X | 125 | 40.258 | 46.083 | 23.946 | 0.00 | 0.00 |
| ATOM | 1924 | OG  | SER | X | 125 | 42.266 | 45.469 | 24.091 | 0.00 | 0.00 |
| ATOM | 1925 | HG  | SER | X | 125 | 42.851 | 44.902 | 23.582 | 0.00 | 0.00 |
| ATOM | 1926 | C   | SER | X | 125 | 40.961 | 42.709 | 24.006 | 0.00 | 0.00 |
| ATOM | 1927 | O   | SER | X | 125 | 40.894 | 42.137 | 22.926 | 0.00 | 0.00 |

|      |      |      |     |   |     |        |        |        |      |      |
|------|------|------|-----|---|-----|--------|--------|--------|------|------|
| ATOM | 1928 | N    | LEU | X | 126 | 41.807 | 42.209 | 24.958 | 0.00 | 0.00 |
| ATOM | 1929 | H    | LEU | X | 126 | 41.836 | 42.842 | 25.744 | 0.00 | 0.00 |
| ATOM | 1930 | CA   | LEU | X | 126 | 42.562 | 41.001 | 25.067 | 0.00 | 0.00 |
| ATOM | 1931 | HA   | LEU | X | 126 | 43.363 | 41.084 | 24.333 | 0.00 | 0.00 |
| ATOM | 1932 | CB   | LEU | X | 126 | 43.234 | 40.762 | 26.387 | 0.00 | 0.00 |
| ATOM | 1933 | HB2  | LEU | X | 126 | 42.409 | 40.675 | 27.094 | 0.00 | 0.00 |
| ATOM | 1934 | HB3  | LEU | X | 126 | 43.657 | 39.757 | 26.384 | 0.00 | 0.00 |
| ATOM | 1935 | CG   | LEU | X | 126 | 44.246 | 41.769 | 26.907 | 0.00 | 0.00 |
| ATOM | 1936 | HG   | LEU | X | 126 | 43.738 | 42.733 | 26.886 | 0.00 | 0.00 |
| ATOM | 1937 | CD1  | LEU | X | 126 | 44.683 | 41.540 | 28.407 | 0.00 | 0.00 |
| ATOM | 1938 | HD11 | LEU | X | 126 | 45.122 | 42.403 | 28.908 | 0.00 | 0.00 |
| ATOM | 1939 | HD12 | LEU | X | 126 | 45.369 | 40.706 | 28.559 | 0.00 | 0.00 |
| ATOM | 1940 | HD13 | LEU | X | 126 | 43.804 | 41.295 | 29.003 | 0.00 | 0.00 |
| ATOM | 1941 | CD2  | LEU | X | 126 | 45.410 | 41.889 | 25.996 | 0.00 | 0.00 |
| ATOM | 1942 | HD21 | LEU | X | 126 | 45.118 | 42.006 | 24.952 | 0.00 | 0.00 |
| ATOM | 1943 | HD22 | LEU | X | 126 | 45.939 | 42.773 | 26.352 | 0.00 | 0.00 |
| ATOM | 1944 | HD23 | LEU | X | 126 | 46.015 | 40.988 | 26.099 | 0.00 | 0.00 |
| ATOM | 1945 | C    | LEU | X | 126 | 41.713 | 39.725 | 24.808 | 0.00 | 0.00 |
| ATOM | 1946 | O    | LEU | X | 126 | 40.607 | 39.627 | 25.325 | 0.00 | 0.00 |
| ATOM | 1947 | N    | ASP | X | 127 | 42.157 | 38.781 | 23.956 | 0.00 | 0.00 |
| ATOM | 1948 | H    | ASP | X | 127 | 42.959 | 38.981 | 23.375 | 0.00 | 0.00 |
| ATOM | 1949 | CA   | ASP | X | 127 | 41.265 | 37.751 | 23.405 | 0.00 | 0.00 |
| ATOM | 1950 | HA   | ASP | X | 127 | 40.349 | 38.285 | 23.152 | 0.00 | 0.00 |
| ATOM | 1951 | CB   | ASP | X | 127 | 41.870 | 37.336 | 22.037 | 0.00 | 0.00 |
| ATOM | 1952 | HB2  | ASP | X | 127 | 41.175 | 36.833 | 21.366 | 0.00 | 0.00 |
| ATOM | 1953 | HB3  | ASP | X | 127 | 42.166 | 38.208 | 21.454 | 0.00 | 0.00 |
| ATOM | 1954 | CG   | ASP | X | 127 | 43.137 | 36.422 | 22.004 | 0.00 | 0.00 |
| ATOM | 1955 | OD1  | ASP | X | 127 | 44.160 | 36.997 | 21.502 | 0.00 | 0.00 |
| ATOM | 1956 | OD2  | ASP | X | 127 | 43.035 | 35.257 | 22.390 | 0.00 | 0.00 |
| ATOM | 1957 | C    | ASP | X | 127 | 40.898 | 36.585 | 24.237 | 0.00 | 0.00 |
| ATOM | 1958 | O    | ASP | X | 127 | 39.981 | 35.844 | 23.959 | 0.00 | 0.00 |
| ATOM | 1959 | N    | VAL | X | 128 | 41.542 | 36.405 | 25.349 | 0.00 | 0.00 |
| ATOM | 1960 | H    | VAL | X | 128 | 42.379 | 36.955 | 25.486 | 0.00 | 0.00 |
| ATOM | 1961 | CA   | VAL | X | 128 | 41.229 | 35.481 | 26.452 | 0.00 | 0.00 |
| ATOM | 1962 | HA   | VAL | X | 128 | 41.078 | 34.516 | 25.968 | 0.00 | 0.00 |
| ATOM | 1963 | CB   | VAL | X | 128 | 42.530 | 35.161 | 27.254 | 0.00 | 0.00 |
| ATOM | 1964 | HB   | VAL | X | 128 | 43.364 | 34.973 | 26.577 | 0.00 | 0.00 |
| ATOM | 1965 | CG1  | VAL | X | 128 | 42.941 | 36.277 | 28.223 | 0.00 | 0.00 |
| ATOM | 1966 | HG11 | VAL | X | 128 | 43.075 | 37.154 | 27.591 | 0.00 | 0.00 |
| ATOM | 1967 | HG12 | VAL | X | 128 | 42.300 | 36.368 | 29.100 | 0.00 | 0.00 |
| ATOM | 1968 | HG13 | VAL | X | 128 | 43.993 | 36.087 | 28.437 | 0.00 | 0.00 |
| ATOM | 1969 | CG2  | VAL | X | 128 | 42.340 | 33.880 | 28.054 | 0.00 | 0.00 |
| ATOM | 1970 | HG21 | VAL | X | 128 | 43.250 | 33.547 | 28.553 | 0.00 | 0.00 |
| ATOM | 1971 | HG22 | VAL | X | 128 | 42.062 | 33.195 | 27.253 | 0.00 | 0.00 |
| ATOM | 1972 | HG23 | VAL | X | 128 | 41.468 | 33.875 | 28.709 | 0.00 | 0.00 |
| ATOM | 1973 | C    | VAL | X | 128 | 39.987 | 35.875 | 27.334 | 0.00 | 0.00 |
| ATOM | 1974 | O    | VAL | X | 128 | 39.367 | 35.031 | 27.960 | 0.00 | 0.00 |
| ATOM | 1975 | N    | TYR | X | 129 | 39.571 | 37.142 | 27.322 | 0.00 | 0.00 |
| ATOM | 1976 | H    | TYR | X | 129 | 40.073 | 37.708 | 26.652 | 0.00 | 0.00 |
| ATOM | 1977 | CA   | TYR | X | 129 | 38.459 | 37.702 | 28.058 | 0.00 | 0.00 |
| ATOM | 1978 | HA   | TYR | X | 129 | 38.204 | 37.046 | 28.890 | 0.00 | 0.00 |
| ATOM | 1979 | CB   | TYR | X | 129 | 38.809 | 39.056 | 28.679 | 0.00 | 0.00 |
| ATOM | 1980 | HB2  | TYR | X | 129 | 38.957 | 39.777 | 27.875 | 0.00 | 0.00 |
| ATOM | 1981 | HB3  | TYR | X | 129 | 37.926 | 39.340 | 29.251 | 0.00 | 0.00 |
| ATOM | 1982 | CG   | TYR | X | 129 | 40.061 | 39.062 | 29.549 | 0.00 | 0.00 |
| ATOM | 1983 | CD1  | TYR | X | 129 | 40.293 | 38.093 | 30.583 | 0.00 | 0.00 |
| ATOM | 1984 | HD1  | TYR | X | 129 | 39.698 | 37.194 | 30.645 | 0.00 | 0.00 |
| ATOM | 1985 | CE1  | TYR | X | 129 | 41.313 | 38.224 | 31.577 | 0.00 | 0.00 |
| ATOM | 1986 | HE1  | TYR | X | 129 | 41.463 | 37.563 | 32.418 | 0.00 | 0.00 |
| ATOM | 1987 | CZ   | TYR | X | 129 | 42.078 | 39.379 | 31.579 | 0.00 | 0.00 |
| ATOM | 1988 | OH   | TYR | X | 129 | 42.987 | 39.585 | 32.558 | 0.00 | 0.00 |
| ATOM | 1989 | HH   | TYR | X | 129 | 42.838 | 39.043 | 33.336 | 0.00 | 0.00 |
| ATOM | 1990 | CE2  | TYR | X | 129 | 41.887 | 40.382 | 30.583 | 0.00 | 0.00 |
| ATOM | 1991 | HE2  | TYR | X | 129 | 42.448 | 41.299 | 30.682 | 0.00 | 0.00 |
| ATOM | 1992 | CD2  | TYR | X | 129 | 40.926 | 40.192 | 29.646 | 0.00 | 0.00 |
| ATOM | 1993 | HD2  | TYR | X | 129 | 40.807 | 40.990 | 28.928 | 0.00 | 0.00 |
| ATOM | 1994 | C    | TYR | X | 129 | 37.097 | 37.817 | 27.175 | 0.00 | 0.00 |

|      |      |      |     |   |     |        |        |        |      |      |
|------|------|------|-----|---|-----|--------|--------|--------|------|------|
| ATOM | 1995 | O    | TYR | X | 129 | 36.202 | 38.577 | 27.520 | 0.00 | 0.00 |
| ATOM | 1996 | N    | ASP | X | 130 | 37.040 | 37.155 | 26.066 | 0.00 | 0.00 |
| ATOM | 1997 | H    | ASP | X | 130 | 37.800 | 36.515 | 25.882 | 0.00 | 0.00 |
| ATOM | 1998 | CA   | ASP | X | 130 | 35.963 | 37.309 | 25.092 | 0.00 | 0.00 |
| ATOM | 1999 | HA   | ASP | X | 130 | 35.667 | 38.358 | 25.120 | 0.00 | 0.00 |
| ATOM | 2000 | CB   | ASP | X | 130 | 36.541 | 36.928 | 23.695 | 0.00 | 0.00 |
| ATOM | 2001 | HB2  | ASP | X | 130 | 37.527 | 37.368 | 23.547 | 0.00 | 0.00 |
| ATOM | 2002 | HB3  | ASP | X | 130 | 36.602 | 35.843 | 23.609 | 0.00 | 0.00 |
| ATOM | 2003 | CG   | ASP | X | 130 | 35.569 | 37.330 | 22.590 | 0.00 | 0.00 |
| ATOM | 2004 | OD1  | ASP | X | 130 | 34.381 | 36.926 | 22.560 | 0.00 | 0.00 |
| ATOM | 2005 | OD2  | ASP | X | 130 | 36.030 | 38.102 | 21.731 | 0.00 | 0.00 |
| ATOM | 2006 | C    | ASP | X | 130 | 34.797 | 36.381 | 25.488 | 0.00 | 0.00 |
| ATOM | 2007 | O    | ASP | X | 130 | 35.047 | 35.189 | 25.683 | 0.00 | 0.00 |
| ATOM | 2008 | N    | GLY | X | 131 | 33.583 | 36.925 | 25.628 | 0.00 | 0.00 |
| ATOM | 2009 | H    | GLY | X | 131 | 33.384 | 37.906 | 25.495 | 0.00 | 0.00 |
| ATOM | 2010 | CA   | GLY | X | 131 | 32.465 | 36.090 | 25.992 | 0.00 | 0.00 |
| ATOM | 2011 | HA2  | GLY | X | 131 | 32.825 | 35.389 | 26.746 | 0.00 | 0.00 |
| ATOM | 2012 | HA3  | GLY | X | 131 | 31.723 | 36.650 | 26.561 | 0.00 | 0.00 |
| ATOM | 2013 | C    | GLY | X | 131 | 31.691 | 35.250 | 24.953 | 0.00 | 0.00 |
| ATOM | 2014 | O    | GLY | X | 131 | 30.718 | 34.600 | 25.318 | 0.00 | 0.00 |
| ATOM | 2015 | N    | ARG | X | 132 | 32.079 | 35.339 | 23.671 | 0.00 | 0.00 |
| ATOM | 2016 | H    | ARG | X | 132 | 32.947 | 35.820 | 23.480 | 0.00 | 0.00 |
| ATOM | 2017 | CA   | ARG | X | 132 | 31.209 | 34.811 | 22.552 | 0.00 | 0.00 |
| ATOM | 2018 | HA   | ARG | X | 132 | 30.356 | 35.486 | 22.467 | 0.00 | 0.00 |
| ATOM | 2019 | CB   | ARG | X | 132 | 31.842 | 35.000 | 21.209 | 0.00 | 0.00 |
| ATOM | 2020 | HB2  | ARG | X | 132 | 31.109 | 34.728 | 20.450 | 0.00 | 0.00 |
| ATOM | 2021 | HB3  | ARG | X | 132 | 32.068 | 36.067 | 21.194 | 0.00 | 0.00 |
| ATOM | 2022 | CG   | ARG | X | 132 | 33.115 | 34.153 | 20.895 | 0.00 | 0.00 |
| ATOM | 2023 | HG2  | ARG | X | 132 | 33.734 | 34.199 | 21.791 | 0.00 | 0.00 |
| ATOM | 2024 | HG3  | ARG | X | 132 | 32.758 | 33.127 | 20.808 | 0.00 | 0.00 |
| ATOM | 2025 | CD   | ARG | X | 132 | 33.917 | 34.570 | 19.605 | 0.00 | 0.00 |
| ATOM | 2026 | HD2  | ARG | X | 132 | 34.640 | 33.813 | 19.302 | 0.00 | 0.00 |
| ATOM | 2027 | HD3  | ARG | X | 132 | 33.127 | 34.624 | 18.856 | 0.00 | 0.00 |
| ATOM | 2028 | NE   | ARG | X | 132 | 34.517 | 35.823 | 19.692 | 0.00 | 0.00 |
| ATOM | 2029 | HE   | ARG | X | 132 | 34.435 | 36.246 | 20.606 | 0.00 | 0.00 |
| ATOM | 2030 | CZ   | ARG | X | 132 | 35.369 | 36.337 | 18.793 | 0.00 | 0.00 |
| ATOM | 2031 | NH1  | ARG | X | 132 | 35.562 | 35.838 | 17.611 | 0.00 | 0.00 |
| ATOM | 2032 | HH11 | ARG | X | 132 | 35.203 | 34.933 | 17.343 | 0.00 | 0.00 |
| ATOM | 2033 | HH12 | ARG | X | 132 | 36.257 | 36.149 | 16.948 | 0.00 | 0.00 |
| ATOM | 2034 | NH2  | ARG | X | 132 | 36.049 | 37.388 | 19.111 | 0.00 | 0.00 |
| ATOM | 2035 | HH21 | ARG | X | 132 | 35.985 | 37.872 | 19.995 | 0.00 | 0.00 |
| ATOM | 2036 | HH22 | ARG | X | 132 | 36.548 | 37.838 | 18.357 | 0.00 | 0.00 |
| ATOM | 2037 | C    | ARG | X | 132 | 30.806 | 33.335 | 22.794 | 0.00 | 0.00 |
| ATOM | 2038 | O    | ARG | X | 132 | 29.638 | 32.957 | 22.582 | 0.00 | 0.00 |
| ATOM | 2039 | N    | PHE | X | 133 | 31.694 | 32.435 | 23.201 | 0.00 | 0.00 |
| ATOM | 2040 | H    | PHE | X | 133 | 32.677 | 32.651 | 23.291 | 0.00 | 0.00 |
| ATOM | 2041 | CA   | PHE | X | 133 | 31.316 | 31.004 | 23.275 | 0.00 | 0.00 |
| ATOM | 2042 | HA   | PHE | X | 133 | 30.824 | 30.790 | 22.326 | 0.00 | 0.00 |
| ATOM | 2043 | CB   | PHE | X | 133 | 32.463 | 30.036 | 23.339 | 0.00 | 0.00 |
| ATOM | 2044 | HB2  | PHE | X | 133 | 33.215 | 30.586 | 23.905 | 0.00 | 0.00 |
| ATOM | 2045 | HB3  | PHE | X | 133 | 32.124 | 29.094 | 23.771 | 0.00 | 0.00 |
| ATOM | 2046 | CG   | PHE | X | 133 | 33.152 | 29.747 | 21.990 | 0.00 | 0.00 |
| ATOM | 2047 | CD1  | PHE | X | 133 | 33.945 | 30.674 | 21.201 | 0.00 | 0.00 |
| ATOM | 2048 | HD1  | PHE | X | 133 | 34.065 | 31.688 | 21.553 | 0.00 | 0.00 |
| ATOM | 2049 | CE1  | PHE | X | 133 | 34.432 | 30.271 | 19.929 | 0.00 | 0.00 |
| ATOM | 2050 | HE1  | PHE | X | 133 | 34.983 | 30.919 | 19.262 | 0.00 | 0.00 |
| ATOM | 2051 | CZ   | PHE | X | 133 | 33.963 | 29.049 | 19.397 | 0.00 | 0.00 |
| ATOM | 2052 | HZ   | PHE | X | 133 | 34.279 | 28.753 | 18.408 | 0.00 | 0.00 |
| ATOM | 2053 | CE2  | PHE | X | 133 | 33.238 | 28.155 | 20.175 | 0.00 | 0.00 |
| ATOM | 2054 | HE2  | PHE | X | 133 | 32.994 | 27.169 | 19.808 | 0.00 | 0.00 |
| ATOM | 2055 | CD2  | PHE | X | 133 | 32.826 | 28.465 | 21.460 | 0.00 | 0.00 |
| ATOM | 2056 | HD2  | PHE | X | 133 | 32.188 | 27.786 | 22.006 | 0.00 | 0.00 |
| ATOM | 2057 | C    | PHE | X | 133 | 30.231 | 30.823 | 24.386 | 0.00 | 0.00 |
| ATOM | 2058 | O    | PHE | X | 133 | 29.180 | 30.188 | 24.175 | 0.00 | 0.00 |
| ATOM | 2059 | N    | LEU | X | 134 | 30.410 | 31.499 | 25.573 | 0.00 | 0.00 |
| ATOM | 2060 | H    | LEU | X | 134 | 31.270 | 32.026 | 25.622 | 0.00 | 0.00 |
| ATOM | 2061 | CA   | LEU | X | 134 | 29.456 | 31.384 | 26.666 | 0.00 | 0.00 |

|      |      |      |     |   |     |        |        |        |      |      |
|------|------|------|-----|---|-----|--------|--------|--------|------|------|
| ATOM | 2062 | HA   | LEU | X | 134 | 29.278 | 30.311 | 26.737 | 0.00 | 0.00 |
| ATOM | 2063 | CB   | LEU | X | 134 | 30.101 | 31.981 | 27.991 | 0.00 | 0.00 |
| ATOM | 2064 | HB2  | LEU | X | 134 | 31.057 | 31.487 | 28.164 | 0.00 | 0.00 |
| ATOM | 2065 | HB3  | LEU | X | 134 | 30.369 | 33.027 | 27.839 | 0.00 | 0.00 |
| ATOM | 2066 | CG   | LEU | X | 134 | 29.165 | 31.794 | 29.220 | 0.00 | 0.00 |
| ATOM | 2067 | HG   | LEU | X | 134 | 28.128 | 31.972 | 28.933 | 0.00 | 0.00 |
| ATOM | 2068 | CD1  | LEU | X | 134 | 29.208 | 30.327 | 29.764 | 0.00 | 0.00 |
| ATOM | 2069 | HD11 | LEU | X | 134 | 30.255 | 30.090 | 29.957 | 0.00 | 0.00 |
| ATOM | 2070 | HD12 | LEU | X | 134 | 28.853 | 29.645 | 28.991 | 0.00 | 0.00 |
| ATOM | 2071 | HD13 | LEU | X | 134 | 28.611 | 30.294 | 30.675 | 0.00 | 0.00 |
| ATOM | 2072 | CD2  | LEU | X | 134 | 29.465 | 32.789 | 30.324 | 0.00 | 0.00 |
| ATOM | 2073 | HD21 | LEU | X | 134 | 30.448 | 32.612 | 30.759 | 0.00 | 0.00 |
| ATOM | 2074 | HD22 | LEU | X | 134 | 29.300 | 33.756 | 29.850 | 0.00 | 0.00 |
| ATOM | 2075 | HD23 | LEU | X | 134 | 28.698 | 32.625 | 31.081 | 0.00 | 0.00 |
| ATOM | 2076 | C    | LEU | X | 134 | 28.104 | 31.989 | 26.339 | 0.00 | 0.00 |
| ATOM | 2077 | O    | LEU | X | 134 | 27.117 | 31.260 | 26.448 | 0.00 | 0.00 |
| ATOM | 2078 | N    | VAL | X | 135 | 27.981 | 33.199 | 25.744 | 0.00 | 0.00 |
| ATOM | 2079 | H    | VAL | X | 135 | 28.814 | 33.736 | 25.547 | 0.00 | 0.00 |
| ATOM | 2080 | CA   | VAL | X | 135 | 26.759 | 33.743 | 25.105 | 0.00 | 0.00 |
| ATOM | 2081 | HA   | VAL | X | 135 | 26.095 | 33.801 | 25.968 | 0.00 | 0.00 |
| ATOM | 2082 | CB   | VAL | X | 135 | 27.030 | 35.140 | 24.466 | 0.00 | 0.00 |
| ATOM | 2083 | HB   | VAL | X | 135 | 27.813 | 34.922 | 23.740 | 0.00 | 0.00 |
| ATOM | 2084 | CG1  | VAL | X | 135 | 25.819 | 35.711 | 23.783 | 0.00 | 0.00 |
| ATOM | 2085 | HG11 | VAL | X | 135 | 25.600 | 35.211 | 22.839 | 0.00 | 0.00 |
| ATOM | 2086 | HG12 | VAL | X | 135 | 24.942 | 35.644 | 24.426 | 0.00 | 0.00 |
| ATOM | 2087 | HG13 | VAL | X | 135 | 25.986 | 36.740 | 23.465 | 0.00 | 0.00 |
| ATOM | 2088 | CG2  | VAL | X | 135 | 27.437 | 36.088 | 25.538 | 0.00 | 0.00 |
| ATOM | 2089 | HG21 | VAL | X | 135 | 26.878 | 36.010 | 26.471 | 0.00 | 0.00 |
| ATOM | 2090 | HG22 | VAL | X | 135 | 27.311 | 37.107 | 25.172 | 0.00 | 0.00 |
| ATOM | 2091 | HG23 | VAL | X | 135 | 28.475 | 35.927 | 25.829 | 0.00 | 0.00 |
| ATOM | 2092 | C    | VAL | X | 135 | 26.066 | 32.839 | 24.086 | 0.00 | 0.00 |
| ATOM | 2093 | O    | VAL | X | 135 | 24.820 | 32.615 | 24.115 | 0.00 | 0.00 |
| ATOM | 2094 | N    | GLN | X | 136 | 26.828 | 32.215 | 23.166 | 0.00 | 0.00 |
| ATOM | 2095 | H    | GLN | X | 136 | 27.825 | 32.367 | 23.109 | 0.00 | 0.00 |
| ATOM | 2096 | CA   | GLN | X | 136 | 26.299 | 31.343 | 22.163 | 0.00 | 0.00 |
| ATOM | 2097 | HA   | GLN | X | 136 | 25.477 | 31.908 | 21.724 | 0.00 | 0.00 |
| ATOM | 2098 | CB   | GLN | X | 136 | 27.307 | 31.022 | 21.088 | 0.00 | 0.00 |
| ATOM | 2099 | HB2  | GLN | X | 136 | 27.554 | 31.912 | 20.510 | 0.00 | 0.00 |
| ATOM | 2100 | HB3  | GLN | X | 136 | 28.218 | 30.724 | 21.608 | 0.00 | 0.00 |
| ATOM | 2101 | CG   | GLN | X | 136 | 26.963 | 29.952 | 19.993 | 0.00 | 0.00 |
| ATOM | 2102 | HG2  | GLN | X | 136 | 25.873 | 29.958 | 20.004 | 0.00 | 0.00 |
| ATOM | 2103 | HG3  | GLN | X | 136 | 27.313 | 30.199 | 18.990 | 0.00 | 0.00 |
| ATOM | 2104 | CD   | GLN | X | 136 | 27.422 | 28.545 | 20.294 | 0.00 | 0.00 |
| ATOM | 2105 | OE1  | GLN | X | 136 | 28.441 | 28.021 | 19.979 | 0.00 | 0.00 |
| ATOM | 2106 | NE2  | GLN | X | 136 | 26.558 | 27.693 | 20.887 | 0.00 | 0.00 |
| ATOM | 2107 | HE21 | GLN | X | 136 | 26.871 | 26.813 | 21.270 | 0.00 | 0.00 |
| ATOM | 2108 | HE22 | GLN | X | 136 | 25.675 | 28.092 | 21.171 | 0.00 | 0.00 |
| ATOM | 2109 | C    | GLN | X | 136 | 25.668 | 30.124 | 22.845 | 0.00 | 0.00 |
| ATOM | 2110 | O    | GLN | X | 136 | 24.674 | 29.583 | 22.409 | 0.00 | 0.00 |
| ATOM | 2111 | N    | ALA | X | 137 | 26.310 | 29.628 | 23.922 | 0.00 | 0.00 |
| ATOM | 2112 | H    | ALA | X | 137 | 27.153 | 30.095 | 24.221 | 0.00 | 0.00 |
| ATOM | 2113 | CA   | ALA | X | 137 | 26.038 | 28.348 | 24.576 | 0.00 | 0.00 |
| ATOM | 2114 | HA   | ALA | X | 137 | 25.880 | 27.625 | 23.776 | 0.00 | 0.00 |
| ATOM | 2115 | CB   | ALA | X | 137 | 27.363 | 28.017 | 25.286 | 0.00 | 0.00 |
| ATOM | 2116 | HB1  | ALA | X | 137 | 27.498 | 28.812 | 26.019 | 0.00 | 0.00 |
| ATOM | 2117 | HB2  | ALA | X | 137 | 28.160 | 27.796 | 24.576 | 0.00 | 0.00 |
| ATOM | 2118 | HB3  | ALA | X | 137 | 27.240 | 27.079 | 25.827 | 0.00 | 0.00 |
| ATOM | 2119 | C    | ALA | X | 137 | 24.750 | 28.366 | 25.502 | 0.00 | 0.00 |
| ATOM | 2120 | O    | ALA | X | 137 | 23.886 | 27.445 | 25.522 | 0.00 | 0.00 |
| ATOM | 2121 | N    | GLU | X | 138 | 24.762 | 29.433 | 26.308 | 0.00 | 0.00 |
| ATOM | 2122 | H    | GLU | X | 138 | 25.560 | 30.046 | 26.222 | 0.00 | 0.00 |
| ATOM | 2123 | CA   | GLU | X | 138 | 23.950 | 29.506 | 27.512 | 0.00 | 0.00 |
| ATOM | 2124 | HA   | GLU | X | 138 | 23.453 | 28.542 | 27.619 | 0.00 | 0.00 |
| ATOM | 2125 | CB   | GLU | X | 138 | 24.842 | 29.765 | 28.740 | 0.00 | 0.00 |
| ATOM | 2126 | HB2  | GLU | X | 138 | 25.449 | 30.635 | 28.489 | 0.00 | 0.00 |
| ATOM | 2127 | HB3  | GLU | X | 138 | 24.251 | 29.948 | 29.637 | 0.00 | 0.00 |
| ATOM | 2128 | CG   | GLU | X | 138 | 25.764 | 28.595 | 28.959 | 0.00 | 0.00 |



|      |      |      |     |   |     |        |        |        |      |      |
|------|------|------|-----|---|-----|--------|--------|--------|------|------|
| ATOM | 2129 | HG2  | GLU | X | 138 | 26.423 | 28.400 | 28.114 | 0.00 | 0.00 |
| ATOM | 2130 | HG3  | GLU | X | 138 | 26.535 | 28.774 | 29.708 | 0.00 | 0.00 |
| ATOM | 2131 | CD   | GLU | X | 138 | 24.959 | 27.370 | 29.462 | 0.00 | 0.00 |
| ATOM | 2132 | OE1  | GLU | X | 138 | 23.922 | 27.559 | 30.147 | 0.00 | 0.00 |
| ATOM | 2133 | OE2  | GLU | X | 138 | 25.388 | 26.196 | 29.162 | 0.00 | 0.00 |
| ATOM | 2134 | C    | GLU | X | 138 | 22.843 | 30.552 | 27.310 | 0.00 | 0.00 |
| ATOM | 2135 | O    | GLU | X | 138 | 21.900 | 30.526 | 28.088 | 0.00 | 0.00 |
| ATOM | 2136 | N    | ARG | X | 139 | 23.010 | 31.433 | 26.327 | 0.00 | 0.00 |
| ATOM | 2137 | H    | ARG | X | 139 | 23.711 | 31.289 | 25.615 | 0.00 | 0.00 |
| ATOM | 2138 | CA   | ARG | X | 139 | 22.092 | 32.468 | 25.862 | 0.00 | 0.00 |
| ATOM | 2139 | HA   | ARG | X | 139 | 22.513 | 33.032 | 25.029 | 0.00 | 0.00 |
| ATOM | 2140 | CB   | ARG | X | 139 | 20.779 | 31.944 | 25.318 | 0.00 | 0.00 |
| ATOM | 2141 | HB2  | ARG | X | 139 | 20.149 | 31.672 | 26.164 | 0.00 | 0.00 |
| ATOM | 2142 | HB3  | ARG | X | 139 | 20.218 | 32.739 | 24.826 | 0.00 | 0.00 |
| ATOM | 2143 | CG   | ARG | X | 139 | 20.946 | 30.812 | 24.278 | 0.00 | 0.00 |
| ATOM | 2144 | HG2  | ARG | X | 139 | 21.554 | 31.278 | 23.503 | 0.00 | 0.00 |
| ATOM | 2145 | HG3  | ARG | X | 139 | 21.479 | 29.923 | 24.618 | 0.00 | 0.00 |
| ATOM | 2146 | CD   | ARG | X | 139 | 19.523 | 30.431 | 23.754 | 0.00 | 0.00 |
| ATOM | 2147 | HD2  | ARG | X | 139 | 19.709 | 29.826 | 22.867 | 0.00 | 0.00 |
| ATOM | 2148 | HD3  | ARG | X | 139 | 19.016 | 29.967 | 24.600 | 0.00 | 0.00 |
| ATOM | 2149 | NE   | ARG | X | 139 | 18.629 | 31.569 | 23.227 | 0.00 | 0.00 |
| ATOM | 2150 | HE   | ARG | X | 139 | 17.886 | 31.830 | 23.860 | 0.00 | 0.00 |
| ATOM | 2151 | CZ   | ARG | X | 139 | 18.734 | 32.364 | 22.161 | 0.00 | 0.00 |
| ATOM | 2152 | NH1  | ARG | X | 139 | 19.782 | 32.365 | 21.308 | 0.00 | 0.00 |
| ATOM | 2153 | HH11 | ARG | X | 139 | 20.588 | 31.787 | 21.495 | 0.00 | 0.00 |
| ATOM | 2154 | HH12 | ARG | X | 139 | 19.687 | 32.766 | 20.386 | 0.00 | 0.00 |
| ATOM | 2155 | NH2  | ARG | X | 139 | 17.718 | 33.179 | 21.906 | 0.00 | 0.00 |
| ATOM | 2156 | HH21 | ARG | X | 139 | 16.927 | 33.271 | 22.527 | 0.00 | 0.00 |
| ATOM | 2157 | HH22 | ARG | X | 139 | 17.722 | 33.871 | 21.170 | 0.00 | 0.00 |
| ATOM | 2158 | C    | ARG | X | 139 | 21.844 | 33.624 | 26.912 | 0.00 | 0.00 |
| ATOM | 2159 | O    | ARG | X | 139 | 21.052 | 34.525 | 26.667 | 0.00 | 0.00 |
| ATOM | 2160 | N    | THR | X | 140 | 22.653 | 33.615 | 28.007 | 0.00 | 0.00 |
| ATOM | 2161 | H    | THR | X | 140 | 23.129 | 32.733 | 28.132 | 0.00 | 0.00 |
| ATOM | 2162 | CA   | THR | X | 140 | 22.927 | 34.725 | 28.866 | 0.00 | 0.00 |
| ATOM | 2163 | HA   | THR | X | 140 | 21.990 | 35.070 | 29.303 | 0.00 | 0.00 |
| ATOM | 2164 | CB   | THR | X | 140 | 23.829 | 34.310 | 30.010 | 0.00 | 0.00 |
| ATOM | 2165 | HB   | THR | X | 140 | 23.983 | 35.236 | 30.565 | 0.00 | 0.00 |
| ATOM | 2166 | CG2  | THR | X | 140 | 23.316 | 33.113 | 30.824 | 0.00 | 0.00 |
| ATOM | 2167 | HG21 | THR | X | 140 | 23.636 | 32.230 | 30.271 | 0.00 | 0.00 |
| ATOM | 2168 | HG22 | THR | X | 140 | 22.233 | 33.230 | 30.819 | 0.00 | 0.00 |
| ATOM | 2169 | HG23 | THR | X | 140 | 23.765 | 33.073 | 31.817 | 0.00 | 0.00 |
| ATOM | 2170 | OG1  | THR | X | 140 | 25.042 | 33.883 | 29.544 | 0.00 | 0.00 |
| ATOM | 2171 | HG1  | THR | X | 140 | 25.319 | 34.358 | 28.757 | 0.00 | 0.00 |
| ATOM | 2172 | C    | THR | X | 140 | 23.658 | 35.839 | 28.110 | 0.00 | 0.00 |
| ATOM | 2173 | O    | THR | X | 140 | 24.533 | 35.487 | 27.332 | 0.00 | 0.00 |
| ATOM | 2174 | N    | VAL | X | 141 | 23.322 | 37.086 | 28.385 | 0.00 | 0.00 |
| ATOM | 2175 | H    | VAL | X | 141 | 22.799 | 37.221 | 29.238 | 0.00 | 0.00 |
| ATOM | 2176 | CA   | VAL | X | 141 | 24.023 | 38.281 | 27.804 | 0.00 | 0.00 |
| ATOM | 2177 | HA   | VAL | X | 141 | 24.339 | 38.018 | 26.794 | 0.00 | 0.00 |
| ATOM | 2178 | CB   | VAL | X | 141 | 23.054 | 39.475 | 27.688 | 0.00 | 0.00 |
| ATOM | 2179 | HB   | VAL | X | 141 | 22.658 | 39.488 | 28.703 | 0.00 | 0.00 |
| ATOM | 2180 | CG1  | VAL | X | 141 | 23.694 | 40.923 | 27.434 | 0.00 | 0.00 |
| ATOM | 2181 | HG11 | VAL | X | 141 | 24.202 | 40.794 | 26.478 | 0.00 | 0.00 |
| ATOM | 2182 | HG12 | VAL | X | 141 | 22.940 | 41.700 | 27.303 | 0.00 | 0.00 |
| ATOM | 2183 | HG13 | VAL | X | 141 | 24.323 | 41.120 | 28.303 | 0.00 | 0.00 |
| ATOM | 2184 | CG2  | VAL | X | 141 | 21.840 | 39.264 | 26.787 | 0.00 | 0.00 |
| ATOM | 2185 | HG21 | VAL | X | 141 | 21.349 | 38.312 | 26.986 | 0.00 | 0.00 |
| ATOM | 2186 | HG22 | VAL | X | 141 | 22.223 | 39.075 | 25.784 | 0.00 | 0.00 |
| ATOM | 2187 | HG23 | VAL | X | 141 | 21.139 | 40.091 | 26.898 | 0.00 | 0.00 |
| ATOM | 2188 | C    | VAL | X | 141 | 25.267 | 38.542 | 28.596 | 0.00 | 0.00 |
| ATOM | 2189 | O    | VAL | X | 141 | 25.257 | 38.356 | 29.802 | 0.00 | 0.00 |
| ATOM | 2190 | N    | LEU | X | 142 | 26.346 | 39.157 | 28.072 | 0.00 | 0.00 |
| ATOM | 2191 | H    | LEU | X | 142 | 26.416 | 39.308 | 27.076 | 0.00 | 0.00 |
| ATOM | 2192 | CA   | LEU | X | 142 | 27.565 | 39.382 | 28.888 | 0.00 | 0.00 |
| ATOM | 2193 | HA   | LEU | X | 142 | 27.324 | 39.500 | 29.945 | 0.00 | 0.00 |
| ATOM | 2194 | CB   | LEU | X | 142 | 28.477 | 38.163 | 28.654 | 0.00 | 0.00 |
| ATOM | 2195 | HB2  | LEU | X | 142 | 27.946 | 37.247 | 28.912 | 0.00 | 0.00 |

|      |      |      |     |   |     |        |        |        |      |      |
|------|------|------|-----|---|-----|--------|--------|--------|------|------|
| ATOM | 2196 | HB3  | LEU | X | 142 | 28.686 | 38.002 | 27.597 | 0.00 | 0.00 |
| ATOM | 2197 | CG   | LEU | X | 142 | 29.800 | 38.236 | 29.419 | 0.00 | 0.00 |
| ATOM | 2198 | HG   | LEU | X | 142 | 29.588 | 38.646 | 30.406 | 0.00 | 0.00 |
| ATOM | 2199 | CD1  | LEU | X | 142 | 30.391 | 36.845 | 29.677 | 0.00 | 0.00 |
| ATOM | 2200 | HD11 | LEU | X | 142 | 31.405 | 36.980 | 30.055 | 0.00 | 0.00 |
| ATOM | 2201 | HD12 | LEU | X | 142 | 30.415 | 36.272 | 28.751 | 0.00 | 0.00 |
| ATOM | 2202 | HD13 | LEU | X | 142 | 29.863 | 36.248 | 30.420 | 0.00 | 0.00 |
| ATOM | 2203 | CD2  | LEU | X | 142 | 30.914 | 39.069 | 28.790 | 0.00 | 0.00 |
| ATOM | 2204 | HD21 | LEU | X | 142 | 31.296 | 38.740 | 27.823 | 0.00 | 0.00 |
| ATOM | 2205 | HD22 | LEU | X | 142 | 30.604 | 40.114 | 28.797 | 0.00 | 0.00 |
| ATOM | 2206 | HD23 | LEU | X | 142 | 31.795 | 39.060 | 29.431 | 0.00 | 0.00 |
| ATOM | 2207 | C    | LEU | X | 142 | 28.165 | 40.769 | 28.549 | 0.00 | 0.00 |
| ATOM | 2208 | O    | LEU | X | 142 | 28.533 | 41.068 | 27.397 | 0.00 | 0.00 |
| ATOM | 2209 | N    | VAL | X | 143 | 28.477 | 41.533 | 29.537 | 0.00 | 0.00 |
| ATOM | 2210 | H    | VAL | X | 143 | 28.196 | 41.076 | 30.393 | 0.00 | 0.00 |
| ATOM | 2211 | CA   | VAL | X | 143 | 29.060 | 42.865 | 29.563 | 0.00 | 0.00 |
| ATOM | 2212 | HA   | VAL | X | 143 | 29.062 | 43.205 | 28.527 | 0.00 | 0.00 |
| ATOM | 2213 | CB   | VAL | X | 143 | 28.192 | 43.783 | 30.457 | 0.00 | 0.00 |
| ATOM | 2214 | HB   | VAL | X | 143 | 28.238 | 43.393 | 31.474 | 0.00 | 0.00 |
| ATOM | 2215 | CG1  | VAL | X | 143 | 28.770 | 45.232 | 30.420 | 0.00 | 0.00 |
| ATOM | 2216 | HG11 | VAL | X | 143 | 28.885 | 45.536 | 29.380 | 0.00 | 0.00 |
| ATOM | 2217 | HG12 | VAL | X | 143 | 28.221 | 45.985 | 30.986 | 0.00 | 0.00 |
| ATOM | 2218 | HG13 | VAL | X | 143 | 29.790 | 45.166 | 30.798 | 0.00 | 0.00 |
| ATOM | 2219 | CG2  | VAL | X | 143 | 26.717 | 43.878 | 30.053 | 0.00 | 0.00 |
| ATOM | 2220 | HG21 | VAL | X | 143 | 26.147 | 42.950 | 30.023 | 0.00 | 0.00 |
| ATOM | 2221 | HG22 | VAL | X | 143 | 26.569 | 44.528 | 29.191 | 0.00 | 0.00 |
| ATOM | 2222 | HG23 | VAL | X | 143 | 26.360 | 44.618 | 30.770 | 0.00 | 0.00 |
| ATOM | 2223 | C    | VAL | X | 143 | 30.445 | 42.735 | 30.022 | 0.00 | 0.00 |
| ATOM | 2224 | O    | VAL | X | 143 | 30.791 | 41.904 | 30.880 | 0.00 | 0.00 |
| ATOM | 2225 | N    | SER | X | 144 | 31.269 | 43.675 | 29.490 | 0.00 | 0.00 |
| ATOM | 2226 | H    | SER | X | 144 | 30.886 | 44.323 | 28.816 | 0.00 | 0.00 |
| ATOM | 2227 | CA   | SER | X | 144 | 32.639 | 43.900 | 29.977 | 0.00 | 0.00 |
| ATOM | 2228 | HA   | SER | X | 144 | 32.644 | 43.615 | 31.029 | 0.00 | 0.00 |
| ATOM | 2229 | CB   | SER | X | 144 | 33.610 | 42.987 | 29.199 | 0.00 | 0.00 |
| ATOM | 2230 | HB2  | SER | X | 144 | 33.212 | 41.980 | 29.071 | 0.00 | 0.00 |
| ATOM | 2231 | HB3  | SER | X | 144 | 33.703 | 43.427 | 28.207 | 0.00 | 0.00 |
| ATOM | 2232 | OG   | SER | X | 144 | 34.847 | 42.902 | 29.834 | 0.00 | 0.00 |
| ATOM | 2233 | HG   | SER | X | 144 | 35.361 | 42.229 | 29.382 | 0.00 | 0.00 |
| ATOM | 2234 | C    | SER | X | 144 | 32.996 | 45.355 | 29.910 | 0.00 | 0.00 |
| ATOM | 2235 | O    | SER | X | 144 | 32.342 | 46.093 | 29.124 | 0.00 | 0.00 |
| ATOM | 2236 | N    | MET | X | 145 | 34.042 | 45.725 | 30.599 | 0.00 | 0.00 |
| ATOM | 2237 | H    | MET | X | 145 | 34.556 | 45.067 | 31.167 | 0.00 | 0.00 |
| ATOM | 2238 | CA   | MET | X | 145 | 34.398 | 47.115 | 30.743 | 0.00 | 0.00 |
| ATOM | 2239 | HA   | MET | X | 145 | 33.851 | 47.636 | 29.957 | 0.00 | 0.00 |
| ATOM | 2240 | CB   | MET | X | 145 | 33.824 | 47.657 | 32.046 | 0.00 | 0.00 |
| ATOM | 2241 | HB2  | MET | X | 145 | 34.189 | 48.676 | 32.179 | 0.00 | 0.00 |
| ATOM | 2242 | HB3  | MET | X | 145 | 32.735 | 47.688 | 32.077 | 0.00 | 0.00 |
| ATOM | 2243 | CG   | MET | X | 145 | 34.294 | 46.948 | 33.297 | 0.00 | 0.00 |
| ATOM | 2244 | HG2  | MET | X | 145 | 33.964 | 45.910 | 33.323 | 0.00 | 0.00 |
| ATOM | 2245 | HG3  | MET | X | 145 | 35.378 | 46.912 | 33.184 | 0.00 | 0.00 |
| ATOM | 2246 | SD   | MET | X | 145 | 33.916 | 47.597 | 34.956 | 0.00 | 0.00 |
| ATOM | 2247 | CE   | MET | X | 145 | 32.181 | 47.046 | 35.219 | 0.00 | 0.00 |
| ATOM | 2248 | HE1  | MET | X | 145 | 31.538 | 47.066 | 34.339 | 0.00 | 0.00 |
| ATOM | 2249 | HE2  | MET | X | 145 | 32.250 | 45.983 | 35.451 | 0.00 | 0.00 |
| ATOM | 2250 | HE3  | MET | X | 145 | 31.793 | 47.640 | 36.047 | 0.00 | 0.00 |
| ATOM | 2251 | C    | MET | X | 145 | 35.887 | 47.334 | 30.621 | 0.00 | 0.00 |
| ATOM | 2252 | O    | MET | X | 145 | 36.613 | 46.364 | 30.526 | 0.00 | 0.00 |
| ATOM | 2253 | N    | ASN | X | 146 | 36.269 | 48.629 | 30.525 | 0.00 | 0.00 |
| ATOM | 2254 | H    | ASN | X | 146 | 35.599 | 49.383 | 30.498 | 0.00 | 0.00 |
| ATOM | 2255 | CA   | ASN | X | 146 | 37.591 | 49.048 | 30.598 | 0.00 | 0.00 |
| ATOM | 2256 | HA   | ASN | X | 146 | 38.199 | 48.243 | 31.011 | 0.00 | 0.00 |
| ATOM | 2257 | CB   | ASN | X | 146 | 38.027 | 49.087 | 29.124 | 0.00 | 0.00 |
| ATOM | 2258 | HB2  | ASN | X | 146 | 37.635 | 48.305 | 28.474 | 0.00 | 0.00 |
| ATOM | 2259 | HB3  | ASN | X | 146 | 37.730 | 50.043 | 28.693 | 0.00 | 0.00 |
| ATOM | 2260 | CG   | ASN | X | 146 | 39.594 | 48.909 | 29.133 | 0.00 | 0.00 |
| ATOM | 2261 | OD1  | ASN | X | 146 | 40.116 | 47.790 | 29.071 | 0.00 | 0.00 |
| ATOM | 2262 | ND2  | ASN | X | 146 | 40.280 | 50.005 | 28.995 | 0.00 | 0.00 |

|      |      |      |     |   |     |        |        |        |      |      |
|------|------|------|-----|---|-----|--------|--------|--------|------|------|
| ATOM | 2263 | HD21 | ASN | X | 146 | 41.246 | 49.873 | 28.733 | 0.00 | 0.00 |
| ATOM | 2264 | HD22 | ASN | X | 146 | 39.804 | 50.891 | 28.908 | 0.00 | 0.00 |
| ATOM | 2265 | C    | ASN | X | 146 | 37.787 | 50.291 | 31.430 | 0.00 | 0.00 |
| ATOM | 2266 | O    | ASN | X | 146 | 36.980 | 51.193 | 31.262 | 0.00 | 0.00 |
| ATOM | 2267 | N    | TYR | X | 147 | 38.791 | 50.338 | 32.308 | 0.00 | 0.00 |
| ATOM | 2268 | H    | TYR | X | 147 | 39.570 | 49.714 | 32.157 | 0.00 | 0.00 |
| ATOM | 2269 | CA   | TYR | X | 147 | 38.913 | 51.349 | 33.375 | 0.00 | 0.00 |
| ATOM | 2270 | HA   | TYR | X | 147 | 38.662 | 52.368 | 33.082 | 0.00 | 0.00 |
| ATOM | 2271 | CB   | TYR | X | 147 | 38.031 | 50.910 | 34.574 | 0.00 | 0.00 |
| ATOM | 2272 | HB2  | TYR | X | 147 | 38.184 | 51.683 | 35.328 | 0.00 | 0.00 |
| ATOM | 2273 | HB3  | TYR | X | 147 | 36.996 | 51.005 | 34.248 | 0.00 | 0.00 |
| ATOM | 2274 | CG   | TYR | X | 147 | 38.299 | 49.502 | 35.100 | 0.00 | 0.00 |
| ATOM | 2275 | CD1  | TYR | X | 147 | 37.519 | 48.480 | 34.572 | 0.00 | 0.00 |
| ATOM | 2276 | HD1  | TYR | X | 147 | 36.659 | 48.710 | 33.961 | 0.00 | 0.00 |
| ATOM | 2277 | CE1  | TYR | X | 147 | 37.755 | 47.125 | 34.913 | 0.00 | 0.00 |
| ATOM | 2278 | HE1  | TYR | X | 147 | 37.150 | 46.304 | 34.558 | 0.00 | 0.00 |
| ATOM | 2279 | CZ   | TYR | X | 147 | 38.906 | 46.793 | 35.691 | 0.00 | 0.00 |
| ATOM | 2280 | OH   | TYR | X | 147 | 39.111 | 45.505 | 36.038 | 0.00 | 0.00 |
| ATOM | 2281 | HH   | TYR | X | 147 | 39.901 | 45.366 | 36.566 | 0.00 | 0.00 |
| ATOM | 2282 | CE2  | TYR | X | 147 | 39.760 | 47.876 | 36.121 | 0.00 | 0.00 |
| ATOM | 2283 | HE2  | TYR | X | 147 | 40.670 | 47.692 | 36.674 | 0.00 | 0.00 |
| ATOM | 2284 | CD2  | TYR | X | 147 | 39.471 | 49.225 | 35.818 | 0.00 | 0.00 |
| ATOM | 2285 | HD2  | TYR | X | 147 | 40.176 | 49.974 | 36.145 | 0.00 | 0.00 |
| ATOM | 2286 | C    | TYR | X | 147 | 40.376 | 51.551 | 33.842 | 0.00 | 0.00 |
| ATOM | 2287 | O    | TYR | X | 147 | 41.300 | 50.764 | 33.567 | 0.00 | 0.00 |
| ATOM | 2288 | N    | ARG | X | 148 | 40.571 | 52.706 | 34.521 | 0.00 | 0.00 |
| ATOM | 2289 | H    | ARG | X | 148 | 39.806 | 53.245 | 34.902 | 0.00 | 0.00 |
| ATOM | 2290 | CA   | ARG | X | 148 | 41.865 | 53.233 | 34.896 | 0.00 | 0.00 |
| ATOM | 2291 | HA   | ARG | X | 148 | 42.560 | 53.290 | 34.058 | 0.00 | 0.00 |
| ATOM | 2292 | CB   | ARG | X | 148 | 41.785 | 54.643 | 35.468 | 0.00 | 0.00 |
| ATOM | 2293 | HB2  | ARG | X | 148 | 41.199 | 54.648 | 36.387 | 0.00 | 0.00 |
| ATOM | 2294 | HB3  | ARG | X | 148 | 42.801 | 54.959 | 35.705 | 0.00 | 0.00 |
| ATOM | 2295 | CG   | ARG | X | 148 | 41.239 | 55.622 | 34.389 | 0.00 | 0.00 |
| ATOM | 2296 | HG2  | ARG | X | 148 | 41.983 | 55.751 | 33.603 | 0.00 | 0.00 |
| ATOM | 2297 | HG3  | ARG | X | 148 | 40.434 | 55.169 | 33.811 | 0.00 | 0.00 |
| ATOM | 2298 | CD   | ARG | X | 148 | 40.941 | 57.000 | 35.037 | 0.00 | 0.00 |
| ATOM | 2299 | HD2  | ARG | X | 148 | 41.849 | 57.296 | 35.564 | 0.00 | 0.00 |
| ATOM | 2300 | HD3  | ARG | X | 148 | 40.763 | 57.649 | 34.180 | 0.00 | 0.00 |
| ATOM | 2301 | NE   | ARG | X | 148 | 39.684 | 56.941 | 35.851 | 0.00 | 0.00 |
| ATOM | 2302 | HE   | ARG | X | 148 | 39.013 | 56.230 | 35.594 | 0.00 | 0.00 |
| ATOM | 2303 | CZ   | ARG | X | 148 | 39.247 | 57.980 | 36.599 | 0.00 | 0.00 |
| ATOM | 2304 | NH1  | ARG | X | 148 | 40.008 | 59.007 | 36.904 | 0.00 | 0.00 |
| ATOM | 2305 | HH11 | ARG | X | 148 | 41.014 | 58.942 | 36.833 | 0.00 | 0.00 |
| ATOM | 2306 | HH12 | ARG | X | 148 | 39.623 | 59.836 | 37.335 | 0.00 | 0.00 |
| ATOM | 2307 | NH2  | ARG | X | 148 | 37.973 | 58.167 | 36.831 | 0.00 | 0.00 |
| ATOM | 2308 | HH21 | ARG | X | 148 | 37.292 | 57.490 | 36.516 | 0.00 | 0.00 |
| ATOM | 2309 | HH22 | ARG | X | 148 | 37.689 | 59.045 | 37.240 | 0.00 | 0.00 |
| ATOM | 2310 | C    | ARG | X | 148 | 42.593 | 52.455 | 36.007 | 0.00 | 0.00 |
| ATOM | 2311 | O    | ARG | X | 148 | 42.655 | 52.806 | 37.245 | 0.00 | 0.00 |
| ATOM | 2312 | N    | VAL | X | 149 | 43.182 | 51.370 | 35.504 | 0.00 | 0.00 |
| ATOM | 2313 | H    | VAL | X | 149 | 42.817 | 51.000 | 34.638 | 0.00 | 0.00 |
| ATOM | 2314 | CA   | VAL | X | 149 | 44.358 | 50.801 | 36.207 | 0.00 | 0.00 |
| ATOM | 2315 | HA   | VAL | X | 149 | 44.077 | 50.421 | 37.189 | 0.00 | 0.00 |
| ATOM | 2316 | CB   | VAL | X | 149 | 44.837 | 49.561 | 35.410 | 0.00 | 0.00 |
| ATOM | 2317 | HB   | VAL | X | 149 | 45.693 | 49.125 | 35.925 | 0.00 | 0.00 |
| ATOM | 2318 | CG1  | VAL | X | 149 | 43.773 | 48.497 | 35.473 | 0.00 | 0.00 |
| ATOM | 2319 | HG11 | VAL | X | 149 | 43.620 | 48.108 | 36.480 | 0.00 | 0.00 |
| ATOM | 2320 | HG12 | VAL | X | 149 | 42.778 | 48.703 | 35.079 | 0.00 | 0.00 |
| ATOM | 2321 | HG13 | VAL | X | 149 | 44.106 | 47.646 | 34.879 | 0.00 | 0.00 |
| ATOM | 2322 | CG2  | VAL | X | 149 | 45.093 | 49.909 | 33.931 | 0.00 | 0.00 |
| ATOM | 2323 | HG21 | VAL | X | 149 | 45.978 | 50.529 | 33.787 | 0.00 | 0.00 |
| ATOM | 2324 | HG22 | VAL | X | 149 | 44.198 | 50.302 | 33.448 | 0.00 | 0.00 |
| ATOM | 2325 | HG23 | VAL | X | 149 | 45.396 | 48.988 | 33.432 | 0.00 | 0.00 |
| ATOM | 2326 | C    | VAL | X | 149 | 45.470 | 51.914 | 36.346 | 0.00 | 0.00 |
| ATOM | 2327 | O    | VAL | X | 149 | 45.401 | 53.040 | 35.802 | 0.00 | 0.00 |
| ATOM | 2328 | N    | GLY | X | 150 | 46.444 | 51.567 | 37.143 | 0.00 | 0.00 |
| ATOM | 2329 | H    | GLY | X | 150 | 46.239 | 50.779 | 37.740 | 0.00 | 0.00 |

|      |      |     |     |   |     |        |        |        |      |      |
|------|------|-----|-----|---|-----|--------|--------|--------|------|------|
| ATOM | 2330 | CA  | GLY | X | 150 | 47.550 | 52.520 | 37.420 | 0.00 | 0.00 |
| ATOM | 2331 | HA2 | GLY | X | 150 | 48.461 | 52.145 | 37.888 | 0.00 | 0.00 |
| ATOM | 2332 | HA3 | GLY | X | 150 | 47.863 | 52.955 | 36.471 | 0.00 | 0.00 |
| ATOM | 2333 | C   | GLY | X | 150 | 47.269 | 53.697 | 38.311 | 0.00 | 0.00 |
| ATOM | 2334 | O   | GLY | X | 150 | 46.217 | 53.821 | 38.928 | 0.00 | 0.00 |
| ATOM | 2335 | N   | ALA | X | 151 | 48.251 | 54.623 | 38.389 | 0.00 | 0.00 |
| ATOM | 2336 | H   | ALA | X | 151 | 49.022 | 54.526 | 37.745 | 0.00 | 0.00 |
| ATOM | 2337 | CA  | ALA | X | 151 | 48.178 | 55.901 | 39.195 | 0.00 | 0.00 |
| ATOM | 2338 | HA  | ALA | X | 151 | 48.131 | 55.484 | 40.201 | 0.00 | 0.00 |
| ATOM | 2339 | CB  | ALA | X | 151 | 49.510 | 56.717 | 39.015 | 0.00 | 0.00 |
| ATOM | 2340 | HB1 | ALA | X | 151 | 49.450 | 57.761 | 39.325 | 0.00 | 0.00 |
| ATOM | 2341 | HB2 | ALA | X | 151 | 49.854 | 56.885 | 37.994 | 0.00 | 0.00 |
| ATOM | 2342 | HB3 | ALA | X | 151 | 50.306 | 56.371 | 39.674 | 0.00 | 0.00 |
| ATOM | 2343 | C   | ALA | X | 151 | 46.940 | 56.732 | 38.760 | 0.00 | 0.00 |
| ATOM | 2344 | O   | ALA | X | 151 | 46.436 | 57.430 | 39.631 | 0.00 | 0.00 |
| ATOM | 2345 | N   | PHE | X | 152 | 46.464 | 56.639 | 37.505 | 0.00 | 0.00 |
| ATOM | 2346 | H   | PHE | X | 152 | 46.908 | 55.965 | 36.898 | 0.00 | 0.00 |
| ATOM | 2347 | CA  | PHE | X | 152 | 45.286 | 57.386 | 36.970 | 0.00 | 0.00 |
| ATOM | 2348 | HA  | PHE | X | 152 | 45.555 | 58.441 | 36.936 | 0.00 | 0.00 |
| ATOM | 2349 | CB  | PHE | X | 152 | 45.086 | 56.905 | 35.513 | 0.00 | 0.00 |
| ATOM | 2350 | HB2 | PHE | X | 152 | 44.808 | 55.851 | 35.483 | 0.00 | 0.00 |
| ATOM | 2351 | HB3 | PHE | X | 152 | 44.308 | 57.468 | 34.998 | 0.00 | 0.00 |
| ATOM | 2352 | CG  | PHE | X | 152 | 46.374 | 57.066 | 34.697 | 0.00 | 0.00 |
| ATOM | 2353 | CD1 | PHE | X | 152 | 47.265 | 56.077 | 34.613 | 0.00 | 0.00 |
| ATOM | 2354 | HD1 | PHE | X | 152 | 47.077 | 55.207 | 35.224 | 0.00 | 0.00 |
| ATOM | 2355 | CE1 | PHE | X | 152 | 48.402 | 56.173 | 33.835 | 0.00 | 0.00 |
| ATOM | 2356 | HE1 | PHE | X | 152 | 49.061 | 55.319 | 33.896 | 0.00 | 0.00 |
| ATOM | 2357 | CZ  | PHE | X | 152 | 48.704 | 57.283 | 33.034 | 0.00 | 0.00 |
| ATOM | 2358 | HZ  | PHE | X | 152 | 49.654 | 57.358 | 32.525 | 0.00 | 0.00 |
| ATOM | 2359 | CE2 | PHE | X | 152 | 47.816 | 58.352 | 33.188 | 0.00 | 0.00 |
| ATOM | 2360 | HE2 | PHE | X | 152 | 48.033 | 59.294 | 32.705 | 0.00 | 0.00 |
| ATOM | 2361 | CD2 | PHE | X | 152 | 46.692 | 58.259 | 34.023 | 0.00 | 0.00 |
| ATOM | 2362 | HD2 | PHE | X | 152 | 46.007 | 59.087 | 34.130 | 0.00 | 0.00 |
| ATOM | 2363 | C   | PHE | X | 152 | 43.969 | 57.271 | 37.766 | 0.00 | 0.00 |
| ATOM | 2364 | O   | PHE | X | 152 | 43.072 | 58.118 | 37.668 | 0.00 | 0.00 |
| ATOM | 2365 | N   | GLY | X | 153 | 43.887 | 56.073 | 38.333 | 0.00 | 0.00 |
| ATOM | 2366 | H   | GLY | X | 153 | 44.648 | 55.410 | 38.309 | 0.00 | 0.00 |
| ATOM | 2367 | CA  | GLY | X | 153 | 42.698 | 55.647 | 39.021 | 0.00 | 0.00 |
| ATOM | 2368 | HA2 | GLY | X | 153 | 41.903 | 56.381 | 38.887 | 0.00 | 0.00 |
| ATOM | 2369 | HA3 | GLY | X | 153 | 42.445 | 54.646 | 38.671 | 0.00 | 0.00 |
| ATOM | 2370 | C   | GLY | X | 153 | 43.045 | 55.618 | 40.543 | 0.00 | 0.00 |
| ATOM | 2371 | O   | GLY | X | 153 | 42.087 | 55.747 | 41.312 | 0.00 | 0.00 |
| ATOM | 2372 | N   | PHE | X | 154 | 44.261 | 55.242 | 40.914 | 0.00 | 0.00 |
| ATOM | 2373 | H   | PHE | X | 154 | 44.923 | 55.133 | 40.159 | 0.00 | 0.00 |
| ATOM | 2374 | CA  | PHE | X | 154 | 44.644 | 54.830 | 42.286 | 0.00 | 0.00 |
| ATOM | 2375 | HA  | PHE | X | 154 | 43.760 | 54.839 | 42.924 | 0.00 | 0.00 |
| ATOM | 2376 | CB  | PHE | X | 154 | 45.015 | 53.360 | 42.285 | 0.00 | 0.00 |
| ATOM | 2377 | HB2 | PHE | X | 154 | 45.889 | 53.170 | 41.661 | 0.00 | 0.00 |
| ATOM | 2378 | HB3 | PHE | X | 154 | 45.351 | 53.070 | 43.281 | 0.00 | 0.00 |
| ATOM | 2379 | CG  | PHE | X | 154 | 43.865 | 52.536 | 41.755 | 0.00 | 0.00 |
| ATOM | 2380 | CD1 | PHE | X | 154 | 44.034 | 51.860 | 40.537 | 0.00 | 0.00 |
| ATOM | 2381 | HD1 | PHE | X | 154 | 45.035 | 51.687 | 40.169 | 0.00 | 0.00 |
| ATOM | 2382 | CE1 | PHE | X | 154 | 42.908 | 51.184 | 39.976 | 0.00 | 0.00 |
| ATOM | 2383 | HE1 | PHE | X | 154 | 43.055 | 50.662 | 39.042 | 0.00 | 0.00 |
| ATOM | 2384 | CZ  | PHE | X | 154 | 41.673 | 51.098 | 40.579 | 0.00 | 0.00 |
| ATOM | 2385 | HZ  | PHE | X | 154 | 40.791 | 50.619 | 40.178 | 0.00 | 0.00 |
| ATOM | 2386 | CE2 | PHE | X | 154 | 41.501 | 51.964 | 41.767 | 0.00 | 0.00 |
| ATOM | 2387 | HE2 | PHE | X | 154 | 40.571 | 52.113 | 42.297 | 0.00 | 0.00 |
| ATOM | 2388 | CD2 | PHE | X | 154 | 42.580 | 52.639 | 42.329 | 0.00 | 0.00 |
| ATOM | 2389 | HD2 | PHE | X | 154 | 42.528 | 53.152 | 43.279 | 0.00 | 0.00 |
| ATOM | 2390 | C   | PHE | X | 154 | 45.464 | 55.733 | 43.136 | 0.00 | 0.00 |
| ATOM | 2391 | O   | PHE | X | 154 | 45.670 | 55.376 | 44.309 | 0.00 | 0.00 |
| ATOM | 2392 | N   | LEU | X | 155 | 46.078 | 56.805 | 42.600 | 0.00 | 0.00 |
| ATOM | 2393 | H   | LEU | X | 155 | 45.839 | 57.086 | 41.660 | 0.00 | 0.00 |
| ATOM | 2394 | CA  | LEU | X | 155 | 47.011 | 57.681 | 43.368 | 0.00 | 0.00 |
| ATOM | 2395 | HA  | LEU | X | 155 | 47.609 | 57.037 | 44.013 | 0.00 | 0.00 |
| ATOM | 2396 | CB  | LEU | X | 155 | 47.922 | 58.412 | 42.384 | 0.00 | 0.00 |

|      |      |      |     |   |     |        |        |        |      |      |
|------|------|------|-----|---|-----|--------|--------|--------|------|------|
| ATOM | 2397 | HB2  | LEU | X | 155 | 48.494 | 57.535 | 42.081 | 0.00 | 0.00 |
| ATOM | 2398 | HB3  | LEU | X | 155 | 47.434 | 58.956 | 41.576 | 0.00 | 0.00 |
| ATOM | 2399 | CG   | LEU | X | 155 | 48.869 | 59.338 | 43.035 | 0.00 | 0.00 |
| ATOM | 2400 | HG   | LEU | X | 155 | 49.248 | 58.963 | 43.986 | 0.00 | 0.00 |
| ATOM | 2401 | CD1  | LEU | X | 155 | 50.028 | 59.471 | 42.057 | 0.00 | 0.00 |
| ATOM | 2402 | HD11 | LEU | X | 155 | 50.474 | 58.526 | 41.745 | 0.00 | 0.00 |
| ATOM | 2403 | HD12 | LEU | X | 155 | 50.830 | 60.097 | 42.449 | 0.00 | 0.00 |
| ATOM | 2404 | HD13 | LEU | X | 155 | 49.737 | 60.006 | 41.153 | 0.00 | 0.00 |
| ATOM | 2405 | CD2  | LEU | X | 155 | 48.455 | 60.772 | 43.442 | 0.00 | 0.00 |
| ATOM | 2406 | HD21 | LEU | X | 155 | 47.954 | 61.186 | 42.567 | 0.00 | 0.00 |
| ATOM | 2407 | HD22 | LEU | X | 155 | 47.941 | 60.728 | 44.402 | 0.00 | 0.00 |
| ATOM | 2408 | HD23 | LEU | X | 155 | 49.383 | 61.338 | 43.526 | 0.00 | 0.00 |
| ATOM | 2409 | C    | LEU | X | 155 | 46.220 | 58.605 | 44.271 | 0.00 | 0.00 |
| ATOM | 2410 | O    | LEU | X | 155 | 45.365 | 59.330 | 43.802 | 0.00 | 0.00 |
| ATOM | 2411 | N    | ALA | X | 156 | 46.631 | 58.710 | 45.538 | 0.00 | 0.00 |
| ATOM | 2412 | H    | ALA | X | 156 | 47.272 | 57.975 | 45.800 | 0.00 | 0.00 |
| ATOM | 2413 | CA   | ALA | X | 156 | 46.163 | 59.521 | 46.596 | 0.00 | 0.00 |
| ATOM | 2414 | HA   | ALA | X | 156 | 45.351 | 60.111 | 46.171 | 0.00 | 0.00 |
| ATOM | 2415 | CB   | ALA | X | 156 | 45.480 | 58.664 | 47.701 | 0.00 | 0.00 |
| ATOM | 2416 | HB1  | ALA | X | 156 | 46.272 | 58.210 | 48.296 | 0.00 | 0.00 |
| ATOM | 2417 | HB2  | ALA | X | 156 | 44.820 | 57.923 | 47.249 | 0.00 | 0.00 |
| ATOM | 2418 | HB3  | ALA | X | 156 | 44.956 | 59.331 | 48.386 | 0.00 | 0.00 |
| ATOM | 2419 | C    | ALA | X | 156 | 47.188 | 60.368 | 47.235 | 0.00 | 0.00 |
| ATOM | 2420 | O    | ALA | X | 156 | 48.108 | 59.925 | 47.901 | 0.00 | 0.00 |
| ATOM | 2421 | N    | LEU | X | 157 | 46.978 | 61.714 | 47.233 | 0.00 | 0.00 |
| ATOM | 2422 | H    | LEU | X | 157 | 46.161 | 62.072 | 46.760 | 0.00 | 0.00 |
| ATOM | 2423 | CA   | LEU | X | 157 | 47.781 | 62.745 | 47.854 | 0.00 | 0.00 |
| ATOM | 2424 | HA   | LEU | X | 157 | 48.577 | 62.225 | 48.386 | 0.00 | 0.00 |
| ATOM | 2425 | CB   | LEU | X | 157 | 48.590 | 63.516 | 46.714 | 0.00 | 0.00 |
| ATOM | 2426 | HB2  | LEU | X | 157 | 49.198 | 62.722 | 46.281 | 0.00 | 0.00 |
| ATOM | 2427 | HB3  | LEU | X | 157 | 47.872 | 63.928 | 46.004 | 0.00 | 0.00 |
| ATOM | 2428 | CG   | LEU | X | 157 | 49.443 | 64.631 | 47.249 | 0.00 | 0.00 |
| ATOM | 2429 | HG   | LEU | X | 157 | 49.174 | 64.922 | 48.264 | 0.00 | 0.00 |
| ATOM | 2430 | CD1  | LEU | X | 157 | 50.920 | 64.317 | 47.395 | 0.00 | 0.00 |
| ATOM | 2431 | HD11 | LEU | X | 157 | 51.556 | 65.104 | 47.799 | 0.00 | 0.00 |
| ATOM | 2432 | HD12 | LEU | X | 157 | 51.489 | 64.023 | 46.513 | 0.00 | 0.00 |
| ATOM | 2433 | HD13 | LEU | X | 157 | 51.011 | 63.482 | 48.091 | 0.00 | 0.00 |
| ATOM | 2434 | CD2  | LEU | X | 157 | 49.341 | 65.839 | 46.419 | 0.00 | 0.00 |
| ATOM | 2435 | HD21 | LEU | X | 157 | 49.705 | 66.629 | 47.076 | 0.00 | 0.00 |
| ATOM | 2436 | HD22 | LEU | X | 157 | 49.922 | 65.780 | 45.498 | 0.00 | 0.00 |
| ATOM | 2437 | HD23 | LEU | X | 157 | 48.322 | 66.034 | 46.085 | 0.00 | 0.00 |
| ATOM | 2438 | C    | LEU | X | 157 | 46.971 | 63.571 | 48.889 | 0.00 | 0.00 |
| ATOM | 2439 | O    | LEU | X | 157 | 46.694 | 64.725 | 48.548 | 0.00 | 0.00 |
| ATOM | 2440 | N    | PRO | X | 158 | 46.721 | 62.979 | 50.072 | 0.00 | 0.00 |
| ATOM | 2441 | CD   | PRO | X | 158 | 46.935 | 61.658 | 50.519 | 0.00 | 0.00 |
| ATOM | 2442 | HD2  | PRO | X | 158 | 48.007 | 61.470 | 50.453 | 0.00 | 0.00 |
| ATOM | 2443 | HD3  | PRO | X | 158 | 46.474 | 60.904 | 49.882 | 0.00 | 0.00 |
| ATOM | 2444 | CG   | PRO | X | 158 | 46.644 | 61.563 | 52.005 | 0.00 | 0.00 |
| ATOM | 2445 | HG2  | PRO | X | 158 | 47.370 | 60.954 | 52.543 | 0.00 | 0.00 |
| ATOM | 2446 | HG3  | PRO | X | 158 | 45.683 | 61.059 | 52.107 | 0.00 | 0.00 |
| ATOM | 2447 | CB   | PRO | X | 158 | 46.553 | 63.048 | 52.461 | 0.00 | 0.00 |
| ATOM | 2448 | HB2  | PRO | X | 158 | 47.546 | 63.277 | 52.848 | 0.00 | 0.00 |
| ATOM | 2449 | HB3  | PRO | X | 158 | 45.764 | 63.148 | 53.205 | 0.00 | 0.00 |
| ATOM | 2450 | CA   | PRO | X | 158 | 46.206 | 63.802 | 51.125 | 0.00 | 0.00 |
| ATOM | 2451 | HA   | PRO | X | 158 | 45.126 | 63.846 | 50.989 | 0.00 | 0.00 |
| ATOM | 2452 | C    | PRO | X | 158 | 46.793 | 65.222 | 51.233 | 0.00 | 0.00 |
| ATOM | 2453 | O    | PRO | X | 158 | 47.927 | 65.553 | 50.966 | 0.00 | 0.00 |
| ATOM | 2454 | N    | GLY | X | 159 | 45.958 | 66.180 | 51.579 | 0.00 | 0.00 |
| ATOM | 2455 | H    | GLY | X | 159 | 45.007 | 65.963 | 51.841 | 0.00 | 0.00 |
| ATOM | 2456 | CA   | GLY | X | 159 | 46.339 | 67.587 | 51.676 | 0.00 | 0.00 |
| ATOM | 2457 | HA2  | GLY | X | 159 | 45.831 | 68.003 | 52.545 | 0.00 | 0.00 |
| ATOM | 2458 | HA3  | GLY | X | 159 | 47.419 | 67.662 | 51.804 | 0.00 | 0.00 |
| ATOM | 2459 | C    | GLY | X | 159 | 45.985 | 68.362 | 50.394 | 0.00 | 0.00 |
| ATOM | 2460 | O    | GLY | X | 159 | 45.701 | 69.555 | 50.375 | 0.00 | 0.00 |
| ATOM | 2461 | N    | SER | X | 160 | 45.793 | 67.621 | 49.302 | 0.00 | 0.00 |
| ATOM | 2462 | H    | SER | X | 160 | 46.136 | 66.682 | 49.444 | 0.00 | 0.00 |
| ATOM | 2463 | CA   | SER | X | 160 | 44.819 | 67.914 | 48.204 | 0.00 | 0.00 |

|      |      |      |     |   |     |        |        |        |      |      |
|------|------|------|-----|---|-----|--------|--------|--------|------|------|
| ATOM | 2464 | HA   | SER | X | 160 | 44.598 | 68.979 | 48.265 | 0.00 | 0.00 |
| ATOM | 2465 | CB   | SER | X | 160 | 45.453 | 67.659 | 46.817 | 0.00 | 0.00 |
| ATOM | 2466 | HB2  | SER | X | 160 | 44.950 | 68.200 | 46.016 | 0.00 | 0.00 |
| ATOM | 2467 | HB3  | SER | X | 160 | 46.431 | 68.141 | 46.818 | 0.00 | 0.00 |
| ATOM | 2468 | OG   | SER | X | 160 | 45.458 | 66.363 | 46.309 | 0.00 | 0.00 |
| ATOM | 2469 | HG   | SER | X | 160 | 46.101 | 65.997 | 46.921 | 0.00 | 0.00 |
| ATOM | 2470 | C    | SER | X | 160 | 43.574 | 67.052 | 48.164 | 0.00 | 0.00 |
| ATOM | 2471 | O    | SER | X | 160 | 43.611 | 66.098 | 48.932 | 0.00 | 0.00 |
| ATOM | 2472 | N    | ARG | X | 161 | 42.544 | 67.499 | 47.458 | 0.00 | 0.00 |
| ATOM | 2473 | H    | ARG | X | 161 | 42.662 | 68.475 | 47.224 | 0.00 | 0.00 |
| ATOM | 2474 | CA   | ARG | X | 161 | 41.327 | 66.777 | 47.017 | 0.00 | 0.00 |
| ATOM | 2475 | HA   | ARG | X | 161 | 41.350 | 65.757 | 47.402 | 0.00 | 0.00 |
| ATOM | 2476 | CB   | ARG | X | 161 | 40.093 | 67.603 | 47.505 | 0.00 | 0.00 |
| ATOM | 2477 | HB2  | ARG | X | 161 | 40.251 | 68.661 | 47.715 | 0.00 | 0.00 |
| ATOM | 2478 | HB3  | ARG | X | 161 | 39.270 | 67.649 | 46.791 | 0.00 | 0.00 |
| ATOM | 2479 | CG   | ARG | X | 161 | 39.580 | 66.880 | 48.806 | 0.00 | 0.00 |
| ATOM | 2480 | HG2  | ARG | X | 161 | 38.654 | 67.251 | 49.245 | 0.00 | 0.00 |
| ATOM | 2481 | HG3  | ARG | X | 161 | 39.442 | 65.820 | 48.592 | 0.00 | 0.00 |
| ATOM | 2482 | CD   | ARG | X | 161 | 40.576 | 67.020 | 50.011 | 0.00 | 0.00 |
| ATOM | 2483 | HD2  | ARG | X | 161 | 40.239 | 66.515 | 50.916 | 0.00 | 0.00 |
| ATOM | 2484 | HD3  | ARG | X | 161 | 41.515 | 66.576 | 49.679 | 0.00 | 0.00 |
| ATOM | 2485 | NE   | ARG | X | 161 | 40.936 | 68.409 | 50.358 | 0.00 | 0.00 |
| ATOM | 2486 | HE   | ARG | X | 161 | 40.142 | 68.973 | 50.090 | 0.00 | 0.00 |
| ATOM | 2487 | CZ   | ARG | X | 161 | 41.933 | 68.868 | 51.088 | 0.00 | 0.00 |
| ATOM | 2488 | NH1  | ARG | X | 161 | 42.879 | 68.064 | 51.547 | 0.00 | 0.00 |
| ATOM | 2489 | HH11 | ARG | X | 161 | 42.743 | 67.072 | 51.679 | 0.00 | 0.00 |
| ATOM | 2490 | HH12 | ARG | X | 161 | 43.570 | 68.444 | 52.178 | 0.00 | 0.00 |
| ATOM | 2491 | NH2  | ARG | X | 161 | 41.980 | 70.151 | 51.395 | 0.00 | 0.00 |
| ATOM | 2492 | HH21 | ARG | X | 161 | 41.221 | 70.735 | 51.074 | 0.00 | 0.00 |
| ATOM | 2493 | HH22 | ARG | X | 161 | 42.743 | 70.468 | 51.976 | 0.00 | 0.00 |
| ATOM | 2494 | C    | ARG | X | 161 | 41.316 | 66.682 | 45.531 | 0.00 | 0.00 |
| ATOM | 2495 | O    | ARG | X | 161 | 40.327 | 66.301 | 44.930 | 0.00 | 0.00 |
| ATOM | 2496 | N    | GLU | X | 162 | 42.403 | 67.054 | 44.783 | 0.00 | 0.00 |
| ATOM | 2497 | H    | GLU | X | 162 | 43.301 | 67.201 | 45.222 | 0.00 | 0.00 |
| ATOM | 2498 | CA   | GLU | X | 162 | 42.460 | 66.809 | 43.334 | 0.00 | 0.00 |
| ATOM | 2499 | HA   | GLU | X | 162 | 41.476 | 66.820 | 42.864 | 0.00 | 0.00 |
| ATOM | 2500 | CB   | GLU | X | 162 | 43.281 | 68.064 | 42.729 | 0.00 | 0.00 |
| ATOM | 2501 | HB2  | GLU | X | 162 | 44.236 | 68.240 | 43.224 | 0.00 | 0.00 |
| ATOM | 2502 | HB3  | GLU | X | 162 | 43.534 | 67.756 | 41.715 | 0.00 | 0.00 |
| ATOM | 2503 | CG   | GLU | X | 162 | 42.493 | 69.419 | 42.697 | 0.00 | 0.00 |
| ATOM | 2504 | HG2  | GLU | X | 162 | 42.481 | 69.766 | 43.730 | 0.00 | 0.00 |
| ATOM | 2505 | HG3  | GLU | X | 162 | 43.055 | 70.143 | 42.105 | 0.00 | 0.00 |
| ATOM | 2506 | CD   | GLU | X | 162 | 41.127 | 69.307 | 42.042 | 0.00 | 0.00 |
| ATOM | 2507 | OE1  | GLU | X | 162 | 41.052 | 69.144 | 40.845 | 0.00 | 0.00 |
| ATOM | 2508 | OE2  | GLU | X | 162 | 40.157 | 69.440 | 42.845 | 0.00 | 0.00 |
| ATOM | 2509 | C    | GLU | X | 162 | 43.045 | 65.440 | 43.038 | 0.00 | 0.00 |
| ATOM | 2510 | O    | GLU | X | 162 | 42.977 | 65.108 | 41.865 | 0.00 | 0.00 |
| ATOM | 2511 | N    | ALA | X | 163 | 43.502 | 64.629 | 44.052 | 0.00 | 0.00 |
| ATOM | 2512 | H    | ALA | X | 163 | 43.622 | 65.036 | 44.969 | 0.00 | 0.00 |
| ATOM | 2513 | CA   | ALA | X | 163 | 43.886 | 63.229 | 43.866 | 0.00 | 0.00 |
| ATOM | 2514 | HA   | ALA | X | 163 | 43.246 | 62.915 | 43.041 | 0.00 | 0.00 |
| ATOM | 2515 | CB   | ALA | X | 163 | 45.332 | 63.165 | 43.346 | 0.00 | 0.00 |
| ATOM | 2516 | HB1  | ALA | X | 163 | 45.441 | 63.700 | 42.403 | 0.00 | 0.00 |
| ATOM | 2517 | HB2  | ALA | X | 163 | 45.598 | 62.113 | 43.249 | 0.00 | 0.00 |
| ATOM | 2518 | HB3  | ALA | X | 163 | 46.084 | 63.556 | 44.032 | 0.00 | 0.00 |
| ATOM | 2519 | C    | ALA | X | 163 | 43.700 | 62.564 | 45.156 | 0.00 | 0.00 |
| ATOM | 2520 | O    | ALA | X | 163 | 44.617 | 62.435 | 45.928 | 0.00 | 0.00 |
| ATOM | 2521 | N    | PRO | X | 164 | 42.510 | 62.048 | 45.511 | 0.00 | 0.00 |
| ATOM | 2522 | CD   | PRO | X | 164 | 41.230 | 62.252 | 44.816 | 0.00 | 0.00 |
| ATOM | 2523 | HD2  | PRO | X | 164 | 41.047 | 61.622 | 43.946 | 0.00 | 0.00 |
| ATOM | 2524 | HD3  | PRO | X | 164 | 41.113 | 63.311 | 44.582 | 0.00 | 0.00 |
| ATOM | 2525 | CG   | PRO | X | 164 | 40.066 | 61.929 | 45.708 | 0.00 | 0.00 |
| ATOM | 2526 | HG2  | PRO | X | 164 | 39.696 | 60.964 | 45.363 | 0.00 | 0.00 |
| ATOM | 2527 | HG3  | PRO | X | 164 | 39.270 | 62.670 | 45.783 | 0.00 | 0.00 |
| ATOM | 2528 | CB   | PRO | X | 164 | 40.804 | 61.691 | 47.040 | 0.00 | 0.00 |
| ATOM | 2529 | HB2  | PRO | X | 164 | 40.288 | 60.912 | 47.602 | 0.00 | 0.00 |
| ATOM | 2530 | HB3  | PRO | X | 164 | 40.801 | 62.565 | 47.692 | 0.00 | 0.00 |

|      |      |      |     |   |     |        |        |        |      |      |
|------|------|------|-----|---|-----|--------|--------|--------|------|------|
| ATOM | 2531 | CA   | PRO | X | 164 | 42.193 | 61.232 | 46.698 | 0.00 | 0.00 |
| ATOM | 2532 | HA   | PRO | X | 164 | 42.802 | 61.545 | 47.547 | 0.00 | 0.00 |
| ATOM | 2533 | C    | PRO | X | 164 | 42.299 | 59.715 | 46.420 | 0.00 | 0.00 |
| ATOM | 2534 | O    | PRO | X | 164 | 42.214 | 58.917 | 47.353 | 0.00 | 0.00 |
| ATOM | 2535 | N    | GLY | X | 165 | 42.377 | 59.366 | 45.130 | 0.00 | 0.00 |
| ATOM | 2536 | H    | GLY | X | 165 | 42.463 | 60.110 | 44.452 | 0.00 | 0.00 |
| ATOM | 2537 | CA   | GLY | X | 165 | 42.650 | 58.043 | 44.666 | 0.00 | 0.00 |
| ATOM | 2538 | HA2  | GLY | X | 165 | 43.083 | 58.032 | 43.666 | 0.00 | 0.00 |
| ATOM | 2539 | HA3  | GLY | X | 165 | 43.292 | 57.474 | 45.339 | 0.00 | 0.00 |
| ATOM | 2540 | C    | GLY | X | 165 | 41.398 | 57.275 | 44.477 | 0.00 | 0.00 |
| ATOM | 2541 | O    | GLY | X | 165 | 40.414 | 57.875 | 44.095 | 0.00 | 0.00 |
| ATOM | 2542 | N    | ASN | X | 166 | 41.400 | 55.958 | 44.649 | 0.00 | 0.00 |
| ATOM | 2543 | H    | ASN | X | 166 | 42.268 | 55.474 | 44.828 | 0.00 | 0.00 |
| ATOM | 2544 | CA   | ASN | X | 166 | 40.172 | 55.101 | 44.597 | 0.00 | 0.00 |
| ATOM | 2545 | HA   | ASN | X | 166 | 40.554 | 54.080 | 44.603 | 0.00 | 0.00 |
| ATOM | 2546 | CB   | ASN | X | 166 | 39.329 | 55.290 | 45.901 | 0.00 | 0.00 |
| ATOM | 2547 | HB2  | ASN | X | 166 | 39.025 | 56.313 | 46.122 | 0.00 | 0.00 |
| ATOM | 2548 | HB3  | ASN | X | 166 | 38.496 | 54.596 | 45.786 | 0.00 | 0.00 |
| ATOM | 2549 | CG   | ASN | X | 166 | 40.146 | 54.884 | 47.089 | 0.00 | 0.00 |
| ATOM | 2550 | OD1  | ASN | X | 166 | 40.643 | 53.818 | 47.174 | 0.00 | 0.00 |
| ATOM | 2551 | ND2  | ASN | X | 166 | 40.270 | 55.753 | 48.146 | 0.00 | 0.00 |
| ATOM | 2552 | HD21 | ASN | X | 166 | 40.614 | 55.491 | 49.059 | 0.00 | 0.00 |
| ATOM | 2553 | HD22 | ASN | X | 166 | 39.896 | 56.674 | 47.967 | 0.00 | 0.00 |
| ATOM | 2554 | C    | ASN | X | 166 | 39.292 | 55.173 | 43.259 | 0.00 | 0.00 |
| ATOM | 2555 | O    | ASN | X | 166 | 38.642 | 54.149 | 43.001 | 0.00 | 0.00 |
| ATOM | 2556 | N    | VAL | X | 167 | 39.345 | 56.200 | 42.443 | 0.00 | 0.00 |
| ATOM | 2557 | H    | VAL | X | 167 | 39.863 | 57.003 | 42.768 | 0.00 | 0.00 |
| ATOM | 2558 | CA   | VAL | X | 167 | 38.480 | 56.361 | 41.239 | 0.00 | 0.00 |
| ATOM | 2559 | HA   | VAL | X | 167 | 37.464 | 56.307 | 41.630 | 0.00 | 0.00 |
| ATOM | 2560 | CB   | VAL | X | 167 | 38.550 | 57.799 | 40.698 | 0.00 | 0.00 |
| ATOM | 2561 | HB   | VAL | X | 167 | 37.854 | 57.803 | 39.860 | 0.00 | 0.00 |
| ATOM | 2562 | CG1  | VAL | X | 167 | 38.038 | 58.835 | 41.714 | 0.00 | 0.00 |
| ATOM | 2563 | HG11 | VAL | X | 167 | 38.517 | 59.784 | 41.474 | 0.00 | 0.00 |
| ATOM | 2564 | HG12 | VAL | X | 167 | 36.958 | 58.799 | 41.857 | 0.00 | 0.00 |
| ATOM | 2565 | HG13 | VAL | X | 167 | 38.418 | 58.581 | 42.704 | 0.00 | 0.00 |
| ATOM | 2566 | CG2  | VAL | X | 167 | 39.984 | 58.156 | 40.164 | 0.00 | 0.00 |
| ATOM | 2567 | HG21 | VAL | X | 167 | 40.760 | 57.773 | 40.826 | 0.00 | 0.00 |
| ATOM | 2568 | HG22 | VAL | X | 167 | 40.099 | 59.223 | 39.975 | 0.00 | 0.00 |
| ATOM | 2569 | HG23 | VAL | X | 167 | 40.117 | 57.606 | 39.232 | 0.00 | 0.00 |
| ATOM | 2570 | C    | VAL | X | 167 | 38.558 | 55.392 | 40.059 | 0.00 | 0.00 |
| ATOM | 2571 | O    | VAL | X | 167 | 37.625 | 55.265 | 39.324 | 0.00 | 0.00 |
| ATOM | 2572 | N    | GLY | X | 168 | 39.637 | 54.651 | 39.977 | 0.00 | 0.00 |
| ATOM | 2573 | H    | GLY | X | 168 | 40.263 | 54.777 | 40.759 | 0.00 | 0.00 |
| ATOM | 2574 | CA   | GLY | X | 168 | 39.716 | 53.519 | 38.994 | 0.00 | 0.00 |
| ATOM | 2575 | HA2  | GLY | X | 168 | 39.451 | 53.969 | 38.038 | 0.00 | 0.00 |
| ATOM | 2576 | HA3  | GLY | X | 168 | 40.665 | 52.987 | 38.914 | 0.00 | 0.00 |
| ATOM | 2577 | C    | GLY | X | 168 | 38.780 | 52.382 | 39.318 | 0.00 | 0.00 |
| ATOM | 2578 | O    | GLY | X | 168 | 38.536 | 51.542 | 38.449 | 0.00 | 0.00 |
| ATOM | 2579 | N    | LEU | X | 169 | 38.327 | 52.373 | 40.566 | 0.00 | 0.00 |
| ATOM | 2580 | H    | LEU | X | 169 | 38.655 | 53.149 | 41.123 | 0.00 | 0.00 |
| ATOM | 2581 | CA   | LEU | X | 169 | 37.213 | 51.527 | 40.959 | 0.00 | 0.00 |
| ATOM | 2582 | HA   | LEU | X | 169 | 37.160 | 50.603 | 40.384 | 0.00 | 0.00 |
| ATOM | 2583 | CB   | LEU | X | 169 | 37.399 | 51.080 | 42.410 | 0.00 | 0.00 |
| ATOM | 2584 | HB2  | LEU | X | 169 | 38.378 | 50.611 | 42.505 | 0.00 | 0.00 |
| ATOM | 2585 | HB3  | LEU | X | 169 | 37.252 | 51.970 | 43.022 | 0.00 | 0.00 |
| ATOM | 2586 | CG   | LEU | X | 169 | 36.447 | 49.885 | 42.796 | 0.00 | 0.00 |
| ATOM | 2587 | HG   | LEU | X | 169 | 35.476 | 50.127 | 42.364 | 0.00 | 0.00 |
| ATOM | 2588 | CD1  | LEU | X | 169 | 36.920 | 48.581 | 42.156 | 0.00 | 0.00 |
| ATOM | 2589 | HD11 | LEU | X | 169 | 37.912 | 48.293 | 42.505 | 0.00 | 0.00 |
| ATOM | 2590 | HD12 | LEU | X | 169 | 37.020 | 48.695 | 41.077 | 0.00 | 0.00 |
| ATOM | 2591 | HD13 | LEU | X | 169 | 36.217 | 47.790 | 42.417 | 0.00 | 0.00 |
| ATOM | 2592 | CD2  | LEU | X | 169 | 36.335 | 49.626 | 44.258 | 0.00 | 0.00 |
| ATOM | 2593 | HD21 | LEU | X | 169 | 35.503 | 48.969 | 44.509 | 0.00 | 0.00 |
| ATOM | 2594 | HD22 | LEU | X | 169 | 37.296 | 49.277 | 44.636 | 0.00 | 0.00 |
| ATOM | 2595 | HD23 | LEU | X | 169 | 36.148 | 50.586 | 44.740 | 0.00 | 0.00 |
| ATOM | 2596 | C    | LEU | X | 169 | 35.845 | 52.245 | 40.676 | 0.00 | 0.00 |
| ATOM | 2597 | O    | LEU | X | 169 | 34.817 | 51.615 | 40.389 | 0.00 | 0.00 |

|      |      |      |     |   |     |        |        |        |      |      |
|------|------|------|-----|---|-----|--------|--------|--------|------|------|
| ATOM | 2598 | N    | LEU | X | 170 | 35.735 | 53.581 | 40.814 | 0.00 | 0.00 |
| ATOM | 2599 | H    | LEU | X | 170 | 36.552 | 54.064 | 41.158 | 0.00 | 0.00 |
| ATOM | 2600 | CA   | LEU | X | 170 | 34.488 | 54.309 | 40.659 | 0.00 | 0.00 |
| ATOM | 2601 | HA   | LEU | X | 170 | 33.736 | 53.641 | 41.078 | 0.00 | 0.00 |
| ATOM | 2602 | CB   | LEU | X | 170 | 34.608 | 55.630 | 41.500 | 0.00 | 0.00 |
| ATOM | 2603 | HB2  | LEU | X | 170 | 35.393 | 56.245 | 41.060 | 0.00 | 0.00 |
| ATOM | 2604 | HB3  | LEU | X | 170 | 33.711 | 56.242 | 41.406 | 0.00 | 0.00 |
| ATOM | 2605 | CG   | LEU | X | 170 | 34.923 | 55.461 | 42.966 | 0.00 | 0.00 |
| ATOM | 2606 | HG   | LEU | X | 170 | 35.867 | 54.935 | 43.103 | 0.00 | 0.00 |
| ATOM | 2607 | CD1  | LEU | X | 170 | 35.160 | 56.775 | 43.629 | 0.00 | 0.00 |
| ATOM | 2608 | HD11 | LEU | X | 170 | 35.719 | 56.631 | 44.554 | 0.00 | 0.00 |
| ATOM | 2609 | HD12 | LEU | X | 170 | 34.152 | 57.167 | 43.766 | 0.00 | 0.00 |
| ATOM | 2610 | HD13 | LEU | X | 170 | 35.786 | 57.482 | 43.084 | 0.00 | 0.00 |
| ATOM | 2611 | CD2  | LEU | X | 170 | 33.778 | 54.768 | 43.649 | 0.00 | 0.00 |
| ATOM | 2612 | HD21 | LEU | X | 170 | 33.753 | 54.837 | 44.737 | 0.00 | 0.00 |
| ATOM | 2613 | HD22 | LEU | X | 170 | 32.908 | 55.352 | 43.348 | 0.00 | 0.00 |
| ATOM | 2614 | HD23 | LEU | X | 170 | 33.737 | 53.724 | 43.337 | 0.00 | 0.00 |
| ATOM | 2615 | C    | LEU | X | 170 | 34.147 | 54.532 | 39.228 | 0.00 | 0.00 |
| ATOM | 2616 | O    | LEU | X | 170 | 33.104 | 55.042 | 38.919 | 0.00 | 0.00 |
| ATOM | 2617 | N    | ASP | X | 171 | 35.077 | 54.193 | 38.287 | 0.00 | 0.00 |
| ATOM | 2618 | H    | ASP | X | 171 | 36.001 | 54.032 | 38.661 | 0.00 | 0.00 |
| ATOM | 2619 | CA   | ASP | X | 171 | 34.871 | 53.871 | 36.842 | 0.00 | 0.00 |
| ATOM | 2620 | HA   | ASP | X | 171 | 34.422 | 54.716 | 36.320 | 0.00 | 0.00 |
| ATOM | 2621 | CB   | ASP | X | 171 | 36.212 | 53.527 | 36.129 | 0.00 | 0.00 |
| ATOM | 2622 | HB2  | ASP | X | 171 | 36.556 | 52.680 | 36.722 | 0.00 | 0.00 |
| ATOM | 2623 | HB3  | ASP | X | 171 | 35.991 | 53.222 | 35.106 | 0.00 | 0.00 |
| ATOM | 2624 | CG   | ASP | X | 171 | 37.265 | 54.630 | 36.047 | 0.00 | 0.00 |
| ATOM | 2625 | OD1  | ASP | X | 171 | 36.908 | 55.838 | 36.092 | 0.00 | 0.00 |
| ATOM | 2626 | OD2  | ASP | X | 171 | 38.432 | 54.229 | 35.819 | 0.00 | 0.00 |
| ATOM | 2627 | C    | ASP | X | 171 | 33.948 | 52.669 | 36.752 | 0.00 | 0.00 |
| ATOM | 2628 | O    | ASP | X | 171 | 33.027 | 52.711 | 35.918 | 0.00 | 0.00 |
| ATOM | 2629 | N    | GLN | X | 172 | 34.181 | 51.642 | 37.515 | 0.00 | 0.00 |
| ATOM | 2630 | H    | GLN | X | 172 | 34.856 | 51.730 | 38.261 | 0.00 | 0.00 |
| ATOM | 2631 | CA   | GLN | X | 172 | 33.343 | 50.396 | 37.510 | 0.00 | 0.00 |
| ATOM | 2632 | HA   | GLN | X | 172 | 33.306 | 50.030 | 36.484 | 0.00 | 0.00 |
| ATOM | 2633 | CB   | GLN | X | 172 | 34.077 | 49.194 | 38.200 | 0.00 | 0.00 |
| ATOM | 2634 | HB2  | GLN | X | 172 | 34.182 | 49.299 | 39.279 | 0.00 | 0.00 |
| ATOM | 2635 | HB3  | GLN | X | 172 | 33.522 | 48.260 | 38.110 | 0.00 | 0.00 |
| ATOM | 2636 | CG   | GLN | X | 172 | 35.509 | 49.175 | 37.652 | 0.00 | 0.00 |
| ATOM | 2637 | HG2  | GLN | X | 172 | 35.563 | 49.058 | 36.570 | 0.00 | 0.00 |
| ATOM | 2638 | HG3  | GLN | X | 172 | 36.160 | 50.021 | 37.872 | 0.00 | 0.00 |
| ATOM | 2639 | CD   | GLN | X | 172 | 36.235 | 47.967 | 38.290 | 0.00 | 0.00 |
| ATOM | 2640 | OE1  | GLN | X | 172 | 35.626 | 47.174 | 39.033 | 0.00 | 0.00 |
| ATOM | 2641 | NE2  | GLN | X | 172 | 37.587 | 48.028 | 38.302 | 0.00 | 0.00 |
| ATOM | 2642 | HE21 | GLN | X | 172 | 38.043 | 47.492 | 39.027 | 0.00 | 0.00 |
| ATOM | 2643 | HE22 | GLN | X | 172 | 38.014 | 48.590 | 37.579 | 0.00 | 0.00 |
| ATOM | 2644 | C    | GLN | X | 172 | 31.945 | 50.638 | 38.059 | 0.00 | 0.00 |
| ATOM | 2645 | O    | GLN | X | 172 | 31.005 | 50.206 | 37.449 | 0.00 | 0.00 |
| ATOM | 2646 | N    | ARG | X | 173 | 31.870 | 51.459 | 39.116 | 0.00 | 0.00 |
| ATOM | 2647 | H    | ARG | X | 173 | 32.750 | 51.846 | 39.424 | 0.00 | 0.00 |
| ATOM | 2648 | CA   | ARG | X | 173 | 30.570 | 51.982 | 39.640 | 0.00 | 0.00 |
| ATOM | 2649 | HA   | ARG | X | 173 | 29.991 | 51.074 | 39.812 | 0.00 | 0.00 |
| ATOM | 2650 | CB   | ARG | X | 173 | 30.825 | 52.745 | 40.871 | 0.00 | 0.00 |
| ATOM | 2651 | HB2  | ARG | X | 173 | 31.602 | 52.273 | 41.474 | 0.00 | 0.00 |
| ATOM | 2652 | HB3  | ARG | X | 173 | 31.329 | 53.697 | 40.707 | 0.00 | 0.00 |
| ATOM | 2653 | CG   | ARG | X | 173 | 29.484 | 52.961 | 41.627 | 0.00 | 0.00 |
| ATOM | 2654 | HG2  | ARG | X | 173 | 28.815 | 53.421 | 40.900 | 0.00 | 0.00 |
| ATOM | 2655 | HG3  | ARG | X | 173 | 29.017 | 51.992 | 41.804 | 0.00 | 0.00 |
| ATOM | 2656 | CD   | ARG | X | 173 | 29.757 | 53.708 | 42.976 | 0.00 | 0.00 |
| ATOM | 2657 | HD2  | ARG | X | 173 | 30.329 | 54.617 | 42.791 | 0.00 | 0.00 |
| ATOM | 2658 | HD3  | ARG | X | 173 | 28.777 | 54.005 | 43.349 | 0.00 | 0.00 |
| ATOM | 2659 | NE   | ARG | X | 173 | 30.498 | 52.846 | 43.885 | 0.00 | 0.00 |
| ATOM | 2660 | HE   | ARG | X | 173 | 30.423 | 51.850 | 43.733 | 0.00 | 0.00 |
| ATOM | 2661 | CZ   | ARG | X | 173 | 31.015 | 53.240 | 45.026 | 0.00 | 0.00 |
| ATOM | 2662 | NH1  | ARG | X | 173 | 31.030 | 54.466 | 45.501 | 0.00 | 0.00 |
| ATOM | 2663 | HH11 | ARG | X | 173 | 30.828 | 55.215 | 44.853 | 0.00 | 0.00 |
| ATOM | 2664 | HH12 | ARG | X | 173 | 31.290 | 54.629 | 46.463 | 0.00 | 0.00 |



|      |      |      |     |   |     |        |        |        |      |      |
|------|------|------|-----|---|-----|--------|--------|--------|------|------|
| ATOM | 2665 | NH2  | ARG | X | 173 | 31.413 | 52.281 | 45.834 | 0.00 | 0.00 |
| ATOM | 2666 | HH21 | ARG | X | 173 | 31.203 | 51.323 | 45.594 | 0.00 | 0.00 |
| ATOM | 2667 | HH22 | ARG | X | 173 | 31.583 | 52.450 | 46.815 | 0.00 | 0.00 |
| ATOM | 2668 | C    | ARG | X | 173 | 29.763 | 52.759 | 38.536 | 0.00 | 0.00 |
| ATOM | 2669 | O    | ARG | X | 173 | 28.584 | 52.632 | 38.512 | 0.00 | 0.00 |
| ATOM | 2670 | N    | LEU | X | 174 | 30.410 | 53.568 | 37.721 | 0.00 | 0.00 |
| ATOM | 2671 | H    | LEU | X | 174 | 31.413 | 53.677 | 37.773 | 0.00 | 0.00 |
| ATOM | 2672 | CA   | LEU | X | 174 | 29.715 | 54.309 | 36.621 | 0.00 | 0.00 |
| ATOM | 2673 | HA   | LEU | X | 174 | 28.717 | 54.628 | 36.922 | 0.00 | 0.00 |
| ATOM | 2674 | CB   | LEU | X | 174 | 30.604 | 55.512 | 36.278 | 0.00 | 0.00 |
| ATOM | 2675 | HB2  | LEU | X | 174 | 31.097 | 56.091 | 37.059 | 0.00 | 0.00 |
| ATOM | 2676 | HB3  | LEU | X | 174 | 31.388 | 55.107 | 35.638 | 0.00 | 0.00 |
| ATOM | 2677 | CG   | LEU | X | 174 | 29.775 | 56.597 | 35.498 | 0.00 | 0.00 |
| ATOM | 2678 | HG   | LEU | X | 174 | 29.246 | 56.079 | 34.698 | 0.00 | 0.00 |
| ATOM | 2679 | CD1  | LEU | X | 174 | 28.767 | 57.293 | 36.393 | 0.00 | 0.00 |
| ATOM | 2680 | HD11 | LEU | X | 174 | 29.245 | 57.768 | 37.250 | 0.00 | 0.00 |
| ATOM | 2681 | HD12 | LEU | X | 174 | 28.086 | 56.569 | 36.840 | 0.00 | 0.00 |
| ATOM | 2682 | HD13 | LEU | X | 174 | 28.179 | 57.997 | 35.804 | 0.00 | 0.00 |
| ATOM | 2683 | CD2  | LEU | X | 174 | 30.614 | 57.699 | 34.781 | 0.00 | 0.00 |
| ATOM | 2684 | HD21 | LEU | X | 174 | 31.423 | 57.260 | 34.197 | 0.00 | 0.00 |
| ATOM | 2685 | HD22 | LEU | X | 174 | 29.888 | 58.125 | 34.088 | 0.00 | 0.00 |
| ATOM | 2686 | HD23 | LEU | X | 174 | 30.985 | 58.378 | 35.549 | 0.00 | 0.00 |
| ATOM | 2687 | C    | LEU | X | 174 | 29.334 | 53.394 | 35.508 | 0.00 | 0.00 |
| ATOM | 2688 | O    | LEU | X | 174 | 28.217 | 53.431 | 35.003 | 0.00 | 0.00 |
| ATOM | 2689 | N    | ALA | X | 175 | 30.123 | 52.359 | 35.239 | 0.00 | 0.00 |
| ATOM | 2690 | H    | ALA | X | 175 | 31.042 | 52.397 | 35.656 | 0.00 | 0.00 |
| ATOM | 2691 | CA   | ALA | X | 175 | 29.734 | 51.288 | 34.299 | 0.00 | 0.00 |
| ATOM | 2692 | HA   | ALA | X | 175 | 29.596 | 51.809 | 33.352 | 0.00 | 0.00 |
| ATOM | 2693 | CB   | ALA | X | 175 | 30.976 | 50.444 | 34.031 | 0.00 | 0.00 |
| ATOM | 2694 | HB1  | ALA | X | 175 | 31.832 | 51.014 | 33.670 | 0.00 | 0.00 |
| ATOM | 2695 | HB2  | ALA | X | 175 | 30.638 | 49.628 | 33.393 | 0.00 | 0.00 |
| ATOM | 2696 | HB3  | ALA | X | 175 | 31.137 | 49.966 | 34.997 | 0.00 | 0.00 |
| ATOM | 2697 | C    | ALA | X | 175 | 28.507 | 50.462 | 34.739 | 0.00 | 0.00 |
| ATOM | 2698 | O    | ALA | X | 175 | 27.577 | 50.214 | 33.990 | 0.00 | 0.00 |
| ATOM | 2699 | N    | LEU | X | 176 | 28.404 | 50.257 | 36.076 | 0.00 | 0.00 |
| ATOM | 2700 | H    | LEU | X | 176 | 29.229 | 50.390 | 36.643 | 0.00 | 0.00 |
| ATOM | 2701 | CA   | LEU | X | 176 | 27.283 | 49.491 | 36.566 | 0.00 | 0.00 |
| ATOM | 2702 | HA   | LEU | X | 176 | 27.070 | 48.654 | 35.901 | 0.00 | 0.00 |
| ATOM | 2703 | CB   | LEU | X | 176 | 27.728 | 48.833 | 37.888 | 0.00 | 0.00 |
| ATOM | 2704 | HB2  | LEU | X | 176 | 28.381 | 49.486 | 38.466 | 0.00 | 0.00 |
| ATOM | 2705 | HB3  | LEU | X | 176 | 26.879 | 48.597 | 38.530 | 0.00 | 0.00 |
| ATOM | 2706 | CG   | LEU | X | 176 | 28.440 | 47.509 | 37.672 | 0.00 | 0.00 |
| ATOM | 2707 | HG   | LEU | X | 176 | 29.242 | 47.549 | 36.936 | 0.00 | 0.00 |
| ATOM | 2708 | CD1  | LEU | X | 176 | 29.218 | 47.220 | 38.978 | 0.00 | 0.00 |
| ATOM | 2709 | HD11 | LEU | X | 176 | 29.888 | 46.384 | 38.774 | 0.00 | 0.00 |
| ATOM | 2710 | HD12 | LEU | X | 176 | 28.511 | 46.914 | 39.749 | 0.00 | 0.00 |
| ATOM | 2711 | HD13 | LEU | X | 176 | 29.812 | 48.040 | 39.381 | 0.00 | 0.00 |
| ATOM | 2712 | CD2  | LEU | X | 176 | 27.447 | 46.429 | 37.260 | 0.00 | 0.00 |
| ATOM | 2713 | HD21 | LEU | X | 176 | 26.587 | 46.413 | 37.929 | 0.00 | 0.00 |
| ATOM | 2714 | HD22 | LEU | X | 176 | 27.078 | 46.600 | 36.248 | 0.00 | 0.00 |
| ATOM | 2715 | HD23 | LEU | X | 176 | 27.977 | 45.493 | 37.433 | 0.00 | 0.00 |
| ATOM | 2716 | C    | LEU | X | 176 | 26.046 | 50.245 | 36.611 | 0.00 | 0.00 |
| ATOM | 2717 | O    | LEU | X | 176 | 24.945 | 49.667 | 36.499 | 0.00 | 0.00 |
| ATOM | 2718 | N    | GLN | X | 177 | 26.138 | 51.568 | 36.743 | 0.00 | 0.00 |
| ATOM | 2719 | H    | GLN | X | 177 | 27.017 | 51.965 | 37.042 | 0.00 | 0.00 |
| ATOM | 2720 | CA   | GLN | X | 177 | 25.073 | 52.570 | 36.578 | 0.00 | 0.00 |
| ATOM | 2721 | HA   | GLN | X | 177 | 24.173 | 52.142 | 37.020 | 0.00 | 0.00 |
| ATOM | 2722 | CB   | GLN | X | 177 | 25.513 | 53.881 | 37.248 | 0.00 | 0.00 |
| ATOM | 2723 | HB2  | GLN | X | 177 | 26.442 | 54.342 | 36.914 | 0.00 | 0.00 |
| ATOM | 2724 | HB3  | GLN | X | 177 | 24.736 | 54.577 | 36.930 | 0.00 | 0.00 |
| ATOM | 2725 | CG   | GLN | X | 177 | 25.404 | 53.861 | 38.797 | 0.00 | 0.00 |
| ATOM | 2726 | HG2  | GLN | X | 177 | 24.427 | 53.554 | 39.169 | 0.00 | 0.00 |
| ATOM | 2727 | HG3  | GLN | X | 177 | 26.084 | 53.095 | 39.170 | 0.00 | 0.00 |
| ATOM | 2728 | CD   | GLN | X | 177 | 25.788 | 55.128 | 39.589 | 0.00 | 0.00 |
| ATOM | 2729 | OE1  | GLN | X | 177 | 26.903 | 55.570 | 39.391 | 0.00 | 0.00 |
| ATOM | 2730 | NE2  | GLN | X | 177 | 24.897 | 55.818 | 40.254 | 0.00 | 0.00 |
| ATOM | 2731 | HE21 | GLN | X | 177 | 25.239 | 56.720 | 40.554 | 0.00 | 0.00 |

|      |      |      |     |   |     |        |        |        |      |      |
|------|------|------|-----|---|-----|--------|--------|--------|------|------|
| ATOM | 2732 | HE22 | GLN | X | 177 | 23.948 | 55.609 | 39.979 | 0.00 | 0.00 |
| ATOM | 2733 | C    | GLN | X | 177 | 24.616 | 52.738 | 35.101 | 0.00 | 0.00 |
| ATOM | 2734 | O    | GLN | X | 177 | 23.443 | 53.057 | 34.864 | 0.00 | 0.00 |
| ATOM | 2735 | N    | TRP | X | 178 | 25.551 | 52.473 | 34.158 | 0.00 | 0.00 |
| ATOM | 2736 | H    | TRP | X | 178 | 26.524 | 52.515 | 34.426 | 0.00 | 0.00 |
| ATOM | 2737 | CA   | TRP | X | 178 | 25.205 | 52.464 | 32.709 | 0.00 | 0.00 |
| ATOM | 2738 | HA   | TRP | X | 178 | 24.624 | 53.374 | 32.557 | 0.00 | 0.00 |
| ATOM | 2739 | CB   | TRP | X | 178 | 26.544 | 52.653 | 31.916 | 0.00 | 0.00 |
| ATOM | 2740 | HB2  | TRP | X | 178 | 27.117 | 53.403 | 32.462 | 0.00 | 0.00 |
| ATOM | 2741 | HB3  | TRP | X | 178 | 27.143 | 51.751 | 31.796 | 0.00 | 0.00 |
| ATOM | 2742 | CG   | TRP | X | 178 | 26.257 | 53.147 | 30.523 | 0.00 | 0.00 |
| ATOM | 2743 | CD1  | TRP | X | 178 | 26.295 | 54.406 | 30.165 | 0.00 | 0.00 |
| ATOM | 2744 | HD1  | TRP | X | 178 | 26.590 | 55.169 | 30.870 | 0.00 | 0.00 |
| ATOM | 2745 | NE1  | TRP | X | 178 | 25.937 | 54.520 | 28.828 | 0.00 | 0.00 |
| ATOM | 2746 | HE1  | TRP | X | 178 | 26.092 | 55.339 | 28.258 | 0.00 | 0.00 |
| ATOM | 2747 | CE2  | TRP | X | 178 | 25.584 | 53.280 | 28.291 | 0.00 | 0.00 |
| ATOM | 2748 | CZ2  | TRP | X | 178 | 25.119 | 52.876 | 26.989 | 0.00 | 0.00 |
| ATOM | 2749 | HZ2  | TRP | X | 178 | 25.156 | 53.518 | 26.122 | 0.00 | 0.00 |
| ATOM | 2750 | CH2  | TRP | X | 178 | 24.997 | 51.510 | 26.784 | 0.00 | 0.00 |
| ATOM | 2751 | HH2  | TRP | X | 178 | 24.752 | 51.120 | 25.807 | 0.00 | 0.00 |
| ATOM | 2752 | CZ3  | TRP | X | 178 | 25.192 | 50.606 | 27.836 | 0.00 | 0.00 |
| ATOM | 2753 | HZ3  | TRP | X | 178 | 25.198 | 49.547 | 27.625 | 0.00 | 0.00 |
| ATOM | 2754 | CE3  | TRP | X | 178 | 25.563 | 51.048 | 29.102 | 0.00 | 0.00 |
| ATOM | 2755 | HE3  | TRP | X | 178 | 25.583 | 50.366 | 29.940 | 0.00 | 0.00 |
| ATOM | 2756 | CD2  | TRP | X | 178 | 25.882 | 52.402 | 29.326 | 0.00 | 0.00 |
| ATOM | 2757 | C    | TRP | X | 178 | 24.428 | 51.166 | 32.330 | 0.00 | 0.00 |
| ATOM | 2758 | O    | TRP | X | 178 | 23.342 | 51.218 | 31.699 | 0.00 | 0.00 |
| ATOM | 2759 | N    | VAL | X | 179 | 25.065 | 49.969 | 32.690 | 0.00 | 0.00 |
| ATOM | 2760 | H    | VAL | X | 179 | 25.869 | 50.021 | 33.299 | 0.00 | 0.00 |
| ATOM | 2761 | CA   | VAL | X | 179 | 24.393 | 48.645 | 32.636 | 0.00 | 0.00 |
| ATOM | 2762 | HA   | VAL | X | 179 | 24.284 | 48.419 | 31.575 | 0.00 | 0.00 |
| ATOM | 2763 | CB   | VAL | X | 179 | 25.276 | 47.590 | 33.241 | 0.00 | 0.00 |
| ATOM | 2764 | HB   | VAL | X | 179 | 25.505 | 47.954 | 34.242 | 0.00 | 0.00 |
| ATOM | 2765 | CG1  | VAL | X | 179 | 24.578 | 46.239 | 33.337 | 0.00 | 0.00 |
| ATOM | 2766 | HG11 | VAL | X | 179 | 25.231 | 45.460 | 33.731 | 0.00 | 0.00 |
| ATOM | 2767 | HG12 | VAL | X | 179 | 23.699 | 46.269 | 33.980 | 0.00 | 0.00 |
| ATOM | 2768 | HG13 | VAL | X | 179 | 24.337 | 45.959 | 32.311 | 0.00 | 0.00 |
| ATOM | 2769 | CG2  | VAL | X | 179 | 26.510 | 47.485 | 32.407 | 0.00 | 0.00 |
| ATOM | 2770 | HG21 | VAL | X | 179 | 27.215 | 46.789 | 32.862 | 0.00 | 0.00 |
| ATOM | 2771 | HG22 | VAL | X | 179 | 27.060 | 48.421 | 32.308 | 0.00 | 0.00 |
| ATOM | 2772 | HG23 | VAL | X | 179 | 26.191 | 47.218 | 31.399 | 0.00 | 0.00 |
| ATOM | 2773 | C    | VAL | X | 179 | 22.901 | 48.644 | 33.147 | 0.00 | 0.00 |
| ATOM | 2774 | O    | VAL | X | 179 | 21.885 | 48.429 | 32.396 | 0.00 | 0.00 |
| ATOM | 2775 | N    | GLN | X | 180 | 22.761 | 49.159 | 34.355 | 0.00 | 0.00 |
| ATOM | 2776 | H    | GLN | X | 180 | 23.626 | 49.352 | 34.839 | 0.00 | 0.00 |
| ATOM | 2777 | CA   | GLN | X | 180 | 21.471 | 49.295 | 34.969 | 0.00 | 0.00 |
| ATOM | 2778 | HA   | GLN | X | 180 | 20.949 | 48.338 | 34.966 | 0.00 | 0.00 |
| ATOM | 2779 | CB   | GLN | X | 180 | 21.703 | 49.704 | 36.498 | 0.00 | 0.00 |
| ATOM | 2780 | HB2  | GLN | X | 180 | 22.528 | 50.396 | 36.669 | 0.00 | 0.00 |
| ATOM | 2781 | HB3  | GLN | X | 180 | 20.782 | 50.179 | 36.835 | 0.00 | 0.00 |
| ATOM | 2782 | CG   | GLN | X | 180 | 22.015 | 48.364 | 37.199 | 0.00 | 0.00 |
| ATOM | 2783 | HG2  | GLN | X | 180 | 22.966 | 47.989 | 36.822 | 0.00 | 0.00 |
| ATOM | 2784 | HG3  | GLN | X | 180 | 22.286 | 48.581 | 38.232 | 0.00 | 0.00 |
| ATOM | 2785 | CD   | GLN | X | 180 | 20.821 | 47.346 | 37.228 | 0.00 | 0.00 |
| ATOM | 2786 | OE1  | GLN | X | 180 | 19.657 | 47.601 | 36.826 | 0.00 | 0.00 |
| ATOM | 2787 | NE2  | GLN | X | 180 | 21.082 | 46.192 | 37.670 | 0.00 | 0.00 |
| ATOM | 2788 | HE21 | GLN | X | 180 | 20.455 | 45.403 | 37.612 | 0.00 | 0.00 |
| ATOM | 2789 | HE22 | GLN | X | 180 | 22.009 | 46.092 | 38.059 | 0.00 | 0.00 |
| ATOM | 2790 | C    | GLN | X | 180 | 20.467 | 50.176 | 34.186 | 0.00 | 0.00 |
| ATOM | 2791 | O    | GLN | X | 180 | 19.347 | 49.709 | 34.026 | 0.00 | 0.00 |
| ATOM | 2792 | N    | GLU | X | 181 | 20.902 | 51.315 | 33.791 | 0.00 | 0.00 |
| ATOM | 2793 | H    | GLU | X | 181 | 21.871 | 51.478 | 34.021 | 0.00 | 0.00 |
| ATOM | 2794 | CA   | GLU | X | 181 | 20.207 | 52.238 | 32.842 | 0.00 | 0.00 |
| ATOM | 2795 | HA   | GLU | X | 181 | 19.257 | 52.563 | 33.265 | 0.00 | 0.00 |
| ATOM | 2796 | CB   | GLU | X | 181 | 21.098 | 53.441 | 32.576 | 0.00 | 0.00 |
| ATOM | 2797 | HB2  | GLU | X | 181 | 21.451 | 53.930 | 33.483 | 0.00 | 0.00 |
| ATOM | 2798 | HB3  | GLU | X | 181 | 21.953 | 53.163 | 31.959 | 0.00 | 0.00 |

|      |      |      |     |   |     |        |        |        |      |      |
|------|------|------|-----|---|-----|--------|--------|--------|------|------|
| ATOM | 2799 | CG   | GLU | X | 181 | 20.277 | 54.516 | 31.808 | 0.00 | 0.00 |
| ATOM | 2800 | HG2  | GLU | X | 181 | 21.020 | 55.266 | 31.537 | 0.00 | 0.00 |
| ATOM | 2801 | HG3  | GLU | X | 181 | 19.973 | 54.069 | 30.861 | 0.00 | 0.00 |
| ATOM | 2802 | CD   | GLU | X | 181 | 19.163 | 55.131 | 32.567 | 0.00 | 0.00 |
| ATOM | 2803 | OE1  | GLU | X | 181 | 17.920 | 55.082 | 32.259 | 0.00 | 0.00 |
| ATOM | 2804 | OE2  | GLU | X | 181 | 19.492 | 55.802 | 33.572 | 0.00 | 0.00 |
| ATOM | 2805 | C    | GLU | X | 181 | 19.788 | 51.609 | 31.438 | 0.00 | 0.00 |
| ATOM | 2806 | O    | GLU | X | 181 | 18.687 | 51.886 | 31.007 | 0.00 | 0.00 |
| ATOM | 2807 | N    | ASN | X | 182 | 20.573 | 50.720 | 30.858 | 0.00 | 0.00 |
| ATOM | 2808 | H    | ASN | X | 182 | 21.445 | 50.520 | 31.327 | 0.00 | 0.00 |
| ATOM | 2809 | CA   | ASN | X | 182 | 20.602 | 50.456 | 29.416 | 0.00 | 0.00 |
| ATOM | 2810 | HA   | ASN | X | 182 | 19.672 | 50.861 | 29.016 | 0.00 | 0.00 |
| ATOM | 2811 | CB   | ASN | X | 182 | 21.738 | 51.126 | 28.689 | 0.00 | 0.00 |
| ATOM | 2812 | HB2  | ASN | X | 182 | 22.678 | 50.723 | 29.066 | 0.00 | 0.00 |
| ATOM | 2813 | HB3  | ASN | X | 182 | 21.545 | 50.839 | 27.655 | 0.00 | 0.00 |
| ATOM | 2814 | CG   | ASN | X | 182 | 21.797 | 52.673 | 28.645 | 0.00 | 0.00 |
| ATOM | 2815 | OD1  | ASN | X | 182 | 21.096 | 53.322 | 27.835 | 0.00 | 0.00 |
| ATOM | 2816 | ND2  | ASN | X | 182 | 22.500 | 53.332 | 29.576 | 0.00 | 0.00 |
| ATOM | 2817 | HD21 | ASN | X | 182 | 22.447 | 54.340 | 29.551 | 0.00 | 0.00 |
| ATOM | 2818 | HD22 | ASN | X | 182 | 23.039 | 52.836 | 30.272 | 0.00 | 0.00 |
| ATOM | 2819 | C    | ASN | X | 182 | 20.545 | 48.957 | 29.001 | 0.00 | 0.00 |
| ATOM | 2820 | O    | ASN | X | 182 | 20.191 | 48.803 | 27.851 | 0.00 | 0.00 |
| ATOM | 2821 | N    | VAL | X | 183 | 20.774 | 47.960 | 29.841 | 0.00 | 0.00 |
| ATOM | 2822 | H    | VAL | X | 183 | 20.882 | 48.079 | 30.838 | 0.00 | 0.00 |
| ATOM | 2823 | CA   | VAL | X | 183 | 21.135 | 46.670 | 29.319 | 0.00 | 0.00 |
| ATOM | 2824 | HA   | VAL | X | 183 | 21.843 | 46.764 | 28.496 | 0.00 | 0.00 |
| ATOM | 2825 | CB   | VAL | X | 183 | 21.896 | 45.784 | 30.345 | 0.00 | 0.00 |
| ATOM | 2826 | HB   | VAL | X | 183 | 22.645 | 46.471 | 30.740 | 0.00 | 0.00 |
| ATOM | 2827 | CG1  | VAL | X | 183 | 21.059 | 45.229 | 31.470 | 0.00 | 0.00 |
| ATOM | 2828 | HG11 | VAL | X | 183 | 20.333 | 44.452 | 31.231 | 0.00 | 0.00 |
| ATOM | 2829 | HG12 | VAL | X | 183 | 21.760 | 44.781 | 32.175 | 0.00 | 0.00 |
| ATOM | 2830 | HG13 | VAL | X | 183 | 20.608 | 46.130 | 31.884 | 0.00 | 0.00 |
| ATOM | 2831 | CG2  | VAL | X | 183 | 22.604 | 44.502 | 29.693 | 0.00 | 0.00 |
| ATOM | 2832 | HG21 | VAL | X | 183 | 23.196 | 44.878 | 28.859 | 0.00 | 0.00 |
| ATOM | 2833 | HG22 | VAL | X | 183 | 21.816 | 43.849 | 29.316 | 0.00 | 0.00 |
| ATOM | 2834 | HG23 | VAL | X | 183 | 23.220 | 44.008 | 30.445 | 0.00 | 0.00 |
| ATOM | 2835 | C    | VAL | X | 183 | 20.008 | 45.914 | 28.596 | 0.00 | 0.00 |
| ATOM | 2836 | O    | VAL | X | 183 | 20.333 | 45.102 | 27.748 | 0.00 | 0.00 |
| ATOM | 2837 | N    | ALA | X | 184 | 18.716 | 46.259 | 28.708 | 0.00 | 0.00 |
| ATOM | 2838 | H    | ALA | X | 184 | 18.517 | 46.948 | 29.420 | 0.00 | 0.00 |
| ATOM | 2839 | CA   | ALA | X | 184 | 17.601 | 45.652 | 27.918 | 0.00 | 0.00 |
| ATOM | 2840 | HA   | ALA | X | 184 | 17.468 | 44.606 | 28.194 | 0.00 | 0.00 |
| ATOM | 2841 | CB   | ALA | X | 184 | 16.350 | 46.379 | 28.403 | 0.00 | 0.00 |
| ATOM | 2842 | HB1  | ALA | X | 184 | 15.640 | 46.465 | 27.580 | 0.00 | 0.00 |
| ATOM | 2843 | HB2  | ALA | X | 184 | 16.512 | 47.440 | 28.591 | 0.00 | 0.00 |
| ATOM | 2844 | HB3  | ALA | X | 184 | 15.955 | 45.860 | 29.276 | 0.00 | 0.00 |
| ATOM | 2845 | C    | ALA | X | 184 | 17.756 | 45.813 | 26.384 | 0.00 | 0.00 |
| ATOM | 2846 | O    | ALA | X | 184 | 17.323 | 44.867 | 25.728 | 0.00 | 0.00 |
| ATOM | 2847 | N    | ALA | X | 185 | 18.345 | 46.841 | 25.869 | 0.00 | 0.00 |
| ATOM | 2848 | H    | ALA | X | 185 | 18.716 | 47.540 | 26.496 | 0.00 | 0.00 |
| ATOM | 2849 | CA   | ALA | X | 185 | 18.442 | 47.130 | 24.457 | 0.00 | 0.00 |
| ATOM | 2850 | HA   | ALA | X | 185 | 17.480 | 47.101 | 23.944 | 0.00 | 0.00 |
| ATOM | 2851 | CB   | ALA | X | 185 | 18.835 | 48.588 | 24.363 | 0.00 | 0.00 |
| ATOM | 2852 | HB1  | ALA | X | 185 | 18.100 | 49.203 | 24.882 | 0.00 | 0.00 |
| ATOM | 2853 | HB2  | ALA | X | 185 | 18.868 | 48.833 | 23.302 | 0.00 | 0.00 |
| ATOM | 2854 | HB3  | ALA | X | 185 | 19.825 | 48.795 | 24.771 | 0.00 | 0.00 |
| ATOM | 2855 | C    | ALA | X | 185 | 19.418 | 46.052 | 23.720 | 0.00 | 0.00 |
| ATOM | 2856 | O    | ALA | X | 185 | 19.169 | 45.732 | 22.573 | 0.00 | 0.00 |
| ATOM | 2857 | N    | PHE | X | 186 | 20.391 | 45.575 | 24.478 | 0.00 | 0.00 |
| ATOM | 2858 | H    | PHE | X | 186 | 20.659 | 46.042 | 25.333 | 0.00 | 0.00 |
| ATOM | 2859 | CA   | PHE | X | 186 | 21.190 | 44.368 | 24.183 | 0.00 | 0.00 |
| ATOM | 2860 | HA   | PHE | X | 186 | 21.400 | 44.380 | 23.114 | 0.00 | 0.00 |
| ATOM | 2861 | CB   | PHE | X | 186 | 22.539 | 44.389 | 24.947 | 0.00 | 0.00 |
| ATOM | 2862 | HB2  | PHE | X | 186 | 22.370 | 44.176 | 26.003 | 0.00 | 0.00 |
| ATOM | 2863 | HB3  | PHE | X | 186 | 23.189 | 43.615 | 24.539 | 0.00 | 0.00 |
| ATOM | 2864 | CG   | PHE | X | 186 | 23.334 | 45.754 | 24.764 | 0.00 | 0.00 |
| ATOM | 2865 | CD1  | PHE | X | 186 | 23.312 | 46.762 | 25.748 | 0.00 | 0.00 |

|      |      |      |     |   |     |        |        |        |      |      |
|------|------|------|-----|---|-----|--------|--------|--------|------|------|
| ATOM | 2866 | HD1  | PHE | X | 186 | 22.874 | 46.454 | 26.685 | 0.00 | 0.00 |
| ATOM | 2867 | CE1  | PHE | X | 186 | 23.789 | 48.028 | 25.461 | 0.00 | 0.00 |
| ATOM | 2868 | HE1  | PHE | X | 186 | 23.789 | 48.767 | 26.249 | 0.00 | 0.00 |
| ATOM | 2869 | CZ   | PHE | X | 186 | 24.421 | 48.214 | 24.259 | 0.00 | 0.00 |
| ATOM | 2870 | HZ   | PHE | X | 186 | 24.697 | 49.253 | 24.154 | 0.00 | 0.00 |
| ATOM | 2871 | CE2  | PHE | X | 186 | 24.477 | 47.234 | 23.245 | 0.00 | 0.00 |
| ATOM | 2872 | HE2  | PHE | X | 186 | 24.946 | 47.438 | 22.293 | 0.00 | 0.00 |
| ATOM | 2873 | CD2  | PHE | X | 186 | 23.973 | 46.016 | 23.565 | 0.00 | 0.00 |
| ATOM | 2874 | HD2  | PHE | X | 186 | 24.056 | 45.200 | 22.863 | 0.00 | 0.00 |
| ATOM | 2875 | C    | PHE | X | 186 | 20.448 | 43.039 | 24.470 | 0.00 | 0.00 |
| ATOM | 2876 | O    | PHE | X | 186 | 20.811 | 42.017 | 23.939 | 0.00 | 0.00 |
| ATOM | 2877 | N    | GLY | X | 187 | 19.526 | 43.032 | 25.481 | 0.00 | 0.00 |
| ATOM | 2878 | H    | GLY | X | 187 | 19.256 | 43.897 | 25.927 | 0.00 | 0.00 |
| ATOM | 2879 | CA   | GLY | X | 187 | 18.702 | 41.867 | 25.639 | 0.00 | 0.00 |
| ATOM | 2880 | HA2  | GLY | X | 187 | 17.655 | 42.102 | 25.449 | 0.00 | 0.00 |
| ATOM | 2881 | HA3  | GLY | X | 187 | 19.023 | 41.079 | 24.959 | 0.00 | 0.00 |
| ATOM | 2882 | C    | GLY | X | 187 | 18.744 | 41.304 | 27.034 | 0.00 | 0.00 |
| ATOM | 2883 | O    | GLY | X | 187 | 17.979 | 40.363 | 27.324 | 0.00 | 0.00 |
| ATOM | 2884 | N    | GLY | X | 188 | 19.658 | 41.676 | 27.896 | 0.00 | 0.00 |
| ATOM | 2885 | H    | GLY | X | 188 | 20.423 | 42.165 | 27.454 | 0.00 | 0.00 |
| ATOM | 2886 | CA   | GLY | X | 188 | 19.759 | 41.034 | 29.198 | 0.00 | 0.00 |
| ATOM | 2887 | HA2  | GLY | X | 188 | 19.444 | 39.992 | 29.131 | 0.00 | 0.00 |
| ATOM | 2888 | HA3  | GLY | X | 188 | 20.727 | 41.139 | 29.686 | 0.00 | 0.00 |
| ATOM | 2889 | C    | GLY | X | 188 | 18.797 | 41.667 | 30.163 | 0.00 | 0.00 |
| ATOM | 2890 | O    | GLY | X | 188 | 18.210 | 42.732 | 29.828 | 0.00 | 0.00 |
| ATOM | 2891 | N    | ASP | X | 189 | 18.683 | 41.109 | 31.352 | 0.00 | 0.00 |
| ATOM | 2892 | H    | ASP | X | 189 | 19.148 | 40.251 | 31.612 | 0.00 | 0.00 |
| ATOM | 2893 | CA   | ASP | X | 189 | 17.728 | 41.592 | 32.318 | 0.00 | 0.00 |
| ATOM | 2894 | HA   | ASP | X | 189 | 16.977 | 42.235 | 31.857 | 0.00 | 0.00 |
| ATOM | 2895 | CB   | ASP | X | 189 | 16.877 | 40.428 | 32.868 | 0.00 | 0.00 |
| ATOM | 2896 | HB2  | ASP | X | 189 | 16.263 | 39.858 | 32.170 | 0.00 | 0.00 |
| ATOM | 2897 | HB3  | ASP | X | 189 | 17.520 | 39.657 | 33.290 | 0.00 | 0.00 |
| ATOM | 2898 | CG   | ASP | X | 189 | 16.011 | 40.816 | 34.026 | 0.00 | 0.00 |
| ATOM | 2899 | OD1  | ASP | X | 189 | 16.020 | 40.077 | 35.043 | 0.00 | 0.00 |
| ATOM | 2900 | OD2  | ASP | X | 189 | 15.457 | 41.902 | 33.998 | 0.00 | 0.00 |
| ATOM | 2901 | C    | ASP | X | 189 | 18.377 | 42.416 | 33.433 | 0.00 | 0.00 |
| ATOM | 2902 | O    | ASP | X | 189 | 19.063 | 41.840 | 34.264 | 0.00 | 0.00 |
| ATOM | 2903 | N    | PRO | X | 190 | 18.058 | 43.670 | 33.672 | 0.00 | 0.00 |
| ATOM | 2904 | CD   | PRO | X | 190 | 17.275 | 44.472 | 32.748 | 0.00 | 0.00 |
| ATOM | 2905 | HD2  | PRO | X | 190 | 16.239 | 44.153 | 32.862 | 0.00 | 0.00 |
| ATOM | 2906 | HD3  | PRO | X | 190 | 17.604 | 44.394 | 31.712 | 0.00 | 0.00 |
| ATOM | 2907 | CG   | PRO | X | 190 | 17.568 | 45.842 | 33.170 | 0.00 | 0.00 |
| ATOM | 2908 | HG2  | PRO | X | 190 | 16.708 | 46.472 | 32.943 | 0.00 | 0.00 |
| ATOM | 2909 | HG3  | PRO | X | 190 | 18.464 | 46.243 | 32.698 | 0.00 | 0.00 |
| ATOM | 2910 | CB   | PRO | X | 190 | 17.786 | 45.705 | 34.658 | 0.00 | 0.00 |
| ATOM | 2911 | HB2  | PRO | X | 190 | 16.868 | 45.571 | 35.231 | 0.00 | 0.00 |
| ATOM | 2912 | HB3  | PRO | X | 190 | 18.330 | 46.602 | 34.955 | 0.00 | 0.00 |
| ATOM | 2913 | CA   | PRO | X | 190 | 18.619 | 44.486 | 34.713 | 0.00 | 0.00 |
| ATOM | 2914 | HA   | PRO | X | 190 | 19.707 | 44.439 | 34.662 | 0.00 | 0.00 |
| ATOM | 2915 | C    | PRO | X | 190 | 18.355 | 43.897 | 36.111 | 0.00 | 0.00 |
| ATOM | 2916 | O    | PRO | X | 190 | 19.178 | 44.220 | 36.990 | 0.00 | 0.00 |
| ATOM | 2917 | N    | THR | X | 191 | 17.317 | 43.074 | 36.357 | 0.00 | 0.00 |
| ATOM | 2918 | H    | THR | X | 191 | 16.660 | 42.826 | 35.631 | 0.00 | 0.00 |
| ATOM | 2919 | CA   | THR | X | 191 | 17.047 | 42.429 | 37.641 | 0.00 | 0.00 |
| ATOM | 2920 | HA   | THR | X | 191 | 17.333 | 43.150 | 38.407 | 0.00 | 0.00 |
| ATOM | 2921 | CB   | THR | X | 191 | 15.549 | 42.098 | 37.771 | 0.00 | 0.00 |
| ATOM | 2922 | HB   | THR | X | 191 | 15.359 | 41.247 | 37.117 | 0.00 | 0.00 |
| ATOM | 2923 | CG2  | THR | X | 191 | 14.914 | 41.652 | 39.070 | 0.00 | 0.00 |
| ATOM | 2924 | HG21 | THR | X | 191 | 15.358 | 42.225 | 39.884 | 0.00 | 0.00 |
| ATOM | 2925 | HG22 | THR | X | 191 | 15.062 | 40.588 | 39.257 | 0.00 | 0.00 |
| ATOM | 2926 | HG23 | THR | X | 191 | 13.853 | 41.899 | 39.065 | 0.00 | 0.00 |
| ATOM | 2927 | OG1  | THR | X | 191 | 14.741 | 43.198 | 37.355 | 0.00 | 0.00 |
| ATOM | 2928 | HG1  | THR | X | 191 | 14.752 | 43.935 | 37.970 | 0.00 | 0.00 |
| ATOM | 2929 | C    | THR | X | 191 | 17.920 | 41.197 | 37.725 | 0.00 | 0.00 |
| ATOM | 2930 | O    | THR | X | 191 | 17.728 | 40.443 | 38.651 | 0.00 | 0.00 |
| ATOM | 2931 | N    | SER | X | 192 | 18.826 | 41.016 | 36.785 | 0.00 | 0.00 |
| ATOM | 2932 | H    | SER | X | 192 | 19.064 | 41.694 | 36.076 | 0.00 | 0.00 |

|      |      |      |     |   |     |        |        |        |      |      |
|------|------|------|-----|---|-----|--------|--------|--------|------|------|
| ATOM | 2933 | CA   | SER | X | 192 | 19.717 | 39.792 | 36.802 | 0.00 | 0.00 |
| ATOM | 2934 | HA   | SER | X | 192 | 19.695 | 39.236 | 37.740 | 0.00 | 0.00 |
| ATOM | 2935 | CB   | SER | X | 192 | 19.160 | 38.802 | 35.788 | 0.00 | 0.00 |
| ATOM | 2936 | HB2  | SER | X | 192 | 19.372 | 39.083 | 34.756 | 0.00 | 0.00 |
| ATOM | 2937 | HB3  | SER | X | 192 | 19.687 | 37.857 | 35.924 | 0.00 | 0.00 |
| ATOM | 2938 | OG   | SER | X | 192 | 17.774 | 38.479 | 35.981 | 0.00 | 0.00 |
| ATOM | 2939 | HG   | SER | X | 192 | 17.289 | 39.148 | 35.494 | 0.00 | 0.00 |
| ATOM | 2940 | C    | SER | X | 192 | 21.234 | 40.056 | 36.588 | 0.00 | 0.00 |
| ATOM | 2941 | O    | SER | X | 192 | 21.838 | 39.347 | 35.835 | 0.00 | 0.00 |
| ATOM | 2942 | N    | VAL | X | 193 | 21.794 | 41.111 | 37.194 | 0.00 | 0.00 |
| ATOM | 2943 | H    | VAL | X | 193 | 21.272 | 41.437 | 37.996 | 0.00 | 0.00 |
| ATOM | 2944 | CA   | VAL | X | 193 | 23.214 | 41.430 | 37.007 | 0.00 | 0.00 |
| ATOM | 2945 | HA   | VAL | X | 193 | 23.578 | 41.127 | 36.026 | 0.00 | 0.00 |
| ATOM | 2946 | CB   | VAL | X | 193 | 23.550 | 42.942 | 36.993 | 0.00 | 0.00 |
| ATOM | 2947 | HB   | VAL | X | 193 | 23.117 | 43.347 | 37.908 | 0.00 | 0.00 |
| ATOM | 2948 | CG1  | VAL | X | 193 | 25.051 | 43.375 | 37.074 | 0.00 | 0.00 |
| ATOM | 2949 | HG11 | VAL | X | 193 | 25.214 | 44.416 | 36.792 | 0.00 | 0.00 |
| ATOM | 2950 | HG12 | VAL | X | 193 | 25.456 | 43.195 | 38.070 | 0.00 | 0.00 |
| ATOM | 2951 | HG13 | VAL | X | 193 | 25.702 | 42.857 | 36.370 | 0.00 | 0.00 |
| ATOM | 2952 | CG2  | VAL | X | 193 | 22.743 | 43.708 | 35.891 | 0.00 | 0.00 |
| ATOM | 2953 | HG21 | VAL | X | 193 | 23.282 | 43.501 | 34.967 | 0.00 | 0.00 |
| ATOM | 2954 | HG22 | VAL | X | 193 | 22.640 | 44.779 | 36.069 | 0.00 | 0.00 |
| ATOM | 2955 | HG23 | VAL | X | 193 | 21.673 | 43.497 | 35.905 | 0.00 | 0.00 |
| ATOM | 2956 | C    | VAL | X | 193 | 24.080 | 40.604 | 38.043 | 0.00 | 0.00 |
| ATOM | 2957 | O    | VAL | X | 193 | 23.605 | 40.310 | 39.168 | 0.00 | 0.00 |
| ATOM | 2958 | N    | THR | X | 194 | 25.203 | 40.064 | 37.529 | 0.00 | 0.00 |
| ATOM | 2959 | H    | THR | X | 194 | 25.348 | 40.231 | 36.543 | 0.00 | 0.00 |
| ATOM | 2960 | CA   | THR | X | 194 | 26.204 | 39.152 | 38.169 | 0.00 | 0.00 |
| ATOM | 2961 | HA   | THR | X | 194 | 26.088 | 39.247 | 39.249 | 0.00 | 0.00 |
| ATOM | 2962 | CB   | THR | X | 194 | 26.079 | 37.688 | 37.722 | 0.00 | 0.00 |
| ATOM | 2963 | HB   | THR | X | 194 | 26.298 | 37.587 | 36.659 | 0.00 | 0.00 |
| ATOM | 2964 | CG2  | THR | X | 194 | 27.061 | 36.718 | 38.340 | 0.00 | 0.00 |
| ATOM | 2965 | HG21 | THR | X | 194 | 26.636 | 36.197 | 39.198 | 0.00 | 0.00 |
| ATOM | 2966 | HG22 | THR | X | 194 | 27.940 | 37.262 | 38.688 | 0.00 | 0.00 |
| ATOM | 2967 | HG23 | THR | X | 194 | 27.428 | 35.993 | 37.614 | 0.00 | 0.00 |
| ATOM | 2968 | OG1  | THR | X | 194 | 24.861 | 37.107 | 38.095 | 0.00 | 0.00 |
| ATOM | 2969 | HG1  | THR | X | 194 | 24.105 | 37.525 | 37.676 | 0.00 | 0.00 |
| ATOM | 2970 | C    | THR | X | 194 | 27.599 | 39.696 | 37.970 | 0.00 | 0.00 |
| ATOM | 2971 | O    | THR | X | 194 | 28.129 | 39.652 | 36.834 | 0.00 | 0.00 |
| ATOM | 2972 | N    | LEU | X | 195 | 28.243 | 40.182 | 38.984 | 0.00 | 0.00 |
| ATOM | 2973 | H    | LEU | X | 195 | 27.911 | 40.163 | 39.938 | 0.00 | 0.00 |
| ATOM | 2974 | CA   | LEU | X | 195 | 29.666 | 40.578 | 38.907 | 0.00 | 0.00 |
| ATOM | 2975 | HA   | LEU | X | 195 | 29.960 | 41.276 | 38.123 | 0.00 | 0.00 |
| ATOM | 2976 | CB   | LEU | X | 195 | 30.038 | 41.335 | 40.176 | 0.00 | 0.00 |
| ATOM | 2977 | HB2  | LEU | X | 195 | 29.837 | 40.605 | 40.960 | 0.00 | 0.00 |
| ATOM | 2978 | HB3  | LEU | X | 195 | 31.109 | 41.530 | 40.241 | 0.00 | 0.00 |
| ATOM | 2979 | CG   | LEU | X | 195 | 29.325 | 42.655 | 40.540 | 0.00 | 0.00 |
| ATOM | 2980 | HG   | LEU | X | 195 | 28.445 | 42.395 | 41.129 | 0.00 | 0.00 |
| ATOM | 2981 | CD1  | LEU | X | 195 | 30.197 | 43.706 | 41.304 | 0.00 | 0.00 |
| ATOM | 2982 | HD11 | LEU | X | 195 | 29.548 | 44.530 | 41.602 | 0.00 | 0.00 |
| ATOM | 2983 | HD12 | LEU | X | 195 | 31.032 | 44.083 | 40.712 | 0.00 | 0.00 |
| ATOM | 2984 | HD13 | LEU | X | 195 | 30.732 | 43.351 | 42.184 | 0.00 | 0.00 |
| ATOM | 2985 | CD2  | LEU | X | 195 | 28.791 | 43.461 | 39.349 | 0.00 | 0.00 |
| ATOM | 2986 | HD21 | LEU | X | 195 | 29.554 | 43.682 | 38.602 | 0.00 | 0.00 |
| ATOM | 2987 | HD22 | LEU | X | 195 | 28.005 | 42.853 | 38.903 | 0.00 | 0.00 |
| ATOM | 2988 | HD23 | LEU | X | 195 | 28.285 | 44.344 | 39.739 | 0.00 | 0.00 |
| ATOM | 2989 | C    | LEU | X | 195 | 30.553 | 39.340 | 38.751 | 0.00 | 0.00 |
| ATOM | 2990 | O    | LEU | X | 195 | 30.238 | 38.344 | 39.393 | 0.00 | 0.00 |
| ATOM | 2991 | N    | PHE | X | 196 | 31.638 | 39.479 | 38.065 | 0.00 | 0.00 |
| ATOM | 2992 | H    | PHE | X | 196 | 31.894 | 40.334 | 37.593 | 0.00 | 0.00 |
| ATOM | 2993 | CA   | PHE | X | 196 | 32.338 | 38.292 | 37.620 | 0.00 | 0.00 |
| ATOM | 2994 | HA   | PHE | X | 196 | 32.404 | 37.664 | 38.508 | 0.00 | 0.00 |
| ATOM | 2995 | CB   | PHE | X | 196 | 31.525 | 37.733 | 36.405 | 0.00 | 0.00 |
| ATOM | 2996 | HB2  | PHE | X | 196 | 30.535 | 37.385 | 36.702 | 0.00 | 0.00 |
| ATOM | 2997 | HB3  | PHE | X | 196 | 31.314 | 38.515 | 35.676 | 0.00 | 0.00 |
| ATOM | 2998 | CG   | PHE | X | 196 | 32.011 | 36.620 | 35.623 | 0.00 | 0.00 |
| ATOM | 2999 | CD1  | PHE | X | 196 | 31.895 | 36.664 | 34.209 | 0.00 | 0.00 |

|      |      |     |     |   |     |        |        |        |      |      |
|------|------|-----|-----|---|-----|--------|--------|--------|------|------|
| ATOM | 3000 | HD1 | PHE | X | 196 | 31.278 | 37.437 | 33.775 | 0.00 | 0.00 |
| ATOM | 3001 | CE1 | PHE | X | 196 | 32.382 | 35.624 | 33.452 | 0.00 | 0.00 |
| ATOM | 3002 | HE1 | PHE | X | 196 | 32.364 | 35.653 | 32.373 | 0.00 | 0.00 |
| ATOM | 3003 | CZ  | PHE | X | 196 | 33.119 | 34.532 | 34.061 | 0.00 | 0.00 |
| ATOM | 3004 | HZ  | PHE | X | 196 | 33.482 | 33.737 | 33.426 | 0.00 | 0.00 |
| ATOM | 3005 | CE2 | PHE | X | 196 | 33.117 | 34.430 | 35.463 | 0.00 | 0.00 |
| ATOM | 3006 | HE2 | PHE | X | 196 | 33.618 | 33.544 | 35.826 | 0.00 | 0.00 |
| ATOM | 3007 | CD2 | PHE | X | 196 | 32.701 | 35.569 | 36.203 | 0.00 | 0.00 |
| ATOM | 3008 | HD2 | PHE | X | 196 | 32.905 | 35.502 | 37.262 | 0.00 | 0.00 |
| ATOM | 3009 | C   | PHE | X | 196 | 33.709 | 38.826 | 37.207 | 0.00 | 0.00 |
| ATOM | 3010 | O   | PHE | X | 196 | 33.867 | 39.929 | 36.741 | 0.00 | 0.00 |
| ATOM | 3011 | N   | GLY | X | 197 | 34.767 | 38.083 | 37.612 | 0.00 | 0.00 |
| ATOM | 3012 | H   | GLY | X | 197 | 34.492 | 37.164 | 37.927 | 0.00 | 0.00 |
| ATOM | 3013 | CA  | GLY | X | 197 | 36.086 | 38.627 | 37.747 | 0.00 | 0.00 |
| ATOM | 3014 | HA2 | GLY | X | 197 | 36.476 | 38.618 | 36.729 | 0.00 | 0.00 |
| ATOM | 3015 | HA3 | GLY | X | 197 | 36.072 | 39.622 | 38.191 | 0.00 | 0.00 |
| ATOM | 3016 | C   | GLY | X | 197 | 37.091 | 37.773 | 38.504 | 0.00 | 0.00 |
| ATOM | 3017 | O   | GLY | X | 197 | 36.766 | 37.003 | 39.411 | 0.00 | 0.00 |
| ATOM | 3018 | N   | GLU | X | 198 | 38.337 | 37.899 | 38.039 | 0.00 | 0.00 |
| ATOM | 3019 | H   | GLU | X | 198 | 38.481 | 38.777 | 37.561 | 0.00 | 0.00 |
| ATOM | 3020 | CA  | GLU | X | 198 | 39.575 | 37.182 | 38.365 | 0.00 | 0.00 |
| ATOM | 3021 | HA  | GLU | X | 198 | 39.416 | 36.355 | 39.057 | 0.00 | 0.00 |
| ATOM | 3022 | CB  | GLU | X | 198 | 40.243 | 36.503 | 37.156 | 0.00 | 0.00 |
| ATOM | 3023 | HB2 | GLU | X | 198 | 41.093 | 35.928 | 37.523 | 0.00 | 0.00 |
| ATOM | 3024 | HB3 | GLU | X | 198 | 39.568 | 35.752 | 36.746 | 0.00 | 0.00 |
| ATOM | 3025 | CG  | GLU | X | 198 | 40.687 | 37.361 | 35.947 | 0.00 | 0.00 |
| ATOM | 3026 | HG2 | GLU | X | 198 | 40.633 | 36.665 | 35.110 | 0.00 | 0.00 |
| ATOM | 3027 | HG3 | GLU | X | 198 | 40.003 | 38.193 | 35.781 | 0.00 | 0.00 |
| ATOM | 3028 | CD  | GLU | X | 198 | 42.194 | 37.721 | 35.957 | 0.00 | 0.00 |
| ATOM | 3029 | OE1 | GLU | X | 198 | 42.614 | 38.355 | 34.917 | 0.00 | 0.00 |
| ATOM | 3030 | OE2 | GLU | X | 198 | 42.971 | 37.478 | 36.932 | 0.00 | 0.00 |
| ATOM | 3031 | C   | GLU | X | 198 | 40.615 | 38.081 | 38.942 | 0.00 | 0.00 |
| ATOM | 3032 | O   | GLU | X | 198 | 40.871 | 39.208 | 38.426 | 0.00 | 0.00 |
| ATOM | 3033 | N   | XA1 | X | 199 | 41.238 | 37.636 | 39.998 | 0.00 | 0.00 |
| ATOM | 3034 | CA  | XA1 | X | 199 | 42.494 | 38.294 | 40.546 | 0.00 | 0.00 |
| ATOM | 3035 | C   | XA1 | X | 199 | 42.198 | 39.691 | 41.239 | 0.00 | 0.00 |
| ATOM | 3036 | O   | XA1 | X | 199 | 41.425 | 39.832 | 42.197 | 0.00 | 0.00 |
| ATOM | 3037 | CB  | XA1 | X | 199 | 43.740 | 38.163 | 39.640 | 0.00 | 0.00 |
| ATOM | 3038 | OG  | XA1 | X | 199 | 44.944 | 38.388 | 40.459 | 0.00 | 0.00 |
| ATOM | 3039 | P1  | XA1 | X | 199 | 46.011 | 39.357 | 39.857 | 0.00 | 0.00 |
| ATOM | 3040 | O1  | XA1 | X | 199 | 45.420 | 40.626 | 39.389 | 0.00 | 0.00 |
| ATOM | 3041 | O2  | XA1 | X | 199 | 46.905 | 38.574 | 38.970 | 0.00 | 0.00 |
| ATOM | 3042 | C1  | XA1 | X | 199 | 47.060 | 39.757 | 41.246 | 0.00 | 0.00 |
| ATOM | 3043 | H   | XA1 | X | 199 | 40.951 | 36.802 | 40.490 | 0.00 | 0.00 |
| ATOM | 3044 | HA  | XA1 | X | 199 | 42.879 | 37.716 | 41.385 | 0.00 | 0.00 |
| ATOM | 3045 | HB2 | XA1 | X | 199 | 43.778 | 37.125 | 39.298 | 0.00 | 0.00 |
| ATOM | 3046 | HB3 | XA1 | X | 199 | 43.714 | 38.839 | 38.781 | 0.00 | 0.00 |
| ATOM | 3047 | H11 | XA1 | X | 199 | 46.524 | 40.129 | 42.122 | 0.00 | 0.00 |
| ATOM | 3048 | H12 | XA1 | X | 199 | 47.601 | 38.820 | 41.395 | 0.00 | 0.00 |
| ATOM | 3049 | H13 | XA1 | X | 199 | 47.858 | 40.437 | 40.944 | 0.00 | 0.00 |
| ATOM | 3050 | N   | ALA | X | 200 | 42.725 | 40.836 | 40.655 | 0.00 | 0.00 |
| ATOM | 3051 | H   | ALA | X | 200 | 43.377 | 40.689 | 39.898 | 0.00 | 0.00 |
| ATOM | 3052 | CA  | ALA | X | 200 | 42.311 | 42.177 | 40.916 | 0.00 | 0.00 |
| ATOM | 3053 | HA  | ALA | X | 200 | 42.363 | 42.286 | 41.999 | 0.00 | 0.00 |
| ATOM | 3054 | CB  | ALA | X | 200 | 43.324 | 43.142 | 40.252 | 0.00 | 0.00 |
| ATOM | 3055 | HB1 | ALA | X | 200 | 44.340 | 42.906 | 40.568 | 0.00 | 0.00 |
| ATOM | 3056 | HB2 | ALA | X | 200 | 43.117 | 44.208 | 40.342 | 0.00 | 0.00 |
| ATOM | 3057 | HB3 | ALA | X | 200 | 43.458 | 42.826 | 39.217 | 0.00 | 0.00 |
| ATOM | 3058 | C   | ALA | X | 200 | 40.881 | 42.436 | 40.441 | 0.00 | 0.00 |
| ATOM | 3059 | O   | ALA | X | 200 | 40.229 | 43.318 | 40.957 | 0.00 | 0.00 |
| ATOM | 3060 | N   | GLY | X | 201 | 40.235 | 41.523 | 39.703 | 0.00 | 0.00 |
| ATOM | 3061 | H   | GLY | X | 201 | 40.669 | 40.726 | 39.259 | 0.00 | 0.00 |
| ATOM | 3062 | CA  | GLY | X | 201 | 38.789 | 41.616 | 39.246 | 0.00 | 0.00 |
| ATOM | 3063 | HA2 | GLY | X | 201 | 38.631 | 42.670 | 39.013 | 0.00 | 0.00 |
| ATOM | 3064 | HA3 | GLY | X | 201 | 38.760 | 41.113 | 38.280 | 0.00 | 0.00 |
| ATOM | 3065 | C   | GLY | X | 201 | 37.853 | 41.035 | 40.265 | 0.00 | 0.00 |
| ATOM | 3066 | O   | GLY | X | 201 | 37.000 | 41.738 | 40.762 | 0.00 | 0.00 |

|      |      |      |     |   |     |        |        |        |      |      |
|------|------|------|-----|---|-----|--------|--------|--------|------|------|
| ATOM | 3067 | N    | ALA | X | 202 | 38.329 | 39.912 | 40.847 | 0.00 | 0.00 |
| ATOM | 3068 | H    | ALA | X | 202 | 39.201 | 39.515 | 40.528 | 0.00 | 0.00 |
| ATOM | 3069 | CA   | ALA | X | 202 | 37.751 | 39.365 | 42.065 | 0.00 | 0.00 |
| ATOM | 3070 | HA   | ALA | X | 202 | 36.684 | 39.239 | 41.886 | 0.00 | 0.00 |
| ATOM | 3071 | CB   | ALA | X | 202 | 38.282 | 37.988 | 42.371 | 0.00 | 0.00 |
| ATOM | 3072 | HB1  | ALA | X | 202 | 37.882 | 37.556 | 43.288 | 0.00 | 0.00 |
| ATOM | 3073 | HB2  | ALA | X | 202 | 39.346 | 38.035 | 42.601 | 0.00 | 0.00 |
| ATOM | 3074 | HB3  | ALA | X | 202 | 38.004 | 37.361 | 41.524 | 0.00 | 0.00 |
| ATOM | 3075 | C    | ALA | X | 202 | 37.908 | 40.278 | 43.339 | 0.00 | 0.00 |
| ATOM | 3076 | O    | ALA | X | 202 | 36.931 | 40.582 | 44.006 | 0.00 | 0.00 |
| ATOM | 3077 | N    | ALA | X | 203 | 39.062 | 40.903 | 43.521 | 0.00 | 0.00 |
| ATOM | 3078 | H    | ALA | X | 203 | 39.918 | 40.562 | 43.107 | 0.00 | 0.00 |
| ATOM | 3079 | CA   | ALA | X | 203 | 39.134 | 41.972 | 44.510 | 0.00 | 0.00 |
| ATOM | 3080 | HA   | ALA | X | 203 | 38.636 | 41.692 | 45.438 | 0.00 | 0.00 |
| ATOM | 3081 | CB   | ALA | X | 203 | 40.598 | 42.274 | 44.724 | 0.00 | 0.00 |
| ATOM | 3082 | HB1  | ALA | X | 203 | 40.670 | 42.924 | 45.595 | 0.00 | 0.00 |
| ATOM | 3083 | HB2  | ALA | X | 203 | 40.907 | 42.761 | 43.799 | 0.00 | 0.00 |
| ATOM | 3084 | HB3  | ALA | X | 203 | 41.145 | 41.375 | 45.008 | 0.00 | 0.00 |
| ATOM | 3085 | C    | ALA | X | 203 | 38.239 | 43.256 | 44.173 | 0.00 | 0.00 |
| ATOM | 3086 | O    | ALA | X | 203 | 37.587 | 43.718 | 45.105 | 0.00 | 0.00 |
| ATOM | 3087 | N    | SER | X | 204 | 38.067 | 43.599 | 42.943 | 0.00 | 0.00 |
| ATOM | 3088 | H    | SER | X | 204 | 38.675 | 43.275 | 42.205 | 0.00 | 0.00 |
| ATOM | 3089 | CA   | SER | X | 204 | 37.148 | 44.691 | 42.569 | 0.00 | 0.00 |
| ATOM | 3090 | HA   | SER | X | 204 | 37.354 | 45.626 | 43.089 | 0.00 | 0.00 |
| ATOM | 3091 | CB   | SER | X | 204 | 37.152 | 44.969 | 41.077 | 0.00 | 0.00 |
| ATOM | 3092 | HB2  | SER | X | 204 | 37.097 | 44.035 | 40.516 | 0.00 | 0.00 |
| ATOM | 3093 | HB3  | SER | X | 204 | 36.249 | 45.538 | 40.855 | 0.00 | 0.00 |
| ATOM | 3094 | OG   | SER | X | 204 | 38.342 | 45.533 | 40.661 | 0.00 | 0.00 |
| ATOM | 3095 | HG   | SER | X | 204 | 38.994 | 44.829 | 40.680 | 0.00 | 0.00 |
| ATOM | 3096 | C    | SER | X | 204 | 35.688 | 44.214 | 42.925 | 0.00 | 0.00 |
| ATOM | 3097 | O    | SER | X | 204 | 35.066 | 44.946 | 43.699 | 0.00 | 0.00 |
| ATOM | 3098 | N    | VAL | X | 205 | 35.184 | 43.085 | 42.369 | 0.00 | 0.00 |
| ATOM | 3099 | H    | VAL | X | 205 | 35.826 | 42.566 | 41.787 | 0.00 | 0.00 |
| ATOM | 3100 | CA   | VAL | X | 205 | 33.924 | 42.422 | 42.695 | 0.00 | 0.00 |
| ATOM | 3101 | HA   | VAL | X | 205 | 33.126 | 43.086 | 42.364 | 0.00 | 0.00 |
| ATOM | 3102 | CB   | VAL | X | 205 | 33.900 | 40.940 | 42.158 | 0.00 | 0.00 |
| ATOM | 3103 | HB   | VAL | X | 205 | 34.766 | 40.320 | 42.390 | 0.00 | 0.00 |
| ATOM | 3104 | CG1  | VAL | X | 205 | 32.688 | 40.201 | 42.677 | 0.00 | 0.00 |
| ATOM | 3105 | HG11 | VAL | X | 205 | 32.551 | 39.271 | 42.126 | 0.00 | 0.00 |
| ATOM | 3106 | HG12 | VAL | X | 205 | 32.933 | 39.905 | 43.697 | 0.00 | 0.00 |
| ATOM | 3107 | HG13 | VAL | X | 205 | 31.874 | 40.914 | 42.544 | 0.00 | 0.00 |
| ATOM | 3108 | CG2  | VAL | X | 205 | 33.854 | 40.986 | 40.578 | 0.00 | 0.00 |
| ATOM | 3109 | HG21 | VAL | X | 205 | 33.299 | 41.841 | 40.192 | 0.00 | 0.00 |
| ATOM | 3110 | HG22 | VAL | X | 205 | 33.599 | 40.019 | 40.146 | 0.00 | 0.00 |
| ATOM | 3111 | HG23 | VAL | X | 205 | 34.846 | 41.047 | 40.130 | 0.00 | 0.00 |
| ATOM | 3112 | C    | VAL | X | 205 | 33.685 | 42.385 | 44.222 | 0.00 | 0.00 |
| ATOM | 3113 | O    | VAL | X | 205 | 32.679 | 42.849 | 44.735 | 0.00 | 0.00 |
| ATOM | 3114 | N    | GLY | X | 206 | 34.764 | 42.162 | 45.050 | 0.00 | 0.00 |
| ATOM | 3115 | H    | GLY | X | 206 | 35.589 | 41.726 | 44.664 | 0.00 | 0.00 |
| ATOM | 3116 | CA   | GLY | X | 206 | 34.582 | 42.133 | 46.529 | 0.00 | 0.00 |
| ATOM | 3117 | HA2  | GLY | X | 206 | 33.760 | 41.461 | 46.774 | 0.00 | 0.00 |
| ATOM | 3118 | HA3  | GLY | X | 206 | 35.438 | 41.607 | 46.953 | 0.00 | 0.00 |
| ATOM | 3119 | C    | GLY | X | 206 | 34.482 | 43.417 | 47.326 | 0.00 | 0.00 |
| ATOM | 3120 | O    | GLY | X | 206 | 33.895 | 43.483 | 48.339 | 0.00 | 0.00 |
| ATOM | 3121 | N    | MET | X | 207 | 35.164 | 44.459 | 46.845 | 0.00 | 0.00 |
| ATOM | 3122 | H    | MET | X | 207 | 35.721 | 44.391 | 46.006 | 0.00 | 0.00 |
| ATOM | 3123 | CA   | MET | X | 207 | 34.971 | 45.786 | 47.314 | 0.00 | 0.00 |
| ATOM | 3124 | HA   | MET | X | 207 | 35.144 | 45.875 | 48.387 | 0.00 | 0.00 |
| ATOM | 3125 | CB   | MET | X | 207 | 36.097 | 46.601 | 46.584 | 0.00 | 0.00 |
| ATOM | 3126 | HB2  | MET | X | 207 | 36.136 | 46.398 | 45.513 | 0.00 | 0.00 |
| ATOM | 3127 | HB3  | MET | X | 207 | 35.858 | 47.659 | 46.688 | 0.00 | 0.00 |
| ATOM | 3128 | CG   | MET | X | 207 | 37.430 | 46.421 | 47.234 | 0.00 | 0.00 |
| ATOM | 3129 | HG2  | MET | X | 207 | 37.270 | 46.720 | 48.270 | 0.00 | 0.00 |
| ATOM | 3130 | HG3  | MET | X | 207 | 37.721 | 45.371 | 47.221 | 0.00 | 0.00 |
| ATOM | 3131 | SD   | MET | X | 207 | 38.807 | 47.247 | 46.518 | 0.00 | 0.00 |
| ATOM | 3132 | CE   | MET | X | 207 | 40.078 | 45.947 | 46.674 | 0.00 | 0.00 |
| ATOM | 3133 | HE1  | MET | X | 207 | 39.703 | 45.062 | 46.160 | 0.00 | 0.00 |

|      |      |      |     |   |     |        |        |        |      |      |
|------|------|------|-----|---|-----|--------|--------|--------|------|------|
| ATOM | 3134 | HE2  | MET | X | 207 | 40.987 | 46.336 | 46.214 | 0.00 | 0.00 |
| ATOM | 3135 | HE3  | MET | X | 207 | 40.400 | 45.856 | 47.711 | 0.00 | 0.00 |
| ATOM | 3136 | C    | MET | X | 207 | 33.574 | 46.289 | 46.945 | 0.00 | 0.00 |
| ATOM | 3137 | O    | MET | X | 207 | 32.994 | 46.982 | 47.711 | 0.00 | 0.00 |
| ATOM | 3138 | N    | HIE | X | 208 | 33.103 | 45.950 | 45.752 | 0.00 | 0.00 |
| ATOM | 3139 | H    | HIE | X | 208 | 33.761 | 45.614 | 45.063 | 0.00 | 0.00 |
| ATOM | 3140 | CA   | HIE | X | 208 | 31.693 | 46.248 | 45.426 | 0.00 | 0.00 |
| ATOM | 3141 | HA   | HIE | X | 208 | 31.587 | 47.309 | 45.655 | 0.00 | 0.00 |
| ATOM | 3142 | CB   | HIE | X | 208 | 31.453 | 46.055 | 43.933 | 0.00 | 0.00 |
| ATOM | 3143 | HB2  | HIE | X | 208 | 31.641 | 44.994 | 43.767 | 0.00 | 0.00 |
| ATOM | 3144 | HB3  | HIE | X | 208 | 30.378 | 46.069 | 43.753 | 0.00 | 0.00 |
| ATOM | 3145 | CG   | HIE | X | 208 | 32.236 | 46.845 | 42.880 | 0.00 | 0.00 |
| ATOM | 3146 | ND1  | HIE | X | 208 | 32.113 | 48.214 | 42.627 | 0.00 | 0.00 |
| ATOM | 3147 | CE1  | HIE | X | 208 | 32.977 | 48.473 | 41.604 | 0.00 | 0.00 |
| ATOM | 3148 | HE1  | HIE | X | 208 | 32.979 | 49.436 | 41.115 | 0.00 | 0.00 |
| ATOM | 3149 | NE2  | HIE | X | 208 | 33.551 | 47.275 | 41.177 | 0.00 | 0.00 |
| ATOM | 3150 | HE2  | HIE | X | 208 | 34.122 | 47.228 | 40.346 | 0.00 | 0.00 |
| ATOM | 3151 | CD2  | HIE | X | 208 | 33.032 | 46.249 | 41.977 | 0.00 | 0.00 |
| ATOM | 3152 | HD2  | HIE | X | 208 | 33.101 | 45.174 | 41.906 | 0.00 | 0.00 |
| ATOM | 3153 | C    | HIE | X | 208 | 30.742 | 45.440 | 46.329 | 0.00 | 0.00 |
| ATOM | 3154 | O    | HIE | X | 208 | 29.696 | 46.024 | 46.603 | 0.00 | 0.00 |
| ATOM | 3155 | N    | LEU | X | 209 | 30.991 | 44.144 | 46.622 | 0.00 | 0.00 |
| ATOM | 3156 | H    | LEU | X | 209 | 31.736 | 43.698 | 46.106 | 0.00 | 0.00 |
| ATOM | 3157 | CA   | LEU | X | 209 | 30.216 | 43.365 | 47.559 | 0.00 | 0.00 |
| ATOM | 3158 | HA   | LEU | X | 209 | 29.181 | 43.157 | 47.285 | 0.00 | 0.00 |
| ATOM | 3159 | CB   | LEU | X | 209 | 30.893 | 41.972 | 47.707 | 0.00 | 0.00 |
| ATOM | 3160 | HB2  | LEU | X | 209 | 31.170 | 41.701 | 46.688 | 0.00 | 0.00 |
| ATOM | 3161 | HB3  | LEU | X | 209 | 31.834 | 42.037 | 48.252 | 0.00 | 0.00 |
| ATOM | 3162 | CG   | LEU | X | 209 | 30.000 | 40.829 | 48.234 | 0.00 | 0.00 |
| ATOM | 3163 | HG   | LEU | X | 209 | 29.726 | 41.059 | 49.264 | 0.00 | 0.00 |
| ATOM | 3164 | CD1  | LEU | X | 209 | 28.734 | 40.521 | 47.362 | 0.00 | 0.00 |
| ATOM | 3165 | HD11 | LEU | X | 209 | 28.974 | 40.618 | 46.303 | 0.00 | 0.00 |
| ATOM | 3166 | HD12 | LEU | X | 209 | 27.933 | 41.244 | 47.518 | 0.00 | 0.00 |
| ATOM | 3167 | HD13 | LEU | X | 209 | 28.502 | 39.472 | 47.545 | 0.00 | 0.00 |
| ATOM | 3168 | CD2  | LEU | X | 209 | 30.795 | 39.558 | 48.062 | 0.00 | 0.00 |
| ATOM | 3169 | HD21 | LEU | X | 209 | 31.690 | 39.466 | 48.677 | 0.00 | 0.00 |
| ATOM | 3170 | HD22 | LEU | X | 209 | 30.194 | 38.704 | 48.373 | 0.00 | 0.00 |
| ATOM | 3171 | HD23 | LEU | X | 209 | 31.108 | 39.418 | 47.027 | 0.00 | 0.00 |
| ATOM | 3172 | C    | LEU | X | 209 | 30.103 | 44.008 | 49.001 | 0.00 | 0.00 |
| ATOM | 3173 | O    | LEU | X | 209 | 29.031 | 43.857 | 49.611 | 0.00 | 0.00 |
| ATOM | 3174 | N    | LEU | X | 210 | 31.212 | 44.606 | 49.481 | 0.00 | 0.00 |
| ATOM | 3175 | H    | LEU | X | 210 | 32.087 | 44.435 | 49.005 | 0.00 | 0.00 |
| ATOM | 3176 | CA   | LEU | X | 210 | 31.388 | 45.168 | 50.835 | 0.00 | 0.00 |
| ATOM | 3177 | HA   | LEU | X | 210 | 30.899 | 44.518 | 51.560 | 0.00 | 0.00 |
| ATOM | 3178 | CB   | LEU | X | 210 | 32.899 | 45.197 | 51.167 | 0.00 | 0.00 |
| ATOM | 3179 | HB2  | LEU | X | 210 | 33.250 | 44.166 | 51.215 | 0.00 | 0.00 |
| ATOM | 3180 | HB3  | LEU | X | 210 | 33.388 | 45.862 | 50.455 | 0.00 | 0.00 |
| ATOM | 3181 | CG   | LEU | X | 210 | 33.352 | 45.899 | 52.548 | 0.00 | 0.00 |
| ATOM | 3182 | HG   | LEU | X | 210 | 33.094 | 46.958 | 52.565 | 0.00 | 0.00 |
| ATOM | 3183 | CD1  | LEU | X | 210 | 32.561 | 45.222 | 53.739 | 0.00 | 0.00 |
| ATOM | 3184 | HD11 | LEU | X | 210 | 31.491 | 45.214 | 53.533 | 0.00 | 0.00 |
| ATOM | 3185 | HD12 | LEU | X | 210 | 32.740 | 45.792 | 54.651 | 0.00 | 0.00 |
| ATOM | 3186 | HD13 | LEU | X | 210 | 32.865 | 44.180 | 53.841 | 0.00 | 0.00 |
| ATOM | 3187 | CD2  | LEU | X | 210 | 34.879 | 45.783 | 52.741 | 0.00 | 0.00 |
| ATOM | 3188 | HD21 | LEU | X | 210 | 35.119 | 44.720 | 52.740 | 0.00 | 0.00 |
| ATOM | 3189 | HD22 | LEU | X | 210 | 35.406 | 46.381 | 51.998 | 0.00 | 0.00 |
| ATOM | 3190 | HD23 | LEU | X | 210 | 35.206 | 46.134 | 53.720 | 0.00 | 0.00 |
| ATOM | 3191 | C    | LEU | X | 210 | 30.791 | 46.561 | 50.935 | 0.00 | 0.00 |
| ATOM | 3192 | O    | LEU | X | 210 | 30.604 | 47.108 | 52.023 | 0.00 | 0.00 |
| ATOM | 3193 | N    | SER | X | 211 | 30.481 | 47.277 | 49.828 | 0.00 | 0.00 |
| ATOM | 3194 | H    | SER | X | 211 | 30.746 | 46.900 | 48.930 | 0.00 | 0.00 |
| ATOM | 3195 | CA   | SER | X | 211 | 30.138 | 48.677 | 49.651 | 0.00 | 0.00 |
| ATOM | 3196 | HA   | SER | X | 211 | 30.296 | 49.091 | 50.647 | 0.00 | 0.00 |
| ATOM | 3197 | CB   | SER | X | 211 | 31.282 | 49.352 | 48.798 | 0.00 | 0.00 |
| ATOM | 3198 | HB2  | SER | X | 211 | 32.227 | 49.088 | 49.274 | 0.00 | 0.00 |
| ATOM | 3199 | HB3  | SER | X | 211 | 31.148 | 48.967 | 47.787 | 0.00 | 0.00 |
| ATOM | 3200 | OG   | SER | X | 211 | 31.198 | 50.795 | 48.575 | 0.00 | 0.00 |



|      |      |      |     |   |     |        |        |        |      |      |
|------|------|------|-----|---|-----|--------|--------|--------|------|------|
| ATOM | 3201 | HG   | SER | X | 211 | 30.968 | 51.195 | 49.417 | 0.00 | 0.00 |
| ATOM | 3202 | C    | SER | X | 211 | 28.717 | 48.843 | 49.151 | 0.00 | 0.00 |
| ATOM | 3203 | O    | SER | X | 211 | 28.495 | 48.510 | 47.958 | 0.00 | 0.00 |
| ATOM | 3204 | N    | PRO | X | 212 | 27.682 | 49.226 | 50.035 | 0.00 | 0.00 |
| ATOM | 3205 | CD   | PRO | X | 212 | 27.858 | 49.629 | 51.378 | 0.00 | 0.00 |
| ATOM | 3206 | HD2  | PRO | X | 212 | 28.364 | 50.593 | 51.331 | 0.00 | 0.00 |
| ATOM | 3207 | HD3  | PRO | X | 212 | 28.493 | 48.887 | 51.862 | 0.00 | 0.00 |
| ATOM | 3208 | CG   | PRO | X | 212 | 26.425 | 49.671 | 51.948 | 0.00 | 0.00 |
| ATOM | 3209 | HG2  | PRO | X | 212 | 26.255 | 50.250 | 52.856 | 0.00 | 0.00 |
| ATOM | 3210 | HG3  | PRO | X | 212 | 26.234 | 48.678 | 52.357 | 0.00 | 0.00 |
| ATOM | 3211 | CB   | PRO | X | 212 | 25.557 | 50.014 | 50.751 | 0.00 | 0.00 |
| ATOM | 3212 | HB2  | PRO | X | 212 | 25.404 | 51.045 | 50.433 | 0.00 | 0.00 |
| ATOM | 3213 | HB3  | PRO | X | 212 | 24.579 | 49.552 | 50.880 | 0.00 | 0.00 |
| ATOM | 3214 | CA   | PRO | X | 212 | 26.278 | 49.303 | 49.569 | 0.00 | 0.00 |
| ATOM | 3215 | HA   | PRO | X | 212 | 25.953 | 48.263 | 49.546 | 0.00 | 0.00 |
| ATOM | 3216 | C    | PRO | X | 212 | 25.944 | 49.981 | 48.258 | 0.00 | 0.00 |
| ATOM | 3217 | O    | PRO | X | 212 | 25.159 | 49.459 | 47.506 | 0.00 | 0.00 |
| ATOM | 3218 | N    | PRO | X | 213 | 26.514 | 51.143 | 47.915 | 0.00 | 0.00 |
| ATOM | 3219 | CD   | PRO | X | 213 | 27.426 | 52.044 | 48.701 | 0.00 | 0.00 |
| ATOM | 3220 | HD2  | PRO | X | 213 | 28.266 | 51.403 | 48.969 | 0.00 | 0.00 |
| ATOM | 3221 | HD3  | PRO | X | 213 | 26.939 | 52.451 | 49.587 | 0.00 | 0.00 |
| ATOM | 3222 | CG   | PRO | X | 213 | 27.904 | 53.133 | 47.728 | 0.00 | 0.00 |
| ATOM | 3223 | HG2  | PRO | X | 213 | 28.697 | 52.743 | 47.089 | 0.00 | 0.00 |
| ATOM | 3224 | HG3  | PRO | X | 213 | 28.243 | 54.077 | 48.153 | 0.00 | 0.00 |
| ATOM | 3225 | CB   | PRO | X | 213 | 26.670 | 53.328 | 46.850 | 0.00 | 0.00 |
| ATOM | 3226 | HB2  | PRO | X | 213 | 26.768 | 53.851 | 45.899 | 0.00 | 0.00 |
| ATOM | 3227 | HB3  | PRO | X | 213 | 25.942 | 53.936 | 47.385 | 0.00 | 0.00 |
| ATOM | 3228 | CA   | PRO | X | 213 | 26.118 | 51.899 | 46.707 | 0.00 | 0.00 |
| ATOM | 3229 | HA   | PRO | X | 213 | 25.032 | 51.982 | 46.661 | 0.00 | 0.00 |
| ATOM | 3230 | C    | PRO | X | 213 | 26.608 | 51.226 | 45.414 | 0.00 | 0.00 |
| ATOM | 3231 | O    | PRO | X | 213 | 26.075 | 51.506 | 44.326 | 0.00 | 0.00 |
| ATOM | 3232 | N    | SER | X | 214 | 27.612 | 50.412 | 45.441 | 0.00 | 0.00 |
| ATOM | 3233 | H    | SER | X | 214 | 28.004 | 50.272 | 46.361 | 0.00 | 0.00 |
| ATOM | 3234 | CA   | SER | X | 214 | 27.985 | 49.498 | 44.377 | 0.00 | 0.00 |
| ATOM | 3235 | HA   | SER | X | 214 | 27.906 | 49.914 | 43.373 | 0.00 | 0.00 |
| ATOM | 3236 | CB   | SER | X | 214 | 29.388 | 48.976 | 44.541 | 0.00 | 0.00 |
| ATOM | 3237 | HB2  | SER | X | 214 | 29.544 | 48.835 | 45.611 | 0.00 | 0.00 |
| ATOM | 3238 | HB3  | SER | X | 214 | 29.512 | 48.031 | 44.012 | 0.00 | 0.00 |
| ATOM | 3239 | OG   | SER | X | 214 | 30.442 | 49.857 | 44.166 | 0.00 | 0.00 |
| ATOM | 3240 | HG   | SER | X | 214 | 31.203 | 49.386 | 43.819 | 0.00 | 0.00 |
| ATOM | 3241 | C    | SER | X | 214 | 27.139 | 48.161 | 44.353 | 0.00 | 0.00 |
| ATOM | 3242 | O    | SER | X | 214 | 26.507 | 47.796 | 43.324 | 0.00 | 0.00 |
| ATOM | 3243 | N    | ARG | X | 215 | 27.076 | 47.527 | 45.501 | 0.00 | 0.00 |
| ATOM | 3244 | H    | ARG | X | 215 | 27.720 | 47.843 | 46.212 | 0.00 | 0.00 |
| ATOM | 3245 | CA   | ARG | X | 215 | 26.277 | 46.340 | 45.929 | 0.00 | 0.00 |
| ATOM | 3246 | HA   | ARG | X | 215 | 26.672 | 45.425 | 45.487 | 0.00 | 0.00 |
| ATOM | 3247 | CB   | ARG | X | 215 | 26.236 | 46.092 | 47.434 | 0.00 | 0.00 |
| ATOM | 3248 | HB2  | ARG | X | 215 | 27.141 | 45.673 | 47.875 | 0.00 | 0.00 |
| ATOM | 3249 | HB3  | ARG | X | 215 | 26.154 | 47.056 | 47.936 | 0.00 | 0.00 |
| ATOM | 3250 | CG   | ARG | X | 215 | 25.164 | 45.154 | 47.909 | 0.00 | 0.00 |
| ATOM | 3251 | HG2  | ARG | X | 215 | 24.207 | 45.666 | 47.808 | 0.00 | 0.00 |
| ATOM | 3252 | HG3  | ARG | X | 215 | 25.128 | 44.327 | 47.199 | 0.00 | 0.00 |
| ATOM | 3253 | CD   | ARG | X | 215 | 25.348 | 44.636 | 49.392 | 0.00 | 0.00 |
| ATOM | 3254 | HD2  | ARG | X | 215 | 26.256 | 44.038 | 49.469 | 0.00 | 0.00 |
| ATOM | 3255 | HD3  | ARG | X | 215 | 25.403 | 45.496 | 50.060 | 0.00 | 0.00 |
| ATOM | 3256 | NE   | ARG | X | 215 | 24.199 | 43.852 | 49.677 | 0.00 | 0.00 |
| ATOM | 3257 | HE   | ARG | X | 215 | 23.588 | 43.713 | 48.885 | 0.00 | 0.00 |
| ATOM | 3258 | CZ   | ARG | X | 215 | 23.850 | 43.311 | 50.849 | 0.00 | 0.00 |
| ATOM | 3259 | NH1  | ARG | X | 215 | 24.384 | 43.611 | 51.993 | 0.00 | 0.00 |
| ATOM | 3260 | HH11 | ARG | X | 215 | 25.067 | 44.355 | 52.021 | 0.00 | 0.00 |
| ATOM | 3261 | HH12 | ARG | X | 215 | 23.831 | 43.285 | 52.772 | 0.00 | 0.00 |
| ATOM | 3262 | NH2  | ARG | X | 215 | 22.780 | 42.529 | 50.900 | 0.00 | 0.00 |
| ATOM | 3263 | HH21 | ARG | X | 215 | 22.297 | 42.158 | 50.094 | 0.00 | 0.00 |
| ATOM | 3264 | HH22 | ARG | X | 215 | 22.437 | 42.159 | 51.775 | 0.00 | 0.00 |
| ATOM | 3265 | C    | ARG | X | 215 | 24.829 | 46.477 | 45.403 | 0.00 | 0.00 |
| ATOM | 3266 | O    | ARG | X | 215 | 24.305 | 45.501 | 44.872 | 0.00 | 0.00 |
| ATOM | 3267 | N    | GLY | X | 216 | 24.223 | 47.667 | 45.551 | 0.00 | 0.00 |

|      |      |      |     |   |     |        |        |        |      |      |
|------|------|------|-----|---|-----|--------|--------|--------|------|------|
| ATOM | 3268 | H    | GLY | X | 216 | 24.811 | 48.397 | 45.927 | 0.00 | 0.00 |
| ATOM | 3269 | CA   | GLY | X | 216 | 22.851 | 48.054 | 45.192 | 0.00 | 0.00 |
| ATOM | 3270 | HA2  | GLY | X | 216 | 22.165 | 47.309 | 45.595 | 0.00 | 0.00 |
| ATOM | 3271 | HA3  | GLY | X | 216 | 22.519 | 48.966 | 45.688 | 0.00 | 0.00 |
| ATOM | 3272 | C    | GLY | X | 216 | 22.571 | 48.191 | 43.662 | 0.00 | 0.00 |
| ATOM | 3273 | O    | GLY | X | 216 | 21.436 | 48.540 | 43.319 | 0.00 | 0.00 |
| ATOM | 3274 | N    | LEU | X | 217 | 23.492 | 47.848 | 42.796 | 0.00 | 0.00 |
| ATOM | 3275 | H    | LEU | X | 217 | 24.404 | 47.549 | 43.112 | 0.00 | 0.00 |
| ATOM | 3276 | CA   | LEU | X | 217 | 23.393 | 47.807 | 41.322 | 0.00 | 0.00 |
| ATOM | 3277 | HA   | LEU | X | 217 | 22.491 | 48.277 | 40.928 | 0.00 | 0.00 |
| ATOM | 3278 | CB   | LEU | X | 217 | 24.563 | 48.654 | 40.668 | 0.00 | 0.00 |
| ATOM | 3279 | HB2  | LEU | X | 217 | 25.492 | 48.200 | 41.011 | 0.00 | 0.00 |
| ATOM | 3280 | HB3  | LEU | X | 217 | 24.425 | 48.536 | 39.593 | 0.00 | 0.00 |
| ATOM | 3281 | CG   | LEU | X | 217 | 24.581 | 50.161 | 40.988 | 0.00 | 0.00 |
| ATOM | 3282 | HG   | LEU | X | 217 | 24.383 | 50.177 | 42.060 | 0.00 | 0.00 |
| ATOM | 3283 | CD1  | LEU | X | 217 | 26.036 | 50.634 | 40.605 | 0.00 | 0.00 |
| ATOM | 3284 | HD11 | LEU | X | 217 | 26.148 | 51.680 | 40.891 | 0.00 | 0.00 |
| ATOM | 3285 | HD12 | LEU | X | 217 | 26.147 | 50.566 | 39.523 | 0.00 | 0.00 |
| ATOM | 3286 | HD13 | LEU | X | 217 | 26.748 | 50.068 | 41.205 | 0.00 | 0.00 |
| ATOM | 3287 | CD2  | LEU | X | 217 | 23.427 | 50.922 | 40.288 | 0.00 | 0.00 |
| ATOM | 3288 | HD21 | LEU | X | 217 | 23.595 | 51.094 | 39.225 | 0.00 | 0.00 |
| ATOM | 3289 | HD22 | LEU | X | 217 | 22.468 | 50.434 | 40.461 | 0.00 | 0.00 |
| ATOM | 3290 | HD23 | LEU | X | 217 | 23.346 | 51.834 | 40.880 | 0.00 | 0.00 |
| ATOM | 3291 | C    | LEU | X | 217 | 23.390 | 46.421 | 40.665 | 0.00 | 0.00 |
| ATOM | 3292 | O    | LEU | X | 217 | 23.330 | 46.214 | 39.425 | 0.00 | 0.00 |
| ATOM | 3293 | N    | PHE | X | 218 | 23.573 | 45.408 | 41.468 | 0.00 | 0.00 |
| ATOM | 3294 | H    | PHE | X | 218 | 23.524 | 45.537 | 42.468 | 0.00 | 0.00 |
| ATOM | 3295 | CA   | PHE | X | 218 | 23.748 | 43.989 | 41.005 | 0.00 | 0.00 |
| ATOM | 3296 | HA   | PHE | X | 218 | 23.194 | 43.913 | 40.069 | 0.00 | 0.00 |
| ATOM | 3297 | CB   | PHE | X | 218 | 25.245 | 43.671 | 40.705 | 0.00 | 0.00 |
| ATOM | 3298 | HB2  | PHE | X | 218 | 25.230 | 42.707 | 40.197 | 0.00 | 0.00 |
| ATOM | 3299 | HB3  | PHE | X | 218 | 25.625 | 44.394 | 39.983 | 0.00 | 0.00 |
| ATOM | 3300 | CG   | PHE | X | 218 | 26.177 | 43.690 | 41.948 | 0.00 | 0.00 |
| ATOM | 3301 | CD1  | PHE | X | 218 | 26.792 | 44.899 | 42.292 | 0.00 | 0.00 |
| ATOM | 3302 | HD1  | PHE | X | 218 | 26.754 | 45.803 | 41.701 | 0.00 | 0.00 |
| ATOM | 3303 | CE1  | PHE | X | 218 | 27.721 | 44.902 | 43.339 | 0.00 | 0.00 |
| ATOM | 3304 | HE1  | PHE | X | 218 | 28.327 | 45.764 | 43.575 | 0.00 | 0.00 |
| ATOM | 3305 | CZ   | PHE | X | 218 | 27.911 | 43.761 | 44.087 | 0.00 | 0.00 |
| ATOM | 3306 | HZ   | PHE | X | 218 | 28.633 | 43.717 | 44.889 | 0.00 | 0.00 |
| ATOM | 3307 | CE2  | PHE | X | 218 | 27.278 | 42.521 | 43.790 | 0.00 | 0.00 |
| ATOM | 3308 | HE2  | PHE | X | 218 | 27.517 | 41.648 | 44.379 | 0.00 | 0.00 |
| ATOM | 3309 | CD2  | PHE | X | 218 | 26.417 | 42.505 | 42.665 | 0.00 | 0.00 |
| ATOM | 3310 | HD2  | PHE | X | 218 | 25.973 | 41.566 | 42.368 | 0.00 | 0.00 |
| ATOM | 3311 | C    | PHE | X | 218 | 23.107 | 43.027 | 42.078 | 0.00 | 0.00 |
| ATOM | 3312 | O    | PHE | X | 218 | 22.630 | 43.483 | 43.143 | 0.00 | 0.00 |
| ATOM | 3313 | N    | HIE | X | 219 | 23.068 | 41.707 | 41.793 | 0.00 | 0.00 |
| ATOM | 3314 | H    | HIE | X | 219 | 23.281 | 41.506 | 40.827 | 0.00 | 0.00 |
| ATOM | 3315 | CA   | HIE | X | 219 | 22.279 | 40.705 | 42.530 | 0.00 | 0.00 |
| ATOM | 3316 | HA   | HIE | X | 219 | 21.796 | 41.164 | 43.392 | 0.00 | 0.00 |
| ATOM | 3317 | CB   | HIE | X | 219 | 21.109 | 40.235 | 41.629 | 0.00 | 0.00 |
| ATOM | 3318 | HB2  | HIE | X | 219 | 21.584 | 39.567 | 40.912 | 0.00 | 0.00 |
| ATOM | 3319 | HB3  | HIE | X | 219 | 20.401 | 39.705 | 42.266 | 0.00 | 0.00 |
| ATOM | 3320 | CG   | HIE | X | 219 | 20.268 | 41.294 | 40.992 | 0.00 | 0.00 |
| ATOM | 3321 | ND1  | HIE | X | 219 | 20.724 | 42.020 | 39.919 | 0.00 | 0.00 |
| ATOM | 3322 | CE1  | HIE | X | 219 | 19.905 | 43.099 | 39.810 | 0.00 | 0.00 |
| ATOM | 3323 | HE1  | HIE | X | 219 | 20.127 | 43.914 | 39.137 | 0.00 | 0.00 |
| ATOM | 3324 | NE2  | HIE | X | 219 | 18.876 | 43.038 | 40.683 | 0.00 | 0.00 |
| ATOM | 3325 | HE2  | HIE | X | 219 | 18.082 | 43.662 | 40.695 | 0.00 | 0.00 |
| ATOM | 3326 | CD2  | HIE | X | 219 | 19.132 | 41.927 | 41.412 | 0.00 | 0.00 |
| ATOM | 3327 | HD2  | HIE | X | 219 | 18.486 | 41.588 | 42.209 | 0.00 | 0.00 |
| ATOM | 3328 | C    | HIE | X | 219 | 23.106 | 39.582 | 43.042 | 0.00 | 0.00 |
| ATOM | 3329 | O    | HIE | X | 219 | 22.846 | 39.016 | 44.127 | 0.00 | 0.00 |
| ATOM | 3330 | N    | ARG | X | 220 | 24.079 | 39.187 | 42.253 | 0.00 | 0.00 |
| ATOM | 3331 | H    | ARG | X | 220 | 24.046 | 39.748 | 41.414 | 0.00 | 0.00 |
| ATOM | 3332 | CA   | ARG | X | 220 | 25.027 | 38.065 | 42.450 | 0.00 | 0.00 |
| ATOM | 3333 | HA   | ARG | X | 220 | 25.157 | 37.707 | 43.472 | 0.00 | 0.00 |
| ATOM | 3334 | CB   | ARG | X | 220 | 24.521 | 36.944 | 41.591 | 0.00 | 0.00 |

|      |      |      |     |   |     |        |        |        |      |      |
|------|------|------|-----|---|-----|--------|--------|--------|------|------|
| ATOM | 3335 | HB2  | ARG | X | 220 | 24.618 | 37.271 | 40.555 | 0.00 | 0.00 |
| ATOM | 3336 | HB3  | ARG | X | 220 | 25.237 | 36.131 | 41.711 | 0.00 | 0.00 |
| ATOM | 3337 | CG   | ARG | X | 220 | 23.162 | 36.333 | 41.893 | 0.00 | 0.00 |
| ATOM | 3338 | HG2  | ARG | X | 220 | 23.411 | 35.778 | 42.797 | 0.00 | 0.00 |
| ATOM | 3339 | HG3  | ARG | X | 220 | 22.387 | 37.021 | 42.231 | 0.00 | 0.00 |
| ATOM | 3340 | CD   | ARG | X | 220 | 22.647 | 35.321 | 40.923 | 0.00 | 0.00 |
| ATOM | 3341 | HD2  | ARG | X | 220 | 22.662 | 35.797 | 39.943 | 0.00 | 0.00 |
| ATOM | 3342 | HD3  | ARG | X | 220 | 23.313 | 34.462 | 40.847 | 0.00 | 0.00 |
| ATOM | 3343 | NE   | ARG | X | 220 | 21.255 | 34.876 | 41.197 | 0.00 | 0.00 |
| ATOM | 3344 | HE   | ARG | X | 220 | 21.071 | 34.525 | 42.126 | 0.00 | 0.00 |
| ATOM | 3345 | CZ   | ARG | X | 220 | 20.207 | 35.256 | 40.499 | 0.00 | 0.00 |
| ATOM | 3346 | NH1  | ARG | X | 220 | 20.251 | 35.726 | 39.224 | 0.00 | 0.00 |
| ATOM | 3347 | HH11 | ARG | X | 220 | 21.185 | 35.769 | 38.842 | 0.00 | 0.00 |
| ATOM | 3348 | HH12 | ARG | X | 220 | 19.493 | 35.830 | 38.565 | 0.00 | 0.00 |
| ATOM | 3349 | NH2  | ARG | X | 220 | 19.015 | 35.200 | 40.991 | 0.00 | 0.00 |
| ATOM | 3350 | HH21 | ARG | X | 220 | 18.832 | 34.908 | 41.940 | 0.00 | 0.00 |
| ATOM | 3351 | HH22 | ARG | X | 220 | 18.166 | 35.606 | 40.626 | 0.00 | 0.00 |
| ATOM | 3352 | C    | ARG | X | 220 | 26.459 | 38.416 | 42.082 | 0.00 | 0.00 |
| ATOM | 3353 | O    | ARG | X | 220 | 26.717 | 39.383 | 41.343 | 0.00 | 0.00 |
| ATOM | 3354 | N    | ALA | X | 221 | 27.463 | 37.720 | 42.609 | 0.00 | 0.00 |
| ATOM | 3355 | H    | ALA | X | 221 | 27.271 | 36.956 | 43.241 | 0.00 | 0.00 |
| ATOM | 3356 | CA   | ALA | X | 221 | 28.908 | 38.038 | 42.411 | 0.00 | 0.00 |
| ATOM | 3357 | HA   | ALA | X | 221 | 29.179 | 38.510 | 41.466 | 0.00 | 0.00 |
| ATOM | 3358 | CB   | ALA | X | 221 | 29.229 | 38.780 | 43.644 | 0.00 | 0.00 |
| ATOM | 3359 | HB1  | ALA | X | 221 | 30.223 | 39.147 | 43.388 | 0.00 | 0.00 |
| ATOM | 3360 | HB2  | ALA | X | 221 | 29.269 | 38.083 | 44.482 | 0.00 | 0.00 |
| ATOM | 3361 | HB3  | ALA | X | 221 | 28.582 | 39.634 | 43.842 | 0.00 | 0.00 |
| ATOM | 3362 | C    | ALA | X | 221 | 29.694 | 36.738 | 42.342 | 0.00 | 0.00 |
| ATOM | 3363 | O    | ALA | X | 221 | 29.335 | 35.745 | 43.009 | 0.00 | 0.00 |
| ATOM | 3364 | N    | VAL | X | 222 | 30.706 | 36.661 | 41.464 | 0.00 | 0.00 |
| ATOM | 3365 | H    | VAL | X | 222 | 30.836 | 37.425 | 40.816 | 0.00 | 0.00 |
| ATOM | 3366 | CA   | VAL | X | 222 | 31.685 | 35.518 | 41.308 | 0.00 | 0.00 |
| ATOM | 3367 | HA   | VAL | X | 222 | 31.465 | 34.708 | 42.004 | 0.00 | 0.00 |
| ATOM | 3368 | CB   | VAL | X | 222 | 31.524 | 34.927 | 39.858 | 0.00 | 0.00 |
| ATOM | 3369 | HB   | VAL | X | 222 | 31.701 | 35.755 | 39.171 | 0.00 | 0.00 |
| ATOM | 3370 | CG1  | VAL | X | 222 | 32.558 | 33.911 | 39.497 | 0.00 | 0.00 |
| ATOM | 3371 | HG11 | VAL | X | 222 | 32.246 | 33.005 | 40.017 | 0.00 | 0.00 |
| ATOM | 3372 | HG12 | VAL | X | 222 | 32.413 | 33.740 | 38.430 | 0.00 | 0.00 |
| ATOM | 3373 | HG13 | VAL | X | 222 | 33.576 | 34.299 | 39.495 | 0.00 | 0.00 |
| ATOM | 3374 | CG2  | VAL | X | 222 | 30.052 | 34.381 | 39.605 | 0.00 | 0.00 |
| ATOM | 3375 | HG21 | VAL | X | 222 | 30.056 | 33.825 | 38.667 | 0.00 | 0.00 |
| ATOM | 3376 | HG22 | VAL | X | 222 | 29.504 | 35.322 | 39.548 | 0.00 | 0.00 |
| ATOM | 3377 | HG23 | VAL | X | 222 | 29.615 | 33.783 | 40.405 | 0.00 | 0.00 |
| ATOM | 3378 | C    | VAL | X | 222 | 33.191 | 35.977 | 41.612 | 0.00 | 0.00 |
| ATOM | 3379 | O    | VAL | X | 222 | 33.509 | 37.036 | 41.010 | 0.00 | 0.00 |
| ATOM | 3380 | N    | LEU | X | 223 | 33.939 | 35.305 | 42.476 | 0.00 | 0.00 |
| ATOM | 3381 | H    | LEU | X | 223 | 33.430 | 34.617 | 43.012 | 0.00 | 0.00 |
| ATOM | 3382 | CA   | LEU | X | 223 | 35.401 | 35.627 | 42.647 | 0.00 | 0.00 |
| ATOM | 3383 | HA   | LEU | X | 223 | 35.633 | 36.532 | 42.086 | 0.00 | 0.00 |
| ATOM | 3384 | CB   | LEU | X | 223 | 35.713 | 35.842 | 44.115 | 0.00 | 0.00 |
| ATOM | 3385 | HB2  | LEU | X | 223 | 35.211 | 35.053 | 44.675 | 0.00 | 0.00 |
| ATOM | 3386 | HB3  | LEU | X | 223 | 36.738 | 35.536 | 44.322 | 0.00 | 0.00 |
| ATOM | 3387 | CG   | LEU | X | 223 | 35.331 | 37.243 | 44.775 | 0.00 | 0.00 |
| ATOM | 3388 | HG   | LEU | X | 223 | 35.455 | 37.959 | 43.963 | 0.00 | 0.00 |
| ATOM | 3389 | CD1  | LEU | X | 223 | 33.859 | 37.202 | 45.075 | 0.00 | 0.00 |
| ATOM | 3390 | HD11 | LEU | X | 223 | 33.518 | 38.197 | 45.359 | 0.00 | 0.00 |
| ATOM | 3391 | HD12 | LEU | X | 223 | 33.699 | 36.619 | 45.982 | 0.00 | 0.00 |
| ATOM | 3392 | HD13 | LEU | X | 223 | 33.263 | 36.839 | 44.237 | 0.00 | 0.00 |
| ATOM | 3393 | CD2  | LEU | X | 223 | 36.269 | 37.720 | 45.958 | 0.00 | 0.00 |
| ATOM | 3394 | HD21 | LEU | X | 223 | 36.150 | 37.075 | 46.829 | 0.00 | 0.00 |
| ATOM | 3395 | HD22 | LEU | X | 223 | 37.346 | 37.634 | 45.817 | 0.00 | 0.00 |
| ATOM | 3396 | HD23 | LEU | X | 223 | 35.929 | 38.728 | 46.195 | 0.00 | 0.00 |
| ATOM | 3397 | C    | LEU | X | 223 | 36.220 | 34.451 | 42.083 | 0.00 | 0.00 |
| ATOM | 3398 | O    | LEU | X | 223 | 35.937 | 33.309 | 42.480 | 0.00 | 0.00 |
| ATOM | 3399 | N    | GLN | X | 224 | 37.355 | 34.744 | 41.435 | 0.00 | 0.00 |
| ATOM | 3400 | H    | GLN | X | 224 | 37.569 | 35.681 | 41.124 | 0.00 | 0.00 |
| ATOM | 3401 | CA   | GLN | X | 224 | 38.277 | 33.731 | 41.106 | 0.00 | 0.00 |

|      |      |      |     |   |     |        |        |        |      |      |
|------|------|------|-----|---|-----|--------|--------|--------|------|------|
| ATOM | 3402 | HA   | GLN | X | 224 | 38.047 | 32.826 | 41.668 | 0.00 | 0.00 |
| ATOM | 3403 | CB   | GLN | X | 224 | 38.144 | 33.442 | 39.566 | 0.00 | 0.00 |
| ATOM | 3404 | HB2  | GLN | X | 224 | 38.174 | 34.378 | 39.008 | 0.00 | 0.00 |
| ATOM | 3405 | HB3  | GLN | X | 224 | 38.891 | 32.730 | 39.217 | 0.00 | 0.00 |
| ATOM | 3406 | CG   | GLN | X | 224 | 36.737 | 32.800 | 39.346 | 0.00 | 0.00 |
| ATOM | 3407 | HG2  | GLN | X | 224 | 36.604 | 32.084 | 40.156 | 0.00 | 0.00 |
| ATOM | 3408 | HG3  | GLN | X | 224 | 35.993 | 33.591 | 39.444 | 0.00 | 0.00 |
| ATOM | 3409 | CD   | GLN | X | 224 | 36.357 | 32.095 | 38.007 | 0.00 | 0.00 |
| ATOM | 3410 | OE1  | GLN | X | 224 | 35.325 | 32.377 | 37.461 | 0.00 | 0.00 |
| ATOM | 3411 | NE2  | GLN | X | 224 | 37.274 | 31.391 | 37.370 | 0.00 | 0.00 |
| ATOM | 3412 | HE21 | GLN | X | 224 | 36.897 | 30.924 | 36.558 | 0.00 | 0.00 |
| ATOM | 3413 | HE22 | GLN | X | 224 | 38.103 | 31.124 | 37.881 | 0.00 | 0.00 |
| ATOM | 3414 | C    | GLN | X | 224 | 39.716 | 34.198 | 41.494 | 0.00 | 0.00 |
| ATOM | 3415 | O    | GLN | X | 224 | 40.026 | 35.301 | 41.203 | 0.00 | 0.00 |
| ATOM | 3416 | N    | SER | X | 225 | 40.593 | 33.390 | 42.106 | 0.00 | 0.00 |
| ATOM | 3417 | H    | SER | X | 225 | 40.173 | 32.631 | 42.624 | 0.00 | 0.00 |
| ATOM | 3418 | CA   | SER | X | 225 | 42.035 | 33.425 | 42.280 | 0.00 | 0.00 |
| ATOM | 3419 | HA   | SER | X | 225 | 42.237 | 32.610 | 42.975 | 0.00 | 0.00 |
| ATOM | 3420 | CB   | SER | X | 225 | 42.727 | 33.140 | 40.870 | 0.00 | 0.00 |
| ATOM | 3421 | HB2  | SER | X | 225 | 42.023 | 32.670 | 40.183 | 0.00 | 0.00 |
| ATOM | 3422 | HB3  | SER | X | 225 | 42.728 | 34.160 | 40.486 | 0.00 | 0.00 |
| ATOM | 3423 | OG   | SER | X | 225 | 43.949 | 32.509 | 40.777 | 0.00 | 0.00 |
| ATOM | 3424 | HG   | SER | X | 225 | 43.995 | 31.920 | 41.534 | 0.00 | 0.00 |
| ATOM | 3425 | C    | SER | X | 225 | 42.552 | 34.654 | 43.053 | 0.00 | 0.00 |
| ATOM | 3426 | O    | SER | X | 225 | 43.760 | 34.950 | 43.173 | 0.00 | 0.00 |
| ATOM | 3427 | N    | GLY | X | 226 | 41.613 | 35.490 | 43.530 | 0.00 | 0.00 |
| ATOM | 3428 | H    | GLY | X | 226 | 40.651 | 35.189 | 43.460 | 0.00 | 0.00 |
| ATOM | 3429 | CA   | GLY | X | 226 | 41.802 | 36.694 | 44.279 | 0.00 | 0.00 |
| ATOM | 3430 | HA2  | GLY | X | 226 | 42.767 | 36.693 | 44.785 | 0.00 | 0.00 |
| ATOM | 3431 | HA3  | GLY | X | 226 | 41.974 | 37.503 | 43.569 | 0.00 | 0.00 |
| ATOM | 3432 | C    | GLY | X | 226 | 40.688 | 37.052 | 45.253 | 0.00 | 0.00 |
| ATOM | 3433 | O    | GLY | X | 226 | 39.579 | 36.674 | 44.920 | 0.00 | 0.00 |
| ATOM | 3434 | N    | ALA | X | 227 | 41.000 | 37.819 | 46.321 | 0.00 | 0.00 |
| ATOM | 3435 | H    | ALA | X | 227 | 41.957 | 38.129 | 46.417 | 0.00 | 0.00 |
| ATOM | 3436 | CA   | ALA | X | 227 | 40.067 | 38.228 | 47.181 | 0.00 | 0.00 |
| ATOM | 3437 | HA   | ALA | X | 227 | 39.064 | 38.182 | 46.757 | 0.00 | 0.00 |
| ATOM | 3438 | CB   | ALA | X | 227 | 40.006 | 37.278 | 48.374 | 0.00 | 0.00 |
| ATOM | 3439 | HB1  | ALA | X | 227 | 39.592 | 37.705 | 49.288 | 0.00 | 0.00 |
| ATOM | 3440 | HB2  | ALA | X | 227 | 40.993 | 36.837 | 48.512 | 0.00 | 0.00 |
| ATOM | 3441 | HB3  | ALA | X | 227 | 39.308 | 36.491 | 48.090 | 0.00 | 0.00 |
| ATOM | 3442 | C    | ALA | X | 227 | 40.276 | 39.651 | 47.701 | 0.00 | 0.00 |
| ATOM | 3443 | O    | ALA | X | 227 | 41.461 | 40.061 | 47.738 | 0.00 | 0.00 |
| ATOM | 3444 | N    | PRO | X | 228 | 39.254 | 40.439 | 48.098 | 0.00 | 0.00 |
| ATOM | 3445 | CD   | PRO | X | 228 | 37.770 | 40.049 | 48.048 | 0.00 | 0.00 |
| ATOM | 3446 | HD2  | PRO | X | 228 | 37.621 | 38.983 | 48.221 | 0.00 | 0.00 |
| ATOM | 3447 | HD3  | PRO | X | 228 | 37.369 | 40.254 | 47.056 | 0.00 | 0.00 |
| ATOM | 3448 | CG   | PRO | X | 228 | 37.165 | 41.005 | 49.061 | 0.00 | 0.00 |
| ATOM | 3449 | HG2  | PRO | X | 228 | 37.456 | 40.665 | 50.055 | 0.00 | 0.00 |
| ATOM | 3450 | HG3  | PRO | X | 228 | 36.080 | 41.078 | 48.983 | 0.00 | 0.00 |
| ATOM | 3451 | CB   | PRO | X | 228 | 37.907 | 42.276 | 48.817 | 0.00 | 0.00 |
| ATOM | 3452 | HB2  | PRO | X | 228 | 37.781 | 42.844 | 49.739 | 0.00 | 0.00 |
| ATOM | 3453 | HB3  | PRO | X | 228 | 37.525 | 42.736 | 47.905 | 0.00 | 0.00 |
| ATOM | 3454 | CA   | PRO | X | 228 | 39.351 | 41.804 | 48.695 | 0.00 | 0.00 |
| ATOM | 3455 | HA   | PRO | X | 228 | 39.861 | 42.542 | 48.076 | 0.00 | 0.00 |
| ATOM | 3456 | C    | PRO | X | 228 | 40.043 | 41.878 | 50.014 | 0.00 | 0.00 |
| ATOM | 3457 | O    | PRO | X | 228 | 40.658 | 42.858 | 50.321 | 0.00 | 0.00 |
| ATOM | 3458 | N    | ASN | X | 229 | 40.005 | 40.831 | 50.866 | 0.00 | 0.00 |
| ATOM | 3459 | H    | ASN | X | 229 | 39.455 | 39.986 | 50.819 | 0.00 | 0.00 |
| ATOM | 3460 | CA   | ASN | X | 229 | 40.679 | 40.823 | 52.148 | 0.00 | 0.00 |
| ATOM | 3461 | HA   | ASN | X | 229 | 40.822 | 41.846 | 52.497 | 0.00 | 0.00 |
| ATOM | 3462 | CB   | ASN | X | 229 | 39.793 | 40.091 | 53.191 | 0.00 | 0.00 |
| ATOM | 3463 | HB2  | ASN | X | 229 | 40.240 | 40.173 | 54.182 | 0.00 | 0.00 |
| ATOM | 3464 | HB3  | ASN | X | 229 | 38.838 | 40.588 | 53.363 | 0.00 | 0.00 |
| ATOM | 3465 | CG   | ASN | X | 229 | 39.511 | 38.643 | 52.887 | 0.00 | 0.00 |
| ATOM | 3466 | OD1  | ASN | X | 229 | 39.215 | 38.328 | 51.753 | 0.00 | 0.00 |
| ATOM | 3467 | ND2  | ASN | X | 229 | 39.480 | 37.772 | 53.879 | 0.00 | 0.00 |
| ATOM | 3468 | HD21 | ASN | X | 229 | 39.194 | 36.886 | 53.490 | 0.00 | 0.00 |

|      |      |      |     |   |     |        |        |        |      |      |
|------|------|------|-----|---|-----|--------|--------|--------|------|------|
| ATOM | 3469 | HD22 | ASN | X | 229 | 39.584 | 38.028 | 54.851 | 0.00 | 0.00 |
| ATOM | 3470 | C    | ASN | X | 229 | 42.072 | 40.295 | 51.988 | 0.00 | 0.00 |
| ATOM | 3471 | O    | ASN | X | 229 | 42.787 | 40.117 | 52.994 | 0.00 | 0.00 |
| ATOM | 3472 | N    | GLY | X | 230 | 42.529 | 40.181 | 50.724 | 0.00 | 0.00 |
| ATOM | 3473 | H    | GLY | X | 230 | 41.838 | 40.091 | 49.993 | 0.00 | 0.00 |
| ATOM | 3474 | CA   | GLY | X | 230 | 43.915 | 40.081 | 50.453 | 0.00 | 0.00 |
| ATOM | 3475 | HA2  | GLY | X | 230 | 44.292 | 39.228 | 51.018 | 0.00 | 0.00 |
| ATOM | 3476 | HA3  | GLY | X | 230 | 44.029 | 39.815 | 49.402 | 0.00 | 0.00 |
| ATOM | 3477 | C    | GLY | X | 230 | 44.790 | 41.345 | 50.695 | 0.00 | 0.00 |
| ATOM | 3478 | O    | GLY | X | 230 | 44.503 | 42.433 | 50.142 | 0.00 | 0.00 |
| ATOM | 3479 | N    | PRO | X | 231 | 45.919 | 41.240 | 51.404 | 0.00 | 0.00 |
| ATOM | 3480 | CD   | PRO | X | 231 | 46.691 | 40.068 | 51.747 | 0.00 | 0.00 |
| ATOM | 3481 | HD2  | PRO | X | 231 | 46.877 | 39.461 | 50.861 | 0.00 | 0.00 |
| ATOM | 3482 | HD3  | PRO | X | 231 | 46.235 | 39.440 | 52.512 | 0.00 | 0.00 |
| ATOM | 3483 | CG   | PRO | X | 231 | 48.063 | 40.502 | 52.290 | 0.00 | 0.00 |
| ATOM | 3484 | HG2  | PRO | X | 231 | 48.761 | 40.742 | 51.488 | 0.00 | 0.00 |
| ATOM | 3485 | HG3  | PRO | X | 231 | 48.384 | 39.799 | 53.059 | 0.00 | 0.00 |
| ATOM | 3486 | CB   | PRO | X | 231 | 47.714 | 41.832 | 52.929 | 0.00 | 0.00 |
| ATOM | 3487 | HB2  | PRO | X | 231 | 48.517 | 42.570 | 52.956 | 0.00 | 0.00 |
| ATOM | 3488 | HB3  | PRO | X | 231 | 47.221 | 41.749 | 53.897 | 0.00 | 0.00 |
| ATOM | 3489 | CA   | PRO | X | 231 | 46.670 | 42.451 | 51.931 | 0.00 | 0.00 |
| ATOM | 3490 | HA   | PRO | X | 231 | 45.949 | 43.040 | 52.498 | 0.00 | 0.00 |
| ATOM | 3491 | C    | PRO | X | 231 | 47.379 | 43.298 | 50.871 | 0.00 | 0.00 |
| ATOM | 3492 | O    | PRO | X | 231 | 47.465 | 44.527 | 51.081 | 0.00 | 0.00 |
| ATOM | 3493 | N    | TRP | X | 232 | 47.772 | 42.680 | 49.735 | 0.00 | 0.00 |
| ATOM | 3494 | H    | TRP | X | 232 | 47.673 | 41.684 | 49.603 | 0.00 | 0.00 |
| ATOM | 3495 | CA   | TRP | X | 232 | 48.003 | 43.502 | 48.496 | 0.00 | 0.00 |
| ATOM | 3496 | HA   | TRP | X | 232 | 48.839 | 44.150 | 48.760 | 0.00 | 0.00 |
| ATOM | 3497 | CB   | TRP | X | 232 | 48.391 | 42.559 | 47.365 | 0.00 | 0.00 |
| ATOM | 3498 | HB2  | TRP | X | 232 | 48.608 | 43.132 | 46.464 | 0.00 | 0.00 |
| ATOM | 3499 | HB3  | TRP | X | 232 | 49.347 | 42.125 | 47.657 | 0.00 | 0.00 |
| ATOM | 3500 | CG   | TRP | X | 232 | 47.490 | 41.404 | 47.112 | 0.00 | 0.00 |
| ATOM | 3501 | CD1  | TRP | X | 232 | 47.543 | 40.291 | 47.872 | 0.00 | 0.00 |
| ATOM | 3502 | HD1  | TRP | X | 232 | 48.240 | 40.018 | 48.650 | 0.00 | 0.00 |
| ATOM | 3503 | NE1  | TRP | X | 232 | 46.400 | 39.435 | 47.564 | 0.00 | 0.00 |
| ATOM | 3504 | HE1  | TRP | X | 232 | 46.426 | 38.456 | 47.810 | 0.00 | 0.00 |
| ATOM | 3505 | CE2  | TRP | X | 232 | 45.643 | 39.916 | 46.567 | 0.00 | 0.00 |
| ATOM | 3506 | CZ2  | TRP | X | 232 | 44.570 | 39.359 | 45.765 | 0.00 | 0.00 |
| ATOM | 3507 | HZ2  | TRP | X | 232 | 44.276 | 38.347 | 46.001 | 0.00 | 0.00 |
| ATOM | 3508 | CH2  | TRP | X | 232 | 44.065 | 40.148 | 44.732 | 0.00 | 0.00 |
| ATOM | 3509 | HH2  | TRP | X | 232 | 43.353 | 39.779 | 44.009 | 0.00 | 0.00 |
| ATOM | 3510 | CZ3  | TRP | X | 232 | 44.559 | 41.434 | 44.508 | 0.00 | 0.00 |
| ATOM | 3511 | HZ3  | TRP | X | 232 | 44.099 | 42.078 | 43.773 | 0.00 | 0.00 |
| ATOM | 3512 | CE3  | TRP | X | 232 | 45.667 | 41.865 | 45.220 | 0.00 | 0.00 |
| ATOM | 3513 | HE3  | TRP | X | 232 | 45.967 | 42.889 | 45.051 | 0.00 | 0.00 |
| ATOM | 3514 | CD2  | TRP | X | 232 | 46.302 | 41.174 | 46.261 | 0.00 | 0.00 |
| ATOM | 3515 | C    | TRP | X | 232 | 46.798 | 44.396 | 47.885 | 0.00 | 0.00 |
| ATOM | 3516 | O    | TRP | X | 232 | 47.029 | 45.491 | 47.370 | 0.00 | 0.00 |
| ATOM | 3517 | N    | ALA | X | 233 | 45.567 | 43.913 | 47.934 | 0.00 | 0.00 |
| ATOM | 3518 | H    | ALA | X | 233 | 45.403 | 43.073 | 48.471 | 0.00 | 0.00 |
| ATOM | 3519 | CA   | ALA | X | 233 | 44.419 | 44.529 | 47.311 | 0.00 | 0.00 |
| ATOM | 3520 | HA   | ALA | X | 233 | 44.666 | 44.572 | 46.250 | 0.00 | 0.00 |
| ATOM | 3521 | CB   | ALA | X | 233 | 43.159 | 43.596 | 47.431 | 0.00 | 0.00 |
| ATOM | 3522 | HB1  | ALA | X | 233 | 43.375 | 42.555 | 47.191 | 0.00 | 0.00 |
| ATOM | 3523 | HB2  | ALA | X | 233 | 42.421 | 44.087 | 46.796 | 0.00 | 0.00 |
| ATOM | 3524 | HB3  | ALA | X | 233 | 42.819 | 43.620 | 48.467 | 0.00 | 0.00 |
| ATOM | 3525 | C    | ALA | X | 233 | 43.999 | 45.901 | 47.792 | 0.00 | 0.00 |
| ATOM | 3526 | O    | ALA | X | 233 | 43.327 | 46.660 | 47.130 | 0.00 | 0.00 |
| ATOM | 3527 | N    | THR | X | 234 | 44.437 | 46.327 | 49.008 | 0.00 | 0.00 |
| ATOM | 3528 | H    | THR | X | 234 | 45.099 | 45.635 | 49.327 | 0.00 | 0.00 |
| ATOM | 3529 | CA   | THR | X | 234 | 44.154 | 47.582 | 49.732 | 0.00 | 0.00 |
| ATOM | 3530 | HA   | THR | X | 234 | 43.833 | 48.276 | 48.956 | 0.00 | 0.00 |
| ATOM | 3531 | CB   | THR | X | 234 | 43.017 | 47.473 | 50.713 | 0.00 | 0.00 |
| ATOM | 3532 | HB   | THR | X | 234 | 42.815 | 48.447 | 51.159 | 0.00 | 0.00 |
| ATOM | 3533 | CG2  | THR | X | 234 | 41.659 | 47.107 | 50.091 | 0.00 | 0.00 |
| ATOM | 3534 | HG21 | THR | X | 234 | 41.242 | 47.984 | 49.595 | 0.00 | 0.00 |
| ATOM | 3535 | HG22 | THR | X | 234 | 40.861 | 46.743 | 50.738 | 0.00 | 0.00 |

|      |      |      |     |   |     |        |        |        |      |      |
|------|------|------|-----|---|-----|--------|--------|--------|------|------|
| ATOM | 3536 | HG23 | THR | X | 234 | 41.750 | 46.296 | 49.368 | 0.00 | 0.00 |
| ATOM | 3537 | OG1  | THR | X | 234 | 43.231 | 46.617 | 51.734 | 0.00 | 0.00 |
| ATOM | 3538 | HG1  | THR | X | 234 | 43.757 | 46.994 | 52.443 | 0.00 | 0.00 |
| ATOM | 3539 | C    | THR | X | 234 | 45.406 | 48.122 | 50.438 | 0.00 | 0.00 |
| ATOM | 3540 | O    | THR | X | 234 | 46.291 | 47.318 | 50.756 | 0.00 | 0.00 |
| ATOM | 3541 | N    | VAL | X | 235 | 45.555 | 49.442 | 50.646 | 0.00 | 0.00 |
| ATOM | 3542 | H    | VAL | X | 235 | 44.719 | 49.920 | 50.342 | 0.00 | 0.00 |
| ATOM | 3543 | CA   | VAL | X | 235 | 46.723 | 50.112 | 51.365 | 0.00 | 0.00 |
| ATOM | 3544 | HA   | VAL | X | 235 | 47.156 | 49.357 | 52.022 | 0.00 | 0.00 |
| ATOM | 3545 | CB   | VAL | X | 235 | 47.857 | 50.365 | 50.371 | 0.00 | 0.00 |
| ATOM | 3546 | HB   | VAL | X | 235 | 48.064 | 49.507 | 49.732 | 0.00 | 0.00 |
| ATOM | 3547 | CG1  | VAL | X | 235 | 47.450 | 51.556 | 49.515 | 0.00 | 0.00 |
| ATOM | 3548 | HG11 | VAL | X | 235 | 46.421 | 51.446 | 49.171 | 0.00 | 0.00 |
| ATOM | 3549 | HG12 | VAL | X | 235 | 47.513 | 52.535 | 49.991 | 0.00 | 0.00 |
| ATOM | 3550 | HG13 | VAL | X | 235 | 48.164 | 51.773 | 48.721 | 0.00 | 0.00 |
| ATOM | 3551 | CG2  | VAL | X | 235 | 49.170 | 50.672 | 51.085 | 0.00 | 0.00 |
| ATOM | 3552 | HG21 | VAL | X | 235 | 49.969 | 50.577 | 50.350 | 0.00 | 0.00 |
| ATOM | 3553 | HG22 | VAL | X | 235 | 49.360 | 49.917 | 51.848 | 0.00 | 0.00 |
| ATOM | 3554 | HG23 | VAL | X | 235 | 49.125 | 51.616 | 51.629 | 0.00 | 0.00 |
| ATOM | 3555 | C    | VAL | X | 235 | 46.359 | 51.347 | 52.196 | 0.00 | 0.00 |
| ATOM | 3556 | O    | VAL | X | 235 | 45.373 | 52.007 | 51.883 | 0.00 | 0.00 |
| ATOM | 3557 | N    | GLY | X | 236 | 47.157 | 51.743 | 53.140 | 0.00 | 0.00 |
| ATOM | 3558 | H    | GLY | X | 236 | 47.932 | 51.143 | 53.382 | 0.00 | 0.00 |
| ATOM | 3559 | CA   | GLY | X | 236 | 47.074 | 52.919 | 53.997 | 0.00 | 0.00 |
| ATOM | 3560 | HA2  | GLY | X | 236 | 46.040 | 53.053 | 54.315 | 0.00 | 0.00 |
| ATOM | 3561 | HA3  | GLY | X | 236 | 47.789 | 52.777 | 54.806 | 0.00 | 0.00 |
| ATOM | 3562 | C    | GLY | X | 236 | 47.518 | 54.132 | 53.281 | 0.00 | 0.00 |
| ATOM | 3563 | O    | GLY | X | 236 | 48.375 | 54.110 | 52.372 | 0.00 | 0.00 |
| ATOM | 3564 | N    | MET | X | 237 | 46.955 | 55.290 | 53.710 | 0.00 | 0.00 |
| ATOM | 3565 | H    | MET | X | 237 | 46.423 | 55.301 | 54.569 | 0.00 | 0.00 |
| ATOM | 3566 | CA   | MET | X | 237 | 47.189 | 56.587 | 53.228 | 0.00 | 0.00 |
| ATOM | 3567 | HA   | MET | X | 237 | 46.839 | 56.799 | 52.218 | 0.00 | 0.00 |
| ATOM | 3568 | CB   | MET | X | 237 | 46.602 | 57.609 | 54.270 | 0.00 | 0.00 |
| ATOM | 3569 | HB2  | MET | X | 237 | 46.937 | 57.328 | 55.269 | 0.00 | 0.00 |
| ATOM | 3570 | HB3  | MET | X | 237 | 46.996 | 58.617 | 54.139 | 0.00 | 0.00 |
| ATOM | 3571 | CG   | MET | X | 237 | 45.129 | 57.703 | 54.158 | 0.00 | 0.00 |
| ATOM | 3572 | HG2  | MET | X | 237 | 44.719 | 58.137 | 53.246 | 0.00 | 0.00 |
| ATOM | 3573 | HG3  | MET | X | 237 | 44.714 | 56.703 | 54.284 | 0.00 | 0.00 |
| ATOM | 3574 | SD   | MET | X | 237 | 44.382 | 58.641 | 55.455 | 0.00 | 0.00 |
| ATOM | 3575 | CE   | MET | X | 237 | 44.970 | 60.170 | 54.966 | 0.00 | 0.00 |
| ATOM | 3576 | HE1  | MET | X | 237 | 44.682 | 60.885 | 55.736 | 0.00 | 0.00 |
| ATOM | 3577 | HE2  | MET | X | 237 | 46.058 | 60.242 | 54.971 | 0.00 | 0.00 |
| ATOM | 3578 | HE3  | MET | X | 237 | 44.506 | 60.458 | 54.023 | 0.00 | 0.00 |
| ATOM | 3579 | C    | MET | X | 237 | 48.714 | 56.956 | 53.080 | 0.00 | 0.00 |
| ATOM | 3580 | O    | MET | X | 237 | 49.105 | 57.543 | 52.015 | 0.00 | 0.00 |
| ATOM | 3581 | N    | GLY | X | 238 | 49.535 | 56.722 | 54.111 | 0.00 | 0.00 |
| ATOM | 3582 | H    | GLY | X | 238 | 49.049 | 56.449 | 54.953 | 0.00 | 0.00 |
| ATOM | 3583 | CA   | GLY | X | 238 | 50.918 | 57.145 | 54.216 | 0.00 | 0.00 |
| ATOM | 3584 | HA2  | GLY | X | 238 | 51.014 | 58.227 | 54.126 | 0.00 | 0.00 |
| ATOM | 3585 | HA3  | GLY | X | 238 | 51.412 | 56.778 | 55.116 | 0.00 | 0.00 |
| ATOM | 3586 | C    | GLY | X | 238 | 51.684 | 56.491 | 53.083 | 0.00 | 0.00 |
| ATOM | 3587 | O    | GLY | X | 238 | 52.440 | 57.187 | 52.397 | 0.00 | 0.00 |
| ATOM | 3588 | N    | GLU | X | 239 | 51.384 | 55.232 | 52.712 | 0.00 | 0.00 |
| ATOM | 3589 | H    | GLU | X | 239 | 50.782 | 54.688 | 53.314 | 0.00 | 0.00 |
| ATOM | 3590 | CA   | GLU | X | 239 | 52.062 | 54.625 | 51.572 | 0.00 | 0.00 |
| ATOM | 3591 | HA   | GLU | X | 239 | 53.130 | 54.810 | 51.687 | 0.00 | 0.00 |
| ATOM | 3592 | CB   | GLU | X | 239 | 51.860 | 53.111 | 51.438 | 0.00 | 0.00 |
| ATOM | 3593 | HB2  | GLU | X | 239 | 50.871 | 52.869 | 51.826 | 0.00 | 0.00 |
| ATOM | 3594 | HB3  | GLU | X | 239 | 51.749 | 52.863 | 50.382 | 0.00 | 0.00 |
| ATOM | 3595 | CG   | GLU | X | 239 | 52.813 | 52.207 | 52.121 | 0.00 | 0.00 |
| ATOM | 3596 | HG2  | GLU | X | 239 | 52.911 | 52.479 | 53.172 | 0.00 | 0.00 |
| ATOM | 3597 | HG3  | GLU | X | 239 | 52.426 | 51.188 | 52.095 | 0.00 | 0.00 |
| ATOM | 3598 | CD   | GLU | X | 239 | 54.235 | 52.237 | 51.526 | 0.00 | 0.00 |
| ATOM | 3599 | OE1  | GLU | X | 239 | 54.347 | 51.977 | 50.324 | 0.00 | 0.00 |
| ATOM | 3600 | OE2  | GLU | X | 239 | 55.164 | 52.542 | 52.260 | 0.00 | 0.00 |
| ATOM | 3601 | C    | GLU | X | 239 | 51.692 | 55.334 | 50.301 | 0.00 | 0.00 |
| ATOM | 3602 | O    | GLU | X | 239 | 52.516 | 55.654 | 49.457 | 0.00 | 0.00 |

|      |      |      |     |   |     |        |        |        |      |      |
|------|------|------|-----|---|-----|--------|--------|--------|------|------|
| ATOM | 3603 | N    | ALA | X | 240 | 50.410 | 55.716 | 50.052 | 0.00 | 0.00 |
| ATOM | 3604 | H    | ALA | X | 240 | 49.767 | 55.764 | 50.830 | 0.00 | 0.00 |
| ATOM | 3605 | CA   | ALA | X | 240 | 49.971 | 56.167 | 48.760 | 0.00 | 0.00 |
| ATOM | 3606 | HA   | ALA | X | 240 | 50.500 | 55.611 | 47.985 | 0.00 | 0.00 |
| ATOM | 3607 | CB   | ALA | X | 240 | 48.487 | 55.917 | 48.648 | 0.00 | 0.00 |
| ATOM | 3608 | HB1  | ALA | X | 240 | 48.149 | 56.303 | 47.686 | 0.00 | 0.00 |
| ATOM | 3609 | HB2  | ALA | X | 240 | 48.003 | 56.378 | 49.509 | 0.00 | 0.00 |
| ATOM | 3610 | HB3  | ALA | X | 240 | 48.316 | 54.844 | 48.732 | 0.00 | 0.00 |
| ATOM | 3611 | C    | ALA | X | 240 | 50.386 | 57.673 | 48.638 | 0.00 | 0.00 |
| ATOM | 3612 | O    | ALA | X | 240 | 50.727 | 58.059 | 47.491 | 0.00 | 0.00 |
| ATOM | 3613 | N    | ARG | X | 241 | 50.518 | 58.410 | 49.679 | 0.00 | 0.00 |
| ATOM | 3614 | H    | ARG | X | 241 | 50.236 | 58.005 | 50.560 | 0.00 | 0.00 |
| ATOM | 3615 | CA   | ARG | X | 241 | 51.110 | 59.789 | 49.663 | 0.00 | 0.00 |
| ATOM | 3616 | HA   | ARG | X | 241 | 50.629 | 60.331 | 48.849 | 0.00 | 0.00 |
| ATOM | 3617 | CB   | ARG | X | 241 | 50.813 | 60.459 | 50.978 | 0.00 | 0.00 |
| ATOM | 3618 | HB2  | ARG | X | 241 | 49.813 | 60.127 | 51.256 | 0.00 | 0.00 |
| ATOM | 3619 | HB3  | ARG | X | 241 | 51.604 | 60.214 | 51.687 | 0.00 | 0.00 |
| ATOM | 3620 | CG   | ARG | X | 241 | 50.805 | 61.998 | 50.894 | 0.00 | 0.00 |
| ATOM | 3621 | HG2  | ARG | X | 241 | 51.817 | 62.306 | 50.629 | 0.00 | 0.00 |
| ATOM | 3622 | HG3  | ARG | X | 241 | 49.996 | 62.315 | 50.236 | 0.00 | 0.00 |
| ATOM | 3623 | CD   | ARG | X | 241 | 50.532 | 62.556 | 52.274 | 0.00 | 0.00 |
| ATOM | 3624 | HD2  | ARG | X | 241 | 49.667 | 62.047 | 52.698 | 0.00 | 0.00 |
| ATOM | 3625 | HD3  | ARG | X | 241 | 51.474 | 62.422 | 52.807 | 0.00 | 0.00 |
| ATOM | 3626 | NE   | ARG | X | 241 | 50.329 | 63.963 | 52.072 | 0.00 | 0.00 |
| ATOM | 3627 | HE   | ARG | X | 241 | 50.299 | 64.206 | 51.092 | 0.00 | 0.00 |
| ATOM | 3628 | CZ   | ARG | X | 241 | 50.405 | 64.922 | 52.966 | 0.00 | 0.00 |
| ATOM | 3629 | NH1  | ARG | X | 241 | 50.327 | 64.610 | 54.281 | 0.00 | 0.00 |
| ATOM | 3630 | HH11 | ARG | X | 241 | 50.218 | 63.644 | 54.556 | 0.00 | 0.00 |
| ATOM | 3631 | HH12 | ARG | X | 241 | 50.416 | 65.309 | 55.004 | 0.00 | 0.00 |
| ATOM | 3632 | NH2  | ARG | X | 241 | 50.632 | 66.167 | 52.588 | 0.00 | 0.00 |
| ATOM | 3633 | HH21 | ARG | X | 241 | 50.615 | 66.349 | 51.595 | 0.00 | 0.00 |
| ATOM | 3634 | HH22 | ARG | X | 241 | 50.615 | 66.902 | 53.280 | 0.00 | 0.00 |
| ATOM | 3635 | C    | ARG | X | 241 | 52.634 | 59.635 | 49.410 | 0.00 | 0.00 |
| ATOM | 3636 | O    | ARG | X | 241 | 53.075 | 60.329 | 48.475 | 0.00 | 0.00 |
| ATOM | 3637 | N    | ARG | X | 242 | 53.326 | 58.818 | 50.163 | 0.00 | 0.00 |
| ATOM | 3638 | H    | ARG | X | 242 | 52.821 | 58.344 | 50.899 | 0.00 | 0.00 |
| ATOM | 3639 | CA   | ARG | X | 242 | 54.724 | 58.526 | 49.906 | 0.00 | 0.00 |
| ATOM | 3640 | HA   | ARG | X | 242 | 55.356 | 59.404 | 50.039 | 0.00 | 0.00 |
| ATOM | 3641 | CB   | ARG | X | 242 | 55.218 | 57.385 | 50.809 | 0.00 | 0.00 |
| ATOM | 3642 | HB2  | ARG | X | 242 | 54.962 | 57.616 | 51.843 | 0.00 | 0.00 |
| ATOM | 3643 | HB3  | ARG | X | 242 | 54.724 | 56.446 | 50.559 | 0.00 | 0.00 |
| ATOM | 3644 | CG   | ARG | X | 242 | 56.755 | 57.268 | 50.914 | 0.00 | 0.00 |
| ATOM | 3645 | HG2  | ARG | X | 242 | 57.147 | 57.378 | 49.903 | 0.00 | 0.00 |
| ATOM | 3646 | HG3  | ARG | X | 242 | 57.214 | 58.202 | 51.237 | 0.00 | 0.00 |
| ATOM | 3647 | CD   | ARG | X | 242 | 57.307 | 56.080 | 51.744 | 0.00 | 0.00 |
| ATOM | 3648 | HD2  | ARG | X | 242 | 58.394 | 56.141 | 51.691 | 0.00 | 0.00 |
| ATOM | 3649 | HD3  | ARG | X | 242 | 57.032 | 56.175 | 52.794 | 0.00 | 0.00 |
| ATOM | 3650 | NE   | ARG | X | 242 | 56.932 | 54.833 | 51.153 | 0.00 | 0.00 |
| ATOM | 3651 | HE   | ARG | X | 242 | 56.291 | 54.198 | 51.609 | 0.00 | 0.00 |
| ATOM | 3652 | CZ   | ARG | X | 242 | 57.233 | 54.422 | 49.881 | 0.00 | 0.00 |
| ATOM | 3653 | NH1  | ARG | X | 242 | 58.053 | 55.098 | 49.139 | 0.00 | 0.00 |
| ATOM | 3654 | HH11 | ARG | X | 242 | 58.529 | 55.944 | 49.418 | 0.00 | 0.00 |
| ATOM | 3655 | HH12 | ARG | X | 242 | 58.109 | 54.844 | 48.163 | 0.00 | 0.00 |
| ATOM | 3656 | NH2  | ARG | X | 242 | 56.553 | 53.443 | 49.243 | 0.00 | 0.00 |
| ATOM | 3657 | HH21 | ARG | X | 242 | 55.864 | 52.918 | 49.761 | 0.00 | 0.00 |
| ATOM | 3658 | HH22 | ARG | X | 242 | 56.717 | 53.274 | 48.260 | 0.00 | 0.00 |
| ATOM | 3659 | C    | ARG | X | 242 | 54.955 | 58.203 | 48.382 | 0.00 | 0.00 |
| ATOM | 3660 | O    | ARG | X | 242 | 55.847 | 58.808 | 47.802 | 0.00 | 0.00 |
| ATOM | 3661 | N    | ARG | X | 243 | 54.228 | 57.287 | 47.747 | 0.00 | 0.00 |
| ATOM | 3662 | H    | ARG | X | 243 | 53.556 | 56.742 | 48.269 | 0.00 | 0.00 |
| ATOM | 3663 | CA   | ARG | X | 243 | 54.380 | 56.882 | 46.331 | 0.00 | 0.00 |
| ATOM | 3664 | HA   | ARG | X | 243 | 55.457 | 56.772 | 46.199 | 0.00 | 0.00 |
| ATOM | 3665 | CB   | ARG | X | 243 | 53.635 | 55.602 | 46.049 | 0.00 | 0.00 |
| ATOM | 3666 | HB2  | ARG | X | 243 | 52.575 | 55.678 | 46.293 | 0.00 | 0.00 |
| ATOM | 3667 | HB3  | ARG | X | 243 | 53.752 | 55.359 | 44.993 | 0.00 | 0.00 |
| ATOM | 3668 | CG   | ARG | X | 243 | 54.095 | 54.466 | 46.845 | 0.00 | 0.00 |
| ATOM | 3669 | HG2  | ARG | X | 243 | 55.091 | 54.202 | 46.490 | 0.00 | 0.00 |

|      |      |      |     |   |     |        |        |        |      |      |
|------|------|------|-----|---|-----|--------|--------|--------|------|------|
| ATOM | 3670 | HG3  | ARG | X | 243 | 54.294 | 54.637 | 47.903 | 0.00 | 0.00 |
| ATOM | 3671 | CD   | ARG | X | 243 | 53.156 | 53.226 | 46.714 | 0.00 | 0.00 |
| ATOM | 3672 | HD2  | ARG | X | 243 | 52.138 | 53.605 | 46.806 | 0.00 | 0.00 |
| ATOM | 3673 | HD3  | ARG | X | 243 | 53.393 | 52.725 | 45.776 | 0.00 | 0.00 |
| ATOM | 3674 | NE   | ARG | X | 243 | 53.284 | 52.260 | 47.798 | 0.00 | 0.00 |
| ATOM | 3675 | HE   | ARG | X | 243 | 53.548 | 52.554 | 48.728 | 0.00 | 0.00 |
| ATOM | 3676 | CZ   | ARG | X | 243 | 52.848 | 51.035 | 47.752 | 0.00 | 0.00 |
| ATOM | 3677 | NH1  | ARG | X | 243 | 52.293 | 50.508 | 46.679 | 0.00 | 0.00 |
| ATOM | 3678 | HH11 | ARG | X | 243 | 52.271 | 51.021 | 45.809 | 0.00 | 0.00 |
| ATOM | 3679 | HH12 | ARG | X | 243 | 52.092 | 49.520 | 46.741 | 0.00 | 0.00 |
| ATOM | 3680 | NH2  | ARG | X | 243 | 53.012 | 50.220 | 48.823 | 0.00 | 0.00 |
| ATOM | 3681 | HH21 | ARG | X | 243 | 53.573 | 50.608 | 49.567 | 0.00 | 0.00 |
| ATOM | 3682 | HH22 | ARG | X | 243 | 52.594 | 49.301 | 48.851 | 0.00 | 0.00 |
| ATOM | 3683 | C    | ARG | X | 243 | 53.978 | 57.998 | 45.304 | 0.00 | 0.00 |
| ATOM | 3684 | O    | ARG | X | 243 | 54.750 | 58.231 | 44.400 | 0.00 | 0.00 |
| ATOM | 3685 | N    | ALA | X | 244 | 52.865 | 58.677 | 45.623 | 0.00 | 0.00 |
| ATOM | 3686 | H    | ALA | X | 244 | 52.297 | 58.339 | 46.386 | 0.00 | 0.00 |
| ATOM | 3687 | CA   | ALA | X | 244 | 52.542 | 59.991 | 44.984 | 0.00 | 0.00 |
| ATOM | 3688 | HA   | ALA | X | 244 | 52.296 | 59.724 | 43.956 | 0.00 | 0.00 |
| ATOM | 3689 | CB   | ALA | X | 244 | 51.343 | 60.626 | 45.666 | 0.00 | 0.00 |
| ATOM | 3690 | HB1  | ALA | X | 244 | 51.057 | 61.493 | 45.070 | 0.00 | 0.00 |
| ATOM | 3691 | HB2  | ALA | X | 244 | 51.528 | 60.970 | 46.683 | 0.00 | 0.00 |
| ATOM | 3692 | HB3  | ALA | X | 244 | 50.526 | 59.925 | 45.831 | 0.00 | 0.00 |
| ATOM | 3693 | C    | ALA | X | 244 | 53.717 | 61.030 | 44.975 | 0.00 | 0.00 |
| ATOM | 3694 | O    | ALA | X | 244 | 54.194 | 61.416 | 43.859 | 0.00 | 0.00 |
| ATOM | 3695 | N    | THR | X | 245 | 54.243 | 61.407 | 46.078 | 0.00 | 0.00 |
| ATOM | 3696 | H    | THR | X | 245 | 53.700 | 61.059 | 46.856 | 0.00 | 0.00 |
| ATOM | 3697 | CA   | THR | X | 245 | 55.364 | 62.325 | 46.298 | 0.00 | 0.00 |
| ATOM | 3698 | HA   | THR | X | 245 | 55.170 | 63.322 | 45.903 | 0.00 | 0.00 |
| ATOM | 3699 | CB   | THR | X | 245 | 55.704 | 62.463 | 47.867 | 0.00 | 0.00 |
| ATOM | 3700 | HB   | THR | X | 245 | 56.062 | 61.517 | 48.274 | 0.00 | 0.00 |
| ATOM | 3701 | CG2  | THR | X | 245 | 56.719 | 63.585 | 48.149 | 0.00 | 0.00 |
| ATOM | 3702 | HG21 | THR | X | 245 | 57.367 | 63.815 | 47.304 | 0.00 | 0.00 |
| ATOM | 3703 | HG22 | THR | X | 245 | 57.331 | 63.312 | 49.010 | 0.00 | 0.00 |
| ATOM | 3704 | HG23 | THR | X | 245 | 56.143 | 64.433 | 48.521 | 0.00 | 0.00 |
| ATOM | 3705 | OG1  | THR | X | 245 | 54.558 | 62.917 | 48.507 | 0.00 | 0.00 |
| ATOM | 3706 | HG1  | THR | X | 245 | 54.419 | 62.342 | 49.263 | 0.00 | 0.00 |
| ATOM | 3707 | C    | THR | X | 245 | 56.609 | 61.782 | 45.553 | 0.00 | 0.00 |
| ATOM | 3708 | O    | THR | X | 245 | 57.317 | 62.617 | 45.072 | 0.00 | 0.00 |
| ATOM | 3709 | N    | GLN | X | 246 | 56.902 | 60.532 | 45.574 | 0.00 | 0.00 |
| ATOM | 3710 | H    | GLN | X | 246 | 56.398 | 59.944 | 46.223 | 0.00 | 0.00 |
| ATOM | 3711 | CA   | GLN | X | 246 | 58.096 | 59.880 | 45.049 | 0.00 | 0.00 |
| ATOM | 3712 | HA   | GLN | X | 246 | 58.960 | 60.484 | 45.326 | 0.00 | 0.00 |
| ATOM | 3713 | CB   | GLN | X | 246 | 58.138 | 58.486 | 45.704 | 0.00 | 0.00 |
| ATOM | 3714 | HB2  | GLN | X | 246 | 58.156 | 58.604 | 46.788 | 0.00 | 0.00 |
| ATOM | 3715 | HB3  | GLN | X | 246 | 57.337 | 57.871 | 45.294 | 0.00 | 0.00 |
| ATOM | 3716 | CG   | GLN | X | 246 | 59.452 | 57.810 | 45.373 | 0.00 | 0.00 |
| ATOM | 3717 | HG2  | GLN | X | 246 | 59.399 | 57.549 | 44.316 | 0.00 | 0.00 |
| ATOM | 3718 | HG3  | GLN | X | 246 | 60.238 | 58.546 | 45.543 | 0.00 | 0.00 |
| ATOM | 3719 | CD   | GLN | X | 246 | 59.796 | 56.493 | 46.150 | 0.00 | 0.00 |
| ATOM | 3720 | OE1  | GLN | X | 246 | 58.918 | 55.681 | 46.353 | 0.00 | 0.00 |
| ATOM | 3721 | NE2  | GLN | X | 246 | 61.021 | 56.238 | 46.561 | 0.00 | 0.00 |
| ATOM | 3722 | HE21 | GLN | X | 246 | 61.144 | 55.293 | 46.894 | 0.00 | 0.00 |
| ATOM | 3723 | HE22 | GLN | X | 246 | 61.789 | 56.875 | 46.404 | 0.00 | 0.00 |
| ATOM | 3724 | C    | GLN | X | 246 | 58.075 | 59.818 | 43.512 | 0.00 | 0.00 |
| ATOM | 3725 | O    | GLN | X | 246 | 59.074 | 60.164 | 42.871 | 0.00 | 0.00 |
| ATOM | 3726 | N    | LEU | X | 247 | 56.879 | 59.605 | 42.954 | 0.00 | 0.00 |
| ATOM | 3727 | H    | LEU | X | 247 | 56.159 | 59.378 | 43.625 | 0.00 | 0.00 |
| ATOM | 3728 | CA   | LEU | X | 247 | 56.497 | 59.792 | 41.545 | 0.00 | 0.00 |
| ATOM | 3729 | HA   | LEU | X | 247 | 57.184 | 59.248 | 40.897 | 0.00 | 0.00 |
| ATOM | 3730 | CB   | LEU | X | 247 | 55.045 | 59.353 | 41.295 | 0.00 | 0.00 |
| ATOM | 3731 | HB2  | LEU | X | 247 | 55.171 | 58.348 | 41.698 | 0.00 | 0.00 |
| ATOM | 3732 | HB3  | LEU | X | 247 | 54.502 | 60.061 | 41.921 | 0.00 | 0.00 |
| ATOM | 3733 | CG   | LEU | X | 247 | 54.413 | 59.329 | 39.860 | 0.00 | 0.00 |
| ATOM | 3734 | HG   | LEU | X | 247 | 54.231 | 60.373 | 39.602 | 0.00 | 0.00 |
| ATOM | 3735 | CD1  | LEU | X | 247 | 55.254 | 58.705 | 38.819 | 0.00 | 0.00 |
| ATOM | 3736 | HD11 | LEU | X | 247 | 55.431 | 57.672 | 39.118 | 0.00 | 0.00 |



|      |      |      |     |   |     |        |        |        |      |      |
|------|------|------|-----|---|-----|--------|--------|--------|------|------|
| ATOM | 3737 | HD12 | LEU | X | 247 | 56.150 | 59.299 | 38.640 | 0.00 | 0.00 |
| ATOM | 3738 | HD13 | LEU | X | 247 | 54.770 | 58.598 | 37.848 | 0.00 | 0.00 |
| ATOM | 3739 | CD2  | LEU | X | 247 | 53.019 | 58.724 | 39.933 | 0.00 | 0.00 |
| ATOM | 3740 | HD21 | LEU | X | 247 | 52.563 | 58.676 | 38.945 | 0.00 | 0.00 |
| ATOM | 3741 | HD22 | LEU | X | 247 | 53.171 | 57.788 | 40.471 | 0.00 | 0.00 |
| ATOM | 3742 | HD23 | LEU | X | 247 | 52.323 | 59.362 | 40.479 | 0.00 | 0.00 |
| ATOM | 3743 | C    | LEU | X | 247 | 56.695 | 61.218 | 41.160 | 0.00 | 0.00 |
| ATOM | 3744 | O    | LEU | X | 247 | 57.468 | 61.609 | 40.283 | 0.00 | 0.00 |
| ATOM | 3745 | N    | ALA | X | 248 | 56.096 | 62.138 | 41.944 | 0.00 | 0.00 |
| ATOM | 3746 | H    | ALA | X | 248 | 55.695 | 61.763 | 42.791 | 0.00 | 0.00 |
| ATOM | 3747 | CA   | ALA | X | 248 | 56.133 | 63.612 | 41.739 | 0.00 | 0.00 |
| ATOM | 3748 | HA   | ALA | X | 248 | 55.799 | 63.764 | 40.712 | 0.00 | 0.00 |
| ATOM | 3749 | CB   | ALA | X | 248 | 55.157 | 64.314 | 42.685 | 0.00 | 0.00 |
| ATOM | 3750 | HB1  | ALA | X | 248 | 54.165 | 63.866 | 42.621 | 0.00 | 0.00 |
| ATOM | 3751 | HB2  | ALA | X | 248 | 55.054 | 65.376 | 42.465 | 0.00 | 0.00 |
| ATOM | 3752 | HB3  | ALA | X | 248 | 55.492 | 64.254 | 43.720 | 0.00 | 0.00 |
| ATOM | 3753 | C    | ALA | X | 248 | 57.603 | 64.160 | 41.801 | 0.00 | 0.00 |
| ATOM | 3754 | O    | ALA | X | 248 | 58.041 | 64.790 | 40.907 | 0.00 | 0.00 |
| ATOM | 3755 | N    | HIE | X | 249 | 58.335 | 63.874 | 42.839 | 0.00 | 0.00 |
| ATOM | 3756 | H    | HIE | X | 249 | 57.997 | 63.314 | 43.608 | 0.00 | 0.00 |
| ATOM | 3757 | CA   | HIE | X | 249 | 59.836 | 64.031 | 42.841 | 0.00 | 0.00 |
| ATOM | 3758 | HA   | HIE | X | 249 | 60.007 | 65.102 | 42.951 | 0.00 | 0.00 |
| ATOM | 3759 | CB   | HIE | X | 249 | 60.261 | 63.367 | 44.209 | 0.00 | 0.00 |
| ATOM | 3760 | HB2  | HIE | X | 249 | 59.804 | 63.868 | 45.063 | 0.00 | 0.00 |
| ATOM | 3761 | HB3  | HIE | X | 249 | 59.926 | 62.332 | 44.267 | 0.00 | 0.00 |
| ATOM | 3762 | CG   | HIE | X | 249 | 61.735 | 63.523 | 44.412 | 0.00 | 0.00 |
| ATOM | 3763 | ND1  | HIE | X | 249 | 62.740 | 62.742 | 43.778 | 0.00 | 0.00 |
| ATOM | 3764 | CE1  | HIE | X | 249 | 63.896 | 63.208 | 44.278 | 0.00 | 0.00 |
| ATOM | 3765 | HE1  | HIE | X | 249 | 64.891 | 62.932 | 43.963 | 0.00 | 0.00 |
| ATOM | 3766 | NE2  | HIE | X | 249 | 63.752 | 64.152 | 45.228 | 0.00 | 0.00 |
| ATOM | 3767 | HE2  | HIE | X | 249 | 64.515 | 64.647 | 45.666 | 0.00 | 0.00 |
| ATOM | 3768 | CD2  | HIE | X | 249 | 62.366 | 64.425 | 45.220 | 0.00 | 0.00 |
| ATOM | 3769 | HD2  | HIE | X | 249 | 61.993 | 65.206 | 45.867 | 0.00 | 0.00 |
| ATOM | 3770 | C    | HIE | X | 249 | 60.560 | 63.630 | 41.545 | 0.00 | 0.00 |
| ATOM | 3771 | O    | HIE | X | 249 | 61.500 | 64.313 | 41.109 | 0.00 | 0.00 |
| ATOM | 3772 | N    | LEU | X | 250 | 60.194 | 62.446 | 40.995 | 0.00 | 0.00 |
| ATOM | 3773 | H    | LEU | X | 250 | 59.565 | 61.819 | 41.476 | 0.00 | 0.00 |
| ATOM | 3774 | CA   | LEU | X | 250 | 60.793 | 61.892 | 39.756 | 0.00 | 0.00 |
| ATOM | 3775 | HA   | LEU | X | 250 | 61.880 | 61.971 | 39.777 | 0.00 | 0.00 |
| ATOM | 3776 | CB   | LEU | X | 250 | 60.466 | 60.390 | 39.754 | 0.00 | 0.00 |
| ATOM | 3777 | HB2  | LEU | X | 250 | 59.596 | 60.343 | 40.410 | 0.00 | 0.00 |
| ATOM | 3778 | HB3  | LEU | X | 250 | 60.181 | 60.068 | 38.753 | 0.00 | 0.00 |
| ATOM | 3779 | CG   | LEU | X | 250 | 61.570 | 59.441 | 40.287 | 0.00 | 0.00 |
| ATOM | 3780 | HG   | LEU | X | 250 | 62.029 | 59.929 | 41.147 | 0.00 | 0.00 |
| ATOM | 3781 | CD1  | LEU | X | 250 | 61.071 | 57.999 | 40.652 | 0.00 | 0.00 |
| ATOM | 3782 | HD11 | LEU | X | 250 | 60.504 | 58.013 | 41.583 | 0.00 | 0.00 |
| ATOM | 3783 | HD12 | LEU | X | 250 | 61.937 | 57.419 | 40.969 | 0.00 | 0.00 |
| ATOM | 3784 | HD13 | LEU | X | 250 | 60.546 | 57.575 | 39.796 | 0.00 | 0.00 |
| ATOM | 3785 | CD2  | LEU | X | 250 | 62.663 | 59.298 | 39.213 | 0.00 | 0.00 |
| ATOM | 3786 | HD21 | LEU | X | 250 | 62.224 | 59.054 | 38.246 | 0.00 | 0.00 |
| ATOM | 3787 | HD22 | LEU | X | 250 | 63.426 | 60.077 | 39.230 | 0.00 | 0.00 |
| ATOM | 3788 | HD23 | LEU | X | 250 | 63.179 | 58.367 | 39.447 | 0.00 | 0.00 |
| ATOM | 3789 | C    | LEU | X | 250 | 60.369 | 62.651 | 38.434 | 0.00 | 0.00 |
| ATOM | 3790 | O    | LEU | X | 250 | 61.268 | 62.867 | 37.573 | 0.00 | 0.00 |
| ATOM | 3791 | N    | VAL | X | 251 | 59.113 | 62.962 | 38.343 | 0.00 | 0.00 |
| ATOM | 3792 | H    | VAL | X | 251 | 58.552 | 62.612 | 39.106 | 0.00 | 0.00 |
| ATOM | 3793 | CA   | VAL | X | 251 | 58.433 | 63.609 | 37.207 | 0.00 | 0.00 |
| ATOM | 3794 | HA   | VAL | X | 251 | 59.063 | 63.416 | 36.338 | 0.00 | 0.00 |
| ATOM | 3795 | CB   | VAL | X | 251 | 57.057 | 62.942 | 37.000 | 0.00 | 0.00 |
| ATOM | 3796 | HB   | VAL | X | 251 | 57.213 | 61.935 | 37.388 | 0.00 | 0.00 |
| ATOM | 3797 | CG1  | VAL | X | 251 | 55.938 | 63.597 | 37.833 | 0.00 | 0.00 |
| ATOM | 3798 | HG11 | VAL | X | 251 | 55.025 | 63.003 | 37.876 | 0.00 | 0.00 |
| ATOM | 3799 | HG12 | VAL | X | 251 | 56.416 | 63.738 | 38.802 | 0.00 | 0.00 |
| ATOM | 3800 | HG13 | VAL | X | 251 | 55.727 | 64.576 | 37.403 | 0.00 | 0.00 |
| ATOM | 3801 | CG2  | VAL | X | 251 | 56.457 | 62.931 | 35.506 | 0.00 | 0.00 |
| ATOM | 3802 | HG21 | VAL | X | 251 | 55.428 | 62.584 | 35.405 | 0.00 | 0.00 |
| ATOM | 3803 | HG22 | VAL | X | 251 | 57.087 | 62.317 | 34.862 | 0.00 | 0.00 |

|      |      |      |     |   |     |        |        |        |      |      |
|------|------|------|-----|---|-----|--------|--------|--------|------|------|
| ATOM | 3804 | HG23 | VAL | X | 251 | 56.578 | 63.951 | 35.143 | 0.00 | 0.00 |
| ATOM | 3805 | C    | VAL | X | 251 | 58.404 | 65.165 | 37.263 | 0.00 | 0.00 |
| ATOM | 3806 | O    | VAL | X | 251 | 58.003 | 65.771 | 36.278 | 0.00 | 0.00 |
| ATOM | 3807 | N    | GLY | X | 252 | 58.829 | 65.755 | 38.382 | 0.00 | 0.00 |
| ATOM | 3808 | H    | GLY | X | 252 | 58.899 | 65.125 | 39.168 | 0.00 | 0.00 |
| ATOM | 3809 | CA   | GLY | X | 252 | 59.258 | 67.110 | 38.482 | 0.00 | 0.00 |
| ATOM | 3810 | HA2  | GLY | X | 252 | 60.015 | 67.318 | 39.238 | 0.00 | 0.00 |
| ATOM | 3811 | HA3  | GLY | X | 252 | 59.635 | 67.369 | 37.492 | 0.00 | 0.00 |
| ATOM | 3812 | C    | GLY | X | 252 | 58.097 | 68.029 | 38.890 | 0.00 | 0.00 |
| ATOM | 3813 | O    | GLY | X | 252 | 57.894 | 69.038 | 38.214 | 0.00 | 0.00 |
| ATOM | 3814 | N    | CYX | X | 253 | 57.356 | 67.678 | 39.943 | 0.00 | 0.00 |
| ATOM | 3815 | H    | CYX | X | 253 | 57.557 | 66.773 | 40.345 | 0.00 | 0.00 |
| ATOM | 3816 | CA   | CYX | X | 253 | 56.323 | 68.575 | 40.383 | 0.00 | 0.00 |
| ATOM | 3817 | HA   | CYX | X | 253 | 56.406 | 69.527 | 39.859 | 0.00 | 0.00 |
| ATOM | 3818 | CB   | CYX | X | 253 | 54.986 | 67.925 | 39.990 | 0.00 | 0.00 |
| ATOM | 3819 | HB2  | CYX | X | 253 | 54.783 | 66.901 | 40.301 | 0.00 | 0.00 |
| ATOM | 3820 | HB3  | CYX | X | 253 | 54.222 | 68.645 | 40.283 | 0.00 | 0.00 |
| ATOM | 3821 | SG   | CYX | X | 253 | 54.671 | 67.851 | 38.190 | 0.00 | 0.00 |
| ATOM | 3822 | C    | CYX | X | 253 | 56.379 | 68.952 | 41.943 | 0.00 | 0.00 |
| ATOM | 3823 | O    | CYX | X | 253 | 56.898 | 68.144 | 42.672 | 0.00 | 0.00 |
| ATOM | 3824 | N    | PRO | X | 254 | 55.821 | 70.070 | 42.399 | 0.00 | 0.00 |
| ATOM | 3825 | CD   | PRO | X | 254 | 56.102 | 70.452 | 43.744 | 0.00 | 0.00 |
| ATOM | 3826 | HD2  | PRO | X | 254 | 56.970 | 71.110 | 43.780 | 0.00 | 0.00 |
| ATOM | 3827 | HD3  | PRO | X | 254 | 56.246 | 69.620 | 44.433 | 0.00 | 0.00 |
| ATOM | 3828 | CG   | PRO | X | 254 | 54.865 | 71.323 | 44.138 | 0.00 | 0.00 |
| ATOM | 3829 | HG2  | PRO | X | 254 | 55.085 | 72.137 | 44.829 | 0.00 | 0.00 |
| ATOM | 3830 | HG3  | PRO | X | 254 | 54.041 | 70.719 | 44.518 | 0.00 | 0.00 |
| ATOM | 3831 | CB   | PRO | X | 254 | 54.482 | 71.952 | 42.819 | 0.00 | 0.00 |
| ATOM | 3832 | HB2  | PRO | X | 254 | 55.070 | 72.868 | 42.752 | 0.00 | 0.00 |
| ATOM | 3833 | HB3  | PRO | X | 254 | 53.415 | 72.137 | 42.696 | 0.00 | 0.00 |
| ATOM | 3834 | CA   | PRO | X | 254 | 55.019 | 71.041 | 41.731 | 0.00 | 0.00 |
| ATOM | 3835 | HA   | PRO | X | 254 | 54.305 | 70.589 | 41.043 | 0.00 | 0.00 |
| ATOM | 3836 | C    | PRO | X | 254 | 55.878 | 71.913 | 40.723 | 0.00 | 0.00 |
| ATOM | 3837 | O    | PRO | X | 254 | 57.074 | 71.577 | 40.604 | 0.00 | 0.00 |
| ATOM | 3838 | N    | PRO | X | 255 | 55.381 | 72.975 | 40.116 | 0.00 | 0.00 |
| ATOM | 3839 | CD   | PRO | X | 255 | 54.056 | 73.399 | 40.084 | 0.00 | 0.00 |
| ATOM | 3840 | HD2  | PRO | X | 255 | 53.858 | 74.049 | 40.936 | 0.00 | 0.00 |
| ATOM | 3841 | HD3  | PRO | X | 255 | 53.348 | 72.574 | 39.994 | 0.00 | 0.00 |
| ATOM | 3842 | CG   | PRO | X | 255 | 53.889 | 74.231 | 38.855 | 0.00 | 0.00 |
| ATOM | 3843 | HG2  | PRO | X | 255 | 53.067 | 74.946 | 38.895 | 0.00 | 0.00 |
| ATOM | 3844 | HG3  | PRO | X | 255 | 53.735 | 73.481 | 38.079 | 0.00 | 0.00 |
| ATOM | 3845 | CB   | PRO | X | 255 | 55.256 | 74.873 | 38.749 | 0.00 | 0.00 |
| ATOM | 3846 | HB2  | PRO | X | 255 | 55.143 | 75.719 | 39.426 | 0.00 | 0.00 |
| ATOM | 3847 | HB3  | PRO | X | 255 | 55.443 | 75.185 | 37.721 | 0.00 | 0.00 |
| ATOM | 3848 | CA   | PRO | X | 255 | 56.187 | 73.844 | 39.236 | 0.00 | 0.00 |
| ATOM | 3849 | HA   | PRO | X | 255 | 56.587 | 73.240 | 38.421 | 0.00 | 0.00 |
| ATOM | 3850 | C    | PRO | X | 255 | 57.319 | 74.529 | 40.092 | 0.00 | 0.00 |
| ATOM | 3851 | O    | PRO | X | 255 | 57.072 | 75.228 | 41.082 | 0.00 | 0.00 |
| ATOM | 3852 | N    | GLY | X | 256 | 58.570 | 74.508 | 39.583 | 0.00 | 0.00 |
| ATOM | 3853 | H    | GLY | X | 256 | 58.688 | 73.992 | 38.723 | 0.00 | 0.00 |
| ATOM | 3854 | CA   | GLY | X | 256 | 59.744 | 75.132 | 40.170 | 0.00 | 0.00 |
| ATOM | 3855 | HA2  | GLY | X | 256 | 60.445 | 75.490 | 39.416 | 0.00 | 0.00 |
| ATOM | 3856 | HA3  | GLY | X | 256 | 59.407 | 76.049 | 40.653 | 0.00 | 0.00 |
| ATOM | 3857 | C    | GLY | X | 256 | 60.560 | 74.394 | 41.159 | 0.00 | 0.00 |
| ATOM | 3858 | O    | GLY | X | 256 | 61.646 | 74.978 | 41.529 | 0.00 | 0.00 |
| ATOM | 3859 | N    | GLY | X | 257 | 60.174 | 73.258 | 41.681 | 0.00 | 0.00 |
| ATOM | 3860 | H    | GLY | X | 257 | 59.220 | 72.997 | 41.477 | 0.00 | 0.00 |
| ATOM | 3861 | CA   | GLY | X | 257 | 60.929 | 72.360 | 42.561 | 0.00 | 0.00 |
| ATOM | 3862 | HA2  | GLY | X | 257 | 61.691 | 71.888 | 41.940 | 0.00 | 0.00 |
| ATOM | 3863 | HA3  | GLY | X | 257 | 61.382 | 72.865 | 43.414 | 0.00 | 0.00 |
| ATOM | 3864 | C    | GLY | X | 257 | 60.212 | 71.041 | 42.880 | 0.00 | 0.00 |
| ATOM | 3865 | O    | GLY | X | 257 | 59.315 | 70.633 | 42.145 | 0.00 | 0.00 |
| ATOM | 3866 | N    | THR | X | 258 | 60.590 | 70.463 | 44.025 | 0.00 | 0.00 |
| ATOM | 3867 | H    | THR | X | 258 | 61.315 | 70.862 | 44.604 | 0.00 | 0.00 |
| ATOM | 3868 | CA   | THR | X | 258 | 59.968 | 69.196 | 44.513 | 0.00 | 0.00 |
| ATOM | 3869 | HA   | THR | X | 258 | 59.074 | 68.957 | 43.937 | 0.00 | 0.00 |
| ATOM | 3870 | CB   | THR | X | 258 | 60.919 | 68.009 | 44.244 | 0.00 | 0.00 |

|      |      |      |     |   |     |        |        |        |      |      |
|------|------|------|-----|---|-----|--------|--------|--------|------|------|
| ATOM | 3871 | HB   | THR | X | 258 | 60.639 | 67.122 | 44.812 | 0.00 | 0.00 |
| ATOM | 3872 | CG2  | THR | X | 258 | 60.856 | 67.517 | 42.783 | 0.00 | 0.00 |
| ATOM | 3873 | HG21 | THR | X | 258 | 61.627 | 66.757 | 42.655 | 0.00 | 0.00 |
| ATOM | 3874 | HG22 | THR | X | 258 | 61.130 | 68.343 | 42.126 | 0.00 | 0.00 |
| ATOM | 3875 | HG23 | THR | X | 258 | 59.862 | 67.204 | 42.461 | 0.00 | 0.00 |
| ATOM | 3876 | OG1  | THR | X | 258 | 62.253 | 68.317 | 44.532 | 0.00 | 0.00 |
| ATOM | 3877 | HG1  | THR | X | 258 | 62.248 | 68.417 | 45.487 | 0.00 | 0.00 |
| ATOM | 3878 | C    | THR | X | 258 | 59.443 | 69.407 | 45.904 | 0.00 | 0.00 |
| ATOM | 3879 | O    | THR | X | 258 | 59.968 | 70.088 | 46.690 | 0.00 | 0.00 |
| ATOM | 3880 | N    | GLY | X | 259 | 58.316 | 68.694 | 46.277 | 0.00 | 0.00 |
| ATOM | 3881 | H    | GLY | X | 259 | 58.067 | 68.004 | 45.583 | 0.00 | 0.00 |
| ATOM | 3882 | CA   | GLY | X | 259 | 57.524 | 68.886 | 47.522 | 0.00 | 0.00 |
| ATOM | 3883 | HA2  | GLY | X | 259 | 56.772 | 68.099 | 47.573 | 0.00 | 0.00 |
| ATOM | 3884 | HA3  | GLY | X | 259 | 58.127 | 68.974 | 48.426 | 0.00 | 0.00 |
| ATOM | 3885 | C    | GLY | X | 259 | 56.760 | 70.162 | 47.591 | 0.00 | 0.00 |
| ATOM | 3886 | O    | GLY | X | 259 | 56.767 | 70.936 | 46.655 | 0.00 | 0.00 |
| ATOM | 3887 | N    | GLY | X | 260 | 56.125 | 70.410 | 48.797 | 0.00 | 0.00 |
| ATOM | 3888 | H    | GLY | X | 260 | 56.252 | 69.803 | 49.594 | 0.00 | 0.00 |
| ATOM | 3889 | CA   | GLY | X | 260 | 55.427 | 71.646 | 49.089 | 0.00 | 0.00 |
| ATOM | 3890 | HA2  | GLY | X | 260 | 55.685 | 71.884 | 50.121 | 0.00 | 0.00 |
| ATOM | 3891 | HA3  | GLY | X | 260 | 55.856 | 72.459 | 48.503 | 0.00 | 0.00 |
| ATOM | 3892 | C    | GLY | X | 260 | 53.883 | 71.586 | 49.164 | 0.00 | 0.00 |
| ATOM | 3893 | O    | GLY | X | 260 | 53.325 | 70.536 | 49.495 | 0.00 | 0.00 |
| ATOM | 3894 | N    | ASN | X | 261 | 53.195 | 72.621 | 48.703 | 0.00 | 0.00 |
| ATOM | 3895 | H    | ASN | X | 261 | 53.749 | 73.389 | 48.352 | 0.00 | 0.00 |
| ATOM | 3896 | CA   | ASN | X | 261 | 51.729 | 72.686 | 48.556 | 0.00 | 0.00 |
| ATOM | 3897 | HA   | ASN | X | 261 | 51.315 | 72.719 | 49.564 | 0.00 | 0.00 |
| ATOM | 3898 | CB   | ASN | X | 261 | 51.404 | 74.036 | 47.908 | 0.00 | 0.00 |
| ATOM | 3899 | HB2  | ASN | X | 261 | 51.785 | 74.844 | 48.533 | 0.00 | 0.00 |
| ATOM | 3900 | HB3  | ASN | X | 261 | 51.791 | 74.126 | 46.893 | 0.00 | 0.00 |
| ATOM | 3901 | CG   | ASN | X | 261 | 49.880 | 74.135 | 47.906 | 0.00 | 0.00 |
| ATOM | 3902 | OD1  | ASN | X | 261 | 49.201 | 73.572 | 47.038 | 0.00 | 0.00 |
| ATOM | 3903 | ND2  | ASN | X | 261 | 49.363 | 74.918 | 48.813 | 0.00 | 0.00 |
| ATOM | 3904 | HD21 | ASN | X | 261 | 48.436 | 75.263 | 48.609 | 0.00 | 0.00 |
| ATOM | 3905 | HD22 | ASN | X | 261 | 49.955 | 75.430 | 49.451 | 0.00 | 0.00 |
| ATOM | 3906 | C    | ASN | X | 261 | 51.202 | 71.446 | 47.691 | 0.00 | 0.00 |
| ATOM | 3907 | O    | ASN | X | 261 | 51.631 | 71.132 | 46.587 | 0.00 | 0.00 |
| ATOM | 3908 | N    | ASP | X | 262 | 50.125 | 70.837 | 48.205 | 0.00 | 0.00 |
| ATOM | 3909 | H    | ASP | X | 262 | 49.793 | 71.131 | 49.112 | 0.00 | 0.00 |
| ATOM | 3910 | CA   | ASP | X | 262 | 49.549 | 69.618 | 47.680 | 0.00 | 0.00 |
| ATOM | 3911 | HA   | ASP | X | 262 | 50.245 | 68.822 | 47.417 | 0.00 | 0.00 |
| ATOM | 3912 | CB   | ASP | X | 262 | 48.703 | 68.858 | 48.784 | 0.00 | 0.00 |
| ATOM | 3913 | HB2  | ASP | X | 262 | 47.943 | 69.567 | 49.111 | 0.00 | 0.00 |
| ATOM | 3914 | HB3  | ASP | X | 262 | 48.253 | 67.989 | 48.303 | 0.00 | 0.00 |
| ATOM | 3915 | CG   | ASP | X | 262 | 49.568 | 68.499 | 49.993 | 0.00 | 0.00 |
| ATOM | 3916 | OD1  | ASP | X | 262 | 49.458 | 69.252 | 50.998 | 0.00 | 0.00 |
| ATOM | 3917 | OD2  | ASP | X | 262 | 50.356 | 67.535 | 49.948 | 0.00 | 0.00 |
| ATOM | 3918 | C    | ASP | X | 262 | 48.755 | 69.852 | 46.360 | 0.00 | 0.00 |
| ATOM | 3919 | O    | ASP | X | 262 | 48.903 | 69.092 | 45.356 | 0.00 | 0.00 |
| ATOM | 3920 | N    | THR | X | 263 | 47.950 | 70.930 | 46.252 | 0.00 | 0.00 |
| ATOM | 3921 | H    | THR | X | 263 | 47.910 | 71.508 | 47.079 | 0.00 | 0.00 |
| ATOM | 3922 | CA   | THR | X | 263 | 47.053 | 71.236 | 45.118 | 0.00 | 0.00 |
| ATOM | 3923 | HA   | THR | X | 263 | 46.546 | 70.349 | 44.739 | 0.00 | 0.00 |
| ATOM | 3924 | CB   | THR | X | 263 | 46.001 | 72.234 | 45.593 | 0.00 | 0.00 |
| ATOM | 3925 | HB   | THR | X | 263 | 46.455 | 73.156 | 45.955 | 0.00 | 0.00 |
| ATOM | 3926 | CG2  | THR | X | 263 | 44.976 | 72.608 | 44.510 | 0.00 | 0.00 |
| ATOM | 3927 | HG21 | THR | X | 263 | 44.258 | 71.813 | 44.304 | 0.00 | 0.00 |
| ATOM | 3928 | HG22 | THR | X | 263 | 45.464 | 72.868 | 43.571 | 0.00 | 0.00 |
| ATOM | 3929 | HG23 | THR | X | 263 | 44.380 | 73.444 | 44.877 | 0.00 | 0.00 |
| ATOM | 3930 | OG1  | THR | X | 263 | 45.365 | 71.732 | 46.697 | 0.00 | 0.00 |
| ATOM | 3931 | HG1  | THR | X | 263 | 45.505 | 72.311 | 47.449 | 0.00 | 0.00 |
| ATOM | 3932 | C    | THR | X | 263 | 47.915 | 71.761 | 43.928 | 0.00 | 0.00 |
| ATOM | 3933 | O    | THR | X | 263 | 47.615 | 71.481 | 42.764 | 0.00 | 0.00 |
| ATOM | 3934 | N    | GLU | X | 264 | 49.086 | 72.379 | 44.193 | 0.00 | 0.00 |
| ATOM | 3935 | H    | GLU | X | 264 | 49.387 | 72.561 | 45.140 | 0.00 | 0.00 |
| ATOM | 3936 | CA   | GLU | X | 264 | 49.900 | 72.854 | 43.132 | 0.00 | 0.00 |
| ATOM | 3937 | HA   | GLU | X | 264 | 49.292 | 73.151 | 42.278 | 0.00 | 0.00 |

|      |      |      |     |   |     |        |        |        |      |      |
|------|------|------|-----|---|-----|--------|--------|--------|------|------|
| ATOM | 3938 | CB   | GLU | X | 264 | 50.847 | 74.040 | 43.593 | 0.00 | 0.00 |
| ATOM | 3939 | HB2  | GLU | X | 264 | 51.517 | 73.631 | 44.348 | 0.00 | 0.00 |
| ATOM | 3940 | HB3  | GLU | X | 264 | 51.533 | 74.267 | 42.777 | 0.00 | 0.00 |
| ATOM | 3941 | CG   | GLU | X | 264 | 50.132 | 75.233 | 44.148 | 0.00 | 0.00 |
| ATOM | 3942 | HG2  | GLU | X | 264 | 49.373 | 74.952 | 44.877 | 0.00 | 0.00 |
| ATOM | 3943 | HG3  | GLU | X | 264 | 50.791 | 75.914 | 44.686 | 0.00 | 0.00 |
| ATOM | 3944 | CD   | GLU | X | 264 | 49.530 | 76.044 | 43.039 | 0.00 | 0.00 |
| ATOM | 3945 | OE1  | GLU | X | 264 | 48.282 | 76.070 | 42.927 | 0.00 | 0.00 |
| ATOM | 3946 | OE2  | GLU | X | 264 | 50.244 | 76.771 | 42.310 | 0.00 | 0.00 |
| ATOM | 3947 | C    | GLU | X | 264 | 50.838 | 71.697 | 42.663 | 0.00 | 0.00 |
| ATOM | 3948 | O    | GLU | X | 264 | 51.151 | 71.618 | 41.484 | 0.00 | 0.00 |
| ATOM | 3949 | N    | LEU | X | 265 | 51.101 | 70.685 | 43.516 | 0.00 | 0.00 |
| ATOM | 3950 | H    | LEU | X | 265 | 50.950 | 70.793 | 44.509 | 0.00 | 0.00 |
| ATOM | 3951 | CA   | LEU | X | 265 | 51.631 | 69.443 | 43.011 | 0.00 | 0.00 |
| ATOM | 3952 | HA   | LEU | X | 265 | 52.550 | 69.646 | 42.462 | 0.00 | 0.00 |
| ATOM | 3953 | CB   | LEU | X | 265 | 51.905 | 68.582 | 44.264 | 0.00 | 0.00 |
| ATOM | 3954 | HB2  | LEU | X | 265 | 52.453 | 69.201 | 44.975 | 0.00 | 0.00 |
| ATOM | 3955 | HB3  | LEU | X | 265 | 51.002 | 68.298 | 44.804 | 0.00 | 0.00 |
| ATOM | 3956 | CG   | LEU | X | 265 | 52.808 | 67.321 | 44.014 | 0.00 | 0.00 |
| ATOM | 3957 | HG   | LEU | X | 265 | 53.664 | 67.609 | 43.405 | 0.00 | 0.00 |
| ATOM | 3958 | CD1  | LEU | X | 265 | 53.315 | 66.936 | 45.396 | 0.00 | 0.00 |
| ATOM | 3959 | HD11 | LEU | X | 265 | 52.590 | 66.888 | 46.209 | 0.00 | 0.00 |
| ATOM | 3960 | HD12 | LEU | X | 265 | 53.999 | 67.662 | 45.833 | 0.00 | 0.00 |
| ATOM | 3961 | HD13 | LEU | X | 265 | 53.793 | 65.956 | 45.362 | 0.00 | 0.00 |
| ATOM | 3962 | CD2  | LEU | X | 265 | 52.132 | 66.137 | 43.303 | 0.00 | 0.00 |
| ATOM | 3963 | HD21 | LEU | X | 265 | 52.159 | 65.203 | 43.864 | 0.00 | 0.00 |
| ATOM | 3964 | HD22 | LEU | X | 265 | 51.055 | 66.288 | 43.232 | 0.00 | 0.00 |
| ATOM | 3965 | HD23 | LEU | X | 265 | 52.633 | 66.073 | 42.337 | 0.00 | 0.00 |
| ATOM | 3966 | C    | LEU | X | 265 | 50.742 | 68.726 | 42.032 | 0.00 | 0.00 |
| ATOM | 3967 | O    | LEU | X | 265 | 51.164 | 68.503 | 40.897 | 0.00 | 0.00 |
| ATOM | 3968 | N    | VAL | X | 266 | 49.483 | 68.338 | 42.385 | 0.00 | 0.00 |
| ATOM | 3969 | H    | VAL | X | 266 | 49.284 | 68.578 | 43.346 | 0.00 | 0.00 |
| ATOM | 3970 | CA   | VAL | X | 266 | 48.521 | 67.588 | 41.543 | 0.00 | 0.00 |
| ATOM | 3971 | HA   | VAL | X | 266 | 48.993 | 66.612 | 41.427 | 0.00 | 0.00 |
| ATOM | 3972 | CB   | VAL | X | 266 | 47.201 | 67.341 | 42.277 | 0.00 | 0.00 |
| ATOM | 3973 | HB   | VAL | X | 266 | 46.856 | 68.218 | 42.825 | 0.00 | 0.00 |
| ATOM | 3974 | CG1  | VAL | X | 266 | 46.116 | 66.782 | 41.337 | 0.00 | 0.00 |
| ATOM | 3975 | HG11 | VAL | X | 266 | 45.821 | 67.535 | 40.607 | 0.00 | 0.00 |
| ATOM | 3976 | HG12 | VAL | X | 266 | 46.519 | 65.950 | 40.760 | 0.00 | 0.00 |
| ATOM | 3977 | HG13 | VAL | X | 266 | 45.285 | 66.370 | 41.909 | 0.00 | 0.00 |
| ATOM | 3978 | CG2  | VAL | X | 266 | 47.446 | 66.248 | 43.347 | 0.00 | 0.00 |
| ATOM | 3979 | HG21 | VAL | X | 266 | 47.843 | 65.316 | 42.946 | 0.00 | 0.00 |
| ATOM | 3980 | HG22 | VAL | X | 266 | 46.598 | 66.106 | 44.017 | 0.00 | 0.00 |
| ATOM | 3981 | HG23 | VAL | X | 266 | 48.181 | 66.734 | 43.988 | 0.00 | 0.00 |
| ATOM | 3982 | C    | VAL | X | 266 | 48.403 | 68.322 | 40.246 | 0.00 | 0.00 |
| ATOM | 3983 | O    | VAL | X | 266 | 48.526 | 67.627 | 39.217 | 0.00 | 0.00 |
| ATOM | 3984 | N    | ALA | X | 267 | 48.035 | 69.614 | 40.281 | 0.00 | 0.00 |
| ATOM | 3985 | H    | ALA | X | 267 | 48.098 | 70.090 | 41.170 | 0.00 | 0.00 |
| ATOM | 3986 | CA   | ALA | X | 267 | 47.899 | 70.419 | 39.093 | 0.00 | 0.00 |
| ATOM | 3987 | HA   | ALA | X | 267 | 47.026 | 70.102 | 38.522 | 0.00 | 0.00 |
| ATOM | 3988 | CB   | ALA | X | 267 | 47.596 | 71.770 | 39.662 | 0.00 | 0.00 |
| ATOM | 3989 | HB1  | ALA | X | 267 | 46.710 | 71.634 | 40.283 | 0.00 | 0.00 |
| ATOM | 3990 | HB2  | ALA | X | 267 | 47.727 | 72.430 | 38.805 | 0.00 | 0.00 |
| ATOM | 3991 | HB3  | ALA | X | 267 | 48.470 | 71.922 | 40.295 | 0.00 | 0.00 |
| ATOM | 3992 | C    | ALA | X | 267 | 49.121 | 70.328 | 38.112 | 0.00 | 0.00 |
| ATOM | 3993 | O    | ALA | X | 267 | 48.888 | 70.152 | 36.960 | 0.00 | 0.00 |
| ATOM | 3994 | N    | CYX | X | 268 | 50.390 | 70.344 | 38.564 | 0.00 | 0.00 |
| ATOM | 3995 | H    | CYX | X | 268 | 50.513 | 70.328 | 39.566 | 0.00 | 0.00 |
| ATOM | 3996 | CA   | CYX | X | 268 | 51.520 | 69.996 | 37.649 | 0.00 | 0.00 |
| ATOM | 3997 | HA   | CYX | X | 268 | 51.423 | 70.595 | 36.744 | 0.00 | 0.00 |
| ATOM | 3998 | CB   | CYX | X | 268 | 52.772 | 70.384 | 38.446 | 0.00 | 0.00 |
| ATOM | 3999 | HB2  | CYX | X | 268 | 52.853 | 71.467 | 38.546 | 0.00 | 0.00 |
| ATOM | 4000 | HB3  | CYX | X | 268 | 52.671 | 70.022 | 39.469 | 0.00 | 0.00 |
| ATOM | 4001 | SG   | CYX | X | 268 | 54.282 | 69.796 | 37.654 | 0.00 | 0.00 |
| ATOM | 4002 | C    | CYX | X | 268 | 51.466 | 68.516 | 37.232 | 0.00 | 0.00 |
| ATOM | 4003 | O    | CYX | X | 268 | 51.831 | 68.090 | 36.141 | 0.00 | 0.00 |
| ATOM | 4004 | N    | LEU | X | 269 | 51.209 | 67.606 | 38.165 | 0.00 | 0.00 |

|      |      |      |     |   |     |        |        |        |      |      |
|------|------|------|-----|---|-----|--------|--------|--------|------|------|
| ATOM | 4005 | H    | LEU | X | 269 | 50.903 | 67.944 | 39.066 | 0.00 | 0.00 |
| ATOM | 4006 | CA   | LEU | X | 269 | 51.085 | 66.139 | 37.894 | 0.00 | 0.00 |
| ATOM | 4007 | HA   | LEU | X | 269 | 52.027 | 65.854 | 37.426 | 0.00 | 0.00 |
| ATOM | 4008 | CB   | LEU | X | 269 | 50.874 | 65.403 | 39.248 | 0.00 | 0.00 |
| ATOM | 4009 | HB2  | LEU | X | 269 | 51.314 | 65.985 | 40.058 | 0.00 | 0.00 |
| ATOM | 4010 | HB3  | LEU | X | 269 | 49.804 | 65.423 | 39.457 | 0.00 | 0.00 |
| ATOM | 4011 | CG   | LEU | X | 269 | 51.306 | 63.940 | 39.412 | 0.00 | 0.00 |
| ATOM | 4012 | HG   | LEU | X | 269 | 50.870 | 63.516 | 38.508 | 0.00 | 0.00 |
| ATOM | 4013 | CD1  | LEU | X | 269 | 52.797 | 63.776 | 39.417 | 0.00 | 0.00 |
| ATOM | 4014 | HD11 | LEU | X | 269 | 53.100 | 64.212 | 38.465 | 0.00 | 0.00 |
| ATOM | 4015 | HD12 | LEU | X | 269 | 53.146 | 62.744 | 39.406 | 0.00 | 0.00 |
| ATOM | 4016 | HD13 | LEU | X | 269 | 53.358 | 64.272 | 40.209 | 0.00 | 0.00 |
| ATOM | 4017 | CD2  | LEU | X | 269 | 50.642 | 63.382 | 40.740 | 0.00 | 0.00 |
| ATOM | 4018 | HD21 | LEU | X | 269 | 51.140 | 63.524 | 41.699 | 0.00 | 0.00 |
| ATOM | 4019 | HD22 | LEU | X | 269 | 49.575 | 63.587 | 40.829 | 0.00 | 0.00 |
| ATOM | 4020 | HD23 | LEU | X | 269 | 50.727 | 62.304 | 40.603 | 0.00 | 0.00 |
| ATOM | 4021 | C    | LEU | X | 269 | 49.964 | 65.804 | 36.760 | 0.00 | 0.00 |
| ATOM | 4022 | O    | LEU | X | 269 | 49.917 | 64.720 | 36.171 | 0.00 | 0.00 |
| ATOM | 4023 | N    | ARG | X | 270 | 49.071 | 66.821 | 36.421 | 0.00 | 0.00 |
| ATOM | 4024 | H    | ARG | X | 270 | 49.067 | 67.516 | 37.154 | 0.00 | 0.00 |
| ATOM | 4025 | CA   | ARG | X | 270 | 48.054 | 66.743 | 35.316 | 0.00 | 0.00 |
| ATOM | 4026 | HA   | ARG | X | 270 | 47.852 | 65.697 | 35.086 | 0.00 | 0.00 |
| ATOM | 4027 | CB   | ARG | X | 270 | 46.735 | 67.392 | 35.796 | 0.00 | 0.00 |
| ATOM | 4028 | HB2  | ARG | X | 270 | 46.940 | 68.404 | 36.144 | 0.00 | 0.00 |
| ATOM | 4029 | HB3  | ARG | X | 270 | 46.055 | 67.340 | 34.946 | 0.00 | 0.00 |
| ATOM | 4030 | CG   | ARG | X | 270 | 46.212 | 66.494 | 36.976 | 0.00 | 0.00 |
| ATOM | 4031 | HG2  | ARG | X | 270 | 46.457 | 65.464 | 36.713 | 0.00 | 0.00 |
| ATOM | 4032 | HG3  | ARG | X | 270 | 46.805 | 66.593 | 37.886 | 0.00 | 0.00 |
| ATOM | 4033 | CD   | ARG | X | 270 | 44.705 | 66.643 | 37.413 | 0.00 | 0.00 |
| ATOM | 4034 | HD2  | ARG | X | 270 | 44.066 | 66.093 | 36.723 | 0.00 | 0.00 |
| ATOM | 4035 | HD3  | ARG | X | 270 | 44.692 | 66.166 | 38.393 | 0.00 | 0.00 |
| ATOM | 4036 | NE   | ARG | X | 270 | 44.387 | 68.061 | 37.660 | 0.00 | 0.00 |
| ATOM | 4037 | HE   | ARG | X | 270 | 44.917 | 68.818 | 37.252 | 0.00 | 0.00 |
| ATOM | 4038 | CZ   | ARG | X | 270 | 43.423 | 68.347 | 38.544 | 0.00 | 0.00 |
| ATOM | 4039 | NH1  | ARG | X | 270 | 42.765 | 67.423 | 39.187 | 0.00 | 0.00 |
| ATOM | 4040 | HH11 | ARG | X | 270 | 42.937 | 66.440 | 39.026 | 0.00 | 0.00 |
| ATOM | 4041 | HH12 | ARG | X | 270 | 41.947 | 67.695 | 39.713 | 0.00 | 0.00 |
| ATOM | 4042 | NH2  | ARG | X | 270 | 43.127 | 69.583 | 38.767 | 0.00 | 0.00 |
| ATOM | 4043 | HH21 | ARG | X | 270 | 43.530 | 70.302 | 38.184 | 0.00 | 0.00 |
| ATOM | 4044 | HH22 | ARG | X | 270 | 42.347 | 69.684 | 39.400 | 0.00 | 0.00 |
| ATOM | 4045 | C    | ARG | X | 270 | 48.619 | 67.304 | 34.024 | 0.00 | 0.00 |
| ATOM | 4046 | O    | ARG | X | 270 | 48.081 | 66.906 | 33.025 | 0.00 | 0.00 |
| ATOM | 4047 | N    | THR | X | 271 | 49.717 | 68.118 | 33.995 | 0.00 | 0.00 |
| ATOM | 4048 | H    | THR | X | 271 | 50.086 | 68.347 | 34.908 | 0.00 | 0.00 |
| ATOM | 4049 | CA   | THR | X | 271 | 50.479 | 68.685 | 32.846 | 0.00 | 0.00 |
| ATOM | 4050 | HA   | THR | X | 271 | 49.764 | 68.866 | 32.044 | 0.00 | 0.00 |
| ATOM | 4051 | CB   | THR | X | 271 | 51.143 | 69.988 | 33.234 | 0.00 | 0.00 |
| ATOM | 4052 | HB   | THR | X | 271 | 52.107 | 69.766 | 33.692 | 0.00 | 0.00 |
| ATOM | 4053 | CG2  | THR | X | 271 | 51.542 | 70.858 | 32.062 | 0.00 | 0.00 |
| ATOM | 4054 | HG21 | THR | X | 271 | 52.077 | 71.738 | 32.420 | 0.00 | 0.00 |
| ATOM | 4055 | HG22 | THR | X | 271 | 50.699 | 71.249 | 31.493 | 0.00 | 0.00 |
| ATOM | 4056 | HG23 | THR | X | 271 | 52.114 | 70.361 | 31.279 | 0.00 | 0.00 |
| ATOM | 4057 | OG1  | THR | X | 271 | 50.343 | 70.702 | 34.032 | 0.00 | 0.00 |
| ATOM | 4058 | HG1  | THR | X | 271 | 50.684 | 71.575 | 34.240 | 0.00 | 0.00 |
| ATOM | 4059 | C    | THR | X | 271 | 51.545 | 67.640 | 32.352 | 0.00 | 0.00 |
| ATOM | 4060 | O    | THR | X | 271 | 51.654 | 67.562 | 31.142 | 0.00 | 0.00 |
| ATOM | 4061 | N    | ARG | X | 272 | 52.127 | 66.853 | 33.261 | 0.00 | 0.00 |
| ATOM | 4062 | H    | ARG | X | 272 | 52.073 | 67.169 | 34.219 | 0.00 | 0.00 |
| ATOM | 4063 | CA   | ARG | X | 272 | 53.282 | 65.959 | 32.840 | 0.00 | 0.00 |
| ATOM | 4064 | HA   | ARG | X | 272 | 53.908 | 66.565 | 32.185 | 0.00 | 0.00 |
| ATOM | 4065 | CB   | ARG | X | 272 | 54.105 | 65.489 | 34.085 | 0.00 | 0.00 |
| ATOM | 4066 | HB2  | ARG | X | 272 | 53.413 | 64.859 | 34.644 | 0.00 | 0.00 |
| ATOM | 4067 | HB3  | ARG | X | 272 | 54.939 | 64.936 | 33.654 | 0.00 | 0.00 |
| ATOM | 4068 | CG   | ARG | X | 272 | 54.804 | 66.574 | 34.909 | 0.00 | 0.00 |
| ATOM | 4069 | HG2  | ARG | X | 272 | 54.114 | 67.300 | 35.340 | 0.00 | 0.00 |
| ATOM | 4070 | HG3  | ARG | X | 272 | 55.297 | 66.105 | 35.759 | 0.00 | 0.00 |
| ATOM | 4071 | CD   | ARG | X | 272 | 55.814 | 67.342 | 34.109 | 0.00 | 0.00 |

|      |      |      |     |   |     |        |        |        |      |      |
|------|------|------|-----|---|-----|--------|--------|--------|------|------|
| ATOM | 4072 | HD2  | ARG | X | 272 | 56.480 | 66.565 | 33.734 | 0.00 | 0.00 |
| ATOM | 4073 | HD3  | ARG | X | 272 | 55.285 | 67.958 | 33.381 | 0.00 | 0.00 |
| ATOM | 4074 | NE   | ARG | X | 272 | 56.673 | 68.085 | 34.957 | 0.00 | 0.00 |
| ATOM | 4075 | HE   | ARG | X | 272 | 56.424 | 68.155 | 35.933 | 0.00 | 0.00 |
| ATOM | 4076 | CZ   | ARG | X | 272 | 57.712 | 68.739 | 34.487 | 0.00 | 0.00 |
| ATOM | 4077 | NH1  | ARG | X | 272 | 58.163 | 68.693 | 33.272 | 0.00 | 0.00 |
| ATOM | 4078 | HH11 | ARG | X | 272 | 57.846 | 68.011 | 32.598 | 0.00 | 0.00 |
| ATOM | 4079 | HH12 | ARG | X | 272 | 58.971 | 69.246 | 33.021 | 0.00 | 0.00 |
| ATOM | 4080 | NH2  | ARG | X | 272 | 58.427 | 69.499 | 35.271 | 0.00 | 0.00 |
| ATOM | 4081 | HH21 | ARG | X | 272 | 58.271 | 69.561 | 36.267 | 0.00 | 0.00 |
| ATOM | 4082 | HH22 | ARG | X | 272 | 59.278 | 69.960 | 34.982 | 0.00 | 0.00 |
| ATOM | 4083 | C    | ARG | X | 272 | 52.727 | 64.766 | 32.048 | 0.00 | 0.00 |
| ATOM | 4084 | O    | ARG | X | 272 | 51.747 | 64.174 | 32.566 | 0.00 | 0.00 |
| ATOM | 4085 | N    | PRO | X | 273 | 53.177 | 64.466 | 30.819 | 0.00 | 0.00 |
| ATOM | 4086 | CD   | PRO | X | 273 | 54.471 | 64.858 | 30.162 | 0.00 | 0.00 |
| ATOM | 4087 | HD2  | PRO | X | 273 | 55.339 | 64.553 | 30.747 | 0.00 | 0.00 |
| ATOM | 4088 | HD3  | PRO | X | 273 | 54.565 | 65.914 | 29.910 | 0.00 | 0.00 |
| ATOM | 4089 | CG   | PRO | X | 273 | 54.432 | 63.933 | 28.921 | 0.00 | 0.00 |
| ATOM | 4090 | HG2  | PRO | X | 273 | 54.858 | 62.940 | 29.060 | 0.00 | 0.00 |
| ATOM | 4091 | HG3  | PRO | X | 273 | 54.876 | 64.354 | 28.019 | 0.00 | 0.00 |
| ATOM | 4092 | CB   | PRO | X | 273 | 52.979 | 63.812 | 28.616 | 0.00 | 0.00 |
| ATOM | 4093 | HB2  | PRO | X | 273 | 52.716 | 63.031 | 27.902 | 0.00 | 0.00 |
| ATOM | 4094 | HB3  | PRO | X | 273 | 52.597 | 64.763 | 28.242 | 0.00 | 0.00 |
| ATOM | 4095 | CA   | PRO | X | 273 | 52.330 | 63.713 | 29.979 | 0.00 | 0.00 |
| ATOM | 4096 | HA   | PRO | X | 273 | 51.321 | 64.114 | 29.892 | 0.00 | 0.00 |
| ATOM | 4097 | C    | PRO | X | 273 | 52.210 | 62.274 | 30.427 | 0.00 | 0.00 |
| ATOM | 4098 | O    | PRO | X | 273 | 53.239 | 61.727 | 30.937 | 0.00 | 0.00 |
| ATOM | 4099 | N    | ALA | X | 274 | 51.179 | 61.469 | 30.154 | 0.00 | 0.00 |
| ATOM | 4100 | H    | ALA | X | 274 | 50.443 | 61.904 | 29.616 | 0.00 | 0.00 |
| ATOM | 4101 | CA   | ALA | X | 274 | 50.935 | 60.148 | 30.680 | 0.00 | 0.00 |
| ATOM | 4102 | HA   | ALA | X | 274 | 50.868 | 60.196 | 31.767 | 0.00 | 0.00 |
| ATOM | 4103 | CB   | ALA | X | 274 | 49.581 | 59.706 | 30.191 | 0.00 | 0.00 |
| ATOM | 4104 | HB1  | ALA | X | 274 | 49.252 | 58.724 | 30.533 | 0.00 | 0.00 |
| ATOM | 4105 | HB2  | ALA | X | 274 | 49.633 | 59.689 | 29.102 | 0.00 | 0.00 |
| ATOM | 4106 | HB3  | ALA | X | 274 | 48.811 | 60.429 | 30.460 | 0.00 | 0.00 |
| ATOM | 4107 | C    | ALA | X | 274 | 52.026 | 59.136 | 30.241 | 0.00 | 0.00 |
| ATOM | 4108 | O    | ALA | X | 274 | 52.508 | 58.397 | 31.093 | 0.00 | 0.00 |
| ATOM | 4109 | N    | GLN | X | 275 | 52.424 | 59.149 | 28.996 | 0.00 | 0.00 |
| ATOM | 4110 | H    | GLN | X | 275 | 52.053 | 59.890 | 28.420 | 0.00 | 0.00 |
| ATOM | 4111 | CA   | GLN | X | 275 | 53.530 | 58.345 | 28.515 | 0.00 | 0.00 |
| ATOM | 4112 | HA   | GLN | X | 275 | 53.212 | 57.305 | 28.594 | 0.00 | 0.00 |
| ATOM | 4113 | CB   | GLN | X | 275 | 53.822 | 58.669 | 26.958 | 0.00 | 0.00 |
| ATOM | 4114 | HB2  | GLN | X | 275 | 52.930 | 58.546 | 26.344 | 0.00 | 0.00 |
| ATOM | 4115 | HB3  | GLN | X | 275 | 54.124 | 59.714 | 26.894 | 0.00 | 0.00 |
| ATOM | 4116 | CG   | GLN | X | 275 | 54.875 | 57.713 | 26.263 | 0.00 | 0.00 |
| ATOM | 4117 | HG2  | GLN | X | 275 | 55.853 | 57.737 | 26.744 | 0.00 | 0.00 |
| ATOM | 4118 | HG3  | GLN | X | 275 | 54.490 | 56.698 | 26.358 | 0.00 | 0.00 |
| ATOM | 4119 | CD   | GLN | X | 275 | 55.005 | 58.039 | 24.810 | 0.00 | 0.00 |
| ATOM | 4120 | OE1  | GLN | X | 275 | 56.030 | 58.479 | 24.344 | 0.00 | 0.00 |
| ATOM | 4121 | NE2  | GLN | X | 275 | 53.949 | 57.924 | 24.051 | 0.00 | 0.00 |
| ATOM | 4122 | HE21 | GLN | X | 275 | 54.035 | 58.408 | 23.169 | 0.00 | 0.00 |
| ATOM | 4123 | HE22 | GLN | X | 275 | 53.205 | 57.269 | 24.246 | 0.00 | 0.00 |
| ATOM | 4124 | C    | GLN | X | 275 | 54.794 | 58.383 | 29.259 | 0.00 | 0.00 |
| ATOM | 4125 | O    | GLN | X | 275 | 55.520 | 57.348 | 29.329 | 0.00 | 0.00 |
| ATOM | 4126 | N    | VAL | X | 276 | 55.117 | 59.503 | 29.906 | 0.00 | 0.00 |
| ATOM | 4127 | H    | VAL | X | 276 | 54.530 | 60.317 | 29.793 | 0.00 | 0.00 |
| ATOM | 4128 | CA   | VAL | X | 276 | 56.255 | 59.630 | 30.838 | 0.00 | 0.00 |
| ATOM | 4129 | HA   | VAL | X | 276 | 57.019 | 58.881 | 30.628 | 0.00 | 0.00 |
| ATOM | 4130 | CB   | VAL | X | 276 | 56.946 | 60.991 | 30.702 | 0.00 | 0.00 |
| ATOM | 4131 | HB   | VAL | X | 276 | 56.361 | 61.832 | 31.073 | 0.00 | 0.00 |
| ATOM | 4132 | CG1  | VAL | X | 276 | 58.170 | 61.037 | 31.657 | 0.00 | 0.00 |
| ATOM | 4133 | HG11 | VAL | X | 276 | 58.568 | 62.047 | 31.755 | 0.00 | 0.00 |
| ATOM | 4134 | HG12 | VAL | X | 276 | 57.883 | 60.823 | 32.686 | 0.00 | 0.00 |
| ATOM | 4135 | HG13 | VAL | X | 276 | 58.883 | 60.248 | 31.417 | 0.00 | 0.00 |
| ATOM | 4136 | CG2  | VAL | X | 276 | 57.468 | 61.101 | 29.300 | 0.00 | 0.00 |
| ATOM | 4137 | HG21 | VAL | X | 276 | 56.636 | 60.988 | 28.605 | 0.00 | 0.00 |
| ATOM | 4138 | HG22 | VAL | X | 276 | 58.333 | 60.445 | 29.210 | 0.00 | 0.00 |

|      |      |      |     |   |     |        |        |        |      |      |
|------|------|------|-----|---|-----|--------|--------|--------|------|------|
| ATOM | 4139 | HG23 | VAL | X | 276 | 57.851 | 62.119 | 29.229 | 0.00 | 0.00 |
| ATOM | 4140 | C    | VAL | X | 276 | 55.857 | 59.284 | 32.319 | 0.00 | 0.00 |
| ATOM | 4141 | O    | VAL | X | 276 | 56.688 | 58.658 | 32.921 | 0.00 | 0.00 |
| ATOM | 4142 | N    | LEU | X | 277 | 54.680 | 59.718 | 32.803 | 0.00 | 0.00 |
| ATOM | 4143 | H    | LEU | X | 277 | 54.103 | 60.085 | 32.059 | 0.00 | 0.00 |
| ATOM | 4144 | CA   | LEU | X | 277 | 54.118 | 59.389 | 34.064 | 0.00 | 0.00 |
| ATOM | 4145 | HA   | LEU | X | 277 | 54.752 | 59.885 | 34.800 | 0.00 | 0.00 |
| ATOM | 4146 | CB   | LEU | X | 277 | 52.771 | 60.067 | 34.288 | 0.00 | 0.00 |
| ATOM | 4147 | HB2  | LEU | X | 277 | 52.847 | 61.127 | 34.045 | 0.00 | 0.00 |
| ATOM | 4148 | HB3  | LEU | X | 277 | 52.126 | 59.740 | 33.472 | 0.00 | 0.00 |
| ATOM | 4149 | CG   | LEU | X | 277 | 52.095 | 59.825 | 35.638 | 0.00 | 0.00 |
| ATOM | 4150 | HG   | LEU | X | 277 | 52.327 | 58.807 | 35.949 | 0.00 | 0.00 |
| ATOM | 4151 | CD1  | LEU | X | 277 | 52.657 | 60.931 | 36.642 | 0.00 | 0.00 |
| ATOM | 4152 | HD11 | LEU | X | 277 | 52.016 | 60.703 | 37.494 | 0.00 | 0.00 |
| ATOM | 4153 | HD12 | LEU | X | 277 | 52.404 | 61.928 | 36.281 | 0.00 | 0.00 |
| ATOM | 4154 | HD13 | LEU | X | 277 | 53.692 | 60.661 | 36.849 | 0.00 | 0.00 |
| ATOM | 4155 | CD2  | LEU | X | 277 | 50.617 | 59.965 | 35.372 | 0.00 | 0.00 |
| ATOM | 4156 | HD21 | LEU | X | 277 | 50.403 | 60.896 | 34.849 | 0.00 | 0.00 |
| ATOM | 4157 | HD22 | LEU | X | 277 | 50.151 | 59.124 | 34.859 | 0.00 | 0.00 |
| ATOM | 4158 | HD23 | LEU | X | 277 | 50.034 | 59.975 | 36.293 | 0.00 | 0.00 |
| ATOM | 4159 | C    | LEU | X | 277 | 54.073 | 57.868 | 34.353 | 0.00 | 0.00 |
| ATOM | 4160 | O    | LEU | X | 277 | 54.645 | 57.374 | 35.311 | 0.00 | 0.00 |
| ATOM | 4161 | N    | VAL | X | 278 | 53.406 | 57.061 | 33.486 | 0.00 | 0.00 |
| ATOM | 4162 | H    | VAL | X | 278 | 52.942 | 57.505 | 32.706 | 0.00 | 0.00 |
| ATOM | 4163 | CA   | VAL | X | 278 | 53.225 | 55.604 | 33.608 | 0.00 | 0.00 |
| ATOM | 4164 | HA   | VAL | X | 278 | 52.637 | 55.413 | 34.506 | 0.00 | 0.00 |
| ATOM | 4165 | CB   | VAL | X | 278 | 52.517 | 55.078 | 32.337 | 0.00 | 0.00 |
| ATOM | 4166 | HB   | VAL | X | 278 | 51.621 | 55.698 | 32.332 | 0.00 | 0.00 |
| ATOM | 4167 | CG1  | VAL | X | 278 | 53.268 | 55.378 | 31.025 | 0.00 | 0.00 |
| ATOM | 4168 | HG11 | VAL | X | 278 | 53.997 | 54.579 | 30.890 | 0.00 | 0.00 |
| ATOM | 4169 | HG12 | VAL | X | 278 | 52.529 | 55.440 | 30.226 | 0.00 | 0.00 |
| ATOM | 4170 | HG13 | VAL | X | 278 | 53.828 | 56.311 | 31.077 | 0.00 | 0.00 |
| ATOM | 4171 | CG2  | VAL | X | 278 | 52.210 | 53.622 | 32.341 | 0.00 | 0.00 |
| ATOM | 4172 | HG21 | VAL | X | 278 | 51.731 | 53.363 | 31.397 | 0.00 | 0.00 |
| ATOM | 4173 | HG22 | VAL | X | 278 | 51.504 | 53.352 | 33.127 | 0.00 | 0.00 |
| ATOM | 4174 | HG23 | VAL | X | 278 | 53.130 | 53.037 | 32.347 | 0.00 | 0.00 |
| ATOM | 4175 | C    | VAL | X | 278 | 54.604 | 54.959 | 33.829 | 0.00 | 0.00 |
| ATOM | 4176 | O    | VAL | X | 278 | 54.812 | 54.179 | 34.746 | 0.00 | 0.00 |
| ATOM | 4177 | N    | ASN | X | 279 | 55.567 | 55.435 | 32.994 | 0.00 | 0.00 |
| ATOM | 4178 | H    | ASN | X | 279 | 55.322 | 55.992 | 32.188 | 0.00 | 0.00 |
| ATOM | 4179 | CA   | ASN | X | 279 | 56.952 | 54.854 | 32.944 | 0.00 | 0.00 |
| ATOM | 4180 | HA   | ASN | X | 279 | 56.876 | 53.769 | 32.873 | 0.00 | 0.00 |
| ATOM | 4181 | CB   | ASN | X | 279 | 57.717 | 55.458 | 31.769 | 0.00 | 0.00 |
| ATOM | 4182 | HB2  | ASN | X | 279 | 56.986 | 55.559 | 30.967 | 0.00 | 0.00 |
| ATOM | 4183 | HB3  | ASN | X | 279 | 57.875 | 56.510 | 32.005 | 0.00 | 0.00 |
| ATOM | 4184 | CG   | ASN | X | 279 | 59.080 | 54.825 | 31.427 | 0.00 | 0.00 |
| ATOM | 4185 | OD1  | ASN | X | 279 | 60.164 | 55.159 | 31.854 | 0.00 | 0.00 |
| ATOM | 4186 | ND2  | ASN | X | 279 | 59.067 | 53.836 | 30.550 | 0.00 | 0.00 |
| ATOM | 4187 | HD21 | ASN | X | 279 | 59.915 | 53.491 | 30.124 | 0.00 | 0.00 |
| ATOM | 4188 | HD22 | ASN | X | 279 | 58.226 | 53.323 | 30.326 | 0.00 | 0.00 |
| ATOM | 4189 | C    | ASN | X | 279 | 57.759 | 55.157 | 34.236 | 0.00 | 0.00 |
| ATOM | 4190 | O    | ASN | X | 279 | 58.475 | 54.334 | 34.777 | 0.00 | 0.00 |
| ATOM | 4191 | N    | HIE | X | 280 | 57.521 | 56.300 | 34.859 | 0.00 | 0.00 |
| ATOM | 4192 | H    | HIE | X | 280 | 56.921 | 56.968 | 34.396 | 0.00 | 0.00 |
| ATOM | 4193 | CA   | HIE | X | 280 | 57.997 | 56.722 | 36.143 | 0.00 | 0.00 |
| ATOM | 4194 | HA   | HIE | X | 280 | 59.001 | 56.305 | 36.212 | 0.00 | 0.00 |
| ATOM | 4195 | CB   | HIE | X | 280 | 58.143 | 58.213 | 36.278 | 0.00 | 0.00 |
| ATOM | 4196 | HB2  | HIE | X | 280 | 57.271 | 58.738 | 35.888 | 0.00 | 0.00 |
| ATOM | 4197 | HB3  | HIE | X | 280 | 58.163 | 58.463 | 37.339 | 0.00 | 0.00 |
| ATOM | 4198 | CG   | HIE | X | 280 | 59.309 | 58.852 | 35.582 | 0.00 | 0.00 |
| ATOM | 4199 | ND1  | HIE | X | 280 | 59.974 | 60.044 | 35.848 | 0.00 | 0.00 |
| ATOM | 4200 | CE1  | HIE | X | 280 | 60.949 | 60.123 | 34.961 | 0.00 | 0.00 |
| ATOM | 4201 | HE1  | HIE | X | 280 | 61.568 | 61.008 | 34.979 | 0.00 | 0.00 |
| ATOM | 4202 | NE2  | HIE | X | 280 | 60.840 | 59.155 | 34.038 | 0.00 | 0.00 |
| ATOM | 4203 | HE2  | HIE | X | 280 | 61.411 | 59.087 | 33.207 | 0.00 | 0.00 |
| ATOM | 4204 | CD2  | HIE | X | 280 | 59.781 | 58.359 | 34.394 | 0.00 | 0.00 |
| ATOM | 4205 | HD2  | HIE | X | 280 | 59.246 | 57.644 | 33.787 | 0.00 | 0.00 |

|      |      |      |     |   |     |        |        |        |      |      |
|------|------|------|-----|---|-----|--------|--------|--------|------|------|
| ATOM | 4206 | C    | HIE | X | 280 | 57.280 | 56.044 | 37.351 | 0.00 | 0.00 |
| ATOM | 4207 | O    | HIE | X | 280 | 57.860 | 56.000 | 38.485 | 0.00 | 0.00 |
| ATOM | 4208 | N    | GLU | X | 281 | 56.032 | 55.524 | 37.223 | 0.00 | 0.00 |
| ATOM | 4209 | H    | GLU | X | 281 | 55.624 | 55.422 | 36.305 | 0.00 | 0.00 |
| ATOM | 4210 | CA   | GLU | X | 281 | 55.343 | 54.696 | 38.236 | 0.00 | 0.00 |
| ATOM | 4211 | HA   | GLU | X | 281 | 55.073 | 55.365 | 39.053 | 0.00 | 0.00 |
| ATOM | 4212 | CB   | GLU | X | 281 | 53.979 | 54.100 | 37.770 | 0.00 | 0.00 |
| ATOM | 4213 | HB2  | GLU | X | 281 | 53.404 | 54.876 | 37.264 | 0.00 | 0.00 |
| ATOM | 4214 | HB3  | GLU | X | 281 | 54.162 | 53.212 | 37.165 | 0.00 | 0.00 |
| ATOM | 4215 | CG   | GLU | X | 281 | 53.009 | 53.692 | 38.893 | 0.00 | 0.00 |
| ATOM | 4216 | HG2  | GLU | X | 281 | 53.585 | 53.007 | 39.515 | 0.00 | 0.00 |
| ATOM | 4217 | HG3  | GLU | X | 281 | 52.764 | 54.608 | 39.432 | 0.00 | 0.00 |
| ATOM | 4218 | CD   | GLU | X | 281 | 51.880 | 52.838 | 38.316 | 0.00 | 0.00 |
| ATOM | 4219 | OE1  | GLU | X | 281 | 50.772 | 53.375 | 38.100 | 0.00 | 0.00 |
| ATOM | 4220 | OE2  | GLU | X | 281 | 52.079 | 51.648 | 37.975 | 0.00 | 0.00 |
| ATOM | 4221 | C    | GLU | X | 281 | 56.208 | 53.565 | 38.741 | 0.00 | 0.00 |
| ATOM | 4222 | O    | GLU | X | 281 | 56.359 | 53.498 | 39.943 | 0.00 | 0.00 |
| ATOM | 4223 | N    | TRP | X | 282 | 56.804 | 52.727 | 37.905 | 0.00 | 0.00 |
| ATOM | 4224 | H    | TRP | X | 282 | 56.734 | 52.803 | 36.900 | 0.00 | 0.00 |
| ATOM | 4225 | CA   | TRP | X | 282 | 57.483 | 51.508 | 38.371 | 0.00 | 0.00 |
| ATOM | 4226 | HA   | TRP | X | 282 | 56.724 | 50.869 | 38.823 | 0.00 | 0.00 |
| ATOM | 4227 | CB   | TRP | X | 282 | 57.928 | 50.728 | 37.167 | 0.00 | 0.00 |
| ATOM | 4228 | HB2  | TRP | X | 282 | 57.029 | 50.751 | 36.551 | 0.00 | 0.00 |
| ATOM | 4229 | HB3  | TRP | X | 282 | 58.672 | 51.333 | 36.648 | 0.00 | 0.00 |
| ATOM | 4230 | CG   | TRP | X | 282 | 58.203 | 49.240 | 37.306 | 0.00 | 0.00 |
| ATOM | 4231 | CD1  | TRP | X | 282 | 57.298 | 48.212 | 37.298 | 0.00 | 0.00 |
| ATOM | 4232 | HD1  | TRP | X | 282 | 56.228 | 48.308 | 37.401 | 0.00 | 0.00 |
| ATOM | 4233 | NE1  | TRP | X | 282 | 58.053 | 47.032 | 37.686 | 0.00 | 0.00 |
| ATOM | 4234 | HE1  | TRP | X | 282 | 57.620 | 46.151 | 37.925 | 0.00 | 0.00 |
| ATOM | 4235 | CE2  | TRP | X | 282 | 59.398 | 47.204 | 37.749 | 0.00 | 0.00 |
| ATOM | 4236 | CZ2  | TRP | X | 282 | 60.454 | 46.346 | 38.097 | 0.00 | 0.00 |
| ATOM | 4237 | HZ2  | TRP | X | 282 | 60.298 | 45.305 | 38.341 | 0.00 | 0.00 |
| ATOM | 4238 | CH2  | TRP | X | 282 | 61.731 | 46.819 | 38.018 | 0.00 | 0.00 |
| ATOM | 4239 | HH2  | TRP | X | 282 | 62.520 | 46.098 | 38.175 | 0.00 | 0.00 |
| ATOM | 4240 | CZ3  | TRP | X | 282 | 61.943 | 48.232 | 37.937 | 0.00 | 0.00 |
| ATOM | 4241 | HZ3  | TRP | X | 282 | 62.915 | 48.701 | 37.888 | 0.00 | 0.00 |
| ATOM | 4242 | CE3  | TRP | X | 282 | 60.873 | 49.053 | 37.504 | 0.00 | 0.00 |
| ATOM | 4243 | HE3  | TRP | X | 282 | 61.113 | 50.085 | 37.292 | 0.00 | 0.00 |
| ATOM | 4244 | CD2  | TRP | X | 282 | 59.549 | 48.597 | 37.484 | 0.00 | 0.00 |
| ATOM | 4245 | C    | TRP | X | 282 | 58.627 | 51.686 | 39.337 | 0.00 | 0.00 |
| ATOM | 4246 | O    | TRP | X | 282 | 58.894 | 50.856 | 40.185 | 0.00 | 0.00 |
| ATOM | 4247 | N    | HIE | X | 283 | 59.207 | 52.931 | 39.385 | 0.00 | 0.00 |
| ATOM | 4248 | H    | HIE | X | 283 | 58.703 | 53.643 | 38.876 | 0.00 | 0.00 |
| ATOM | 4249 | CA   | HIE | X | 283 | 60.234 | 53.356 | 40.466 | 0.00 | 0.00 |
| ATOM | 4250 | HA   | HIE | X | 283 | 61.050 | 52.633 | 40.465 | 0.00 | 0.00 |
| ATOM | 4251 | CB   | HIE | X | 283 | 60.841 | 54.730 | 40.121 | 0.00 | 0.00 |
| ATOM | 4252 | HB2  | HIE | X | 283 | 60.058 | 55.476 | 40.261 | 0.00 | 0.00 |
| ATOM | 4253 | HB3  | HIE | X | 283 | 61.617 | 55.074 | 40.804 | 0.00 | 0.00 |
| ATOM | 4254 | CG   | HIE | X | 283 | 61.432 | 54.806 | 38.704 | 0.00 | 0.00 |
| ATOM | 4255 | ND1  | HIE | X | 283 | 62.336 | 53.923 | 38.193 | 0.00 | 0.00 |
| ATOM | 4256 | CE1  | HIE | X | 283 | 62.548 | 54.331 | 36.902 | 0.00 | 0.00 |
| ATOM | 4257 | HE1  | HIE | X | 283 | 62.988 | 53.748 | 36.106 | 0.00 | 0.00 |
| ATOM | 4258 | NE2  | HIE | X | 283 | 62.013 | 55.568 | 36.666 | 0.00 | 0.00 |
| ATOM | 4259 | HE2  | HIE | X | 283 | 61.969 | 55.968 | 35.740 | 0.00 | 0.00 |
| ATOM | 4260 | CD2  | HIE | X | 283 | 61.290 | 55.799 | 37.832 | 0.00 | 0.00 |
| ATOM | 4261 | HD2  | HIE | X | 283 | 60.534 | 56.566 | 37.922 | 0.00 | 0.00 |
| ATOM | 4262 | C    | HIE | X | 283 | 59.549 | 53.346 | 41.825 | 0.00 | 0.00 |
| ATOM | 4263 | O    | HIE | X | 283 | 60.190 | 53.253 | 42.840 | 0.00 | 0.00 |
| ATOM | 4264 | N    | VAL | X | 284 | 58.202 | 53.459 | 41.856 | 0.00 | 0.00 |
| ATOM | 4265 | H    | VAL | X | 284 | 57.809 | 53.506 | 40.927 | 0.00 | 0.00 |
| ATOM | 4266 | CA   | VAL | X | 284 | 57.375 | 53.552 | 43.085 | 0.00 | 0.00 |
| ATOM | 4267 | HA   | VAL | X | 284 | 58.051 | 53.457 | 43.935 | 0.00 | 0.00 |
| ATOM | 4268 | CB   | VAL | X | 284 | 56.636 | 54.911 | 43.115 | 0.00 | 0.00 |
| ATOM | 4269 | HB   | VAL | X | 284 | 56.330 | 54.984 | 44.158 | 0.00 | 0.00 |
| ATOM | 4270 | CG1  | VAL | X | 284 | 57.545 | 56.161 | 42.851 | 0.00 | 0.00 |
| ATOM | 4271 | HG11 | VAL | X | 284 | 58.488 | 56.014 | 43.377 | 0.00 | 0.00 |
| ATOM | 4272 | HG12 | VAL | X | 284 | 57.829 | 56.196 | 41.799 | 0.00 | 0.00 |



|      |      |      |     |   |     |        |        |        |      |      |
|------|------|------|-----|---|-----|--------|--------|--------|------|------|
| ATOM | 4273 | HG13 | VAL | X | 284 | 57.067 | 57.097 | 43.140 | 0.00 | 0.00 |
| ATOM | 4274 | CG2  | VAL | X | 284 | 55.364 | 55.069 | 42.256 | 0.00 | 0.00 |
| ATOM | 4275 | HG21 | VAL | X | 284 | 54.573 | 55.719 | 42.630 | 0.00 | 0.00 |
| ATOM | 4276 | HG22 | VAL | X | 284 | 54.872 | 54.103 | 42.143 | 0.00 | 0.00 |
| ATOM | 4277 | HG23 | VAL | X | 284 | 55.672 | 55.436 | 41.278 | 0.00 | 0.00 |
| ATOM | 4278 | C    | VAL | X | 284 | 56.425 | 52.349 | 43.184 | 0.00 | 0.00 |
| ATOM | 4279 | O    | VAL | X | 284 | 55.470 | 52.287 | 43.927 | 0.00 | 0.00 |
| ATOM | 4280 | N    | LEU | X | 285 | 56.734 | 51.341 | 42.363 | 0.00 | 0.00 |
| ATOM | 4281 | H    | LEU | X | 285 | 57.695 | 51.315 | 42.052 | 0.00 | 0.00 |
| ATOM | 4282 | CA   | LEU | X | 285 | 56.326 | 49.945 | 42.624 | 0.00 | 0.00 |
| ATOM | 4283 | HA   | LEU | X | 285 | 55.323 | 50.027 | 43.043 | 0.00 | 0.00 |
| ATOM | 4284 | CB   | LEU | X | 285 | 56.120 | 49.148 | 41.294 | 0.00 | 0.00 |
| ATOM | 4285 | HB2  | LEU | X | 285 | 55.355 | 49.773 | 40.832 | 0.00 | 0.00 |
| ATOM | 4286 | HB3  | LEU | X | 285 | 57.039 | 49.108 | 40.709 | 0.00 | 0.00 |
| ATOM | 4287 | CG   | LEU | X | 285 | 55.630 | 47.710 | 41.529 | 0.00 | 0.00 |
| ATOM | 4288 | HG   | LEU | X | 285 | 55.093 | 47.745 | 42.476 | 0.00 | 0.00 |
| ATOM | 4289 | CD1  | LEU | X | 285 | 54.765 | 47.199 | 40.376 | 0.00 | 0.00 |
| ATOM | 4290 | HD11 | LEU | X | 285 | 53.845 | 47.758 | 40.203 | 0.00 | 0.00 |
| ATOM | 4291 | HD12 | LEU | X | 285 | 54.629 | 46.126 | 40.510 | 0.00 | 0.00 |
| ATOM | 4292 | HD13 | LEU | X | 285 | 55.353 | 47.266 | 39.460 | 0.00 | 0.00 |
| ATOM | 4293 | CD2  | LEU | X | 285 | 56.821 | 46.725 | 41.536 | 0.00 | 0.00 |
| ATOM | 4294 | HD21 | LEU | X | 285 | 57.636 | 46.853 | 42.249 | 0.00 | 0.00 |
| ATOM | 4295 | HD22 | LEU | X | 285 | 56.469 | 45.723 | 41.780 | 0.00 | 0.00 |
| ATOM | 4296 | HD23 | LEU | X | 285 | 57.356 | 46.662 | 40.589 | 0.00 | 0.00 |
| ATOM | 4297 | C    | LEU | X | 285 | 57.316 | 49.303 | 43.638 | 0.00 | 0.00 |
| ATOM | 4298 | O    | LEU | X | 285 | 58.536 | 49.339 | 43.405 | 0.00 | 0.00 |
| ATOM | 4299 | N    | PRO | X | 286 | 56.773 | 48.829 | 44.835 | 0.00 | 0.00 |
| ATOM | 4300 | CD   | PRO | X | 286 | 55.401 | 49.025 | 45.306 | 0.00 | 0.00 |
| ATOM | 4301 | HD2  | PRO | X | 286 | 54.873 | 48.147 | 44.934 | 0.00 | 0.00 |
| ATOM | 4302 | HD3  | PRO | X | 286 | 55.046 | 50.018 | 45.032 | 0.00 | 0.00 |
| ATOM | 4303 | CG   | PRO | X | 286 | 55.553 | 48.897 | 46.800 | 0.00 | 0.00 |
| ATOM | 4304 | HG2  | PRO | X | 286 | 54.632 | 48.633 | 47.320 | 0.00 | 0.00 |
| ATOM | 4305 | HG3  | PRO | X | 286 | 55.894 | 49.872 | 47.146 | 0.00 | 0.00 |
| ATOM | 4306 | CB   | PRO | X | 286 | 56.619 | 47.830 | 47.003 | 0.00 | 0.00 |
| ATOM | 4307 | HB2  | PRO | X | 286 | 56.299 | 46.814 | 46.773 | 0.00 | 0.00 |
| ATOM | 4308 | HB3  | PRO | X | 286 | 57.252 | 47.826 | 47.891 | 0.00 | 0.00 |
| ATOM | 4309 | CA   | PRO | X | 286 | 57.580 | 48.347 | 45.909 | 0.00 | 0.00 |
| ATOM | 4310 | HA   | PRO | X | 286 | 58.135 | 49.178 | 46.345 | 0.00 | 0.00 |
| ATOM | 4311 | C    | PRO | X | 286 | 58.412 | 47.159 | 45.460 | 0.00 | 0.00 |
| ATOM | 4312 | O    | PRO | X | 286 | 57.910 | 46.214 | 44.793 | 0.00 | 0.00 |
| ATOM | 4313 | N    | GLN | X | 287 | 59.724 | 47.231 | 45.765 | 0.00 | 0.00 |
| ATOM | 4314 | H    | GLN | X | 287 | 60.032 | 48.061 | 46.251 | 0.00 | 0.00 |
| ATOM | 4315 | CA   | GLN | X | 287 | 60.810 | 46.376 | 45.324 | 0.00 | 0.00 |
| ATOM | 4316 | HA   | GLN | X | 287 | 60.498 | 45.702 | 44.526 | 0.00 | 0.00 |
| ATOM | 4317 | CB   | GLN | X | 287 | 62.116 | 47.186 | 44.995 | 0.00 | 0.00 |
| ATOM | 4318 | HB2  | GLN | X | 287 | 62.398 | 47.787 | 45.859 | 0.00 | 0.00 |
| ATOM | 4319 | HB3  | GLN | X | 287 | 62.950 | 46.503 | 44.834 | 0.00 | 0.00 |
| ATOM | 4320 | CG   | GLN | X | 287 | 62.063 | 48.129 | 43.826 | 0.00 | 0.00 |
| ATOM | 4321 | HG2  | GLN | X | 287 | 61.438 | 48.968 | 44.131 | 0.00 | 0.00 |
| ATOM | 4322 | HG3  | GLN | X | 287 | 63.020 | 48.566 | 43.540 | 0.00 | 0.00 |
| ATOM | 4323 | CD   | GLN | X | 287 | 61.540 | 47.456 | 42.586 | 0.00 | 0.00 |
| ATOM | 4324 | OE1  | GLN | X | 287 | 62.242 | 46.605 | 42.023 | 0.00 | 0.00 |
| ATOM | 4325 | NE2  | GLN | X | 287 | 60.357 | 47.693 | 42.047 | 0.00 | 0.00 |
| ATOM | 4326 | HE21 | GLN | X | 287 | 60.150 | 47.104 | 41.253 | 0.00 | 0.00 |
| ATOM | 4327 | HE22 | GLN | X | 287 | 59.753 | 48.443 | 42.352 | 0.00 | 0.00 |
| ATOM | 4328 | C    | GLN | X | 287 | 61.220 | 45.469 | 46.536 | 0.00 | 0.00 |
| ATOM | 4329 | O    | GLN | X | 287 | 61.144 | 45.942 | 47.675 | 0.00 | 0.00 |
| ATOM | 4330 | N    | GLU | X | 288 | 61.681 | 44.294 | 46.266 | 0.00 | 0.00 |
| ATOM | 4331 | H    | GLU | X | 288 | 61.613 | 43.935 | 45.324 | 0.00 | 0.00 |
| ATOM | 4332 | CA   | GLU | X | 288 | 62.185 | 43.261 | 47.252 | 0.00 | 0.00 |
| ATOM | 4333 | HA   | GLU | X | 288 | 62.574 | 42.396 | 46.716 | 0.00 | 0.00 |
| ATOM | 4334 | CB   | GLU | X | 288 | 63.299 | 43.755 | 48.195 | 0.00 | 0.00 |
| ATOM | 4335 | HB2  | GLU | X | 288 | 63.027 | 44.680 | 48.702 | 0.00 | 0.00 |
| ATOM | 4336 | HB3  | GLU | X | 288 | 63.535 | 42.955 | 48.896 | 0.00 | 0.00 |
| ATOM | 4337 | CG   | GLU | X | 288 | 64.514 | 44.104 | 47.321 | 0.00 | 0.00 |
| ATOM | 4338 | HG2  | GLU | X | 288 | 64.915 | 43.239 | 46.793 | 0.00 | 0.00 |
| ATOM | 4339 | HG3  | GLU | X | 288 | 64.351 | 44.921 | 46.618 | 0.00 | 0.00 |

|      |      |      |     |   |     |        |        |        |      |      |
|------|------|------|-----|---|-----|--------|--------|--------|------|------|
| ATOM | 4340 | CD   | GLU | X | 288 | 65.572 | 44.614 | 48.278 | 0.00 | 0.00 |
| ATOM | 4341 | OE1  | GLU | X | 288 | 66.207 | 43.821 | 49.016 | 0.00 | 0.00 |
| ATOM | 4342 | OE2  | GLU | X | 288 | 65.708 | 45.873 | 48.257 | 0.00 | 0.00 |
| ATOM | 4343 | C    | GLU | X | 288 | 60.952 | 42.677 | 48.012 | 0.00 | 0.00 |
| ATOM | 4344 | O    | GLU | X | 288 | 61.118 | 42.167 | 49.100 | 0.00 | 0.00 |
| ATOM | 4345 | N    | SER | X | 289 | 59.766 | 42.743 | 47.403 | 0.00 | 0.00 |
| ATOM | 4346 | H    | SER | X | 289 | 59.825 | 43.342 | 46.593 | 0.00 | 0.00 |
| ATOM | 4347 | CA   | SER | X | 289 | 58.435 | 42.168 | 47.710 | 0.00 | 0.00 |
| ATOM | 4348 | HA   | SER | X | 289 | 58.574 | 41.443 | 48.512 | 0.00 | 0.00 |
| ATOM | 4349 | CB   | SER | X | 289 | 57.530 | 43.285 | 48.198 | 0.00 | 0.00 |
| ATOM | 4350 | HB2  | SER | X | 289 | 57.668 | 44.152 | 47.551 | 0.00 | 0.00 |
| ATOM | 4351 | HB3  | SER | X | 289 | 56.487 | 42.968 | 48.205 | 0.00 | 0.00 |
| ATOM | 4352 | OG   | SER | X | 289 | 57.873 | 43.786 | 49.459 | 0.00 | 0.00 |
| ATOM | 4353 | HG   | SER | X | 289 | 58.232 | 44.676 | 49.443 | 0.00 | 0.00 |
| ATOM | 4354 | C    | SER | X | 289 | 57.730 | 41.570 | 46.484 | 0.00 | 0.00 |
| ATOM | 4355 | O    | SER | X | 289 | 57.121 | 42.219 | 45.602 | 0.00 | 0.00 |
| ATOM | 4356 | N    | VAL | X | 290 | 57.676 | 40.248 | 46.533 | 0.00 | 0.00 |
| ATOM | 4357 | H    | VAL | X | 290 | 58.207 | 39.698 | 47.194 | 0.00 | 0.00 |
| ATOM | 4358 | CA   | VAL | X | 290 | 56.985 | 39.352 | 45.613 | 0.00 | 0.00 |
| ATOM | 4359 | HA   | VAL | X | 290 | 57.154 | 39.592 | 44.564 | 0.00 | 0.00 |
| ATOM | 4360 | CB   | VAL | X | 290 | 57.316 | 37.816 | 45.743 | 0.00 | 0.00 |
| ATOM | 4361 | HB   | VAL | X | 290 | 57.017 | 37.427 | 46.716 | 0.00 | 0.00 |
| ATOM | 4362 | CG1  | VAL | X | 290 | 56.549 | 36.880 | 44.774 | 0.00 | 0.00 |
| ATOM | 4363 | HG11 | VAL | X | 290 | 56.988 | 35.882 | 44.763 | 0.00 | 0.00 |
| ATOM | 4364 | HG12 | VAL | X | 290 | 55.506 | 37.007 | 45.064 | 0.00 | 0.00 |
| ATOM | 4365 | HG13 | VAL | X | 290 | 56.765 | 37.218 | 43.760 | 0.00 | 0.00 |
| ATOM | 4366 | CG2  | VAL | X | 290 | 58.839 | 37.567 | 45.768 | 0.00 | 0.00 |
| ATOM | 4367 | HG21 | VAL | X | 290 | 59.159 | 37.648 | 44.729 | 0.00 | 0.00 |
| ATOM | 4368 | HG22 | VAL | X | 290 | 59.015 | 36.598 | 46.235 | 0.00 | 0.00 |
| ATOM | 4369 | HG23 | VAL | X | 290 | 59.367 | 38.269 | 46.413 | 0.00 | 0.00 |
| ATOM | 4370 | C    | VAL | X | 290 | 55.475 | 39.456 | 45.845 | 0.00 | 0.00 |
| ATOM | 4371 | O    | VAL | X | 290 | 54.993 | 39.384 | 47.030 | 0.00 | 0.00 |
| ATOM | 4372 | N    | PHE | X | 291 | 54.638 | 39.595 | 44.836 | 0.00 | 0.00 |
| ATOM | 4373 | H    | PHE | X | 291 | 55.080 | 39.692 | 43.933 | 0.00 | 0.00 |
| ATOM | 4374 | CA   | PHE | X | 291 | 53.143 | 39.825 | 44.872 | 0.00 | 0.00 |
| ATOM | 4375 | HA   | PHE | X | 291 | 52.905 | 39.909 | 43.812 | 0.00 | 0.00 |
| ATOM | 4376 | CB   | PHE | X | 291 | 52.555 | 38.532 | 45.497 | 0.00 | 0.00 |
| ATOM | 4377 | HB2  | PHE | X | 291 | 53.116 | 37.675 | 45.124 | 0.00 | 0.00 |
| ATOM | 4378 | HB3  | PHE | X | 291 | 52.661 | 38.574 | 46.581 | 0.00 | 0.00 |
| ATOM | 4379 | CG   | PHE | X | 291 | 51.147 | 38.045 | 45.090 | 0.00 | 0.00 |
| ATOM | 4380 | CD1  | PHE | X | 291 | 50.128 | 39.029 | 44.719 | 0.00 | 0.00 |
| ATOM | 4381 | HD1  | PHE | X | 291 | 50.325 | 40.087 | 44.624 | 0.00 | 0.00 |
| ATOM | 4382 | CE1  | PHE | X | 291 | 48.808 | 38.517 | 44.559 | 0.00 | 0.00 |
| ATOM | 4383 | HE1  | PHE | X | 291 | 47.976 | 39.174 | 44.355 | 0.00 | 0.00 |
| ATOM | 4384 | CZ   | PHE | X | 291 | 48.513 | 37.168 | 44.711 | 0.00 | 0.00 |
| ATOM | 4385 | HZ   | PHE | X | 291 | 47.520 | 36.779 | 44.539 | 0.00 | 0.00 |
| ATOM | 4386 | CE2  | PHE | X | 291 | 49.546 | 36.218 | 44.978 | 0.00 | 0.00 |
| ATOM | 4387 | HE2  | PHE | X | 291 | 49.350 | 35.169 | 44.809 | 0.00 | 0.00 |
| ATOM | 4388 | CD2  | PHE | X | 291 | 50.850 | 36.692 | 45.080 | 0.00 | 0.00 |
| ATOM | 4389 | HD2  | PHE | X | 291 | 51.638 | 35.955 | 45.132 | 0.00 | 0.00 |
| ATOM | 4390 | C    | PHE | X | 291 | 52.632 | 41.073 | 45.543 | 0.00 | 0.00 |
| ATOM | 4391 | O    | PHE | X | 291 | 52.022 | 41.047 | 46.666 | 0.00 | 0.00 |
| ATOM | 4392 | N    | ARG | X | 292 | 53.038 | 42.182 | 44.958 | 0.00 | 0.00 |
| ATOM | 4393 | H    | ARG | X | 292 | 53.491 | 42.085 | 44.061 | 0.00 | 0.00 |
| ATOM | 4394 | CA   | ARG | X | 292 | 52.726 | 43.657 | 45.458 | 0.00 | 0.00 |
| ATOM | 4395 | HA   | ARG | X | 292 | 51.658 | 43.678 | 45.672 | 0.00 | 0.00 |
| ATOM | 4396 | CB   | ARG | X | 292 | 53.612 | 44.041 | 46.647 | 0.00 | 0.00 |
| ATOM | 4397 | HB2  | ARG | X | 292 | 54.668 | 43.915 | 46.411 | 0.00 | 0.00 |
| ATOM | 4398 | HB3  | ARG | X | 292 | 53.546 | 45.109 | 46.856 | 0.00 | 0.00 |
| ATOM | 4399 | CG   | ARG | X | 292 | 53.427 | 43.326 | 48.031 | 0.00 | 0.00 |
| ATOM | 4400 | HG2  | ARG | X | 292 | 53.731 | 42.280 | 47.993 | 0.00 | 0.00 |
| ATOM | 4401 | HG3  | ARG | X | 292 | 54.193 | 43.629 | 48.745 | 0.00 | 0.00 |
| ATOM | 4402 | CD   | ARG | X | 292 | 52.094 | 43.463 | 48.758 | 0.00 | 0.00 |
| ATOM | 4403 | HD2  | ARG | X | 292 | 52.097 | 44.230 | 49.533 | 0.00 | 0.00 |
| ATOM | 4404 | HD3  | ARG | X | 292 | 51.346 | 43.822 | 48.052 | 0.00 | 0.00 |
| ATOM | 4405 | NE   | ARG | X | 292 | 51.732 | 42.172 | 49.360 | 0.00 | 0.00 |
| ATOM | 4406 | HE   | ARG | X | 292 | 51.444 | 41.473 | 48.691 | 0.00 | 0.00 |

|      |      |      |     |   |     |        |        |        |      |      |
|------|------|------|-----|---|-----|--------|--------|--------|------|------|
| ATOM | 4407 | CZ   | ARG | X | 292 | 51.616 | 41.876 | 50.668 | 0.00 | 0.00 |
| ATOM | 4408 | NH1  | ARG | X | 292 | 52.024 | 42.693 | 51.671 | 0.00 | 0.00 |
| ATOM | 4409 | HH11 | ARG | X | 292 | 52.467 | 43.561 | 51.407 | 0.00 | 0.00 |
| ATOM | 4410 | HH12 | ARG | X | 292 | 51.837 | 42.467 | 52.637 | 0.00 | 0.00 |
| ATOM | 4411 | NH2  | ARG | X | 292 | 51.103 | 40.727 | 51.087 | 0.00 | 0.00 |
| ATOM | 4412 | HH21 | ARG | X | 292 | 50.682 | 40.103 | 50.414 | 0.00 | 0.00 |
| ATOM | 4413 | HH22 | ARG | X | 292 | 50.873 | 40.669 | 52.068 | 0.00 | 0.00 |
| ATOM | 4414 | C    | ARG | X | 292 | 52.930 | 44.613 | 44.280 | 0.00 | 0.00 |
| ATOM | 4415 | O    | ARG | X | 292 | 53.597 | 44.223 | 43.261 | 0.00 | 0.00 |
| ATOM | 4416 | N    | PHE | X | 293 | 52.255 | 45.769 | 44.319 | 0.00 | 0.00 |
| ATOM | 4417 | H    | PHE | X | 293 | 51.758 | 45.830 | 45.195 | 0.00 | 0.00 |
| ATOM | 4418 | CA   | PHE | X | 293 | 51.859 | 46.629 | 43.176 | 0.00 | 0.00 |
| ATOM | 4419 | HA   | PHE | X | 293 | 52.465 | 46.235 | 42.360 | 0.00 | 0.00 |
| ATOM | 4420 | CB   | PHE | X | 293 | 50.435 | 46.389 | 42.671 | 0.00 | 0.00 |
| ATOM | 4421 | HB2  | PHE | X | 293 | 49.771 | 46.694 | 43.480 | 0.00 | 0.00 |
| ATOM | 4422 | HB3  | PHE | X | 293 | 50.230 | 46.988 | 41.784 | 0.00 | 0.00 |
| ATOM | 4423 | CG   | PHE | X | 293 | 50.163 | 44.951 | 42.408 | 0.00 | 0.00 |
| ATOM | 4424 | CD1  | PHE | X | 293 | 50.968 | 44.227 | 41.530 | 0.00 | 0.00 |
| ATOM | 4425 | HD1  | PHE | X | 293 | 51.737 | 44.726 | 40.959 | 0.00 | 0.00 |
| ATOM | 4426 | CE1  | PHE | X | 293 | 50.714 | 42.908 | 41.317 | 0.00 | 0.00 |
| ATOM | 4427 | HE1  | PHE | X | 293 | 51.303 | 42.359 | 40.598 | 0.00 | 0.00 |
| ATOM | 4428 | CZ   | PHE | X | 293 | 49.702 | 42.314 | 41.908 | 0.00 | 0.00 |
| ATOM | 4429 | HZ   | PHE | X | 293 | 49.459 | 41.283 | 41.701 | 0.00 | 0.00 |
| ATOM | 4430 | CE2  | PHE | X | 293 | 48.886 | 42.969 | 42.897 | 0.00 | 0.00 |
| ATOM | 4431 | HE2  | PHE | X | 293 | 48.154 | 42.508 | 43.543 | 0.00 | 0.00 |
| ATOM | 4432 | CD2  | PHE | X | 293 | 49.077 | 44.372 | 43.063 | 0.00 | 0.00 |
| ATOM | 4433 | HD2  | PHE | X | 293 | 48.463 | 45.018 | 43.673 | 0.00 | 0.00 |
| ATOM | 4434 | C    | PHE | X | 293 | 52.108 | 48.133 | 43.418 | 0.00 | 0.00 |
| ATOM | 4435 | O    | PHE | X | 293 | 52.280 | 48.543 | 44.616 | 0.00 | 0.00 |
| ATOM | 4436 | N    | SER | X | 294 | 52.062 | 48.998 | 42.391 | 0.00 | 0.00 |
| ATOM | 4437 | H    | SER | X | 294 | 51.804 | 48.661 | 41.475 | 0.00 | 0.00 |
| ATOM | 4438 | CA   | SER | X | 294 | 52.307 | 50.426 | 42.548 | 0.00 | 0.00 |
| ATOM | 4439 | HA   | SER | X | 294 | 53.156 | 50.570 | 43.215 | 0.00 | 0.00 |
| ATOM | 4440 | CB   | SER | X | 294 | 52.536 | 51.048 | 41.129 | 0.00 | 0.00 |
| ATOM | 4441 | HB2  | SER | X | 294 | 51.781 | 51.766 | 40.812 | 0.00 | 0.00 |
| ATOM | 4442 | HB3  | SER | X | 294 | 53.498 | 51.560 | 41.095 | 0.00 | 0.00 |
| ATOM | 4443 | OG   | SER | X | 294 | 52.455 | 50.042 | 40.097 | 0.00 | 0.00 |
| ATOM | 4444 | HG   | SER | X | 294 | 52.294 | 50.495 | 39.266 | 0.00 | 0.00 |
| ATOM | 4445 | C    | SER | X | 294 | 51.212 | 51.271 | 43.316 | 0.00 | 0.00 |
| ATOM | 4446 | O    | SER | X | 294 | 51.586 | 52.016 | 44.186 | 0.00 | 0.00 |
| ATOM | 4447 | N    | PHE | X | 295 | 49.996 | 51.112 | 42.890 | 0.00 | 0.00 |
| ATOM | 4448 | H    | PHE | X | 295 | 49.834 | 50.527 | 42.082 | 0.00 | 0.00 |
| ATOM | 4449 | CA   | PHE | X | 295 | 48.776 | 51.790 | 43.405 | 0.00 | 0.00 |
| ATOM | 4450 | HA   | PHE | X | 295 | 49.009 | 51.909 | 44.463 | 0.00 | 0.00 |
| ATOM | 4451 | CB   | PHE | X | 295 | 48.530 | 53.075 | 42.631 | 0.00 | 0.00 |
| ATOM | 4452 | HB2  | PHE | X | 295 | 48.300 | 52.874 | 41.585 | 0.00 | 0.00 |
| ATOM | 4453 | HB3  | PHE | X | 295 | 47.636 | 53.521 | 43.067 | 0.00 | 0.00 |
| ATOM | 4454 | CG   | PHE | X | 295 | 49.593 | 54.179 | 42.828 | 0.00 | 0.00 |
| ATOM | 4455 | CD1  | PHE | X | 295 | 49.658 | 54.783 | 44.047 | 0.00 | 0.00 |
| ATOM | 4456 | HD1  | PHE | X | 295 | 48.942 | 54.657 | 44.846 | 0.00 | 0.00 |
| ATOM | 4457 | CE1  | PHE | X | 295 | 50.530 | 55.827 | 44.234 | 0.00 | 0.00 |
| ATOM | 4458 | HE1  | PHE | X | 295 | 50.554 | 56.348 | 45.179 | 0.00 | 0.00 |
| ATOM | 4459 | CZ   | PHE | X | 295 | 51.500 | 56.104 | 43.268 | 0.00 | 0.00 |
| ATOM | 4460 | HZ   | PHE | X | 295 | 52.292 | 56.807 | 43.478 | 0.00 | 0.00 |
| ATOM | 4461 | CE2  | PHE | X | 295 | 51.403 | 55.526 | 42.024 | 0.00 | 0.00 |
| ATOM | 4462 | HE2  | PHE | X | 295 | 51.848 | 56.008 | 41.166 | 0.00 | 0.00 |
| ATOM | 4463 | CD2  | PHE | X | 295 | 50.465 | 54.525 | 41.751 | 0.00 | 0.00 |
| ATOM | 4464 | HD2  | PHE | X | 295 | 50.322 | 54.016 | 40.809 | 0.00 | 0.00 |
| ATOM | 4465 | C    | PHE | X | 295 | 47.577 | 50.874 | 43.405 | 0.00 | 0.00 |
| ATOM | 4466 | O    | PHE | X | 295 | 47.442 | 50.042 | 42.534 | 0.00 | 0.00 |
| ATOM | 4467 | N    | VAL | X | 296 | 46.833 | 51.029 | 44.469 | 0.00 | 0.00 |
| ATOM | 4468 | H    | VAL | X | 296 | 46.943 | 51.929 | 44.912 | 0.00 | 0.00 |
| ATOM | 4469 | CA   | VAL | X | 296 | 45.711 | 50.207 | 44.848 | 0.00 | 0.00 |
| ATOM | 4470 | HA   | VAL | X | 296 | 45.243 | 49.767 | 43.968 | 0.00 | 0.00 |
| ATOM | 4471 | CB   | VAL | X | 296 | 46.210 | 49.024 | 45.644 | 0.00 | 0.00 |
| ATOM | 4472 | HB   | VAL | X | 296 | 45.377 | 48.464 | 46.069 | 0.00 | 0.00 |
| ATOM | 4473 | CG1  | VAL | X | 296 | 46.993 | 48.000 | 44.787 | 0.00 | 0.00 |

|      |      |      |     |   |     |        |        |        |      |      |
|------|------|------|-----|---|-----|--------|--------|--------|------|------|
| ATOM | 4474 | HG11 | VAL | X | 296 | 47.996 | 48.374 | 44.583 | 0.00 | 0.00 |
| ATOM | 4475 | HG12 | VAL | X | 296 | 47.251 | 47.163 | 45.436 | 0.00 | 0.00 |
| ATOM | 4476 | HG13 | VAL | X | 296 | 46.430 | 47.577 | 43.955 | 0.00 | 0.00 |
| ATOM | 4477 | CG2  | VAL | X | 296 | 46.883 | 49.478 | 46.915 | 0.00 | 0.00 |
| ATOM | 4478 | HG21 | VAL | X | 296 | 47.655 | 50.216 | 46.696 | 0.00 | 0.00 |
| ATOM | 4479 | HG22 | VAL | X | 296 | 47.304 | 48.702 | 47.554 | 0.00 | 0.00 |
| ATOM | 4480 | HG23 | VAL | X | 296 | 46.057 | 49.973 | 47.426 | 0.00 | 0.00 |
| ATOM | 4481 | C    | VAL | X | 296 | 44.624 | 51.031 | 45.630 | 0.00 | 0.00 |
| ATOM | 4482 | O    | VAL | X | 296 | 44.798 | 52.142 | 46.090 | 0.00 | 0.00 |
| ATOM | 4483 | N    | PRO | X | 297 | 43.356 | 50.502 | 45.765 | 0.00 | 0.00 |
| ATOM | 4484 | CD   | PRO | X | 297 | 42.824 | 49.501 | 44.859 | 0.00 | 0.00 |
| ATOM | 4485 | HD2  | PRO | X | 297 | 43.282 | 48.513 | 44.897 | 0.00 | 0.00 |
| ATOM | 4486 | HD3  | PRO | X | 297 | 42.836 | 49.857 | 43.828 | 0.00 | 0.00 |
| ATOM | 4487 | CG   | PRO | X | 297 | 41.349 | 49.354 | 45.219 | 0.00 | 0.00 |
| ATOM | 4488 | HG2  | PRO | X | 297 | 41.119 | 48.293 | 45.129 | 0.00 | 0.00 |
| ATOM | 4489 | HG3  | PRO | X | 297 | 40.805 | 49.990 | 44.520 | 0.00 | 0.00 |
| ATOM | 4490 | CB   | PRO | X | 297 | 41.270 | 49.950 | 46.670 | 0.00 | 0.00 |
| ATOM | 4491 | HB2  | PRO | X | 297 | 41.510 | 49.126 | 47.341 | 0.00 | 0.00 |
| ATOM | 4492 | HB3  | PRO | X | 297 | 40.303 | 50.419 | 46.854 | 0.00 | 0.00 |
| ATOM | 4493 | CA   | PRO | X | 297 | 42.365 | 50.987 | 46.712 | 0.00 | 0.00 |
| ATOM | 4494 | HA   | PRO | X | 297 | 41.977 | 51.941 | 46.356 | 0.00 | 0.00 |
| ATOM | 4495 | C    | PRO | X | 297 | 42.877 | 51.267 | 48.165 | 0.00 | 0.00 |
| ATOM | 4496 | O    | PRO | X | 297 | 43.590 | 50.531 | 48.879 | 0.00 | 0.00 |
| ATOM | 4497 | N    | VAL | X | 298 | 42.571 | 52.502 | 48.557 | 0.00 | 0.00 |
| ATOM | 4498 | H    | VAL | X | 298 | 41.940 | 52.991 | 47.938 | 0.00 | 0.00 |
| ATOM | 4499 | CA   | VAL | X | 298 | 43.139 | 53.213 | 49.648 | 0.00 | 0.00 |
| ATOM | 4500 | HA   | VAL | X | 298 | 44.032 | 52.686 | 49.985 | 0.00 | 0.00 |
| ATOM | 4501 | CB   | VAL | X | 298 | 43.559 | 54.745 | 49.296 | 0.00 | 0.00 |
| ATOM | 4502 | HB   | VAL | X | 298 | 42.692 | 55.398 | 49.196 | 0.00 | 0.00 |
| ATOM | 4503 | CG1  | VAL | X | 298 | 44.374 | 55.363 | 50.464 | 0.00 | 0.00 |
| ATOM | 4504 | HG11 | VAL | X | 298 | 45.365 | 54.917 | 50.552 | 0.00 | 0.00 |
| ATOM | 4505 | HG12 | VAL | X | 298 | 44.487 | 56.431 | 50.283 | 0.00 | 0.00 |
| ATOM | 4506 | HG13 | VAL | X | 298 | 43.893 | 55.141 | 51.417 | 0.00 | 0.00 |
| ATOM | 4507 | CG2  | VAL | X | 298 | 44.244 | 54.895 | 47.922 | 0.00 | 0.00 |
| ATOM | 4508 | HG21 | VAL | X | 298 | 45.207 | 54.397 | 48.037 | 0.00 | 0.00 |
| ATOM | 4509 | HG22 | VAL | X | 298 | 44.410 | 55.965 | 47.791 | 0.00 | 0.00 |
| ATOM | 4510 | HG23 | VAL | X | 298 | 43.627 | 54.434 | 47.151 | 0.00 | 0.00 |
| ATOM | 4511 | C    | VAL | X | 298 | 42.184 | 53.341 | 50.867 | 0.00 | 0.00 |
| ATOM | 4512 | O    | VAL | X | 298 | 41.106 | 53.958 | 50.777 | 0.00 | 0.00 |
| ATOM | 4513 | N    | VAL | X | 299 | 42.616 | 52.794 | 52.036 | 0.00 | 0.00 |
| ATOM | 4514 | H    | VAL | X | 299 | 43.569 | 52.466 | 52.108 | 0.00 | 0.00 |
| ATOM | 4515 | CA   | VAL | X | 299 | 41.982 | 52.944 | 53.368 | 0.00 | 0.00 |
| ATOM | 4516 | HA   | VAL | X | 299 | 40.894 | 52.883 | 53.322 | 0.00 | 0.00 |
| ATOM | 4517 | CB   | VAL | X | 299 | 42.296 | 51.715 | 54.291 | 0.00 | 0.00 |
| ATOM | 4518 | HB   | VAL | X | 299 | 43.378 | 51.692 | 54.421 | 0.00 | 0.00 |
| ATOM | 4519 | CG1  | VAL | X | 299 | 41.534 | 51.841 | 55.591 | 0.00 | 0.00 |
| ATOM | 4520 | HG11 | VAL | X | 299 | 41.589 | 50.839 | 56.017 | 0.00 | 0.00 |
| ATOM | 4521 | HG12 | VAL | X | 299 | 42.007 | 52.618 | 56.191 | 0.00 | 0.00 |
| ATOM | 4522 | HG13 | VAL | X | 299 | 40.516 | 52.182 | 55.405 | 0.00 | 0.00 |
| ATOM | 4523 | CG2  | VAL | X | 299 | 41.808 | 50.354 | 53.773 | 0.00 | 0.00 |
| ATOM | 4524 | HG21 | VAL | X | 299 | 42.250 | 49.528 | 54.331 | 0.00 | 0.00 |
| ATOM | 4525 | HG22 | VAL | X | 299 | 42.185 | 50.302 | 52.752 | 0.00 | 0.00 |
| ATOM | 4526 | HG23 | VAL | X | 299 | 40.733 | 50.234 | 53.640 | 0.00 | 0.00 |
| ATOM | 4527 | C    | VAL | X | 299 | 42.323 | 54.311 | 54.019 | 0.00 | 0.00 |
| ATOM | 4528 | O    | VAL | X | 299 | 43.484 | 54.581 | 54.299 | 0.00 | 0.00 |
| ATOM | 4529 | N    | ASP | X | 300 | 41.296 | 55.187 | 54.193 | 0.00 | 0.00 |
| ATOM | 4530 | H    | ASP | X | 300 | 40.406 | 54.809 | 53.902 | 0.00 | 0.00 |
| ATOM | 4531 | CA   | ASP | X | 300 | 41.413 | 56.632 | 54.259 | 0.00 | 0.00 |
| ATOM | 4532 | HA   | ASP | X | 300 | 42.318 | 56.884 | 54.812 | 0.00 | 0.00 |
| ATOM | 4533 | CB   | ASP | X | 300 | 41.538 | 57.240 | 52.896 | 0.00 | 0.00 |
| ATOM | 4534 | HB2  | ASP | X | 300 | 41.858 | 58.273 | 53.027 | 0.00 | 0.00 |
| ATOM | 4535 | HB3  | ASP | X | 300 | 42.384 | 56.746 | 52.416 | 0.00 | 0.00 |
| ATOM | 4536 | CG   | ASP | X | 300 | 40.363 | 57.140 | 51.946 | 0.00 | 0.00 |
| ATOM | 4537 | OD1  | ASP | X | 300 | 39.297 | 56.547 | 52.240 | 0.00 | 0.00 |
| ATOM | 4538 | OD2  | ASP | X | 300 | 40.457 | 57.766 | 50.861 | 0.00 | 0.00 |
| ATOM | 4539 | C    | ASP | X | 300 | 40.377 | 57.377 | 55.210 | 0.00 | 0.00 |
| ATOM | 4540 | O    | ASP | X | 300 | 40.718 | 58.410 | 55.736 | 0.00 | 0.00 |

|      |      |      |     |   |     |        |        |        |      |      |
|------|------|------|-----|---|-----|--------|--------|--------|------|------|
| ATOM | 4541 | N    | GLY | X | 301 | 39.197 | 56.824 | 55.402 | 0.00 | 0.00 |
| ATOM | 4542 | H    | GLY | X | 301 | 39.114 | 55.898 | 55.008 | 0.00 | 0.00 |
| ATOM | 4543 | CA   | GLY | X | 301 | 38.044 | 57.325 | 56.099 | 0.00 | 0.00 |
| ATOM | 4544 | HA2  | GLY | X | 301 | 37.643 | 56.466 | 56.638 | 0.00 | 0.00 |
| ATOM | 4545 | HA3  | GLY | X | 301 | 38.305 | 58.167 | 56.741 | 0.00 | 0.00 |
| ATOM | 4546 | C    | GLY | X | 301 | 36.916 | 57.723 | 55.102 | 0.00 | 0.00 |
| ATOM | 4547 | O    | GLY | X | 301 | 35.984 | 58.317 | 55.602 | 0.00 | 0.00 |
| ATOM | 4548 | N    | ASP | X | 302 | 36.988 | 57.473 | 53.770 | 0.00 | 0.00 |
| ATOM | 4549 | H    | ASP | X | 302 | 37.765 | 56.922 | 53.434 | 0.00 | 0.00 |
| ATOM | 4550 | CA   | ASP | X | 302 | 35.982 | 57.789 | 52.773 | 0.00 | 0.00 |
| ATOM | 4551 | HA   | ASP | X | 302 | 34.994 | 58.064 | 53.141 | 0.00 | 0.00 |
| ATOM | 4552 | CB   | ASP | X | 302 | 36.598 | 58.955 | 51.953 | 0.00 | 0.00 |
| ATOM | 4553 | HB2  | ASP | X | 302 | 36.735 | 59.864 | 52.538 | 0.00 | 0.00 |
| ATOM | 4554 | HB3  | ASP | X | 302 | 37.570 | 58.606 | 51.604 | 0.00 | 0.00 |
| ATOM | 4555 | CG   | ASP | X | 302 | 35.671 | 59.458 | 50.829 | 0.00 | 0.00 |
| ATOM | 4556 | OD1  | ASP | X | 302 | 34.957 | 60.390 | 51.108 | 0.00 | 0.00 |
| ATOM | 4557 | OD2  | ASP | X | 302 | 35.810 | 58.968 | 49.680 | 0.00 | 0.00 |
| ATOM | 4558 | C    | ASP | X | 302 | 35.581 | 56.509 | 51.902 | 0.00 | 0.00 |
| ATOM | 4559 | O    | ASP | X | 302 | 34.453 | 56.028 | 52.039 | 0.00 | 0.00 |
| ATOM | 4560 | N    | PHE | X | 303 | 36.513 | 55.929 | 51.135 | 0.00 | 0.00 |
| ATOM | 4561 | H    | PHE | X | 303 | 37.490 | 56.181 | 51.180 | 0.00 | 0.00 |
| ATOM | 4562 | CA   | PHE | X | 303 | 36.201 | 54.661 | 50.521 | 0.00 | 0.00 |
| ATOM | 4563 | HA   | PHE | X | 303 | 35.210 | 54.626 | 50.069 | 0.00 | 0.00 |
| ATOM | 4564 | CB   | PHE | X | 303 | 37.202 | 54.407 | 49.440 | 0.00 | 0.00 |
| ATOM | 4565 | HB2  | PHE | X | 303 | 37.196 | 55.225 | 48.720 | 0.00 | 0.00 |
| ATOM | 4566 | HB3  | PHE | X | 303 | 38.189 | 54.449 | 49.900 | 0.00 | 0.00 |
| ATOM | 4567 | CG   | PHE | X | 303 | 37.033 | 53.066 | 48.740 | 0.00 | 0.00 |
| ATOM | 4568 | CD1  | PHE | X | 303 | 38.130 | 52.108 | 48.833 | 0.00 | 0.00 |
| ATOM | 4569 | HD1  | PHE | X | 303 | 39.076 | 52.371 | 49.282 | 0.00 | 0.00 |
| ATOM | 4570 | CE1  | PHE | X | 303 | 37.852 | 50.813 | 48.363 | 0.00 | 0.00 |
| ATOM | 4571 | HE1  | PHE | X | 303 | 38.695 | 50.138 | 48.411 | 0.00 | 0.00 |
| ATOM | 4572 | CZ   | PHE | X | 303 | 36.716 | 50.505 | 47.617 | 0.00 | 0.00 |
| ATOM | 4573 | HZ   | PHE | X | 303 | 36.691 | 49.603 | 47.023 | 0.00 | 0.00 |
| ATOM | 4574 | CE2  | PHE | X | 303 | 35.676 | 51.424 | 47.560 | 0.00 | 0.00 |
| ATOM | 4575 | HE2  | PHE | X | 303 | 34.780 | 51.220 | 46.992 | 0.00 | 0.00 |
| ATOM | 4576 | CD2  | PHE | X | 303 | 35.783 | 52.741 | 48.113 | 0.00 | 0.00 |
| ATOM | 4577 | HD2  | PHE | X | 303 | 35.035 | 53.520 | 48.108 | 0.00 | 0.00 |
| ATOM | 4578 | C    | PHE | X | 303 | 36.187 | 53.528 | 51.556 | 0.00 | 0.00 |
| ATOM | 4579 | O    | PHE | X | 303 | 35.194 | 52.778 | 51.588 | 0.00 | 0.00 |
| ATOM | 4580 | N    | LEU | X | 304 | 37.252 | 53.407 | 52.358 | 0.00 | 0.00 |
| ATOM | 4581 | H    | LEU | X | 304 | 37.906 | 54.176 | 52.375 | 0.00 | 0.00 |
| ATOM | 4582 | CA   | LEU | X | 304 | 37.382 | 52.431 | 53.413 | 0.00 | 0.00 |
| ATOM | 4583 | HA   | LEU | X | 304 | 36.384 | 52.124 | 53.725 | 0.00 | 0.00 |
| ATOM | 4584 | CB   | LEU | X | 304 | 38.246 | 51.227 | 53.016 | 0.00 | 0.00 |
| ATOM | 4585 | HB2  | LEU | X | 304 | 39.184 | 51.610 | 52.614 | 0.00 | 0.00 |
| ATOM | 4586 | HB3  | LEU | X | 304 | 38.524 | 50.590 | 53.856 | 0.00 | 0.00 |
| ATOM | 4587 | CG   | LEU | X | 304 | 37.778 | 50.345 | 51.873 | 0.00 | 0.00 |
| ATOM | 4588 | HG   | LEU | X | 304 | 37.216 | 50.928 | 51.143 | 0.00 | 0.00 |
| ATOM | 4589 | CD1  | LEU | X | 304 | 38.986 | 49.561 | 51.224 | 0.00 | 0.00 |
| ATOM | 4590 | HD11 | LEU | X | 304 | 39.750 | 50.223 | 50.817 | 0.00 | 0.00 |
| ATOM | 4591 | HD12 | LEU | X | 304 | 38.702 | 48.971 | 50.353 | 0.00 | 0.00 |
| ATOM | 4592 | HD13 | LEU | X | 304 | 39.522 | 48.946 | 51.948 | 0.00 | 0.00 |
| ATOM | 4593 | CD2  | LEU | X | 304 | 36.763 | 49.287 | 52.312 | 0.00 | 0.00 |
| ATOM | 4594 | HD21 | LEU | X | 304 | 36.594 | 48.733 | 51.389 | 0.00 | 0.00 |
| ATOM | 4595 | HD22 | LEU | X | 304 | 37.156 | 48.685 | 53.131 | 0.00 | 0.00 |
| ATOM | 4596 | HD23 | LEU | X | 304 | 35.905 | 49.843 | 52.690 | 0.00 | 0.00 |
| ATOM | 4597 | C    | LEU | X | 304 | 37.951 | 53.138 | 54.703 | 0.00 | 0.00 |
| ATOM | 4598 | O    | LEU | X | 304 | 38.760 | 54.106 | 54.602 | 0.00 | 0.00 |
| ATOM | 4599 | N    | SER | X | 305 | 37.552 | 52.714 | 55.879 | 0.00 | 0.00 |
| ATOM | 4600 | H    | SER | X | 305 | 36.868 | 51.972 | 55.901 | 0.00 | 0.00 |
| ATOM | 4601 | CA   | SER | X | 305 | 38.046 | 53.325 | 57.176 | 0.00 | 0.00 |
| ATOM | 4602 | HA   | SER | X | 305 | 38.759 | 54.123 | 56.972 | 0.00 | 0.00 |
| ATOM | 4603 | CB   | SER | X | 305 | 36.726 | 53.946 | 57.833 | 0.00 | 0.00 |
| ATOM | 4604 | HB2  | SER | X | 305 | 37.090 | 54.573 | 58.647 | 0.00 | 0.00 |
| ATOM | 4605 | HB3  | SER | X | 305 | 36.346 | 54.742 | 57.193 | 0.00 | 0.00 |
| ATOM | 4606 | OG   | SER | X | 305 | 35.773 | 52.975 | 58.234 | 0.00 | 0.00 |
| ATOM | 4607 | HG   | SER | X | 305 | 35.310 | 52.661 | 57.455 | 0.00 | 0.00 |

|      |      |      |     |   |     |        |        |        |      |      |
|------|------|------|-----|---|-----|--------|--------|--------|------|------|
| ATOM | 4608 | C    | SER | X | 305 | 38.752 | 52.241 | 57.989 | 0.00 | 0.00 |
| ATOM | 4609 | O    | SER | X | 305 | 39.386 | 52.611 | 58.988 | 0.00 | 0.00 |
| ATOM | 4610 | N    | ASP | X | 306 | 38.638 | 50.986 | 57.508 | 0.00 | 0.00 |
| ATOM | 4611 | H    | ASP | X | 306 | 38.315 | 50.899 | 56.555 | 0.00 | 0.00 |
| ATOM | 4612 | CA   | ASP | X | 306 | 39.380 | 49.781 | 58.003 | 0.00 | 0.00 |
| ATOM | 4613 | HA   | ASP | X | 306 | 40.263 | 50.246 | 58.442 | 0.00 | 0.00 |
| ATOM | 4614 | CB   | ASP | X | 306 | 38.547 | 49.113 | 59.167 | 0.00 | 0.00 |
| ATOM | 4615 | HB2  | ASP | X | 306 | 37.802 | 49.810 | 59.549 | 0.00 | 0.00 |
| ATOM | 4616 | HB3  | ASP | X | 306 | 38.004 | 48.276 | 58.728 | 0.00 | 0.00 |
| ATOM | 4617 | CG   | ASP | X | 306 | 39.356 | 48.566 | 60.367 | 0.00 | 0.00 |
| ATOM | 4618 | OD1  | ASP | X | 306 | 40.447 | 47.949 | 60.205 | 0.00 | 0.00 |
| ATOM | 4619 | OD2  | ASP | X | 306 | 39.055 | 48.890 | 61.503 | 0.00 | 0.00 |
| ATOM | 4620 | C    | ASP | X | 306 | 39.796 | 48.840 | 56.889 | 0.00 | 0.00 |
| ATOM | 4621 | O    | ASP | X | 306 | 39.428 | 49.075 | 55.735 | 0.00 | 0.00 |
| ATOM | 4622 | N    | THR | X | 307 | 40.527 | 47.745 | 57.155 | 0.00 | 0.00 |
| ATOM | 4623 | H    | THR | X | 307 | 40.615 | 47.536 | 58.139 | 0.00 | 0.00 |
| ATOM | 4624 | CA   | THR | X | 307 | 40.888 | 46.634 | 56.231 | 0.00 | 0.00 |
| ATOM | 4625 | HA   | THR | X | 307 | 41.317 | 47.044 | 55.316 | 0.00 | 0.00 |
| ATOM | 4626 | CB   | THR | X | 307 | 41.981 | 45.680 | 56.816 | 0.00 | 0.00 |
| ATOM | 4627 | HB   | THR | X | 307 | 42.389 | 45.082 | 56.001 | 0.00 | 0.00 |
| ATOM | 4628 | CG2  | THR | X | 307 | 43.250 | 46.334 | 57.291 | 0.00 | 0.00 |
| ATOM | 4629 | HG21 | THR | X | 307 | 43.859 | 46.606 | 56.429 | 0.00 | 0.00 |
| ATOM | 4630 | HG22 | THR | X | 307 | 43.767 | 45.571 | 57.872 | 0.00 | 0.00 |
| ATOM | 4631 | HG23 | THR | X | 307 | 43.161 | 47.218 | 57.923 | 0.00 | 0.00 |
| ATOM | 4632 | OG1  | THR | X | 307 | 41.470 | 44.818 | 57.893 | 0.00 | 0.00 |
| ATOM | 4633 | HG1  | THR | X | 307 | 41.331 | 45.375 | 58.662 | 0.00 | 0.00 |
| ATOM | 4634 | C    | THR | X | 307 | 39.575 | 45.833 | 55.978 | 0.00 | 0.00 |
| ATOM | 4635 | O    | THR | X | 307 | 38.793 | 45.596 | 56.903 | 0.00 | 0.00 |
| ATOM | 4636 | N    | PRO | X | 308 | 39.254 | 45.404 | 54.760 | 0.00 | 0.00 |
| ATOM | 4637 | CD   | PRO | X | 308 | 39.943 | 45.795 | 53.541 | 0.00 | 0.00 |
| ATOM | 4638 | HD2  | PRO | X | 308 | 40.814 | 45.139 | 53.540 | 0.00 | 0.00 |
| ATOM | 4639 | HD3  | PRO | X | 308 | 40.113 | 46.868 | 53.451 | 0.00 | 0.00 |
| ATOM | 4640 | CG   | PRO | X | 308 | 38.976 | 45.313 | 52.464 | 0.00 | 0.00 |
| ATOM | 4641 | HG2  | PRO | X | 308 | 39.456 | 45.186 | 51.494 | 0.00 | 0.00 |
| ATOM | 4642 | HG3  | PRO | X | 308 | 38.195 | 46.066 | 52.360 | 0.00 | 0.00 |
| ATOM | 4643 | CB   | PRO | X | 308 | 38.444 | 43.992 | 53.007 | 0.00 | 0.00 |
| ATOM | 4644 | HB2  | PRO | X | 308 | 39.209 | 43.217 | 52.949 | 0.00 | 0.00 |
| ATOM | 4645 | HB3  | PRO | X | 308 | 37.493 | 43.793 | 52.512 | 0.00 | 0.00 |
| ATOM | 4646 | CA   | PRO | X | 308 | 38.191 | 44.396 | 54.454 | 0.00 | 0.00 |
| ATOM | 4647 | HA   | PRO | X | 308 | 37.228 | 44.905 | 54.482 | 0.00 | 0.00 |
| ATOM | 4648 | C    | PRO | X | 308 | 38.058 | 43.174 | 55.364 | 0.00 | 0.00 |
| ATOM | 4649 | O    | PRO | X | 308 | 36.872 | 42.773 | 55.592 | 0.00 | 0.00 |
| ATOM | 4650 | N    | GLU | X | 309 | 39.165 | 42.714 | 55.909 | 0.00 | 0.00 |
| ATOM | 4651 | H    | GLU | X | 309 | 40.095 | 43.081 | 55.762 | 0.00 | 0.00 |
| ATOM | 4652 | CA   | GLU | X | 309 | 39.016 | 41.668 | 56.924 | 0.00 | 0.00 |
| ATOM | 4653 | HA   | GLU | X | 309 | 38.479 | 40.840 | 56.461 | 0.00 | 0.00 |
| ATOM | 4654 | CB   | GLU | X | 309 | 40.378 | 41.214 | 57.446 | 0.00 | 0.00 |
| ATOM | 4655 | HB2  | GLU | X | 309 | 41.004 | 42.104 | 57.516 | 0.00 | 0.00 |
| ATOM | 4656 | HB3  | GLU | X | 309 | 40.242 | 40.737 | 58.416 | 0.00 | 0.00 |
| ATOM | 4657 | CG   | GLU | X | 309 | 41.222 | 40.283 | 56.664 | 0.00 | 0.00 |
| ATOM | 4658 | HG2  | GLU | X | 309 | 40.736 | 39.379 | 56.297 | 0.00 | 0.00 |
| ATOM | 4659 | HG3  | GLU | X | 309 | 41.609 | 40.845 | 55.815 | 0.00 | 0.00 |
| ATOM | 4660 | CD   | GLU | X | 309 | 42.501 | 39.833 | 57.365 | 0.00 | 0.00 |
| ATOM | 4661 | OE1  | GLU | X | 309 | 42.842 | 40.430 | 58.411 | 0.00 | 0.00 |
| ATOM | 4662 | OE2  | GLU | X | 309 | 43.155 | 38.891 | 56.893 | 0.00 | 0.00 |
| ATOM | 4663 | C    | GLU | X | 309 | 38.279 | 42.146 | 58.224 | 0.00 | 0.00 |
| ATOM | 4664 | O    | GLU | X | 309 | 37.836 | 41.281 | 58.965 | 0.00 | 0.00 |
| ATOM | 4665 | N    | ALA | X | 310 | 38.221 | 43.469 | 58.506 | 0.00 | 0.00 |
| ATOM | 4666 | H    | ALA | X | 310 | 38.476 | 44.179 | 57.835 | 0.00 | 0.00 |
| ATOM | 4667 | CA   | ALA | X | 310 | 37.537 | 44.003 | 59.713 | 0.00 | 0.00 |
| ATOM | 4668 | HA   | ALA | X | 310 | 37.499 | 43.212 | 60.462 | 0.00 | 0.00 |
| ATOM | 4669 | CB   | ALA | X | 310 | 38.234 | 45.172 | 60.411 | 0.00 | 0.00 |
| ATOM | 4670 | HB1  | ALA | X | 310 | 38.404 | 45.968 | 59.686 | 0.00 | 0.00 |
| ATOM | 4671 | HB2  | ALA | X | 310 | 39.238 | 44.915 | 60.749 | 0.00 | 0.00 |
| ATOM | 4672 | HB3  | ALA | X | 310 | 37.814 | 45.509 | 61.359 | 0.00 | 0.00 |
| ATOM | 4673 | C    | ALA | X | 310 | 36.109 | 44.339 | 59.382 | 0.00 | 0.00 |
| ATOM | 4674 | O    | ALA | X | 310 | 35.219 | 43.836 | 60.020 | 0.00 | 0.00 |

|      |      |      |     |   |     |        |        |        |      |      |
|------|------|------|-----|---|-----|--------|--------|--------|------|------|
| ATOM | 4675 | N    | LEU | X | 311 | 35.940 | 45.077 | 58.345 | 0.00 | 0.00 |
| ATOM | 4676 | H    | LEU | X | 311 | 36.745 | 45.371 | 57.810 | 0.00 | 0.00 |
| ATOM | 4677 | CA   | LEU | X | 311 | 34.676 | 45.656 | 57.899 | 0.00 | 0.00 |
| ATOM | 4678 | HA   | LEU | X | 311 | 34.242 | 46.305 | 58.659 | 0.00 | 0.00 |
| ATOM | 4679 | CB   | LEU | X | 311 | 34.919 | 46.525 | 56.640 | 0.00 | 0.00 |
| ATOM | 4680 | HB2  | LEU | X | 311 | 35.564 | 45.838 | 56.092 | 0.00 | 0.00 |
| ATOM | 4681 | HB3  | LEU | X | 311 | 33.987 | 46.632 | 56.083 | 0.00 | 0.00 |
| ATOM | 4682 | CG   | LEU | X | 311 | 35.611 | 47.895 | 56.976 | 0.00 | 0.00 |
| ATOM | 4683 | HG   | LEU | X | 311 | 36.420 | 47.666 | 57.670 | 0.00 | 0.00 |
| ATOM | 4684 | CD1  | LEU | X | 311 | 36.262 | 48.442 | 55.722 | 0.00 | 0.00 |
| ATOM | 4685 | HD11 | LEU | X | 311 | 36.748 | 49.361 | 56.051 | 0.00 | 0.00 |
| ATOM | 4686 | HD12 | LEU | X | 311 | 35.445 | 48.623 | 55.023 | 0.00 | 0.00 |
| ATOM | 4687 | HD13 | LEU | X | 311 | 37.092 | 47.852 | 55.334 | 0.00 | 0.00 |
| ATOM | 4688 | CD2  | LEU | X | 311 | 34.724 | 48.917 | 57.660 | 0.00 | 0.00 |
| ATOM | 4689 | HD21 | LEU | X | 311 | 35.081 | 49.945 | 57.593 | 0.00 | 0.00 |
| ATOM | 4690 | HD22 | LEU | X | 311 | 33.854 | 48.979 | 57.006 | 0.00 | 0.00 |
| ATOM | 4691 | HD23 | LEU | X | 311 | 34.591 | 48.667 | 58.712 | 0.00 | 0.00 |
| ATOM | 4692 | C    | LEU | X | 311 | 33.597 | 44.552 | 57.582 | 0.00 | 0.00 |
| ATOM | 4693 | O    | LEU | X | 311 | 32.412 | 44.764 | 57.721 | 0.00 | 0.00 |
| ATOM | 4694 | N    | ILE | X | 312 | 34.023 | 43.456 | 57.038 | 0.00 | 0.00 |
| ATOM | 4695 | H    | ILE | X | 312 | 35.018 | 43.301 | 56.969 | 0.00 | 0.00 |
| ATOM | 4696 | CA   | ILE | X | 312 | 33.061 | 42.518 | 56.359 | 0.00 | 0.00 |
| ATOM | 4697 | HA   | ILE | X | 312 | 32.348 | 43.087 | 55.763 | 0.00 | 0.00 |
| ATOM | 4698 | CB   | ILE | X | 312 | 33.893 | 41.593 | 55.457 | 0.00 | 0.00 |
| ATOM | 4699 | HB   | ILE | X | 312 | 34.466 | 42.300 | 54.858 | 0.00 | 0.00 |
| ATOM | 4700 | CG2  | ILE | X | 312 | 34.749 | 40.607 | 56.210 | 0.00 | 0.00 |
| ATOM | 4701 | HG21 | ILE | X | 312 | 34.122 | 39.806 | 56.603 | 0.00 | 0.00 |
| ATOM | 4702 | HG22 | ILE | X | 312 | 35.259 | 41.027 | 57.077 | 0.00 | 0.00 |
| ATOM | 4703 | HG23 | ILE | X | 312 | 35.402 | 40.104 | 55.496 | 0.00 | 0.00 |
| ATOM | 4704 | CG1  | ILE | X | 312 | 33.063 | 40.790 | 54.458 | 0.00 | 0.00 |
| ATOM | 4705 | HG12 | ILE | X | 312 | 33.678 | 40.085 | 53.899 | 0.00 | 0.00 |
| ATOM | 4706 | HG13 | ILE | X | 312 | 32.405 | 40.186 | 55.083 | 0.00 | 0.00 |
| ATOM | 4707 | CD1  | ILE | X | 312 | 32.116 | 41.457 | 53.452 | 0.00 | 0.00 |
| ATOM | 4708 | HD11 | ILE | X | 312 | 32.729 | 41.991 | 52.725 | 0.00 | 0.00 |
| ATOM | 4709 | HD12 | ILE | X | 312 | 31.377 | 42.036 | 54.006 | 0.00 | 0.00 |
| ATOM | 4710 | HD13 | ILE | X | 312 | 31.538 | 40.743 | 52.865 | 0.00 | 0.00 |
| ATOM | 4711 | C    | ILE | X | 312 | 32.188 | 41.748 | 57.349 | 0.00 | 0.00 |
| ATOM | 4712 | O    | ILE | X | 312 | 31.168 | 41.210 | 56.890 | 0.00 | 0.00 |
| ATOM | 4713 | N    | ASN | X | 313 | 32.474 | 41.723 | 58.638 | 0.00 | 0.00 |
| ATOM | 4714 | H    | ASN | X | 313 | 33.335 | 42.158 | 58.935 | 0.00 | 0.00 |
| ATOM | 4715 | CA   | ASN | X | 313 | 31.761 | 41.102 | 59.758 | 0.00 | 0.00 |
| ATOM | 4716 | HA   | ASN | X | 313 | 31.535 | 40.084 | 59.440 | 0.00 | 0.00 |
| ATOM | 4717 | CB   | ASN | X | 313 | 32.537 | 41.127 | 61.028 | 0.00 | 0.00 |
| ATOM | 4718 | HB2  | ASN | X | 313 | 33.484 | 40.621 | 60.842 | 0.00 | 0.00 |
| ATOM | 4719 | HB3  | ASN | X | 313 | 32.739 | 42.157 | 61.323 | 0.00 | 0.00 |
| ATOM | 4720 | CG   | ASN | X | 313 | 31.790 | 40.389 | 62.153 | 0.00 | 0.00 |
| ATOM | 4721 | OD1  | ASN | X | 313 | 30.939 | 40.951 | 62.854 | 0.00 | 0.00 |
| ATOM | 4722 | ND2  | ASN | X | 313 | 32.204 | 39.209 | 62.565 | 0.00 | 0.00 |
| ATOM | 4723 | HD21 | ASN | X | 313 | 31.773 | 38.720 | 63.336 | 0.00 | 0.00 |
| ATOM | 4724 | HD22 | ASN | X | 313 | 32.972 | 38.845 | 62.018 | 0.00 | 0.00 |
| ATOM | 4725 | C    | ASN | X | 313 | 30.379 | 41.849 | 59.904 | 0.00 | 0.00 |
| ATOM | 4726 | O    | ASN | X | 313 | 29.467 | 41.149 | 60.339 | 0.00 | 0.00 |
| ATOM | 4727 | N    | ALA | X | 314 | 30.290 | 43.122 | 59.541 | 0.00 | 0.00 |
| ATOM | 4728 | H    | ALA | X | 314 | 31.031 | 43.572 | 59.023 | 0.00 | 0.00 |
| ATOM | 4729 | CA   | ALA | X | 314 | 29.080 | 43.841 | 59.619 | 0.00 | 0.00 |
| ATOM | 4730 | HA   | ALA | X | 314 | 28.530 | 43.566 | 60.519 | 0.00 | 0.00 |
| ATOM | 4731 | CB   | ALA | X | 314 | 29.428 | 45.329 | 59.838 | 0.00 | 0.00 |
| ATOM | 4732 | HB1  | ALA | X | 314 | 30.096 | 45.863 | 59.162 | 0.00 | 0.00 |
| ATOM | 4733 | HB2  | ALA | X | 314 | 29.925 | 45.428 | 60.803 | 0.00 | 0.00 |
| ATOM | 4734 | HB3  | ALA | X | 314 | 28.567 | 45.969 | 60.033 | 0.00 | 0.00 |
| ATOM | 4735 | C    | ALA | X | 314 | 28.051 | 43.586 | 58.507 | 0.00 | 0.00 |
| ATOM | 4736 | O    | ALA | X | 314 | 26.907 | 44.099 | 58.581 | 0.00 | 0.00 |
| ATOM | 4737 | N    | GLY | X | 315 | 28.420 | 42.967 | 57.366 | 0.00 | 0.00 |
| ATOM | 4738 | H    | GLY | X | 315 | 29.390 | 42.710 | 57.251 | 0.00 | 0.00 |
| ATOM | 4739 | CA   | GLY | X | 315 | 27.479 | 42.803 | 56.275 | 0.00 | 0.00 |
| ATOM | 4740 | HA2  | GLY | X | 315 | 27.187 | 43.774 | 55.874 | 0.00 | 0.00 |
| ATOM | 4741 | HA3  | GLY | X | 315 | 28.162 | 42.334 | 55.567 | 0.00 | 0.00 |

|      |      |     |     |   |     |        |        |        |      |      |
|------|------|-----|-----|---|-----|--------|--------|--------|------|------|
| ATOM | 4742 | C   | GLY | X | 315 | 26.282 | 41.904 | 56.635 | 0.00 | 0.00 |
| ATOM | 4743 | O   | GLY | X | 315 | 26.337 | 41.136 | 57.557 | 0.00 | 0.00 |
| ATOM | 4744 | N   | ASP | X | 316 | 25.262 | 41.923 | 55.789 | 0.00 | 0.00 |
| ATOM | 4745 | H   | ASP | X | 316 | 25.165 | 42.663 | 55.109 | 0.00 | 0.00 |
| ATOM | 4746 | CA  | ASP | X | 316 | 24.072 | 40.958 | 55.817 | 0.00 | 0.00 |
| ATOM | 4747 | HA  | ASP | X | 316 | 24.414 | 40.054 | 56.320 | 0.00 | 0.00 |
| ATOM | 4748 | CB  | ASP | X | 316 | 22.968 | 41.560 | 56.667 | 0.00 | 0.00 |
| ATOM | 4749 | HB2 | ASP | X | 316 | 23.475 | 41.914 | 57.565 | 0.00 | 0.00 |
| ATOM | 4750 | HB3 | ASP | X | 316 | 22.495 | 42.363 | 56.102 | 0.00 | 0.00 |
| ATOM | 4751 | CG  | ASP | X | 316 | 22.052 | 40.447 | 57.119 | 0.00 | 0.00 |
| ATOM | 4752 | OD1 | ASP | X | 316 | 22.043 | 40.060 | 58.313 | 0.00 | 0.00 |
| ATOM | 4753 | OD2 | ASP | X | 316 | 21.316 | 39.983 | 56.248 | 0.00 | 0.00 |
| ATOM | 4754 | C   | ASP | X | 316 | 23.537 | 40.617 | 54.334 | 0.00 | 0.00 |
| ATOM | 4755 | O   | ASP | X | 316 | 23.315 | 41.523 | 53.538 | 0.00 | 0.00 |
| ATOM | 4756 | N   | PHE | X | 317 | 23.496 | 39.287 | 54.029 | 0.00 | 0.00 |
| ATOM | 4757 | H   | PHE | X | 317 | 23.390 | 38.631 | 54.790 | 0.00 | 0.00 |
| ATOM | 4758 | CA  | PHE | X | 317 | 23.496 | 38.839 | 52.636 | 0.00 | 0.00 |
| ATOM | 4759 | HA  | PHE | X | 317 | 23.386 | 39.735 | 52.025 | 0.00 | 0.00 |
| ATOM | 4760 | CB  | PHE | X | 317 | 24.893 | 38.315 | 52.333 | 0.00 | 0.00 |
| ATOM | 4761 | HB2 | PHE | X | 317 | 25.072 | 37.422 | 52.932 | 0.00 | 0.00 |
| ATOM | 4762 | HB3 | PHE | X | 317 | 24.940 | 38.091 | 51.268 | 0.00 | 0.00 |
| ATOM | 4763 | CG  | PHE | X | 317 | 26.067 | 39.287 | 52.562 | 0.00 | 0.00 |
| ATOM | 4764 | CD1 | PHE | X | 317 | 26.279 | 40.357 | 51.669 | 0.00 | 0.00 |
| ATOM | 4765 | HD1 | PHE | X | 317 | 25.667 | 40.499 | 50.791 | 0.00 | 0.00 |
| ATOM | 4766 | CE1 | PHE | X | 317 | 27.421 | 41.166 | 51.726 | 0.00 | 0.00 |
| ATOM | 4767 | HE1 | PHE | X | 317 | 27.511 | 41.854 | 50.899 | 0.00 | 0.00 |
| ATOM | 4768 | CZ  | PHE | X | 317 | 28.415 | 40.819 | 52.671 | 0.00 | 0.00 |
| ATOM | 4769 | HZ  | PHE | X | 317 | 29.366 | 41.293 | 52.474 | 0.00 | 0.00 |
| ATOM | 4770 | CE2 | PHE | X | 317 | 28.139 | 39.837 | 53.654 | 0.00 | 0.00 |
| ATOM | 4771 | HE2 | PHE | X | 317 | 28.889 | 39.651 | 54.408 | 0.00 | 0.00 |
| ATOM | 4772 | CD2 | PHE | X | 317 | 26.870 | 39.141 | 53.687 | 0.00 | 0.00 |
| ATOM | 4773 | HD2 | PHE | X | 317 | 26.717 | 38.379 | 54.437 | 0.00 | 0.00 |
| ATOM | 4774 | C   | PHE | X | 317 | 22.420 | 37.873 | 52.319 | 0.00 | 0.00 |
| ATOM | 4775 | O   | PHE | X | 317 | 22.579 | 37.127 | 51.388 | 0.00 | 0.00 |
| ATOM | 4776 | N   | HIE | X | 318 | 21.347 | 37.791 | 53.180 | 0.00 | 0.00 |
| ATOM | 4777 | H   | HIE | X | 318 | 21.418 | 38.307 | 54.046 | 0.00 | 0.00 |
| ATOM | 4778 | CA  | HIE | X | 318 | 20.042 | 37.176 | 52.799 | 0.00 | 0.00 |
| ATOM | 4779 | HA  | HIE | X | 318 | 20.187 | 36.101 | 52.693 | 0.00 | 0.00 |
| ATOM | 4780 | CB  | HIE | X | 318 | 19.092 | 37.422 | 54.002 | 0.00 | 0.00 |
| ATOM | 4781 | HB2 | HIE | X | 318 | 19.460 | 36.892 | 54.880 | 0.00 | 0.00 |
| ATOM | 4782 | HB3 | HIE | X | 318 | 18.965 | 38.453 | 54.332 | 0.00 | 0.00 |
| ATOM | 4783 | CG  | HIE | X | 318 | 17.703 | 36.911 | 53.756 | 0.00 | 0.00 |
| ATOM | 4784 | ND1 | HIE | X | 318 | 17.260 | 36.188 | 52.589 | 0.00 | 0.00 |
| ATOM | 4785 | CE1 | HIE | X | 318 | 16.051 | 35.696 | 52.947 | 0.00 | 0.00 |
| ATOM | 4786 | HE1 | HIE | X | 318 | 15.387 | 35.279 | 52.204 | 0.00 | 0.00 |
| ATOM | 4787 | NE2 | HIE | X | 318 | 15.785 | 36.059 | 54.246 | 0.00 | 0.00 |
| ATOM | 4788 | HE2 | HIE | X | 318 | 15.019 | 35.695 | 54.795 | 0.00 | 0.00 |
| ATOM | 4789 | CD2 | HIE | X | 318 | 16.848 | 36.788 | 54.729 | 0.00 | 0.00 |
| ATOM | 4790 | HD2 | HIE | X | 318 | 16.933 | 37.274 | 55.690 | 0.00 | 0.00 |
| ATOM | 4791 | C   | HIE | X | 318 | 19.558 | 37.799 | 51.489 | 0.00 | 0.00 |
| ATOM | 4792 | O   | HIE | X | 318 | 19.220 | 38.951 | 51.450 | 0.00 | 0.00 |
| ATOM | 4793 | N   | GLY | X | 319 | 19.568 | 37.083 | 50.381 | 0.00 | 0.00 |
| ATOM | 4794 | H   | GLY | X | 319 | 19.801 | 36.100 | 50.404 | 0.00 | 0.00 |
| ATOM | 4795 | CA  | GLY | X | 319 | 19.192 | 37.648 | 49.030 | 0.00 | 0.00 |
| ATOM | 4796 | HA2 | GLY | X | 319 | 18.340 | 37.057 | 48.694 | 0.00 | 0.00 |
| ATOM | 4797 | HA3 | GLY | X | 319 | 18.789 | 38.660 | 49.078 | 0.00 | 0.00 |
| ATOM | 4798 | C   | GLY | X | 319 | 20.302 | 37.648 | 47.991 | 0.00 | 0.00 |
| ATOM | 4799 | O   | GLY | X | 319 | 20.008 | 37.616 | 46.804 | 0.00 | 0.00 |
| ATOM | 4800 | N   | LEU | X | 320 | 21.504 | 37.619 | 48.490 | 0.00 | 0.00 |
| ATOM | 4801 | H   | LEU | X | 320 | 21.556 | 37.468 | 49.487 | 0.00 | 0.00 |
| ATOM | 4802 | CA  | LEU | X | 320 | 22.708 | 37.417 | 47.677 | 0.00 | 0.00 |
| ATOM | 4803 | HA  | LEU | X | 320 | 22.519 | 37.731 | 46.651 | 0.00 | 0.00 |
| ATOM | 4804 | CB  | LEU | X | 320 | 23.865 | 38.327 | 48.297 | 0.00 | 0.00 |
| ATOM | 4805 | HB2 | LEU | X | 320 | 23.553 | 38.822 | 49.217 | 0.00 | 0.00 |
| ATOM | 4806 | HB3 | LEU | X | 320 | 24.768 | 37.739 | 48.459 | 0.00 | 0.00 |
| ATOM | 4807 | CG  | LEU | X | 320 | 24.195 | 39.406 | 47.190 | 0.00 | 0.00 |
| ATOM | 4808 | HG  | LEU | X | 320 | 23.270 | 39.753 | 46.730 | 0.00 | 0.00 |



|      |      |      |     |   |     |        |        |        |      |      |
|------|------|------|-----|---|-----|--------|--------|--------|------|------|
| ATOM | 4809 | CD1  | LEU | X | 320 | 24.843 | 40.582 | 47.978 | 0.00 | 0.00 |
| ATOM | 4810 | HD11 | LEU | X | 320 | 23.989 | 40.852 | 48.599 | 0.00 | 0.00 |
| ATOM | 4811 | HD12 | LEU | X | 320 | 25.088 | 41.441 | 47.353 | 0.00 | 0.00 |
| ATOM | 4812 | HD13 | LEU | X | 320 | 25.689 | 40.256 | 48.583 | 0.00 | 0.00 |
| ATOM | 4813 | CD2  | LEU | X | 320 | 25.059 | 38.706 | 46.189 | 0.00 | 0.00 |
| ATOM | 4814 | HD21 | LEU | X | 320 | 25.236 | 39.419 | 45.384 | 0.00 | 0.00 |
| ATOM | 4815 | HD22 | LEU | X | 320 | 26.020 | 38.572 | 46.686 | 0.00 | 0.00 |
| ATOM | 4816 | HD23 | LEU | X | 320 | 24.679 | 37.752 | 45.823 | 0.00 | 0.00 |
| ATOM | 4817 | C    | LEU | X | 320 | 23.138 | 35.943 | 47.653 | 0.00 | 0.00 |
| ATOM | 4818 | O    | LEU | X | 320 | 22.941 | 35.269 | 48.691 | 0.00 | 0.00 |
| ATOM | 4819 | N    | GLN | X | 321 | 23.595 | 35.525 | 46.491 | 0.00 | 0.00 |
| ATOM | 4820 | H    | GLN | X | 321 | 23.554 | 36.138 | 45.690 | 0.00 | 0.00 |
| ATOM | 4821 | CA   | GLN | X | 321 | 24.283 | 34.301 | 46.282 | 0.00 | 0.00 |
| ATOM | 4822 | HA   | GLN | X | 321 | 24.602 | 33.829 | 47.211 | 0.00 | 0.00 |
| ATOM | 4823 | CB   | GLN | X | 321 | 23.479 | 33.293 | 45.477 | 0.00 | 0.00 |
| ATOM | 4824 | HB2  | GLN | X | 321 | 23.467 | 33.551 | 44.418 | 0.00 | 0.00 |
| ATOM | 4825 | HB3  | GLN | X | 321 | 23.974 | 32.325 | 45.548 | 0.00 | 0.00 |
| ATOM | 4826 | CG   | GLN | X | 321 | 21.994 | 33.192 | 45.907 | 0.00 | 0.00 |
| ATOM | 4827 | HG2  | GLN | X | 321 | 21.678 | 32.171 | 45.696 | 0.00 | 0.00 |
| ATOM | 4828 | HG3  | GLN | X | 321 | 21.958 | 33.150 | 46.996 | 0.00 | 0.00 |
| ATOM | 4829 | CD   | GLN | X | 321 | 21.037 | 34.313 | 45.407 | 0.00 | 0.00 |
| ATOM | 4830 | OE1  | GLN | X | 321 | 21.195 | 34.707 | 44.228 | 0.00 | 0.00 |
| ATOM | 4831 | NE2  | GLN | X | 321 | 20.207 | 34.877 | 46.290 | 0.00 | 0.00 |
| ATOM | 4832 | HE21 | GLN | X | 321 | 19.596 | 35.575 | 45.889 | 0.00 | 0.00 |
| ATOM | 4833 | HE22 | GLN | X | 321 | 20.219 | 34.607 | 47.263 | 0.00 | 0.00 |
| ATOM | 4834 | C    | GLN | X | 321 | 25.588 | 34.543 | 45.506 | 0.00 | 0.00 |
| ATOM | 4835 | O    | GLN | X | 321 | 25.597 | 35.531 | 44.746 | 0.00 | 0.00 |
| ATOM | 4836 | N    | VAL | X | 322 | 26.633 | 33.794 | 45.895 | 0.00 | 0.00 |
| ATOM | 4837 | H    | VAL | X | 322 | 26.487 | 32.926 | 46.390 | 0.00 | 0.00 |
| ATOM | 4838 | CA   | VAL | X | 322 | 27.987 | 34.245 | 45.672 | 0.00 | 0.00 |
| ATOM | 4839 | HA   | VAL | X | 322 | 28.048 | 34.963 | 44.855 | 0.00 | 0.00 |
| ATOM | 4840 | CB   | VAL | X | 322 | 28.669 | 34.930 | 46.869 | 0.00 | 0.00 |
| ATOM | 4841 | HB   | VAL | X | 322 | 28.533 | 34.235 | 47.697 | 0.00 | 0.00 |
| ATOM | 4842 | CG1  | VAL | X | 322 | 30.122 | 35.290 | 46.477 | 0.00 | 0.00 |
| ATOM | 4843 | HG11 | VAL | X | 322 | 30.055 | 35.799 | 45.516 | 0.00 | 0.00 |
| ATOM | 4844 | HG12 | VAL | X | 322 | 30.529 | 35.972 | 47.223 | 0.00 | 0.00 |
| ATOM | 4845 | HG13 | VAL | X | 322 | 30.712 | 34.377 | 46.390 | 0.00 | 0.00 |
| ATOM | 4846 | CG2  | VAL | X | 322 | 27.919 | 36.248 | 47.210 | 0.00 | 0.00 |
| ATOM | 4847 | HG21 | VAL | X | 322 | 28.347 | 36.553 | 48.165 | 0.00 | 0.00 |
| ATOM | 4848 | HG22 | VAL | X | 322 | 26.835 | 36.148 | 47.262 | 0.00 | 0.00 |
| ATOM | 4849 | HG23 | VAL | X | 322 | 28.257 | 36.911 | 46.414 | 0.00 | 0.00 |
| ATOM | 4850 | C    | VAL | X | 322 | 28.760 | 32.946 | 45.231 | 0.00 | 0.00 |
| ATOM | 4851 | O    | VAL | X | 322 | 28.515 | 31.827 | 45.720 | 0.00 | 0.00 |
| ATOM | 4852 | N    | LEU | X | 323 | 29.711 | 33.110 | 44.368 | 0.00 | 0.00 |
| ATOM | 4853 | H    | LEU | X | 323 | 29.825 | 33.989 | 43.884 | 0.00 | 0.00 |
| ATOM | 4854 | CA   | LEU | X | 323 | 30.619 | 32.069 | 43.933 | 0.00 | 0.00 |
| ATOM | 4855 | HA   | LEU | X | 323 | 30.444 | 31.170 | 44.524 | 0.00 | 0.00 |
| ATOM | 4856 | CB   | LEU | X | 323 | 30.382 | 31.675 | 42.428 | 0.00 | 0.00 |
| ATOM | 4857 | HB2  | LEU | X | 323 | 29.309 | 31.698 | 42.242 | 0.00 | 0.00 |
| ATOM | 4858 | HB3  | LEU | X | 323 | 30.788 | 32.513 | 41.862 | 0.00 | 0.00 |
| ATOM | 4859 | CG   | LEU | X | 323 | 30.924 | 30.287 | 41.901 | 0.00 | 0.00 |
| ATOM | 4860 | HG   | LEU | X | 323 | 30.463 | 29.481 | 42.471 | 0.00 | 0.00 |
| ATOM | 4861 | CD1  | LEU | X | 323 | 30.439 | 30.001 | 40.449 | 0.00 | 0.00 |
| ATOM | 4862 | HD11 | LEU | X | 323 | 30.968 | 29.126 | 40.071 | 0.00 | 0.00 |
| ATOM | 4863 | HD12 | LEU | X | 323 | 30.707 | 30.879 | 39.861 | 0.00 | 0.00 |
| ATOM | 4864 | HD13 | LEU | X | 323 | 29.359 | 29.858 | 40.403 | 0.00 | 0.00 |
| ATOM | 4865 | CD2  | LEU | X | 323 | 32.430 | 30.128 | 41.847 | 0.00 | 0.00 |
| ATOM | 4866 | HD21 | LEU | X | 323 | 32.736 | 29.817 | 42.845 | 0.00 | 0.00 |
| ATOM | 4867 | HD22 | LEU | X | 323 | 32.668 | 29.288 | 41.194 | 0.00 | 0.00 |
| ATOM | 4868 | HD23 | LEU | X | 323 | 32.868 | 31.070 | 41.519 | 0.00 | 0.00 |
| ATOM | 4869 | C    | LEU | X | 323 | 32.051 | 32.482 | 44.223 | 0.00 | 0.00 |
| ATOM | 4870 | O    | LEU | X | 323 | 32.350 | 33.667 | 44.153 | 0.00 | 0.00 |
| ATOM | 4871 | N    | VAL | X | 324 | 32.972 | 31.540 | 44.606 | 0.00 | 0.00 |
| ATOM | 4872 | H    | VAL | X | 324 | 32.698 | 30.569 | 44.658 | 0.00 | 0.00 |
| ATOM | 4873 | CA   | VAL | X | 324 | 34.336 | 31.892 | 45.058 | 0.00 | 0.00 |
| ATOM | 4874 | HA   | VAL | X | 324 | 34.765 | 32.736 | 44.518 | 0.00 | 0.00 |
| ATOM | 4875 | CB   | VAL | X | 324 | 34.424 | 32.124 | 46.596 | 0.00 | 0.00 |

|      |      |      |     |   |     |        |        |        |      |      |
|------|------|------|-----|---|-----|--------|--------|--------|------|------|
| ATOM | 4876 | HB   | VAL | X | 324 | 34.441 | 31.148 | 47.082 | 0.00 | 0.00 |
| ATOM | 4877 | CG1  | VAL | X | 324 | 35.741 | 32.687 | 47.059 | 0.00 | 0.00 |
| ATOM | 4878 | HG11 | VAL | X | 324 | 36.615 | 32.497 | 46.436 | 0.00 | 0.00 |
| ATOM | 4879 | HG12 | VAL | X | 324 | 35.728 | 33.760 | 47.250 | 0.00 | 0.00 |
| ATOM | 4880 | HG13 | VAL | X | 324 | 35.969 | 32.166 | 47.989 | 0.00 | 0.00 |
| ATOM | 4881 | CG2  | VAL | X | 324 | 33.285 | 32.899 | 47.162 | 0.00 | 0.00 |
| ATOM | 4882 | HG21 | VAL | X | 324 | 33.263 | 33.843 | 46.616 | 0.00 | 0.00 |
| ATOM | 4883 | HG22 | VAL | X | 324 | 33.361 | 32.956 | 48.248 | 0.00 | 0.00 |
| ATOM | 4884 | HG23 | VAL | X | 324 | 32.337 | 32.477 | 46.826 | 0.00 | 0.00 |
| ATOM | 4885 | C    | VAL | X | 324 | 35.335 | 30.761 | 44.706 | 0.00 | 0.00 |
| ATOM | 4886 | O    | VAL | X | 324 | 34.927 | 29.626 | 45.014 | 0.00 | 0.00 |
| ATOM | 4887 | N    | GLY | X | 325 | 36.563 | 31.054 | 44.315 | 0.00 | 0.00 |
| ATOM | 4888 | H    | GLY | X | 325 | 36.897 | 31.981 | 44.090 | 0.00 | 0.00 |
| ATOM | 4889 | CA   | GLY | X | 325 | 37.618 | 30.022 | 44.472 | 0.00 | 0.00 |
| ATOM | 4890 | HA2  | GLY | X | 325 | 37.786 | 29.741 | 45.512 | 0.00 | 0.00 |
| ATOM | 4891 | HA3  | GLY | X | 325 | 37.310 | 29.116 | 43.951 | 0.00 | 0.00 |
| ATOM | 4892 | C    | GLY | X | 325 | 38.975 | 30.503 | 43.906 | 0.00 | 0.00 |
| ATOM | 4893 | O    | GLY | X | 325 | 39.318 | 31.692 | 43.944 | 0.00 | 0.00 |
| ATOM | 4894 | N    | VAL | X | 326 | 39.808 | 29.480 | 43.645 | 0.00 | 0.00 |
| ATOM | 4895 | H    | VAL | X | 326 | 39.484 | 28.532 | 43.770 | 0.00 | 0.00 |
| ATOM | 4896 | CA   | VAL | X | 326 | 41.258 | 29.525 | 43.414 | 0.00 | 0.00 |
| ATOM | 4897 | HA   | VAL | X | 326 | 41.524 | 30.442 | 42.888 | 0.00 | 0.00 |
| ATOM | 4898 | CB   | VAL | X | 326 | 42.092 | 29.391 | 44.702 | 0.00 | 0.00 |
| ATOM | 4899 | HB   | VAL | X | 326 | 43.113 | 29.281 | 44.337 | 0.00 | 0.00 |
| ATOM | 4900 | CG1  | VAL | X | 326 | 41.939 | 30.589 | 45.653 | 0.00 | 0.00 |
| ATOM | 4901 | HG11 | VAL | X | 326 | 40.947 | 30.601 | 46.104 | 0.00 | 0.00 |
| ATOM | 4902 | HG12 | VAL | X | 326 | 42.685 | 30.586 | 46.448 | 0.00 | 0.00 |
| ATOM | 4903 | HG13 | VAL | X | 326 | 42.140 | 31.503 | 45.094 | 0.00 | 0.00 |
| ATOM | 4904 | CG2  | VAL | X | 326 | 41.694 | 28.084 | 45.526 | 0.00 | 0.00 |
| ATOM | 4905 | HG21 | VAL | X | 326 | 42.352 | 28.046 | 46.394 | 0.00 | 0.00 |
| ATOM | 4906 | HG22 | VAL | X | 326 | 41.878 | 27.132 | 45.028 | 0.00 | 0.00 |
| ATOM | 4907 | HG23 | VAL | X | 326 | 40.655 | 28.158 | 45.848 | 0.00 | 0.00 |
| ATOM | 4908 | C    | VAL | X | 326 | 41.644 | 28.402 | 42.384 | 0.00 | 0.00 |
| ATOM | 4909 | O    | VAL | X | 326 | 40.929 | 27.358 | 42.291 | 0.00 | 0.00 |
| ATOM | 4910 | N    | VAL | X | 327 | 42.829 | 28.480 | 41.751 | 0.00 | 0.00 |
| ATOM | 4911 | H    | VAL | X | 327 | 43.385 | 29.262 | 42.067 | 0.00 | 0.00 |
| ATOM | 4912 | CA   | VAL | X | 327 | 43.584 | 27.279 | 41.298 | 0.00 | 0.00 |
| ATOM | 4913 | HA   | VAL | X | 327 | 42.810 | 26.555 | 41.044 | 0.00 | 0.00 |
| ATOM | 4914 | CB   | VAL | X | 327 | 44.514 | 27.594 | 40.104 | 0.00 | 0.00 |
| ATOM | 4915 | HB   | VAL | X | 327 | 45.098 | 26.686 | 39.956 | 0.00 | 0.00 |
| ATOM | 4916 | CG1  | VAL | X | 327 | 43.857 | 28.051 | 38.715 | 0.00 | 0.00 |
| ATOM | 4917 | HG11 | VAL | X | 327 | 44.515 | 28.661 | 38.096 | 0.00 | 0.00 |
| ATOM | 4918 | HG12 | VAL | X | 327 | 43.399 | 27.227 | 38.167 | 0.00 | 0.00 |
| ATOM | 4919 | HG13 | VAL | X | 327 | 43.101 | 28.757 | 39.058 | 0.00 | 0.00 |
| ATOM | 4920 | CG2  | VAL | X | 327 | 45.644 | 28.571 | 40.520 | 0.00 | 0.00 |
| ATOM | 4921 | HG21 | VAL | X | 327 | 46.089 | 28.417 | 41.503 | 0.00 | 0.00 |
| ATOM | 4922 | HG22 | VAL | X | 327 | 45.194 | 29.556 | 40.644 | 0.00 | 0.00 |
| ATOM | 4923 | HG23 | VAL | X | 327 | 46.401 | 28.618 | 39.737 | 0.00 | 0.00 |
| ATOM | 4924 | C    | VAL | X | 327 | 44.319 | 26.539 | 42.378 | 0.00 | 0.00 |
| ATOM | 4925 | O    | VAL | X | 327 | 44.516 | 27.194 | 43.406 | 0.00 | 0.00 |
| ATOM | 4926 | N    | LYS | X | 328 | 44.968 | 25.374 | 42.121 | 0.00 | 0.00 |
| ATOM | 4927 | H    | LYS | X | 328 | 44.909 | 25.030 | 41.173 | 0.00 | 0.00 |
| ATOM | 4928 | CA   | LYS | X | 328 | 45.853 | 24.707 | 43.032 | 0.00 | 0.00 |
| ATOM | 4929 | HA   | LYS | X | 328 | 45.307 | 24.547 | 43.962 | 0.00 | 0.00 |
| ATOM | 4930 | CB   | LYS | X | 328 | 46.132 | 23.315 | 42.447 | 0.00 | 0.00 |
| ATOM | 4931 | HB2  | LYS | X | 328 | 45.108 | 22.971 | 42.302 | 0.00 | 0.00 |
| ATOM | 4932 | HB3  | LYS | X | 328 | 46.729 | 23.418 | 41.540 | 0.00 | 0.00 |
| ATOM | 4933 | CG   | LYS | X | 328 | 46.786 | 22.376 | 43.438 | 0.00 | 0.00 |
| ATOM | 4934 | HG2  | LYS | X | 328 | 47.826 | 22.635 | 43.633 | 0.00 | 0.00 |
| ATOM | 4935 | HG3  | LYS | X | 328 | 46.067 | 22.438 | 44.255 | 0.00 | 0.00 |
| ATOM | 4936 | CD   | LYS | X | 328 | 46.821 | 20.974 | 42.835 | 0.00 | 0.00 |
| ATOM | 4937 | HD2  | LYS | X | 328 | 47.177 | 20.316 | 43.628 | 0.00 | 0.00 |
| ATOM | 4938 | HD3  | LYS | X | 328 | 45.803 | 20.825 | 42.475 | 0.00 | 0.00 |
| ATOM | 4939 | CE   | LYS | X | 328 | 47.830 | 20.984 | 41.574 | 0.00 | 0.00 |
| ATOM | 4940 | HE2  | LYS | X | 328 | 47.710 | 20.013 | 41.094 | 0.00 | 0.00 |
| ATOM | 4941 | HE3  | LYS | X | 328 | 47.462 | 21.654 | 40.797 | 0.00 | 0.00 |
| ATOM | 4942 | NZ   | LYS | X | 328 | 49.261 | 21.257 | 41.948 | 0.00 | 0.00 |

|      |      |     |     |   |     |        |        |        |      |      |
|------|------|-----|-----|---|-----|--------|--------|--------|------|------|
| ATOM | 4943 | HZ1 | LYS | X | 328 | 49.927 | 20.844 | 41.310 | 0.00 | 0.00 |
| ATOM | 4944 | HZ2 | LYS | X | 328 | 49.360 | 22.248 | 42.112 | 0.00 | 0.00 |
| ATOM | 4945 | HZ3 | LYS | X | 328 | 49.493 | 20.800 | 42.819 | 0.00 | 0.00 |
| ATOM | 4946 | C   | LYS | X | 328 | 47.107 | 25.494 | 43.451 | 0.00 | 0.00 |
| ATOM | 4947 | O   | LYS | X | 328 | 47.413 | 25.349 | 44.583 | 0.00 | 0.00 |
| ATOM | 4948 | N   | ASP | X | 329 | 47.687 | 26.193 | 42.535 | 0.00 | 0.00 |
| ATOM | 4949 | H   | ASP | X | 329 | 47.464 | 26.145 | 41.551 | 0.00 | 0.00 |
| ATOM | 4950 | CA  | ASP | X | 329 | 49.098 | 26.697 | 42.676 | 0.00 | 0.00 |
| ATOM | 4951 | HA  | ASP | X | 329 | 49.450 | 26.367 | 43.653 | 0.00 | 0.00 |
| ATOM | 4952 | CB  | ASP | X | 329 | 49.969 | 25.998 | 41.622 | 0.00 | 0.00 |
| ATOM | 4953 | HB2 | ASP | X | 329 | 49.742 | 26.391 | 40.631 | 0.00 | 0.00 |
| ATOM | 4954 | HB3 | ASP | X | 329 | 50.980 | 26.340 | 41.841 | 0.00 | 0.00 |
| ATOM | 4955 | CG  | ASP | X | 329 | 50.015 | 24.471 | 41.603 | 0.00 | 0.00 |
| ATOM | 4956 | OD1 | ASP | X | 329 | 50.752 | 23.886 | 42.444 | 0.00 | 0.00 |
| ATOM | 4957 | OD2 | ASP | X | 329 | 49.339 | 23.783 | 40.801 | 0.00 | 0.00 |
| ATOM | 4958 | C   | ASP | X | 329 | 49.150 | 28.235 | 42.699 | 0.00 | 0.00 |
| ATOM | 4959 | O   | ASP | X | 329 | 49.781 | 28.806 | 41.826 | 0.00 | 0.00 |
| ATOM | 4960 | N   | GLU | X | 330 | 48.543 | 28.840 | 43.702 | 0.00 | 0.00 |
| ATOM | 4961 | H   | GLU | X | 330 | 48.203 | 28.359 | 44.523 | 0.00 | 0.00 |
| ATOM | 4962 | CA  | GLU | X | 330 | 48.374 | 30.320 | 43.697 | 0.00 | 0.00 |
| ATOM | 4963 | HA  | GLU | X | 330 | 48.073 | 30.672 | 42.710 | 0.00 | 0.00 |
| ATOM | 4964 | CB  | GLU | X | 330 | 47.304 | 30.864 | 44.676 | 0.00 | 0.00 |
| ATOM | 4965 | HB2 | GLU | X | 330 | 47.585 | 30.512 | 45.669 | 0.00 | 0.00 |
| ATOM | 4966 | HB3 | GLU | X | 330 | 47.312 | 31.952 | 44.626 | 0.00 | 0.00 |
| ATOM | 4967 | CG  | GLU | X | 330 | 45.899 | 30.323 | 44.362 | 0.00 | 0.00 |
| ATOM | 4968 | HG2 | GLU | X | 330 | 45.933 | 29.282 | 44.043 | 0.00 | 0.00 |
| ATOM | 4969 | HG3 | GLU | X | 330 | 45.201 | 30.327 | 45.200 | 0.00 | 0.00 |
| ATOM | 4970 | CD  | GLU | X | 330 | 45.280 | 31.101 | 43.178 | 0.00 | 0.00 |
| ATOM | 4971 | OE1 | GLU | X | 330 | 45.864 | 32.094 | 42.759 | 0.00 | 0.00 |
| ATOM | 4972 | OE2 | GLU | X | 330 | 44.210 | 30.698 | 42.671 | 0.00 | 0.00 |
| ATOM | 4973 | C   | GLU | X | 330 | 49.713 | 31.117 | 43.869 | 0.00 | 0.00 |
| ATOM | 4974 | O   | GLU | X | 330 | 49.910 | 32.198 | 43.337 | 0.00 | 0.00 |
| ATOM | 4975 | N   | GLY | X | 331 | 50.680 | 30.551 | 44.538 | 0.00 | 0.00 |
| ATOM | 4976 | H   | GLY | X | 331 | 50.470 | 29.663 | 44.969 | 0.00 | 0.00 |
| ATOM | 4977 | CA  | GLY | X | 331 | 52.002 | 31.068 | 44.869 | 0.00 | 0.00 |
| ATOM | 4978 | HA2 | GLY | X | 331 | 51.914 | 32.142 | 45.032 | 0.00 | 0.00 |
| ATOM | 4979 | HA3 | GLY | X | 331 | 52.388 | 30.470 | 45.695 | 0.00 | 0.00 |
| ATOM | 4980 | C   | GLY | X | 331 | 52.980 | 30.760 | 43.688 | 0.00 | 0.00 |
| ATOM | 4981 | O   | GLY | X | 331 | 54.134 | 30.930 | 43.930 | 0.00 | 0.00 |
| ATOM | 4982 | N   | SER | X | 332 | 52.555 | 30.185 | 42.621 | 0.00 | 0.00 |
| ATOM | 4983 | H   | SER | X | 332 | 51.569 | 29.982 | 42.531 | 0.00 | 0.00 |
| ATOM | 4984 | CA  | SER | X | 332 | 53.432 | 29.694 | 41.482 | 0.00 | 0.00 |
| ATOM | 4985 | HA  | SER | X | 332 | 54.373 | 29.323 | 41.889 | 0.00 | 0.00 |
| ATOM | 4986 | CB  | SER | X | 332 | 52.798 | 28.410 | 41.003 | 0.00 | 0.00 |
| ATOM | 4987 | HB2 | SER | X | 332 | 52.739 | 27.781 | 41.892 | 0.00 | 0.00 |
| ATOM | 4988 | HB3 | SER | X | 332 | 51.795 | 28.497 | 40.586 | 0.00 | 0.00 |
| ATOM | 4989 | OG  | SER | X | 332 | 53.585 | 27.779 | 39.991 | 0.00 | 0.00 |
| ATOM | 4990 | HG  | SER | X | 332 | 53.099 | 27.108 | 39.507 | 0.00 | 0.00 |
| ATOM | 4991 | C   | SER | X | 332 | 53.812 | 30.679 | 40.342 | 0.00 | 0.00 |
| ATOM | 4992 | O   | SER | X | 332 | 54.977 | 30.738 | 39.966 | 0.00 | 0.00 |
| ATOM | 4993 | N   | TYR | X | 333 | 52.816 | 31.467 | 39.955 | 0.00 | 0.00 |
| ATOM | 4994 | H   | TYR | X | 333 | 51.962 | 31.497 | 40.493 | 0.00 | 0.00 |
| ATOM | 4995 | CA  | TYR | X | 333 | 52.975 | 32.482 | 38.946 | 0.00 | 0.00 |
| ATOM | 4996 | HA  | TYR | X | 333 | 53.269 | 31.996 | 38.016 | 0.00 | 0.00 |
| ATOM | 4997 | CB  | TYR | X | 333 | 51.588 | 33.100 | 38.793 | 0.00 | 0.00 |
| ATOM | 4998 | HB2 | TYR | X | 333 | 50.915 | 32.273 | 38.566 | 0.00 | 0.00 |
| ATOM | 4999 | HB3 | TYR | X | 333 | 51.349 | 33.633 | 39.713 | 0.00 | 0.00 |
| ATOM | 5000 | CG  | TYR | X | 333 | 51.491 | 34.183 | 37.690 | 0.00 | 0.00 |
| ATOM | 5001 | CD1 | TYR | X | 333 | 51.706 | 33.754 | 36.366 | 0.00 | 0.00 |
| ATOM | 5002 | HD1 | TYR | X | 333 | 51.878 | 32.721 | 36.103 | 0.00 | 0.00 |
| ATOM | 5003 | CE1 | TYR | X | 333 | 51.754 | 34.720 | 35.320 | 0.00 | 0.00 |
| ATOM | 5004 | HE1 | TYR | X | 333 | 51.930 | 34.391 | 34.306 | 0.00 | 0.00 |
| ATOM | 5005 | CZ  | TYR | X | 333 | 51.710 | 36.106 | 35.581 | 0.00 | 0.00 |
| ATOM | 5006 | OH  | TYR | X | 333 | 51.999 | 37.098 | 34.738 | 0.00 | 0.00 |
| ATOM | 5007 | HH  | TYR | X | 333 | 52.041 | 36.675 | 33.877 | 0.00 | 0.00 |
| ATOM | 5008 | CE2 | TYR | X | 333 | 51.503 | 36.524 | 36.944 | 0.00 | 0.00 |
| ATOM | 5009 | HE2 | TYR | X | 333 | 51.391 | 37.575 | 37.164 | 0.00 | 0.00 |

|      |      |      |     |   |     |        |        |        |      |      |
|------|------|------|-----|---|-----|--------|--------|--------|------|------|
| ATOM | 5010 | CD2  | TYR | X | 333 | 51.302 | 35.555 | 37.921 | 0.00 | 0.00 |
| ATOM | 5011 | HD2  | TYR | X | 333 | 51.017 | 35.848 | 38.921 | 0.00 | 0.00 |
| ATOM | 5012 | C    | TYR | X | 333 | 54.025 | 33.625 | 39.265 | 0.00 | 0.00 |
| ATOM | 5013 | O    | TYR | X | 333 | 54.621 | 34.233 | 38.371 | 0.00 | 0.00 |
| ATOM | 5014 | N    | PHE | X | 334 | 54.303 | 33.786 | 40.537 | 0.00 | 0.00 |
| ATOM | 5015 | H    | PHE | X | 334 | 53.757 | 33.314 | 41.243 | 0.00 | 0.00 |
| ATOM | 5016 | CA   | PHE | X | 334 | 55.025 | 35.019 | 40.917 | 0.00 | 0.00 |
| ATOM | 5017 | HA   | PHE | X | 334 | 54.871 | 35.829 | 40.205 | 0.00 | 0.00 |
| ATOM | 5018 | CB   | PHE | X | 334 | 54.389 | 35.523 | 42.281 | 0.00 | 0.00 |
| ATOM | 5019 | HB2  | PHE | X | 334 | 54.519 | 34.742 | 43.031 | 0.00 | 0.00 |
| ATOM | 5020 | HB3  | PHE | X | 334 | 54.977 | 36.354 | 42.670 | 0.00 | 0.00 |
| ATOM | 5021 | CG   | PHE | X | 334 | 52.932 | 35.890 | 42.136 | 0.00 | 0.00 |
| ATOM | 5022 | CD1  | PHE | X | 334 | 51.862 | 34.955 | 42.247 | 0.00 | 0.00 |
| ATOM | 5023 | HD1  | PHE | X | 334 | 51.945 | 33.906 | 42.488 | 0.00 | 0.00 |
| ATOM | 5024 | CE1  | PHE | X | 334 | 50.528 | 35.435 | 42.141 | 0.00 | 0.00 |
| ATOM | 5025 | HE1  | PHE | X | 334 | 49.729 | 34.719 | 42.268 | 0.00 | 0.00 |
| ATOM | 5026 | CZ   | PHE | X | 334 | 50.233 | 36.770 | 41.902 | 0.00 | 0.00 |
| ATOM | 5027 | HZ   | PHE | X | 334 | 49.216 | 37.129 | 41.952 | 0.00 | 0.00 |
| ATOM | 5028 | CE2  | PHE | X | 334 | 51.337 | 37.671 | 41.614 | 0.00 | 0.00 |
| ATOM | 5029 | HE2  | PHE | X | 334 | 51.209 | 38.733 | 41.468 | 0.00 | 0.00 |
| ATOM | 5030 | CD2  | PHE | X | 334 | 52.669 | 37.213 | 41.835 | 0.00 | 0.00 |
| ATOM | 5031 | HD2  | PHE | X | 334 | 53.502 | 37.887 | 41.705 | 0.00 | 0.00 |
| ATOM | 5032 | C    | PHE | X | 334 | 56.510 | 34.786 | 41.123 | 0.00 | 0.00 |
| ATOM | 5033 | O    | PHE | X | 334 | 57.315 | 35.662 | 40.934 | 0.00 | 0.00 |
| ATOM | 5034 | N    | LEU | X | 335 | 56.964 | 33.566 | 41.434 | 0.00 | 0.00 |
| ATOM | 5035 | H    | LEU | X | 335 | 56.274 | 32.837 | 41.545 | 0.00 | 0.00 |
| ATOM | 5036 | CA   | LEU | X | 335 | 58.363 | 33.259 | 41.789 | 0.00 | 0.00 |
| ATOM | 5037 | HA   | LEU | X | 335 | 58.536 | 33.758 | 42.742 | 0.00 | 0.00 |
| ATOM | 5038 | CB   | LEU | X | 335 | 58.439 | 31.722 | 42.110 | 0.00 | 0.00 |
| ATOM | 5039 | HB2  | LEU | X | 335 | 58.358 | 31.222 | 41.145 | 0.00 | 0.00 |
| ATOM | 5040 | HB3  | LEU | X | 335 | 59.400 | 31.554 | 42.595 | 0.00 | 0.00 |
| ATOM | 5041 | CG   | LEU | X | 335 | 57.406 | 31.173 | 43.049 | 0.00 | 0.00 |
| ATOM | 5042 | HG   | LEU | X | 335 | 56.431 | 31.246 | 42.567 | 0.00 | 0.00 |
| ATOM | 5043 | CD1  | LEU | X | 335 | 57.717 | 29.693 | 43.265 | 0.00 | 0.00 |
| ATOM | 5044 | HD11 | LEU | X | 335 | 57.800 | 29.192 | 42.300 | 0.00 | 0.00 |
| ATOM | 5045 | HD12 | LEU | X | 335 | 56.912 | 29.264 | 43.862 | 0.00 | 0.00 |
| ATOM | 5046 | HD13 | LEU | X | 335 | 58.695 | 29.481 | 43.695 | 0.00 | 0.00 |
| ATOM | 5047 | CD2  | LEU | X | 335 | 57.282 | 31.847 | 44.370 | 0.00 | 0.00 |
| ATOM | 5048 | HD21 | LEU | X | 335 | 56.664 | 31.277 | 45.064 | 0.00 | 0.00 |
| ATOM | 5049 | HD22 | LEU | X | 335 | 58.250 | 31.832 | 44.871 | 0.00 | 0.00 |
| ATOM | 5050 | HD23 | LEU | X | 335 | 57.021 | 32.900 | 44.266 | 0.00 | 0.00 |
| ATOM | 5051 | C    | LEU | X | 335 | 59.460 | 33.641 | 40.755 | 0.00 | 0.00 |
| ATOM | 5052 | O    | LEU | X | 335 | 60.452 | 34.231 | 41.149 | 0.00 | 0.00 |
| ATOM | 5053 | N    | VAL | X | 336 | 59.130 | 33.345 | 39.484 | 0.00 | 0.00 |
| ATOM | 5054 | H    | VAL | X | 336 | 58.350 | 32.728 | 39.303 | 0.00 | 0.00 |
| ATOM | 5055 | CA   | VAL | X | 336 | 60.040 | 33.543 | 38.311 | 0.00 | 0.00 |
| ATOM | 5056 | HA   | VAL | X | 336 | 61.015 | 33.181 | 38.636 | 0.00 | 0.00 |
| ATOM | 5057 | CB   | VAL | X | 336 | 59.695 | 32.614 | 37.105 | 0.00 | 0.00 |
| ATOM | 5058 | HB   | VAL | X | 336 | 60.359 | 32.869 | 36.279 | 0.00 | 0.00 |
| ATOM | 5059 | CG1  | VAL | X | 336 | 59.954 | 31.118 | 37.325 | 0.00 | 0.00 |
| ATOM | 5060 | HG11 | VAL | X | 336 | 59.360 | 30.459 | 36.691 | 0.00 | 0.00 |
| ATOM | 5061 | HG12 | VAL | X | 336 | 61.023 | 30.987 | 37.163 | 0.00 | 0.00 |
| ATOM | 5062 | HG13 | VAL | X | 336 | 59.704 | 30.839 | 38.349 | 0.00 | 0.00 |
| ATOM | 5063 | CG2  | VAL | X | 336 | 58.309 | 32.906 | 36.539 | 0.00 | 0.00 |
| ATOM | 5064 | HG21 | VAL | X | 336 | 58.442 | 33.817 | 35.954 | 0.00 | 0.00 |
| ATOM | 5065 | HG22 | VAL | X | 336 | 57.652 | 33.114 | 37.383 | 0.00 | 0.00 |
| ATOM | 5066 | HG23 | VAL | X | 336 | 58.071 | 32.106 | 35.838 | 0.00 | 0.00 |
| ATOM | 5067 | C    | VAL | X | 336 | 60.153 | 35.014 | 37.940 | 0.00 | 0.00 |
| ATOM | 5068 | O    | VAL | X | 336 | 61.014 | 35.384 | 37.143 | 0.00 | 0.00 |
| ATOM | 5069 | N    | TYR | X | 337 | 59.463 | 35.926 | 38.697 | 0.00 | 0.00 |
| ATOM | 5070 | H    | TYR | X | 337 | 58.826 | 35.551 | 39.385 | 0.00 | 0.00 |
| ATOM | 5071 | CA   | TYR | X | 337 | 59.680 | 37.378 | 38.565 | 0.00 | 0.00 |
| ATOM | 5072 | HA   | TYR | X | 337 | 60.157 | 37.663 | 37.627 | 0.00 | 0.00 |
| ATOM | 5073 | CB   | TYR | X | 337 | 58.245 | 38.102 | 38.509 | 0.00 | 0.00 |
| ATOM | 5074 | HB2  | TYR | X | 337 | 57.550 | 37.830 | 39.303 | 0.00 | 0.00 |
| ATOM | 5075 | HB3  | TYR | X | 337 | 58.443 | 39.168 | 38.619 | 0.00 | 0.00 |
| ATOM | 5076 | CG   | TYR | X | 337 | 57.543 | 37.836 | 37.150 | 0.00 | 0.00 |

|      |      |     |     |   |     |        |        |        |      |      |
|------|------|-----|-----|---|-----|--------|--------|--------|------|------|
| ATOM | 5077 | CD1 | TYR | X | 337 | 57.697 | 38.720 | 36.004 | 0.00 | 0.00 |
| ATOM | 5078 | HD1 | TYR | X | 337 | 58.364 | 39.568 | 36.052 | 0.00 | 0.00 |
| ATOM | 5079 | CE1 | TYR | X | 337 | 57.006 | 38.441 | 34.802 | 0.00 | 0.00 |
| ATOM | 5080 | HE1 | TYR | X | 337 | 57.162 | 39.235 | 34.086 | 0.00 | 0.00 |
| ATOM | 5081 | CZ  | TYR | X | 337 | 56.088 | 37.420 | 34.685 | 0.00 | 0.00 |
| ATOM | 5082 | OH  | TYR | X | 337 | 55.396 | 37.226 | 33.516 | 0.00 | 0.00 |
| ATOM | 5083 | HH  | TYR | X | 337 | 55.480 | 37.894 | 32.832 | 0.00 | 0.00 |
| ATOM | 5084 | CE2 | TYR | X | 337 | 56.033 | 36.505 | 35.793 | 0.00 | 0.00 |
| ATOM | 5085 | HE2 | TYR | X | 337 | 55.304 | 35.709 | 35.787 | 0.00 | 0.00 |
| ATOM | 5086 | CD2 | TYR | X | 337 | 56.666 | 36.775 | 37.030 | 0.00 | 0.00 |
| ATOM | 5087 | HD2 | TYR | X | 337 | 56.518 | 36.075 | 37.839 | 0.00 | 0.00 |
| ATOM | 5088 | C   | TYR | X | 337 | 60.628 | 38.007 | 39.614 | 0.00 | 0.00 |
| ATOM | 5089 | O   | TYR | X | 337 | 60.716 | 39.240 | 39.628 | 0.00 | 0.00 |
| ATOM | 5090 | N   | GLY | X | 338 | 61.149 | 37.261 | 40.577 | 0.00 | 0.00 |
| ATOM | 5091 | H   | GLY | X | 338 | 61.015 | 36.265 | 40.477 | 0.00 | 0.00 |
| ATOM | 5092 | CA  | GLY | X | 338 | 61.807 | 37.934 | 41.717 | 0.00 | 0.00 |
| ATOM | 5093 | HA2 | GLY | X | 338 | 62.694 | 38.461 | 41.365 | 0.00 | 0.00 |
| ATOM | 5094 | HA3 | GLY | X | 338 | 61.156 | 38.672 | 42.186 | 0.00 | 0.00 |
| ATOM | 5095 | C   | GLY | X | 338 | 62.375 | 37.072 | 42.883 | 0.00 | 0.00 |
| ATOM | 5096 | O   | GLY | X | 338 | 63.316 | 37.632 | 43.551 | 0.00 | 0.00 |
| ATOM | 5097 | N   | ALA | X | 339 | 62.001 | 35.795 | 43.011 | 0.00 | 0.00 |
| ATOM | 5098 | H   | ALA | X | 339 | 61.248 | 35.458 | 42.428 | 0.00 | 0.00 |
| ATOM | 5099 | CA  | ALA | X | 339 | 62.566 | 34.882 | 43.987 | 0.00 | 0.00 |
| ATOM | 5100 | HA  | ALA | X | 339 | 62.881 | 35.386 | 44.901 | 0.00 | 0.00 |
| ATOM | 5101 | CB  | ALA | X | 339 | 61.462 | 33.822 | 44.298 | 0.00 | 0.00 |
| ATOM | 5102 | HB1 | ALA | X | 339 | 60.514 | 34.269 | 44.595 | 0.00 | 0.00 |
| ATOM | 5103 | HB2 | ALA | X | 339 | 61.731 | 33.352 | 45.243 | 0.00 | 0.00 |
| ATOM | 5104 | HB3 | ALA | X | 339 | 61.264 | 33.044 | 43.560 | 0.00 | 0.00 |
| ATOM | 5105 | C   | ALA | X | 339 | 63.922 | 34.327 | 43.512 | 0.00 | 0.00 |
| ATOM | 5106 | O   | ALA | X | 339 | 64.244 | 34.492 | 42.326 | 0.00 | 0.00 |
| ATOM | 5107 | N   | PRO | X | 340 | 64.786 | 33.729 | 44.406 | 0.00 | 0.00 |
| ATOM | 5108 | CD  | PRO | X | 340 | 64.488 | 33.386 | 45.774 | 0.00 | 0.00 |
| ATOM | 5109 | HD2 | PRO | X | 340 | 63.584 | 32.778 | 45.747 | 0.00 | 0.00 |
| ATOM | 5110 | HD3 | PRO | X | 340 | 64.319 | 34.250 | 46.417 | 0.00 | 0.00 |
| ATOM | 5111 | CG  | PRO | X | 340 | 65.693 | 32.644 | 46.333 | 0.00 | 0.00 |
| ATOM | 5112 | HG2 | PRO | X | 340 | 65.648 | 31.562 | 46.217 | 0.00 | 0.00 |
| ATOM | 5113 | HG3 | PRO | X | 340 | 65.939 | 32.900 | 47.363 | 0.00 | 0.00 |
| ATOM | 5114 | CB  | PRO | X | 340 | 66.829 | 33.172 | 45.479 | 0.00 | 0.00 |
| ATOM | 5115 | HB2 | PRO | X | 340 | 67.680 | 32.492 | 45.447 | 0.00 | 0.00 |
| ATOM | 5116 | HB3 | PRO | X | 340 | 67.022 | 34.118 | 45.985 | 0.00 | 0.00 |
| ATOM | 5117 | CA  | PRO | X | 340 | 66.212 | 33.480 | 44.139 | 0.00 | 0.00 |
| ATOM | 5118 | HA  | PRO | X | 340 | 66.683 | 34.359 | 43.700 | 0.00 | 0.00 |
| ATOM | 5119 | C   | PRO | X | 340 | 66.588 | 32.458 | 43.071 | 0.00 | 0.00 |
| ATOM | 5120 | O   | PRO | X | 340 | 66.663 | 31.275 | 43.393 | 0.00 | 0.00 |
| ATOM | 5121 | N   | GLY | X | 341 | 66.849 | 32.947 | 41.862 | 0.00 | 0.00 |
| ATOM | 5122 | H   | GLY | X | 341 | 66.701 | 33.932 | 41.695 | 0.00 | 0.00 |
| ATOM | 5123 | CA  | GLY | X | 341 | 67.325 | 32.277 | 40.705 | 0.00 | 0.00 |
| ATOM | 5124 | HA2 | GLY | X | 341 | 67.796 | 33.029 | 40.072 | 0.00 | 0.00 |
| ATOM | 5125 | HA3 | GLY | X | 341 | 68.141 | 31.574 | 40.868 | 0.00 | 0.00 |
| ATOM | 5126 | C   | GLY | X | 341 | 66.290 | 31.615 | 39.777 | 0.00 | 0.00 |
| ATOM | 5127 | O   | GLY | X | 341 | 66.671 | 31.063 | 38.725 | 0.00 | 0.00 |
| ATOM | 5128 | N   | PHE | X | 342 | 65.032 | 31.766 | 40.095 | 0.00 | 0.00 |
| ATOM | 5129 | H   | PHE | X | 342 | 64.916 | 32.181 | 41.009 | 0.00 | 0.00 |
| ATOM | 5130 | CA  | PHE | X | 342 | 63.920 | 31.269 | 39.300 | 0.00 | 0.00 |
| ATOM | 5131 | HA  | PHE | X | 342 | 63.971 | 30.182 | 39.250 | 0.00 | 0.00 |
| ATOM | 5132 | CB  | PHE | X | 342 | 62.597 | 31.573 | 40.040 | 0.00 | 0.00 |
| ATOM | 5133 | HB2 | PHE | X | 342 | 62.722 | 32.570 | 40.464 | 0.00 | 0.00 |
| ATOM | 5134 | HB3 | PHE | X | 342 | 61.782 | 31.521 | 39.318 | 0.00 | 0.00 |
| ATOM | 5135 | CG  | PHE | X | 342 | 62.280 | 30.733 | 41.181 | 0.00 | 0.00 |
| ATOM | 5136 | CD1 | PHE | X | 342 | 61.271 | 29.744 | 41.171 | 0.00 | 0.00 |
| ATOM | 5137 | HD1 | PHE | X | 342 | 60.692 | 29.724 | 40.259 | 0.00 | 0.00 |
| ATOM | 5138 | CE1 | PHE | X | 342 | 61.059 | 28.828 | 42.215 | 0.00 | 0.00 |
| ATOM | 5139 | HE1 | PHE | X | 342 | 60.314 | 28.054 | 42.103 | 0.00 | 0.00 |
| ATOM | 5140 | CZ  | PHE | X | 342 | 61.966 | 28.741 | 43.338 | 0.00 | 0.00 |
| ATOM | 5141 | HZ  | PHE | X | 342 | 61.988 | 27.906 | 44.023 | 0.00 | 0.00 |
| ATOM | 5142 | CE2 | PHE | X | 342 | 62.855 | 29.848 | 43.426 | 0.00 | 0.00 |
| ATOM | 5143 | HE2 | PHE | X | 342 | 63.494 | 29.800 | 44.296 | 0.00 | 0.00 |

|      |      |      |     |   |     |        |        |        |      |      |
|------|------|------|-----|---|-----|--------|--------|--------|------|------|
| ATOM | 5144 | CD2  | PHE | X | 342 | 63.032 | 30.757 | 42.324 | 0.00 | 0.00 |
| ATOM | 5145 | HD2  | PHE | X | 342 | 63.794 | 31.518 | 42.409 | 0.00 | 0.00 |
| ATOM | 5146 | C    | PHE | X | 342 | 63.776 | 31.946 | 37.930 | 0.00 | 0.00 |
| ATOM | 5147 | O    | PHE | X | 342 | 63.724 | 33.217 | 37.883 | 0.00 | 0.00 |
| ATOM | 5148 | N    | SER | X | 343 | 63.490 | 31.209 | 36.811 | 0.00 | 0.00 |
| ATOM | 5149 | H    | SER | X | 343 | 63.750 | 30.236 | 36.729 | 0.00 | 0.00 |
| ATOM | 5150 | CA   | SER | X | 343 | 63.088 | 31.894 | 35.507 | 0.00 | 0.00 |
| ATOM | 5151 | HA   | SER | X | 343 | 62.297 | 32.628 | 35.661 | 0.00 | 0.00 |
| ATOM | 5152 | CB   | SER | X | 343 | 64.283 | 32.682 | 34.901 | 0.00 | 0.00 |
| ATOM | 5153 | HB2  | SER | X | 343 | 63.981 | 33.283 | 34.043 | 0.00 | 0.00 |
| ATOM | 5154 | HB3  | SER | X | 343 | 64.737 | 33.420 | 35.563 | 0.00 | 0.00 |
| ATOM | 5155 | OG   | SER | X | 343 | 65.426 | 31.859 | 34.478 | 0.00 | 0.00 |
| ATOM | 5156 | HG   | SER | X | 343 | 66.160 | 32.443 | 34.273 | 0.00 | 0.00 |
| ATOM | 5157 | C    | SER | X | 343 | 62.655 | 30.906 | 34.499 | 0.00 | 0.00 |
| ATOM | 5158 | O    | SER | X | 343 | 62.829 | 29.695 | 34.628 | 0.00 | 0.00 |
| ATOM | 5159 | N    | LYS | X | 344 | 62.090 | 31.273 | 33.354 | 0.00 | 0.00 |
| ATOM | 5160 | H    | LYS | X | 344 | 62.149 | 32.247 | 33.090 | 0.00 | 0.00 |
| ATOM | 5161 | CA   | LYS | X | 344 | 61.714 | 30.304 | 32.329 | 0.00 | 0.00 |
| ATOM | 5162 | HA   | LYS | X | 344 | 61.089 | 29.526 | 32.768 | 0.00 | 0.00 |
| ATOM | 5163 | CB   | LYS | X | 344 | 60.697 | 31.073 | 31.373 | 0.00 | 0.00 |
| ATOM | 5164 | HB2  | LYS | X | 344 | 60.171 | 30.274 | 30.850 | 0.00 | 0.00 |
| ATOM | 5165 | HB3  | LYS | X | 344 | 59.920 | 31.566 | 31.957 | 0.00 | 0.00 |
| ATOM | 5166 | CG   | LYS | X | 344 | 61.313 | 32.045 | 30.308 | 0.00 | 0.00 |
| ATOM | 5167 | HG2  | LYS | X | 344 | 61.438 | 33.032 | 30.753 | 0.00 | 0.00 |
| ATOM | 5168 | HG3  | LYS | X | 344 | 62.296 | 31.588 | 30.192 | 0.00 | 0.00 |
| ATOM | 5169 | CD   | LYS | X | 344 | 60.503 | 32.250 | 29.003 | 0.00 | 0.00 |
| ATOM | 5170 | HD2  | LYS | X | 344 | 59.545 | 32.696 | 29.268 | 0.00 | 0.00 |
| ATOM | 5171 | HD3  | LYS | X | 344 | 61.064 | 33.026 | 28.483 | 0.00 | 0.00 |
| ATOM | 5172 | CE   | LYS | X | 344 | 60.420 | 30.843 | 28.207 | 0.00 | 0.00 |
| ATOM | 5173 | HE2  | LYS | X | 344 | 60.256 | 29.906 | 28.739 | 0.00 | 0.00 |
| ATOM | 5174 | HE3  | LYS | X | 344 | 59.481 | 31.060 | 27.696 | 0.00 | 0.00 |
| ATOM | 5175 | NZ   | LYS | X | 344 | 61.510 | 30.713 | 27.233 | 0.00 | 0.00 |
| ATOM | 5176 | HZ1  | LYS | X | 344 | 62.361 | 30.340 | 27.629 | 0.00 | 0.00 |
| ATOM | 5177 | HZ2  | LYS | X | 344 | 61.214 | 30.115 | 26.476 | 0.00 | 0.00 |
| ATOM | 5178 | HZ3  | LYS | X | 344 | 61.826 | 31.593 | 26.851 | 0.00 | 0.00 |
| ATOM | 5179 | C    | LYS | X | 344 | 62.893 | 29.601 | 31.517 | 0.00 | 0.00 |
| ATOM | 5180 | O    | LYS | X | 344 | 62.725 | 28.645 | 30.755 | 0.00 | 0.00 |
| ATOM | 5181 | N    | ASP | X | 345 | 64.141 | 29.940 | 31.852 | 0.00 | 0.00 |
| ATOM | 5182 | H    | ASP | X | 345 | 64.219 | 30.660 | 32.556 | 0.00 | 0.00 |
| ATOM | 5183 | CA   | ASP | X | 345 | 65.345 | 29.158 | 31.527 | 0.00 | 0.00 |
| ATOM | 5184 | HA   | ASP | X | 345 | 65.214 | 28.601 | 30.600 | 0.00 | 0.00 |
| ATOM | 5185 | CB   | ASP | X | 345 | 66.474 | 30.123 | 31.445 | 0.00 | 0.00 |
| ATOM | 5186 | HB2  | ASP | X | 345 | 66.316 | 30.536 | 30.449 | 0.00 | 0.00 |
| ATOM | 5187 | HB3  | ASP | X | 345 | 66.335 | 30.886 | 32.211 | 0.00 | 0.00 |
| ATOM | 5188 | CG   | ASP | X | 345 | 67.904 | 29.508 | 31.442 | 0.00 | 0.00 |
| ATOM | 5189 | OD1  | ASP | X | 345 | 68.796 | 29.930 | 32.240 | 0.00 | 0.00 |
| ATOM | 5190 | OD2  | ASP | X | 345 | 68.215 | 28.622 | 30.594 | 0.00 | 0.00 |
| ATOM | 5191 | C    | ASP | X | 345 | 65.748 | 28.237 | 32.722 | 0.00 | 0.00 |
| ATOM | 5192 | O    | ASP | X | 345 | 65.987 | 27.058 | 32.499 | 0.00 | 0.00 |
| ATOM | 5193 | N    | ASN | X | 346 | 65.838 | 28.749 | 33.958 | 0.00 | 0.00 |
| ATOM | 5194 | H    | ASN | X | 346 | 65.441 | 29.669 | 34.086 | 0.00 | 0.00 |
| ATOM | 5195 | CA   | ASN | X | 346 | 66.694 | 28.193 | 34.998 | 0.00 | 0.00 |
| ATOM | 5196 | HA   | ASN | X | 346 | 67.690 | 27.989 | 34.607 | 0.00 | 0.00 |
| ATOM | 5197 | CB   | ASN | X | 346 | 66.864 | 29.283 | 36.096 | 0.00 | 0.00 |
| ATOM | 5198 | HB2  | ASN | X | 346 | 67.300 | 30.209 | 35.722 | 0.00 | 0.00 |
| ATOM | 5199 | HB3  | ASN | X | 346 | 65.885 | 29.525 | 36.510 | 0.00 | 0.00 |
| ATOM | 5200 | CG   | ASN | X | 346 | 67.929 | 28.701 | 37.206 | 0.00 | 0.00 |
| ATOM | 5201 | OD1  | ASN | X | 346 | 67.607 | 28.196 | 38.271 | 0.00 | 0.00 |
| ATOM | 5202 | ND2  | ASN | X | 346 | 69.220 | 28.755 | 36.853 | 0.00 | 0.00 |
| ATOM | 5203 | HD21 | ASN | X | 346 | 69.838 | 28.295 | 37.506 | 0.00 | 0.00 |
| ATOM | 5204 | HD22 | ASN | X | 346 | 69.476 | 29.160 | 35.964 | 0.00 | 0.00 |
| ATOM | 5205 | C    | ASN | X | 346 | 66.100 | 26.837 | 35.576 | 0.00 | 0.00 |
| ATOM | 5206 | O    | ASN | X | 346 | 64.895 | 26.762 | 35.687 | 0.00 | 0.00 |
| ATOM | 5207 | N    | GLU | X | 347 | 66.942 | 25.883 | 36.013 | 0.00 | 0.00 |
| ATOM | 5208 | H    | GLU | X | 347 | 67.918 | 25.826 | 35.758 | 0.00 | 0.00 |
| ATOM | 5209 | CA   | GLU | X | 347 | 66.402 | 24.645 | 36.634 | 0.00 | 0.00 |
| ATOM | 5210 | HA   | GLU | X | 347 | 65.715 | 24.269 | 35.876 | 0.00 | 0.00 |

|      |      |      |     |   |     |        |        |        |      |      |
|------|------|------|-----|---|-----|--------|--------|--------|------|------|
| ATOM | 5211 | CB   | GLU | X | 347 | 67.540 | 23.711 | 36.914 | 0.00 | 0.00 |
| ATOM | 5212 | HB2  | GLU | X | 347 | 68.030 | 23.497 | 35.964 | 0.00 | 0.00 |
| ATOM | 5213 | HB3  | GLU | X | 347 | 68.149 | 24.236 | 37.651 | 0.00 | 0.00 |
| ATOM | 5214 | CG   | GLU | X | 347 | 67.171 | 22.329 | 37.426 | 0.00 | 0.00 |
| ATOM | 5215 | HG2  | GLU | X | 347 | 66.587 | 22.441 | 38.339 | 0.00 | 0.00 |
| ATOM | 5216 | HG3  | GLU | X | 347 | 66.529 | 21.827 | 36.702 | 0.00 | 0.00 |
| ATOM | 5217 | CD   | GLU | X | 347 | 68.398 | 21.525 | 37.872 | 0.00 | 0.00 |
| ATOM | 5218 | OE1  | GLU | X | 347 | 69.418 | 22.098 | 38.244 | 0.00 | 0.00 |
| ATOM | 5219 | OE2  | GLU | X | 347 | 68.416 | 20.285 | 37.921 | 0.00 | 0.00 |
| ATOM | 5220 | C    | GLU | X | 347 | 65.521 | 25.000 | 37.813 | 0.00 | 0.00 |
| ATOM | 5221 | O    | GLU | X | 347 | 64.509 | 24.344 | 38.015 | 0.00 | 0.00 |
| ATOM | 5222 | N    | SER | X | 348 | 65.792 | 26.063 | 38.510 | 0.00 | 0.00 |
| ATOM | 5223 | H    | SER | X | 348 | 66.596 | 26.606 | 38.229 | 0.00 | 0.00 |
| ATOM | 5224 | CA   | SER | X | 348 | 64.985 | 26.646 | 39.599 | 0.00 | 0.00 |
| ATOM | 5225 | HA   | SER | X | 348 | 65.574 | 27.504 | 39.924 | 0.00 | 0.00 |
| ATOM | 5226 | CB   | SER | X | 348 | 63.597 | 27.121 | 39.039 | 0.00 | 0.00 |
| ATOM | 5227 | HB2  | SER | X | 348 | 62.972 | 26.298 | 38.694 | 0.00 | 0.00 |
| ATOM | 5228 | HB3  | SER | X | 348 | 63.170 | 27.592 | 39.924 | 0.00 | 0.00 |
| ATOM | 5229 | OG   | SER | X | 348 | 63.761 | 28.157 | 38.073 | 0.00 | 0.00 |
| ATOM | 5230 | HG   | SER | X | 348 | 64.002 | 27.698 | 37.265 | 0.00 | 0.00 |
| ATOM | 5231 | C    | SER | X | 348 | 64.856 | 25.857 | 40.907 | 0.00 | 0.00 |
| ATOM | 5232 | O    | SER | X | 348 | 64.114 | 26.185 | 41.841 | 0.00 | 0.00 |
| ATOM | 5233 | N    | LEU | X | 349 | 65.696 | 24.823 | 41.111 | 0.00 | 0.00 |
| ATOM | 5234 | H    | LEU | X | 349 | 66.299 | 24.662 | 40.316 | 0.00 | 0.00 |
| ATOM | 5235 | CA   | LEU | X | 349 | 66.010 | 24.132 | 42.358 | 0.00 | 0.00 |
| ATOM | 5236 | HA   | LEU | X | 349 | 65.037 | 24.002 | 42.832 | 0.00 | 0.00 |
| ATOM | 5237 | CB   | LEU | X | 349 | 66.634 | 22.783 | 42.101 | 0.00 | 0.00 |
| ATOM | 5238 | HB2  | LEU | X | 349 | 67.460 | 22.803 | 41.390 | 0.00 | 0.00 |
| ATOM | 5239 | HB3  | LEU | X | 349 | 67.052 | 22.475 | 43.059 | 0.00 | 0.00 |
| ATOM | 5240 | CG   | LEU | X | 349 | 65.670 | 21.714 | 41.536 | 0.00 | 0.00 |
| ATOM | 5241 | HG   | LEU | X | 349 | 65.134 | 22.296 | 40.786 | 0.00 | 0.00 |
| ATOM | 5242 | CD1  | LEU | X | 349 | 66.378 | 20.561 | 40.841 | 0.00 | 0.00 |
| ATOM | 5243 | HD11 | LEU | X | 349 | 65.741 | 19.679 | 40.784 | 0.00 | 0.00 |
| ATOM | 5244 | HD12 | LEU | X | 349 | 67.229 | 20.296 | 41.468 | 0.00 | 0.00 |
| ATOM | 5245 | HD13 | LEU | X | 349 | 66.683 | 20.896 | 39.850 | 0.00 | 0.00 |
| ATOM | 5246 | CD2  | LEU | X | 349 | 64.637 | 21.219 | 42.562 | 0.00 | 0.00 |
| ATOM | 5247 | HD21 | LEU | X | 349 | 64.304 | 22.094 | 43.120 | 0.00 | 0.00 |
| ATOM | 5248 | HD22 | LEU | X | 349 | 63.814 | 20.800 | 41.982 | 0.00 | 0.00 |
| ATOM | 5249 | HD23 | LEU | X | 349 | 65.041 | 20.500 | 43.274 | 0.00 | 0.00 |
| ATOM | 5250 | C    | LEU | X | 349 | 66.953 | 25.020 | 43.222 | 0.00 | 0.00 |
| ATOM | 5251 | O    | LEU | X | 349 | 67.636 | 25.949 | 42.781 | 0.00 | 0.00 |
| ATOM | 5252 | N    | ILE | X | 350 | 66.853 | 24.862 | 44.550 | 0.00 | 0.00 |
| ATOM | 5253 | H    | ILE | X | 350 | 66.299 | 24.137 | 44.981 | 0.00 | 0.00 |
| ATOM | 5254 | CA   | ILE | X | 350 | 67.478 | 25.791 | 45.543 | 0.00 | 0.00 |
| ATOM | 5255 | HA   | ILE | X | 350 | 68.369 | 26.289 | 45.162 | 0.00 | 0.00 |
| ATOM | 5256 | CB   | ILE | X | 350 | 66.390 | 26.887 | 45.887 | 0.00 | 0.00 |
| ATOM | 5257 | HB   | ILE | X | 350 | 66.802 | 27.403 | 46.755 | 0.00 | 0.00 |
| ATOM | 5258 | CG2  | ILE | X | 350 | 66.217 | 27.990 | 44.777 | 0.00 | 0.00 |
| ATOM | 5259 | HG21 | ILE | X | 350 | 67.244 | 28.329 | 44.638 | 0.00 | 0.00 |
| ATOM | 5260 | HG22 | ILE | X | 350 | 65.621 | 28.871 | 45.011 | 0.00 | 0.00 |
| ATOM | 5261 | HG23 | ILE | X | 350 | 65.880 | 27.405 | 43.921 | 0.00 | 0.00 |
| ATOM | 5262 | CG1  | ILE | X | 350 | 64.982 | 26.260 | 46.305 | 0.00 | 0.00 |
| ATOM | 5263 | HG12 | ILE | X | 350 | 64.491 | 25.823 | 45.436 | 0.00 | 0.00 |
| ATOM | 5264 | HG13 | ILE | X | 350 | 65.127 | 25.523 | 47.096 | 0.00 | 0.00 |
| ATOM | 5265 | CD1  | ILE | X | 350 | 64.037 | 27.361 | 46.727 | 0.00 | 0.00 |
| ATOM | 5266 | HD11 | ILE | X | 350 | 62.992 | 27.065 | 46.810 | 0.00 | 0.00 |
| ATOM | 5267 | HD12 | ILE | X | 350 | 63.943 | 28.028 | 45.870 | 0.00 | 0.00 |
| ATOM | 5268 | HD13 | ILE | X | 350 | 64.421 | 27.793 | 47.651 | 0.00 | 0.00 |
| ATOM | 5269 | C    | ILE | X | 350 | 67.890 | 25.120 | 46.844 | 0.00 | 0.00 |
| ATOM | 5270 | O    | ILE | X | 350 | 67.312 | 24.077 | 47.285 | 0.00 | 0.00 |
| ATOM | 5271 | N    | SER | X | 351 | 68.942 | 25.591 | 47.436 | 0.00 | 0.00 |
| ATOM | 5272 | H    | SER | X | 351 | 69.245 | 26.522 | 47.186 | 0.00 | 0.00 |
| ATOM | 5273 | CA   | SER | X | 351 | 69.375 | 25.264 | 48.799 | 0.00 | 0.00 |
| ATOM | 5274 | HA   | SER | X | 351 | 69.343 | 24.174 | 48.789 | 0.00 | 0.00 |
| ATOM | 5275 | CB   | SER | X | 351 | 70.825 | 25.753 | 48.969 | 0.00 | 0.00 |
| ATOM | 5276 | HB2  | SER | X | 351 | 71.253 | 25.186 | 49.796 | 0.00 | 0.00 |
| ATOM | 5277 | HB3  | SER | X | 351 | 71.535 | 25.604 | 48.155 | 0.00 | 0.00 |

|      |      |      |     |   |     |        |        |        |      |      |
|------|------|------|-----|---|-----|--------|--------|--------|------|------|
| ATOM | 5278 | OG   | SER | X | 351 | 70.874 | 27.089 | 49.240 | 0.00 | 0.00 |
| ATOM | 5279 | HG   | SER | X | 351 | 70.829 | 27.520 | 48.383 | 0.00 | 0.00 |
| ATOM | 5280 | C    | SER | X | 351 | 68.555 | 25.807 | 49.965 | 0.00 | 0.00 |
| ATOM | 5281 | O    | SER | X | 351 | 67.906 | 26.864 | 49.855 | 0.00 | 0.00 |
| ATOM | 5282 | N    | ARG | X | 352 | 68.591 | 25.188 | 51.135 | 0.00 | 0.00 |
| ATOM | 5283 | H    | ARG | X | 352 | 69.126 | 24.339 | 51.249 | 0.00 | 0.00 |
| ATOM | 5284 | CA   | ARG | X | 352 | 67.827 | 25.633 | 52.282 | 0.00 | 0.00 |
| ATOM | 5285 | HA   | ARG | X | 352 | 66.763 | 25.602 | 52.046 | 0.00 | 0.00 |
| ATOM | 5286 | CB   | ARG | X | 352 | 68.028 | 24.683 | 53.443 | 0.00 | 0.00 |
| ATOM | 5287 | HB2  | ARG | X | 352 | 67.684 | 23.682 | 53.180 | 0.00 | 0.00 |
| ATOM | 5288 | HB3  | ARG | X | 352 | 69.106 | 24.632 | 53.599 | 0.00 | 0.00 |
| ATOM | 5289 | CG   | ARG | X | 352 | 67.212 | 25.068 | 54.664 | 0.00 | 0.00 |
| ATOM | 5290 | HG2  | ARG | X | 352 | 67.847 | 25.802 | 55.160 | 0.00 | 0.00 |
| ATOM | 5291 | HG3  | ARG | X | 352 | 66.273 | 25.546 | 54.386 | 0.00 | 0.00 |
| ATOM | 5292 | CD   | ARG | X | 352 | 67.058 | 23.808 | 55.451 | 0.00 | 0.00 |
| ATOM | 5293 | HD2  | ARG | X | 352 | 66.493 | 23.027 | 54.942 | 0.00 | 0.00 |
| ATOM | 5294 | HD3  | ARG | X | 352 | 68.007 | 23.288 | 55.585 | 0.00 | 0.00 |
| ATOM | 5295 | NE   | ARG | X | 352 | 66.503 | 24.021 | 56.823 | 0.00 | 0.00 |
| ATOM | 5296 | HE   | ARG | X | 352 | 67.054 | 24.576 | 57.462 | 0.00 | 0.00 |
| ATOM | 5297 | CZ   | ARG | X | 352 | 65.405 | 23.496 | 57.327 | 0.00 | 0.00 |
| ATOM | 5298 | NH1  | ARG | X | 352 | 64.714 | 22.538 | 56.789 | 0.00 | 0.00 |
| ATOM | 5299 | HH11 | ARG | X | 352 | 64.959 | 22.209 | 55.866 | 0.00 | 0.00 |
| ATOM | 5300 | HH12 | ARG | X | 352 | 63.944 | 22.070 | 57.244 | 0.00 | 0.00 |
| ATOM | 5301 | NH2  | ARG | X | 352 | 65.026 | 23.893 | 58.519 | 0.00 | 0.00 |
| ATOM | 5302 | HH21 | ARG | X | 352 | 65.494 | 24.549 | 59.127 | 0.00 | 0.00 |
| ATOM | 5303 | HH22 | ARG | X | 352 | 64.066 | 23.601 | 58.634 | 0.00 | 0.00 |
| ATOM | 5304 | C    | ARG | X | 352 | 68.110 | 27.135 | 52.629 | 0.00 | 0.00 |
| ATOM | 5305 | O    | ARG | X | 352 | 67.239 | 27.884 | 52.980 | 0.00 | 0.00 |
| ATOM | 5306 | N    | ALA | X | 353 | 69.367 | 27.645 | 52.405 | 0.00 | 0.00 |
| ATOM | 5307 | H    | ALA | X | 353 | 70.073 | 26.932 | 52.293 | 0.00 | 0.00 |
| ATOM | 5308 | CA   | ALA | X | 353 | 69.722 | 29.060 | 52.569 | 0.00 | 0.00 |
| ATOM | 5309 | HA   | ALA | X | 353 | 69.427 | 29.376 | 53.570 | 0.00 | 0.00 |
| ATOM | 5310 | CB   | ALA | X | 353 | 71.268 | 29.290 | 52.652 | 0.00 | 0.00 |
| ATOM | 5311 | HB1  | ALA | X | 353 | 71.726 | 29.073 | 51.687 | 0.00 | 0.00 |
| ATOM | 5312 | HB2  | ALA | X | 353 | 71.616 | 28.656 | 53.467 | 0.00 | 0.00 |
| ATOM | 5313 | HB3  | ALA | X | 353 | 71.402 | 30.348 | 52.878 | 0.00 | 0.00 |
| ATOM | 5314 | C    | ALA | X | 353 | 69.008 | 29.941 | 51.454 | 0.00 | 0.00 |
| ATOM | 5315 | O    | ALA | X | 353 | 68.513 | 31.046 | 51.738 | 0.00 | 0.00 |
| ATOM | 5316 | N    | GLU | X | 354 | 68.873 | 29.448 | 50.248 | 0.00 | 0.00 |
| ATOM | 5317 | H    | GLU | X | 354 | 69.399 | 28.618 | 50.017 | 0.00 | 0.00 |
| ATOM | 5318 | CA   | GLU | X | 354 | 68.088 | 30.150 | 49.183 | 0.00 | 0.00 |
| ATOM | 5319 | HA   | GLU | X | 354 | 68.431 | 31.170 | 49.014 | 0.00 | 0.00 |
| ATOM | 5320 | CB   | GLU | X | 354 | 68.475 | 29.437 | 47.873 | 0.00 | 0.00 |
| ATOM | 5321 | HB2  | GLU | X | 354 | 68.525 | 28.359 | 48.026 | 0.00 | 0.00 |
| ATOM | 5322 | HB3  | GLU | X | 354 | 67.770 | 29.548 | 47.049 | 0.00 | 0.00 |
| ATOM | 5323 | CG   | GLU | X | 354 | 69.813 | 29.865 | 47.311 | 0.00 | 0.00 |
| ATOM | 5324 | HG2  | GLU | X | 354 | 69.791 | 30.914 | 47.016 | 0.00 | 0.00 |
| ATOM | 5325 | HG3  | GLU | X | 354 | 70.550 | 29.645 | 48.084 | 0.00 | 0.00 |
| ATOM | 5326 | CD   | GLU | X | 354 | 70.310 | 28.918 | 46.330 | 0.00 | 0.00 |
| ATOM | 5327 | OE1  | GLU | X | 354 | 70.286 | 29.163 | 45.115 | 0.00 | 0.00 |
| ATOM | 5328 | OE2  | GLU | X | 354 | 70.644 | 27.763 | 46.662 | 0.00 | 0.00 |
| ATOM | 5329 | C    | GLU | X | 354 | 66.577 | 30.096 | 49.388 | 0.00 | 0.00 |
| ATOM | 5330 | O    | GLU | X | 354 | 65.820 | 31.054 | 49.116 | 0.00 | 0.00 |
| ATOM | 5331 | N    | PHE | X | 355 | 66.036 | 29.008 | 49.907 | 0.00 | 0.00 |
| ATOM | 5332 | H    | PHE | X | 355 | 66.681 | 28.260 | 50.122 | 0.00 | 0.00 |
| ATOM | 5333 | CA   | PHE | X | 355 | 64.643 | 28.981 | 50.325 | 0.00 | 0.00 |
| ATOM | 5334 | HA   | PHE | X | 355 | 64.024 | 29.265 | 49.474 | 0.00 | 0.00 |
| ATOM | 5335 | CB   | PHE | X | 355 | 64.418 | 27.503 | 50.787 | 0.00 | 0.00 |
| ATOM | 5336 | HB2  | PHE | X | 355 | 64.620 | 26.805 | 49.974 | 0.00 | 0.00 |
| ATOM | 5337 | HB3  | PHE | X | 355 | 65.205 | 27.193 | 51.475 | 0.00 | 0.00 |
| ATOM | 5338 | CG   | PHE | X | 355 | 63.041 | 27.379 | 51.349 | 0.00 | 0.00 |
| ATOM | 5339 | CD1  | PHE | X | 355 | 61.928 | 27.368 | 50.503 | 0.00 | 0.00 |
| ATOM | 5340 | HD1  | PHE | X | 355 | 62.008 | 27.479 | 49.432 | 0.00 | 0.00 |
| ATOM | 5341 | CE1  | PHE | X | 355 | 60.649 | 27.143 | 51.038 | 0.00 | 0.00 |
| ATOM | 5342 | HE1  | PHE | X | 355 | 59.802 | 27.078 | 50.372 | 0.00 | 0.00 |
| ATOM | 5343 | CZ   | PHE | X | 355 | 60.432 | 26.939 | 52.449 | 0.00 | 0.00 |
| ATOM | 5344 | HZ   | PHE | X | 355 | 59.457 | 26.750 | 52.873 | 0.00 | 0.00 |



|      |      |      |     |   |     |        |        |        |      |      |
|------|------|------|-----|---|-----|--------|--------|--------|------|------|
| ATOM | 5345 | CE2  | PHE | X | 355 | 61.559 | 26.973 | 53.284 | 0.00 | 0.00 |
| ATOM | 5346 | HE2  | PHE | X | 355 | 61.415 | 26.854 | 54.347 | 0.00 | 0.00 |
| ATOM | 5347 | CD2  | PHE | X | 355 | 62.799 | 27.321 | 52.749 | 0.00 | 0.00 |
| ATOM | 5348 | HD2  | PHE | X | 355 | 63.649 | 27.324 | 53.416 | 0.00 | 0.00 |
| ATOM | 5349 | C    | PHE | X | 355 | 64.365 | 30.034 | 51.414 | 0.00 | 0.00 |
| ATOM | 5350 | O    | PHE | X | 355 | 63.387 | 30.836 | 51.390 | 0.00 | 0.00 |
| ATOM | 5351 | N    | LEU | X | 356 | 65.307 | 30.126 | 52.400 | 0.00 | 0.00 |
| ATOM | 5352 | H    | LEU | X | 356 | 66.191 | 29.638 | 52.361 | 0.00 | 0.00 |
| ATOM | 5353 | CA   | LEU | X | 356 | 65.237 | 31.186 | 53.404 | 0.00 | 0.00 |
| ATOM | 5354 | HA   | LEU | X | 356 | 64.302 | 31.180 | 53.965 | 0.00 | 0.00 |
| ATOM | 5355 | CB   | LEU | X | 356 | 66.360 | 30.867 | 54.428 | 0.00 | 0.00 |
| ATOM | 5356 | HB2  | LEU | X | 356 | 66.195 | 29.900 | 54.903 | 0.00 | 0.00 |
| ATOM | 5357 | HB3  | LEU | X | 356 | 67.276 | 30.649 | 53.878 | 0.00 | 0.00 |
| ATOM | 5358 | CG   | LEU | X | 356 | 66.621 | 31.866 | 55.527 | 0.00 | 0.00 |
| ATOM | 5359 | HG   | LEU | X | 356 | 66.911 | 32.781 | 55.010 | 0.00 | 0.00 |
| ATOM | 5360 | CD1  | LEU | X | 356 | 65.349 | 32.174 | 56.337 | 0.00 | 0.00 |
| ATOM | 5361 | HD11 | LEU | X | 356 | 64.577 | 32.625 | 55.712 | 0.00 | 0.00 |
| ATOM | 5362 | HD12 | LEU | X | 356 | 65.545 | 32.911 | 57.115 | 0.00 | 0.00 |
| ATOM | 5363 | HD13 | LEU | X | 356 | 64.926 | 31.345 | 56.904 | 0.00 | 0.00 |
| ATOM | 5364 | CD2  | LEU | X | 356 | 67.774 | 31.541 | 56.434 | 0.00 | 0.00 |
| ATOM | 5365 | HD21 | LEU | X | 356 | 67.476 | 30.630 | 56.953 | 0.00 | 0.00 |
| ATOM | 5366 | HD22 | LEU | X | 356 | 68.604 | 31.397 | 55.743 | 0.00 | 0.00 |
| ATOM | 5367 | HD23 | LEU | X | 356 | 67.917 | 32.413 | 57.073 | 0.00 | 0.00 |
| ATOM | 5368 | C    | LEU | X | 356 | 65.211 | 32.670 | 52.792 | 0.00 | 0.00 |
| ATOM | 5369 | O    | LEU | X | 356 | 64.396 | 33.520 | 53.205 | 0.00 | 0.00 |
| ATOM | 5370 | N    | ALA | X | 357 | 66.005 | 32.849 | 51.773 | 0.00 | 0.00 |
| ATOM | 5371 | H    | ALA | X | 357 | 66.861 | 32.316 | 51.721 | 0.00 | 0.00 |
| ATOM | 5372 | CA   | ALA | X | 357 | 65.892 | 34.111 | 50.952 | 0.00 | 0.00 |
| ATOM | 5373 | HA   | ALA | X | 357 | 66.012 | 35.018 | 51.545 | 0.00 | 0.00 |
| ATOM | 5374 | CB   | ALA | X | 357 | 66.947 | 33.980 | 49.923 | 0.00 | 0.00 |
| ATOM | 5375 | HB1  | ALA | X | 357 | 66.969 | 33.036 | 49.377 | 0.00 | 0.00 |
| ATOM | 5376 | HB2  | ALA | X | 357 | 67.916 | 34.115 | 50.404 | 0.00 | 0.00 |
| ATOM | 5377 | HB3  | ALA | X | 357 | 66.826 | 34.775 | 49.188 | 0.00 | 0.00 |
| ATOM | 5378 | C    | ALA | X | 357 | 64.522 | 34.205 | 50.297 | 0.00 | 0.00 |
| ATOM | 5379 | O    | ALA | X | 357 | 63.913 | 35.274 | 50.250 | 0.00 | 0.00 |
| ATOM | 5380 | N    | GLY | X | 358 | 64.062 | 33.097 | 49.680 | 0.00 | 0.00 |
| ATOM | 5381 | H    | GLY | X | 358 | 64.603 | 32.249 | 49.765 | 0.00 | 0.00 |
| ATOM | 5382 | CA   | GLY | X | 358 | 62.752 | 33.034 | 48.954 | 0.00 | 0.00 |
| ATOM | 5383 | HA2  | GLY | X | 358 | 62.637 | 33.771 | 48.159 | 0.00 | 0.00 |
| ATOM | 5384 | HA3  | GLY | X | 358 | 62.627 | 32.071 | 48.458 | 0.00 | 0.00 |
| ATOM | 5385 | C    | GLY | X | 358 | 61.517 | 33.237 | 49.845 | 0.00 | 0.00 |
| ATOM | 5386 | O    | GLY | X | 358 | 60.612 | 33.934 | 49.399 | 0.00 | 0.00 |
| ATOM | 5387 | N    | VAL | X | 359 | 61.521 | 32.893 | 51.095 | 0.00 | 0.00 |
| ATOM | 5388 | H    | VAL | X | 359 | 62.368 | 32.434 | 51.400 | 0.00 | 0.00 |
| ATOM | 5389 | CA   | VAL | X | 359 | 60.526 | 33.203 | 52.159 | 0.00 | 0.00 |
| ATOM | 5390 | HA   | VAL | X | 359 | 59.484 | 32.968 | 51.943 | 0.00 | 0.00 |
| ATOM | 5391 | CB   | VAL | X | 359 | 60.849 | 32.262 | 53.378 | 0.00 | 0.00 |
| ATOM | 5392 | HB   | VAL | X | 359 | 61.923 | 32.288 | 53.564 | 0.00 | 0.00 |
| ATOM | 5393 | CG1  | VAL | X | 359 | 60.099 | 32.758 | 54.676 | 0.00 | 0.00 |
| ATOM | 5394 | HG11 | VAL | X | 359 | 60.370 | 33.806 | 54.801 | 0.00 | 0.00 |
| ATOM | 5395 | HG12 | VAL | X | 359 | 59.018 | 32.650 | 54.594 | 0.00 | 0.00 |
| ATOM | 5396 | HG13 | VAL | X | 359 | 60.400 | 32.104 | 55.494 | 0.00 | 0.00 |
| ATOM | 5397 | CG2  | VAL | X | 359 | 60.359 | 30.807 | 52.995 | 0.00 | 0.00 |
| ATOM | 5398 | HG21 | VAL | X | 359 | 59.270 | 30.793 | 52.957 | 0.00 | 0.00 |
| ATOM | 5399 | HG22 | VAL | X | 359 | 60.580 | 30.082 | 53.779 | 0.00 | 0.00 |
| ATOM | 5400 | HG23 | VAL | X | 359 | 60.795 | 30.500 | 52.044 | 0.00 | 0.00 |
| ATOM | 5401 | C    | VAL | X | 359 | 60.632 | 34.621 | 52.567 | 0.00 | 0.00 |
| ATOM | 5402 | O    | VAL | X | 359 | 59.568 | 35.240 | 52.614 | 0.00 | 0.00 |
| ATOM | 5403 | N    | ARG | X | 360 | 61.813 | 35.162 | 52.807 | 0.00 | 0.00 |
| ATOM | 5404 | H    | ARG | X | 360 | 62.680 | 34.648 | 52.874 | 0.00 | 0.00 |
| ATOM | 5405 | CA   | ARG | X | 360 | 61.959 | 36.589 | 53.075 | 0.00 | 0.00 |
| ATOM | 5406 | HA   | ARG | X | 360 | 61.394 | 36.819 | 53.978 | 0.00 | 0.00 |
| ATOM | 5407 | CB   | ARG | X | 360 | 63.447 | 36.881 | 53.391 | 0.00 | 0.00 |
| ATOM | 5408 | HB2  | ARG | X | 360 | 63.768 | 36.102 | 54.082 | 0.00 | 0.00 |
| ATOM | 5409 | HB3  | ARG | X | 360 | 64.001 | 36.663 | 52.478 | 0.00 | 0.00 |
| ATOM | 5410 | CG   | ARG | X | 360 | 63.630 | 38.251 | 54.045 | 0.00 | 0.00 |
| ATOM | 5411 | HG2  | ARG | X | 360 | 63.274 | 39.121 | 53.492 | 0.00 | 0.00 |

|      |      |      |     |   |     |        |        |        |      |      |
|------|------|------|-----|---|-----|--------|--------|--------|------|------|
| ATOM | 5412 | HG3  | ARG | X | 360 | 63.044 | 38.258 | 54.964 | 0.00 | 0.00 |
| ATOM | 5413 | CD   | ARG | X | 360 | 65.133 | 38.444 | 54.329 | 0.00 | 0.00 |
| ATOM | 5414 | HD2  | ARG | X | 360 | 65.324 | 39.493 | 54.558 | 0.00 | 0.00 |
| ATOM | 5415 | HD3  | ARG | X | 360 | 65.305 | 37.848 | 55.225 | 0.00 | 0.00 |
| ATOM | 5416 | NE   | ARG | X | 360 | 65.993 | 38.061 | 53.192 | 0.00 | 0.00 |
| ATOM | 5417 | HE   | ARG | X | 360 | 66.034 | 38.853 | 52.566 | 0.00 | 0.00 |
| ATOM | 5418 | CZ   | ARG | X | 360 | 67.054 | 37.218 | 53.209 | 0.00 | 0.00 |
| ATOM | 5419 | NH1  | ARG | X | 360 | 67.047 | 36.169 | 53.988 | 0.00 | 0.00 |
| ATOM | 5420 | HH11 | ARG | X | 360 | 66.443 | 36.066 | 54.791 | 0.00 | 0.00 |
| ATOM | 5421 | HH12 | ARG | X | 360 | 67.775 | 35.482 | 53.855 | 0.00 | 0.00 |
| ATOM | 5422 | NH2  | ARG | X | 360 | 67.992 | 37.390 | 52.300 | 0.00 | 0.00 |
| ATOM | 5423 | HH21 | ARG | X | 360 | 68.048 | 38.178 | 51.670 | 0.00 | 0.00 |
| ATOM | 5424 | HH22 | ARG | X | 360 | 68.757 | 36.731 | 52.277 | 0.00 | 0.00 |
| ATOM | 5425 | C    | ARG | X | 360 | 61.567 | 37.594 | 51.986 | 0.00 | 0.00 |
| ATOM | 5426 | O    | ARG | X | 360 | 61.082 | 38.645 | 52.336 | 0.00 | 0.00 |
| ATOM | 5427 | N    | VAL | X | 361 | 61.740 | 37.299 | 50.707 | 0.00 | 0.00 |
| ATOM | 5428 | H    | VAL | X | 361 | 62.317 | 36.498 | 50.493 | 0.00 | 0.00 |
| ATOM | 5429 | CA   | VAL | X | 361 | 60.940 | 38.044 | 49.664 | 0.00 | 0.00 |
| ATOM | 5430 | HA   | VAL | X | 361 | 60.946 | 39.095 | 49.952 | 0.00 | 0.00 |
| ATOM | 5431 | CB   | VAL | X | 361 | 61.705 | 38.026 | 48.312 | 0.00 | 0.00 |
| ATOM | 5432 | HB   | VAL | X | 361 | 61.185 | 38.718 | 47.650 | 0.00 | 0.00 |
| ATOM | 5433 | CG1  | VAL | X | 361 | 63.189 | 38.465 | 48.402 | 0.00 | 0.00 |
| ATOM | 5434 | HG11 | VAL | X | 361 | 63.699 | 37.643 | 48.904 | 0.00 | 0.00 |
| ATOM | 5435 | HG12 | VAL | X | 361 | 63.530 | 38.672 | 47.387 | 0.00 | 0.00 |
| ATOM | 5436 | HG13 | VAL | X | 361 | 63.403 | 39.406 | 48.909 | 0.00 | 0.00 |
| ATOM | 5437 | CG2  | VAL | X | 361 | 61.680 | 36.637 | 47.672 | 0.00 | 0.00 |
| ATOM | 5438 | HG21 | VAL | X | 361 | 60.748 | 36.072 | 47.693 | 0.00 | 0.00 |
| ATOM | 5439 | HG22 | VAL | X | 361 | 62.443 | 35.998 | 48.117 | 0.00 | 0.00 |
| ATOM | 5440 | HG23 | VAL | X | 361 | 61.851 | 36.742 | 46.601 | 0.00 | 0.00 |
| ATOM | 5441 | C    | VAL | X | 361 | 59.481 | 37.633 | 49.400 | 0.00 | 0.00 |
| ATOM | 5442 | O    | VAL | X | 361 | 58.633 | 38.448 | 49.000 | 0.00 | 0.00 |
| ATOM | 5443 | N    | GLY | X | 362 | 59.094 | 36.384 | 49.739 | 0.00 | 0.00 |
| ATOM | 5444 | H    | GLY | X | 362 | 59.851 | 35.787 | 50.040 | 0.00 | 0.00 |
| ATOM | 5445 | CA   | GLY | X | 362 | 57.829 | 35.803 | 49.455 | 0.00 | 0.00 |
| ATOM | 5446 | HA2  | GLY | X | 362 | 57.513 | 36.142 | 48.469 | 0.00 | 0.00 |
| ATOM | 5447 | HA3  | GLY | X | 362 | 58.049 | 34.741 | 49.338 | 0.00 | 0.00 |
| ATOM | 5448 | C    | GLY | X | 362 | 56.770 | 36.139 | 50.494 | 0.00 | 0.00 |
| ATOM | 5449 | O    | GLY | X | 362 | 55.585 | 36.050 | 50.152 | 0.00 | 0.00 |
| ATOM | 5450 | N    | VAL | X | 363 | 57.089 | 36.469 | 51.731 | 0.00 | 0.00 |
| ATOM | 5451 | H    | VAL | X | 363 | 58.080 | 36.407 | 51.915 | 0.00 | 0.00 |
| ATOM | 5452 | CA   | VAL | X | 363 | 56.189 | 37.182 | 52.713 | 0.00 | 0.00 |
| ATOM | 5453 | HA   | VAL | X | 363 | 55.162 | 37.182 | 52.350 | 0.00 | 0.00 |
| ATOM | 5454 | CB   | VAL | X | 363 | 56.161 | 36.444 | 54.064 | 0.00 | 0.00 |
| ATOM | 5455 | HB   | VAL | X | 363 | 57.142 | 36.686 | 54.473 | 0.00 | 0.00 |
| ATOM | 5456 | CG1  | VAL | X | 363 | 55.158 | 37.064 | 55.018 | 0.00 | 0.00 |
| ATOM | 5457 | HG11 | VAL | X | 363 | 54.128 | 36.926 | 54.689 | 0.00 | 0.00 |
| ATOM | 5458 | HG12 | VAL | X | 363 | 55.278 | 36.638 | 56.014 | 0.00 | 0.00 |
| ATOM | 5459 | HG13 | VAL | X | 363 | 55.368 | 38.127 | 55.138 | 0.00 | 0.00 |
| ATOM | 5460 | CG2  | VAL | X | 363 | 56.014 | 34.955 | 53.935 | 0.00 | 0.00 |
| ATOM | 5461 | HG21 | VAL | X | 363 | 55.105 | 34.621 | 53.435 | 0.00 | 0.00 |
| ATOM | 5462 | HG22 | VAL | X | 363 | 55.972 | 34.451 | 54.900 | 0.00 | 0.00 |
| ATOM | 5463 | HG23 | VAL | X | 363 | 56.862 | 34.399 | 53.534 | 0.00 | 0.00 |
| ATOM | 5464 | C    | VAL | X | 363 | 56.679 | 38.653 | 52.738 | 0.00 | 0.00 |
| ATOM | 5465 | O    | VAL | X | 363 | 57.712 | 38.915 | 53.302 | 0.00 | 0.00 |
| ATOM | 5466 | N    | PRO | X | 364 | 55.965 | 39.589 | 52.067 | 0.00 | 0.00 |
| ATOM | 5467 | CD   | PRO | X | 364 | 54.765 | 39.443 | 51.302 | 0.00 | 0.00 |
| ATOM | 5468 | HD2  | PRO | X | 364 | 53.904 | 39.698 | 51.920 | 0.00 | 0.00 |
| ATOM | 5469 | HD3  | PRO | X | 364 | 54.657 | 38.447 | 50.874 | 0.00 | 0.00 |
| ATOM | 5470 | CG   | PRO | X | 364 | 54.915 | 40.542 | 50.222 | 0.00 | 0.00 |
| ATOM | 5471 | HG2  | PRO | X | 364 | 53.943 | 40.779 | 49.789 | 0.00 | 0.00 |
| ATOM | 5472 | HG3  | PRO | X | 364 | 55.673 | 40.359 | 49.462 | 0.00 | 0.00 |
| ATOM | 5473 | CB   | PRO | X | 364 | 55.472 | 41.701 | 51.054 | 0.00 | 0.00 |
| ATOM | 5474 | HB2  | PRO | X | 364 | 54.768 | 42.217 | 51.706 | 0.00 | 0.00 |
| ATOM | 5475 | HB3  | PRO | X | 364 | 55.928 | 42.486 | 50.450 | 0.00 | 0.00 |
| ATOM | 5476 | CA   | PRO | X | 364 | 56.484 | 40.934 | 51.911 | 0.00 | 0.00 |
| ATOM | 5477 | HA   | PRO | X | 364 | 57.382 | 40.863 | 51.298 | 0.00 | 0.00 |
| ATOM | 5478 | C    | PRO | X | 364 | 56.773 | 41.629 | 53.236 | 0.00 | 0.00 |

|      |      |      |     |   |     |        |        |        |      |      |
|------|------|------|-----|---|-----|--------|--------|--------|------|------|
| ATOM | 5479 | O    | PRO | X | 364 | 55.986 | 41.718 | 54.136 | 0.00 | 0.00 |
| ATOM | 5480 | N    | GLN | X | 365 | 57.996 | 42.140 | 53.328 | 0.00 | 0.00 |
| ATOM | 5481 | H    | GLN | X | 365 | 58.623 | 41.864 | 52.586 | 0.00 | 0.00 |
| ATOM | 5482 | CA   | GLN | X | 365 | 58.518 | 42.963 | 54.394 | 0.00 | 0.00 |
| ATOM | 5483 | HA   | GLN | X | 365 | 59.586 | 43.099 | 54.229 | 0.00 | 0.00 |
| ATOM | 5484 | CB   | GLN | X | 365 | 57.792 | 44.336 | 54.496 | 0.00 | 0.00 |
| ATOM | 5485 | HB2  | GLN | X | 365 | 56.724 | 44.138 | 54.580 | 0.00 | 0.00 |
| ATOM | 5486 | HB3  | GLN | X | 365 | 58.070 | 44.939 | 55.360 | 0.00 | 0.00 |
| ATOM | 5487 | CG   | GLN | X | 365 | 58.070 | 45.243 | 53.267 | 0.00 | 0.00 |
| ATOM | 5488 | HG2  | GLN | X | 365 | 57.939 | 44.622 | 52.381 | 0.00 | 0.00 |
| ATOM | 5489 | HG3  | GLN | X | 365 | 57.374 | 46.082 | 53.254 | 0.00 | 0.00 |
| ATOM | 5490 | CD   | GLN | X | 365 | 59.423 | 45.952 | 53.278 | 0.00 | 0.00 |
| ATOM | 5491 | OE1  | GLN | X | 365 | 60.339 | 45.630 | 54.029 | 0.00 | 0.00 |
| ATOM | 5492 | NE2  | GLN | X | 365 | 59.498 | 47.060 | 52.500 | 0.00 | 0.00 |
| ATOM | 5493 | HE21 | GLN | X | 365 | 60.306 | 47.665 | 52.466 | 0.00 | 0.00 |
| ATOM | 5494 | HE22 | GLN | X | 365 | 58.700 | 47.365 | 51.961 | 0.00 | 0.00 |
| ATOM | 5495 | C    | GLN | X | 365 | 58.462 | 42.156 | 55.764 | 0.00 | 0.00 |
| ATOM | 5496 | O    | GLN | X | 365 | 58.721 | 42.793 | 56.820 | 0.00 | 0.00 |
| ATOM | 5497 | N    | VAL | X | 366 | 58.291 | 40.789 | 55.745 | 0.00 | 0.00 |
| ATOM | 5498 | H    | VAL | X | 366 | 57.956 | 40.334 | 54.908 | 0.00 | 0.00 |
| ATOM | 5499 | CA   | VAL | X | 366 | 58.876 | 39.951 | 56.830 | 0.00 | 0.00 |
| ATOM | 5500 | HA   | VAL | X | 366 | 58.358 | 40.216 | 57.752 | 0.00 | 0.00 |
| ATOM | 5501 | CB   | VAL | X | 366 | 58.505 | 38.436 | 56.509 | 0.00 | 0.00 |
| ATOM | 5502 | HB   | VAL | X | 366 | 57.507 | 38.465 | 56.074 | 0.00 | 0.00 |
| ATOM | 5503 | CG1  | VAL | X | 366 | 59.433 | 37.660 | 55.576 | 0.00 | 0.00 |
| ATOM | 5504 | HG11 | VAL | X | 366 | 59.649 | 38.224 | 54.669 | 0.00 | 0.00 |
| ATOM | 5505 | HG12 | VAL | X | 366 | 60.367 | 37.379 | 56.062 | 0.00 | 0.00 |
| ATOM | 5506 | HG13 | VAL | X | 366 | 58.881 | 36.753 | 55.328 | 0.00 | 0.00 |
| ATOM | 5507 | CG2  | VAL | X | 366 | 58.506 | 37.515 | 57.806 | 0.00 | 0.00 |
| ATOM | 5508 | HG21 | VAL | X | 366 | 57.696 | 37.965 | 58.379 | 0.00 | 0.00 |
| ATOM | 5509 | HG22 | VAL | X | 366 | 59.437 | 37.562 | 58.370 | 0.00 | 0.00 |
| ATOM | 5510 | HG23 | VAL | X | 366 | 58.279 | 36.452 | 57.725 | 0.00 | 0.00 |
| ATOM | 5511 | C    | VAL | X | 366 | 60.329 | 40.100 | 57.127 | 0.00 | 0.00 |
| ATOM | 5512 | O    | VAL | X | 366 | 61.151 | 40.040 | 56.207 | 0.00 | 0.00 |
| ATOM | 5513 | N    | SER | X | 367 | 60.740 | 40.214 | 58.382 | 0.00 | 0.00 |
| ATOM | 5514 | H    | SER | X | 367 | 60.085 | 40.092 | 59.142 | 0.00 | 0.00 |
| ATOM | 5515 | CA   | SER | X | 367 | 62.146 | 40.356 | 58.635 | 0.00 | 0.00 |
| ATOM | 5516 | HA   | SER | X | 367 | 62.691 | 41.084 | 58.034 | 0.00 | 0.00 |
| ATOM | 5517 | CB   | SER | X | 367 | 62.282 | 40.983 | 60.028 | 0.00 | 0.00 |
| ATOM | 5518 | HB2  | SER | X | 367 | 63.350 | 41.131 | 60.188 | 0.00 | 0.00 |
| ATOM | 5519 | HB3  | SER | X | 367 | 61.959 | 42.021 | 59.951 | 0.00 | 0.00 |
| ATOM | 5520 | OG   | SER | X | 367 | 61.737 | 40.269 | 61.042 | 0.00 | 0.00 |
| ATOM | 5521 | HG   | SER | X | 367 | 62.066 | 40.575 | 61.890 | 0.00 | 0.00 |
| ATOM | 5522 | C    | SER | X | 367 | 62.949 | 39.039 | 58.512 | 0.00 | 0.00 |
| ATOM | 5523 | O    | SER | X | 367 | 62.429 | 37.905 | 58.566 | 0.00 | 0.00 |
| ATOM | 5524 | N    | ASP | X | 368 | 64.261 | 39.160 | 58.553 | 0.00 | 0.00 |
| ATOM | 5525 | H    | ASP | X | 368 | 64.589 | 40.093 | 58.760 | 0.00 | 0.00 |
| ATOM | 5526 | CA   | ASP | X | 368 | 65.264 | 38.119 | 58.565 | 0.00 | 0.00 |
| ATOM | 5527 | HA   | ASP | X | 368 | 65.333 | 37.731 | 57.549 | 0.00 | 0.00 |
| ATOM | 5528 | CB   | ASP | X | 368 | 66.626 | 38.765 | 58.816 | 0.00 | 0.00 |
| ATOM | 5529 | HB2  | ASP | X | 368 | 66.862 | 39.360 | 57.933 | 0.00 | 0.00 |
| ATOM | 5530 | HB3  | ASP | X | 368 | 66.600 | 39.334 | 59.745 | 0.00 | 0.00 |
| ATOM | 5531 | CG   | ASP | X | 368 | 67.839 | 37.839 | 59.007 | 0.00 | 0.00 |
| ATOM | 5532 | OD1  | ASP | X | 368 | 68.682 | 38.122 | 59.865 | 0.00 | 0.00 |
| ATOM | 5533 | OD2  | ASP | X | 368 | 67.828 | 36.825 | 58.290 | 0.00 | 0.00 |
| ATOM | 5534 | C    | ASP | X | 368 | 65.010 | 37.049 | 59.590 | 0.00 | 0.00 |
| ATOM | 5535 | O    | ASP | X | 368 | 65.001 | 35.853 | 59.201 | 0.00 | 0.00 |
| ATOM | 5536 | N    | LEU | X | 369 | 64.778 | 37.408 | 60.840 | 0.00 | 0.00 |
| ATOM | 5537 | H    | LEU | X | 369 | 64.929 | 38.396 | 60.986 | 0.00 | 0.00 |
| ATOM | 5538 | CA   | LEU | X | 369 | 64.778 | 36.466 | 61.939 | 0.00 | 0.00 |
| ATOM | 5539 | HA   | LEU | X | 369 | 65.397 | 35.616 | 61.651 | 0.00 | 0.00 |
| ATOM | 5540 | CB   | LEU | X | 369 | 65.210 | 37.201 | 63.266 | 0.00 | 0.00 |
| ATOM | 5541 | HB2  | LEU | X | 369 | 66.221 | 37.540 | 63.037 | 0.00 | 0.00 |
| ATOM | 5542 | HB3  | LEU | X | 369 | 64.654 | 38.095 | 63.550 | 0.00 | 0.00 |
| ATOM | 5543 | CG   | LEU | X | 369 | 65.324 | 36.277 | 64.531 | 0.00 | 0.00 |
| ATOM | 5544 | HG   | LEU | X | 369 | 64.308 | 36.028 | 64.838 | 0.00 | 0.00 |
| ATOM | 5545 | CD1  | LEU | X | 369 | 66.067 | 34.948 | 64.224 | 0.00 | 0.00 |

|      |      |      |     |   |     |        |        |        |      |      |
|------|------|------|-----|---|-----|--------|--------|--------|------|------|
| ATOM | 5546 | HD11 | LEU | X | 369 | 67.111 | 35.158 | 63.992 | 0.00 | 0.00 |
| ATOM | 5547 | HD12 | LEU | X | 369 | 65.602 | 34.353 | 63.438 | 0.00 | 0.00 |
| ATOM | 5548 | HD13 | LEU | X | 369 | 65.997 | 34.200 | 65.014 | 0.00 | 0.00 |
| ATOM | 5549 | CD2  | LEU | X | 369 | 66.082 | 36.931 | 65.692 | 0.00 | 0.00 |
| ATOM | 5550 | HD21 | LEU | X | 369 | 67.147 | 36.719 | 65.589 | 0.00 | 0.00 |
| ATOM | 5551 | HD22 | LEU | X | 369 | 65.881 | 38.002 | 65.717 | 0.00 | 0.00 |
| ATOM | 5552 | HD23 | LEU | X | 369 | 65.740 | 36.489 | 66.627 | 0.00 | 0.00 |
| ATOM | 5553 | C    | LEU | X | 369 | 63.357 | 35.814 | 61.977 | 0.00 | 0.00 |
| ATOM | 5554 | O    | LEU | X | 369 | 63.229 | 34.640 | 62.426 | 0.00 | 0.00 |
| ATOM | 5555 | N    | ALA | X | 370 | 62.338 | 36.456 | 61.458 | 0.00 | 0.00 |
| ATOM | 5556 | H    | ALA | X | 370 | 62.419 | 37.338 | 60.973 | 0.00 | 0.00 |
| ATOM | 5557 | CA   | ALA | X | 370 | 61.071 | 35.837 | 61.268 | 0.00 | 0.00 |
| ATOM | 5558 | HA   | ALA | X | 370 | 60.831 | 35.277 | 62.172 | 0.00 | 0.00 |
| ATOM | 5559 | CB   | ALA | X | 370 | 60.019 | 36.918 | 61.210 | 0.00 | 0.00 |
| ATOM | 5560 | HB1  | ALA | X | 370 | 59.994 | 37.342 | 60.206 | 0.00 | 0.00 |
| ATOM | 5561 | HB2  | ALA | X | 370 | 60.077 | 37.693 | 61.974 | 0.00 | 0.00 |
| ATOM | 5562 | HB3  | ALA | X | 370 | 59.017 | 36.493 | 61.157 | 0.00 | 0.00 |
| ATOM | 5563 | C    | ALA | X | 370 | 61.109 | 34.833 | 60.081 | 0.00 | 0.00 |
| ATOM | 5564 | O    | ALA | X | 370 | 60.538 | 33.742 | 60.244 | 0.00 | 0.00 |
| ATOM | 5565 | N    | ALA | X | 371 | 61.733 | 35.122 | 58.958 | 0.00 | 0.00 |
| ATOM | 5566 | H    | ALA | X | 371 | 61.958 | 36.093 | 58.792 | 0.00 | 0.00 |
| ATOM | 5567 | CA   | ALA | X | 371 | 61.989 | 34.178 | 57.848 | 0.00 | 0.00 |
| ATOM | 5568 | HA   | ALA | X | 371 | 61.016 | 33.790 | 57.544 | 0.00 | 0.00 |
| ATOM | 5569 | CB   | ALA | X | 371 | 62.716 | 34.824 | 56.689 | 0.00 | 0.00 |
| ATOM | 5570 | HB1  | ALA | X | 371 | 62.085 | 35.657 | 56.382 | 0.00 | 0.00 |
| ATOM | 5571 | HB2  | ALA | X | 371 | 62.728 | 34.140 | 55.840 | 0.00 | 0.00 |
| ATOM | 5572 | HB3  | ALA | X | 371 | 63.706 | 35.194 | 56.958 | 0.00 | 0.00 |
| ATOM | 5573 | C    | ALA | X | 371 | 62.727 | 32.968 | 58.377 | 0.00 | 0.00 |
| ATOM | 5574 | O    | ALA | X | 371 | 62.185 | 31.831 | 58.096 | 0.00 | 0.00 |
| ATOM | 5575 | N    | GLU | X | 372 | 63.668 | 33.023 | 59.230 | 0.00 | 0.00 |
| ATOM | 5576 | H    | GLU | X | 372 | 64.136 | 33.911 | 59.347 | 0.00 | 0.00 |
| ATOM | 5577 | CA   | GLU | X | 372 | 64.257 | 31.821 | 59.963 | 0.00 | 0.00 |
| ATOM | 5578 | HA   | GLU | X | 372 | 64.649 | 31.151 | 59.198 | 0.00 | 0.00 |
| ATOM | 5579 | CB   | GLU | X | 372 | 65.430 | 32.272 | 60.854 | 0.00 | 0.00 |
| ATOM | 5580 | HB2  | GLU | X | 372 | 65.158 | 33.227 | 61.303 | 0.00 | 0.00 |
| ATOM | 5581 | HB3  | GLU | X | 372 | 65.459 | 31.478 | 61.601 | 0.00 | 0.00 |
| ATOM | 5582 | CG   | GLU | X | 372 | 66.778 | 32.315 | 60.137 | 0.00 | 0.00 |
| ATOM | 5583 | HG2  | GLU | X | 372 | 67.063 | 31.376 | 59.662 | 0.00 | 0.00 |
| ATOM | 5584 | HG3  | GLU | X | 372 | 66.847 | 33.070 | 59.353 | 0.00 | 0.00 |
| ATOM | 5585 | CD   | GLU | X | 372 | 67.904 | 32.568 | 61.183 | 0.00 | 0.00 |
| ATOM | 5586 | OE1  | GLU | X | 372 | 68.421 | 33.702 | 61.273 | 0.00 | 0.00 |
| ATOM | 5587 | OE2  | GLU | X | 372 | 68.245 | 31.591 | 61.918 | 0.00 | 0.00 |
| ATOM | 5588 | C    | GLU | X | 372 | 63.198 | 30.970 | 60.732 | 0.00 | 0.00 |
| ATOM | 5589 | O    | GLU | X | 372 | 63.198 | 29.717 | 60.492 | 0.00 | 0.00 |
| ATOM | 5590 | N    | ALA | X | 373 | 62.321 | 31.574 | 61.519 | 0.00 | 0.00 |
| ATOM | 5591 | H    | ALA | X | 373 | 62.675 | 32.452 | 61.872 | 0.00 | 0.00 |
| ATOM | 5592 | CA   | ALA | X | 373 | 61.254 | 30.953 | 62.228 | 0.00 | 0.00 |
| ATOM | 5593 | HA   | ALA | X | 373 | 61.603 | 30.133 | 62.857 | 0.00 | 0.00 |
| ATOM | 5594 | CB   | ALA | X | 373 | 60.619 | 32.024 | 63.141 | 0.00 | 0.00 |
| ATOM | 5595 | HB1  | ALA | X | 373 | 61.372 | 32.741 | 63.467 | 0.00 | 0.00 |
| ATOM | 5596 | HB2  | ALA | X | 373 | 60.273 | 31.548 | 64.058 | 0.00 | 0.00 |
| ATOM | 5597 | HB3  | ALA | X | 373 | 59.851 | 32.628 | 62.656 | 0.00 | 0.00 |
| ATOM | 5598 | C    | ALA | X | 373 | 60.247 | 30.293 | 61.261 | 0.00 | 0.00 |
| ATOM | 5599 | O    | ALA | X | 373 | 59.713 | 29.215 | 61.450 | 0.00 | 0.00 |
| ATOM | 5600 | N    | VAL | X | 374 | 59.976 | 30.989 | 60.140 | 0.00 | 0.00 |
| ATOM | 5601 | H    | VAL | X | 374 | 60.279 | 31.953 | 60.128 | 0.00 | 0.00 |
| ATOM | 5602 | CA   | VAL | X | 374 | 59.090 | 30.504 | 59.038 | 0.00 | 0.00 |
| ATOM | 5603 | HA   | VAL | X | 374 | 58.130 | 30.120 | 59.381 | 0.00 | 0.00 |
| ATOM | 5604 | CB   | VAL | X | 374 | 58.745 | 31.655 | 58.059 | 0.00 | 0.00 |
| ATOM | 5605 | HB   | VAL | X | 374 | 59.680 | 31.962 | 57.590 | 0.00 | 0.00 |
| ATOM | 5606 | CG1  | VAL | X | 374 | 57.938 | 31.094 | 56.875 | 0.00 | 0.00 |
| ATOM | 5607 | HG11 | VAL | X | 374 | 57.078 | 30.459 | 57.089 | 0.00 | 0.00 |
| ATOM | 5608 | HG12 | VAL | X | 374 | 57.603 | 31.880 | 56.198 | 0.00 | 0.00 |
| ATOM | 5609 | HG13 | VAL | X | 374 | 58.535 | 30.453 | 56.226 | 0.00 | 0.00 |
| ATOM | 5610 | CG2  | VAL | X | 374 | 58.067 | 32.836 | 58.784 | 0.00 | 0.00 |
| ATOM | 5611 | HG21 | VAL | X | 374 | 56.988 | 32.693 | 58.730 | 0.00 | 0.00 |
| ATOM | 5612 | HG22 | VAL | X | 374 | 58.422 | 33.807 | 58.439 | 0.00 | 0.00 |

|      |      |      |     |   |     |        |        |        |      |      |
|------|------|------|-----|---|-----|--------|--------|--------|------|------|
| ATOM | 5613 | HG23 | VAL | X | 374 | 58.277 | 32.794 | 59.853 | 0.00 | 0.00 |
| ATOM | 5614 | C    | VAL | X | 374 | 59.758 | 29.348 | 58.278 | 0.00 | 0.00 |
| ATOM | 5615 | O    | VAL | X | 374 | 59.033 | 28.387 | 57.974 | 0.00 | 0.00 |
| ATOM | 5616 | N    | VAL | X | 375 | 61.027 | 29.343 | 58.042 | 0.00 | 0.00 |
| ATOM | 5617 | H    | VAL | X | 375 | 61.606 | 30.125 | 58.315 | 0.00 | 0.00 |
| ATOM | 5618 | CA   | VAL | X | 375 | 61.663 | 28.178 | 57.446 | 0.00 | 0.00 |
| ATOM | 5619 | HA   | VAL | X | 375 | 61.219 | 27.908 | 56.488 | 0.00 | 0.00 |
| ATOM | 5620 | CB   | VAL | X | 375 | 63.130 | 28.610 | 57.149 | 0.00 | 0.00 |
| ATOM | 5621 | HB   | VAL | X | 375 | 63.510 | 29.101 | 58.045 | 0.00 | 0.00 |
| ATOM | 5622 | CG1  | VAL | X | 375 | 64.110 | 27.430 | 57.041 | 0.00 | 0.00 |
| ATOM | 5623 | HG11 | VAL | X | 375 | 65.160 | 27.669 | 56.870 | 0.00 | 0.00 |
| ATOM | 5624 | HG12 | VAL | X | 375 | 64.144 | 26.922 | 58.005 | 0.00 | 0.00 |
| ATOM | 5625 | HG13 | VAL | X | 375 | 63.731 | 26.699 | 56.326 | 0.00 | 0.00 |
| ATOM | 5626 | CG2  | VAL | X | 375 | 63.174 | 29.504 | 55.913 | 0.00 | 0.00 |
| ATOM | 5627 | HG21 | VAL | X | 375 | 62.651 | 29.012 | 55.093 | 0.00 | 0.00 |
| ATOM | 5628 | HG22 | VAL | X | 375 | 64.239 | 29.562 | 55.688 | 0.00 | 0.00 |
| ATOM | 5629 | HG23 | VAL | X | 375 | 62.799 | 30.509 | 56.106 | 0.00 | 0.00 |
| ATOM | 5630 | C    | VAL | X | 375 | 61.548 | 26.933 | 58.343 | 0.00 | 0.00 |
| ATOM | 5631 | O    | VAL | X | 375 | 61.218 | 25.846 | 57.911 | 0.00 | 0.00 |
| ATOM | 5632 | N    | LEU | X | 376 | 61.743 | 27.107 | 59.662 | 0.00 | 0.00 |
| ATOM | 5633 | H    | LEU | X | 376 | 61.924 | 28.024 | 60.044 | 0.00 | 0.00 |
| ATOM | 5634 | CA   | LEU | X | 376 | 61.528 | 26.096 | 60.571 | 0.00 | 0.00 |
| ATOM | 5635 | HA   | LEU | X | 376 | 62.210 | 25.320 | 60.221 | 0.00 | 0.00 |
| ATOM | 5636 | CB   | LEU | X | 376 | 61.855 | 26.546 | 62.061 | 0.00 | 0.00 |
| ATOM | 5637 | HB2  | LEU | X | 376 | 62.470 | 27.446 | 62.039 | 0.00 | 0.00 |
| ATOM | 5638 | HB3  | LEU | X | 376 | 60.888 | 26.808 | 62.489 | 0.00 | 0.00 |
| ATOM | 5639 | CG   | LEU | X | 376 | 62.552 | 25.513 | 63.021 | 0.00 | 0.00 |
| ATOM | 5640 | HG   | LEU | X | 376 | 61.886 | 24.651 | 63.055 | 0.00 | 0.00 |
| ATOM | 5641 | CD1  | LEU | X | 376 | 63.917 | 25.160 | 62.348 | 0.00 | 0.00 |
| ATOM | 5642 | HD11 | LEU | X | 376 | 64.557 | 26.010 | 62.115 | 0.00 | 0.00 |
| ATOM | 5643 | HD12 | LEU | X | 376 | 63.882 | 24.601 | 61.413 | 0.00 | 0.00 |
| ATOM | 5644 | HD13 | LEU | X | 376 | 64.419 | 24.554 | 63.102 | 0.00 | 0.00 |
| ATOM | 5645 | CD2  | LEU | X | 376 | 62.691 | 26.174 | 64.375 | 0.00 | 0.00 |
| ATOM | 5646 | HD21 | LEU | X | 376 | 61.762 | 26.588 | 64.766 | 0.00 | 0.00 |
| ATOM | 5647 | HD22 | LEU | X | 376 | 63.101 | 25.414 | 65.041 | 0.00 | 0.00 |
| ATOM | 5648 | HD23 | LEU | X | 376 | 63.436 | 26.966 | 64.302 | 0.00 | 0.00 |
| ATOM | 5649 | C    | LEU | X | 376 | 60.116 | 25.504 | 60.410 | 0.00 | 0.00 |
| ATOM | 5650 | O    | LEU | X | 376 | 59.956 | 24.258 | 60.605 | 0.00 | 0.00 |
| ATOM | 5651 | N    | HIE | X | 377 | 59.052 | 26.279 | 60.189 | 0.00 | 0.00 |
| ATOM | 5652 | H    | HIE | X | 377 | 59.353 | 27.239 | 60.277 | 0.00 | 0.00 |
| ATOM | 5653 | CA   | HIE | X | 377 | 57.622 | 25.803 | 60.094 | 0.00 | 0.00 |
| ATOM | 5654 | HA   | HIE | X | 377 | 57.576 | 25.053 | 60.884 | 0.00 | 0.00 |
| ATOM | 5655 | CB   | HIE | X | 377 | 56.627 | 27.020 | 60.285 | 0.00 | 0.00 |
| ATOM | 5656 | HB2  | HIE | X | 377 | 57.036 | 27.662 | 61.065 | 0.00 | 0.00 |
| ATOM | 5657 | HB3  | HIE | X | 377 | 56.667 | 27.535 | 59.325 | 0.00 | 0.00 |
| ATOM | 5658 | CG   | HIE | X | 377 | 55.138 | 26.755 | 60.578 | 0.00 | 0.00 |
| ATOM | 5659 | ND1  | HIE | X | 377 | 54.531 | 26.310 | 61.761 | 0.00 | 0.00 |
| ATOM | 5660 | CE1  | HIE | X | 377 | 53.261 | 26.131 | 61.506 | 0.00 | 0.00 |
| ATOM | 5661 | HE1  | HIE | X | 377 | 52.621 | 25.747 | 62.286 | 0.00 | 0.00 |
| ATOM | 5662 | NE2  | HIE | X | 377 | 52.966 | 26.458 | 60.224 | 0.00 | 0.00 |
| ATOM | 5663 | HE2  | HIE | X | 377 | 52.162 | 26.276 | 59.641 | 0.00 | 0.00 |
| ATOM | 5664 | CD2  | HIE | X | 377 | 54.194 | 26.731 | 59.663 | 0.00 | 0.00 |
| ATOM | 5665 | HD2  | HIE | X | 377 | 54.401 | 26.898 | 58.616 | 0.00 | 0.00 |
| ATOM | 5666 | C    | HIE | X | 377 | 57.266 | 25.186 | 58.769 | 0.00 | 0.00 |
| ATOM | 5667 | O    | HIE | X | 377 | 56.235 | 24.482 | 58.682 | 0.00 | 0.00 |
| ATOM | 5668 | N    | TYR | X | 378 | 58.135 | 25.335 | 57.762 | 0.00 | 0.00 |
| ATOM | 5669 | H    | TYR | X | 378 | 58.828 | 26.049 | 57.941 | 0.00 | 0.00 |
| ATOM | 5670 | CA   | TYR | X | 378 | 57.856 | 24.726 | 56.454 | 0.00 | 0.00 |
| ATOM | 5671 | HA   | TYR | X | 378 | 56.852 | 24.308 | 56.383 | 0.00 | 0.00 |
| ATOM | 5672 | CB   | TYR | X | 378 | 57.964 | 25.696 | 55.306 | 0.00 | 0.00 |
| ATOM | 5673 | HB2  | TYR | X | 378 | 58.817 | 26.338 | 55.526 | 0.00 | 0.00 |
| ATOM | 5674 | HB3  | TYR | X | 378 | 58.235 | 25.141 | 54.408 | 0.00 | 0.00 |
| ATOM | 5675 | CG   | TYR | X | 378 | 56.596 | 26.231 | 55.013 | 0.00 | 0.00 |
| ATOM | 5676 | CD1  | TYR | X | 378 | 55.892 | 25.880 | 53.826 | 0.00 | 0.00 |
| ATOM | 5677 | HD1  | TYR | X | 378 | 56.413 | 25.344 | 53.047 | 0.00 | 0.00 |
| ATOM | 5678 | CE1  | TYR | X | 378 | 54.589 | 26.413 | 53.465 | 0.00 | 0.00 |
| ATOM | 5679 | HE1  | TYR | X | 378 | 54.092 | 26.264 | 52.518 | 0.00 | 0.00 |

|      |      |      |     |   |     |        |        |        |      |      |
|------|------|------|-----|---|-----|--------|--------|--------|------|------|
| ATOM | 5680 | CZ   | TYR | X | 378 | 54.051 | 27.350 | 54.337 | 0.00 | 0.00 |
| ATOM | 5681 | OH   | TYR | X | 378 | 52.847 | 27.885 | 54.097 | 0.00 | 0.00 |
| ATOM | 5682 | HH   | TYR | X | 378 | 52.548 | 27.796 | 53.189 | 0.00 | 0.00 |
| ATOM | 5683 | CE2  | TYR | X | 378 | 54.712 | 27.703 | 55.530 | 0.00 | 0.00 |
| ATOM | 5684 | HE2  | TYR | X | 378 | 54.248 | 28.440 | 56.169 | 0.00 | 0.00 |
| ATOM | 5685 | CD2  | TYR | X | 378 | 55.908 | 27.107 | 55.923 | 0.00 | 0.00 |
| ATOM | 5686 | HD2  | TYR | X | 378 | 56.394 | 27.388 | 56.845 | 0.00 | 0.00 |
| ATOM | 5687 | C    | TYR | X | 378 | 58.851 | 23.558 | 56.377 | 0.00 | 0.00 |
| ATOM | 5688 | O    | TYR | X | 378 | 59.109 | 23.138 | 55.250 | 0.00 | 0.00 |
| ATOM | 5689 | N    | THR | X | 379 | 59.510 | 23.115 | 57.471 | 0.00 | 0.00 |
| ATOM | 5690 | H    | THR | X | 379 | 59.279 | 23.457 | 58.393 | 0.00 | 0.00 |
| ATOM | 5691 | CA   | THR | X | 379 | 60.576 | 21.990 | 57.388 | 0.00 | 0.00 |
| ATOM | 5692 | HA   | THR | X | 379 | 61.155 | 22.114 | 56.473 | 0.00 | 0.00 |
| ATOM | 5693 | CB   | THR | X | 379 | 61.612 | 22.098 | 58.482 | 0.00 | 0.00 |
| ATOM | 5694 | HB   | THR | X | 379 | 61.198 | 22.144 | 59.489 | 0.00 | 0.00 |
| ATOM | 5695 | CG2  | THR | X | 379 | 62.662 | 20.944 | 58.685 | 0.00 | 0.00 |
| ATOM | 5696 | HG21 | THR | X | 379 | 63.091 | 20.696 | 57.715 | 0.00 | 0.00 |
| ATOM | 5697 | HG22 | THR | X | 379 | 62.165 | 20.093 | 59.150 | 0.00 | 0.00 |
| ATOM | 5698 | HG23 | THR | X | 379 | 63.477 | 21.279 | 59.327 | 0.00 | 0.00 |
| ATOM | 5699 | OG1  | THR | X | 379 | 62.173 | 23.366 | 58.301 | 0.00 | 0.00 |
| ATOM | 5700 | HG1  | THR | X | 379 | 61.679 | 23.970 | 57.742 | 0.00 | 0.00 |
| ATOM | 5701 | C    | THR | X | 379 | 59.822 | 20.707 | 57.587 | 0.00 | 0.00 |
| ATOM | 5702 | O    | THR | X | 379 | 58.895 | 20.634 | 58.397 | 0.00 | 0.00 |
| ATOM | 5703 | N    | ASP | X | 380 | 60.258 | 19.701 | 56.814 | 0.00 | 0.00 |
| ATOM | 5704 | H    | ASP | X | 380 | 60.899 | 19.889 | 56.057 | 0.00 | 0.00 |
| ATOM | 5705 | CA   | ASP | X | 380 | 59.819 | 18.316 | 56.885 | 0.00 | 0.00 |
| ATOM | 5706 | HA   | ASP | X | 380 | 58.830 | 18.244 | 57.337 | 0.00 | 0.00 |
| ATOM | 5707 | CB   | ASP | X | 380 | 59.487 | 17.835 | 55.482 | 0.00 | 0.00 |
| ATOM | 5708 | HB2  | ASP | X | 380 | 58.916 | 18.510 | 54.846 | 0.00 | 0.00 |
| ATOM | 5709 | HB3  | ASP | X | 380 | 60.369 | 17.574 | 54.897 | 0.00 | 0.00 |
| ATOM | 5710 | CG   | ASP | X | 380 | 58.850 | 16.464 | 55.537 | 0.00 | 0.00 |
| ATOM | 5711 | OD1  | ASP | X | 380 | 57.730 | 16.285 | 54.944 | 0.00 | 0.00 |
| ATOM | 5712 | OD2  | ASP | X | 380 | 59.404 | 15.590 | 56.182 | 0.00 | 0.00 |
| ATOM | 5713 | C    | ASP | X | 380 | 61.017 | 17.514 | 57.460 | 0.00 | 0.00 |
| ATOM | 5714 | O    | ASP | X | 380 | 62.052 | 17.403 | 56.845 | 0.00 | 0.00 |
| ATOM | 5715 | N    | TRP | X | 381 | 60.942 | 17.059 | 58.683 | 0.00 | 0.00 |
| ATOM | 5716 | H    | TRP | X | 381 | 60.176 | 17.334 | 59.281 | 0.00 | 0.00 |
| ATOM | 5717 | CA   | TRP | X | 381 | 62.127 | 16.577 | 59.380 | 0.00 | 0.00 |
| ATOM | 5718 | HA   | TRP | X | 381 | 62.930 | 17.261 | 59.106 | 0.00 | 0.00 |
| ATOM | 5719 | CB   | TRP | X | 381 | 61.913 | 16.678 | 60.880 | 0.00 | 0.00 |
| ATOM | 5720 | HB2  | TRP | X | 381 | 60.959 | 16.208 | 61.118 | 0.00 | 0.00 |
| ATOM | 5721 | HB3  | TRP | X | 381 | 62.710 | 16.150 | 61.403 | 0.00 | 0.00 |
| ATOM | 5722 | CG   | TRP | X | 381 | 61.925 | 18.021 | 61.429 | 0.00 | 0.00 |
| ATOM | 5723 | CD1  | TRP | X | 381 | 60.830 | 18.657 | 61.870 | 0.00 | 0.00 |
| ATOM | 5724 | HD1  | TRP | X | 381 | 59.834 | 18.247 | 61.952 | 0.00 | 0.00 |
| ATOM | 5725 | NE1  | TRP | X | 381 | 61.123 | 19.940 | 62.364 | 0.00 | 0.00 |
| ATOM | 5726 | HE1  | TRP | X | 381 | 60.407 | 20.567 | 62.704 | 0.00 | 0.00 |
| ATOM | 5727 | CE2  | TRP | X | 381 | 62.480 | 20.262 | 62.118 | 0.00 | 0.00 |
| ATOM | 5728 | CZ2  | TRP | X | 381 | 63.332 | 21.374 | 62.297 | 0.00 | 0.00 |
| ATOM | 5729 | HZ2  | TRP | X | 381 | 62.907 | 22.311 | 62.624 | 0.00 | 0.00 |
| ATOM | 5730 | CH2  | TRP | X | 381 | 64.695 | 21.300 | 61.960 | 0.00 | 0.00 |
| ATOM | 5731 | HH2  | TRP | X | 381 | 65.312 | 22.179 | 62.072 | 0.00 | 0.00 |
| ATOM | 5732 | CZ3  | TRP | X | 381 | 65.248 | 20.137 | 61.610 | 0.00 | 0.00 |
| ATOM | 5733 | HZ3  | TRP | X | 381 | 66.267 | 20.092 | 61.255 | 0.00 | 0.00 |
| ATOM | 5734 | CE3  | TRP | X | 381 | 64.435 | 18.990 | 61.495 | 0.00 | 0.00 |
| ATOM | 5735 | HE3  | TRP | X | 381 | 64.923 | 18.063 | 61.232 | 0.00 | 0.00 |
| ATOM | 5736 | CD2  | TRP | X | 381 | 63.016 | 19.001 | 61.662 | 0.00 | 0.00 |
| ATOM | 5737 | C    | TRP | X | 381 | 62.566 | 15.168 | 58.849 | 0.00 | 0.00 |
| ATOM | 5738 | O    | TRP | X | 381 | 63.696 | 14.708 | 59.154 | 0.00 | 0.00 |
| ATOM | 5739 | N    | LEU | X | 382 | 61.868 | 14.535 | 57.865 | 0.00 | 0.00 |
| ATOM | 5740 | H    | LEU | X | 382 | 61.057 | 15.043 | 57.541 | 0.00 | 0.00 |
| ATOM | 5741 | CA   | LEU | X | 382 | 62.336 | 13.409 | 57.134 | 0.00 | 0.00 |
| ATOM | 5742 | HA   | LEU | X | 382 | 63.048 | 12.872 | 57.760 | 0.00 | 0.00 |
| ATOM | 5743 | CB   | LEU | X | 382 | 61.119 | 12.489 | 56.864 | 0.00 | 0.00 |
| ATOM | 5744 | HB2  | LEU | X | 382 | 60.726 | 12.204 | 57.840 | 0.00 | 0.00 |
| ATOM | 5745 | HB3  | LEU | X | 382 | 60.437 | 13.089 | 56.261 | 0.00 | 0.00 |
| ATOM | 5746 | CG   | LEU | X | 382 | 61.331 | 11.193 | 56.023 | 0.00 | 0.00 |

|      |      |      |     |   |     |        |        |        |      |      |
|------|------|------|-----|---|-----|--------|--------|--------|------|------|
| ATOM | 5747 | HG   | LEU | X | 382 | 61.646 | 11.560 | 55.046 | 0.00 | 0.00 |
| ATOM | 5748 | CD1  | LEU | X | 382 | 62.310 | 10.222 | 56.637 | 0.00 | 0.00 |
| ATOM | 5749 | HD11 | LEU | X | 382 | 63.324 | 10.524 | 56.376 | 0.00 | 0.00 |
| ATOM | 5750 | HD12 | LEU | X | 382 | 62.101 | 9.198  | 56.327 | 0.00 | 0.00 |
| ATOM | 5751 | HD13 | LEU | X | 382 | 62.165 | 10.279 | 57.715 | 0.00 | 0.00 |
| ATOM | 5752 | CD2  | LEU | X | 382 | 60.051 | 10.470 | 55.604 | 0.00 | 0.00 |
| ATOM | 5753 | HD21 | LEU | X | 382 | 60.173 | 9.768  | 54.779 | 0.00 | 0.00 |
| ATOM | 5754 | HD22 | LEU | X | 382 | 59.597 | 10.010 | 56.482 | 0.00 | 0.00 |
| ATOM | 5755 | HD23 | LEU | X | 382 | 59.326 | 11.183 | 55.213 | 0.00 | 0.00 |
| ATOM | 5756 | C    | LEU | X | 382 | 63.000 | 13.861 | 55.834 | 0.00 | 0.00 |
| ATOM | 5757 | O    | LEU | X | 382 | 63.861 | 13.166 | 55.303 | 0.00 | 0.00 |
| ATOM | 5758 | N    | HIE | X | 383 | 62.564 | 15.035 | 55.313 | 0.00 | 0.00 |
| ATOM | 5759 | H    | HIE | X | 383 | 61.939 | 15.563 | 55.905 | 0.00 | 0.00 |
| ATOM | 5760 | CA   | HIE | X | 383 | 63.076 | 15.661 | 54.030 | 0.00 | 0.00 |
| ATOM | 5761 | HA   | HIE | X | 383 | 63.960 | 15.073 | 53.784 | 0.00 | 0.00 |
| ATOM | 5762 | CB   | HIE | X | 383 | 61.889 | 15.529 | 52.923 | 0.00 | 0.00 |
| ATOM | 5763 | HB2  | HIE | X | 383 | 61.012 | 16.125 | 53.176 | 0.00 | 0.00 |
| ATOM | 5764 | HB3  | HIE | X | 383 | 62.296 | 15.819 | 51.955 | 0.00 | 0.00 |
| ATOM | 5765 | CG   | HIE | X | 383 | 61.272 | 14.157 | 52.870 | 0.00 | 0.00 |
| ATOM | 5766 | ND1  | HIE | X | 383 | 61.839 | 13.006 | 52.241 | 0.00 | 0.00 |
| ATOM | 5767 | CE1  | HIE | X | 383 | 60.955 | 12.026 | 52.408 | 0.00 | 0.00 |
| ATOM | 5768 | HE1  | HIE | X | 383 | 61.040 | 11.004 | 52.068 | 0.00 | 0.00 |
| ATOM | 5769 | NE2  | HIE | X | 383 | 59.814 | 12.512 | 52.990 | 0.00 | 0.00 |
| ATOM | 5770 | HE2  | HIE | X | 383 | 58.959 | 12.000 | 53.151 | 0.00 | 0.00 |
| ATOM | 5771 | CD2  | HIE | X | 383 | 60.043 | 13.769 | 53.381 | 0.00 | 0.00 |
| ATOM | 5772 | HD2  | HIE | X | 383 | 59.334 | 14.394 | 53.905 | 0.00 | 0.00 |
| ATOM | 5773 | C    | HIE | X | 383 | 63.653 | 17.073 | 54.233 | 0.00 | 0.00 |
| ATOM | 5774 | O    | HIE | X | 383 | 63.421 | 17.951 | 53.418 | 0.00 | 0.00 |
| ATOM | 5775 | N    | PRO | X | 384 | 64.464 | 17.410 | 55.245 | 0.00 | 0.00 |
| ATOM | 5776 | CD   | PRO | X | 384 | 65.150 | 16.533 | 56.110 | 0.00 | 0.00 |
| ATOM | 5777 | HD2  | PRO | X | 384 | 65.695 | 15.684 | 55.698 | 0.00 | 0.00 |
| ATOM | 5778 | HD3  | PRO | X | 384 | 64.420 | 15.989 | 56.709 | 0.00 | 0.00 |
| ATOM | 5779 | CG   | PRO | X | 384 | 66.041 | 17.333 | 57.028 | 0.00 | 0.00 |
| ATOM | 5780 | HG2  | PRO | X | 384 | 67.017 | 17.422 | 56.552 | 0.00 | 0.00 |
| ATOM | 5781 | HG3  | PRO | X | 384 | 66.110 | 17.036 | 58.074 | 0.00 | 0.00 |
| ATOM | 5782 | CB   | PRO | X | 384 | 65.377 | 18.693 | 56.983 | 0.00 | 0.00 |
| ATOM | 5783 | HB2  | PRO | X | 384 | 66.121 | 19.457 | 57.208 | 0.00 | 0.00 |
| ATOM | 5784 | HB3  | PRO | X | 384 | 64.585 | 18.674 | 57.732 | 0.00 | 0.00 |
| ATOM | 5785 | CA   | PRO | X | 384 | 64.708 | 18.805 | 55.650 | 0.00 | 0.00 |
| ATOM | 5786 | HA   | PRO | X | 384 | 63.731 | 19.271 | 55.782 | 0.00 | 0.00 |
| ATOM | 5787 | C    | PRO | X | 384 | 65.592 | 19.594 | 54.696 | 0.00 | 0.00 |
| ATOM | 5788 | O    | PRO | X | 384 | 65.445 | 20.822 | 54.679 | 0.00 | 0.00 |
| ATOM | 5789 | N    | GLU | X | 385 | 66.491 | 18.958 | 53.941 | 0.00 | 0.00 |
| ATOM | 5790 | H    | GLU | X | 385 | 66.541 | 17.950 | 53.952 | 0.00 | 0.00 |
| ATOM | 5791 | CA   | GLU | X | 385 | 67.210 | 19.577 | 52.863 | 0.00 | 0.00 |
| ATOM | 5792 | HA   | GLU | X | 385 | 67.090 | 20.658 | 52.932 | 0.00 | 0.00 |
| ATOM | 5793 | CB   | GLU | X | 385 | 68.690 | 19.261 | 53.188 | 0.00 | 0.00 |
| ATOM | 5794 | HB2  | GLU | X | 385 | 68.920 | 18.218 | 53.404 | 0.00 | 0.00 |
| ATOM | 5795 | HB3  | GLU | X | 385 | 69.262 | 19.537 | 52.302 | 0.00 | 0.00 |
| ATOM | 5796 | CG   | GLU | X | 385 | 69.209 | 20.224 | 54.334 | 0.00 | 0.00 |
| ATOM | 5797 | HG2  | GLU | X | 385 | 68.808 | 21.197 | 54.051 | 0.00 | 0.00 |
| ATOM | 5798 | HG3  | GLU | X | 385 | 68.763 | 19.900 | 55.275 | 0.00 | 0.00 |
| ATOM | 5799 | CD   | GLU | X | 385 | 70.688 | 20.320 | 54.403 | 0.00 | 0.00 |
| ATOM | 5800 | OE1  | GLU | X | 385 | 71.344 | 21.099 | 53.685 | 0.00 | 0.00 |
| ATOM | 5801 | OE2  | GLU | X | 385 | 71.207 | 19.522 | 55.239 | 0.00 | 0.00 |
| ATOM | 5802 | C    | GLU | X | 385 | 66.714 | 19.296 | 51.416 | 0.00 | 0.00 |
| ATOM | 5803 | O    | GLU | X | 385 | 67.375 | 19.678 | 50.465 | 0.00 | 0.00 |
| ATOM | 5804 | N    | ASP | X | 386 | 65.558 | 18.686 | 51.246 | 0.00 | 0.00 |
| ATOM | 5805 | H    | ASP | X | 386 | 65.132 | 18.297 | 52.074 | 0.00 | 0.00 |
| ATOM | 5806 | CA   | ASP | X | 386 | 65.043 | 18.228 | 49.908 | 0.00 | 0.00 |
| ATOM | 5807 | HA   | ASP | X | 386 | 65.903 | 17.681 | 49.520 | 0.00 | 0.00 |
| ATOM | 5808 | CB   | ASP | X | 386 | 63.930 | 17.225 | 49.985 | 0.00 | 0.00 |
| ATOM | 5809 | HB2  | ASP | X | 386 | 64.257 | 16.417 | 50.639 | 0.00 | 0.00 |
| ATOM | 5810 | HB3  | ASP | X | 386 | 63.060 | 17.639 | 50.494 | 0.00 | 0.00 |
| ATOM | 5811 | CG   | ASP | X | 386 | 63.564 | 16.687 | 48.602 | 0.00 | 0.00 |
| ATOM | 5812 | OD1  | ASP | X | 386 | 64.138 | 15.631 | 48.276 | 0.00 | 0.00 |
| ATOM | 5813 | OD2  | ASP | X | 386 | 62.771 | 17.234 | 47.804 | 0.00 | 0.00 |

|      |      |      |     |   |     |        |        |        |      |      |
|------|------|------|-----|---|-----|--------|--------|--------|------|------|
| ATOM | 5814 | C    | ASP | X | 386 | 64.776 | 19.352 | 48.893 | 0.00 | 0.00 |
| ATOM | 5815 | O    | ASP | X | 386 | 63.758 | 20.068 | 49.045 | 0.00 | 0.00 |
| ATOM | 5816 | N    | PRO | X | 387 | 65.620 | 19.531 | 47.893 | 0.00 | 0.00 |
| ATOM | 5817 | CD   | PRO | X | 387 | 66.735 | 18.602 | 47.497 | 0.00 | 0.00 |
| ATOM | 5818 | HD2  | PRO | X | 387 | 66.556 | 17.528 | 47.455 | 0.00 | 0.00 |
| ATOM | 5819 | HD3  | PRO | X | 387 | 67.524 | 18.827 | 48.216 | 0.00 | 0.00 |
| ATOM | 5820 | CG   | PRO | X | 387 | 67.117 | 19.103 | 46.068 | 0.00 | 0.00 |
| ATOM | 5821 | HG2  | PRO | X | 387 | 66.449 | 18.708 | 45.302 | 0.00 | 0.00 |
| ATOM | 5822 | HG3  | PRO | X | 387 | 68.176 | 18.901 | 45.906 | 0.00 | 0.00 |
| ATOM | 5823 | CB   | PRO | X | 387 | 66.876 | 20.631 | 46.166 | 0.00 | 0.00 |
| ATOM | 5824 | HB2  | PRO | X | 387 | 66.499 | 21.109 | 45.261 | 0.00 | 0.00 |
| ATOM | 5825 | HB3  | PRO | X | 387 | 67.746 | 21.154 | 46.561 | 0.00 | 0.00 |
| ATOM | 5826 | CA   | PRO | X | 387 | 65.640 | 20.683 | 47.047 | 0.00 | 0.00 |
| ATOM | 5827 | HA   | PRO | X | 387 | 65.713 | 21.615 | 47.607 | 0.00 | 0.00 |
| ATOM | 5828 | C    | PRO | X | 387 | 64.338 | 20.844 | 46.281 | 0.00 | 0.00 |
| ATOM | 5829 | O    | PRO | X | 387 | 63.702 | 21.887 | 46.299 | 0.00 | 0.00 |
| ATOM | 5830 | N    | ALA | X | 388 | 63.872 | 19.759 | 45.596 | 0.00 | 0.00 |
| ATOM | 5831 | H    | ALA | X | 388 | 64.306 | 18.865 | 45.774 | 0.00 | 0.00 |
| ATOM | 5832 | CA   | ALA | X | 388 | 62.578 | 19.763 | 44.920 | 0.00 | 0.00 |
| ATOM | 5833 | HA   | ALA | X | 388 | 62.624 | 20.661 | 44.303 | 0.00 | 0.00 |
| ATOM | 5834 | CB   | ALA | X | 388 | 62.368 | 18.605 | 43.996 | 0.00 | 0.00 |
| ATOM | 5835 | HB1  | ALA | X | 388 | 62.259 | 17.767 | 44.685 | 0.00 | 0.00 |
| ATOM | 5836 | HB2  | ALA | X | 388 | 63.211 | 18.440 | 43.325 | 0.00 | 0.00 |
| ATOM | 5837 | HB3  | ALA | X | 388 | 61.428 | 18.753 | 43.466 | 0.00 | 0.00 |
| ATOM | 5838 | C    | ALA | X | 388 | 61.360 | 20.008 | 45.938 | 0.00 | 0.00 |
| ATOM | 5839 | O    | ALA | X | 388 | 60.425 | 20.670 | 45.622 | 0.00 | 0.00 |
| ATOM | 5840 | N    | ARG | X | 389 | 61.388 | 19.510 | 47.173 | 0.00 | 0.00 |
| ATOM | 5841 | H    | ARG | X | 389 | 62.153 | 18.922 | 47.471 | 0.00 | 0.00 |
| ATOM | 5842 | CA   | ARG | X | 389 | 60.378 | 19.796 | 48.130 | 0.00 | 0.00 |
| ATOM | 5843 | HA   | ARG | X | 389 | 59.382 | 19.608 | 47.731 | 0.00 | 0.00 |
| ATOM | 5844 | CB   | ARG | X | 389 | 60.332 | 18.883 | 49.384 | 0.00 | 0.00 |
| ATOM | 5845 | HB2  | ARG | X | 389 | 60.346 | 17.876 | 48.968 | 0.00 | 0.00 |
| ATOM | 5846 | HB3  | ARG | X | 389 | 61.229 | 18.982 | 49.996 | 0.00 | 0.00 |
| ATOM | 5847 | CG   | ARG | X | 389 | 59.139 | 19.079 | 50.405 | 0.00 | 0.00 |
| ATOM | 5848 | HG2  | ARG | X | 389 | 59.371 | 20.058 | 50.825 | 0.00 | 0.00 |
| ATOM | 5849 | HG3  | ARG | X | 389 | 58.140 | 19.170 | 49.978 | 0.00 | 0.00 |
| ATOM | 5850 | CD   | ARG | X | 389 | 59.177 | 18.013 | 51.581 | 0.00 | 0.00 |
| ATOM | 5851 | HD2  | ARG | X | 389 | 60.201 | 17.907 | 51.939 | 0.00 | 0.00 |
| ATOM | 5852 | HD3  | ARG | X | 389 | 58.549 | 18.252 | 52.439 | 0.00 | 0.00 |
| ATOM | 5853 | NE   | ARG | X | 389 | 58.803 | 16.658 | 51.211 | 0.00 | 0.00 |
| ATOM | 5854 | HE   | ARG | X | 389 | 59.565 | 16.032 | 50.991 | 0.00 | 0.00 |
| ATOM | 5855 | CZ   | ARG | X | 389 | 57.614 | 16.133 | 51.286 | 0.00 | 0.00 |
| ATOM | 5856 | NH1  | ARG | X | 389 | 56.476 | 16.821 | 51.492 | 0.00 | 0.00 |
| ATOM | 5857 | HH11 | ARG | X | 389 | 56.543 | 17.790 | 51.771 | 0.00 | 0.00 |
| ATOM | 5858 | HH12 | ARG | X | 389 | 55.620 | 16.360 | 51.221 | 0.00 | 0.00 |
| ATOM | 5859 | NH2  | ARG | X | 389 | 57.442 | 14.850 | 50.949 | 0.00 | 0.00 |
| ATOM | 5860 | HH21 | ARG | X | 389 | 58.269 | 14.376 | 50.615 | 0.00 | 0.00 |
| ATOM | 5861 | HH22 | ARG | X | 389 | 56.620 | 14.405 | 51.331 | 0.00 | 0.00 |
| ATOM | 5862 | C    | ARG | X | 389 | 60.422 | 21.252 | 48.518 | 0.00 | 0.00 |
| ATOM | 5863 | O    | ARG | X | 389 | 59.374 | 21.875 | 48.580 | 0.00 | 0.00 |
| ATOM | 5864 | N    | LEU | X | 390 | 61.650 | 21.932 | 48.599 | 0.00 | 0.00 |
| ATOM | 5865 | H    | LEU | X | 390 | 62.487 | 21.376 | 48.491 | 0.00 | 0.00 |
| ATOM | 5866 | CA   | LEU | X | 390 | 61.906 | 23.357 | 48.882 | 0.00 | 0.00 |
| ATOM | 5867 | HA   | LEU | X | 390 | 61.434 | 23.587 | 49.838 | 0.00 | 0.00 |
| ATOM | 5868 | CB   | LEU | X | 390 | 63.397 | 23.643 | 49.131 | 0.00 | 0.00 |
| ATOM | 5869 | HB2  | LEU | X | 390 | 64.026 | 23.132 | 48.402 | 0.00 | 0.00 |
| ATOM | 5870 | HB3  | LEU | X | 390 | 63.483 | 24.728 | 49.190 | 0.00 | 0.00 |
| ATOM | 5871 | CG   | LEU | X | 390 | 63.980 | 23.175 | 50.442 | 0.00 | 0.00 |
| ATOM | 5872 | HG   | LEU | X | 390 | 64.051 | 22.089 | 50.390 | 0.00 | 0.00 |
| ATOM | 5873 | CD1  | LEU | X | 390 | 65.425 | 23.645 | 50.584 | 0.00 | 0.00 |
| ATOM | 5874 | HD11 | LEU | X | 390 | 65.538 | 24.721 | 50.713 | 0.00 | 0.00 |
| ATOM | 5875 | HD12 | LEU | X | 390 | 65.987 | 23.435 | 49.673 | 0.00 | 0.00 |
| ATOM | 5876 | HD13 | LEU | X | 390 | 66.029 | 23.178 | 51.362 | 0.00 | 0.00 |
| ATOM | 5877 | CD2  | LEU | X | 390 | 63.284 | 23.545 | 51.820 | 0.00 | 0.00 |
| ATOM | 5878 | HD21 | LEU | X | 390 | 63.907 | 23.052 | 52.566 | 0.00 | 0.00 |
| ATOM | 5879 | HD22 | LEU | X | 390 | 63.369 | 24.601 | 52.079 | 0.00 | 0.00 |
| ATOM | 5880 | HD23 | LEU | X | 390 | 62.307 | 23.093 | 51.990 | 0.00 | 0.00 |



|      |      |      |     |   |     |        |        |        |      |      |
|------|------|------|-----|---|-----|--------|--------|--------|------|------|
| ATOM | 5881 | C    | LEU | X | 390 | 61.385 | 24.304 | 47.813 | 0.00 | 0.00 |
| ATOM | 5882 | O    | LEU | X | 390 | 60.871 | 25.391 | 48.051 | 0.00 | 0.00 |
| ATOM | 5883 | N    | ARG | X | 391 | 61.436 | 23.867 | 46.553 | 0.00 | 0.00 |
| ATOM | 5884 | H    | ARG | X | 391 | 62.067 | 23.099 | 46.373 | 0.00 | 0.00 |
| ATOM | 5885 | CA   | ARG | X | 391 | 60.794 | 24.504 | 45.344 | 0.00 | 0.00 |
| ATOM | 5886 | HA   | ARG | X | 391 | 61.017 | 25.571 | 45.342 | 0.00 | 0.00 |
| ATOM | 5887 | CB   | ARG | X | 391 | 61.424 | 23.815 | 44.086 | 0.00 | 0.00 |
| ATOM | 5888 | HB2  | ARG | X | 391 | 62.498 | 23.722 | 44.242 | 0.00 | 0.00 |
| ATOM | 5889 | HB3  | ARG | X | 391 | 61.098 | 22.779 | 43.994 | 0.00 | 0.00 |
| ATOM | 5890 | CG   | ARG | X | 391 | 61.144 | 24.642 | 42.722 | 0.00 | 0.00 |
| ATOM | 5891 | HG2  | ARG | X | 391 | 60.137 | 25.050 | 42.806 | 0.00 | 0.00 |
| ATOM | 5892 | HG3  | ARG | X | 391 | 61.685 | 25.588 | 42.720 | 0.00 | 0.00 |
| ATOM | 5893 | CD   | ARG | X | 391 | 61.289 | 23.977 | 41.371 | 0.00 | 0.00 |
| ATOM | 5894 | HD2  | ARG | X | 391 | 60.848 | 24.630 | 40.618 | 0.00 | 0.00 |
| ATOM | 5895 | HD3  | ARG | X | 391 | 62.321 | 23.909 | 41.025 | 0.00 | 0.00 |
| ATOM | 5896 | NE   | ARG | X | 391 | 60.717 | 22.625 | 41.177 | 0.00 | 0.00 |
| ATOM | 5897 | HE   | ARG | X | 391 | 61.300 | 21.865 | 40.858 | 0.00 | 0.00 |
| ATOM | 5898 | CZ   | ARG | X | 391 | 59.518 | 22.245 | 41.621 | 0.00 | 0.00 |
| ATOM | 5899 | NH1  | ARG | X | 391 | 58.568 | 23.010 | 42.068 | 0.00 | 0.00 |
| ATOM | 5900 | HH11 | ARG | X | 391 | 58.652 | 24.010 | 41.953 | 0.00 | 0.00 |
| ATOM | 5901 | HH12 | ARG | X | 391 | 57.711 | 22.590 | 42.398 | 0.00 | 0.00 |
| ATOM | 5902 | NH2  | ARG | X | 391 | 59.256 | 20.980 | 41.786 | 0.00 | 0.00 |
| ATOM | 5903 | HH21 | ARG | X | 391 | 59.884 | 20.269 | 41.440 | 0.00 | 0.00 |
| ATOM | 5904 | HH22 | ARG | X | 391 | 58.377 | 20.758 | 42.231 | 0.00 | 0.00 |
| ATOM | 5905 | C    | ARG | X | 391 | 59.276 | 24.387 | 45.527 | 0.00 | 0.00 |
| ATOM | 5906 | O    | ARG | X | 391 | 58.617 | 25.363 | 45.361 | 0.00 | 0.00 |
| ATOM | 5907 | N    | GLU | X | 392 | 58.781 | 23.151 | 45.811 | 0.00 | 0.00 |
| ATOM | 5908 | H    | GLU | X | 392 | 59.308 | 22.291 | 45.853 | 0.00 | 0.00 |
| ATOM | 5909 | CA   | GLU | X | 392 | 57.293 | 22.965 | 45.921 | 0.00 | 0.00 |
| ATOM | 5910 | HA   | GLU | X | 392 | 56.711 | 23.273 | 45.052 | 0.00 | 0.00 |
| ATOM | 5911 | CB   | GLU | X | 392 | 56.973 | 21.503 | 46.244 | 0.00 | 0.00 |
| ATOM | 5912 | HB2  | GLU | X | 392 | 57.547 | 21.162 | 47.106 | 0.00 | 0.00 |
| ATOM | 5913 | HB3  | GLU | X | 392 | 55.928 | 21.402 | 46.539 | 0.00 | 0.00 |
| ATOM | 5914 | CG   | GLU | X | 392 | 57.056 | 20.507 | 45.079 | 0.00 | 0.00 |
| ATOM | 5915 | HG2  | GLU | X | 392 | 58.070 | 20.479 | 44.680 | 0.00 | 0.00 |
| ATOM | 5916 | HG3  | GLU | X | 392 | 56.863 | 19.552 | 45.567 | 0.00 | 0.00 |
| ATOM | 5917 | CD   | GLU | X | 392 | 56.063 | 20.715 | 43.952 | 0.00 | 0.00 |
| ATOM | 5918 | OE1  | GLU | X | 392 | 54.868 | 20.321 | 44.064 | 0.00 | 0.00 |
| ATOM | 5919 | OE2  | GLU | X | 392 | 56.477 | 21.414 | 42.979 | 0.00 | 0.00 |
| ATOM | 5920 | C    | GLU | X | 392 | 56.736 | 23.788 | 47.140 | 0.00 | 0.00 |
| ATOM | 5921 | O    | GLU | X | 392 | 55.643 | 24.328 | 47.141 | 0.00 | 0.00 |
| ATOM | 5922 | N    | ALA | X | 393 | 57.477 | 23.785 | 48.271 | 0.00 | 0.00 |
| ATOM | 5923 | H    | ALA | X | 393 | 58.301 | 23.203 | 48.241 | 0.00 | 0.00 |
| ATOM | 5924 | CA   | ALA | X | 393 | 57.196 | 24.409 | 49.570 | 0.00 | 0.00 |
| ATOM | 5925 | HA   | ALA | X | 393 | 56.252 | 24.072 | 49.999 | 0.00 | 0.00 |
| ATOM | 5926 | CB   | ALA | X | 393 | 58.332 | 24.141 | 50.550 | 0.00 | 0.00 |
| ATOM | 5927 | HB1  | ALA | X | 393 | 58.415 | 23.076 | 50.770 | 0.00 | 0.00 |
| ATOM | 5928 | HB2  | ALA | X | 393 | 58.070 | 24.725 | 51.432 | 0.00 | 0.00 |
| ATOM | 5929 | HB3  | ALA | X | 393 | 59.291 | 24.320 | 50.065 | 0.00 | 0.00 |
| ATOM | 5930 | C    | ALA | X | 393 | 56.940 | 25.939 | 49.367 | 0.00 | 0.00 |
| ATOM | 5931 | O    | ALA | X | 393 | 56.086 | 26.591 | 50.041 | 0.00 | 0.00 |
| ATOM | 5932 | N    | LEU | X | 394 | 57.855 | 26.532 | 48.579 | 0.00 | 0.00 |
| ATOM | 5933 | H    | LEU | X | 394 | 58.554 | 25.992 | 48.089 | 0.00 | 0.00 |
| ATOM | 5934 | CA   | LEU | X | 394 | 57.881 | 27.979 | 48.346 | 0.00 | 0.00 |
| ATOM | 5935 | HA   | LEU | X | 394 | 57.799 | 28.387 | 49.353 | 0.00 | 0.00 |
| ATOM | 5936 | CB   | LEU | X | 394 | 59.218 | 28.397 | 47.742 | 0.00 | 0.00 |
| ATOM | 5937 | HB2  | LEU | X | 394 | 60.008 | 28.186 | 48.463 | 0.00 | 0.00 |
| ATOM | 5938 | HB3  | LEU | X | 394 | 59.344 | 27.788 | 46.847 | 0.00 | 0.00 |
| ATOM | 5939 | CG   | LEU | X | 394 | 59.362 | 29.858 | 47.313 | 0.00 | 0.00 |
| ATOM | 5940 | HG   | LEU | X | 394 | 58.602 | 30.080 | 46.565 | 0.00 | 0.00 |
| ATOM | 5941 | CD1  | LEU | X | 394 | 59.203 | 30.853 | 48.492 | 0.00 | 0.00 |
| ATOM | 5942 | HD11 | LEU | X | 394 | 58.310 | 30.515 | 49.017 | 0.00 | 0.00 |
| ATOM | 5943 | HD12 | LEU | X | 394 | 59.185 | 31.879 | 48.122 | 0.00 | 0.00 |
| ATOM | 5944 | HD13 | LEU | X | 394 | 60.110 | 30.884 | 49.096 | 0.00 | 0.00 |
| ATOM | 5945 | CD2  | LEU | X | 394 | 60.707 | 30.064 | 46.619 | 0.00 | 0.00 |
| ATOM | 5946 | HD21 | LEU | X | 394 | 61.523 | 29.772 | 47.279 | 0.00 | 0.00 |
| ATOM | 5947 | HD22 | LEU | X | 394 | 60.811 | 29.560 | 45.658 | 0.00 | 0.00 |

|      |      |      |     |   |     |        |        |        |      |      |
|------|------|------|-----|---|-----|--------|--------|--------|------|------|
| ATOM | 5948 | HD23 | LEU | X | 394 | 60.889 | 31.135 | 46.522 | 0.00 | 0.00 |
| ATOM | 5949 | C    | LEU | X | 394 | 56.688 | 28.539 | 47.647 | 0.00 | 0.00 |
| ATOM | 5950 | O    | LEU | X | 394 | 56.037 | 29.455 | 48.062 | 0.00 | 0.00 |
| ATOM | 5951 | N    | SER | X | 395 | 56.221 | 27.818 | 46.583 | 0.00 | 0.00 |
| ATOM | 5952 | H    | SER | X | 395 | 56.792 | 27.068 | 46.220 | 0.00 | 0.00 |
| ATOM | 5953 | CA   | SER | X | 395 | 54.897 | 27.973 | 45.956 | 0.00 | 0.00 |
| ATOM | 5954 | HA   | SER | X | 395 | 54.903 | 28.979 | 45.535 | 0.00 | 0.00 |
| ATOM | 5955 | CB   | SER | X | 395 | 54.813 | 27.021 | 44.790 | 0.00 | 0.00 |
| ATOM | 5956 | HB2  | SER | X | 395 | 55.217 | 26.065 | 45.126 | 0.00 | 0.00 |
| ATOM | 5957 | HB3  | SER | X | 395 | 53.782 | 26.939 | 44.445 | 0.00 | 0.00 |
| ATOM | 5958 | OG   | SER | X | 395 | 55.520 | 27.287 | 43.516 | 0.00 | 0.00 |
| ATOM | 5959 | HG   | SER | X | 395 | 55.333 | 26.535 | 42.949 | 0.00 | 0.00 |
| ATOM | 5960 | C    | SER | X | 395 | 53.656 | 27.808 | 46.916 | 0.00 | 0.00 |
| ATOM | 5961 | O    | SER | X | 395 | 52.688 | 28.578 | 46.806 | 0.00 | 0.00 |
| ATOM | 5962 | N    | ASP | X | 396 | 53.726 | 26.954 | 47.914 | 0.00 | 0.00 |
| ATOM | 5963 | H    | ASP | X | 396 | 54.575 | 26.413 | 47.992 | 0.00 | 0.00 |
| ATOM | 5964 | CA   | ASP | X | 396 | 52.684 | 26.920 | 48.989 | 0.00 | 0.00 |
| ATOM | 5965 | HA   | ASP | X | 396 | 51.747 | 26.796 | 48.445 | 0.00 | 0.00 |
| ATOM | 5966 | CB   | ASP | X | 396 | 52.838 | 25.511 | 49.693 | 0.00 | 0.00 |
| ATOM | 5967 | HB2  | ASP | X | 396 | 52.907 | 24.756 | 48.910 | 0.00 | 0.00 |
| ATOM | 5968 | HB3  | ASP | X | 396 | 53.819 | 25.408 | 50.156 | 0.00 | 0.00 |
| ATOM | 5969 | CG   | ASP | X | 396 | 51.643 | 25.258 | 50.693 | 0.00 | 0.00 |
| ATOM | 5970 | OD1  | ASP | X | 396 | 51.843 | 25.418 | 51.864 | 0.00 | 0.00 |
| ATOM | 5971 | OD2  | ASP | X | 396 | 50.591 | 24.876 | 50.153 | 0.00 | 0.00 |
| ATOM | 5972 | C    | ASP | X | 396 | 52.786 | 28.153 | 49.928 | 0.00 | 0.00 |
| ATOM | 5973 | O    | ASP | X | 396 | 51.775 | 28.794 | 50.128 | 0.00 | 0.00 |
| ATOM | 5974 | N    | VAL | X | 397 | 54.025 | 28.576 | 50.454 | 0.00 | 0.00 |
| ATOM | 5975 | H    | VAL | X | 397 | 54.859 | 28.045 | 50.244 | 0.00 | 0.00 |
| ATOM | 5976 | CA   | VAL | X | 397 | 54.278 | 29.819 | 51.146 | 0.00 | 0.00 |
| ATOM | 5977 | HA   | VAL | X | 397 | 53.789 | 29.713 | 52.114 | 0.00 | 0.00 |
| ATOM | 5978 | CB   | VAL | X | 397 | 55.741 | 30.089 | 51.463 | 0.00 | 0.00 |
| ATOM | 5979 | HB   | VAL | X | 397 | 56.341 | 30.065 | 50.553 | 0.00 | 0.00 |
| ATOM | 5980 | CG1  | VAL | X | 397 | 56.057 | 31.613 | 51.877 | 0.00 | 0.00 |
| ATOM | 5981 | HG11 | VAL | X | 397 | 55.738 | 32.388 | 51.180 | 0.00 | 0.00 |
| ATOM | 5982 | HG12 | VAL | X | 397 | 55.471 | 31.740 | 52.788 | 0.00 | 0.00 |
| ATOM | 5983 | HG13 | VAL | X | 397 | 57.102 | 31.742 | 52.160 | 0.00 | 0.00 |
| ATOM | 5984 | CG2  | VAL | X | 397 | 56.330 | 29.083 | 52.443 | 0.00 | 0.00 |
| ATOM | 5985 | HG21 | VAL | X | 397 | 55.890 | 29.309 | 53.414 | 0.00 | 0.00 |
| ATOM | 5986 | HG22 | VAL | X | 397 | 57.420 | 29.053 | 52.443 | 0.00 | 0.00 |
| ATOM | 5987 | HG23 | VAL | X | 397 | 56.047 | 28.049 | 52.244 | 0.00 | 0.00 |
| ATOM | 5988 | C    | VAL | X | 397 | 53.673 | 31.076 | 50.311 | 0.00 | 0.00 |
| ATOM | 5989 | O    | VAL | X | 397 | 52.958 | 31.897 | 50.909 | 0.00 | 0.00 |
| ATOM | 5990 | N    | VAL | X | 398 | 53.983 | 31.277 | 49.051 | 0.00 | 0.00 |
| ATOM | 5991 | H    | VAL | X | 398 | 54.620 | 30.652 | 48.577 | 0.00 | 0.00 |
| ATOM | 5992 | CA   | VAL | X | 398 | 53.748 | 32.608 | 48.372 | 0.00 | 0.00 |
| ATOM | 5993 | HA   | VAL | X | 398 | 54.094 | 33.435 | 48.992 | 0.00 | 0.00 |
| ATOM | 5994 | CB   | VAL | X | 398 | 54.560 | 32.843 | 47.099 | 0.00 | 0.00 |
| ATOM | 5995 | HB   | VAL | X | 398 | 54.716 | 31.939 | 46.511 | 0.00 | 0.00 |
| ATOM | 5996 | CG1  | VAL | X | 398 | 54.084 | 33.962 | 46.137 | 0.00 | 0.00 |
| ATOM | 5997 | HG11 | VAL | X | 398 | 53.226 | 33.595 | 45.573 | 0.00 | 0.00 |
| ATOM | 5998 | HG12 | VAL | X | 398 | 53.856 | 34.826 | 46.761 | 0.00 | 0.00 |
| ATOM | 5999 | HG13 | VAL | X | 398 | 54.890 | 34.326 | 45.499 | 0.00 | 0.00 |
| ATOM | 6000 | CG2  | VAL | X | 398 | 55.959 | 33.320 | 47.574 | 0.00 | 0.00 |
| ATOM | 6001 | HG21 | VAL | X | 398 | 56.509 | 32.479 | 47.996 | 0.00 | 0.00 |
| ATOM | 6002 | HG22 | VAL | X | 398 | 55.962 | 34.084 | 48.351 | 0.00 | 0.00 |
| ATOM | 6003 | HG23 | VAL | X | 398 | 56.533 | 33.765 | 46.762 | 0.00 | 0.00 |
| ATOM | 6004 | C    | VAL | X | 398 | 52.209 | 32.798 | 48.081 | 0.00 | 0.00 |
| ATOM | 6005 | O    | VAL | X | 398 | 51.797 | 33.916 | 47.834 | 0.00 | 0.00 |
| ATOM | 6006 | N    | GLY | X | 399 | 51.422 | 31.691 | 48.204 | 0.00 | 0.00 |
| ATOM | 6007 | H    | GLY | X | 399 | 51.820 | 30.812 | 48.504 | 0.00 | 0.00 |
| ATOM | 6008 | CA   | GLY | X | 399 | 49.955 | 31.716 | 47.953 | 0.00 | 0.00 |
| ATOM | 6009 | HA2  | GLY | X | 399 | 49.718 | 32.416 | 47.151 | 0.00 | 0.00 |
| ATOM | 6010 | HA3  | GLY | X | 399 | 49.698 | 30.713 | 47.614 | 0.00 | 0.00 |
| ATOM | 6011 | C    | GLY | X | 399 | 49.096 | 31.998 | 49.199 | 0.00 | 0.00 |
| ATOM | 6012 | O    | GLY | X | 399 | 47.980 | 32.447 | 49.011 | 0.00 | 0.00 |
| ATOM | 6013 | N    | ASP | X | 400 | 49.596 | 31.569 | 50.365 | 0.00 | 0.00 |
| ATOM | 6014 | H    | ASP | X | 400 | 50.585 | 31.367 | 50.407 | 0.00 | 0.00 |

|      |      |      |     |   |     |        |        |        |      |      |
|------|------|------|-----|---|-----|--------|--------|--------|------|------|
| ATOM | 6015 | CA   | ASP | X | 400 | 48.669 | 31.393 | 51.505 | 0.00 | 0.00 |
| ATOM | 6016 | HA   | ASP | X | 400 | 47.864 | 30.821 | 51.043 | 0.00 | 0.00 |
| ATOM | 6017 | CB   | ASP | X | 400 | 49.304 | 30.668 | 52.717 | 0.00 | 0.00 |
| ATOM | 6018 | HB2  | ASP | X | 400 | 50.355 | 30.934 | 52.826 | 0.00 | 0.00 |
| ATOM | 6019 | HB3  | ASP | X | 400 | 48.805 | 31.008 | 53.624 | 0.00 | 0.00 |
| ATOM | 6020 | CG   | ASP | X | 400 | 49.139 | 29.174 | 52.644 | 0.00 | 0.00 |
| ATOM | 6021 | OD1  | ASP | X | 400 | 48.542 | 28.686 | 51.652 | 0.00 | 0.00 |
| ATOM | 6022 | OD2  | ASP | X | 400 | 49.458 | 28.421 | 53.575 | 0.00 | 0.00 |
| ATOM | 6023 | C    | ASP | X | 400 | 47.997 | 32.704 | 52.063 | 0.00 | 0.00 |
| ATOM | 6024 | O    | ASP | X | 400 | 46.897 | 33.092 | 51.656 | 0.00 | 0.00 |
| ATOM | 6025 | N    | HIE | X | 401 | 48.726 | 33.542 | 52.834 | 0.00 | 0.00 |
| ATOM | 6026 | H    | HIE | X | 401 | 49.682 | 33.233 | 52.943 | 0.00 | 0.00 |
| ATOM | 6027 | CA   | HIE | X | 401 | 48.395 | 34.894 | 53.332 | 0.00 | 0.00 |
| ATOM | 6028 | HA   | HIE | X | 401 | 47.507 | 34.796 | 53.957 | 0.00 | 0.00 |
| ATOM | 6029 | CB   | HIE | X | 401 | 49.621 | 35.312 | 54.227 | 0.00 | 0.00 |
| ATOM | 6030 | HB2  | HIE | X | 401 | 49.397 | 36.299 | 54.631 | 0.00 | 0.00 |
| ATOM | 6031 | HB3  | HIE | X | 401 | 49.588 | 34.633 | 55.078 | 0.00 | 0.00 |
| ATOM | 6032 | CG   | HIE | X | 401 | 50.875 | 35.290 | 53.438 | 0.00 | 0.00 |
| ATOM | 6033 | ND1  | HIE | X | 401 | 51.253 | 36.266 | 52.494 | 0.00 | 0.00 |
| ATOM | 6034 | CE1  | HIE | X | 401 | 52.325 | 35.759 | 51.858 | 0.00 | 0.00 |
| ATOM | 6035 | HE1  | HIE | X | 401 | 52.864 | 36.286 | 51.084 | 0.00 | 0.00 |
| ATOM | 6036 | NE2  | HIE | X | 401 | 52.586 | 34.533 | 52.317 | 0.00 | 0.00 |
| ATOM | 6037 | HE2  | HIE | X | 401 | 53.226 | 33.849 | 51.939 | 0.00 | 0.00 |
| ATOM | 6038 | CD2  | HIE | X | 401 | 51.690 | 34.182 | 53.328 | 0.00 | 0.00 |
| ATOM | 6039 | HD2  | HIE | X | 401 | 51.520 | 33.242 | 53.833 | 0.00 | 0.00 |
| ATOM | 6040 | C    | HIE | X | 401 | 48.160 | 35.847 | 52.210 | 0.00 | 0.00 |
| ATOM | 6041 | O    | HIE | X | 401 | 47.445 | 36.820 | 52.422 | 0.00 | 0.00 |
| ATOM | 6042 | N    | ASN | X | 402 | 48.577 | 35.638 | 50.928 | 0.00 | 0.00 |
| ATOM | 6043 | H    | ASN | X | 402 | 49.340 | 34.995 | 50.769 | 0.00 | 0.00 |
| ATOM | 6044 | CA   | ASN | X | 402 | 48.242 | 36.499 | 49.794 | 0.00 | 0.00 |
| ATOM | 6045 | HA   | ASN | X | 402 | 48.182 | 37.535 | 50.126 | 0.00 | 0.00 |
| ATOM | 6046 | CB   | ASN | X | 402 | 49.285 | 36.502 | 48.638 | 0.00 | 0.00 |
| ATOM | 6047 | HB2  | ASN | X | 402 | 49.615 | 35.464 | 48.579 | 0.00 | 0.00 |
| ATOM | 6048 | HB3  | ASN | X | 402 | 48.927 | 36.873 | 47.678 | 0.00 | 0.00 |
| ATOM | 6049 | CG   | ASN | X | 402 | 50.494 | 37.372 | 48.930 | 0.00 | 0.00 |
| ATOM | 6050 | OD1  | ASN | X | 402 | 50.372 | 38.538 | 49.313 | 0.00 | 0.00 |
| ATOM | 6051 | ND2  | ASN | X | 402 | 51.766 | 37.052 | 48.699 | 0.00 | 0.00 |
| ATOM | 6052 | HD21 | ASN | X | 402 | 52.469 | 37.775 | 48.633 | 0.00 | 0.00 |
| ATOM | 6053 | HD22 | ASN | X | 402 | 51.999 | 36.209 | 48.194 | 0.00 | 0.00 |
| ATOM | 6054 | C    | ASN | X | 402 | 46.796 | 36.227 | 49.250 | 0.00 | 0.00 |
| ATOM | 6055 | O    | ASN | X | 402 | 46.046 | 37.161 | 48.983 | 0.00 | 0.00 |
| ATOM | 6056 | N    | VAL | X | 403 | 46.402 | 34.956 | 49.176 | 0.00 | 0.00 |
| ATOM | 6057 | H    | VAL | X | 403 | 46.991 | 34.261 | 49.611 | 0.00 | 0.00 |
| ATOM | 6058 | CA   | VAL | X | 403 | 45.216 | 34.527 | 48.464 | 0.00 | 0.00 |
| ATOM | 6059 | HA   | VAL | X | 403 | 44.584 | 35.398 | 48.293 | 0.00 | 0.00 |
| ATOM | 6060 | CB   | VAL | X | 403 | 45.629 | 33.854 | 47.064 | 0.00 | 0.00 |
| ATOM | 6061 | HB   | VAL | X | 403 | 46.316 | 33.020 | 47.205 | 0.00 | 0.00 |
| ATOM | 6062 | CG1  | VAL | X | 403 | 44.322 | 33.376 | 46.366 | 0.00 | 0.00 |
| ATOM | 6063 | HG11 | VAL | X | 403 | 43.659 | 34.223 | 46.541 | 0.00 | 0.00 |
| ATOM | 6064 | HG12 | VAL | X | 403 | 44.459 | 33.266 | 45.291 | 0.00 | 0.00 |
| ATOM | 6065 | HG13 | VAL | X | 403 | 43.913 | 32.512 | 46.890 | 0.00 | 0.00 |
| ATOM | 6066 | CG2  | VAL | X | 403 | 46.252 | 34.953 | 46.171 | 0.00 | 0.00 |
| ATOM | 6067 | HG21 | VAL | X | 403 | 45.500 | 35.654 | 45.811 | 0.00 | 0.00 |
| ATOM | 6068 | HG22 | VAL | X | 403 | 46.725 | 34.571 | 45.267 | 0.00 | 0.00 |
| ATOM | 6069 | HG23 | VAL | X | 403 | 46.989 | 35.513 | 46.747 | 0.00 | 0.00 |
| ATOM | 6070 | C    | VAL | X | 403 | 44.435 | 33.432 | 49.254 | 0.00 | 0.00 |
| ATOM | 6071 | O    | VAL | X | 403 | 43.312 | 33.722 | 49.648 | 0.00 | 0.00 |
| ATOM | 6072 | N    | VAL | X | 404 | 44.849 | 32.229 | 49.546 | 0.00 | 0.00 |
| ATOM | 6073 | H    | VAL | X | 404 | 45.683 | 31.893 | 49.087 | 0.00 | 0.00 |
| ATOM | 6074 | CA   | VAL | X | 404 | 44.030 | 31.069 | 49.948 | 0.00 | 0.00 |
| ATOM | 6075 | HA   | VAL | X | 404 | 43.258 | 31.173 | 49.185 | 0.00 | 0.00 |
| ATOM | 6076 | CB   | VAL | X | 404 | 44.875 | 29.818 | 49.879 | 0.00 | 0.00 |
| ATOM | 6077 | HB   | VAL | X | 404 | 45.635 | 29.895 | 50.656 | 0.00 | 0.00 |
| ATOM | 6078 | CG1  | VAL | X | 404 | 43.918 | 28.655 | 50.106 | 0.00 | 0.00 |
| ATOM | 6079 | HG11 | VAL | X | 404 | 43.205 | 28.442 | 49.309 | 0.00 | 0.00 |
| ATOM | 6080 | HG12 | VAL | X | 404 | 44.528 | 27.770 | 50.288 | 0.00 | 0.00 |
| ATOM | 6081 | HG13 | VAL | X | 404 | 43.422 | 28.772 | 51.069 | 0.00 | 0.00 |

|      |      |      |     |   |     |        |        |        |      |      |
|------|------|------|-----|---|-----|--------|--------|--------|------|------|
| ATOM | 6082 | CG2  | VAL | X | 404 | 45.474 | 29.505 | 48.484 | 0.00 | 0.00 |
| ATOM | 6083 | HG21 | VAL | X | 404 | 46.131 | 28.636 | 48.467 | 0.00 | 0.00 |
| ATOM | 6084 | HG22 | VAL | X | 404 | 46.005 | 30.359 | 48.064 | 0.00 | 0.00 |
| ATOM | 6085 | HG23 | VAL | X | 404 | 44.690 | 29.392 | 47.736 | 0.00 | 0.00 |
| ATOM | 6086 | C    | VAL | X | 404 | 43.502 | 31.360 | 51.352 | 0.00 | 0.00 |
| ATOM | 6087 | O    | VAL | X | 404 | 42.315 | 31.211 | 51.503 | 0.00 | 0.00 |
| ATOM | 6088 | N    | CYX | X | 405 | 44.308 | 31.824 | 52.232 | 0.00 | 0.00 |
| ATOM | 6089 | H    | CYX | X | 405 | 45.213 | 32.092 | 51.873 | 0.00 | 0.00 |
| ATOM | 6090 | CA   | CYX | X | 405 | 43.780 | 32.392 | 53.498 | 0.00 | 0.00 |
| ATOM | 6091 | HA   | CYX | X | 405 | 43.330 | 31.550 | 54.024 | 0.00 | 0.00 |
| ATOM | 6092 | CB   | CYX | X | 405 | 45.024 | 32.697 | 54.355 | 0.00 | 0.00 |
| ATOM | 6093 | HB2  | CYX | X | 405 | 45.706 | 33.317 | 53.773 | 0.00 | 0.00 |
| ATOM | 6094 | HB3  | CYX | X | 405 | 44.697 | 33.262 | 55.228 | 0.00 | 0.00 |
| ATOM | 6095 | SG   | CYX | X | 405 | 46.033 | 31.347 | 54.823 | 0.00 | 0.00 |
| ATOM | 6096 | C    | CYX | X | 405 | 42.696 | 33.471 | 53.404 | 0.00 | 0.00 |
| ATOM | 6097 | O    | CYX | X | 405 | 41.667 | 33.247 | 54.066 | 0.00 | 0.00 |
| ATOM | 6098 | N    | PRO | X | 406 | 42.920 | 34.625 | 52.724 | 0.00 | 0.00 |
| ATOM | 6099 | CD   | PRO | X | 406 | 44.168 | 35.207 | 52.402 | 0.00 | 0.00 |
| ATOM | 6100 | HD2  | PRO | X | 406 | 44.759 | 34.759 | 51.603 | 0.00 | 0.00 |
| ATOM | 6101 | HD3  | PRO | X | 406 | 44.731 | 35.255 | 53.334 | 0.00 | 0.00 |
| ATOM | 6102 | CG   | PRO | X | 406 | 43.801 | 36.628 | 52.049 | 0.00 | 0.00 |
| ATOM | 6103 | HG2  | PRO | X | 406 | 44.476 | 37.015 | 51.285 | 0.00 | 0.00 |
| ATOM | 6104 | HG3  | PRO | X | 406 | 43.908 | 37.197 | 52.972 | 0.00 | 0.00 |
| ATOM | 6105 | CB   | PRO | X | 406 | 42.336 | 36.641 | 51.635 | 0.00 | 0.00 |
| ATOM | 6106 | HB2  | PRO | X | 406 | 42.113 | 36.498 | 50.578 | 0.00 | 0.00 |
| ATOM | 6107 | HB3  | PRO | X | 406 | 41.917 | 37.578 | 52.003 | 0.00 | 0.00 |
| ATOM | 6108 | CA   | PRO | X | 406 | 41.800 | 35.467 | 52.493 | 0.00 | 0.00 |
| ATOM | 6109 | HA   | PRO | X | 406 | 41.478 | 35.780 | 53.486 | 0.00 | 0.00 |
| ATOM | 6110 | C    | PRO | X | 406 | 40.501 | 34.827 | 51.904 | 0.00 | 0.00 |
| ATOM | 6111 | O    | PRO | X | 406 | 39.399 | 35.002 | 52.419 | 0.00 | 0.00 |
| ATOM | 6112 | N    | VAL | X | 407 | 40.607 | 34.057 | 50.820 | 0.00 | 0.00 |
| ATOM | 6113 | H    | VAL | X | 407 | 41.458 | 34.179 | 50.290 | 0.00 | 0.00 |
| ATOM | 6114 | CA   | VAL | X | 407 | 39.466 | 33.327 | 50.276 | 0.00 | 0.00 |
| ATOM | 6115 | HA   | VAL | X | 407 | 38.728 | 34.058 | 49.944 | 0.00 | 0.00 |
| ATOM | 6116 | CB   | VAL | X | 407 | 39.865 | 32.416 | 49.084 | 0.00 | 0.00 |
| ATOM | 6117 | HB   | VAL | X | 407 | 40.754 | 31.864 | 49.389 | 0.00 | 0.00 |
| ATOM | 6118 | CG1  | VAL | X | 407 | 38.796 | 31.360 | 48.576 | 0.00 | 0.00 |
| ATOM | 6119 | HG11 | VAL | X | 407 | 38.905 | 31.169 | 47.509 | 0.00 | 0.00 |
| ATOM | 6120 | HG12 | VAL | X | 407 | 38.887 | 30.419 | 49.119 | 0.00 | 0.00 |
| ATOM | 6121 | HG13 | VAL | X | 407 | 37.779 | 31.724 | 48.725 | 0.00 | 0.00 |
| ATOM | 6122 | CG2  | VAL | X | 407 | 40.226 | 33.324 | 47.885 | 0.00 | 0.00 |
| ATOM | 6123 | HG21 | VAL | X | 407 | 39.296 | 33.815 | 47.598 | 0.00 | 0.00 |
| ATOM | 6124 | HG22 | VAL | X | 407 | 40.636 | 32.790 | 47.028 | 0.00 | 0.00 |
| ATOM | 6125 | HG23 | VAL | X | 407 | 40.910 | 34.089 | 48.252 | 0.00 | 0.00 |
| ATOM | 6126 | C    | VAL | X | 407 | 38.675 | 32.500 | 51.342 | 0.00 | 0.00 |
| ATOM | 6127 | O    | VAL | X | 407 | 37.430 | 32.390 | 51.396 | 0.00 | 0.00 |
| ATOM | 6128 | N    | ALA | X | 408 | 39.433 | 31.868 | 52.214 | 0.00 | 0.00 |
| ATOM | 6129 | H    | ALA | X | 408 | 40.435 | 31.965 | 52.128 | 0.00 | 0.00 |
| ATOM | 6130 | CA   | ALA | X | 408 | 38.935 | 30.977 | 53.256 | 0.00 | 0.00 |
| ATOM | 6131 | HA   | ALA | X | 408 | 38.209 | 30.289 | 52.823 | 0.00 | 0.00 |
| ATOM | 6132 | CB   | ALA | X | 408 | 40.061 | 30.113 | 53.823 | 0.00 | 0.00 |
| ATOM | 6133 | HB1  | ALA | X | 408 | 40.487 | 29.669 | 52.923 | 0.00 | 0.00 |
| ATOM | 6134 | HB2  | ALA | X | 408 | 39.707 | 29.357 | 54.524 | 0.00 | 0.00 |
| ATOM | 6135 | HB3  | ALA | X | 408 | 40.730 | 30.740 | 54.412 | 0.00 | 0.00 |
| ATOM | 6136 | C    | ALA | X | 408 | 38.166 | 31.756 | 54.367 | 0.00 | 0.00 |
| ATOM | 6137 | O    | ALA | X | 408 | 37.033 | 31.415 | 54.783 | 0.00 | 0.00 |
| ATOM | 6138 | N    | GLN | X | 409 | 38.690 | 32.932 | 54.709 | 0.00 | 0.00 |
| ATOM | 6139 | H    | GLN | X | 409 | 39.553 | 33.222 | 54.273 | 0.00 | 0.00 |
| ATOM | 6140 | CA   | GLN | X | 409 | 38.081 | 33.745 | 55.788 | 0.00 | 0.00 |
| ATOM | 6141 | HA   | GLN | X | 409 | 37.698 | 33.026 | 56.512 | 0.00 | 0.00 |
| ATOM | 6142 | CB   | GLN | X | 409 | 39.046 | 34.668 | 56.490 | 0.00 | 0.00 |
| ATOM | 6143 | HB2  | GLN | X | 409 | 39.876 | 34.001 | 56.723 | 0.00 | 0.00 |
| ATOM | 6144 | HB3  | GLN | X | 409 | 39.496 | 35.386 | 55.805 | 0.00 | 0.00 |
| ATOM | 6145 | CG   | GLN | X | 409 | 38.524 | 35.439 | 57.683 | 0.00 | 0.00 |
| ATOM | 6146 | HG2  | GLN | X | 409 | 39.344 | 36.027 | 58.095 | 0.00 | 0.00 |
| ATOM | 6147 | HG3  | GLN | X | 409 | 37.883 | 36.261 | 57.366 | 0.00 | 0.00 |
| ATOM | 6148 | CD   | GLN | X | 409 | 37.842 | 34.650 | 58.806 | 0.00 | 0.00 |

|      |      |      |     |   |     |        |        |        |      |      |
|------|------|------|-----|---|-----|--------|--------|--------|------|------|
| ATOM | 6149 | OE1  | GLN | X | 409 | 38.439 | 34.241 | 59.802 | 0.00 | 0.00 |
| ATOM | 6150 | NE2  | GLN | X | 409 | 36.530 | 34.391 | 58.631 | 0.00 | 0.00 |
| ATOM | 6151 | HE21 | GLN | X | 409 | 36.115 | 33.812 | 59.347 | 0.00 | 0.00 |
| ATOM | 6152 | HE22 | GLN | X | 409 | 36.097 | 34.587 | 57.739 | 0.00 | 0.00 |
| ATOM | 6153 | C    | GLN | X | 409 | 36.838 | 34.514 | 55.202 | 0.00 | 0.00 |
| ATOM | 6154 | O    | GLN | X | 409 | 35.935 | 34.835 | 55.938 | 0.00 | 0.00 |
| ATOM | 6155 | N    | LEU | X | 410 | 36.825 | 34.755 | 53.888 | 0.00 | 0.00 |
| ATOM | 6156 | H    | LEU | X | 410 | 37.585 | 34.450 | 53.296 | 0.00 | 0.00 |
| ATOM | 6157 | CA   | LEU | X | 410 | 35.747 | 35.402 | 53.191 | 0.00 | 0.00 |
| ATOM | 6158 | HA   | LEU | X | 410 | 35.523 | 36.267 | 53.814 | 0.00 | 0.00 |
| ATOM | 6159 | CB   | LEU | X | 410 | 36.276 | 36.026 | 51.920 | 0.00 | 0.00 |
| ATOM | 6160 | HB2  | LEU | X | 410 | 37.168 | 36.582 | 52.209 | 0.00 | 0.00 |
| ATOM | 6161 | HB3  | LEU | X | 410 | 36.514 | 35.180 | 51.276 | 0.00 | 0.00 |
| ATOM | 6162 | CG   | LEU | X | 410 | 35.237 | 36.808 | 51.058 | 0.00 | 0.00 |
| ATOM | 6163 | HG   | LEU | X | 410 | 34.490 | 36.053 | 50.814 | 0.00 | 0.00 |
| ATOM | 6164 | CD1  | LEU | X | 410 | 34.639 | 38.087 | 51.659 | 0.00 | 0.00 |
| ATOM | 6165 | HD11 | LEU | X | 410 | 33.845 | 37.784 | 52.342 | 0.00 | 0.00 |
| ATOM | 6166 | HD12 | LEU | X | 410 | 34.291 | 38.698 | 50.825 | 0.00 | 0.00 |
| ATOM | 6167 | HD13 | LEU | X | 410 | 35.453 | 38.615 | 52.156 | 0.00 | 0.00 |
| ATOM | 6168 | CD2  | LEU | X | 410 | 35.896 | 37.243 | 49.699 | 0.00 | 0.00 |
| ATOM | 6169 | HD21 | LEU | X | 410 | 36.215 | 36.318 | 49.218 | 0.00 | 0.00 |
| ATOM | 6170 | HD22 | LEU | X | 410 | 35.158 | 37.712 | 49.048 | 0.00 | 0.00 |
| ATOM | 6171 | HD23 | LEU | X | 410 | 36.772 | 37.880 | 49.825 | 0.00 | 0.00 |
| ATOM | 6172 | C    | LEU | X | 410 | 34.636 | 34.471 | 52.948 | 0.00 | 0.00 |
| ATOM | 6173 | O    | LEU | X | 410 | 33.499 | 34.850 | 53.251 | 0.00 | 0.00 |
| ATOM | 6174 | N    | ALA | X | 411 | 34.799 | 33.223 | 52.446 | 0.00 | 0.00 |
| ATOM | 6175 | H    | ALA | X | 411 | 35.725 | 32.902 | 52.203 | 0.00 | 0.00 |
| ATOM | 6176 | CA   | ALA | X | 411 | 33.761 | 32.194 | 52.331 | 0.00 | 0.00 |
| ATOM | 6177 | HA   | ALA | X | 411 | 32.921 | 32.518 | 51.718 | 0.00 | 0.00 |
| ATOM | 6178 | CB   | ALA | X | 411 | 34.305 | 30.949 | 51.706 | 0.00 | 0.00 |
| ATOM | 6179 | HB1  | ALA | X | 411 | 35.002 | 30.506 | 52.417 | 0.00 | 0.00 |
| ATOM | 6180 | HB2  | ALA | X | 411 | 34.971 | 31.244 | 50.895 | 0.00 | 0.00 |
| ATOM | 6181 | HB3  | ALA | X | 411 | 33.480 | 30.286 | 51.446 | 0.00 | 0.00 |
| ATOM | 6182 | C    | ALA | X | 411 | 33.135 | 31.933 | 53.716 | 0.00 | 0.00 |
| ATOM | 6183 | O    | ALA | X | 411 | 31.938 | 32.008 | 53.884 | 0.00 | 0.00 |
| ATOM | 6184 | N    | GLY | X | 412 | 33.938 | 31.970 | 54.816 | 0.00 | 0.00 |
| ATOM | 6185 | H    | GLY | X | 412 | 34.920 | 31.963 | 54.577 | 0.00 | 0.00 |
| ATOM | 6186 | CA   | GLY | X | 412 | 33.483 | 31.869 | 56.213 | 0.00 | 0.00 |
| ATOM | 6187 | HA2  | GLY | X | 412 | 32.953 | 30.938 | 56.414 | 0.00 | 0.00 |
| ATOM | 6188 | HA3  | GLY | X | 412 | 34.316 | 31.927 | 56.914 | 0.00 | 0.00 |
| ATOM | 6189 | C    | GLY | X | 412 | 32.577 | 33.000 | 56.682 | 0.00 | 0.00 |
| ATOM | 6190 | O    | GLY | X | 412 | 31.448 | 32.695 | 57.188 | 0.00 | 0.00 |
| ATOM | 6191 | N    | ARG | X | 413 | 32.971 | 34.244 | 56.565 | 0.00 | 0.00 |
| ATOM | 6192 | H    | ARG | X | 413 | 33.911 | 34.453 | 56.260 | 0.00 | 0.00 |
| ATOM | 6193 | CA   | ARG | X | 413 | 32.110 | 35.411 | 56.776 | 0.00 | 0.00 |
| ATOM | 6194 | HA   | ARG | X | 413 | 31.856 | 35.428 | 57.835 | 0.00 | 0.00 |
| ATOM | 6195 | CB   | ARG | X | 413 | 32.811 | 36.809 | 56.517 | 0.00 | 0.00 |
| ATOM | 6196 | HB2  | ARG | X | 413 | 33.272 | 36.814 | 55.529 | 0.00 | 0.00 |
| ATOM | 6197 | HB3  | ARG | X | 413 | 31.994 | 37.526 | 56.594 | 0.00 | 0.00 |
| ATOM | 6198 | CG   | ARG | X | 413 | 33.938 | 36.947 | 57.530 | 0.00 | 0.00 |
| ATOM | 6199 | HG2  | ARG | X | 413 | 34.444 | 35.986 | 57.624 | 0.00 | 0.00 |
| ATOM | 6200 | HG3  | ARG | X | 413 | 34.683 | 37.691 | 57.245 | 0.00 | 0.00 |
| ATOM | 6201 | CD   | ARG | X | 413 | 33.356 | 37.351 | 58.915 | 0.00 | 0.00 |
| ATOM | 6202 | HD2  | ARG | X | 413 | 33.178 | 38.418 | 58.785 | 0.00 | 0.00 |
| ATOM | 6203 | HD3  | ARG | X | 413 | 32.467 | 36.756 | 59.125 | 0.00 | 0.00 |
| ATOM | 6204 | NE   | ARG | X | 413 | 34.370 | 37.092 | 59.948 | 0.00 | 0.00 |
| ATOM | 6205 | HE   | ARG | X | 413 | 35.213 | 37.624 | 59.786 | 0.00 | 0.00 |
| ATOM | 6206 | CZ   | ARG | X | 413 | 34.394 | 36.096 | 60.788 | 0.00 | 0.00 |
| ATOM | 6207 | NH1  | ARG | X | 413 | 33.305 | 35.355 | 60.962 | 0.00 | 0.00 |
| ATOM | 6208 | HH11 | ARG | X | 413 | 32.456 | 35.539 | 60.447 | 0.00 | 0.00 |
| ATOM | 6209 | HH12 | ARG | X | 413 | 33.407 | 34.645 | 61.673 | 0.00 | 0.00 |
| ATOM | 6210 | NH2  | ARG | X | 413 | 35.500 | 35.938 | 61.513 | 0.00 | 0.00 |
| ATOM | 6211 | HH21 | ARG | X | 413 | 36.335 | 36.492 | 61.389 | 0.00 | 0.00 |
| ATOM | 6212 | HH22 | ARG | X | 413 | 35.599 | 35.164 | 62.155 | 0.00 | 0.00 |
| ATOM | 6213 | C    | ARG | X | 413 | 30.801 | 35.466 | 55.989 | 0.00 | 0.00 |
| ATOM | 6214 | O    | ARG | X | 413 | 29.727 | 35.554 | 56.556 | 0.00 | 0.00 |
| ATOM | 6215 | N    | LEU | X | 414 | 30.836 | 35.437 | 54.589 | 0.00 | 0.00 |

|      |      |      |     |   |     |        |        |        |      |      |
|------|------|------|-----|---|-----|--------|--------|--------|------|------|
| ATOM | 6216 | H    | LEU | X | 414 | 31.777 | 35.281 | 54.257 | 0.00 | 0.00 |
| ATOM | 6217 | CA   | LEU | X | 414 | 29.684 | 35.507 | 53.670 | 0.00 | 0.00 |
| ATOM | 6218 | HA   | LEU | X | 414 | 29.126 | 36.413 | 53.909 | 0.00 | 0.00 |
| ATOM | 6219 | CB   | LEU | X | 414 | 30.115 | 35.458 | 52.240 | 0.00 | 0.00 |
| ATOM | 6220 | HB2  | LEU | X | 414 | 30.798 | 34.610 | 52.181 | 0.00 | 0.00 |
| ATOM | 6221 | HB3  | LEU | X | 414 | 29.156 | 35.210 | 51.786 | 0.00 | 0.00 |
| ATOM | 6222 | CG   | LEU | X | 414 | 30.882 | 36.610 | 51.568 | 0.00 | 0.00 |
| ATOM | 6223 | HG   | LEU | X | 414 | 31.840 | 36.743 | 52.070 | 0.00 | 0.00 |
| ATOM | 6224 | CD1  | LEU | X | 414 | 31.298 | 36.296 | 50.078 | 0.00 | 0.00 |
| ATOM | 6225 | HD11 | LEU | X | 414 | 31.980 | 35.448 | 50.023 | 0.00 | 0.00 |
| ATOM | 6226 | HD12 | LEU | X | 414 | 31.901 | 37.120 | 49.696 | 0.00 | 0.00 |
| ATOM | 6227 | HD13 | LEU | X | 414 | 30.366 | 36.206 | 49.521 | 0.00 | 0.00 |
| ATOM | 6228 | CD2  | LEU | X | 414 | 30.086 | 37.937 | 51.744 | 0.00 | 0.00 |
| ATOM | 6229 | HD21 | LEU | X | 414 | 30.536 | 38.783 | 51.223 | 0.00 | 0.00 |
| ATOM | 6230 | HD22 | LEU | X | 414 | 29.049 | 37.796 | 51.441 | 0.00 | 0.00 |
| ATOM | 6231 | HD23 | LEU | X | 414 | 30.032 | 38.124 | 52.817 | 0.00 | 0.00 |
| ATOM | 6232 | C    | LEU | X | 414 | 28.702 | 34.332 | 53.990 | 0.00 | 0.00 |
| ATOM | 6233 | O    | LEU | X | 414 | 27.529 | 34.552 | 54.292 | 0.00 | 0.00 |
| ATOM | 6234 | N    | ALA | X | 415 | 29.240 | 33.118 | 54.299 | 0.00 | 0.00 |
| ATOM | 6235 | H    | ALA | X | 415 | 30.236 | 32.961 | 54.233 | 0.00 | 0.00 |
| ATOM | 6236 | CA   | ALA | X | 415 | 28.419 | 32.026 | 54.637 | 0.00 | 0.00 |
| ATOM | 6237 | HA   | ALA | X | 415 | 27.567 | 31.986 | 53.959 | 0.00 | 0.00 |
| ATOM | 6238 | CB   | ALA | X | 415 | 29.209 | 30.647 | 54.504 | 0.00 | 0.00 |
| ATOM | 6239 | HB1  | ALA | X | 415 | 29.674 | 30.553 | 53.523 | 0.00 | 0.00 |
| ATOM | 6240 | HB2  | ALA | X | 415 | 28.551 | 29.778 | 54.524 | 0.00 | 0.00 |
| ATOM | 6241 | HB3  | ALA | X | 415 | 29.872 | 30.566 | 55.366 | 0.00 | 0.00 |
| ATOM | 6242 | C    | ALA | X | 415 | 27.762 | 32.163 | 56.035 | 0.00 | 0.00 |
| ATOM | 6243 | O    | ALA | X | 415 | 26.623 | 31.770 | 56.198 | 0.00 | 0.00 |
| ATOM | 6244 | N    | ALA | X | 416 | 28.441 | 32.674 | 57.037 | 0.00 | 0.00 |
| ATOM | 6245 | H    | ALA | X | 416 | 29.372 | 33.006 | 56.830 | 0.00 | 0.00 |
| ATOM | 6246 | CA   | ALA | X | 416 | 27.936 | 32.866 | 58.426 | 0.00 | 0.00 |
| ATOM | 6247 | HA   | ALA | X | 416 | 27.446 | 31.964 | 58.793 | 0.00 | 0.00 |
| ATOM | 6248 | CB   | ALA | X | 416 | 29.114 | 33.267 | 59.312 | 0.00 | 0.00 |
| ATOM | 6249 | HB1  | ALA | X | 416 | 29.785 | 32.416 | 59.196 | 0.00 | 0.00 |
| ATOM | 6250 | HB2  | ALA | X | 416 | 28.752 | 33.368 | 60.335 | 0.00 | 0.00 |
| ATOM | 6251 | HB3  | ALA | X | 416 | 29.541 | 34.214 | 58.980 | 0.00 | 0.00 |
| ATOM | 6252 | C    | ALA | X | 416 | 26.931 | 34.082 | 58.505 | 0.00 | 0.00 |
| ATOM | 6253 | O    | ALA | X | 416 | 25.947 | 33.971 | 59.230 | 0.00 | 0.00 |
| ATOM | 6254 | N    | GLN | X | 417 | 26.987 | 35.022 | 57.599 | 0.00 | 0.00 |
| ATOM | 6255 | H    | GLN | X | 417 | 27.815 | 35.023 | 57.020 | 0.00 | 0.00 |
| ATOM | 6256 | CA   | GLN | X | 417 | 26.053 | 36.207 | 57.505 | 0.00 | 0.00 |
| ATOM | 6257 | HA   | GLN | X | 417 | 25.440 | 36.270 | 58.404 | 0.00 | 0.00 |
| ATOM | 6258 | CB   | GLN | X | 417 | 26.845 | 37.509 | 57.278 | 0.00 | 0.00 |
| ATOM | 6259 | HB2  | GLN | X | 417 | 27.562 | 37.308 | 56.482 | 0.00 | 0.00 |
| ATOM | 6260 | HB3  | GLN | X | 417 | 26.178 | 38.344 | 57.068 | 0.00 | 0.00 |
| ATOM | 6261 | CG   | GLN | X | 417 | 27.625 | 37.835 | 58.557 | 0.00 | 0.00 |
| ATOM | 6262 | HG2  | GLN | X | 417 | 26.973 | 38.396 | 59.226 | 0.00 | 0.00 |
| ATOM | 6263 | HG3  | GLN | X | 417 | 27.937 | 36.939 | 59.095 | 0.00 | 0.00 |
| ATOM | 6264 | CD   | GLN | X | 417 | 28.955 | 38.611 | 58.296 | 0.00 | 0.00 |
| ATOM | 6265 | OE1  | GLN | X | 417 | 30.048 | 38.210 | 58.630 | 0.00 | 0.00 |
| ATOM | 6266 | NE2  | GLN | X | 417 | 28.834 | 39.697 | 57.616 | 0.00 | 0.00 |
| ATOM | 6267 | HE21 | GLN | X | 417 | 29.634 | 40.278 | 57.408 | 0.00 | 0.00 |
| ATOM | 6268 | HE22 | GLN | X | 417 | 27.903 | 40.064 | 57.479 | 0.00 | 0.00 |
| ATOM | 6269 | C    | GLN | X | 417 | 24.946 | 35.975 | 56.455 | 0.00 | 0.00 |
| ATOM | 6270 | O    | GLN | X | 417 | 24.052 | 36.786 | 56.317 | 0.00 | 0.00 |
| ATOM | 6271 | N    | GLY | X | 418 | 24.942 | 34.864 | 55.658 | 0.00 | 0.00 |
| ATOM | 6272 | H    | GLY | X | 418 | 25.681 | 34.176 | 55.676 | 0.00 | 0.00 |
| ATOM | 6273 | CA   | GLY | X | 418 | 23.721 | 34.419 | 55.022 | 0.00 | 0.00 |
| ATOM | 6274 | HA2  | GLY | X | 418 | 23.559 | 33.366 | 55.255 | 0.00 | 0.00 |
| ATOM | 6275 | HA3  | GLY | X | 418 | 22.825 | 34.962 | 55.325 | 0.00 | 0.00 |
| ATOM | 6276 | C    | GLY | X | 418 | 23.734 | 34.418 | 53.511 | 0.00 | 0.00 |
| ATOM | 6277 | O    | GLY | X | 418 | 22.730 | 34.100 | 52.833 | 0.00 | 0.00 |
| ATOM | 6278 | N    | ALA | X | 419 | 24.854 | 34.800 | 52.917 | 0.00 | 0.00 |
| ATOM | 6279 | H    | ALA | X | 419 | 25.568 | 35.079 | 53.575 | 0.00 | 0.00 |
| ATOM | 6280 | CA   | ALA | X | 419 | 25.061 | 34.484 | 51.554 | 0.00 | 0.00 |
| ATOM | 6281 | HA   | ALA | X | 419 | 24.188 | 34.836 | 51.006 | 0.00 | 0.00 |
| ATOM | 6282 | CB   | ALA | X | 419 | 26.362 | 35.131 | 50.965 | 0.00 | 0.00 |

|      |      |      |     |   |     |        |        |        |      |      |
|------|------|------|-----|---|-----|--------|--------|--------|------|------|
| ATOM | 6283 | HB1  | ALA | X | 419 | 26.381 | 34.959 | 49.889 | 0.00 | 0.00 |
| ATOM | 6284 | HB2  | ALA | X | 419 | 27.180 | 34.765 | 51.586 | 0.00 | 0.00 |
| ATOM | 6285 | HB3  | ALA | X | 419 | 26.336 | 36.180 | 51.263 | 0.00 | 0.00 |
| ATOM | 6286 | C    | ALA | X | 419 | 25.163 | 32.936 | 51.391 | 0.00 | 0.00 |
| ATOM | 6287 | O    | ALA | X | 419 | 25.844 | 32.271 | 52.152 | 0.00 | 0.00 |
| ATOM | 6288 | N    | ARG | X | 420 | 24.478 | 32.396 | 50.418 | 0.00 | 0.00 |
| ATOM | 6289 | H    | ARG | X | 420 | 23.962 | 33.026 | 49.820 | 0.00 | 0.00 |
| ATOM | 6290 | CA   | ARG | X | 420 | 24.720 | 31.161 | 49.817 | 0.00 | 0.00 |
| ATOM | 6291 | HA   | ARG | X | 420 | 24.680 | 30.366 | 50.562 | 0.00 | 0.00 |
| ATOM | 6292 | CB   | ARG | X | 420 | 23.509 | 30.978 | 48.857 | 0.00 | 0.00 |
| ATOM | 6293 | HB2  | ARG | X | 420 | 22.544 | 31.201 | 49.312 | 0.00 | 0.00 |
| ATOM | 6294 | HB3  | ARG | X | 420 | 23.545 | 31.715 | 48.055 | 0.00 | 0.00 |
| ATOM | 6295 | CG   | ARG | X | 420 | 23.127 | 29.598 | 48.146 | 0.00 | 0.00 |
| ATOM | 6296 | HG2  | ARG | X | 420 | 23.894 | 29.538 | 47.374 | 0.00 | 0.00 |
| ATOM | 6297 | HG3  | ARG | X | 420 | 23.272 | 28.741 | 48.804 | 0.00 | 0.00 |
| ATOM | 6298 | CD   | ARG | X | 420 | 21.691 | 29.466 | 47.604 | 0.00 | 0.00 |
| ATOM | 6299 | HD2  | ARG | X | 420 | 21.064 | 29.786 | 48.436 | 0.00 | 0.00 |
| ATOM | 6300 | HD3  | ARG | X | 420 | 21.362 | 30.107 | 46.786 | 0.00 | 0.00 |
| ATOM | 6301 | NE   | ARG | X | 420 | 21.308 | 28.119 | 47.150 | 0.00 | 0.00 |
| ATOM | 6302 | HE   | ARG | X | 420 | 21.984 | 27.374 | 47.233 | 0.00 | 0.00 |
| ATOM | 6303 | CZ   | ARG | X | 420 | 20.219 | 27.814 | 46.458 | 0.00 | 0.00 |
| ATOM | 6304 | NH1  | ARG | X | 420 | 19.458 | 28.793 | 46.036 | 0.00 | 0.00 |
| ATOM | 6305 | HH11 | ARG | X | 420 | 19.773 | 29.748 | 46.129 | 0.00 | 0.00 |
| ATOM | 6306 | HH12 | ARG | X | 420 | 18.612 | 28.648 | 45.504 | 0.00 | 0.00 |
| ATOM | 6307 | NH2  | ARG | X | 420 | 19.973 | 26.644 | 46.000 | 0.00 | 0.00 |
| ATOM | 6308 | HH21 | ARG | X | 420 | 20.429 | 25.855 | 46.435 | 0.00 | 0.00 |
| ATOM | 6309 | HH22 | ARG | X | 420 | 19.388 | 26.532 | 45.184 | 0.00 | 0.00 |
| ATOM | 6310 | C    | ARG | X | 420 | 26.075 | 31.257 | 49.094 | 0.00 | 0.00 |
| ATOM | 6311 | O    | ARG | X | 420 | 26.122 | 31.979 | 48.083 | 0.00 | 0.00 |
| ATOM | 6312 | N    | VAL | X | 421 | 27.167 | 30.736 | 49.578 | 0.00 | 0.00 |
| ATOM | 6313 | H    | VAL | X | 421 | 27.025 | 30.197 | 50.421 | 0.00 | 0.00 |
| ATOM | 6314 | CA   | VAL | X | 421 | 28.425 | 30.708 | 48.891 | 0.00 | 0.00 |
| ATOM | 6315 | HA   | VAL | X | 421 | 28.588 | 31.528 | 48.192 | 0.00 | 0.00 |
| ATOM | 6316 | CB   | VAL | X | 421 | 29.557 | 31.083 | 49.948 | 0.00 | 0.00 |
| ATOM | 6317 | HB   | VAL | X | 421 | 29.418 | 30.501 | 50.859 | 0.00 | 0.00 |
| ATOM | 6318 | CG1  | VAL | X | 421 | 31.006 | 30.874 | 49.359 | 0.00 | 0.00 |
| ATOM | 6319 | HG11 | VAL | X | 421 | 31.849 | 31.116 | 50.006 | 0.00 | 0.00 |
| ATOM | 6320 | HG12 | VAL | X | 421 | 31.254 | 29.920 | 48.895 | 0.00 | 0.00 |
| ATOM | 6321 | HG13 | VAL | X | 421 | 31.001 | 31.558 | 48.511 | 0.00 | 0.00 |
| ATOM | 6322 | CG2  | VAL | X | 421 | 29.354 | 32.522 | 50.231 | 0.00 | 0.00 |
| ATOM | 6323 | HG21 | VAL | X | 421 | 29.667 | 33.096 | 49.358 | 0.00 | 0.00 |
| ATOM | 6324 | HG22 | VAL | X | 421 | 29.970 | 32.818 | 51.080 | 0.00 | 0.00 |
| ATOM | 6325 | HG23 | VAL | X | 421 | 28.303 | 32.795 | 50.321 | 0.00 | 0.00 |
| ATOM | 6326 | C    | VAL | X | 421 | 28.701 | 29.303 | 48.233 | 0.00 | 0.00 |
| ATOM | 6327 | O    | VAL | X | 421 | 28.439 | 28.226 | 48.798 | 0.00 | 0.00 |
| ATOM | 6328 | N    | TYR | X | 422 | 29.241 | 29.291 | 47.049 | 0.00 | 0.00 |
| ATOM | 6329 | H    | TYR | X | 422 | 29.193 | 30.149 | 46.519 | 0.00 | 0.00 |
| ATOM | 6330 | CA   | TYR | X | 422 | 29.804 | 28.073 | 46.364 | 0.00 | 0.00 |
| ATOM | 6331 | HA   | TYR | X | 422 | 29.700 | 27.205 | 47.015 | 0.00 | 0.00 |
| ATOM | 6332 | CB   | TYR | X | 422 | 29.135 | 27.782 | 44.995 | 0.00 | 0.00 |
| ATOM | 6333 | HB2  | TYR | X | 422 | 29.171 | 28.746 | 44.486 | 0.00 | 0.00 |
| ATOM | 6334 | HB3  | TYR | X | 422 | 29.672 | 26.984 | 44.482 | 0.00 | 0.00 |
| ATOM | 6335 | CG   | TYR | X | 422 | 27.645 | 27.359 | 45.073 | 0.00 | 0.00 |
| ATOM | 6336 | CD1  | TYR | X | 422 | 27.260 | 26.007 | 45.416 | 0.00 | 0.00 |
| ATOM | 6337 | HD1  | TYR | X | 422 | 27.950 | 25.176 | 45.433 | 0.00 | 0.00 |
| ATOM | 6338 | CE1  | TYR | X | 422 | 25.912 | 25.726 | 45.608 | 0.00 | 0.00 |
| ATOM | 6339 | HE1  | TYR | X | 422 | 25.580 | 24.698 | 45.600 | 0.00 | 0.00 |
| ATOM | 6340 | CZ   | TYR | X | 422 | 24.896 | 26.712 | 45.597 | 0.00 | 0.00 |
| ATOM | 6341 | OH   | TYR | X | 422 | 23.619 | 26.424 | 45.967 | 0.00 | 0.00 |
| ATOM | 6342 | HH   | TYR | X | 422 | 23.493 | 25.473 | 45.988 | 0.00 | 0.00 |
| ATOM | 6343 | CE2  | TYR | X | 422 | 25.300 | 28.101 | 45.390 | 0.00 | 0.00 |
| ATOM | 6344 | HE2  | TYR | X | 422 | 24.564 | 28.889 | 45.327 | 0.00 | 0.00 |
| ATOM | 6345 | CD2  | TYR | X | 422 | 26.619 | 28.389 | 45.017 | 0.00 | 0.00 |
| ATOM | 6346 | HD2  | TYR | X | 422 | 26.834 | 29.407 | 44.728 | 0.00 | 0.00 |
| ATOM | 6347 | C    | TYR | X | 422 | 31.328 | 28.252 | 46.048 | 0.00 | 0.00 |
| ATOM | 6348 | O    | TYR | X | 422 | 31.714 | 29.190 | 45.381 | 0.00 | 0.00 |
| ATOM | 6349 | N    | ALA | X | 423 | 32.139 | 27.272 | 46.545 | 0.00 | 0.00 |

|      |      |      |     |   |     |        |        |        |      |      |
|------|------|------|-----|---|-----|--------|--------|--------|------|------|
| ATOM | 6350 | H    | ALA | X | 423 | 31.757 | 26.595 | 47.189 | 0.00 | 0.00 |
| ATOM | 6351 | CA   | ALA | X | 423 | 33.561 | 27.311 | 46.589 | 0.00 | 0.00 |
| ATOM | 6352 | HA   | ALA | X | 423 | 33.788 | 28.344 | 46.327 | 0.00 | 0.00 |
| ATOM | 6353 | CB   | ALA | X | 423 | 34.079 | 27.260 | 47.993 | 0.00 | 0.00 |
| ATOM | 6354 | HB1  | ALA | X | 423 | 33.423 | 27.831 | 48.649 | 0.00 | 0.00 |
| ATOM | 6355 | HB2  | ALA | X | 423 | 35.097 | 27.619 | 48.146 | 0.00 | 0.00 |
| ATOM | 6356 | HB3  | ALA | X | 423 | 33.886 | 26.232 | 48.303 | 0.00 | 0.00 |
| ATOM | 6357 | C    | ALA | X | 423 | 34.193 | 26.238 | 45.723 | 0.00 | 0.00 |
| ATOM | 6358 | O    | ALA | X | 423 | 33.802 | 25.104 | 45.689 | 0.00 | 0.00 |
| ATOM | 6359 | N    | TYR | X | 424 | 35.239 | 26.589 | 44.996 | 0.00 | 0.00 |
| ATOM | 6360 | H    | TYR | X | 424 | 35.601 | 27.522 | 45.129 | 0.00 | 0.00 |
| ATOM | 6361 | CA   | TYR | X | 424 | 36.053 | 25.662 | 44.274 | 0.00 | 0.00 |
| ATOM | 6362 | HA   | TYR | X | 424 | 35.963 | 24.722 | 44.819 | 0.00 | 0.00 |
| ATOM | 6363 | CB   | TYR | X | 424 | 35.609 | 25.560 | 42.768 | 0.00 | 0.00 |
| ATOM | 6364 | HB2  | TYR | X | 424 | 35.932 | 24.631 | 42.298 | 0.00 | 0.00 |
| ATOM | 6365 | HB3  | TYR | X | 424 | 34.520 | 25.616 | 42.783 | 0.00 | 0.00 |
| ATOM | 6366 | CG   | TYR | X | 424 | 36.206 | 26.763 | 42.025 | 0.00 | 0.00 |
| ATOM | 6367 | CD1  | TYR | X | 424 | 37.459 | 26.582 | 41.425 | 0.00 | 0.00 |
| ATOM | 6368 | HD1  | TYR | X | 424 | 37.831 | 25.583 | 41.249 | 0.00 | 0.00 |
| ATOM | 6369 | CE1  | TYR | X | 424 | 38.149 | 27.719 | 40.914 | 0.00 | 0.00 |
| ATOM | 6370 | HE1  | TYR | X | 424 | 39.145 | 27.675 | 40.498 | 0.00 | 0.00 |
| ATOM | 6371 | CZ   | TYR | X | 424 | 37.599 | 29.035 | 41.124 | 0.00 | 0.00 |
| ATOM | 6372 | OH   | TYR | X | 424 | 38.239 | 30.216 | 40.652 | 0.00 | 0.00 |
| ATOM | 6373 | HH   | TYR | X | 424 | 38.868 | 30.132 | 39.931 | 0.00 | 0.00 |
| ATOM | 6374 | CE2  | TYR | X | 424 | 36.319 | 29.165 | 41.621 | 0.00 | 0.00 |
| ATOM | 6375 | HE2  | TYR | X | 424 | 35.955 | 30.176 | 41.731 | 0.00 | 0.00 |
| ATOM | 6376 | CD2  | TYR | X | 424 | 35.582 | 28.059 | 42.076 | 0.00 | 0.00 |
| ATOM | 6377 | HD2  | TYR | X | 424 | 34.594 | 28.140 | 42.506 | 0.00 | 0.00 |
| ATOM | 6378 | C    | TYR | X | 424 | 37.555 | 25.729 | 44.378 | 0.00 | 0.00 |
| ATOM | 6379 | O    | TYR | X | 424 | 38.028 | 26.816 | 44.773 | 0.00 | 0.00 |
| ATOM | 6380 | N    | VAL | X | 425 | 38.182 | 24.643 | 44.007 | 0.00 | 0.00 |
| ATOM | 6381 | H    | VAL | X | 425 | 37.546 | 23.876 | 43.838 | 0.00 | 0.00 |
| ATOM | 6382 | CA   | VAL | X | 425 | 39.587 | 24.476 | 43.651 | 0.00 | 0.00 |
| ATOM | 6383 | HA   | VAL | X | 425 | 40.119 | 25.427 | 43.672 | 0.00 | 0.00 |
| ATOM | 6384 | CB   | VAL | X | 425 | 40.327 | 23.652 | 44.782 | 0.00 | 0.00 |
| ATOM | 6385 | HB   | VAL | X | 425 | 39.736 | 22.743 | 44.899 | 0.00 | 0.00 |
| ATOM | 6386 | CG1  | VAL | X | 425 | 41.671 | 23.059 | 44.302 | 0.00 | 0.00 |
| ATOM | 6387 | HG11 | VAL | X | 425 | 42.348 | 23.828 | 43.931 | 0.00 | 0.00 |
| ATOM | 6388 | HG12 | VAL | X | 425 | 42.209 | 22.577 | 45.118 | 0.00 | 0.00 |
| ATOM | 6389 | HG13 | VAL | X | 425 | 41.517 | 22.285 | 43.550 | 0.00 | 0.00 |
| ATOM | 6390 | CG2  | VAL | X | 425 | 40.434 | 24.496 | 46.046 | 0.00 | 0.00 |
| ATOM | 6391 | HG21 | VAL | X | 425 | 40.943 | 23.884 | 46.791 | 0.00 | 0.00 |
| ATOM | 6392 | HG22 | VAL | X | 425 | 39.436 | 24.833 | 46.324 | 0.00 | 0.00 |
| ATOM | 6393 | HG23 | VAL | X | 425 | 40.983 | 25.416 | 45.846 | 0.00 | 0.00 |
| ATOM | 6394 | C    | VAL | X | 425 | 39.708 | 23.733 | 42.353 | 0.00 | 0.00 |
| ATOM | 6395 | O    | VAL | X | 425 | 39.075 | 22.677 | 42.142 | 0.00 | 0.00 |
| ATOM | 6396 | N    | PHE | X | 426 | 40.551 | 24.189 | 41.468 | 0.00 | 0.00 |
| ATOM | 6397 | H    | PHE | X | 426 | 41.033 | 25.060 | 41.634 | 0.00 | 0.00 |
| ATOM | 6398 | CA   | PHE | X | 426 | 40.732 | 23.682 | 40.084 | 0.00 | 0.00 |
| ATOM | 6399 | HA   | PHE | X | 426 | 40.019 | 22.896 | 39.836 | 0.00 | 0.00 |
| ATOM | 6400 | CB   | PHE | X | 426 | 40.375 | 24.832 | 39.143 | 0.00 | 0.00 |
| ATOM | 6401 | HB2  | PHE | X | 426 | 39.417 | 25.258 | 39.442 | 0.00 | 0.00 |
| ATOM | 6402 | HB3  | PHE | X | 426 | 41.072 | 25.661 | 39.273 | 0.00 | 0.00 |
| ATOM | 6403 | CG   | PHE | X | 426 | 40.404 | 24.502 | 37.683 | 0.00 | 0.00 |
| ATOM | 6404 | CD1  | PHE | X | 426 | 39.212 | 24.226 | 36.979 | 0.00 | 0.00 |
| ATOM | 6405 | HD1  | PHE | X | 426 | 38.228 | 24.289 | 37.420 | 0.00 | 0.00 |
| ATOM | 6406 | CE1  | PHE | X | 426 | 39.300 | 24.065 | 35.603 | 0.00 | 0.00 |
| ATOM | 6407 | HE1  | PHE | X | 426 | 38.464 | 23.894 | 34.941 | 0.00 | 0.00 |
| ATOM | 6408 | CZ   | PHE | X | 426 | 40.463 | 24.212 | 34.895 | 0.00 | 0.00 |
| ATOM | 6409 | HZ   | PHE | X | 426 | 40.472 | 24.239 | 33.815 | 0.00 | 0.00 |
| ATOM | 6410 | CE2  | PHE | X | 426 | 41.667 | 24.526 | 35.607 | 0.00 | 0.00 |
| ATOM | 6411 | HE2  | PHE | X | 426 | 42.572 | 24.738 | 35.058 | 0.00 | 0.00 |
| ATOM | 6412 | CD2  | PHE | X | 426 | 41.648 | 24.639 | 36.979 | 0.00 | 0.00 |
| ATOM | 6413 | HD2  | PHE | X | 426 | 42.506 | 25.026 | 37.509 | 0.00 | 0.00 |
| ATOM | 6414 | C    | PHE | X | 426 | 42.188 | 23.178 | 39.727 | 0.00 | 0.00 |
| ATOM | 6415 | O    | PHE | X | 426 | 43.192 | 23.681 | 40.216 | 0.00 | 0.00 |
| ATOM | 6416 | N    | GLU | X | 427 | 42.207 | 22.023 | 39.063 | 0.00 | 0.00 |



|      |      |      |     |   |     |        |        |        |      |      |
|------|------|------|-----|---|-----|--------|--------|--------|------|------|
| ATOM | 6417 | H    | GLU | X | 427 | 41.315 | 21.652 | 38.771 | 0.00 | 0.00 |
| ATOM | 6418 | CA   | GLU | X | 427 | 43.189 | 20.957 | 39.237 | 0.00 | 0.00 |
| ATOM | 6419 | HA   | GLU | X | 427 | 44.065 | 21.467 | 39.638 | 0.00 | 0.00 |
| ATOM | 6420 | CB   | GLU | X | 427 | 42.694 | 19.840 | 40.130 | 0.00 | 0.00 |
| ATOM | 6421 | HB2  | GLU | X | 427 | 41.773 | 19.356 | 39.806 | 0.00 | 0.00 |
| ATOM | 6422 | HB3  | GLU | X | 427 | 43.525 | 19.148 | 40.269 | 0.00 | 0.00 |
| ATOM | 6423 | CG   | GLU | X | 427 | 42.350 | 20.285 | 41.530 | 0.00 | 0.00 |
| ATOM | 6424 | HG2  | GLU | X | 427 | 43.054 | 21.062 | 41.828 | 0.00 | 0.00 |
| ATOM | 6425 | HG3  | GLU | X | 427 | 41.304 | 20.583 | 41.600 | 0.00 | 0.00 |
| ATOM | 6426 | CD   | GLU | X | 427 | 42.449 | 19.084 | 42.497 | 0.00 | 0.00 |
| ATOM | 6427 | OE1  | GLU | X | 427 | 43.432 | 19.080 | 43.298 | 0.00 | 0.00 |
| ATOM | 6428 | OE2  | GLU | X | 427 | 41.663 | 18.144 | 42.414 | 0.00 | 0.00 |
| ATOM | 6429 | C    | GLU | X | 427 | 43.658 | 20.387 | 37.932 | 0.00 | 0.00 |
| ATOM | 6430 | O    | GLU | X | 427 | 44.817 | 20.012 | 37.916 | 0.00 | 0.00 |
| ATOM | 6431 | N    | HIE | X | 428 | 42.858 | 20.307 | 36.914 | 0.00 | 0.00 |
| ATOM | 6432 | H    | HIE | X | 428 | 42.007 | 20.829 | 37.067 | 0.00 | 0.00 |
| ATOM | 6433 | CA   | HIE | X | 428 | 43.217 | 19.975 | 35.530 | 0.00 | 0.00 |
| ATOM | 6434 | HA   | HIE | X | 428 | 43.630 | 18.967 | 35.506 | 0.00 | 0.00 |
| ATOM | 6435 | CB   | HIE | X | 428 | 41.982 | 20.043 | 34.634 | 0.00 | 0.00 |
| ATOM | 6436 | HB2  | HIE | X | 428 | 41.270 | 19.307 | 35.007 | 0.00 | 0.00 |
| ATOM | 6437 | HB3  | HIE | X | 428 | 41.521 | 21.023 | 34.763 | 0.00 | 0.00 |
| ATOM | 6438 | CG   | HIE | X | 428 | 42.353 | 19.723 | 33.125 | 0.00 | 0.00 |
| ATOM | 6439 | ND1  | HIE | X | 428 | 43.287 | 18.776 | 32.710 | 0.00 | 0.00 |
| ATOM | 6440 | CE1  | HIE | X | 428 | 43.464 | 19.011 | 31.396 | 0.00 | 0.00 |
| ATOM | 6441 | HE1  | HIE | X | 428 | 44.063 | 18.366 | 30.770 | 0.00 | 0.00 |
| ATOM | 6442 | NE2  | HIE | X | 428 | 42.729 | 19.958 | 30.928 | 0.00 | 0.00 |
| ATOM | 6443 | HE2  | HIE | X | 428 | 42.834 | 20.306 | 29.985 | 0.00 | 0.00 |
| ATOM | 6444 | CD2  | HIE | X | 428 | 41.964 | 20.461 | 32.017 | 0.00 | 0.00 |
| ATOM | 6445 | HD2  | HIE | X | 428 | 41.353 | 21.350 | 31.953 | 0.00 | 0.00 |
| ATOM | 6446 | C    | HIE | X | 428 | 44.342 | 20.854 | 34.958 | 0.00 | 0.00 |
| ATOM | 6447 | O    | HIE | X | 428 | 44.224 | 22.079 | 34.978 | 0.00 | 0.00 |
| ATOM | 6448 | N    | ARG | X | 429 | 45.456 | 20.248 | 34.308 | 0.00 | 0.00 |
| ATOM | 6449 | H    | ARG | X | 429 | 45.347 | 19.254 | 34.167 | 0.00 | 0.00 |
| ATOM | 6450 | CA   | ARG | X | 429 | 46.615 | 21.067 | 33.685 | 0.00 | 0.00 |
| ATOM | 6451 | HA   | ARG | X | 429 | 46.315 | 22.064 | 34.006 | 0.00 | 0.00 |
| ATOM | 6452 | CB   | ARG | X | 429 | 47.873 | 20.705 | 34.354 | 0.00 | 0.00 |
| ATOM | 6453 | HB2  | ARG | X | 429 | 47.706 | 20.685 | 35.431 | 0.00 | 0.00 |
| ATOM | 6454 | HB3  | ARG | X | 429 | 48.105 | 19.662 | 34.139 | 0.00 | 0.00 |
| ATOM | 6455 | CG   | ARG | X | 429 | 49.015 | 21.619 | 33.996 | 0.00 | 0.00 |
| ATOM | 6456 | HG2  | ARG | X | 429 | 48.988 | 21.792 | 32.921 | 0.00 | 0.00 |
| ATOM | 6457 | HG3  | ARG | X | 429 | 48.879 | 22.517 | 34.600 | 0.00 | 0.00 |
| ATOM | 6458 | CD   | ARG | X | 429 | 50.459 | 21.277 | 34.309 | 0.00 | 0.00 |
| ATOM | 6459 | HD2  | ARG | X | 429 | 50.741 | 21.514 | 35.335 | 0.00 | 0.00 |
| ATOM | 6460 | HD3  | ARG | X | 429 | 50.638 | 20.222 | 34.103 | 0.00 | 0.00 |
| ATOM | 6461 | NE   | ARG | X | 429 | 51.451 | 22.050 | 33.493 | 0.00 | 0.00 |
| ATOM | 6462 | HE   | ARG | X | 429 | 51.755 | 22.937 | 33.869 | 0.00 | 0.00 |
| ATOM | 6463 | CZ   | ARG | X | 429 | 51.919 | 21.722 | 32.244 | 0.00 | 0.00 |
| ATOM | 6464 | NH1  | ARG | X | 429 | 51.626 | 20.551 | 31.629 | 0.00 | 0.00 |
| ATOM | 6465 | HH11 | ARG | X | 429 | 51.049 | 19.845 | 32.065 | 0.00 | 0.00 |
| ATOM | 6466 | HH12 | ARG | X | 429 | 52.317 | 20.298 | 30.938 | 0.00 | 0.00 |
| ATOM | 6467 | NH2  | ARG | X | 429 | 52.740 | 22.568 | 31.679 | 0.00 | 0.00 |
| ATOM | 6468 | HH21 | ARG | X | 429 | 52.816 | 23.517 | 32.018 | 0.00 | 0.00 |
| ATOM | 6469 | HH22 | ARG | X | 429 | 53.147 | 22.381 | 30.774 | 0.00 | 0.00 |
| ATOM | 6470 | C    | ARG | X | 429 | 46.575 | 21.010 | 32.134 | 0.00 | 0.00 |
| ATOM | 6471 | O    | ARG | X | 429 | 46.961 | 19.978 | 31.535 | 0.00 | 0.00 |
| ATOM | 6472 | N    | ALA | X | 430 | 46.008 | 22.037 | 31.521 | 0.00 | 0.00 |
| ATOM | 6473 | H    | ALA | X | 430 | 45.792 | 22.895 | 32.008 | 0.00 | 0.00 |
| ATOM | 6474 | CA   | ALA | X | 430 | 45.535 | 21.921 | 30.140 | 0.00 | 0.00 |
| ATOM | 6475 | HA   | ALA | X | 430 | 44.910 | 21.058 | 29.911 | 0.00 | 0.00 |
| ATOM | 6476 | CB   | ALA | X | 430 | 44.499 | 23.009 | 29.896 | 0.00 | 0.00 |
| ATOM | 6477 | HB1  | ALA | X | 430 | 44.875 | 24.002 | 30.146 | 0.00 | 0.00 |
| ATOM | 6478 | HB2  | ALA | X | 430 | 43.572 | 22.778 | 30.419 | 0.00 | 0.00 |
| ATOM | 6479 | HB3  | ALA | X | 430 | 44.256 | 23.064 | 28.835 | 0.00 | 0.00 |
| ATOM | 6480 | C    | ALA | X | 430 | 46.621 | 21.929 | 29.045 | 0.00 | 0.00 |
| ATOM | 6481 | O    | ALA | X | 430 | 47.689 | 22.485 | 29.191 | 0.00 | 0.00 |
| ATOM | 6482 | N    | SER | X | 431 | 46.259 | 21.362 | 27.910 | 0.00 | 0.00 |
| ATOM | 6483 | H    | SER | X | 431 | 45.279 | 21.126 | 27.841 | 0.00 | 0.00 |

|      |      |      |     |   |     |        |        |        |      |      |
|------|------|------|-----|---|-----|--------|--------|--------|------|------|
| ATOM | 6484 | CA   | SER | X | 431 | 47.141 | 21.197 | 26.675 | 0.00 | 0.00 |
| ATOM | 6485 | HA   | SER | X | 431 | 47.952 | 20.513 | 26.927 | 0.00 | 0.00 |
| ATOM | 6486 | CB   | SER | X | 431 | 46.262 | 20.599 | 25.529 | 0.00 | 0.00 |
| ATOM | 6487 | HB2  | SER | X | 431 | 46.734 | 20.526 | 24.549 | 0.00 | 0.00 |
| ATOM | 6488 | HB3  | SER | X | 431 | 45.927 | 19.638 | 25.918 | 0.00 | 0.00 |
| ATOM | 6489 | OG   | SER | X | 431 | 45.095 | 21.400 | 25.389 | 0.00 | 0.00 |
| ATOM | 6490 | HG   | SER | X | 431 | 44.266 | 20.995 | 25.654 | 0.00 | 0.00 |
| ATOM | 6491 | C    | SER | X | 431 | 47.819 | 22.469 | 26.279 | 0.00 | 0.00 |
| ATOM | 6492 | O    | SER | X | 431 | 48.854 | 22.471 | 25.616 | 0.00 | 0.00 |
| ATOM | 6493 | N    | THR | X | 432 | 47.130 | 23.643 | 26.528 | 0.00 | 0.00 |
| ATOM | 6494 | H    | THR | X | 432 | 46.372 | 23.442 | 27.164 | 0.00 | 0.00 |
| ATOM | 6495 | CA   | THR | X | 432 | 47.548 | 25.036 | 26.220 | 0.00 | 0.00 |
| ATOM | 6496 | HA   | THR | X | 432 | 48.121 | 25.128 | 25.297 | 0.00 | 0.00 |
| ATOM | 6497 | CB   | THR | X | 432 | 46.274 | 25.882 | 25.921 | 0.00 | 0.00 |
| ATOM | 6498 | HB   | THR | X | 432 | 45.584 | 25.819 | 26.762 | 0.00 | 0.00 |
| ATOM | 6499 | CG2  | THR | X | 432 | 46.457 | 27.387 | 25.590 | 0.00 | 0.00 |
| ATOM | 6500 | HG21 | THR | X | 432 | 47.216 | 27.523 | 24.820 | 0.00 | 0.00 |
| ATOM | 6501 | HG22 | THR | X | 432 | 46.809 | 27.907 | 26.481 | 0.00 | 0.00 |
| ATOM | 6502 | HG23 | THR | X | 432 | 45.480 | 27.811 | 25.358 | 0.00 | 0.00 |
| ATOM | 6503 | OG1  | THR | X | 432 | 45.746 | 25.332 | 24.750 | 0.00 | 0.00 |
| ATOM | 6504 | HG1  | THR | X | 432 | 44.973 | 24.806 | 24.966 | 0.00 | 0.00 |
| ATOM | 6505 | C    | THR | X | 432 | 48.446 | 25.672 | 27.246 | 0.00 | 0.00 |
| ATOM | 6506 | O    | THR | X | 432 | 49.172 | 26.643 | 26.884 | 0.00 | 0.00 |
| ATOM | 6507 | N    | LEU | X | 433 | 48.548 | 25.180 | 28.455 | 0.00 | 0.00 |
| ATOM | 6508 | H    | LEU | X | 433 | 48.096 | 24.309 | 28.694 | 0.00 | 0.00 |
| ATOM | 6509 | CA   | LEU | X | 433 | 49.391 | 25.898 | 29.454 | 0.00 | 0.00 |
| ATOM | 6510 | HA   | LEU | X | 433 | 49.161 | 26.963 | 29.497 | 0.00 | 0.00 |
| ATOM | 6511 | CB   | LEU | X | 433 | 48.949 | 25.179 | 30.722 | 0.00 | 0.00 |
| ATOM | 6512 | HB2  | LEU | X | 433 | 48.001 | 24.663 | 30.566 | 0.00 | 0.00 |
| ATOM | 6513 | HB3  | LEU | X | 433 | 49.767 | 24.528 | 31.031 | 0.00 | 0.00 |
| ATOM | 6514 | CG   | LEU | X | 433 | 48.586 | 26.184 | 31.848 | 0.00 | 0.00 |
| ATOM | 6515 | HG   | LEU | X | 433 | 47.643 | 26.672 | 31.603 | 0.00 | 0.00 |
| ATOM | 6516 | CD1  | LEU | X | 433 | 48.351 | 25.368 | 33.115 | 0.00 | 0.00 |
| ATOM | 6517 | HD11 | LEU | X | 433 | 49.269 | 25.227 | 33.686 | 0.00 | 0.00 |
| ATOM | 6518 | HD12 | LEU | X | 433 | 47.932 | 24.371 | 32.976 | 0.00 | 0.00 |
| ATOM | 6519 | HD13 | LEU | X | 433 | 47.708 | 25.979 | 33.748 | 0.00 | 0.00 |
| ATOM | 6520 | CD2  | LEU | X | 433 | 49.660 | 27.271 | 32.122 | 0.00 | 0.00 |
| ATOM | 6521 | HD21 | LEU | X | 433 | 49.866 | 27.902 | 31.258 | 0.00 | 0.00 |
| ATOM | 6522 | HD22 | LEU | X | 433 | 49.230 | 27.975 | 32.835 | 0.00 | 0.00 |
| ATOM | 6523 | HD23 | LEU | X | 433 | 50.558 | 26.844 | 32.568 | 0.00 | 0.00 |
| ATOM | 6524 | C    | LEU | X | 433 | 50.918 | 25.784 | 29.197 | 0.00 | 0.00 |
| ATOM | 6525 | O    | LEU | X | 433 | 51.445 | 24.715 | 28.892 | 0.00 | 0.00 |
| ATOM | 6526 | N    | SER | X | 434 | 51.612 | 26.920 | 29.234 | 0.00 | 0.00 |
| ATOM | 6527 | H    | SER | X | 434 | 51.072 | 27.764 | 29.358 | 0.00 | 0.00 |
| ATOM | 6528 | CA   | SER | X | 434 | 52.920 | 27.122 | 28.698 | 0.00 | 0.00 |
| ATOM | 6529 | HA   | SER | X | 434 | 53.133 | 26.306 | 28.007 | 0.00 | 0.00 |
| ATOM | 6530 | CB   | SER | X | 434 | 52.984 | 28.408 | 27.840 | 0.00 | 0.00 |
| ATOM | 6531 | HB2  | SER | X | 434 | 53.999 | 28.762 | 27.655 | 0.00 | 0.00 |
| ATOM | 6532 | HB3  | SER | X | 434 | 52.505 | 28.173 | 26.890 | 0.00 | 0.00 |
| ATOM | 6533 | OG   | SER | X | 434 | 52.296 | 29.453 | 28.399 | 0.00 | 0.00 |
| ATOM | 6534 | HG   | SER | X | 434 | 51.344 | 29.448 | 28.270 | 0.00 | 0.00 |
| ATOM | 6535 | C    | SER | X | 434 | 54.056 | 27.076 | 29.752 | 0.00 | 0.00 |
| ATOM | 6536 | O    | SER | X | 434 | 55.151 | 26.630 | 29.486 | 0.00 | 0.00 |
| ATOM | 6537 | N    | TRP | X | 435 | 53.688 | 27.644 | 30.915 | 0.00 | 0.00 |
| ATOM | 6538 | H    | TRP | X | 435 | 52.779 | 28.079 | 30.982 | 0.00 | 0.00 |
| ATOM | 6539 | CA   | TRP | X | 435 | 54.465 | 27.438 | 32.121 | 0.00 | 0.00 |
| ATOM | 6540 | HA   | TRP | X | 435 | 55.414 | 27.966 | 32.026 | 0.00 | 0.00 |
| ATOM | 6541 | CB   | TRP | X | 435 | 53.651 | 28.008 | 33.245 | 0.00 | 0.00 |
| ATOM | 6542 | HB2  | TRP | X | 435 | 52.644 | 27.617 | 33.100 | 0.00 | 0.00 |
| ATOM | 6543 | HB3  | TRP | X | 435 | 54.125 | 27.795 | 34.204 | 0.00 | 0.00 |
| ATOM | 6544 | CG   | TRP | X | 435 | 53.490 | 29.474 | 33.200 | 0.00 | 0.00 |
| ATOM | 6545 | CD1  | TRP | X | 435 | 52.295 | 30.050 | 32.988 | 0.00 | 0.00 |
| ATOM | 6546 | HD1  | TRP | X | 435 | 51.356 | 29.527 | 33.096 | 0.00 | 0.00 |
| ATOM | 6547 | NE1  | TRP | X | 435 | 52.500 | 31.435 | 32.917 | 0.00 | 0.00 |
| ATOM | 6548 | HE1  | TRP | X | 435 | 51.729 | 32.061 | 32.734 | 0.00 | 0.00 |
| ATOM | 6549 | CE2  | TRP | X | 435 | 53.826 | 31.800 | 33.049 | 0.00 | 0.00 |
| ATOM | 6550 | CZ2  | TRP | X | 435 | 54.497 | 33.035 | 33.236 | 0.00 | 0.00 |

|      |      |      |     |   |     |        |        |        |      |      |
|------|------|------|-----|---|-----|--------|--------|--------|------|------|
| ATOM | 6551 | HZ2  | TRP | X | 435 | 53.981 | 33.984 | 33.230 | 0.00 | 0.00 |
| ATOM | 6552 | CH2  | TRP | X | 435 | 55.884 | 33.013 | 33.365 | 0.00 | 0.00 |
| ATOM | 6553 | HH2  | TRP | X | 435 | 56.416 | 33.923 | 33.597 | 0.00 | 0.00 |
| ATOM | 6554 | CZ3  | TRP | X | 435 | 56.578 | 31.784 | 33.293 | 0.00 | 0.00 |
| ATOM | 6555 | HZ3  | TRP | X | 435 | 57.658 | 31.791 | 33.306 | 0.00 | 0.00 |
| ATOM | 6556 | CE3  | TRP | X | 435 | 55.911 | 30.580 | 33.149 | 0.00 | 0.00 |
| ATOM | 6557 | HE3  | TRP | X | 435 | 56.432 | 29.654 | 33.345 | 0.00 | 0.00 |
| ATOM | 6558 | CD2  | TRP | X | 435 | 54.485 | 30.558 | 33.080 | 0.00 | 0.00 |
| ATOM | 6559 | C    | TRP | X | 435 | 54.742 | 25.984 | 32.389 | 0.00 | 0.00 |
| ATOM | 6560 | O    | TRP | X | 435 | 53.883 | 25.142 | 32.063 | 0.00 | 0.00 |
| ATOM | 6561 | N    | PRO | X | 436 | 55.934 | 25.605 | 32.909 | 0.00 | 0.00 |
| ATOM | 6562 | CD   | PRO | X | 436 | 57.050 | 26.479 | 33.342 | 0.00 | 0.00 |
| ATOM | 6563 | HD2  | PRO | X | 436 | 56.665 | 27.329 | 33.905 | 0.00 | 0.00 |
| ATOM | 6564 | HD3  | PRO | X | 436 | 57.684 | 26.820 | 32.524 | 0.00 | 0.00 |
| ATOM | 6565 | CG   | PRO | X | 436 | 57.953 | 25.687 | 34.247 | 0.00 | 0.00 |
| ATOM | 6566 | HG2  | PRO | X | 436 | 57.544 | 25.794 | 35.251 | 0.00 | 0.00 |
| ATOM | 6567 | HG3  | PRO | X | 436 | 58.969 | 25.999 | 34.004 | 0.00 | 0.00 |
| ATOM | 6568 | CB   | PRO | X | 436 | 57.790 | 24.236 | 33.758 | 0.00 | 0.00 |
| ATOM | 6569 | HB2  | PRO | X | 436 | 57.892 | 23.474 | 34.531 | 0.00 | 0.00 |
| ATOM | 6570 | HB3  | PRO | X | 436 | 58.422 | 24.081 | 32.883 | 0.00 | 0.00 |
| ATOM | 6571 | CA   | PRO | X | 436 | 56.435 | 24.237 | 33.192 | 0.00 | 0.00 |
| ATOM | 6572 | HA   | PRO | X | 436 | 56.448 | 23.698 | 32.245 | 0.00 | 0.00 |
| ATOM | 6573 | C    | PRO | X | 436 | 55.553 | 23.452 | 34.147 | 0.00 | 0.00 |
| ATOM | 6574 | O    | PRO | X | 436 | 54.831 | 24.107 | 34.934 | 0.00 | 0.00 |
| ATOM | 6575 | N    | LEU | X | 437 | 55.666 | 22.113 | 34.023 | 0.00 | 0.00 |
| ATOM | 6576 | H    | LEU | X | 437 | 56.251 | 21.790 | 33.266 | 0.00 | 0.00 |
| ATOM | 6577 | CA   | LEU | X | 437 | 55.075 | 21.097 | 34.854 | 0.00 | 0.00 |
| ATOM | 6578 | HA   | LEU | X | 437 | 54.002 | 21.088 | 34.665 | 0.00 | 0.00 |
| ATOM | 6579 | CB   | LEU | X | 437 | 55.703 | 19.769 | 34.406 | 0.00 | 0.00 |
| ATOM | 6580 | HB2  | LEU | X | 437 | 55.817 | 19.811 | 33.323 | 0.00 | 0.00 |
| ATOM | 6581 | HB3  | LEU | X | 437 | 56.688 | 19.655 | 34.860 | 0.00 | 0.00 |
| ATOM | 6582 | CG   | LEU | X | 437 | 54.965 | 18.510 | 34.846 | 0.00 | 0.00 |
| ATOM | 6583 | HG   | LEU | X | 437 | 55.080 | 18.421 | 35.926 | 0.00 | 0.00 |
| ATOM | 6584 | CD1  | LEU | X | 437 | 53.440 | 18.442 | 34.566 | 0.00 | 0.00 |
| ATOM | 6585 | HD11 | LEU | X | 437 | 53.029 | 17.535 | 35.008 | 0.00 | 0.00 |
| ATOM | 6586 | HD12 | LEU | X | 437 | 53.226 | 18.449 | 33.497 | 0.00 | 0.00 |
| ATOM | 6587 | HD13 | LEU | X | 437 | 52.949 | 19.296 | 35.031 | 0.00 | 0.00 |
| ATOM | 6588 | CD2  | LEU | X | 437 | 55.625 | 17.278 | 34.139 | 0.00 | 0.00 |
| ATOM | 6589 | HD21 | LEU | X | 437 | 55.135 | 16.375 | 34.500 | 0.00 | 0.00 |
| ATOM | 6590 | HD22 | LEU | X | 437 | 55.546 | 17.327 | 33.053 | 0.00 | 0.00 |
| ATOM | 6591 | HD23 | LEU | X | 437 | 56.684 | 17.235 | 34.394 | 0.00 | 0.00 |
| ATOM | 6592 | C    | LEU | X | 437 | 55.223 | 21.444 | 36.313 | 0.00 | 0.00 |
| ATOM | 6593 | O    | LEU | X | 437 | 54.258 | 21.340 | 37.012 | 0.00 | 0.00 |
| ATOM | 6594 | N    | TRP | X | 438 | 56.380 | 21.857 | 36.743 | 0.00 | 0.00 |
| ATOM | 6595 | H    | TRP | X | 438 | 57.146 | 22.074 | 36.121 | 0.00 | 0.00 |
| ATOM | 6596 | CA   | TRP | X | 438 | 56.739 | 22.144 | 38.062 | 0.00 | 0.00 |
| ATOM | 6597 | HA   | TRP | X | 438 | 56.425 | 21.351 | 38.741 | 0.00 | 0.00 |
| ATOM | 6598 | CB   | TRP | X | 438 | 58.275 | 22.252 | 38.249 | 0.00 | 0.00 |
| ATOM | 6599 | HB2  | TRP | X | 438 | 58.580 | 22.480 | 39.271 | 0.00 | 0.00 |
| ATOM | 6600 | HB3  | TRP | X | 438 | 58.688 | 21.246 | 38.178 | 0.00 | 0.00 |
| ATOM | 6601 | CG   | TRP | X | 438 | 59.096 | 23.271 | 37.431 | 0.00 | 0.00 |
| ATOM | 6602 | CD1  | TRP | X | 438 | 59.742 | 23.042 | 36.299 | 0.00 | 0.00 |
| ATOM | 6603 | HD1  | TRP | X | 438 | 59.817 | 22.070 | 35.835 | 0.00 | 0.00 |
| ATOM | 6604 | NE1  | TRP | X | 438 | 60.307 | 24.261 | 35.889 | 0.00 | 0.00 |
| ATOM | 6605 | HE1  | TRP | X | 438 | 61.037 | 24.299 | 35.192 | 0.00 | 0.00 |
| ATOM | 6606 | CE2  | TRP | X | 438 | 60.042 | 25.286 | 36.725 | 0.00 | 0.00 |
| ATOM | 6607 | CZ2  | TRP | X | 438 | 60.483 | 26.620 | 36.829 | 0.00 | 0.00 |
| ATOM | 6608 | HZ2  | TRP | X | 438 | 61.097 | 27.026 | 36.038 | 0.00 | 0.00 |
| ATOM | 6609 | CH2  | TRP | X | 438 | 60.066 | 27.356 | 37.929 | 0.00 | 0.00 |
| ATOM | 6610 | HH2  | TRP | X | 438 | 60.421 | 28.375 | 37.967 | 0.00 | 0.00 |
| ATOM | 6611 | CZ3  | TRP | X | 438 | 59.263 | 26.867 | 38.955 | 0.00 | 0.00 |
| ATOM | 6612 | HZ3  | TRP | X | 438 | 58.861 | 27.448 | 39.772 | 0.00 | 0.00 |
| ATOM | 6613 | CE3  | TRP | X | 438 | 58.823 | 25.501 | 38.780 | 0.00 | 0.00 |
| ATOM | 6614 | HE3  | TRP | X | 438 | 58.084 | 25.024 | 39.408 | 0.00 | 0.00 |
| ATOM | 6615 | CD2  | TRP | X | 438 | 59.222 | 24.681 | 37.721 | 0.00 | 0.00 |
| ATOM | 6616 | C    | TRP | X | 438 | 56.002 | 23.406 | 38.661 | 0.00 | 0.00 |
| ATOM | 6617 | O    | TRP | X | 438 | 55.771 | 23.368 | 39.855 | 0.00 | 0.00 |

|      |      |      |     |   |     |        |        |        |      |      |
|------|------|------|-----|---|-----|--------|--------|--------|------|------|
| ATOM | 6618 | N    | MET | X | 439 | 55.605 | 24.307 | 37.760 | 0.00 | 0.00 |
| ATOM | 6619 | H    | MET | X | 439 | 55.865 | 24.206 | 36.789 | 0.00 | 0.00 |
| ATOM | 6620 | CA   | MET | X | 439 | 54.705 | 25.403 | 38.152 | 0.00 | 0.00 |
| ATOM | 6621 | HA   | MET | X | 439 | 55.055 | 25.857 | 39.079 | 0.00 | 0.00 |
| ATOM | 6622 | CB   | MET | X | 439 | 54.789 | 26.581 | 37.121 | 0.00 | 0.00 |
| ATOM | 6623 | HB2  | MET | X | 439 | 55.013 | 26.093 | 36.173 | 0.00 | 0.00 |
| ATOM | 6624 | HB3  | MET | X | 439 | 53.829 | 27.091 | 37.034 | 0.00 | 0.00 |
| ATOM | 6625 | CG   | MET | X | 439 | 55.914 | 27.521 | 37.631 | 0.00 | 0.00 |
| ATOM | 6626 | HG2  | MET | X | 439 | 55.490 | 27.998 | 38.514 | 0.00 | 0.00 |
| ATOM | 6627 | HG3  | MET | X | 439 | 56.857 | 27.014 | 37.837 | 0.00 | 0.00 |
| ATOM | 6628 | SD   | MET | X | 439 | 56.388 | 28.756 | 36.409 | 0.00 | 0.00 |
| ATOM | 6629 | CE   | MET | X | 439 | 55.112 | 29.973 | 36.784 | 0.00 | 0.00 |
| ATOM | 6630 | HE1  | MET | X | 439 | 55.146 | 30.261 | 37.834 | 0.00 | 0.00 |
| ATOM | 6631 | HE2  | MET | X | 439 | 55.171 | 30.857 | 36.149 | 0.00 | 0.00 |
| ATOM | 6632 | HE3  | MET | X | 439 | 54.163 | 29.462 | 36.626 | 0.00 | 0.00 |
| ATOM | 6633 | C    | MET | X | 439 | 53.266 | 24.986 | 38.366 | 0.00 | 0.00 |
| ATOM | 6634 | O    | MET | X | 439 | 52.467 | 25.713 | 38.988 | 0.00 | 0.00 |
| ATOM | 6635 | N    | GLY | X | 440 | 52.889 | 23.819 | 37.977 | 0.00 | 0.00 |
| ATOM | 6636 | H    | GLY | X | 440 | 53.550 | 23.164 | 37.584 | 0.00 | 0.00 |
| ATOM | 6637 | CA   | GLY | X | 440 | 51.567 | 23.214 | 38.226 | 0.00 | 0.00 |
| ATOM | 6638 | HA2  | GLY | X | 440 | 51.601 | 22.132 | 38.092 | 0.00 | 0.00 |
| ATOM | 6639 | HA3  | GLY | X | 440 | 51.385 | 23.354 | 39.291 | 0.00 | 0.00 |
| ATOM | 6640 | C    | GLY | X | 440 | 50.517 | 23.925 | 37.408 | 0.00 | 0.00 |
| ATOM | 6641 | O    | GLY | X | 440 | 50.647 | 24.152 | 36.221 | 0.00 | 0.00 |
| ATOM | 6642 | N    | VAL | X | 441 | 49.389 | 24.158 | 37.972 | 0.00 | 0.00 |
| ATOM | 6643 | H    | VAL | X | 441 | 49.440 | 23.962 | 38.961 | 0.00 | 0.00 |
| ATOM | 6644 | CA   | VAL | X | 441 | 48.313 | 25.042 | 37.452 | 0.00 | 0.00 |
| ATOM | 6645 | HA   | VAL | X | 441 | 48.392 | 25.188 | 36.375 | 0.00 | 0.00 |
| ATOM | 6646 | CB   | VAL | X | 441 | 46.921 | 24.467 | 37.735 | 0.00 | 0.00 |
| ATOM | 6647 | HB   | VAL | X | 441 | 46.745 | 24.406 | 38.809 | 0.00 | 0.00 |
| ATOM | 6648 | CG1  | VAL | X | 441 | 45.734 | 25.239 | 37.062 | 0.00 | 0.00 |
| ATOM | 6649 | HG11 | VAL | X | 441 | 45.311 | 24.716 | 36.205 | 0.00 | 0.00 |
| ATOM | 6650 | HG12 | VAL | X | 441 | 44.841 | 25.183 | 37.684 | 0.00 | 0.00 |
| ATOM | 6651 | HG13 | VAL | X | 441 | 46.015 | 26.235 | 36.720 | 0.00 | 0.00 |
| ATOM | 6652 | CG2  | VAL | X | 441 | 46.782 | 22.990 | 37.384 | 0.00 | 0.00 |
| ATOM | 6653 | HG21 | VAL | X | 441 | 45.722 | 22.739 | 37.396 | 0.00 | 0.00 |
| ATOM | 6654 | HG22 | VAL | X | 441 | 47.185 | 22.247 | 38.073 | 0.00 | 0.00 |
| ATOM | 6655 | HG23 | VAL | X | 441 | 47.119 | 23.032 | 36.349 | 0.00 | 0.00 |
| ATOM | 6656 | C    | VAL | X | 441 | 48.337 | 26.444 | 38.045 | 0.00 | 0.00 |
| ATOM | 6657 | O    | VAL | X | 441 | 47.859 | 26.587 | 39.171 | 0.00 | 0.00 |
| ATOM | 6658 | N    | PRO | X | 442 | 49.005 | 27.385 | 37.441 | 0.00 | 0.00 |
| ATOM | 6659 | CD   | PRO | X | 442 | 49.781 | 27.242 | 36.182 | 0.00 | 0.00 |
| ATOM | 6660 | HD2  | PRO | X | 442 | 49.090 | 26.943 | 35.393 | 0.00 | 0.00 |
| ATOM | 6661 | HD3  | PRO | X | 442 | 50.637 | 26.578 | 36.298 | 0.00 | 0.00 |
| ATOM | 6662 | CG   | PRO | X | 442 | 50.343 | 28.638 | 35.957 | 0.00 | 0.00 |
| ATOM | 6663 | HG2  | PRO | X | 442 | 49.649 | 29.326 | 35.474 | 0.00 | 0.00 |
| ATOM | 6664 | HG3  | PRO | X | 442 | 51.294 | 28.511 | 35.441 | 0.00 | 0.00 |
| ATOM | 6665 | CB   | PRO | X | 442 | 50.634 | 29.103 | 37.399 | 0.00 | 0.00 |
| ATOM | 6666 | HB2  | PRO | X | 442 | 50.593 | 30.186 | 37.516 | 0.00 | 0.00 |
| ATOM | 6667 | HB3  | PRO | X | 442 | 51.613 | 28.647 | 37.552 | 0.00 | 0.00 |
| ATOM | 6668 | CA   | PRO | X | 442 | 49.486 | 28.513 | 38.225 | 0.00 | 0.00 |
| ATOM | 6669 | HA   | PRO | X | 442 | 49.818 | 28.133 | 39.191 | 0.00 | 0.00 |
| ATOM | 6670 | C    | PRO | X | 442 | 48.341 | 29.512 | 38.296 | 0.00 | 0.00 |
| ATOM | 6671 | O    | PRO | X | 442 | 47.359 | 29.395 | 37.573 | 0.00 | 0.00 |
| ATOM | 6672 | N    | HIP | X | 443 | 48.500 | 30.521 | 39.076 | 0.00 | 0.00 |
| ATOM | 6673 | H    | HIP | X | 443 | 49.305 | 30.475 | 39.685 | 0.00 | 0.00 |
| ATOM | 6674 | CA   | HIP | X | 443 | 47.512 | 31.568 | 39.419 | 0.00 | 0.00 |
| ATOM | 6675 | HA   | HIP | X | 443 | 46.717 | 31.163 | 40.045 | 0.00 | 0.00 |
| ATOM | 6676 | CB   | HIP | X | 443 | 48.151 | 32.651 | 40.245 | 0.00 | 0.00 |
| ATOM | 6677 | HB2  | HIP | X | 443 | 48.255 | 32.249 | 41.253 | 0.00 | 0.00 |
| ATOM | 6678 | HB3  | HIP | X | 443 | 49.185 | 32.814 | 39.940 | 0.00 | 0.00 |
| ATOM | 6679 | CG   | HIP | X | 443 | 47.407 | 33.991 | 40.396 | 0.00 | 0.00 |
| ATOM | 6680 | ND1  | HIP | X | 443 | 46.173 | 34.210 | 41.054 | 0.00 | 0.00 |
| ATOM | 6681 | HD1  | HIP | X | 443 | 45.717 | 33.587 | 41.705 | 0.00 | 0.00 |
| ATOM | 6682 | CE1  | HIP | X | 443 | 45.780 | 35.448 | 40.734 | 0.00 | 0.00 |
| ATOM | 6683 | HE1  | HIP | X | 443 | 44.854 | 35.852 | 41.116 | 0.00 | 0.00 |
| ATOM | 6684 | NE2  | HIP | X | 443 | 46.673 | 36.045 | 39.922 | 0.00 | 0.00 |

|      |      |      |     |   |     |        |        |        |      |      |
|------|------|------|-----|---|-----|--------|--------|--------|------|------|
| ATOM | 6685 | HE2  | HIP | X | 443 | 46.510 | 36.916 | 39.438 | 0.00 | 0.00 |
| ATOM | 6686 | CD2  | HIP | X | 443 | 47.712 | 35.164 | 39.687 | 0.00 | 0.00 |
| ATOM | 6687 | HD2  | HIP | X | 443 | 48.440 | 35.235 | 38.892 | 0.00 | 0.00 |
| ATOM | 6688 | C    | HIP | X | 443 | 46.855 | 32.189 | 38.242 | 0.00 | 0.00 |
| ATOM | 6689 | O    | HIP | X | 443 | 47.532 | 32.720 | 37.341 | 0.00 | 0.00 |
| ATOM | 6690 | N    | GLY | X | 444 | 45.458 | 32.102 | 38.220 | 0.00 | 0.00 |
| ATOM | 6691 | H    | GLY | X | 444 | 44.979 | 31.589 | 38.946 | 0.00 | 0.00 |
| ATOM | 6692 | CA   | GLY | X | 444 | 44.519 | 32.858 | 37.388 | 0.00 | 0.00 |
| ATOM | 6693 | HA2  | GLY | X | 444 | 43.501 | 32.683 | 37.735 | 0.00 | 0.00 |
| ATOM | 6694 | HA3  | GLY | X | 444 | 44.849 | 33.896 | 37.343 | 0.00 | 0.00 |
| ATOM | 6695 | C    | GLY | X | 444 | 44.593 | 32.367 | 35.971 | 0.00 | 0.00 |
| ATOM | 6696 | O    | GLY | X | 444 | 44.638 | 33.253 | 35.104 | 0.00 | 0.00 |
| ATOM | 6697 | N    | TYR | X | 445 | 44.463 | 31.058 | 35.711 | 0.00 | 0.00 |
| ATOM | 6698 | H    | TYR | X | 445 | 44.361 | 30.459 | 36.517 | 0.00 | 0.00 |
| ATOM | 6699 | CA   | TYR | X | 445 | 44.440 | 30.389 | 34.455 | 0.00 | 0.00 |
| ATOM | 6700 | HA   | TYR | X | 445 | 44.452 | 31.141 | 33.666 | 0.00 | 0.00 |
| ATOM | 6701 | CB   | TYR | X | 445 | 45.760 | 29.524 | 34.301 | 0.00 | 0.00 |
| ATOM | 6702 | HB2  | TYR | X | 445 | 46.137 | 29.097 | 35.230 | 0.00 | 0.00 |
| ATOM | 6703 | HB3  | TYR | X | 445 | 45.429 | 28.635 | 33.764 | 0.00 | 0.00 |
| ATOM | 6704 | CG   | TYR | X | 445 | 46.890 | 30.232 | 33.597 | 0.00 | 0.00 |
| ATOM | 6705 | CD1  | TYR | X | 445 | 47.051 | 30.267 | 32.176 | 0.00 | 0.00 |
| ATOM | 6706 | HD1  | TYR | X | 445 | 46.431 | 29.757 | 31.453 | 0.00 | 0.00 |
| ATOM | 6707 | CE1  | TYR | X | 445 | 48.031 | 31.090 | 31.677 | 0.00 | 0.00 |
| ATOM | 6708 | HE1  | TYR | X | 445 | 48.254 | 31.141 | 30.622 | 0.00 | 0.00 |
| ATOM | 6709 | CZ   | TYR | X | 445 | 48.873 | 31.908 | 32.509 | 0.00 | 0.00 |
| ATOM | 6710 | OH   | TYR | X | 445 | 49.714 | 32.863 | 32.064 | 0.00 | 0.00 |
| ATOM | 6711 | HH   | TYR | X | 445 | 49.708 | 32.849 | 31.104 | 0.00 | 0.00 |
| ATOM | 6712 | CE2  | TYR | X | 445 | 48.730 | 31.797 | 33.907 | 0.00 | 0.00 |
| ATOM | 6713 | HE2  | TYR | X | 445 | 49.425 | 32.381 | 34.494 | 0.00 | 0.00 |
| ATOM | 6714 | CD2  | TYR | X | 445 | 47.707 | 30.984 | 34.458 | 0.00 | 0.00 |
| ATOM | 6715 | HD2  | TYR | X | 445 | 47.454 | 30.938 | 35.507 | 0.00 | 0.00 |
| ATOM | 6716 | C    | TYR | X | 445 | 43.251 | 29.452 | 34.152 | 0.00 | 0.00 |
| ATOM | 6717 | O    | TYR | X | 445 | 43.038 | 29.076 | 32.982 | 0.00 | 0.00 |
| ATOM | 6718 | N    | GLU | X | 446 | 42.404 | 29.150 | 35.067 | 0.00 | 0.00 |
| ATOM | 6719 | H    | GLU | X | 446 | 42.461 | 29.512 | 36.007 | 0.00 | 0.00 |
| ATOM | 6720 | CA   | GLU | X | 446 | 41.148 | 28.304 | 34.823 | 0.00 | 0.00 |
| ATOM | 6721 | HA   | GLU | X | 446 | 41.490 | 27.467 | 34.214 | 0.00 | 0.00 |
| ATOM | 6722 | CB   | GLU | X | 446 | 40.592 | 27.773 | 36.238 | 0.00 | 0.00 |
| ATOM | 6723 | HB2  | GLU | X | 446 | 39.882 | 26.963 | 36.071 | 0.00 | 0.00 |
| ATOM | 6724 | HB3  | GLU | X | 446 | 41.359 | 27.397 | 36.915 | 0.00 | 0.00 |
| ATOM | 6725 | CG   | GLU | X | 446 | 39.815 | 28.741 | 37.064 | 0.00 | 0.00 |
| ATOM | 6726 | HG2  | GLU | X | 446 | 38.867 | 28.895 | 36.549 | 0.00 | 0.00 |
| ATOM | 6727 | HG3  | GLU | X | 446 | 39.664 | 28.215 | 38.008 | 0.00 | 0.00 |
| ATOM | 6728 | CD   | GLU | X | 446 | 40.392 | 30.069 | 37.541 | 0.00 | 0.00 |
| ATOM | 6729 | OE1  | GLU | X | 446 | 41.172 | 30.678 | 36.800 | 0.00 | 0.00 |
| ATOM | 6730 | OE2  | GLU | X | 446 | 39.784 | 30.604 | 38.544 | 0.00 | 0.00 |
| ATOM | 6731 | C    | GLU | X | 446 | 40.055 | 29.084 | 34.005 | 0.00 | 0.00 |
| ATOM | 6732 | O    | GLU | X | 446 | 39.136 | 28.459 | 33.468 | 0.00 | 0.00 |
| ATOM | 6733 | N    | ILE | X | 447 | 40.175 | 30.442 | 33.974 | 0.00 | 0.00 |
| ATOM | 6734 | H    | ILE | X | 447 | 40.818 | 30.869 | 34.625 | 0.00 | 0.00 |
| ATOM | 6735 | CA   | ILE | X | 447 | 39.227 | 31.375 | 33.245 | 0.00 | 0.00 |
| ATOM | 6736 | HA   | ILE | X | 447 | 38.294 | 31.185 | 33.776 | 0.00 | 0.00 |
| ATOM | 6737 | CB   | ILE | X | 447 | 39.766 | 32.827 | 33.325 | 0.00 | 0.00 |
| ATOM | 6738 | HB   | ILE | X | 447 | 39.017 | 33.405 | 32.783 | 0.00 | 0.00 |
| ATOM | 6739 | CG2  | ILE | X | 447 | 39.712 | 33.337 | 34.787 | 0.00 | 0.00 |
| ATOM | 6740 | HG21 | ILE | X | 447 | 38.830 | 32.970 | 35.312 | 0.00 | 0.00 |
| ATOM | 6741 | HG22 | ILE | X | 447 | 39.904 | 34.409 | 34.812 | 0.00 | 0.00 |
| ATOM | 6742 | HG23 | ILE | X | 447 | 40.559 | 32.949 | 35.353 | 0.00 | 0.00 |
| ATOM | 6743 | CG1  | ILE | X | 447 | 41.114 | 33.022 | 32.602 | 0.00 | 0.00 |
| ATOM | 6744 | HG12 | ILE | X | 447 | 41.860 | 32.289 | 32.911 | 0.00 | 0.00 |
| ATOM | 6745 | HG13 | ILE | X | 447 | 41.017 | 32.785 | 31.542 | 0.00 | 0.00 |
| ATOM | 6746 | CD1  | ILE | X | 447 | 41.730 | 34.468 | 32.727 | 0.00 | 0.00 |
| ATOM | 6747 | HD11 | ILE | X | 447 | 42.211 | 34.634 | 33.691 | 0.00 | 0.00 |
| ATOM | 6748 | HD12 | ILE | X | 447 | 40.987 | 35.260 | 32.627 | 0.00 | 0.00 |
| ATOM | 6749 | HD13 | ILE | X | 447 | 42.378 | 34.537 | 31.854 | 0.00 | 0.00 |
| ATOM | 6750 | C    | ILE | X | 447 | 38.792 | 30.975 | 31.871 | 0.00 | 0.00 |
| ATOM | 6751 | O    | ILE | X | 447 | 37.623 | 31.285 | 31.526 | 0.00 | 0.00 |

|      |      |      |     |   |     |        |        |        |      |      |
|------|------|------|-----|---|-----|--------|--------|--------|------|------|
| ATOM | 6752 | N    | GLU | X | 448 | 39.685 | 30.439 | 31.013 | 0.00 | 0.00 |
| ATOM | 6753 | H    | GLU | X | 448 | 40.601 | 30.199 | 31.365 | 0.00 | 0.00 |
| ATOM | 6754 | CA   | GLU | X | 448 | 39.473 | 29.993 | 29.600 | 0.00 | 0.00 |
| ATOM | 6755 | HA   | GLU | X | 448 | 39.220 | 30.910 | 29.068 | 0.00 | 0.00 |
| ATOM | 6756 | CB   | GLU | X | 448 | 40.831 | 29.540 | 28.982 | 0.00 | 0.00 |
| ATOM | 6757 | HB2  | GLU | X | 448 | 40.698 | 28.685 | 28.319 | 0.00 | 0.00 |
| ATOM | 6758 | HB3  | GLU | X | 448 | 41.202 | 30.329 | 28.328 | 0.00 | 0.00 |
| ATOM | 6759 | CG   | GLU | X | 448 | 41.925 | 29.241 | 30.066 | 0.00 | 0.00 |
| ATOM | 6760 | HG2  | GLU | X | 448 | 42.107 | 30.169 | 30.608 | 0.00 | 0.00 |
| ATOM | 6761 | HG3  | GLU | X | 448 | 41.550 | 28.536 | 30.807 | 0.00 | 0.00 |
| ATOM | 6762 | CD   | GLU | X | 448 | 43.225 | 28.592 | 29.515 | 0.00 | 0.00 |
| ATOM | 6763 | OE1  | GLU | X | 448 | 44.168 | 29.341 | 29.044 | 0.00 | 0.00 |
| ATOM | 6764 | OE2  | GLU | X | 448 | 43.400 | 27.357 | 29.653 | 0.00 | 0.00 |
| ATOM | 6765 | C    | GLU | X | 448 | 38.279 | 29.055 | 29.453 | 0.00 | 0.00 |
| ATOM | 6766 | O    | GLU | X | 448 | 37.504 | 29.246 | 28.523 | 0.00 | 0.00 |
| ATOM | 6767 | N    | PHE | X | 449 | 38.167 | 28.082 | 30.397 | 0.00 | 0.00 |
| ATOM | 6768 | H    | PHE | X | 449 | 38.772 | 28.091 | 31.206 | 0.00 | 0.00 |
| ATOM | 6769 | CA   | PHE | X | 449 | 37.105 | 27.105 | 30.439 | 0.00 | 0.00 |
| ATOM | 6770 | HA   | PHE | X | 449 | 37.042 | 26.668 | 29.443 | 0.00 | 0.00 |
| ATOM | 6771 | CB   | PHE | X | 449 | 37.480 | 26.122 | 31.477 | 0.00 | 0.00 |
| ATOM | 6772 | HB2  | PHE | X | 449 | 37.828 | 26.668 | 32.355 | 0.00 | 0.00 |
| ATOM | 6773 | HB3  | PHE | X | 449 | 36.572 | 25.553 | 31.677 | 0.00 | 0.00 |
| ATOM | 6774 | CG   | PHE | X | 449 | 38.591 | 25.141 | 31.035 | 0.00 | 0.00 |
| ATOM | 6775 | CD1  | PHE | X | 449 | 39.983 | 25.533 | 31.130 | 0.00 | 0.00 |
| ATOM | 6776 | HD1  | PHE | X | 449 | 40.161 | 26.552 | 31.440 | 0.00 | 0.00 |
| ATOM | 6777 | CE1  | PHE | X | 449 | 40.987 | 24.710 | 30.759 | 0.00 | 0.00 |
| ATOM | 6778 | HE1  | PHE | X | 449 | 42.006 | 25.052 | 30.865 | 0.00 | 0.00 |
| ATOM | 6779 | CZ   | PHE | X | 449 | 40.710 | 23.373 | 30.296 | 0.00 | 0.00 |
| ATOM | 6780 | HZ   | PHE | X | 449 | 41.462 | 22.751 | 29.833 | 0.00 | 0.00 |
| ATOM | 6781 | CE2  | PHE | X | 449 | 39.368 | 22.927 | 30.297 | 0.00 | 0.00 |
| ATOM | 6782 | HE2  | PHE | X | 449 | 39.252 | 21.882 | 30.048 | 0.00 | 0.00 |
| ATOM | 6783 | CD2  | PHE | X | 449 | 38.283 | 23.781 | 30.686 | 0.00 | 0.00 |
| ATOM | 6784 | HD2  | PHE | X | 449 | 37.261 | 23.433 | 30.724 | 0.00 | 0.00 |
| ATOM | 6785 | C    | PHE | X | 449 | 35.814 | 27.866 | 30.573 | 0.00 | 0.00 |
| ATOM | 6786 | O    | PHE | X | 449 | 34.826 | 27.709 | 29.857 | 0.00 | 0.00 |
| ATOM | 6787 | N    | ILE | X | 450 | 35.741 | 28.816 | 31.574 | 0.00 | 0.00 |
| ATOM | 6788 | H    | ILE | X | 450 | 36.563 | 28.961 | 32.143 | 0.00 | 0.00 |
| ATOM | 6789 | CA   | ILE | X | 450 | 34.582 | 29.584 | 31.954 | 0.00 | 0.00 |
| ATOM | 6790 | HA   | ILE | X | 450 | 33.746 | 28.932 | 32.205 | 0.00 | 0.00 |
| ATOM | 6791 | CB   | ILE | X | 450 | 34.741 | 30.426 | 33.299 | 0.00 | 0.00 |
| ATOM | 6792 | HB   | ILE | X | 450 | 35.133 | 31.399 | 33.003 | 0.00 | 0.00 |
| ATOM | 6793 | CG2  | ILE | X | 450 | 33.338 | 30.586 | 33.938 | 0.00 | 0.00 |
| ATOM | 6794 | HG21 | ILE | X | 450 | 33.049 | 29.553 | 34.130 | 0.00 | 0.00 |
| ATOM | 6795 | HG22 | ILE | X | 450 | 32.717 | 31.037 | 33.164 | 0.00 | 0.00 |
| ATOM | 6796 | HG23 | ILE | X | 450 | 33.338 | 31.210 | 34.832 | 0.00 | 0.00 |
| ATOM | 6797 | CG1  | ILE | X | 450 | 35.787 | 29.845 | 34.321 | 0.00 | 0.00 |
| ATOM | 6798 | HG12 | ILE | X | 450 | 36.791 | 29.922 | 33.905 | 0.00 | 0.00 |
| ATOM | 6799 | HG13 | ILE | X | 450 | 35.742 | 30.388 | 35.265 | 0.00 | 0.00 |
| ATOM | 6800 | CD1  | ILE | X | 450 | 35.431 | 28.369 | 34.844 | 0.00 | 0.00 |
| ATOM | 6801 | HD11 | ILE | X | 450 | 34.363 | 28.308 | 35.054 | 0.00 | 0.00 |
| ATOM | 6802 | HD12 | ILE | X | 450 | 36.025 | 28.060 | 35.705 | 0.00 | 0.00 |
| ATOM | 6803 | HD13 | ILE | X | 450 | 35.752 | 27.673 | 34.068 | 0.00 | 0.00 |
| ATOM | 6804 | C    | ILE | X | 450 | 34.054 | 30.450 | 30.786 | 0.00 | 0.00 |
| ATOM | 6805 | O    | ILE | X | 450 | 32.871 | 30.421 | 30.498 | 0.00 | 0.00 |
| ATOM | 6806 | N    | PHE | X | 451 | 34.956 | 31.181 | 30.111 | 0.00 | 0.00 |
| ATOM | 6807 | H    | PHE | X | 451 | 35.926 | 31.133 | 30.386 | 0.00 | 0.00 |
| ATOM | 6808 | CA   | PHE | X | 451 | 34.601 | 31.937 | 28.898 | 0.00 | 0.00 |
| ATOM | 6809 | HA   | PHE | X | 451 | 33.700 | 32.513 | 29.111 | 0.00 | 0.00 |
| ATOM | 6810 | CB   | PHE | X | 451 | 35.767 | 32.829 | 28.524 | 0.00 | 0.00 |
| ATOM | 6811 | HB2  | PHE | X | 451 | 36.719 | 32.327 | 28.694 | 0.00 | 0.00 |
| ATOM | 6812 | HB3  | PHE | X | 451 | 35.710 | 33.062 | 27.460 | 0.00 | 0.00 |
| ATOM | 6813 | CG   | PHE | X | 451 | 35.788 | 34.129 | 29.269 | 0.00 | 0.00 |
| ATOM | 6814 | CD1  | PHE | X | 451 | 36.804 | 34.336 | 30.235 | 0.00 | 0.00 |
| ATOM | 6815 | HD1  | PHE | X | 451 | 37.494 | 33.564 | 30.541 | 0.00 | 0.00 |
| ATOM | 6816 | CE1  | PHE | X | 451 | 37.012 | 35.614 | 30.757 | 0.00 | 0.00 |
| ATOM | 6817 | HE1  | PHE | X | 451 | 37.763 | 35.890 | 31.482 | 0.00 | 0.00 |
| ATOM | 6818 | CZ   | PHE | X | 451 | 36.047 | 36.619 | 30.432 | 0.00 | 0.00 |

|      |      |      |     |   |     |        |        |        |      |      |
|------|------|------|-----|---|-----|--------|--------|--------|------|------|
| ATOM | 6819 | HZ   | PHE | X | 451 | 36.152 | 37.575 | 30.923 | 0.00 | 0.00 |
| ATOM | 6820 | CE2  | PHE | X | 451 | 34.989 | 36.394 | 29.484 | 0.00 | 0.00 |
| ATOM | 6821 | HE2  | PHE | X | 451 | 34.234 | 37.126 | 29.237 | 0.00 | 0.00 |
| ATOM | 6822 | CD2  | PHE | X | 451 | 34.923 | 35.099 | 28.896 | 0.00 | 0.00 |
| ATOM | 6823 | HD2  | PHE | X | 451 | 34.217 | 34.840 | 28.121 | 0.00 | 0.00 |
| ATOM | 6824 | C    | PHE | X | 451 | 34.173 | 31.106 | 27.650 | 0.00 | 0.00 |
| ATOM | 6825 | O    | PHE | X | 451 | 33.523 | 31.633 | 26.771 | 0.00 | 0.00 |
| ATOM | 6826 | N    | GLY | X | 452 | 34.543 | 29.861 | 27.626 | 0.00 | 0.00 |
| ATOM | 6827 | H    | GLY | X | 452 | 35.132 | 29.646 | 28.418 | 0.00 | 0.00 |
| ATOM | 6828 | CA   | GLY | X | 452 | 34.346 | 28.974 | 26.546 | 0.00 | 0.00 |
| ATOM | 6829 | HA2  | GLY | X | 452 | 34.135 | 27.946 | 26.841 | 0.00 | 0.00 |
| ATOM | 6830 | HA3  | GLY | X | 452 | 33.515 | 29.280 | 25.911 | 0.00 | 0.00 |
| ATOM | 6831 | C    | GLY | X | 452 | 35.507 | 28.862 | 25.512 | 0.00 | 0.00 |
| ATOM | 6832 | O    | GLY | X | 452 | 35.391 | 28.125 | 24.561 | 0.00 | 0.00 |
| ATOM | 6833 | N    | ILE | X | 453 | 36.632 | 29.506 | 25.749 | 0.00 | 0.00 |
| ATOM | 6834 | H    | ILE | X | 453 | 36.817 | 29.813 | 26.693 | 0.00 | 0.00 |
| ATOM | 6835 | CA   | ILE | X | 453 | 37.815 | 29.587 | 24.923 | 0.00 | 0.00 |
| ATOM | 6836 | HA   | ILE | X | 453 | 37.455 | 30.110 | 24.036 | 0.00 | 0.00 |
| ATOM | 6837 | CB   | ILE | X | 453 | 38.969 | 30.258 | 25.658 | 0.00 | 0.00 |
| ATOM | 6838 | HB   | ILE | X | 453 | 39.043 | 29.684 | 26.582 | 0.00 | 0.00 |
| ATOM | 6839 | CG2  | ILE | X | 453 | 40.267 | 30.275 | 24.878 | 0.00 | 0.00 |
| ATOM | 6840 | HG21 | ILE | X | 453 | 40.152 | 30.753 | 23.906 | 0.00 | 0.00 |
| ATOM | 6841 | HG22 | ILE | X | 453 | 40.649 | 29.264 | 24.737 | 0.00 | 0.00 |
| ATOM | 6842 | HG23 | ILE | X | 453 | 41.027 | 30.785 | 25.470 | 0.00 | 0.00 |
| ATOM | 6843 | CG1  | ILE | X | 453 | 38.706 | 31.693 | 26.205 | 0.00 | 0.00 |
| ATOM | 6844 | HG12 | ILE | X | 453 | 37.924 | 31.522 | 26.945 | 0.00 | 0.00 |
| ATOM | 6845 | HG13 | ILE | X | 453 | 39.549 | 32.114 | 26.752 | 0.00 | 0.00 |
| ATOM | 6846 | CD1  | ILE | X | 453 | 38.147 | 32.773 | 25.236 | 0.00 | 0.00 |
| ATOM | 6847 | HD11 | ILE | X | 453 | 37.122 | 32.565 | 24.928 | 0.00 | 0.00 |
| ATOM | 6848 | HD12 | ILE | X | 453 | 38.761 | 32.978 | 24.359 | 0.00 | 0.00 |
| ATOM | 6849 | HD13 | ILE | X | 453 | 38.029 | 33.700 | 25.798 | 0.00 | 0.00 |
| ATOM | 6850 | C    | ILE | X | 453 | 38.249 | 28.128 | 24.439 | 0.00 | 0.00 |
| ATOM | 6851 | O    | ILE | X | 453 | 38.564 | 28.041 | 23.259 | 0.00 | 0.00 |
| ATOM | 6852 | N    | PRO | X | 454 | 38.311 | 26.977 | 25.207 | 0.00 | 0.00 |
| ATOM | 6853 | CD   | PRO | X | 454 | 38.196 | 26.912 | 26.681 | 0.00 | 0.00 |
| ATOM | 6854 | HD2  | PRO | X | 454 | 37.169 | 27.067 | 27.011 | 0.00 | 0.00 |
| ATOM | 6855 | HD3  | PRO | X | 454 | 38.781 | 27.685 | 27.180 | 0.00 | 0.00 |
| ATOM | 6856 | CG   | PRO | X | 454 | 38.697 | 25.560 | 27.130 | 0.00 | 0.00 |
| ATOM | 6857 | HG2  | PRO | X | 454 | 38.159 | 25.185 | 28.001 | 0.00 | 0.00 |
| ATOM | 6858 | HG3  | PRO | X | 454 | 39.764 | 25.669 | 27.320 | 0.00 | 0.00 |
| ATOM | 6859 | CB   | PRO | X | 454 | 38.548 | 24.709 | 25.880 | 0.00 | 0.00 |
| ATOM | 6860 | HB2  | PRO | X | 454 | 37.535 | 24.314 | 25.951 | 0.00 | 0.00 |
| ATOM | 6861 | HB3  | PRO | X | 454 | 39.277 | 23.901 | 25.834 | 0.00 | 0.00 |
| ATOM | 6862 | CA   | PRO | X | 454 | 38.628 | 25.671 | 24.678 | 0.00 | 0.00 |
| ATOM | 6863 | HA   | PRO | X | 454 | 39.697 | 25.629 | 24.471 | 0.00 | 0.00 |
| ATOM | 6864 | C    | PRO | X | 454 | 37.779 | 25.222 | 23.546 | 0.00 | 0.00 |
| ATOM | 6865 | O    | PRO | X | 454 | 38.174 | 24.257 | 22.923 | 0.00 | 0.00 |
| ATOM | 6866 | N    | LEU | X | 455 | 36.615 | 25.811 | 23.284 | 0.00 | 0.00 |
| ATOM | 6867 | H    | LEU | X | 455 | 36.430 | 26.730 | 23.661 | 0.00 | 0.00 |
| ATOM | 6868 | CA   | LEU | X | 455 | 35.756 | 25.544 | 22.130 | 0.00 | 0.00 |
| ATOM | 6869 | HA   | LEU | X | 455 | 35.780 | 24.483 | 21.882 | 0.00 | 0.00 |
| ATOM | 6870 | CB   | LEU | X | 455 | 34.349 | 25.739 | 22.589 | 0.00 | 0.00 |
| ATOM | 6871 | HB2  | LEU | X | 455 | 34.163 | 26.795 | 22.784 | 0.00 | 0.00 |
| ATOM | 6872 | HB3  | LEU | X | 455 | 33.684 | 25.510 | 21.756 | 0.00 | 0.00 |
| ATOM | 6873 | CG   | LEU | X | 455 | 33.892 | 24.843 | 23.748 | 0.00 | 0.00 |
| ATOM | 6874 | HG   | LEU | X | 455 | 34.540 | 25.206 | 24.545 | 0.00 | 0.00 |
| ATOM | 6875 | CD1  | LEU | X | 455 | 32.376 | 25.150 | 23.993 | 0.00 | 0.00 |
| ATOM | 6876 | HD11 | LEU | X | 455 | 32.062 | 25.148 | 25.037 | 0.00 | 0.00 |
| ATOM | 6877 | HD12 | LEU | X | 455 | 31.815 | 24.468 | 23.353 | 0.00 | 0.00 |
| ATOM | 6878 | HD13 | LEU | X | 455 | 32.177 | 26.191 | 23.735 | 0.00 | 0.00 |
| ATOM | 6879 | CD2  | LEU | X | 455 | 34.066 | 23.308 | 23.547 | 0.00 | 0.00 |
| ATOM | 6880 | HD21 | LEU | X | 455 | 33.543 | 22.988 | 22.645 | 0.00 | 0.00 |
| ATOM | 6881 | HD22 | LEU | X | 455 | 35.099 | 22.963 | 23.496 | 0.00 | 0.00 |
| ATOM | 6882 | HD23 | LEU | X | 455 | 33.597 | 22.709 | 24.327 | 0.00 | 0.00 |
| ATOM | 6883 | C    | LEU | X | 455 | 36.060 | 26.235 | 20.867 | 0.00 | 0.00 |
| ATOM | 6884 | O    | LEU | X | 455 | 35.359 | 25.983 | 19.877 | 0.00 | 0.00 |
| ATOM | 6885 | N    | ASP | X | 456 | 37.027 | 27.163 | 20.831 | 0.00 | 0.00 |

|      |      |      |     |   |     |        |        |        |      |      |
|------|------|------|-----|---|-----|--------|--------|--------|------|------|
| ATOM | 6886 | H    | ASP | X | 456 | 37.448 | 27.390 | 21.720 | 0.00 | 0.00 |
| ATOM | 6887 | CA   | ASP | X | 456 | 37.565 | 27.795 | 19.643 | 0.00 | 0.00 |
| ATOM | 6888 | HA   | ASP | X | 456 | 36.663 | 28.164 | 19.153 | 0.00 | 0.00 |
| ATOM | 6889 | CB   | ASP | X | 456 | 38.214 | 29.093 | 19.976 | 0.00 | 0.00 |
| ATOM | 6890 | HB2  | ASP | X | 456 | 37.588 | 29.645 | 20.678 | 0.00 | 0.00 |
| ATOM | 6891 | HB3  | ASP | X | 456 | 39.174 | 28.830 | 20.418 | 0.00 | 0.00 |
| ATOM | 6892 | CG   | ASP | X | 456 | 38.571 | 29.973 | 18.723 | 0.00 | 0.00 |
| ATOM | 6893 | OD1  | ASP | X | 456 | 38.339 | 31.219 | 18.801 | 0.00 | 0.00 |
| ATOM | 6894 | OD2  | ASP | X | 456 | 39.050 | 29.499 | 17.710 | 0.00 | 0.00 |
| ATOM | 6895 | C    | ASP | X | 456 | 38.381 | 26.833 | 18.805 | 0.00 | 0.00 |
| ATOM | 6896 | O    | ASP | X | 456 | 39.416 | 26.313 | 19.190 | 0.00 | 0.00 |
| ATOM | 6897 | N    | PRO | X | 457 | 37.939 | 26.608 | 17.545 | 0.00 | 0.00 |
| ATOM | 6898 | CD   | PRO | X | 457 | 36.704 | 27.083 | 16.942 | 0.00 | 0.00 |
| ATOM | 6899 | HD2  | PRO | X | 457 | 36.739 | 28.165 | 17.063 | 0.00 | 0.00 |
| ATOM | 6900 | HD3  | PRO | X | 457 | 35.817 | 26.686 | 17.435 | 0.00 | 0.00 |
| ATOM | 6901 | CG   | PRO | X | 457 | 36.771 | 26.725 | 15.447 | 0.00 | 0.00 |
| ATOM | 6902 | HG2  | PRO | X | 457 | 37.291 | 27.571 | 15.000 | 0.00 | 0.00 |
| ATOM | 6903 | HG3  | PRO | X | 457 | 35.796 | 26.673 | 14.963 | 0.00 | 0.00 |
| ATOM | 6904 | CB   | PRO | X | 457 | 37.578 | 25.365 | 15.482 | 0.00 | 0.00 |
| ATOM | 6905 | HB2  | PRO | X | 457 | 38.135 | 25.162 | 14.567 | 0.00 | 0.00 |
| ATOM | 6906 | HB3  | PRO | X | 457 | 36.944 | 24.502 | 15.687 | 0.00 | 0.00 |
| ATOM | 6907 | CA   | PRO | X | 457 | 38.579 | 25.696 | 16.588 | 0.00 | 0.00 |
| ATOM | 6908 | HA   | PRO | X | 457 | 38.750 | 24.774 | 17.144 | 0.00 | 0.00 |
| ATOM | 6909 | C    | PRO | X | 457 | 39.959 | 26.151 | 16.025 | 0.00 | 0.00 |
| ATOM | 6910 | O    | PRO | X | 457 | 40.683 | 25.402 | 15.352 | 0.00 | 0.00 |
| ATOM | 6911 | N    | SER | X | 458 | 40.305 | 27.412 | 16.273 | 0.00 | 0.00 |
| ATOM | 6912 | H    | SER | X | 458 | 39.785 | 27.972 | 16.934 | 0.00 | 0.00 |
| ATOM | 6913 | CA   | SER | X | 458 | 41.674 | 27.966 | 15.859 | 0.00 | 0.00 |
| ATOM | 6914 | HA   | SER | X | 458 | 42.058 | 27.511 | 14.946 | 0.00 | 0.00 |
| ATOM | 6915 | CB   | SER | X | 458 | 41.692 | 29.466 | 15.697 | 0.00 | 0.00 |
| ATOM | 6916 | HB2  | SER | X | 458 | 42.673 | 29.763 | 15.325 | 0.00 | 0.00 |
| ATOM | 6917 | HB3  | SER | X | 458 | 40.894 | 29.689 | 14.989 | 0.00 | 0.00 |
| ATOM | 6918 | OG   | SER | X | 458 | 41.314 | 30.073 | 16.915 | 0.00 | 0.00 |
| ATOM | 6919 | HG   | SER | X | 458 | 40.402 | 29.869 | 17.134 | 0.00 | 0.00 |
| ATOM | 6920 | C    | SER | X | 458 | 42.663 | 27.622 | 16.968 | 0.00 | 0.00 |
| ATOM | 6921 | O    | SER | X | 458 | 43.888 | 27.803 | 16.765 | 0.00 | 0.00 |
| ATOM | 6922 | N    | ARG | X | 459 | 42.272 | 27.219 | 18.169 | 0.00 | 0.00 |
| ATOM | 6923 | H    | ARG | X | 459 | 41.310 | 26.911 | 18.185 | 0.00 | 0.00 |
| ATOM | 6924 | CA   | ARG | X | 459 | 43.083 | 26.975 | 19.306 | 0.00 | 0.00 |
| ATOM | 6925 | HA   | ARG | X | 459 | 44.013 | 27.503 | 19.098 | 0.00 | 0.00 |
| ATOM | 6926 | CB   | ARG | X | 459 | 42.537 | 27.550 | 20.587 | 0.00 | 0.00 |
| ATOM | 6927 | HB2  | ARG | X | 459 | 41.559 | 27.101 | 20.759 | 0.00 | 0.00 |
| ATOM | 6928 | HB3  | ARG | X | 459 | 43.277 | 27.284 | 21.342 | 0.00 | 0.00 |
| ATOM | 6929 | CG   | ARG | X | 459 | 42.408 | 29.097 | 20.557 | 0.00 | 0.00 |
| ATOM | 6930 | HG2  | ARG | X | 459 | 43.383 | 29.515 | 20.303 | 0.00 | 0.00 |
| ATOM | 6931 | HG3  | ARG | X | 459 | 41.684 | 29.206 | 19.750 | 0.00 | 0.00 |
| ATOM | 6932 | CD   | ARG | X | 459 | 41.986 | 29.653 | 21.915 | 0.00 | 0.00 |
| ATOM | 6933 | HD2  | ARG | X | 459 | 41.344 | 28.916 | 22.397 | 0.00 | 0.00 |
| ATOM | 6934 | HD3  | ARG | X | 459 | 42.823 | 29.686 | 22.612 | 0.00 | 0.00 |
| ATOM | 6935 | NE   | ARG | X | 459 | 41.369 | 30.994 | 21.797 | 0.00 | 0.00 |
| ATOM | 6936 | HE   | ARG | X | 459 | 40.376 | 31.041 | 21.615 | 0.00 | 0.00 |
| ATOM | 6937 | CZ   | ARG | X | 459 | 41.832 | 32.169 | 22.278 | 0.00 | 0.00 |
| ATOM | 6938 | NH1  | ARG | X | 459 | 43.048 | 32.450 | 22.652 | 0.00 | 0.00 |
| ATOM | 6939 | HH11 | ARG | X | 459 | 43.735 | 31.762 | 22.378 | 0.00 | 0.00 |
| ATOM | 6940 | HH12 | ARG | X | 459 | 43.358 | 33.345 | 23.003 | 0.00 | 0.00 |
| ATOM | 6941 | NH2  | ARG | X | 459 | 41.026 | 33.090 | 22.592 | 0.00 | 0.00 |
| ATOM | 6942 | HH21 | ARG | X | 459 | 40.042 | 32.869 | 22.545 | 0.00 | 0.00 |
| ATOM | 6943 | HH22 | ARG | X | 459 | 41.389 | 34.012 | 22.787 | 0.00 | 0.00 |
| ATOM | 6944 | C    | ARG | X | 459 | 43.353 | 25.488 | 19.446 | 0.00 | 0.00 |
| ATOM | 6945 | O    | ARG | X | 459 | 42.406 | 24.704 | 19.277 | 0.00 | 0.00 |
| ATOM | 6946 | N    | ASN | X | 460 | 44.532 | 25.051 | 19.838 | 0.00 | 0.00 |
| ATOM | 6947 | H    | ASN | X | 460 | 45.235 | 25.657 | 20.239 | 0.00 | 0.00 |
| ATOM | 6948 | CA   | ASN | X | 460 | 44.751 | 23.650 | 20.089 | 0.00 | 0.00 |
| ATOM | 6949 | HA   | ASN | X | 460 | 44.053 | 23.209 | 19.378 | 0.00 | 0.00 |
| ATOM | 6950 | CB   | ASN | X | 460 | 46.214 | 23.281 | 19.824 | 0.00 | 0.00 |
| ATOM | 6951 | HB2  | ASN | X | 460 | 46.579 | 23.929 | 19.027 | 0.00 | 0.00 |
| ATOM | 6952 | HB3  | ASN | X | 460 | 46.791 | 23.507 | 20.721 | 0.00 | 0.00 |



|      |      |      |     |   |     |        |        |        |      |      |
|------|------|------|-----|---|-----|--------|--------|--------|------|------|
| ATOM | 6953 | CG   | ASN | X | 460 | 46.434 | 21.799 | 19.454 | 0.00 | 0.00 |
| ATOM | 6954 | OD1  | ASN | X | 460 | 46.013 | 21.361 | 18.343 | 0.00 | 0.00 |
| ATOM | 6955 | ND2  | ASN | X | 460 | 46.888 | 20.986 | 20.396 | 0.00 | 0.00 |
| ATOM | 6956 | HD21 | ASN | X | 460 | 46.806 | 20.005 | 20.167 | 0.00 | 0.00 |
| ATOM | 6957 | HD22 | ASN | X | 460 | 47.201 | 21.315 | 21.298 | 0.00 | 0.00 |
| ATOM | 6958 | C    | ASN | X | 460 | 44.290 | 23.248 | 21.436 | 0.00 | 0.00 |
| ATOM | 6959 | O    | ASN | X | 460 | 44.940 | 23.567 | 22.465 | 0.00 | 0.00 |
| ATOM | 6960 | N    | TYR | X | 461 | 43.094 | 22.624 | 21.571 | 0.00 | 0.00 |
| ATOM | 6961 | H    | TYR | X | 461 | 42.640 | 22.347 | 20.713 | 0.00 | 0.00 |
| ATOM | 6962 | CA   | TYR | X | 461 | 42.622 | 21.895 | 22.761 | 0.00 | 0.00 |
| ATOM | 6963 | HA   | TYR | X | 461 | 43.441 | 21.563 | 23.398 | 0.00 | 0.00 |
| ATOM | 6964 | CB   | TYR | X | 461 | 41.607 | 22.726 | 23.664 | 0.00 | 0.00 |
| ATOM | 6965 | HB2  | TYR | X | 461 | 40.682 | 22.970 | 23.141 | 0.00 | 0.00 |
| ATOM | 6966 | HB3  | TYR | X | 461 | 41.249 | 22.045 | 24.436 | 0.00 | 0.00 |
| ATOM | 6967 | CG   | TYR | X | 461 | 42.169 | 24.003 | 24.268 | 0.00 | 0.00 |
| ATOM | 6968 | CD1  | TYR | X | 461 | 42.129 | 25.211 | 23.545 | 0.00 | 0.00 |
| ATOM | 6969 | HD1  | TYR | X | 461 | 41.840 | 25.259 | 22.505 | 0.00 | 0.00 |
| ATOM | 6970 | CE1  | TYR | X | 461 | 42.430 | 26.442 | 24.169 | 0.00 | 0.00 |
| ATOM | 6971 | HE1  | TYR | X | 461 | 42.231 | 27.368 | 23.649 | 0.00 | 0.00 |
| ATOM | 6972 | CZ   | TYR | X | 461 | 42.741 | 26.470 | 25.524 | 0.00 | 0.00 |
| ATOM | 6973 | OH   | TYR | X | 461 | 42.806 | 27.697 | 26.069 | 0.00 | 0.00 |
| ATOM | 6974 | HH   | TYR | X | 461 | 42.968 | 27.659 | 27.015 | 0.00 | 0.00 |
| ATOM | 6975 | CE2  | TYR | X | 461 | 42.800 | 25.324 | 26.312 | 0.00 | 0.00 |
| ATOM | 6976 | HE2  | TYR | X | 461 | 43.048 | 25.199 | 27.356 | 0.00 | 0.00 |
| ATOM | 6977 | CD2  | TYR | X | 461 | 42.566 | 24.060 | 25.650 | 0.00 | 0.00 |
| ATOM | 6978 | HD2  | TYR | X | 461 | 42.633 | 23.107 | 26.153 | 0.00 | 0.00 |
| ATOM | 6979 | C    | TYR | X | 461 | 41.946 | 20.579 | 22.358 | 0.00 | 0.00 |
| ATOM | 6980 | O    | TYR | X | 461 | 41.365 | 20.356 | 21.251 | 0.00 | 0.00 |
| ATOM | 6981 | N    | THR | X | 462 | 42.179 | 19.584 | 23.226 | 0.00 | 0.00 |
| ATOM | 6982 | H    | THR | X | 462 | 42.724 | 19.812 | 24.046 | 0.00 | 0.00 |
| ATOM | 6983 | CA   | THR | X | 462 | 41.757 | 18.174 | 23.159 | 0.00 | 0.00 |
| ATOM | 6984 | HA   | THR | X | 462 | 41.829 | 17.686 | 22.187 | 0.00 | 0.00 |
| ATOM | 6985 | CB   | THR | X | 462 | 42.727 | 17.363 | 24.047 | 0.00 | 0.00 |
| ATOM | 6986 | HB   | THR | X | 462 | 42.501 | 16.316 | 23.847 | 0.00 | 0.00 |
| ATOM | 6987 | CG2  | THR | X | 462 | 44.223 | 17.621 | 23.794 | 0.00 | 0.00 |
| ATOM | 6988 | HG21 | THR | X | 462 | 44.760 | 16.958 | 24.473 | 0.00 | 0.00 |
| ATOM | 6989 | HG22 | THR | X | 462 | 44.433 | 18.686 | 23.885 | 0.00 | 0.00 |
| ATOM | 6990 | HG23 | THR | X | 462 | 44.442 | 17.329 | 22.767 | 0.00 | 0.00 |
| ATOM | 6991 | OG1  | THR | X | 462 | 42.556 | 17.770 | 25.380 | 0.00 | 0.00 |
| ATOM | 6992 | HG1  | THR | X | 462 | 42.791 | 18.696 | 25.476 | 0.00 | 0.00 |
| ATOM | 6993 | C    | THR | X | 462 | 40.385 | 17.966 | 23.548 | 0.00 | 0.00 |
| ATOM | 6994 | O    | THR | X | 462 | 39.785 | 18.629 | 24.357 | 0.00 | 0.00 |
| ATOM | 6995 | N    | ALA | X | 463 | 39.771 | 16.904 | 23.043 | 0.00 | 0.00 |
| ATOM | 6996 | H    | ALA | X | 463 | 40.287 | 16.304 | 22.414 | 0.00 | 0.00 |
| ATOM | 6997 | CA   | ALA | X | 463 | 38.328 | 16.643 | 23.182 | 0.00 | 0.00 |
| ATOM | 6998 | HA   | ALA | X | 463 | 37.828 | 17.553 | 22.850 | 0.00 | 0.00 |
| ATOM | 6999 | CB   | ALA | X | 463 | 37.960 | 15.514 | 22.189 | 0.00 | 0.00 |
| ATOM | 7000 | HB1  | ALA | X | 463 | 38.552 | 14.685 | 22.576 | 0.00 | 0.00 |
| ATOM | 7001 | HB2  | ALA | X | 463 | 38.209 | 15.580 | 21.130 | 0.00 | 0.00 |
| ATOM | 7002 | HB3  | ALA | X | 463 | 36.905 | 15.238 | 22.208 | 0.00 | 0.00 |
| ATOM | 7003 | C    | ALA | X | 463 | 37.796 | 16.412 | 24.630 | 0.00 | 0.00 |
| ATOM | 7004 | O    | ALA | X | 463 | 36.628 | 16.672 | 24.952 | 0.00 | 0.00 |
| ATOM | 7005 | N    | GLU | X | 464 | 38.676 | 15.926 | 25.575 | 0.00 | 0.00 |
| ATOM | 7006 | H    | GLU | X | 464 | 39.524 | 15.515 | 25.212 | 0.00 | 0.00 |
| ATOM | 7007 | CA   | GLU | X | 464 | 38.445 | 15.874 | 27.028 | 0.00 | 0.00 |
| ATOM | 7008 | HA   | GLU | X | 464 | 37.584 | 15.218 | 27.153 | 0.00 | 0.00 |
| ATOM | 7009 | CB   | GLU | X | 464 | 39.564 | 15.047 | 27.752 | 0.00 | 0.00 |
| ATOM | 7010 | HB2  | GLU | X | 464 | 39.425 | 14.891 | 28.822 | 0.00 | 0.00 |
| ATOM | 7011 | HB3  | GLU | X | 464 | 39.551 | 14.031 | 27.358 | 0.00 | 0.00 |
| ATOM | 7012 | CG   | GLU | X | 464 | 40.986 | 15.586 | 27.507 | 0.00 | 0.00 |
| ATOM | 7013 | HG2  | GLU | X | 464 | 40.938 | 16.670 | 27.404 | 0.00 | 0.00 |
| ATOM | 7014 | HG3  | GLU | X | 464 | 41.518 | 15.371 | 28.434 | 0.00 | 0.00 |
| ATOM | 7015 | CD   | GLU | X | 464 | 41.689 | 14.832 | 26.369 | 0.00 | 0.00 |
| ATOM | 7016 | OE1  | GLU | X | 464 | 40.991 | 14.443 | 25.397 | 0.00 | 0.00 |
| ATOM | 7017 | OE2  | GLU | X | 464 | 42.910 | 14.634 | 26.509 | 0.00 | 0.00 |
| ATOM | 7018 | C    | GLU | X | 464 | 38.264 | 17.256 | 27.710 | 0.00 | 0.00 |
| ATOM | 7019 | O    | GLU | X | 464 | 37.478 | 17.433 | 28.682 | 0.00 | 0.00 |

|      |      |      |     |   |     |        |        |        |      |      |
|------|------|------|-----|---|-----|--------|--------|--------|------|------|
| ATOM | 7020 | N    | GLU | X | 465 | 38.867 | 18.240 | 27.119 | 0.00 | 0.00 |
| ATOM | 7021 | H    | GLU | X | 465 | 39.460 | 17.996 | 26.339 | 0.00 | 0.00 |
| ATOM | 7022 | CA   | GLU | X | 465 | 38.808 | 19.638 | 27.618 | 0.00 | 0.00 |
| ATOM | 7023 | HA   | GLU | X | 465 | 38.604 | 19.630 | 28.688 | 0.00 | 0.00 |
| ATOM | 7024 | CB   | GLU | X | 465 | 40.071 | 20.371 | 27.176 | 0.00 | 0.00 |
| ATOM | 7025 | HB2  | GLU | X | 465 | 40.098 | 20.344 | 26.086 | 0.00 | 0.00 |
| ATOM | 7026 | HB3  | GLU | X | 465 | 40.068 | 21.432 | 27.423 | 0.00 | 0.00 |
| ATOM | 7027 | CG   | GLU | X | 465 | 41.275 | 19.731 | 27.840 | 0.00 | 0.00 |
| ATOM | 7028 | HG2  | GLU | X | 465 | 41.101 | 19.765 | 28.916 | 0.00 | 0.00 |
| ATOM | 7029 | HG3  | GLU | X | 465 | 41.267 | 18.668 | 27.600 | 0.00 | 0.00 |
| ATOM | 7030 | CD   | GLU | X | 465 | 42.621 | 20.234 | 27.293 | 0.00 | 0.00 |
| ATOM | 7031 | OE1  | GLU | X | 465 | 42.922 | 20.295 | 26.068 | 0.00 | 0.00 |
| ATOM | 7032 | OE2  | GLU | X | 465 | 43.509 | 20.533 | 28.092 | 0.00 | 0.00 |
| ATOM | 7033 | C    | GLU | X | 465 | 37.606 | 20.393 | 27.038 | 0.00 | 0.00 |
| ATOM | 7034 | O    | GLU | X | 465 | 36.978 | 21.097 | 27.803 | 0.00 | 0.00 |
| ATOM | 7035 | N    | LYS | X | 466 | 37.276 | 20.138 | 25.801 | 0.00 | 0.00 |
| ATOM | 7036 | H    | LYS | X | 466 | 37.993 | 19.679 | 25.256 | 0.00 | 0.00 |
| ATOM | 7037 | CA   | LYS | X | 466 | 36.121 | 20.648 | 25.180 | 0.00 | 0.00 |
| ATOM | 7038 | HA   | LYS | X | 466 | 36.147 | 21.737 | 25.239 | 0.00 | 0.00 |
| ATOM | 7039 | CB   | LYS | X | 466 | 36.016 | 20.115 | 23.727 | 0.00 | 0.00 |
| ATOM | 7040 | HB2  | LYS | X | 466 | 36.084 | 19.035 | 23.600 | 0.00 | 0.00 |
| ATOM | 7041 | HB3  | LYS | X | 466 | 35.094 | 20.480 | 23.274 | 0.00 | 0.00 |
| ATOM | 7042 | CG   | LYS | X | 466 | 37.063 | 20.923 | 22.845 | 0.00 | 0.00 |
| ATOM | 7043 | HG2  | LYS | X | 466 | 36.840 | 21.981 | 22.986 | 0.00 | 0.00 |
| ATOM | 7044 | HG3  | LYS | X | 466 | 38.054 | 20.617 | 23.178 | 0.00 | 0.00 |
| ATOM | 7045 | CD   | LYS | X | 466 | 36.961 | 20.554 | 21.351 | 0.00 | 0.00 |
| ATOM | 7046 | HD2  | LYS | X | 466 | 36.975 | 19.476 | 21.191 | 0.00 | 0.00 |
| ATOM | 7047 | HD3  | LYS | X | 466 | 36.010 | 20.861 | 20.916 | 0.00 | 0.00 |
| ATOM | 7048 | CE   | LYS | X | 466 | 38.137 | 21.253 | 20.562 | 0.00 | 0.00 |
| ATOM | 7049 | HE2  | LYS | X | 466 | 39.127 | 20.981 | 20.927 | 0.00 | 0.00 |
| ATOM | 7050 | HE3  | LYS | X | 466 | 38.171 | 20.939 | 19.518 | 0.00 | 0.00 |
| ATOM | 7051 | NZ   | LYS | X | 466 | 38.130 | 22.756 | 20.467 | 0.00 | 0.00 |
| ATOM | 7052 | HZ1  | LYS | X | 466 | 37.342 | 22.968 | 19.873 | 0.00 | 0.00 |
| ATOM | 7053 | HZ2  | LYS | X | 466 | 38.036 | 23.112 | 21.408 | 0.00 | 0.00 |
| ATOM | 7054 | HZ3  | LYS | X | 466 | 38.935 | 23.104 | 19.967 | 0.00 | 0.00 |
| ATOM | 7055 | C    | LYS | X | 466 | 34.755 | 20.236 | 25.890 | 0.00 | 0.00 |
| ATOM | 7056 | O    | LYS | X | 466 | 33.799 | 20.992 | 26.051 | 0.00 | 0.00 |
| ATOM | 7057 | N    | ILE | X | 467 | 34.693 | 19.027 | 26.382 | 0.00 | 0.00 |
| ATOM | 7058 | H    | ILE | X | 467 | 35.553 | 18.498 | 26.388 | 0.00 | 0.00 |
| ATOM | 7059 | CA   | ILE | X | 467 | 33.637 | 18.634 | 27.277 | 0.00 | 0.00 |
| ATOM | 7060 | HA   | ILE | X | 467 | 32.690 | 18.931 | 26.826 | 0.00 | 0.00 |
| ATOM | 7061 | CB   | ILE | X | 467 | 33.593 | 17.044 | 27.343 | 0.00 | 0.00 |
| ATOM | 7062 | HB   | ILE | X | 467 | 34.541 | 16.650 | 27.711 | 0.00 | 0.00 |
| ATOM | 7063 | CG2  | ILE | X | 467 | 32.480 | 16.620 | 28.375 | 0.00 | 0.00 |
| ATOM | 7064 | HG21 | ILE | X | 467 | 32.267 | 15.553 | 28.452 | 0.00 | 0.00 |
| ATOM | 7065 | HG22 | ILE | X | 467 | 31.551 | 17.134 | 28.128 | 0.00 | 0.00 |
| ATOM | 7066 | HG23 | ILE | X | 467 | 32.686 | 17.001 | 29.375 | 0.00 | 0.00 |
| ATOM | 7067 | CG1  | ILE | X | 467 | 33.391 | 16.124 | 26.143 | 0.00 | 0.00 |
| ATOM | 7068 | HG12 | ILE | X | 467 | 34.255 | 16.107 | 25.478 | 0.00 | 0.00 |
| ATOM | 7069 | HG13 | ILE | X | 467 | 33.493 | 15.073 | 26.415 | 0.00 | 0.00 |
| ATOM | 7070 | CD1  | ILE | X | 467 | 32.074 | 16.327 | 25.368 | 0.00 | 0.00 |
| ATOM | 7071 | HD11 | ILE | X | 467 | 31.821 | 15.452 | 24.770 | 0.00 | 0.00 |
| ATOM | 7072 | HD12 | ILE | X | 467 | 32.254 | 17.240 | 24.800 | 0.00 | 0.00 |
| ATOM | 7073 | HD13 | ILE | X | 467 | 31.264 | 16.500 | 26.076 | 0.00 | 0.00 |
| ATOM | 7074 | C    | ILE | X | 467 | 33.625 | 19.234 | 28.698 | 0.00 | 0.00 |
| ATOM | 7075 | O    | ILE | X | 467 | 32.708 | 19.853 | 29.148 | 0.00 | 0.00 |
| ATOM | 7076 | N    | PHE | X | 468 | 34.782 | 19.137 | 29.347 | 0.00 | 0.00 |
| ATOM | 7077 | H    | PHE | X | 468 | 35.545 | 18.712 | 28.840 | 0.00 | 0.00 |
| ATOM | 7078 | CA   | PHE | X | 468 | 35.085 | 19.780 | 30.637 | 0.00 | 0.00 |
| ATOM | 7079 | HA   | PHE | X | 468 | 34.392 | 19.333 | 31.349 | 0.00 | 0.00 |
| ATOM | 7080 | CB   | PHE | X | 468 | 36.551 | 19.454 | 31.051 | 0.00 | 0.00 |
| ATOM | 7081 | HB2  | PHE | X | 468 | 36.657 | 18.370 | 31.082 | 0.00 | 0.00 |
| ATOM | 7082 | HB3  | PHE | X | 468 | 37.223 | 19.797 | 30.264 | 0.00 | 0.00 |
| ATOM | 7083 | CG   | PHE | X | 468 | 36.953 | 19.993 | 32.445 | 0.00 | 0.00 |
| ATOM | 7084 | CD1  | PHE | X | 468 | 36.047 | 20.066 | 33.570 | 0.00 | 0.00 |
| ATOM | 7085 | HD1  | PHE | X | 468 | 34.983 | 19.887 | 33.520 | 0.00 | 0.00 |
| ATOM | 7086 | CE1  | PHE | X | 468 | 36.541 | 20.574 | 34.814 | 0.00 | 0.00 |

|      |      |      |     |   |     |        |        |        |      |      |
|------|------|------|-----|---|-----|--------|--------|--------|------|------|
| ATOM | 7087 | HE1  | PHE | X | 468 | 35.889 | 20.736 | 35.659 | 0.00 | 0.00 |
| ATOM | 7088 | CZ   | PHE | X | 468 | 37.917 | 20.991 | 34.896 | 0.00 | 0.00 |
| ATOM | 7089 | HZ   | PHE | X | 468 | 38.254 | 21.452 | 35.812 | 0.00 | 0.00 |
| ATOM | 7090 | CE2  | PHE | X | 468 | 38.717 | 20.907 | 33.768 | 0.00 | 0.00 |
| ATOM | 7091 | HE2  | PHE | X | 468 | 39.695 | 21.315 | 33.978 | 0.00 | 0.00 |
| ATOM | 7092 | CD2  | PHE | X | 468 | 38.335 | 20.388 | 32.520 | 0.00 | 0.00 |
| ATOM | 7093 | HD2  | PHE | X | 468 | 38.979 | 20.321 | 31.656 | 0.00 | 0.00 |
| ATOM | 7094 | C    | PHE | X | 468 | 34.758 | 21.317 | 30.764 | 0.00 | 0.00 |
| ATOM | 7095 | O    | PHE | X | 468 | 34.200 | 21.707 | 31.776 | 0.00 | 0.00 |
| ATOM | 7096 | N    | ALA | X | 469 | 35.081 | 22.111 | 29.743 | 0.00 | 0.00 |
| ATOM | 7097 | H    | ALA | X | 469 | 35.589 | 21.706 | 28.970 | 0.00 | 0.00 |
| ATOM | 7098 | CA   | ALA | X | 469 | 34.688 | 23.475 | 29.608 | 0.00 | 0.00 |
| ATOM | 7099 | HA   | ALA | X | 469 | 35.045 | 24.051 | 30.462 | 0.00 | 0.00 |
| ATOM | 7100 | CB   | ALA | X | 469 | 35.426 | 24.095 | 28.350 | 0.00 | 0.00 |
| ATOM | 7101 | HB1  | ALA | X | 469 | 35.064 | 25.123 | 28.309 | 0.00 | 0.00 |
| ATOM | 7102 | HB2  | ALA | X | 469 | 35.136 | 23.532 | 27.462 | 0.00 | 0.00 |
| ATOM | 7103 | HB3  | ALA | X | 469 | 36.485 | 23.902 | 28.518 | 0.00 | 0.00 |
| ATOM | 7104 | C    | ALA | X | 469 | 33.183 | 23.631 | 29.536 | 0.00 | 0.00 |
| ATOM | 7105 | O    | ALA | X | 469 | 32.637 | 24.459 | 30.224 | 0.00 | 0.00 |
| ATOM | 7106 | N    | GLN | X | 470 | 32.456 | 22.833 | 28.822 | 0.00 | 0.00 |
| ATOM | 7107 | H    | GLN | X | 470 | 32.964 | 22.277 | 28.149 | 0.00 | 0.00 |
| ATOM | 7108 | CA   | GLN | X | 470 | 31.010 | 22.889 | 28.862 | 0.00 | 0.00 |
| ATOM | 7109 | HA   | GLN | X | 470 | 30.620 | 23.862 | 28.563 | 0.00 | 0.00 |
| ATOM | 7110 | CB   | GLN | X | 470 | 30.432 | 21.897 | 27.851 | 0.00 | 0.00 |
| ATOM | 7111 | HB2  | GLN | X | 470 | 30.955 | 20.944 | 27.927 | 0.00 | 0.00 |
| ATOM | 7112 | HB3  | GLN | X | 470 | 29.364 | 21.705 | 27.956 | 0.00 | 0.00 |
| ATOM | 7113 | CG   | GLN | X | 470 | 30.665 | 22.517 | 26.419 | 0.00 | 0.00 |
| ATOM | 7114 | HG2  | GLN | X | 470 | 30.111 | 23.437 | 26.234 | 0.00 | 0.00 |
| ATOM | 7115 | HG3  | GLN | X | 470 | 31.693 | 22.725 | 26.123 | 0.00 | 0.00 |
| ATOM | 7116 | CD   | GLN | X | 470 | 30.311 | 21.578 | 25.257 | 0.00 | 0.00 |
| ATOM | 7117 | OE1  | GLN | X | 470 | 29.539 | 21.848 | 24.423 | 0.00 | 0.00 |
| ATOM | 7118 | NE2  | GLN | X | 470 | 30.844 | 20.416 | 25.189 | 0.00 | 0.00 |
| ATOM | 7119 | HE21 | GLN | X | 470 | 30.692 | 19.804 | 24.400 | 0.00 | 0.00 |
| ATOM | 7120 | HE22 | GLN | X | 470 | 31.659 | 20.295 | 25.774 | 0.00 | 0.00 |
| ATOM | 7121 | C    | GLN | X | 470 | 30.329 | 22.643 | 30.222 | 0.00 | 0.00 |
| ATOM | 7122 | O    | GLN | X | 470 | 29.227 | 23.172 | 30.355 | 0.00 | 0.00 |
| ATOM | 7123 | N    | ARG | X | 471 | 30.997 | 21.895 | 31.111 | 0.00 | 0.00 |
| ATOM | 7124 | H    | ARG | X | 471 | 31.864 | 21.428 | 30.887 | 0.00 | 0.00 |
| ATOM | 7125 | CA   | ARG | X | 471 | 30.653 | 21.803 | 32.543 | 0.00 | 0.00 |
| ATOM | 7126 | HA   | ARG | X | 471 | 29.627 | 21.435 | 32.565 | 0.00 | 0.00 |
| ATOM | 7127 | CB   | ARG | X | 471 | 31.399 | 20.676 | 33.300 | 0.00 | 0.00 |
| ATOM | 7128 | HB2  | ARG | X | 471 | 32.469 | 20.878 | 33.339 | 0.00 | 0.00 |
| ATOM | 7129 | HB3  | ARG | X | 471 | 31.102 | 20.798 | 34.341 | 0.00 | 0.00 |
| ATOM | 7130 | CG   | ARG | X | 471 | 31.297 | 19.265 | 32.677 | 0.00 | 0.00 |
| ATOM | 7131 | HG2  | ARG | X | 471 | 30.286 | 18.875 | 32.794 | 0.00 | 0.00 |
| ATOM | 7132 | HG3  | ARG | X | 471 | 31.554 | 19.416 | 31.628 | 0.00 | 0.00 |
| ATOM | 7133 | CD   | ARG | X | 471 | 32.274 | 18.310 | 33.281 | 0.00 | 0.00 |
| ATOM | 7134 | HD2  | ARG | X | 471 | 32.088 | 17.295 | 32.930 | 0.00 | 0.00 |
| ATOM | 7135 | HD3  | ARG | X | 471 | 33.290 | 18.401 | 32.896 | 0.00 | 0.00 |
| ATOM | 7136 | NE   | ARG | X | 471 | 32.230 | 18.287 | 34.766 | 0.00 | 0.00 |
| ATOM | 7137 | HE   | ARG | X | 471 | 31.444 | 18.652 | 35.284 | 0.00 | 0.00 |
| ATOM | 7138 | CZ   | ARG | X | 471 | 33.277 | 17.985 | 35.541 | 0.00 | 0.00 |
| ATOM | 7139 | NH1  | ARG | X | 471 | 34.330 | 17.370 | 35.000 | 0.00 | 0.00 |
| ATOM | 7140 | HH11 | ARG | X | 471 | 34.459 | 17.052 | 34.050 | 0.00 | 0.00 |
| ATOM | 7141 | HH12 | ARG | X | 471 | 35.135 | 17.471 | 35.601 | 0.00 | 0.00 |
| ATOM | 7142 | NH2  | ARG | X | 471 | 33.217 | 18.322 | 36.816 | 0.00 | 0.00 |
| ATOM | 7143 | HH21 | ARG | X | 471 | 32.333 | 18.647 | 37.181 | 0.00 | 0.00 |
| ATOM | 7144 | HH22 | ARG | X | 471 | 33.952 | 18.103 | 37.473 | 0.00 | 0.00 |
| ATOM | 7145 | C    | ARG | X | 471 | 30.772 | 23.122 | 33.276 | 0.00 | 0.00 |
| ATOM | 7146 | O    | ARG | X | 471 | 29.857 | 23.572 | 33.980 | 0.00 | 0.00 |
| ATOM | 7147 | N    | LEU | X | 472 | 31.865 | 23.824 | 33.105 | 0.00 | 0.00 |
| ATOM | 7148 | H    | LEU | X | 472 | 32.501 | 23.497 | 32.391 | 0.00 | 0.00 |
| ATOM | 7149 | CA   | LEU | X | 472 | 32.105 | 25.063 | 33.804 | 0.00 | 0.00 |
| ATOM | 7150 | HA   | LEU | X | 472 | 31.872 | 24.988 | 34.866 | 0.00 | 0.00 |
| ATOM | 7151 | CB   | LEU | X | 472 | 33.604 | 25.283 | 33.692 | 0.00 | 0.00 |
| ATOM | 7152 | HB2  | LEU | X | 472 | 33.997 | 25.270 | 32.675 | 0.00 | 0.00 |
| ATOM | 7153 | HB3  | LEU | X | 472 | 33.875 | 26.203 | 34.210 | 0.00 | 0.00 |

|      |      |      |     |   |     |        |        |        |      |      |
|------|------|------|-----|---|-----|--------|--------|--------|------|------|
| ATOM | 7154 | CG   | LEU | X | 472 | 34.323 | 24.164 | 34.477 | 0.00 | 0.00 |
| ATOM | 7155 | HG   | LEU | X | 472 | 34.013 | 23.144 | 34.252 | 0.00 | 0.00 |
| ATOM | 7156 | CD1  | LEU | X | 472 | 35.837 | 24.373 | 34.196 | 0.00 | 0.00 |
| ATOM | 7157 | HD11 | LEU | X | 472 | 36.181 | 25.398 | 34.059 | 0.00 | 0.00 |
| ATOM | 7158 | HD12 | LEU | X | 472 | 36.034 | 23.813 | 33.282 | 0.00 | 0.00 |
| ATOM | 7159 | HD13 | LEU | X | 472 | 36.364 | 23.830 | 34.981 | 0.00 | 0.00 |
| ATOM | 7160 | CD2  | LEU | X | 472 | 34.209 | 24.113 | 36.041 | 0.00 | 0.00 |
| ATOM | 7161 | HD21 | LEU | X | 472 | 34.635 | 25.041 | 36.422 | 0.00 | 0.00 |
| ATOM | 7162 | HD22 | LEU | X | 472 | 33.161 | 23.882 | 36.229 | 0.00 | 0.00 |
| ATOM | 7163 | HD23 | LEU | X | 472 | 34.765 | 23.224 | 36.338 | 0.00 | 0.00 |
| ATOM | 7164 | C    | LEU | X | 472 | 31.278 | 26.185 | 33.308 | 0.00 | 0.00 |
| ATOM | 7165 | O    | LEU | X | 472 | 30.639 | 26.874 | 34.148 | 0.00 | 0.00 |
| ATOM | 7166 | N    | MET | X | 473 | 31.239 | 26.337 | 31.962 | 0.00 | 0.00 |
| ATOM | 7167 | H    | MET | X | 473 | 31.823 | 25.725 | 31.410 | 0.00 | 0.00 |
| ATOM | 7168 | CA   | MET | X | 473 | 30.258 | 27.265 | 31.264 | 0.00 | 0.00 |
| ATOM | 7169 | HA   | MET | X | 473 | 30.489 | 28.329 | 31.210 | 0.00 | 0.00 |
| ATOM | 7170 | CB   | MET | X | 473 | 30.255 | 26.946 | 29.809 | 0.00 | 0.00 |
| ATOM | 7171 | HB2  | MET | X | 473 | 29.942 | 25.906 | 29.715 | 0.00 | 0.00 |
| ATOM | 7172 | HB3  | MET | X | 473 | 29.480 | 27.576 | 29.371 | 0.00 | 0.00 |
| ATOM | 7173 | CG   | MET | X | 473 | 31.606 | 27.038 | 29.183 | 0.00 | 0.00 |
| ATOM | 7174 | HG2  | MET | X | 473 | 31.863 | 28.097 | 29.224 | 0.00 | 0.00 |
| ATOM | 7175 | HG3  | MET | X | 473 | 32.406 | 26.592 | 29.774 | 0.00 | 0.00 |
| ATOM | 7176 | SD   | MET | X | 473 | 31.736 | 26.355 | 27.503 | 0.00 | 0.00 |
| ATOM | 7177 | CE   | MET | X | 473 | 30.736 | 27.530 | 26.604 | 0.00 | 0.00 |
| ATOM | 7178 | HE1  | MET | X | 473 | 30.845 | 27.390 | 25.528 | 0.00 | 0.00 |
| ATOM | 7179 | HE2  | MET | X | 473 | 29.700 | 27.401 | 26.919 | 0.00 | 0.00 |
| ATOM | 7180 | HE3  | MET | X | 473 | 30.999 | 28.563 | 26.828 | 0.00 | 0.00 |
| ATOM | 7181 | C    | MET | X | 473 | 28.892 | 27.166 | 31.944 | 0.00 | 0.00 |
| ATOM | 7182 | O    | MET | X | 473 | 28.382 | 28.220 | 32.369 | 0.00 | 0.00 |
| ATOM | 7183 | N    | ARG | X | 474 | 28.470 | 25.898 | 32.078 | 0.00 | 0.00 |
| ATOM | 7184 | H    | ARG | X | 474 | 29.080 | 25.189 | 31.698 | 0.00 | 0.00 |
| ATOM | 7185 | CA   | ARG | X | 474 | 27.095 | 25.588 | 32.604 | 0.00 | 0.00 |
| ATOM | 7186 | HA   | ARG | X | 474 | 26.395 | 26.345 | 32.252 | 0.00 | 0.00 |
| ATOM | 7187 | CB   | ARG | X | 474 | 26.621 | 24.174 | 32.251 | 0.00 | 0.00 |
| ATOM | 7188 | HB2  | ARG | X | 474 | 26.795 | 23.956 | 31.197 | 0.00 | 0.00 |
| ATOM | 7189 | HB3  | ARG | X | 474 | 27.230 | 23.482 | 32.834 | 0.00 | 0.00 |
| ATOM | 7190 | CG   | ARG | X | 474 | 25.099 | 23.985 | 32.590 | 0.00 | 0.00 |
| ATOM | 7191 | HG2  | ARG | X | 474 | 24.888 | 22.916 | 32.545 | 0.00 | 0.00 |
| ATOM | 7192 | HG3  | ARG | X | 474 | 24.927 | 24.325 | 33.611 | 0.00 | 0.00 |
| ATOM | 7193 | CD   | ARG | X | 474 | 24.093 | 24.740 | 31.695 | 0.00 | 0.00 |
| ATOM | 7194 | HD2  | ARG | X | 474 | 24.157 | 25.818 | 31.837 | 0.00 | 0.00 |
| ATOM | 7195 | HD3  | ARG | X | 474 | 24.317 | 24.615 | 30.636 | 0.00 | 0.00 |
| ATOM | 7196 | NE   | ARG | X | 474 | 22.696 | 24.353 | 32.037 | 0.00 | 0.00 |
| ATOM | 7197 | HE   | ARG | X | 474 | 22.540 | 23.780 | 32.853 | 0.00 | 0.00 |
| ATOM | 7198 | CZ   | ARG | X | 474 | 21.642 | 24.808 | 31.423 | 0.00 | 0.00 |
| ATOM | 7199 | NH1  | ARG | X | 474 | 21.714 | 25.710 | 30.497 | 0.00 | 0.00 |
| ATOM | 7200 | HH11 | ARG | X | 474 | 22.617 | 26.037 | 30.186 | 0.00 | 0.00 |
| ATOM | 7201 | HH12 | ARG | X | 474 | 20.926 | 26.282 | 30.230 | 0.00 | 0.00 |
| ATOM | 7202 | NH2  | ARG | X | 474 | 20.443 | 24.420 | 31.798 | 0.00 | 0.00 |
| ATOM | 7203 | HH21 | ARG | X | 474 | 20.317 | 23.765 | 32.557 | 0.00 | 0.00 |
| ATOM | 7204 | HH22 | ARG | X | 474 | 19.689 | 24.674 | 31.176 | 0.00 | 0.00 |
| ATOM | 7205 | C    | ARG | X | 474 | 27.008 | 25.909 | 34.057 | 0.00 | 0.00 |
| ATOM | 7206 | O    | ARG | X | 474 | 26.117 | 26.776 | 34.451 | 0.00 | 0.00 |
| ATOM | 7207 | N    | TYR | X | 475 | 27.861 | 25.336 | 34.953 | 0.00 | 0.00 |
| ATOM | 7208 | H    | TYR | X | 475 | 28.422 | 24.533 | 34.705 | 0.00 | 0.00 |
| ATOM | 7209 | CA   | TYR | X | 475 | 27.792 | 25.708 | 36.428 | 0.00 | 0.00 |
| ATOM | 7210 | HA   | TYR | X | 475 | 26.851 | 25.365 | 36.857 | 0.00 | 0.00 |
| ATOM | 7211 | CB   | TYR | X | 475 | 29.003 | 25.092 | 37.178 | 0.00 | 0.00 |
| ATOM | 7212 | HB2  | TYR | X | 475 | 29.864 | 25.665 | 36.834 | 0.00 | 0.00 |
| ATOM | 7213 | HB3  | TYR | X | 475 | 28.869 | 25.422 | 38.209 | 0.00 | 0.00 |
| ATOM | 7214 | CG   | TYR | X | 475 | 29.232 | 23.595 | 37.123 | 0.00 | 0.00 |
| ATOM | 7215 | CD1  | TYR | X | 475 | 28.305 | 22.635 | 36.782 | 0.00 | 0.00 |
| ATOM | 7216 | HD1  | TYR | X | 475 | 27.301 | 22.995 | 36.615 | 0.00 | 0.00 |
| ATOM | 7217 | CE1  | TYR | X | 475 | 28.658 | 21.284 | 36.744 | 0.00 | 0.00 |
| ATOM | 7218 | HE1  | TYR | X | 475 | 27.915 | 20.531 | 36.530 | 0.00 | 0.00 |
| ATOM | 7219 | CZ   | TYR | X | 475 | 29.989 | 20.886 | 36.991 | 0.00 | 0.00 |
| ATOM | 7220 | OH   | TYR | X | 475 | 30.311 | 19.586 | 37.070 | 0.00 | 0.00 |

|      |      |      |     |   |     |        |        |        |      |      |
|------|------|------|-----|---|-----|--------|--------|--------|------|------|
| ATOM | 7221 | HH   | TYR | X | 475 | 29.678 | 19.042 | 36.596 | 0.00 | 0.00 |
| ATOM | 7222 | CE2  | TYR | X | 475 | 30.980 | 21.825 | 37.326 | 0.00 | 0.00 |
| ATOM | 7223 | HE2  | TYR | X | 475 | 31.978 | 21.585 | 37.662 | 0.00 | 0.00 |
| ATOM | 7224 | CD2  | TYR | X | 475 | 30.567 | 23.184 | 37.376 | 0.00 | 0.00 |
| ATOM | 7225 | HD2  | TYR | X | 475 | 31.227 | 23.989 | 37.662 | 0.00 | 0.00 |
| ATOM | 7226 | C    | TYR | X | 475 | 27.718 | 27.230 | 36.754 | 0.00 | 0.00 |
| ATOM | 7227 | O    | TYR | X | 475 | 26.911 | 27.724 | 37.526 | 0.00 | 0.00 |
| ATOM | 7228 | N    | TRP | X | 476 | 28.547 | 28.064 | 36.035 | 0.00 | 0.00 |
| ATOM | 7229 | H    | TRP | X | 476 | 29.207 | 27.568 | 35.453 | 0.00 | 0.00 |
| ATOM | 7230 | CA   | TRP | X | 476 | 28.679 | 29.527 | 36.219 | 0.00 | 0.00 |
| ATOM | 7231 | HA   | TRP | X | 476 | 28.790 | 29.802 | 37.268 | 0.00 | 0.00 |
| ATOM | 7232 | CB   | TRP | X | 476 | 29.912 | 30.154 | 35.644 | 0.00 | 0.00 |
| ATOM | 7233 | HB2  | TRP | X | 476 | 30.270 | 29.490 | 34.857 | 0.00 | 0.00 |
| ATOM | 7234 | HB3  | TRP | X | 476 | 29.651 | 31.087 | 35.144 | 0.00 | 0.00 |
| ATOM | 7235 | CG   | TRP | X | 476 | 31.089 | 30.314 | 36.491 | 0.00 | 0.00 |
| ATOM | 7236 | CD1  | TRP | X | 476 | 31.530 | 31.530 | 36.841 | 0.00 | 0.00 |
| ATOM | 7237 | HD1  | TRP | X | 476 | 31.162 | 32.507 | 36.562 | 0.00 | 0.00 |
| ATOM | 7238 | NE1  | TRP | X | 476 | 32.795 | 31.325 | 37.457 | 0.00 | 0.00 |
| ATOM | 7239 | HE1  | TRP | X | 476 | 33.499 | 32.016 | 37.677 | 0.00 | 0.00 |
| ATOM | 7240 | CE2  | TRP | X | 476 | 32.989 | 30.026 | 37.709 | 0.00 | 0.00 |
| ATOM | 7241 | CZ2  | TRP | X | 476 | 34.093 | 29.496 | 38.347 | 0.00 | 0.00 |
| ATOM | 7242 | HZ2  | TRP | X | 476 | 34.875 | 30.131 | 38.738 | 0.00 | 0.00 |
| ATOM | 7243 | CH2  | TRP | X | 476 | 34.164 | 28.125 | 38.608 | 0.00 | 0.00 |
| ATOM | 7244 | HH2  | TRP | X | 476 | 34.934 | 27.754 | 39.270 | 0.00 | 0.00 |
| ATOM | 7245 | CZ3  | TRP | X | 476 | 33.125 | 27.362 | 38.062 | 0.00 | 0.00 |
| ATOM | 7246 | HZ3  | TRP | X | 476 | 33.169 | 26.300 | 38.252 | 0.00 | 0.00 |
| ATOM | 7247 | CE3  | TRP | X | 476 | 32.094 | 27.882 | 37.285 | 0.00 | 0.00 |
| ATOM | 7248 | HE3  | TRP | X | 476 | 31.412 | 27.222 | 36.770 | 0.00 | 0.00 |
| ATOM | 7249 | CD2  | TRP | X | 476 | 31.995 | 29.294 | 37.114 | 0.00 | 0.00 |
| ATOM | 7250 | C    | TRP | X | 476 | 27.443 | 30.221 | 35.615 | 0.00 | 0.00 |
| ATOM | 7251 | O    | TRP | X | 476 | 27.045 | 31.227 | 36.240 | 0.00 | 0.00 |
| ATOM | 7252 | N    | ALA | X | 477 | 26.980 | 29.831 | 34.431 | 0.00 | 0.00 |
| ATOM | 7253 | H    | ALA | X | 477 | 27.454 | 29.134 | 33.875 | 0.00 | 0.00 |
| ATOM | 7254 | CA   | ALA | X | 477 | 25.836 | 30.351 | 33.718 | 0.00 | 0.00 |
| ATOM | 7255 | HA   | ALA | X | 477 | 26.040 | 31.421 | 33.730 | 0.00 | 0.00 |
| ATOM | 7256 | CB   | ALA | X | 477 | 25.541 | 29.809 | 32.348 | 0.00 | 0.00 |
| ATOM | 7257 | HB1  | ALA | X | 477 | 25.178 | 28.788 | 32.462 | 0.00 | 0.00 |
| ATOM | 7258 | HB2  | ALA | X | 477 | 26.438 | 29.906 | 31.737 | 0.00 | 0.00 |
| ATOM | 7259 | HB3  | ALA | X | 477 | 24.835 | 30.439 | 31.806 | 0.00 | 0.00 |
| ATOM | 7260 | C    | ALA | X | 477 | 24.583 | 30.120 | 34.591 | 0.00 | 0.00 |
| ATOM | 7261 | O    | ALA | X | 477 | 23.851 | 31.128 | 34.814 | 0.00 | 0.00 |
| ATOM | 7262 | N    | ASN | X | 478 | 24.247 | 28.879 | 35.040 | 0.00 | 0.00 |
| ATOM | 7263 | H    | ASN | X | 478 | 24.967 | 28.188 | 34.884 | 0.00 | 0.00 |
| ATOM | 7264 | CA   | ASN | X | 478 | 23.341 | 28.415 | 36.117 | 0.00 | 0.00 |
| ATOM | 7265 | HA   | ASN | X | 478 | 22.295 | 28.484 | 35.820 | 0.00 | 0.00 |
| ATOM | 7266 | CB   | ASN | X | 478 | 23.674 | 26.937 | 36.465 | 0.00 | 0.00 |
| ATOM | 7267 | HB2  | ASN | X | 478 | 24.736 | 26.738 | 36.605 | 0.00 | 0.00 |
| ATOM | 7268 | HB3  | ASN | X | 478 | 23.250 | 26.805 | 37.460 | 0.00 | 0.00 |
| ATOM | 7269 | CG   | ASN | X | 478 | 22.950 | 25.970 | 35.505 | 0.00 | 0.00 |
| ATOM | 7270 | OD1  | ASN | X | 478 | 22.245 | 26.382 | 34.577 | 0.00 | 0.00 |
| ATOM | 7271 | ND2  | ASN | X | 478 | 23.251 | 24.696 | 35.789 | 0.00 | 0.00 |
| ATOM | 7272 | HD21 | ASN | X | 478 | 22.886 | 24.018 | 35.136 | 0.00 | 0.00 |
| ATOM | 7273 | HD22 | ASN | X | 478 | 23.947 | 24.430 | 36.471 | 0.00 | 0.00 |
| ATOM | 7274 | C    | ASN | X | 478 | 23.358 | 29.270 | 37.402 | 0.00 | 0.00 |
| ATOM | 7275 | O    | ASN | X | 478 | 22.306 | 29.826 | 37.793 | 0.00 | 0.00 |
| ATOM | 7276 | N    | PHE | X | 479 | 24.581 | 29.520 | 37.868 | 0.00 | 0.00 |
| ATOM | 7277 | H    | PHE | X | 479 | 25.419 | 29.109 | 37.482 | 0.00 | 0.00 |
| ATOM | 7278 | CA   | PHE | X | 479 | 24.736 | 30.391 | 39.033 | 0.00 | 0.00 |
| ATOM | 7279 | HA   | PHE | X | 479 | 24.014 | 30.135 | 39.809 | 0.00 | 0.00 |
| ATOM | 7280 | CB   | PHE | X | 479 | 26.199 | 30.382 | 39.542 | 0.00 | 0.00 |
| ATOM | 7281 | HB2  | PHE | X | 479 | 26.512 | 29.378 | 39.829 | 0.00 | 0.00 |
| ATOM | 7282 | HB3  | PHE | X | 479 | 26.854 | 30.604 | 38.700 | 0.00 | 0.00 |
| ATOM | 7283 | CG   | PHE | X | 479 | 26.382 | 31.447 | 40.560 | 0.00 | 0.00 |
| ATOM | 7284 | CD1  | PHE | X | 479 | 25.873 | 31.294 | 41.814 | 0.00 | 0.00 |
| ATOM | 7285 | HD1  | PHE | X | 479 | 25.318 | 30.390 | 42.016 | 0.00 | 0.00 |
| ATOM | 7286 | CE1  | PHE | X | 479 | 25.982 | 32.268 | 42.767 | 0.00 | 0.00 |
| ATOM | 7287 | HE1  | PHE | X | 479 | 25.646 | 32.094 | 43.779 | 0.00 | 0.00 |

|      |      |      |     |   |     |        |        |        |      |      |
|------|------|------|-----|---|-----|--------|--------|--------|------|------|
| ATOM | 7288 | CZ   | PHE | X | 479 | 26.709 | 33.408 | 42.449 | 0.00 | 0.00 |
| ATOM | 7289 | HZ   | PHE | X | 479 | 26.936 | 34.183 | 43.166 | 0.00 | 0.00 |
| ATOM | 7290 | CE2  | PHE | X | 479 | 27.104 | 33.584 | 41.143 | 0.00 | 0.00 |
| ATOM | 7291 | HE2  | PHE | X | 479 | 27.466 | 34.586 | 40.964 | 0.00 | 0.00 |
| ATOM | 7292 | CD2  | PHE | X | 479 | 27.075 | 32.613 | 40.126 | 0.00 | 0.00 |
| ATOM | 7293 | HD2  | PHE | X | 479 | 27.482 | 32.722 | 39.132 | 0.00 | 0.00 |
| ATOM | 7294 | C    | PHE | X | 479 | 24.321 | 31.838 | 38.599 | 0.00 | 0.00 |
| ATOM | 7295 | O    | PHE | X | 479 | 23.659 | 32.503 | 39.419 | 0.00 | 0.00 |
| ATOM | 7296 | N    | ALA | X | 480 | 24.680 | 32.394 | 37.441 | 0.00 | 0.00 |
| ATOM | 7297 | H    | ALA | X | 480 | 25.429 | 31.967 | 36.915 | 0.00 | 0.00 |
| ATOM | 7298 | CA   | ALA | X | 480 | 24.093 | 33.599 | 37.004 | 0.00 | 0.00 |
| ATOM | 7299 | HA   | ALA | X | 480 | 24.346 | 34.341 | 37.761 | 0.00 | 0.00 |
| ATOM | 7300 | CB   | ALA | X | 480 | 24.994 | 34.151 | 35.789 | 0.00 | 0.00 |
| ATOM | 7301 | HB1  | ALA | X | 480 | 24.758 | 35.213 | 35.734 | 0.00 | 0.00 |
| ATOM | 7302 | HB2  | ALA | X | 480 | 24.715 | 33.589 | 34.898 | 0.00 | 0.00 |
| ATOM | 7303 | HB3  | ALA | X | 480 | 26.070 | 34.088 | 35.956 | 0.00 | 0.00 |
| ATOM | 7304 | C    | ALA | X | 480 | 22.569 | 33.573 | 36.746 | 0.00 | 0.00 |
| ATOM | 7305 | O    | ALA | X | 480 | 21.904 | 34.524 | 36.943 | 0.00 | 0.00 |
| ATOM | 7306 | N    | ARG | X | 481 | 21.959 | 32.335 | 36.479 | 0.00 | 0.00 |
| ATOM | 7307 | H    | ARG | X | 481 | 22.556 | 31.539 | 36.306 | 0.00 | 0.00 |
| ATOM | 7308 | CA   | ARG | X | 481 | 20.546 | 32.199 | 36.394 | 0.00 | 0.00 |
| ATOM | 7309 | HA   | ARG | X | 481 | 20.212 | 32.985 | 35.716 | 0.00 | 0.00 |
| ATOM | 7310 | CB   | ARG | X | 481 | 20.095 | 30.897 | 35.765 | 0.00 | 0.00 |
| ATOM | 7311 | HB2  | ARG | X | 481 | 20.684 | 30.137 | 36.277 | 0.00 | 0.00 |
| ATOM | 7312 | HB3  | ARG | X | 481 | 19.035 | 30.789 | 35.996 | 0.00 | 0.00 |
| ATOM | 7313 | CG   | ARG | X | 481 | 20.299 | 30.921 | 34.198 | 0.00 | 0.00 |
| ATOM | 7314 | HG2  | ARG | X | 481 | 19.641 | 31.671 | 33.758 | 0.00 | 0.00 |
| ATOM | 7315 | HG3  | ARG | X | 481 | 21.372 | 31.009 | 34.024 | 0.00 | 0.00 |
| ATOM | 7316 | CD   | ARG | X | 481 | 19.901 | 29.488 | 33.670 | 0.00 | 0.00 |
| ATOM | 7317 | HD2  | ARG | X | 481 | 20.443 | 28.717 | 34.216 | 0.00 | 0.00 |
| ATOM | 7318 | HD3  | ARG | X | 481 | 18.811 | 29.491 | 33.651 | 0.00 | 0.00 |
| ATOM | 7319 | NE   | ARG | X | 481 | 20.277 | 29.430 | 32.268 | 0.00 | 0.00 |
| ATOM | 7320 | HE   | ARG | X | 481 | 19.638 | 29.825 | 31.593 | 0.00 | 0.00 |
| ATOM | 7321 | CZ   | ARG | X | 481 | 21.438 | 29.011 | 31.777 | 0.00 | 0.00 |
| ATOM | 7322 | NH1  | ARG | X | 481 | 22.313 | 28.362 | 32.462 | 0.00 | 0.00 |
| ATOM | 7323 | HH11 | ARG | X | 481 | 21.982 | 27.832 | 33.256 | 0.00 | 0.00 |
| ATOM | 7324 | HH12 | ARG | X | 481 | 23.024 | 27.854 | 31.955 | 0.00 | 0.00 |
| ATOM | 7325 | NH2  | ARG | X | 481 | 21.720 | 29.204 | 30.513 | 0.00 | 0.00 |
| ATOM | 7326 | HH21 | ARG | X | 481 | 21.138 | 29.786 | 29.928 | 0.00 | 0.00 |
| ATOM | 7327 | HH22 | ARG | X | 481 | 22.533 | 28.666 | 30.248 | 0.00 | 0.00 |
| ATOM | 7328 | C    | ARG | X | 481 | 19.853 | 32.506 | 37.788 | 0.00 | 0.00 |
| ATOM | 7329 | O    | ARG | X | 481 | 19.074 | 33.393 | 37.892 | 0.00 | 0.00 |
| ATOM | 7330 | N    | THR | X | 482 | 20.166 | 31.656 | 38.740 | 0.00 | 0.00 |
| ATOM | 7331 | H    | THR | X | 482 | 20.835 | 30.919 | 38.568 | 0.00 | 0.00 |
| ATOM | 7332 | CA   | THR | X | 482 | 19.345 | 31.427 | 39.944 | 0.00 | 0.00 |
| ATOM | 7333 | HA   | THR | X | 482 | 18.628 | 32.244 | 40.024 | 0.00 | 0.00 |
| ATOM | 7334 | CB   | THR | X | 482 | 18.614 | 30.035 | 39.820 | 0.00 | 0.00 |
| ATOM | 7335 | HB   | THR | X | 482 | 18.036 | 29.858 | 40.726 | 0.00 | 0.00 |
| ATOM | 7336 | CG2  | THR | X | 482 | 17.619 | 30.278 | 38.686 | 0.00 | 0.00 |
| ATOM | 7337 | HG21 | THR | X | 482 | 18.066 | 30.065 | 37.714 | 0.00 | 0.00 |
| ATOM | 7338 | HG22 | THR | X | 482 | 17.099 | 31.228 | 38.809 | 0.00 | 0.00 |
| ATOM | 7339 | HG23 | THR | X | 482 | 16.758 | 29.616 | 38.776 | 0.00 | 0.00 |
| ATOM | 7340 | OG1  | THR | X | 482 | 19.423 | 28.874 | 39.688 | 0.00 | 0.00 |
| ATOM | 7341 | HG1  | THR | X | 482 | 18.869 | 28.249 | 40.162 | 0.00 | 0.00 |
| ATOM | 7342 | C    | THR | X | 482 | 20.152 | 31.509 | 41.210 | 0.00 | 0.00 |
| ATOM | 7343 | O    | THR | X | 482 | 19.561 | 31.713 | 42.308 | 0.00 | 0.00 |
| ATOM | 7344 | N    | GLY | X | 483 | 21.453 | 31.419 | 41.107 | 0.00 | 0.00 |
| ATOM | 7345 | H    | GLY | X | 483 | 21.806 | 31.158 | 40.197 | 0.00 | 0.00 |
| ATOM | 7346 | CA   | GLY | X | 483 | 22.400 | 31.667 | 42.179 | 0.00 | 0.00 |
| ATOM | 7347 | HA2  | GLY | X | 483 | 23.296 | 32.074 | 41.710 | 0.00 | 0.00 |
| ATOM | 7348 | HA3  | GLY | X | 483 | 21.934 | 32.204 | 43.006 | 0.00 | 0.00 |
| ATOM | 7349 | C    | GLY | X | 483 | 22.859 | 30.321 | 42.818 | 0.00 | 0.00 |
| ATOM | 7350 | O    | GLY | X | 483 | 23.180 | 30.320 | 43.989 | 0.00 | 0.00 |
| ATOM | 7351 | N    | ASP | X | 484 | 22.809 | 29.260 | 42.036 | 0.00 | 0.00 |
| ATOM | 7352 | H    | ASP | X | 484 | 22.365 | 29.531 | 41.170 | 0.00 | 0.00 |
| ATOM | 7353 | CA   | ASP | X | 484 | 23.151 | 27.818 | 42.214 | 0.00 | 0.00 |
| ATOM | 7354 | HA   | ASP | X | 484 | 23.820 | 27.725 | 43.069 | 0.00 | 0.00 |

|      |      |      |     |   |     |        |        |        |      |      |
|------|------|------|-----|---|-----|--------|--------|--------|------|------|
| ATOM | 7355 | CB   | ASP | X | 484 | 21.845 | 27.154 | 42.707 | 0.00 | 0.00 |
| ATOM | 7356 | HB2  | ASP | X | 484 | 21.690 | 27.378 | 43.762 | 0.00 | 0.00 |
| ATOM | 7357 | HB3  | ASP | X | 484 | 20.988 | 27.527 | 42.146 | 0.00 | 0.00 |
| ATOM | 7358 | CG   | ASP | X | 484 | 21.828 | 25.642 | 42.780 | 0.00 | 0.00 |
| ATOM | 7359 | OD1  | ASP | X | 484 | 22.944 | 24.977 | 42.734 | 0.00 | 0.00 |
| ATOM | 7360 | OD2  | ASP | X | 484 | 20.679 | 25.074 | 42.760 | 0.00 | 0.00 |
| ATOM | 7361 | C    | ASP | X | 484 | 23.748 | 27.140 | 40.891 | 0.00 | 0.00 |
| ATOM | 7362 | O    | ASP | X | 484 | 23.013 | 27.293 | 39.879 | 0.00 | 0.00 |
| ATOM | 7363 | N    | PRO | X | 485 | 24.954 | 26.461 | 40.893 | 0.00 | 0.00 |
| ATOM | 7364 | CD   | PRO | X | 485 | 25.952 | 26.629 | 42.009 | 0.00 | 0.00 |
| ATOM | 7365 | HD2  | PRO | X | 485 | 25.415 | 26.406 | 42.930 | 0.00 | 0.00 |
| ATOM | 7366 | HD3  | PRO | X | 485 | 26.282 | 27.665 | 42.088 | 0.00 | 0.00 |
| ATOM | 7367 | CG   | PRO | X | 485 | 27.073 | 25.648 | 41.711 | 0.00 | 0.00 |
| ATOM | 7368 | HG2  | PRO | X | 485 | 26.637 | 24.719 | 42.078 | 0.00 | 0.00 |
| ATOM | 7369 | HG3  | PRO | X | 485 | 27.963 | 26.012 | 42.223 | 0.00 | 0.00 |
| ATOM | 7370 | CB   | PRO | X | 485 | 27.065 | 25.601 | 40.180 | 0.00 | 0.00 |
| ATOM | 7371 | HB2  | PRO | X | 485 | 27.444 | 24.633 | 39.854 | 0.00 | 0.00 |
| ATOM | 7372 | HB3  | PRO | X | 485 | 27.686 | 26.448 | 39.887 | 0.00 | 0.00 |
| ATOM | 7373 | CA   | PRO | X | 485 | 25.555 | 25.801 | 39.731 | 0.00 | 0.00 |
| ATOM | 7374 | HA   | PRO | X | 485 | 25.538 | 26.403 | 38.823 | 0.00 | 0.00 |
| ATOM | 7375 | C    | PRO | X | 485 | 24.877 | 24.539 | 39.279 | 0.00 | 0.00 |
| ATOM | 7376 | O    | PRO | X | 485 | 25.035 | 24.024 | 38.186 | 0.00 | 0.00 |
| ATOM | 7377 | N    | ASN | X | 486 | 24.027 | 24.024 | 40.129 | 0.00 | 0.00 |
| ATOM | 7378 | H    | ASN | X | 486 | 23.952 | 24.545 | 40.991 | 0.00 | 0.00 |
| ATOM | 7379 | CA   | ASN | X | 486 | 23.174 | 22.876 | 39.857 | 0.00 | 0.00 |
| ATOM | 7380 | HA   | ASN | X | 486 | 23.657 | 22.144 | 39.209 | 0.00 | 0.00 |
| ATOM | 7381 | CB   | ASN | X | 486 | 22.797 | 22.176 | 41.199 | 0.00 | 0.00 |
| ATOM | 7382 | HB2  | ASN | X | 486 | 23.698 | 22.104 | 41.808 | 0.00 | 0.00 |
| ATOM | 7383 | HB3  | ASN | X | 486 | 22.085 | 22.848 | 41.680 | 0.00 | 0.00 |
| ATOM | 7384 | CG   | ASN | X | 486 | 22.195 | 20.781 | 41.131 | 0.00 | 0.00 |
| ATOM | 7385 | OD1  | ASN | X | 486 | 22.057 | 20.167 | 40.083 | 0.00 | 0.00 |
| ATOM | 7386 | ND2  | ASN | X | 486 | 21.837 | 20.229 | 42.313 | 0.00 | 0.00 |
| ATOM | 7387 | HD21 | ASN | X | 486 | 21.252 | 19.411 | 42.225 | 0.00 | 0.00 |
| ATOM | 7388 | HD22 | ASN | X | 486 | 21.861 | 20.636 | 43.237 | 0.00 | 0.00 |
| ATOM | 7389 | C    | ASN | X | 486 | 21.896 | 23.281 | 39.084 | 0.00 | 0.00 |
| ATOM | 7390 | O    | ASN | X | 486 | 21.408 | 24.403 | 39.165 | 0.00 | 0.00 |
| ATOM | 7391 | N    | GLU | X | 487 | 21.360 | 22.408 | 38.274 | 0.00 | 0.00 |
| ATOM | 7392 | H    | GLU | X | 487 | 21.650 | 21.441 | 38.320 | 0.00 | 0.00 |
| ATOM | 7393 | CA   | GLU | X | 487 | 20.035 | 22.672 | 37.576 | 0.00 | 0.00 |
| ATOM | 7394 | HA   | GLU | X | 487 | 20.074 | 23.557 | 36.941 | 0.00 | 0.00 |
| ATOM | 7395 | CB   | GLU | X | 487 | 19.733 | 21.465 | 36.671 | 0.00 | 0.00 |
| ATOM | 7396 | HB2  | GLU | X | 487 | 19.624 | 20.590 | 37.313 | 0.00 | 0.00 |
| ATOM | 7397 | HB3  | GLU | X | 487 | 18.768 | 21.736 | 36.243 | 0.00 | 0.00 |
| ATOM | 7398 | CG   | GLU | X | 487 | 20.702 | 21.076 | 35.526 | 0.00 | 0.00 |
| ATOM | 7399 | HG2  | GLU | X | 487 | 21.667 | 20.839 | 35.973 | 0.00 | 0.00 |
| ATOM | 7400 | HG3  | GLU | X | 487 | 20.384 | 20.130 | 35.088 | 0.00 | 0.00 |
| ATOM | 7401 | CD   | GLU | X | 487 | 20.901 | 22.208 | 34.466 | 0.00 | 0.00 |
| ATOM | 7402 | OE1  | GLU | X | 487 | 19.834 | 22.637 | 33.910 | 0.00 | 0.00 |
| ATOM | 7403 | OE2  | GLU | X | 487 | 22.019 | 22.663 | 34.207 | 0.00 | 0.00 |
| ATOM | 7404 | C    | GLU | X | 487 | 18.902 | 22.795 | 38.566 | 0.00 | 0.00 |
| ATOM | 7405 | O    | GLU | X | 487 | 18.952 | 22.071 | 39.542 | 0.00 | 0.00 |
| ATOM | 7406 | N    | PRO | X | 488 | 17.938 | 23.771 | 38.400 | 0.00 | 0.00 |
| ATOM | 7407 | CD   | PRO | X | 488 | 17.840 | 24.597 | 37.178 | 0.00 | 0.00 |
| ATOM | 7408 | HD2  | PRO | X | 488 | 18.081 | 24.027 | 36.280 | 0.00 | 0.00 |
| ATOM | 7409 | HD3  | PRO | X | 488 | 18.582 | 25.386 | 37.301 | 0.00 | 0.00 |
| ATOM | 7410 | CG   | PRO | X | 488 | 16.427 | 25.228 | 37.222 | 0.00 | 0.00 |
| ATOM | 7411 | HG2  | PRO | X | 488 | 15.764 | 24.686 | 36.548 | 0.00 | 0.00 |
| ATOM | 7412 | HG3  | PRO | X | 488 | 16.382 | 26.291 | 36.983 | 0.00 | 0.00 |
| ATOM | 7413 | CB   | PRO | X | 488 | 16.017 | 25.027 | 38.632 | 0.00 | 0.00 |
| ATOM | 7414 | HB2  | PRO | X | 488 | 14.954 | 24.788 | 38.670 | 0.00 | 0.00 |
| ATOM | 7415 | HB3  | PRO | X | 488 | 16.248 | 25.925 | 39.204 | 0.00 | 0.00 |
| ATOM | 7416 | CA   | PRO | X | 488 | 16.751 | 23.822 | 39.200 | 0.00 | 0.00 |
| ATOM | 7417 | HA   | PRO | X | 488 | 17.017 | 24.039 | 40.235 | 0.00 | 0.00 |
| ATOM | 7418 | C    | PRO | X | 488 | 15.964 | 22.479 | 39.162 | 0.00 | 0.00 |
| ATOM | 7419 | O    | PRO | X | 488 | 15.176 | 22.113 | 40.053 | 0.00 | 0.00 |
| ATOM | 7420 | N    | ARG | X | 489 | 16.154 | 21.608 | 38.179 | 0.00 | 0.00 |
| ATOM | 7421 | H    | ARG | X | 489 | 16.895 | 21.827 | 37.529 | 0.00 | 0.00 |

|      |      |      |     |   |     |        |        |        |      |      |
|------|------|------|-----|---|-----|--------|--------|--------|------|------|
| ATOM | 7422 | CA   | ARG | X | 489 | 15.470 | 20.337 | 38.042 | 0.00 | 0.00 |
| ATOM | 7423 | HA   | ARG | X | 489 | 14.471 | 20.416 | 38.472 | 0.00 | 0.00 |
| ATOM | 7424 | CB   | ARG | X | 489 | 15.204 | 19.982 | 36.521 | 0.00 | 0.00 |
| ATOM | 7425 | HB2  | ARG | X | 489 | 14.679 | 19.028 | 36.461 | 0.00 | 0.00 |
| ATOM | 7426 | HB3  | ARG | X | 489 | 14.663 | 20.796 | 36.038 | 0.00 | 0.00 |
| ATOM | 7427 | CG   | ARG | X | 489 | 16.490 | 19.935 | 35.792 | 0.00 | 0.00 |
| ATOM | 7428 | HG2  | ARG | X | 489 | 16.886 | 20.951 | 35.770 | 0.00 | 0.00 |
| ATOM | 7429 | HG3  | ARG | X | 489 | 17.236 | 19.272 | 36.232 | 0.00 | 0.00 |
| ATOM | 7430 | CD   | ARG | X | 489 | 16.366 | 19.368 | 34.358 | 0.00 | 0.00 |
| ATOM | 7431 | HD2  | ARG | X | 489 | 16.001 | 18.341 | 34.379 | 0.00 | 0.00 |
| ATOM | 7432 | HD3  | ARG | X | 489 | 15.628 | 19.861 | 33.725 | 0.00 | 0.00 |
| ATOM | 7433 | NE   | ARG | X | 489 | 17.668 | 19.393 | 33.735 | 0.00 | 0.00 |
| ATOM | 7434 | HE   | ARG | X | 489 | 17.839 | 20.310 | 33.347 | 0.00 | 0.00 |
| ATOM | 7435 | CZ   | ARG | X | 489 | 18.437 | 18.344 | 33.489 | 0.00 | 0.00 |
| ATOM | 7436 | NH1  | ARG | X | 489 | 19.448 | 18.437 | 32.634 | 0.00 | 0.00 |
| ATOM | 7437 | HH11 | ARG | X | 489 | 19.736 | 19.261 | 32.124 | 0.00 | 0.00 |
| ATOM | 7438 | HH12 | ARG | X | 489 | 20.174 | 17.737 | 32.673 | 0.00 | 0.00 |
| ATOM | 7439 | NH2  | ARG | X | 489 | 18.170 | 17.181 | 33.997 | 0.00 | 0.00 |
| ATOM | 7440 | HH21 | ARG | X | 489 | 17.365 | 17.125 | 34.603 | 0.00 | 0.00 |
| ATOM | 7441 | HH22 | ARG | X | 489 | 18.786 | 16.386 | 33.900 | 0.00 | 0.00 |
| ATOM | 7442 | C    | ARG | X | 489 | 16.132 | 19.146 | 38.815 | 0.00 | 0.00 |
| ATOM | 7443 | O    | ARG | X | 489 | 15.687 | 17.990 | 38.664 | 0.00 | 0.00 |
| ATOM | 7444 | N    | ASP | X | 490 | 17.129 | 19.478 | 39.615 | 0.00 | 0.00 |
| ATOM | 7445 | H    | ASP | X | 490 | 17.358 | 20.460 | 39.675 | 0.00 | 0.00 |
| ATOM | 7446 | CA   | ASP | X | 490 | 17.904 | 18.594 | 40.453 | 0.00 | 0.00 |
| ATOM | 7447 | HA   | ASP | X | 490 | 18.879 | 19.083 | 40.459 | 0.00 | 0.00 |
| ATOM | 7448 | CB   | ASP | X | 490 | 17.328 | 18.643 | 41.890 | 0.00 | 0.00 |
| ATOM | 7449 | HB2  | ASP | X | 490 | 16.975 | 19.613 | 42.240 | 0.00 | 0.00 |
| ATOM | 7450 | HB3  | ASP | X | 490 | 16.422 | 18.041 | 41.814 | 0.00 | 0.00 |
| ATOM | 7451 | CG   | ASP | X | 490 | 18.373 | 18.159 | 42.965 | 0.00 | 0.00 |
| ATOM | 7452 | OD1  | ASP | X | 490 | 17.936 | 17.815 | 44.047 | 0.00 | 0.00 |
| ATOM | 7453 | OD2  | ASP | X | 490 | 19.572 | 18.481 | 42.888 | 0.00 | 0.00 |
| ATOM | 7454 | C    | ASP | X | 490 | 18.262 | 17.070 | 40.060 | 0.00 | 0.00 |
| ATOM | 7455 | O    | ASP | X | 490 | 17.666 | 16.113 | 40.536 | 0.00 | 0.00 |
| ATOM | 7456 | N    | PRO | X | 491 | 19.257 | 16.908 | 39.102 | 0.00 | 0.00 |
| ATOM | 7457 | CD   | PRO | X | 491 | 20.077 | 17.923 | 38.593 | 0.00 | 0.00 |
| ATOM | 7458 | HD2  | PRO | X | 491 | 20.957 | 18.008 | 39.231 | 0.00 | 0.00 |
| ATOM | 7459 | HD3  | PRO | X | 491 | 19.573 | 18.885 | 38.501 | 0.00 | 0.00 |
| ATOM | 7460 | CG   | PRO | X | 491 | 20.523 | 17.347 | 37.259 | 0.00 | 0.00 |
| ATOM | 7461 | HG2  | PRO | X | 491 | 21.409 | 17.786 | 36.800 | 0.00 | 0.00 |
| ATOM | 7462 | HG3  | PRO | X | 491 | 19.790 | 17.467 | 36.461 | 0.00 | 0.00 |
| ATOM | 7463 | CB   | PRO | X | 491 | 20.648 | 15.868 | 37.414 | 0.00 | 0.00 |
| ATOM | 7464 | HB2  | PRO | X | 491 | 21.627 | 15.595 | 37.808 | 0.00 | 0.00 |
| ATOM | 7465 | HB3  | PRO | X | 491 | 20.439 | 15.237 | 36.550 | 0.00 | 0.00 |
| ATOM | 7466 | CA   | PRO | X | 491 | 19.563 | 15.590 | 38.501 | 0.00 | 0.00 |
| ATOM | 7467 | HA   | PRO | X | 491 | 18.652 | 15.205 | 38.043 | 0.00 | 0.00 |
| ATOM | 7468 | C    | PRO | X | 491 | 20.044 | 14.647 | 39.547 | 0.00 | 0.00 |
| ATOM | 7469 | O    | PRO | X | 491 | 20.610 | 15.105 | 40.561 | 0.00 | 0.00 |
| ATOM | 7470 | N    | LYS | X | 492 | 19.953 | 13.259 | 39.410 | 0.00 | 0.00 |
| ATOM | 7471 | H    | LYS | X | 492 | 19.729 | 12.878 | 38.502 | 0.00 | 0.00 |
| ATOM | 7472 | CA   | LYS | X | 492 | 20.503 | 12.230 | 40.325 | 0.00 | 0.00 |
| ATOM | 7473 | HA   | LYS | X | 492 | 20.129 | 12.346 | 41.342 | 0.00 | 0.00 |
| ATOM | 7474 | CB   | LYS | X | 492 | 19.882 | 10.870 | 39.885 | 0.00 | 0.00 |
| ATOM | 7475 | HB2  | LYS | X | 492 | 20.260 | 10.088 | 40.544 | 0.00 | 0.00 |
| ATOM | 7476 | HB3  | LYS | X | 492 | 18.808 | 10.982 | 40.031 | 0.00 | 0.00 |
| ATOM | 7477 | CG   | LYS | X | 492 | 20.128 | 10.546 | 38.440 | 0.00 | 0.00 |
| ATOM | 7478 | HG2  | LYS | X | 492 | 19.807 | 11.263 | 37.683 | 0.00 | 0.00 |
| ATOM | 7479 | HG3  | LYS | X | 492 | 21.161 | 10.385 | 38.134 | 0.00 | 0.00 |
| ATOM | 7480 | CD   | LYS | X | 492 | 19.225 | 9.255  | 38.176 | 0.00 | 0.00 |
| ATOM | 7481 | HD2  | LYS | X | 492 | 19.682 | 8.336  | 38.544 | 0.00 | 0.00 |
| ATOM | 7482 | HD3  | LYS | X | 492 | 18.236 | 9.359  | 38.623 | 0.00 | 0.00 |
| ATOM | 7483 | CE   | LYS | X | 492 | 18.958 | 8.992  | 36.668 | 0.00 | 0.00 |
| ATOM | 7484 | HE2  | LYS | X | 492 | 19.825 | 8.850  | 36.023 | 0.00 | 0.00 |
| ATOM | 7485 | HE3  | LYS | X | 492 | 18.370 | 8.083  | 36.539 | 0.00 | 0.00 |
| ATOM | 7486 | NZ   | LYS | X | 492 | 18.200 | 10.086 | 36.087 | 0.00 | 0.00 |
| ATOM | 7487 | HZ1  | LYS | X | 492 | 18.030 | 9.763  | 35.146 | 0.00 | 0.00 |
| ATOM | 7488 | HZ2  | LYS | X | 492 | 17.356 | 10.281 | 36.606 | 0.00 | 0.00 |



|      |      |      |     |   |     |        |        |        |      |      |
|------|------|------|-----|---|-----|--------|--------|--------|------|------|
| ATOM | 7489 | HZ3  | LYS | X | 492 | 18.802 | 10.888 | 35.971 | 0.00 | 0.00 |
| ATOM | 7490 | C    | LYS | X | 492 | 22.029 | 12.084 | 40.521 | 0.00 | 0.00 |
| ATOM | 7491 | O    | LYS | X | 492 | 22.529 | 11.476 | 41.459 | 0.00 | 0.00 |
| ATOM | 7492 | N    | ALA | X | 493 | 22.788 | 12.527 | 39.503 | 0.00 | 0.00 |
| ATOM | 7493 | H    | ALA | X | 493 | 22.255 | 13.095 | 38.859 | 0.00 | 0.00 |
| ATOM | 7494 | CA   | ALA | X | 493 | 24.262 | 12.634 | 39.530 | 0.00 | 0.00 |
| ATOM | 7495 | HA   | ALA | X | 493 | 24.546 | 11.583 | 39.559 | 0.00 | 0.00 |
| ATOM | 7496 | CB   | ALA | X | 493 | 24.797 | 12.931 | 38.186 | 0.00 | 0.00 |
| ATOM | 7497 | HB1  | ALA | X | 493 | 25.883 | 12.891 | 38.265 | 0.00 | 0.00 |
| ATOM | 7498 | HB2  | ALA | X | 493 | 24.493 | 13.931 | 37.876 | 0.00 | 0.00 |
| ATOM | 7499 | HB3  | ALA | X | 493 | 24.454 | 12.202 | 37.452 | 0.00 | 0.00 |
| ATOM | 7500 | C    | ALA | X | 493 | 24.810 | 13.472 | 40.683 | 0.00 | 0.00 |
| ATOM | 7501 | O    | ALA | X | 493 | 24.107 | 14.394 | 41.012 | 0.00 | 0.00 |
| ATOM | 7502 | N    | PRO | X | 494 | 26.066 | 13.169 | 41.209 | 0.00 | 0.00 |
| ATOM | 7503 | CD   | PRO | X | 494 | 27.167 | 12.269 | 40.788 | 0.00 | 0.00 |
| ATOM | 7504 | HD2  | PRO | X | 494 | 27.522 | 12.243 | 39.758 | 0.00 | 0.00 |
| ATOM | 7505 | HD3  | PRO | X | 494 | 26.788 | 11.278 | 41.037 | 0.00 | 0.00 |
| ATOM | 7506 | CG   | PRO | X | 494 | 28.358 | 12.658 | 41.601 | 0.00 | 0.00 |
| ATOM | 7507 | HG2  | PRO | X | 494 | 28.909 | 13.365 | 40.980 | 0.00 | 0.00 |
| ATOM | 7508 | HG3  | PRO | X | 494 | 29.065 | 11.886 | 41.903 | 0.00 | 0.00 |
| ATOM | 7509 | CB   | PRO | X | 494 | 27.746 | 13.258 | 42.899 | 0.00 | 0.00 |
| ATOM | 7510 | HB2  | PRO | X | 494 | 28.482 | 13.897 | 43.387 | 0.00 | 0.00 |
| ATOM | 7511 | HB3  | PRO | X | 494 | 27.442 | 12.468 | 43.586 | 0.00 | 0.00 |
| ATOM | 7512 | CA   | PRO | X | 494 | 26.564 | 14.021 | 42.311 | 0.00 | 0.00 |
| ATOM | 7513 | HA   | PRO | X | 494 | 25.756 | 14.072 | 43.041 | 0.00 | 0.00 |
| ATOM | 7514 | C    | PRO | X | 494 | 26.920 | 15.485 | 41.944 | 0.00 | 0.00 |
| ATOM | 7515 | O    | PRO | X | 494 | 27.511 | 15.790 | 40.875 | 0.00 | 0.00 |
| ATOM | 7516 | N    | GLN | X | 495 | 26.404 | 16.467 | 42.720 | 0.00 | 0.00 |
| ATOM | 7517 | H    | GLN | X | 495 | 26.024 | 16.095 | 43.578 | 0.00 | 0.00 |
| ATOM | 7518 | CA   | GLN | X | 495 | 26.423 | 17.939 | 42.505 | 0.00 | 0.00 |
| ATOM | 7519 | HA   | GLN | X | 495 | 26.666 | 18.181 | 41.470 | 0.00 | 0.00 |
| ATOM | 7520 | CB   | GLN | X | 495 | 24.971 | 18.401 | 42.619 | 0.00 | 0.00 |
| ATOM | 7521 | HB2  | GLN | X | 495 | 24.531 | 18.245 | 43.603 | 0.00 | 0.00 |
| ATOM | 7522 | HB3  | GLN | X | 495 | 25.080 | 19.485 | 42.587 | 0.00 | 0.00 |
| ATOM | 7523 | CG   | GLN | X | 495 | 24.077 | 17.717 | 41.622 | 0.00 | 0.00 |
| ATOM | 7524 | HG2  | GLN | X | 495 | 24.138 | 16.648 | 41.830 | 0.00 | 0.00 |
| ATOM | 7525 | HG3  | GLN | X | 495 | 23.015 | 17.949 | 41.713 | 0.00 | 0.00 |
| ATOM | 7526 | CD   | GLN | X | 495 | 24.384 | 17.987 | 40.166 | 0.00 | 0.00 |
| ATOM | 7527 | OE1  | GLN | X | 495 | 24.850 | 19.035 | 39.781 | 0.00 | 0.00 |
| ATOM | 7528 | NE2  | GLN | X | 495 | 24.324 | 16.970 | 39.325 | 0.00 | 0.00 |
| ATOM | 7529 | HE21 | GLN | X | 495 | 24.583 | 17.024 | 38.350 | 0.00 | 0.00 |
| ATOM | 7530 | HE22 | GLN | X | 495 | 23.909 | 16.128 | 39.698 | 0.00 | 0.00 |
| ATOM | 7531 | C    | GLN | X | 495 | 27.331 | 18.698 | 43.418 | 0.00 | 0.00 |
| ATOM | 7532 | O    | GLN | X | 495 | 27.730 | 18.240 | 44.473 | 0.00 | 0.00 |
| ATOM | 7533 | N    | TRP | X | 496 | 27.628 | 19.971 | 43.045 | 0.00 | 0.00 |
| ATOM | 7534 | H    | TRP | X | 496 | 27.338 | 20.168 | 42.098 | 0.00 | 0.00 |
| ATOM | 7535 | CA   | TRP | X | 496 | 28.487 | 20.932 | 43.829 | 0.00 | 0.00 |
| ATOM | 7536 | HA   | TRP | X | 496 | 29.380 | 20.435 | 44.209 | 0.00 | 0.00 |
| ATOM | 7537 | CB   | TRP | X | 496 | 28.914 | 22.026 | 42.873 | 0.00 | 0.00 |
| ATOM | 7538 | HB2  | TRP | X | 496 | 29.412 | 21.505 | 42.055 | 0.00 | 0.00 |
| ATOM | 7539 | HB3  | TRP | X | 496 | 27.985 | 22.490 | 42.543 | 0.00 | 0.00 |
| ATOM | 7540 | CG   | TRP | X | 496 | 29.834 | 23.257 | 43.307 | 0.00 | 0.00 |
| ATOM | 7541 | CD1  | TRP | X | 496 | 30.333 | 23.421 | 44.529 | 0.00 | 0.00 |
| ATOM | 7542 | HD1  | TRP | X | 496 | 30.170 | 22.764 | 45.371 | 0.00 | 0.00 |
| ATOM | 7543 | NE1  | TRP | X | 496 | 31.076 | 24.636 | 44.521 | 0.00 | 0.00 |
| ATOM | 7544 | HE1  | TRP | X | 496 | 31.530 | 24.984 | 45.354 | 0.00 | 0.00 |
| ATOM | 7545 | CE2  | TRP | X | 496 | 31.153 | 25.205 | 43.246 | 0.00 | 0.00 |
| ATOM | 7546 | CZ2  | TRP | X | 496 | 31.866 | 26.277 | 42.757 | 0.00 | 0.00 |
| ATOM | 7547 | HZ2  | TRP | X | 496 | 32.490 | 26.796 | 43.470 | 0.00 | 0.00 |
| ATOM | 7548 | CH2  | TRP | X | 496 | 31.950 | 26.433 | 41.392 | 0.00 | 0.00 |
| ATOM | 7549 | HH2  | TRP | X | 496 | 32.487 | 27.224 | 40.889 | 0.00 | 0.00 |
| ATOM | 7550 | CZ3  | TRP | X | 496 | 31.255 | 25.566 | 40.519 | 0.00 | 0.00 |
| ATOM | 7551 | HZ3  | TRP | X | 496 | 31.270 | 25.736 | 39.453 | 0.00 | 0.00 |
| ATOM | 7552 | CE3  | TRP | X | 496 | 30.592 | 24.411 | 40.948 | 0.00 | 0.00 |
| ATOM | 7553 | HE3  | TRP | X | 496 | 30.196 | 23.676 | 40.264 | 0.00 | 0.00 |
| ATOM | 7554 | CD2  | TRP | X | 496 | 30.467 | 24.253 | 42.403 | 0.00 | 0.00 |
| ATOM | 7555 | C    | TRP | X | 496 | 27.641 | 21.401 | 45.037 | 0.00 | 0.00 |

|      |      |      |     |   |     |        |        |        |      |      |
|------|------|------|-----|---|-----|--------|--------|--------|------|------|
| ATOM | 7556 | O    | TRP | X | 496 | 26.587 | 22.056 | 44.852 | 0.00 | 0.00 |
| ATOM | 7557 | N    | PRO | X | 497 | 28.011 | 21.166 | 46.305 | 0.00 | 0.00 |
| ATOM | 7558 | CD   | PRO | X | 497 | 29.029 | 20.272 | 46.784 | 0.00 | 0.00 |
| ATOM | 7559 | HD2  | PRO | X | 497 | 30.006 | 20.584 | 46.417 | 0.00 | 0.00 |
| ATOM | 7560 | HD3  | PRO | X | 497 | 28.786 | 19.283 | 46.394 | 0.00 | 0.00 |
| ATOM | 7561 | CG   | PRO | X | 497 | 28.955 | 20.334 | 48.261 | 0.00 | 0.00 |
| ATOM | 7562 | HG2  | PRO | X | 497 | 29.608 | 21.136 | 48.606 | 0.00 | 0.00 |
| ATOM | 7563 | HG3  | PRO | X | 497 | 29.177 | 19.360 | 48.697 | 0.00 | 0.00 |
| ATOM | 7564 | CB   | PRO | X | 497 | 27.540 | 20.706 | 48.495 | 0.00 | 0.00 |
| ATOM | 7565 | HB2  | PRO | X | 497 | 27.388 | 21.038 | 49.522 | 0.00 | 0.00 |
| ATOM | 7566 | HB3  | PRO | X | 497 | 27.009 | 19.770 | 48.320 | 0.00 | 0.00 |
| ATOM | 7567 | CA   | PRO | X | 497 | 27.253 | 21.700 | 47.394 | 0.00 | 0.00 |
| ATOM | 7568 | HA   | PRO | X | 497 | 26.183 | 21.696 | 47.182 | 0.00 | 0.00 |
| ATOM | 7569 | C    | PRO | X | 497 | 27.755 | 23.096 | 47.719 | 0.00 | 0.00 |
| ATOM | 7570 | O    | PRO | X | 497 | 28.853 | 23.427 | 47.361 | 0.00 | 0.00 |
| ATOM | 7571 | N    | PRO | X | 498 | 26.978 | 23.835 | 48.499 | 0.00 | 0.00 |
| ATOM | 7572 | CD   | PRO | X | 498 | 25.638 | 23.599 | 48.818 | 0.00 | 0.00 |
| ATOM | 7573 | HD2  | PRO | X | 498 | 25.485 | 22.826 | 49.572 | 0.00 | 0.00 |
| ATOM | 7574 | HD3  | PRO | X | 498 | 25.133 | 23.645 | 47.853 | 0.00 | 0.00 |
| ATOM | 7575 | CG   | PRO | X | 498 | 25.188 | 24.899 | 49.543 | 0.00 | 0.00 |
| ATOM | 7576 | HG2  | PRO | X | 498 | 25.234 | 24.645 | 50.602 | 0.00 | 0.00 |
| ATOM | 7577 | HG3  | PRO | X | 498 | 24.181 | 25.254 | 49.322 | 0.00 | 0.00 |
| ATOM | 7578 | CB   | PRO | X | 498 | 26.215 | 26.012 | 49.320 | 0.00 | 0.00 |
| ATOM | 7579 | HB2  | PRO | X | 498 | 26.406 | 26.749 | 50.101 | 0.00 | 0.00 |
| ATOM | 7580 | HB3  | PRO | X | 498 | 25.938 | 26.470 | 48.371 | 0.00 | 0.00 |
| ATOM | 7581 | CA   | PRO | X | 498 | 27.442 | 25.137 | 48.991 | 0.00 | 0.00 |
| ATOM | 7582 | HA   | PRO | X | 498 | 28.115 | 25.563 | 48.247 | 0.00 | 0.00 |
| ATOM | 7583 | C    | PRO | X | 498 | 28.352 | 25.065 | 50.246 | 0.00 | 0.00 |
| ATOM | 7584 | O    | PRO | X | 498 | 28.247 | 24.130 | 51.058 | 0.00 | 0.00 |
| ATOM | 7585 | N    | TYR | X | 499 | 29.015 | 26.154 | 50.635 | 0.00 | 0.00 |
| ATOM | 7586 | H    | TYR | X | 499 | 28.950 | 26.997 | 50.083 | 0.00 | 0.00 |
| ATOM | 7587 | CA   | TYR | X | 499 | 30.006 | 26.237 | 51.646 | 0.00 | 0.00 |
| ATOM | 7588 | HA   | TYR | X | 499 | 30.400 | 25.251 | 51.894 | 0.00 | 0.00 |
| ATOM | 7589 | CB   | TYR | X | 499 | 31.158 | 27.076 | 51.048 | 0.00 | 0.00 |
| ATOM | 7590 | HB2  | TYR | X | 499 | 31.538 | 26.745 | 50.082 | 0.00 | 0.00 |
| ATOM | 7591 | HB3  | TYR | X | 499 | 30.765 | 28.068 | 50.825 | 0.00 | 0.00 |
| ATOM | 7592 | CG   | TYR | X | 499 | 32.427 | 27.320 | 51.866 | 0.00 | 0.00 |
| ATOM | 7593 | CD1  | TYR | X | 499 | 32.398 | 28.114 | 53.080 | 0.00 | 0.00 |
| ATOM | 7594 | HD1  | TYR | X | 499 | 31.558 | 28.697 | 53.428 | 0.00 | 0.00 |
| ATOM | 7595 | CE1  | TYR | X | 499 | 33.702 | 28.238 | 53.809 | 0.00 | 0.00 |
| ATOM | 7596 | HE1  | TYR | X | 499 | 33.816 | 28.890 | 54.663 | 0.00 | 0.00 |
| ATOM | 7597 | CZ   | TYR | X | 499 | 34.796 | 27.471 | 53.428 | 0.00 | 0.00 |
| ATOM | 7598 | OH   | TYR | X | 499 | 35.959 | 27.598 | 54.085 | 0.00 | 0.00 |
| ATOM | 7599 | HH   | TYR | X | 499 | 35.975 | 28.130 | 54.884 | 0.00 | 0.00 |
| ATOM | 7600 | CE2  | TYR | X | 499 | 34.730 | 26.714 | 52.278 | 0.00 | 0.00 |
| ATOM | 7601 | HE2  | TYR | X | 499 | 35.575 | 26.131 | 51.942 | 0.00 | 0.00 |
| ATOM | 7602 | CD2  | TYR | X | 499 | 33.612 | 26.593 | 51.481 | 0.00 | 0.00 |
| ATOM | 7603 | HD2  | TYR | X | 499 | 33.694 | 25.922 | 50.639 | 0.00 | 0.00 |
| ATOM | 7604 | C    | TYR | X | 499 | 29.426 | 26.819 | 52.925 | 0.00 | 0.00 |
| ATOM | 7605 | O    | TYR | X | 499 | 28.661 | 27.811 | 52.967 | 0.00 | 0.00 |
| ATOM | 7606 | N    | THR | X | 500 | 29.825 | 26.233 | 54.054 | 0.00 | 0.00 |
| ATOM | 7607 | H    | THR | X | 500 | 30.274 | 25.329 | 54.022 | 0.00 | 0.00 |
| ATOM | 7608 | CA   | THR | X | 500 | 29.442 | 26.748 | 55.407 | 0.00 | 0.00 |
| ATOM | 7609 | HA   | THR | X | 500 | 28.746 | 27.582 | 55.327 | 0.00 | 0.00 |
| ATOM | 7610 | CB   | THR | X | 500 | 28.667 | 25.661 | 56.187 | 0.00 | 0.00 |
| ATOM | 7611 | HB   | THR | X | 500 | 28.343 | 26.056 | 57.150 | 0.00 | 0.00 |
| ATOM | 7612 | CG2  | THR | X | 500 | 27.334 | 25.310 | 55.468 | 0.00 | 0.00 |
| ATOM | 7613 | HG21 | THR | X | 500 | 26.712 | 24.713 | 56.135 | 0.00 | 0.00 |
| ATOM | 7614 | HG22 | THR | X | 500 | 27.490 | 24.711 | 54.571 | 0.00 | 0.00 |
| ATOM | 7615 | HG23 | THR | X | 500 | 26.777 | 26.173 | 55.105 | 0.00 | 0.00 |
| ATOM | 7616 | OG1  | THR | X | 500 | 29.510 | 24.618 | 56.372 | 0.00 | 0.00 |
| ATOM | 7617 | HG1  | THR | X | 500 | 28.941 | 24.053 | 56.900 | 0.00 | 0.00 |
| ATOM | 7618 | C    | THR | X | 500 | 30.765 | 27.164 | 56.090 | 0.00 | 0.00 |
| ATOM | 7619 | O    | THR | X | 500 | 31.834 | 26.556 | 55.737 | 0.00 | 0.00 |
| ATOM | 7620 | N    | ALA | X | 501 | 30.692 | 28.017 | 57.040 | 0.00 | 0.00 |
| ATOM | 7621 | H    | ALA | X | 501 | 29.816 | 28.506 | 57.157 | 0.00 | 0.00 |
| ATOM | 7622 | CA   | ALA | X | 501 | 31.730 | 28.313 | 58.018 | 0.00 | 0.00 |

|      |      |      |     |   |     |        |        |        |      |      |
|------|------|------|-----|---|-----|--------|--------|--------|------|------|
| ATOM | 7623 | HA   | ALA | X | 501 | 32.649 | 28.578 | 57.494 | 0.00 | 0.00 |
| ATOM | 7624 | CB   | ALA | X | 501 | 31.345 | 29.515 | 58.934 | 0.00 | 0.00 |
| ATOM | 7625 | HB1  | ALA | X | 501 | 30.880 | 30.292 | 58.327 | 0.00 | 0.00 |
| ATOM | 7626 | HB2  | ALA | X | 501 | 32.243 | 29.824 | 59.469 | 0.00 | 0.00 |
| ATOM | 7627 | HB3  | ALA | X | 501 | 30.642 | 29.237 | 59.719 | 0.00 | 0.00 |
| ATOM | 7628 | C    | ALA | X | 501 | 32.174 | 26.985 | 58.805 | 0.00 | 0.00 |
| ATOM | 7629 | O    | ALA | X | 501 | 33.281 | 26.983 | 59.349 | 0.00 | 0.00 |
| ATOM | 7630 | N    | GLY | X | 502 | 31.290 | 25.978 | 58.902 | 0.00 | 0.00 |
| ATOM | 7631 | H    | GLY | X | 502 | 30.423 | 26.014 | 58.384 | 0.00 | 0.00 |
| ATOM | 7632 | CA   | GLY | X | 502 | 31.427 | 24.785 | 59.737 | 0.00 | 0.00 |
| ATOM | 7633 | HA2  | GLY | X | 502 | 32.004 | 24.970 | 60.643 | 0.00 | 0.00 |
| ATOM | 7634 | HA3  | GLY | X | 502 | 30.424 | 24.507 | 60.061 | 0.00 | 0.00 |
| ATOM | 7635 | C    | GLY | X | 502 | 32.196 | 23.627 | 58.983 | 0.00 | 0.00 |
| ATOM | 7636 | O    | GLY | X | 502 | 33.378 | 23.434 | 59.156 | 0.00 | 0.00 |
| ATOM | 7637 | N    | ALA | X | 503 | 31.446 | 22.845 | 58.175 | 0.00 | 0.00 |
| ATOM | 7638 | H    | ALA | X | 503 | 30.502 | 23.149 | 57.984 | 0.00 | 0.00 |
| ATOM | 7639 | CA   | ALA | X | 503 | 31.905 | 21.819 | 57.266 | 0.00 | 0.00 |
| ATOM | 7640 | HA   | ALA | X | 503 | 32.581 | 21.126 | 57.768 | 0.00 | 0.00 |
| ATOM | 7641 | CB   | ALA | X | 503 | 30.738 | 20.959 | 56.710 | 0.00 | 0.00 |
| ATOM | 7642 | HB1  | ALA | X | 503 | 30.037 | 20.621 | 57.473 | 0.00 | 0.00 |
| ATOM | 7643 | HB2  | ALA | X | 503 | 31.192 | 20.096 | 56.222 | 0.00 | 0.00 |
| ATOM | 7644 | HB3  | ALA | X | 503 | 30.265 | 21.642 | 56.005 | 0.00 | 0.00 |
| ATOM | 7645 | C    | ALA | X | 503 | 32.834 | 22.360 | 56.129 | 0.00 | 0.00 |
| ATOM | 7646 | O    | ALA | X | 503 | 33.675 | 21.627 | 55.560 | 0.00 | 0.00 |
| ATOM | 7647 | N    | GLN | X | 504 | 32.768 | 23.656 | 55.738 | 0.00 | 0.00 |
| ATOM | 7648 | H    | GLN | X | 504 | 32.137 | 24.279 | 56.222 | 0.00 | 0.00 |
| ATOM | 7649 | CA   | GLN | X | 504 | 33.656 | 24.359 | 54.750 | 0.00 | 0.00 |
| ATOM | 7650 | HA   | GLN | X | 504 | 33.129 | 25.238 | 54.379 | 0.00 | 0.00 |
| ATOM | 7651 | CB   | GLN | X | 504 | 34.970 | 24.757 | 55.551 | 0.00 | 0.00 |
| ATOM | 7652 | HB2  | GLN | X | 504 | 35.455 | 23.870 | 55.956 | 0.00 | 0.00 |
| ATOM | 7653 | HB3  | GLN | X | 504 | 35.637 | 25.228 | 54.828 | 0.00 | 0.00 |
| ATOM | 7654 | CG   | GLN | X | 504 | 34.782 | 25.779 | 56.670 | 0.00 | 0.00 |
| ATOM | 7655 | HG2  | GLN | X | 504 | 34.557 | 26.766 | 56.265 | 0.00 | 0.00 |
| ATOM | 7656 | HG3  | GLN | X | 504 | 33.944 | 25.467 | 57.294 | 0.00 | 0.00 |
| ATOM | 7657 | CD   | GLN | X | 504 | 36.069 | 25.924 | 57.492 | 0.00 | 0.00 |
| ATOM | 7658 | OE1  | GLN | X | 504 | 37.158 | 25.737 | 56.973 | 0.00 | 0.00 |
| ATOM | 7659 | NE2  | GLN | X | 504 | 35.943 | 26.332 | 58.711 | 0.00 | 0.00 |
| ATOM | 7660 | HE21 | GLN | X | 504 | 36.753 | 26.418 | 59.308 | 0.00 | 0.00 |
| ATOM | 7661 | HE22 | GLN | X | 504 | 35.034 | 26.538 | 59.101 | 0.00 | 0.00 |
| ATOM | 7662 | C    | GLN | X | 504 | 33.885 | 23.430 | 53.516 | 0.00 | 0.00 |
| ATOM | 7663 | O    | GLN | X | 504 | 35.039 | 23.139 | 53.169 | 0.00 | 0.00 |
| ATOM | 7664 | N    | GLN | X | 505 | 32.792 | 23.003 | 52.909 | 0.00 | 0.00 |
| ATOM | 7665 | H    | GLN | X | 505 | 31.872 | 23.320 | 53.177 | 0.00 | 0.00 |
| ATOM | 7666 | CA   | GLN | X | 505 | 32.932 | 22.104 | 51.823 | 0.00 | 0.00 |
| ATOM | 7667 | HA   | GLN | X | 505 | 33.833 | 21.521 | 52.015 | 0.00 | 0.00 |
| ATOM | 7668 | CB   | GLN | X | 505 | 31.661 | 21.229 | 51.757 | 0.00 | 0.00 |
| ATOM | 7669 | HB2  | GLN | X | 505 | 30.742 | 21.811 | 51.686 | 0.00 | 0.00 |
| ATOM | 7670 | HB3  | GLN | X | 505 | 31.716 | 20.596 | 50.871 | 0.00 | 0.00 |
| ATOM | 7671 | CG   | GLN | X | 505 | 31.338 | 20.266 | 52.877 | 0.00 | 0.00 |
| ATOM | 7672 | HG2  | GLN | X | 505 | 32.171 | 19.605 | 53.116 | 0.00 | 0.00 |
| ATOM | 7673 | HG3  | GLN | X | 505 | 31.116 | 20.753 | 53.826 | 0.00 | 0.00 |
| ATOM | 7674 | CD   | GLN | X | 505 | 30.188 | 19.376 | 52.538 | 0.00 | 0.00 |
| ATOM | 7675 | OE1  | GLN | X | 505 | 30.291 | 18.481 | 51.759 | 0.00 | 0.00 |
| ATOM | 7676 | NE2  | GLN | X | 505 | 28.974 | 19.634 | 52.880 | 0.00 | 0.00 |
| ATOM | 7677 | HE21 | GLN | X | 505 | 28.263 | 19.072 | 52.436 | 0.00 | 0.00 |
| ATOM | 7678 | HE22 | GLN | X | 505 | 28.688 | 20.565 | 53.149 | 0.00 | 0.00 |
| ATOM | 7679 | C    | GLN | X | 505 | 33.037 | 22.837 | 50.493 | 0.00 | 0.00 |
| ATOM | 7680 | O    | GLN | X | 505 | 32.125 | 23.570 | 50.119 | 0.00 | 0.00 |
| ATOM | 7681 | N    | TYR | X | 506 | 34.111 | 22.637 | 49.783 | 0.00 | 0.00 |
| ATOM | 7682 | H    | TYR | X | 506 | 34.655 | 21.863 | 50.137 | 0.00 | 0.00 |
| ATOM | 7683 | CA   | TYR | X | 506 | 34.464 | 23.153 | 48.449 | 0.00 | 0.00 |
| ATOM | 7684 | HA   | TYR | X | 506 | 33.624 | 23.763 | 48.117 | 0.00 | 0.00 |
| ATOM | 7685 | CB   | TYR | X | 506 | 35.805 | 23.906 | 48.564 | 0.00 | 0.00 |
| ATOM | 7686 | HB2  | TYR | X | 506 | 35.973 | 24.434 | 47.625 | 0.00 | 0.00 |
| ATOM | 7687 | HB3  | TYR | X | 506 | 35.777 | 24.704 | 49.306 | 0.00 | 0.00 |
| ATOM | 7688 | CG   | TYR | X | 506 | 36.999 | 23.038 | 48.963 | 0.00 | 0.00 |
| ATOM | 7689 | CD1  | TYR | X | 506 | 37.111 | 22.615 | 50.323 | 0.00 | 0.00 |

|      |      |      |     |   |     |        |        |        |      |      |
|------|------|------|-----|---|-----|--------|--------|--------|------|------|
| ATOM | 7690 | HD1  | TYR | X | 506 | 36.314 | 22.741 | 51.040 | 0.00 | 0.00 |
| ATOM | 7691 | CE1  | TYR | X | 506 | 38.267 | 21.881 | 50.735 | 0.00 | 0.00 |
| ATOM | 7692 | HE1  | TYR | X | 506 | 38.315 | 21.536 | 51.758 | 0.00 | 0.00 |
| ATOM | 7693 | CZ   | TYR | X | 506 | 39.347 | 21.659 | 49.864 | 0.00 | 0.00 |
| ATOM | 7694 | OH   | TYR | X | 506 | 40.452 | 20.954 | 50.321 | 0.00 | 0.00 |
| ATOM | 7695 | HH   | TYR | X | 506 | 40.283 | 20.538 | 51.169 | 0.00 | 0.00 |
| ATOM | 7696 | CE2  | TYR | X | 506 | 39.198 | 22.078 | 48.520 | 0.00 | 0.00 |
| ATOM | 7697 | HE2  | TYR | X | 506 | 40.007 | 21.828 | 47.849 | 0.00 | 0.00 |
| ATOM | 7698 | CD2  | TYR | X | 506 | 38.029 | 22.726 | 48.062 | 0.00 | 0.00 |
| ATOM | 7699 | HD2  | TYR | X | 506 | 38.036 | 23.051 | 47.032 | 0.00 | 0.00 |
| ATOM | 7700 | C    | TYR | X | 506 | 34.701 | 21.987 | 47.531 | 0.00 | 0.00 |
| ATOM | 7701 | O    | TYR | X | 506 | 34.883 | 20.868 | 47.963 | 0.00 | 0.00 |
| ATOM | 7702 | N    | VAL | X | 507 | 34.707 | 22.207 | 46.202 | 0.00 | 0.00 |
| ATOM | 7703 | H    | VAL | X | 507 | 34.463 | 23.129 | 45.869 | 0.00 | 0.00 |
| ATOM | 7704 | CA   | VAL | X | 507 | 34.889 | 21.135 | 45.222 | 0.00 | 0.00 |
| ATOM | 7705 | HA   | VAL | X | 507 | 34.833 | 20.136 | 45.655 | 0.00 | 0.00 |
| ATOM | 7706 | CB   | VAL | X | 507 | 33.728 | 21.126 | 44.115 | 0.00 | 0.00 |
| ATOM | 7707 | HB   | VAL | X | 507 | 33.989 | 20.422 | 43.324 | 0.00 | 0.00 |
| ATOM | 7708 | CG1  | VAL | X | 507 | 32.374 | 20.661 | 44.725 | 0.00 | 0.00 |
| ATOM | 7709 | HG11 | VAL | X | 507 | 32.097 | 21.480 | 45.389 | 0.00 | 0.00 |
| ATOM | 7710 | HG12 | VAL | X | 507 | 31.688 | 20.331 | 43.945 | 0.00 | 0.00 |
| ATOM | 7711 | HG13 | VAL | X | 507 | 32.770 | 19.765 | 45.204 | 0.00 | 0.00 |
| ATOM | 7712 | CG2  | VAL | X | 507 | 33.573 | 22.448 | 43.404 | 0.00 | 0.00 |
| ATOM | 7713 | HG21 | VAL | X | 507 | 34.557 | 22.671 | 42.992 | 0.00 | 0.00 |
| ATOM | 7714 | HG22 | VAL | X | 507 | 33.138 | 23.145 | 44.121 | 0.00 | 0.00 |
| ATOM | 7715 | HG23 | VAL | X | 507 | 32.812 | 22.192 | 42.667 | 0.00 | 0.00 |
| ATOM | 7716 | C    | VAL | X | 507 | 36.203 | 21.228 | 44.503 | 0.00 | 0.00 |
| ATOM | 7717 | O    | VAL | X | 507 | 36.755 | 22.321 | 44.216 | 0.00 | 0.00 |
| ATOM | 7718 | N    | SER | X | 508 | 36.634 | 20.085 | 43.996 | 0.00 | 0.00 |
| ATOM | 7719 | H    | SER | X | 508 | 36.162 | 19.239 | 44.281 | 0.00 | 0.00 |
| ATOM | 7720 | CA   | SER | X | 508 | 37.584 | 19.913 | 42.913 | 0.00 | 0.00 |
| ATOM | 7721 | HA   | SER | X | 508 | 38.287 | 20.745 | 42.951 | 0.00 | 0.00 |
| ATOM | 7722 | CB   | SER | X | 508 | 38.353 | 18.646 | 43.062 | 0.00 | 0.00 |
| ATOM | 7723 | HB2  | SER | X | 508 | 38.999 | 18.742 | 43.935 | 0.00 | 0.00 |
| ATOM | 7724 | HB3  | SER | X | 508 | 37.728 | 17.760 | 43.172 | 0.00 | 0.00 |
| ATOM | 7725 | OG   | SER | X | 508 | 39.174 | 18.394 | 41.958 | 0.00 | 0.00 |
| ATOM | 7726 | HG   | SER | X | 508 | 40.105 | 18.362 | 42.190 | 0.00 | 0.00 |
| ATOM | 7727 | C    | SER | X | 508 | 37.056 | 20.031 | 41.535 | 0.00 | 0.00 |
| ATOM | 7728 | O    | SER | X | 508 | 36.066 | 19.402 | 41.209 | 0.00 | 0.00 |
| ATOM | 7729 | N    | LEU | X | 509 | 37.790 | 20.684 | 40.576 | 0.00 | 0.00 |
| ATOM | 7730 | H    | LEU | X | 509 | 38.622 | 21.182 | 40.861 | 0.00 | 0.00 |
| ATOM | 7731 | CA   | LEU | X | 509 | 37.458 | 20.651 | 39.176 | 0.00 | 0.00 |
| ATOM | 7732 | HA   | LEU | X | 509 | 36.564 | 20.050 | 39.008 | 0.00 | 0.00 |
| ATOM | 7733 | CB   | LEU | X | 509 | 37.039 | 22.086 | 38.724 | 0.00 | 0.00 |
| ATOM | 7734 | HB2  | LEU | X | 509 | 37.934 | 22.701 | 38.813 | 0.00 | 0.00 |
| ATOM | 7735 | HB3  | LEU | X | 509 | 36.766 | 22.115 | 37.669 | 0.00 | 0.00 |
| ATOM | 7736 | CG   | LEU | X | 509 | 35.900 | 22.770 | 39.612 | 0.00 | 0.00 |
| ATOM | 7737 | HG   | LEU | X | 509 | 36.132 | 22.689 | 40.674 | 0.00 | 0.00 |
| ATOM | 7738 | CD1  | LEU | X | 509 | 35.821 | 24.288 | 39.287 | 0.00 | 0.00 |
| ATOM | 7739 | HD11 | LEU | X | 509 | 35.719 | 24.330 | 38.202 | 0.00 | 0.00 |
| ATOM | 7740 | HD12 | LEU | X | 509 | 36.717 | 24.745 | 39.707 | 0.00 | 0.00 |
| ATOM | 7741 | HD13 | LEU | X | 509 | 34.871 | 24.631 | 39.696 | 0.00 | 0.00 |
| ATOM | 7742 | CD2  | LEU | X | 509 | 34.557 | 22.029 | 39.293 | 0.00 | 0.00 |
| ATOM | 7743 | HD21 | LEU | X | 509 | 34.649 | 20.977 | 39.564 | 0.00 | 0.00 |
| ATOM | 7744 | HD22 | LEU | X | 509 | 33.723 | 22.319 | 39.931 | 0.00 | 0.00 |
| ATOM | 7745 | HD23 | LEU | X | 509 | 34.220 | 22.006 | 38.257 | 0.00 | 0.00 |
| ATOM | 7746 | C    | LEU | X | 509 | 38.530 | 20.039 | 38.287 | 0.00 | 0.00 |
| ATOM | 7747 | O    | LEU | X | 509 | 39.631 | 20.510 | 38.246 | 0.00 | 0.00 |
| ATOM | 7748 | N    | ASP | X | 510 | 38.195 | 18.972 | 37.606 | 0.00 | 0.00 |
| ATOM | 7749 | H    | ASP | X | 510 | 37.230 | 18.676 | 37.576 | 0.00 | 0.00 |
| ATOM | 7750 | CA   | ASP | X | 510 | 39.152 | 18.153 | 36.811 | 0.00 | 0.00 |
| ATOM | 7751 | HA   | ASP | X | 510 | 39.981 | 18.730 | 36.400 | 0.00 | 0.00 |
| ATOM | 7752 | CB   | ASP | X | 510 | 39.810 | 17.249 | 37.885 | 0.00 | 0.00 |
| ATOM | 7753 | HB2  | ASP | X | 510 | 40.005 | 17.822 | 38.792 | 0.00 | 0.00 |
| ATOM | 7754 | HB3  | ASP | X | 510 | 39.138 | 16.445 | 38.188 | 0.00 | 0.00 |
| ATOM | 7755 | CG   | ASP | X | 510 | 41.141 | 16.579 | 37.498 | 0.00 | 0.00 |
| ATOM | 7756 | OD1  | ASP | X | 510 | 42.051 | 16.570 | 38.380 | 0.00 | 0.00 |

|      |      |      |     |   |     |        |        |        |      |      |
|------|------|------|-----|---|-----|--------|--------|--------|------|------|
| ATOM | 7757 | OD2  | ASP | X | 510 | 41.243 | 15.936 | 36.421 | 0.00 | 0.00 |
| ATOM | 7758 | C    | ASP | X | 510 | 38.345 | 17.428 | 35.726 | 0.00 | 0.00 |
| ATOM | 7759 | O    | ASP | X | 510 | 37.104 | 17.399 | 35.642 | 0.00 | 0.00 |
| ATOM | 7760 | N    | LEU | X | 511 | 39.049 | 16.611 | 34.942 | 0.00 | 0.00 |
| ATOM | 7761 | H    | LEU | X | 511 | 40.038 | 16.557 | 35.139 | 0.00 | 0.00 |
| ATOM | 7762 | CA   | LEU | X | 511 | 38.429 | 15.673 | 33.957 | 0.00 | 0.00 |
| ATOM | 7763 | HA   | LEU | X | 511 | 37.743 | 16.239 | 33.327 | 0.00 | 0.00 |
| ATOM | 7764 | CB   | LEU | X | 511 | 39.511 | 15.073 | 33.080 | 0.00 | 0.00 |
| ATOM | 7765 | HB2  | LEU | X | 511 | 40.099 | 14.394 | 33.697 | 0.00 | 0.00 |
| ATOM | 7766 | HB3  | LEU | X | 511 | 38.941 | 14.441 | 32.400 | 0.00 | 0.00 |
| ATOM | 7767 | CG   | LEU | X | 511 | 40.509 | 16.018 | 32.375 | 0.00 | 0.00 |
| ATOM | 7768 | HG   | LEU | X | 511 | 41.056 | 16.593 | 33.123 | 0.00 | 0.00 |
| ATOM | 7769 | CD1  | LEU | X | 511 | 41.558 | 15.257 | 31.518 | 0.00 | 0.00 |
| ATOM | 7770 | HD11 | LEU | X | 511 | 42.221 | 16.002 | 31.077 | 0.00 | 0.00 |
| ATOM | 7771 | HD12 | LEU | X | 511 | 41.088 | 14.635 | 30.756 | 0.00 | 0.00 |
| ATOM | 7772 | HD13 | LEU | X | 511 | 42.128 | 14.533 | 32.100 | 0.00 | 0.00 |
| ATOM | 7773 | CD2  | LEU | X | 511 | 39.772 | 17.050 | 31.504 | 0.00 | 0.00 |
| ATOM | 7774 | HD21 | LEU | X | 511 | 39.080 | 17.651 | 32.095 | 0.00 | 0.00 |
| ATOM | 7775 | HD22 | LEU | X | 511 | 40.599 | 17.691 | 31.198 | 0.00 | 0.00 |
| ATOM | 7776 | HD23 | LEU | X | 511 | 39.427 | 16.525 | 30.613 | 0.00 | 0.00 |
| ATOM | 7777 | C    | LEU | X | 511 | 37.513 | 14.550 | 34.582 | 0.00 | 0.00 |
| ATOM | 7778 | O    | LEU | X | 511 | 36.398 | 14.238 | 34.091 | 0.00 | 0.00 |
| ATOM | 7779 | N    | ARG | X | 512 | 37.843 | 14.086 | 35.804 | 0.00 | 0.00 |
| ATOM | 7780 | H    | ARG | X | 512 | 38.645 | 14.525 | 36.235 | 0.00 | 0.00 |
| ATOM | 7781 | CA   | ARG | X | 512 | 36.935 | 13.257 | 36.610 | 0.00 | 0.00 |
| ATOM | 7782 | HA   | ARG | X | 512 | 36.670 | 12.393 | 36.000 | 0.00 | 0.00 |
| ATOM | 7783 | CB   | ARG | X | 512 | 37.686 | 12.692 | 37.826 | 0.00 | 0.00 |
| ATOM | 7784 | HB2  | ARG | X | 512 | 38.111 | 13.496 | 38.427 | 0.00 | 0.00 |
| ATOM | 7785 | HB3  | ARG | X | 512 | 37.015 | 12.148 | 38.491 | 0.00 | 0.00 |
| ATOM | 7786 | CG   | ARG | X | 512 | 38.917 | 11.791 | 37.517 | 0.00 | 0.00 |
| ATOM | 7787 | HG2  | ARG | X | 512 | 38.511 | 11.021 | 36.861 | 0.00 | 0.00 |
| ATOM | 7788 | HG3  | ARG | X | 512 | 39.641 | 12.222 | 36.825 | 0.00 | 0.00 |
| ATOM | 7789 | CD   | ARG | X | 512 | 39.439 | 11.216 | 38.841 | 0.00 | 0.00 |
| ATOM | 7790 | HD2  | ARG | X | 512 | 39.951 | 12.019 | 39.371 | 0.00 | 0.00 |
| ATOM | 7791 | HD3  | ARG | X | 512 | 38.597 | 11.065 | 39.516 | 0.00 | 0.00 |
| ATOM | 7792 | NE   | ARG | X | 512 | 40.274 | 10.089 | 38.535 | 0.00 | 0.00 |
| ATOM | 7793 | HE   | ARG | X | 512 | 39.987 | 9.266  | 38.025 | 0.00 | 0.00 |
| ATOM | 7794 | CZ   | ARG | X | 512 | 41.615 | 10.122 | 38.565 | 0.00 | 0.00 |
| ATOM | 7795 | NH1  | ARG | X | 512 | 42.343 | 11.130 | 39.006 | 0.00 | 0.00 |
| ATOM | 7796 | HH11 | ARG | X | 512 | 41.863 | 11.950 | 39.347 | 0.00 | 0.00 |
| ATOM | 7797 | HH12 | ARG | X | 512 | 43.345 | 11.155 | 38.880 | 0.00 | 0.00 |
| ATOM | 7798 | NH2  | ARG | X | 512 | 42.209 | 9.066  | 38.107 | 0.00 | 0.00 |
| ATOM | 7799 | HH21 | ARG | X | 512 | 41.753 | 8.203  | 37.850 | 0.00 | 0.00 |
| ATOM | 7800 | HH22 | ARG | X | 512 | 43.211 | 9.159  | 38.020 | 0.00 | 0.00 |
| ATOM | 7801 | C    | ARG | X | 512 | 35.725 | 14.065 | 37.095 | 0.00 | 0.00 |
| ATOM | 7802 | O    | ARG | X | 512 | 35.748 | 15.325 | 37.133 | 0.00 | 0.00 |
| ATOM | 7803 | N    | PRO | X | 513 | 34.623 | 13.366 | 37.442 | 0.00 | 0.00 |
| ATOM | 7804 | CD   | PRO | X | 513 | 34.411 | 11.910 | 37.327 | 0.00 | 0.00 |
| ATOM | 7805 | HD2  | PRO | X | 513 | 35.286 | 11.472 | 37.807 | 0.00 | 0.00 |
| ATOM | 7806 | HD3  | PRO | X | 513 | 34.381 | 11.545 | 36.301 | 0.00 | 0.00 |
| ATOM | 7807 | CG   | PRO | X | 513 | 33.092 | 11.550 | 38.099 | 0.00 | 0.00 |
| ATOM | 7808 | HG2  | PRO | X | 513 | 33.346 | 11.366 | 39.142 | 0.00 | 0.00 |
| ATOM | 7809 | HG3  | PRO | X | 513 | 32.555 | 10.721 | 37.639 | 0.00 | 0.00 |
| ATOM | 7810 | CB   | PRO | X | 513 | 32.281 | 12.906 | 38.057 | 0.00 | 0.00 |
| ATOM | 7811 | HB2  | PRO | X | 513 | 31.616 | 12.951 | 38.919 | 0.00 | 0.00 |
| ATOM | 7812 | HB3  | PRO | X | 513 | 31.764 | 13.002 | 37.103 | 0.00 | 0.00 |
| ATOM | 7813 | CA   | PRO | X | 513 | 33.386 | 13.947 | 38.068 | 0.00 | 0.00 |
| ATOM | 7814 | HA   | PRO | X | 513 | 33.002 | 14.735 | 37.419 | 0.00 | 0.00 |
| ATOM | 7815 | C    | PRO | X | 513 | 33.701 | 14.546 | 39.401 | 0.00 | 0.00 |
| ATOM | 7816 | O    | PRO | X | 513 | 34.669 | 14.110 | 40.006 | 0.00 | 0.00 |
| ATOM | 7817 | N    | LEU | X | 514 | 32.826 | 15.410 | 39.942 | 0.00 | 0.00 |
| ATOM | 7818 | H    | LEU | X | 514 | 32.057 | 15.564 | 39.305 | 0.00 | 0.00 |
| ATOM | 7819 | CA   | LEU | X | 514 | 33.118 | 16.169 | 41.142 | 0.00 | 0.00 |
| ATOM | 7820 | HA   | LEU | X | 514 | 33.888 | 16.870 | 40.819 | 0.00 | 0.00 |
| ATOM | 7821 | CB   | LEU | X | 514 | 31.890 | 17.031 | 41.539 | 0.00 | 0.00 |
| ATOM | 7822 | HB2  | LEU | X | 514 | 31.030 | 16.372 | 41.659 | 0.00 | 0.00 |
| ATOM | 7823 | HB3  | LEU | X | 514 | 32.120 | 17.415 | 42.533 | 0.00 | 0.00 |

|      |      |      |     |   |     |        |        |        |      |      |
|------|------|------|-----|---|-----|--------|--------|--------|------|------|
| ATOM | 7824 | CG   | LEU | X | 514 | 31.458 | 18.190 | 40.533 | 0.00 | 0.00 |
| ATOM | 7825 | HG   | LEU | X | 514 | 31.541 | 17.862 | 39.496 | 0.00 | 0.00 |
| ATOM | 7826 | CD1  | LEU | X | 514 | 30.077 | 18.696 | 40.981 | 0.00 | 0.00 |
| ATOM | 7827 | HD11 | LEU | X | 514 | 29.336 | 17.934 | 40.738 | 0.00 | 0.00 |
| ATOM | 7828 | HD12 | LEU | X | 514 | 29.906 | 19.656 | 40.495 | 0.00 | 0.00 |
| ATOM | 7829 | HD13 | LEU | X | 514 | 30.140 | 18.851 | 42.059 | 0.00 | 0.00 |
| ATOM | 7830 | CD2  | LEU | X | 514 | 32.391 | 19.330 | 40.587 | 0.00 | 0.00 |
| ATOM | 7831 | HD21 | LEU | X | 514 | 33.430 | 19.012 | 40.678 | 0.00 | 0.00 |
| ATOM | 7832 | HD22 | LEU | X | 514 | 32.276 | 19.817 | 39.618 | 0.00 | 0.00 |
| ATOM | 7833 | HD23 | LEU | X | 514 | 32.139 | 19.982 | 41.423 | 0.00 | 0.00 |
| ATOM | 7834 | C    | LEU | X | 514 | 33.410 | 15.401 | 42.451 | 0.00 | 0.00 |
| ATOM | 7835 | O    | LEU | X | 514 | 32.582 | 14.558 | 42.881 | 0.00 | 0.00 |
| ATOM | 7836 | N    | GLU | X | 515 | 34.659 | 15.497 | 43.075 | 0.00 | 0.00 |
| ATOM | 7837 | H    | GLU | X | 515 | 35.333 | 16.107 | 42.635 | 0.00 | 0.00 |
| ATOM | 7838 | CA   | GLU | X | 515 | 35.014 | 15.112 | 44.402 | 0.00 | 0.00 |
| ATOM | 7839 | HA   | GLU | X | 515 | 34.516 | 14.214 | 44.770 | 0.00 | 0.00 |
| ATOM | 7840 | CB   | GLU | X | 515 | 36.531 | 14.814 | 44.427 | 0.00 | 0.00 |
| ATOM | 7841 | HB2  | GLU | X | 515 | 36.740 | 13.927 | 43.830 | 0.00 | 0.00 |
| ATOM | 7842 | HB3  | GLU | X | 515 | 37.038 | 15.650 | 43.946 | 0.00 | 0.00 |
| ATOM | 7843 | CG   | GLU | X | 515 | 37.117 | 14.442 | 45.809 | 0.00 | 0.00 |
| ATOM | 7844 | HG2  | GLU | X | 515 | 36.683 | 15.086 | 46.574 | 0.00 | 0.00 |
| ATOM | 7845 | HG3  | GLU | X | 515 | 36.822 | 13.429 | 46.082 | 0.00 | 0.00 |
| ATOM | 7846 | CD   | GLU | X | 515 | 38.648 | 14.633 | 45.754 | 0.00 | 0.00 |
| ATOM | 7847 | OE1  | GLU | X | 515 | 39.261 | 14.876 | 44.673 | 0.00 | 0.00 |
| ATOM | 7848 | OE2  | GLU | X | 515 | 39.248 | 14.640 | 46.795 | 0.00 | 0.00 |
| ATOM | 7849 | C    | GLU | X | 515 | 34.592 | 16.396 | 45.188 | 0.00 | 0.00 |
| ATOM | 7850 | O    | GLU | X | 515 | 35.175 | 17.466 | 44.827 | 0.00 | 0.00 |
| ATOM | 7851 | N    | VAL | X | 516 | 33.767 | 16.279 | 46.239 | 0.00 | 0.00 |
| ATOM | 7852 | H    | VAL | X | 516 | 33.497 | 15.329 | 46.452 | 0.00 | 0.00 |
| ATOM | 7853 | CA   | VAL | X | 516 | 33.692 | 17.277 | 47.282 | 0.00 | 0.00 |
| ATOM | 7854 | HA   | VAL | X | 516 | 33.807 | 18.307 | 46.944 | 0.00 | 0.00 |
| ATOM | 7855 | CB   | VAL | X | 516 | 32.303 | 17.391 | 47.907 | 0.00 | 0.00 |
| ATOM | 7856 | HB   | VAL | X | 516 | 32.238 | 16.529 | 48.571 | 0.00 | 0.00 |
| ATOM | 7857 | CG1  | VAL | X | 516 | 32.008 | 18.653 | 48.734 | 0.00 | 0.00 |
| ATOM | 7858 | HG11 | VAL | X | 516 | 32.756 | 18.816 | 49.510 | 0.00 | 0.00 |
| ATOM | 7859 | HG12 | VAL | X | 516 | 31.932 | 19.538 | 48.102 | 0.00 | 0.00 |
| ATOM | 7860 | HG13 | VAL | X | 516 | 31.059 | 18.467 | 49.238 | 0.00 | 0.00 |
| ATOM | 7861 | CG2  | VAL | X | 516 | 31.224 | 17.329 | 46.868 | 0.00 | 0.00 |
| ATOM | 7862 | HG21 | VAL | X | 516 | 31.390 | 18.084 | 46.100 | 0.00 | 0.00 |
| ATOM | 7863 | HG22 | VAL | X | 516 | 30.233 | 17.387 | 47.320 | 0.00 | 0.00 |
| ATOM | 7864 | HG23 | VAL | X | 516 | 31.302 | 16.346 | 46.405 | 0.00 | 0.00 |
| ATOM | 7865 | C    | VAL | X | 516 | 34.791 | 17.069 | 48.381 | 0.00 | 0.00 |
| ATOM | 7866 | O    | VAL | X | 516 | 35.165 | 15.909 | 48.782 | 0.00 | 0.00 |
| ATOM | 7867 | N    | ARG | X | 517 | 35.295 | 18.173 | 48.908 | 0.00 | 0.00 |
| ATOM | 7868 | H    | ARG | X | 517 | 34.972 | 19.050 | 48.526 | 0.00 | 0.00 |
| ATOM | 7869 | CA   | ARG | X | 517 | 36.359 | 18.160 | 49.924 | 0.00 | 0.00 |
| ATOM | 7870 | HA   | ARG | X | 517 | 36.557 | 17.138 | 50.248 | 0.00 | 0.00 |
| ATOM | 7871 | CB   | ARG | X | 517 | 37.618 | 18.588 | 49.258 | 0.00 | 0.00 |
| ATOM | 7872 | HB2  | ARG | X | 517 | 37.545 | 19.530 | 48.715 | 0.00 | 0.00 |
| ATOM | 7873 | HB3  | ARG | X | 517 | 38.333 | 18.713 | 50.071 | 0.00 | 0.00 |
| ATOM | 7874 | CG   | ARG | X | 517 | 38.314 | 17.603 | 48.334 | 0.00 | 0.00 |
| ATOM | 7875 | HG2  | ARG | X | 517 | 38.405 | 16.655 | 48.865 | 0.00 | 0.00 |
| ATOM | 7876 | HG3  | ARG | X | 517 | 37.810 | 17.433 | 47.383 | 0.00 | 0.00 |
| ATOM | 7877 | CD   | ARG | X | 517 | 39.793 | 18.128 | 47.986 | 0.00 | 0.00 |
| ATOM | 7878 | HD2  | ARG | X | 517 | 39.670 | 19.043 | 47.407 | 0.00 | 0.00 |
| ATOM | 7879 | HD3  | ARG | X | 517 | 40.458 | 18.256 | 48.840 | 0.00 | 0.00 |
| ATOM | 7880 | NE   | ARG | X | 517 | 40.447 | 17.229 | 47.014 | 0.00 | 0.00 |
| ATOM | 7881 | HE   | ARG | X | 517 | 40.460 | 16.247 | 47.247 | 0.00 | 0.00 |
| ATOM | 7882 | CZ   | ARG | X | 517 | 41.024 | 17.582 | 45.917 | 0.00 | 0.00 |
| ATOM | 7883 | NH1  | ARG | X | 517 | 41.504 | 18.835 | 45.683 | 0.00 | 0.00 |
| ATOM | 7884 | HH11 | ARG | X | 517 | 41.745 | 19.421 | 46.470 | 0.00 | 0.00 |
| ATOM | 7885 | HH12 | ARG | X | 517 | 41.936 | 19.013 | 44.788 | 0.00 | 0.00 |
| ATOM | 7886 | NH2  | ARG | X | 517 | 41.121 | 16.700 | 44.920 | 0.00 | 0.00 |
| ATOM | 7887 | HH21 | ARG | X | 517 | 40.488 | 15.913 | 44.923 | 0.00 | 0.00 |
| ATOM | 7888 | HH22 | ARG | X | 517 | 41.584 | 17.040 | 44.089 | 0.00 | 0.00 |
| ATOM | 7889 | C    | ARG | X | 517 | 36.100 | 19.126 | 51.096 | 0.00 | 0.00 |
| ATOM | 7890 | O    | ARG | X | 517 | 35.332 | 20.092 | 50.884 | 0.00 | 0.00 |

|      |      |      |     |   |     |        |        |        |      |      |
|------|------|------|-----|---|-----|--------|--------|--------|------|------|
| ATOM | 7891 | N    | ARG | X | 518 | 36.663 | 18.907 | 52.281 | 0.00 | 0.00 |
| ATOM | 7892 | H    | ARG | X | 518 | 37.251 | 18.086 | 52.239 | 0.00 | 0.00 |
| ATOM | 7893 | CA   | ARG | X | 518 | 36.275 | 19.497 | 53.592 | 0.00 | 0.00 |
| ATOM | 7894 | HA   | ARG | X | 518 | 35.391 | 20.101 | 53.386 | 0.00 | 0.00 |
| ATOM | 7895 | CB   | ARG | X | 518 | 36.053 | 18.332 | 54.496 | 0.00 | 0.00 |
| ATOM | 7896 | HB2  | ARG | X | 518 | 35.452 | 17.589 | 53.972 | 0.00 | 0.00 |
| ATOM | 7897 | HB3  | ARG | X | 518 | 36.968 | 17.833 | 54.816 | 0.00 | 0.00 |
| ATOM | 7898 | CG   | ARG | X | 518 | 35.154 | 18.710 | 55.654 | 0.00 | 0.00 |
| ATOM | 7899 | HG2  | ARG | X | 518 | 35.465 | 19.689 | 56.021 | 0.00 | 0.00 |
| ATOM | 7900 | HG3  | ARG | X | 518 | 34.110 | 18.839 | 55.368 | 0.00 | 0.00 |
| ATOM | 7901 | CD   | ARG | X | 518 | 35.182 | 17.743 | 56.904 | 0.00 | 0.00 |
| ATOM | 7902 | HD2  | ARG | X | 518 | 34.934 | 16.733 | 56.576 | 0.00 | 0.00 |
| ATOM | 7903 | HD3  | ARG | X | 518 | 36.209 | 17.567 | 57.224 | 0.00 | 0.00 |
| ATOM | 7904 | NE   | ARG | X | 518 | 34.315 | 18.213 | 58.049 | 0.00 | 0.00 |
| ATOM | 7905 | HE   | ARG | X | 518 | 34.808 | 18.852 | 58.656 | 0.00 | 0.00 |
| ATOM | 7906 | CZ   | ARG | X | 518 | 33.036 | 18.057 | 58.301 | 0.00 | 0.00 |
| ATOM | 7907 | NH1  | ARG | X | 518 | 32.223 | 17.629 | 57.377 | 0.00 | 0.00 |
| ATOM | 7908 | HH11 | ARG | X | 518 | 32.666 | 17.121 | 56.626 | 0.00 | 0.00 |
| ATOM | 7909 | HH12 | ARG | X | 518 | 31.254 | 17.474 | 57.618 | 0.00 | 0.00 |
| ATOM | 7910 | NH2  | ARG | X | 518 | 32.550 | 18.356 | 59.492 | 0.00 | 0.00 |
| ATOM | 7911 | HH21 | ARG | X | 518 | 33.141 | 18.750 | 60.210 | 0.00 | 0.00 |
| ATOM | 7912 | HH22 | ARG | X | 518 | 31.587 | 18.076 | 59.611 | 0.00 | 0.00 |
| ATOM | 7913 | C    | ARG | X | 518 | 37.293 | 20.443 | 54.239 | 0.00 | 0.00 |
| ATOM | 7914 | O    | ARG | X | 518 | 38.433 | 20.069 | 54.153 | 0.00 | 0.00 |
| ATOM | 7915 | N    | GLY | X | 519 | 36.888 | 21.564 | 54.927 | 0.00 | 0.00 |
| ATOM | 7916 | H    | GLY | X | 519 | 35.915 | 21.835 | 54.919 | 0.00 | 0.00 |
| ATOM | 7917 | CA   | GLY | X | 519 | 37.730 | 22.222 | 55.916 | 0.00 | 0.00 |
| ATOM | 7918 | HA2  | GLY | X | 519 | 37.166 | 22.873 | 56.584 | 0.00 | 0.00 |
| ATOM | 7919 | HA3  | GLY | X | 519 | 38.289 | 21.427 | 56.410 | 0.00 | 0.00 |
| ATOM | 7920 | C    | GLY | X | 519 | 38.763 | 23.131 | 55.305 | 0.00 | 0.00 |
| ATOM | 7921 | O    | GLY | X | 519 | 39.893 | 23.230 | 55.854 | 0.00 | 0.00 |
| ATOM | 7922 | N    | LEU | X | 520 | 38.452 | 23.911 | 54.220 | 0.00 | 0.00 |
| ATOM | 7923 | H    | LEU | X | 520 | 37.470 | 23.812 | 54.007 | 0.00 | 0.00 |
| ATOM | 7924 | CA   | LEU | X | 520 | 39.353 | 24.596 | 53.318 | 0.00 | 0.00 |
| ATOM | 7925 | HA   | LEU | X | 520 | 39.902 | 23.917 | 52.665 | 0.00 | 0.00 |
| ATOM | 7926 | CB   | LEU | X | 520 | 38.492 | 25.539 | 52.384 | 0.00 | 0.00 |
| ATOM | 7927 | HB2  | LEU | X | 520 | 37.890 | 24.828 | 51.817 | 0.00 | 0.00 |
| ATOM | 7928 | HB3  | LEU | X | 520 | 37.795 | 26.164 | 52.941 | 0.00 | 0.00 |
| ATOM | 7929 | CG   | LEU | X | 520 | 39.194 | 26.591 | 51.500 | 0.00 | 0.00 |
| ATOM | 7930 | HG   | LEU | X | 520 | 39.817 | 27.157 | 52.193 | 0.00 | 0.00 |
| ATOM | 7931 | CD1  | LEU | X | 520 | 39.981 | 25.885 | 50.389 | 0.00 | 0.00 |
| ATOM | 7932 | HD11 | LEU | X | 520 | 40.486 | 26.679 | 49.839 | 0.00 | 0.00 |
| ATOM | 7933 | HD12 | LEU | X | 520 | 39.347 | 25.233 | 49.788 | 0.00 | 0.00 |
| ATOM | 7934 | HD13 | LEU | X | 520 | 40.782 | 25.278 | 50.812 | 0.00 | 0.00 |
| ATOM | 7935 | CD2  | LEU | X | 520 | 38.367 | 27.734 | 50.965 | 0.00 | 0.00 |
| ATOM | 7936 | HD21 | LEU | X | 520 | 37.985 | 28.321 | 51.800 | 0.00 | 0.00 |
| ATOM | 7937 | HD22 | LEU | X | 520 | 39.021 | 28.356 | 50.354 | 0.00 | 0.00 |
| ATOM | 7938 | HD23 | LEU | X | 520 | 37.568 | 27.469 | 50.272 | 0.00 | 0.00 |
| ATOM | 7939 | C    | LEU | X | 520 | 40.461 | 25.427 | 54.036 | 0.00 | 0.00 |
| ATOM | 7940 | O    | LEU | X | 520 | 40.117 | 26.472 | 54.647 | 0.00 | 0.00 |
| ATOM | 7941 | N    | ARG | X | 521 | 41.748 | 25.057 | 53.928 | 0.00 | 0.00 |
| ATOM | 7942 | H    | ARG | X | 521 | 41.815 | 24.178 | 53.436 | 0.00 | 0.00 |
| ATOM | 7943 | CA   | ARG | X | 521 | 42.988 | 25.751 | 54.334 | 0.00 | 0.00 |
| ATOM | 7944 | HA   | ARG | X | 521 | 43.704 | 24.940 | 54.204 | 0.00 | 0.00 |
| ATOM | 7945 | CB   | ARG | X | 521 | 43.267 | 26.888 | 53.380 | 0.00 | 0.00 |
| ATOM | 7946 | HB2  | ARG | X | 521 | 42.844 | 26.749 | 52.385 | 0.00 | 0.00 |
| ATOM | 7947 | HB3  | ARG | X | 521 | 42.722 | 27.800 | 53.626 | 0.00 | 0.00 |
| ATOM | 7948 | CG   | ARG | X | 521 | 44.718 | 27.302 | 53.323 | 0.00 | 0.00 |
| ATOM | 7949 | HG2  | ARG | X | 521 | 44.898 | 28.189 | 52.717 | 0.00 | 0.00 |
| ATOM | 7950 | HG3  | ARG | X | 521 | 45.162 | 27.468 | 54.305 | 0.00 | 0.00 |
| ATOM | 7951 | CD   | ARG | X | 521 | 45.489 | 26.085 | 52.689 | 0.00 | 0.00 |
| ATOM | 7952 | HD2  | ARG | X | 521 | 45.480 | 25.242 | 53.381 | 0.00 | 0.00 |
| ATOM | 7953 | HD3  | ARG | X | 521 | 44.882 | 25.868 | 51.810 | 0.00 | 0.00 |
| ATOM | 7954 | NE   | ARG | X | 521 | 46.890 | 26.384 | 52.385 | 0.00 | 0.00 |
| ATOM | 7955 | HE   | ARG | X | 521 | 47.181 | 27.346 | 52.288 | 0.00 | 0.00 |
| ATOM | 7956 | CZ   | ARG | X | 521 | 47.874 | 25.554 | 52.212 | 0.00 | 0.00 |
| ATOM | 7957 | NH1  | ARG | X | 521 | 47.721 | 24.250 | 52.123 | 0.00 | 0.00 |

|      |      |      |     |   |     |        |        |        |      |      |
|------|------|------|-----|---|-----|--------|--------|--------|------|------|
| ATOM | 7958 | HH11 | ARG | X | 521 | 46.772 | 23.903 | 52.143 | 0.00 | 0.00 |
| ATOM | 7959 | HH12 | ARG | X | 521 | 48.447 | 23.578 | 51.922 | 0.00 | 0.00 |
| ATOM | 7960 | NH2  | ARG | X | 521 | 49.131 | 25.973 | 52.136 | 0.00 | 0.00 |
| ATOM | 7961 | HH21 | ARG | X | 521 | 49.304 | 26.961 | 52.256 | 0.00 | 0.00 |
| ATOM | 7962 | HH22 | ARG | X | 521 | 49.885 | 25.459 | 51.703 | 0.00 | 0.00 |
| ATOM | 7963 | C    | ARG | X | 521 | 43.070 | 26.078 | 55.890 | 0.00 | 0.00 |
| ATOM | 7964 | O    | ARG | X | 521 | 43.809 | 26.937 | 56.327 | 0.00 | 0.00 |
| ATOM | 7965 | N    | ALA | X | 522 | 42.175 | 25.420 | 56.688 | 0.00 | 0.00 |
| ATOM | 7966 | H    | ALA | X | 522 | 41.564 | 24.741 | 56.258 | 0.00 | 0.00 |
| ATOM | 7967 | CA   | ALA | X | 522 | 41.686 | 25.782 | 57.993 | 0.00 | 0.00 |
| ATOM | 7968 | HA   | ALA | X | 522 | 41.223 | 26.768 | 57.972 | 0.00 | 0.00 |
| ATOM | 7969 | CB   | ALA | X | 522 | 40.527 | 24.816 | 58.388 | 0.00 | 0.00 |
| ATOM | 7970 | HB1  | ALA | X | 522 | 40.938 | 23.807 | 58.362 | 0.00 | 0.00 |
| ATOM | 7971 | HB2  | ALA | X | 522 | 39.618 | 24.846 | 57.787 | 0.00 | 0.00 |
| ATOM | 7972 | HB3  | ALA | X | 522 | 40.335 | 25.047 | 59.436 | 0.00 | 0.00 |
| ATOM | 7973 | C    | ALA | X | 522 | 42.803 | 25.734 | 59.074 | 0.00 | 0.00 |
| ATOM | 7974 | O    | ALA | X | 522 | 43.000 | 26.758 | 59.714 | 0.00 | 0.00 |
| ATOM | 7975 | N    | GLN | X | 523 | 43.558 | 24.627 | 59.177 | 0.00 | 0.00 |
| ATOM | 7976 | H    | GLN | X | 523 | 43.352 | 23.841 | 58.576 | 0.00 | 0.00 |
| ATOM | 7977 | CA   | GLN | X | 523 | 44.794 | 24.567 | 59.973 | 0.00 | 0.00 |
| ATOM | 7978 | HA   | GLN | X | 523 | 44.653 | 25.014 | 60.957 | 0.00 | 0.00 |
| ATOM | 7979 | CB   | GLN | X | 523 | 45.475 | 23.273 | 60.135 | 0.00 | 0.00 |
| ATOM | 7980 | HB2  | GLN | X | 523 | 45.996 | 22.854 | 59.274 | 0.00 | 0.00 |
| ATOM | 7981 | HB3  | GLN | X | 523 | 46.246 | 23.382 | 60.897 | 0.00 | 0.00 |
| ATOM | 7982 | CG   | GLN | X | 523 | 44.590 | 22.193 | 60.674 | 0.00 | 0.00 |
| ATOM | 7983 | HG2  | GLN | X | 523 | 45.162 | 21.511 | 61.304 | 0.00 | 0.00 |
| ATOM | 7984 | HG3  | GLN | X | 523 | 43.769 | 22.564 | 61.289 | 0.00 | 0.00 |
| ATOM | 7985 | CD   | GLN | X | 523 | 43.945 | 21.502 | 59.496 | 0.00 | 0.00 |
| ATOM | 7986 | OE1  | GLN | X | 523 | 42.995 | 21.975 | 58.957 | 0.00 | 0.00 |
| ATOM | 7987 | NE2  | GLN | X | 523 | 44.522 | 20.498 | 58.883 | 0.00 | 0.00 |
| ATOM | 7988 | HE21 | GLN | X | 523 | 44.128 | 20.141 | 58.024 | 0.00 | 0.00 |
| ATOM | 7989 | HE22 | GLN | X | 523 | 45.267 | 20.062 | 59.406 | 0.00 | 0.00 |
| ATOM | 7990 | C    | GLN | X | 523 | 45.830 | 25.490 | 59.405 | 0.00 | 0.00 |
| ATOM | 7991 | O    | GLN | X | 523 | 46.363 | 26.298 | 60.169 | 0.00 | 0.00 |
| ATOM | 7992 | N    | ALA | X | 524 | 46.099 | 25.445 | 58.035 | 0.00 | 0.00 |
| ATOM | 7993 | H    | ALA | X | 524 | 45.575 | 24.791 | 57.471 | 0.00 | 0.00 |
| ATOM | 7994 | CA   | ALA | X | 524 | 47.176 | 26.138 | 57.385 | 0.00 | 0.00 |
| ATOM | 7995 | HA   | ALA | X | 524 | 48.030 | 25.691 | 57.894 | 0.00 | 0.00 |
| ATOM | 7996 | CB   | ALA | X | 524 | 47.324 | 25.732 | 55.874 | 0.00 | 0.00 |
| ATOM | 7997 | HB1  | ALA | X | 524 | 46.987 | 26.509 | 55.188 | 0.00 | 0.00 |
| ATOM | 7998 | HB2  | ALA | X | 524 | 46.867 | 24.772 | 55.635 | 0.00 | 0.00 |
| ATOM | 7999 | HB3  | ALA | X | 524 | 48.396 | 25.714 | 55.679 | 0.00 | 0.00 |
| ATOM | 8000 | C    | ALA | X | 524 | 47.233 | 27.677 | 57.687 | 0.00 | 0.00 |
| ATOM | 8001 | O    | ALA | X | 524 | 48.304 | 28.060 | 58.100 | 0.00 | 0.00 |
| ATOM | 8002 | N    | CYX | X | 525 | 46.089 | 28.334 | 57.783 | 0.00 | 0.00 |
| ATOM | 8003 | H    | CYX | X | 525 | 45.283 | 27.868 | 57.392 | 0.00 | 0.00 |
| ATOM | 8004 | CA   | CYX | X | 525 | 46.073 | 29.772 | 58.106 | 0.00 | 0.00 |
| ATOM | 8005 | HA   | CYX | X | 525 | 46.981 | 30.263 | 57.757 | 0.00 | 0.00 |
| ATOM | 8006 | CB   | CYX | X | 525 | 44.762 | 30.358 | 57.552 | 0.00 | 0.00 |
| ATOM | 8007 | HB2  | CYX | X | 525 | 43.957 | 29.774 | 57.998 | 0.00 | 0.00 |
| ATOM | 8008 | HB3  | CYX | X | 525 | 44.641 | 31.407 | 57.826 | 0.00 | 0.00 |
| ATOM | 8009 | SG   | CYX | X | 525 | 44.603 | 30.128 | 55.716 | 0.00 | 0.00 |
| ATOM | 8010 | C    | CYX | X | 525 | 46.174 | 30.117 | 59.601 | 0.00 | 0.00 |
| ATOM | 8011 | O    | CYX | X | 525 | 46.515 | 31.234 | 59.900 | 0.00 | 0.00 |
| ATOM | 8012 | N    | ALA | X | 526 | 46.015 | 29.163 | 60.527 | 0.00 | 0.00 |
| ATOM | 8013 | H    | ALA | X | 526 | 45.862 | 28.238 | 60.151 | 0.00 | 0.00 |
| ATOM | 8014 | CA   | ALA | X | 526 | 46.156 | 29.317 | 62.015 | 0.00 | 0.00 |
| ATOM | 8015 | HA   | ALA | X | 526 | 45.542 | 30.106 | 62.448 | 0.00 | 0.00 |
| ATOM | 8016 | CB   | ALA | X | 526 | 46.006 | 27.923 | 62.677 | 0.00 | 0.00 |
| ATOM | 8017 | HB1  | ALA | X | 526 | 46.820 | 27.237 | 62.443 | 0.00 | 0.00 |
| ATOM | 8018 | HB2  | ALA | X | 526 | 45.059 | 27.458 | 62.400 | 0.00 | 0.00 |
| ATOM | 8019 | HB3  | ALA | X | 526 | 45.980 | 28.085 | 63.754 | 0.00 | 0.00 |
| ATOM | 8020 | C    | ALA | X | 526 | 47.640 | 29.863 | 62.250 | 0.00 | 0.00 |
| ATOM | 8021 | O    | ALA | X | 526 | 47.805 | 30.662 | 63.188 | 0.00 | 0.00 |
| ATOM | 8022 | N    | PHE | X | 527 | 48.602 | 29.473 | 61.394 | 0.00 | 0.00 |
| ATOM | 8023 | H    | PHE | X | 527 | 48.327 | 28.849 | 60.649 | 0.00 | 0.00 |
| ATOM | 8024 | CA   | PHE | X | 527 | 49.956 | 30.073 | 61.395 | 0.00 | 0.00 |



|      |      |      |     |   |     |        |        |        |      |      |
|------|------|------|-----|---|-----|--------|--------|--------|------|------|
| ATOM | 8025 | HA   | PHE | X | 527 | 50.364 | 30.054 | 62.406 | 0.00 | 0.00 |
| ATOM | 8026 | CB   | PHE | X | 527 | 50.785 | 29.167 | 60.464 | 0.00 | 0.00 |
| ATOM | 8027 | HB2  | PHE | X | 527 | 50.722 | 28.157 | 60.868 | 0.00 | 0.00 |
| ATOM | 8028 | HB3  | PHE | X | 527 | 50.435 | 29.204 | 59.433 | 0.00 | 0.00 |
| ATOM | 8029 | CG   | PHE | X | 527 | 52.245 | 29.677 | 60.326 | 0.00 | 0.00 |
| ATOM | 8030 | CD1  | PHE | X | 527 | 53.162 | 29.648 | 61.462 | 0.00 | 0.00 |
| ATOM | 8031 | HD1  | PHE | X | 527 | 52.840 | 29.265 | 62.419 | 0.00 | 0.00 |
| ATOM | 8032 | CE1  | PHE | X | 527 | 54.495 | 30.025 | 61.299 | 0.00 | 0.00 |
| ATOM | 8033 | HE1  | PHE | X | 527 | 55.276 | 29.930 | 62.038 | 0.00 | 0.00 |
| ATOM | 8034 | CZ   | PHE | X | 527 | 54.931 | 30.532 | 60.035 | 0.00 | 0.00 |
| ATOM | 8035 | HZ   | PHE | X | 527 | 55.956 | 30.854 | 59.927 | 0.00 | 0.00 |
| ATOM | 8036 | CE2  | PHE | X | 527 | 54.067 | 30.683 | 58.929 | 0.00 | 0.00 |
| ATOM | 8037 | HE2  | PHE | X | 527 | 54.487 | 31.041 | 58.001 | 0.00 | 0.00 |
| ATOM | 8038 | CD2  | PHE | X | 527 | 52.741 | 30.220 | 59.093 | 0.00 | 0.00 |
| ATOM | 8039 | HD2  | PHE | X | 527 | 52.124 | 30.322 | 58.213 | 0.00 | 0.00 |
| ATOM | 8040 | C    | PHE | X | 527 | 49.911 | 31.524 | 60.969 | 0.00 | 0.00 |
| ATOM | 8041 | O    | PHE | X | 527 | 50.292 | 32.472 | 61.669 | 0.00 | 0.00 |
| ATOM | 8042 | N    | TRP | X | 528 | 49.313 | 31.712 | 59.764 | 0.00 | 0.00 |
| ATOM | 8043 | H    | TRP | X | 528 | 48.911 | 30.897 | 59.325 | 0.00 | 0.00 |
| ATOM | 8044 | CA   | TRP | X | 528 | 49.209 | 32.970 | 59.027 | 0.00 | 0.00 |
| ATOM | 8045 | HA   | TRP | X | 528 | 50.191 | 33.427 | 59.149 | 0.00 | 0.00 |
| ATOM | 8046 | CB   | TRP | X | 528 | 48.974 | 32.728 | 57.510 | 0.00 | 0.00 |
| ATOM | 8047 | HB2  | TRP | X | 528 | 47.969 | 32.310 | 57.452 | 0.00 | 0.00 |
| ATOM | 8048 | HB3  | TRP | X | 528 | 48.971 | 33.687 | 56.992 | 0.00 | 0.00 |
| ATOM | 8049 | CG   | TRP | X | 528 | 49.962 | 31.880 | 56.788 | 0.00 | 0.00 |
| ATOM | 8050 | CD1  | TRP | X | 528 | 49.739 | 30.668 | 56.305 | 0.00 | 0.00 |
| ATOM | 8051 | HD1  | TRP | X | 528 | 48.791 | 30.161 | 56.400 | 0.00 | 0.00 |
| ATOM | 8052 | NE1  | TRP | X | 528 | 50.847 | 30.173 | 55.680 | 0.00 | 0.00 |
| ATOM | 8053 | HE1  | TRP | X | 528 | 50.807 | 29.258 | 55.255 | 0.00 | 0.00 |
| ATOM | 8054 | CE2  | TRP | X | 528 | 51.920 | 31.067 | 55.760 | 0.00 | 0.00 |
| ATOM | 8055 | CZ2  | TRP | X | 528 | 53.223 | 31.089 | 55.318 | 0.00 | 0.00 |
| ATOM | 8056 | HZ2  | TRP | X | 528 | 53.659 | 30.326 | 54.690 | 0.00 | 0.00 |
| ATOM | 8057 | CH2  | TRP | X | 528 | 54.008 | 32.225 | 55.629 | 0.00 | 0.00 |
| ATOM | 8058 | HH2  | TRP | X | 528 | 55.051 | 32.224 | 55.349 | 0.00 | 0.00 |
| ATOM | 8059 | CZ3  | TRP | X | 528 | 53.482 | 33.327 | 56.343 | 0.00 | 0.00 |
| ATOM | 8060 | HZ3  | TRP | X | 528 | 54.090 | 34.185 | 56.591 | 0.00 | 0.00 |
| ATOM | 8061 | CE3  | TRP | X | 528 | 52.201 | 33.240 | 56.828 | 0.00 | 0.00 |
| ATOM | 8062 | HE3  | TRP | X | 528 | 51.854 | 34.085 | 57.404 | 0.00 | 0.00 |
| ATOM | 8063 | CD2  | TRP | X | 528 | 51.384 | 32.151 | 56.543 | 0.00 | 0.00 |
| ATOM | 8064 | C    | TRP | X | 528 | 48.287 | 34.072 | 59.552 | 0.00 | 0.00 |
| ATOM | 8065 | O    | TRP | X | 528 | 48.209 | 35.127 | 58.917 | 0.00 | 0.00 |
| ATOM | 8066 | N    | ASN | X | 529 | 47.626 | 33.866 | 60.728 | 0.00 | 0.00 |
| ATOM | 8067 | H    | ASN | X | 529 | 47.612 | 32.935 | 61.121 | 0.00 | 0.00 |
| ATOM | 8068 | CA   | ASN | X | 529 | 46.767 | 34.848 | 61.407 | 0.00 | 0.00 |
| ATOM | 8069 | HA   | ASN | X | 529 | 46.757 | 35.858 | 60.996 | 0.00 | 0.00 |
| ATOM | 8070 | CB   | ASN | X | 529 | 45.374 | 34.265 | 61.222 | 0.00 | 0.00 |
| ATOM | 8071 | HB2  | ASN | X | 529 | 45.363 | 33.202 | 61.463 | 0.00 | 0.00 |
| ATOM | 8072 | HB3  | ASN | X | 529 | 44.673 | 34.614 | 61.981 | 0.00 | 0.00 |
| ATOM | 8073 | CG   | ASN | X | 529 | 44.850 | 34.470 | 59.824 | 0.00 | 0.00 |
| ATOM | 8074 | OD1  | ASN | X | 529 | 45.126 | 35.430 | 59.203 | 0.00 | 0.00 |
| ATOM | 8075 | ND2  | ASN | X | 529 | 44.304 | 33.452 | 59.088 | 0.00 | 0.00 |
| ATOM | 8076 | HD21 | ASN | X | 529 | 44.046 | 33.537 | 58.115 | 0.00 | 0.00 |
| ATOM | 8077 | HD22 | ASN | X | 529 | 44.408 | 32.525 | 59.476 | 0.00 | 0.00 |
| ATOM | 8078 | C    | ASN | X | 529 | 47.088 | 34.848 | 62.951 | 0.00 | 0.00 |
| ATOM | 8079 | O    | ASN | X | 529 | 47.027 | 35.916 | 63.491 | 0.00 | 0.00 |
| ATOM | 8080 | N    | ARG | X | 530 | 47.469 | 33.715 | 63.549 | 0.00 | 0.00 |
| ATOM | 8081 | H    | ARG | X | 530 | 47.572 | 32.880 | 62.990 | 0.00 | 0.00 |
| ATOM | 8082 | CA   | ARG | X | 530 | 47.769 | 33.671 | 64.996 | 0.00 | 0.00 |
| ATOM | 8083 | HA   | ARG | X | 530 | 47.413 | 34.553 | 65.529 | 0.00 | 0.00 |
| ATOM | 8084 | CB   | ARG | X | 530 | 47.123 | 32.447 | 65.666 | 0.00 | 0.00 |
| ATOM | 8085 | HB2  | ARG | X | 530 | 47.651 | 31.493 | 65.660 | 0.00 | 0.00 |
| ATOM | 8086 | HB3  | ARG | X | 530 | 47.025 | 32.652 | 66.732 | 0.00 | 0.00 |
| ATOM | 8087 | CG   | ARG | X | 530 | 45.671 | 32.277 | 65.202 | 0.00 | 0.00 |
| ATOM | 8088 | HG2  | ARG | X | 530 | 45.151 | 33.234 | 65.185 | 0.00 | 0.00 |
| ATOM | 8089 | HG3  | ARG | X | 530 | 45.572 | 31.965 | 64.162 | 0.00 | 0.00 |
| ATOM | 8090 | CD   | ARG | X | 530 | 44.842 | 31.444 | 66.102 | 0.00 | 0.00 |
| ATOM | 8091 | HD2  | ARG | X | 530 | 44.821 | 31.880 | 67.101 | 0.00 | 0.00 |

|      |      |      |     |   |     |        |        |        |      |      |
|------|------|------|-----|---|-----|--------|--------|--------|------|------|
| ATOM | 8092 | HD3  | ARG | X | 530 | 43.815 | 31.364 | 65.746 | 0.00 | 0.00 |
| ATOM | 8093 | NE   | ARG | X | 530 | 45.392 | 30.055 | 66.180 | 0.00 | 0.00 |
| ATOM | 8094 | HE   | ARG | X | 530 | 46.348 | 30.011 | 65.857 | 0.00 | 0.00 |
| ATOM | 8095 | CZ   | ARG | X | 530 | 44.970 | 29.187 | 67.086 | 0.00 | 0.00 |
| ATOM | 8096 | NH1  | ARG | X | 530 | 43.870 | 29.254 | 67.813 | 0.00 | 0.00 |
| ATOM | 8097 | HH11 | ARG | X | 530 | 43.168 | 29.939 | 67.570 | 0.00 | 0.00 |
| ATOM | 8098 | HH12 | ARG | X | 530 | 43.624 | 28.393 | 68.280 | 0.00 | 0.00 |
| ATOM | 8099 | NH2  | ARG | X | 530 | 45.782 | 28.134 | 67.221 | 0.00 | 0.00 |
| ATOM | 8100 | HH21 | ARG | X | 530 | 46.618 | 28.062 | 66.659 | 0.00 | 0.00 |
| ATOM | 8101 | HH22 | ARG | X | 530 | 45.567 | 27.461 | 67.943 | 0.00 | 0.00 |
| ATOM | 8102 | C    | ARG | X | 530 | 49.284 | 33.767 | 65.271 | 0.00 | 0.00 |
| ATOM | 8103 | O    | ARG | X | 530 | 49.661 | 34.626 | 66.031 | 0.00 | 0.00 |
| ATOM | 8104 | N    | PHE | X | 531 | 50.132 | 32.909 | 64.706 | 0.00 | 0.00 |
| ATOM | 8105 | H    | PHE | X | 531 | 49.756 | 32.154 | 64.151 | 0.00 | 0.00 |
| ATOM | 8106 | CA   | PHE | X | 531 | 51.532 | 32.910 | 65.072 | 0.00 | 0.00 |
| ATOM | 8107 | HA   | PHE | X | 531 | 51.681 | 33.111 | 66.132 | 0.00 | 0.00 |
| ATOM | 8108 | CB   | PHE | X | 531 | 52.129 | 31.495 | 64.836 | 0.00 | 0.00 |
| ATOM | 8109 | HB2  | PHE | X | 531 | 51.540 | 30.740 | 65.358 | 0.00 | 0.00 |
| ATOM | 8110 | HB3  | PHE | X | 531 | 51.883 | 31.313 | 63.790 | 0.00 | 0.00 |
| ATOM | 8111 | CG   | PHE | X | 531 | 53.624 | 31.394 | 65.013 | 0.00 | 0.00 |
| ATOM | 8112 | CD1  | PHE | X | 531 | 54.532 | 31.650 | 63.955 | 0.00 | 0.00 |
| ATOM | 8113 | HD1  | PHE | X | 531 | 54.241 | 31.901 | 62.946 | 0.00 | 0.00 |
| ATOM | 8114 | CE1  | PHE | X | 531 | 55.905 | 31.548 | 64.163 | 0.00 | 0.00 |
| ATOM | 8115 | HE1  | PHE | X | 531 | 56.576 | 31.554 | 63.317 | 0.00 | 0.00 |
| ATOM | 8116 | CZ   | PHE | X | 531 | 56.434 | 31.265 | 65.435 | 0.00 | 0.00 |
| ATOM | 8117 | HZ   | PHE | X | 531 | 57.489 | 31.077 | 65.572 | 0.00 | 0.00 |
| ATOM | 8118 | CE2  | PHE | X | 531 | 55.560 | 31.003 | 66.507 | 0.00 | 0.00 |
| ATOM | 8119 | HE2  | PHE | X | 531 | 55.978 | 30.634 | 67.432 | 0.00 | 0.00 |
| ATOM | 8120 | CD2  | PHE | X | 531 | 54.186 | 31.081 | 66.307 | 0.00 | 0.00 |
| ATOM | 8121 | HD2  | PHE | X | 531 | 53.551 | 30.871 | 67.154 | 0.00 | 0.00 |
| ATOM | 8122 | C    | PHE | X | 531 | 52.286 | 33.983 | 64.338 | 0.00 | 0.00 |
| ATOM | 8123 | O    | PHE | X | 531 | 52.735 | 34.957 | 64.924 | 0.00 | 0.00 |
| ATOM | 8124 | N    | LEU | X | 532 | 52.265 | 33.880 | 63.031 | 0.00 | 0.00 |
| ATOM | 8125 | H    | LEU | X | 532 | 51.629 | 33.300 | 62.502 | 0.00 | 0.00 |
| ATOM | 8126 | CA   | LEU | X | 532 | 53.215 | 34.601 | 62.189 | 0.00 | 0.00 |
| ATOM | 8127 | HA   | LEU | X | 532 | 54.225 | 34.534 | 62.593 | 0.00 | 0.00 |
| ATOM | 8128 | CB   | LEU | X | 532 | 53.245 | 34.040 | 60.787 | 0.00 | 0.00 |
| ATOM | 8129 | HB2  | LEU | X | 532 | 53.575 | 33.002 | 60.823 | 0.00 | 0.00 |
| ATOM | 8130 | HB3  | LEU | X | 532 | 52.214 | 34.065 | 60.432 | 0.00 | 0.00 |
| ATOM | 8131 | CG   | LEU | X | 532 | 54.151 | 34.606 | 59.646 | 0.00 | 0.00 |
| ATOM | 8132 | HG   | LEU | X | 532 | 54.198 | 33.804 | 58.910 | 0.00 | 0.00 |
| ATOM | 8133 | CD1  | LEU | X | 532 | 53.496 | 35.850 | 59.023 | 0.00 | 0.00 |
| ATOM | 8134 | HD11 | LEU | X | 532 | 54.133 | 36.116 | 58.179 | 0.00 | 0.00 |
| ATOM | 8135 | HD12 | LEU | X | 532 | 53.491 | 36.720 | 59.681 | 0.00 | 0.00 |
| ATOM | 8136 | HD13 | LEU | X | 532 | 52.467 | 35.744 | 58.681 | 0.00 | 0.00 |
| ATOM | 8137 | CD2  | LEU | X | 532 | 55.634 | 34.928 | 60.085 | 0.00 | 0.00 |
| ATOM | 8138 | HD21 | LEU | X | 532 | 56.153 | 34.074 | 60.520 | 0.00 | 0.00 |
| ATOM | 8139 | HD22 | LEU | X | 532 | 56.143 | 35.092 | 59.136 | 0.00 | 0.00 |
| ATOM | 8140 | HD23 | LEU | X | 532 | 55.717 | 35.846 | 60.668 | 0.00 | 0.00 |
| ATOM | 8141 | C    | LEU | X | 532 | 52.844 | 36.132 | 62.189 | 0.00 | 0.00 |
| ATOM | 8142 | O    | LEU | X | 532 | 53.811 | 36.856 | 62.261 | 0.00 | 0.00 |
| ATOM | 8143 | N    | PRO | X | 533 | 51.643 | 36.662 | 62.198 | 0.00 | 0.00 |
| ATOM | 8144 | CD   | PRO | X | 533 | 50.389 | 35.969 | 61.897 | 0.00 | 0.00 |
| ATOM | 8145 | HD2  | PRO | X | 533 | 50.058 | 35.585 | 62.862 | 0.00 | 0.00 |
| ATOM | 8146 | HD3  | PRO | X | 533 | 50.530 | 35.313 | 61.038 | 0.00 | 0.00 |
| ATOM | 8147 | CG   | PRO | X | 533 | 49.469 | 37.192 | 61.492 | 0.00 | 0.00 |
| ATOM | 8148 | HG2  | PRO | X | 533 | 48.423 | 36.945 | 61.671 | 0.00 | 0.00 |
| ATOM | 8149 | HG3  | PRO | X | 533 | 49.529 | 37.400 | 60.423 | 0.00 | 0.00 |
| ATOM | 8150 | CB   | PRO | X | 533 | 49.881 | 38.406 | 62.329 | 0.00 | 0.00 |
| ATOM | 8151 | HB2  | PRO | X | 533 | 49.372 | 38.394 | 63.293 | 0.00 | 0.00 |
| ATOM | 8152 | HB3  | PRO | X | 533 | 49.795 | 39.384 | 61.856 | 0.00 | 0.00 |
| ATOM | 8153 | CA   | PRO | X | 533 | 51.378 | 38.111 | 62.326 | 0.00 | 0.00 |
| ATOM | 8154 | HA   | PRO | X | 533 | 51.838 | 38.526 | 61.429 | 0.00 | 0.00 |
| ATOM | 8155 | C    | PRO | X | 533 | 52.018 | 38.778 | 63.548 | 0.00 | 0.00 |
| ATOM | 8156 | O    | PRO | X | 533 | 52.214 | 39.946 | 63.514 | 0.00 | 0.00 |
| ATOM | 8157 | N    | LYS | X | 534 | 52.241 | 37.974 | 64.615 | 0.00 | 0.00 |
| ATOM | 8158 | H    | LYS | X | 534 | 52.016 | 36.990 | 64.590 | 0.00 | 0.00 |

|      |      |      |     |   |     |        |        |        |      |      |
|------|------|------|-----|---|-----|--------|--------|--------|------|------|
| ATOM | 8159 | CA   | LYS | X | 534 | 52.932 | 38.443 | 65.862 | 0.00 | 0.00 |
| ATOM | 8160 | HA   | LYS | X | 534 | 52.510 | 39.426 | 66.075 | 0.00 | 0.00 |
| ATOM | 8161 | CB   | LYS | X | 534 | 52.525 | 37.579 | 67.063 | 0.00 | 0.00 |
| ATOM | 8162 | HB2  | LYS | X | 534 | 52.677 | 36.520 | 66.852 | 0.00 | 0.00 |
| ATOM | 8163 | HB3  | LYS | X | 534 | 53.264 | 37.779 | 67.838 | 0.00 | 0.00 |
| ATOM | 8164 | CG   | LYS | X | 534 | 51.135 | 37.841 | 67.503 | 0.00 | 0.00 |
| ATOM | 8165 | HG2  | LYS | X | 534 | 51.035 | 38.875 | 67.835 | 0.00 | 0.00 |
| ATOM | 8166 | HG3  | LYS | X | 534 | 50.522 | 37.685 | 66.615 | 0.00 | 0.00 |
| ATOM | 8167 | CD   | LYS | X | 534 | 50.769 | 36.916 | 68.629 | 0.00 | 0.00 |
| ATOM | 8168 | HD2  | LYS | X | 534 | 50.920 | 35.893 | 68.283 | 0.00 | 0.00 |
| ATOM | 8169 | HD3  | LYS | X | 534 | 51.455 | 37.157 | 69.440 | 0.00 | 0.00 |
| ATOM | 8170 | CE   | LYS | X | 534 | 49.299 | 37.105 | 68.899 | 0.00 | 0.00 |
| ATOM | 8171 | HE2  | LYS | X | 534 | 49.112 | 36.826 | 69.936 | 0.00 | 0.00 |
| ATOM | 8172 | HE3  | LYS | X | 534 | 49.075 | 38.170 | 68.840 | 0.00 | 0.00 |
| ATOM | 8173 | NZ   | LYS | X | 534 | 48.373 | 36.351 | 67.989 | 0.00 | 0.00 |
| ATOM | 8174 | HZ1  | LYS | X | 534 | 47.438 | 36.314 | 68.368 | 0.00 | 0.00 |
| ATOM | 8175 | HZ2  | LYS | X | 534 | 48.310 | 36.797 | 67.085 | 0.00 | 0.00 |
| ATOM | 8176 | HZ3  | LYS | X | 534 | 48.637 | 35.392 | 67.817 | 0.00 | 0.00 |
| ATOM | 8177 | C    | LYS | X | 534 | 54.460 | 38.746 | 65.621 | 0.00 | 0.00 |
| ATOM | 8178 | O    | LYS | X | 534 | 55.091 | 39.676 | 66.105 | 0.00 | 0.00 |
| ATOM | 8179 | N    | LEU | X | 535 | 55.047 | 37.926 | 64.757 | 0.00 | 0.00 |
| ATOM | 8180 | H    | LEU | X | 535 | 54.416 | 37.230 | 64.386 | 0.00 | 0.00 |
| ATOM | 8181 | CA   | LEU | X | 535 | 56.430 | 38.097 | 64.182 | 0.00 | 0.00 |
| ATOM | 8182 | HA   | LEU | X | 535 | 57.110 | 38.439 | 64.962 | 0.00 | 0.00 |
| ATOM | 8183 | CB   | LEU | X | 535 | 56.997 | 36.667 | 63.790 | 0.00 | 0.00 |
| ATOM | 8184 | HB2  | LEU | X | 535 | 56.323 | 36.106 | 63.142 | 0.00 | 0.00 |
| ATOM | 8185 | HB3  | LEU | X | 535 | 57.861 | 36.862 | 63.155 | 0.00 | 0.00 |
| ATOM | 8186 | CG   | LEU | X | 535 | 57.471 | 35.720 | 64.871 | 0.00 | 0.00 |
| ATOM | 8187 | HG   | LEU | X | 535 | 58.083 | 36.322 | 65.542 | 0.00 | 0.00 |
| ATOM | 8188 | CD1  | LEU | X | 535 | 56.287 | 35.098 | 65.684 | 0.00 | 0.00 |
| ATOM | 8189 | HD11 | LEU | X | 535 | 55.773 | 35.942 | 66.144 | 0.00 | 0.00 |
| ATOM | 8190 | HD12 | LEU | X | 535 | 56.763 | 34.448 | 66.419 | 0.00 | 0.00 |
| ATOM | 8191 | HD13 | LEU | X | 535 | 55.555 | 34.531 | 65.108 | 0.00 | 0.00 |
| ATOM | 8192 | CD2  | LEU | X | 535 | 58.205 | 34.477 | 64.300 | 0.00 | 0.00 |
| ATOM | 8193 | HD21 | LEU | X | 535 | 57.504 | 34.006 | 63.611 | 0.00 | 0.00 |
| ATOM | 8194 | HD22 | LEU | X | 535 | 58.980 | 34.808 | 63.609 | 0.00 | 0.00 |
| ATOM | 8195 | HD23 | LEU | X | 535 | 58.615 | 33.812 | 65.060 | 0.00 | 0.00 |
| ATOM | 8196 | C    | LEU | X | 535 | 56.566 | 39.145 | 63.057 | 0.00 | 0.00 |
| ATOM | 8197 | O    | LEU | X | 535 | 57.361 | 40.065 | 63.191 | 0.00 | 0.00 |
| ATOM | 8198 | N    | LEU | X | 536 | 55.766 | 38.963 | 62.030 | 0.00 | 0.00 |
| ATOM | 8199 | H    | LEU | X | 536 | 55.232 | 38.106 | 62.012 | 0.00 | 0.00 |
| ATOM | 8200 | CA   | LEU | X | 536 | 55.644 | 39.887 | 60.875 | 0.00 | 0.00 |
| ATOM | 8201 | HA   | LEU | X | 536 | 56.647 | 39.879 | 60.449 | 0.00 | 0.00 |
| ATOM | 8202 | CB   | LEU | X | 536 | 54.527 | 39.321 | 60.017 | 0.00 | 0.00 |
| ATOM | 8203 | HB2  | LEU | X | 536 | 54.931 | 38.369 | 59.673 | 0.00 | 0.00 |
| ATOM | 8204 | HB3  | LEU | X | 536 | 53.649 | 39.126 | 60.632 | 0.00 | 0.00 |
| ATOM | 8205 | CG   | LEU | X | 536 | 54.198 | 40.160 | 58.668 | 0.00 | 0.00 |
| ATOM | 8206 | HG   | LEU | X | 536 | 53.878 | 41.147 | 59.003 | 0.00 | 0.00 |
| ATOM | 8207 | CD1  | LEU | X | 536 | 55.361 | 40.270 | 57.641 | 0.00 | 0.00 |
| ATOM | 8208 | HD11 | LEU | X | 536 | 56.260 | 40.683 | 58.098 | 0.00 | 0.00 |
| ATOM | 8209 | HD12 | LEU | X | 536 | 54.965 | 40.747 | 56.744 | 0.00 | 0.00 |
| ATOM | 8210 | HD13 | LEU | X | 536 | 55.591 | 39.245 | 57.351 | 0.00 | 0.00 |
| ATOM | 8211 | CD2  | LEU | X | 536 | 53.054 | 39.406 | 57.836 | 0.00 | 0.00 |
| ATOM | 8212 | HD21 | LEU | X | 536 | 53.475 | 38.535 | 57.334 | 0.00 | 0.00 |
| ATOM | 8213 | HD22 | LEU | X | 536 | 52.261 | 39.194 | 58.553 | 0.00 | 0.00 |
| ATOM | 8214 | HD23 | LEU | X | 536 | 52.777 | 40.133 | 57.072 | 0.00 | 0.00 |
| ATOM | 8215 | C    | LEU | X | 536 | 55.525 | 41.442 | 61.186 | 0.00 | 0.00 |
| ATOM | 8216 | O    | LEU | X | 536 | 56.176 | 42.218 | 60.429 | 0.00 | 0.00 |
| ATOM | 8217 | N    | SER | X | 537 | 54.796 | 41.810 | 62.265 | 0.00 | 0.00 |
| ATOM | 8218 | H    | SER | X | 537 | 54.203 | 41.174 | 62.779 | 0.00 | 0.00 |
| ATOM | 8219 | CA   | SER | X | 537 | 54.731 | 43.208 | 62.848 | 0.00 | 0.00 |
| ATOM | 8220 | HA   | SER | X | 537 | 54.567 | 43.854 | 61.985 | 0.00 | 0.00 |
| ATOM | 8221 | CB   | SER | X | 537 | 53.503 | 43.314 | 63.776 | 0.00 | 0.00 |
| ATOM | 8222 | HB2  | SER | X | 537 | 53.394 | 44.373 | 64.007 | 0.00 | 0.00 |
| ATOM | 8223 | HB3  | SER | X | 537 | 52.630 | 42.974 | 63.218 | 0.00 | 0.00 |
| ATOM | 8224 | OG   | SER | X | 537 | 53.704 | 42.463 | 64.892 | 0.00 | 0.00 |
| ATOM | 8225 | HG   | SER | X | 537 | 52.982 | 42.572 | 65.516 | 0.00 | 0.00 |

|      |      |      |     |   |     |        |        |        |      |      |
|------|------|------|-----|---|-----|--------|--------|--------|------|------|
| ATOM | 8226 | C    | SER | X | 537 | 55.916 | 43.764 | 63.536 | 0.00 | 0.00 |
| ATOM | 8227 | O    | SER | X | 537 | 55.937 | 45.000 | 63.616 | 0.00 | 0.00 |
| ATOM | 8228 | N    | ALA | X | 538 | 56.780 | 42.845 | 63.979 | 0.00 | 0.00 |
| ATOM | 8229 | H    | ALA | X | 538 | 56.683 | 41.874 | 63.716 | 0.00 | 0.00 |
| ATOM | 8230 | CA   | ALA | X | 538 | 58.020 | 43.164 | 64.709 | 0.00 | 0.00 |
| ATOM | 8231 | HA   | ALA | X | 538 | 58.654 | 43.635 | 63.957 | 0.00 | 0.00 |
| ATOM | 8232 | CB   | ALA | X | 538 | 57.730 | 44.069 | 66.001 | 0.00 | 0.00 |
| ATOM | 8233 | HB1  | ALA | X | 538 | 58.612 | 44.100 | 66.641 | 0.00 | 0.00 |
| ATOM | 8234 | HB2  | ALA | X | 538 | 56.972 | 43.539 | 66.577 | 0.00 | 0.00 |
| ATOM | 8235 | HB3  | ALA | X | 538 | 57.406 | 45.088 | 65.790 | 0.00 | 0.00 |
| ATOM | 8236 | C    | ALA | X | 538 | 58.890 | 41.976 | 65.171 | 0.00 | 0.00 |
| ATOM | 8237 | O    | ALA | X | 538 | 58.458 | 41.154 | 65.934 | 0.00 | 0.00 |
| ATOM | 8238 | N    | THR | X | 539 | 60.131 | 41.853 | 64.612 | 0.00 | 0.00 |
| ATOM | 8239 | H    | THR | X | 539 | 60.291 | 42.546 | 63.895 | 0.00 | 0.00 |
| ATOM | 8240 | CA   | THR | X | 539 | 61.234 | 40.963 | 64.969 | 0.00 | 0.00 |
| ATOM | 8241 | HA   | THR | X | 539 | 61.349 | 40.983 | 66.053 | 0.00 | 0.00 |
| ATOM | 8242 | CB   | THR | X | 539 | 61.089 | 39.473 | 64.665 | 0.00 | 0.00 |
| ATOM | 8243 | HB   | THR | X | 539 | 61.064 | 39.356 | 63.581 | 0.00 | 0.00 |
| ATOM | 8244 | CG2  | THR | X | 539 | 62.161 | 38.630 | 65.257 | 0.00 | 0.00 |
| ATOM | 8245 | HG21 | THR | X | 539 | 61.935 | 37.568 | 65.161 | 0.00 | 0.00 |
| ATOM | 8246 | HG22 | THR | X | 539 | 62.160 | 38.789 | 66.335 | 0.00 | 0.00 |
| ATOM | 8247 | HG23 | THR | X | 539 | 63.144 | 38.978 | 64.939 | 0.00 | 0.00 |
| ATOM | 8248 | OG1  | THR | X | 539 | 59.830 | 38.989 | 65.197 | 0.00 | 0.00 |
| ATOM | 8249 | HG1  | THR | X | 539 | 59.406 | 39.785 | 65.528 | 0.00 | 0.00 |
| ATOM | 8250 | C    | THR | X | 539 | 62.481 | 41.483 | 64.363 | 0.00 | 0.00 |
| ATOM | 8251 | O    | THR | X | 539 | 62.443 | 41.444 | 63.113 | 0.00 | 0.00 |
| ATOM | 8252 | OXT  | THR | X | 539 | 63.409 | 41.863 | 65.133 | 0.00 | 0.00 |

END

#-----  
# 1B41 Production MD Frame 1000  
#-----

| CRYST1 | 82.043 | 82.043 | 82.043 | 90.00 | 90.00 | 90.00  | P 1    | 1      |      |      |
|--------|--------|--------|--------|-------|-------|--------|--------|--------|------|------|
| ATOM   | 1      | N      | ASP    | X     | 1     | 20.710 | 46.111 | 7.496  | 0.00 | 0.00 |
| ATOM   | 2      | H1     | ASP    | X     | 1     | 20.426 | 45.760 | 6.593  | 0.00 | 0.00 |
| ATOM   | 3      | H2     | ASP    | X     | 1     | 20.346 | 45.499 | 8.212  | 0.00 | 0.00 |
| ATOM   | 4      | H3     | ASP    | X     | 1     | 21.708 | 45.982 | 7.586  | 0.00 | 0.00 |
| ATOM   | 5      | CA     | ASP    | X     | 1     | 20.290 | 47.558 | 7.673  | 0.00 | 0.00 |
| ATOM   | 6      | HA     | ASP    | X     | 1     | 20.783 | 48.052 | 6.835  | 0.00 | 0.00 |
| ATOM   | 7      | CB     | ASP    | X     | 1     | 18.767 | 47.778 | 7.507  | 0.00 | 0.00 |
| ATOM   | 8      | HB2    | ASP    | X     | 1     | 18.466 | 47.405 | 6.528  | 0.00 | 0.00 |
| ATOM   | 9      | HB3    | ASP    | X     | 1     | 18.279 | 47.268 | 8.338  | 0.00 | 0.00 |
| ATOM   | 10     | CG     | ASP    | X     | 1     | 18.379 | 49.249 | 7.589  | 0.00 | 0.00 |
| ATOM   | 11     | OD1    | ASP    | X     | 1     | 17.204 | 49.526 | 7.532  | 0.00 | 0.00 |
| ATOM   | 12     | OD2    | ASP    | X     | 1     | 19.294 | 50.128 | 7.555  | 0.00 | 0.00 |
| ATOM   | 13     | C      | ASP    | X     | 1     | 20.877 | 48.072 | 9.044  | 0.00 | 0.00 |
| ATOM   | 14     | O      | ASP    | X     | 1     | 22.058 | 48.277 | 9.141  | 0.00 | 0.00 |
| ATOM   | 15     | N      | ALA    | X     | 2     | 20.086 | 48.272 | 10.118 | 0.00 | 0.00 |
| ATOM   | 16     | H      | ALA    | X     | 2     | 19.138 | 47.926 | 10.113 | 0.00 | 0.00 |
| ATOM   | 17     | CA     | ALA    | X     | 2     | 20.519 | 48.972 | 11.325 | 0.00 | 0.00 |
| ATOM   | 18     | HA     | ALA    | X     | 2     | 21.375 | 49.594 | 11.061 | 0.00 | 0.00 |
| ATOM   | 19     | CB     | ALA    | X     | 2     | 19.344 | 49.914 | 11.728 | 0.00 | 0.00 |
| ATOM   | 20     | HB1    | ALA    | X     | 2     | 19.096 | 50.600 | 10.918 | 0.00 | 0.00 |
| ATOM   | 21     | HB2    | ALA    | X     | 2     | 19.657 | 50.618 | 12.499 | 0.00 | 0.00 |
| ATOM   | 22     | HB3    | ALA    | X     | 2     | 18.553 | 49.374 | 12.250 | 0.00 | 0.00 |
| ATOM   | 23     | C      | ALA    | X     | 2     | 20.935 | 48.114 | 12.479 | 0.00 | 0.00 |
| ATOM   | 24     | O      | ALA    | X     | 2     | 20.842 | 48.610 | 13.605 | 0.00 | 0.00 |
| ATOM   | 25     | N      | GLU    | X     | 3     | 21.337 | 46.847 | 12.269 | 0.00 | 0.00 |
| ATOM   | 26     | H      | GLU    | X     | 3     | 21.442 | 46.423 | 11.358 | 0.00 | 0.00 |
| ATOM   | 27     | CA     | GLU    | X     | 3     | 21.326 | 45.936 | 13.372 | 0.00 | 0.00 |
| ATOM   | 28     | HA     | GLU    | X     | 3     | 20.470 | 46.113 | 14.024 | 0.00 | 0.00 |
| ATOM   | 29     | CB     | GLU    | X     | 3     | 21.436 | 44.534 | 12.826 | 0.00 | 0.00 |
| ATOM   | 30     | HB2    | GLU    | X     | 3     | 22.478 | 44.422 | 12.526 | 0.00 | 0.00 |
| ATOM   | 31     | HB3    | GLU    | X     | 3     | 21.380 | 43.901 | 13.712 | 0.00 | 0.00 |

|      |    |      |     |   |   |        |        |        |      |      |
|------|----|------|-----|---|---|--------|--------|--------|------|------|
| ATOM | 32 | CG   | GLU | X | 3 | 20.392 | 43.952 | 11.911 | 0.00 | 0.00 |
| ATOM | 33 | HG2  | GLU | X | 3 | 20.381 | 42.863 | 11.872 | 0.00 | 0.00 |
| ATOM | 34 | HG3  | GLU | X | 3 | 19.414 | 44.212 | 12.316 | 0.00 | 0.00 |
| ATOM | 35 | CD   | GLU | X | 3 | 20.422 | 44.554 | 10.506 | 0.00 | 0.00 |
| ATOM | 36 | OE1  | GLU | X | 3 | 21.476 | 44.709 | 9.854  | 0.00 | 0.00 |
| ATOM | 37 | OE2  | GLU | X | 3 | 19.388 | 45.043 | 10.054 | 0.00 | 0.00 |
| ATOM | 38 | C    | GLU | X | 3 | 22.450 | 46.272 | 14.384 | 0.00 | 0.00 |
| ATOM | 39 | O    | GLU | X | 3 | 22.347 | 45.934 | 15.597 | 0.00 | 0.00 |
| ATOM | 40 | N    | LEU | X | 4 | 23.525 | 46.883 | 13.945 | 0.00 | 0.00 |
| ATOM | 41 | H    | LEU | X | 4 | 23.633 | 47.124 | 12.970 | 0.00 | 0.00 |
| ATOM | 42 | CA   | LEU | X | 4 | 24.593 | 47.506 | 14.753 | 0.00 | 0.00 |
| ATOM | 43 | HA   | LEU | X | 4 | 24.802 | 46.899 | 15.634 | 0.00 | 0.00 |
| ATOM | 44 | CB   | LEU | X | 4 | 25.929 | 47.403 | 13.927 | 0.00 | 0.00 |
| ATOM | 45 | HB2  | LEU | X | 4 | 25.960 | 48.142 | 13.126 | 0.00 | 0.00 |
| ATOM | 46 | HB3  | LEU | X | 4 | 26.783 | 47.648 | 14.559 | 0.00 | 0.00 |
| ATOM | 47 | CG   | LEU | X | 4 | 26.287 | 45.988 | 13.394 | 0.00 | 0.00 |
| ATOM | 48 | HG   | LEU | X | 4 | 25.413 | 45.462 | 13.009 | 0.00 | 0.00 |
| ATOM | 49 | CD1  | LEU | X | 4 | 27.383 | 46.063 | 12.349 | 0.00 | 0.00 |
| ATOM | 50 | HD11 | LEU | X | 4 | 27.359 | 45.148 | 11.757 | 0.00 | 0.00 |
| ATOM | 51 | HD12 | LEU | X | 4 | 28.375 | 46.151 | 12.791 | 0.00 | 0.00 |
| ATOM | 52 | HD13 | LEU | X | 4 | 27.357 | 46.938 | 11.699 | 0.00 | 0.00 |
| ATOM | 53 | CD2  | LEU | X | 4 | 26.653 | 45.081 | 14.512 | 0.00 | 0.00 |
| ATOM | 54 | HD21 | LEU | X | 4 | 26.702 | 44.082 | 14.080 | 0.00 | 0.00 |
| ATOM | 55 | HD22 | LEU | X | 4 | 27.543 | 45.388 | 15.061 | 0.00 | 0.00 |
| ATOM | 56 | HD23 | LEU | X | 4 | 25.775 | 44.946 | 15.144 | 0.00 | 0.00 |
| ATOM | 57 | C    | LEU | X | 4 | 24.386 | 48.974 | 15.153 | 0.00 | 0.00 |
| ATOM | 58 | O    | LEU | X | 4 | 25.331 | 49.662 | 15.495 | 0.00 | 0.00 |
| ATOM | 59 | N    | LEU | X | 5 | 23.169 | 49.519 | 15.184 | 0.00 | 0.00 |
| ATOM | 60 | H    | LEU | X | 5 | 22.429 | 48.896 | 14.892 | 0.00 | 0.00 |
| ATOM | 61 | CA   | LEU | X | 5 | 22.883 | 50.929 | 15.613 | 0.00 | 0.00 |
| ATOM | 62 | HA   | LEU | X | 5 | 23.790 | 51.458 | 15.906 | 0.00 | 0.00 |
| ATOM | 63 | CB   | LEU | X | 5 | 22.232 | 51.657 | 14.370 | 0.00 | 0.00 |
| ATOM | 64 | HB2  | LEU | X | 5 | 22.696 | 51.233 | 13.481 | 0.00 | 0.00 |
| ATOM | 65 | HB3  | LEU | X | 5 | 21.185 | 51.372 | 14.268 | 0.00 | 0.00 |
| ATOM | 66 | CG   | LEU | X | 5 | 22.396 | 53.217 | 14.238 | 0.00 | 0.00 |
| ATOM | 67 | HG   | LEU | X | 5 | 21.774 | 53.510 | 13.392 | 0.00 | 0.00 |
| ATOM | 68 | CD1  | LEU | X | 5 | 21.833 | 54.114 | 15.341 | 0.00 | 0.00 |
| ATOM | 69 | HD11 | LEU | X | 5 | 22.089 | 55.157 | 15.155 | 0.00 | 0.00 |
| ATOM | 70 | HD12 | LEU | X | 5 | 22.380 | 53.872 | 16.252 | 0.00 | 0.00 |
| ATOM | 71 | HD13 | LEU | X | 5 | 20.751 | 53.986 | 15.341 | 0.00 | 0.00 |
| ATOM | 72 | CD2  | LEU | X | 5 | 23.843 | 53.701 | 14.009 | 0.00 | 0.00 |
| ATOM | 73 | HD21 | LEU | X | 5 | 23.945 | 54.717 | 13.625 | 0.00 | 0.00 |
| ATOM | 74 | HD22 | LEU | X | 5 | 24.411 | 53.713 | 14.939 | 0.00 | 0.00 |
| ATOM | 75 | HD23 | LEU | X | 5 | 24.310 | 53.009 | 13.308 | 0.00 | 0.00 |
| ATOM | 76 | C    | LEU | X | 5 | 21.860 | 50.813 | 16.767 | 0.00 | 0.00 |
| ATOM | 77 | O    | LEU | X | 5 | 20.866 | 50.072 | 16.640 | 0.00 | 0.00 |
| ATOM | 78 | N    | VAL | X | 6 | 21.957 | 51.640 | 17.799 | 0.00 | 0.00 |
| ATOM | 79 | H    | VAL | X | 6 | 22.795 | 52.200 | 17.731 | 0.00 | 0.00 |
| ATOM | 80 | CA   | VAL | X | 6 | 21.299 | 51.451 | 19.082 | 0.00 | 0.00 |
| ATOM | 81 | HA   | VAL | X | 6 | 20.285 | 51.093 | 18.906 | 0.00 | 0.00 |
| ATOM | 82 | CB   | VAL | X | 6 | 22.057 | 50.360 | 19.976 | 0.00 | 0.00 |
| ATOM | 83 | HB   | VAL | X | 6 | 23.121 | 50.506 | 19.787 | 0.00 | 0.00 |
| ATOM | 84 | CG1  | VAL | X | 6 | 22.019 | 50.546 | 21.533 | 0.00 | 0.00 |
| ATOM | 85 | HG11 | VAL | X | 6 | 22.480 | 51.498 | 21.798 | 0.00 | 0.00 |
| ATOM | 86 | HG12 | VAL | X | 6 | 20.986 | 50.561 | 21.879 | 0.00 | 0.00 |
| ATOM | 87 | HG13 | VAL | X | 6 | 22.623 | 49.811 | 22.066 | 0.00 | 0.00 |
| ATOM | 88 | CG2  | VAL | X | 6 | 21.945 | 48.765 | 19.690 | 0.00 | 0.00 |
| ATOM | 89 | HG21 | VAL | X | 6 | 22.637 | 48.266 | 20.369 | 0.00 | 0.00 |
| ATOM | 90 | HG22 | VAL | X | 6 | 22.309 | 48.593 | 18.677 | 0.00 | 0.00 |
| ATOM | 91 | HG23 | VAL | X | 6 | 20.928 | 48.644 | 20.064 | 0.00 | 0.00 |
| ATOM | 92 | C    | VAL | X | 6 | 21.172 | 52.826 | 19.755 | 0.00 | 0.00 |
| ATOM | 93 | O    | VAL | X | 6 | 22.140 | 53.615 | 19.773 | 0.00 | 0.00 |
| ATOM | 94 | N    | THR | X | 7 | 19.990 | 53.107 | 20.378 | 0.00 | 0.00 |
| ATOM | 95 | H    | THR | X | 7 | 19.361 | 52.317 | 20.398 | 0.00 | 0.00 |
| ATOM | 96 | CA   | THR | X | 7 | 19.599 | 54.349 | 21.144 | 0.00 | 0.00 |
| ATOM | 97 | HA   | THR | X | 7 | 20.289 | 55.152 | 20.885 | 0.00 | 0.00 |
| ATOM | 98 | CB   | THR | X | 7 | 18.149 | 54.805 | 20.780 | 0.00 | 0.00 |

|      |     |      |     |   |    |        |        |        |      |      |
|------|-----|------|-----|---|----|--------|--------|--------|------|------|
| ATOM | 99  | HB   | THR | X | 7  | 17.443 | 54.075 | 21.177 | 0.00 | 0.00 |
| ATOM | 100 | CG2  | THR | X | 7  | 17.918 | 56.231 | 21.385 | 0.00 | 0.00 |
| ATOM | 101 | HG21 | THR | X | 7  | 16.889 | 56.558 | 21.241 | 0.00 | 0.00 |
| ATOM | 102 | HG22 | THR | X | 7  | 18.669 | 56.933 | 21.022 | 0.00 | 0.00 |
| ATOM | 103 | HG23 | THR | X | 7  | 17.975 | 56.237 | 22.474 | 0.00 | 0.00 |
| ATOM | 104 | OG1  | THR | X | 7  | 18.084 | 54.955 | 19.337 | 0.00 | 0.00 |
| ATOM | 105 | HG1  | THR | X | 7  | 17.671 | 55.803 | 19.153 | 0.00 | 0.00 |
| ATOM | 106 | C    | THR | X | 7  | 19.735 | 54.042 | 22.651 | 0.00 | 0.00 |
| ATOM | 107 | O    | THR | X | 7  | 19.338 | 52.995 | 23.179 | 0.00 | 0.00 |
| ATOM | 108 | N    | VAL | X | 8  | 20.343 | 55.026 | 23.293 | 0.00 | 0.00 |
| ATOM | 109 | H    | VAL | X | 8  | 20.576 | 55.895 | 22.833 | 0.00 | 0.00 |
| ATOM | 110 | CA   | VAL | X | 8  | 20.670 | 55.110 | 24.735 | 0.00 | 0.00 |
| ATOM | 111 | HA   | VAL | X | 8  | 20.143 | 54.333 | 25.287 | 0.00 | 0.00 |
| ATOM | 112 | CB   | VAL | X | 8  | 22.147 | 54.818 | 25.009 | 0.00 | 0.00 |
| ATOM | 113 | HB   | VAL | X | 8  | 22.387 | 55.002 | 26.056 | 0.00 | 0.00 |
| ATOM | 114 | CG1  | VAL | X | 8  | 22.603 | 53.308 | 24.896 | 0.00 | 0.00 |
| ATOM | 115 | HG11 | VAL | X | 8  | 23.628 | 53.356 | 25.264 | 0.00 | 0.00 |
| ATOM | 116 | HG12 | VAL | X | 8  | 22.018 | 52.712 | 25.597 | 0.00 | 0.00 |
| ATOM | 117 | HG13 | VAL | X | 8  | 22.567 | 52.965 | 23.863 | 0.00 | 0.00 |
| ATOM | 118 | CG2  | VAL | X | 8  | 23.150 | 55.673 | 24.134 | 0.00 | 0.00 |
| ATOM | 119 | HG21 | VAL | X | 8  | 23.001 | 56.743 | 24.277 | 0.00 | 0.00 |
| ATOM | 120 | HG22 | VAL | X | 8  | 23.071 | 55.411 | 23.079 | 0.00 | 0.00 |
| ATOM | 121 | HG23 | VAL | X | 8  | 24.116 | 55.238 | 24.390 | 0.00 | 0.00 |
| ATOM | 122 | C    | VAL | X | 8  | 20.202 | 56.463 | 25.193 | 0.00 | 0.00 |
| ATOM | 123 | O    | VAL | X | 8  | 19.930 | 57.399 | 24.407 | 0.00 | 0.00 |
| ATOM | 124 | N    | ARG | X | 9  | 20.153 | 56.708 | 26.482 | 0.00 | 0.00 |
| ATOM | 125 | H    | ARG | X | 9  | 20.399 | 56.004 | 27.163 | 0.00 | 0.00 |
| ATOM | 126 | CA   | ARG | X | 9  | 19.461 | 57.976 | 26.931 | 0.00 | 0.00 |
| ATOM | 127 | HA   | ARG | X | 9  | 18.435 | 57.993 | 26.563 | 0.00 | 0.00 |
| ATOM | 128 | CB   | ARG | X | 9  | 19.429 | 57.978 | 28.518 | 0.00 | 0.00 |
| ATOM | 129 | HB2  | ARG | X | 9  | 18.912 | 57.130 | 28.967 | 0.00 | 0.00 |
| ATOM | 130 | HB3  | ARG | X | 9  | 20.458 | 58.040 | 28.873 | 0.00 | 0.00 |
| ATOM | 131 | CG   | ARG | X | 9  | 18.798 | 59.233 | 29.075 | 0.00 | 0.00 |
| ATOM | 132 | HG2  | ARG | X | 9  | 19.425 | 60.093 | 28.838 | 0.00 | 0.00 |
| ATOM | 133 | HG3  | ARG | X | 9  | 17.803 | 59.457 | 28.691 | 0.00 | 0.00 |
| ATOM | 134 | CD   | ARG | X | 9  | 18.707 | 59.099 | 30.676 | 0.00 | 0.00 |
| ATOM | 135 | HD2  | ARG | X | 9  | 18.538 | 58.044 | 30.892 | 0.00 | 0.00 |
| ATOM | 136 | HD3  | ARG | X | 9  | 19.683 | 59.413 | 31.048 | 0.00 | 0.00 |
| ATOM | 137 | NE   | ARG | X | 9  | 17.664 | 59.963 | 31.251 | 0.00 | 0.00 |
| ATOM | 138 | HE   | ARG | X | 9  | 17.035 | 60.477 | 30.651 | 0.00 | 0.00 |
| ATOM | 139 | CZ   | ARG | X | 9  | 17.443 | 60.128 | 32.550 | 0.00 | 0.00 |
| ATOM | 140 | NH1  | ARG | X | 9  | 18.064 | 59.563 | 33.560 | 0.00 | 0.00 |
| ATOM | 141 | HH11 | ARG | X | 9  | 18.890 | 59.007 | 33.393 | 0.00 | 0.00 |
| ATOM | 142 | HH12 | ARG | X | 9  | 17.898 | 59.909 | 34.494 | 0.00 | 0.00 |
| ATOM | 143 | NH2  | ARG | X | 9  | 16.431 | 60.961 | 32.859 | 0.00 | 0.00 |
| ATOM | 144 | HH21 | ARG | X | 9  | 15.920 | 61.433 | 32.126 | 0.00 | 0.00 |
| ATOM | 145 | HH22 | ARG | X | 9  | 16.006 | 60.935 | 33.775 | 0.00 | 0.00 |
| ATOM | 146 | C    | ARG | X | 9  | 20.082 | 59.281 | 26.366 | 0.00 | 0.00 |
| ATOM | 147 | O    | ARG | X | 9  | 19.394 | 60.313 | 26.116 | 0.00 | 0.00 |
| ATOM | 148 | N    | GLY | X | 10 | 21.396 | 59.252 | 26.030 | 0.00 | 0.00 |
| ATOM | 149 | H    | GLY | X | 10 | 21.923 | 58.439 | 26.316 | 0.00 | 0.00 |
| ATOM | 150 | CA   | GLY | X | 10 | 22.050 | 60.458 | 25.438 | 0.00 | 0.00 |
| ATOM | 151 | HA2  | GLY | X | 10 | 21.580 | 61.377 | 25.788 | 0.00 | 0.00 |
| ATOM | 152 | HA3  | GLY | X | 10 | 23.122 | 60.439 | 25.635 | 0.00 | 0.00 |
| ATOM | 153 | C    | GLY | X | 10 | 21.908 | 60.666 | 23.932 | 0.00 | 0.00 |
| ATOM | 154 | O    | GLY | X | 10 | 22.141 | 61.721 | 23.377 | 0.00 | 0.00 |
| ATOM | 155 | N    | GLY | X | 11 | 21.391 | 59.658 | 23.250 | 0.00 | 0.00 |
| ATOM | 156 | H    | GLY | X | 11 | 21.096 | 58.854 | 23.786 | 0.00 | 0.00 |
| ATOM | 157 | CA   | GLY | X | 11 | 21.059 | 59.568 | 21.749 | 0.00 | 0.00 |
| ATOM | 158 | HA2  | GLY | X | 11 | 19.994 | 59.592 | 21.517 | 0.00 | 0.00 |
| ATOM | 159 | HA3  | GLY | X | 11 | 21.348 | 60.469 | 21.207 | 0.00 | 0.00 |
| ATOM | 160 | C    | GLY | X | 11 | 21.604 | 58.280 | 21.145 | 0.00 | 0.00 |
| ATOM | 161 | O    | GLY | X | 11 | 21.367 | 57.220 | 21.727 | 0.00 | 0.00 |
| ATOM | 162 | N    | ARG | X | 12 | 22.164 | 58.299 | 19.931 | 0.00 | 0.00 |
| ATOM | 163 | H    | ARG | X | 12 | 22.160 | 59.124 | 19.348 | 0.00 | 0.00 |
| ATOM | 164 | CA   | ARG | X | 12 | 22.559 | 57.063 | 19.193 | 0.00 | 0.00 |
| ATOM | 165 | HA   | ARG | X | 12 | 22.012 | 56.218 | 19.611 | 0.00 | 0.00 |

|      |     |      |     |   |    |        |        |        |      |      |
|------|-----|------|-----|---|----|--------|--------|--------|------|------|
| ATOM | 166 | CB   | ARG | X | 12 | 21.989 | 57.057 | 17.779 | 0.00 | 0.00 |
| ATOM | 167 | HB2  | ARG | X | 12 | 22.327 | 57.959 | 17.268 | 0.00 | 0.00 |
| ATOM | 168 | HB3  | ARG | X | 12 | 22.436 | 56.190 | 17.293 | 0.00 | 0.00 |
| ATOM | 169 | CG   | ARG | X | 12 | 20.466 | 56.758 | 17.665 | 0.00 | 0.00 |
| ATOM | 170 | HG2  | ARG | X | 12 | 20.229 | 55.696 | 17.601 | 0.00 | 0.00 |
| ATOM | 171 | HG3  | ARG | X | 12 | 19.993 | 57.205 | 18.539 | 0.00 | 0.00 |
| ATOM | 172 | CD   | ARG | X | 12 | 19.765 | 57.189 | 16.361 | 0.00 | 0.00 |
| ATOM | 173 | HD2  | ARG | X | 12 | 20.352 | 56.756 | 15.551 | 0.00 | 0.00 |
| ATOM | 174 | HD3  | ARG | X | 12 | 18.774 | 56.748 | 16.460 | 0.00 | 0.00 |
| ATOM | 175 | NE   | ARG | X | 12 | 19.685 | 58.655 | 16.224 | 0.00 | 0.00 |
| ATOM | 176 | HE   | ARG | X | 12 | 19.378 | 59.111 | 17.072 | 0.00 | 0.00 |
| ATOM | 177 | CZ   | ARG | X | 12 | 20.011 | 59.422 | 15.189 | 0.00 | 0.00 |
| ATOM | 178 | NH1  | ARG | X | 12 | 20.537 | 58.903 | 14.071 | 0.00 | 0.00 |
| ATOM | 179 | HH11 | ARG | X | 12 | 20.388 | 57.908 | 13.985 | 0.00 | 0.00 |
| ATOM | 180 | HH12 | ARG | X | 12 | 20.790 | 59.454 | 13.263 | 0.00 | 0.00 |
| ATOM | 181 | NH2  | ARG | X | 12 | 19.787 | 60.724 | 15.263 | 0.00 | 0.00 |
| ATOM | 182 | HH21 | ARG | X | 12 | 19.332 | 61.170 | 16.046 | 0.00 | 0.00 |
| ATOM | 183 | HH22 | ARG | X | 12 | 20.230 | 61.276 | 14.542 | 0.00 | 0.00 |
| ATOM | 184 | C    | ARG | X | 12 | 24.071 | 56.688 | 19.262 | 0.00 | 0.00 |
| ATOM | 185 | O    | ARG | X | 12 | 24.984 | 57.477 | 19.313 | 0.00 | 0.00 |
| ATOM | 186 | N    | LEU | X | 13 | 24.273 | 55.373 | 19.154 | 0.00 | 0.00 |
| ATOM | 187 | H    | LEU | X | 13 | 23.452 | 54.793 | 19.061 | 0.00 | 0.00 |
| ATOM | 188 | CA   | LEU | X | 13 | 25.605 | 54.725 | 18.942 | 0.00 | 0.00 |
| ATOM | 189 | HA   | LEU | X | 13 | 26.248 | 55.550 | 18.634 | 0.00 | 0.00 |
| ATOM | 190 | CB   | LEU | X | 13 | 26.093 | 53.943 | 20.208 | 0.00 | 0.00 |
| ATOM | 191 | HB2  | LEU | X | 13 | 25.575 | 53.011 | 20.434 | 0.00 | 0.00 |
| ATOM | 192 | HB3  | LEU | X | 13 | 27.127 | 53.683 | 19.981 | 0.00 | 0.00 |
| ATOM | 193 | CG   | LEU | X | 13 | 26.102 | 54.792 | 21.519 | 0.00 | 0.00 |
| ATOM | 194 | HG   | LEU | X | 13 | 25.126 | 55.254 | 21.664 | 0.00 | 0.00 |
| ATOM | 195 | CD1  | LEU | X | 13 | 26.296 | 53.833 | 22.701 | 0.00 | 0.00 |
| ATOM | 196 | HD11 | LEU | X | 13 | 25.328 | 53.358 | 22.856 | 0.00 | 0.00 |
| ATOM | 197 | HD12 | LEU | X | 13 | 26.471 | 54.348 | 23.645 | 0.00 | 0.00 |
| ATOM | 198 | HD13 | LEU | X | 13 | 27.035 | 53.031 | 22.694 | 0.00 | 0.00 |
| ATOM | 199 | CD2  | LEU | X | 13 | 27.089 | 55.979 | 21.642 | 0.00 | 0.00 |
| ATOM | 200 | HD21 | LEU | X | 13 | 27.142 | 56.397 | 22.647 | 0.00 | 0.00 |
| ATOM | 201 | HD22 | LEU | X | 13 | 28.100 | 55.676 | 21.370 | 0.00 | 0.00 |
| ATOM | 202 | HD23 | LEU | X | 13 | 26.857 | 56.708 | 20.865 | 0.00 | 0.00 |
| ATOM | 203 | C    | LEU | X | 13 | 25.551 | 53.763 | 17.736 | 0.00 | 0.00 |
| ATOM | 204 | O    | LEU | X | 13 | 24.499 | 53.078 | 17.558 | 0.00 | 0.00 |
| ATOM | 205 | N    | ARG | X | 14 | 26.673 | 53.726 | 17.047 | 0.00 | 0.00 |
| ATOM | 206 | H    | ARG | X | 14 | 27.380 | 54.388 | 17.330 | 0.00 | 0.00 |
| ATOM | 207 | CA   | ARG | X | 14 | 27.094 | 52.658 | 16.023 | 0.00 | 0.00 |
| ATOM | 208 | HA   | ARG | X | 14 | 26.200 | 52.053 | 15.874 | 0.00 | 0.00 |
| ATOM | 209 | CB   | ARG | X | 14 | 27.432 | 53.208 | 14.620 | 0.00 | 0.00 |
| ATOM | 210 | HB2  | ARG | X | 14 | 26.712 | 54.014 | 14.474 | 0.00 | 0.00 |
| ATOM | 211 | HB3  | ARG | X | 14 | 28.454 | 53.586 | 14.629 | 0.00 | 0.00 |
| ATOM | 212 | CG   | ARG | X | 14 | 27.253 | 52.124 | 13.517 | 0.00 | 0.00 |
| ATOM | 213 | HG2  | ARG | X | 14 | 27.855 | 51.232 | 13.692 | 0.00 | 0.00 |
| ATOM | 214 | HG3  | ARG | X | 14 | 26.211 | 51.804 | 13.533 | 0.00 | 0.00 |
| ATOM | 215 | CD   | ARG | X | 14 | 27.825 | 52.603 | 12.129 | 0.00 | 0.00 |
| ATOM | 216 | HD2  | ARG | X | 14 | 28.860 | 52.930 | 12.231 | 0.00 | 0.00 |
| ATOM | 217 | HD3  | ARG | X | 14 | 27.692 | 51.781 | 11.426 | 0.00 | 0.00 |
| ATOM | 218 | NE   | ARG | X | 14 | 27.006 | 53.658 | 11.518 | 0.00 | 0.00 |
| ATOM | 219 | HE   | ARG | X | 14 | 26.074 | 53.350 | 11.278 | 0.00 | 0.00 |
| ATOM | 220 | CZ   | ARG | X | 14 | 27.242 | 54.980 | 11.596 | 0.00 | 0.00 |
| ATOM | 221 | NH1  | ARG | X | 14 | 28.401 | 55.477 | 12.019 | 0.00 | 0.00 |
| ATOM | 222 | HH11 | ARG | X | 14 | 29.164 | 54.910 | 12.360 | 0.00 | 0.00 |
| ATOM | 223 | HH12 | ARG | X | 14 | 28.545 | 56.472 | 11.913 | 0.00 | 0.00 |
| ATOM | 224 | NH2  | ARG | X | 14 | 26.261 | 55.872 | 11.480 | 0.00 | 0.00 |
| ATOM | 225 | HH21 | ARG | X | 14 | 25.320 | 55.602 | 11.231 | 0.00 | 0.00 |
| ATOM | 226 | HH22 | ARG | X | 14 | 26.486 | 56.849 | 11.602 | 0.00 | 0.00 |
| ATOM | 227 | C    | ARG | X | 14 | 28.202 | 51.759 | 16.522 | 0.00 | 0.00 |
| ATOM | 228 | O    | ARG | X | 14 | 29.161 | 52.291 | 17.047 | 0.00 | 0.00 |
| ATOM | 229 | N    | GLY | X | 15 | 28.091 | 50.429 | 16.319 | 0.00 | 0.00 |
| ATOM | 230 | H    | GLY | X | 15 | 27.310 | 50.142 | 15.747 | 0.00 | 0.00 |
| ATOM | 231 | CA   | GLY | X | 15 | 29.088 | 49.370 | 16.638 | 0.00 | 0.00 |
| ATOM | 232 | HA2  | GLY | X | 15 | 30.034 | 49.790 | 16.977 | 0.00 | 0.00 |

|      |     |      |     |   |    |        |        |        |      |      |
|------|-----|------|-----|---|----|--------|--------|--------|------|------|
| ATOM | 233 | HA3  | GLY | X | 15 | 28.648 | 48.762 | 17.429 | 0.00 | 0.00 |
| ATOM | 234 | C    | GLY | X | 15 | 29.378 | 48.363 | 15.499 | 0.00 | 0.00 |
| ATOM | 235 | O    | GLY | X | 15 | 29.359 | 48.748 | 14.359 | 0.00 | 0.00 |
| ATOM | 236 | N    | ILE | X | 16 | 29.752 | 47.139 | 15.892 | 0.00 | 0.00 |
| ATOM | 237 | H    | ILE | X | 16 | 29.974 | 47.080 | 16.876 | 0.00 | 0.00 |
| ATOM | 238 | CA   | ILE | X | 16 | 30.491 | 46.166 | 15.033 | 0.00 | 0.00 |
| ATOM | 239 | HA   | ILE | X | 16 | 30.252 | 46.433 | 14.003 | 0.00 | 0.00 |
| ATOM | 240 | CB   | ILE | X | 16 | 32.029 | 46.285 | 15.161 | 0.00 | 0.00 |
| ATOM | 241 | HB   | ILE | X | 16 | 32.382 | 45.435 | 14.576 | 0.00 | 0.00 |
| ATOM | 242 | CG2  | ILE | X | 16 | 32.675 | 47.499 | 14.538 | 0.00 | 0.00 |
| ATOM | 243 | HG21 | ILE | X | 16 | 32.274 | 48.409 | 14.983 | 0.00 | 0.00 |
| ATOM | 244 | HG22 | ILE | X | 16 | 32.434 | 47.464 | 13.475 | 0.00 | 0.00 |
| ATOM | 245 | HG23 | ILE | X | 16 | 33.746 | 47.349 | 14.674 | 0.00 | 0.00 |
| ATOM | 246 | CG1  | ILE | X | 16 | 32.617 | 46.047 | 16.607 | 0.00 | 0.00 |
| ATOM | 247 | HG12 | ILE | X | 16 | 32.194 | 46.861 | 17.196 | 0.00 | 0.00 |
| ATOM | 248 | HG13 | ILE | X | 16 | 32.209 | 45.099 | 16.957 | 0.00 | 0.00 |
| ATOM | 249 | CD1  | ILE | X | 16 | 34.095 | 45.886 | 16.841 | 0.00 | 0.00 |
| ATOM | 250 | HD11 | ILE | X | 16 | 34.472 | 45.082 | 16.207 | 0.00 | 0.00 |
| ATOM | 251 | HD12 | ILE | X | 16 | 34.360 | 45.656 | 17.873 | 0.00 | 0.00 |
| ATOM | 252 | HD13 | ILE | X | 16 | 34.736 | 46.718 | 16.553 | 0.00 | 0.00 |
| ATOM | 253 | C    | ILE | X | 16 | 30.154 | 44.723 | 15.403 | 0.00 | 0.00 |
| ATOM | 254 | O    | ILE | X | 16 | 30.095 | 44.351 | 16.597 | 0.00 | 0.00 |
| ATOM | 255 | N    | ARG | X | 17 | 30.028 | 43.917 | 14.369 | 0.00 | 0.00 |
| ATOM | 256 | H    | ARG | X | 17 | 30.096 | 44.366 | 13.467 | 0.00 | 0.00 |
| ATOM | 257 | CA   | ARG | X | 17 | 29.951 | 42.447 | 14.434 | 0.00 | 0.00 |
| ATOM | 258 | HA   | ARG | X | 17 | 29.250 | 42.101 | 15.193 | 0.00 | 0.00 |
| ATOM | 259 | CB   | ARG | X | 17 | 29.455 | 41.936 | 13.077 | 0.00 | 0.00 |
| ATOM | 260 | HB2  | ARG | X | 17 | 28.627 | 42.589 | 12.801 | 0.00 | 0.00 |
| ATOM | 261 | HB3  | ARG | X | 17 | 30.235 | 42.022 | 12.320 | 0.00 | 0.00 |
| ATOM | 262 | CG   | ARG | X | 17 | 28.932 | 40.483 | 13.055 | 0.00 | 0.00 |
| ATOM | 263 | HG2  | ARG | X | 17 | 29.756 | 39.848 | 13.382 | 0.00 | 0.00 |
| ATOM | 264 | HG3  | ARG | X | 17 | 28.019 | 40.399 | 13.643 | 0.00 | 0.00 |
| ATOM | 265 | CD   | ARG | X | 17 | 28.660 | 40.191 | 11.603 | 0.00 | 0.00 |
| ATOM | 266 | HD2  | ARG | X | 17 | 27.807 | 40.824 | 11.362 | 0.00 | 0.00 |
| ATOM | 267 | HD3  | ARG | X | 17 | 29.468 | 40.368 | 10.892 | 0.00 | 0.00 |
| ATOM | 268 | NE   | ARG | X | 17 | 28.190 | 38.853 | 11.317 | 0.00 | 0.00 |
| ATOM | 269 | HE   | ARG | X | 17 | 27.192 | 38.706 | 11.371 | 0.00 | 0.00 |
| ATOM | 270 | CZ   | ARG | X | 17 | 28.861 | 37.822 | 10.920 | 0.00 | 0.00 |
| ATOM | 271 | NH1  | ARG | X | 17 | 30.158 | 37.735 | 10.989 | 0.00 | 0.00 |
| ATOM | 272 | HH11 | ARG | X | 17 | 30.663 | 38.558 | 11.285 | 0.00 | 0.00 |
| ATOM | 273 | HH12 | ARG | X | 17 | 30.615 | 36.929 | 10.589 | 0.00 | 0.00 |
| ATOM | 274 | NH2  | ARG | X | 17 | 28.193 | 36.851 | 10.436 | 0.00 | 0.00 |
| ATOM | 275 | HH21 | ARG | X | 17 | 27.186 | 36.889 | 10.365 | 0.00 | 0.00 |
| ATOM | 276 | HH22 | ARG | X | 17 | 28.650 | 36.077 | 9.976  | 0.00 | 0.00 |
| ATOM | 277 | C    | ARG | X | 17 | 31.363 | 41.857 | 14.763 | 0.00 | 0.00 |
| ATOM | 278 | O    | ARG | X | 17 | 32.405 | 42.234 | 14.234 | 0.00 | 0.00 |
| ATOM | 279 | N    | LEU | X | 18 | 31.311 | 40.777 | 15.498 | 0.00 | 0.00 |
| ATOM | 280 | H    | LEU | X | 18 | 30.445 | 40.598 | 15.987 | 0.00 | 0.00 |
| ATOM | 281 | CA   | LEU | X | 18 | 32.451 | 39.917 | 15.938 | 0.00 | 0.00 |
| ATOM | 282 | HA   | LEU | X | 18 | 33.296 | 40.280 | 15.353 | 0.00 | 0.00 |
| ATOM | 283 | CB   | LEU | X | 18 | 32.697 | 40.100 | 17.412 | 0.00 | 0.00 |
| ATOM | 284 | HB2  | LEU | X | 18 | 31.827 | 39.857 | 18.022 | 0.00 | 0.00 |
| ATOM | 285 | HB3  | LEU | X | 18 | 33.494 | 39.432 | 17.739 | 0.00 | 0.00 |
| ATOM | 286 | CG   | LEU | X | 18 | 33.150 | 41.538 | 17.815 | 0.00 | 0.00 |
| ATOM | 287 | HG   | LEU | X | 18 | 32.426 | 42.283 | 17.485 | 0.00 | 0.00 |
| ATOM | 288 | CD1  | LEU | X | 18 | 33.198 | 41.573 | 19.343 | 0.00 | 0.00 |
| ATOM | 289 | HD11 | LEU | X | 18 | 33.674 | 42.470 | 19.740 | 0.00 | 0.00 |
| ATOM | 290 | HD12 | LEU | X | 18 | 33.666 | 40.718 | 19.832 | 0.00 | 0.00 |
| ATOM | 291 | HD13 | LEU | X | 18 | 32.188 | 41.488 | 19.743 | 0.00 | 0.00 |
| ATOM | 292 | CD2  | LEU | X | 18 | 34.518 | 41.934 | 17.225 | 0.00 | 0.00 |
| ATOM | 293 | HD21 | LEU | X | 18 | 34.883 | 42.819 | 17.747 | 0.00 | 0.00 |
| ATOM | 294 | HD22 | LEU | X | 18 | 35.300 | 41.223 | 17.493 | 0.00 | 0.00 |
| ATOM | 295 | HD23 | LEU | X | 18 | 34.640 | 41.909 | 16.142 | 0.00 | 0.00 |
| ATOM | 296 | C    | LEU | X | 18 | 32.065 | 38.476 | 15.602 | 0.00 | 0.00 |
| ATOM | 297 | O    | LEU | X | 18 | 30.859 | 38.132 | 15.759 | 0.00 | 0.00 |
| ATOM | 298 | N    | LYS | X | 19 | 33.022 | 37.698 | 15.080 | 0.00 | 0.00 |
| ATOM | 299 | H    | LYS | X | 19 | 33.977 | 38.006 | 15.196 | 0.00 | 0.00 |



|      |     |      |     |   |    |        |        |        |      |      |
|------|-----|------|-----|---|----|--------|--------|--------|------|------|
| ATOM | 300 | CA   | LYS | X | 19 | 32.867 | 36.373 | 14.458 | 0.00 | 0.00 |
| ATOM | 301 | HA   | LYS | X | 19 | 31.811 | 36.185 | 14.264 | 0.00 | 0.00 |
| ATOM | 302 | CB   | LYS | X | 19 | 33.635 | 36.539 | 13.203 | 0.00 | 0.00 |
| ATOM | 303 | HB2  | LYS | X | 19 | 33.198 | 37.385 | 12.672 | 0.00 | 0.00 |
| ATOM | 304 | HB3  | LYS | X | 19 | 34.670 | 36.868 | 13.292 | 0.00 | 0.00 |
| ATOM | 305 | CG   | LYS | X | 19 | 33.732 | 35.239 | 12.318 | 0.00 | 0.00 |
| ATOM | 306 | HG2  | LYS | X | 19 | 34.420 | 34.531 | 12.780 | 0.00 | 0.00 |
| ATOM | 307 | HG3  | LYS | X | 19 | 32.745 | 34.778 | 12.279 | 0.00 | 0.00 |
| ATOM | 308 | CD   | LYS | X | 19 | 34.241 | 35.605 | 10.928 | 0.00 | 0.00 |
| ATOM | 309 | HD2  | LYS | X | 19 | 33.551 | 36.334 | 10.504 | 0.00 | 0.00 |
| ATOM | 310 | HD3  | LYS | X | 19 | 35.157 | 36.179 | 11.069 | 0.00 | 0.00 |
| ATOM | 311 | CE   | LYS | X | 19 | 34.332 | 34.315 | 10.202 | 0.00 | 0.00 |
| ATOM | 312 | HE2  | LYS | X | 19 | 35.039 | 33.579 | 10.586 | 0.00 | 0.00 |
| ATOM | 313 | HE3  | LYS | X | 19 | 33.347 | 33.853 | 10.276 | 0.00 | 0.00 |
| ATOM | 314 | NZ   | LYS | X | 19 | 34.816 | 34.448 | 8.809  | 0.00 | 0.00 |
| ATOM | 315 | HZ1  | LYS | X | 19 | 34.225 | 35.035 | 8.238  | 0.00 | 0.00 |
| ATOM | 316 | HZ2  | LYS | X | 19 | 35.698 | 34.941 | 8.812  | 0.00 | 0.00 |
| ATOM | 317 | HZ3  | LYS | X | 19 | 34.963 | 33.531 | 8.412  | 0.00 | 0.00 |
| ATOM | 318 | C    | LYS | X | 19 | 33.471 | 35.288 | 15.374 | 0.00 | 0.00 |
| ATOM | 319 | O    | LYS | X | 19 | 34.608 | 35.521 | 15.787 | 0.00 | 0.00 |
| ATOM | 320 | N    | THR | X | 20 | 32.751 | 34.164 | 15.479 | 0.00 | 0.00 |
| ATOM | 321 | H    | THR | X | 20 | 31.945 | 34.091 | 14.874 | 0.00 | 0.00 |
| ATOM | 322 | CA   | THR | X | 20 | 32.800 | 33.205 | 16.608 | 0.00 | 0.00 |
| ATOM | 323 | HA   | THR | X | 20 | 33.835 | 32.872 | 16.684 | 0.00 | 0.00 |
| ATOM | 324 | CB   | THR | X | 20 | 32.223 | 33.834 | 17.901 | 0.00 | 0.00 |
| ATOM | 325 | HB   | THR | X | 20 | 31.991 | 32.996 | 18.557 | 0.00 | 0.00 |
| ATOM | 326 | CG2  | THR | X | 20 | 33.179 | 34.765 | 18.657 | 0.00 | 0.00 |
| ATOM | 327 | HG21 | THR | X | 20 | 34.175 | 34.340 | 18.782 | 0.00 | 0.00 |
| ATOM | 328 | HG22 | THR | X | 20 | 32.709 | 34.880 | 19.633 | 0.00 | 0.00 |
| ATOM | 329 | HG23 | THR | X | 20 | 33.252 | 35.663 | 18.043 | 0.00 | 0.00 |
| ATOM | 330 | OG1  | THR | X | 20 | 31.037 | 34.503 | 17.572 | 0.00 | 0.00 |
| ATOM | 331 | HG1  | THR | X | 20 | 30.459 | 33.904 | 17.094 | 0.00 | 0.00 |
| ATOM | 332 | C    | THR | X | 20 | 32.063 | 31.935 | 16.206 | 0.00 | 0.00 |
| ATOM | 333 | O    | THR | X | 20 | 31.199 | 31.905 | 15.360 | 0.00 | 0.00 |
| ATOM | 334 | N    | PRO | X | 21 | 32.500 | 30.776 | 16.681 | 0.00 | 0.00 |
| ATOM | 335 | CD   | PRO | X | 21 | 33.411 | 30.682 | 17.782 | 0.00 | 0.00 |
| ATOM | 336 | HD2  | PRO | X | 21 | 33.131 | 31.364 | 18.586 | 0.00 | 0.00 |
| ATOM | 337 | HD3  | PRO | X | 21 | 34.391 | 30.888 | 17.352 | 0.00 | 0.00 |
| ATOM | 338 | CG   | PRO | X | 21 | 33.294 | 29.157 | 18.240 | 0.00 | 0.00 |
| ATOM | 339 | HG2  | PRO | X | 21 | 32.573 | 28.947 | 19.030 | 0.00 | 0.00 |
| ATOM | 340 | HG3  | PRO | X | 21 | 34.263 | 28.759 | 18.541 | 0.00 | 0.00 |
| ATOM | 341 | CB   | PRO | X | 21 | 33.009 | 28.375 | 16.945 | 0.00 | 0.00 |
| ATOM | 342 | HB2  | PRO | X | 21 | 32.548 | 27.397 | 17.086 | 0.00 | 0.00 |
| ATOM | 343 | HB3  | PRO | X | 21 | 33.993 | 28.156 | 16.530 | 0.00 | 0.00 |
| ATOM | 344 | CA   | PRO | X | 21 | 32.309 | 29.424 | 16.130 | 0.00 | 0.00 |
| ATOM | 345 | HA   | PRO | X | 21 | 32.601 | 29.333 | 15.083 | 0.00 | 0.00 |
| ATOM | 346 | C    | PRO | X | 21 | 30.828 | 29.078 | 16.054 | 0.00 | 0.00 |
| ATOM | 347 | O    | PRO | X | 21 | 30.360 | 28.551 | 15.050 | 0.00 | 0.00 |
| ATOM | 348 | N    | GLY | X | 22 | 30.080 | 29.289 | 17.136 | 0.00 | 0.00 |
| ATOM | 349 | H    | GLY | X | 22 | 30.530 | 29.541 | 18.005 | 0.00 | 0.00 |
| ATOM | 350 | CA   | GLY | X | 22 | 28.637 | 28.946 | 17.194 | 0.00 | 0.00 |
| ATOM | 351 | HA2  | GLY | X | 22 | 28.497 | 28.040 | 16.605 | 0.00 | 0.00 |
| ATOM | 352 | HA3  | GLY | X | 22 | 28.354 | 28.818 | 18.239 | 0.00 | 0.00 |
| ATOM | 353 | C    | GLY | X | 22 | 27.614 | 29.950 | 16.605 | 0.00 | 0.00 |
| ATOM | 354 | O    | GLY | X | 22 | 26.600 | 30.207 | 17.248 | 0.00 | 0.00 |
| ATOM | 355 | N    | GLY | X | 23 | 27.991 | 30.744 | 15.632 | 0.00 | 0.00 |
| ATOM | 356 | H    | GLY | X | 23 | 28.918 | 30.585 | 15.262 | 0.00 | 0.00 |
| ATOM | 357 | CA   | GLY | X | 23 | 27.340 | 31.981 | 15.304 | 0.00 | 0.00 |
| ATOM | 358 | HA2  | GLY | X | 23 | 27.183 | 31.923 | 14.227 | 0.00 | 0.00 |
| ATOM | 359 | HA3  | GLY | X | 23 | 26.362 | 31.893 | 15.776 | 0.00 | 0.00 |
| ATOM | 360 | C    | GLY | X | 23 | 28.080 | 33.209 | 15.680 | 0.00 | 0.00 |
| ATOM | 361 | O    | GLY | X | 23 | 28.938 | 33.164 | 16.530 | 0.00 | 0.00 |
| ATOM | 362 | N    | PRO | X | 24 | 27.722 | 34.421 | 15.113 | 0.00 | 0.00 |
| ATOM | 363 | CD   | PRO | X | 24 | 26.743 | 34.555 | 13.959 | 0.00 | 0.00 |
| ATOM | 364 | HD2  | PRO | X | 24 | 25.772 | 34.074 | 14.075 | 0.00 | 0.00 |
| ATOM | 365 | HD3  | PRO | X | 24 | 27.314 | 34.180 | 13.110 | 0.00 | 0.00 |
| ATOM | 366 | CG   | PRO | X | 24 | 26.535 | 36.098 | 13.806 | 0.00 | 0.00 |

|      |     |      |     |   |    |        |        |        |      |      |
|------|-----|------|-----|---|----|--------|--------|--------|------|------|
| ATOM | 367 | HG2  | PRO | X | 24 | 25.716 | 36.354 | 14.478 | 0.00 | 0.00 |
| ATOM | 368 | HG3  | PRO | X | 24 | 26.279 | 36.338 | 12.774 | 0.00 | 0.00 |
| ATOM | 369 | CB   | PRO | X | 24 | 27.944 | 36.579 | 14.214 | 0.00 | 0.00 |
| ATOM | 370 | HB2  | PRO | X | 24 | 27.984 | 37.634 | 14.488 | 0.00 | 0.00 |
| ATOM | 371 | HB3  | PRO | X | 24 | 28.660 | 36.250 | 13.462 | 0.00 | 0.00 |
| ATOM | 372 | CA   | PRO | X | 24 | 28.280 | 35.749 | 15.454 | 0.00 | 0.00 |
| ATOM | 373 | HA   | PRO | X | 24 | 29.365 | 35.648 | 15.492 | 0.00 | 0.00 |
| ATOM | 374 | C    | PRO | X | 24 | 27.746 | 36.332 | 16.715 | 0.00 | 0.00 |
| ATOM | 375 | O    | PRO | X | 24 | 26.602 | 36.050 | 17.087 | 0.00 | 0.00 |
| ATOM | 376 | N    | VAL | X | 25 | 28.495 | 37.279 | 17.230 | 0.00 | 0.00 |
| ATOM | 377 | H    | VAL | X | 25 | 29.292 | 37.620 | 16.713 | 0.00 | 0.00 |
| ATOM | 378 | CA   | VAL | X | 25 | 28.088 | 38.177 | 18.379 | 0.00 | 0.00 |
| ATOM | 379 | HA   | VAL | X | 25 | 27.025 | 37.985 | 18.526 | 0.00 | 0.00 |
| ATOM | 380 | CB   | VAL | X | 25 | 28.821 | 37.833 | 19.684 | 0.00 | 0.00 |
| ATOM | 381 | HB   | VAL | X | 25 | 28.397 | 38.496 | 20.439 | 0.00 | 0.00 |
| ATOM | 382 | CG1  | VAL | X | 25 | 28.302 | 36.397 | 20.021 | 0.00 | 0.00 |
| ATOM | 383 | HG11 | VAL | X | 25 | 28.783 | 35.612 | 19.437 | 0.00 | 0.00 |
| ATOM | 384 | HG12 | VAL | X | 25 | 28.433 | 36.103 | 21.063 | 0.00 | 0.00 |
| ATOM | 385 | HG13 | VAL | X | 25 | 27.218 | 36.344 | 19.915 | 0.00 | 0.00 |
| ATOM | 386 | CG2  | VAL | X | 25 | 30.395 | 37.917 | 19.787 | 0.00 | 0.00 |
| ATOM | 387 | HG21 | VAL | X | 25 | 30.867 | 37.297 | 19.025 | 0.00 | 0.00 |
| ATOM | 388 | HG22 | VAL | X | 25 | 30.773 | 37.436 | 20.690 | 0.00 | 0.00 |
| ATOM | 389 | HG23 | VAL | X | 25 | 30.682 | 38.961 | 19.917 | 0.00 | 0.00 |
| ATOM | 390 | C    | VAL | X | 25 | 28.373 | 39.687 | 18.006 | 0.00 | 0.00 |
| ATOM | 391 | O    | VAL | X | 25 | 28.754 | 39.952 | 16.870 | 0.00 | 0.00 |
| ATOM | 392 | N    | SER | X | 26 | 28.159 | 40.640 | 18.905 | 0.00 | 0.00 |
| ATOM | 393 | H    | SER | X | 26 | 27.657 | 40.457 | 19.762 | 0.00 | 0.00 |
| ATOM | 394 | CA   | SER | X | 26 | 28.218 | 42.096 | 18.495 | 0.00 | 0.00 |
| ATOM | 395 | HA   | SER | X | 26 | 28.958 | 42.322 | 17.728 | 0.00 | 0.00 |
| ATOM | 396 | CB   | SER | X | 26 | 26.842 | 42.658 | 18.030 | 0.00 | 0.00 |
| ATOM | 397 | HB2  | SER | X | 26 | 26.986 | 43.643 | 17.587 | 0.00 | 0.00 |
| ATOM | 398 | HB3  | SER | X | 26 | 26.406 | 41.986 | 17.290 | 0.00 | 0.00 |
| ATOM | 399 | OG   | SER | X | 26 | 25.888 | 42.839 | 19.072 | 0.00 | 0.00 |
| ATOM | 400 | HG   | SER | X | 26 | 25.890 | 42.037 | 19.600 | 0.00 | 0.00 |
| ATOM | 401 | C    | SER | X | 26 | 28.619 | 42.986 | 19.693 | 0.00 | 0.00 |
| ATOM | 402 | O    | SER | X | 26 | 28.495 | 42.554 | 20.851 | 0.00 | 0.00 |
| ATOM | 403 | N    | ALA | X | 27 | 29.170 | 44.141 | 19.360 | 0.00 | 0.00 |
| ATOM | 404 | H    | ALA | X | 27 | 29.301 | 44.407 | 18.395 | 0.00 | 0.00 |
| ATOM | 405 | CA   | ALA | X | 27 | 29.843 | 44.961 | 20.325 | 0.00 | 0.00 |
| ATOM | 406 | HA   | ALA | X | 27 | 29.188 | 44.842 | 21.187 | 0.00 | 0.00 |
| ATOM | 407 | CB   | ALA | X | 27 | 31.210 | 44.345 | 20.578 | 0.00 | 0.00 |
| ATOM | 408 | HB1  | ALA | X | 27 | 31.778 | 44.330 | 19.647 | 0.00 | 0.00 |
| ATOM | 409 | HB2  | ALA | X | 27 | 31.149 | 43.351 | 21.021 | 0.00 | 0.00 |
| ATOM | 410 | HB3  | ALA | X | 27 | 31.683 | 45.122 | 21.179 | 0.00 | 0.00 |
| ATOM | 411 | C    | ALA | X | 27 | 29.963 | 46.518 | 19.858 | 0.00 | 0.00 |
| ATOM | 412 | O    | ALA | X | 27 | 30.190 | 46.913 | 18.713 | 0.00 | 0.00 |
| ATOM | 413 | N    | PHE | X | 28 | 29.750 | 47.355 | 20.884 | 0.00 | 0.00 |
| ATOM | 414 | H    | PHE | X | 28 | 29.684 | 46.870 | 21.767 | 0.00 | 0.00 |
| ATOM | 415 | CA   | PHE | X | 28 | 29.900 | 48.795 | 20.986 | 0.00 | 0.00 |
| ATOM | 416 | HA   | PHE | X | 28 | 30.228 | 49.277 | 20.065 | 0.00 | 0.00 |
| ATOM | 417 | CB   | PHE | X | 28 | 28.606 | 49.352 | 21.549 | 0.00 | 0.00 |
| ATOM | 418 | HB2  | PHE | X | 28 | 28.501 | 48.957 | 22.559 | 0.00 | 0.00 |
| ATOM | 419 | HB3  | PHE | X | 28 | 28.763 | 50.430 | 21.567 | 0.00 | 0.00 |
| ATOM | 420 | CG   | PHE | X | 28 | 27.316 | 49.012 | 20.778 | 0.00 | 0.00 |
| ATOM | 421 | CD1  | PHE | X | 28 | 26.719 | 47.709 | 20.861 | 0.00 | 0.00 |
| ATOM | 422 | HD1  | PHE | X | 28 | 27.165 | 46.916 | 21.443 | 0.00 | 0.00 |
| ATOM | 423 | CE1  | PHE | X | 28 | 25.702 | 47.408 | 19.963 | 0.00 | 0.00 |
| ATOM | 424 | HE1  | PHE | X | 28 | 25.273 | 46.424 | 20.077 | 0.00 | 0.00 |
| ATOM | 425 | CZ   | PHE | X | 28 | 25.233 | 48.385 | 19.058 | 0.00 | 0.00 |
| ATOM | 426 | HZ   | PHE | X | 28 | 24.419 | 48.197 | 18.373 | 0.00 | 0.00 |
| ATOM | 427 | CE2  | PHE | X | 28 | 25.847 | 49.638 | 18.939 | 0.00 | 0.00 |
| ATOM | 428 | HE2  | PHE | X | 28 | 25.379 | 50.350 | 18.275 | 0.00 | 0.00 |
| ATOM | 429 | CD2  | PHE | X | 28 | 26.919 | 49.951 | 19.812 | 0.00 | 0.00 |
| ATOM | 430 | HD2  | PHE | X | 28 | 27.440 | 50.888 | 19.686 | 0.00 | 0.00 |
| ATOM | 431 | C    | PHE | X | 28 | 31.052 | 48.893 | 22.028 | 0.00 | 0.00 |
| ATOM | 432 | O    | PHE | X | 28 | 31.041 | 48.261 | 23.073 | 0.00 | 0.00 |
| ATOM | 433 | N    | LEU | X | 29 | 32.121 | 49.564 | 21.680 | 0.00 | 0.00 |

|      |     |      |     |   |    |        |        |        |      |      |
|------|-----|------|-----|---|----|--------|--------|--------|------|------|
| ATOM | 434 | H    | LEU | X | 29 | 32.055 | 50.183 | 20.884 | 0.00 | 0.00 |
| ATOM | 435 | CA   | LEU | X | 29 | 33.434 | 49.745 | 22.308 | 0.00 | 0.00 |
| ATOM | 436 | HA   | LEU | X | 29 | 33.481 | 49.489 | 23.367 | 0.00 | 0.00 |
| ATOM | 437 | CB   | LEU | X | 29 | 34.520 | 48.937 | 21.597 | 0.00 | 0.00 |
| ATOM | 438 | HB2  | LEU | X | 29 | 34.596 | 49.380 | 20.605 | 0.00 | 0.00 |
| ATOM | 439 | HB3  | LEU | X | 29 | 35.497 | 49.212 | 21.996 | 0.00 | 0.00 |
| ATOM | 440 | CG   | LEU | X | 29 | 34.424 | 47.393 | 21.461 | 0.00 | 0.00 |
| ATOM | 441 | HG   | LEU | X | 29 | 33.680 | 47.119 | 20.713 | 0.00 | 0.00 |
| ATOM | 442 | CD1  | LEU | X | 29 | 35.688 | 46.762 | 20.797 | 0.00 | 0.00 |
| ATOM | 443 | HD11 | LEU | X | 29 | 35.876 | 47.248 | 19.840 | 0.00 | 0.00 |
| ATOM | 444 | HD12 | LEU | X | 29 | 35.502 | 45.690 | 20.736 | 0.00 | 0.00 |
| ATOM | 445 | HD13 | LEU | X | 29 | 36.515 | 46.841 | 21.503 | 0.00 | 0.00 |
| ATOM | 446 | CD2  | LEU | X | 29 | 34.177 | 46.691 | 22.832 | 0.00 | 0.00 |
| ATOM | 447 | HD21 | LEU | X | 29 | 33.805 | 45.681 | 22.658 | 0.00 | 0.00 |
| ATOM | 448 | HD22 | LEU | X | 29 | 35.110 | 46.574 | 23.382 | 0.00 | 0.00 |
| ATOM | 449 | HD23 | LEU | X | 29 | 33.452 | 47.267 | 23.407 | 0.00 | 0.00 |
| ATOM | 450 | C    | LEU | X | 29 | 33.776 | 51.230 | 22.317 | 0.00 | 0.00 |
| ATOM | 451 | O    | LEU | X | 29 | 33.665 | 51.964 | 21.307 | 0.00 | 0.00 |
| ATOM | 452 | N    | GLY | X | 30 | 34.394 | 51.699 | 23.424 | 0.00 | 0.00 |
| ATOM | 453 | H    | GLY | X | 30 | 34.655 | 51.171 | 24.245 | 0.00 | 0.00 |
| ATOM | 454 | CA   | GLY | X | 30 | 34.811 | 53.036 | 23.443 | 0.00 | 0.00 |
| ATOM | 455 | HA2  | GLY | X | 30 | 35.547 | 53.195 | 24.231 | 0.00 | 0.00 |
| ATOM | 456 | HA3  | GLY | X | 30 | 35.028 | 53.414 | 22.444 | 0.00 | 0.00 |
| ATOM | 457 | C    | GLY | X | 30 | 33.653 | 53.993 | 23.841 | 0.00 | 0.00 |
| ATOM | 458 | O    | GLY | X | 30 | 33.629 | 55.135 | 23.414 | 0.00 | 0.00 |
| ATOM | 459 | N    | ILE | X | 31 | 32.643 | 53.561 | 24.562 | 0.00 | 0.00 |
| ATOM | 460 | H    | ILE | X | 31 | 32.653 | 52.618 | 24.924 | 0.00 | 0.00 |
| ATOM | 461 | CA   | ILE | X | 31 | 31.473 | 54.376 | 24.913 | 0.00 | 0.00 |
| ATOM | 462 | HA   | ILE | X | 31 | 31.110 | 54.896 | 24.026 | 0.00 | 0.00 |
| ATOM | 463 | CB   | ILE | X | 31 | 30.302 | 53.465 | 25.344 | 0.00 | 0.00 |
| ATOM | 464 | HB   | ILE | X | 31 | 30.563 | 52.932 | 26.258 | 0.00 | 0.00 |
| ATOM | 465 | CG2  | ILE | X | 31 | 29.054 | 54.465 | 25.532 | 0.00 | 0.00 |
| ATOM | 466 | HG21 | ILE | X | 31 | 28.766 | 54.920 | 24.585 | 0.00 | 0.00 |
| ATOM | 467 | HG22 | ILE | X | 31 | 29.237 | 55.299 | 26.210 | 0.00 | 0.00 |
| ATOM | 468 | HG23 | ILE | X | 31 | 28.186 | 53.997 | 25.997 | 0.00 | 0.00 |
| ATOM | 469 | CG1  | ILE | X | 31 | 29.997 | 52.387 | 24.236 | 0.00 | 0.00 |
| ATOM | 470 | HG12 | ILE | X | 31 | 29.726 | 52.852 | 23.288 | 0.00 | 0.00 |
| ATOM | 471 | HG13 | ILE | X | 31 | 30.906 | 51.809 | 24.068 | 0.00 | 0.00 |
| ATOM | 472 | CD1  | ILE | X | 31 | 28.767 | 51.512 | 24.734 | 0.00 | 0.00 |
| ATOM | 473 | HD11 | ILE | X | 31 | 27.872 | 52.101 | 24.533 | 0.00 | 0.00 |
| ATOM | 474 | HD12 | ILE | X | 31 | 28.755 | 51.205 | 25.780 | 0.00 | 0.00 |
| ATOM | 475 | HD13 | ILE | X | 31 | 28.655 | 50.602 | 24.146 | 0.00 | 0.00 |
| ATOM | 476 | C    | ILE | X | 31 | 31.801 | 55.338 | 26.027 | 0.00 | 0.00 |
| ATOM | 477 | O    | ILE | X | 31 | 32.008 | 54.843 | 27.174 | 0.00 | 0.00 |
| ATOM | 478 | N    | PRO | X | 32 | 31.926 | 56.609 | 25.827 | 0.00 | 0.00 |
| ATOM | 479 | CD   | PRO | X | 32 | 31.605 | 57.303 | 24.605 | 0.00 | 0.00 |
| ATOM | 480 | HD2  | PRO | X | 32 | 30.719 | 57.057 | 24.021 | 0.00 | 0.00 |
| ATOM | 481 | HD3  | PRO | X | 32 | 32.456 | 57.102 | 23.954 | 0.00 | 0.00 |
| ATOM | 482 | CG   | PRO | X | 32 | 31.710 | 58.816 | 24.881 | 0.00 | 0.00 |
| ATOM | 483 | HG2  | PRO | X | 32 | 30.767 | 59.344 | 25.022 | 0.00 | 0.00 |
| ATOM | 484 | HG3  | PRO | X | 32 | 32.239 | 59.331 | 24.080 | 0.00 | 0.00 |
| ATOM | 485 | CB   | PRO | X | 32 | 32.589 | 58.868 | 26.131 | 0.00 | 0.00 |
| ATOM | 486 | HB2  | PRO | X | 32 | 32.259 | 59.701 | 26.751 | 0.00 | 0.00 |
| ATOM | 487 | HB3  | PRO | X | 32 | 33.615 | 58.939 | 25.770 | 0.00 | 0.00 |
| ATOM | 488 | CA   | PRO | X | 32 | 32.245 | 57.582 | 26.827 | 0.00 | 0.00 |
| ATOM | 489 | HA   | PRO | X | 32 | 33.101 | 57.226 | 27.400 | 0.00 | 0.00 |
| ATOM | 490 | C    | PRO | X | 32 | 31.011 | 57.743 | 27.744 | 0.00 | 0.00 |
| ATOM | 491 | O    | PRO | X | 32 | 30.074 | 58.531 | 27.547 | 0.00 | 0.00 |
| ATOM | 492 | N    | PHE | X | 33 | 30.942 | 57.160 | 28.894 | 0.00 | 0.00 |
| ATOM | 493 | H    | PHE | X | 33 | 31.702 | 56.613 | 29.272 | 0.00 | 0.00 |
| ATOM | 494 | CA   | PHE | X | 33 | 29.845 | 57.266 | 29.923 | 0.00 | 0.00 |
| ATOM | 495 | HA   | PHE | X | 33 | 28.937 | 57.435 | 29.344 | 0.00 | 0.00 |
| ATOM | 496 | CB   | PHE | X | 33 | 29.801 | 55.937 | 30.807 | 0.00 | 0.00 |
| ATOM | 497 | HB2  | PHE | X | 33 | 28.871 | 55.986 | 31.373 | 0.00 | 0.00 |
| ATOM | 498 | HB3  | PHE | X | 33 | 29.761 | 55.070 | 30.148 | 0.00 | 0.00 |
| ATOM | 499 | CG   | PHE | X | 33 | 30.937 | 55.690 | 31.834 | 0.00 | 0.00 |
| ATOM | 500 | CD1  | PHE | X | 33 | 30.817 | 56.193 | 33.187 | 0.00 | 0.00 |

|      |     |     |     |   |    |        |        |        |      |      |
|------|-----|-----|-----|---|----|--------|--------|--------|------|------|
| ATOM | 501 | HD1 | PHE | X | 33 | 29.927 | 56.718 | 33.499 | 0.00 | 0.00 |
| ATOM | 502 | CE1 | PHE | X | 33 | 31.794 | 55.971 | 34.093 | 0.00 | 0.00 |
| ATOM | 503 | HE1 | PHE | X | 33 | 31.749 | 56.288 | 35.125 | 0.00 | 0.00 |
| ATOM | 504 | CZ  | PHE | X | 33 | 32.941 | 55.283 | 33.733 | 0.00 | 0.00 |
| ATOM | 505 | HZ  | PHE | X | 33 | 33.766 | 55.142 | 34.415 | 0.00 | 0.00 |
| ATOM | 506 | CE2 | PHE | X | 33 | 33.037 | 54.754 | 32.459 | 0.00 | 0.00 |
| ATOM | 507 | HE2 | PHE | X | 33 | 34.002 | 54.437 | 32.092 | 0.00 | 0.00 |
| ATOM | 508 | CD2 | PHE | X | 33 | 32.149 | 55.017 | 31.490 | 0.00 | 0.00 |
| ATOM | 509 | HD2 | PHE | X | 33 | 32.241 | 54.592 | 30.501 | 0.00 | 0.00 |
| ATOM | 510 | C   | PHE | X | 33 | 29.894 | 58.527 | 30.830 | 0.00 | 0.00 |
| ATOM | 511 | O   | PHE | X | 33 | 28.841 | 58.857 | 31.385 | 0.00 | 0.00 |
| ATOM | 512 | N   | ALA | X | 34 | 31.063 | 59.081 | 31.100 | 0.00 | 0.00 |
| ATOM | 513 | H   | ALA | X | 34 | 31.875 | 58.668 | 30.663 | 0.00 | 0.00 |
| ATOM | 514 | CA  | ALA | X | 34 | 31.302 | 60.240 | 31.917 | 0.00 | 0.00 |
| ATOM | 515 | HA  | ALA | X | 34 | 30.501 | 60.553 | 32.587 | 0.00 | 0.00 |
| ATOM | 516 | CB  | ALA | X | 34 | 32.392 | 59.841 | 32.904 | 0.00 | 0.00 |
| ATOM | 517 | HB1 | ALA | X | 34 | 32.678 | 60.666 | 33.556 | 0.00 | 0.00 |
| ATOM | 518 | HB2 | ALA | X | 34 | 33.214 | 59.536 | 32.257 | 0.00 | 0.00 |
| ATOM | 519 | HB3 | ALA | X | 34 | 32.134 | 58.975 | 33.515 | 0.00 | 0.00 |
| ATOM | 520 | C   | ALA | X | 34 | 31.861 | 61.351 | 30.933 | 0.00 | 0.00 |
| ATOM | 521 | O   | ALA | X | 34 | 32.240 | 61.069 | 29.770 | 0.00 | 0.00 |
| ATOM | 522 | N   | GLU | X | 35 | 31.874 | 62.586 | 31.438 | 0.00 | 0.00 |
| ATOM | 523 | H   | GLU | X | 35 | 31.686 | 62.615 | 32.430 | 0.00 | 0.00 |
| ATOM | 524 | CA  | GLU | X | 35 | 32.768 | 63.578 | 30.911 | 0.00 | 0.00 |
| ATOM | 525 | HA  | GLU | X | 35 | 32.621 | 63.570 | 29.831 | 0.00 | 0.00 |
| ATOM | 526 | CB  | GLU | X | 35 | 32.443 | 64.930 | 31.532 | 0.00 | 0.00 |
| ATOM | 527 | HB2 | GLU | X | 35 | 32.469 | 64.839 | 32.618 | 0.00 | 0.00 |
| ATOM | 528 | HB3 | GLU | X | 35 | 33.236 | 65.583 | 31.168 | 0.00 | 0.00 |
| ATOM | 529 | CG  | GLU | X | 35 | 31.026 | 65.530 | 31.152 | 0.00 | 0.00 |
| ATOM | 530 | HG2 | GLU | X | 35 | 30.305 | 64.818 | 31.554 | 0.00 | 0.00 |
| ATOM | 531 | HG3 | GLU | X | 35 | 30.954 | 66.494 | 31.655 | 0.00 | 0.00 |
| ATOM | 532 | CD  | GLU | X | 35 | 30.897 | 65.838 | 29.659 | 0.00 | 0.00 |
| ATOM | 533 | OE1 | GLU | X | 35 | 30.041 | 65.293 | 28.979 | 0.00 | 0.00 |
| ATOM | 534 | OE2 | GLU | X | 35 | 31.795 | 66.593 | 29.144 | 0.00 | 0.00 |
| ATOM | 535 | C   | GLU | X | 35 | 34.207 | 63.227 | 31.307 | 0.00 | 0.00 |
| ATOM | 536 | O   | GLU | X | 35 | 34.409 | 62.657 | 32.415 | 0.00 | 0.00 |
| ATOM | 537 | N   | PRO | X | 36 | 35.214 | 63.652 | 30.539 | 0.00 | 0.00 |
| ATOM | 538 | CD  | PRO | X | 36 | 35.124 | 64.351 | 29.257 | 0.00 | 0.00 |
| ATOM | 539 | HD2 | PRO | X | 36 | 34.525 | 65.255 | 29.366 | 0.00 | 0.00 |
| ATOM | 540 | HD3 | PRO | X | 36 | 34.554 | 63.854 | 28.472 | 0.00 | 0.00 |
| ATOM | 541 | CG  | PRO | X | 36 | 36.526 | 64.663 | 28.812 | 0.00 | 0.00 |
| ATOM | 542 | HG2 | PRO | X | 36 | 36.833 | 65.578 | 29.320 | 0.00 | 0.00 |
| ATOM | 543 | HG3 | PRO | X | 36 | 36.491 | 64.688 | 27.723 | 0.00 | 0.00 |
| ATOM | 544 | CB  | PRO | X | 36 | 37.370 | 63.530 | 29.464 | 0.00 | 0.00 |
| ATOM | 545 | HB2 | PRO | X | 36 | 38.342 | 63.945 | 29.730 | 0.00 | 0.00 |
| ATOM | 546 | HB3 | PRO | X | 36 | 37.368 | 62.602 | 28.893 | 0.00 | 0.00 |
| ATOM | 547 | CA  | PRO | X | 36 | 36.623 | 63.246 | 30.739 | 0.00 | 0.00 |
| ATOM | 548 | HA  | PRO | X | 36 | 36.516 | 62.173 | 30.897 | 0.00 | 0.00 |
| ATOM | 549 | C   | PRO | X | 36 | 37.260 | 63.904 | 32.038 | 0.00 | 0.00 |
| ATOM | 550 | O   | PRO | X | 36 | 37.123 | 65.085 | 32.201 | 0.00 | 0.00 |
| ATOM | 551 | N   | PRO | X | 37 | 38.021 | 63.114 | 32.869 | 0.00 | 0.00 |
| ATOM | 552 | CD  | PRO | X | 37 | 38.213 | 61.653 | 32.687 | 0.00 | 0.00 |
| ATOM | 553 | HD2 | PRO | X | 37 | 38.869 | 61.420 | 31.848 | 0.00 | 0.00 |
| ATOM | 554 | HD3 | PRO | X | 37 | 37.287 | 61.081 | 32.634 | 0.00 | 0.00 |
| ATOM | 555 | CG  | PRO | X | 37 | 38.929 | 61.184 | 34.043 | 0.00 | 0.00 |
| ATOM | 556 | HG2 | PRO | X | 37 | 40.007 | 61.270 | 33.902 | 0.00 | 0.00 |
| ATOM | 557 | HG3 | PRO | X | 37 | 38.523 | 60.200 | 34.281 | 0.00 | 0.00 |
| ATOM | 558 | CB  | PRO | X | 37 | 38.537 | 62.300 | 35.011 | 0.00 | 0.00 |
| ATOM | 559 | HB2 | PRO | X | 37 | 39.025 | 62.396 | 35.981 | 0.00 | 0.00 |
| ATOM | 560 | HB3 | PRO | X | 37 | 37.492 | 62.147 | 35.282 | 0.00 | 0.00 |
| ATOM | 561 | CA  | PRO | X | 37 | 38.414 | 63.559 | 34.162 | 0.00 | 0.00 |
| ATOM | 562 | HA  | PRO | X | 37 | 37.624 | 64.205 | 34.545 | 0.00 | 0.00 |
| ATOM | 563 | C   | PRO | X | 37 | 39.744 | 64.322 | 34.073 | 0.00 | 0.00 |
| ATOM | 564 | O   | PRO | X | 37 | 40.470 | 64.418 | 35.052 | 0.00 | 0.00 |
| ATOM | 565 | N   | MET | X | 38 | 40.064 | 64.920 | 32.934 | 0.00 | 0.00 |
| ATOM | 566 | H   | MET | X | 38 | 39.359 | 64.932 | 32.211 | 0.00 | 0.00 |
| ATOM | 567 | CA  | MET | X | 38 | 41.302 | 65.691 | 32.718 | 0.00 | 0.00 |

|      |     |      |     |   |    |        |        |        |      |      |
|------|-----|------|-----|---|----|--------|--------|--------|------|------|
| ATOM | 568 | HA   | MET | X | 38 | 42.132 | 65.019 | 32.937 | 0.00 | 0.00 |
| ATOM | 569 | CB   | MET | X | 38 | 41.434 | 65.934 | 31.196 | 0.00 | 0.00 |
| ATOM | 570 | HB2  | MET | X | 38 | 42.347 | 66.514 | 31.066 | 0.00 | 0.00 |
| ATOM | 571 | HB3  | MET | X | 38 | 41.554 | 64.984 | 30.675 | 0.00 | 0.00 |
| ATOM | 572 | CG   | MET | X | 38 | 40.320 | 66.690 | 30.613 | 0.00 | 0.00 |
| ATOM | 573 | HG2  | MET | X | 38 | 39.324 | 66.294 | 30.812 | 0.00 | 0.00 |
| ATOM | 574 | HG3  | MET | X | 38 | 40.210 | 67.583 | 31.229 | 0.00 | 0.00 |
| ATOM | 575 | SD   | MET | X | 38 | 40.387 | 67.225 | 28.924 | 0.00 | 0.00 |
| ATOM | 576 | CE   | MET | X | 38 | 40.129 | 65.648 | 28.222 | 0.00 | 0.00 |
| ATOM | 577 | HE1  | MET | X | 38 | 40.455 | 65.414 | 27.208 | 0.00 | 0.00 |
| ATOM | 578 | HE2  | MET | X | 38 | 40.540 | 64.855 | 28.847 | 0.00 | 0.00 |
| ATOM | 579 | HE3  | MET | X | 38 | 39.059 | 65.441 | 28.205 | 0.00 | 0.00 |
| ATOM | 580 | C    | MET | X | 38 | 41.365 | 66.997 | 33.635 | 0.00 | 0.00 |
| ATOM | 581 | O    | MET | X | 38 | 40.381 | 67.710 | 33.958 | 0.00 | 0.00 |
| ATOM | 582 | N    | GLY | X | 39 | 42.623 | 67.395 | 33.952 | 0.00 | 0.00 |
| ATOM | 583 | H    | GLY | X | 39 | 43.421 | 66.777 | 33.920 | 0.00 | 0.00 |
| ATOM | 584 | CA   | GLY | X | 39 | 42.989 | 68.773 | 34.263 | 0.00 | 0.00 |
| ATOM | 585 | HA2  | GLY | X | 39 | 44.066 | 68.939 | 34.223 | 0.00 | 0.00 |
| ATOM | 586 | HA3  | GLY | X | 39 | 42.568 | 69.423 | 33.496 | 0.00 | 0.00 |
| ATOM | 587 | C    | GLY | X | 39 | 42.518 | 69.185 | 35.696 | 0.00 | 0.00 |
| ATOM | 588 | O    | GLY | X | 39 | 42.779 | 68.394 | 36.564 | 0.00 | 0.00 |
| ATOM | 589 | N    | PRO | X | 40 | 41.707 | 70.198 | 35.915 | 0.00 | 0.00 |
| ATOM | 590 | CD   | PRO | X | 40 | 41.172 | 71.021 | 34.820 | 0.00 | 0.00 |
| ATOM | 591 | HD2  | PRO | X | 40 | 40.911 | 70.393 | 33.969 | 0.00 | 0.00 |
| ATOM | 592 | HD3  | PRO | X | 40 | 41.874 | 71.817 | 34.568 | 0.00 | 0.00 |
| ATOM | 593 | CG   | PRO | X | 40 | 39.910 | 71.729 | 35.405 | 0.00 | 0.00 |
| ATOM | 594 | HG2  | PRO | X | 40 | 39.026 | 71.113 | 35.233 | 0.00 | 0.00 |
| ATOM | 595 | HG3  | PRO | X | 40 | 39.758 | 72.664 | 34.866 | 0.00 | 0.00 |
| ATOM | 596 | CB   | PRO | X | 40 | 40.313 | 71.800 | 36.868 | 0.00 | 0.00 |
| ATOM | 597 | HB2  | PRO | X | 40 | 39.447 | 71.855 | 37.527 | 0.00 | 0.00 |
| ATOM | 598 | HB3  | PRO | X | 40 | 41.010 | 72.631 | 36.986 | 0.00 | 0.00 |
| ATOM | 599 | CA   | PRO | X | 40 | 41.204 | 70.578 | 37.201 | 0.00 | 0.00 |
| ATOM | 600 | HA   | PRO | X | 40 | 42.032 | 70.838 | 37.861 | 0.00 | 0.00 |
| ATOM | 601 | C    | PRO | X | 40 | 40.447 | 69.412 | 37.859 | 0.00 | 0.00 |
| ATOM | 602 | O    | PRO | X | 40 | 40.444 | 69.367 | 39.071 | 0.00 | 0.00 |
| ATOM | 603 | N    | ARG | X | 41 | 39.775 | 68.541 | 37.025 | 0.00 | 0.00 |
| ATOM | 604 | H    | ARG | X | 41 | 39.935 | 68.572 | 36.029 | 0.00 | 0.00 |
| ATOM | 605 | CA   | ARG | X | 41 | 39.147 | 67.299 | 37.476 | 0.00 | 0.00 |
| ATOM | 606 | HA   | ARG | X | 41 | 38.476 | 67.502 | 38.310 | 0.00 | 0.00 |
| ATOM | 607 | CB   | ARG | X | 41 | 38.336 | 66.746 | 36.328 | 0.00 | 0.00 |
| ATOM | 608 | HB2  | ARG | X | 41 | 38.977 | 66.535 | 35.472 | 0.00 | 0.00 |
| ATOM | 609 | HB3  | ARG | X | 41 | 37.952 | 65.790 | 36.684 | 0.00 | 0.00 |
| ATOM | 610 | CG   | ARG | X | 41 | 37.101 | 67.585 | 35.918 | 0.00 | 0.00 |
| ATOM | 611 | HG2  | ARG | X | 41 | 36.588 | 67.791 | 36.858 | 0.00 | 0.00 |
| ATOM | 612 | HG3  | ARG | X | 41 | 37.526 | 68.532 | 35.586 | 0.00 | 0.00 |
| ATOM | 613 | CD   | ARG | X | 41 | 36.275 | 66.898 | 34.781 | 0.00 | 0.00 |
| ATOM | 614 | HD2  | ARG | X | 41 | 36.890 | 66.930 | 33.882 | 0.00 | 0.00 |
| ATOM | 615 | HD3  | ARG | X | 41 | 36.060 | 65.851 | 34.996 | 0.00 | 0.00 |
| ATOM | 616 | NE   | ARG | X | 41 | 34.920 | 67.497 | 34.613 | 0.00 | 0.00 |
| ATOM | 617 | HE   | ARG | X | 41 | 34.250 | 67.466 | 35.367 | 0.00 | 0.00 |
| ATOM | 618 | CZ   | ARG | X | 41 | 34.583 | 68.176 | 33.485 | 0.00 | 0.00 |
| ATOM | 619 | NH1  | ARG | X | 41 | 35.456 | 68.554 | 32.656 | 0.00 | 0.00 |
| ATOM | 620 | HH11 | ARG | X | 41 | 36.422 | 68.528 | 32.951 | 0.00 | 0.00 |
| ATOM | 621 | HH12 | ARG | X | 41 | 35.216 | 69.103 | 31.842 | 0.00 | 0.00 |
| ATOM | 622 | NH2  | ARG | X | 41 | 33.292 | 68.347 | 33.237 | 0.00 | 0.00 |
| ATOM | 623 | HH21 | ARG | X | 41 | 32.612 | 68.248 | 33.977 | 0.00 | 0.00 |
| ATOM | 624 | HH22 | ARG | X | 41 | 32.932 | 68.676 | 32.352 | 0.00 | 0.00 |
| ATOM | 625 | C    | ARG | X | 41 | 40.066 | 66.127 | 37.902 | 0.00 | 0.00 |
| ATOM | 626 | O    | ARG | X | 41 | 39.558 | 65.177 | 38.562 | 0.00 | 0.00 |
| ATOM | 627 | N    | ARG | X | 42 | 41.389 | 66.216 | 37.676 | 0.00 | 0.00 |
| ATOM | 628 | H    | ARG | X | 42 | 41.711 | 67.041 | 37.190 | 0.00 | 0.00 |
| ATOM | 629 | CA   | ARG | X | 42 | 42.308 | 65.220 | 38.138 | 0.00 | 0.00 |
| ATOM | 630 | HA   | ARG | X | 42 | 41.982 | 64.210 | 37.889 | 0.00 | 0.00 |
| ATOM | 631 | CB   | ARG | X | 42 | 43.706 | 65.446 | 37.475 | 0.00 | 0.00 |
| ATOM | 632 | HB2  | ARG | X | 42 | 43.638 | 65.308 | 36.396 | 0.00 | 0.00 |
| ATOM | 633 | HB3  | ARG | X | 42 | 43.992 | 66.489 | 37.610 | 0.00 | 0.00 |
| ATOM | 634 | CG   | ARG | X | 42 | 44.727 | 64.464 | 37.940 | 0.00 | 0.00 |

|      |     |      |     |   |    |        |        |        |      |      |
|------|-----|------|-----|---|----|--------|--------|--------|------|------|
| ATOM | 635 | HG2  | ARG | X | 42 | 44.750 | 64.459 | 39.030 | 0.00 | 0.00 |
| ATOM | 636 | HG3  | ARG | X | 42 | 44.496 | 63.443 | 37.636 | 0.00 | 0.00 |
| ATOM | 637 | CD   | ARG | X | 42 | 46.105 | 64.951 | 37.542 | 0.00 | 0.00 |
| ATOM | 638 | HD2  | ARG | X | 42 | 46.289 | 65.950 | 37.938 | 0.00 | 0.00 |
| ATOM | 639 | HD3  | ARG | X | 42 | 46.745 | 64.167 | 37.947 | 0.00 | 0.00 |
| ATOM | 640 | NE   | ARG | X | 42 | 46.336 | 65.065 | 36.059 | 0.00 | 0.00 |
| ATOM | 641 | HE   | ARG | X | 42 | 45.652 | 64.702 | 35.411 | 0.00 | 0.00 |
| ATOM | 642 | CZ   | ARG | X | 42 | 47.204 | 65.971 | 35.532 | 0.00 | 0.00 |
| ATOM | 643 | NH1  | ARG | X | 42 | 48.302 | 66.375 | 36.168 | 0.00 | 0.00 |
| ATOM | 644 | HH11 | ARG | X | 42 | 48.599 | 66.041 | 37.073 | 0.00 | 0.00 |
| ATOM | 645 | HH12 | ARG | X | 42 | 48.929 | 67.002 | 35.683 | 0.00 | 0.00 |
| ATOM | 646 | NH2  | ARG | X | 42 | 46.941 | 66.415 | 34.331 | 0.00 | 0.00 |
| ATOM | 647 | HH21 | ARG | X | 42 | 46.073 | 66.219 | 33.854 | 0.00 | 0.00 |
| ATOM | 648 | HH22 | ARG | X | 42 | 47.493 | 67.166 | 33.942 | 0.00 | 0.00 |
| ATOM | 649 | C    | ARG | X | 42 | 42.343 | 65.178 | 39.669 | 0.00 | 0.00 |
| ATOM | 650 | O    | ARG | X | 42 | 42.407 | 66.217 | 40.309 | 0.00 | 0.00 |
| ATOM | 651 | N    | PHE | X | 43 | 42.116 | 63.962 | 40.211 | 0.00 | 0.00 |
| ATOM | 652 | H    | PHE | X | 43 | 42.045 | 63.137 | 39.632 | 0.00 | 0.00 |
| ATOM | 653 | CA   | PHE | X | 43 | 42.052 | 63.612 | 41.639 | 0.00 | 0.00 |
| ATOM | 654 | HA   | PHE | X | 43 | 42.416 | 62.584 | 41.644 | 0.00 | 0.00 |
| ATOM | 655 | CB   | PHE | X | 43 | 43.055 | 64.284 | 42.567 | 0.00 | 0.00 |
| ATOM | 656 | HB2  | PHE | X | 43 | 42.632 | 65.247 | 42.855 | 0.00 | 0.00 |
| ATOM | 657 | HB3  | PHE | X | 43 | 43.162 | 63.678 | 43.466 | 0.00 | 0.00 |
| ATOM | 658 | CG   | PHE | X | 43 | 44.454 | 64.459 | 41.997 | 0.00 | 0.00 |
| ATOM | 659 | CD1  | PHE | X | 43 | 45.084 | 63.271 | 41.516 | 0.00 | 0.00 |
| ATOM | 660 | HD1  | PHE | X | 43 | 44.592 | 62.332 | 41.723 | 0.00 | 0.00 |
| ATOM | 661 | CE1  | PHE | X | 43 | 46.407 | 63.314 | 41.082 | 0.00 | 0.00 |
| ATOM | 662 | HE1  | PHE | X | 43 | 46.950 | 62.429 | 40.785 | 0.00 | 0.00 |
| ATOM | 663 | CZ   | PHE | X | 43 | 47.062 | 64.524 | 41.029 | 0.00 | 0.00 |
| ATOM | 664 | HZ   | PHE | X | 43 | 48.108 | 64.602 | 40.772 | 0.00 | 0.00 |
| ATOM | 665 | CE2  | PHE | X | 43 | 46.430 | 65.709 | 41.392 | 0.00 | 0.00 |
| ATOM | 666 | HE2  | PHE | X | 43 | 47.028 | 66.607 | 41.350 | 0.00 | 0.00 |
| ATOM | 667 | CD2  | PHE | X | 43 | 45.107 | 65.712 | 41.944 | 0.00 | 0.00 |
| ATOM | 668 | HD2  | PHE | X | 43 | 44.662 | 66.609 | 42.347 | 0.00 | 0.00 |
| ATOM | 669 | C    | PHE | X | 43 | 40.663 | 63.717 | 42.218 | 0.00 | 0.00 |
| ATOM | 670 | O    | PHE | X | 43 | 40.409 | 63.166 | 43.298 | 0.00 | 0.00 |
| ATOM | 671 | N    | LEU | X | 44 | 39.635 | 64.306 | 41.566 | 0.00 | 0.00 |
| ATOM | 672 | H    | LEU | X | 44 | 39.864 | 64.695 | 40.663 | 0.00 | 0.00 |
| ATOM | 673 | CA   | LEU | X | 44 | 38.318 | 64.472 | 42.151 | 0.00 | 0.00 |
| ATOM | 674 | HA   | LEU | X | 44 | 38.343 | 64.362 | 43.236 | 0.00 | 0.00 |
| ATOM | 675 | CB   | LEU | X | 44 | 37.908 | 65.931 | 41.917 | 0.00 | 0.00 |
| ATOM | 676 | HB2  | LEU | X | 44 | 37.972 | 66.158 | 40.853 | 0.00 | 0.00 |
| ATOM | 677 | HB3  | LEU | X | 44 | 36.851 | 65.977 | 42.179 | 0.00 | 0.00 |
| ATOM | 678 | CG   | LEU | X | 44 | 38.642 | 67.023 | 42.701 | 0.00 | 0.00 |
| ATOM | 679 | HG   | LEU | X | 44 | 39.717 | 66.848 | 42.680 | 0.00 | 0.00 |
| ATOM | 680 | CD1  | LEU | X | 44 | 38.513 | 68.493 | 42.172 | 0.00 | 0.00 |
| ATOM | 681 | HD11 | LEU | X | 44 | 39.084 | 68.498 | 41.244 | 0.00 | 0.00 |
| ATOM | 682 | HD12 | LEU | X | 44 | 38.963 | 69.225 | 42.843 | 0.00 | 0.00 |
| ATOM | 683 | HD13 | LEU | X | 44 | 37.477 | 68.755 | 41.960 | 0.00 | 0.00 |
| ATOM | 684 | CD2  | LEU | X | 44 | 38.150 | 67.140 | 44.183 | 0.00 | 0.00 |
| ATOM | 685 | HD21 | LEU | X | 44 | 38.557 | 66.300 | 44.746 | 0.00 | 0.00 |
| ATOM | 686 | HD22 | LEU | X | 44 | 38.344 | 68.104 | 44.651 | 0.00 | 0.00 |
| ATOM | 687 | HD23 | LEU | X | 44 | 37.081 | 67.018 | 44.352 | 0.00 | 0.00 |
| ATOM | 688 | C    | LEU | X | 44 | 37.264 | 63.440 | 41.588 | 0.00 | 0.00 |
| ATOM | 689 | O    | LEU | X | 44 | 37.487 | 62.783 | 40.555 | 0.00 | 0.00 |
| ATOM | 690 | N    | PRO | X | 45 | 36.138 | 63.315 | 42.302 | 0.00 | 0.00 |
| ATOM | 691 | CD   | PRO | X | 45 | 35.936 | 63.764 | 43.687 | 0.00 | 0.00 |
| ATOM | 692 | HD2  | PRO | X | 45 | 35.660 | 64.816 | 43.616 | 0.00 | 0.00 |
| ATOM | 693 | HD3  | PRO | X | 45 | 36.840 | 63.585 | 44.269 | 0.00 | 0.00 |
| ATOM | 694 | CG   | PRO | X | 45 | 34.864 | 62.791 | 44.174 | 0.00 | 0.00 |
| ATOM | 695 | HG2  | PRO | X | 45 | 34.283 | 63.046 | 45.061 | 0.00 | 0.00 |
| ATOM | 696 | HG3  | PRO | X | 45 | 35.272 | 61.790 | 44.311 | 0.00 | 0.00 |
| ATOM | 697 | CB   | PRO | X | 45 | 33.944 | 62.688 | 42.972 | 0.00 | 0.00 |
| ATOM | 698 | HB2  | PRO | X | 45 | 33.411 | 63.633 | 42.876 | 0.00 | 0.00 |
| ATOM | 699 | HB3  | PRO | X | 45 | 33.262 | 61.852 | 43.129 | 0.00 | 0.00 |
| ATOM | 700 | CA   | PRO | X | 45 | 35.037 | 62.574 | 41.865 | 0.00 | 0.00 |
| ATOM | 701 | HA   | PRO | X | 45 | 35.372 | 61.545 | 41.991 | 0.00 | 0.00 |

|      |     |     |     |   |    |        |        |        |      |      |
|------|-----|-----|-----|---|----|--------|--------|--------|------|------|
| ATOM | 702 | C   | PRO | X | 45 | 34.455 | 62.792 | 40.422 | 0.00 | 0.00 |
| ATOM | 703 | O   | PRO | X | 45 | 34.422 | 63.974 | 40.121 | 0.00 | 0.00 |
| ATOM | 704 | N   | PRO | X | 46 | 33.888 | 61.835 | 39.685 | 0.00 | 0.00 |
| ATOM | 705 | CD  | PRO | X | 46 | 33.631 | 60.442 | 40.107 | 0.00 | 0.00 |
| ATOM | 706 | HD2 | PRO | X | 46 | 32.883 | 60.451 | 40.900 | 0.00 | 0.00 |
| ATOM | 707 | HD3 | PRO | X | 46 | 34.543 | 60.035 | 40.544 | 0.00 | 0.00 |
| ATOM | 708 | CG  | PRO | X | 46 | 33.035 | 59.718 | 38.895 | 0.00 | 0.00 |
| ATOM | 709 | HG2 | PRO | X | 46 | 31.964 | 59.917 | 38.870 | 0.00 | 0.00 |
| ATOM | 710 | HG3 | PRO | X | 46 | 33.266 | 58.653 | 38.901 | 0.00 | 0.00 |
| ATOM | 711 | CB  | PRO | X | 46 | 33.640 | 60.489 | 37.750 | 0.00 | 0.00 |
| ATOM | 712 | HB2 | PRO | X | 46 | 33.171 | 60.271 | 36.790 | 0.00 | 0.00 |
| ATOM | 713 | HB3 | PRO | X | 46 | 34.692 | 60.216 | 37.676 | 0.00 | 0.00 |
| ATOM | 714 | CA  | PRO | X | 46 | 33.559 | 61.979 | 38.249 | 0.00 | 0.00 |
| ATOM | 715 | HA  | PRO | X | 46 | 34.344 | 62.567 | 37.775 | 0.00 | 0.00 |
| ATOM | 716 | C   | PRO | X | 46 | 32.220 | 62.646 | 38.140 | 0.00 | 0.00 |
| ATOM | 717 | O   | PRO | X | 46 | 31.428 | 62.655 | 39.076 | 0.00 | 0.00 |
| ATOM | 718 | N   | GLU | X | 47 | 31.797 | 63.058 | 36.914 | 0.00 | 0.00 |
| ATOM | 719 | H   | GLU | X | 47 | 32.435 | 62.930 | 36.142 | 0.00 | 0.00 |
| ATOM | 720 | CA  | GLU | X | 47 | 30.400 | 63.422 | 36.620 | 0.00 | 0.00 |
| ATOM | 721 | HA  | GLU | X | 47 | 29.780 | 63.132 | 37.469 | 0.00 | 0.00 |
| ATOM | 722 | CB  | GLU | X | 47 | 30.343 | 64.971 | 36.475 | 0.00 | 0.00 |
| ATOM | 723 | HB2 | GLU | X | 47 | 29.345 | 65.400 | 36.383 | 0.00 | 0.00 |
| ATOM | 724 | HB3 | GLU | X | 47 | 30.697 | 65.324 | 37.444 | 0.00 | 0.00 |
| ATOM | 725 | CG  | GLU | X | 47 | 31.462 | 65.577 | 35.510 | 0.00 | 0.00 |
| ATOM | 726 | HG2 | GLU | X | 47 | 32.433 | 65.127 | 35.719 | 0.00 | 0.00 |
| ATOM | 727 | HG3 | GLU | X | 47 | 31.186 | 65.527 | 34.457 | 0.00 | 0.00 |
| ATOM | 728 | CD  | GLU | X | 47 | 31.810 | 67.060 | 35.756 | 0.00 | 0.00 |
| ATOM | 729 | OE1 | GLU | X | 47 | 31.160 | 67.939 | 35.108 | 0.00 | 0.00 |
| ATOM | 730 | OE2 | GLU | X | 47 | 32.594 | 67.435 | 36.644 | 0.00 | 0.00 |
| ATOM | 731 | C   | GLU | X | 47 | 29.992 | 62.715 | 35.306 | 0.00 | 0.00 |
| ATOM | 732 | O   | GLU | X | 47 | 30.779 | 62.402 | 34.472 | 0.00 | 0.00 |
| ATOM | 733 | N   | PRO | X | 48 | 28.739 | 62.389 | 35.145 | 0.00 | 0.00 |
| ATOM | 734 | CD  | PRO | X | 48 | 27.693 | 62.613 | 36.135 | 0.00 | 0.00 |
| ATOM | 735 | HD2 | PRO | X | 48 | 27.599 | 63.681 | 36.332 | 0.00 | 0.00 |
| ATOM | 736 | HD3 | PRO | X | 48 | 27.896 | 61.914 | 36.946 | 0.00 | 0.00 |
| ATOM | 737 | CG  | PRO | X | 48 | 26.390 | 62.332 | 35.450 | 0.00 | 0.00 |
| ATOM | 738 | HG2 | PRO | X | 48 | 26.023 | 63.301 | 35.111 | 0.00 | 0.00 |
| ATOM | 739 | HG3 | PRO | X | 48 | 25.735 | 61.837 | 36.166 | 0.00 | 0.00 |
| ATOM | 740 | CB  | PRO | X | 48 | 26.767 | 61.444 | 34.308 | 0.00 | 0.00 |
| ATOM | 741 | HB2 | PRO | X | 48 | 26.085 | 61.711 | 33.502 | 0.00 | 0.00 |
| ATOM | 742 | HB3 | PRO | X | 48 | 26.588 | 60.417 | 34.625 | 0.00 | 0.00 |
| ATOM | 743 | CA  | PRO | X | 48 | 28.214 | 61.636 | 33.932 | 0.00 | 0.00 |
| ATOM | 744 | HA  | PRO | X | 48 | 28.585 | 60.612 | 33.895 | 0.00 | 0.00 |
| ATOM | 745 | C   | PRO | X | 48 | 28.262 | 62.472 | 32.581 | 0.00 | 0.00 |
| ATOM | 746 | O   | PRO | X | 48 | 28.214 | 63.705 | 32.593 | 0.00 | 0.00 |
| ATOM | 747 | N   | LYS | X | 49 | 28.270 | 61.783 | 31.437 | 0.00 | 0.00 |
| ATOM | 748 | H   | LYS | X | 49 | 28.542 | 60.816 | 31.535 | 0.00 | 0.00 |
| ATOM | 749 | CA  | LYS | X | 49 | 28.469 | 62.348 | 30.050 | 0.00 | 0.00 |
| ATOM | 750 | HA  | LYS | X | 49 | 29.361 | 62.974 | 30.064 | 0.00 | 0.00 |
| ATOM | 751 | CB  | LYS | X | 49 | 28.655 | 61.150 | 28.999 | 0.00 | 0.00 |
| ATOM | 752 | HB2 | LYS | X | 49 | 29.625 | 60.744 | 29.286 | 0.00 | 0.00 |
| ATOM | 753 | HB3 | LYS | X | 49 | 27.831 | 60.495 | 29.280 | 0.00 | 0.00 |
| ATOM | 754 | CG  | LYS | X | 49 | 28.548 | 61.485 | 27.543 | 0.00 | 0.00 |
| ATOM | 755 | HG2 | LYS | X | 49 | 28.569 | 60.544 | 26.993 | 0.00 | 0.00 |
| ATOM | 756 | HG3 | LYS | X | 49 | 27.542 | 61.849 | 27.334 | 0.00 | 0.00 |
| ATOM | 757 | CD  | LYS | X | 49 | 29.691 | 62.424 | 26.990 | 0.00 | 0.00 |
| ATOM | 758 | HD2 | LYS | X | 49 | 29.649 | 63.373 | 27.526 | 0.00 | 0.00 |
| ATOM | 759 | HD3 | LYS | X | 49 | 30.640 | 61.943 | 27.229 | 0.00 | 0.00 |
| ATOM | 760 | CE  | LYS | X | 49 | 29.471 | 62.447 | 25.432 | 0.00 | 0.00 |
| ATOM | 761 | HE2 | LYS | X | 49 | 30.386 | 62.117 | 24.939 | 0.00 | 0.00 |
| ATOM | 762 | HE3 | LYS | X | 49 | 28.759 | 61.645 | 25.236 | 0.00 | 0.00 |
| ATOM | 763 | NZ  | LYS | X | 49 | 28.915 | 63.716 | 24.861 | 0.00 | 0.00 |
| ATOM | 764 | HZ1 | LYS | X | 49 | 28.093 | 63.855 | 25.431 | 0.00 | 0.00 |
| ATOM | 765 | HZ2 | LYS | X | 49 | 29.432 | 64.560 | 25.066 | 0.00 | 0.00 |
| ATOM | 766 | HZ3 | LYS | X | 49 | 28.718 | 63.709 | 23.870 | 0.00 | 0.00 |
| ATOM | 767 | C   | LYS | X | 49 | 27.192 | 63.133 | 29.674 | 0.00 | 0.00 |
| ATOM | 768 | O   | LYS | X | 49 | 26.054 | 62.631 | 29.814 | 0.00 | 0.00 |

|      |     |      |     |   |    |        |        |        |      |      |
|------|-----|------|-----|---|----|--------|--------|--------|------|------|
| ATOM | 769 | N    | GLN | X | 50 | 27.435 | 64.350 | 29.171 | 0.00 | 0.00 |
| ATOM | 770 | H    | GLN | X | 50 | 28.336 | 64.803 | 29.236 | 0.00 | 0.00 |
| ATOM | 771 | CA   | GLN | X | 50 | 26.399 | 65.137 | 28.578 | 0.00 | 0.00 |
| ATOM | 772 | HA   | GLN | X | 50 | 25.651 | 65.160 | 29.371 | 0.00 | 0.00 |
| ATOM | 773 | CB   | GLN | X | 50 | 26.974 | 66.584 | 28.357 | 0.00 | 0.00 |
| ATOM | 774 | HB2  | GLN | X | 50 | 27.356 | 66.993 | 29.292 | 0.00 | 0.00 |
| ATOM | 775 | HB3  | GLN | X | 50 | 27.789 | 66.471 | 27.642 | 0.00 | 0.00 |
| ATOM | 776 | CG   | GLN | X | 50 | 25.996 | 67.540 | 27.734 | 0.00 | 0.00 |
| ATOM | 777 | HG2  | GLN | X | 50 | 25.687 | 67.148 | 26.766 | 0.00 | 0.00 |
| ATOM | 778 | HG3  | GLN | X | 50 | 25.169 | 67.576 | 28.444 | 0.00 | 0.00 |
| ATOM | 779 | CD   | GLN | X | 50 | 26.474 | 68.995 | 27.578 | 0.00 | 0.00 |
| ATOM | 780 | OE1  | GLN | X | 50 | 25.947 | 70.009 | 28.030 | 0.00 | 0.00 |
| ATOM | 781 | NE2  | GLN | X | 50 | 27.538 | 69.091 | 26.821 | 0.00 | 0.00 |
| ATOM | 782 | HE21 | GLN | X | 50 | 27.924 | 70.023 | 26.772 | 0.00 | 0.00 |
| ATOM | 783 | HE22 | GLN | X | 50 | 27.801 | 68.306 | 26.243 | 0.00 | 0.00 |
| ATOM | 784 | C    | GLN | X | 50 | 25.854 | 64.542 | 27.275 | 0.00 | 0.00 |
| ATOM | 785 | O    | GLN | X | 50 | 26.639 | 64.233 | 26.372 | 0.00 | 0.00 |
| ATOM | 786 | N    | PRO | X | 51 | 24.521 | 64.330 | 27.162 | 0.00 | 0.00 |
| ATOM | 787 | CD   | PRO | X | 51 | 23.548 | 64.257 | 28.245 | 0.00 | 0.00 |
| ATOM | 788 | HD2  | PRO | X | 51 | 23.451 | 65.247 | 28.692 | 0.00 | 0.00 |
| ATOM | 789 | HD3  | PRO | X | 51 | 23.890 | 63.514 | 28.965 | 0.00 | 0.00 |
| ATOM | 790 | CG   | PRO | X | 51 | 22.216 | 63.822 | 27.517 | 0.00 | 0.00 |
| ATOM | 791 | HG2  | PRO | X | 51 | 21.343 | 64.254 | 28.005 | 0.00 | 0.00 |
| ATOM | 792 | HG3  | PRO | X | 51 | 22.041 | 62.752 | 27.632 | 0.00 | 0.00 |
| ATOM | 793 | CB   | PRO | X | 51 | 22.400 | 64.231 | 26.066 | 0.00 | 0.00 |
| ATOM | 794 | HB2  | PRO | X | 51 | 22.043 | 65.252 | 25.930 | 0.00 | 0.00 |
| ATOM | 795 | HB3  | PRO | X | 51 | 21.826 | 63.586 | 25.400 | 0.00 | 0.00 |
| ATOM | 796 | CA   | PRO | X | 51 | 23.895 | 64.003 | 25.887 | 0.00 | 0.00 |
| ATOM | 797 | HA   | PRO | X | 51 | 23.942 | 62.923 | 25.752 | 0.00 | 0.00 |
| ATOM | 798 | C    | PRO | X | 51 | 24.397 | 64.801 | 24.692 | 0.00 | 0.00 |
| ATOM | 799 | O    | PRO | X | 51 | 24.770 | 65.968 | 24.833 | 0.00 | 0.00 |
| ATOM | 800 | N    | TRP | X | 52 | 24.286 | 64.184 | 23.474 | 0.00 | 0.00 |
| ATOM | 801 | H    | TRP | X | 52 | 23.887 | 63.262 | 23.368 | 0.00 | 0.00 |
| ATOM | 802 | CA   | TRP | X | 52 | 24.871 | 64.595 | 22.216 | 0.00 | 0.00 |
| ATOM | 803 | HA   | TRP | X | 52 | 25.337 | 65.579 | 22.248 | 0.00 | 0.00 |
| ATOM | 804 | CB   | TRP | X | 52 | 26.058 | 63.763 | 21.903 | 0.00 | 0.00 |
| ATOM | 805 | HB2  | TRP | X | 52 | 26.554 | 64.223 | 21.048 | 0.00 | 0.00 |
| ATOM | 806 | HB3  | TRP | X | 52 | 26.828 | 63.765 | 22.675 | 0.00 | 0.00 |
| ATOM | 807 | CG   | TRP | X | 52 | 25.844 | 62.335 | 21.712 | 0.00 | 0.00 |
| ATOM | 808 | CD1  | TRP | X | 52 | 25.479 | 61.745 | 20.536 | 0.00 | 0.00 |
| ATOM | 809 | HD1  | TRP | X | 52 | 25.274 | 62.294 | 19.629 | 0.00 | 0.00 |
| ATOM | 810 | NE1  | TRP | X | 52 | 25.118 | 60.402 | 20.713 | 0.00 | 0.00 |
| ATOM | 811 | HE1  | TRP | X | 52 | 24.832 | 59.820 | 19.939 | 0.00 | 0.00 |
| ATOM | 812 | CE2  | TRP | X | 52 | 25.269 | 59.993 | 21.976 | 0.00 | 0.00 |
| ATOM | 813 | CZ2  | TRP | X | 52 | 24.955 | 58.825 | 22.637 | 0.00 | 0.00 |
| ATOM | 814 | HZ2  | TRP | X | 52 | 24.502 | 57.951 | 22.191 | 0.00 | 0.00 |
| ATOM | 815 | CH2  | TRP | X | 52 | 25.087 | 58.773 | 24.057 | 0.00 | 0.00 |
| ATOM | 816 | HH2  | TRP | X | 52 | 24.795 | 57.903 | 24.627 | 0.00 | 0.00 |
| ATOM | 817 | CZ3  | TRP | X | 52 | 25.563 | 59.926 | 24.709 | 0.00 | 0.00 |
| ATOM | 818 | HZ3  | TRP | X | 52 | 25.739 | 59.858 | 25.772 | 0.00 | 0.00 |
| ATOM | 819 | CE3  | TRP | X | 52 | 25.804 | 61.101 | 24.003 | 0.00 | 0.00 |
| ATOM | 820 | HE3  | TRP | X | 52 | 26.157 | 61.980 | 24.521 | 0.00 | 0.00 |
| ATOM | 821 | CD2  | TRP | X | 52 | 25.738 | 61.172 | 22.628 | 0.00 | 0.00 |
| ATOM | 822 | C    | TRP | X | 52 | 23.877 | 64.589 | 20.946 | 0.00 | 0.00 |
| ATOM | 823 | O    | TRP | X | 52 | 22.834 | 63.957 | 21.141 | 0.00 | 0.00 |
| ATOM | 824 | N    | SER | X | 53 | 24.134 | 65.311 | 19.861 | 0.00 | 0.00 |
| ATOM | 825 | H    | SER | X | 53 | 24.925 | 65.939 | 19.848 | 0.00 | 0.00 |
| ATOM | 826 | CA   | SER | X | 53 | 23.256 | 65.290 | 18.657 | 0.00 | 0.00 |
| ATOM | 827 | HA   | SER | X | 53 | 22.206 | 65.046 | 18.822 | 0.00 | 0.00 |
| ATOM | 828 | CB   | SER | X | 53 | 23.353 | 66.626 | 17.995 | 0.00 | 0.00 |
| ATOM | 829 | HB2  | SER | X | 53 | 24.342 | 66.751 | 17.553 | 0.00 | 0.00 |
| ATOM | 830 | HB3  | SER | X | 53 | 22.434 | 66.610 | 17.409 | 0.00 | 0.00 |
| ATOM | 831 | OG   | SER | X | 53 | 23.249 | 67.798 | 18.770 | 0.00 | 0.00 |
| ATOM | 832 | HG   | SER | X | 53 | 23.546 | 68.572 | 18.284 | 0.00 | 0.00 |
| ATOM | 833 | C    | SER | X | 53 | 23.793 | 64.254 | 17.644 | 0.00 | 0.00 |
| ATOM | 834 | O    | SER | X | 53 | 25.011 | 64.143 | 17.447 | 0.00 | 0.00 |
| ATOM | 835 | N    | GLY | X | 54 | 22.919 | 63.475 | 16.988 | 0.00 | 0.00 |



|      |     |      |     |   |    |        |        |        |      |      |
|------|-----|------|-----|---|----|--------|--------|--------|------|------|
| ATOM | 836 | H    | GLY | X | 54 | 21.965 | 63.537 | 17.312 | 0.00 | 0.00 |
| ATOM | 837 | CA   | GLY | X | 54 | 23.224 | 62.382 | 16.017 | 0.00 | 0.00 |
| ATOM | 838 | HA2  | GLY | X | 54 | 22.429 | 62.118 | 15.320 | 0.00 | 0.00 |
| ATOM | 839 | HA3  | GLY | X | 54 | 24.001 | 62.827 | 15.395 | 0.00 | 0.00 |
| ATOM | 840 | C    | GLY | X | 54 | 23.813 | 61.140 | 16.689 | 0.00 | 0.00 |
| ATOM | 841 | O    | GLY | X | 54 | 23.584 | 60.866 | 17.875 | 0.00 | 0.00 |
| ATOM | 842 | N    | VAL | X | 55 | 24.427 | 60.367 | 15.804 | 0.00 | 0.00 |
| ATOM | 843 | H    | VAL | X | 55 | 24.677 | 60.798 | 14.925 | 0.00 | 0.00 |
| ATOM | 844 | CA   | VAL | X | 55 | 25.106 | 59.124 | 16.090 | 0.00 | 0.00 |
| ATOM | 845 | HA   | VAL | X | 55 | 24.535 | 58.738 | 16.935 | 0.00 | 0.00 |
| ATOM | 846 | CB   | VAL | X | 55 | 25.026 | 58.137 | 14.894 | 0.00 | 0.00 |
| ATOM | 847 | HB   | VAL | X | 55 | 25.780 | 58.398 | 14.152 | 0.00 | 0.00 |
| ATOM | 848 | CG1  | VAL | X | 55 | 25.447 | 56.693 | 15.357 | 0.00 | 0.00 |
| ATOM | 849 | HG11 | VAL | X | 55 | 26.359 | 56.691 | 15.955 | 0.00 | 0.00 |
| ATOM | 850 | HG12 | VAL | X | 55 | 24.663 | 56.246 | 15.968 | 0.00 | 0.00 |
| ATOM | 851 | HG13 | VAL | X | 55 | 25.554 | 56.056 | 14.480 | 0.00 | 0.00 |
| ATOM | 852 | CG2  | VAL | X | 55 | 23.689 | 57.903 | 14.156 | 0.00 | 0.00 |
| ATOM | 853 | HG21 | VAL | X | 55 | 23.249 | 58.883 | 13.972 | 0.00 | 0.00 |
| ATOM | 854 | HG22 | VAL | X | 55 | 22.935 | 57.395 | 14.757 | 0.00 | 0.00 |
| ATOM | 855 | HG23 | VAL | X | 55 | 23.850 | 57.462 | 13.172 | 0.00 | 0.00 |
| ATOM | 856 | C    | VAL | X | 55 | 26.552 | 59.310 | 16.483 | 0.00 | 0.00 |
| ATOM | 857 | O    | VAL | X | 55 | 27.380 | 59.738 | 15.705 | 0.00 | 0.00 |
| ATOM | 858 | N    | VAL | X | 56 | 26.902 | 58.707 | 17.669 | 0.00 | 0.00 |
| ATOM | 859 | H    | VAL | X | 56 | 26.176 | 58.345 | 18.270 | 0.00 | 0.00 |
| ATOM | 860 | CA   | VAL | X | 56 | 28.293 | 58.559 | 18.050 | 0.00 | 0.00 |
| ATOM | 861 | HA   | VAL | X | 56 | 28.868 | 59.306 | 17.502 | 0.00 | 0.00 |
| ATOM | 862 | CB   | VAL | X | 56 | 28.454 | 58.912 | 19.517 | 0.00 | 0.00 |
| ATOM | 863 | HB   | VAL | X | 56 | 27.601 | 58.460 | 20.024 | 0.00 | 0.00 |
| ATOM | 864 | CG1  | VAL | X | 56 | 29.731 | 58.419 | 20.161 | 0.00 | 0.00 |
| ATOM | 865 | HG11 | VAL | X | 56 | 30.616 | 58.815 | 19.662 | 0.00 | 0.00 |
| ATOM | 866 | HG12 | VAL | X | 56 | 29.913 | 58.891 | 21.126 | 0.00 | 0.00 |
| ATOM | 867 | HG13 | VAL | X | 56 | 29.748 | 57.335 | 20.273 | 0.00 | 0.00 |
| ATOM | 868 | CG2  | VAL | X | 56 | 28.444 | 60.451 | 19.673 | 0.00 | 0.00 |
| ATOM | 869 | HG21 | VAL | X | 56 | 27.665 | 60.885 | 19.046 | 0.00 | 0.00 |
| ATOM | 870 | HG22 | VAL | X | 56 | 29.370 | 60.892 | 19.305 | 0.00 | 0.00 |
| ATOM | 871 | HG23 | VAL | X | 56 | 28.304 | 60.761 | 20.708 | 0.00 | 0.00 |
| ATOM | 872 | C    | VAL | X | 56 | 28.845 | 57.269 | 17.563 | 0.00 | 0.00 |
| ATOM | 873 | O    | VAL | X | 56 | 28.236 | 56.230 | 17.763 | 0.00 | 0.00 |
| ATOM | 874 | N    | ASP | X | 57 | 30.043 | 57.332 | 16.998 | 0.00 | 0.00 |
| ATOM | 875 | H    | ASP | X | 57 | 30.445 | 58.252 | 16.894 | 0.00 | 0.00 |
| ATOM | 876 | CA   | ASP | X | 57 | 30.876 | 56.172 | 16.781 | 0.00 | 0.00 |
| ATOM | 877 | HA   | ASP | X | 57 | 30.263 | 55.441 | 16.253 | 0.00 | 0.00 |
| ATOM | 878 | CB   | ASP | X | 57 | 32.014 | 56.616 | 15.873 | 0.00 | 0.00 |
| ATOM | 879 | HB2  | ASP | X | 57 | 31.572 | 57.045 | 14.974 | 0.00 | 0.00 |
| ATOM | 880 | HB3  | ASP | X | 57 | 32.568 | 57.462 | 16.281 | 0.00 | 0.00 |
| ATOM | 881 | CG   | ASP | X | 57 | 32.960 | 55.472 | 15.462 | 0.00 | 0.00 |
| ATOM | 882 | OD1  | ASP | X | 57 | 32.429 | 54.324 | 15.338 | 0.00 | 0.00 |
| ATOM | 883 | OD2  | ASP | X | 57 | 34.176 | 55.732 | 15.020 | 0.00 | 0.00 |
| ATOM | 884 | C    | ASP | X | 57 | 31.481 | 55.554 | 18.145 | 0.00 | 0.00 |
| ATOM | 885 | O    | ASP | X | 57 | 32.368 | 56.081 | 18.793 | 0.00 | 0.00 |
| ATOM | 886 | N    | ALA | X | 58 | 30.890 | 54.390 | 18.450 | 0.00 | 0.00 |
| ATOM | 887 | H    | ALA | X | 58 | 30.053 | 54.229 | 17.909 | 0.00 | 0.00 |
| ATOM | 888 | CA   | ALA | X | 58 | 31.330 | 53.357 | 19.355 | 0.00 | 0.00 |
| ATOM | 889 | HA   | ALA | X | 58 | 32.188 | 53.733 | 19.912 | 0.00 | 0.00 |
| ATOM | 890 | CB   | ALA | X | 58 | 30.346 | 53.157 | 20.443 | 0.00 | 0.00 |
| ATOM | 891 | HB1  | ALA | X | 58 | 29.317 | 53.228 | 20.091 | 0.00 | 0.00 |
| ATOM | 892 | HB2  | ALA | X | 58 | 30.386 | 54.034 | 21.090 | 0.00 | 0.00 |
| ATOM | 893 | HB3  | ALA | X | 58 | 30.428 | 52.194 | 20.947 | 0.00 | 0.00 |
| ATOM | 894 | C    | ALA | X | 58 | 31.883 | 52.088 | 18.683 | 0.00 | 0.00 |
| ATOM | 895 | O    | ALA | X | 58 | 31.591 | 50.974 | 19.181 | 0.00 | 0.00 |
| ATOM | 896 | N    | THR | X | 59 | 32.600 | 52.235 | 17.540 | 0.00 | 0.00 |
| ATOM | 897 | H    | THR | X | 59 | 32.744 | 53.130 | 17.095 | 0.00 | 0.00 |
| ATOM | 898 | CA   | THR | X | 59 | 33.165 | 50.995 | 16.890 | 0.00 | 0.00 |
| ATOM | 899 | HA   | THR | X | 59 | 32.538 | 50.128 | 17.096 | 0.00 | 0.00 |
| ATOM | 900 | CB   | THR | X | 59 | 33.169 | 51.081 | 15.379 | 0.00 | 0.00 |
| ATOM | 901 | HB   | THR | X | 59 | 33.744 | 50.296 | 14.889 | 0.00 | 0.00 |
| ATOM | 902 | CG2  | THR | X | 59 | 31.774 | 51.209 | 14.714 | 0.00 | 0.00 |

|      |     |      |     |   |    |        |        |        |      |      |
|------|-----|------|-----|---|----|--------|--------|--------|------|------|
| ATOM | 903 | HG21 | THR | X | 59 | 31.877 | 51.263 | 13.630 | 0.00 | 0.00 |
| ATOM | 904 | HG22 | THR | X | 59 | 31.245 | 52.140 | 14.919 | 0.00 | 0.00 |
| ATOM | 905 | HG23 | THR | X | 59 | 31.177 | 50.335 | 14.975 | 0.00 | 0.00 |
| ATOM | 906 | OG1  | THR | X | 59 | 33.895 | 52.259 | 15.079 | 0.00 | 0.00 |
| ATOM | 907 | HG1  | THR | X | 59 | 33.247 | 52.954 | 15.219 | 0.00 | 0.00 |
| ATOM | 908 | C    | THR | X | 59 | 34.493 | 50.481 | 17.415 | 0.00 | 0.00 |
| ATOM | 909 | O    | THR | X | 59 | 34.854 | 49.355 | 17.017 | 0.00 | 0.00 |
| ATOM | 910 | N    | THR | X | 60 | 35.244 | 51.206 | 18.189 | 0.00 | 0.00 |
| ATOM | 911 | H    | THR | X | 60 | 35.062 | 52.183 | 18.365 | 0.00 | 0.00 |
| ATOM | 912 | CA   | THR | X | 60 | 36.584 | 50.752 | 18.630 | 0.00 | 0.00 |
| ATOM | 913 | HA   | THR | X | 60 | 36.492 | 49.712 | 18.945 | 0.00 | 0.00 |
| ATOM | 914 | CB   | THR | X | 60 | 37.658 | 50.802 | 17.533 | 0.00 | 0.00 |
| ATOM | 915 | HB   | THR | X | 60 | 37.168 | 50.228 | 16.746 | 0.00 | 0.00 |
| ATOM | 916 | CG2  | THR | X | 60 | 38.006 | 52.194 | 17.010 | 0.00 | 0.00 |
| ATOM | 917 | HG21 | THR | X | 60 | 38.233 | 52.826 | 17.869 | 0.00 | 0.00 |
| ATOM | 918 | HG22 | THR | X | 60 | 37.189 | 52.598 | 16.413 | 0.00 | 0.00 |
| ATOM | 919 | HG23 | THR | X | 60 | 38.803 | 52.109 | 16.272 | 0.00 | 0.00 |
| ATOM | 920 | OG1  | THR | X | 60 | 38.924 | 50.224 | 17.917 | 0.00 | 0.00 |
| ATOM | 921 | HG1  | THR | X | 60 | 39.375 | 50.163 | 17.072 | 0.00 | 0.00 |
| ATOM | 922 | C    | THR | X | 60 | 36.982 | 51.522 | 19.857 | 0.00 | 0.00 |
| ATOM | 923 | O    | THR | X | 60 | 36.460 | 52.655 | 20.069 | 0.00 | 0.00 |
| ATOM | 924 | N    | PHE | X | 61 | 37.851 | 50.890 | 20.696 | 0.00 | 0.00 |
| ATOM | 925 | H    | PHE | X | 61 | 38.217 | 50.029 | 20.316 | 0.00 | 0.00 |
| ATOM | 926 | CA   | PHE | X | 61 | 38.551 | 51.565 | 21.851 | 0.00 | 0.00 |
| ATOM | 927 | HA   | PHE | X | 61 | 37.847 | 51.750 | 22.662 | 0.00 | 0.00 |
| ATOM | 928 | CB   | PHE | X | 61 | 39.668 | 50.694 | 22.395 | 0.00 | 0.00 |
| ATOM | 929 | HB2  | PHE | X | 61 | 40.466 | 50.525 | 21.672 | 0.00 | 0.00 |
| ATOM | 930 | HB3  | PHE | X | 61 | 39.989 | 51.134 | 23.339 | 0.00 | 0.00 |
| ATOM | 931 | CG   | PHE | X | 61 | 39.165 | 49.325 | 22.836 | 0.00 | 0.00 |
| ATOM | 932 | CD1  | PHE | X | 61 | 38.101 | 49.264 | 23.748 | 0.00 | 0.00 |
| ATOM | 933 | HD1  | PHE | X | 61 | 37.558 | 50.127 | 24.105 | 0.00 | 0.00 |
| ATOM | 934 | CE1  | PHE | X | 61 | 37.755 | 48.036 | 24.208 | 0.00 | 0.00 |
| ATOM | 935 | HE1  | PHE | X | 61 | 36.967 | 47.979 | 24.945 | 0.00 | 0.00 |
| ATOM | 936 | CZ   | PHE | X | 61 | 38.361 | 46.835 | 23.726 | 0.00 | 0.00 |
| ATOM | 937 | HZ   | PHE | X | 61 | 38.048 | 45.857 | 24.060 | 0.00 | 0.00 |
| ATOM | 938 | CE2  | PHE | X | 61 | 39.443 | 46.875 | 22.832 | 0.00 | 0.00 |
| ATOM | 939 | HE2  | PHE | X | 61 | 39.921 | 45.963 | 22.505 | 0.00 | 0.00 |
| ATOM | 940 | CD2  | PHE | X | 61 | 39.885 | 48.168 | 22.455 | 0.00 | 0.00 |
| ATOM | 941 | HD2  | PHE | X | 61 | 40.804 | 48.265 | 21.897 | 0.00 | 0.00 |
| ATOM | 942 | C    | PHE | X | 61 | 39.218 | 52.794 | 21.433 | 0.00 | 0.00 |
| ATOM | 943 | O    | PHE | X | 61 | 39.958 | 52.832 | 20.465 | 0.00 | 0.00 |
| ATOM | 944 | N    | GLN | X | 62 | 39.020 | 53.816 | 22.244 | 0.00 | 0.00 |
| ATOM | 945 | H    | GLN | X | 62 | 38.487 | 53.665 | 23.088 | 0.00 | 0.00 |
| ATOM | 946 | CA   | GLN | X | 62 | 39.417 | 55.153 | 21.830 | 0.00 | 0.00 |
| ATOM | 947 | HA   | GLN | X | 62 | 39.671 | 55.132 | 20.770 | 0.00 | 0.00 |
| ATOM | 948 | CB   | GLN | X | 62 | 38.257 | 56.173 | 22.038 | 0.00 | 0.00 |
| ATOM | 949 | HB2  | GLN | X | 62 | 37.967 | 56.229 | 23.087 | 0.00 | 0.00 |
| ATOM | 950 | HB3  | GLN | X | 62 | 38.628 | 57.184 | 21.870 | 0.00 | 0.00 |
| ATOM | 951 | CG   | GLN | X | 62 | 37.020 | 55.832 | 21.234 | 0.00 | 0.00 |
| ATOM | 952 | HG2  | GLN | X | 62 | 37.480 | 55.677 | 20.258 | 0.00 | 0.00 |
| ATOM | 953 | HG3  | GLN | X | 62 | 36.565 | 54.948 | 21.681 | 0.00 | 0.00 |
| ATOM | 954 | CD   | GLN | X | 62 | 36.043 | 56.981 | 21.034 | 0.00 | 0.00 |
| ATOM | 955 | OE1  | GLN | X | 62 | 36.346 | 57.926 | 20.275 | 0.00 | 0.00 |
| ATOM | 956 | NE2  | GLN | X | 62 | 34.962 | 57.130 | 21.782 | 0.00 | 0.00 |
| ATOM | 957 | HE21 | GLN | X | 62 | 34.373 | 57.941 | 21.661 | 0.00 | 0.00 |
| ATOM | 958 | HE22 | GLN | X | 62 | 34.736 | 56.427 | 22.471 | 0.00 | 0.00 |
| ATOM | 959 | C    | GLN | X | 62 | 40.629 | 55.687 | 22.621 | 0.00 | 0.00 |
| ATOM | 960 | O    | GLN | X | 62 | 41.517 | 56.412 | 22.073 | 0.00 | 0.00 |
| ATOM | 961 | N    | SER | X | 63 | 40.771 | 55.320 | 23.883 | 0.00 | 0.00 |
| ATOM | 962 | H    | SER | X | 63 | 39.993 | 54.819 | 24.286 | 0.00 | 0.00 |
| ATOM | 963 | CA   | SER | X | 63 | 41.967 | 55.576 | 24.697 | 0.00 | 0.00 |
| ATOM | 964 | HA   | SER | X | 63 | 42.810 | 55.168 | 24.138 | 0.00 | 0.00 |
| ATOM | 965 | CB   | SER | X | 63 | 42.164 | 57.101 | 24.902 | 0.00 | 0.00 |
| ATOM | 966 | HB2  | SER | X | 63 | 43.002 | 57.486 | 24.321 | 0.00 | 0.00 |
| ATOM | 967 | HB3  | SER | X | 63 | 41.356 | 57.526 | 24.305 | 0.00 | 0.00 |
| ATOM | 968 | OG   | SER | X | 63 | 42.157 | 57.512 | 26.276 | 0.00 | 0.00 |
| ATOM | 969 | HG   | SER | X | 63 | 41.677 | 58.338 | 26.368 | 0.00 | 0.00 |

|      |      |      |     |   |    |        |        |        |      |      |
|------|------|------|-----|---|----|--------|--------|--------|------|------|
| ATOM | 970  | C    | SER | X | 63 | 42.002 | 54.829 | 26.068 | 0.00 | 0.00 |
| ATOM | 971  | O    | SER | X | 63 | 41.042 | 54.179 | 26.476 | 0.00 | 0.00 |
| ATOM | 972  | N    | VAL | X | 64 | 43.178 | 54.776 | 26.664 | 0.00 | 0.00 |
| ATOM | 973  | H    | VAL | X | 64 | 43.884 | 55.375 | 26.261 | 0.00 | 0.00 |
| ATOM | 974  | CA   | VAL | X | 64 | 43.480 | 54.102 | 27.958 | 0.00 | 0.00 |
| ATOM | 975  | HA   | VAL | X | 64 | 42.553 | 53.827 | 28.461 | 0.00 | 0.00 |
| ATOM | 976  | CB   | VAL | X | 64 | 44.302 | 52.821 | 27.678 | 0.00 | 0.00 |
| ATOM | 977  | HB   | VAL | X | 64 | 44.691 | 52.427 | 28.616 | 0.00 | 0.00 |
| ATOM | 978  | CG1  | VAL | X | 64 | 43.447 | 51.700 | 27.126 | 0.00 | 0.00 |
| ATOM | 979  | HG11 | VAL | X | 64 | 42.786 | 51.993 | 26.310 | 0.00 | 0.00 |
| ATOM | 980  | HG12 | VAL | X | 64 | 44.017 | 50.783 | 26.975 | 0.00 | 0.00 |
| ATOM | 981  | HG13 | VAL | X | 64 | 42.717 | 51.470 | 27.902 | 0.00 | 0.00 |
| ATOM | 982  | CG2  | VAL | X | 64 | 45.421 | 53.045 | 26.639 | 0.00 | 0.00 |
| ATOM | 983  | HG21 | VAL | X | 64 | 45.080 | 53.455 | 25.688 | 0.00 | 0.00 |
| ATOM | 984  | HG22 | VAL | X | 64 | 45.844 | 52.069 | 26.401 | 0.00 | 0.00 |
| ATOM | 985  | HG23 | VAL | X | 64 | 46.237 | 53.685 | 26.976 | 0.00 | 0.00 |
| ATOM | 986  | C    | VAL | X | 64 | 44.187 | 55.026 | 28.905 | 0.00 | 0.00 |
| ATOM | 987  | O    | VAL | X | 64 | 44.837 | 56.002 | 28.538 | 0.00 | 0.00 |
| ATOM | 988  | N    | CYX | X | 65 | 44.173 | 54.637 | 30.200 | 0.00 | 0.00 |
| ATOM | 989  | H    | CYX | X | 65 | 43.704 | 53.792 | 30.494 | 0.00 | 0.00 |
| ATOM | 990  | CA   | CYX | X | 65 | 44.643 | 55.445 | 31.376 | 0.00 | 0.00 |
| ATOM | 991  | HA   | CYX | X | 65 | 44.393 | 56.493 | 31.217 | 0.00 | 0.00 |
| ATOM | 992  | CB   | CYX | X | 65 | 43.891 | 55.128 | 32.636 | 0.00 | 0.00 |
| ATOM | 993  | HB2  | CYX | X | 65 | 44.312 | 54.224 | 33.076 | 0.00 | 0.00 |
| ATOM | 994  | HB3  | CYX | X | 65 | 44.141 | 55.923 | 33.338 | 0.00 | 0.00 |
| ATOM | 995  | SG   | CYX | X | 65 | 42.063 | 55.124 | 32.623 | 0.00 | 0.00 |
| ATOM | 996  | C    | CYX | X | 65 | 46.141 | 55.335 | 31.648 | 0.00 | 0.00 |
| ATOM | 997  | O    | CYX | X | 65 | 46.810 | 54.302 | 31.583 | 0.00 | 0.00 |
| ATOM | 998  | N    | TYR | X | 66 | 46.813 | 56.482 | 31.956 | 0.00 | 0.00 |
| ATOM | 999  | H    | TYR | X | 66 | 46.303 | 57.353 | 31.967 | 0.00 | 0.00 |
| ATOM | 1000 | CA   | TYR | X | 66 | 48.195 | 56.488 | 32.459 | 0.00 | 0.00 |
| ATOM | 1001 | HA   | TYR | X | 66 | 48.815 | 56.139 | 31.633 | 0.00 | 0.00 |
| ATOM | 1002 | CB   | TYR | X | 66 | 48.615 | 57.903 | 32.849 | 0.00 | 0.00 |
| ATOM | 1003 | HB2  | TYR | X | 66 | 47.802 | 58.246 | 33.489 | 0.00 | 0.00 |
| ATOM | 1004 | HB3  | TYR | X | 66 | 49.559 | 57.897 | 33.393 | 0.00 | 0.00 |
| ATOM | 1005 | CG   | TYR | X | 66 | 48.673 | 58.898 | 31.679 | 0.00 | 0.00 |
| ATOM | 1006 | CD1  | TYR | X | 66 | 47.970 | 60.147 | 31.743 | 0.00 | 0.00 |
| ATOM | 1007 | HD1  | TYR | X | 66 | 47.596 | 60.420 | 32.719 | 0.00 | 0.00 |
| ATOM | 1008 | CE1  | TYR | X | 66 | 47.875 | 61.057 | 30.628 | 0.00 | 0.00 |
| ATOM | 1009 | HE1  | TYR | X | 66 | 47.360 | 62.002 | 30.719 | 0.00 | 0.00 |
| ATOM | 1010 | CZ   | TYR | X | 66 | 48.655 | 60.782 | 29.479 | 0.00 | 0.00 |
| ATOM | 1011 | OH   | TYR | X | 66 | 48.857 | 61.653 | 28.465 | 0.00 | 0.00 |
| ATOM | 1012 | HH   | TYR | X | 66 | 48.249 | 62.396 | 28.447 | 0.00 | 0.00 |
| ATOM | 1013 | CE2  | TYR | X | 66 | 49.405 | 59.627 | 29.493 | 0.00 | 0.00 |
| ATOM | 1014 | HE2  | TYR | X | 66 | 49.961 | 59.415 | 28.592 | 0.00 | 0.00 |
| ATOM | 1015 | CD2  | TYR | X | 66 | 49.390 | 58.658 | 30.481 | 0.00 | 0.00 |
| ATOM | 1016 | HD2  | TYR | X | 66 | 49.878 | 57.706 | 30.330 | 0.00 | 0.00 |
| ATOM | 1017 | C    | TYR | X | 66 | 48.479 | 55.561 | 33.604 | 0.00 | 0.00 |
| ATOM | 1018 | O    | TYR | X | 66 | 47.668 | 55.508 | 34.524 | 0.00 | 0.00 |
| ATOM | 1019 | N    | GLN | X | 67 | 49.608 | 54.844 | 33.539 | 0.00 | 0.00 |
| ATOM | 1020 | H    | GLN | X | 67 | 50.144 | 54.978 | 32.693 | 0.00 | 0.00 |
| ATOM | 1021 | CA   | GLN | X | 67 | 49.970 | 53.736 | 34.453 | 0.00 | 0.00 |
| ATOM | 1022 | HA   | GLN | X | 67 | 49.896 | 54.113 | 35.473 | 0.00 | 0.00 |
| ATOM | 1023 | CB   | GLN | X | 67 | 49.023 | 52.534 | 34.182 | 0.00 | 0.00 |
| ATOM | 1024 | HB2  | GLN | X | 67 | 49.312 | 51.761 | 34.895 | 0.00 | 0.00 |
| ATOM | 1025 | HB3  | GLN | X | 67 | 48.003 | 52.797 | 34.460 | 0.00 | 0.00 |
| ATOM | 1026 | CG   | GLN | X | 67 | 48.999 | 51.966 | 32.741 | 0.00 | 0.00 |
| ATOM | 1027 | HG2  | GLN | X | 67 | 48.946 | 52.674 | 31.915 | 0.00 | 0.00 |
| ATOM | 1028 | HG3  | GLN | X | 67 | 49.878 | 51.359 | 32.522 | 0.00 | 0.00 |
| ATOM | 1029 | CD   | GLN | X | 67 | 47.808 | 51.046 | 32.435 | 0.00 | 0.00 |
| ATOM | 1030 | OE1  | GLN | X | 67 | 47.969 | 49.846 | 32.303 | 0.00 | 0.00 |
| ATOM | 1031 | NE2  | GLN | X | 67 | 46.592 | 51.589 | 32.261 | 0.00 | 0.00 |
| ATOM | 1032 | HE21 | GLN | X | 67 | 45.814 | 50.954 | 32.364 | 0.00 | 0.00 |
| ATOM | 1033 | HE22 | GLN | X | 67 | 46.437 | 52.587 | 32.281 | 0.00 | 0.00 |
| ATOM | 1034 | C    | GLN | X | 67 | 51.394 | 53.193 | 34.173 | 0.00 | 0.00 |
| ATOM | 1035 | O    | GLN | X | 67 | 52.057 | 53.579 | 33.166 | 0.00 | 0.00 |
| ATOM | 1036 | N    | TYR | X | 68 | 51.959 | 52.236 | 34.969 | 0.00 | 0.00 |

|      |      |      |     |   |    |        |        |        |      |      |
|------|------|------|-----|---|----|--------|--------|--------|------|------|
| ATOM | 1037 | H    | TYR | X | 68 | 51.435 | 51.983 | 35.795 | 0.00 | 0.00 |
| ATOM | 1038 | CA   | TYR | X | 68 | 53.214 | 51.581 | 34.736 | 0.00 | 0.00 |
| ATOM | 1039 | HA   | TYR | X | 68 | 53.965 | 52.275 | 34.359 | 0.00 | 0.00 |
| ATOM | 1040 | CB   | TYR | X | 68 | 53.824 | 50.974 | 36.045 | 0.00 | 0.00 |
| ATOM | 1041 | HB2  | TYR | X | 68 | 54.035 | 51.858 | 36.648 | 0.00 | 0.00 |
| ATOM | 1042 | HB3  | TYR | X | 68 | 53.175 | 50.353 | 36.661 | 0.00 | 0.00 |
| ATOM | 1043 | CG   | TYR | X | 68 | 55.183 | 50.345 | 35.839 | 0.00 | 0.00 |
| ATOM | 1044 | CD1  | TYR | X | 68 | 56.349 | 51.189 | 35.885 | 0.00 | 0.00 |
| ATOM | 1045 | HD1  | TYR | X | 68 | 56.311 | 52.230 | 36.170 | 0.00 | 0.00 |
| ATOM | 1046 | CE1  | TYR | X | 68 | 57.564 | 50.550 | 35.645 | 0.00 | 0.00 |
| ATOM | 1047 | HE1  | TYR | X | 68 | 58.512 | 51.063 | 35.576 | 0.00 | 0.00 |
| ATOM | 1048 | CZ   | TYR | X | 68 | 57.650 | 49.151 | 35.462 | 0.00 | 0.00 |
| ATOM | 1049 | OH   | TYR | X | 68 | 58.808 | 48.534 | 35.207 | 0.00 | 0.00 |
| ATOM | 1050 | HH   | TYR | X | 68 | 59.535 | 49.161 | 35.208 | 0.00 | 0.00 |
| ATOM | 1051 | CE2  | TYR | X | 68 | 56.496 | 48.389 | 35.464 | 0.00 | 0.00 |
| ATOM | 1052 | HE2  | TYR | X | 68 | 56.580 | 47.319 | 35.341 | 0.00 | 0.00 |
| ATOM | 1053 | CD2  | TYR | X | 68 | 55.212 | 48.932 | 35.677 | 0.00 | 0.00 |
| ATOM | 1054 | HD2  | TYR | X | 68 | 54.370 | 48.262 | 35.578 | 0.00 | 0.00 |
| ATOM | 1055 | C    | TYR | X | 68 | 53.048 | 50.477 | 33.692 | 0.00 | 0.00 |
| ATOM | 1056 | O    | TYR | X | 68 | 52.109 | 49.650 | 33.772 | 0.00 | 0.00 |
| ATOM | 1057 | N    | VAL | X | 69 | 53.948 | 50.357 | 32.737 | 0.00 | 0.00 |
| ATOM | 1058 | H    | VAL | X | 69 | 54.699 | 51.028 | 32.820 | 0.00 | 0.00 |
| ATOM | 1059 | CA   | VAL | X | 69 | 54.030 | 49.177 | 31.833 | 0.00 | 0.00 |
| ATOM | 1060 | HA   | VAL | X | 69 | 53.433 | 48.286 | 32.026 | 0.00 | 0.00 |
| ATOM | 1061 | CB   | VAL | X | 69 | 53.831 | 49.541 | 30.382 | 0.00 | 0.00 |
| ATOM | 1062 | HB   | VAL | X | 69 | 54.249 | 48.667 | 29.883 | 0.00 | 0.00 |
| ATOM | 1063 | CG1  | VAL | X | 69 | 52.377 | 49.764 | 30.033 | 0.00 | 0.00 |
| ATOM | 1064 | HG11 | VAL | X | 69 | 52.131 | 50.781 | 30.342 | 0.00 | 0.00 |
| ATOM | 1065 | HG12 | VAL | X | 69 | 52.146 | 49.724 | 28.969 | 0.00 | 0.00 |
| ATOM | 1066 | HG13 | VAL | X | 69 | 51.722 | 49.024 | 30.494 | 0.00 | 0.00 |
| ATOM | 1067 | CG2  | VAL | X | 69 | 54.650 | 50.748 | 29.953 | 0.00 | 0.00 |
| ATOM | 1068 | HG21 | VAL | X | 69 | 54.593 | 50.790 | 28.865 | 0.00 | 0.00 |
| ATOM | 1069 | HG22 | VAL | X | 69 | 55.680 | 50.591 | 30.272 | 0.00 | 0.00 |
| ATOM | 1070 | HG23 | VAL | X | 69 | 54.248 | 51.655 | 30.404 | 0.00 | 0.00 |
| ATOM | 1071 | C    | VAL | X | 69 | 55.468 | 48.666 | 32.068 | 0.00 | 0.00 |
| ATOM | 1072 | O    | VAL | X | 69 | 56.351 | 49.448 | 32.435 | 0.00 | 0.00 |
| ATOM | 1073 | N    | ASP | X | 70 | 55.788 | 47.404 | 31.809 | 0.00 | 0.00 |
| ATOM | 1074 | H    | ASP | X | 70 | 55.088 | 46.748 | 31.495 | 0.00 | 0.00 |
| ATOM | 1075 | CA   | ASP | X | 70 | 57.062 | 46.796 | 32.304 | 0.00 | 0.00 |
| ATOM | 1076 | HA   | ASP | X | 70 | 57.242 | 47.156 | 33.317 | 0.00 | 0.00 |
| ATOM | 1077 | CB   | ASP | X | 70 | 56.842 | 45.279 | 32.365 | 0.00 | 0.00 |
| ATOM | 1078 | HB2  | ASP | X | 70 | 55.807 | 45.028 | 32.598 | 0.00 | 0.00 |
| ATOM | 1079 | HB3  | ASP | X | 70 | 57.148 | 44.801 | 31.435 | 0.00 | 0.00 |
| ATOM | 1080 | CG   | ASP | X | 70 | 57.662 | 44.580 | 33.522 | 0.00 | 0.00 |
| ATOM | 1081 | OD1  | ASP | X | 70 | 57.000 | 43.702 | 34.099 | 0.00 | 0.00 |
| ATOM | 1082 | OD2  | ASP | X | 70 | 58.859 | 44.828 | 33.675 | 0.00 | 0.00 |
| ATOM | 1083 | C    | ASP | X | 70 | 58.314 | 47.115 | 31.487 | 0.00 | 0.00 |
| ATOM | 1084 | O    | ASP | X | 70 | 58.239 | 47.027 | 30.223 | 0.00 | 0.00 |
| ATOM | 1085 | N    | THR | X | 71 | 59.377 | 47.537 | 32.187 | 0.00 | 0.00 |
| ATOM | 1086 | H    | THR | X | 71 | 59.081 | 47.829 | 33.107 | 0.00 | 0.00 |
| ATOM | 1087 | CA   | THR | X | 71 | 60.720 | 47.724 | 31.786 | 0.00 | 0.00 |
| ATOM | 1088 | HA   | THR | X | 71 | 60.851 | 47.417 | 30.748 | 0.00 | 0.00 |
| ATOM | 1089 | CB   | THR | X | 71 | 61.054 | 49.293 | 31.793 | 0.00 | 0.00 |
| ATOM | 1090 | HB   | THR | X | 71 | 62.015 | 49.543 | 31.343 | 0.00 | 0.00 |
| ATOM | 1091 | CG2  | THR | X | 71 | 60.030 | 50.133 | 31.035 | 0.00 | 0.00 |
| ATOM | 1092 | HG21 | THR | X | 71 | 60.030 | 49.813 | 29.993 | 0.00 | 0.00 |
| ATOM | 1093 | HG22 | THR | X | 71 | 60.370 | 51.168 | 31.052 | 0.00 | 0.00 |
| ATOM | 1094 | HG23 | THR | X | 71 | 59.036 | 50.058 | 31.477 | 0.00 | 0.00 |
| ATOM | 1095 | OG1  | THR | X | 71 | 60.883 | 49.875 | 33.035 | 0.00 | 0.00 |
| ATOM | 1096 | HG1  | THR | X | 71 | 61.749 | 49.945 | 33.443 | 0.00 | 0.00 |
| ATOM | 1097 | C    | THR | X | 71 | 61.762 | 46.957 | 32.657 | 0.00 | 0.00 |
| ATOM | 1098 | O    | THR | X | 71 | 62.948 | 47.222 | 32.396 | 0.00 | 0.00 |
| ATOM | 1099 | N    | LEU | X | 72 | 61.356 | 46.029 | 33.522 | 0.00 | 0.00 |
| ATOM | 1100 | H    | LEU | X | 72 | 60.372 | 45.809 | 33.574 | 0.00 | 0.00 |
| ATOM | 1101 | CA   | LEU | X | 72 | 62.278 | 45.140 | 34.173 | 0.00 | 0.00 |
| ATOM | 1102 | HA   | LEU | X | 72 | 63.295 | 45.524 | 34.096 | 0.00 | 0.00 |
| ATOM | 1103 | CB   | LEU | X | 72 | 61.964 | 44.898 | 35.668 | 0.00 | 0.00 |

|      |      |      |     |   |    |        |        |        |      |      |
|------|------|------|-----|---|----|--------|--------|--------|------|------|
| ATOM | 1104 | HB2  | LEU | X | 72 | 60.929 | 44.565 | 35.748 | 0.00 | 0.00 |
| ATOM | 1105 | HB3  | LEU | X | 72 | 62.648 | 44.146 | 36.062 | 0.00 | 0.00 |
| ATOM | 1106 | CG   | LEU | X | 72 | 62.060 | 46.192 | 36.539 | 0.00 | 0.00 |
| ATOM | 1107 | HG   | LEU | X | 72 | 61.432 | 47.002 | 36.170 | 0.00 | 0.00 |
| ATOM | 1108 | CD1  | LEU | X | 72 | 61.702 | 45.890 | 38.024 | 0.00 | 0.00 |
| ATOM | 1109 | HD11 | LEU | X | 72 | 62.369 | 45.153 | 38.471 | 0.00 | 0.00 |
| ATOM | 1110 | HD12 | LEU | X | 72 | 60.662 | 45.571 | 38.082 | 0.00 | 0.00 |
| ATOM | 1111 | HD13 | LEU | X | 72 | 61.765 | 46.821 | 38.588 | 0.00 | 0.00 |
| ATOM | 1112 | CD2  | LEU | X | 72 | 63.463 | 46.792 | 36.565 | 0.00 | 0.00 |
| ATOM | 1113 | HD21 | LEU | X | 72 | 64.129 | 45.985 | 36.870 | 0.00 | 0.00 |
| ATOM | 1114 | HD22 | LEU | X | 72 | 63.733 | 47.061 | 35.543 | 0.00 | 0.00 |
| ATOM | 1115 | HD23 | LEU | X | 72 | 63.518 | 47.705 | 37.158 | 0.00 | 0.00 |
| ATOM | 1116 | C    | LEU | X | 72 | 62.348 | 43.804 | 33.433 | 0.00 | 0.00 |
| ATOM | 1117 | O    | LEU | X | 72 | 63.390 | 43.232 | 33.173 | 0.00 | 0.00 |
| ATOM | 1118 | N    | TYR | X | 73 | 61.179 | 43.395 | 32.948 | 0.00 | 0.00 |
| ATOM | 1119 | H    | TYR | X | 73 | 60.389 | 43.880 | 33.350 | 0.00 | 0.00 |
| ATOM | 1120 | CA   | TYR | X | 73 | 61.010 | 42.274 | 31.981 | 0.00 | 0.00 |
| ATOM | 1121 | HA   | TYR | X | 73 | 61.970 | 42.161 | 31.477 | 0.00 | 0.00 |
| ATOM | 1122 | CB   | TYR | X | 73 | 60.546 | 41.028 | 32.727 | 0.00 | 0.00 |
| ATOM | 1123 | HB2  | TYR | X | 73 | 59.589 | 41.223 | 33.212 | 0.00 | 0.00 |
| ATOM | 1124 | HB3  | TYR | X | 73 | 60.526 | 40.188 | 32.033 | 0.00 | 0.00 |
| ATOM | 1125 | CG   | TYR | X | 73 | 61.429 | 40.625 | 33.867 | 0.00 | 0.00 |
| ATOM | 1126 | CD1  | TYR | X | 73 | 62.774 | 40.197 | 33.673 | 0.00 | 0.00 |
| ATOM | 1127 | HD1  | TYR | X | 73 | 63.136 | 40.146 | 32.656 | 0.00 | 0.00 |
| ATOM | 1128 | CE1  | TYR | X | 73 | 63.497 | 39.725 | 34.714 | 0.00 | 0.00 |
| ATOM | 1129 | HE1  | TYR | X | 73 | 64.453 | 39.255 | 34.536 | 0.00 | 0.00 |
| ATOM | 1130 | CZ   | TYR | X | 73 | 63.051 | 39.803 | 36.041 | 0.00 | 0.00 |
| ATOM | 1131 | OH   | TYR | X | 73 | 63.808 | 39.384 | 37.081 | 0.00 | 0.00 |
| ATOM | 1132 | HH   | TYR | X | 73 | 63.398 | 39.607 | 37.920 | 0.00 | 0.00 |
| ATOM | 1133 | CE2  | TYR | X | 73 | 61.773 | 40.411 | 36.240 | 0.00 | 0.00 |
| ATOM | 1134 | HE2  | TYR | X | 73 | 61.439 | 40.518 | 37.261 | 0.00 | 0.00 |
| ATOM | 1135 | CD2  | TYR | X | 73 | 60.937 | 40.740 | 35.157 | 0.00 | 0.00 |
| ATOM | 1136 | HD2  | TYR | X | 73 | 59.892 | 40.972 | 35.300 | 0.00 | 0.00 |
| ATOM | 1137 | C    | TYR | X | 73 | 60.171 | 42.651 | 30.791 | 0.00 | 0.00 |
| ATOM | 1138 | O    | TYR | X | 73 | 59.068 | 42.120 | 30.644 | 0.00 | 0.00 |
| ATOM | 1139 | N    | PRO | X | 74 | 60.691 | 43.545 | 29.918 | 0.00 | 0.00 |
| ATOM | 1140 | CD   | PRO | X | 74 | 62.011 | 44.142 | 29.835 | 0.00 | 0.00 |
| ATOM | 1141 | HD2  | PRO | X | 74 | 62.711 | 43.428 | 29.400 | 0.00 | 0.00 |
| ATOM | 1142 | HD3  | PRO | X | 74 | 62.332 | 44.483 | 30.819 | 0.00 | 0.00 |
| ATOM | 1143 | CG   | PRO | X | 74 | 61.858 | 45.372 | 28.960 | 0.00 | 0.00 |
| ATOM | 1144 | HG2  | PRO | X | 74 | 62.690 | 45.413 | 28.257 | 0.00 | 0.00 |
| ATOM | 1145 | HG3  | PRO | X | 74 | 61.983 | 46.357 | 29.409 | 0.00 | 0.00 |
| ATOM | 1146 | CB   | PRO | X | 74 | 60.471 | 45.206 | 28.287 | 0.00 | 0.00 |
| ATOM | 1147 | HB2  | PRO | X | 74 | 60.536 | 45.443 | 27.226 | 0.00 | 0.00 |
| ATOM | 1148 | HB3  | PRO | X | 74 | 59.795 | 45.974 | 28.663 | 0.00 | 0.00 |
| ATOM | 1149 | CA   | PRO | X | 74 | 59.941 | 43.825 | 28.684 | 0.00 | 0.00 |
| ATOM | 1150 | HA   | PRO | X | 74 | 58.875 | 43.908 | 28.895 | 0.00 | 0.00 |
| ATOM | 1151 | C    | PRO | X | 74 | 60.187 | 42.805 | 27.624 | 0.00 | 0.00 |
| ATOM | 1152 | O    | PRO | X | 74 | 61.143 | 42.046 | 27.642 | 0.00 | 0.00 |
| ATOM | 1153 | N    | GLY | X | 75 | 59.242 | 42.667 | 26.680 | 0.00 | 0.00 |
| ATOM | 1154 | H    | GLY | X | 75 | 58.382 | 43.191 | 26.763 | 0.00 | 0.00 |
| ATOM | 1155 | CA   | GLY | X | 75 | 59.392 | 41.849 | 25.471 | 0.00 | 0.00 |
| ATOM | 1156 | HA2  | GLY | X | 75 | 58.874 | 42.342 | 24.648 | 0.00 | 0.00 |
| ATOM | 1157 | HA3  | GLY | X | 75 | 60.401 | 41.750 | 25.070 | 0.00 | 0.00 |
| ATOM | 1158 | C    | GLY | X | 75 | 58.816 | 40.430 | 25.732 | 0.00 | 0.00 |
| ATOM | 1159 | O    | GLY | X | 75 | 58.292 | 39.768 | 24.866 | 0.00 | 0.00 |
| ATOM | 1160 | N    | PHE | X | 76 | 58.755 | 40.011 | 27.002 | 0.00 | 0.00 |
| ATOM | 1161 | H    | PHE | X | 76 | 59.077 | 40.652 | 27.713 | 0.00 | 0.00 |
| ATOM | 1162 | CA   | PHE | X | 76 | 58.380 | 38.731 | 27.431 | 0.00 | 0.00 |
| ATOM | 1163 | HA   | PHE | X | 76 | 58.774 | 37.981 | 26.745 | 0.00 | 0.00 |
| ATOM | 1164 | CB   | PHE | X | 76 | 58.740 | 38.545 | 28.895 | 0.00 | 0.00 |
| ATOM | 1165 | HB2  | PHE | X | 76 | 59.827 | 38.578 | 28.962 | 0.00 | 0.00 |
| ATOM | 1166 | HB3  | PHE | X | 76 | 58.303 | 39.450 | 29.316 | 0.00 | 0.00 |
| ATOM | 1167 | CG   | PHE | X | 76 | 58.239 | 37.345 | 29.603 | 0.00 | 0.00 |
| ATOM | 1168 | CD1  | PHE | X | 76 | 58.582 | 36.088 | 29.028 | 0.00 | 0.00 |
| ATOM | 1169 | HD1  | PHE | X | 76 | 59.165 | 36.048 | 28.119 | 0.00 | 0.00 |
| ATOM | 1170 | CE1  | PHE | X | 76 | 58.080 | 34.855 | 29.556 | 0.00 | 0.00 |

|      |      |      |     |   |    |        |        |        |      |      |
|------|------|------|-----|---|----|--------|--------|--------|------|------|
| ATOM | 1171 | HE1  | PHE | X | 76 | 58.346 | 33.878 | 29.180 | 0.00 | 0.00 |
| ATOM | 1172 | CZ   | PHE | X | 76 | 57.326 | 34.929 | 30.764 | 0.00 | 0.00 |
| ATOM | 1173 | HZ   | PHE | X | 76 | 56.971 | 34.027 | 31.240 | 0.00 | 0.00 |
| ATOM | 1174 | CE2  | PHE | X | 76 | 57.066 | 36.150 | 31.384 | 0.00 | 0.00 |
| ATOM | 1175 | HE2  | PHE | X | 76 | 56.480 | 36.048 | 32.286 | 0.00 | 0.00 |
| ATOM | 1176 | CD2  | PHE | X | 76 | 57.420 | 37.353 | 30.775 | 0.00 | 0.00 |
| ATOM | 1177 | HD2  | PHE | X | 76 | 57.286 | 38.328 | 31.219 | 0.00 | 0.00 |
| ATOM | 1178 | C    | PHE | X | 76 | 56.817 | 38.712 | 27.314 | 0.00 | 0.00 |
| ATOM | 1179 | O    | PHE | X | 76 | 56.080 | 39.646 | 27.715 | 0.00 | 0.00 |
| ATOM | 1180 | N    | GLU | X | 77 | 56.287 | 37.573 | 26.919 | 0.00 | 0.00 |
| ATOM | 1181 | H    | GLU | X | 77 | 56.872 | 36.763 | 26.776 | 0.00 | 0.00 |
| ATOM | 1182 | CA   | GLU | X | 77 | 54.773 | 37.369 | 26.626 | 0.00 | 0.00 |
| ATOM | 1183 | HA   | GLU | X | 77 | 54.450 | 38.005 | 25.802 | 0.00 | 0.00 |
| ATOM | 1184 | CB   | GLU | X | 77 | 54.470 | 35.919 | 26.213 | 0.00 | 0.00 |
| ATOM | 1185 | HB2  | GLU | X | 77 | 54.875 | 35.254 | 26.976 | 0.00 | 0.00 |
| ATOM | 1186 | HB3  | GLU | X | 77 | 53.381 | 35.895 | 26.196 | 0.00 | 0.00 |
| ATOM | 1187 | CG   | GLU | X | 77 | 54.975 | 35.531 | 24.811 | 0.00 | 0.00 |
| ATOM | 1188 | HG2  | GLU | X | 77 | 56.045 | 35.720 | 24.719 | 0.00 | 0.00 |
| ATOM | 1189 | HG3  | GLU | X | 77 | 54.835 | 34.454 | 24.715 | 0.00 | 0.00 |
| ATOM | 1190 | CD   | GLU | X | 77 | 54.256 | 36.216 | 23.708 | 0.00 | 0.00 |
| ATOM | 1191 | OE1  | GLU | X | 77 | 54.741 | 37.294 | 23.353 | 0.00 | 0.00 |
| ATOM | 1192 | OE2  | GLU | X | 77 | 53.112 | 35.920 | 23.326 | 0.00 | 0.00 |
| ATOM | 1193 | C    | GLU | X | 77 | 53.862 | 37.655 | 27.815 | 0.00 | 0.00 |
| ATOM | 1194 | O    | GLU | X | 77 | 52.757 | 38.242 | 27.628 | 0.00 | 0.00 |
| ATOM | 1195 | N    | GLY | X | 78 | 54.305 | 37.330 | 28.948 | 0.00 | 0.00 |
| ATOM | 1196 | H    | GLY | X | 78 | 55.198 | 36.859 | 28.924 | 0.00 | 0.00 |
| ATOM | 1197 | CA   | GLY | X | 78 | 53.544 | 37.606 | 30.092 | 0.00 | 0.00 |
| ATOM | 1198 | HA2  | GLY | X | 78 | 52.535 | 37.196 | 30.049 | 0.00 | 0.00 |
| ATOM | 1199 | HA3  | GLY | X | 78 | 54.052 | 37.177 | 30.956 | 0.00 | 0.00 |
| ATOM | 1200 | C    | GLY | X | 78 | 53.481 | 39.043 | 30.539 | 0.00 | 0.00 |
| ATOM | 1201 | O    | GLY | X | 78 | 52.573 | 39.364 | 31.301 | 0.00 | 0.00 |
| ATOM | 1202 | N    | THR | X | 79 | 54.383 | 39.933 | 30.022 | 0.00 | 0.00 |
| ATOM | 1203 | H    | THR | X | 79 | 55.159 | 39.525 | 29.520 | 0.00 | 0.00 |
| ATOM | 1204 | CA   | THR | X | 79 | 54.365 | 41.362 | 30.325 | 0.00 | 0.00 |
| ATOM | 1205 | HA   | THR | X | 79 | 53.756 | 41.525 | 31.214 | 0.00 | 0.00 |
| ATOM | 1206 | CB   | THR | X | 79 | 55.736 | 41.877 | 30.713 | 0.00 | 0.00 |
| ATOM | 1207 | HB   | THR | X | 79 | 55.631 | 42.912 | 31.040 | 0.00 | 0.00 |
| ATOM | 1208 | CG2  | THR | X | 79 | 56.271 | 41.073 | 31.956 | 0.00 | 0.00 |
| ATOM | 1209 | HG21 | THR | X | 79 | 55.552 | 41.067 | 32.775 | 0.00 | 0.00 |
| ATOM | 1210 | HG22 | THR | X | 79 | 57.209 | 41.501 | 32.311 | 0.00 | 0.00 |
| ATOM | 1211 | HG23 | THR | X | 79 | 56.520 | 40.071 | 31.607 | 0.00 | 0.00 |
| ATOM | 1212 | OG1  | THR | X | 79 | 56.658 | 41.830 | 29.620 | 0.00 | 0.00 |
| ATOM | 1213 | HG1  | THR | X | 79 | 57.526 | 41.791 | 30.029 | 0.00 | 0.00 |
| ATOM | 1214 | C    | THR | X | 79 | 53.813 | 42.058 | 29.097 | 0.00 | 0.00 |
| ATOM | 1215 | O    | THR | X | 79 | 53.022 | 42.979 | 29.297 | 0.00 | 0.00 |
| ATOM | 1216 | N    | GLU | X | 80 | 54.096 | 41.628 | 27.851 | 0.00 | 0.00 |
| ATOM | 1217 | H    | GLU | X | 80 | 54.776 | 40.893 | 27.716 | 0.00 | 0.00 |
| ATOM | 1218 | CA   | GLU | X | 80 | 53.528 | 42.241 | 26.635 | 0.00 | 0.00 |
| ATOM | 1219 | HA   | GLU | X | 80 | 53.782 | 43.299 | 26.565 | 0.00 | 0.00 |
| ATOM | 1220 | CB   | GLU | X | 80 | 54.285 | 41.499 | 25.475 | 0.00 | 0.00 |
| ATOM | 1221 | HB2  | GLU | X | 80 | 55.359 | 41.461 | 25.655 | 0.00 | 0.00 |
| ATOM | 1222 | HB3  | GLU | X | 80 | 53.871 | 40.492 | 25.416 | 0.00 | 0.00 |
| ATOM | 1223 | CG   | GLU | X | 80 | 54.249 | 42.180 | 24.162 | 0.00 | 0.00 |
| ATOM | 1224 | HG2  | GLU | X | 80 | 53.244 | 42.214 | 23.740 | 0.00 | 0.00 |
| ATOM | 1225 | HG3  | GLU | X | 80 | 54.591 | 43.204 | 24.313 | 0.00 | 0.00 |
| ATOM | 1226 | CD   | GLU | X | 80 | 55.154 | 41.490 | 23.208 | 0.00 | 0.00 |
| ATOM | 1227 | OE1  | GLU | X | 80 | 54.775 | 40.360 | 22.807 | 0.00 | 0.00 |
| ATOM | 1228 | OE2  | GLU | X | 80 | 56.178 | 42.028 | 22.776 | 0.00 | 0.00 |
| ATOM | 1229 | C    | GLU | X | 80 | 52.012 | 42.037 | 26.581 | 0.00 | 0.00 |
| ATOM | 1230 | O    | GLU | X | 80 | 51.336 | 42.857 | 25.915 | 0.00 | 0.00 |
| ATOM | 1231 | N    | MET | X | 81 | 51.435 | 41.050 | 27.282 | 0.00 | 0.00 |
| ATOM | 1232 | H    | MET | X | 81 | 52.023 | 40.331 | 27.679 | 0.00 | 0.00 |
| ATOM | 1233 | CA   | MET | X | 81 | 49.981 | 40.946 | 27.391 | 0.00 | 0.00 |
| ATOM | 1234 | HA   | MET | X | 81 | 49.629 | 40.973 | 26.360 | 0.00 | 0.00 |
| ATOM | 1235 | CB   | MET | X | 81 | 49.583 | 39.553 | 27.799 | 0.00 | 0.00 |
| ATOM | 1236 | HB2  | MET | X | 81 | 48.497 | 39.469 | 27.827 | 0.00 | 0.00 |
| ATOM | 1237 | HB3  | MET | X | 81 | 49.828 | 38.756 | 27.098 | 0.00 | 0.00 |

|      |      |      |     |   |    |        |        |        |      |      |
|------|------|------|-----|---|----|--------|--------|--------|------|------|
| ATOM | 1238 | CG   | MET | X | 81 | 50.060 | 39.161 | 29.194 | 0.00 | 0.00 |
| ATOM | 1239 | HG2  | MET | X | 81 | 51.144 | 39.049 | 29.170 | 0.00 | 0.00 |
| ATOM | 1240 | HG3  | MET | X | 81 | 49.757 | 39.962 | 29.867 | 0.00 | 0.00 |
| ATOM | 1241 | SD   | MET | X | 81 | 49.334 | 37.632 | 29.841 | 0.00 | 0.00 |
| ATOM | 1242 | CE   | MET | X | 81 | 47.539 | 37.980 | 29.934 | 0.00 | 0.00 |
| ATOM | 1243 | HE1  | MET | X | 81 | 47.280 | 38.993 | 30.242 | 0.00 | 0.00 |
| ATOM | 1244 | HE2  | MET | X | 81 | 46.981 | 37.812 | 29.012 | 0.00 | 0.00 |
| ATOM | 1245 | HE3  | MET | X | 81 | 47.026 | 37.255 | 30.566 | 0.00 | 0.00 |
| ATOM | 1246 | C    | MET | X | 81 | 49.275 | 41.963 | 28.196 | 0.00 | 0.00 |
| ATOM | 1247 | O    | MET | X | 81 | 48.172 | 42.387 | 27.880 | 0.00 | 0.00 |
| ATOM | 1248 | N    | TRP | X | 82 | 50.009 | 42.474 | 29.221 | 0.00 | 0.00 |
| ATOM | 1249 | H    | TRP | X | 82 | 50.971 | 42.188 | 29.332 | 0.00 | 0.00 |
| ATOM | 1250 | CA   | TRP | X | 82 | 49.620 | 43.643 | 30.006 | 0.00 | 0.00 |
| ATOM | 1251 | HA   | TRP | X | 82 | 48.542 | 43.774 | 30.099 | 0.00 | 0.00 |
| ATOM | 1252 | CB   | TRP | X | 82 | 50.116 | 43.454 | 31.452 | 0.00 | 0.00 |
| ATOM | 1253 | HB2  | TRP | X | 82 | 51.175 | 43.678 | 31.586 | 0.00 | 0.00 |
| ATOM | 1254 | HB3  | TRP | X | 82 | 49.587 | 44.232 | 32.002 | 0.00 | 0.00 |
| ATOM | 1255 | CG   | TRP | X | 82 | 49.851 | 42.127 | 32.072 | 0.00 | 0.00 |
| ATOM | 1256 | CD1  | TRP | X | 82 | 50.780 | 41.333 | 32.579 | 0.00 | 0.00 |
| ATOM | 1257 | HD1  | TRP | X | 82 | 51.839 | 41.536 | 32.528 | 0.00 | 0.00 |
| ATOM | 1258 | NE1  | TRP | X | 82 | 50.221 | 40.157 | 33.059 | 0.00 | 0.00 |
| ATOM | 1259 | HE1  | TRP | X | 82 | 50.699 | 39.268 | 33.096 | 0.00 | 0.00 |
| ATOM | 1260 | CE2  | TRP | X | 82 | 48.855 | 40.122 | 32.924 | 0.00 | 0.00 |
| ATOM | 1261 | CZ2  | TRP | X | 82 | 47.776 | 39.175 | 33.063 | 0.00 | 0.00 |
| ATOM | 1262 | HZ2  | TRP | X | 82 | 48.024 | 38.200 | 33.454 | 0.00 | 0.00 |
| ATOM | 1263 | CH2  | TRP | X | 82 | 46.461 | 39.511 | 32.776 | 0.00 | 0.00 |
| ATOM | 1264 | HH2  | TRP | X | 82 | 45.755 | 38.703 | 32.901 | 0.00 | 0.00 |
| ATOM | 1265 | CZ3  | TRP | X | 82 | 46.143 | 40.814 | 32.355 | 0.00 | 0.00 |
| ATOM | 1266 | HZ3  | TRP | X | 82 | 45.097 | 40.982 | 32.145 | 0.00 | 0.00 |
| ATOM | 1267 | CE3  | TRP | X | 82 | 47.190 | 41.685 | 32.097 | 0.00 | 0.00 |
| ATOM | 1268 | HE3  | TRP | X | 82 | 47.024 | 42.650 | 31.642 | 0.00 | 0.00 |
| ATOM | 1269 | CD2  | TRP | X | 82 | 48.555 | 41.395 | 32.371 | 0.00 | 0.00 |
| ATOM | 1270 | C    | TRP | X | 82 | 49.954 | 45.026 | 29.484 | 0.00 | 0.00 |
| ATOM | 1271 | O    | TRP | X | 82 | 49.320 | 45.999 | 29.952 | 0.00 | 0.00 |
| ATOM | 1272 | N    | ASN | X | 83 | 51.023 | 45.157 | 28.669 | 0.00 | 0.00 |
| ATOM | 1273 | H    | ASN | X | 83 | 51.533 | 44.349 | 28.342 | 0.00 | 0.00 |
| ATOM | 1274 | CA   | ASN | X | 83 | 51.283 | 46.439 | 27.980 | 0.00 | 0.00 |
| ATOM | 1275 | HA   | ASN | X | 83 | 51.512 | 47.124 | 28.796 | 0.00 | 0.00 |
| ATOM | 1276 | CB   | ASN | X | 83 | 52.686 | 46.360 | 27.286 | 0.00 | 0.00 |
| ATOM | 1277 | HB2  | ASN | X | 83 | 53.453 | 46.033 | 27.988 | 0.00 | 0.00 |
| ATOM | 1278 | HB3  | ASN | X | 83 | 52.535 | 45.751 | 26.395 | 0.00 | 0.00 |
| ATOM | 1279 | CG   | ASN | X | 83 | 53.049 | 47.707 | 26.722 | 0.00 | 0.00 |
| ATOM | 1280 | OD1  | ASN | X | 83 | 52.355 | 48.417 | 26.008 | 0.00 | 0.00 |
| ATOM | 1281 | ND2  | ASN | X | 83 | 54.255 | 48.109 | 27.093 | 0.00 | 0.00 |
| ATOM | 1282 | HD21 | ASN | X | 83 | 54.715 | 48.921 | 26.705 | 0.00 | 0.00 |
| ATOM | 1283 | HD22 | ASN | X | 83 | 54.755 | 47.410 | 27.624 | 0.00 | 0.00 |
| ATOM | 1284 | C    | ASN | X | 83 | 50.064 | 46.904 | 26.987 | 0.00 | 0.00 |
| ATOM | 1285 | O    | ASN | X | 83 | 49.936 | 46.315 | 25.935 | 0.00 | 0.00 |
| ATOM | 1286 | N    | PRO | X | 84 | 49.269 | 47.964 | 27.196 | 0.00 | 0.00 |
| ATOM | 1287 | CD   | PRO | X | 84 | 49.294 | 48.921 | 28.291 | 0.00 | 0.00 |
| ATOM | 1288 | HD2  | PRO | X | 84 | 50.172 | 49.532 | 28.080 | 0.00 | 0.00 |
| ATOM | 1289 | HD3  | PRO | X | 84 | 49.430 | 48.326 | 29.194 | 0.00 | 0.00 |
| ATOM | 1290 | CG   | PRO | X | 84 | 47.989 | 49.642 | 28.265 | 0.00 | 0.00 |
| ATOM | 1291 | HG2  | PRO | X | 84 | 48.082 | 50.687 | 28.563 | 0.00 | 0.00 |
| ATOM | 1292 | HG3  | PRO | X | 84 | 47.173 | 49.162 | 28.805 | 0.00 | 0.00 |
| ATOM | 1293 | CB   | PRO | X | 84 | 47.547 | 49.634 | 26.816 | 0.00 | 0.00 |
| ATOM | 1294 | HB2  | PRO | X | 84 | 47.916 | 50.558 | 26.371 | 0.00 | 0.00 |
| ATOM | 1295 | HB3  | PRO | X | 84 | 46.464 | 49.511 | 26.795 | 0.00 | 0.00 |
| ATOM | 1296 | CA   | PRO | X | 84 | 48.181 | 48.370 | 26.280 | 0.00 | 0.00 |
| ATOM | 1297 | HA   | PRO | X | 84 | 47.398 | 47.615 | 26.222 | 0.00 | 0.00 |
| ATOM | 1298 | C    | PRO | X | 84 | 48.502 | 48.697 | 24.812 | 0.00 | 0.00 |
| ATOM | 1299 | O    | PRO | X | 84 | 49.614 | 48.754 | 24.372 | 0.00 | 0.00 |
| ATOM | 1300 | N    | ASN | X | 85 | 47.403 | 48.859 | 24.126 | 0.00 | 0.00 |
| ATOM | 1301 | H    | ASN | X | 85 | 46.514 | 48.760 | 24.594 | 0.00 | 0.00 |
| ATOM | 1302 | CA   | ASN | X | 85 | 47.218 | 48.724 | 22.683 | 0.00 | 0.00 |
| ATOM | 1303 | HA   | ASN | X | 85 | 48.170 | 48.680 | 22.154 | 0.00 | 0.00 |
| ATOM | 1304 | CB   | ASN | X | 85 | 46.550 | 47.424 | 22.339 | 0.00 | 0.00 |

|      |      |      |     |   |    |        |        |        |      |      |
|------|------|------|-----|---|----|--------|--------|--------|------|------|
| ATOM | 1305 | HB2  | ASN | X | 85 | 46.562 | 47.427 | 21.249 | 0.00 | 0.00 |
| ATOM | 1306 | HB3  | ASN | X | 85 | 47.171 | 46.614 | 22.721 | 0.00 | 0.00 |
| ATOM | 1307 | CG   | ASN | X | 85 | 45.172 | 47.274 | 22.944 | 0.00 | 0.00 |
| ATOM | 1308 | OD1  | ASN | X | 85 | 44.604 | 48.181 | 23.615 | 0.00 | 0.00 |
| ATOM | 1309 | ND2  | ASN | X | 85 | 44.636 | 46.064 | 22.806 | 0.00 | 0.00 |
| ATOM | 1310 | HD21 | ASN | X | 85 | 43.753 | 45.849 | 23.248 | 0.00 | 0.00 |
| ATOM | 1311 | HD22 | ASN | X | 85 | 45.244 | 45.404 | 22.342 | 0.00 | 0.00 |
| ATOM | 1312 | C    | ASN | X | 85 | 46.551 | 49.962 | 22.066 | 0.00 | 0.00 |
| ATOM | 1313 | O    | ASN | X | 85 | 45.944 | 49.876 | 20.947 | 0.00 | 0.00 |
| ATOM | 1314 | N    | ARG | X | 86 | 46.421 | 51.115 | 22.838 | 0.00 | 0.00 |
| ATOM | 1315 | H    | ARG | X | 86 | 46.587 | 50.995 | 23.827 | 0.00 | 0.00 |
| ATOM | 1316 | CA   | ARG | X | 86 | 45.773 | 52.325 | 22.423 | 0.00 | 0.00 |
| ATOM | 1317 | HA   | ARG | X | 86 | 45.808 | 52.403 | 21.336 | 0.00 | 0.00 |
| ATOM | 1318 | CB   | ARG | X | 86 | 44.360 | 52.344 | 22.873 | 0.00 | 0.00 |
| ATOM | 1319 | HB2  | ARG | X | 86 | 44.376 | 52.213 | 23.955 | 0.00 | 0.00 |
| ATOM | 1320 | HB3  | ARG | X | 86 | 43.868 | 53.298 | 22.684 | 0.00 | 0.00 |
| ATOM | 1321 | CG   | ARG | X | 86 | 43.392 | 51.349 | 22.187 | 0.00 | 0.00 |
| ATOM | 1322 | HG2  | ARG | X | 86 | 43.778 | 50.332 | 22.255 | 0.00 | 0.00 |
| ATOM | 1323 | HG3  | ARG | X | 86 | 42.455 | 51.473 | 22.731 | 0.00 | 0.00 |
| ATOM | 1324 | CD   | ARG | X | 86 | 43.097 | 51.662 | 20.686 | 0.00 | 0.00 |
| ATOM | 1325 | HD2  | ARG | X | 86 | 42.765 | 52.700 | 20.715 | 0.00 | 0.00 |
| ATOM | 1326 | HD3  | ARG | X | 86 | 44.001 | 51.621 | 20.078 | 0.00 | 0.00 |
| ATOM | 1327 | NE   | ARG | X | 86 | 42.154 | 50.805 | 19.956 | 0.00 | 0.00 |
| ATOM | 1328 | HE   | ARG | X | 86 | 41.319 | 51.220 | 19.568 | 0.00 | 0.00 |
| ATOM | 1329 | CZ   | ARG | X | 86 | 42.380 | 49.509 | 19.670 | 0.00 | 0.00 |
| ATOM | 1330 | NH1  | ARG | X | 86 | 43.555 | 48.874 | 19.902 | 0.00 | 0.00 |
| ATOM | 1331 | HH11 | ARG | X | 86 | 44.433 | 49.351 | 20.054 | 0.00 | 0.00 |
| ATOM | 1332 | HH12 | ARG | X | 86 | 43.641 | 47.916 | 19.595 | 0.00 | 0.00 |
| ATOM | 1333 | NH2  | ARG | X | 86 | 41.420 | 48.732 | 19.177 | 0.00 | 0.00 |
| ATOM | 1334 | HH21 | ARG | X | 86 | 40.464 | 49.054 | 19.117 | 0.00 | 0.00 |
| ATOM | 1335 | HH22 | ARG | X | 86 | 41.648 | 47.812 | 18.827 | 0.00 | 0.00 |
| ATOM | 1336 | C    | ARG | X | 86 | 46.469 | 53.557 | 22.999 | 0.00 | 0.00 |
| ATOM | 1337 | O    | ARG | X | 86 | 47.438 | 53.427 | 23.705 | 0.00 | 0.00 |
| ATOM | 1338 | N    | GLU | X | 87 | 45.910 | 54.764 | 22.759 | 0.00 | 0.00 |
| ATOM | 1339 | H    | GLU | X | 87 | 45.138 | 55.001 | 22.153 | 0.00 | 0.00 |
| ATOM | 1340 | CA   | GLU | X | 87 | 46.501 | 55.994 | 23.189 | 0.00 | 0.00 |
| ATOM | 1341 | HA   | GLU | X | 87 | 47.530 | 55.918 | 22.838 | 0.00 | 0.00 |
| ATOM | 1342 | CB   | GLU | X | 87 | 45.947 | 57.225 | 22.449 | 0.00 | 0.00 |
| ATOM | 1343 | HB2  | GLU | X | 87 | 45.915 | 57.026 | 21.377 | 0.00 | 0.00 |
| ATOM | 1344 | HB3  | GLU | X | 87 | 44.903 | 57.280 | 22.757 | 0.00 | 0.00 |
| ATOM | 1345 | CG   | GLU | X | 87 | 46.789 | 58.468 | 22.760 | 0.00 | 0.00 |
| ATOM | 1346 | HG2  | GLU | X | 87 | 46.799 | 58.582 | 23.844 | 0.00 | 0.00 |
| ATOM | 1347 | HG3  | GLU | X | 87 | 47.803 | 58.470 | 22.360 | 0.00 | 0.00 |
| ATOM | 1348 | CD   | GLU | X | 87 | 46.188 | 59.725 | 22.143 | 0.00 | 0.00 |
| ATOM | 1349 | OE1  | GLU | X | 87 | 45.628 | 60.454 | 22.947 | 0.00 | 0.00 |
| ATOM | 1350 | OE2  | GLU | X | 87 | 46.312 | 59.865 | 20.892 | 0.00 | 0.00 |
| ATOM | 1351 | C    | GLU | X | 87 | 46.339 | 56.081 | 24.708 | 0.00 | 0.00 |
| ATOM | 1352 | O    | GLU | X | 87 | 45.292 | 55.951 | 25.260 | 0.00 | 0.00 |
| ATOM | 1353 | N    | LEU | X | 88 | 47.509 | 56.373 | 25.335 | 0.00 | 0.00 |
| ATOM | 1354 | H    | LEU | X | 88 | 48.218 | 56.729 | 24.710 | 0.00 | 0.00 |
| ATOM | 1355 | CA   | LEU | X | 88 | 47.673 | 56.554 | 26.705 | 0.00 | 0.00 |
| ATOM | 1356 | HA   | LEU | X | 88 | 46.874 | 56.102 | 27.293 | 0.00 | 0.00 |
| ATOM | 1357 | CB   | LEU | X | 88 | 49.069 | 56.060 | 27.175 | 0.00 | 0.00 |
| ATOM | 1358 | HB2  | LEU | X | 88 | 49.795 | 56.321 | 26.405 | 0.00 | 0.00 |
| ATOM | 1359 | HB3  | LEU | X | 88 | 49.298 | 56.631 | 28.074 | 0.00 | 0.00 |
| ATOM | 1360 | CG   | LEU | X | 88 | 49.218 | 54.629 | 27.654 | 0.00 | 0.00 |
| ATOM | 1361 | HG   | LEU | X | 88 | 48.768 | 54.026 | 26.865 | 0.00 | 0.00 |
| ATOM | 1362 | CD1  | LEU | X | 88 | 50.675 | 54.218 | 27.825 | 0.00 | 0.00 |
| ATOM | 1363 | HD11 | LEU | X | 88 | 51.276 | 54.404 | 26.935 | 0.00 | 0.00 |
| ATOM | 1364 | HD12 | LEU | X | 88 | 50.579 | 53.134 | 27.891 | 0.00 | 0.00 |
| ATOM | 1365 | HD13 | LEU | X | 88 | 51.118 | 54.650 | 28.722 | 0.00 | 0.00 |
| ATOM | 1366 | CD2  | LEU | X | 88 | 48.562 | 54.198 | 28.959 | 0.00 | 0.00 |
| ATOM | 1367 | HD21 | LEU | X | 88 | 48.862 | 54.880 | 29.755 | 0.00 | 0.00 |
| ATOM | 1368 | HD22 | LEU | X | 88 | 47.473 | 54.241 | 28.932 | 0.00 | 0.00 |
| ATOM | 1369 | HD23 | LEU | X | 88 | 48.820 | 53.164 | 29.187 | 0.00 | 0.00 |
| ATOM | 1370 | C    | LEU | X | 88 | 47.486 | 58.028 | 26.980 | 0.00 | 0.00 |
| ATOM | 1371 | O    | LEU | X | 88 | 47.981 | 58.805 | 26.163 | 0.00 | 0.00 |



|      |      |      |     |   |    |        |        |        |      |      |
|------|------|------|-----|---|----|--------|--------|--------|------|------|
| ATOM | 1372 | N    | SER | X | 89 | 46.575 | 58.343 | 27.894 | 0.00 | 0.00 |
| ATOM | 1373 | H    | SER | X | 89 | 46.388 | 57.704 | 28.654 | 0.00 | 0.00 |
| ATOM | 1374 | CA   | SER | X | 89 | 45.814 | 59.579 | 27.898 | 0.00 | 0.00 |
| ATOM | 1375 | HA   | SER | X | 89 | 46.410 | 60.435 | 27.578 | 0.00 | 0.00 |
| ATOM | 1376 | CB   | SER | X | 89 | 44.754 | 59.352 | 26.840 | 0.00 | 0.00 |
| ATOM | 1377 | HB2  | SER | X | 89 | 45.340 | 59.148 | 25.944 | 0.00 | 0.00 |
| ATOM | 1378 | HB3  | SER | X | 89 | 44.283 | 58.414 | 27.135 | 0.00 | 0.00 |
| ATOM | 1379 | OG   | SER | X | 89 | 43.837 | 60.375 | 26.784 | 0.00 | 0.00 |
| ATOM | 1380 | HG   | SER | X | 89 | 43.005 | 60.128 | 26.375 | 0.00 | 0.00 |
| ATOM | 1381 | C    | SER | X | 89 | 45.076 | 59.795 | 29.195 | 0.00 | 0.00 |
| ATOM | 1382 | O    | SER | X | 89 | 44.889 | 58.908 | 30.025 | 0.00 | 0.00 |
| ATOM | 1383 | N    | GLU | X | 90 | 44.685 | 61.080 | 29.411 | 0.00 | 0.00 |
| ATOM | 1384 | H    | GLU | X | 90 | 44.804 | 61.789 | 28.701 | 0.00 | 0.00 |
| ATOM | 1385 | CA   | GLU | X | 90 | 43.953 | 61.527 | 30.581 | 0.00 | 0.00 |
| ATOM | 1386 | HA   | GLU | X | 90 | 44.139 | 60.856 | 31.419 | 0.00 | 0.00 |
| ATOM | 1387 | CB   | GLU | X | 90 | 44.346 | 63.009 | 30.878 | 0.00 | 0.00 |
| ATOM | 1388 | HB2  | GLU | X | 90 | 45.333 | 63.179 | 30.450 | 0.00 | 0.00 |
| ATOM | 1389 | HB3  | GLU | X | 90 | 43.616 | 63.671 | 30.412 | 0.00 | 0.00 |
| ATOM | 1390 | CG   | GLU | X | 90 | 44.466 | 63.264 | 32.391 | 0.00 | 0.00 |
| ATOM | 1391 | HG2  | GLU | X | 90 | 43.457 | 63.094 | 32.766 | 0.00 | 0.00 |
| ATOM | 1392 | HG3  | GLU | X | 90 | 45.197 | 62.579 | 32.820 | 0.00 | 0.00 |
| ATOM | 1393 | CD   | GLU | X | 90 | 44.882 | 64.749 | 32.721 | 0.00 | 0.00 |
| ATOM | 1394 | OE1  | GLU | X | 90 | 44.494 | 65.260 | 33.816 | 0.00 | 0.00 |
| ATOM | 1395 | OE2  | GLU | X | 90 | 45.537 | 65.404 | 31.908 | 0.00 | 0.00 |
| ATOM | 1396 | C    | GLU | X | 90 | 42.411 | 61.519 | 30.453 | 0.00 | 0.00 |
| ATOM | 1397 | O    | GLU | X | 90 | 41.653 | 61.675 | 31.337 | 0.00 | 0.00 |
| ATOM | 1398 | N    | ASP | X | 91 | 41.852 | 61.368 | 29.231 | 0.00 | 0.00 |
| ATOM | 1399 | H    | ASP | X | 91 | 42.527 | 61.253 | 28.488 | 0.00 | 0.00 |
| ATOM | 1400 | CA   | ASP | X | 91 | 40.410 | 61.333 | 28.834 | 0.00 | 0.00 |
| ATOM | 1401 | HA   | ASP | X | 91 | 39.896 | 62.086 | 29.431 | 0.00 | 0.00 |
| ATOM | 1402 | CB   | ASP | X | 91 | 40.267 | 61.915 | 27.417 | 0.00 | 0.00 |
| ATOM | 1403 | HB2  | ASP | X | 91 | 39.310 | 62.433 | 27.352 | 0.00 | 0.00 |
| ATOM | 1404 | HB3  | ASP | X | 91 | 41.138 | 62.529 | 27.191 | 0.00 | 0.00 |
| ATOM | 1405 | CG   | ASP | X | 91 | 40.341 | 60.918 | 26.258 | 0.00 | 0.00 |
| ATOM | 1406 | OD1  | ASP | X | 91 | 39.448 | 60.994 | 25.409 | 0.00 | 0.00 |
| ATOM | 1407 | OD2  | ASP | X | 91 | 41.226 | 60.060 | 26.312 | 0.00 | 0.00 |
| ATOM | 1408 | C    | ASP | X | 91 | 39.722 | 59.975 | 29.120 | 0.00 | 0.00 |
| ATOM | 1409 | O    | ASP | X | 91 | 38.651 | 59.627 | 28.668 | 0.00 | 0.00 |
| ATOM | 1410 | N    | CYX | X | 92 | 40.390 | 59.035 | 29.739 | 0.00 | 0.00 |
| ATOM | 1411 | H    | CYX | X | 92 | 41.211 | 59.405 | 30.197 | 0.00 | 0.00 |
| ATOM | 1412 | CA   | CYX | X | 92 | 40.219 | 57.549 | 29.687 | 0.00 | 0.00 |
| ATOM | 1413 | HA   | CYX | X | 92 | 40.360 | 57.281 | 28.640 | 0.00 | 0.00 |
| ATOM | 1414 | CB   | CYX | X | 92 | 41.368 | 56.911 | 30.420 | 0.00 | 0.00 |
| ATOM | 1415 | HB2  | CYX | X | 92 | 41.381 | 55.879 | 30.069 | 0.00 | 0.00 |
| ATOM | 1416 | HB3  | CYX | X | 92 | 42.301 | 57.365 | 30.087 | 0.00 | 0.00 |
| ATOM | 1417 | SG   | CYX | X | 92 | 41.379 | 57.038 | 32.242 | 0.00 | 0.00 |
| ATOM | 1418 | C    | CYX | X | 92 | 38.905 | 56.979 | 30.196 | 0.00 | 0.00 |
| ATOM | 1419 | O    | CYX | X | 92 | 38.819 | 55.736 | 30.105 | 0.00 | 0.00 |
| ATOM | 1420 | N    | LEU | X | 93 | 37.940 | 57.727 | 30.744 | 0.00 | 0.00 |
| ATOM | 1421 | H    | LEU | X | 93 | 37.933 | 58.728 | 30.608 | 0.00 | 0.00 |
| ATOM | 1422 | CA   | LEU | X | 93 | 36.675 | 57.160 | 31.112 | 0.00 | 0.00 |
| ATOM | 1423 | HA   | LEU | X | 93 | 36.816 | 56.214 | 31.635 | 0.00 | 0.00 |
| ATOM | 1424 | CB   | LEU | X | 93 | 35.886 | 58.077 | 32.036 | 0.00 | 0.00 |
| ATOM | 1425 | HB2  | LEU | X | 93 | 35.791 | 59.086 | 31.636 | 0.00 | 0.00 |
| ATOM | 1426 | HB3  | LEU | X | 93 | 34.856 | 57.724 | 31.980 | 0.00 | 0.00 |
| ATOM | 1427 | CG   | LEU | X | 93 | 36.510 | 58.142 | 33.418 | 0.00 | 0.00 |
| ATOM | 1428 | HG   | LEU | X | 93 | 37.505 | 58.578 | 33.319 | 0.00 | 0.00 |
| ATOM | 1429 | CD1  | LEU | X | 93 | 35.782 | 59.052 | 34.430 | 0.00 | 0.00 |
| ATOM | 1430 | HD11 | LEU | X | 93 | 36.238 | 59.069 | 35.420 | 0.00 | 0.00 |
| ATOM | 1431 | HD12 | LEU | X | 93 | 34.743 | 58.754 | 34.569 | 0.00 | 0.00 |
| ATOM | 1432 | HD13 | LEU | X | 93 | 35.661 | 60.060 | 34.034 | 0.00 | 0.00 |
| ATOM | 1433 | CD2  | LEU | X | 93 | 36.635 | 56.797 | 34.097 | 0.00 | 0.00 |
| ATOM | 1434 | HD21 | LEU | X | 93 | 37.580 | 56.326 | 33.828 | 0.00 | 0.00 |
| ATOM | 1435 | HD22 | LEU | X | 93 | 36.821 | 56.766 | 35.171 | 0.00 | 0.00 |
| ATOM | 1436 | HD23 | LEU | X | 93 | 35.824 | 56.104 | 33.872 | 0.00 | 0.00 |
| ATOM | 1437 | C    | LEU | X | 93 | 35.862 | 56.829 | 29.882 | 0.00 | 0.00 |
| ATOM | 1438 | O    | LEU | X | 93 | 35.249 | 57.684 | 29.222 | 0.00 | 0.00 |

|      |      |      |     |   |    |        |        |        |      |      |
|------|------|------|-----|---|----|--------|--------|--------|------|------|
| ATOM | 1439 | N    | TYR | X | 94 | 35.705 | 55.513 | 29.746 | 0.00 | 0.00 |
| ATOM | 1440 | H    | TYR | X | 94 | 36.265 | 54.911 | 30.334 | 0.00 | 0.00 |
| ATOM | 1441 | CA   | TYR | X | 94 | 34.988 | 54.764 | 28.606 | 0.00 | 0.00 |
| ATOM | 1442 | HA   | TYR | X | 94 | 34.116 | 55.264 | 28.185 | 0.00 | 0.00 |
| ATOM | 1443 | CB   | TYR | X | 94 | 36.088 | 54.408 | 27.562 | 0.00 | 0.00 |
| ATOM | 1444 | HB2  | TYR | X | 94 | 36.966 | 53.947 | 28.016 | 0.00 | 0.00 |
| ATOM | 1445 | HB3  | TYR | X | 94 | 35.708 | 53.696 | 26.830 | 0.00 | 0.00 |
| ATOM | 1446 | CG   | TYR | X | 94 | 36.562 | 55.648 | 26.812 | 0.00 | 0.00 |
| ATOM | 1447 | CD1  | TYR | X | 94 | 35.637 | 56.139 | 25.826 | 0.00 | 0.00 |
| ATOM | 1448 | HD1  | TYR | X | 94 | 34.720 | 55.610 | 25.615 | 0.00 | 0.00 |
| ATOM | 1449 | CE1  | TYR | X | 94 | 35.906 | 57.348 | 25.192 | 0.00 | 0.00 |
| ATOM | 1450 | HE1  | TYR | X | 94 | 35.235 | 57.845 | 24.507 | 0.00 | 0.00 |
| ATOM | 1451 | CZ   | TYR | X | 94 | 37.115 | 57.954 | 25.412 | 0.00 | 0.00 |
| ATOM | 1452 | OH   | TYR | X | 94 | 37.376 | 59.131 | 24.826 | 0.00 | 0.00 |
| ATOM | 1453 | HH   | TYR | X | 94 | 38.277 | 59.462 | 24.836 | 0.00 | 0.00 |
| ATOM | 1454 | CE2  | TYR | X | 94 | 38.096 | 57.469 | 26.287 | 0.00 | 0.00 |
| ATOM | 1455 | HE2  | TYR | X | 94 | 38.987 | 58.064 | 26.422 | 0.00 | 0.00 |
| ATOM | 1456 | CD2  | TYR | X | 94 | 37.780 | 56.315 | 26.984 | 0.00 | 0.00 |
| ATOM | 1457 | HD2  | TYR | X | 94 | 38.480 | 56.002 | 27.743 | 0.00 | 0.00 |
| ATOM | 1458 | C    | TYR | X | 94 | 34.451 | 53.389 | 29.116 | 0.00 | 0.00 |
| ATOM | 1459 | O    | TYR | X | 94 | 35.008 | 52.791 | 30.059 | 0.00 | 0.00 |
| ATOM | 1460 | N    | LEU | X | 95 | 33.437 | 52.832 | 28.428 | 0.00 | 0.00 |
| ATOM | 1461 | H    | LEU | X | 95 | 33.032 | 53.411 | 27.706 | 0.00 | 0.00 |
| ATOM | 1462 | CA   | LEU | X | 95 | 32.686 | 51.563 | 28.740 | 0.00 | 0.00 |
| ATOM | 1463 | HA   | LEU | X | 95 | 33.392 | 50.915 | 29.260 | 0.00 | 0.00 |
| ATOM | 1464 | CB   | LEU | X | 95 | 31.562 | 52.011 | 29.693 | 0.00 | 0.00 |
| ATOM | 1465 | HB2  | LEU | X | 95 | 31.863 | 52.467 | 30.636 | 0.00 | 0.00 |
| ATOM | 1466 | HB3  | LEU | X | 95 | 31.076 | 52.827 | 29.159 | 0.00 | 0.00 |
| ATOM | 1467 | CG   | LEU | X | 95 | 30.492 | 50.926 | 30.007 | 0.00 | 0.00 |
| ATOM | 1468 | HG   | LEU | X | 95 | 30.908 | 49.934 | 30.184 | 0.00 | 0.00 |
| ATOM | 1469 | CD1  | LEU | X | 95 | 29.815 | 51.260 | 31.380 | 0.00 | 0.00 |
| ATOM | 1470 | HD11 | LEU | X | 95 | 29.020 | 50.557 | 31.631 | 0.00 | 0.00 |
| ATOM | 1471 | HD12 | LEU | X | 95 | 29.356 | 52.248 | 31.417 | 0.00 | 0.00 |
| ATOM | 1472 | HD13 | LEU | X | 95 | 30.613 | 51.133 | 32.111 | 0.00 | 0.00 |
| ATOM | 1473 | CD2  | LEU | X | 95 | 29.375 | 50.817 | 28.956 | 0.00 | 0.00 |
| ATOM | 1474 | HD21 | LEU | X | 95 | 28.816 | 51.736 | 28.775 | 0.00 | 0.00 |
| ATOM | 1475 | HD22 | LEU | X | 95 | 29.827 | 50.501 | 28.016 | 0.00 | 0.00 |
| ATOM | 1476 | HD23 | LEU | X | 95 | 28.599 | 50.130 | 29.293 | 0.00 | 0.00 |
| ATOM | 1477 | C    | LEU | X | 95 | 32.503 | 50.747 | 27.443 | 0.00 | 0.00 |
| ATOM | 1478 | O    | LEU | X | 95 | 32.567 | 51.316 | 26.328 | 0.00 | 0.00 |
| ATOM | 1479 | N    | ASN | X | 96 | 32.217 | 49.465 | 27.565 | 0.00 | 0.00 |
| ATOM | 1480 | H    | ASN | X | 96 | 32.070 | 49.106 | 28.498 | 0.00 | 0.00 |
| ATOM | 1481 | CA   | ASN | X | 96 | 32.224 | 48.580 | 26.414 | 0.00 | 0.00 |
| ATOM | 1482 | HA   | ASN | X | 96 | 31.999 | 49.135 | 25.504 | 0.00 | 0.00 |
| ATOM | 1483 | CB   | ASN | X | 96 | 33.646 | 47.996 | 26.399 | 0.00 | 0.00 |
| ATOM | 1484 | HB2  | ASN | X | 96 | 33.850 | 47.385 | 27.278 | 0.00 | 0.00 |
| ATOM | 1485 | HB3  | ASN | X | 96 | 33.763 | 47.273 | 25.592 | 0.00 | 0.00 |
| ATOM | 1486 | CG   | ASN | X | 96 | 34.914 | 48.912 | 26.327 | 0.00 | 0.00 |
| ATOM | 1487 | OD1  | ASN | X | 96 | 35.042 | 49.835 | 25.494 | 0.00 | 0.00 |
| ATOM | 1488 | ND2  | ASN | X | 96 | 35.740 | 48.728 | 27.340 | 0.00 | 0.00 |
| ATOM | 1489 | HD21 | ASN | X | 96 | 36.596 | 49.264 | 27.364 | 0.00 | 0.00 |
| ATOM | 1490 | HD22 | ASN | X | 96 | 35.574 | 47.931 | 27.938 | 0.00 | 0.00 |
| ATOM | 1491 | C    | ASN | X | 96 | 31.186 | 47.534 | 26.627 | 0.00 | 0.00 |
| ATOM | 1492 | O    | ASN | X | 96 | 31.040 | 46.985 | 27.708 | 0.00 | 0.00 |
| ATOM | 1493 | N    | VAL | X | 97 | 30.376 | 47.198 | 25.630 | 0.00 | 0.00 |
| ATOM | 1494 | H    | VAL | X | 97 | 30.391 | 47.590 | 24.700 | 0.00 | 0.00 |
| ATOM | 1495 | CA   | VAL | X | 97 | 29.311 | 46.150 | 25.843 | 0.00 | 0.00 |
| ATOM | 1496 | HA   | VAL | X | 97 | 29.485 | 45.588 | 26.761 | 0.00 | 0.00 |
| ATOM | 1497 | CB   | VAL | X | 97 | 27.912 | 46.714 | 25.932 | 0.00 | 0.00 |
| ATOM | 1498 | HB   | VAL | X | 97 | 27.587 | 46.913 | 24.911 | 0.00 | 0.00 |
| ATOM | 1499 | CG1  | VAL | X | 97 | 26.871 | 45.721 | 26.558 | 0.00 | 0.00 |
| ATOM | 1500 | HG11 | VAL | X | 97 | 27.203 | 45.589 | 27.588 | 0.00 | 0.00 |
| ATOM | 1501 | HG12 | VAL | X | 97 | 25.843 | 46.061 | 26.439 | 0.00 | 0.00 |
| ATOM | 1502 | HG13 | VAL | X | 97 | 26.917 | 44.729 | 26.108 | 0.00 | 0.00 |
| ATOM | 1503 | CG2  | VAL | X | 97 | 27.792 | 48.069 | 26.769 | 0.00 | 0.00 |
| ATOM | 1504 | HG21 | VAL | X | 97 | 28.441 | 48.788 | 26.270 | 0.00 | 0.00 |
| ATOM | 1505 | HG22 | VAL | X | 97 | 28.203 | 47.928 | 27.768 | 0.00 | 0.00 |

|      |      |      |     |   |     |        |        |        |      |      |
|------|------|------|-----|---|-----|--------|--------|--------|------|------|
| ATOM | 1506 | HG23 | VAL | X | 97  | 26.741 | 48.348 | 26.854 | 0.00 | 0.00 |
| ATOM | 1507 | C    | VAL | X | 97  | 29.325 | 45.157 | 24.649 | 0.00 | 0.00 |
| ATOM | 1508 | O    | VAL | X | 97  | 29.052 | 45.612 | 23.540 | 0.00 | 0.00 |
| ATOM | 1509 | N    | TRP | X | 98  | 29.396 | 43.880 | 24.961 | 0.00 | 0.00 |
| ATOM | 1510 | H    | TRP | X | 98  | 29.556 | 43.707 | 25.943 | 0.00 | 0.00 |
| ATOM | 1511 | CA   | TRP | X | 98  | 29.120 | 42.712 | 24.106 | 0.00 | 0.00 |
| ATOM | 1512 | HA   | TRP | X | 98  | 29.154 | 43.030 | 23.064 | 0.00 | 0.00 |
| ATOM | 1513 | CB   | TRP | X | 98  | 30.140 | 41.564 | 24.384 | 0.00 | 0.00 |
| ATOM | 1514 | HB2  | TRP | X | 98  | 30.082 | 41.398 | 25.460 | 0.00 | 0.00 |
| ATOM | 1515 | HB3  | TRP | X | 98  | 29.760 | 40.741 | 23.778 | 0.00 | 0.00 |
| ATOM | 1516 | CG   | TRP | X | 98  | 31.598 | 41.720 | 24.121 | 0.00 | 0.00 |
| ATOM | 1517 | CD1  | TRP | X | 98  | 32.333 | 41.147 | 23.113 | 0.00 | 0.00 |
| ATOM | 1518 | HD1  | TRP | X | 98  | 31.958 | 40.297 | 22.563 | 0.00 | 0.00 |
| ATOM | 1519 | NE1  | TRP | X | 98  | 33.600 | 41.560 | 23.074 | 0.00 | 0.00 |
| ATOM | 1520 | HE1  | TRP | X | 98  | 34.314 | 40.994 | 22.639 | 0.00 | 0.00 |
| ATOM | 1521 | CE2  | TRP | X | 98  | 33.838 | 42.481 | 24.112 | 0.00 | 0.00 |
| ATOM | 1522 | CZ2  | TRP | X | 98  | 34.973 | 43.237 | 24.470 | 0.00 | 0.00 |
| ATOM | 1523 | HZ2  | TRP | X | 98  | 35.917 | 43.177 | 23.950 | 0.00 | 0.00 |
| ATOM | 1524 | CH2  | TRP | X | 98  | 34.799 | 44.256 | 25.441 | 0.00 | 0.00 |
| ATOM | 1525 | HH2  | TRP | X | 98  | 35.660 | 44.818 | 25.772 | 0.00 | 0.00 |
| ATOM | 1526 | CZ3  | TRP | X | 98  | 33.574 | 44.381 | 26.078 | 0.00 | 0.00 |
| ATOM | 1527 | HZ3  | TRP | X | 98  | 33.447 | 45.067 | 26.903 | 0.00 | 0.00 |
| ATOM | 1528 | CE3  | TRP | X | 98  | 32.538 | 43.562 | 25.772 | 0.00 | 0.00 |
| ATOM | 1529 | HE3  | TRP | X | 98  | 31.679 | 43.534 | 26.426 | 0.00 | 0.00 |
| ATOM | 1530 | CD2  | TRP | X | 98  | 32.568 | 42.610 | 24.765 | 0.00 | 0.00 |
| ATOM | 1531 | C    | TRP | X | 98  | 27.680 | 42.127 | 24.242 | 0.00 | 0.00 |
| ATOM | 1532 | O    | TRP | X | 98  | 27.132 | 42.090 | 25.341 | 0.00 | 0.00 |
| ATOM | 1533 | N    | THR | X | 99  | 27.135 | 41.695 | 23.126 | 0.00 | 0.00 |
| ATOM | 1534 | H    | THR | X | 99  | 27.620 | 41.838 | 22.251 | 0.00 | 0.00 |
| ATOM | 1535 | CA   | THR | X | 99  | 25.673 | 41.268 | 23.129 | 0.00 | 0.00 |
| ATOM | 1536 | HA   | THR | X | 99  | 25.604 | 40.622 | 24.003 | 0.00 | 0.00 |
| ATOM | 1537 | CB   | THR | X | 99  | 24.624 | 42.406 | 23.305 | 0.00 | 0.00 |
| ATOM | 1538 | HB   | THR | X | 99  | 24.703 | 42.748 | 24.337 | 0.00 | 0.00 |
| ATOM | 1539 | CG2  | THR | X | 99  | 24.823 | 43.679 | 22.435 | 0.00 | 0.00 |
| ATOM | 1540 | HG21 | THR | X | 99  | 24.118 | 44.448 | 22.753 | 0.00 | 0.00 |
| ATOM | 1541 | HG22 | THR | X | 99  | 24.711 | 43.337 | 21.406 | 0.00 | 0.00 |
| ATOM | 1542 | HG23 | THR | X | 99  | 25.824 | 44.089 | 22.565 | 0.00 | 0.00 |
| ATOM | 1543 | OG1  | THR | X | 99  | 23.401 | 41.798 | 23.150 | 0.00 | 0.00 |
| ATOM | 1544 | HG1  | THR | X | 99  | 22.805 | 42.469 | 23.489 | 0.00 | 0.00 |
| ATOM | 1545 | C    | THR | X | 99  | 25.524 | 40.365 | 21.871 | 0.00 | 0.00 |
| ATOM | 1546 | O    | THR | X | 99  | 25.996 | 40.715 | 20.785 | 0.00 | 0.00 |
| ATOM | 1547 | N    | PRO | X | 100 | 24.782 | 39.240 | 21.953 | 0.00 | 0.00 |
| ATOM | 1548 | CD   | PRO | X | 100 | 24.300 | 38.651 | 23.237 | 0.00 | 0.00 |
| ATOM | 1549 | HD2  | PRO | X | 100 | 23.261 | 38.972 | 23.309 | 0.00 | 0.00 |
| ATOM | 1550 | HD3  | PRO | X | 100 | 24.986 | 38.867 | 24.056 | 0.00 | 0.00 |
| ATOM | 1551 | CG   | PRO | X | 100 | 24.164 | 37.120 | 23.042 | 0.00 | 0.00 |
| ATOM | 1552 | HG2  | PRO | X | 100 | 23.341 | 36.671 | 23.598 | 0.00 | 0.00 |
| ATOM | 1553 | HG3  | PRO | X | 100 | 25.126 | 36.649 | 23.248 | 0.00 | 0.00 |
| ATOM | 1554 | CB   | PRO | X | 100 | 23.836 | 37.127 | 21.499 | 0.00 | 0.00 |
| ATOM | 1555 | HB2  | PRO | X | 100 | 22.757 | 37.186 | 21.359 | 0.00 | 0.00 |
| ATOM | 1556 | HB3  | PRO | X | 100 | 24.041 | 36.168 | 21.023 | 0.00 | 0.00 |
| ATOM | 1557 | CA   | PRO | X | 100 | 24.601 | 38.281 | 20.836 | 0.00 | 0.00 |
| ATOM | 1558 | HA   | PRO | X | 100 | 25.578 | 37.935 | 20.497 | 0.00 | 0.00 |
| ATOM | 1559 | C    | PRO | X | 100 | 23.869 | 38.969 | 19.645 | 0.00 | 0.00 |
| ATOM | 1560 | O    | PRO | X | 100 | 23.201 | 39.995 | 19.829 | 0.00 | 0.00 |
| ATOM | 1561 | N    | TYR | X | 101 | 24.089 | 38.496 | 18.429 | 0.00 | 0.00 |
| ATOM | 1562 | H    | TYR | X | 101 | 24.698 | 37.695 | 18.349 | 0.00 | 0.00 |
| ATOM | 1563 | CA   | TYR | X | 101 | 23.762 | 39.045 | 17.259 | 0.00 | 0.00 |
| ATOM | 1564 | HA   | TYR | X | 101 | 23.436 | 40.071 | 17.432 | 0.00 | 0.00 |
| ATOM | 1565 | CB   | TYR | X | 101 | 25.049 | 39.206 | 16.462 | 0.00 | 0.00 |
| ATOM | 1566 | HB2  | TYR | X | 101 | 25.768 | 39.756 | 17.069 | 0.00 | 0.00 |
| ATOM | 1567 | HB3  | TYR | X | 101 | 25.464 | 38.245 | 16.155 | 0.00 | 0.00 |
| ATOM | 1568 | CG   | TYR | X | 101 | 24.808 | 40.031 | 15.198 | 0.00 | 0.00 |
| ATOM | 1569 | CD1  | TYR | X | 101 | 25.120 | 39.532 | 13.917 | 0.00 | 0.00 |
| ATOM | 1570 | HD1  | TYR | X | 101 | 25.442 | 38.503 | 13.844 | 0.00 | 0.00 |
| ATOM | 1571 | CE1  | TYR | X | 101 | 25.041 | 40.400 | 12.827 | 0.00 | 0.00 |
| ATOM | 1572 | HE1  | TYR | X | 101 | 25.256 | 40.030 | 11.836 | 0.00 | 0.00 |

|      |      |      |     |   |     |        |        |        |      |      |
|------|------|------|-----|---|-----|--------|--------|--------|------|------|
| ATOM | 1573 | CZ   | TYR | X | 101 | 24.592 | 41.719 | 12.953 | 0.00 | 0.00 |
| ATOM | 1574 | OH   | TYR | X | 101 | 24.284 | 42.498 | 11.913 | 0.00 | 0.00 |
| ATOM | 1575 | HH   | TYR | X | 101 | 24.428 | 42.150 | 11.030 | 0.00 | 0.00 |
| ATOM | 1576 | CE2  | TYR | X | 101 | 24.230 | 42.147 | 14.212 | 0.00 | 0.00 |
| ATOM | 1577 | HE2  | TYR | X | 101 | 23.861 | 43.157 | 14.311 | 0.00 | 0.00 |
| ATOM | 1578 | CD2  | TYR | X | 101 | 24.354 | 41.314 | 15.356 | 0.00 | 0.00 |
| ATOM | 1579 | HD2  | TYR | X | 101 | 24.116 | 41.706 | 16.334 | 0.00 | 0.00 |
| ATOM | 1580 | C    | TYR | X | 101 | 22.712 | 38.210 | 16.492 | 0.00 | 0.00 |
| ATOM | 1581 | O    | TYR | X | 101 | 22.979 | 36.944 | 16.475 | 0.00 | 0.00 |
| ATOM | 1582 | N    | PRO | X | 102 | 21.603 | 38.785 | 16.036 | 0.00 | 0.00 |
| ATOM | 1583 | CD   | PRO | X | 102 | 20.602 | 37.982 | 15.339 | 0.00 | 0.00 |
| ATOM | 1584 | HD2  | PRO | X | 102 | 20.224 | 37.164 | 15.953 | 0.00 | 0.00 |
| ATOM | 1585 | HD3  | PRO | X | 102 | 21.076 | 37.556 | 14.455 | 0.00 | 0.00 |
| ATOM | 1586 | CG   | PRO | X | 102 | 19.442 | 38.873 | 14.812 | 0.00 | 0.00 |
| ATOM | 1587 | HG2  | PRO | X | 102 | 18.465 | 38.629 | 15.228 | 0.00 | 0.00 |
| ATOM | 1588 | HG3  | PRO | X | 102 | 19.268 | 38.972 | 13.740 | 0.00 | 0.00 |
| ATOM | 1589 | CB   | PRO | X | 102 | 19.921 | 40.283 | 15.272 | 0.00 | 0.00 |
| ATOM | 1590 | HB2  | PRO | X | 102 | 19.066 | 40.773 | 15.737 | 0.00 | 0.00 |
| ATOM | 1591 | HB3  | PRO | X | 102 | 20.371 | 40.778 | 14.412 | 0.00 | 0.00 |
| ATOM | 1592 | CA   | PRO | X | 102 | 21.011 | 40.092 | 16.330 | 0.00 | 0.00 |
| ATOM | 1593 | HA   | PRO | X | 102 | 21.668 | 40.948 | 16.176 | 0.00 | 0.00 |
| ATOM | 1594 | C    | PRO | X | 102 | 20.431 | 40.170 | 17.771 | 0.00 | 0.00 |
| ATOM | 1595 | O    | PRO | X | 102 | 20.324 | 39.114 | 18.434 | 0.00 | 0.00 |
| ATOM | 1596 | N    | ARG | X | 103 | 20.201 | 41.430 | 18.242 | 0.00 | 0.00 |
| ATOM | 1597 | H    | ARG | X | 103 | 20.394 | 42.222 | 17.646 | 0.00 | 0.00 |
| ATOM | 1598 | CA   | ARG | X | 103 | 20.034 | 41.673 | 19.698 | 0.00 | 0.00 |
| ATOM | 1599 | HA   | ARG | X | 103 | 21.006 | 41.506 | 20.161 | 0.00 | 0.00 |
| ATOM | 1600 | CB   | ARG | X | 103 | 19.689 | 43.113 | 20.014 | 0.00 | 0.00 |
| ATOM | 1601 | HB2  | ARG | X | 103 | 20.377 | 43.753 | 19.460 | 0.00 | 0.00 |
| ATOM | 1602 | HB3  | ARG | X | 103 | 18.701 | 43.282 | 19.586 | 0.00 | 0.00 |
| ATOM | 1603 | CG   | ARG | X | 103 | 19.686 | 43.584 | 21.438 | 0.00 | 0.00 |
| ATOM | 1604 | HG2  | ARG | X | 103 | 19.311 | 42.783 | 22.075 | 0.00 | 0.00 |
| ATOM | 1605 | HG3  | ARG | X | 103 | 20.734 | 43.683 | 21.719 | 0.00 | 0.00 |
| ATOM | 1606 | CD   | ARG | X | 103 | 18.877 | 44.901 | 21.763 | 0.00 | 0.00 |
| ATOM | 1607 | HD2  | ARG | X | 103 | 19.152 | 45.163 | 22.785 | 0.00 | 0.00 |
| ATOM | 1608 | HD3  | ARG | X | 103 | 19.214 | 45.731 | 21.142 | 0.00 | 0.00 |
| ATOM | 1609 | NE   | ARG | X | 103 | 17.430 | 44.727 | 21.679 | 0.00 | 0.00 |
| ATOM | 1610 | HE   | ARG | X | 103 | 17.180 | 44.074 | 20.949 | 0.00 | 0.00 |
| ATOM | 1611 | CZ   | ARG | X | 103 | 16.507 | 45.555 | 22.236 | 0.00 | 0.00 |
| ATOM | 1612 | NH1  | ARG | X | 103 | 16.800 | 46.621 | 22.868 | 0.00 | 0.00 |
| ATOM | 1613 | HH11 | ARG | X | 103 | 17.773 | 46.849 | 23.016 | 0.00 | 0.00 |
| ATOM | 1614 | HH12 | ARG | X | 103 | 16.162 | 47.064 | 23.513 | 0.00 | 0.00 |
| ATOM | 1615 | NH2  | ARG | X | 103 | 15.237 | 45.321 | 22.155 | 0.00 | 0.00 |
| ATOM | 1616 | HH21 | ARG | X | 103 | 14.953 | 44.477 | 21.677 | 0.00 | 0.00 |
| ATOM | 1617 | HH22 | ARG | X | 103 | 14.584 | 45.937 | 22.617 | 0.00 | 0.00 |
| ATOM | 1618 | C    | ARG | X | 103 | 19.125 | 40.644 | 20.314 | 0.00 | 0.00 |
| ATOM | 1619 | O    | ARG | X | 103 | 17.940 | 40.536 | 19.874 | 0.00 | 0.00 |
| ATOM | 1620 | N    | PRO | X | 104 | 19.554 | 39.914 | 21.366 | 0.00 | 0.00 |
| ATOM | 1621 | CD   | PRO | X | 104 | 20.737 | 40.155 | 22.240 | 0.00 | 0.00 |
| ATOM | 1622 | HD2  | PRO | X | 104 | 21.023 | 41.201 | 22.346 | 0.00 | 0.00 |
| ATOM | 1623 | HD3  | PRO | X | 104 | 21.507 | 39.472 | 21.881 | 0.00 | 0.00 |
| ATOM | 1624 | CG   | PRO | X | 104 | 20.413 | 39.724 | 23.656 | 0.00 | 0.00 |
| ATOM | 1625 | HG2  | PRO | X | 104 | 20.017 | 40.539 | 24.263 | 0.00 | 0.00 |
| ATOM | 1626 | HG3  | PRO | X | 104 | 21.308 | 39.382 | 24.177 | 0.00 | 0.00 |
| ATOM | 1627 | CB   | PRO | X | 104 | 19.536 | 38.524 | 23.380 | 0.00 | 0.00 |
| ATOM | 1628 | HB2  | PRO | X | 104 | 18.931 | 38.151 | 24.207 | 0.00 | 0.00 |
| ATOM | 1629 | HB3  | PRO | X | 104 | 20.196 | 37.780 | 22.933 | 0.00 | 0.00 |
| ATOM | 1630 | CA   | PRO | X | 104 | 18.720 | 39.073 | 22.211 | 0.00 | 0.00 |
| ATOM | 1631 | HA   | PRO | X | 104 | 18.490 | 38.179 | 21.631 | 0.00 | 0.00 |
| ATOM | 1632 | C    | PRO | X | 104 | 17.364 | 39.734 | 22.599 | 0.00 | 0.00 |
| ATOM | 1633 | O    | PRO | X | 104 | 17.326 | 40.983 | 22.865 | 0.00 | 0.00 |
| ATOM | 1634 | N    | THR | X | 105 | 16.339 | 38.998 | 22.552 | 0.00 | 0.00 |
| ATOM | 1635 | H    | THR | X | 105 | 16.474 | 38.034 | 22.284 | 0.00 | 0.00 |
| ATOM | 1636 | CA   | THR | X | 105 | 14.997 | 39.591 | 22.474 | 0.00 | 0.00 |
| ATOM | 1637 | HA   | THR | X | 105 | 15.036 | 40.662 | 22.276 | 0.00 | 0.00 |
| ATOM | 1638 | CB   | THR | X | 105 | 14.240 | 39.030 | 21.273 | 0.00 | 0.00 |
| ATOM | 1639 | HB   | THR | X | 105 | 13.224 | 39.424 | 21.264 | 0.00 | 0.00 |

|      |      |      |     |   |     |        |        |        |      |      |
|------|------|------|-----|---|-----|--------|--------|--------|------|------|
| ATOM | 1640 | CG2  | THR | X | 105 | 14.824 | 39.557 | 19.976 | 0.00 | 0.00 |
| ATOM | 1641 | HG21 | THR | X | 105 | 14.189 | 39.215 | 19.158 | 0.00 | 0.00 |
| ATOM | 1642 | HG22 | THR | X | 105 | 15.866 | 39.273 | 19.824 | 0.00 | 0.00 |
| ATOM | 1643 | HG23 | THR | X | 105 | 14.755 | 40.644 | 19.964 | 0.00 | 0.00 |
| ATOM | 1644 | OG1  | THR | X | 105 | 14.209 | 37.575 | 21.266 | 0.00 | 0.00 |
| ATOM | 1645 | HG1  | THR | X | 105 | 13.368 | 37.401 | 20.836 | 0.00 | 0.00 |
| ATOM | 1646 | C    | THR | X | 105 | 14.299 | 39.526 | 23.857 | 0.00 | 0.00 |
| ATOM | 1647 | O    | THR | X | 105 | 13.589 | 40.482 | 24.138 | 0.00 | 0.00 |
| ATOM | 1648 | N    | SER | X | 106 | 14.628 | 38.514 | 24.692 | 0.00 | 0.00 |
| ATOM | 1649 | H    | SER | X | 106 | 15.112 | 37.736 | 24.267 | 0.00 | 0.00 |
| ATOM | 1650 | CA   | SER | X | 106 | 14.494 | 38.475 | 26.099 | 0.00 | 0.00 |
| ATOM | 1651 | HA   | SER | X | 106 | 13.495 | 38.826 | 26.356 | 0.00 | 0.00 |
| ATOM | 1652 | CB   | SER | X | 106 | 14.380 | 37.045 | 26.460 | 0.00 | 0.00 |
| ATOM | 1653 | HB2  | SER | X | 106 | 13.674 | 36.533 | 25.806 | 0.00 | 0.00 |
| ATOM | 1654 | HB3  | SER | X | 106 | 15.325 | 36.504 | 26.494 | 0.00 | 0.00 |
| ATOM | 1655 | OG   | SER | X | 106 | 13.874 | 36.916 | 27.755 | 0.00 | 0.00 |
| ATOM | 1656 | HG   | SER | X | 106 | 13.029 | 37.366 | 27.825 | 0.00 | 0.00 |
| ATOM | 1657 | C    | SER | X | 106 | 15.649 | 39.142 | 26.922 | 0.00 | 0.00 |
| ATOM | 1658 | O    | SER | X | 106 | 16.813 | 38.888 | 26.580 | 0.00 | 0.00 |
| ATOM | 1659 | N    | PRO | X | 107 | 15.371 | 39.925 | 28.015 | 0.00 | 0.00 |
| ATOM | 1660 | CD   | PRO | X | 107 | 14.034 | 40.212 | 28.461 | 0.00 | 0.00 |
| ATOM | 1661 | HD2  | PRO | X | 107 | 13.604 | 39.288 | 28.847 | 0.00 | 0.00 |
| ATOM | 1662 | HD3  | PRO | X | 107 | 13.496 | 40.573 | 27.584 | 0.00 | 0.00 |
| ATOM | 1663 | CG   | PRO | X | 107 | 14.242 | 41.296 | 29.536 | 0.00 | 0.00 |
| ATOM | 1664 | HG2  | PRO | X | 107 | 13.345 | 41.310 | 30.155 | 0.00 | 0.00 |
| ATOM | 1665 | HG3  | PRO | X | 107 | 14.378 | 42.284 | 29.095 | 0.00 | 0.00 |
| ATOM | 1666 | CB   | PRO | X | 107 | 15.562 | 40.900 | 30.206 | 0.00 | 0.00 |
| ATOM | 1667 | HB2  | PRO | X | 107 | 15.329 | 40.273 | 31.066 | 0.00 | 0.00 |
| ATOM | 1668 | HB3  | PRO | X | 107 | 16.030 | 41.811 | 30.579 | 0.00 | 0.00 |
| ATOM | 1669 | CA   | PRO | X | 107 | 16.356 | 40.363 | 29.032 | 0.00 | 0.00 |
| ATOM | 1670 | HA   | PRO | X | 107 | 17.010 | 41.145 | 28.648 | 0.00 | 0.00 |
| ATOM | 1671 | C    | PRO | X | 107 | 17.275 | 39.253 | 29.509 | 0.00 | 0.00 |
| ATOM | 1672 | O    | PRO | X | 107 | 16.860 | 38.235 | 30.025 | 0.00 | 0.00 |
| ATOM | 1673 | N    | THR | X | 108 | 18.606 | 39.444 | 29.430 | 0.00 | 0.00 |
| ATOM | 1674 | H    | THR | X | 108 | 18.905 | 40.282 | 28.952 | 0.00 | 0.00 |
| ATOM | 1675 | CA   | THR | X | 108 | 19.546 | 38.446 | 29.770 | 0.00 | 0.00 |
| ATOM | 1676 | HA   | THR | X | 108 | 19.100 | 37.515 | 30.119 | 0.00 | 0.00 |
| ATOM | 1677 | CB   | THR | X | 108 | 20.233 | 38.027 | 28.490 | 0.00 | 0.00 |
| ATOM | 1678 | HB   | THR | X | 108 | 19.606 | 37.736 | 27.647 | 0.00 | 0.00 |
| ATOM | 1679 | CG2  | THR | X | 108 | 21.439 | 38.915 | 28.062 | 0.00 | 0.00 |
| ATOM | 1680 | HG21 | THR | X | 108 | 22.127 | 39.051 | 28.897 | 0.00 | 0.00 |
| ATOM | 1681 | HG22 | THR | X | 108 | 20.975 | 39.857 | 27.768 | 0.00 | 0.00 |
| ATOM | 1682 | HG23 | THR | X | 108 | 21.898 | 38.403 | 27.217 | 0.00 | 0.00 |
| ATOM | 1683 | OG1  | THR | X | 108 | 20.966 | 36.861 | 28.824 | 0.00 | 0.00 |
| ATOM | 1684 | HG1  | THR | X | 108 | 21.310 | 36.564 | 27.979 | 0.00 | 0.00 |
| ATOM | 1685 | C    | THR | X | 108 | 20.552 | 38.935 | 30.848 | 0.00 | 0.00 |
| ATOM | 1686 | O    | THR | X | 108 | 20.712 | 40.136 | 30.930 | 0.00 | 0.00 |
| ATOM | 1687 | N    | PRO | X | 109 | 21.063 | 38.103 | 31.753 | 0.00 | 0.00 |
| ATOM | 1688 | CD   | PRO | X | 109 | 20.742 | 36.706 | 31.975 | 0.00 | 0.00 |
| ATOM | 1689 | HD2  | PRO | X | 109 | 21.121 | 36.093 | 31.157 | 0.00 | 0.00 |
| ATOM | 1690 | HD3  | PRO | X | 109 | 19.660 | 36.583 | 31.936 | 0.00 | 0.00 |
| ATOM | 1691 | CG   | PRO | X | 109 | 21.316 | 36.187 | 33.311 | 0.00 | 0.00 |
| ATOM | 1692 | HG2  | PRO | X | 109 | 21.563 | 35.127 | 33.250 | 0.00 | 0.00 |
| ATOM | 1693 | HG3  | PRO | X | 109 | 20.753 | 36.443 | 34.208 | 0.00 | 0.00 |
| ATOM | 1694 | CB   | PRO | X | 109 | 22.613 | 37.034 | 33.356 | 0.00 | 0.00 |
| ATOM | 1695 | HB2  | PRO | X | 109 | 23.305 | 36.566 | 32.657 | 0.00 | 0.00 |
| ATOM | 1696 | HB3  | PRO | X | 109 | 23.043 | 37.265 | 34.331 | 0.00 | 0.00 |
| ATOM | 1697 | CA   | PRO | X | 109 | 22.131 | 38.361 | 32.768 | 0.00 | 0.00 |
| ATOM | 1698 | HA   | PRO | X | 109 | 21.621 | 38.880 | 33.580 | 0.00 | 0.00 |
| ATOM | 1699 | C    | PRO | X | 109 | 23.272 | 39.266 | 32.251 | 0.00 | 0.00 |
| ATOM | 1700 | O    | PRO | X | 109 | 23.664 | 39.165 | 31.078 | 0.00 | 0.00 |
| ATOM | 1701 | N    | VAL | X | 110 | 23.760 | 40.181 | 33.074 | 0.00 | 0.00 |
| ATOM | 1702 | H    | VAL | X | 110 | 23.327 | 40.201 | 33.986 | 0.00 | 0.00 |
| ATOM | 1703 | CA   | VAL | X | 110 | 24.826 | 41.195 | 32.747 | 0.00 | 0.00 |
| ATOM | 1704 | HA   | VAL | X | 110 | 25.097 | 41.147 | 31.692 | 0.00 | 0.00 |
| ATOM | 1705 | CB   | VAL | X | 110 | 24.279 | 42.588 | 32.923 | 0.00 | 0.00 |
| ATOM | 1706 | HB   | VAL | X | 110 | 23.955 | 42.572 | 33.963 | 0.00 | 0.00 |

|      |      |      |     |   |     |        |        |        |      |      |
|------|------|------|-----|---|-----|--------|--------|--------|------|------|
| ATOM | 1707 | CG1  | VAL | X | 110 | 25.325 | 43.648 | 32.605 | 0.00 | 0.00 |
| ATOM | 1708 | HG11 | VAL | X | 110 | 25.692 | 43.543 | 31.584 | 0.00 | 0.00 |
| ATOM | 1709 | HG12 | VAL | X | 110 | 24.942 | 44.661 | 32.733 | 0.00 | 0.00 |
| ATOM | 1710 | HG13 | VAL | X | 110 | 26.104 | 43.483 | 33.350 | 0.00 | 0.00 |
| ATOM | 1711 | CG2  | VAL | X | 110 | 22.998 | 42.836 | 32.048 | 0.00 | 0.00 |
| ATOM | 1712 | HG21 | VAL | X | 110 | 22.159 | 42.271 | 32.456 | 0.00 | 0.00 |
| ATOM | 1713 | HG22 | VAL | X | 110 | 23.089 | 42.680 | 30.974 | 0.00 | 0.00 |
| ATOM | 1714 | HG23 | VAL | X | 110 | 22.765 | 43.897 | 32.140 | 0.00 | 0.00 |
| ATOM | 1715 | C    | VAL | X | 110 | 26.074 | 40.970 | 33.605 | 0.00 | 0.00 |
| ATOM | 1716 | O    | VAL | X | 110 | 25.910 | 41.048 | 34.787 | 0.00 | 0.00 |
| ATOM | 1717 | N    | LEU | X | 111 | 27.235 | 40.735 | 32.978 | 0.00 | 0.00 |
| ATOM | 1718 | H    | LEU | X | 111 | 27.199 | 40.503 | 31.996 | 0.00 | 0.00 |
| ATOM | 1719 | CA   | LEU | X | 111 | 28.536 | 40.610 | 33.701 | 0.00 | 0.00 |
| ATOM | 1720 | HA   | LEU | X | 111 | 28.420 | 40.275 | 34.732 | 0.00 | 0.00 |
| ATOM | 1721 | CB   | LEU | X | 111 | 29.405 | 39.521 | 33.152 | 0.00 | 0.00 |
| ATOM | 1722 | HB2  | LEU | X | 111 | 29.821 | 39.937 | 32.235 | 0.00 | 0.00 |
| ATOM | 1723 | HB3  | LEU | X | 111 | 30.290 | 39.363 | 33.768 | 0.00 | 0.00 |
| ATOM | 1724 | CG   | LEU | X | 111 | 28.766 | 38.163 | 32.953 | 0.00 | 0.00 |
| ATOM | 1725 | HG   | LEU | X | 111 | 27.785 | 38.245 | 32.483 | 0.00 | 0.00 |
| ATOM | 1726 | CD1  | LEU | X | 111 | 29.599 | 37.288 | 32.019 | 0.00 | 0.00 |
| ATOM | 1727 | HD11 | LEU | X | 111 | 29.071 | 36.363 | 31.787 | 0.00 | 0.00 |
| ATOM | 1728 | HD12 | LEU | X | 111 | 30.627 | 37.180 | 32.366 | 0.00 | 0.00 |
| ATOM | 1729 | HD13 | LEU | X | 111 | 29.538 | 37.735 | 31.026 | 0.00 | 0.00 |
| ATOM | 1730 | CD2  | LEU | X | 111 | 28.613 | 37.536 | 34.343 | 0.00 | 0.00 |
| ATOM | 1731 | HD21 | LEU | X | 111 | 29.518 | 37.645 | 34.942 | 0.00 | 0.00 |
| ATOM | 1732 | HD22 | LEU | X | 111 | 27.852 | 38.067 | 34.915 | 0.00 | 0.00 |
| ATOM | 1733 | HD23 | LEU | X | 111 | 28.341 | 36.484 | 34.257 | 0.00 | 0.00 |
| ATOM | 1734 | C    | LEU | X | 111 | 29.208 | 41.928 | 33.618 | 0.00 | 0.00 |
| ATOM | 1735 | O    | LEU | X | 111 | 29.361 | 42.344 | 32.451 | 0.00 | 0.00 |
| ATOM | 1736 | N    | VAL | X | 112 | 29.531 | 42.582 | 34.671 | 0.00 | 0.00 |
| ATOM | 1737 | H    | VAL | X | 112 | 29.227 | 42.188 | 35.549 | 0.00 | 0.00 |
| ATOM | 1738 | CA   | VAL | X | 112 | 30.265 | 43.892 | 34.749 | 0.00 | 0.00 |
| ATOM | 1739 | HA   | VAL | X | 112 | 30.216 | 44.376 | 33.774 | 0.00 | 0.00 |
| ATOM | 1740 | CB   | VAL | X | 112 | 29.597 | 44.814 | 35.836 | 0.00 | 0.00 |
| ATOM | 1741 | HB   | VAL | X | 112 | 29.580 | 44.367 | 36.830 | 0.00 | 0.00 |
| ATOM | 1742 | CG1  | VAL | X | 112 | 30.248 | 46.255 | 35.955 | 0.00 | 0.00 |
| ATOM | 1743 | HG11 | VAL | X | 112 | 30.593 | 46.708 | 35.026 | 0.00 | 0.00 |
| ATOM | 1744 | HG12 | VAL | X | 112 | 29.503 | 46.889 | 36.434 | 0.00 | 0.00 |
| ATOM | 1745 | HG13 | VAL | X | 112 | 31.146 | 46.151 | 36.565 | 0.00 | 0.00 |
| ATOM | 1746 | CG2  | VAL | X | 112 | 28.151 | 44.994 | 35.384 | 0.00 | 0.00 |
| ATOM | 1747 | HG21 | VAL | X | 112 | 27.685 | 45.546 | 36.200 | 0.00 | 0.00 |
| ATOM | 1748 | HG22 | VAL | X | 112 | 27.643 | 44.040 | 35.239 | 0.00 | 0.00 |
| ATOM | 1749 | HG23 | VAL | X | 112 | 28.219 | 45.440 | 34.391 | 0.00 | 0.00 |
| ATOM | 1750 | C    | VAL | X | 112 | 31.707 | 43.720 | 35.123 | 0.00 | 0.00 |
| ATOM | 1751 | O    | VAL | X | 112 | 31.976 | 43.506 | 36.314 | 0.00 | 0.00 |
| ATOM | 1752 | N    | TRP | X | 113 | 32.572 | 43.757 | 34.118 | 0.00 | 0.00 |
| ATOM | 1753 | H    | TRP | X | 113 | 32.266 | 43.963 | 33.178 | 0.00 | 0.00 |
| ATOM | 1754 | CA   | TRP | X | 113 | 33.998 | 43.366 | 34.296 | 0.00 | 0.00 |
| ATOM | 1755 | HA   | TRP | X | 113 | 33.965 | 42.505 | 34.964 | 0.00 | 0.00 |
| ATOM | 1756 | CB   | TRP | X | 113 | 34.621 | 42.887 | 32.966 | 0.00 | 0.00 |
| ATOM | 1757 | HB2  | TRP | X | 113 | 34.276 | 41.897 | 32.670 | 0.00 | 0.00 |
| ATOM | 1758 | HB3  | TRP | X | 113 | 34.320 | 43.616 | 32.213 | 0.00 | 0.00 |
| ATOM | 1759 | CG   | TRP | X | 113 | 36.117 | 42.621 | 33.031 | 0.00 | 0.00 |
| ATOM | 1760 | CD1  | TRP | X | 113 | 37.152 | 43.350 | 32.496 | 0.00 | 0.00 |
| ATOM | 1761 | HD1  | TRP | X | 113 | 37.041 | 44.125 | 31.752 | 0.00 | 0.00 |
| ATOM | 1762 | NE1  | TRP | X | 113 | 38.297 | 42.736 | 32.799 | 0.00 | 0.00 |
| ATOM | 1763 | HE1  | TRP | X | 113 | 39.136 | 43.002 | 32.302 | 0.00 | 0.00 |
| ATOM | 1764 | CE2  | TRP | X | 113 | 38.213 | 41.658 | 33.621 | 0.00 | 0.00 |
| ATOM | 1765 | CZ2  | TRP | X | 113 | 39.116 | 40.719 | 34.168 | 0.00 | 0.00 |
| ATOM | 1766 | HZ2  | TRP | X | 113 | 40.191 | 40.806 | 34.121 | 0.00 | 0.00 |
| ATOM | 1767 | CH2  | TRP | X | 113 | 38.555 | 39.708 | 34.965 | 0.00 | 0.00 |
| ATOM | 1768 | HH2  | TRP | X | 113 | 39.193 | 38.969 | 35.428 | 0.00 | 0.00 |
| ATOM | 1769 | CZ3  | TRP | X | 113 | 37.150 | 39.618 | 35.162 | 0.00 | 0.00 |
| ATOM | 1770 | HZ3  | TRP | X | 113 | 36.771 | 38.866 | 35.840 | 0.00 | 0.00 |
| ATOM | 1771 | CE3  | TRP | X | 113 | 36.336 | 40.578 | 34.656 | 0.00 | 0.00 |
| ATOM | 1772 | HE3  | TRP | X | 113 | 35.334 | 40.595 | 35.057 | 0.00 | 0.00 |
| ATOM | 1773 | CD2  | TRP | X | 113 | 36.831 | 41.597 | 33.835 | 0.00 | 0.00 |

|      |      |      |     |   |     |        |        |        |      |      |
|------|------|------|-----|---|-----|--------|--------|--------|------|------|
| ATOM | 1774 | C    | TRP | X | 113 | 34.637 | 44.543 | 34.970 | 0.00 | 0.00 |
| ATOM | 1775 | O    | TRP | X | 113 | 34.571 | 45.698 | 34.486 | 0.00 | 0.00 |
| ATOM | 1776 | N    | ILE | X | 114 | 35.411 | 44.225 | 36.022 | 0.00 | 0.00 |
| ATOM | 1777 | H    | ILE | X | 114 | 35.327 | 43.257 | 36.299 | 0.00 | 0.00 |
| ATOM | 1778 | CA   | ILE | X | 114 | 36.473 | 45.095 | 36.570 | 0.00 | 0.00 |
| ATOM | 1779 | HA   | ILE | X | 114 | 36.564 | 46.021 | 36.001 | 0.00 | 0.00 |
| ATOM | 1780 | CB   | ILE | X | 114 | 36.200 | 45.418 | 38.075 | 0.00 | 0.00 |
| ATOM | 1781 | HB   | ILE | X | 114 | 36.538 | 44.601 | 38.714 | 0.00 | 0.00 |
| ATOM | 1782 | CG2  | ILE | X | 114 | 36.949 | 46.733 | 38.307 | 0.00 | 0.00 |
| ATOM | 1783 | HG21 | ILE | X | 114 | 36.552 | 47.561 | 37.721 | 0.00 | 0.00 |
| ATOM | 1784 | HG22 | ILE | X | 114 | 37.999 | 46.583 | 38.054 | 0.00 | 0.00 |
| ATOM | 1785 | HG23 | ILE | X | 114 | 36.963 | 46.883 | 39.387 | 0.00 | 0.00 |
| ATOM | 1786 | CG1  | ILE | X | 114 | 34.660 | 45.696 | 38.426 | 0.00 | 0.00 |
| ATOM | 1787 | HG12 | ILE | X | 114 | 34.359 | 46.414 | 37.662 | 0.00 | 0.00 |
| ATOM | 1788 | HG13 | ILE | X | 114 | 34.130 | 44.754 | 38.290 | 0.00 | 0.00 |
| ATOM | 1789 | CD1  | ILE | X | 114 | 34.329 | 46.282 | 39.840 | 0.00 | 0.00 |
| ATOM | 1790 | HD11 | ILE | X | 114 | 34.339 | 47.365 | 39.710 | 0.00 | 0.00 |
| ATOM | 1791 | HD12 | ILE | X | 114 | 35.070 | 46.025 | 40.596 | 0.00 | 0.00 |
| ATOM | 1792 | HD13 | ILE | X | 114 | 33.295 | 46.053 | 40.100 | 0.00 | 0.00 |
| ATOM | 1793 | C    | ILE | X | 114 | 37.758 | 44.241 | 36.481 | 0.00 | 0.00 |
| ATOM | 1794 | O    | ILE | X | 114 | 37.983 | 43.271 | 37.160 | 0.00 | 0.00 |
| ATOM | 1795 | N    | TYR | X | 115 | 38.662 | 44.809 | 35.692 | 0.00 | 0.00 |
| ATOM | 1796 | H    | TYR | X | 115 | 38.403 | 45.574 | 35.086 | 0.00 | 0.00 |
| ATOM | 1797 | CA   | TYR | X | 115 | 40.114 | 44.460 | 35.624 | 0.00 | 0.00 |
| ATOM | 1798 | HA   | TYR | X | 115 | 40.177 | 43.421 | 35.299 | 0.00 | 0.00 |
| ATOM | 1799 | CB   | TYR | X | 115 | 40.725 | 45.221 | 34.425 | 0.00 | 0.00 |
| ATOM | 1800 | HB2  | TYR | X | 115 | 41.801 | 45.058 | 34.487 | 0.00 | 0.00 |
| ATOM | 1801 | HB3  | TYR | X | 115 | 40.303 | 44.837 | 33.496 | 0.00 | 0.00 |
| ATOM | 1802 | CG   | TYR | X | 115 | 40.556 | 46.744 | 34.342 | 0.00 | 0.00 |
| ATOM | 1803 | CD1  | TYR | X | 115 | 41.364 | 47.619 | 35.131 | 0.00 | 0.00 |
| ATOM | 1804 | HD1  | TYR | X | 115 | 41.945 | 47.201 | 35.940 | 0.00 | 0.00 |
| ATOM | 1805 | CE1  | TYR | X | 115 | 41.641 | 48.986 | 34.811 | 0.00 | 0.00 |
| ATOM | 1806 | HE1  | TYR | X | 115 | 42.307 | 49.544 | 35.452 | 0.00 | 0.00 |
| ATOM | 1807 | CZ   | TYR | X | 115 | 40.830 | 49.529 | 33.778 | 0.00 | 0.00 |
| ATOM | 1808 | OH   | TYR | X | 115 | 40.908 | 50.845 | 33.361 | 0.00 | 0.00 |
| ATOM | 1809 | HH   | TYR | X | 115 | 41.430 | 51.407 | 33.939 | 0.00 | 0.00 |
| ATOM | 1810 | CE2  | TYR | X | 115 | 40.001 | 48.694 | 32.991 | 0.00 | 0.00 |
| ATOM | 1811 | HE2  | TYR | X | 115 | 39.435 | 49.126 | 32.178 | 0.00 | 0.00 |
| ATOM | 1812 | CD2  | TYR | X | 115 | 39.911 | 47.300 | 33.226 | 0.00 | 0.00 |
| ATOM | 1813 | HD2  | TYR | X | 115 | 39.543 | 46.668 | 32.431 | 0.00 | 0.00 |
| ATOM | 1814 | C    | TYR | X | 115 | 40.945 | 44.541 | 36.883 | 0.00 | 0.00 |
| ATOM | 1815 | O    | TYR | X | 115 | 40.648 | 45.394 | 37.772 | 0.00 | 0.00 |
| ATOM | 1816 | N    | GLY | X | 116 | 42.065 | 43.793 | 36.937 | 0.00 | 0.00 |
| ATOM | 1817 | H    | GLY | X | 116 | 42.204 | 43.189 | 36.140 | 0.00 | 0.00 |
| ATOM | 1818 | CA   | GLY | X | 116 | 43.064 | 43.915 | 37.977 | 0.00 | 0.00 |
| ATOM | 1819 | HA2  | GLY | X | 116 | 42.787 | 44.209 | 38.989 | 0.00 | 0.00 |
| ATOM | 1820 | HA3  | GLY | X | 116 | 43.641 | 43.000 | 38.109 | 0.00 | 0.00 |
| ATOM | 1821 | C    | GLY | X | 116 | 44.167 | 44.931 | 37.529 | 0.00 | 0.00 |
| ATOM | 1822 | O    | GLY | X | 116 | 43.965 | 45.698 | 36.627 | 0.00 | 0.00 |
| ATOM | 1823 | N    | GLY | X | 117 | 45.287 | 44.952 | 38.237 | 0.00 | 0.00 |
| ATOM | 1824 | H    | GLY | X | 117 | 45.332 | 44.277 | 38.987 | 0.00 | 0.00 |
| ATOM | 1825 | CA   | GLY | X | 117 | 46.525 | 45.505 | 37.888 | 0.00 | 0.00 |
| ATOM | 1826 | HA2  | GLY | X | 117 | 47.166 | 44.690 | 37.553 | 0.00 | 0.00 |
| ATOM | 1827 | HA3  | GLY | X | 117 | 46.514 | 46.131 | 36.996 | 0.00 | 0.00 |
| ATOM | 1828 | C    | GLY | X | 117 | 47.275 | 46.243 | 39.005 | 0.00 | 0.00 |
| ATOM | 1829 | O    | GLY | X | 117 | 48.091 | 47.123 | 38.792 | 0.00 | 0.00 |
| ATOM | 1830 | N    | GLY | X | 118 | 47.069 | 45.741 | 40.222 | 0.00 | 0.00 |
| ATOM | 1831 | H    | GLY | X | 118 | 46.437 | 44.958 | 40.316 | 0.00 | 0.00 |
| ATOM | 1832 | CA   | GLY | X | 118 | 47.655 | 46.228 | 41.597 | 0.00 | 0.00 |
| ATOM | 1833 | HA2  | GLY | X | 118 | 47.197 | 45.555 | 42.323 | 0.00 | 0.00 |
| ATOM | 1834 | HA3  | GLY | X | 118 | 48.744 | 46.251 | 41.558 | 0.00 | 0.00 |
| ATOM | 1835 | C    | GLY | X | 118 | 47.162 | 47.689 | 41.856 | 0.00 | 0.00 |
| ATOM | 1836 | O    | GLY | X | 118 | 47.736 | 48.323 | 42.715 | 0.00 | 0.00 |
| ATOM | 1837 | N    | PHE | X | 119 | 46.193 | 48.205 | 41.188 | 0.00 | 0.00 |
| ATOM | 1838 | H    | PHE | X | 119 | 45.820 | 47.637 | 40.441 | 0.00 | 0.00 |
| ATOM | 1839 | CA   | PHE | X | 119 | 45.558 | 49.554 | 41.261 | 0.00 | 0.00 |
| ATOM | 1840 | HA   | PHE | X | 119 | 44.604 | 49.492 | 40.739 | 0.00 | 0.00 |

|      |      |     |     |   |     |        |        |        |      |      |
|------|------|-----|-----|---|-----|--------|--------|--------|------|------|
| ATOM | 1841 | CB  | PHE | X | 119 | 45.330 | 50.063 | 42.727 | 0.00 | 0.00 |
| ATOM | 1842 | HB2 | PHE | X | 119 | 46.295 | 49.961 | 43.225 | 0.00 | 0.00 |
| ATOM | 1843 | HB3 | PHE | X | 119 | 45.037 | 51.109 | 42.631 | 0.00 | 0.00 |
| ATOM | 1844 | CG  | PHE | X | 119 | 44.407 | 49.166 | 43.596 | 0.00 | 0.00 |
| ATOM | 1845 | CD1 | PHE | X | 119 | 43.024 | 49.168 | 43.351 | 0.00 | 0.00 |
| ATOM | 1846 | HD1 | PHE | X | 119 | 42.608 | 49.872 | 42.645 | 0.00 | 0.00 |
| ATOM | 1847 | CE1 | PHE | X | 119 | 42.124 | 48.416 | 44.170 | 0.00 | 0.00 |
| ATOM | 1848 | HE1 | PHE | X | 119 | 41.071 | 48.630 | 44.059 | 0.00 | 0.00 |
| ATOM | 1849 | CZ  | PHE | X | 119 | 42.634 | 47.505 | 45.101 | 0.00 | 0.00 |
| ATOM | 1850 | HZ  | PHE | X | 119 | 42.006 | 46.806 | 45.632 | 0.00 | 0.00 |
| ATOM | 1851 | CE2 | PHE | X | 119 | 43.994 | 47.557 | 45.379 | 0.00 | 0.00 |
| ATOM | 1852 | HE2 | PHE | X | 119 | 44.420 | 46.914 | 46.135 | 0.00 | 0.00 |
| ATOM | 1853 | CD2 | PHE | X | 119 | 44.882 | 48.335 | 44.612 | 0.00 | 0.00 |
| ATOM | 1854 | HD2 | PHE | X | 119 | 45.914 | 48.332 | 44.930 | 0.00 | 0.00 |
| ATOM | 1855 | C   | PHE | X | 119 | 46.489 | 50.492 | 40.495 | 0.00 | 0.00 |
| ATOM | 1856 | O   | PHE | X | 119 | 46.012 | 51.490 | 40.045 | 0.00 | 0.00 |
| ATOM | 1857 | N   | TYR | X | 120 | 47.803 | 50.221 | 40.250 | 0.00 | 0.00 |
| ATOM | 1858 | H   | TYR | X | 120 | 48.156 | 49.445 | 40.791 | 0.00 | 0.00 |
| ATOM | 1859 | CA  | TYR | X | 120 | 48.694 | 51.108 | 39.544 | 0.00 | 0.00 |
| ATOM | 1860 | HA  | TYR | X | 120 | 48.453 | 52.141 | 39.794 | 0.00 | 0.00 |
| ATOM | 1861 | CB  | TYR | X | 120 | 50.077 | 50.957 | 40.232 | 0.00 | 0.00 |
| ATOM | 1862 | HB2 | TYR | X | 120 | 50.761 | 51.774 | 40.006 | 0.00 | 0.00 |
| ATOM | 1863 | HB3 | TYR | X | 120 | 50.038 | 51.035 | 41.318 | 0.00 | 0.00 |
| ATOM | 1864 | CG  | TYR | X | 120 | 50.885 | 49.695 | 39.914 | 0.00 | 0.00 |
| ATOM | 1865 | CD1 | TYR | X | 120 | 51.896 | 49.762 | 38.962 | 0.00 | 0.00 |
| ATOM | 1866 | HD1 | TYR | X | 120 | 52.036 | 50.700 | 38.446 | 0.00 | 0.00 |
| ATOM | 1867 | CE1 | TYR | X | 120 | 52.551 | 48.590 | 38.588 | 0.00 | 0.00 |
| ATOM | 1868 | HE1 | TYR | X | 120 | 53.313 | 48.510 | 37.826 | 0.00 | 0.00 |
| ATOM | 1869 | CZ  | TYR | X | 120 | 52.314 | 47.431 | 39.403 | 0.00 | 0.00 |
| ATOM | 1870 | OH  | TYR | X | 120 | 53.064 | 46.299 | 39.231 | 0.00 | 0.00 |
| ATOM | 1871 | HH  | TYR | X | 120 | 52.672 | 45.503 | 39.597 | 0.00 | 0.00 |
| ATOM | 1872 | CE2 | TYR | X | 120 | 51.289 | 47.381 | 40.284 | 0.00 | 0.00 |
| ATOM | 1873 | HE2 | TYR | X | 120 | 51.137 | 46.451 | 40.811 | 0.00 | 0.00 |
| ATOM | 1874 | CD2 | TYR | X | 120 | 50.514 | 48.484 | 40.516 | 0.00 | 0.00 |
| ATOM | 1875 | HD2 | TYR | X | 120 | 49.740 | 48.472 | 41.268 | 0.00 | 0.00 |
| ATOM | 1876 | C   | TYR | X | 120 | 48.742 | 50.924 | 38.011 | 0.00 | 0.00 |
| ATOM | 1877 | O   | TYR | X | 120 | 49.568 | 51.586 | 37.354 | 0.00 | 0.00 |
| ATOM | 1878 | N   | SER | X | 121 | 47.877 | 50.091 | 37.390 | 0.00 | 0.00 |
| ATOM | 1879 | H   | SER | X | 121 | 47.240 | 49.578 | 37.983 | 0.00 | 0.00 |
| ATOM | 1880 | CA  | SER | X | 121 | 47.792 | 49.738 | 35.986 | 0.00 | 0.00 |
| ATOM | 1881 | HA  | SER | X | 121 | 47.647 | 50.607 | 35.344 | 0.00 | 0.00 |
| ATOM | 1882 | CB  | SER | X | 121 | 49.065 | 48.964 | 35.569 | 0.00 | 0.00 |
| ATOM | 1883 | HB2 | SER | X | 121 | 49.001 | 48.808 | 34.492 | 0.00 | 0.00 |
| ATOM | 1884 | HB3 | SER | X | 121 | 49.965 | 49.556 | 35.739 | 0.00 | 0.00 |
| ATOM | 1885 | OG  | SER | X | 121 | 49.264 | 47.786 | 36.254 | 0.00 | 0.00 |
| ATOM | 1886 | HG  | SER | X | 121 | 48.709 | 47.733 | 37.035 | 0.00 | 0.00 |
| ATOM | 1887 | C   | SER | X | 121 | 46.610 | 48.784 | 35.788 | 0.00 | 0.00 |
| ATOM | 1888 | O   | SER | X | 121 | 45.977 | 48.403 | 36.768 | 0.00 | 0.00 |
| ATOM | 1889 | N   | GLY | X | 122 | 46.227 | 48.572 | 34.524 | 0.00 | 0.00 |
| ATOM | 1890 | H   | GLY | X | 122 | 46.795 | 48.745 | 33.707 | 0.00 | 0.00 |
| ATOM | 1891 | CA  | GLY | X | 122 | 44.963 | 47.951 | 34.095 | 0.00 | 0.00 |
| ATOM | 1892 | HA2 | GLY | X | 122 | 45.217 | 47.028 | 33.574 | 0.00 | 0.00 |
| ATOM | 1893 | HA3 | GLY | X | 122 | 44.289 | 47.792 | 34.937 | 0.00 | 0.00 |
| ATOM | 1894 | C   | GLY | X | 122 | 44.303 | 48.755 | 32.968 | 0.00 | 0.00 |
| ATOM | 1895 | O   | GLY | X | 122 | 44.574 | 49.881 | 32.827 | 0.00 | 0.00 |
| ATOM | 1896 | N   | ALA | X | 123 | 43.528 | 48.058 | 32.129 | 0.00 | 0.00 |
| ATOM | 1897 | H   | ALA | X | 123 | 43.233 | 47.159 | 32.482 | 0.00 | 0.00 |
| ATOM | 1898 | CA  | ALA | X | 123 | 42.897 | 48.645 | 30.944 | 0.00 | 0.00 |
| ATOM | 1899 | HA  | ALA | X | 123 | 42.350 | 49.482 | 31.380 | 0.00 | 0.00 |
| ATOM | 1900 | CB  | ALA | X | 123 | 43.946 | 49.164 | 29.912 | 0.00 | 0.00 |
| ATOM | 1901 | HB1 | ALA | X | 123 | 44.574 | 49.970 | 30.292 | 0.00 | 0.00 |
| ATOM | 1902 | HB2 | ALA | X | 123 | 43.457 | 49.555 | 29.020 | 0.00 | 0.00 |
| ATOM | 1903 | HB3 | ALA | X | 123 | 44.595 | 48.372 | 29.539 | 0.00 | 0.00 |
| ATOM | 1904 | C   | ALA | X | 123 | 41.937 | 47.697 | 30.274 | 0.00 | 0.00 |
| ATOM | 1905 | O   | ALA | X | 123 | 42.282 | 46.493 | 30.202 | 0.00 | 0.00 |
| ATOM | 1906 | N   | SER | X | 124 | 40.806 | 48.230 | 29.775 | 0.00 | 0.00 |
| ATOM | 1907 | H   | SER | X | 124 | 40.743 | 49.223 | 29.950 | 0.00 | 0.00 |



|      |      |      |     |   |     |        |        |        |      |      |
|------|------|------|-----|---|-----|--------|--------|--------|------|------|
| ATOM | 1908 | CA   | SER | X | 124 | 39.683 | 47.435 | 29.229 | 0.00 | 0.00 |
| ATOM | 1909 | HA   | SER | X | 124 | 39.479 | 46.532 | 29.805 | 0.00 | 0.00 |
| ATOM | 1910 | CB   | SER | X | 124 | 38.404 | 48.257 | 29.233 | 0.00 | 0.00 |
| ATOM | 1911 | HB2  | SER | X | 124 | 37.423 | 47.782 | 29.223 | 0.00 | 0.00 |
| ATOM | 1912 | HB3  | SER | X | 124 | 38.191 | 48.735 | 30.189 | 0.00 | 0.00 |
| ATOM | 1913 | OG   | SER | X | 124 | 38.498 | 49.351 | 28.345 | 0.00 | 0.00 |
| ATOM | 1914 | HG   | SER | X | 124 | 38.874 | 50.107 | 28.801 | 0.00 | 0.00 |
| ATOM | 1915 | C    | SER | X | 124 | 39.919 | 46.964 | 27.781 | 0.00 | 0.00 |
| ATOM | 1916 | O    | SER | X | 124 | 39.148 | 46.124 | 27.364 | 0.00 | 0.00 |
| ATOM | 1917 | N    | SER | X | 125 | 40.957 | 47.433 | 27.138 | 0.00 | 0.00 |
| ATOM | 1918 | H    | SER | X | 125 | 41.596 | 48.038 | 27.634 | 0.00 | 0.00 |
| ATOM | 1919 | CA   | SER | X | 125 | 41.278 | 47.175 | 25.763 | 0.00 | 0.00 |
| ATOM | 1920 | HA   | SER | X | 125 | 40.382 | 46.854 | 25.233 | 0.00 | 0.00 |
| ATOM | 1921 | CB   | SER | X | 125 | 41.755 | 48.491 | 25.094 | 0.00 | 0.00 |
| ATOM | 1922 | HB2  | SER | X | 125 | 41.943 | 48.339 | 24.031 | 0.00 | 0.00 |
| ATOM | 1923 | HB3  | SER | X | 125 | 41.055 | 49.325 | 25.149 | 0.00 | 0.00 |
| ATOM | 1924 | OG   | SER | X | 125 | 42.978 | 49.024 | 25.622 | 0.00 | 0.00 |
| ATOM | 1925 | HG   | SER | X | 125 | 43.648 | 48.982 | 24.936 | 0.00 | 0.00 |
| ATOM | 1926 | C    | SER | X | 125 | 42.070 | 45.896 | 25.523 | 0.00 | 0.00 |
| ATOM | 1927 | O    | SER | X | 125 | 42.409 | 45.541 | 24.372 | 0.00 | 0.00 |
| ATOM | 1928 | N    | LEU | X | 126 | 42.672 | 45.254 | 26.555 | 0.00 | 0.00 |
| ATOM | 1929 | H    | LEU | X | 126 | 42.561 | 45.620 | 27.490 | 0.00 | 0.00 |
| ATOM | 1930 | CA   | LEU | X | 126 | 43.516 | 44.094 | 26.367 | 0.00 | 0.00 |
| ATOM | 1931 | HA   | LEU | X | 126 | 44.246 | 44.275 | 25.578 | 0.00 | 0.00 |
| ATOM | 1932 | CB   | LEU | X | 126 | 44.236 | 43.858 | 27.720 | 0.00 | 0.00 |
| ATOM | 1933 | HB2  | LEU | X | 126 | 43.501 | 43.420 | 28.395 | 0.00 | 0.00 |
| ATOM | 1934 | HB3  | LEU | X | 126 | 45.012 | 43.137 | 27.461 | 0.00 | 0.00 |
| ATOM | 1935 | CG   | LEU | X | 126 | 44.969 | 45.013 | 28.401 | 0.00 | 0.00 |
| ATOM | 1936 | HG   | LEU | X | 126 | 44.240 | 45.823 | 28.412 | 0.00 | 0.00 |
| ATOM | 1937 | CD1  | LEU | X | 126 | 45.412 | 44.553 | 29.807 | 0.00 | 0.00 |
| ATOM | 1938 | HD11 | LEU | X | 126 | 44.460 | 44.435 | 30.326 | 0.00 | 0.00 |
| ATOM | 1939 | HD12 | LEU | X | 126 | 46.107 | 45.294 | 30.201 | 0.00 | 0.00 |
| ATOM | 1940 | HD13 | LEU | X | 126 | 45.909 | 43.595 | 29.656 | 0.00 | 0.00 |
| ATOM | 1941 | CD2  | LEU | X | 126 | 46.234 | 45.367 | 27.606 | 0.00 | 0.00 |
| ATOM | 1942 | HD21 | LEU | X | 126 | 46.649 | 46.257 | 28.081 | 0.00 | 0.00 |
| ATOM | 1943 | HD22 | LEU | X | 126 | 46.942 | 44.540 | 27.650 | 0.00 | 0.00 |
| ATOM | 1944 | HD23 | LEU | X | 126 | 46.201 | 45.651 | 26.554 | 0.00 | 0.00 |
| ATOM | 1945 | C    | LEU | X | 126 | 42.652 | 42.840 | 26.012 | 0.00 | 0.00 |
| ATOM | 1946 | O    | LEU | X | 126 | 41.641 | 42.572 | 26.629 | 0.00 | 0.00 |
| ATOM | 1947 | N    | ASP | X | 127 | 43.098 | 42.152 | 25.031 | 0.00 | 0.00 |
| ATOM | 1948 | H    | ASP | X | 127 | 44.024 | 42.349 | 24.679 | 0.00 | 0.00 |
| ATOM | 1949 | CA   | ASP | X | 127 | 42.224 | 41.154 | 24.406 | 0.00 | 0.00 |
| ATOM | 1950 | HA   | ASP | X | 127 | 41.311 | 41.646 | 24.072 | 0.00 | 0.00 |
| ATOM | 1951 | CB   | ASP | X | 127 | 42.854 | 40.681 | 23.100 | 0.00 | 0.00 |
| ATOM | 1952 | HB2  | ASP | X | 127 | 42.178 | 40.031 | 22.545 | 0.00 | 0.00 |
| ATOM | 1953 | HB3  | ASP | X | 127 | 43.010 | 41.458 | 22.351 | 0.00 | 0.00 |
| ATOM | 1954 | CG   | ASP | X | 127 | 44.141 | 39.905 | 23.263 | 0.00 | 0.00 |
| ATOM | 1955 | OD1  | ASP | X | 127 | 45.227 | 40.480 | 23.511 | 0.00 | 0.00 |
| ATOM | 1956 | OD2  | ASP | X | 127 | 44.146 | 38.690 | 22.932 | 0.00 | 0.00 |
| ATOM | 1957 | C    | ASP | X | 127 | 41.826 | 39.991 | 25.314 | 0.00 | 0.00 |
| ATOM | 1958 | O    | ASP | X | 127 | 40.945 | 39.257 | 24.884 | 0.00 | 0.00 |
| ATOM | 1959 | N    | VAL | X | 128 | 42.514 | 39.745 | 26.426 | 0.00 | 0.00 |
| ATOM | 1960 | H    | VAL | X | 128 | 43.346 | 40.313 | 26.499 | 0.00 | 0.00 |
| ATOM | 1961 | CA   | VAL | X | 128 | 42.138 | 38.822 | 27.516 | 0.00 | 0.00 |
| ATOM | 1962 | HA   | VAL | X | 128 | 42.157 | 37.824 | 27.078 | 0.00 | 0.00 |
| ATOM | 1963 | CB   | VAL | X | 128 | 43.295 | 38.773 | 28.522 | 0.00 | 0.00 |
| ATOM | 1964 | HB   | VAL | X | 128 | 44.130 | 38.602 | 27.843 | 0.00 | 0.00 |
| ATOM | 1965 | CG1  | VAL | X | 128 | 43.621 | 40.147 | 29.198 | 0.00 | 0.00 |
| ATOM | 1966 | HG11 | VAL | X | 128 | 42.781 | 40.397 | 29.846 | 0.00 | 0.00 |
| ATOM | 1967 | HG12 | VAL | X | 128 | 44.560 | 40.025 | 29.737 | 0.00 | 0.00 |
| ATOM | 1968 | HG13 | VAL | X | 128 | 43.754 | 40.865 | 28.388 | 0.00 | 0.00 |
| ATOM | 1969 | CG2  | VAL | X | 128 | 43.191 | 37.698 | 29.576 | 0.00 | 0.00 |
| ATOM | 1970 | HG21 | VAL | X | 128 | 44.138 | 37.450 | 30.055 | 0.00 | 0.00 |
| ATOM | 1971 | HG22 | VAL | X | 128 | 42.739 | 36.794 | 29.169 | 0.00 | 0.00 |
| ATOM | 1972 | HG23 | VAL | X | 128 | 42.550 | 38.093 | 30.363 | 0.00 | 0.00 |
| ATOM | 1973 | C    | VAL | X | 128 | 40.853 | 39.136 | 28.258 | 0.00 | 0.00 |
| ATOM | 1974 | O    | VAL | X | 128 | 40.076 | 38.263 | 28.650 | 0.00 | 0.00 |

|      |      |      |     |   |     |        |        |        |      |      |
|------|------|------|-----|---|-----|--------|--------|--------|------|------|
| ATOM | 1975 | N    | TYR | X | 129 | 40.476 | 40.404 | 28.274 | 0.00 | 0.00 |
| ATOM | 1976 | H    | TYR | X | 129 | 41.151 | 41.027 | 27.853 | 0.00 | 0.00 |
| ATOM | 1977 | CA   | TYR | X | 129 | 39.187 | 40.960 | 28.740 | 0.00 | 0.00 |
| ATOM | 1978 | HA   | TYR | X | 129 | 38.688 | 40.282 | 29.432 | 0.00 | 0.00 |
| ATOM | 1979 | CB   | TYR | X | 129 | 39.413 | 42.264 | 29.542 | 0.00 | 0.00 |
| ATOM | 1980 | HB2  | TYR | X | 129 | 39.511 | 43.047 | 28.791 | 0.00 | 0.00 |
| ATOM | 1981 | HB3  | TYR | X | 129 | 38.559 | 42.441 | 30.195 | 0.00 | 0.00 |
| ATOM | 1982 | CG   | TYR | X | 129 | 40.658 | 42.313 | 30.427 | 0.00 | 0.00 |
| ATOM | 1983 | CD1  | TYR | X | 129 | 40.854 | 41.265 | 31.334 | 0.00 | 0.00 |
| ATOM | 1984 | HD1  | TYR | X | 129 | 40.155 | 40.443 | 31.380 | 0.00 | 0.00 |
| ATOM | 1985 | CE1  | TYR | X | 129 | 41.857 | 41.331 | 32.332 | 0.00 | 0.00 |
| ATOM | 1986 | HE1  | TYR | X | 129 | 41.974 | 40.566 | 33.085 | 0.00 | 0.00 |
| ATOM | 1987 | CZ   | TYR | X | 129 | 42.470 | 42.575 | 32.521 | 0.00 | 0.00 |
| ATOM | 1988 | OH   | TYR | X | 129 | 43.223 | 42.893 | 33.620 | 0.00 | 0.00 |
| ATOM | 1989 | HH   | TYR | X | 129 | 43.234 | 42.285 | 34.363 | 0.00 | 0.00 |
| ATOM | 1990 | CE2  | TYR | X | 129 | 42.269 | 43.600 | 31.580 | 0.00 | 0.00 |
| ATOM | 1991 | HE2  | TYR | X | 129 | 42.578 | 44.618 | 31.763 | 0.00 | 0.00 |
| ATOM | 1992 | CD2  | TYR | X | 129 | 41.385 | 43.479 | 30.496 | 0.00 | 0.00 |
| ATOM | 1993 | HD2  | TYR | X | 129 | 41.134 | 44.310 | 29.853 | 0.00 | 0.00 |
| ATOM | 1994 | C    | TYR | X | 129 | 38.091 | 41.148 | 27.626 | 0.00 | 0.00 |
| ATOM | 1995 | O    | TYR | X | 129 | 37.283 | 42.070 | 27.757 | 0.00 | 0.00 |
| ATOM | 1996 | N    | ASP | X | 130 | 38.214 | 40.467 | 26.518 | 0.00 | 0.00 |
| ATOM | 1997 | H    | ASP | X | 130 | 39.026 | 39.871 | 26.450 | 0.00 | 0.00 |
| ATOM | 1998 | CA   | ASP | X | 130 | 37.170 | 40.337 | 25.524 | 0.00 | 0.00 |
| ATOM | 1999 | HA   | ASP | X | 130 | 36.610 | 41.272 | 25.516 | 0.00 | 0.00 |
| ATOM | 2000 | CB   | ASP | X | 130 | 37.965 | 40.244 | 24.188 | 0.00 | 0.00 |
| ATOM | 2001 | HB2  | ASP | X | 130 | 38.724 | 41.020 | 24.087 | 0.00 | 0.00 |
| ATOM | 2002 | HB3  | ASP | X | 130 | 38.509 | 39.300 | 24.161 | 0.00 | 0.00 |
| ATOM | 2003 | CG   | ASP | X | 130 | 36.924 | 40.401 | 23.023 | 0.00 | 0.00 |
| ATOM | 2004 | OD1  | ASP | X | 130 | 35.931 | 39.676 | 22.970 | 0.00 | 0.00 |
| ATOM | 2005 | OD2  | ASP | X | 130 | 37.223 | 41.153 | 22.099 | 0.00 | 0.00 |
| ATOM | 2006 | C    | ASP | X | 130 | 36.123 | 39.217 | 25.807 | 0.00 | 0.00 |
| ATOM | 2007 | O    | ASP | X | 130 | 36.509 | 38.043 | 26.008 | 0.00 | 0.00 |
| ATOM | 2008 | N    | GLY | X | 131 | 34.829 | 39.516 | 25.827 | 0.00 | 0.00 |
| ATOM | 2009 | H    | GLY | X | 131 | 34.557 | 40.484 | 25.725 | 0.00 | 0.00 |
| ATOM | 2010 | CA   | GLY | X | 131 | 33.780 | 38.560 | 26.192 | 0.00 | 0.00 |
| ATOM | 2011 | HA2  | GLY | X | 131 | 34.262 | 37.811 | 26.820 | 0.00 | 0.00 |
| ATOM | 2012 | HA3  | GLY | X | 131 | 32.959 | 39.141 | 26.612 | 0.00 | 0.00 |
| ATOM | 2013 | C    | GLY | X | 131 | 33.237 | 37.808 | 24.980 | 0.00 | 0.00 |
| ATOM | 2014 | O    | GLY | X | 131 | 32.261 | 37.057 | 25.224 | 0.00 | 0.00 |
| ATOM | 2015 | N    | ARG | X | 132 | 33.673 | 37.947 | 23.729 | 0.00 | 0.00 |
| ATOM | 2016 | H    | ARG | X | 132 | 34.504 | 38.512 | 23.630 | 0.00 | 0.00 |
| ATOM | 2017 | CA   | ARG | X | 132 | 33.008 | 37.274 | 22.511 | 0.00 | 0.00 |
| ATOM | 2018 | HA   | ARG | X | 132 | 32.077 | 37.829 | 22.400 | 0.00 | 0.00 |
| ATOM | 2019 | CB   | ARG | X | 132 | 33.842 | 37.530 | 21.236 | 0.00 | 0.00 |
| ATOM | 2020 | HB2  | ARG | X | 132 | 33.307 | 37.274 | 20.322 | 0.00 | 0.00 |
| ATOM | 2021 | HB3  | ARG | X | 132 | 33.940 | 38.615 | 21.267 | 0.00 | 0.00 |
| ATOM | 2022 | CG   | ARG | X | 132 | 35.208 | 36.794 | 21.215 | 0.00 | 0.00 |
| ATOM | 2023 | HG2  | ARG | X | 132 | 35.904 | 37.036 | 22.018 | 0.00 | 0.00 |
| ATOM | 2024 | HG3  | ARG | X | 132 | 34.971 | 35.730 | 21.179 | 0.00 | 0.00 |
| ATOM | 2025 | CD   | ARG | X | 132 | 36.048 | 37.255 | 20.005 | 0.00 | 0.00 |
| ATOM | 2026 | HD2  | ARG | X | 132 | 36.765 | 36.451 | 19.836 | 0.00 | 0.00 |
| ATOM | 2027 | HD3  | ARG | X | 132 | 35.463 | 37.366 | 19.092 | 0.00 | 0.00 |
| ATOM | 2028 | NE   | ARG | X | 132 | 36.722 | 38.519 | 20.182 | 0.00 | 0.00 |
| ATOM | 2029 | HE   | ARG | X | 132 | 36.532 | 38.946 | 21.077 | 0.00 | 0.00 |
| ATOM | 2030 | CZ   | ARG | X | 132 | 37.179 | 39.243 | 19.161 | 0.00 | 0.00 |
| ATOM | 2031 | NH1  | ARG | X | 132 | 37.302 | 38.871 | 17.913 | 0.00 | 0.00 |
| ATOM | 2032 | HH11 | ARG | X | 132 | 37.054 | 37.917 | 17.691 | 0.00 | 0.00 |
| ATOM | 2033 | HH12 | ARG | X | 132 | 37.562 | 39.493 | 17.161 | 0.00 | 0.00 |
| ATOM | 2034 | NH2  | ARG | X | 132 | 37.639 | 40.404 | 19.412 | 0.00 | 0.00 |
| ATOM | 2035 | HH21 | ARG | X | 132 | 37.639 | 40.770 | 20.353 | 0.00 | 0.00 |
| ATOM | 2036 | HH22 | ARG | X | 132 | 38.064 | 40.914 | 18.650 | 0.00 | 0.00 |
| ATOM | 2037 | C    | ARG | X | 132 | 32.597 | 35.823 | 22.727 | 0.00 | 0.00 |
| ATOM | 2038 | O    | ARG | X | 132 | 31.485 | 35.456 | 22.420 | 0.00 | 0.00 |
| ATOM | 2039 | N    | PHE | X | 133 | 33.529 | 34.945 | 23.334 | 0.00 | 0.00 |
| ATOM | 2040 | H    | PHE | X | 133 | 34.391 | 35.307 | 23.714 | 0.00 | 0.00 |
| ATOM | 2041 | CA   | PHE | X | 133 | 33.235 | 33.550 | 23.359 | 0.00 | 0.00 |

|      |      |      |     |   |     |        |        |        |      |      |
|------|------|------|-----|---|-----|--------|--------|--------|------|------|
| ATOM | 2042 | HA   | PHE | X | 133 | 32.708 | 33.356 | 22.425 | 0.00 | 0.00 |
| ATOM | 2043 | CB   | PHE | X | 133 | 34.441 | 32.668 | 23.585 | 0.00 | 0.00 |
| ATOM | 2044 | HB2  | PHE | X | 133 | 34.982 | 32.985 | 24.477 | 0.00 | 0.00 |
| ATOM | 2045 | HB3  | PHE | X | 133 | 34.187 | 31.643 | 23.855 | 0.00 | 0.00 |
| ATOM | 2046 | CG   | PHE | X | 133 | 35.397 | 32.623 | 22.418 | 0.00 | 0.00 |
| ATOM | 2047 | CD1  | PHE | X | 133 | 36.671 | 33.180 | 22.643 | 0.00 | 0.00 |
| ATOM | 2048 | HD1  | PHE | X | 133 | 36.951 | 33.469 | 23.645 | 0.00 | 0.00 |
| ATOM | 2049 | CE1  | PHE | X | 133 | 37.540 | 33.175 | 21.522 | 0.00 | 0.00 |
| ATOM | 2050 | HE1  | PHE | X | 133 | 38.502 | 33.650 | 21.647 | 0.00 | 0.00 |
| ATOM | 2051 | CZ   | PHE | X | 133 | 37.226 | 32.573 | 20.287 | 0.00 | 0.00 |
| ATOM | 2052 | HZ   | PHE | X | 133 | 37.968 | 32.510 | 19.504 | 0.00 | 0.00 |
| ATOM | 2053 | CE2  | PHE | X | 133 | 35.912 | 32.121 | 20.048 | 0.00 | 0.00 |
| ATOM | 2054 | HE2  | PHE | X | 133 | 35.664 | 31.623 | 19.122 | 0.00 | 0.00 |
| ATOM | 2055 | CD2  | PHE | X | 133 | 34.988 | 32.215 | 21.096 | 0.00 | 0.00 |
| ATOM | 2056 | HD2  | PHE | X | 133 | 34.041 | 31.727 | 20.920 | 0.00 | 0.00 |
| ATOM | 2057 | C    | PHE | X | 133 | 32.190 | 33.164 | 24.418 | 0.00 | 0.00 |
| ATOM | 2058 | O    | PHE | X | 133 | 31.314 | 32.374 | 24.145 | 0.00 | 0.00 |
| ATOM | 2059 | N    | LEU | X | 134 | 32.288 | 33.749 | 25.652 | 0.00 | 0.00 |
| ATOM | 2060 | H    | LEU | X | 134 | 33.094 | 34.332 | 25.825 | 0.00 | 0.00 |
| ATOM | 2061 | CA   | LEU | X | 134 | 31.318 | 33.706 | 26.724 | 0.00 | 0.00 |
| ATOM | 2062 | HA   | LEU | X | 134 | 31.169 | 32.686 | 27.080 | 0.00 | 0.00 |
| ATOM | 2063 | CB   | LEU | X | 134 | 31.889 | 34.609 | 27.837 | 0.00 | 0.00 |
| ATOM | 2064 | HB2  | LEU | X | 134 | 32.967 | 34.447 | 27.843 | 0.00 | 0.00 |
| ATOM | 2065 | HB3  | LEU | X | 134 | 31.558 | 35.608 | 27.554 | 0.00 | 0.00 |
| ATOM | 2066 | CG   | LEU | X | 134 | 31.344 | 34.363 | 29.214 | 0.00 | 0.00 |
| ATOM | 2067 | HG   | LEU | X | 134 | 31.746 | 33.376 | 29.443 | 0.00 | 0.00 |
| ATOM | 2068 | CD1  | LEU | X | 134 | 31.916 | 35.381 | 30.194 | 0.00 | 0.00 |
| ATOM | 2069 | HD11 | LEU | X | 134 | 31.772 | 35.066 | 31.228 | 0.00 | 0.00 |
| ATOM | 2070 | HD12 | LEU | X | 134 | 31.509 | 36.384 | 30.066 | 0.00 | 0.00 |
| ATOM | 2071 | HD13 | LEU | X | 134 | 32.947 | 35.456 | 29.848 | 0.00 | 0.00 |
| ATOM | 2072 | CD2  | LEU | X | 134 | 29.775 | 34.244 | 29.325 | 0.00 | 0.00 |
| ATOM | 2073 | HD21 | LEU | X | 134 | 29.525 | 33.317 | 28.809 | 0.00 | 0.00 |
| ATOM | 2074 | HD22 | LEU | X | 134 | 29.452 | 34.302 | 30.364 | 0.00 | 0.00 |
| ATOM | 2075 | HD23 | LEU | X | 134 | 29.307 | 34.998 | 28.692 | 0.00 | 0.00 |
| ATOM | 2076 | C    | LEU | X | 134 | 29.973 | 34.133 | 26.169 | 0.00 | 0.00 |
| ATOM | 2077 | O    | LEU | X | 134 | 29.014 | 33.433 | 26.148 | 0.00 | 0.00 |
| ATOM | 2078 | N    | VAL | X | 135 | 29.919 | 35.324 | 25.616 | 0.00 | 0.00 |
| ATOM | 2079 | H    | VAL | X | 135 | 30.709 | 35.946 | 25.522 | 0.00 | 0.00 |
| ATOM | 2080 | CA   | VAL | X | 135 | 28.606 | 35.877 | 25.151 | 0.00 | 0.00 |
| ATOM | 2081 | HA   | VAL | X | 135 | 27.832 | 35.865 | 25.918 | 0.00 | 0.00 |
| ATOM | 2082 | CB   | VAL | X | 135 | 28.729 | 37.364 | 24.660 | 0.00 | 0.00 |
| ATOM | 2083 | HB   | VAL | X | 135 | 29.571 | 37.308 | 23.970 | 0.00 | 0.00 |
| ATOM | 2084 | CG1  | VAL | X | 135 | 27.482 | 37.868 | 23.869 | 0.00 | 0.00 |
| ATOM | 2085 | HG11 | VAL | X | 135 | 27.336 | 37.377 | 22.907 | 0.00 | 0.00 |
| ATOM | 2086 | HG12 | VAL | X | 135 | 26.559 | 37.703 | 24.424 | 0.00 | 0.00 |
| ATOM | 2087 | HG13 | VAL | X | 135 | 27.569 | 38.931 | 23.647 | 0.00 | 0.00 |
| ATOM | 2088 | CG2  | VAL | X | 135 | 29.105 | 38.342 | 25.882 | 0.00 | 0.00 |
| ATOM | 2089 | HG21 | VAL | X | 135 | 29.331 | 39.342 | 25.512 | 0.00 | 0.00 |
| ATOM | 2090 | HG22 | VAL | X | 135 | 29.964 | 38.016 | 26.469 | 0.00 | 0.00 |
| ATOM | 2091 | HG23 | VAL | X | 135 | 28.224 | 38.455 | 26.515 | 0.00 | 0.00 |
| ATOM | 2092 | C    | VAL | X | 135 | 27.982 | 34.995 | 24.035 | 0.00 | 0.00 |
| ATOM | 2093 | O    | VAL | X | 135 | 26.767 | 34.833 | 23.916 | 0.00 | 0.00 |
| ATOM | 2094 | N    | GLN | X | 136 | 28.791 | 34.373 | 23.160 | 0.00 | 0.00 |
| ATOM | 2095 | H    | GLN | X | 136 | 29.779 | 34.351 | 23.369 | 0.00 | 0.00 |
| ATOM | 2096 | CA   | GLN | X | 136 | 28.408 | 33.540 | 22.003 | 0.00 | 0.00 |
| ATOM | 2097 | HA   | GLN | X | 136 | 27.572 | 34.020 | 21.494 | 0.00 | 0.00 |
| ATOM | 2098 | CB   | GLN | X | 136 | 29.649 | 33.188 | 21.107 | 0.00 | 0.00 |
| ATOM | 2099 | HB2  | GLN | X | 136 | 30.031 | 34.147 | 20.758 | 0.00 | 0.00 |
| ATOM | 2100 | HB3  | GLN | X | 136 | 30.383 | 32.694 | 21.744 | 0.00 | 0.00 |
| ATOM | 2101 | CG   | GLN | X | 136 | 29.197 | 32.343 | 19.883 | 0.00 | 0.00 |
| ATOM | 2102 | HG2  | GLN | X | 136 | 28.118 | 32.185 | 19.904 | 0.00 | 0.00 |
| ATOM | 2103 | HG3  | GLN | X | 136 | 29.355 | 32.757 | 18.887 | 0.00 | 0.00 |
| ATOM | 2104 | CD   | GLN | X | 136 | 29.801 | 30.926 | 19.913 | 0.00 | 0.00 |
| ATOM | 2105 | OE1  | GLN | X | 136 | 30.952 | 30.728 | 19.497 | 0.00 | 0.00 |
| ATOM | 2106 | NE2  | GLN | X | 136 | 29.075 | 29.936 | 20.555 | 0.00 | 0.00 |
| ATOM | 2107 | HE21 | GLN | X | 136 | 29.510 | 29.038 | 20.716 | 0.00 | 0.00 |
| ATOM | 2108 | HE22 | GLN | X | 136 | 28.168 | 30.150 | 20.945 | 0.00 | 0.00 |

|      |      |      |     |   |     |        |        |        |      |      |
|------|------|------|-----|---|-----|--------|--------|--------|------|------|
| ATOM | 2109 | C    | GLN | X | 136 | 27.820 | 32.209 | 22.454 | 0.00 | 0.00 |
| ATOM | 2110 | O    | GLN | X | 136 | 26.844 | 31.736 | 21.868 | 0.00 | 0.00 |
| ATOM | 2111 | N    | ALA | X | 137 | 28.428 | 31.546 | 23.415 | 0.00 | 0.00 |
| ATOM | 2112 | H    | ALA | X | 137 | 29.314 | 31.866 | 23.779 | 0.00 | 0.00 |
| ATOM | 2113 | CA   | ALA | X | 137 | 28.013 | 30.251 | 23.896 | 0.00 | 0.00 |
| ATOM | 2114 | HA   | ALA | X | 137 | 27.690 | 29.620 | 23.068 | 0.00 | 0.00 |
| ATOM | 2115 | CB   | ALA | X | 137 | 29.379 | 29.642 | 24.424 | 0.00 | 0.00 |
| ATOM | 2116 | HB1  | ALA | X | 137 | 29.090 | 28.676 | 24.837 | 0.00 | 0.00 |
| ATOM | 2117 | HB2  | ALA | X | 137 | 29.619 | 30.203 | 25.327 | 0.00 | 0.00 |
| ATOM | 2118 | HB3  | ALA | X | 137 | 30.082 | 29.607 | 23.591 | 0.00 | 0.00 |
| ATOM | 2119 | C    | ALA | X | 137 | 26.915 | 30.257 | 25.067 | 0.00 | 0.00 |
| ATOM | 2120 | O    | ALA | X | 137 | 26.042 | 29.375 | 25.087 | 0.00 | 0.00 |
| ATOM | 2121 | N    | GLU | X | 138 | 26.848 | 31.267 | 25.945 | 0.00 | 0.00 |
| ATOM | 2122 | H    | GLU | X | 138 | 27.699 | 31.795 | 26.074 | 0.00 | 0.00 |
| ATOM | 2123 | CA   | GLU | X | 138 | 25.986 | 31.372 | 27.092 | 0.00 | 0.00 |
| ATOM | 2124 | HA   | GLU | X | 138 | 25.443 | 30.450 | 27.296 | 0.00 | 0.00 |
| ATOM | 2125 | CB   | GLU | X | 138 | 26.882 | 31.843 | 28.321 | 0.00 | 0.00 |
| ATOM | 2126 | HB2  | GLU | X | 138 | 27.311 | 32.839 | 28.209 | 0.00 | 0.00 |
| ATOM | 2127 | HB3  | GLU | X | 138 | 26.354 | 32.145 | 29.226 | 0.00 | 0.00 |
| ATOM | 2128 | CG   | GLU | X | 138 | 27.934 | 30.671 | 28.603 | 0.00 | 0.00 |
| ATOM | 2129 | HG2  | GLU | X | 138 | 28.654 | 30.689 | 27.784 | 0.00 | 0.00 |
| ATOM | 2130 | HG3  | GLU | X | 138 | 28.594 | 31.050 | 29.384 | 0.00 | 0.00 |
| ATOM | 2131 | CD   | GLU | X | 138 | 27.324 | 29.245 | 28.804 | 0.00 | 0.00 |
| ATOM | 2132 | OE1  | GLU | X | 138 | 26.219 | 29.127 | 29.417 | 0.00 | 0.00 |
| ATOM | 2133 | OE2  | GLU | X | 138 | 28.004 | 28.289 | 28.460 | 0.00 | 0.00 |
| ATOM | 2134 | C    | GLU | X | 138 | 24.796 | 32.419 | 26.937 | 0.00 | 0.00 |
| ATOM | 2135 | O    | GLU | X | 138 | 23.911 | 32.483 | 27.825 | 0.00 | 0.00 |
| ATOM | 2136 | N    | ARG | X | 139 | 24.884 | 33.311 | 25.940 | 0.00 | 0.00 |
| ATOM | 2137 | H    | ARG | X | 139 | 25.740 | 33.411 | 25.414 | 0.00 | 0.00 |
| ATOM | 2138 | CA   | ARG | X | 139 | 23.796 | 34.237 | 25.656 | 0.00 | 0.00 |
| ATOM | 2139 | HA   | ARG | X | 139 | 24.227 | 34.959 | 24.963 | 0.00 | 0.00 |
| ATOM | 2140 | CB   | ARG | X | 139 | 22.524 | 33.642 | 25.060 | 0.00 | 0.00 |
| ATOM | 2141 | HB2  | ARG | X | 139 | 21.830 | 33.485 | 25.885 | 0.00 | 0.00 |
| ATOM | 2142 | HB3  | ARG | X | 139 | 21.986 | 34.417 | 24.514 | 0.00 | 0.00 |
| ATOM | 2143 | CG   | ARG | X | 139 | 22.720 | 32.425 | 24.133 | 0.00 | 0.00 |
| ATOM | 2144 | HG2  | ARG | X | 139 | 23.307 | 32.700 | 23.257 | 0.00 | 0.00 |
| ATOM | 2145 | HG3  | ARG | X | 139 | 23.144 | 31.597 | 24.700 | 0.00 | 0.00 |
| ATOM | 2146 | CD   | ARG | X | 139 | 21.525 | 31.733 | 23.471 | 0.00 | 0.00 |
| ATOM | 2147 | HD2  | ARG | X | 139 | 21.801 | 31.039 | 22.677 | 0.00 | 0.00 |
| ATOM | 2148 | HD3  | ARG | X | 139 | 21.036 | 31.132 | 24.238 | 0.00 | 0.00 |
| ATOM | 2149 | NE   | ARG | X | 139 | 20.571 | 32.645 | 22.858 | 0.00 | 0.00 |
| ATOM | 2150 | HE   | ARG | X | 139 | 19.711 | 32.710 | 23.384 | 0.00 | 0.00 |
| ATOM | 2151 | CZ   | ARG | X | 139 | 20.725 | 33.387 | 21.807 | 0.00 | 0.00 |
| ATOM | 2152 | NH1  | ARG | X | 139 | 21.809 | 33.295 | 21.110 | 0.00 | 0.00 |
| ATOM | 2153 | HH11 | ARG | X | 139 | 22.540 | 32.626 | 21.310 | 0.00 | 0.00 |
| ATOM | 2154 | HH12 | ARG | X | 139 | 21.768 | 33.711 | 20.191 | 0.00 | 0.00 |
| ATOM | 2155 | NH2  | ARG | X | 139 | 19.800 | 34.178 | 21.400 | 0.00 | 0.00 |
| ATOM | 2156 | HH21 | ARG | X | 139 | 18.945 | 34.224 | 21.935 | 0.00 | 0.00 |
| ATOM | 2157 | HH22 | ARG | X | 139 | 19.942 | 34.772 | 20.595 | 0.00 | 0.00 |
| ATOM | 2158 | C    | ARG | X | 139 | 23.543 | 35.211 | 26.844 | 0.00 | 0.00 |
| ATOM | 2159 | O    | ARG | X | 139 | 22.544 | 35.961 | 26.784 | 0.00 | 0.00 |
| ATOM | 2160 | N    | THR | X | 140 | 24.451 | 35.321 | 27.791 | 0.00 | 0.00 |
| ATOM | 2161 | H    | THR | X | 140 | 25.275 | 34.759 | 27.636 | 0.00 | 0.00 |
| ATOM | 2162 | CA   | THR | X | 140 | 24.666 | 36.382 | 28.810 | 0.00 | 0.00 |
| ATOM | 2163 | HA   | THR | X | 140 | 23.663 | 36.745 | 29.037 | 0.00 | 0.00 |
| ATOM | 2164 | CB   | THR | X | 140 | 25.345 | 35.884 | 30.049 | 0.00 | 0.00 |
| ATOM | 2165 | HB   | THR | X | 140 | 25.381 | 36.709 | 30.761 | 0.00 | 0.00 |
| ATOM | 2166 | CG2  | THR | X | 140 | 24.464 | 34.715 | 30.617 | 0.00 | 0.00 |
| ATOM | 2167 | HG21 | THR | X | 140 | 23.415 | 34.929 | 30.415 | 0.00 | 0.00 |
| ATOM | 2168 | HG22 | THR | X | 140 | 24.544 | 34.704 | 31.704 | 0.00 | 0.00 |
| ATOM | 2169 | HG23 | THR | X | 140 | 24.687 | 33.721 | 30.229 | 0.00 | 0.00 |
| ATOM | 2170 | OG1  | THR | X | 140 | 26.623 | 35.409 | 29.682 | 0.00 | 0.00 |
| ATOM | 2171 | HG1  | THR | X | 140 | 27.145 | 36.133 | 29.330 | 0.00 | 0.00 |
| ATOM | 2172 | C    | THR | X | 140 | 25.473 | 37.541 | 28.190 | 0.00 | 0.00 |
| ATOM | 2173 | O    | THR | X | 140 | 26.506 | 37.278 | 27.623 | 0.00 | 0.00 |
| ATOM | 2174 | N    | VAL | X | 141 | 25.117 | 38.793 | 28.544 | 0.00 | 0.00 |
| ATOM | 2175 | H    | VAL | X | 141 | 24.500 | 38.967 | 29.325 | 0.00 | 0.00 |

|      |      |      |     |   |     |        |        |        |      |      |
|------|------|------|-----|---|-----|--------|--------|--------|------|------|
| ATOM | 2176 | CA   | VAL | X | 141 | 25.831 | 40.006 | 28.155 | 0.00 | 0.00 |
| ATOM | 2177 | HA   | VAL | X | 141 | 26.109 | 40.058 | 27.102 | 0.00 | 0.00 |
| ATOM | 2178 | CB   | VAL | X | 141 | 24.852 | 41.195 | 28.417 | 0.00 | 0.00 |
| ATOM | 2179 | HB   | VAL | X | 141 | 24.362 | 40.976 | 29.366 | 0.00 | 0.00 |
| ATOM | 2180 | CG1  | VAL | X | 141 | 25.532 | 42.574 | 28.641 | 0.00 | 0.00 |
| ATOM | 2181 | HG11 | VAL | X | 141 | 26.163 | 42.930 | 27.827 | 0.00 | 0.00 |
| ATOM | 2182 | HG12 | VAL | X | 141 | 24.683 | 43.250 | 28.738 | 0.00 | 0.00 |
| ATOM | 2183 | HG13 | VAL | X | 141 | 26.052 | 42.537 | 29.598 | 0.00 | 0.00 |
| ATOM | 2184 | CG2  | VAL | X | 141 | 23.793 | 41.410 | 27.350 | 0.00 | 0.00 |
| ATOM | 2185 | HG21 | VAL | X | 141 | 23.360 | 40.449 | 27.072 | 0.00 | 0.00 |
| ATOM | 2186 | HG22 | VAL | X | 141 | 24.229 | 41.716 | 26.399 | 0.00 | 0.00 |
| ATOM | 2187 | HG23 | VAL | X | 141 | 23.049 | 42.162 | 27.611 | 0.00 | 0.00 |
| ATOM | 2188 | C    | VAL | X | 141 | 27.066 | 40.202 | 29.082 | 0.00 | 0.00 |
| ATOM | 2189 | O    | VAL | X | 141 | 27.065 | 39.848 | 30.255 | 0.00 | 0.00 |
| ATOM | 2190 | N    | LEU | X | 142 | 28.103 | 40.790 | 28.504 | 0.00 | 0.00 |
| ATOM | 2191 | H    | LEU | X | 142 | 28.053 | 41.051 | 27.530 | 0.00 | 0.00 |
| ATOM | 2192 | CA   | LEU | X | 142 | 29.192 | 41.306 | 29.334 | 0.00 | 0.00 |
| ATOM | 2193 | HA   | LEU | X | 142 | 29.065 | 41.199 | 30.411 | 0.00 | 0.00 |
| ATOM | 2194 | CB   | LEU | X | 142 | 30.461 | 40.455 | 29.050 | 0.00 | 0.00 |
| ATOM | 2195 | HB2  | LEU | X | 142 | 30.311 | 39.416 | 29.344 | 0.00 | 0.00 |
| ATOM | 2196 | HB3  | LEU | X | 142 | 30.673 | 40.441 | 27.981 | 0.00 | 0.00 |
| ATOM | 2197 | CG   | LEU | X | 142 | 31.756 | 40.930 | 29.726 | 0.00 | 0.00 |
| ATOM | 2198 | HG   | LEU | X | 142 | 31.504 | 41.338 | 30.705 | 0.00 | 0.00 |
| ATOM | 2199 | CD1  | LEU | X | 142 | 32.624 | 39.702 | 30.030 | 0.00 | 0.00 |
| ATOM | 2200 | HD11 | LEU | X | 142 | 32.111 | 39.095 | 30.776 | 0.00 | 0.00 |
| ATOM | 2201 | HD12 | LEU | X | 142 | 33.557 | 39.939 | 30.541 | 0.00 | 0.00 |
| ATOM | 2202 | HD13 | LEU | X | 142 | 32.862 | 39.122 | 29.138 | 0.00 | 0.00 |
| ATOM | 2203 | CD2  | LEU | X | 142 | 32.640 | 42.019 | 28.996 | 0.00 | 0.00 |
| ATOM | 2204 | HD21 | LEU | X | 142 | 32.172 | 43.001 | 28.926 | 0.00 | 0.00 |
| ATOM | 2205 | HD22 | LEU | X | 142 | 33.579 | 42.141 | 29.536 | 0.00 | 0.00 |
| ATOM | 2206 | HD23 | LEU | X | 142 | 32.962 | 41.725 | 27.997 | 0.00 | 0.00 |
| ATOM | 2207 | C    | LEU | X | 142 | 29.430 | 42.775 | 28.997 | 0.00 | 0.00 |
| ATOM | 2208 | O    | LEU | X | 142 | 29.487 | 43.181 | 27.842 | 0.00 | 0.00 |
| ATOM | 2209 | N    | VAL | X | 143 | 29.365 | 43.607 | 29.986 | 0.00 | 0.00 |
| ATOM | 2210 | H    | VAL | X | 143 | 29.221 | 43.174 | 30.887 | 0.00 | 0.00 |
| ATOM | 2211 | CA   | VAL | X | 143 | 29.880 | 45.017 | 30.055 | 0.00 | 0.00 |
| ATOM | 2212 | HA   | VAL | X | 143 | 29.818 | 45.434 | 29.050 | 0.00 | 0.00 |
| ATOM | 2213 | CB   | VAL | X | 143 | 28.968 | 45.834 | 31.068 | 0.00 | 0.00 |
| ATOM | 2214 | HB   | VAL | X | 143 | 28.873 | 45.269 | 31.995 | 0.00 | 0.00 |
| ATOM | 2215 | CG1  | VAL | X | 143 | 29.525 | 47.210 | 31.571 | 0.00 | 0.00 |
| ATOM | 2216 | HG11 | VAL | X | 143 | 28.871 | 47.541 | 32.379 | 0.00 | 0.00 |
| ATOM | 2217 | HG12 | VAL | X | 143 | 30.486 | 47.051 | 32.062 | 0.00 | 0.00 |
| ATOM | 2218 | HG13 | VAL | X | 143 | 29.653 | 47.889 | 30.729 | 0.00 | 0.00 |
| ATOM | 2219 | CG2  | VAL | X | 143 | 27.494 | 46.016 | 30.576 | 0.00 | 0.00 |
| ATOM | 2220 | HG21 | VAL | X | 143 | 27.025 | 46.663 | 31.317 | 0.00 | 0.00 |
| ATOM | 2221 | HG22 | VAL | X | 143 | 26.962 | 45.065 | 30.552 | 0.00 | 0.00 |
| ATOM | 2222 | HG23 | VAL | X | 143 | 27.518 | 46.552 | 29.627 | 0.00 | 0.00 |
| ATOM | 2223 | C    | VAL | X | 143 | 31.283 | 45.008 | 30.581 | 0.00 | 0.00 |
| ATOM | 2224 | O    | VAL | X | 143 | 31.616 | 44.258 | 31.489 | 0.00 | 0.00 |
| ATOM | 2225 | N    | SER | X | 144 | 32.131 | 45.819 | 29.987 | 0.00 | 0.00 |
| ATOM | 2226 | H    | SER | X | 144 | 31.908 | 46.400 | 29.191 | 0.00 | 0.00 |
| ATOM | 2227 | CA   | SER | X | 144 | 33.346 | 46.257 | 30.757 | 0.00 | 0.00 |
| ATOM | 2228 | HA   | SER | X | 144 | 33.295 | 46.063 | 31.828 | 0.00 | 0.00 |
| ATOM | 2229 | CB   | SER | X | 144 | 34.591 | 45.502 | 30.226 | 0.00 | 0.00 |
| ATOM | 2230 | HB2  | SER | X | 144 | 35.263 | 45.408 | 31.079 | 0.00 | 0.00 |
| ATOM | 2231 | HB3  | SER | X | 144 | 34.333 | 44.495 | 29.898 | 0.00 | 0.00 |
| ATOM | 2232 | OG   | SER | X | 144 | 35.191 | 46.163 | 29.184 | 0.00 | 0.00 |
| ATOM | 2233 | HG   | SER | X | 144 | 35.984 | 45.685 | 28.929 | 0.00 | 0.00 |
| ATOM | 2234 | C    | SER | X | 144 | 33.549 | 47.765 | 30.660 | 0.00 | 0.00 |
| ATOM | 2235 | O    | SER | X | 144 | 32.733 | 48.493 | 30.090 | 0.00 | 0.00 |
| ATOM | 2236 | N    | MET | X | 145 | 34.691 | 48.262 | 31.207 | 0.00 | 0.00 |
| ATOM | 2237 | H    | MET | X | 145 | 35.345 | 47.525 | 31.425 | 0.00 | 0.00 |
| ATOM | 2238 | CA   | MET | X | 145 | 34.918 | 49.705 | 31.390 | 0.00 | 0.00 |
| ATOM | 2239 | HA   | MET | X | 145 | 34.671 | 50.129 | 30.416 | 0.00 | 0.00 |
| ATOM | 2240 | CB   | MET | X | 145 | 33.830 | 50.337 | 32.338 | 0.00 | 0.00 |
| ATOM | 2241 | HB2  | MET | X | 145 | 34.119 | 51.309 | 32.739 | 0.00 | 0.00 |
| ATOM | 2242 | HB3  | MET | X | 145 | 32.852 | 50.446 | 31.869 | 0.00 | 0.00 |

|      |      |      |     |   |     |        |        |        |      |      |
|------|------|------|-----|---|-----|--------|--------|--------|------|------|
| ATOM | 2243 | CG   | MET | X | 145 | 33.684 | 49.370 | 33.517 | 0.00 | 0.00 |
| ATOM | 2244 | HG2  | MET | X | 145 | 32.952 | 48.614 | 33.234 | 0.00 | 0.00 |
| ATOM | 2245 | HG3  | MET | X | 145 | 34.583 | 48.845 | 33.840 | 0.00 | 0.00 |
| ATOM | 2246 | SD   | MET | X | 145 | 33.236 | 50.292 | 35.009 | 0.00 | 0.00 |
| ATOM | 2247 | CE   | MET | X | 145 | 32.954 | 48.838 | 36.059 | 0.00 | 0.00 |
| ATOM | 2248 | HE1  | MET | X | 145 | 32.026 | 48.345 | 35.772 | 0.00 | 0.00 |
| ATOM | 2249 | HE2  | MET | X | 145 | 33.813 | 48.167 | 36.063 | 0.00 | 0.00 |
| ATOM | 2250 | HE3  | MET | X | 145 | 32.871 | 49.212 | 37.080 | 0.00 | 0.00 |
| ATOM | 2251 | C    | MET | X | 145 | 36.343 | 49.995 | 31.764 | 0.00 | 0.00 |
| ATOM | 2252 | O    | MET | X | 145 | 37.062 | 49.183 | 32.323 | 0.00 | 0.00 |
| ATOM | 2253 | N    | ASN | X | 146 | 36.768 | 51.262 | 31.612 | 0.00 | 0.00 |
| ATOM | 2254 | H    | ASN | X | 146 | 36.160 | 51.936 | 31.170 | 0.00 | 0.00 |
| ATOM | 2255 | CA   | ASN | X | 146 | 37.991 | 51.840 | 32.195 | 0.00 | 0.00 |
| ATOM | 2256 | HA   | ASN | X | 146 | 38.705 | 51.041 | 32.396 | 0.00 | 0.00 |
| ATOM | 2257 | CB   | ASN | X | 146 | 38.658 | 52.817 | 31.254 | 0.00 | 0.00 |
| ATOM | 2258 | HB2  | ASN | X | 146 | 37.976 | 53.581 | 30.882 | 0.00 | 0.00 |
| ATOM | 2259 | HB3  | ASN | X | 146 | 39.345 | 53.427 | 31.841 | 0.00 | 0.00 |
| ATOM | 2260 | CG   | ASN | X | 146 | 39.546 | 52.132 | 30.109 | 0.00 | 0.00 |
| ATOM | 2261 | OD1  | ASN | X | 146 | 39.847 | 50.967 | 30.101 | 0.00 | 0.00 |
| ATOM | 2262 | ND2  | ASN | X | 146 | 39.813 | 52.899 | 29.072 | 0.00 | 0.00 |
| ATOM | 2263 | HD21 | ASN | X | 146 | 40.651 | 52.686 | 28.551 | 0.00 | 0.00 |
| ATOM | 2264 | HD22 | ASN | X | 146 | 39.358 | 53.796 | 28.983 | 0.00 | 0.00 |
| ATOM | 2265 | C    | ASN | X | 146 | 37.671 | 52.688 | 33.496 | 0.00 | 0.00 |
| ATOM | 2266 | O    | ASN | X | 146 | 36.800 | 53.573 | 33.497 | 0.00 | 0.00 |
| ATOM | 2267 | N    | TYR | X | 147 | 38.444 | 52.463 | 34.520 | 0.00 | 0.00 |
| ATOM | 2268 | H    | TYR | X | 147 | 39.198 | 51.791 | 34.521 | 0.00 | 0.00 |
| ATOM | 2269 | CA   | TYR | X | 147 | 38.529 | 53.418 | 35.701 | 0.00 | 0.00 |
| ATOM | 2270 | HA   | TYR | X | 147 | 37.929 | 54.309 | 35.513 | 0.00 | 0.00 |
| ATOM | 2271 | CB   | TYR | X | 147 | 37.828 | 52.759 | 36.933 | 0.00 | 0.00 |
| ATOM | 2272 | HB2  | TYR | X | 147 | 37.794 | 53.504 | 37.728 | 0.00 | 0.00 |
| ATOM | 2273 | HB3  | TYR | X | 147 | 36.810 | 52.457 | 36.688 | 0.00 | 0.00 |
| ATOM | 2274 | CG   | TYR | X | 147 | 38.659 | 51.587 | 37.336 | 0.00 | 0.00 |
| ATOM | 2275 | CD1  | TYR | X | 147 | 38.419 | 50.312 | 36.786 | 0.00 | 0.00 |
| ATOM | 2276 | HD1  | TYR | X | 147 | 37.621 | 50.106 | 36.088 | 0.00 | 0.00 |
| ATOM | 2277 | CE1  | TYR | X | 147 | 39.240 | 49.262 | 37.207 | 0.00 | 0.00 |
| ATOM | 2278 | HE1  | TYR | X | 147 | 39.184 | 48.283 | 36.755 | 0.00 | 0.00 |
| ATOM | 2279 | CZ   | TYR | X | 147 | 40.430 | 49.521 | 37.983 | 0.00 | 0.00 |
| ATOM | 2280 | OH   | TYR | X | 147 | 41.434 | 48.563 | 38.200 | 0.00 | 0.00 |
| ATOM | 2281 | HH   | TYR | X | 147 | 42.226 | 48.963 | 38.567 | 0.00 | 0.00 |
| ATOM | 2282 | CE2  | TYR | X | 147 | 40.624 | 50.805 | 38.556 | 0.00 | 0.00 |
| ATOM | 2283 | HE2  | TYR | X | 147 | 41.492 | 51.123 | 39.114 | 0.00 | 0.00 |
| ATOM | 2284 | CD2  | TYR | X | 147 | 39.709 | 51.840 | 38.223 | 0.00 | 0.00 |
| ATOM | 2285 | HD2  | TYR | X | 147 | 39.878 | 52.846 | 38.577 | 0.00 | 0.00 |
| ATOM | 2286 | C    | TYR | X | 147 | 39.946 | 53.999 | 35.781 | 0.00 | 0.00 |
| ATOM | 2287 | O    | TYR | X | 147 | 40.959 | 53.313 | 35.458 | 0.00 | 0.00 |
| ATOM | 2288 | N    | ARG | X | 148 | 40.066 | 55.268 | 36.305 | 0.00 | 0.00 |
| ATOM | 2289 | H    | ARG | X | 148 | 39.232 | 55.813 | 36.473 | 0.00 | 0.00 |
| ATOM | 2290 | CA   | ARG | X | 148 | 41.296 | 55.966 | 36.627 | 0.00 | 0.00 |
| ATOM | 2291 | HA   | ARG | X | 148 | 41.763 | 56.013 | 35.643 | 0.00 | 0.00 |
| ATOM | 2292 | CB   | ARG | X | 148 | 40.972 | 57.354 | 37.153 | 0.00 | 0.00 |
| ATOM | 2293 | HB2  | ARG | X | 148 | 40.261 | 57.320 | 37.978 | 0.00 | 0.00 |
| ATOM | 2294 | HB3  | ARG | X | 148 | 41.923 | 57.664 | 37.585 | 0.00 | 0.00 |
| ATOM | 2295 | CG   | ARG | X | 148 | 40.434 | 58.357 | 36.092 | 0.00 | 0.00 |
| ATOM | 2296 | HG2  | ARG | X | 148 | 41.288 | 58.455 | 35.421 | 0.00 | 0.00 |
| ATOM | 2297 | HG3  | ARG | X | 148 | 39.517 | 57.940 | 35.675 | 0.00 | 0.00 |
| ATOM | 2298 | CD   | ARG | X | 148 | 40.143 | 59.633 | 36.839 | 0.00 | 0.00 |
| ATOM | 2299 | HD2  | ARG | X | 148 | 40.921 | 59.805 | 37.582 | 0.00 | 0.00 |
| ATOM | 2300 | HD3  | ARG | X | 148 | 40.151 | 60.326 | 35.998 | 0.00 | 0.00 |
| ATOM | 2301 | NE   | ARG | X | 148 | 38.834 | 59.638 | 37.588 | 0.00 | 0.00 |
| ATOM | 2302 | HE   | ARG | X | 148 | 38.301 | 58.786 | 37.483 | 0.00 | 0.00 |
| ATOM | 2303 | CZ   | ARG | X | 148 | 38.352 | 60.713 | 38.281 | 0.00 | 0.00 |
| ATOM | 2304 | NH1  | ARG | X | 148 | 38.968 | 61.858 | 38.395 | 0.00 | 0.00 |
| ATOM | 2305 | HH11 | ARG | X | 148 | 39.907 | 62.037 | 38.068 | 0.00 | 0.00 |
| ATOM | 2306 | HH12 | ARG | X | 148 | 38.648 | 62.511 | 39.096 | 0.00 | 0.00 |
| ATOM | 2307 | NH2  | ARG | X | 148 | 37.225 | 60.570 | 38.889 | 0.00 | 0.00 |
| ATOM | 2308 | HH21 | ARG | X | 148 | 36.676 | 59.732 | 38.766 | 0.00 | 0.00 |
| ATOM | 2309 | HH22 | ARG | X | 148 | 36.937 | 61.342 | 39.474 | 0.00 | 0.00 |

|      |      |      |     |   |     |        |        |        |      |      |
|------|------|------|-----|---|-----|--------|--------|--------|------|------|
| ATOM | 2310 | C    | ARG | X | 148 | 42.189 | 55.159 | 37.665 | 0.00 | 0.00 |
| ATOM | 2311 | O    | ARG | X | 148 | 41.572 | 54.698 | 38.619 | 0.00 | 0.00 |
| ATOM | 2312 | N    | VAL | X | 149 | 43.499 | 54.926 | 37.364 | 0.00 | 0.00 |
| ATOM | 2313 | H    | VAL | X | 149 | 43.914 | 55.556 | 36.692 | 0.00 | 0.00 |
| ATOM | 2314 | CA   | VAL | X | 149 | 44.416 | 54.054 | 38.046 | 0.00 | 0.00 |
| ATOM | 2315 | HA   | VAL | X | 149 | 43.914 | 53.543 | 38.869 | 0.00 | 0.00 |
| ATOM | 2316 | CB   | VAL | X | 149 | 44.908 | 52.805 | 37.178 | 0.00 | 0.00 |
| ATOM | 2317 | HB   | VAL | X | 149 | 45.673 | 52.204 | 37.671 | 0.00 | 0.00 |
| ATOM | 2318 | CG1  | VAL | X | 149 | 43.856 | 51.689 | 37.105 | 0.00 | 0.00 |
| ATOM | 2319 | HG11 | VAL | X | 149 | 43.511 | 51.428 | 38.105 | 0.00 | 0.00 |
| ATOM | 2320 | HG12 | VAL | X | 149 | 42.973 | 52.055 | 36.581 | 0.00 | 0.00 |
| ATOM | 2321 | HG13 | VAL | X | 149 | 44.256 | 50.822 | 36.577 | 0.00 | 0.00 |
| ATOM | 2322 | CG2  | VAL | X | 149 | 45.470 | 53.233 | 35.835 | 0.00 | 0.00 |
| ATOM | 2323 | HG21 | VAL | X | 149 | 46.253 | 53.966 | 36.029 | 0.00 | 0.00 |
| ATOM | 2324 | HG22 | VAL | X | 149 | 44.736 | 53.634 | 35.135 | 0.00 | 0.00 |
| ATOM | 2325 | HG23 | VAL | X | 149 | 45.855 | 52.360 | 35.307 | 0.00 | 0.00 |
| ATOM | 2326 | C    | VAL | X | 149 | 45.547 | 54.862 | 38.681 | 0.00 | 0.00 |
| ATOM | 2327 | O    | VAL | X | 149 | 45.740 | 56.070 | 38.407 | 0.00 | 0.00 |
| ATOM | 2328 | N    | GLY | X | 150 | 46.254 | 54.230 | 39.629 | 0.00 | 0.00 |
| ATOM | 2329 | H    | GLY | X | 150 | 46.107 | 53.231 | 39.672 | 0.00 | 0.00 |
| ATOM | 2330 | CA   | GLY | X | 150 | 47.332 | 54.788 | 40.385 | 0.00 | 0.00 |
| ATOM | 2331 | HA2  | GLY | X | 150 | 47.461 | 54.012 | 41.140 | 0.00 | 0.00 |
| ATOM | 2332 | HA3  | GLY | X | 150 | 48.205 | 55.084 | 39.804 | 0.00 | 0.00 |
| ATOM | 2333 | C    | GLY | X | 150 | 46.892 | 56.089 | 41.101 | 0.00 | 0.00 |
| ATOM | 2334 | O    | GLY | X | 150 | 45.763 | 56.226 | 41.526 | 0.00 | 0.00 |
| ATOM | 2335 | N    | ALA | X | 151 | 47.815 | 57.019 | 41.124 | 0.00 | 0.00 |
| ATOM | 2336 | H    | ALA | X | 151 | 48.694 | 56.823 | 40.666 | 0.00 | 0.00 |
| ATOM | 2337 | CA   | ALA | X | 151 | 47.624 | 58.403 | 41.778 | 0.00 | 0.00 |
| ATOM | 2338 | HA   | ALA | X | 151 | 47.475 | 58.213 | 42.840 | 0.00 | 0.00 |
| ATOM | 2339 | CB   | ALA | X | 151 | 48.920 | 59.173 | 41.556 | 0.00 | 0.00 |
| ATOM | 2340 | HB1  | ALA | X | 151 | 49.703 | 58.584 | 42.035 | 0.00 | 0.00 |
| ATOM | 2341 | HB2  | ALA | X | 151 | 48.827 | 60.186 | 41.946 | 0.00 | 0.00 |
| ATOM | 2342 | HB3  | ALA | X | 151 | 49.073 | 59.379 | 40.497 | 0.00 | 0.00 |
| ATOM | 2343 | C    | ALA | X | 151 | 46.341 | 59.070 | 41.214 | 0.00 | 0.00 |
| ATOM | 2344 | O    | ALA | X | 151 | 45.498 | 59.620 | 41.946 | 0.00 | 0.00 |
| ATOM | 2345 | N    | PHE | X | 152 | 46.025 | 58.876 | 39.881 | 0.00 | 0.00 |
| ATOM | 2346 | H    | PHE | X | 152 | 46.703 | 58.411 | 39.295 | 0.00 | 0.00 |
| ATOM | 2347 | CA   | PHE | X | 152 | 44.827 | 59.508 | 39.295 | 0.00 | 0.00 |
| ATOM | 2348 | HA   | PHE | X | 152 | 44.749 | 60.589 | 39.407 | 0.00 | 0.00 |
| ATOM | 2349 | CB   | PHE | X | 152 | 44.870 | 59.226 | 37.792 | 0.00 | 0.00 |
| ATOM | 2350 | HB2  | PHE | X | 152 | 45.908 | 59.465 | 37.561 | 0.00 | 0.00 |
| ATOM | 2351 | HB3  | PHE | X | 152 | 44.690 | 58.160 | 37.647 | 0.00 | 0.00 |
| ATOM | 2352 | CG   | PHE | X | 152 | 43.968 | 60.010 | 36.791 | 0.00 | 0.00 |
| ATOM | 2353 | CD1  | PHE | X | 152 | 43.852 | 59.552 | 35.510 | 0.00 | 0.00 |
| ATOM | 2354 | HD1  | PHE | X | 152 | 44.311 | 58.594 | 35.316 | 0.00 | 0.00 |
| ATOM | 2355 | CE1  | PHE | X | 152 | 43.146 | 60.234 | 34.486 | 0.00 | 0.00 |
| ATOM | 2356 | HE1  | PHE | X | 152 | 43.080 | 59.960 | 33.443 | 0.00 | 0.00 |
| ATOM | 2357 | CZ   | PHE | X | 152 | 42.647 | 61.501 | 34.778 | 0.00 | 0.00 |
| ATOM | 2358 | HZ   | PHE | X | 152 | 42.085 | 62.021 | 34.016 | 0.00 | 0.00 |
| ATOM | 2359 | CE2  | PHE | X | 152 | 42.764 | 62.057 | 36.078 | 0.00 | 0.00 |
| ATOM | 2360 | HE2  | PHE | X | 152 | 42.300 | 63.018 | 36.246 | 0.00 | 0.00 |
| ATOM | 2361 | CD2  | PHE | X | 152 | 43.360 | 61.286 | 37.108 | 0.00 | 0.00 |
| ATOM | 2362 | HD2  | PHE | X | 152 | 43.525 | 61.666 | 38.105 | 0.00 | 0.00 |
| ATOM | 2363 | C    | PHE | X | 152 | 43.489 | 58.987 | 39.866 | 0.00 | 0.00 |
| ATOM | 2364 | O    | PHE | X | 152 | 42.473 | 59.691 | 39.823 | 0.00 | 0.00 |
| ATOM | 2365 | N    | GLY | X | 153 | 43.597 | 57.880 | 40.540 | 0.00 | 0.00 |
| ATOM | 2366 | H    | GLY | X | 153 | 44.454 | 57.349 | 40.474 | 0.00 | 0.00 |
| ATOM | 2367 | CA   | GLY | X | 153 | 42.447 | 57.165 | 41.029 | 0.00 | 0.00 |
| ATOM | 2368 | HA2  | GLY | X | 153 | 41.506 | 57.640 | 40.749 | 0.00 | 0.00 |
| ATOM | 2369 | HA3  | GLY | X | 153 | 42.293 | 56.168 | 40.618 | 0.00 | 0.00 |
| ATOM | 2370 | C    | GLY | X | 153 | 42.377 | 57.062 | 42.559 | 0.00 | 0.00 |
| ATOM | 2371 | O    | GLY | X | 153 | 41.293 | 56.858 | 43.147 | 0.00 | 0.00 |
| ATOM | 2372 | N    | PHE | X | 154 | 43.482 | 57.346 | 43.240 | 0.00 | 0.00 |
| ATOM | 2373 | H    | PHE | X | 154 | 44.337 | 57.488 | 42.720 | 0.00 | 0.00 |
| ATOM | 2374 | CA   | PHE | X | 154 | 43.642 | 56.893 | 44.643 | 0.00 | 0.00 |
| ATOM | 2375 | HA   | PHE | X | 154 | 42.649 | 56.930 | 45.092 | 0.00 | 0.00 |
| ATOM | 2376 | CB   | PHE | X | 154 | 44.184 | 55.428 | 44.626 | 0.00 | 0.00 |

|      |      |      |     |   |     |        |        |        |      |      |
|------|------|------|-----|---|-----|--------|--------|--------|------|------|
| ATOM | 2377 | HB2  | PHE | X | 154 | 44.947 | 55.432 | 43.847 | 0.00 | 0.00 |
| ATOM | 2378 | HB3  | PHE | X | 154 | 44.590 | 55.173 | 45.605 | 0.00 | 0.00 |
| ATOM | 2379 | CG   | PHE | X | 154 | 43.206 | 54.279 | 44.281 | 0.00 | 0.00 |
| ATOM | 2380 | CD1  | PHE | X | 154 | 43.111 | 53.644 | 43.015 | 0.00 | 0.00 |
| ATOM | 2381 | HD1  | PHE | X | 154 | 43.852 | 53.864 | 42.260 | 0.00 | 0.00 |
| ATOM | 2382 | CE1  | PHE | X | 154 | 42.014 | 52.830 | 42.730 | 0.00 | 0.00 |
| ATOM | 2383 | HE1  | PHE | X | 154 | 41.917 | 52.401 | 41.743 | 0.00 | 0.00 |
| ATOM | 2384 | CZ   | PHE | X | 154 | 41.090 | 52.499 | 43.712 | 0.00 | 0.00 |
| ATOM | 2385 | HZ   | PHE | X | 154 | 40.199 | 51.941 | 43.467 | 0.00 | 0.00 |
| ATOM | 2386 | CE2  | PHE | X | 154 | 41.291 | 52.999 | 45.021 | 0.00 | 0.00 |
| ATOM | 2387 | HE2  | PHE | X | 154 | 40.529 | 52.817 | 45.764 | 0.00 | 0.00 |
| ATOM | 2388 | CD2  | PHE | X | 154 | 42.312 | 53.906 | 45.300 | 0.00 | 0.00 |
| ATOM | 2389 | HD2  | PHE | X | 154 | 42.333 | 54.321 | 46.297 | 0.00 | 0.00 |
| ATOM | 2390 | C    | PHE | X | 154 | 44.438 | 57.859 | 45.551 | 0.00 | 0.00 |
| ATOM | 2391 | O    | PHE | X | 154 | 44.362 | 57.729 | 46.737 | 0.00 | 0.00 |
| ATOM | 2392 | N    | LEU | X | 155 | 45.062 | 58.910 | 45.013 | 0.00 | 0.00 |
| ATOM | 2393 | H    | LEU | X | 155 | 45.012 | 58.983 | 44.007 | 0.00 | 0.00 |
| ATOM | 2394 | CA   | LEU | X | 155 | 45.852 | 59.960 | 45.707 | 0.00 | 0.00 |
| ATOM | 2395 | HA   | LEU | X | 155 | 46.487 | 59.538 | 46.486 | 0.00 | 0.00 |
| ATOM | 2396 | CB   | LEU | X | 155 | 46.720 | 60.797 | 44.771 | 0.00 | 0.00 |
| ATOM | 2397 | HB2  | LEU | X | 155 | 47.345 | 60.005 | 44.359 | 0.00 | 0.00 |
| ATOM | 2398 | HB3  | LEU | X | 155 | 46.150 | 61.119 | 43.899 | 0.00 | 0.00 |
| ATOM | 2399 | CG   | LEU | X | 155 | 47.556 | 61.988 | 45.280 | 0.00 | 0.00 |
| ATOM | 2400 | HG   | LEU | X | 155 | 47.962 | 61.832 | 46.280 | 0.00 | 0.00 |
| ATOM | 2401 | CD1  | LEU | X | 155 | 48.766 | 62.105 | 44.306 | 0.00 | 0.00 |
| ATOM | 2402 | HD11 | LEU | X | 155 | 49.450 | 62.926 | 44.518 | 0.00 | 0.00 |
| ATOM | 2403 | HD12 | LEU | X | 155 | 48.412 | 62.271 | 43.288 | 0.00 | 0.00 |
| ATOM | 2404 | HD13 | LEU | X | 155 | 49.322 | 61.168 | 44.281 | 0.00 | 0.00 |
| ATOM | 2405 | CD2  | LEU | X | 155 | 46.834 | 63.315 | 45.125 | 0.00 | 0.00 |
| ATOM | 2406 | HD21 | LEU | X | 155 | 46.409 | 63.363 | 44.123 | 0.00 | 0.00 |
| ATOM | 2407 | HD22 | LEU | X | 155 | 46.056 | 63.358 | 45.888 | 0.00 | 0.00 |
| ATOM | 2408 | HD23 | LEU | X | 155 | 47.441 | 64.190 | 45.359 | 0.00 | 0.00 |
| ATOM | 2409 | C    | LEU | X | 155 | 44.834 | 60.885 | 46.495 | 0.00 | 0.00 |
| ATOM | 2410 | O    | LEU | X | 155 | 43.838 | 61.420 | 46.001 | 0.00 | 0.00 |
| ATOM | 2411 | N    | ALA | X | 156 | 45.237 | 61.088 | 47.740 | 0.00 | 0.00 |
| ATOM | 2412 | H    | ALA | X | 156 | 46.114 | 60.717 | 48.076 | 0.00 | 0.00 |
| ATOM | 2413 | CA   | ALA | X | 156 | 44.605 | 61.972 | 48.726 | 0.00 | 0.00 |
| ATOM | 2414 | HA   | ALA | X | 156 | 43.833 | 62.629 | 48.324 | 0.00 | 0.00 |
| ATOM | 2415 | CB   | ALA | X | 156 | 43.967 | 61.177 | 49.880 | 0.00 | 0.00 |
| ATOM | 2416 | HB1  | ALA | X | 156 | 43.222 | 60.476 | 49.502 | 0.00 | 0.00 |
| ATOM | 2417 | HB2  | ALA | X | 156 | 43.474 | 61.878 | 50.552 | 0.00 | 0.00 |
| ATOM | 2418 | HB3  | ALA | X | 156 | 44.707 | 60.672 | 50.501 | 0.00 | 0.00 |
| ATOM | 2419 | C    | ALA | X | 156 | 45.632 | 63.001 | 49.217 | 0.00 | 0.00 |
| ATOM | 2420 | O    | ALA | X | 156 | 46.793 | 62.612 | 49.431 | 0.00 | 0.00 |
| ATOM | 2421 | N    | LEU | X | 157 | 45.223 | 64.186 | 49.683 | 0.00 | 0.00 |
| ATOM | 2422 | H    | LEU | X | 157 | 44.232 | 64.313 | 49.831 | 0.00 | 0.00 |
| ATOM | 2423 | CA   | LEU | X | 157 | 46.167 | 65.020 | 50.421 | 0.00 | 0.00 |
| ATOM | 2424 | HA   | LEU | X | 157 | 46.867 | 64.388 | 50.968 | 0.00 | 0.00 |
| ATOM | 2425 | CB   | LEU | X | 157 | 46.988 | 65.749 | 49.421 | 0.00 | 0.00 |
| ATOM | 2426 | HB2  | LEU | X | 157 | 47.573 | 65.117 | 48.753 | 0.00 | 0.00 |
| ATOM | 2427 | HB3  | LEU | X | 157 | 46.334 | 66.360 | 48.798 | 0.00 | 0.00 |
| ATOM | 2428 | CG   | LEU | X | 157 | 48.024 | 66.716 | 50.015 | 0.00 | 0.00 |
| ATOM | 2429 | HG   | LEU | X | 157 | 47.587 | 67.338 | 50.797 | 0.00 | 0.00 |
| ATOM | 2430 | CD1  | LEU | X | 157 | 49.140 | 66.042 | 50.714 | 0.00 | 0.00 |
| ATOM | 2431 | HD11 | LEU | X | 157 | 49.644 | 66.781 | 51.337 | 0.00 | 0.00 |
| ATOM | 2432 | HD12 | LEU | X | 157 | 49.972 | 65.770 | 50.064 | 0.00 | 0.00 |
| ATOM | 2433 | HD13 | LEU | X | 157 | 48.828 | 65.216 | 51.354 | 0.00 | 0.00 |
| ATOM | 2434 | CD2  | LEU | X | 157 | 48.637 | 67.714 | 48.942 | 0.00 | 0.00 |
| ATOM | 2435 | HD21 | LEU | X | 157 | 49.461 | 68.281 | 49.375 | 0.00 | 0.00 |
| ATOM | 2436 | HD22 | LEU | X | 157 | 48.985 | 67.217 | 48.036 | 0.00 | 0.00 |
| ATOM | 2437 | HD23 | LEU | X | 157 | 47.827 | 68.376 | 48.636 | 0.00 | 0.00 |
| ATOM | 2438 | C    | LEU | X | 157 | 45.435 | 65.885 | 51.493 | 0.00 | 0.00 |
| ATOM | 2439 | O    | LEU | X | 157 | 44.909 | 66.934 | 51.087 | 0.00 | 0.00 |
| ATOM | 2440 | N    | PRO | X | 158 | 45.532 | 65.466 | 52.772 | 0.00 | 0.00 |
| ATOM | 2441 | CD   | PRO | X | 158 | 45.760 | 64.147 | 53.227 | 0.00 | 0.00 |
| ATOM | 2442 | HD2  | PRO | X | 158 | 46.827 | 63.923 | 53.236 | 0.00 | 0.00 |
| ATOM | 2443 | HD3  | PRO | X | 158 | 45.235 | 63.395 | 52.637 | 0.00 | 0.00 |



|      |      |      |     |   |     |        |        |        |      |      |
|------|------|------|-----|---|-----|--------|--------|--------|------|------|
| ATOM | 2444 | CG   | PRO | X | 158 | 45.289 | 64.041 | 54.646 | 0.00 | 0.00 |
| ATOM | 2445 | HG2  | PRO | X | 158 | 45.827 | 63.296 | 55.232 | 0.00 | 0.00 |
| ATOM | 2446 | HG3  | PRO | X | 158 | 44.268 | 63.670 | 54.560 | 0.00 | 0.00 |
| ATOM | 2447 | CB   | PRO | X | 158 | 45.282 | 65.507 | 55.202 | 0.00 | 0.00 |
| ATOM | 2448 | HB2  | PRO | X | 158 | 46.253 | 65.812 | 55.593 | 0.00 | 0.00 |
| ATOM | 2449 | HB3  | PRO | X | 158 | 44.415 | 65.787 | 55.800 | 0.00 | 0.00 |
| ATOM | 2450 | CA   | PRO | X | 158 | 45.090 | 66.302 | 53.875 | 0.00 | 0.00 |
| ATOM | 2451 | HA   | PRO | X | 158 | 44.035 | 66.573 | 53.828 | 0.00 | 0.00 |
| ATOM | 2452 | C    | PRO | X | 158 | 45.975 | 67.561 | 53.932 | 0.00 | 0.00 |
| ATOM | 2453 | O    | PRO | X | 158 | 47.190 | 67.426 | 53.714 | 0.00 | 0.00 |
| ATOM | 2454 | N    | GLY | X | 159 | 45.401 | 68.727 | 54.223 | 0.00 | 0.00 |
| ATOM | 2455 | H    | GLY | X | 159 | 44.408 | 68.740 | 54.405 | 0.00 | 0.00 |
| ATOM | 2456 | CA   | GLY | X | 159 | 46.212 | 69.954 | 54.081 | 0.00 | 0.00 |
| ATOM | 2457 | HA2  | GLY | X | 159 | 45.904 | 70.541 | 54.947 | 0.00 | 0.00 |
| ATOM | 2458 | HA3  | GLY | X | 159 | 47.289 | 69.888 | 53.929 | 0.00 | 0.00 |
| ATOM | 2459 | C    | GLY | X | 159 | 45.685 | 70.829 | 52.966 | 0.00 | 0.00 |
| ATOM | 2460 | O    | GLY | X | 159 | 45.610 | 72.050 | 53.200 | 0.00 | 0.00 |
| ATOM | 2461 | N    | SER | X | 160 | 45.101 | 70.148 | 51.915 | 0.00 | 0.00 |
| ATOM | 2462 | H    | SER | X | 160 | 45.226 | 69.148 | 51.984 | 0.00 | 0.00 |
| ATOM | 2463 | CA   | SER | X | 160 | 44.210 | 70.705 | 50.928 | 0.00 | 0.00 |
| ATOM | 2464 | HA   | SER | X | 160 | 43.948 | 71.700 | 51.287 | 0.00 | 0.00 |
| ATOM | 2465 | CB   | SER | X | 160 | 44.970 | 70.857 | 49.578 | 0.00 | 0.00 |
| ATOM | 2466 | HB2  | SER | X | 160 | 44.273 | 71.179 | 48.805 | 0.00 | 0.00 |
| ATOM | 2467 | HB3  | SER | X | 160 | 45.603 | 71.730 | 49.740 | 0.00 | 0.00 |
| ATOM | 2468 | OG   | SER | X | 160 | 45.697 | 69.746 | 49.253 | 0.00 | 0.00 |
| ATOM | 2469 | HG   | SER | X | 160 | 46.403 | 69.651 | 49.897 | 0.00 | 0.00 |
| ATOM | 2470 | C    | SER | X | 160 | 42.952 | 69.816 | 50.791 | 0.00 | 0.00 |
| ATOM | 2471 | O    | SER | X | 160 | 42.884 | 68.796 | 51.435 | 0.00 | 0.00 |
| ATOM | 2472 | N    | ARG | X | 161 | 41.959 | 70.258 | 49.972 | 0.00 | 0.00 |
| ATOM | 2473 | H    | ARG | X | 161 | 42.116 | 71.090 | 49.421 | 0.00 | 0.00 |
| ATOM | 2474 | CA   | ARG | X | 161 | 40.687 | 69.509 | 49.780 | 0.00 | 0.00 |
| ATOM | 2475 | HA   | ARG | X | 161 | 40.747 | 68.559 | 50.312 | 0.00 | 0.00 |
| ATOM | 2476 | CB   | ARG | X | 161 | 39.509 | 70.333 | 50.427 | 0.00 | 0.00 |
| ATOM | 2477 | HB2  | ARG | X | 161 | 39.566 | 71.356 | 50.055 | 0.00 | 0.00 |
| ATOM | 2478 | HB3  | ARG | X | 161 | 38.538 | 69.974 | 50.085 | 0.00 | 0.00 |
| ATOM | 2479 | CG   | ARG | X | 161 | 39.425 | 70.585 | 51.959 | 0.00 | 0.00 |
| ATOM | 2480 | HG2  | ARG | X | 161 | 38.621 | 71.290 | 52.173 | 0.00 | 0.00 |
| ATOM | 2481 | HG3  | ARG | X | 161 | 39.255 | 69.587 | 52.364 | 0.00 | 0.00 |
| ATOM | 2482 | CD   | ARG | X | 161 | 40.627 | 71.168 | 52.701 | 0.00 | 0.00 |
| ATOM | 2483 | HD2  | ARG | X | 161 | 40.254 | 71.416 | 53.694 | 0.00 | 0.00 |
| ATOM | 2484 | HD3  | ARG | X | 161 | 41.408 | 70.408 | 52.683 | 0.00 | 0.00 |
| ATOM | 2485 | NE   | ARG | X | 161 | 41.113 | 72.371 | 52.011 | 0.00 | 0.00 |
| ATOM | 2486 | HE   | ARG | X | 161 | 40.692 | 72.574 | 51.116 | 0.00 | 0.00 |
| ATOM | 2487 | CZ   | ARG | X | 161 | 41.944 | 73.323 | 52.478 | 0.00 | 0.00 |
| ATOM | 2488 | NH1  | ARG | X | 161 | 42.545 | 73.233 | 53.631 | 0.00 | 0.00 |
| ATOM | 2489 | HH11 | ARG | X | 161 | 42.444 | 72.449 | 54.261 | 0.00 | 0.00 |
| ATOM | 2490 | HH12 | ARG | X | 161 | 43.234 | 73.941 | 53.842 | 0.00 | 0.00 |
| ATOM | 2491 | NH2  | ARG | X | 161 | 42.258 | 74.329 | 51.692 | 0.00 | 0.00 |
| ATOM | 2492 | HH21 | ARG | X | 161 | 41.678 | 74.524 | 50.889 | 0.00 | 0.00 |
| ATOM | 2493 | HH22 | ARG | X | 161 | 42.982 | 74.967 | 51.992 | 0.00 | 0.00 |
| ATOM | 2494 | C    | ARG | X | 161 | 40.416 | 69.125 | 48.287 | 0.00 | 0.00 |
| ATOM | 2495 | O    | ARG | X | 161 | 39.338 | 68.776 | 47.933 | 0.00 | 0.00 |
| ATOM | 2496 | N    | GLU | X | 162 | 41.499 | 69.099 | 47.469 | 0.00 | 0.00 |
| ATOM | 2497 | H    | GLU | X | 162 | 42.417 | 68.916 | 47.849 | 0.00 | 0.00 |
| ATOM | 2498 | CA   | GLU | X | 162 | 41.406 | 68.910 | 45.978 | 0.00 | 0.00 |
| ATOM | 2499 | HA   | GLU | X | 162 | 40.461 | 69.386 | 45.716 | 0.00 | 0.00 |
| ATOM | 2500 | CB   | GLU | X | 162 | 42.611 | 69.718 | 45.317 | 0.00 | 0.00 |
| ATOM | 2501 | HB2  | GLU | X | 162 | 43.579 | 69.389 | 45.694 | 0.00 | 0.00 |
| ATOM | 2502 | HB3  | GLU | X | 162 | 42.738 | 69.545 | 44.249 | 0.00 | 0.00 |
| ATOM | 2503 | CG   | GLU | X | 162 | 42.422 | 71.240 | 45.534 | 0.00 | 0.00 |
| ATOM | 2504 | HG2  | GLU | X | 162 | 42.699 | 71.440 | 46.569 | 0.00 | 0.00 |
| ATOM | 2505 | HG3  | GLU | X | 162 | 43.168 | 71.726 | 44.905 | 0.00 | 0.00 |
| ATOM | 2506 | CD   | GLU | X | 162 | 41.073 | 71.824 | 45.127 | 0.00 | 0.00 |
| ATOM | 2507 | OE1  | GLU | X | 162 | 40.505 | 71.480 | 44.045 | 0.00 | 0.00 |
| ATOM | 2508 | OE2  | GLU | X | 162 | 40.604 | 72.753 | 45.850 | 0.00 | 0.00 |
| ATOM | 2509 | C    | GLU | X | 162 | 41.427 | 67.400 | 45.584 | 0.00 | 0.00 |
| ATOM | 2510 | O    | GLU | X | 162 | 41.606 | 67.125 | 44.401 | 0.00 | 0.00 |

|      |      |      |     |   |     |        |        |        |      |      |
|------|------|------|-----|---|-----|--------|--------|--------|------|------|
| ATOM | 2511 | N    | ALA | X | 163 | 41.534 | 66.451 | 46.557 | 0.00 | 0.00 |
| ATOM | 2512 | H    | ALA | X | 163 | 41.402 | 66.727 | 47.519 | 0.00 | 0.00 |
| ATOM | 2513 | CA   | ALA | X | 163 | 41.934 | 65.095 | 46.377 | 0.00 | 0.00 |
| ATOM | 2514 | HA   | ALA | X | 163 | 41.315 | 64.678 | 45.583 | 0.00 | 0.00 |
| ATOM | 2515 | CB   | ALA | X | 163 | 43.416 | 64.921 | 46.129 | 0.00 | 0.00 |
| ATOM | 2516 | HB1  | ALA | X | 163 | 43.951 | 65.140 | 47.053 | 0.00 | 0.00 |
| ATOM | 2517 | HB2  | ALA | X | 163 | 43.799 | 65.537 | 45.316 | 0.00 | 0.00 |
| ATOM | 2518 | HB3  | ALA | X | 163 | 43.717 | 63.915 | 45.836 | 0.00 | 0.00 |
| ATOM | 2519 | C    | ALA | X | 163 | 41.449 | 64.248 | 47.582 | 0.00 | 0.00 |
| ATOM | 2520 | O    | ALA | X | 163 | 42.167 | 64.190 | 48.578 | 0.00 | 0.00 |
| ATOM | 2521 | N    | PRO | X | 164 | 40.263 | 63.663 | 47.581 | 0.00 | 0.00 |
| ATOM | 2522 | CD   | PRO | X | 164 | 39.271 | 63.636 | 46.487 | 0.00 | 0.00 |
| ATOM | 2523 | HD2  | PRO | X | 164 | 39.574 | 63.211 | 45.530 | 0.00 | 0.00 |
| ATOM | 2524 | HD3  | PRO | X | 164 | 38.774 | 64.587 | 46.293 | 0.00 | 0.00 |
| ATOM | 2525 | CG   | PRO | X | 164 | 38.235 | 62.645 | 46.972 | 0.00 | 0.00 |
| ATOM | 2526 | HG2  | PRO | X | 164 | 38.537 | 61.658 | 46.622 | 0.00 | 0.00 |
| ATOM | 2527 | HG3  | PRO | X | 164 | 37.252 | 62.920 | 46.589 | 0.00 | 0.00 |
| ATOM | 2528 | CB   | PRO | X | 164 | 38.318 | 62.619 | 48.495 | 0.00 | 0.00 |
| ATOM | 2529 | HB2  | PRO | X | 164 | 38.009 | 61.622 | 48.810 | 0.00 | 0.00 |
| ATOM | 2530 | HB3  | PRO | X | 164 | 37.697 | 63.394 | 48.943 | 0.00 | 0.00 |
| ATOM | 2531 | CA   | PRO | X | 164 | 39.782 | 62.829 | 48.729 | 0.00 | 0.00 |
| ATOM | 2532 | HA   | PRO | X | 164 | 39.966 | 63.352 | 49.667 | 0.00 | 0.00 |
| ATOM | 2533 | C    | PRO | X | 164 | 40.573 | 61.554 | 48.854 | 0.00 | 0.00 |
| ATOM | 2534 | O    | PRO | X | 164 | 40.535 | 60.924 | 49.917 | 0.00 | 0.00 |
| ATOM | 2535 | N    | GLY | X | 165 | 41.126 | 61.082 | 47.725 | 0.00 | 0.00 |
| ATOM | 2536 | H    | GLY | X | 165 | 41.283 | 61.748 | 46.981 | 0.00 | 0.00 |
| ATOM | 2537 | CA   | GLY | X | 165 | 41.410 | 59.661 | 47.488 | 0.00 | 0.00 |
| ATOM | 2538 | HA2  | GLY | X | 165 | 42.220 | 59.442 | 46.792 | 0.00 | 0.00 |
| ATOM | 2539 | HA3  | GLY | X | 165 | 41.679 | 59.207 | 48.442 | 0.00 | 0.00 |
| ATOM | 2540 | C    | GLY | X | 165 | 40.176 | 58.845 | 47.019 | 0.00 | 0.00 |
| ATOM | 2541 | O    | GLY | X | 165 | 39.113 | 59.365 | 46.712 | 0.00 | 0.00 |
| ATOM | 2542 | N    | ASN | X | 166 | 40.388 | 57.492 | 46.890 | 0.00 | 0.00 |
| ATOM | 2543 | H    | ASN | X | 166 | 41.266 | 57.113 | 47.214 | 0.00 | 0.00 |
| ATOM | 2544 | CA   | ASN | X | 166 | 39.386 | 56.474 | 46.501 | 0.00 | 0.00 |
| ATOM | 2545 | HA   | ASN | X | 166 | 39.949 | 55.567 | 46.279 | 0.00 | 0.00 |
| ATOM | 2546 | CB   | ASN | X | 166 | 38.428 | 56.142 | 47.685 | 0.00 | 0.00 |
| ATOM | 2547 | HB2  | ASN | X | 166 | 37.869 | 57.024 | 47.998 | 0.00 | 0.00 |
| ATOM | 2548 | HB3  | ASN | X | 166 | 37.749 | 55.398 | 47.268 | 0.00 | 0.00 |
| ATOM | 2549 | CG   | ASN | X | 166 | 39.145 | 55.460 | 48.822 | 0.00 | 0.00 |
| ATOM | 2550 | OD1  | ASN | X | 166 | 40.205 | 54.913 | 48.652 | 0.00 | 0.00 |
| ATOM | 2551 | ND2  | ASN | X | 166 | 38.510 | 55.476 | 50.001 | 0.00 | 0.00 |
| ATOM | 2552 | HD21 | ASN | X | 166 | 38.915 | 54.995 | 50.791 | 0.00 | 0.00 |
| ATOM | 2553 | HD22 | ASN | X | 166 | 37.706 | 56.080 | 50.091 | 0.00 | 0.00 |
| ATOM | 2554 | C    | ASN | X | 166 | 38.671 | 56.692 | 45.148 | 0.00 | 0.00 |
| ATOM | 2555 | O    | ASN | X | 166 | 37.793 | 55.899 | 44.852 | 0.00 | 0.00 |
| ATOM | 2556 | N    | VAL | X | 167 | 38.972 | 57.635 | 44.231 | 0.00 | 0.00 |
| ATOM | 2557 | H    | VAL | X | 167 | 39.836 | 58.128 | 44.409 | 0.00 | 0.00 |
| ATOM | 2558 | CA   | VAL | X | 167 | 38.115 | 58.168 | 43.174 | 0.00 | 0.00 |
| ATOM | 2559 | HA   | VAL | X | 167 | 37.117 | 58.178 | 43.612 | 0.00 | 0.00 |
| ATOM | 2560 | CB   | VAL | X | 167 | 38.432 | 59.616 | 42.794 | 0.00 | 0.00 |
| ATOM | 2561 | HB   | VAL | X | 167 | 37.788 | 59.824 | 41.939 | 0.00 | 0.00 |
| ATOM | 2562 | CG1  | VAL | X | 167 | 38.259 | 60.655 | 43.943 | 0.00 | 0.00 |
| ATOM | 2563 | HG11 | VAL | X | 167 | 39.125 | 60.609 | 44.603 | 0.00 | 0.00 |
| ATOM | 2564 | HG12 | VAL | X | 167 | 38.261 | 61.676 | 43.562 | 0.00 | 0.00 |
| ATOM | 2565 | HG13 | VAL | X | 167 | 37.342 | 60.494 | 44.510 | 0.00 | 0.00 |
| ATOM | 2566 | CG2  | VAL | X | 167 | 39.876 | 59.798 | 42.244 | 0.00 | 0.00 |
| ATOM | 2567 | HG21 | VAL | X | 167 | 40.546 | 59.790 | 43.103 | 0.00 | 0.00 |
| ATOM | 2568 | HG22 | VAL | X | 167 | 39.926 | 60.818 | 41.863 | 0.00 | 0.00 |
| ATOM | 2569 | HG23 | VAL | X | 167 | 39.984 | 59.111 | 41.404 | 0.00 | 0.00 |
| ATOM | 2570 | C    | VAL | X | 167 | 37.931 | 57.154 | 41.928 | 0.00 | 0.00 |
| ATOM | 2571 | O    | VAL | X | 167 | 36.923 | 57.237 | 41.237 | 0.00 | 0.00 |
| ATOM | 2572 | N    | GLY | X | 168 | 38.809 | 56.150 | 41.726 | 0.00 | 0.00 |
| ATOM | 2573 | H    | GLY | X | 168 | 39.621 | 56.221 | 42.321 | 0.00 | 0.00 |
| ATOM | 2574 | CA   | GLY | X | 168 | 38.690 | 55.061 | 40.759 | 0.00 | 0.00 |
| ATOM | 2575 | HA2  | GLY | X | 168 | 38.223 | 55.397 | 39.833 | 0.00 | 0.00 |
| ATOM | 2576 | HA3  | GLY | X | 168 | 39.682 | 54.673 | 40.528 | 0.00 | 0.00 |
| ATOM | 2577 | C    | GLY | X | 168 | 37.806 | 53.936 | 41.232 | 0.00 | 0.00 |

|      |      |      |     |   |     |        |        |        |      |      |
|------|------|------|-----|---|-----|--------|--------|--------|------|------|
| ATOM | 2578 | O    | GLY | X | 168 | 37.454 | 53.073 | 40.420 | 0.00 | 0.00 |
| ATOM | 2579 | N    | LEU | X | 169 | 37.213 | 54.003 | 42.467 | 0.00 | 0.00 |
| ATOM | 2580 | H    | LEU | X | 169 | 37.689 | 54.528 | 43.187 | 0.00 | 0.00 |
| ATOM | 2581 | CA   | LEU | X | 169 | 35.987 | 53.212 | 42.854 | 0.00 | 0.00 |
| ATOM | 2582 | HA   | LEU | X | 169 | 35.847 | 52.340 | 42.214 | 0.00 | 0.00 |
| ATOM | 2583 | CB   | LEU | X | 169 | 36.086 | 52.817 | 44.375 | 0.00 | 0.00 |
| ATOM | 2584 | HB2  | LEU | X | 169 | 35.812 | 53.759 | 44.850 | 0.00 | 0.00 |
| ATOM | 2585 | HB3  | LEU | X | 169 | 35.212 | 52.206 | 44.599 | 0.00 | 0.00 |
| ATOM | 2586 | CG   | LEU | X | 169 | 37.378 | 52.048 | 44.922 | 0.00 | 0.00 |
| ATOM | 2587 | HG   | LEU | X | 169 | 38.244 | 52.621 | 44.591 | 0.00 | 0.00 |
| ATOM | 2588 | CD1  | LEU | X | 169 | 37.376 | 52.047 | 46.493 | 0.00 | 0.00 |
| ATOM | 2589 | HD11 | LEU | X | 169 | 38.190 | 51.441 | 46.892 | 0.00 | 0.00 |
| ATOM | 2590 | HD12 | LEU | X | 169 | 36.448 | 51.685 | 46.935 | 0.00 | 0.00 |
| ATOM | 2591 | HD13 | LEU | X | 169 | 37.599 | 53.036 | 46.893 | 0.00 | 0.00 |
| ATOM | 2592 | CD2  | LEU | X | 169 | 37.532 | 50.615 | 44.452 | 0.00 | 0.00 |
| ATOM | 2593 | HD21 | LEU | X | 169 | 36.601 | 50.072 | 44.615 | 0.00 | 0.00 |
| ATOM | 2594 | HD22 | LEU | X | 169 | 37.670 | 50.647 | 43.371 | 0.00 | 0.00 |
| ATOM | 2595 | HD23 | LEU | X | 169 | 38.333 | 50.137 | 45.016 | 0.00 | 0.00 |
| ATOM | 2596 | C    | LEU | X | 169 | 34.688 | 53.985 | 42.565 | 0.00 | 0.00 |
| ATOM | 2597 | O    | LEU | X | 169 | 33.663 | 53.381 | 42.249 | 0.00 | 0.00 |
| ATOM | 2598 | N    | LEU | X | 170 | 34.777 | 55.307 | 42.455 | 0.00 | 0.00 |
| ATOM | 2599 | H    | LEU | X | 170 | 35.684 | 55.705 | 42.655 | 0.00 | 0.00 |
| ATOM | 2600 | CA   | LEU | X | 170 | 33.656 | 56.177 | 42.162 | 0.00 | 0.00 |
| ATOM | 2601 | HA   | LEU | X | 170 | 32.740 | 55.861 | 42.661 | 0.00 | 0.00 |
| ATOM | 2602 | CB   | LEU | X | 170 | 33.967 | 57.527 | 42.756 | 0.00 | 0.00 |
| ATOM | 2603 | HB2  | LEU | X | 170 | 34.648 | 58.068 | 42.100 | 0.00 | 0.00 |
| ATOM | 2604 | HB3  | LEU | X | 170 | 32.999 | 58.008 | 42.898 | 0.00 | 0.00 |
| ATOM | 2605 | CG   | LEU | X | 170 | 34.598 | 57.649 | 44.191 | 0.00 | 0.00 |
| ATOM | 2606 | HG   | LEU | X | 170 | 35.568 | 57.156 | 44.118 | 0.00 | 0.00 |
| ATOM | 2607 | CD1  | LEU | X | 170 | 34.685 | 59.135 | 44.446 | 0.00 | 0.00 |
| ATOM | 2608 | HD11 | LEU | X | 170 | 35.019 | 59.719 | 43.588 | 0.00 | 0.00 |
| ATOM | 2609 | HD12 | LEU | X | 170 | 35.241 | 59.372 | 45.353 | 0.00 | 0.00 |
| ATOM | 2610 | HD13 | LEU | X | 170 | 33.664 | 59.462 | 44.644 | 0.00 | 0.00 |
| ATOM | 2611 | CD2  | LEU | X | 170 | 33.587 | 56.984 | 45.156 | 0.00 | 0.00 |
| ATOM | 2612 | HD21 | LEU | X | 170 | 34.004 | 57.012 | 46.163 | 0.00 | 0.00 |
| ATOM | 2613 | HD22 | LEU | X | 170 | 32.560 | 57.338 | 45.067 | 0.00 | 0.00 |
| ATOM | 2614 | HD23 | LEU | X | 170 | 33.559 | 55.937 | 44.855 | 0.00 | 0.00 |
| ATOM | 2615 | C    | LEU | X | 170 | 33.409 | 56.140 | 40.660 | 0.00 | 0.00 |
| ATOM | 2616 | O    | LEU | X | 170 | 32.286 | 56.212 | 40.270 | 0.00 | 0.00 |
| ATOM | 2617 | N    | ASP | X | 171 | 34.487 | 55.999 | 39.815 | 0.00 | 0.00 |
| ATOM | 2618 | H    | ASP | X | 171 | 35.388 | 56.164 | 40.242 | 0.00 | 0.00 |
| ATOM | 2619 | CA   | ASP | X | 171 | 34.341 | 55.736 | 38.385 | 0.00 | 0.00 |
| ATOM | 2620 | HA   | ASP | X | 171 | 33.831 | 56.572 | 37.908 | 0.00 | 0.00 |
| ATOM | 2621 | CB   | ASP | X | 171 | 35.756 | 55.602 | 37.799 | 0.00 | 0.00 |
| ATOM | 2622 | HB2  | ASP | X | 171 | 36.261 | 54.855 | 38.411 | 0.00 | 0.00 |
| ATOM | 2623 | HB3  | ASP | X | 171 | 35.697 | 55.266 | 36.764 | 0.00 | 0.00 |
| ATOM | 2624 | CG   | ASP | X | 171 | 36.597 | 56.894 | 37.815 | 0.00 | 0.00 |
| ATOM | 2625 | OD1  | ASP | X | 171 | 36.011 | 58.001 | 37.778 | 0.00 | 0.00 |
| ATOM | 2626 | OD2  | ASP | X | 171 | 37.830 | 56.733 | 37.660 | 0.00 | 0.00 |
| ATOM | 2627 | C    | ASP | X | 171 | 33.537 | 54.476 | 38.067 | 0.00 | 0.00 |
| ATOM | 2628 | O    | ASP | X | 171 | 32.783 | 54.430 | 37.100 | 0.00 | 0.00 |
| ATOM | 2629 | N    | GLN | X | 172 | 33.718 | 53.452 | 38.874 | 0.00 | 0.00 |
| ATOM | 2630 | H    | GLN | X | 172 | 34.241 | 53.587 | 39.727 | 0.00 | 0.00 |
| ATOM | 2631 | CA   | GLN | X | 172 | 32.934 | 52.111 | 38.710 | 0.00 | 0.00 |
| ATOM | 2632 | HA   | GLN | X | 172 | 32.825 | 51.929 | 37.641 | 0.00 | 0.00 |
| ATOM | 2633 | CB   | GLN | X | 172 | 33.688 | 51.050 | 39.508 | 0.00 | 0.00 |
| ATOM | 2634 | HB2  | GLN | X | 172 | 33.818 | 51.297 | 40.561 | 0.00 | 0.00 |
| ATOM | 2635 | HB3  | GLN | X | 172 | 33.250 | 50.052 | 39.477 | 0.00 | 0.00 |
| ATOM | 2636 | CG   | GLN | X | 172 | 35.157 | 50.818 | 38.952 | 0.00 | 0.00 |
| ATOM | 2637 | HG2  | GLN | X | 172 | 35.108 | 50.234 | 38.033 | 0.00 | 0.00 |
| ATOM | 2638 | HG3  | GLN | X | 172 | 35.644 | 51.791 | 38.890 | 0.00 | 0.00 |
| ATOM | 2639 | CD   | GLN | X | 172 | 36.032 | 49.992 | 39.991 | 0.00 | 0.00 |
| ATOM | 2640 | OE1  | GLN | X | 172 | 35.583 | 49.348 | 40.875 | 0.00 | 0.00 |
| ATOM | 2641 | NE2  | GLN | X | 172 | 37.355 | 50.052 | 39.750 | 0.00 | 0.00 |
| ATOM | 2642 | HE21 | GLN | X | 172 | 37.977 | 49.529 | 40.350 | 0.00 | 0.00 |
| ATOM | 2643 | HE22 | GLN | X | 172 | 37.626 | 50.551 | 38.915 | 0.00 | 0.00 |
| ATOM | 2644 | C    | GLN | X | 172 | 31.485 | 52.185 | 39.195 | 0.00 | 0.00 |

|      |      |      |     |   |     |        |        |        |      |      |
|------|------|------|-----|---|-----|--------|--------|--------|------|------|
| ATOM | 2645 | O    | GLN | X | 172 | 30.643 | 51.516 | 38.613 | 0.00 | 0.00 |
| ATOM | 2646 | N    | ARG | X | 173 | 31.261 | 53.044 | 40.232 | 0.00 | 0.00 |
| ATOM | 2647 | H    | ARG | X | 173 | 32.141 | 53.432 | 40.541 | 0.00 | 0.00 |
| ATOM | 2648 | CA   | ARG | X | 173 | 29.948 | 53.489 | 40.772 | 0.00 | 0.00 |
| ATOM | 2649 | HA   | ARG | X | 173 | 29.298 | 52.646 | 41.007 | 0.00 | 0.00 |
| ATOM | 2650 | CB   | ARG | X | 173 | 30.174 | 54.247 | 42.102 | 0.00 | 0.00 |
| ATOM | 2651 | HB2  | ARG | X | 173 | 30.852 | 53.692 | 42.751 | 0.00 | 0.00 |
| ATOM | 2652 | HB3  | ARG | X | 173 | 30.657 | 55.218 | 41.990 | 0.00 | 0.00 |
| ATOM | 2653 | CG   | ARG | X | 173 | 28.905 | 54.508 | 42.909 | 0.00 | 0.00 |
| ATOM | 2654 | HG2  | ARG | X | 173 | 28.218 | 55.174 | 42.388 | 0.00 | 0.00 |
| ATOM | 2655 | HG3  | ARG | X | 173 | 28.320 | 53.591 | 42.982 | 0.00 | 0.00 |
| ATOM | 2656 | CD   | ARG | X | 173 | 29.086 | 55.107 | 44.350 | 0.00 | 0.00 |
| ATOM | 2657 | HD2  | ARG | X | 173 | 29.652 | 56.035 | 44.262 | 0.00 | 0.00 |
| ATOM | 2658 | HD3  | ARG | X | 173 | 28.104 | 55.360 | 44.750 | 0.00 | 0.00 |
| ATOM | 2659 | NE   | ARG | X | 173 | 29.667 | 54.114 | 45.214 | 0.00 | 0.00 |
| ATOM | 2660 | HE   | ARG | X | 173 | 29.545 | 53.179 | 44.853 | 0.00 | 0.00 |
| ATOM | 2661 | CZ   | ARG | X | 173 | 30.275 | 54.187 | 46.368 | 0.00 | 0.00 |
| ATOM | 2662 | NH1  | ARG | X | 173 | 30.373 | 55.297 | 47.012 | 0.00 | 0.00 |
| ATOM | 2663 | HH11 | ARG | X | 173 | 29.907 | 56.131 | 46.684 | 0.00 | 0.00 |
| ATOM | 2664 | HH12 | ARG | X | 173 | 30.744 | 55.322 | 47.951 | 0.00 | 0.00 |
| ATOM | 2665 | NH2  | ARG | X | 173 | 30.772 | 53.123 | 46.967 | 0.00 | 0.00 |
| ATOM | 2666 | HH21 | ARG | X | 173 | 30.921 | 52.251 | 46.480 | 0.00 | 0.00 |
| ATOM | 2667 | HH22 | ARG | X | 173 | 30.863 | 53.209 | 47.969 | 0.00 | 0.00 |
| ATOM | 2668 | C    | ARG | X | 173 | 29.224 | 54.330 | 39.760 | 0.00 | 0.00 |
| ATOM | 2669 | O    | ARG | X | 173 | 27.996 | 54.380 | 39.751 | 0.00 | 0.00 |
| ATOM | 2670 | N    | LEU | X | 174 | 29.912 | 55.143 | 38.947 | 0.00 | 0.00 |
| ATOM | 2671 | H    | LEU | X | 174 | 30.921 | 55.155 | 38.978 | 0.00 | 0.00 |
| ATOM | 2672 | CA   | LEU | X | 174 | 29.281 | 55.984 | 37.836 | 0.00 | 0.00 |
| ATOM | 2673 | HA   | LEU | X | 174 | 28.319 | 56.389 | 38.152 | 0.00 | 0.00 |
| ATOM | 2674 | CB   | LEU | X | 174 | 30.241 | 57.116 | 37.517 | 0.00 | 0.00 |
| ATOM | 2675 | HB2  | LEU | X | 174 | 30.339 | 57.746 | 38.401 | 0.00 | 0.00 |
| ATOM | 2676 | HB3  | LEU | X | 174 | 31.249 | 56.715 | 37.409 | 0.00 | 0.00 |
| ATOM | 2677 | CG   | LEU | X | 174 | 29.811 | 57.982 | 36.368 | 0.00 | 0.00 |
| ATOM | 2678 | HG   | LEU | X | 174 | 29.774 | 57.463 | 35.410 | 0.00 | 0.00 |
| ATOM | 2679 | CD1  | LEU | X | 174 | 28.506 | 58.730 | 36.619 | 0.00 | 0.00 |
| ATOM | 2680 | HD11 | LEU | X | 174 | 28.561 | 59.397 | 37.479 | 0.00 | 0.00 |
| ATOM | 2681 | HD12 | LEU | X | 174 | 27.643 | 58.066 | 36.567 | 0.00 | 0.00 |
| ATOM | 2682 | HD13 | LEU | X | 174 | 28.377 | 59.440 | 35.802 | 0.00 | 0.00 |
| ATOM | 2683 | CD2  | LEU | X | 174 | 30.784 | 59.135 | 36.170 | 0.00 | 0.00 |
| ATOM | 2684 | HD21 | LEU | X | 174 | 30.541 | 59.693 | 35.266 | 0.00 | 0.00 |
| ATOM | 2685 | HD22 | LEU | X | 174 | 30.719 | 59.903 | 36.942 | 0.00 | 0.00 |
| ATOM | 2686 | HD23 | LEU | X | 174 | 31.806 | 58.763 | 36.112 | 0.00 | 0.00 |
| ATOM | 2687 | C    | LEU | X | 174 | 29.003 | 55.181 | 36.614 | 0.00 | 0.00 |
| ATOM | 2688 | O    | LEU | X | 174 | 28.045 | 55.354 | 35.897 | 0.00 | 0.00 |
| ATOM | 2689 | N    | ALA | X | 175 | 29.807 | 54.150 | 36.372 | 0.00 | 0.00 |
| ATOM | 2690 | H    | ALA | X | 175 | 30.681 | 54.041 | 36.866 | 0.00 | 0.00 |
| ATOM | 2691 | CA   | ALA | X | 175 | 29.559 | 53.148 | 35.341 | 0.00 | 0.00 |
| ATOM | 2692 | HA   | ALA | X | 175 | 29.111 | 53.610 | 34.461 | 0.00 | 0.00 |
| ATOM | 2693 | CB   | ALA | X | 175 | 30.823 | 52.366 | 34.988 | 0.00 | 0.00 |
| ATOM | 2694 | HB1  | ALA | X | 175 | 31.553 | 53.086 | 34.619 | 0.00 | 0.00 |
| ATOM | 2695 | HB2  | ALA | X | 175 | 30.604 | 51.655 | 34.191 | 0.00 | 0.00 |
| ATOM | 2696 | HB3  | ALA | X | 175 | 31.202 | 51.926 | 35.910 | 0.00 | 0.00 |
| ATOM | 2697 | C    | ALA | X | 175 | 28.357 | 52.213 | 35.787 | 0.00 | 0.00 |
| ATOM | 2698 | O    | ALA | X | 175 | 27.364 | 52.007 | 35.017 | 0.00 | 0.00 |
| ATOM | 2699 | N    | LEU | X | 176 | 28.323 | 51.792 | 37.002 | 0.00 | 0.00 |
| ATOM | 2700 | H    | LEU | X | 176 | 29.091 | 52.134 | 37.562 | 0.00 | 0.00 |
| ATOM | 2701 | CA   | LEU | X | 176 | 27.183 | 50.976 | 37.589 | 0.00 | 0.00 |
| ATOM | 2702 | HA   | LEU | X | 176 | 27.111 | 50.038 | 37.039 | 0.00 | 0.00 |
| ATOM | 2703 | CB   | LEU | X | 176 | 27.455 | 50.702 | 39.122 | 0.00 | 0.00 |
| ATOM | 2704 | HB2  | LEU | X | 176 | 28.012 | 51.544 | 39.533 | 0.00 | 0.00 |
| ATOM | 2705 | HB3  | LEU | X | 176 | 26.516 | 50.555 | 39.656 | 0.00 | 0.00 |
| ATOM | 2706 | CG   | LEU | X | 176 | 28.408 | 49.462 | 39.264 | 0.00 | 0.00 |
| ATOM | 2707 | HG   | LEU | X | 176 | 29.200 | 49.403 | 38.518 | 0.00 | 0.00 |
| ATOM | 2708 | CD1  | LEU | X | 176 | 29.118 | 49.439 | 40.626 | 0.00 | 0.00 |
| ATOM | 2709 | HD11 | LEU | X | 176 | 29.656 | 50.337 | 40.930 | 0.00 | 0.00 |
| ATOM | 2710 | HD12 | LEU | X | 176 | 29.867 | 48.660 | 40.480 | 0.00 | 0.00 |
| ATOM | 2711 | HD13 | LEU | X | 176 | 28.465 | 49.182 | 41.460 | 0.00 | 0.00 |

|      |      |      |     |   |     |        |        |        |      |      |
|------|------|------|-----|---|-----|--------|--------|--------|------|------|
| ATOM | 2712 | CD2  | LEU | X | 176 | 27.524 | 48.220 | 39.047 | 0.00 | 0.00 |
| ATOM | 2713 | HD21 | LEU | X | 176 | 26.855 | 47.946 | 39.863 | 0.00 | 0.00 |
| ATOM | 2714 | HD22 | LEU | X | 176 | 26.884 | 48.287 | 38.167 | 0.00 | 0.00 |
| ATOM | 2715 | HD23 | LEU | X | 176 | 28.160 | 47.336 | 38.999 | 0.00 | 0.00 |
| ATOM | 2716 | C    | LEU | X | 176 | 25.806 | 51.713 | 37.482 | 0.00 | 0.00 |
| ATOM | 2717 | O    | LEU | X | 176 | 24.775 | 51.113 | 37.116 | 0.00 | 0.00 |
| ATOM | 2718 | N    | GLN | X | 177 | 25.815 | 53.040 | 37.731 | 0.00 | 0.00 |
| ATOM | 2719 | H    | GLN | X | 177 | 26.686 | 53.495 | 37.963 | 0.00 | 0.00 |
| ATOM | 2720 | CA   | GLN | X | 177 | 24.717 | 53.971 | 37.514 | 0.00 | 0.00 |
| ATOM | 2721 | HA   | GLN | X | 177 | 23.798 | 53.688 | 38.028 | 0.00 | 0.00 |
| ATOM | 2722 | CB   | GLN | X | 177 | 25.076 | 55.389 | 37.775 | 0.00 | 0.00 |
| ATOM | 2723 | HB2  | GLN | X | 177 | 26.150 | 55.522 | 37.642 | 0.00 | 0.00 |
| ATOM | 2724 | HB3  | GLN | X | 177 | 24.492 | 56.064 | 37.150 | 0.00 | 0.00 |
| ATOM | 2725 | CG   | GLN | X | 177 | 24.734 | 55.596 | 39.259 | 0.00 | 0.00 |
| ATOM | 2726 | HG2  | GLN | X | 177 | 23.698 | 55.911 | 39.377 | 0.00 | 0.00 |
| ATOM | 2727 | HG3  | GLN | X | 177 | 24.985 | 54.770 | 39.925 | 0.00 | 0.00 |
| ATOM | 2728 | CD   | GLN | X | 177 | 25.407 | 56.894 | 39.855 | 0.00 | 0.00 |
| ATOM | 2729 | OE1  | GLN | X | 177 | 24.809 | 57.971 | 40.030 | 0.00 | 0.00 |
| ATOM | 2730 | NE2  | GLN | X | 177 | 26.571 | 56.719 | 40.343 | 0.00 | 0.00 |
| ATOM | 2731 | HE21 | GLN | X | 177 | 27.092 | 57.407 | 40.866 | 0.00 | 0.00 |
| ATOM | 2732 | HE22 | GLN | X | 177 | 26.838 | 55.771 | 40.566 | 0.00 | 0.00 |
| ATOM | 2733 | C    | GLN | X | 177 | 24.295 | 53.915 | 36.012 | 0.00 | 0.00 |
| ATOM | 2734 | O    | GLN | X | 177 | 23.116 | 53.732 | 35.664 | 0.00 | 0.00 |
| ATOM | 2735 | N    | TRP | X | 178 | 25.227 | 54.114 | 35.057 | 0.00 | 0.00 |
| ATOM | 2736 | H    | TRP | X | 178 | 26.199 | 54.177 | 35.324 | 0.00 | 0.00 |
| ATOM | 2737 | CA   | TRP | X | 178 | 24.966 | 54.095 | 33.654 | 0.00 | 0.00 |
| ATOM | 2738 | HA   | TRP | X | 178 | 24.256 | 54.893 | 33.436 | 0.00 | 0.00 |
| ATOM | 2739 | CB   | TRP | X | 178 | 26.237 | 54.559 | 32.995 | 0.00 | 0.00 |
| ATOM | 2740 | HB2  | TRP | X | 178 | 26.725 | 55.293 | 33.637 | 0.00 | 0.00 |
| ATOM | 2741 | HB3  | TRP | X | 178 | 26.885 | 53.685 | 33.056 | 0.00 | 0.00 |
| ATOM | 2742 | CG   | TRP | X | 178 | 26.201 | 55.220 | 31.601 | 0.00 | 0.00 |
| ATOM | 2743 | CD1  | TRP | X | 178 | 26.253 | 56.549 | 31.329 | 0.00 | 0.00 |
| ATOM | 2744 | HD1  | TRP | X | 178 | 26.353 | 57.333 | 32.065 | 0.00 | 0.00 |
| ATOM | 2745 | NE1  | TRP | X | 178 | 26.262 | 56.785 | 29.965 | 0.00 | 0.00 |
| ATOM | 2746 | HE1  | TRP | X | 178 | 26.476 | 57.661 | 29.509 | 0.00 | 0.00 |
| ATOM | 2747 | CE2  | TRP | X | 178 | 26.157 | 55.607 | 29.291 | 0.00 | 0.00 |
| ATOM | 2748 | CZ2  | TRP | X | 178 | 26.051 | 55.257 | 27.944 | 0.00 | 0.00 |
| ATOM | 2749 | HZ2  | TRP | X | 178 | 26.158 | 56.093 | 27.268 | 0.00 | 0.00 |
| ATOM | 2750 | CH2  | TRP | X | 178 | 26.019 | 53.880 | 27.577 | 0.00 | 0.00 |
| ATOM | 2751 | HH2  | TRP | X | 178 | 25.947 | 53.566 | 26.546 | 0.00 | 0.00 |
| ATOM | 2752 | CZ3  | TRP | X | 178 | 26.021 | 52.868 | 28.613 | 0.00 | 0.00 |
| ATOM | 2753 | HZ3  | TRP | X | 178 | 26.229 | 51.837 | 28.365 | 0.00 | 0.00 |
| ATOM | 2754 | CE3  | TRP | X | 178 | 26.146 | 53.246 | 29.960 | 0.00 | 0.00 |
| ATOM | 2755 | HE3  | TRP | X | 178 | 26.324 | 52.525 | 30.743 | 0.00 | 0.00 |
| ATOM | 2756 | CD2  | TRP | X | 178 | 26.144 | 54.630 | 30.329 | 0.00 | 0.00 |
| ATOM | 2757 | C    | TRP | X | 178 | 24.454 | 52.664 | 33.212 | 0.00 | 0.00 |
| ATOM | 2758 | O    | TRP | X | 178 | 23.480 | 52.568 | 32.458 | 0.00 | 0.00 |
| ATOM | 2759 | N    | VAL | X | 179 | 25.030 | 51.569 | 33.671 | 0.00 | 0.00 |
| ATOM | 2760 | H    | VAL | X | 179 | 25.816 | 51.655 | 34.299 | 0.00 | 0.00 |
| ATOM | 2761 | CA   | VAL | X | 179 | 24.525 | 50.242 | 33.470 | 0.00 | 0.00 |
| ATOM | 2762 | HA   | VAL | X | 179 | 24.571 | 50.072 | 32.394 | 0.00 | 0.00 |
| ATOM | 2763 | CB   | VAL | X | 179 | 25.443 | 49.161 | 34.084 | 0.00 | 0.00 |
| ATOM | 2764 | HB   | VAL | X | 179 | 25.667 | 49.525 | 35.087 | 0.00 | 0.00 |
| ATOM | 2765 | CG1  | VAL | X | 179 | 24.807 | 47.768 | 34.232 | 0.00 | 0.00 |
| ATOM | 2766 | HG11 | VAL | X | 179 | 23.825 | 47.866 | 34.697 | 0.00 | 0.00 |
| ATOM | 2767 | HG12 | VAL | X | 179 | 24.769 | 47.476 | 33.183 | 0.00 | 0.00 |
| ATOM | 2768 | HG13 | VAL | X | 179 | 25.452 | 47.127 | 34.834 | 0.00 | 0.00 |
| ATOM | 2769 | CG2  | VAL | X | 179 | 26.753 | 49.155 | 33.320 | 0.00 | 0.00 |
| ATOM | 2770 | HG21 | VAL | X | 179 | 26.695 | 48.902 | 32.261 | 0.00 | 0.00 |
| ATOM | 2771 | HG22 | VAL | X | 179 | 27.416 | 48.485 | 33.866 | 0.00 | 0.00 |
| ATOM | 2772 | HG23 | VAL | X | 179 | 27.266 | 50.117 | 33.349 | 0.00 | 0.00 |
| ATOM | 2773 | C    | VAL | X | 179 | 23.035 | 50.122 | 33.837 | 0.00 | 0.00 |
| ATOM | 2774 | O    | VAL | X | 179 | 22.204 | 49.777 | 32.975 | 0.00 | 0.00 |
| ATOM | 2775 | N    | GLN | X | 180 | 22.635 | 50.399 | 35.039 | 0.00 | 0.00 |
| ATOM | 2776 | H    | GLN | X | 180 | 23.289 | 50.767 | 35.715 | 0.00 | 0.00 |
| ATOM | 2777 | CA   | GLN | X | 180 | 21.223 | 50.404 | 35.443 | 0.00 | 0.00 |
| ATOM | 2778 | HA   | GLN | X | 180 | 20.851 | 49.384 | 35.354 | 0.00 | 0.00 |

|      |      |      |     |   |     |        |        |        |      |      |
|------|------|------|-----|---|-----|--------|--------|--------|------|------|
| ATOM | 2779 | CB   | GLN | X | 180 | 21.039 | 50.841 | 36.895 | 0.00 | 0.00 |
| ATOM | 2780 | HB2  | GLN | X | 180 | 21.480 | 51.829 | 37.022 | 0.00 | 0.00 |
| ATOM | 2781 | HB3  | GLN | X | 180 | 19.993 | 51.053 | 37.113 | 0.00 | 0.00 |
| ATOM | 2782 | CG   | GLN | X | 180 | 21.656 | 49.782 | 37.881 | 0.00 | 0.00 |
| ATOM | 2783 | HG2  | GLN | X | 180 | 22.721 | 49.597 | 37.742 | 0.00 | 0.00 |
| ATOM | 2784 | HG3  | GLN | X | 180 | 21.613 | 50.183 | 38.893 | 0.00 | 0.00 |
| ATOM | 2785 | CD   | GLN | X | 180 | 20.830 | 48.433 | 37.910 | 0.00 | 0.00 |
| ATOM | 2786 | OE1  | GLN | X | 180 | 19.577 | 48.404 | 37.855 | 0.00 | 0.00 |
| ATOM | 2787 | NE2  | GLN | X | 180 | 21.454 | 47.303 | 38.090 | 0.00 | 0.00 |
| ATOM | 2788 | HE21 | GLN | X | 180 | 20.980 | 46.412 | 38.057 | 0.00 | 0.00 |
| ATOM | 2789 | HE22 | GLN | X | 180 | 22.406 | 47.335 | 38.426 | 0.00 | 0.00 |
| ATOM | 2790 | C    | GLN | X | 180 | 20.296 | 51.205 | 34.470 | 0.00 | 0.00 |
| ATOM | 2791 | O    | GLN | X | 180 | 19.294 | 50.623 | 34.023 | 0.00 | 0.00 |
| ATOM | 2792 | N    | GLU | X | 181 | 20.644 | 52.396 | 34.054 | 0.00 | 0.00 |
| ATOM | 2793 | H    | GLU | X | 181 | 21.523 | 52.760 | 34.393 | 0.00 | 0.00 |
| ATOM | 2794 | CA   | GLU | X | 181 | 20.021 | 53.339 | 33.110 | 0.00 | 0.00 |
| ATOM | 2795 | HA   | GLU | X | 181 | 18.985 | 53.427 | 33.438 | 0.00 | 0.00 |
| ATOM | 2796 | CB   | GLU | X | 181 | 20.718 | 54.705 | 33.300 | 0.00 | 0.00 |
| ATOM | 2797 | HB2  | GLU | X | 181 | 20.795 | 55.021 | 34.341 | 0.00 | 0.00 |
| ATOM | 2798 | HB3  | GLU | X | 181 | 21.728 | 54.712 | 32.890 | 0.00 | 0.00 |
| ATOM | 2799 | CG   | GLU | X | 181 | 19.921 | 55.745 | 32.552 | 0.00 | 0.00 |
| ATOM | 2800 | HG2  | GLU | X | 181 | 19.947 | 55.474 | 31.497 | 0.00 | 0.00 |
| ATOM | 2801 | HG3  | GLU | X | 181 | 18.850 | 55.811 | 32.743 | 0.00 | 0.00 |
| ATOM | 2802 | CD   | GLU | X | 181 | 20.589 | 57.172 | 32.563 | 0.00 | 0.00 |
| ATOM | 2803 | OE1  | GLU | X | 181 | 20.150 | 57.930 | 33.421 | 0.00 | 0.00 |
| ATOM | 2804 | OE2  | GLU | X | 181 | 21.519 | 57.434 | 31.818 | 0.00 | 0.00 |
| ATOM | 2805 | C    | GLU | X | 181 | 20.004 | 52.821 | 31.687 | 0.00 | 0.00 |
| ATOM | 2806 | O    | GLU | X | 181 | 19.040 | 53.028 | 30.980 | 0.00 | 0.00 |
| ATOM | 2807 | N    | ASN | X | 182 | 21.003 | 52.072 | 31.217 | 0.00 | 0.00 |
| ATOM | 2808 | H    | ASN | X | 182 | 21.745 | 51.790 | 31.842 | 0.00 | 0.00 |
| ATOM | 2809 | CA   | ASN | X | 182 | 21.319 | 51.918 | 29.801 | 0.00 | 0.00 |
| ATOM | 2810 | HA   | ASN | X | 182 | 20.474 | 52.259 | 29.202 | 0.00 | 0.00 |
| ATOM | 2811 | CB   | ASN | X | 182 | 22.534 | 52.774 | 29.372 | 0.00 | 0.00 |
| ATOM | 2812 | HB2  | ASN | X | 182 | 23.336 | 52.737 | 30.108 | 0.00 | 0.00 |
| ATOM | 2813 | HB3  | ASN | X | 182 | 22.848 | 52.497 | 28.366 | 0.00 | 0.00 |
| ATOM | 2814 | CG   | ASN | X | 182 | 22.111 | 54.244 | 29.348 | 0.00 | 0.00 |
| ATOM | 2815 | OD1  | ASN | X | 182 | 21.270 | 54.691 | 28.547 | 0.00 | 0.00 |
| ATOM | 2816 | ND2  | ASN | X | 182 | 22.707 | 55.045 | 30.167 | 0.00 | 0.00 |
| ATOM | 2817 | HD21 | ASN | X | 182 | 22.325 | 55.978 | 30.224 | 0.00 | 0.00 |
| ATOM | 2818 | HD22 | ASN | X | 182 | 23.371 | 54.674 | 30.832 | 0.00 | 0.00 |
| ATOM | 2819 | C    | ASN | X | 182 | 21.503 | 50.441 | 29.264 | 0.00 | 0.00 |
| ATOM | 2820 | O    | ASN | X | 182 | 21.365 | 50.271 | 28.012 | 0.00 | 0.00 |
| ATOM | 2821 | N    | VAL | X | 183 | 21.760 | 49.425 | 30.073 | 0.00 | 0.00 |
| ATOM | 2822 | H    | VAL | X | 183 | 21.526 | 49.626 | 31.035 | 0.00 | 0.00 |
| ATOM | 2823 | CA   | VAL | X | 183 | 22.059 | 48.021 | 29.618 | 0.00 | 0.00 |
| ATOM | 2824 | HA   | VAL | X | 183 | 22.841 | 48.116 | 28.865 | 0.00 | 0.00 |
| ATOM | 2825 | CB   | VAL | X | 183 | 22.701 | 47.275 | 30.768 | 0.00 | 0.00 |
| ATOM | 2826 | HB   | VAL | X | 183 | 23.420 | 47.939 | 31.247 | 0.00 | 0.00 |
| ATOM | 2827 | CG1  | VAL | X | 183 | 21.717 | 46.735 | 31.867 | 0.00 | 0.00 |
| ATOM | 2828 | HG11 | VAL | X | 183 | 22.286 | 46.243 | 32.656 | 0.00 | 0.00 |
| ATOM | 2829 | HG12 | VAL | X | 183 | 21.207 | 47.594 | 32.302 | 0.00 | 0.00 |
| ATOM | 2830 | HG13 | VAL | X | 183 | 20.937 | 46.103 | 31.441 | 0.00 | 0.00 |
| ATOM | 2831 | CG2  | VAL | X | 183 | 23.572 | 46.123 | 30.244 | 0.00 | 0.00 |
| ATOM | 2832 | HG21 | VAL | X | 183 | 22.840 | 45.450 | 29.797 | 0.00 | 0.00 |
| ATOM | 2833 | HG22 | VAL | X | 183 | 24.063 | 45.553 | 31.032 | 0.00 | 0.00 |
| ATOM | 2834 | HG23 | VAL | X | 183 | 24.286 | 46.529 | 29.527 | 0.00 | 0.00 |
| ATOM | 2835 | C    | VAL | X | 183 | 20.936 | 47.333 | 28.938 | 0.00 | 0.00 |
| ATOM | 2836 | O    | VAL | X | 183 | 21.211 | 46.488 | 28.086 | 0.00 | 0.00 |
| ATOM | 2837 | N    | ALA | X | 184 | 19.644 | 47.703 | 29.237 | 0.00 | 0.00 |
| ATOM | 2838 | H    | ALA | X | 184 | 19.511 | 48.415 | 29.940 | 0.00 | 0.00 |
| ATOM | 2839 | CA   | ALA | X | 184 | 18.414 | 47.304 | 28.516 | 0.00 | 0.00 |
| ATOM | 2840 | HA   | ALA | X | 184 | 18.338 | 46.222 | 28.628 | 0.00 | 0.00 |
| ATOM | 2841 | CB   | ALA | X | 184 | 17.243 | 48.041 | 29.159 | 0.00 | 0.00 |
| ATOM | 2842 | HB1  | ALA | X | 184 | 17.381 | 49.108 | 28.984 | 0.00 | 0.00 |
| ATOM | 2843 | HB2  | ALA | X | 184 | 17.291 | 47.898 | 30.238 | 0.00 | 0.00 |
| ATOM | 2844 | HB3  | ALA | X | 184 | 16.387 | 47.730 | 28.560 | 0.00 | 0.00 |
| ATOM | 2845 | C    | ALA | X | 184 | 18.418 | 47.622 | 27.010 | 0.00 | 0.00 |

|      |      |     |     |   |     |        |        |        |      |      |
|------|------|-----|-----|---|-----|--------|--------|--------|------|------|
| ATOM | 2846 | O   | ALA | X | 184 | 17.921 | 46.844 | 26.227 | 0.00 | 0.00 |
| ATOM | 2847 | N   | ALA | X | 185 | 19.070 | 48.683 | 26.589 | 0.00 | 0.00 |
| ATOM | 2848 | H   | ALA | X | 185 | 19.605 | 49.259 | 27.223 | 0.00 | 0.00 |
| ATOM | 2849 | CA  | ALA | X | 185 | 19.315 | 49.023 | 25.226 | 0.00 | 0.00 |
| ATOM | 2850 | HA  | ALA | X | 185 | 18.379 | 49.220 | 24.703 | 0.00 | 0.00 |
| ATOM | 2851 | CB  | ALA | X | 185 | 20.114 | 50.386 | 25.226 | 0.00 | 0.00 |
| ATOM | 2852 | HB1 | ALA | X | 185 | 19.669 | 51.074 | 25.945 | 0.00 | 0.00 |
| ATOM | 2853 | HB2 | ALA | X | 185 | 20.040 | 50.846 | 24.241 | 0.00 | 0.00 |
| ATOM | 2854 | HB3 | ALA | X | 185 | 21.167 | 50.325 | 25.497 | 0.00 | 0.00 |
| ATOM | 2855 | C   | ALA | X | 185 | 20.091 | 47.995 | 24.360 | 0.00 | 0.00 |
| ATOM | 2856 | O   | ALA | X | 185 | 19.761 | 47.745 | 23.209 | 0.00 | 0.00 |
| ATOM | 2857 | N   | PHE | X | 186 | 21.064 | 47.331 | 24.988 | 0.00 | 0.00 |
| ATOM | 2858 | H   | PHE | X | 186 | 21.311 | 47.698 | 25.896 | 0.00 | 0.00 |
| ATOM | 2859 | CA  | PHE | X | 186 | 21.943 | 46.351 | 24.333 | 0.00 | 0.00 |
| ATOM | 2860 | HA  | PHE | X | 186 | 22.006 | 46.666 | 23.292 | 0.00 | 0.00 |
| ATOM | 2861 | CB  | PHE | X | 186 | 23.317 | 46.527 | 24.978 | 0.00 | 0.00 |
| ATOM | 2862 | HB2 | PHE | X | 186 | 23.202 | 46.399 | 26.054 | 0.00 | 0.00 |
| ATOM | 2863 | HB3 | PHE | X | 186 | 24.088 | 45.807 | 24.703 | 0.00 | 0.00 |
| ATOM | 2864 | CG  | PHE | X | 186 | 23.919 | 47.877 | 24.755 | 0.00 | 0.00 |
| ATOM | 2865 | CD1 | PHE | X | 186 | 23.942 | 48.799 | 25.832 | 0.00 | 0.00 |
| ATOM | 2866 | HD1 | PHE | X | 186 | 23.653 | 48.514 | 26.833 | 0.00 | 0.00 |
| ATOM | 2867 | CE1 | PHE | X | 186 | 24.478 | 50.113 | 25.613 | 0.00 | 0.00 |
| ATOM | 2868 | HE1 | PHE | X | 186 | 24.439 | 50.842 | 26.409 | 0.00 | 0.00 |
| ATOM | 2869 | CZ  | PHE | X | 186 | 24.944 | 50.488 | 24.322 | 0.00 | 0.00 |
| ATOM | 2870 | HZ  | PHE | X | 186 | 25.267 | 51.490 | 24.082 | 0.00 | 0.00 |
| ATOM | 2871 | CE2 | PHE | X | 186 | 25.083 | 49.536 | 23.308 | 0.00 | 0.00 |
| ATOM | 2872 | HE2 | PHE | X | 186 | 25.392 | 49.848 | 22.321 | 0.00 | 0.00 |
| ATOM | 2873 | CD2 | PHE | X | 186 | 24.520 | 48.230 | 23.525 | 0.00 | 0.00 |
| ATOM | 2874 | HD2 | PHE | X | 186 | 24.309 | 47.603 | 22.671 | 0.00 | 0.00 |
| ATOM | 2875 | C   | PHE | X | 186 | 21.384 | 44.922 | 24.510 | 0.00 | 0.00 |
| ATOM | 2876 | O   | PHE | X | 186 | 21.996 | 43.939 | 24.043 | 0.00 | 0.00 |
| ATOM | 2877 | N   | GLY | X | 187 | 20.234 | 44.764 | 25.127 | 0.00 | 0.00 |
| ATOM | 2878 | H   | GLY | X | 187 | 19.830 | 45.614 | 25.493 | 0.00 | 0.00 |
| ATOM | 2879 | CA  | GLY | X | 187 | 19.606 | 43.427 | 25.376 | 0.00 | 0.00 |
| ATOM | 2880 | HA2 | GLY | X | 187 | 18.521 | 43.501 | 25.299 | 0.00 | 0.00 |
| ATOM | 2881 | HA3 | GLY | X | 187 | 19.972 | 42.726 | 24.627 | 0.00 | 0.00 |
| ATOM | 2882 | C   | GLY | X | 187 | 19.972 | 42.855 | 26.753 | 0.00 | 0.00 |
| ATOM | 2883 | O   | GLY | X | 187 | 19.460 | 41.751 | 26.959 | 0.00 | 0.00 |
| ATOM | 2884 | N   | GLY | X | 188 | 20.752 | 43.550 | 27.537 | 0.00 | 0.00 |
| ATOM | 2885 | H   | GLY | X | 188 | 21.176 | 44.418 | 27.243 | 0.00 | 0.00 |
| ATOM | 2886 | CA  | GLY | X | 188 | 20.981 | 43.043 | 28.846 | 0.00 | 0.00 |
| ATOM | 2887 | HA2 | GLY | X | 188 | 21.124 | 41.963 | 28.856 | 0.00 | 0.00 |
| ATOM | 2888 | HA3 | GLY | X | 188 | 21.816 | 43.628 | 29.231 | 0.00 | 0.00 |
| ATOM | 2889 | C   | GLY | X | 188 | 19.818 | 43.319 | 29.663 | 0.00 | 0.00 |
| ATOM | 2890 | O   | GLY | X | 188 | 18.862 | 44.052 | 29.245 | 0.00 | 0.00 |
| ATOM | 2891 | N   | ASP | X | 189 | 19.854 | 42.840 | 30.892 | 0.00 | 0.00 |
| ATOM | 2892 | H   | ASP | X | 189 | 20.518 | 42.089 | 31.015 | 0.00 | 0.00 |
| ATOM | 2893 | CA  | ASP | X | 189 | 18.839 | 43.025 | 31.946 | 0.00 | 0.00 |
| ATOM | 2894 | HA  | ASP | X | 189 | 17.968 | 43.588 | 31.612 | 0.00 | 0.00 |
| ATOM | 2895 | CB  | ASP | X | 189 | 18.252 | 41.645 | 32.273 | 0.00 | 0.00 |
| ATOM | 2896 | HB2 | ASP | X | 189 | 17.857 | 41.187 | 31.366 | 0.00 | 0.00 |
| ATOM | 2897 | HB3 | ASP | X | 189 | 19.001 | 41.084 | 32.831 | 0.00 | 0.00 |
| ATOM | 2898 | CG  | ASP | X | 189 | 17.097 | 41.811 | 33.335 | 0.00 | 0.00 |
| ATOM | 2899 | OD1 | ASP | X | 189 | 16.766 | 40.757 | 33.859 | 0.00 | 0.00 |
| ATOM | 2900 | OD2 | ASP | X | 189 | 16.643 | 42.964 | 33.679 | 0.00 | 0.00 |
| ATOM | 2901 | C   | ASP | X | 189 | 19.349 | 43.760 | 33.168 | 0.00 | 0.00 |
| ATOM | 2902 | O   | ASP | X | 189 | 19.975 | 43.203 | 34.056 | 0.00 | 0.00 |
| ATOM | 2903 | N   | PRO | X | 190 | 18.887 | 44.998 | 33.436 | 0.00 | 0.00 |
| ATOM | 2904 | CD  | PRO | X | 190 | 17.984 | 45.808 | 32.622 | 0.00 | 0.00 |
| ATOM | 2905 | HD2 | PRO | X | 190 | 17.169 | 45.281 | 32.126 | 0.00 | 0.00 |
| ATOM | 2906 | HD3 | PRO | X | 190 | 18.450 | 46.250 | 31.742 | 0.00 | 0.00 |
| ATOM | 2907 | CG  | PRO | X | 190 | 17.474 | 46.847 | 33.512 | 0.00 | 0.00 |
| ATOM | 2908 | HG2 | PRO | X | 190 | 16.729 | 46.428 | 34.188 | 0.00 | 0.00 |
| ATOM | 2909 | HG3 | PRO | X | 190 | 17.107 | 47.714 | 32.963 | 0.00 | 0.00 |
| ATOM | 2910 | CB  | PRO | X | 190 | 18.667 | 47.188 | 34.493 | 0.00 | 0.00 |
| ATOM | 2911 | HB2 | PRO | X | 190 | 18.431 | 47.663 | 35.445 | 0.00 | 0.00 |
| ATOM | 2912 | HB3 | PRO | X | 190 | 19.356 | 47.792 | 33.901 | 0.00 | 0.00 |

|      |      |      |     |   |     |        |        |        |      |      |
|------|------|------|-----|---|-----|--------|--------|--------|------|------|
| ATOM | 2913 | CA   | PRO | X | 190 | 19.322 | 45.806 | 34.604 | 0.00 | 0.00 |
| ATOM | 2914 | HA   | PRO | X | 190 | 20.396 | 45.974 | 34.677 | 0.00 | 0.00 |
| ATOM | 2915 | C    | PRO | X | 190 | 18.899 | 45.113 | 35.961 | 0.00 | 0.00 |
| ATOM | 2916 | O    | PRO | X | 190 | 19.557 | 45.313 | 36.970 | 0.00 | 0.00 |
| ATOM | 2917 | N    | THR | X | 191 | 17.879 | 44.269 | 36.014 | 0.00 | 0.00 |
| ATOM | 2918 | H    | THR | X | 191 | 17.274 | 44.180 | 35.210 | 0.00 | 0.00 |
| ATOM | 2919 | CA   | THR | X | 191 | 17.406 | 43.485 | 37.295 | 0.00 | 0.00 |
| ATOM | 2920 | HA   | THR | X | 191 | 17.604 | 44.076 | 38.189 | 0.00 | 0.00 |
| ATOM | 2921 | CB   | THR | X | 191 | 15.890 | 43.041 | 37.190 | 0.00 | 0.00 |
| ATOM | 2922 | HB   | THR | X | 191 | 15.499 | 42.619 | 38.116 | 0.00 | 0.00 |
| ATOM | 2923 | CG2  | THR | X | 191 | 14.857 | 44.099 | 37.010 | 0.00 | 0.00 |
| ATOM | 2924 | HG21 | THR | X | 191 | 15.109 | 44.851 | 37.758 | 0.00 | 0.00 |
| ATOM | 2925 | HG22 | THR | X | 191 | 13.903 | 43.578 | 37.078 | 0.00 | 0.00 |
| ATOM | 2926 | HG23 | THR | X | 191 | 14.926 | 44.578 | 36.033 | 0.00 | 0.00 |
| ATOM | 2927 | OG1  | THR | X | 191 | 15.595 | 42.028 | 36.206 | 0.00 | 0.00 |
| ATOM | 2928 | HG1  | THR | X | 191 | 16.147 | 42.234 | 35.448 | 0.00 | 0.00 |
| ATOM | 2929 | C    | THR | X | 191 | 18.316 | 42.290 | 37.536 | 0.00 | 0.00 |
| ATOM | 2930 | O    | THR | X | 191 | 18.341 | 41.704 | 38.612 | 0.00 | 0.00 |
| ATOM | 2931 | N    | SER | X | 192 | 19.147 | 41.858 | 36.600 | 0.00 | 0.00 |
| ATOM | 2932 | H    | SER | X | 192 | 19.193 | 42.245 | 35.669 | 0.00 | 0.00 |
| ATOM | 2933 | CA   | SER | X | 192 | 20.115 | 40.754 | 36.766 | 0.00 | 0.00 |
| ATOM | 2934 | HA   | SER | X | 192 | 20.110 | 40.414 | 37.802 | 0.00 | 0.00 |
| ATOM | 2935 | CB   | SER | X | 192 | 19.619 | 39.625 | 35.907 | 0.00 | 0.00 |
| ATOM | 2936 | HB2  | SER | X | 192 | 19.905 | 39.720 | 34.859 | 0.00 | 0.00 |
| ATOM | 2937 | HB3  | SER | X | 192 | 20.195 | 38.776 | 36.275 | 0.00 | 0.00 |
| ATOM | 2938 | OG   | SER | X | 192 | 18.178 | 39.358 | 35.981 | 0.00 | 0.00 |
| ATOM | 2939 | HG   | SER | X | 192 | 17.709 | 40.029 | 35.480 | 0.00 | 0.00 |
| ATOM | 2940 | C    | SER | X | 192 | 21.534 | 41.075 | 36.456 | 0.00 | 0.00 |
| ATOM | 2941 | O    | SER | X | 192 | 22.031 | 40.663 | 35.401 | 0.00 | 0.00 |
| ATOM | 2942 | N    | VAL | X | 193 | 22.182 | 41.927 | 37.358 | 0.00 | 0.00 |
| ATOM | 2943 | H    | VAL | X | 193 | 21.660 | 42.372 | 38.099 | 0.00 | 0.00 |
| ATOM | 2944 | CA   | VAL | X | 193 | 23.573 | 42.429 | 37.122 | 0.00 | 0.00 |
| ATOM | 2945 | HA   | VAL | X | 193 | 23.892 | 42.154 | 36.117 | 0.00 | 0.00 |
| ATOM | 2946 | CB   | VAL | X | 193 | 23.665 | 43.985 | 37.313 | 0.00 | 0.00 |
| ATOM | 2947 | HB   | VAL | X | 193 | 23.001 | 44.249 | 38.137 | 0.00 | 0.00 |
| ATOM | 2948 | CG1  | VAL | X | 193 | 25.066 | 44.626 | 37.476 | 0.00 | 0.00 |
| ATOM | 2949 | HG11 | VAL | X | 193 | 25.021 | 45.700 | 37.658 | 0.00 | 0.00 |
| ATOM | 2950 | HG12 | VAL | X | 193 | 25.583 | 44.228 | 38.349 | 0.00 | 0.00 |
| ATOM | 2951 | HG13 | VAL | X | 193 | 25.616 | 44.500 | 36.543 | 0.00 | 0.00 |
| ATOM | 2952 | CG2  | VAL | X | 193 | 23.093 | 44.699 | 36.075 | 0.00 | 0.00 |
| ATOM | 2953 | HG21 | VAL | X | 193 | 22.187 | 44.136 | 35.849 | 0.00 | 0.00 |
| ATOM | 2954 | HG22 | VAL | X | 193 | 23.896 | 44.657 | 35.338 | 0.00 | 0.00 |
| ATOM | 2955 | HG23 | VAL | X | 193 | 22.878 | 45.741 | 36.311 | 0.00 | 0.00 |
| ATOM | 2956 | C    | VAL | X | 193 | 24.566 | 41.799 | 38.093 | 0.00 | 0.00 |
| ATOM | 2957 | O    | VAL | X | 193 | 24.338 | 41.759 | 39.324 | 0.00 | 0.00 |
| ATOM | 2958 | N    | THR | X | 194 | 25.729 | 41.376 | 37.571 | 0.00 | 0.00 |
| ATOM | 2959 | H    | THR | X | 194 | 25.791 | 41.247 | 36.571 | 0.00 | 0.00 |
| ATOM | 2960 | CA   | THR | X | 194 | 26.787 | 40.637 | 38.291 | 0.00 | 0.00 |
| ATOM | 2961 | HA   | THR | X | 194 | 26.501 | 40.400 | 39.316 | 0.00 | 0.00 |
| ATOM | 2962 | CB   | THR | X | 194 | 27.054 | 39.236 | 37.674 | 0.00 | 0.00 |
| ATOM | 2963 | HB   | THR | X | 194 | 27.018 | 39.391 | 36.596 | 0.00 | 0.00 |
| ATOM | 2964 | CG2  | THR | X | 194 | 28.372 | 38.580 | 38.105 | 0.00 | 0.00 |
| ATOM | 2965 | HG21 | THR | X | 194 | 28.577 | 38.403 | 39.161 | 0.00 | 0.00 |
| ATOM | 2966 | HG22 | THR | X | 194 | 29.248 | 39.149 | 37.791 | 0.00 | 0.00 |
| ATOM | 2967 | HG23 | THR | X | 194 | 28.436 | 37.592 | 37.649 | 0.00 | 0.00 |
| ATOM | 2968 | OG1  | THR | X | 194 | 25.996 | 38.373 | 37.999 | 0.00 | 0.00 |
| ATOM | 2969 | HG1  | THR | X | 194 | 25.165 | 38.729 | 37.675 | 0.00 | 0.00 |
| ATOM | 2970 | C    | THR | X | 194 | 28.116 | 41.405 | 38.179 | 0.00 | 0.00 |
| ATOM | 2971 | O    | THR | X | 194 | 28.652 | 41.657 | 37.122 | 0.00 | 0.00 |
| ATOM | 2972 | N    | LEU | X | 195 | 28.746 | 41.625 | 39.336 | 0.00 | 0.00 |
| ATOM | 2973 | H    | LEU | X | 195 | 28.369 | 41.252 | 40.196 | 0.00 | 0.00 |
| ATOM | 2974 | CA   | LEU | X | 195 | 30.061 | 42.218 | 39.432 | 0.00 | 0.00 |
| ATOM | 2975 | HA   | LEU | X | 195 | 30.294 | 42.838 | 38.567 | 0.00 | 0.00 |
| ATOM | 2976 | CB   | LEU | X | 195 | 30.318 | 42.964 | 40.740 | 0.00 | 0.00 |
| ATOM | 2977 | HB2  | LEU | X | 195 | 30.188 | 42.199 | 41.506 | 0.00 | 0.00 |
| ATOM | 2978 | HB3  | LEU | X | 195 | 31.370 | 43.251 | 40.754 | 0.00 | 0.00 |
| ATOM | 2979 | CG   | LEU | X | 195 | 29.505 | 44.204 | 41.063 | 0.00 | 0.00 |



|      |      |      |     |   |     |        |        |        |      |      |
|------|------|------|-----|---|-----|--------|--------|--------|------|------|
| ATOM | 2980 | HG   | LEU | X | 195 | 28.437 | 43.988 | 41.089 | 0.00 | 0.00 |
| ATOM | 2981 | CD1  | LEU | X | 195 | 29.826 | 44.605 | 42.512 | 0.00 | 0.00 |
| ATOM | 2982 | HD11 | LEU | X | 195 | 29.862 | 43.756 | 43.195 | 0.00 | 0.00 |
| ATOM | 2983 | HD12 | LEU | X | 195 | 29.140 | 45.423 | 42.729 | 0.00 | 0.00 |
| ATOM | 2984 | HD13 | LEU | X | 195 | 30.850 | 44.955 | 42.638 | 0.00 | 0.00 |
| ATOM | 2985 | CD2  | LEU | X | 195 | 29.935 | 45.285 | 40.153 | 0.00 | 0.00 |
| ATOM | 2986 | HD21 | LEU | X | 195 | 29.406 | 46.165 | 40.518 | 0.00 | 0.00 |
| ATOM | 2987 | HD22 | LEU | X | 195 | 31.005 | 45.488 | 40.102 | 0.00 | 0.00 |
| ATOM | 2988 | HD23 | LEU | X | 195 | 29.510 | 44.999 | 39.190 | 0.00 | 0.00 |
| ATOM | 2989 | C    | LEU | X | 195 | 31.169 | 41.161 | 39.379 | 0.00 | 0.00 |
| ATOM | 2990 | O    | LEU | X | 195 | 31.045 | 40.108 | 39.992 | 0.00 | 0.00 |
| ATOM | 2991 | N    | PHE | X | 196 | 32.117 | 41.398 | 38.509 | 0.00 | 0.00 |
| ATOM | 2992 | H    | PHE | X | 196 | 32.088 | 42.267 | 37.995 | 0.00 | 0.00 |
| ATOM | 2993 | CA   | PHE | X | 196 | 33.039 | 40.386 | 37.975 | 0.00 | 0.00 |
| ATOM | 2994 | HA   | PHE | X | 196 | 33.071 | 39.569 | 38.696 | 0.00 | 0.00 |
| ATOM | 2995 | CB   | PHE | X | 196 | 32.509 | 39.915 | 36.624 | 0.00 | 0.00 |
| ATOM | 2996 | HB2  | PHE | X | 196 | 31.506 | 39.508 | 36.757 | 0.00 | 0.00 |
| ATOM | 2997 | HB3  | PHE | X | 196 | 32.401 | 40.810 | 36.013 | 0.00 | 0.00 |
| ATOM | 2998 | CG   | PHE | X | 196 | 33.215 | 38.938 | 35.788 | 0.00 | 0.00 |
| ATOM | 2999 | CD1  | PHE | X | 196 | 33.220 | 39.127 | 34.389 | 0.00 | 0.00 |
| ATOM | 3000 | HD1  | PHE | X | 196 | 32.612 | 39.906 | 33.954 | 0.00 | 0.00 |
| ATOM | 3001 | CE1  | PHE | X | 196 | 33.613 | 38.139 | 33.493 | 0.00 | 0.00 |
| ATOM | 3002 | HE1  | PHE | X | 196 | 33.643 | 38.332 | 32.431 | 0.00 | 0.00 |
| ATOM | 3003 | CZ   | PHE | X | 196 | 34.208 | 37.003 | 34.004 | 0.00 | 0.00 |
| ATOM | 3004 | HZ   | PHE | X | 196 | 34.586 | 36.200 | 33.389 | 0.00 | 0.00 |
| ATOM | 3005 | CE2  | PHE | X | 196 | 34.426 | 36.853 | 35.346 | 0.00 | 0.00 |
| ATOM | 3006 | HE2  | PHE | X | 196 | 34.961 | 35.963 | 35.646 | 0.00 | 0.00 |
| ATOM | 3007 | CD2  | PHE | X | 196 | 33.884 | 37.795 | 36.283 | 0.00 | 0.00 |
| ATOM | 3008 | HD2  | PHE | X | 196 | 33.919 | 37.711 | 37.359 | 0.00 | 0.00 |
| ATOM | 3009 | C    | PHE | X | 196 | 34.478 | 40.877 | 37.798 | 0.00 | 0.00 |
| ATOM | 3010 | O    | PHE | X | 196 | 34.609 | 41.980 | 37.276 | 0.00 | 0.00 |
| ATOM | 3011 | N    | GLY | X | 197 | 35.510 | 40.225 | 38.387 | 0.00 | 0.00 |
| ATOM | 3012 | H    | GLY | X | 197 | 35.520 | 39.419 | 38.995 | 0.00 | 0.00 |
| ATOM | 3013 | CA   | GLY | X | 197 | 36.802 | 40.889 | 38.522 | 0.00 | 0.00 |
| ATOM | 3014 | HA2  | GLY | X | 197 | 37.096 | 41.282 | 37.549 | 0.00 | 0.00 |
| ATOM | 3015 | HA3  | GLY | X | 197 | 36.703 | 41.675 | 39.271 | 0.00 | 0.00 |
| ATOM | 3016 | C    | GLY | X | 197 | 37.907 | 39.958 | 39.102 | 0.00 | 0.00 |
| ATOM | 3017 | O    | GLY | X | 197 | 37.546 | 38.941 | 39.699 | 0.00 | 0.00 |
| ATOM | 3018 | N    | GLU | X | 198 | 39.203 | 40.300 | 38.790 | 0.00 | 0.00 |
| ATOM | 3019 | H    | GLU | X | 198 | 39.311 | 41.170 | 38.288 | 0.00 | 0.00 |
| ATOM | 3020 | CA   | GLU | X | 198 | 40.406 | 39.591 | 39.129 | 0.00 | 0.00 |
| ATOM | 3021 | HA   | GLU | X | 198 | 40.101 | 38.716 | 39.704 | 0.00 | 0.00 |
| ATOM | 3022 | CB   | GLU | X | 198 | 40.900 | 39.062 | 37.815 | 0.00 | 0.00 |
| ATOM | 3023 | HB2  | GLU | X | 198 | 41.644 | 38.288 | 38.006 | 0.00 | 0.00 |
| ATOM | 3024 | HB3  | GLU | X | 198 | 40.102 | 38.457 | 37.383 | 0.00 | 0.00 |
| ATOM | 3025 | CG   | GLU | X | 198 | 41.396 | 40.139 | 36.771 | 0.00 | 0.00 |
| ATOM | 3026 | HG2  | GLU | X | 198 | 41.244 | 39.698 | 35.786 | 0.00 | 0.00 |
| ATOM | 3027 | HG3  | GLU | X | 198 | 40.737 | 40.964 | 37.041 | 0.00 | 0.00 |
| ATOM | 3028 | CD   | GLU | X | 198 | 42.807 | 40.576 | 36.836 | 0.00 | 0.00 |
| ATOM | 3029 | OE1  | GLU | X | 198 | 43.221 | 41.178 | 35.794 | 0.00 | 0.00 |
| ATOM | 3030 | OE2  | GLU | X | 198 | 43.510 | 40.251 | 37.803 | 0.00 | 0.00 |
| ATOM | 3031 | C    | GLU | X | 198 | 41.360 | 40.485 | 40.001 | 0.00 | 0.00 |
| ATOM | 3032 | O    | GLU | X | 198 | 41.431 | 41.669 | 39.787 | 0.00 | 0.00 |
| ATOM | 3033 | N    | XA1 | X | 199 | 42.029 | 39.887 | 40.958 | 0.00 | 0.00 |
| ATOM | 3034 | CA   | XA1 | X | 199 | 43.036 | 40.590 | 41.684 | 0.00 | 0.00 |
| ATOM | 3035 | C    | XA1 | X | 199 | 42.570 | 41.975 | 42.301 | 0.00 | 0.00 |
| ATOM | 3036 | O    | XA1 | X | 199 | 41.675 | 41.978 | 43.178 | 0.00 | 0.00 |
| ATOM | 3037 | CB   | XA1 | X | 199 | 44.377 | 40.756 | 40.900 | 0.00 | 0.00 |
| ATOM | 3038 | OG   | XA1 | X | 199 | 45.416 | 41.241 | 41.790 | 0.00 | 0.00 |
| ATOM | 3039 | P1   | XA1 | X | 199 | 46.587 | 42.065 | 41.193 | 0.00 | 0.00 |
| ATOM | 3040 | O1   | XA1 | X | 199 | 45.913 | 43.263 | 40.719 | 0.00 | 0.00 |
| ATOM | 3041 | O2   | XA1 | X | 199 | 47.386 | 41.198 | 40.343 | 0.00 | 0.00 |
| ATOM | 3042 | C1   | XA1 | X | 199 | 47.492 | 42.510 | 42.576 | 0.00 | 0.00 |
| ATOM | 3043 | H    | XA1 | X | 199 | 41.896 | 38.919 | 41.213 | 0.00 | 0.00 |
| ATOM | 3044 | HA   | XA1 | X | 199 | 43.198 | 40.029 | 42.604 | 0.00 | 0.00 |
| ATOM | 3045 | HB2  | XA1 | X | 199 | 44.681 | 39.767 | 40.546 | 0.00 | 0.00 |
| ATOM | 3046 | HB3  | XA1 | X | 199 | 44.317 | 41.419 | 40.033 | 0.00 | 0.00 |

|      |      |      |     |   |     |        |        |        |      |      |
|------|------|------|-----|---|-----|--------|--------|--------|------|------|
| ATOM | 3047 | H11  | XA1 | X | 199 | 47.595 | 41.591 | 43.157 | 0.00 | 0.00 |
| ATOM | 3048 | H12  | XA1 | X | 199 | 48.496 | 42.804 | 42.262 | 0.00 | 0.00 |
| ATOM | 3049 | H13  | XA1 | X | 199 | 46.918 | 43.261 | 43.123 | 0.00 | 0.00 |
| ATOM | 3050 | N    | ALA | X | 200 | 43.186 | 43.104 | 41.894 | 0.00 | 0.00 |
| ATOM | 3051 | H    | ALA | X | 200 | 43.969 | 42.994 | 41.265 | 0.00 | 0.00 |
| ATOM | 3052 | CA   | ALA | X | 200 | 42.798 | 44.435 | 42.390 | 0.00 | 0.00 |
| ATOM | 3053 | HA   | ALA | X | 200 | 42.798 | 44.353 | 43.477 | 0.00 | 0.00 |
| ATOM | 3054 | CB   | ALA | X | 200 | 43.698 | 45.605 | 41.825 | 0.00 | 0.00 |
| ATOM | 3055 | HB1  | ALA | X | 200 | 43.413 | 46.585 | 42.208 | 0.00 | 0.00 |
| ATOM | 3056 | HB2  | ALA | X | 200 | 43.730 | 45.566 | 40.736 | 0.00 | 0.00 |
| ATOM | 3057 | HB3  | ALA | X | 200 | 44.768 | 45.429 | 41.940 | 0.00 | 0.00 |
| ATOM | 3058 | C    | ALA | X | 200 | 41.305 | 44.772 | 41.949 | 0.00 | 0.00 |
| ATOM | 3059 | O    | ALA | X | 200 | 40.531 | 45.514 | 42.577 | 0.00 | 0.00 |
| ATOM | 3060 | N    | GLY | X | 201 | 40.852 | 44.256 | 40.840 | 0.00 | 0.00 |
| ATOM | 3061 | H    | GLY | X | 201 | 41.453 | 43.653 | 40.296 | 0.00 | 0.00 |
| ATOM | 3062 | CA   | GLY | X | 201 | 39.451 | 44.302 | 40.359 | 0.00 | 0.00 |
| ATOM | 3063 | HA2  | GLY | X | 201 | 38.961 | 45.275 | 40.380 | 0.00 | 0.00 |
| ATOM | 3064 | HA3  | GLY | X | 201 | 39.376 | 43.977 | 39.322 | 0.00 | 0.00 |
| ATOM | 3065 | C    | GLY | X | 201 | 38.617 | 43.434 | 41.271 | 0.00 | 0.00 |
| ATOM | 3066 | O    | GLY | X | 201 | 37.574 | 43.867 | 41.728 | 0.00 | 0.00 |
| ATOM | 3067 | N    | ALA | X | 202 | 39.074 | 42.190 | 41.536 | 0.00 | 0.00 |
| ATOM | 3068 | H    | ALA | X | 202 | 39.992 | 41.843 | 41.297 | 0.00 | 0.00 |
| ATOM | 3069 | CA   | ALA | X | 202 | 38.364 | 41.372 | 42.549 | 0.00 | 0.00 |
| ATOM | 3070 | HA   | ALA | X | 202 | 37.383 | 41.242 | 42.091 | 0.00 | 0.00 |
| ATOM | 3071 | CB   | ALA | X | 202 | 39.107 | 39.982 | 42.683 | 0.00 | 0.00 |
| ATOM | 3072 | HB1  | ALA | X | 202 | 39.272 | 39.582 | 41.683 | 0.00 | 0.00 |
| ATOM | 3073 | HB2  | ALA | X | 202 | 38.523 | 39.307 | 43.310 | 0.00 | 0.00 |
| ATOM | 3074 | HB3  | ALA | X | 202 | 39.999 | 40.117 | 43.295 | 0.00 | 0.00 |
| ATOM | 3075 | C    | ALA | X | 202 | 38.233 | 42.053 | 43.950 | 0.00 | 0.00 |
| ATOM | 3076 | O    | ALA | X | 202 | 37.257 | 41.956 | 44.698 | 0.00 | 0.00 |
| ATOM | 3077 | N    | ALA | X | 203 | 39.273 | 42.811 | 44.342 | 0.00 | 0.00 |
| ATOM | 3078 | H    | ALA | X | 203 | 40.147 | 42.805 | 43.835 | 0.00 | 0.00 |
| ATOM | 3079 | CA   | ALA | X | 203 | 39.174 | 43.703 | 45.510 | 0.00 | 0.00 |
| ATOM | 3080 | HA   | ALA | X | 203 | 38.841 | 43.047 | 46.313 | 0.00 | 0.00 |
| ATOM | 3081 | CB   | ALA | X | 203 | 40.536 | 44.319 | 45.869 | 0.00 | 0.00 |
| ATOM | 3082 | HB1  | ALA | X | 203 | 40.356 | 44.790 | 46.836 | 0.00 | 0.00 |
| ATOM | 3083 | HB2  | ALA | X | 203 | 40.763 | 45.047 | 45.090 | 0.00 | 0.00 |
| ATOM | 3084 | HB3  | ALA | X | 203 | 41.232 | 43.481 | 45.854 | 0.00 | 0.00 |
| ATOM | 3085 | C    | ALA | X | 203 | 38.214 | 44.820 | 45.300 | 0.00 | 0.00 |
| ATOM | 3086 | O    | ALA | X | 203 | 37.426 | 45.139 | 46.212 | 0.00 | 0.00 |
| ATOM | 3087 | N    | SER | X | 204 | 38.159 | 45.413 | 44.090 | 0.00 | 0.00 |
| ATOM | 3088 | H    | SER | X | 204 | 38.804 | 45.078 | 43.389 | 0.00 | 0.00 |
| ATOM | 3089 | CA   | SER | X | 204 | 37.261 | 46.539 | 43.705 | 0.00 | 0.00 |
| ATOM | 3090 | HA   | SER | X | 204 | 37.321 | 47.394 | 44.379 | 0.00 | 0.00 |
| ATOM | 3091 | CB   | SER | X | 204 | 37.521 | 46.998 | 42.272 | 0.00 | 0.00 |
| ATOM | 3092 | HB2  | SER | X | 204 | 37.357 | 46.238 | 41.508 | 0.00 | 0.00 |
| ATOM | 3093 | HB3  | SER | X | 204 | 36.810 | 47.820 | 42.184 | 0.00 | 0.00 |
| ATOM | 3094 | OG   | SER | X | 204 | 38.741 | 47.614 | 42.001 | 0.00 | 0.00 |
| ATOM | 3095 | HG   | SER | X | 204 | 39.537 | 47.095 | 42.134 | 0.00 | 0.00 |
| ATOM | 3096 | C    | SER | X | 204 | 35.794 | 46.072 | 43.830 | 0.00 | 0.00 |
| ATOM | 3097 | O    | SER | X | 204 | 35.007 | 46.702 | 44.551 | 0.00 | 0.00 |
| ATOM | 3098 | N    | VAL | X | 205 | 35.399 | 44.944 | 43.214 | 0.00 | 0.00 |
| ATOM | 3099 | H    | VAL | X | 205 | 36.071 | 44.659 | 42.516 | 0.00 | 0.00 |
| ATOM | 3100 | CA   | VAL | X | 205 | 34.135 | 44.288 | 43.211 | 0.00 | 0.00 |
| ATOM | 3101 | HA   | VAL | X | 205 | 33.316 | 44.827 | 42.735 | 0.00 | 0.00 |
| ATOM | 3102 | CB   | VAL | X | 205 | 34.299 | 42.888 | 42.423 | 0.00 | 0.00 |
| ATOM | 3103 | HB   | VAL | X | 205 | 35.242 | 42.498 | 42.807 | 0.00 | 0.00 |
| ATOM | 3104 | CG1  | VAL | X | 205 | 33.114 | 41.880 | 42.697 | 0.00 | 0.00 |
| ATOM | 3105 | HG11 | VAL | X | 205 | 32.109 | 42.301 | 42.719 | 0.00 | 0.00 |
| ATOM | 3106 | HG12 | VAL | X | 205 | 33.094 | 41.021 | 42.025 | 0.00 | 0.00 |
| ATOM | 3107 | HG13 | VAL | X | 205 | 33.298 | 41.377 | 43.646 | 0.00 | 0.00 |
| ATOM | 3108 | CG2  | VAL | X | 205 | 34.335 | 43.103 | 40.970 | 0.00 | 0.00 |
| ATOM | 3109 | HG21 | VAL | X | 205 | 34.378 | 42.119 | 40.503 | 0.00 | 0.00 |
| ATOM | 3110 | HG22 | VAL | X | 205 | 35.217 | 43.619 | 40.590 | 0.00 | 0.00 |
| ATOM | 3111 | HG23 | VAL | X | 205 | 33.471 | 43.694 | 40.668 | 0.00 | 0.00 |
| ATOM | 3112 | C    | VAL | X | 205 | 33.745 | 43.887 | 44.726 | 0.00 | 0.00 |
| ATOM | 3113 | O    | VAL | X | 205 | 32.585 | 44.145 | 45.068 | 0.00 | 0.00 |

|      |      |      |     |   |     |        |        |        |      |      |
|------|------|------|-----|---|-----|--------|--------|--------|------|------|
| ATOM | 3114 | N    | GLY | X | 206 | 34.692 | 43.508 | 45.606 | 0.00 | 0.00 |
| ATOM | 3115 | H    | GLY | X | 206 | 35.574 | 43.268 | 45.176 | 0.00 | 0.00 |
| ATOM | 3116 | CA   | GLY | X | 206 | 34.499 | 43.286 | 47.092 | 0.00 | 0.00 |
| ATOM | 3117 | HA2  | GLY | X | 206 | 33.742 | 42.522 | 47.267 | 0.00 | 0.00 |
| ATOM | 3118 | HA3  | GLY | X | 206 | 35.432 | 42.962 | 47.554 | 0.00 | 0.00 |
| ATOM | 3119 | C    | GLY | X | 206 | 34.305 | 44.513 | 47.944 | 0.00 | 0.00 |
| ATOM | 3120 | O    | GLY | X | 206 | 33.697 | 44.424 | 49.007 | 0.00 | 0.00 |
| ATOM | 3121 | N    | MET | X | 207 | 34.917 | 45.653 | 47.461 | 0.00 | 0.00 |
| ATOM | 3122 | H    | MET | X | 207 | 35.472 | 45.594 | 46.620 | 0.00 | 0.00 |
| ATOM | 3123 | CA   | MET | X | 207 | 34.755 | 46.985 | 48.005 | 0.00 | 0.00 |
| ATOM | 3124 | HA   | MET | X | 207 | 34.848 | 46.903 | 49.088 | 0.00 | 0.00 |
| ATOM | 3125 | CB   | MET | X | 207 | 35.931 | 47.925 | 47.671 | 0.00 | 0.00 |
| ATOM | 3126 | HB2  | MET | X | 207 | 36.192 | 47.830 | 46.617 | 0.00 | 0.00 |
| ATOM | 3127 | HB3  | MET | X | 207 | 35.698 | 48.941 | 47.991 | 0.00 | 0.00 |
| ATOM | 3128 | CG   | MET | X | 207 | 37.112 | 47.541 | 48.531 | 0.00 | 0.00 |
| ATOM | 3129 | HG2  | MET | X | 207 | 36.954 | 47.817 | 49.574 | 0.00 | 0.00 |
| ATOM | 3130 | HG3  | MET | X | 207 | 37.157 | 46.453 | 48.468 | 0.00 | 0.00 |
| ATOM | 3131 | SD   | MET | X | 207 | 38.690 | 48.189 | 47.785 | 0.00 | 0.00 |
| ATOM | 3132 | CE   | MET | X | 207 | 39.768 | 47.069 | 48.651 | 0.00 | 0.00 |
| ATOM | 3133 | HE1  | MET | X | 207 | 40.713 | 47.528 | 48.941 | 0.00 | 0.00 |
| ATOM | 3134 | HE2  | MET | X | 207 | 39.373 | 46.803 | 49.632 | 0.00 | 0.00 |
| ATOM | 3135 | HE3  | MET | X | 207 | 39.986 | 46.274 | 47.938 | 0.00 | 0.00 |
| ATOM | 3136 | C    | MET | X | 207 | 33.353 | 47.488 | 47.735 | 0.00 | 0.00 |
| ATOM | 3137 | O    | MET | X | 207 | 32.736 | 48.086 | 48.596 | 0.00 | 0.00 |
| ATOM | 3138 | N    | HIE | X | 208 | 32.829 | 47.183 | 46.536 | 0.00 | 0.00 |
| ATOM | 3139 | H    | HIE | X | 208 | 33.457 | 46.774 | 45.859 | 0.00 | 0.00 |
| ATOM | 3140 | CA   | HIE | X | 208 | 31.368 | 47.407 | 46.109 | 0.00 | 0.00 |
| ATOM | 3141 | HA   | HIE | X | 208 | 31.031 | 48.389 | 46.441 | 0.00 | 0.00 |
| ATOM | 3142 | CB   | HIE | X | 208 | 31.221 | 47.230 | 44.584 | 0.00 | 0.00 |
| ATOM | 3143 | HB2  | HIE | X | 208 | 31.715 | 46.331 | 44.215 | 0.00 | 0.00 |
| ATOM | 3144 | HB3  | HIE | X | 208 | 30.168 | 47.107 | 44.332 | 0.00 | 0.00 |
| ATOM | 3145 | CG   | HIE | X | 208 | 31.912 | 48.397 | 43.825 | 0.00 | 0.00 |
| ATOM | 3146 | ND1  | HIE | X | 208 | 31.964 | 49.733 | 44.238 | 0.00 | 0.00 |
| ATOM | 3147 | CE1  | HIE | X | 208 | 32.941 | 50.278 | 43.502 | 0.00 | 0.00 |
| ATOM | 3148 | HE1  | HIE | X | 208 | 33.175 | 51.322 | 43.654 | 0.00 | 0.00 |
| ATOM | 3149 | NE2  | HIE | X | 208 | 33.515 | 49.401 | 42.681 | 0.00 | 0.00 |
| ATOM | 3150 | HE2  | HIE | X | 208 | 34.306 | 49.553 | 42.070 | 0.00 | 0.00 |
| ATOM | 3151 | CD2  | HIE | X | 208 | 32.838 | 48.215 | 42.863 | 0.00 | 0.00 |
| ATOM | 3152 | HD2  | HIE | X | 208 | 33.138 | 47.283 | 42.408 | 0.00 | 0.00 |
| ATOM | 3153 | C    | HIE | X | 208 | 30.374 | 46.483 | 46.907 | 0.00 | 0.00 |
| ATOM | 3154 | O    | HIE | X | 208 | 29.248 | 46.837 | 47.160 | 0.00 | 0.00 |
| ATOM | 3155 | N    | LEU | X | 209 | 30.880 | 45.323 | 47.346 | 0.00 | 0.00 |
| ATOM | 3156 | H    | LEU | X | 209 | 31.749 | 45.115 | 46.875 | 0.00 | 0.00 |
| ATOM | 3157 | CA   | LEU | X | 209 | 30.177 | 44.358 | 48.187 | 0.00 | 0.00 |
| ATOM | 3158 | HA   | LEU | X | 209 | 29.168 | 44.259 | 47.788 | 0.00 | 0.00 |
| ATOM | 3159 | CB   | LEU | X | 209 | 30.896 | 43.005 | 47.960 | 0.00 | 0.00 |
| ATOM | 3160 | HB2  | LEU | X | 209 | 30.844 | 42.696 | 46.916 | 0.00 | 0.00 |
| ATOM | 3161 | HB3  | LEU | X | 209 | 31.909 | 43.087 | 48.356 | 0.00 | 0.00 |
| ATOM | 3162 | CG   | LEU | X | 209 | 30.328 | 41.866 | 48.808 | 0.00 | 0.00 |
| ATOM | 3163 | HG   | LEU | X | 209 | 30.502 | 42.184 | 49.836 | 0.00 | 0.00 |
| ATOM | 3164 | CD1  | LEU | X | 209 | 28.831 | 41.482 | 48.679 | 0.00 | 0.00 |
| ATOM | 3165 | HD11 | LEU | X | 209 | 28.763 | 40.548 | 49.237 | 0.00 | 0.00 |
| ATOM | 3166 | HD12 | LEU | X | 209 | 28.507 | 41.334 | 47.649 | 0.00 | 0.00 |
| ATOM | 3167 | HD13 | LEU | X | 209 | 28.184 | 42.302 | 48.992 | 0.00 | 0.00 |
| ATOM | 3168 | CD2  | LEU | X | 209 | 31.224 | 40.597 | 48.654 | 0.00 | 0.00 |
| ATOM | 3169 | HD21 | LEU | X | 209 | 31.253 | 40.266 | 47.615 | 0.00 | 0.00 |
| ATOM | 3170 | HD22 | LEU | X | 209 | 32.237 | 40.805 | 48.998 | 0.00 | 0.00 |
| ATOM | 3171 | HD23 | LEU | X | 209 | 30.947 | 39.684 | 49.182 | 0.00 | 0.00 |
| ATOM | 3172 | C    | LEU | X | 209 | 30.089 | 44.808 | 49.624 | 0.00 | 0.00 |
| ATOM | 3173 | O    | LEU | X | 209 | 29.233 | 44.441 | 50.408 | 0.00 | 0.00 |
| ATOM | 3174 | N    | LEU | X | 210 | 31.053 | 45.682 | 49.961 | 0.00 | 0.00 |
| ATOM | 3175 | H    | LEU | X | 210 | 31.730 | 45.931 | 49.254 | 0.00 | 0.00 |
| ATOM | 3176 | CA   | LEU | X | 210 | 31.116 | 46.279 | 51.271 | 0.00 | 0.00 |
| ATOM | 3177 | HA   | LEU | X | 210 | 30.632 | 45.633 | 52.003 | 0.00 | 0.00 |
| ATOM | 3178 | CB   | LEU | X | 210 | 32.592 | 46.370 | 51.449 | 0.00 | 0.00 |
| ATOM | 3179 | HB2  | LEU | X | 210 | 33.048 | 45.386 | 51.345 | 0.00 | 0.00 |
| ATOM | 3180 | HB3  | LEU | X | 210 | 32.916 | 47.124 | 50.731 | 0.00 | 0.00 |

|      |      |      |     |   |     |        |        |        |      |      |
|------|------|------|-----|---|-----|--------|--------|--------|------|------|
| ATOM | 3181 | CG   | LEU | X | 210 | 33.019 | 46.859 | 52.803 | 0.00 | 0.00 |
| ATOM | 3182 | HG   | LEU | X | 210 | 32.293 | 47.599 | 53.142 | 0.00 | 0.00 |
| ATOM | 3183 | CD1  | LEU | X | 210 | 32.931 | 45.764 | 53.866 | 0.00 | 0.00 |
| ATOM | 3184 | HD11 | LEU | X | 210 | 33.414 | 44.800 | 53.705 | 0.00 | 0.00 |
| ATOM | 3185 | HD12 | LEU | X | 210 | 31.860 | 45.626 | 54.013 | 0.00 | 0.00 |
| ATOM | 3186 | HD13 | LEU | X | 210 | 33.300 | 46.151 | 54.816 | 0.00 | 0.00 |
| ATOM | 3187 | CD2  | LEU | X | 210 | 34.489 | 47.402 | 52.730 | 0.00 | 0.00 |
| ATOM | 3188 | HD21 | LEU | X | 210 | 34.888 | 47.983 | 53.562 | 0.00 | 0.00 |
| ATOM | 3189 | HD22 | LEU | X | 210 | 35.136 | 46.528 | 52.657 | 0.00 | 0.00 |
| ATOM | 3190 | HD23 | LEU | X | 210 | 34.689 | 47.880 | 51.771 | 0.00 | 0.00 |
| ATOM | 3191 | C    | LEU | X | 210 | 30.368 | 47.585 | 51.301 | 0.00 | 0.00 |
| ATOM | 3192 | O    | LEU | X | 210 | 29.700 | 47.911 | 52.281 | 0.00 | 0.00 |
| ATOM | 3193 | N    | SER | X | 211 | 30.537 | 48.491 | 50.333 | 0.00 | 0.00 |
| ATOM | 3194 | H    | SER | X | 211 | 31.167 | 48.184 | 49.606 | 0.00 | 0.00 |
| ATOM | 3195 | CA   | SER | X | 211 | 30.126 | 49.912 | 50.378 | 0.00 | 0.00 |
| ATOM | 3196 | HA   | SER | X | 211 | 30.234 | 50.189 | 51.427 | 0.00 | 0.00 |
| ATOM | 3197 | CB   | SER | X | 211 | 31.076 | 50.652 | 49.522 | 0.00 | 0.00 |
| ATOM | 3198 | HB2  | SER | X | 211 | 32.077 | 50.261 | 49.708 | 0.00 | 0.00 |
| ATOM | 3199 | HB3  | SER | X | 211 | 30.835 | 50.472 | 48.475 | 0.00 | 0.00 |
| ATOM | 3200 | OG   | SER | X | 211 | 31.032 | 52.049 | 49.762 | 0.00 | 0.00 |
| ATOM | 3201 | HG   | SER | X | 211 | 31.232 | 52.137 | 50.697 | 0.00 | 0.00 |
| ATOM | 3202 | C    | SER | X | 211 | 28.686 | 50.216 | 49.915 | 0.00 | 0.00 |
| ATOM | 3203 | O    | SER | X | 211 | 28.437 | 50.012 | 48.733 | 0.00 | 0.00 |
| ATOM | 3204 | N    | PRO | X | 212 | 27.742 | 50.815 | 50.707 | 0.00 | 0.00 |
| ATOM | 3205 | CD   | PRO | X | 212 | 27.885 | 51.262 | 52.062 | 0.00 | 0.00 |
| ATOM | 3206 | HD2  | PRO | X | 212 | 28.284 | 52.276 | 52.021 | 0.00 | 0.00 |
| ATOM | 3207 | HD3  | PRO | X | 212 | 28.599 | 50.669 | 52.633 | 0.00 | 0.00 |
| ATOM | 3208 | CG   | PRO | X | 212 | 26.552 | 51.177 | 52.697 | 0.00 | 0.00 |
| ATOM | 3209 | HG2  | PRO | X | 212 | 26.550 | 51.946 | 53.470 | 0.00 | 0.00 |
| ATOM | 3210 | HG3  | PRO | X | 212 | 26.276 | 50.205 | 53.106 | 0.00 | 0.00 |
| ATOM | 3211 | CB   | PRO | X | 212 | 25.552 | 51.571 | 51.544 | 0.00 | 0.00 |
| ATOM | 3212 | HB2  | PRO | X | 212 | 25.427 | 52.646 | 51.418 | 0.00 | 0.00 |
| ATOM | 3213 | HB3  | PRO | X | 212 | 24.607 | 51.061 | 51.730 | 0.00 | 0.00 |
| ATOM | 3214 | CA   | PRO | X | 212 | 26.340 | 50.969 | 50.287 | 0.00 | 0.00 |
| ATOM | 3215 | HA   | PRO | X | 212 | 26.148 | 49.918 | 50.074 | 0.00 | 0.00 |
| ATOM | 3216 | C    | PRO | X | 212 | 25.980 | 51.778 | 49.062 | 0.00 | 0.00 |
| ATOM | 3217 | O    | PRO | X | 212 | 25.107 | 51.306 | 48.325 | 0.00 | 0.00 |
| ATOM | 3218 | N    | PRO | X | 213 | 26.588 | 52.942 | 48.745 | 0.00 | 0.00 |
| ATOM | 3219 | CD   | PRO | X | 213 | 27.676 | 53.545 | 49.432 | 0.00 | 0.00 |
| ATOM | 3220 | HD2  | PRO | X | 213 | 28.669 | 53.125 | 49.268 | 0.00 | 0.00 |
| ATOM | 3221 | HD3  | PRO | X | 213 | 27.422 | 53.454 | 50.488 | 0.00 | 0.00 |
| ATOM | 3222 | CG   | PRO | X | 213 | 27.672 | 55.026 | 49.021 | 0.00 | 0.00 |
| ATOM | 3223 | HG2  | PRO | X | 213 | 28.699 | 55.386 | 49.081 | 0.00 | 0.00 |
| ATOM | 3224 | HG3  | PRO | X | 213 | 27.040 | 55.432 | 49.811 | 0.00 | 0.00 |
| ATOM | 3225 | CB   | PRO | X | 213 | 27.004 | 55.004 | 47.649 | 0.00 | 0.00 |
| ATOM | 3226 | HB2  | PRO | X | 213 | 27.760 | 54.949 | 46.865 | 0.00 | 0.00 |
| ATOM | 3227 | HB3  | PRO | X | 213 | 26.359 | 55.880 | 47.590 | 0.00 | 0.00 |
| ATOM | 3228 | CA   | PRO | X | 213 | 26.203 | 53.694 | 47.522 | 0.00 | 0.00 |
| ATOM | 3229 | HA   | PRO | X | 213 | 25.148 | 53.905 | 47.698 | 0.00 | 0.00 |
| ATOM | 3230 | C    | PRO | X | 213 | 26.521 | 52.984 | 46.201 | 0.00 | 0.00 |
| ATOM | 3231 | O    | PRO | X | 213 | 25.990 | 53.379 | 45.126 | 0.00 | 0.00 |
| ATOM | 3232 | N    | SER | X | 214 | 27.247 | 51.885 | 46.238 | 0.00 | 0.00 |
| ATOM | 3233 | H    | SER | X | 214 | 27.628 | 51.632 | 47.138 | 0.00 | 0.00 |
| ATOM | 3234 | CA   | SER | X | 214 | 27.444 | 50.928 | 45.131 | 0.00 | 0.00 |
| ATOM | 3235 | HA   | SER | X | 214 | 27.238 | 51.435 | 44.188 | 0.00 | 0.00 |
| ATOM | 3236 | CB   | SER | X | 214 | 28.860 | 50.350 | 45.269 | 0.00 | 0.00 |
| ATOM | 3237 | HB2  | SER | X | 214 | 29.085 | 50.015 | 46.281 | 0.00 | 0.00 |
| ATOM | 3238 | HB3  | SER | X | 214 | 28.786 | 49.485 | 44.611 | 0.00 | 0.00 |
| ATOM | 3239 | OG   | SER | X | 214 | 29.817 | 51.250 | 44.813 | 0.00 | 0.00 |
| ATOM | 3240 | HG   | SER | X | 214 | 30.635 | 50.845 | 44.517 | 0.00 | 0.00 |
| ATOM | 3241 | C    | SER | X | 214 | 26.453 | 49.714 | 45.255 | 0.00 | 0.00 |
| ATOM | 3242 | O    | SER | X | 214 | 26.081 | 49.174 | 44.254 | 0.00 | 0.00 |
| ATOM | 3243 | N    | ARG | X | 215 | 25.985 | 49.341 | 46.489 | 0.00 | 0.00 |
| ATOM | 3244 | H    | ARG | X | 215 | 26.418 | 49.697 | 47.329 | 0.00 | 0.00 |
| ATOM | 3245 | CA   | ARG | X | 215 | 25.428 | 48.053 | 46.708 | 0.00 | 0.00 |
| ATOM | 3246 | HA   | ARG | X | 215 | 26.110 | 47.385 | 46.182 | 0.00 | 0.00 |
| ATOM | 3247 | CB   | ARG | X | 215 | 25.565 | 47.619 | 48.171 | 0.00 | 0.00 |

|      |      |      |     |   |     |        |        |        |      |      |
|------|------|------|-----|---|-----|--------|--------|--------|------|------|
| ATOM | 3248 | HB2  | ARG | X | 215 | 26.575 | 47.893 | 48.474 | 0.00 | 0.00 |
| ATOM | 3249 | HB3  | ARG | X | 215 | 24.915 | 48.255 | 48.772 | 0.00 | 0.00 |
| ATOM | 3250 | CG   | ARG | X | 215 | 25.530 | 46.150 | 48.502 | 0.00 | 0.00 |
| ATOM | 3251 | HG2  | ARG | X | 215 | 24.537 | 45.728 | 48.658 | 0.00 | 0.00 |
| ATOM | 3252 | HG3  | ARG | X | 215 | 26.054 | 45.503 | 47.799 | 0.00 | 0.00 |
| ATOM | 3253 | CD   | ARG | X | 215 | 26.416 | 45.830 | 49.701 | 0.00 | 0.00 |
| ATOM | 3254 | HD2  | ARG | X | 215 | 26.321 | 44.763 | 49.903 | 0.00 | 0.00 |
| ATOM | 3255 | HD3  | ARG | X | 215 | 27.441 | 46.100 | 49.446 | 0.00 | 0.00 |
| ATOM | 3256 | NE   | ARG | X | 215 | 25.930 | 46.509 | 50.972 | 0.00 | 0.00 |
| ATOM | 3257 | HE   | ARG | X | 215 | 25.182 | 47.186 | 50.931 | 0.00 | 0.00 |
| ATOM | 3258 | CZ   | ARG | X | 215 | 26.505 | 46.398 | 52.117 | 0.00 | 0.00 |
| ATOM | 3259 | NH1  | ARG | X | 215 | 27.429 | 45.552 | 52.331 | 0.00 | 0.00 |
| ATOM | 3260 | HH11 | ARG | X | 215 | 27.611 | 44.845 | 51.633 | 0.00 | 0.00 |
| ATOM | 3261 | HH12 | ARG | X | 215 | 27.720 | 45.306 | 53.267 | 0.00 | 0.00 |
| ATOM | 3262 | NH2  | ARG | X | 215 | 25.942 | 46.977 | 53.137 | 0.00 | 0.00 |
| ATOM | 3263 | HH21 | ARG | X | 215 | 25.002 | 47.341 | 53.197 | 0.00 | 0.00 |
| ATOM | 3264 | HH22 | ARG | X | 215 | 26.455 | 46.915 | 54.004 | 0.00 | 0.00 |
| ATOM | 3265 | C    | ARG | X | 215 | 23.999 | 47.746 | 46.195 | 0.00 | 0.00 |
| ATOM | 3266 | O    | ARG | X | 215 | 23.801 | 46.560 | 45.938 | 0.00 | 0.00 |
| ATOM | 3267 | N    | GLY | X | 216 | 23.184 | 48.731 | 45.861 | 0.00 | 0.00 |
| ATOM | 3268 | H    | GLY | X | 216 | 23.618 | 49.642 | 45.897 | 0.00 | 0.00 |
| ATOM | 3269 | CA   | GLY | X | 216 | 21.953 | 48.531 | 45.185 | 0.00 | 0.00 |
| ATOM | 3270 | HA2  | GLY | X | 216 | 21.542 | 47.574 | 45.506 | 0.00 | 0.00 |
| ATOM | 3271 | HA3  | GLY | X | 216 | 21.205 | 49.261 | 45.494 | 0.00 | 0.00 |
| ATOM | 3272 | C    | GLY | X | 216 | 21.959 | 48.592 | 43.678 | 0.00 | 0.00 |
| ATOM | 3273 | O    | GLY | X | 216 | 20.881 | 48.680 | 43.040 | 0.00 | 0.00 |
| ATOM | 3274 | N    | LEU | X | 217 | 23.153 | 48.709 | 43.031 | 0.00 | 0.00 |
| ATOM | 3275 | H    | LEU | X | 217 | 24.043 | 48.601 | 43.497 | 0.00 | 0.00 |
| ATOM | 3276 | CA   | LEU | X | 217 | 23.219 | 48.982 | 41.621 | 0.00 | 0.00 |
| ATOM | 3277 | HA   | LEU | X | 217 | 22.238 | 49.311 | 41.275 | 0.00 | 0.00 |
| ATOM | 3278 | CB   | LEU | X | 217 | 24.178 | 50.161 | 41.280 | 0.00 | 0.00 |
| ATOM | 3279 | HB2  | LEU | X | 217 | 25.126 | 49.624 | 41.309 | 0.00 | 0.00 |
| ATOM | 3280 | HB3  | LEU | X | 217 | 24.143 | 50.486 | 40.240 | 0.00 | 0.00 |
| ATOM | 3281 | CG   | LEU | X | 217 | 24.108 | 51.511 | 42.082 | 0.00 | 0.00 |
| ATOM | 3282 | HG   | LEU | X | 217 | 24.070 | 51.361 | 43.161 | 0.00 | 0.00 |
| ATOM | 3283 | CD1  | LEU | X | 217 | 25.383 | 52.297 | 41.865 | 0.00 | 0.00 |
| ATOM | 3284 | HD11 | LEU | X | 217 | 25.360 | 53.299 | 42.294 | 0.00 | 0.00 |
| ATOM | 3285 | HD12 | LEU | X | 217 | 25.615 | 52.267 | 40.801 | 0.00 | 0.00 |
| ATOM | 3286 | HD13 | LEU | X | 217 | 26.212 | 51.703 | 42.249 | 0.00 | 0.00 |
| ATOM | 3287 | CD2  | LEU | X | 217 | 23.000 | 52.437 | 41.548 | 0.00 | 0.00 |
| ATOM | 3288 | HD21 | LEU | X | 217 | 22.821 | 53.236 | 42.268 | 0.00 | 0.00 |
| ATOM | 3289 | HD22 | LEU | X | 217 | 23.210 | 52.919 | 40.593 | 0.00 | 0.00 |
| ATOM | 3290 | HD23 | LEU | X | 217 | 22.043 | 51.918 | 41.498 | 0.00 | 0.00 |
| ATOM | 3291 | C    | LEU | X | 217 | 23.594 | 47.689 | 40.843 | 0.00 | 0.00 |
| ATOM | 3292 | O    | LEU | X | 217 | 23.998 | 47.696 | 39.667 | 0.00 | 0.00 |
| ATOM | 3293 | N    | PHE | X | 218 | 23.556 | 46.593 | 41.577 | 0.00 | 0.00 |
| ATOM | 3294 | H    | PHE | X | 218 | 23.022 | 46.676 | 42.431 | 0.00 | 0.00 |
| ATOM | 3295 | CA   | PHE | X | 218 | 23.904 | 45.214 | 41.122 | 0.00 | 0.00 |
| ATOM | 3296 | HA   | PHE | X | 218 | 23.580 | 45.035 | 40.097 | 0.00 | 0.00 |
| ATOM | 3297 | CB   | PHE | X | 218 | 25.440 | 45.078 | 41.120 | 0.00 | 0.00 |
| ATOM | 3298 | HB2  | PHE | X | 218 | 25.689 | 44.196 | 40.531 | 0.00 | 0.00 |
| ATOM | 3299 | HB3  | PHE | X | 218 | 25.838 | 45.879 | 40.498 | 0.00 | 0.00 |
| ATOM | 3300 | CG   | PHE | X | 218 | 26.095 | 44.947 | 42.500 | 0.00 | 0.00 |
| ATOM | 3301 | CD1  | PHE | X | 218 | 26.668 | 46.081 | 43.071 | 0.00 | 0.00 |
| ATOM | 3302 | HD1  | PHE | X | 218 | 26.687 | 46.947 | 42.426 | 0.00 | 0.00 |
| ATOM | 3303 | CE1  | PHE | X | 218 | 27.187 | 46.050 | 44.327 | 0.00 | 0.00 |
| ATOM | 3304 | HE1  | PHE | X | 218 | 27.462 | 46.965 | 44.829 | 0.00 | 0.00 |
| ATOM | 3305 | CZ   | PHE | X | 218 | 27.375 | 44.820 | 44.938 | 0.00 | 0.00 |
| ATOM | 3306 | HZ   | PHE | X | 218 | 27.661 | 44.821 | 45.980 | 0.00 | 0.00 |
| ATOM | 3307 | CE2  | PHE | X | 218 | 26.908 | 43.583 | 44.327 | 0.00 | 0.00 |
| ATOM | 3308 | HE2  | PHE | X | 218 | 27.085 | 42.618 | 44.778 | 0.00 | 0.00 |
| ATOM | 3309 | CD2  | PHE | X | 218 | 26.338 | 43.719 | 43.077 | 0.00 | 0.00 |
| ATOM | 3310 | HD2  | PHE | X | 218 | 25.994 | 42.840 | 42.552 | 0.00 | 0.00 |
| ATOM | 3311 | C    | PHE | X | 218 | 23.251 | 44.195 | 41.970 | 0.00 | 0.00 |
| ATOM | 3312 | O    | PHE | X | 218 | 22.645 | 44.564 | 42.978 | 0.00 | 0.00 |
| ATOM | 3313 | N    | HIE | X | 219 | 23.405 | 42.926 | 41.582 | 0.00 | 0.00 |
| ATOM | 3314 | H    | HIE | X | 219 | 23.903 | 42.655 | 40.746 | 0.00 | 0.00 |

|      |      |      |     |   |     |        |        |        |      |      |
|------|------|------|-----|---|-----|--------|--------|--------|------|------|
| ATOM | 3315 | CA   | HIE | X | 219 | 22.580 | 41.860 | 42.177 | 0.00 | 0.00 |
| ATOM | 3316 | HA   | HIE | X | 219 | 21.996 | 42.225 | 43.022 | 0.00 | 0.00 |
| ATOM | 3317 | CB   | HIE | X | 219 | 21.508 | 41.452 | 41.130 | 0.00 | 0.00 |
| ATOM | 3318 | HB2  | HIE | X | 219 | 21.942 | 41.204 | 40.161 | 0.00 | 0.00 |
| ATOM | 3319 | HB3  | HIE | X | 219 | 20.939 | 40.590 | 41.477 | 0.00 | 0.00 |
| ATOM | 3320 | CG   | HIE | X | 219 | 20.644 | 42.722 | 40.910 | 0.00 | 0.00 |
| ATOM | 3321 | ND1  | HIE | X | 219 | 20.851 | 43.510 | 39.836 | 0.00 | 0.00 |
| ATOM | 3322 | CE1  | HIE | X | 219 | 19.920 | 44.465 | 39.923 | 0.00 | 0.00 |
| ATOM | 3323 | HE1  | HIE | X | 219 | 19.864 | 45.349 | 39.306 | 0.00 | 0.00 |
| ATOM | 3324 | NE2  | HIE | X | 219 | 19.152 | 44.341 | 41.075 | 0.00 | 0.00 |
| ATOM | 3325 | HE2  | HIE | X | 219 | 18.429 | 44.985 | 41.364 | 0.00 | 0.00 |
| ATOM | 3326 | CD2  | HIE | X | 219 | 19.615 | 43.261 | 41.769 | 0.00 | 0.00 |
| ATOM | 3327 | HD2  | HIE | X | 219 | 19.199 | 42.864 | 42.684 | 0.00 | 0.00 |
| ATOM | 3328 | C    | HIE | X | 219 | 23.408 | 40.629 | 42.653 | 0.00 | 0.00 |
| ATOM | 3329 | O    | HIE | X | 219 | 22.977 | 39.841 | 43.460 | 0.00 | 0.00 |
| ATOM | 3330 | N    | ARG | X | 220 | 24.522 | 40.331 | 42.011 | 0.00 | 0.00 |
| ATOM | 3331 | H    | ARG | X | 220 | 24.735 | 40.957 | 41.248 | 0.00 | 0.00 |
| ATOM | 3332 | CA   | ARG | X | 220 | 25.519 | 39.281 | 42.577 | 0.00 | 0.00 |
| ATOM | 3333 | HA   | ARG | X | 220 | 25.423 | 39.187 | 43.659 | 0.00 | 0.00 |
| ATOM | 3334 | CB   | ARG | X | 220 | 25.316 | 37.916 | 41.826 | 0.00 | 0.00 |
| ATOM | 3335 | HB2  | ARG | X | 220 | 25.409 | 38.071 | 40.751 | 0.00 | 0.00 |
| ATOM | 3336 | HB3  | ARG | X | 220 | 26.128 | 37.231 | 42.068 | 0.00 | 0.00 |
| ATOM | 3337 | CG   | ARG | X | 220 | 23.946 | 37.315 | 42.118 | 0.00 | 0.00 |
| ATOM | 3338 | HG2  | ARG | X | 220 | 23.988 | 37.362 | 43.206 | 0.00 | 0.00 |
| ATOM | 3339 | HG3  | ARG | X | 220 | 23.109 | 37.953 | 41.835 | 0.00 | 0.00 |
| ATOM | 3340 | CD   | ARG | X | 220 | 23.793 | 35.868 | 41.673 | 0.00 | 0.00 |
| ATOM | 3341 | HD2  | ARG | X | 220 | 24.054 | 35.773 | 40.620 | 0.00 | 0.00 |
| ATOM | 3342 | HD3  | ARG | X | 220 | 24.525 | 35.278 | 42.225 | 0.00 | 0.00 |
| ATOM | 3343 | NE   | ARG | X | 220 | 22.389 | 35.556 | 41.989 | 0.00 | 0.00 |
| ATOM | 3344 | HE   | ARG | X | 220 | 22.060 | 35.790 | 42.915 | 0.00 | 0.00 |
| ATOM | 3345 | CZ   | ARG | X | 220 | 21.477 | 35.352 | 41.111 | 0.00 | 0.00 |
| ATOM | 3346 | NH1  | ARG | X | 220 | 21.700 | 35.218 | 39.841 | 0.00 | 0.00 |
| ATOM | 3347 | HH11 | ARG | X | 220 | 22.612 | 35.101 | 39.423 | 0.00 | 0.00 |
| ATOM | 3348 | HH12 | ARG | X | 220 | 20.911 | 35.310 | 39.218 | 0.00 | 0.00 |
| ATOM | 3349 | NH2  | ARG | X | 220 | 20.229 | 35.214 | 41.487 | 0.00 | 0.00 |
| ATOM | 3350 | HH21 | ARG | X | 220 | 19.903 | 35.390 | 42.427 | 0.00 | 0.00 |
| ATOM | 3351 | HH22 | ARG | X | 220 | 19.558 | 34.909 | 40.797 | 0.00 | 0.00 |
| ATOM | 3352 | C    | ARG | X | 220 | 26.970 | 39.716 | 42.335 | 0.00 | 0.00 |
| ATOM | 3353 | O    | ARG | X | 220 | 27.195 | 40.633 | 41.562 | 0.00 | 0.00 |
| ATOM | 3354 | N    | ALA | X | 221 | 27.943 | 39.004 | 42.899 | 0.00 | 0.00 |
| ATOM | 3355 | H    | ALA | X | 221 | 27.672 | 38.050 | 43.090 | 0.00 | 0.00 |
| ATOM | 3356 | CA   | ALA | X | 221 | 29.351 | 39.212 | 42.853 | 0.00 | 0.00 |
| ATOM | 3357 | HA   | ALA | X | 221 | 29.707 | 39.971 | 42.156 | 0.00 | 0.00 |
| ATOM | 3358 | CB   | ALA | X | 221 | 29.706 | 39.938 | 44.169 | 0.00 | 0.00 |
| ATOM | 3359 | HB1  | ALA | X | 221 | 29.485 | 39.409 | 45.096 | 0.00 | 0.00 |
| ATOM | 3360 | HB2  | ALA | X | 221 | 29.009 | 40.776 | 44.175 | 0.00 | 0.00 |
| ATOM | 3361 | HB3  | ALA | X | 221 | 30.760 | 40.214 | 44.123 | 0.00 | 0.00 |
| ATOM | 3362 | C    | ALA | X | 221 | 30.229 | 37.983 | 42.571 | 0.00 | 0.00 |
| ATOM | 3363 | O    | ALA | X | 221 | 29.789 | 36.903 | 42.978 | 0.00 | 0.00 |
| ATOM | 3364 | N    | VAL | X | 222 | 31.341 | 38.097 | 41.860 | 0.00 | 0.00 |
| ATOM | 3365 | H    | VAL | X | 222 | 31.359 | 38.902 | 41.251 | 0.00 | 0.00 |
| ATOM | 3366 | CA   | VAL | X | 222 | 32.365 | 37.114 | 41.524 | 0.00 | 0.00 |
| ATOM | 3367 | HA   | VAL | X | 222 | 32.177 | 36.200 | 42.086 | 0.00 | 0.00 |
| ATOM | 3368 | CB   | VAL | X | 222 | 32.314 | 36.777 | 39.996 | 0.00 | 0.00 |
| ATOM | 3369 | HB   | VAL | X | 222 | 32.536 | 37.718 | 39.491 | 0.00 | 0.00 |
| ATOM | 3370 | CG1  | VAL | X | 222 | 33.451 | 35.794 | 39.802 | 0.00 | 0.00 |
| ATOM | 3371 | HG11 | VAL | X | 222 | 33.296 | 35.283 | 38.852 | 0.00 | 0.00 |
| ATOM | 3372 | HG12 | VAL | X | 222 | 34.457 | 36.212 | 39.850 | 0.00 | 0.00 |
| ATOM | 3373 | HG13 | VAL | X | 222 | 33.463 | 35.083 | 40.628 | 0.00 | 0.00 |
| ATOM | 3374 | CG2  | VAL | X | 222 | 30.939 | 36.210 | 39.584 | 0.00 | 0.00 |
| ATOM | 3375 | HG21 | VAL | X | 222 | 30.189 | 36.697 | 40.207 | 0.00 | 0.00 |
| ATOM | 3376 | HG22 | VAL | X | 222 | 30.913 | 35.127 | 39.709 | 0.00 | 0.00 |
| ATOM | 3377 | HG23 | VAL | X | 222 | 30.783 | 36.419 | 38.526 | 0.00 | 0.00 |
| ATOM | 3378 | C    | VAL | X | 222 | 33.767 | 37.698 | 41.892 | 0.00 | 0.00 |
| ATOM | 3379 | O    | VAL | X | 222 | 34.152 | 38.766 | 41.366 | 0.00 | 0.00 |
| ATOM | 3380 | N    | LEU | X | 223 | 34.700 | 36.946 | 42.523 | 0.00 | 0.00 |
| ATOM | 3381 | H    | LEU | X | 223 | 34.460 | 36.095 | 43.010 | 0.00 | 0.00 |

|      |      |      |     |   |     |        |        |        |      |      |
|------|------|------|-----|---|-----|--------|--------|--------|------|------|
| ATOM | 3382 | CA   | LEU | X | 223 | 36.082 | 37.356 | 42.811 | 0.00 | 0.00 |
| ATOM | 3383 | HA   | LEU | X | 223 | 36.386 | 38.273 | 42.307 | 0.00 | 0.00 |
| ATOM | 3384 | CB   | LEU | X | 223 | 36.201 | 37.505 | 44.290 | 0.00 | 0.00 |
| ATOM | 3385 | HB2  | LEU | X | 223 | 35.816 | 36.629 | 44.811 | 0.00 | 0.00 |
| ATOM | 3386 | HB3  | LEU | X | 223 | 37.271 | 37.493 | 44.497 | 0.00 | 0.00 |
| ATOM | 3387 | CG   | LEU | X | 223 | 35.532 | 38.731 | 44.980 | 0.00 | 0.00 |
| ATOM | 3388 | HG   | LEU | X | 223 | 35.585 | 39.660 | 44.412 | 0.00 | 0.00 |
| ATOM | 3389 | CD1  | LEU | X | 223 | 34.057 | 38.607 | 45.321 | 0.00 | 0.00 |
| ATOM | 3390 | HD11 | LEU | X | 223 | 33.851 | 37.870 | 46.098 | 0.00 | 0.00 |
| ATOM | 3391 | HD12 | LEU | X | 223 | 33.461 | 38.375 | 44.439 | 0.00 | 0.00 |
| ATOM | 3392 | HD13 | LEU | X | 223 | 33.619 | 39.520 | 45.724 | 0.00 | 0.00 |
| ATOM | 3393 | CD2  | LEU | X | 223 | 36.252 | 39.089 | 46.343 | 0.00 | 0.00 |
| ATOM | 3394 | HD21 | LEU | X | 223 | 36.193 | 38.338 | 47.131 | 0.00 | 0.00 |
| ATOM | 3395 | HD22 | LEU | X | 223 | 37.290 | 39.344 | 46.130 | 0.00 | 0.00 |
| ATOM | 3396 | HD23 | LEU | X | 223 | 35.780 | 40.009 | 46.687 | 0.00 | 0.00 |
| ATOM | 3397 | C    | LEU | X | 223 | 37.071 | 36.240 | 42.373 | 0.00 | 0.00 |
| ATOM | 3398 | O    | LEU | X | 223 | 36.829 | 35.048 | 42.710 | 0.00 | 0.00 |
| ATOM | 3399 | N    | GLN | X | 224 | 38.018 | 36.571 | 41.506 | 0.00 | 0.00 |
| ATOM | 3400 | H    | GLN | X | 224 | 38.019 | 37.543 | 41.232 | 0.00 | 0.00 |
| ATOM | 3401 | CA   | GLN | X | 224 | 39.129 | 35.780 | 41.059 | 0.00 | 0.00 |
| ATOM | 3402 | HA   | GLN | X | 224 | 38.895 | 34.784 | 41.434 | 0.00 | 0.00 |
| ATOM | 3403 | CB   | GLN | X | 224 | 39.076 | 35.678 | 39.530 | 0.00 | 0.00 |
| ATOM | 3404 | HB2  | GLN | X | 224 | 39.209 | 36.653 | 39.062 | 0.00 | 0.00 |
| ATOM | 3405 | HB3  | GLN | X | 224 | 39.938 | 35.073 | 39.248 | 0.00 | 0.00 |
| ATOM | 3406 | CG   | GLN | X | 224 | 37.772 | 35.106 | 39.038 | 0.00 | 0.00 |
| ATOM | 3407 | HG2  | GLN | X | 224 | 37.495 | 34.188 | 39.556 | 0.00 | 0.00 |
| ATOM | 3408 | HG3  | GLN | X | 224 | 37.003 | 35.875 | 39.105 | 0.00 | 0.00 |
| ATOM | 3409 | CD   | GLN | X | 224 | 37.856 | 34.819 | 37.565 | 0.00 | 0.00 |
| ATOM | 3410 | OE1  | GLN | X | 224 | 37.140 | 35.326 | 36.715 | 0.00 | 0.00 |
| ATOM | 3411 | NE2  | GLN | X | 224 | 38.787 | 33.984 | 37.193 | 0.00 | 0.00 |
| ATOM | 3412 | HE21 | GLN | X | 224 | 38.896 | 33.759 | 36.215 | 0.00 | 0.00 |
| ATOM | 3413 | HE22 | GLN | X | 224 | 39.372 | 33.595 | 37.919 | 0.00 | 0.00 |
| ATOM | 3414 | C    | GLN | X | 224 | 40.504 | 36.204 | 41.700 | 0.00 | 0.00 |
| ATOM | 3415 | O    | GLN | X | 224 | 40.946 | 37.323 | 41.535 | 0.00 | 0.00 |
| ATOM | 3416 | N    | SER | X | 225 | 41.251 | 35.293 | 42.315 | 0.00 | 0.00 |
| ATOM | 3417 | H    | SER | X | 225 | 40.834 | 34.405 | 42.555 | 0.00 | 0.00 |
| ATOM | 3418 | CA   | SER | X | 225 | 42.614 | 35.432 | 42.686 | 0.00 | 0.00 |
| ATOM | 3419 | HA   | SER | X | 225 | 43.002 | 34.617 | 43.296 | 0.00 | 0.00 |
| ATOM | 3420 | CB   | SER | X | 225 | 43.522 | 35.480 | 41.387 | 0.00 | 0.00 |
| ATOM | 3421 | HB2  | SER | X | 225 | 43.118 | 34.952 | 40.523 | 0.00 | 0.00 |
| ATOM | 3422 | HB3  | SER | X | 225 | 43.688 | 36.531 | 41.151 | 0.00 | 0.00 |
| ATOM | 3423 | OG   | SER | X | 225 | 44.787 | 34.846 | 41.629 | 0.00 | 0.00 |
| ATOM | 3424 | HG   | SER | X | 225 | 44.771 | 34.106 | 42.240 | 0.00 | 0.00 |
| ATOM | 3425 | C    | SER | X | 225 | 42.917 | 36.631 | 43.672 | 0.00 | 0.00 |
| ATOM | 3426 | O    | SER | X | 225 | 44.020 | 37.122 | 43.659 | 0.00 | 0.00 |
| ATOM | 3427 | N    | GLY | X | 226 | 41.931 | 37.267 | 44.287 | 0.00 | 0.00 |
| ATOM | 3428 | H    | GLY | X | 226 | 40.991 | 36.915 | 44.182 | 0.00 | 0.00 |
| ATOM | 3429 | CA   | GLY | X | 226 | 42.082 | 38.500 | 45.111 | 0.00 | 0.00 |
| ATOM | 3430 | HA2  | GLY | X | 226 | 42.962 | 38.383 | 45.744 | 0.00 | 0.00 |
| ATOM | 3431 | HA3  | GLY | X | 226 | 42.439 | 39.250 | 44.406 | 0.00 | 0.00 |
| ATOM | 3432 | C    | GLY | X | 226 | 40.781 | 38.890 | 45.801 | 0.00 | 0.00 |
| ATOM | 3433 | O    | GLY | X | 226 | 39.710 | 38.384 | 45.537 | 0.00 | 0.00 |
| ATOM | 3434 | N    | ALA | X | 227 | 40.895 | 39.784 | 46.790 | 0.00 | 0.00 |
| ATOM | 3435 | H    | ALA | X | 227 | 41.782 | 40.264 | 46.854 | 0.00 | 0.00 |
| ATOM | 3436 | CA   | ALA | X | 227 | 39.897 | 40.058 | 47.826 | 0.00 | 0.00 |
| ATOM | 3437 | HA   | ALA | X | 227 | 38.981 | 40.082 | 47.236 | 0.00 | 0.00 |
| ATOM | 3438 | CB   | ALA | X | 227 | 39.783 | 38.893 | 48.711 | 0.00 | 0.00 |
| ATOM | 3439 | HB1  | ALA | X | 227 | 39.217 | 38.980 | 49.639 | 0.00 | 0.00 |
| ATOM | 3440 | HB2  | ALA | X | 227 | 40.775 | 38.695 | 49.118 | 0.00 | 0.00 |
| ATOM | 3441 | HB3  | ALA | X | 227 | 39.390 | 38.079 | 48.103 | 0.00 | 0.00 |
| ATOM | 3442 | C    | ALA | X | 227 | 40.177 | 41.406 | 48.549 | 0.00 | 0.00 |
| ATOM | 3443 | O    | ALA | X | 227 | 41.349 | 41.862 | 48.768 | 0.00 | 0.00 |
| ATOM | 3444 | N    | PRO | X | 228 | 39.051 | 42.039 | 48.998 | 0.00 | 0.00 |
| ATOM | 3445 | CD   | PRO | X | 228 | 37.694 | 41.546 | 49.032 | 0.00 | 0.00 |
| ATOM | 3446 | HD2  | PRO | X | 228 | 37.675 | 40.561 | 49.498 | 0.00 | 0.00 |
| ATOM | 3447 | HD3  | PRO | X | 228 | 37.183 | 41.551 | 48.069 | 0.00 | 0.00 |
| ATOM | 3448 | CG   | PRO | X | 228 | 36.927 | 42.468 | 49.970 | 0.00 | 0.00 |

|      |      |      |     |   |     |        |        |        |      |      |
|------|------|------|-----|---|-----|--------|--------|--------|------|------|
| ATOM | 3449 | HG2  | PRO | X | 228 | 36.993 | 42.211 | 51.028 | 0.00 | 0.00 |
| ATOM | 3450 | HG3  | PRO | X | 228 | 35.881 | 42.483 | 49.665 | 0.00 | 0.00 |
| ATOM | 3451 | CB   | PRO | X | 228 | 37.664 | 43.772 | 49.833 | 0.00 | 0.00 |
| ATOM | 3452 | HB2  | PRO | X | 228 | 37.517 | 44.399 | 50.713 | 0.00 | 0.00 |
| ATOM | 3453 | HB3  | PRO | X | 228 | 37.268 | 44.273 | 48.950 | 0.00 | 0.00 |
| ATOM | 3454 | CA   | PRO | X | 228 | 39.118 | 43.357 | 49.603 | 0.00 | 0.00 |
| ATOM | 3455 | HA   | PRO | X | 228 | 39.664 | 43.945 | 48.866 | 0.00 | 0.00 |
| ATOM | 3456 | C    | PRO | X | 228 | 39.861 | 43.390 | 50.923 | 0.00 | 0.00 |
| ATOM | 3457 | O    | PRO | X | 228 | 40.535 | 44.324 | 51.293 | 0.00 | 0.00 |
| ATOM | 3458 | N    | ASN | X | 229 | 39.695 | 42.331 | 51.705 | 0.00 | 0.00 |
| ATOM | 3459 | H    | ASN | X | 229 | 39.086 | 41.578 | 51.418 | 0.00 | 0.00 |
| ATOM | 3460 | CA   | ASN | X | 229 | 40.326 | 42.059 | 53.010 | 0.00 | 0.00 |
| ATOM | 3461 | HA   | ASN | X | 229 | 40.474 | 43.021 | 53.501 | 0.00 | 0.00 |
| ATOM | 3462 | CB   | ASN | X | 229 | 39.457 | 41.173 | 53.910 | 0.00 | 0.00 |
| ATOM | 3463 | HB2  | ASN | X | 229 | 40.100 | 41.020 | 54.776 | 0.00 | 0.00 |
| ATOM | 3464 | HB3  | ASN | X | 229 | 38.523 | 41.691 | 54.129 | 0.00 | 0.00 |
| ATOM | 3465 | CG   | ASN | X | 229 | 39.088 | 39.770 | 53.236 | 0.00 | 0.00 |
| ATOM | 3466 | OD1  | ASN | X | 229 | 38.666 | 39.721 | 52.164 | 0.00 | 0.00 |
| ATOM | 3467 | ND2  | ASN | X | 229 | 39.239 | 38.625 | 53.863 | 0.00 | 0.00 |
| ATOM | 3468 | HD21 | ASN | X | 229 | 38.968 | 37.738 | 53.462 | 0.00 | 0.00 |
| ATOM | 3469 | HD22 | ASN | X | 229 | 39.821 | 38.632 | 54.688 | 0.00 | 0.00 |
| ATOM | 3470 | C    | ASN | X | 229 | 41.775 | 41.591 | 52.798 | 0.00 | 0.00 |
| ATOM | 3471 | O    | ASN | X | 229 | 42.388 | 41.184 | 53.772 | 0.00 | 0.00 |
| ATOM | 3472 | N    | GLY | X | 230 | 42.344 | 41.612 | 51.592 | 0.00 | 0.00 |
| ATOM | 3473 | H    | GLY | X | 230 | 41.853 | 41.884 | 50.753 | 0.00 | 0.00 |
| ATOM | 3474 | CA   | GLY | X | 230 | 43.798 | 41.426 | 51.394 | 0.00 | 0.00 |
| ATOM | 3475 | HA2  | GLY | X | 230 | 43.974 | 40.425 | 51.789 | 0.00 | 0.00 |
| ATOM | 3476 | HA3  | GLY | X | 230 | 44.034 | 41.352 | 50.332 | 0.00 | 0.00 |
| ATOM | 3477 | C    | GLY | X | 230 | 44.688 | 42.474 | 51.953 | 0.00 | 0.00 |
| ATOM | 3478 | O    | GLY | X | 230 | 44.461 | 43.589 | 51.654 | 0.00 | 0.00 |
| ATOM | 3479 | N    | PRO | X | 231 | 45.792 | 42.178 | 52.709 | 0.00 | 0.00 |
| ATOM | 3480 | CD   | PRO | X | 231 | 46.238 | 40.868 | 53.071 | 0.00 | 0.00 |
| ATOM | 3481 | HD2  | PRO | X | 231 | 46.052 | 40.210 | 52.222 | 0.00 | 0.00 |
| ATOM | 3482 | HD3  | PRO | X | 231 | 45.657 | 40.536 | 53.931 | 0.00 | 0.00 |
| ATOM | 3483 | CG   | PRO | X | 231 | 47.738 | 40.984 | 53.322 | 0.00 | 0.00 |
| ATOM | 3484 | HG2  | PRO | X | 231 | 48.278 | 41.082 | 52.380 | 0.00 | 0.00 |
| ATOM | 3485 | HG3  | PRO | X | 231 | 48.168 | 40.149 | 53.875 | 0.00 | 0.00 |
| ATOM | 3486 | CB   | PRO | X | 231 | 47.743 | 42.348 | 54.040 | 0.00 | 0.00 |
| ATOM | 3487 | HB2  | PRO | X | 231 | 48.723 | 42.818 | 54.112 | 0.00 | 0.00 |
| ATOM | 3488 | HB3  | PRO | X | 231 | 47.454 | 42.187 | 55.078 | 0.00 | 0.00 |
| ATOM | 3489 | CA   | PRO | X | 231 | 46.655 | 43.213 | 53.336 | 0.00 | 0.00 |
| ATOM | 3490 | HA   | PRO | X | 231 | 46.094 | 43.828 | 54.039 | 0.00 | 0.00 |
| ATOM | 3491 | C    | PRO | X | 231 | 47.218 | 44.195 | 52.340 | 0.00 | 0.00 |
| ATOM | 3492 | O    | PRO | X | 231 | 47.264 | 45.394 | 52.688 | 0.00 | 0.00 |
| ATOM | 3493 | N    | TRP | X | 232 | 47.448 | 43.775 | 51.083 | 0.00 | 0.00 |
| ATOM | 3494 | H    | TRP | X | 232 | 47.180 | 42.849 | 50.782 | 0.00 | 0.00 |
| ATOM | 3495 | CA   | TRP | X | 232 | 47.848 | 44.719 | 49.985 | 0.00 | 0.00 |
| ATOM | 3496 | HA   | TRP | X | 232 | 48.634 | 45.423 | 50.262 | 0.00 | 0.00 |
| ATOM | 3497 | CB   | TRP | X | 232 | 48.304 | 43.821 | 48.815 | 0.00 | 0.00 |
| ATOM | 3498 | HB2  | TRP | X | 232 | 48.649 | 44.444 | 47.989 | 0.00 | 0.00 |
| ATOM | 3499 | HB3  | TRP | X | 232 | 49.154 | 43.234 | 49.161 | 0.00 | 0.00 |
| ATOM | 3500 | CG   | TRP | X | 232 | 47.258 | 42.890 | 48.348 | 0.00 | 0.00 |
| ATOM | 3501 | CD1  | TRP | X | 232 | 47.090 | 41.663 | 48.909 | 0.00 | 0.00 |
| ATOM | 3502 | HD1  | TRP | X | 232 | 47.786 | 41.167 | 49.570 | 0.00 | 0.00 |
| ATOM | 3503 | NE1  | TRP | X | 232 | 46.144 | 40.994 | 48.155 | 0.00 | 0.00 |
| ATOM | 3504 | HE1  | TRP | X | 232 | 46.184 | 39.985 | 48.162 | 0.00 | 0.00 |
| ATOM | 3505 | CE2  | TRP | X | 232 | 45.517 | 41.854 | 47.275 | 0.00 | 0.00 |
| ATOM | 3506 | CZ2  | TRP | X | 232 | 44.301 | 41.645 | 46.453 | 0.00 | 0.00 |
| ATOM | 3507 | HZ2  | TRP | X | 232 | 43.844 | 40.675 | 46.326 | 0.00 | 0.00 |
| ATOM | 3508 | CH2  | TRP | X | 232 | 43.944 | 42.717 | 45.612 | 0.00 | 0.00 |
| ATOM | 3509 | HH2  | TRP | X | 232 | 43.227 | 42.544 | 44.823 | 0.00 | 0.00 |
| ATOM | 3510 | CZ3  | TRP | X | 232 | 44.712 | 43.960 | 45.653 | 0.00 | 0.00 |
| ATOM | 3511 | HZ3  | TRP | X | 232 | 44.364 | 44.816 | 45.093 | 0.00 | 0.00 |
| ATOM | 3512 | CE3  | TRP | X | 232 | 45.874 | 44.022 | 46.375 | 0.00 | 0.00 |
| ATOM | 3513 | HE3  | TRP | X | 232 | 46.453 | 44.933 | 46.415 | 0.00 | 0.00 |
| ATOM | 3514 | CD2  | TRP | X | 232 | 46.238 | 43.002 | 47.331 | 0.00 | 0.00 |
| ATOM | 3515 | C    | TRP | X | 232 | 46.739 | 45.632 | 49.513 | 0.00 | 0.00 |



|      |      |      |     |   |     |        |        |        |      |      |
|------|------|------|-----|---|-----|--------|--------|--------|------|------|
| ATOM | 3516 | O    | TRP | X | 232 | 46.945 | 46.574 | 48.726 | 0.00 | 0.00 |
| ATOM | 3517 | N    | ALA | X | 233 | 45.508 | 45.320 | 49.881 | 0.00 | 0.00 |
| ATOM | 3518 | H    | ALA | X | 233 | 45.401 | 44.489 | 50.445 | 0.00 | 0.00 |
| ATOM | 3519 | CA   | ALA | X | 233 | 44.262 | 45.936 | 49.322 | 0.00 | 0.00 |
| ATOM | 3520 | HA   | ALA | X | 233 | 44.613 | 46.293 | 48.354 | 0.00 | 0.00 |
| ATOM | 3521 | CB   | ALA | X | 233 | 43.068 | 44.959 | 49.088 | 0.00 | 0.00 |
| ATOM | 3522 | HB1  | ALA | X | 233 | 42.270 | 45.322 | 48.440 | 0.00 | 0.00 |
| ATOM | 3523 | HB2  | ALA | X | 233 | 42.467 | 44.729 | 49.968 | 0.00 | 0.00 |
| ATOM | 3524 | HB3  | ALA | X | 233 | 43.466 | 43.999 | 48.759 | 0.00 | 0.00 |
| ATOM | 3525 | C    | ALA | X | 233 | 43.833 | 47.286 | 49.998 | 0.00 | 0.00 |
| ATOM | 3526 | O    | ALA | X | 233 | 42.880 | 47.912 | 49.613 | 0.00 | 0.00 |
| ATOM | 3527 | N    | THR | X | 234 | 44.571 | 47.723 | 51.100 | 0.00 | 0.00 |
| ATOM | 3528 | H    | THR | X | 234 | 45.446 | 47.279 | 51.336 | 0.00 | 0.00 |
| ATOM | 3529 | CA   | THR | X | 234 | 44.290 | 49.028 | 51.765 | 0.00 | 0.00 |
| ATOM | 3530 | HA   | THR | X | 234 | 43.766 | 49.575 | 50.981 | 0.00 | 0.00 |
| ATOM | 3531 | CB   | THR | X | 234 | 43.435 | 48.869 | 53.013 | 0.00 | 0.00 |
| ATOM | 3532 | HB   | THR | X | 234 | 43.706 | 49.751 | 53.593 | 0.00 | 0.00 |
| ATOM | 3533 | CG2  | THR | X | 234 | 41.891 | 48.963 | 52.728 | 0.00 | 0.00 |
| ATOM | 3534 | HG21 | THR | X | 234 | 41.386 | 48.538 | 53.595 | 0.00 | 0.00 |
| ATOM | 3535 | HG22 | THR | X | 234 | 41.674 | 48.354 | 51.850 | 0.00 | 0.00 |
| ATOM | 3536 | HG23 | THR | X | 234 | 41.502 | 49.976 | 52.623 | 0.00 | 0.00 |
| ATOM | 3537 | OG1  | THR | X | 234 | 43.750 | 47.731 | 53.755 | 0.00 | 0.00 |
| ATOM | 3538 | HG1  | THR | X | 234 | 43.609 | 46.929 | 53.248 | 0.00 | 0.00 |
| ATOM | 3539 | C    | THR | X | 234 | 45.590 | 49.703 | 52.197 | 0.00 | 0.00 |
| ATOM | 3540 | O    | THR | X | 234 | 46.526 | 49.067 | 52.548 | 0.00 | 0.00 |
| ATOM | 3541 | N    | VAL | X | 235 | 45.594 | 51.050 | 52.333 | 0.00 | 0.00 |
| ATOM | 3542 | H    | VAL | X | 235 | 44.733 | 51.452 | 51.992 | 0.00 | 0.00 |
| ATOM | 3543 | CA   | VAL | X | 235 | 46.626 | 51.867 | 52.934 | 0.00 | 0.00 |
| ATOM | 3544 | HA   | VAL | X | 235 | 47.201 | 51.204 | 53.581 | 0.00 | 0.00 |
| ATOM | 3545 | CB   | VAL | X | 235 | 47.547 | 52.463 | 51.788 | 0.00 | 0.00 |
| ATOM | 3546 | HB   | VAL | X | 235 | 47.856 | 51.648 | 51.134 | 0.00 | 0.00 |
| ATOM | 3547 | CG1  | VAL | X | 235 | 46.807 | 53.554 | 51.003 | 0.00 | 0.00 |
| ATOM | 3548 | HG11 | VAL | X | 235 | 46.900 | 54.432 | 51.642 | 0.00 | 0.00 |
| ATOM | 3549 | HG12 | VAL | X | 235 | 47.444 | 53.741 | 50.138 | 0.00 | 0.00 |
| ATOM | 3550 | HG13 | VAL | X | 235 | 45.799 | 53.199 | 50.789 | 0.00 | 0.00 |
| ATOM | 3551 | CG2  | VAL | X | 235 | 48.839 | 52.867 | 52.392 | 0.00 | 0.00 |
| ATOM | 3552 | HG21 | VAL | X | 235 | 49.574 | 53.186 | 51.652 | 0.00 | 0.00 |
| ATOM | 3553 | HG22 | VAL | X | 235 | 49.376 | 52.078 | 52.918 | 0.00 | 0.00 |
| ATOM | 3554 | HG23 | VAL | X | 235 | 48.748 | 53.721 | 53.064 | 0.00 | 0.00 |
| ATOM | 3555 | C    | VAL | X | 235 | 45.912 | 52.904 | 53.774 | 0.00 | 0.00 |
| ATOM | 3556 | O    | VAL | X | 235 | 44.743 | 53.222 | 53.532 | 0.00 | 0.00 |
| ATOM | 3557 | N    | GLY | X | 236 | 46.496 | 53.509 | 54.758 | 0.00 | 0.00 |
| ATOM | 3558 | H    | GLY | X | 236 | 47.435 | 53.159 | 54.878 | 0.00 | 0.00 |
| ATOM | 3559 | CA   | GLY | X | 236 | 46.014 | 54.553 | 55.617 | 0.00 | 0.00 |
| ATOM | 3560 | HA2  | GLY | X | 236 | 44.950 | 54.374 | 55.776 | 0.00 | 0.00 |
| ATOM | 3561 | HA3  | GLY | X | 236 | 46.413 | 54.581 | 56.631 | 0.00 | 0.00 |
| ATOM | 3562 | C    | GLY | X | 236 | 46.111 | 55.929 | 54.923 | 0.00 | 0.00 |
| ATOM | 3563 | O    | GLY | X | 236 | 46.879 | 56.102 | 53.914 | 0.00 | 0.00 |
| ATOM | 3564 | N    | MET | X | 237 | 45.450 | 56.966 | 55.538 | 0.00 | 0.00 |
| ATOM | 3565 | H    | MET | X | 237 | 44.887 | 56.717 | 56.339 | 0.00 | 0.00 |
| ATOM | 3566 | CA   | MET | X | 237 | 45.508 | 58.320 | 54.948 | 0.00 | 0.00 |
| ATOM | 3567 | HA   | MET | X | 237 | 45.377 | 58.148 | 53.880 | 0.00 | 0.00 |
| ATOM | 3568 | CB   | MET | X | 237 | 44.324 | 59.054 | 55.566 | 0.00 | 0.00 |
| ATOM | 3569 | HB2  | MET | X | 237 | 43.389 | 58.561 | 55.301 | 0.00 | 0.00 |
| ATOM | 3570 | HB3  | MET | X | 237 | 44.445 | 59.144 | 56.645 | 0.00 | 0.00 |
| ATOM | 3571 | CG   | MET | X | 237 | 44.316 | 60.529 | 54.986 | 0.00 | 0.00 |
| ATOM | 3572 | HG2  | MET | X | 237 | 43.646 | 61.162 | 55.568 | 0.00 | 0.00 |
| ATOM | 3573 | HG3  | MET | X | 237 | 45.267 | 61.053 | 55.077 | 0.00 | 0.00 |
| ATOM | 3574 | SD   | MET | X | 237 | 43.931 | 60.509 | 53.168 | 0.00 | 0.00 |
| ATOM | 3575 | CE   | MET | X | 237 | 42.214 | 60.107 | 53.180 | 0.00 | 0.00 |
| ATOM | 3576 | HE1  | MET | X | 237 | 41.898 | 59.321 | 53.866 | 0.00 | 0.00 |
| ATOM | 3577 | HE2  | MET | X | 237 | 41.708 | 60.970 | 53.612 | 0.00 | 0.00 |
| ATOM | 3578 | HE3  | MET | X | 237 | 41.947 | 59.878 | 52.148 | 0.00 | 0.00 |
| ATOM | 3579 | C    | MET | X | 237 | 46.868 | 59.022 | 55.092 | 0.00 | 0.00 |
| ATOM | 3580 | O    | MET | X | 237 | 47.333 | 59.696 | 54.192 | 0.00 | 0.00 |
| ATOM | 3581 | N    | GLY | X | 238 | 47.496 | 58.842 | 56.252 | 0.00 | 0.00 |
| ATOM | 3582 | H    | GLY | X | 238 | 47.122 | 58.198 | 56.935 | 0.00 | 0.00 |

|      |      |      |     |   |     |        |        |        |      |      |
|------|------|------|-----|---|-----|--------|--------|--------|------|------|
| ATOM | 3583 | CA   | GLY | X | 238 | 48.835 | 59.499 | 56.505 | 0.00 | 0.00 |
| ATOM | 3584 | HA2  | GLY | X | 238 | 48.679 | 60.563 | 56.327 | 0.00 | 0.00 |
| ATOM | 3585 | HA3  | GLY | X | 238 | 49.094 | 59.466 | 57.563 | 0.00 | 0.00 |
| ATOM | 3586 | C    | GLY | X | 238 | 49.975 | 59.040 | 55.558 | 0.00 | 0.00 |
| ATOM | 3587 | O    | GLY | X | 238 | 50.750 | 59.831 | 54.967 | 0.00 | 0.00 |
| ATOM | 3588 | N    | GLU | X | 239 | 49.913 | 57.736 | 55.186 | 0.00 | 0.00 |
| ATOM | 3589 | H    | GLU | X | 239 | 49.312 | 57.114 | 55.707 | 0.00 | 0.00 |
| ATOM | 3590 | CA   | GLU | X | 239 | 50.723 | 57.182 | 54.104 | 0.00 | 0.00 |
| ATOM | 3591 | HA   | GLU | X | 239 | 51.756 | 57.430 | 54.347 | 0.00 | 0.00 |
| ATOM | 3592 | CB   | GLU | X | 239 | 50.419 | 55.704 | 53.976 | 0.00 | 0.00 |
| ATOM | 3593 | HB2  | GLU | X | 239 | 49.455 | 55.489 | 54.437 | 0.00 | 0.00 |
| ATOM | 3594 | HB3  | GLU | X | 239 | 50.498 | 55.427 | 52.925 | 0.00 | 0.00 |
| ATOM | 3595 | CG   | GLU | X | 239 | 51.443 | 54.786 | 54.604 | 0.00 | 0.00 |
| ATOM | 3596 | HG2  | GLU | X | 239 | 51.383 | 54.958 | 55.678 | 0.00 | 0.00 |
| ATOM | 3597 | HG3  | GLU | X | 239 | 51.270 | 53.722 | 54.445 | 0.00 | 0.00 |
| ATOM | 3598 | CD   | GLU | X | 239 | 52.861 | 55.103 | 54.136 | 0.00 | 0.00 |
| ATOM | 3599 | OE1  | GLU | X | 239 | 53.243 | 54.538 | 53.057 | 0.00 | 0.00 |
| ATOM | 3600 | OE2  | GLU | X | 239 | 53.602 | 55.881 | 54.759 | 0.00 | 0.00 |
| ATOM | 3601 | C    | GLU | X | 239 | 50.388 | 57.812 | 52.708 | 0.00 | 0.00 |
| ATOM | 3602 | O    | GLU | X | 239 | 51.345 | 58.270 | 52.038 | 0.00 | 0.00 |
| ATOM | 3603 | N    | ALA | X | 240 | 49.168 | 58.127 | 52.361 | 0.00 | 0.00 |
| ATOM | 3604 | H    | ALA | X | 240 | 48.389 | 57.883 | 52.957 | 0.00 | 0.00 |
| ATOM | 3605 | CA   | ALA | X | 240 | 48.909 | 58.791 | 51.110 | 0.00 | 0.00 |
| ATOM | 3606 | HA   | ALA | X | 240 | 49.463 | 58.403 | 50.255 | 0.00 | 0.00 |
| ATOM | 3607 | CB   | ALA | X | 240 | 47.439 | 58.646 | 50.778 | 0.00 | 0.00 |
| ATOM | 3608 | HB1  | ALA | X | 240 | 47.210 | 57.620 | 50.489 | 0.00 | 0.00 |
| ATOM | 3609 | HB2  | ALA | X | 240 | 47.194 | 59.350 | 49.983 | 0.00 | 0.00 |
| ATOM | 3610 | HB3  | ALA | X | 240 | 46.856 | 58.785 | 51.689 | 0.00 | 0.00 |
| ATOM | 3611 | C    | ALA | X | 240 | 49.243 | 60.238 | 51.149 | 0.00 | 0.00 |
| ATOM | 3612 | O    | ALA | X | 240 | 49.802 | 60.752 | 50.174 | 0.00 | 0.00 |
| ATOM | 3613 | N    | ARG | X | 241 | 49.159 | 60.870 | 52.303 | 0.00 | 0.00 |
| ATOM | 3614 | H    | ARG | X | 241 | 48.769 | 60.293 | 53.034 | 0.00 | 0.00 |
| ATOM | 3615 | CA   | ARG | X | 241 | 49.644 | 62.242 | 52.616 | 0.00 | 0.00 |
| ATOM | 3616 | HA   | ARG | X | 241 | 49.123 | 62.893 | 51.913 | 0.00 | 0.00 |
| ATOM | 3617 | CB   | ARG | X | 241 | 49.208 | 62.697 | 54.060 | 0.00 | 0.00 |
| ATOM | 3618 | HB2  | ARG | X | 241 | 48.152 | 62.485 | 54.230 | 0.00 | 0.00 |
| ATOM | 3619 | HB3  | ARG | X | 241 | 49.782 | 62.124 | 54.788 | 0.00 | 0.00 |
| ATOM | 3620 | CG   | ARG | X | 241 | 49.552 | 64.238 | 54.329 | 0.00 | 0.00 |
| ATOM | 3621 | HG2  | ARG | X | 241 | 50.618 | 64.387 | 54.158 | 0.00 | 0.00 |
| ATOM | 3622 | HG3  | ARG | X | 241 | 48.978 | 64.842 | 53.626 | 0.00 | 0.00 |
| ATOM | 3623 | CD   | ARG | X | 241 | 49.142 | 64.488 | 55.754 | 0.00 | 0.00 |
| ATOM | 3624 | HD2  | ARG | X | 241 | 48.228 | 63.905 | 55.875 | 0.00 | 0.00 |
| ATOM | 3625 | HD3  | ARG | X | 241 | 50.018 | 64.194 | 56.332 | 0.00 | 0.00 |
| ATOM | 3626 | NE   | ARG | X | 241 | 48.880 | 65.968 | 55.958 | 0.00 | 0.00 |
| ATOM | 3627 | HE   | ARG | X | 241 | 48.908 | 66.629 | 55.194 | 0.00 | 0.00 |
| ATOM | 3628 | CZ   | ARG | X | 241 | 49.112 | 66.486 | 57.149 | 0.00 | 0.00 |
| ATOM | 3629 | NH1  | ARG | X | 241 | 49.082 | 65.772 | 58.209 | 0.00 | 0.00 |
| ATOM | 3630 | HH11 | ARG | X | 241 | 48.772 | 64.811 | 58.240 | 0.00 | 0.00 |
| ATOM | 3631 | HH12 | ARG | X | 241 | 49.362 | 66.161 | 59.098 | 0.00 | 0.00 |
| ATOM | 3632 | NH2  | ARG | X | 241 | 49.473 | 67.772 | 57.344 | 0.00 | 0.00 |
| ATOM | 3633 | HH21 | ARG | X | 241 | 49.374 | 68.473 | 56.624 | 0.00 | 0.00 |
| ATOM | 3634 | HH22 | ARG | X | 241 | 49.808 | 68.141 | 58.223 | 0.00 | 0.00 |
| ATOM | 3635 | C    | ARG | X | 241 | 51.140 | 62.319 | 52.228 | 0.00 | 0.00 |
| ATOM | 3636 | O    | ARG | X | 241 | 51.465 | 63.123 | 51.366 | 0.00 | 0.00 |
| ATOM | 3637 | N    | ARG | X | 242 | 51.911 | 61.409 | 52.753 | 0.00 | 0.00 |
| ATOM | 3638 | H    | ARG | X | 242 | 51.470 | 60.658 | 53.265 | 0.00 | 0.00 |
| ATOM | 3639 | CA   | ARG | X | 242 | 53.363 | 61.274 | 52.508 | 0.00 | 0.00 |
| ATOM | 3640 | HA   | ARG | X | 242 | 53.761 | 62.259 | 52.754 | 0.00 | 0.00 |
| ATOM | 3641 | CB   | ARG | X | 242 | 53.905 | 60.261 | 53.484 | 0.00 | 0.00 |
| ATOM | 3642 | HB2  | ARG | X | 242 | 53.450 | 60.330 | 54.472 | 0.00 | 0.00 |
| ATOM | 3643 | HB3  | ARG | X | 242 | 53.737 | 59.252 | 53.107 | 0.00 | 0.00 |
| ATOM | 3644 | CG   | ARG | X | 242 | 55.436 | 60.331 | 53.768 | 0.00 | 0.00 |
| ATOM | 3645 | HG2  | ARG | X | 242 | 55.958 | 60.531 | 52.832 | 0.00 | 0.00 |
| ATOM | 3646 | HG3  | ARG | X | 242 | 55.574 | 61.032 | 54.591 | 0.00 | 0.00 |
| ATOM | 3647 | CD   | ARG | X | 242 | 55.874 | 58.988 | 54.435 | 0.00 | 0.00 |
| ATOM | 3648 | HD2  | ARG | X | 242 | 56.963 | 59.006 | 54.463 | 0.00 | 0.00 |
| ATOM | 3649 | HD3  | ARG | X | 242 | 55.475 | 58.976 | 55.450 | 0.00 | 0.00 |

|      |      |      |     |   |     |        |        |        |      |      |
|------|------|------|-----|---|-----|--------|--------|--------|------|------|
| ATOM | 3650 | NE   | ARG | X | 242 | 55.604 | 57.686 | 53.756 | 0.00 | 0.00 |
| ATOM | 3651 | HE   | ARG | X | 242 | 54.765 | 57.227 | 54.080 | 0.00 | 0.00 |
| ATOM | 3652 | CZ   | ARG | X | 242 | 56.205 | 57.077 | 52.723 | 0.00 | 0.00 |
| ATOM | 3653 | NH1  | ARG | X | 242 | 57.381 | 57.458 | 52.283 | 0.00 | 0.00 |
| ATOM | 3654 | HH11 | ARG | X | 242 | 57.845 | 58.166 | 52.834 | 0.00 | 0.00 |
| ATOM | 3655 | HH12 | ARG | X | 242 | 57.737 | 56.885 | 51.530 | 0.00 | 0.00 |
| ATOM | 3656 | NH2  | ARG | X | 242 | 55.715 | 55.972 | 52.273 | 0.00 | 0.00 |
| ATOM | 3657 | HH21 | ARG | X | 242 | 54.967 | 55.476 | 52.737 | 0.00 | 0.00 |
| ATOM | 3658 | HH22 | ARG | X | 242 | 56.155 | 55.548 | 51.469 | 0.00 | 0.00 |
| ATOM | 3659 | C    | ARG | X | 242 | 53.660 | 60.889 | 51.054 | 0.00 | 0.00 |
| ATOM | 3660 | O    | ARG | X | 242 | 54.370 | 61.604 | 50.404 | 0.00 | 0.00 |
| ATOM | 3661 | N    | ARG | X | 243 | 53.025 | 59.891 | 50.467 | 0.00 | 0.00 |
| ATOM | 3662 | H    | ARG | X | 243 | 52.340 | 59.334 | 50.957 | 0.00 | 0.00 |
| ATOM | 3663 | CA   | ARG | X | 243 | 53.295 | 59.551 | 49.039 | 0.00 | 0.00 |
| ATOM | 3664 | HA   | ARG | X | 243 | 54.370 | 59.503 | 48.862 | 0.00 | 0.00 |
| ATOM | 3665 | CB   | ARG | X | 243 | 52.736 | 58.176 | 48.498 | 0.00 | 0.00 |
| ATOM | 3666 | HB2  | ARG | X | 243 | 51.650 | 58.241 | 48.436 | 0.00 | 0.00 |
| ATOM | 3667 | HB3  | ARG | X | 243 | 53.112 | 58.028 | 47.485 | 0.00 | 0.00 |
| ATOM | 3668 | CG   | ARG | X | 243 | 53.172 | 56.995 | 49.374 | 0.00 | 0.00 |
| ATOM | 3669 | HG2  | ARG | X | 243 | 54.224 | 56.860 | 49.123 | 0.00 | 0.00 |
| ATOM | 3670 | HG3  | ARG | X | 243 | 53.217 | 57.245 | 50.434 | 0.00 | 0.00 |
| ATOM | 3671 | CD   | ARG | X | 243 | 52.400 | 55.682 | 49.130 | 0.00 | 0.00 |
| ATOM | 3672 | HD2  | ARG | X | 243 | 51.350 | 55.968 | 49.066 | 0.00 | 0.00 |
| ATOM | 3673 | HD3  | ARG | X | 243 | 52.601 | 55.185 | 48.181 | 0.00 | 0.00 |
| ATOM | 3674 | NE   | ARG | X | 243 | 52.479 | 54.753 | 50.265 | 0.00 | 0.00 |
| ATOM | 3675 | HE   | ARG | X | 243 | 52.864 | 55.076 | 51.141 | 0.00 | 0.00 |
| ATOM | 3676 | CZ   | ARG | X | 243 | 52.278 | 53.430 | 50.132 | 0.00 | 0.00 |
| ATOM | 3677 | NH1  | ARG | X | 243 | 51.927 | 52.926 | 48.963 | 0.00 | 0.00 |
| ATOM | 3678 | HH11 | ARG | X | 243 | 51.754 | 53.536 | 48.178 | 0.00 | 0.00 |
| ATOM | 3679 | HH12 | ARG | X | 243 | 51.653 | 51.953 | 48.965 | 0.00 | 0.00 |
| ATOM | 3680 | NH2  | ARG | X | 243 | 52.300 | 52.627 | 51.187 | 0.00 | 0.00 |
| ATOM | 3681 | HH21 | ARG | X | 243 | 52.472 | 53.135 | 52.043 | 0.00 | 0.00 |
| ATOM | 3682 | HH22 | ARG | X | 243 | 51.876 | 51.711 | 51.204 | 0.00 | 0.00 |
| ATOM | 3683 | C    | ARG | X | 243 | 52.907 | 60.693 | 48.108 | 0.00 | 0.00 |
| ATOM | 3684 | O    | ARG | X | 243 | 53.573 | 60.771 | 47.102 | 0.00 | 0.00 |
| ATOM | 3685 | N    | ALA | X | 244 | 51.947 | 61.545 | 48.417 | 0.00 | 0.00 |
| ATOM | 3686 | H    | ALA | X | 244 | 51.324 | 61.354 | 49.189 | 0.00 | 0.00 |
| ATOM | 3687 | CA   | ALA | X | 244 | 51.575 | 62.728 | 47.650 | 0.00 | 0.00 |
| ATOM | 3688 | HA   | ALA | X | 244 | 51.387 | 62.395 | 46.630 | 0.00 | 0.00 |
| ATOM | 3689 | CB   | ALA | X | 244 | 50.204 | 63.226 | 48.098 | 0.00 | 0.00 |
| ATOM | 3690 | HB1  | ALA | X | 244 | 49.761 | 63.928 | 47.392 | 0.00 | 0.00 |
| ATOM | 3691 | HB2  | ALA | X | 244 | 50.198 | 63.721 | 49.070 | 0.00 | 0.00 |
| ATOM | 3692 | HB3  | ALA | X | 244 | 49.426 | 62.474 | 48.233 | 0.00 | 0.00 |
| ATOM | 3693 | C    | ALA | X | 244 | 52.617 | 63.843 | 47.719 | 0.00 | 0.00 |
| ATOM | 3694 | O    | ALA | X | 244 | 53.138 | 64.237 | 46.686 | 0.00 | 0.00 |
| ATOM | 3695 | N    | THR | X | 245 | 53.095 | 64.132 | 48.968 | 0.00 | 0.00 |
| ATOM | 3696 | H    | THR | X | 245 | 52.508 | 63.822 | 49.729 | 0.00 | 0.00 |
| ATOM | 3697 | CA   | THR | X | 245 | 54.298 | 64.898 | 49.358 | 0.00 | 0.00 |
| ATOM | 3698 | HA   | THR | X | 245 | 54.207 | 65.943 | 49.063 | 0.00 | 0.00 |
| ATOM | 3699 | CB   | THR | X | 245 | 54.549 | 65.014 | 50.839 | 0.00 | 0.00 |
| ATOM | 3700 | HB   | THR | X | 245 | 54.130 | 64.151 | 51.356 | 0.00 | 0.00 |
| ATOM | 3701 | CG2  | THR | X | 245 | 55.976 | 65.405 | 51.384 | 0.00 | 0.00 |
| ATOM | 3702 | HG21 | THR | X | 245 | 56.302 | 66.372 | 51.000 | 0.00 | 0.00 |
| ATOM | 3703 | HG22 | THR | X | 245 | 56.770 | 64.685 | 51.181 | 0.00 | 0.00 |
| ATOM | 3704 | HG23 | THR | X | 245 | 55.875 | 65.492 | 52.466 | 0.00 | 0.00 |
| ATOM | 3705 | OG1  | THR | X | 245 | 53.679 | 65.990 | 51.283 | 0.00 | 0.00 |
| ATOM | 3706 | HG1  | THR | X | 245 | 53.427 | 65.659 | 52.149 | 0.00 | 0.00 |
| ATOM | 3707 | C    | THR | X | 245 | 55.500 | 64.364 | 48.572 | 0.00 | 0.00 |
| ATOM | 3708 | O    | THR | X | 245 | 56.324 | 65.170 | 48.111 | 0.00 | 0.00 |
| ATOM | 3709 | N    | GLN | X | 246 | 55.653 | 63.034 | 48.530 | 0.00 | 0.00 |
| ATOM | 3710 | H    | GLN | X | 246 | 54.864 | 62.490 | 48.849 | 0.00 | 0.00 |
| ATOM | 3711 | CA   | GLN | X | 246 | 56.813 | 62.396 | 47.920 | 0.00 | 0.00 |
| ATOM | 3712 | HA   | GLN | X | 246 | 57.695 | 62.919 | 48.289 | 0.00 | 0.00 |
| ATOM | 3713 | CB   | GLN | X | 246 | 56.856 | 60.951 | 48.349 | 0.00 | 0.00 |
| ATOM | 3714 | HB2  | GLN | X | 246 | 56.556 | 60.891 | 49.395 | 0.00 | 0.00 |
| ATOM | 3715 | HB3  | GLN | X | 246 | 56.138 | 60.505 | 47.661 | 0.00 | 0.00 |
| ATOM | 3716 | CG   | GLN | X | 246 | 58.208 | 60.277 | 48.064 | 0.00 | 0.00 |

|      |      |      |     |   |     |        |        |        |      |      |
|------|------|------|-----|---|-----|--------|--------|--------|------|------|
| ATOM | 3717 | HG2  | GLN | X | 246 | 58.431 | 60.288 | 46.997 | 0.00 | 0.00 |
| ATOM | 3718 | HG3  | GLN | X | 246 | 59.029 | 60.799 | 48.557 | 0.00 | 0.00 |
| ATOM | 3719 | CD   | GLN | X | 246 | 58.230 | 58.758 | 48.425 | 0.00 | 0.00 |
| ATOM | 3720 | OE1  | GLN | X | 246 | 57.296 | 58.158 | 48.892 | 0.00 | 0.00 |
| ATOM | 3721 | NE2  | GLN | X | 246 | 59.348 | 58.096 | 48.293 | 0.00 | 0.00 |
| ATOM | 3722 | HE21 | GLN | X | 246 | 59.284 | 57.093 | 48.388 | 0.00 | 0.00 |
| ATOM | 3723 | HE22 | GLN | X | 246 | 60.116 | 58.545 | 47.816 | 0.00 | 0.00 |
| ATOM | 3724 | C    | GLN | X | 246 | 56.768 | 62.586 | 46.319 | 0.00 | 0.00 |
| ATOM | 3725 | O    | GLN | X | 246 | 57.845 | 62.911 | 45.763 | 0.00 | 0.00 |
| ATOM | 3726 | N    | LEU | X | 247 | 55.605 | 62.321 | 45.648 | 0.00 | 0.00 |
| ATOM | 3727 | H    | LEU | X | 247 | 54.802 | 62.098 | 46.220 | 0.00 | 0.00 |
| ATOM | 3728 | CA   | LEU | X | 247 | 55.459 | 62.557 | 44.196 | 0.00 | 0.00 |
| ATOM | 3729 | HA   | LEU | X | 247 | 56.118 | 61.912 | 43.614 | 0.00 | 0.00 |
| ATOM | 3730 | CB   | LEU | X | 247 | 53.981 | 62.134 | 43.855 | 0.00 | 0.00 |
| ATOM | 3731 | HB2  | LEU | X | 247 | 53.914 | 61.058 | 44.019 | 0.00 | 0.00 |
| ATOM | 3732 | HB3  | LEU | X | 247 | 53.347 | 62.634 | 44.587 | 0.00 | 0.00 |
| ATOM | 3733 | CG   | LEU | X | 247 | 53.404 | 62.337 | 42.453 | 0.00 | 0.00 |
| ATOM | 3734 | HG   | LEU | X | 247 | 53.482 | 63.403 | 42.241 | 0.00 | 0.00 |
| ATOM | 3735 | CD1  | LEU | X | 247 | 54.356 | 61.753 | 41.425 | 0.00 | 0.00 |
| ATOM | 3736 | HD11 | LEU | X | 247 | 55.277 | 62.329 | 41.338 | 0.00 | 0.00 |
| ATOM | 3737 | HD12 | LEU | X | 247 | 53.775 | 61.857 | 40.509 | 0.00 | 0.00 |
| ATOM | 3738 | HD13 | LEU | X | 247 | 54.522 | 60.699 | 41.649 | 0.00 | 0.00 |
| ATOM | 3739 | CD2  | LEU | X | 247 | 51.970 | 61.816 | 42.120 | 0.00 | 0.00 |
| ATOM | 3740 | HD21 | LEU | X | 247 | 51.341 | 61.624 | 42.990 | 0.00 | 0.00 |
| ATOM | 3741 | HD22 | LEU | X | 247 | 51.475 | 62.553 | 41.488 | 0.00 | 0.00 |
| ATOM | 3742 | HD23 | LEU | X | 247 | 52.027 | 60.830 | 41.659 | 0.00 | 0.00 |
| ATOM | 3743 | C    | LEU | X | 247 | 55.761 | 64.029 | 43.807 | 0.00 | 0.00 |
| ATOM | 3744 | O    | LEU | X | 247 | 56.573 | 64.304 | 42.877 | 0.00 | 0.00 |
| ATOM | 3745 | N    | ALA | X | 248 | 55.172 | 64.975 | 44.557 | 0.00 | 0.00 |
| ATOM | 3746 | H    | ALA | X | 248 | 54.694 | 64.627 | 45.376 | 0.00 | 0.00 |
| ATOM | 3747 | CA   | ALA | X | 248 | 55.533 | 66.382 | 44.589 | 0.00 | 0.00 |
| ATOM | 3748 | HA   | ALA | X | 248 | 55.199 | 66.739 | 43.614 | 0.00 | 0.00 |
| ATOM | 3749 | CB   | ALA | X | 248 | 54.783 | 67.104 | 45.693 | 0.00 | 0.00 |
| ATOM | 3750 | HB1  | ALA | X | 248 | 53.730 | 67.027 | 45.422 | 0.00 | 0.00 |
| ATOM | 3751 | HB2  | ALA | X | 248 | 55.035 | 68.159 | 45.797 | 0.00 | 0.00 |
| ATOM | 3752 | HB3  | ALA | X | 248 | 54.987 | 66.559 | 46.615 | 0.00 | 0.00 |
| ATOM | 3753 | C    | ALA | X | 248 | 57.058 | 66.676 | 44.695 | 0.00 | 0.00 |
| ATOM | 3754 | O    | ALA | X | 248 | 57.514 | 67.272 | 43.717 | 0.00 | 0.00 |
| ATOM | 3755 | N    | HIE | X | 249 | 57.807 | 66.218 | 45.635 | 0.00 | 0.00 |
| ATOM | 3756 | H    | HIE | X | 249 | 57.376 | 65.831 | 46.463 | 0.00 | 0.00 |
| ATOM | 3757 | CA   | HIE | X | 249 | 59.223 | 66.190 | 45.534 | 0.00 | 0.00 |
| ATOM | 3758 | HA   | HIE | X | 249 | 59.667 | 67.179 | 45.645 | 0.00 | 0.00 |
| ATOM | 3759 | CB   | HIE | X | 249 | 59.695 | 65.536 | 46.862 | 0.00 | 0.00 |
| ATOM | 3760 | HB2  | HIE | X | 249 | 59.284 | 65.951 | 47.782 | 0.00 | 0.00 |
| ATOM | 3761 | HB3  | HIE | X | 249 | 59.611 | 64.453 | 46.775 | 0.00 | 0.00 |
| ATOM | 3762 | CG   | HIE | X | 249 | 61.183 | 65.814 | 47.049 | 0.00 | 0.00 |
| ATOM | 3763 | ND1  | HIE | X | 249 | 61.743 | 67.053 | 47.374 | 0.00 | 0.00 |
| ATOM | 3764 | CE1  | HIE | X | 249 | 63.059 | 66.840 | 47.350 | 0.00 | 0.00 |
| ATOM | 3765 | HE1  | HIE | X | 249 | 63.868 | 67.478 | 47.674 | 0.00 | 0.00 |
| ATOM | 3766 | NE2  | HIE | X | 249 | 63.331 | 65.638 | 46.936 | 0.00 | 0.00 |
| ATOM | 3767 | HE2  | HIE | X | 249 | 64.241 | 65.228 | 46.783 | 0.00 | 0.00 |
| ATOM | 3768 | CD2  | HIE | X | 249 | 62.144 | 64.914 | 46.751 | 0.00 | 0.00 |
| ATOM | 3769 | HD2  | HIE | X | 249 | 62.047 | 63.911 | 46.364 | 0.00 | 0.00 |
| ATOM | 3770 | C    | HIE | X | 249 | 59.875 | 65.402 | 44.389 | 0.00 | 0.00 |
| ATOM | 3771 | O    | HIE | X | 249 | 60.641 | 66.125 | 43.707 | 0.00 | 0.00 |
| ATOM | 3772 | N    | LEU | X | 250 | 59.738 | 64.102 | 44.095 | 0.00 | 0.00 |
| ATOM | 3773 | H    | LEU | X | 250 | 59.087 | 63.554 | 44.640 | 0.00 | 0.00 |
| ATOM | 3774 | CA   | LEU | X | 250 | 60.255 | 63.515 | 42.804 | 0.00 | 0.00 |
| ATOM | 3775 | HA   | LEU | X | 250 | 61.329 | 63.378 | 42.924 | 0.00 | 0.00 |
| ATOM | 3776 | CB   | LEU | X | 250 | 59.628 | 62.104 | 42.555 | 0.00 | 0.00 |
| ATOM | 3777 | HB2  | LEU | X | 250 | 58.563 | 62.302 | 42.677 | 0.00 | 0.00 |
| ATOM | 3778 | HB3  | LEU | X | 250 | 59.762 | 61.762 | 41.529 | 0.00 | 0.00 |
| ATOM | 3779 | CG   | LEU | X | 250 | 60.099 | 61.074 | 43.571 | 0.00 | 0.00 |
| ATOM | 3780 | HG   | LEU | X | 250 | 60.219 | 61.682 | 44.467 | 0.00 | 0.00 |
| ATOM | 3781 | CD1  | LEU | X | 250 | 58.932 | 60.052 | 43.808 | 0.00 | 0.00 |
| ATOM | 3782 | HD11 | LEU | X | 250 | 58.025 | 60.600 | 44.065 | 0.00 | 0.00 |
| ATOM | 3783 | HD12 | LEU | X | 250 | 59.241 | 59.354 | 44.586 | 0.00 | 0.00 |

|      |      |      |     |   |     |        |        |        |      |      |
|------|------|------|-----|---|-----|--------|--------|--------|------|------|
| ATOM | 3784 | HD13 | LEU | X | 250 | 58.790 | 59.495 | 42.881 | 0.00 | 0.00 |
| ATOM | 3785 | CD2  | LEU | X | 250 | 61.436 | 60.451 | 43.083 | 0.00 | 0.00 |
| ATOM | 3786 | HD21 | LEU | X | 250 | 62.175 | 61.253 | 43.083 | 0.00 | 0.00 |
| ATOM | 3787 | HD22 | LEU | X | 250 | 61.752 | 59.786 | 43.887 | 0.00 | 0.00 |
| ATOM | 3788 | HD23 | LEU | X | 250 | 61.230 | 59.992 | 42.116 | 0.00 | 0.00 |
| ATOM | 3789 | C    | LEU | X | 250 | 59.958 | 64.301 | 41.471 | 0.00 | 0.00 |
| ATOM | 3790 | O    | LEU | X | 250 | 60.875 | 64.464 | 40.687 | 0.00 | 0.00 |
| ATOM | 3791 | N    | VAL | X | 251 | 58.699 | 64.842 | 41.300 | 0.00 | 0.00 |
| ATOM | 3792 | H    | VAL | X | 251 | 58.006 | 64.498 | 41.949 | 0.00 | 0.00 |
| ATOM | 3793 | CA   | VAL | X | 251 | 58.350 | 65.648 | 40.058 | 0.00 | 0.00 |
| ATOM | 3794 | HA   | VAL | X | 251 | 58.900 | 65.280 | 39.192 | 0.00 | 0.00 |
| ATOM | 3795 | CB   | VAL | X | 251 | 56.851 | 65.591 | 39.686 | 0.00 | 0.00 |
| ATOM | 3796 | HB   | VAL | X | 251 | 56.576 | 64.586 | 40.007 | 0.00 | 0.00 |
| ATOM | 3797 | CG1  | VAL | X | 251 | 55.996 | 66.554 | 40.495 | 0.00 | 0.00 |
| ATOM | 3798 | HG11 | VAL | X | 251 | 54.940 | 66.294 | 40.416 | 0.00 | 0.00 |
| ATOM | 3799 | HG12 | VAL | X | 251 | 56.439 | 66.689 | 41.482 | 0.00 | 0.00 |
| ATOM | 3800 | HG13 | VAL | X | 251 | 55.994 | 67.572 | 40.106 | 0.00 | 0.00 |
| ATOM | 3801 | CG2  | VAL | X | 251 | 56.632 | 65.550 | 38.069 | 0.00 | 0.00 |
| ATOM | 3802 | HG21 | VAL | X | 251 | 57.294 | 66.274 | 37.595 | 0.00 | 0.00 |
| ATOM | 3803 | HG22 | VAL | X | 251 | 55.617 | 65.765 | 37.735 | 0.00 | 0.00 |
| ATOM | 3804 | HG23 | VAL | X | 251 | 56.952 | 64.581 | 37.684 | 0.00 | 0.00 |
| ATOM | 3805 | C    | VAL | X | 251 | 58.865 | 67.142 | 40.116 | 0.00 | 0.00 |
| ATOM | 3806 | O    | VAL | X | 251 | 58.965 | 67.829 | 39.079 | 0.00 | 0.00 |
| ATOM | 3807 | N    | GLY | X | 252 | 59.215 | 67.608 | 41.328 | 0.00 | 0.00 |
| ATOM | 3808 | H    | GLY | X | 252 | 58.922 | 67.053 | 42.120 | 0.00 | 0.00 |
| ATOM | 3809 | CA   | GLY | X | 252 | 59.665 | 69.036 | 41.514 | 0.00 | 0.00 |
| ATOM | 3810 | HA2  | GLY | X | 252 | 60.231 | 69.100 | 42.444 | 0.00 | 0.00 |
| ATOM | 3811 | HA3  | GLY | X | 252 | 60.236 | 69.447 | 40.681 | 0.00 | 0.00 |
| ATOM | 3812 | C    | GLY | X | 252 | 58.545 | 70.068 | 41.615 | 0.00 | 0.00 |
| ATOM | 3813 | O    | GLY | X | 252 | 58.696 | 71.132 | 40.974 | 0.00 | 0.00 |
| ATOM | 3814 | N    | CYX | X | 253 | 57.491 | 69.783 | 42.355 | 0.00 | 0.00 |
| ATOM | 3815 | H    | CYX | X | 253 | 57.543 | 68.934 | 42.901 | 0.00 | 0.00 |
| ATOM | 3816 | CA   | CYX | X | 253 | 56.286 | 70.627 | 42.589 | 0.00 | 0.00 |
| ATOM | 3817 | HA   | CYX | X | 253 | 56.357 | 71.336 | 41.764 | 0.00 | 0.00 |
| ATOM | 3818 | CB   | CYX | X | 253 | 54.992 | 69.762 | 42.380 | 0.00 | 0.00 |
| ATOM | 3819 | HB2  | CYX | X | 253 | 55.187 | 68.737 | 42.694 | 0.00 | 0.00 |
| ATOM | 3820 | HB3  | CYX | X | 253 | 54.217 | 70.020 | 43.101 | 0.00 | 0.00 |
| ATOM | 3821 | SG   | CYX | X | 253 | 54.307 | 69.981 | 40.735 | 0.00 | 0.00 |
| ATOM | 3822 | C    | CYX | X | 253 | 56.411 | 71.224 | 44.014 | 0.00 | 0.00 |
| ATOM | 3823 | O    | CYX | X | 253 | 56.876 | 70.512 | 44.892 | 0.00 | 0.00 |
| ATOM | 3824 | N    | PRO | X | 254 | 55.782 | 72.394 | 44.330 | 0.00 | 0.00 |
| ATOM | 3825 | CD   | PRO | X | 254 | 55.618 | 72.960 | 45.730 | 0.00 | 0.00 |
| ATOM | 3826 | HD2  | PRO | X | 254 | 56.395 | 72.791 | 46.475 | 0.00 | 0.00 |
| ATOM | 3827 | HD3  | PRO | X | 254 | 54.697 | 72.467 | 46.042 | 0.00 | 0.00 |
| ATOM | 3828 | CG   | PRO | X | 254 | 55.381 | 74.472 | 45.556 | 0.00 | 0.00 |
| ATOM | 3829 | HG2  | PRO | X | 254 | 56.335 | 74.979 | 45.413 | 0.00 | 0.00 |
| ATOM | 3830 | HG3  | PRO | X | 254 | 54.968 | 74.813 | 46.506 | 0.00 | 0.00 |
| ATOM | 3831 | CB   | PRO | X | 254 | 54.588 | 74.540 | 44.274 | 0.00 | 0.00 |
| ATOM | 3832 | HB2  | PRO | X | 254 | 54.528 | 75.507 | 43.774 | 0.00 | 0.00 |
| ATOM | 3833 | HB3  | PRO | X | 254 | 53.575 | 74.192 | 44.478 | 0.00 | 0.00 |
| ATOM | 3834 | CA   | PRO | X | 254 | 55.378 | 73.500 | 43.453 | 0.00 | 0.00 |
| ATOM | 3835 | HA   | PRO | X | 254 | 54.829 | 73.043 | 42.630 | 0.00 | 0.00 |
| ATOM | 3836 | C    | PRO | X | 254 | 56.641 | 74.053 | 42.873 | 0.00 | 0.00 |
| ATOM | 3837 | O    | PRO | X | 254 | 57.716 | 73.840 | 43.418 | 0.00 | 0.00 |
| ATOM | 3838 | N    | PRO | X | 255 | 56.529 | 74.832 | 41.754 | 0.00 | 0.00 |
| ATOM | 3839 | CD   | PRO | X | 255 | 55.428 | 75.095 | 40.879 | 0.00 | 0.00 |
| ATOM | 3840 | HD2  | PRO | X | 255 | 54.570 | 75.411 | 41.472 | 0.00 | 0.00 |
| ATOM | 3841 | HD3  | PRO | X | 255 | 55.274 | 74.194 | 40.284 | 0.00 | 0.00 |
| ATOM | 3842 | CG   | PRO | X | 255 | 55.881 | 76.304 | 39.986 | 0.00 | 0.00 |
| ATOM | 3843 | HG2  | PRO | X | 255 | 55.551 | 77.187 | 40.534 | 0.00 | 0.00 |
| ATOM | 3844 | HG3  | PRO | X | 255 | 55.368 | 76.174 | 39.033 | 0.00 | 0.00 |
| ATOM | 3845 | CB   | PRO | X | 255 | 57.421 | 76.263 | 39.880 | 0.00 | 0.00 |
| ATOM | 3846 | HB2  | PRO | X | 255 | 57.841 | 77.263 | 39.765 | 0.00 | 0.00 |
| ATOM | 3847 | HB3  | PRO | X | 255 | 57.550 | 75.671 | 38.974 | 0.00 | 0.00 |
| ATOM | 3848 | CA   | PRO | X | 255 | 57.713 | 75.508 | 41.209 | 0.00 | 0.00 |
| ATOM | 3849 | HA   | PRO | X | 255 | 58.502 | 74.780 | 41.021 | 0.00 | 0.00 |
| ATOM | 3850 | C    | PRO | X | 255 | 58.371 | 76.458 | 42.136 | 0.00 | 0.00 |

|      |      |      |     |   |     |        |        |        |      |      |
|------|------|------|-----|---|-----|--------|--------|--------|------|------|
| ATOM | 3851 | O    | PRO | X | 255 | 57.843 | 76.921 | 43.151 | 0.00 | 0.00 |
| ATOM | 3852 | N    | GLY | X | 256 | 59.661 | 76.663 | 41.867 | 0.00 | 0.00 |
| ATOM | 3853 | H    | GLY | X | 256 | 59.931 | 76.006 | 41.150 | 0.00 | 0.00 |
| ATOM | 3854 | CA   | GLY | X | 256 | 60.646 | 77.417 | 42.643 | 0.00 | 0.00 |
| ATOM | 3855 | HA2  | GLY | X | 256 | 61.381 | 77.852 | 41.965 | 0.00 | 0.00 |
| ATOM | 3856 | HA3  | GLY | X | 256 | 60.260 | 78.327 | 43.103 | 0.00 | 0.00 |
| ATOM | 3857 | C    | GLY | X | 256 | 61.353 | 76.699 | 43.779 | 0.00 | 0.00 |
| ATOM | 3858 | O    | GLY | X | 256 | 62.280 | 77.297 | 44.304 | 0.00 | 0.00 |
| ATOM | 3859 | N    | GLY | X | 257 | 60.897 | 75.535 | 44.189 | 0.00 | 0.00 |
| ATOM | 3860 | H    | GLY | X | 257 | 60.068 | 75.266 | 43.679 | 0.00 | 0.00 |
| ATOM | 3861 | CA   | GLY | X | 257 | 61.529 | 74.613 | 45.106 | 0.00 | 0.00 |
| ATOM | 3862 | HA2  | GLY | X | 257 | 62.109 | 73.914 | 44.503 | 0.00 | 0.00 |
| ATOM | 3863 | HA3  | GLY | X | 257 | 62.330 | 75.049 | 45.704 | 0.00 | 0.00 |
| ATOM | 3864 | C    | GLY | X | 257 | 60.446 | 73.858 | 45.883 | 0.00 | 0.00 |
| ATOM | 3865 | O    | GLY | X | 257 | 59.392 | 74.402 | 46.287 | 0.00 | 0.00 |
| ATOM | 3866 | N    | THR | X | 258 | 60.718 | 72.584 | 46.074 | 0.00 | 0.00 |
| ATOM | 3867 | H    | THR | X | 258 | 61.483 | 72.206 | 45.534 | 0.00 | 0.00 |
| ATOM | 3868 | CA   | THR | X | 258 | 59.802 | 71.623 | 46.706 | 0.00 | 0.00 |
| ATOM | 3869 | HA   | THR | X | 258 | 58.857 | 71.891 | 46.233 | 0.00 | 0.00 |
| ATOM | 3870 | CB   | THR | X | 258 | 60.239 | 70.111 | 46.528 | 0.00 | 0.00 |
| ATOM | 3871 | HB   | THR | X | 258 | 59.522 | 69.447 | 47.012 | 0.00 | 0.00 |
| ATOM | 3872 | CG2  | THR | X | 258 | 60.348 | 69.912 | 44.949 | 0.00 | 0.00 |
| ATOM | 3873 | HG21 | THR | X | 258 | 60.739 | 68.910 | 44.771 | 0.00 | 0.00 |
| ATOM | 3874 | HG22 | THR | X | 258 | 61.068 | 70.663 | 44.623 | 0.00 | 0.00 |
| ATOM | 3875 | HG23 | THR | X | 258 | 59.441 | 70.125 | 44.385 | 0.00 | 0.00 |
| ATOM | 3876 | OG1  | THR | X | 258 | 61.460 | 69.839 | 47.034 | 0.00 | 0.00 |
| ATOM | 3877 | HG1  | THR | X | 258 | 61.580 | 68.887 | 47.024 | 0.00 | 0.00 |
| ATOM | 3878 | C    | THR | X | 258 | 59.360 | 71.827 | 48.209 | 0.00 | 0.00 |
| ATOM | 3879 | O    | THR | X | 258 | 59.959 | 72.568 | 48.951 | 0.00 | 0.00 |
| ATOM | 3880 | N    | GLY | X | 259 | 58.204 | 71.267 | 48.545 | 0.00 | 0.00 |
| ATOM | 3881 | H    | GLY | X | 259 | 57.696 | 70.755 | 47.838 | 0.00 | 0.00 |
| ATOM | 3882 | CA   | GLY | X | 259 | 57.484 | 71.501 | 49.824 | 0.00 | 0.00 |
| ATOM | 3883 | HA2  | GLY | X | 259 | 56.698 | 70.746 | 49.799 | 0.00 | 0.00 |
| ATOM | 3884 | HA3  | GLY | X | 259 | 58.178 | 71.483 | 50.664 | 0.00 | 0.00 |
| ATOM | 3885 | C    | GLY | X | 259 | 56.628 | 72.743 | 49.947 | 0.00 | 0.00 |
| ATOM | 3886 | O    | GLY | X | 259 | 56.212 | 73.369 | 48.972 | 0.00 | 0.00 |
| ATOM | 3887 | N    | GLY | X | 260 | 56.246 | 73.032 | 51.190 | 0.00 | 0.00 |
| ATOM | 3888 | H    | GLY | X | 260 | 56.581 | 72.464 | 51.955 | 0.00 | 0.00 |
| ATOM | 3889 | CA   | GLY | X | 260 | 55.400 | 74.242 | 51.450 | 0.00 | 0.00 |
| ATOM | 3890 | HA2  | GLY | X | 260 | 55.784 | 74.705 | 52.359 | 0.00 | 0.00 |
| ATOM | 3891 | HA3  | GLY | X | 260 | 55.440 | 74.908 | 50.588 | 0.00 | 0.00 |
| ATOM | 3892 | C    | GLY | X | 260 | 53.915 | 73.947 | 51.807 | 0.00 | 0.00 |
| ATOM | 3893 | O    | GLY | X | 260 | 53.455 | 72.882 | 52.345 | 0.00 | 0.00 |
| ATOM | 3894 | N    | ASN | X | 261 | 53.056 | 74.940 | 51.330 | 0.00 | 0.00 |
| ATOM | 3895 | H    | ASN | X | 261 | 53.481 | 75.792 | 50.994 | 0.00 | 0.00 |
| ATOM | 3896 | CA   | ASN | X | 261 | 51.636 | 74.925 | 51.345 | 0.00 | 0.00 |
| ATOM | 3897 | HA   | ASN | X | 261 | 51.317 | 74.737 | 52.370 | 0.00 | 0.00 |
| ATOM | 3898 | CB   | ASN | X | 261 | 51.178 | 76.281 | 50.989 | 0.00 | 0.00 |
| ATOM | 3899 | HB2  | ASN | X | 261 | 51.363 | 77.011 | 51.777 | 0.00 | 0.00 |
| ATOM | 3900 | HB3  | ASN | X | 261 | 51.581 | 76.730 | 50.081 | 0.00 | 0.00 |
| ATOM | 3901 | CG   | ASN | X | 261 | 49.701 | 76.319 | 50.757 | 0.00 | 0.00 |
| ATOM | 3902 | OD1  | ASN | X | 261 | 49.228 | 76.424 | 49.560 | 0.00 | 0.00 |
| ATOM | 3903 | ND2  | ASN | X | 261 | 48.840 | 76.229 | 51.771 | 0.00 | 0.00 |
| ATOM | 3904 | HD21 | ASN | X | 261 | 47.843 | 76.119 | 51.651 | 0.00 | 0.00 |
| ATOM | 3905 | HD22 | ASN | X | 261 | 49.205 | 76.406 | 52.695 | 0.00 | 0.00 |
| ATOM | 3906 | C    | ASN | X | 261 | 51.003 | 73.796 | 50.453 | 0.00 | 0.00 |
| ATOM | 3907 | O    | ASN | X | 261 | 51.102 | 73.841 | 49.210 | 0.00 | 0.00 |
| ATOM | 3908 | N    | ASP | X | 262 | 50.217 | 72.918 | 51.034 | 0.00 | 0.00 |
| ATOM | 3909 | H    | ASP | X | 262 | 50.005 | 72.976 | 52.020 | 0.00 | 0.00 |
| ATOM | 3910 | CA   | ASP | X | 262 | 49.555 | 71.772 | 50.409 | 0.00 | 0.00 |
| ATOM | 3911 | HA   | ASP | X | 262 | 50.292 | 71.047 | 50.062 | 0.00 | 0.00 |
| ATOM | 3912 | CB   | ASP | X | 262 | 48.617 | 71.135 | 51.455 | 0.00 | 0.00 |
| ATOM | 3913 | HB2  | ASP | X | 262 | 47.871 | 71.857 | 51.788 | 0.00 | 0.00 |
| ATOM | 3914 | HB3  | ASP | X | 262 | 48.221 | 70.240 | 50.976 | 0.00 | 0.00 |
| ATOM | 3915 | CG   | ASP | X | 262 | 49.437 | 70.713 | 52.649 | 0.00 | 0.00 |
| ATOM | 3916 | OD1  | ASP | X | 262 | 49.188 | 71.349 | 53.713 | 0.00 | 0.00 |
| ATOM | 3917 | OD2  | ASP | X | 262 | 50.267 | 69.781 | 52.584 | 0.00 | 0.00 |

|      |      |      |     |   |     |        |        |        |      |      |
|------|------|------|-----|---|-----|--------|--------|--------|------|------|
| ATOM | 3918 | C    | ASP | X | 262 | 48.773 | 72.180 | 49.150 | 0.00 | 0.00 |
| ATOM | 3919 | O    | ASP | X | 262 | 48.642 | 71.349 | 48.199 | 0.00 | 0.00 |
| ATOM | 3920 | N    | THR | X | 263 | 48.142 | 73.350 | 49.129 | 0.00 | 0.00 |
| ATOM | 3921 | H    | THR | X | 263 | 48.284 | 74.016 | 49.875 | 0.00 | 0.00 |
| ATOM | 3922 | CA   | THR | X | 263 | 47.266 | 73.778 | 48.091 | 0.00 | 0.00 |
| ATOM | 3923 | HA   | THR | X | 263 | 46.512 | 73.001 | 47.965 | 0.00 | 0.00 |
| ATOM | 3924 | CB   | THR | X | 263 | 46.409 | 74.938 | 48.493 | 0.00 | 0.00 |
| ATOM | 3925 | HB   | THR | X | 263 | 46.692 | 75.948 | 48.197 | 0.00 | 0.00 |
| ATOM | 3926 | CG2  | THR | X | 263 | 44.961 | 74.810 | 48.088 | 0.00 | 0.00 |
| ATOM | 3927 | HG21 | THR | X | 263 | 44.777 | 74.570 | 47.041 | 0.00 | 0.00 |
| ATOM | 3928 | HG22 | THR | X | 263 | 44.462 | 75.760 | 48.282 | 0.00 | 0.00 |
| ATOM | 3929 | HG23 | THR | X | 263 | 44.432 | 74.045 | 48.656 | 0.00 | 0.00 |
| ATOM | 3930 | OG1  | THR | X | 263 | 46.401 | 75.019 | 49.900 | 0.00 | 0.00 |
| ATOM | 3931 | HG1  | THR | X | 263 | 46.068 | 75.903 | 50.074 | 0.00 | 0.00 |
| ATOM | 3932 | C    | THR | X | 263 | 47.966 | 74.086 | 46.752 | 0.00 | 0.00 |
| ATOM | 3933 | O    | THR | X | 263 | 47.602 | 73.587 | 45.712 | 0.00 | 0.00 |
| ATOM | 3934 | N    | GLU | X | 264 | 48.995 | 74.892 | 46.782 | 0.00 | 0.00 |
| ATOM | 3935 | H    | GLU | X | 264 | 49.304 | 75.333 | 47.637 | 0.00 | 0.00 |
| ATOM | 3936 | CA   | GLU | X | 264 | 49.935 | 75.149 | 45.680 | 0.00 | 0.00 |
| ATOM | 3937 | HA   | GLU | X | 264 | 49.334 | 75.651 | 44.922 | 0.00 | 0.00 |
| ATOM | 3938 | CB   | GLU | X | 264 | 50.975 | 76.171 | 46.223 | 0.00 | 0.00 |
| ATOM | 3939 | HB2  | GLU | X | 264 | 51.293 | 75.879 | 47.224 | 0.00 | 0.00 |
| ATOM | 3940 | HB3  | GLU | X | 264 | 51.865 | 76.169 | 45.594 | 0.00 | 0.00 |
| ATOM | 3941 | CG   | GLU | X | 264 | 50.286 | 77.511 | 46.421 | 0.00 | 0.00 |
| ATOM | 3942 | HG2  | GLU | X | 264 | 49.505 | 77.468 | 47.180 | 0.00 | 0.00 |
| ATOM | 3943 | HG3  | GLU | X | 264 | 51.039 | 78.224 | 46.758 | 0.00 | 0.00 |
| ATOM | 3944 | CD   | GLU | X | 264 | 49.692 | 78.006 | 45.178 | 0.00 | 0.00 |
| ATOM | 3945 | OE1  | GLU | X | 264 | 50.326 | 78.065 | 44.110 | 0.00 | 0.00 |
| ATOM | 3946 | OE2  | GLU | X | 264 | 48.514 | 78.495 | 45.210 | 0.00 | 0.00 |
| ATOM | 3947 | C    | GLU | X | 264 | 50.645 | 73.823 | 45.150 | 0.00 | 0.00 |
| ATOM | 3948 | O    | GLU | X | 264 | 50.992 | 73.629 | 43.984 | 0.00 | 0.00 |
| ATOM | 3949 | N    | LEU | X | 265 | 50.853 | 72.940 | 46.106 | 0.00 | 0.00 |
| ATOM | 3950 | H    | LEU | X | 265 | 50.544 | 73.163 | 47.042 | 0.00 | 0.00 |
| ATOM | 3951 | CA   | LEU | X | 265 | 51.461 | 71.674 | 45.824 | 0.00 | 0.00 |
| ATOM | 3952 | HA   | LEU | X | 265 | 52.219 | 71.782 | 45.049 | 0.00 | 0.00 |
| ATOM | 3953 | CB   | LEU | X | 265 | 52.165 | 71.183 | 47.036 | 0.00 | 0.00 |
| ATOM | 3954 | HB2  | LEU | X | 265 | 52.976 | 71.897 | 47.182 | 0.00 | 0.00 |
| ATOM | 3955 | HB3  | LEU | X | 265 | 51.462 | 71.344 | 47.853 | 0.00 | 0.00 |
| ATOM | 3956 | CG   | LEU | X | 265 | 52.721 | 69.748 | 47.064 | 0.00 | 0.00 |
| ATOM | 3957 | HG   | LEU | X | 265 | 53.347 | 69.650 | 46.177 | 0.00 | 0.00 |
| ATOM | 3958 | CD1  | LEU | X | 265 | 53.767 | 69.599 | 48.174 | 0.00 | 0.00 |
| ATOM | 3959 | HD11 | LEU | X | 265 | 53.500 | 70.210 | 49.036 | 0.00 | 0.00 |
| ATOM | 3960 | HD12 | LEU | X | 265 | 54.713 | 70.037 | 47.856 | 0.00 | 0.00 |
| ATOM | 3961 | HD13 | LEU | X | 265 | 53.886 | 68.530 | 48.348 | 0.00 | 0.00 |
| ATOM | 3962 | CD2  | LEU | X | 265 | 51.607 | 68.666 | 47.029 | 0.00 | 0.00 |
| ATOM | 3963 | HD21 | LEU | X | 265 | 51.774 | 67.733 | 47.567 | 0.00 | 0.00 |
| ATOM | 3964 | HD22 | LEU | X | 265 | 50.651 | 69.068 | 47.364 | 0.00 | 0.00 |
| ATOM | 3965 | HD23 | LEU | X | 265 | 51.664 | 68.378 | 45.979 | 0.00 | 0.00 |
| ATOM | 3966 | C    | LEU | X | 265 | 50.505 | 70.630 | 45.133 | 0.00 | 0.00 |
| ATOM | 3967 | O    | LEU | X | 265 | 50.961 | 70.146 | 44.075 | 0.00 | 0.00 |
| ATOM | 3968 | N    | VAL | X | 266 | 49.260 | 70.386 | 45.548 | 0.00 | 0.00 |
| ATOM | 3969 | H    | VAL | X | 266 | 48.962 | 70.846 | 46.396 | 0.00 | 0.00 |
| ATOM | 3970 | CA   | VAL | X | 266 | 48.277 | 69.634 | 44.706 | 0.00 | 0.00 |
| ATOM | 3971 | HA   | VAL | X | 266 | 48.767 | 68.707 | 44.409 | 0.00 | 0.00 |
| ATOM | 3972 | CB   | VAL | X | 266 | 47.070 | 69.187 | 45.590 | 0.00 | 0.00 |
| ATOM | 3973 | HB   | VAL | X | 266 | 47.499 | 68.750 | 46.491 | 0.00 | 0.00 |
| ATOM | 3974 | CG1  | VAL | X | 266 | 46.132 | 70.430 | 45.810 | 0.00 | 0.00 |
| ATOM | 3975 | HG11 | VAL | X | 266 | 46.726 | 71.172 | 46.343 | 0.00 | 0.00 |
| ATOM | 3976 | HG12 | VAL | X | 266 | 45.779 | 70.798 | 44.846 | 0.00 | 0.00 |
| ATOM | 3977 | HG13 | VAL | X | 266 | 45.300 | 70.202 | 46.475 | 0.00 | 0.00 |
| ATOM | 3978 | CG2  | VAL | X | 266 | 46.275 | 68.157 | 44.839 | 0.00 | 0.00 |
| ATOM | 3979 | HG21 | VAL | X | 266 | 45.592 | 67.667 | 45.533 | 0.00 | 0.00 |
| ATOM | 3980 | HG22 | VAL | X | 266 | 46.804 | 67.320 | 44.383 | 0.00 | 0.00 |
| ATOM | 3981 | HG23 | VAL | X | 266 | 45.756 | 68.643 | 44.013 | 0.00 | 0.00 |
| ATOM | 3982 | C    | VAL | X | 266 | 47.735 | 70.374 | 43.348 | 0.00 | 0.00 |
| ATOM | 3983 | O    | VAL | X | 266 | 47.627 | 69.774 | 42.338 | 0.00 | 0.00 |
| ATOM | 3984 | N    | ALA | X | 267 | 47.744 | 71.681 | 43.403 | 0.00 | 0.00 |

|      |      |      |     |   |     |        |        |        |      |      |
|------|------|------|-----|---|-----|--------|--------|--------|------|------|
| ATOM | 3985 | H    | ALA | X | 267 | 47.654 | 72.101 | 44.317 | 0.00 | 0.00 |
| ATOM | 3986 | CA   | ALA | X | 267 | 47.530 | 72.496 | 42.207 | 0.00 | 0.00 |
| ATOM | 3987 | HA   | ALA | X | 267 | 46.510 | 72.330 | 41.857 | 0.00 | 0.00 |
| ATOM | 3988 | CB   | ALA | X | 267 | 47.636 | 74.018 | 42.490 | 0.00 | 0.00 |
| ATOM | 3989 | HB1  | ALA | X | 267 | 46.854 | 74.278 | 43.202 | 0.00 | 0.00 |
| ATOM | 3990 | HB2  | ALA | X | 267 | 47.497 | 74.643 | 41.608 | 0.00 | 0.00 |
| ATOM | 3991 | HB3  | ALA | X | 267 | 48.597 | 74.155 | 42.985 | 0.00 | 0.00 |
| ATOM | 3992 | C    | ALA | X | 267 | 48.625 | 72.184 | 41.135 | 0.00 | 0.00 |
| ATOM | 3993 | O    | ALA | X | 267 | 48.338 | 71.744 | 40.038 | 0.00 | 0.00 |
| ATOM | 3994 | N    | CYX | X | 268 | 49.934 | 72.242 | 41.510 | 0.00 | 0.00 |
| ATOM | 3995 | H    | CYX | X | 268 | 50.136 | 72.531 | 42.456 | 0.00 | 0.00 |
| ATOM | 3996 | CA   | CYX | X | 268 | 51.074 | 71.962 | 40.588 | 0.00 | 0.00 |
| ATOM | 3997 | HA   | CYX | X | 268 | 50.988 | 72.703 | 39.793 | 0.00 | 0.00 |
| ATOM | 3998 | CB   | CYX | X | 268 | 52.367 | 72.158 | 41.369 | 0.00 | 0.00 |
| ATOM | 3999 | HB2  | CYX | X | 268 | 52.262 | 73.156 | 41.794 | 0.00 | 0.00 |
| ATOM | 4000 | HB3  | CYX | X | 268 | 52.440 | 71.442 | 42.187 | 0.00 | 0.00 |
| ATOM | 4001 | SG   | CYX | X | 268 | 53.990 | 71.917 | 40.533 | 0.00 | 0.00 |
| ATOM | 4002 | C    | CYX | X | 268 | 51.046 | 70.499 | 39.981 | 0.00 | 0.00 |
| ATOM | 4003 | O    | CYX | X | 268 | 51.235 | 70.232 | 38.818 | 0.00 | 0.00 |
| ATOM | 4004 | N    | LEU | X | 269 | 50.650 | 69.536 | 40.841 | 0.00 | 0.00 |
| ATOM | 4005 | H    | LEU | X | 269 | 50.546 | 69.855 | 41.793 | 0.00 | 0.00 |
| ATOM | 4006 | CA   | LEU | X | 269 | 50.257 | 68.130 | 40.452 | 0.00 | 0.00 |
| ATOM | 4007 | HA   | LEU | X | 269 | 51.051 | 67.732 | 39.821 | 0.00 | 0.00 |
| ATOM | 4008 | CB   | LEU | X | 269 | 50.102 | 67.373 | 41.801 | 0.00 | 0.00 |
| ATOM | 4009 | HB2  | LEU | X | 269 | 49.972 | 68.103 | 42.600 | 0.00 | 0.00 |
| ATOM | 4010 | HB3  | LEU | X | 269 | 49.241 | 66.714 | 41.684 | 0.00 | 0.00 |
| ATOM | 4011 | CG   | LEU | X | 269 | 51.324 | 66.504 | 42.120 | 0.00 | 0.00 |
| ATOM | 4012 | HG   | LEU | X | 269 | 51.416 | 65.764 | 41.325 | 0.00 | 0.00 |
| ATOM | 4013 | CD1  | LEU | X | 269 | 52.604 | 67.197 | 42.301 | 0.00 | 0.00 |
| ATOM | 4014 | HD11 | LEU | X | 269 | 53.435 | 66.651 | 42.749 | 0.00 | 0.00 |
| ATOM | 4015 | HD12 | LEU | X | 269 | 52.382 | 68.067 | 42.919 | 0.00 | 0.00 |
| ATOM | 4016 | HD13 | LEU | X | 269 | 52.801 | 67.570 | 41.296 | 0.00 | 0.00 |
| ATOM | 4017 | CD2  | LEU | X | 269 | 51.043 | 65.652 | 43.395 | 0.00 | 0.00 |
| ATOM | 4018 | HD21 | LEU | X | 269 | 50.947 | 66.450 | 44.132 | 0.00 | 0.00 |
| ATOM | 4019 | HD22 | LEU | X | 269 | 50.095 | 65.130 | 43.262 | 0.00 | 0.00 |
| ATOM | 4020 | HD23 | LEU | X | 269 | 51.834 | 64.930 | 43.597 | 0.00 | 0.00 |
| ATOM | 4021 | C    | LEU | X | 269 | 48.951 | 67.899 | 39.597 | 0.00 | 0.00 |
| ATOM | 4022 | O    | LEU | X | 269 | 48.760 | 66.860 | 38.977 | 0.00 | 0.00 |
| ATOM | 4023 | N    | ARG | X | 270 | 48.165 | 68.956 | 39.401 | 0.00 | 0.00 |
| ATOM | 4024 | H    | ARG | X | 270 | 48.250 | 69.785 | 39.971 | 0.00 | 0.00 |
| ATOM | 4025 | CA   | ARG | X | 270 | 47.128 | 69.059 | 38.364 | 0.00 | 0.00 |
| ATOM | 4026 | HA   | ARG | X | 270 | 46.906 | 68.045 | 38.033 | 0.00 | 0.00 |
| ATOM | 4027 | CB   | ARG | X | 270 | 45.821 | 69.664 | 38.930 | 0.00 | 0.00 |
| ATOM | 4028 | HB2  | ARG | X | 270 | 46.001 | 70.598 | 39.463 | 0.00 | 0.00 |
| ATOM | 4029 | HB3  | ARG | X | 270 | 45.181 | 69.783 | 38.055 | 0.00 | 0.00 |
| ATOM | 4030 | CG   | ARG | X | 270 | 45.030 | 68.711 | 39.869 | 0.00 | 0.00 |
| ATOM | 4031 | HG2  | ARG | X | 270 | 45.072 | 67.704 | 39.457 | 0.00 | 0.00 |
| ATOM | 4032 | HG3  | ARG | X | 270 | 45.496 | 68.668 | 40.854 | 0.00 | 0.00 |
| ATOM | 4033 | CD   | ARG | X | 270 | 43.594 | 69.058 | 40.103 | 0.00 | 0.00 |
| ATOM | 4034 | HD2  | ARG | X | 270 | 42.917 | 68.705 | 39.324 | 0.00 | 0.00 |
| ATOM | 4035 | HD3  | ARG | X | 270 | 43.371 | 68.396 | 40.940 | 0.00 | 0.00 |
| ATOM | 4036 | NE   | ARG | X | 270 | 43.272 | 70.464 | 40.465 | 0.00 | 0.00 |
| ATOM | 4037 | HE   | ARG | X | 270 | 43.889 | 71.169 | 40.088 | 0.00 | 0.00 |
| ATOM | 4038 | CZ   | ARG | X | 270 | 42.364 | 70.771 | 41.389 | 0.00 | 0.00 |
| ATOM | 4039 | NH1  | ARG | X | 270 | 41.614 | 69.830 | 41.984 | 0.00 | 0.00 |
| ATOM | 4040 | HH11 | ARG | X | 270 | 41.766 | 68.833 | 41.940 | 0.00 | 0.00 |
| ATOM | 4041 | HH12 | ARG | X | 270 | 40.895 | 70.122 | 42.630 | 0.00 | 0.00 |
| ATOM | 4042 | NH2  | ARG | X | 270 | 42.202 | 71.998 | 41.770 | 0.00 | 0.00 |
| ATOM | 4043 | HH21 | ARG | X | 270 | 42.700 | 72.664 | 41.196 | 0.00 | 0.00 |
| ATOM | 4044 | HH22 | ARG | X | 270 | 41.503 | 72.326 | 42.420 | 0.00 | 0.00 |
| ATOM | 4045 | C    | ARG | X | 270 | 47.572 | 69.860 | 37.164 | 0.00 | 0.00 |
| ATOM | 4046 | O    | ARG | X | 270 | 47.004 | 69.626 | 36.071 | 0.00 | 0.00 |
| ATOM | 4047 | N    | THR | X | 271 | 48.522 | 70.731 | 37.309 | 0.00 | 0.00 |
| ATOM | 4048 | H    | THR | X | 271 | 48.725 | 70.994 | 38.263 | 0.00 | 0.00 |
| ATOM | 4049 | CA   | THR | X | 271 | 49.131 | 71.575 | 36.233 | 0.00 | 0.00 |
| ATOM | 4050 | HA   | THR | X | 271 | 48.389 | 71.812 | 35.471 | 0.00 | 0.00 |
| ATOM | 4051 | CB   | THR | X | 271 | 49.634 | 72.878 | 36.844 | 0.00 | 0.00 |



|      |      |      |     |   |     |        |        |        |      |      |
|------|------|------|-----|---|-----|--------|--------|--------|------|------|
| ATOM | 4052 | HB   | THR | X | 271 | 50.610 | 72.712 | 37.299 | 0.00 | 0.00 |
| ATOM | 4053 | CG2  | THR | X | 271 | 49.631 | 74.010 | 35.806 | 0.00 | 0.00 |
| ATOM | 4054 | HG21 | THR | X | 271 | 48.643 | 74.046 | 35.345 | 0.00 | 0.00 |
| ATOM | 4055 | HG22 | THR | X | 271 | 50.286 | 73.729 | 34.981 | 0.00 | 0.00 |
| ATOM | 4056 | HG23 | THR | X | 271 | 49.887 | 74.959 | 36.277 | 0.00 | 0.00 |
| ATOM | 4057 | OG1  | THR | X | 271 | 48.710 | 73.412 | 37.784 | 0.00 | 0.00 |
| ATOM | 4058 | HG1  | THR | X | 271 | 49.131 | 74.209 | 38.113 | 0.00 | 0.00 |
| ATOM | 4059 | C    | THR | X | 271 | 50.250 | 71.014 | 35.509 | 0.00 | 0.00 |
| ATOM | 4060 | O    | THR | X | 271 | 50.194 | 70.935 | 34.290 | 0.00 | 0.00 |
| ATOM | 4061 | N    | ARG | X | 272 | 51.175 | 70.293 | 36.072 | 0.00 | 0.00 |
| ATOM | 4062 | H    | ARG | X | 272 | 51.292 | 70.342 | 37.074 | 0.00 | 0.00 |
| ATOM | 4063 | CA   | ARG | X | 272 | 52.189 | 69.514 | 35.355 | 0.00 | 0.00 |
| ATOM | 4064 | HA   | ARG | X | 272 | 52.617 | 70.169 | 34.596 | 0.00 | 0.00 |
| ATOM | 4065 | CB   | ARG | X | 272 | 53.305 | 69.188 | 36.314 | 0.00 | 0.00 |
| ATOM | 4066 | HB2  | ARG | X | 272 | 53.650 | 70.091 | 36.818 | 0.00 | 0.00 |
| ATOM | 4067 | HB3  | ARG | X | 272 | 52.920 | 68.503 | 37.069 | 0.00 | 0.00 |
| ATOM | 4068 | CG   | ARG | X | 272 | 54.566 | 68.535 | 35.661 | 0.00 | 0.00 |
| ATOM | 4069 | HG2  | ARG | X | 272 | 55.108 | 68.102 | 36.501 | 0.00 | 0.00 |
| ATOM | 4070 | HG3  | ARG | X | 272 | 54.282 | 67.707 | 35.012 | 0.00 | 0.00 |
| ATOM | 4071 | CD   | ARG | X | 272 | 55.504 | 69.468 | 34.799 | 0.00 | 0.00 |
| ATOM | 4072 | HD2  | ARG | X | 272 | 54.977 | 70.243 | 34.242 | 0.00 | 0.00 |
| ATOM | 4073 | HD3  | ARG | X | 272 | 56.148 | 69.983 | 35.513 | 0.00 | 0.00 |
| ATOM | 4074 | NE   | ARG | X | 272 | 56.516 | 68.861 | 34.001 | 0.00 | 0.00 |
| ATOM | 4075 | HE   | ARG | X | 272 | 57.153 | 68.235 | 34.472 | 0.00 | 0.00 |
| ATOM | 4076 | CZ   | ARG | X | 272 | 56.651 | 68.930 | 32.677 | 0.00 | 0.00 |
| ATOM | 4077 | NH1  | ARG | X | 272 | 56.099 | 69.806 | 31.905 | 0.00 | 0.00 |
| ATOM | 4078 | HH11 | ARG | X | 272 | 55.304 | 70.348 | 32.213 | 0.00 | 0.00 |
| ATOM | 4079 | HH12 | ARG | X | 272 | 56.384 | 69.828 | 30.937 | 0.00 | 0.00 |
| ATOM | 4080 | NH2  | ARG | X | 272 | 57.553 | 68.253 | 32.089 | 0.00 | 0.00 |
| ATOM | 4081 | HH21 | ARG | X | 272 | 58.107 | 67.594 | 32.618 | 0.00 | 0.00 |
| ATOM | 4082 | HH22 | ARG | X | 272 | 57.846 | 68.583 | 31.181 | 0.00 | 0.00 |
| ATOM | 4083 | C    | ARG | X | 272 | 51.513 | 68.237 | 34.771 | 0.00 | 0.00 |
| ATOM | 4084 | O    | ARG | X | 272 | 50.637 | 67.714 | 35.499 | 0.00 | 0.00 |
| ATOM | 4085 | N    | PRO | X | 273 | 51.698 | 67.908 | 33.479 | 0.00 | 0.00 |
| ATOM | 4086 | CD   | PRO | X | 273 | 52.559 | 68.581 | 32.494 | 0.00 | 0.00 |
| ATOM | 4087 | HD2  | PRO | X | 273 | 53.574 | 68.210 | 32.635 | 0.00 | 0.00 |
| ATOM | 4088 | HD3  | PRO | X | 273 | 52.547 | 69.671 | 32.520 | 0.00 | 0.00 |
| ATOM | 4089 | CG   | PRO | X | 273 | 52.031 | 68.142 | 31.119 | 0.00 | 0.00 |
| ATOM | 4090 | HG2  | PRO | X | 273 | 52.872 | 68.073 | 30.430 | 0.00 | 0.00 |
| ATOM | 4091 | HG3  | PRO | X | 273 | 51.269 | 68.803 | 30.706 | 0.00 | 0.00 |
| ATOM | 4092 | CB   | PRO | X | 273 | 51.457 | 66.790 | 31.348 | 0.00 | 0.00 |
| ATOM | 4093 | HB2  | PRO | X | 273 | 52.185 | 65.982 | 31.284 | 0.00 | 0.00 |
| ATOM | 4094 | HB3  | PRO | X | 273 | 50.569 | 66.572 | 30.753 | 0.00 | 0.00 |
| ATOM | 4095 | CA   | PRO | X | 273 | 51.060 | 66.762 | 32.842 | 0.00 | 0.00 |
| ATOM | 4096 | HA   | PRO | X | 273 | 49.990 | 66.965 | 32.904 | 0.00 | 0.00 |
| ATOM | 4097 | C    | PRO | X | 273 | 51.287 | 65.467 | 33.629 | 0.00 | 0.00 |
| ATOM | 4098 | O    | PRO | X | 273 | 52.156 | 65.231 | 34.427 | 0.00 | 0.00 |
| ATOM | 4099 | N    | ALA | X | 274 | 50.270 | 64.626 | 33.439 | 0.00 | 0.00 |
| ATOM | 4100 | H    | ALA | X | 274 | 49.545 | 64.809 | 32.760 | 0.00 | 0.00 |
| ATOM | 4101 | CA   | ALA | X | 274 | 49.975 | 63.401 | 34.192 | 0.00 | 0.00 |
| ATOM | 4102 | HA   | ALA | X | 274 | 50.087 | 63.531 | 35.269 | 0.00 | 0.00 |
| ATOM | 4103 | CB   | ALA | X | 274 | 48.501 | 63.125 | 33.828 | 0.00 | 0.00 |
| ATOM | 4104 | HB1  | ALA | X | 274 | 48.104 | 62.286 | 34.400 | 0.00 | 0.00 |
| ATOM | 4105 | HB2  | ALA | X | 274 | 48.514 | 62.921 | 32.758 | 0.00 | 0.00 |
| ATOM | 4106 | HB3  | ALA | X | 274 | 47.885 | 64.021 | 33.916 | 0.00 | 0.00 |
| ATOM | 4107 | C    | ALA | X | 274 | 50.869 | 62.234 | 33.765 | 0.00 | 0.00 |
| ATOM | 4108 | O    | ALA | X | 274 | 51.193 | 61.346 | 34.573 | 0.00 | 0.00 |
| ATOM | 4109 | N    | GLN | X | 275 | 51.437 | 62.277 | 32.530 | 0.00 | 0.00 |
| ATOM | 4110 | H    | GLN | X | 275 | 51.112 | 62.977 | 31.878 | 0.00 | 0.00 |
| ATOM | 4111 | CA   | GLN | X | 275 | 52.315 | 61.206 | 32.036 | 0.00 | 0.00 |
| ATOM | 4112 | HA   | GLN | X | 275 | 51.809 | 60.283 | 32.320 | 0.00 | 0.00 |
| ATOM | 4113 | CB   | GLN | X | 275 | 52.291 | 61.272 | 30.477 | 0.00 | 0.00 |
| ATOM | 4114 | HB2  | GLN | X | 275 | 51.239 | 61.296 | 30.196 | 0.00 | 0.00 |
| ATOM | 4115 | HB3  | GLN | X | 275 | 52.522 | 62.284 | 30.143 | 0.00 | 0.00 |
| ATOM | 4116 | CG   | GLN | X | 275 | 52.935 | 60.087 | 29.754 | 0.00 | 0.00 |
| ATOM | 4117 | HG2  | GLN | X | 275 | 53.987 | 59.886 | 29.958 | 0.00 | 0.00 |
| ATOM | 4118 | HG3  | GLN | X | 275 | 52.376 | 59.175 | 29.962 | 0.00 | 0.00 |

|      |      |      |     |   |     |        |        |        |      |      |
|------|------|------|-----|---|-----|--------|--------|--------|------|------|
| ATOM | 4119 | CD   | GLN | X | 275 | 52.881 | 60.269 | 28.273 | 0.00 | 0.00 |
| ATOM | 4120 | OE1  | GLN | X | 275 | 52.996 | 61.305 | 27.647 | 0.00 | 0.00 |
| ATOM | 4121 | NE2  | GLN | X | 275 | 52.672 | 59.144 | 27.563 | 0.00 | 0.00 |
| ATOM | 4122 | HE21 | GLN | X | 275 | 52.397 | 59.177 | 26.591 | 0.00 | 0.00 |
| ATOM | 4123 | HE22 | GLN | X | 275 | 52.690 | 58.296 | 28.112 | 0.00 | 0.00 |
| ATOM | 4124 | C    | GLN | X | 275 | 53.613 | 61.196 | 32.823 | 0.00 | 0.00 |
| ATOM | 4125 | O    | GLN | X | 275 | 54.097 | 60.134 | 33.188 | 0.00 | 0.00 |
| ATOM | 4126 | N    | VAL | X | 276 | 54.176 | 62.409 | 33.108 | 0.00 | 0.00 |
| ATOM | 4127 | H    | VAL | X | 276 | 53.792 | 63.230 | 32.662 | 0.00 | 0.00 |
| ATOM | 4128 | CA   | VAL | X | 276 | 55.520 | 62.519 | 33.791 | 0.00 | 0.00 |
| ATOM | 4129 | HA   | VAL | X | 276 | 56.141 | 61.786 | 33.274 | 0.00 | 0.00 |
| ATOM | 4130 | CB   | VAL | X | 276 | 56.217 | 63.842 | 33.439 | 0.00 | 0.00 |
| ATOM | 4131 | HB   | VAL | X | 276 | 56.208 | 63.971 | 32.357 | 0.00 | 0.00 |
| ATOM | 4132 | CG1  | VAL | X | 276 | 55.491 | 65.093 | 34.056 | 0.00 | 0.00 |
| ATOM | 4133 | HG11 | VAL | X | 276 | 56.140 | 65.952 | 34.228 | 0.00 | 0.00 |
| ATOM | 4134 | HG12 | VAL | X | 276 | 54.732 | 65.470 | 33.371 | 0.00 | 0.00 |
| ATOM | 4135 | HG13 | VAL | X | 276 | 54.848 | 64.847 | 34.901 | 0.00 | 0.00 |
| ATOM | 4136 | CG2  | VAL | X | 276 | 57.717 | 63.749 | 33.869 | 0.00 | 0.00 |
| ATOM | 4137 | HG21 | VAL | X | 276 | 58.329 | 63.077 | 33.267 | 0.00 | 0.00 |
| ATOM | 4138 | HG22 | VAL | X | 276 | 57.699 | 63.384 | 34.896 | 0.00 | 0.00 |
| ATOM | 4139 | HG23 | VAL | X | 276 | 58.128 | 64.758 | 33.834 | 0.00 | 0.00 |
| ATOM | 4140 | C    | VAL | X | 276 | 55.349 | 62.202 | 35.320 | 0.00 | 0.00 |
| ATOM | 4141 | O    | VAL | X | 276 | 56.224 | 61.674 | 36.037 | 0.00 | 0.00 |
| ATOM | 4142 | N    | LEU | X | 277 | 54.152 | 62.509 | 35.846 | 0.00 | 0.00 |
| ATOM | 4143 | H    | LEU | X | 277 | 53.490 | 62.948 | 35.222 | 0.00 | 0.00 |
| ATOM | 4144 | CA   | LEU | X | 277 | 53.693 | 62.174 | 37.199 | 0.00 | 0.00 |
| ATOM | 4145 | HA   | LEU | X | 277 | 54.443 | 62.585 | 37.874 | 0.00 | 0.00 |
| ATOM | 4146 | CB   | LEU | X | 277 | 52.293 | 62.702 | 37.579 | 0.00 | 0.00 |
| ATOM | 4147 | HB2  | LEU | X | 277 | 51.580 | 62.197 | 36.926 | 0.00 | 0.00 |
| ATOM | 4148 | HB3  | LEU | X | 277 | 52.078 | 62.336 | 38.583 | 0.00 | 0.00 |
| ATOM | 4149 | CG   | LEU | X | 277 | 52.156 | 64.227 | 37.659 | 0.00 | 0.00 |
| ATOM | 4150 | HG   | LEU | X | 277 | 52.341 | 64.623 | 36.661 | 0.00 | 0.00 |
| ATOM | 4151 | CD1  | LEU | X | 277 | 50.669 | 64.535 | 37.975 | 0.00 | 0.00 |
| ATOM | 4152 | HD11 | LEU | X | 277 | 50.526 | 65.615 | 37.954 | 0.00 | 0.00 |
| ATOM | 4153 | HD12 | LEU | X | 277 | 50.343 | 64.148 | 38.941 | 0.00 | 0.00 |
| ATOM | 4154 | HD13 | LEU | X | 277 | 50.029 | 63.998 | 37.275 | 0.00 | 0.00 |
| ATOM | 4155 | CD2  | LEU | X | 277 | 53.057 | 64.860 | 38.741 | 0.00 | 0.00 |
| ATOM | 4156 | HD21 | LEU | X | 277 | 52.762 | 64.442 | 39.703 | 0.00 | 0.00 |
| ATOM | 4157 | HD22 | LEU | X | 277 | 54.045 | 64.473 | 38.491 | 0.00 | 0.00 |
| ATOM | 4158 | HD23 | LEU | X | 277 | 52.936 | 65.943 | 38.732 | 0.00 | 0.00 |
| ATOM | 4159 | C    | LEU | X | 277 | 53.689 | 60.666 | 37.426 | 0.00 | 0.00 |
| ATOM | 4160 | O    | LEU | X | 277 | 54.329 | 60.276 | 38.366 | 0.00 | 0.00 |
| ATOM | 4161 | N    | VAL | X | 278 | 53.115 | 59.876 | 36.520 | 0.00 | 0.00 |
| ATOM | 4162 | H    | VAL | X | 278 | 52.527 | 60.333 | 35.839 | 0.00 | 0.00 |
| ATOM | 4163 | CA   | VAL | X | 278 | 53.068 | 58.464 | 36.682 | 0.00 | 0.00 |
| ATOM | 4164 | HA   | VAL | X | 278 | 52.920 | 58.291 | 37.748 | 0.00 | 0.00 |
| ATOM | 4165 | CB   | VAL | X | 278 | 51.978 | 57.667 | 35.982 | 0.00 | 0.00 |
| ATOM | 4166 | HB   | VAL | X | 278 | 50.983 | 58.068 | 36.177 | 0.00 | 0.00 |
| ATOM | 4167 | CG1  | VAL | X | 278 | 52.209 | 57.751 | 34.465 | 0.00 | 0.00 |
| ATOM | 4168 | HG11 | VAL | X | 278 | 51.938 | 56.823 | 33.961 | 0.00 | 0.00 |
| ATOM | 4169 | HG12 | VAL | X | 278 | 51.464 | 58.447 | 34.081 | 0.00 | 0.00 |
| ATOM | 4170 | HG13 | VAL | X | 278 | 53.225 | 58.061 | 34.222 | 0.00 | 0.00 |
| ATOM | 4171 | CG2  | VAL | X | 278 | 51.888 | 56.184 | 36.381 | 0.00 | 0.00 |
| ATOM | 4172 | HG21 | VAL | X | 278 | 52.752 | 55.599 | 36.068 | 0.00 | 0.00 |
| ATOM | 4173 | HG22 | VAL | X | 278 | 50.986 | 55.690 | 36.019 | 0.00 | 0.00 |
| ATOM | 4174 | HG23 | VAL | X | 278 | 52.002 | 56.158 | 37.465 | 0.00 | 0.00 |
| ATOM | 4175 | C    | VAL | X | 278 | 54.479 | 57.844 | 36.416 | 0.00 | 0.00 |
| ATOM | 4176 | O    | VAL | X | 278 | 54.784 | 56.868 | 37.070 | 0.00 | 0.00 |
| ATOM | 4177 | N    | ASN | X | 279 | 55.251 | 58.601 | 35.683 | 0.00 | 0.00 |
| ATOM | 4178 | H    | ASN | X | 279 | 54.981 | 59.445 | 35.197 | 0.00 | 0.00 |
| ATOM | 4179 | CA   | ASN | X | 279 | 56.601 | 58.053 | 35.435 | 0.00 | 0.00 |
| ATOM | 4180 | HA   | ASN | X | 279 | 56.544 | 57.006 | 35.136 | 0.00 | 0.00 |
| ATOM | 4181 | CB   | ASN | X | 279 | 57.196 | 58.846 | 34.264 | 0.00 | 0.00 |
| ATOM | 4182 | HB2  | ASN | X | 279 | 56.378 | 58.941 | 33.551 | 0.00 | 0.00 |
| ATOM | 4183 | HB3  | ASN | X | 279 | 57.489 | 59.862 | 34.526 | 0.00 | 0.00 |
| ATOM | 4184 | CG   | ASN | X | 279 | 58.293 | 57.953 | 33.623 | 0.00 | 0.00 |
| ATOM | 4185 | OD1  | ASN | X | 279 | 57.974 | 57.025 | 32.877 | 0.00 | 0.00 |

|      |      |      |     |   |     |        |        |        |      |      |
|------|------|------|-----|---|-----|--------|--------|--------|------|------|
| ATOM | 4186 | ND2  | ASN | X | 279 | 59.570 | 58.312 | 33.899 | 0.00 | 0.00 |
| ATOM | 4187 | HD21 | ASN | X | 279 | 60.338 | 57.781 | 33.515 | 0.00 | 0.00 |
| ATOM | 4188 | HD22 | ASN | X | 279 | 59.778 | 59.209 | 34.314 | 0.00 | 0.00 |
| ATOM | 4189 | C    | ASN | X | 279 | 57.536 | 58.145 | 36.671 | 0.00 | 0.00 |
| ATOM | 4190 | O    | ASN | X | 279 | 58.241 | 57.206 | 37.039 | 0.00 | 0.00 |
| ATOM | 4191 | N    | HIE | X | 280 | 57.411 | 59.244 | 37.442 | 0.00 | 0.00 |
| ATOM | 4192 | H    | HIE | X | 280 | 56.692 | 59.931 | 37.264 | 0.00 | 0.00 |
| ATOM | 4193 | CA   | HIE | X | 280 | 57.974 | 59.250 | 38.799 | 0.00 | 0.00 |
| ATOM | 4194 | HA   | HIE | X | 280 | 58.951 | 58.776 | 38.888 | 0.00 | 0.00 |
| ATOM | 4195 | CB   | HIE | X | 280 | 58.172 | 60.742 | 39.151 | 0.00 | 0.00 |
| ATOM | 4196 | HB2  | HIE | X | 280 | 57.455 | 61.335 | 38.583 | 0.00 | 0.00 |
| ATOM | 4197 | HB3  | HIE | X | 280 | 58.074 | 60.928 | 40.221 | 0.00 | 0.00 |
| ATOM | 4198 | CG   | HIE | X | 280 | 59.452 | 61.315 | 38.734 | 0.00 | 0.00 |
| ATOM | 4199 | ND1  | HIE | X | 280 | 60.659 | 60.598 | 38.934 | 0.00 | 0.00 |
| ATOM | 4200 | CE1  | HIE | X | 280 | 61.575 | 61.469 | 38.435 | 0.00 | 0.00 |
| ATOM | 4201 | HE1  | HIE | X | 280 | 62.649 | 61.383 | 38.354 | 0.00 | 0.00 |
| ATOM | 4202 | NE2  | HIE | X | 280 | 61.006 | 62.553 | 37.952 | 0.00 | 0.00 |
| ATOM | 4203 | HE2  | HIE | X | 280 | 61.377 | 63.320 | 37.410 | 0.00 | 0.00 |
| ATOM | 4204 | CD2  | HIE | X | 280 | 59.637 | 62.460 | 38.081 | 0.00 | 0.00 |
| ATOM | 4205 | HD2  | HIE | X | 280 | 58.927 | 63.254 | 37.900 | 0.00 | 0.00 |
| ATOM | 4206 | C    | HIE | X | 280 | 57.017 | 58.612 | 39.916 | 0.00 | 0.00 |
| ATOM | 4207 | O    | HIE | X | 280 | 57.523 | 58.418 | 41.068 | 0.00 | 0.00 |
| ATOM | 4208 | N    | GLU | X | 281 | 55.747 | 58.111 | 39.662 | 0.00 | 0.00 |
| ATOM | 4209 | H    | GLU | X | 281 | 55.370 | 58.288 | 38.742 | 0.00 | 0.00 |
| ATOM | 4210 | CA   | GLU | X | 281 | 54.925 | 57.475 | 40.699 | 0.00 | 0.00 |
| ATOM | 4211 | HA   | GLU | X | 281 | 55.162 | 58.084 | 41.572 | 0.00 | 0.00 |
| ATOM | 4212 | CB   | GLU | X | 281 | 53.431 | 57.377 | 40.194 | 0.00 | 0.00 |
| ATOM | 4213 | HB2  | GLU | X | 281 | 53.134 | 58.357 | 39.823 | 0.00 | 0.00 |
| ATOM | 4214 | HB3  | GLU | X | 281 | 53.364 | 56.711 | 39.334 | 0.00 | 0.00 |
| ATOM | 4215 | CG   | GLU | X | 281 | 52.266 | 56.918 | 41.183 | 0.00 | 0.00 |
| ATOM | 4216 | HG2  | GLU | X | 281 | 52.637 | 56.166 | 41.879 | 0.00 | 0.00 |
| ATOM | 4217 | HG3  | GLU | X | 281 | 52.055 | 57.801 | 41.787 | 0.00 | 0.00 |
| ATOM | 4218 | CD   | GLU | X | 281 | 51.049 | 56.391 | 40.426 | 0.00 | 0.00 |
| ATOM | 4219 | OE1  | GLU | X | 281 | 50.256 | 57.049 | 39.805 | 0.00 | 0.00 |
| ATOM | 4220 | OE2  | GLU | X | 281 | 50.961 | 55.154 | 40.311 | 0.00 | 0.00 |
| ATOM | 4221 | C    | GLU | X | 281 | 55.435 | 56.061 | 40.976 | 0.00 | 0.00 |
| ATOM | 4222 | O    | GLU | X | 281 | 55.312 | 55.634 | 42.081 | 0.00 | 0.00 |
| ATOM | 4223 | N    | TRP | X | 282 | 55.984 | 55.328 | 39.956 | 0.00 | 0.00 |
| ATOM | 4224 | H    | TRP | X | 282 | 56.057 | 55.575 | 38.979 | 0.00 | 0.00 |
| ATOM | 4225 | CA   | TRP | X | 282 | 56.650 | 53.996 | 40.198 | 0.00 | 0.00 |
| ATOM | 4226 | HA   | TRP | X | 282 | 55.932 | 53.208 | 40.426 | 0.00 | 0.00 |
| ATOM | 4227 | CB   | TRP | X | 282 | 57.217 | 53.580 | 38.849 | 0.00 | 0.00 |
| ATOM | 4228 | HB2  | TRP | X | 282 | 56.370 | 53.583 | 38.162 | 0.00 | 0.00 |
| ATOM | 4229 | HB3  | TRP | X | 282 | 57.960 | 54.330 | 38.577 | 0.00 | 0.00 |
| ATOM | 4230 | CG   | TRP | X | 282 | 57.947 | 52.275 | 38.783 | 0.00 | 0.00 |
| ATOM | 4231 | CD1  | TRP | X | 282 | 57.413 | 51.055 | 39.022 | 0.00 | 0.00 |
| ATOM | 4232 | HD1  | TRP | X | 282 | 56.390 | 50.846 | 39.297 | 0.00 | 0.00 |
| ATOM | 4233 | NE1  | TRP | X | 282 | 58.404 | 50.092 | 39.135 | 0.00 | 0.00 |
| ATOM | 4234 | HE1  | TRP | X | 282 | 58.234 | 49.141 | 39.431 | 0.00 | 0.00 |
| ATOM | 4235 | CE2  | TRP | X | 282 | 59.623 | 50.555 | 38.863 | 0.00 | 0.00 |
| ATOM | 4236 | CZ2  | TRP | X | 282 | 60.876 | 49.967 | 38.666 | 0.00 | 0.00 |
| ATOM | 4237 | HZ2  | TRP | X | 282 | 61.035 | 48.935 | 38.944 | 0.00 | 0.00 |
| ATOM | 4238 | CH2  | TRP | X | 282 | 61.932 | 50.659 | 38.048 | 0.00 | 0.00 |
| ATOM | 4239 | HH2  | TRP | X | 282 | 62.894 | 50.194 | 37.890 | 0.00 | 0.00 |
| ATOM | 4240 | CZ3  | TRP | X | 282 | 61.681 | 51.957 | 37.685 | 0.00 | 0.00 |
| ATOM | 4241 | HZ3  | TRP | X | 282 | 62.532 | 52.576 | 37.442 | 0.00 | 0.00 |
| ATOM | 4242 | CE3  | TRP | X | 282 | 60.519 | 52.644 | 37.930 | 0.00 | 0.00 |
| ATOM | 4243 | HE3  | TRP | X | 282 | 60.475 | 53.687 | 37.654 | 0.00 | 0.00 |
| ATOM | 4244 | CD2  | TRP | X | 282 | 59.357 | 51.942 | 38.448 | 0.00 | 0.00 |
| ATOM | 4245 | C    | TRP | X | 282 | 57.737 | 54.029 | 41.299 | 0.00 | 0.00 |
| ATOM | 4246 | O    | TRP | X | 282 | 58.070 | 53.000 | 41.874 | 0.00 | 0.00 |
| ATOM | 4247 | N    | HIE | X | 283 | 58.245 | 55.250 | 41.623 | 0.00 | 0.00 |
| ATOM | 4248 | H    | HIE | X | 283 | 57.873 | 56.063 | 41.153 | 0.00 | 0.00 |
| ATOM | 4249 | CA   | HIE | X | 283 | 59.217 | 55.456 | 42.704 | 0.00 | 0.00 |
| ATOM | 4250 | HA   | HIE | X | 283 | 59.787 | 54.572 | 42.990 | 0.00 | 0.00 |
| ATOM | 4251 | CB   | HIE | X | 283 | 60.178 | 56.521 | 42.232 | 0.00 | 0.00 |
| ATOM | 4252 | HB2  | HIE | X | 283 | 59.625 | 57.435 | 42.018 | 0.00 | 0.00 |

|      |      |      |     |   |     |        |        |        |      |      |
|------|------|------|-----|---|-----|--------|--------|--------|------|------|
| ATOM | 4253 | HB3  | HIE | X | 283 | 60.827 | 56.715 | 43.087 | 0.00 | 0.00 |
| ATOM | 4254 | CG   | HIE | X | 283 | 61.155 | 56.089 | 41.158 | 0.00 | 0.00 |
| ATOM | 4255 | ND1  | HIE | X | 283 | 61.682 | 56.968 | 40.240 | 0.00 | 0.00 |
| ATOM | 4256 | CE1  | HIE | X | 283 | 62.508 | 56.232 | 39.484 | 0.00 | 0.00 |
| ATOM | 4257 | HE1  | HIE | X | 283 | 63.158 | 56.663 | 38.737 | 0.00 | 0.00 |
| ATOM | 4258 | NE2  | HIE | X | 283 | 62.506 | 54.982 | 39.889 | 0.00 | 0.00 |
| ATOM | 4259 | HE2  | HIE | X | 283 | 62.994 | 54.218 | 39.444 | 0.00 | 0.00 |
| ATOM | 4260 | CD2  | HIE | X | 283 | 61.799 | 54.857 | 41.054 | 0.00 | 0.00 |
| ATOM | 4261 | HD2  | HIE | X | 283 | 61.482 | 53.957 | 41.561 | 0.00 | 0.00 |
| ATOM | 4262 | C    | HIE | X | 283 | 58.531 | 55.803 | 44.047 | 0.00 | 0.00 |
| ATOM | 4263 | O    | HIE | X | 283 | 59.267 | 55.875 | 45.005 | 0.00 | 0.00 |
| ATOM | 4264 | N    | VAL | X | 284 | 57.194 | 55.917 | 44.196 | 0.00 | 0.00 |
| ATOM | 4265 | H    | VAL | X | 284 | 56.602 | 55.908 | 43.378 | 0.00 | 0.00 |
| ATOM | 4266 | CA   | VAL | X | 284 | 56.493 | 55.969 | 45.516 | 0.00 | 0.00 |
| ATOM | 4267 | HA   | VAL | X | 284 | 57.230 | 56.440 | 46.166 | 0.00 | 0.00 |
| ATOM | 4268 | CB   | VAL | X | 284 | 55.297 | 56.906 | 45.638 | 0.00 | 0.00 |
| ATOM | 4269 | HB   | VAL | X | 284 | 55.051 | 57.021 | 46.694 | 0.00 | 0.00 |
| ATOM | 4270 | CG1  | VAL | X | 284 | 55.748 | 58.303 | 45.132 | 0.00 | 0.00 |
| ATOM | 4271 | HG11 | VAL | X | 284 | 55.957 | 58.193 | 44.068 | 0.00 | 0.00 |
| ATOM | 4272 | HG12 | VAL | X | 284 | 54.978 | 59.053 | 45.316 | 0.00 | 0.00 |
| ATOM | 4273 | HG13 | VAL | X | 284 | 56.561 | 58.448 | 45.843 | 0.00 | 0.00 |
| ATOM | 4274 | CG2  | VAL | X | 284 | 53.982 | 56.553 | 44.892 | 0.00 | 0.00 |
| ATOM | 4275 | HG21 | VAL | X | 284 | 53.782 | 57.040 | 43.938 | 0.00 | 0.00 |
| ATOM | 4276 | HG22 | VAL | X | 284 | 53.127 | 56.626 | 45.565 | 0.00 | 0.00 |
| ATOM | 4277 | HG23 | VAL | X | 284 | 53.919 | 55.504 | 44.601 | 0.00 | 0.00 |
| ATOM | 4278 | C    | VAL | X | 284 | 56.205 | 54.547 | 46.141 | 0.00 | 0.00 |
| ATOM | 4279 | O    | VAL | X | 284 | 55.956 | 54.485 | 47.349 | 0.00 | 0.00 |
| ATOM | 4280 | N    | LEU | X | 285 | 56.342 | 53.485 | 45.317 | 0.00 | 0.00 |
| ATOM | 4281 | H    | LEU | X | 285 | 56.651 | 53.594 | 44.362 | 0.00 | 0.00 |
| ATOM | 4282 | CA   | LEU | X | 285 | 56.267 | 52.087 | 45.780 | 0.00 | 0.00 |
| ATOM | 4283 | HA   | LEU | X | 285 | 55.232 | 51.894 | 46.065 | 0.00 | 0.00 |
| ATOM | 4284 | CB   | LEU | X | 285 | 56.717 | 51.106 | 44.664 | 0.00 | 0.00 |
| ATOM | 4285 | HB2  | LEU | X | 285 | 57.576 | 51.484 | 44.109 | 0.00 | 0.00 |
| ATOM | 4286 | HB3  | LEU | X | 285 | 57.023 | 50.203 | 45.192 | 0.00 | 0.00 |
| ATOM | 4287 | CG   | LEU | X | 285 | 55.637 | 50.592 | 43.705 | 0.00 | 0.00 |
| ATOM | 4288 | HG   | LEU | X | 285 | 54.957 | 49.991 | 44.309 | 0.00 | 0.00 |
| ATOM | 4289 | CD1  | LEU | X | 285 | 54.920 | 51.783 | 43.040 | 0.00 | 0.00 |
| ATOM | 4290 | HD11 | LEU | X | 285 | 55.661 | 52.512 | 42.713 | 0.00 | 0.00 |
| ATOM | 4291 | HD12 | LEU | X | 285 | 54.193 | 52.212 | 43.729 | 0.00 | 0.00 |
| ATOM | 4292 | HD13 | LEU | X | 285 | 54.320 | 51.480 | 42.182 | 0.00 | 0.00 |
| ATOM | 4293 | CD2  | LEU | X | 285 | 56.404 | 49.684 | 42.696 | 0.00 | 0.00 |
| ATOM | 4294 | HD21 | LEU | X | 285 | 56.932 | 50.284 | 41.955 | 0.00 | 0.00 |
| ATOM | 4295 | HD22 | LEU | X | 285 | 57.134 | 49.042 | 43.190 | 0.00 | 0.00 |
| ATOM | 4296 | HD23 | LEU | X | 285 | 55.700 | 49.026 | 42.187 | 0.00 | 0.00 |
| ATOM | 4297 | C    | LEU | X | 285 | 57.027 | 51.897 | 47.120 | 0.00 | 0.00 |
| ATOM | 4298 | O    | LEU | X | 285 | 58.122 | 52.397 | 47.375 | 0.00 | 0.00 |
| ATOM | 4299 | N    | PRO | X | 286 | 56.480 | 51.071 | 48.084 | 0.00 | 0.00 |
| ATOM | 4300 | CD   | PRO | X | 286 | 55.076 | 50.522 | 48.193 | 0.00 | 0.00 |
| ATOM | 4301 | HD2  | PRO | X | 286 | 54.844 | 49.900 | 47.329 | 0.00 | 0.00 |
| ATOM | 4302 | HD3  | PRO | X | 286 | 54.495 | 51.438 | 48.306 | 0.00 | 0.00 |
| ATOM | 4303 | CG   | PRO | X | 286 | 54.991 | 49.743 | 49.485 | 0.00 | 0.00 |
| ATOM | 4304 | HG2  | PRO | X | 286 | 55.044 | 48.667 | 49.321 | 0.00 | 0.00 |
| ATOM | 4305 | HG3  | PRO | X | 286 | 54.020 | 49.961 | 49.930 | 0.00 | 0.00 |
| ATOM | 4306 | CB   | PRO | X | 286 | 56.174 | 50.360 | 50.316 | 0.00 | 0.00 |
| ATOM | 4307 | HB2  | PRO | X | 286 | 56.618 | 49.629 | 50.992 | 0.00 | 0.00 |
| ATOM | 4308 | HB3  | PRO | X | 286 | 55.970 | 51.310 | 50.809 | 0.00 | 0.00 |
| ATOM | 4309 | CA   | PRO | X | 286 | 57.247 | 50.738 | 49.244 | 0.00 | 0.00 |
| ATOM | 4310 | HA   | PRO | X | 286 | 57.790 | 51.546 | 49.735 | 0.00 | 0.00 |
| ATOM | 4311 | C    | PRO | X | 286 | 58.247 | 49.599 | 49.038 | 0.00 | 0.00 |
| ATOM | 4312 | O    | PRO | X | 286 | 58.079 | 48.739 | 48.170 | 0.00 | 0.00 |
| ATOM | 4313 | N    | GLN | X | 287 | 59.315 | 49.631 | 49.844 | 0.00 | 0.00 |
| ATOM | 4314 | H    | GLN | X | 287 | 59.534 | 50.402 | 50.459 | 0.00 | 0.00 |
| ATOM | 4315 | CA   | GLN | X | 287 | 60.364 | 48.592 | 49.986 | 0.00 | 0.00 |
| ATOM | 4316 | HA   | GLN | X | 287 | 60.259 | 47.903 | 49.148 | 0.00 | 0.00 |
| ATOM | 4317 | CB   | GLN | X | 287 | 61.747 | 49.326 | 49.881 | 0.00 | 0.00 |
| ATOM | 4318 | HB2  | GLN | X | 287 | 61.849 | 50.127 | 50.614 | 0.00 | 0.00 |
| ATOM | 4319 | HB3  | GLN | X | 287 | 62.451 | 48.555 | 50.193 | 0.00 | 0.00 |

|      |      |      |     |   |     |        |        |        |      |      |
|------|------|------|-----|---|-----|--------|--------|--------|------|------|
| ATOM | 4320 | CG   | GLN | X | 287 | 62.093 | 49.757 | 48.464 | 0.00 | 0.00 |
| ATOM | 4321 | HG2  | GLN | X | 287 | 62.122 | 48.895 | 47.796 | 0.00 | 0.00 |
| ATOM | 4322 | HG3  | GLN | X | 287 | 61.304 | 50.467 | 48.220 | 0.00 | 0.00 |
| ATOM | 4323 | CD   | GLN | X | 287 | 63.408 | 50.576 | 48.573 | 0.00 | 0.00 |
| ATOM | 4324 | OE1  | GLN | X | 287 | 63.363 | 51.784 | 48.511 | 0.00 | 0.00 |
| ATOM | 4325 | NE2  | GLN | X | 287 | 64.519 | 49.963 | 48.621 | 0.00 | 0.00 |
| ATOM | 4326 | HE21 | GLN | X | 287 | 65.351 | 50.438 | 48.942 | 0.00 | 0.00 |
| ATOM | 4327 | HE22 | GLN | X | 287 | 64.535 | 48.967 | 48.455 | 0.00 | 0.00 |
| ATOM | 4328 | C    | GLN | X | 287 | 60.309 | 47.657 | 51.250 | 0.00 | 0.00 |
| ATOM | 4329 | O    | GLN | X | 287 | 59.475 | 47.817 | 52.097 | 0.00 | 0.00 |
| ATOM | 4330 | N    | GLU | X | 288 | 61.190 | 46.619 | 51.193 | 0.00 | 0.00 |
| ATOM | 4331 | H    | GLU | X | 288 | 61.649 | 46.508 | 50.300 | 0.00 | 0.00 |
| ATOM | 4332 | CA   | GLU | X | 288 | 61.125 | 45.418 | 51.986 | 0.00 | 0.00 |
| ATOM | 4333 | HA   | GLU | X | 288 | 61.604 | 44.630 | 51.405 | 0.00 | 0.00 |
| ATOM | 4334 | CB   | GLU | X | 288 | 61.893 | 45.513 | 53.338 | 0.00 | 0.00 |
| ATOM | 4335 | HB2  | GLU | X | 288 | 61.384 | 46.181 | 54.032 | 0.00 | 0.00 |
| ATOM | 4336 | HB3  | GLU | X | 288 | 61.816 | 44.578 | 53.894 | 0.00 | 0.00 |
| ATOM | 4337 | CG   | GLU | X | 288 | 63.351 | 45.796 | 53.131 | 0.00 | 0.00 |
| ATOM | 4338 | HG2  | GLU | X | 288 | 63.816 | 44.912 | 52.694 | 0.00 | 0.00 |
| ATOM | 4339 | HG3  | GLU | X | 288 | 63.531 | 46.664 | 52.497 | 0.00 | 0.00 |
| ATOM | 4340 | CD   | GLU | X | 288 | 64.086 | 46.141 | 54.452 | 0.00 | 0.00 |
| ATOM | 4341 | OE1  | GLU | X | 288 | 64.075 | 47.302 | 54.862 | 0.00 | 0.00 |
| ATOM | 4342 | OE2  | GLU | X | 288 | 64.548 | 45.219 | 55.179 | 0.00 | 0.00 |
| ATOM | 4343 | C    | GLU | X | 288 | 59.662 | 44.851 | 52.040 | 0.00 | 0.00 |
| ATOM | 4344 | O    | GLU | X | 288 | 59.147 | 44.676 | 53.139 | 0.00 | 0.00 |
| ATOM | 4345 | N    | SER | X | 289 | 58.922 | 44.802 | 50.917 | 0.00 | 0.00 |
| ATOM | 4346 | H    | SER | X | 289 | 59.341 | 45.132 | 50.060 | 0.00 | 0.00 |
| ATOM | 4347 | CA   | SER | X | 289 | 57.466 | 44.644 | 50.880 | 0.00 | 0.00 |
| ATOM | 4348 | HA   | SER | X | 289 | 57.166 | 43.858 | 51.574 | 0.00 | 0.00 |
| ATOM | 4349 | CB   | SER | X | 289 | 56.682 | 45.985 | 51.271 | 0.00 | 0.00 |
| ATOM | 4350 | HB2  | SER | X | 289 | 56.929 | 46.786 | 50.574 | 0.00 | 0.00 |
| ATOM | 4351 | HB3  | SER | X | 289 | 55.603 | 45.860 | 51.173 | 0.00 | 0.00 |
| ATOM | 4352 | OG   | SER | X | 289 | 57.062 | 46.465 | 52.564 | 0.00 | 0.00 |
| ATOM | 4353 | HG   | SER | X | 289 | 58.009 | 46.380 | 52.700 | 0.00 | 0.00 |
| ATOM | 4354 | C    | SER | X | 289 | 57.004 | 44.113 | 49.524 | 0.00 | 0.00 |
| ATOM | 4355 | O    | SER | X | 289 | 56.474 | 44.882 | 48.695 | 0.00 | 0.00 |
| ATOM | 4356 | N    | VAL | X | 290 | 57.037 | 42.784 | 49.271 | 0.00 | 0.00 |
| ATOM | 4357 | H    | VAL | X | 290 | 57.466 | 42.157 | 49.936 | 0.00 | 0.00 |
| ATOM | 4358 | CA   | VAL | X | 290 | 56.511 | 42.243 | 48.039 | 0.00 | 0.00 |
| ATOM | 4359 | HA   | VAL | X | 290 | 56.876 | 42.846 | 47.208 | 0.00 | 0.00 |
| ATOM | 4360 | CB   | VAL | X | 290 | 56.913 | 40.809 | 47.737 | 0.00 | 0.00 |
| ATOM | 4361 | HB   | VAL | X | 290 | 56.671 | 40.251 | 48.642 | 0.00 | 0.00 |
| ATOM | 4362 | CG1  | VAL | X | 290 | 56.398 | 40.107 | 46.406 | 0.00 | 0.00 |
| ATOM | 4363 | HG11 | VAL | X | 290 | 57.024 | 39.243 | 46.185 | 0.00 | 0.00 |
| ATOM | 4364 | HG12 | VAL | X | 290 | 55.341 | 39.874 | 46.538 | 0.00 | 0.00 |
| ATOM | 4365 | HG13 | VAL | X | 290 | 56.561 | 40.799 | 45.580 | 0.00 | 0.00 |
| ATOM | 4366 | CG2  | VAL | X | 290 | 58.445 | 40.753 | 47.464 | 0.00 | 0.00 |
| ATOM | 4367 | HG21 | VAL | X | 290 | 58.651 | 41.379 | 46.596 | 0.00 | 0.00 |
| ATOM | 4368 | HG22 | VAL | X | 290 | 58.804 | 39.736 | 47.309 | 0.00 | 0.00 |
| ATOM | 4369 | HG23 | VAL | X | 290 | 59.094 | 41.125 | 48.257 | 0.00 | 0.00 |
| ATOM | 4370 | C    | VAL | X | 290 | 55.020 | 42.373 | 48.026 | 0.00 | 0.00 |
| ATOM | 4371 | O    | VAL | X | 290 | 54.368 | 42.413 | 49.055 | 0.00 | 0.00 |
| ATOM | 4372 | N    | PHE | X | 291 | 54.379 | 42.267 | 46.866 | 0.00 | 0.00 |
| ATOM | 4373 | H    | PHE | X | 291 | 54.911 | 42.095 | 46.024 | 0.00 | 0.00 |
| ATOM | 4374 | CA   | PHE | X | 291 | 52.836 | 42.339 | 46.699 | 0.00 | 0.00 |
| ATOM | 4375 | HA   | PHE | X | 291 | 52.567 | 42.383 | 45.643 | 0.00 | 0.00 |
| ATOM | 4376 | CB   | PHE | X | 291 | 52.254 | 41.021 | 47.148 | 0.00 | 0.00 |
| ATOM | 4377 | HB2  | PHE | X | 291 | 53.065 | 40.305 | 47.019 | 0.00 | 0.00 |
| ATOM | 4378 | HB3  | PHE | X | 291 | 52.028 | 41.074 | 48.213 | 0.00 | 0.00 |
| ATOM | 4379 | CG   | PHE | X | 291 | 50.961 | 40.484 | 46.479 | 0.00 | 0.00 |
| ATOM | 4380 | CD1  | PHE | X | 291 | 49.837 | 41.256 | 46.226 | 0.00 | 0.00 |
| ATOM | 4381 | HD1  | PHE | X | 291 | 49.827 | 42.301 | 46.500 | 0.00 | 0.00 |
| ATOM | 4382 | CE1  | PHE | X | 291 | 48.734 | 40.734 | 45.580 | 0.00 | 0.00 |
| ATOM | 4383 | HE1  | PHE | X | 291 | 47.836 | 41.298 | 45.372 | 0.00 | 0.00 |
| ATOM | 4384 | CZ   | PHE | X | 291 | 48.686 | 39.345 | 45.336 | 0.00 | 0.00 |
| ATOM | 4385 | HZ   | PHE | X | 291 | 47.793 | 38.872 | 44.954 | 0.00 | 0.00 |
| ATOM | 4386 | CE2  | PHE | X | 291 | 49.762 | 38.517 | 45.620 | 0.00 | 0.00 |

|      |      |      |     |   |     |        |        |        |      |      |
|------|------|------|-----|---|-----|--------|--------|--------|------|------|
| ATOM | 4387 | HE2  | PHE | X | 291 | 49.740 | 37.450 | 45.453 | 0.00 | 0.00 |
| ATOM | 4388 | CD2  | PHE | X | 291 | 50.903 | 39.116 | 46.141 | 0.00 | 0.00 |
| ATOM | 4389 | HD2  | PHE | X | 291 | 51.764 | 38.494 | 46.338 | 0.00 | 0.00 |
| ATOM | 4390 | C    | PHE | X | 291 | 52.236 | 43.664 | 47.183 | 0.00 | 0.00 |
| ATOM | 4391 | O    | PHE | X | 291 | 51.278 | 43.664 | 47.970 | 0.00 | 0.00 |
| ATOM | 4392 | N    | ARG | X | 292 | 52.949 | 44.787 | 46.909 | 0.00 | 0.00 |
| ATOM | 4393 | H    | ARG | X | 292 | 53.609 | 44.747 | 46.145 | 0.00 | 0.00 |
| ATOM | 4394 | CA   | ARG | X | 292 | 52.555 | 46.119 | 47.421 | 0.00 | 0.00 |
| ATOM | 4395 | HA   | ARG | X | 292 | 51.468 | 46.059 | 47.473 | 0.00 | 0.00 |
| ATOM | 4396 | CB   | ARG | X | 292 | 53.258 | 46.384 | 48.781 | 0.00 | 0.00 |
| ATOM | 4397 | HB2  | ARG | X | 292 | 54.325 | 46.272 | 48.586 | 0.00 | 0.00 |
| ATOM | 4398 | HB3  | ARG | X | 292 | 53.155 | 47.428 | 49.078 | 0.00 | 0.00 |
| ATOM | 4399 | CG   | ARG | X | 292 | 52.940 | 45.534 | 49.954 | 0.00 | 0.00 |
| ATOM | 4400 | HG2  | ARG | X | 292 | 53.331 | 44.553 | 49.681 | 0.00 | 0.00 |
| ATOM | 4401 | HG3  | ARG | X | 292 | 53.629 | 45.667 | 50.788 | 0.00 | 0.00 |
| ATOM | 4402 | CD   | ARG | X | 292 | 51.500 | 45.431 | 50.398 | 0.00 | 0.00 |
| ATOM | 4403 | HD2  | ARG | X | 292 | 51.183 | 46.125 | 51.176 | 0.00 | 0.00 |
| ATOM | 4404 | HD3  | ARG | X | 292 | 50.906 | 45.462 | 49.484 | 0.00 | 0.00 |
| ATOM | 4405 | NE   | ARG | X | 292 | 51.254 | 44.099 | 50.939 | 0.00 | 0.00 |
| ATOM | 4406 | HE   | ARG | X | 292 | 51.380 | 43.341 | 50.284 | 0.00 | 0.00 |
| ATOM | 4407 | CZ   | ARG | X | 292 | 50.922 | 43.751 | 52.157 | 0.00 | 0.00 |
| ATOM | 4408 | NH1  | ARG | X | 292 | 50.703 | 44.646 | 53.080 | 0.00 | 0.00 |
| ATOM | 4409 | HH11 | ARG | X | 292 | 50.967 | 45.597 | 52.868 | 0.00 | 0.00 |
| ATOM | 4410 | HH12 | ARG | X | 292 | 50.236 | 44.347 | 53.925 | 0.00 | 0.00 |
| ATOM | 4411 | NH2  | ARG | X | 292 | 50.739 | 42.521 | 52.534 | 0.00 | 0.00 |
| ATOM | 4412 | HH21 | ARG | X | 292 | 50.738 | 41.722 | 51.916 | 0.00 | 0.00 |
| ATOM | 4413 | HH22 | ARG | X | 292 | 50.649 | 42.180 | 53.480 | 0.00 | 0.00 |
| ATOM | 4414 | C    | ARG | X | 292 | 53.040 | 47.266 | 46.446 | 0.00 | 0.00 |
| ATOM | 4415 | O    | ARG | X | 292 | 54.084 | 47.172 | 45.777 | 0.00 | 0.00 |
| ATOM | 4416 | N    | PHE | X | 293 | 52.205 | 48.302 | 46.286 | 0.00 | 0.00 |
| ATOM | 4417 | H    | PHE | X | 293 | 51.451 | 48.218 | 46.952 | 0.00 | 0.00 |
| ATOM | 4418 | CA   | PHE | X | 293 | 51.911 | 49.115 | 45.100 | 0.00 | 0.00 |
| ATOM | 4419 | HA   | PHE | X | 293 | 52.748 | 49.008 | 44.410 | 0.00 | 0.00 |
| ATOM | 4420 | CB   | PHE | X | 293 | 50.739 | 48.454 | 44.480 | 0.00 | 0.00 |
| ATOM | 4421 | HB2  | PHE | X | 293 | 49.937 | 48.737 | 45.163 | 0.00 | 0.00 |
| ATOM | 4422 | HB3  | PHE | X | 293 | 50.568 | 48.936 | 43.518 | 0.00 | 0.00 |
| ATOM | 4423 | CG   | PHE | X | 293 | 50.651 | 46.875 | 44.422 | 0.00 | 0.00 |
| ATOM | 4424 | CD1  | PHE | X | 293 | 51.750 | 46.291 | 43.734 | 0.00 | 0.00 |
| ATOM | 4425 | HD1  | PHE | X | 293 | 52.550 | 46.828 | 43.246 | 0.00 | 0.00 |
| ATOM | 4426 | CE1  | PHE | X | 293 | 51.783 | 44.861 | 43.699 | 0.00 | 0.00 |
| ATOM | 4427 | HE1  | PHE | X | 293 | 52.645 | 44.426 | 43.213 | 0.00 | 0.00 |
| ATOM | 4428 | CZ   | PHE | X | 293 | 50.818 | 44.034 | 44.259 | 0.00 | 0.00 |
| ATOM | 4429 | HZ   | PHE | X | 293 | 50.850 | 42.965 | 44.106 | 0.00 | 0.00 |
| ATOM | 4430 | CE2  | PHE | X | 293 | 49.709 | 44.677 | 44.842 | 0.00 | 0.00 |
| ATOM | 4431 | HE2  | PHE | X | 293 | 48.884 | 44.092 | 45.222 | 0.00 | 0.00 |
| ATOM | 4432 | CD2  | PHE | X | 293 | 49.528 | 46.086 | 44.830 | 0.00 | 0.00 |
| ATOM | 4433 | HD2  | PHE | X | 293 | 48.594 | 46.498 | 45.182 | 0.00 | 0.00 |
| ATOM | 4434 | C    | PHE | X | 293 | 51.895 | 50.644 | 45.413 | 0.00 | 0.00 |
| ATOM | 4435 | O    | PHE | X | 293 | 52.363 | 51.083 | 46.474 | 0.00 | 0.00 |
| ATOM | 4436 | N    | SER | X | 294 | 51.403 | 51.471 | 44.487 | 0.00 | 0.00 |
| ATOM | 4437 | H    | SER | X | 294 | 51.125 | 51.077 | 43.600 | 0.00 | 0.00 |
| ATOM | 4438 | CA   | SER | X | 294 | 51.634 | 52.933 | 44.631 | 0.00 | 0.00 |
| ATOM | 4439 | HA   | SER | X | 294 | 52.599 | 53.112 | 45.104 | 0.00 | 0.00 |
| ATOM | 4440 | CB   | SER | X | 294 | 51.822 | 53.557 | 43.210 | 0.00 | 0.00 |
| ATOM | 4441 | HB2  | SER | X | 294 | 51.917 | 54.638 | 43.318 | 0.00 | 0.00 |
| ATOM | 4442 | HB3  | SER | X | 294 | 52.763 | 53.278 | 42.736 | 0.00 | 0.00 |
| ATOM | 4443 | OG   | SER | X | 294 | 50.760 | 53.382 | 42.327 | 0.00 | 0.00 |
| ATOM | 4444 | HG   | SER | X | 294 | 50.699 | 54.056 | 41.647 | 0.00 | 0.00 |
| ATOM | 4445 | C    | SER | X | 294 | 50.571 | 53.702 | 45.449 | 0.00 | 0.00 |
| ATOM | 4446 | O    | SER | X | 294 | 50.864 | 54.159 | 46.541 | 0.00 | 0.00 |
| ATOM | 4447 | N    | PHE | X | 295 | 49.364 | 53.902 | 44.906 | 0.00 | 0.00 |
| ATOM | 4448 | H    | PHE | X | 295 | 49.276 | 53.512 | 43.979 | 0.00 | 0.00 |
| ATOM | 4449 | CA   | PHE | X | 295 | 48.170 | 54.513 | 45.555 | 0.00 | 0.00 |
| ATOM | 4450 | HA   | PHE | X | 295 | 48.359 | 54.648 | 46.620 | 0.00 | 0.00 |
| ATOM | 4451 | CB   | PHE | X | 295 | 47.780 | 55.867 | 44.846 | 0.00 | 0.00 |
| ATOM | 4452 | HB2  | PHE | X | 295 | 47.771 | 55.631 | 43.782 | 0.00 | 0.00 |
| ATOM | 4453 | HB3  | PHE | X | 295 | 46.862 | 56.191 | 45.337 | 0.00 | 0.00 |

|      |      |      |     |   |     |        |        |        |      |      |
|------|------|------|-----|---|-----|--------|--------|--------|------|------|
| ATOM | 4454 | CG   | PHE | X | 295 | 48.717 | 57.022 | 45.102 | 0.00 | 0.00 |
| ATOM | 4455 | CD1  | PHE | X | 295 | 48.516 | 57.906 | 46.273 | 0.00 | 0.00 |
| ATOM | 4456 | HD1  | PHE | X | 295 | 47.638 | 57.656 | 46.849 | 0.00 | 0.00 |
| ATOM | 4457 | CE1  | PHE | X | 295 | 49.388 | 58.948 | 46.542 | 0.00 | 0.00 |
| ATOM | 4458 | HE1  | PHE | X | 295 | 49.181 | 59.556 | 47.410 | 0.00 | 0.00 |
| ATOM | 4459 | CZ   | PHE | X | 295 | 50.506 | 59.008 | 45.802 | 0.00 | 0.00 |
| ATOM | 4460 | HZ   | PHE | X | 295 | 51.267 | 59.705 | 46.119 | 0.00 | 0.00 |
| ATOM | 4461 | CE2  | PHE | X | 295 | 50.801 | 58.136 | 44.774 | 0.00 | 0.00 |
| ATOM | 4462 | HE2  | PHE | X | 295 | 51.774 | 58.163 | 44.306 | 0.00 | 0.00 |
| ATOM | 4463 | CD2  | PHE | X | 295 | 49.886 | 57.168 | 44.367 | 0.00 | 0.00 |
| ATOM | 4464 | HD2  | PHE | X | 295 | 50.117 | 56.535 | 43.523 | 0.00 | 0.00 |
| ATOM | 4465 | C    | PHE | X | 295 | 47.087 | 53.411 | 45.323 | 0.00 | 0.00 |
| ATOM | 4466 | O    | PHE | X | 295 | 46.789 | 52.901 | 44.240 | 0.00 | 0.00 |
| ATOM | 4467 | N    | VAL | X | 296 | 46.424 | 53.021 | 46.457 | 0.00 | 0.00 |
| ATOM | 4468 | H    | VAL | X | 296 | 46.507 | 53.722 | 47.180 | 0.00 | 0.00 |
| ATOM | 4469 | CA   | VAL | X | 296 | 45.572 | 51.863 | 46.619 | 0.00 | 0.00 |
| ATOM | 4470 | HA   | VAL | X | 296 | 45.256 | 51.643 | 45.599 | 0.00 | 0.00 |
| ATOM | 4471 | CB   | VAL | X | 296 | 46.421 | 50.708 | 47.260 | 0.00 | 0.00 |
| ATOM | 4472 | HB   | VAL | X | 296 | 45.757 | 49.858 | 47.099 | 0.00 | 0.00 |
| ATOM | 4473 | CG1  | VAL | X | 296 | 47.728 | 50.390 | 46.531 | 0.00 | 0.00 |
| ATOM | 4474 | HG11 | VAL | X | 296 | 48.461 | 51.059 | 46.982 | 0.00 | 0.00 |
| ATOM | 4475 | HG12 | VAL | X | 296 | 47.964 | 49.334 | 46.659 | 0.00 | 0.00 |
| ATOM | 4476 | HG13 | VAL | X | 296 | 47.715 | 50.638 | 45.470 | 0.00 | 0.00 |
| ATOM | 4477 | CG2  | VAL | X | 296 | 46.713 | 50.849 | 48.774 | 0.00 | 0.00 |
| ATOM | 4478 | HG21 | VAL | X | 296 | 47.360 | 51.714 | 48.922 | 0.00 | 0.00 |
| ATOM | 4479 | HG22 | VAL | X | 296 | 47.261 | 49.980 | 49.139 | 0.00 | 0.00 |
| ATOM | 4480 | HG23 | VAL | X | 296 | 45.764 | 50.916 | 49.305 | 0.00 | 0.00 |
| ATOM | 4481 | C    | VAL | X | 296 | 44.366 | 52.322 | 47.428 | 0.00 | 0.00 |
| ATOM | 4482 | O    | VAL | X | 296 | 44.389 | 53.448 | 47.881 | 0.00 | 0.00 |
| ATOM | 4483 | N    | PRO | X | 297 | 43.266 | 51.548 | 47.668 | 0.00 | 0.00 |
| ATOM | 4484 | CD   | PRO | X | 297 | 43.043 | 50.303 | 47.074 | 0.00 | 0.00 |
| ATOM | 4485 | HD2  | PRO | X | 297 | 43.663 | 49.494 | 47.460 | 0.00 | 0.00 |
| ATOM | 4486 | HD3  | PRO | X | 297 | 43.331 | 50.329 | 46.024 | 0.00 | 0.00 |
| ATOM | 4487 | CG   | PRO | X | 297 | 41.554 | 49.956 | 47.310 | 0.00 | 0.00 |
| ATOM | 4488 | HG2  | PRO | X | 297 | 41.322 | 48.896 | 47.418 | 0.00 | 0.00 |
| ATOM | 4489 | HG3  | PRO | X | 297 | 40.887 | 50.466 | 46.615 | 0.00 | 0.00 |
| ATOM | 4490 | CB   | PRO | X | 297 | 41.312 | 50.607 | 48.661 | 0.00 | 0.00 |
| ATOM | 4491 | HB2  | PRO | X | 297 | 41.545 | 49.920 | 49.474 | 0.00 | 0.00 |
| ATOM | 4492 | HB3  | PRO | X | 297 | 40.258 | 50.808 | 48.852 | 0.00 | 0.00 |
| ATOM | 4493 | CA   | PRO | X | 297 | 42.164 | 51.834 | 48.525 | 0.00 | 0.00 |
| ATOM | 4494 | HA   | PRO | X | 297 | 41.629 | 52.612 | 47.980 | 0.00 | 0.00 |
| ATOM | 4495 | C    | PRO | X | 297 | 42.493 | 52.390 | 49.919 | 0.00 | 0.00 |
| ATOM | 4496 | O    | PRO | X | 297 | 43.314 | 51.802 | 50.641 | 0.00 | 0.00 |
| ATOM | 4497 | N    | VAL | X | 298 | 42.064 | 53.588 | 50.224 | 0.00 | 0.00 |
| ATOM | 4498 | H    | VAL | X | 298 | 41.256 | 53.988 | 49.768 | 0.00 | 0.00 |
| ATOM | 4499 | CA   | VAL | X | 298 | 42.328 | 54.319 | 51.471 | 0.00 | 0.00 |
| ATOM | 4500 | HA   | VAL | X | 298 | 43.213 | 53.932 | 51.978 | 0.00 | 0.00 |
| ATOM | 4501 | CB   | VAL | X | 298 | 42.510 | 55.820 | 51.139 | 0.00 | 0.00 |
| ATOM | 4502 | HB   | VAL | X | 298 | 41.539 | 56.204 | 50.825 | 0.00 | 0.00 |
| ATOM | 4503 | CG1  | VAL | X | 298 | 43.071 | 56.554 | 52.357 | 0.00 | 0.00 |
| ATOM | 4504 | HG11 | VAL | X | 298 | 44.008 | 56.047 | 52.586 | 0.00 | 0.00 |
| ATOM | 4505 | HG12 | VAL | X | 298 | 43.075 | 57.596 | 52.039 | 0.00 | 0.00 |
| ATOM | 4506 | HG13 | VAL | X | 298 | 42.451 | 56.426 | 53.244 | 0.00 | 0.00 |
| ATOM | 4507 | CG2  | VAL | X | 298 | 43.337 | 56.143 | 49.936 | 0.00 | 0.00 |
| ATOM | 4508 | HG21 | VAL | X | 298 | 43.464 | 57.225 | 49.925 | 0.00 | 0.00 |
| ATOM | 4509 | HG22 | VAL | X | 298 | 42.842 | 55.943 | 48.985 | 0.00 | 0.00 |
| ATOM | 4510 | HG23 | VAL | X | 298 | 44.272 | 55.582 | 49.931 | 0.00 | 0.00 |
| ATOM | 4511 | C    | VAL | X | 298 | 41.322 | 54.017 | 52.476 | 0.00 | 0.00 |
| ATOM | 4512 | O    | VAL | X | 298 | 40.112 | 54.299 | 52.270 | 0.00 | 0.00 |
| ATOM | 4513 | N    | VAL | X | 299 | 41.755 | 53.534 | 53.644 | 0.00 | 0.00 |
| ATOM | 4514 | H    | VAL | X | 299 | 42.693 | 53.167 | 53.718 | 0.00 | 0.00 |
| ATOM | 4515 | CA   | VAL | X | 299 | 40.986 | 53.655 | 54.852 | 0.00 | 0.00 |
| ATOM | 4516 | HA   | VAL | X | 299 | 39.978 | 53.256 | 54.742 | 0.00 | 0.00 |
| ATOM | 4517 | CB   | VAL | X | 299 | 41.651 | 52.743 | 55.943 | 0.00 | 0.00 |
| ATOM | 4518 | HB   | VAL | X | 299 | 42.712 | 52.991 | 55.949 | 0.00 | 0.00 |
| ATOM | 4519 | CG1  | VAL | X | 299 | 41.107 | 53.002 | 57.404 | 0.00 | 0.00 |
| ATOM | 4520 | HG11 | VAL | X | 299 | 41.508 | 52.287 | 58.122 | 0.00 | 0.00 |

|      |      |      |     |   |     |        |        |        |      |      |
|------|------|------|-----|---|-----|--------|--------|--------|------|------|
| ATOM | 4521 | HG12 | VAL | X | 299 | 41.422 | 53.937 | 57.869 | 0.00 | 0.00 |
| ATOM | 4522 | HG13 | VAL | X | 299 | 40.017 | 53.002 | 57.394 | 0.00 | 0.00 |
| ATOM | 4523 | CG2  | VAL | X | 299 | 41.500 | 51.315 | 55.525 | 0.00 | 0.00 |
| ATOM | 4524 | HG21 | VAL | X | 299 | 42.478 | 50.941 | 55.221 | 0.00 | 0.00 |
| ATOM | 4525 | HG22 | VAL | X | 299 | 40.866 | 51.040 | 54.682 | 0.00 | 0.00 |
| ATOM | 4526 | HG23 | VAL | X | 299 | 41.171 | 50.773 | 56.412 | 0.00 | 0.00 |
| ATOM | 4527 | C    | VAL | X | 299 | 40.886 | 55.124 | 55.238 | 0.00 | 0.00 |
| ATOM | 4528 | O    | VAL | X | 299 | 41.792 | 55.667 | 55.833 | 0.00 | 0.00 |
| ATOM | 4529 | N    | ASP | X | 300 | 39.829 | 55.761 | 54.858 | 0.00 | 0.00 |
| ATOM | 4530 | H    | ASP | X | 300 | 39.182 | 55.147 | 54.384 | 0.00 | 0.00 |
| ATOM | 4531 | CA   | ASP | X | 300 | 39.737 | 57.228 | 54.686 | 0.00 | 0.00 |
| ATOM | 4532 | HA   | ASP | X | 300 | 40.708 | 57.662 | 54.924 | 0.00 | 0.00 |
| ATOM | 4533 | CB   | ASP | X | 300 | 39.446 | 57.502 | 53.237 | 0.00 | 0.00 |
| ATOM | 4534 | HB2  | ASP | X | 300 | 39.547 | 58.561 | 53.002 | 0.00 | 0.00 |
| ATOM | 4535 | HB3  | ASP | X | 300 | 40.057 | 56.900 | 52.565 | 0.00 | 0.00 |
| ATOM | 4536 | CG   | ASP | X | 300 | 38.013 | 57.203 | 52.943 | 0.00 | 0.00 |
| ATOM | 4537 | OD1  | ASP | X | 300 | 37.554 | 56.041 | 52.871 | 0.00 | 0.00 |
| ATOM | 4538 | OD2  | ASP | X | 300 | 37.173 | 58.115 | 52.724 | 0.00 | 0.00 |
| ATOM | 4539 | C    | ASP | X | 300 | 38.626 | 57.883 | 55.539 | 0.00 | 0.00 |
| ATOM | 4540 | O    | ASP | X | 300 | 38.623 | 59.118 | 55.738 | 0.00 | 0.00 |
| ATOM | 4541 | N    | GLY | X | 301 | 37.823 | 56.994 | 56.107 | 0.00 | 0.00 |
| ATOM | 4542 | H    | GLY | X | 301 | 38.038 | 56.026 | 55.914 | 0.00 | 0.00 |
| ATOM | 4543 | CA   | GLY | X | 301 | 36.792 | 57.184 | 57.098 | 0.00 | 0.00 |
| ATOM | 4544 | HA2  | GLY | X | 301 | 36.831 | 56.473 | 57.924 | 0.00 | 0.00 |
| ATOM | 4545 | HA3  | GLY | X | 301 | 36.892 | 58.177 | 57.536 | 0.00 | 0.00 |
| ATOM | 4546 | C    | GLY | X | 301 | 35.410 | 57.196 | 56.538 | 0.00 | 0.00 |
| ATOM | 4547 | O    | GLY | X | 301 | 34.540 | 56.903 | 57.320 | 0.00 | 0.00 |
| ATOM | 4548 | N    | ASP | X | 302 | 35.280 | 57.439 | 55.211 | 0.00 | 0.00 |
| ATOM | 4549 | H    | ASP | X | 302 | 36.131 | 57.741 | 54.758 | 0.00 | 0.00 |
| ATOM | 4550 | CA   | ASP | X | 302 | 33.935 | 57.655 | 54.602 | 0.00 | 0.00 |
| ATOM | 4551 | HA   | ASP | X | 302 | 33.126 | 57.604 | 55.330 | 0.00 | 0.00 |
| ATOM | 4552 | CB   | ASP | X | 302 | 34.033 | 59.040 | 53.992 | 0.00 | 0.00 |
| ATOM | 4553 | HB2  | ASP | X | 302 | 34.387 | 59.758 | 54.732 | 0.00 | 0.00 |
| ATOM | 4554 | HB3  | ASP | X | 302 | 34.752 | 58.971 | 53.176 | 0.00 | 0.00 |
| ATOM | 4555 | CG   | ASP | X | 302 | 32.689 | 59.405 | 53.324 | 0.00 | 0.00 |
| ATOM | 4556 | OD1  | ASP | X | 302 | 31.653 | 59.356 | 53.974 | 0.00 | 0.00 |
| ATOM | 4557 | OD2  | ASP | X | 302 | 32.674 | 59.775 | 52.080 | 0.00 | 0.00 |
| ATOM | 4558 | C    | ASP | X | 302 | 33.500 | 56.689 | 53.509 | 0.00 | 0.00 |
| ATOM | 4559 | O    | ASP | X | 302 | 32.326 | 56.314 | 53.446 | 0.00 | 0.00 |
| ATOM | 4560 | N    | PHE | X | 303 | 34.421 | 56.181 | 52.720 | 0.00 | 0.00 |
| ATOM | 4561 | H    | PHE | X | 303 | 35.405 | 56.373 | 52.836 | 0.00 | 0.00 |
| ATOM | 4562 | CA   | PHE | X | 303 | 34.244 | 54.812 | 52.101 | 0.00 | 0.00 |
| ATOM | 4563 | HA   | PHE | X | 303 | 33.241 | 54.702 | 51.688 | 0.00 | 0.00 |
| ATOM | 4564 | CB   | PHE | X | 303 | 35.171 | 54.750 | 50.938 | 0.00 | 0.00 |
| ATOM | 4565 | HB2  | PHE | X | 303 | 35.484 | 55.692 | 50.486 | 0.00 | 0.00 |
| ATOM | 4566 | HB3  | PHE | X | 303 | 36.088 | 54.313 | 51.334 | 0.00 | 0.00 |
| ATOM | 4567 | CG   | PHE | X | 303 | 34.618 | 53.883 | 49.844 | 0.00 | 0.00 |
| ATOM | 4568 | CD1  | PHE | X | 303 | 34.625 | 52.451 | 49.895 | 0.00 | 0.00 |
| ATOM | 4569 | HD1  | PHE | X | 303 | 34.965 | 51.936 | 50.781 | 0.00 | 0.00 |
| ATOM | 4570 | CE1  | PHE | X | 303 | 34.446 | 51.766 | 48.698 | 0.00 | 0.00 |
| ATOM | 4571 | HE1  | PHE | X | 303 | 34.529 | 50.690 | 48.756 | 0.00 | 0.00 |
| ATOM | 4572 | CZ   | PHE | X | 303 | 33.964 | 52.401 | 47.588 | 0.00 | 0.00 |
| ATOM | 4573 | HZ   | PHE | X | 303 | 33.867 | 51.876 | 46.685 | 0.00 | 0.00 |
| ATOM | 4574 | CE2  | PHE | X | 303 | 33.867 | 53.827 | 47.483 | 0.00 | 0.00 |
| ATOM | 4575 | HE2  | PHE | X | 303 | 33.436 | 54.200 | 46.566 | 0.00 | 0.00 |
| ATOM | 4576 | CD2  | PHE | X | 303 | 34.265 | 54.547 | 48.576 | 0.00 | 0.00 |
| ATOM | 4577 | HD2  | PHE | X | 303 | 34.381 | 55.619 | 48.530 | 0.00 | 0.00 |
| ATOM | 4578 | C    | PHE | X | 303 | 34.474 | 53.686 | 53.118 | 0.00 | 0.00 |
| ATOM | 4579 | O    | PHE | X | 303 | 33.622 | 52.814 | 53.302 | 0.00 | 0.00 |
| ATOM | 4580 | N    | LEU | X | 304 | 35.607 | 53.759 | 53.774 | 0.00 | 0.00 |
| ATOM | 4581 | H    | LEU | X | 304 | 36.245 | 54.502 | 53.525 | 0.00 | 0.00 |
| ATOM | 4582 | CA   | LEU | X | 304 | 36.258 | 52.683 | 54.594 | 0.00 | 0.00 |
| ATOM | 4583 | HA   | LEU | X | 304 | 35.581 | 51.838 | 54.717 | 0.00 | 0.00 |
| ATOM | 4584 | CB   | LEU | X | 304 | 37.527 | 52.300 | 53.822 | 0.00 | 0.00 |
| ATOM | 4585 | HB2  | LEU | X | 304 | 38.086 | 53.221 | 53.656 | 0.00 | 0.00 |
| ATOM | 4586 | HB3  | LEU | X | 304 | 38.161 | 51.674 | 54.449 | 0.00 | 0.00 |
| ATOM | 4587 | CG   | LEU | X | 304 | 37.370 | 51.397 | 52.576 | 0.00 | 0.00 |



|      |      |      |     |   |     |        |        |        |      |      |
|------|------|------|-----|---|-----|--------|--------|--------|------|------|
| ATOM | 4588 | HG   | LEU | X | 304 | 37.024 | 52.032 | 51.760 | 0.00 | 0.00 |
| ATOM | 4589 | CD1  | LEU | X | 304 | 38.772 | 50.767 | 52.308 | 0.00 | 0.00 |
| ATOM | 4590 | HD11 | LEU | X | 304 | 39.485 | 51.586 | 52.208 | 0.00 | 0.00 |
| ATOM | 4591 | HD12 | LEU | X | 304 | 38.882 | 50.137 | 51.425 | 0.00 | 0.00 |
| ATOM | 4592 | HD13 | LEU | X | 304 | 39.141 | 50.146 | 53.124 | 0.00 | 0.00 |
| ATOM | 4593 | CD2  | LEU | X | 304 | 36.364 | 50.280 | 52.828 | 0.00 | 0.00 |
| ATOM | 4594 | HD21 | LEU | X | 304 | 36.548 | 49.784 | 53.781 | 0.00 | 0.00 |
| ATOM | 4595 | HD22 | LEU | X | 304 | 35.363 | 50.710 | 52.801 | 0.00 | 0.00 |
| ATOM | 4596 | HD23 | LEU | X | 304 | 36.437 | 49.569 | 52.005 | 0.00 | 0.00 |
| ATOM | 4597 | C    | LEU | X | 304 | 36.503 | 53.234 | 56.040 | 0.00 | 0.00 |
| ATOM | 4598 | O    | LEU | X | 304 | 37.557 | 53.799 | 56.279 | 0.00 | 0.00 |
| ATOM | 4599 | N    | SER | X | 305 | 35.575 | 53.037 | 56.915 | 0.00 | 0.00 |
| ATOM | 4600 | H    | SER | X | 305 | 34.799 | 52.534 | 56.509 | 0.00 | 0.00 |
| ATOM | 4601 | CA   | SER | X | 305 | 35.777 | 53.371 | 58.367 | 0.00 | 0.00 |
| ATOM | 4602 | HA   | SER | X | 305 | 36.161 | 54.378 | 58.525 | 0.00 | 0.00 |
| ATOM | 4603 | CB   | SER | X | 305 | 34.414 | 53.243 | 59.115 | 0.00 | 0.00 |
| ATOM | 4604 | HB2  | SER | X | 305 | 34.564 | 53.489 | 60.166 | 0.00 | 0.00 |
| ATOM | 4605 | HB3  | SER | X | 305 | 33.713 | 53.956 | 58.680 | 0.00 | 0.00 |
| ATOM | 4606 | OG   | SER | X | 305 | 33.765 | 51.946 | 59.016 | 0.00 | 0.00 |
| ATOM | 4607 | HG   | SER | X | 305 | 33.309 | 51.927 | 58.172 | 0.00 | 0.00 |
| ATOM | 4608 | C    | SER | X | 305 | 36.838 | 52.507 | 59.019 | 0.00 | 0.00 |
| ATOM | 4609 | O    | SER | X | 305 | 37.089 | 52.775 | 60.198 | 0.00 | 0.00 |
| ATOM | 4610 | N    | ASP | X | 306 | 37.435 | 51.550 | 58.370 | 0.00 | 0.00 |
| ATOM | 4611 | H    | ASP | X | 306 | 37.197 | 51.379 | 57.403 | 0.00 | 0.00 |
| ATOM | 4612 | CA   | ASP | X | 306 | 38.432 | 50.632 | 58.875 | 0.00 | 0.00 |
| ATOM | 4613 | HA   | ASP | X | 306 | 39.337 | 51.189 | 59.118 | 0.00 | 0.00 |
| ATOM | 4614 | CB   | ASP | X | 306 | 37.932 | 49.857 | 60.175 | 0.00 | 0.00 |
| ATOM | 4615 | HB2  | ASP | X | 306 | 37.109 | 50.375 | 60.667 | 0.00 | 0.00 |
| ATOM | 4616 | HB3  | ASP | X | 306 | 37.725 | 48.800 | 60.004 | 0.00 | 0.00 |
| ATOM | 4617 | CG   | ASP | X | 306 | 39.133 | 49.753 | 61.121 | 0.00 | 0.00 |
| ATOM | 4618 | OD1  | ASP | X | 306 | 40.097 | 49.099 | 60.685 | 0.00 | 0.00 |
| ATOM | 4619 | OD2  | ASP | X | 306 | 39.050 | 50.243 | 62.272 | 0.00 | 0.00 |
| ATOM | 4620 | C    | ASP | X | 306 | 38.719 | 49.642 | 57.698 | 0.00 | 0.00 |
| ATOM | 4621 | O    | ASP | X | 306 | 38.079 | 49.672 | 56.634 | 0.00 | 0.00 |
| ATOM | 4622 | N    | THR | X | 307 | 39.762 | 48.813 | 57.831 | 0.00 | 0.00 |
| ATOM | 4623 | H    | THR | X | 307 | 40.148 | 48.702 | 58.758 | 0.00 | 0.00 |
| ATOM | 4624 | CA   | THR | X | 307 | 40.267 | 47.800 | 56.881 | 0.00 | 0.00 |
| ATOM | 4625 | HA   | THR | X | 307 | 40.497 | 48.293 | 55.937 | 0.00 | 0.00 |
| ATOM | 4626 | CB   | THR | X | 307 | 41.508 | 47.091 | 57.297 | 0.00 | 0.00 |
| ATOM | 4627 | HB   | THR | X | 307 | 41.915 | 46.371 | 56.586 | 0.00 | 0.00 |
| ATOM | 4628 | CG2  | THR | X | 307 | 42.696 | 48.125 | 57.416 | 0.00 | 0.00 |
| ATOM | 4629 | HG21 | THR | X | 307 | 43.174 | 48.246 | 56.444 | 0.00 | 0.00 |
| ATOM | 4630 | HG22 | THR | X | 307 | 43.389 | 47.694 | 58.139 | 0.00 | 0.00 |
| ATOM | 4631 | HG23 | THR | X | 307 | 42.392 | 49.034 | 57.935 | 0.00 | 0.00 |
| ATOM | 4632 | OG1  | THR | X | 307 | 41.333 | 46.375 | 58.481 | 0.00 | 0.00 |
| ATOM | 4633 | HG1  | THR | X | 307 | 42.095 | 45.852 | 58.741 | 0.00 | 0.00 |
| ATOM | 4634 | C    | THR | X | 307 | 39.185 | 46.730 | 56.643 | 0.00 | 0.00 |
| ATOM | 4635 | O    | THR | X | 307 | 38.442 | 46.416 | 57.587 | 0.00 | 0.00 |
| ATOM | 4636 | N    | PRO | X | 308 | 38.883 | 46.323 | 55.378 | 0.00 | 0.00 |
| ATOM | 4637 | CD   | PRO | X | 308 | 39.281 | 46.923 | 54.105 | 0.00 | 0.00 |
| ATOM | 4638 | HD2  | PRO | X | 308 | 40.310 | 46.646 | 53.880 | 0.00 | 0.00 |
| ATOM | 4639 | HD3  | PRO | X | 308 | 39.203 | 48.010 | 54.137 | 0.00 | 0.00 |
| ATOM | 4640 | CG   | PRO | X | 308 | 38.366 | 46.347 | 53.042 | 0.00 | 0.00 |
| ATOM | 4641 | HG2  | PRO | X | 308 | 38.892 | 46.310 | 52.088 | 0.00 | 0.00 |
| ATOM | 4642 | HG3  | PRO | X | 308 | 37.484 | 46.976 | 52.913 | 0.00 | 0.00 |
| ATOM | 4643 | CB   | PRO | X | 308 | 38.003 | 44.980 | 53.655 | 0.00 | 0.00 |
| ATOM | 4644 | HB2  | PRO | X | 308 | 38.873 | 44.325 | 53.625 | 0.00 | 0.00 |
| ATOM | 4645 | HB3  | PRO | X | 308 | 37.138 | 44.513 | 53.182 | 0.00 | 0.00 |
| ATOM | 4646 | CA   | PRO | X | 308 | 37.856 | 45.379 | 55.124 | 0.00 | 0.00 |
| ATOM | 4647 | HA   | PRO | X | 308 | 36.916 | 45.881 | 55.349 | 0.00 | 0.00 |
| ATOM | 4648 | C    | PRO | X | 308 | 37.961 | 44.026 | 55.951 | 0.00 | 0.00 |
| ATOM | 4649 | O    | PRO | X | 308 | 36.947 | 43.450 | 56.219 | 0.00 | 0.00 |
| ATOM | 4650 | N    | GLU | X | 309 | 39.115 | 43.652 | 56.524 | 0.00 | 0.00 |
| ATOM | 4651 | H    | GLU | X | 309 | 39.906 | 44.180 | 56.184 | 0.00 | 0.00 |
| ATOM | 4652 | CA   | GLU | X | 309 | 39.262 | 42.547 | 57.455 | 0.00 | 0.00 |
| ATOM | 4653 | HA   | GLU | X | 309 | 38.775 | 41.733 | 56.918 | 0.00 | 0.00 |
| ATOM | 4654 | CB   | GLU | X | 309 | 40.740 | 42.182 | 57.500 | 0.00 | 0.00 |

|      |      |      |     |   |     |        |        |        |      |      |
|------|------|------|-----|---|-----|--------|--------|--------|------|------|
| ATOM | 4655 | HB2  | GLU | X | 309 | 41.055 | 41.786 | 56.535 | 0.00 | 0.00 |
| ATOM | 4656 | HB3  | GLU | X | 309 | 41.329 | 43.079 | 57.695 | 0.00 | 0.00 |
| ATOM | 4657 | CG   | GLU | X | 309 | 41.044 | 41.058 | 58.467 | 0.00 | 0.00 |
| ATOM | 4658 | HG2  | GLU | X | 309 | 40.755 | 41.401 | 59.461 | 0.00 | 0.00 |
| ATOM | 4659 | HG3  | GLU | X | 309 | 40.370 | 40.242 | 58.205 | 0.00 | 0.00 |
| ATOM | 4660 | CD   | GLU | X | 309 | 42.440 | 40.567 | 58.537 | 0.00 | 0.00 |
| ATOM | 4661 | OE1  | GLU | X | 309 | 42.628 | 39.390 | 58.172 | 0.00 | 0.00 |
| ATOM | 4662 | OE2  | GLU | X | 309 | 43.370 | 41.354 | 58.846 | 0.00 | 0.00 |
| ATOM | 4663 | C    | GLU | X | 309 | 38.619 | 42.754 | 58.804 | 0.00 | 0.00 |
| ATOM | 4664 | O    | GLU | X | 309 | 38.185 | 41.750 | 59.401 | 0.00 | 0.00 |
| ATOM | 4665 | N    | ALA | X | 310 | 38.528 | 44.039 | 59.322 | 0.00 | 0.00 |
| ATOM | 4666 | H    | ALA | X | 310 | 38.787 | 44.830 | 58.749 | 0.00 | 0.00 |
| ATOM | 4667 | CA   | ALA | X | 310 | 37.718 | 44.367 | 60.464 | 0.00 | 0.00 |
| ATOM | 4668 | HA   | ALA | X | 310 | 37.665 | 43.580 | 61.216 | 0.00 | 0.00 |
| ATOM | 4669 | CB   | ALA | X | 310 | 38.314 | 45.637 | 61.153 | 0.00 | 0.00 |
| ATOM | 4670 | HB1  | ALA | X | 310 | 38.122 | 46.557 | 60.602 | 0.00 | 0.00 |
| ATOM | 4671 | HB2  | ALA | X | 310 | 39.390 | 45.525 | 61.286 | 0.00 | 0.00 |
| ATOM | 4672 | HB3  | ALA | X | 310 | 37.787 | 45.625 | 62.107 | 0.00 | 0.00 |
| ATOM | 4673 | C    | ALA | X | 310 | 36.194 | 44.566 | 60.098 | 0.00 | 0.00 |
| ATOM | 4674 | O    | ALA | X | 310 | 35.269 | 44.057 | 60.771 | 0.00 | 0.00 |
| ATOM | 4675 | N    | LEU | X | 311 | 35.981 | 45.182 | 58.919 | 0.00 | 0.00 |
| ATOM | 4676 | H    | LEU | X | 311 | 36.748 | 45.523 | 58.358 | 0.00 | 0.00 |
| ATOM | 4677 | CA   | LEU | X | 311 | 34.614 | 45.604 | 58.504 | 0.00 | 0.00 |
| ATOM | 4678 | HA   | LEU | X | 311 | 34.156 | 46.075 | 59.373 | 0.00 | 0.00 |
| ATOM | 4679 | CB   | LEU | X | 311 | 34.637 | 46.773 | 57.489 | 0.00 | 0.00 |
| ATOM | 4680 | HB2  | LEU | X | 311 | 35.214 | 46.395 | 56.645 | 0.00 | 0.00 |
| ATOM | 4681 | HB3  | LEU | X | 311 | 33.611 | 47.030 | 57.223 | 0.00 | 0.00 |
| ATOM | 4682 | CG   | LEU | X | 311 | 35.210 | 48.130 | 58.020 | 0.00 | 0.00 |
| ATOM | 4683 | HG   | LEU | X | 311 | 36.268 | 48.108 | 58.282 | 0.00 | 0.00 |
| ATOM | 4684 | CD1  | LEU | X | 311 | 34.908 | 49.214 | 56.977 | 0.00 | 0.00 |
| ATOM | 4685 | HD11 | LEU | X | 311 | 35.310 | 50.172 | 57.306 | 0.00 | 0.00 |
| ATOM | 4686 | HD12 | LEU | X | 311 | 33.839 | 49.213 | 56.762 | 0.00 | 0.00 |
| ATOM | 4687 | HD13 | LEU | X | 311 | 35.577 | 48.984 | 56.147 | 0.00 | 0.00 |
| ATOM | 4688 | CD2  | LEU | X | 311 | 34.557 | 48.575 | 59.337 | 0.00 | 0.00 |
| ATOM | 4689 | HD21 | LEU | X | 311 | 34.719 | 47.816 | 60.103 | 0.00 | 0.00 |
| ATOM | 4690 | HD22 | LEU | X | 311 | 34.969 | 49.454 | 59.832 | 0.00 | 0.00 |
| ATOM | 4691 | HD23 | LEU | X | 311 | 33.478 | 48.707 | 59.254 | 0.00 | 0.00 |
| ATOM | 4692 | C    | LEU | X | 311 | 33.739 | 44.445 | 58.011 | 0.00 | 0.00 |
| ATOM | 4693 | O    | LEU | X | 311 | 32.458 | 44.624 | 58.044 | 0.00 | 0.00 |
| ATOM | 4694 | N    | ILE | X | 312 | 34.284 | 43.268 | 57.701 | 0.00 | 0.00 |
| ATOM | 4695 | H    | ILE | X | 312 | 35.290 | 43.212 | 57.632 | 0.00 | 0.00 |
| ATOM | 4696 | CA   | ILE | X | 312 | 33.563 | 42.021 | 57.325 | 0.00 | 0.00 |
| ATOM | 4697 | HA   | ILE | X | 312 | 32.663 | 42.362 | 56.812 | 0.00 | 0.00 |
| ATOM | 4698 | CB   | ILE | X | 312 | 34.441 | 41.076 | 56.466 | 0.00 | 0.00 |
| ATOM | 4699 | HB   | ILE | X | 312 | 34.958 | 41.712 | 55.747 | 0.00 | 0.00 |
| ATOM | 4700 | CG2  | ILE | X | 312 | 35.683 | 40.542 | 57.237 | 0.00 | 0.00 |
| ATOM | 4701 | HG21 | ILE | X | 312 | 36.026 | 41.274 | 57.968 | 0.00 | 0.00 |
| ATOM | 4702 | HG22 | ILE | X | 312 | 36.536 | 40.333 | 56.592 | 0.00 | 0.00 |
| ATOM | 4703 | HG23 | ILE | X | 312 | 35.392 | 39.610 | 57.721 | 0.00 | 0.00 |
| ATOM | 4704 | CG1  | ILE | X | 312 | 33.705 | 39.923 | 55.747 | 0.00 | 0.00 |
| ATOM | 4705 | HG12 | ILE | X | 312 | 34.501 | 39.272 | 55.385 | 0.00 | 0.00 |
| ATOM | 4706 | HG13 | ILE | X | 312 | 32.937 | 39.404 | 56.320 | 0.00 | 0.00 |
| ATOM | 4707 | CD1  | ILE | X | 312 | 33.025 | 40.459 | 54.440 | 0.00 | 0.00 |
| ATOM | 4708 | HD11 | ILE | X | 312 | 33.674 | 40.655 | 53.587 | 0.00 | 0.00 |
| ATOM | 4709 | HD12 | ILE | X | 312 | 32.364 | 41.321 | 54.531 | 0.00 | 0.00 |
| ATOM | 4710 | HD13 | ILE | X | 312 | 32.365 | 39.629 | 54.191 | 0.00 | 0.00 |
| ATOM | 4711 | C    | ILE | X | 312 | 33.083 | 41.312 | 58.586 | 0.00 | 0.00 |
| ATOM | 4712 | O    | ILE | X | 312 | 32.098 | 40.609 | 58.386 | 0.00 | 0.00 |
| ATOM | 4713 | N    | ASN | X | 313 | 33.654 | 41.512 | 59.786 | 0.00 | 0.00 |
| ATOM | 4714 | H    | ASN | X | 313 | 34.487 | 42.083 | 59.800 | 0.00 | 0.00 |
| ATOM | 4715 | CA   | ASN | X | 313 | 33.242 | 41.030 | 61.117 | 0.00 | 0.00 |
| ATOM | 4716 | HA   | ASN | X | 313 | 32.741 | 40.078 | 60.942 | 0.00 | 0.00 |
| ATOM | 4717 | CB   | ASN | X | 313 | 34.497 | 40.807 | 62.063 | 0.00 | 0.00 |
| ATOM | 4718 | HB2  | ASN | X | 313 | 35.292 | 40.238 | 61.581 | 0.00 | 0.00 |
| ATOM | 4719 | HB3  | ASN | X | 313 | 34.758 | 41.839 | 62.295 | 0.00 | 0.00 |
| ATOM | 4720 | CG   | ASN | X | 313 | 34.174 | 40.020 | 63.339 | 0.00 | 0.00 |
| ATOM | 4721 | OD1  | ASN | X | 313 | 33.082 | 39.503 | 63.545 | 0.00 | 0.00 |

|      |      |      |     |   |     |        |        |        |      |      |
|------|------|------|-----|---|-----|--------|--------|--------|------|------|
| ATOM | 4722 | ND2  | ASN | X | 313 | 35.221 | 39.767 | 64.123 | 0.00 | 0.00 |
| ATOM | 4723 | HD21 | ASN | X | 313 | 35.199 | 39.162 | 64.932 | 0.00 | 0.00 |
| ATOM | 4724 | HD22 | ASN | X | 313 | 36.093 | 40.205 | 63.865 | 0.00 | 0.00 |
| ATOM | 4725 | C    | ASN | X | 313 | 32.227 | 41.974 | 61.773 | 0.00 | 0.00 |
| ATOM | 4726 | O    | ASN | X | 313 | 31.224 | 41.506 | 62.335 | 0.00 | 0.00 |
| ATOM | 4727 | N    | ALA | X | 314 | 32.439 | 43.237 | 61.649 | 0.00 | 0.00 |
| ATOM | 4728 | H    | ALA | X | 314 | 33.407 | 43.412 | 61.418 | 0.00 | 0.00 |
| ATOM | 4729 | CA   | ALA | X | 314 | 31.616 | 44.299 | 62.179 | 0.00 | 0.00 |
| ATOM | 4730 | HA   | ALA | X | 314 | 31.047 | 44.010 | 63.063 | 0.00 | 0.00 |
| ATOM | 4731 | CB   | ALA | X | 314 | 32.564 | 45.435 | 62.504 | 0.00 | 0.00 |
| ATOM | 4732 | HB1  | ALA | X | 314 | 32.097 | 46.296 | 62.982 | 0.00 | 0.00 |
| ATOM | 4733 | HB2  | ALA | X | 314 | 33.076 | 45.730 | 61.589 | 0.00 | 0.00 |
| ATOM | 4734 | HB3  | ALA | X | 314 | 33.301 | 44.994 | 63.176 | 0.00 | 0.00 |
| ATOM | 4735 | C    | ALA | X | 314 | 30.549 | 44.766 | 61.247 | 0.00 | 0.00 |
| ATOM | 4736 | O    | ALA | X | 314 | 29.772 | 45.771 | 61.463 | 0.00 | 0.00 |
| ATOM | 4737 | N    | GLY | X | 315 | 30.358 | 44.023 | 60.142 | 0.00 | 0.00 |
| ATOM | 4738 | H    | GLY | X | 315 | 31.011 | 43.283 | 59.928 | 0.00 | 0.00 |
| ATOM | 4739 | CA   | GLY | X | 315 | 29.244 | 44.262 | 59.218 | 0.00 | 0.00 |
| ATOM | 4740 | HA2  | GLY | X | 315 | 28.649 | 45.158 | 59.394 | 0.00 | 0.00 |
| ATOM | 4741 | HA3  | GLY | X | 315 | 29.720 | 44.466 | 58.259 | 0.00 | 0.00 |
| ATOM | 4742 | C    | GLY | X | 315 | 28.294 | 43.089 | 58.990 | 0.00 | 0.00 |
| ATOM | 4743 | O    | GLY | X | 315 | 28.506 | 42.051 | 59.645 | 0.00 | 0.00 |
| ATOM | 4744 | N    | ASP | X | 316 | 27.254 | 43.331 | 58.155 | 0.00 | 0.00 |
| ATOM | 4745 | H    | ASP | X | 316 | 27.266 | 44.198 | 57.637 | 0.00 | 0.00 |
| ATOM | 4746 | CA   | ASP | X | 316 | 26.183 | 42.394 | 57.811 | 0.00 | 0.00 |
| ATOM | 4747 | HA   | ASP | X | 316 | 26.403 | 41.446 | 58.301 | 0.00 | 0.00 |
| ATOM | 4748 | CB   | ASP | X | 316 | 24.891 | 43.035 | 58.456 | 0.00 | 0.00 |
| ATOM | 4749 | HB2  | ASP | X | 316 | 24.945 | 43.046 | 59.545 | 0.00 | 0.00 |
| ATOM | 4750 | HB3  | ASP | X | 316 | 24.759 | 44.066 | 58.128 | 0.00 | 0.00 |
| ATOM | 4751 | CG   | ASP | X | 316 | 23.651 | 42.305 | 58.075 | 0.00 | 0.00 |
| ATOM | 4752 | OD1  | ASP | X | 316 | 22.711 | 42.914 | 57.563 | 0.00 | 0.00 |
| ATOM | 4753 | OD2  | ASP | X | 316 | 23.651 | 41.101 | 58.405 | 0.00 | 0.00 |
| ATOM | 4754 | C    | ASP | X | 316 | 26.009 | 42.099 | 56.347 | 0.00 | 0.00 |
| ATOM | 4755 | O    | ASP | X | 316 | 26.002 | 43.145 | 55.716 | 0.00 | 0.00 |
| ATOM | 4756 | N    | PHE | X | 317 | 25.825 | 40.840 | 55.908 | 0.00 | 0.00 |
| ATOM | 4757 | H    | PHE | X | 317 | 25.898 | 40.155 | 56.646 | 0.00 | 0.00 |
| ATOM | 4758 | CA   | PHE | X | 317 | 25.688 | 40.515 | 54.473 | 0.00 | 0.00 |
| ATOM | 4759 | HA   | PHE | X | 317 | 25.405 | 41.368 | 53.856 | 0.00 | 0.00 |
| ATOM | 4760 | CB   | PHE | X | 317 | 27.116 | 39.999 | 54.042 | 0.00 | 0.00 |
| ATOM | 4761 | HB2  | PHE | X | 317 | 27.206 | 38.996 | 54.461 | 0.00 | 0.00 |
| ATOM | 4762 | HB3  | PHE | X | 317 | 27.097 | 39.946 | 52.954 | 0.00 | 0.00 |
| ATOM | 4763 | CG   | PHE | X | 317 | 28.248 | 40.908 | 54.331 | 0.00 | 0.00 |
| ATOM | 4764 | CD1  | PHE | X | 317 | 28.551 | 41.935 | 53.401 | 0.00 | 0.00 |
| ATOM | 4765 | HD1  | PHE | X | 317 | 27.993 | 42.043 | 52.483 | 0.00 | 0.00 |
| ATOM | 4766 | CE1  | PHE | X | 317 | 29.655 | 42.738 | 53.693 | 0.00 | 0.00 |
| ATOM | 4767 | HE1  | PHE | X | 317 | 29.994 | 43.519 | 53.028 | 0.00 | 0.00 |
| ATOM | 4768 | CZ   | PHE | X | 317 | 30.291 | 42.677 | 54.940 | 0.00 | 0.00 |
| ATOM | 4769 | HZ   | PHE | X | 317 | 31.009 | 43.447 | 55.183 | 0.00 | 0.00 |
| ATOM | 4770 | CE2  | PHE | X | 317 | 29.990 | 41.631 | 55.836 | 0.00 | 0.00 |
| ATOM | 4771 | HE2  | PHE | X | 317 | 30.420 | 41.626 | 56.827 | 0.00 | 0.00 |
| ATOM | 4772 | CD2  | PHE | X | 317 | 28.914 | 40.769 | 55.546 | 0.00 | 0.00 |
| ATOM | 4773 | HD2  | PHE | X | 317 | 28.590 | 40.077 | 56.310 | 0.00 | 0.00 |
| ATOM | 4774 | C    | PHE | X | 317 | 24.573 | 39.450 | 54.134 | 0.00 | 0.00 |
| ATOM | 4775 | O    | PHE | X | 317 | 24.728 | 38.691 | 53.182 | 0.00 | 0.00 |
| ATOM | 4776 | N    | HIE | X | 318 | 23.536 | 39.319 | 54.947 | 0.00 | 0.00 |
| ATOM | 4777 | H    | HIE | X | 318 | 23.660 | 39.771 | 55.842 | 0.00 | 0.00 |
| ATOM | 4778 | CA   | HIE | X | 318 | 22.399 | 38.336 | 54.809 | 0.00 | 0.00 |
| ATOM | 4779 | HA   | HIE | X | 318 | 22.839 | 37.385 | 55.109 | 0.00 | 0.00 |
| ATOM | 4780 | CB   | HIE | X | 318 | 21.342 | 38.614 | 55.870 | 0.00 | 0.00 |
| ATOM | 4781 | HB2  | HIE | X | 318 | 21.778 | 38.979 | 56.800 | 0.00 | 0.00 |
| ATOM | 4782 | HB3  | HIE | X | 318 | 20.708 | 39.444 | 55.557 | 0.00 | 0.00 |
| ATOM | 4783 | CG   | HIE | X | 318 | 20.444 | 37.417 | 56.165 | 0.00 | 0.00 |
| ATOM | 4784 | ND1  | HIE | X | 318 | 20.836 | 36.126 | 56.458 | 0.00 | 0.00 |
| ATOM | 4785 | CE1  | HIE | X | 318 | 19.677 | 35.499 | 56.825 | 0.00 | 0.00 |
| ATOM | 4786 | HE1  | HIE | X | 318 | 19.638 | 34.443 | 57.045 | 0.00 | 0.00 |
| ATOM | 4787 | NE2  | HIE | X | 318 | 18.660 | 36.320 | 56.749 | 0.00 | 0.00 |
| ATOM | 4788 | HE2  | HIE | X | 318 | 17.707 | 35.996 | 56.833 | 0.00 | 0.00 |

|      |      |      |     |   |     |        |        |        |      |      |
|------|------|------|-----|---|-----|--------|--------|--------|------|------|
| ATOM | 4789 | CD2  | HIE | X | 318 | 19.084 | 37.516 | 56.262 | 0.00 | 0.00 |
| ATOM | 4790 | HD2  | HIE | X | 318 | 18.491 | 38.365 | 55.956 | 0.00 | 0.00 |
| ATOM | 4791 | C    | HIE | X | 318 | 21.755 | 38.224 | 53.428 | 0.00 | 0.00 |
| ATOM | 4792 | O    | HIE | X | 318 | 21.421 | 39.296 | 52.838 | 0.00 | 0.00 |
| ATOM | 4793 | N    | GLY | X | 319 | 21.401 | 37.008 | 52.978 | 0.00 | 0.00 |
| ATOM | 4794 | H    | GLY | X | 319 | 21.669 | 36.286 | 53.631 | 0.00 | 0.00 |
| ATOM | 4795 | CA   | GLY | X | 319 | 20.602 | 36.645 | 51.808 | 0.00 | 0.00 |
| ATOM | 4796 | HA2  | GLY | X | 319 | 20.321 | 35.593 | 51.843 | 0.00 | 0.00 |
| ATOM | 4797 | HA3  | GLY | X | 319 | 19.706 | 37.265 | 51.822 | 0.00 | 0.00 |
| ATOM | 4798 | C    | GLY | X | 319 | 21.249 | 36.987 | 50.423 | 0.00 | 0.00 |
| ATOM | 4799 | O    | GLY | X | 319 | 20.480 | 37.094 | 49.493 | 0.00 | 0.00 |
| ATOM | 4800 | N    | LEU | X | 320 | 22.554 | 37.236 | 50.401 | 0.00 | 0.00 |
| ATOM | 4801 | H    | LEU | X | 320 | 23.114 | 37.193 | 51.240 | 0.00 | 0.00 |
| ATOM | 4802 | CA   | LEU | X | 320 | 23.286 | 37.531 | 49.153 | 0.00 | 0.00 |
| ATOM | 4803 | HA   | LEU | X | 320 | 22.704 | 37.989 | 48.353 | 0.00 | 0.00 |
| ATOM | 4804 | CB   | LEU | X | 320 | 24.414 | 38.501 | 49.533 | 0.00 | 0.00 |
| ATOM | 4805 | HB2  | LEU | X | 320 | 25.026 | 37.923 | 50.225 | 0.00 | 0.00 |
| ATOM | 4806 | HB3  | LEU | X | 320 | 25.090 | 38.729 | 48.708 | 0.00 | 0.00 |
| ATOM | 4807 | CG   | LEU | X | 320 | 24.020 | 39.810 | 50.200 | 0.00 | 0.00 |
| ATOM | 4808 | HG   | LEU | X | 320 | 23.653 | 39.662 | 51.216 | 0.00 | 0.00 |
| ATOM | 4809 | CD1  | LEU | X | 320 | 25.353 | 40.588 | 50.421 | 0.00 | 0.00 |
| ATOM | 4810 | HD11 | LEU | X | 320 | 25.673 | 40.957 | 49.446 | 0.00 | 0.00 |
| ATOM | 4811 | HD12 | LEU | X | 320 | 26.029 | 39.855 | 50.860 | 0.00 | 0.00 |
| ATOM | 4812 | HD13 | LEU | X | 320 | 25.049 | 41.339 | 51.151 | 0.00 | 0.00 |
| ATOM | 4813 | CD2  | LEU | X | 320 | 23.193 | 40.822 | 49.410 | 0.00 | 0.00 |
| ATOM | 4814 | HD21 | LEU | X | 320 | 23.509 | 40.790 | 48.367 | 0.00 | 0.00 |
| ATOM | 4815 | HD22 | LEU | X | 320 | 22.143 | 40.541 | 49.493 | 0.00 | 0.00 |
| ATOM | 4816 | HD23 | LEU | X | 320 | 23.158 | 41.828 | 49.829 | 0.00 | 0.00 |
| ATOM | 4817 | C    | LEU | X | 320 | 23.889 | 36.298 | 48.432 | 0.00 | 0.00 |
| ATOM | 4818 | O    | LEU | X | 320 | 23.874 | 35.277 | 49.078 | 0.00 | 0.00 |
| ATOM | 4819 | N    | GLN | X | 321 | 24.271 | 36.385 | 47.132 | 0.00 | 0.00 |
| ATOM | 4820 | H    | GLN | X | 321 | 24.139 | 37.266 | 46.656 | 0.00 | 0.00 |
| ATOM | 4821 | CA   | GLN | X | 321 | 24.972 | 35.391 | 46.440 | 0.00 | 0.00 |
| ATOM | 4822 | HA   | GLN | X | 321 | 25.098 | 34.536 | 47.104 | 0.00 | 0.00 |
| ATOM | 4823 | CB   | GLN | X | 321 | 24.210 | 34.733 | 45.261 | 0.00 | 0.00 |
| ATOM | 4824 | HB2  | GLN | X | 321 | 24.137 | 35.528 | 44.518 | 0.00 | 0.00 |
| ATOM | 4825 | HB3  | GLN | X | 321 | 24.772 | 33.834 | 45.009 | 0.00 | 0.00 |
| ATOM | 4826 | CG   | GLN | X | 321 | 22.799 | 34.211 | 45.571 | 0.00 | 0.00 |
| ATOM | 4827 | HG2  | GLN | X | 321 | 22.627 | 33.448 | 44.811 | 0.00 | 0.00 |
| ATOM | 4828 | HG3  | GLN | X | 321 | 22.758 | 33.781 | 46.572 | 0.00 | 0.00 |
| ATOM | 4829 | CD   | GLN | X | 321 | 21.642 | 35.266 | 45.653 | 0.00 | 0.00 |
| ATOM | 4830 | OE1  | GLN | X | 321 | 21.552 | 36.164 | 44.860 | 0.00 | 0.00 |
| ATOM | 4831 | NE2  | GLN | X | 321 | 20.679 | 35.089 | 46.602 | 0.00 | 0.00 |
| ATOM | 4832 | HE21 | GLN | X | 321 | 19.829 | 35.632 | 46.548 | 0.00 | 0.00 |
| ATOM | 4833 | HE22 | GLN | X | 321 | 20.840 | 34.381 | 47.303 | 0.00 | 0.00 |
| ATOM | 4834 | C    | GLN | X | 321 | 26.389 | 35.876 | 45.989 | 0.00 | 0.00 |
| ATOM | 4835 | O    | GLN | X | 321 | 26.445 | 36.939 | 45.336 | 0.00 | 0.00 |
| ATOM | 4836 | N    | VAL | X | 322 | 27.432 | 35.128 | 46.299 | 0.00 | 0.00 |
| ATOM | 4837 | H    | VAL | X | 322 | 27.328 | 34.444 | 47.034 | 0.00 | 0.00 |
| ATOM | 4838 | CA   | VAL | X | 322 | 28.811 | 35.642 | 46.024 | 0.00 | 0.00 |
| ATOM | 4839 | HA   | VAL | X | 322 | 28.793 | 36.489 | 45.337 | 0.00 | 0.00 |
| ATOM | 4840 | CB   | VAL | X | 322 | 29.408 | 36.212 | 47.342 | 0.00 | 0.00 |
| ATOM | 4841 | HB   | VAL | X | 322 | 29.804 | 35.397 | 47.948 | 0.00 | 0.00 |
| ATOM | 4842 | CG1  | VAL | X | 322 | 30.629 | 37.113 | 47.117 | 0.00 | 0.00 |
| ATOM | 4843 | HG11 | VAL | X | 322 | 30.425 | 38.180 | 47.028 | 0.00 | 0.00 |
| ATOM | 4844 | HG12 | VAL | X | 322 | 31.169 | 36.932 | 48.047 | 0.00 | 0.00 |
| ATOM | 4845 | HG13 | VAL | X | 322 | 31.159 | 36.759 | 46.233 | 0.00 | 0.00 |
| ATOM | 4846 | CG2  | VAL | X | 322 | 28.434 | 36.917 | 48.308 | 0.00 | 0.00 |
| ATOM | 4847 | HG21 | VAL | X | 322 | 28.932 | 37.367 | 49.167 | 0.00 | 0.00 |
| ATOM | 4848 | HG22 | VAL | X | 322 | 27.623 | 36.255 | 48.613 | 0.00 | 0.00 |
| ATOM | 4849 | HG23 | VAL | X | 322 | 27.968 | 37.773 | 47.821 | 0.00 | 0.00 |
| ATOM | 4850 | C    | VAL | X | 322 | 29.712 | 34.485 | 45.466 | 0.00 | 0.00 |
| ATOM | 4851 | O    | VAL | X | 322 | 29.614 | 33.405 | 46.055 | 0.00 | 0.00 |
| ATOM | 4852 | N    | LEU | X | 323 | 30.556 | 34.598 | 44.434 | 0.00 | 0.00 |
| ATOM | 4853 | H    | LEU | X | 323 | 30.565 | 35.525 | 44.032 | 0.00 | 0.00 |
| ATOM | 4854 | CA   | LEU | X | 323 | 31.555 | 33.622 | 44.011 | 0.00 | 0.00 |
| ATOM | 4855 | HA   | LEU | X | 323 | 31.401 | 32.771 | 44.675 | 0.00 | 0.00 |

|      |      |      |     |   |     |        |        |        |      |      |
|------|------|------|-----|---|-----|--------|--------|--------|------|------|
| ATOM | 4856 | CB   | LEU | X | 323 | 31.262 | 33.205 | 42.546 | 0.00 | 0.00 |
| ATOM | 4857 | HB2  | LEU | X | 323 | 30.186 | 33.038 | 42.507 | 0.00 | 0.00 |
| ATOM | 4858 | HB3  | LEU | X | 323 | 31.522 | 33.973 | 41.817 | 0.00 | 0.00 |
| ATOM | 4859 | CG   | LEU | X | 323 | 31.763 | 31.825 | 42.089 | 0.00 | 0.00 |
| ATOM | 4860 | HG   | LEU | X | 323 | 31.640 | 31.080 | 42.875 | 0.00 | 0.00 |
| ATOM | 4861 | CD1  | LEU | X | 323 | 30.949 | 31.385 | 40.843 | 0.00 | 0.00 |
| ATOM | 4862 | HD11 | LEU | X | 323 | 31.159 | 30.354 | 40.559 | 0.00 | 0.00 |
| ATOM | 4863 | HD12 | LEU | X | 323 | 31.171 | 31.928 | 39.924 | 0.00 | 0.00 |
| ATOM | 4864 | HD13 | LEU | X | 323 | 29.911 | 31.324 | 41.170 | 0.00 | 0.00 |
| ATOM | 4865 | CD2  | LEU | X | 323 | 33.178 | 31.919 | 41.568 | 0.00 | 0.00 |
| ATOM | 4866 | HD21 | LEU | X | 323 | 33.759 | 32.246 | 42.430 | 0.00 | 0.00 |
| ATOM | 4867 | HD22 | LEU | X | 323 | 33.802 | 31.106 | 41.196 | 0.00 | 0.00 |
| ATOM | 4868 | HD23 | LEU | X | 323 | 33.181 | 32.693 | 40.800 | 0.00 | 0.00 |
| ATOM | 4869 | C    | LEU | X | 323 | 32.980 | 34.102 | 44.331 | 0.00 | 0.00 |
| ATOM | 4870 | O    | LEU | X | 323 | 33.122 | 35.339 | 44.366 | 0.00 | 0.00 |
| ATOM | 4871 | N    | VAL | X | 324 | 33.823 | 33.203 | 44.827 | 0.00 | 0.00 |
| ATOM | 4872 | H    | VAL | X | 324 | 33.605 | 32.224 | 44.711 | 0.00 | 0.00 |
| ATOM | 4873 | CA   | VAL | X | 324 | 35.214 | 33.567 | 45.158 | 0.00 | 0.00 |
| ATOM | 4874 | HA   | VAL | X | 324 | 35.598 | 34.480 | 44.704 | 0.00 | 0.00 |
| ATOM | 4875 | CB   | VAL | X | 324 | 35.555 | 33.744 | 46.679 | 0.00 | 0.00 |
| ATOM | 4876 | HB   | VAL | X | 324 | 36.588 | 34.071 | 46.799 | 0.00 | 0.00 |
| ATOM | 4877 | CG1  | VAL | X | 324 | 34.723 | 34.846 | 47.290 | 0.00 | 0.00 |
| ATOM | 4878 | HG11 | VAL | X | 324 | 33.653 | 34.639 | 47.315 | 0.00 | 0.00 |
| ATOM | 4879 | HG12 | VAL | X | 324 | 34.929 | 34.853 | 48.360 | 0.00 | 0.00 |
| ATOM | 4880 | HG13 | VAL | X | 324 | 34.960 | 35.825 | 46.873 | 0.00 | 0.00 |
| ATOM | 4881 | CG2  | VAL | X | 324 | 35.343 | 32.490 | 47.560 | 0.00 | 0.00 |
| ATOM | 4882 | HG21 | VAL | X | 324 | 36.056 | 31.684 | 47.384 | 0.00 | 0.00 |
| ATOM | 4883 | HG22 | VAL | X | 324 | 34.340 | 32.114 | 47.359 | 0.00 | 0.00 |
| ATOM | 4884 | HG23 | VAL | X | 324 | 35.497 | 32.747 | 48.608 | 0.00 | 0.00 |
| ATOM | 4885 | C    | VAL | X | 324 | 36.135 | 32.395 | 44.698 | 0.00 | 0.00 |
| ATOM | 4886 | O    | VAL | X | 324 | 35.637 | 31.319 | 44.388 | 0.00 | 0.00 |
| ATOM | 4887 | N    | GLY | X | 325 | 37.409 | 32.633 | 44.713 | 0.00 | 0.00 |
| ATOM | 4888 | H    | GLY | X | 325 | 37.768 | 33.550 | 44.939 | 0.00 | 0.00 |
| ATOM | 4889 | CA   | GLY | X | 325 | 38.485 | 31.621 | 44.705 | 0.00 | 0.00 |
| ATOM | 4890 | HA2  | GLY | X | 325 | 38.545 | 31.117 | 45.670 | 0.00 | 0.00 |
| ATOM | 4891 | HA3  | GLY | X | 325 | 38.187 | 30.884 | 43.961 | 0.00 | 0.00 |
| ATOM | 4892 | C    | GLY | X | 325 | 39.874 | 32.143 | 44.269 | 0.00 | 0.00 |
| ATOM | 4893 | O    | GLY | X | 325 | 40.167 | 33.338 | 44.326 | 0.00 | 0.00 |
| ATOM | 4894 | N    | VAL | X | 326 | 40.746 | 31.156 | 44.041 | 0.00 | 0.00 |
| ATOM | 4895 | H    | VAL | X | 326 | 40.426 | 30.200 | 43.971 | 0.00 | 0.00 |
| ATOM | 4896 | CA   | VAL | X | 326 | 42.168 | 31.438 | 43.922 | 0.00 | 0.00 |
| ATOM | 4897 | HA   | VAL | X | 326 | 42.510 | 32.433 | 43.636 | 0.00 | 0.00 |
| ATOM | 4898 | CB   | VAL | X | 326 | 42.857 | 31.214 | 45.384 | 0.00 | 0.00 |
| ATOM | 4899 | HB   | VAL | X | 326 | 43.911 | 31.327 | 45.128 | 0.00 | 0.00 |
| ATOM | 4900 | CG1  | VAL | X | 326 | 42.584 | 32.328 | 46.443 | 0.00 | 0.00 |
| ATOM | 4901 | HG11 | VAL | X | 326 | 43.376 | 32.233 | 47.185 | 0.00 | 0.00 |
| ATOM | 4902 | HG12 | VAL | X | 326 | 42.522 | 33.303 | 45.958 | 0.00 | 0.00 |
| ATOM | 4903 | HG13 | VAL | X | 326 | 41.619 | 32.168 | 46.923 | 0.00 | 0.00 |
| ATOM | 4904 | CG2  | VAL | X | 326 | 42.683 | 29.780 | 45.985 | 0.00 | 0.00 |
| ATOM | 4905 | HG21 | VAL | X | 326 | 43.409 | 29.124 | 45.504 | 0.00 | 0.00 |
| ATOM | 4906 | HG22 | VAL | X | 326 | 41.623 | 29.534 | 46.043 | 0.00 | 0.00 |
| ATOM | 4907 | HG23 | VAL | X | 326 | 42.853 | 29.922 | 47.052 | 0.00 | 0.00 |
| ATOM | 4908 | C    | VAL | X | 326 | 42.890 | 30.430 | 42.974 | 0.00 | 0.00 |
| ATOM | 4909 | O    | VAL | X | 326 | 42.202 | 29.406 | 42.657 | 0.00 | 0.00 |
| ATOM | 4910 | N    | VAL | X | 327 | 44.172 | 30.654 | 42.545 | 0.00 | 0.00 |
| ATOM | 4911 | H    | VAL | X | 327 | 44.779 | 31.383 | 42.893 | 0.00 | 0.00 |
| ATOM | 4912 | CA   | VAL | X | 327 | 44.900 | 29.644 | 41.757 | 0.00 | 0.00 |
| ATOM | 4913 | HA   | VAL | X | 327 | 44.143 | 29.040 | 41.257 | 0.00 | 0.00 |
| ATOM | 4914 | CB   | VAL | X | 327 | 45.819 | 30.253 | 40.717 | 0.00 | 0.00 |
| ATOM | 4915 | HB   | VAL | X | 327 | 46.078 | 29.487 | 39.985 | 0.00 | 0.00 |
| ATOM | 4916 | CG1  | VAL | X | 327 | 45.148 | 31.148 | 39.729 | 0.00 | 0.00 |
| ATOM | 4917 | HG11 | VAL | X | 327 | 44.734 | 32.053 | 40.172 | 0.00 | 0.00 |
| ATOM | 4918 | HG12 | VAL | X | 327 | 45.813 | 31.449 | 38.919 | 0.00 | 0.00 |
| ATOM | 4919 | HG13 | VAL | X | 327 | 44.307 | 30.589 | 39.320 | 0.00 | 0.00 |
| ATOM | 4920 | CG2  | VAL | X | 327 | 47.122 | 30.984 | 41.264 | 0.00 | 0.00 |
| ATOM | 4921 | HG21 | VAL | X | 327 | 47.041 | 31.993 | 41.668 | 0.00 | 0.00 |
| ATOM | 4922 | HG22 | VAL | X | 327 | 47.846 | 31.169 | 40.471 | 0.00 | 0.00 |

|      |      |      |     |   |     |        |        |        |      |      |
|------|------|------|-----|---|-----|--------|--------|--------|------|------|
| ATOM | 4923 | HG23 | VAL | X | 327 | 47.548 | 30.379 | 42.065 | 0.00 | 0.00 |
| ATOM | 4924 | C    | VAL | X | 327 | 45.776 | 28.789 | 42.663 | 0.00 | 0.00 |
| ATOM | 4925 | O    | VAL | X | 327 | 46.088 | 29.231 | 43.773 | 0.00 | 0.00 |
| ATOM | 4926 | N    | LYS | X | 328 | 46.068 | 27.576 | 42.257 | 0.00 | 0.00 |
| ATOM | 4927 | H    | LYS | X | 328 | 45.911 | 27.144 | 41.358 | 0.00 | 0.00 |
| ATOM | 4928 | CA   | LYS | X | 328 | 47.002 | 26.672 | 42.965 | 0.00 | 0.00 |
| ATOM | 4929 | HA   | LYS | X | 328 | 46.445 | 26.471 | 43.880 | 0.00 | 0.00 |
| ATOM | 4930 | CB   | LYS | X | 328 | 47.271 | 25.473 | 42.075 | 0.00 | 0.00 |
| ATOM | 4931 | HB2  | LYS | X | 328 | 46.370 | 25.094 | 41.592 | 0.00 | 0.00 |
| ATOM | 4932 | HB3  | LYS | X | 328 | 47.761 | 25.739 | 41.138 | 0.00 | 0.00 |
| ATOM | 4933 | CG   | LYS | X | 328 | 48.017 | 24.224 | 42.697 | 0.00 | 0.00 |
| ATOM | 4934 | HG2  | LYS | X | 328 | 49.019 | 24.610 | 42.881 | 0.00 | 0.00 |
| ATOM | 4935 | HG3  | LYS | X | 328 | 47.456 | 24.017 | 43.608 | 0.00 | 0.00 |
| ATOM | 4936 | CD   | LYS | X | 328 | 48.082 | 22.968 | 41.807 | 0.00 | 0.00 |
| ATOM | 4937 | HD2  | LYS | X | 328 | 48.584 | 22.223 | 42.423 | 0.00 | 0.00 |
| ATOM | 4938 | HD3  | LYS | X | 328 | 47.054 | 22.662 | 41.610 | 0.00 | 0.00 |
| ATOM | 4939 | CE   | LYS | X | 328 | 48.844 | 23.072 | 40.392 | 0.00 | 0.00 |
| ATOM | 4940 | HE2  | LYS | X | 328 | 48.565 | 22.246 | 39.739 | 0.00 | 0.00 |
| ATOM | 4941 | HE3  | LYS | X | 328 | 48.777 | 24.046 | 39.907 | 0.00 | 0.00 |
| ATOM | 4942 | NZ   | LYS | X | 328 | 50.360 | 22.978 | 40.644 | 0.00 | 0.00 |
| ATOM | 4943 | HZ1  | LYS | X | 328 | 50.782 | 22.779 | 39.749 | 0.00 | 0.00 |
| ATOM | 4944 | HZ2  | LYS | X | 328 | 50.641 | 23.800 | 41.160 | 0.00 | 0.00 |
| ATOM | 4945 | HZ3  | LYS | X | 328 | 50.662 | 22.142 | 41.125 | 0.00 | 0.00 |
| ATOM | 4946 | C    | LYS | X | 328 | 48.335 | 27.320 | 43.464 | 0.00 | 0.00 |
| ATOM | 4947 | O    | LYS | X | 328 | 48.720 | 26.903 | 44.589 | 0.00 | 0.00 |
| ATOM | 4948 | N    | ASP | X | 329 | 49.048 | 28.091 | 42.727 | 0.00 | 0.00 |
| ATOM | 4949 | H    | ASP | X | 329 | 48.758 | 28.286 | 41.780 | 0.00 | 0.00 |
| ATOM | 4950 | CA   | ASP | X | 329 | 50.360 | 28.576 | 43.052 | 0.00 | 0.00 |
| ATOM | 4951 | HA   | ASP | X | 329 | 50.695 | 28.202 | 44.020 | 0.00 | 0.00 |
| ATOM | 4952 | CB   | ASP | X | 329 | 51.349 | 27.812 | 42.116 | 0.00 | 0.00 |
| ATOM | 4953 | HB2  | ASP | X | 329 | 51.357 | 28.207 | 41.101 | 0.00 | 0.00 |
| ATOM | 4954 | HB3  | ASP | X | 329 | 52.324 | 27.834 | 42.605 | 0.00 | 0.00 |
| ATOM | 4955 | CG   | ASP | X | 329 | 51.139 | 26.300 | 41.961 | 0.00 | 0.00 |
| ATOM | 4956 | OD1  | ASP | X | 329 | 51.531 | 25.492 | 42.813 | 0.00 | 0.00 |
| ATOM | 4957 | OD2  | ASP | X | 329 | 50.501 | 25.855 | 40.977 | 0.00 | 0.00 |
| ATOM | 4958 | C    | ASP | X | 329 | 50.541 | 30.147 | 42.970 | 0.00 | 0.00 |
| ATOM | 4959 | O    | ASP | X | 329 | 51.507 | 30.642 | 42.347 | 0.00 | 0.00 |
| ATOM | 4960 | N    | GLU | X | 330 | 49.593 | 30.810 | 43.588 | 0.00 | 0.00 |
| ATOM | 4961 | H    | GLU | X | 330 | 48.928 | 30.207 | 44.050 | 0.00 | 0.00 |
| ATOM | 4962 | CA   | GLU | X | 330 | 49.545 | 32.259 | 43.694 | 0.00 | 0.00 |
| ATOM | 4963 | HA   | GLU | X | 330 | 49.072 | 32.522 | 42.748 | 0.00 | 0.00 |
| ATOM | 4964 | CB   | GLU | X | 330 | 48.813 | 32.668 | 45.003 | 0.00 | 0.00 |
| ATOM | 4965 | HB2  | GLU | X | 330 | 49.126 | 32.180 | 45.926 | 0.00 | 0.00 |
| ATOM | 4966 | HB3  | GLU | X | 330 | 48.966 | 33.746 | 45.057 | 0.00 | 0.00 |
| ATOM | 4967 | CG   | GLU | X | 330 | 47.345 | 32.451 | 44.936 | 0.00 | 0.00 |
| ATOM | 4968 | HG2  | GLU | X | 330 | 47.032 | 31.469 | 44.582 | 0.00 | 0.00 |
| ATOM | 4969 | HG3  | GLU | X | 330 | 46.924 | 32.480 | 45.941 | 0.00 | 0.00 |
| ATOM | 4970 | CD   | GLU | X | 330 | 46.532 | 33.418 | 44.035 | 0.00 | 0.00 |
| ATOM | 4971 | OE1  | GLU | X | 330 | 46.968 | 34.601 | 43.980 | 0.00 | 0.00 |
| ATOM | 4972 | OE2  | GLU | X | 330 | 45.492 | 32.963 | 43.434 | 0.00 | 0.00 |
| ATOM | 4973 | C    | GLU | X | 330 | 50.816 | 33.089 | 43.670 | 0.00 | 0.00 |
| ATOM | 4974 | O    | GLU | X | 330 | 51.037 | 33.926 | 42.737 | 0.00 | 0.00 |
| ATOM | 4975 | N    | GLY | X | 331 | 51.740 | 32.833 | 44.623 | 0.00 | 0.00 |
| ATOM | 4976 | H    | GLY | X | 331 | 51.634 | 32.098 | 45.307 | 0.00 | 0.00 |
| ATOM | 4977 | CA   | GLY | X | 331 | 52.859 | 33.667 | 44.899 | 0.00 | 0.00 |
| ATOM | 4978 | HA2  | GLY | X | 331 | 52.544 | 34.707 | 44.817 | 0.00 | 0.00 |
| ATOM | 4979 | HA3  | GLY | X | 331 | 53.272 | 33.529 | 45.898 | 0.00 | 0.00 |
| ATOM | 4980 | C    | GLY | X | 331 | 53.996 | 33.569 | 43.896 | 0.00 | 0.00 |
| ATOM | 4981 | O    | GLY | X | 331 | 54.972 | 34.367 | 43.875 | 0.00 | 0.00 |
| ATOM | 4982 | N    | SER | X | 332 | 53.990 | 32.621 | 43.000 | 0.00 | 0.00 |
| ATOM | 4983 | H    | SER | X | 332 | 53.310 | 31.877 | 43.067 | 0.00 | 0.00 |
| ATOM | 4984 | CA   | SER | X | 332 | 54.935 | 32.466 | 41.897 | 0.00 | 0.00 |
| ATOM | 4985 | HA   | SER | X | 332 | 55.927 | 32.223 | 42.278 | 0.00 | 0.00 |
| ATOM | 4986 | CB   | SER | X | 332 | 54.538 | 31.314 | 40.977 | 0.00 | 0.00 |
| ATOM | 4987 | HB2  | SER | X | 332 | 53.571 | 31.524 | 40.518 | 0.00 | 0.00 |
| ATOM | 4988 | HB3  | SER | X | 332 | 55.238 | 31.338 | 40.142 | 0.00 | 0.00 |
| ATOM | 4989 | OG   | SER | X | 332 | 54.376 | 30.101 | 41.726 | 0.00 | 0.00 |

|      |      |      |     |   |     |        |        |        |      |      |
|------|------|------|-----|---|-----|--------|--------|--------|------|------|
| ATOM | 4990 | HG   | SER | X | 332 | 53.894 | 29.459 | 41.200 | 0.00 | 0.00 |
| ATOM | 4991 | C    | SER | X | 332 | 54.933 | 33.741 | 41.032 | 0.00 | 0.00 |
| ATOM | 4992 | O    | SER | X | 332 | 56.000 | 34.142 | 40.566 | 0.00 | 0.00 |
| ATOM | 4993 | N    | TYR | X | 333 | 53.796 | 34.432 | 40.852 | 0.00 | 0.00 |
| ATOM | 4994 | H    | TYR | X | 333 | 52.939 | 34.111 | 41.279 | 0.00 | 0.00 |
| ATOM | 4995 | CA   | TYR | X | 333 | 53.801 | 35.647 | 40.018 | 0.00 | 0.00 |
| ATOM | 4996 | HA   | TYR | X | 333 | 54.251 | 35.506 | 39.035 | 0.00 | 0.00 |
| ATOM | 4997 | CB   | TYR | X | 333 | 52.333 | 36.059 | 39.819 | 0.00 | 0.00 |
| ATOM | 4998 | HB2  | TYR | X | 333 | 51.751 | 35.241 | 39.393 | 0.00 | 0.00 |
| ATOM | 4999 | HB3  | TYR | X | 333 | 52.039 | 36.324 | 40.835 | 0.00 | 0.00 |
| ATOM | 5000 | CG   | TYR | X | 333 | 52.092 | 37.251 | 38.902 | 0.00 | 0.00 |
| ATOM | 5001 | CD1  | TYR | X | 333 | 52.016 | 37.159 | 37.515 | 0.00 | 0.00 |
| ATOM | 5002 | HD1  | TYR | X | 333 | 52.132 | 36.226 | 36.985 | 0.00 | 0.00 |
| ATOM | 5003 | CE1  | TYR | X | 333 | 51.812 | 38.331 | 36.718 | 0.00 | 0.00 |
| ATOM | 5004 | HE1  | TYR | X | 333 | 51.931 | 38.257 | 35.647 | 0.00 | 0.00 |
| ATOM | 5005 | CZ   | TYR | X | 333 | 51.750 | 39.598 | 37.350 | 0.00 | 0.00 |
| ATOM | 5006 | OH   | TYR | X | 333 | 51.562 | 40.742 | 36.701 | 0.00 | 0.00 |
| ATOM | 5007 | HH   | TYR | X | 333 | 51.890 | 40.655 | 35.803 | 0.00 | 0.00 |
| ATOM | 5008 | CE2  | TYR | X | 333 | 51.648 | 39.573 | 38.729 | 0.00 | 0.00 |
| ATOM | 5009 | HE2  | TYR | X | 333 | 51.458 | 40.544 | 39.161 | 0.00 | 0.00 |
| ATOM | 5010 | CD2  | TYR | X | 333 | 51.717 | 38.473 | 39.529 | 0.00 | 0.00 |
| ATOM | 5011 | HD2  | TYR | X | 333 | 51.691 | 38.511 | 40.608 | 0.00 | 0.00 |
| ATOM | 5012 | C    | TYR | X | 333 | 54.696 | 36.880 | 40.516 | 0.00 | 0.00 |
| ATOM | 5013 | O    | TYR | X | 333 | 55.110 | 37.601 | 39.680 | 0.00 | 0.00 |
| ATOM | 5014 | N    | PHE | X | 334 | 55.015 | 37.052 | 41.787 | 0.00 | 0.00 |
| ATOM | 5015 | H    | PHE | X | 334 | 54.702 | 36.317 | 42.406 | 0.00 | 0.00 |
| ATOM | 5016 | CA   | PHE | X | 334 | 55.860 | 38.181 | 42.257 | 0.00 | 0.00 |
| ATOM | 5017 | HA   | PHE | X | 334 | 56.010 | 38.906 | 41.456 | 0.00 | 0.00 |
| ATOM | 5018 | CB   | PHE | X | 334 | 55.167 | 38.939 | 43.343 | 0.00 | 0.00 |
| ATOM | 5019 | HB2  | PHE | X | 334 | 55.096 | 38.416 | 44.297 | 0.00 | 0.00 |
| ATOM | 5020 | HB3  | PHE | X | 334 | 55.751 | 39.800 | 43.668 | 0.00 | 0.00 |
| ATOM | 5021 | CG   | PHE | X | 334 | 53.844 | 39.525 | 42.984 | 0.00 | 0.00 |
| ATOM | 5022 | CD1  | PHE | X | 334 | 52.602 | 38.884 | 43.266 | 0.00 | 0.00 |
| ATOM | 5023 | HD1  | PHE | X | 334 | 52.596 | 37.875 | 43.650 | 0.00 | 0.00 |
| ATOM | 5024 | CE1  | PHE | X | 334 | 51.378 | 39.534 | 43.028 | 0.00 | 0.00 |
| ATOM | 5025 | HE1  | PHE | X | 334 | 50.489 | 38.923 | 42.994 | 0.00 | 0.00 |
| ATOM | 5026 | CZ   | PHE | X | 334 | 51.316 | 40.840 | 42.496 | 0.00 | 0.00 |
| ATOM | 5027 | HZ   | PHE | X | 334 | 50.379 | 41.373 | 42.421 | 0.00 | 0.00 |
| ATOM | 5028 | CE2  | PHE | X | 334 | 52.562 | 41.415 | 42.122 | 0.00 | 0.00 |
| ATOM | 5029 | HE2  | PHE | X | 334 | 52.526 | 42.433 | 41.763 | 0.00 | 0.00 |
| ATOM | 5030 | CD2  | PHE | X | 334 | 53.814 | 40.782 | 42.329 | 0.00 | 0.00 |
| ATOM | 5031 | HD2  | PHE | X | 334 | 54.670 | 41.333 | 41.968 | 0.00 | 0.00 |
| ATOM | 5032 | C    | PHE | X | 334 | 57.274 | 37.755 | 42.630 | 0.00 | 0.00 |
| ATOM | 5033 | O    | PHE | X | 334 | 58.118 | 38.587 | 43.016 | 0.00 | 0.00 |
| ATOM | 5034 | N    | LEU | X | 335 | 57.748 | 36.529 | 42.290 | 0.00 | 0.00 |
| ATOM | 5035 | H    | LEU | X | 335 | 57.063 | 35.804 | 42.128 | 0.00 | 0.00 |
| ATOM | 5036 | CA   | LEU | X | 335 | 59.132 | 36.077 | 42.605 | 0.00 | 0.00 |
| ATOM | 5037 | HA   | LEU | X | 335 | 59.312 | 36.358 | 43.643 | 0.00 | 0.00 |
| ATOM | 5038 | CB   | LEU | X | 335 | 59.172 | 34.594 | 42.501 | 0.00 | 0.00 |
| ATOM | 5039 | HB2  | LEU | X | 335 | 58.869 | 34.336 | 41.486 | 0.00 | 0.00 |
| ATOM | 5040 | HB3  | LEU | X | 335 | 60.186 | 34.195 | 42.501 | 0.00 | 0.00 |
| ATOM | 5041 | CG   | LEU | X | 335 | 58.235 | 33.704 | 43.369 | 0.00 | 0.00 |
| ATOM | 5042 | HG   | LEU | X | 335 | 57.248 | 33.950 | 42.977 | 0.00 | 0.00 |
| ATOM | 5043 | CD1  | LEU | X | 335 | 58.507 | 32.194 | 43.400 | 0.00 | 0.00 |
| ATOM | 5044 | HD11 | LEU | X | 335 | 58.669 | 31.777 | 42.406 | 0.00 | 0.00 |
| ATOM | 5045 | HD12 | LEU | X | 335 | 57.687 | 31.729 | 43.947 | 0.00 | 0.00 |
| ATOM | 5046 | HD13 | LEU | X | 335 | 59.454 | 31.926 | 43.869 | 0.00 | 0.00 |
| ATOM | 5047 | CD2  | LEU | X | 335 | 58.276 | 34.314 | 44.822 | 0.00 | 0.00 |
| ATOM | 5048 | HD21 | LEU | X | 335 | 57.793 | 35.290 | 44.787 | 0.00 | 0.00 |
| ATOM | 5049 | HD22 | LEU | X | 335 | 57.661 | 33.744 | 45.520 | 0.00 | 0.00 |
| ATOM | 5050 | HD23 | LEU | X | 335 | 59.279 | 34.514 | 45.197 | 0.00 | 0.00 |
| ATOM | 5051 | C    | LEU | X | 335 | 60.264 | 36.732 | 41.760 | 0.00 | 0.00 |
| ATOM | 5052 | O    | LEU | X | 335 | 61.234 | 37.146 | 42.437 | 0.00 | 0.00 |
| ATOM | 5053 | N    | VAL | X | 336 | 60.047 | 36.915 | 40.467 | 0.00 | 0.00 |
| ATOM | 5054 | H    | VAL | X | 336 | 59.173 | 36.539 | 40.130 | 0.00 | 0.00 |
| ATOM | 5055 | CA   | VAL | X | 336 | 61.016 | 37.606 | 39.596 | 0.00 | 0.00 |
| ATOM | 5056 | HA   | VAL | X | 336 | 61.954 | 37.095 | 39.812 | 0.00 | 0.00 |

|      |      |      |     |   |     |        |        |        |      |      |
|------|------|------|-----|---|-----|--------|--------|--------|------|------|
| ATOM | 5057 | CB   | VAL | X | 336 | 60.712 | 37.288 | 38.066 | 0.00 | 0.00 |
| ATOM | 5058 | HB   | VAL | X | 336 | 61.596 | 37.553 | 37.486 | 0.00 | 0.00 |
| ATOM | 5059 | CG1  | VAL | X | 336 | 60.478 | 35.771 | 37.815 | 0.00 | 0.00 |
| ATOM | 5060 | HG11 | VAL | X | 336 | 59.831 | 35.367 | 38.593 | 0.00 | 0.00 |
| ATOM | 5061 | HG12 | VAL | X | 336 | 60.088 | 35.530 | 36.826 | 0.00 | 0.00 |
| ATOM | 5062 | HG13 | VAL | X | 336 | 61.448 | 35.277 | 37.867 | 0.00 | 0.00 |
| ATOM | 5063 | CG2  | VAL | X | 336 | 59.542 | 38.095 | 37.426 | 0.00 | 0.00 |
| ATOM | 5064 | HG21 | VAL | X | 336 | 58.598 | 37.810 | 37.890 | 0.00 | 0.00 |
| ATOM | 5065 | HG22 | VAL | X | 336 | 59.526 | 37.822 | 36.371 | 0.00 | 0.00 |
| ATOM | 5066 | HG23 | VAL | X | 336 | 59.830 | 39.143 | 37.507 | 0.00 | 0.00 |
| ATOM | 5067 | C    | VAL | X | 336 | 61.216 | 39.061 | 39.820 | 0.00 | 0.00 |
| ATOM | 5068 | O    | VAL | X | 336 | 62.309 | 39.609 | 39.666 | 0.00 | 0.00 |
| ATOM | 5069 | N    | TYR | X | 337 | 60.126 | 39.685 | 40.220 | 0.00 | 0.00 |
| ATOM | 5070 | H    | TYR | X | 337 | 59.284 | 39.137 | 40.324 | 0.00 | 0.00 |
| ATOM | 5071 | CA   | TYR | X | 337 | 60.165 | 41.135 | 40.675 | 0.00 | 0.00 |
| ATOM | 5072 | HA   | TYR | X | 337 | 60.859 | 41.628 | 39.995 | 0.00 | 0.00 |
| ATOM | 5073 | CB   | TYR | X | 337 | 58.754 | 41.697 | 40.373 | 0.00 | 0.00 |
| ATOM | 5074 | HB2  | TYR | X | 337 | 58.007 | 41.274 | 41.045 | 0.00 | 0.00 |
| ATOM | 5075 | HB3  | TYR | X | 337 | 58.880 | 42.743 | 40.651 | 0.00 | 0.00 |
| ATOM | 5076 | CG   | TYR | X | 337 | 58.236 | 41.636 | 38.993 | 0.00 | 0.00 |
| ATOM | 5077 | CD1  | TYR | X | 337 | 58.632 | 42.521 | 38.004 | 0.00 | 0.00 |
| ATOM | 5078 | HD1  | TYR | X | 337 | 59.400 | 43.265 | 38.151 | 0.00 | 0.00 |
| ATOM | 5079 | CE1  | TYR | X | 337 | 58.138 | 42.430 | 36.684 | 0.00 | 0.00 |
| ATOM | 5080 | HE1  | TYR | X | 337 | 58.495 | 43.058 | 35.882 | 0.00 | 0.00 |
| ATOM | 5081 | CZ   | TYR | X | 337 | 57.228 | 41.375 | 36.377 | 0.00 | 0.00 |
| ATOM | 5082 | OH   | TYR | X | 337 | 56.718 | 41.252 | 35.148 | 0.00 | 0.00 |
| ATOM | 5083 | HH   | TYR | X | 337 | 57.120 | 41.863 | 34.526 | 0.00 | 0.00 |
| ATOM | 5084 | CE2  | TYR | X | 337 | 56.801 | 40.481 | 37.349 | 0.00 | 0.00 |
| ATOM | 5085 | HE2  | TYR | X | 337 | 55.987 | 39.791 | 37.181 | 0.00 | 0.00 |
| ATOM | 5086 | CD2  | TYR | X | 337 | 57.302 | 40.668 | 38.666 | 0.00 | 0.00 |
| ATOM | 5087 | HD2  | TYR | X | 337 | 56.848 | 40.073 | 39.445 | 0.00 | 0.00 |
| ATOM | 5088 | C    | TYR | X | 337 | 60.531 | 41.344 | 42.148 | 0.00 | 0.00 |
| ATOM | 5089 | O    | TYR | X | 337 | 61.018 | 42.418 | 42.464 | 0.00 | 0.00 |
| ATOM | 5090 | N    | GLY | X | 338 | 60.253 | 40.321 | 42.957 | 0.00 | 0.00 |
| ATOM | 5091 | H    | GLY | X | 338 | 59.991 | 39.444 | 42.528 | 0.00 | 0.00 |
| ATOM | 5092 | CA   | GLY | X | 338 | 60.284 | 40.552 | 44.423 | 0.00 | 0.00 |
| ATOM | 5093 | HA2  | GLY | X | 338 | 60.390 | 41.625 | 44.586 | 0.00 | 0.00 |
| ATOM | 5094 | HA3  | GLY | X | 338 | 59.318 | 40.177 | 44.759 | 0.00 | 0.00 |
| ATOM | 5095 | C    | GLY | X | 338 | 61.440 | 39.907 | 45.259 | 0.00 | 0.00 |
| ATOM | 5096 | O    | GLY | X | 338 | 61.726 | 40.332 | 46.303 | 0.00 | 0.00 |
| ATOM | 5097 | N    | ALA | X | 339 | 62.070 | 38.924 | 44.643 | 0.00 | 0.00 |
| ATOM | 5098 | H    | ALA | X | 339 | 61.771 | 38.766 | 43.691 | 0.00 | 0.00 |
| ATOM | 5099 | CA   | ALA | X | 339 | 62.933 | 37.949 | 45.317 | 0.00 | 0.00 |
| ATOM | 5100 | HA   | ALA | X | 339 | 63.135 | 38.285 | 46.334 | 0.00 | 0.00 |
| ATOM | 5101 | CB   | ALA | X | 339 | 62.325 | 36.593 | 45.386 | 0.00 | 0.00 |
| ATOM | 5102 | HB1  | ALA | X | 339 | 61.271 | 36.821 | 45.543 | 0.00 | 0.00 |
| ATOM | 5103 | HB2  | ALA | X | 339 | 62.732 | 35.920 | 46.141 | 0.00 | 0.00 |
| ATOM | 5104 | HB3  | ALA | X | 339 | 62.539 | 36.120 | 44.428 | 0.00 | 0.00 |
| ATOM | 5105 | C    | ALA | X | 339 | 64.377 | 37.821 | 44.629 | 0.00 | 0.00 |
| ATOM | 5106 | O    | ALA | X | 339 | 64.466 | 37.707 | 43.397 | 0.00 | 0.00 |
| ATOM | 5107 | N    | PRO | X | 340 | 65.422 | 37.852 | 45.485 | 0.00 | 0.00 |
| ATOM | 5108 | CD   | PRO | X | 340 | 65.416 | 37.841 | 46.949 | 0.00 | 0.00 |
| ATOM | 5109 | HD2  | PRO | X | 340 | 64.949 | 36.953 | 47.377 | 0.00 | 0.00 |
| ATOM | 5110 | HD3  | PRO | X | 340 | 64.920 | 38.740 | 47.314 | 0.00 | 0.00 |
| ATOM | 5111 | CG   | PRO | X | 340 | 66.870 | 37.864 | 47.370 | 0.00 | 0.00 |
| ATOM | 5112 | HG2  | PRO | X | 340 | 67.210 | 36.864 | 47.640 | 0.00 | 0.00 |
| ATOM | 5113 | HG3  | PRO | X | 340 | 66.957 | 38.590 | 48.178 | 0.00 | 0.00 |
| ATOM | 5114 | CB   | PRO | X | 340 | 67.691 | 38.318 | 46.156 | 0.00 | 0.00 |
| ATOM | 5115 | HB2  | PRO | X | 340 | 68.702 | 37.921 | 46.243 | 0.00 | 0.00 |
| ATOM | 5116 | HB3  | PRO | X | 340 | 67.645 | 39.401 | 46.278 | 0.00 | 0.00 |
| ATOM | 5117 | CA   | PRO | X | 340 | 66.768 | 37.909 | 44.978 | 0.00 | 0.00 |
| ATOM | 5118 | HA   | PRO | X | 340 | 66.783 | 38.727 | 44.258 | 0.00 | 0.00 |
| ATOM | 5119 | C    | PRO | X | 340 | 67.245 | 36.649 | 44.261 | 0.00 | 0.00 |
| ATOM | 5120 | O    | PRO | X | 340 | 67.209 | 35.600 | 44.925 | 0.00 | 0.00 |
| ATOM | 5121 | N    | GLY | X | 341 | 67.832 | 36.678 | 43.035 | 0.00 | 0.00 |
| ATOM | 5122 | H    | GLY | X | 341 | 67.888 | 37.503 | 42.454 | 0.00 | 0.00 |
| ATOM | 5123 | CA   | GLY | X | 341 | 68.278 | 35.489 | 42.308 | 0.00 | 0.00 |



|      |      |     |     |   |     |        |        |        |      |      |
|------|------|-----|-----|---|-----|--------|--------|--------|------|------|
| ATOM | 5124 | HA2 | GLY | X | 341 | 69.165 | 35.641 | 41.692 | 0.00 | 0.00 |
| ATOM | 5125 | HA3 | GLY | X | 341 | 68.644 | 34.764 | 43.035 | 0.00 | 0.00 |
| ATOM | 5126 | C   | GLY | X | 341 | 67.196 | 34.844 | 41.413 | 0.00 | 0.00 |
| ATOM | 5127 | O   | GLY | X | 341 | 67.500 | 33.793 | 40.849 | 0.00 | 0.00 |
| ATOM | 5128 | N   | PHE | X | 342 | 66.038 | 35.447 | 41.275 | 0.00 | 0.00 |
| ATOM | 5129 | H   | PHE | X | 342 | 65.847 | 36.283 | 41.810 | 0.00 | 0.00 |
| ATOM | 5130 | CA  | PHE | X | 342 | 64.939 | 35.047 | 40.382 | 0.00 | 0.00 |
| ATOM | 5131 | HA  | PHE | X | 342 | 65.107 | 33.997 | 40.144 | 0.00 | 0.00 |
| ATOM | 5132 | CB  | PHE | X | 342 | 63.594 | 35.187 | 41.107 | 0.00 | 0.00 |
| ATOM | 5133 | HB2 | PHE | X | 342 | 63.556 | 36.180 | 41.556 | 0.00 | 0.00 |
| ATOM | 5134 | HB3 | PHE | X | 342 | 62.835 | 35.149 | 40.326 | 0.00 | 0.00 |
| ATOM | 5135 | CG  | PHE | X | 342 | 63.338 | 34.129 | 42.162 | 0.00 | 0.00 |
| ATOM | 5136 | CD1 | PHE | X | 342 | 62.383 | 33.102 | 41.905 | 0.00 | 0.00 |
| ATOM | 5137 | HD1 | PHE | X | 342 | 61.855 | 33.057 | 40.964 | 0.00 | 0.00 |
| ATOM | 5138 | CE1 | PHE | X | 342 | 62.180 | 32.076 | 42.847 | 0.00 | 0.00 |
| ATOM | 5139 | HE1 | PHE | X | 342 | 61.616 | 31.205 | 42.550 | 0.00 | 0.00 |
| ATOM | 5140 | CZ  | PHE | X | 342 | 62.832 | 32.056 | 44.068 | 0.00 | 0.00 |
| ATOM | 5141 | HZ  | PHE | X | 342 | 62.780 | 31.154 | 44.660 | 0.00 | 0.00 |
| ATOM | 5142 | CE2 | PHE | X | 342 | 63.626 | 33.179 | 44.466 | 0.00 | 0.00 |
| ATOM | 5143 | HE2 | PHE | X | 342 | 64.211 | 33.154 | 45.374 | 0.00 | 0.00 |
| ATOM | 5144 | CD2 | PHE | X | 342 | 63.818 | 34.210 | 43.486 | 0.00 | 0.00 |
| ATOM | 5145 | HD2 | PHE | X | 342 | 64.468 | 35.025 | 43.771 | 0.00 | 0.00 |
| ATOM | 5146 | C   | PHE | X | 342 | 64.926 | 35.851 | 39.051 | 0.00 | 0.00 |
| ATOM | 5147 | O   | PHE | X | 342 | 65.445 | 36.907 | 38.943 | 0.00 | 0.00 |
| ATOM | 5148 | N   | SER | X | 343 | 64.388 | 35.213 | 37.999 | 0.00 | 0.00 |
| ATOM | 5149 | H   | SER | X | 343 | 64.123 | 34.239 | 38.045 | 0.00 | 0.00 |
| ATOM | 5150 | CA  | SER | X | 343 | 64.144 | 35.730 | 36.626 | 0.00 | 0.00 |
| ATOM | 5151 | HA  | SER | X | 343 | 63.793 | 36.758 | 36.712 | 0.00 | 0.00 |
| ATOM | 5152 | CB  | SER | X | 343 | 65.512 | 35.828 | 35.905 | 0.00 | 0.00 |
| ATOM | 5153 | HB2 | SER | X | 343 | 65.879 | 34.802 | 35.875 | 0.00 | 0.00 |
| ATOM | 5154 | HB3 | SER | X | 343 | 65.281 | 36.287 | 34.944 | 0.00 | 0.00 |
| ATOM | 5155 | OG  | SER | X | 343 | 66.427 | 36.697 | 36.536 | 0.00 | 0.00 |
| ATOM | 5156 | HG  | SER | X | 343 | 66.508 | 36.474 | 37.466 | 0.00 | 0.00 |
| ATOM | 5157 | C   | SER | X | 343 | 63.171 | 34.852 | 35.751 | 0.00 | 0.00 |
| ATOM | 5158 | O   | SER | X | 343 | 62.986 | 33.695 | 36.015 | 0.00 | 0.00 |
| ATOM | 5159 | N   | LYS | X | 344 | 62.543 | 35.480 | 34.753 | 0.00 | 0.00 |
| ATOM | 5160 | H   | LYS | X | 344 | 62.817 | 36.408 | 34.462 | 0.00 | 0.00 |
| ATOM | 5161 | CA  | LYS | X | 344 | 61.468 | 34.930 | 33.897 | 0.00 | 0.00 |
| ATOM | 5162 | HA  | LYS | X | 344 | 60.766 | 34.703 | 34.699 | 0.00 | 0.00 |
| ATOM | 5163 | CB  | LYS | X | 344 | 60.898 | 36.085 | 32.999 | 0.00 | 0.00 |
| ATOM | 5164 | HB2 | LYS | X | 344 | 60.001 | 35.711 | 32.505 | 0.00 | 0.00 |
| ATOM | 5165 | HB3 | LYS | X | 344 | 60.633 | 36.905 | 33.667 | 0.00 | 0.00 |
| ATOM | 5166 | CG  | LYS | X | 344 | 61.812 | 36.696 | 31.938 | 0.00 | 0.00 |
| ATOM | 5167 | HG2 | LYS | X | 344 | 61.163 | 37.353 | 31.359 | 0.00 | 0.00 |
| ATOM | 5168 | HG3 | LYS | X | 344 | 62.608 | 37.202 | 32.485 | 0.00 | 0.00 |
| ATOM | 5169 | CD  | LYS | X | 344 | 62.654 | 35.803 | 30.953 | 0.00 | 0.00 |
| ATOM | 5170 | HD2 | LYS | X | 344 | 63.061 | 34.908 | 31.424 | 0.00 | 0.00 |
| ATOM | 5171 | HD3 | LYS | X | 344 | 61.968 | 35.457 | 30.181 | 0.00 | 0.00 |
| ATOM | 5172 | CE  | LYS | X | 344 | 63.859 | 36.550 | 30.314 | 0.00 | 0.00 |
| ATOM | 5173 | HE2 | LYS | X | 344 | 63.442 | 37.463 | 29.889 | 0.00 | 0.00 |
| ATOM | 5174 | HE3 | LYS | X | 344 | 64.552 | 36.804 | 31.116 | 0.00 | 0.00 |
| ATOM | 5175 | NZ  | LYS | X | 344 | 64.516 | 35.688 | 29.337 | 0.00 | 0.00 |
| ATOM | 5176 | HZ1 | LYS | X | 344 | 65.321 | 36.120 | 28.908 | 0.00 | 0.00 |
| ATOM | 5177 | HZ2 | LYS | X | 344 | 64.788 | 34.772 | 29.664 | 0.00 | 0.00 |
| ATOM | 5178 | HZ3 | LYS | X | 344 | 63.892 | 35.482 | 28.570 | 0.00 | 0.00 |
| ATOM | 5179 | C   | LYS | X | 344 | 61.683 | 33.559 | 33.133 | 0.00 | 0.00 |
| ATOM | 5180 | O   | LYS | X | 344 | 60.718 | 32.999 | 32.658 | 0.00 | 0.00 |
| ATOM | 5181 | N   | ASP | X | 345 | 62.878 | 32.930 | 33.270 | 0.00 | 0.00 |
| ATOM | 5182 | H   | ASP | X | 345 | 63.717 | 33.426 | 33.535 | 0.00 | 0.00 |
| ATOM | 5183 | CA  | ASP | X | 345 | 63.211 | 31.558 | 32.882 | 0.00 | 0.00 |
| ATOM | 5184 | HA  | ASP | X | 345 | 62.301 | 30.995 | 33.089 | 0.00 | 0.00 |
| ATOM | 5185 | CB  | ASP | X | 345 | 63.381 | 31.526 | 31.383 | 0.00 | 0.00 |
| ATOM | 5186 | HB2 | ASP | X | 345 | 63.354 | 30.492 | 31.040 | 0.00 | 0.00 |
| ATOM | 5187 | HB3 | ASP | X | 345 | 62.439 | 31.848 | 30.938 | 0.00 | 0.00 |
| ATOM | 5188 | CG  | ASP | X | 345 | 64.757 | 32.102 | 30.847 | 0.00 | 0.00 |
| ATOM | 5189 | OD1 | ASP | X | 345 | 64.994 | 33.299 | 30.831 | 0.00 | 0.00 |
| ATOM | 5190 | OD2 | ASP | X | 345 | 65.559 | 31.218 | 30.459 | 0.00 | 0.00 |

|      |      |      |     |   |     |        |        |        |      |      |
|------|------|------|-----|---|-----|--------|--------|--------|------|------|
| ATOM | 5191 | C    | ASP | X | 345 | 64.418 | 30.890 | 33.612 | 0.00 | 0.00 |
| ATOM | 5192 | O    | ASP | X | 345 | 64.678 | 29.697 | 33.435 | 0.00 | 0.00 |
| ATOM | 5193 | N    | ASN | X | 346 | 65.223 | 31.563 | 34.421 | 0.00 | 0.00 |
| ATOM | 5194 | H    | ASN | X | 346 | 64.865 | 32.450 | 34.744 | 0.00 | 0.00 |
| ATOM | 5195 | CA   | ASN | X | 346 | 66.340 | 31.000 | 35.192 | 0.00 | 0.00 |
| ATOM | 5196 | HA   | ASN | X | 346 | 67.095 | 30.548 | 34.549 | 0.00 | 0.00 |
| ATOM | 5197 | CB   | ASN | X | 346 | 66.903 | 32.077 | 36.036 | 0.00 | 0.00 |
| ATOM | 5198 | HB2  | ASN | X | 346 | 67.075 | 33.005 | 35.490 | 0.00 | 0.00 |
| ATOM | 5199 | HB3  | ASN | X | 346 | 66.132 | 32.391 | 36.740 | 0.00 | 0.00 |
| ATOM | 5200 | CG   | ASN | X | 346 | 68.196 | 31.667 | 36.819 | 0.00 | 0.00 |
| ATOM | 5201 | OD1  | ASN | X | 346 | 68.141 | 31.141 | 37.932 | 0.00 | 0.00 |
| ATOM | 5202 | ND2  | ASN | X | 346 | 69.413 | 31.903 | 36.306 | 0.00 | 0.00 |
| ATOM | 5203 | HD21 | ASN | X | 346 | 70.175 | 31.452 | 36.792 | 0.00 | 0.00 |
| ATOM | 5204 | HD22 | ASN | X | 346 | 69.661 | 32.340 | 35.430 | 0.00 | 0.00 |
| ATOM | 5205 | C    | ASN | X | 346 | 65.807 | 29.906 | 36.200 | 0.00 | 0.00 |
| ATOM | 5206 | O    | ASN | X | 346 | 64.770 | 30.014 | 36.833 | 0.00 | 0.00 |
| ATOM | 5207 | N    | GLU | X | 347 | 66.519 | 28.827 | 36.447 | 0.00 | 0.00 |
| ATOM | 5208 | H    | GLU | X | 347 | 67.324 | 28.596 | 35.882 | 0.00 | 0.00 |
| ATOM | 5209 | CA   | GLU | X | 347 | 66.083 | 27.638 | 37.270 | 0.00 | 0.00 |
| ATOM | 5210 | HA   | GLU | X | 347 | 65.144 | 27.389 | 36.777 | 0.00 | 0.00 |
| ATOM | 5211 | CB   | GLU | X | 347 | 67.049 | 26.404 | 37.162 | 0.00 | 0.00 |
| ATOM | 5212 | HB2  | GLU | X | 347 | 68.049 | 26.811 | 37.314 | 0.00 | 0.00 |
| ATOM | 5213 | HB3  | GLU | X | 347 | 66.829 | 25.643 | 37.910 | 0.00 | 0.00 |
| ATOM | 5214 | CG   | GLU | X | 347 | 66.902 | 25.697 | 35.794 | 0.00 | 0.00 |
| ATOM | 5215 | HG2  | GLU | X | 347 | 66.022 | 25.077 | 35.625 | 0.00 | 0.00 |
| ATOM | 5216 | HG3  | GLU | X | 347 | 66.976 | 26.434 | 34.994 | 0.00 | 0.00 |
| ATOM | 5217 | CD   | GLU | X | 347 | 68.149 | 24.770 | 35.556 | 0.00 | 0.00 |
| ATOM | 5218 | OE1  | GLU | X | 347 | 68.100 | 23.653 | 36.106 | 0.00 | 0.00 |
| ATOM | 5219 | OE2  | GLU | X | 347 | 69.140 | 25.280 | 34.996 | 0.00 | 0.00 |
| ATOM | 5220 | C    | GLU | X | 347 | 65.955 | 27.967 | 38.736 | 0.00 | 0.00 |
| ATOM | 5221 | O    | GLU | X | 347 | 65.298 | 27.193 | 39.438 | 0.00 | 0.00 |
| ATOM | 5222 | N    | SER | X | 348 | 66.438 | 29.116 | 39.215 | 0.00 | 0.00 |
| ATOM | 5223 | H    | SER | X | 348 | 66.872 | 29.739 | 38.549 | 0.00 | 0.00 |
| ATOM | 5224 | CA   | SER | X | 348 | 66.038 | 29.690 | 40.545 | 0.00 | 0.00 |
| ATOM | 5225 | HA   | SER | X | 348 | 66.568 | 30.642 | 40.574 | 0.00 | 0.00 |
| ATOM | 5226 | CB   | SER | X | 348 | 64.529 | 30.062 | 40.602 | 0.00 | 0.00 |
| ATOM | 5227 | HB2  | SER | X | 348 | 63.857 | 29.204 | 40.636 | 0.00 | 0.00 |
| ATOM | 5228 | HB3  | SER | X | 348 | 64.400 | 30.427 | 41.621 | 0.00 | 0.00 |
| ATOM | 5229 | OG   | SER | X | 348 | 64.234 | 30.931 | 39.590 | 0.00 | 0.00 |
| ATOM | 5230 | HG   | SER | X | 348 | 64.079 | 30.626 | 38.692 | 0.00 | 0.00 |
| ATOM | 5231 | C    | SER | X | 348 | 66.405 | 28.729 | 41.736 | 0.00 | 0.00 |
| ATOM | 5232 | O    | SER | X | 348 | 65.627 | 28.474 | 42.719 | 0.00 | 0.00 |
| ATOM | 5233 | N    | LEU | X | 349 | 67.543 | 28.036 | 41.576 | 0.00 | 0.00 |
| ATOM | 5234 | H    | LEU | X | 349 | 68.004 | 28.172 | 40.688 | 0.00 | 0.00 |
| ATOM | 5235 | CA   | LEU | X | 349 | 68.058 | 26.890 | 42.368 | 0.00 | 0.00 |
| ATOM | 5236 | HA   | LEU | X | 349 | 67.344 | 26.138 | 42.704 | 0.00 | 0.00 |
| ATOM | 5237 | CB   | LEU | X | 349 | 69.068 | 26.243 | 41.486 | 0.00 | 0.00 |
| ATOM | 5238 | HB2  | LEU | X | 349 | 69.798 | 27.004 | 41.212 | 0.00 | 0.00 |
| ATOM | 5239 | HB3  | LEU | X | 349 | 69.619 | 25.561 | 42.134 | 0.00 | 0.00 |
| ATOM | 5240 | CG   | LEU | X | 349 | 68.532 | 25.442 | 40.269 | 0.00 | 0.00 |
| ATOM | 5241 | HG   | LEU | X | 349 | 67.779 | 26.088 | 39.817 | 0.00 | 0.00 |
| ATOM | 5242 | CD1  | LEU | X | 349 | 69.554 | 24.966 | 39.222 | 0.00 | 0.00 |
| ATOM | 5243 | HD11 | LEU | X | 349 | 68.989 | 24.711 | 38.325 | 0.00 | 0.00 |
| ATOM | 5244 | HD12 | LEU | X | 349 | 70.043 | 24.055 | 39.567 | 0.00 | 0.00 |
| ATOM | 5245 | HD13 | LEU | X | 349 | 70.256 | 25.768 | 38.994 | 0.00 | 0.00 |
| ATOM | 5246 | CD2  | LEU | X | 349 | 67.819 | 24.220 | 40.790 | 0.00 | 0.00 |
| ATOM | 5247 | HD21 | LEU | X | 349 | 67.179 | 23.755 | 40.039 | 0.00 | 0.00 |
| ATOM | 5248 | HD22 | LEU | X | 349 | 68.606 | 23.523 | 41.077 | 0.00 | 0.00 |
| ATOM | 5249 | HD23 | LEU | X | 349 | 67.328 | 24.298 | 41.760 | 0.00 | 0.00 |
| ATOM | 5250 | C    | LEU | X | 349 | 68.630 | 27.467 | 43.710 | 0.00 | 0.00 |
| ATOM | 5251 | O    | LEU | X | 349 | 69.782 | 27.251 | 44.006 | 0.00 | 0.00 |
| ATOM | 5252 | N    | ILE | X | 350 | 67.859 | 28.199 | 44.529 | 0.00 | 0.00 |
| ATOM | 5253 | H    | ILE | X | 350 | 66.899 | 28.266 | 44.223 | 0.00 | 0.00 |
| ATOM | 5254 | CA   | ILE | X | 350 | 68.220 | 29.076 | 45.677 | 0.00 | 0.00 |
| ATOM | 5255 | HA   | ILE | X | 350 | 69.050 | 29.729 | 45.408 | 0.00 | 0.00 |
| ATOM | 5256 | CB   | ILE | X | 350 | 67.028 | 29.937 | 46.070 | 0.00 | 0.00 |
| ATOM | 5257 | HB   | ILE | X | 350 | 67.317 | 30.384 | 47.022 | 0.00 | 0.00 |

|      |      |      |     |   |     |        |        |        |      |      |
|------|------|------|-----|---|-----|--------|--------|--------|------|------|
| ATOM | 5258 | CG2  | ILE | X | 350 | 66.770 | 31.109 | 45.136 | 0.00 | 0.00 |
| ATOM | 5259 | HG21 | ILE | X | 350 | 66.177 | 31.902 | 45.590 | 0.00 | 0.00 |
| ATOM | 5260 | HG22 | ILE | X | 350 | 66.267 | 30.788 | 44.224 | 0.00 | 0.00 |
| ATOM | 5261 | HG23 | ILE | X | 350 | 67.701 | 31.577 | 44.814 | 0.00 | 0.00 |
| ATOM | 5262 | CG1  | ILE | X | 350 | 65.700 | 29.225 | 46.269 | 0.00 | 0.00 |
| ATOM | 5263 | HG12 | ILE | X | 350 | 65.361 | 28.984 | 45.262 | 0.00 | 0.00 |
| ATOM | 5264 | HG13 | ILE | X | 350 | 65.908 | 28.273 | 46.758 | 0.00 | 0.00 |
| ATOM | 5265 | CD1  | ILE | X | 350 | 64.723 | 30.030 | 47.191 | 0.00 | 0.00 |
| ATOM | 5266 | HD11 | ILE | X | 350 | 63.752 | 29.535 | 47.222 | 0.00 | 0.00 |
| ATOM | 5267 | HD12 | ILE | X | 350 | 64.541 | 31.006 | 46.740 | 0.00 | 0.00 |
| ATOM | 5268 | HD13 | ILE | X | 350 | 65.270 | 30.216 | 48.115 | 0.00 | 0.00 |
| ATOM | 5269 | C    | ILE | X | 350 | 68.697 | 28.238 | 46.905 | 0.00 | 0.00 |
| ATOM | 5270 | O    | ILE | X | 350 | 68.340 | 27.100 | 47.092 | 0.00 | 0.00 |
| ATOM | 5271 | N    | SER | X | 351 | 69.442 | 28.853 | 47.764 | 0.00 | 0.00 |
| ATOM | 5272 | H    | SER | X | 351 | 69.702 | 29.817 | 47.615 | 0.00 | 0.00 |
| ATOM | 5273 | CA   | SER | X | 351 | 69.745 | 28.308 | 49.108 | 0.00 | 0.00 |
| ATOM | 5274 | HA   | SER | X | 351 | 69.508 | 27.251 | 49.231 | 0.00 | 0.00 |
| ATOM | 5275 | CB   | SER | X | 351 | 71.203 | 28.577 | 49.391 | 0.00 | 0.00 |
| ATOM | 5276 | HB2  | SER | X | 351 | 71.471 | 28.095 | 50.331 | 0.00 | 0.00 |
| ATOM | 5277 | HB3  | SER | X | 351 | 71.756 | 28.223 | 48.521 | 0.00 | 0.00 |
| ATOM | 5278 | OG   | SER | X | 351 | 71.423 | 29.953 | 49.468 | 0.00 | 0.00 |
| ATOM | 5279 | HG   | SER | X | 351 | 71.389 | 30.385 | 48.611 | 0.00 | 0.00 |
| ATOM | 5280 | C    | SER | X | 351 | 68.839 | 28.972 | 50.239 | 0.00 | 0.00 |
| ATOM | 5281 | O    | SER | X | 351 | 68.219 | 29.982 | 49.983 | 0.00 | 0.00 |
| ATOM | 5282 | N    | ARG | X | 352 | 68.918 | 28.461 | 51.492 | 0.00 | 0.00 |
| ATOM | 5283 | H    | ARG | X | 352 | 69.358 | 27.554 | 51.551 | 0.00 | 0.00 |
| ATOM | 5284 | CA   | ARG | X | 352 | 68.350 | 28.997 | 52.771 | 0.00 | 0.00 |
| ATOM | 5285 | HA   | ARG | X | 352 | 67.268 | 28.869 | 52.734 | 0.00 | 0.00 |
| ATOM | 5286 | CB   | ARG | X | 352 | 68.781 | 28.220 | 54.044 | 0.00 | 0.00 |
| ATOM | 5287 | HB2  | ARG | X | 352 | 69.871 | 28.231 | 54.045 | 0.00 | 0.00 |
| ATOM | 5288 | HB3  | ARG | X | 352 | 68.476 | 28.793 | 54.919 | 0.00 | 0.00 |
| ATOM | 5289 | CG   | ARG | X | 352 | 68.102 | 26.862 | 54.004 | 0.00 | 0.00 |
| ATOM | 5290 | HG2  | ARG | X | 352 | 67.044 | 26.951 | 53.760 | 0.00 | 0.00 |
| ATOM | 5291 | HG3  | ARG | X | 352 | 68.540 | 26.467 | 53.088 | 0.00 | 0.00 |
| ATOM | 5292 | CD   | ARG | X | 352 | 68.466 | 25.965 | 55.194 | 0.00 | 0.00 |
| ATOM | 5293 | HD2  | ARG | X | 352 | 68.212 | 24.920 | 55.018 | 0.00 | 0.00 |
| ATOM | 5294 | HD3  | ARG | X | 352 | 69.543 | 26.096 | 55.300 | 0.00 | 0.00 |
| ATOM | 5295 | NE   | ARG | X | 352 | 67.866 | 26.422 | 56.452 | 0.00 | 0.00 |
| ATOM | 5296 | HE   | ARG | X | 352 | 68.495 | 26.714 | 57.186 | 0.00 | 0.00 |
| ATOM | 5297 | CZ   | ARG | X | 352 | 66.646 | 26.242 | 56.791 | 0.00 | 0.00 |
| ATOM | 5298 | NH1  | ARG | X | 352 | 65.764 | 25.841 | 55.948 | 0.00 | 0.00 |
| ATOM | 5299 | HH11 | ARG | X | 352 | 66.065 | 25.614 | 55.011 | 0.00 | 0.00 |
| ATOM | 5300 | HH12 | ARG | X | 352 | 64.830 | 25.578 | 56.227 | 0.00 | 0.00 |
| ATOM | 5301 | NH2  | ARG | X | 352 | 66.226 | 26.553 | 58.009 | 0.00 | 0.00 |
| ATOM | 5302 | HH21 | ARG | X | 352 | 66.913 | 26.951 | 58.633 | 0.00 | 0.00 |
| ATOM | 5303 | HH22 | ARG | X | 352 | 65.257 | 26.432 | 58.267 | 0.00 | 0.00 |
| ATOM | 5304 | C    | ARG | X | 352 | 68.520 | 30.524 | 52.952 | 0.00 | 0.00 |
| ATOM | 5305 | O    | ARG | X | 352 | 67.570 | 31.063 | 53.489 | 0.00 | 0.00 |
| ATOM | 5306 | N    | ALA | X | 353 | 69.576 | 31.133 | 52.452 | 0.00 | 0.00 |
| ATOM | 5307 | H    | ALA | X | 353 | 70.320 | 30.588 | 52.040 | 0.00 | 0.00 |
| ATOM | 5308 | CA   | ALA | X | 353 | 69.782 | 32.566 | 52.558 | 0.00 | 0.00 |
| ATOM | 5309 | HA   | ALA | X | 353 | 69.571 | 32.799 | 53.602 | 0.00 | 0.00 |
| ATOM | 5310 | CB   | ALA | X | 353 | 71.299 | 32.726 | 52.318 | 0.00 | 0.00 |
| ATOM | 5311 | HB1  | ALA | X | 353 | 71.448 | 33.806 | 52.310 | 0.00 | 0.00 |
| ATOM | 5312 | HB2  | ALA | X | 353 | 71.637 | 32.325 | 51.363 | 0.00 | 0.00 |
| ATOM | 5313 | HB3  | ALA | X | 353 | 71.887 | 32.306 | 53.135 | 0.00 | 0.00 |
| ATOM | 5314 | C    | ALA | X | 353 | 68.931 | 33.333 | 51.545 | 0.00 | 0.00 |
| ATOM | 5315 | O    | ALA | X | 353 | 68.263 | 34.263 | 51.996 | 0.00 | 0.00 |
| ATOM | 5316 | N    | GLU | X | 354 | 68.846 | 33.029 | 50.235 | 0.00 | 0.00 |
| ATOM | 5317 | H    | GLU | X | 354 | 69.244 | 32.154 | 49.926 | 0.00 | 0.00 |
| ATOM | 5318 | CA   | GLU | X | 354 | 67.949 | 33.725 | 49.275 | 0.00 | 0.00 |
| ATOM | 5319 | HA   | GLU | X | 354 | 68.094 | 34.805 | 49.311 | 0.00 | 0.00 |
| ATOM | 5320 | CB   | GLU | X | 354 | 68.154 | 33.299 | 47.801 | 0.00 | 0.00 |
| ATOM | 5321 | HB2  | GLU | X | 354 | 67.973 | 32.229 | 47.707 | 0.00 | 0.00 |
| ATOM | 5322 | HB3  | GLU | X | 354 | 67.457 | 33.904 | 47.221 | 0.00 | 0.00 |
| ATOM | 5323 | CG   | GLU | X | 354 | 69.580 | 33.597 | 47.307 | 0.00 | 0.00 |
| ATOM | 5324 | HG2  | GLU | X | 354 | 69.531 | 33.533 | 46.220 | 0.00 | 0.00 |

|      |      |      |     |   |     |        |        |        |      |      |
|------|------|------|-----|---|-----|--------|--------|--------|------|------|
| ATOM | 5325 | HG3  | GLU | X | 354 | 69.796 | 34.632 | 47.574 | 0.00 | 0.00 |
| ATOM | 5326 | CD   | GLU | X | 354 | 70.708 | 32.726 | 47.890 | 0.00 | 0.00 |
| ATOM | 5327 | OE1  | GLU | X | 354 | 70.708 | 31.484 | 47.611 | 0.00 | 0.00 |
| ATOM | 5328 | OE2  | GLU | X | 354 | 71.724 | 33.188 | 48.454 | 0.00 | 0.00 |
| ATOM | 5329 | C    | GLU | X | 354 | 66.477 | 33.519 | 49.747 | 0.00 | 0.00 |
| ATOM | 5330 | O    | GLU | X | 354 | 65.634 | 34.427 | 49.533 | 0.00 | 0.00 |
| ATOM | 5331 | N    | PHE | X | 355 | 66.162 | 32.354 | 50.308 | 0.00 | 0.00 |
| ATOM | 5332 | H    | PHE | X | 355 | 66.781 | 31.557 | 50.271 | 0.00 | 0.00 |
| ATOM | 5333 | CA   | PHE | X | 355 | 64.864 | 32.105 | 50.988 | 0.00 | 0.00 |
| ATOM | 5334 | HA   | PHE | X | 355 | 64.182 | 32.328 | 50.168 | 0.00 | 0.00 |
| ATOM | 5335 | CB   | PHE | X | 355 | 64.746 | 30.655 | 51.419 | 0.00 | 0.00 |
| ATOM | 5336 | HB2  | PHE | X | 355 | 64.835 | 30.031 | 50.529 | 0.00 | 0.00 |
| ATOM | 5337 | HB3  | PHE | X | 355 | 65.626 | 30.498 | 52.042 | 0.00 | 0.00 |
| ATOM | 5338 | CG   | PHE | X | 355 | 63.385 | 30.327 | 52.059 | 0.00 | 0.00 |
| ATOM | 5339 | CD1  | PHE | X | 355 | 62.279 | 30.361 | 51.194 | 0.00 | 0.00 |
| ATOM | 5340 | HD1  | PHE | X | 355 | 62.414 | 30.645 | 50.161 | 0.00 | 0.00 |
| ATOM | 5341 | CE1  | PHE | X | 355 | 61.047 | 30.036 | 51.796 | 0.00 | 0.00 |
| ATOM | 5342 | HE1  | PHE | X | 355 | 60.151 | 29.978 | 51.196 | 0.00 | 0.00 |
| ATOM | 5343 | CZ   | PHE | X | 355 | 60.909 | 29.613 | 53.107 | 0.00 | 0.00 |
| ATOM | 5344 | HZ   | PHE | X | 355 | 59.952 | 29.378 | 53.550 | 0.00 | 0.00 |
| ATOM | 5345 | CE2  | PHE | X | 355 | 62.090 | 29.431 | 53.863 | 0.00 | 0.00 |
| ATOM | 5346 | HE2  | PHE | X | 355 | 62.031 | 29.071 | 54.880 | 0.00 | 0.00 |
| ATOM | 5347 | CD2  | PHE | X | 355 | 63.334 | 29.811 | 53.337 | 0.00 | 0.00 |
| ATOM | 5348 | HD2  | PHE | X | 355 | 64.245 | 29.851 | 53.916 | 0.00 | 0.00 |
| ATOM | 5349 | C    | PHE | X | 355 | 64.574 | 33.134 | 52.121 | 0.00 | 0.00 |
| ATOM | 5350 | O    | PHE | X | 355 | 63.497 | 33.745 | 52.127 | 0.00 | 0.00 |
| ATOM | 5351 | N    | LEU | X | 356 | 65.367 | 33.235 | 53.123 | 0.00 | 0.00 |
| ATOM | 5352 | H    | LEU | X | 356 | 66.035 | 32.486 | 53.233 | 0.00 | 0.00 |
| ATOM | 5353 | CA   | LEU | X | 356 | 65.248 | 34.117 | 54.272 | 0.00 | 0.00 |
| ATOM | 5354 | HA   | LEU | X | 356 | 64.360 | 33.785 | 54.811 | 0.00 | 0.00 |
| ATOM | 5355 | CB   | LEU | X | 356 | 66.519 | 33.893 | 55.057 | 0.00 | 0.00 |
| ATOM | 5356 | HB2  | LEU | X | 356 | 66.522 | 32.822 | 55.259 | 0.00 | 0.00 |
| ATOM | 5357 | HB3  | LEU | X | 356 | 67.398 | 33.934 | 54.414 | 0.00 | 0.00 |
| ATOM | 5358 | CG   | LEU | X | 356 | 66.537 | 34.698 | 56.409 | 0.00 | 0.00 |
| ATOM | 5359 | HG   | LEU | X | 356 | 66.859 | 35.714 | 56.180 | 0.00 | 0.00 |
| ATOM | 5360 | CD1  | LEU | X | 356 | 65.252 | 34.741 | 57.195 | 0.00 | 0.00 |
| ATOM | 5361 | HD11 | LEU | X | 356 | 64.505 | 35.439 | 56.818 | 0.00 | 0.00 |
| ATOM | 5362 | HD12 | LEU | X | 356 | 65.543 | 35.118 | 58.175 | 0.00 | 0.00 |
| ATOM | 5363 | HD13 | LEU | X | 356 | 64.960 | 33.692 | 57.247 | 0.00 | 0.00 |
| ATOM | 5364 | CD2  | LEU | X | 356 | 67.551 | 34.092 | 57.351 | 0.00 | 0.00 |
| ATOM | 5365 | HD21 | LEU | X | 356 | 67.780 | 34.911 | 58.032 | 0.00 | 0.00 |
| ATOM | 5366 | HD22 | LEU | X | 356 | 67.141 | 33.268 | 57.935 | 0.00 | 0.00 |
| ATOM | 5367 | HD23 | LEU | X | 356 | 68.483 | 33.699 | 56.944 | 0.00 | 0.00 |
| ATOM | 5368 | C    | LEU | X | 356 | 65.021 | 35.555 | 53.825 | 0.00 | 0.00 |
| ATOM | 5369 | O    | LEU | X | 356 | 64.114 | 36.233 | 54.303 | 0.00 | 0.00 |
| ATOM | 5370 | N    | ALA | X | 357 | 65.793 | 35.979 | 52.762 | 0.00 | 0.00 |
| ATOM | 5371 | H    | ALA | X | 357 | 66.460 | 35.326 | 52.376 | 0.00 | 0.00 |
| ATOM | 5372 | CA   | ALA | X | 357 | 65.562 | 37.308 | 52.200 | 0.00 | 0.00 |
| ATOM | 5373 | HA   | ALA | X | 357 | 65.629 | 38.029 | 53.014 | 0.00 | 0.00 |
| ATOM | 5374 | CB   | ALA | X | 357 | 66.629 | 37.604 | 51.215 | 0.00 | 0.00 |
| ATOM | 5375 | HB1  | ALA | X | 357 | 67.650 | 37.587 | 51.597 | 0.00 | 0.00 |
| ATOM | 5376 | HB2  | ALA | X | 357 | 66.315 | 38.558 | 50.791 | 0.00 | 0.00 |
| ATOM | 5377 | HB3  | ALA | X | 357 | 66.689 | 36.842 | 50.438 | 0.00 | 0.00 |
| ATOM | 5378 | C    | ALA | X | 357 | 64.219 | 37.406 | 51.493 | 0.00 | 0.00 |
| ATOM | 5379 | O    | ALA | X | 357 | 63.440 | 38.344 | 51.791 | 0.00 | 0.00 |
| ATOM | 5380 | N    | GLY | X | 358 | 63.888 | 36.379 | 50.709 | 0.00 | 0.00 |
| ATOM | 5381 | H    | GLY | X | 358 | 64.487 | 35.586 | 50.527 | 0.00 | 0.00 |
| ATOM | 5382 | CA   | GLY | X | 358 | 62.577 | 36.218 | 50.130 | 0.00 | 0.00 |
| ATOM | 5383 | HA2  | GLY | X | 358 | 62.360 | 36.989 | 49.391 | 0.00 | 0.00 |
| ATOM | 5384 | HA3  | GLY | X | 358 | 62.558 | 35.182 | 49.793 | 0.00 | 0.00 |
| ATOM | 5385 | C    | GLY | X | 358 | 61.457 | 36.329 | 51.225 | 0.00 | 0.00 |
| ATOM | 5386 | O    | GLY | X | 358 | 60.480 | 36.979 | 50.961 | 0.00 | 0.00 |
| ATOM | 5387 | N    | VAL | X | 359 | 61.542 | 35.780 | 52.462 | 0.00 | 0.00 |
| ATOM | 5388 | H    | VAL | X | 359 | 62.300 | 35.131 | 52.619 | 0.00 | 0.00 |
| ATOM | 5389 | CA   | VAL | X | 359 | 60.595 | 35.911 | 53.563 | 0.00 | 0.00 |
| ATOM | 5390 | HA   | VAL | X | 359 | 59.561 | 35.821 | 53.229 | 0.00 | 0.00 |
| ATOM | 5391 | CB   | VAL | X | 359 | 60.959 | 34.739 | 54.553 | 0.00 | 0.00 |

|      |      |      |     |   |     |        |        |        |      |      |
|------|------|------|-----|---|-----|--------|--------|--------|------|------|
| ATOM | 5392 | HB   | VAL | X | 359 | 62.013 | 34.750 | 54.831 | 0.00 | 0.00 |
| ATOM | 5393 | CG1  | VAL | X | 359 | 60.018 | 34.683 | 55.741 | 0.00 | 0.00 |
| ATOM | 5394 | HG11 | VAL | X | 359 | 58.975 | 34.726 | 55.427 | 0.00 | 0.00 |
| ATOM | 5395 | HG12 | VAL | X | 359 | 60.097 | 33.856 | 56.446 | 0.00 | 0.00 |
| ATOM | 5396 | HG13 | VAL | X | 359 | 60.097 | 35.643 | 56.252 | 0.00 | 0.00 |
| ATOM | 5397 | CG2  | VAL | X | 359 | 60.587 | 33.440 | 53.794 | 0.00 | 0.00 |
| ATOM | 5398 | HG21 | VAL | X | 359 | 59.515 | 33.288 | 53.670 | 0.00 | 0.00 |
| ATOM | 5399 | HG22 | VAL | X | 359 | 60.987 | 32.533 | 54.248 | 0.00 | 0.00 |
| ATOM | 5400 | HG23 | VAL | X | 359 | 60.998 | 33.379 | 52.787 | 0.00 | 0.00 |
| ATOM | 5401 | C    | VAL | X | 359 | 60.662 | 37.287 | 54.332 | 0.00 | 0.00 |
| ATOM | 5402 | O    | VAL | X | 359 | 59.605 | 37.852 | 54.524 | 0.00 | 0.00 |
| ATOM | 5403 | N    | ARG | X | 360 | 61.901 | 37.811 | 54.571 | 0.00 | 0.00 |
| ATOM | 5404 | H    | ARG | X | 360 | 62.693 | 37.195 | 54.448 | 0.00 | 0.00 |
| ATOM | 5405 | CA   | ARG | X | 360 | 62.121 | 39.219 | 54.947 | 0.00 | 0.00 |
| ATOM | 5406 | HA   | ARG | X | 360 | 61.676 | 39.352 | 55.933 | 0.00 | 0.00 |
| ATOM | 5407 | CB   | ARG | X | 360 | 63.666 | 39.501 | 55.068 | 0.00 | 0.00 |
| ATOM | 5408 | HB2  | ARG | X | 360 | 64.148 | 38.677 | 55.595 | 0.00 | 0.00 |
| ATOM | 5409 | HB3  | ARG | X | 360 | 64.080 | 39.604 | 54.065 | 0.00 | 0.00 |
| ATOM | 5410 | CG   | ARG | X | 360 | 64.070 | 40.756 | 55.852 | 0.00 | 0.00 |
| ATOM | 5411 | HG2  | ARG | X | 360 | 63.736 | 41.492 | 55.120 | 0.00 | 0.00 |
| ATOM | 5412 | HG3  | ARG | X | 360 | 63.455 | 40.824 | 56.749 | 0.00 | 0.00 |
| ATOM | 5413 | CD   | ARG | X | 360 | 65.536 | 40.747 | 56.192 | 0.00 | 0.00 |
| ATOM | 5414 | HD2  | ARG | X | 360 | 65.723 | 41.694 | 56.699 | 0.00 | 0.00 |
| ATOM | 5415 | HD3  | ARG | X | 360 | 65.694 | 39.911 | 56.873 | 0.00 | 0.00 |
| ATOM | 5416 | NE   | ARG | X | 360 | 66.434 | 40.631 | 55.005 | 0.00 | 0.00 |
| ATOM | 5417 | HE   | ARG | X | 360 | 66.489 | 41.503 | 54.497 | 0.00 | 0.00 |
| ATOM | 5418 | CZ   | ARG | X | 360 | 67.309 | 39.635 | 54.779 | 0.00 | 0.00 |
| ATOM | 5419 | NH1  | ARG | X | 360 | 67.483 | 38.596 | 55.528 | 0.00 | 0.00 |
| ATOM | 5420 | HH11 | ARG | X | 360 | 67.091 | 38.476 | 56.451 | 0.00 | 0.00 |
| ATOM | 5421 | HH12 | ARG | X | 360 | 68.121 | 37.884 | 55.203 | 0.00 | 0.00 |
| ATOM | 5422 | NH2  | ARG | X | 360 | 68.049 | 39.590 | 53.690 | 0.00 | 0.00 |
| ATOM | 5423 | HH21 | ARG | X | 360 | 68.007 | 40.415 | 53.110 | 0.00 | 0.00 |
| ATOM | 5424 | HH22 | ARG | X | 360 | 68.719 | 38.877 | 53.439 | 0.00 | 0.00 |
| ATOM | 5425 | C    | ARG | X | 360 | 61.468 | 40.275 | 54.059 | 0.00 | 0.00 |
| ATOM | 5426 | O    | ARG | X | 360 | 61.074 | 41.315 | 54.569 | 0.00 | 0.00 |
| ATOM | 5427 | N    | VAL | X | 361 | 61.250 | 40.085 | 52.776 | 0.00 | 0.00 |
| ATOM | 5428 | H    | VAL | X | 361 | 61.800 | 39.372 | 52.318 | 0.00 | 0.00 |
| ATOM | 5429 | CA   | VAL | X | 361 | 60.553 | 41.029 | 51.903 | 0.00 | 0.00 |
| ATOM | 5430 | HA   | VAL | X | 361 | 60.407 | 41.995 | 52.387 | 0.00 | 0.00 |
| ATOM | 5431 | CB   | VAL | X | 361 | 61.342 | 41.323 | 50.590 | 0.00 | 0.00 |
| ATOM | 5432 | HB   | VAL | X | 361 | 60.862 | 42.131 | 50.038 | 0.00 | 0.00 |
| ATOM | 5433 | CG1  | VAL | X | 361 | 62.782 | 41.911 | 50.838 | 0.00 | 0.00 |
| ATOM | 5434 | HG11 | VAL | X | 361 | 63.384 | 41.062 | 51.160 | 0.00 | 0.00 |
| ATOM | 5435 | HG12 | VAL | X | 361 | 63.076 | 42.320 | 49.871 | 0.00 | 0.00 |
| ATOM | 5436 | HG13 | VAL | X | 361 | 62.719 | 42.655 | 51.633 | 0.00 | 0.00 |
| ATOM | 5437 | CG2  | VAL | X | 361 | 61.472 | 40.025 | 49.719 | 0.00 | 0.00 |
| ATOM | 5438 | HG21 | VAL | X | 361 | 60.695 | 39.894 | 48.967 | 0.00 | 0.00 |
| ATOM | 5439 | HG22 | VAL | X | 361 | 61.456 | 39.121 | 50.327 | 0.00 | 0.00 |
| ATOM | 5440 | HG23 | VAL | X | 361 | 62.437 | 39.966 | 49.215 | 0.00 | 0.00 |
| ATOM | 5441 | C    | VAL | X | 361 | 59.130 | 40.477 | 51.525 | 0.00 | 0.00 |
| ATOM | 5442 | O    | VAL | X | 361 | 58.277 | 41.243 | 51.108 | 0.00 | 0.00 |
| ATOM | 5443 | N    | GLY | X | 362 | 58.949 | 39.209 | 51.698 | 0.00 | 0.00 |
| ATOM | 5444 | H    | GLY | X | 362 | 59.631 | 38.604 | 52.133 | 0.00 | 0.00 |
| ATOM | 5445 | CA   | GLY | X | 362 | 57.588 | 38.642 | 51.407 | 0.00 | 0.00 |
| ATOM | 5446 | HA2  | GLY | X | 362 | 57.077 | 38.959 | 50.498 | 0.00 | 0.00 |
| ATOM | 5447 | HA3  | GLY | X | 362 | 57.844 | 37.588 | 51.296 | 0.00 | 0.00 |
| ATOM | 5448 | C    | GLY | X | 362 | 56.608 | 38.817 | 52.511 | 0.00 | 0.00 |
| ATOM | 5449 | O    | GLY | X | 362 | 55.399 | 38.714 | 52.356 | 0.00 | 0.00 |
| ATOM | 5450 | N    | VAL | X | 363 | 57.055 | 39.111 | 53.733 | 0.00 | 0.00 |
| ATOM | 5451 | H    | VAL | X | 363 | 58.049 | 38.962 | 53.836 | 0.00 | 0.00 |
| ATOM | 5452 | CA   | VAL | X | 363 | 56.255 | 39.400 | 54.905 | 0.00 | 0.00 |
| ATOM | 5453 | HA   | VAL | X | 363 | 55.201 | 39.283 | 54.654 | 0.00 | 0.00 |
| ATOM | 5454 | CB   | VAL | X | 363 | 56.370 | 38.323 | 56.042 | 0.00 | 0.00 |
| ATOM | 5455 | HB   | VAL | X | 363 | 57.384 | 38.294 | 56.442 | 0.00 | 0.00 |
| ATOM | 5456 | CG1  | VAL | X | 363 | 55.299 | 38.595 | 57.091 | 0.00 | 0.00 |
| ATOM | 5457 | HG11 | VAL | X | 363 | 55.392 | 37.887 | 57.915 | 0.00 | 0.00 |
| ATOM | 5458 | HG12 | VAL | X | 363 | 55.506 | 39.548 | 57.578 | 0.00 | 0.00 |

|      |      |      |     |   |     |        |        |        |      |      |
|------|------|------|-----|---|-----|--------|--------|--------|------|------|
| ATOM | 5459 | HG13 | VAL | X | 363 | 54.283 | 38.548 | 56.701 | 0.00 | 0.00 |
| ATOM | 5460 | CG2  | VAL | X | 363 | 56.190 | 36.889 | 55.554 | 0.00 | 0.00 |
| ATOM | 5461 | HG21 | VAL | X | 363 | 55.339 | 36.859 | 54.873 | 0.00 | 0.00 |
| ATOM | 5462 | HG22 | VAL | X | 363 | 56.226 | 36.201 | 56.399 | 0.00 | 0.00 |
| ATOM | 5463 | HG23 | VAL | X | 363 | 57.040 | 36.623 | 54.926 | 0.00 | 0.00 |
| ATOM | 5464 | C    | VAL | X | 363 | 56.474 | 40.916 | 55.347 | 0.00 | 0.00 |
| ATOM | 5465 | O    | VAL | X | 363 | 57.492 | 41.199 | 56.006 | 0.00 | 0.00 |
| ATOM | 5466 | N    | PRO | X | 364 | 55.811 | 41.887 | 54.797 | 0.00 | 0.00 |
| ATOM | 5467 | CD   | PRO | X | 364 | 54.662 | 41.765 | 53.875 | 0.00 | 0.00 |
| ATOM | 5468 | HD2  | PRO | X | 364 | 53.833 | 41.383 | 54.471 | 0.00 | 0.00 |
| ATOM | 5469 | HD3  | PRO | X | 364 | 54.957 | 41.038 | 53.118 | 0.00 | 0.00 |
| ATOM | 5470 | CG   | PRO | X | 364 | 54.413 | 43.153 | 53.329 | 0.00 | 0.00 |
| ATOM | 5471 | HG2  | PRO | X | 364 | 53.362 | 43.172 | 53.041 | 0.00 | 0.00 |
| ATOM | 5472 | HG3  | PRO | X | 364 | 55.111 | 43.506 | 52.570 | 0.00 | 0.00 |
| ATOM | 5473 | CB   | PRO | X | 364 | 54.695 | 43.996 | 54.621 | 0.00 | 0.00 |
| ATOM | 5474 | HB2  | PRO | X | 364 | 53.862 | 43.774 | 55.289 | 0.00 | 0.00 |
| ATOM | 5475 | HB3  | PRO | X | 364 | 54.837 | 45.012 | 54.252 | 0.00 | 0.00 |
| ATOM | 5476 | CA   | PRO | X | 364 | 55.829 | 43.297 | 55.234 | 0.00 | 0.00 |
| ATOM | 5477 | HA   | PRO | X | 364 | 56.707 | 43.646 | 54.690 | 0.00 | 0.00 |
| ATOM | 5478 | C    | PRO | X | 364 | 56.017 | 43.510 | 56.710 | 0.00 | 0.00 |
| ATOM | 5479 | O    | PRO | X | 364 | 55.336 | 42.844 | 57.570 | 0.00 | 0.00 |
| ATOM | 5480 | N    | GLN | X | 365 | 56.870 | 44.482 | 57.037 | 0.00 | 0.00 |
| ATOM | 5481 | H    | GLN | X | 365 | 57.352 | 45.025 | 56.334 | 0.00 | 0.00 |
| ATOM | 5482 | CA   | GLN | X | 365 | 57.116 | 44.929 | 58.377 | 0.00 | 0.00 |
| ATOM | 5483 | HA   | GLN | X | 365 | 57.702 | 45.843 | 58.282 | 0.00 | 0.00 |
| ATOM | 5484 | CB   | GLN | X | 365 | 55.899 | 45.489 | 59.022 | 0.00 | 0.00 |
| ATOM | 5485 | HB2  | GLN | X | 365 | 55.207 | 44.692 | 59.296 | 0.00 | 0.00 |
| ATOM | 5486 | HB3  | GLN | X | 365 | 56.224 | 45.993 | 59.932 | 0.00 | 0.00 |
| ATOM | 5487 | CG   | GLN | X | 365 | 55.082 | 46.481 | 58.169 | 0.00 | 0.00 |
| ATOM | 5488 | HG2  | GLN | X | 365 | 55.721 | 47.304 | 57.849 | 0.00 | 0.00 |
| ATOM | 5489 | HG3  | GLN | X | 365 | 54.654 | 46.064 | 57.257 | 0.00 | 0.00 |
| ATOM | 5490 | CD   | GLN | X | 365 | 54.051 | 47.248 | 58.948 | 0.00 | 0.00 |
| ATOM | 5491 | OE1  | GLN | X | 365 | 52.866 | 46.848 | 59.038 | 0.00 | 0.00 |
| ATOM | 5492 | NE2  | GLN | X | 365 | 54.373 | 48.318 | 59.570 | 0.00 | 0.00 |
| ATOM | 5493 | HE21 | GLN | X | 365 | 53.715 | 48.724 | 60.219 | 0.00 | 0.00 |
| ATOM | 5494 | HE22 | GLN | X | 365 | 55.291 | 48.736 | 59.515 | 0.00 | 0.00 |
| ATOM | 5495 | C    | GLN | X | 365 | 57.938 | 43.917 | 59.237 | 0.00 | 0.00 |
| ATOM | 5496 | O    | GLN | X | 365 | 58.630 | 44.332 | 60.207 | 0.00 | 0.00 |
| ATOM | 5497 | N    | VAL | X | 366 | 57.917 | 42.652 | 58.979 | 0.00 | 0.00 |
| ATOM | 5498 | H    | VAL | X | 366 | 57.402 | 42.351 | 58.164 | 0.00 | 0.00 |
| ATOM | 5499 | CA   | VAL | X | 366 | 58.617 | 41.669 | 59.801 | 0.00 | 0.00 |
| ATOM | 5500 | HA   | VAL | X | 366 | 58.379 | 41.875 | 60.845 | 0.00 | 0.00 |
| ATOM | 5501 | CB   | VAL | X | 366 | 58.161 | 40.164 | 59.441 | 0.00 | 0.00 |
| ATOM | 5502 | HB   | VAL | X | 366 | 57.391 | 40.343 | 58.690 | 0.00 | 0.00 |
| ATOM | 5503 | CG1  | VAL | X | 366 | 59.289 | 39.245 | 58.873 | 0.00 | 0.00 |
| ATOM | 5504 | HG11 | VAL | X | 366 | 60.005 | 38.858 | 59.597 | 0.00 | 0.00 |
| ATOM | 5505 | HG12 | VAL | X | 366 | 58.803 | 38.370 | 58.442 | 0.00 | 0.00 |
| ATOM | 5506 | HG13 | VAL | X | 366 | 59.832 | 39.636 | 58.012 | 0.00 | 0.00 |
| ATOM | 5507 | CG2  | VAL | X | 366 | 57.383 | 39.491 | 60.580 | 0.00 | 0.00 |
| ATOM | 5508 | HG21 | VAL | X | 366 | 57.025 | 38.547 | 60.170 | 0.00 | 0.00 |
| ATOM | 5509 | HG22 | VAL | X | 366 | 56.593 | 40.185 | 60.866 | 0.00 | 0.00 |
| ATOM | 5510 | HG23 | VAL | X | 366 | 58.038 | 39.282 | 61.426 | 0.00 | 0.00 |
| ATOM | 5511 | C    | VAL | X | 366 | 60.109 | 41.846 | 59.584 | 0.00 | 0.00 |
| ATOM | 5512 | O    | VAL | X | 366 | 60.631 | 42.104 | 58.494 | 0.00 | 0.00 |
| ATOM | 5513 | N    | SER | X | 367 | 60.796 | 41.583 | 60.729 | 0.00 | 0.00 |
| ATOM | 5514 | H    | SER | X | 367 | 60.220 | 41.412 | 61.540 | 0.00 | 0.00 |
| ATOM | 5515 | CA   | SER | X | 367 | 62.234 | 41.822 | 60.861 | 0.00 | 0.00 |
| ATOM | 5516 | HA   | SER | X | 367 | 62.410 | 42.615 | 60.134 | 0.00 | 0.00 |
| ATOM | 5517 | CB   | SER | X | 367 | 62.612 | 42.357 | 62.309 | 0.00 | 0.00 |
| ATOM | 5518 | HB2  | SER | X | 367 | 63.698 | 42.439 | 62.343 | 0.00 | 0.00 |
| ATOM | 5519 | HB3  | SER | X | 367 | 62.138 | 43.329 | 62.443 | 0.00 | 0.00 |
| ATOM | 5520 | OG   | SER | X | 367 | 62.213 | 41.447 | 63.240 | 0.00 | 0.00 |
| ATOM | 5521 | HG   | SER | X | 367 | 61.257 | 41.390 | 63.169 | 0.00 | 0.00 |
| ATOM | 5522 | C    | SER | X | 367 | 62.967 | 40.555 | 60.507 | 0.00 | 0.00 |
| ATOM | 5523 | O    | SER | X | 367 | 62.312 | 39.537 | 60.461 | 0.00 | 0.00 |
| ATOM | 5524 | N    | ASP | X | 368 | 64.306 | 40.514 | 60.272 | 0.00 | 0.00 |
| ATOM | 5525 | H    | ASP | X | 368 | 64.729 | 41.431 | 60.243 | 0.00 | 0.00 |

|      |      |      |     |   |     |        |        |        |      |      |
|------|------|------|-----|---|-----|--------|--------|--------|------|------|
| ATOM | 5526 | CA   | ASP | X | 368 | 65.176 | 39.275 | 60.134 | 0.00 | 0.00 |
| ATOM | 5527 | HA   | ASP | X | 368 | 64.865 | 38.807 | 59.200 | 0.00 | 0.00 |
| ATOM | 5528 | CB   | ASP | X | 368 | 66.642 | 39.674 | 59.985 | 0.00 | 0.00 |
| ATOM | 5529 | HB2  | ASP | X | 368 | 66.718 | 40.390 | 59.166 | 0.00 | 0.00 |
| ATOM | 5530 | HB3  | ASP | X | 368 | 66.931 | 40.053 | 60.965 | 0.00 | 0.00 |
| ATOM | 5531 | CG   | ASP | X | 368 | 67.604 | 38.521 | 59.558 | 0.00 | 0.00 |
| ATOM | 5532 | OD1  | ASP | X | 368 | 68.236 | 37.942 | 60.476 | 0.00 | 0.00 |
| ATOM | 5533 | OD2  | ASP | X | 368 | 67.915 | 38.343 | 58.363 | 0.00 | 0.00 |
| ATOM | 5534 | C    | ASP | X | 368 | 64.936 | 38.299 | 61.293 | 0.00 | 0.00 |
| ATOM | 5535 | O    | ASP | X | 368 | 64.834 | 37.119 | 61.054 | 0.00 | 0.00 |
| ATOM | 5536 | N    | LEU | X | 369 | 64.950 | 38.640 | 62.613 | 0.00 | 0.00 |
| ATOM | 5537 | H    | LEU | X | 369 | 65.197 | 39.599 | 62.810 | 0.00 | 0.00 |
| ATOM | 5538 | CA   | LEU | X | 369 | 64.775 | 37.689 | 63.666 | 0.00 | 0.00 |
| ATOM | 5539 | HA   | LEU | X | 369 | 65.528 | 36.908 | 63.568 | 0.00 | 0.00 |
| ATOM | 5540 | CB   | LEU | X | 369 | 65.036 | 38.404 | 64.976 | 0.00 | 0.00 |
| ATOM | 5541 | HB2  | LEU | X | 369 | 65.981 | 38.946 | 64.949 | 0.00 | 0.00 |
| ATOM | 5542 | HB3  | LEU | X | 369 | 64.225 | 39.130 | 65.021 | 0.00 | 0.00 |
| ATOM | 5543 | CG   | LEU | X | 369 | 64.981 | 37.714 | 66.321 | 0.00 | 0.00 |
| ATOM | 5544 | HG   | LEU | X | 369 | 64.012 | 37.239 | 66.475 | 0.00 | 0.00 |
| ATOM | 5545 | CD1  | LEU | X | 369 | 66.054 | 36.636 | 66.385 | 0.00 | 0.00 |
| ATOM | 5546 | HD11 | LEU | X | 369 | 65.759 | 35.721 | 65.870 | 0.00 | 0.00 |
| ATOM | 5547 | HD12 | LEU | X | 369 | 66.236 | 36.444 | 67.442 | 0.00 | 0.00 |
| ATOM | 5548 | HD13 | LEU | X | 369 | 66.977 | 37.021 | 65.952 | 0.00 | 0.00 |
| ATOM | 5549 | CD2  | LEU | X | 369 | 65.079 | 38.723 | 67.454 | 0.00 | 0.00 |
| ATOM | 5550 | HD21 | LEU | X | 369 | 66.124 | 39.031 | 67.452 | 0.00 | 0.00 |
| ATOM | 5551 | HD22 | LEU | X | 369 | 64.354 | 39.536 | 67.412 | 0.00 | 0.00 |
| ATOM | 5552 | HD23 | LEU | X | 369 | 64.920 | 38.166 | 68.377 | 0.00 | 0.00 |
| ATOM | 5553 | C    | LEU | X | 369 | 63.380 | 37.093 | 63.700 | 0.00 | 0.00 |
| ATOM | 5554 | O    | LEU | X | 369 | 63.201 | 36.015 | 64.250 | 0.00 | 0.00 |
| ATOM | 5555 | N    | ALA | X | 370 | 62.316 | 37.727 | 63.125 | 0.00 | 0.00 |
| ATOM | 5556 | H    | ALA | X | 370 | 62.506 | 38.621 | 62.694 | 0.00 | 0.00 |
| ATOM | 5557 | CA   | ALA | X | 370 | 61.020 | 37.059 | 62.886 | 0.00 | 0.00 |
| ATOM | 5558 | HA   | ALA | X | 370 | 60.880 | 36.315 | 63.670 | 0.00 | 0.00 |
| ATOM | 5559 | CB   | ALA | X | 370 | 59.922 | 38.052 | 62.938 | 0.00 | 0.00 |
| ATOM | 5560 | HB1  | ALA | X | 370 | 58.945 | 37.567 | 62.928 | 0.00 | 0.00 |
| ATOM | 5561 | HB2  | ALA | X | 370 | 59.950 | 38.582 | 61.986 | 0.00 | 0.00 |
| ATOM | 5562 | HB3  | ALA | X | 370 | 59.856 | 38.692 | 63.818 | 0.00 | 0.00 |
| ATOM | 5563 | C    | ALA | X | 370 | 60.945 | 36.226 | 61.599 | 0.00 | 0.00 |
| ATOM | 5564 | O    | ALA | X | 370 | 60.456 | 35.092 | 61.632 | 0.00 | 0.00 |
| ATOM | 5565 | N    | ALA | X | 371 | 61.604 | 36.745 | 60.545 | 0.00 | 0.00 |
| ATOM | 5566 | H    | ALA | X | 371 | 61.900 | 37.707 | 60.634 | 0.00 | 0.00 |
| ATOM | 5567 | CA   | ALA | X | 371 | 61.705 | 36.109 | 59.272 | 0.00 | 0.00 |
| ATOM | 5568 | HA   | ALA | X | 371 | 60.679 | 35.962 | 58.935 | 0.00 | 0.00 |
| ATOM | 5569 | CB   | ALA | X | 371 | 62.316 | 36.989 | 58.172 | 0.00 | 0.00 |
| ATOM | 5570 | HB1  | ALA | X | 371 | 63.359 | 37.151 | 58.443 | 0.00 | 0.00 |
| ATOM | 5571 | HB2  | ALA | X | 371 | 61.775 | 37.911 | 57.957 | 0.00 | 0.00 |
| ATOM | 5572 | HB3  | ALA | X | 371 | 62.431 | 36.390 | 57.269 | 0.00 | 0.00 |
| ATOM | 5573 | C    | ALA | X | 371 | 62.513 | 34.805 | 59.342 | 0.00 | 0.00 |
| ATOM | 5574 | O    | ALA | X | 371 | 62.099 | 33.788 | 58.762 | 0.00 | 0.00 |
| ATOM | 5575 | N    | GLU | X | 372 | 63.519 | 34.658 | 60.172 | 0.00 | 0.00 |
| ATOM | 5576 | H    | GLU | X | 372 | 63.761 | 35.515 | 60.649 | 0.00 | 0.00 |
| ATOM | 5577 | CA   | GLU | X | 372 | 64.264 | 33.404 | 60.533 | 0.00 | 0.00 |
| ATOM | 5578 | HA   | GLU | X | 372 | 64.658 | 33.014 | 59.595 | 0.00 | 0.00 |
| ATOM | 5579 | CB   | GLU | X | 372 | 65.549 | 33.745 | 61.316 | 0.00 | 0.00 |
| ATOM | 5580 | HB2  | GLU | X | 372 | 66.019 | 34.550 | 60.751 | 0.00 | 0.00 |
| ATOM | 5581 | HB3  | GLU | X | 372 | 65.236 | 34.015 | 62.325 | 0.00 | 0.00 |
| ATOM | 5582 | CG   | GLU | X | 372 | 66.402 | 32.525 | 61.349 | 0.00 | 0.00 |
| ATOM | 5583 | HG2  | GLU | X | 372 | 65.897 | 31.645 | 61.747 | 0.00 | 0.00 |
| ATOM | 5584 | HG3  | GLU | X | 372 | 66.733 | 32.284 | 60.339 | 0.00 | 0.00 |
| ATOM | 5585 | CD   | GLU | X | 372 | 67.602 | 32.769 | 62.254 | 0.00 | 0.00 |
| ATOM | 5586 | OE1  | GLU | X | 372 | 67.632 | 32.376 | 63.467 | 0.00 | 0.00 |
| ATOM | 5587 | OE2  | GLU | X | 372 | 68.516 | 33.350 | 61.674 | 0.00 | 0.00 |
| ATOM | 5588 | C    | GLU | X | 372 | 63.335 | 32.330 | 61.246 | 0.00 | 0.00 |
| ATOM | 5589 | O    | GLU | X | 372 | 63.472 | 31.138 | 60.898 | 0.00 | 0.00 |
| ATOM | 5590 | N    | ALA | X | 373 | 62.308 | 32.700 | 62.057 | 0.00 | 0.00 |
| ATOM | 5591 | H    | ALA | X | 373 | 62.266 | 33.699 | 62.199 | 0.00 | 0.00 |
| ATOM | 5592 | CA   | ALA | X | 373 | 61.330 | 31.870 | 62.726 | 0.00 | 0.00 |

|      |      |      |     |   |     |        |        |        |      |      |
|------|------|------|-----|---|-----|--------|--------|--------|------|------|
| ATOM | 5593 | HA   | ALA | X | 373 | 61.718 | 30.939 | 63.139 | 0.00 | 0.00 |
| ATOM | 5594 | CB   | ALA | X | 373 | 60.756 | 32.693 | 63.924 | 0.00 | 0.00 |
| ATOM | 5595 | HB1  | ALA | X | 373 | 60.600 | 33.765 | 63.800 | 0.00 | 0.00 |
| ATOM | 5596 | HB2  | ALA | X | 373 | 61.484 | 32.679 | 64.735 | 0.00 | 0.00 |
| ATOM | 5597 | HB3  | ALA | X | 373 | 59.816 | 32.325 | 64.334 | 0.00 | 0.00 |
| ATOM | 5598 | C    | ALA | X | 373 | 60.151 | 31.571 | 61.761 | 0.00 | 0.00 |
| ATOM | 5599 | O    | ALA | X | 373 | 59.698 | 30.460 | 61.882 | 0.00 | 0.00 |
| ATOM | 5600 | N    | VAL | X | 374 | 59.893 | 32.428 | 60.764 | 0.00 | 0.00 |
| ATOM | 5601 | H    | VAL | X | 374 | 60.256 | 33.370 | 60.781 | 0.00 | 0.00 |
| ATOM | 5602 | CA   | VAL | X | 374 | 59.012 | 32.054 | 59.596 | 0.00 | 0.00 |
| ATOM | 5603 | HA   | VAL | X | 374 | 58.131 | 31.518 | 59.949 | 0.00 | 0.00 |
| ATOM | 5604 | CB   | VAL | X | 374 | 58.478 | 33.224 | 58.761 | 0.00 | 0.00 |
| ATOM | 5605 | HB   | VAL | X | 374 | 59.404 | 33.673 | 58.402 | 0.00 | 0.00 |
| ATOM | 5606 | CG1  | VAL | X | 374 | 57.824 | 32.771 | 57.451 | 0.00 | 0.00 |
| ATOM | 5607 | HG11 | VAL | X | 374 | 57.313 | 33.633 | 57.022 | 0.00 | 0.00 |
| ATOM | 5608 | HG12 | VAL | X | 374 | 58.564 | 32.373 | 56.757 | 0.00 | 0.00 |
| ATOM | 5609 | HG13 | VAL | X | 374 | 57.180 | 31.908 | 57.625 | 0.00 | 0.00 |
| ATOM | 5610 | CG2  | VAL | X | 374 | 57.721 | 34.258 | 59.566 | 0.00 | 0.00 |
| ATOM | 5611 | HG21 | VAL | X | 374 | 58.062 | 35.277 | 59.387 | 0.00 | 0.00 |
| ATOM | 5612 | HG22 | VAL | X | 374 | 57.895 | 34.079 | 60.627 | 0.00 | 0.00 |
| ATOM | 5613 | HG23 | VAL | X | 374 | 56.679 | 34.269 | 59.245 | 0.00 | 0.00 |
| ATOM | 5614 | C    | VAL | X | 374 | 59.731 | 30.957 | 58.755 | 0.00 | 0.00 |
| ATOM | 5615 | O    | VAL | X | 374 | 59.088 | 30.009 | 58.371 | 0.00 | 0.00 |
| ATOM | 5616 | N    | VAL | X | 375 | 61.032 | 31.128 | 58.496 | 0.00 | 0.00 |
| ATOM | 5617 | H    | VAL | X | 375 | 61.453 | 31.965 | 58.874 | 0.00 | 0.00 |
| ATOM | 5618 | CA   | VAL | X | 375 | 61.798 | 30.074 | 57.825 | 0.00 | 0.00 |
| ATOM | 5619 | HA   | VAL | X | 375 | 61.274 | 29.881 | 56.888 | 0.00 | 0.00 |
| ATOM | 5620 | CB   | VAL | X | 375 | 63.266 | 30.604 | 57.552 | 0.00 | 0.00 |
| ATOM | 5621 | HB   | VAL | X | 375 | 63.704 | 31.083 | 58.429 | 0.00 | 0.00 |
| ATOM | 5622 | CG1  | VAL | X | 375 | 64.142 | 29.454 | 57.072 | 0.00 | 0.00 |
| ATOM | 5623 | HG11 | VAL | X | 375 | 64.236 | 28.744 | 57.893 | 0.00 | 0.00 |
| ATOM | 5624 | HG12 | VAL | X | 375 | 63.725 | 28.950 | 56.199 | 0.00 | 0.00 |
| ATOM | 5625 | HG13 | VAL | X | 375 | 65.108 | 29.915 | 56.864 | 0.00 | 0.00 |
| ATOM | 5626 | CG2  | VAL | X | 375 | 63.239 | 31.695 | 56.436 | 0.00 | 0.00 |
| ATOM | 5627 | HG21 | VAL | X | 375 | 64.235 | 31.908 | 56.048 | 0.00 | 0.00 |
| ATOM | 5628 | HG22 | VAL | X | 375 | 62.856 | 32.643 | 56.813 | 0.00 | 0.00 |
| ATOM | 5629 | HG23 | VAL | X | 375 | 62.689 | 31.277 | 55.592 | 0.00 | 0.00 |
| ATOM | 5630 | C    | VAL | X | 375 | 61.777 | 28.680 | 58.508 | 0.00 | 0.00 |
| ATOM | 5631 | O    | VAL | X | 375 | 61.567 | 27.634 | 57.915 | 0.00 | 0.00 |
| ATOM | 5632 | N    | LEU | X | 376 | 61.800 | 28.782 | 59.843 | 0.00 | 0.00 |
| ATOM | 5633 | H    | LEU | X | 376 | 62.028 | 29.693 | 60.215 | 0.00 | 0.00 |
| ATOM | 5634 | CA   | LEU | X | 376 | 61.806 | 27.662 | 60.807 | 0.00 | 0.00 |
| ATOM | 5635 | HA   | LEU | X | 376 | 62.618 | 27.028 | 60.450 | 0.00 | 0.00 |
| ATOM | 5636 | CB   | LEU | X | 376 | 62.061 | 28.191 | 62.272 | 0.00 | 0.00 |
| ATOM | 5637 | HB2  | LEU | X | 376 | 63.080 | 28.577 | 62.255 | 0.00 | 0.00 |
| ATOM | 5638 | HB3  | LEU | X | 376 | 61.340 | 28.912 | 62.657 | 0.00 | 0.00 |
| ATOM | 5639 | CG   | LEU | X | 376 | 62.261 | 27.158 | 63.369 | 0.00 | 0.00 |
| ATOM | 5640 | HG   | LEU | X | 376 | 62.942 | 26.366 | 63.058 | 0.00 | 0.00 |
| ATOM | 5641 | CD1  | LEU | X | 376 | 62.755 | 27.788 | 64.669 | 0.00 | 0.00 |
| ATOM | 5642 | HD11 | LEU | X | 376 | 62.830 | 27.099 | 65.511 | 0.00 | 0.00 |
| ATOM | 5643 | HD12 | LEU | X | 376 | 62.105 | 28.614 | 64.957 | 0.00 | 0.00 |
| ATOM | 5644 | HD13 | LEU | X | 376 | 63.704 | 28.319 | 64.583 | 0.00 | 0.00 |
| ATOM | 5645 | CD2  | LEU | X | 376 | 61.067 | 26.311 | 63.842 | 0.00 | 0.00 |
| ATOM | 5646 | HD21 | LEU | X | 376 | 60.422 | 26.081 | 62.994 | 0.00 | 0.00 |
| ATOM | 5647 | HD22 | LEU | X | 376 | 61.472 | 25.371 | 64.218 | 0.00 | 0.00 |
| ATOM | 5648 | HD23 | LEU | X | 376 | 60.551 | 26.819 | 64.657 | 0.00 | 0.00 |
| ATOM | 5649 | C    | LEU | X | 376 | 60.508 | 26.865 | 60.684 | 0.00 | 0.00 |
| ATOM | 5650 | O    | LEU | X | 376 | 60.518 | 25.653 | 60.614 | 0.00 | 0.00 |
| ATOM | 5651 | N    | HIE | X | 377 | 59.282 | 27.463 | 60.687 | 0.00 | 0.00 |
| ATOM | 5652 | H    | HIE | X | 377 | 59.284 | 28.467 | 60.798 | 0.00 | 0.00 |
| ATOM | 5653 | CA   | HIE | X | 377 | 57.994 | 26.860 | 60.348 | 0.00 | 0.00 |
| ATOM | 5654 | HA   | HIE | X | 377 | 57.643 | 26.102 | 61.048 | 0.00 | 0.00 |
| ATOM | 5655 | CB   | HIE | X | 377 | 56.985 | 27.991 | 60.322 | 0.00 | 0.00 |
| ATOM | 5656 | HB2  | HIE | X | 377 | 56.980 | 28.524 | 61.273 | 0.00 | 0.00 |
| ATOM | 5657 | HB3  | HIE | X | 377 | 57.348 | 28.771 | 59.654 | 0.00 | 0.00 |
| ATOM | 5658 | CG   | HIE | X | 377 | 55.600 | 27.559 | 60.021 | 0.00 | 0.00 |
| ATOM | 5659 | ND1  | HIE | X | 377 | 54.709 | 26.890 | 60.848 | 0.00 | 0.00 |



|      |      |      |     |   |     |        |        |        |      |      |
|------|------|------|-----|---|-----|--------|--------|--------|------|------|
| ATOM | 5660 | CE1  | HIE | X | 377 | 53.601 | 26.894 | 60.141 | 0.00 | 0.00 |
| ATOM | 5661 | HE1  | HIE | X | 377 | 52.644 | 26.547 | 60.502 | 0.00 | 0.00 |
| ATOM | 5662 | NE2  | HIE | X | 377 | 53.760 | 27.410 | 58.917 | 0.00 | 0.00 |
| ATOM | 5663 | HE2  | HIE | X | 377 | 53.064 | 27.508 | 58.192 | 0.00 | 0.00 |
| ATOM | 5664 | CD2  | HIE | X | 377 | 55.007 | 27.895 | 58.827 | 0.00 | 0.00 |
| ATOM | 5665 | HD2  | HIE | X | 377 | 55.462 | 28.484 | 58.044 | 0.00 | 0.00 |
| ATOM | 5666 | C    | HIE | X | 377 | 57.983 | 26.221 | 58.949 | 0.00 | 0.00 |
| ATOM | 5667 | O    | HIE | X | 377 | 57.470 | 25.103 | 58.866 | 0.00 | 0.00 |
| ATOM | 5668 | N    | TYR | X | 378 | 58.589 | 26.756 | 57.900 | 0.00 | 0.00 |
| ATOM | 5669 | H    | TYR | X | 378 | 58.944 | 27.692 | 58.034 | 0.00 | 0.00 |
| ATOM | 5670 | CA   | TYR | X | 378 | 58.807 | 26.161 | 56.593 | 0.00 | 0.00 |
| ATOM | 5671 | HA   | TYR | X | 378 | 57.940 | 25.510 | 56.479 | 0.00 | 0.00 |
| ATOM | 5672 | CB   | TYR | X | 378 | 58.713 | 27.313 | 55.546 | 0.00 | 0.00 |
| ATOM | 5673 | HB2  | TYR | X | 378 | 59.436 | 28.045 | 55.908 | 0.00 | 0.00 |
| ATOM | 5674 | HB3  | TYR | X | 378 | 58.982 | 26.970 | 54.547 | 0.00 | 0.00 |
| ATOM | 5675 | CG   | TYR | X | 378 | 57.311 | 27.882 | 55.371 | 0.00 | 0.00 |
| ATOM | 5676 | CD1  | TYR | X | 378 | 56.357 | 27.177 | 54.599 | 0.00 | 0.00 |
| ATOM | 5677 | HD1  | TYR | X | 378 | 56.601 | 26.186 | 54.245 | 0.00 | 0.00 |
| ATOM | 5678 | CE1  | TYR | X | 378 | 55.106 | 27.759 | 54.370 | 0.00 | 0.00 |
| ATOM | 5679 | HE1  | TYR | X | 378 | 54.392 | 27.192 | 53.790 | 0.00 | 0.00 |
| ATOM | 5680 | CZ   | TYR | X | 378 | 54.790 | 29.021 | 54.936 | 0.00 | 0.00 |
| ATOM | 5681 | OH   | TYR | X | 378 | 53.622 | 29.514 | 54.556 | 0.00 | 0.00 |
| ATOM | 5682 | HH   | TYR | X | 378 | 53.268 | 28.866 | 53.943 | 0.00 | 0.00 |
| ATOM | 5683 | CE2  | TYR | X | 378 | 55.794 | 29.761 | 55.667 | 0.00 | 0.00 |
| ATOM | 5684 | HE2  | TYR | X | 378 | 55.569 | 30.701 | 56.148 | 0.00 | 0.00 |
| ATOM | 5685 | CD2  | TYR | X | 378 | 57.097 | 29.196 | 55.818 | 0.00 | 0.00 |
| ATOM | 5686 | HD2  | TYR | X | 378 | 57.831 | 29.664 | 56.458 | 0.00 | 0.00 |
| ATOM | 5687 | C    | TYR | X | 378 | 60.080 | 25.271 | 56.327 | 0.00 | 0.00 |
| ATOM | 5688 | O    | TYR | X | 378 | 60.337 | 25.039 | 55.155 | 0.00 | 0.00 |
| ATOM | 5689 | N    | THR | X | 379 | 60.713 | 24.763 | 57.419 | 0.00 | 0.00 |
| ATOM | 5690 | H    | THR | X | 379 | 60.442 | 25.015 | 58.359 | 0.00 | 0.00 |
| ATOM | 5691 | CA   | THR | X | 379 | 61.873 | 23.824 | 57.363 | 0.00 | 0.00 |
| ATOM | 5692 | HA   | THR | X | 379 | 62.313 | 23.806 | 56.366 | 0.00 | 0.00 |
| ATOM | 5693 | CB   | THR | X | 379 | 62.842 | 24.278 | 58.364 | 0.00 | 0.00 |
| ATOM | 5694 | HB   | THR | X | 379 | 62.357 | 24.176 | 59.334 | 0.00 | 0.00 |
| ATOM | 5695 | CG2  | THR | X | 379 | 64.048 | 23.448 | 58.547 | 0.00 | 0.00 |
| ATOM | 5696 | HG21 | THR | X | 379 | 64.581 | 23.288 | 57.610 | 0.00 | 0.00 |
| ATOM | 5697 | HG22 | THR | X | 379 | 63.784 | 22.453 | 58.907 | 0.00 | 0.00 |
| ATOM | 5698 | HG23 | THR | X | 379 | 64.730 | 23.943 | 59.238 | 0.00 | 0.00 |
| ATOM | 5699 | OG1  | THR | X | 379 | 63.205 | 25.626 | 58.069 | 0.00 | 0.00 |
| ATOM | 5700 | HG1  | THR | X | 379 | 62.387 | 26.126 | 58.021 | 0.00 | 0.00 |
| ATOM | 5701 | C    | THR | X | 379 | 61.456 | 22.381 | 57.530 | 0.00 | 0.00 |
| ATOM | 5702 | O    | THR | X | 379 | 60.388 | 22.175 | 58.189 | 0.00 | 0.00 |
| ATOM | 5703 | N    | ASP | X | 380 | 62.162 | 21.390 | 57.009 | 0.00 | 0.00 |
| ATOM | 5704 | H    | ASP | X | 380 | 63.033 | 21.706 | 56.607 | 0.00 | 0.00 |
| ATOM | 5705 | CA   | ASP | X | 380 | 61.881 | 19.970 | 57.122 | 0.00 | 0.00 |
| ATOM | 5706 | HA   | ASP | X | 380 | 61.055 | 19.817 | 57.817 | 0.00 | 0.00 |
| ATOM | 5707 | CB   | ASP | X | 380 | 61.604 | 19.355 | 55.746 | 0.00 | 0.00 |
| ATOM | 5708 | HB2  | ASP | X | 380 | 60.976 | 19.913 | 55.051 | 0.00 | 0.00 |
| ATOM | 5709 | HB3  | ASP | X | 380 | 62.519 | 19.429 | 55.158 | 0.00 | 0.00 |
| ATOM | 5710 | CG   | ASP | X | 380 | 61.183 | 17.906 | 55.761 | 0.00 | 0.00 |
| ATOM | 5711 | OD1  | ASP | X | 380 | 59.970 | 17.534 | 55.499 | 0.00 | 0.00 |
| ATOM | 5712 | OD2  | ASP | X | 380 | 62.056 | 17.055 | 56.004 | 0.00 | 0.00 |
| ATOM | 5713 | C    | ASP | X | 380 | 63.075 | 19.282 | 57.807 | 0.00 | 0.00 |
| ATOM | 5714 | O    | ASP | X | 380 | 64.171 | 19.826 | 57.703 | 0.00 | 0.00 |
| ATOM | 5715 | N    | TRP | X | 381 | 62.804 | 18.275 | 58.575 | 0.00 | 0.00 |
| ATOM | 5716 | H    | TRP | X | 381 | 61.840 | 18.073 | 58.801 | 0.00 | 0.00 |
| ATOM | 5717 | CA   | TRP | X | 381 | 63.875 | 17.743 | 59.427 | 0.00 | 0.00 |
| ATOM | 5718 | HA   | TRP | X | 381 | 64.575 | 18.514 | 59.749 | 0.00 | 0.00 |
| ATOM | 5719 | CB   | TRP | X | 381 | 63.293 | 17.044 | 60.650 | 0.00 | 0.00 |
| ATOM | 5720 | HB2  | TRP | X | 381 | 62.616 | 16.238 | 60.367 | 0.00 | 0.00 |
| ATOM | 5721 | HB3  | TRP | X | 381 | 64.096 | 16.502 | 61.150 | 0.00 | 0.00 |
| ATOM | 5722 | CG   | TRP | X | 381 | 62.565 | 17.783 | 61.652 | 0.00 | 0.00 |
| ATOM | 5723 | CD1  | TRP | X | 381 | 61.884 | 17.195 | 62.602 | 0.00 | 0.00 |
| ATOM | 5724 | HD1  | TRP | X | 381 | 61.864 | 16.133 | 62.799 | 0.00 | 0.00 |
| ATOM | 5725 | NE1  | TRP | X | 381 | 61.257 | 18.141 | 63.442 | 0.00 | 0.00 |
| ATOM | 5726 | HE1  | TRP | X | 381 | 60.784 | 17.957 | 64.315 | 0.00 | 0.00 |

|      |      |      |     |   |     |        |        |        |      |      |
|------|------|------|-----|---|-----|--------|--------|--------|------|------|
| ATOM | 5727 | CE2  | TRP | X | 381 | 61.482 | 19.404 | 63.023 | 0.00 | 0.00 |
| ATOM | 5728 | CZ2  | TRP | X | 381 | 60.944 | 20.559 | 63.501 | 0.00 | 0.00 |
| ATOM | 5729 | HZ2  | TRP | X | 381 | 60.292 | 20.602 | 64.361 | 0.00 | 0.00 |
| ATOM | 5730 | CH2  | TRP | X | 381 | 61.403 | 21.713 | 62.808 | 0.00 | 0.00 |
| ATOM | 5731 | HH2  | TRP | X | 381 | 61.072 | 22.675 | 63.170 | 0.00 | 0.00 |
| ATOM | 5732 | CZ3  | TRP | X | 381 | 62.231 | 21.673 | 61.608 | 0.00 | 0.00 |
| ATOM | 5733 | HZ3  | TRP | X | 381 | 62.274 | 22.515 | 60.932 | 0.00 | 0.00 |
| ATOM | 5734 | CE3  | TRP | X | 381 | 62.602 | 20.416 | 61.149 | 0.00 | 0.00 |
| ATOM | 5735 | HE3  | TRP | X | 381 | 63.211 | 20.253 | 60.272 | 0.00 | 0.00 |
| ATOM | 5736 | CD2  | TRP | X | 381 | 62.267 | 19.267 | 61.850 | 0.00 | 0.00 |
| ATOM | 5737 | C    | TRP | X | 381 | 64.843 | 16.883 | 58.660 | 0.00 | 0.00 |
| ATOM | 5738 | O    | TRP | X | 381 | 65.984 | 16.617 | 59.082 | 0.00 | 0.00 |
| ATOM | 5739 | N    | LEU | X | 382 | 64.521 | 16.528 | 57.413 | 0.00 | 0.00 |
| ATOM | 5740 | H    | LEU | X | 382 | 63.576 | 16.714 | 57.109 | 0.00 | 0.00 |
| ATOM | 5741 | CA   | LEU | X | 382 | 65.363 | 15.812 | 56.469 | 0.00 | 0.00 |
| ATOM | 5742 | HA   | LEU | X | 382 | 66.300 | 15.639 | 56.999 | 0.00 | 0.00 |
| ATOM | 5743 | CB   | LEU | X | 382 | 64.610 | 14.557 | 56.088 | 0.00 | 0.00 |
| ATOM | 5744 | HB2  | LEU | X | 382 | 64.486 | 13.970 | 56.998 | 0.00 | 0.00 |
| ATOM | 5745 | HB3  | LEU | X | 382 | 63.692 | 14.781 | 55.544 | 0.00 | 0.00 |
| ATOM | 5746 | CG   | LEU | X | 382 | 65.447 | 13.550 | 55.078 | 0.00 | 0.00 |
| ATOM | 5747 | HG   | LEU | X | 382 | 65.511 | 14.056 | 54.115 | 0.00 | 0.00 |
| ATOM | 5748 | CD1  | LEU | X | 382 | 66.860 | 13.083 | 55.581 | 0.00 | 0.00 |
| ATOM | 5749 | HD11 | LEU | X | 382 | 66.710 | 12.620 | 56.557 | 0.00 | 0.00 |
| ATOM | 5750 | HD12 | LEU | X | 382 | 67.555 | 13.911 | 55.721 | 0.00 | 0.00 |
| ATOM | 5751 | HD13 | LEU | X | 382 | 67.235 | 12.343 | 54.874 | 0.00 | 0.00 |
| ATOM | 5752 | CD2  | LEU | X | 382 | 64.458 | 12.356 | 54.941 | 0.00 | 0.00 |
| ATOM | 5753 | HD21 | LEU | X | 382 | 64.434 | 11.905 | 55.933 | 0.00 | 0.00 |
| ATOM | 5754 | HD22 | LEU | X | 382 | 63.544 | 12.777 | 54.522 | 0.00 | 0.00 |
| ATOM | 5755 | HD23 | LEU | X | 382 | 64.820 | 11.657 | 54.188 | 0.00 | 0.00 |
| ATOM | 5756 | C    | LEU | X | 382 | 65.622 | 16.572 | 55.180 | 0.00 | 0.00 |
| ATOM | 5757 | O    | LEU | X | 382 | 66.768 | 16.419 | 54.631 | 0.00 | 0.00 |
| ATOM | 5758 | N    | HIE | X | 383 | 64.707 | 17.502 | 54.821 | 0.00 | 0.00 |
| ATOM | 5759 | H    | HIE | X | 383 | 63.894 | 17.674 | 55.395 | 0.00 | 0.00 |
| ATOM | 5760 | CA   | HIE | X | 383 | 64.865 | 18.286 | 53.553 | 0.00 | 0.00 |
| ATOM | 5761 | HA   | HIE | X | 383 | 65.639 | 17.927 | 52.874 | 0.00 | 0.00 |
| ATOM | 5762 | CB   | HIE | X | 383 | 63.617 | 17.927 | 52.725 | 0.00 | 0.00 |
| ATOM | 5763 | HB2  | HIE | X | 383 | 62.659 | 18.167 | 53.184 | 0.00 | 0.00 |
| ATOM | 5764 | HB3  | HIE | X | 383 | 63.683 | 18.416 | 51.753 | 0.00 | 0.00 |
| ATOM | 5765 | CG   | HIE | X | 383 | 63.558 | 16.504 | 52.392 | 0.00 | 0.00 |
| ATOM | 5766 | ND1  | HIE | X | 383 | 64.228 | 15.903 | 51.347 | 0.00 | 0.00 |
| ATOM | 5767 | CE1  | HIE | X | 383 | 63.740 | 14.676 | 51.255 | 0.00 | 0.00 |
| ATOM | 5768 | HE1  | HIE | X | 383 | 63.956 | 13.937 | 50.497 | 0.00 | 0.00 |
| ATOM | 5769 | NE2  | HIE | X | 383 | 62.883 | 14.437 | 52.209 | 0.00 | 0.00 |
| ATOM | 5770 | HE2  | HIE | X | 383 | 62.293 | 13.626 | 52.333 | 0.00 | 0.00 |
| ATOM | 5771 | CD2  | HIE | X | 383 | 62.710 | 15.571 | 52.949 | 0.00 | 0.00 |
| ATOM | 5772 | HD2  | HIE | X | 383 | 62.029 | 15.659 | 53.783 | 0.00 | 0.00 |
| ATOM | 5773 | C    | HIE | X | 383 | 64.935 | 19.833 | 53.721 | 0.00 | 0.00 |
| ATOM | 5774 | O    | HIE | X | 383 | 64.142 | 20.563 | 53.064 | 0.00 | 0.00 |
| ATOM | 5775 | N    | PRO | X | 384 | 65.822 | 20.296 | 54.599 | 0.00 | 0.00 |
| ATOM | 5776 | CD   | PRO | X | 384 | 66.837 | 19.585 | 55.442 | 0.00 | 0.00 |
| ATOM | 5777 | HD2  | PRO | X | 384 | 67.533 | 18.911 | 54.942 | 0.00 | 0.00 |
| ATOM | 5778 | HD3  | PRO | X | 384 | 66.273 | 19.011 | 56.178 | 0.00 | 0.00 |
| ATOM | 5779 | CG   | PRO | X | 384 | 67.681 | 20.629 | 56.129 | 0.00 | 0.00 |
| ATOM | 5780 | HG2  | PRO | X | 384 | 68.535 | 20.923 | 55.518 | 0.00 | 0.00 |
| ATOM | 5781 | HG3  | PRO | X | 384 | 67.928 | 20.317 | 57.144 | 0.00 | 0.00 |
| ATOM | 5782 | CB   | PRO | X | 384 | 66.788 | 21.835 | 56.213 | 0.00 | 0.00 |
| ATOM | 5783 | HB2  | PRO | X | 384 | 67.197 | 22.843 | 56.282 | 0.00 | 0.00 |
| ATOM | 5784 | HB3  | PRO | X | 384 | 66.133 | 21.730 | 57.078 | 0.00 | 0.00 |
| ATOM | 5785 | CA   | PRO | X | 384 | 65.854 | 21.707 | 54.976 | 0.00 | 0.00 |
| ATOM | 5786 | HA   | PRO | X | 384 | 64.930 | 22.233 | 55.219 | 0.00 | 0.00 |
| ATOM | 5787 | C    | PRO | X | 384 | 66.501 | 22.601 | 53.835 | 0.00 | 0.00 |
| ATOM | 5788 | O    | PRO | X | 384 | 66.178 | 23.851 | 53.770 | 0.00 | 0.00 |
| ATOM | 5789 | N    | GLU | X | 385 | 67.336 | 21.986 | 52.974 | 0.00 | 0.00 |
| ATOM | 5790 | H    | GLU | X | 385 | 67.426 | 20.980 | 52.983 | 0.00 | 0.00 |
| ATOM | 5791 | CA   | GLU | X | 385 | 68.116 | 22.732 | 51.992 | 0.00 | 0.00 |
| ATOM | 5792 | HA   | GLU | X | 385 | 67.943 | 23.805 | 52.069 | 0.00 | 0.00 |
| ATOM | 5793 | CB   | GLU | X | 385 | 69.661 | 22.592 | 52.235 | 0.00 | 0.00 |

|      |      |      |     |   |     |        |        |        |      |      |
|------|------|------|-----|---|-----|--------|--------|--------|------|------|
| ATOM | 5794 | HB2  | GLU | X | 385 | 69.904 | 21.531 | 52.291 | 0.00 | 0.00 |
| ATOM | 5795 | HB3  | GLU | X | 385 | 70.117 | 23.181 | 51.439 | 0.00 | 0.00 |
| ATOM | 5796 | CG   | GLU | X | 385 | 70.227 | 23.156 | 53.533 | 0.00 | 0.00 |
| ATOM | 5797 | HG2  | GLU | X | 385 | 69.979 | 24.207 | 53.680 | 0.00 | 0.00 |
| ATOM | 5798 | HG3  | GLU | X | 385 | 69.674 | 22.692 | 54.350 | 0.00 | 0.00 |
| ATOM | 5799 | CD   | GLU | X | 385 | 71.660 | 22.825 | 53.733 | 0.00 | 0.00 |
| ATOM | 5800 | OE1  | GLU | X | 385 | 72.338 | 23.641 | 54.316 | 0.00 | 0.00 |
| ATOM | 5801 | OE2  | GLU | X | 385 | 72.154 | 21.776 | 53.302 | 0.00 | 0.00 |
| ATOM | 5802 | C    | GLU | X | 385 | 67.764 | 22.155 | 50.556 | 0.00 | 0.00 |
| ATOM | 5803 | O    | GLU | X | 385 | 68.641 | 22.184 | 49.669 | 0.00 | 0.00 |
| ATOM | 5804 | N    | ASP | X | 386 | 66.452 | 21.856 | 50.383 | 0.00 | 0.00 |
| ATOM | 5805 | H    | ASP | X | 386 | 65.772 | 21.935 | 51.125 | 0.00 | 0.00 |
| ATOM | 5806 | CA   | ASP | X | 386 | 65.956 | 21.527 | 49.049 | 0.00 | 0.00 |
| ATOM | 5807 | HA   | ASP | X | 386 | 66.748 | 21.061 | 48.463 | 0.00 | 0.00 |
| ATOM | 5808 | CB   | ASP | X | 386 | 64.894 | 20.460 | 49.215 | 0.00 | 0.00 |
| ATOM | 5809 | HB2  | ASP | X | 386 | 65.253 | 19.513 | 49.616 | 0.00 | 0.00 |
| ATOM | 5810 | HB3  | ASP | X | 386 | 64.153 | 20.823 | 49.927 | 0.00 | 0.00 |
| ATOM | 5811 | CG   | ASP | X | 386 | 64.341 | 19.964 | 47.860 | 0.00 | 0.00 |
| ATOM | 5812 | OD1  | ASP | X | 386 | 63.412 | 19.100 | 47.910 | 0.00 | 0.00 |
| ATOM | 5813 | OD2  | ASP | X | 386 | 64.771 | 20.491 | 46.771 | 0.00 | 0.00 |
| ATOM | 5814 | C    | ASP | X | 386 | 65.487 | 22.840 | 48.336 | 0.00 | 0.00 |
| ATOM | 5815 | O    | ASP | X | 386 | 64.506 | 23.477 | 48.775 | 0.00 | 0.00 |
| ATOM | 5816 | N    | PRO | X | 387 | 66.091 | 23.206 | 47.169 | 0.00 | 0.00 |
| ATOM | 5817 | CD   | PRO | X | 387 | 67.158 | 22.531 | 46.381 | 0.00 | 0.00 |
| ATOM | 5818 | HD2  | PRO | X | 387 | 66.585 | 21.888 | 45.713 | 0.00 | 0.00 |
| ATOM | 5819 | HD3  | PRO | X | 387 | 67.893 | 22.077 | 47.047 | 0.00 | 0.00 |
| ATOM | 5820 | CG   | PRO | X | 387 | 67.755 | 23.742 | 45.654 | 0.00 | 0.00 |
| ATOM | 5821 | HG2  | PRO | X | 387 | 68.242 | 23.407 | 44.738 | 0.00 | 0.00 |
| ATOM | 5822 | HG3  | PRO | X | 387 | 68.473 | 24.356 | 46.198 | 0.00 | 0.00 |
| ATOM | 5823 | CB   | PRO | X | 387 | 66.525 | 24.593 | 45.202 | 0.00 | 0.00 |
| ATOM | 5824 | HB2  | PRO | X | 387 | 65.996 | 24.341 | 44.284 | 0.00 | 0.00 |
| ATOM | 5825 | HB3  | PRO | X | 387 | 66.885 | 25.622 | 45.230 | 0.00 | 0.00 |
| ATOM | 5826 | CA   | PRO | X | 387 | 65.565 | 24.287 | 46.377 | 0.00 | 0.00 |
| ATOM | 5827 | HA   | PRO | X | 387 | 65.649 | 25.204 | 46.961 | 0.00 | 0.00 |
| ATOM | 5828 | C    | PRO | X | 387 | 64.131 | 24.091 | 45.889 | 0.00 | 0.00 |
| ATOM | 5829 | O    | PRO | X | 387 | 63.455 | 25.124 | 45.830 | 0.00 | 0.00 |
| ATOM | 5830 | N    | ALA | X | 388 | 63.682 | 22.921 | 45.501 | 0.00 | 0.00 |
| ATOM | 5831 | H    | ALA | X | 388 | 64.207 | 22.061 | 45.563 | 0.00 | 0.00 |
| ATOM | 5832 | CA   | ALA | X | 388 | 62.247 | 22.762 | 45.169 | 0.00 | 0.00 |
| ATOM | 5833 | HA   | ALA | X | 388 | 62.104 | 23.535 | 44.415 | 0.00 | 0.00 |
| ATOM | 5834 | CB   | ALA | X | 388 | 62.139 | 21.326 | 44.575 | 0.00 | 0.00 |
| ATOM | 5835 | HB1  | ALA | X | 388 | 62.402 | 20.608 | 45.351 | 0.00 | 0.00 |
| ATOM | 5836 | HB2  | ALA | X | 388 | 62.730 | 21.130 | 43.680 | 0.00 | 0.00 |
| ATOM | 5837 | HB3  | ALA | X | 388 | 61.125 | 21.030 | 44.305 | 0.00 | 0.00 |
| ATOM | 5838 | C    | ALA | X | 388 | 61.260 | 23.092 | 46.300 | 0.00 | 0.00 |
| ATOM | 5839 | O    | ALA | X | 388 | 60.250 | 23.724 | 46.058 | 0.00 | 0.00 |
| ATOM | 5840 | N    | ARG | X | 389 | 61.626 | 22.659 | 47.497 | 0.00 | 0.00 |
| ATOM | 5841 | H    | ARG | X | 389 | 62.459 | 22.090 | 47.542 | 0.00 | 0.00 |
| ATOM | 5842 | CA   | ARG | X | 389 | 60.956 | 22.965 | 48.785 | 0.00 | 0.00 |
| ATOM | 5843 | HA   | ARG | X | 389 | 59.921 | 22.700 | 48.571 | 0.00 | 0.00 |
| ATOM | 5844 | CB   | ARG | X | 389 | 61.365 | 22.082 | 49.978 | 0.00 | 0.00 |
| ATOM | 5845 | HB2  | ARG | X | 389 | 62.449 | 22.068 | 50.094 | 0.00 | 0.00 |
| ATOM | 5846 | HB3  | ARG | X | 389 | 60.931 | 22.460 | 50.904 | 0.00 | 0.00 |
| ATOM | 5847 | CG   | ARG | X | 389 | 60.841 | 20.683 | 49.741 | 0.00 | 0.00 |
| ATOM | 5848 | HG2  | ARG | X | 389 | 59.783 | 20.642 | 49.485 | 0.00 | 0.00 |
| ATOM | 5849 | HG3  | ARG | X | 389 | 61.425 | 20.236 | 48.936 | 0.00 | 0.00 |
| ATOM | 5850 | CD   | ARG | X | 389 | 61.044 | 19.789 | 50.941 | 0.00 | 0.00 |
| ATOM | 5851 | HD2  | ARG | X | 389 | 61.974 | 20.061 | 51.438 | 0.00 | 0.00 |
| ATOM | 5852 | HD3  | ARG | X | 389 | 60.177 | 19.940 | 51.583 | 0.00 | 0.00 |
| ATOM | 5853 | NE   | ARG | X | 389 | 61.212 | 18.410 | 50.582 | 0.00 | 0.00 |
| ATOM | 5854 | HE   | ARG | X | 389 | 61.889 | 18.092 | 49.903 | 0.00 | 0.00 |
| ATOM | 5855 | CZ   | ARG | X | 389 | 60.455 | 17.375 | 51.049 | 0.00 | 0.00 |
| ATOM | 5856 | NH1  | ARG | X | 389 | 59.580 | 17.453 | 52.030 | 0.00 | 0.00 |
| ATOM | 5857 | HH11 | ARG | X | 389 | 59.135 | 18.330 | 52.259 | 0.00 | 0.00 |
| ATOM | 5858 | HH12 | ARG | X | 389 | 58.930 | 16.698 | 52.199 | 0.00 | 0.00 |
| ATOM | 5859 | NH2  | ARG | X | 389 | 60.686 | 16.193 | 50.525 | 0.00 | 0.00 |
| ATOM | 5860 | HH21 | ARG | X | 389 | 61.592 | 16.013 | 50.115 | 0.00 | 0.00 |

|      |      |      |     |   |     |        |        |        |      |      |
|------|------|------|-----|---|-----|--------|--------|--------|------|------|
| ATOM | 5861 | HH22 | ARG | X | 389 | 60.151 | 15.411 | 50.875 | 0.00 | 0.00 |
| ATOM | 5862 | C    | ARG | X | 389 | 61.077 | 24.480 | 49.151 | 0.00 | 0.00 |
| ATOM | 5863 | O    | ARG | X | 389 | 60.055 | 25.062 | 49.460 | 0.00 | 0.00 |
| ATOM | 5864 | N    | LEU | X | 390 | 62.262 | 25.090 | 49.119 | 0.00 | 0.00 |
| ATOM | 5865 | H    | LEU | X | 390 | 63.098 | 24.540 | 48.982 | 0.00 | 0.00 |
| ATOM | 5866 | CA   | LEU | X | 390 | 62.501 | 26.482 | 49.419 | 0.00 | 0.00 |
| ATOM | 5867 | HA   | LEU | X | 390 | 62.253 | 26.888 | 50.399 | 0.00 | 0.00 |
| ATOM | 5868 | CB   | LEU | X | 390 | 64.013 | 26.825 | 49.159 | 0.00 | 0.00 |
| ATOM | 5869 | HB2  | LEU | X | 390 | 64.297 | 26.569 | 48.138 | 0.00 | 0.00 |
| ATOM | 5870 | HB3  | LEU | X | 390 | 64.070 | 27.901 | 49.324 | 0.00 | 0.00 |
| ATOM | 5871 | CG   | LEU | X | 390 | 64.939 | 26.231 | 50.217 | 0.00 | 0.00 |
| ATOM | 5872 | HG   | LEU | X | 390 | 64.576 | 25.232 | 50.460 | 0.00 | 0.00 |
| ATOM | 5873 | CD1  | LEU | X | 390 | 66.366 | 26.251 | 49.697 | 0.00 | 0.00 |
| ATOM | 5874 | HD11 | LEU | X | 390 | 67.038 | 25.757 | 50.399 | 0.00 | 0.00 |
| ATOM | 5875 | HD12 | LEU | X | 390 | 66.692 | 27.259 | 49.442 | 0.00 | 0.00 |
| ATOM | 5876 | HD13 | LEU | X | 390 | 66.411 | 25.645 | 48.792 | 0.00 | 0.00 |
| ATOM | 5877 | CD2  | LEU | X | 390 | 64.775 | 26.859 | 51.598 | 0.00 | 0.00 |
| ATOM | 5878 | HD21 | LEU | X | 390 | 63.732 | 26.992 | 51.886 | 0.00 | 0.00 |
| ATOM | 5879 | HD22 | LEU | X | 390 | 65.487 | 26.497 | 52.340 | 0.00 | 0.00 |
| ATOM | 5880 | HD23 | LEU | X | 390 | 65.164 | 27.870 | 51.477 | 0.00 | 0.00 |
| ATOM | 5881 | C    | LEU | X | 390 | 61.657 | 27.342 | 48.407 | 0.00 | 0.00 |
| ATOM | 5882 | O    | LEU | X | 390 | 60.955 | 28.309 | 48.821 | 0.00 | 0.00 |
| ATOM | 5883 | N    | ARG | X | 391 | 61.784 | 27.051 | 47.109 | 0.00 | 0.00 |
| ATOM | 5884 | H    | ARG | X | 391 | 62.310 | 26.235 | 46.831 | 0.00 | 0.00 |
| ATOM | 5885 | CA   | ARG | X | 391 | 61.079 | 27.811 | 46.100 | 0.00 | 0.00 |
| ATOM | 5886 | HA   | ARG | X | 391 | 61.421 | 28.842 | 46.185 | 0.00 | 0.00 |
| ATOM | 5887 | CB   | ARG | X | 391 | 61.547 | 27.359 | 44.724 | 0.00 | 0.00 |
| ATOM | 5888 | HB2  | ARG | X | 391 | 62.595 | 27.652 | 44.659 | 0.00 | 0.00 |
| ATOM | 5889 | HB3  | ARG | X | 391 | 61.340 | 26.302 | 44.561 | 0.00 | 0.00 |
| ATOM | 5890 | CG   | ARG | X | 391 | 60.892 | 28.198 | 43.599 | 0.00 | 0.00 |
| ATOM | 5891 | HG2  | ARG | X | 391 | 59.816 | 28.057 | 43.699 | 0.00 | 0.00 |
| ATOM | 5892 | HG3  | ARG | X | 391 | 60.931 | 29.282 | 43.708 | 0.00 | 0.00 |
| ATOM | 5893 | CD   | ARG | X | 391 | 61.571 | 27.810 | 42.288 | 0.00 | 0.00 |
| ATOM | 5894 | HD2  | ARG | X | 391 | 61.064 | 28.217 | 41.414 | 0.00 | 0.00 |
| ATOM | 5895 | HD3  | ARG | X | 391 | 62.580 | 28.212 | 42.192 | 0.00 | 0.00 |
| ATOM | 5896 | NE   | ARG | X | 391 | 61.419 | 26.385 | 41.980 | 0.00 | 0.00 |
| ATOM | 5897 | HE   | ARG | X | 391 | 62.226 | 25.885 | 41.634 | 0.00 | 0.00 |
| ATOM | 5898 | CZ   | ARG | X | 391 | 60.275 | 25.660 | 41.886 | 0.00 | 0.00 |
| ATOM | 5899 | NH1  | ARG | X | 391 | 59.056 | 26.234 | 41.996 | 0.00 | 0.00 |
| ATOM | 5900 | HH11 | ARG | X | 391 | 58.937 | 27.210 | 42.226 | 0.00 | 0.00 |
| ATOM | 5901 | HH12 | ARG | X | 391 | 58.280 | 25.666 | 41.687 | 0.00 | 0.00 |
| ATOM | 5902 | NH2  | ARG | X | 391 | 60.346 | 24.407 | 41.543 | 0.00 | 0.00 |
| ATOM | 5903 | HH21 | ARG | X | 391 | 61.223 | 23.950 | 41.335 | 0.00 | 0.00 |
| ATOM | 5904 | HH22 | ARG | X | 391 | 59.446 | 24.016 | 41.306 | 0.00 | 0.00 |
| ATOM | 5905 | C    | ARG | X | 391 | 59.531 | 27.614 | 46.367 | 0.00 | 0.00 |
| ATOM | 5906 | O    | ARG | X | 391 | 58.796 | 28.596 | 46.311 | 0.00 | 0.00 |
| ATOM | 5907 | N    | GLU | X | 392 | 59.046 | 26.420 | 46.644 | 0.00 | 0.00 |
| ATOM | 5908 | H    | GLU | X | 392 | 59.667 | 25.634 | 46.770 | 0.00 | 0.00 |
| ATOM | 5909 | CA   | GLU | X | 392 | 57.613 | 26.168 | 46.913 | 0.00 | 0.00 |
| ATOM | 5910 | HA   | GLU | X | 392 | 56.987 | 26.433 | 46.061 | 0.00 | 0.00 |
| ATOM | 5911 | CB   | GLU | X | 392 | 57.435 | 24.661 | 47.075 | 0.00 | 0.00 |
| ATOM | 5912 | HB2  | GLU | X | 392 | 57.800 | 24.143 | 46.189 | 0.00 | 0.00 |
| ATOM | 5913 | HB3  | GLU | X | 392 | 58.027 | 24.341 | 47.932 | 0.00 | 0.00 |
| ATOM | 5914 | CG   | GLU | X | 392 | 55.919 | 24.254 | 47.140 | 0.00 | 0.00 |
| ATOM | 5915 | HG2  | GLU | X | 392 | 55.350 | 25.152 | 47.380 | 0.00 | 0.00 |
| ATOM | 5916 | HG3  | GLU | X | 392 | 55.605 | 23.936 | 46.145 | 0.00 | 0.00 |
| ATOM | 5917 | CD   | GLU | X | 392 | 55.728 | 23.181 | 48.132 | 0.00 | 0.00 |
| ATOM | 5918 | OE1  | GLU | X | 392 | 55.167 | 23.433 | 49.210 | 0.00 | 0.00 |
| ATOM | 5919 | OE2  | GLU | X | 392 | 56.258 | 22.058 | 47.965 | 0.00 | 0.00 |
| ATOM | 5920 | C    | GLU | X | 392 | 57.074 | 26.916 | 48.183 | 0.00 | 0.00 |
| ATOM | 5921 | O    | GLU | X | 392 | 56.058 | 27.561 | 48.101 | 0.00 | 0.00 |
| ATOM | 5922 | N    | ALA | X | 393 | 57.818 | 26.897 | 49.312 | 0.00 | 0.00 |
| ATOM | 5923 | H    | ALA | X | 393 | 58.635 | 26.317 | 49.444 | 0.00 | 0.00 |
| ATOM | 5924 | CA   | ALA | X | 393 | 57.517 | 27.649 | 50.470 | 0.00 | 0.00 |
| ATOM | 5925 | HA   | ALA | X | 393 | 56.532 | 27.396 | 50.863 | 0.00 | 0.00 |
| ATOM | 5926 | CB   | ALA | X | 393 | 58.538 | 27.314 | 51.487 | 0.00 | 0.00 |
| ATOM | 5927 | HB1  | ALA | X | 393 | 58.149 | 27.762 | 52.402 | 0.00 | 0.00 |

|      |      |      |     |   |     |        |        |        |      |      |
|------|------|------|-----|---|-----|--------|--------|--------|------|------|
| ATOM | 5928 | HB2  | ALA | X | 393 | 59.534 | 27.631 | 51.180 | 0.00 | 0.00 |
| ATOM | 5929 | HB3  | ALA | X | 393 | 58.540 | 26.228 | 51.579 | 0.00 | 0.00 |
| ATOM | 5930 | C    | ALA | X | 393 | 57.419 | 29.141 | 50.129 | 0.00 | 0.00 |
| ATOM | 5931 | O    | ALA | X | 393 | 56.562 | 29.846 | 50.594 | 0.00 | 0.00 |
| ATOM | 5932 | N    | LEU | X | 394 | 58.332 | 29.584 | 49.272 | 0.00 | 0.00 |
| ATOM | 5933 | H    | LEU | X | 394 | 59.043 | 28.920 | 49.002 | 0.00 | 0.00 |
| ATOM | 5934 | CA   | LEU | X | 394 | 58.378 | 31.015 | 48.900 | 0.00 | 0.00 |
| ATOM | 5935 | HA   | LEU | X | 394 | 58.177 | 31.502 | 49.854 | 0.00 | 0.00 |
| ATOM | 5936 | CB   | LEU | X | 394 | 59.755 | 31.452 | 48.271 | 0.00 | 0.00 |
| ATOM | 5937 | HB2  | LEU | X | 394 | 60.556 | 31.124 | 48.934 | 0.00 | 0.00 |
| ATOM | 5938 | HB3  | LEU | X | 394 | 59.988 | 30.978 | 47.318 | 0.00 | 0.00 |
| ATOM | 5939 | CG   | LEU | X | 394 | 59.864 | 32.953 | 48.099 | 0.00 | 0.00 |
| ATOM | 5940 | HG   | LEU | X | 394 | 59.091 | 33.346 | 47.439 | 0.00 | 0.00 |
| ATOM | 5941 | CD1  | LEU | X | 394 | 59.742 | 33.745 | 49.433 | 0.00 | 0.00 |
| ATOM | 5942 | HD11 | LEU | X | 394 | 59.763 | 34.801 | 49.163 | 0.00 | 0.00 |
| ATOM | 5943 | HD12 | LEU | X | 394 | 60.656 | 33.643 | 50.019 | 0.00 | 0.00 |
| ATOM | 5944 | HD13 | LEU | X | 394 | 58.857 | 33.513 | 50.026 | 0.00 | 0.00 |
| ATOM | 5945 | CD2  | LEU | X | 394 | 61.200 | 33.353 | 47.505 | 0.00 | 0.00 |
| ATOM | 5946 | HD21 | LEU | X | 394 | 61.287 | 32.908 | 46.513 | 0.00 | 0.00 |
| ATOM | 5947 | HD22 | LEU | X | 394 | 61.222 | 34.433 | 47.356 | 0.00 | 0.00 |
| ATOM | 5948 | HD23 | LEU | X | 394 | 62.073 | 33.056 | 48.085 | 0.00 | 0.00 |
| ATOM | 5949 | C    | LEU | X | 394 | 57.245 | 31.424 | 47.997 | 0.00 | 0.00 |
| ATOM | 5950 | O    | LEU | X | 394 | 56.688 | 32.491 | 48.198 | 0.00 | 0.00 |
| ATOM | 5951 | N    | SER | X | 395 | 56.729 | 30.560 | 47.130 | 0.00 | 0.00 |
| ATOM | 5952 | H    | SER | X | 395 | 57.174 | 29.656 | 47.064 | 0.00 | 0.00 |
| ATOM | 5953 | CA   | SER | X | 395 | 55.430 | 30.660 | 46.596 | 0.00 | 0.00 |
| ATOM | 5954 | HA   | SER | X | 395 | 55.331 | 31.624 | 46.097 | 0.00 | 0.00 |
| ATOM | 5955 | CB   | SER | X | 395 | 55.124 | 29.620 | 45.540 | 0.00 | 0.00 |
| ATOM | 5956 | HB2  | SER | X | 395 | 55.596 | 28.677 | 45.815 | 0.00 | 0.00 |
| ATOM | 5957 | HB3  | SER | X | 395 | 54.048 | 29.629 | 45.366 | 0.00 | 0.00 |
| ATOM | 5958 | OG   | SER | X | 395 | 55.819 | 30.048 | 44.409 | 0.00 | 0.00 |
| ATOM | 5959 | HG   | SER | X | 395 | 55.255 | 30.069 | 43.632 | 0.00 | 0.00 |
| ATOM | 5960 | C    | SER | X | 395 | 54.337 | 30.741 | 47.684 | 0.00 | 0.00 |
| ATOM | 5961 | O    | SER | X | 395 | 53.437 | 31.547 | 47.459 | 0.00 | 0.00 |
| ATOM | 5962 | N    | ASP | X | 396 | 54.416 | 30.005 | 48.843 | 0.00 | 0.00 |
| ATOM | 5963 | H    | ASP | X | 396 | 55.188 | 29.371 | 48.988 | 0.00 | 0.00 |
| ATOM | 5964 | CA   | ASP | X | 396 | 53.265 | 30.024 | 49.784 | 0.00 | 0.00 |
| ATOM | 5965 | HA   | ASP | X | 396 | 52.352 | 30.050 | 49.190 | 0.00 | 0.00 |
| ATOM | 5966 | CB   | ASP | X | 396 | 53.279 | 28.917 | 50.870 | 0.00 | 0.00 |
| ATOM | 5967 | HB2  | ASP | X | 396 | 54.015 | 29.132 | 51.644 | 0.00 | 0.00 |
| ATOM | 5968 | HB3  | ASP | X | 396 | 52.356 | 29.058 | 51.433 | 0.00 | 0.00 |
| ATOM | 5969 | CG   | ASP | X | 396 | 53.205 | 27.451 | 50.396 | 0.00 | 0.00 |
| ATOM | 5970 | OD1  | ASP | X | 396 | 52.541 | 27.188 | 49.400 | 0.00 | 0.00 |
| ATOM | 5971 | OD2  | ASP | X | 396 | 53.877 | 26.665 | 51.081 | 0.00 | 0.00 |
| ATOM | 5972 | C    | ASP | X | 396 | 53.306 | 31.322 | 50.452 | 0.00 | 0.00 |
| ATOM | 5973 | O    | ASP | X | 396 | 52.254 | 31.932 | 50.515 | 0.00 | 0.00 |
| ATOM | 5974 | N    | VAL | X | 397 | 54.463 | 31.800 | 50.868 | 0.00 | 0.00 |
| ATOM | 5975 | H    | VAL | X | 397 | 55.202 | 31.126 | 50.729 | 0.00 | 0.00 |
| ATOM | 5976 | CA   | VAL | X | 397 | 54.579 | 33.080 | 51.646 | 0.00 | 0.00 |
| ATOM | 5977 | HA   | VAL | X | 397 | 54.050 | 33.023 | 52.597 | 0.00 | 0.00 |
| ATOM | 5978 | CB   | VAL | X | 397 | 56.086 | 33.428 | 52.010 | 0.00 | 0.00 |
| ATOM | 5979 | HB   | VAL | X | 397 | 56.666 | 33.526 | 51.093 | 0.00 | 0.00 |
| ATOM | 5980 | CG1  | VAL | X | 397 | 56.196 | 34.768 | 52.746 | 0.00 | 0.00 |
| ATOM | 5981 | HG11 | VAL | X | 397 | 55.472 | 34.813 | 53.560 | 0.00 | 0.00 |
| ATOM | 5982 | HG12 | VAL | X | 397 | 57.239 | 34.790 | 53.059 | 0.00 | 0.00 |
| ATOM | 5983 | HG13 | VAL | X | 397 | 55.984 | 35.584 | 52.055 | 0.00 | 0.00 |
| ATOM | 5984 | CG2  | VAL | X | 397 | 56.721 | 32.278 | 52.874 | 0.00 | 0.00 |
| ATOM | 5985 | HG21 | VAL | X | 397 | 55.942 | 31.600 | 53.222 | 0.00 | 0.00 |
| ATOM | 5986 | HG22 | VAL | X | 397 | 57.091 | 32.596 | 53.849 | 0.00 | 0.00 |
| ATOM | 5987 | HG23 | VAL | X | 397 | 57.541 | 31.772 | 52.365 | 0.00 | 0.00 |
| ATOM | 5988 | C    | VAL | X | 397 | 54.032 | 34.230 | 50.864 | 0.00 | 0.00 |
| ATOM | 5989 | O    | VAL | X | 397 | 53.191 | 34.926 | 51.412 | 0.00 | 0.00 |
| ATOM | 5990 | N    | VAL | X | 398 | 54.324 | 34.238 | 49.534 | 0.00 | 0.00 |
| ATOM | 5991 | H    | VAL | X | 398 | 54.979 | 33.545 | 49.202 | 0.00 | 0.00 |
| ATOM | 5992 | CA   | VAL | X | 398 | 53.846 | 35.272 | 48.683 | 0.00 | 0.00 |
| ATOM | 5993 | HA   | VAL | X | 398 | 53.946 | 36.147 | 49.326 | 0.00 | 0.00 |
| ATOM | 5994 | CB   | VAL | X | 398 | 54.812 | 35.500 | 47.511 | 0.00 | 0.00 |

|      |      |      |     |   |     |        |        |        |      |      |
|------|------|------|-----|---|-----|--------|--------|--------|------|------|
| ATOM | 5995 | HB   | VAL | X | 398 | 54.661 | 34.642 | 46.856 | 0.00 | 0.00 |
| ATOM | 5996 | CG1  | VAL | X | 398 | 54.475 | 36.706 | 46.627 | 0.00 | 0.00 |
| ATOM | 5997 | HG11 | VAL | X | 398 | 53.578 | 36.566 | 46.023 | 0.00 | 0.00 |
| ATOM | 5998 | HG12 | VAL | X | 398 | 54.315 | 37.612 | 47.211 | 0.00 | 0.00 |
| ATOM | 5999 | HG13 | VAL | X | 398 | 55.320 | 36.866 | 45.957 | 0.00 | 0.00 |
| ATOM | 6000 | CG2  | VAL | X | 398 | 56.357 | 35.673 | 47.898 | 0.00 | 0.00 |
| ATOM | 6001 | HG21 | VAL | X | 398 | 56.561 | 34.808 | 48.530 | 0.00 | 0.00 |
| ATOM | 6002 | HG22 | VAL | X | 398 | 56.460 | 36.559 | 48.524 | 0.00 | 0.00 |
| ATOM | 6003 | HG23 | VAL | X | 398 | 56.988 | 35.637 | 47.010 | 0.00 | 0.00 |
| ATOM | 6004 | C    | VAL | X | 398 | 52.371 | 35.202 | 48.214 | 0.00 | 0.00 |
| ATOM | 6005 | O    | VAL | X | 398 | 51.826 | 36.169 | 47.780 | 0.00 | 0.00 |
| ATOM | 6006 | N    | GLY | X | 399 | 51.689 | 34.112 | 48.450 | 0.00 | 0.00 |
| ATOM | 6007 | H    | GLY | X | 399 | 52.167 | 33.341 | 48.895 | 0.00 | 0.00 |
| ATOM | 6008 | CA   | GLY | X | 399 | 50.252 | 33.832 | 48.205 | 0.00 | 0.00 |
| ATOM | 6009 | HA2  | GLY | X | 399 | 49.818 | 34.581 | 47.542 | 0.00 | 0.00 |
| ATOM | 6010 | HA3  | GLY | X | 399 | 50.200 | 32.830 | 47.779 | 0.00 | 0.00 |
| ATOM | 6011 | C    | GLY | X | 399 | 49.244 | 33.763 | 49.392 | 0.00 | 0.00 |
| ATOM | 6012 | O    | GLY | X | 399 | 48.117 | 34.263 | 49.343 | 0.00 | 0.00 |
| ATOM | 6013 | N    | ASP | X | 400 | 49.668 | 33.086 | 50.486 | 0.00 | 0.00 |
| ATOM | 6014 | H    | ASP | X | 400 | 50.610 | 32.730 | 50.562 | 0.00 | 0.00 |
| ATOM | 6015 | CA   | ASP | X | 400 | 48.857 | 32.799 | 51.648 | 0.00 | 0.00 |
| ATOM | 6016 | HA   | ASP | X | 400 | 48.008 | 32.247 | 51.245 | 0.00 | 0.00 |
| ATOM | 6017 | CB   | ASP | X | 400 | 49.563 | 31.943 | 52.706 | 0.00 | 0.00 |
| ATOM | 6018 | HB2  | ASP | X | 400 | 50.580 | 32.331 | 52.648 | 0.00 | 0.00 |
| ATOM | 6019 | HB3  | ASP | X | 400 | 49.185 | 32.151 | 53.707 | 0.00 | 0.00 |
| ATOM | 6020 | CG   | ASP | X | 400 | 49.456 | 30.418 | 52.488 | 0.00 | 0.00 |
| ATOM | 6021 | OD1  | ASP | X | 400 | 48.538 | 30.003 | 51.764 | 0.00 | 0.00 |
| ATOM | 6022 | OD2  | ASP | X | 400 | 50.216 | 29.717 | 53.146 | 0.00 | 0.00 |
| ATOM | 6023 | C    | ASP | X | 400 | 48.219 | 33.997 | 52.382 | 0.00 | 0.00 |
| ATOM | 6024 | O    | ASP | X | 400 | 47.055 | 34.344 | 52.128 | 0.00 | 0.00 |
| ATOM | 6025 | N    | HIE | X | 401 | 48.982 | 34.670 | 53.259 | 0.00 | 0.00 |
| ATOM | 6026 | H    | HIE | X | 401 | 49.907 | 34.288 | 53.397 | 0.00 | 0.00 |
| ATOM | 6027 | CA   | HIE | X | 401 | 48.617 | 35.879 | 53.977 | 0.00 | 0.00 |
| ATOM | 6028 | HA   | HIE | X | 401 | 47.780 | 35.702 | 54.652 | 0.00 | 0.00 |
| ATOM | 6029 | CB   | HIE | X | 401 | 49.815 | 36.079 | 54.907 | 0.00 | 0.00 |
| ATOM | 6030 | HB2  | HIE | X | 401 | 49.318 | 36.642 | 55.697 | 0.00 | 0.00 |
| ATOM | 6031 | HB3  | HIE | X | 401 | 50.107 | 35.121 | 55.338 | 0.00 | 0.00 |
| ATOM | 6032 | CG   | HIE | X | 401 | 50.833 | 37.084 | 54.502 | 0.00 | 0.00 |
| ATOM | 6033 | ND1  | HIE | X | 401 | 50.705 | 38.489 | 54.622 | 0.00 | 0.00 |
| ATOM | 6034 | CE1  | HIE | X | 401 | 51.851 | 39.023 | 54.183 | 0.00 | 0.00 |
| ATOM | 6035 | HE1  | HIE | X | 401 | 51.984 | 40.095 | 54.157 | 0.00 | 0.00 |
| ATOM | 6036 | NE2  | HIE | X | 401 | 52.663 | 38.071 | 53.673 | 0.00 | 0.00 |
| ATOM | 6037 | HE2  | HIE | X | 401 | 53.493 | 38.202 | 53.113 | 0.00 | 0.00 |
| ATOM | 6038 | CD2  | HIE | X | 401 | 52.007 | 36.873 | 53.817 | 0.00 | 0.00 |
| ATOM | 6039 | HD2  | HIE | X | 401 | 52.383 | 35.913 | 53.496 | 0.00 | 0.00 |
| ATOM | 6040 | C    | HIE | X | 401 | 48.189 | 36.958 | 52.987 | 0.00 | 0.00 |
| ATOM | 6041 | O    | HIE | X | 401 | 47.264 | 37.747 | 53.258 | 0.00 | 0.00 |
| ATOM | 6042 | N    | ASN | X | 402 | 48.857 | 37.097 | 51.931 | 0.00 | 0.00 |
| ATOM | 6043 | H    | ASN | X | 402 | 49.733 | 36.601 | 51.850 | 0.00 | 0.00 |
| ATOM | 6044 | CA   | ASN | X | 402 | 48.529 | 38.107 | 50.935 | 0.00 | 0.00 |
| ATOM | 6045 | HA   | ASN | X | 402 | 48.417 | 39.060 | 51.454 | 0.00 | 0.00 |
| ATOM | 6046 | CB   | ASN | X | 402 | 49.649 | 38.302 | 49.868 | 0.00 | 0.00 |
| ATOM | 6047 | HB2  | ASN | X | 402 | 49.857 | 37.339 | 49.400 | 0.00 | 0.00 |
| ATOM | 6048 | HB3  | ASN | X | 402 | 49.308 | 38.971 | 49.078 | 0.00 | 0.00 |
| ATOM | 6049 | CG   | ASN | X | 402 | 50.977 | 38.903 | 50.457 | 0.00 | 0.00 |
| ATOM | 6050 | OD1  | ASN | X | 402 | 50.927 | 39.969 | 51.084 | 0.00 | 0.00 |
| ATOM | 6051 | ND2  | ASN | X | 402 | 52.069 | 38.234 | 50.260 | 0.00 | 0.00 |
| ATOM | 6052 | HD21 | ASN | X | 402 | 52.857 | 38.699 | 50.688 | 0.00 | 0.00 |
| ATOM | 6053 | HD22 | ASN | X | 402 | 52.056 | 37.439 | 49.637 | 0.00 | 0.00 |
| ATOM | 6054 | C    | ASN | X | 402 | 47.118 | 37.838 | 50.261 | 0.00 | 0.00 |
| ATOM | 6055 | O    | ASN | X | 402 | 46.512 | 38.840 | 49.928 | 0.00 | 0.00 |
| ATOM | 6056 | N    | VAL | X | 403 | 46.729 | 36.605 | 49.963 | 0.00 | 0.00 |
| ATOM | 6057 | H    | VAL | X | 403 | 47.244 | 35.814 | 50.323 | 0.00 | 0.00 |
| ATOM | 6058 | CA   | VAL | X | 403 | 45.475 | 36.363 | 49.132 | 0.00 | 0.00 |
| ATOM | 6059 | HA   | VAL | X | 403 | 44.791 | 37.210 | 49.190 | 0.00 | 0.00 |
| ATOM | 6060 | CB   | VAL | X | 403 | 45.796 | 36.189 | 47.674 | 0.00 | 0.00 |
| ATOM | 6061 | HB   | VAL | X | 403 | 46.491 | 35.384 | 47.434 | 0.00 | 0.00 |

|      |      |      |     |   |     |        |        |        |      |      |
|------|------|------|-----|---|-----|--------|--------|--------|------|------|
| ATOM | 6062 | CG1  | VAL | X | 403 | 44.568 | 35.987 | 46.826 | 0.00 | 0.00 |
| ATOM | 6063 | HG11 | VAL | X | 403 | 43.762 | 36.617 | 47.203 | 0.00 | 0.00 |
| ATOM | 6064 | HG12 | VAL | X | 403 | 44.710 | 36.234 | 45.774 | 0.00 | 0.00 |
| ATOM | 6065 | HG13 | VAL | X | 403 | 44.367 | 34.920 | 46.919 | 0.00 | 0.00 |
| ATOM | 6066 | CG2  | VAL | X | 403 | 46.345 | 37.481 | 47.065 | 0.00 | 0.00 |
| ATOM | 6067 | HG21 | VAL | X | 403 | 45.608 | 38.245 | 47.312 | 0.00 | 0.00 |
| ATOM | 6068 | HG22 | VAL | X | 403 | 46.469 | 37.446 | 45.983 | 0.00 | 0.00 |
| ATOM | 6069 | HG23 | VAL | X | 403 | 47.270 | 37.733 | 47.585 | 0.00 | 0.00 |
| ATOM | 6070 | C    | VAL | X | 403 | 44.732 | 35.102 | 49.653 | 0.00 | 0.00 |
| ATOM | 6071 | O    | VAL | X | 403 | 43.566 | 35.212 | 50.026 | 0.00 | 0.00 |
| ATOM | 6072 | N    | VAL | X | 404 | 45.340 | 33.876 | 49.687 | 0.00 | 0.00 |
| ATOM | 6073 | H    | VAL | X | 404 | 46.277 | 33.879 | 49.309 | 0.00 | 0.00 |
| ATOM | 6074 | CA   | VAL | X | 404 | 44.531 | 32.629 | 49.884 | 0.00 | 0.00 |
| ATOM | 6075 | HA   | VAL | X | 404 | 43.787 | 32.499 | 49.098 | 0.00 | 0.00 |
| ATOM | 6076 | CB   | VAL | X | 404 | 45.336 | 31.336 | 49.689 | 0.00 | 0.00 |
| ATOM | 6077 | HB   | VAL | X | 404 | 46.156 | 31.350 | 50.407 | 0.00 | 0.00 |
| ATOM | 6078 | CG1  | VAL | X | 404 | 44.380 | 30.093 | 49.865 | 0.00 | 0.00 |
| ATOM | 6079 | HG11 | VAL | X | 404 | 44.170 | 29.893 | 50.916 | 0.00 | 0.00 |
| ATOM | 6080 | HG12 | VAL | X | 404 | 43.425 | 30.274 | 49.372 | 0.00 | 0.00 |
| ATOM | 6081 | HG13 | VAL | X | 404 | 44.951 | 29.260 | 49.455 | 0.00 | 0.00 |
| ATOM | 6082 | CG2  | VAL | X | 404 | 46.045 | 31.345 | 48.309 | 0.00 | 0.00 |
| ATOM | 6083 | HG21 | VAL | X | 404 | 46.275 | 32.298 | 47.834 | 0.00 | 0.00 |
| ATOM | 6084 | HG22 | VAL | X | 404 | 45.329 | 30.791 | 47.702 | 0.00 | 0.00 |
| ATOM | 6085 | HG23 | VAL | X | 404 | 47.031 | 30.880 | 48.334 | 0.00 | 0.00 |
| ATOM | 6086 | C    | VAL | X | 404 | 43.830 | 32.666 | 51.271 | 0.00 | 0.00 |
| ATOM | 6087 | O    | VAL | X | 404 | 42.680 | 32.271 | 51.337 | 0.00 | 0.00 |
| ATOM | 6088 | N    | CYX | X | 405 | 44.560 | 32.978 | 52.389 | 0.00 | 0.00 |
| ATOM | 6089 | H    | CYX | X | 405 | 45.553 | 33.151 | 52.319 | 0.00 | 0.00 |
| ATOM | 6090 | CA   | CYX | X | 405 | 44.004 | 33.100 | 53.698 | 0.00 | 0.00 |
| ATOM | 6091 | HA   | CYX | X | 405 | 43.483 | 32.151 | 53.828 | 0.00 | 0.00 |
| ATOM | 6092 | CB   | CYX | X | 405 | 45.097 | 33.182 | 54.774 | 0.00 | 0.00 |
| ATOM | 6093 | HB2  | CYX | X | 405 | 45.638 | 34.128 | 54.761 | 0.00 | 0.00 |
| ATOM | 6094 | HB3  | CYX | X | 405 | 44.533 | 33.099 | 55.703 | 0.00 | 0.00 |
| ATOM | 6095 | SG   | CYX | X | 405 | 46.255 | 31.748 | 54.775 | 0.00 | 0.00 |
| ATOM | 6096 | C    | CYX | X | 405 | 42.902 | 34.112 | 53.904 | 0.00 | 0.00 |
| ATOM | 6097 | O    | CYX | X | 405 | 41.939 | 33.707 | 54.566 | 0.00 | 0.00 |
| ATOM | 6098 | N    | PRO | X | 406 | 42.966 | 35.377 | 53.477 | 0.00 | 0.00 |
| ATOM | 6099 | CD   | PRO | X | 406 | 44.227 | 36.065 | 53.125 | 0.00 | 0.00 |
| ATOM | 6100 | HD2  | PRO | X | 406 | 44.506 | 35.723 | 52.128 | 0.00 | 0.00 |
| ATOM | 6101 | HD3  | PRO | X | 406 | 44.992 | 35.971 | 53.895 | 0.00 | 0.00 |
| ATOM | 6102 | CG   | PRO | X | 406 | 43.920 | 37.510 | 52.867 | 0.00 | 0.00 |
| ATOM | 6103 | HG2  | PRO | X | 406 | 44.350 | 37.843 | 51.922 | 0.00 | 0.00 |
| ATOM | 6104 | HG3  | PRO | X | 406 | 44.318 | 38.112 | 53.684 | 0.00 | 0.00 |
| ATOM | 6105 | CB   | PRO | X | 406 | 42.374 | 37.588 | 52.833 | 0.00 | 0.00 |
| ATOM | 6106 | HB2  | PRO | X | 406 | 42.027 | 37.643 | 51.801 | 0.00 | 0.00 |
| ATOM | 6107 | HB3  | PRO | X | 406 | 41.987 | 38.472 | 53.340 | 0.00 | 0.00 |
| ATOM | 6108 | CA   | PRO | X | 406 | 41.855 | 36.317 | 53.386 | 0.00 | 0.00 |
| ATOM | 6109 | HA   | PRO | X | 406 | 41.564 | 36.453 | 54.428 | 0.00 | 0.00 |
| ATOM | 6110 | C    | PRO | X | 406 | 40.673 | 35.813 | 52.578 | 0.00 | 0.00 |
| ATOM | 6111 | O    | PRO | X | 406 | 39.539 | 35.930 | 53.069 | 0.00 | 0.00 |
| ATOM | 6112 | N    | VAL | X | 407 | 40.879 | 35.145 | 51.418 | 0.00 | 0.00 |
| ATOM | 6113 | H    | VAL | X | 407 | 41.818 | 35.026 | 51.066 | 0.00 | 0.00 |
| ATOM | 6114 | CA   | VAL | X | 407 | 39.745 | 34.513 | 50.719 | 0.00 | 0.00 |
| ATOM | 6115 | HA   | VAL | X | 407 | 39.022 | 35.294 | 50.484 | 0.00 | 0.00 |
| ATOM | 6116 | CB   | VAL | X | 407 | 40.236 | 33.946 | 49.255 | 0.00 | 0.00 |
| ATOM | 6117 | HB   | VAL | X | 407 | 41.193 | 33.435 | 49.369 | 0.00 | 0.00 |
| ATOM | 6118 | CG1  | VAL | X | 407 | 39.092 | 33.140 | 48.573 | 0.00 | 0.00 |
| ATOM | 6119 | HG11 | VAL | X | 407 | 39.358 | 32.793 | 47.574 | 0.00 | 0.00 |
| ATOM | 6120 | HG12 | VAL | X | 407 | 38.951 | 32.295 | 49.246 | 0.00 | 0.00 |
| ATOM | 6121 | HG13 | VAL | X | 407 | 38.182 | 33.703 | 48.367 | 0.00 | 0.00 |
| ATOM | 6122 | CG2  | VAL | X | 407 | 40.285 | 35.169 | 48.273 | 0.00 | 0.00 |
| ATOM | 6123 | HG21 | VAL | X | 407 | 39.431 | 35.789 | 48.547 | 0.00 | 0.00 |
| ATOM | 6124 | HG22 | VAL | X | 407 | 40.340 | 34.892 | 47.221 | 0.00 | 0.00 |
| ATOM | 6125 | HG23 | VAL | X | 407 | 41.166 | 35.784 | 48.457 | 0.00 | 0.00 |
| ATOM | 6126 | C    | VAL | X | 407 | 38.959 | 33.521 | 51.481 | 0.00 | 0.00 |
| ATOM | 6127 | O    | VAL | X | 407 | 37.721 | 33.487 | 51.568 | 0.00 | 0.00 |
| ATOM | 6128 | N    | ALA | X | 408 | 39.665 | 32.779 | 52.294 | 0.00 | 0.00 |

|      |      |      |     |   |     |        |        |        |      |      |
|------|------|------|-----|---|-----|--------|--------|--------|------|------|
| ATOM | 6129 | H    | ALA | X | 408 | 40.674 | 32.784 | 52.263 | 0.00 | 0.00 |
| ATOM | 6130 | CA   | ALA | X | 408 | 39.056 | 31.811 | 53.223 | 0.00 | 0.00 |
| ATOM | 6131 | HA   | ALA | X | 408 | 38.389 | 31.189 | 52.626 | 0.00 | 0.00 |
| ATOM | 6132 | CB   | ALA | X | 408 | 40.272 | 30.958 | 53.558 | 0.00 | 0.00 |
| ATOM | 6133 | HB1  | ALA | X | 408 | 40.760 | 30.593 | 52.654 | 0.00 | 0.00 |
| ATOM | 6134 | HB2  | ALA | X | 408 | 39.964 | 29.986 | 53.942 | 0.00 | 0.00 |
| ATOM | 6135 | HB3  | ALA | X | 408 | 40.992 | 31.403 | 54.244 | 0.00 | 0.00 |
| ATOM | 6136 | C    | ALA | X | 408 | 38.352 | 32.403 | 54.498 | 0.00 | 0.00 |
| ATOM | 6137 | O    | ALA | X | 408 | 37.259 | 31.895 | 54.827 | 0.00 | 0.00 |
| ATOM | 6138 | N    | GLN | X | 409 | 38.961 | 33.497 | 55.062 | 0.00 | 0.00 |
| ATOM | 6139 | H    | GLN | X | 409 | 39.852 | 33.756 | 54.662 | 0.00 | 0.00 |
| ATOM | 6140 | CA   | GLN | X | 409 | 38.260 | 34.332 | 56.042 | 0.00 | 0.00 |
| ATOM | 6141 | HA   | GLN | X | 409 | 37.906 | 33.713 | 56.866 | 0.00 | 0.00 |
| ATOM | 6142 | CB   | GLN | X | 409 | 39.276 | 35.263 | 56.585 | 0.00 | 0.00 |
| ATOM | 6143 | HB2  | GLN | X | 409 | 40.040 | 34.656 | 57.071 | 0.00 | 0.00 |
| ATOM | 6144 | HB3  | GLN | X | 409 | 39.737 | 35.881 | 55.814 | 0.00 | 0.00 |
| ATOM | 6145 | CG   | GLN | X | 409 | 38.725 | 36.151 | 57.741 | 0.00 | 0.00 |
| ATOM | 6146 | HG2  | GLN | X | 409 | 39.359 | 37.027 | 57.877 | 0.00 | 0.00 |
| ATOM | 6147 | HG3  | GLN | X | 409 | 37.734 | 36.493 | 57.441 | 0.00 | 0.00 |
| ATOM | 6148 | CD   | GLN | X | 409 | 38.673 | 35.506 | 59.172 | 0.00 | 0.00 |
| ATOM | 6149 | OE1  | GLN | X | 409 | 37.600 | 35.049 | 59.572 | 0.00 | 0.00 |
| ATOM | 6150 | NE2  | GLN | X | 409 | 39.793 | 35.339 | 59.897 | 0.00 | 0.00 |
| ATOM | 6151 | HE21 | GLN | X | 409 | 39.715 | 35.145 | 60.885 | 0.00 | 0.00 |
| ATOM | 6152 | HE22 | GLN | X | 409 | 40.630 | 35.776 | 59.537 | 0.00 | 0.00 |
| ATOM | 6153 | C    | GLN | X | 409 | 36.960 | 35.012 | 55.494 | 0.00 | 0.00 |
| ATOM | 6154 | O    | GLN | X | 409 | 35.978 | 35.109 | 56.177 | 0.00 | 0.00 |
| ATOM | 6155 | N    | LEU | X | 410 | 36.991 | 35.349 | 54.222 | 0.00 | 0.00 |
| ATOM | 6156 | H    | LEU | X | 410 | 37.859 | 35.108 | 53.764 | 0.00 | 0.00 |
| ATOM | 6157 | CA   | LEU | X | 410 | 35.966 | 36.142 | 53.503 | 0.00 | 0.00 |
| ATOM | 6158 | HA   | LEU | X | 410 | 35.723 | 37.014 | 54.111 | 0.00 | 0.00 |
| ATOM | 6159 | CB   | LEU | X | 410 | 36.523 | 36.680 | 52.174 | 0.00 | 0.00 |
| ATOM | 6160 | HB2  | LEU | X | 410 | 37.348 | 37.358 | 52.392 | 0.00 | 0.00 |
| ATOM | 6161 | HB3  | LEU | X | 410 | 37.001 | 35.840 | 51.670 | 0.00 | 0.00 |
| ATOM | 6162 | CG   | LEU | X | 410 | 35.507 | 37.429 | 51.239 | 0.00 | 0.00 |
| ATOM | 6163 | HG   | LEU | X | 410 | 34.680 | 36.733 | 51.104 | 0.00 | 0.00 |
| ATOM | 6164 | CD1  | LEU | X | 410 | 35.035 | 38.722 | 51.855 | 0.00 | 0.00 |
| ATOM | 6165 | HD11 | LEU | X | 410 | 35.848 | 39.392 | 52.136 | 0.00 | 0.00 |
| ATOM | 6166 | HD12 | LEU | X | 410 | 34.479 | 38.605 | 52.786 | 0.00 | 0.00 |
| ATOM | 6167 | HD13 | LEU | X | 410 | 34.359 | 39.216 | 51.157 | 0.00 | 0.00 |
| ATOM | 6168 | CD2  | LEU | X | 410 | 36.255 | 37.774 | 49.908 | 0.00 | 0.00 |
| ATOM | 6169 | HD21 | LEU | X | 410 | 35.556 | 38.243 | 49.216 | 0.00 | 0.00 |
| ATOM | 6170 | HD22 | LEU | X | 410 | 37.143 | 38.385 | 50.075 | 0.00 | 0.00 |
| ATOM | 6171 | HD23 | LEU | X | 410 | 36.690 | 36.844 | 49.542 | 0.00 | 0.00 |
| ATOM | 6172 | C    | LEU | X | 410 | 34.841 | 35.241 | 53.216 | 0.00 | 0.00 |
| ATOM | 6173 | O    | LEU | X | 410 | 33.682 | 35.557 | 53.516 | 0.00 | 0.00 |
| ATOM | 6174 | N    | ALA | X | 411 | 35.088 | 34.058 | 52.657 | 0.00 | 0.00 |
| ATOM | 6175 | H    | ALA | X | 411 | 36.026 | 33.965 | 52.295 | 0.00 | 0.00 |
| ATOM | 6176 | CA   | ALA | X | 411 | 34.181 | 32.899 | 52.579 | 0.00 | 0.00 |
| ATOM | 6177 | HA   | ALA | X | 411 | 33.272 | 33.135 | 52.025 | 0.00 | 0.00 |
| ATOM | 6178 | CB   | ALA | X | 411 | 34.896 | 31.719 | 51.868 | 0.00 | 0.00 |
| ATOM | 6179 | HB1  | ALA | X | 411 | 35.884 | 31.547 | 52.295 | 0.00 | 0.00 |
| ATOM | 6180 | HB2  | ALA | X | 411 | 34.838 | 31.979 | 50.811 | 0.00 | 0.00 |
| ATOM | 6181 | HB3  | ALA | X | 411 | 34.267 | 30.836 | 51.979 | 0.00 | 0.00 |
| ATOM | 6182 | C    | ALA | X | 411 | 33.550 | 32.594 | 53.906 | 0.00 | 0.00 |
| ATOM | 6183 | O    | ALA | X | 411 | 32.303 | 32.584 | 53.958 | 0.00 | 0.00 |
| ATOM | 6184 | N    | GLY | X | 412 | 34.372 | 32.312 | 54.938 | 0.00 | 0.00 |
| ATOM | 6185 | H    | GLY | X | 412 | 35.348 | 32.374 | 54.682 | 0.00 | 0.00 |
| ATOM | 6186 | CA   | GLY | X | 412 | 34.084 | 32.004 | 56.332 | 0.00 | 0.00 |
| ATOM | 6187 | HA2  | GLY | X | 412 | 33.545 | 31.059 | 56.409 | 0.00 | 0.00 |
| ATOM | 6188 | HA3  | GLY | X | 412 | 35.047 | 31.897 | 56.831 | 0.00 | 0.00 |
| ATOM | 6189 | C    | GLY | X | 412 | 33.175 | 33.027 | 56.971 | 0.00 | 0.00 |
| ATOM | 6190 | O    | GLY | X | 412 | 32.013 | 32.637 | 57.175 | 0.00 | 0.00 |
| ATOM | 6191 | N    | ARG | X | 413 | 33.484 | 34.329 | 57.050 | 0.00 | 0.00 |
| ATOM | 6192 | H    | ARG | X | 413 | 34.415 | 34.594 | 56.761 | 0.00 | 0.00 |
| ATOM | 6193 | CA   | ARG | X | 413 | 32.699 | 35.438 | 57.504 | 0.00 | 0.00 |
| ATOM | 6194 | HA   | ARG | X | 413 | 32.410 | 35.301 | 58.545 | 0.00 | 0.00 |
| ATOM | 6195 | CB   | ARG | X | 413 | 33.536 | 36.811 | 57.369 | 0.00 | 0.00 |



|      |      |      |     |   |     |        |        |        |      |      |
|------|------|------|-----|---|-----|--------|--------|--------|------|------|
| ATOM | 6196 | HB2  | ARG | X | 413 | 33.989 | 36.859 | 56.378 | 0.00 | 0.00 |
| ATOM | 6197 | HB3  | ARG | X | 413 | 33.003 | 37.737 | 57.585 | 0.00 | 0.00 |
| ATOM | 6198 | CG   | ARG | X | 413 | 34.680 | 36.752 | 58.388 | 0.00 | 0.00 |
| ATOM | 6199 | HG2  | ARG | X | 413 | 35.202 | 35.800 | 58.291 | 0.00 | 0.00 |
| ATOM | 6200 | HG3  | ARG | X | 413 | 35.348 | 37.554 | 58.075 | 0.00 | 0.00 |
| ATOM | 6201 | CD   | ARG | X | 413 | 34.108 | 36.998 | 59.770 | 0.00 | 0.00 |
| ATOM | 6202 | HD2  | ARG | X | 413 | 33.379 | 37.805 | 59.709 | 0.00 | 0.00 |
| ATOM | 6203 | HD3  | ARG | X | 413 | 33.485 | 36.178 | 60.126 | 0.00 | 0.00 |
| ATOM | 6204 | NE   | ARG | X | 413 | 35.228 | 37.364 | 60.733 | 0.00 | 0.00 |
| ATOM | 6205 | HE   | ARG | X | 413 | 35.938 | 37.961 | 60.334 | 0.00 | 0.00 |
| ATOM | 6206 | CZ   | ARG | X | 413 | 35.456 | 36.706 | 61.847 | 0.00 | 0.00 |
| ATOM | 6207 | NH1  | ARG | X | 413 | 34.491 | 36.230 | 62.595 | 0.00 | 0.00 |
| ATOM | 6208 | HH11 | ARG | X | 413 | 33.527 | 36.077 | 62.334 | 0.00 | 0.00 |
| ATOM | 6209 | HH12 | ARG | X | 413 | 34.785 | 35.881 | 63.496 | 0.00 | 0.00 |
| ATOM | 6210 | NH2  | ARG | X | 413 | 36.591 | 36.819 | 62.416 | 0.00 | 0.00 |
| ATOM | 6211 | HH21 | ARG | X | 413 | 37.330 | 37.295 | 61.918 | 0.00 | 0.00 |
| ATOM | 6212 | HH22 | ARG | X | 413 | 36.674 | 36.614 | 63.402 | 0.00 | 0.00 |
| ATOM | 6213 | C    | ARG | X | 413 | 31.341 | 35.596 | 56.720 | 0.00 | 0.00 |
| ATOM | 6214 | O    | ARG | X | 413 | 30.336 | 35.730 | 57.435 | 0.00 | 0.00 |
| ATOM | 6215 | N    | LEU | X | 414 | 31.379 | 35.480 | 55.404 | 0.00 | 0.00 |
| ATOM | 6216 | H    | LEU | X | 414 | 32.295 | 35.329 | 55.006 | 0.00 | 0.00 |
| ATOM | 6217 | CA   | LEU | X | 414 | 30.145 | 35.713 | 54.642 | 0.00 | 0.00 |
| ATOM | 6218 | HA   | LEU | X | 414 | 29.750 | 36.670 | 54.986 | 0.00 | 0.00 |
| ATOM | 6219 | CB   | LEU | X | 414 | 30.484 | 35.811 | 53.147 | 0.00 | 0.00 |
| ATOM | 6220 | HB2  | LEU | X | 414 | 31.207 | 35.041 | 52.880 | 0.00 | 0.00 |
| ATOM | 6221 | HB3  | LEU | X | 414 | 29.577 | 35.668 | 52.560 | 0.00 | 0.00 |
| ATOM | 6222 | CG   | LEU | X | 414 | 31.053 | 37.198 | 52.834 | 0.00 | 0.00 |
| ATOM | 6223 | HG   | LEU | X | 414 | 31.981 | 37.411 | 53.364 | 0.00 | 0.00 |
| ATOM | 6224 | CD1  | LEU | X | 414 | 31.542 | 37.222 | 51.394 | 0.00 | 0.00 |
| ATOM | 6225 | HD11 | LEU | X | 414 | 30.790 | 37.600 | 50.701 | 0.00 | 0.00 |
| ATOM | 6226 | HD12 | LEU | X | 414 | 31.802 | 36.204 | 51.104 | 0.00 | 0.00 |
| ATOM | 6227 | HD13 | LEU | X | 414 | 32.412 | 37.869 | 51.278 | 0.00 | 0.00 |
| ATOM | 6228 | CD2  | LEU | X | 414 | 30.107 | 38.437 | 52.956 | 0.00 | 0.00 |
| ATOM | 6229 | HD21 | LEU | X | 414 | 29.858 | 38.809 | 53.950 | 0.00 | 0.00 |
| ATOM | 6230 | HD22 | LEU | X | 414 | 30.578 | 39.285 | 52.460 | 0.00 | 0.00 |
| ATOM | 6231 | HD23 | LEU | X | 414 | 29.189 | 38.202 | 52.416 | 0.00 | 0.00 |
| ATOM | 6232 | C    | LEU | X | 414 | 29.182 | 34.480 | 54.864 | 0.00 | 0.00 |
| ATOM | 6233 | O    | LEU | X | 414 | 27.990 | 34.629 | 55.203 | 0.00 | 0.00 |
| ATOM | 6234 | N    | ALA | X | 415 | 29.639 | 33.182 | 54.831 | 0.00 | 0.00 |
| ATOM | 6235 | H    | ALA | X | 415 | 30.619 | 33.195 | 54.586 | 0.00 | 0.00 |
| ATOM | 6236 | CA   | ALA | X | 415 | 28.941 | 31.953 | 55.193 | 0.00 | 0.00 |
| ATOM | 6237 | HA   | ALA | X | 415 | 28.009 | 31.744 | 54.669 | 0.00 | 0.00 |
| ATOM | 6238 | CB   | ALA | X | 415 | 29.979 | 30.776 | 54.919 | 0.00 | 0.00 |
| ATOM | 6239 | HB1  | ALA | X | 415 | 30.418 | 30.812 | 53.922 | 0.00 | 0.00 |
| ATOM | 6240 | HB2  | ALA | X | 415 | 29.447 | 29.827 | 54.979 | 0.00 | 0.00 |
| ATOM | 6241 | HB3  | ALA | X | 415 | 30.755 | 30.850 | 55.681 | 0.00 | 0.00 |
| ATOM | 6242 | C    | ALA | X | 415 | 28.459 | 31.901 | 56.638 | 0.00 | 0.00 |
| ATOM | 6243 | O    | ALA | X | 415 | 27.464 | 31.180 | 56.900 | 0.00 | 0.00 |
| ATOM | 6244 | N    | ALA | X | 416 | 29.018 | 32.781 | 57.583 | 0.00 | 0.00 |
| ATOM | 6245 | H    | ALA | X | 416 | 29.798 | 33.323 | 57.240 | 0.00 | 0.00 |
| ATOM | 6246 | CA   | ALA | X | 416 | 28.530 | 32.901 | 58.947 | 0.00 | 0.00 |
| ATOM | 6247 | HA   | ALA | X | 416 | 27.834 | 32.071 | 59.068 | 0.00 | 0.00 |
| ATOM | 6248 | CB   | ALA | X | 416 | 29.751 | 32.792 | 59.858 | 0.00 | 0.00 |
| ATOM | 6249 | HB1  | ALA | X | 416 | 30.576 | 33.470 | 59.637 | 0.00 | 0.00 |
| ATOM | 6250 | HB2  | ALA | X | 416 | 30.176 | 31.790 | 59.803 | 0.00 | 0.00 |
| ATOM | 6251 | HB3  | ALA | X | 416 | 29.464 | 32.975 | 60.893 | 0.00 | 0.00 |
| ATOM | 6252 | C    | ALA | X | 416 | 27.691 | 34.125 | 59.162 | 0.00 | 0.00 |
| ATOM | 6253 | O    | ALA | X | 416 | 26.963 | 34.122 | 60.182 | 0.00 | 0.00 |
| ATOM | 6254 | N    | GLN | X | 417 | 27.753 | 35.162 | 58.286 | 0.00 | 0.00 |
| ATOM | 6255 | H    | GLN | X | 417 | 28.373 | 35.150 | 57.489 | 0.00 | 0.00 |
| ATOM | 6256 | CA   | GLN | X | 417 | 26.876 | 36.361 | 58.394 | 0.00 | 0.00 |
| ATOM | 6257 | HA   | GLN | X | 417 | 26.542 | 36.495 | 59.422 | 0.00 | 0.00 |
| ATOM | 6258 | CB   | GLN | X | 417 | 27.695 | 37.657 | 58.040 | 0.00 | 0.00 |
| ATOM | 6259 | HB2  | GLN | X | 417 | 28.414 | 37.393 | 57.265 | 0.00 | 0.00 |
| ATOM | 6260 | HB3  | GLN | X | 417 | 27.009 | 38.388 | 57.612 | 0.00 | 0.00 |
| ATOM | 6261 | CG   | GLN | X | 417 | 28.367 | 38.343 | 59.167 | 0.00 | 0.00 |
| ATOM | 6262 | HG2  | GLN | X | 417 | 28.622 | 39.362 | 58.878 | 0.00 | 0.00 |

|      |      |      |     |   |     |        |        |        |      |      |
|------|------|------|-----|---|-----|--------|--------|--------|------|------|
| ATOM | 6263 | HG3  | GLN | X | 417 | 27.717 | 38.691 | 59.970 | 0.00 | 0.00 |
| ATOM | 6264 | CD   | GLN | X | 417 | 29.564 | 37.632 | 59.849 | 0.00 | 0.00 |
| ATOM | 6265 | OE1  | GLN | X | 417 | 29.312 | 36.592 | 60.448 | 0.00 | 0.00 |
| ATOM | 6266 | NE2  | GLN | X | 417 | 30.801 | 38.146 | 59.968 | 0.00 | 0.00 |
| ATOM | 6267 | HE21 | GLN | X | 417 | 31.438 | 37.539 | 60.465 | 0.00 | 0.00 |
| ATOM | 6268 | HE22 | GLN | X | 417 | 31.073 | 38.836 | 59.282 | 0.00 | 0.00 |
| ATOM | 6269 | C    | GLN | X | 417 | 25.610 | 36.232 | 57.528 | 0.00 | 0.00 |
| ATOM | 6270 | O    | GLN | X | 417 | 24.741 | 37.094 | 57.345 | 0.00 | 0.00 |
| ATOM | 6271 | N    | GLY | X | 418 | 25.509 | 35.093 | 56.828 | 0.00 | 0.00 |
| ATOM | 6272 | H    | GLY | X | 418 | 26.294 | 34.460 | 56.771 | 0.00 | 0.00 |
| ATOM | 6273 | CA   | GLY | X | 418 | 24.234 | 34.813 | 56.043 | 0.00 | 0.00 |
| ATOM | 6274 | HA2  | GLY | X | 418 | 24.050 | 33.788 | 56.366 | 0.00 | 0.00 |
| ATOM | 6275 | HA3  | GLY | X | 418 | 23.486 | 35.537 | 56.365 | 0.00 | 0.00 |
| ATOM | 6276 | C    | GLY | X | 418 | 24.166 | 34.925 | 54.563 | 0.00 | 0.00 |
| ATOM | 6277 | O    | GLY | X | 418 | 23.133 | 34.957 | 53.989 | 0.00 | 0.00 |
| ATOM | 6278 | N    | ALA | X | 419 | 25.388 | 34.898 | 53.962 | 0.00 | 0.00 |
| ATOM | 6279 | H    | ALA | X | 419 | 26.214 | 34.839 | 54.539 | 0.00 | 0.00 |
| ATOM | 6280 | CA   | ALA | X | 419 | 25.406 | 34.764 | 52.511 | 0.00 | 0.00 |
| ATOM | 6281 | HA   | ALA | X | 419 | 24.502 | 35.231 | 52.121 | 0.00 | 0.00 |
| ATOM | 6282 | CB   | ALA | X | 419 | 26.610 | 35.652 | 52.055 | 0.00 | 0.00 |
| ATOM | 6283 | HB1  | ALA | X | 419 | 26.859 | 35.500 | 51.004 | 0.00 | 0.00 |
| ATOM | 6284 | HB2  | ALA | X | 419 | 27.487 | 35.370 | 52.638 | 0.00 | 0.00 |
| ATOM | 6285 | HB3  | ALA | X | 419 | 26.468 | 36.700 | 52.317 | 0.00 | 0.00 |
| ATOM | 6286 | C    | ALA | X | 419 | 25.450 | 33.381 | 51.896 | 0.00 | 0.00 |
| ATOM | 6287 | O    | ALA | X | 419 | 26.043 | 32.484 | 52.511 | 0.00 | 0.00 |
| ATOM | 6288 | N    | ARG | X | 420 | 24.977 | 33.199 | 50.649 | 0.00 | 0.00 |
| ATOM | 6289 | H    | ARG | X | 420 | 24.559 | 34.006 | 50.209 | 0.00 | 0.00 |
| ATOM | 6290 | CA   | ARG | X | 420 | 25.331 | 32.040 | 49.753 | 0.00 | 0.00 |
| ATOM | 6291 | HA   | ARG | X | 420 | 25.490 | 31.154 | 50.367 | 0.00 | 0.00 |
| ATOM | 6292 | CB   | ARG | X | 420 | 24.101 | 31.780 | 48.868 | 0.00 | 0.00 |
| ATOM | 6293 | HB2  | ARG | X | 420 | 23.252 | 31.939 | 49.532 | 0.00 | 0.00 |
| ATOM | 6294 | HB3  | ARG | X | 420 | 24.045 | 32.521 | 48.070 | 0.00 | 0.00 |
| ATOM | 6295 | CG   | ARG | X | 420 | 24.014 | 30.360 | 48.198 | 0.00 | 0.00 |
| ATOM | 6296 | HG2  | ARG | X | 420 | 23.239 | 30.469 | 47.439 | 0.00 | 0.00 |
| ATOM | 6297 | HG3  | ARG | X | 420 | 24.961 | 30.123 | 47.713 | 0.00 | 0.00 |
| ATOM | 6298 | CD   | ARG | X | 420 | 23.671 | 29.262 | 49.268 | 0.00 | 0.00 |
| ATOM | 6299 | HD2  | ARG | X | 420 | 24.578 | 29.022 | 49.823 | 0.00 | 0.00 |
| ATOM | 6300 | HD3  | ARG | X | 420 | 22.900 | 29.616 | 49.953 | 0.00 | 0.00 |
| ATOM | 6301 | NE   | ARG | X | 420 | 23.146 | 28.028 | 48.625 | 0.00 | 0.00 |
| ATOM | 6302 | HE   | ARG | X | 420 | 23.070 | 28.060 | 47.618 | 0.00 | 0.00 |
| ATOM | 6303 | CZ   | ARG | X | 420 | 22.687 | 26.874 | 49.191 | 0.00 | 0.00 |
| ATOM | 6304 | NH1  | ARG | X | 420 | 22.625 | 26.749 | 50.512 | 0.00 | 0.00 |
| ATOM | 6305 | HH11 | ARG | X | 420 | 23.097 | 27.349 | 51.173 | 0.00 | 0.00 |
| ATOM | 6306 | HH12 | ARG | X | 420 | 22.126 | 25.936 | 50.845 | 0.00 | 0.00 |
| ATOM | 6307 | NH2  | ARG | X | 420 | 22.187 | 25.944 | 48.408 | 0.00 | 0.00 |
| ATOM | 6308 | HH21 | ARG | X | 420 | 22.400 | 26.067 | 47.429 | 0.00 | 0.00 |
| ATOM | 6309 | HH22 | ARG | X | 420 | 21.730 | 25.104 | 48.732 | 0.00 | 0.00 |
| ATOM | 6310 | C    | ARG | X | 420 | 26.669 | 32.218 | 48.924 | 0.00 | 0.00 |
| ATOM | 6311 | O    | ARG | X | 420 | 26.787 | 33.146 | 48.098 | 0.00 | 0.00 |
| ATOM | 6312 | N    | VAL | X | 421 | 27.700 | 31.547 | 49.383 | 0.00 | 0.00 |
| ATOM | 6313 | H    | VAL | X | 421 | 27.461 | 30.861 | 50.085 | 0.00 | 0.00 |
| ATOM | 6314 | CA   | VAL | X | 421 | 29.147 | 31.632 | 48.989 | 0.00 | 0.00 |
| ATOM | 6315 | HA   | VAL | X | 421 | 29.371 | 32.458 | 48.314 | 0.00 | 0.00 |
| ATOM | 6316 | CB   | VAL | X | 421 | 29.945 | 31.860 | 50.298 | 0.00 | 0.00 |
| ATOM | 6317 | HB   | VAL | X | 421 | 29.712 | 31.021 | 50.954 | 0.00 | 0.00 |
| ATOM | 6318 | CG1  | VAL | X | 421 | 31.429 | 31.898 | 50.111 | 0.00 | 0.00 |
| ATOM | 6319 | HG11 | VAL | X | 421 | 31.857 | 32.007 | 51.108 | 0.00 | 0.00 |
| ATOM | 6320 | HG12 | VAL | X | 421 | 31.809 | 31.000 | 49.623 | 0.00 | 0.00 |
| ATOM | 6321 | HG13 | VAL | X | 421 | 31.679 | 32.707 | 49.425 | 0.00 | 0.00 |
| ATOM | 6322 | CG2  | VAL | X | 421 | 29.493 | 33.069 | 51.104 | 0.00 | 0.00 |
| ATOM | 6323 | HG21 | VAL | X | 421 | 28.498 | 32.786 | 51.449 | 0.00 | 0.00 |
| ATOM | 6324 | HG22 | VAL | X | 421 | 29.463 | 33.965 | 50.485 | 0.00 | 0.00 |
| ATOM | 6325 | HG23 | VAL | X | 421 | 30.122 | 33.193 | 51.986 | 0.00 | 0.00 |
| ATOM | 6326 | C    | VAL | X | 421 | 29.563 | 30.318 | 48.272 | 0.00 | 0.00 |
| ATOM | 6327 | O    | VAL | X | 421 | 28.968 | 29.241 | 48.541 | 0.00 | 0.00 |
| ATOM | 6328 | N    | TYR | X | 422 | 30.461 | 30.434 | 47.275 | 0.00 | 0.00 |
| ATOM | 6329 | H    | TYR | X | 422 | 30.735 | 31.357 | 46.968 | 0.00 | 0.00 |

|      |      |      |     |   |     |        |        |        |      |      |
|------|------|------|-----|---|-----|--------|--------|--------|------|------|
| ATOM | 6330 | CA   | TYR | X | 422 | 30.960 | 29.338 | 46.392 | 0.00 | 0.00 |
| ATOM | 6331 | HA   | TYR | X | 422 | 30.711 | 28.351 | 46.783 | 0.00 | 0.00 |
| ATOM | 6332 | CB   | TYR | X | 422 | 30.224 | 29.444 | 45.033 | 0.00 | 0.00 |
| ATOM | 6333 | HB2  | TYR | X | 422 | 30.273 | 30.491 | 44.736 | 0.00 | 0.00 |
| ATOM | 6334 | HB3  | TYR | X | 422 | 30.842 | 28.924 | 44.301 | 0.00 | 0.00 |
| ATOM | 6335 | CG   | TYR | X | 422 | 28.782 | 28.972 | 45.052 | 0.00 | 0.00 |
| ATOM | 6336 | CD1  | TYR | X | 422 | 28.479 | 27.629 | 45.313 | 0.00 | 0.00 |
| ATOM | 6337 | HD1  | TYR | X | 422 | 29.293 | 26.926 | 45.414 | 0.00 | 0.00 |
| ATOM | 6338 | CE1  | TYR | X | 422 | 27.135 | 27.154 | 45.344 | 0.00 | 0.00 |
| ATOM | 6339 | HE1  | TYR | X | 422 | 26.868 | 26.114 | 45.459 | 0.00 | 0.00 |
| ATOM | 6340 | CZ   | TYR | X | 422 | 26.082 | 28.074 | 45.196 | 0.00 | 0.00 |
| ATOM | 6341 | OH   | TYR | X | 422 | 24.728 | 27.649 | 45.251 | 0.00 | 0.00 |
| ATOM | 6342 | HH   | TYR | X | 422 | 24.493 | 26.723 | 45.338 | 0.00 | 0.00 |
| ATOM | 6343 | CE2  | TYR | X | 422 | 26.420 | 29.465 | 45.039 | 0.00 | 0.00 |
| ATOM | 6344 | HE2  | TYR | X | 422 | 25.602 | 30.169 | 45.054 | 0.00 | 0.00 |
| ATOM | 6345 | CD2  | TYR | X | 422 | 27.770 | 29.884 | 44.921 | 0.00 | 0.00 |
| ATOM | 6346 | HD2  | TYR | X | 422 | 27.942 | 30.896 | 44.584 | 0.00 | 0.00 |
| ATOM | 6347 | C    | TYR | X | 422 | 32.479 | 29.618 | 46.145 | 0.00 | 0.00 |
| ATOM | 6348 | O    | TYR | X | 422 | 32.816 | 30.714 | 45.645 | 0.00 | 0.00 |
| ATOM | 6349 | N    | ALA | X | 423 | 33.331 | 28.656 | 46.450 | 0.00 | 0.00 |
| ATOM | 6350 | H    | ALA | X | 423 | 32.919 | 27.764 | 46.684 | 0.00 | 0.00 |
| ATOM | 6351 | CA   | ALA | X | 423 | 34.781 | 28.715 | 46.476 | 0.00 | 0.00 |
| ATOM | 6352 | HA   | ALA | X | 423 | 35.226 | 29.678 | 46.225 | 0.00 | 0.00 |
| ATOM | 6353 | CB   | ALA | X | 423 | 35.110 | 28.288 | 47.909 | 0.00 | 0.00 |
| ATOM | 6354 | HB1  | ALA | X | 423 | 34.495 | 27.448 | 48.233 | 0.00 | 0.00 |
| ATOM | 6355 | HB2  | ALA | X | 423 | 34.866 | 29.062 | 48.637 | 0.00 | 0.00 |
| ATOM | 6356 | HB3  | ALA | X | 423 | 36.164 | 28.089 | 48.099 | 0.00 | 0.00 |
| ATOM | 6357 | C    | ALA | X | 423 | 35.468 | 27.688 | 45.577 | 0.00 | 0.00 |
| ATOM | 6358 | O    | ALA | X | 423 | 35.108 | 26.507 | 45.488 | 0.00 | 0.00 |
| ATOM | 6359 | N    | TYR | X | 424 | 36.516 | 28.095 | 44.857 | 0.00 | 0.00 |
| ATOM | 6360 | H    | TYR | X | 424 | 36.762 | 29.071 | 44.933 | 0.00 | 0.00 |
| ATOM | 6361 | CA   | TYR | X | 424 | 37.375 | 27.303 | 43.976 | 0.00 | 0.00 |
| ATOM | 6362 | HA   | TYR | X | 424 | 37.244 | 26.251 | 44.232 | 0.00 | 0.00 |
| ATOM | 6363 | CB   | TYR | X | 424 | 37.033 | 27.464 | 42.468 | 0.00 | 0.00 |
| ATOM | 6364 | HB2  | TYR | X | 424 | 37.443 | 26.611 | 41.927 | 0.00 | 0.00 |
| ATOM | 6365 | HB3  | TYR | X | 424 | 35.957 | 27.438 | 42.300 | 0.00 | 0.00 |
| ATOM | 6366 | CG   | TYR | X | 424 | 37.588 | 28.768 | 41.920 | 0.00 | 0.00 |
| ATOM | 6367 | CD1  | TYR | X | 424 | 38.869 | 28.762 | 41.338 | 0.00 | 0.00 |
| ATOM | 6368 | HD1  | TYR | X | 424 | 39.432 | 27.844 | 41.255 | 0.00 | 0.00 |
| ATOM | 6369 | CE1  | TYR | X | 424 | 39.488 | 29.995 | 40.916 | 0.00 | 0.00 |
| ATOM | 6370 | HE1  | TYR | X | 424 | 40.500 | 30.036 | 40.542 | 0.00 | 0.00 |
| ATOM | 6371 | CZ   | TYR | X | 424 | 38.682 | 31.179 | 41.018 | 0.00 | 0.00 |
| ATOM | 6372 | OH   | TYR | X | 424 | 39.230 | 32.436 | 40.704 | 0.00 | 0.00 |
| ATOM | 6373 | HH   | TYR | X | 424 | 40.119 | 32.310 | 40.366 | 0.00 | 0.00 |
| ATOM | 6374 | CE2  | TYR | X | 424 | 37.394 | 31.149 | 41.553 | 0.00 | 0.00 |
| ATOM | 6375 | HE2  | TYR | X | 424 | 36.817 | 32.060 | 41.511 | 0.00 | 0.00 |
| ATOM | 6376 | CD2  | TYR | X | 424 | 36.871 | 29.937 | 41.955 | 0.00 | 0.00 |
| ATOM | 6377 | HD2  | TYR | X | 424 | 35.831 | 29.808 | 42.217 | 0.00 | 0.00 |
| ATOM | 6378 | C    | TYR | X | 424 | 38.900 | 27.477 | 44.151 | 0.00 | 0.00 |
| ATOM | 6379 | O    | TYR | X | 424 | 39.329 | 28.559 | 44.420 | 0.00 | 0.00 |
| ATOM | 6380 | N    | VAL | X | 425 | 39.670 | 26.370 | 44.066 | 0.00 | 0.00 |
| ATOM | 6381 | H    | VAL | X | 425 | 39.222 | 25.467 | 44.007 | 0.00 | 0.00 |
| ATOM | 6382 | CA   | VAL | X | 425 | 41.104 | 26.468 | 43.800 | 0.00 | 0.00 |
| ATOM | 6383 | HA   | VAL | X | 425 | 41.505 | 27.477 | 43.899 | 0.00 | 0.00 |
| ATOM | 6384 | CB   | VAL | X | 425 | 41.823 | 25.649 | 44.909 | 0.00 | 0.00 |
| ATOM | 6385 | HB   | VAL | X | 425 | 41.532 | 24.610 | 44.753 | 0.00 | 0.00 |
| ATOM | 6386 | CG1  | VAL | X | 425 | 43.305 | 25.743 | 44.739 | 0.00 | 0.00 |
| ATOM | 6387 | HG11 | VAL | X | 425 | 43.563 | 25.350 | 43.756 | 0.00 | 0.00 |
| ATOM | 6388 | HG12 | VAL | X | 425 | 43.728 | 26.747 | 44.779 | 0.00 | 0.00 |
| ATOM | 6389 | HG13 | VAL | X | 425 | 43.808 | 25.041 | 45.404 | 0.00 | 0.00 |
| ATOM | 6390 | CG2  | VAL | X | 425 | 41.534 | 25.977 | 46.376 | 0.00 | 0.00 |
| ATOM | 6391 | HG21 | VAL | X | 425 | 40.469 | 26.164 | 46.517 | 0.00 | 0.00 |
| ATOM | 6392 | HG22 | VAL | X | 425 | 41.814 | 26.998 | 46.636 | 0.00 | 0.00 |
| ATOM | 6393 | HG23 | VAL | X | 425 | 41.772 | 25.205 | 47.108 | 0.00 | 0.00 |
| ATOM | 6394 | C    | VAL | X | 425 | 41.416 | 25.878 | 42.398 | 0.00 | 0.00 |
| ATOM | 6395 | O    | VAL | X | 425 | 40.884 | 24.852 | 42.159 | 0.00 | 0.00 |
| ATOM | 6396 | N    | PHE | X | 426 | 42.194 | 26.480 | 41.574 | 0.00 | 0.00 |

|      |      |     |     |   |     |        |        |        |      |      |
|------|------|-----|-----|---|-----|--------|--------|--------|------|------|
| ATOM | 6397 | H   | PHE | X | 426 | 42.595 | 27.365 | 41.849 | 0.00 | 0.00 |
| ATOM | 6398 | CA  | PHE | X | 426 | 42.330 | 26.158 | 40.109 | 0.00 | 0.00 |
| ATOM | 6399 | HA  | PHE | X | 426 | 41.636 | 25.355 | 39.862 | 0.00 | 0.00 |
| ATOM | 6400 | CB  | PHE | X | 426 | 42.093 | 27.515 | 39.311 | 0.00 | 0.00 |
| ATOM | 6401 | HB2 | PHE | X | 426 | 41.040 | 27.752 | 39.465 | 0.00 | 0.00 |
| ATOM | 6402 | HB3 | PHE | X | 426 | 42.733 | 28.334 | 39.639 | 0.00 | 0.00 |
| ATOM | 6403 | CG  | PHE | X | 426 | 42.270 | 27.236 | 37.851 | 0.00 | 0.00 |
| ATOM | 6404 | CD1 | PHE | X | 426 | 41.212 | 26.889 | 36.986 | 0.00 | 0.00 |
| ATOM | 6405 | HD1 | PHE | X | 426 | 40.256 | 26.624 | 37.414 | 0.00 | 0.00 |
| ATOM | 6406 | CE1 | PHE | X | 426 | 41.442 | 26.912 | 35.625 | 0.00 | 0.00 |
| ATOM | 6407 | HE1 | PHE | X | 426 | 40.673 | 26.573 | 34.948 | 0.00 | 0.00 |
| ATOM | 6408 | CZ  | PHE | X | 426 | 42.733 | 27.179 | 35.120 | 0.00 | 0.00 |
| ATOM | 6409 | HZ  | PHE | X | 426 | 42.989 | 27.013 | 34.084 | 0.00 | 0.00 |
| ATOM | 6410 | CE2 | PHE | X | 426 | 43.747 | 27.607 | 35.924 | 0.00 | 0.00 |
| ATOM | 6411 | HE2 | PHE | X | 426 | 44.761 | 27.706 | 35.567 | 0.00 | 0.00 |
| ATOM | 6412 | CD2 | PHE | X | 426 | 43.513 | 27.662 | 37.291 | 0.00 | 0.00 |
| ATOM | 6413 | HD2 | PHE | X | 426 | 44.332 | 28.000 | 37.909 | 0.00 | 0.00 |
| ATOM | 6414 | C   | PHE | X | 426 | 43.715 | 25.510 | 39.789 | 0.00 | 0.00 |
| ATOM | 6415 | O   | PHE | X | 426 | 44.744 | 26.151 | 39.976 | 0.00 | 0.00 |
| ATOM | 6416 | N   | GLU | X | 427 | 43.720 | 24.279 | 39.314 | 0.00 | 0.00 |
| ATOM | 6417 | H   | GLU | X | 427 | 42.842 | 23.899 | 38.990 | 0.00 | 0.00 |
| ATOM | 6418 | CA  | GLU | X | 427 | 44.957 | 23.469 | 39.223 | 0.00 | 0.00 |
| ATOM | 6419 | HA  | GLU | X | 427 | 45.672 | 23.902 | 39.922 | 0.00 | 0.00 |
| ATOM | 6420 | CB  | GLU | X | 427 | 44.653 | 21.988 | 39.572 | 0.00 | 0.00 |
| ATOM | 6421 | HB2 | GLU | X | 427 | 44.001 | 21.508 | 38.843 | 0.00 | 0.00 |
| ATOM | 6422 | HB3 | GLU | X | 427 | 45.603 | 21.468 | 39.693 | 0.00 | 0.00 |
| ATOM | 6423 | CG  | GLU | X | 427 | 43.926 | 21.940 | 40.854 | 0.00 | 0.00 |
| ATOM | 6424 | HG2 | GLU | X | 427 | 44.178 | 22.817 | 41.449 | 0.00 | 0.00 |
| ATOM | 6425 | HG3 | GLU | X | 427 | 42.871 | 22.004 | 40.585 | 0.00 | 0.00 |
| ATOM | 6426 | CD  | GLU | X | 427 | 44.292 | 20.675 | 41.707 | 0.00 | 0.00 |
| ATOM | 6427 | OE1 | GLU | X | 427 | 45.107 | 20.854 | 42.646 | 0.00 | 0.00 |
| ATOM | 6428 | OE2 | GLU | X | 427 | 43.790 | 19.577 | 41.432 | 0.00 | 0.00 |
| ATOM | 6429 | C   | GLU | X | 427 | 45.684 | 23.502 | 37.889 | 0.00 | 0.00 |
| ATOM | 6430 | O   | GLU | X | 427 | 46.753 | 23.009 | 37.795 | 0.00 | 0.00 |
| ATOM | 6431 | N   | HIE | X | 428 | 45.043 | 23.904 | 36.812 | 0.00 | 0.00 |
| ATOM | 6432 | H   | HIE | X | 428 | 44.137 | 24.347 | 36.863 | 0.00 | 0.00 |
| ATOM | 6433 | CA  | HIE | X | 428 | 45.586 | 23.663 | 35.473 | 0.00 | 0.00 |
| ATOM | 6434 | HA  | HIE | X | 428 | 46.266 | 22.813 | 35.525 | 0.00 | 0.00 |
| ATOM | 6435 | CB  | HIE | X | 428 | 44.463 | 23.305 | 34.468 | 0.00 | 0.00 |
| ATOM | 6436 | HB2 | HIE | X | 428 | 43.840 | 22.507 | 34.872 | 0.00 | 0.00 |
| ATOM | 6437 | HB3 | HIE | X | 428 | 43.772 | 24.143 | 34.383 | 0.00 | 0.00 |
| ATOM | 6438 | CG  | HIE | X | 428 | 45.098 | 22.882 | 33.156 | 0.00 | 0.00 |
| ATOM | 6439 | ND1 | HIE | X | 428 | 45.654 | 21.660 | 33.010 | 0.00 | 0.00 |
| ATOM | 6440 | CE1 | HIE | X | 428 | 46.078 | 21.677 | 31.739 | 0.00 | 0.00 |
| ATOM | 6441 | HE1 | HIE | X | 428 | 46.511 | 20.838 | 31.215 | 0.00 | 0.00 |
| ATOM | 6442 | NE2 | HIE | X | 428 | 45.918 | 22.861 | 31.122 | 0.00 | 0.00 |
| ATOM | 6443 | HE2 | HIE | X | 428 | 46.274 | 23.117 | 30.212 | 0.00 | 0.00 |
| ATOM | 6444 | CD2 | HIE | X | 428 | 45.274 | 23.684 | 31.989 | 0.00 | 0.00 |
| ATOM | 6445 | HD2 | HIE | X | 428 | 44.963 | 24.716 | 31.921 | 0.00 | 0.00 |
| ATOM | 6446 | C   | HIE | X | 428 | 46.423 | 24.806 | 34.905 | 0.00 | 0.00 |
| ATOM | 6447 | O   | HIE | X | 428 | 45.880 | 25.882 | 34.700 | 0.00 | 0.00 |
| ATOM | 6448 | N   | ARG | X | 429 | 47.701 | 24.590 | 34.607 | 0.00 | 0.00 |
| ATOM | 6449 | H   | ARG | X | 429 | 47.998 | 23.632 | 34.728 | 0.00 | 0.00 |
| ATOM | 6450 | CA  | ARG | X | 429 | 48.551 | 25.551 | 33.937 | 0.00 | 0.00 |
| ATOM | 6451 | HA  | ARG | X | 429 | 48.375 | 26.559 | 34.311 | 0.00 | 0.00 |
| ATOM | 6452 | CB  | ARG | X | 429 | 50.044 | 25.243 | 34.424 | 0.00 | 0.00 |
| ATOM | 6453 | HB2 | ARG | X | 429 | 50.031 | 25.229 | 35.514 | 0.00 | 0.00 |
| ATOM | 6454 | HB3 | ARG | X | 429 | 50.267 | 24.238 | 34.065 | 0.00 | 0.00 |
| ATOM | 6455 | CG  | ARG | X | 429 | 51.149 | 26.150 | 33.838 | 0.00 | 0.00 |
| ATOM | 6456 | HG2 | ARG | X | 429 | 50.996 | 26.278 | 32.766 | 0.00 | 0.00 |
| ATOM | 6457 | HG3 | ARG | X | 429 | 51.034 | 27.088 | 34.382 | 0.00 | 0.00 |
| ATOM | 6458 | CD  | ARG | X | 429 | 52.596 | 25.637 | 34.045 | 0.00 | 0.00 |
| ATOM | 6459 | HD2 | ARG | X | 429 | 52.911 | 25.595 | 35.087 | 0.00 | 0.00 |
| ATOM | 6460 | HD3 | ARG | X | 429 | 52.661 | 24.603 | 33.705 | 0.00 | 0.00 |
| ATOM | 6461 | NE  | ARG | X | 429 | 53.526 | 26.408 | 33.201 | 0.00 | 0.00 |
| ATOM | 6462 | HE  | ARG | X | 429 | 53.807 | 27.264 | 33.658 | 0.00 | 0.00 |
| ATOM | 6463 | CZ  | ARG | X | 429 | 53.823 | 26.228 | 31.917 | 0.00 | 0.00 |

|      |      |      |     |   |     |        |        |        |      |      |
|------|------|------|-----|---|-----|--------|--------|--------|------|------|
| ATOM | 6464 | NH1  | ARG | X | 429 | 53.399 | 25.221 | 31.189 | 0.00 | 0.00 |
| ATOM | 6465 | HH11 | ARG | X | 429 | 52.860 | 24.521 | 31.678 | 0.00 | 0.00 |
| ATOM | 6466 | HH12 | ARG | X | 429 | 53.637 | 25.233 | 30.208 | 0.00 | 0.00 |
| ATOM | 6467 | NH2  | ARG | X | 429 | 54.569 | 27.122 | 31.244 | 0.00 | 0.00 |
| ATOM | 6468 | HH21 | ARG | X | 429 | 55.006 | 27.882 | 31.747 | 0.00 | 0.00 |
| ATOM | 6469 | HH22 | ARG | X | 429 | 54.632 | 27.148 | 30.237 | 0.00 | 0.00 |
| ATOM | 6470 | C    | ARG | X | 429 | 48.477 | 25.450 | 32.368 | 0.00 | 0.00 |
| ATOM | 6471 | O    | ARG | X | 429 | 48.775 | 24.361 | 31.811 | 0.00 | 0.00 |
| ATOM | 6472 | N    | ALA | X | 430 | 48.012 | 26.489 | 31.736 | 0.00 | 0.00 |
| ATOM | 6473 | H    | ALA | X | 430 | 47.716 | 27.262 | 32.316 | 0.00 | 0.00 |
| ATOM | 6474 | CA   | ALA | X | 430 | 47.723 | 26.578 | 30.297 | 0.00 | 0.00 |
| ATOM | 6475 | HA   | ALA | X | 430 | 46.806 | 26.032 | 30.072 | 0.00 | 0.00 |
| ATOM | 6476 | CB   | ALA | X | 430 | 47.480 | 28.055 | 29.908 | 0.00 | 0.00 |
| ATOM | 6477 | HB1  | ALA | X | 430 | 46.993 | 28.116 | 28.935 | 0.00 | 0.00 |
| ATOM | 6478 | HB2  | ALA | X | 430 | 48.484 | 28.470 | 29.813 | 0.00 | 0.00 |
| ATOM | 6479 | HB3  | ALA | X | 430 | 46.883 | 28.602 | 30.638 | 0.00 | 0.00 |
| ATOM | 6480 | C    | ALA | X | 430 | 48.979 | 26.032 | 29.470 | 0.00 | 0.00 |
| ATOM | 6481 | O    | ALA | X | 430 | 50.141 | 26.348 | 29.793 | 0.00 | 0.00 |
| ATOM | 6482 | N    | SER | X | 431 | 48.701 | 25.248 | 28.446 | 0.00 | 0.00 |
| ATOM | 6483 | H    | SER | X | 431 | 47.746 | 24.919 | 28.431 | 0.00 | 0.00 |
| ATOM | 6484 | CA   | SER | X | 431 | 49.700 | 24.637 | 27.562 | 0.00 | 0.00 |
| ATOM | 6485 | HA   | SER | X | 431 | 50.388 | 24.091 | 28.208 | 0.00 | 0.00 |
| ATOM | 6486 | CB   | SER | X | 431 | 49.054 | 23.633 | 26.569 | 0.00 | 0.00 |
| ATOM | 6487 | HB2  | SER | X | 431 | 49.860 | 23.229 | 25.956 | 0.00 | 0.00 |
| ATOM | 6488 | HB3  | SER | X | 431 | 48.455 | 22.863 | 27.055 | 0.00 | 0.00 |
| ATOM | 6489 | OG   | SER | X | 431 | 48.207 | 24.316 | 25.656 | 0.00 | 0.00 |
| ATOM | 6490 | HG   | SER | X | 431 | 47.293 | 24.178 | 25.916 | 0.00 | 0.00 |
| ATOM | 6491 | C    | SER | X | 431 | 50.437 | 25.774 | 26.779 | 0.00 | 0.00 |
| ATOM | 6492 | O    | SER | X | 431 | 51.555 | 25.630 | 26.331 | 0.00 | 0.00 |
| ATOM | 6493 | N    | THR | X | 432 | 49.769 | 26.900 | 26.625 | 0.00 | 0.00 |
| ATOM | 6494 | H    | THR | X | 432 | 48.845 | 26.885 | 27.034 | 0.00 | 0.00 |
| ATOM | 6495 | CA   | THR | X | 432 | 50.273 | 28.200 | 26.051 | 0.00 | 0.00 |
| ATOM | 6496 | HA   | THR | X | 432 | 51.136 | 27.912 | 25.451 | 0.00 | 0.00 |
| ATOM | 6497 | CB   | THR | X | 432 | 49.105 | 28.898 | 25.319 | 0.00 | 0.00 |
| ATOM | 6498 | HB   | THR | X | 432 | 49.445 | 29.898 | 25.050 | 0.00 | 0.00 |
| ATOM | 6499 | CG2  | THR | X | 432 | 48.578 | 28.111 | 24.121 | 0.00 | 0.00 |
| ATOM | 6500 | HG21 | THR | X | 432 | 49.396 | 28.012 | 23.408 | 0.00 | 0.00 |
| ATOM | 6501 | HG22 | THR | X | 432 | 47.706 | 28.596 | 23.681 | 0.00 | 0.00 |
| ATOM | 6502 | HG23 | THR | X | 432 | 48.212 | 27.178 | 24.549 | 0.00 | 0.00 |
| ATOM | 6503 | OG1  | THR | X | 432 | 48.035 | 28.981 | 26.236 | 0.00 | 0.00 |
| ATOM | 6504 | HG1  | THR | X | 432 | 47.272 | 28.718 | 25.715 | 0.00 | 0.00 |
| ATOM | 6505 | C    | THR | X | 432 | 50.962 | 29.140 | 27.046 | 0.00 | 0.00 |
| ATOM | 6506 | O    | THR | X | 432 | 51.376 | 30.214 | 26.576 | 0.00 | 0.00 |
| ATOM | 6507 | N    | LEU | X | 433 | 50.883 | 28.911 | 28.364 | 0.00 | 0.00 |
| ATOM | 6508 | H    | LEU | X | 433 | 50.686 | 27.962 | 28.648 | 0.00 | 0.00 |
| ATOM | 6509 | CA   | LEU | X | 433 | 51.266 | 29.890 | 29.420 | 0.00 | 0.00 |
| ATOM | 6510 | HA   | LEU | X | 433 | 50.585 | 30.740 | 29.453 | 0.00 | 0.00 |
| ATOM | 6511 | CB   | LEU | X | 433 | 51.354 | 29.302 | 30.765 | 0.00 | 0.00 |
| ATOM | 6512 | HB2  | LEU | X | 433 | 50.414 | 28.790 | 30.970 | 0.00 | 0.00 |
| ATOM | 6513 | HB3  | LEU | X | 433 | 52.104 | 28.515 | 30.842 | 0.00 | 0.00 |
| ATOM | 6514 | CG   | LEU | X | 433 | 51.504 | 30.253 | 31.943 | 0.00 | 0.00 |
| ATOM | 6515 | HG   | LEU | X | 433 | 52.486 | 30.702 | 32.094 | 0.00 | 0.00 |
| ATOM | 6516 | CD1  | LEU | X | 433 | 50.557 | 31.447 | 31.938 | 0.00 | 0.00 |
| ATOM | 6517 | HD11 | LEU | X | 433 | 50.884 | 32.349 | 31.422 | 0.00 | 0.00 |
| ATOM | 6518 | HD12 | LEU | X | 433 | 50.288 | 31.798 | 32.934 | 0.00 | 0.00 |
| ATOM | 6519 | HD13 | LEU | X | 433 | 49.686 | 31.128 | 31.364 | 0.00 | 0.00 |
| ATOM | 6520 | CD2  | LEU | X | 433 | 51.323 | 29.388 | 33.217 | 0.00 | 0.00 |
| ATOM | 6521 | HD21 | LEU | X | 433 | 52.041 | 28.576 | 33.102 | 0.00 | 0.00 |
| ATOM | 6522 | HD22 | LEU | X | 433 | 51.620 | 30.068 | 34.015 | 0.00 | 0.00 |
| ATOM | 6523 | HD23 | LEU | X | 433 | 50.304 | 29.052 | 33.414 | 0.00 | 0.00 |
| ATOM | 6524 | C    | LEU | X | 433 | 52.687 | 30.496 | 29.270 | 0.00 | 0.00 |
| ATOM | 6525 | O    | LEU | X | 433 | 53.573 | 29.712 | 29.059 | 0.00 | 0.00 |
| ATOM | 6526 | N    | SER | X | 434 | 52.896 | 31.833 | 29.465 | 0.00 | 0.00 |
| ATOM | 6527 | H    | SER | X | 434 | 52.064 | 32.367 | 29.673 | 0.00 | 0.00 |
| ATOM | 6528 | CA   | SER | X | 434 | 54.165 | 32.562 | 29.387 | 0.00 | 0.00 |
| ATOM | 6529 | HA   | SER | X | 434 | 54.551 | 32.299 | 28.402 | 0.00 | 0.00 |
| ATOM | 6530 | CB   | SER | X | 434 | 53.883 | 34.088 | 29.368 | 0.00 | 0.00 |

|      |      |      |     |   |     |        |        |        |      |      |
|------|------|------|-----|---|-----|--------|--------|--------|------|------|
| ATOM | 6531 | HB2  | SER | X | 434 | 54.898 | 34.483 | 29.412 | 0.00 | 0.00 |
| ATOM | 6532 | HB3  | SER | X | 434 | 53.447 | 34.489 | 28.453 | 0.00 | 0.00 |
| ATOM | 6533 | OG   | SER | X | 434 | 53.162 | 34.531 | 30.518 | 0.00 | 0.00 |
| ATOM | 6534 | HG   | SER | X | 434 | 52.227 | 34.532 | 30.300 | 0.00 | 0.00 |
| ATOM | 6535 | C    | SER | X | 434 | 55.163 | 32.122 | 30.506 | 0.00 | 0.00 |
| ATOM | 6536 | O    | SER | X | 434 | 56.295 | 31.690 | 30.262 | 0.00 | 0.00 |
| ATOM | 6537 | N    | TRP | X | 435 | 54.757 | 32.271 | 31.744 | 0.00 | 0.00 |
| ATOM | 6538 | H    | TRP | X | 435 | 53.809 | 32.583 | 31.898 | 0.00 | 0.00 |
| ATOM | 6539 | CA   | TRP | X | 435 | 55.550 | 32.017 | 32.941 | 0.00 | 0.00 |
| ATOM | 6540 | HA   | TRP | X | 435 | 56.302 | 32.804 | 32.893 | 0.00 | 0.00 |
| ATOM | 6541 | CB   | TRP | X | 435 | 54.650 | 32.176 | 34.240 | 0.00 | 0.00 |
| ATOM | 6542 | HB2  | TRP | X | 435 | 53.728 | 31.601 | 34.164 | 0.00 | 0.00 |
| ATOM | 6543 | HB3  | TRP | X | 435 | 55.337 | 31.953 | 35.057 | 0.00 | 0.00 |
| ATOM | 6544 | CG   | TRP | X | 435 | 54.228 | 33.625 | 34.288 | 0.00 | 0.00 |
| ATOM | 6545 | CD1  | TRP | X | 435 | 52.998 | 34.030 | 33.942 | 0.00 | 0.00 |
| ATOM | 6546 | HD1  | TRP | X | 435 | 52.217 | 33.396 | 33.549 | 0.00 | 0.00 |
| ATOM | 6547 | NE1  | TRP | X | 435 | 52.915 | 35.395 | 34.037 | 0.00 | 0.00 |
| ATOM | 6548 | HE1  | TRP | X | 435 | 52.050 | 35.908 | 33.946 | 0.00 | 0.00 |
| ATOM | 6549 | CE2  | TRP | X | 435 | 54.102 | 36.003 | 34.357 | 0.00 | 0.00 |
| ATOM | 6550 | CZ2  | TRP | X | 435 | 54.563 | 37.335 | 34.515 | 0.00 | 0.00 |
| ATOM | 6551 | HZ2  | TRP | X | 435 | 53.839 | 38.101 | 34.280 | 0.00 | 0.00 |
| ATOM | 6552 | CH2  | TRP | X | 435 | 55.871 | 37.591 | 34.960 | 0.00 | 0.00 |
| ATOM | 6553 | HH2  | TRP | X | 435 | 56.240 | 38.601 | 35.063 | 0.00 | 0.00 |
| ATOM | 6554 | CZ3  | TRP | X | 435 | 56.724 | 36.497 | 35.155 | 0.00 | 0.00 |
| ATOM | 6555 | HZ3  | TRP | X | 435 | 57.741 | 36.684 | 35.466 | 0.00 | 0.00 |
| ATOM | 6556 | CE3  | TRP | X | 435 | 56.241 | 35.222 | 35.066 | 0.00 | 0.00 |
| ATOM | 6557 | HE3  | TRP | X | 435 | 57.000 | 34.461 | 35.170 | 0.00 | 0.00 |
| ATOM | 6558 | CD2  | TRP | X | 435 | 54.901 | 34.865 | 34.729 | 0.00 | 0.00 |
| ATOM | 6559 | C    | TRP | X | 435 | 56.109 | 30.565 | 32.912 | 0.00 | 0.00 |
| ATOM | 6560 | O    | TRP | X | 435 | 55.413 | 29.673 | 32.310 | 0.00 | 0.00 |
| ATOM | 6561 | N    | PRO | X | 436 | 57.304 | 30.262 | 33.525 | 0.00 | 0.00 |
| ATOM | 6562 | CD   | PRO | X | 436 | 58.247 | 31.242 | 34.021 | 0.00 | 0.00 |
| ATOM | 6563 | HD2  | PRO | X | 436 | 57.703 | 31.642 | 34.877 | 0.00 | 0.00 |
| ATOM | 6564 | HD3  | PRO | X | 436 | 58.481 | 31.948 | 33.224 | 0.00 | 0.00 |
| ATOM | 6565 | CG   | PRO | X | 436 | 59.413 | 30.380 | 34.458 | 0.00 | 0.00 |
| ATOM | 6566 | HG2  | PRO | X | 436 | 59.293 | 30.028 | 35.482 | 0.00 | 0.00 |
| ATOM | 6567 | HB3  | PRO | X | 436 | 60.323 | 30.979 | 34.421 | 0.00 | 0.00 |
| ATOM | 6568 | CB   | PRO | X | 436 | 59.514 | 29.208 | 33.426 | 0.00 | 0.00 |
| ATOM | 6569 | HB2  | PRO | X | 436 | 60.014 | 28.313 | 33.798 | 0.00 | 0.00 |
| ATOM | 6570 | HB3  | PRO | X | 436 | 59.941 | 29.565 | 32.489 | 0.00 | 0.00 |
| ATOM | 6571 | CA   | PRO | X | 436 | 58.034 | 29.009 | 33.209 | 0.00 | 0.00 |
| ATOM | 6572 | HA   | PRO | X | 436 | 57.863 | 28.801 | 32.152 | 0.00 | 0.00 |
| ATOM | 6573 | C    | PRO | X | 436 | 57.510 | 27.760 | 33.994 | 0.00 | 0.00 |
| ATOM | 6574 | O    | PRO | X | 436 | 56.709 | 27.875 | 34.885 | 0.00 | 0.00 |
| ATOM | 6575 | N    | LEU | X | 437 | 57.854 | 26.515 | 33.547 | 0.00 | 0.00 |
| ATOM | 6576 | H    | LEU | X | 437 | 58.456 | 26.491 | 32.737 | 0.00 | 0.00 |
| ATOM | 6577 | CA   | LEU | X | 437 | 57.194 | 25.340 | 34.092 | 0.00 | 0.00 |
| ATOM | 6578 | HA   | LEU | X | 437 | 56.198 | 25.634 | 33.763 | 0.00 | 0.00 |
| ATOM | 6579 | CB   | LEU | X | 437 | 57.688 | 24.033 | 33.431 | 0.00 | 0.00 |
| ATOM | 6580 | HB2  | LEU | X | 437 | 58.507 | 24.206 | 32.733 | 0.00 | 0.00 |
| ATOM | 6581 | HB3  | LEU | X | 437 | 58.072 | 23.381 | 34.215 | 0.00 | 0.00 |
| ATOM | 6582 | CG   | LEU | X | 437 | 56.566 | 23.245 | 32.692 | 0.00 | 0.00 |
| ATOM | 6583 | HG   | LEU | X | 437 | 56.078 | 23.992 | 32.065 | 0.00 | 0.00 |
| ATOM | 6584 | CD1  | LEU | X | 437 | 57.134 | 22.140 | 31.800 | 0.00 | 0.00 |
| ATOM | 6585 | HD11 | LEU | X | 437 | 56.364 | 21.562 | 31.289 | 0.00 | 0.00 |
| ATOM | 6586 | HD12 | LEU | X | 437 | 57.622 | 21.450 | 32.489 | 0.00 | 0.00 |
| ATOM | 6587 | HD13 | LEU | X | 437 | 57.797 | 22.599 | 31.067 | 0.00 | 0.00 |
| ATOM | 6588 | CD2  | LEU | X | 437 | 55.472 | 22.698 | 33.748 | 0.00 | 0.00 |
| ATOM | 6589 | HD21 | LEU | X | 437 | 54.890 | 23.447 | 34.285 | 0.00 | 0.00 |
| ATOM | 6590 | HD22 | LEU | X | 437 | 54.719 | 22.060 | 33.286 | 0.00 | 0.00 |
| ATOM | 6591 | HD23 | LEU | X | 437 | 55.949 | 21.963 | 34.397 | 0.00 | 0.00 |
| ATOM | 6592 | C    | LEU | X | 437 | 57.171 | 25.249 | 35.616 | 0.00 | 0.00 |
| ATOM | 6593 | O    | LEU | X | 437 | 56.108 | 25.034 | 36.221 | 0.00 | 0.00 |
| ATOM | 6594 | N    | TRP | X | 438 | 58.344 | 25.489 | 36.209 | 0.00 | 0.00 |
| ATOM | 6595 | H    | TRP | X | 438 | 59.072 | 25.886 | 35.632 | 0.00 | 0.00 |
| ATOM | 6596 | CA   | TRP | X | 438 | 58.548 | 25.287 | 37.615 | 0.00 | 0.00 |
| ATOM | 6597 | HA   | TRP | X | 438 | 58.296 | 24.239 | 37.775 | 0.00 | 0.00 |

|      |      |      |     |   |     |        |        |        |      |      |
|------|------|------|-----|---|-----|--------|--------|--------|------|------|
| ATOM | 6598 | CB   | TRP | X | 438 | 59.991 | 25.541 | 37.980 | 0.00 | 0.00 |
| ATOM | 6599 | HB2  | TRP | X | 438 | 60.181 | 25.488 | 39.052 | 0.00 | 0.00 |
| ATOM | 6600 | HB3  | TRP | X | 438 | 60.572 | 24.752 | 37.504 | 0.00 | 0.00 |
| ATOM | 6601 | CG   | TRP | X | 438 | 60.541 | 26.871 | 37.406 | 0.00 | 0.00 |
| ATOM | 6602 | CD1  | TRP | X | 438 | 61.305 | 26.970 | 36.237 | 0.00 | 0.00 |
| ATOM | 6603 | HD1  | TRP | X | 438 | 61.521 | 26.120 | 35.608 | 0.00 | 0.00 |
| ATOM | 6604 | NE1  | TRP | X | 438 | 61.800 | 28.242 | 36.113 | 0.00 | 0.00 |
| ATOM | 6605 | HE1  | TRP | X | 438 | 62.432 | 28.462 | 35.356 | 0.00 | 0.00 |
| ATOM | 6606 | CE2  | TRP | X | 438 | 61.321 | 29.043 | 37.110 | 0.00 | 0.00 |
| ATOM | 6607 | CZ2  | TRP | X | 438 | 61.491 | 30.367 | 37.438 | 0.00 | 0.00 |
| ATOM | 6608 | HZ2  | TRP | X | 438 | 62.112 | 30.994 | 36.815 | 0.00 | 0.00 |
| ATOM | 6609 | CH2  | TRP | X | 438 | 60.827 | 30.844 | 38.600 | 0.00 | 0.00 |
| ATOM | 6610 | HH2  | TRP | X | 438 | 60.994 | 31.831 | 39.004 | 0.00 | 0.00 |
| ATOM | 6611 | CZ3  | TRP | X | 438 | 60.075 | 30.041 | 39.436 | 0.00 | 0.00 |
| ATOM | 6612 | HZ3  | TRP | X | 438 | 59.600 | 30.364 | 40.351 | 0.00 | 0.00 |
| ATOM | 6613 | CE3  | TRP | X | 438 | 60.113 | 28.699 | 39.133 | 0.00 | 0.00 |
| ATOM | 6614 | HE3  | TRP | X | 438 | 59.470 | 28.047 | 39.706 | 0.00 | 0.00 |
| ATOM | 6615 | CD2  | TRP | X | 438 | 60.557 | 28.183 | 37.945 | 0.00 | 0.00 |
| ATOM | 6616 | C    | TRP | X | 438 | 57.679 | 26.218 | 38.531 | 0.00 | 0.00 |
| ATOM | 6617 | O    | TRP | X | 438 | 57.550 | 25.938 | 39.702 | 0.00 | 0.00 |
| ATOM | 6618 | N    | MET | X | 439 | 57.101 | 27.351 | 38.071 | 0.00 | 0.00 |
| ATOM | 6619 | H    | MET | X | 439 | 57.000 | 27.465 | 37.072 | 0.00 | 0.00 |
| ATOM | 6620 | CA   | MET | X | 439 | 56.226 | 28.231 | 38.868 | 0.00 | 0.00 |
| ATOM | 6621 | HA   | MET | X | 439 | 56.780 | 28.395 | 39.793 | 0.00 | 0.00 |
| ATOM | 6622 | CB   | MET | X | 439 | 55.991 | 29.548 | 38.053 | 0.00 | 0.00 |
| ATOM | 6623 | HB2  | MET | X | 439 | 55.828 | 29.264 | 37.014 | 0.00 | 0.00 |
| ATOM | 6624 | HB3  | MET | X | 439 | 55.029 | 29.949 | 38.370 | 0.00 | 0.00 |
| ATOM | 6625 | CG   | MET | X | 439 | 57.192 | 30.463 | 38.067 | 0.00 | 0.00 |
| ATOM | 6626 | HG2  | MET | X | 439 | 57.493 | 30.618 | 39.103 | 0.00 | 0.00 |
| ATOM | 6627 | HG3  | MET | X | 439 | 57.936 | 30.064 | 37.376 | 0.00 | 0.00 |
| ATOM | 6628 | SD   | MET | X | 439 | 56.812 | 32.110 | 37.585 | 0.00 | 0.00 |
| ATOM | 6629 | CE   | MET | X | 439 | 58.262 | 33.038 | 38.010 | 0.00 | 0.00 |
| ATOM | 6630 | HE1  | MET | X | 439 | 58.151 | 34.092 | 37.754 | 0.00 | 0.00 |
| ATOM | 6631 | HE2  | MET | X | 439 | 58.417 | 32.889 | 39.079 | 0.00 | 0.00 |
| ATOM | 6632 | HE3  | MET | X | 439 | 59.174 | 32.630 | 37.575 | 0.00 | 0.00 |
| ATOM | 6633 | C    | MET | X | 439 | 54.870 | 27.621 | 39.213 | 0.00 | 0.00 |
| ATOM | 6634 | O    | MET | X | 439 | 54.228 | 28.037 | 40.187 | 0.00 | 0.00 |
| ATOM | 6635 | N    | GLY | X | 440 | 54.382 | 26.693 | 38.431 | 0.00 | 0.00 |
| ATOM | 6636 | H    | GLY | X | 440 | 54.940 | 26.206 | 37.745 | 0.00 | 0.00 |
| ATOM | 6637 | CA   | GLY | X | 440 | 52.976 | 26.297 | 38.593 | 0.00 | 0.00 |
| ATOM | 6638 | HA2  | GLY | X | 440 | 52.889 | 25.240 | 38.341 | 0.00 | 0.00 |
| ATOM | 6639 | HA3  | GLY | X | 440 | 52.664 | 26.389 | 39.634 | 0.00 | 0.00 |
| ATOM | 6640 | C    | GLY | X | 440 | 51.905 | 27.181 | 37.955 | 0.00 | 0.00 |
| ATOM | 6641 | O    | GLY | X | 440 | 52.187 | 27.811 | 36.905 | 0.00 | 0.00 |
| ATOM | 6642 | N    | VAL | X | 441 | 50.658 | 27.134 | 38.421 | 0.00 | 0.00 |
| ATOM | 6643 | H    | VAL | X | 441 | 50.447 | 26.626 | 39.269 | 0.00 | 0.00 |
| ATOM | 6644 | CA   | VAL | X | 441 | 49.678 | 28.132 | 37.939 | 0.00 | 0.00 |
| ATOM | 6645 | HA   | VAL | X | 441 | 49.852 | 28.301 | 36.876 | 0.00 | 0.00 |
| ATOM | 6646 | CB   | VAL | X | 441 | 48.206 | 27.754 | 38.129 | 0.00 | 0.00 |
| ATOM | 6647 | HB   | VAL | X | 441 | 47.902 | 27.840 | 39.172 | 0.00 | 0.00 |
| ATOM | 6648 | CG1  | VAL | X | 441 | 47.340 | 28.719 | 37.231 | 0.00 | 0.00 |
| ATOM | 6649 | HG11 | VAL | X | 441 | 47.462 | 28.423 | 36.189 | 0.00 | 0.00 |
| ATOM | 6650 | HG12 | VAL | X | 441 | 46.307 | 28.561 | 37.541 | 0.00 | 0.00 |
| ATOM | 6651 | HG13 | VAL | X | 441 | 47.681 | 29.745 | 37.369 | 0.00 | 0.00 |
| ATOM | 6652 | CG2  | VAL | X | 441 | 47.877 | 26.344 | 37.680 | 0.00 | 0.00 |
| ATOM | 6653 | HG21 | VAL | X | 441 | 46.802 | 26.208 | 37.557 | 0.00 | 0.00 |
| ATOM | 6654 | HG22 | VAL | X | 441 | 48.140 | 25.543 | 38.371 | 0.00 | 0.00 |
| ATOM | 6655 | HG23 | VAL | X | 441 | 48.374 | 26.221 | 36.718 | 0.00 | 0.00 |
| ATOM | 6656 | C    | VAL | X | 441 | 49.881 | 29.514 | 38.709 | 0.00 | 0.00 |
| ATOM | 6657 | O    | VAL | X | 441 | 49.735 | 29.451 | 39.949 | 0.00 | 0.00 |
| ATOM | 6658 | N    | PRO | X | 442 | 50.227 | 30.651 | 38.087 | 0.00 | 0.00 |
| ATOM | 6659 | CD   | PRO | X | 442 | 50.647 | 30.737 | 36.739 | 0.00 | 0.00 |
| ATOM | 6660 | HD2  | PRO | X | 442 | 49.816 | 30.475 | 36.084 | 0.00 | 0.00 |
| ATOM | 6661 | HD3  | PRO | X | 442 | 51.409 | 29.987 | 36.527 | 0.00 | 0.00 |
| ATOM | 6662 | CG   | PRO | X | 442 | 51.307 | 32.035 | 36.551 | 0.00 | 0.00 |
| ATOM | 6663 | HG2  | PRO | X | 442 | 50.607 | 32.691 | 36.031 | 0.00 | 0.00 |
| ATOM | 6664 | HG3  | PRO | X | 442 | 52.233 | 31.945 | 35.983 | 0.00 | 0.00 |

|      |      |     |     |   |     |        |        |        |      |      |
|------|------|-----|-----|---|-----|--------|--------|--------|------|------|
| ATOM | 6665 | CB  | PRO | X | 442 | 51.560 | 32.575 | 37.984 | 0.00 | 0.00 |
| ATOM | 6666 | HB2 | PRO | X | 442 | 51.530 | 33.665 | 38.017 | 0.00 | 0.00 |
| ATOM | 6667 | HB3 | PRO | X | 442 | 52.561 | 32.226 | 38.236 | 0.00 | 0.00 |
| ATOM | 6668 | CA  | PRO | X | 442 | 50.522 | 31.859 | 38.794 | 0.00 | 0.00 |
| ATOM | 6669 | HA  | PRO | X | 442 | 51.036 | 31.534 | 39.699 | 0.00 | 0.00 |
| ATOM | 6670 | C   | PRO | X | 442 | 49.302 | 32.741 | 39.031 | 0.00 | 0.00 |
| ATOM | 6671 | O   | PRO | X | 442 | 48.315 | 32.671 | 38.234 | 0.00 | 0.00 |
| ATOM | 6672 | N   | HIP | X | 443 | 49.388 | 33.631 | 40.096 | 0.00 | 0.00 |
| ATOM | 6673 | H   | HIP | X | 443 | 50.224 | 33.644 | 40.662 | 0.00 | 0.00 |
| ATOM | 6674 | CA  | HIP | X | 443 | 48.271 | 34.490 | 40.516 | 0.00 | 0.00 |
| ATOM | 6675 | HA  | HIP | X | 443 | 47.617 | 33.821 | 41.075 | 0.00 | 0.00 |
| ATOM | 6676 | CB  | HIP | X | 443 | 48.807 | 35.551 | 41.486 | 0.00 | 0.00 |
| ATOM | 6677 | HB2 | HIP | X | 443 | 48.970 | 35.108 | 42.469 | 0.00 | 0.00 |
| ATOM | 6678 | HB3 | HIP | X | 443 | 49.810 | 35.783 | 41.128 | 0.00 | 0.00 |
| ATOM | 6679 | CG  | HIP | X | 443 | 47.943 | 36.709 | 41.653 | 0.00 | 0.00 |
| ATOM | 6680 | ND1 | HIP | X | 443 | 47.034 | 36.933 | 42.675 | 0.00 | 0.00 |
| ATOM | 6681 | HD1 | HIP | X | 443 | 46.790 | 36.194 | 43.319 | 0.00 | 0.00 |
| ATOM | 6682 | CE1 | HIP | X | 443 | 46.481 | 38.156 | 42.439 | 0.00 | 0.00 |
| ATOM | 6683 | HE1 | HIP | X | 443 | 45.678 | 38.507 | 43.070 | 0.00 | 0.00 |
| ATOM | 6684 | NE2 | HIP | X | 443 | 47.149 | 38.752 | 41.435 | 0.00 | 0.00 |
| ATOM | 6685 | HE2 | HIP | X | 443 | 46.925 | 39.687 | 41.124 | 0.00 | 0.00 |
| ATOM | 6686 | CD2 | HIP | X | 443 | 47.997 | 37.800 | 40.849 | 0.00 | 0.00 |
| ATOM | 6687 | HD2 | HIP | X | 443 | 48.618 | 37.886 | 39.969 | 0.00 | 0.00 |
| ATOM | 6688 | C   | HIP | X | 443 | 47.566 | 35.193 | 39.273 | 0.00 | 0.00 |
| ATOM | 6689 | O   | HIP | X | 443 | 48.172 | 35.882 | 38.414 | 0.00 | 0.00 |
| ATOM | 6690 | N   | GLY | X | 444 | 46.261 | 35.021 | 39.217 | 0.00 | 0.00 |
| ATOM | 6691 | H   | GLY | X | 444 | 45.858 | 34.339 | 39.844 | 0.00 | 0.00 |
| ATOM | 6692 | CA  | GLY | X | 444 | 45.318 | 35.650 | 38.307 | 0.00 | 0.00 |
| ATOM | 6693 | HA2 | GLY | X | 444 | 44.315 | 35.243 | 38.438 | 0.00 | 0.00 |
| ATOM | 6694 | HA3 | GLY | X | 444 | 45.407 | 36.718 | 38.501 | 0.00 | 0.00 |
| ATOM | 6695 | C   | GLY | X | 444 | 45.558 | 35.262 | 36.859 | 0.00 | 0.00 |
| ATOM | 6696 | O   | GLY | X | 444 | 45.752 | 36.088 | 35.983 | 0.00 | 0.00 |
| ATOM | 6697 | N   | TYR | X | 445 | 45.723 | 33.911 | 36.623 | 0.00 | 0.00 |
| ATOM | 6698 | H   | TYR | X | 445 | 45.584 | 33.330 | 37.438 | 0.00 | 0.00 |
| ATOM | 6699 | CA  | TYR | X | 445 | 45.788 | 33.319 | 35.308 | 0.00 | 0.00 |
| ATOM | 6700 | HA  | TYR | X | 445 | 45.403 | 34.140 | 34.704 | 0.00 | 0.00 |
| ATOM | 6701 | CB  | TYR | X | 445 | 47.247 | 32.937 | 35.000 | 0.00 | 0.00 |
| ATOM | 6702 | HB2 | TYR | X | 445 | 47.853 | 32.619 | 35.848 | 0.00 | 0.00 |
| ATOM | 6703 | HB3 | TYR | X | 445 | 47.254 | 32.173 | 34.222 | 0.00 | 0.00 |
| ATOM | 6704 | CG  | TYR | X | 445 | 48.106 | 34.124 | 34.381 | 0.00 | 0.00 |
| ATOM | 6705 | CD1 | TYR | X | 445 | 48.171 | 34.252 | 33.073 | 0.00 | 0.00 |
| ATOM | 6706 | HD1 | TYR | X | 445 | 47.586 | 33.569 | 32.475 | 0.00 | 0.00 |
| ATOM | 6707 | CE1 | TYR | X | 445 | 48.973 | 35.266 | 32.476 | 0.00 | 0.00 |
| ATOM | 6708 | HE1 | TYR | X | 445 | 49.108 | 35.309 | 31.406 | 0.00 | 0.00 |
| ATOM | 6709 | CZ  | TYR | X | 445 | 49.666 | 36.163 | 33.285 | 0.00 | 0.00 |
| ATOM | 6710 | OH  | TYR | X | 445 | 50.504 | 37.114 | 32.754 | 0.00 | 0.00 |
| ATOM | 6711 | HH  | TYR | X | 445 | 50.361 | 37.258 | 31.815 | 0.00 | 0.00 |
| ATOM | 6712 | CE2 | TYR | X | 445 | 49.614 | 36.036 | 34.672 | 0.00 | 0.00 |
| ATOM | 6713 | HE2 | TYR | X | 445 | 50.131 | 36.726 | 35.323 | 0.00 | 0.00 |
| ATOM | 6714 | CD2 | TYR | X | 445 | 48.848 | 34.944 | 35.207 | 0.00 | 0.00 |
| ATOM | 6715 | HD2 | TYR | X | 445 | 48.821 | 34.812 | 36.279 | 0.00 | 0.00 |
| ATOM | 6716 | C   | TYR | X | 445 | 44.773 | 32.225 | 34.944 | 0.00 | 0.00 |
| ATOM | 6717 | O   | TYR | X | 445 | 44.888 | 31.648 | 33.867 | 0.00 | 0.00 |
| ATOM | 6718 | N   | GLU | X | 446 | 43.717 | 32.004 | 35.727 | 0.00 | 0.00 |
| ATOM | 6719 | H   | GLU | X | 446 | 43.500 | 32.531 | 36.561 | 0.00 | 0.00 |
| ATOM | 6720 | CA  | GLU | X | 446 | 42.577 | 31.121 | 35.350 | 0.00 | 0.00 |
| ATOM | 6721 | HA  | GLU | X | 446 | 43.031 | 30.339 | 34.741 | 0.00 | 0.00 |
| ATOM | 6722 | CB  | GLU | X | 446 | 41.873 | 30.461 | 36.507 | 0.00 | 0.00 |
| ATOM | 6723 | HB2 | GLU | X | 446 | 41.281 | 29.644 | 36.094 | 0.00 | 0.00 |
| ATOM | 6724 | HB3 | GLU | X | 446 | 42.719 | 30.054 | 37.060 | 0.00 | 0.00 |
| ATOM | 6725 | CG  | GLU | X | 446 | 41.044 | 31.301 | 37.515 | 0.00 | 0.00 |
| ATOM | 6726 | HG2 | GLU | X | 446 | 40.180 | 31.694 | 36.979 | 0.00 | 0.00 |
| ATOM | 6727 | HG3 | GLU | X | 446 | 40.637 | 30.647 | 38.287 | 0.00 | 0.00 |
| ATOM | 6728 | CD  | GLU | X | 446 | 41.727 | 32.475 | 38.259 | 0.00 | 0.00 |
| ATOM | 6729 | OE1 | GLU | X | 446 | 42.145 | 33.290 | 37.416 | 0.00 | 0.00 |
| ATOM | 6730 | OE2 | GLU | X | 446 | 41.581 | 32.677 | 39.446 | 0.00 | 0.00 |
| ATOM | 6731 | C   | GLU | X | 446 | 41.669 | 31.888 | 34.376 | 0.00 | 0.00 |



|      |      |      |     |   |     |        |        |        |      |      |
|------|------|------|-----|---|-----|--------|--------|--------|------|------|
| ATOM | 6732 | O    | GLU | X | 446 | 40.965 | 31.225 | 33.594 | 0.00 | 0.00 |
| ATOM | 6733 | N    | ILE | X | 447 | 41.646 | 33.249 | 34.453 | 0.00 | 0.00 |
| ATOM | 6734 | H    | ILE | X | 447 | 42.147 | 33.661 | 35.227 | 0.00 | 0.00 |
| ATOM | 6735 | CA   | ILE | X | 447 | 40.647 | 34.102 | 33.801 | 0.00 | 0.00 |
| ATOM | 6736 | HA   | ILE | X | 447 | 39.675 | 33.986 | 34.281 | 0.00 | 0.00 |
| ATOM | 6737 | CB   | ILE | X | 447 | 41.130 | 35.594 | 33.993 | 0.00 | 0.00 |
| ATOM | 6738 | HB   | ILE | X | 447 | 40.723 | 36.184 | 33.172 | 0.00 | 0.00 |
| ATOM | 6739 | CG2  | ILE | X | 447 | 40.587 | 36.088 | 35.306 | 0.00 | 0.00 |
| ATOM | 6740 | HG21 | ILE | X | 447 | 40.990 | 35.568 | 36.175 | 0.00 | 0.00 |
| ATOM | 6741 | HG22 | ILE | X | 447 | 39.499 | 36.033 | 35.333 | 0.00 | 0.00 |
| ATOM | 6742 | HG23 | ILE | X | 447 | 40.791 | 37.154 | 35.407 | 0.00 | 0.00 |
| ATOM | 6743 | CG1  | ILE | X | 447 | 42.665 | 35.696 | 33.968 | 0.00 | 0.00 |
| ATOM | 6744 | HG12 | ILE | X | 447 | 43.210 | 35.348 | 34.845 | 0.00 | 0.00 |
| ATOM | 6745 | HG13 | ILE | X | 447 | 42.999 | 35.045 | 33.160 | 0.00 | 0.00 |
| ATOM | 6746 | CD1  | ILE | X | 447 | 43.198 | 37.187 | 33.776 | 0.00 | 0.00 |
| ATOM | 6747 | HD11 | ILE | X | 447 | 42.858 | 37.444 | 32.773 | 0.00 | 0.00 |
| ATOM | 6748 | HD12 | ILE | X | 447 | 44.281 | 37.072 | 33.805 | 0.00 | 0.00 |
| ATOM | 6749 | HD13 | ILE | X | 447 | 42.902 | 37.934 | 34.513 | 0.00 | 0.00 |
| ATOM | 6750 | C    | ILE | X | 447 | 40.444 | 33.844 | 32.328 | 0.00 | 0.00 |
| ATOM | 6751 | O    | ILE | X | 447 | 39.290 | 33.710 | 31.890 | 0.00 | 0.00 |
| ATOM | 6752 | N    | GLU | X | 448 | 41.521 | 33.602 | 31.559 | 0.00 | 0.00 |
| ATOM | 6753 | H    | GLU | X | 448 | 42.398 | 33.652 | 32.059 | 0.00 | 0.00 |
| ATOM | 6754 | CA   | GLU | X | 448 | 41.489 | 33.207 | 30.135 | 0.00 | 0.00 |
| ATOM | 6755 | HA   | GLU | X | 448 | 41.106 | 34.032 | 29.534 | 0.00 | 0.00 |
| ATOM | 6756 | CB   | GLU | X | 448 | 42.876 | 32.850 | 29.672 | 0.00 | 0.00 |
| ATOM | 6757 | HB2  | GLU | X | 448 | 43.240 | 32.186 | 30.457 | 0.00 | 0.00 |
| ATOM | 6758 | HB3  | GLU | X | 448 | 42.840 | 32.421 | 28.671 | 0.00 | 0.00 |
| ATOM | 6759 | CG   | GLU | X | 448 | 43.780 | 34.101 | 29.542 | 0.00 | 0.00 |
| ATOM | 6760 | HG2  | GLU | X | 448 | 43.297 | 34.858 | 28.923 | 0.00 | 0.00 |
| ATOM | 6761 | HG3  | GLU | X | 448 | 43.979 | 34.407 | 30.569 | 0.00 | 0.00 |
| ATOM | 6762 | CD   | GLU | X | 448 | 45.126 | 33.680 | 28.936 | 0.00 | 0.00 |
| ATOM | 6763 | OE1  | GLU | X | 448 | 45.579 | 34.252 | 27.940 | 0.00 | 0.00 |
| ATOM | 6764 | OE2  | GLU | X | 448 | 45.694 | 32.734 | 29.496 | 0.00 | 0.00 |
| ATOM | 6765 | C    | GLU | X | 448 | 40.515 | 31.986 | 29.922 | 0.00 | 0.00 |
| ATOM | 6766 | O    | GLU | X | 448 | 39.933 | 32.009 | 28.828 | 0.00 | 0.00 |
| ATOM | 6767 | N    | PHE | X | 449 | 40.192 | 31.061 | 30.880 | 0.00 | 0.00 |
| ATOM | 6768 | H    | PHE | X | 449 | 40.541 | 31.246 | 31.810 | 0.00 | 0.00 |
| ATOM | 6769 | CA   | PHE | X | 449 | 39.265 | 29.950 | 30.773 | 0.00 | 0.00 |
| ATOM | 6770 | HA   | PHE | X | 449 | 39.409 | 29.494 | 29.794 | 0.00 | 0.00 |
| ATOM | 6771 | CB   | PHE | X | 449 | 39.579 | 28.891 | 31.868 | 0.00 | 0.00 |
| ATOM | 6772 | HB2  | PHE | X | 449 | 39.641 | 29.349 | 32.856 | 0.00 | 0.00 |
| ATOM | 6773 | HB3  | PHE | X | 449 | 38.687 | 28.268 | 31.939 | 0.00 | 0.00 |
| ATOM | 6774 | CG   | PHE | X | 449 | 40.693 | 27.978 | 31.605 | 0.00 | 0.00 |
| ATOM | 6775 | CD1  | PHE | X | 449 | 41.979 | 28.305 | 32.012 | 0.00 | 0.00 |
| ATOM | 6776 | HD1  | PHE | X | 449 | 42.162 | 29.195 | 32.596 | 0.00 | 0.00 |
| ATOM | 6777 | CE1  | PHE | X | 449 | 43.112 | 27.653 | 31.471 | 0.00 | 0.00 |
| ATOM | 6778 | HE1  | PHE | X | 449 | 44.120 | 27.910 | 31.763 | 0.00 | 0.00 |
| ATOM | 6779 | CZ   | PHE | X | 449 | 42.909 | 26.646 | 30.528 | 0.00 | 0.00 |
| ATOM | 6780 | HZ   | PHE | X | 449 | 43.782 | 26.094 | 30.215 | 0.00 | 0.00 |
| ATOM | 6781 | CE2  | PHE | X | 449 | 41.631 | 26.184 | 30.166 | 0.00 | 0.00 |
| ATOM | 6782 | HE2  | PHE | X | 449 | 41.512 | 25.431 | 29.401 | 0.00 | 0.00 |
| ATOM | 6783 | CD2  | PHE | X | 449 | 40.494 | 26.867 | 30.714 | 0.00 | 0.00 |
| ATOM | 6784 | HD2  | PHE | X | 449 | 39.537 | 26.526 | 30.350 | 0.00 | 0.00 |
| ATOM | 6785 | C    | PHE | X | 449 | 37.756 | 30.431 | 30.853 | 0.00 | 0.00 |
| ATOM | 6786 | O    | PHE | X | 449 | 36.952 | 29.872 | 30.252 | 0.00 | 0.00 |
| ATOM | 6787 | N    | ILE | X | 450 | 37.410 | 31.508 | 31.585 | 0.00 | 0.00 |
| ATOM | 6788 | H    | ILE | X | 450 | 38.179 | 32.038 | 31.969 | 0.00 | 0.00 |
| ATOM | 6789 | CA   | ILE | X | 450 | 35.994 | 31.960 | 31.735 | 0.00 | 0.00 |
| ATOM | 6790 | HA   | ILE | X | 450 | 35.209 | 31.204 | 31.704 | 0.00 | 0.00 |
| ATOM | 6791 | CB   | ILE | X | 450 | 35.861 | 32.683 | 33.094 | 0.00 | 0.00 |
| ATOM | 6792 | HB   | ILE | X | 450 | 36.268 | 33.691 | 33.012 | 0.00 | 0.00 |
| ATOM | 6793 | CG2  | ILE | X | 450 | 34.404 | 32.902 | 33.467 | 0.00 | 0.00 |
| ATOM | 6794 | HG21 | ILE | X | 450 | 34.079 | 31.960 | 33.909 | 0.00 | 0.00 |
| ATOM | 6795 | HG22 | ILE | X | 450 | 33.819 | 33.132 | 32.576 | 0.00 | 0.00 |
| ATOM | 6796 | HG23 | ILE | X | 450 | 34.255 | 33.804 | 34.061 | 0.00 | 0.00 |
| ATOM | 6797 | CG1  | ILE | X | 450 | 36.823 | 32.235 | 34.304 | 0.00 | 0.00 |
| ATOM | 6798 | HG12 | ILE | X | 450 | 37.883 | 32.387 | 34.102 | 0.00 | 0.00 |

|      |      |      |     |   |     |        |        |        |      |      |
|------|------|------|-----|---|-----|--------|--------|--------|------|------|
| ATOM | 6799 | HG13 | ILE | X | 450 | 36.508 | 32.815 | 35.172 | 0.00 | 0.00 |
| ATOM | 6800 | CD1  | ILE | X | 450 | 36.687 | 30.789 | 34.781 | 0.00 | 0.00 |
| ATOM | 6801 | HD11 | ILE | X | 450 | 35.678 | 30.393 | 34.669 | 0.00 | 0.00 |
| ATOM | 6802 | HD12 | ILE | X | 450 | 37.048 | 30.711 | 35.807 | 0.00 | 0.00 |
| ATOM | 6803 | HD13 | ILE | X | 450 | 37.180 | 30.147 | 34.051 | 0.00 | 0.00 |
| ATOM | 6804 | C    | ILE | X | 450 | 35.678 | 32.907 | 30.550 | 0.00 | 0.00 |
| ATOM | 6805 | O    | ILE | X | 450 | 34.535 | 33.002 | 30.036 | 0.00 | 0.00 |
| ATOM | 6806 | N    | PHE | X | 451 | 36.692 | 33.613 | 30.098 | 0.00 | 0.00 |
| ATOM | 6807 | H    | PHE | X | 451 | 37.509 | 33.561 | 30.690 | 0.00 | 0.00 |
| ATOM | 6808 | CA   | PHE | X | 451 | 36.729 | 34.378 | 28.883 | 0.00 | 0.00 |
| ATOM | 6809 | HA   | PHE | X | 451 | 35.789 | 34.925 | 28.820 | 0.00 | 0.00 |
| ATOM | 6810 | CB   | PHE | X | 451 | 37.776 | 35.450 | 28.868 | 0.00 | 0.00 |
| ATOM | 6811 | HB2  | PHE | X | 451 | 38.722 | 35.007 | 29.181 | 0.00 | 0.00 |
| ATOM | 6812 | HB3  | PHE | X | 451 | 38.007 | 35.797 | 27.861 | 0.00 | 0.00 |
| ATOM | 6813 | CG   | PHE | X | 451 | 37.484 | 36.710 | 29.711 | 0.00 | 0.00 |
| ATOM | 6814 | CD1  | PHE | X | 451 | 38.145 | 37.005 | 30.941 | 0.00 | 0.00 |
| ATOM | 6815 | HD1  | PHE | X | 451 | 38.835 | 36.281 | 31.347 | 0.00 | 0.00 |
| ATOM | 6816 | CE1  | PHE | X | 451 | 37.821 | 38.101 | 31.705 | 0.00 | 0.00 |
| ATOM | 6817 | HE1  | PHE | X | 451 | 38.349 | 38.324 | 32.621 | 0.00 | 0.00 |
| ATOM | 6818 | CZ   | PHE | X | 451 | 36.861 | 39.010 | 31.167 | 0.00 | 0.00 |
| ATOM | 6819 | HZ   | PHE | X | 451 | 36.741 | 39.996 | 31.591 | 0.00 | 0.00 |
| ATOM | 6820 | CE2  | PHE | X | 451 | 36.136 | 38.751 | 29.968 | 0.00 | 0.00 |
| ATOM | 6821 | HE2  | PHE | X | 451 | 35.342 | 39.360 | 29.562 | 0.00 | 0.00 |
| ATOM | 6822 | CD2  | PHE | X | 451 | 36.495 | 37.583 | 29.243 | 0.00 | 0.00 |
| ATOM | 6823 | HD2  | PHE | X | 451 | 36.014 | 37.408 | 28.292 | 0.00 | 0.00 |
| ATOM | 6824 | C    | PHE | X | 451 | 36.651 | 33.495 | 27.580 | 0.00 | 0.00 |
| ATOM | 6825 | O    | PHE | X | 451 | 36.183 | 34.024 | 26.552 | 0.00 | 0.00 |
| ATOM | 6826 | N    | GLY | X | 452 | 36.997 | 32.234 | 27.669 | 0.00 | 0.00 |
| ATOM | 6827 | H    | GLY | X | 452 | 37.288 | 31.921 | 28.584 | 0.00 | 0.00 |
| ATOM | 6828 | CA   | GLY | X | 452 | 36.973 | 31.194 | 26.623 | 0.00 | 0.00 |
| ATOM | 6829 | HA2  | GLY | X | 452 | 37.067 | 30.238 | 27.138 | 0.00 | 0.00 |
| ATOM | 6830 | HA3  | GLY | X | 452 | 36.043 | 31.195 | 26.054 | 0.00 | 0.00 |
| ATOM | 6831 | C    | GLY | X | 452 | 38.087 | 31.268 | 25.605 | 0.00 | 0.00 |
| ATOM | 6832 | O    | GLY | X | 452 | 38.012 | 30.630 | 24.517 | 0.00 | 0.00 |
| ATOM | 6833 | N    | ILE | X | 453 | 39.196 | 31.898 | 25.932 | 0.00 | 0.00 |
| ATOM | 6834 | H    | ILE | X | 453 | 39.389 | 32.112 | 26.899 | 0.00 | 0.00 |
| ATOM | 6835 | CA   | ILE | X | 453 | 40.379 | 32.004 | 25.108 | 0.00 | 0.00 |
| ATOM | 6836 | HA   | ILE | X | 453 | 40.143 | 32.642 | 24.256 | 0.00 | 0.00 |
| ATOM | 6837 | CB   | ILE | X | 453 | 41.441 | 32.824 | 25.833 | 0.00 | 0.00 |
| ATOM | 6838 | HB   | ILE | X | 453 | 41.962 | 32.286 | 26.625 | 0.00 | 0.00 |
| ATOM | 6839 | CG2  | ILE | X | 453 | 42.636 | 33.287 | 25.020 | 0.00 | 0.00 |
| ATOM | 6840 | HG21 | ILE | X | 453 | 42.291 | 33.945 | 24.223 | 0.00 | 0.00 |
| ATOM | 6841 | HG22 | ILE | X | 453 | 43.095 | 32.376 | 24.635 | 0.00 | 0.00 |
| ATOM | 6842 | HG23 | ILE | X | 453 | 43.430 | 33.807 | 25.557 | 0.00 | 0.00 |
| ATOM | 6843 | CG1  | ILE | X | 453 | 40.805 | 34.154 | 26.420 | 0.00 | 0.00 |
| ATOM | 6844 | HG12 | ILE | X | 453 | 40.284 | 33.987 | 27.363 | 0.00 | 0.00 |
| ATOM | 6845 | HG13 | ILE | X | 453 | 41.657 | 34.789 | 26.662 | 0.00 | 0.00 |
| ATOM | 6846 | CD1  | ILE | X | 453 | 39.907 | 34.973 | 25.527 | 0.00 | 0.00 |
| ATOM | 6847 | HD11 | ILE | X | 453 | 40.307 | 35.069 | 24.517 | 0.00 | 0.00 |
| ATOM | 6848 | HD12 | ILE | X | 453 | 39.859 | 36.012 | 25.855 | 0.00 | 0.00 |
| ATOM | 6849 | HD13 | ILE | X | 453 | 38.882 | 34.623 | 25.406 | 0.00 | 0.00 |
| ATOM | 6850 | C    | ILE | X | 453 | 40.891 | 30.667 | 24.547 | 0.00 | 0.00 |
| ATOM | 6851 | O    | ILE | X | 453 | 41.304 | 30.674 | 23.394 | 0.00 | 0.00 |
| ATOM | 6852 | N    | PRO | X | 454 | 40.878 | 29.550 | 25.249 | 0.00 | 0.00 |
| ATOM | 6853 | CD   | PRO | X | 454 | 40.765 | 29.367 | 26.736 | 0.00 | 0.00 |
| ATOM | 6854 | HD2  | PRO | X | 454 | 39.708 | 29.514 | 26.962 | 0.00 | 0.00 |
| ATOM | 6855 | HD3  | PRO | X | 454 | 41.379 | 30.149 | 27.183 | 0.00 | 0.00 |
| ATOM | 6856 | CG   | PRO | X | 454 | 41.364 | 27.977 | 26.985 | 0.00 | 0.00 |
| ATOM | 6857 | HG2  | PRO | X | 454 | 40.958 | 27.479 | 27.866 | 0.00 | 0.00 |
| ATOM | 6858 | HG3  | PRO | X | 454 | 42.414 | 28.181 | 27.196 | 0.00 | 0.00 |
| ATOM | 6859 | CB   | PRO | X | 454 | 41.059 | 27.176 | 25.710 | 0.00 | 0.00 |
| ATOM | 6860 | HB2  | PRO | X | 454 | 40.048 | 26.776 | 25.794 | 0.00 | 0.00 |
| ATOM | 6861 | HB3  | PRO | X | 454 | 41.809 | 26.401 | 25.555 | 0.00 | 0.00 |
| ATOM | 6862 | CA   | PRO | X | 454 | 41.176 | 28.208 | 24.639 | 0.00 | 0.00 |
| ATOM | 6863 | HA   | PRO | X | 454 | 42.162 | 28.487 | 24.267 | 0.00 | 0.00 |
| ATOM | 6864 | C    | PRO | X | 454 | 40.325 | 27.865 | 23.402 | 0.00 | 0.00 |
| ATOM | 6865 | O    | PRO | X | 454 | 40.780 | 26.994 | 22.665 | 0.00 | 0.00 |

|      |      |      |     |   |     |        |        |        |      |      |
|------|------|------|-----|---|-----|--------|--------|--------|------|------|
| ATOM | 6866 | N    | LEU | X | 455 | 39.237 | 28.589 | 22.982 | 0.00 | 0.00 |
| ATOM | 6867 | H    | LEU | X | 455 | 38.924 | 29.385 | 23.518 | 0.00 | 0.00 |
| ATOM | 6868 | CA   | LEU | X | 455 | 38.633 | 28.587 | 21.616 | 0.00 | 0.00 |
| ATOM | 6869 | HA   | LEU | X | 455 | 38.603 | 27.538 | 21.324 | 0.00 | 0.00 |
| ATOM | 6870 | CB   | LEU | X | 455 | 37.158 | 28.969 | 21.816 | 0.00 | 0.00 |
| ATOM | 6871 | HB2  | LEU | X | 455 | 37.131 | 30.041 | 22.014 | 0.00 | 0.00 |
| ATOM | 6872 | HB3  | LEU | X | 455 | 36.648 | 29.002 | 20.853 | 0.00 | 0.00 |
| ATOM | 6873 | CG   | LEU | X | 455 | 36.261 | 28.159 | 22.796 | 0.00 | 0.00 |
| ATOM | 6874 | HG   | LEU | X | 455 | 36.578 | 28.249 | 23.835 | 0.00 | 0.00 |
| ATOM | 6875 | CD1  | LEU | X | 455 | 34.822 | 28.627 | 22.676 | 0.00 | 0.00 |
| ATOM | 6876 | HD11 | LEU | X | 455 | 34.160 | 28.277 | 23.467 | 0.00 | 0.00 |
| ATOM | 6877 | HD12 | LEU | X | 455 | 34.367 | 28.458 | 21.700 | 0.00 | 0.00 |
| ATOM | 6878 | HD13 | LEU | X | 455 | 34.677 | 29.691 | 22.863 | 0.00 | 0.00 |
| ATOM | 6879 | CD2  | LEU | X | 455 | 36.529 | 26.622 | 22.694 | 0.00 | 0.00 |
| ATOM | 6880 | HD21 | LEU | X | 455 | 37.604 | 26.488 | 22.812 | 0.00 | 0.00 |
| ATOM | 6881 | HD22 | LEU | X | 455 | 36.009 | 26.136 | 23.519 | 0.00 | 0.00 |
| ATOM | 6882 | HD23 | LEU | X | 455 | 36.275 | 26.357 | 21.668 | 0.00 | 0.00 |
| ATOM | 6883 | C    | LEU | X | 455 | 39.361 | 29.441 | 20.578 | 0.00 | 0.00 |
| ATOM | 6884 | O    | LEU | X | 455 | 39.091 | 29.178 | 19.410 | 0.00 | 0.00 |
| ATOM | 6885 | N    | ASP | X | 456 | 40.321 | 30.275 | 20.890 | 0.00 | 0.00 |
| ATOM | 6886 | H    | ASP | X | 456 | 40.584 | 30.347 | 21.863 | 0.00 | 0.00 |
| ATOM | 6887 | CA   | ASP | X | 456 | 41.095 | 30.998 | 19.882 | 0.00 | 0.00 |
| ATOM | 6888 | HA   | ASP | X | 456 | 40.366 | 31.669 | 19.429 | 0.00 | 0.00 |
| ATOM | 6889 | CB   | ASP | X | 456 | 42.036 | 31.997 | 20.604 | 0.00 | 0.00 |
| ATOM | 6890 | HB2  | ASP | X | 456 | 41.571 | 32.565 | 21.410 | 0.00 | 0.00 |
| ATOM | 6891 | HB3  | ASP | X | 456 | 42.752 | 31.302 | 21.042 | 0.00 | 0.00 |
| ATOM | 6892 | CG   | ASP | X | 456 | 42.694 | 32.925 | 19.483 | 0.00 | 0.00 |
| ATOM | 6893 | OD1  | ASP | X | 456 | 42.559 | 34.165 | 19.630 | 0.00 | 0.00 |
| ATOM | 6894 | OD2  | ASP | X | 456 | 43.362 | 32.445 | 18.527 | 0.00 | 0.00 |
| ATOM | 6895 | C    | ASP | X | 456 | 41.779 | 30.035 | 18.892 | 0.00 | 0.00 |
| ATOM | 6896 | O    | ASP | X | 456 | 42.539 | 29.173 | 19.385 | 0.00 | 0.00 |
| ATOM | 6897 | N    | PRO | X | 457 | 41.525 | 30.199 | 17.553 | 0.00 | 0.00 |
| ATOM | 6898 | CD   | PRO | X | 457 | 40.600 | 31.084 | 17.022 | 0.00 | 0.00 |
| ATOM | 6899 | HD2  | PRO | X | 457 | 40.734 | 32.140 | 17.255 | 0.00 | 0.00 |
| ATOM | 6900 | HD3  | PRO | X | 457 | 39.593 | 30.849 | 17.368 | 0.00 | 0.00 |
| ATOM | 6901 | CG   | PRO | X | 457 | 40.570 | 30.908 | 15.535 | 0.00 | 0.00 |
| ATOM | 6902 | HG2  | PRO | X | 457 | 41.316 | 31.507 | 15.014 | 0.00 | 0.00 |
| ATOM | 6903 | HG3  | PRO | X | 457 | 39.604 | 31.252 | 15.166 | 0.00 | 0.00 |
| ATOM | 6904 | CB   | PRO | X | 457 | 40.921 | 29.411 | 15.358 | 0.00 | 0.00 |
| ATOM | 6905 | HB2  | PRO | X | 457 | 41.407 | 29.259 | 14.394 | 0.00 | 0.00 |
| ATOM | 6906 | HB3  | PRO | X | 457 | 40.066 | 28.742 | 15.458 | 0.00 | 0.00 |
| ATOM | 6907 | CA   | PRO | X | 457 | 41.909 | 29.237 | 16.526 | 0.00 | 0.00 |
| ATOM | 6908 | HA   | PRO | X | 457 | 41.828 | 28.219 | 16.907 | 0.00 | 0.00 |
| ATOM | 6909 | C    | PRO | X | 457 | 43.413 | 29.382 | 16.122 | 0.00 | 0.00 |
| ATOM | 6910 | O    | PRO | X | 457 | 44.014 | 28.399 | 15.690 | 0.00 | 0.00 |
| ATOM | 6911 | N    | SER | X | 458 | 44.025 | 30.453 | 16.480 | 0.00 | 0.00 |
| ATOM | 6912 | H    | SER | X | 458 | 43.489 | 31.076 | 17.066 | 0.00 | 0.00 |
| ATOM | 6913 | CA   | SER | X | 458 | 45.450 | 30.893 | 16.161 | 0.00 | 0.00 |
| ATOM | 6914 | HA   | SER | X | 458 | 45.826 | 30.556 | 15.194 | 0.00 | 0.00 |
| ATOM | 6915 | CB   | SER | X | 458 | 45.503 | 32.428 | 16.147 | 0.00 | 0.00 |
| ATOM | 6916 | HB2  | SER | X | 458 | 46.420 | 32.770 | 15.666 | 0.00 | 0.00 |
| ATOM | 6917 | HB3  | SER | X | 458 | 44.647 | 32.885 | 15.651 | 0.00 | 0.00 |
| ATOM | 6918 | OG   | SER | X | 458 | 45.497 | 32.957 | 17.444 | 0.00 | 0.00 |
| ATOM | 6919 | HG   | SER | X | 458 | 44.679 | 32.613 | 17.810 | 0.00 | 0.00 |
| ATOM | 6920 | C    | SER | X | 458 | 46.445 | 30.423 | 17.275 | 0.00 | 0.00 |
| ATOM | 6921 | O    | SER | X | 458 | 47.631 | 30.338 | 16.904 | 0.00 | 0.00 |
| ATOM | 6922 | N    | ARG | X | 459 | 45.972 | 30.042 | 18.516 | 0.00 | 0.00 |
| ATOM | 6923 | H    | ARG | X | 459 | 44.970 | 30.122 | 18.618 | 0.00 | 0.00 |
| ATOM | 6924 | CA   | ARG | X | 459 | 46.806 | 29.710 | 19.749 | 0.00 | 0.00 |
| ATOM | 6925 | HA   | ARG | X | 459 | 47.835 | 30.044 | 19.619 | 0.00 | 0.00 |
| ATOM | 6926 | CB   | ARG | X | 459 | 46.200 | 30.407 | 20.911 | 0.00 | 0.00 |
| ATOM | 6927 | HB2  | ARG | X | 459 | 45.119 | 30.267 | 20.906 | 0.00 | 0.00 |
| ATOM | 6928 | HB3  | ARG | X | 459 | 46.643 | 30.018 | 21.828 | 0.00 | 0.00 |
| ATOM | 6929 | CG   | ARG | X | 459 | 46.496 | 31.898 | 20.751 | 0.00 | 0.00 |
| ATOM | 6930 | HG2  | ARG | X | 459 | 47.568 | 32.091 | 20.792 | 0.00 | 0.00 |
| ATOM | 6931 | HG3  | ARG | X | 459 | 46.127 | 32.228 | 19.779 | 0.00 | 0.00 |
| ATOM | 6932 | CD   | ARG | X | 459 | 45.659 | 32.682 | 21.775 | 0.00 | 0.00 |

|      |      |      |     |   |     |        |        |        |      |      |
|------|------|------|-----|---|-----|--------|--------|--------|------|------|
| ATOM | 6933 | HD2  | ARG | X | 459 | 44.588 | 32.639 | 21.580 | 0.00 | 0.00 |
| ATOM | 6934 | HD3  | ARG | X | 459 | 45.833 | 32.385 | 22.809 | 0.00 | 0.00 |
| ATOM | 6935 | NE   | ARG | X | 459 | 45.895 | 34.142 | 21.595 | 0.00 | 0.00 |
| ATOM | 6936 | HE   | ARG | X | 459 | 46.222 | 34.400 | 20.675 | 0.00 | 0.00 |
| ATOM | 6937 | CZ   | ARG | X | 459 | 45.811 | 35.151 | 22.446 | 0.00 | 0.00 |
| ATOM | 6938 | NH1  | ARG | X | 459 | 45.729 | 34.919 | 23.743 | 0.00 | 0.00 |
| ATOM | 6939 | HH11 | ARG | X | 459 | 45.812 | 33.980 | 24.105 | 0.00 | 0.00 |
| ATOM | 6940 | HH12 | ARG | X | 459 | 45.616 | 35.657 | 24.423 | 0.00 | 0.00 |
| ATOM | 6941 | NH2  | ARG | X | 459 | 45.908 | 36.401 | 22.040 | 0.00 | 0.00 |
| ATOM | 6942 | HH21 | ARG | X | 459 | 46.032 | 36.602 | 21.058 | 0.00 | 0.00 |
| ATOM | 6943 | HH22 | ARG | X | 459 | 45.629 | 37.143 | 22.665 | 0.00 | 0.00 |
| ATOM | 6944 | C    | ARG | X | 459 | 46.845 | 28.174 | 19.955 | 0.00 | 0.00 |
| ATOM | 6945 | O    | ARG | X | 459 | 46.007 | 27.496 | 19.514 | 0.00 | 0.00 |
| ATOM | 6946 | N    | ASN | X | 460 | 47.931 | 27.667 | 20.636 | 0.00 | 0.00 |
| ATOM | 6947 | H    | ASN | X | 460 | 48.607 | 28.324 | 20.998 | 0.00 | 0.00 |
| ATOM | 6948 | CA   | ASN | X | 460 | 48.395 | 26.269 | 20.640 | 0.00 | 0.00 |
| ATOM | 6949 | HA   | ASN | X | 460 | 48.199 | 25.911 | 19.629 | 0.00 | 0.00 |
| ATOM | 6950 | CB   | ASN | X | 460 | 49.904 | 26.319 | 20.777 | 0.00 | 0.00 |
| ATOM | 6951 | HB2  | ASN | X | 460 | 50.261 | 27.053 | 20.055 | 0.00 | 0.00 |
| ATOM | 6952 | HB3  | ASN | X | 460 | 50.236 | 26.784 | 21.705 | 0.00 | 0.00 |
| ATOM | 6953 | CG   | ASN | X | 460 | 50.593 | 24.973 | 20.501 | 0.00 | 0.00 |
| ATOM | 6954 | OD1  | ASN | X | 460 | 50.303 | 24.160 | 19.632 | 0.00 | 0.00 |
| ATOM | 6955 | ND2  | ASN | X | 460 | 51.748 | 24.800 | 21.144 | 0.00 | 0.00 |
| ATOM | 6956 | HD21 | ASN | X | 460 | 52.243 | 23.922 | 21.079 | 0.00 | 0.00 |
| ATOM | 6957 | HD22 | ASN | X | 460 | 52.041 | 25.396 | 21.905 | 0.00 | 0.00 |
| ATOM | 6958 | C    | ASN | X | 460 | 47.696 | 25.379 | 21.711 | 0.00 | 0.00 |
| ATOM | 6959 | O    | ASN | X | 460 | 48.209 | 24.414 | 22.217 | 0.00 | 0.00 |
| ATOM | 6960 | N    | TYR | X | 461 | 46.447 | 25.768 | 22.013 | 0.00 | 0.00 |
| ATOM | 6961 | H    | TYR | X | 461 | 46.145 | 26.671 | 21.676 | 0.00 | 0.00 |
| ATOM | 6962 | CA   | TYR | X | 461 | 45.447 | 24.949 | 22.776 | 0.00 | 0.00 |
| ATOM | 6963 | HA   | TYR | X | 461 | 45.946 | 24.871 | 23.742 | 0.00 | 0.00 |
| ATOM | 6964 | CB   | TYR | X | 461 | 44.262 | 25.815 | 23.064 | 0.00 | 0.00 |
| ATOM | 6965 | HB2  | TYR | X | 461 | 43.708 | 25.925 | 22.132 | 0.00 | 0.00 |
| ATOM | 6966 | HB3  | TYR | X | 461 | 43.473 | 25.343 | 23.649 | 0.00 | 0.00 |
| ATOM | 6967 | CG   | TYR | X | 461 | 44.569 | 27.143 | 23.635 | 0.00 | 0.00 |
| ATOM | 6968 | CD1  | TYR | X | 461 | 44.298 | 28.381 | 23.020 | 0.00 | 0.00 |
| ATOM | 6969 | HD1  | TYR | X | 461 | 44.051 | 28.448 | 21.971 | 0.00 | 0.00 |
| ATOM | 6970 | CE1  | TYR | X | 461 | 44.440 | 29.609 | 23.765 | 0.00 | 0.00 |
| ATOM | 6971 | HE1  | TYR | X | 461 | 44.414 | 30.586 | 23.305 | 0.00 | 0.00 |
| ATOM | 6972 | CZ   | TYR | X | 461 | 44.792 | 29.463 | 25.142 | 0.00 | 0.00 |
| ATOM | 6973 | OH   | TYR | X | 461 | 44.737 | 30.521 | 25.995 | 0.00 | 0.00 |
| ATOM | 6974 | HH   | TYR | X | 461 | 45.121 | 30.310 | 26.849 | 0.00 | 0.00 |
| ATOM | 6975 | CE2  | TYR | X | 461 | 45.133 | 28.238 | 25.721 | 0.00 | 0.00 |
| ATOM | 6976 | HE2  | TYR | X | 461 | 45.385 | 28.267 | 26.771 | 0.00 | 0.00 |
| ATOM | 6977 | CD2  | TYR | X | 461 | 45.071 | 27.051 | 24.994 | 0.00 | 0.00 |
| ATOM | 6978 | HD2  | TYR | X | 461 | 45.328 | 26.121 | 25.478 | 0.00 | 0.00 |
| ATOM | 6979 | C    | TYR | X | 461 | 45.073 | 23.527 | 22.290 | 0.00 | 0.00 |
| ATOM | 6980 | O    | TYR | X | 461 | 45.062 | 23.140 | 21.150 | 0.00 | 0.00 |
| ATOM | 6981 | N    | THR | X | 462 | 44.793 | 22.733 | 23.283 | 0.00 | 0.00 |
| ATOM | 6982 | H    | THR | X | 462 | 44.621 | 23.129 | 24.196 | 0.00 | 0.00 |
| ATOM | 6983 | CA   | THR | X | 462 | 44.650 | 21.272 | 23.231 | 0.00 | 0.00 |
| ATOM | 6984 | HA   | THR | X | 462 | 45.007 | 20.996 | 22.239 | 0.00 | 0.00 |
| ATOM | 6985 | CB   | THR | X | 462 | 45.491 | 20.442 | 24.217 | 0.00 | 0.00 |
| ATOM | 6986 | HB   | THR | X | 462 | 45.233 | 19.385 | 24.165 | 0.00 | 0.00 |
| ATOM | 6987 | CG2  | THR | X | 462 | 47.056 | 20.541 | 24.084 | 0.00 | 0.00 |
| ATOM | 6988 | HG21 | THR | X | 462 | 47.464 | 19.936 | 23.274 | 0.00 | 0.00 |
| ATOM | 6989 | HG22 | THR | X | 462 | 47.506 | 20.224 | 25.025 | 0.00 | 0.00 |
| ATOM | 6990 | HG23 | THR | X | 462 | 47.404 | 21.559 | 23.908 | 0.00 | 0.00 |
| ATOM | 6991 | OG1  | THR | X | 462 | 45.311 | 21.021 | 25.510 | 0.00 | 0.00 |
| ATOM | 6992 | HG1  | THR | X | 462 | 45.799 | 21.844 | 25.579 | 0.00 | 0.00 |
| ATOM | 6993 | C    | THR | X | 462 | 43.164 | 20.978 | 23.376 | 0.00 | 0.00 |
| ATOM | 6994 | O    | THR | X | 462 | 42.508 | 21.725 | 24.138 | 0.00 | 0.00 |
| ATOM | 6995 | N    | ALA | X | 463 | 42.646 | 19.936 | 22.802 | 0.00 | 0.00 |
| ATOM | 6996 | H    | ALA | X | 463 | 43.351 | 19.308 | 22.442 | 0.00 | 0.00 |
| ATOM | 6997 | CA   | ALA | X | 463 | 41.164 | 19.651 | 22.782 | 0.00 | 0.00 |
| ATOM | 6998 | HA   | ALA | X | 463 | 40.576 | 20.400 | 22.253 | 0.00 | 0.00 |
| ATOM | 6999 | CB   | ALA | X | 463 | 40.957 | 18.263 | 22.076 | 0.00 | 0.00 |

|      |      |      |     |   |     |        |        |        |      |      |
|------|------|------|-----|---|-----|--------|--------|--------|------|------|
| ATOM | 7000 | HB1  | ALA | X | 463 | 41.549 | 17.437 | 22.470 | 0.00 | 0.00 |
| ATOM | 7001 | HB2  | ALA | X | 463 | 41.382 | 18.372 | 21.078 | 0.00 | 0.00 |
| ATOM | 7002 | HB3  | ALA | X | 463 | 39.916 | 17.952 | 21.987 | 0.00 | 0.00 |
| ATOM | 7003 | C    | ALA | X | 463 | 40.537 | 19.501 | 24.174 | 0.00 | 0.00 |
| ATOM | 7004 | O    | ALA | X | 463 | 39.349 | 19.794 | 24.363 | 0.00 | 0.00 |
| ATOM | 7005 | N    | GLU | X | 464 | 41.330 | 18.966 | 25.118 | 0.00 | 0.00 |
| ATOM | 7006 | H    | GLU | X | 464 | 42.254 | 18.658 | 24.850 | 0.00 | 0.00 |
| ATOM | 7007 | CA   | GLU | X | 464 | 40.997 | 18.886 | 26.522 | 0.00 | 0.00 |
| ATOM | 7008 | HA   | GLU | X | 464 | 39.982 | 18.492 | 26.580 | 0.00 | 0.00 |
| ATOM | 7009 | CB   | GLU | X | 464 | 42.042 | 17.967 | 27.253 | 0.00 | 0.00 |
| ATOM | 7010 | HB2  | GLU | X | 464 | 41.671 | 17.980 | 28.278 | 0.00 | 0.00 |
| ATOM | 7011 | HB3  | GLU | X | 464 | 41.884 | 16.916 | 27.008 | 0.00 | 0.00 |
| ATOM | 7012 | CG   | GLU | X | 464 | 43.497 | 18.368 | 27.137 | 0.00 | 0.00 |
| ATOM | 7013 | HG2  | GLU | X | 464 | 43.617 | 19.451 | 27.113 | 0.00 | 0.00 |
| ATOM | 7014 | HG3  | GLU | X | 464 | 44.043 | 18.111 | 28.044 | 0.00 | 0.00 |
| ATOM | 7015 | CD   | GLU | X | 464 | 44.154 | 17.640 | 25.928 | 0.00 | 0.00 |
| ATOM | 7016 | OE1  | GLU | X | 464 | 43.542 | 17.457 | 24.827 | 0.00 | 0.00 |
| ATOM | 7017 | OE2  | GLU | X | 464 | 45.277 | 17.123 | 26.172 | 0.00 | 0.00 |
| ATOM | 7018 | C    | GLU | X | 464 | 40.895 | 20.240 | 27.197 | 0.00 | 0.00 |
| ATOM | 7019 | O    | GLU | X | 464 | 40.074 | 20.450 | 28.045 | 0.00 | 0.00 |
| ATOM | 7020 | N    | GLU | X | 465 | 41.721 | 21.268 | 26.831 | 0.00 | 0.00 |
| ATOM | 7021 | H    | GLU | X | 465 | 42.272 | 21.214 | 25.986 | 0.00 | 0.00 |
| ATOM | 7022 | CA   | GLU | X | 465 | 41.625 | 22.599 | 27.450 | 0.00 | 0.00 |
| ATOM | 7023 | HA   | GLU | X | 465 | 41.620 | 22.414 | 28.524 | 0.00 | 0.00 |
| ATOM | 7024 | CB   | GLU | X | 465 | 42.863 | 23.452 | 27.022 | 0.00 | 0.00 |
| ATOM | 7025 | HB2  | GLU | X | 465 | 43.009 | 23.378 | 25.944 | 0.00 | 0.00 |
| ATOM | 7026 | HB3  | GLU | X | 465 | 42.681 | 24.493 | 27.287 | 0.00 | 0.00 |
| ATOM | 7027 | CG   | GLU | X | 465 | 44.122 | 23.013 | 27.760 | 0.00 | 0.00 |
| ATOM | 7028 | HG2  | GLU | X | 465 | 44.026 | 23.303 | 28.807 | 0.00 | 0.00 |
| ATOM | 7029 | HG3  | GLU | X | 465 | 44.219 | 21.930 | 27.692 | 0.00 | 0.00 |
| ATOM | 7030 | CD   | GLU | X | 465 | 45.425 | 23.641 | 27.384 | 0.00 | 0.00 |
| ATOM | 7031 | OE1  | GLU | X | 465 | 45.705 | 23.717 | 26.163 | 0.00 | 0.00 |
| ATOM | 7032 | OE2  | GLU | X | 465 | 46.259 | 23.983 | 28.209 | 0.00 | 0.00 |
| ATOM | 7033 | C    | GLU | X | 465 | 40.369 | 23.303 | 26.814 | 0.00 | 0.00 |
| ATOM | 7034 | O    | GLU | X | 465 | 39.752 | 24.175 | 27.444 | 0.00 | 0.00 |
| ATOM | 7035 | N    | LYS | X | 466 | 39.961 | 22.984 | 25.558 | 0.00 | 0.00 |
| ATOM | 7036 | H    | LYS | X | 466 | 40.407 | 22.226 | 25.063 | 0.00 | 0.00 |
| ATOM | 7037 | CA   | LYS | X | 466 | 38.763 | 23.606 | 24.886 | 0.00 | 0.00 |
| ATOM | 7038 | HA   | LYS | X | 466 | 38.820 | 24.688 | 25.000 | 0.00 | 0.00 |
| ATOM | 7039 | CB   | LYS | X | 466 | 38.771 | 23.240 | 23.386 | 0.00 | 0.00 |
| ATOM | 7040 | HB2  | LYS | X | 466 | 38.839 | 22.170 | 23.188 | 0.00 | 0.00 |
| ATOM | 7041 | HB3  | LYS | X | 466 | 37.833 | 23.532 | 22.914 | 0.00 | 0.00 |
| ATOM | 7042 | CG   | LYS | X | 466 | 39.870 | 23.955 | 22.652 | 0.00 | 0.00 |
| ATOM | 7043 | HG2  | LYS | X | 466 | 39.529 | 24.986 | 22.560 | 0.00 | 0.00 |
| ATOM | 7044 | HG3  | LYS | X | 466 | 40.805 | 24.008 | 23.211 | 0.00 | 0.00 |
| ATOM | 7045 | CD   | LYS | X | 466 | 40.160 | 23.430 | 21.216 | 0.00 | 0.00 |
| ATOM | 7046 | HD2  | LYS | X | 466 | 40.546 | 22.412 | 21.266 | 0.00 | 0.00 |
| ATOM | 7047 | HD3  | LYS | X | 466 | 39.154 | 23.369 | 20.800 | 0.00 | 0.00 |
| ATOM | 7048 | CE   | LYS | X | 466 | 41.153 | 24.273 | 20.475 | 0.00 | 0.00 |
| ATOM | 7049 | HE2  | LYS | X | 466 | 42.047 | 24.325 | 21.096 | 0.00 | 0.00 |
| ATOM | 7050 | HE3  | LYS | X | 466 | 41.442 | 23.686 | 19.603 | 0.00 | 0.00 |
| ATOM | 7051 | NZ   | LYS | X | 466 | 40.818 | 25.727 | 20.153 | 0.00 | 0.00 |
| ATOM | 7052 | HZ1  | LYS | X | 466 | 41.658 | 26.135 | 19.767 | 0.00 | 0.00 |
| ATOM | 7053 | HZ2  | LYS | X | 466 | 40.020 | 25.905 | 19.560 | 0.00 | 0.00 |
| ATOM | 7054 | HZ3  | LYS | X | 466 | 40.670 | 26.218 | 21.023 | 0.00 | 0.00 |
| ATOM | 7055 | C    | LYS | X | 466 | 37.450 | 23.248 | 25.527 | 0.00 | 0.00 |
| ATOM | 7056 | O    | LYS | X | 466 | 36.720 | 24.184 | 25.900 | 0.00 | 0.00 |
| ATOM | 7057 | N    | ILE | X | 467 | 37.113 | 21.963 | 25.749 | 0.00 | 0.00 |
| ATOM | 7058 | H    | ILE | X | 467 | 37.678 | 21.276 | 25.269 | 0.00 | 0.00 |
| ATOM | 7059 | CA   | ILE | X | 467 | 35.954 | 21.492 | 26.529 | 0.00 | 0.00 |
| ATOM | 7060 | HA   | ILE | X | 467 | 35.073 | 21.971 | 26.101 | 0.00 | 0.00 |
| ATOM | 7061 | CB   | ILE | X | 467 | 35.732 | 19.980 | 26.261 | 0.00 | 0.00 |
| ATOM | 7062 | HB   | ILE | X | 467 | 35.863 | 19.726 | 25.209 | 0.00 | 0.00 |
| ATOM | 7063 | CG2  | ILE | X | 467 | 36.848 | 19.118 | 26.871 | 0.00 | 0.00 |
| ATOM | 7064 | HG21 | ILE | X | 467 | 37.030 | 18.216 | 26.287 | 0.00 | 0.00 |
| ATOM | 7065 | HG22 | ILE | X | 467 | 36.650 | 18.861 | 27.912 | 0.00 | 0.00 |
| ATOM | 7066 | HG23 | ILE | X | 467 | 37.762 | 19.709 | 26.913 | 0.00 | 0.00 |

|      |      |      |     |   |     |        |        |        |      |      |
|------|------|------|-----|---|-----|--------|--------|--------|------|------|
| ATOM | 7067 | CG1  | ILE | X | 467 | 34.352 | 19.522 | 26.691 | 0.00 | 0.00 |
| ATOM | 7068 | HG12 | ILE | X | 467 | 34.239 | 19.612 | 27.771 | 0.00 | 0.00 |
| ATOM | 7069 | HG13 | ILE | X | 467 | 33.694 | 20.218 | 26.172 | 0.00 | 0.00 |
| ATOM | 7070 | CD1  | ILE | X | 467 | 33.944 | 18.047 | 26.230 | 0.00 | 0.00 |
| ATOM | 7071 | HD11 | ILE | X | 467 | 34.074 | 17.927 | 25.155 | 0.00 | 0.00 |
| ATOM | 7072 | HD12 | ILE | X | 467 | 32.915 | 17.979 | 26.583 | 0.00 | 0.00 |
| ATOM | 7073 | HD13 | ILE | X | 467 | 34.569 | 17.323 | 26.755 | 0.00 | 0.00 |
| ATOM | 7074 | C    | ILE | X | 467 | 35.997 | 21.905 | 28.004 | 0.00 | 0.00 |
| ATOM | 7075 | O    | ILE | X | 467 | 34.980 | 22.371 | 28.535 | 0.00 | 0.00 |
| ATOM | 7076 | N    | PHE | X | 468 | 37.228 | 22.106 | 28.525 | 0.00 | 0.00 |
| ATOM | 7077 | H    | PHE | X | 468 | 38.019 | 21.961 | 27.914 | 0.00 | 0.00 |
| ATOM | 7078 | CA   | PHE | X | 468 | 37.504 | 22.657 | 29.868 | 0.00 | 0.00 |
| ATOM | 7079 | HA   | PHE | X | 468 | 36.851 | 22.159 | 30.585 | 0.00 | 0.00 |
| ATOM | 7080 | CB   | PHE | X | 468 | 38.925 | 22.388 | 30.235 | 0.00 | 0.00 |
| ATOM | 7081 | HB2  | PHE | X | 468 | 39.038 | 21.305 | 30.184 | 0.00 | 0.00 |
| ATOM | 7082 | HB3  | PHE | X | 468 | 39.508 | 22.809 | 29.416 | 0.00 | 0.00 |
| ATOM | 7083 | CG   | PHE | X | 468 | 39.386 | 22.894 | 31.591 | 0.00 | 0.00 |
| ATOM | 7084 | CD1  | PHE | X | 468 | 38.646 | 22.539 | 32.724 | 0.00 | 0.00 |
| ATOM | 7085 | HD1  | PHE | X | 468 | 37.714 | 22.015 | 32.575 | 0.00 | 0.00 |
| ATOM | 7086 | CE1  | PHE | X | 468 | 39.031 | 22.862 | 34.039 | 0.00 | 0.00 |
| ATOM | 7087 | HE1  | PHE | X | 468 | 38.363 | 22.620 | 34.853 | 0.00 | 0.00 |
| ATOM | 7088 | CZ   | PHE | X | 468 | 40.227 | 23.664 | 34.149 | 0.00 | 0.00 |
| ATOM | 7089 | HZ   | PHE | X | 468 | 40.604 | 23.937 | 35.124 | 0.00 | 0.00 |
| ATOM | 7090 | CE2  | PHE | X | 468 | 40.996 | 24.020 | 33.011 | 0.00 | 0.00 |
| ATOM | 7091 | HE2  | PHE | X | 468 | 41.973 | 24.471 | 33.102 | 0.00 | 0.00 |
| ATOM | 7092 | CD2  | PHE | X | 468 | 40.637 | 23.490 | 31.759 | 0.00 | 0.00 |
| ATOM | 7093 | HD2  | PHE | X | 468 | 41.302 | 23.696 | 30.933 | 0.00 | 0.00 |
| ATOM | 7094 | C    | PHE | X | 468 | 37.164 | 24.129 | 30.037 | 0.00 | 0.00 |
| ATOM | 7095 | O    | PHE | X | 468 | 36.668 | 24.642 | 31.018 | 0.00 | 0.00 |
| ATOM | 7096 | N    | ALA | X | 469 | 37.507 | 24.962 | 29.034 | 0.00 | 0.00 |
| ATOM | 7097 | H    | ALA | X | 469 | 38.100 | 24.607 | 28.297 | 0.00 | 0.00 |
| ATOM | 7098 | CA   | ALA | X | 469 | 37.062 | 26.319 | 28.945 | 0.00 | 0.00 |
| ATOM | 7099 | HA   | ALA | X | 469 | 37.323 | 26.722 | 29.924 | 0.00 | 0.00 |
| ATOM | 7100 | CB   | ALA | X | 469 | 37.793 | 27.027 | 27.798 | 0.00 | 0.00 |
| ATOM | 7101 | HB1  | ALA | X | 469 | 38.839 | 26.722 | 27.826 | 0.00 | 0.00 |
| ATOM | 7102 | HB2  | ALA | X | 469 | 37.859 | 28.092 | 28.019 | 0.00 | 0.00 |
| ATOM | 7103 | HB3  | ALA | X | 469 | 37.244 | 26.821 | 26.879 | 0.00 | 0.00 |
| ATOM | 7104 | C    | ALA | X | 469 | 35.524 | 26.447 | 28.865 | 0.00 | 0.00 |
| ATOM | 7105 | O    | ALA | X | 469 | 34.897 | 27.152 | 29.660 | 0.00 | 0.00 |
| ATOM | 7106 | N    | GLN | X | 470 | 34.862 | 25.586 | 28.072 | 0.00 | 0.00 |
| ATOM | 7107 | H    | GLN | X | 470 | 35.453 | 25.044 | 27.458 | 0.00 | 0.00 |
| ATOM | 7108 | CA   | GLN | X | 470 | 33.405 | 25.707 | 27.926 | 0.00 | 0.00 |
| ATOM | 7109 | HA   | GLN | X | 470 | 33.191 | 26.773 | 27.845 | 0.00 | 0.00 |
| ATOM | 7110 | CB   | GLN | X | 470 | 32.877 | 24.975 | 26.704 | 0.00 | 0.00 |
| ATOM | 7111 | HB2  | GLN | X | 470 | 33.391 | 24.015 | 26.740 | 0.00 | 0.00 |
| ATOM | 7112 | HB3  | GLN | X | 470 | 31.791 | 24.931 | 26.789 | 0.00 | 0.00 |
| ATOM | 7113 | CG   | GLN | X | 470 | 33.197 | 25.753 | 25.402 | 0.00 | 0.00 |
| ATOM | 7114 | HG2  | GLN | X | 470 | 32.552 | 26.622 | 25.269 | 0.00 | 0.00 |
| ATOM | 7115 | HG3  | GLN | X | 470 | 34.251 | 26.022 | 25.464 | 0.00 | 0.00 |
| ATOM | 7116 | CD   | GLN | X | 470 | 33.047 | 24.825 | 24.197 | 0.00 | 0.00 |
| ATOM | 7117 | OE1  | GLN | X | 470 | 33.956 | 24.163 | 23.760 | 0.00 | 0.00 |
| ATOM | 7118 | NE2  | GLN | X | 470 | 31.894 | 24.772 | 23.585 | 0.00 | 0.00 |
| ATOM | 7119 | HE21 | GLN | X | 470 | 31.731 | 24.158 | 22.800 | 0.00 | 0.00 |
| ATOM | 7120 | HE22 | GLN | X | 470 | 31.051 | 25.132 | 24.009 | 0.00 | 0.00 |
| ATOM | 7121 | C    | GLN | X | 470 | 32.767 | 25.221 | 29.174 | 0.00 | 0.00 |
| ATOM | 7122 | O    | GLN | X | 470 | 31.695 | 25.698 | 29.491 | 0.00 | 0.00 |
| ATOM | 7123 | N    | ARG | X | 471 | 33.425 | 24.264 | 29.893 | 0.00 | 0.00 |
| ATOM | 7124 | H    | ARG | X | 471 | 34.240 | 23.790 | 29.532 | 0.00 | 0.00 |
| ATOM | 7125 | CA   | ARG | X | 471 | 32.962 | 23.874 | 31.267 | 0.00 | 0.00 |
| ATOM | 7126 | HA   | ARG | X | 471 | 31.915 | 23.579 | 31.195 | 0.00 | 0.00 |
| ATOM | 7127 | CB   | ARG | X | 471 | 33.808 | 22.663 | 31.626 | 0.00 | 0.00 |
| ATOM | 7128 | HB2  | ARG | X | 471 | 33.708 | 21.885 | 30.868 | 0.00 | 0.00 |
| ATOM | 7129 | HB3  | ARG | X | 471 | 34.810 | 23.068 | 31.766 | 0.00 | 0.00 |
| ATOM | 7130 | CG   | ARG | X | 471 | 33.591 | 22.112 | 33.004 | 0.00 | 0.00 |
| ATOM | 7131 | HG2  | ARG | X | 471 | 34.012 | 22.762 | 33.772 | 0.00 | 0.00 |
| ATOM | 7132 | HG3  | ARG | X | 471 | 32.527 | 21.947 | 33.175 | 0.00 | 0.00 |
| ATOM | 7133 | CD   | ARG | X | 471 | 34.288 | 20.732 | 33.033 | 0.00 | 0.00 |

|      |      |      |     |   |     |        |        |        |      |      |
|------|------|------|-----|---|-----|--------|--------|--------|------|------|
| ATOM | 7134 | HD2  | ARG | X | 471 | 33.531 | 20.008 | 32.731 | 0.00 | 0.00 |
| ATOM | 7135 | HD3  | ARG | X | 471 | 35.167 | 20.680 | 32.390 | 0.00 | 0.00 |
| ATOM | 7136 | NE   | ARG | X | 471 | 34.489 | 20.424 | 34.435 | 0.00 | 0.00 |
| ATOM | 7137 | HE   | ARG | X | 471 | 33.621 | 20.448 | 34.951 | 0.00 | 0.00 |
| ATOM | 7138 | CZ   | ARG | X | 471 | 35.586 | 19.908 | 35.016 | 0.00 | 0.00 |
| ATOM | 7139 | NH1  | ARG | X | 471 | 36.622 | 19.489 | 34.321 | 0.00 | 0.00 |
| ATOM | 7140 | HH11 | ARG | X | 471 | 36.613 | 19.671 | 33.327 | 0.00 | 0.00 |
| ATOM | 7141 | HH12 | ARG | X | 471 | 37.467 | 19.238 | 34.814 | 0.00 | 0.00 |
| ATOM | 7142 | NH2  | ARG | X | 471 | 35.578 | 19.638 | 36.260 | 0.00 | 0.00 |
| ATOM | 7143 | HH21 | ARG | X | 471 | 34.759 | 19.855 | 36.809 | 0.00 | 0.00 |
| ATOM | 7144 | HH22 | ARG | X | 471 | 36.434 | 19.285 | 36.664 | 0.00 | 0.00 |
| ATOM | 7145 | C    | ARG | X | 471 | 33.098 | 25.073 | 32.333 | 0.00 | 0.00 |
| ATOM | 7146 | O    | ARG | X | 471 | 32.180 | 25.474 | 33.064 | 0.00 | 0.00 |
| ATOM | 7147 | N    | LEU | X | 472 | 34.213 | 25.680 | 32.406 | 0.00 | 0.00 |
| ATOM | 7148 | H    | LEU | X | 472 | 35.051 | 25.294 | 31.995 | 0.00 | 0.00 |
| ATOM | 7149 | CA   | LEU | X | 472 | 34.374 | 26.869 | 33.270 | 0.00 | 0.00 |
| ATOM | 7150 | HA   | LEU | X | 472 | 34.045 | 26.555 | 34.260 | 0.00 | 0.00 |
| ATOM | 7151 | CB   | LEU | X | 472 | 35.944 | 27.156 | 33.411 | 0.00 | 0.00 |
| ATOM | 7152 | HB2  | LEU | X | 472 | 36.563 | 26.833 | 32.574 | 0.00 | 0.00 |
| ATOM | 7153 | HB3  | LEU | X | 472 | 36.141 | 28.225 | 33.488 | 0.00 | 0.00 |
| ATOM | 7154 | CG   | LEU | X | 472 | 36.519 | 26.549 | 34.709 | 0.00 | 0.00 |
| ATOM | 7155 | HG   | LEU | X | 472 | 36.088 | 27.185 | 35.482 | 0.00 | 0.00 |
| ATOM | 7156 | CD1  | LEU | X | 472 | 36.264 | 25.031 | 34.840 | 0.00 | 0.00 |
| ATOM | 7157 | HD11 | LEU | X | 472 | 35.233 | 24.694 | 34.946 | 0.00 | 0.00 |
| ATOM | 7158 | HD12 | LEU | X | 472 | 36.830 | 24.543 | 35.633 | 0.00 | 0.00 |
| ATOM | 7159 | HD13 | LEU | X | 472 | 36.543 | 24.585 | 33.885 | 0.00 | 0.00 |
| ATOM | 7160 | CD2  | LEU | X | 472 | 38.041 | 26.889 | 34.639 | 0.00 | 0.00 |
| ATOM | 7161 | HD21 | LEU | X | 472 | 38.448 | 26.294 | 33.821 | 0.00 | 0.00 |
| ATOM | 7162 | HD22 | LEU | X | 472 | 38.236 | 27.949 | 34.481 | 0.00 | 0.00 |
| ATOM | 7163 | HD23 | LEU | X | 472 | 38.427 | 26.526 | 35.592 | 0.00 | 0.00 |
| ATOM | 7164 | C    | LEU | X | 472 | 33.561 | 28.166 | 32.937 | 0.00 | 0.00 |
| ATOM | 7165 | O    | LEU | X | 472 | 32.907 | 28.717 | 33.835 | 0.00 | 0.00 |
| ATOM | 7166 | N    | MET | X | 473 | 33.358 | 28.440 | 31.643 | 0.00 | 0.00 |
| ATOM | 7167 | H    | MET | X | 473 | 33.911 | 28.018 | 30.910 | 0.00 | 0.00 |
| ATOM | 7168 | CA   | MET | X | 473 | 32.385 | 29.461 | 31.090 | 0.00 | 0.00 |
| ATOM | 7169 | HA   | MET | X | 473 | 32.633 | 30.513 | 31.225 | 0.00 | 0.00 |
| ATOM | 7170 | CB   | MET | X | 473 | 32.309 | 29.246 | 29.584 | 0.00 | 0.00 |
| ATOM | 7171 | HB2  | MET | X | 473 | 32.491 | 28.187 | 29.401 | 0.00 | 0.00 |
| ATOM | 7172 | HB3  | MET | X | 473 | 31.354 | 29.616 | 29.210 | 0.00 | 0.00 |
| ATOM | 7173 | CG   | MET | X | 473 | 33.356 | 30.140 | 28.849 | 0.00 | 0.00 |
| ATOM | 7174 | HG2  | MET | X | 473 | 33.032 | 31.179 | 28.918 | 0.00 | 0.00 |
| ATOM | 7175 | HG3  | MET | X | 473 | 34.361 | 30.060 | 29.263 | 0.00 | 0.00 |
| ATOM | 7176 | SD   | MET | X | 473 | 33.665 | 29.400 | 27.140 | 0.00 | 0.00 |
| ATOM | 7177 | CE   | MET | X | 473 | 32.147 | 29.686 | 26.159 | 0.00 | 0.00 |
| ATOM | 7178 | HE1  | MET | X | 473 | 31.884 | 30.744 | 26.182 | 0.00 | 0.00 |
| ATOM | 7179 | HE2  | MET | X | 473 | 32.140 | 29.296 | 25.141 | 0.00 | 0.00 |
| ATOM | 7180 | HE3  | MET | X | 473 | 31.386 | 29.221 | 26.785 | 0.00 | 0.00 |
| ATOM | 7181 | C    | MET | X | 473 | 30.988 | 29.153 | 31.712 | 0.00 | 0.00 |
| ATOM | 7182 | O    | MET | X | 473 | 30.290 | 30.071 | 32.162 | 0.00 | 0.00 |
| ATOM | 7183 | N    | ARG | X | 474 | 30.545 | 27.899 | 31.633 | 0.00 | 0.00 |
| ATOM | 7184 | H    | ARG | X | 474 | 31.184 | 27.244 | 31.206 | 0.00 | 0.00 |
| ATOM | 7185 | CA   | ARG | X | 474 | 29.204 | 27.474 | 32.161 | 0.00 | 0.00 |
| ATOM | 7186 | HA   | ARG | X | 474 | 28.429 | 28.156 | 31.811 | 0.00 | 0.00 |
| ATOM | 7187 | CB   | ARG | X | 474 | 28.891 | 26.023 | 31.645 | 0.00 | 0.00 |
| ATOM | 7188 | HB2  | ARG | X | 474 | 29.111 | 25.952 | 30.580 | 0.00 | 0.00 |
| ATOM | 7189 | HB3  | ARG | X | 474 | 29.624 | 25.340 | 32.076 | 0.00 | 0.00 |
| ATOM | 7190 | CG   | ARG | X | 474 | 27.501 | 25.503 | 31.974 | 0.00 | 0.00 |
| ATOM | 7191 | HG2  | ARG | X | 474 | 27.431 | 24.508 | 31.534 | 0.00 | 0.00 |
| ATOM | 7192 | HG3  | ARG | X | 474 | 27.177 | 25.553 | 33.013 | 0.00 | 0.00 |
| ATOM | 7193 | CD   | ARG | X | 474 | 26.464 | 26.439 | 31.327 | 0.00 | 0.00 |
| ATOM | 7194 | HD2  | ARG | X | 474 | 26.328 | 27.205 | 32.090 | 0.00 | 0.00 |
| ATOM | 7195 | HD3  | ARG | X | 474 | 26.864 | 26.767 | 30.367 | 0.00 | 0.00 |
| ATOM | 7196 | NE   | ARG | X | 474 | 25.188 | 25.709 | 30.946 | 0.00 | 0.00 |
| ATOM | 7197 | HE   | ARG | X | 474 | 24.871 | 24.898 | 31.458 | 0.00 | 0.00 |
| ATOM | 7198 | CZ   | ARG | X | 474 | 24.410 | 25.929 | 29.914 | 0.00 | 0.00 |
| ATOM | 7199 | NH1  | ARG | X | 474 | 24.544 | 26.961 | 29.057 | 0.00 | 0.00 |
| ATOM | 7200 | HH11 | ARG | X | 474 | 25.203 | 27.705 | 29.235 | 0.00 | 0.00 |

|      |      |      |     |   |     |        |        |        |      |      |
|------|------|------|-----|---|-----|--------|--------|--------|------|------|
| ATOM | 7201 | HH12 | ARG | X | 474 | 23.865 | 27.018 | 28.311 | 0.00 | 0.00 |
| ATOM | 7202 | NH2  | ARG | X | 474 | 23.371 | 25.155 | 29.737 | 0.00 | 0.00 |
| ATOM | 7203 | HH21 | ARG | X | 474 | 23.200 | 24.388 | 30.371 | 0.00 | 0.00 |
| ATOM | 7204 | HH22 | ARG | X | 474 | 22.766 | 25.338 | 28.949 | 0.00 | 0.00 |
| ATOM | 7205 | C    | ARG | X | 474 | 29.069 | 27.529 | 33.701 | 0.00 | 0.00 |
| ATOM | 7206 | O    | ARG | X | 474 | 27.962 | 27.752 | 34.252 | 0.00 | 0.00 |
| ATOM | 7207 | N    | TYR | X | 475 | 30.154 | 27.314 | 34.474 | 0.00 | 0.00 |
| ATOM | 7208 | H    | TYR | X | 475 | 31.008 | 26.936 | 34.089 | 0.00 | 0.00 |
| ATOM | 7209 | CA   | TYR | X | 475 | 30.041 | 27.504 | 35.942 | 0.00 | 0.00 |
| ATOM | 7210 | HA   | TYR | X | 475 | 29.196 | 26.938 | 36.334 | 0.00 | 0.00 |
| ATOM | 7211 | CB   | TYR | X | 475 | 31.305 | 26.948 | 36.701 | 0.00 | 0.00 |
| ATOM | 7212 | HB2  | TYR | X | 475 | 32.185 | 27.388 | 36.231 | 0.00 | 0.00 |
| ATOM | 7213 | HB3  | TYR | X | 475 | 31.406 | 27.407 | 37.684 | 0.00 | 0.00 |
| ATOM | 7214 | CG   | TYR | X | 475 | 31.583 | 25.396 | 36.768 | 0.00 | 0.00 |
| ATOM | 7215 | CD1  | TYR | X | 475 | 30.546 | 24.490 | 36.996 | 0.00 | 0.00 |
| ATOM | 7216 | HD1  | TYR | X | 475 | 29.500 | 24.758 | 37.042 | 0.00 | 0.00 |
| ATOM | 7217 | CE1  | TYR | X | 475 | 30.798 | 23.106 | 37.129 | 0.00 | 0.00 |
| ATOM | 7218 | HE1  | TYR | X | 475 | 30.009 | 22.389 | 37.304 | 0.00 | 0.00 |
| ATOM | 7219 | CZ   | TYR | X | 475 | 32.138 | 22.688 | 36.967 | 0.00 | 0.00 |
| ATOM | 7220 | OH   | TYR | X | 475 | 32.458 | 21.380 | 37.131 | 0.00 | 0.00 |
| ATOM | 7221 | HH   | TYR | X | 475 | 31.620 | 20.966 | 37.348 | 0.00 | 0.00 |
| ATOM | 7222 | CE2  | TYR | X | 475 | 33.253 | 23.589 | 36.830 | 0.00 | 0.00 |
| ATOM | 7223 | HE2  | TYR | X | 475 | 34.233 | 23.149 | 36.715 | 0.00 | 0.00 |
| ATOM | 7224 | CD2  | TYR | X | 475 | 32.925 | 24.957 | 36.695 | 0.00 | 0.00 |
| ATOM | 7225 | HD2  | TYR | X | 475 | 33.684 | 25.692 | 36.473 | 0.00 | 0.00 |
| ATOM | 7226 | C    | TYR | X | 475 | 29.741 | 28.996 | 36.213 | 0.00 | 0.00 |
| ATOM | 7227 | O    | TYR | X | 475 | 28.780 | 29.410 | 36.913 | 0.00 | 0.00 |
| ATOM | 7228 | N    | TRP | X | 476 | 30.601 | 29.888 | 35.608 | 0.00 | 0.00 |
| ATOM | 7229 | H    | TRP | X | 476 | 31.281 | 29.510 | 34.965 | 0.00 | 0.00 |
| ATOM | 7230 | CA   | TRP | X | 476 | 30.618 | 31.305 | 35.848 | 0.00 | 0.00 |
| ATOM | 7231 | HA   | TRP | X | 476 | 30.626 | 31.628 | 36.890 | 0.00 | 0.00 |
| ATOM | 7232 | CB   | TRP | X | 476 | 31.764 | 32.085 | 35.216 | 0.00 | 0.00 |
| ATOM | 7233 | HB2  | TRP | X | 476 | 32.078 | 31.537 | 34.328 | 0.00 | 0.00 |
| ATOM | 7234 | HB3  | TRP | X | 476 | 31.464 | 33.002 | 34.710 | 0.00 | 0.00 |
| ATOM | 7235 | CG   | TRP | X | 476 | 32.818 | 32.371 | 36.211 | 0.00 | 0.00 |
| ATOM | 7236 | CD1  | TRP | X | 476 | 33.375 | 33.558 | 36.445 | 0.00 | 0.00 |
| ATOM | 7237 | HD1  | TRP | X | 476 | 33.036 | 34.461 | 35.958 | 0.00 | 0.00 |
| ATOM | 7238 | NE1  | TRP | X | 476 | 34.439 | 33.446 | 37.340 | 0.00 | 0.00 |
| ATOM | 7239 | HE1  | TRP | X | 476 | 34.922 | 34.260 | 37.692 | 0.00 | 0.00 |
| ATOM | 7240 | CE2  | TRP | X | 476 | 34.640 | 32.158 | 37.721 | 0.00 | 0.00 |
| ATOM | 7241 | CZ2  | TRP | X | 476 | 35.484 | 31.495 | 38.654 | 0.00 | 0.00 |
| ATOM | 7242 | HZ2  | TRP | X | 476 | 36.215 | 32.003 | 39.265 | 0.00 | 0.00 |
| ATOM | 7243 | CH2  | TRP | X | 476 | 35.569 | 30.062 | 38.613 | 0.00 | 0.00 |
| ATOM | 7244 | HH2  | TRP | X | 476 | 36.218 | 29.568 | 39.320 | 0.00 | 0.00 |
| ATOM | 7245 | CZ3  | TRP | X | 476 | 34.730 | 29.330 | 37.770 | 0.00 | 0.00 |
| ATOM | 7246 | HZ3  | TRP | X | 476 | 34.913 | 28.268 | 37.691 | 0.00 | 0.00 |
| ATOM | 7247 | CE3  | TRP | X | 476 | 33.729 | 29.973 | 37.016 | 0.00 | 0.00 |
| ATOM | 7248 | HE3  | TRP | X | 476 | 33.196 | 29.450 | 36.236 | 0.00 | 0.00 |
| ATOM | 7249 | CD2  | TRP | X | 476 | 33.661 | 31.427 | 36.937 | 0.00 | 0.00 |
| ATOM | 7250 | C    | TRP | X | 476 | 29.303 | 31.907 | 35.297 | 0.00 | 0.00 |
| ATOM | 7251 | O    | TRP | X | 476 | 28.670 | 32.701 | 36.000 | 0.00 | 0.00 |
| ATOM | 7252 | N    | ALA | X | 477 | 28.772 | 31.396 | 34.184 | 0.00 | 0.00 |
| ATOM | 7253 | H    | ALA | X | 477 | 29.272 | 30.628 | 33.760 | 0.00 | 0.00 |
| ATOM | 7254 | CA   | ALA | X | 477 | 27.498 | 31.868 | 33.592 | 0.00 | 0.00 |
| ATOM | 7255 | HA   | ALA | X | 477 | 27.423 | 32.956 | 33.619 | 0.00 | 0.00 |
| ATOM | 7256 | CB   | ALA | X | 477 | 27.442 | 31.566 | 32.062 | 0.00 | 0.00 |
| ATOM | 7257 | HB1  | ALA | X | 477 | 26.402 | 31.440 | 31.760 | 0.00 | 0.00 |
| ATOM | 7258 | HB2  | ALA | X | 477 | 27.944 | 30.614 | 31.888 | 0.00 | 0.00 |
| ATOM | 7259 | HB3  | ALA | X | 477 | 27.808 | 32.390 | 31.449 | 0.00 | 0.00 |
| ATOM | 7260 | C    | ALA | X | 477 | 26.192 | 31.374 | 34.252 | 0.00 | 0.00 |
| ATOM | 7261 | O    | ALA | X | 477 | 25.269 | 32.188 | 34.527 | 0.00 | 0.00 |
| ATOM | 7262 | N    | ASN | X | 478 | 26.137 | 30.138 | 34.763 | 0.00 | 0.00 |
| ATOM | 7263 | H    | ASN | X | 478 | 26.873 | 29.478 | 34.558 | 0.00 | 0.00 |
| ATOM | 7264 | CA   | ASN | X | 478 | 25.043 | 29.694 | 35.611 | 0.00 | 0.00 |
| ATOM | 7265 | HA   | ASN | X | 478 | 24.077 | 29.773 | 35.111 | 0.00 | 0.00 |
| ATOM | 7266 | CB   | ASN | X | 478 | 25.259 | 28.232 | 35.943 | 0.00 | 0.00 |
| ATOM | 7267 | HB2  | ASN | X | 478 | 26.277 | 28.004 | 36.259 | 0.00 | 0.00 |



|      |      |      |     |   |     |        |        |        |      |      |
|------|------|------|-----|---|-----|--------|--------|--------|------|------|
| ATOM | 7268 | HB3  | ASN | X | 478 | 24.579 | 27.982 | 36.758 | 0.00 | 0.00 |
| ATOM | 7269 | CG   | ASN | X | 478 | 24.947 | 27.233 | 34.848 | 0.00 | 0.00 |
| ATOM | 7270 | OD1  | ASN | X | 478 | 24.108 | 27.435 | 33.942 | 0.00 | 0.00 |
| ATOM | 7271 | ND2  | ASN | X | 478 | 25.471 | 26.014 | 34.954 | 0.00 | 0.00 |
| ATOM | 7272 | HD21 | ASN | X | 478 | 24.943 | 25.297 | 34.477 | 0.00 | 0.00 |
| ATOM | 7273 | HD22 | ASN | X | 478 | 26.083 | 25.808 | 35.730 | 0.00 | 0.00 |
| ATOM | 7274 | C    | ASN | X | 478 | 24.942 | 30.482 | 36.917 | 0.00 | 0.00 |
| ATOM | 7275 | O    | ASN | X | 478 | 23.751 | 30.735 | 37.315 | 0.00 | 0.00 |
| ATOM | 7276 | N    | PHE | X | 479 | 26.028 | 30.822 | 37.643 | 0.00 | 0.00 |
| ATOM | 7277 | H    | PHE | X | 479 | 26.885 | 30.501 | 37.217 | 0.00 | 0.00 |
| ATOM | 7278 | CA   | PHE | X | 479 | 25.988 | 31.728 | 38.780 | 0.00 | 0.00 |
| ATOM | 7279 | HA   | PHE | X | 479 | 25.391 | 31.301 | 39.587 | 0.00 | 0.00 |
| ATOM | 7280 | CB   | PHE | X | 479 | 27.419 | 32.049 | 39.288 | 0.00 | 0.00 |
| ATOM | 7281 | HB2  | PHE | X | 479 | 28.014 | 31.178 | 39.560 | 0.00 | 0.00 |
| ATOM | 7282 | HB3  | PHE | X | 479 | 27.986 | 32.580 | 38.523 | 0.00 | 0.00 |
| ATOM | 7283 | CG   | PHE | X | 479 | 27.374 | 32.979 | 40.482 | 0.00 | 0.00 |
| ATOM | 7284 | CD1  | PHE | X | 479 | 27.105 | 32.467 | 41.778 | 0.00 | 0.00 |
| ATOM | 7285 | HD1  | PHE | X | 479 | 26.776 | 31.460 | 41.992 | 0.00 | 0.00 |
| ATOM | 7286 | CE1  | PHE | X | 479 | 27.031 | 33.405 | 42.805 | 0.00 | 0.00 |
| ATOM | 7287 | HE1  | PHE | X | 479 | 26.734 | 33.082 | 43.792 | 0.00 | 0.00 |
| ATOM | 7288 | CZ   | PHE | X | 479 | 27.229 | 34.734 | 42.574 | 0.00 | 0.00 |
| ATOM | 7289 | HZ   | PHE | X | 479 | 27.136 | 35.329 | 43.470 | 0.00 | 0.00 |
| ATOM | 7290 | CE2  | PHE | X | 479 | 27.618 | 35.215 | 41.303 | 0.00 | 0.00 |
| ATOM | 7291 | HE2  | PHE | X | 479 | 27.913 | 36.233 | 41.092 | 0.00 | 0.00 |
| ATOM | 7292 | CD2  | PHE | X | 479 | 27.627 | 34.341 | 40.211 | 0.00 | 0.00 |
| ATOM | 7293 | HD2  | PHE | X | 479 | 27.951 | 34.632 | 39.222 | 0.00 | 0.00 |
| ATOM | 7294 | C    | PHE | X | 479 | 25.320 | 33.022 | 38.282 | 0.00 | 0.00 |
| ATOM | 7295 | O    | PHE | X | 479 | 24.548 | 33.562 | 39.080 | 0.00 | 0.00 |
| ATOM | 7296 | N    | ALA | X | 480 | 25.630 | 33.551 | 37.096 | 0.00 | 0.00 |
| ATOM | 7297 | H    | ALA | X | 480 | 26.142 | 33.116 | 36.342 | 0.00 | 0.00 |
| ATOM | 7298 | CA   | ALA | X | 480 | 25.015 | 34.842 | 36.692 | 0.00 | 0.00 |
| ATOM | 7299 | HA   | ALA | X | 480 | 25.248 | 35.584 | 37.456 | 0.00 | 0.00 |
| ATOM | 7300 | CB   | ALA | X | 480 | 25.776 | 35.383 | 35.528 | 0.00 | 0.00 |
| ATOM | 7301 | HB1  | ALA | X | 480 | 26.853 | 35.285 | 35.668 | 0.00 | 0.00 |
| ATOM | 7302 | HB2  | ALA | X | 480 | 25.604 | 36.459 | 35.510 | 0.00 | 0.00 |
| ATOM | 7303 | HB3  | ALA | X | 480 | 25.414 | 34.937 | 34.601 | 0.00 | 0.00 |
| ATOM | 7304 | C    | ALA | X | 480 | 23.547 | 34.776 | 36.420 | 0.00 | 0.00 |
| ATOM | 7305 | O    | ALA | X | 480 | 22.788 | 35.534 | 37.030 | 0.00 | 0.00 |
| ATOM | 7306 | N    | ARG | X | 481 | 23.135 | 33.755 | 35.648 | 0.00 | 0.00 |
| ATOM | 7307 | H    | ARG | X | 481 | 23.906 | 33.203 | 35.300 | 0.00 | 0.00 |
| ATOM | 7308 | CA   | ARG | X | 481 | 21.848 | 33.151 | 35.739 | 0.00 | 0.00 |
| ATOM | 7309 | HA   | ARG | X | 481 | 21.089 | 33.760 | 35.248 | 0.00 | 0.00 |
| ATOM | 7310 | CB   | ARG | X | 481 | 21.776 | 31.877 | 34.906 | 0.00 | 0.00 |
| ATOM | 7311 | HB2  | ARG | X | 481 | 22.535 | 31.166 | 35.232 | 0.00 | 0.00 |
| ATOM | 7312 | HB3  | ARG | X | 481 | 20.828 | 31.374 | 35.097 | 0.00 | 0.00 |
| ATOM | 7313 | CG   | ARG | X | 481 | 21.961 | 31.981 | 33.384 | 0.00 | 0.00 |
| ATOM | 7314 | HG2  | ARG | X | 481 | 21.109 | 32.580 | 33.063 | 0.00 | 0.00 |
| ATOM | 7315 | HG3  | ARG | X | 481 | 22.934 | 32.411 | 33.143 | 0.00 | 0.00 |
| ATOM | 7316 | CD   | ARG | X | 481 | 21.869 | 30.549 | 32.796 | 0.00 | 0.00 |
| ATOM | 7317 | HD2  | ARG | X | 481 | 22.373 | 29.801 | 33.407 | 0.00 | 0.00 |
| ATOM | 7318 | HD3  | ARG | X | 481 | 20.793 | 30.378 | 32.748 | 0.00 | 0.00 |
| ATOM | 7319 | NE   | ARG | X | 481 | 22.397 | 30.671 | 31.490 | 0.00 | 0.00 |
| ATOM | 7320 | HE   | ARG | X | 481 | 21.870 | 31.289 | 30.890 | 0.00 | 0.00 |
| ATOM | 7321 | CZ   | ARG | X | 481 | 23.478 | 30.078 | 30.987 | 0.00 | 0.00 |
| ATOM | 7322 | NH1  | ARG | X | 481 | 24.289 | 29.190 | 31.555 | 0.00 | 0.00 |
| ATOM | 7323 | HH11 | ARG | X | 481 | 24.087 | 28.767 | 32.449 | 0.00 | 0.00 |
| ATOM | 7324 | HH12 | ARG | X | 481 | 24.977 | 28.696 | 31.003 | 0.00 | 0.00 |
| ATOM | 7325 | NH2  | ARG | X | 481 | 23.780 | 30.480 | 29.791 | 0.00 | 0.00 |
| ATOM | 7326 | HH21 | ARG | X | 481 | 23.414 | 31.283 | 29.299 | 0.00 | 0.00 |
| ATOM | 7327 | HH22 | ARG | X | 481 | 24.629 | 30.091 | 29.408 | 0.00 | 0.00 |
| ATOM | 7328 | C    | ARG | X | 481 | 21.172 | 33.024 | 37.129 | 0.00 | 0.00 |
| ATOM | 7329 | O    | ARG | X | 481 | 20.550 | 33.941 | 37.642 | 0.00 | 0.00 |
| ATOM | 7330 | N    | THR | X | 482 | 21.214 | 31.802 | 37.720 | 0.00 | 0.00 |
| ATOM | 7331 | H    | THR | X | 482 | 21.956 | 31.204 | 37.387 | 0.00 | 0.00 |
| ATOM | 7332 | CA   | THR | X | 482 | 20.480 | 31.446 | 39.019 | 0.00 | 0.00 |
| ATOM | 7333 | HA   | THR | X | 482 | 19.632 | 32.128 | 39.064 | 0.00 | 0.00 |
| ATOM | 7334 | CB   | THR | X | 482 | 19.734 | 30.093 | 38.952 | 0.00 | 0.00 |

|      |      |      |     |   |     |        |        |        |      |      |
|------|------|------|-----|---|-----|--------|--------|--------|------|------|
| ATOM | 7335 | HB   | THR | X | 482 | 20.309 | 29.229 | 39.286 | 0.00 | 0.00 |
| ATOM | 7336 | CG2  | THR | X | 482 | 18.382 | 29.986 | 39.792 | 0.00 | 0.00 |
| ATOM | 7337 | HG21 | THR | X | 482 | 18.573 | 29.836 | 40.854 | 0.00 | 0.00 |
| ATOM | 7338 | HG22 | THR | X | 482 | 17.792 | 29.189 | 39.339 | 0.00 | 0.00 |
| ATOM | 7339 | HG23 | THR | X | 482 | 17.858 | 30.941 | 39.748 | 0.00 | 0.00 |
| ATOM | 7340 | OG1  | THR | X | 482 | 19.340 | 30.004 | 37.620 | 0.00 | 0.00 |
| ATOM | 7341 | HG1  | THR | X | 482 | 19.987 | 29.571 | 37.057 | 0.00 | 0.00 |
| ATOM | 7342 | C    | THR | X | 482 | 21.146 | 31.658 | 40.386 | 0.00 | 0.00 |
| ATOM | 7343 | O    | THR | X | 482 | 20.592 | 31.259 | 41.405 | 0.00 | 0.00 |
| ATOM | 7344 | N    | GLY | X | 483 | 22.316 | 32.199 | 40.389 | 0.00 | 0.00 |
| ATOM | 7345 | H    | GLY | X | 483 | 22.790 | 32.524 | 39.558 | 0.00 | 0.00 |
| ATOM | 7346 | CA   | GLY | X | 483 | 23.016 | 32.406 | 41.614 | 0.00 | 0.00 |
| ATOM | 7347 | HA2  | GLY | X | 483 | 23.837 | 33.103 | 41.445 | 0.00 | 0.00 |
| ATOM | 7348 | HA3  | GLY | X | 483 | 22.424 | 32.723 | 42.473 | 0.00 | 0.00 |
| ATOM | 7349 | C    | GLY | X | 483 | 23.602 | 31.135 | 42.120 | 0.00 | 0.00 |
| ATOM | 7350 | O    | GLY | X | 483 | 24.338 | 31.089 | 43.129 | 0.00 | 0.00 |
| ATOM | 7351 | N    | ASP | X | 484 | 23.482 | 30.052 | 41.353 | 0.00 | 0.00 |
| ATOM | 7352 | H    | ASP | X | 484 | 22.871 | 30.084 | 40.549 | 0.00 | 0.00 |
| ATOM | 7353 | CA   | ASP | X | 484 | 24.227 | 28.757 | 41.642 | 0.00 | 0.00 |
| ATOM | 7354 | HA   | ASP | X | 484 | 25.027 | 28.916 | 42.365 | 0.00 | 0.00 |
| ATOM | 7355 | CB   | ASP | X | 484 | 23.173 | 27.768 | 42.169 | 0.00 | 0.00 |
| ATOM | 7356 | HB2  | ASP | X | 484 | 22.887 | 28.050 | 43.183 | 0.00 | 0.00 |
| ATOM | 7357 | HB3  | ASP | X | 484 | 22.263 | 27.859 | 41.575 | 0.00 | 0.00 |
| ATOM | 7358 | CG   | ASP | X | 484 | 23.550 | 26.278 | 42.185 | 0.00 | 0.00 |
| ATOM | 7359 | OD1  | ASP | X | 484 | 24.756 | 25.891 | 42.301 | 0.00 | 0.00 |
| ATOM | 7360 | OD2  | ASP | X | 484 | 22.664 | 25.404 | 42.237 | 0.00 | 0.00 |
| ATOM | 7361 | C    | ASP | X | 484 | 24.935 | 28.173 | 40.334 | 0.00 | 0.00 |
| ATOM | 7362 | O    | ASP | X | 484 | 24.384 | 28.066 | 39.226 | 0.00 | 0.00 |
| ATOM | 7363 | N    | PRO | X | 485 | 26.177 | 27.637 | 40.476 | 0.00 | 0.00 |
| ATOM | 7364 | CD   | PRO | X | 485 | 27.134 | 28.226 | 41.496 | 0.00 | 0.00 |
| ATOM | 7365 | HD2  | PRO | X | 485 | 27.173 | 27.543 | 42.345 | 0.00 | 0.00 |
| ATOM | 7366 | HD3  | PRO | X | 485 | 26.842 | 29.210 | 41.862 | 0.00 | 0.00 |
| ATOM | 7367 | CG   | PRO | X | 485 | 28.415 | 28.327 | 40.751 | 0.00 | 0.00 |
| ATOM | 7368 | HG2  | PRO | X | 485 | 29.341 | 28.477 | 41.306 | 0.00 | 0.00 |
| ATOM | 7369 | HG3  | PRO | X | 485 | 28.366 | 29.097 | 39.981 | 0.00 | 0.00 |
| ATOM | 7370 | CB   | PRO | X | 485 | 28.375 | 27.002 | 39.932 | 0.00 | 0.00 |
| ATOM | 7371 | HB2  | PRO | X | 485 | 28.562 | 26.125 | 40.552 | 0.00 | 0.00 |
| ATOM | 7372 | HB3  | PRO | X | 485 | 29.105 | 27.067 | 39.125 | 0.00 | 0.00 |
| ATOM | 7373 | CA   | PRO | X | 485 | 26.915 | 27.065 | 39.407 | 0.00 | 0.00 |
| ATOM | 7374 | HA   | PRO | X | 485 | 26.898 | 27.827 | 38.628 | 0.00 | 0.00 |
| ATOM | 7375 | C    | PRO | X | 485 | 26.492 | 25.704 | 38.823 | 0.00 | 0.00 |
| ATOM | 7376 | O    | PRO | X | 485 | 26.779 | 25.410 | 37.649 | 0.00 | 0.00 |
| ATOM | 7377 | N    | ASN | X | 486 | 25.851 | 24.805 | 39.627 | 0.00 | 0.00 |
| ATOM | 7378 | H    | ASN | X | 486 | 25.632 | 24.998 | 40.594 | 0.00 | 0.00 |
| ATOM | 7379 | CA   | ASN | X | 486 | 25.230 | 23.516 | 39.152 | 0.00 | 0.00 |
| ATOM | 7380 | HA   | ASN | X | 486 | 25.989 | 22.886 | 38.689 | 0.00 | 0.00 |
| ATOM | 7381 | CB   | ASN | X | 486 | 24.690 | 22.772 | 40.340 | 0.00 | 0.00 |
| ATOM | 7382 | HB2  | ASN | X | 486 | 25.422 | 22.776 | 41.148 | 0.00 | 0.00 |
| ATOM | 7383 | HB3  | ASN | X | 486 | 23.833 | 23.357 | 40.676 | 0.00 | 0.00 |
| ATOM | 7384 | CG   | ASN | X | 486 | 24.111 | 21.387 | 40.086 | 0.00 | 0.00 |
| ATOM | 7385 | OD1  | ASN | X | 486 | 24.218 | 20.792 | 39.019 | 0.00 | 0.00 |
| ATOM | 7386 | ND2  | ASN | X | 486 | 23.482 | 20.706 | 41.002 | 0.00 | 0.00 |
| ATOM | 7387 | HD21 | ASN | X | 486 | 23.111 | 19.781 | 40.840 | 0.00 | 0.00 |
| ATOM | 7388 | HD22 | ASN | X | 486 | 23.201 | 21.190 | 41.843 | 0.00 | 0.00 |
| ATOM | 7389 | C    | ASN | X | 486 | 24.175 | 23.758 | 38.024 | 0.00 | 0.00 |
| ATOM | 7390 | O    | ASN | X | 486 | 23.336 | 24.621 | 38.080 | 0.00 | 0.00 |
| ATOM | 7391 | N    | GLU | X | 487 | 24.306 | 23.102 | 36.881 | 0.00 | 0.00 |
| ATOM | 7392 | H    | GLU | X | 487 | 25.072 | 22.452 | 36.776 | 0.00 | 0.00 |
| ATOM | 7393 | CA   | GLU | X | 487 | 23.268 | 23.006 | 35.823 | 0.00 | 0.00 |
| ATOM | 7394 | HA   | GLU | X | 487 | 23.122 | 23.985 | 35.365 | 0.00 | 0.00 |
| ATOM | 7395 | CB   | GLU | X | 487 | 23.735 | 21.978 | 34.794 | 0.00 | 0.00 |
| ATOM | 7396 | HB2  | GLU | X | 487 | 24.103 | 21.082 | 35.293 | 0.00 | 0.00 |
| ATOM | 7397 | HB3  | GLU | X | 487 | 22.903 | 21.755 | 34.127 | 0.00 | 0.00 |
| ATOM | 7398 | CG   | GLU | X | 487 | 24.847 | 22.458 | 33.889 | 0.00 | 0.00 |
| ATOM | 7399 | HG2  | GLU | X | 487 | 25.714 | 22.924 | 34.356 | 0.00 | 0.00 |
| ATOM | 7400 | HG3  | GLU | X | 487 | 25.359 | 21.596 | 33.462 | 0.00 | 0.00 |
| ATOM | 7401 | CD   | GLU | X | 487 | 24.208 | 23.185 | 32.685 | 0.00 | 0.00 |

|      |      |      |     |   |     |        |        |        |      |      |
|------|------|------|-----|---|-----|--------|--------|--------|------|------|
| ATOM | 7402 | OE1  | GLU | X | 487 | 23.927 | 22.614 | 31.609 | 0.00 | 0.00 |
| ATOM | 7403 | OE2  | GLU | X | 487 | 23.916 | 24.395 | 32.973 | 0.00 | 0.00 |
| ATOM | 7404 | C    | GLU | X | 487 | 21.844 | 22.604 | 36.303 | 0.00 | 0.00 |
| ATOM | 7405 | O    | GLU | X | 487 | 21.640 | 21.761 | 37.169 | 0.00 | 0.00 |
| ATOM | 7406 | N    | PRO | X | 488 | 20.789 | 23.275 | 35.719 | 0.00 | 0.00 |
| ATOM | 7407 | CD   | PRO | X | 488 | 20.769 | 24.037 | 34.496 | 0.00 | 0.00 |
| ATOM | 7408 | HD2  | PRO | X | 488 | 20.981 | 23.404 | 33.634 | 0.00 | 0.00 |
| ATOM | 7409 | HD3  | PRO | X | 488 | 21.348 | 24.945 | 34.661 | 0.00 | 0.00 |
| ATOM | 7410 | CG   | PRO | X | 488 | 19.345 | 24.662 | 34.287 | 0.00 | 0.00 |
| ATOM | 7411 | HG2  | PRO | X | 488 | 18.914 | 24.644 | 33.286 | 0.00 | 0.00 |
| ATOM | 7412 | HG3  | PRO | X | 488 | 19.387 | 25.610 | 34.822 | 0.00 | 0.00 |
| ATOM | 7413 | CB   | PRO | X | 488 | 18.554 | 23.725 | 35.060 | 0.00 | 0.00 |
| ATOM | 7414 | HB2  | PRO | X | 488 | 18.164 | 23.010 | 34.337 | 0.00 | 0.00 |
| ATOM | 7415 | HB3  | PRO | X | 488 | 17.714 | 24.280 | 35.479 | 0.00 | 0.00 |
| ATOM | 7416 | CA   | PRO | X | 488 | 19.401 | 23.110 | 36.185 | 0.00 | 0.00 |
| ATOM | 7417 | HA   | PRO | X | 488 | 19.292 | 23.703 | 37.093 | 0.00 | 0.00 |
| ATOM | 7418 | C    | PRO | X | 488 | 18.923 | 21.641 | 36.476 | 0.00 | 0.00 |
| ATOM | 7419 | O    | PRO | X | 488 | 18.363 | 21.350 | 37.523 | 0.00 | 0.00 |
| ATOM | 7420 | N    | ARG | X | 489 | 19.240 | 20.711 | 35.571 | 0.00 | 0.00 |
| ATOM | 7421 | H    | ARG | X | 489 | 19.566 | 21.062 | 34.682 | 0.00 | 0.00 |
| ATOM | 7422 | CA   | ARG | X | 489 | 18.959 | 19.255 | 35.624 | 0.00 | 0.00 |
| ATOM | 7423 | HA   | ARG | X | 489 | 17.903 | 19.002 | 35.531 | 0.00 | 0.00 |
| ATOM | 7424 | CB   | ARG | X | 489 | 19.386 | 18.755 | 34.204 | 0.00 | 0.00 |
| ATOM | 7425 | HB2  | ARG | X | 489 | 19.059 | 17.725 | 34.060 | 0.00 | 0.00 |
| ATOM | 7426 | HB3  | ARG | X | 489 | 18.977 | 19.364 | 33.398 | 0.00 | 0.00 |
| ATOM | 7427 | CG   | ARG | X | 489 | 20.844 | 18.539 | 33.940 | 0.00 | 0.00 |
| ATOM | 7428 | HG2  | ARG | X | 489 | 21.462 | 19.436 | 33.960 | 0.00 | 0.00 |
| ATOM | 7429 | HG3  | ARG | X | 489 | 21.206 | 17.871 | 34.722 | 0.00 | 0.00 |
| ATOM | 7430 | CD   | ARG | X | 489 | 21.101 | 17.870 | 32.591 | 0.00 | 0.00 |
| ATOM | 7431 | HD2  | ARG | X | 489 | 20.544 | 16.949 | 32.419 | 0.00 | 0.00 |
| ATOM | 7432 | HD3  | ARG | X | 489 | 20.767 | 18.598 | 31.852 | 0.00 | 0.00 |
| ATOM | 7433 | NE   | ARG | X | 489 | 22.535 | 17.673 | 32.293 | 0.00 | 0.00 |
| ATOM | 7434 | HE   | ARG | X | 489 | 23.070 | 18.489 | 32.032 | 0.00 | 0.00 |
| ATOM | 7435 | CZ   | ARG | X | 489 | 23.195 | 16.502 | 32.404 | 0.00 | 0.00 |
| ATOM | 7436 | NH1  | ARG | X | 489 | 24.451 | 16.435 | 32.043 | 0.00 | 0.00 |
| ATOM | 7437 | HH11 | ARG | X | 489 | 24.916 | 17.306 | 31.831 | 0.00 | 0.00 |
| ATOM | 7438 | HH12 | ARG | X | 489 | 24.941 | 15.568 | 32.214 | 0.00 | 0.00 |
| ATOM | 7439 | NH2  | ARG | X | 489 | 22.622 | 15.398 | 32.798 | 0.00 | 0.00 |
| ATOM | 7440 | HH21 | ARG | X | 489 | 21.629 | 15.320 | 32.969 | 0.00 | 0.00 |
| ATOM | 7441 | HH22 | ARG | X | 489 | 23.217 | 14.593 | 32.934 | 0.00 | 0.00 |
| ATOM | 7442 | C    | ARG | X | 489 | 19.547 | 18.412 | 36.707 | 0.00 | 0.00 |
| ATOM | 7443 | O    | ARG | X | 489 | 19.557 | 17.191 | 36.659 | 0.00 | 0.00 |
| ATOM | 7444 | N    | ASP | X | 490 | 20.412 | 19.001 | 37.547 | 0.00 | 0.00 |
| ATOM | 7445 | H    | ASP | X | 490 | 20.409 | 20.006 | 37.446 | 0.00 | 0.00 |
| ATOM | 7446 | CA   | ASP | X | 490 | 21.268 | 18.324 | 38.477 | 0.00 | 0.00 |
| ATOM | 7447 | HA   | ASP | X | 490 | 22.046 | 19.002 | 38.827 | 0.00 | 0.00 |
| ATOM | 7448 | CB   | ASP | X | 490 | 20.421 | 17.958 | 39.757 | 0.00 | 0.00 |
| ATOM | 7449 | HB2  | ASP | X | 490 | 19.990 | 18.907 | 40.075 | 0.00 | 0.00 |
| ATOM | 7450 | HB3  | ASP | X | 490 | 19.604 | 17.296 | 39.471 | 0.00 | 0.00 |
| ATOM | 7451 | CG   | ASP | X | 490 | 21.228 | 17.570 | 41.029 | 0.00 | 0.00 |
| ATOM | 7452 | OD1  | ASP | X | 490 | 20.629 | 16.965 | 41.955 | 0.00 | 0.00 |
| ATOM | 7453 | OD2  | ASP | X | 490 | 22.380 | 17.926 | 41.092 | 0.00 | 0.00 |
| ATOM | 7454 | C    | ASP | X | 490 | 22.002 | 17.100 | 37.949 | 0.00 | 0.00 |
| ATOM | 7455 | O    | ASP | X | 490 | 21.563 | 15.984 | 38.152 | 0.00 | 0.00 |
| ATOM | 7456 | N    | PRO | X | 491 | 23.052 | 17.339 | 37.168 | 0.00 | 0.00 |
| ATOM | 7457 | CD   | PRO | X | 491 | 23.712 | 18.595 | 36.822 | 0.00 | 0.00 |
| ATOM | 7458 | HD2  | PRO | X | 491 | 24.472 | 18.906 | 37.539 | 0.00 | 0.00 |
| ATOM | 7459 | HD3  | PRO | X | 491 | 23.058 | 19.424 | 36.551 | 0.00 | 0.00 |
| ATOM | 7460 | CG   | PRO | X | 491 | 24.468 | 18.308 | 35.535 | 0.00 | 0.00 |
| ATOM | 7461 | HG2  | PRO | X | 491 | 25.331 | 18.939 | 35.321 | 0.00 | 0.00 |
| ATOM | 7462 | HG3  | PRO | X | 491 | 23.740 | 18.342 | 34.725 | 0.00 | 0.00 |
| ATOM | 7463 | CB   | PRO | X | 491 | 24.951 | 16.887 | 35.796 | 0.00 | 0.00 |
| ATOM | 7464 | HB2  | PRO | X | 491 | 25.892 | 16.910 | 36.345 | 0.00 | 0.00 |
| ATOM | 7465 | HB3  | PRO | X | 491 | 25.099 | 16.351 | 34.858 | 0.00 | 0.00 |
| ATOM | 7466 | CA   | PRO | X | 491 | 23.790 | 16.255 | 36.476 | 0.00 | 0.00 |
| ATOM | 7467 | HA   | PRO | X | 491 | 23.054 | 15.915 | 35.747 | 0.00 | 0.00 |
| ATOM | 7468 | C    | PRO | X | 491 | 24.320 | 15.118 | 37.316 | 0.00 | 0.00 |

|      |      |      |     |   |     |        |        |        |      |      |
|------|------|------|-----|---|-----|--------|--------|--------|------|------|
| ATOM | 7469 | O    | PRO | X | 491 | 24.832 | 15.437 | 38.378 | 0.00 | 0.00 |
| ATOM | 7470 | N    | LYS | X | 492 | 24.392 | 13.909 | 36.812 | 0.00 | 0.00 |
| ATOM | 7471 | H    | LYS | X | 492 | 24.068 | 13.900 | 35.855 | 0.00 | 0.00 |
| ATOM | 7472 | CA   | LYS | X | 492 | 25.034 | 12.766 | 37.500 | 0.00 | 0.00 |
| ATOM | 7473 | HA   | LYS | X | 492 | 24.720 | 12.864 | 38.539 | 0.00 | 0.00 |
| ATOM | 7474 | CB   | LYS | X | 492 | 24.518 | 11.438 | 36.978 | 0.00 | 0.00 |
| ATOM | 7475 | HB2  | LYS | X | 492 | 24.767 | 10.686 | 37.727 | 0.00 | 0.00 |
| ATOM | 7476 | HB3  | LYS | X | 492 | 23.428 | 11.422 | 37.018 | 0.00 | 0.00 |
| ATOM | 7477 | CG   | LYS | X | 492 | 25.012 | 10.839 | 35.609 | 0.00 | 0.00 |
| ATOM | 7478 | HG2  | LYS | X | 492 | 24.855 | 11.637 | 34.884 | 0.00 | 0.00 |
| ATOM | 7479 | HG3  | LYS | X | 492 | 26.024 | 10.434 | 35.649 | 0.00 | 0.00 |
| ATOM | 7480 | CD   | LYS | X | 492 | 24.065 | 9.747  | 35.123 | 0.00 | 0.00 |
| ATOM | 7481 | HD2  | LYS | X | 492 | 23.964 | 8.937  | 35.846 | 0.00 | 0.00 |
| ATOM | 7482 | HD3  | LYS | X | 492 | 23.158 | 10.350 | 35.150 | 0.00 | 0.00 |
| ATOM | 7483 | CE   | LYS | X | 492 | 24.460 | 9.177  | 33.757 | 0.00 | 0.00 |
| ATOM | 7484 | HE2  | LYS | X | 492 | 24.595 | 9.981  | 33.033 | 0.00 | 0.00 |
| ATOM | 7485 | HE3  | LYS | X | 492 | 25.454 | 8.741  | 33.661 | 0.00 | 0.00 |
| ATOM | 7486 | NZ   | LYS | X | 492 | 23.419 | 8.210  | 33.318 | 0.00 | 0.00 |
| ATOM | 7487 | HZ1  | LYS | X | 492 | 23.198 | 7.577  | 34.074 | 0.00 | 0.00 |
| ATOM | 7488 | HZ2  | LYS | X | 492 | 22.610 | 8.656  | 32.910 | 0.00 | 0.00 |
| ATOM | 7489 | HZ3  | LYS | X | 492 | 23.793 | 7.596  | 32.609 | 0.00 | 0.00 |
| ATOM | 7490 | C    | LYS | X | 492 | 26.619 | 12.837 | 37.715 | 0.00 | 0.00 |
| ATOM | 7491 | O    | LYS | X | 492 | 27.204 | 11.966 | 38.419 | 0.00 | 0.00 |
| ATOM | 7492 | N    | ALA | X | 493 | 27.353 | 13.822 | 37.182 | 0.00 | 0.00 |
| ATOM | 7493 | H    | ALA | X | 493 | 26.930 | 14.605 | 36.705 | 0.00 | 0.00 |
| ATOM | 7494 | CA   | ALA | X | 493 | 28.717 | 14.207 | 37.638 | 0.00 | 0.00 |
| ATOM | 7495 | HA   | ALA | X | 493 | 29.409 | 13.365 | 37.659 | 0.00 | 0.00 |
| ATOM | 7496 | CB   | ALA | X | 493 | 29.174 | 15.044 | 36.453 | 0.00 | 0.00 |
| ATOM | 7497 | HB1  | ALA | X | 493 | 28.439 | 15.826 | 36.259 | 0.00 | 0.00 |
| ATOM | 7498 | HB2  | ALA | X | 493 | 29.228 | 14.436 | 35.550 | 0.00 | 0.00 |
| ATOM | 7499 | HB3  | ALA | X | 493 | 30.155 | 15.494 | 36.608 | 0.00 | 0.00 |
| ATOM | 7500 | C    | ALA | X | 493 | 28.767 | 14.987 | 38.951 | 0.00 | 0.00 |
| ATOM | 7501 | O    | ALA | X | 493 | 27.769 | 15.632 | 39.262 | 0.00 | 0.00 |
| ATOM | 7502 | N    | PRO | X | 494 | 29.988 | 15.093 | 39.571 | 0.00 | 0.00 |
| ATOM | 7503 | CD   | PRO | X | 494 | 31.233 | 14.459 | 39.168 | 0.00 | 0.00 |
| ATOM | 7504 | HD2  | PRO | X | 494 | 31.532 | 14.765 | 38.166 | 0.00 | 0.00 |
| ATOM | 7505 | HD3  | PRO | X | 494 | 31.111 | 13.376 | 39.149 | 0.00 | 0.00 |
| ATOM | 7506 | CG   | PRO | X | 494 | 32.258 | 14.859 | 40.249 | 0.00 | 0.00 |
| ATOM | 7507 | HG2  | PRO | X | 494 | 33.098 | 15.461 | 39.905 | 0.00 | 0.00 |
| ATOM | 7508 | HG3  | PRO | X | 494 | 32.657 | 13.911 | 40.612 | 0.00 | 0.00 |
| ATOM | 7509 | CB   | PRO | X | 494 | 31.469 | 15.529 | 41.359 | 0.00 | 0.00 |
| ATOM | 7510 | HB2  | PRO | X | 494 | 31.961 | 16.401 | 41.789 | 0.00 | 0.00 |
| ATOM | 7511 | HB3  | PRO | X | 494 | 31.423 | 14.689 | 42.052 | 0.00 | 0.00 |
| ATOM | 7512 | CA   | PRO | X | 494 | 30.073 | 15.907 | 40.841 | 0.00 | 0.00 |
| ATOM | 7513 | HA   | PRO | X | 494 | 29.297 | 15.512 | 41.497 | 0.00 | 0.00 |
| ATOM | 7514 | C    | PRO | X | 494 | 29.878 | 17.457 | 40.701 | 0.00 | 0.00 |
| ATOM | 7515 | O    | PRO | X | 494 | 30.260 | 18.063 | 39.724 | 0.00 | 0.00 |
| ATOM | 7516 | N    | GLN | X | 495 | 29.282 | 18.111 | 41.785 | 0.00 | 0.00 |
| ATOM | 7517 | H    | GLN | X | 495 | 28.840 | 17.503 | 42.460 | 0.00 | 0.00 |
| ATOM | 7518 | CA   | GLN | X | 495 | 28.815 | 19.458 | 41.737 | 0.00 | 0.00 |
| ATOM | 7519 | HA   | GLN | X | 495 | 29.243 | 19.932 | 40.854 | 0.00 | 0.00 |
| ATOM | 7520 | CB   | GLN | X | 495 | 27.320 | 19.497 | 41.691 | 0.00 | 0.00 |
| ATOM | 7521 | HB2  | GLN | X | 495 | 27.013 | 19.170 | 42.685 | 0.00 | 0.00 |
| ATOM | 7522 | HB3  | GLN | X | 495 | 26.973 | 20.530 | 41.747 | 0.00 | 0.00 |
| ATOM | 7523 | CG   | GLN | X | 495 | 26.656 | 18.662 | 40.519 | 0.00 | 0.00 |
| ATOM | 7524 | HG2  | GLN | X | 495 | 26.917 | 17.610 | 40.630 | 0.00 | 0.00 |
| ATOM | 7525 | HG3  | GLN | X | 495 | 25.567 | 18.714 | 40.526 | 0.00 | 0.00 |
| ATOM | 7526 | CD   | GLN | X | 495 | 27.094 | 19.160 | 39.133 | 0.00 | 0.00 |
| ATOM | 7527 | OE1  | GLN | X | 495 | 27.388 | 20.285 | 38.771 | 0.00 | 0.00 |
| ATOM | 7528 | NE2  | GLN | X | 495 | 27.222 | 18.223 | 38.196 | 0.00 | 0.00 |
| ATOM | 7529 | HE21 | GLN | X | 495 | 27.450 | 18.489 | 37.249 | 0.00 | 0.00 |
| ATOM | 7530 | HE22 | GLN | X | 495 | 27.141 | 17.242 | 38.423 | 0.00 | 0.00 |
| ATOM | 7531 | C    | GLN | X | 495 | 29.274 | 20.312 | 42.962 | 0.00 | 0.00 |
| ATOM | 7532 | O    | GLN | X | 495 | 29.671 | 19.870 | 44.061 | 0.00 | 0.00 |
| ATOM | 7533 | N    | TRP | X | 496 | 29.383 | 21.665 | 42.720 | 0.00 | 0.00 |
| ATOM | 7534 | H    | TRP | X | 496 | 28.908 | 22.059 | 41.920 | 0.00 | 0.00 |
| ATOM | 7535 | CA   | TRP | X | 496 | 30.011 | 22.660 | 43.624 | 0.00 | 0.00 |

|      |      |     |     |   |     |        |        |        |      |      |
|------|------|-----|-----|---|-----|--------|--------|--------|------|------|
| ATOM | 7536 | HA  | TRP | X | 496 | 31.029 | 22.316 | 43.802 | 0.00 | 0.00 |
| ATOM | 7537 | CB  | TRP | X | 496 | 30.041 | 24.008 | 42.847 | 0.00 | 0.00 |
| ATOM | 7538 | HB2 | TRP | X | 496 | 30.276 | 23.696 | 41.829 | 0.00 | 0.00 |
| ATOM | 7539 | HB3 | TRP | X | 496 | 29.052 | 24.458 | 42.936 | 0.00 | 0.00 |
| ATOM | 7540 | CG  | TRP | X | 496 | 31.103 | 25.011 | 43.215 | 0.00 | 0.00 |
| ATOM | 7541 | CD1 | TRP | X | 496 | 31.578 | 25.172 | 44.469 | 0.00 | 0.00 |
| ATOM | 7542 | HD1 | TRP | X | 496 | 31.243 | 24.591 | 45.315 | 0.00 | 0.00 |
| ATOM | 7543 | NE1 | TRP | X | 496 | 32.439 | 26.241 | 44.501 | 0.00 | 0.00 |
| ATOM | 7544 | HE1 | TRP | X | 496 | 32.989 | 26.461 | 45.319 | 0.00 | 0.00 |
| ATOM | 7545 | CE2 | TRP | X | 496 | 32.650 | 26.713 | 43.226 | 0.00 | 0.00 |
| ATOM | 7546 | CZ2 | TRP | X | 496 | 33.382 | 27.846 | 42.769 | 0.00 | 0.00 |
| ATOM | 7547 | HZ2 | TRP | X | 496 | 33.986 | 28.431 | 43.446 | 0.00 | 0.00 |
| ATOM | 7548 | CH2 | TRP | X | 496 | 33.440 | 28.071 | 41.387 | 0.00 | 0.00 |
| ATOM | 7549 | HH2 | TRP | X | 496 | 34.109 | 28.864 | 41.089 | 0.00 | 0.00 |
| ATOM | 7550 | CZ3 | TRP | X | 496 | 32.776 | 27.196 | 40.530 | 0.00 | 0.00 |
| ATOM | 7551 | HZ3 | TRP | X | 496 | 32.997 | 27.269 | 39.475 | 0.00 | 0.00 |
| ATOM | 7552 | CE3 | TRP | X | 496 | 31.896 | 26.225 | 41.005 | 0.00 | 0.00 |
| ATOM | 7553 | HE3 | TRP | X | 496 | 31.179 | 25.800 | 40.319 | 0.00 | 0.00 |
| ATOM | 7554 | CD2 | TRP | X | 496 | 31.835 | 25.928 | 42.380 | 0.00 | 0.00 |
| ATOM | 7555 | C   | TRP | X | 496 | 29.173 | 22.854 | 44.927 | 0.00 | 0.00 |
| ATOM | 7556 | O   | TRP | X | 496 | 27.954 | 23.042 | 44.904 | 0.00 | 0.00 |
| ATOM | 7557 | N   | PRO | X | 497 | 29.783 | 22.651 | 46.067 | 0.00 | 0.00 |
| ATOM | 7558 | CD  | PRO | X | 497 | 31.163 | 22.242 | 46.392 | 0.00 | 0.00 |
| ATOM | 7559 | HD2 | PRO | X | 497 | 31.830 | 23.028 | 46.746 | 0.00 | 0.00 |
| ATOM | 7560 | HD3 | PRO | X | 497 | 31.649 | 21.673 | 45.600 | 0.00 | 0.00 |
| ATOM | 7561 | CG  | PRO | X | 497 | 31.013 | 21.455 | 47.650 | 0.00 | 0.00 |
| ATOM | 7562 | HG2 | PRO | X | 497 | 31.926 | 21.448 | 48.246 | 0.00 | 0.00 |
| ATOM | 7563 | HG3 | PRO | X | 497 | 30.830 | 20.429 | 47.332 | 0.00 | 0.00 |
| ATOM | 7564 | CB  | PRO | X | 497 | 29.871 | 22.085 | 48.370 | 0.00 | 0.00 |
| ATOM | 7565 | HB2 | PRO | X | 497 | 30.244 | 22.773 | 49.129 | 0.00 | 0.00 |
| ATOM | 7566 | HB3 | PRO | X | 497 | 29.264 | 21.325 | 48.863 | 0.00 | 0.00 |
| ATOM | 7567 | CA  | PRO | X | 497 | 29.071 | 22.787 | 47.292 | 0.00 | 0.00 |
| ATOM | 7568 | HA  | PRO | X | 497 | 28.140 | 22.229 | 47.187 | 0.00 | 0.00 |
| ATOM | 7569 | C   | PRO | X | 497 | 28.878 | 24.285 | 47.595 | 0.00 | 0.00 |
| ATOM | 7570 | O   | PRO | X | 497 | 29.788 | 25.018 | 47.173 | 0.00 | 0.00 |
| ATOM | 7571 | N   | PRO | X | 498 | 27.804 | 24.649 | 48.295 | 0.00 | 0.00 |
| ATOM | 7572 | CD  | PRO | X | 498 | 26.627 | 23.863 | 48.744 | 0.00 | 0.00 |
| ATOM | 7573 | HD2 | PRO | X | 498 | 26.906 | 22.909 | 49.191 | 0.00 | 0.00 |
| ATOM | 7574 | HD3 | PRO | X | 498 | 25.984 | 23.655 | 47.888 | 0.00 | 0.00 |
| ATOM | 7575 | CG  | PRO | X | 498 | 25.978 | 24.798 | 49.774 | 0.00 | 0.00 |
| ATOM | 7576 | HG2 | PRO | X | 498 | 26.246 | 24.581 | 50.808 | 0.00 | 0.00 |
| ATOM | 7577 | HG3 | PRO | X | 498 | 24.904 | 24.644 | 49.664 | 0.00 | 0.00 |
| ATOM | 7578 | CB  | PRO | X | 498 | 26.388 | 26.207 | 49.423 | 0.00 | 0.00 |
| ATOM | 7579 | HB2 | PRO | X | 498 | 26.198 | 26.830 | 50.297 | 0.00 | 0.00 |
| ATOM | 7580 | HB3 | PRO | X | 498 | 25.745 | 26.566 | 48.620 | 0.00 | 0.00 |
| ATOM | 7581 | CA  | PRO | X | 498 | 27.827 | 25.946 | 48.992 | 0.00 | 0.00 |
| ATOM | 7582 | HA  | PRO | X | 498 | 28.107 | 26.745 | 48.305 | 0.00 | 0.00 |
| ATOM | 7583 | C   | PRO | X | 498 | 28.810 | 25.935 | 50.054 | 0.00 | 0.00 |
| ATOM | 7584 | O   | PRO | X | 498 | 28.818 | 25.020 | 50.917 | 0.00 | 0.00 |
| ATOM | 7585 | N   | TYR | X | 499 | 29.799 | 26.815 | 50.036 | 0.00 | 0.00 |
| ATOM | 7586 | H   | TYR | X | 499 | 29.829 | 27.471 | 49.268 | 0.00 | 0.00 |
| ATOM | 7587 | CA  | TYR | X | 499 | 30.804 | 27.021 | 51.102 | 0.00 | 0.00 |
| ATOM | 7588 | HA  | TYR | X | 499 | 31.425 | 26.141 | 51.275 | 0.00 | 0.00 |
| ATOM | 7589 | CB  | TYR | X | 499 | 31.803 | 28.080 | 50.676 | 0.00 | 0.00 |
| ATOM | 7590 | HB2 | TYR | X | 499 | 32.203 | 27.815 | 49.697 | 0.00 | 0.00 |
| ATOM | 7591 | HB3 | TYR | X | 499 | 31.401 | 29.080 | 50.515 | 0.00 | 0.00 |
| ATOM | 7592 | CG  | TYR | X | 499 | 32.979 | 28.290 | 51.711 | 0.00 | 0.00 |
| ATOM | 7593 | CD1 | TYR | X | 499 | 32.851 | 28.930 | 52.946 | 0.00 | 0.00 |
| ATOM | 7594 | HD1 | TYR | X | 499 | 31.893 | 29.314 | 53.261 | 0.00 | 0.00 |
| ATOM | 7595 | CE1 | TYR | X | 499 | 33.936 | 29.234 | 53.761 | 0.00 | 0.00 |
| ATOM | 7596 | HE1 | TYR | X | 499 | 33.853 | 29.777 | 54.691 | 0.00 | 0.00 |
| ATOM | 7597 | CZ  | TYR | X | 499 | 35.201 | 28.841 | 53.338 | 0.00 | 0.00 |
| ATOM | 7598 | OH  | TYR | X | 499 | 36.357 | 29.049 | 54.037 | 0.00 | 0.00 |
| ATOM | 7599 | HH  | TYR | X | 499 | 36.108 | 29.404 | 54.893 | 0.00 | 0.00 |
| ATOM | 7600 | CE2 | TYR | X | 499 | 35.341 | 28.103 | 52.136 | 0.00 | 0.00 |
| ATOM | 7601 | HE2 | TYR | X | 499 | 36.285 | 27.729 | 51.770 | 0.00 | 0.00 |
| ATOM | 7602 | CD2 | TYR | X | 499 | 34.209 | 27.892 | 51.326 | 0.00 | 0.00 |

|      |      |      |     |   |     |        |        |        |      |      |
|------|------|------|-----|---|-----|--------|--------|--------|------|------|
| ATOM | 7603 | HD2  | TYR | X | 499 | 34.375 | 27.481 | 50.341 | 0.00 | 0.00 |
| ATOM | 7604 | C    | TYR | X | 499 | 30.074 | 27.482 | 52.449 | 0.00 | 0.00 |
| ATOM | 7605 | O    | TYR | X | 499 | 29.465 | 28.594 | 52.544 | 0.00 | 0.00 |
| ATOM | 7606 | N    | THR | X | 500 | 30.142 | 26.663 | 53.535 | 0.00 | 0.00 |
| ATOM | 7607 | H    | THR | X | 500 | 30.771 | 25.875 | 53.482 | 0.00 | 0.00 |
| ATOM | 7608 | CA   | THR | X | 500 | 29.521 | 26.805 | 54.870 | 0.00 | 0.00 |
| ATOM | 7609 | HA   | THR | X | 500 | 28.921 | 27.710 | 54.963 | 0.00 | 0.00 |
| ATOM | 7610 | CB   | THR | X | 500 | 28.606 | 25.595 | 55.103 | 0.00 | 0.00 |
| ATOM | 7611 | HB   | THR | X | 500 | 28.116 | 25.762 | 56.062 | 0.00 | 0.00 |
| ATOM | 7612 | CG2  | THR | X | 500 | 27.545 | 25.330 | 54.092 | 0.00 | 0.00 |
| ATOM | 7613 | HG21 | THR | X | 500 | 27.904 | 24.912 | 53.151 | 0.00 | 0.00 |
| ATOM | 7614 | HG22 | THR | X | 500 | 26.999 | 26.259 | 53.930 | 0.00 | 0.00 |
| ATOM | 7615 | HG23 | THR | X | 500 | 26.843 | 24.687 | 54.624 | 0.00 | 0.00 |
| ATOM | 7616 | OG1  | THR | X | 500 | 29.393 | 24.472 | 55.178 | 0.00 | 0.00 |
| ATOM | 7617 | HG1  | THR | X | 500 | 28.807 | 23.745 | 54.956 | 0.00 | 0.00 |
| ATOM | 7618 | C    | THR | X | 500 | 30.632 | 26.895 | 55.944 | 0.00 | 0.00 |
| ATOM | 7619 | O    | THR | X | 500 | 31.743 | 26.316 | 55.819 | 0.00 | 0.00 |
| ATOM | 7620 | N    | ALA | X | 501 | 30.351 | 27.596 | 57.044 | 0.00 | 0.00 |
| ATOM | 7621 | H    | ALA | X | 501 | 29.390 | 27.856 | 57.217 | 0.00 | 0.00 |
| ATOM | 7622 | CA   | ALA | X | 501 | 31.327 | 28.184 | 57.947 | 0.00 | 0.00 |
| ATOM | 7623 | HA   | ALA | X | 501 | 32.036 | 28.669 | 57.277 | 0.00 | 0.00 |
| ATOM | 7624 | CB   | ALA | X | 501 | 30.520 | 29.133 | 58.771 | 0.00 | 0.00 |
| ATOM | 7625 | HB1  | ALA | X | 501 | 31.164 | 29.769 | 59.379 | 0.00 | 0.00 |
| ATOM | 7626 | HB2  | ALA | X | 501 | 29.725 | 28.715 | 59.388 | 0.00 | 0.00 |
| ATOM | 7627 | HB3  | ALA | X | 501 | 29.959 | 29.869 | 58.195 | 0.00 | 0.00 |
| ATOM | 7628 | C    | ALA | X | 501 | 32.139 | 27.189 | 58.818 | 0.00 | 0.00 |
| ATOM | 7629 | O    | ALA | X | 501 | 33.206 | 27.543 | 59.314 | 0.00 | 0.00 |
| ATOM | 7630 | N    | GLY | X | 502 | 31.697 | 26.011 | 59.020 | 0.00 | 0.00 |
| ATOM | 7631 | H    | GLY | X | 502 | 30.917 | 25.723 | 58.447 | 0.00 | 0.00 |
| ATOM | 7632 | CA   | GLY | X | 502 | 32.518 | 24.859 | 59.505 | 0.00 | 0.00 |
| ATOM | 7633 | HA2  | GLY | X | 502 | 33.205 | 25.182 | 60.287 | 0.00 | 0.00 |
| ATOM | 7634 | HA3  | GLY | X | 502 | 31.841 | 24.133 | 59.956 | 0.00 | 0.00 |
| ATOM | 7635 | C    | GLY | X | 502 | 33.296 | 24.058 | 58.393 | 0.00 | 0.00 |
| ATOM | 7636 | O    | GLY | X | 502 | 34.528 | 23.994 | 58.323 | 0.00 | 0.00 |
| ATOM | 7637 | N    | ALA | X | 503 | 32.555 | 23.423 | 57.463 | 0.00 | 0.00 |
| ATOM | 7638 | H    | ALA | X | 503 | 31.555 | 23.546 | 57.527 | 0.00 | 0.00 |
| ATOM | 7639 | CA   | ALA | X | 503 | 33.197 | 22.493 | 56.546 | 0.00 | 0.00 |
| ATOM | 7640 | HA   | ALA | X | 503 | 33.909 | 21.848 | 57.061 | 0.00 | 0.00 |
| ATOM | 7641 | CB   | ALA | X | 503 | 32.167 | 21.639 | 55.768 | 0.00 | 0.00 |
| ATOM | 7642 | HB1  | ALA | X | 503 | 31.692 | 21.047 | 56.551 | 0.00 | 0.00 |
| ATOM | 7643 | HB2  | ALA | X | 503 | 32.672 | 20.883 | 55.165 | 0.00 | 0.00 |
| ATOM | 7644 | HB3  | ALA | X | 503 | 31.407 | 22.204 | 55.229 | 0.00 | 0.00 |
| ATOM | 7645 | C    | ALA | X | 503 | 34.149 | 23.242 | 55.544 | 0.00 | 0.00 |
| ATOM | 7646 | O    | ALA | X | 503 | 35.225 | 22.632 | 55.211 | 0.00 | 0.00 |
| ATOM | 7647 | N    | GLN | X | 504 | 33.886 | 24.467 | 55.092 | 0.00 | 0.00 |
| ATOM | 7648 | H    | GLN | X | 504 | 33.007 | 24.866 | 55.390 | 0.00 | 0.00 |
| ATOM | 7649 | CA   | GLN | X | 504 | 34.715 | 25.301 | 54.314 | 0.00 | 0.00 |
| ATOM | 7650 | HA   | GLN | X | 504 | 34.164 | 26.146 | 53.900 | 0.00 | 0.00 |
| ATOM | 7651 | CB   | GLN | X | 504 | 35.661 | 26.039 | 55.292 | 0.00 | 0.00 |
| ATOM | 7652 | HB2  | GLN | X | 504 | 36.366 | 25.402 | 55.826 | 0.00 | 0.00 |
| ATOM | 7653 | HB3  | GLN | X | 504 | 36.325 | 26.667 | 54.698 | 0.00 | 0.00 |
| ATOM | 7654 | CG   | GLN | X | 504 | 34.900 | 26.890 | 56.407 | 0.00 | 0.00 |
| ATOM | 7655 | HG2  | GLN | X | 504 | 34.093 | 27.552 | 56.091 | 0.00 | 0.00 |
| ATOM | 7656 | HG3  | GLN | X | 504 | 34.416 | 26.261 | 57.154 | 0.00 | 0.00 |
| ATOM | 7657 | CD   | GLN | X | 504 | 35.860 | 27.958 | 57.056 | 0.00 | 0.00 |
| ATOM | 7658 | OE1  | GLN | X | 504 | 35.854 | 29.172 | 56.751 | 0.00 | 0.00 |
| ATOM | 7659 | NE2  | GLN | X | 504 | 36.803 | 27.556 | 57.859 | 0.00 | 0.00 |
| ATOM | 7660 | HE21 | GLN | X | 504 | 37.540 | 28.201 | 58.108 | 0.00 | 0.00 |
| ATOM | 7661 | HE22 | GLN | X | 504 | 36.850 | 26.562 | 58.034 | 0.00 | 0.00 |
| ATOM | 7662 | C    | GLN | X | 504 | 35.222 | 24.578 | 53.064 | 0.00 | 0.00 |
| ATOM | 7663 | O    | GLN | X | 504 | 36.416 | 24.332 | 52.909 | 0.00 | 0.00 |
| ATOM | 7664 | N    | GLN | X | 505 | 34.277 | 24.156 | 52.208 | 0.00 | 0.00 |
| ATOM | 7665 | H    | GLN | X | 505 | 33.351 | 24.531 | 52.357 | 0.00 | 0.00 |
| ATOM | 7666 | CA   | GLN | X | 505 | 34.525 | 23.298 | 51.086 | 0.00 | 0.00 |
| ATOM | 7667 | HA   | GLN | X | 505 | 35.457 | 22.754 | 51.237 | 0.00 | 0.00 |
| ATOM | 7668 | CB   | GLN | X | 505 | 33.355 | 22.261 | 50.848 | 0.00 | 0.00 |
| ATOM | 7669 | HB2  | GLN | X | 505 | 32.464 | 22.885 | 50.778 | 0.00 | 0.00 |

|      |      |      |     |   |     |        |        |        |      |      |
|------|------|------|-----|---|-----|--------|--------|--------|------|------|
| ATOM | 7670 | HB3  | GLN | X | 505 | 33.578 | 21.732 | 49.922 | 0.00 | 0.00 |
| ATOM | 7671 | CG   | GLN | X | 505 | 33.259 | 21.248 | 51.989 | 0.00 | 0.00 |
| ATOM | 7672 | HG2  | GLN | X | 505 | 34.243 | 20.862 | 52.257 | 0.00 | 0.00 |
| ATOM | 7673 | HG3  | GLN | X | 505 | 32.819 | 21.622 | 52.914 | 0.00 | 0.00 |
| ATOM | 7674 | CD   | GLN | X | 505 | 32.430 | 19.964 | 51.715 | 0.00 | 0.00 |
| ATOM | 7675 | OE1  | GLN | X | 505 | 32.856 | 18.776 | 51.927 | 0.00 | 0.00 |
| ATOM | 7676 | NE2  | GLN | X | 505 | 31.103 | 20.110 | 51.392 | 0.00 | 0.00 |
| ATOM | 7677 | HE21 | GLN | X | 505 | 30.592 | 19.294 | 51.086 | 0.00 | 0.00 |
| ATOM | 7678 | HE22 | GLN | X | 505 | 30.693 | 21.032 | 51.346 | 0.00 | 0.00 |
| ATOM | 7679 | C    | GLN | X | 505 | 34.806 | 24.148 | 49.792 | 0.00 | 0.00 |
| ATOM | 7680 | O    | GLN | X | 505 | 34.037 | 25.083 | 49.429 | 0.00 | 0.00 |
| ATOM | 7681 | N    | TYR | X | 506 | 35.743 | 23.711 | 49.000 | 0.00 | 0.00 |
| ATOM | 7682 | H    | TYR | X | 506 | 36.318 | 22.932 | 49.287 | 0.00 | 0.00 |
| ATOM | 7683 | CA   | TYR | X | 506 | 36.183 | 24.304 | 47.745 | 0.00 | 0.00 |
| ATOM | 7684 | HA   | TYR | X | 506 | 35.480 | 25.095 | 47.483 | 0.00 | 0.00 |
| ATOM | 7685 | CB   | TYR | X | 506 | 37.548 | 25.014 | 48.025 | 0.00 | 0.00 |
| ATOM | 7686 | HB2  | TYR | X | 506 | 37.910 | 25.537 | 47.140 | 0.00 | 0.00 |
| ATOM | 7687 | HB3  | TYR | X | 506 | 37.489 | 25.754 | 48.823 | 0.00 | 0.00 |
| ATOM | 7688 | CG   | TYR | X | 506 | 38.690 | 24.078 | 48.340 | 0.00 | 0.00 |
| ATOM | 7689 | CD1  | TYR | X | 506 | 38.978 | 23.657 | 49.682 | 0.00 | 0.00 |
| ATOM | 7690 | HD1  | TYR | X | 506 | 38.427 | 23.876 | 50.585 | 0.00 | 0.00 |
| ATOM | 7691 | CE1  | TYR | X | 506 | 40.052 | 22.864 | 49.970 | 0.00 | 0.00 |
| ATOM | 7692 | HE1  | TYR | X | 506 | 40.258 | 22.516 | 50.972 | 0.00 | 0.00 |
| ATOM | 7693 | CZ   | TYR | X | 506 | 40.900 | 22.492 | 48.896 | 0.00 | 0.00 |
| ATOM | 7694 | OH   | TYR | X | 506 | 41.948 | 21.636 | 49.040 | 0.00 | 0.00 |
| ATOM | 7695 | HH   | TYR | X | 506 | 42.081 | 21.372 | 49.954 | 0.00 | 0.00 |
| ATOM | 7696 | CE2  | TYR | X | 506 | 40.680 | 22.974 | 47.553 | 0.00 | 0.00 |
| ATOM | 7697 | HE2  | TYR | X | 506 | 41.348 | 22.592 | 46.795 | 0.00 | 0.00 |
| ATOM | 7698 | CD2  | TYR | X | 506 | 39.550 | 23.730 | 47.301 | 0.00 | 0.00 |
| ATOM | 7699 | HD2  | TYR | X | 506 | 39.242 | 23.986 | 46.297 | 0.00 | 0.00 |
| ATOM | 7700 | C    | TYR | X | 506 | 36.317 | 23.259 | 46.573 | 0.00 | 0.00 |
| ATOM | 7701 | O    | TYR | X | 506 | 36.930 | 22.194 | 46.688 | 0.00 | 0.00 |
| ATOM | 7702 | N    | VAL | X | 507 | 35.702 | 23.541 | 45.420 | 0.00 | 0.00 |
| ATOM | 7703 | H    | VAL | X | 507 | 35.160 | 24.390 | 45.340 | 0.00 | 0.00 |
| ATOM | 7704 | CA   | VAL | X | 507 | 36.064 | 22.730 | 44.286 | 0.00 | 0.00 |
| ATOM | 7705 | HA   | VAL | X | 507 | 35.972 | 21.656 | 44.448 | 0.00 | 0.00 |
| ATOM | 7706 | CB   | VAL | X | 507 | 35.149 | 23.077 | 43.084 | 0.00 | 0.00 |
| ATOM | 7707 | HB   | VAL | X | 507 | 35.625 | 22.504 | 42.289 | 0.00 | 0.00 |
| ATOM | 7708 | CG1  | VAL | X | 507 | 33.700 | 22.502 | 43.287 | 0.00 | 0.00 |
| ATOM | 7709 | HG11 | VAL | X | 507 | 33.031 | 22.884 | 42.517 | 0.00 | 0.00 |
| ATOM | 7710 | HG12 | VAL | X | 507 | 33.707 | 21.412 | 43.285 | 0.00 | 0.00 |
| ATOM | 7711 | HG13 | VAL | X | 507 | 33.331 | 22.917 | 44.225 | 0.00 | 0.00 |
| ATOM | 7712 | CG2  | VAL | X | 507 | 35.041 | 24.517 | 42.552 | 0.00 | 0.00 |
| ATOM | 7713 | HG21 | VAL | X | 507 | 36.007 | 24.809 | 42.140 | 0.00 | 0.00 |
| ATOM | 7714 | HG22 | VAL | X | 507 | 34.783 | 25.242 | 43.324 | 0.00 | 0.00 |
| ATOM | 7715 | HG23 | VAL | X | 507 | 34.334 | 24.625 | 41.730 | 0.00 | 0.00 |
| ATOM | 7716 | C    | VAL | X | 507 | 37.502 | 22.897 | 43.778 | 0.00 | 0.00 |
| ATOM | 7717 | O    | VAL | X | 507 | 38.081 | 23.977 | 43.908 | 0.00 | 0.00 |
| ATOM | 7718 | N    | SER | X | 508 | 38.051 | 21.794 | 43.382 | 0.00 | 0.00 |
| ATOM | 7719 | H    | SER | X | 508 | 37.498 | 20.950 | 43.438 | 0.00 | 0.00 |
| ATOM | 7720 | CA   | SER | X | 508 | 39.393 | 21.736 | 42.828 | 0.00 | 0.00 |
| ATOM | 7721 | HA   | SER | X | 508 | 39.953 | 22.583 | 43.223 | 0.00 | 0.00 |
| ATOM | 7722 | CB   | SER | X | 508 | 40.182 | 20.579 | 43.417 | 0.00 | 0.00 |
| ATOM | 7723 | HB2  | SER | X | 508 | 39.892 | 19.586 | 43.075 | 0.00 | 0.00 |
| ATOM | 7724 | HB3  | SER | X | 508 | 41.244 | 20.609 | 43.170 | 0.00 | 0.00 |
| ATOM | 7725 | OG   | SER | X | 508 | 40.124 | 20.765 | 44.785 | 0.00 | 0.00 |
| ATOM | 7726 | HG   | SER | X | 508 | 39.186 | 20.670 | 44.967 | 0.00 | 0.00 |
| ATOM | 7727 | C    | SER | X | 508 | 39.253 | 21.670 | 41.305 | 0.00 | 0.00 |
| ATOM | 7728 | O    | SER | X | 508 | 38.790 | 20.628 | 40.804 | 0.00 | 0.00 |
| ATOM | 7729 | N    | LEU | X | 509 | 39.609 | 22.710 | 40.536 | 0.00 | 0.00 |
| ATOM | 7730 | H    | LEU | X | 509 | 39.876 | 23.587 | 40.960 | 0.00 | 0.00 |
| ATOM | 7731 | CA   | LEU | X | 509 | 39.177 | 22.819 | 39.119 | 0.00 | 0.00 |
| ATOM | 7732 | HA   | LEU | X | 509 | 38.377 | 22.088 | 39.001 | 0.00 | 0.00 |
| ATOM | 7733 | CB   | LEU | X | 509 | 38.753 | 24.232 | 38.874 | 0.00 | 0.00 |
| ATOM | 7734 | HB2  | LEU | X | 509 | 39.447 | 24.909 | 39.373 | 0.00 | 0.00 |
| ATOM | 7735 | HB3  | LEU | X | 509 | 38.600 | 24.388 | 37.806 | 0.00 | 0.00 |
| ATOM | 7736 | CG   | LEU | X | 509 | 37.428 | 24.608 | 39.524 | 0.00 | 0.00 |

|      |      |      |     |   |     |        |        |        |      |      |
|------|------|------|-----|---|-----|--------|--------|--------|------|------|
| ATOM | 7737 | HG   | LEU | X | 509 | 37.552 | 24.445 | 40.595 | 0.00 | 0.00 |
| ATOM | 7738 | CD1  | LEU | X | 509 | 36.990 | 25.944 | 39.135 | 0.00 | 0.00 |
| ATOM | 7739 | HD11 | LEU | X | 509 | 36.909 | 26.005 | 38.050 | 0.00 | 0.00 |
| ATOM | 7740 | HD12 | LEU | X | 509 | 37.634 | 26.662 | 39.642 | 0.00 | 0.00 |
| ATOM | 7741 | HD13 | LEU | X | 509 | 36.010 | 26.137 | 39.571 | 0.00 | 0.00 |
| ATOM | 7742 | CD2  | LEU | X | 509 | 36.226 | 23.673 | 39.241 | 0.00 | 0.00 |
| ATOM | 7743 | HD21 | LEU | X | 509 | 36.417 | 22.603 | 39.313 | 0.00 | 0.00 |
| ATOM | 7744 | HD22 | LEU | X | 509 | 35.412 | 23.965 | 39.906 | 0.00 | 0.00 |
| ATOM | 7745 | HD23 | LEU | X | 509 | 35.829 | 23.890 | 38.249 | 0.00 | 0.00 |
| ATOM | 7746 | C    | LEU | X | 509 | 40.379 | 22.449 | 38.235 | 0.00 | 0.00 |
| ATOM | 7747 | O    | LEU | X | 509 | 41.485 | 22.885 | 38.478 | 0.00 | 0.00 |
| ATOM | 7748 | N    | ASP | X | 510 | 40.153 | 21.495 | 37.353 | 0.00 | 0.00 |
| ATOM | 7749 | H    | ASP | X | 510 | 39.218 | 21.113 | 37.357 | 0.00 | 0.00 |
| ATOM | 7750 | CA   | ASP | X | 510 | 41.115 | 20.707 | 36.560 | 0.00 | 0.00 |
| ATOM | 7751 | HA   | ASP | X | 510 | 41.882 | 21.381 | 36.179 | 0.00 | 0.00 |
| ATOM | 7752 | CB   | ASP | X | 510 | 41.776 | 19.697 | 37.498 | 0.00 | 0.00 |
| ATOM | 7753 | HB2  | ASP | X | 510 | 41.893 | 20.036 | 38.528 | 0.00 | 0.00 |
| ATOM | 7754 | HB3  | ASP | X | 510 | 41.010 | 18.935 | 37.644 | 0.00 | 0.00 |
| ATOM | 7755 | CG   | ASP | X | 510 | 43.136 | 19.216 | 36.960 | 0.00 | 0.00 |
| ATOM | 7756 | OD1  | ASP | X | 510 | 43.459 | 19.266 | 35.761 | 0.00 | 0.00 |
| ATOM | 7757 | OD2  | ASP | X | 510 | 43.782 | 18.608 | 37.817 | 0.00 | 0.00 |
| ATOM | 7758 | C    | ASP | X | 510 | 40.378 | 19.992 | 35.411 | 0.00 | 0.00 |
| ATOM | 7759 | O    | ASP | X | 510 | 39.172 | 19.909 | 35.446 | 0.00 | 0.00 |
| ATOM | 7760 | N    | LEU | X | 511 | 41.165 | 19.317 | 34.526 | 0.00 | 0.00 |
| ATOM | 7761 | H    | LEU | X | 511 | 42.164 | 19.266 | 34.668 | 0.00 | 0.00 |
| ATOM | 7762 | CA   | LEU | X | 511 | 40.595 | 18.598 | 33.429 | 0.00 | 0.00 |
| ATOM | 7763 | HA   | LEU | X | 511 | 39.837 | 19.204 | 32.933 | 0.00 | 0.00 |
| ATOM | 7764 | CB   | LEU | X | 511 | 41.662 | 18.219 | 32.404 | 0.00 | 0.00 |
| ATOM | 7765 | HB2  | LEU | X | 511 | 42.379 | 17.535 | 32.858 | 0.00 | 0.00 |
| ATOM | 7766 | HB3  | LEU | X | 511 | 41.247 | 17.811 | 31.483 | 0.00 | 0.00 |
| ATOM | 7767 | CG   | LEU | X | 511 | 42.655 | 19.380 | 32.055 | 0.00 | 0.00 |
| ATOM | 7768 | HG   | LEU | X | 511 | 43.121 | 19.834 | 32.929 | 0.00 | 0.00 |
| ATOM | 7769 | CD1  | LEU | X | 511 | 43.760 | 18.797 | 31.149 | 0.00 | 0.00 |
| ATOM | 7770 | HD11 | LEU | X | 511 | 43.307 | 18.397 | 30.241 | 0.00 | 0.00 |
| ATOM | 7771 | HD12 | LEU | X | 511 | 44.220 | 17.959 | 31.673 | 0.00 | 0.00 |
| ATOM | 7772 | HD13 | LEU | X | 511 | 44.520 | 19.540 | 30.908 | 0.00 | 0.00 |
| ATOM | 7773 | CD2  | LEU | X | 511 | 41.909 | 20.472 | 31.348 | 0.00 | 0.00 |
| ATOM | 7774 | HD21 | LEU | X | 511 | 42.445 | 21.417 | 31.256 | 0.00 | 0.00 |
| ATOM | 7775 | HD22 | LEU | X | 511 | 41.483 | 20.131 | 30.405 | 0.00 | 0.00 |
| ATOM | 7776 | HD23 | LEU | X | 511 | 41.080 | 20.738 | 32.004 | 0.00 | 0.00 |
| ATOM | 7777 | C    | LEU | X | 511 | 39.954 | 17.327 | 33.945 | 0.00 | 0.00 |
| ATOM | 7778 | O    | LEU | X | 511 | 38.984 | 16.751 | 33.393 | 0.00 | 0.00 |
| ATOM | 7779 | N    | ARG | X | 512 | 40.454 | 16.849 | 35.095 | 0.00 | 0.00 |
| ATOM | 7780 | H    | ARG | X | 512 | 41.230 | 17.413 | 35.412 | 0.00 | 0.00 |
| ATOM | 7781 | CA   | ARG | X | 512 | 39.807 | 15.746 | 35.878 | 0.00 | 0.00 |
| ATOM | 7782 | HA   | ARG | X | 512 | 39.951 | 14.819 | 35.324 | 0.00 | 0.00 |
| ATOM | 7783 | CB   | ARG | X | 512 | 40.569 | 15.621 | 37.237 | 0.00 | 0.00 |
| ATOM | 7784 | HB2  | ARG | X | 512 | 40.264 | 16.433 | 37.898 | 0.00 | 0.00 |
| ATOM | 7785 | HB3  | ARG | X | 512 | 40.262 | 14.704 | 37.740 | 0.00 | 0.00 |
| ATOM | 7786 | CG   | ARG | X | 512 | 42.092 | 15.510 | 37.211 | 0.00 | 0.00 |
| ATOM | 7787 | HG2  | ARG | X | 512 | 42.366 | 14.560 | 36.753 | 0.00 | 0.00 |
| ATOM | 7788 | HG3  | ARG | X | 512 | 42.460 | 16.364 | 36.642 | 0.00 | 0.00 |
| ATOM | 7789 | CD   | ARG | X | 512 | 42.866 | 15.481 | 38.519 | 0.00 | 0.00 |
| ATOM | 7790 | HD2  | ARG | X | 512 | 43.918 | 15.487 | 38.232 | 0.00 | 0.00 |
| ATOM | 7791 | HD3  | ARG | X | 512 | 42.704 | 16.422 | 39.045 | 0.00 | 0.00 |
| ATOM | 7792 | NE   | ARG | X | 512 | 42.650 | 14.282 | 39.298 | 0.00 | 0.00 |
| ATOM | 7793 | HE   | ARG | X | 512 | 43.303 | 13.531 | 39.125 | 0.00 | 0.00 |
| ATOM | 7794 | CZ   | ARG | X | 512 | 41.593 | 14.093 | 40.062 | 0.00 | 0.00 |
| ATOM | 7795 | NH1  | ARG | X | 512 | 40.646 | 15.030 | 40.357 | 0.00 | 0.00 |
| ATOM | 7796 | HH11 | ARG | X | 512 | 40.861 | 15.991 | 40.133 | 0.00 | 0.00 |
| ATOM | 7797 | HH12 | ARG | X | 512 | 39.782 | 14.780 | 40.817 | 0.00 | 0.00 |
| ATOM | 7798 | NH2  | ARG | X | 512 | 41.501 | 12.925 | 40.659 | 0.00 | 0.00 |
| ATOM | 7799 | HH21 | ARG | X | 512 | 42.239 | 12.238 | 40.595 | 0.00 | 0.00 |
| ATOM | 7800 | HH22 | ARG | X | 512 | 40.594 | 12.646 | 41.005 | 0.00 | 0.00 |
| ATOM | 7801 | C    | ARG | X | 512 | 38.333 | 16.057 | 36.181 | 0.00 | 0.00 |
| ATOM | 7802 | O    | ARG | X | 512 | 37.886 | 17.195 | 36.097 | 0.00 | 0.00 |
| ATOM | 7803 | N    | PRO | X | 513 | 37.500 | 15.063 | 36.595 | 0.00 | 0.00 |



|      |      |      |     |   |     |        |        |        |      |      |
|------|------|------|-----|---|-----|--------|--------|--------|------|------|
| ATOM | 7804 | CD   | PRO | X | 513 | 37.805 | 13.609 | 36.523 | 0.00 | 0.00 |
| ATOM | 7805 | HD2  | PRO | X | 513 | 38.413 | 13.212 | 37.335 | 0.00 | 0.00 |
| ATOM | 7806 | HD3  | PRO | X | 513 | 38.209 | 13.427 | 35.527 | 0.00 | 0.00 |
| ATOM | 7807 | CG   | PRO | X | 513 | 36.389 | 13.004 | 36.577 | 0.00 | 0.00 |
| ATOM | 7808 | HG2  | PRO | X | 513 | 36.518 | 11.981 | 36.932 | 0.00 | 0.00 |
| ATOM | 7809 | HG3  | PRO | X | 513 | 35.938 | 13.060 | 35.587 | 0.00 | 0.00 |
| ATOM | 7810 | CB   | PRO | X | 513 | 35.638 | 13.965 | 37.535 | 0.00 | 0.00 |
| ATOM | 7811 | HB2  | PRO | X | 513 | 35.936 | 13.606 | 38.520 | 0.00 | 0.00 |
| ATOM | 7812 | HB3  | PRO | X | 513 | 34.575 | 14.030 | 37.300 | 0.00 | 0.00 |
| ATOM | 7813 | CA   | PRO | X | 513 | 36.261 | 15.382 | 37.203 | 0.00 | 0.00 |
| ATOM | 7814 | HA   | PRO | X | 513 | 35.696 | 15.942 | 36.458 | 0.00 | 0.00 |
| ATOM | 7815 | C    | PRO | X | 513 | 36.432 | 16.261 | 38.394 | 0.00 | 0.00 |
| ATOM | 7816 | O    | PRO | X | 513 | 37.503 | 16.430 | 39.014 | 0.00 | 0.00 |
| ATOM | 7817 | N    | LEU | X | 514 | 35.325 | 16.940 | 38.713 | 0.00 | 0.00 |
| ATOM | 7818 | H    | LEU | X | 514 | 34.496 | 16.789 | 38.156 | 0.00 | 0.00 |
| ATOM | 7819 | CA   | LEU | X | 514 | 35.152 | 17.927 | 39.738 | 0.00 | 0.00 |
| ATOM | 7820 | HA   | LEU | X | 514 | 35.880 | 18.724 | 39.586 | 0.00 | 0.00 |
| ATOM | 7821 | CB   | LEU | X | 514 | 33.742 | 18.480 | 39.685 | 0.00 | 0.00 |
| ATOM | 7822 | HB2  | LEU | X | 514 | 33.331 | 18.780 | 38.721 | 0.00 | 0.00 |
| ATOM | 7823 | HB3  | LEU | X | 514 | 32.958 | 17.839 | 40.087 | 0.00 | 0.00 |
| ATOM | 7824 | CG   | LEU | X | 514 | 33.754 | 19.840 | 40.556 | 0.00 | 0.00 |
| ATOM | 7825 | HG   | LEU | X | 514 | 34.274 | 19.588 | 41.481 | 0.00 | 0.00 |
| ATOM | 7826 | CD1  | LEU | X | 514 | 34.627 | 20.837 | 39.846 | 0.00 | 0.00 |
| ATOM | 7827 | HD11 | LEU | X | 514 | 34.261 | 21.830 | 40.111 | 0.00 | 0.00 |
| ATOM | 7828 | HD12 | LEU | X | 514 | 34.621 | 20.681 | 38.767 | 0.00 | 0.00 |
| ATOM | 7829 | HD13 | LEU | X | 514 | 35.621 | 20.884 | 40.291 | 0.00 | 0.00 |
| ATOM | 7830 | CD2  | LEU | X | 514 | 32.327 | 20.287 | 40.750 | 0.00 | 0.00 |
| ATOM | 7831 | HD21 | LEU | X | 514 | 32.315 | 21.300 | 41.151 | 0.00 | 0.00 |
| ATOM | 7832 | HD22 | LEU | X | 514 | 31.925 | 20.262 | 39.737 | 0.00 | 0.00 |
| ATOM | 7833 | HD23 | LEU | X | 514 | 31.796 | 19.495 | 41.278 | 0.00 | 0.00 |
| ATOM | 7834 | C    | LEU | X | 514 | 35.492 | 17.265 | 41.110 | 0.00 | 0.00 |
| ATOM | 7835 | O    | LEU | X | 514 | 34.928 | 16.232 | 41.438 | 0.00 | 0.00 |
| ATOM | 7836 | N    | GLU | X | 515 | 36.473 | 17.715 | 41.894 | 0.00 | 0.00 |
| ATOM | 7837 | H    | GLU | X | 515 | 36.937 | 18.576 | 41.642 | 0.00 | 0.00 |
| ATOM | 7838 | CA   | GLU | X | 515 | 36.836 | 17.039 | 43.145 | 0.00 | 0.00 |
| ATOM | 7839 | HA   | GLU | X | 515 | 36.194 | 16.199 | 43.409 | 0.00 | 0.00 |
| ATOM | 7840 | CB   | GLU | X | 515 | 38.264 | 16.603 | 43.018 | 0.00 | 0.00 |
| ATOM | 7841 | HB2  | GLU | X | 515 | 38.250 | 15.811 | 42.269 | 0.00 | 0.00 |
| ATOM | 7842 | HB3  | GLU | X | 515 | 38.879 | 17.464 | 42.755 | 0.00 | 0.00 |
| ATOM | 7843 | CG   | GLU | X | 515 | 38.685 | 15.917 | 44.341 | 0.00 | 0.00 |
| ATOM | 7844 | HG2  | GLU | X | 515 | 38.710 | 16.600 | 45.189 | 0.00 | 0.00 |
| ATOM | 7845 | HG3  | GLU | X | 515 | 38.026 | 15.114 | 44.672 | 0.00 | 0.00 |
| ATOM | 7846 | CD   | GLU | X | 515 | 40.079 | 15.311 | 44.393 | 0.00 | 0.00 |
| ATOM | 7847 | OE1  | GLU | X | 515 | 40.333 | 14.287 | 45.017 | 0.00 | 0.00 |
| ATOM | 7848 | OE2  | GLU | X | 515 | 41.027 | 16.023 | 43.923 | 0.00 | 0.00 |
| ATOM | 7849 | C    | GLU | X | 515 | 36.634 | 18.111 | 44.186 | 0.00 | 0.00 |
| ATOM | 7850 | O    | GLU | X | 515 | 37.263 | 19.162 | 44.171 | 0.00 | 0.00 |
| ATOM | 7851 | N    | VAL | X | 516 | 35.849 | 17.751 | 45.162 | 0.00 | 0.00 |
| ATOM | 7852 | H    | VAL | X | 516 | 35.469 | 16.816 | 45.138 | 0.00 | 0.00 |
| ATOM | 7853 | CA   | VAL | X | 516 | 35.601 | 18.592 | 46.320 | 0.00 | 0.00 |
| ATOM | 7854 | HA   | VAL | X | 516 | 35.789 | 19.628 | 46.036 | 0.00 | 0.00 |
| ATOM | 7855 | CB   | VAL | X | 516 | 34.123 | 18.329 | 46.746 | 0.00 | 0.00 |
| ATOM | 7856 | HB   | VAL | X | 516 | 33.933 | 17.287 | 47.003 | 0.00 | 0.00 |
| ATOM | 7857 | CG1  | VAL | X | 516 | 33.761 | 19.062 | 48.062 | 0.00 | 0.00 |
| ATOM | 7858 | HG11 | VAL | X | 516 | 33.897 | 18.419 | 48.932 | 0.00 | 0.00 |
| ATOM | 7859 | HG12 | VAL | X | 516 | 34.213 | 20.048 | 48.168 | 0.00 | 0.00 |
| ATOM | 7860 | HG13 | VAL | X | 516 | 32.702 | 19.316 | 48.006 | 0.00 | 0.00 |
| ATOM | 7861 | CG2  | VAL | X | 516 | 33.122 | 18.652 | 45.577 | 0.00 | 0.00 |
| ATOM | 7862 | HG21 | VAL | X | 516 | 32.097 | 18.733 | 45.940 | 0.00 | 0.00 |
| ATOM | 7863 | HG22 | VAL | X | 516 | 33.171 | 17.832 | 44.862 | 0.00 | 0.00 |
| ATOM | 7864 | HG23 | VAL | X | 516 | 33.271 | 19.666 | 45.206 | 0.00 | 0.00 |
| ATOM | 7865 | C    | VAL | X | 516 | 36.570 | 18.275 | 47.438 | 0.00 | 0.00 |
| ATOM | 7866 | O    | VAL | X | 516 | 36.520 | 17.072 | 47.787 | 0.00 | 0.00 |
| ATOM | 7867 | N    | ARG | X | 517 | 37.297 | 19.249 | 47.995 | 0.00 | 0.00 |
| ATOM | 7868 | H    | ARG | X | 517 | 37.282 | 20.101 | 47.454 | 0.00 | 0.00 |
| ATOM | 7869 | CA   | ARG | X | 517 | 38.255 | 19.162 | 49.095 | 0.00 | 0.00 |
| ATOM | 7870 | HA   | ARG | X | 517 | 38.357 | 18.128 | 49.426 | 0.00 | 0.00 |

|      |      |      |     |   |     |        |        |        |      |      |
|------|------|------|-----|---|-----|--------|--------|--------|------|------|
| ATOM | 7871 | CB   | ARG | X | 517 | 39.626 | 19.599 | 48.588 | 0.00 | 0.00 |
| ATOM | 7872 | HB2  | ARG | X | 517 | 39.471 | 20.606 | 48.200 | 0.00 | 0.00 |
| ATOM | 7873 | HB3  | ARG | X | 517 | 40.275 | 19.687 | 49.459 | 0.00 | 0.00 |
| ATOM | 7874 | CG   | ARG | X | 517 | 40.161 | 18.729 | 47.455 | 0.00 | 0.00 |
| ATOM | 7875 | HG2  | ARG | X | 517 | 40.095 | 17.660 | 47.661 | 0.00 | 0.00 |
| ATOM | 7876 | HG3  | ARG | X | 517 | 39.492 | 18.832 | 46.601 | 0.00 | 0.00 |
| ATOM | 7877 | CD   | ARG | X | 517 | 41.551 | 18.965 | 46.966 | 0.00 | 0.00 |
| ATOM | 7878 | HD2  | ARG | X | 517 | 41.673 | 20.022 | 46.733 | 0.00 | 0.00 |
| ATOM | 7879 | HD3  | ARG | X | 517 | 42.316 | 18.638 | 47.670 | 0.00 | 0.00 |
| ATOM | 7880 | NE   | ARG | X | 517 | 41.765 | 18.249 | 45.643 | 0.00 | 0.00 |
| ATOM | 7881 | HE   | ARG | X | 517 | 41.308 | 17.371 | 45.445 | 0.00 | 0.00 |
| ATOM | 7882 | CZ   | ARG | X | 517 | 42.583 | 18.685 | 44.698 | 0.00 | 0.00 |
| ATOM | 7883 | NH1  | ARG | X | 517 | 43.464 | 19.711 | 44.791 | 0.00 | 0.00 |
| ATOM | 7884 | HH11 | ARG | X | 517 | 43.617 | 20.101 | 45.710 | 0.00 | 0.00 |
| ATOM | 7885 | HH12 | ARG | X | 517 | 44.054 | 19.927 | 44.000 | 0.00 | 0.00 |
| ATOM | 7886 | NH2  | ARG | X | 517 | 42.541 | 18.106 | 43.515 | 0.00 | 0.00 |
| ATOM | 7887 | HH21 | ARG | X | 517 | 41.887 | 17.372 | 43.284 | 0.00 | 0.00 |
| ATOM | 7888 | HH22 | ARG | X | 517 | 43.125 | 18.430 | 42.757 | 0.00 | 0.00 |
| ATOM | 7889 | C    | ARG | X | 517 | 37.746 | 20.052 | 50.281 | 0.00 | 0.00 |
| ATOM | 7890 | O    | ARG | X | 517 | 36.954 | 20.995 | 50.001 | 0.00 | 0.00 |
| ATOM | 7891 | N    | ARG | X | 518 | 38.068 | 19.600 | 51.545 | 0.00 | 0.00 |
| ATOM | 7892 | H    | ARG | X | 518 | 38.510 | 18.692 | 51.580 | 0.00 | 0.00 |
| ATOM | 7893 | CA   | ARG | X | 518 | 37.354 | 20.087 | 52.716 | 0.00 | 0.00 |
| ATOM | 7894 | HA   | ARG | X | 518 | 36.518 | 20.674 | 52.335 | 0.00 | 0.00 |
| ATOM | 7895 | CB   | ARG | X | 518 | 36.810 | 18.893 | 53.511 | 0.00 | 0.00 |
| ATOM | 7896 | HB2  | ARG | X | 518 | 36.341 | 18.179 | 52.833 | 0.00 | 0.00 |
| ATOM | 7897 | HB3  | ARG | X | 518 | 37.576 | 18.306 | 54.017 | 0.00 | 0.00 |
| ATOM | 7898 | CG   | ARG | X | 518 | 35.754 | 19.341 | 54.501 | 0.00 | 0.00 |
| ATOM | 7899 | HG2  | ARG | X | 518 | 35.970 | 20.203 | 55.132 | 0.00 | 0.00 |
| ATOM | 7900 | HG3  | ARG | X | 518 | 34.882 | 19.690 | 53.946 | 0.00 | 0.00 |
| ATOM | 7901 | CD   | ARG | X | 518 | 35.322 | 18.162 | 55.370 | 0.00 | 0.00 |
| ATOM | 7902 | HD2  | ARG | X | 518 | 34.387 | 18.532 | 55.789 | 0.00 | 0.00 |
| ATOM | 7903 | HD3  | ARG | X | 518 | 35.160 | 17.274 | 54.758 | 0.00 | 0.00 |
| ATOM | 7904 | NE   | ARG | X | 518 | 36.294 | 17.971 | 56.475 | 0.00 | 0.00 |
| ATOM | 7905 | HE   | ARG | X | 518 | 36.465 | 18.759 | 57.084 | 0.00 | 0.00 |
| ATOM | 7906 | CZ   | ARG | X | 518 | 37.084 | 16.957 | 56.739 | 0.00 | 0.00 |
| ATOM | 7907 | NH1  | ARG | X | 518 | 37.188 | 15.941 | 55.982 | 0.00 | 0.00 |
| ATOM | 7908 | HH11 | ARG | X | 518 | 36.709 | 15.923 | 55.093 | 0.00 | 0.00 |
| ATOM | 7909 | HH12 | ARG | X | 518 | 37.626 | 15.109 | 56.350 | 0.00 | 0.00 |
| ATOM | 7910 | NH2  | ARG | X | 518 | 37.852 | 17.011 | 57.808 | 0.00 | 0.00 |
| ATOM | 7911 | HH21 | ARG | X | 518 | 37.938 | 17.860 | 58.349 | 0.00 | 0.00 |
| ATOM | 7912 | HH22 | ARG | X | 518 | 38.371 | 16.165 | 57.992 | 0.00 | 0.00 |
| ATOM | 7913 | C    | ARG | X | 518 | 38.302 | 20.964 | 53.584 | 0.00 | 0.00 |
| ATOM | 7914 | O    | ARG | X | 518 | 39.334 | 20.496 | 54.071 | 0.00 | 0.00 |
| ATOM | 7915 | N    | GLY | X | 519 | 37.868 | 22.173 | 53.876 | 0.00 | 0.00 |
| ATOM | 7916 | H    | GLY | X | 519 | 36.934 | 22.404 | 53.570 | 0.00 | 0.00 |
| ATOM | 7917 | CA   | GLY | X | 519 | 38.617 | 23.230 | 54.553 | 0.00 | 0.00 |
| ATOM | 7918 | HA2  | GLY | X | 519 | 37.894 | 23.892 | 55.030 | 0.00 | 0.00 |
| ATOM | 7919 | HA3  | GLY | X | 519 | 39.053 | 22.688 | 55.392 | 0.00 | 0.00 |
| ATOM | 7920 | C    | GLY | X | 519 | 39.679 | 23.971 | 53.665 | 0.00 | 0.00 |
| ATOM | 7921 | O    | GLY | X | 519 | 40.863 | 23.535 | 53.557 | 0.00 | 0.00 |
| ATOM | 7922 | N    | LEU | X | 520 | 39.258 | 25.060 | 53.047 | 0.00 | 0.00 |
| ATOM | 7923 | H    | LEU | X | 520 | 38.259 | 25.182 | 52.961 | 0.00 | 0.00 |
| ATOM | 7924 | CA   | LEU | X | 520 | 40.130 | 25.922 | 52.336 | 0.00 | 0.00 |
| ATOM | 7925 | HA   | LEU | X | 520 | 40.667 | 25.303 | 51.618 | 0.00 | 0.00 |
| ATOM | 7926 | CB   | LEU | X | 520 | 39.308 | 27.045 | 51.621 | 0.00 | 0.00 |
| ATOM | 7927 | HB2  | LEU | X | 520 | 38.632 | 26.431 | 51.026 | 0.00 | 0.00 |
| ATOM | 7928 | HB3  | LEU | X | 520 | 38.720 | 27.479 | 52.430 | 0.00 | 0.00 |
| ATOM | 7929 | CG   | LEU | X | 520 | 40.068 | 28.146 | 50.855 | 0.00 | 0.00 |
| ATOM | 7930 | HG   | LEU | X | 520 | 40.805 | 28.604 | 51.515 | 0.00 | 0.00 |
| ATOM | 7931 | CD1  | LEU | X | 520 | 40.933 | 27.607 | 49.673 | 0.00 | 0.00 |
| ATOM | 7932 | HD11 | LEU | X | 520 | 41.293 | 28.467 | 49.108 | 0.00 | 0.00 |
| ATOM | 7933 | HD12 | LEU | X | 520 | 40.285 | 27.030 | 49.012 | 0.00 | 0.00 |
| ATOM | 7934 | HD13 | LEU | X | 520 | 41.750 | 27.074 | 50.158 | 0.00 | 0.00 |
| ATOM | 7935 | CD2  | LEU | X | 520 | 39.015 | 29.151 | 50.393 | 0.00 | 0.00 |
| ATOM | 7936 | HD21 | LEU | X | 520 | 38.322 | 28.547 | 49.808 | 0.00 | 0.00 |
| ATOM | 7937 | HD22 | LEU | X | 520 | 38.534 | 29.631 | 51.245 | 0.00 | 0.00 |

|      |      |      |     |   |     |        |        |        |      |      |
|------|------|------|-----|---|-----|--------|--------|--------|------|------|
| ATOM | 7938 | HD23 | LEU | X | 520 | 39.472 | 29.886 | 49.730 | 0.00 | 0.00 |
| ATOM | 7939 | C    | LEU | X | 520 | 41.215 | 26.530 | 53.255 | 0.00 | 0.00 |
| ATOM | 7940 | O    | LEU | X | 520 | 41.029 | 27.450 | 54.107 | 0.00 | 0.00 |
| ATOM | 7941 | N    | ARG | X | 521 | 42.477 | 26.037 | 53.085 | 0.00 | 0.00 |
| ATOM | 7942 | H    | ARG | X | 521 | 42.580 | 25.334 | 52.367 | 0.00 | 0.00 |
| ATOM | 7943 | CA   | ARG | X | 521 | 43.715 | 26.578 | 53.651 | 0.00 | 0.00 |
| ATOM | 7944 | HA   | ARG | X | 521 | 44.435 | 25.802 | 53.390 | 0.00 | 0.00 |
| ATOM | 7945 | CB   | ARG | X | 521 | 44.159 | 27.873 | 52.839 | 0.00 | 0.00 |
| ATOM | 7946 | HB2  | ARG | X | 521 | 43.842 | 27.797 | 51.799 | 0.00 | 0.00 |
| ATOM | 7947 | HB3  | ARG | X | 521 | 43.747 | 28.763 | 53.315 | 0.00 | 0.00 |
| ATOM | 7948 | CG   | ARG | X | 521 | 45.661 | 28.089 | 52.715 | 0.00 | 0.00 |
| ATOM | 7949 | HG2  | ARG | X | 521 | 45.751 | 29.021 | 52.158 | 0.00 | 0.00 |
| ATOM | 7950 | HG3  | ARG | X | 521 | 46.113 | 28.283 | 53.688 | 0.00 | 0.00 |
| ATOM | 7951 | CD   | ARG | X | 521 | 46.328 | 26.961 | 51.978 | 0.00 | 0.00 |
| ATOM | 7952 | HD2  | ARG | X | 521 | 46.315 | 26.138 | 52.693 | 0.00 | 0.00 |
| ATOM | 7953 | HD3  | ARG | X | 521 | 45.662 | 26.651 | 51.173 | 0.00 | 0.00 |
| ATOM | 7954 | NE   | ARG | X | 521 | 47.710 | 27.306 | 51.678 | 0.00 | 0.00 |
| ATOM | 7955 | HE   | ARG | X | 521 | 47.925 | 28.263 | 51.922 | 0.00 | 0.00 |
| ATOM | 7956 | CZ   | ARG | X | 521 | 48.773 | 26.536 | 51.597 | 0.00 | 0.00 |
| ATOM | 7957 | NH1  | ARG | X | 521 | 48.660 | 25.184 | 51.574 | 0.00 | 0.00 |
| ATOM | 7958 | HH11 | ARG | X | 521 | 47.764 | 24.773 | 51.793 | 0.00 | 0.00 |
| ATOM | 7959 | HH12 | ARG | X | 521 | 49.401 | 24.498 | 51.591 | 0.00 | 0.00 |
| ATOM | 7960 | NH2  | ARG | X | 521 | 49.965 | 27.135 | 51.654 | 0.00 | 0.00 |
| ATOM | 7961 | HH21 | ARG | X | 521 | 50.012 | 28.115 | 51.896 | 0.00 | 0.00 |
| ATOM | 7962 | HH22 | ARG | X | 521 | 50.820 | 26.599 | 51.686 | 0.00 | 0.00 |
| ATOM | 7963 | C    | ARG | X | 521 | 43.832 | 26.746 | 55.243 | 0.00 | 0.00 |
| ATOM | 7964 | O    | ARG | X | 521 | 44.844 | 27.285 | 55.686 | 0.00 | 0.00 |
| ATOM | 7965 | N    | ALA | X | 522 | 42.794 | 26.466 | 55.967 | 0.00 | 0.00 |
| ATOM | 7966 | H    | ALA | X | 522 | 41.917 | 26.199 | 55.544 | 0.00 | 0.00 |
| ATOM | 7967 | CA   | ALA | X | 522 | 42.695 | 26.705 | 57.409 | 0.00 | 0.00 |
| ATOM | 7968 | HA   | ALA | X | 522 | 42.865 | 27.749 | 57.670 | 0.00 | 0.00 |
| ATOM | 7969 | CB   | ALA | X | 522 | 41.233 | 26.371 | 57.959 | 0.00 | 0.00 |
| ATOM | 7970 | HB1  | ALA | X | 522 | 41.284 | 26.598 | 59.024 | 0.00 | 0.00 |
| ATOM | 7971 | HB2  | ALA | X | 522 | 40.954 | 25.338 | 57.750 | 0.00 | 0.00 |
| ATOM | 7972 | HB3  | ALA | X | 522 | 40.502 | 26.967 | 57.411 | 0.00 | 0.00 |
| ATOM | 7973 | C    | ALA | X | 522 | 43.756 | 26.036 | 58.339 | 0.00 | 0.00 |
| ATOM | 7974 | O    | ALA | X | 522 | 43.822 | 26.287 | 59.571 | 0.00 | 0.00 |
| ATOM | 7975 | N    | GLN | X | 523 | 44.564 | 25.136 | 57.790 | 0.00 | 0.00 |
| ATOM | 7976 | H    | GLN | X | 523 | 44.443 | 24.916 | 56.812 | 0.00 | 0.00 |
| ATOM | 7977 | CA   | GLN | X | 523 | 45.732 | 24.546 | 58.495 | 0.00 | 0.00 |
| ATOM | 7978 | HA   | GLN | X | 523 | 45.675 | 24.622 | 59.581 | 0.00 | 0.00 |
| ATOM | 7979 | CB   | GLN | X | 523 | 45.960 | 23.071 | 58.085 | 0.00 | 0.00 |
| ATOM | 7980 | HB2  | GLN | X | 523 | 46.189 | 22.963 | 57.024 | 0.00 | 0.00 |
| ATOM | 7981 | HB3  | GLN | X | 523 | 46.851 | 22.721 | 58.606 | 0.00 | 0.00 |
| ATOM | 7982 | CG   | GLN | X | 523 | 44.854 | 22.110 | 58.488 | 0.00 | 0.00 |
| ATOM | 7983 | HG2  | GLN | X | 523 | 44.684 | 22.392 | 59.527 | 0.00 | 0.00 |
| ATOM | 7984 | HG3  | GLN | X | 523 | 43.881 | 22.225 | 58.009 | 0.00 | 0.00 |
| ATOM | 7985 | CD   | GLN | X | 523 | 45.301 | 20.690 | 58.467 | 0.00 | 0.00 |
| ATOM | 7986 | OE1  | GLN | X | 523 | 45.969 | 20.244 | 57.583 | 0.00 | 0.00 |
| ATOM | 7987 | NE2  | GLN | X | 523 | 45.047 | 19.928 | 59.506 | 0.00 | 0.00 |
| ATOM | 7988 | HE21 | GLN | X | 523 | 45.183 | 18.929 | 59.439 | 0.00 | 0.00 |
| ATOM | 7989 | HE22 | GLN | X | 523 | 44.451 | 20.245 | 60.257 | 0.00 | 0.00 |
| ATOM | 7990 | C    | GLN | X | 523 | 47.026 | 25.354 | 58.174 | 0.00 | 0.00 |
| ATOM | 7991 | O    | GLN | X | 523 | 47.833 | 25.548 | 59.090 | 0.00 | 0.00 |
| ATOM | 7992 | N    | ALA | X | 524 | 47.176 | 25.836 | 56.926 | 0.00 | 0.00 |
| ATOM | 7993 | H    | ALA | X | 524 | 46.523 | 25.577 | 56.201 | 0.00 | 0.00 |
| ATOM | 7994 | CA   | ALA | X | 524 | 48.308 | 26.741 | 56.524 | 0.00 | 0.00 |
| ATOM | 7995 | HA   | ALA | X | 524 | 49.287 | 26.456 | 56.909 | 0.00 | 0.00 |
| ATOM | 7996 | CB   | ALA | X | 524 | 48.492 | 26.834 | 55.045 | 0.00 | 0.00 |
| ATOM | 7997 | HB1  | ALA | X | 524 | 48.994 | 25.956 | 54.638 | 0.00 | 0.00 |
| ATOM | 7998 | HB2  | ALA | X | 524 | 49.044 | 27.702 | 54.684 | 0.00 | 0.00 |
| ATOM | 7999 | HB3  | ALA | X | 524 | 47.467 | 26.863 | 54.675 | 0.00 | 0.00 |
| ATOM | 8000 | C    | ALA | X | 524 | 48.058 | 28.079 | 57.172 | 0.00 | 0.00 |
| ATOM | 8001 | O    | ALA | X | 524 | 49.032 | 28.649 | 57.634 | 0.00 | 0.00 |
| ATOM | 8002 | N    | CYX | X | 525 | 46.810 | 28.559 | 57.154 | 0.00 | 0.00 |
| ATOM | 8003 | H    | CYX | X | 525 | 46.017 | 28.104 | 56.725 | 0.00 | 0.00 |
| ATOM | 8004 | CA   | CYX | X | 525 | 46.428 | 29.924 | 57.710 | 0.00 | 0.00 |

|      |      |     |     |   |     |        |        |        |      |      |
|------|------|-----|-----|---|-----|--------|--------|--------|------|------|
| ATOM | 8005 | HA  | CYX | X | 525 | 47.196 | 30.619 | 57.372 | 0.00 | 0.00 |
| ATOM | 8006 | CB  | CYX | X | 525 | 45.049 | 30.452 | 57.240 | 0.00 | 0.00 |
| ATOM | 8007 | HB2 | CYX | X | 525 | 44.249 | 29.884 | 57.716 | 0.00 | 0.00 |
| ATOM | 8008 | HB3 | CYX | X | 525 | 44.945 | 31.509 | 57.486 | 0.00 | 0.00 |
| ATOM | 8009 | SG  | CYX | X | 525 | 44.988 | 30.253 | 55.496 | 0.00 | 0.00 |
| ATOM | 8010 | C   | CYX | X | 525 | 46.477 | 29.940 | 59.210 | 0.00 | 0.00 |
| ATOM | 8011 | O   | CYX | X | 525 | 46.566 | 31.059 | 59.758 | 0.00 | 0.00 |
| ATOM | 8012 | N   | ALA | X | 526 | 46.465 | 28.742 | 59.838 | 0.00 | 0.00 |
| ATOM | 8013 | H   | ALA | X | 526 | 46.380 | 27.938 | 59.233 | 0.00 | 0.00 |
| ATOM | 8014 | CA  | ALA | X | 526 | 46.697 | 28.621 | 61.256 | 0.00 | 0.00 |
| ATOM | 8015 | HA  | ALA | X | 526 | 45.802 | 28.954 | 61.781 | 0.00 | 0.00 |
| ATOM | 8016 | CB  | ALA | X | 526 | 46.846 | 27.115 | 61.535 | 0.00 | 0.00 |
| ATOM | 8017 | HB1 | ALA | X | 526 | 46.146 | 26.502 | 60.967 | 0.00 | 0.00 |
| ATOM | 8018 | HB2 | ALA | X | 526 | 46.589 | 27.029 | 62.591 | 0.00 | 0.00 |
| ATOM | 8019 | HB3 | ALA | X | 526 | 47.873 | 26.790 | 61.369 | 0.00 | 0.00 |
| ATOM | 8020 | C   | ALA | X | 526 | 47.947 | 29.394 | 61.637 | 0.00 | 0.00 |
| ATOM | 8021 | O   | ALA | X | 526 | 47.850 | 30.031 | 62.701 | 0.00 | 0.00 |
| ATOM | 8022 | N   | PHE | X | 527 | 49.020 | 29.326 | 60.927 | 0.00 | 0.00 |
| ATOM | 8023 | H   | PHE | X | 527 | 48.965 | 28.788 | 60.073 | 0.00 | 0.00 |
| ATOM | 8024 | CA  | PHE | X | 527 | 50.234 | 30.152 | 61.322 | 0.00 | 0.00 |
| ATOM | 8025 | HA  | PHE | X | 527 | 50.353 | 29.986 | 62.392 | 0.00 | 0.00 |
| ATOM | 8026 | CB  | PHE | X | 527 | 51.436 | 29.479 | 60.520 | 0.00 | 0.00 |
| ATOM | 8027 | HB2 | PHE | X | 527 | 51.436 | 28.441 | 60.853 | 0.00 | 0.00 |
| ATOM | 8028 | HB3 | PHE | X | 527 | 51.215 | 29.371 | 59.458 | 0.00 | 0.00 |
| ATOM | 8029 | CG  | PHE | X | 527 | 52.739 | 30.090 | 60.758 | 0.00 | 0.00 |
| ATOM | 8030 | CD1 | PHE | X | 527 | 53.484 | 29.675 | 61.880 | 0.00 | 0.00 |
| ATOM | 8031 | HD1 | PHE | X | 527 | 53.132 | 28.817 | 62.433 | 0.00 | 0.00 |
| ATOM | 8032 | CE1 | PHE | X | 527 | 54.723 | 30.226 | 62.186 | 0.00 | 0.00 |
| ATOM | 8033 | HE1 | PHE | X | 527 | 55.239 | 29.892 | 63.074 | 0.00 | 0.00 |
| ATOM | 8034 | CZ  | PHE | X | 527 | 55.266 | 31.175 | 61.325 | 0.00 | 0.00 |
| ATOM | 8035 | HZ  | PHE | X | 527 | 56.167 | 31.692 | 61.622 | 0.00 | 0.00 |
| ATOM | 8036 | CE2 | PHE | X | 527 | 54.529 | 31.613 | 60.204 | 0.00 | 0.00 |
| ATOM | 8037 | HE2 | PHE | X | 527 | 54.914 | 32.415 | 59.592 | 0.00 | 0.00 |
| ATOM | 8038 | CD2 | PHE | X | 527 | 53.239 | 31.059 | 59.916 | 0.00 | 0.00 |
| ATOM | 8039 | HD2 | PHE | X | 527 | 52.670 | 31.497 | 59.110 | 0.00 | 0.00 |
| ATOM | 8040 | C   | PHE | X | 527 | 50.080 | 31.654 | 61.119 | 0.00 | 0.00 |
| ATOM | 8041 | O   | PHE | X | 527 | 50.270 | 32.460 | 62.058 | 0.00 | 0.00 |
| ATOM | 8042 | N   | TRP | X | 528 | 49.761 | 32.114 | 59.904 | 0.00 | 0.00 |
| ATOM | 8043 | H   | TRP | X | 528 | 49.994 | 31.432 | 59.196 | 0.00 | 0.00 |
| ATOM | 8044 | CA  | TRP | X | 528 | 49.679 | 33.487 | 59.450 | 0.00 | 0.00 |
| ATOM | 8045 | HA  | TRP | X | 528 | 50.639 | 33.965 | 59.647 | 0.00 | 0.00 |
| ATOM | 8046 | CB  | TRP | X | 528 | 49.291 | 33.506 | 57.991 | 0.00 | 0.00 |
| ATOM | 8047 | HB2 | TRP | X | 528 | 48.311 | 33.054 | 57.835 | 0.00 | 0.00 |
| ATOM | 8048 | HB3 | TRP | X | 528 | 49.095 | 34.545 | 57.728 | 0.00 | 0.00 |
| ATOM | 8049 | CG  | TRP | X | 528 | 50.382 | 33.006 | 56.994 | 0.00 | 0.00 |
| ATOM | 8050 | CD1 | TRP | X | 528 | 50.198 | 31.928 | 56.166 | 0.00 | 0.00 |
| ATOM | 8051 | HD1 | TRP | X | 528 | 49.316 | 31.308 | 56.099 | 0.00 | 0.00 |
| ATOM | 8052 | NE1 | TRP | X | 528 | 51.259 | 31.824 | 55.355 | 0.00 | 0.00 |
| ATOM | 8053 | HE1 | TRP | X | 528 | 51.139 | 31.195 | 54.574 | 0.00 | 0.00 |
| ATOM | 8054 | CE2 | TRP | X | 528 | 52.323 | 32.653 | 55.750 | 0.00 | 0.00 |
| ATOM | 8055 | CZ2 | TRP | X | 528 | 53.602 | 32.797 | 55.298 | 0.00 | 0.00 |
| ATOM | 8056 | HZ2 | TRP | X | 528 | 53.920 | 32.265 | 54.414 | 0.00 | 0.00 |
| ATOM | 8057 | CH2 | TRP | X | 528 | 54.483 | 33.643 | 55.961 | 0.00 | 0.00 |
| ATOM | 8058 | HH2 | TRP | X | 528 | 55.481 | 33.776 | 55.571 | 0.00 | 0.00 |
| ATOM | 8059 | CZ3 | TRP | X | 528 | 54.046 | 34.253 | 57.157 | 0.00 | 0.00 |
| ATOM | 8060 | HZ3 | TRP | X | 528 | 54.725 | 34.829 | 57.767 | 0.00 | 0.00 |
| ATOM | 8061 | CE3 | TRP | X | 528 | 52.662 | 34.146 | 57.638 | 0.00 | 0.00 |
| ATOM | 8062 | HE3 | TRP | X | 528 | 52.280 | 34.548 | 58.565 | 0.00 | 0.00 |
| ATOM | 8063 | CD2 | TRP | X | 528 | 51.809 | 33.359 | 56.845 | 0.00 | 0.00 |
| ATOM | 8064 | C   | TRP | X | 528 | 48.734 | 34.336 | 60.279 | 0.00 | 0.00 |
| ATOM | 8065 | O   | TRP | X | 528 | 48.982 | 35.534 | 60.517 | 0.00 | 0.00 |
| ATOM | 8066 | N   | ASN | X | 529 | 47.634 | 33.761 | 60.743 | 0.00 | 0.00 |
| ATOM | 8067 | H   | ASN | X | 529 | 47.506 | 32.791 | 60.492 | 0.00 | 0.00 |
| ATOM | 8068 | CA  | ASN | X | 529 | 46.512 | 34.405 | 61.461 | 0.00 | 0.00 |
| ATOM | 8069 | HA  | ASN | X | 529 | 46.324 | 35.418 | 61.108 | 0.00 | 0.00 |
| ATOM | 8070 | CB  | ASN | X | 529 | 45.230 | 33.561 | 61.266 | 0.00 | 0.00 |
| ATOM | 8071 | HB2 | ASN | X | 529 | 45.302 | 32.538 | 61.634 | 0.00 | 0.00 |

|      |      |      |     |   |     |        |        |        |      |      |
|------|------|------|-----|---|-----|--------|--------|--------|------|------|
| ATOM | 8072 | HB3  | ASN | X | 529 | 44.445 | 34.049 | 61.844 | 0.00 | 0.00 |
| ATOM | 8073 | CG   | ASN | X | 529 | 44.677 | 33.581 | 59.843 | 0.00 | 0.00 |
| ATOM | 8074 | OD1  | ASN | X | 529 | 45.282 | 34.169 | 58.929 | 0.00 | 0.00 |
| ATOM | 8075 | ND2  | ASN | X | 529 | 43.472 | 33.110 | 59.554 | 0.00 | 0.00 |
| ATOM | 8076 | HD21 | ASN | X | 529 | 43.208 | 33.179 | 58.582 | 0.00 | 0.00 |
| ATOM | 8077 | HD22 | ASN | X | 529 | 42.844 | 32.736 | 60.252 | 0.00 | 0.00 |
| ATOM | 8078 | C    | ASN | X | 529 | 46.729 | 34.587 | 62.966 | 0.00 | 0.00 |
| ATOM | 8079 | O    | ASN | X | 529 | 46.026 | 35.319 | 63.665 | 0.00 | 0.00 |
| ATOM | 8080 | N    | ARG | X | 530 | 47.742 | 33.897 | 63.550 | 0.00 | 0.00 |
| ATOM | 8081 | H    | ARG | X | 530 | 48.335 | 33.307 | 62.983 | 0.00 | 0.00 |
| ATOM | 8082 | CA   | ARG | X | 530 | 48.003 | 33.687 | 64.992 | 0.00 | 0.00 |
| ATOM | 8083 | HA   | ARG | X | 530 | 47.422 | 34.394 | 65.584 | 0.00 | 0.00 |
| ATOM | 8084 | CB   | ARG | X | 530 | 47.498 | 32.269 | 65.452 | 0.00 | 0.00 |
| ATOM | 8085 | HB2  | ARG | X | 530 | 48.149 | 31.465 | 65.109 | 0.00 | 0.00 |
| ATOM | 8086 | HB3  | ARG | X | 530 | 47.566 | 32.222 | 66.538 | 0.00 | 0.00 |
| ATOM | 8087 | CG   | ARG | X | 530 | 46.016 | 31.869 | 65.159 | 0.00 | 0.00 |
| ATOM | 8088 | HG2  | ARG | X | 530 | 45.407 | 32.659 | 65.598 | 0.00 | 0.00 |
| ATOM | 8089 | HG3  | ARG | X | 530 | 45.791 | 31.839 | 64.093 | 0.00 | 0.00 |
| ATOM | 8090 | CD   | ARG | X | 530 | 45.539 | 30.548 | 65.833 | 0.00 | 0.00 |
| ATOM | 8091 | HD2  | ARG | X | 530 | 45.578 | 30.673 | 66.915 | 0.00 | 0.00 |
| ATOM | 8092 | HD3  | ARG | X | 530 | 44.493 | 30.463 | 65.537 | 0.00 | 0.00 |
| ATOM | 8093 | NE   | ARG | X | 530 | 46.394 | 29.428 | 65.430 | 0.00 | 0.00 |
| ATOM | 8094 | HE   | ARG | X | 530 | 47.162 | 29.598 | 64.796 | 0.00 | 0.00 |
| ATOM | 8095 | CZ   | ARG | X | 530 | 46.289 | 28.154 | 65.764 | 0.00 | 0.00 |
| ATOM | 8096 | NH1  | ARG | X | 530 | 45.377 | 27.647 | 66.552 | 0.00 | 0.00 |
| ATOM | 8097 | HH11 | ARG | X | 530 | 44.630 | 28.252 | 66.862 | 0.00 | 0.00 |
| ATOM | 8098 | HH12 | ARG | X | 530 | 45.104 | 26.686 | 66.401 | 0.00 | 0.00 |
| ATOM | 8099 | NH2  | ARG | X | 530 | 47.197 | 27.259 | 65.372 | 0.00 | 0.00 |
| ATOM | 8100 | HH21 | ARG | X | 530 | 48.054 | 27.400 | 64.857 | 0.00 | 0.00 |
| ATOM | 8101 | HH22 | ARG | X | 530 | 46.905 | 26.304 | 65.525 | 0.00 | 0.00 |
| ATOM | 8102 | C    | ARG | X | 530 | 49.476 | 33.862 | 65.418 | 0.00 | 0.00 |
| ATOM | 8103 | O    | ARG | X | 530 | 49.688 | 34.631 | 66.354 | 0.00 | 0.00 |
| ATOM | 8104 | N    | PHE | X | 531 | 50.470 | 33.168 | 64.843 | 0.00 | 0.00 |
| ATOM | 8105 | H    | PHE | X | 531 | 50.298 | 32.551 | 64.062 | 0.00 | 0.00 |
| ATOM | 8106 | CA   | PHE | X | 531 | 51.838 | 33.205 | 65.350 | 0.00 | 0.00 |
| ATOM | 8107 | HA   | PHE | X | 531 | 51.834 | 33.314 | 66.435 | 0.00 | 0.00 |
| ATOM | 8108 | CB   | PHE | X | 531 | 52.505 | 31.864 | 64.947 | 0.00 | 0.00 |
| ATOM | 8109 | HB2  | PHE | X | 531 | 51.677 | 31.188 | 65.161 | 0.00 | 0.00 |
| ATOM | 8110 | HB3  | PHE | X | 531 | 52.741 | 31.860 | 63.882 | 0.00 | 0.00 |
| ATOM | 8111 | CG   | PHE | X | 531 | 53.696 | 31.525 | 65.657 | 0.00 | 0.00 |
| ATOM | 8112 | CD1  | PHE | X | 531 | 54.926 | 32.005 | 65.075 | 0.00 | 0.00 |
| ATOM | 8113 | HD1  | PHE | X | 531 | 54.879 | 32.540 | 64.138 | 0.00 | 0.00 |
| ATOM | 8114 | CE1  | PHE | X | 531 | 56.072 | 31.824 | 65.837 | 0.00 | 0.00 |
| ATOM | 8115 | HE1  | PHE | X | 531 | 57.029 | 32.162 | 65.468 | 0.00 | 0.00 |
| ATOM | 8116 | CZ   | PHE | X | 531 | 56.053 | 31.132 | 67.093 | 0.00 | 0.00 |
| ATOM | 8117 | HZ   | PHE | X | 531 | 56.959 | 31.205 | 67.677 | 0.00 | 0.00 |
| ATOM | 8118 | CE2  | PHE | X | 531 | 54.822 | 30.773 | 67.635 | 0.00 | 0.00 |
| ATOM | 8119 | HE2  | PHE | X | 531 | 54.723 | 30.369 | 68.631 | 0.00 | 0.00 |
| ATOM | 8120 | CD2  | PHE | X | 531 | 53.631 | 30.912 | 66.930 | 0.00 | 0.00 |
| ATOM | 8121 | HD2  | PHE | X | 531 | 52.653 | 30.650 | 67.306 | 0.00 | 0.00 |
| ATOM | 8122 | C    | PHE | X | 531 | 52.605 | 34.390 | 64.810 | 0.00 | 0.00 |
| ATOM | 8123 | O    | PHE | X | 531 | 53.452 | 34.972 | 65.521 | 0.00 | 0.00 |
| ATOM | 8124 | N    | LEU | X | 532 | 52.352 | 34.874 | 63.543 | 0.00 | 0.00 |
| ATOM | 8125 | H    | LEU | X | 532 | 51.656 | 34.359 | 63.023 | 0.00 | 0.00 |
| ATOM | 8126 | CA   | LEU | X | 532 | 52.979 | 36.051 | 62.889 | 0.00 | 0.00 |
| ATOM | 8127 | HA   | LEU | X | 532 | 54.057 | 35.886 | 62.886 | 0.00 | 0.00 |
| ATOM | 8128 | CB   | LEU | X | 532 | 52.483 | 36.091 | 61.488 | 0.00 | 0.00 |
| ATOM | 8129 | HB2  | LEU | X | 532 | 52.263 | 35.085 | 61.131 | 0.00 | 0.00 |
| ATOM | 8130 | HB3  | LEU | X | 532 | 51.628 | 36.755 | 61.362 | 0.00 | 0.00 |
| ATOM | 8131 | CG   | LEU | X | 532 | 53.505 | 36.667 | 60.471 | 0.00 | 0.00 |
| ATOM | 8132 | HG   | LEU | X | 532 | 53.054 | 36.470 | 59.498 | 0.00 | 0.00 |
| ATOM | 8133 | CD1  | LEU | X | 532 | 53.476 | 38.209 | 60.588 | 0.00 | 0.00 |
| ATOM | 8134 | HD11 | LEU | X | 532 | 54.167 | 38.515 | 59.803 | 0.00 | 0.00 |
| ATOM | 8135 | HD12 | LEU | X | 532 | 53.824 | 38.733 | 61.478 | 0.00 | 0.00 |
| ATOM | 8136 | HD13 | LEU | X | 532 | 52.476 | 38.637 | 60.531 | 0.00 | 0.00 |
| ATOM | 8137 | CD2  | LEU | X | 532 | 54.947 | 36.254 | 60.523 | 0.00 | 0.00 |
| ATOM | 8138 | HD21 | LEU | X | 532 | 55.051 | 35.169 | 60.551 | 0.00 | 0.00 |

|      |      |      |     |   |     |        |        |        |      |      |
|------|------|------|-----|---|-----|--------|--------|--------|------|------|
| ATOM | 8139 | HD22 | LEU | X | 532 | 55.524 | 36.437 | 59.616 | 0.00 | 0.00 |
| ATOM | 8140 | HD23 | LEU | X | 532 | 55.453 | 36.656 | 61.400 | 0.00 | 0.00 |
| ATOM | 8141 | C    | LEU | X | 532 | 52.806 | 37.335 | 63.762 | 0.00 | 0.00 |
| ATOM | 8142 | O    | LEU | X | 532 | 53.782 | 38.010 | 64.023 | 0.00 | 0.00 |
| ATOM | 8143 | N    | PRO | X | 533 | 51.607 | 37.817 | 64.184 | 0.00 | 0.00 |
| ATOM | 8144 | CD   | PRO | X | 533 | 50.349 | 37.090 | 63.962 | 0.00 | 0.00 |
| ATOM | 8145 | HD2  | PRO | X | 533 | 50.333 | 36.176 | 64.555 | 0.00 | 0.00 |
| ATOM | 8146 | HD3  | PRO | X | 533 | 50.207 | 36.988 | 62.886 | 0.00 | 0.00 |
| ATOM | 8147 | CG   | PRO | X | 533 | 49.219 | 38.002 | 64.365 | 0.00 | 0.00 |
| ATOM | 8148 | HG2  | PRO | X | 533 | 48.333 | 37.443 | 64.668 | 0.00 | 0.00 |
| ATOM | 8149 | HG3  | PRO | X | 533 | 48.883 | 38.546 | 63.483 | 0.00 | 0.00 |
| ATOM | 8150 | CB   | PRO | X | 533 | 49.881 | 38.987 | 65.428 | 0.00 | 0.00 |
| ATOM | 8151 | HB2  | PRO | X | 533 | 49.787 | 38.672 | 66.467 | 0.00 | 0.00 |
| ATOM | 8152 | HB3  | PRO | X | 533 | 49.424 | 39.976 | 65.380 | 0.00 | 0.00 |
| ATOM | 8153 | CA   | PRO | X | 533 | 51.368 | 39.051 | 64.984 | 0.00 | 0.00 |
| ATOM | 8154 | HA   | PRO | X | 533 | 51.624 | 39.951 | 64.426 | 0.00 | 0.00 |
| ATOM | 8155 | C    | PRO | X | 533 | 52.357 | 39.049 | 66.213 | 0.00 | 0.00 |
| ATOM | 8156 | O    | PRO | X | 533 | 52.977 | 39.992 | 66.722 | 0.00 | 0.00 |
| ATOM | 8157 | N    | LYS | X | 534 | 52.454 | 37.830 | 66.793 | 0.00 | 0.00 |
| ATOM | 8158 | H    | LYS | X | 534 | 51.894 | 37.072 | 66.429 | 0.00 | 0.00 |
| ATOM | 8159 | CA   | LYS | X | 534 | 53.266 | 37.563 | 67.985 | 0.00 | 0.00 |
| ATOM | 8160 | HA   | LYS | X | 534 | 53.171 | 38.408 | 68.667 | 0.00 | 0.00 |
| ATOM | 8161 | CB   | LYS | X | 534 | 52.560 | 36.341 | 68.682 | 0.00 | 0.00 |
| ATOM | 8162 | HB2  | LYS | X | 534 | 52.565 | 35.443 | 68.065 | 0.00 | 0.00 |
| ATOM | 8163 | HB3  | LYS | X | 534 | 53.125 | 36.012 | 69.554 | 0.00 | 0.00 |
| ATOM | 8164 | CG   | LYS | X | 534 | 51.145 | 36.645 | 69.115 | 0.00 | 0.00 |
| ATOM | 8165 | HG2  | LYS | X | 534 | 51.248 | 37.543 | 69.724 | 0.00 | 0.00 |
| ATOM | 8166 | HG3  | LYS | X | 534 | 50.484 | 36.649 | 68.248 | 0.00 | 0.00 |
| ATOM | 8167 | CD   | LYS | X | 534 | 50.670 | 35.523 | 70.123 | 0.00 | 0.00 |
| ATOM | 8168 | HD2  | LYS | X | 534 | 51.205 | 35.596 | 71.071 | 0.00 | 0.00 |
| ATOM | 8169 | HD3  | LYS | X | 534 | 49.609 | 35.654 | 70.336 | 0.00 | 0.00 |
| ATOM | 8170 | CE   | LYS | X | 534 | 50.728 | 34.183 | 69.511 | 0.00 | 0.00 |
| ATOM | 8171 | HE2  | LYS | X | 534 | 50.123 | 34.125 | 68.606 | 0.00 | 0.00 |
| ATOM | 8172 | HE3  | LYS | X | 534 | 51.766 | 34.002 | 69.232 | 0.00 | 0.00 |
| ATOM | 8173 | NZ   | LYS | X | 534 | 50.312 | 33.138 | 70.470 | 0.00 | 0.00 |
| ATOM | 8174 | HZ1  | LYS | X | 534 | 50.865 | 33.124 | 71.315 | 0.00 | 0.00 |
| ATOM | 8175 | HZ2  | LYS | X | 534 | 49.354 | 33.299 | 70.746 | 0.00 | 0.00 |
| ATOM | 8176 | HZ3  | LYS | X | 534 | 50.436 | 32.246 | 70.013 | 0.00 | 0.00 |
| ATOM | 8177 | C    | LYS | X | 534 | 54.816 | 37.409 | 67.703 | 0.00 | 0.00 |
| ATOM | 8178 | O    | LYS | X | 534 | 55.575 | 37.185 | 68.666 | 0.00 | 0.00 |
| ATOM | 8179 | N    | LEU | X | 535 | 55.211 | 37.708 | 66.474 | 0.00 | 0.00 |
| ATOM | 8180 | H    | LEU | X | 535 | 54.479 | 37.953 | 65.823 | 0.00 | 0.00 |
| ATOM | 8181 | CA   | LEU | X | 535 | 56.561 | 38.023 | 66.114 | 0.00 | 0.00 |
| ATOM | 8182 | HA   | LEU | X | 535 | 57.245 | 37.974 | 66.961 | 0.00 | 0.00 |
| ATOM | 8183 | CB   | LEU | X | 535 | 57.033 | 37.086 | 65.021 | 0.00 | 0.00 |
| ATOM | 8184 | HB2  | LEU | X | 535 | 56.402 | 37.235 | 64.145 | 0.00 | 0.00 |
| ATOM | 8185 | HB3  | LEU | X | 535 | 58.071 | 37.331 | 64.798 | 0.00 | 0.00 |
| ATOM | 8186 | CG   | LEU | X | 535 | 57.087 | 35.549 | 65.336 | 0.00 | 0.00 |
| ATOM | 8187 | HG   | LEU | X | 535 | 56.122 | 35.267 | 65.757 | 0.00 | 0.00 |
| ATOM | 8188 | CD1  | LEU | X | 535 | 57.348 | 34.705 | 64.101 | 0.00 | 0.00 |
| ATOM | 8189 | HD11 | LEU | X | 535 | 57.868 | 33.799 | 64.414 | 0.00 | 0.00 |
| ATOM | 8190 | HD12 | LEU | X | 535 | 58.061 | 35.231 | 63.467 | 0.00 | 0.00 |
| ATOM | 8191 | HD13 | LEU | X | 535 | 56.451 | 34.539 | 63.504 | 0.00 | 0.00 |
| ATOM | 8192 | CD2  | LEU | X | 535 | 58.118 | 35.190 | 66.431 | 0.00 | 0.00 |
| ATOM | 8193 | HD21 | LEU | X | 535 | 57.955 | 35.718 | 67.370 | 0.00 | 0.00 |
| ATOM | 8194 | HD22 | LEU | X | 535 | 57.787 | 34.207 | 66.767 | 0.00 | 0.00 |
| ATOM | 8195 | HD23 | LEU | X | 535 | 59.153 | 35.132 | 66.093 | 0.00 | 0.00 |
| ATOM | 8196 | C    | LEU | X | 535 | 56.703 | 39.456 | 65.557 | 0.00 | 0.00 |
| ATOM | 8197 | O    | LEU | X | 535 | 57.567 | 40.232 | 65.854 | 0.00 | 0.00 |
| ATOM | 8198 | N    | LEU | X | 536 | 55.733 | 39.897 | 64.810 | 0.00 | 0.00 |
| ATOM | 8199 | H    | LEU | X | 536 | 55.136 | 39.144 | 64.501 | 0.00 | 0.00 |
| ATOM | 8200 | CA   | LEU | X | 536 | 55.762 | 41.175 | 64.032 | 0.00 | 0.00 |
| ATOM | 8201 | HA   | LEU | X | 536 | 56.755 | 41.226 | 63.584 | 0.00 | 0.00 |
| ATOM | 8202 | CB   | LEU | X | 536 | 54.569 | 41.235 | 63.022 | 0.00 | 0.00 |
| ATOM | 8203 | HB2  | LEU | X | 536 | 54.640 | 40.251 | 62.559 | 0.00 | 0.00 |
| ATOM | 8204 | HB3  | LEU | X | 536 | 53.652 | 41.378 | 63.596 | 0.00 | 0.00 |
| ATOM | 8205 | CG   | LEU | X | 536 | 54.642 | 42.360 | 61.943 | 0.00 | 0.00 |

|      |      |      |     |   |     |        |        |        |      |      |
|------|------|------|-----|---|-----|--------|--------|--------|------|------|
| ATOM | 8206 | HG   | LEU | X | 536 | 55.703 | 42.540 | 61.769 | 0.00 | 0.00 |
| ATOM | 8207 | CD1  | LEU | X | 536 | 53.896 | 41.871 | 60.664 | 0.00 | 0.00 |
| ATOM | 8208 | HD11 | LEU | X | 536 | 53.990 | 42.657 | 59.914 | 0.00 | 0.00 |
| ATOM | 8209 | HD12 | LEU | X | 536 | 52.827 | 41.707 | 60.801 | 0.00 | 0.00 |
| ATOM | 8210 | HD13 | LEU | X | 536 | 54.346 | 40.939 | 60.322 | 0.00 | 0.00 |
| ATOM | 8211 | CD2  | LEU | X | 536 | 54.033 | 43.716 | 62.309 | 0.00 | 0.00 |
| ATOM | 8212 | HD21 | LEU | X | 536 | 53.099 | 43.544 | 62.843 | 0.00 | 0.00 |
| ATOM | 8213 | HD22 | LEU | X | 536 | 54.718 | 44.243 | 62.974 | 0.00 | 0.00 |
| ATOM | 8214 | HD23 | LEU | X | 536 | 54.023 | 44.363 | 61.431 | 0.00 | 0.00 |
| ATOM | 8215 | C    | LEU | X | 536 | 55.729 | 42.348 | 65.043 | 0.00 | 0.00 |
| ATOM | 8216 | O    | LEU | X | 536 | 56.412 | 43.354 | 64.857 | 0.00 | 0.00 |
| ATOM | 8217 | N    | SER | X | 537 | 55.108 | 42.239 | 66.185 | 0.00 | 0.00 |
| ATOM | 8218 | H    | SER | X | 537 | 54.541 | 41.412 | 66.308 | 0.00 | 0.00 |
| ATOM | 8219 | CA   | SER | X | 537 | 55.032 | 43.332 | 67.136 | 0.00 | 0.00 |
| ATOM | 8220 | HA   | SER | X | 537 | 54.718 | 44.255 | 66.649 | 0.00 | 0.00 |
| ATOM | 8221 | CB   | SER | X | 537 | 53.872 | 43.067 | 68.093 | 0.00 | 0.00 |
| ATOM | 8222 | HB2  | SER | X | 537 | 54.091 | 42.289 | 68.825 | 0.00 | 0.00 |
| ATOM | 8223 | HB3  | SER | X | 537 | 53.596 | 43.887 | 68.756 | 0.00 | 0.00 |
| ATOM | 8224 | OG   | SER | X | 537 | 52.713 | 42.699 | 67.415 | 0.00 | 0.00 |
| ATOM | 8225 | HG   | SER | X | 537 | 52.122 | 42.242 | 68.018 | 0.00 | 0.00 |
| ATOM | 8226 | C    | SER | X | 537 | 56.329 | 43.631 | 67.993 | 0.00 | 0.00 |
| ATOM | 8227 | O    | SER | X | 537 | 56.659 | 44.839 | 68.166 | 0.00 | 0.00 |
| ATOM | 8228 | N    | ALA | X | 538 | 56.928 | 42.541 | 68.468 | 0.00 | 0.00 |
| ATOM | 8229 | H    | ALA | X | 538 | 56.491 | 41.655 | 68.262 | 0.00 | 0.00 |
| ATOM | 8230 | CA   | ALA | X | 538 | 58.106 | 42.566 | 69.367 | 0.00 | 0.00 |
| ATOM | 8231 | HA   | ALA | X | 538 | 58.871 | 43.246 | 68.993 | 0.00 | 0.00 |
| ATOM | 8232 | CB   | ALA | X | 538 | 57.716 | 43.194 | 70.764 | 0.00 | 0.00 |
| ATOM | 8233 | HB1  | ALA | X | 538 | 56.974 | 42.510 | 71.174 | 0.00 | 0.00 |
| ATOM | 8234 | HB2  | ALA | X | 538 | 57.212 | 44.159 | 70.706 | 0.00 | 0.00 |
| ATOM | 8235 | HB3  | ALA | X | 538 | 58.574 | 43.283 | 71.430 | 0.00 | 0.00 |
| ATOM | 8236 | C    | ALA | X | 538 | 58.700 | 41.190 | 69.661 | 0.00 | 0.00 |
| ATOM | 8237 | O    | ALA | X | 538 | 57.948 | 40.215 | 69.831 | 0.00 | 0.00 |
| ATOM | 8238 | N    | THR | X | 539 | 60.039 | 41.108 | 69.700 | 0.00 | 0.00 |
| ATOM | 8239 | H    | THR | X | 539 | 60.549 | 41.977 | 69.632 | 0.00 | 0.00 |
| ATOM | 8240 | CA   | THR | X | 539 | 60.804 | 39.887 | 69.983 | 0.00 | 0.00 |
| ATOM | 8241 | HA   | THR | X | 539 | 60.169 | 39.108 | 70.403 | 0.00 | 0.00 |
| ATOM | 8242 | CB   | THR | X | 539 | 61.268 | 39.258 | 68.668 | 0.00 | 0.00 |
| ATOM | 8243 | HB   | THR | X | 539 | 62.093 | 38.612 | 68.968 | 0.00 | 0.00 |
| ATOM | 8244 | CG2  | THR | X | 539 | 60.218 | 38.496 | 67.862 | 0.00 | 0.00 |
| ATOM | 8245 | HG21 | THR | X | 539 | 59.374 | 39.077 | 67.490 | 0.00 | 0.00 |
| ATOM | 8246 | HG22 | THR | X | 539 | 59.709 | 37.761 | 68.485 | 0.00 | 0.00 |
| ATOM | 8247 | HG23 | THR | X | 539 | 60.623 | 37.870 | 67.067 | 0.00 | 0.00 |
| ATOM | 8248 | OG1  | THR | X | 539 | 61.682 | 40.283 | 67.814 | 0.00 | 0.00 |
| ATOM | 8249 | HG1  | THR | X | 539 | 62.347 | 40.754 | 68.321 | 0.00 | 0.00 |
| ATOM | 8250 | C    | THR | X | 539 | 62.023 | 40.100 | 70.925 | 0.00 | 0.00 |
| ATOM | 8251 | O    | THR | X | 539 | 62.765 | 41.107 | 70.794 | 0.00 | 0.00 |
| ATOM | 8252 | OXT  | THR | X | 539 | 62.230 | 39.220 | 71.779 | 0.00 | 0.00 |

END

#-----  
# 1B41 Production MD Frame 1200  
#-----

|        |        |        |        |       |       |        |        |       |      |      |
|--------|--------|--------|--------|-------|-------|--------|--------|-------|------|------|
| CRYST1 | 82.094 | 82.094 | 82.094 | 90.00 | 90.00 | 90.00  | P 1    | 1     |      |      |
| ATOM   | 1      | N      | ASP    | X     | 1     | 27.260 | 49.539 | 6.042 | 0.00 | 0.00 |
| ATOM   | 2      | H1     | ASP    | X     | 1     | 27.150 | 48.667 | 6.540 | 0.00 | 0.00 |
| ATOM   | 3      | H2     | ASP    | X     | 1     | 27.874 | 49.467 | 5.244 | 0.00 | 0.00 |
| ATOM   | 4      | H3     | ASP    | X     | 1     | 26.355 | 49.816 | 5.689 | 0.00 | 0.00 |
| ATOM   | 5      | CA     | ASP    | X     | 1     | 27.758 | 50.565 | 6.988 | 0.00 | 0.00 |
| ATOM   | 6      | HA     | ASP    | X     | 1     | 28.779 | 50.361 | 7.311 | 0.00 | 0.00 |
| ATOM   | 7      | CB     | ASP    | X     | 1     | 27.936 | 51.936 | 6.339 | 0.00 | 0.00 |
| ATOM   | 8      | HB2    | ASP    | X     | 1     | 28.442 | 51.895 | 5.375 | 0.00 | 0.00 |
| ATOM   | 9      | HB3    | ASP    | X     | 1     | 26.927 | 52.298 | 6.143 | 0.00 | 0.00 |
| ATOM   | 10     | CG     | ASP    | X     | 1     | 28.797 | 52.875 | 7.215 | 0.00 | 0.00 |
| ATOM   | 11     | OD1    | ASP    | X     | 1     | 28.062 | 53.710 | 7.777 | 0.00 | 0.00 |

|      |    |      |     |   |   |        |        |        |      |      |
|------|----|------|-----|---|---|--------|--------|--------|------|------|
| ATOM | 12 | OD2  | ASP | X | 1 | 29.994 | 52.711 | 7.346  | 0.00 | 0.00 |
| ATOM | 13 | C    | ASP | X | 1 | 26.889 | 50.657 | 8.216  | 0.00 | 0.00 |
| ATOM | 14 | O    | ASP | X | 1 | 27.490 | 50.791 | 9.331  | 0.00 | 0.00 |
| ATOM | 15 | N    | ALA | X | 2 | 25.578 | 50.633 | 8.063  | 0.00 | 0.00 |
| ATOM | 16 | H    | ALA | X | 2 | 25.113 | 50.688 | 7.167  | 0.00 | 0.00 |
| ATOM | 17 | CA   | ALA | X | 2 | 24.661 | 50.700 | 9.230  | 0.00 | 0.00 |
| ATOM | 18 | HA   | ALA | X | 2 | 24.624 | 51.659 | 9.746  | 0.00 | 0.00 |
| ATOM | 19 | CB   | ALA | X | 2 | 23.269 | 50.643 | 8.569  | 0.00 | 0.00 |
| ATOM | 20 | HB1  | ALA | X | 2 | 23.057 | 49.685 | 8.094  | 0.00 | 0.00 |
| ATOM | 21 | HB2  | ALA | X | 2 | 23.016 | 51.366 | 7.794  | 0.00 | 0.00 |
| ATOM | 22 | HB3  | ALA | X | 2 | 22.543 | 50.660 | 9.382  | 0.00 | 0.00 |
| ATOM | 23 | C    | ALA | X | 2 | 24.818 | 49.612 | 10.320 | 0.00 | 0.00 |
| ATOM | 24 | O    | ALA | X | 2 | 24.684 | 49.814 | 11.547 | 0.00 | 0.00 |
| ATOM | 25 | N    | GLU | X | 3 | 25.321 | 48.466 | 9.842  | 0.00 | 0.00 |
| ATOM | 26 | H    | GLU | X | 3 | 25.262 | 48.351 | 8.841  | 0.00 | 0.00 |
| ATOM | 27 | CA   | GLU | X | 3 | 25.675 | 47.222 | 10.624 | 0.00 | 0.00 |
| ATOM | 28 | HA   | GLU | X | 3 | 24.824 | 46.765 | 11.129 | 0.00 | 0.00 |
| ATOM | 29 | CB   | GLU | X | 3 | 26.269 | 46.204 | 9.740  | 0.00 | 0.00 |
| ATOM | 30 | HB2  | GLU | X | 3 | 27.138 | 46.594 | 9.211  | 0.00 | 0.00 |
| ATOM | 31 | HB3  | GLU | X | 3 | 26.744 | 45.379 | 10.271 | 0.00 | 0.00 |
| ATOM | 32 | CG   | GLU | X | 3 | 25.350 | 45.518 | 8.703  | 0.00 | 0.00 |
| ATOM | 33 | HG2  | GLU | X | 3 | 25.685 | 44.481 | 8.728  | 0.00 | 0.00 |
| ATOM | 34 | HG3  | GLU | X | 3 | 24.332 | 45.525 | 9.092  | 0.00 | 0.00 |
| ATOM | 35 | CD   | GLU | X | 3 | 25.352 | 46.136 | 7.345  | 0.00 | 0.00 |
| ATOM | 36 | OE1  | GLU | X | 3 | 25.087 | 47.371 | 7.237  | 0.00 | 0.00 |
| ATOM | 37 | OE2  | GLU | X | 3 | 25.723 | 45.510 | 6.369  | 0.00 | 0.00 |
| ATOM | 38 | C    | GLU | X | 3 | 26.531 | 47.540 | 11.802 | 0.00 | 0.00 |
| ATOM | 39 | O    | GLU | X | 3 | 26.313 | 47.046 | 12.895 | 0.00 | 0.00 |
| ATOM | 40 | N    | LEU | X | 4 | 27.321 | 48.594 | 11.618 | 0.00 | 0.00 |
| ATOM | 41 | H    | LEU | X | 4 | 27.355 | 48.968 | 10.680 | 0.00 | 0.00 |
| ATOM | 42 | CA   | LEU | X | 4 | 28.371 | 49.021 | 12.563 | 0.00 | 0.00 |
| ATOM | 43 | HA   | LEU | X | 4 | 28.515 | 48.275 | 13.345 | 0.00 | 0.00 |
| ATOM | 44 | CB   | LEU | X | 4 | 29.686 | 49.154 | 11.713 | 0.00 | 0.00 |
| ATOM | 45 | HB2  | LEU | X | 4 | 29.520 | 49.749 | 10.814 | 0.00 | 0.00 |
| ATOM | 46 | HB3  | LEU | X | 4 | 30.501 | 49.539 | 12.325 | 0.00 | 0.00 |
| ATOM | 47 | CG   | LEU | X | 4 | 30.163 | 47.774 | 11.205 | 0.00 | 0.00 |
| ATOM | 48 | HG   | LEU | X | 4 | 29.408 | 47.317 | 10.566 | 0.00 | 0.00 |
| ATOM | 49 | CD1  | LEU | X | 4 | 31.441 | 47.981 | 10.450 | 0.00 | 0.00 |
| ATOM | 50 | HD11 | LEU | X | 4 | 32.276 | 47.979 | 11.150 | 0.00 | 0.00 |
| ATOM | 51 | HD12 | LEU | X | 4 | 31.437 | 48.870 | 9.818  | 0.00 | 0.00 |
| ATOM | 52 | HD13 | LEU | X | 4 | 31.491 | 47.087 | 9.829  | 0.00 | 0.00 |
| ATOM | 53 | CD2  | LEU | X | 4 | 30.472 | 46.817 | 12.369 | 0.00 | 0.00 |
| ATOM | 54 | HD21 | LEU | X | 4 | 31.202 | 47.079 | 13.135 | 0.00 | 0.00 |
| ATOM | 55 | HD22 | LEU | X | 4 | 29.529 | 46.535 | 12.837 | 0.00 | 0.00 |
| ATOM | 56 | HD23 | LEU | X | 4 | 30.875 | 45.960 | 11.831 | 0.00 | 0.00 |
| ATOM | 57 | C    | LEU | X | 4 | 27.900 | 50.347 | 13.315 | 0.00 | 0.00 |
| ATOM | 58 | O    | LEU | X | 4 | 28.691 | 50.965 | 14.018 | 0.00 | 0.00 |
| ATOM | 59 | N    | LEU | X | 5 | 26.608 | 50.672 | 13.361 | 0.00 | 0.00 |
| ATOM | 60 | H    | LEU | X | 5 | 26.004 | 50.242 | 12.675 | 0.00 | 0.00 |
| ATOM | 61 | CA   | LEU | X | 5 | 26.063 | 51.800 | 14.089 | 0.00 | 0.00 |
| ATOM | 62 | HA   | LEU | X | 5 | 26.862 | 52.355 | 14.582 | 0.00 | 0.00 |
| ATOM | 63 | CB   | LEU | X | 5 | 25.314 | 52.659 | 13.019 | 0.00 | 0.00 |
| ATOM | 64 | HB2  | LEU | X | 5 | 24.697 | 52.059 | 12.350 | 0.00 | 0.00 |
| ATOM | 65 | HB3  | LEU | X | 5 | 24.659 | 53.351 | 13.548 | 0.00 | 0.00 |
| ATOM | 66 | CG   | LEU | X | 5 | 26.127 | 53.551 | 11.989 | 0.00 | 0.00 |
| ATOM | 67 | HG   | LEU | X | 5 | 26.651 | 52.916 | 11.275 | 0.00 | 0.00 |
| ATOM | 68 | CD1  | LEU | X | 5 | 25.119 | 54.558 | 11.352 | 0.00 | 0.00 |
| ATOM | 69 | HD11 | LEU | X | 5 | 24.682 | 55.170 | 12.141 | 0.00 | 0.00 |
| ATOM | 70 | HD12 | LEU | X | 5 | 24.377 | 54.017 | 10.764 | 0.00 | 0.00 |
| ATOM | 71 | HD13 | LEU | X | 5 | 25.630 | 55.161 | 10.601 | 0.00 | 0.00 |
| ATOM | 72 | CD2  | LEU | X | 5 | 27.027 | 54.377 | 12.815 | 0.00 | 0.00 |
| ATOM | 73 | HD21 | LEU | X | 5 | 26.426 | 54.948 | 13.523 | 0.00 | 0.00 |
| ATOM | 74 | HD22 | LEU | X | 5 | 27.761 | 53.776 | 13.352 | 0.00 | 0.00 |
| ATOM | 75 | HD23 | LEU | X | 5 | 27.603 | 55.116 | 12.259 | 0.00 | 0.00 |
| ATOM | 76 | C    | LEU | X | 5 | 25.075 | 51.395 | 15.178 | 0.00 | 0.00 |
| ATOM | 77 | O    | LEU | X | 5 | 24.252 | 50.519 | 14.937 | 0.00 | 0.00 |
| ATOM | 78 | N    | VAL | X | 6 | 25.248 | 51.998 | 16.326 | 0.00 | 0.00 |



|      |     |      |     |   |   |        |        |        |      |      |
|------|-----|------|-----|---|---|--------|--------|--------|------|------|
| ATOM | 79  | H    | VAL | X | 6 | 25.993 | 52.679 | 16.373 | 0.00 | 0.00 |
| ATOM | 80  | CA   | VAL | X | 6 | 24.422 | 51.751 | 17.557 | 0.00 | 0.00 |
| ATOM | 81  | HA   | VAL | X | 6 | 23.442 | 51.291 | 17.434 | 0.00 | 0.00 |
| ATOM | 82  | CB   | VAL | X | 6 | 25.263 | 50.922 | 18.537 | 0.00 | 0.00 |
| ATOM | 83  | HB   | VAL | X | 6 | 26.294 | 51.266 | 18.448 | 0.00 | 0.00 |
| ATOM | 84  | CG1  | VAL | X | 6 | 24.790 | 51.225 | 20.002 | 0.00 | 0.00 |
| ATOM | 85  | HG11 | VAL | X | 6 | 23.732 | 50.975 | 20.076 | 0.00 | 0.00 |
| ATOM | 86  | HG12 | VAL | X | 6 | 25.171 | 50.546 | 20.765 | 0.00 | 0.00 |
| ATOM | 87  | HG13 | VAL | X | 6 | 24.922 | 52.255 | 20.333 | 0.00 | 0.00 |
| ATOM | 88  | CG2  | VAL | X | 6 | 25.165 | 49.413 | 18.177 | 0.00 | 0.00 |
| ATOM | 89  | HG21 | VAL | X | 6 | 25.286 | 48.867 | 19.112 | 0.00 | 0.00 |
| ATOM | 90  | HG22 | VAL | X | 6 | 25.916 | 49.052 | 17.474 | 0.00 | 0.00 |
| ATOM | 91  | HG23 | VAL | X | 6 | 24.202 | 49.224 | 17.701 | 0.00 | 0.00 |
| ATOM | 92  | C    | VAL | X | 6 | 24.107 | 53.196 | 17.971 | 0.00 | 0.00 |
| ATOM | 93  | O    | VAL | X | 6 | 24.923 | 54.164 | 17.881 | 0.00 | 0.00 |
| ATOM | 94  | N    | THR | X | 7 | 22.892 | 53.402 | 18.618 | 0.00 | 0.00 |
| ATOM | 95  | H    | THR | X | 7 | 22.251 | 52.637 | 18.772 | 0.00 | 0.00 |
| ATOM | 96  | CA   | THR | X | 7 | 22.478 | 54.684 | 19.275 | 0.00 | 0.00 |
| ATOM | 97  | HA   | THR | X | 7 | 23.247 | 55.443 | 19.134 | 0.00 | 0.00 |
| ATOM | 98  | CB   | THR | X | 7 | 21.170 | 55.286 | 18.586 | 0.00 | 0.00 |
| ATOM | 99  | HB   | THR | X | 7 | 20.313 | 54.625 | 18.450 | 0.00 | 0.00 |
| ATOM | 100 | CG2  | THR | X | 7 | 20.672 | 56.566 | 19.314 | 0.00 | 0.00 |
| ATOM | 101 | HG21 | THR | X | 7 | 20.025 | 57.054 | 18.586 | 0.00 | 0.00 |
| ATOM | 102 | HG22 | THR | X | 7 | 21.514 | 57.251 | 19.410 | 0.00 | 0.00 |
| ATOM | 103 | HG23 | THR | X | 7 | 20.209 | 56.342 | 20.275 | 0.00 | 0.00 |
| ATOM | 104 | OG1  | THR | X | 7 | 21.514 | 55.706 | 17.331 | 0.00 | 0.00 |
| ATOM | 105 | HG1  | THR | X | 7 | 20.707 | 55.867 | 16.836 | 0.00 | 0.00 |
| ATOM | 106 | C    | THR | X | 7 | 22.324 | 54.454 | 20.785 | 0.00 | 0.00 |
| ATOM | 107 | O    | THR | X | 7 | 21.446 | 53.695 | 21.167 | 0.00 | 0.00 |
| ATOM | 108 | N    | VAL | X | 8 | 22.983 | 55.291 | 21.638 | 0.00 | 0.00 |
| ATOM | 109 | H    | VAL | X | 8 | 23.528 | 56.021 | 21.203 | 0.00 | 0.00 |
| ATOM | 110 | CA   | VAL | X | 8 | 22.817 | 55.382 | 23.060 | 0.00 | 0.00 |
| ATOM | 111 | HA   | VAL | X | 8 | 22.150 | 54.586 | 23.390 | 0.00 | 0.00 |
| ATOM | 112 | CB   | VAL | X | 8 | 24.147 | 55.160 | 23.792 | 0.00 | 0.00 |
| ATOM | 113 | HB   | VAL | X | 8 | 24.018 | 55.249 | 24.870 | 0.00 | 0.00 |
| ATOM | 114 | CG1  | VAL | X | 8 | 24.607 | 53.640 | 23.535 | 0.00 | 0.00 |
| ATOM | 115 | HG11 | VAL | X | 8 | 25.459 | 53.475 | 24.194 | 0.00 | 0.00 |
| ATOM | 116 | HG12 | VAL | X | 8 | 23.752 | 53.033 | 23.834 | 0.00 | 0.00 |
| ATOM | 117 | HG13 | VAL | X | 8 | 24.795 | 53.451 | 22.478 | 0.00 | 0.00 |
| ATOM | 118 | CG2  | VAL | X | 8 | 25.361 | 56.084 | 23.489 | 0.00 | 0.00 |
| ATOM | 119 | HG21 | VAL | X | 8 | 26.341 | 55.843 | 23.901 | 0.00 | 0.00 |
| ATOM | 120 | HG22 | VAL | X | 8 | 25.125 | 57.090 | 23.835 | 0.00 | 0.00 |
| ATOM | 121 | HG23 | VAL | X | 8 | 25.512 | 56.023 | 22.412 | 0.00 | 0.00 |
| ATOM | 122 | C    | VAL | X | 8 | 22.302 | 56.750 | 23.493 | 0.00 | 0.00 |
| ATOM | 123 | O    | VAL | X | 8 | 22.088 | 57.609 | 22.604 | 0.00 | 0.00 |
| ATOM | 124 | N    | ARG | X | 9 | 22.118 | 56.948 | 24.807 | 0.00 | 0.00 |
| ATOM | 125 | H    | ARG | X | 9 | 22.346 | 56.123 | 25.343 | 0.00 | 0.00 |
| ATOM | 126 | CA   | ARG | X | 9 | 21.442 | 58.048 | 25.429 | 0.00 | 0.00 |
| ATOM | 127 | HA   | ARG | X | 9 | 20.472 | 58.005 | 24.932 | 0.00 | 0.00 |
| ATOM | 128 | CB   | ARG | X | 9 | 21.309 | 57.948 | 26.911 | 0.00 | 0.00 |
| ATOM | 129 | HB2  | ARG | X | 9 | 20.743 | 57.029 | 27.065 | 0.00 | 0.00 |
| ATOM | 130 | HB3  | ARG | X | 9 | 22.348 | 57.932 | 27.240 | 0.00 | 0.00 |
| ATOM | 131 | CG   | ARG | X | 9 | 20.426 | 59.046 | 27.602 | 0.00 | 0.00 |
| ATOM | 132 | HG2  | ARG | X | 9 | 20.688 | 60.009 | 27.162 | 0.00 | 0.00 |
| ATOM | 133 | HG3  | ARG | X | 9 | 19.400 | 58.903 | 27.263 | 0.00 | 0.00 |
| ATOM | 134 | CD   | ARG | X | 9 | 20.635 | 59.083 | 29.159 | 0.00 | 0.00 |
| ATOM | 135 | HD2  | ARG | X | 9 | 20.315 | 58.155 | 29.632 | 0.00 | 0.00 |
| ATOM | 136 | HD3  | ARG | X | 9 | 21.675 | 59.132 | 29.481 | 0.00 | 0.00 |
| ATOM | 137 | NE   | ARG | X | 9 | 19.773 | 60.195 | 29.714 | 0.00 | 0.00 |
| ATOM | 138 | HE   | ARG | X | 9 | 19.212 | 60.678 | 29.027 | 0.00 | 0.00 |
| ATOM | 139 | CZ   | ARG | X | 9 | 19.621 | 60.367 | 31.022 | 0.00 | 0.00 |
| ATOM | 140 | NH1  | ARG | X | 9 | 20.268 | 59.714 | 31.974 | 0.00 | 0.00 |
| ATOM | 141 | HH11 | ARG | X | 9 | 20.897 | 58.933 | 31.858 | 0.00 | 0.00 |
| ATOM | 142 | HH12 | ARG | X | 9 | 20.080 | 59.831 | 32.959 | 0.00 | 0.00 |
| ATOM | 143 | NH2  | ARG | X | 9 | 18.690 | 61.222 | 31.424 | 0.00 | 0.00 |
| ATOM | 144 | HH21 | ARG | X | 9 | 18.244 | 61.807 | 30.732 | 0.00 | 0.00 |
| ATOM | 145 | HH22 | ARG | X | 9 | 18.756 | 61.532 | 32.383 | 0.00 | 0.00 |

|      |     |      |     |   |    |        |        |        |      |      |
|------|-----|------|-----|---|----|--------|--------|--------|------|------|
| ATOM | 146 | C    | ARG | X | 9  | 22.141 | 59.366 | 25.089 | 0.00 | 0.00 |
| ATOM | 147 | O    | ARG | X | 9  | 21.468 | 60.376 | 24.901 | 0.00 | 0.00 |
| ATOM | 148 | N    | GLY | X | 10 | 23.467 | 59.338 | 24.945 | 0.00 | 0.00 |
| ATOM | 149 | H    | GLY | X | 10 | 23.957 | 58.472 | 25.121 | 0.00 | 0.00 |
| ATOM | 150 | CA   | GLY | X | 10 | 24.341 | 60.467 | 24.477 | 0.00 | 0.00 |
| ATOM | 151 | HA2  | GLY | X | 10 | 24.290 | 61.344 | 25.122 | 0.00 | 0.00 |
| ATOM | 152 | HA3  | GLY | X | 10 | 25.329 | 60.029 | 24.620 | 0.00 | 0.00 |
| ATOM | 153 | C    | GLY | X | 10 | 24.063 | 60.738 | 23.030 | 0.00 | 0.00 |
| ATOM | 154 | O    | GLY | X | 10 | 24.312 | 61.846 | 22.584 | 0.00 | 0.00 |
| ATOM | 155 | N    | GLY | X | 11 | 23.870 | 59.678 | 22.285 | 0.00 | 0.00 |
| ATOM | 156 | H    | GLY | X | 11 | 23.783 | 58.780 | 22.740 | 0.00 | 0.00 |
| ATOM | 157 | CA   | GLY | X | 11 | 23.932 | 59.701 | 20.854 | 0.00 | 0.00 |
| ATOM | 158 | HA2  | GLY | X | 11 | 22.921 | 59.895 | 20.495 | 0.00 | 0.00 |
| ATOM | 159 | HA3  | GLY | X | 11 | 24.432 | 60.611 | 20.522 | 0.00 | 0.00 |
| ATOM | 160 | C    | GLY | X | 11 | 24.498 | 58.492 | 20.156 | 0.00 | 0.00 |
| ATOM | 161 | O    | GLY | X | 11 | 24.565 | 57.422 | 20.771 | 0.00 | 0.00 |
| ATOM | 162 | N    | ARG | X | 12 | 24.642 | 58.618 | 18.790 | 0.00 | 0.00 |
| ATOM | 163 | H    | ARG | X | 12 | 24.409 | 59.498 | 18.352 | 0.00 | 0.00 |
| ATOM | 164 | CA   | ARG | X | 12 | 25.246 | 57.664 | 17.811 | 0.00 | 0.00 |
| ATOM | 165 | HA   | ARG | X | 12 | 24.771 | 56.683 | 17.827 | 0.00 | 0.00 |
| ATOM | 166 | CB   | ARG | X | 12 | 25.117 | 58.123 | 16.312 | 0.00 | 0.00 |
| ATOM | 167 | HB2  | ARG | X | 12 | 25.704 | 59.034 | 16.193 | 0.00 | 0.00 |
| ATOM | 168 | HB3  | ARG | X | 12 | 25.587 | 57.465 | 15.581 | 0.00 | 0.00 |
| ATOM | 169 | CG   | ARG | X | 12 | 23.612 | 58.199 | 15.891 | 0.00 | 0.00 |
| ATOM | 170 | HG2  | ARG | X | 12 | 23.288 | 57.206 | 15.580 | 0.00 | 0.00 |
| ATOM | 171 | HG3  | ARG | X | 12 | 23.027 | 58.530 | 16.748 | 0.00 | 0.00 |
| ATOM | 172 | CD   | ARG | X | 12 | 23.226 | 59.162 | 14.701 | 0.00 | 0.00 |
| ATOM | 173 | HD2  | ARG | X | 12 | 23.993 | 59.119 | 13.928 | 0.00 | 0.00 |
| ATOM | 174 | HD3  | ARG | X | 12 | 22.395 | 58.834 | 14.076 | 0.00 | 0.00 |
| ATOM | 175 | NE   | ARG | X | 12 | 23.054 | 60.563 | 15.150 | 0.00 | 0.00 |
| ATOM | 176 | HE   | ARG | X | 12 | 22.680 | 60.684 | 16.081 | 0.00 | 0.00 |
| ATOM | 177 | CZ   | ARG | X | 12 | 23.174 | 61.626 | 14.348 | 0.00 | 0.00 |
| ATOM | 178 | NH1  | ARG | X | 12 | 23.292 | 61.586 | 13.004 | 0.00 | 0.00 |
| ATOM | 179 | HH11 | ARG | X | 12 | 23.437 | 60.716 | 12.512 | 0.00 | 0.00 |
| ATOM | 180 | HH12 | ARG | X | 12 | 23.361 | 62.429 | 12.451 | 0.00 | 0.00 |
| ATOM | 181 | NH2  | ARG | X | 12 | 22.995 | 62.796 | 14.925 | 0.00 | 0.00 |
| ATOM | 182 | HH21 | ARG | X | 12 | 22.769 | 62.890 | 15.905 | 0.00 | 0.00 |
| ATOM | 183 | HH22 | ARG | X | 12 | 23.276 | 63.632 | 14.432 | 0.00 | 0.00 |
| ATOM | 184 | C    | ARG | X | 12 | 26.737 | 57.240 | 17.997 | 0.00 | 0.00 |
| ATOM | 185 | O    | ARG | X | 12 | 27.597 | 58.067 | 18.323 | 0.00 | 0.00 |
| ATOM | 186 | N    | LEU | X | 13 | 26.975 | 55.903 | 17.946 | 0.00 | 0.00 |
| ATOM | 187 | H    | LEU | X | 13 | 26.231 | 55.336 | 17.563 | 0.00 | 0.00 |
| ATOM | 188 | CA   | LEU | X | 13 | 28.311 | 55.315 | 17.976 | 0.00 | 0.00 |
| ATOM | 189 | HA   | LEU | X | 13 | 29.046 | 56.119 | 17.951 | 0.00 | 0.00 |
| ATOM | 190 | CB   | LEU | X | 13 | 28.527 | 54.510 | 19.305 | 0.00 | 0.00 |
| ATOM | 191 | HB2  | LEU | X | 13 | 27.858 | 53.659 | 19.183 | 0.00 | 0.00 |
| ATOM | 192 | HB3  | LEU | X | 13 | 29.507 | 54.050 | 19.436 | 0.00 | 0.00 |
| ATOM | 193 | CG   | LEU | X | 13 | 28.153 | 55.178 | 20.595 | 0.00 | 0.00 |
| ATOM | 194 | HG   | LEU | X | 13 | 27.215 | 55.673 | 20.347 | 0.00 | 0.00 |
| ATOM | 195 | CD1  | LEU | X | 13 | 28.032 | 54.105 | 21.735 | 0.00 | 0.00 |
| ATOM | 196 | HD11 | LEU | X | 13 | 27.058 | 53.618 | 21.687 | 0.00 | 0.00 |
| ATOM | 197 | HD12 | LEU | X | 13 | 28.237 | 54.621 | 22.673 | 0.00 | 0.00 |
| ATOM | 198 | HD13 | LEU | X | 13 | 28.699 | 53.271 | 21.515 | 0.00 | 0.00 |
| ATOM | 199 | CD2  | LEU | X | 13 | 29.033 | 56.345 | 20.929 | 0.00 | 0.00 |
| ATOM | 200 | HD21 | LEU | X | 13 | 30.012 | 55.947 | 21.195 | 0.00 | 0.00 |
| ATOM | 201 | HD22 | LEU | X | 13 | 29.148 | 57.018 | 20.079 | 0.00 | 0.00 |
| ATOM | 202 | HD23 | LEU | X | 13 | 28.486 | 56.837 | 21.733 | 0.00 | 0.00 |
| ATOM | 203 | C    | LEU | X | 13 | 28.597 | 54.479 | 16.709 | 0.00 | 0.00 |
| ATOM | 204 | O    | LEU | X | 13 | 27.673 | 53.777 | 16.337 | 0.00 | 0.00 |
| ATOM | 205 | N    | ARG | X | 14 | 29.762 | 54.706 | 16.080 | 0.00 | 0.00 |
| ATOM | 206 | H    | ARG | X | 14 | 30.396 | 55.357 | 16.520 | 0.00 | 0.00 |
| ATOM | 207 | CA   | ARG | X | 14 | 30.269 | 53.797 | 15.027 | 0.00 | 0.00 |
| ATOM | 208 | HA   | ARG | X | 14 | 29.459 | 53.210 | 14.595 | 0.00 | 0.00 |
| ATOM | 209 | CB   | ARG | X | 14 | 30.912 | 54.662 | 13.896 | 0.00 | 0.00 |
| ATOM | 210 | HB2  | ARG | X | 14 | 30.131 | 55.341 | 13.554 | 0.00 | 0.00 |
| ATOM | 211 | HB3  | ARG | X | 14 | 31.828 | 55.159 | 14.216 | 0.00 | 0.00 |
| ATOM | 212 | CG   | ARG | X | 14 | 31.288 | 53.840 | 12.605 | 0.00 | 0.00 |

|      |     |      |     |   |    |        |        |        |      |      |
|------|-----|------|-----|---|----|--------|--------|--------|------|------|
| ATOM | 213 | HG2  | ARG | X | 14 | 31.947 | 53.013 | 12.870 | 0.00 | 0.00 |
| ATOM | 214 | HG3  | ARG | X | 14 | 30.348 | 53.357 | 12.337 | 0.00 | 0.00 |
| ATOM | 215 | CD   | ARG | X | 14 | 31.722 | 54.745 | 11.415 | 0.00 | 0.00 |
| ATOM | 216 | HD2  | ARG | X | 14 | 32.608 | 55.311 | 11.703 | 0.00 | 0.00 |
| ATOM | 217 | HD3  | ARG | X | 14 | 32.047 | 54.241 | 10.505 | 0.00 | 0.00 |
| ATOM | 218 | NE   | ARG | X | 14 | 30.676 | 55.676 | 10.929 | 0.00 | 0.00 |
| ATOM | 219 | HE   | ARG | X | 14 | 29.848 | 55.336 | 10.463 | 0.00 | 0.00 |
| ATOM | 220 | CZ   | ARG | X | 14 | 30.695 | 56.993 | 11.294 | 0.00 | 0.00 |
| ATOM | 221 | NH1  | ARG | X | 14 | 31.696 | 57.631 | 11.945 | 0.00 | 0.00 |
| ATOM | 222 | HH11 | ARG | X | 14 | 32.502 | 57.193 | 12.367 | 0.00 | 0.00 |
| ATOM | 223 | HH12 | ARG | X | 14 | 31.765 | 58.639 | 11.931 | 0.00 | 0.00 |
| ATOM | 224 | NH2  | ARG | X | 14 | 29.720 | 57.804 | 10.934 | 0.00 | 0.00 |
| ATOM | 225 | HH21 | ARG | X | 14 | 28.950 | 57.412 | 10.410 | 0.00 | 0.00 |
| ATOM | 226 | HH22 | ARG | X | 14 | 29.732 | 58.803 | 11.084 | 0.00 | 0.00 |
| ATOM | 227 | C    | ARG | X | 14 | 31.336 | 52.809 | 15.505 | 0.00 | 0.00 |
| ATOM | 228 | O    | ARG | X | 14 | 32.086 | 53.289 | 16.332 | 0.00 | 0.00 |
| ATOM | 229 | N    | GLY | X | 15 | 31.274 | 51.513 | 15.085 | 0.00 | 0.00 |
| ATOM | 230 | H    | GLY | X | 15 | 30.623 | 51.302 | 14.341 | 0.00 | 0.00 |
| ATOM | 231 | CA   | GLY | X | 15 | 32.180 | 50.451 | 15.567 | 0.00 | 0.00 |
| ATOM | 232 | HA2  | GLY | X | 15 | 32.852 | 50.950 | 16.266 | 0.00 | 0.00 |
| ATOM | 233 | HA3  | GLY | X | 15 | 31.608 | 49.613 | 15.966 | 0.00 | 0.00 |
| ATOM | 234 | C    | GLY | X | 15 | 33.121 | 49.886 | 14.448 | 0.00 | 0.00 |
| ATOM | 235 | O    | GLY | X | 15 | 33.206 | 50.427 | 13.376 | 0.00 | 0.00 |
| ATOM | 236 | N    | ILE | X | 16 | 33.802 | 48.724 | 14.680 | 0.00 | 0.00 |
| ATOM | 237 | H    | ILE | X | 16 | 33.728 | 48.321 | 15.603 | 0.00 | 0.00 |
| ATOM | 238 | CA   | ILE | X | 16 | 34.541 | 47.911 | 13.634 | 0.00 | 0.00 |
| ATOM | 239 | HA   | ILE | X | 16 | 34.189 | 48.295 | 12.677 | 0.00 | 0.00 |
| ATOM | 240 | CB   | ILE | X | 16 | 36.144 | 48.115 | 13.760 | 0.00 | 0.00 |
| ATOM | 241 | HB   | ILE | X | 16 | 36.610 | 47.588 | 12.927 | 0.00 | 0.00 |
| ATOM | 242 | CG2  | ILE | X | 16 | 36.590 | 49.554 | 13.716 | 0.00 | 0.00 |
| ATOM | 243 | HG21 | ILE | X | 16 | 36.297 | 50.051 | 14.640 | 0.00 | 0.00 |
| ATOM | 244 | HG22 | ILE | X | 16 | 35.980 | 50.004 | 12.933 | 0.00 | 0.00 |
| ATOM | 245 | HG23 | ILE | X | 16 | 37.632 | 49.567 | 13.398 | 0.00 | 0.00 |
| ATOM | 246 | CG1  | ILE | X | 16 | 36.731 | 47.426 | 14.980 | 0.00 | 0.00 |
| ATOM | 247 | HG12 | ILE | X | 16 | 36.180 | 47.853 | 15.818 | 0.00 | 0.00 |
| ATOM | 248 | HG13 | ILE | X | 16 | 36.623 | 46.344 | 14.903 | 0.00 | 0.00 |
| ATOM | 249 | CD1  | ILE | X | 16 | 38.239 | 47.547 | 15.069 | 0.00 | 0.00 |
| ATOM | 250 | HD11 | ILE | X | 16 | 38.502 | 48.600 | 15.176 | 0.00 | 0.00 |
| ATOM | 251 | HD12 | ILE | X | 16 | 38.778 | 47.243 | 14.171 | 0.00 | 0.00 |
| ATOM | 252 | HD13 | ILE | X | 16 | 38.610 | 47.039 | 15.959 | 0.00 | 0.00 |
| ATOM | 253 | C    | ILE | X | 16 | 34.140 | 46.393 | 13.617 | 0.00 | 0.00 |
| ATOM | 254 | O    | ILE | X | 16 | 33.805 | 45.777 | 14.611 | 0.00 | 0.00 |
| ATOM | 255 | N    | ARG | X | 17 | 34.022 | 45.887 | 12.355 | 0.00 | 0.00 |
| ATOM | 256 | H    | ARG | X | 17 | 34.077 | 46.600 | 11.642 | 0.00 | 0.00 |
| ATOM | 257 | CA   | ARG | X | 17 | 33.859 | 44.510 | 12.035 | 0.00 | 0.00 |
| ATOM | 258 | HA   | ARG | X | 17 | 33.073 | 44.194 | 12.721 | 0.00 | 0.00 |
| ATOM | 259 | CB   | ARG | X | 17 | 33.570 | 44.418 | 10.567 | 0.00 | 0.00 |
| ATOM | 260 | HB2  | ARG | X | 17 | 32.772 | 45.146 | 10.425 | 0.00 | 0.00 |
| ATOM | 261 | HB3  | ARG | X | 17 | 34.355 | 44.777 | 9.901  | 0.00 | 0.00 |
| ATOM | 262 | CG   | ARG | X | 17 | 32.969 | 43.124 | 10.055 | 0.00 | 0.00 |
| ATOM | 263 | HG2  | ARG | X | 17 | 33.515 | 42.229 | 10.353 | 0.00 | 0.00 |
| ATOM | 264 | HG3  | ARG | X | 17 | 31.955 | 43.179 | 10.451 | 0.00 | 0.00 |
| ATOM | 265 | CD   | ARG | X | 17 | 32.872 | 43.209 | 8.525  | 0.00 | 0.00 |
| ATOM | 266 | HD2  | ARG | X | 17 | 32.465 | 44.184 | 8.254  | 0.00 | 0.00 |
| ATOM | 267 | HD3  | ARG | X | 17 | 33.876 | 43.222 | 8.100  | 0.00 | 0.00 |
| ATOM | 268 | NE   | ARG | X | 17 | 31.996 | 42.087 | 8.013  | 0.00 | 0.00 |
| ATOM | 269 | HE   | ARG | X | 17 | 31.142 | 42.318 | 7.526  | 0.00 | 0.00 |
| ATOM | 270 | CZ   | ARG | X | 17 | 32.096 | 40.760 | 8.062  | 0.00 | 0.00 |
| ATOM | 271 | NH1  | ARG | X | 17 | 33.170 | 40.132 | 8.549  | 0.00 | 0.00 |
| ATOM | 272 | HH11 | ARG | X | 17 | 34.031 | 40.638 | 8.703  | 0.00 | 0.00 |
| ATOM | 273 | HH12 | ARG | X | 17 | 33.197 | 39.133 | 8.402  | 0.00 | 0.00 |
| ATOM | 274 | NH2  | ARG | X | 17 | 31.150 | 40.028 | 7.534  | 0.00 | 0.00 |
| ATOM | 275 | HH21 | ARG | X | 17 | 30.257 | 40.449 | 7.322  | 0.00 | 0.00 |
| ATOM | 276 | HH22 | ARG | X | 17 | 31.224 | 39.024 | 7.609  | 0.00 | 0.00 |
| ATOM | 277 | C    | ARG | X | 17 | 35.215 | 43.814 | 12.472 | 0.00 | 0.00 |
| ATOM | 278 | O    | ARG | X | 17 | 36.311 | 44.224 | 12.138 | 0.00 | 0.00 |
| ATOM | 279 | N    | LEU | X | 18 | 35.099 | 42.706 | 13.189 | 0.00 | 0.00 |

|      |     |      |     |   |    |        |        |        |      |      |
|------|-----|------|-----|---|----|--------|--------|--------|------|------|
| ATOM | 280 | H    | LEU | X | 18 | 34.146 | 42.436 | 13.385 | 0.00 | 0.00 |
| ATOM | 281 | CA   | LEU | X | 18 | 36.155 | 41.773 | 13.472 | 0.00 | 0.00 |
| ATOM | 282 | HA   | LEU | X | 18 | 37.008 | 42.091 | 12.873 | 0.00 | 0.00 |
| ATOM | 283 | CB   | LEU | X | 18 | 36.537 | 41.773 | 14.986 | 0.00 | 0.00 |
| ATOM | 284 | HB2  | LEU | X | 18 | 35.673 | 41.422 | 15.549 | 0.00 | 0.00 |
| ATOM | 285 | HB3  | LEU | X | 18 | 37.277 | 40.982 | 15.113 | 0.00 | 0.00 |
| ATOM | 286 | CG   | LEU | X | 18 | 37.224 | 42.988 | 15.644 | 0.00 | 0.00 |
| ATOM | 287 | HG   | LEU | X | 18 | 36.708 | 43.949 | 15.633 | 0.00 | 0.00 |
| ATOM | 288 | CD1  | LEU | X | 18 | 37.320 | 42.534 | 17.140 | 0.00 | 0.00 |
| ATOM | 289 | HD11 | LEU | X | 18 | 37.828 | 41.569 | 17.147 | 0.00 | 0.00 |
| ATOM | 290 | HD12 | LEU | X | 18 | 36.339 | 42.463 | 17.610 | 0.00 | 0.00 |
| ATOM | 291 | HD13 | LEU | X | 18 | 37.821 | 43.305 | 17.725 | 0.00 | 0.00 |
| ATOM | 292 | CD2  | LEU | X | 18 | 38.600 | 43.333 | 15.048 | 0.00 | 0.00 |
| ATOM | 293 | HD21 | LEU | X | 18 | 39.050 | 44.283 | 15.336 | 0.00 | 0.00 |
| ATOM | 294 | HD22 | LEU | X | 18 | 39.325 | 42.561 | 15.307 | 0.00 | 0.00 |
| ATOM | 295 | HD23 | LEU | X | 18 | 38.465 | 43.276 | 13.968 | 0.00 | 0.00 |
| ATOM | 296 | C    | LEU | X | 18 | 35.778 | 40.358 | 13.008 | 0.00 | 0.00 |
| ATOM | 297 | O    | LEU | X | 18 | 34.910 | 39.701 | 13.510 | 0.00 | 0.00 |
| ATOM | 298 | N    | LYS | X | 19 | 36.606 | 39.847 | 12.172 | 0.00 | 0.00 |
| ATOM | 299 | H    | LYS | X | 19 | 37.401 | 40.398 | 11.881 | 0.00 | 0.00 |
| ATOM | 300 | CA   | LYS | X | 19 | 36.498 | 38.482 | 11.712 | 0.00 | 0.00 |
| ATOM | 301 | HA   | LYS | X | 19 | 35.464 | 38.135 | 11.736 | 0.00 | 0.00 |
| ATOM | 302 | CB   | LYS | X | 19 | 37.074 | 38.408 | 10.284 | 0.00 | 0.00 |
| ATOM | 303 | HB2  | LYS | X | 19 | 36.558 | 37.586 | 9.788  | 0.00 | 0.00 |
| ATOM | 304 | HB3  | LYS | X | 19 | 36.703 | 39.218 | 9.657  | 0.00 | 0.00 |
| ATOM | 305 | CG   | LYS | X | 19 | 38.597 | 38.247 | 10.224 | 0.00 | 0.00 |
| ATOM | 306 | HG2  | LYS | X | 19 | 39.053 | 39.018 | 10.845 | 0.00 | 0.00 |
| ATOM | 307 | HG3  | LYS | X | 19 | 38.752 | 37.239 | 10.610 | 0.00 | 0.00 |
| ATOM | 308 | CD   | LYS | X | 19 | 39.083 | 38.457 | 8.800  | 0.00 | 0.00 |
| ATOM | 309 | HD2  | LYS | X | 19 | 38.470 | 37.805 | 8.178  | 0.00 | 0.00 |
| ATOM | 310 | HD3  | LYS | X | 19 | 39.001 | 39.479 | 8.430  | 0.00 | 0.00 |
| ATOM | 311 | CE   | LYS | X | 19 | 40.611 | 38.145 | 8.508  | 0.00 | 0.00 |
| ATOM | 312 | HE2  | LYS | X | 19 | 41.287 | 38.879 | 8.946  | 0.00 | 0.00 |
| ATOM | 313 | HE3  | LYS | X | 19 | 40.826 | 37.175 | 8.957  | 0.00 | 0.00 |
| ATOM | 314 | NZ   | LYS | X | 19 | 40.866 | 38.138 | 7.030  | 0.00 | 0.00 |
| ATOM | 315 | HZ1  | LYS | X | 19 | 40.353 | 37.421 | 6.536  | 0.00 | 0.00 |
| ATOM | 316 | HZ2  | LYS | X | 19 | 40.440 | 38.974 | 6.656  | 0.00 | 0.00 |
| ATOM | 317 | HZ3  | LYS | X | 19 | 41.870 | 38.051 | 6.959  | 0.00 | 0.00 |
| ATOM | 318 | C    | LYS | X | 19 | 37.268 | 37.591 | 12.714 | 0.00 | 0.00 |
| ATOM | 319 | O    | LYS | X | 19 | 38.312 | 38.056 | 13.192 | 0.00 | 0.00 |
| ATOM | 320 | N    | THR | X | 20 | 36.901 | 36.351 | 12.837 | 0.00 | 0.00 |
| ATOM | 321 | H    | THR | X | 20 | 36.158 | 35.974 | 12.265 | 0.00 | 0.00 |
| ATOM | 322 | CA   | THR | X | 20 | 37.434 | 35.474 | 13.949 | 0.00 | 0.00 |
| ATOM | 323 | HA   | THR | X | 20 | 38.508 | 35.622 | 14.057 | 0.00 | 0.00 |
| ATOM | 324 | CB   | THR | X | 20 | 36.660 | 35.762 | 15.272 | 0.00 | 0.00 |
| ATOM | 325 | HB   | THR | X | 20 | 36.058 | 34.908 | 15.583 | 0.00 | 0.00 |
| ATOM | 326 | CG2  | THR | X | 20 | 37.567 | 36.114 | 16.484 | 0.00 | 0.00 |
| ATOM | 327 | HG21 | THR | X | 20 | 38.015 | 37.099 | 16.352 | 0.00 | 0.00 |
| ATOM | 328 | HG22 | THR | X | 20 | 38.360 | 35.370 | 16.558 | 0.00 | 0.00 |
| ATOM | 329 | HG23 | THR | X | 20 | 36.918 | 36.152 | 17.359 | 0.00 | 0.00 |
| ATOM | 330 | OG1  | THR | X | 20 | 35.741 | 36.829 | 15.075 | 0.00 | 0.00 |
| ATOM | 331 | HG1  | THR | X | 20 | 35.143 | 36.618 | 14.354 | 0.00 | 0.00 |
| ATOM | 332 | C    | THR | X | 20 | 37.148 | 34.031 | 13.541 | 0.00 | 0.00 |
| ATOM | 333 | O    | THR | X | 20 | 36.283 | 33.833 | 12.708 | 0.00 | 0.00 |
| ATOM | 334 | N    | PRO | X | 21 | 37.777 | 32.971 | 14.060 | 0.00 | 0.00 |
| ATOM | 335 | CD   | PRO | X | 21 | 38.776 | 33.137 | 15.078 | 0.00 | 0.00 |
| ATOM | 336 | HD2  | PRO | X | 21 | 38.150 | 33.131 | 15.971 | 0.00 | 0.00 |
| ATOM | 337 | HD3  | PRO | X | 21 | 39.323 | 34.079 | 15.044 | 0.00 | 0.00 |
| ATOM | 338 | CG   | PRO | X | 21 | 39.635 | 31.920 | 14.946 | 0.00 | 0.00 |
| ATOM | 339 | HG2  | PRO | X | 21 | 40.105 | 31.736 | 15.912 | 0.00 | 0.00 |
| ATOM | 340 | HG3  | PRO | X | 21 | 40.359 | 32.066 | 14.144 | 0.00 | 0.00 |
| ATOM | 341 | CB   | PRO | X | 21 | 38.630 | 30.807 | 14.490 | 0.00 | 0.00 |
| ATOM | 342 | HB2  | PRO | X | 21 | 37.999 | 30.418 | 15.290 | 0.00 | 0.00 |
| ATOM | 343 | HB3  | PRO | X | 21 | 39.170 | 29.957 | 14.073 | 0.00 | 0.00 |
| ATOM | 344 | CA   | PRO | X | 21 | 37.885 | 31.625 | 13.458 | 0.00 | 0.00 |
| ATOM | 345 | HA   | PRO | X | 21 | 38.526 | 31.815 | 12.598 | 0.00 | 0.00 |
| ATOM | 346 | C    | PRO | X | 21 | 36.488 | 31.042 | 13.042 | 0.00 | 0.00 |

|      |     |      |     |   |    |        |        |        |      |      |
|------|-----|------|-----|---|----|--------|--------|--------|------|------|
| ATOM | 347 | O    | PRO | X | 21 | 36.281 | 30.682 | 11.881 | 0.00 | 0.00 |
| ATOM | 348 | N    | GLY | X | 22 | 35.523 | 30.921 | 13.991 | 0.00 | 0.00 |
| ATOM | 349 | H    | GLY | X | 22 | 35.882 | 31.149 | 14.907 | 0.00 | 0.00 |
| ATOM | 350 | CA   | GLY | X | 22 | 34.115 | 30.418 | 13.788 | 0.00 | 0.00 |
| ATOM | 351 | HA2  | GLY | X | 22 | 34.000 | 29.658 | 13.015 | 0.00 | 0.00 |
| ATOM | 352 | HA3  | GLY | X | 22 | 33.648 | 30.199 | 14.748 | 0.00 | 0.00 |
| ATOM | 353 | C    | GLY | X | 22 | 33.111 | 31.409 | 13.317 | 0.00 | 0.00 |
| ATOM | 354 | O    | GLY | X | 22 | 31.931 | 31.111 | 13.331 | 0.00 | 0.00 |
| ATOM | 355 | N    | GLY | X | 23 | 33.508 | 32.588 | 12.890 | 0.00 | 0.00 |
| ATOM | 356 | H    | GLY | X | 23 | 34.500 | 32.711 | 12.746 | 0.00 | 0.00 |
| ATOM | 357 | CA   | GLY | X | 23 | 32.608 | 33.662 | 12.437 | 0.00 | 0.00 |
| ATOM | 358 | HA2  | GLY | X | 23 | 32.690 | 33.838 | 11.365 | 0.00 | 0.00 |
| ATOM | 359 | HA3  | GLY | X | 23 | 31.564 | 33.369 | 12.545 | 0.00 | 0.00 |
| ATOM | 360 | C    | GLY | X | 23 | 32.916 | 35.056 | 13.032 | 0.00 | 0.00 |
| ATOM | 361 | O    | GLY | X | 23 | 33.763 | 35.284 | 13.943 | 0.00 | 0.00 |
| ATOM | 362 | N    | PRO | X | 24 | 32.293 | 36.155 | 12.531 | 0.00 | 0.00 |
| ATOM | 363 | CD   | PRO | X | 24 | 31.041 | 36.099 | 11.718 | 0.00 | 0.00 |
| ATOM | 364 | HD2  | PRO | X | 24 | 30.217 | 35.777 | 12.356 | 0.00 | 0.00 |
| ATOM | 365 | HD3  | PRO | X | 24 | 31.157 | 35.389 | 10.899 | 0.00 | 0.00 |
| ATOM | 366 | CG   | PRO | X | 24 | 30.742 | 37.575 | 11.334 | 0.00 | 0.00 |
| ATOM | 367 | HG2  | PRO | X | 24 | 29.853 | 37.968 | 11.826 | 0.00 | 0.00 |
| ATOM | 368 | HG3  | PRO | X | 24 | 30.542 | 37.670 | 10.267 | 0.00 | 0.00 |
| ATOM | 369 | CB   | PRO | X | 24 | 32.022 | 38.378 | 11.660 | 0.00 | 0.00 |
| ATOM | 370 | HB2  | PRO | X | 24 | 31.795 | 39.433 | 11.811 | 0.00 | 0.00 |
| ATOM | 371 | HB3  | PRO | X | 24 | 32.723 | 38.321 | 10.827 | 0.00 | 0.00 |
| ATOM | 372 | CA   | PRO | X | 24 | 32.629 | 37.561 | 12.792 | 0.00 | 0.00 |
| ATOM | 373 | HA   | PRO | X | 24 | 33.717 | 37.627 | 12.759 | 0.00 | 0.00 |
| ATOM | 374 | C    | PRO | X | 24 | 32.087 | 38.040 | 14.117 | 0.00 | 0.00 |
| ATOM | 375 | O    | PRO | X | 24 | 31.141 | 37.413 | 14.585 | 0.00 | 0.00 |
| ATOM | 376 | N    | VAL | X | 25 | 32.626 | 39.009 | 14.757 | 0.00 | 0.00 |
| ATOM | 377 | H    | VAL | X | 25 | 33.535 | 39.323 | 14.447 | 0.00 | 0.00 |
| ATOM | 378 | CA   | VAL | X | 25 | 32.120 | 39.755 | 15.928 | 0.00 | 0.00 |
| ATOM | 379 | HA   | VAL | X | 25 | 31.043 | 39.644 | 16.055 | 0.00 | 0.00 |
| ATOM | 380 | CB   | VAL | X | 25 | 32.686 | 39.262 | 17.278 | 0.00 | 0.00 |
| ATOM | 381 | HB   | VAL | X | 25 | 32.169 | 39.703 | 18.130 | 0.00 | 0.00 |
| ATOM | 382 | CG1  | VAL | X | 25 | 32.542 | 37.723 | 17.449 | 0.00 | 0.00 |
| ATOM | 383 | HG11 | VAL | X | 25 | 32.711 | 37.464 | 18.494 | 0.00 | 0.00 |
| ATOM | 384 | HG12 | VAL | X | 25 | 31.509 | 37.466 | 17.213 | 0.00 | 0.00 |
| ATOM | 385 | HG13 | VAL | X | 25 | 33.191 | 37.138 | 16.797 | 0.00 | 0.00 |
| ATOM | 386 | CG2  | VAL | X | 25 | 34.207 | 39.545 | 17.310 | 0.00 | 0.00 |
| ATOM | 387 | HG21 | VAL | X | 25 | 34.475 | 40.592 | 17.170 | 0.00 | 0.00 |
| ATOM | 388 | HG22 | VAL | X | 25 | 34.597 | 39.116 | 16.388 | 0.00 | 0.00 |
| ATOM | 389 | HG23 | VAL | X | 25 | 34.495 | 39.162 | 18.289 | 0.00 | 0.00 |
| ATOM | 390 | C    | VAL | X | 25 | 32.445 | 41.228 | 15.629 | 0.00 | 0.00 |
| ATOM | 391 | O    | VAL | X | 25 | 32.929 | 41.569 | 14.532 | 0.00 | 0.00 |
| ATOM | 392 | N    | SER | X | 26 | 32.079 | 42.109 | 16.585 | 0.00 | 0.00 |
| ATOM | 393 | H    | SER | X | 26 | 31.627 | 41.648 | 17.362 | 0.00 | 0.00 |
| ATOM | 394 | CA   | SER | X | 26 | 32.150 | 43.581 | 16.431 | 0.00 | 0.00 |
| ATOM | 395 | HA   | SER | X | 26 | 32.945 | 43.719 | 15.698 | 0.00 | 0.00 |
| ATOM | 396 | CB   | SER | X | 26 | 30.831 | 44.017 | 15.690 | 0.00 | 0.00 |
| ATOM | 397 | HB2  | SER | X | 26 | 31.010 | 45.065 | 15.449 | 0.00 | 0.00 |
| ATOM | 398 | HB3  | SER | X | 26 | 30.755 | 43.569 | 14.699 | 0.00 | 0.00 |
| ATOM | 399 | OG   | SER | X | 26 | 29.697 | 43.734 | 16.513 | 0.00 | 0.00 |
| ATOM | 400 | HG   | SER | X | 26 | 29.952 | 43.159 | 17.238 | 0.00 | 0.00 |
| ATOM | 401 | C    | SER | X | 26 | 32.440 | 44.457 | 17.682 | 0.00 | 0.00 |
| ATOM | 402 | O    | SER | X | 26 | 31.811 | 44.374 | 18.742 | 0.00 | 0.00 |
| ATOM | 403 | N    | ALA | X | 27 | 33.453 | 45.268 | 17.518 | 0.00 | 0.00 |
| ATOM | 404 | H    | ALA | X | 27 | 33.935 | 45.391 | 16.638 | 0.00 | 0.00 |
| ATOM | 405 | CA   | ALA | X | 27 | 33.985 | 46.072 | 18.603 | 0.00 | 0.00 |
| ATOM | 406 | HA   | ALA | X | 27 | 33.447 | 45.773 | 19.502 | 0.00 | 0.00 |
| ATOM | 407 | CB   | ALA | X | 27 | 35.499 | 45.759 | 18.694 | 0.00 | 0.00 |
| ATOM | 408 | HB1  | ALA | X | 27 | 35.850 | 46.353 | 19.537 | 0.00 | 0.00 |
| ATOM | 409 | HB2  | ALA | X | 27 | 35.946 | 45.969 | 17.722 | 0.00 | 0.00 |
| ATOM | 410 | HB3  | ALA | X | 27 | 35.508 | 44.698 | 18.946 | 0.00 | 0.00 |
| ATOM | 411 | C    | ALA | X | 27 | 33.773 | 47.570 | 18.451 | 0.00 | 0.00 |
| ATOM | 412 | O    | ALA | X | 27 | 34.184 | 48.173 | 17.441 | 0.00 | 0.00 |
| ATOM | 413 | N    | PHE | X | 28 | 33.052 | 48.203 | 19.330 | 0.00 | 0.00 |

|      |     |      |     |   |    |        |        |        |      |      |
|------|-----|------|-----|---|----|--------|--------|--------|------|------|
| ATOM | 414 | H    | PHE | X | 28 | 32.745 | 47.611 | 20.089 | 0.00 | 0.00 |
| ATOM | 415 | CA   | PHE | X | 28 | 32.930 | 49.560 | 19.632 | 0.00 | 0.00 |
| ATOM | 416 | HA   | PHE | X | 28 | 33.179 | 50.124 | 18.733 | 0.00 | 0.00 |
| ATOM | 417 | CB   | PHE | X | 28 | 31.494 | 49.825 | 20.053 | 0.00 | 0.00 |
| ATOM | 418 | HB2  | PHE | X | 28 | 31.258 | 49.107 | 20.838 | 0.00 | 0.00 |
| ATOM | 419 | HB3  | PHE | X | 28 | 31.479 | 50.851 | 20.422 | 0.00 | 0.00 |
| ATOM | 420 | CG   | PHE | X | 28 | 30.521 | 49.679 | 18.990 | 0.00 | 0.00 |
| ATOM | 421 | CD1  | PHE | X | 28 | 30.294 | 48.382 | 18.408 | 0.00 | 0.00 |
| ATOM | 422 | HD1  | PHE | X | 28 | 30.740 | 47.483 | 18.809 | 0.00 | 0.00 |
| ATOM | 423 | CE1  | PHE | X | 28 | 29.371 | 48.201 | 17.360 | 0.00 | 0.00 |
| ATOM | 424 | HE1  | PHE | X | 28 | 29.134 | 47.234 | 16.941 | 0.00 | 0.00 |
| ATOM | 425 | CZ   | PHE | X | 28 | 28.861 | 49.387 | 16.825 | 0.00 | 0.00 |
| ATOM | 426 | HZ   | PHE | X | 28 | 28.203 | 49.214 | 15.987 | 0.00 | 0.00 |
| ATOM | 427 | CE2  | PHE | X | 28 | 29.096 | 50.670 | 17.243 | 0.00 | 0.00 |
| ATOM | 428 | HE2  | PHE | X | 28 | 28.598 | 51.490 | 16.746 | 0.00 | 0.00 |
| ATOM | 429 | CD2  | PHE | X | 28 | 29.910 | 50.836 | 18.347 | 0.00 | 0.00 |
| ATOM | 430 | HD2  | PHE | X | 28 | 30.082 | 51.813 | 18.775 | 0.00 | 0.00 |
| ATOM | 431 | C    | PHE | X | 28 | 33.988 | 49.917 | 20.675 | 0.00 | 0.00 |
| ATOM | 432 | O    | PHE | X | 28 | 33.953 | 49.287 | 21.731 | 0.00 | 0.00 |
| ATOM | 433 | N    | LEU | X | 29 | 34.963 | 50.772 | 20.428 | 0.00 | 0.00 |
| ATOM | 434 | H    | LEU | X | 29 | 34.889 | 51.220 | 19.525 | 0.00 | 0.00 |
| ATOM | 435 | CA   | LEU | X | 29 | 36.239 | 50.966 | 21.155 | 0.00 | 0.00 |
| ATOM | 436 | HA   | LEU | X | 29 | 36.244 | 50.516 | 22.148 | 0.00 | 0.00 |
| ATOM | 437 | CB   | LEU | X | 29 | 37.371 | 50.345 | 20.311 | 0.00 | 0.00 |
| ATOM | 438 | HB2  | LEU | X | 29 | 37.289 | 50.817 | 19.332 | 0.00 | 0.00 |
| ATOM | 439 | HB3  | LEU | X | 29 | 38.331 | 50.714 | 20.673 | 0.00 | 0.00 |
| ATOM | 440 | CG   | LEU | X | 29 | 37.491 | 48.836 | 20.149 | 0.00 | 0.00 |
| ATOM | 441 | HG   | LEU | X | 29 | 36.507 | 48.428 | 19.920 | 0.00 | 0.00 |
| ATOM | 442 | CD1  | LEU | X | 29 | 38.456 | 48.376 | 19.001 | 0.00 | 0.00 |
| ATOM | 443 | HD11 | LEU | X | 29 | 38.289 | 47.312 | 18.833 | 0.00 | 0.00 |
| ATOM | 444 | HD12 | LEU | X | 29 | 39.503 | 48.553 | 19.248 | 0.00 | 0.00 |
| ATOM | 445 | HD13 | LEU | X | 29 | 38.245 | 48.966 | 18.109 | 0.00 | 0.00 |
| ATOM | 446 | CD2  | LEU | X | 29 | 37.959 | 48.059 | 21.417 | 0.00 | 0.00 |
| ATOM | 447 | HD21 | LEU | X | 29 | 37.209 | 48.139 | 22.204 | 0.00 | 0.00 |
| ATOM | 448 | HD22 | LEU | X | 29 | 37.951 | 46.994 | 21.186 | 0.00 | 0.00 |
| ATOM | 449 | HD23 | LEU | X | 29 | 38.942 | 48.423 | 21.718 | 0.00 | 0.00 |
| ATOM | 450 | C    | LEU | X | 29 | 36.409 | 52.467 | 21.291 | 0.00 | 0.00 |
| ATOM | 451 | O    | LEU | X | 29 | 36.234 | 53.231 | 20.342 | 0.00 | 0.00 |
| ATOM | 452 | N    | GLY | X | 30 | 36.841 | 53.033 | 22.394 | 0.00 | 0.00 |
| ATOM | 453 | H    | GLY | X | 30 | 37.027 | 52.413 | 23.170 | 0.00 | 0.00 |
| ATOM | 454 | CA   | GLY | X | 30 | 36.954 | 54.470 | 22.647 | 0.00 | 0.00 |
| ATOM | 455 | HA2  | GLY | X | 30 | 37.588 | 54.696 | 23.505 | 0.00 | 0.00 |
| ATOM | 456 | HA3  | GLY | X | 30 | 37.350 | 54.860 | 21.710 | 0.00 | 0.00 |
| ATOM | 457 | C    | GLY | X | 30 | 35.575 | 55.162 | 22.946 | 0.00 | 0.00 |
| ATOM | 458 | O    | GLY | X | 30 | 35.464 | 56.290 | 22.657 | 0.00 | 0.00 |
| ATOM | 459 | N    | ILE | X | 31 | 34.542 | 54.474 | 23.465 | 0.00 | 0.00 |
| ATOM | 460 | H    | ILE | X | 31 | 34.832 | 53.619 | 23.917 | 0.00 | 0.00 |
| ATOM | 461 | CA   | ILE | X | 31 | 33.133 | 55.016 | 23.773 | 0.00 | 0.00 |
| ATOM | 462 | HA   | ILE | X | 31 | 32.734 | 55.456 | 22.859 | 0.00 | 0.00 |
| ATOM | 463 | CB   | ILE | X | 31 | 32.271 | 53.779 | 24.045 | 0.00 | 0.00 |
| ATOM | 464 | HB   | ILE | X | 31 | 32.743 | 53.464 | 24.976 | 0.00 | 0.00 |
| ATOM | 465 | CG2  | ILE | X | 31 | 30.808 | 54.156 | 24.360 | 0.00 | 0.00 |
| ATOM | 466 | HG21 | ILE | X | 31 | 30.299 | 53.454 | 25.019 | 0.00 | 0.00 |
| ATOM | 467 | HG22 | ILE | X | 31 | 30.248 | 54.218 | 23.426 | 0.00 | 0.00 |
| ATOM | 468 | HG23 | ILE | X | 31 | 30.807 | 55.057 | 24.973 | 0.00 | 0.00 |
| ATOM | 469 | CG1  | ILE | X | 31 | 32.299 | 52.621 | 23.018 | 0.00 | 0.00 |
| ATOM | 470 | HG12 | ILE | X | 31 | 31.796 | 52.934 | 22.103 | 0.00 | 0.00 |
| ATOM | 471 | HG13 | ILE | X | 31 | 33.315 | 52.422 | 22.678 | 0.00 | 0.00 |
| ATOM | 472 | CD1  | ILE | X | 31 | 31.486 | 51.368 | 23.512 | 0.00 | 0.00 |
| ATOM | 473 | HD11 | ILE | X | 31 | 31.737 | 51.132 | 24.546 | 0.00 | 0.00 |
| ATOM | 474 | HD12 | ILE | X | 31 | 31.838 | 50.465 | 23.013 | 0.00 | 0.00 |
| ATOM | 475 | HD13 | ILE | X | 31 | 30.415 | 51.522 | 23.381 | 0.00 | 0.00 |
| ATOM | 476 | C    | ILE | X | 31 | 33.340 | 56.047 | 24.944 | 0.00 | 0.00 |
| ATOM | 477 | O    | ILE | X | 31 | 34.074 | 55.674 | 25.837 | 0.00 | 0.00 |
| ATOM | 478 | N    | PRO | X | 32 | 32.891 | 57.291 | 24.838 | 0.00 | 0.00 |
| ATOM | 479 | CD   | PRO | X | 32 | 32.364 | 57.901 | 23.574 | 0.00 | 0.00 |
| ATOM | 480 | HD2  | PRO | X | 32 | 31.469 | 57.391 | 23.217 | 0.00 | 0.00 |

|      |     |     |     |   |    |        |        |        |      |      |
|------|-----|-----|-----|---|----|--------|--------|--------|------|------|
| ATOM | 481 | HD3 | PRO | X | 32 | 33.207 | 57.933 | 22.884 | 0.00 | 0.00 |
| ATOM | 482 | CG  | PRO | X | 32 | 31.971 | 59.322 | 23.984 | 0.00 | 0.00 |
| ATOM | 483 | HG2 | PRO | X | 32 | 30.893 | 59.313 | 24.145 | 0.00 | 0.00 |
| ATOM | 484 | HG3 | PRO | X | 32 | 32.203 | 60.006 | 23.168 | 0.00 | 0.00 |
| ATOM | 485 | CB  | PRO | X | 32 | 32.868 | 59.621 | 25.207 | 0.00 | 0.00 |
| ATOM | 486 | HB2 | PRO | X | 32 | 32.470 | 60.396 | 25.863 | 0.00 | 0.00 |
| ATOM | 487 | HB3 | PRO | X | 32 | 33.851 | 59.829 | 24.784 | 0.00 | 0.00 |
| ATOM | 488 | CA  | PRO | X | 32 | 32.913 | 58.284 | 25.885 | 0.00 | 0.00 |
| ATOM | 489 | HA  | PRO | X | 32 | 33.918 | 58.162 | 26.289 | 0.00 | 0.00 |
| ATOM | 490 | C   | PRO | X | 32 | 31.721 | 57.987 | 26.818 | 0.00 | 0.00 |
| ATOM | 491 | O   | PRO | X | 32 | 30.795 | 57.368 | 26.396 | 0.00 | 0.00 |
| ATOM | 492 | N   | PHE | X | 33 | 31.908 | 58.433 | 28.111 | 0.00 | 0.00 |
| ATOM | 493 | H   | PHE | X | 33 | 32.706 | 59.027 | 28.284 | 0.00 | 0.00 |
| ATOM | 494 | CA  | PHE | X | 33 | 30.862 | 58.327 | 29.154 | 0.00 | 0.00 |
| ATOM | 495 | HA  | PHE | X | 33 | 29.898 | 58.576 | 28.710 | 0.00 | 0.00 |
| ATOM | 496 | CB  | PHE | X | 33 | 30.746 | 56.944 | 29.757 | 0.00 | 0.00 |
| ATOM | 497 | HB2 | PHE | X | 33 | 29.807 | 56.944 | 30.310 | 0.00 | 0.00 |
| ATOM | 498 | HB3 | PHE | X | 33 | 30.811 | 56.220 | 28.945 | 0.00 | 0.00 |
| ATOM | 499 | CG  | PHE | X | 33 | 31.978 | 56.574 | 30.630 | 0.00 | 0.00 |
| ATOM | 500 | CD1 | PHE | X | 33 | 31.849 | 56.796 | 32.028 | 0.00 | 0.00 |
| ATOM | 501 | HD1 | PHE | X | 33 | 30.980 | 57.233 | 32.498 | 0.00 | 0.00 |
| ATOM | 502 | CE1 | PHE | X | 33 | 32.943 | 56.507 | 32.851 | 0.00 | 0.00 |
| ATOM | 503 | HE1 | PHE | X | 33 | 32.852 | 56.938 | 33.838 | 0.00 | 0.00 |
| ATOM | 504 | CZ  | PHE | X | 33 | 34.115 | 55.909 | 32.396 | 0.00 | 0.00 |
| ATOM | 505 | HZ  | PHE | X | 33 | 34.902 | 55.706 | 33.107 | 0.00 | 0.00 |
| ATOM | 506 | CE2 | PHE | X | 33 | 34.252 | 55.766 | 30.973 | 0.00 | 0.00 |
| ATOM | 507 | HE2 | PHE | X | 33 | 35.180 | 55.409 | 30.551 | 0.00 | 0.00 |
| ATOM | 508 | CD2 | PHE | X | 33 | 33.227 | 56.137 | 30.117 | 0.00 | 0.00 |
| ATOM | 509 | HD2 | PHE | X | 33 | 33.310 | 56.040 | 29.044 | 0.00 | 0.00 |
| ATOM | 510 | C   | PHE | X | 33 | 31.072 | 59.316 | 30.288 | 0.00 | 0.00 |
| ATOM | 511 | O   | PHE | X | 33 | 30.153 | 59.593 | 31.026 | 0.00 | 0.00 |
| ATOM | 512 | N   | ALA | X | 34 | 32.319 | 59.864 | 30.435 | 0.00 | 0.00 |
| ATOM | 513 | H   | ALA | X | 34 | 32.915 | 59.635 | 29.652 | 0.00 | 0.00 |
| ATOM | 514 | CA  | ALA | X | 34 | 32.806 | 60.806 | 31.476 | 0.00 | 0.00 |
| ATOM | 515 | HA  | ALA | X | 34 | 32.053 | 61.155 | 32.183 | 0.00 | 0.00 |
| ATOM | 516 | CB  | ALA | X | 34 | 33.776 | 60.111 | 32.352 | 0.00 | 0.00 |
| ATOM | 517 | HB1 | ALA | X | 34 | 33.257 | 59.328 | 32.906 | 0.00 | 0.00 |
| ATOM | 518 | HB2 | ALA | X | 34 | 34.123 | 60.843 | 33.081 | 0.00 | 0.00 |
| ATOM | 519 | HB3 | ALA | X | 34 | 34.613 | 59.745 | 31.758 | 0.00 | 0.00 |
| ATOM | 520 | C   | ALA | X | 34 | 33.463 | 62.010 | 30.853 | 0.00 | 0.00 |
| ATOM | 521 | O   | ALA | X | 34 | 34.076 | 61.838 | 29.765 | 0.00 | 0.00 |
| ATOM | 522 | N   | GLU | X | 35 | 33.631 | 63.181 | 31.480 | 0.00 | 0.00 |
| ATOM | 523 | H   | GLU | X | 35 | 33.127 | 63.254 | 32.353 | 0.00 | 0.00 |
| ATOM | 524 | CA  | GLU | X | 35 | 34.450 | 64.296 | 30.987 | 0.00 | 0.00 |
| ATOM | 525 | HA  | GLU | X | 35 | 34.256 | 64.354 | 29.916 | 0.00 | 0.00 |
| ATOM | 526 | CB  | GLU | X | 35 | 34.125 | 65.668 | 31.570 | 0.00 | 0.00 |
| ATOM | 527 | HB2 | GLU | X | 35 | 34.260 | 65.750 | 32.649 | 0.00 | 0.00 |
| ATOM | 528 | HB3 | GLU | X | 35 | 34.705 | 66.405 | 31.015 | 0.00 | 0.00 |
| ATOM | 529 | CG  | GLU | X | 35 | 32.635 | 66.161 | 31.322 | 0.00 | 0.00 |
| ATOM | 530 | HG2 | GLU | X | 35 | 31.961 | 65.519 | 31.888 | 0.00 | 0.00 |
| ATOM | 531 | HG3 | GLU | X | 35 | 32.564 | 67.183 | 31.695 | 0.00 | 0.00 |
| ATOM | 532 | CD  | GLU | X | 35 | 32.136 | 66.175 | 29.854 | 0.00 | 0.00 |
| ATOM | 533 | OE1 | GLU | X | 35 | 30.912 | 66.208 | 29.795 | 0.00 | 0.00 |
| ATOM | 534 | OE2 | GLU | X | 35 | 32.940 | 66.094 | 28.862 | 0.00 | 0.00 |
| ATOM | 535 | C   | GLU | X | 35 | 35.888 | 64.119 | 31.302 | 0.00 | 0.00 |
| ATOM | 536 | O   | GLU | X | 35 | 36.212 | 63.595 | 32.399 | 0.00 | 0.00 |
| ATOM | 537 | N   | PRO | X | 36 | 36.804 | 64.625 | 30.445 | 0.00 | 0.00 |
| ATOM | 538 | CD  | PRO | X | 36 | 36.645 | 65.332 | 29.153 | 0.00 | 0.00 |
| ATOM | 539 | HD2 | PRO | X | 36 | 36.369 | 66.349 | 29.433 | 0.00 | 0.00 |
| ATOM | 540 | HD3 | PRO | X | 36 | 35.848 | 64.862 | 28.577 | 0.00 | 0.00 |
| ATOM | 541 | CG  | PRO | X | 36 | 38.048 | 65.376 | 28.530 | 0.00 | 0.00 |
| ATOM | 542 | HG2 | PRO | X | 36 | 38.185 | 66.277 | 27.933 | 0.00 | 0.00 |
| ATOM | 543 | HG3 | PRO | X | 36 | 38.037 | 64.519 | 27.856 | 0.00 | 0.00 |
| ATOM | 544 | CB  | PRO | X | 36 | 38.998 | 65.257 | 29.708 | 0.00 | 0.00 |
| ATOM | 545 | HB2 | PRO | X | 36 | 39.337 | 66.224 | 30.080 | 0.00 | 0.00 |
| ATOM | 546 | HB3 | PRO | X | 36 | 39.880 | 64.788 | 29.271 | 0.00 | 0.00 |
| ATOM | 547 | CA  | PRO | X | 36 | 38.261 | 64.437 | 30.711 | 0.00 | 0.00 |

|      |     |     |     |   |    |        |        |        |      |      |
|------|-----|-----|-----|---|----|--------|--------|--------|------|------|
| ATOM | 548 | HA  | PRO | X | 36 | 38.510 | 63.383 | 30.589 | 0.00 | 0.00 |
| ATOM | 549 | C   | PRO | X | 36 | 38.763 | 64.783 | 32.140 | 0.00 | 0.00 |
| ATOM | 550 | O   | PRO | X | 36 | 38.548 | 65.917 | 32.526 | 0.00 | 0.00 |
| ATOM | 551 | N   | PRO | X | 37 | 39.388 | 63.899 | 32.867 | 0.00 | 0.00 |
| ATOM | 552 | CD  | PRO | X | 37 | 39.604 | 62.489 | 32.593 | 0.00 | 0.00 |
| ATOM | 553 | HD2 | PRO | X | 37 | 40.196 | 62.260 | 31.707 | 0.00 | 0.00 |
| ATOM | 554 | HD3 | PRO | X | 37 | 38.632 | 62.078 | 32.319 | 0.00 | 0.00 |
| ATOM | 555 | CG  | PRO | X | 37 | 40.127 | 61.788 | 33.770 | 0.00 | 0.00 |
| ATOM | 556 | HG2 | PRO | X | 37 | 41.212 | 61.762 | 33.868 | 0.00 | 0.00 |
| ATOM | 557 | HG3 | PRO | X | 37 | 39.704 | 60.792 | 33.902 | 0.00 | 0.00 |
| ATOM | 558 | CB  | PRO | X | 37 | 39.661 | 62.718 | 34.913 | 0.00 | 0.00 |
| ATOM | 559 | HB2 | PRO | X | 37 | 40.164 | 62.507 | 35.856 | 0.00 | 0.00 |
| ATOM | 560 | HB3 | PRO | X | 37 | 38.596 | 62.658 | 35.141 | 0.00 | 0.00 |
| ATOM | 561 | CA  | PRO | X | 37 | 39.750 | 64.131 | 34.268 | 0.00 | 0.00 |
| ATOM | 562 | HA  | PRO | X | 37 | 39.021 | 64.666 | 34.877 | 0.00 | 0.00 |
| ATOM | 563 | C   | PRO | X | 37 | 41.035 | 64.909 | 34.337 | 0.00 | 0.00 |
| ATOM | 564 | O   | PRO | X | 37 | 41.766 | 64.702 | 35.287 | 0.00 | 0.00 |
| ATOM | 565 | N   | MET | X | 38 | 41.330 | 65.832 | 33.377 | 0.00 | 0.00 |
| ATOM | 566 | H   | MET | X | 38 | 40.692 | 66.004 | 32.614 | 0.00 | 0.00 |
| ATOM | 567 | CA  | MET | X | 38 | 42.597 | 66.487 | 33.456 | 0.00 | 0.00 |
| ATOM | 568 | HA  | MET | X | 38 | 43.395 | 65.830 | 33.801 | 0.00 | 0.00 |
| ATOM | 569 | CB  | MET | X | 38 | 43.073 | 66.964 | 32.021 | 0.00 | 0.00 |
| ATOM | 570 | HB2 | MET | X | 38 | 44.018 | 67.492 | 32.143 | 0.00 | 0.00 |
| ATOM | 571 | HB3 | MET | X | 38 | 43.199 | 66.057 | 31.430 | 0.00 | 0.00 |
| ATOM | 572 | CG  | MET | X | 38 | 41.939 | 67.829 | 31.367 | 0.00 | 0.00 |
| ATOM | 573 | HG2 | MET | X | 38 | 40.952 | 67.369 | 31.397 | 0.00 | 0.00 |
| ATOM | 574 | HG3 | MET | X | 38 | 41.788 | 68.713 | 31.987 | 0.00 | 0.00 |
| ATOM | 575 | SD  | MET | X | 38 | 42.351 | 68.357 | 29.652 | 0.00 | 0.00 |
| ATOM | 576 | CE  | MET | X | 38 | 42.688 | 66.806 | 28.803 | 0.00 | 0.00 |
| ATOM | 577 | HE1 | MET | X | 38 | 41.924 | 66.032 | 28.728 | 0.00 | 0.00 |
| ATOM | 578 | HE2 | MET | X | 38 | 42.846 | 66.987 | 27.740 | 0.00 | 0.00 |
| ATOM | 579 | HE3 | MET | X | 38 | 43.597 | 66.370 | 29.217 | 0.00 | 0.00 |
| ATOM | 580 | C   | MET | X | 38 | 42.693 | 67.651 | 34.525 | 0.00 | 0.00 |
| ATOM | 581 | O   | MET | X | 38 | 41.688 | 68.365 | 34.811 | 0.00 | 0.00 |
| ATOM | 582 | N   | GLY | X | 39 | 43.953 | 68.055 | 34.783 | 0.00 | 0.00 |
| ATOM | 583 | H   | GLY | X | 39 | 44.718 | 67.415 | 34.624 | 0.00 | 0.00 |
| ATOM | 584 | CA  | GLY | X | 39 | 44.384 | 69.369 | 35.342 | 0.00 | 0.00 |
| ATOM | 585 | HA2 | GLY | X | 39 | 45.436 | 69.300 | 35.619 | 0.00 | 0.00 |
| ATOM | 586 | HA3 | GLY | X | 39 | 44.106 | 70.066 | 34.552 | 0.00 | 0.00 |
| ATOM | 587 | C   | GLY | X | 39 | 43.570 | 69.655 | 36.680 | 0.00 | 0.00 |
| ATOM | 588 | O   | GLY | X | 39 | 43.672 | 68.906 | 37.626 | 0.00 | 0.00 |
| ATOM | 589 | N   | PRO | X | 40 | 42.728 | 70.691 | 36.686 | 0.00 | 0.00 |
| ATOM | 590 | CD  | PRO | X | 40 | 42.506 | 71.711 | 35.650 | 0.00 | 0.00 |
| ATOM | 591 | HD2 | PRO | X | 40 | 42.080 | 71.289 | 34.739 | 0.00 | 0.00 |
| ATOM | 592 | HD3 | PRO | X | 40 | 43.409 | 72.212 | 35.301 | 0.00 | 0.00 |
| ATOM | 593 | CG  | PRO | X | 40 | 41.584 | 72.778 | 36.275 | 0.00 | 0.00 |
| ATOM | 594 | HG2 | PRO | X | 40 | 41.069 | 73.369 | 35.518 | 0.00 | 0.00 |
| ATOM | 595 | HG3 | PRO | X | 40 | 42.263 | 73.403 | 36.855 | 0.00 | 0.00 |
| ATOM | 596 | CB  | PRO | X | 40 | 40.730 | 71.852 | 37.148 | 0.00 | 0.00 |
| ATOM | 597 | HB2 | PRO | X | 40 | 39.995 | 71.406 | 36.478 | 0.00 | 0.00 |
| ATOM | 598 | HB3 | PRO | X | 40 | 40.125 | 72.346 | 37.907 | 0.00 | 0.00 |
| ATOM | 599 | CA  | PRO | X | 40 | 41.734 | 70.869 | 37.789 | 0.00 | 0.00 |
| ATOM | 600 | HA  | PRO | X | 40 | 42.324 | 71.319 | 38.588 | 0.00 | 0.00 |
| ATOM | 601 | C   | PRO | X | 40 | 40.875 | 69.692 | 38.338 | 0.00 | 0.00 |
| ATOM | 602 | O   | PRO | X | 40 | 40.527 | 69.676 | 39.495 | 0.00 | 0.00 |
| ATOM | 603 | N   | ARG | X | 41 | 40.624 | 68.697 | 37.487 | 0.00 | 0.00 |
| ATOM | 604 | H   | ARG | X | 41 | 40.926 | 68.810 | 36.530 | 0.00 | 0.00 |
| ATOM | 605 | CA  | ARG | X | 41 | 39.920 | 67.473 | 37.905 | 0.00 | 0.00 |
| ATOM | 606 | HA  | ARG | X | 41 | 39.195 | 67.694 | 38.688 | 0.00 | 0.00 |
| ATOM | 607 | CB  | ARG | X | 41 | 39.209 | 66.910 | 36.702 | 0.00 | 0.00 |
| ATOM | 608 | HB2 | ARG | X | 41 | 39.969 | 66.768 | 35.934 | 0.00 | 0.00 |
| ATOM | 609 | HB3 | ARG | X | 41 | 38.723 | 65.959 | 36.920 | 0.00 | 0.00 |
| ATOM | 610 | CG  | ARG | X | 41 | 38.125 | 67.886 | 36.159 | 0.00 | 0.00 |
| ATOM | 611 | HG2 | ARG | X | 41 | 37.390 | 67.968 | 36.960 | 0.00 | 0.00 |
| ATOM | 612 | HG3 | ARG | X | 41 | 38.679 | 68.784 | 35.887 | 0.00 | 0.00 |
| ATOM | 613 | CD  | ARG | X | 41 | 37.353 | 67.284 | 34.999 | 0.00 | 0.00 |
| ATOM | 614 | HD2 | ARG | X | 41 | 38.074 | 67.209 | 34.185 | 0.00 | 0.00 |



|      |     |      |     |   |    |        |        |        |      |      |
|------|-----|------|-----|---|----|--------|--------|--------|------|------|
| ATOM | 615 | HD3  | ARG | X | 41 | 36.971 | 66.346 | 35.402 | 0.00 | 0.00 |
| ATOM | 616 | NE   | ARG | X | 41 | 36.252 | 68.073 | 34.461 | 0.00 | 0.00 |
| ATOM | 617 | HE   | ARG | X | 41 | 35.373 | 67.946 | 34.942 | 0.00 | 0.00 |
| ATOM | 618 | CZ   | ARG | X | 41 | 36.102 | 68.643 | 33.351 | 0.00 | 0.00 |
| ATOM | 619 | NH1  | ARG | X | 41 | 37.002 | 68.698 | 32.352 | 0.00 | 0.00 |
| ATOM | 620 | HH11 | ARG | X | 41 | 37.896 | 68.244 | 32.473 | 0.00 | 0.00 |
| ATOM | 621 | HH12 | ARG | X | 41 | 36.801 | 68.926 | 31.388 | 0.00 | 0.00 |
| ATOM | 622 | NH2  | ARG | X | 41 | 34.937 | 69.071 | 33.062 | 0.00 | 0.00 |
| ATOM | 623 | HH21 | ARG | X | 41 | 34.189 | 68.991 | 33.735 | 0.00 | 0.00 |
| ATOM | 624 | HH22 | ARG | X | 41 | 34.768 | 69.261 | 32.084 | 0.00 | 0.00 |
| ATOM | 625 | C    | ARG | X | 41 | 40.879 | 66.263 | 38.376 | 0.00 | 0.00 |
| ATOM | 626 | O    | ARG | X | 41 | 40.482 | 65.170 | 38.767 | 0.00 | 0.00 |
| ATOM | 627 | N    | ARG | X | 42 | 42.202 | 66.522 | 38.307 | 0.00 | 0.00 |
| ATOM | 628 | H    | ARG | X | 42 | 42.507 | 67.443 | 38.026 | 0.00 | 0.00 |
| ATOM | 629 | CA   | ARG | X | 42 | 43.170 | 65.522 | 38.673 | 0.00 | 0.00 |
| ATOM | 630 | HA   | ARG | X | 42 | 42.928 | 64.592 | 38.159 | 0.00 | 0.00 |
| ATOM | 631 | CB   | ARG | X | 42 | 44.617 | 65.930 | 38.323 | 0.00 | 0.00 |
| ATOM | 632 | HB2  | ARG | X | 42 | 44.680 | 66.039 | 37.240 | 0.00 | 0.00 |
| ATOM | 633 | HB3  | ARG | X | 42 | 44.840 | 66.849 | 38.864 | 0.00 | 0.00 |
| ATOM | 634 | CG   | ARG | X | 42 | 45.663 | 64.848 | 38.685 | 0.00 | 0.00 |
| ATOM | 635 | HG2  | ARG | X | 42 | 45.430 | 64.353 | 39.627 | 0.00 | 0.00 |
| ATOM | 636 | HG3  | ARG | X | 42 | 45.555 | 63.939 | 38.092 | 0.00 | 0.00 |
| ATOM | 637 | CD   | ARG | X | 42 | 47.169 | 65.297 | 38.631 | 0.00 | 0.00 |
| ATOM | 638 | HD2  | ARG | X | 42 | 47.333 | 66.041 | 39.410 | 0.00 | 0.00 |
| ATOM | 639 | HD3  | ARG | X | 42 | 47.869 | 64.468 | 38.736 | 0.00 | 0.00 |
| ATOM | 640 | NE   | ARG | X | 42 | 47.432 | 65.855 | 37.289 | 0.00 | 0.00 |
| ATOM | 641 | HE   | ARG | X | 42 | 46.897 | 65.381 | 36.575 | 0.00 | 0.00 |
| ATOM | 642 | CZ   | ARG | X | 42 | 48.287 | 66.828 | 36.884 | 0.00 | 0.00 |
| ATOM | 643 | NH1  | ARG | X | 42 | 48.990 | 67.423 | 37.851 | 0.00 | 0.00 |
| ATOM | 644 | HH11 | ARG | X | 42 | 48.860 | 67.255 | 38.838 | 0.00 | 0.00 |
| ATOM | 645 | HH12 | ARG | X | 42 | 49.775 | 68.012 | 37.615 | 0.00 | 0.00 |
| ATOM | 646 | NH2  | ARG | X | 42 | 48.539 | 66.978 | 35.574 | 0.00 | 0.00 |
| ATOM | 647 | HH21 | ARG | X | 42 | 48.160 | 66.477 | 34.783 | 0.00 | 0.00 |
| ATOM | 648 | HH22 | ARG | X | 42 | 49.052 | 67.810 | 35.319 | 0.00 | 0.00 |
| ATOM | 649 | C    | ARG | X | 42 | 43.069 | 65.271 | 40.154 | 0.00 | 0.00 |
| ATOM | 650 | O    | ARG | X | 42 | 43.061 | 66.290 | 40.898 | 0.00 | 0.00 |
| ATOM | 651 | N    | PHE | X | 43 | 42.849 | 64.000 | 40.602 | 0.00 | 0.00 |
| ATOM | 652 | H    | PHE | X | 43 | 42.792 | 63.325 | 39.853 | 0.00 | 0.00 |
| ATOM | 653 | CA   | PHE | X | 43 | 42.701 | 63.408 | 41.960 | 0.00 | 0.00 |
| ATOM | 654 | HA   | PHE | X | 43 | 42.987 | 62.360 | 41.864 | 0.00 | 0.00 |
| ATOM | 655 | CB   | PHE | X | 43 | 43.574 | 64.167 | 42.971 | 0.00 | 0.00 |
| ATOM | 656 | HB2  | PHE | X | 43 | 43.136 | 65.089 | 43.352 | 0.00 | 0.00 |
| ATOM | 657 | HB3  | PHE | X | 43 | 43.526 | 63.616 | 43.911 | 0.00 | 0.00 |
| ATOM | 658 | CG   | PHE | X | 43 | 45.051 | 64.294 | 42.667 | 0.00 | 0.00 |
| ATOM | 659 | CD1  | PHE | X | 43 | 45.874 | 63.171 | 42.248 | 0.00 | 0.00 |
| ATOM | 660 | HD1  | PHE | X | 43 | 45.456 | 62.175 | 42.257 | 0.00 | 0.00 |
| ATOM | 661 | CE1  | PHE | X | 43 | 47.224 | 63.429 | 42.026 | 0.00 | 0.00 |
| ATOM | 662 | HE1  | PHE | X | 43 | 47.941 | 62.667 | 41.757 | 0.00 | 0.00 |
| ATOM | 663 | CZ   | PHE | X | 43 | 47.683 | 64.709 | 42.095 | 0.00 | 0.00 |
| ATOM | 664 | HZ   | PHE | X | 43 | 48.721 | 64.726 | 41.796 | 0.00 | 0.00 |
| ATOM | 665 | CE2  | PHE | X | 43 | 46.909 | 65.831 | 42.357 | 0.00 | 0.00 |
| ATOM | 666 | HE2  | PHE | X | 43 | 47.282 | 66.836 | 42.229 | 0.00 | 0.00 |
| ATOM | 667 | CD2  | PHE | X | 43 | 45.564 | 65.575 | 42.754 | 0.00 | 0.00 |
| ATOM | 668 | HD2  | PHE | X | 43 | 44.864 | 66.284 | 43.172 | 0.00 | 0.00 |
| ATOM | 669 | C    | PHE | X | 43 | 41.244 | 63.613 | 42.472 | 0.00 | 0.00 |
| ATOM | 670 | O    | PHE | X | 43 | 41.007 | 63.195 | 43.595 | 0.00 | 0.00 |
| ATOM | 671 | N    | LEU | X | 44 | 40.298 | 64.235 | 41.762 | 0.00 | 0.00 |
| ATOM | 672 | H    | LEU | X | 44 | 40.685 | 64.608 | 40.907 | 0.00 | 0.00 |
| ATOM | 673 | CA   | LEU | X | 44 | 38.863 | 64.433 | 42.154 | 0.00 | 0.00 |
| ATOM | 674 | HA   | LEU | X | 44 | 38.826 | 64.371 | 43.242 | 0.00 | 0.00 |
| ATOM | 675 | CB   | LEU | X | 44 | 38.359 | 65.812 | 41.685 | 0.00 | 0.00 |
| ATOM | 676 | HB2  | LEU | X | 44 | 38.810 | 66.016 | 40.714 | 0.00 | 0.00 |
| ATOM | 677 | HB3  | LEU | X | 44 | 37.303 | 65.709 | 41.432 | 0.00 | 0.00 |
| ATOM | 678 | CG   | LEU | X | 44 | 38.693 | 67.023 | 42.534 | 0.00 | 0.00 |
| ATOM | 679 | HG   | LEU | X | 44 | 39.775 | 66.998 | 42.660 | 0.00 | 0.00 |
| ATOM | 680 | CD1  | LEU | X | 44 | 38.357 | 68.307 | 41.749 | 0.00 | 0.00 |
| ATOM | 681 | HD11 | LEU | X | 44 | 38.576 | 69.224 | 42.296 | 0.00 | 0.00 |

|      |     |      |     |   |    |        |        |        |      |      |
|------|-----|------|-----|---|----|--------|--------|--------|------|------|
| ATOM | 682 | HD12 | LEU | X | 44 | 37.291 | 68.323 | 41.521 | 0.00 | 0.00 |
| ATOM | 683 | HD13 | LEU | X | 44 | 38.990 | 68.319 | 40.862 | 0.00 | 0.00 |
| ATOM | 684 | CD2  | LEU | X | 44 | 37.993 | 66.908 | 43.907 | 0.00 | 0.00 |
| ATOM | 685 | HD21 | LEU | X | 44 | 38.375 | 67.712 | 44.536 | 0.00 | 0.00 |
| ATOM | 686 | HD22 | LEU | X | 44 | 36.919 | 67.088 | 43.843 | 0.00 | 0.00 |
| ATOM | 687 | HD23 | LEU | X | 44 | 38.171 | 65.931 | 44.356 | 0.00 | 0.00 |
| ATOM | 688 | C    | LEU | X | 44 | 37.931 | 63.412 | 41.534 | 0.00 | 0.00 |
| ATOM | 689 | O    | LEU | X | 44 | 38.354 | 62.680 | 40.584 | 0.00 | 0.00 |
| ATOM | 690 | N    | PRO | X | 45 | 36.744 | 63.201 | 42.027 | 0.00 | 0.00 |
| ATOM | 691 | CD   | PRO | X | 45 | 36.019 | 63.911 | 43.088 | 0.00 | 0.00 |
| ATOM | 692 | HD2  | PRO | X | 45 | 35.606 | 64.852 | 42.724 | 0.00 | 0.00 |
| ATOM | 693 | HD3  | PRO | X | 45 | 36.573 | 64.233 | 43.969 | 0.00 | 0.00 |
| ATOM | 694 | CG   | PRO | X | 45 | 34.902 | 63.029 | 43.598 | 0.00 | 0.00 |
| ATOM | 695 | HG2  | PRO | X | 45 | 34.023 | 63.580 | 43.932 | 0.00 | 0.00 |
| ATOM | 696 | HG3  | PRO | X | 45 | 35.317 | 62.437 | 44.414 | 0.00 | 0.00 |
| ATOM | 697 | CB   | PRO | X | 45 | 34.675 | 62.126 | 42.428 | 0.00 | 0.00 |
| ATOM | 698 | HB2  | PRO | X | 45 | 33.796 | 62.539 | 41.933 | 0.00 | 0.00 |
| ATOM | 699 | HB3  | PRO | X | 45 | 34.478 | 61.129 | 42.821 | 0.00 | 0.00 |
| ATOM | 700 | CA   | PRO | X | 45 | 35.856 | 62.231 | 41.466 | 0.00 | 0.00 |
| ATOM | 701 | HA   | PRO | X | 45 | 36.383 | 61.276 | 41.479 | 0.00 | 0.00 |
| ATOM | 702 | C    | PRO | X | 45 | 35.367 | 62.694 | 40.130 | 0.00 | 0.00 |
| ATOM | 703 | O    | PRO | X | 45 | 35.262 | 63.961 | 39.857 | 0.00 | 0.00 |
| ATOM | 704 | N    | PRO | X | 46 | 35.058 | 61.644 | 39.283 | 0.00 | 0.00 |
| ATOM | 705 | CD   | PRO | X | 46 | 35.158 | 60.205 | 39.600 | 0.00 | 0.00 |
| ATOM | 706 | HD2  | PRO | X | 46 | 34.758 | 59.830 | 40.542 | 0.00 | 0.00 |
| ATOM | 707 | HD3  | PRO | X | 46 | 36.146 | 59.743 | 39.576 | 0.00 | 0.00 |
| ATOM | 708 | CG   | PRO | X | 46 | 34.268 | 59.598 | 38.493 | 0.00 | 0.00 |
| ATOM | 709 | HG2  | PRO | X | 46 | 33.205 | 59.684 | 38.719 | 0.00 | 0.00 |
| ATOM | 710 | HG3  | PRO | X | 46 | 34.445 | 58.525 | 38.415 | 0.00 | 0.00 |
| ATOM | 711 | CB   | PRO | X | 46 | 34.625 | 60.441 | 37.280 | 0.00 | 0.00 |
| ATOM | 712 | HB2  | PRO | X | 46 | 33.909 | 60.446 | 36.458 | 0.00 | 0.00 |
| ATOM | 713 | HB3  | PRO | X | 46 | 35.603 | 60.231 | 36.848 | 0.00 | 0.00 |
| ATOM | 714 | CA   | PRO | X | 46 | 34.666 | 61.812 | 37.879 | 0.00 | 0.00 |
| ATOM | 715 | HA   | PRO | X | 46 | 35.347 | 62.460 | 37.327 | 0.00 | 0.00 |
| ATOM | 716 | C    | PRO | X | 46 | 33.261 | 62.462 | 37.813 | 0.00 | 0.00 |
| ATOM | 717 | O    | PRO | X | 46 | 32.527 | 62.435 | 38.824 | 0.00 | 0.00 |
| ATOM | 718 | N    | GLU | X | 47 | 32.975 | 63.062 | 36.658 | 0.00 | 0.00 |
| ATOM | 719 | H    | GLU | X | 47 | 33.722 | 63.083 | 35.979 | 0.00 | 0.00 |
| ATOM | 720 | CA   | GLU | X | 47 | 31.658 | 63.546 | 36.356 | 0.00 | 0.00 |
| ATOM | 721 | HA   | GLU | X | 47 | 30.982 | 63.053 | 37.055 | 0.00 | 0.00 |
| ATOM | 722 | CB   | GLU | X | 47 | 31.590 | 65.100 | 36.597 | 0.00 | 0.00 |
| ATOM | 723 | HB2  | GLU | X | 47 | 30.600 | 65.522 | 36.428 | 0.00 | 0.00 |
| ATOM | 724 | HB3  | GLU | X | 47 | 31.976 | 65.325 | 37.591 | 0.00 | 0.00 |
| ATOM | 725 | CG   | GLU | X | 47 | 32.554 | 65.829 | 35.554 | 0.00 | 0.00 |
| ATOM | 726 | HG2  | GLU | X | 47 | 33.574 | 65.475 | 35.707 | 0.00 | 0.00 |
| ATOM | 727 | HG3  | GLU | X | 47 | 32.264 | 65.596 | 34.529 | 0.00 | 0.00 |
| ATOM | 728 | CD   | GLU | X | 47 | 32.525 | 67.333 | 35.512 | 0.00 | 0.00 |
| ATOM | 729 | OE1  | GLU | X | 47 | 31.417 | 67.964 | 35.432 | 0.00 | 0.00 |
| ATOM | 730 | OE2  | GLU | X | 47 | 33.679 | 67.935 | 35.488 | 0.00 | 0.00 |
| ATOM | 731 | C    | GLU | X | 47 | 31.163 | 63.003 | 34.980 | 0.00 | 0.00 |
| ATOM | 732 | O    | GLU | X | 47 | 32.025 | 62.917 | 34.072 | 0.00 | 0.00 |
| ATOM | 733 | N    | PRO | X | 48 | 29.847 | 62.902 | 34.679 | 0.00 | 0.00 |
| ATOM | 734 | CD   | PRO | X | 48 | 28.778 | 63.342 | 35.558 | 0.00 | 0.00 |
| ATOM | 735 | HD2  | PRO | X | 48 | 29.005 | 64.399 | 35.695 | 0.00 | 0.00 |
| ATOM | 736 | HD3  | PRO | X | 48 | 28.885 | 62.869 | 36.534 | 0.00 | 0.00 |
| ATOM | 737 | CG   | PRO | X | 48 | 27.486 | 63.154 | 34.827 | 0.00 | 0.00 |
| ATOM | 738 | HG2  | PRO | X | 48 | 27.014 | 64.108 | 34.594 | 0.00 | 0.00 |
| ATOM | 739 | HG3  | PRO | X | 48 | 26.893 | 62.703 | 35.623 | 0.00 | 0.00 |
| ATOM | 740 | CB   | PRO | X | 48 | 27.780 | 62.167 | 33.744 | 0.00 | 0.00 |
| ATOM | 741 | HB2  | PRO | X | 48 | 27.184 | 62.229 | 32.834 | 0.00 | 0.00 |
| ATOM | 742 | HB3  | PRO | X | 48 | 27.679 | 61.106 | 33.974 | 0.00 | 0.00 |
| ATOM | 743 | CA   | PRO | X | 48 | 29.272 | 62.376 | 33.445 | 0.00 | 0.00 |
| ATOM | 744 | HA   | PRO | X | 48 | 29.728 | 61.404 | 33.252 | 0.00 | 0.00 |
| ATOM | 745 | C    | PRO | X | 48 | 29.471 | 63.263 | 32.223 | 0.00 | 0.00 |
| ATOM | 746 | O    | PRO | X | 48 | 29.417 | 64.486 | 32.274 | 0.00 | 0.00 |
| ATOM | 747 | N    | LYS | X | 49 | 29.720 | 62.639 | 31.088 | 0.00 | 0.00 |
| ATOM | 748 | H    | LYS | X | 49 | 29.677 | 61.630 | 31.078 | 0.00 | 0.00 |

|      |     |      |     |   |    |        |        |        |      |      |
|------|-----|------|-----|---|----|--------|--------|--------|------|------|
| ATOM | 749 | CA   | LYS | X | 49 | 29.674 | 63.326 | 29.754 | 0.00 | 0.00 |
| ATOM | 750 | HA   | LYS | X | 49 | 30.517 | 64.000 | 29.597 | 0.00 | 0.00 |
| ATOM | 751 | CB   | LYS | X | 49 | 29.964 | 62.204 | 28.702 | 0.00 | 0.00 |
| ATOM | 752 | HB2  | LYS | X | 49 | 30.964 | 61.823 | 28.909 | 0.00 | 0.00 |
| ATOM | 753 | HB3  | LYS | X | 49 | 29.234 | 61.397 | 28.771 | 0.00 | 0.00 |
| ATOM | 754 | CG   | LYS | X | 49 | 29.879 | 62.616 | 27.222 | 0.00 | 0.00 |
| ATOM | 755 | HG2  | LYS | X | 49 | 30.102 | 61.733 | 26.622 | 0.00 | 0.00 |
| ATOM | 756 | HG3  | LYS | X | 49 | 28.855 | 62.912 | 26.995 | 0.00 | 0.00 |
| ATOM | 757 | CD   | LYS | X | 49 | 30.835 | 63.803 | 26.742 | 0.00 | 0.00 |
| ATOM | 758 | HD2  | LYS | X | 49 | 30.674 | 64.008 | 25.684 | 0.00 | 0.00 |
| ATOM | 759 | HD3  | LYS | X | 49 | 30.561 | 64.703 | 27.293 | 0.00 | 0.00 |
| ATOM | 760 | CE   | LYS | X | 49 | 32.339 | 63.455 | 26.963 | 0.00 | 0.00 |
| ATOM | 761 | HE2  | LYS | X | 49 | 32.535 | 63.122 | 27.982 | 0.00 | 0.00 |
| ATOM | 762 | HE3  | LYS | X | 49 | 32.614 | 62.675 | 26.253 | 0.00 | 0.00 |
| ATOM | 763 | NZ   | LYS | X | 49 | 33.238 | 64.625 | 26.724 | 0.00 | 0.00 |
| ATOM | 764 | HZ1  | LYS | X | 49 | 34.146 | 64.185 | 26.741 | 0.00 | 0.00 |
| ATOM | 765 | HZ2  | LYS | X | 49 | 33.200 | 65.064 | 25.815 | 0.00 | 0.00 |
| ATOM | 766 | HZ3  | LYS | X | 49 | 33.139 | 65.349 | 27.422 | 0.00 | 0.00 |
| ATOM | 767 | C    | LYS | X | 49 | 28.310 | 63.997 | 29.438 | 0.00 | 0.00 |
| ATOM | 768 | O    | LYS | X | 49 | 27.269 | 63.364 | 29.468 | 0.00 | 0.00 |
| ATOM | 769 | N    | GLN | X | 50 | 28.283 | 65.246 | 29.046 | 0.00 | 0.00 |
| ATOM | 770 | H    | GLN | X | 50 | 29.124 | 65.780 | 29.218 | 0.00 | 0.00 |
| ATOM | 771 | CA   | GLN | X | 50 | 27.209 | 66.002 | 28.294 | 0.00 | 0.00 |
| ATOM | 772 | HA   | GLN | X | 50 | 26.197 | 65.929 | 28.693 | 0.00 | 0.00 |
| ATOM | 773 | CB   | GLN | X | 50 | 27.644 | 67.489 | 28.276 | 0.00 | 0.00 |
| ATOM | 774 | HB2  | GLN | X | 50 | 27.777 | 67.618 | 29.350 | 0.00 | 0.00 |
| ATOM | 775 | HB3  | GLN | X | 50 | 28.648 | 67.438 | 27.854 | 0.00 | 0.00 |
| ATOM | 776 | CG   | GLN | X | 50 | 26.825 | 68.569 | 27.524 | 0.00 | 0.00 |
| ATOM | 777 | HG2  | GLN | X | 50 | 26.609 | 68.272 | 26.498 | 0.00 | 0.00 |
| ATOM | 778 | HG3  | GLN | X | 50 | 25.837 | 68.713 | 27.962 | 0.00 | 0.00 |
| ATOM | 779 | CD   | GLN | X | 50 | 27.446 | 70.031 | 27.567 | 0.00 | 0.00 |
| ATOM | 780 | OE1  | GLN | X | 50 | 28.062 | 70.304 | 28.600 | 0.00 | 0.00 |
| ATOM | 781 | NE2  | GLN | X | 50 | 27.245 | 70.713 | 26.469 | 0.00 | 0.00 |
| ATOM | 782 | HE21 | GLN | X | 50 | 27.525 | 71.683 | 26.459 | 0.00 | 0.00 |
| ATOM | 783 | HE22 | GLN | X | 50 | 26.771 | 70.374 | 25.645 | 0.00 | 0.00 |
| ATOM | 784 | C    | GLN | X | 50 | 27.069 | 65.517 | 26.891 | 0.00 | 0.00 |
| ATOM | 785 | O    | GLN | X | 50 | 28.130 | 65.447 | 26.185 | 0.00 | 0.00 |
| ATOM | 786 | N    | PRO | X | 51 | 25.808 | 65.302 | 26.379 | 0.00 | 0.00 |
| ATOM | 787 | CD   | PRO | X | 51 | 24.516 | 65.366 | 27.156 | 0.00 | 0.00 |
| ATOM | 788 | HD2  | PRO | X | 51 | 24.301 | 66.420 | 27.335 | 0.00 | 0.00 |
| ATOM | 789 | HD3  | PRO | X | 51 | 24.559 | 64.785 | 28.077 | 0.00 | 0.00 |
| ATOM | 790 | CG   | PRO | X | 51 | 23.477 | 64.736 | 26.288 | 0.00 | 0.00 |
| ATOM | 791 | HG2  | PRO | X | 51 | 22.539 | 65.214 | 26.568 | 0.00 | 0.00 |
| ATOM | 792 | HG3  | PRO | X | 51 | 23.256 | 63.680 | 26.441 | 0.00 | 0.00 |
| ATOM | 793 | CB   | PRO | X | 51 | 23.966 | 64.990 | 24.850 | 0.00 | 0.00 |
| ATOM | 794 | HB2  | PRO | X | 51 | 23.851 | 66.021 | 24.514 | 0.00 | 0.00 |
| ATOM | 795 | HB3  | PRO | X | 51 | 23.498 | 64.288 | 24.160 | 0.00 | 0.00 |
| ATOM | 796 | CA   | PRO | X | 51 | 25.473 | 64.787 | 25.005 | 0.00 | 0.00 |
| ATOM | 797 | HA   | PRO | X | 51 | 25.710 | 63.723 | 24.991 | 0.00 | 0.00 |
| ATOM | 798 | C    | PRO | X | 51 | 26.181 | 65.545 | 23.898 | 0.00 | 0.00 |
| ATOM | 799 | O    | PRO | X | 51 | 26.563 | 66.743 | 24.012 | 0.00 | 0.00 |
| ATOM | 800 | N    | TRP | X | 52 | 26.408 | 64.775 | 22.828 | 0.00 | 0.00 |
| ATOM | 801 | H    | TRP | X | 52 | 26.145 | 63.800 | 22.822 | 0.00 | 0.00 |
| ATOM | 802 | CA   | TRP | X | 52 | 27.313 | 65.174 | 21.688 | 0.00 | 0.00 |
| ATOM | 803 | HA   | TRP | X | 52 | 27.675 | 66.194 | 21.819 | 0.00 | 0.00 |
| ATOM | 804 | CB   | TRP | X | 52 | 28.413 | 64.181 | 21.547 | 0.00 | 0.00 |
| ATOM | 805 | HB2  | TRP | X | 52 | 29.068 | 64.545 | 20.755 | 0.00 | 0.00 |
| ATOM | 806 | HB3  | TRP | X | 52 | 28.869 | 64.212 | 22.537 | 0.00 | 0.00 |
| ATOM | 807 | CG   | TRP | X | 52 | 28.016 | 62.761 | 21.262 | 0.00 | 0.00 |
| ATOM | 808 | CD1  | TRP | X | 52 | 27.522 | 62.244 | 20.070 | 0.00 | 0.00 |
| ATOM | 809 | HD1  | TRP | X | 52 | 27.413 | 62.838 | 19.175 | 0.00 | 0.00 |
| ATOM | 810 | NE1  | TRP | X | 52 | 27.073 | 60.973 | 20.260 | 0.00 | 0.00 |
| ATOM | 811 | HE1  | TRP | X | 52 | 26.661 | 60.437 | 19.509 | 0.00 | 0.00 |
| ATOM | 812 | CE2  | TRP | X | 52 | 27.315 | 60.580 | 21.570 | 0.00 | 0.00 |
| ATOM | 813 | CZ2  | TRP | X | 52 | 27.138 | 59.322 | 22.100 | 0.00 | 0.00 |
| ATOM | 814 | HZ2  | TRP | X | 52 | 26.789 | 58.474 | 21.529 | 0.00 | 0.00 |
| ATOM | 815 | CH2  | TRP | X | 52 | 27.510 | 59.141 | 23.459 | 0.00 | 0.00 |

|      |     |      |     |   |    |        |        |        |      |      |
|------|-----|------|-----|---|----|--------|--------|--------|------|------|
| ATOM | 816 | HH2  | TRP | X | 52 | 27.207 | 58.216 | 23.927 | 0.00 | 0.00 |
| ATOM | 817 | CZ3  | TRP | X | 52 | 28.117 | 60.172 | 24.202 | 0.00 | 0.00 |
| ATOM | 818 | HZ3  | TRP | X | 52 | 28.402 | 60.155 | 25.243 | 0.00 | 0.00 |
| ATOM | 819 | CE3  | TRP | X | 52 | 28.325 | 61.399 | 23.574 | 0.00 | 0.00 |
| ATOM | 820 | HE3  | TRP | X | 52 | 28.841 | 62.152 | 24.152 | 0.00 | 0.00 |
| ATOM | 821 | CD2  | TRP | X | 52 | 27.929 | 61.697 | 22.246 | 0.00 | 0.00 |
| ATOM | 822 | C    | TRP | X | 52 | 26.565 | 65.278 | 20.309 | 0.00 | 0.00 |
| ATOM | 823 | O    | TRP | X | 52 | 25.453 | 64.757 | 20.134 | 0.00 | 0.00 |
| ATOM | 824 | N    | SER | X | 53 | 27.122 | 66.007 | 19.311 | 0.00 | 0.00 |
| ATOM | 825 | H    | SER | X | 53 | 28.014 | 66.424 | 19.534 | 0.00 | 0.00 |
| ATOM | 826 | CA   | SER | X | 53 | 26.617 | 65.916 | 17.917 | 0.00 | 0.00 |
| ATOM | 827 | HA   | SER | X | 53 | 25.535 | 65.794 | 17.858 | 0.00 | 0.00 |
| ATOM | 828 | CB   | SER | X | 53 | 26.801 | 67.283 | 17.236 | 0.00 | 0.00 |
| ATOM | 829 | HB2  | SER | X | 53 | 27.694 | 67.817 | 17.559 | 0.00 | 0.00 |
| ATOM | 830 | HB3  | SER | X | 53 | 26.828 | 67.244 | 16.147 | 0.00 | 0.00 |
| ATOM | 831 | OG   | SER | X | 53 | 25.640 | 68.069 | 17.564 | 0.00 | 0.00 |
| ATOM | 832 | HG   | SER | X | 53 | 25.803 | 68.930 | 17.174 | 0.00 | 0.00 |
| ATOM | 833 | C    | SER | X | 53 | 27.158 | 64.723 | 17.126 | 0.00 | 0.00 |
| ATOM | 834 | O    | SER | X | 53 | 28.266 | 64.187 | 17.236 | 0.00 | 0.00 |
| ATOM | 835 | N    | GLY | X | 54 | 26.359 | 64.327 | 15.996 | 0.00 | 0.00 |
| ATOM | 836 | H    | GLY | X | 54 | 25.420 | 64.690 | 15.920 | 0.00 | 0.00 |
| ATOM | 837 | CA   | GLY | X | 54 | 26.804 | 63.444 | 15.048 | 0.00 | 0.00 |
| ATOM | 838 | HA2  | GLY | X | 54 | 26.116 | 63.458 | 14.203 | 0.00 | 0.00 |
| ATOM | 839 | HA3  | GLY | X | 54 | 27.783 | 63.725 | 14.661 | 0.00 | 0.00 |
| ATOM | 840 | C    | GLY | X | 54 | 26.974 | 62.014 | 15.579 | 0.00 | 0.00 |
| ATOM | 841 | O    | GLY | X | 54 | 26.170 | 61.534 | 16.344 | 0.00 | 0.00 |
| ATOM | 842 | N    | VAL | X | 55 | 28.038 | 61.287 | 15.226 | 0.00 | 0.00 |
| ATOM | 843 | H    | VAL | X | 55 | 28.575 | 61.819 | 14.556 | 0.00 | 0.00 |
| ATOM | 844 | CA   | VAL | X | 55 | 28.519 | 59.934 | 15.480 | 0.00 | 0.00 |
| ATOM | 845 | HA   | VAL | X | 55 | 27.827 | 59.385 | 16.120 | 0.00 | 0.00 |
| ATOM | 846 | CB   | VAL | X | 55 | 28.611 | 59.130 | 14.161 | 0.00 | 0.00 |
| ATOM | 847 | HB   | VAL | X | 55 | 29.514 | 59.481 | 13.661 | 0.00 | 0.00 |
| ATOM | 848 | CG1  | VAL | X | 55 | 28.851 | 57.678 | 14.508 | 0.00 | 0.00 |
| ATOM | 849 | HG11 | VAL | X | 55 | 29.923 | 57.481 | 14.524 | 0.00 | 0.00 |
| ATOM | 850 | HG12 | VAL | X | 55 | 28.513 | 57.337 | 15.486 | 0.00 | 0.00 |
| ATOM | 851 | HG13 | VAL | X | 55 | 28.385 | 56.983 | 13.809 | 0.00 | 0.00 |
| ATOM | 852 | CG2  | VAL | X | 55 | 27.321 | 59.268 | 13.247 | 0.00 | 0.00 |
| ATOM | 853 | HG21 | VAL | X | 55 | 27.132 | 60.331 | 13.095 | 0.00 | 0.00 |
| ATOM | 854 | HG22 | VAL | X | 55 | 26.544 | 58.801 | 13.853 | 0.00 | 0.00 |
| ATOM | 855 | HG23 | VAL | X | 55 | 27.355 | 58.645 | 12.353 | 0.00 | 0.00 |
| ATOM | 856 | C    | VAL | X | 55 | 29.875 | 60.099 | 16.150 | 0.00 | 0.00 |
| ATOM | 857 | O    | VAL | X | 55 | 30.812 | 60.542 | 15.487 | 0.00 | 0.00 |
| ATOM | 858 | N    | VAL | X | 56 | 29.980 | 59.737 | 17.381 | 0.00 | 0.00 |
| ATOM | 859 | H    | VAL | X | 56 | 29.204 | 59.406 | 17.936 | 0.00 | 0.00 |
| ATOM | 860 | CA   | VAL | X | 56 | 31.263 | 59.503 | 18.011 | 0.00 | 0.00 |
| ATOM | 861 | HA   | VAL | X | 56 | 32.010 | 60.254 | 17.756 | 0.00 | 0.00 |
| ATOM | 862 | CB   | VAL | X | 56 | 31.263 | 59.452 | 19.522 | 0.00 | 0.00 |
| ATOM | 863 | HB   | VAL | X | 56 | 30.561 | 58.724 | 19.930 | 0.00 | 0.00 |
| ATOM | 864 | CG1  | VAL | X | 56 | 32.630 | 59.010 | 20.152 | 0.00 | 0.00 |
| ATOM | 865 | HG11 | VAL | X | 56 | 32.379 | 58.865 | 21.203 | 0.00 | 0.00 |
| ATOM | 866 | HG12 | VAL | X | 56 | 33.035 | 58.120 | 19.669 | 0.00 | 0.00 |
| ATOM | 867 | HG13 | VAL | X | 56 | 33.393 | 59.788 | 20.177 | 0.00 | 0.00 |
| ATOM | 868 | CG2  | VAL | X | 56 | 30.784 | 60.782 | 20.104 | 0.00 | 0.00 |
| ATOM | 869 | HG21 | VAL | X | 56 | 29.706 | 60.825 | 19.950 | 0.00 | 0.00 |
| ATOM | 870 | HG22 | VAL | X | 56 | 31.492 | 61.514 | 19.715 | 0.00 | 0.00 |
| ATOM | 871 | HG23 | VAL | X | 56 | 30.920 | 60.700 | 21.183 | 0.00 | 0.00 |
| ATOM | 872 | C    | VAL | X | 56 | 31.760 | 58.222 | 17.451 | 0.00 | 0.00 |
| ATOM | 873 | O    | VAL | X | 56 | 31.125 | 57.161 | 17.490 | 0.00 | 0.00 |
| ATOM | 874 | N    | ASP | X | 57 | 33.003 | 58.358 | 16.903 | 0.00 | 0.00 |
| ATOM | 875 | H    | ASP | X | 57 | 33.243 | 59.311 | 16.672 | 0.00 | 0.00 |
| ATOM | 876 | CA   | ASP | X | 57 | 33.729 | 57.374 | 16.087 | 0.00 | 0.00 |
| ATOM | 877 | HA   | ASP | X | 57 | 33.008 | 56.789 | 15.516 | 0.00 | 0.00 |
| ATOM | 878 | CB   | ASP | X | 57 | 34.624 | 58.036 | 15.057 | 0.00 | 0.00 |
| ATOM | 879 | HB2  | ASP | X | 57 | 34.116 | 58.881 | 14.593 | 0.00 | 0.00 |
| ATOM | 880 | HB3  | ASP | X | 57 | 35.512 | 58.488 | 15.498 | 0.00 | 0.00 |
| ATOM | 881 | CG   | ASP | X | 57 | 35.001 | 56.983 | 13.994 | 0.00 | 0.00 |
| ATOM | 882 | OD1  | ASP | X | 57 | 34.041 | 56.656 | 13.292 | 0.00 | 0.00 |

|      |     |      |     |   |    |        |        |        |      |      |
|------|-----|------|-----|---|----|--------|--------|--------|------|------|
| ATOM | 883 | OD2  | ASP | X | 57 | 36.234 | 56.648 | 13.846 | 0.00 | 0.00 |
| ATOM | 884 | C    | ASP | X | 57 | 34.492 | 56.340 | 16.975 | 0.00 | 0.00 |
| ATOM | 885 | O    | ASP | X | 57 | 35.657 | 56.482 | 17.400 | 0.00 | 0.00 |
| ATOM | 886 | N    | ALA | X | 58 | 33.779 | 55.327 | 17.479 | 0.00 | 0.00 |
| ATOM | 887 | H    | ALA | X | 58 | 32.844 | 55.269 | 17.101 | 0.00 | 0.00 |
| ATOM | 888 | CA   | ALA | X | 58 | 34.095 | 54.363 | 18.563 | 0.00 | 0.00 |
| ATOM | 889 | HA   | ALA | X | 58 | 34.696 | 54.812 | 19.353 | 0.00 | 0.00 |
| ATOM | 890 | CB   | ALA | X | 58 | 32.845 | 54.018 | 19.367 | 0.00 | 0.00 |
| ATOM | 891 | HB1  | ALA | X | 58 | 33.072 | 53.531 | 20.316 | 0.00 | 0.00 |
| ATOM | 892 | HB2  | ALA | X | 58 | 32.216 | 53.362 | 18.765 | 0.00 | 0.00 |
| ATOM | 893 | HB3  | ALA | X | 58 | 32.304 | 54.935 | 19.598 | 0.00 | 0.00 |
| ATOM | 894 | C    | ALA | X | 58 | 34.932 | 53.180 | 17.926 | 0.00 | 0.00 |
| ATOM | 895 | O    | ALA | X | 58 | 34.583 | 52.023 | 18.113 | 0.00 | 0.00 |
| ATOM | 896 | N    | THR | X | 59 | 35.950 | 53.523 | 17.160 | 0.00 | 0.00 |
| ATOM | 897 | H    | THR | X | 59 | 36.083 | 54.511 | 16.999 | 0.00 | 0.00 |
| ATOM | 898 | CA   | THR | X | 59 | 36.755 | 52.489 | 16.414 | 0.00 | 0.00 |
| ATOM | 899 | HA   | THR | X | 59 | 36.209 | 51.551 | 16.512 | 0.00 | 0.00 |
| ATOM | 900 | CB   | THR | X | 59 | 36.834 | 52.975 | 14.962 | 0.00 | 0.00 |
| ATOM | 901 | HB   | THR | X | 59 | 37.361 | 52.276 | 14.313 | 0.00 | 0.00 |
| ATOM | 902 | CG2  | THR | X | 59 | 35.348 | 53.328 | 14.351 | 0.00 | 0.00 |
| ATOM | 903 | HG21 | THR | X | 59 | 34.740 | 52.431 | 14.464 | 0.00 | 0.00 |
| ATOM | 904 | HG22 | THR | X | 59 | 35.445 | 53.604 | 13.301 | 0.00 | 0.00 |
| ATOM | 905 | HG23 | THR | X | 59 | 34.759 | 54.115 | 14.823 | 0.00 | 0.00 |
| ATOM | 906 | OG1  | THR | X | 59 | 37.503 | 54.203 | 14.892 | 0.00 | 0.00 |
| ATOM | 907 | HG1  | THR | X | 59 | 37.045 | 54.854 | 14.355 | 0.00 | 0.00 |
| ATOM | 908 | C    | THR | X | 59 | 38.153 | 52.177 | 16.936 | 0.00 | 0.00 |
| ATOM | 909 | O    | THR | X | 59 | 38.750 | 51.323 | 16.315 | 0.00 | 0.00 |
| ATOM | 910 | N    | THR | X | 60 | 38.556 | 52.806 | 18.046 | 0.00 | 0.00 |
| ATOM | 911 | H    | THR | X | 60 | 37.944 | 53.447 | 18.529 | 0.00 | 0.00 |
| ATOM | 912 | CA   | THR | X | 60 | 39.809 | 52.506 | 18.721 | 0.00 | 0.00 |
| ATOM | 913 | HA   | THR | X | 60 | 39.732 | 51.432 | 18.893 | 0.00 | 0.00 |
| ATOM | 914 | CB   | THR | X | 60 | 41.055 | 52.764 | 17.815 | 0.00 | 0.00 |
| ATOM | 915 | HB   | THR | X | 60 | 40.744 | 52.498 | 16.805 | 0.00 | 0.00 |
| ATOM | 916 | CG2  | THR | X | 60 | 41.416 | 54.249 | 17.757 | 0.00 | 0.00 |
| ATOM | 917 | HG21 | THR | X | 60 | 41.879 | 54.518 | 18.707 | 0.00 | 0.00 |
| ATOM | 918 | HG22 | THR | X | 60 | 40.554 | 54.884 | 17.552 | 0.00 | 0.00 |
| ATOM | 919 | HG23 | THR | X | 60 | 42.171 | 54.461 | 16.999 | 0.00 | 0.00 |
| ATOM | 920 | OG1  | THR | X | 60 | 42.155 | 51.984 | 18.310 | 0.00 | 0.00 |
| ATOM | 921 | HG1  | THR | X | 60 | 42.663 | 51.547 | 17.624 | 0.00 | 0.00 |
| ATOM | 922 | C    | THR | X | 60 | 40.058 | 53.082 | 20.090 | 0.00 | 0.00 |
| ATOM | 923 | O    | THR | X | 60 | 39.294 | 53.952 | 20.564 | 0.00 | 0.00 |
| ATOM | 924 | N    | PHE | X | 61 | 41.081 | 52.659 | 20.746 | 0.00 | 0.00 |
| ATOM | 925 | H    | PHE | X | 61 | 41.737 | 52.104 | 20.214 | 0.00 | 0.00 |
| ATOM | 926 | CA   | PHE | X | 61 | 41.468 | 53.209 | 22.089 | 0.00 | 0.00 |
| ATOM | 927 | HA   | PHE | X | 61 | 40.574 | 53.371 | 22.690 | 0.00 | 0.00 |
| ATOM | 928 | CB   | PHE | X | 61 | 42.441 | 52.352 | 22.885 | 0.00 | 0.00 |
| ATOM | 929 | HB2  | PHE | X | 61 | 43.306 | 52.129 | 22.260 | 0.00 | 0.00 |
| ATOM | 930 | HB3  | PHE | X | 61 | 42.775 | 52.888 | 23.774 | 0.00 | 0.00 |
| ATOM | 931 | CG   | PHE | X | 61 | 41.918 | 51.000 | 23.275 | 0.00 | 0.00 |
| ATOM | 932 | CD1  | PHE | X | 61 | 41.312 | 50.766 | 24.599 | 0.00 | 0.00 |
| ATOM | 933 | HD1  | PHE | X | 61 | 41.312 | 51.632 | 25.244 | 0.00 | 0.00 |
| ATOM | 934 | CE1  | PHE | X | 61 | 40.786 | 49.396 | 24.901 | 0.00 | 0.00 |
| ATOM | 935 | HE1  | PHE | X | 61 | 40.217 | 49.170 | 25.791 | 0.00 | 0.00 |
| ATOM | 936 | CZ   | PHE | X | 61 | 41.034 | 48.386 | 23.976 | 0.00 | 0.00 |
| ATOM | 937 | HZ   | PHE | X | 61 | 40.550 | 47.425 | 24.076 | 0.00 | 0.00 |
| ATOM | 938 | CE2  | PHE | X | 61 | 41.699 | 48.602 | 22.824 | 0.00 | 0.00 |
| ATOM | 939 | HE2  | PHE | X | 61 | 41.760 | 47.835 | 22.066 | 0.00 | 0.00 |
| ATOM | 940 | CD2  | PHE | X | 61 | 42.205 | 49.836 | 22.512 | 0.00 | 0.00 |
| ATOM | 941 | HD2  | PHE | X | 61 | 42.726 | 49.904 | 21.568 | 0.00 | 0.00 |
| ATOM | 942 | C    | PHE | X | 61 | 42.129 | 54.543 | 21.787 | 0.00 | 0.00 |
| ATOM | 943 | O    | PHE | X | 61 | 43.069 | 54.577 | 20.980 | 0.00 | 0.00 |
| ATOM | 944 | N    | GLN | X | 62 | 41.703 | 55.630 | 22.436 | 0.00 | 0.00 |
| ATOM | 945 | H    | GLN | X | 62 | 40.946 | 55.454 | 23.081 | 0.00 | 0.00 |
| ATOM | 946 | CA   | GLN | X | 62 | 42.191 | 56.959 | 22.129 | 0.00 | 0.00 |
| ATOM | 947 | HA   | GLN | X | 62 | 42.478 | 57.150 | 21.095 | 0.00 | 0.00 |
| ATOM | 948 | CB   | GLN | X | 62 | 41.060 | 57.953 | 22.445 | 0.00 | 0.00 |
| ATOM | 949 | HB2  | GLN | X | 62 | 40.813 | 58.007 | 23.505 | 0.00 | 0.00 |

|      |      |      |     |   |    |        |        |        |      |      |
|------|------|------|-----|---|----|--------|--------|--------|------|------|
| ATOM | 950  | HB3  | GLN | X | 62 | 41.489 | 58.929 | 22.218 | 0.00 | 0.00 |
| ATOM | 951  | CG   | GLN | X | 62 | 39.779 | 57.820 | 21.630 | 0.00 | 0.00 |
| ATOM | 952  | HG2  | GLN | X | 62 | 39.222 | 56.923 | 21.899 | 0.00 | 0.00 |
| ATOM | 953  | HG3  | GLN | X | 62 | 39.082 | 58.622 | 21.872 | 0.00 | 0.00 |
| ATOM | 954  | CD   | GLN | X | 62 | 39.980 | 57.783 | 20.107 | 0.00 | 0.00 |
| ATOM | 955  | OE1  | GLN | X | 62 | 40.349 | 58.779 | 19.538 | 0.00 | 0.00 |
| ATOM | 956  | NE2  | GLN | X | 62 | 39.931 | 56.626 | 19.483 | 0.00 | 0.00 |
| ATOM | 957  | HE21 | GLN | X | 62 | 39.857 | 56.589 | 18.476 | 0.00 | 0.00 |
| ATOM | 958  | HE22 | GLN | X | 62 | 39.668 | 55.863 | 20.091 | 0.00 | 0.00 |
| ATOM | 959  | C    | GLN | X | 62 | 43.436 | 57.253 | 23.017 | 0.00 | 0.00 |
| ATOM | 960  | O    | GLN | X | 62 | 44.415 | 57.698 | 22.449 | 0.00 | 0.00 |
| ATOM | 961  | N    | SER | X | 63 | 43.434 | 56.866 | 24.258 | 0.00 | 0.00 |
| ATOM | 962  | H    | SER | X | 63 | 42.559 | 56.494 | 24.600 | 0.00 | 0.00 |
| ATOM | 963  | CA   | SER | X | 63 | 44.465 | 57.111 | 25.224 | 0.00 | 0.00 |
| ATOM | 964  | HA   | SER | X | 63 | 45.423 | 56.789 | 24.815 | 0.00 | 0.00 |
| ATOM | 965  | CB   | SER | X | 63 | 44.550 | 58.671 | 25.469 | 0.00 | 0.00 |
| ATOM | 966  | HB2  | SER | X | 63 | 45.605 | 58.808 | 25.707 | 0.00 | 0.00 |
| ATOM | 967  | HB3  | SER | X | 63 | 44.482 | 59.206 | 24.521 | 0.00 | 0.00 |
| ATOM | 968  | OG   | SER | X | 63 | 43.729 | 59.178 | 26.449 | 0.00 | 0.00 |
| ATOM | 969  | HG   | SER | X | 63 | 43.812 | 60.134 | 26.489 | 0.00 | 0.00 |
| ATOM | 970  | C    | SER | X | 63 | 44.099 | 56.370 | 26.490 | 0.00 | 0.00 |
| ATOM | 971  | O    | SER | X | 63 | 42.984 | 55.856 | 26.612 | 0.00 | 0.00 |
| ATOM | 972  | N    | VAL | X | 64 | 45.057 | 56.240 | 27.404 | 0.00 | 0.00 |
| ATOM | 973  | H    | VAL | X | 64 | 45.862 | 56.834 | 27.268 | 0.00 | 0.00 |
| ATOM | 974  | CA   | VAL | X | 64 | 45.126 | 55.409 | 28.599 | 0.00 | 0.00 |
| ATOM | 975  | HA   | VAL | X | 64 | 44.065 | 55.233 | 28.771 | 0.00 | 0.00 |
| ATOM | 976  | CB   | VAL | X | 64 | 45.649 | 53.953 | 28.349 | 0.00 | 0.00 |
| ATOM | 977  | HB   | VAL | X | 64 | 45.562 | 53.380 | 29.272 | 0.00 | 0.00 |
| ATOM | 978  | CG1  | VAL | X | 64 | 44.903 | 53.280 | 27.237 | 0.00 | 0.00 |
| ATOM | 979  | HG11 | VAL | X | 64 | 43.861 | 53.123 | 27.514 | 0.00 | 0.00 |
| ATOM | 980  | HG12 | VAL | X | 64 | 44.930 | 53.888 | 26.333 | 0.00 | 0.00 |
| ATOM | 981  | HG13 | VAL | X | 64 | 45.461 | 52.385 | 26.964 | 0.00 | 0.00 |
| ATOM | 982  | CG2  | VAL | X | 64 | 47.146 | 54.132 | 27.949 | 0.00 | 0.00 |
| ATOM | 983  | HG21 | VAL | X | 64 | 47.599 | 53.173 | 27.700 | 0.00 | 0.00 |
| ATOM | 984  | HG22 | VAL | X | 64 | 47.685 | 54.584 | 28.781 | 0.00 | 0.00 |
| ATOM | 985  | HG23 | VAL | X | 64 | 47.311 | 54.794 | 27.098 | 0.00 | 0.00 |
| ATOM | 986  | C    | VAL | X | 64 | 45.688 | 56.153 | 29.836 | 0.00 | 0.00 |
| ATOM | 987  | O    | VAL | X | 64 | 46.490 | 57.052 | 29.641 | 0.00 | 0.00 |
| ATOM | 988  | N    | CYX | X | 65 | 45.323 | 55.941 | 31.105 | 0.00 | 0.00 |
| ATOM | 989  | H    | CYX | X | 65 | 44.811 | 55.089 | 31.285 | 0.00 | 0.00 |
| ATOM | 990  | CA   | CYX | X | 65 | 45.558 | 56.940 | 32.183 | 0.00 | 0.00 |
| ATOM | 991  | HA   | CYX | X | 65 | 45.221 | 57.903 | 31.800 | 0.00 | 0.00 |
| ATOM | 992  | CB   | CYX | X | 65 | 44.635 | 56.663 | 33.388 | 0.00 | 0.00 |
| ATOM | 993  | HB2  | CYX | X | 65 | 44.877 | 55.698 | 33.835 | 0.00 | 0.00 |
| ATOM | 994  | HB3  | CYX | X | 65 | 44.920 | 57.457 | 34.078 | 0.00 | 0.00 |
| ATOM | 995  | SG   | CYX | X | 65 | 42.846 | 56.775 | 33.124 | 0.00 | 0.00 |
| ATOM | 996  | C    | CYX | X | 65 | 47.111 | 57.097 | 32.548 | 0.00 | 0.00 |
| ATOM | 997  | O    | CYX | X | 65 | 47.638 | 56.150 | 33.039 | 0.00 | 0.00 |
| ATOM | 998  | N    | TYR | X | 66 | 47.692 | 58.328 | 32.452 | 0.00 | 0.00 |
| ATOM | 999  | H    | TYR | X | 66 | 47.136 | 59.080 | 32.069 | 0.00 | 0.00 |
| ATOM | 1000 | CA   | TYR | X | 66 | 49.073 | 58.636 | 32.827 | 0.00 | 0.00 |
| ATOM | 1001 | HA   | TYR | X | 66 | 49.741 | 58.415 | 31.995 | 0.00 | 0.00 |
| ATOM | 1002 | CB   | TYR | X | 66 | 49.097 | 60.190 | 33.084 | 0.00 | 0.00 |
| ATOM | 1003 | HB2  | TYR | X | 66 | 48.268 | 60.655 | 32.551 | 0.00 | 0.00 |
| ATOM | 1004 | HB3  | TYR | X | 66 | 49.107 | 60.525 | 34.121 | 0.00 | 0.00 |
| ATOM | 1005 | CG   | TYR | X | 66 | 50.377 | 60.683 | 32.520 | 0.00 | 0.00 |
| ATOM | 1006 | CD1  | TYR | X | 66 | 50.504 | 61.182 | 31.182 | 0.00 | 0.00 |
| ATOM | 1007 | HD1  | TYR | X | 66 | 49.664 | 61.214 | 30.504 | 0.00 | 0.00 |
| ATOM | 1008 | CE1  | TYR | X | 66 | 51.776 | 61.533 | 30.684 | 0.00 | 0.00 |
| ATOM | 1009 | HE1  | TYR | X | 66 | 51.920 | 62.110 | 29.783 | 0.00 | 0.00 |
| ATOM | 1010 | CZ   | TYR | X | 66 | 52.919 | 61.380 | 31.541 | 0.00 | 0.00 |
| ATOM | 1011 | OH   | TYR | X | 66 | 54.176 | 61.757 | 31.153 | 0.00 | 0.00 |
| ATOM | 1012 | HH   | TYR | X | 66 | 54.331 | 62.000 | 30.237 | 0.00 | 0.00 |
| ATOM | 1013 | CE2  | TYR | X | 66 | 52.806 | 60.813 | 32.845 | 0.00 | 0.00 |
| ATOM | 1014 | HE2  | TYR | X | 66 | 53.667 | 60.677 | 33.483 | 0.00 | 0.00 |
| ATOM | 1015 | CD2  | TYR | X | 66 | 51.517 | 60.547 | 33.406 | 0.00 | 0.00 |
| ATOM | 1016 | HD2  | TYR | X | 66 | 51.416 | 60.145 | 34.403 | 0.00 | 0.00 |

|      |      |      |     |   |    |        |        |        |      |      |
|------|------|------|-----|---|----|--------|--------|--------|------|------|
| ATOM | 1017 | C    | TYR | X | 66 | 49.619 | 57.870 | 34.103 | 0.00 | 0.00 |
| ATOM | 1018 | O    | TYR | X | 66 | 49.023 | 57.856 | 35.171 | 0.00 | 0.00 |
| ATOM | 1019 | N    | GLN | X | 67 | 50.804 | 57.201 | 34.031 | 0.00 | 0.00 |
| ATOM | 1020 | H    | GLN | X | 67 | 51.369 | 56.998 | 33.219 | 0.00 | 0.00 |
| ATOM | 1021 | CA   | GLN | X | 67 | 51.193 | 56.166 | 35.033 | 0.00 | 0.00 |
| ATOM | 1022 | HA   | GLN | X | 67 | 51.061 | 56.603 | 36.023 | 0.00 | 0.00 |
| ATOM | 1023 | CB   | GLN | X | 67 | 50.332 | 54.912 | 35.064 | 0.00 | 0.00 |
| ATOM | 1024 | HB2  | GLN | X | 67 | 50.688 | 54.131 | 35.736 | 0.00 | 0.00 |
| ATOM | 1025 | HB3  | GLN | X | 67 | 49.293 | 55.088 | 35.341 | 0.00 | 0.00 |
| ATOM | 1026 | CG   | GLN | X | 67 | 50.209 | 54.131 | 33.742 | 0.00 | 0.00 |
| ATOM | 1027 | HG2  | GLN | X | 67 | 49.933 | 54.837 | 32.959 | 0.00 | 0.00 |
| ATOM | 1028 | HG3  | GLN | X | 67 | 51.144 | 53.635 | 33.483 | 0.00 | 0.00 |
| ATOM | 1029 | CD   | GLN | X | 67 | 49.123 | 53.014 | 33.783 | 0.00 | 0.00 |
| ATOM | 1030 | OE1  | GLN | X | 67 | 49.478 | 51.859 | 33.920 | 0.00 | 0.00 |
| ATOM | 1031 | NE2  | GLN | X | 67 | 47.809 | 53.252 | 33.580 | 0.00 | 0.00 |
| ATOM | 1032 | HE21 | GLN | X | 67 | 47.176 | 52.476 | 33.711 | 0.00 | 0.00 |
| ATOM | 1033 | HE22 | GLN | X | 67 | 47.385 | 54.164 | 33.488 | 0.00 | 0.00 |
| ATOM | 1034 | C    | GLN | X | 67 | 52.676 | 55.870 | 34.884 | 0.00 | 0.00 |
| ATOM | 1035 | O    | GLN | X | 67 | 53.251 | 55.951 | 33.787 | 0.00 | 0.00 |
| ATOM | 1036 | N    | TYR | X | 68 | 53.309 | 55.555 | 36.037 | 0.00 | 0.00 |
| ATOM | 1037 | H    | TYR | X | 68 | 52.691 | 55.578 | 36.836 | 0.00 | 0.00 |
| ATOM | 1038 | CA   | TYR | X | 68 | 54.578 | 54.856 | 36.197 | 0.00 | 0.00 |
| ATOM | 1039 | HA   | TYR | X | 68 | 55.395 | 55.458 | 35.800 | 0.00 | 0.00 |
| ATOM | 1040 | CB   | TYR | X | 68 | 54.766 | 54.326 | 37.679 | 0.00 | 0.00 |
| ATOM | 1041 | HB2  | TYR | X | 68 | 54.897 | 55.152 | 38.378 | 0.00 | 0.00 |
| ATOM | 1042 | HB3  | TYR | X | 68 | 53.876 | 53.847 | 38.089 | 0.00 | 0.00 |
| ATOM | 1043 | CG   | TYR | X | 68 | 55.931 | 53.389 | 37.860 | 0.00 | 0.00 |
| ATOM | 1044 | CD1  | TYR | X | 68 | 57.254 | 53.850 | 37.905 | 0.00 | 0.00 |
| ATOM | 1045 | HD1  | TYR | X | 68 | 57.538 | 54.868 | 37.683 | 0.00 | 0.00 |
| ATOM | 1046 | CE1  | TYR | X | 68 | 58.349 | 52.950 | 38.012 | 0.00 | 0.00 |
| ATOM | 1047 | HE1  | TYR | X | 68 | 59.358 | 53.290 | 37.832 | 0.00 | 0.00 |
| ATOM | 1048 | CZ   | TYR | X | 68 | 58.150 | 51.576 | 38.312 | 0.00 | 0.00 |
| ATOM | 1049 | OH   | TYR | X | 68 | 59.153 | 50.656 | 38.413 | 0.00 | 0.00 |
| ATOM | 1050 | HH   | TYR | X | 68 | 59.969 | 51.149 | 38.527 | 0.00 | 0.00 |
| ATOM | 1051 | CE2  | TYR | X | 68 | 56.798 | 51.097 | 38.268 | 0.00 | 0.00 |
| ATOM | 1052 | HE2  | TYR | X | 68 | 56.530 | 50.060 | 38.411 | 0.00 | 0.00 |
| ATOM | 1053 | CD2  | TYR | X | 68 | 55.736 | 51.990 | 38.054 | 0.00 | 0.00 |
| ATOM | 1054 | HD2  | TYR | X | 68 | 54.823 | 51.451 | 37.853 | 0.00 | 0.00 |
| ATOM | 1055 | C    | TYR | X | 68 | 54.603 | 53.583 | 35.303 | 0.00 | 0.00 |
| ATOM | 1056 | O    | TYR | X | 68 | 53.692 | 52.799 | 35.211 | 0.00 | 0.00 |
| ATOM | 1057 | N    | VAL | X | 69 | 55.721 | 53.400 | 34.562 | 0.00 | 0.00 |
| ATOM | 1058 | H    | VAL | X | 69 | 56.569 | 53.892 | 34.804 | 0.00 | 0.00 |
| ATOM | 1059 | CA   | VAL | X | 69 | 55.871 | 52.201 | 33.720 | 0.00 | 0.00 |
| ATOM | 1060 | HA   | VAL | X | 69 | 55.072 | 51.463 | 33.796 | 0.00 | 0.00 |
| ATOM | 1061 | CB   | VAL | X | 69 | 56.118 | 52.581 | 32.217 | 0.00 | 0.00 |
| ATOM | 1062 | HB   | VAL | X | 69 | 56.417 | 51.725 | 31.611 | 0.00 | 0.00 |
| ATOM | 1063 | CG1  | VAL | X | 69 | 54.664 | 52.968 | 31.762 | 0.00 | 0.00 |
| ATOM | 1064 | HG11 | VAL | X | 69 | 54.342 | 53.989 | 31.967 | 0.00 | 0.00 |
| ATOM | 1065 | HG12 | VAL | X | 69 | 54.538 | 52.845 | 30.686 | 0.00 | 0.00 |
| ATOM | 1066 | HG13 | VAL | X | 69 | 53.984 | 52.304 | 32.297 | 0.00 | 0.00 |
| ATOM | 1067 | CG2  | VAL | X | 69 | 57.124 | 53.695 | 31.875 | 0.00 | 0.00 |
| ATOM | 1068 | HG21 | VAL | X | 69 | 57.138 | 53.814 | 30.792 | 0.00 | 0.00 |
| ATOM | 1069 | HG22 | VAL | X | 69 | 58.150 | 53.401 | 32.097 | 0.00 | 0.00 |
| ATOM | 1070 | HG23 | VAL | X | 69 | 56.879 | 54.591 | 32.447 | 0.00 | 0.00 |
| ATOM | 1071 | C    | VAL | X | 69 | 57.160 | 51.462 | 34.200 | 0.00 | 0.00 |
| ATOM | 1072 | O    | VAL | X | 69 | 58.139 | 52.116 | 34.377 | 0.00 | 0.00 |
| ATOM | 1073 | N    | ASP | X | 70 | 57.146 | 50.188 | 34.455 | 0.00 | 0.00 |
| ATOM | 1074 | H    | ASP | X | 70 | 56.202 | 49.835 | 34.509 | 0.00 | 0.00 |
| ATOM | 1075 | CA   | ASP | X | 70 | 58.304 | 49.295 | 34.781 | 0.00 | 0.00 |
| ATOM | 1076 | HA   | ASP | X | 70 | 59.026 | 49.884 | 35.347 | 0.00 | 0.00 |
| ATOM | 1077 | CB   | ASP | X | 70 | 57.716 | 48.205 | 35.643 | 0.00 | 0.00 |
| ATOM | 1078 | HB2  | ASP | X | 70 | 57.253 | 48.688 | 36.504 | 0.00 | 0.00 |
| ATOM | 1079 | HB3  | ASP | X | 70 | 56.870 | 47.678 | 35.202 | 0.00 | 0.00 |
| ATOM | 1080 | CG   | ASP | X | 70 | 58.684 | 47.205 | 36.250 | 0.00 | 0.00 |
| ATOM | 1081 | OD1  | ASP | X | 70 | 59.708 | 46.945 | 35.613 | 0.00 | 0.00 |
| ATOM | 1082 | OD2  | ASP | X | 70 | 58.324 | 46.638 | 37.314 | 0.00 | 0.00 |
| ATOM | 1083 | C    | ASP | X | 70 | 58.789 | 48.733 | 33.459 | 0.00 | 0.00 |

|      |      |      |     |   |    |        |        |        |      |      |
|------|------|------|-----|---|----|--------|--------|--------|------|------|
| ATOM | 1084 | O    | ASP | X | 70 | 58.074 | 48.033 | 32.728 | 0.00 | 0.00 |
| ATOM | 1085 | N    | THR | X | 71 | 60.105 | 48.925 | 33.216 | 0.00 | 0.00 |
| ATOM | 1086 | H    | THR | X | 71 | 60.526 | 49.603 | 33.835 | 0.00 | 0.00 |
| ATOM | 1087 | CA   | THR | X | 71 | 60.967 | 48.416 | 32.176 | 0.00 | 0.00 |
| ATOM | 1088 | HA   | THR | X | 71 | 60.450 | 47.641 | 31.610 | 0.00 | 0.00 |
| ATOM | 1089 | CB   | THR | X | 71 | 61.256 | 49.491 | 31.159 | 0.00 | 0.00 |
| ATOM | 1090 | HB   | THR | X | 71 | 61.925 | 49.130 | 30.378 | 0.00 | 0.00 |
| ATOM | 1091 | CG2  | THR | X | 71 | 59.981 | 49.979 | 30.453 | 0.00 | 0.00 |
| ATOM | 1092 | HG21 | THR | X | 71 | 60.235 | 50.687 | 29.664 | 0.00 | 0.00 |
| ATOM | 1093 | HG22 | THR | X | 71 | 59.324 | 50.573 | 31.088 | 0.00 | 0.00 |
| ATOM | 1094 | HG23 | THR | X | 71 | 59.392 | 49.145 | 30.073 | 0.00 | 0.00 |
| ATOM | 1095 | OG1  | THR | X | 71 | 61.845 | 50.721 | 31.657 | 0.00 | 0.00 |
| ATOM | 1096 | HG1  | THR | X | 71 | 61.661 | 50.776 | 32.598 | 0.00 | 0.00 |
| ATOM | 1097 | C    | THR | X | 71 | 62.197 | 47.693 | 32.751 | 0.00 | 0.00 |
| ATOM | 1098 | O    | THR | X | 71 | 63.259 | 47.659 | 32.061 | 0.00 | 0.00 |
| ATOM | 1099 | N    | LEU | X | 72 | 62.063 | 46.965 | 33.814 | 0.00 | 0.00 |
| ATOM | 1100 | H    | LEU | X | 72 | 61.191 | 47.022 | 34.319 | 0.00 | 0.00 |
| ATOM | 1101 | CA   | LEU | X | 72 | 63.101 | 46.209 | 34.472 | 0.00 | 0.00 |
| ATOM | 1102 | HA   | LEU | X | 72 | 63.918 | 46.909 | 34.650 | 0.00 | 0.00 |
| ATOM | 1103 | CB   | LEU | X | 72 | 62.479 | 45.689 | 35.829 | 0.00 | 0.00 |
| ATOM | 1104 | HB2  | LEU | X | 72 | 62.059 | 46.571 | 36.313 | 0.00 | 0.00 |
| ATOM | 1105 | HB3  | LEU | X | 72 | 61.596 | 45.085 | 35.621 | 0.00 | 0.00 |
| ATOM | 1106 | CG   | LEU | X | 72 | 63.506 | 44.950 | 36.721 | 0.00 | 0.00 |
| ATOM | 1107 | HG   | LEU | X | 72 | 63.831 | 43.986 | 36.330 | 0.00 | 0.00 |
| ATOM | 1108 | CD1  | LEU | X | 72 | 64.718 | 45.793 | 37.129 | 0.00 | 0.00 |
| ATOM | 1109 | HD11 | LEU | X | 72 | 64.429 | 46.829 | 37.310 | 0.00 | 0.00 |
| ATOM | 1110 | HD12 | LEU | X | 72 | 65.460 | 45.826 | 36.332 | 0.00 | 0.00 |
| ATOM | 1111 | HD13 | LEU | X | 72 | 65.163 | 45.373 | 38.030 | 0.00 | 0.00 |
| ATOM | 1112 | CD2  | LEU | X | 72 | 62.660 | 44.628 | 37.972 | 0.00 | 0.00 |
| ATOM | 1113 | HD21 | LEU | X | 72 | 62.473 | 45.496 | 38.604 | 0.00 | 0.00 |
| ATOM | 1114 | HD22 | LEU | X | 72 | 61.742 | 44.050 | 37.864 | 0.00 | 0.00 |
| ATOM | 1115 | HD23 | LEU | X | 72 | 63.248 | 44.069 | 38.700 | 0.00 | 0.00 |
| ATOM | 1116 | C    | LEU | X | 72 | 63.675 | 45.083 | 33.679 | 0.00 | 0.00 |
| ATOM | 1117 | O    | LEU | X | 72 | 64.873 | 44.723 | 33.833 | 0.00 | 0.00 |
| ATOM | 1118 | N    | TYR | X | 73 | 62.853 | 44.457 | 32.817 | 0.00 | 0.00 |
| ATOM | 1119 | H    | TYR | X | 73 | 61.869 | 44.635 | 32.958 | 0.00 | 0.00 |
| ATOM | 1120 | CA   | TYR | X | 73 | 63.183 | 43.317 | 31.951 | 0.00 | 0.00 |
| ATOM | 1121 | HA   | TYR | X | 73 | 64.242 | 43.093 | 32.081 | 0.00 | 0.00 |
| ATOM | 1122 | CB   | TYR | X | 73 | 62.318 | 42.107 | 32.517 | 0.00 | 0.00 |
| ATOM | 1123 | HB2  | TYR | X | 73 | 61.298 | 42.488 | 32.480 | 0.00 | 0.00 |
| ATOM | 1124 | HB3  | TYR | X | 73 | 62.354 | 41.211 | 31.897 | 0.00 | 0.00 |
| ATOM | 1125 | CG   | TYR | X | 73 | 62.655 | 41.699 | 33.917 | 0.00 | 0.00 |
| ATOM | 1126 | CD1  | TYR | X | 73 | 64.005 | 41.494 | 34.214 | 0.00 | 0.00 |
| ATOM | 1127 | HD1  | TYR | X | 73 | 64.760 | 41.582 | 33.445 | 0.00 | 0.00 |
| ATOM | 1128 | CE1  | TYR | X | 73 | 64.492 | 41.176 | 35.479 | 0.00 | 0.00 |
| ATOM | 1129 | HE1  | TYR | X | 73 | 65.547 | 40.983 | 35.603 | 0.00 | 0.00 |
| ATOM | 1130 | CZ   | TYR | X | 73 | 63.606 | 41.042 | 36.523 | 0.00 | 0.00 |
| ATOM | 1131 | OH   | TYR | X | 73 | 64.069 | 40.796 | 37.761 | 0.00 | 0.00 |
| ATOM | 1132 | HH   | TYR | X | 73 | 63.423 | 41.058 | 38.422 | 0.00 | 0.00 |
| ATOM | 1133 | CE2  | TYR | X | 73 | 62.273 | 41.251 | 36.278 | 0.00 | 0.00 |
| ATOM | 1134 | HE2  | TYR | X | 73 | 61.627 | 41.055 | 37.121 | 0.00 | 0.00 |
| ATOM | 1135 | CD2  | TYR | X | 73 | 61.739 | 41.668 | 34.997 | 0.00 | 0.00 |
| ATOM | 1136 | HD2  | TYR | X | 73 | 60.685 | 41.876 | 34.885 | 0.00 | 0.00 |
| ATOM | 1137 | C    | TYR | X | 73 | 62.894 | 43.592 | 30.481 | 0.00 | 0.00 |
| ATOM | 1138 | O    | TYR | X | 73 | 61.955 | 43.090 | 29.863 | 0.00 | 0.00 |
| ATOM | 1139 | N    | PRO | X | 74 | 63.772 | 44.384 | 29.869 | 0.00 | 0.00 |
| ATOM | 1140 | CD   | PRO | X | 74 | 65.028 | 45.014 | 30.320 | 0.00 | 0.00 |
| ATOM | 1141 | HD2  | PRO | X | 74 | 65.691 | 44.245 | 30.715 | 0.00 | 0.00 |
| ATOM | 1142 | HD3  | PRO | X | 74 | 64.784 | 45.800 | 31.035 | 0.00 | 0.00 |
| ATOM | 1143 | CG   | PRO | X | 74 | 65.730 | 45.486 | 28.965 | 0.00 | 0.00 |
| ATOM | 1144 | HG2  | PRO | X | 74 | 66.229 | 44.630 | 28.511 | 0.00 | 0.00 |
| ATOM | 1145 | HG3  | PRO | X | 74 | 66.360 | 46.350 | 29.175 | 0.00 | 0.00 |
| ATOM | 1146 | CB   | PRO | X | 74 | 64.516 | 45.934 | 28.165 | 0.00 | 0.00 |
| ATOM | 1147 | HB2  | PRO | X | 74 | 64.776 | 46.084 | 27.118 | 0.00 | 0.00 |
| ATOM | 1148 | HB3  | PRO | X | 74 | 64.247 | 46.890 | 28.616 | 0.00 | 0.00 |
| ATOM | 1149 | CA   | PRO | X | 74 | 63.584 | 44.748 | 28.458 | 0.00 | 0.00 |
| ATOM | 1150 | HA   | PRO | X | 74 | 62.608 | 45.200 | 28.281 | 0.00 | 0.00 |



|      |      |      |     |   |    |        |        |        |      |      |
|------|------|------|-----|---|----|--------|--------|--------|------|------|
| ATOM | 1151 | C    | PRO | X | 74 | 63.717 | 43.597 | 27.478 | 0.00 | 0.00 |
| ATOM | 1152 | O    | PRO | X | 74 | 64.474 | 42.645 | 27.711 | 0.00 | 0.00 |
| ATOM | 1153 | N    | GLY | X | 75 | 62.795 | 43.592 | 26.476 | 0.00 | 0.00 |
| ATOM | 1154 | H    | GLY | X | 75 | 62.224 | 44.406 | 26.302 | 0.00 | 0.00 |
| ATOM | 1155 | CA   | GLY | X | 75 | 62.534 | 42.689 | 25.393 | 0.00 | 0.00 |
| ATOM | 1156 | HA2  | GLY | X | 75 | 61.863 | 43.196 | 24.698 | 0.00 | 0.00 |
| ATOM | 1157 | HA3  | GLY | X | 75 | 63.473 | 42.416 | 24.912 | 0.00 | 0.00 |
| ATOM | 1158 | C    | GLY | X | 75 | 61.710 | 41.362 | 25.737 | 0.00 | 0.00 |
| ATOM | 1159 | O    | GLY | X | 75 | 61.288 | 40.668 | 24.847 | 0.00 | 0.00 |
| ATOM | 1160 | N    | PHE | X | 76 | 61.565 | 41.028 | 27.060 | 0.00 | 0.00 |
| ATOM | 1161 | H    | PHE | X | 76 | 62.014 | 41.669 | 27.698 | 0.00 | 0.00 |
| ATOM | 1162 | CA   | PHE | X | 76 | 60.887 | 39.881 | 27.609 | 0.00 | 0.00 |
| ATOM | 1163 | HA   | PHE | X | 76 | 61.290 | 39.015 | 27.085 | 0.00 | 0.00 |
| ATOM | 1164 | CB   | PHE | X | 76 | 61.286 | 39.790 | 29.074 | 0.00 | 0.00 |
| ATOM | 1165 | HB2  | PHE | X | 76 | 62.375 | 39.785 | 29.030 | 0.00 | 0.00 |
| ATOM | 1166 | HB3  | PHE | X | 76 | 60.930 | 40.748 | 29.451 | 0.00 | 0.00 |
| ATOM | 1167 | CG   | PHE | X | 76 | 60.872 | 38.551 | 29.910 | 0.00 | 0.00 |
| ATOM | 1168 | CD1  | PHE | X | 76 | 61.212 | 37.279 | 29.451 | 0.00 | 0.00 |
| ATOM | 1169 | HD1  | PHE | X | 76 | 61.968 | 37.113 | 28.698 | 0.00 | 0.00 |
| ATOM | 1170 | CE1  | PHE | X | 76 | 60.637 | 36.122 | 29.971 | 0.00 | 0.00 |
| ATOM | 1171 | HE1  | PHE | X | 76 | 60.715 | 35.153 | 29.501 | 0.00 | 0.00 |
| ATOM | 1172 | CZ   | PHE | X | 76 | 59.614 | 36.328 | 30.955 | 0.00 | 0.00 |
| ATOM | 1173 | HZ   | PHE | X | 76 | 59.173 | 35.462 | 31.425 | 0.00 | 0.00 |
| ATOM | 1174 | CE2  | PHE | X | 76 | 59.296 | 37.586 | 31.472 | 0.00 | 0.00 |
| ATOM | 1175 | HE2  | PHE | X | 76 | 58.446 | 37.661 | 32.134 | 0.00 | 0.00 |
| ATOM | 1176 | CD2  | PHE | X | 76 | 59.956 | 38.704 | 30.945 | 0.00 | 0.00 |
| ATOM | 1177 | HD2  | PHE | X | 76 | 59.639 | 39.707 | 31.186 | 0.00 | 0.00 |
| ATOM | 1178 | C    | PHE | X | 76 | 59.327 | 39.903 | 27.421 | 0.00 | 0.00 |
| ATOM | 1179 | O    | PHE | X | 76 | 58.742 | 40.947 | 27.642 | 0.00 | 0.00 |
| ATOM | 1180 | N    | GLU | X | 77 | 58.679 | 38.789 | 27.105 | 0.00 | 0.00 |
| ATOM | 1181 | H    | GLU | X | 77 | 59.238 | 37.960 | 26.963 | 0.00 | 0.00 |
| ATOM | 1182 | CA   | GLU | X | 77 | 57.239 | 38.807 | 26.772 | 0.00 | 0.00 |
| ATOM | 1183 | HA   | GLU | X | 77 | 57.066 | 39.734 | 26.226 | 0.00 | 0.00 |
| ATOM | 1184 | CB   | GLU | X | 77 | 56.832 | 37.633 | 25.803 | 0.00 | 0.00 |
| ATOM | 1185 | HB2  | GLU | X | 77 | 57.084 | 36.758 | 26.402 | 0.00 | 0.00 |
| ATOM | 1186 | HB3  | GLU | X | 77 | 55.753 | 37.686 | 25.660 | 0.00 | 0.00 |
| ATOM | 1187 | CG   | GLU | X | 77 | 57.584 | 37.633 | 24.544 | 0.00 | 0.00 |
| ATOM | 1188 | HG2  | GLU | X | 77 | 58.660 | 37.485 | 24.645 | 0.00 | 0.00 |
| ATOM | 1189 | HG3  | GLU | X | 77 | 57.315 | 36.706 | 24.038 | 0.00 | 0.00 |
| ATOM | 1190 | CD   | GLU | X | 77 | 57.283 | 38.890 | 23.661 | 0.00 | 0.00 |
| ATOM | 1191 | OE1  | GLU | X | 77 | 56.447 | 39.708 | 24.038 | 0.00 | 0.00 |
| ATOM | 1192 | OE2  | GLU | X | 77 | 57.906 | 39.046 | 22.584 | 0.00 | 0.00 |
| ATOM | 1193 | C    | GLU | X | 77 | 56.265 | 38.689 | 27.903 | 0.00 | 0.00 |
| ATOM | 1194 | O    | GLU | X | 77 | 55.103 | 39.132 | 27.800 | 0.00 | 0.00 |
| ATOM | 1195 | N    | GLY | X | 78 | 56.706 | 38.152 | 29.064 | 0.00 | 0.00 |
| ATOM | 1196 | H    | GLY | X | 78 | 57.585 | 37.654 | 29.028 | 0.00 | 0.00 |
| ATOM | 1197 | CA   | GLY | X | 78 | 56.055 | 38.039 | 30.351 | 0.00 | 0.00 |
| ATOM | 1198 | HA2  | GLY | X | 78 | 55.075 | 37.606 | 30.151 | 0.00 | 0.00 |
| ATOM | 1199 | HA3  | GLY | X | 78 | 56.576 | 37.245 | 30.886 | 0.00 | 0.00 |
| ATOM | 1200 | C    | GLY | X | 78 | 55.851 | 39.389 | 31.027 | 0.00 | 0.00 |
| ATOM | 1201 | O    | GLY | X | 78 | 55.230 | 39.409 | 32.075 | 0.00 | 0.00 |
| ATOM | 1202 | N    | THR | X | 79 | 56.509 | 40.474 | 30.525 | 0.00 | 0.00 |
| ATOM | 1203 | H    | THR | X | 79 | 57.141 | 40.344 | 29.748 | 0.00 | 0.00 |
| ATOM | 1204 | CA   | THR | X | 79 | 56.509 | 41.921 | 31.024 | 0.00 | 0.00 |
| ATOM | 1205 | HA   | THR | X | 79 | 55.719 | 41.973 | 31.774 | 0.00 | 0.00 |
| ATOM | 1206 | CB   | THR | X | 79 | 57.874 | 42.330 | 31.630 | 0.00 | 0.00 |
| ATOM | 1207 | HB   | THR | X | 79 | 57.869 | 43.391 | 31.883 | 0.00 | 0.00 |
| ATOM | 1208 | CG2  | THR | X | 79 | 58.011 | 41.559 | 32.916 | 0.00 | 0.00 |
| ATOM | 1209 | HG21 | THR | X | 79 | 58.318 | 40.514 | 32.869 | 0.00 | 0.00 |
| ATOM | 1210 | HG22 | THR | X | 79 | 57.129 | 41.569 | 33.557 | 0.00 | 0.00 |
| ATOM | 1211 | HG23 | THR | X | 79 | 58.753 | 42.027 | 33.563 | 0.00 | 0.00 |
| ATOM | 1212 | OG1  | THR | X | 79 | 59.016 | 42.053 | 30.829 | 0.00 | 0.00 |
| ATOM | 1213 | HG1  | THR | X | 79 | 59.786 | 42.491 | 31.198 | 0.00 | 0.00 |
| ATOM | 1214 | C    | THR | X | 79 | 56.185 | 42.918 | 29.942 | 0.00 | 0.00 |
| ATOM | 1215 | O    | THR | X | 79 | 55.842 | 44.066 | 30.242 | 0.00 | 0.00 |
| ATOM | 1216 | N    | GLU | X | 80 | 56.246 | 42.522 | 28.645 | 0.00 | 0.00 |
| ATOM | 1217 | H    | GLU | X | 80 | 56.654 | 41.620 | 28.446 | 0.00 | 0.00 |

|      |      |      |     |   |    |        |        |        |      |      |
|------|------|------|-----|---|----|--------|--------|--------|------|------|
| ATOM | 1218 | CA   | GLU | X | 80 | 55.792 | 43.444 | 27.515 | 0.00 | 0.00 |
| ATOM | 1219 | HA   | GLU | X | 80 | 56.176 | 44.448 | 27.692 | 0.00 | 0.00 |
| ATOM | 1220 | CB   | GLU | X | 80 | 56.443 | 43.078 | 26.199 | 0.00 | 0.00 |
| ATOM | 1221 | HB2  | GLU | X | 80 | 57.531 | 43.141 | 26.191 | 0.00 | 0.00 |
| ATOM | 1222 | HB3  | GLU | X | 80 | 56.217 | 42.030 | 26.000 | 0.00 | 0.00 |
| ATOM | 1223 | CG   | GLU | X | 80 | 55.890 | 43.860 | 25.003 | 0.00 | 0.00 |
| ATOM | 1224 | HG2  | GLU | X | 80 | 54.881 | 43.534 | 24.747 | 0.00 | 0.00 |
| ATOM | 1225 | HG3  | GLU | X | 80 | 55.684 | 44.869 | 25.360 | 0.00 | 0.00 |
| ATOM | 1226 | CD   | GLU | X | 80 | 56.892 | 43.888 | 23.879 | 0.00 | 0.00 |
| ATOM | 1227 | OE1  | GLU | X | 80 | 57.947 | 44.453 | 24.127 | 0.00 | 0.00 |
| ATOM | 1228 | OE2  | GLU | X | 80 | 56.718 | 43.342 | 22.776 | 0.00 | 0.00 |
| ATOM | 1229 | C    | GLU | X | 80 | 54.252 | 43.438 | 27.406 | 0.00 | 0.00 |
| ATOM | 1230 | O    | GLU | X | 80 | 53.637 | 44.440 | 27.090 | 0.00 | 0.00 |
| ATOM | 1231 | N    | MET | X | 81 | 53.596 | 42.378 | 27.900 | 0.00 | 0.00 |
| ATOM | 1232 | H    | MET | X | 81 | 54.177 | 41.682 | 28.345 | 0.00 | 0.00 |
| ATOM | 1233 | CA   | MET | X | 81 | 52.123 | 42.234 | 27.972 | 0.00 | 0.00 |
| ATOM | 1234 | HA   | MET | X | 81 | 51.769 | 42.434 | 26.961 | 0.00 | 0.00 |
| ATOM | 1235 | CB   | MET | X | 81 | 51.722 | 40.752 | 28.261 | 0.00 | 0.00 |
| ATOM | 1236 | HB2  | MET | X | 81 | 50.674 | 40.676 | 27.971 | 0.00 | 0.00 |
| ATOM | 1237 | HB3  | MET | X | 81 | 52.322 | 40.125 | 27.602 | 0.00 | 0.00 |
| ATOM | 1238 | CG   | MET | X | 81 | 51.822 | 40.328 | 29.735 | 0.00 | 0.00 |
| ATOM | 1239 | HG2  | MET | X | 81 | 52.651 | 40.797 | 30.266 | 0.00 | 0.00 |
| ATOM | 1240 | HG3  | MET | X | 81 | 50.933 | 40.710 | 30.237 | 0.00 | 0.00 |
| ATOM | 1241 | SD   | MET | X | 81 | 51.989 | 38.556 | 30.142 | 0.00 | 0.00 |
| ATOM | 1242 | CE   | MET | X | 81 | 50.353 | 37.976 | 29.686 | 0.00 | 0.00 |
| ATOM | 1243 | HE1  | MET | X | 81 | 49.934 | 38.351 | 28.752 | 0.00 | 0.00 |
| ATOM | 1244 | HE2  | MET | X | 81 | 50.324 | 36.892 | 29.796 | 0.00 | 0.00 |
| ATOM | 1245 | HE3  | MET | X | 81 | 49.651 | 38.395 | 30.407 | 0.00 | 0.00 |
| ATOM | 1246 | C    | MET | X | 81 | 51.394 | 43.220 | 28.950 | 0.00 | 0.00 |
| ATOM | 1247 | O    | MET | X | 81 | 50.147 | 43.356 | 28.962 | 0.00 | 0.00 |
| ATOM | 1248 | N    | TRP | X | 82 | 52.294 | 43.945 | 29.702 | 0.00 | 0.00 |
| ATOM | 1249 | H    | TRP | X | 82 | 53.225 | 43.556 | 29.661 | 0.00 | 0.00 |
| ATOM | 1250 | CA   | TRP | X | 82 | 51.957 | 44.887 | 30.749 | 0.00 | 0.00 |
| ATOM | 1251 | HA   | TRP | X | 82 | 50.870 | 44.929 | 30.823 | 0.00 | 0.00 |
| ATOM | 1252 | CB   | TRP | X | 82 | 52.498 | 44.389 | 32.083 | 0.00 | 0.00 |
| ATOM | 1253 | HB2  | TRP | X | 82 | 53.582 | 44.502 | 32.085 | 0.00 | 0.00 |
| ATOM | 1254 | HB3  | TRP | X | 82 | 52.109 | 45.141 | 32.770 | 0.00 | 0.00 |
| ATOM | 1255 | CG   | TRP | X | 82 | 52.102 | 43.015 | 32.458 | 0.00 | 0.00 |
| ATOM | 1256 | CD1  | TRP | X | 82 | 53.063 | 42.181 | 32.877 | 0.00 | 0.00 |
| ATOM | 1257 | HD1  | TRP | X | 82 | 54.131 | 42.340 | 32.867 | 0.00 | 0.00 |
| ATOM | 1258 | NE1  | TRP | X | 82 | 52.420 | 41.045 | 33.236 | 0.00 | 0.00 |
| ATOM | 1259 | HE1  | TRP | X | 82 | 52.960 | 40.195 | 33.310 | 0.00 | 0.00 |
| ATOM | 1260 | CE2  | TRP | X | 82 | 51.089 | 40.973 | 32.872 | 0.00 | 0.00 |
| ATOM | 1261 | CZ2  | TRP | X | 82 | 50.166 | 39.933 | 32.906 | 0.00 | 0.00 |
| ATOM | 1262 | HZ2  | TRP | X | 82 | 50.428 | 38.964 | 33.305 | 0.00 | 0.00 |
| ATOM | 1263 | CH2  | TRP | X | 82 | 48.924 | 40.236 | 32.429 | 0.00 | 0.00 |
| ATOM | 1264 | HH2  | TRP | X | 82 | 48.199 | 39.437 | 32.381 | 0.00 | 0.00 |
| ATOM | 1265 | CZ3  | TRP | X | 82 | 48.541 | 41.555 | 32.066 | 0.00 | 0.00 |
| ATOM | 1266 | HZ3  | TRP | X | 82 | 47.553 | 41.750 | 31.676 | 0.00 | 0.00 |
| ATOM | 1267 | CE3  | TRP | X | 82 | 49.518 | 42.549 | 32.052 | 0.00 | 0.00 |
| ATOM | 1268 | HE3  | TRP | X | 82 | 49.260 | 43.529 | 31.678 | 0.00 | 0.00 |
| ATOM | 1269 | CD2  | TRP | X | 82 | 50.824 | 42.270 | 32.414 | 0.00 | 0.00 |
| ATOM | 1270 | C    | TRP | X | 82 | 52.449 | 46.282 | 30.514 | 0.00 | 0.00 |
| ATOM | 1271 | O    | TRP | X | 82 | 52.126 | 47.256 | 31.264 | 0.00 | 0.00 |
| ATOM | 1272 | N    | ASN | X | 83 | 53.224 | 46.499 | 29.433 | 0.00 | 0.00 |
| ATOM | 1273 | H    | ASN | X | 83 | 53.311 | 45.758 | 28.752 | 0.00 | 0.00 |
| ATOM | 1274 | CA   | ASN | X | 83 | 53.603 | 47.805 | 28.953 | 0.00 | 0.00 |
| ATOM | 1275 | HA   | ASN | X | 83 | 53.982 | 48.334 | 29.827 | 0.00 | 0.00 |
| ATOM | 1276 | CB   | ASN | X | 83 | 54.860 | 47.599 | 28.046 | 0.00 | 0.00 |
| ATOM | 1277 | HB2  | ASN | X | 83 | 55.703 | 47.190 | 28.603 | 0.00 | 0.00 |
| ATOM | 1278 | HB3  | ASN | X | 83 | 54.598 | 46.874 | 27.276 | 0.00 | 0.00 |
| ATOM | 1279 | CG   | ASN | X | 83 | 55.404 | 48.876 | 27.306 | 0.00 | 0.00 |
| ATOM | 1280 | OD1  | ASN | X | 83 | 55.502 | 48.867 | 26.097 | 0.00 | 0.00 |
| ATOM | 1281 | ND2  | ASN | X | 83 | 55.744 | 49.914 | 28.032 | 0.00 | 0.00 |
| ATOM | 1282 | HD21 | ASN | X | 83 | 56.224 | 50.691 | 27.601 | 0.00 | 0.00 |
| ATOM | 1283 | HD22 | ASN | X | 83 | 55.734 | 49.720 | 29.023 | 0.00 | 0.00 |
| ATOM | 1284 | C    | ASN | X | 83 | 52.514 | 48.636 | 28.207 | 0.00 | 0.00 |

|      |      |      |     |   |    |        |        |        |      |      |
|------|------|------|-----|---|----|--------|--------|--------|------|------|
| ATOM | 1285 | O    | ASN | X | 83 | 52.138 | 48.144 | 27.160 | 0.00 | 0.00 |
| ATOM | 1286 | N    | PRO | X | 84 | 52.011 | 49.762 | 28.705 | 0.00 | 0.00 |
| ATOM | 1287 | CD   | PRO | X | 84 | 52.501 | 50.412 | 29.881 | 0.00 | 0.00 |
| ATOM | 1288 | HD2  | PRO | X | 84 | 53.477 | 50.848 | 29.667 | 0.00 | 0.00 |
| ATOM | 1289 | HD3  | PRO | X | 84 | 52.455 | 49.676 | 30.683 | 0.00 | 0.00 |
| ATOM | 1290 | CG   | PRO | X | 84 | 51.417 | 51.442 | 30.314 | 0.00 | 0.00 |
| ATOM | 1291 | HG2  | PRO | X | 84 | 51.736 | 52.258 | 30.964 | 0.00 | 0.00 |
| ATOM | 1292 | HG3  | PRO | X | 84 | 50.640 | 50.978 | 30.923 | 0.00 | 0.00 |
| ATOM | 1293 | CB   | PRO | X | 84 | 50.775 | 51.828 | 28.937 | 0.00 | 0.00 |
| ATOM | 1294 | HB2  | PRO | X | 84 | 51.484 | 52.443 | 28.383 | 0.00 | 0.00 |
| ATOM | 1295 | HB3  | PRO | X | 84 | 49.757 | 52.210 | 29.004 | 0.00 | 0.00 |
| ATOM | 1296 | CA   | PRO | X | 84 | 50.849 | 50.398 | 28.165 | 0.00 | 0.00 |
| ATOM | 1297 | HA   | PRO | X | 84 | 49.966 | 49.786 | 28.350 | 0.00 | 0.00 |
| ATOM | 1298 | C    | PRO | X | 84 | 50.948 | 50.628 | 26.642 | 0.00 | 0.00 |
| ATOM | 1299 | O    | PRO | X | 84 | 51.674 | 51.451 | 26.117 | 0.00 | 0.00 |
| ATOM | 1300 | N    | ASN | X | 85 | 50.203 | 49.857 | 25.864 | 0.00 | 0.00 |
| ATOM | 1301 | H    | ASN | X | 85 | 49.656 | 49.159 | 26.348 | 0.00 | 0.00 |
| ATOM | 1302 | CA   | ASN | X | 85 | 50.235 | 49.834 | 24.396 | 0.00 | 0.00 |
| ATOM | 1303 | HA   | ASN | X | 85 | 51.257 | 49.994 | 24.052 | 0.00 | 0.00 |
| ATOM | 1304 | CB   | ASN | X | 85 | 49.870 | 48.440 | 23.773 | 0.00 | 0.00 |
| ATOM | 1305 | HB2  | ASN | X | 85 | 49.887 | 48.478 | 22.683 | 0.00 | 0.00 |
| ATOM | 1306 | HB3  | ASN | X | 85 | 50.620 | 47.722 | 24.104 | 0.00 | 0.00 |
| ATOM | 1307 | CG   | ASN | X | 85 | 48.427 | 47.982 | 24.077 | 0.00 | 0.00 |
| ATOM | 1308 | OD1  | ASN | X | 85 | 47.640 | 48.767 | 24.656 | 0.00 | 0.00 |
| ATOM | 1309 | ND2  | ASN | X | 85 | 48.051 | 46.786 | 23.764 | 0.00 | 0.00 |
| ATOM | 1310 | HD21 | ASN | X | 85 | 47.080 | 46.533 | 23.877 | 0.00 | 0.00 |
| ATOM | 1311 | HD22 | ASN | X | 85 | 48.687 | 46.250 | 23.190 | 0.00 | 0.00 |
| ATOM | 1312 | C    | ASN | X | 85 | 49.527 | 50.970 | 23.741 | 0.00 | 0.00 |
| ATOM | 1313 | O    | ASN | X | 85 | 49.187 | 50.865 | 22.528 | 0.00 | 0.00 |
| ATOM | 1314 | N    | ARG | X | 86 | 49.305 | 52.051 | 24.450 | 0.00 | 0.00 |
| ATOM | 1315 | H    | ARG | X | 86 | 49.416 | 51.990 | 25.452 | 0.00 | 0.00 |
| ATOM | 1316 | CA   | ARG | X | 86 | 48.623 | 53.238 | 23.919 | 0.00 | 0.00 |
| ATOM | 1317 | HA   | ARG | X | 86 | 48.752 | 53.284 | 22.837 | 0.00 | 0.00 |
| ATOM | 1318 | CB   | ARG | X | 86 | 47.230 | 53.133 | 24.344 | 0.00 | 0.00 |
| ATOM | 1319 | HB2  | ARG | X | 86 | 47.276 | 52.752 | 25.365 | 0.00 | 0.00 |
| ATOM | 1320 | HB3  | ARG | X | 86 | 46.773 | 54.121 | 24.284 | 0.00 | 0.00 |
| ATOM | 1321 | CG   | ARG | X | 86 | 46.372 | 52.147 | 23.530 | 0.00 | 0.00 |
| ATOM | 1322 | HG2  | ARG | X | 86 | 46.672 | 51.102 | 23.616 | 0.00 | 0.00 |
| ATOM | 1323 | HG3  | ARG | X | 86 | 45.368 | 52.104 | 23.954 | 0.00 | 0.00 |
| ATOM | 1324 | CD   | ARG | X | 86 | 46.147 | 52.560 | 22.124 | 0.00 | 0.00 |
| ATOM | 1325 | HD2  | ARG | X | 86 | 45.299 | 53.236 | 22.015 | 0.00 | 0.00 |
| ATOM | 1326 | HD3  | ARG | X | 86 | 47.050 | 52.993 | 21.695 | 0.00 | 0.00 |
| ATOM | 1327 | NE   | ARG | X | 86 | 45.746 | 51.439 | 21.293 | 0.00 | 0.00 |
| ATOM | 1328 | HE   | ARG | X | 86 | 45.922 | 50.524 | 21.683 | 0.00 | 0.00 |
| ATOM | 1329 | CZ   | ARG | X | 86 | 45.182 | 51.431 | 20.099 | 0.00 | 0.00 |
| ATOM | 1330 | NH1  | ARG | X | 86 | 44.754 | 52.552 | 19.525 | 0.00 | 0.00 |
| ATOM | 1331 | HH11 | ARG | X | 86 | 44.876 | 53.431 | 20.008 | 0.00 | 0.00 |
| ATOM | 1332 | HH12 | ARG | X | 86 | 44.183 | 52.622 | 18.694 | 0.00 | 0.00 |
| ATOM | 1333 | NH2  | ARG | X | 86 | 45.052 | 50.276 | 19.403 | 0.00 | 0.00 |
| ATOM | 1334 | HH21 | ARG | X | 86 | 45.436 | 49.497 | 19.920 | 0.00 | 0.00 |
| ATOM | 1335 | HH22 | ARG | X | 86 | 44.395 | 50.162 | 18.645 | 0.00 | 0.00 |
| ATOM | 1336 | C    | ARG | X | 86 | 49.194 | 54.554 | 24.528 | 0.00 | 0.00 |
| ATOM | 1337 | O    | ARG | X | 86 | 49.942 | 54.551 | 25.526 | 0.00 | 0.00 |
| ATOM | 1338 | N    | GLU | X | 87 | 48.960 | 55.713 | 23.878 | 0.00 | 0.00 |
| ATOM | 1339 | H    | GLU | X | 87 | 48.771 | 55.591 | 22.893 | 0.00 | 0.00 |
| ATOM | 1340 | CA   | GLU | X | 87 | 49.233 | 57.019 | 24.433 | 0.00 | 0.00 |
| ATOM | 1341 | HA   | GLU | X | 87 | 50.317 | 57.131 | 24.435 | 0.00 | 0.00 |
| ATOM | 1342 | CB   | GLU | X | 87 | 48.652 | 58.168 | 23.569 | 0.00 | 0.00 |
| ATOM | 1343 | HB2  | GLU | X | 87 | 48.972 | 57.930 | 22.554 | 0.00 | 0.00 |
| ATOM | 1344 | HB3  | GLU | X | 87 | 47.564 | 58.113 | 23.534 | 0.00 | 0.00 |
| ATOM | 1345 | CG   | GLU | X | 87 | 49.239 | 59.507 | 23.933 | 0.00 | 0.00 |
| ATOM | 1346 | HG2  | GLU | X | 87 | 49.194 | 59.631 | 25.015 | 0.00 | 0.00 |
| ATOM | 1347 | HG3  | GLU | X | 87 | 50.290 | 59.397 | 23.667 | 0.00 | 0.00 |
| ATOM | 1348 | CD   | GLU | X | 87 | 48.631 | 60.740 | 23.294 | 0.00 | 0.00 |
| ATOM | 1349 | OE1  | GLU | X | 87 | 48.128 | 60.702 | 22.175 | 0.00 | 0.00 |
| ATOM | 1350 | OE2  | GLU | X | 87 | 48.749 | 61.792 | 23.991 | 0.00 | 0.00 |
| ATOM | 1351 | C    | GLU | X | 87 | 48.744 | 57.279 | 25.870 | 0.00 | 0.00 |

|      |      |      |     |   |    |        |        |        |      |      |
|------|------|------|-----|---|----|--------|--------|--------|------|------|
| ATOM | 1352 | O    | GLU | X | 87 | 47.550 | 57.149 | 26.159 | 0.00 | 0.00 |
| ATOM | 1353 | N    | LEU | X | 88 | 49.718 | 57.576 | 26.729 | 0.00 | 0.00 |
| ATOM | 1354 | H    | LEU | X | 88 | 50.685 | 57.575 | 26.435 | 0.00 | 0.00 |
| ATOM | 1355 | CA   | LEU | X | 88 | 49.508 | 57.955 | 28.125 | 0.00 | 0.00 |
| ATOM | 1356 | HA   | LEU | X | 88 | 48.750 | 57.350 | 28.623 | 0.00 | 0.00 |
| ATOM | 1357 | CB   | LEU | X | 88 | 50.925 | 57.716 | 28.772 | 0.00 | 0.00 |
| ATOM | 1358 | HB2  | LEU | X | 88 | 51.685 | 57.999 | 28.043 | 0.00 | 0.00 |
| ATOM | 1359 | HB3  | LEU | X | 88 | 50.985 | 58.412 | 29.608 | 0.00 | 0.00 |
| ATOM | 1360 | CG   | LEU | X | 88 | 51.301 | 56.286 | 29.195 | 0.00 | 0.00 |
| ATOM | 1361 | HG   | LEU | X | 88 | 51.060 | 55.581 | 28.400 | 0.00 | 0.00 |
| ATOM | 1362 | CD1  | LEU | X | 88 | 52.836 | 56.244 | 29.341 | 0.00 | 0.00 |
| ATOM | 1363 | HD11 | LEU | X | 88 | 53.011 | 55.216 | 29.661 | 0.00 | 0.00 |
| ATOM | 1364 | HD12 | LEU | X | 88 | 53.251 | 56.965 | 30.045 | 0.00 | 0.00 |
| ATOM | 1365 | HD13 | LEU | X | 88 | 53.294 | 56.264 | 28.352 | 0.00 | 0.00 |
| ATOM | 1366 | CD2  | LEU | X | 88 | 50.432 | 55.884 | 30.395 | 0.00 | 0.00 |
| ATOM | 1367 | HD21 | LEU | X | 88 | 49.385 | 55.799 | 30.104 | 0.00 | 0.00 |
| ATOM | 1368 | HD22 | LEU | X | 88 | 50.671 | 54.851 | 30.650 | 0.00 | 0.00 |
| ATOM | 1369 | HD23 | LEU | X | 88 | 50.659 | 56.597 | 31.187 | 0.00 | 0.00 |
| ATOM | 1370 | C    | LEU | X | 88 | 49.087 | 59.453 | 28.249 | 0.00 | 0.00 |
| ATOM | 1371 | O    | LEU | X | 88 | 49.681 | 60.323 | 27.660 | 0.00 | 0.00 |
| ATOM | 1372 | N    | SER | X | 89 | 47.991 | 59.701 | 28.957 | 0.00 | 0.00 |
| ATOM | 1373 | H    | SER | X | 89 | 47.459 | 58.930 | 29.337 | 0.00 | 0.00 |
| ATOM | 1374 | CA   | SER | X | 89 | 47.395 | 61.074 | 28.963 | 0.00 | 0.00 |
| ATOM | 1375 | HA   | SER | X | 89 | 48.172 | 61.835 | 29.030 | 0.00 | 0.00 |
| ATOM | 1376 | CB   | SER | X | 89 | 46.624 | 61.259 | 27.703 | 0.00 | 0.00 |
| ATOM | 1377 | HB2  | SER | X | 89 | 47.214 | 61.204 | 26.788 | 0.00 | 0.00 |
| ATOM | 1378 | HB3  | SER | X | 89 | 45.982 | 60.380 | 27.645 | 0.00 | 0.00 |
| ATOM | 1379 | OG   | SER | X | 89 | 45.677 | 62.391 | 27.753 | 0.00 | 0.00 |
| ATOM | 1380 | HG   | SER | X | 89 | 44.946 | 62.220 | 27.154 | 0.00 | 0.00 |
| ATOM | 1381 | C    | SER | X | 89 | 46.518 | 61.221 | 30.229 | 0.00 | 0.00 |
| ATOM | 1382 | O    | SER | X | 89 | 46.301 | 60.262 | 30.903 | 0.00 | 0.00 |
| ATOM | 1383 | N    | GLU | X | 90 | 45.961 | 62.477 | 30.507 | 0.00 | 0.00 |
| ATOM | 1384 | H    | GLU | X | 90 | 46.105 | 63.234 | 29.854 | 0.00 | 0.00 |
| ATOM | 1385 | CA   | GLU | X | 90 | 44.881 | 62.652 | 31.441 | 0.00 | 0.00 |
| ATOM | 1386 | HA   | GLU | X | 90 | 44.864 | 61.911 | 32.240 | 0.00 | 0.00 |
| ATOM | 1387 | CB   | GLU | X | 90 | 45.196 | 64.003 | 32.226 | 0.00 | 0.00 |
| ATOM | 1388 | HB2  | GLU | X | 90 | 45.356 | 64.811 | 31.513 | 0.00 | 0.00 |
| ATOM | 1389 | HB3  | GLU | X | 90 | 44.487 | 64.185 | 33.034 | 0.00 | 0.00 |
| ATOM | 1390 | CG   | GLU | X | 90 | 46.509 | 63.771 | 32.988 | 0.00 | 0.00 |
| ATOM | 1391 | HG2  | GLU | X | 90 | 46.201 | 63.088 | 33.780 | 0.00 | 0.00 |
| ATOM | 1392 | HG3  | GLU | X | 90 | 47.338 | 63.333 | 32.433 | 0.00 | 0.00 |
| ATOM | 1393 | CD   | GLU | X | 90 | 46.917 | 65.051 | 33.639 | 0.00 | 0.00 |
| ATOM | 1394 | OE1  | GLU | X | 90 | 46.190 | 65.682 | 34.440 | 0.00 | 0.00 |
| ATOM | 1395 | OE2  | GLU | X | 90 | 48.036 | 65.520 | 33.285 | 0.00 | 0.00 |
| ATOM | 1396 | C    | GLU | X | 90 | 43.448 | 62.787 | 30.884 | 0.00 | 0.00 |
| ATOM | 1397 | O    | GLU | X | 90 | 42.462 | 62.728 | 31.606 | 0.00 | 0.00 |
| ATOM | 1398 | N    | ASP | X | 91 | 43.275 | 62.731 | 29.546 | 0.00 | 0.00 |
| ATOM | 1399 | H    | ASP | X | 91 | 44.077 | 62.706 | 28.932 | 0.00 | 0.00 |
| ATOM | 1400 | CA   | ASP | X | 91 | 41.905 | 62.645 | 28.961 | 0.00 | 0.00 |
| ATOM | 1401 | HA   | ASP | X | 91 | 41.246 | 63.272 | 29.561 | 0.00 | 0.00 |
| ATOM | 1402 | CB   | ASP | X | 91 | 42.034 | 63.316 | 27.546 | 0.00 | 0.00 |
| ATOM | 1403 | HB2  | ASP | X | 91 | 41.058 | 63.770 | 27.373 | 0.00 | 0.00 |
| ATOM | 1404 | HB3  | ASP | X | 91 | 42.774 | 64.115 | 27.524 | 0.00 | 0.00 |
| ATOM | 1405 | CG   | ASP | X | 91 | 42.293 | 62.437 | 26.364 | 0.00 | 0.00 |
| ATOM | 1406 | OD1  | ASP | X | 91 | 43.461 | 61.888 | 26.386 | 0.00 | 0.00 |
| ATOM | 1407 | OD2  | ASP | X | 91 | 41.590 | 62.366 | 25.303 | 0.00 | 0.00 |
| ATOM | 1408 | C    | ASP | X | 91 | 41.292 | 61.258 | 28.932 | 0.00 | 0.00 |
| ATOM | 1409 | O    | ASP | X | 91 | 40.636 | 60.858 | 27.992 | 0.00 | 0.00 |
| ATOM | 1410 | N    | CYX | X | 92 | 41.655 | 60.486 | 29.885 | 0.00 | 0.00 |
| ATOM | 1411 | H    | CYX | X | 92 | 42.081 | 60.942 | 30.680 | 0.00 | 0.00 |
| ATOM | 1412 | CA   | CYX | X | 92 | 41.843 | 58.977 | 29.757 | 0.00 | 0.00 |
| ATOM | 1413 | HA   | CYX | X | 92 | 42.232 | 58.926 | 28.740 | 0.00 | 0.00 |
| ATOM | 1414 | CB   | CYX | X | 92 | 43.026 | 58.596 | 30.674 | 0.00 | 0.00 |
| ATOM | 1415 | HB2  | CYX | X | 92 | 43.252 | 57.575 | 30.366 | 0.00 | 0.00 |
| ATOM | 1416 | HB3  | CYX | X | 92 | 43.792 | 59.333 | 30.432 | 0.00 | 0.00 |
| ATOM | 1417 | SG   | CYX | X | 92 | 42.636 | 58.687 | 32.445 | 0.00 | 0.00 |
| ATOM | 1418 | C    | CYX | X | 92 | 40.631 | 57.998 | 29.959 | 0.00 | 0.00 |

|      |      |      |     |   |    |        |        |        |      |      |
|------|------|------|-----|---|----|--------|--------|--------|------|------|
| ATOM | 1419 | O    | CYX | X | 92 | 40.791 | 56.785 | 29.894 | 0.00 | 0.00 |
| ATOM | 1420 | N    | LEU | X | 93 | 39.470 | 58.542 | 30.304 | 0.00 | 0.00 |
| ATOM | 1421 | H    | LEU | X | 93 | 39.351 | 59.544 | 30.329 | 0.00 | 0.00 |
| ATOM | 1422 | CA   | LEU | X | 93 | 38.257 | 57.731 | 30.659 | 0.00 | 0.00 |
| ATOM | 1423 | HA   | LEU | X | 93 | 38.434 | 56.731 | 31.053 | 0.00 | 0.00 |
| ATOM | 1424 | CB   | LEU | X | 93 | 37.368 | 58.470 | 31.663 | 0.00 | 0.00 |
| ATOM | 1425 | HB2  | LEU | X | 93 | 37.208 | 59.493 | 31.321 | 0.00 | 0.00 |
| ATOM | 1426 | HB3  | LEU | X | 93 | 36.399 | 57.972 | 31.659 | 0.00 | 0.00 |
| ATOM | 1427 | CG   | LEU | X | 93 | 37.815 | 58.461 | 33.134 | 0.00 | 0.00 |
| ATOM | 1428 | HG   | LEU | X | 93 | 38.776 | 58.972 | 33.182 | 0.00 | 0.00 |
| ATOM | 1429 | CD1  | LEU | X | 93 | 36.770 | 59.188 | 34.054 | 0.00 | 0.00 |
| ATOM | 1430 | HD11 | LEU | X | 93 | 35.898 | 58.549 | 34.191 | 0.00 | 0.00 |
| ATOM | 1431 | HD12 | LEU | X | 93 | 36.425 | 60.116 | 33.600 | 0.00 | 0.00 |
| ATOM | 1432 | HD13 | LEU | X | 93 | 37.280 | 59.389 | 34.996 | 0.00 | 0.00 |
| ATOM | 1433 | CD2  | LEU | X | 93 | 38.118 | 57.060 | 33.701 | 0.00 | 0.00 |
| ATOM | 1434 | HD21 | LEU | X | 93 | 38.418 | 57.135 | 34.746 | 0.00 | 0.00 |
| ATOM | 1435 | HD22 | LEU | X | 93 | 37.243 | 56.410 | 33.678 | 0.00 | 0.00 |
| ATOM | 1436 | HD23 | LEU | X | 93 | 38.911 | 56.686 | 33.053 | 0.00 | 0.00 |
| ATOM | 1437 | C    | LEU | X | 93 | 37.568 | 57.301 | 29.358 | 0.00 | 0.00 |
| ATOM | 1438 | O    | LEU | X | 93 | 37.235 | 58.156 | 28.611 | 0.00 | 0.00 |
| ATOM | 1439 | N    | TYR | X | 94 | 37.386 | 56.009 | 29.112 | 0.00 | 0.00 |
| ATOM | 1440 | H    | TYR | X | 94 | 37.662 | 55.324 | 29.801 | 0.00 | 0.00 |
| ATOM | 1441 | CA   | TYR | X | 94 | 36.742 | 55.483 | 27.962 | 0.00 | 0.00 |
| ATOM | 1442 | HA   | TYR | X | 94 | 35.969 | 56.137 | 27.559 | 0.00 | 0.00 |
| ATOM | 1443 | CB   | TYR | X | 94 | 37.829 | 55.314 | 26.862 | 0.00 | 0.00 |
| ATOM | 1444 | HB2  | TYR | X | 94 | 38.687 | 54.820 | 27.318 | 0.00 | 0.00 |
| ATOM | 1445 | HB3  | TYR | X | 94 | 37.471 | 54.728 | 26.015 | 0.00 | 0.00 |
| ATOM | 1446 | CG   | TYR | X | 94 | 38.339 | 56.595 | 26.349 | 0.00 | 0.00 |
| ATOM | 1447 | CD1  | TYR | X | 94 | 37.458 | 57.391 | 25.552 | 0.00 | 0.00 |
| ATOM | 1448 | HD1  | TYR | X | 94 | 36.425 | 57.135 | 25.369 | 0.00 | 0.00 |
| ATOM | 1449 | CE1  | TYR | X | 94 | 37.883 | 58.646 | 25.063 | 0.00 | 0.00 |
| ATOM | 1450 | HE1  | TYR | X | 94 | 37.236 | 59.421 | 24.679 | 0.00 | 0.00 |
| ATOM | 1451 | CZ   | TYR | X | 94 | 39.217 | 59.118 | 25.426 | 0.00 | 0.00 |
| ATOM | 1452 | OH   | TYR | X | 94 | 39.630 | 60.397 | 25.052 | 0.00 | 0.00 |
| ATOM | 1453 | HH   | TYR | X | 94 | 40.400 | 60.702 | 25.539 | 0.00 | 0.00 |
| ATOM | 1454 | CE2  | TYR | X | 94 | 40.102 | 58.310 | 26.145 | 0.00 | 0.00 |
| ATOM | 1455 | HE2  | TYR | X | 94 | 41.089 | 58.637 | 26.436 | 0.00 | 0.00 |
| ATOM | 1456 | CD2  | TYR | X | 94 | 39.619 | 57.058 | 26.558 | 0.00 | 0.00 |
| ATOM | 1457 | HD2  | TYR | X | 94 | 40.197 | 56.362 | 27.147 | 0.00 | 0.00 |
| ATOM | 1458 | C    | TYR | X | 94 | 36.095 | 54.121 | 28.341 | 0.00 | 0.00 |
| ATOM | 1459 | O    | TYR | X | 94 | 36.668 | 53.416 | 29.235 | 0.00 | 0.00 |
| ATOM | 1460 | N    | LEU | X | 95 | 34.973 | 53.840 | 27.693 | 0.00 | 0.00 |
| ATOM | 1461 | H    | LEU | X | 95 | 34.594 | 54.590 | 27.134 | 0.00 | 0.00 |
| ATOM | 1462 | CA   | LEU | X | 95 | 34.235 | 52.619 | 27.522 | 0.00 | 0.00 |
| ATOM | 1463 | HA   | LEU | X | 95 | 34.512 | 51.916 | 28.308 | 0.00 | 0.00 |
| ATOM | 1464 | CB   | LEU | X | 95 | 32.734 | 52.714 | 27.517 | 0.00 | 0.00 |
| ATOM | 1465 | HB2  | LEU | X | 95 | 32.420 | 53.674 | 27.108 | 0.00 | 0.00 |
| ATOM | 1466 | HB3  | LEU | X | 95 | 32.191 | 51.961 | 26.946 | 0.00 | 0.00 |
| ATOM | 1467 | CG   | LEU | X | 95 | 32.142 | 52.833 | 28.913 | 0.00 | 0.00 |
| ATOM | 1468 | HG   | LEU | X | 95 | 32.611 | 53.719 | 29.341 | 0.00 | 0.00 |
| ATOM | 1469 | CD1  | LEU | X | 95 | 30.625 | 53.069 | 28.864 | 0.00 | 0.00 |
| ATOM | 1470 | HD11 | LEU | X | 95 | 30.246 | 53.656 | 29.701 | 0.00 | 0.00 |
| ATOM | 1471 | HD12 | LEU | X | 95 | 30.107 | 52.110 | 28.844 | 0.00 | 0.00 |
| ATOM | 1472 | HD13 | LEU | X | 95 | 30.407 | 53.624 | 27.951 | 0.00 | 0.00 |
| ATOM | 1473 | CD2  | LEU | X | 95 | 32.462 | 51.521 | 29.762 | 0.00 | 0.00 |
| ATOM | 1474 | HD21 | LEU | X | 95 | 33.536 | 51.518 | 29.948 | 0.00 | 0.00 |
| ATOM | 1475 | HD22 | LEU | X | 95 | 31.863 | 51.566 | 30.672 | 0.00 | 0.00 |
| ATOM | 1476 | HD23 | LEU | X | 95 | 32.262 | 50.621 | 29.181 | 0.00 | 0.00 |
| ATOM | 1477 | C    | LEU | X | 95 | 34.542 | 51.864 | 26.308 | 0.00 | 0.00 |
| ATOM | 1478 | O    | LEU | X | 95 | 35.178 | 52.484 | 25.445 | 0.00 | 0.00 |
| ATOM | 1479 | N    | ASN | X | 96 | 34.363 | 50.567 | 26.260 | 0.00 | 0.00 |
| ATOM | 1480 | H    | ASN | X | 96 | 34.011 | 50.157 | 27.113 | 0.00 | 0.00 |
| ATOM | 1481 | CA   | ASN | X | 96 | 34.635 | 49.651 | 25.162 | 0.00 | 0.00 |
| ATOM | 1482 | HA   | ASN | X | 96 | 34.297 | 50.231 | 24.302 | 0.00 | 0.00 |
| ATOM | 1483 | CB   | ASN | X | 96 | 36.132 | 49.235 | 25.168 | 0.00 | 0.00 |
| ATOM | 1484 | HB2  | ASN | X | 96 | 36.439 | 48.501 | 25.913 | 0.00 | 0.00 |
| ATOM | 1485 | HB3  | ASN | X | 96 | 36.398 | 48.743 | 24.232 | 0.00 | 0.00 |

|      |      |      |     |   |     |        |        |        |      |      |
|------|------|------|-----|---|-----|--------|--------|--------|------|------|
| ATOM | 1486 | CG   | ASN | X | 96  | 37.191 | 50.324 | 25.226 | 0.00 | 0.00 |
| ATOM | 1487 | OD1  | ASN | X | 96  | 37.677 | 50.731 | 24.199 | 0.00 | 0.00 |
| ATOM | 1488 | ND2  | ASN | X | 96  | 37.664 | 50.630 | 26.454 | 0.00 | 0.00 |
| ATOM | 1489 | HD21 | ASN | X | 96  | 38.561 | 51.090 | 26.525 | 0.00 | 0.00 |
| ATOM | 1490 | HD22 | ASN | X | 96  | 37.229 | 50.337 | 27.317 | 0.00 | 0.00 |
| ATOM | 1491 | C    | ASN | X | 96  | 33.677 | 48.416 | 25.251 | 0.00 | 0.00 |
| ATOM | 1492 | O    | ASN | X | 96  | 33.372 | 47.902 | 26.313 | 0.00 | 0.00 |
| ATOM | 1493 | N    | VAL | X | 97  | 33.218 | 47.880 | 24.125 | 0.00 | 0.00 |
| ATOM | 1494 | H    | VAL | X | 97  | 33.529 | 48.289 | 23.255 | 0.00 | 0.00 |
| ATOM | 1495 | CA   | VAL | X | 97  | 32.210 | 46.842 | 23.926 | 0.00 | 0.00 |
| ATOM | 1496 | HA   | VAL | X | 97  | 32.403 | 46.237 | 24.813 | 0.00 | 0.00 |
| ATOM | 1497 | CB   | VAL | X | 97  | 30.768 | 47.390 | 23.834 | 0.00 | 0.00 |
| ATOM | 1498 | HB   | VAL | X | 97  | 30.695 | 47.967 | 22.912 | 0.00 | 0.00 |
| ATOM | 1499 | CG1  | VAL | X | 97  | 29.750 | 46.258 | 23.760 | 0.00 | 0.00 |
| ATOM | 1500 | HG11 | VAL | X | 97  | 29.837 | 45.830 | 22.761 | 0.00 | 0.00 |
| ATOM | 1501 | HG12 | VAL | X | 97  | 29.928 | 45.486 | 24.509 | 0.00 | 0.00 |
| ATOM | 1502 | HG13 | VAL | X | 97  | 28.764 | 46.694 | 23.916 | 0.00 | 0.00 |
| ATOM | 1503 | CG2  | VAL | X | 97  | 30.353 | 48.245 | 24.991 | 0.00 | 0.00 |
| ATOM | 1504 | HG21 | VAL | X | 97  | 31.050 | 49.082 | 25.021 | 0.00 | 0.00 |
| ATOM | 1505 | HG22 | VAL | X | 97  | 30.511 | 47.724 | 25.935 | 0.00 | 0.00 |
| ATOM | 1506 | HG23 | VAL | X | 97  | 29.369 | 48.712 | 24.937 | 0.00 | 0.00 |
| ATOM | 1507 | C    | VAL | X | 97  | 32.458 | 45.942 | 22.740 | 0.00 | 0.00 |
| ATOM | 1508 | O    | VAL | X | 97  | 32.545 | 46.528 | 21.671 | 0.00 | 0.00 |
| ATOM | 1509 | N    | TRP | X | 98  | 32.583 | 44.635 | 22.960 | 0.00 | 0.00 |
| ATOM | 1510 | H    | TRP | X | 98  | 32.588 | 44.319 | 23.919 | 0.00 | 0.00 |
| ATOM | 1511 | CA   | TRP | X | 98  | 32.675 | 43.609 | 21.933 | 0.00 | 0.00 |
| ATOM | 1512 | HA   | TRP | X | 98  | 32.864 | 44.041 | 20.951 | 0.00 | 0.00 |
| ATOM | 1513 | CB   | TRP | X | 98  | 33.799 | 42.635 | 22.152 | 0.00 | 0.00 |
| ATOM | 1514 | HB2  | TRP | X | 98  | 33.839 | 42.144 | 23.125 | 0.00 | 0.00 |
| ATOM | 1515 | HB3  | TRP | X | 98  | 33.733 | 41.871 | 21.378 | 0.00 | 0.00 |
| ATOM | 1516 | CG   | TRP | X | 98  | 35.241 | 43.108 | 22.029 | 0.00 | 0.00 |
| ATOM | 1517 | CD1  | TRP | X | 98  | 36.116 | 42.601 | 21.163 | 0.00 | 0.00 |
| ATOM | 1518 | HD1  | TRP | X | 98  | 35.840 | 41.988 | 20.317 | 0.00 | 0.00 |
| ATOM | 1519 | NE1  | TRP | X | 98  | 37.308 | 43.275 | 21.268 | 0.00 | 0.00 |
| ATOM | 1520 | HE1  | TRP | X | 98  | 38.157 | 42.947 | 20.830 | 0.00 | 0.00 |
| ATOM | 1521 | CE2  | TRP | X | 98  | 37.367 | 44.012 | 22.452 | 0.00 | 0.00 |
| ATOM | 1522 | CZ2  | TRP | X | 98  | 38.383 | 44.764 | 23.011 | 0.00 | 0.00 |
| ATOM | 1523 | HZ2  | TRP | X | 98  | 39.402 | 44.857 | 22.667 | 0.00 | 0.00 |
| ATOM | 1524 | CH2  | TRP | X | 98  | 37.965 | 45.476 | 24.140 | 0.00 | 0.00 |
| ATOM | 1525 | HH2  | TRP | X | 98  | 38.736 | 46.085 | 24.587 | 0.00 | 0.00 |
| ATOM | 1526 | CZ3  | TRP | X | 98  | 36.605 | 45.522 | 24.609 | 0.00 | 0.00 |
| ATOM | 1527 | HZ3  | TRP | X | 98  | 36.361 | 45.999 | 25.546 | 0.00 | 0.00 |
| ATOM | 1528 | CE3  | TRP | X | 98  | 35.657 | 44.798 | 23.925 | 0.00 | 0.00 |
| ATOM | 1529 | HE3  | TRP | X | 98  | 34.655 | 44.807 | 24.328 | 0.00 | 0.00 |
| ATOM | 1530 | CD2  | TRP | X | 98  | 36.013 | 43.976 | 22.840 | 0.00 | 0.00 |
| ATOM | 1531 | C    | TRP | X | 98  | 31.310 | 42.844 | 22.060 | 0.00 | 0.00 |
| ATOM | 1532 | O    | TRP | X | 98  | 31.153 | 42.054 | 23.001 | 0.00 | 0.00 |
| ATOM | 1533 | N    | THR | X | 99  | 30.552 | 42.874 | 20.953 | 0.00 | 0.00 |
| ATOM | 1534 | H    | THR | X | 99  | 30.857 | 43.528 | 20.246 | 0.00 | 0.00 |
| ATOM | 1535 | CA   | THR | X | 99  | 29.309 | 42.110 | 20.791 | 0.00 | 0.00 |
| ATOM | 1536 | HA   | THR | X | 99  | 29.175 | 41.358 | 21.568 | 0.00 | 0.00 |
| ATOM | 1537 | CB   | THR | X | 99  | 28.178 | 43.160 | 20.851 | 0.00 | 0.00 |
| ATOM | 1538 | HB   | THR | X | 99  | 28.162 | 43.651 | 21.823 | 0.00 | 0.00 |
| ATOM | 1539 | CG2  | THR | X | 99  | 28.346 | 44.245 | 19.768 | 0.00 | 0.00 |
| ATOM | 1540 | HG21 | THR | X | 99  | 28.417 | 43.800 | 18.776 | 0.00 | 0.00 |
| ATOM | 1541 | HG22 | THR | X | 99  | 29.303 | 44.746 | 19.920 | 0.00 | 0.00 |
| ATOM | 1542 | HG23 | THR | X | 99  | 27.472 | 44.888 | 19.870 | 0.00 | 0.00 |
| ATOM | 1543 | OG1  | THR | X | 99  | 26.939 | 42.529 | 20.624 | 0.00 | 0.00 |
| ATOM | 1544 | HG1  | THR | X | 99  | 26.199 | 43.129 | 20.737 | 0.00 | 0.00 |
| ATOM | 1545 | C    | THR | X | 99  | 29.297 | 41.315 | 19.408 | 0.00 | 0.00 |
| ATOM | 1546 | O    | THR | X | 99  | 30.105 | 41.658 | 18.551 | 0.00 | 0.00 |
| ATOM | 1547 | N    | PRO | X | 100 | 28.507 | 40.289 | 19.188 | 0.00 | 0.00 |
| ATOM | 1548 | CD   | PRO | X | 100 | 27.809 | 39.523 | 20.277 | 0.00 | 0.00 |
| ATOM | 1549 | HD2  | PRO | X | 100 | 26.813 | 39.962 | 20.318 | 0.00 | 0.00 |
| ATOM | 1550 | HD3  | PRO | X | 100 | 28.187 | 39.632 | 21.293 | 0.00 | 0.00 |
| ATOM | 1551 | CG   | PRO | X | 100 | 27.761 | 38.050 | 19.851 | 0.00 | 0.00 |
| ATOM | 1552 | HG2  | PRO | X | 100 | 27.047 | 37.571 | 20.521 | 0.00 | 0.00 |

|      |      |      |     |   |     |        |        |        |      |      |
|------|------|------|-----|---|-----|--------|--------|--------|------|------|
| ATOM | 1553 | HG3  | PRO | X | 100 | 28.769 | 37.657 | 19.986 | 0.00 | 0.00 |
| ATOM | 1554 | CB   | PRO | X | 100 | 27.458 | 38.324 | 18.359 | 0.00 | 0.00 |
| ATOM | 1555 | HB2  | PRO | X | 100 | 26.404 | 38.602 | 18.342 | 0.00 | 0.00 |
| ATOM | 1556 | HB3  | PRO | X | 100 | 27.734 | 37.431 | 17.799 | 0.00 | 0.00 |
| ATOM | 1557 | CA   | PRO | X | 100 | 28.370 | 39.493 | 17.966 | 0.00 | 0.00 |
| ATOM | 1558 | HA   | PRO | X | 100 | 29.333 | 39.074 | 17.674 | 0.00 | 0.00 |
| ATOM | 1559 | C    | PRO | X | 100 | 27.797 | 40.218 | 16.725 | 0.00 | 0.00 |
| ATOM | 1560 | O    | PRO | X | 100 | 27.319 | 41.353 | 16.812 | 0.00 | 0.00 |
| ATOM | 1561 | N    | TYR | X | 101 | 27.821 | 39.488 | 15.546 | 0.00 | 0.00 |
| ATOM | 1562 | H    | TYR | X | 101 | 28.370 | 38.643 | 15.479 | 0.00 | 0.00 |
| ATOM | 1563 | CA   | TYR | X | 101 | 27.573 | 40.249 | 14.306 | 0.00 | 0.00 |
| ATOM | 1564 | HA   | TYR | X | 101 | 27.039 | 41.181 | 14.490 | 0.00 | 0.00 |
| ATOM | 1565 | CB   | TYR | X | 101 | 28.997 | 40.626 | 13.837 | 0.00 | 0.00 |
| ATOM | 1566 | HB2  | TYR | X | 101 | 29.522 | 41.202 | 14.600 | 0.00 | 0.00 |
| ATOM | 1567 | HB3  | TYR | X | 101 | 29.496 | 39.697 | 13.562 | 0.00 | 0.00 |
| ATOM | 1568 | CG   | TYR | X | 101 | 29.008 | 41.671 | 12.718 | 0.00 | 0.00 |
| ATOM | 1569 | CD1  | TYR | X | 101 | 29.425 | 41.238 | 11.405 | 0.00 | 0.00 |
| ATOM | 1570 | HD1  | TYR | X | 101 | 29.663 | 40.204 | 11.203 | 0.00 | 0.00 |
| ATOM | 1571 | CE1  | TYR | X | 101 | 29.348 | 42.156 | 10.377 | 0.00 | 0.00 |
| ATOM | 1572 | HE1  | TYR | X | 101 | 29.603 | 41.879 | 9.365  | 0.00 | 0.00 |
| ATOM | 1573 | CZ   | TYR | X | 101 | 28.999 | 43.496 | 10.655 | 0.00 | 0.00 |
| ATOM | 1574 | OH   | TYR | X | 101 | 29.212 | 44.407 | 9.657  | 0.00 | 0.00 |
| ATOM | 1575 | HH   | TYR | X | 101 | 29.485 | 44.045 | 8.811  | 0.00 | 0.00 |
| ATOM | 1576 | CE2  | TYR | X | 101 | 28.620 | 43.946 | 11.934 | 0.00 | 0.00 |
| ATOM | 1577 | HE2  | TYR | X | 101 | 28.234 | 44.940 | 12.108 | 0.00 | 0.00 |
| ATOM | 1578 | CD2  | TYR | X | 101 | 28.595 | 43.032 | 13.011 | 0.00 | 0.00 |
| ATOM | 1579 | HD2  | TYR | X | 101 | 28.399 | 43.381 | 14.014 | 0.00 | 0.00 |
| ATOM | 1580 | C    | TYR | X | 101 | 26.833 | 39.458 | 13.210 | 0.00 | 0.00 |
| ATOM | 1581 | O    | TYR | X | 101 | 27.193 | 38.330 | 12.907 | 0.00 | 0.00 |
| ATOM | 1582 | N    | PRO | X | 102 | 25.808 | 40.063 | 12.557 | 0.00 | 0.00 |
| ATOM | 1583 | CD   | PRO | X | 102 | 25.335 | 39.816 | 11.148 | 0.00 | 0.00 |
| ATOM | 1584 | HD2  | PRO | X | 102 | 24.728 | 38.911 | 11.116 | 0.00 | 0.00 |
| ATOM | 1585 | HD3  | PRO | X | 102 | 26.126 | 39.690 | 10.410 | 0.00 | 0.00 |
| ATOM | 1586 | CG   | PRO | X | 102 | 24.352 | 40.948 | 10.838 | 0.00 | 0.00 |
| ATOM | 1587 | HG2  | PRO | X | 102 | 23.526 | 40.594 | 10.220 | 0.00 | 0.00 |
| ATOM | 1588 | HG3  | PRO | X | 102 | 24.963 | 41.759 | 10.442 | 0.00 | 0.00 |
| ATOM | 1589 | CB   | PRO | X | 102 | 23.795 | 41.303 | 12.229 | 0.00 | 0.00 |
| ATOM | 1590 | HB2  | PRO | X | 102 | 22.984 | 40.614 | 12.468 | 0.00 | 0.00 |
| ATOM | 1591 | HB3  | PRO | X | 102 | 23.372 | 42.305 | 12.307 | 0.00 | 0.00 |
| ATOM | 1592 | CA   | PRO | X | 102 | 24.963 | 41.174 | 13.118 | 0.00 | 0.00 |
| ATOM | 1593 | HA   | PRO | X | 102 | 25.483 | 42.132 | 13.074 | 0.00 | 0.00 |
| ATOM | 1594 | C    | PRO | X | 102 | 24.467 | 40.991 | 14.619 | 0.00 | 0.00 |
| ATOM | 1595 | O    | PRO | X | 102 | 24.818 | 39.961 | 15.201 | 0.00 | 0.00 |
| ATOM | 1596 | N    | ARG | X | 103 | 23.708 | 41.947 | 15.212 | 0.00 | 0.00 |
| ATOM | 1597 | H    | ARG | X | 103 | 23.470 | 42.794 | 14.717 | 0.00 | 0.00 |
| ATOM | 1598 | CA   | ARG | X | 103 | 23.221 | 41.926 | 16.565 | 0.00 | 0.00 |
| ATOM | 1599 | HA   | ARG | X | 103 | 24.105 | 41.995 | 17.199 | 0.00 | 0.00 |
| ATOM | 1600 | CB   | ARG | X | 103 | 22.358 | 43.166 | 16.771 | 0.00 | 0.00 |
| ATOM | 1601 | HB2  | ARG | X | 103 | 22.881 | 44.100 | 16.564 | 0.00 | 0.00 |
| ATOM | 1602 | HB3  | ARG | X | 103 | 21.413 | 43.183 | 16.228 | 0.00 | 0.00 |
| ATOM | 1603 | CG   | ARG | X | 103 | 22.036 | 43.198 | 18.304 | 0.00 | 0.00 |
| ATOM | 1604 | HG2  | ARG | X | 103 | 21.417 | 42.363 | 18.635 | 0.00 | 0.00 |
| ATOM | 1605 | HG3  | ARG | X | 103 | 22.973 | 43.198 | 18.862 | 0.00 | 0.00 |
| ATOM | 1606 | CD   | ARG | X | 103 | 21.411 | 44.540 | 18.680 | 0.00 | 0.00 |
| ATOM | 1607 | HD2  | ARG | X | 103 | 21.237 | 44.552 | 19.756 | 0.00 | 0.00 |
| ATOM | 1608 | HD3  | ARG | X | 103 | 22.037 | 45.354 | 18.315 | 0.00 | 0.00 |
| ATOM | 1609 | NE   | ARG | X | 103 | 20.061 | 44.645 | 18.004 | 0.00 | 0.00 |
| ATOM | 1610 | HE   | ARG | X | 103 | 19.254 | 44.369 | 18.544 | 0.00 | 0.00 |
| ATOM | 1611 | CZ   | ARG | X | 103 | 19.743 | 45.303 | 16.908 | 0.00 | 0.00 |
| ATOM | 1612 | NH1  | ARG | X | 103 | 20.594 | 45.979 | 16.217 | 0.00 | 0.00 |
| ATOM | 1613 | HH11 | ARG | X | 103 | 21.570 | 45.943 | 16.475 | 0.00 | 0.00 |
| ATOM | 1614 | HH12 | ARG | X | 103 | 20.323 | 46.578 | 15.450 | 0.00 | 0.00 |
| ATOM | 1615 | NH2  | ARG | X | 103 | 18.540 | 45.406 | 16.559 | 0.00 | 0.00 |
| ATOM | 1616 | HH21 | ARG | X | 103 | 17.841 | 45.249 | 17.270 | 0.00 | 0.00 |
| ATOM | 1617 | HH22 | ARG | X | 103 | 18.309 | 46.045 | 15.813 | 0.00 | 0.00 |
| ATOM | 1618 | C    | ARG | X | 103 | 22.377 | 40.592 | 16.750 | 0.00 | 0.00 |
| ATOM | 1619 | O    | ARG | X | 103 | 21.588 | 40.303 | 15.847 | 0.00 | 0.00 |

|      |      |      |     |   |     |        |        |        |      |      |
|------|------|------|-----|---|-----|--------|--------|--------|------|------|
| ATOM | 1620 | N    | PRO | X | 104 | 22.630 | 39.818 | 17.850 | 0.00 | 0.00 |
| ATOM | 1621 | CD   | PRO | X | 104 | 23.706 | 40.052 | 18.794 | 0.00 | 0.00 |
| ATOM | 1622 | HD2  | PRO | X | 104 | 23.409 | 40.995 | 19.252 | 0.00 | 0.00 |
| ATOM | 1623 | HD3  | PRO | X | 104 | 24.725 | 40.161 | 18.423 | 0.00 | 0.00 |
| ATOM | 1624 | CG   | PRO | X | 104 | 23.716 | 38.928 | 19.822 | 0.00 | 0.00 |
| ATOM | 1625 | HG2  | PRO | X | 104 | 23.989 | 39.122 | 20.859 | 0.00 | 0.00 |
| ATOM | 1626 | HG3  | PRO | X | 104 | 24.401 | 38.171 | 19.440 | 0.00 | 0.00 |
| ATOM | 1627 | CB   | PRO | X | 104 | 22.263 | 38.400 | 19.800 | 0.00 | 0.00 |
| ATOM | 1628 | HB2  | PRO | X | 104 | 21.752 | 38.971 | 20.575 | 0.00 | 0.00 |
| ATOM | 1629 | HB3  | PRO | X | 104 | 22.229 | 37.348 | 20.081 | 0.00 | 0.00 |
| ATOM | 1630 | CA   | PRO | X | 104 | 21.749 | 38.707 | 18.389 | 0.00 | 0.00 |
| ATOM | 1631 | HA   | PRO | X | 104 | 21.886 | 37.813 | 17.781 | 0.00 | 0.00 |
| ATOM | 1632 | C    | PRO | X | 104 | 20.244 | 39.081 | 18.385 | 0.00 | 0.00 |
| ATOM | 1633 | O    | PRO | X | 104 | 19.938 | 40.263 | 18.576 | 0.00 | 0.00 |
| ATOM | 1634 | N    | THR | X | 105 | 19.288 | 38.176 | 18.152 | 0.00 | 0.00 |
| ATOM | 1635 | H    | THR | X | 105 | 19.652 | 37.270 | 17.891 | 0.00 | 0.00 |
| ATOM | 1636 | CA   | THR | X | 105 | 17.879 | 38.417 | 18.129 | 0.00 | 0.00 |
| ATOM | 1637 | HA   | THR | X | 105 | 17.727 | 39.414 | 17.716 | 0.00 | 0.00 |
| ATOM | 1638 | CB   | THR | X | 105 | 17.284 | 37.423 | 17.128 | 0.00 | 0.00 |
| ATOM | 1639 | HB   | THR | X | 105 | 16.235 | 37.718 | 17.129 | 0.00 | 0.00 |
| ATOM | 1640 | CG2  | THR | X | 105 | 17.724 | 37.797 | 15.706 | 0.00 | 0.00 |
| ATOM | 1641 | HG21 | THR | X | 105 | 17.303 | 37.103 | 14.980 | 0.00 | 0.00 |
| ATOM | 1642 | HG22 | THR | X | 105 | 18.810 | 37.712 | 15.671 | 0.00 | 0.00 |
| ATOM | 1643 | HG23 | THR | X | 105 | 17.435 | 38.805 | 15.410 | 0.00 | 0.00 |
| ATOM | 1644 | OG1  | THR | X | 105 | 17.403 | 36.098 | 17.385 | 0.00 | 0.00 |
| ATOM | 1645 | HG1  | THR | X | 105 | 16.851 | 35.559 | 16.813 | 0.00 | 0.00 |
| ATOM | 1646 | C    | THR | X | 105 | 17.150 | 38.327 | 19.415 | 0.00 | 0.00 |
| ATOM | 1647 | O    | THR | X | 105 | 15.910 | 38.477 | 19.472 | 0.00 | 0.00 |
| ATOM | 1648 | N    | SER | X | 106 | 17.911 | 38.196 | 20.436 | 0.00 | 0.00 |
| ATOM | 1649 | H    | SER | X | 106 | 18.914 | 38.211 | 20.321 | 0.00 | 0.00 |
| ATOM | 1650 | CA   | SER | X | 106 | 17.471 | 38.221 | 21.841 | 0.00 | 0.00 |
| ATOM | 1651 | HA   | SER | X | 106 | 16.587 | 38.854 | 21.925 | 0.00 | 0.00 |
| ATOM | 1652 | CB   | SER | X | 106 | 17.060 | 36.812 | 22.289 | 0.00 | 0.00 |
| ATOM | 1653 | HB2  | SER | X | 106 | 16.518 | 36.880 | 23.232 | 0.00 | 0.00 |
| ATOM | 1654 | HB3  | SER | X | 106 | 16.310 | 36.453 | 21.583 | 0.00 | 0.00 |
| ATOM | 1655 | OG   | SER | X | 106 | 18.138 | 35.899 | 22.311 | 0.00 | 0.00 |
| ATOM | 1656 | HG   | SER | X | 106 | 18.389 | 35.781 | 21.392 | 0.00 | 0.00 |
| ATOM | 1657 | C    | SER | X | 106 | 18.610 | 38.787 | 22.773 | 0.00 | 0.00 |
| ATOM | 1658 | O    | SER | X | 106 | 19.756 | 38.937 | 22.337 | 0.00 | 0.00 |
| ATOM | 1659 | N    | PRO | X | 107 | 18.221 | 39.179 | 23.988 | 0.00 | 0.00 |
| ATOM | 1660 | CD   | PRO | X | 107 | 16.936 | 39.249 | 24.620 | 0.00 | 0.00 |
| ATOM | 1661 | HD2  | PRO | X | 107 | 16.668 | 38.204 | 24.779 | 0.00 | 0.00 |
| ATOM | 1662 | HD3  | PRO | X | 107 | 16.233 | 39.763 | 23.965 | 0.00 | 0.00 |
| ATOM | 1663 | CG   | PRO | X | 107 | 17.063 | 40.096 | 25.830 | 0.00 | 0.00 |
| ATOM | 1664 | HG2  | PRO | X | 107 | 16.334 | 39.692 | 26.532 | 0.00 | 0.00 |
| ATOM | 1665 | HG3  | PRO | X | 107 | 16.991 | 41.165 | 25.629 | 0.00 | 0.00 |
| ATOM | 1666 | CB   | PRO | X | 107 | 18.472 | 39.841 | 26.334 | 0.00 | 0.00 |
| ATOM | 1667 | HB2  | PRO | X | 107 | 18.443 | 39.006 | 27.034 | 0.00 | 0.00 |
| ATOM | 1668 | HB3  | PRO | X | 107 | 18.918 | 40.737 | 26.766 | 0.00 | 0.00 |
| ATOM | 1669 | CA   | PRO | X | 107 | 19.186 | 39.600 | 25.037 | 0.00 | 0.00 |
| ATOM | 1670 | HA   | PRO | X | 107 | 19.528 | 40.556 | 24.642 | 0.00 | 0.00 |
| ATOM | 1671 | C    | PRO | X | 107 | 20.302 | 38.538 | 25.230 | 0.00 | 0.00 |
| ATOM | 1672 | O    | PRO | X | 107 | 20.075 | 37.369 | 24.931 | 0.00 | 0.00 |
| ATOM | 1673 | N    | THR | X | 108 | 21.512 | 38.948 | 25.705 | 0.00 | 0.00 |
| ATOM | 1674 | H    | THR | X | 108 | 21.665 | 39.919 | 25.937 | 0.00 | 0.00 |
| ATOM | 1675 | CA   | THR | X | 108 | 22.627 | 38.004 | 26.076 | 0.00 | 0.00 |
| ATOM | 1676 | HA   | THR | X | 108 | 22.159 | 37.071 | 26.389 | 0.00 | 0.00 |
| ATOM | 1677 | CB   | THR | X | 108 | 23.479 | 37.608 | 24.861 | 0.00 | 0.00 |
| ATOM | 1678 | HB   | THR | X | 108 | 23.142 | 36.628 | 24.523 | 0.00 | 0.00 |
| ATOM | 1679 | CG2  | THR | X | 108 | 23.512 | 38.632 | 23.711 | 0.00 | 0.00 |
| ATOM | 1680 | HG21 | THR | X | 108 | 23.853 | 39.505 | 24.268 | 0.00 | 0.00 |
| ATOM | 1681 | HG22 | THR | X | 108 | 22.506 | 38.766 | 23.314 | 0.00 | 0.00 |
| ATOM | 1682 | HG23 | THR | X | 108 | 24.293 | 38.417 | 22.981 | 0.00 | 0.00 |
| ATOM | 1683 | OG1  | THR | X | 108 | 24.781 | 37.359 | 25.392 | 0.00 | 0.00 |
| ATOM | 1684 | HG1  | THR | X | 108 | 25.335 | 37.099 | 24.653 | 0.00 | 0.00 |
| ATOM | 1685 | C    | THR | X | 108 | 23.379 | 38.527 | 27.313 | 0.00 | 0.00 |
| ATOM | 1686 | O    | THR | X | 108 | 23.585 | 39.725 | 27.468 | 0.00 | 0.00 |



|      |      |      |     |   |     |        |        |        |      |      |
|------|------|------|-----|---|-----|--------|--------|--------|------|------|
| ATOM | 1687 | N    | PRO | X | 109 | 23.937 | 37.604 | 28.142 | 0.00 | 0.00 |
| ATOM | 1688 | CD   | PRO | X | 109 | 23.692 | 36.171 | 28.211 | 0.00 | 0.00 |
| ATOM | 1689 | HD2  | PRO | X | 109 | 23.903 | 35.659 | 27.272 | 0.00 | 0.00 |
| ATOM | 1690 | HD3  | PRO | X | 109 | 22.612 | 36.116 | 28.354 | 0.00 | 0.00 |
| ATOM | 1691 | CG   | PRO | X | 109 | 24.483 | 35.594 | 29.359 | 0.00 | 0.00 |
| ATOM | 1692 | HG2  | PRO | X | 109 | 25.351 | 35.074 | 28.955 | 0.00 | 0.00 |
| ATOM | 1693 | HG3  | PRO | X | 109 | 23.908 | 34.963 | 30.038 | 0.00 | 0.00 |
| ATOM | 1694 | CB   | PRO | X | 109 | 25.004 | 36.792 | 30.127 | 0.00 | 0.00 |
| ATOM | 1695 | HB2  | PRO | X | 109 | 26.057 | 36.540 | 30.252 | 0.00 | 0.00 |
| ATOM | 1696 | HB3  | PRO | X | 109 | 24.527 | 36.804 | 31.107 | 0.00 | 0.00 |
| ATOM | 1697 | CA   | PRO | X | 109 | 24.685 | 38.058 | 29.294 | 0.00 | 0.00 |
| ATOM | 1698 | HA   | PRO | X | 109 | 24.025 | 38.683 | 29.896 | 0.00 | 0.00 |
| ATOM | 1699 | C    | PRO | X | 109 | 25.862 | 38.953 | 28.954 | 0.00 | 0.00 |
| ATOM | 1700 | O    | PRO | X | 109 | 26.619 | 38.725 | 27.977 | 0.00 | 0.00 |
| ATOM | 1701 | N    | VAL | X | 110 | 26.049 | 39.922 | 29.806 | 0.00 | 0.00 |
| ATOM | 1702 | H    | VAL | X | 110 | 25.400 | 40.018 | 30.574 | 0.00 | 0.00 |
| ATOM | 1703 | CA   | VAL | X | 110 | 27.104 | 40.990 | 29.693 | 0.00 | 0.00 |
| ATOM | 1704 | HA   | VAL | X | 110 | 27.554 | 40.889 | 28.705 | 0.00 | 0.00 |
| ATOM | 1705 | CB   | VAL | X | 110 | 26.491 | 42.489 | 29.804 | 0.00 | 0.00 |
| ATOM | 1706 | HB   | VAL | X | 110 | 25.970 | 42.486 | 30.762 | 0.00 | 0.00 |
| ATOM | 1707 | CG1  | VAL | X | 110 | 27.591 | 43.562 | 29.880 | 0.00 | 0.00 |
| ATOM | 1708 | HG11 | VAL | X | 110 | 27.306 | 44.615 | 29.882 | 0.00 | 0.00 |
| ATOM | 1709 | HG12 | VAL | X | 110 | 28.237 | 43.443 | 30.750 | 0.00 | 0.00 |
| ATOM | 1710 | HG13 | VAL | X | 110 | 28.321 | 43.474 | 29.076 | 0.00 | 0.00 |
| ATOM | 1711 | CG2  | VAL | X | 110 | 25.454 | 42.748 | 28.752 | 0.00 | 0.00 |
| ATOM | 1712 | HG21 | VAL | X | 110 | 25.119 | 43.775 | 28.895 | 0.00 | 0.00 |
| ATOM | 1713 | HG22 | VAL | X | 110 | 24.603 | 42.071 | 28.826 | 0.00 | 0.00 |
| ATOM | 1714 | HG23 | VAL | X | 110 | 26.007 | 42.548 | 27.834 | 0.00 | 0.00 |
| ATOM | 1715 | C    | VAL | X | 110 | 28.188 | 40.785 | 30.785 | 0.00 | 0.00 |
| ATOM | 1716 | O    | VAL | X | 110 | 27.858 | 40.527 | 31.940 | 0.00 | 0.00 |
| ATOM | 1717 | N    | LEU | X | 111 | 29.467 | 40.769 | 30.389 | 0.00 | 0.00 |
| ATOM | 1718 | H    | LEU | X | 111 | 29.651 | 40.927 | 29.409 | 0.00 | 0.00 |
| ATOM | 1719 | CA   | LEU | X | 111 | 30.693 | 40.607 | 31.234 | 0.00 | 0.00 |
| ATOM | 1720 | HA   | LEU | X | 111 | 30.465 | 40.359 | 32.270 | 0.00 | 0.00 |
| ATOM | 1721 | CB   | LEU | X | 111 | 31.551 | 39.547 | 30.483 | 0.00 | 0.00 |
| ATOM | 1722 | HB2  | LEU | X | 111 | 31.645 | 39.969 | 29.482 | 0.00 | 0.00 |
| ATOM | 1723 | HB3  | LEU | X | 111 | 32.583 | 39.608 | 30.828 | 0.00 | 0.00 |
| ATOM | 1724 | CG   | LEU | X | 111 | 31.254 | 38.022 | 30.462 | 0.00 | 0.00 |
| ATOM | 1725 | HG   | LEU | X | 111 | 30.342 | 37.931 | 29.873 | 0.00 | 0.00 |
| ATOM | 1726 | CD1  | LEU | X | 111 | 32.226 | 37.138 | 29.769 | 0.00 | 0.00 |
| ATOM | 1727 | HD11 | LEU | X | 111 | 31.912 | 36.204 | 29.304 | 0.00 | 0.00 |
| ATOM | 1728 | HD12 | LEU | X | 111 | 33.109 | 36.885 | 30.356 | 0.00 | 0.00 |
| ATOM | 1729 | HD13 | LEU | X | 111 | 32.733 | 37.742 | 29.016 | 0.00 | 0.00 |
| ATOM | 1730 | CD2  | LEU | X | 111 | 30.902 | 37.525 | 31.936 | 0.00 | 0.00 |
| ATOM | 1731 | HD21 | LEU | X | 111 | 29.834 | 37.585 | 32.144 | 0.00 | 0.00 |
| ATOM | 1732 | HD22 | LEU | X | 111 | 31.275 | 36.513 | 32.089 | 0.00 | 0.00 |
| ATOM | 1733 | HD23 | LEU | X | 111 | 31.365 | 38.161 | 32.691 | 0.00 | 0.00 |
| ATOM | 1734 | C    | LEU | X | 111 | 31.524 | 41.909 | 31.251 | 0.00 | 0.00 |
| ATOM | 1735 | O    | LEU | X | 111 | 31.998 | 42.392 | 30.202 | 0.00 | 0.00 |
| ATOM | 1736 | N    | VAL | X | 112 | 31.882 | 42.339 | 32.424 | 0.00 | 0.00 |
| ATOM | 1737 | H    | VAL | X | 112 | 31.542 | 41.763 | 33.181 | 0.00 | 0.00 |
| ATOM | 1738 | CA   | VAL | X | 112 | 32.441 | 43.717 | 32.627 | 0.00 | 0.00 |
| ATOM | 1739 | HA   | VAL | X | 112 | 32.469 | 44.273 | 31.689 | 0.00 | 0.00 |
| ATOM | 1740 | CB   | VAL | X | 112 | 31.628 | 44.592 | 33.569 | 0.00 | 0.00 |
| ATOM | 1741 | HB   | VAL | X | 112 | 31.483 | 44.053 | 34.505 | 0.00 | 0.00 |
| ATOM | 1742 | CG1  | VAL | X | 112 | 32.317 | 45.945 | 33.833 | 0.00 | 0.00 |
| ATOM | 1743 | HG11 | VAL | X | 112 | 33.406 | 45.895 | 33.838 | 0.00 | 0.00 |
| ATOM | 1744 | HG12 | VAL | X | 112 | 32.092 | 46.681 | 33.061 | 0.00 | 0.00 |
| ATOM | 1745 | HG13 | VAL | X | 112 | 31.922 | 46.431 | 34.726 | 0.00 | 0.00 |
| ATOM | 1746 | CG2  | VAL | X | 112 | 30.282 | 44.961 | 33.057 | 0.00 | 0.00 |
| ATOM | 1747 | HG21 | VAL | X | 112 | 29.594 | 45.289 | 33.836 | 0.00 | 0.00 |
| ATOM | 1748 | HG22 | VAL | X | 112 | 29.822 | 44.044 | 32.689 | 0.00 | 0.00 |
| ATOM | 1749 | HG23 | VAL | X | 112 | 30.300 | 45.628 | 32.194 | 0.00 | 0.00 |
| ATOM | 1750 | C    | VAL | X | 112 | 33.827 | 43.517 | 33.119 | 0.00 | 0.00 |
| ATOM | 1751 | O    | VAL | X | 112 | 34.027 | 43.266 | 34.302 | 0.00 | 0.00 |
| ATOM | 1752 | N    | TRP | X | 113 | 34.752 | 43.718 | 32.173 | 0.00 | 0.00 |
| ATOM | 1753 | H    | TRP | X | 113 | 34.470 | 44.008 | 31.247 | 0.00 | 0.00 |

|      |      |      |     |   |     |        |        |        |      |      |
|------|------|------|-----|---|-----|--------|--------|--------|------|------|
| ATOM | 1754 | CA   | TRP | X | 113 | 36.141 | 43.658 | 32.441 | 0.00 | 0.00 |
| ATOM | 1755 | HA   | TRP | X | 113 | 36.280 | 42.807 | 33.108 | 0.00 | 0.00 |
| ATOM | 1756 | CB   | TRP | X | 113 | 36.991 | 43.319 | 31.157 | 0.00 | 0.00 |
| ATOM | 1757 | HB2  | TRP | X | 113 | 36.596 | 42.383 | 30.760 | 0.00 | 0.00 |
| ATOM | 1758 | HB3  | TRP | X | 113 | 36.938 | 44.112 | 30.412 | 0.00 | 0.00 |
| ATOM | 1759 | CG   | TRP | X | 113 | 38.412 | 43.095 | 31.584 | 0.00 | 0.00 |
| ATOM | 1760 | CD1  | TRP | X | 113 | 39.494 | 43.913 | 31.479 | 0.00 | 0.00 |
| ATOM | 1761 | HD1  | TRP | X | 113 | 39.519 | 44.847 | 30.938 | 0.00 | 0.00 |
| ATOM | 1762 | NE1  | TRP | X | 113 | 40.626 | 43.296 | 32.046 | 0.00 | 0.00 |
| ATOM | 1763 | HE1  | TRP | X | 113 | 41.597 | 43.536 | 31.904 | 0.00 | 0.00 |
| ATOM | 1764 | CE2  | TRP | X | 113 | 40.292 | 42.120 | 32.629 | 0.00 | 0.00 |
| ATOM | 1765 | CZ2  | TRP | X | 113 | 41.001 | 41.114 | 33.230 | 0.00 | 0.00 |
| ATOM | 1766 | HZ2  | TRP | X | 113 | 42.033 | 41.331 | 33.461 | 0.00 | 0.00 |
| ATOM | 1767 | CH2  | TRP | X | 113 | 40.424 | 39.913 | 33.570 | 0.00 | 0.00 |
| ATOM | 1768 | HH2  | TRP | X | 113 | 40.986 | 39.100 | 34.006 | 0.00 | 0.00 |
| ATOM | 1769 | CZ3  | TRP | X | 113 | 39.027 | 39.723 | 33.360 | 0.00 | 0.00 |
| ATOM | 1770 | HZ3  | TRP | X | 113 | 38.596 | 38.810 | 33.743 | 0.00 | 0.00 |
| ATOM | 1771 | CE3  | TRP | X | 113 | 38.205 | 40.764 | 32.903 | 0.00 | 0.00 |
| ATOM | 1772 | HE3  | TRP | X | 113 | 37.130 | 40.719 | 32.813 | 0.00 | 0.00 |
| ATOM | 1773 | CD2  | TRP | X | 113 | 38.881 | 41.929 | 32.384 | 0.00 | 0.00 |
| ATOM | 1774 | C    | TRP | X | 113 | 36.722 | 44.867 | 33.210 | 0.00 | 0.00 |
| ATOM | 1775 | O    | TRP | X | 113 | 36.547 | 46.031 | 32.898 | 0.00 | 0.00 |
| ATOM | 1776 | N    | ILE | X | 114 | 37.476 | 44.514 | 34.231 | 0.00 | 0.00 |
| ATOM | 1777 | H    | ILE | X | 114 | 37.757 | 43.544 | 34.263 | 0.00 | 0.00 |
| ATOM | 1778 | CA   | ILE | X | 114 | 38.146 | 45.390 | 35.225 | 0.00 | 0.00 |
| ATOM | 1779 | HA   | ILE | X | 114 | 38.243 | 46.397 | 34.821 | 0.00 | 0.00 |
| ATOM | 1780 | CB   | ILE | X | 114 | 37.250 | 45.486 | 36.496 | 0.00 | 0.00 |
| ATOM | 1781 | HB   | ILE | X | 114 | 37.111 | 44.472 | 36.871 | 0.00 | 0.00 |
| ATOM | 1782 | CG2  | ILE | X | 114 | 37.861 | 46.324 | 37.646 | 0.00 | 0.00 |
| ATOM | 1783 | HG21 | ILE | X | 114 | 37.344 | 46.162 | 38.592 | 0.00 | 0.00 |
| ATOM | 1784 | HG22 | ILE | X | 114 | 37.918 | 47.380 | 37.381 | 0.00 | 0.00 |
| ATOM | 1785 | HG23 | ILE | X | 114 | 38.896 | 46.020 | 37.809 | 0.00 | 0.00 |
| ATOM | 1786 | CG1  | ILE | X | 114 | 35.853 | 46.090 | 36.205 | 0.00 | 0.00 |
| ATOM | 1787 | HG12 | ILE | X | 114 | 35.989 | 47.072 | 35.752 | 0.00 | 0.00 |
| ATOM | 1788 | HG13 | ILE | X | 114 | 35.385 | 45.490 | 35.424 | 0.00 | 0.00 |
| ATOM | 1789 | CD1  | ILE | X | 114 | 34.843 | 46.257 | 37.355 | 0.00 | 0.00 |
| ATOM | 1790 | HD11 | ILE | X | 114 | 34.211 | 47.117 | 37.130 | 0.00 | 0.00 |
| ATOM | 1791 | HD12 | ILE | X | 114 | 35.163 | 46.531 | 38.360 | 0.00 | 0.00 |
| ATOM | 1792 | HD13 | ILE | X | 114 | 34.339 | 45.297 | 37.461 | 0.00 | 0.00 |
| ATOM | 1793 | C    | ILE | X | 114 | 39.561 | 44.822 | 35.423 | 0.00 | 0.00 |
| ATOM | 1794 | O    | ILE | X | 114 | 39.691 | 43.638 | 35.752 | 0.00 | 0.00 |
| ATOM | 1795 | N    | TYR | X | 115 | 40.619 | 45.597 | 35.130 | 0.00 | 0.00 |
| ATOM | 1796 | H    | TYR | X | 115 | 40.563 | 46.604 | 35.185 | 0.00 | 0.00 |
| ATOM | 1797 | CA   | TYR | X | 115 | 42.059 | 45.139 | 35.136 | 0.00 | 0.00 |
| ATOM | 1798 | HA   | TYR | X | 115 | 42.144 | 44.063 | 34.983 | 0.00 | 0.00 |
| ATOM | 1799 | CB   | TYR | X | 115 | 42.747 | 45.713 | 33.929 | 0.00 | 0.00 |
| ATOM | 1800 | HB2  | TYR | X | 115 | 43.784 | 45.385 | 33.993 | 0.00 | 0.00 |
| ATOM | 1801 | HB3  | TYR | X | 115 | 42.219 | 45.239 | 33.102 | 0.00 | 0.00 |
| ATOM | 1802 | CG   | TYR | X | 115 | 42.697 | 47.209 | 33.858 | 0.00 | 0.00 |
| ATOM | 1803 | CD1  | TYR | X | 115 | 43.347 | 48.019 | 34.922 | 0.00 | 0.00 |
| ATOM | 1804 | HD1  | TYR | X | 115 | 43.852 | 47.509 | 35.729 | 0.00 | 0.00 |
| ATOM | 1805 | CE1  | TYR | X | 115 | 43.301 | 49.404 | 34.941 | 0.00 | 0.00 |
| ATOM | 1806 | HE1  | TYR | X | 115 | 43.822 | 50.023 | 35.657 | 0.00 | 0.00 |
| ATOM | 1807 | CZ   | TYR | X | 115 | 42.554 | 50.077 | 33.944 | 0.00 | 0.00 |
| ATOM | 1808 | OH   | TYR | X | 115 | 42.298 | 51.448 | 34.058 | 0.00 | 0.00 |
| ATOM | 1809 | HH   | TYR | X | 115 | 42.746 | 51.699 | 34.869 | 0.00 | 0.00 |
| ATOM | 1810 | CE2  | TYR | X | 115 | 41.870 | 49.332 | 32.924 | 0.00 | 0.00 |
| ATOM | 1811 | HE2  | TYR | X | 115 | 41.154 | 49.824 | 32.282 | 0.00 | 0.00 |
| ATOM | 1812 | CD2  | TYR | X | 115 | 41.926 | 47.921 | 32.877 | 0.00 | 0.00 |
| ATOM | 1813 | HD2  | TYR | X | 115 | 41.336 | 47.381 | 32.150 | 0.00 | 0.00 |
| ATOM | 1814 | C    | TYR | X | 115 | 42.721 | 45.359 | 36.490 | 0.00 | 0.00 |
| ATOM | 1815 | O    | TYR | X | 115 | 42.386 | 46.219 | 37.280 | 0.00 | 0.00 |
| ATOM | 1816 | N    | GLY | X | 116 | 43.724 | 44.529 | 36.820 | 0.00 | 0.00 |
| ATOM | 1817 | H    | GLY | X | 116 | 43.781 | 43.684 | 36.271 | 0.00 | 0.00 |
| ATOM | 1818 | CA   | GLY | X | 116 | 44.630 | 44.701 | 37.979 | 0.00 | 0.00 |
| ATOM | 1819 | HA2  | GLY | X | 116 | 44.057 | 44.994 | 38.859 | 0.00 | 0.00 |
| ATOM | 1820 | HA3  | GLY | X | 116 | 45.067 | 43.705 | 38.048 | 0.00 | 0.00 |

|      |      |     |     |   |     |        |        |        |      |      |
|------|------|-----|-----|---|-----|--------|--------|--------|------|------|
| ATOM | 1821 | C   | GLY | X | 116 | 45.722 | 45.661 | 37.826 | 0.00 | 0.00 |
| ATOM | 1822 | O   | GLY | X | 116 | 45.527 | 46.600 | 37.065 | 0.00 | 0.00 |
| ATOM | 1823 | N   | GLY | X | 117 | 46.735 | 45.587 | 38.594 | 0.00 | 0.00 |
| ATOM | 1824 | H   | GLY | X | 117 | 46.796 | 44.760 | 39.170 | 0.00 | 0.00 |
| ATOM | 1825 | CA  | GLY | X | 117 | 47.964 | 46.453 | 38.604 | 0.00 | 0.00 |
| ATOM | 1826 | HA2 | GLY | X | 117 | 48.821 | 45.893 | 38.230 | 0.00 | 0.00 |
| ATOM | 1827 | HA3 | GLY | X | 117 | 47.726 | 47.366 | 38.058 | 0.00 | 0.00 |
| ATOM | 1828 | C   | GLY | X | 117 | 48.377 | 46.923 | 39.964 | 0.00 | 0.00 |
| ATOM | 1829 | O   | GLY | X | 117 | 49.130 | 47.896 | 39.962 | 0.00 | 0.00 |
| ATOM | 1830 | N   | GLY | X | 118 | 47.808 | 46.354 | 41.045 | 0.00 | 0.00 |
| ATOM | 1831 | H   | GLY | X | 118 | 47.188 | 45.585 | 40.833 | 0.00 | 0.00 |
| ATOM | 1832 | CA  | GLY | X | 118 | 48.024 | 46.777 | 42.427 | 0.00 | 0.00 |
| ATOM | 1833 | HA2 | GLY | X | 118 | 47.303 | 46.281 | 43.076 | 0.00 | 0.00 |
| ATOM | 1834 | HA3 | GLY | X | 118 | 49.006 | 46.501 | 42.812 | 0.00 | 0.00 |
| ATOM | 1835 | C   | GLY | X | 118 | 47.615 | 48.198 | 42.706 | 0.00 | 0.00 |
| ATOM | 1836 | O   | GLY | X | 118 | 48.102 | 48.765 | 43.685 | 0.00 | 0.00 |
| ATOM | 1837 | N   | PHE | X | 119 | 46.755 | 48.788 | 41.875 | 0.00 | 0.00 |
| ATOM | 1838 | H   | PHE | X | 119 | 46.568 | 48.302 | 41.009 | 0.00 | 0.00 |
| ATOM | 1839 | CA  | PHE | X | 119 | 46.227 | 50.200 | 41.824 | 0.00 | 0.00 |
| ATOM | 1840 | HA  | PHE | X | 119 | 45.311 | 50.271 | 41.237 | 0.00 | 0.00 |
| ATOM | 1841 | CB  | PHE | X | 119 | 45.639 | 50.606 | 43.141 | 0.00 | 0.00 |
| ATOM | 1842 | HB2 | PHE | X | 119 | 46.289 | 50.507 | 44.010 | 0.00 | 0.00 |
| ATOM | 1843 | HB3 | PHE | X | 119 | 45.201 | 51.604 | 43.184 | 0.00 | 0.00 |
| ATOM | 1844 | CG  | PHE | X | 119 | 44.512 | 49.666 | 43.585 | 0.00 | 0.00 |
| ATOM | 1845 | CD1 | PHE | X | 119 | 43.278 | 49.796 | 42.927 | 0.00 | 0.00 |
| ATOM | 1846 | HD1 | PHE | X | 119 | 43.108 | 50.506 | 42.131 | 0.00 | 0.00 |
| ATOM | 1847 | CE1 | PHE | X | 119 | 42.134 | 49.076 | 43.443 | 0.00 | 0.00 |
| ATOM | 1848 | HE1 | PHE | X | 119 | 41.123 | 49.204 | 43.086 | 0.00 | 0.00 |
| ATOM | 1849 | CZ  | PHE | X | 119 | 42.300 | 48.067 | 44.406 | 0.00 | 0.00 |
| ATOM | 1850 | HZ  | PHE | X | 119 | 41.492 | 47.434 | 44.741 | 0.00 | 0.00 |
| ATOM | 1851 | CE2 | PHE | X | 119 | 43.582 | 47.875 | 45.022 | 0.00 | 0.00 |
| ATOM | 1852 | HE2 | PHE | X | 119 | 43.780 | 47.173 | 45.818 | 0.00 | 0.00 |
| ATOM | 1853 | CD2 | PHE | X | 119 | 44.636 | 48.737 | 44.630 | 0.00 | 0.00 |
| ATOM | 1854 | HD2 | PHE | X | 119 | 45.554 | 48.574 | 45.175 | 0.00 | 0.00 |
| ATOM | 1855 | C   | PHE | X | 119 | 47.256 | 51.223 | 41.338 | 0.00 | 0.00 |
| ATOM | 1856 | O   | PHE | X | 119 | 46.935 | 52.391 | 41.340 | 0.00 | 0.00 |
| ATOM | 1857 | N   | TYR | X | 120 | 48.475 | 50.853 | 40.896 | 0.00 | 0.00 |
| ATOM | 1858 | H   | TYR | X | 120 | 48.673 | 49.863 | 40.926 | 0.00 | 0.00 |
| ATOM | 1859 | CA  | TYR | X | 120 | 49.466 | 51.678 | 40.365 | 0.00 | 0.00 |
| ATOM | 1860 | HA  | TYR | X | 120 | 49.124 | 52.705 | 40.238 | 0.00 | 0.00 |
| ATOM | 1861 | CB  | TYR | X | 120 | 50.616 | 51.787 | 41.420 | 0.00 | 0.00 |
| ATOM | 1862 | HB2 | TYR | X | 120 | 50.970 | 52.818 | 41.422 | 0.00 | 0.00 |
| ATOM | 1863 | HB3 | TYR | X | 120 | 50.173 | 51.777 | 42.416 | 0.00 | 0.00 |
| ATOM | 1864 | CG  | TYR | X | 120 | 51.724 | 50.733 | 41.251 | 0.00 | 0.00 |
| ATOM | 1865 | CD1 | TYR | X | 120 | 52.951 | 51.230 | 40.784 | 0.00 | 0.00 |
| ATOM | 1866 | HD1 | TYR | X | 120 | 53.006 | 52.216 | 40.348 | 0.00 | 0.00 |
| ATOM | 1867 | CE1 | TYR | X | 120 | 54.092 | 50.311 | 40.763 | 0.00 | 0.00 |
| ATOM | 1868 | HE1 | TYR | X | 120 | 55.066 | 50.680 | 40.481 | 0.00 | 0.00 |
| ATOM | 1869 | CZ  | TYR | X | 120 | 53.918 | 48.975 | 41.161 | 0.00 | 0.00 |
| ATOM | 1870 | OH  | TYR | X | 120 | 54.967 | 48.078 | 41.112 | 0.00 | 0.00 |
| ATOM | 1871 | HH  | TYR | X | 120 | 54.610 | 47.188 | 41.153 | 0.00 | 0.00 |
| ATOM | 1872 | CE2 | TYR | X | 120 | 52.622 | 48.539 | 41.554 | 0.00 | 0.00 |
| ATOM | 1873 | HE2 | TYR | X | 120 | 52.533 | 47.467 | 41.647 | 0.00 | 0.00 |
| ATOM | 1874 | CD2 | TYR | X | 120 | 51.544 | 49.406 | 41.543 | 0.00 | 0.00 |
| ATOM | 1875 | HD2 | TYR | X | 120 | 50.595 | 49.016 | 41.881 | 0.00 | 0.00 |
| ATOM | 1876 | C   | TYR | X | 120 | 50.021 | 51.430 | 38.921 | 0.00 | 0.00 |
| ATOM | 1877 | O   | TYR | X | 120 | 50.720 | 52.324 | 38.464 | 0.00 | 0.00 |
| ATOM | 1878 | N   | SER | X | 121 | 49.614 | 50.327 | 38.208 | 0.00 | 0.00 |
| ATOM | 1879 | H   | SER | X | 121 | 49.321 | 49.528 | 38.751 | 0.00 | 0.00 |
| ATOM | 1880 | CA  | SER | X | 121 | 49.986 | 50.114 | 36.849 | 0.00 | 0.00 |
| ATOM | 1881 | HA  | SER | X | 121 | 49.996 | 51.022 | 36.246 | 0.00 | 0.00 |
| ATOM | 1882 | CB  | SER | X | 121 | 51.473 | 49.616 | 36.807 | 0.00 | 0.00 |
| ATOM | 1883 | HB2 | SER | X | 121 | 51.772 | 49.421 | 35.778 | 0.00 | 0.00 |
| ATOM | 1884 | HB3 | SER | X | 121 | 52.156 | 50.384 | 37.173 | 0.00 | 0.00 |
| ATOM | 1885 | OG  | SER | X | 121 | 51.632 | 48.366 | 37.477 | 0.00 | 0.00 |
| ATOM | 1886 | HG  | SER | X | 121 | 50.937 | 47.775 | 37.179 | 0.00 | 0.00 |
| ATOM | 1887 | C   | SER | X | 121 | 49.021 | 49.136 | 36.182 | 0.00 | 0.00 |

|      |      |      |     |   |     |        |        |        |      |      |
|------|------|------|-----|---|-----|--------|--------|--------|------|------|
| ATOM | 1888 | O    | SER | X | 121 | 49.097 | 47.955 | 36.477 | 0.00 | 0.00 |
| ATOM | 1889 | N    | GLY | X | 122 | 48.153 | 49.639 | 35.309 | 0.00 | 0.00 |
| ATOM | 1890 | H    | GLY | X | 122 | 48.067 | 50.645 | 35.311 | 0.00 | 0.00 |
| ATOM | 1891 | CA   | GLY | X | 122 | 47.223 | 48.810 | 34.550 | 0.00 | 0.00 |
| ATOM | 1892 | HA2  | GLY | X | 122 | 47.828 | 48.035 | 34.078 | 0.00 | 0.00 |
| ATOM | 1893 | HA3  | GLY | X | 122 | 46.550 | 48.288 | 35.230 | 0.00 | 0.00 |
| ATOM | 1894 | C    | GLY | X | 122 | 46.431 | 49.658 | 33.538 | 0.00 | 0.00 |
| ATOM | 1895 | O    | GLY | X | 122 | 46.327 | 50.921 | 33.654 | 0.00 | 0.00 |
| ATOM | 1896 | N    | ALA | X | 123 | 46.017 | 48.995 | 32.463 | 0.00 | 0.00 |
| ATOM | 1897 | H    | ALA | X | 123 | 46.467 | 48.104 | 32.307 | 0.00 | 0.00 |
| ATOM | 1898 | CA   | ALA | X | 123 | 45.163 | 49.530 | 31.376 | 0.00 | 0.00 |
| ATOM | 1899 | HA   | ALA | X | 123 | 44.388 | 50.158 | 31.814 | 0.00 | 0.00 |
| ATOM | 1900 | CB   | ALA | X | 123 | 46.027 | 50.322 | 30.445 | 0.00 | 0.00 |
| ATOM | 1901 | HB1  | ALA | X | 123 | 47.016 | 49.921 | 30.222 | 0.00 | 0.00 |
| ATOM | 1902 | HB2  | ALA | X | 123 | 46.199 | 51.300 | 30.894 | 0.00 | 0.00 |
| ATOM | 1903 | HB3  | ALA | X | 123 | 45.431 | 50.749 | 29.637 | 0.00 | 0.00 |
| ATOM | 1904 | C    | ALA | X | 123 | 44.385 | 48.506 | 30.442 | 0.00 | 0.00 |
| ATOM | 1905 | O    | ALA | X | 123 | 44.842 | 47.461 | 30.180 | 0.00 | 0.00 |
| ATOM | 1906 | N    | SER | X | 124 | 43.248 | 48.869 | 30.001 | 0.00 | 0.00 |
| ATOM | 1907 | H    | SER | X | 124 | 42.855 | 49.747 | 30.309 | 0.00 | 0.00 |
| ATOM | 1908 | CA   | SER | X | 124 | 42.315 | 47.993 | 29.205 | 0.00 | 0.00 |
| ATOM | 1909 | HA   | SER | X | 124 | 42.315 | 47.053 | 29.756 | 0.00 | 0.00 |
| ATOM | 1910 | CB   | SER | X | 124 | 40.866 | 48.392 | 29.293 | 0.00 | 0.00 |
| ATOM | 1911 | HB2  | SER | X | 124 | 40.353 | 48.092 | 28.380 | 0.00 | 0.00 |
| ATOM | 1912 | HB3  | SER | X | 124 | 40.344 | 47.855 | 30.085 | 0.00 | 0.00 |
| ATOM | 1913 | OG   | SER | X | 124 | 40.782 | 49.769 | 29.459 | 0.00 | 0.00 |
| ATOM | 1914 | HG   | SER | X | 124 | 40.125 | 49.945 | 30.136 | 0.00 | 0.00 |
| ATOM | 1915 | C    | SER | X | 124 | 42.643 | 47.689 | 27.791 | 0.00 | 0.00 |
| ATOM | 1916 | O    | SER | X | 124 | 42.238 | 46.711 | 27.178 | 0.00 | 0.00 |
| ATOM | 1917 | N    | SER | X | 125 | 43.558 | 48.466 | 27.254 | 0.00 | 0.00 |
| ATOM | 1918 | H    | SER | X | 125 | 43.936 | 49.260 | 27.751 | 0.00 | 0.00 |
| ATOM | 1919 | CA   | SER | X | 125 | 44.008 | 48.279 | 25.874 | 0.00 | 0.00 |
| ATOM | 1920 | HA   | SER | X | 125 | 43.232 | 47.975 | 25.172 | 0.00 | 0.00 |
| ATOM | 1921 | CB   | SER | X | 125 | 44.484 | 49.611 | 25.341 | 0.00 | 0.00 |
| ATOM | 1922 | HB2  | SER | X | 125 | 44.539 | 49.372 | 24.279 | 0.00 | 0.00 |
| ATOM | 1923 | HB3  | SER | X | 125 | 43.724 | 50.362 | 25.558 | 0.00 | 0.00 |
| ATOM | 1924 | OG   | SER | X | 125 | 45.741 | 49.889 | 25.944 | 0.00 | 0.00 |
| ATOM | 1925 | HG   | SER | X | 125 | 46.444 | 49.500 | 25.419 | 0.00 | 0.00 |
| ATOM | 1926 | C    | SER | X | 125 | 45.123 | 47.222 | 25.672 | 0.00 | 0.00 |
| ATOM | 1927 | O    | SER | X | 125 | 45.374 | 46.902 | 24.513 | 0.00 | 0.00 |
| ATOM | 1928 | N    | LEU | X | 126 | 45.745 | 46.643 | 26.740 | 0.00 | 0.00 |
| ATOM | 1929 | H    | LEU | X | 126 | 45.297 | 46.881 | 27.613 | 0.00 | 0.00 |
| ATOM | 1930 | CA   | LEU | X | 126 | 46.743 | 45.582 | 26.737 | 0.00 | 0.00 |
| ATOM | 1931 | HA   | LEU | X | 126 | 47.587 | 45.808 | 26.086 | 0.00 | 0.00 |
| ATOM | 1932 | CB   | LEU | X | 126 | 47.199 | 45.345 | 28.170 | 0.00 | 0.00 |
| ATOM | 1933 | HB2  | LEU | X | 126 | 46.323 | 44.999 | 28.719 | 0.00 | 0.00 |
| ATOM | 1934 | HB3  | LEU | X | 126 | 47.902 | 44.527 | 28.332 | 0.00 | 0.00 |
| ATOM | 1935 | CG   | LEU | X | 126 | 47.917 | 46.557 | 28.795 | 0.00 | 0.00 |
| ATOM | 1936 | HG   | LEU | X | 126 | 47.272 | 47.434 | 28.743 | 0.00 | 0.00 |
| ATOM | 1937 | CD1  | LEU | X | 126 | 48.281 | 46.292 | 30.294 | 0.00 | 0.00 |
| ATOM | 1938 | HD11 | LEU | X | 126 | 49.250 | 46.682 | 30.606 | 0.00 | 0.00 |
| ATOM | 1939 | HD12 | LEU | X | 126 | 48.381 | 45.214 | 30.423 | 0.00 | 0.00 |
| ATOM | 1940 | HD13 | LEU | X | 126 | 47.471 | 46.555 | 30.975 | 0.00 | 0.00 |
| ATOM | 1941 | CD2  | LEU | X | 126 | 49.206 | 46.877 | 28.064 | 0.00 | 0.00 |
| ATOM | 1942 | HD21 | LEU | X | 126 | 48.973 | 47.442 | 27.161 | 0.00 | 0.00 |
| ATOM | 1943 | HD22 | LEU | X | 126 | 49.855 | 47.508 | 28.672 | 0.00 | 0.00 |
| ATOM | 1944 | HD23 | LEU | X | 126 | 49.807 | 46.060 | 27.665 | 0.00 | 0.00 |
| ATOM | 1945 | C    | LEU | X | 126 | 46.011 | 44.362 | 26.187 | 0.00 | 0.00 |
| ATOM | 1946 | O    | LEU | X | 126 | 44.974 | 43.941 | 26.687 | 0.00 | 0.00 |
| ATOM | 1947 | N    | ASP | X | 127 | 46.583 | 43.742 | 25.103 | 0.00 | 0.00 |
| ATOM | 1948 | H    | ASP | X | 127 | 47.498 | 44.062 | 24.817 | 0.00 | 0.00 |
| ATOM | 1949 | CA   | ASP | X | 127 | 45.701 | 42.998 | 24.166 | 0.00 | 0.00 |
| ATOM | 1950 | HA   | ASP | X | 127 | 44.814 | 43.630 | 24.118 | 0.00 | 0.00 |
| ATOM | 1951 | CB   | ASP | X | 127 | 46.306 | 42.954 | 22.763 | 0.00 | 0.00 |
| ATOM | 1952 | HB2  | ASP | X | 127 | 45.615 | 42.454 | 22.084 | 0.00 | 0.00 |
| ATOM | 1953 | HB3  | ASP | X | 127 | 46.447 | 43.972 | 22.399 | 0.00 | 0.00 |
| ATOM | 1954 | CG   | ASP | X | 127 | 47.613 | 42.250 | 22.551 | 0.00 | 0.00 |

|      |      |      |     |   |     |        |        |        |      |      |
|------|------|------|-----|---|-----|--------|--------|--------|------|------|
| ATOM | 1955 | OD1  | ASP | X | 127 | 47.676 | 41.048 | 22.821 | 0.00 | 0.00 |
| ATOM | 1956 | OD2  | ASP | X | 127 | 48.483 | 42.871 | 21.830 | 0.00 | 0.00 |
| ATOM | 1957 | C    | ASP | X | 127 | 45.353 | 41.599 | 24.715 | 0.00 | 0.00 |
| ATOM | 1958 | O    | ASP | X | 127 | 44.561 | 40.882 | 24.077 | 0.00 | 0.00 |
| ATOM | 1959 | N    | VAL | X | 128 | 45.847 | 41.176 | 25.907 | 0.00 | 0.00 |
| ATOM | 1960 | H    | VAL | X | 128 | 46.476 | 41.829 | 26.351 | 0.00 | 0.00 |
| ATOM | 1961 | CA   | VAL | X | 128 | 45.404 | 39.934 | 26.587 | 0.00 | 0.00 |
| ATOM | 1962 | HA   | VAL | X | 128 | 45.376 | 39.159 | 25.822 | 0.00 | 0.00 |
| ATOM | 1963 | CB   | VAL | X | 128 | 46.448 | 39.494 | 27.663 | 0.00 | 0.00 |
| ATOM | 1964 | HB   | VAL | X | 128 | 47.423 | 39.454 | 27.176 | 0.00 | 0.00 |
| ATOM | 1965 | CG1  | VAL | X | 128 | 46.406 | 40.414 | 28.907 | 0.00 | 0.00 |
| ATOM | 1966 | HG11 | VAL | X | 128 | 45.978 | 39.828 | 29.721 | 0.00 | 0.00 |
| ATOM | 1967 | HG12 | VAL | X | 128 | 47.435 | 40.444 | 29.265 | 0.00 | 0.00 |
| ATOM | 1968 | HG13 | VAL | X | 128 | 46.124 | 41.427 | 28.619 | 0.00 | 0.00 |
| ATOM | 1969 | CG2  | VAL | X | 128 | 46.192 | 38.026 | 28.099 | 0.00 | 0.00 |
| ATOM | 1970 | HG21 | VAL | X | 128 | 46.817 | 37.689 | 28.926 | 0.00 | 0.00 |
| ATOM | 1971 | HG22 | VAL | X | 128 | 46.288 | 37.371 | 27.233 | 0.00 | 0.00 |
| ATOM | 1972 | HG23 | VAL | X | 128 | 45.226 | 37.933 | 28.593 | 0.00 | 0.00 |
| ATOM | 1973 | C    | VAL | X | 128 | 44.011 | 40.044 | 27.172 | 0.00 | 0.00 |
| ATOM | 1974 | O    | VAL | X | 128 | 43.269 | 39.063 | 27.429 | 0.00 | 0.00 |
| ATOM | 1975 | N    | TYR | X | 129 | 43.515 | 41.308 | 27.233 | 0.00 | 0.00 |
| ATOM | 1976 | H    | TYR | X | 129 | 44.107 | 42.096 | 27.015 | 0.00 | 0.00 |
| ATOM | 1977 | CA   | TYR | X | 129 | 42.150 | 41.679 | 27.763 | 0.00 | 0.00 |
| ATOM | 1978 | HA   | TYR | X | 129 | 41.655 | 40.879 | 28.314 | 0.00 | 0.00 |
| ATOM | 1979 | CB   | TYR | X | 129 | 42.288 | 43.021 | 28.572 | 0.00 | 0.00 |
| ATOM | 1980 | HB2  | TYR | X | 129 | 42.565 | 43.858 | 27.932 | 0.00 | 0.00 |
| ATOM | 1981 | HB3  | TYR | X | 129 | 41.287 | 43.265 | 28.928 | 0.00 | 0.00 |
| ATOM | 1982 | CG   | TYR | X | 129 | 43.200 | 43.126 | 29.843 | 0.00 | 0.00 |
| ATOM | 1983 | CD1  | TYR | X | 129 | 43.416 | 42.014 | 30.651 | 0.00 | 0.00 |
| ATOM | 1984 | HD1  | TYR | X | 129 | 42.898 | 41.094 | 30.422 | 0.00 | 0.00 |
| ATOM | 1985 | CE1  | TYR | X | 129 | 44.301 | 42.078 | 31.738 | 0.00 | 0.00 |
| ATOM | 1986 | HE1  | TYR | X | 129 | 44.292 | 41.260 | 32.443 | 0.00 | 0.00 |
| ATOM | 1987 | CZ   | TYR | X | 129 | 44.906 | 43.313 | 31.988 | 0.00 | 0.00 |
| ATOM | 1988 | OH   | TYR | X | 129 | 45.671 | 43.463 | 33.099 | 0.00 | 0.00 |
| ATOM | 1989 | HH   | TYR | X | 129 | 45.216 | 43.010 | 33.813 | 0.00 | 0.00 |
| ATOM | 1990 | CE2  | TYR | X | 129 | 44.831 | 44.401 | 31.076 | 0.00 | 0.00 |
| ATOM | 1991 | HE2  | TYR | X | 129 | 45.299 | 45.329 | 31.368 | 0.00 | 0.00 |
| ATOM | 1992 | CD2  | TYR | X | 129 | 43.940 | 44.332 | 30.046 | 0.00 | 0.00 |
| ATOM | 1993 | HD2  | TYR | X | 129 | 43.625 | 45.181 | 29.456 | 0.00 | 0.00 |
| ATOM | 1994 | C    | TYR | X | 129 | 41.125 | 41.961 | 26.545 | 0.00 | 0.00 |
| ATOM | 1995 | O    | TYR | X | 129 | 40.254 | 42.741 | 26.672 | 0.00 | 0.00 |
| ATOM | 1996 | N    | ASP | X | 130 | 41.333 | 41.345 | 25.372 | 0.00 | 0.00 |
| ATOM | 1997 | H    | ASP | X | 130 | 42.177 | 40.794 | 25.306 | 0.00 | 0.00 |
| ATOM | 1998 | CA   | ASP | X | 130 | 40.574 | 41.671 | 24.147 | 0.00 | 0.00 |
| ATOM | 1999 | HA   | ASP | X | 130 | 40.081 | 42.621 | 24.355 | 0.00 | 0.00 |
| ATOM | 2000 | CB   | ASP | X | 130 | 41.493 | 41.757 | 22.922 | 0.00 | 0.00 |
| ATOM | 2001 | HB2  | ASP | X | 130 | 42.323 | 42.398 | 23.218 | 0.00 | 0.00 |
| ATOM | 2002 | HB3  | ASP | X | 130 | 41.852 | 40.733 | 22.821 | 0.00 | 0.00 |
| ATOM | 2003 | CG   | ASP | X | 130 | 40.831 | 42.307 | 21.620 | 0.00 | 0.00 |
| ATOM | 2004 | OD1  | ASP | X | 130 | 39.826 | 41.775 | 21.089 | 0.00 | 0.00 |
| ATOM | 2005 | OD2  | ASP | X | 130 | 41.376 | 43.289 | 21.117 | 0.00 | 0.00 |
| ATOM | 2006 | C    | ASP | X | 130 | 39.521 | 40.530 | 23.904 | 0.00 | 0.00 |
| ATOM | 2007 | O    | ASP | X | 130 | 39.924 | 39.370 | 23.859 | 0.00 | 0.00 |
| ATOM | 2008 | N    | GLY | X | 131 | 38.274 | 40.927 | 23.764 | 0.00 | 0.00 |
| ATOM | 2009 | H    | GLY | X | 131 | 38.139 | 41.928 | 23.768 | 0.00 | 0.00 |
| ATOM | 2010 | CA   | GLY | X | 131 | 37.117 | 39.959 | 23.985 | 0.00 | 0.00 |
| ATOM | 2011 | HA2  | GLY | X | 131 | 37.296 | 39.360 | 24.878 | 0.00 | 0.00 |
| ATOM | 2012 | HA3  | GLY | X | 131 | 36.220 | 40.558 | 24.141 | 0.00 | 0.00 |
| ATOM | 2013 | C    | GLY | X | 131 | 36.695 | 39.060 | 22.727 | 0.00 | 0.00 |
| ATOM | 2014 | O    | GLY | X | 131 | 35.800 | 38.265 | 22.883 | 0.00 | 0.00 |
| ATOM | 2015 | N    | ARG | X | 132 | 37.276 | 39.228 | 21.517 | 0.00 | 0.00 |
| ATOM | 2016 | H    | ARG | X | 132 | 37.951 | 39.979 | 21.498 | 0.00 | 0.00 |
| ATOM | 2017 | CA   | ARG | X | 132 | 36.848 | 38.658 | 20.246 | 0.00 | 0.00 |
| ATOM | 2018 | HA   | ARG | X | 132 | 35.860 | 39.090 | 20.083 | 0.00 | 0.00 |
| ATOM | 2019 | CB   | ARG | X | 132 | 37.780 | 38.925 | 19.087 | 0.00 | 0.00 |
| ATOM | 2020 | HB2  | ARG | X | 132 | 37.410 | 38.433 | 18.188 | 0.00 | 0.00 |
| ATOM | 2021 | HB3  | ARG | X | 132 | 37.851 | 39.996 | 18.902 | 0.00 | 0.00 |

|      |      |      |     |   |     |        |        |        |      |      |
|------|------|------|-----|---|-----|--------|--------|--------|------|------|
| ATOM | 2022 | CG   | ARG | X | 132 | 39.225 | 38.473 | 19.210 | 0.00 | 0.00 |
| ATOM | 2023 | HG2  | ARG | X | 132 | 39.462 | 38.502 | 20.274 | 0.00 | 0.00 |
| ATOM | 2024 | HG3  | ARG | X | 132 | 39.184 | 37.444 | 18.852 | 0.00 | 0.00 |
| ATOM | 2025 | CD   | ARG | X | 132 | 40.204 | 39.143 | 18.311 | 0.00 | 0.00 |
| ATOM | 2026 | HD2  | ARG | X | 132 | 41.176 | 38.654 | 18.376 | 0.00 | 0.00 |
| ATOM | 2027 | HD3  | ARG | X | 132 | 39.873 | 39.051 | 17.276 | 0.00 | 0.00 |
| ATOM | 2028 | NE   | ARG | X | 132 | 40.456 | 40.531 | 18.712 | 0.00 | 0.00 |
| ATOM | 2029 | HE   | ARG | X | 132 | 40.429 | 40.759 | 19.695 | 0.00 | 0.00 |
| ATOM | 2030 | CZ   | ARG | X | 132 | 41.018 | 41.392 | 17.916 | 0.00 | 0.00 |
| ATOM | 2031 | NH1  | ARG | X | 132 | 41.255 | 41.123 | 16.588 | 0.00 | 0.00 |
| ATOM | 2032 | HH11 | ARG | X | 132 | 40.940 | 40.252 | 16.184 | 0.00 | 0.00 |
| ATOM | 2033 | HH12 | ARG | X | 132 | 41.809 | 41.823 | 16.117 | 0.00 | 0.00 |
| ATOM | 2034 | NH2  | ARG | X | 132 | 41.377 | 42.568 | 18.344 | 0.00 | 0.00 |
| ATOM | 2035 | HH21 | ARG | X | 132 | 41.071 | 42.879 | 19.255 | 0.00 | 0.00 |
| ATOM | 2036 | HH22 | ARG | X | 132 | 41.802 | 43.191 | 17.673 | 0.00 | 0.00 |
| ATOM | 2037 | C    | ARG | X | 132 | 36.573 | 37.141 | 20.222 | 0.00 | 0.00 |
| ATOM | 2038 | O    | ARG | X | 132 | 35.599 | 36.596 | 19.691 | 0.00 | 0.00 |
| ATOM | 2039 | N    | PHE | X | 133 | 37.436 | 36.387 | 20.901 | 0.00 | 0.00 |
| ATOM | 2040 | H    | PHE | X | 133 | 38.250 | 36.795 | 21.338 | 0.00 | 0.00 |
| ATOM | 2041 | CA   | PHE | X | 133 | 37.404 | 34.944 | 21.059 | 0.00 | 0.00 |
| ATOM | 2042 | HA   | PHE | X | 133 | 37.067 | 34.618 | 20.075 | 0.00 | 0.00 |
| ATOM | 2043 | CB   | PHE | X | 133 | 38.798 | 34.372 | 21.387 | 0.00 | 0.00 |
| ATOM | 2044 | HB2  | PHE | X | 133 | 39.256 | 34.855 | 22.249 | 0.00 | 0.00 |
| ATOM | 2045 | HB3  | PHE | X | 133 | 38.805 | 33.302 | 21.598 | 0.00 | 0.00 |
| ATOM | 2046 | CG   | PHE | X | 133 | 39.697 | 34.686 | 20.193 | 0.00 | 0.00 |
| ATOM | 2047 | CD1  | PHE | X | 133 | 40.604 | 35.784 | 20.382 | 0.00 | 0.00 |
| ATOM | 2048 | HD1  | PHE | X | 133 | 40.780 | 36.258 | 21.337 | 0.00 | 0.00 |
| ATOM | 2049 | CE1  | PHE | X | 133 | 41.528 | 36.130 | 19.352 | 0.00 | 0.00 |
| ATOM | 2050 | HE1  | PHE | X | 133 | 42.282 | 36.849 | 19.639 | 0.00 | 0.00 |
| ATOM | 2051 | CZ   | PHE | X | 133 | 41.502 | 35.482 | 18.128 | 0.00 | 0.00 |
| ATOM | 2052 | HZ   | PHE | X | 133 | 42.174 | 35.750 | 17.326 | 0.00 | 0.00 |
| ATOM | 2053 | CE2  | PHE | X | 133 | 40.658 | 34.356 | 17.989 | 0.00 | 0.00 |
| ATOM | 2054 | HE2  | PHE | X | 133 | 40.751 | 33.862 | 17.033 | 0.00 | 0.00 |
| ATOM | 2055 | CD2  | PHE | X | 133 | 39.746 | 33.964 | 18.988 | 0.00 | 0.00 |
| ATOM | 2056 | HD2  | PHE | X | 133 | 39.016 | 33.200 | 18.762 | 0.00 | 0.00 |
| ATOM | 2057 | C    | PHE | X | 133 | 36.296 | 34.528 | 22.018 | 0.00 | 0.00 |
| ATOM | 2058 | O    | PHE | X | 133 | 35.494 | 33.667 | 21.679 | 0.00 | 0.00 |
| ATOM | 2059 | N    | LEU | X | 134 | 36.364 | 35.161 | 23.205 | 0.00 | 0.00 |
| ATOM | 2060 | H    | LEU | X | 134 | 37.108 | 35.810 | 23.415 | 0.00 | 0.00 |
| ATOM | 2061 | CA   | LEU | X | 134 | 35.344 | 34.949 | 24.223 | 0.00 | 0.00 |
| ATOM | 2062 | HA   | LEU | X | 134 | 35.324 | 33.888 | 24.472 | 0.00 | 0.00 |
| ATOM | 2063 | CB   | LEU | X | 134 | 35.714 | 35.759 | 25.481 | 0.00 | 0.00 |
| ATOM | 2064 | HB2  | LEU | X | 134 | 36.759 | 35.599 | 25.746 | 0.00 | 0.00 |
| ATOM | 2065 | HB3  | LEU | X | 134 | 35.640 | 36.838 | 25.346 | 0.00 | 0.00 |
| ATOM | 2066 | CG   | LEU | X | 134 | 34.825 | 35.373 | 26.727 | 0.00 | 0.00 |
| ATOM | 2067 | HG   | LEU | X | 134 | 33.846 | 35.838 | 26.608 | 0.00 | 0.00 |
| ATOM | 2068 | CD1  | LEU | X | 134 | 34.633 | 33.879 | 27.004 | 0.00 | 0.00 |
| ATOM | 2069 | HD11 | LEU | X | 134 | 35.523 | 33.291 | 27.227 | 0.00 | 0.00 |
| ATOM | 2070 | HD12 | LEU | X | 134 | 33.984 | 33.457 | 26.237 | 0.00 | 0.00 |
| ATOM | 2071 | HD13 | LEU | X | 134 | 33.992 | 33.853 | 27.885 | 0.00 | 0.00 |
| ATOM | 2072 | CD2  | LEU | X | 134 | 35.473 | 36.123 | 27.886 | 0.00 | 0.00 |
| ATOM | 2073 | HD21 | LEU | X | 134 | 34.849 | 35.927 | 28.758 | 0.00 | 0.00 |
| ATOM | 2074 | HD22 | LEU | X | 134 | 36.504 | 35.777 | 27.961 | 0.00 | 0.00 |
| ATOM | 2075 | HD23 | LEU | X | 134 | 35.421 | 37.196 | 27.701 | 0.00 | 0.00 |
| ATOM | 2076 | C    | LEU | X | 134 | 33.920 | 35.290 | 23.679 | 0.00 | 0.00 |
| ATOM | 2077 | O    | LEU | X | 134 | 32.962 | 34.570 | 23.925 | 0.00 | 0.00 |
| ATOM | 2078 | N    | VAL | X | 135 | 33.852 | 36.371 | 22.916 | 0.00 | 0.00 |
| ATOM | 2079 | H    | VAL | X | 135 | 34.646 | 36.983 | 23.039 | 0.00 | 0.00 |
| ATOM | 2080 | CA   | VAL | X | 135 | 32.675 | 36.789 | 22.181 | 0.00 | 0.00 |
| ATOM | 2081 | HA   | VAL | X | 135 | 31.922 | 36.895 | 22.961 | 0.00 | 0.00 |
| ATOM | 2082 | CB   | VAL | X | 135 | 32.570 | 38.268 | 21.806 | 0.00 | 0.00 |
| ATOM | 2083 | HB   | VAL | X | 135 | 33.486 | 38.378 | 21.227 | 0.00 | 0.00 |
| ATOM | 2084 | CG1  | VAL | X | 135 | 31.293 | 38.802 | 21.139 | 0.00 | 0.00 |
| ATOM | 2085 | HG11 | VAL | X | 135 | 30.404 | 38.620 | 21.743 | 0.00 | 0.00 |
| ATOM | 2086 | HG12 | VAL | X | 135 | 31.294 | 39.892 | 21.173 | 0.00 | 0.00 |
| ATOM | 2087 | HG13 | VAL | X | 135 | 31.261 | 38.414 | 20.121 | 0.00 | 0.00 |
| ATOM | 2088 | CG2  | VAL | X | 135 | 32.761 | 39.092 | 23.089 | 0.00 | 0.00 |

|      |      |      |     |   |     |        |        |        |      |      |
|------|------|------|-----|---|-----|--------|--------|--------|------|------|
| ATOM | 2089 | HG21 | VAL | X | 135 | 31.818 | 39.331 | 23.581 | 0.00 | 0.00 |
| ATOM | 2090 | HG22 | VAL | X | 135 | 33.276 | 40.021 | 22.847 | 0.00 | 0.00 |
| ATOM | 2091 | HG23 | VAL | X | 135 | 33.377 | 38.521 | 23.784 | 0.00 | 0.00 |
| ATOM | 2092 | C    | VAL | X | 135 | 32.135 | 35.906 | 21.097 | 0.00 | 0.00 |
| ATOM | 2093 | O    | VAL | X | 135 | 30.937 | 35.675 | 21.037 | 0.00 | 0.00 |
| ATOM | 2094 | N    | GLN | X | 136 | 33.027 | 35.413 | 20.245 | 0.00 | 0.00 |
| ATOM | 2095 | H    | GLN | X | 136 | 33.972 | 35.767 | 20.298 | 0.00 | 0.00 |
| ATOM | 2096 | CA   | GLN | X | 136 | 32.657 | 34.404 | 19.262 | 0.00 | 0.00 |
| ATOM | 2097 | HA   | GLN | X | 136 | 31.804 | 34.832 | 18.734 | 0.00 | 0.00 |
| ATOM | 2098 | CB   | GLN | X | 136 | 33.872 | 34.195 | 18.260 | 0.00 | 0.00 |
| ATOM | 2099 | HB2  | GLN | X | 136 | 34.493 | 35.082 | 18.135 | 0.00 | 0.00 |
| ATOM | 2100 | HB3  | GLN | X | 136 | 34.514 | 33.404 | 18.647 | 0.00 | 0.00 |
| ATOM | 2101 | CG   | GLN | X | 136 | 33.497 | 33.710 | 16.841 | 0.00 | 0.00 |
| ATOM | 2102 | HG2  | GLN | X | 136 | 32.746 | 34.384 | 16.428 | 0.00 | 0.00 |
| ATOM | 2103 | HG3  | GLN | X | 136 | 34.422 | 33.752 | 16.266 | 0.00 | 0.00 |
| ATOM | 2104 | CD   | GLN | X | 136 | 32.872 | 32.230 | 16.855 | 0.00 | 0.00 |
| ATOM | 2105 | OE1  | GLN | X | 136 | 33.557 | 31.215 | 17.131 | 0.00 | 0.00 |
| ATOM | 2106 | NE2  | GLN | X | 136 | 31.625 | 32.056 | 16.415 | 0.00 | 0.00 |
| ATOM | 2107 | HE21 | GLN | X | 136 | 31.215 | 31.133 | 16.445 | 0.00 | 0.00 |
| ATOM | 2108 | HE22 | GLN | X | 136 | 31.112 | 32.845 | 16.048 | 0.00 | 0.00 |
| ATOM | 2109 | C    | GLN | X | 136 | 32.272 | 33.010 | 19.835 | 0.00 | 0.00 |
| ATOM | 2110 | O    | GLN | X | 136 | 31.102 | 32.570 | 19.649 | 0.00 | 0.00 |
| ATOM | 2111 | N    | ALA | X | 137 | 33.138 | 32.357 | 20.645 | 0.00 | 0.00 |
| ATOM | 2112 | H    | ALA | X | 137 | 33.955 | 32.890 | 20.908 | 0.00 | 0.00 |
| ATOM | 2113 | CA   | ALA | X | 137 | 32.834 | 31.117 | 21.314 | 0.00 | 0.00 |
| ATOM | 2114 | HA   | ALA | X | 137 | 32.824 | 30.347 | 20.543 | 0.00 | 0.00 |
| ATOM | 2115 | CB   | ALA | X | 137 | 34.020 | 30.744 | 22.307 | 0.00 | 0.00 |
| ATOM | 2116 | HB1  | ALA | X | 137 | 34.947 | 30.638 | 21.744 | 0.00 | 0.00 |
| ATOM | 2117 | HB2  | ALA | X | 137 | 33.818 | 29.865 | 22.920 | 0.00 | 0.00 |
| ATOM | 2118 | HB3  | ALA | X | 137 | 34.264 | 31.586 | 22.956 | 0.00 | 0.00 |
| ATOM | 2119 | C    | ALA | X | 137 | 31.468 | 31.086 | 22.095 | 0.00 | 0.00 |
| ATOM | 2120 | O    | ALA | X | 137 | 30.660 | 30.176 | 21.835 | 0.00 | 0.00 |
| ATOM | 2121 | N    | GLU | X | 138 | 31.196 | 32.013 | 23.005 | 0.00 | 0.00 |
| ATOM | 2122 | H    | GLU | X | 138 | 31.931 | 32.682 | 23.188 | 0.00 | 0.00 |
| ATOM | 2123 | CA   | GLU | X | 138 | 30.193 | 31.896 | 24.054 | 0.00 | 0.00 |
| ATOM | 2124 | HA   | GLU | X | 138 | 29.620 | 30.976 | 23.940 | 0.00 | 0.00 |
| ATOM | 2125 | CB   | GLU | X | 138 | 30.809 | 31.926 | 25.462 | 0.00 | 0.00 |
| ATOM | 2126 | HB2  | GLU | X | 138 | 31.571 | 32.706 | 25.454 | 0.00 | 0.00 |
| ATOM | 2127 | HB3  | GLU | X | 138 | 30.020 | 32.215 | 26.157 | 0.00 | 0.00 |
| ATOM | 2128 | CG   | GLU | X | 138 | 31.487 | 30.601 | 26.092 | 0.00 | 0.00 |
| ATOM | 2129 | HG2  | GLU | X | 138 | 32.431 | 30.372 | 25.599 | 0.00 | 0.00 |
| ATOM | 2130 | HG3  | GLU | X | 138 | 31.818 | 30.842 | 27.102 | 0.00 | 0.00 |
| ATOM | 2131 | CD   | GLU | X | 138 | 30.421 | 29.477 | 26.178 | 0.00 | 0.00 |
| ATOM | 2132 | OE1  | GLU | X | 138 | 29.326 | 29.696 | 26.759 | 0.00 | 0.00 |
| ATOM | 2133 | OE2  | GLU | X | 138 | 30.620 | 28.522 | 25.364 | 0.00 | 0.00 |
| ATOM | 2134 | C    | GLU | X | 138 | 29.061 | 32.975 | 23.913 | 0.00 | 0.00 |
| ATOM | 2135 | O    | GLU | X | 138 | 28.052 | 32.881 | 24.590 | 0.00 | 0.00 |
| ATOM | 2136 | N    | ARG | X | 139 | 29.071 | 33.949 | 22.984 | 0.00 | 0.00 |
| ATOM | 2137 | H    | ARG | X | 139 | 29.886 | 34.187 | 22.436 | 0.00 | 0.00 |
| ATOM | 2138 | CA   | ARG | X | 139 | 27.943 | 34.848 | 22.704 | 0.00 | 0.00 |
| ATOM | 2139 | HA   | ARG | X | 139 | 28.388 | 35.436 | 21.901 | 0.00 | 0.00 |
| ATOM | 2140 | CB   | ARG | X | 139 | 26.753 | 34.128 | 22.099 | 0.00 | 0.00 |
| ATOM | 2141 | HB2  | ARG | X | 139 | 26.298 | 33.352 | 22.714 | 0.00 | 0.00 |
| ATOM | 2142 | HB3  | ARG | X | 139 | 26.038 | 34.915 | 21.859 | 0.00 | 0.00 |
| ATOM | 2143 | CG   | ARG | X | 139 | 27.168 | 33.455 | 20.788 | 0.00 | 0.00 |
| ATOM | 2144 | HG2  | ARG | X | 139 | 27.737 | 34.053 | 20.077 | 0.00 | 0.00 |
| ATOM | 2145 | HG3  | ARG | X | 139 | 27.837 | 32.646 | 21.084 | 0.00 | 0.00 |
| ATOM | 2146 | CD   | ARG | X | 139 | 26.063 | 32.777 | 19.998 | 0.00 | 0.00 |
| ATOM | 2147 | HD2  | ARG | X | 139 | 26.457 | 32.270 | 19.118 | 0.00 | 0.00 |
| ATOM | 2148 | HD3  | ARG | X | 139 | 25.647 | 31.915 | 20.521 | 0.00 | 0.00 |
| ATOM | 2149 | NE   | ARG | X | 139 | 25.042 | 33.793 | 19.516 | 0.00 | 0.00 |
| ATOM | 2150 | HE   | ARG | X | 139 | 24.230 | 33.933 | 20.100 | 0.00 | 0.00 |
| ATOM | 2151 | CZ   | ARG | X | 139 | 25.187 | 34.598 | 18.487 | 0.00 | 0.00 |
| ATOM | 2152 | NH1  | ARG | X | 139 | 26.353 | 34.597 | 17.909 | 0.00 | 0.00 |
| ATOM | 2153 | HH11 | ARG | X | 139 | 27.053 | 33.891 | 18.088 | 0.00 | 0.00 |
| ATOM | 2154 | HH12 | ARG | X | 139 | 26.645 | 35.140 | 17.109 | 0.00 | 0.00 |
| ATOM | 2155 | NH2  | ARG | X | 139 | 24.324 | 35.498 | 18.045 | 0.00 | 0.00 |

|      |      |      |     |   |     |        |        |        |      |      |
|------|------|------|-----|---|-----|--------|--------|--------|------|------|
| ATOM | 2156 | HH21 | ARG | X | 139 | 23.458 | 35.497 | 18.564 | 0.00 | 0.00 |
| ATOM | 2157 | HH22 | ARG | X | 139 | 24.518 | 36.166 | 17.312 | 0.00 | 0.00 |
| ATOM | 2158 | C    | ARG | X | 139 | 27.564 | 35.870 | 23.783 | 0.00 | 0.00 |
| ATOM | 2159 | O    | ARG | X | 139 | 26.915 | 36.930 | 23.517 | 0.00 | 0.00 |
| ATOM | 2160 | N    | THR | X | 140 | 27.938 | 35.764 | 25.084 | 0.00 | 0.00 |
| ATOM | 2161 | H    | THR | X | 140 | 28.354 | 34.855 | 25.228 | 0.00 | 0.00 |
| ATOM | 2162 | CA   | THR | X | 140 | 28.259 | 36.740 | 26.107 | 0.00 | 0.00 |
| ATOM | 2163 | HA   | THR | X | 140 | 27.336 | 37.024 | 26.613 | 0.00 | 0.00 |
| ATOM | 2164 | CB   | THR | X | 140 | 29.220 | 36.035 | 27.138 | 0.00 | 0.00 |
| ATOM | 2165 | HB   | THR | X | 140 | 29.499 | 36.814 | 27.848 | 0.00 | 0.00 |
| ATOM | 2166 | CG2  | THR | X | 140 | 28.378 | 35.041 | 27.981 | 0.00 | 0.00 |
| ATOM | 2167 | HG21 | THR | X | 140 | 27.732 | 34.352 | 27.437 | 0.00 | 0.00 |
| ATOM | 2168 | HG22 | THR | X | 140 | 27.790 | 35.581 | 28.723 | 0.00 | 0.00 |
| ATOM | 2169 | HG23 | THR | X | 140 | 29.121 | 34.515 | 28.582 | 0.00 | 0.00 |
| ATOM | 2170 | OG1  | THR | X | 140 | 30.284 | 35.392 | 26.572 | 0.00 | 0.00 |
| ATOM | 2171 | HG1  | THR | X | 140 | 30.848 | 35.998 | 26.086 | 0.00 | 0.00 |
| ATOM | 2172 | C    | THR | X | 140 | 28.963 | 37.912 | 25.552 | 0.00 | 0.00 |
| ATOM | 2173 | O    | THR | X | 140 | 29.937 | 37.686 | 24.857 | 0.00 | 0.00 |
| ATOM | 2174 | N    | VAL | X | 141 | 28.519 | 39.098 | 25.861 | 0.00 | 0.00 |
| ATOM | 2175 | H    | VAL | X | 141 | 27.694 | 39.133 | 26.443 | 0.00 | 0.00 |
| ATOM | 2176 | CA   | VAL | X | 141 | 28.996 | 40.372 | 25.333 | 0.00 | 0.00 |
| ATOM | 2177 | HA   | VAL | X | 141 | 29.284 | 40.141 | 24.308 | 0.00 | 0.00 |
| ATOM | 2178 | CB   | VAL | X | 141 | 27.854 | 41.429 | 25.190 | 0.00 | 0.00 |
| ATOM | 2179 | HB   | VAL | X | 141 | 27.337 | 41.581 | 26.138 | 0.00 | 0.00 |
| ATOM | 2180 | CG1  | VAL | X | 141 | 28.476 | 42.757 | 24.702 | 0.00 | 0.00 |
| ATOM | 2181 | HG11 | VAL | X | 141 | 27.788 | 43.590 | 24.843 | 0.00 | 0.00 |
| ATOM | 2182 | HG12 | VAL | X | 141 | 29.281 | 43.058 | 25.373 | 0.00 | 0.00 |
| ATOM | 2183 | HG13 | VAL | X | 141 | 28.720 | 42.594 | 23.652 | 0.00 | 0.00 |
| ATOM | 2184 | CG2  | VAL | X | 141 | 26.840 | 40.974 | 24.027 | 0.00 | 0.00 |
| ATOM | 2185 | HG21 | VAL | X | 141 | 26.722 | 39.892 | 23.981 | 0.00 | 0.00 |
| ATOM | 2186 | HG22 | VAL | X | 141 | 27.099 | 41.273 | 23.011 | 0.00 | 0.00 |
| ATOM | 2187 | HG23 | VAL | X | 141 | 25.893 | 41.457 | 24.270 | 0.00 | 0.00 |
| ATOM | 2188 | C    | VAL | X | 141 | 30.044 | 40.964 | 26.336 | 0.00 | 0.00 |
| ATOM | 2189 | O    | VAL | X | 141 | 29.715 | 41.097 | 27.544 | 0.00 | 0.00 |
| ATOM | 2190 | N    | LEU | X | 142 | 31.288 | 41.221 | 25.854 | 0.00 | 0.00 |
| ATOM | 2191 | H    | LEU | X | 142 | 31.545 | 40.946 | 24.917 | 0.00 | 0.00 |
| ATOM | 2192 | CA   | LEU | X | 142 | 32.390 | 41.673 | 26.708 | 0.00 | 0.00 |
| ATOM | 2193 | HA   | LEU | X | 142 | 32.073 | 41.381 | 27.709 | 0.00 | 0.00 |
| ATOM | 2194 | CB   | LEU | X | 142 | 33.739 | 41.003 | 26.335 | 0.00 | 0.00 |
| ATOM | 2195 | HB2  | LEU | X | 142 | 33.587 | 39.923 | 26.346 | 0.00 | 0.00 |
| ATOM | 2196 | HB3  | LEU | X | 142 | 34.059 | 41.412 | 25.377 | 0.00 | 0.00 |
| ATOM | 2197 | CG   | LEU | X | 142 | 34.799 | 41.404 | 27.370 | 0.00 | 0.00 |
| ATOM | 2198 | HG   | LEU | X | 142 | 34.449 | 42.152 | 28.082 | 0.00 | 0.00 |
| ATOM | 2199 | CD1  | LEU | X | 142 | 35.178 | 40.129 | 28.184 | 0.00 | 0.00 |
| ATOM | 2200 | HD11 | LEU | X | 142 | 35.719 | 39.441 | 27.534 | 0.00 | 0.00 |
| ATOM | 2201 | HD12 | LEU | X | 142 | 34.271 | 39.668 | 28.576 | 0.00 | 0.00 |
| ATOM | 2202 | HD13 | LEU | X | 142 | 35.722 | 40.468 | 29.065 | 0.00 | 0.00 |
| ATOM | 2203 | CD2  | LEU | X | 142 | 36.027 | 42.113 | 26.871 | 0.00 | 0.00 |
| ATOM | 2204 | HD21 | LEU | X | 142 | 36.484 | 41.498 | 26.095 | 0.00 | 0.00 |
| ATOM | 2205 | HD22 | LEU | X | 142 | 35.750 | 43.068 | 26.424 | 0.00 | 0.00 |
| ATOM | 2206 | HD23 | LEU | X | 142 | 36.671 | 42.255 | 27.739 | 0.00 | 0.00 |
| ATOM | 2207 | C    | LEU | X | 142 | 32.432 | 43.180 | 26.724 | 0.00 | 0.00 |
| ATOM | 2208 | O    | LEU | X | 142 | 32.612 | 43.778 | 25.696 | 0.00 | 0.00 |
| ATOM | 2209 | N    | VAL | X | 143 | 32.373 | 43.799 | 27.894 | 0.00 | 0.00 |
| ATOM | 2210 | H    | VAL | X | 143 | 32.227 | 43.190 | 28.686 | 0.00 | 0.00 |
| ATOM | 2211 | CA   | VAL | X | 143 | 32.485 | 45.210 | 28.099 | 0.00 | 0.00 |
| ATOM | 2212 | HA   | VAL | X | 143 | 32.298 | 45.704 | 27.145 | 0.00 | 0.00 |
| ATOM | 2213 | CB   | VAL | X | 143 | 31.353 | 45.744 | 29.134 | 0.00 | 0.00 |
| ATOM | 2214 | HB   | VAL | X | 143 | 31.290 | 45.123 | 30.027 | 0.00 | 0.00 |
| ATOM | 2215 | CG1  | VAL | X | 143 | 31.479 | 47.184 | 29.561 | 0.00 | 0.00 |
| ATOM | 2216 | HG11 | VAL | X | 143 | 32.401 | 47.378 | 30.110 | 0.00 | 0.00 |
| ATOM | 2217 | HG12 | VAL | X | 143 | 31.593 | 47.826 | 28.688 | 0.00 | 0.00 |
| ATOM | 2218 | HG13 | VAL | X | 143 | 30.623 | 47.588 | 30.102 | 0.00 | 0.00 |
| ATOM | 2219 | CG2  | VAL | X | 143 | 30.012 | 45.585 | 28.360 | 0.00 | 0.00 |
| ATOM | 2220 | HG21 | VAL | X | 143 | 29.132 | 45.969 | 28.876 | 0.00 | 0.00 |
| ATOM | 2221 | HG22 | VAL | X | 143 | 29.840 | 44.534 | 28.123 | 0.00 | 0.00 |
| ATOM | 2222 | HG23 | VAL | X | 143 | 30.076 | 46.242 | 27.493 | 0.00 | 0.00 |



|      |      |      |     |   |     |        |        |        |      |      |
|------|------|------|-----|---|-----|--------|--------|--------|------|------|
| ATOM | 2223 | C    | VAL | X | 143 | 33.893 | 45.439 | 28.721 | 0.00 | 0.00 |
| ATOM | 2224 | O    | VAL | X | 143 | 34.417 | 44.511 | 29.327 | 0.00 | 0.00 |
| ATOM | 2225 | N    | SER | X | 144 | 34.471 | 46.563 | 28.688 | 0.00 | 0.00 |
| ATOM | 2226 | H    | SER | X | 144 | 34.182 | 47.236 | 27.992 | 0.00 | 0.00 |
| ATOM | 2227 | CA   | SER | X | 144 | 35.678 | 46.997 | 29.349 | 0.00 | 0.00 |
| ATOM | 2228 | HA   | SER | X | 144 | 35.781 | 46.456 | 30.289 | 0.00 | 0.00 |
| ATOM | 2229 | CB   | SER | X | 144 | 36.886 | 46.446 | 28.496 | 0.00 | 0.00 |
| ATOM | 2230 | HB2  | SER | X | 144 | 36.819 | 45.363 | 28.395 | 0.00 | 0.00 |
| ATOM | 2231 | HB3  | SER | X | 144 | 36.774 | 47.047 | 27.594 | 0.00 | 0.00 |
| ATOM | 2232 | OG   | SER | X | 144 | 38.140 | 46.722 | 29.140 | 0.00 | 0.00 |
| ATOM | 2233 | HG   | SER | X | 144 | 38.863 | 46.207 | 28.777 | 0.00 | 0.00 |
| ATOM | 2234 | C    | SER | X | 144 | 35.811 | 48.490 | 29.555 | 0.00 | 0.00 |
| ATOM | 2235 | O    | SER | X | 144 | 35.343 | 49.339 | 28.750 | 0.00 | 0.00 |
| ATOM | 2236 | N    | MET | X | 145 | 36.330 | 48.941 | 30.696 | 0.00 | 0.00 |
| ATOM | 2237 | H    | MET | X | 145 | 36.787 | 48.233 | 31.252 | 0.00 | 0.00 |
| ATOM | 2238 | CA   | MET | X | 145 | 36.466 | 50.376 | 31.076 | 0.00 | 0.00 |
| ATOM | 2239 | HA   | MET | X | 145 | 36.204 | 50.922 | 30.170 | 0.00 | 0.00 |
| ATOM | 2240 | CB   | MET | X | 145 | 35.645 | 50.535 | 32.341 | 0.00 | 0.00 |
| ATOM | 2241 | HB2  | MET | X | 145 | 35.592 | 51.601 | 32.559 | 0.00 | 0.00 |
| ATOM | 2242 | HB3  | MET | X | 145 | 34.604 | 50.319 | 32.102 | 0.00 | 0.00 |
| ATOM | 2243 | CG   | MET | X | 145 | 35.994 | 49.638 | 33.504 | 0.00 | 0.00 |
| ATOM | 2244 | HG2  | MET | X | 145 | 36.011 | 48.559 | 33.349 | 0.00 | 0.00 |
| ATOM | 2245 | HG3  | MET | X | 145 | 37.028 | 49.954 | 33.643 | 0.00 | 0.00 |
| ATOM | 2246 | SD   | MET | X | 145 | 35.034 | 49.974 | 35.122 | 0.00 | 0.00 |
| ATOM | 2247 | CE   | MET | X | 145 | 33.571 | 49.133 | 34.579 | 0.00 | 0.00 |
| ATOM | 2248 | HE1  | MET | X | 145 | 33.780 | 48.065 | 34.522 | 0.00 | 0.00 |
| ATOM | 2249 | HE2  | MET | X | 145 | 32.739 | 49.284 | 35.267 | 0.00 | 0.00 |
| ATOM | 2250 | HE3  | MET | X | 145 | 33.239 | 49.637 | 33.671 | 0.00 | 0.00 |
| ATOM | 2251 | C    | MET | X | 145 | 37.967 | 50.670 | 31.189 | 0.00 | 0.00 |
| ATOM | 2252 | O    | MET | X | 145 | 38.766 | 49.814 | 31.510 | 0.00 | 0.00 |
| ATOM | 2253 | N    | ASN | X | 146 | 38.346 | 51.934 | 31.144 | 0.00 | 0.00 |
| ATOM | 2254 | H    | ASN | X | 146 | 37.671 | 52.647 | 30.912 | 0.00 | 0.00 |
| ATOM | 2255 | CA   | ASN | X | 146 | 39.655 | 52.453 | 31.438 | 0.00 | 0.00 |
| ATOM | 2256 | HA   | ASN | X | 146 | 40.369 | 51.731 | 31.834 | 0.00 | 0.00 |
| ATOM | 2257 | CB   | ASN | X | 146 | 40.282 | 53.034 | 30.139 | 0.00 | 0.00 |
| ATOM | 2258 | HB2  | ASN | X | 146 | 39.983 | 52.412 | 29.295 | 0.00 | 0.00 |
| ATOM | 2259 | HB3  | ASN | X | 146 | 39.939 | 54.067 | 30.084 | 0.00 | 0.00 |
| ATOM | 2260 | CG   | ASN | X | 146 | 41.826 | 52.956 | 30.300 | 0.00 | 0.00 |
| ATOM | 2261 | OD1  | ASN | X | 146 | 42.553 | 51.936 | 30.213 | 0.00 | 0.00 |
| ATOM | 2262 | ND2  | ASN | X | 146 | 42.477 | 54.107 | 30.599 | 0.00 | 0.00 |
| ATOM | 2263 | HD21 | ASN | X | 146 | 43.457 | 54.067 | 30.841 | 0.00 | 0.00 |
| ATOM | 2264 | HD22 | ASN | X | 146 | 42.089 | 55.037 | 30.530 | 0.00 | 0.00 |
| ATOM | 2265 | C    | ASN | X | 146 | 39.525 | 53.540 | 32.416 | 0.00 | 0.00 |
| ATOM | 2266 | O    | ASN | X | 146 | 38.735 | 54.462 | 32.155 | 0.00 | 0.00 |
| ATOM | 2267 | N    | TYR | X | 147 | 40.098 | 53.362 | 33.624 | 0.00 | 0.00 |
| ATOM | 2268 | H    | TYR | X | 147 | 40.798 | 52.634 | 33.625 | 0.00 | 0.00 |
| ATOM | 2269 | CA   | TYR | X | 147 | 40.026 | 54.292 | 34.804 | 0.00 | 0.00 |
| ATOM | 2270 | HA   | TYR | X | 147 | 39.564 | 55.245 | 34.546 | 0.00 | 0.00 |
| ATOM | 2271 | CB   | TYR | X | 147 | 39.159 | 53.703 | 35.899 | 0.00 | 0.00 |
| ATOM | 2272 | HB2  | TYR | X | 147 | 39.202 | 54.364 | 36.765 | 0.00 | 0.00 |
| ATOM | 2273 | HB3  | TYR | X | 147 | 38.169 | 53.756 | 35.445 | 0.00 | 0.00 |
| ATOM | 2274 | CG   | TYR | X | 147 | 39.351 | 52.251 | 36.229 | 0.00 | 0.00 |
| ATOM | 2275 | CD1  | TYR | X | 147 | 38.691 | 51.266 | 35.454 | 0.00 | 0.00 |
| ATOM | 2276 | HD1  | TYR | X | 147 | 38.065 | 51.632 | 34.654 | 0.00 | 0.00 |
| ATOM | 2277 | CE1  | TYR | X | 147 | 39.090 | 49.895 | 35.524 | 0.00 | 0.00 |
| ATOM | 2278 | HE1  | TYR | X | 147 | 38.598 | 49.135 | 34.935 | 0.00 | 0.00 |
| ATOM | 2279 | CZ   | TYR | X | 147 | 40.164 | 49.541 | 36.417 | 0.00 | 0.00 |
| ATOM | 2280 | OH   | TYR | X | 147 | 40.417 | 48.205 | 36.476 | 0.00 | 0.00 |
| ATOM | 2281 | HH   | TYR | X | 147 | 41.273 | 48.078 | 36.891 | 0.00 | 0.00 |
| ATOM | 2282 | CE2  | TYR | X | 147 | 40.667 | 50.500 | 37.267 | 0.00 | 0.00 |
| ATOM | 2283 | HE2  | TYR | X | 147 | 41.443 | 50.159 | 37.937 | 0.00 | 0.00 |
| ATOM | 2284 | CD2  | TYR | X | 147 | 40.309 | 51.895 | 37.184 | 0.00 | 0.00 |
| ATOM | 2285 | HD2  | TYR | X | 147 | 40.839 | 52.623 | 37.781 | 0.00 | 0.00 |
| ATOM | 2286 | C    | TYR | X | 147 | 41.376 | 54.561 | 35.412 | 0.00 | 0.00 |
| ATOM | 2287 | O    | TYR | X | 147 | 42.374 | 54.004 | 34.969 | 0.00 | 0.00 |
| ATOM | 2288 | N    | ARG | X | 148 | 41.509 | 55.575 | 36.281 | 0.00 | 0.00 |
| ATOM | 2289 | H    | ARG | X | 148 | 40.599 | 55.935 | 36.531 | 0.00 | 0.00 |

|      |      |      |     |   |     |        |        |        |      |      |
|------|------|------|-----|---|-----|--------|--------|--------|------|------|
| ATOM | 2290 | CA   | ARG | X | 148 | 42.800 | 56.088 | 36.740 | 0.00 | 0.00 |
| ATOM | 2291 | HA   | ARG | X | 148 | 43.453 | 56.031 | 35.869 | 0.00 | 0.00 |
| ATOM | 2292 | CB   | ARG | X | 148 | 42.654 | 57.514 | 37.296 | 0.00 | 0.00 |
| ATOM | 2293 | HB2  | ARG | X | 148 | 42.021 | 57.548 | 38.183 | 0.00 | 0.00 |
| ATOM | 2294 | HB3  | ARG | X | 148 | 43.611 | 57.807 | 37.729 | 0.00 | 0.00 |
| ATOM | 2295 | CG   | ARG | X | 148 | 42.156 | 58.460 | 36.255 | 0.00 | 0.00 |
| ATOM | 2296 | HG2  | ARG | X | 148 | 42.942 | 58.586 | 35.511 | 0.00 | 0.00 |
| ATOM | 2297 | HG3  | ARG | X | 148 | 41.276 | 58.199 | 35.667 | 0.00 | 0.00 |
| ATOM | 2298 | CD   | ARG | X | 148 | 41.690 | 59.796 | 36.922 | 0.00 | 0.00 |
| ATOM | 2299 | HD2  | ARG | X | 148 | 42.433 | 60.114 | 37.653 | 0.00 | 0.00 |
| ATOM | 2300 | HD3  | ARG | X | 148 | 41.639 | 60.477 | 36.072 | 0.00 | 0.00 |
| ATOM | 2301 | NE   | ARG | X | 148 | 40.301 | 59.653 | 37.519 | 0.00 | 0.00 |
| ATOM | 2302 | HE   | ARG | X | 148 | 39.779 | 58.790 | 37.457 | 0.00 | 0.00 |
| ATOM | 2303 | CZ   | ARG | X | 148 | 39.695 | 60.578 | 38.303 | 0.00 | 0.00 |
| ATOM | 2304 | NH1  | ARG | X | 148 | 40.361 | 61.656 | 38.747 | 0.00 | 0.00 |
| ATOM | 2305 | HH11 | ARG | X | 148 | 41.311 | 61.832 | 38.453 | 0.00 | 0.00 |
| ATOM | 2306 | HH12 | ARG | X | 148 | 39.864 | 62.145 | 39.479 | 0.00 | 0.00 |
| ATOM | 2307 | NH2  | ARG | X | 148 | 38.425 | 60.412 | 38.616 | 0.00 | 0.00 |
| ATOM | 2308 | HH21 | ARG | X | 148 | 37.907 | 59.654 | 38.194 | 0.00 | 0.00 |
| ATOM | 2309 | HH22 | ARG | X | 148 | 38.051 | 61.070 | 39.284 | 0.00 | 0.00 |
| ATOM | 2310 | C    | ARG | X | 148 | 43.488 | 55.176 | 37.719 | 0.00 | 0.00 |
| ATOM | 2311 | O    | ARG | X | 148 | 42.960 | 54.561 | 38.641 | 0.00 | 0.00 |
| ATOM | 2312 | N    | VAL | X | 149 | 44.782 | 55.049 | 37.622 | 0.00 | 0.00 |
| ATOM | 2313 | H    | VAL | X | 149 | 45.218 | 55.625 | 36.916 | 0.00 | 0.00 |
| ATOM | 2314 | CA   | VAL | X | 149 | 45.640 | 54.340 | 38.585 | 0.00 | 0.00 |
| ATOM | 2315 | HA   | VAL | X | 149 | 45.102 | 53.917 | 39.434 | 0.00 | 0.00 |
| ATOM | 2316 | CB   | VAL | X | 149 | 46.276 | 52.990 | 37.899 | 0.00 | 0.00 |
| ATOM | 2317 | HB   | VAL | X | 149 | 46.914 | 52.453 | 38.601 | 0.00 | 0.00 |
| ATOM | 2318 | CG1  | VAL | X | 149 | 45.341 | 51.980 | 37.345 | 0.00 | 0.00 |
| ATOM | 2319 | HG11 | VAL | X | 149 | 44.877 | 52.265 | 36.401 | 0.00 | 0.00 |
| ATOM | 2320 | HG12 | VAL | X | 149 | 45.875 | 51.040 | 37.206 | 0.00 | 0.00 |
| ATOM | 2321 | HG13 | VAL | X | 149 | 44.475 | 51.832 | 37.991 | 0.00 | 0.00 |
| ATOM | 2322 | CG2  | VAL | X | 149 | 47.300 | 53.332 | 36.788 | 0.00 | 0.00 |
| ATOM | 2323 | HG21 | VAL | X | 149 | 48.142 | 53.803 | 37.296 | 0.00 | 0.00 |
| ATOM | 2324 | HG22 | VAL | X | 149 | 46.854 | 53.989 | 36.041 | 0.00 | 0.00 |
| ATOM | 2325 | HG23 | VAL | X | 149 | 47.539 | 52.403 | 36.270 | 0.00 | 0.00 |
| ATOM | 2326 | C    | VAL | X | 149 | 46.741 | 55.228 | 39.148 | 0.00 | 0.00 |
| ATOM | 2327 | O    | VAL | X | 149 | 46.718 | 56.420 | 38.890 | 0.00 | 0.00 |
| ATOM | 2328 | N    | GLY | X | 150 | 47.638 | 54.715 | 39.998 | 0.00 | 0.00 |
| ATOM | 2329 | H    | GLY | X | 150 | 47.547 | 53.748 | 40.276 | 0.00 | 0.00 |
| ATOM | 2330 | CA   | GLY | X | 150 | 48.797 | 55.415 | 40.653 | 0.00 | 0.00 |
| ATOM | 2331 | HA2  | GLY | X | 150 | 49.412 | 54.713 | 41.217 | 0.00 | 0.00 |
| ATOM | 2332 | HA3  | GLY | X | 150 | 49.371 | 56.034 | 39.964 | 0.00 | 0.00 |
| ATOM | 2333 | C    | GLY | X | 150 | 48.282 | 56.511 | 41.649 | 0.00 | 0.00 |
| ATOM | 2334 | O    | GLY | X | 150 | 47.159 | 56.361 | 42.246 | 0.00 | 0.00 |
| ATOM | 2335 | N    | ALA | X | 151 | 48.978 | 57.630 | 41.741 | 0.00 | 0.00 |
| ATOM | 2336 | H    | ALA | X | 151 | 49.875 | 57.633 | 41.277 | 0.00 | 0.00 |
| ATOM | 2337 | CA   | ALA | X | 151 | 48.493 | 58.746 | 42.528 | 0.00 | 0.00 |
| ATOM | 2338 | HA   | ALA | X | 151 | 48.222 | 58.447 | 43.541 | 0.00 | 0.00 |
| ATOM | 2339 | CB   | ALA | X | 151 | 49.694 | 59.723 | 42.635 | 0.00 | 0.00 |
| ATOM | 2340 | HB1  | ALA | X | 151 | 49.281 | 60.672 | 42.976 | 0.00 | 0.00 |
| ATOM | 2341 | HB2  | ALA | X | 151 | 50.096 | 59.932 | 41.644 | 0.00 | 0.00 |
| ATOM | 2342 | HB3  | ALA | X | 151 | 50.475 | 59.416 | 43.332 | 0.00 | 0.00 |
| ATOM | 2343 | C    | ALA | X | 151 | 47.211 | 59.394 | 41.978 | 0.00 | 0.00 |
| ATOM | 2344 | O    | ALA | X | 151 | 46.196 | 59.507 | 42.705 | 0.00 | 0.00 |
| ATOM | 2345 | N    | PHE | X | 152 | 47.112 | 59.626 | 40.677 | 0.00 | 0.00 |
| ATOM | 2346 | H    | PHE | X | 152 | 47.920 | 59.412 | 40.111 | 0.00 | 0.00 |
| ATOM | 2347 | CA   | PHE | X | 152 | 45.826 | 59.995 | 39.931 | 0.00 | 0.00 |
| ATOM | 2348 | HA   | PHE | X | 152 | 45.616 | 61.043 | 40.146 | 0.00 | 0.00 |
| ATOM | 2349 | CB   | PHE | X | 152 | 46.242 | 59.903 | 38.461 | 0.00 | 0.00 |
| ATOM | 2350 | HB2  | PHE | X | 152 | 47.125 | 60.535 | 38.359 | 0.00 | 0.00 |
| ATOM | 2351 | HB3  | PHE | X | 152 | 46.631 | 58.901 | 38.283 | 0.00 | 0.00 |
| ATOM | 2352 | CG   | PHE | X | 152 | 45.416 | 60.467 | 37.320 | 0.00 | 0.00 |
| ATOM | 2353 | CD1  | PHE | X | 152 | 45.863 | 60.064 | 36.041 | 0.00 | 0.00 |
| ATOM | 2354 | HD1  | PHE | X | 152 | 46.593 | 59.290 | 35.860 | 0.00 | 0.00 |
| ATOM | 2355 | CE1  | PHE | X | 152 | 45.312 | 60.769 | 34.952 | 0.00 | 0.00 |
| ATOM | 2356 | HE1  | PHE | X | 152 | 45.538 | 60.409 | 33.959 | 0.00 | 0.00 |

|      |      |      |     |   |     |        |        |        |      |      |
|------|------|------|-----|---|-----|--------|--------|--------|------|------|
| ATOM | 2357 | CZ   | PHE | X | 152 | 44.294 | 61.811 | 35.133 | 0.00 | 0.00 |
| ATOM | 2358 | HZ   | PHE | X | 152 | 43.794 | 62.320 | 34.323 | 0.00 | 0.00 |
| ATOM | 2359 | CE2  | PHE | X | 152 | 43.865 | 62.189 | 36.436 | 0.00 | 0.00 |
| ATOM | 2360 | HE2  | PHE | X | 152 | 43.027 | 62.859 | 36.554 | 0.00 | 0.00 |
| ATOM | 2361 | CD2  | PHE | X | 152 | 44.480 | 61.516 | 37.574 | 0.00 | 0.00 |
| ATOM | 2362 | HD2  | PHE | X | 152 | 44.244 | 61.859 | 38.571 | 0.00 | 0.00 |
| ATOM | 2363 | C    | PHE | X | 152 | 44.560 | 59.135 | 40.145 | 0.00 | 0.00 |
| ATOM | 2364 | O    | PHE | X | 152 | 43.491 | 59.600 | 39.804 | 0.00 | 0.00 |
| ATOM | 2365 | N    | GLY | X | 153 | 44.806 | 57.905 | 40.704 | 0.00 | 0.00 |
| ATOM | 2366 | H    | GLY | X | 153 | 45.730 | 57.529 | 40.863 | 0.00 | 0.00 |
| ATOM | 2367 | CA   | GLY | X | 153 | 43.769 | 57.014 | 41.155 | 0.00 | 0.00 |
| ATOM | 2368 | HA2  | GLY | X | 153 | 42.816 | 57.175 | 40.651 | 0.00 | 0.00 |
| ATOM | 2369 | HA3  | GLY | X | 153 | 44.094 | 55.992 | 40.956 | 0.00 | 0.00 |
| ATOM | 2370 | C    | GLY | X | 153 | 43.445 | 57.171 | 42.664 | 0.00 | 0.00 |
| ATOM | 2371 | O    | GLY | X | 153 | 42.301 | 56.897 | 43.052 | 0.00 | 0.00 |
| ATOM | 2372 | N    | PHE | X | 154 | 44.481 | 57.368 | 43.494 | 0.00 | 0.00 |
| ATOM | 2373 | H    | PHE | X | 154 | 45.381 | 57.577 | 43.086 | 0.00 | 0.00 |
| ATOM | 2374 | CA   | PHE | X | 154 | 44.455 | 56.842 | 44.901 | 0.00 | 0.00 |
| ATOM | 2375 | HA   | PHE | X | 154 | 43.403 | 56.952 | 45.162 | 0.00 | 0.00 |
| ATOM | 2376 | CB   | PHE | X | 154 | 44.851 | 55.343 | 44.827 | 0.00 | 0.00 |
| ATOM | 2377 | HB2  | PHE | X | 154 | 45.616 | 55.279 | 44.053 | 0.00 | 0.00 |
| ATOM | 2378 | HB3  | PHE | X | 154 | 45.140 | 54.973 | 45.811 | 0.00 | 0.00 |
| ATOM | 2379 | CG   | PHE | X | 154 | 43.850 | 54.316 | 44.328 | 0.00 | 0.00 |
| ATOM | 2380 | CD1  | PHE | X | 154 | 43.865 | 53.973 | 42.948 | 0.00 | 0.00 |
| ATOM | 2381 | HD1  | PHE | X | 154 | 44.659 | 54.271 | 42.280 | 0.00 | 0.00 |
| ATOM | 2382 | CE1  | PHE | X | 154 | 42.807 | 53.294 | 42.405 | 0.00 | 0.00 |
| ATOM | 2383 | HE1  | PHE | X | 154 | 42.720 | 53.095 | 41.347 | 0.00 | 0.00 |
| ATOM | 2384 | CZ   | PHE | X | 154 | 41.677 | 52.879 | 43.173 | 0.00 | 0.00 |
| ATOM | 2385 | HZ   | PHE | X | 154 | 40.816 | 52.365 | 42.772 | 0.00 | 0.00 |
| ATOM | 2386 | CE2  | PHE | X | 154 | 41.589 | 53.419 | 44.472 | 0.00 | 0.00 |
| ATOM | 2387 | HE2  | PHE | X | 154 | 40.696 | 53.110 | 44.994 | 0.00 | 0.00 |
| ATOM | 2388 | CD2  | PHE | X | 154 | 42.728 | 54.014 | 45.121 | 0.00 | 0.00 |
| ATOM | 2389 | HD2  | PHE | X | 154 | 42.678 | 54.289 | 46.164 | 0.00 | 0.00 |
| ATOM | 2390 | C    | PHE | X | 154 | 45.218 | 57.669 | 45.972 | 0.00 | 0.00 |
| ATOM | 2391 | O    | PHE | X | 154 | 45.199 | 57.345 | 47.134 | 0.00 | 0.00 |
| ATOM | 2392 | N    | LEU | X | 155 | 45.697 | 58.812 | 45.546 | 0.00 | 0.00 |
| ATOM | 2393 | H    | LEU | X | 155 | 45.382 | 59.082 | 44.625 | 0.00 | 0.00 |
| ATOM | 2394 | CA   | LEU | X | 155 | 46.231 | 59.874 | 46.409 | 0.00 | 0.00 |
| ATOM | 2395 | HA   | LEU | X | 155 | 46.915 | 59.464 | 47.153 | 0.00 | 0.00 |
| ATOM | 2396 | CB   | LEU | X | 155 | 46.993 | 60.825 | 45.538 | 0.00 | 0.00 |
| ATOM | 2397 | HB2  | LEU | X | 155 | 47.770 | 60.317 | 44.967 | 0.00 | 0.00 |
| ATOM | 2398 | HB3  | LEU | X | 155 | 46.366 | 61.281 | 44.772 | 0.00 | 0.00 |
| ATOM | 2399 | CG   | LEU | X | 155 | 47.681 | 61.955 | 46.371 | 0.00 | 0.00 |
| ATOM | 2400 | HG   | LEU | X | 155 | 47.715 | 61.731 | 47.437 | 0.00 | 0.00 |
| ATOM | 2401 | CD1  | LEU | X | 155 | 49.161 | 62.096 | 45.880 | 0.00 | 0.00 |
| ATOM | 2402 | HD11 | LEU | X | 155 | 49.705 | 62.861 | 46.433 | 0.00 | 0.00 |
| ATOM | 2403 | HD12 | LEU | X | 155 | 49.205 | 62.368 | 44.826 | 0.00 | 0.00 |
| ATOM | 2404 | HD13 | LEU | X | 155 | 49.602 | 61.114 | 46.051 | 0.00 | 0.00 |
| ATOM | 2405 | CD2  | LEU | X | 155 | 47.046 | 63.287 | 46.235 | 0.00 | 0.00 |
| ATOM | 2406 | HD21 | LEU | X | 155 | 46.173 | 63.430 | 46.873 | 0.00 | 0.00 |
| ATOM | 2407 | HD22 | LEU | X | 155 | 47.760 | 64.029 | 46.593 | 0.00 | 0.00 |
| ATOM | 2408 | HD23 | LEU | X | 155 | 46.860 | 63.723 | 45.254 | 0.00 | 0.00 |
| ATOM | 2409 | C    | LEU | X | 155 | 45.027 | 60.542 | 47.171 | 0.00 | 0.00 |
| ATOM | 2410 | O    | LEU | X | 155 | 43.918 | 60.773 | 46.695 | 0.00 | 0.00 |
| ATOM | 2411 | N    | ALA | X | 156 | 45.130 | 60.485 | 48.527 | 0.00 | 0.00 |
| ATOM | 2412 | H    | ALA | X | 156 | 46.012 | 60.215 | 48.939 | 0.00 | 0.00 |
| ATOM | 2413 | CA   | ALA | X | 156 | 44.064 | 60.934 | 49.386 | 0.00 | 0.00 |
| ATOM | 2414 | HA   | ALA | X | 156 | 43.337 | 61.460 | 48.767 | 0.00 | 0.00 |
| ATOM | 2415 | CB   | ALA | X | 156 | 43.376 | 59.776 | 49.946 | 0.00 | 0.00 |
| ATOM | 2416 | HB1  | ALA | X | 156 | 43.116 | 59.104 | 49.128 | 0.00 | 0.00 |
| ATOM | 2417 | HB2  | ALA | X | 156 | 42.385 | 60.071 | 50.293 | 0.00 | 0.00 |
| ATOM | 2418 | HB3  | ALA | X | 156 | 43.968 | 59.208 | 50.663 | 0.00 | 0.00 |
| ATOM | 2419 | C    | ALA | X | 156 | 44.686 | 61.887 | 50.458 | 0.00 | 0.00 |
| ATOM | 2420 | O    | ALA | X | 156 | 45.790 | 61.630 | 50.863 | 0.00 | 0.00 |
| ATOM | 2421 | N    | LEU | X | 157 | 43.928 | 62.953 | 50.812 | 0.00 | 0.00 |
| ATOM | 2422 | H    | LEU | X | 157 | 43.128 | 63.101 | 50.214 | 0.00 | 0.00 |
| ATOM | 2423 | CA   | LEU | X | 157 | 44.195 | 63.770 | 51.955 | 0.00 | 0.00 |

|      |      |      |     |   |     |        |        |        |      |      |
|------|------|------|-----|---|-----|--------|--------|--------|------|------|
| ATOM | 2424 | HA   | LEU | X | 157 | 44.789 | 63.238 | 52.698 | 0.00 | 0.00 |
| ATOM | 2425 | CB   | LEU | X | 157 | 44.952 | 64.966 | 51.457 | 0.00 | 0.00 |
| ATOM | 2426 | HB2  | LEU | X | 157 | 44.417 | 65.512 | 50.681 | 0.00 | 0.00 |
| ATOM | 2427 | HB3  | LEU | X | 157 | 44.909 | 65.622 | 52.327 | 0.00 | 0.00 |
| ATOM | 2428 | CG   | LEU | X | 157 | 46.360 | 64.798 | 50.898 | 0.00 | 0.00 |
| ATOM | 2429 | HG   | LEU | X | 157 | 46.830 | 63.886 | 51.268 | 0.00 | 0.00 |
| ATOM | 2430 | CD1  | LEU | X | 157 | 46.325 | 64.867 | 49.347 | 0.00 | 0.00 |
| ATOM | 2431 | HD11 | LEU | X | 157 | 45.625 | 64.106 | 49.004 | 0.00 | 0.00 |
| ATOM | 2432 | HD12 | LEU | X | 157 | 47.344 | 64.738 | 48.981 | 0.00 | 0.00 |
| ATOM | 2433 | HD13 | LEU | X | 157 | 46.026 | 65.880 | 49.076 | 0.00 | 0.00 |
| ATOM | 2434 | CD2  | LEU | X | 157 | 47.178 | 65.956 | 51.412 | 0.00 | 0.00 |
| ATOM | 2435 | HD21 | LEU | X | 157 | 47.245 | 65.871 | 52.496 | 0.00 | 0.00 |
| ATOM | 2436 | HD22 | LEU | X | 157 | 48.170 | 65.877 | 50.968 | 0.00 | 0.00 |
| ATOM | 2437 | HD23 | LEU | X | 157 | 46.734 | 66.886 | 51.056 | 0.00 | 0.00 |
| ATOM | 2438 | C    | LEU | X | 157 | 42.849 | 64.237 | 52.566 | 0.00 | 0.00 |
| ATOM | 2439 | O    | LEU | X | 157 | 41.880 | 64.424 | 51.789 | 0.00 | 0.00 |
| ATOM | 2440 | N    | PRO | X | 158 | 42.717 | 64.378 | 53.922 | 0.00 | 0.00 |
| ATOM | 2441 | CD   | PRO | X | 158 | 43.936 | 64.182 | 54.850 | 0.00 | 0.00 |
| ATOM | 2442 | HD2  | PRO | X | 158 | 44.642 | 64.977 | 54.610 | 0.00 | 0.00 |
| ATOM | 2443 | HD3  | PRO | X | 158 | 44.288 | 63.164 | 54.682 | 0.00 | 0.00 |
| ATOM | 2444 | CG   | PRO | X | 158 | 43.278 | 64.181 | 56.256 | 0.00 | 0.00 |
| ATOM | 2445 | HG2  | PRO | X | 158 | 43.409 | 65.165 | 56.705 | 0.00 | 0.00 |
| ATOM | 2446 | HG3  | PRO | X | 158 | 43.695 | 63.428 | 56.924 | 0.00 | 0.00 |
| ATOM | 2447 | CB   | PRO | X | 158 | 41.797 | 63.850 | 56.029 | 0.00 | 0.00 |
| ATOM | 2448 | HB2  | PRO | X | 158 | 41.183 | 64.198 | 56.860 | 0.00 | 0.00 |
| ATOM | 2449 | HB3  | PRO | X | 158 | 41.741 | 62.781 | 55.821 | 0.00 | 0.00 |
| ATOM | 2450 | CA   | PRO | X | 158 | 41.578 | 64.671 | 54.731 | 0.00 | 0.00 |
| ATOM | 2451 | HA   | PRO | X | 158 | 40.642 | 64.312 | 54.304 | 0.00 | 0.00 |
| ATOM | 2452 | C    | PRO | X | 158 | 41.294 | 66.181 | 54.999 | 0.00 | 0.00 |
| ATOM | 2453 | O    | PRO | X | 158 | 42.221 | 67.056 | 54.780 | 0.00 | 0.00 |
| ATOM | 2454 | N    | GLY | X | 159 | 40.101 | 66.519 | 55.585 | 0.00 | 0.00 |
| ATOM | 2455 | H    | GLY | X | 159 | 39.488 | 65.735 | 55.760 | 0.00 | 0.00 |
| ATOM | 2456 | CA   | GLY | X | 159 | 39.576 | 67.828 | 56.129 | 0.00 | 0.00 |
| ATOM | 2457 | HA2  | GLY | X | 159 | 39.116 | 67.698 | 57.108 | 0.00 | 0.00 |
| ATOM | 2458 | HA3  | GLY | X | 159 | 40.350 | 68.564 | 56.345 | 0.00 | 0.00 |
| ATOM | 2459 | C    | GLY | X | 159 | 38.629 | 68.454 | 55.170 | 0.00 | 0.00 |
| ATOM | 2460 | O    | GLY | X | 159 | 38.100 | 69.537 | 55.443 | 0.00 | 0.00 |
| ATOM | 2461 | N    | SER | X | 160 | 38.355 | 67.788 | 54.074 | 0.00 | 0.00 |
| ATOM | 2462 | H    | SER | X | 160 | 38.615 | 66.833 | 53.874 | 0.00 | 0.00 |
| ATOM | 2463 | CA   | SER | X | 160 | 37.696 | 68.399 | 52.855 | 0.00 | 0.00 |
| ATOM | 2464 | HA   | SER | X | 160 | 36.779 | 68.888 | 53.185 | 0.00 | 0.00 |
| ATOM | 2465 | CB   | SER | X | 160 | 38.628 | 69.535 | 52.305 | 0.00 | 0.00 |
| ATOM | 2466 | HB2  | SER | X | 160 | 37.993 | 69.975 | 51.536 | 0.00 | 0.00 |
| ATOM | 2467 | HB3  | SER | X | 160 | 38.779 | 70.284 | 53.082 | 0.00 | 0.00 |
| ATOM | 2468 | OG   | SER | X | 160 | 39.825 | 69.080 | 51.710 | 0.00 | 0.00 |
| ATOM | 2469 | HG   | SER | X | 160 | 40.651 | 69.355 | 52.115 | 0.00 | 0.00 |
| ATOM | 2470 | C    | SER | X | 160 | 37.479 | 67.322 | 51.819 | 0.00 | 0.00 |
| ATOM | 2471 | O    | SER | X | 160 | 37.827 | 66.158 | 52.055 | 0.00 | 0.00 |
| ATOM | 2472 | N    | ARG | X | 161 | 36.866 | 67.719 | 50.714 | 0.00 | 0.00 |
| ATOM | 2473 | H    | ARG | X | 161 | 36.616 | 68.690 | 50.593 | 0.00 | 0.00 |
| ATOM | 2474 | CA   | ARG | X | 161 | 36.490 | 66.805 | 49.593 | 0.00 | 0.00 |
| ATOM | 2475 | HA   | ARG | X | 161 | 36.617 | 65.746 | 49.820 | 0.00 | 0.00 |
| ATOM | 2476 | CB   | ARG | X | 161 | 35.022 | 67.046 | 49.175 | 0.00 | 0.00 |
| ATOM | 2477 | HB2  | ARG | X | 161 | 34.506 | 66.995 | 50.134 | 0.00 | 0.00 |
| ATOM | 2478 | HB3  | ARG | X | 161 | 34.768 | 68.054 | 48.850 | 0.00 | 0.00 |
| ATOM | 2479 | CG   | ARG | X | 161 | 34.351 | 66.048 | 48.186 | 0.00 | 0.00 |
| ATOM | 2480 | HG2  | ARG | X | 161 | 33.285 | 66.275 | 48.201 | 0.00 | 0.00 |
| ATOM | 2481 | HG3  | ARG | X | 161 | 34.709 | 66.136 | 47.160 | 0.00 | 0.00 |
| ATOM | 2482 | CD   | ARG | X | 161 | 34.498 | 64.581 | 48.680 | 0.00 | 0.00 |
| ATOM | 2483 | HD2  | ARG | X | 161 | 34.008 | 63.833 | 48.056 | 0.00 | 0.00 |
| ATOM | 2484 | HD3  | ARG | X | 161 | 35.571 | 64.394 | 48.720 | 0.00 | 0.00 |
| ATOM | 2485 | NE   | ARG | X | 161 | 33.947 | 64.334 | 50.063 | 0.00 | 0.00 |
| ATOM | 2486 | HE   | ARG | X | 161 | 33.569 | 65.086 | 50.621 | 0.00 | 0.00 |
| ATOM | 2487 | CZ   | ARG | X | 161 | 33.568 | 63.139 | 50.526 | 0.00 | 0.00 |
| ATOM | 2488 | NH1  | ARG | X | 161 | 33.839 | 62.058 | 49.884 | 0.00 | 0.00 |
| ATOM | 2489 | HH11 | ARG | X | 161 | 34.449 | 62.171 | 49.087 | 0.00 | 0.00 |
| ATOM | 2490 | HH12 | ARG | X | 161 | 33.522 | 61.184 | 50.278 | 0.00 | 0.00 |

|      |      |      |     |   |     |        |        |        |      |      |
|------|------|------|-----|---|-----|--------|--------|--------|------|------|
| ATOM | 2491 | NH2  | ARG | X | 161 | 32.823 | 63.129 | 51.604 | 0.00 | 0.00 |
| ATOM | 2492 | HH21 | ARG | X | 161 | 32.584 | 63.975 | 52.101 | 0.00 | 0.00 |
| ATOM | 2493 | HH22 | ARG | X | 161 | 32.369 | 62.286 | 51.925 | 0.00 | 0.00 |
| ATOM | 2494 | C    | ARG | X | 161 | 37.490 | 66.992 | 48.406 | 0.00 | 0.00 |
| ATOM | 2495 | O    | ARG | X | 161 | 37.108 | 66.540 | 47.311 | 0.00 | 0.00 |
| ATOM | 2496 | N    | GLU | X | 162 | 38.652 | 67.646 | 48.526 | 0.00 | 0.00 |
| ATOM | 2497 | H    | GLU | X | 162 | 38.870 | 68.018 | 49.440 | 0.00 | 0.00 |
| ATOM | 2498 | CA   | GLU | X | 162 | 39.449 | 68.127 | 47.359 | 0.00 | 0.00 |
| ATOM | 2499 | HA   | GLU | X | 162 | 38.855 | 68.351 | 46.474 | 0.00 | 0.00 |
| ATOM | 2500 | CB   | GLU | X | 162 | 40.147 | 69.422 | 47.853 | 0.00 | 0.00 |
| ATOM | 2501 | HB2  | GLU | X | 162 | 40.847 | 69.126 | 48.634 | 0.00 | 0.00 |
| ATOM | 2502 | HB3  | GLU | X | 162 | 40.643 | 69.827 | 46.971 | 0.00 | 0.00 |
| ATOM | 2503 | CG   | GLU | X | 162 | 39.308 | 70.602 | 48.310 | 0.00 | 0.00 |
| ATOM | 2504 | HG2  | GLU | X | 162 | 39.056 | 70.481 | 49.363 | 0.00 | 0.00 |
| ATOM | 2505 | HG3  | GLU | X | 162 | 39.891 | 71.520 | 48.231 | 0.00 | 0.00 |
| ATOM | 2506 | CD   | GLU | X | 162 | 37.989 | 70.804 | 47.521 | 0.00 | 0.00 |
| ATOM | 2507 | OE1  | GLU | X | 162 | 37.041 | 70.041 | 47.756 | 0.00 | 0.00 |
| ATOM | 2508 | OE2  | GLU | X | 162 | 37.933 | 71.726 | 46.679 | 0.00 | 0.00 |
| ATOM | 2509 | C    | GLU | X | 162 | 40.528 | 67.073 | 46.858 | 0.00 | 0.00 |
| ATOM | 2510 | O    | GLU | X | 162 | 40.876 | 67.143 | 45.647 | 0.00 | 0.00 |
| ATOM | 2511 | N    | ALA | X | 163 | 41.084 | 66.180 | 47.643 | 0.00 | 0.00 |
| ATOM | 2512 | H    | ALA | X | 163 | 40.752 | 66.264 | 48.593 | 0.00 | 0.00 |
| ATOM | 2513 | CA   | ALA | X | 163 | 41.727 | 64.951 | 47.144 | 0.00 | 0.00 |
| ATOM | 2514 | HA   | ALA | X | 163 | 41.556 | 64.781 | 46.081 | 0.00 | 0.00 |
| ATOM | 2515 | CB   | ALA | X | 163 | 43.259 | 65.084 | 47.203 | 0.00 | 0.00 |
| ATOM | 2516 | HB1  | ALA | X | 163 | 43.692 | 65.179 | 48.199 | 0.00 | 0.00 |
| ATOM | 2517 | HB2  | ALA | X | 163 | 43.570 | 65.908 | 46.561 | 0.00 | 0.00 |
| ATOM | 2518 | HB3  | ALA | X | 163 | 43.724 | 64.190 | 46.787 | 0.00 | 0.00 |
| ATOM | 2519 | C    | ALA | X | 163 | 41.121 | 63.760 | 47.969 | 0.00 | 0.00 |
| ATOM | 2520 | O    | ALA | X | 163 | 41.783 | 63.367 | 48.920 | 0.00 | 0.00 |
| ATOM | 2521 | N    | PRO | X | 164 | 39.939 | 63.259 | 47.593 | 0.00 | 0.00 |
| ATOM | 2522 | CD   | PRO | X | 164 | 39.117 | 63.722 | 46.495 | 0.00 | 0.00 |
| ATOM | 2523 | HD2  | PRO | X | 164 | 39.641 | 63.549 | 45.554 | 0.00 | 0.00 |
| ATOM | 2524 | HD3  | PRO | X | 164 | 38.912 | 64.775 | 46.685 | 0.00 | 0.00 |
| ATOM | 2525 | CG   | PRO | X | 164 | 37.776 | 62.987 | 46.595 | 0.00 | 0.00 |
| ATOM | 2526 | HG2  | PRO | X | 164 | 37.754 | 62.129 | 45.923 | 0.00 | 0.00 |
| ATOM | 2527 | HG3  | PRO | X | 164 | 36.891 | 63.544 | 46.288 | 0.00 | 0.00 |
| ATOM | 2528 | CB   | PRO | X | 164 | 37.650 | 62.569 | 48.041 | 0.00 | 0.00 |
| ATOM | 2529 | HB2  | PRO | X | 164 | 37.069 | 61.653 | 48.153 | 0.00 | 0.00 |
| ATOM | 2530 | HB3  | PRO | X | 164 | 37.321 | 63.376 | 48.695 | 0.00 | 0.00 |
| ATOM | 2531 | CA   | PRO | X | 164 | 39.135 | 62.338 | 48.461 | 0.00 | 0.00 |
| ATOM | 2532 | HA   | PRO | X | 164 | 39.173 | 62.625 | 49.512 | 0.00 | 0.00 |
| ATOM | 2533 | C    | PRO | X | 164 | 39.640 | 60.925 | 48.503 | 0.00 | 0.00 |
| ATOM | 2534 | O    | PRO | X | 164 | 39.065 | 60.175 | 49.283 | 0.00 | 0.00 |
| ATOM | 2535 | N    | GLY | X | 165 | 40.615 | 60.453 | 47.713 | 0.00 | 0.00 |
| ATOM | 2536 | H    | GLY | X | 165 | 41.024 | 61.104 | 47.059 | 0.00 | 0.00 |
| ATOM | 2537 | CA   | GLY | X | 165 | 41.034 | 59.066 | 47.635 | 0.00 | 0.00 |
| ATOM | 2538 | HA2  | GLY | X | 165 | 41.987 | 58.983 | 47.113 | 0.00 | 0.00 |
| ATOM | 2539 | HA3  | GLY | X | 165 | 41.158 | 58.728 | 48.664 | 0.00 | 0.00 |
| ATOM | 2540 | C    | GLY | X | 165 | 40.035 | 58.253 | 46.797 | 0.00 | 0.00 |
| ATOM | 2541 | O    | GLY | X | 165 | 39.014 | 58.764 | 46.414 | 0.00 | 0.00 |
| ATOM | 2542 | N    | ASN | X | 166 | 40.265 | 57.012 | 46.464 | 0.00 | 0.00 |
| ATOM | 2543 | H    | ASN | X | 166 | 41.103 | 56.599 | 46.847 | 0.00 | 0.00 |
| ATOM | 2544 | CA   | ASN | X | 166 | 39.348 | 56.031 | 45.809 | 0.00 | 0.00 |
| ATOM | 2545 | HA   | ASN | X | 166 | 39.976 | 55.196 | 45.498 | 0.00 | 0.00 |
| ATOM | 2546 | CB   | ASN | X | 166 | 38.241 | 55.648 | 46.781 | 0.00 | 0.00 |
| ATOM | 2547 | HB2  | ASN | X | 166 | 37.579 | 56.506 | 46.897 | 0.00 | 0.00 |
| ATOM | 2548 | HB3  | ASN | X | 166 | 37.666 | 54.848 | 46.315 | 0.00 | 0.00 |
| ATOM | 2549 | CG   | ASN | X | 166 | 38.818 | 55.134 | 48.104 | 0.00 | 0.00 |
| ATOM | 2550 | OD1  | ASN | X | 166 | 39.764 | 54.364 | 48.121 | 0.00 | 0.00 |
| ATOM | 2551 | ND2  | ASN | X | 166 | 38.305 | 55.551 | 49.267 | 0.00 | 0.00 |
| ATOM | 2552 | HD21 | ASN | X | 166 | 38.794 | 55.264 | 50.103 | 0.00 | 0.00 |
| ATOM | 2553 | HD22 | ASN | X | 166 | 37.486 | 56.138 | 49.336 | 0.00 | 0.00 |
| ATOM | 2554 | C    | ASN | X | 166 | 38.796 | 56.360 | 44.501 | 0.00 | 0.00 |
| ATOM | 2555 | O    | ASN | X | 166 | 37.918 | 55.580 | 44.036 | 0.00 | 0.00 |
| ATOM | 2556 | N    | VAL | X | 167 | 39.077 | 57.537 | 43.916 | 0.00 | 0.00 |
| ATOM | 2557 | H    | VAL | X | 167 | 39.528 | 58.281 | 44.428 | 0.00 | 0.00 |

|      |      |      |     |   |     |        |        |        |      |      |
|------|------|------|-----|---|-----|--------|--------|--------|------|------|
| ATOM | 2558 | CA   | VAL | X | 167 | 38.521 | 57.953 | 42.664 | 0.00 | 0.00 |
| ATOM | 2559 | HA   | VAL | X | 167 | 37.443 | 58.005 | 42.820 | 0.00 | 0.00 |
| ATOM | 2560 | CB   | VAL | X | 167 | 38.898 | 59.390 | 42.280 | 0.00 | 0.00 |
| ATOM | 2561 | HB   | VAL | X | 167 | 38.438 | 59.724 | 41.350 | 0.00 | 0.00 |
| ATOM | 2562 | CG1  | VAL | X | 167 | 38.308 | 60.351 | 43.346 | 0.00 | 0.00 |
| ATOM | 2563 | HG11 | VAL | X | 167 | 38.735 | 60.072 | 44.310 | 0.00 | 0.00 |
| ATOM | 2564 | HG12 | VAL | X | 167 | 38.626 | 61.388 | 43.244 | 0.00 | 0.00 |
| ATOM | 2565 | HG13 | VAL | X | 167 | 37.224 | 60.461 | 43.347 | 0.00 | 0.00 |
| ATOM | 2566 | CG2  | VAL | X | 167 | 40.434 | 59.580 | 42.156 | 0.00 | 0.00 |
| ATOM | 2567 | HG21 | VAL | X | 167 | 40.817 | 58.959 | 41.347 | 0.00 | 0.00 |
| ATOM | 2568 | HG22 | VAL | X | 167 | 40.980 | 59.499 | 43.096 | 0.00 | 0.00 |
| ATOM | 2569 | HG23 | VAL | X | 167 | 40.577 | 60.605 | 41.814 | 0.00 | 0.00 |
| ATOM | 2570 | C    | VAL | X | 167 | 38.825 | 57.081 | 41.452 | 0.00 | 0.00 |
| ATOM | 2571 | O    | VAL | X | 167 | 37.971 | 57.104 | 40.590 | 0.00 | 0.00 |
| ATOM | 2572 | N    | GLY | X | 168 | 39.863 | 56.216 | 41.495 | 0.00 | 0.00 |
| ATOM | 2573 | H    | GLY | X | 168 | 40.557 | 56.321 | 42.221 | 0.00 | 0.00 |
| ATOM | 2574 | CA   | GLY | X | 168 | 40.023 | 55.328 | 40.349 | 0.00 | 0.00 |
| ATOM | 2575 | HA2  | GLY | X | 168 | 39.850 | 55.863 | 39.414 | 0.00 | 0.00 |
| ATOM | 2576 | HA3  | GLY | X | 168 | 41.025 | 54.904 | 40.410 | 0.00 | 0.00 |
| ATOM | 2577 | C    | GLY | X | 168 | 38.993 | 54.216 | 40.420 | 0.00 | 0.00 |
| ATOM | 2578 | O    | GLY | X | 168 | 38.851 | 53.460 | 39.455 | 0.00 | 0.00 |
| ATOM | 2579 | N    | LEU | X | 169 | 38.320 | 54.002 | 41.561 | 0.00 | 0.00 |
| ATOM | 2580 | H    | LEU | X | 169 | 38.666 | 54.500 | 42.368 | 0.00 | 0.00 |
| ATOM | 2581 | CA   | LEU | X | 169 | 37.270 | 53.070 | 41.795 | 0.00 | 0.00 |
| ATOM | 2582 | HA   | LEU | X | 169 | 37.209 | 52.305 | 41.021 | 0.00 | 0.00 |
| ATOM | 2583 | CB   | LEU | X | 169 | 37.417 | 52.454 | 43.182 | 0.00 | 0.00 |
| ATOM | 2584 | HB2  | LEU | X | 169 | 38.325 | 52.840 | 43.645 | 0.00 | 0.00 |
| ATOM | 2585 | HB3  | LEU | X | 169 | 36.605 | 52.688 | 43.870 | 0.00 | 0.00 |
| ATOM | 2586 | CG   | LEU | X | 169 | 37.448 | 50.892 | 43.087 | 0.00 | 0.00 |
| ATOM | 2587 | HG   | LEU | X | 169 | 38.114 | 50.622 | 42.268 | 0.00 | 0.00 |
| ATOM | 2588 | CD1  | LEU | X | 169 | 38.061 | 50.420 | 44.434 | 0.00 | 0.00 |
| ATOM | 2589 | HD11 | LEU | X | 169 | 37.681 | 50.946 | 45.310 | 0.00 | 0.00 |
| ATOM | 2590 | HD12 | LEU | X | 169 | 39.143 | 50.492 | 44.323 | 0.00 | 0.00 |
| ATOM | 2591 | HD13 | LEU | X | 169 | 37.816 | 49.384 | 44.669 | 0.00 | 0.00 |
| ATOM | 2592 | CD2  | LEU | X | 169 | 36.029 | 50.352 | 43.000 | 0.00 | 0.00 |
| ATOM | 2593 | HD21 | LEU | X | 169 | 35.698 | 50.287 | 41.964 | 0.00 | 0.00 |
| ATOM | 2594 | HD22 | LEU | X | 169 | 36.050 | 49.343 | 43.413 | 0.00 | 0.00 |
| ATOM | 2595 | HD23 | LEU | X | 169 | 35.405 | 50.989 | 43.626 | 0.00 | 0.00 |
| ATOM | 2596 | C    | LEU | X | 169 | 35.921 | 53.757 | 41.649 | 0.00 | 0.00 |
| ATOM | 2597 | O    | LEU | X | 169 | 34.951 | 53.076 | 41.193 | 0.00 | 0.00 |
| ATOM | 2598 | N    | LEU | X | 170 | 35.780 | 55.092 | 41.995 | 0.00 | 0.00 |
| ATOM | 2599 | H    | LEU | X | 170 | 36.484 | 55.471 | 42.612 | 0.00 | 0.00 |
| ATOM | 2600 | CA   | LEU | X | 170 | 34.482 | 55.891 | 41.649 | 0.00 | 0.00 |
| ATOM | 2601 | HA   | LEU | X | 170 | 33.638 | 55.277 | 41.962 | 0.00 | 0.00 |
| ATOM | 2602 | CB   | LEU | X | 170 | 34.272 | 57.273 | 42.232 | 0.00 | 0.00 |
| ATOM | 2603 | HB2  | LEU | X | 170 | 35.133 | 57.884 | 41.961 | 0.00 | 0.00 |
| ATOM | 2604 | HB3  | LEU | X | 170 | 33.363 | 57.657 | 41.769 | 0.00 | 0.00 |
| ATOM | 2605 | CG   | LEU | X | 170 | 33.843 | 57.145 | 43.738 | 0.00 | 0.00 |
| ATOM | 2606 | HG   | LEU | X | 170 | 34.676 | 56.650 | 44.238 | 0.00 | 0.00 |
| ATOM | 2607 | CD1  | LEU | X | 170 | 33.751 | 58.552 | 44.213 | 0.00 | 0.00 |
| ATOM | 2608 | HD11 | LEU | X | 170 | 34.612 | 59.141 | 43.899 | 0.00 | 0.00 |
| ATOM | 2609 | HD12 | LEU | X | 170 | 33.723 | 58.553 | 45.303 | 0.00 | 0.00 |
| ATOM | 2610 | HD13 | LEU | X | 170 | 32.878 | 59.123 | 43.895 | 0.00 | 0.00 |
| ATOM | 2611 | CD2  | LEU | X | 170 | 32.558 | 56.430 | 43.994 | 0.00 | 0.00 |
| ATOM | 2612 | HD21 | LEU | X | 170 | 31.716 | 56.612 | 43.325 | 0.00 | 0.00 |
| ATOM | 2613 | HD22 | LEU | X | 170 | 32.725 | 55.356 | 43.920 | 0.00 | 0.00 |
| ATOM | 2614 | HD23 | LEU | X | 170 | 32.376 | 56.705 | 45.033 | 0.00 | 0.00 |
| ATOM | 2615 | C    | LEU | X | 170 | 34.262 | 55.947 | 40.160 | 0.00 | 0.00 |
| ATOM | 2616 | O    | LEU | X | 170 | 33.097 | 55.795 | 39.753 | 0.00 | 0.00 |
| ATOM | 2617 | N    | ASP | X | 171 | 35.307 | 55.963 | 39.356 | 0.00 | 0.00 |
| ATOM | 2618 | H    | ASP | X | 171 | 36.206 | 56.034 | 39.809 | 0.00 | 0.00 |
| ATOM | 2619 | CA   | ASP | X | 171 | 35.265 | 55.873 | 37.837 | 0.00 | 0.00 |
| ATOM | 2620 | HA   | ASP | X | 171 | 34.884 | 56.740 | 37.297 | 0.00 | 0.00 |
| ATOM | 2621 | CB   | ASP | X | 171 | 36.706 | 55.732 | 37.355 | 0.00 | 0.00 |
| ATOM | 2622 | HB2  | ASP | X | 171 | 37.242 | 54.943 | 37.882 | 0.00 | 0.00 |
| ATOM | 2623 | HB3  | ASP | X | 171 | 36.669 | 55.453 | 36.302 | 0.00 | 0.00 |
| ATOM | 2624 | CG   | ASP | X | 171 | 37.621 | 57.014 | 37.428 | 0.00 | 0.00 |

|      |      |      |     |   |     |        |        |        |      |      |
|------|------|------|-----|---|-----|--------|--------|--------|------|------|
| ATOM | 2625 | OD1  | ASP | X | 171 | 37.074 | 58.110 | 37.322 | 0.00 | 0.00 |
| ATOM | 2626 | OD2  | ASP | X | 171 | 38.841 | 56.841 | 37.428 | 0.00 | 0.00 |
| ATOM | 2627 | C    | ASP | X | 171 | 34.422 | 54.776 | 37.295 | 0.00 | 0.00 |
| ATOM | 2628 | O    | ASP | X | 171 | 33.600 | 54.994 | 36.435 | 0.00 | 0.00 |
| ATOM | 2629 | N    | GLN | X | 172 | 34.562 | 53.673 | 37.931 | 0.00 | 0.00 |
| ATOM | 2630 | H    | GLN | X | 172 | 35.279 | 53.709 | 38.642 | 0.00 | 0.00 |
| ATOM | 2631 | CA   | GLN | X | 172 | 33.912 | 52.414 | 37.671 | 0.00 | 0.00 |
| ATOM | 2632 | HA   | GLN | X | 172 | 34.021 | 52.215 | 36.605 | 0.00 | 0.00 |
| ATOM | 2633 | CB   | GLN | X | 172 | 34.644 | 51.169 | 38.428 | 0.00 | 0.00 |
| ATOM | 2634 | HB2  | GLN | X | 172 | 34.163 | 51.103 | 39.404 | 0.00 | 0.00 |
| ATOM | 2635 | HB3  | GLN | X | 172 | 34.515 | 50.252 | 37.853 | 0.00 | 0.00 |
| ATOM | 2636 | CG   | GLN | X | 172 | 36.199 | 51.356 | 38.403 | 0.00 | 0.00 |
| ATOM | 2637 | HG2  | GLN | X | 172 | 36.566 | 51.440 | 37.380 | 0.00 | 0.00 |
| ATOM | 2638 | HG3  | GLN | X | 172 | 36.411 | 52.270 | 38.959 | 0.00 | 0.00 |
| ATOM | 2639 | CD   | GLN | X | 172 | 36.876 | 50.265 | 39.084 | 0.00 | 0.00 |
| ATOM | 2640 | OE1  | GLN | X | 172 | 36.395 | 49.265 | 39.576 | 0.00 | 0.00 |
| ATOM | 2641 | NE2  | GLN | X | 172 | 38.146 | 50.371 | 39.251 | 0.00 | 0.00 |
| ATOM | 2642 | HE21 | GLN | X | 172 | 38.620 | 49.632 | 39.749 | 0.00 | 0.00 |
| ATOM | 2643 | HE22 | GLN | X | 172 | 38.690 | 51.208 | 39.097 | 0.00 | 0.00 |
| ATOM | 2644 | C    | GLN | X | 172 | 32.393 | 52.369 | 38.000 | 0.00 | 0.00 |
| ATOM | 2645 | O    | GLN | X | 172 | 31.661 | 51.745 | 37.241 | 0.00 | 0.00 |
| ATOM | 2646 | N    | ARG | X | 173 | 31.992 | 52.922 | 39.185 | 0.00 | 0.00 |
| ATOM | 2647 | H    | ARG | X | 173 | 32.741 | 53.365 | 39.698 | 0.00 | 0.00 |
| ATOM | 2648 | CA   | ARG | X | 173 | 30.625 | 53.070 | 39.582 | 0.00 | 0.00 |
| ATOM | 2649 | HA   | ARG | X | 173 | 30.116 | 52.107 | 39.624 | 0.00 | 0.00 |
| ATOM | 2650 | CB   | ARG | X | 173 | 30.621 | 53.417 | 41.141 | 0.00 | 0.00 |
| ATOM | 2651 | HB2  | ARG | X | 173 | 31.102 | 52.629 | 41.721 | 0.00 | 0.00 |
| ATOM | 2652 | HB3  | ARG | X | 173 | 31.159 | 54.359 | 41.245 | 0.00 | 0.00 |
| ATOM | 2653 | CG   | ARG | X | 173 | 29.204 | 53.788 | 41.603 | 0.00 | 0.00 |
| ATOM | 2654 | HG2  | ARG | X | 173 | 28.857 | 54.701 | 41.120 | 0.00 | 0.00 |
| ATOM | 2655 | HG3  | ARG | X | 173 | 28.500 | 53.009 | 41.314 | 0.00 | 0.00 |
| ATOM | 2656 | CD   | ARG | X | 173 | 29.075 | 53.999 | 43.151 | 0.00 | 0.00 |
| ATOM | 2657 | HD2  | ARG | X | 173 | 29.780 | 54.791 | 43.402 | 0.00 | 0.00 |
| ATOM | 2658 | HD3  | ARG | X | 173 | 28.076 | 54.353 | 43.402 | 0.00 | 0.00 |
| ATOM | 2659 | NE   | ARG | X | 173 | 29.334 | 52.841 | 44.002 | 0.00 | 0.00 |
| ATOM | 2660 | HE   | ARG | X | 173 | 29.259 | 51.970 | 43.495 | 0.00 | 0.00 |
| ATOM | 2661 | CZ   | ARG | X | 173 | 29.842 | 52.883 | 45.234 | 0.00 | 0.00 |
| ATOM | 2662 | NH1  | ARG | X | 173 | 29.912 | 53.948 | 45.964 | 0.00 | 0.00 |
| ATOM | 2663 | HH11 | ARG | X | 173 | 29.548 | 54.837 | 45.653 | 0.00 | 0.00 |
| ATOM | 2664 | HH12 | ARG | X | 173 | 30.333 | 53.901 | 46.880 | 0.00 | 0.00 |
| ATOM | 2665 | NH2  | ARG | X | 173 | 30.257 | 51.744 | 45.754 | 0.00 | 0.00 |
| ATOM | 2666 | HH21 | ARG | X | 173 | 30.204 | 50.943 | 45.141 | 0.00 | 0.00 |
| ATOM | 2667 | HH22 | ARG | X | 173 | 30.819 | 51.719 | 46.593 | 0.00 | 0.00 |
| ATOM | 2668 | C    | ARG | X | 173 | 29.838 | 54.018 | 38.662 | 0.00 | 0.00 |
| ATOM | 2669 | O    | ARG | X | 173 | 28.730 | 53.773 | 38.237 | 0.00 | 0.00 |
| ATOM | 2670 | N    | LEU | X | 174 | 30.501 | 55.068 | 38.163 | 0.00 | 0.00 |
| ATOM | 2671 | H    | LEU | X | 174 | 31.479 | 55.151 | 38.401 | 0.00 | 0.00 |
| ATOM | 2672 | CA   | LEU | X | 174 | 29.962 | 55.983 | 37.154 | 0.00 | 0.00 |
| ATOM | 2673 | HA   | LEU | X | 174 | 28.989 | 56.366 | 37.461 | 0.00 | 0.00 |
| ATOM | 2674 | CB   | LEU | X | 174 | 30.912 | 57.117 | 36.942 | 0.00 | 0.00 |
| ATOM | 2675 | HB2  | LEU | X | 174 | 31.018 | 57.614 | 37.906 | 0.00 | 0.00 |
| ATOM | 2676 | HB3  | LEU | X | 174 | 31.912 | 56.767 | 36.684 | 0.00 | 0.00 |
| ATOM | 2677 | CG   | LEU | X | 174 | 30.361 | 58.183 | 36.007 | 0.00 | 0.00 |
| ATOM | 2678 | HG   | LEU | X | 174 | 30.126 | 57.745 | 35.037 | 0.00 | 0.00 |
| ATOM | 2679 | CD1  | LEU | X | 174 | 29.062 | 58.846 | 36.467 | 0.00 | 0.00 |
| ATOM | 2680 | HD11 | LEU | X | 174 | 28.236 | 58.142 | 36.563 | 0.00 | 0.00 |
| ATOM | 2681 | HD12 | LEU | X | 174 | 28.682 | 59.588 | 35.765 | 0.00 | 0.00 |
| ATOM | 2682 | HD13 | LEU | X | 174 | 29.274 | 59.302 | 37.434 | 0.00 | 0.00 |
| ATOM | 2683 | CD2  | LEU | X | 174 | 31.471 | 59.215 | 35.803 | 0.00 | 0.00 |
| ATOM | 2684 | HD21 | LEU | X | 174 | 30.910 | 59.988 | 35.276 | 0.00 | 0.00 |
| ATOM | 2685 | HD22 | LEU | X | 174 | 31.837 | 59.638 | 36.738 | 0.00 | 0.00 |
| ATOM | 2686 | HD23 | LEU | X | 174 | 32.263 | 58.668 | 35.292 | 0.00 | 0.00 |
| ATOM | 2687 | C    | LEU | X | 174 | 29.674 | 55.240 | 35.836 | 0.00 | 0.00 |
| ATOM | 2688 | O    | LEU | X | 174 | 28.558 | 55.216 | 35.323 | 0.00 | 0.00 |
| ATOM | 2689 | N    | ALA | X | 175 | 30.669 | 54.591 | 35.256 | 0.00 | 0.00 |
| ATOM | 2690 | H    | ALA | X | 175 | 31.603 | 54.545 | 35.638 | 0.00 | 0.00 |
| ATOM | 2691 | CA   | ALA | X | 175 | 30.493 | 53.792 | 34.011 | 0.00 | 0.00 |

|      |      |      |     |   |     |        |        |        |      |      |
|------|------|------|-----|---|-----|--------|--------|--------|------|------|
| ATOM | 2692 | HA   | ALA | X | 175 | 30.283 | 54.437 | 33.157 | 0.00 | 0.00 |
| ATOM | 2693 | CB   | ALA | X | 175 | 31.811 | 52.973 | 33.815 | 0.00 | 0.00 |
| ATOM | 2694 | HB1  | ALA | X | 175 | 31.806 | 52.277 | 32.976 | 0.00 | 0.00 |
| ATOM | 2695 | HB2  | ALA | X | 175 | 31.910 | 52.342 | 34.698 | 0.00 | 0.00 |
| ATOM | 2696 | HB3  | ALA | X | 175 | 32.638 | 53.683 | 33.823 | 0.00 | 0.00 |
| ATOM | 2697 | C    | ALA | X | 175 | 29.320 | 52.749 | 34.299 | 0.00 | 0.00 |
| ATOM | 2698 | O    | ALA | X | 175 | 28.479 | 52.549 | 33.389 | 0.00 | 0.00 |
| ATOM | 2699 | N    | LEU | X | 176 | 29.349 | 51.987 | 35.375 | 0.00 | 0.00 |
| ATOM | 2700 | H    | LEU | X | 176 | 30.168 | 52.127 | 35.949 | 0.00 | 0.00 |
| ATOM | 2701 | CA   | LEU | X | 176 | 28.337 | 50.896 | 35.672 | 0.00 | 0.00 |
| ATOM | 2702 | HA   | LEU | X | 176 | 28.404 | 50.162 | 34.868 | 0.00 | 0.00 |
| ATOM | 2703 | CB   | LEU | X | 176 | 28.654 | 50.133 | 36.879 | 0.00 | 0.00 |
| ATOM | 2704 | HB2  | LEU | X | 176 | 28.866 | 50.918 | 37.606 | 0.00 | 0.00 |
| ATOM | 2705 | HB3  | LEU | X | 176 | 27.783 | 49.570 | 37.214 | 0.00 | 0.00 |
| ATOM | 2706 | CG   | LEU | X | 176 | 29.764 | 49.150 | 36.814 | 0.00 | 0.00 |
| ATOM | 2707 | HG   | LEU | X | 176 | 30.560 | 49.712 | 36.326 | 0.00 | 0.00 |
| ATOM | 2708 | CD1  | LEU | X | 176 | 30.244 | 48.812 | 38.213 | 0.00 | 0.00 |
| ATOM | 2709 | HD11 | LEU | X | 176 | 29.375 | 48.432 | 38.752 | 0.00 | 0.00 |
| ATOM | 2710 | HD12 | LEU | X | 176 | 30.561 | 49.713 | 38.737 | 0.00 | 0.00 |
| ATOM | 2711 | HD13 | LEU | X | 176 | 31.080 | 48.121 | 38.104 | 0.00 | 0.00 |
| ATOM | 2712 | CD2  | LEU | X | 176 | 29.254 | 47.960 | 35.906 | 0.00 | 0.00 |
| ATOM | 2713 | HD21 | LEU | X | 176 | 29.947 | 47.119 | 35.868 | 0.00 | 0.00 |
| ATOM | 2714 | HD22 | LEU | X | 176 | 28.256 | 47.546 | 36.053 | 0.00 | 0.00 |
| ATOM | 2715 | HD23 | LEU | X | 176 | 29.336 | 48.289 | 34.870 | 0.00 | 0.00 |
| ATOM | 2716 | C    | LEU | X | 176 | 26.932 | 51.390 | 35.791 | 0.00 | 0.00 |
| ATOM | 2717 | O    | LEU | X | 176 | 26.004 | 50.707 | 35.338 | 0.00 | 0.00 |
| ATOM | 2718 | N    | GLN | X | 177 | 26.682 | 52.651 | 36.176 | 0.00 | 0.00 |
| ATOM | 2719 | H    | GLN | X | 177 | 27.481 | 53.107 | 36.595 | 0.00 | 0.00 |
| ATOM | 2720 | CA   | GLN | X | 177 | 25.449 | 53.387 | 35.905 | 0.00 | 0.00 |
| ATOM | 2721 | HA   | GLN | X | 177 | 24.603 | 52.815 | 36.285 | 0.00 | 0.00 |
| ATOM | 2722 | CB   | GLN | X | 177 | 25.567 | 54.738 | 36.586 | 0.00 | 0.00 |
| ATOM | 2723 | HB2  | GLN | X | 177 | 26.404 | 55.335 | 36.223 | 0.00 | 0.00 |
| ATOM | 2724 | HB3  | GLN | X | 177 | 24.661 | 55.310 | 36.384 | 0.00 | 0.00 |
| ATOM | 2725 | CG   | GLN | X | 177 | 25.616 | 54.577 | 38.146 | 0.00 | 0.00 |
| ATOM | 2726 | HG2  | GLN | X | 177 | 24.565 | 54.427 | 38.395 | 0.00 | 0.00 |
| ATOM | 2727 | HG3  | GLN | X | 177 | 26.174 | 53.754 | 38.592 | 0.00 | 0.00 |
| ATOM | 2728 | CD   | GLN | X | 177 | 25.976 | 55.865 | 38.874 | 0.00 | 0.00 |
| ATOM | 2729 | OE1  | GLN | X | 177 | 26.124 | 56.953 | 38.389 | 0.00 | 0.00 |
| ATOM | 2730 | NE2  | GLN | X | 177 | 25.931 | 55.914 | 40.208 | 0.00 | 0.00 |
| ATOM | 2731 | HE21 | GLN | X | 177 | 26.123 | 56.829 | 40.592 | 0.00 | 0.00 |
| ATOM | 2732 | HE22 | GLN | X | 177 | 25.796 | 55.060 | 40.729 | 0.00 | 0.00 |
| ATOM | 2733 | C    | GLN | X | 177 | 25.136 | 53.604 | 34.369 | 0.00 | 0.00 |
| ATOM | 2734 | O    | GLN | X | 177 | 24.097 | 53.372 | 33.891 | 0.00 | 0.00 |
| ATOM | 2735 | N    | TRP | X | 178 | 26.112 | 54.090 | 33.600 | 0.00 | 0.00 |
| ATOM | 2736 | H    | TRP | X | 178 | 27.016 | 54.415 | 33.912 | 0.00 | 0.00 |
| ATOM | 2737 | CA   | TRP | X | 178 | 25.899 | 54.251 | 32.168 | 0.00 | 0.00 |
| ATOM | 2738 | HA   | TRP | X | 178 | 25.060 | 54.907 | 31.935 | 0.00 | 0.00 |
| ATOM | 2739 | CB   | TRP | X | 178 | 27.198 | 54.887 | 31.636 | 0.00 | 0.00 |
| ATOM | 2740 | HB2  | TRP | X | 178 | 27.270 | 55.761 | 32.283 | 0.00 | 0.00 |
| ATOM | 2741 | HB3  | TRP | X | 178 | 28.053 | 54.227 | 31.786 | 0.00 | 0.00 |
| ATOM | 2742 | CG   | TRP | X | 178 | 27.245 | 55.321 | 30.198 | 0.00 | 0.00 |
| ATOM | 2743 | CD1  | TRP | X | 178 | 27.141 | 56.616 | 29.832 | 0.00 | 0.00 |
| ATOM | 2744 | HD1  | TRP | X | 178 | 27.081 | 57.388 | 30.585 | 0.00 | 0.00 |
| ATOM | 2745 | NE1  | TRP | X | 178 | 27.192 | 56.731 | 28.472 | 0.00 | 0.00 |
| ATOM | 2746 | HE1  | TRP | X | 178 | 27.349 | 57.589 | 27.964 | 0.00 | 0.00 |
| ATOM | 2747 | CE2  | TRP | X | 178 | 27.348 | 55.574 | 27.864 | 0.00 | 0.00 |
| ATOM | 2748 | CZ2  | TRP | X | 178 | 27.490 | 55.296 | 26.518 | 0.00 | 0.00 |
| ATOM | 2749 | HZ2  | TRP | X | 178 | 27.616 | 56.130 | 25.843 | 0.00 | 0.00 |
| ATOM | 2750 | CH2  | TRP | X | 178 | 27.481 | 53.932 | 26.141 | 0.00 | 0.00 |
| ATOM | 2751 | HH2  | TRP | X | 178 | 27.464 | 53.708 | 25.084 | 0.00 | 0.00 |
| ATOM | 2752 | CZ3  | TRP | X | 178 | 27.357 | 52.942 | 27.178 | 0.00 | 0.00 |
| ATOM | 2753 | HZ3  | TRP | X | 178 | 27.344 | 51.871 | 27.041 | 0.00 | 0.00 |
| ATOM | 2754 | CE3  | TRP | X | 178 | 27.312 | 53.279 | 28.524 | 0.00 | 0.00 |
| ATOM | 2755 | HE3  | TRP | X | 178 | 27.171 | 52.538 | 29.297 | 0.00 | 0.00 |
| ATOM | 2756 | CD2  | TRP | X | 178 | 27.275 | 54.669 | 28.918 | 0.00 | 0.00 |
| ATOM | 2757 | C    | TRP | X | 178 | 25.613 | 52.930 | 31.451 | 0.00 | 0.00 |
| ATOM | 2758 | O    | TRP | X | 178 | 24.962 | 52.957 | 30.367 | 0.00 | 0.00 |



|      |      |      |     |   |     |        |        |        |      |      |
|------|------|------|-----|---|-----|--------|--------|--------|------|------|
| ATOM | 2759 | N    | VAL | X | 179 | 26.086 | 51.784 | 32.042 | 0.00 | 0.00 |
| ATOM | 2760 | H    | VAL | X | 179 | 26.675 | 51.993 | 32.835 | 0.00 | 0.00 |
| ATOM | 2761 | CA   | VAL | X | 179 | 26.102 | 50.492 | 31.363 | 0.00 | 0.00 |
| ATOM | 2762 | HA   | VAL | X | 179 | 26.207 | 50.595 | 30.283 | 0.00 | 0.00 |
| ATOM | 2763 | CB   | VAL | X | 179 | 27.296 | 49.685 | 31.790 | 0.00 | 0.00 |
| ATOM | 2764 | HB   | VAL | X | 179 | 27.650 | 49.950 | 32.787 | 0.00 | 0.00 |
| ATOM | 2765 | CG1  | VAL | X | 179 | 27.040 | 48.216 | 31.763 | 0.00 | 0.00 |
| ATOM | 2766 | HG11 | VAL | X | 179 | 27.908 | 47.605 | 32.012 | 0.00 | 0.00 |
| ATOM | 2767 | HG12 | VAL | X | 179 | 26.271 | 47.971 | 32.497 | 0.00 | 0.00 |
| ATOM | 2768 | HG13 | VAL | X | 179 | 26.573 | 47.858 | 30.845 | 0.00 | 0.00 |
| ATOM | 2769 | CG2  | VAL | X | 179 | 28.478 | 49.983 | 30.845 | 0.00 | 0.00 |
| ATOM | 2770 | HG21 | VAL | X | 179 | 28.803 | 51.003 | 31.047 | 0.00 | 0.00 |
| ATOM | 2771 | HG22 | VAL | X | 179 | 28.125 | 49.837 | 29.824 | 0.00 | 0.00 |
| ATOM | 2772 | HG23 | VAL | X | 179 | 29.286 | 49.286 | 31.067 | 0.00 | 0.00 |
| ATOM | 2773 | C    | VAL | X | 179 | 24.702 | 49.861 | 31.582 | 0.00 | 0.00 |
| ATOM | 2774 | O    | VAL | X | 179 | 24.008 | 49.469 | 30.616 | 0.00 | 0.00 |
| ATOM | 2775 | N    | GLN | X | 180 | 24.203 | 49.944 | 32.832 | 0.00 | 0.00 |
| ATOM | 2776 | H    | GLN | X | 180 | 24.822 | 50.238 | 33.575 | 0.00 | 0.00 |
| ATOM | 2777 | CA   | GLN | X | 180 | 22.805 | 49.645 | 33.136 | 0.00 | 0.00 |
| ATOM | 2778 | HA   | GLN | X | 180 | 22.516 | 48.636 | 32.843 | 0.00 | 0.00 |
| ATOM | 2779 | CB   | GLN | X | 180 | 22.635 | 50.018 | 34.647 | 0.00 | 0.00 |
| ATOM | 2780 | HB2  | GLN | X | 180 | 23.270 | 50.891 | 34.799 | 0.00 | 0.00 |
| ATOM | 2781 | HB3  | GLN | X | 180 | 21.567 | 50.165 | 34.804 | 0.00 | 0.00 |
| ATOM | 2782 | CG   | GLN | X | 180 | 23.136 | 48.867 | 35.541 | 0.00 | 0.00 |
| ATOM | 2783 | HG2  | GLN | X | 180 | 24.138 | 48.491 | 35.333 | 0.00 | 0.00 |
| ATOM | 2784 | HG3  | GLN | X | 180 | 23.108 | 49.216 | 36.573 | 0.00 | 0.00 |
| ATOM | 2785 | CD   | GLN | X | 180 | 22.201 | 47.661 | 35.575 | 0.00 | 0.00 |
| ATOM | 2786 | OE1  | GLN | X | 180 | 21.014 | 47.775 | 35.284 | 0.00 | 0.00 |
| ATOM | 2787 | NE2  | GLN | X | 180 | 22.643 | 46.470 | 35.854 | 0.00 | 0.00 |
| ATOM | 2788 | HE21 | GLN | X | 180 | 22.086 | 45.679 | 35.563 | 0.00 | 0.00 |
| ATOM | 2789 | HE22 | GLN | X | 180 | 23.634 | 46.450 | 36.050 | 0.00 | 0.00 |
| ATOM | 2790 | C    | GLN | X | 180 | 21.895 | 50.524 | 32.281 | 0.00 | 0.00 |
| ATOM | 2791 | O    | GLN | X | 180 | 20.841 | 49.993 | 31.858 | 0.00 | 0.00 |
| ATOM | 2792 | N    | GLU | X | 181 | 22.179 | 51.798 | 31.977 | 0.00 | 0.00 |
| ATOM | 2793 | H    | GLU | X | 181 | 22.958 | 52.298 | 32.379 | 0.00 | 0.00 |
| ATOM | 2794 | CA   | GLU | X | 181 | 21.342 | 52.693 | 31.141 | 0.00 | 0.00 |
| ATOM | 2795 | HA   | GLU | X | 181 | 20.291 | 52.505 | 31.364 | 0.00 | 0.00 |
| ATOM | 2796 | CB   | GLU | X | 181 | 21.773 | 54.177 | 31.366 | 0.00 | 0.00 |
| ATOM | 2797 | HB2  | GLU | X | 181 | 21.552 | 54.528 | 32.374 | 0.00 | 0.00 |
| ATOM | 2798 | HB3  | GLU | X | 181 | 22.850 | 54.112 | 31.217 | 0.00 | 0.00 |
| ATOM | 2799 | CG   | GLU | X | 181 | 21.356 | 55.205 | 30.385 | 0.00 | 0.00 |
| ATOM | 2800 | HG2  | GLU | X | 181 | 21.424 | 55.035 | 29.311 | 0.00 | 0.00 |
| ATOM | 2801 | HG3  | GLU | X | 181 | 20.288 | 55.274 | 30.595 | 0.00 | 0.00 |
| ATOM | 2802 | CD   | GLU | X | 181 | 22.133 | 56.517 | 30.715 | 0.00 | 0.00 |
| ATOM | 2803 | OE1  | GLU | X | 181 | 21.735 | 57.292 | 31.597 | 0.00 | 0.00 |
| ATOM | 2804 | OE2  | GLU | X | 181 | 23.111 | 56.910 | 29.979 | 0.00 | 0.00 |
| ATOM | 2805 | C    | GLU | X | 181 | 21.308 | 52.330 | 29.636 | 0.00 | 0.00 |
| ATOM | 2806 | O    | GLU | X | 181 | 20.295 | 52.565 | 28.963 | 0.00 | 0.00 |
| ATOM | 2807 | N    | ASN | X | 182 | 22.433 | 51.806 | 29.100 | 0.00 | 0.00 |
| ATOM | 2808 | H    | ASN | X | 182 | 23.228 | 51.572 | 29.676 | 0.00 | 0.00 |
| ATOM | 2809 | CA   | ASN | X | 182 | 22.664 | 51.813 | 27.622 | 0.00 | 0.00 |
| ATOM | 2810 | HA   | ASN | X | 182 | 21.710 | 52.127 | 27.199 | 0.00 | 0.00 |
| ATOM | 2811 | CB   | ASN | X | 182 | 23.775 | 52.785 | 27.223 | 0.00 | 0.00 |
| ATOM | 2812 | HB2  | ASN | X | 182 | 24.772 | 52.524 | 27.577 | 0.00 | 0.00 |
| ATOM | 2813 | HB3  | ASN | X | 182 | 23.772 | 52.651 | 26.141 | 0.00 | 0.00 |
| ATOM | 2814 | CG   | ASN | X | 182 | 23.461 | 54.226 | 27.598 | 0.00 | 0.00 |
| ATOM | 2815 | OD1  | ASN | X | 182 | 22.526 | 54.814 | 26.965 | 0.00 | 0.00 |
| ATOM | 2816 | ND2  | ASN | X | 182 | 24.149 | 54.771 | 28.586 | 0.00 | 0.00 |
| ATOM | 2817 | HD21 | ASN | X | 182 | 23.981 | 55.711 | 28.917 | 0.00 | 0.00 |
| ATOM | 2818 | HD22 | ASN | X | 182 | 24.860 | 54.247 | 29.076 | 0.00 | 0.00 |
| ATOM | 2819 | C    | ASN | X | 182 | 22.988 | 50.444 | 26.979 | 0.00 | 0.00 |
| ATOM | 2820 | O    | ASN | X | 182 | 22.801 | 50.322 | 25.767 | 0.00 | 0.00 |
| ATOM | 2821 | N    | VAL | X | 183 | 23.422 | 49.434 | 27.678 | 0.00 | 0.00 |
| ATOM | 2822 | H    | VAL | X | 183 | 23.296 | 49.473 | 28.680 | 0.00 | 0.00 |
| ATOM | 2823 | CA   | VAL | X | 183 | 23.886 | 48.165 | 27.148 | 0.00 | 0.00 |
| ATOM | 2824 | HA   | VAL | X | 183 | 24.565 | 48.495 | 26.362 | 0.00 | 0.00 |
| ATOM | 2825 | CB   | VAL | X | 183 | 24.726 | 47.305 | 28.131 | 0.00 | 0.00 |

|      |      |      |     |   |     |        |        |        |      |      |
|------|------|------|-----|---|-----|--------|--------|--------|------|------|
| ATOM | 2826 | HB   | VAL | X | 183 | 25.326 | 48.108 | 28.560 | 0.00 | 0.00 |
| ATOM | 2827 | CG1  | VAL | X | 183 | 24.030 | 46.558 | 29.249 | 0.00 | 0.00 |
| ATOM | 2828 | HG11 | VAL | X | 183 | 24.566 | 46.626 | 30.196 | 0.00 | 0.00 |
| ATOM | 2829 | HG12 | VAL | X | 183 | 23.036 | 46.960 | 29.448 | 0.00 | 0.00 |
| ATOM | 2830 | HG13 | VAL | X | 183 | 23.872 | 45.517 | 28.969 | 0.00 | 0.00 |
| ATOM | 2831 | CG2  | VAL | X | 183 | 25.726 | 46.384 | 27.441 | 0.00 | 0.00 |
| ATOM | 2832 | HG21 | VAL | X | 183 | 26.280 | 46.938 | 26.684 | 0.00 | 0.00 |
| ATOM | 2833 | HG22 | VAL | X | 183 | 25.302 | 45.515 | 26.938 | 0.00 | 0.00 |
| ATOM | 2834 | HG23 | VAL | X | 183 | 26.346 | 45.945 | 28.222 | 0.00 | 0.00 |
| ATOM | 2835 | C    | VAL | X | 183 | 22.808 | 47.265 | 26.449 | 0.00 | 0.00 |
| ATOM | 2836 | O    | VAL | X | 183 | 23.102 | 46.361 | 25.707 | 0.00 | 0.00 |
| ATOM | 2837 | N    | ALA | X | 184 | 21.483 | 47.638 | 26.548 | 0.00 | 0.00 |
| ATOM | 2838 | H    | ALA | X | 184 | 21.351 | 48.435 | 27.153 | 0.00 | 0.00 |
| ATOM | 2839 | CA   | ALA | X | 184 | 20.485 | 47.186 | 25.633 | 0.00 | 0.00 |
| ATOM | 2840 | HA   | ALA | X | 184 | 20.535 | 46.099 | 25.563 | 0.00 | 0.00 |
| ATOM | 2841 | CB   | ALA | X | 184 | 19.088 | 47.482 | 26.351 | 0.00 | 0.00 |
| ATOM | 2842 | HB1  | ALA | X | 184 | 18.947 | 48.545 | 26.550 | 0.00 | 0.00 |
| ATOM | 2843 | HB2  | ALA | X | 184 | 19.078 | 47.049 | 27.351 | 0.00 | 0.00 |
| ATOM | 2844 | HB3  | ALA | X | 184 | 18.223 | 47.079 | 25.825 | 0.00 | 0.00 |
| ATOM | 2845 | C    | ALA | X | 184 | 20.541 | 47.737 | 24.159 | 0.00 | 0.00 |
| ATOM | 2846 | O    | ALA | X | 184 | 20.066 | 47.096 | 23.183 | 0.00 | 0.00 |
| ATOM | 2847 | N    | ALA | X | 185 | 21.153 | 48.883 | 23.940 | 0.00 | 0.00 |
| ATOM | 2848 | H    | ALA | X | 185 | 21.234 | 49.365 | 24.824 | 0.00 | 0.00 |
| ATOM | 2849 | CA   | ALA | X | 185 | 21.612 | 49.419 | 22.663 | 0.00 | 0.00 |
| ATOM | 2850 | HA   | ALA | X | 185 | 20.766 | 49.555 | 21.989 | 0.00 | 0.00 |
| ATOM | 2851 | CB   | ALA | X | 185 | 22.199 | 50.814 | 22.774 | 0.00 | 0.00 |
| ATOM | 2852 | HB1  | ALA | X | 185 | 21.700 | 51.492 | 23.466 | 0.00 | 0.00 |
| ATOM | 2853 | HB2  | ALA | X | 185 | 22.268 | 51.151 | 21.739 | 0.00 | 0.00 |
| ATOM | 2854 | HB3  | ALA | X | 185 | 23.227 | 50.742 | 23.130 | 0.00 | 0.00 |
| ATOM | 2855 | C    | ALA | X | 185 | 22.619 | 48.523 | 21.879 | 0.00 | 0.00 |
| ATOM | 2856 | O    | ALA | X | 185 | 22.482 | 48.421 | 20.645 | 0.00 | 0.00 |
| ATOM | 2857 | N    | PHE | X | 186 | 23.547 | 47.798 | 22.555 | 0.00 | 0.00 |
| ATOM | 2858 | H    | PHE | X | 186 | 23.543 | 47.803 | 23.565 | 0.00 | 0.00 |
| ATOM | 2859 | CA   | PHE | X | 186 | 24.552 | 46.971 | 21.975 | 0.00 | 0.00 |
| ATOM | 2860 | HA   | PHE | X | 186 | 24.847 | 47.452 | 21.042 | 0.00 | 0.00 |
| ATOM | 2861 | CB   | PHE | X | 186 | 25.759 | 46.913 | 22.875 | 0.00 | 0.00 |
| ATOM | 2862 | HB2  | PHE | X | 186 | 25.467 | 46.641 | 23.889 | 0.00 | 0.00 |
| ATOM | 2863 | HB3  | PHE | X | 186 | 26.292 | 46.064 | 22.447 | 0.00 | 0.00 |
| ATOM | 2864 | CG   | PHE | X | 186 | 26.556 | 48.214 | 22.930 | 0.00 | 0.00 |
| ATOM | 2865 | CD1  | PHE | X | 186 | 26.058 | 49.290 | 23.663 | 0.00 | 0.00 |
| ATOM | 2866 | HD1  | PHE | X | 186 | 25.126 | 49.258 | 24.208 | 0.00 | 0.00 |
| ATOM | 2867 | CE1  | PHE | X | 186 | 26.750 | 50.482 | 23.705 | 0.00 | 0.00 |
| ATOM | 2868 | HE1  | PHE | X | 186 | 26.483 | 51.249 | 24.417 | 0.00 | 0.00 |
| ATOM | 2869 | CZ   | PHE | X | 186 | 27.856 | 50.640 | 22.869 | 0.00 | 0.00 |
| ATOM | 2870 | HZ   | PHE | X | 186 | 28.303 | 51.623 | 22.909 | 0.00 | 0.00 |
| ATOM | 2871 | CE2  | PHE | X | 186 | 28.260 | 49.670 | 21.923 | 0.00 | 0.00 |
| ATOM | 2872 | HE2  | PHE | X | 186 | 29.104 | 49.970 | 21.321 | 0.00 | 0.00 |
| ATOM | 2873 | CD2  | PHE | X | 186 | 27.592 | 48.427 | 21.999 | 0.00 | 0.00 |
| ATOM | 2874 | HD2  | PHE | X | 186 | 27.871 | 47.641 | 21.313 | 0.00 | 0.00 |
| ATOM | 2875 | C    | PHE | X | 186 | 24.011 | 45.533 | 21.662 | 0.00 | 0.00 |
| ATOM | 2876 | O    | PHE | X | 186 | 24.757 | 44.762 | 20.992 | 0.00 | 0.00 |
| ATOM | 2877 | N    | GLY | X | 187 | 22.826 | 45.140 | 22.207 | 0.00 | 0.00 |
| ATOM | 2878 | H    | GLY | X | 187 | 22.306 | 45.819 | 22.744 | 0.00 | 0.00 |
| ATOM | 2879 | CA   | GLY | X | 187 | 22.320 | 43.803 | 22.156 | 0.00 | 0.00 |
| ATOM | 2880 | HA2  | GLY | X | 187 | 21.246 | 43.747 | 21.978 | 0.00 | 0.00 |
| ATOM | 2881 | HA3  | GLY | X | 187 | 22.902 | 43.231 | 21.433 | 0.00 | 0.00 |
| ATOM | 2882 | C    | GLY | X | 187 | 22.540 | 43.038 | 23.427 | 0.00 | 0.00 |
| ATOM | 2883 | O    | GLY | X | 187 | 22.127 | 41.861 | 23.468 | 0.00 | 0.00 |
| ATOM | 2884 | N    | GLY | X | 188 | 23.168 | 43.625 | 24.437 | 0.00 | 0.00 |
| ATOM | 2885 | H    | GLY | X | 188 | 23.471 | 44.581 | 24.318 | 0.00 | 0.00 |
| ATOM | 2886 | CA   | GLY | X | 188 | 23.397 | 42.987 | 25.743 | 0.00 | 0.00 |
| ATOM | 2887 | HA2  | GLY | X | 188 | 23.631 | 41.935 | 25.581 | 0.00 | 0.00 |
| ATOM | 2888 | HA3  | GLY | X | 188 | 24.133 | 43.571 | 26.296 | 0.00 | 0.00 |
| ATOM | 2889 | C    | GLY | X | 188 | 22.132 | 43.051 | 26.645 | 0.00 | 0.00 |
| ATOM | 2890 | O    | GLY | X | 188 | 21.247 | 43.876 | 26.473 | 0.00 | 0.00 |
| ATOM | 2891 | N    | ASP | X | 189 | 22.050 | 42.099 | 27.558 | 0.00 | 0.00 |
| ATOM | 2892 | H    | ASP | X | 189 | 22.831 | 41.468 | 27.665 | 0.00 | 0.00 |

|      |      |      |     |   |     |        |        |        |      |      |
|------|------|------|-----|---|-----|--------|--------|--------|------|------|
| ATOM | 2893 | CA   | ASP | X | 189 | 21.046 | 42.044 | 28.580 | 0.00 | 0.00 |
| ATOM | 2894 | HA   | ASP | X | 189 | 20.106 | 42.434 | 28.189 | 0.00 | 0.00 |
| ATOM | 2895 | CB   | ASP | X | 189 | 20.847 | 40.601 | 28.933 | 0.00 | 0.00 |
| ATOM | 2896 | HB2  | ASP | X | 189 | 20.447 | 40.155 | 28.022 | 0.00 | 0.00 |
| ATOM | 2897 | HB3  | ASP | X | 189 | 21.763 | 40.157 | 29.323 | 0.00 | 0.00 |
| ATOM | 2898 | CG   | ASP | X | 189 | 19.686 | 40.372 | 29.966 | 0.00 | 0.00 |
| ATOM | 2899 | OD1  | ASP | X | 189 | 19.342 | 39.231 | 30.277 | 0.00 | 0.00 |
| ATOM | 2900 | OD2  | ASP | X | 189 | 19.110 | 41.359 | 30.471 | 0.00 | 0.00 |
| ATOM | 2901 | C    | ASP | X | 189 | 21.501 | 42.812 | 29.817 | 0.00 | 0.00 |
| ATOM | 2902 | O    | ASP | X | 189 | 22.324 | 42.287 | 30.548 | 0.00 | 0.00 |
| ATOM | 2903 | N    | PRO | X | 190 | 20.886 | 44.014 | 30.089 | 0.00 | 0.00 |
| ATOM | 2904 | CD   | PRO | X | 190 | 19.990 | 44.832 | 29.221 | 0.00 | 0.00 |
| ATOM | 2905 | HD2  | PRO | X | 190 | 19.096 | 44.321 | 28.865 | 0.00 | 0.00 |
| ATOM | 2906 | HD3  | PRO | X | 190 | 20.523 | 45.227 | 28.356 | 0.00 | 0.00 |
| ATOM | 2907 | CG   | PRO | X | 190 | 19.320 | 45.874 | 30.151 | 0.00 | 0.00 |
| ATOM | 2908 | HG2  | PRO | X | 190 | 18.475 | 45.415 | 30.664 | 0.00 | 0.00 |
| ATOM | 2909 | HG3  | PRO | X | 190 | 19.021 | 46.731 | 29.548 | 0.00 | 0.00 |
| ATOM | 2910 | CB   | PRO | X | 190 | 20.486 | 46.121 | 31.128 | 0.00 | 0.00 |
| ATOM | 2911 | HB2  | PRO | X | 190 | 20.103 | 46.482 | 32.083 | 0.00 | 0.00 |
| ATOM | 2912 | HB3  | PRO | X | 190 | 21.116 | 46.861 | 30.634 | 0.00 | 0.00 |
| ATOM | 2913 | CA   | PRO | X | 190 | 21.229 | 44.829 | 31.315 | 0.00 | 0.00 |
| ATOM | 2914 | HA   | PRO | X | 190 | 22.297 | 45.032 | 31.393 | 0.00 | 0.00 |
| ATOM | 2915 | C    | PRO | X | 190 | 20.782 | 44.210 | 32.694 | 0.00 | 0.00 |
| ATOM | 2916 | O    | PRO | X | 190 | 21.080 | 44.715 | 33.782 | 0.00 | 0.00 |
| ATOM | 2917 | N    | THR | X | 191 | 19.970 | 43.121 | 32.570 | 0.00 | 0.00 |
| ATOM | 2918 | H    | THR | X | 191 | 19.686 | 42.878 | 31.632 | 0.00 | 0.00 |
| ATOM | 2919 | CA   | THR | X | 191 | 19.500 | 42.263 | 33.676 | 0.00 | 0.00 |
| ATOM | 2920 | HA   | THR | X | 191 | 19.768 | 42.926 | 34.498 | 0.00 | 0.00 |
| ATOM | 2921 | CB   | THR | X | 191 | 18.065 | 41.942 | 33.679 | 0.00 | 0.00 |
| ATOM | 2922 | HB   | THR | X | 191 | 17.837 | 41.439 | 34.618 | 0.00 | 0.00 |
| ATOM | 2923 | CG2  | THR | X | 191 | 17.162 | 43.195 | 33.666 | 0.00 | 0.00 |
| ATOM | 2924 | HG21 | THR | X | 191 | 17.453 | 43.812 | 34.516 | 0.00 | 0.00 |
| ATOM | 2925 | HG22 | THR | X | 191 | 16.126 | 42.873 | 33.768 | 0.00 | 0.00 |
| ATOM | 2926 | HG23 | THR | X | 191 | 17.418 | 43.822 | 32.811 | 0.00 | 0.00 |
| ATOM | 2927 | OG1  | THR | X | 191 | 17.729 | 41.140 | 32.624 | 0.00 | 0.00 |
| ATOM | 2928 | HG1  | THR | X | 191 | 18.320 | 41.350 | 31.896 | 0.00 | 0.00 |
| ATOM | 2929 | C    | THR | X | 191 | 20.339 | 41.035 | 33.877 | 0.00 | 0.00 |
| ATOM | 2930 | O    | THR | X | 191 | 20.240 | 40.292 | 34.886 | 0.00 | 0.00 |
| ATOM | 2931 | N    | SER | X | 192 | 21.325 | 40.838 | 33.031 | 0.00 | 0.00 |
| ATOM | 2932 | H    | SER | X | 192 | 21.473 | 41.563 | 32.344 | 0.00 | 0.00 |
| ATOM | 2933 | CA   | SER | X | 192 | 22.316 | 39.714 | 33.165 | 0.00 | 0.00 |
| ATOM | 2934 | HA   | SER | X | 192 | 22.201 | 39.221 | 34.131 | 0.00 | 0.00 |
| ATOM | 2935 | CB   | SER | X | 192 | 21.970 | 38.566 | 32.205 | 0.00 | 0.00 |
| ATOM | 2936 | HB2  | SER | X | 192 | 22.203 | 39.056 | 31.259 | 0.00 | 0.00 |
| ATOM | 2937 | HB3  | SER | X | 192 | 22.726 | 37.783 | 32.268 | 0.00 | 0.00 |
| ATOM | 2938 | OG   | SER | X | 192 | 20.629 | 38.147 | 32.345 | 0.00 | 0.00 |
| ATOM | 2939 | HG   | SER | X | 192 | 20.107 | 38.652 | 31.717 | 0.00 | 0.00 |
| ATOM | 2940 | C    | SER | X | 192 | 23.777 | 40.331 | 33.099 | 0.00 | 0.00 |
| ATOM | 2941 | O    | SER | X | 192 | 24.485 | 40.083 | 32.082 | 0.00 | 0.00 |
| ATOM | 2942 | N    | VAL | X | 193 | 24.179 | 41.057 | 34.083 | 0.00 | 0.00 |
| ATOM | 2943 | H    | VAL | X | 193 | 23.526 | 41.231 | 34.834 | 0.00 | 0.00 |
| ATOM | 2944 | CA   | VAL | X | 193 | 25.533 | 41.775 | 34.082 | 0.00 | 0.00 |
| ATOM | 2945 | HA   | VAL | X | 193 | 25.973 | 41.487 | 33.127 | 0.00 | 0.00 |
| ATOM | 2946 | CB   | VAL | X | 193 | 25.439 | 43.282 | 34.260 | 0.00 | 0.00 |
| ATOM | 2947 | HB   | VAL | X | 193 | 25.023 | 43.418 | 35.259 | 0.00 | 0.00 |
| ATOM | 2948 | CG1  | VAL | X | 193 | 26.693 | 44.110 | 34.115 | 0.00 | 0.00 |
| ATOM | 2949 | HG11 | VAL | X | 193 | 26.947 | 44.140 | 33.055 | 0.00 | 0.00 |
| ATOM | 2950 | HG12 | VAL | X | 193 | 26.637 | 45.106 | 34.554 | 0.00 | 0.00 |
| ATOM | 2951 | HG13 | VAL | X | 193 | 27.464 | 43.521 | 34.611 | 0.00 | 0.00 |
| ATOM | 2952 | CG2  | VAL | X | 193 | 24.397 | 43.903 | 33.298 | 0.00 | 0.00 |
| ATOM | 2953 | HG21 | VAL | X | 193 | 24.199 | 44.889 | 33.718 | 0.00 | 0.00 |
| ATOM | 2954 | HG22 | VAL | X | 193 | 23.483 | 43.331 | 33.455 | 0.00 | 0.00 |
| ATOM | 2955 | HG23 | VAL | X | 193 | 24.766 | 43.871 | 32.273 | 0.00 | 0.00 |
| ATOM | 2956 | C    | VAL | X | 193 | 26.378 | 41.116 | 35.223 | 0.00 | 0.00 |
| ATOM | 2957 | O    | VAL | X | 193 | 25.955 | 40.942 | 36.347 | 0.00 | 0.00 |
| ATOM | 2958 | N    | THR | X | 194 | 27.662 | 40.835 | 34.882 | 0.00 | 0.00 |
| ATOM | 2959 | H    | THR | X | 194 | 28.008 | 41.121 | 33.978 | 0.00 | 0.00 |

|      |      |      |     |   |     |        |        |        |      |      |
|------|------|------|-----|---|-----|--------|--------|--------|------|------|
| ATOM | 2960 | CA   | THR | X | 194 | 28.666 | 40.188 | 35.729 | 0.00 | 0.00 |
| ATOM | 2961 | HA   | THR | X | 194 | 28.363 | 40.180 | 36.776 | 0.00 | 0.00 |
| ATOM | 2962 | CB   | THR | X | 194 | 28.964 | 38.831 | 35.076 | 0.00 | 0.00 |
| ATOM | 2963 | HB   | THR | X | 194 | 29.362 | 38.965 | 34.070 | 0.00 | 0.00 |
| ATOM | 2964 | CG2  | THR | X | 194 | 29.945 | 38.062 | 35.886 | 0.00 | 0.00 |
| ATOM | 2965 | HG21 | THR | X | 194 | 29.853 | 37.052 | 35.487 | 0.00 | 0.00 |
| ATOM | 2966 | HG22 | THR | X | 194 | 29.719 | 38.067 | 36.952 | 0.00 | 0.00 |
| ATOM | 2967 | HG23 | THR | X | 194 | 30.938 | 38.458 | 35.674 | 0.00 | 0.00 |
| ATOM | 2968 | OG1  | THR | X | 194 | 27.720 | 38.171 | 35.115 | 0.00 | 0.00 |
| ATOM | 2969 | HG1  | THR | X | 194 | 27.410 | 38.083 | 34.210 | 0.00 | 0.00 |
| ATOM | 2970 | C    | THR | X | 194 | 29.928 | 41.002 | 35.752 | 0.00 | 0.00 |
| ATOM | 2971 | O    | THR | X | 194 | 30.515 | 41.223 | 34.716 | 0.00 | 0.00 |
| ATOM | 2972 | N    | LEU | X | 195 | 30.411 | 41.364 | 36.938 | 0.00 | 0.00 |
| ATOM | 2973 | H    | LEU | X | 195 | 29.929 | 41.012 | 37.753 | 0.00 | 0.00 |
| ATOM | 2974 | CA   | LEU | X | 195 | 31.777 | 41.941 | 37.104 | 0.00 | 0.00 |
| ATOM | 2975 | HA   | LEU | X | 195 | 32.070 | 42.595 | 36.283 | 0.00 | 0.00 |
| ATOM | 2976 | CB   | LEU | X | 195 | 31.884 | 42.762 | 38.407 | 0.00 | 0.00 |
| ATOM | 2977 | HB2  | LEU | X | 195 | 31.692 | 42.072 | 39.228 | 0.00 | 0.00 |
| ATOM | 2978 | HB3  | LEU | X | 195 | 32.919 | 42.998 | 38.654 | 0.00 | 0.00 |
| ATOM | 2979 | CG   | LEU | X | 195 | 30.932 | 44.026 | 38.525 | 0.00 | 0.00 |
| ATOM | 2980 | HG   | LEU | X | 195 | 29.867 | 43.811 | 38.607 | 0.00 | 0.00 |
| ATOM | 2981 | CD1  | LEU | X | 195 | 31.281 | 44.840 | 39.794 | 0.00 | 0.00 |
| ATOM | 2982 | HD11 | LEU | X | 195 | 31.019 | 44.195 | 40.633 | 0.00 | 0.00 |
| ATOM | 2983 | HD12 | LEU | X | 195 | 30.646 | 45.727 | 39.798 | 0.00 | 0.00 |
| ATOM | 2984 | HD13 | LEU | X | 195 | 32.345 | 45.040 | 39.921 | 0.00 | 0.00 |
| ATOM | 2985 | CD2  | LEU | X | 195 | 31.100 | 44.938 | 37.333 | 0.00 | 0.00 |
| ATOM | 2986 | HD21 | LEU | X | 195 | 30.546 | 45.808 | 37.687 | 0.00 | 0.00 |
| ATOM | 2987 | HD22 | LEU | X | 195 | 32.164 | 45.136 | 37.210 | 0.00 | 0.00 |
| ATOM | 2988 | HD23 | LEU | X | 195 | 30.620 | 44.576 | 36.423 | 0.00 | 0.00 |
| ATOM | 2989 | C    | LEU | X | 195 | 32.836 | 40.766 | 37.015 | 0.00 | 0.00 |
| ATOM | 2990 | O    | LEU | X | 195 | 32.733 | 39.802 | 37.712 | 0.00 | 0.00 |
| ATOM | 2991 | N    | PHE | X | 196 | 33.879 | 41.027 | 36.168 | 0.00 | 0.00 |
| ATOM | 2992 | H    | PHE | X | 196 | 33.779 | 41.852 | 35.594 | 0.00 | 0.00 |
| ATOM | 2993 | CA   | PHE | X | 196 | 34.776 | 39.943 | 35.702 | 0.00 | 0.00 |
| ATOM | 2994 | HA   | PHE | X | 196 | 34.722 | 38.971 | 36.194 | 0.00 | 0.00 |
| ATOM | 2995 | CB   | PHE | X | 196 | 34.306 | 39.557 | 34.227 | 0.00 | 0.00 |
| ATOM | 2996 | HB2  | PHE | X | 196 | 33.292 | 39.166 | 34.299 | 0.00 | 0.00 |
| ATOM | 2997 | HB3  | PHE | X | 196 | 34.391 | 40.450 | 33.607 | 0.00 | 0.00 |
| ATOM | 2998 | CG   | PHE | X | 196 | 35.232 | 38.510 | 33.580 | 0.00 | 0.00 |
| ATOM | 2999 | CD1  | PHE | X | 196 | 35.493 | 38.551 | 32.194 | 0.00 | 0.00 |
| ATOM | 3000 | HD1  | PHE | X | 196 | 35.020 | 39.335 | 31.621 | 0.00 | 0.00 |
| ATOM | 3001 | CE1  | PHE | X | 196 | 36.412 | 37.735 | 31.524 | 0.00 | 0.00 |
| ATOM | 3002 | HE1  | PHE | X | 196 | 36.615 | 37.706 | 30.464 | 0.00 | 0.00 |
| ATOM | 3003 | CZ   | PHE | X | 196 | 37.099 | 36.837 | 32.305 | 0.00 | 0.00 |
| ATOM | 3004 | HZ   | PHE | X | 196 | 37.887 | 36.213 | 31.911 | 0.00 | 0.00 |
| ATOM | 3005 | CE2  | PHE | X | 196 | 36.787 | 36.709 | 33.654 | 0.00 | 0.00 |
| ATOM | 3006 | HE2  | PHE | X | 196 | 37.371 | 35.959 | 34.167 | 0.00 | 0.00 |
| ATOM | 3007 | CD2  | PHE | X | 196 | 35.766 | 37.430 | 34.323 | 0.00 | 0.00 |
| ATOM | 3008 | HD2  | PHE | X | 196 | 35.527 | 37.248 | 35.361 | 0.00 | 0.00 |
| ATOM | 3009 | C    | PHE | X | 196 | 36.221 | 40.477 | 35.771 | 0.00 | 0.00 |
| ATOM | 3010 | O    | PHE | X | 196 | 36.420 | 41.563 | 35.208 | 0.00 | 0.00 |
| ATOM | 3011 | N    | GLY | X | 197 | 37.270 | 39.925 | 36.465 | 0.00 | 0.00 |
| ATOM | 3012 | H    | GLY | X | 197 | 37.188 | 39.129 | 37.081 | 0.00 | 0.00 |
| ATOM | 3013 | CA   | GLY | X | 197 | 38.558 | 40.679 | 36.615 | 0.00 | 0.00 |
| ATOM | 3014 | HA2  | GLY | X | 197 | 39.082 | 40.814 | 35.669 | 0.00 | 0.00 |
| ATOM | 3015 | HA3  | GLY | X | 197 | 38.328 | 41.639 | 37.078 | 0.00 | 0.00 |
| ATOM | 3016 | C    | GLY | X | 197 | 39.658 | 40.055 | 37.510 | 0.00 | 0.00 |
| ATOM | 3017 | O    | GLY | X | 197 | 39.328 | 39.237 | 38.337 | 0.00 | 0.00 |
| ATOM | 3018 | N    | GLU | X | 198 | 40.920 | 40.402 | 37.322 | 0.00 | 0.00 |
| ATOM | 3019 | H    | GLU | X | 198 | 41.171 | 40.978 | 36.531 | 0.00 | 0.00 |
| ATOM | 3020 | CA   | GLU | X | 198 | 42.052 | 39.899 | 38.241 | 0.00 | 0.00 |
| ATOM | 3021 | HA   | GLU | X | 198 | 41.538 | 39.235 | 38.935 | 0.00 | 0.00 |
| ATOM | 3022 | CB   | GLU | X | 198 | 43.081 | 39.180 | 37.454 | 0.00 | 0.00 |
| ATOM | 3023 | HB2  | GLU | X | 198 | 43.834 | 38.869 | 38.178 | 0.00 | 0.00 |
| ATOM | 3024 | HB3  | GLU | X | 198 | 42.652 | 38.208 | 37.213 | 0.00 | 0.00 |
| ATOM | 3025 | CG   | GLU | X | 198 | 43.713 | 39.792 | 36.164 | 0.00 | 0.00 |
| ATOM | 3026 | HG2  | GLU | X | 198 | 44.444 | 39.070 | 35.800 | 0.00 | 0.00 |

|      |      |     |     |   |     |        |        |        |      |      |
|------|------|-----|-----|---|-----|--------|--------|--------|------|------|
| ATOM | 3027 | HG3 | GLU | X | 198 | 42.893 | 39.892 | 35.452 | 0.00 | 0.00 |
| ATOM | 3028 | CD  | GLU | X | 198 | 44.433 | 41.135 | 36.212 | 0.00 | 0.00 |
| ATOM | 3029 | OE1 | GLU | X | 198 | 44.171 | 41.978 | 35.302 | 0.00 | 0.00 |
| ATOM | 3030 | OE2 | GLU | X | 198 | 45.268 | 41.330 | 37.158 | 0.00 | 0.00 |
| ATOM | 3031 | C   | GLU | X | 198 | 42.669 | 41.014 | 39.152 | 0.00 | 0.00 |
| ATOM | 3032 | O   | GLU | X | 198 | 42.656 | 42.232 | 38.909 | 0.00 | 0.00 |
| ATOM | 3033 | N   | XA1 | X | 199 | 43.196 | 40.469 | 40.299 | 0.00 | 0.00 |
| ATOM | 3034 | CA  | XA1 | X | 199 | 44.145 | 41.163 | 41.164 | 0.00 | 0.00 |
| ATOM | 3035 | C   | XA1 | X | 199 | 43.596 | 42.436 | 41.807 | 0.00 | 0.00 |
| ATOM | 3036 | O   | XA1 | X | 199 | 42.683 | 42.288 | 42.585 | 0.00 | 0.00 |
| ATOM | 3037 | CB  | XA1 | X | 199 | 45.520 | 41.327 | 40.416 | 0.00 | 0.00 |
| ATOM | 3038 | OG  | XA1 | X | 199 | 46.524 | 41.485 | 41.439 | 0.00 | 0.00 |
| ATOM | 3039 | P1  | XA1 | X | 199 | 47.591 | 42.648 | 41.306 | 0.00 | 0.00 |
| ATOM | 3040 | O1  | XA1 | X | 199 | 46.945 | 43.837 | 40.715 | 0.00 | 0.00 |
| ATOM | 3041 | O2  | XA1 | X | 199 | 48.702 | 42.065 | 40.645 | 0.00 | 0.00 |
| ATOM | 3042 | C1  | XA1 | X | 199 | 48.032 | 43.066 | 42.940 | 0.00 | 0.00 |
| ATOM | 3043 | H   | XA1 | X | 199 | 43.056 | 39.482 | 40.460 | 0.00 | 0.00 |
| ATOM | 3044 | HA  | XA1 | X | 199 | 44.302 | 40.435 | 41.960 | 0.00 | 0.00 |
| ATOM | 3045 | HB2 | XA1 | X | 199 | 45.742 | 40.390 | 39.899 | 0.00 | 0.00 |
| ATOM | 3046 | HB3 | XA1 | X | 199 | 45.609 | 42.133 | 39.683 | 0.00 | 0.00 |
| ATOM | 3047 | H11 | XA1 | X | 199 | 48.517 | 44.040 | 42.852 | 0.00 | 0.00 |
| ATOM | 3048 | H12 | XA1 | X | 199 | 47.175 | 43.015 | 43.616 | 0.00 | 0.00 |
| ATOM | 3049 | H13 | XA1 | X | 199 | 48.797 | 42.411 | 43.362 | 0.00 | 0.00 |
| ATOM | 3050 | N   | ALA | X | 200 | 44.121 | 43.710 | 41.598 | 0.00 | 0.00 |
| ATOM | 3051 | H   | ALA | X | 200 | 45.061 | 43.759 | 41.232 | 0.00 | 0.00 |
| ATOM | 3052 | CA  | ALA | X | 200 | 43.474 | 44.987 | 41.950 | 0.00 | 0.00 |
| ATOM | 3053 | HA  | ALA | X | 200 | 43.376 | 45.128 | 43.026 | 0.00 | 0.00 |
| ATOM | 3054 | CB  | ALA | X | 200 | 44.449 | 46.111 | 41.615 | 0.00 | 0.00 |
| ATOM | 3055 | HB1 | ALA | X | 200 | 45.205 | 45.867 | 40.868 | 0.00 | 0.00 |
| ATOM | 3056 | HB2 | ALA | X | 200 | 44.940 | 46.360 | 42.556 | 0.00 | 0.00 |
| ATOM | 3057 | HB3 | ALA | X | 200 | 43.922 | 47.007 | 41.287 | 0.00 | 0.00 |
| ATOM | 3058 | C   | ALA | X | 200 | 42.084 | 45.288 | 41.298 | 0.00 | 0.00 |
| ATOM | 3059 | O   | ALA | X | 200 | 41.253 | 45.983 | 41.869 | 0.00 | 0.00 |
| ATOM | 3060 | N   | GLY | X | 201 | 41.848 | 44.773 | 40.075 | 0.00 | 0.00 |
| ATOM | 3061 | H   | GLY | X | 201 | 42.475 | 44.102 | 39.655 | 0.00 | 0.00 |
| ATOM | 3062 | CA  | GLY | X | 201 | 40.493 | 44.733 | 39.503 | 0.00 | 0.00 |
| ATOM | 3063 | HA2 | GLY | X | 201 | 40.131 | 45.758 | 39.576 | 0.00 | 0.00 |
| ATOM | 3064 | HA3 | GLY | X | 201 | 40.504 | 44.457 | 38.448 | 0.00 | 0.00 |
| ATOM | 3065 | C   | GLY | X | 201 | 39.591 | 43.797 | 40.278 | 0.00 | 0.00 |
| ATOM | 3066 | O   | GLY | X | 201 | 38.469 | 44.105 | 40.618 | 0.00 | 0.00 |
| ATOM | 3067 | N   | ALA | X | 202 | 40.052 | 42.567 | 40.635 | 0.00 | 0.00 |
| ATOM | 3068 | H   | ALA | X | 202 | 40.981 | 42.242 | 40.409 | 0.00 | 0.00 |
| ATOM | 3069 | CA  | ALA | X | 202 | 39.295 | 41.730 | 41.550 | 0.00 | 0.00 |
| ATOM | 3070 | HA  | ALA | X | 202 | 38.343 | 41.518 | 41.064 | 0.00 | 0.00 |
| ATOM | 3071 | CB  | ALA | X | 202 | 40.079 | 40.448 | 41.825 | 0.00 | 0.00 |
| ATOM | 3072 | HB1 | ALA | X | 202 | 40.306 | 39.940 | 40.887 | 0.00 | 0.00 |
| ATOM | 3073 | HB2 | ALA | X | 202 | 39.435 | 39.782 | 42.399 | 0.00 | 0.00 |
| ATOM | 3074 | HB3 | ALA | X | 202 | 41.045 | 40.594 | 42.307 | 0.00 | 0.00 |
| ATOM | 3075 | C   | ALA | X | 202 | 38.922 | 42.396 | 42.979 | 0.00 | 0.00 |
| ATOM | 3076 | O   | ALA | X | 202 | 37.728 | 42.331 | 43.374 | 0.00 | 0.00 |
| ATOM | 3077 | N   | ALA | X | 203 | 39.915 | 42.897 | 43.709 | 0.00 | 0.00 |
| ATOM | 3078 | H   | ALA | X | 203 | 40.817 | 43.074 | 43.291 | 0.00 | 0.00 |
| ATOM | 3079 | CA  | ALA | X | 203 | 39.728 | 43.663 | 44.959 | 0.00 | 0.00 |
| ATOM | 3080 | HA  | ALA | X | 203 | 39.221 | 43.029 | 45.686 | 0.00 | 0.00 |
| ATOM | 3081 | CB  | ALA | X | 203 | 41.036 | 44.130 | 45.532 | 0.00 | 0.00 |
| ATOM | 3082 | HB1 | ALA | X | 203 | 40.901 | 44.694 | 46.454 | 0.00 | 0.00 |
| ATOM | 3083 | HB2 | ALA | X | 203 | 41.606 | 44.889 | 44.997 | 0.00 | 0.00 |
| ATOM | 3084 | HB3 | ALA | X | 203 | 41.752 | 43.361 | 45.821 | 0.00 | 0.00 |
| ATOM | 3085 | C   | ALA | X | 203 | 38.726 | 44.832 | 44.741 | 0.00 | 0.00 |
| ATOM | 3086 | O   | ALA | X | 203 | 37.882 | 45.063 | 45.557 | 0.00 | 0.00 |
| ATOM | 3087 | N   | SER | X | 204 | 38.825 | 45.539 | 43.564 | 0.00 | 0.00 |
| ATOM | 3088 | H   | SER | X | 204 | 39.680 | 45.359 | 43.058 | 0.00 | 0.00 |
| ATOM | 3089 | CA  | SER | X | 204 | 37.783 | 46.442 | 43.180 | 0.00 | 0.00 |
| ATOM | 3090 | HA  | SER | X | 204 | 37.594 | 47.255 | 43.882 | 0.00 | 0.00 |
| ATOM | 3091 | CB  | SER | X | 204 | 38.162 | 47.061 | 41.834 | 0.00 | 0.00 |
| ATOM | 3092 | HB2 | SER | X | 204 | 38.407 | 46.394 | 41.008 | 0.00 | 0.00 |
| ATOM | 3093 | HB3 | SER | X | 204 | 37.281 | 47.575 | 41.448 | 0.00 | 0.00 |

|      |      |      |     |   |     |        |        |        |      |      |
|------|------|------|-----|---|-----|--------|--------|--------|------|------|
| ATOM | 3094 | OG   | SER | X | 204 | 39.249 | 47.945 | 42.000 | 0.00 | 0.00 |
| ATOM | 3095 | HG   | SER | X | 204 | 40.082 | 47.468 | 42.015 | 0.00 | 0.00 |
| ATOM | 3096 | C    | SER | X | 204 | 36.389 | 45.721 | 43.122 | 0.00 | 0.00 |
| ATOM | 3097 | O    | SER | X | 204 | 35.444 | 46.237 | 43.778 | 0.00 | 0.00 |
| ATOM | 3098 | N    | VAL | X | 205 | 36.209 | 44.623 | 42.429 | 0.00 | 0.00 |
| ATOM | 3099 | H    | VAL | X | 205 | 37.012 | 44.313 | 41.902 | 0.00 | 0.00 |
| ATOM | 3100 | CA   | VAL | X | 205 | 35.005 | 43.834 | 42.393 | 0.00 | 0.00 |
| ATOM | 3101 | HA   | VAL | X | 205 | 34.174 | 44.357 | 41.919 | 0.00 | 0.00 |
| ATOM | 3102 | CB   | VAL | X | 205 | 35.177 | 42.644 | 41.433 | 0.00 | 0.00 |
| ATOM | 3103 | HB   | VAL | X | 205 | 36.048 | 42.015 | 41.615 | 0.00 | 0.00 |
| ATOM | 3104 | CG1  | VAL | X | 205 | 34.002 | 41.649 | 41.442 | 0.00 | 0.00 |
| ATOM | 3105 | HG11 | VAL | X | 205 | 33.944 | 41.062 | 42.359 | 0.00 | 0.00 |
| ATOM | 3106 | HG12 | VAL | X | 205 | 33.096 | 42.249 | 41.358 | 0.00 | 0.00 |
| ATOM | 3107 | HG13 | VAL | X | 205 | 34.011 | 40.980 | 40.582 | 0.00 | 0.00 |
| ATOM | 3108 | CG2  | VAL | X | 205 | 35.318 | 43.115 | 39.973 | 0.00 | 0.00 |
| ATOM | 3109 | HG21 | VAL | X | 205 | 35.127 | 42.323 | 39.249 | 0.00 | 0.00 |
| ATOM | 3110 | HG22 | VAL | X | 205 | 36.283 | 43.606 | 39.846 | 0.00 | 0.00 |
| ATOM | 3111 | HG23 | VAL | X | 205 | 34.677 | 43.966 | 39.742 | 0.00 | 0.00 |
| ATOM | 3112 | C    | VAL | X | 205 | 34.609 | 43.396 | 43.761 | 0.00 | 0.00 |
| ATOM | 3113 | O    | VAL | X | 205 | 33.379 | 43.241 | 44.016 | 0.00 | 0.00 |
| ATOM | 3114 | N    | GLY | X | 206 | 35.588 | 43.276 | 44.632 | 0.00 | 0.00 |
| ATOM | 3115 | H    | GLY | X | 206 | 36.518 | 43.465 | 44.286 | 0.00 | 0.00 |
| ATOM | 3116 | CA   | GLY | X | 206 | 35.294 | 43.187 | 46.049 | 0.00 | 0.00 |
| ATOM | 3117 | HA2  | GLY | X | 206 | 34.837 | 42.230 | 46.302 | 0.00 | 0.00 |
| ATOM | 3118 | HA3  | GLY | X | 206 | 36.262 | 43.081 | 46.539 | 0.00 | 0.00 |
| ATOM | 3119 | C    | GLY | X | 206 | 34.721 | 44.375 | 46.848 | 0.00 | 0.00 |
| ATOM | 3120 | O    | GLY | X | 206 | 33.894 | 44.183 | 47.740 | 0.00 | 0.00 |
| ATOM | 3121 | N    | MET | X | 207 | 35.149 | 45.576 | 46.581 | 0.00 | 0.00 |
| ATOM | 3122 | H    | MET | X | 207 | 35.850 | 45.670 | 45.861 | 0.00 | 0.00 |
| ATOM | 3123 | CA   | MET | X | 207 | 34.493 | 46.747 | 47.148 | 0.00 | 0.00 |
| ATOM | 3124 | HA   | MET | X | 207 | 34.491 | 46.626 | 48.231 | 0.00 | 0.00 |
| ATOM | 3125 | CB   | MET | X | 207 | 35.312 | 48.049 | 47.004 | 0.00 | 0.00 |
| ATOM | 3126 | HB2  | MET | X | 207 | 35.524 | 48.286 | 45.962 | 0.00 | 0.00 |
| ATOM | 3127 | HB3  | MET | X | 207 | 34.769 | 48.958 | 47.263 | 0.00 | 0.00 |
| ATOM | 3128 | CG   | MET | X | 207 | 36.636 | 47.819 | 47.719 | 0.00 | 0.00 |
| ATOM | 3129 | HG2  | MET | X | 207 | 36.466 | 47.546 | 48.761 | 0.00 | 0.00 |
| ATOM | 3130 | HD3  | MET | X | 207 | 37.189 | 46.996 | 47.266 | 0.00 | 0.00 |
| ATOM | 3131 | SD   | MET | X | 207 | 37.769 | 49.172 | 47.780 | 0.00 | 0.00 |
| ATOM | 3132 | CE   | MET | X | 207 | 39.016 | 48.298 | 48.777 | 0.00 | 0.00 |
| ATOM | 3133 | HE1  | MET | X | 207 | 39.344 | 47.378 | 48.293 | 0.00 | 0.00 |
| ATOM | 3134 | HE2  | MET | X | 207 | 39.891 | 48.858 | 49.107 | 0.00 | 0.00 |
| ATOM | 3135 | HE3  | MET | X | 207 | 38.579 | 47.971 | 49.721 | 0.00 | 0.00 |
| ATOM | 3136 | C    | MET | X | 207 | 33.103 | 47.001 | 46.585 | 0.00 | 0.00 |
| ATOM | 3137 | O    | MET | X | 207 | 32.245 | 47.400 | 47.341 | 0.00 | 0.00 |
| ATOM | 3138 | N    | HIE | X | 208 | 32.893 | 46.750 | 45.299 | 0.00 | 0.00 |
| ATOM | 3139 | H    | HIE | X | 208 | 33.672 | 46.501 | 44.706 | 0.00 | 0.00 |
| ATOM | 3140 | CA   | HIE | X | 208 | 31.588 | 46.677 | 44.722 | 0.00 | 0.00 |
| ATOM | 3141 | HA   | HIE | X | 208 | 31.093 | 47.646 | 44.795 | 0.00 | 0.00 |
| ATOM | 3142 | CB   | HIE | X | 208 | 31.795 | 46.400 | 43.220 | 0.00 | 0.00 |
| ATOM | 3143 | HB2  | HIE | X | 208 | 32.350 | 45.472 | 43.081 | 0.00 | 0.00 |
| ATOM | 3144 | HB3  | HIE | X | 208 | 30.795 | 46.331 | 42.793 | 0.00 | 0.00 |
| ATOM | 3145 | CG   | HIE | X | 208 | 32.313 | 47.529 | 42.384 | 0.00 | 0.00 |
| ATOM | 3146 | ND1  | HIE | X | 208 | 32.112 | 48.884 | 42.451 | 0.00 | 0.00 |
| ATOM | 3147 | CE1  | HIE | X | 208 | 33.038 | 49.503 | 41.688 | 0.00 | 0.00 |
| ATOM | 3148 | HE1  | HIE | X | 208 | 33.303 | 50.549 | 41.652 | 0.00 | 0.00 |
| ATOM | 3149 | NE2  | HIE | X | 208 | 33.855 | 48.577 | 41.176 | 0.00 | 0.00 |
| ATOM | 3150 | HE2  | HIE | X | 208 | 34.720 | 48.741 | 40.682 | 0.00 | 0.00 |
| ATOM | 3151 | CD2  | HIE | X | 208 | 33.421 | 47.272 | 41.526 | 0.00 | 0.00 |
| ATOM | 3152 | HD2  | HIE | X | 208 | 33.919 | 46.344 | 41.287 | 0.00 | 0.00 |
| ATOM | 3153 | C    | HIE | X | 208 | 30.702 | 45.651 | 45.348 | 0.00 | 0.00 |
| ATOM | 3154 | O    | HIE | X | 208 | 29.553 | 45.972 | 45.477 | 0.00 | 0.00 |
| ATOM | 3155 | N    | LEU | X | 209 | 31.246 | 44.468 | 45.686 | 0.00 | 0.00 |
| ATOM | 3156 | H    | LEU | X | 209 | 32.240 | 44.354 | 45.549 | 0.00 | 0.00 |
| ATOM | 3157 | CA   | LEU | X | 209 | 30.508 | 43.480 | 46.450 | 0.00 | 0.00 |
| ATOM | 3158 | HA   | LEU | X | 209 | 29.545 | 43.264 | 45.986 | 0.00 | 0.00 |
| ATOM | 3159 | CB   | LEU | X | 209 | 31.266 | 42.143 | 46.426 | 0.00 | 0.00 |
| ATOM | 3160 | HB2  | LEU | X | 209 | 31.508 | 41.956 | 45.380 | 0.00 | 0.00 |

|      |      |      |     |   |     |        |        |        |      |      |
|------|------|------|-----|---|-----|--------|--------|--------|------|------|
| ATOM | 3161 | HB3  | LEU | X | 209 | 32.099 | 42.261 | 47.119 | 0.00 | 0.00 |
| ATOM | 3162 | CG   | LEU | X | 209 | 30.380 | 40.953 | 46.932 | 0.00 | 0.00 |
| ATOM | 3163 | HG   | LEU | X | 209 | 30.176 | 41.071 | 47.996 | 0.00 | 0.00 |
| ATOM | 3164 | CD1  | LEU | X | 209 | 29.127 | 40.820 | 46.156 | 0.00 | 0.00 |
| ATOM | 3165 | HD11 | LEU | X | 209 | 28.602 | 39.913 | 46.455 | 0.00 | 0.00 |
| ATOM | 3166 | HD12 | LEU | X | 209 | 29.402 | 40.731 | 45.105 | 0.00 | 0.00 |
| ATOM | 3167 | HD13 | LEU | X | 209 | 28.442 | 41.600 | 46.488 | 0.00 | 0.00 |
| ATOM | 3168 | CD2  | LEU | X | 209 | 31.057 | 39.563 | 46.823 | 0.00 | 0.00 |
| ATOM | 3169 | HD21 | LEU | X | 209 | 30.588 | 38.756 | 47.386 | 0.00 | 0.00 |
| ATOM | 3170 | HD22 | LEU | X | 209 | 31.041 | 39.344 | 45.755 | 0.00 | 0.00 |
| ATOM | 3171 | HD23 | LEU | X | 209 | 32.117 | 39.584 | 47.076 | 0.00 | 0.00 |
| ATOM | 3172 | C    | LEU | X | 209 | 30.221 | 43.890 | 47.890 | 0.00 | 0.00 |
| ATOM | 3173 | O    | LEU | X | 209 | 29.068 | 43.795 | 48.372 | 0.00 | 0.00 |
| ATOM | 3174 | N    | LEU | X | 210 | 31.175 | 44.451 | 48.552 | 0.00 | 0.00 |
| ATOM | 3175 | H    | LEU | X | 210 | 32.077 | 44.726 | 48.191 | 0.00 | 0.00 |
| ATOM | 3176 | CA   | LEU | X | 210 | 30.945 | 45.029 | 49.875 | 0.00 | 0.00 |
| ATOM | 3177 | HA   | LEU | X | 210 | 30.475 | 44.303 | 50.539 | 0.00 | 0.00 |
| ATOM | 3178 | CB   | LEU | X | 210 | 32.303 | 45.519 | 50.524 | 0.00 | 0.00 |
| ATOM | 3179 | HB2  | LEU | X | 210 | 32.891 | 45.906 | 49.692 | 0.00 | 0.00 |
| ATOM | 3180 | HB3  | LEU | X | 210 | 32.082 | 46.329 | 51.219 | 0.00 | 0.00 |
| ATOM | 3181 | CG   | LEU | X | 210 | 32.967 | 44.345 | 51.248 | 0.00 | 0.00 |
| ATOM | 3182 | HG   | LEU | X | 210 | 32.353 | 44.209 | 52.139 | 0.00 | 0.00 |
| ATOM | 3183 | CD1  | LEU | X | 210 | 33.116 | 42.960 | 50.567 | 0.00 | 0.00 |
| ATOM | 3184 | HD11 | LEU | X | 210 | 33.691 | 42.306 | 51.223 | 0.00 | 0.00 |
| ATOM | 3185 | HD12 | LEU | X | 210 | 33.808 | 42.918 | 49.726 | 0.00 | 0.00 |
| ATOM | 3186 | HD13 | LEU | X | 210 | 32.205 | 42.470 | 50.222 | 0.00 | 0.00 |
| ATOM | 3187 | CD2  | LEU | X | 210 | 34.333 | 44.866 | 51.619 | 0.00 | 0.00 |
| ATOM | 3188 | HD21 | LEU | X | 210 | 35.029 | 44.852 | 50.780 | 0.00 | 0.00 |
| ATOM | 3189 | HD22 | LEU | X | 210 | 34.363 | 45.842 | 52.103 | 0.00 | 0.00 |
| ATOM | 3190 | HD23 | LEU | X | 210 | 34.716 | 44.144 | 52.341 | 0.00 | 0.00 |
| ATOM | 3191 | C    | LEU | X | 210 | 29.879 | 46.151 | 49.900 | 0.00 | 0.00 |
| ATOM | 3192 | O    | LEU | X | 210 | 29.140 | 46.273 | 50.910 | 0.00 | 0.00 |
| ATOM | 3193 | N    | SER | X | 211 | 29.682 | 47.024 | 48.904 | 0.00 | 0.00 |
| ATOM | 3194 | H    | SER | X | 211 | 30.131 | 46.842 | 48.018 | 0.00 | 0.00 |
| ATOM | 3195 | CA   | SER | X | 211 | 29.025 | 48.314 | 49.002 | 0.00 | 0.00 |
| ATOM | 3196 | HA   | SER | X | 211 | 28.880 | 48.513 | 50.064 | 0.00 | 0.00 |
| ATOM | 3197 | CB   | SER | X | 211 | 29.984 | 49.414 | 48.432 | 0.00 | 0.00 |
| ATOM | 3198 | HB2  | SER | X | 211 | 30.969 | 49.116 | 48.790 | 0.00 | 0.00 |
| ATOM | 3199 | HB3  | SER | X | 211 | 29.926 | 49.442 | 47.344 | 0.00 | 0.00 |
| ATOM | 3200 | OG   | SER | X | 211 | 29.651 | 50.718 | 48.896 | 0.00 | 0.00 |
| ATOM | 3201 | HG   | SER | X | 211 | 29.918 | 50.864 | 49.807 | 0.00 | 0.00 |
| ATOM | 3202 | C    | SER | X | 211 | 27.665 | 48.253 | 48.223 | 0.00 | 0.00 |
| ATOM | 3203 | O    | SER | X | 211 | 27.778 | 47.968 | 47.034 | 0.00 | 0.00 |
| ATOM | 3204 | N    | PRO | X | 212 | 26.508 | 48.455 | 48.892 | 0.00 | 0.00 |
| ATOM | 3205 | CD   | PRO | X | 212 | 26.335 | 48.382 | 50.385 | 0.00 | 0.00 |
| ATOM | 3206 | HD2  | PRO | X | 212 | 26.718 | 49.294 | 50.842 | 0.00 | 0.00 |
| ATOM | 3207 | HD3  | PRO | X | 212 | 26.981 | 47.612 | 50.807 | 0.00 | 0.00 |
| ATOM | 3208 | CG   | PRO | X | 212 | 24.847 | 48.102 | 50.601 | 0.00 | 0.00 |
| ATOM | 3209 | HG2  | PRO | X | 212 | 24.468 | 48.563 | 51.513 | 0.00 | 0.00 |
| ATOM | 3210 | HG3  | PRO | X | 212 | 24.602 | 47.041 | 50.556 | 0.00 | 0.00 |
| ATOM | 3211 | CB   | PRO | X | 212 | 24.216 | 48.664 | 49.365 | 0.00 | 0.00 |
| ATOM | 3212 | HB2  | PRO | X | 212 | 24.059 | 49.731 | 49.522 | 0.00 | 0.00 |
| ATOM | 3213 | HB3  | PRO | X | 212 | 23.306 | 48.162 | 49.035 | 0.00 | 0.00 |
| ATOM | 3214 | CA   | PRO | X | 212 | 25.260 | 48.466 | 48.194 | 0.00 | 0.00 |
| ATOM | 3215 | HA   | PRO | X | 212 | 25.097 | 47.450 | 47.834 | 0.00 | 0.00 |
| ATOM | 3216 | C    | PRO | X | 212 | 25.068 | 49.445 | 47.049 | 0.00 | 0.00 |
| ATOM | 3217 | O    | PRO | X | 212 | 24.416 | 49.056 | 46.091 | 0.00 | 0.00 |
| ATOM | 3218 | N    | PRO | X | 213 | 25.606 | 50.726 | 47.060 | 0.00 | 0.00 |
| ATOM | 3219 | CD   | PRO | X | 213 | 26.063 | 51.480 | 48.215 | 0.00 | 0.00 |
| ATOM | 3220 | HD2  | PRO | X | 213 | 26.619 | 50.845 | 48.905 | 0.00 | 0.00 |
| ATOM | 3221 | HD3  | PRO | X | 213 | 25.213 | 51.884 | 48.764 | 0.00 | 0.00 |
| ATOM | 3222 | CG   | PRO | X | 213 | 26.842 | 52.599 | 47.599 | 0.00 | 0.00 |
| ATOM | 3223 | HG2  | PRO | X | 213 | 27.777 | 52.145 | 47.271 | 0.00 | 0.00 |
| ATOM | 3224 | HG3  | PRO | X | 213 | 27.029 | 53.478 | 48.216 | 0.00 | 0.00 |
| ATOM | 3225 | CB   | PRO | X | 213 | 25.965 | 53.012 | 46.444 | 0.00 | 0.00 |
| ATOM | 3226 | HB2  | PRO | X | 213 | 26.635 | 53.468 | 45.716 | 0.00 | 0.00 |
| ATOM | 3227 | HB3  | PRO | X | 213 | 25.088 | 53.480 | 46.893 | 0.00 | 0.00 |

|      |      |      |     |   |     |        |        |        |      |      |
|------|------|------|-----|---|-----|--------|--------|--------|------|------|
| ATOM | 3228 | CA   | PRO | X | 213 | 25.479 | 51.596 | 45.909 | 0.00 | 0.00 |
| ATOM | 3229 | HA   | PRO | X | 213 | 24.406 | 51.549 | 45.726 | 0.00 | 0.00 |
| ATOM | 3230 | C    | PRO | X | 213 | 26.116 | 51.038 | 44.595 | 0.00 | 0.00 |
| ATOM | 3231 | O    | PRO | X | 213 | 25.833 | 51.651 | 43.523 | 0.00 | 0.00 |
| ATOM | 3232 | N    | SER | X | 214 | 27.036 | 50.052 | 44.677 | 0.00 | 0.00 |
| ATOM | 3233 | H    | SER | X | 214 | 27.415 | 49.800 | 45.579 | 0.00 | 0.00 |
| ATOM | 3234 | CA   | SER | X | 214 | 27.463 | 49.307 | 43.502 | 0.00 | 0.00 |
| ATOM | 3235 | HA   | SER | X | 214 | 27.311 | 49.966 | 42.647 | 0.00 | 0.00 |
| ATOM | 3236 | CB   | SER | X | 214 | 28.927 | 49.002 | 43.546 | 0.00 | 0.00 |
| ATOM | 3237 | HB2  | SER | X | 214 | 29.148 | 48.493 | 44.484 | 0.00 | 0.00 |
| ATOM | 3238 | HB3  | SER | X | 214 | 29.226 | 48.352 | 42.724 | 0.00 | 0.00 |
| ATOM | 3239 | OG   | SER | X | 214 | 29.783 | 50.068 | 43.394 | 0.00 | 0.00 |
| ATOM | 3240 | HG   | SER | X | 214 | 30.638 | 49.649 | 43.268 | 0.00 | 0.00 |
| ATOM | 3241 | C    | SER | X | 214 | 26.748 | 47.996 | 43.210 | 0.00 | 0.00 |
| ATOM | 3242 | O    | SER | X | 214 | 26.699 | 47.618 | 42.073 | 0.00 | 0.00 |
| ATOM | 3243 | N    | ARG | X | 215 | 26.155 | 47.311 | 44.171 | 0.00 | 0.00 |
| ATOM | 3244 | H    | ARG | X | 215 | 26.104 | 47.563 | 45.148 | 0.00 | 0.00 |
| ATOM | 3245 | CA   | ARG | X | 215 | 25.400 | 46.081 | 43.973 | 0.00 | 0.00 |
| ATOM | 3246 | HA   | ARG | X | 215 | 25.881 | 45.388 | 43.282 | 0.00 | 0.00 |
| ATOM | 3247 | CB   | ARG | X | 215 | 25.120 | 45.365 | 45.274 | 0.00 | 0.00 |
| ATOM | 3248 | HB2  | ARG | X | 215 | 24.607 | 45.978 | 46.015 | 0.00 | 0.00 |
| ATOM | 3249 | HB3  | ARG | X | 215 | 24.428 | 44.525 | 45.214 | 0.00 | 0.00 |
| ATOM | 3250 | CG   | ARG | X | 215 | 26.361 | 44.845 | 46.040 | 0.00 | 0.00 |
| ATOM | 3251 | HG2  | ARG | X | 215 | 27.103 | 44.374 | 45.395 | 0.00 | 0.00 |
| ATOM | 3252 | HG3  | ARG | X | 215 | 26.732 | 45.719 | 46.575 | 0.00 | 0.00 |
| ATOM | 3253 | CD   | ARG | X | 215 | 25.932 | 43.806 | 47.072 | 0.00 | 0.00 |
| ATOM | 3254 | HD2  | ARG | X | 215 | 25.309 | 43.102 | 46.520 | 0.00 | 0.00 |
| ATOM | 3255 | HD3  | ARG | X | 215 | 26.802 | 43.302 | 47.494 | 0.00 | 0.00 |
| ATOM | 3256 | NE   | ARG | X | 215 | 25.203 | 44.460 | 48.241 | 0.00 | 0.00 |
| ATOM | 3257 | HE   | ARG | X | 215 | 24.306 | 44.881 | 48.046 | 0.00 | 0.00 |
| ATOM | 3258 | CZ   | ARG | X | 215 | 25.638 | 44.503 | 49.493 | 0.00 | 0.00 |
| ATOM | 3259 | NH1  | ARG | X | 215 | 26.851 | 44.133 | 49.865 | 0.00 | 0.00 |
| ATOM | 3260 | HH11 | ARG | X | 215 | 27.668 | 44.154 | 49.273 | 0.00 | 0.00 |
| ATOM | 3261 | HH12 | ARG | X | 215 | 27.186 | 44.100 | 50.818 | 0.00 | 0.00 |
| ATOM | 3262 | NH2  | ARG | X | 215 | 24.729 | 44.715 | 50.513 | 0.00 | 0.00 |
| ATOM | 3263 | HH21 | ARG | X | 215 | 23.756 | 44.923 | 50.342 | 0.00 | 0.00 |
| ATOM | 3264 | HH22 | ARG | X | 215 | 25.012 | 44.718 | 51.483 | 0.00 | 0.00 |
| ATOM | 3265 | C    | ARG | X | 215 | 23.997 | 46.312 | 43.317 | 0.00 | 0.00 |
| ATOM | 3266 | O    | ARG | X | 215 | 23.391 | 45.464 | 42.633 | 0.00 | 0.00 |
| ATOM | 3267 | N    | GLY | X | 216 | 23.576 | 47.559 | 43.278 | 0.00 | 0.00 |
| ATOM | 3268 | H    | GLY | X | 216 | 24.085 | 48.181 | 43.890 | 0.00 | 0.00 |
| ATOM | 3269 | CA   | GLY | X | 216 | 22.639 | 48.312 | 42.396 | 0.00 | 0.00 |
| ATOM | 3270 | HA2  | GLY | X | 216 | 21.601 | 48.050 | 42.598 | 0.00 | 0.00 |
| ATOM | 3271 | HA3  | GLY | X | 216 | 22.735 | 49.356 | 42.696 | 0.00 | 0.00 |
| ATOM | 3272 | C    | GLY | X | 216 | 22.866 | 48.260 | 40.929 | 0.00 | 0.00 |
| ATOM | 3273 | O    | GLY | X | 216 | 22.145 | 48.870 | 40.185 | 0.00 | 0.00 |
| ATOM | 3274 | N    | LEU | X | 217 | 23.966 | 47.583 | 40.444 | 0.00 | 0.00 |
| ATOM | 3275 | H    | LEU | X | 217 | 24.650 | 47.211 | 41.087 | 0.00 | 0.00 |
| ATOM | 3276 | CA   | LEU | X | 217 | 24.385 | 47.796 | 39.073 | 0.00 | 0.00 |
| ATOM | 3277 | HA   | LEU | X | 217 | 23.586 | 48.103 | 38.398 | 0.00 | 0.00 |
| ATOM | 3278 | CB   | LEU | X | 217 | 25.656 | 48.722 | 39.059 | 0.00 | 0.00 |
| ATOM | 3279 | HB2  | LEU | X | 217 | 26.393 | 48.296 | 39.740 | 0.00 | 0.00 |
| ATOM | 3280 | HB3  | LEU | X | 217 | 26.009 | 48.876 | 38.039 | 0.00 | 0.00 |
| ATOM | 3281 | CG   | LEU | X | 217 | 25.423 | 50.207 | 39.539 | 0.00 | 0.00 |
| ATOM | 3282 | HG   | LEU | X | 217 | 25.085 | 50.112 | 40.571 | 0.00 | 0.00 |
| ATOM | 3283 | CD1  | LEU | X | 217 | 26.710 | 51.110 | 39.653 | 0.00 | 0.00 |
| ATOM | 3284 | HD11 | LEU | X | 217 | 27.601 | 50.663 | 40.092 | 0.00 | 0.00 |
| ATOM | 3285 | HD12 | LEU | X | 217 | 26.440 | 51.931 | 40.317 | 0.00 | 0.00 |
| ATOM | 3286 | HD13 | LEU | X | 217 | 26.942 | 51.592 | 38.703 | 0.00 | 0.00 |
| ATOM | 3287 | CD2  | LEU | X | 217 | 24.428 | 50.984 | 38.635 | 0.00 | 0.00 |
| ATOM | 3288 | HD21 | LEU | X | 217 | 24.514 | 52.038 | 38.899 | 0.00 | 0.00 |
| ATOM | 3289 | HD22 | LEU | X | 217 | 24.706 | 51.045 | 37.583 | 0.00 | 0.00 |
| ATOM | 3290 | HD23 | LEU | X | 217 | 23.411 | 50.608 | 38.748 | 0.00 | 0.00 |
| ATOM | 3291 | C    | LEU | X | 217 | 24.914 | 46.549 | 38.377 | 0.00 | 0.00 |
| ATOM | 3292 | O    | LEU | X | 217 | 25.404 | 46.665 | 37.250 | 0.00 | 0.00 |
| ATOM | 3293 | N    | PHE | X | 218 | 24.877 | 45.387 | 39.046 | 0.00 | 0.00 |
| ATOM | 3294 | H    | PHE | X | 218 | 24.435 | 45.459 | 39.951 | 0.00 | 0.00 |



|      |      |      |     |   |     |        |        |        |      |      |
|------|------|------|-----|---|-----|--------|--------|--------|------|------|
| ATOM | 3295 | CA   | PHE | X | 218 | 25.159 | 44.099 | 38.524 | 0.00 | 0.00 |
| ATOM | 3296 | HA   | PHE | X | 218 | 24.876 | 44.098 | 37.471 | 0.00 | 0.00 |
| ATOM | 3297 | CB   | PHE | X | 218 | 26.690 | 43.810 | 38.737 | 0.00 | 0.00 |
| ATOM | 3298 | HB2  | PHE | X | 218 | 26.928 | 42.913 | 38.165 | 0.00 | 0.00 |
| ATOM | 3299 | HB3  | PHE | X | 218 | 27.243 | 44.618 | 38.257 | 0.00 | 0.00 |
| ATOM | 3300 | CG   | PHE | X | 218 | 27.325 | 43.608 | 40.130 | 0.00 | 0.00 |
| ATOM | 3301 | CD1  | PHE | X | 218 | 27.821 | 44.773 | 40.743 | 0.00 | 0.00 |
| ATOM | 3302 | HD1  | PHE | X | 218 | 27.682 | 45.700 | 40.207 | 0.00 | 0.00 |
| ATOM | 3303 | CE1  | PHE | X | 218 | 28.436 | 44.681 | 41.990 | 0.00 | 0.00 |
| ATOM | 3304 | HE1  | PHE | X | 218 | 28.989 | 45.517 | 42.393 | 0.00 | 0.00 |
| ATOM | 3305 | CZ   | PHE | X | 218 | 28.549 | 43.488 | 42.611 | 0.00 | 0.00 |
| ATOM | 3306 | HZ   | PHE | X | 218 | 29.183 | 43.403 | 43.481 | 0.00 | 0.00 |
| ATOM | 3307 | CE2  | PHE | X | 218 | 27.964 | 42.314 | 42.070 | 0.00 | 0.00 |
| ATOM | 3308 | HE2  | PHE | X | 218 | 28.038 | 41.378 | 42.604 | 0.00 | 0.00 |
| ATOM | 3309 | CD2  | PHE | X | 218 | 27.394 | 42.390 | 40.781 | 0.00 | 0.00 |
| ATOM | 3310 | HD2  | PHE | X | 218 | 26.883 | 41.514 | 40.410 | 0.00 | 0.00 |
| ATOM | 3311 | C    | PHE | X | 218 | 24.467 | 42.875 | 39.227 | 0.00 | 0.00 |
| ATOM | 3312 | O    | PHE | X | 218 | 23.946 | 43.038 | 40.358 | 0.00 | 0.00 |
| ATOM | 3313 | N    | HIE | X | 219 | 24.592 | 41.641 | 38.611 | 0.00 | 0.00 |
| ATOM | 3314 | H    | HIE | X | 219 | 25.013 | 41.662 | 37.693 | 0.00 | 0.00 |
| ATOM | 3315 | CA   | HIE | X | 219 | 23.882 | 40.409 | 39.046 | 0.00 | 0.00 |
| ATOM | 3316 | HA   | HIE | X | 219 | 23.171 | 40.661 | 39.833 | 0.00 | 0.00 |
| ATOM | 3317 | CB   | HIE | X | 219 | 23.055 | 39.913 | 37.863 | 0.00 | 0.00 |
| ATOM | 3318 | HB2  | HIE | X | 219 | 23.669 | 39.463 | 37.084 | 0.00 | 0.00 |
| ATOM | 3319 | HB3  | HIE | X | 219 | 22.358 | 39.168 | 38.248 | 0.00 | 0.00 |
| ATOM | 3320 | CG   | HIE | X | 219 | 22.173 | 40.933 | 37.239 | 0.00 | 0.00 |
| ATOM | 3321 | ND1  | HIE | X | 219 | 22.559 | 41.965 | 36.439 | 0.00 | 0.00 |
| ATOM | 3322 | CE1  | HIE | X | 219 | 21.594 | 42.875 | 36.433 | 0.00 | 0.00 |
| ATOM | 3323 | HE1  | HIE | X | 219 | 21.686 | 43.809 | 35.899 | 0.00 | 0.00 |
| ATOM | 3324 | NE2  | HIE | X | 219 | 20.574 | 42.458 | 37.279 | 0.00 | 0.00 |
| ATOM | 3325 | HE2  | HIE | X | 219 | 19.673 | 42.901 | 37.390 | 0.00 | 0.00 |
| ATOM | 3326 | CD2  | HIE | X | 219 | 20.939 | 41.235 | 37.762 | 0.00 | 0.00 |
| ATOM | 3327 | HD2  | HIE | X | 219 | 20.374 | 40.645 | 38.468 | 0.00 | 0.00 |
| ATOM | 3328 | C    | HIE | X | 219 | 24.848 | 39.247 | 39.588 | 0.00 | 0.00 |
| ATOM | 3329 | O    | HIE | X | 219 | 24.458 | 38.420 | 40.319 | 0.00 | 0.00 |
| ATOM | 3330 | N    | ARG | X | 220 | 26.177 | 39.297 | 39.281 | 0.00 | 0.00 |
| ATOM | 3331 | H    | ARG | X | 220 | 26.416 | 40.068 | 38.674 | 0.00 | 0.00 |
| ATOM | 3332 | CA   | ARG | X | 220 | 27.248 | 38.331 | 39.689 | 0.00 | 0.00 |
| ATOM | 3333 | HA   | ARG | X | 220 | 27.100 | 37.837 | 40.649 | 0.00 | 0.00 |
| ATOM | 3334 | CB   | ARG | X | 220 | 27.312 | 37.068 | 38.722 | 0.00 | 0.00 |
| ATOM | 3335 | HB2  | ARG | X | 220 | 27.521 | 37.423 | 37.713 | 0.00 | 0.00 |
| ATOM | 3336 | HB3  | ARG | X | 220 | 28.170 | 36.471 | 39.031 | 0.00 | 0.00 |
| ATOM | 3337 | CG   | ARG | X | 220 | 26.065 | 36.065 | 38.876 | 0.00 | 0.00 |
| ATOM | 3338 | HG2  | ARG | X | 220 | 26.453 | 35.051 | 38.780 | 0.00 | 0.00 |
| ATOM | 3339 | HG3  | ARG | X | 220 | 25.567 | 36.192 | 39.837 | 0.00 | 0.00 |
| ATOM | 3340 | CD   | ARG | X | 220 | 25.061 | 36.369 | 37.730 | 0.00 | 0.00 |
| ATOM | 3341 | HD2  | ARG | X | 220 | 24.977 | 37.437 | 37.526 | 0.00 | 0.00 |
| ATOM | 3342 | HD3  | ARG | X | 220 | 25.423 | 35.940 | 36.796 | 0.00 | 0.00 |
| ATOM | 3343 | NE   | ARG | X | 220 | 23.720 | 35.951 | 38.203 | 0.00 | 0.00 |
| ATOM | 3344 | HE   | ARG | X | 220 | 23.682 | 35.345 | 39.011 | 0.00 | 0.00 |
| ATOM | 3345 | CZ   | ARG | X | 220 | 22.632 | 35.952 | 37.539 | 0.00 | 0.00 |
| ATOM | 3346 | NH1  | ARG | X | 220 | 22.454 | 36.756 | 36.483 | 0.00 | 0.00 |
| ATOM | 3347 | HH11 | ARG | X | 220 | 23.307 | 37.060 | 36.036 | 0.00 | 0.00 |
| ATOM | 3348 | HH12 | ARG | X | 220 | 21.603 | 36.612 | 35.958 | 0.00 | 0.00 |
| ATOM | 3349 | NH2  | ARG | X | 220 | 21.714 | 35.071 | 37.820 | 0.00 | 0.00 |
| ATOM | 3350 | HH21 | ARG | X | 220 | 21.725 | 34.698 | 38.759 | 0.00 | 0.00 |
| ATOM | 3351 | HH22 | ARG | X | 220 | 20.913 | 34.886 | 37.234 | 0.00 | 0.00 |
| ATOM | 3352 | C    | ARG | X | 220 | 28.653 | 39.028 | 39.796 | 0.00 | 0.00 |
| ATOM | 3353 | O    | ARG | X | 220 | 28.978 | 39.940 | 39.075 | 0.00 | 0.00 |
| ATOM | 3354 | N    | ALA | X | 221 | 29.558 | 38.465 | 40.550 | 0.00 | 0.00 |
| ATOM | 3355 | H    | ALA | X | 221 | 29.296 | 37.691 | 41.144 | 0.00 | 0.00 |
| ATOM | 3356 | CA   | ALA | X | 221 | 30.897 | 39.014 | 40.789 | 0.00 | 0.00 |
| ATOM | 3357 | HA   | ALA | X | 221 | 31.184 | 39.767 | 40.055 | 0.00 | 0.00 |
| ATOM | 3358 | CB   | ALA | X | 221 | 30.819 | 39.706 | 42.147 | 0.00 | 0.00 |
| ATOM | 3359 | HB1  | ALA | X | 221 | 31.815 | 40.033 | 42.446 | 0.00 | 0.00 |
| ATOM | 3360 | HB2  | ALA | X | 221 | 30.439 | 38.991 | 42.877 | 0.00 | 0.00 |
| ATOM | 3361 | HB3  | ALA | X | 221 | 30.090 | 40.508 | 42.028 | 0.00 | 0.00 |

|      |      |      |     |   |     |        |        |        |      |      |
|------|------|------|-----|---|-----|--------|--------|--------|------|------|
| ATOM | 3362 | C    | ALA | X | 221 | 31.970 | 37.904 | 40.719 | 0.00 | 0.00 |
| ATOM | 3363 | O    | ALA | X | 221 | 31.805 | 36.958 | 41.477 | 0.00 | 0.00 |
| ATOM | 3364 | N    | VAL | X | 222 | 33.045 | 38.138 | 39.945 | 0.00 | 0.00 |
| ATOM | 3365 | H    | VAL | X | 222 | 33.011 | 38.996 | 39.415 | 0.00 | 0.00 |
| ATOM | 3366 | CA   | VAL | X | 222 | 34.167 | 37.251 | 39.852 | 0.00 | 0.00 |
| ATOM | 3367 | HA   | VAL | X | 222 | 33.920 | 36.353 | 40.419 | 0.00 | 0.00 |
| ATOM | 3368 | CB   | VAL | X | 222 | 34.355 | 36.646 | 38.421 | 0.00 | 0.00 |
| ATOM | 3369 | HB   | VAL | X | 222 | 34.594 | 37.453 | 37.728 | 0.00 | 0.00 |
| ATOM | 3370 | CG1  | VAL | X | 222 | 35.567 | 35.836 | 38.219 | 0.00 | 0.00 |
| ATOM | 3371 | HG11 | VAL | X | 222 | 35.916 | 35.237 | 39.061 | 0.00 | 0.00 |
| ATOM | 3372 | HG12 | VAL | X | 222 | 35.453 | 35.206 | 37.337 | 0.00 | 0.00 |
| ATOM | 3373 | HG13 | VAL | X | 222 | 36.301 | 36.635 | 38.123 | 0.00 | 0.00 |
| ATOM | 3374 | CG2  | VAL | X | 222 | 33.149 | 35.905 | 37.870 | 0.00 | 0.00 |
| ATOM | 3375 | HG21 | VAL | X | 222 | 33.308 | 35.601 | 36.836 | 0.00 | 0.00 |
| ATOM | 3376 | HG22 | VAL | X | 222 | 32.270 | 36.537 | 38.001 | 0.00 | 0.00 |
| ATOM | 3377 | HG23 | VAL | X | 222 | 33.053 | 34.923 | 38.334 | 0.00 | 0.00 |
| ATOM | 3378 | C    | VAL | X | 222 | 35.459 | 37.856 | 40.417 | 0.00 | 0.00 |
| ATOM | 3379 | O    | VAL | X | 222 | 35.844 | 38.994 | 40.099 | 0.00 | 0.00 |
| ATOM | 3380 | N    | LEU | X | 223 | 36.084 | 37.054 | 41.294 | 0.00 | 0.00 |
| ATOM | 3381 | H    | LEU | X | 223 | 35.591 | 36.234 | 41.617 | 0.00 | 0.00 |
| ATOM | 3382 | CA   | LEU | X | 223 | 37.338 | 37.342 | 41.930 | 0.00 | 0.00 |
| ATOM | 3383 | HA   | LEU | X | 223 | 37.775 | 38.264 | 41.546 | 0.00 | 0.00 |
| ATOM | 3384 | CB   | LEU | X | 223 | 37.241 | 37.563 | 43.453 | 0.00 | 0.00 |
| ATOM | 3385 | HB2  | LEU | X | 223 | 36.763 | 36.658 | 43.827 | 0.00 | 0.00 |
| ATOM | 3386 | HB3  | LEU | X | 223 | 38.250 | 37.662 | 43.853 | 0.00 | 0.00 |
| ATOM | 3387 | CG   | LEU | X | 223 | 36.392 | 38.775 | 43.886 | 0.00 | 0.00 |
| ATOM | 3388 | HG   | LEU | X | 223 | 36.870 | 39.645 | 43.435 | 0.00 | 0.00 |
| ATOM | 3389 | CD1  | LEU | X | 223 | 34.902 | 38.666 | 43.655 | 0.00 | 0.00 |
| ATOM | 3390 | HD11 | LEU | X | 223 | 34.516 | 37.671 | 43.874 | 0.00 | 0.00 |
| ATOM | 3391 | HD12 | LEU | X | 223 | 34.679 | 38.819 | 42.599 | 0.00 | 0.00 |
| ATOM | 3392 | HD13 | LEU | X | 223 | 34.432 | 39.421 | 44.285 | 0.00 | 0.00 |
| ATOM | 3393 | CD2  | LEU | X | 223 | 36.557 | 38.902 | 45.414 | 0.00 | 0.00 |
| ATOM | 3394 | HD21 | LEU | X | 223 | 35.890 | 38.198 | 45.913 | 0.00 | 0.00 |
| ATOM | 3395 | HD22 | LEU | X | 223 | 37.610 | 38.857 | 45.692 | 0.00 | 0.00 |
| ATOM | 3396 | HD23 | LEU | X | 223 | 36.231 | 39.882 | 45.764 | 0.00 | 0.00 |
| ATOM | 3397 | C    | LEU | X | 223 | 38.436 | 36.334 | 41.542 | 0.00 | 0.00 |
| ATOM | 3398 | O    | LEU | X | 223 | 38.240 | 35.110 | 41.778 | 0.00 | 0.00 |
| ATOM | 3399 | N    | GLN | X | 224 | 39.550 | 36.811 | 40.969 | 0.00 | 0.00 |
| ATOM | 3400 | H    | GLN | X | 224 | 39.606 | 37.814 | 40.867 | 0.00 | 0.00 |
| ATOM | 3401 | CA   | GLN | X | 224 | 40.691 | 36.043 | 40.465 | 0.00 | 0.00 |
| ATOM | 3402 | HA   | GLN | X | 224 | 40.674 | 34.995 | 40.765 | 0.00 | 0.00 |
| ATOM | 3403 | CB   | GLN | X | 224 | 40.658 | 36.173 | 38.925 | 0.00 | 0.00 |
| ATOM | 3404 | HB2  | GLN | X | 224 | 40.642 | 37.217 | 38.612 | 0.00 | 0.00 |
| ATOM | 3405 | HB3  | GLN | X | 224 | 41.541 | 35.697 | 38.500 | 0.00 | 0.00 |
| ATOM | 3406 | CG   | GLN | X | 224 | 39.391 | 35.572 | 38.319 | 0.00 | 0.00 |
| ATOM | 3407 | HG2  | GLN | X | 224 | 39.203 | 34.689 | 38.930 | 0.00 | 0.00 |
| ATOM | 3408 | HG3  | GLN | X | 224 | 38.525 | 36.217 | 38.469 | 0.00 | 0.00 |
| ATOM | 3409 | CD   | GLN | X | 224 | 39.556 | 35.095 | 36.816 | 0.00 | 0.00 |
| ATOM | 3410 | OE1  | GLN | X | 224 | 38.646 | 35.310 | 36.028 | 0.00 | 0.00 |
| ATOM | 3411 | NE2  | GLN | X | 224 | 40.688 | 34.560 | 36.387 | 0.00 | 0.00 |
| ATOM | 3412 | HE21 | GLN | X | 224 | 40.700 | 34.051 | 35.515 | 0.00 | 0.00 |
| ATOM | 3413 | HE22 | GLN | X | 224 | 41.440 | 34.331 | 37.021 | 0.00 | 0.00 |
| ATOM | 3414 | C    | GLN | X | 224 | 41.990 | 36.650 | 41.013 | 0.00 | 0.00 |
| ATOM | 3415 | O    | GLN | X | 224 | 42.304 | 37.789 | 40.731 | 0.00 | 0.00 |
| ATOM | 3416 | N    | SER | X | 225 | 42.646 | 35.928 | 41.955 | 0.00 | 0.00 |
| ATOM | 3417 | H    | SER | X | 225 | 42.282 | 35.045 | 42.284 | 0.00 | 0.00 |
| ATOM | 3418 | CA   | SER | X | 225 | 44.057 | 36.150 | 42.375 | 0.00 | 0.00 |
| ATOM | 3419 | HA   | SER | X | 225 | 44.405 | 35.310 | 42.976 | 0.00 | 0.00 |
| ATOM | 3420 | CB   | SER | X | 225 | 44.878 | 36.157 | 41.082 | 0.00 | 0.00 |
| ATOM | 3421 | HB2  | SER | X | 225 | 44.355 | 35.387 | 40.515 | 0.00 | 0.00 |
| ATOM | 3422 | HB3  | SER | X | 225 | 44.773 | 37.039 | 40.450 | 0.00 | 0.00 |
| ATOM | 3423 | OG   | SER | X | 225 | 46.215 | 35.819 | 41.378 | 0.00 | 0.00 |
| ATOM | 3424 | HG   | SER | X | 225 | 46.253 | 34.923 | 41.720 | 0.00 | 0.00 |
| ATOM | 3425 | C    | SER | X | 225 | 44.145 | 37.432 | 43.289 | 0.00 | 0.00 |
| ATOM | 3426 | O    | SER | X | 225 | 45.215 | 37.959 | 43.499 | 0.00 | 0.00 |
| ATOM | 3427 | N    | GLY | X | 226 | 42.968 | 37.802 | 43.876 | 0.00 | 0.00 |
| ATOM | 3428 | H    | GLY | X | 226 | 42.137 | 37.317 | 43.569 | 0.00 | 0.00 |

|      |      |      |     |   |     |        |        |        |      |      |
|------|------|------|-----|---|-----|--------|--------|--------|------|------|
| ATOM | 3429 | CA   | GLY | X | 226 | 42.860 | 39.007 | 44.706 | 0.00 | 0.00 |
| ATOM | 3430 | HA2  | GLY | X | 226 | 43.618 | 39.068 | 45.487 | 0.00 | 0.00 |
| ATOM | 3431 | HA3  | GLY | X | 226 | 43.018 | 39.848 | 44.030 | 0.00 | 0.00 |
| ATOM | 3432 | C    | GLY | X | 226 | 41.449 | 39.117 | 45.298 | 0.00 | 0.00 |
| ATOM | 3433 | O    | GLY | X | 226 | 40.460 | 38.701 | 44.715 | 0.00 | 0.00 |
| ATOM | 3434 | N    | ALA | X | 227 | 41.428 | 39.818 | 46.420 | 0.00 | 0.00 |
| ATOM | 3435 | H    | ALA | X | 227 | 42.328 | 40.249 | 46.578 | 0.00 | 0.00 |
| ATOM | 3436 | CA   | ALA | X | 227 | 40.413 | 39.900 | 47.499 | 0.00 | 0.00 |
| ATOM | 3437 | HA   | ALA | X | 227 | 39.415 | 39.814 | 47.067 | 0.00 | 0.00 |
| ATOM | 3438 | CB   | ALA | X | 227 | 40.555 | 38.795 | 48.585 | 0.00 | 0.00 |
| ATOM | 3439 | HB1  | ALA | X | 227 | 40.329 | 37.798 | 48.206 | 0.00 | 0.00 |
| ATOM | 3440 | HB2  | ALA | X | 227 | 39.871 | 38.911 | 49.426 | 0.00 | 0.00 |
| ATOM | 3441 | HB3  | ALA | X | 227 | 41.542 | 38.589 | 49.000 | 0.00 | 0.00 |
| ATOM | 3442 | C    | ALA | X | 227 | 40.530 | 41.272 | 48.221 | 0.00 | 0.00 |
| ATOM | 3443 | O    | ALA | X | 227 | 41.630 | 41.821 | 48.135 | 0.00 | 0.00 |
| ATOM | 3444 | N    | PRO | X | 228 | 39.474 | 41.959 | 48.701 | 0.00 | 0.00 |
| ATOM | 3445 | CD   | PRO | X | 228 | 38.076 | 41.462 | 48.843 | 0.00 | 0.00 |
| ATOM | 3446 | HD2  | PRO | X | 228 | 38.044 | 40.594 | 49.502 | 0.00 | 0.00 |
| ATOM | 3447 | HD3  | PRO | X | 228 | 37.678 | 41.116 | 47.889 | 0.00 | 0.00 |
| ATOM | 3448 | CG   | PRO | X | 228 | 37.253 | 42.547 | 49.487 | 0.00 | 0.00 |
| ATOM | 3449 | HG2  | PRO | X | 228 | 37.114 | 42.372 | 50.554 | 0.00 | 0.00 |
| ATOM | 3450 | HG3  | PRO | X | 228 | 36.317 | 42.716 | 48.956 | 0.00 | 0.00 |
| ATOM | 3451 | CB   | PRO | X | 228 | 38.041 | 43.788 | 49.170 | 0.00 | 0.00 |
| ATOM | 3452 | HB2  | PRO | X | 228 | 37.802 | 44.584 | 49.875 | 0.00 | 0.00 |
| ATOM | 3453 | HB3  | PRO | X | 228 | 37.780 | 44.126 | 48.168 | 0.00 | 0.00 |
| ATOM | 3454 | CA   | PRO | X | 228 | 39.536 | 43.376 | 49.138 | 0.00 | 0.00 |
| ATOM | 3455 | HA   | PRO | X | 228 | 40.143 | 43.937 | 48.427 | 0.00 | 0.00 |
| ATOM | 3456 | C    | PRO | X | 228 | 40.078 | 43.428 | 50.586 | 0.00 | 0.00 |
| ATOM | 3457 | O    | PRO | X | 228 | 40.911 | 44.317 | 50.808 | 0.00 | 0.00 |
| ATOM | 3458 | N    | ASN | X | 229 | 39.844 | 42.398 | 51.453 | 0.00 | 0.00 |
| ATOM | 3459 | H    | ASN | X | 229 | 39.019 | 41.845 | 51.271 | 0.00 | 0.00 |
| ATOM | 3460 | CA   | ASN | X | 229 | 40.434 | 42.066 | 52.761 | 0.00 | 0.00 |
| ATOM | 3461 | HA   | ASN | X | 229 | 40.505 | 42.942 | 53.406 | 0.00 | 0.00 |
| ATOM | 3462 | CB   | ASN | X | 229 | 39.475 | 41.038 | 53.416 | 0.00 | 0.00 |
| ATOM | 3463 | HB2  | ASN | X | 229 | 39.782 | 40.896 | 54.452 | 0.00 | 0.00 |
| ATOM | 3464 | HB3  | ASN | X | 229 | 38.502 | 41.528 | 53.456 | 0.00 | 0.00 |
| ATOM | 3465 | CG   | ASN | X | 229 | 39.476 | 39.848 | 52.582 | 0.00 | 0.00 |
| ATOM | 3466 | OD1  | ASN | X | 229 | 38.988 | 39.835 | 51.467 | 0.00 | 0.00 |
| ATOM | 3467 | ND2  | ASN | X | 229 | 40.003 | 38.777 | 53.126 | 0.00 | 0.00 |
| ATOM | 3468 | HD21 | ASN | X | 229 | 40.122 | 38.023 | 52.465 | 0.00 | 0.00 |
| ATOM | 3469 | HD22 | ASN | X | 229 | 40.460 | 38.826 | 54.025 | 0.00 | 0.00 |
| ATOM | 3470 | C    | ASN | X | 229 | 41.898 | 41.697 | 52.613 | 0.00 | 0.00 |
| ATOM | 3471 | O    | ASN | X | 229 | 42.611 | 41.386 | 53.534 | 0.00 | 0.00 |
| ATOM | 3472 | N    | GLY | X | 230 | 42.482 | 41.706 | 51.423 | 0.00 | 0.00 |
| ATOM | 3473 | H    | GLY | X | 230 | 42.001 | 41.938 | 50.566 | 0.00 | 0.00 |
| ATOM | 3474 | CA   | GLY | X | 230 | 43.918 | 41.410 | 51.288 | 0.00 | 0.00 |
| ATOM | 3475 | HA2  | GLY | X | 230 | 44.187 | 40.488 | 51.804 | 0.00 | 0.00 |
| ATOM | 3476 | HA3  | GLY | X | 230 | 44.347 | 41.306 | 50.291 | 0.00 | 0.00 |
| ATOM | 3477 | C    | GLY | X | 230 | 44.675 | 42.604 | 51.889 | 0.00 | 0.00 |
| ATOM | 3478 | O    | GLY | X | 230 | 44.270 | 43.724 | 51.489 | 0.00 | 0.00 |
| ATOM | 3479 | N    | PRO | X | 231 | 45.753 | 42.293 | 52.693 | 0.00 | 0.00 |
| ATOM | 3480 | CD   | PRO | X | 231 | 46.360 | 41.001 | 52.967 | 0.00 | 0.00 |
| ATOM | 3481 | HD2  | PRO | X | 231 | 46.529 | 40.449 | 52.043 | 0.00 | 0.00 |
| ATOM | 3482 | HD3  | PRO | X | 231 | 45.701 | 40.418 | 53.611 | 0.00 | 0.00 |
| ATOM | 3483 | CG   | PRO | X | 231 | 47.784 | 41.361 | 53.532 | 0.00 | 0.00 |
| ATOM | 3484 | HG2  | PRO | X | 231 | 48.518 | 41.439 | 52.729 | 0.00 | 0.00 |
| ATOM | 3485 | HG3  | PRO | X | 231 | 48.099 | 40.618 | 54.264 | 0.00 | 0.00 |
| ATOM | 3486 | CB   | PRO | X | 231 | 47.634 | 42.646 | 54.249 | 0.00 | 0.00 |
| ATOM | 3487 | HB2  | PRO | X | 231 | 48.535 | 43.251 | 54.348 | 0.00 | 0.00 |
| ATOM | 3488 | HB3  | PRO | X | 231 | 47.234 | 42.498 | 55.252 | 0.00 | 0.00 |
| ATOM | 3489 | CA   | PRO | X | 231 | 46.504 | 43.372 | 53.455 | 0.00 | 0.00 |
| ATOM | 3490 | HA   | PRO | X | 231 | 45.845 | 43.910 | 54.138 | 0.00 | 0.00 |
| ATOM | 3491 | C    | PRO | X | 231 | 47.121 | 44.409 | 52.426 | 0.00 | 0.00 |
| ATOM | 3492 | O    | PRO | X | 231 | 47.431 | 45.493 | 52.895 | 0.00 | 0.00 |
| ATOM | 3493 | N    | TRP | X | 232 | 47.452 | 44.097 | 51.180 | 0.00 | 0.00 |
| ATOM | 3494 | H    | TRP | X | 232 | 47.238 | 43.175 | 50.828 | 0.00 | 0.00 |
| ATOM | 3495 | CA   | TRP | X | 232 | 48.035 | 45.077 | 50.141 | 0.00 | 0.00 |

|      |      |      |     |   |     |        |        |        |      |      |
|------|------|------|-----|---|-----|--------|--------|--------|------|------|
| ATOM | 3496 | HA   | TRP | X | 232 | 48.745 | 45.750 | 50.623 | 0.00 | 0.00 |
| ATOM | 3497 | CB   | TRP | X | 232 | 48.659 | 44.202 | 49.011 | 0.00 | 0.00 |
| ATOM | 3498 | HB2  | TRP | X | 232 | 49.128 | 44.881 | 48.299 | 0.00 | 0.00 |
| ATOM | 3499 | HB3  | TRP | X | 232 | 49.366 | 43.526 | 49.492 | 0.00 | 0.00 |
| ATOM | 3500 | CG   | TRP | X | 232 | 47.666 | 43.278 | 48.353 | 0.00 | 0.00 |
| ATOM | 3501 | CD1  | TRP | X | 232 | 47.490 | 42.006 | 48.682 | 0.00 | 0.00 |
| ATOM | 3502 | HD1  | TRP | X | 232 | 48.049 | 41.430 | 49.405 | 0.00 | 0.00 |
| ATOM | 3503 | NE1  | TRP | X | 232 | 46.495 | 41.560 | 47.847 | 0.00 | 0.00 |
| ATOM | 3504 | HE1  | TRP | X | 232 | 46.082 | 40.643 | 47.934 | 0.00 | 0.00 |
| ATOM | 3505 | CE2  | TRP | X | 232 | 46.075 | 42.462 | 46.850 | 0.00 | 0.00 |
| ATOM | 3506 | CZ2  | TRP | X | 232 | 45.165 | 42.448 | 45.784 | 0.00 | 0.00 |
| ATOM | 3507 | HZ2  | TRP | X | 232 | 44.740 | 41.531 | 45.403 | 0.00 | 0.00 |
| ATOM | 3508 | CH2  | TRP | X | 232 | 44.913 | 43.655 | 45.088 | 0.00 | 0.00 |
| ATOM | 3509 | HH2  | TRP | X | 232 | 44.110 | 43.650 | 44.366 | 0.00 | 0.00 |
| ATOM | 3510 | CZ3  | TRP | X | 232 | 45.550 | 44.894 | 45.486 | 0.00 | 0.00 |
| ATOM | 3511 | HZ3  | TRP | X | 232 | 45.447 | 45.739 | 44.820 | 0.00 | 0.00 |
| ATOM | 3512 | CE3  | TRP | X | 232 | 46.513 | 44.841 | 46.532 | 0.00 | 0.00 |
| ATOM | 3513 | HE3  | TRP | X | 232 | 47.122 | 45.676 | 46.847 | 0.00 | 0.00 |
| ATOM | 3514 | CD2  | TRP | X | 232 | 46.775 | 43.656 | 47.246 | 0.00 | 0.00 |
| ATOM | 3515 | C    | TRP | X | 232 | 46.882 | 46.011 | 49.619 | 0.00 | 0.00 |
| ATOM | 3516 | O    | TRP | X | 232 | 47.241 | 47.084 | 49.166 | 0.00 | 0.00 |
| ATOM | 3517 | N    | ALA | X | 233 | 45.619 | 45.584 | 49.499 | 0.00 | 0.00 |
| ATOM | 3518 | H    | ALA | X | 233 | 45.393 | 44.644 | 49.790 | 0.00 | 0.00 |
| ATOM | 3519 | CA   | ALA | X | 233 | 44.666 | 46.361 | 48.712 | 0.00 | 0.00 |
| ATOM | 3520 | HA   | ALA | X | 233 | 45.163 | 46.771 | 47.833 | 0.00 | 0.00 |
| ATOM | 3521 | CB   | ALA | X | 233 | 43.586 | 45.331 | 48.293 | 0.00 | 0.00 |
| ATOM | 3522 | HB1  | ALA | X | 233 | 43.165 | 44.891 | 49.196 | 0.00 | 0.00 |
| ATOM | 3523 | HB2  | ALA | X | 233 | 43.984 | 44.497 | 47.716 | 0.00 | 0.00 |
| ATOM | 3524 | HB3  | ALA | X | 233 | 42.688 | 45.756 | 47.846 | 0.00 | 0.00 |
| ATOM | 3525 | C    | ALA | X | 233 | 44.028 | 47.601 | 49.424 | 0.00 | 0.00 |
| ATOM | 3526 | O    | ALA | X | 233 | 43.589 | 48.506 | 48.806 | 0.00 | 0.00 |
| ATOM | 3527 | N    | THR | X | 234 | 44.072 | 47.693 | 50.783 | 0.00 | 0.00 |
| ATOM | 3528 | H    | THR | X | 234 | 44.373 | 46.856 | 51.261 | 0.00 | 0.00 |
| ATOM | 3529 | CA   | THR | X | 234 | 43.787 | 48.986 | 51.490 | 0.00 | 0.00 |
| ATOM | 3530 | HA   | THR | X | 234 | 43.511 | 49.713 | 50.727 | 0.00 | 0.00 |
| ATOM | 3531 | CB   | THR | X | 234 | 42.680 | 48.793 | 52.533 | 0.00 | 0.00 |
| ATOM | 3532 | HB   | THR | X | 234 | 42.518 | 49.711 | 53.098 | 0.00 | 0.00 |
| ATOM | 3533 | CG2  | THR | X | 234 | 41.362 | 48.388 | 51.976 | 0.00 | 0.00 |
| ATOM | 3534 | HG21 | THR | X | 234 | 41.361 | 47.369 | 51.587 | 0.00 | 0.00 |
| ATOM | 3535 | HG22 | THR | X | 234 | 41.149 | 49.116 | 51.194 | 0.00 | 0.00 |
| ATOM | 3536 | HG23 | THR | X | 234 | 40.715 | 48.494 | 52.846 | 0.00 | 0.00 |
| ATOM | 3537 | OG1  | THR | X | 234 | 42.989 | 47.733 | 53.441 | 0.00 | 0.00 |
| ATOM | 3538 | HG1  | THR | X | 234 | 43.425 | 48.083 | 54.221 | 0.00 | 0.00 |
| ATOM | 3539 | C    | THR | X | 234 | 45.045 | 49.498 | 52.158 | 0.00 | 0.00 |
| ATOM | 3540 | O    | THR | X | 234 | 45.992 | 48.713 | 52.290 | 0.00 | 0.00 |
| ATOM | 3541 | N    | VAL | X | 235 | 44.970 | 50.777 | 52.474 | 0.00 | 0.00 |
| ATOM | 3542 | H    | VAL | X | 235 | 44.236 | 51.301 | 52.018 | 0.00 | 0.00 |
| ATOM | 3543 | CA   | VAL | X | 235 | 45.708 | 51.530 | 53.485 | 0.00 | 0.00 |
| ATOM | 3544 | HA   | VAL | X | 235 | 46.036 | 50.802 | 54.227 | 0.00 | 0.00 |
| ATOM | 3545 | CB   | VAL | X | 235 | 46.835 | 52.262 | 52.695 | 0.00 | 0.00 |
| ATOM | 3546 | HB   | VAL | X | 235 | 47.174 | 51.582 | 51.914 | 0.00 | 0.00 |
| ATOM | 3547 | CG1  | VAL | X | 235 | 46.252 | 53.512 | 51.956 | 0.00 | 0.00 |
| ATOM | 3548 | HG11 | VAL | X | 235 | 45.199 | 53.541 | 51.678 | 0.00 | 0.00 |
| ATOM | 3549 | HG12 | VAL | X | 235 | 46.324 | 54.406 | 52.576 | 0.00 | 0.00 |
| ATOM | 3550 | HG13 | VAL | X | 235 | 46.850 | 53.677 | 51.059 | 0.00 | 0.00 |
| ATOM | 3551 | CG2  | VAL | X | 235 | 48.031 | 52.602 | 53.579 | 0.00 | 0.00 |
| ATOM | 3552 | HG21 | VAL | X | 235 | 48.415 | 51.630 | 53.889 | 0.00 | 0.00 |
| ATOM | 3553 | HG22 | VAL | X | 235 | 47.687 | 53.162 | 54.449 | 0.00 | 0.00 |
| ATOM | 3554 | HG23 | VAL | X | 235 | 48.811 | 53.128 | 53.028 | 0.00 | 0.00 |
| ATOM | 3555 | C    | VAL | X | 235 | 44.772 | 52.558 | 54.162 | 0.00 | 0.00 |
| ATOM | 3556 | O    | VAL | X | 235 | 43.681 | 52.817 | 53.686 | 0.00 | 0.00 |
| ATOM | 3557 | N    | GLY | X | 236 | 45.204 | 53.213 | 55.301 | 0.00 | 0.00 |
| ATOM | 3558 | H    | GLY | X | 236 | 46.064 | 52.907 | 55.734 | 0.00 | 0.00 |
| ATOM | 3559 | CA   | GLY | X | 236 | 44.512 | 54.294 | 55.957 | 0.00 | 0.00 |
| ATOM | 3560 | HA2  | GLY | X | 236 | 43.466 | 54.012 | 55.840 | 0.00 | 0.00 |
| ATOM | 3561 | HA3  | GLY | X | 236 | 44.753 | 54.267 | 57.020 | 0.00 | 0.00 |
| ATOM | 3562 | C    | GLY | X | 236 | 44.844 | 55.722 | 55.389 | 0.00 | 0.00 |

|      |      |     |     |   |     |        |        |        |      |      |
|------|------|-----|-----|---|-----|--------|--------|--------|------|------|
| ATOM | 3563 | O   | GLY | X | 236 | 46.007 | 56.041 | 55.063 | 0.00 | 0.00 |
| ATOM | 3564 | N   | MET | X | 237 | 43.847 | 56.605 | 55.494 | 0.00 | 0.00 |
| ATOM | 3565 | H   | MET | X | 237 | 43.030 | 56.257 | 55.975 | 0.00 | 0.00 |
| ATOM | 3566 | CA  | MET | X | 237 | 43.902 | 57.932 | 55.077 | 0.00 | 0.00 |
| ATOM | 3567 | HA  | MET | X | 237 | 43.861 | 57.951 | 53.988 | 0.00 | 0.00 |
| ATOM | 3568 | CB  | MET | X | 237 | 42.654 | 58.770 | 55.568 | 0.00 | 0.00 |
| ATOM | 3569 | HB2 | MET | X | 237 | 41.680 | 58.438 | 55.210 | 0.00 | 0.00 |
| ATOM | 3570 | HB3 | MET | X | 237 | 42.574 | 58.642 | 56.648 | 0.00 | 0.00 |
| ATOM | 3571 | CG  | MET | X | 237 | 42.699 | 60.222 | 55.326 | 0.00 | 0.00 |
| ATOM | 3572 | HG2 | MET | X | 237 | 41.711 | 60.558 | 55.643 | 0.00 | 0.00 |
| ATOM | 3573 | HG3 | MET | X | 237 | 43.500 | 60.698 | 55.891 | 0.00 | 0.00 |
| ATOM | 3574 | SD  | MET | X | 237 | 42.844 | 60.700 | 53.600 | 0.00 | 0.00 |
| ATOM | 3575 | CE  | MET | X | 237 | 41.109 | 60.688 | 53.047 | 0.00 | 0.00 |
| ATOM | 3576 | HE1 | MET | X | 237 | 40.981 | 61.262 | 52.129 | 0.00 | 0.00 |
| ATOM | 3577 | HE2 | MET | X | 237 | 40.885 | 59.651 | 52.799 | 0.00 | 0.00 |
| ATOM | 3578 | HE3 | MET | X | 237 | 40.523 | 61.220 | 53.796 | 0.00 | 0.00 |
| ATOM | 3579 | C   | MET | X | 237 | 45.169 | 58.698 | 55.625 | 0.00 | 0.00 |
| ATOM | 3580 | O   | MET | X | 237 | 45.709 | 59.534 | 54.847 | 0.00 | 0.00 |
| ATOM | 3581 | N   | GLY | X | 238 | 45.654 | 58.499 | 56.900 | 0.00 | 0.00 |
| ATOM | 3582 | H   | GLY | X | 238 | 45.165 | 57.918 | 57.566 | 0.00 | 0.00 |
| ATOM | 3583 | CA  | GLY | X | 238 | 46.906 | 59.109 | 57.422 | 0.00 | 0.00 |
| ATOM | 3584 | HA2 | GLY | X | 238 | 46.850 | 60.198 | 57.443 | 0.00 | 0.00 |
| ATOM | 3585 | HA3 | GLY | X | 238 | 46.826 | 58.711 | 58.434 | 0.00 | 0.00 |
| ATOM | 3586 | C   | GLY | X | 238 | 48.193 | 58.718 | 56.726 | 0.00 | 0.00 |
| ATOM | 3587 | O   | GLY | X | 238 | 49.079 | 59.561 | 56.593 | 0.00 | 0.00 |
| ATOM | 3588 | N   | GLU | X | 239 | 48.260 | 57.431 | 56.298 | 0.00 | 0.00 |
| ATOM | 3589 | H   | GLU | X | 239 | 47.599 | 56.720 | 56.577 | 0.00 | 0.00 |
| ATOM | 3590 | CA  | GLU | X | 239 | 49.391 | 56.971 | 55.537 | 0.00 | 0.00 |
| ATOM | 3591 | HA  | GLU | X | 239 | 50.354 | 57.344 | 55.885 | 0.00 | 0.00 |
| ATOM | 3592 | CB  | GLU | X | 239 | 49.543 | 55.413 | 55.633 | 0.00 | 0.00 |
| ATOM | 3593 | HB2 | GLU | X | 239 | 48.542 | 55.002 | 55.766 | 0.00 | 0.00 |
| ATOM | 3594 | HB3 | GLU | X | 239 | 49.862 | 55.043 | 54.659 | 0.00 | 0.00 |
| ATOM | 3595 | CG  | GLU | X | 239 | 50.434 | 54.814 | 56.733 | 0.00 | 0.00 |
| ATOM | 3596 | HG2 | GLU | X | 239 | 49.910 | 55.123 | 57.637 | 0.00 | 0.00 |
| ATOM | 3597 | HG3 | GLU | X | 239 | 50.433 | 53.725 | 56.776 | 0.00 | 0.00 |
| ATOM | 3598 | CD  | GLU | X | 239 | 51.823 | 55.405 | 56.705 | 0.00 | 0.00 |
| ATOM | 3599 | OE1 | GLU | X | 239 | 52.645 | 55.154 | 55.760 | 0.00 | 0.00 |
| ATOM | 3600 | OE2 | GLU | X | 239 | 52.279 | 56.108 | 57.611 | 0.00 | 0.00 |
| ATOM | 3601 | C   | GLU | X | 239 | 49.190 | 57.433 | 54.089 | 0.00 | 0.00 |
| ATOM | 3602 | O   | GLU | X | 239 | 50.193 | 57.832 | 53.464 | 0.00 | 0.00 |
| ATOM | 3603 | N   | ALA | X | 240 | 47.958 | 57.577 | 53.513 | 0.00 | 0.00 |
| ATOM | 3604 | H   | ALA | X | 240 | 47.144 | 57.297 | 54.041 | 0.00 | 0.00 |
| ATOM | 3605 | CA  | ALA | X | 240 | 47.880 | 58.061 | 52.111 | 0.00 | 0.00 |
| ATOM | 3606 | HA  | ALA | X | 240 | 48.655 | 57.532 | 51.555 | 0.00 | 0.00 |
| ATOM | 3607 | CB  | ALA | X | 240 | 46.527 | 57.707 | 51.515 | 0.00 | 0.00 |
| ATOM | 3608 | HB1 | ALA | X | 240 | 46.543 | 56.627 | 51.369 | 0.00 | 0.00 |
| ATOM | 3609 | HB2 | ALA | X | 240 | 46.269 | 58.352 | 50.675 | 0.00 | 0.00 |
| ATOM | 3610 | HB3 | ALA | X | 240 | 45.849 | 57.873 | 52.352 | 0.00 | 0.00 |
| ATOM | 3611 | C   | ALA | X | 240 | 48.310 | 59.539 | 52.096 | 0.00 | 0.00 |
| ATOM | 3612 | O   | ALA | X | 240 | 49.116 | 59.981 | 51.268 | 0.00 | 0.00 |
| ATOM | 3613 | N   | ARG | X | 241 | 47.907 | 60.228 | 53.192 | 0.00 | 0.00 |
| ATOM | 3614 | H   | ARG | X | 241 | 47.211 | 59.826 | 53.802 | 0.00 | 0.00 |
| ATOM | 3615 | CA  | ARG | X | 241 | 48.260 | 61.631 | 53.532 | 0.00 | 0.00 |
| ATOM | 3616 | HA  | ARG | X | 241 | 47.948 | 62.262 | 52.699 | 0.00 | 0.00 |
| ATOM | 3617 | CB  | ARG | X | 241 | 47.474 | 62.189 | 54.769 | 0.00 | 0.00 |
| ATOM | 3618 | HB2 | ARG | X | 241 | 46.424 | 61.939 | 54.620 | 0.00 | 0.00 |
| ATOM | 3619 | HB3 | ARG | X | 241 | 47.767 | 61.605 | 55.642 | 0.00 | 0.00 |
| ATOM | 3620 | CG  | ARG | X | 241 | 47.549 | 63.665 | 55.141 | 0.00 | 0.00 |
| ATOM | 3621 | HG2 | ARG | X | 241 | 48.528 | 64.141 | 55.088 | 0.00 | 0.00 |
| ATOM | 3622 | HG3 | ARG | X | 241 | 46.943 | 64.254 | 54.452 | 0.00 | 0.00 |
| ATOM | 3623 | CD  | ARG | X | 241 | 46.898 | 63.912 | 56.481 | 0.00 | 0.00 |
| ATOM | 3624 | HD2 | ARG | X | 241 | 46.109 | 63.166 | 56.573 | 0.00 | 0.00 |
| ATOM | 3625 | HD3 | ARG | X | 241 | 47.594 | 63.679 | 57.287 | 0.00 | 0.00 |
| ATOM | 3626 | NE  | ARG | X | 241 | 46.449 | 65.283 | 56.560 | 0.00 | 0.00 |
| ATOM | 3627 | HE  | ARG | X | 241 | 46.555 | 65.795 | 55.696 | 0.00 | 0.00 |
| ATOM | 3628 | CZ  | ARG | X | 241 | 46.266 | 66.143 | 57.612 | 0.00 | 0.00 |
| ATOM | 3629 | NH1 | ARG | X | 241 | 46.016 | 65.676 | 58.806 | 0.00 | 0.00 |

|      |      |      |     |   |     |        |        |        |      |      |
|------|------|------|-----|---|-----|--------|--------|--------|------|------|
| ATOM | 3630 | HH11 | ARG | X | 241 | 45.870 | 64.686 | 58.941 | 0.00 | 0.00 |
| ATOM | 3631 | HH12 | ARG | X | 241 | 45.697 | 66.354 | 59.483 | 0.00 | 0.00 |
| ATOM | 3632 | NH2  | ARG | X | 241 | 46.396 | 67.460 | 57.616 | 0.00 | 0.00 |
| ATOM | 3633 | HH21 | ARG | X | 241 | 46.519 | 68.034 | 56.794 | 0.00 | 0.00 |
| ATOM | 3634 | HH22 | ARG | X | 241 | 46.327 | 67.828 | 58.554 | 0.00 | 0.00 |
| ATOM | 3635 | C    | ARG | X | 241 | 49.773 | 61.773 | 53.727 | 0.00 | 0.00 |
| ATOM | 3636 | O    | ARG | X | 241 | 50.293 | 62.718 | 53.136 | 0.00 | 0.00 |
| ATOM | 3637 | N    | ARG | X | 242 | 50.424 | 60.818 | 54.277 | 0.00 | 0.00 |
| ATOM | 3638 | H    | ARG | X | 242 | 49.964 | 59.965 | 54.562 | 0.00 | 0.00 |
| ATOM | 3639 | CA   | ARG | X | 242 | 51.901 | 60.881 | 54.320 | 0.00 | 0.00 |
| ATOM | 3640 | HA   | ARG | X | 242 | 52.164 | 61.857 | 54.728 | 0.00 | 0.00 |
| ATOM | 3641 | CB   | ARG | X | 242 | 52.429 | 59.793 | 55.203 | 0.00 | 0.00 |
| ATOM | 3642 | HB2  | ARG | X | 242 | 51.678 | 59.604 | 55.970 | 0.00 | 0.00 |
| ATOM | 3643 | HB3  | ARG | X | 242 | 52.419 | 58.857 | 54.645 | 0.00 | 0.00 |
| ATOM | 3644 | CG   | ARG | X | 242 | 53.855 | 60.033 | 55.751 | 0.00 | 0.00 |
| ATOM | 3645 | HG2  | ARG | X | 242 | 54.529 | 60.260 | 54.925 | 0.00 | 0.00 |
| ATOM | 3646 | HG3  | ARG | X | 242 | 53.805 | 60.799 | 56.524 | 0.00 | 0.00 |
| ATOM | 3647 | CD   | ARG | X | 242 | 54.421 | 58.794 | 56.487 | 0.00 | 0.00 |
| ATOM | 3648 | HD2  | ARG | X | 242 | 55.427 | 58.955 | 56.875 | 0.00 | 0.00 |
| ATOM | 3649 | HD3  | ARG | X | 242 | 53.786 | 58.605 | 57.352 | 0.00 | 0.00 |
| ATOM | 3650 | NE   | ARG | X | 242 | 54.396 | 57.524 | 55.725 | 0.00 | 0.00 |
| ATOM | 3651 | HE   | ARG | X | 242 | 53.835 | 56.728 | 55.994 | 0.00 | 0.00 |
| ATOM | 3652 | CZ   | ARG | X | 242 | 54.782 | 57.374 | 54.427 | 0.00 | 0.00 |
| ATOM | 3653 | NH1  | ARG | X | 242 | 55.690 | 58.207 | 53.959 | 0.00 | 0.00 |
| ATOM | 3654 | HH11 | ARG | X | 242 | 56.045 | 58.925 | 54.574 | 0.00 | 0.00 |
| ATOM | 3655 | HH12 | ARG | X | 242 | 56.026 | 58.081 | 53.015 | 0.00 | 0.00 |
| ATOM | 3656 | NH2  | ARG | X | 242 | 54.280 | 56.340 | 53.842 | 0.00 | 0.00 |
| ATOM | 3657 | HH21 | ARG | X | 242 | 53.652 | 55.791 | 54.412 | 0.00 | 0.00 |
| ATOM | 3658 | HH22 | ARG | X | 242 | 54.657 | 56.096 | 52.938 | 0.00 | 0.00 |
| ATOM | 3659 | C    | ARG | X | 242 | 52.522 | 60.681 | 52.909 | 0.00 | 0.00 |
| ATOM | 3660 | O    | ARG | X | 242 | 53.247 | 61.556 | 52.463 | 0.00 | 0.00 |
| ATOM | 3661 | N    | ARG | X | 243 | 52.163 | 59.667 | 52.102 | 0.00 | 0.00 |
| ATOM | 3662 | H    | ARG | X | 243 | 51.649 | 58.869 | 52.447 | 0.00 | 0.00 |
| ATOM | 3663 | CA   | ARG | X | 243 | 52.715 | 59.544 | 50.765 | 0.00 | 0.00 |
| ATOM | 3664 | HA   | ARG | X | 243 | 53.794 | 59.543 | 50.920 | 0.00 | 0.00 |
| ATOM | 3665 | CB   | ARG | X | 243 | 52.132 | 58.246 | 50.148 | 0.00 | 0.00 |
| ATOM | 3666 | HB2  | ARG | X | 243 | 51.047 | 58.348 | 50.140 | 0.00 | 0.00 |
| ATOM | 3667 | HB3  | ARG | X | 243 | 52.563 | 58.090 | 49.159 | 0.00 | 0.00 |
| ATOM | 3668 | CG   | ARG | X | 243 | 52.645 | 56.990 | 50.894 | 0.00 | 0.00 |
| ATOM | 3669 | HG2  | ARG | X | 243 | 53.734 | 57.020 | 50.878 | 0.00 | 0.00 |
| ATOM | 3670 | HG3  | ARG | X | 243 | 52.281 | 57.033 | 51.921 | 0.00 | 0.00 |
| ATOM | 3671 | CD   | ARG | X | 243 | 52.145 | 55.727 | 50.221 | 0.00 | 0.00 |
| ATOM | 3672 | HD2  | ARG | X | 243 | 51.130 | 55.889 | 49.857 | 0.00 | 0.00 |
| ATOM | 3673 | HD3  | ARG | X | 243 | 52.719 | 55.471 | 49.330 | 0.00 | 0.00 |
| ATOM | 3674 | NE   | ARG | X | 243 | 52.193 | 54.499 | 51.076 | 0.00 | 0.00 |
| ATOM | 3675 | HE   | ARG | X | 243 | 52.545 | 54.593 | 52.017 | 0.00 | 0.00 |
| ATOM | 3676 | CZ   | ARG | X | 243 | 51.861 | 53.283 | 50.681 | 0.00 | 0.00 |
| ATOM | 3677 | NH1  | ARG | X | 243 | 51.677 | 52.989 | 49.420 | 0.00 | 0.00 |
| ATOM | 3678 | HH11 | ARG | X | 243 | 51.699 | 53.716 | 48.719 | 0.00 | 0.00 |
| ATOM | 3679 | HH12 | ARG | X | 243 | 51.620 | 52.023 | 49.128 | 0.00 | 0.00 |
| ATOM | 3680 | NH2  | ARG | X | 243 | 51.731 | 52.288 | 51.571 | 0.00 | 0.00 |
| ATOM | 3681 | HH21 | ARG | X | 243 | 51.714 | 52.547 | 52.547 | 0.00 | 0.00 |
| ATOM | 3682 | HH22 | ARG | X | 243 | 51.629 | 51.297 | 51.403 | 0.00 | 0.00 |
| ATOM | 3683 | C    | ARG | X | 243 | 52.467 | 60.802 | 49.953 | 0.00 | 0.00 |
| ATOM | 3684 | O    | ARG | X | 243 | 53.363 | 61.233 | 49.223 | 0.00 | 0.00 |
| ATOM | 3685 | N    | ALA | X | 244 | 51.270 | 61.345 | 50.138 | 0.00 | 0.00 |
| ATOM | 3686 | H    | ALA | X | 244 | 50.585 | 60.856 | 50.696 | 0.00 | 0.00 |
| ATOM | 3687 | CA   | ALA | X | 244 | 50.877 | 62.561 | 49.415 | 0.00 | 0.00 |
| ATOM | 3688 | HA   | ALA | X | 244 | 50.950 | 62.365 | 48.345 | 0.00 | 0.00 |
| ATOM | 3689 | CB   | ALA | X | 244 | 49.359 | 62.696 | 49.747 | 0.00 | 0.00 |
| ATOM | 3690 | HB1  | ALA | X | 244 | 48.941 | 63.549 | 49.212 | 0.00 | 0.00 |
| ATOM | 3691 | HB2  | ALA | X | 244 | 49.105 | 62.844 | 50.796 | 0.00 | 0.00 |
| ATOM | 3692 | HB3  | ALA | X | 244 | 48.827 | 61.804 | 49.417 | 0.00 | 0.00 |
| ATOM | 3693 | C    | ALA | X | 244 | 51.802 | 63.738 | 49.735 | 0.00 | 0.00 |
| ATOM | 3694 | O    | ALA | X | 244 | 52.392 | 64.252 | 48.804 | 0.00 | 0.00 |
| ATOM | 3695 | N    | THR | X | 245 | 51.898 | 64.104 | 51.025 | 0.00 | 0.00 |
| ATOM | 3696 | H    | THR | X | 245 | 51.295 | 63.582 | 51.645 | 0.00 | 0.00 |

|      |      |      |     |   |     |        |        |        |      |      |
|------|------|------|-----|---|-----|--------|--------|--------|------|------|
| ATOM | 3697 | CA   | THR | X | 245 | 52.766 | 65.163 | 51.645 | 0.00 | 0.00 |
| ATOM | 3698 | HA   | THR | X | 245 | 52.497 | 66.137 | 51.237 | 0.00 | 0.00 |
| ATOM | 3699 | CB   | THR | X | 245 | 52.676 | 65.157 | 53.212 | 0.00 | 0.00 |
| ATOM | 3700 | HB   | THR | X | 245 | 53.109 | 64.266 | 53.667 | 0.00 | 0.00 |
| ATOM | 3701 | CG2  | THR | X | 245 | 53.398 | 66.447 | 53.716 | 0.00 | 0.00 |
| ATOM | 3702 | HG21 | THR | X | 245 | 53.121 | 66.498 | 54.769 | 0.00 | 0.00 |
| ATOM | 3703 | HG22 | THR | X | 245 | 53.146 | 67.350 | 53.160 | 0.00 | 0.00 |
| ATOM | 3704 | HG23 | THR | X | 245 | 54.470 | 66.323 | 53.563 | 0.00 | 0.00 |
| ATOM | 3705 | OG1  | THR | X | 245 | 51.308 | 65.279 | 53.491 | 0.00 | 0.00 |
| ATOM | 3706 | HG1  | THR | X | 245 | 50.867 | 64.429 | 53.425 | 0.00 | 0.00 |
| ATOM | 3707 | C    | THR | X | 245 | 54.256 | 64.894 | 51.205 | 0.00 | 0.00 |
| ATOM | 3708 | O    | THR | X | 245 | 54.964 | 65.774 | 50.830 | 0.00 | 0.00 |
| ATOM | 3709 | N    | GLN | X | 246 | 54.748 | 63.689 | 51.277 | 0.00 | 0.00 |
| ATOM | 3710 | H    | GLN | X | 246 | 54.123 | 63.024 | 51.708 | 0.00 | 0.00 |
| ATOM | 3711 | CA   | GLN | X | 246 | 56.068 | 63.314 | 50.733 | 0.00 | 0.00 |
| ATOM | 3712 | HA   | GLN | X | 246 | 56.662 | 64.127 | 51.150 | 0.00 | 0.00 |
| ATOM | 3713 | CB   | GLN | X | 246 | 56.589 | 61.891 | 51.057 | 0.00 | 0.00 |
| ATOM | 3714 | HB2  | GLN | X | 246 | 56.574 | 61.822 | 52.144 | 0.00 | 0.00 |
| ATOM | 3715 | HB3  | GLN | X | 246 | 55.955 | 61.099 | 50.657 | 0.00 | 0.00 |
| ATOM | 3716 | CG   | GLN | X | 246 | 58.064 | 61.650 | 50.586 | 0.00 | 0.00 |
| ATOM | 3717 | HG2  | GLN | X | 246 | 58.114 | 61.449 | 49.516 | 0.00 | 0.00 |
| ATOM | 3718 | HG3  | GLN | X | 246 | 58.599 | 62.587 | 50.744 | 0.00 | 0.00 |
| ATOM | 3719 | CD   | GLN | X | 246 | 58.946 | 60.643 | 51.340 | 0.00 | 0.00 |
| ATOM | 3720 | OE1  | GLN | X | 246 | 59.467 | 59.621 | 50.833 | 0.00 | 0.00 |
| ATOM | 3721 | NE2  | GLN | X | 246 | 59.058 | 60.813 | 52.652 | 0.00 | 0.00 |
| ATOM | 3722 | HE21 | GLN | X | 246 | 59.514 | 60.072 | 53.165 | 0.00 | 0.00 |
| ATOM | 3723 | HE22 | GLN | X | 246 | 58.788 | 61.684 | 53.085 | 0.00 | 0.00 |
| ATOM | 3724 | C    | GLN | X | 246 | 56.172 | 63.460 | 49.203 | 0.00 | 0.00 |
| ATOM | 3725 | O    | GLN | X | 246 | 57.259 | 63.796 | 48.772 | 0.00 | 0.00 |
| ATOM | 3726 | N    | LEU | X | 247 | 55.132 | 63.333 | 48.396 | 0.00 | 0.00 |
| ATOM | 3727 | H    | LEU | X | 247 | 54.276 | 62.915 | 48.732 | 0.00 | 0.00 |
| ATOM | 3728 | CA   | LEU | X | 247 | 55.171 | 63.516 | 46.955 | 0.00 | 0.00 |
| ATOM | 3729 | HA   | LEU | X | 247 | 56.160 | 63.134 | 46.703 | 0.00 | 0.00 |
| ATOM | 3730 | CB   | LEU | X | 247 | 54.014 | 62.711 | 46.322 | 0.00 | 0.00 |
| ATOM | 3731 | HB2  | LEU | X | 247 | 54.073 | 61.720 | 46.772 | 0.00 | 0.00 |
| ATOM | 3732 | HB3  | LEU | X | 247 | 53.039 | 63.141 | 46.552 | 0.00 | 0.00 |
| ATOM | 3733 | CG   | LEU | X | 247 | 54.243 | 62.525 | 44.773 | 0.00 | 0.00 |
| ATOM | 3734 | HG   | LEU | X | 247 | 54.167 | 63.507 | 44.306 | 0.00 | 0.00 |
| ATOM | 3735 | CD1  | LEU | X | 247 | 55.686 | 61.979 | 44.479 | 0.00 | 0.00 |
| ATOM | 3736 | HD11 | LEU | X | 247 | 55.758 | 61.689 | 43.431 | 0.00 | 0.00 |
| ATOM | 3737 | HD12 | LEU | X | 247 | 55.983 | 61.125 | 45.088 | 0.00 | 0.00 |
| ATOM | 3738 | HD13 | LEU | X | 247 | 56.331 | 62.836 | 44.674 | 0.00 | 0.00 |
| ATOM | 3739 | CD2  | LEU | X | 247 | 53.196 | 61.607 | 44.153 | 0.00 | 0.00 |
| ATOM | 3740 | HD21 | LEU | X | 247 | 52.817 | 60.825 | 44.811 | 0.00 | 0.00 |
| ATOM | 3741 | HD22 | LEU | X | 247 | 52.419 | 62.281 | 43.793 | 0.00 | 0.00 |
| ATOM | 3742 | HD23 | LEU | X | 247 | 53.605 | 60.988 | 43.354 | 0.00 | 0.00 |
| ATOM | 3743 | C    | LEU | X | 247 | 55.266 | 65.024 | 46.660 | 0.00 | 0.00 |
| ATOM | 3744 | O    | LEU | X | 247 | 56.144 | 65.459 | 45.875 | 0.00 | 0.00 |
| ATOM | 3745 | N    | ALA | X | 248 | 54.262 | 65.776 | 47.125 | 0.00 | 0.00 |
| ATOM | 3746 | H    | ALA | X | 248 | 53.583 | 65.252 | 47.658 | 0.00 | 0.00 |
| ATOM | 3747 | CA   | ALA | X | 248 | 54.477 | 67.229 | 47.284 | 0.00 | 0.00 |
| ATOM | 3748 | HA   | ALA | X | 248 | 54.251 | 67.560 | 46.270 | 0.00 | 0.00 |
| ATOM | 3749 | CB   | ALA | X | 248 | 53.340 | 67.789 | 48.185 | 0.00 | 0.00 |
| ATOM | 3750 | HB1  | ALA | X | 248 | 53.469 | 68.871 | 48.207 | 0.00 | 0.00 |
| ATOM | 3751 | HB2  | ALA | X | 248 | 53.527 | 67.317 | 49.149 | 0.00 | 0.00 |
| ATOM | 3752 | HB3  | ALA | X | 248 | 52.371 | 67.551 | 47.745 | 0.00 | 0.00 |
| ATOM | 3753 | C    | ALA | X | 248 | 55.803 | 67.713 | 47.660 | 0.00 | 0.00 |
| ATOM | 3754 | O    | ALA | X | 248 | 56.429 | 68.386 | 46.820 | 0.00 | 0.00 |
| ATOM | 3755 | N    | HIE | X | 249 | 56.374 | 67.265 | 48.802 | 0.00 | 0.00 |
| ATOM | 3756 | H    | HIE | X | 249 | 55.954 | 66.736 | 49.553 | 0.00 | 0.00 |
| ATOM | 3757 | CA   | HIE | X | 249 | 57.780 | 67.518 | 49.145 | 0.00 | 0.00 |
| ATOM | 3758 | HA   | HIE | X | 249 | 57.868 | 68.590 | 49.321 | 0.00 | 0.00 |
| ATOM | 3759 | CB   | HIE | X | 249 | 58.033 | 66.768 | 50.490 | 0.00 | 0.00 |
| ATOM | 3760 | HB2  | HIE | X | 249 | 57.136 | 66.888 | 51.097 | 0.00 | 0.00 |
| ATOM | 3761 | HB3  | HIE | X | 249 | 58.201 | 65.700 | 50.346 | 0.00 | 0.00 |
| ATOM | 3762 | CG   | HIE | X | 249 | 59.213 | 67.351 | 51.279 | 0.00 | 0.00 |
| ATOM | 3763 | ND1  | HIE | X | 249 | 59.661 | 68.694 | 51.410 | 0.00 | 0.00 |

|      |      |      |     |   |     |        |        |        |      |      |
|------|------|------|-----|---|-----|--------|--------|--------|------|------|
| ATOM | 3764 | CE1  | HIE | X | 249 | 60.707 | 68.643 | 52.257 | 0.00 | 0.00 |
| ATOM | 3765 | HE1  | HIE | X | 249 | 61.270 | 69.539 | 52.479 | 0.00 | 0.00 |
| ATOM | 3766 | NE2  | HIE | X | 249 | 61.049 | 67.433 | 52.589 | 0.00 | 0.00 |
| ATOM | 3767 | HE2  | HIE | X | 249 | 61.778 | 67.013 | 53.148 | 0.00 | 0.00 |
| ATOM | 3768 | CD2  | HIE | X | 249 | 60.136 | 66.640 | 51.931 | 0.00 | 0.00 |
| ATOM | 3769 | HD2  | HIE | X | 249 | 60.146 | 65.560 | 51.938 | 0.00 | 0.00 |
| ATOM | 3770 | C    | HIE | X | 249 | 58.832 | 67.168 | 48.117 | 0.00 | 0.00 |
| ATOM | 3771 | O    | HIE | X | 249 | 59.849 | 67.808 | 48.009 | 0.00 | 0.00 |
| ATOM | 3772 | N    | LEU | X | 250 | 58.614 | 66.106 | 47.296 | 0.00 | 0.00 |
| ATOM | 3773 | H    | LEU | X | 250 | 57.786 | 65.568 | 47.509 | 0.00 | 0.00 |
| ATOM | 3774 | CA   | LEU | X | 250 | 59.447 | 65.702 | 46.131 | 0.00 | 0.00 |
| ATOM | 3775 | HA   | LEU | X | 250 | 60.498 | 65.828 | 46.394 | 0.00 | 0.00 |
| ATOM | 3776 | CB   | LEU | X | 250 | 59.176 | 64.142 | 45.868 | 0.00 | 0.00 |
| ATOM | 3777 | HB2  | LEU | X | 250 | 58.123 | 63.939 | 46.064 | 0.00 | 0.00 |
| ATOM | 3778 | HB3  | LEU | X | 250 | 59.356 | 63.971 | 44.807 | 0.00 | 0.00 |
| ATOM | 3779 | CG   | LEU | X | 250 | 60.143 | 63.207 | 46.633 | 0.00 | 0.00 |
| ATOM | 3780 | HG   | LEU | X | 250 | 60.396 | 63.609 | 47.614 | 0.00 | 0.00 |
| ATOM | 3781 | CD1  | LEU | X | 250 | 59.541 | 61.814 | 46.750 | 0.00 | 0.00 |
| ATOM | 3782 | HD11 | LEU | X | 250 | 60.103 | 61.327 | 47.547 | 0.00 | 0.00 |
| ATOM | 3783 | HD12 | LEU | X | 250 | 59.454 | 61.284 | 45.802 | 0.00 | 0.00 |
| ATOM | 3784 | HD13 | LEU | X | 250 | 58.575 | 61.912 | 47.245 | 0.00 | 0.00 |
| ATOM | 3785 | CD2  | LEU | X | 250 | 61.520 | 63.241 | 45.872 | 0.00 | 0.00 |
| ATOM | 3786 | HD21 | LEU | X | 250 | 61.516 | 62.365 | 45.224 | 0.00 | 0.00 |
| ATOM | 3787 | HD22 | LEU | X | 250 | 61.797 | 64.156 | 45.347 | 0.00 | 0.00 |
| ATOM | 3788 | HD23 | LEU | X | 250 | 62.321 | 63.087 | 46.594 | 0.00 | 0.00 |
| ATOM | 3789 | C    | LEU | X | 250 | 59.271 | 66.451 | 44.809 | 0.00 | 0.00 |
| ATOM | 3790 | O    | LEU | X | 250 | 60.265 | 66.906 | 44.250 | 0.00 | 0.00 |
| ATOM | 3791 | N    | VAL | X | 251 | 58.049 | 66.658 | 44.373 | 0.00 | 0.00 |
| ATOM | 3792 | H    | VAL | X | 251 | 57.296 | 66.191 | 44.856 | 0.00 | 0.00 |
| ATOM | 3793 | CA   | VAL | X | 251 | 57.573 | 67.448 | 43.211 | 0.00 | 0.00 |
| ATOM | 3794 | HA   | VAL | X | 251 | 58.100 | 67.043 | 42.347 | 0.00 | 0.00 |
| ATOM | 3795 | CB   | VAL | X | 251 | 56.040 | 67.321 | 43.000 | 0.00 | 0.00 |
| ATOM | 3796 | HB   | VAL | X | 251 | 55.573 | 67.376 | 43.984 | 0.00 | 0.00 |
| ATOM | 3797 | CG1  | VAL | X | 251 | 55.531 | 68.463 | 42.122 | 0.00 | 0.00 |
| ATOM | 3798 | HG11 | VAL | X | 251 | 54.441 | 68.467 | 42.152 | 0.00 | 0.00 |
| ATOM | 3799 | HG12 | VAL | X | 251 | 55.718 | 69.465 | 42.507 | 0.00 | 0.00 |
| ATOM | 3800 | HG13 | VAL | X | 251 | 55.756 | 68.370 | 41.060 | 0.00 | 0.00 |
| ATOM | 3801 | CG2  | VAL | X | 251 | 55.770 | 65.928 | 42.311 | 0.00 | 0.00 |
| ATOM | 3802 | HG21 | VAL | X | 251 | 54.771 | 65.585 | 42.581 | 0.00 | 0.00 |
| ATOM | 3803 | HG22 | VAL | X | 251 | 56.437 | 65.185 | 42.747 | 0.00 | 0.00 |
| ATOM | 3804 | HG23 | VAL | X | 251 | 56.036 | 66.105 | 41.269 | 0.00 | 0.00 |
| ATOM | 3805 | C    | VAL | X | 251 | 57.986 | 68.896 | 43.437 | 0.00 | 0.00 |
| ATOM | 3806 | O    | VAL | X | 251 | 58.544 | 69.484 | 42.490 | 0.00 | 0.00 |
| ATOM | 3807 | N    | GLY | X | 252 | 57.636 | 69.421 | 44.621 | 0.00 | 0.00 |
| ATOM | 3808 | H    | GLY | X | 252 | 57.240 | 68.831 | 45.339 | 0.00 | 0.00 |
| ATOM | 3809 | CA   | GLY | X | 252 | 57.883 | 70.778 | 45.008 | 0.00 | 0.00 |
| ATOM | 3810 | HA2  | GLY | X | 252 | 58.542 | 70.684 | 45.871 | 0.00 | 0.00 |
| ATOM | 3811 | HA3  | GLY | X | 252 | 58.528 | 71.296 | 44.298 | 0.00 | 0.00 |
| ATOM | 3812 | C    | GLY | X | 252 | 56.731 | 71.686 | 45.439 | 0.00 | 0.00 |
| ATOM | 3813 | O    | GLY | X | 252 | 56.588 | 72.820 | 45.005 | 0.00 | 0.00 |
| ATOM | 3814 | N    | CYX | X | 253 | 55.849 | 71.168 | 46.243 | 0.00 | 0.00 |
| ATOM | 3815 | H    | CYX | X | 253 | 55.949 | 70.217 | 46.568 | 0.00 | 0.00 |
| ATOM | 3816 | CA   | CYX | X | 253 | 54.567 | 71.778 | 46.494 | 0.00 | 0.00 |
| ATOM | 3817 | HA   | CYX | X | 253 | 54.495 | 72.740 | 45.987 | 0.00 | 0.00 |
| ATOM | 3818 | CB   | CYX | X | 253 | 53.582 | 70.844 | 45.675 | 0.00 | 0.00 |
| ATOM | 3819 | HB2  | CYX | X | 253 | 53.955 | 69.835 | 45.855 | 0.00 | 0.00 |
| ATOM | 3820 | HB3  | CYX | X | 253 | 52.587 | 70.811 | 46.120 | 0.00 | 0.00 |
| ATOM | 3821 | SG   | CYX | X | 253 | 53.515 | 71.070 | 43.872 | 0.00 | 0.00 |
| ATOM | 3822 | C    | CYX | X | 253 | 54.145 | 71.843 | 48.034 | 0.00 | 0.00 |
| ATOM | 3823 | O    | CYX | X | 253 | 54.566 | 70.978 | 48.762 | 0.00 | 0.00 |
| ATOM | 3824 | N    | PRO | X | 254 | 53.308 | 72.846 | 48.450 | 0.00 | 0.00 |
| ATOM | 3825 | CD   | PRO | X | 254 | 52.771 | 73.002 | 49.851 | 0.00 | 0.00 |
| ATOM | 3826 | HD2  | PRO | X | 254 | 53.630 | 72.931 | 50.518 | 0.00 | 0.00 |
| ATOM | 3827 | HD3  | PRO | X | 254 | 52.065 | 72.221 | 50.135 | 0.00 | 0.00 |
| ATOM | 3828 | CG   | PRO | X | 254 | 52.176 | 74.365 | 49.917 | 0.00 | 0.00 |
| ATOM | 3829 | HG2  | PRO | X | 254 | 52.936 | 75.104 | 50.174 | 0.00 | 0.00 |
| ATOM | 3830 | HG3  | PRO | X | 254 | 51.371 | 74.565 | 50.625 | 0.00 | 0.00 |



|      |      |      |     |   |     |        |        |        |      |      |
|------|------|------|-----|---|-----|--------|--------|--------|------|------|
| ATOM | 3831 | CB   | PRO | X | 254 | 51.626 | 74.677 | 48.563 | 0.00 | 0.00 |
| ATOM | 3832 | HB2  | PRO | X | 254 | 51.613 | 75.720 | 48.246 | 0.00 | 0.00 |
| ATOM | 3833 | HB3  | PRO | X | 254 | 50.707 | 74.143 | 48.327 | 0.00 | 0.00 |
| ATOM | 3834 | CA   | PRO | X | 254 | 52.763 | 74.013 | 47.706 | 0.00 | 0.00 |
| ATOM | 3835 | HA   | PRO | X | 254 | 52.348 | 73.596 | 46.789 | 0.00 | 0.00 |
| ATOM | 3836 | C    | PRO | X | 254 | 53.882 | 74.993 | 47.424 | 0.00 | 0.00 |
| ATOM | 3837 | O    | PRO | X | 254 | 54.953 | 74.823 | 47.971 | 0.00 | 0.00 |
| ATOM | 3838 | N    | PRO | X | 255 | 53.575 | 75.949 | 46.561 | 0.00 | 0.00 |
| ATOM | 3839 | CD   | PRO | X | 255 | 52.419 | 76.190 | 45.801 | 0.00 | 0.00 |
| ATOM | 3840 | HD2  | PRO | X | 255 | 51.466 | 75.932 | 46.263 | 0.00 | 0.00 |
| ATOM | 3841 | HD3  | PRO | X | 255 | 52.484 | 75.598 | 44.888 | 0.00 | 0.00 |
| ATOM | 3842 | CG   | PRO | X | 255 | 52.389 | 77.677 | 45.300 | 0.00 | 0.00 |
| ATOM | 3843 | HG2  | PRO | X | 255 | 51.862 | 78.324 | 46.001 | 0.00 | 0.00 |
| ATOM | 3844 | HG3  | PRO | X | 255 | 51.940 | 77.827 | 44.319 | 0.00 | 0.00 |
| ATOM | 3845 | CB   | PRO | X | 255 | 53.874 | 77.946 | 45.275 | 0.00 | 0.00 |
| ATOM | 3846 | HB2  | PRO | X | 255 | 54.053 | 79.013 | 45.411 | 0.00 | 0.00 |
| ATOM | 3847 | HB3  | PRO | X | 255 | 54.251 | 77.565 | 44.326 | 0.00 | 0.00 |
| ATOM | 3848 | CA   | PRO | X | 255 | 54.495 | 77.105 | 46.364 | 0.00 | 0.00 |
| ATOM | 3849 | HA   | PRO | X | 255 | 55.427 | 76.654 | 46.026 | 0.00 | 0.00 |
| ATOM | 3850 | C    | PRO | X | 255 | 54.741 | 77.841 | 47.688 | 0.00 | 0.00 |
| ATOM | 3851 | O    | PRO | X | 255 | 53.909 | 77.879 | 48.616 | 0.00 | 0.00 |
| ATOM | 3852 | N    | GLY | X | 256 | 55.891 | 78.457 | 47.764 | 0.00 | 0.00 |
| ATOM | 3853 | H    | GLY | X | 256 | 56.391 | 78.493 | 46.887 | 0.00 | 0.00 |
| ATOM | 3854 | CA   | GLY | X | 256 | 56.287 | 79.290 | 48.902 | 0.00 | 0.00 |
| ATOM | 3855 | HA2  | GLY | X | 256 | 57.067 | 79.923 | 48.480 | 0.00 | 0.00 |
| ATOM | 3856 | HA3  | GLY | X | 256 | 55.469 | 79.880 | 49.315 | 0.00 | 0.00 |
| ATOM | 3857 | C    | GLY | X | 256 | 56.936 | 78.482 | 50.049 | 0.00 | 0.00 |
| ATOM | 3858 | O    | GLY | X | 256 | 57.363 | 79.102 | 51.017 | 0.00 | 0.00 |
| ATOM | 3859 | N    | GLY | X | 257 | 57.113 | 77.139 | 49.921 | 0.00 | 0.00 |
| ATOM | 3860 | H    | GLY | X | 257 | 56.910 | 76.777 | 49.000 | 0.00 | 0.00 |
| ATOM | 3861 | CA   | GLY | X | 257 | 57.767 | 76.213 | 50.792 | 0.00 | 0.00 |
| ATOM | 3862 | HA2  | GLY | X | 257 | 58.647 | 75.819 | 50.283 | 0.00 | 0.00 |
| ATOM | 3863 | HA3  | GLY | X | 257 | 58.044 | 76.609 | 51.769 | 0.00 | 0.00 |
| ATOM | 3864 | C    | GLY | X | 257 | 56.898 | 74.945 | 51.065 | 0.00 | 0.00 |
| ATOM | 3865 | O    | GLY | X | 257 | 55.643 | 75.006 | 51.017 | 0.00 | 0.00 |
| ATOM | 3866 | N    | THR | X | 258 | 57.561 | 73.785 | 51.167 | 0.00 | 0.00 |
| ATOM | 3867 | H    | THR | X | 258 | 58.570 | 73.761 | 51.200 | 0.00 | 0.00 |
| ATOM | 3868 | CA   | THR | X | 258 | 56.862 | 72.455 | 51.249 | 0.00 | 0.00 |
| ATOM | 3869 | HA   | THR | X | 258 | 56.041 | 72.463 | 50.531 | 0.00 | 0.00 |
| ATOM | 3870 | CB   | THR | X | 258 | 57.878 | 71.366 | 50.894 | 0.00 | 0.00 |
| ATOM | 3871 | HB   | THR | X | 258 | 57.462 | 70.393 | 51.155 | 0.00 | 0.00 |
| ATOM | 3872 | CG2  | THR | X | 258 | 58.321 | 71.352 | 49.425 | 0.00 | 0.00 |
| ATOM | 3873 | HG21 | THR | X | 258 | 59.030 | 70.574 | 49.141 | 0.00 | 0.00 |
| ATOM | 3874 | HG22 | THR | X | 258 | 58.492 | 72.359 | 49.045 | 0.00 | 0.00 |
| ATOM | 3875 | HG23 | THR | X | 258 | 57.457 | 71.027 | 48.845 | 0.00 | 0.00 |
| ATOM | 3876 | OG1  | THR | X | 258 | 58.888 | 71.520 | 51.799 | 0.00 | 0.00 |
| ATOM | 3877 | HG1  | THR | X | 258 | 59.549 | 70.877 | 51.530 | 0.00 | 0.00 |
| ATOM | 3878 | C    | THR | X | 258 | 56.262 | 72.288 | 52.618 | 0.00 | 0.00 |
| ATOM | 3879 | O    | THR | X | 258 | 56.755 | 72.879 | 53.650 | 0.00 | 0.00 |
| ATOM | 3880 | N    | GLY | X | 259 | 55.234 | 71.446 | 52.801 | 0.00 | 0.00 |
| ATOM | 3881 | H    | GLY | X | 259 | 54.843 | 70.966 | 52.003 | 0.00 | 0.00 |
| ATOM | 3882 | CA   | GLY | X | 259 | 54.455 | 71.344 | 54.050 | 0.00 | 0.00 |
| ATOM | 3883 | HA2  | GLY | X | 259 | 54.142 | 70.300 | 54.059 | 0.00 | 0.00 |
| ATOM | 3884 | HA3  | GLY | X | 259 | 55.053 | 71.530 | 54.942 | 0.00 | 0.00 |
| ATOM | 3885 | C    | GLY | X | 259 | 53.185 | 72.182 | 53.971 | 0.00 | 0.00 |
| ATOM | 3886 | O    | GLY | X | 259 | 52.871 | 72.605 | 52.849 | 0.00 | 0.00 |
| ATOM | 3887 | N    | GLY | X | 260 | 52.598 | 72.528 | 55.136 | 0.00 | 0.00 |
| ATOM | 3888 | H    | GLY | X | 260 | 52.938 | 72.135 | 56.003 | 0.00 | 0.00 |
| ATOM | 3889 | CA   | GLY | X | 260 | 51.433 | 73.483 | 55.213 | 0.00 | 0.00 |
| ATOM | 3890 | HA2  | GLY | X | 260 | 51.201 | 73.976 | 56.157 | 0.00 | 0.00 |
| ATOM | 3891 | HA3  | GLY | X | 260 | 51.610 | 74.312 | 54.528 | 0.00 | 0.00 |
| ATOM | 3892 | C    | GLY | X | 260 | 50.141 | 72.765 | 54.791 | 0.00 | 0.00 |
| ATOM | 3893 | O    | GLY | X | 260 | 50.064 | 71.497 | 54.763 | 0.00 | 0.00 |
| ATOM | 3894 | N    | ASN | X | 261 | 49.098 | 73.467 | 54.490 | 0.00 | 0.00 |
| ATOM | 3895 | H    | ASN | X | 261 | 49.342 | 74.434 | 54.329 | 0.00 | 0.00 |
| ATOM | 3896 | CA   | ASN | X | 261 | 47.741 | 73.009 | 54.312 | 0.00 | 0.00 |
| ATOM | 3897 | HA   | ASN | X | 261 | 47.524 | 72.471 | 55.235 | 0.00 | 0.00 |

|      |      |      |     |   |     |        |        |        |      |      |
|------|------|------|-----|---|-----|--------|--------|--------|------|------|
| ATOM | 3898 | CB   | ASN | X | 261 | 46.754 | 74.123 | 54.421 | 0.00 | 0.00 |
| ATOM | 3899 | HB2  | ASN | X | 261 | 46.922 | 74.743 | 55.302 | 0.00 | 0.00 |
| ATOM | 3900 | HB3  | ASN | X | 261 | 47.058 | 74.810 | 53.631 | 0.00 | 0.00 |
| ATOM | 3901 | CG   | ASN | X | 261 | 45.235 | 73.782 | 54.363 | 0.00 | 0.00 |
| ATOM | 3902 | OD1  | ASN | X | 261 | 44.787 | 72.742 | 53.953 | 0.00 | 0.00 |
| ATOM | 3903 | ND2  | ASN | X | 261 | 44.420 | 74.778 | 54.813 | 0.00 | 0.00 |
| ATOM | 3904 | HD21 | ASN | X | 261 | 43.433 | 74.605 | 54.934 | 0.00 | 0.00 |
| ATOM | 3905 | HD22 | ASN | X | 261 | 44.881 | 75.623 | 55.119 | 0.00 | 0.00 |
| ATOM | 3906 | C    | ASN | X | 261 | 47.557 | 72.063 | 53.117 | 0.00 | 0.00 |
| ATOM | 3907 | O    | ASN | X | 261 | 48.036 | 72.281 | 52.005 | 0.00 | 0.00 |
| ATOM | 3908 | N    | ASP | X | 262 | 46.886 | 70.889 | 53.351 | 0.00 | 0.00 |
| ATOM | 3909 | H    | ASP | X | 262 | 46.665 | 70.715 | 54.321 | 0.00 | 0.00 |
| ATOM | 3910 | CA   | ASP | X | 262 | 46.560 | 69.729 | 52.447 | 0.00 | 0.00 |
| ATOM | 3911 | HA   | ASP | X | 262 | 47.495 | 69.222 | 52.211 | 0.00 | 0.00 |
| ATOM | 3912 | CB   | ASP | X | 262 | 45.609 | 68.758 | 53.195 | 0.00 | 0.00 |
| ATOM | 3913 | HB2  | ASP | X | 262 | 44.614 | 69.202 | 53.242 | 0.00 | 0.00 |
| ATOM | 3914 | HB3  | ASP | X | 262 | 45.583 | 67.847 | 52.598 | 0.00 | 0.00 |
| ATOM | 3915 | CG   | ASP | X | 262 | 46.096 | 68.388 | 54.602 | 0.00 | 0.00 |
| ATOM | 3916 | OD1  | ASP | X | 262 | 46.563 | 67.265 | 54.730 | 0.00 | 0.00 |
| ATOM | 3917 | OD2  | ASP | X | 262 | 45.999 | 69.302 | 55.471 | 0.00 | 0.00 |
| ATOM | 3918 | C    | ASP | X | 262 | 45.974 | 70.182 | 51.058 | 0.00 | 0.00 |
| ATOM | 3919 | O    | ASP | X | 262 | 46.430 | 69.746 | 50.022 | 0.00 | 0.00 |
| ATOM | 3920 | N    | THR | X | 263 | 45.139 | 71.245 | 51.065 | 0.00 | 0.00 |
| ATOM | 3921 | H    | THR | X | 263 | 45.122 | 71.792 | 51.914 | 0.00 | 0.00 |
| ATOM | 3922 | CA   | THR | X | 263 | 44.269 | 71.615 | 49.942 | 0.00 | 0.00 |
| ATOM | 3923 | HA   | THR | X | 263 | 44.020 | 70.691 | 49.420 | 0.00 | 0.00 |
| ATOM | 3924 | CB   | THR | X | 263 | 42.985 | 72.338 | 50.348 | 0.00 | 0.00 |
| ATOM | 3925 | HB   | THR | X | 263 | 42.445 | 72.406 | 49.403 | 0.00 | 0.00 |
| ATOM | 3926 | CG2  | THR | X | 263 | 42.066 | 71.621 | 51.352 | 0.00 | 0.00 |
| ATOM | 3927 | HG21 | THR | X | 263 | 41.683 | 70.713 | 50.888 | 0.00 | 0.00 |
| ATOM | 3928 | HG22 | THR | X | 263 | 41.188 | 72.236 | 51.547 | 0.00 | 0.00 |
| ATOM | 3929 | HG23 | THR | X | 263 | 42.588 | 71.402 | 52.283 | 0.00 | 0.00 |
| ATOM | 3930 | OG1  | THR | X | 263 | 43.280 | 73.519 | 50.932 | 0.00 | 0.00 |
| ATOM | 3931 | HG1  | THR | X | 263 | 42.757 | 74.269 | 50.639 | 0.00 | 0.00 |
| ATOM | 3932 | C    | THR | X | 263 | 45.057 | 72.449 | 48.962 | 0.00 | 0.00 |
| ATOM | 3933 | O    | THR | X | 263 | 44.875 | 72.238 | 47.769 | 0.00 | 0.00 |
| ATOM | 3934 | N    | GLU | X | 264 | 45.865 | 73.405 | 49.442 | 0.00 | 0.00 |
| ATOM | 3935 | H    | GLU | X | 264 | 45.626 | 73.582 | 50.407 | 0.00 | 0.00 |
| ATOM | 3936 | CA   | GLU | X | 264 | 46.797 | 74.250 | 48.658 | 0.00 | 0.00 |
| ATOM | 3937 | HA   | GLU | X | 264 | 46.304 | 74.393 | 47.696 | 0.00 | 0.00 |
| ATOM | 3938 | CB   | GLU | X | 264 | 46.976 | 75.610 | 49.335 | 0.00 | 0.00 |
| ATOM | 3939 | HB2  | GLU | X | 264 | 47.320 | 75.438 | 50.355 | 0.00 | 0.00 |
| ATOM | 3940 | HB3  | GLU | X | 264 | 47.755 | 76.171 | 48.818 | 0.00 | 0.00 |
| ATOM | 3941 | CG   | GLU | X | 264 | 45.709 | 76.403 | 49.459 | 0.00 | 0.00 |
| ATOM | 3942 | HG2  | GLU | X | 264 | 44.910 | 75.853 | 49.956 | 0.00 | 0.00 |
| ATOM | 3943 | HG3  | GLU | X | 264 | 45.827 | 77.276 | 50.101 | 0.00 | 0.00 |
| ATOM | 3944 | CD   | GLU | X | 264 | 45.327 | 76.866 | 48.079 | 0.00 | 0.00 |
| ATOM | 3945 | OE1  | GLU | X | 264 | 44.308 | 76.400 | 47.483 | 0.00 | 0.00 |
| ATOM | 3946 | OE2  | GLU | X | 264 | 45.932 | 77.789 | 47.535 | 0.00 | 0.00 |
| ATOM | 3947 | C    | GLU | X | 264 | 48.031 | 73.329 | 48.337 | 0.00 | 0.00 |
| ATOM | 3948 | O    | GLU | X | 264 | 48.619 | 73.444 | 47.275 | 0.00 | 0.00 |
| ATOM | 3949 | N    | LEU | X | 265 | 48.434 | 72.358 | 49.165 | 0.00 | 0.00 |
| ATOM | 3950 | H    | LEU | X | 265 | 48.152 | 72.426 | 50.133 | 0.00 | 0.00 |
| ATOM | 3951 | CA   | LEU | X | 265 | 49.426 | 71.381 | 48.842 | 0.00 | 0.00 |
| ATOM | 3952 | HA   | LEU | X | 265 | 50.338 | 71.957 | 48.685 | 0.00 | 0.00 |
| ATOM | 3953 | CB   | LEU | X | 265 | 49.692 | 70.538 | 50.133 | 0.00 | 0.00 |
| ATOM | 3954 | HB2  | LEU | X | 265 | 50.108 | 71.274 | 50.822 | 0.00 | 0.00 |
| ATOM | 3955 | HB3  | LEU | X | 265 | 48.755 | 70.178 | 50.556 | 0.00 | 0.00 |
| ATOM | 3956 | CG   | LEU | X | 265 | 50.663 | 69.342 | 50.034 | 0.00 | 0.00 |
| ATOM | 3957 | HG   | LEU | X | 265 | 51.254 | 69.313 | 49.119 | 0.00 | 0.00 |
| ATOM | 3958 | CD1  | LEU | X | 265 | 51.764 | 69.385 | 51.118 | 0.00 | 0.00 |
| ATOM | 3959 | HD11 | LEU | X | 265 | 52.454 | 70.225 | 51.035 | 0.00 | 0.00 |
| ATOM | 3960 | HD12 | LEU | X | 265 | 52.481 | 68.583 | 50.942 | 0.00 | 0.00 |
| ATOM | 3961 | HD13 | LEU | X | 265 | 51.277 | 69.261 | 52.085 | 0.00 | 0.00 |
| ATOM | 3962 | CD2  | LEU | X | 265 | 49.846 | 68.027 | 50.196 | 0.00 | 0.00 |
| ATOM | 3963 | HD21 | LEU | X | 265 | 48.917 | 67.976 | 49.628 | 0.00 | 0.00 |
| ATOM | 3964 | HD22 | LEU | X | 265 | 50.471 | 67.180 | 49.912 | 0.00 | 0.00 |

|      |      |      |     |   |     |        |        |        |      |      |
|------|------|------|-----|---|-----|--------|--------|--------|------|------|
| ATOM | 3965 | HD23 | LEU | X | 265 | 49.474 | 67.914 | 51.214 | 0.00 | 0.00 |
| ATOM | 3966 | C    | LEU | X | 265 | 49.089 | 70.693 | 47.545 | 0.00 | 0.00 |
| ATOM | 3967 | O    | LEU | X | 265 | 49.880 | 70.666 | 46.622 | 0.00 | 0.00 |
| ATOM | 3968 | N    | VAL | X | 266 | 47.879 | 70.083 | 47.528 | 0.00 | 0.00 |
| ATOM | 3969 | H    | VAL | X | 266 | 47.402 | 69.970 | 48.411 | 0.00 | 0.00 |
| ATOM | 3970 | CA   | VAL | X | 266 | 47.396 | 69.235 | 46.452 | 0.00 | 0.00 |
| ATOM | 3971 | HA   | VAL | X | 266 | 48.259 | 68.625 | 46.184 | 0.00 | 0.00 |
| ATOM | 3972 | CB   | VAL | X | 266 | 46.358 | 68.201 | 46.966 | 0.00 | 0.00 |
| ATOM | 3973 | HB   | VAL | X | 266 | 46.722 | 67.912 | 47.952 | 0.00 | 0.00 |
| ATOM | 3974 | CG1  | VAL | X | 266 | 44.942 | 68.739 | 47.281 | 0.00 | 0.00 |
| ATOM | 3975 | HG11 | VAL | X | 266 | 44.530 | 69.042 | 46.319 | 0.00 | 0.00 |
| ATOM | 3976 | HG12 | VAL | X | 266 | 44.374 | 68.050 | 47.907 | 0.00 | 0.00 |
| ATOM | 3977 | HG13 | VAL | X | 266 | 44.995 | 69.686 | 47.817 | 0.00 | 0.00 |
| ATOM | 3978 | CG2  | VAL | X | 266 | 46.504 | 66.898 | 46.218 | 0.00 | 0.00 |
| ATOM | 3979 | HG21 | VAL | X | 266 | 47.538 | 66.564 | 46.303 | 0.00 | 0.00 |
| ATOM | 3980 | HG22 | VAL | X | 266 | 46.254 | 66.996 | 45.161 | 0.00 | 0.00 |
| ATOM | 3981 | HG23 | VAL | X | 266 | 45.757 | 66.201 | 46.598 | 0.00 | 0.00 |
| ATOM | 3982 | C    | VAL | X | 266 | 46.970 | 70.161 | 45.284 | 0.00 | 0.00 |
| ATOM | 3983 | O    | VAL | X | 266 | 47.107 | 69.774 | 44.139 | 0.00 | 0.00 |
| ATOM | 3984 | N    | ALA | X | 267 | 46.505 | 71.388 | 45.494 | 0.00 | 0.00 |
| ATOM | 3985 | H    | ALA | X | 267 | 46.191 | 71.689 | 46.405 | 0.00 | 0.00 |
| ATOM | 3986 | CA   | ALA | X | 267 | 46.281 | 72.356 | 44.440 | 0.00 | 0.00 |
| ATOM | 3987 | HA   | ALA | X | 267 | 45.571 | 71.947 | 43.721 | 0.00 | 0.00 |
| ATOM | 3988 | CB   | ALA | X | 267 | 45.735 | 73.626 | 45.025 | 0.00 | 0.00 |
| ATOM | 3989 | HB1  | ALA | X | 267 | 45.557 | 74.335 | 44.217 | 0.00 | 0.00 |
| ATOM | 3990 | HB2  | ALA | X | 267 | 46.460 | 74.076 | 45.703 | 0.00 | 0.00 |
| ATOM | 3991 | HB3  | ALA | X | 267 | 44.846 | 73.463 | 45.636 | 0.00 | 0.00 |
| ATOM | 3992 | C    | ALA | X | 267 | 47.457 | 72.562 | 43.561 | 0.00 | 0.00 |
| ATOM | 3993 | O    | ALA | X | 267 | 47.361 | 72.458 | 42.354 | 0.00 | 0.00 |
| ATOM | 3994 | N    | CYX | X | 268 | 48.649 | 72.735 | 44.131 | 0.00 | 0.00 |
| ATOM | 3995 | H    | CYX | X | 268 | 48.667 | 72.564 | 45.126 | 0.00 | 0.00 |
| ATOM | 3996 | CA   | CYX | X | 268 | 49.919 | 72.780 | 43.353 | 0.00 | 0.00 |
| ATOM | 3997 | HA   | CYX | X | 268 | 49.844 | 73.583 | 42.619 | 0.00 | 0.00 |
| ATOM | 3998 | CB   | CYX | X | 268 | 51.115 | 72.953 | 44.375 | 0.00 | 0.00 |
| ATOM | 3999 | HB2  | CYX | X | 268 | 50.847 | 73.809 | 44.995 | 0.00 | 0.00 |
| ATOM | 4000 | HB3  | CYX | X | 268 | 51.026 | 72.086 | 45.029 | 0.00 | 0.00 |
| ATOM | 4001 | SG   | CYX | X | 268 | 52.792 | 73.003 | 43.751 | 0.00 | 0.00 |
| ATOM | 4002 | C    | CYX | X | 268 | 50.050 | 71.497 | 42.517 | 0.00 | 0.00 |
| ATOM | 4003 | O    | CYX | X | 268 | 50.333 | 71.539 | 41.352 | 0.00 | 0.00 |
| ATOM | 4004 | N    | LEU | X | 269 | 49.765 | 70.339 | 43.121 | 0.00 | 0.00 |
| ATOM | 4005 | H    | LEU | X | 269 | 49.420 | 70.352 | 44.071 | 0.00 | 0.00 |
| ATOM | 4006 | CA   | LEU | X | 269 | 49.964 | 69.020 | 42.578 | 0.00 | 0.00 |
| ATOM | 4007 | HA   | LEU | X | 269 | 50.884 | 69.052 | 41.993 | 0.00 | 0.00 |
| ATOM | 4008 | CB   | LEU | X | 269 | 49.837 | 68.065 | 43.806 | 0.00 | 0.00 |
| ATOM | 4009 | HB2  | LEU | X | 269 | 50.140 | 68.622 | 44.693 | 0.00 | 0.00 |
| ATOM | 4010 | HB3  | LEU | X | 269 | 48.777 | 67.871 | 43.972 | 0.00 | 0.00 |
| ATOM | 4011 | CG   | LEU | X | 269 | 50.795 | 66.866 | 43.749 | 0.00 | 0.00 |
| ATOM | 4012 | HG   | LEU | X | 269 | 50.533 | 66.297 | 42.857 | 0.00 | 0.00 |
| ATOM | 4013 | CD1  | LEU | X | 269 | 52.244 | 67.325 | 43.842 | 0.00 | 0.00 |
| ATOM | 4014 | HD11 | LEU | X | 269 | 52.454 | 68.000 | 43.013 | 0.00 | 0.00 |
| ATOM | 4015 | HD12 | LEU | X | 269 | 52.883 | 66.444 | 43.899 | 0.00 | 0.00 |
| ATOM | 4016 | HD13 | LEU | X | 269 | 52.534 | 67.934 | 44.699 | 0.00 | 0.00 |
| ATOM | 4017 | CD2  | LEU | X | 269 | 50.591 | 65.836 | 44.867 | 0.00 | 0.00 |
| ATOM | 4018 | HD21 | LEU | X | 269 | 49.590 | 65.424 | 44.744 | 0.00 | 0.00 |
| ATOM | 4019 | HD22 | LEU | X | 269 | 51.278 | 65.008 | 44.691 | 0.00 | 0.00 |
| ATOM | 4020 | HD23 | LEU | X | 269 | 50.751 | 66.151 | 45.898 | 0.00 | 0.00 |
| ATOM | 4021 | C    | LEU | X | 269 | 48.868 | 68.752 | 41.481 | 0.00 | 0.00 |
| ATOM | 4022 | O    | LEU | X | 269 | 49.119 | 67.799 | 40.750 | 0.00 | 0.00 |
| ATOM | 4023 | N    | ARG | X | 270 | 47.900 | 69.595 | 41.141 | 0.00 | 0.00 |
| ATOM | 4024 | H    | ARG | X | 270 | 47.842 | 70.482 | 41.620 | 0.00 | 0.00 |
| ATOM | 4025 | CA   | ARG | X | 270 | 47.057 | 69.404 | 39.946 | 0.00 | 0.00 |
| ATOM | 4026 | HA   | ARG | X | 270 | 47.007 | 68.349 | 39.675 | 0.00 | 0.00 |
| ATOM | 4027 | CB   | ARG | X | 270 | 45.637 | 69.947 | 40.144 | 0.00 | 0.00 |
| ATOM | 4028 | HB2  | ARG | X | 270 | 45.601 | 70.985 | 40.474 | 0.00 | 0.00 |
| ATOM | 4029 | HB3  | ARG | X | 270 | 45.067 | 69.940 | 39.215 | 0.00 | 0.00 |
| ATOM | 4030 | CG   | ARG | X | 270 | 44.850 | 69.238 | 41.334 | 0.00 | 0.00 |
| ATOM | 4031 | HG2  | ARG | X | 270 | 44.967 | 68.155 | 41.372 | 0.00 | 0.00 |

|      |      |      |     |   |     |        |        |        |      |      |
|------|------|------|-----|---|-----|--------|--------|--------|------|------|
| ATOM | 4032 | HG3  | ARG | X | 270 | 45.249 | 69.611 | 42.278 | 0.00 | 0.00 |
| ATOM | 4033 | CD   | ARG | X | 270 | 43.329 | 69.611 | 41.222 | 0.00 | 0.00 |
| ATOM | 4034 | HD2  | ARG | X | 270 | 43.181 | 70.511 | 40.625 | 0.00 | 0.00 |
| ATOM | 4035 | HD3  | ARG | X | 270 | 42.724 | 68.847 | 40.734 | 0.00 | 0.00 |
| ATOM | 4036 | NE   | ARG | X | 270 | 42.834 | 69.958 | 42.518 | 0.00 | 0.00 |
| ATOM | 4037 | HE   | ARG | X | 270 | 42.759 | 70.928 | 42.789 | 0.00 | 0.00 |
| ATOM | 4038 | CZ   | ARG | X | 270 | 42.396 | 69.086 | 43.435 | 0.00 | 0.00 |
| ATOM | 4039 | NH1  | ARG | X | 270 | 42.231 | 67.773 | 43.115 | 0.00 | 0.00 |
| ATOM | 4040 | HH11 | ARG | X | 270 | 42.402 | 67.557 | 42.143 | 0.00 | 0.00 |
| ATOM | 4041 | HH12 | ARG | X | 270 | 41.765 | 67.164 | 43.772 | 0.00 | 0.00 |
| ATOM | 4042 | NH2  | ARG | X | 270 | 41.982 | 69.425 | 44.638 | 0.00 | 0.00 |
| ATOM | 4043 | HH21 | ARG | X | 270 | 42.215 | 70.321 | 45.043 | 0.00 | 0.00 |
| ATOM | 4044 | HH22 | ARG | X | 270 | 41.637 | 68.719 | 45.273 | 0.00 | 0.00 |
| ATOM | 4045 | C    | ARG | X | 270 | 47.609 | 70.187 | 38.788 | 0.00 | 0.00 |
| ATOM | 4046 | O    | ARG | X | 270 | 47.487 | 69.786 | 37.613 | 0.00 | 0.00 |
| ATOM | 4047 | N    | THR | X | 271 | 48.251 | 71.351 | 39.080 | 0.00 | 0.00 |
| ATOM | 4048 | H    | THR | X | 271 | 48.404 | 71.613 | 40.043 | 0.00 | 0.00 |
| ATOM | 4049 | CA   | THR | X | 271 | 48.930 | 72.297 | 38.081 | 0.00 | 0.00 |
| ATOM | 4050 | HA   | THR | X | 271 | 48.152 | 72.600 | 37.380 | 0.00 | 0.00 |
| ATOM | 4051 | CB   | THR | X | 271 | 49.389 | 73.687 | 38.632 | 0.00 | 0.00 |
| ATOM | 4052 | HB   | THR | X | 271 | 50.109 | 73.453 | 39.416 | 0.00 | 0.00 |
| ATOM | 4053 | CG2  | THR | X | 271 | 49.696 | 74.662 | 37.513 | 0.00 | 0.00 |
| ATOM | 4054 | HG21 | THR | X | 271 | 48.797 | 74.800 | 36.913 | 0.00 | 0.00 |
| ATOM | 4055 | HG22 | THR | X | 271 | 50.460 | 74.134 | 36.943 | 0.00 | 0.00 |
| ATOM | 4056 | HG23 | THR | X | 271 | 50.063 | 75.616 | 37.892 | 0.00 | 0.00 |
| ATOM | 4057 | OG1  | THR | X | 271 | 48.269 | 74.167 | 39.304 | 0.00 | 0.00 |
| ATOM | 4058 | HG1  | THR | X | 271 | 48.321 | 75.115 | 39.447 | 0.00 | 0.00 |
| ATOM | 4059 | C    | THR | X | 271 | 50.069 | 71.684 | 37.320 | 0.00 | 0.00 |
| ATOM | 4060 | O    | THR | X | 271 | 50.074 | 71.807 | 36.104 | 0.00 | 0.00 |
| ATOM | 4061 | N    | ARG | X | 272 | 51.163 | 71.330 | 38.016 | 0.00 | 0.00 |
| ATOM | 4062 | H    | ARG | X | 272 | 51.118 | 71.469 | 39.015 | 0.00 | 0.00 |
| ATOM | 4063 | CA   | ARG | X | 272 | 52.365 | 70.829 | 37.462 | 0.00 | 0.00 |
| ATOM | 4064 | HA   | ARG | X | 272 | 52.825 | 71.633 | 36.888 | 0.00 | 0.00 |
| ATOM | 4065 | CB   | ARG | X | 272 | 53.334 | 70.409 | 38.538 | 0.00 | 0.00 |
| ATOM | 4066 | HB2  | ARG | X | 272 | 53.080 | 69.425 | 38.931 | 0.00 | 0.00 |
| ATOM | 4067 | HB3  | ARG | X | 272 | 54.357 | 70.402 | 38.159 | 0.00 | 0.00 |
| ATOM | 4068 | CG   | ARG | X | 272 | 53.463 | 71.442 | 39.740 | 0.00 | 0.00 |
| ATOM | 4069 | HG2  | ARG | X | 272 | 52.566 | 71.663 | 40.318 | 0.00 | 0.00 |
| ATOM | 4070 | HG3  | ARG | X | 272 | 54.189 | 71.024 | 40.438 | 0.00 | 0.00 |
| ATOM | 4071 | CD   | ARG | X | 272 | 54.030 | 72.821 | 39.229 | 0.00 | 0.00 |
| ATOM | 4072 | HD2  | ARG | X | 272 | 54.997 | 72.601 | 38.775 | 0.00 | 0.00 |
| ATOM | 4073 | HD3  | ARG | X | 272 | 53.261 | 73.246 | 38.585 | 0.00 | 0.00 |
| ATOM | 4074 | NE   | ARG | X | 272 | 54.341 | 73.743 | 40.312 | 0.00 | 0.00 |
| ATOM | 4075 | HE   | ARG | X | 272 | 53.608 | 74.424 | 40.448 | 0.00 | 0.00 |
| ATOM | 4076 | CZ   | ARG | X | 272 | 55.394 | 73.709 | 41.171 | 0.00 | 0.00 |
| ATOM | 4077 | NH1  | ARG | X | 272 | 56.325 | 72.823 | 41.198 | 0.00 | 0.00 |
| ATOM | 4078 | HH11 | ARG | X | 272 | 56.340 | 72.091 | 40.502 | 0.00 | 0.00 |
| ATOM | 4079 | HH12 | ARG | X | 272 | 57.110 | 72.988 | 41.812 | 0.00 | 0.00 |
| ATOM | 4080 | NH2  | ARG | X | 272 | 55.372 | 74.678 | 42.081 | 0.00 | 0.00 |
| ATOM | 4081 | HH21 | ARG | X | 272 | 54.625 | 75.356 | 42.036 | 0.00 | 0.00 |
| ATOM | 4082 | HH22 | ARG | X | 272 | 55.909 | 74.569 | 42.930 | 0.00 | 0.00 |
| ATOM | 4083 | C    | ARG | X | 272 | 52.067 | 69.657 | 36.525 | 0.00 | 0.00 |
| ATOM | 4084 | O    | ARG | X | 272 | 51.048 | 69.045 | 36.777 | 0.00 | 0.00 |
| ATOM | 4085 | N    | PRO | X | 273 | 52.718 | 69.384 | 35.389 | 0.00 | 0.00 |
| ATOM | 4086 | CD   | PRO | X | 273 | 53.827 | 70.201 | 34.923 | 0.00 | 0.00 |
| ATOM | 4087 | HD2  | PRO | X | 273 | 54.730 | 70.009 | 35.503 | 0.00 | 0.00 |
| ATOM | 4088 | HD3  | PRO | X | 273 | 53.604 | 71.242 | 34.689 | 0.00 | 0.00 |
| ATOM | 4089 | CG   | PRO | X | 273 | 54.206 | 69.588 | 33.569 | 0.00 | 0.00 |
| ATOM | 4090 | HG2  | PRO | X | 273 | 55.277 | 69.400 | 33.489 | 0.00 | 0.00 |
| ATOM | 4091 | HG3  | PRO | X | 273 | 53.780 | 70.119 | 32.718 | 0.00 | 0.00 |
| ATOM | 4092 | CB   | PRO | X | 273 | 53.546 | 68.221 | 33.456 | 0.00 | 0.00 |
| ATOM | 4093 | HB2  | PRO | X | 273 | 54.234 | 67.398 | 33.653 | 0.00 | 0.00 |
| ATOM | 4094 | HB3  | PRO | X | 273 | 53.128 | 68.141 | 32.453 | 0.00 | 0.00 |
| ATOM | 4095 | CA   | PRO | X | 273 | 52.481 | 68.134 | 34.569 | 0.00 | 0.00 |
| ATOM | 4096 | HA   | PRO | X | 273 | 51.570 | 68.293 | 33.992 | 0.00 | 0.00 |
| ATOM | 4097 | C    | PRO | X | 273 | 52.491 | 66.769 | 35.259 | 0.00 | 0.00 |
| ATOM | 4098 | O    | PRO | X | 273 | 53.388 | 66.433 | 36.067 | 0.00 | 0.00 |

|      |      |      |     |   |     |        |        |        |      |      |
|------|------|------|-----|---|-----|--------|--------|--------|------|------|
| ATOM | 4099 | N    | ALA | X | 274 | 51.569 | 65.912 | 34.829 | 0.00 | 0.00 |
| ATOM | 4100 | H    | ALA | X | 274 | 50.927 | 66.210 | 34.108 | 0.00 | 0.00 |
| ATOM | 4101 | CA   | ALA | X | 274 | 51.617 | 64.533 | 35.299 | 0.00 | 0.00 |
| ATOM | 4102 | HA   | ALA | X | 274 | 51.319 | 64.474 | 36.346 | 0.00 | 0.00 |
| ATOM | 4103 | CB   | ALA | X | 274 | 50.376 | 63.831 | 34.703 | 0.00 | 0.00 |
| ATOM | 4104 | HB1  | ALA | X | 274 | 50.180 | 62.908 | 35.250 | 0.00 | 0.00 |
| ATOM | 4105 | HB2  | ALA | X | 274 | 50.536 | 63.771 | 33.627 | 0.00 | 0.00 |
| ATOM | 4106 | HB3  | ALA | X | 274 | 49.559 | 64.536 | 34.853 | 0.00 | 0.00 |
| ATOM | 4107 | C    | ALA | X | 274 | 52.939 | 63.740 | 34.945 | 0.00 | 0.00 |
| ATOM | 4108 | O    | ALA | X | 274 | 53.318 | 62.905 | 35.780 | 0.00 | 0.00 |
| ATOM | 4109 | N    | GLN | X | 275 | 53.704 | 64.136 | 33.939 | 0.00 | 0.00 |
| ATOM | 4110 | H    | GLN | X | 275 | 53.265 | 64.731 | 33.250 | 0.00 | 0.00 |
| ATOM | 4111 | CA   | GLN | X | 275 | 55.068 | 63.717 | 33.674 | 0.00 | 0.00 |
| ATOM | 4112 | HA   | GLN | X | 275 | 55.121 | 62.665 | 33.392 | 0.00 | 0.00 |
| ATOM | 4113 | CB   | GLN | X | 275 | 55.711 | 64.509 | 32.472 | 0.00 | 0.00 |
| ATOM | 4114 | HB2  | GLN | X | 275 | 54.934 | 64.498 | 31.707 | 0.00 | 0.00 |
| ATOM | 4115 | HB3  | GLN | X | 275 | 55.778 | 65.563 | 32.744 | 0.00 | 0.00 |
| ATOM | 4116 | CG   | GLN | X | 275 | 57.061 | 63.902 | 31.953 | 0.00 | 0.00 |
| ATOM | 4117 | HG2  | GLN | X | 275 | 57.785 | 63.743 | 32.752 | 0.00 | 0.00 |
| ATOM | 4118 | HG3  | GLN | X | 275 | 56.886 | 62.893 | 31.580 | 0.00 | 0.00 |
| ATOM | 4119 | CD   | GLN | X | 275 | 57.708 | 64.823 | 30.835 | 0.00 | 0.00 |
| ATOM | 4120 | OE1  | GLN | X | 275 | 57.056 | 65.656 | 30.132 | 0.00 | 0.00 |
| ATOM | 4121 | NE2  | GLN | X | 275 | 59.044 | 64.883 | 30.768 | 0.00 | 0.00 |
| ATOM | 4122 | HE21 | GLN | X | 275 | 59.430 | 65.583 | 30.151 | 0.00 | 0.00 |
| ATOM | 4123 | HE22 | GLN | X | 275 | 59.644 | 64.492 | 31.481 | 0.00 | 0.00 |
| ATOM | 4124 | C    | GLN | X | 275 | 55.933 | 63.927 | 34.916 | 0.00 | 0.00 |
| ATOM | 4125 | O    | GLN | X | 275 | 56.707 | 63.099 | 35.357 | 0.00 | 0.00 |
| ATOM | 4126 | N    | VAL | X | 276 | 55.754 | 65.015 | 35.614 | 0.00 | 0.00 |
| ATOM | 4127 | H    | VAL | X | 276 | 55.014 | 65.634 | 35.313 | 0.00 | 0.00 |
| ATOM | 4128 | CA   | VAL | X | 276 | 56.560 | 65.530 | 36.703 | 0.00 | 0.00 |
| ATOM | 4129 | HA   | VAL | X | 276 | 57.571 | 65.230 | 36.427 | 0.00 | 0.00 |
| ATOM | 4130 | CB   | VAL | X | 276 | 56.415 | 67.038 | 36.882 | 0.00 | 0.00 |
| ATOM | 4131 | HB   | VAL | X | 276 | 55.388 | 67.227 | 37.193 | 0.00 | 0.00 |
| ATOM | 4132 | CG1  | VAL | X | 276 | 57.322 | 67.530 | 38.052 | 0.00 | 0.00 |
| ATOM | 4133 | HG11 | VAL | X | 276 | 57.038 | 67.093 | 39.009 | 0.00 | 0.00 |
| ATOM | 4134 | HG12 | VAL | X | 276 | 58.361 | 67.281 | 37.837 | 0.00 | 0.00 |
| ATOM | 4135 | HG13 | VAL | X | 276 | 57.227 | 68.609 | 38.173 | 0.00 | 0.00 |
| ATOM | 4136 | CG2  | VAL | X | 276 | 56.817 | 67.780 | 35.588 | 0.00 | 0.00 |
| ATOM | 4137 | HG21 | VAL | X | 276 | 57.826 | 67.550 | 35.246 | 0.00 | 0.00 |
| ATOM | 4138 | HG22 | VAL | X | 276 | 56.742 | 68.842 | 35.819 | 0.00 | 0.00 |
| ATOM | 4139 | HG23 | VAL | X | 276 | 56.109 | 67.423 | 34.839 | 0.00 | 0.00 |
| ATOM | 4140 | C    | VAL | X | 276 | 56.095 | 64.868 | 38.039 | 0.00 | 0.00 |
| ATOM | 4141 | O    | VAL | X | 276 | 56.954 | 64.601 | 38.871 | 0.00 | 0.00 |
| ATOM | 4142 | N    | LEU | X | 277 | 54.812 | 64.470 | 38.201 | 0.00 | 0.00 |
| ATOM | 4143 | H    | LEU | X | 277 | 54.081 | 64.664 | 37.531 | 0.00 | 0.00 |
| ATOM | 4144 | CA   | LEU | X | 277 | 54.479 | 63.596 | 39.337 | 0.00 | 0.00 |
| ATOM | 4145 | HA   | LEU | X | 277 | 54.905 | 64.013 | 40.249 | 0.00 | 0.00 |
| ATOM | 4146 | CB   | LEU | X | 277 | 52.981 | 63.512 | 39.540 | 0.00 | 0.00 |
| ATOM | 4147 | HB2  | LEU | X | 277 | 52.591 | 62.998 | 38.662 | 0.00 | 0.00 |
| ATOM | 4148 | HB3  | LEU | X | 277 | 52.711 | 62.861 | 40.372 | 0.00 | 0.00 |
| ATOM | 4149 | CG   | LEU | X | 277 | 52.135 | 64.819 | 39.549 | 0.00 | 0.00 |
| ATOM | 4150 | HG   | LEU | X | 277 | 52.270 | 65.414 | 38.646 | 0.00 | 0.00 |
| ATOM | 4151 | CD1  | LEU | X | 277 | 50.605 | 64.456 | 39.687 | 0.00 | 0.00 |
| ATOM | 4152 | HD11 | LEU | X | 277 | 49.995 | 65.304 | 39.997 | 0.00 | 0.00 |
| ATOM | 4153 | HD12 | LEU | X | 277 | 50.556 | 63.700 | 40.471 | 0.00 | 0.00 |
| ATOM | 4154 | HD13 | LEU | X | 277 | 50.216 | 64.205 | 38.700 | 0.00 | 0.00 |
| ATOM | 4155 | CD2  | LEU | X | 277 | 52.452 | 65.789 | 40.677 | 0.00 | 0.00 |
| ATOM | 4156 | HD21 | LEU | X | 277 | 52.526 | 65.341 | 41.668 | 0.00 | 0.00 |
| ATOM | 4157 | HD22 | LEU | X | 277 | 53.410 | 66.276 | 40.495 | 0.00 | 0.00 |
| ATOM | 4158 | HD23 | LEU | X | 277 | 51.603 | 66.470 | 40.734 | 0.00 | 0.00 |
| ATOM | 4159 | C    | LEU | X | 277 | 54.961 | 62.160 | 39.069 | 0.00 | 0.00 |
| ATOM | 4160 | O    | LEU | X | 277 | 55.500 | 61.558 | 39.936 | 0.00 | 0.00 |
| ATOM | 4161 | N    | VAL | X | 278 | 54.810 | 61.643 | 37.856 | 0.00 | 0.00 |
| ATOM | 4162 | H    | VAL | X | 278 | 54.269 | 62.127 | 37.154 | 0.00 | 0.00 |
| ATOM | 4163 | CA   | VAL | X | 278 | 55.144 | 60.205 | 37.645 | 0.00 | 0.00 |
| ATOM | 4164 | HA   | VAL | X | 278 | 54.582 | 59.605 | 38.361 | 0.00 | 0.00 |
| ATOM | 4165 | CB   | VAL | X | 278 | 54.803 | 59.709 | 36.232 | 0.00 | 0.00 |

|      |      |      |     |   |     |        |        |        |      |      |
|------|------|------|-----|---|-----|--------|--------|--------|------|------|
| ATOM | 4166 | HB   | VAL | X | 278 | 55.251 | 60.374 | 35.493 | 0.00 | 0.00 |
| ATOM | 4167 | CG1  | VAL | X | 278 | 55.433 | 58.335 | 35.969 | 0.00 | 0.00 |
| ATOM | 4168 | HG11 | VAL | X | 278 | 56.514 | 58.199 | 35.939 | 0.00 | 0.00 |
| ATOM | 4169 | HG12 | VAL | X | 278 | 55.021 | 57.656 | 36.716 | 0.00 | 0.00 |
| ATOM | 4170 | HG13 | VAL | X | 278 | 55.080 | 58.018 | 34.987 | 0.00 | 0.00 |
| ATOM | 4171 | CG2  | VAL | X | 278 | 53.283 | 59.406 | 36.079 | 0.00 | 0.00 |
| ATOM | 4172 | HG21 | VAL | X | 278 | 53.009 | 58.646 | 36.810 | 0.00 | 0.00 |
| ATOM | 4173 | HG22 | VAL | X | 278 | 53.136 | 58.987 | 35.084 | 0.00 | 0.00 |
| ATOM | 4174 | HG23 | VAL | X | 278 | 52.588 | 60.224 | 36.273 | 0.00 | 0.00 |
| ATOM | 4175 | C    | VAL | X | 278 | 56.710 | 59.963 | 37.865 | 0.00 | 0.00 |
| ATOM | 4176 | O    | VAL | X | 278 | 57.050 | 58.983 | 38.555 | 0.00 | 0.00 |
| ATOM | 4177 | N    | ASN | X | 279 | 57.521 | 60.985 | 37.539 | 0.00 | 0.00 |
| ATOM | 4178 | H    | ASN | X | 279 | 57.153 | 61.789 | 37.050 | 0.00 | 0.00 |
| ATOM | 4179 | CA   | ASN | X | 279 | 58.963 | 60.898 | 37.697 | 0.00 | 0.00 |
| ATOM | 4180 | HA   | ASN | X | 279 | 59.418 | 60.098 | 37.113 | 0.00 | 0.00 |
| ATOM | 4181 | CB   | ASN | X | 279 | 59.529 | 62.180 | 37.078 | 0.00 | 0.00 |
| ATOM | 4182 | HB2  | ASN | X | 279 | 59.388 | 62.311 | 36.005 | 0.00 | 0.00 |
| ATOM | 4183 | HB3  | ASN | X | 279 | 59.084 | 63.068 | 37.529 | 0.00 | 0.00 |
| ATOM | 4184 | CG   | ASN | X | 279 | 61.008 | 62.312 | 37.192 | 0.00 | 0.00 |
| ATOM | 4185 | OD1  | ASN | X | 279 | 61.694 | 61.314 | 37.118 | 0.00 | 0.00 |
| ATOM | 4186 | ND2  | ASN | X | 279 | 61.508 | 63.537 | 37.440 | 0.00 | 0.00 |
| ATOM | 4187 | HD21 | ASN | X | 279 | 62.483 | 63.638 | 37.684 | 0.00 | 0.00 |
| ATOM | 4188 | HD22 | ASN | X | 279 | 60.911 | 64.351 | 37.411 | 0.00 | 0.00 |
| ATOM | 4189 | C    | ASN | X | 279 | 59.403 | 60.661 | 39.206 | 0.00 | 0.00 |
| ATOM | 4190 | O    | ASN | X | 279 | 60.375 | 59.977 | 39.537 | 0.00 | 0.00 |
| ATOM | 4191 | N    | HIE | X | 280 | 58.514 | 61.146 | 40.095 | 0.00 | 0.00 |
| ATOM | 4192 | H    | HIE | X | 280 | 57.665 | 61.596 | 39.787 | 0.00 | 0.00 |
| ATOM | 4193 | CA   | HIE | X | 280 | 58.679 | 61.028 | 41.551 | 0.00 | 0.00 |
| ATOM | 4194 | HA   | HIE | X | 280 | 59.684 | 60.651 | 41.741 | 0.00 | 0.00 |
| ATOM | 4195 | CB   | HIE | X | 280 | 58.685 | 62.511 | 42.141 | 0.00 | 0.00 |
| ATOM | 4196 | HB2  | HIE | X | 280 | 57.721 | 63.005 | 42.018 | 0.00 | 0.00 |
| ATOM | 4197 | HB3  | HIE | X | 280 | 58.775 | 62.556 | 43.226 | 0.00 | 0.00 |
| ATOM | 4198 | CG   | HIE | X | 280 | 59.882 | 63.267 | 41.508 | 0.00 | 0.00 |
| ATOM | 4199 | ND1  | HIE | X | 280 | 61.179 | 63.074 | 41.874 | 0.00 | 0.00 |
| ATOM | 4200 | CE1  | HIE | X | 280 | 61.901 | 63.897 | 41.181 | 0.00 | 0.00 |
| ATOM | 4201 | HE1  | HIE | X | 280 | 62.962 | 63.804 | 41.000 | 0.00 | 0.00 |
| ATOM | 4202 | NE2  | HIE | X | 280 | 61.155 | 64.844 | 40.589 | 0.00 | 0.00 |
| ATOM | 4203 | HE2  | HIE | X | 280 | 61.462 | 65.581 | 39.972 | 0.00 | 0.00 |
| ATOM | 4204 | CD2  | HIE | X | 280 | 59.860 | 64.355 | 40.664 | 0.00 | 0.00 |
| ATOM | 4205 | HD2  | HIE | X | 280 | 59.000 | 64.867 | 40.258 | 0.00 | 0.00 |
| ATOM | 4206 | C    | HIE | X | 280 | 57.782 | 59.964 | 42.297 | 0.00 | 0.00 |
| ATOM | 4207 | O    | HIE | X | 280 | 58.125 | 59.546 | 43.460 | 0.00 | 0.00 |
| ATOM | 4208 | N    | GLU | X | 281 | 56.729 | 59.464 | 41.697 | 0.00 | 0.00 |
| ATOM | 4209 | H    | GLU | X | 281 | 56.422 | 59.881 | 40.830 | 0.00 | 0.00 |
| ATOM | 4210 | CA   | GLU | X | 281 | 55.786 | 58.540 | 42.332 | 0.00 | 0.00 |
| ATOM | 4211 | HA   | GLU | X | 281 | 55.358 | 58.883 | 43.274 | 0.00 | 0.00 |
| ATOM | 4212 | CB   | GLU | X | 281 | 54.719 | 58.178 | 41.320 | 0.00 | 0.00 |
| ATOM | 4213 | HB2  | GLU | X | 281 | 54.184 | 59.003 | 40.850 | 0.00 | 0.00 |
| ATOM | 4214 | HB3  | GLU | X | 281 | 55.144 | 57.502 | 40.577 | 0.00 | 0.00 |
| ATOM | 4215 | CG   | GLU | X | 281 | 53.518 | 57.450 | 42.052 | 0.00 | 0.00 |
| ATOM | 4216 | HG2  | GLU | X | 281 | 54.066 | 56.723 | 42.651 | 0.00 | 0.00 |
| ATOM | 4217 | HG3  | GLU | X | 281 | 53.020 | 58.103 | 42.769 | 0.00 | 0.00 |
| ATOM | 4218 | CD   | GLU | X | 281 | 52.455 | 56.949 | 41.080 | 0.00 | 0.00 |
| ATOM | 4219 | OE1  | GLU | X | 281 | 51.565 | 57.779 | 40.631 | 0.00 | 0.00 |
| ATOM | 4220 | OE2  | GLU | X | 281 | 52.577 | 55.831 | 40.514 | 0.00 | 0.00 |
| ATOM | 4221 | C    | GLU | X | 281 | 56.562 | 57.222 | 42.733 | 0.00 | 0.00 |
| ATOM | 4222 | O    | GLU | X | 281 | 56.444 | 56.778 | 43.824 | 0.00 | 0.00 |
| ATOM | 4223 | N    | TRP | X | 282 | 57.409 | 56.733 | 41.845 | 0.00 | 0.00 |
| ATOM | 4224 | H    | TRP | X | 282 | 57.563 | 57.249 | 40.990 | 0.00 | 0.00 |
| ATOM | 4225 | CA   | TRP | X | 282 | 58.331 | 55.651 | 42.040 | 0.00 | 0.00 |
| ATOM | 4226 | HA   | TRP | X | 282 | 57.715 | 54.752 | 42.007 | 0.00 | 0.00 |
| ATOM | 4227 | CB   | TRP | X | 282 | 59.282 | 55.610 | 40.878 | 0.00 | 0.00 |
| ATOM | 4228 | HB2  | TRP | X | 282 | 58.741 | 55.543 | 39.935 | 0.00 | 0.00 |
| ATOM | 4229 | HB3  | TRP | X | 282 | 59.941 | 56.478 | 40.850 | 0.00 | 0.00 |
| ATOM | 4230 | CG   | TRP | X | 282 | 60.188 | 54.462 | 40.929 | 0.00 | 0.00 |
| ATOM | 4231 | CD1  | TRP | X | 282 | 59.792 | 53.133 | 40.751 | 0.00 | 0.00 |
| ATOM | 4232 | HD1  | TRP | X | 282 | 58.782 | 52.771 | 40.626 | 0.00 | 0.00 |

|      |      |      |     |   |     |        |        |        |      |      |
|------|------|------|-----|---|-----|--------|--------|--------|------|------|
| ATOM | 4233 | NE1  | TRP | X | 282 | 60.883 | 52.328 | 40.874 | 0.00 | 0.00 |
| ATOM | 4234 | HE1  | TRP | X | 282 | 60.738 | 51.333 | 40.970 | 0.00 | 0.00 |
| ATOM | 4235 | CE2  | TRP | X | 282 | 62.058 | 52.995 | 41.103 | 0.00 | 0.00 |
| ATOM | 4236 | CZ2  | TRP | X | 282 | 63.413 | 52.616 | 41.139 | 0.00 | 0.00 |
| ATOM | 4237 | HZ2  | TRP | X | 282 | 63.625 | 51.591 | 40.874 | 0.00 | 0.00 |
| ATOM | 4238 | CH2  | TRP | X | 282 | 64.340 | 53.618 | 41.277 | 0.00 | 0.00 |
| ATOM | 4239 | HH2  | TRP | X | 282 | 65.332 | 53.204 | 41.383 | 0.00 | 0.00 |
| ATOM | 4240 | CZ3  | TRP | X | 282 | 63.973 | 54.968 | 41.389 | 0.00 | 0.00 |
| ATOM | 4241 | HZ3  | TRP | X | 282 | 64.695 | 55.750 | 41.571 | 0.00 | 0.00 |
| ATOM | 4242 | CE3  | TRP | X | 282 | 62.652 | 55.323 | 41.371 | 0.00 | 0.00 |
| ATOM | 4243 | HE3  | TRP | X | 282 | 62.402 | 56.373 | 41.423 | 0.00 | 0.00 |
| ATOM | 4244 | CD2  | TRP | X | 282 | 61.634 | 54.368 | 41.203 | 0.00 | 0.00 |
| ATOM | 4245 | C    | TRP | X | 282 | 59.082 | 55.609 | 43.395 | 0.00 | 0.00 |
| ATOM | 4246 | O    | TRP | X | 282 | 59.364 | 54.523 | 43.952 | 0.00 | 0.00 |
| ATOM | 4247 | N    | HIE | X | 283 | 59.422 | 56.773 | 43.972 | 0.00 | 0.00 |
| ATOM | 4248 | H    | HIE | X | 283 | 59.184 | 57.624 | 43.483 | 0.00 | 0.00 |
| ATOM | 4249 | CA   | HIE | X | 283 | 60.080 | 56.974 | 45.263 | 0.00 | 0.00 |
| ATOM | 4250 | HA   | HIE | X | 283 | 60.771 | 56.141 | 45.388 | 0.00 | 0.00 |
| ATOM | 4251 | CB   | HIE | X | 283 | 60.934 | 58.308 | 45.195 | 0.00 | 0.00 |
| ATOM | 4252 | HB2  | HIE | X | 283 | 60.260 | 59.151 | 45.345 | 0.00 | 0.00 |
| ATOM | 4253 | HB3  | HIE | X | 283 | 61.496 | 58.326 | 46.129 | 0.00 | 0.00 |
| ATOM | 4254 | CG   | HIE | X | 283 | 61.889 | 58.535 | 44.124 | 0.00 | 0.00 |
| ATOM | 4255 | ND1  | HIE | X | 283 | 63.295 | 58.818 | 44.285 | 0.00 | 0.00 |
| ATOM | 4256 | CE1  | HIE | X | 283 | 63.756 | 59.043 | 43.076 | 0.00 | 0.00 |
| ATOM | 4257 | HE1  | HIE | X | 283 | 64.753 | 59.421 | 42.905 | 0.00 | 0.00 |
| ATOM | 4258 | NE2  | HIE | X | 283 | 62.744 | 58.988 | 42.167 | 0.00 | 0.00 |
| ATOM | 4259 | HE2  | HIE | X | 283 | 62.830 | 59.342 | 41.225 | 0.00 | 0.00 |
| ATOM | 4260 | CD2  | HIE | X | 283 | 61.610 | 58.627 | 42.785 | 0.00 | 0.00 |
| ATOM | 4261 | HD2  | HIE | X | 283 | 60.636 | 58.572 | 42.322 | 0.00 | 0.00 |
| ATOM | 4262 | C    | HIE | X | 283 | 59.153 | 56.928 | 46.457 | 0.00 | 0.00 |
| ATOM | 4263 | O    | HIE | X | 283 | 59.592 | 56.766 | 47.601 | 0.00 | 0.00 |
| ATOM | 4264 | N    | VAL | X | 284 | 57.828 | 57.102 | 46.279 | 0.00 | 0.00 |
| ATOM | 4265 | H    | VAL | X | 284 | 57.569 | 57.211 | 45.308 | 0.00 | 0.00 |
| ATOM | 4266 | CA   | VAL | X | 284 | 56.823 | 56.859 | 47.310 | 0.00 | 0.00 |
| ATOM | 4267 | HA   | VAL | X | 284 | 57.337 | 56.821 | 48.270 | 0.00 | 0.00 |
| ATOM | 4268 | CB   | VAL | X | 284 | 55.803 | 57.977 | 47.454 | 0.00 | 0.00 |
| ATOM | 4269 | HB   | VAL | X | 284 | 55.133 | 57.740 | 48.281 | 0.00 | 0.00 |
| ATOM | 4270 | CG1  | VAL | X | 284 | 56.456 | 59.247 | 48.008 | 0.00 | 0.00 |
| ATOM | 4271 | HG11 | VAL | X | 284 | 55.701 | 60.006 | 48.215 | 0.00 | 0.00 |
| ATOM | 4272 | HG12 | VAL | X | 284 | 57.003 | 59.059 | 48.932 | 0.00 | 0.00 |
| ATOM | 4273 | HG13 | VAL | X | 284 | 57.234 | 59.528 | 47.299 | 0.00 | 0.00 |
| ATOM | 4274 | CG2  | VAL | X | 284 | 54.865 | 58.143 | 46.260 | 0.00 | 0.00 |
| ATOM | 4275 | HG21 | VAL | X | 284 | 54.058 | 58.774 | 46.632 | 0.00 | 0.00 |
| ATOM | 4276 | HG22 | VAL | X | 284 | 54.380 | 57.224 | 45.931 | 0.00 | 0.00 |
| ATOM | 4277 | HG23 | VAL | X | 284 | 55.339 | 58.592 | 45.387 | 0.00 | 0.00 |
| ATOM | 4278 | C    | VAL | X | 284 | 56.235 | 55.465 | 47.058 | 0.00 | 0.00 |
| ATOM | 4279 | O    | VAL | X | 284 | 55.196 | 55.086 | 47.600 | 0.00 | 0.00 |
| ATOM | 4280 | N    | LEU | X | 285 | 56.852 | 54.599 | 46.244 | 0.00 | 0.00 |
| ATOM | 4281 | H    | LEU | X | 285 | 57.382 | 54.981 | 45.474 | 0.00 | 0.00 |
| ATOM | 4282 | CA   | LEU | X | 285 | 56.644 | 53.155 | 46.404 | 0.00 | 0.00 |
| ATOM | 4283 | HA   | LEU | X | 285 | 55.565 | 53.031 | 46.317 | 0.00 | 0.00 |
| ATOM | 4284 | CB   | LEU | X | 285 | 57.344 | 52.318 | 45.266 | 0.00 | 0.00 |
| ATOM | 4285 | HB2  | LEU | X | 285 | 57.226 | 52.855 | 44.325 | 0.00 | 0.00 |
| ATOM | 4286 | HB3  | LEU | X | 285 | 58.425 | 52.451 | 45.315 | 0.00 | 0.00 |
| ATOM | 4287 | CG   | LEU | X | 285 | 57.041 | 50.793 | 45.306 | 0.00 | 0.00 |
| ATOM | 4288 | HG   | LEU | X | 285 | 57.201 | 50.448 | 46.327 | 0.00 | 0.00 |
| ATOM | 4289 | CD1  | LEU | X | 285 | 55.646 | 50.271 | 44.949 | 0.00 | 0.00 |
| ATOM | 4290 | HD11 | LEU | X | 285 | 55.563 | 49.185 | 44.970 | 0.00 | 0.00 |
| ATOM | 4291 | HD12 | LEU | X | 285 | 55.506 | 50.580 | 43.913 | 0.00 | 0.00 |
| ATOM | 4292 | HD13 | LEU | X | 285 | 54.906 | 50.755 | 45.586 | 0.00 | 0.00 |
| ATOM | 4293 | CD2  | LEU | X | 285 | 58.038 | 50.053 | 44.444 | 0.00 | 0.00 |
| ATOM | 4294 | HD21 | LEU | X | 285 | 57.861 | 48.984 | 44.569 | 0.00 | 0.00 |
| ATOM | 4295 | HD22 | LEU | X | 285 | 57.837 | 50.171 | 43.379 | 0.00 | 0.00 |
| ATOM | 4296 | HD23 | LEU | X | 285 | 59.042 | 50.446 | 44.604 | 0.00 | 0.00 |
| ATOM | 4297 | C    | LEU | X | 285 | 57.110 | 52.682 | 47.860 | 0.00 | 0.00 |
| ATOM | 4298 | O    | LEU | X | 285 | 58.139 | 53.210 | 48.246 | 0.00 | 0.00 |
| ATOM | 4299 | N    | PRO | X | 286 | 56.432 | 51.804 | 48.627 | 0.00 | 0.00 |

|      |      |      |     |   |     |        |        |        |      |      |
|------|------|------|-----|---|-----|--------|--------|--------|------|------|
| ATOM | 4300 | CD   | PRO | X | 286 | 55.008 | 51.404 | 48.354 | 0.00 | 0.00 |
| ATOM | 4301 | HD2  | PRO | X | 286 | 54.967 | 50.631 | 47.586 | 0.00 | 0.00 |
| ATOM | 4302 | HD3  | PRO | X | 286 | 54.361 | 52.186 | 47.958 | 0.00 | 0.00 |
| ATOM | 4303 | CG   | PRO | X | 286 | 54.449 | 50.769 | 49.641 | 0.00 | 0.00 |
| ATOM | 4304 | HG2  | PRO | X | 286 | 53.713 | 49.972 | 49.545 | 0.00 | 0.00 |
| ATOM | 4305 | HG3  | PRO | X | 286 | 53.983 | 51.590 | 50.186 | 0.00 | 0.00 |
| ATOM | 4306 | CB   | PRO | X | 286 | 55.677 | 50.339 | 50.343 | 0.00 | 0.00 |
| ATOM | 4307 | HB2  | PRO | X | 286 | 55.928 | 49.287 | 50.213 | 0.00 | 0.00 |
| ATOM | 4308 | HB3  | PRO | X | 286 | 55.471 | 50.411 | 51.411 | 0.00 | 0.00 |
| ATOM | 4309 | CA   | PRO | X | 286 | 56.781 | 51.335 | 49.938 | 0.00 | 0.00 |
| ATOM | 4310 | HA   | PRO | X | 286 | 56.735 | 52.191 | 50.611 | 0.00 | 0.00 |
| ATOM | 4311 | C    | PRO | X | 286 | 58.215 | 50.729 | 50.021 | 0.00 | 0.00 |
| ATOM | 4312 | O    | PRO | X | 286 | 58.687 | 50.039 | 49.089 | 0.00 | 0.00 |
| ATOM | 4313 | N    | GLN | X | 287 | 58.963 | 51.054 | 51.071 | 0.00 | 0.00 |
| ATOM | 4314 | H    | GLN | X | 287 | 58.495 | 51.626 | 51.760 | 0.00 | 0.00 |
| ATOM | 4315 | CA   | GLN | X | 287 | 60.309 | 50.508 | 51.389 | 0.00 | 0.00 |
| ATOM | 4316 | HA   | GLN | X | 287 | 60.773 | 50.222 | 50.445 | 0.00 | 0.00 |
| ATOM | 4317 | CB   | GLN | X | 287 | 61.112 | 51.489 | 52.253 | 0.00 | 0.00 |
| ATOM | 4318 | HB2  | GLN | X | 287 | 60.586 | 51.711 | 53.182 | 0.00 | 0.00 |
| ATOM | 4319 | HB3  | GLN | X | 287 | 62.001 | 51.013 | 52.667 | 0.00 | 0.00 |
| ATOM | 4320 | CG   | GLN | X | 287 | 61.489 | 52.740 | 51.401 | 0.00 | 0.00 |
| ATOM | 4321 | HG2  | GLN | X | 287 | 62.068 | 52.313 | 50.582 | 0.00 | 0.00 |
| ATOM | 4322 | HG3  | GLN | X | 287 | 60.650 | 53.311 | 51.003 | 0.00 | 0.00 |
| ATOM | 4323 | CD   | GLN | X | 287 | 62.309 | 53.768 | 52.252 | 0.00 | 0.00 |
| ATOM | 4324 | OE1  | GLN | X | 287 | 63.036 | 53.489 | 53.159 | 0.00 | 0.00 |
| ATOM | 4325 | NE2  | GLN | X | 287 | 62.157 | 55.072 | 51.926 | 0.00 | 0.00 |
| ATOM | 4326 | HE21 | GLN | X | 287 | 62.696 | 55.771 | 52.416 | 0.00 | 0.00 |
| ATOM | 4327 | HE22 | GLN | X | 287 | 61.598 | 55.295 | 51.114 | 0.00 | 0.00 |
| ATOM | 4328 | C    | GLN | X | 287 | 60.005 | 49.247 | 52.243 | 0.00 | 0.00 |
| ATOM | 4329 | O    | GLN | X | 287 | 58.869 | 49.123 | 52.781 | 0.00 | 0.00 |
| ATOM | 4330 | N    | GLU | X | 288 | 60.996 | 48.368 | 52.485 | 0.00 | 0.00 |
| ATOM | 4331 | H    | GLU | X | 288 | 61.911 | 48.501 | 52.077 | 0.00 | 0.00 |
| ATOM | 4332 | CA   | GLU | X | 288 | 60.897 | 47.306 | 53.481 | 0.00 | 0.00 |
| ATOM | 4333 | HA   | GLU | X | 288 | 61.771 | 46.656 | 53.473 | 0.00 | 0.00 |
| ATOM | 4334 | CB   | GLU | X | 288 | 60.840 | 47.948 | 54.914 | 0.00 | 0.00 |
| ATOM | 4335 | HB2  | GLU | X | 288 | 59.919 | 48.509 | 55.079 | 0.00 | 0.00 |
| ATOM | 4336 | HB3  | GLU | X | 288 | 60.917 | 47.098 | 55.592 | 0.00 | 0.00 |
| ATOM | 4337 | CG   | GLU | X | 288 | 62.115 | 48.664 | 55.277 | 0.00 | 0.00 |
| ATOM | 4338 | HG2  | GLU | X | 288 | 62.943 | 48.083 | 54.870 | 0.00 | 0.00 |
| ATOM | 4339 | HG3  | GLU | X | 288 | 62.122 | 49.661 | 54.837 | 0.00 | 0.00 |
| ATOM | 4340 | CD   | GLU | X | 288 | 62.365 | 48.808 | 56.776 | 0.00 | 0.00 |
| ATOM | 4341 | OE1  | GLU | X | 288 | 62.885 | 47.849 | 57.392 | 0.00 | 0.00 |
| ATOM | 4342 | OE2  | GLU | X | 288 | 62.166 | 49.909 | 57.299 | 0.00 | 0.00 |
| ATOM | 4343 | C    | GLU | X | 288 | 59.751 | 46.395 | 53.072 | 0.00 | 0.00 |
| ATOM | 4344 | O    | GLU | X | 288 | 58.865 | 45.972 | 53.915 | 0.00 | 0.00 |
| ATOM | 4345 | N    | SER | X | 289 | 59.593 | 46.047 | 51.783 | 0.00 | 0.00 |
| ATOM | 4346 | H    | SER | X | 289 | 60.286 | 46.436 | 51.161 | 0.00 | 0.00 |
| ATOM | 4347 | CA   | SER | X | 289 | 58.337 | 45.457 | 51.314 | 0.00 | 0.00 |
| ATOM | 4348 | HA   | SER | X | 289 | 58.012 | 44.806 | 52.126 | 0.00 | 0.00 |
| ATOM | 4349 | CB   | SER | X | 289 | 57.259 | 46.562 | 51.148 | 0.00 | 0.00 |
| ATOM | 4350 | HB2  | SER | X | 289 | 57.594 | 47.368 | 50.495 | 0.00 | 0.00 |
| ATOM | 4351 | HB3  | SER | X | 289 | 56.376 | 46.103 | 50.702 | 0.00 | 0.00 |
| ATOM | 4352 | OG   | SER | X | 289 | 56.908 | 47.196 | 52.371 | 0.00 | 0.00 |
| ATOM | 4353 | HG   | SER | X | 289 | 57.699 | 47.574 | 52.760 | 0.00 | 0.00 |
| ATOM | 4354 | C    | SER | X | 289 | 58.454 | 44.757 | 49.945 | 0.00 | 0.00 |
| ATOM | 4355 | O    | SER | X | 289 | 58.986 | 45.284 | 49.011 | 0.00 | 0.00 |
| ATOM | 4356 | N    | VAL | X | 290 | 57.849 | 43.618 | 49.782 | 0.00 | 0.00 |
| ATOM | 4357 | H    | VAL | X | 290 | 57.515 | 43.114 | 50.591 | 0.00 | 0.00 |
| ATOM | 4358 | CA   | VAL | X | 290 | 57.310 | 43.013 | 48.573 | 0.00 | 0.00 |
| ATOM | 4359 | HA   | VAL | X | 290 | 57.367 | 43.678 | 47.711 | 0.00 | 0.00 |
| ATOM | 4360 | CB   | VAL | X | 290 | 58.104 | 41.704 | 48.243 | 0.00 | 0.00 |
| ATOM | 4361 | HB   | VAL | X | 290 | 58.263 | 41.213 | 49.203 | 0.00 | 0.00 |
| ATOM | 4362 | CG1  | VAL | X | 290 | 57.433 | 40.651 | 47.308 | 0.00 | 0.00 |
| ATOM | 4363 | HG11 | VAL | X | 290 | 57.510 | 41.106 | 46.321 | 0.00 | 0.00 |
| ATOM | 4364 | HG12 | VAL | X | 290 | 57.967 | 39.701 | 47.327 | 0.00 | 0.00 |
| ATOM | 4365 | HG13 | VAL | X | 290 | 56.421 | 40.547 | 47.699 | 0.00 | 0.00 |
| ATOM | 4366 | CG2  | VAL | X | 290 | 59.490 | 42.045 | 47.789 | 0.00 | 0.00 |



|      |      |      |     |   |     |        |        |        |      |      |
|------|------|------|-----|---|-----|--------|--------|--------|------|------|
| ATOM | 4367 | HG21 | VAL | X | 290 | 60.024 | 41.125 | 47.548 | 0.00 | 0.00 |
| ATOM | 4368 | HG22 | VAL | X | 290 | 60.076 | 42.633 | 48.495 | 0.00 | 0.00 |
| ATOM | 4369 | HG23 | VAL | X | 290 | 59.423 | 42.534 | 46.817 | 0.00 | 0.00 |
| ATOM | 4370 | C    | VAL | X | 290 | 55.841 | 42.662 | 48.807 | 0.00 | 0.00 |
| ATOM | 4371 | O    | VAL | X | 290 | 55.322 | 42.176 | 49.820 | 0.00 | 0.00 |
| ATOM | 4372 | N    | PHE | X | 291 | 55.141 | 42.958 | 47.707 | 0.00 | 0.00 |
| ATOM | 4373 | H    | PHE | X | 291 | 55.683 | 43.175 | 46.883 | 0.00 | 0.00 |
| ATOM | 4374 | CA   | PHE | X | 291 | 53.690 | 42.730 | 47.498 | 0.00 | 0.00 |
| ATOM | 4375 | HA   | PHE | X | 291 | 53.473 | 42.755 | 46.430 | 0.00 | 0.00 |
| ATOM | 4376 | CB   | PHE | X | 291 | 53.140 | 41.348 | 47.975 | 0.00 | 0.00 |
| ATOM | 4377 | HB2  | PHE | X | 291 | 53.920 | 40.596 | 47.856 | 0.00 | 0.00 |
| ATOM | 4378 | HB3  | PHE | X | 291 | 52.860 | 41.436 | 49.024 | 0.00 | 0.00 |
| ATOM | 4379 | CG   | PHE | X | 291 | 51.919 | 40.821 | 47.217 | 0.00 | 0.00 |
| ATOM | 4380 | CD1  | PHE | X | 291 | 50.680 | 41.498 | 46.949 | 0.00 | 0.00 |
| ATOM | 4381 | HD1  | PHE | X | 291 | 50.579 | 42.461 | 47.427 | 0.00 | 0.00 |
| ATOM | 4382 | CE1  | PHE | X | 291 | 49.662 | 40.864 | 46.216 | 0.00 | 0.00 |
| ATOM | 4383 | HE1  | PHE | X | 291 | 48.739 | 41.401 | 46.054 | 0.00 | 0.00 |
| ATOM | 4384 | CZ   | PHE | X | 291 | 49.862 | 39.565 | 45.651 | 0.00 | 0.00 |
| ATOM | 4385 | HZ   | PHE | X | 291 | 49.034 | 39.138 | 45.103 | 0.00 | 0.00 |
| ATOM | 4386 | CE2  | PHE | X | 291 | 51.023 | 38.844 | 45.910 | 0.00 | 0.00 |
| ATOM | 4387 | HE2  | PHE | X | 291 | 51.169 | 37.862 | 45.485 | 0.00 | 0.00 |
| ATOM | 4388 | CD2  | PHE | X | 291 | 52.016 | 39.548 | 46.619 | 0.00 | 0.00 |
| ATOM | 4389 | HD2  | PHE | X | 291 | 52.964 | 39.031 | 46.638 | 0.00 | 0.00 |
| ATOM | 4390 | C    | PHE | X | 291 | 52.941 | 43.972 | 48.061 | 0.00 | 0.00 |
| ATOM | 4391 | O    | PHE | X | 291 | 52.030 | 43.783 | 48.817 | 0.00 | 0.00 |
| ATOM | 4392 | N    | ARG | X | 292 | 53.416 | 45.181 | 47.763 | 0.00 | 0.00 |
| ATOM | 4393 | H    | ARG | X | 292 | 54.263 | 45.239 | 47.215 | 0.00 | 0.00 |
| ATOM | 4394 | CA   | ARG | X | 292 | 52.866 | 46.498 | 48.222 | 0.00 | 0.00 |
| ATOM | 4395 | HA   | ARG | X | 292 | 51.794 | 46.337 | 48.332 | 0.00 | 0.00 |
| ATOM | 4396 | CB   | ARG | X | 292 | 53.436 | 46.859 | 49.653 | 0.00 | 0.00 |
| ATOM | 4397 | HB2  | ARG | X | 292 | 54.518 | 46.923 | 49.531 | 0.00 | 0.00 |
| ATOM | 4398 | HB3  | ARG | X | 292 | 53.037 | 47.836 | 49.924 | 0.00 | 0.00 |
| ATOM | 4399 | CG   | ARG | X | 292 | 53.285 | 45.796 | 50.800 | 0.00 | 0.00 |
| ATOM | 4400 | HG2  | ARG | X | 292 | 53.752 | 44.867 | 50.474 | 0.00 | 0.00 |
| ATOM | 4401 | HG3  | ARG | X | 292 | 53.752 | 46.320 | 51.634 | 0.00 | 0.00 |
| ATOM | 4402 | CD   | ARG | X | 292 | 51.784 | 45.584 | 51.158 | 0.00 | 0.00 |
| ATOM | 4403 | HD2  | ARG | X | 292 | 51.681 | 46.324 | 51.951 | 0.00 | 0.00 |
| ATOM | 4404 | HD3  | ARG | X | 292 | 51.089 | 46.006 | 50.432 | 0.00 | 0.00 |
| ATOM | 4405 | NE   | ARG | X | 292 | 51.499 | 44.198 | 51.539 | 0.00 | 0.00 |
| ATOM | 4406 | HE   | ARG | X | 292 | 51.381 | 43.568 | 50.757 | 0.00 | 0.00 |
| ATOM | 4407 | CZ   | ARG | X | 292 | 51.296 | 43.664 | 52.727 | 0.00 | 0.00 |
| ATOM | 4408 | NH1  | ARG | X | 292 | 51.256 | 44.480 | 53.749 | 0.00 | 0.00 |
| ATOM | 4409 | HH11 | ARG | X | 292 | 51.653 | 45.403 | 53.645 | 0.00 | 0.00 |
| ATOM | 4410 | HH12 | ARG | X | 292 | 51.231 | 44.101 | 54.685 | 0.00 | 0.00 |
| ATOM | 4411 | NH2  | ARG | X | 292 | 51.166 | 42.369 | 52.896 | 0.00 | 0.00 |
| ATOM | 4412 | HH21 | ARG | X | 292 | 51.183 | 41.719 | 52.123 | 0.00 | 0.00 |
| ATOM | 4413 | HH22 | ARG | X | 292 | 51.240 | 42.009 | 53.837 | 0.00 | 0.00 |
| ATOM | 4414 | C    | ARG | X | 292 | 53.125 | 47.669 | 47.303 | 0.00 | 0.00 |
| ATOM | 4415 | O    | ARG | X | 292 | 54.214 | 47.744 | 46.706 | 0.00 | 0.00 |
| ATOM | 4416 | N    | PHE | X | 293 | 52.152 | 48.588 | 47.072 | 0.00 | 0.00 |
| ATOM | 4417 | H    | PHE | X | 293 | 51.415 | 48.691 | 47.755 | 0.00 | 0.00 |
| ATOM | 4418 | CA   | PHE | X | 293 | 52.130 | 49.458 | 45.889 | 0.00 | 0.00 |
| ATOM | 4419 | HA   | PHE | X | 293 | 53.024 | 49.337 | 45.279 | 0.00 | 0.00 |
| ATOM | 4420 | CB   | PHE | X | 293 | 50.957 | 48.952 | 44.953 | 0.00 | 0.00 |
| ATOM | 4421 | HB2  | PHE | X | 293 | 50.047 | 49.199 | 45.499 | 0.00 | 0.00 |
| ATOM | 4422 | HB3  | PHE | X | 293 | 51.038 | 49.495 | 44.011 | 0.00 | 0.00 |
| ATOM | 4423 | CG   | PHE | X | 293 | 50.894 | 47.443 | 44.788 | 0.00 | 0.00 |
| ATOM | 4424 | CD1  | PHE | X | 293 | 51.953 | 46.730 | 44.181 | 0.00 | 0.00 |
| ATOM | 4425 | HD1  | PHE | X | 293 | 52.808 | 47.254 | 43.779 | 0.00 | 0.00 |
| ATOM | 4426 | CE1  | PHE | X | 293 | 52.031 | 45.331 | 44.268 | 0.00 | 0.00 |
| ATOM | 4427 | HE1  | PHE | X | 293 | 52.904 | 44.830 | 43.878 | 0.00 | 0.00 |
| ATOM | 4428 | CZ   | PHE | X | 293 | 51.050 | 44.631 | 44.869 | 0.00 | 0.00 |
| ATOM | 4429 | HZ   | PHE | X | 293 | 51.039 | 43.551 | 44.875 | 0.00 | 0.00 |
| ATOM | 4430 | CE2  | PHE | X | 293 | 49.967 | 45.223 | 45.526 | 0.00 | 0.00 |
| ATOM | 4431 | HE2  | PHE | X | 293 | 49.163 | 44.664 | 45.981 | 0.00 | 0.00 |
| ATOM | 4432 | CD2  | PHE | X | 293 | 49.926 | 46.623 | 45.472 | 0.00 | 0.00 |
| ATOM | 4433 | HD2  | PHE | X | 293 | 49.104 | 47.085 | 45.997 | 0.00 | 0.00 |

|      |      |      |     |   |     |        |        |        |      |      |
|------|------|------|-----|---|-----|--------|--------|--------|------|------|
| ATOM | 4434 | C    | PHE | X | 293 | 52.051 | 50.944 | 46.229 | 0.00 | 0.00 |
| ATOM | 4435 | O    | PHE | X | 293 | 51.548 | 51.229 | 47.332 | 0.00 | 0.00 |
| ATOM | 4436 | N    | SER | X | 294 | 52.401 | 51.773 | 45.257 | 0.00 | 0.00 |
| ATOM | 4437 | H    | SER | X | 294 | 53.003 | 51.371 | 44.552 | 0.00 | 0.00 |
| ATOM | 4438 | CA   | SER | X | 294 | 52.592 | 53.191 | 45.463 | 0.00 | 0.00 |
| ATOM | 4439 | HA   | SER | X | 294 | 53.422 | 53.313 | 46.159 | 0.00 | 0.00 |
| ATOM | 4440 | CB   | SER | X | 294 | 53.064 | 53.905 | 44.156 | 0.00 | 0.00 |
| ATOM | 4441 | HB2  | SER | X | 294 | 52.255 | 53.841 | 43.428 | 0.00 | 0.00 |
| ATOM | 4442 | HB3  | SER | X | 294 | 53.249 | 54.945 | 44.422 | 0.00 | 0.00 |
| ATOM | 4443 | OG   | SER | X | 294 | 54.276 | 53.221 | 43.680 | 0.00 | 0.00 |
| ATOM | 4444 | HG   | SER | X | 294 | 54.482 | 53.512 | 42.788 | 0.00 | 0.00 |
| ATOM | 4445 | C    | SER | X | 294 | 51.390 | 53.950 | 46.008 | 0.00 | 0.00 |
| ATOM | 4446 | O    | SER | X | 294 | 51.586 | 54.676 | 46.966 | 0.00 | 0.00 |
| ATOM | 4447 | N    | PHE | X | 295 | 50.137 | 53.564 | 45.611 | 0.00 | 0.00 |
| ATOM | 4448 | H    | PHE | X | 295 | 49.948 | 52.741 | 45.057 | 0.00 | 0.00 |
| ATOM | 4449 | CA   | PHE | X | 295 | 48.951 | 54.248 | 46.061 | 0.00 | 0.00 |
| ATOM | 4450 | HA   | PHE | X | 295 | 48.958 | 54.493 | 47.123 | 0.00 | 0.00 |
| ATOM | 4451 | CB   | PHE | X | 295 | 48.758 | 55.565 | 45.207 | 0.00 | 0.00 |
| ATOM | 4452 | HB2  | PHE | X | 295 | 48.923 | 55.350 | 44.151 | 0.00 | 0.00 |
| ATOM | 4453 | HB3  | PHE | X | 295 | 47.717 | 55.867 | 45.317 | 0.00 | 0.00 |
| ATOM | 4454 | CG   | PHE | X | 295 | 49.548 | 56.819 | 45.578 | 0.00 | 0.00 |
| ATOM | 4455 | CD1  | PHE | X | 295 | 49.027 | 57.587 | 46.660 | 0.00 | 0.00 |
| ATOM | 4456 | HD1  | PHE | X | 295 | 48.036 | 57.434 | 47.059 | 0.00 | 0.00 |
| ATOM | 4457 | CE1  | PHE | X | 295 | 49.765 | 58.681 | 47.098 | 0.00 | 0.00 |
| ATOM | 4458 | HE1  | PHE | X | 295 | 49.495 | 59.318 | 47.927 | 0.00 | 0.00 |
| ATOM | 4459 | CZ   | PHE | X | 295 | 51.068 | 58.914 | 46.615 | 0.00 | 0.00 |
| ATOM | 4460 | HZ   | PHE | X | 295 | 51.597 | 59.773 | 47.001 | 0.00 | 0.00 |
| ATOM | 4461 | CE2  | PHE | X | 295 | 51.462 | 58.223 | 45.468 | 0.00 | 0.00 |
| ATOM | 4462 | HE2  | PHE | X | 295 | 52.461 | 58.417 | 45.107 | 0.00 | 0.00 |
| ATOM | 4463 | CD2  | PHE | X | 295 | 50.787 | 57.143 | 44.971 | 0.00 | 0.00 |
| ATOM | 4464 | HD2  | PHE | X | 295 | 51.201 | 56.596 | 44.136 | 0.00 | 0.00 |
| ATOM | 4465 | C    | PHE | X | 295 | 47.781 | 53.343 | 45.881 | 0.00 | 0.00 |
| ATOM | 4466 | O    | PHE | X | 295 | 47.670 | 52.802 | 44.774 | 0.00 | 0.00 |
| ATOM | 4467 | N    | VAL | X | 296 | 46.982 | 53.132 | 46.912 | 0.00 | 0.00 |
| ATOM | 4468 | H    | VAL | X | 296 | 47.185 | 53.629 | 47.767 | 0.00 | 0.00 |
| ATOM | 4469 | CA   | VAL | X | 296 | 45.949 | 52.068 | 46.943 | 0.00 | 0.00 |
| ATOM | 4470 | HA   | VAL | X | 296 | 45.664 | 51.754 | 45.939 | 0.00 | 0.00 |
| ATOM | 4471 | CB   | VAL | X | 296 | 46.532 | 50.888 | 47.702 | 0.00 | 0.00 |
| ATOM | 4472 | HB   | VAL | X | 296 | 45.699 | 50.189 | 47.767 | 0.00 | 0.00 |
| ATOM | 4473 | CG1  | VAL | X | 296 | 47.794 | 50.232 | 47.037 | 0.00 | 0.00 |
| ATOM | 4474 | HG11 | VAL | X | 296 | 48.629 | 50.929 | 47.101 | 0.00 | 0.00 |
| ATOM | 4475 | HG12 | VAL | X | 296 | 47.963 | 49.288 | 47.556 | 0.00 | 0.00 |
| ATOM | 4476 | HG13 | VAL | X | 296 | 47.492 | 50.059 | 46.004 | 0.00 | 0.00 |
| ATOM | 4477 | CG2  | VAL | X | 296 | 46.921 | 51.300 | 49.153 | 0.00 | 0.00 |
| ATOM | 4478 | HG21 | VAL | X | 296 | 47.393 | 50.427 | 49.606 | 0.00 | 0.00 |
| ATOM | 4479 | HG22 | VAL | X | 296 | 46.023 | 51.510 | 49.734 | 0.00 | 0.00 |
| ATOM | 4480 | HG23 | VAL | X | 296 | 47.677 | 52.085 | 49.149 | 0.00 | 0.00 |
| ATOM | 4481 | C    | VAL | X | 296 | 44.629 | 52.516 | 47.583 | 0.00 | 0.00 |
| ATOM | 4482 | O    | VAL | X | 296 | 44.670 | 53.536 | 48.304 | 0.00 | 0.00 |
| ATOM | 4483 | N    | PRO | X | 297 | 43.410 | 51.871 | 47.402 | 0.00 | 0.00 |
| ATOM | 4484 | CD   | PRO | X | 297 | 43.226 | 50.771 | 46.515 | 0.00 | 0.00 |
| ATOM | 4485 | HD2  | PRO | X | 297 | 43.904 | 49.945 | 46.726 | 0.00 | 0.00 |
| ATOM | 4486 | HD3  | PRO | X | 297 | 43.372 | 51.005 | 45.460 | 0.00 | 0.00 |
| ATOM | 4487 | CG   | PRO | X | 297 | 41.816 | 50.333 | 46.663 | 0.00 | 0.00 |
| ATOM | 4488 | HG2  | PRO | X | 297 | 41.726 | 49.247 | 46.656 | 0.00 | 0.00 |
| ATOM | 4489 | HG3  | PRO | X | 297 | 41.173 | 50.796 | 45.914 | 0.00 | 0.00 |
| ATOM | 4490 | CB   | PRO | X | 297 | 41.276 | 50.962 | 47.971 | 0.00 | 0.00 |
| ATOM | 4491 | HB2  | PRO | X | 297 | 41.440 | 50.169 | 48.701 | 0.00 | 0.00 |
| ATOM | 4492 | HB3  | PRO | X | 297 | 40.249 | 51.327 | 48.000 | 0.00 | 0.00 |
| ATOM | 4493 | CA   | PRO | X | 297 | 42.159 | 52.162 | 48.119 | 0.00 | 0.00 |
| ATOM | 4494 | HA   | PRO | X | 297 | 41.647 | 52.989 | 47.626 | 0.00 | 0.00 |
| ATOM | 4495 | C    | PRO | X | 297 | 42.371 | 52.538 | 49.572 | 0.00 | 0.00 |
| ATOM | 4496 | O    | PRO | X | 297 | 43.214 | 51.915 | 50.228 | 0.00 | 0.00 |
| ATOM | 4497 | N    | VAL | X | 298 | 41.733 | 53.589 | 49.935 | 0.00 | 0.00 |
| ATOM | 4498 | H    | VAL | X | 298 | 40.895 | 53.868 | 49.445 | 0.00 | 0.00 |
| ATOM | 4499 | CA   | VAL | X | 298 | 41.865 | 54.230 | 51.207 | 0.00 | 0.00 |
| ATOM | 4500 | HA   | VAL | X | 298 | 42.783 | 53.970 | 51.735 | 0.00 | 0.00 |

|      |      |      |     |   |     |        |        |        |      |      |
|------|------|------|-----|---|-----|--------|--------|--------|------|------|
| ATOM | 4501 | CB   | VAL | X | 298 | 41.970 | 55.777 | 51.062 | 0.00 | 0.00 |
| ATOM | 4502 | HB   | VAL | X | 298 | 41.015 | 56.154 | 50.696 | 0.00 | 0.00 |
| ATOM | 4503 | CG1  | VAL | X | 298 | 42.224 | 56.464 | 52.388 | 0.00 | 0.00 |
| ATOM | 4504 | HG11 | VAL | X | 298 | 43.229 | 56.167 | 52.688 | 0.00 | 0.00 |
| ATOM | 4505 | HG12 | VAL | X | 298 | 42.274 | 57.552 | 52.345 | 0.00 | 0.00 |
| ATOM | 4506 | HG13 | VAL | X | 298 | 41.560 | 56.065 | 53.156 | 0.00 | 0.00 |
| ATOM | 4507 | CG2  | VAL | X | 298 | 43.153 | 56.061 | 50.028 | 0.00 | 0.00 |
| ATOM | 4508 | HG21 | VAL | X | 298 | 42.871 | 55.643 | 49.062 | 0.00 | 0.00 |
| ATOM | 4509 | HG22 | VAL | X | 298 | 44.003 | 55.421 | 50.267 | 0.00 | 0.00 |
| ATOM | 4510 | HG23 | VAL | X | 298 | 43.351 | 57.123 | 49.889 | 0.00 | 0.00 |
| ATOM | 4511 | C    | VAL | X | 298 | 40.656 | 53.786 | 52.065 | 0.00 | 0.00 |
| ATOM | 4512 | O    | VAL | X | 298 | 39.483 | 54.020 | 51.566 | 0.00 | 0.00 |
| ATOM | 4513 | N    | VAL | X | 299 | 40.950 | 53.246 | 53.254 | 0.00 | 0.00 |
| ATOM | 4514 | H    | VAL | X | 299 | 41.878 | 53.243 | 53.653 | 0.00 | 0.00 |
| ATOM | 4515 | CA   | VAL | X | 299 | 39.949 | 53.232 | 54.306 | 0.00 | 0.00 |
| ATOM | 4516 | HA   | VAL | X | 299 | 39.017 | 52.898 | 53.849 | 0.00 | 0.00 |
| ATOM | 4517 | CB   | VAL | X | 299 | 40.339 | 52.233 | 55.335 | 0.00 | 0.00 |
| ATOM | 4518 | HB   | VAL | X | 299 | 41.374 | 52.390 | 55.639 | 0.00 | 0.00 |
| ATOM | 4519 | CG1  | VAL | X | 299 | 39.441 | 52.179 | 56.659 | 0.00 | 0.00 |
| ATOM | 4520 | HG11 | VAL | X | 299 | 38.431 | 51.905 | 56.352 | 0.00 | 0.00 |
| ATOM | 4521 | HG12 | VAL | X | 299 | 39.664 | 51.399 | 57.388 | 0.00 | 0.00 |
| ATOM | 4522 | HG13 | VAL | X | 299 | 39.399 | 53.181 | 57.085 | 0.00 | 0.00 |
| ATOM | 4523 | CG2  | VAL | X | 299 | 40.205 | 50.902 | 54.587 | 0.00 | 0.00 |
| ATOM | 4524 | HG21 | VAL | X | 299 | 40.681 | 50.915 | 53.606 | 0.00 | 0.00 |
| ATOM | 4525 | HG22 | VAL | X | 299 | 39.170 | 50.564 | 54.556 | 0.00 | 0.00 |
| ATOM | 4526 | HG23 | VAL | X | 299 | 40.745 | 50.198 | 55.220 | 0.00 | 0.00 |
| ATOM | 4527 | C    | VAL | X | 299 | 39.783 | 54.655 | 54.855 | 0.00 | 0.00 |
| ATOM | 4528 | O    | VAL | X | 299 | 40.619 | 55.146 | 55.542 | 0.00 | 0.00 |
| ATOM | 4529 | N    | ASP | X | 300 | 38.633 | 55.307 | 54.536 | 0.00 | 0.00 |
| ATOM | 4530 | H    | ASP | X | 300 | 38.022 | 54.824 | 53.894 | 0.00 | 0.00 |
| ATOM | 4531 | CA   | ASP | X | 300 | 38.473 | 56.780 | 54.703 | 0.00 | 0.00 |
| ATOM | 4532 | HA   | ASP | X | 300 | 39.410 | 57.239 | 55.019 | 0.00 | 0.00 |
| ATOM | 4533 | CB   | ASP | X | 300 | 38.369 | 57.477 | 53.309 | 0.00 | 0.00 |
| ATOM | 4534 | HB2  | ASP | X | 300 | 38.529 | 58.533 | 53.527 | 0.00 | 0.00 |
| ATOM | 4535 | HB3  | ASP | X | 300 | 39.076 | 57.165 | 52.541 | 0.00 | 0.00 |
| ATOM | 4536 | CG   | ASP | X | 300 | 37.064 | 57.309 | 52.466 | 0.00 | 0.00 |
| ATOM | 4537 | OD1  | ASP | X | 300 | 36.245 | 56.476 | 52.854 | 0.00 | 0.00 |
| ATOM | 4538 | OD2  | ASP | X | 300 | 36.859 | 58.072 | 51.476 | 0.00 | 0.00 |
| ATOM | 4539 | C    | ASP | X | 300 | 37.277 | 57.282 | 55.624 | 0.00 | 0.00 |
| ATOM | 4540 | O    | ASP | X | 300 | 37.209 | 58.467 | 55.919 | 0.00 | 0.00 |
| ATOM | 4541 | N    | GLY | X | 301 | 36.298 | 56.376 | 55.935 | 0.00 | 0.00 |
| ATOM | 4542 | H    | GLY | X | 301 | 36.446 | 55.583 | 55.326 | 0.00 | 0.00 |
| ATOM | 4543 | CA   | GLY | X | 301 | 35.154 | 56.446 | 56.735 | 0.00 | 0.00 |
| ATOM | 4544 | HA2  | GLY | X | 301 | 34.856 | 55.450 | 57.065 | 0.00 | 0.00 |
| ATOM | 4545 | HA3  | GLY | X | 301 | 35.258 | 57.187 | 57.527 | 0.00 | 0.00 |
| ATOM | 4546 | C    | GLY | X | 301 | 34.030 | 56.990 | 55.872 | 0.00 | 0.00 |
| ATOM | 4547 | O    | GLY | X | 301 | 33.062 | 57.432 | 56.483 | 0.00 | 0.00 |
| ATOM | 4548 | N    | ASP | X | 302 | 34.001 | 56.961 | 54.529 | 0.00 | 0.00 |
| ATOM | 4549 | H    | ASP | X | 302 | 34.801 | 56.568 | 54.054 | 0.00 | 0.00 |
| ATOM | 4550 | CA   | ASP | X | 302 | 32.914 | 57.485 | 53.663 | 0.00 | 0.00 |
| ATOM | 4551 | HA   | ASP | X | 302 | 31.990 | 57.711 | 54.194 | 0.00 | 0.00 |
| ATOM | 4552 | CB   | ASP | X | 302 | 33.568 | 58.788 | 53.171 | 0.00 | 0.00 |
| ATOM | 4553 | HB2  | ASP | X | 302 | 33.652 | 59.542 | 53.953 | 0.00 | 0.00 |
| ATOM | 4554 | HB3  | ASP | X | 302 | 34.530 | 58.640 | 52.679 | 0.00 | 0.00 |
| ATOM | 4555 | CG   | ASP | X | 302 | 32.766 | 59.509 | 52.121 | 0.00 | 0.00 |
| ATOM | 4556 | OD1  | ASP | X | 302 | 33.012 | 59.259 | 50.914 | 0.00 | 0.00 |
| ATOM | 4557 | OD2  | ASP | X | 302 | 31.866 | 60.274 | 52.475 | 0.00 | 0.00 |
| ATOM | 4558 | C    | ASP | X | 302 | 32.711 | 56.583 | 52.417 | 0.00 | 0.00 |
| ATOM | 4559 | O    | ASP | X | 302 | 31.653 | 56.179 | 52.111 | 0.00 | 0.00 |
| ATOM | 4560 | N    | PHE | X | 303 | 33.712 | 56.240 | 51.600 | 0.00 | 0.00 |
| ATOM | 4561 | H    | PHE | X | 303 | 34.567 | 56.747 | 51.781 | 0.00 | 0.00 |
| ATOM | 4562 | CA   | PHE | X | 303 | 33.623 | 55.214 | 50.487 | 0.00 | 0.00 |
| ATOM | 4563 | HA   | PHE | X | 303 | 32.667 | 55.280 | 49.966 | 0.00 | 0.00 |
| ATOM | 4564 | CB   | PHE | X | 303 | 34.758 | 55.561 | 49.527 | 0.00 | 0.00 |
| ATOM | 4565 | HB2  | PHE | X | 303 | 34.651 | 56.580 | 49.154 | 0.00 | 0.00 |
| ATOM | 4566 | HB3  | PHE | X | 303 | 35.719 | 55.592 | 50.039 | 0.00 | 0.00 |
| ATOM | 4567 | CG   | PHE | X | 303 | 34.884 | 54.681 | 48.302 | 0.00 | 0.00 |

|      |      |      |     |   |     |        |        |        |      |      |
|------|------|------|-----|---|-----|--------|--------|--------|------|------|
| ATOM | 4568 | CD1  | PHE | X | 303 | 35.704 | 53.530 | 48.450 | 0.00 | 0.00 |
| ATOM | 4569 | HD1  | PHE | X | 303 | 36.291 | 53.466 | 49.355 | 0.00 | 0.00 |
| ATOM | 4570 | CE1  | PHE | X | 303 | 35.832 | 52.550 | 47.513 | 0.00 | 0.00 |
| ATOM | 4571 | HE1  | PHE | X | 303 | 36.534 | 51.786 | 47.811 | 0.00 | 0.00 |
| ATOM | 4572 | CZ   | PHE | X | 303 | 35.048 | 52.566 | 46.373 | 0.00 | 0.00 |
| ATOM | 4573 | HZ   | PHE | X | 303 | 35.043 | 51.694 | 45.735 | 0.00 | 0.00 |
| ATOM | 4574 | CE2  | PHE | X | 303 | 34.254 | 53.698 | 46.163 | 0.00 | 0.00 |
| ATOM | 4575 | HE2  | PHE | X | 303 | 33.808 | 53.798 | 45.185 | 0.00 | 0.00 |
| ATOM | 4576 | CD2  | PHE | X | 303 | 34.088 | 54.757 | 47.127 | 0.00 | 0.00 |
| ATOM | 4577 | HD2  | PHE | X | 303 | 33.573 | 55.662 | 46.842 | 0.00 | 0.00 |
| ATOM | 4578 | C    | PHE | X | 303 | 33.797 | 53.802 | 51.020 | 0.00 | 0.00 |
| ATOM | 4579 | O    | PHE | X | 303 | 33.088 | 52.974 | 50.482 | 0.00 | 0.00 |
| ATOM | 4580 | N    | LEU | X | 304 | 34.675 | 53.677 | 52.082 | 0.00 | 0.00 |
| ATOM | 4581 | H    | LEU | X | 304 | 35.055 | 54.581 | 52.325 | 0.00 | 0.00 |
| ATOM | 4582 | CA   | LEU | X | 304 | 34.874 | 52.505 | 52.981 | 0.00 | 0.00 |
| ATOM | 4583 | HA   | LEU | X | 304 | 34.287 | 51.646 | 52.656 | 0.00 | 0.00 |
| ATOM | 4584 | CB   | LEU | X | 304 | 36.257 | 52.029 | 52.826 | 0.00 | 0.00 |
| ATOM | 4585 | HB2  | LEU | X | 304 | 36.953 | 52.862 | 52.719 | 0.00 | 0.00 |
| ATOM | 4586 | HB3  | LEU | X | 304 | 36.598 | 51.540 | 53.738 | 0.00 | 0.00 |
| ATOM | 4587 | CG   | LEU | X | 304 | 36.522 | 51.140 | 51.552 | 0.00 | 0.00 |
| ATOM | 4588 | HG   | LEU | X | 304 | 36.453 | 51.552 | 50.545 | 0.00 | 0.00 |
| ATOM | 4589 | CD1  | LEU | X | 304 | 37.958 | 50.553 | 51.712 | 0.00 | 0.00 |
| ATOM | 4590 | HD11 | LEU | X | 304 | 38.195 | 49.872 | 50.894 | 0.00 | 0.00 |
| ATOM | 4591 | HD12 | LEU | X | 304 | 38.072 | 49.913 | 52.586 | 0.00 | 0.00 |
| ATOM | 4592 | HD13 | LEU | X | 304 | 38.667 | 51.370 | 51.841 | 0.00 | 0.00 |
| ATOM | 4593 | CD2  | LEU | X | 304 | 35.525 | 49.923 | 51.731 | 0.00 | 0.00 |
| ATOM | 4594 | HD21 | LEU | X | 304 | 34.526 | 50.159 | 51.364 | 0.00 | 0.00 |
| ATOM | 4595 | HD22 | LEU | X | 304 | 35.891 | 49.053 | 51.185 | 0.00 | 0.00 |
| ATOM | 4596 | HD23 | LEU | X | 304 | 35.510 | 49.729 | 52.803 | 0.00 | 0.00 |
| ATOM | 4597 | C    | LEU | X | 304 | 34.630 | 52.948 | 54.405 | 0.00 | 0.00 |
| ATOM | 4598 | O    | LEU | X | 304 | 35.413 | 53.670 | 55.085 | 0.00 | 0.00 |
| ATOM | 4599 | N    | SER | X | 305 | 33.503 | 52.515 | 54.895 | 0.00 | 0.00 |
| ATOM | 4600 | H    | SER | X | 305 | 32.856 | 52.072 | 54.259 | 0.00 | 0.00 |
| ATOM | 4601 | CA   | SER | X | 305 | 33.022 | 52.887 | 56.241 | 0.00 | 0.00 |
| ATOM | 4602 | HA   | SER | X | 305 | 33.014 | 53.968 | 56.376 | 0.00 | 0.00 |
| ATOM | 4603 | CB   | SER | X | 305 | 31.506 | 52.463 | 56.513 | 0.00 | 0.00 |
| ATOM | 4604 | HB2  | SER | X | 305 | 31.287 | 51.489 | 56.077 | 0.00 | 0.00 |
| ATOM | 4605 | HB3  | SER | X | 305 | 31.421 | 52.307 | 57.588 | 0.00 | 0.00 |
| ATOM | 4606 | OG   | SER | X | 305 | 30.525 | 53.358 | 56.085 | 0.00 | 0.00 |
| ATOM | 4607 | HG   | SER | X | 305 | 30.612 | 53.532 | 55.144 | 0.00 | 0.00 |
| ATOM | 4608 | C    | SER | X | 305 | 33.852 | 52.368 | 57.438 | 0.00 | 0.00 |
| ATOM | 4609 | O    | SER | X | 305 | 33.683 | 52.876 | 58.571 | 0.00 | 0.00 |
| ATOM | 4610 | N    | ASP | X | 306 | 34.782 | 51.442 | 57.175 | 0.00 | 0.00 |
| ATOM | 4611 | H    | ASP | X | 306 | 34.926 | 51.305 | 56.184 | 0.00 | 0.00 |
| ATOM | 4612 | CA   | ASP | X | 306 | 35.858 | 50.813 | 57.967 | 0.00 | 0.00 |
| ATOM | 4613 | HA   | ASP | X | 306 | 36.572 | 51.533 | 58.367 | 0.00 | 0.00 |
| ATOM | 4614 | CB   | ASP | X | 306 | 35.365 | 50.042 | 59.248 | 0.00 | 0.00 |
| ATOM | 4615 | HB2  | ASP | X | 306 | 34.668 | 50.739 | 59.713 | 0.00 | 0.00 |
| ATOM | 4616 | HB3  | ASP | X | 306 | 34.925 | 49.080 | 58.986 | 0.00 | 0.00 |
| ATOM | 4617 | CG   | ASP | X | 306 | 36.465 | 49.971 | 60.341 | 0.00 | 0.00 |
| ATOM | 4618 | OD1  | ASP | X | 306 | 36.049 | 49.688 | 61.475 | 0.00 | 0.00 |
| ATOM | 4619 | OD2  | ASP | X | 306 | 37.667 | 50.247 | 60.155 | 0.00 | 0.00 |
| ATOM | 4620 | C    | ASP | X | 306 | 36.772 | 49.811 | 57.097 | 0.00 | 0.00 |
| ATOM | 4621 | O    | ASP | X | 306 | 36.628 | 49.893 | 55.908 | 0.00 | 0.00 |
| ATOM | 4622 | N    | THR | X | 307 | 37.595 | 49.000 | 57.694 | 0.00 | 0.00 |
| ATOM | 4623 | H    | THR | X | 307 | 37.742 | 49.110 | 58.687 | 0.00 | 0.00 |
| ATOM | 4624 | CA   | THR | X | 307 | 38.419 | 48.095 | 56.921 | 0.00 | 0.00 |
| ATOM | 4625 | HA   | THR | X | 307 | 38.767 | 48.710 | 56.091 | 0.00 | 0.00 |
| ATOM | 4626 | CB   | THR | X | 307 | 39.630 | 47.463 | 57.720 | 0.00 | 0.00 |
| ATOM | 4627 | HB   | THR | X | 307 | 40.092 | 46.683 | 57.114 | 0.00 | 0.00 |
| ATOM | 4628 | CG2  | THR | X | 307 | 40.699 | 48.539 | 58.029 | 0.00 | 0.00 |
| ATOM | 4629 | HG21 | THR | X | 307 | 41.014 | 48.905 | 57.052 | 0.00 | 0.00 |
| ATOM | 4630 | HG22 | THR | X | 307 | 41.529 | 48.041 | 58.530 | 0.00 | 0.00 |
| ATOM | 4631 | HG23 | THR | X | 307 | 40.367 | 49.303 | 58.731 | 0.00 | 0.00 |
| ATOM | 4632 | OG1  | THR | X | 307 | 39.279 | 47.047 | 59.051 | 0.00 | 0.00 |
| ATOM | 4633 | HG1  | THR | X | 307 | 40.028 | 46.493 | 59.284 | 0.00 | 0.00 |
| ATOM | 4634 | C    | THR | X | 307 | 37.597 | 46.918 | 56.386 | 0.00 | 0.00 |

|      |      |      |     |   |     |        |        |        |      |      |
|------|------|------|-----|---|-----|--------|--------|--------|------|------|
| ATOM | 4635 | O    | THR | X | 307 | 36.625 | 46.573 | 57.109 | 0.00 | 0.00 |
| ATOM | 4636 | N    | PRO | X | 308 | 37.929 | 46.379 | 55.221 | 0.00 | 0.00 |
| ATOM | 4637 | CD   | PRO | X | 308 | 38.915 | 46.915 | 54.239 | 0.00 | 0.00 |
| ATOM | 4638 | HD2  | PRO | X | 308 | 39.907 | 46.571 | 54.531 | 0.00 | 0.00 |
| ATOM | 4639 | HD3  | PRO | X | 308 | 38.948 | 48.004 | 54.206 | 0.00 | 0.00 |
| ATOM | 4640 | CG   | PRO | X | 308 | 38.546 | 46.245 | 52.890 | 0.00 | 0.00 |
| ATOM | 4641 | HG2  | PRO | X | 308 | 39.435 | 46.108 | 52.275 | 0.00 | 0.00 |
| ATOM | 4642 | HG3  | PRO | X | 308 | 37.853 | 46.940 | 52.414 | 0.00 | 0.00 |
| ATOM | 4643 | CB   | PRO | X | 308 | 38.030 | 44.921 | 53.401 | 0.00 | 0.00 |
| ATOM | 4644 | HB2  | PRO | X | 308 | 38.898 | 44.299 | 53.618 | 0.00 | 0.00 |
| ATOM | 4645 | HB3  | PRO | X | 308 | 37.430 | 44.428 | 52.637 | 0.00 | 0.00 |
| ATOM | 4646 | CA   | PRO | X | 308 | 37.217 | 45.261 | 54.640 | 0.00 | 0.00 |
| ATOM | 4647 | HA   | PRO | X | 308 | 36.266 | 45.642 | 54.267 | 0.00 | 0.00 |
| ATOM | 4648 | C    | PRO | X | 308 | 36.995 | 43.996 | 55.548 | 0.00 | 0.00 |
| ATOM | 4649 | O    | PRO | X | 308 | 35.956 | 43.379 | 55.495 | 0.00 | 0.00 |
| ATOM | 4650 | N    | GLU | X | 309 | 38.007 | 43.738 | 56.436 | 0.00 | 0.00 |
| ATOM | 4651 | H    | GLU | X | 309 | 38.910 | 44.188 | 56.387 | 0.00 | 0.00 |
| ATOM | 4652 | CA   | GLU | X | 309 | 37.950 | 42.757 | 57.525 | 0.00 | 0.00 |
| ATOM | 4653 | HA   | GLU | X | 309 | 37.689 | 41.799 | 57.077 | 0.00 | 0.00 |
| ATOM | 4654 | CB   | GLU | X | 309 | 39.324 | 42.563 | 58.179 | 0.00 | 0.00 |
| ATOM | 4655 | HB2  | GLU | X | 309 | 40.019 | 42.369 | 57.362 | 0.00 | 0.00 |
| ATOM | 4656 | HB3  | GLU | X | 309 | 39.684 | 43.488 | 58.631 | 0.00 | 0.00 |
| ATOM | 4657 | CG   | GLU | X | 309 | 39.198 | 41.529 | 59.267 | 0.00 | 0.00 |
| ATOM | 4658 | HG2  | GLU | X | 309 | 38.440 | 41.776 | 60.011 | 0.00 | 0.00 |
| ATOM | 4659 | HG3  | GLU | X | 309 | 38.923 | 40.554 | 58.866 | 0.00 | 0.00 |
| ATOM | 4660 | CD   | GLU | X | 309 | 40.488 | 41.369 | 59.997 | 0.00 | 0.00 |
| ATOM | 4661 | OE1  | GLU | X | 309 | 41.485 | 40.981 | 59.341 | 0.00 | 0.00 |
| ATOM | 4662 | OE2  | GLU | X | 309 | 40.559 | 41.499 | 61.243 | 0.00 | 0.00 |
| ATOM | 4663 | C    | GLU | X | 309 | 36.803 | 43.084 | 58.478 | 0.00 | 0.00 |
| ATOM | 4664 | O    | GLU | X | 309 | 36.104 | 42.207 | 59.001 | 0.00 | 0.00 |
| ATOM | 4665 | N    | ALA | X | 310 | 36.602 | 44.390 | 58.851 | 0.00 | 0.00 |
| ATOM | 4666 | H    | ALA | X | 310 | 37.139 | 45.110 | 58.388 | 0.00 | 0.00 |
| ATOM | 4667 | CA   | ALA | X | 310 | 35.652 | 44.756 | 59.858 | 0.00 | 0.00 |
| ATOM | 4668 | HA   | ALA | X | 310 | 35.637 | 44.011 | 60.653 | 0.00 | 0.00 |
| ATOM | 4669 | CB   | ALA | X | 310 | 36.135 | 46.160 | 60.364 | 0.00 | 0.00 |
| ATOM | 4670 | HB1  | ALA | X | 310 | 36.220 | 46.906 | 59.573 | 0.00 | 0.00 |
| ATOM | 4671 | HB2  | ALA | X | 310 | 37.153 | 46.060 | 60.741 | 0.00 | 0.00 |
| ATOM | 4672 | HB3  | ALA | X | 310 | 35.668 | 46.570 | 61.259 | 0.00 | 0.00 |
| ATOM | 4673 | C    | ALA | X | 310 | 34.250 | 44.929 | 59.245 | 0.00 | 0.00 |
| ATOM | 4674 | O    | ALA | X | 310 | 33.254 | 44.425 | 59.879 | 0.00 | 0.00 |
| ATOM | 4675 | N    | LEU | X | 311 | 34.149 | 45.597 | 58.064 | 0.00 | 0.00 |
| ATOM | 4676 | H    | LEU | X | 311 | 35.020 | 46.010 | 57.765 | 0.00 | 0.00 |
| ATOM | 4677 | CA   | LEU | X | 311 | 32.860 | 45.628 | 57.283 | 0.00 | 0.00 |
| ATOM | 4678 | HA   | LEU | X | 311 | 32.061 | 46.152 | 57.808 | 0.00 | 0.00 |
| ATOM | 4679 | CB   | LEU | X | 311 | 33.091 | 46.308 | 55.902 | 0.00 | 0.00 |
| ATOM | 4680 | HB2  | LEU | X | 311 | 33.755 | 45.755 | 55.237 | 0.00 | 0.00 |
| ATOM | 4681 | HB3  | LEU | X | 311 | 32.129 | 46.409 | 55.399 | 0.00 | 0.00 |
| ATOM | 4682 | CG   | LEU | X | 311 | 33.651 | 47.771 | 55.952 | 0.00 | 0.00 |
| ATOM | 4683 | HG   | LEU | X | 311 | 34.520 | 47.785 | 56.610 | 0.00 | 0.00 |
| ATOM | 4684 | CD1  | LEU | X | 311 | 33.973 | 48.271 | 54.520 | 0.00 | 0.00 |
| ATOM | 4685 | HD11 | LEU | X | 311 | 34.938 | 47.896 | 54.181 | 0.00 | 0.00 |
| ATOM | 4686 | HD12 | LEU | X | 311 | 34.115 | 49.351 | 54.503 | 0.00 | 0.00 |
| ATOM | 4687 | HD13 | LEU | X | 311 | 33.284 | 48.006 | 53.717 | 0.00 | 0.00 |
| ATOM | 4688 | CD2  | LEU | X | 311 | 32.635 | 48.704 | 56.598 | 0.00 | 0.00 |
| ATOM | 4689 | HD21 | LEU | X | 311 | 31.808 | 48.887 | 55.912 | 0.00 | 0.00 |
| ATOM | 4690 | HD22 | LEU | X | 311 | 32.290 | 48.350 | 57.570 | 0.00 | 0.00 |
| ATOM | 4691 | HD23 | LEU | X | 311 | 32.983 | 49.734 | 56.674 | 0.00 | 0.00 |
| ATOM | 4692 | C    | LEU | X | 311 | 32.236 | 44.245 | 56.992 | 0.00 | 0.00 |
| ATOM | 4693 | O    | LEU | X | 311 | 31.082 | 43.931 | 57.348 | 0.00 | 0.00 |
| ATOM | 4694 | N    | ILE | X | 312 | 33.060 | 43.257 | 56.665 | 0.00 | 0.00 |
| ATOM | 4695 | H    | ILE | X | 312 | 33.947 | 43.535 | 56.270 | 0.00 | 0.00 |
| ATOM | 4696 | CA   | ILE | X | 312 | 32.481 | 41.836 | 56.530 | 0.00 | 0.00 |
| ATOM | 4697 | HA   | ILE | X | 312 | 31.541 | 41.961 | 55.992 | 0.00 | 0.00 |
| ATOM | 4698 | CB   | ILE | X | 312 | 33.485 | 41.012 | 55.615 | 0.00 | 0.00 |
| ATOM | 4699 | HB   | ILE | X | 312 | 33.905 | 41.781 | 54.967 | 0.00 | 0.00 |
| ATOM | 4700 | CG2  | ILE | X | 312 | 34.653 | 40.359 | 56.411 | 0.00 | 0.00 |
| ATOM | 4701 | HG21 | ILE | X | 312 | 35.142 | 39.641 | 55.752 | 0.00 | 0.00 |

|      |      |      |     |   |     |        |        |        |      |      |
|------|------|------|-----|---|-----|--------|--------|--------|------|------|
| ATOM | 4702 | HG22 | ILE | X | 312 | 34.374 | 39.895 | 57.357 | 0.00 | 0.00 |
| ATOM | 4703 | HG23 | ILE | X | 312 | 35.377 | 41.133 | 56.666 | 0.00 | 0.00 |
| ATOM | 4704 | CG1  | ILE | X | 312 | 32.662 | 40.077 | 54.712 | 0.00 | 0.00 |
| ATOM | 4705 | HG12 | ILE | X | 312 | 32.144 | 39.366 | 55.356 | 0.00 | 0.00 |
| ATOM | 4706 | HG13 | ILE | X | 312 | 31.970 | 40.685 | 54.129 | 0.00 | 0.00 |
| ATOM | 4707 | CD1  | ILE | X | 312 | 33.614 | 39.364 | 53.690 | 0.00 | 0.00 |
| ATOM | 4708 | HD11 | ILE | X | 312 | 33.124 | 39.076 | 52.760 | 0.00 | 0.00 |
| ATOM | 4709 | HD12 | ILE | X | 312 | 34.096 | 38.498 | 54.143 | 0.00 | 0.00 |
| ATOM | 4710 | HD13 | ILE | X | 312 | 34.456 | 40.001 | 53.418 | 0.00 | 0.00 |
| ATOM | 4711 | C    | ILE | X | 312 | 32.136 | 41.166 | 57.839 | 0.00 | 0.00 |
| ATOM | 4712 | O    | ILE | X | 312 | 31.415 | 40.211 | 57.788 | 0.00 | 0.00 |
| ATOM | 4713 | N    | ASN | X | 313 | 32.619 | 41.595 | 59.030 | 0.00 | 0.00 |
| ATOM | 4714 | H    | ASN | X | 313 | 33.452 | 42.156 | 58.931 | 0.00 | 0.00 |
| ATOM | 4715 | CA   | ASN | X | 313 | 32.146 | 41.182 | 60.341 | 0.00 | 0.00 |
| ATOM | 4716 | HA   | ASN | X | 313 | 32.218 | 40.094 | 60.338 | 0.00 | 0.00 |
| ATOM | 4717 | CB   | ASN | X | 313 | 33.072 | 41.694 | 61.487 | 0.00 | 0.00 |
| ATOM | 4718 | HB2  | ASN | X | 313 | 34.106 | 41.436 | 61.255 | 0.00 | 0.00 |
| ATOM | 4719 | HB3  | ASN | X | 313 | 32.961 | 42.778 | 61.530 | 0.00 | 0.00 |
| ATOM | 4720 | CG   | ASN | X | 313 | 32.631 | 41.068 | 62.795 | 0.00 | 0.00 |
| ATOM | 4721 | OD1  | ASN | X | 313 | 31.977 | 40.061 | 62.986 | 0.00 | 0.00 |
| ATOM | 4722 | ND2  | ASN | X | 313 | 33.128 | 41.717 | 63.842 | 0.00 | 0.00 |
| ATOM | 4723 | HD21 | ASN | X | 313 | 32.758 | 41.491 | 64.754 | 0.00 | 0.00 |
| ATOM | 4724 | HD22 | ASN | X | 313 | 33.925 | 42.321 | 63.701 | 0.00 | 0.00 |
| ATOM | 4725 | C    | ASN | X | 313 | 30.669 | 41.620 | 60.431 | 0.00 | 0.00 |
| ATOM | 4726 | O    | ASN | X | 313 | 29.816 | 40.716 | 60.653 | 0.00 | 0.00 |
| ATOM | 4727 | N    | ALA | X | 314 | 30.345 | 42.876 | 60.183 | 0.00 | 0.00 |
| ATOM | 4728 | H    | ALA | X | 314 | 31.039 | 43.503 | 59.803 | 0.00 | 0.00 |
| ATOM | 4729 | CA   | ALA | X | 314 | 29.014 | 43.528 | 60.446 | 0.00 | 0.00 |
| ATOM | 4730 | HA   | ALA | X | 314 | 28.429 | 42.949 | 61.161 | 0.00 | 0.00 |
| ATOM | 4731 | CB   | ALA | X | 314 | 29.274 | 44.900 | 61.080 | 0.00 | 0.00 |
| ATOM | 4732 | HB1  | ALA | X | 314 | 30.112 | 45.416 | 60.610 | 0.00 | 0.00 |
| ATOM | 4733 | HB2  | ALA | X | 314 | 29.611 | 44.755 | 62.107 | 0.00 | 0.00 |
| ATOM | 4734 | HB3  | ALA | X | 314 | 28.297 | 45.366 | 61.205 | 0.00 | 0.00 |
| ATOM | 4735 | C    | ALA | X | 314 | 27.994 | 43.555 | 59.233 | 0.00 | 0.00 |
| ATOM | 4736 | O    | ALA | X | 314 | 26.857 | 44.030 | 59.444 | 0.00 | 0.00 |
| ATOM | 4737 | N    | GLY | X | 315 | 28.374 | 43.166 | 58.045 | 0.00 | 0.00 |
| ATOM | 4738 | H    | GLY | X | 315 | 29.322 | 42.849 | 57.905 | 0.00 | 0.00 |
| ATOM | 4739 | CA   | GLY | X | 315 | 27.436 | 43.247 | 56.868 | 0.00 | 0.00 |
| ATOM | 4740 | HA2  | GLY | X | 315 | 26.609 | 43.905 | 57.132 | 0.00 | 0.00 |
| ATOM | 4741 | HA3  | GLY | X | 315 | 27.935 | 43.648 | 55.985 | 0.00 | 0.00 |
| ATOM | 4742 | C    | GLY | X | 315 | 26.840 | 41.880 | 56.481 | 0.00 | 0.00 |
| ATOM | 4743 | O    | GLY | X | 315 | 27.371 | 40.810 | 56.833 | 0.00 | 0.00 |
| ATOM | 4744 | N    | ASP | X | 316 | 25.616 | 41.911 | 55.895 | 0.00 | 0.00 |
| ATOM | 4745 | H    | ASP | X | 316 | 25.313 | 42.783 | 55.485 | 0.00 | 0.00 |
| ATOM | 4746 | CA   | ASP | X | 316 | 24.840 | 40.747 | 55.427 | 0.00 | 0.00 |
| ATOM | 4747 | HA   | ASP | X | 316 | 25.381 | 39.907 | 55.861 | 0.00 | 0.00 |
| ATOM | 4748 | CB   | ASP | X | 316 | 23.353 | 40.874 | 55.945 | 0.00 | 0.00 |
| ATOM | 4749 | HB2  | ASP | X | 316 | 23.417 | 41.129 | 57.003 | 0.00 | 0.00 |
| ATOM | 4750 | HB3  | ASP | X | 316 | 22.961 | 41.763 | 55.450 | 0.00 | 0.00 |
| ATOM | 4751 | CG   | ASP | X | 316 | 22.522 | 39.544 | 55.771 | 0.00 | 0.00 |
| ATOM | 4752 | OD1  | ASP | X | 316 | 22.059 | 39.260 | 54.685 | 0.00 | 0.00 |
| ATOM | 4753 | OD2  | ASP | X | 316 | 22.175 | 38.975 | 56.784 | 0.00 | 0.00 |
| ATOM | 4754 | C    | ASP | X | 316 | 24.989 | 40.559 | 53.923 | 0.00 | 0.00 |
| ATOM | 4755 | O    | ASP | X | 316 | 24.977 | 41.497 | 53.084 | 0.00 | 0.00 |
| ATOM | 4756 | N    | PHE | X | 317 | 24.992 | 39.292 | 53.506 | 0.00 | 0.00 |
| ATOM | 4757 | H    | PHE | X | 317 | 25.003 | 38.552 | 54.194 | 0.00 | 0.00 |
| ATOM | 4758 | CA   | PHE | X | 317 | 25.260 | 38.961 | 52.087 | 0.00 | 0.00 |
| ATOM | 4759 | HA   | PHE | X | 317 | 25.176 | 39.784 | 51.378 | 0.00 | 0.00 |
| ATOM | 4760 | CB   | PHE | X | 317 | 26.747 | 38.485 | 51.993 | 0.00 | 0.00 |
| ATOM | 4761 | HB2  | PHE | X | 317 | 27.004 | 37.722 | 52.728 | 0.00 | 0.00 |
| ATOM | 4762 | HB3  | PHE | X | 317 | 26.909 | 38.151 | 50.968 | 0.00 | 0.00 |
| ATOM | 4763 | CG   | PHE | X | 317 | 27.705 | 39.688 | 52.065 | 0.00 | 0.00 |
| ATOM | 4764 | CD1  | PHE | X | 317 | 28.115 | 40.438 | 50.958 | 0.00 | 0.00 |
| ATOM | 4765 | HD1  | PHE | X | 317 | 27.815 | 40.272 | 49.934 | 0.00 | 0.00 |
| ATOM | 4766 | CE1  | PHE | X | 317 | 29.010 | 41.503 | 51.120 | 0.00 | 0.00 |
| ATOM | 4767 | HE1  | PHE | X | 317 | 29.268 | 42.126 | 50.276 | 0.00 | 0.00 |
| ATOM | 4768 | CZ   | PHE | X | 317 | 29.592 | 41.828 | 52.381 | 0.00 | 0.00 |

|      |      |      |     |   |     |        |        |        |      |      |
|------|------|------|-----|---|-----|--------|--------|--------|------|------|
| ATOM | 4769 | HZ   | PHE | X | 317 | 30.389 | 42.520 | 52.611 | 0.00 | 0.00 |
| ATOM | 4770 | CE2  | PHE | X | 317 | 29.089 | 41.176 | 53.532 | 0.00 | 0.00 |
| ATOM | 4771 | HE2  | PHE | X | 317 | 29.528 | 41.314 | 54.509 | 0.00 | 0.00 |
| ATOM | 4772 | CD2  | PHE | X | 317 | 28.272 | 40.072 | 53.346 | 0.00 | 0.00 |
| ATOM | 4773 | HD2  | PHE | X | 317 | 28.048 | 39.583 | 54.282 | 0.00 | 0.00 |
| ATOM | 4774 | C    | PHE | X | 317 | 24.231 | 37.923 | 51.506 | 0.00 | 0.00 |
| ATOM | 4775 | O    | PHE | X | 317 | 24.371 | 37.486 | 50.377 | 0.00 | 0.00 |
| ATOM | 4776 | N    | HIE | X | 318 | 23.113 | 37.675 | 52.205 | 0.00 | 0.00 |
| ATOM | 4777 | H    | HIE | X | 318 | 22.935 | 38.192 | 53.055 | 0.00 | 0.00 |
| ATOM | 4778 | CA   | HIE | X | 318 | 22.162 | 36.606 | 51.771 | 0.00 | 0.00 |
| ATOM | 4779 | HA   | HIE | X | 318 | 22.632 | 35.638 | 51.943 | 0.00 | 0.00 |
| ATOM | 4780 | CB   | HIE | X | 318 | 21.062 | 36.605 | 52.791 | 0.00 | 0.00 |
| ATOM | 4781 | HB2  | HIE | X | 318 | 21.456 | 36.580 | 53.807 | 0.00 | 0.00 |
| ATOM | 4782 | HB3  | HIE | X | 318 | 20.560 | 37.556 | 52.616 | 0.00 | 0.00 |
| ATOM | 4783 | CG   | HIE | X | 318 | 20.065 | 35.502 | 52.725 | 0.00 | 0.00 |
| ATOM | 4784 | ND1  | HIE | X | 318 | 20.321 | 34.271 | 52.224 | 0.00 | 0.00 |
| ATOM | 4785 | CE1  | HIE | X | 318 | 19.184 | 33.549 | 52.479 | 0.00 | 0.00 |
| ATOM | 4786 | HE1  | HIE | X | 318 | 19.035 | 32.493 | 52.308 | 0.00 | 0.00 |
| ATOM | 4787 | NE2  | HIE | X | 318 | 18.216 | 34.323 | 53.081 | 0.00 | 0.00 |
| ATOM | 4788 | HE2  | HIE | X | 318 | 17.268 | 34.115 | 53.358 | 0.00 | 0.00 |
| ATOM | 4789 | CD2  | HIE | X | 318 | 18.814 | 35.574 | 53.213 | 0.00 | 0.00 |
| ATOM | 4790 | HD2  | HIE | X | 318 | 18.272 | 36.469 | 53.478 | 0.00 | 0.00 |
| ATOM | 4791 | C    | HIE | X | 318 | 21.594 | 36.713 | 50.314 | 0.00 | 0.00 |
| ATOM | 4792 | O    | HIE | X | 318 | 20.966 | 37.738 | 49.963 | 0.00 | 0.00 |
| ATOM | 4793 | N    | GLY | X | 319 | 21.745 | 35.648 | 49.544 | 0.00 | 0.00 |
| ATOM | 4794 | H    | GLY | X | 319 | 22.185 | 34.855 | 49.989 | 0.00 | 0.00 |
| ATOM | 4795 | CA   | GLY | X | 319 | 21.203 | 35.452 | 48.200 | 0.00 | 0.00 |
| ATOM | 4796 | HA2  | GLY | X | 319 | 21.159 | 34.385 | 47.980 | 0.00 | 0.00 |
| ATOM | 4797 | HA3  | GLY | X | 319 | 20.205 | 35.885 | 48.141 | 0.00 | 0.00 |
| ATOM | 4798 | C    | GLY | X | 319 | 22.097 | 36.004 | 47.014 | 0.00 | 0.00 |
| ATOM | 4799 | O    | GLY | X | 319 | 21.678 | 35.821 | 45.891 | 0.00 | 0.00 |
| ATOM | 4800 | N    | LEU | X | 320 | 23.342 | 36.520 | 47.244 | 0.00 | 0.00 |
| ATOM | 4801 | H    | LEU | X | 320 | 23.601 | 36.675 | 48.208 | 0.00 | 0.00 |
| ATOM | 4802 | CA   | LEU | X | 320 | 24.406 | 36.917 | 46.219 | 0.00 | 0.00 |
| ATOM | 4803 | HA   | LEU | X | 320 | 23.845 | 37.391 | 45.413 | 0.00 | 0.00 |
| ATOM | 4804 | CB   | LEU | X | 320 | 25.302 | 37.872 | 46.874 | 0.00 | 0.00 |
| ATOM | 4805 | HB2  | LEU | X | 320 | 25.883 | 37.265 | 47.569 | 0.00 | 0.00 |
| ATOM | 4806 | HB3  | LEU | X | 320 | 26.024 | 38.195 | 46.125 | 0.00 | 0.00 |
| ATOM | 4807 | CG   | LEU | X | 320 | 24.567 | 39.139 | 47.464 | 0.00 | 0.00 |
| ATOM | 4808 | HG   | LEU | X | 320 | 23.813 | 38.707 | 48.122 | 0.00 | 0.00 |
| ATOM | 4809 | CD1  | LEU | X | 320 | 25.523 | 40.053 | 48.141 | 0.00 | 0.00 |
| ATOM | 4810 | HD11 | LEU | X | 320 | 26.373 | 40.329 | 47.517 | 0.00 | 0.00 |
| ATOM | 4811 | HD12 | LEU | X | 320 | 25.948 | 39.548 | 49.008 | 0.00 | 0.00 |
| ATOM | 4812 | HD13 | LEU | X | 320 | 24.959 | 40.913 | 48.501 | 0.00 | 0.00 |
| ATOM | 4813 | CD2  | LEU | X | 320 | 23.865 | 39.962 | 46.387 | 0.00 | 0.00 |
| ATOM | 4814 | HD21 | LEU | X | 320 | 24.582 | 40.458 | 45.733 | 0.00 | 0.00 |
| ATOM | 4815 | HD22 | LEU | X | 320 | 23.148 | 39.331 | 45.862 | 0.00 | 0.00 |
| ATOM | 4816 | HD23 | LEU | X | 320 | 23.262 | 40.764 | 46.811 | 0.00 | 0.00 |
| ATOM | 4817 | C    | LEU | X | 320 | 25.040 | 35.675 | 45.482 | 0.00 | 0.00 |
| ATOM | 4818 | O    | LEU | X | 320 | 25.296 | 34.611 | 46.070 | 0.00 | 0.00 |
| ATOM | 4819 | N    | GLN | X | 321 | 25.364 | 35.791 | 44.230 | 0.00 | 0.00 |
| ATOM | 4820 | H    | GLN | X | 321 | 25.042 | 36.664 | 43.836 | 0.00 | 0.00 |
| ATOM | 4821 | CA   | GLN | X | 321 | 26.108 | 34.818 | 43.453 | 0.00 | 0.00 |
| ATOM | 4822 | HA   | GLN | X | 321 | 26.189 | 33.939 | 44.093 | 0.00 | 0.00 |
| ATOM | 4823 | CB   | GLN | X | 321 | 25.258 | 34.549 | 42.203 | 0.00 | 0.00 |
| ATOM | 4824 | HB2  | GLN | X | 321 | 24.974 | 35.500 | 41.753 | 0.00 | 0.00 |
| ATOM | 4825 | HB3  | GLN | X | 321 | 25.826 | 34.072 | 41.404 | 0.00 | 0.00 |
| ATOM | 4826 | CG   | GLN | X | 321 | 23.968 | 33.813 | 42.599 | 0.00 | 0.00 |
| ATOM | 4827 | HG2  | GLN | X | 321 | 24.300 | 32.854 | 42.995 | 0.00 | 0.00 |
| ATOM | 4828 | HG3  | GLN | X | 321 | 23.452 | 34.355 | 43.393 | 0.00 | 0.00 |
| ATOM | 4829 | CD   | GLN | X | 321 | 22.979 | 33.585 | 41.497 | 0.00 | 0.00 |
| ATOM | 4830 | OE1  | GLN | X | 321 | 22.662 | 34.467 | 40.694 | 0.00 | 0.00 |
| ATOM | 4831 | NE2  | GLN | X | 321 | 22.361 | 32.432 | 41.386 | 0.00 | 0.00 |
| ATOM | 4832 | HE21 | GLN | X | 321 | 21.595 | 32.361 | 40.732 | 0.00 | 0.00 |
| ATOM | 4833 | HE22 | GLN | X | 321 | 22.511 | 31.660 | 42.020 | 0.00 | 0.00 |
| ATOM | 4834 | C    | GLN | X | 321 | 27.580 | 35.280 | 43.204 | 0.00 | 0.00 |
| ATOM | 4835 | O    | GLN | X | 321 | 27.905 | 36.254 | 42.459 | 0.00 | 0.00 |

|      |      |      |     |   |     |        |        |        |      |      |
|------|------|------|-----|---|-----|--------|--------|--------|------|------|
| ATOM | 4836 | N    | VAL | X | 322 | 28.522 | 34.543 | 43.792 | 0.00 | 0.00 |
| ATOM | 4837 | H    | VAL | X | 322 | 28.189 | 33.676 | 44.191 | 0.00 | 0.00 |
| ATOM | 4838 | CA   | VAL | X | 322 | 29.938 | 34.803 | 43.885 | 0.00 | 0.00 |
| ATOM | 4839 | HA   | VAL | X | 322 | 30.228 | 35.693 | 43.327 | 0.00 | 0.00 |
| ATOM | 4840 | CB   | VAL | X | 322 | 30.209 | 35.142 | 45.386 | 0.00 | 0.00 |
| ATOM | 4841 | HB   | VAL | X | 322 | 29.860 | 34.317 | 46.008 | 0.00 | 0.00 |
| ATOM | 4842 | CG1  | VAL | X | 322 | 31.716 | 35.223 | 45.703 | 0.00 | 0.00 |
| ATOM | 4843 | HG11 | VAL | X | 322 | 31.849 | 35.517 | 46.744 | 0.00 | 0.00 |
| ATOM | 4844 | HG12 | VAL | X | 322 | 32.250 | 34.298 | 45.488 | 0.00 | 0.00 |
| ATOM | 4845 | HG13 | VAL | X | 322 | 32.098 | 35.976 | 45.013 | 0.00 | 0.00 |
| ATOM | 4846 | CG2  | VAL | X | 322 | 29.456 | 36.344 | 45.867 | 0.00 | 0.00 |
| ATOM | 4847 | HG21 | VAL | X | 322 | 29.567 | 37.176 | 45.171 | 0.00 | 0.00 |
| ATOM | 4848 | HG22 | VAL | X | 322 | 29.795 | 36.757 | 46.817 | 0.00 | 0.00 |
| ATOM | 4849 | HG23 | VAL | X | 322 | 28.406 | 36.073 | 45.978 | 0.00 | 0.00 |
| ATOM | 4850 | C    | VAL | X | 322 | 30.860 | 33.689 | 43.333 | 0.00 | 0.00 |
| ATOM | 4851 | O    | VAL | X | 322 | 30.478 | 32.532 | 43.395 | 0.00 | 0.00 |
| ATOM | 4852 | N    | LEU | X | 323 | 32.024 | 34.065 | 42.767 | 0.00 | 0.00 |
| ATOM | 4853 | H    | LEU | X | 323 | 32.172 | 35.060 | 42.675 | 0.00 | 0.00 |
| ATOM | 4854 | CA   | LEU | X | 323 | 33.042 | 33.178 | 42.310 | 0.00 | 0.00 |
| ATOM | 4855 | HA   | LEU | X | 323 | 32.929 | 32.264 | 42.893 | 0.00 | 0.00 |
| ATOM | 4856 | CB   | LEU | X | 323 | 32.720 | 32.852 | 40.812 | 0.00 | 0.00 |
| ATOM | 4857 | HB2  | LEU | X | 323 | 31.673 | 32.577 | 40.683 | 0.00 | 0.00 |
| ATOM | 4858 | HB3  | LEU | X | 323 | 32.891 | 33.797 | 40.298 | 0.00 | 0.00 |
| ATOM | 4859 | CG   | LEU | X | 323 | 33.544 | 31.646 | 40.269 | 0.00 | 0.00 |
| ATOM | 4860 | HG   | LEU | X | 323 | 33.742 | 30.857 | 40.994 | 0.00 | 0.00 |
| ATOM | 4861 | CD1  | LEU | X | 323 | 32.761 | 31.123 | 39.094 | 0.00 | 0.00 |
| ATOM | 4862 | HD11 | LEU | X | 323 | 31.712 | 30.974 | 39.349 | 0.00 | 0.00 |
| ATOM | 4863 | HD12 | LEU | X | 323 | 33.196 | 30.149 | 38.871 | 0.00 | 0.00 |
| ATOM | 4864 | HD13 | LEU | X | 323 | 32.775 | 31.686 | 38.161 | 0.00 | 0.00 |
| ATOM | 4865 | CD2  | LEU | X | 323 | 34.978 | 32.129 | 39.958 | 0.00 | 0.00 |
| ATOM | 4866 | HD21 | LEU | X | 323 | 35.463 | 31.349 | 39.371 | 0.00 | 0.00 |
| ATOM | 4867 | HD22 | LEU | X | 323 | 35.046 | 33.068 | 39.409 | 0.00 | 0.00 |
| ATOM | 4868 | HD23 | LEU | X | 323 | 35.549 | 32.341 | 40.862 | 0.00 | 0.00 |
| ATOM | 4869 | C    | LEU | X | 323 | 34.461 | 33.730 | 42.661 | 0.00 | 0.00 |
| ATOM | 4870 | O    | LEU | X | 323 | 34.728 | 34.868 | 42.434 | 0.00 | 0.00 |
| ATOM | 4871 | N    | VAL | X | 324 | 35.260 | 32.834 | 43.247 | 0.00 | 0.00 |
| ATOM | 4872 | H    | VAL | X | 324 | 35.008 | 31.856 | 43.214 | 0.00 | 0.00 |
| ATOM | 4873 | CA   | VAL | X | 324 | 36.628 | 33.122 | 43.747 | 0.00 | 0.00 |
| ATOM | 4874 | HA   | VAL | X | 324 | 36.958 | 33.984 | 43.167 | 0.00 | 0.00 |
| ATOM | 4875 | CB   | VAL | X | 324 | 36.769 | 33.453 | 45.288 | 0.00 | 0.00 |
| ATOM | 4876 | HB   | VAL | X | 324 | 37.643 | 34.104 | 45.290 | 0.00 | 0.00 |
| ATOM | 4877 | CG1  | VAL | X | 324 | 35.591 | 34.252 | 45.853 | 0.00 | 0.00 |
| ATOM | 4878 | HG11 | VAL | X | 324 | 34.671 | 33.668 | 45.827 | 0.00 | 0.00 |
| ATOM | 4879 | HG12 | VAL | X | 324 | 35.773 | 34.458 | 46.907 | 0.00 | 0.00 |
| ATOM | 4880 | HG13 | VAL | X | 324 | 35.542 | 35.197 | 45.312 | 0.00 | 0.00 |
| ATOM | 4881 | CG2  | VAL | X | 324 | 36.899 | 32.302 | 46.240 | 0.00 | 0.00 |
| ATOM | 4882 | HG21 | VAL | X | 324 | 35.958 | 31.777 | 46.402 | 0.00 | 0.00 |
| ATOM | 4883 | HG22 | VAL | X | 324 | 37.170 | 32.750 | 47.196 | 0.00 | 0.00 |
| ATOM | 4884 | HG23 | VAL | X | 324 | 37.596 | 31.511 | 45.963 | 0.00 | 0.00 |
| ATOM | 4885 | C    | VAL | X | 324 | 37.669 | 32.075 | 43.376 | 0.00 | 0.00 |
| ATOM | 4886 | O    | VAL | X | 324 | 37.358 | 30.966 | 42.950 | 0.00 | 0.00 |
| ATOM | 4887 | N    | GLY | X | 325 | 38.957 | 32.508 | 43.583 | 0.00 | 0.00 |
| ATOM | 4888 | H    | GLY | X | 325 | 39.101 | 33.499 | 43.712 | 0.00 | 0.00 |
| ATOM | 4889 | CA   | GLY | X | 325 | 40.164 | 31.641 | 43.422 | 0.00 | 0.00 |
| ATOM | 4890 | HA2  | GLY | X | 325 | 40.119 | 30.851 | 44.172 | 0.00 | 0.00 |
| ATOM | 4891 | HA3  | GLY | X | 325 | 40.240 | 31.305 | 42.388 | 0.00 | 0.00 |
| ATOM | 4892 | C    | GLY | X | 325 | 41.505 | 32.356 | 43.430 | 0.00 | 0.00 |
| ATOM | 4893 | O    | GLY | X | 325 | 41.686 | 33.525 | 43.792 | 0.00 | 0.00 |
| ATOM | 4894 | N    | VAL | X | 326 | 42.523 | 31.545 | 43.091 | 0.00 | 0.00 |
| ATOM | 4895 | H    | VAL | X | 326 | 42.180 | 30.652 | 42.768 | 0.00 | 0.00 |
| ATOM | 4896 | CA   | VAL | X | 326 | 43.950 | 31.818 | 42.896 | 0.00 | 0.00 |
| ATOM | 4897 | HA   | VAL | X | 326 | 44.032 | 32.848 | 42.552 | 0.00 | 0.00 |
| ATOM | 4898 | CB   | VAL | X | 326 | 44.736 | 31.571 | 44.276 | 0.00 | 0.00 |
| ATOM | 4899 | HB   | VAL | X | 326 | 45.804 | 31.453 | 44.099 | 0.00 | 0.00 |
| ATOM | 4900 | CG1  | VAL | X | 326 | 44.484 | 32.668 | 45.285 | 0.00 | 0.00 |
| ATOM | 4901 | HG11 | VAL | X | 326 | 45.209 | 32.717 | 46.097 | 0.00 | 0.00 |
| ATOM | 4902 | HG12 | VAL | X | 326 | 44.564 | 33.674 | 44.873 | 0.00 | 0.00 |



|      |      |      |     |   |     |        |        |        |      |      |
|------|------|------|-----|---|-----|--------|--------|--------|------|------|
| ATOM | 4903 | HG13 | VAL | X | 326 | 43.469 | 32.511 | 45.651 | 0.00 | 0.00 |
| ATOM | 4904 | CG2  | VAL | X | 326 | 44.357 | 30.187 | 44.918 | 0.00 | 0.00 |
| ATOM | 4905 | HG21 | VAL | X | 326 | 44.759 | 30.064 | 45.924 | 0.00 | 0.00 |
| ATOM | 4906 | HG22 | VAL | X | 326 | 44.719 | 29.361 | 44.306 | 0.00 | 0.00 |
| ATOM | 4907 | HG23 | VAL | X | 326 | 43.282 | 30.160 | 45.092 | 0.00 | 0.00 |
| ATOM | 4908 | C    | VAL | X | 326 | 44.608 | 30.826 | 41.869 | 0.00 | 0.00 |
| ATOM | 4909 | O    | VAL | X | 326 | 43.935 | 29.934 | 41.465 | 0.00 | 0.00 |
| ATOM | 4910 | N    | VAL | X | 327 | 45.817 | 31.077 | 41.389 | 0.00 | 0.00 |
| ATOM | 4911 | H    | VAL | X | 327 | 46.130 | 32.000 | 41.656 | 0.00 | 0.00 |
| ATOM | 4912 | CA   | VAL | X | 327 | 46.652 | 30.151 | 40.573 | 0.00 | 0.00 |
| ATOM | 4913 | HA   | VAL | X | 327 | 46.009 | 29.476 | 40.009 | 0.00 | 0.00 |
| ATOM | 4914 | CB   | VAL | X | 327 | 47.582 | 30.888 | 39.653 | 0.00 | 0.00 |
| ATOM | 4915 | HB   | VAL | X | 327 | 48.188 | 30.171 | 39.098 | 0.00 | 0.00 |
| ATOM | 4916 | CG1  | VAL | X | 327 | 46.729 | 31.696 | 38.643 | 0.00 | 0.00 |
| ATOM | 4917 | HG11 | VAL | X | 327 | 47.252 | 32.243 | 37.859 | 0.00 | 0.00 |
| ATOM | 4918 | HG12 | VAL | X | 327 | 46.159 | 30.938 | 38.106 | 0.00 | 0.00 |
| ATOM | 4919 | HG13 | VAL | X | 327 | 45.972 | 32.340 | 39.090 | 0.00 | 0.00 |
| ATOM | 4920 | CG2  | VAL | X | 327 | 48.487 | 31.855 | 40.362 | 0.00 | 0.00 |
| ATOM | 4921 | HG21 | VAL | X | 327 | 47.984 | 32.770 | 40.673 | 0.00 | 0.00 |
| ATOM | 4922 | HG22 | VAL | X | 327 | 49.263 | 32.203 | 39.680 | 0.00 | 0.00 |
| ATOM | 4923 | HG23 | VAL | X | 327 | 48.793 | 31.337 | 41.272 | 0.00 | 0.00 |
| ATOM | 4924 | C    | VAL | X | 327 | 47.475 | 29.342 | 41.571 | 0.00 | 0.00 |
| ATOM | 4925 | O    | VAL | X | 327 | 47.577 | 29.519 | 42.748 | 0.00 | 0.00 |
| ATOM | 4926 | N    | LYS | X | 328 | 48.191 | 28.379 | 40.967 | 0.00 | 0.00 |
| ATOM | 4927 | H    | LYS | X | 328 | 47.988 | 28.162 | 40.002 | 0.00 | 0.00 |
| ATOM | 4928 | CA   | LYS | X | 328 | 48.992 | 27.430 | 41.680 | 0.00 | 0.00 |
| ATOM | 4929 | HA   | LYS | X | 328 | 48.306 | 26.875 | 42.320 | 0.00 | 0.00 |
| ATOM | 4930 | CB   | LYS | X | 328 | 49.621 | 26.449 | 40.608 | 0.00 | 0.00 |
| ATOM | 4931 | HB2  | LYS | X | 328 | 48.722 | 26.013 | 40.173 | 0.00 | 0.00 |
| ATOM | 4932 | HB3  | LYS | X | 328 | 50.192 | 26.946 | 39.824 | 0.00 | 0.00 |
| ATOM | 4933 | CG   | LYS | X | 328 | 50.356 | 25.320 | 41.390 | 0.00 | 0.00 |
| ATOM | 4934 | HG2  | LYS | X | 328 | 51.313 | 25.787 | 41.620 | 0.00 | 0.00 |
| ATOM | 4935 | HG3  | LYS | X | 328 | 49.654 | 25.036 | 42.174 | 0.00 | 0.00 |
| ATOM | 4936 | CD   | LYS | X | 328 | 50.544 | 24.090 | 40.513 | 0.00 | 0.00 |
| ATOM | 4937 | HD2  | LYS | X | 328 | 50.795 | 23.227 | 41.129 | 0.00 | 0.00 |
| ATOM | 4938 | HD3  | LYS | X | 328 | 49.726 | 23.812 | 39.847 | 0.00 | 0.00 |
| ATOM | 4939 | CE   | LYS | X | 328 | 51.634 | 24.334 | 39.507 | 0.00 | 0.00 |
| ATOM | 4940 | HE2  | LYS | X | 328 | 51.901 | 23.347 | 39.129 | 0.00 | 0.00 |
| ATOM | 4941 | HE3  | LYS | X | 328 | 51.359 | 25.086 | 38.767 | 0.00 | 0.00 |
| ATOM | 4942 | NZ   | LYS | X | 328 | 52.909 | 24.747 | 40.128 | 0.00 | 0.00 |
| ATOM | 4943 | HZ1  | LYS | X | 328 | 52.812 | 25.565 | 40.712 | 0.00 | 0.00 |
| ATOM | 4944 | HZ2  | LYS | X | 328 | 53.306 | 24.027 | 40.715 | 0.00 | 0.00 |
| ATOM | 4945 | HZ3  | LYS | X | 328 | 53.560 | 25.096 | 39.440 | 0.00 | 0.00 |
| ATOM | 4946 | C    | LYS | X | 328 | 50.129 | 27.967 | 42.562 | 0.00 | 0.00 |
| ATOM | 4947 | O    | LYS | X | 328 | 50.240 | 27.521 | 43.707 | 0.00 | 0.00 |
| ATOM | 4948 | N    | ASP | X | 329 | 50.940 | 28.854 | 42.074 | 0.00 | 0.00 |
| ATOM | 4949 | H    | ASP | X | 329 | 50.745 | 29.091 | 41.112 | 0.00 | 0.00 |
| ATOM | 4950 | CA   | ASP | X | 329 | 52.107 | 29.348 | 42.697 | 0.00 | 0.00 |
| ATOM | 4951 | HA   | ASP | X | 329 | 52.401 | 28.751 | 43.561 | 0.00 | 0.00 |
| ATOM | 4952 | CB   | ASP | X | 329 | 53.343 | 29.232 | 41.748 | 0.00 | 0.00 |
| ATOM | 4953 | HB2  | ASP | X | 329 | 53.179 | 29.815 | 40.842 | 0.00 | 0.00 |
| ATOM | 4954 | HB3  | ASP | X | 329 | 54.185 | 29.674 | 42.281 | 0.00 | 0.00 |
| ATOM | 4955 | CG   | ASP | X | 329 | 53.524 | 27.810 | 41.346 | 0.00 | 0.00 |
| ATOM | 4956 | OD1  | ASP | X | 329 | 53.920 | 26.924 | 42.135 | 0.00 | 0.00 |
| ATOM | 4957 | OD2  | ASP | X | 329 | 53.119 | 27.510 | 40.192 | 0.00 | 0.00 |
| ATOM | 4958 | C    | ASP | X | 329 | 51.977 | 30.780 | 43.311 | 0.00 | 0.00 |
| ATOM | 4959 | O    | ASP | X | 329 | 52.902 | 31.190 | 43.929 | 0.00 | 0.00 |
| ATOM | 4960 | N    | GLU | X | 330 | 50.912 | 31.621 | 43.061 | 0.00 | 0.00 |
| ATOM | 4961 | H    | GLU | X | 330 | 50.225 | 31.054 | 42.585 | 0.00 | 0.00 |
| ATOM | 4962 | CA   | GLU | X | 330 | 50.663 | 32.942 | 43.593 | 0.00 | 0.00 |
| ATOM | 4963 | HA   | GLU | X | 330 | 50.234 | 33.349 | 42.677 | 0.00 | 0.00 |
| ATOM | 4964 | CB   | GLU | X | 330 | 49.642 | 33.163 | 44.740 | 0.00 | 0.00 |
| ATOM | 4965 | HB2  | GLU | X | 330 | 49.875 | 32.572 | 45.626 | 0.00 | 0.00 |
| ATOM | 4966 | HB3  | GLU | X | 330 | 49.656 | 34.195 | 45.093 | 0.00 | 0.00 |
| ATOM | 4967 | CG   | GLU | X | 330 | 48.152 | 32.823 | 44.227 | 0.00 | 0.00 |
| ATOM | 4968 | HG2  | GLU | X | 330 | 48.080 | 31.839 | 43.764 | 0.00 | 0.00 |
| ATOM | 4969 | HG3  | GLU | X | 330 | 47.523 | 32.890 | 45.115 | 0.00 | 0.00 |

|      |      |     |     |   |     |        |        |        |      |      |
|------|------|-----|-----|---|-----|--------|--------|--------|------|------|
| ATOM | 4970 | CD  | GLU | X | 330 | 47.690 | 33.769 | 43.134 | 0.00 | 0.00 |
| ATOM | 4971 | OE1 | GLU | X | 330 | 48.380 | 34.744 | 42.747 | 0.00 | 0.00 |
| ATOM | 4972 | OE2 | GLU | X | 330 | 46.608 | 33.486 | 42.548 | 0.00 | 0.00 |
| ATOM | 4973 | C   | GLU | X | 330 | 51.966 | 33.882 | 43.789 | 0.00 | 0.00 |
| ATOM | 4974 | O   | GLU | X | 330 | 52.397 | 34.501 | 42.798 | 0.00 | 0.00 |
| ATOM | 4975 | N   | GLY | X | 331 | 52.466 | 33.834 | 45.017 | 0.00 | 0.00 |
| ATOM | 4976 | H   | GLY | X | 331 | 52.207 | 33.021 | 45.558 | 0.00 | 0.00 |
| ATOM | 4977 | CA  | GLY | X | 331 | 53.456 | 34.781 | 45.591 | 0.00 | 0.00 |
| ATOM | 4978 | HA2 | GLY | X | 331 | 53.243 | 35.829 | 45.379 | 0.00 | 0.00 |
| ATOM | 4979 | HA3 | GLY | X | 331 | 53.617 | 34.553 | 46.644 | 0.00 | 0.00 |
| ATOM | 4980 | C   | GLY | X | 331 | 54.837 | 34.619 | 44.944 | 0.00 | 0.00 |
| ATOM | 4981 | O   | GLY | X | 331 | 55.720 | 35.366 | 45.336 | 0.00 | 0.00 |
| ATOM | 4982 | N   | SER | X | 332 | 55.046 | 33.622 | 43.947 | 0.00 | 0.00 |
| ATOM | 4983 | H   | SER | X | 332 | 54.283 | 32.997 | 43.730 | 0.00 | 0.00 |
| ATOM | 4984 | CA  | SER | X | 332 | 56.278 | 33.473 | 43.185 | 0.00 | 0.00 |
| ATOM | 4985 | HA  | SER | X | 332 | 57.117 | 33.535 | 43.877 | 0.00 | 0.00 |
| ATOM | 4986 | CB  | SER | X | 332 | 56.334 | 32.126 | 42.462 | 0.00 | 0.00 |
| ATOM | 4987 | HB2 | SER | X | 332 | 57.181 | 32.194 | 41.778 | 0.00 | 0.00 |
| ATOM | 4988 | HB3 | SER | X | 332 | 56.476 | 31.221 | 43.053 | 0.00 | 0.00 |
| ATOM | 4989 | OG  | SER | X | 332 | 55.113 | 32.073 | 41.709 | 0.00 | 0.00 |
| ATOM | 4990 | HG  | SER | X | 332 | 55.086 | 31.389 | 41.036 | 0.00 | 0.00 |
| ATOM | 4991 | C   | SER | X | 332 | 56.471 | 34.547 | 42.128 | 0.00 | 0.00 |
| ATOM | 4992 | O   | SER | X | 332 | 57.566 | 34.663 | 41.529 | 0.00 | 0.00 |
| ATOM | 4993 | N   | TYR | X | 333 | 55.451 | 35.247 | 41.772 | 0.00 | 0.00 |
| ATOM | 4994 | H   | TYR | X | 333 | 54.562 | 34.962 | 42.159 | 0.00 | 0.00 |
| ATOM | 4995 | CA  | TYR | X | 333 | 55.579 | 36.183 | 40.681 | 0.00 | 0.00 |
| ATOM | 4996 | HA  | TYR | X | 333 | 56.158 | 35.690 | 39.900 | 0.00 | 0.00 |
| ATOM | 4997 | CB  | TYR | X | 333 | 54.258 | 36.606 | 40.148 | 0.00 | 0.00 |
| ATOM | 4998 | HB2 | TYR | X | 333 | 53.804 | 35.678 | 39.801 | 0.00 | 0.00 |
| ATOM | 4999 | HB3 | TYR | X | 333 | 53.682 | 36.953 | 41.005 | 0.00 | 0.00 |
| ATOM | 5000 | CG  | TYR | X | 333 | 54.016 | 37.762 | 39.232 | 0.00 | 0.00 |
| ATOM | 5001 | CD1 | TYR | X | 333 | 54.646 | 37.792 | 38.006 | 0.00 | 0.00 |
| ATOM | 5002 | HD1 | TYR | X | 333 | 55.258 | 36.953 | 37.706 | 0.00 | 0.00 |
| ATOM | 5003 | CE1 | TYR | X | 333 | 54.386 | 38.836 | 37.074 | 0.00 | 0.00 |
| ATOM | 5004 | HE1 | TYR | X | 333 | 54.934 | 38.891 | 36.146 | 0.00 | 0.00 |
| ATOM | 5005 | CZ  | TYR | X | 333 | 53.524 | 39.897 | 37.382 | 0.00 | 0.00 |
| ATOM | 5006 | OH  | TYR | X | 333 | 53.171 | 40.938 | 36.631 | 0.00 | 0.00 |
| ATOM | 5007 | HH  | TYR | X | 333 | 53.770 | 41.011 | 35.884 | 0.00 | 0.00 |
| ATOM | 5008 | CE2 | TYR | X | 333 | 52.977 | 39.890 | 38.697 | 0.00 | 0.00 |
| ATOM | 5009 | HE2 | TYR | X | 333 | 52.294 | 40.676 | 38.985 | 0.00 | 0.00 |
| ATOM | 5010 | CD2 | TYR | X | 333 | 53.303 | 38.865 | 39.620 | 0.00 | 0.00 |
| ATOM | 5011 | HD2 | TYR | X | 333 | 52.911 | 38.818 | 40.625 | 0.00 | 0.00 |
| ATOM | 5012 | C   | TYR | X | 333 | 56.374 | 37.468 | 41.107 | 0.00 | 0.00 |
| ATOM | 5013 | O   | TYR | X | 333 | 57.180 | 37.973 | 40.323 | 0.00 | 0.00 |
| ATOM | 5014 | N   | PHE | X | 334 | 56.189 | 38.009 | 42.376 | 0.00 | 0.00 |
| ATOM | 5015 | H   | PHE | X | 334 | 55.415 | 37.624 | 42.898 | 0.00 | 0.00 |
| ATOM | 5016 | CA  | PHE | X | 334 | 56.739 | 39.258 | 42.801 | 0.00 | 0.00 |
| ATOM | 5017 | HA  | PHE | X | 334 | 56.705 | 39.919 | 41.935 | 0.00 | 0.00 |
| ATOM | 5018 | CB  | PHE | X | 334 | 55.669 | 39.883 | 43.823 | 0.00 | 0.00 |
| ATOM | 5019 | HB2 | PHE | X | 334 | 55.538 | 39.172 | 44.639 | 0.00 | 0.00 |
| ATOM | 5020 | HB3 | PHE | X | 334 | 56.090 | 40.778 | 44.281 | 0.00 | 0.00 |
| ATOM | 5021 | CG  | PHE | X | 334 | 54.313 | 40.141 | 43.261 | 0.00 | 0.00 |
| ATOM | 5022 | CD1 | PHE | X | 334 | 53.175 | 39.270 | 43.468 | 0.00 | 0.00 |
| ATOM | 5023 | HD1 | PHE | X | 334 | 53.262 | 38.291 | 43.915 | 0.00 | 0.00 |
| ATOM | 5024 | CE1 | PHE | X | 334 | 51.886 | 39.759 | 43.133 | 0.00 | 0.00 |
| ATOM | 5025 | HE1 | PHE | X | 334 | 51.118 | 39.034 | 43.361 | 0.00 | 0.00 |
| ATOM | 5026 | CZ  | PHE | X | 334 | 51.712 | 40.987 | 42.427 | 0.00 | 0.00 |
| ATOM | 5027 | HZ  | PHE | X | 334 | 50.718 | 41.278 | 42.121 | 0.00 | 0.00 |
| ATOM | 5028 | CE2 | PHE | X | 334 | 52.855 | 41.789 | 42.285 | 0.00 | 0.00 |
| ATOM | 5029 | HE2 | PHE | X | 334 | 52.815 | 42.679 | 41.674 | 0.00 | 0.00 |
| ATOM | 5030 | CD2 | PHE | X | 334 | 54.161 | 41.340 | 42.601 | 0.00 | 0.00 |
| ATOM | 5031 | HD2 | PHE | X | 334 | 55.054 | 41.896 | 42.353 | 0.00 | 0.00 |
| ATOM | 5032 | C   | PHE | X | 334 | 58.181 | 39.305 | 43.401 | 0.00 | 0.00 |
| ATOM | 5033 | O   | PHE | X | 334 | 58.795 | 40.320 | 43.543 | 0.00 | 0.00 |
| ATOM | 5034 | N   | LEU | X | 335 | 58.811 | 38.091 | 43.523 | 0.00 | 0.00 |
| ATOM | 5035 | H   | LEU | X | 335 | 58.387 | 37.327 | 43.016 | 0.00 | 0.00 |
| ATOM | 5036 | CA  | LEU | X | 335 | 60.129 | 37.906 | 44.134 | 0.00 | 0.00 |

|      |      |      |     |   |     |        |        |        |      |      |
|------|------|------|-----|---|-----|--------|--------|--------|------|------|
| ATOM | 5037 | HA   | LEU | X | 335 | 60.185 | 38.496 | 45.049 | 0.00 | 0.00 |
| ATOM | 5038 | CB   | LEU | X | 335 | 60.393 | 36.377 | 44.369 | 0.00 | 0.00 |
| ATOM | 5039 | HB2  | LEU | X | 335 | 60.419 | 35.763 | 43.469 | 0.00 | 0.00 |
| ATOM | 5040 | HB3  | LEU | X | 335 | 61.344 | 36.264 | 44.889 | 0.00 | 0.00 |
| ATOM | 5041 | CG   | LEU | X | 335 | 59.273 | 35.777 | 45.314 | 0.00 | 0.00 |
| ATOM | 5042 | HG   | LEU | X | 335 | 58.443 | 35.776 | 44.607 | 0.00 | 0.00 |
| ATOM | 5043 | CD1  | LEU | X | 335 | 59.710 | 34.343 | 45.638 | 0.00 | 0.00 |
| ATOM | 5044 | HD11 | LEU | X | 335 | 60.653 | 34.291 | 46.184 | 0.00 | 0.00 |
| ATOM | 5045 | HD12 | LEU | X | 335 | 59.833 | 33.658 | 44.798 | 0.00 | 0.00 |
| ATOM | 5046 | HD13 | LEU | X | 335 | 58.916 | 33.835 | 46.185 | 0.00 | 0.00 |
| ATOM | 5047 | CD2  | LEU | X | 335 | 58.828 | 36.462 | 46.592 | 0.00 | 0.00 |
| ATOM | 5048 | HD21 | LEU | X | 335 | 58.531 | 37.494 | 46.406 | 0.00 | 0.00 |
| ATOM | 5049 | HD22 | LEU | X | 335 | 58.016 | 35.903 | 47.058 | 0.00 | 0.00 |
| ATOM | 5050 | HD23 | LEU | X | 335 | 59.687 | 36.425 | 47.262 | 0.00 | 0.00 |
| ATOM | 5051 | C    | LEU | X | 335 | 61.271 | 38.614 | 43.289 | 0.00 | 0.00 |
| ATOM | 5052 | O    | LEU | X | 335 | 62.133 | 39.307 | 43.801 | 0.00 | 0.00 |
| ATOM | 5053 | N    | VAL | X | 336 | 61.160 | 38.509 | 41.995 | 0.00 | 0.00 |
| ATOM | 5054 | H    | VAL | X | 336 | 60.369 | 37.984 | 41.651 | 0.00 | 0.00 |
| ATOM | 5055 | CA   | VAL | X | 336 | 62.064 | 39.206 | 41.033 | 0.00 | 0.00 |
| ATOM | 5056 | HA   | VAL | X | 336 | 63.052 | 38.842 | 41.317 | 0.00 | 0.00 |
| ATOM | 5057 | CB   | VAL | X | 336 | 61.725 | 38.781 | 39.555 | 0.00 | 0.00 |
| ATOM | 5058 | HB   | VAL | X | 336 | 62.356 | 39.334 | 38.858 | 0.00 | 0.00 |
| ATOM | 5059 | CG1  | VAL | X | 336 | 62.008 | 37.324 | 39.135 | 0.00 | 0.00 |
| ATOM | 5060 | HG11 | VAL | X | 336 | 61.928 | 37.242 | 38.051 | 0.00 | 0.00 |
| ATOM | 5061 | HG12 | VAL | X | 336 | 63.077 | 37.262 | 39.341 | 0.00 | 0.00 |
| ATOM | 5062 | HG13 | VAL | X | 336 | 61.457 | 36.567 | 39.693 | 0.00 | 0.00 |
| ATOM | 5063 | CG2  | VAL | X | 336 | 60.297 | 39.197 | 39.161 | 0.00 | 0.00 |
| ATOM | 5064 | HG21 | VAL | X | 336 | 60.044 | 38.698 | 38.225 | 0.00 | 0.00 |
| ATOM | 5065 | HG22 | VAL | X | 336 | 60.060 | 40.243 | 38.967 | 0.00 | 0.00 |
| ATOM | 5066 | HG23 | VAL | X | 336 | 59.689 | 38.824 | 39.985 | 0.00 | 0.00 |
| ATOM | 5067 | C    | VAL | X | 336 | 62.027 | 40.710 | 41.096 | 0.00 | 0.00 |
| ATOM | 5068 | O    | VAL | X | 336 | 62.854 | 41.447 | 40.494 | 0.00 | 0.00 |
| ATOM | 5069 | N    | TYR | X | 337 | 61.051 | 41.274 | 41.834 | 0.00 | 0.00 |
| ATOM | 5070 | H    | TYR | X | 337 | 60.475 | 40.637 | 42.366 | 0.00 | 0.00 |
| ATOM | 5071 | CA   | TYR | X | 337 | 60.931 | 42.730 | 41.977 | 0.00 | 0.00 |
| ATOM | 5072 | HA   | TYR | X | 337 | 61.498 | 43.141 | 41.141 | 0.00 | 0.00 |
| ATOM | 5073 | CB   | TYR | X | 337 | 59.419 | 43.066 | 41.748 | 0.00 | 0.00 |
| ATOM | 5074 | HB2  | TYR | X | 337 | 58.875 | 42.373 | 42.390 | 0.00 | 0.00 |
| ATOM | 5075 | HB3  | TYR | X | 337 | 59.134 | 44.080 | 42.029 | 0.00 | 0.00 |
| ATOM | 5076 | CG   | TYR | X | 337 | 59.014 | 42.938 | 40.255 | 0.00 | 0.00 |
| ATOM | 5077 | CD1  | TYR | X | 337 | 59.440 | 43.820 | 39.214 | 0.00 | 0.00 |
| ATOM | 5078 | HD1  | TYR | X | 337 | 60.085 | 44.627 | 39.530 | 0.00 | 0.00 |
| ATOM | 5079 | CE1  | TYR | X | 337 | 59.221 | 43.634 | 37.872 | 0.00 | 0.00 |
| ATOM | 5080 | HE1  | TYR | X | 337 | 59.607 | 44.355 | 37.167 | 0.00 | 0.00 |
| ATOM | 5081 | CZ   | TYR | X | 337 | 58.303 | 42.594 | 37.477 | 0.00 | 0.00 |
| ATOM | 5082 | OH   | TYR | X | 337 | 57.785 | 42.435 | 36.230 | 0.00 | 0.00 |
| ATOM | 5083 | HH   | TYR | X | 337 | 57.913 | 43.172 | 35.629 | 0.00 | 0.00 |
| ATOM | 5084 | CE2  | TYR | X | 337 | 57.852 | 41.742 | 38.466 | 0.00 | 0.00 |
| ATOM | 5085 | HE2  | TYR | X | 337 | 57.140 | 41.000 | 38.134 | 0.00 | 0.00 |
| ATOM | 5086 | CD2  | TYR | X | 337 | 58.146 | 41.877 | 39.817 | 0.00 | 0.00 |
| ATOM | 5087 | HD2  | TYR | X | 337 | 57.756 | 41.085 | 40.439 | 0.00 | 0.00 |
| ATOM | 5088 | C    | TYR | X | 337 | 61.508 | 43.359 | 43.239 | 0.00 | 0.00 |
| ATOM | 5089 | O    | TYR | X | 337 | 61.239 | 44.547 | 43.577 | 0.00 | 0.00 |
| ATOM | 5090 | N    | GLY | X | 338 | 62.368 | 42.539 | 43.939 | 0.00 | 0.00 |
| ATOM | 5091 | H    | GLY | X | 338 | 62.339 | 41.561 | 43.688 | 0.00 | 0.00 |
| ATOM | 5092 | CA   | GLY | X | 338 | 63.197 | 43.016 | 45.084 | 0.00 | 0.00 |
| ATOM | 5093 | HA2  | GLY | X | 338 | 64.215 | 43.162 | 44.723 | 0.00 | 0.00 |
| ATOM | 5094 | HA3  | GLY | X | 338 | 62.744 | 43.952 | 45.410 | 0.00 | 0.00 |
| ATOM | 5095 | C    | GLY | X | 338 | 63.271 | 42.176 | 46.316 | 0.00 | 0.00 |
| ATOM | 5096 | O    | GLY | X | 338 | 63.600 | 42.640 | 47.437 | 0.00 | 0.00 |
| ATOM | 5097 | N    | ALA | X | 339 | 63.133 | 40.873 | 46.156 | 0.00 | 0.00 |
| ATOM | 5098 | H    | ALA | X | 339 | 62.830 | 40.506 | 45.265 | 0.00 | 0.00 |
| ATOM | 5099 | CA   | ALA | X | 339 | 63.627 | 39.903 | 47.148 | 0.00 | 0.00 |
| ATOM | 5100 | HA   | ALA | X | 339 | 63.742 | 40.452 | 48.082 | 0.00 | 0.00 |
| ATOM | 5101 | CB   | ALA | X | 339 | 62.544 | 38.822 | 47.188 | 0.00 | 0.00 |
| ATOM | 5102 | HB1  | ALA | X | 339 | 62.213 | 38.547 | 46.186 | 0.00 | 0.00 |
| ATOM | 5103 | HB2  | ALA | X | 339 | 61.730 | 39.264 | 47.761 | 0.00 | 0.00 |

|      |      |     |     |   |     |        |        |        |      |      |
|------|------|-----|-----|---|-----|--------|--------|--------|------|------|
| ATOM | 5104 | HB3 | ALA | X | 339 | 62.824 | 37.878 | 47.655 | 0.00 | 0.00 |
| ATOM | 5105 | C   | ALA | X | 339 | 65.010 | 39.278 | 46.730 | 0.00 | 0.00 |
| ATOM | 5106 | O   | ALA | X | 339 | 65.381 | 39.314 | 45.573 | 0.00 | 0.00 |
| ATOM | 5107 | N   | PRO | X | 340 | 65.740 | 38.694 | 47.733 | 0.00 | 0.00 |
| ATOM | 5108 | CD  | PRO | X | 340 | 65.384 | 38.646 | 49.135 | 0.00 | 0.00 |
| ATOM | 5109 | HD2 | PRO | X | 340 | 64.431 | 38.136 | 49.277 | 0.00 | 0.00 |
| ATOM | 5110 | HD3 | PRO | X | 340 | 65.285 | 39.664 | 49.512 | 0.00 | 0.00 |
| ATOM | 5111 | CG  | PRO | X | 340 | 66.454 | 37.884 | 49.859 | 0.00 | 0.00 |
| ATOM | 5112 | HG2 | PRO | X | 340 | 66.183 | 36.836 | 49.738 | 0.00 | 0.00 |
| ATOM | 5113 | HG3 | PRO | X | 340 | 66.549 | 38.073 | 50.928 | 0.00 | 0.00 |
| ATOM | 5114 | CB  | PRO | X | 340 | 67.672 | 38.255 | 49.021 | 0.00 | 0.00 |
| ATOM | 5115 | HB2 | PRO | X | 340 | 68.537 | 37.605 | 49.150 | 0.00 | 0.00 |
| ATOM | 5116 | HB3 | PRO | X | 340 | 68.060 | 39.146 | 49.515 | 0.00 | 0.00 |
| ATOM | 5117 | CA  | PRO | X | 340 | 67.183 | 38.651 | 47.670 | 0.00 | 0.00 |
| ATOM | 5118 | HA  | PRO | X | 340 | 67.611 | 39.623 | 47.424 | 0.00 | 0.00 |
| ATOM | 5119 | C   | PRO | X | 340 | 67.758 | 37.787 | 46.602 | 0.00 | 0.00 |
| ATOM | 5120 | O   | PRO | X | 340 | 67.586 | 36.597 | 46.636 | 0.00 | 0.00 |
| ATOM | 5121 | N   | GLY | X | 341 | 68.397 | 38.374 | 45.570 | 0.00 | 0.00 |
| ATOM | 5122 | H   | GLY | X | 341 | 68.340 | 39.374 | 45.439 | 0.00 | 0.00 |
| ATOM | 5123 | CA  | GLY | X | 341 | 69.098 | 37.612 | 44.474 | 0.00 | 0.00 |
| ATOM | 5124 | HA2 | GLY | X | 341 | 69.881 | 38.254 | 44.072 | 0.00 | 0.00 |
| ATOM | 5125 | HA3 | GLY | X | 341 | 69.677 | 36.756 | 44.821 | 0.00 | 0.00 |
| ATOM | 5126 | C   | GLY | X | 341 | 68.160 | 37.209 | 43.329 | 0.00 | 0.00 |
| ATOM | 5127 | O   | GLY | X | 341 | 68.692 | 36.862 | 42.298 | 0.00 | 0.00 |
| ATOM | 5128 | N   | PHE | X | 342 | 66.839 | 37.294 | 43.415 | 0.00 | 0.00 |
| ATOM | 5129 | H   | PHE | X | 342 | 66.490 | 37.708 | 44.268 | 0.00 | 0.00 |
| ATOM | 5130 | CA  | PHE | X | 342 | 65.892 | 36.882 | 42.378 | 0.00 | 0.00 |
| ATOM | 5131 | HA  | PHE | X | 342 | 66.119 | 35.846 | 42.127 | 0.00 | 0.00 |
| ATOM | 5132 | CB  | PHE | X | 342 | 64.461 | 36.881 | 42.980 | 0.00 | 0.00 |
| ATOM | 5133 | HB2 | PHE | X | 342 | 64.334 | 37.871 | 43.418 | 0.00 | 0.00 |
| ATOM | 5134 | HB3 | PHE | X | 342 | 63.762 | 36.700 | 42.164 | 0.00 | 0.00 |
| ATOM | 5135 | CG  | PHE | X | 342 | 64.176 | 35.868 | 44.002 | 0.00 | 0.00 |
| ATOM | 5136 | CD1 | PHE | X | 342 | 63.435 | 34.742 | 43.550 | 0.00 | 0.00 |
| ATOM | 5137 | HD1 | PHE | X | 342 | 63.112 | 34.743 | 42.519 | 0.00 | 0.00 |
| ATOM | 5138 | CE1 | PHE | X | 342 | 63.114 | 33.774 | 44.510 | 0.00 | 0.00 |
| ATOM | 5139 | HE1 | PHE | X | 342 | 62.620 | 32.863 | 44.205 | 0.00 | 0.00 |
| ATOM | 5140 | CZ  | PHE | X | 342 | 63.456 | 33.863 | 45.841 | 0.00 | 0.00 |
| ATOM | 5141 | HZ  | PHE | X | 342 | 63.251 | 33.006 | 46.466 | 0.00 | 0.00 |
| ATOM | 5142 | CE2 | PHE | X | 342 | 64.240 | 34.969 | 46.259 | 0.00 | 0.00 |
| ATOM | 5143 | HE2 | PHE | X | 342 | 64.527 | 34.985 | 47.300 | 0.00 | 0.00 |
| ATOM | 5144 | CD2 | PHE | X | 342 | 64.601 | 35.964 | 45.353 | 0.00 | 0.00 |
| ATOM | 5145 | HD2 | PHE | X | 342 | 65.275 | 36.771 | 45.602 | 0.00 | 0.00 |
| ATOM | 5146 | C   | PHE | X | 342 | 66.045 | 37.683 | 41.077 | 0.00 | 0.00 |
| ATOM | 5147 | O   | PHE | X | 342 | 66.220 | 38.883 | 41.129 | 0.00 | 0.00 |
| ATOM | 5148 | N   | SER | X | 343 | 65.860 | 37.079 | 39.865 | 0.00 | 0.00 |
| ATOM | 5149 | H   | SER | X | 343 | 65.826 | 36.070 | 39.860 | 0.00 | 0.00 |
| ATOM | 5150 | CA  | SER | X | 343 | 65.941 | 37.706 | 38.550 | 0.00 | 0.00 |
| ATOM | 5151 | HA  | SER | X | 343 | 65.367 | 38.632 | 38.575 | 0.00 | 0.00 |
| ATOM | 5152 | CB  | SER | X | 343 | 67.317 | 38.179 | 38.091 | 0.00 | 0.00 |
| ATOM | 5153 | HB2 | SER | X | 343 | 67.752 | 38.566 | 39.013 | 0.00 | 0.00 |
| ATOM | 5154 | HB3 | SER | X | 343 | 68.004 | 37.397 | 37.768 | 0.00 | 0.00 |
| ATOM | 5155 | OG  | SER | X | 343 | 67.345 | 39.159 | 37.064 | 0.00 | 0.00 |
| ATOM | 5156 | HG  | SER | X | 343 | 68.057 | 38.950 | 36.456 | 0.00 | 0.00 |
| ATOM | 5157 | C   | SER | X | 343 | 65.240 | 36.753 | 37.461 | 0.00 | 0.00 |
| ATOM | 5158 | O   | SER | X | 343 | 65.118 | 35.542 | 37.797 | 0.00 | 0.00 |
| ATOM | 5159 | N   | LYS | X | 344 | 64.708 | 37.204 | 36.300 | 0.00 | 0.00 |
| ATOM | 5160 | H   | LYS | X | 344 | 64.812 | 38.177 | 36.048 | 0.00 | 0.00 |
| ATOM | 5161 | CA  | LYS | X | 344 | 63.648 | 36.445 | 35.595 | 0.00 | 0.00 |
| ATOM | 5162 | HA  | LYS | X | 344 | 62.930 | 36.174 | 36.369 | 0.00 | 0.00 |
| ATOM | 5163 | CB  | LYS | X | 344 | 63.034 | 37.342 | 34.539 | 0.00 | 0.00 |
| ATOM | 5164 | HB2 | LYS | X | 344 | 62.294 | 36.760 | 33.991 | 0.00 | 0.00 |
| ATOM | 5165 | HB3 | LYS | X | 344 | 62.608 | 38.259 | 34.947 | 0.00 | 0.00 |
| ATOM | 5166 | CG  | LYS | X | 344 | 64.082 | 37.809 | 33.502 | 0.00 | 0.00 |
| ATOM | 5167 | HG2 | LYS | X | 344 | 64.757 | 38.588 | 33.855 | 0.00 | 0.00 |
| ATOM | 5168 | HG3 | LYS | X | 344 | 64.617 | 36.942 | 33.114 | 0.00 | 0.00 |
| ATOM | 5169 | CD  | LYS | X | 344 | 63.261 | 38.331 | 32.295 | 0.00 | 0.00 |
| ATOM | 5170 | HD2 | LYS | X | 344 | 62.645 | 37.539 | 31.870 | 0.00 | 0.00 |

|      |      |      |     |   |     |        |        |        |      |      |
|------|------|------|-----|---|-----|--------|--------|--------|------|------|
| ATOM | 5171 | HD3  | LYS | X | 344 | 62.558 | 39.025 | 32.757 | 0.00 | 0.00 |
| ATOM | 5172 | CE   | LYS | X | 344 | 64.192 | 39.081 | 31.293 | 0.00 | 0.00 |
| ATOM | 5173 | HE2  | LYS | X | 344 | 63.485 | 39.487 | 30.568 | 0.00 | 0.00 |
| ATOM | 5174 | HE3  | LYS | X | 344 | 64.787 | 39.874 | 31.744 | 0.00 | 0.00 |
| ATOM | 5175 | NZ   | LYS | X | 344 | 65.135 | 38.163 | 30.517 | 0.00 | 0.00 |
| ATOM | 5176 | HZ1  | LYS | X | 344 | 65.942 | 38.024 | 31.108 | 0.00 | 0.00 |
| ATOM | 5177 | HZ2  | LYS | X | 344 | 64.703 | 37.258 | 30.397 | 0.00 | 0.00 |
| ATOM | 5178 | HZ3  | LYS | X | 344 | 65.540 | 38.559 | 29.680 | 0.00 | 0.00 |
| ATOM | 5179 | C    | LYS | X | 344 | 64.090 | 35.125 | 34.913 | 0.00 | 0.00 |
| ATOM | 5180 | O    | LYS | X | 344 | 63.249 | 34.328 | 34.487 | 0.00 | 0.00 |
| ATOM | 5181 | N    | ASP | X | 345 | 65.374 | 34.983 | 34.530 | 0.00 | 0.00 |
| ATOM | 5182 | H    | ASP | X | 345 | 66.000 | 35.746 | 34.745 | 0.00 | 0.00 |
| ATOM | 5183 | CA   | ASP | X | 345 | 65.989 | 33.751 | 33.949 | 0.00 | 0.00 |
| ATOM | 5184 | HA   | ASP | X | 345 | 65.215 | 33.079 | 33.578 | 0.00 | 0.00 |
| ATOM | 5185 | CB   | ASP | X | 345 | 66.948 | 34.195 | 32.787 | 0.00 | 0.00 |
| ATOM | 5186 | HB2  | ASP | X | 345 | 67.254 | 33.298 | 32.249 | 0.00 | 0.00 |
| ATOM | 5187 | HB3  | ASP | X | 345 | 66.378 | 34.669 | 31.988 | 0.00 | 0.00 |
| ATOM | 5188 | CG   | ASP | X | 345 | 68.175 | 34.992 | 33.238 | 0.00 | 0.00 |
| ATOM | 5189 | OD1  | ASP | X | 345 | 69.346 | 34.613 | 32.993 | 0.00 | 0.00 |
| ATOM | 5190 | OD2  | ASP | X | 345 | 67.831 | 36.035 | 33.875 | 0.00 | 0.00 |
| ATOM | 5191 | C    | ASP | X | 345 | 66.773 | 32.969 | 34.933 | 0.00 | 0.00 |
| ATOM | 5192 | O    | ASP | X | 345 | 67.217 | 31.840 | 34.666 | 0.00 | 0.00 |
| ATOM | 5193 | N    | ASN | X | 346 | 67.004 | 33.528 | 36.108 | 0.00 | 0.00 |
| ATOM | 5194 | H    | ASN | X | 346 | 66.526 | 34.397 | 36.299 | 0.00 | 0.00 |
| ATOM | 5195 | CA   | ASN | X | 346 | 67.991 | 32.992 | 37.090 | 0.00 | 0.00 |
| ATOM | 5196 | HA   | ASN | X | 346 | 68.813 | 32.511 | 36.559 | 0.00 | 0.00 |
| ATOM | 5197 | CB   | ASN | X | 346 | 68.518 | 34.229 | 37.808 | 0.00 | 0.00 |
| ATOM | 5198 | HB2  | ASN | X | 346 | 68.845 | 34.973 | 37.082 | 0.00 | 0.00 |
| ATOM | 5199 | HB3  | ASN | X | 346 | 67.852 | 34.696 | 38.534 | 0.00 | 0.00 |
| ATOM | 5200 | CG   | ASN | X | 346 | 69.700 | 33.846 | 38.691 | 0.00 | 0.00 |
| ATOM | 5201 | OD1  | ASN | X | 346 | 69.636 | 33.699 | 39.913 | 0.00 | 0.00 |
| ATOM | 5202 | ND2  | ASN | X | 346 | 70.860 | 33.686 | 38.099 | 0.00 | 0.00 |
| ATOM | 5203 | HD21 | ASN | X | 346 | 71.682 | 33.383 | 38.601 | 0.00 | 0.00 |
| ATOM | 5204 | HD22 | ASN | X | 346 | 71.036 | 33.895 | 37.127 | 0.00 | 0.00 |
| ATOM | 5205 | C    | ASN | X | 346 | 67.244 | 32.002 | 38.072 | 0.00 | 0.00 |
| ATOM | 5206 | O    | ASN | X | 346 | 66.113 | 32.355 | 38.539 | 0.00 | 0.00 |
| ATOM | 5207 | N    | GLU | X | 347 | 67.887 | 30.930 | 38.518 | 0.00 | 0.00 |
| ATOM | 5208 | H    | GLU | X | 347 | 68.777 | 30.700 | 38.099 | 0.00 | 0.00 |
| ATOM | 5209 | CA   | GLU | X | 347 | 67.277 | 29.886 | 39.436 | 0.00 | 0.00 |
| ATOM | 5210 | HA   | GLU | X | 347 | 66.206 | 29.732 | 39.299 | 0.00 | 0.00 |
| ATOM | 5211 | CB   | GLU | X | 347 | 68.142 | 28.616 | 39.519 | 0.00 | 0.00 |
| ATOM | 5212 | HB2  | GLU | X | 347 | 69.191 | 28.890 | 39.627 | 0.00 | 0.00 |
| ATOM | 5213 | HB3  | GLU | X | 347 | 67.827 | 28.016 | 40.373 | 0.00 | 0.00 |
| ATOM | 5214 | CG   | GLU | X | 347 | 67.946 | 27.709 | 38.334 | 0.00 | 0.00 |
| ATOM | 5215 | HG2  | GLU | X | 347 | 66.888 | 27.506 | 38.169 | 0.00 | 0.00 |
| ATOM | 5216 | HG3  | GLU | X | 347 | 68.201 | 28.162 | 37.376 | 0.00 | 0.00 |
| ATOM | 5217 | CD   | GLU | X | 347 | 68.688 | 26.388 | 38.442 | 0.00 | 0.00 |
| ATOM | 5218 | OE1  | GLU | X | 347 | 68.015 | 25.381 | 38.192 | 0.00 | 0.00 |
| ATOM | 5219 | OE2  | GLU | X | 347 | 69.935 | 26.311 | 38.673 | 0.00 | 0.00 |
| ATOM | 5220 | C    | GLU | X | 347 | 67.209 | 30.521 | 40.859 | 0.00 | 0.00 |
| ATOM | 5221 | O    | GLU | X | 347 | 66.479 | 29.881 | 41.641 | 0.00 | 0.00 |
| ATOM | 5222 | N    | SER | X | 348 | 67.800 | 31.663 | 41.270 | 0.00 | 0.00 |
| ATOM | 5223 | H    | SER | X | 348 | 68.291 | 32.101 | 40.504 | 0.00 | 0.00 |
| ATOM | 5224 | CA   | SER | X | 348 | 67.359 | 32.490 | 42.384 | 0.00 | 0.00 |
| ATOM | 5225 | HA   | SER | X | 348 | 68.108 | 33.281 | 42.414 | 0.00 | 0.00 |
| ATOM | 5226 | CB   | SER | X | 348 | 65.987 | 33.101 | 41.977 | 0.00 | 0.00 |
| ATOM | 5227 | HB2  | SER | X | 348 | 65.181 | 32.382 | 41.831 | 0.00 | 0.00 |
| ATOM | 5228 | HB3  | SER | X | 348 | 65.723 | 33.756 | 42.807 | 0.00 | 0.00 |
| ATOM | 5229 | OG   | SER | X | 348 | 66.134 | 33.866 | 40.818 | 0.00 | 0.00 |
| ATOM | 5230 | HG   | SER | X | 348 | 66.065 | 33.313 | 40.036 | 0.00 | 0.00 |
| ATOM | 5231 | C    | SER | X | 348 | 67.373 | 31.823 | 43.730 | 0.00 | 0.00 |
| ATOM | 5232 | O    | SER | X | 348 | 66.620 | 32.179 | 44.655 | 0.00 | 0.00 |
| ATOM | 5233 | N    | LEU | X | 349 | 68.162 | 30.791 | 43.810 | 0.00 | 0.00 |
| ATOM | 5234 | H    | LEU | X | 349 | 68.626 | 30.647 | 42.924 | 0.00 | 0.00 |
| ATOM | 5235 | CA   | LEU | X | 349 | 68.679 | 30.018 | 44.968 | 0.00 | 0.00 |
| ATOM | 5236 | HA   | LEU | X | 349 | 67.902 | 29.347 | 45.335 | 0.00 | 0.00 |
| ATOM | 5237 | CB   | LEU | X | 349 | 69.876 | 29.284 | 44.338 | 0.00 | 0.00 |

|      |      |      |     |   |     |        |        |        |      |      |
|------|------|------|-----|---|-----|--------|--------|--------|------|------|
| ATOM | 5238 | HB2  | LEU | X | 349 | 70.582 | 29.966 | 43.864 | 0.00 | 0.00 |
| ATOM | 5239 | HB3  | LEU | X | 349 | 70.442 | 28.909 | 45.191 | 0.00 | 0.00 |
| ATOM | 5240 | CG   | LEU | X | 349 | 69.497 | 28.270 | 43.227 | 0.00 | 0.00 |
| ATOM | 5241 | HG   | LEU | X | 349 | 68.806 | 28.807 | 42.578 | 0.00 | 0.00 |
| ATOM | 5242 | CD1  | LEU | X | 349 | 70.639 | 27.885 | 42.410 | 0.00 | 0.00 |
| ATOM | 5243 | HD11 | LEU | X | 349 | 71.524 | 27.754 | 43.033 | 0.00 | 0.00 |
| ATOM | 5244 | HD12 | LEU | X | 349 | 70.879 | 28.627 | 41.649 | 0.00 | 0.00 |
| ATOM | 5245 | HD13 | LEU | X | 349 | 70.448 | 26.955 | 41.875 | 0.00 | 0.00 |
| ATOM | 5246 | CD2  | LEU | X | 349 | 68.719 | 27.021 | 43.754 | 0.00 | 0.00 |
| ATOM | 5247 | HD21 | LEU | X | 349 | 67.820 | 27.272 | 44.318 | 0.00 | 0.00 |
| ATOM | 5248 | HD22 | LEU | X | 349 | 68.441 | 26.466 | 42.859 | 0.00 | 0.00 |
| ATOM | 5249 | HD23 | LEU | X | 349 | 69.404 | 26.381 | 44.310 | 0.00 | 0.00 |
| ATOM | 5250 | C    | LEU | X | 349 | 69.152 | 30.873 | 46.183 | 0.00 | 0.00 |
| ATOM | 5251 | O    | LEU | X | 349 | 70.217 | 31.516 | 46.098 | 0.00 | 0.00 |
| ATOM | 5252 | N    | ILE | X | 350 | 68.496 | 30.725 | 47.351 | 0.00 | 0.00 |
| ATOM | 5253 | H    | ILE | X | 350 | 67.614 | 30.249 | 47.476 | 0.00 | 0.00 |
| ATOM | 5254 | CA   | ILE | X | 350 | 68.836 | 31.483 | 48.615 | 0.00 | 0.00 |
| ATOM | 5255 | HA   | ILE | X | 350 | 69.639 | 32.173 | 48.355 | 0.00 | 0.00 |
| ATOM | 5256 | CB   | ILE | X | 350 | 67.659 | 32.312 | 49.151 | 0.00 | 0.00 |
| ATOM | 5257 | HB   | ILE | X | 350 | 67.931 | 32.501 | 50.190 | 0.00 | 0.00 |
| ATOM | 5258 | CG2  | ILE | X | 350 | 67.333 | 33.532 | 48.283 | 0.00 | 0.00 |
| ATOM | 5259 | HG21 | ILE | X | 350 | 66.881 | 33.136 | 47.374 | 0.00 | 0.00 |
| ATOM | 5260 | HG22 | ILE | X | 350 | 68.252 | 34.107 | 48.169 | 0.00 | 0.00 |
| ATOM | 5261 | HG23 | ILE | X | 350 | 66.575 | 34.177 | 48.726 | 0.00 | 0.00 |
| ATOM | 5262 | CG1  | ILE | X | 350 | 66.325 | 31.449 | 49.261 | 0.00 | 0.00 |
| ATOM | 5263 | HG12 | ILE | X | 350 | 66.216 | 31.018 | 48.266 | 0.00 | 0.00 |
| ATOM | 5264 | HG13 | ILE | X | 350 | 66.602 | 30.663 | 49.963 | 0.00 | 0.00 |
| ATOM | 5265 | CD1  | ILE | X | 350 | 65.060 | 32.107 | 49.797 | 0.00 | 0.00 |
| ATOM | 5266 | HD11 | ILE | X | 350 | 64.752 | 33.068 | 49.384 | 0.00 | 0.00 |
| ATOM | 5267 | HD12 | ILE | X | 350 | 65.217 | 32.399 | 50.835 | 0.00 | 0.00 |
| ATOM | 5268 | HD13 | ILE | X | 350 | 64.241 | 31.393 | 49.877 | 0.00 | 0.00 |
| ATOM | 5269 | C    | ILE | X | 350 | 69.352 | 30.516 | 49.738 | 0.00 | 0.00 |
| ATOM | 5270 | O    | ILE | X | 350 | 69.224 | 29.304 | 49.729 | 0.00 | 0.00 |
| ATOM | 5271 | N    | SER | X | 351 | 70.135 | 31.082 | 50.597 | 0.00 | 0.00 |
| ATOM | 5272 | H    | SER | X | 351 | 70.340 | 32.071 | 50.588 | 0.00 | 0.00 |
| ATOM | 5273 | CA   | SER | X | 351 | 70.625 | 30.322 | 51.779 | 0.00 | 0.00 |
| ATOM | 5274 | HA   | SER | X | 351 | 70.639 | 29.236 | 51.689 | 0.00 | 0.00 |
| ATOM | 5275 | CB   | SER | X | 351 | 72.052 | 30.760 | 52.057 | 0.00 | 0.00 |
| ATOM | 5276 | HB2  | SER | X | 351 | 72.418 | 30.191 | 52.912 | 0.00 | 0.00 |
| ATOM | 5277 | HB3  | SER | X | 351 | 72.569 | 30.693 | 51.100 | 0.00 | 0.00 |
| ATOM | 5278 | OG   | SER | X | 351 | 72.097 | 32.057 | 52.521 | 0.00 | 0.00 |
| ATOM | 5279 | HG   | SER | X | 351 | 71.908 | 32.572 | 51.733 | 0.00 | 0.00 |
| ATOM | 5280 | C    | SER | X | 351 | 69.696 | 30.757 | 52.960 | 0.00 | 0.00 |
| ATOM | 5281 | O    | SER | X | 351 | 68.874 | 31.653 | 52.761 | 0.00 | 0.00 |
| ATOM | 5282 | N    | ARG | X | 352 | 69.855 | 30.113 | 54.135 | 0.00 | 0.00 |
| ATOM | 5283 | H    | ARG | X | 352 | 70.546 | 29.397 | 54.310 | 0.00 | 0.00 |
| ATOM | 5284 | CA   | ARG | X | 352 | 69.014 | 30.575 | 55.289 | 0.00 | 0.00 |
| ATOM | 5285 | HA   | ARG | X | 352 | 67.954 | 30.526 | 55.043 | 0.00 | 0.00 |
| ATOM | 5286 | CB   | ARG | X | 352 | 69.141 | 29.569 | 56.422 | 0.00 | 0.00 |
| ATOM | 5287 | HB2  | ARG | X | 352 | 70.138 | 29.609 | 56.862 | 0.00 | 0.00 |
| ATOM | 5288 | HB3  | ARG | X | 352 | 68.434 | 29.908 | 57.179 | 0.00 | 0.00 |
| ATOM | 5289 | CG   | ARG | X | 352 | 68.819 | 28.149 | 56.153 | 0.00 | 0.00 |
| ATOM | 5290 | HG2  | ARG | X | 352 | 67.879 | 28.068 | 55.607 | 0.00 | 0.00 |
| ATOM | 5291 | HG3  | ARG | X | 352 | 69.670 | 27.785 | 55.578 | 0.00 | 0.00 |
| ATOM | 5292 | CD   | ARG | X | 352 | 68.802 | 27.219 | 57.407 | 0.00 | 0.00 |
| ATOM | 5293 | HD2  | ARG | X | 352 | 68.805 | 26.162 | 57.144 | 0.00 | 0.00 |
| ATOM | 5294 | HD3  | ARG | X | 352 | 69.763 | 27.443 | 57.870 | 0.00 | 0.00 |
| ATOM | 5295 | NE   | ARG | X | 352 | 67.768 | 27.527 | 58.364 | 0.00 | 0.00 |
| ATOM | 5296 | HE   | ARG | X | 352 | 68.143 | 27.994 | 59.177 | 0.00 | 0.00 |
| ATOM | 5297 | CZ   | ARG | X | 352 | 66.411 | 27.293 | 58.223 | 0.00 | 0.00 |
| ATOM | 5298 | NH1  | ARG | X | 352 | 65.854 | 26.526 | 57.306 | 0.00 | 0.00 |
| ATOM | 5299 | HH11 | ARG | X | 352 | 66.320 | 26.317 | 56.435 | 0.00 | 0.00 |
| ATOM | 5300 | HH12 | ARG | X | 352 | 64.847 | 26.447 | 57.298 | 0.00 | 0.00 |
| ATOM | 5301 | NH2  | ARG | X | 352 | 65.569 | 27.952 | 58.982 | 0.00 | 0.00 |
| ATOM | 5302 | HH21 | ARG | X | 352 | 65.948 | 28.446 | 59.777 | 0.00 | 0.00 |
| ATOM | 5303 | HH22 | ARG | X | 352 | 64.631 | 27.590 | 59.074 | 0.00 | 0.00 |
| ATOM | 5304 | C    | ARG | X | 352 | 69.271 | 32.009 | 55.716 | 0.00 | 0.00 |

|      |      |      |     |   |     |        |        |        |      |      |
|------|------|------|-----|---|-----|--------|--------|--------|------|------|
| ATOM | 5305 | O    | ARG | X | 352 | 68.319 | 32.636 | 56.235 | 0.00 | 0.00 |
| ATOM | 5306 | N    | ALA | X | 353 | 70.448 | 32.563 | 55.397 | 0.00 | 0.00 |
| ATOM | 5307 | H    | ALA | X | 353 | 71.141 | 31.994 | 54.932 | 0.00 | 0.00 |
| ATOM | 5308 | CA   | ALA | X | 353 | 70.843 | 33.954 | 55.545 | 0.00 | 0.00 |
| ATOM | 5309 | HA   | ALA | X | 353 | 70.584 | 34.266 | 56.557 | 0.00 | 0.00 |
| ATOM | 5310 | CB   | ALA | X | 353 | 72.320 | 34.075 | 55.348 | 0.00 | 0.00 |
| ATOM | 5311 | HB1  | ALA | X | 353 | 72.730 | 34.950 | 55.852 | 0.00 | 0.00 |
| ATOM | 5312 | HB2  | ALA | X | 353 | 72.572 | 34.303 | 54.312 | 0.00 | 0.00 |
| ATOM | 5313 | HB3  | ALA | X | 353 | 72.934 | 33.218 | 55.624 | 0.00 | 0.00 |
| ATOM | 5314 | C    | ALA | X | 353 | 70.173 | 34.954 | 54.634 | 0.00 | 0.00 |
| ATOM | 5315 | O    | ALA | X | 353 | 70.044 | 36.097 | 54.991 | 0.00 | 0.00 |
| ATOM | 5316 | N    | GLU | X | 354 | 69.631 | 34.459 | 53.520 | 0.00 | 0.00 |
| ATOM | 5317 | H    | GLU | X | 354 | 69.658 | 33.465 | 53.341 | 0.00 | 0.00 |
| ATOM | 5318 | CA   | GLU | X | 354 | 68.781 | 35.320 | 52.692 | 0.00 | 0.00 |
| ATOM | 5319 | HA   | GLU | X | 354 | 68.937 | 36.387 | 52.850 | 0.00 | 0.00 |
| ATOM | 5320 | CB   | GLU | X | 354 | 69.238 | 35.218 | 51.204 | 0.00 | 0.00 |
| ATOM | 5321 | HB2  | GLU | X | 354 | 69.223 | 34.138 | 51.060 | 0.00 | 0.00 |
| ATOM | 5322 | HB3  | GLU | X | 354 | 68.426 | 35.600 | 50.585 | 0.00 | 0.00 |
| ATOM | 5323 | CG   | GLU | X | 354 | 70.584 | 35.835 | 50.785 | 0.00 | 0.00 |
| ATOM | 5324 | HG2  | GLU | X | 354 | 70.615 | 36.138 | 49.738 | 0.00 | 0.00 |
| ATOM | 5325 | HG3  | GLU | X | 354 | 70.853 | 36.748 | 51.316 | 0.00 | 0.00 |
| ATOM | 5326 | CD   | GLU | X | 354 | 71.717 | 34.726 | 50.888 | 0.00 | 0.00 |
| ATOM | 5327 | OE1  | GLU | X | 354 | 71.337 | 33.566 | 50.564 | 0.00 | 0.00 |
| ATOM | 5328 | OE2  | GLU | X | 354 | 72.829 | 35.060 | 51.309 | 0.00 | 0.00 |
| ATOM | 5329 | C    | GLU | X | 354 | 67.319 | 35.004 | 52.772 | 0.00 | 0.00 |
| ATOM | 5330 | O    | GLU | X | 354 | 66.500 | 35.885 | 52.502 | 0.00 | 0.00 |
| ATOM | 5331 | N    | PHE | X | 355 | 66.926 | 33.812 | 53.278 | 0.00 | 0.00 |
| ATOM | 5332 | H    | PHE | X | 355 | 67.648 | 33.125 | 53.444 | 0.00 | 0.00 |
| ATOM | 5333 | CA   | PHE | X | 355 | 65.519 | 33.387 | 53.479 | 0.00 | 0.00 |
| ATOM | 5334 | HA   | PHE | X | 355 | 64.933 | 33.507 | 52.568 | 0.00 | 0.00 |
| ATOM | 5335 | CB   | PHE | X | 355 | 65.489 | 31.938 | 53.971 | 0.00 | 0.00 |
| ATOM | 5336 | HB2  | PHE | X | 355 | 65.962 | 31.344 | 53.190 | 0.00 | 0.00 |
| ATOM | 5337 | HB3  | PHE | X | 355 | 66.019 | 31.866 | 54.920 | 0.00 | 0.00 |
| ATOM | 5338 | CG   | PHE | X | 355 | 64.091 | 31.359 | 54.169 | 0.00 | 0.00 |
| ATOM | 5339 | CD1  | PHE | X | 355 | 63.100 | 31.402 | 53.137 | 0.00 | 0.00 |
| ATOM | 5340 | HD1  | PHE | X | 355 | 63.271 | 31.959 | 52.228 | 0.00 | 0.00 |
| ATOM | 5341 | CE1  | PHE | X | 355 | 61.843 | 30.828 | 53.389 | 0.00 | 0.00 |
| ATOM | 5342 | HE1  | PHE | X | 355 | 61.183 | 30.681 | 52.547 | 0.00 | 0.00 |
| ATOM | 5343 | CZ   | PHE | X | 355 | 61.456 | 30.286 | 54.586 | 0.00 | 0.00 |
| ATOM | 5344 | HZ   | PHE | X | 355 | 60.445 | 29.919 | 54.682 | 0.00 | 0.00 |
| ATOM | 5345 | CE2  | PHE | X | 355 | 62.469 | 30.037 | 55.498 | 0.00 | 0.00 |
| ATOM | 5346 | HE2  | PHE | X | 355 | 62.097 | 29.370 | 56.262 | 0.00 | 0.00 |
| ATOM | 5347 | CD2  | PHE | X | 355 | 63.782 | 30.612 | 55.404 | 0.00 | 0.00 |
| ATOM | 5348 | HD2  | PHE | X | 355 | 64.528 | 30.330 | 56.132 | 0.00 | 0.00 |
| ATOM | 5349 | C    | PHE | X | 355 | 64.870 | 34.316 | 54.482 | 0.00 | 0.00 |
| ATOM | 5350 | O    | PHE | X | 355 | 63.762 | 34.735 | 54.269 | 0.00 | 0.00 |
| ATOM | 5351 | N    | LEU | X | 356 | 65.466 | 34.629 | 55.664 | 0.00 | 0.00 |
| ATOM | 5352 | H    | LEU | X | 356 | 66.330 | 34.132 | 55.829 | 0.00 | 0.00 |
| ATOM | 5353 | CA   | LEU | X | 356 | 64.974 | 35.537 | 56.629 | 0.00 | 0.00 |
| ATOM | 5354 | HA   | LEU | X | 356 | 64.038 | 35.051 | 56.902 | 0.00 | 0.00 |
| ATOM | 5355 | CB   | LEU | X | 356 | 65.815 | 35.629 | 57.971 | 0.00 | 0.00 |
| ATOM | 5356 | HB2  | LEU | X | 356 | 65.732 | 34.749 | 58.609 | 0.00 | 0.00 |
| ATOM | 5357 | HB3  | LEU | X | 356 | 66.883 | 35.660 | 57.754 | 0.00 | 0.00 |
| ATOM | 5358 | CG   | LEU | X | 356 | 65.434 | 36.802 | 58.931 | 0.00 | 0.00 |
| ATOM | 5359 | HG   | LEU | X | 356 | 65.583 | 37.814 | 58.556 | 0.00 | 0.00 |
| ATOM | 5360 | CD1  | LEU | X | 356 | 64.013 | 36.725 | 59.485 | 0.00 | 0.00 |
| ATOM | 5361 | HD11 | LEU | X | 356 | 63.792 | 35.728 | 59.866 | 0.00 | 0.00 |
| ATOM | 5362 | HD12 | LEU | X | 356 | 63.212 | 36.876 | 58.761 | 0.00 | 0.00 |
| ATOM | 5363 | HD13 | LEU | X | 356 | 63.903 | 37.449 | 60.292 | 0.00 | 0.00 |
| ATOM | 5364 | CD2  | LEU | X | 356 | 66.500 | 36.774 | 60.032 | 0.00 | 0.00 |
| ATOM | 5365 | HD21 | LEU | X | 356 | 66.291 | 37.488 | 60.828 | 0.00 | 0.00 |
| ATOM | 5366 | HD22 | LEU | X | 356 | 66.591 | 35.763 | 60.427 | 0.00 | 0.00 |
| ATOM | 5367 | HD23 | LEU | X | 356 | 67.554 | 36.915 | 59.795 | 0.00 | 0.00 |
| ATOM | 5368 | C    | LEU | X | 356 | 64.755 | 36.868 | 56.019 | 0.00 | 0.00 |
| ATOM | 5369 | O    | LEU | X | 356 | 63.708 | 37.534 | 56.163 | 0.00 | 0.00 |
| ATOM | 5370 | N    | ALA | X | 357 | 65.736 | 37.454 | 55.384 | 0.00 | 0.00 |
| ATOM | 5371 | H    | ALA | X | 357 | 66.599 | 36.970 | 55.183 | 0.00 | 0.00 |

|      |      |      |     |   |     |        |        |        |      |      |
|------|------|------|-----|---|-----|--------|--------|--------|------|------|
| ATOM | 5372 | CA   | ALA | X | 357 | 65.683 | 38.753 | 54.663 | 0.00 | 0.00 |
| ATOM | 5373 | HA   | ALA | X | 357 | 65.536 | 39.469 | 55.472 | 0.00 | 0.00 |
| ATOM | 5374 | CB   | ALA | X | 357 | 67.110 | 39.026 | 54.120 | 0.00 | 0.00 |
| ATOM | 5375 | HB1  | ALA | X | 357 | 67.329 | 40.003 | 53.688 | 0.00 | 0.00 |
| ATOM | 5376 | HB2  | ALA | X | 357 | 67.314 | 38.278 | 53.355 | 0.00 | 0.00 |
| ATOM | 5377 | HB3  | ALA | X | 357 | 67.852 | 38.948 | 54.915 | 0.00 | 0.00 |
| ATOM | 5378 | C    | ALA | X | 357 | 64.533 | 38.805 | 53.636 | 0.00 | 0.00 |
| ATOM | 5379 | O    | ALA | X | 357 | 63.879 | 39.852 | 53.520 | 0.00 | 0.00 |
| ATOM | 5380 | N    | GLY | X | 358 | 64.297 | 37.716 | 52.870 | 0.00 | 0.00 |
| ATOM | 5381 | H    | GLY | X | 358 | 64.975 | 36.968 | 52.820 | 0.00 | 0.00 |
| ATOM | 5382 | CA   | GLY | X | 358 | 63.193 | 37.554 | 51.897 | 0.00 | 0.00 |
| ATOM | 5383 | HA2  | GLY | X | 358 | 63.037 | 38.376 | 51.199 | 0.00 | 0.00 |
| ATOM | 5384 | HA3  | GLY | X | 358 | 63.321 | 36.630 | 51.333 | 0.00 | 0.00 |
| ATOM | 5385 | C    | GLY | X | 358 | 61.866 | 37.511 | 52.649 | 0.00 | 0.00 |
| ATOM | 5386 | O    | GLY | X | 358 | 60.979 | 38.188 | 52.158 | 0.00 | 0.00 |
| ATOM | 5387 | N    | VAL | X | 359 | 61.731 | 36.702 | 53.723 | 0.00 | 0.00 |
| ATOM | 5388 | H    | VAL | X | 359 | 62.520 | 36.106 | 53.927 | 0.00 | 0.00 |
| ATOM | 5389 | CA   | VAL | X | 359 | 60.497 | 36.611 | 54.602 | 0.00 | 0.00 |
| ATOM | 5390 | HA   | VAL | X | 359 | 59.599 | 36.475 | 54.000 | 0.00 | 0.00 |
| ATOM | 5391 | CB   | VAL | X | 359 | 60.539 | 35.381 | 55.558 | 0.00 | 0.00 |
| ATOM | 5392 | HB   | VAL | X | 359 | 61.490 | 35.484 | 56.082 | 0.00 | 0.00 |
| ATOM | 5393 | CG1  | VAL | X | 359 | 59.350 | 35.403 | 56.547 | 0.00 | 0.00 |
| ATOM | 5394 | HG11 | VAL | X | 359 | 58.475 | 35.808 | 56.037 | 0.00 | 0.00 |
| ATOM | 5395 | HG12 | VAL | X | 359 | 59.239 | 34.383 | 56.915 | 0.00 | 0.00 |
| ATOM | 5396 | HG13 | VAL | X | 359 | 59.416 | 36.015 | 57.446 | 0.00 | 0.00 |
| ATOM | 5397 | CG2  | VAL | X | 359 | 60.458 | 34.088 | 54.732 | 0.00 | 0.00 |
| ATOM | 5398 | HG21 | VAL | X | 359 | 59.490 | 33.981 | 54.243 | 0.00 | 0.00 |
| ATOM | 5399 | HG22 | VAL | X | 359 | 60.525 | 33.128 | 55.245 | 0.00 | 0.00 |
| ATOM | 5400 | HG23 | VAL | X | 359 | 61.276 | 34.043 | 54.012 | 0.00 | 0.00 |
| ATOM | 5401 | C    | VAL | X | 359 | 60.154 | 37.965 | 55.255 | 0.00 | 0.00 |
| ATOM | 5402 | O    | VAL | X | 359 | 59.036 | 38.350 | 55.274 | 0.00 | 0.00 |
| ATOM | 5403 | N    | ARG | X | 360 | 61.172 | 38.858 | 55.618 | 0.00 | 0.00 |
| ATOM | 5404 | H    | ARG | X | 360 | 62.117 | 38.515 | 55.706 | 0.00 | 0.00 |
| ATOM | 5405 | CA   | ARG | X | 360 | 60.954 | 40.119 | 56.252 | 0.00 | 0.00 |
| ATOM | 5406 | HA   | ARG | X | 360 | 60.201 | 39.960 | 57.025 | 0.00 | 0.00 |
| ATOM | 5407 | CB   | ARG | X | 360 | 62.277 | 40.456 | 56.959 | 0.00 | 0.00 |
| ATOM | 5408 | HB2  | ARG | X | 360 | 62.751 | 39.677 | 57.556 | 0.00 | 0.00 |
| ATOM | 5409 | HB3  | ARG | X | 360 | 63.048 | 40.799 | 56.268 | 0.00 | 0.00 |
| ATOM | 5410 | CG   | ARG | X | 360 | 62.068 | 41.763 | 57.854 | 0.00 | 0.00 |
| ATOM | 5411 | HG2  | ARG | X | 360 | 61.922 | 42.729 | 57.370 | 0.00 | 0.00 |
| ATOM | 5412 | HG3  | ARG | X | 360 | 61.226 | 41.653 | 58.537 | 0.00 | 0.00 |
| ATOM | 5413 | CD   | ARG | X | 360 | 63.318 | 42.047 | 58.754 | 0.00 | 0.00 |
| ATOM | 5414 | HD2  | ARG | X | 360 | 63.058 | 42.861 | 59.431 | 0.00 | 0.00 |
| ATOM | 5415 | HD3  | ARG | X | 360 | 63.489 | 41.142 | 59.337 | 0.00 | 0.00 |
| ATOM | 5416 | NE   | ARG | X | 360 | 64.483 | 42.462 | 57.924 | 0.00 | 0.00 |
| ATOM | 5417 | HE   | ARG | X | 360 | 64.236 | 43.088 | 57.171 | 0.00 | 0.00 |
| ATOM | 5418 | CZ   | ARG | X | 360 | 65.699 | 41.992 | 58.010 | 0.00 | 0.00 |
| ATOM | 5419 | NH1  | ARG | X | 360 | 66.060 | 41.268 | 59.013 | 0.00 | 0.00 |
| ATOM | 5420 | HH11 | ARG | X | 360 | 65.410 | 41.074 | 59.761 | 0.00 | 0.00 |
| ATOM | 5421 | HH12 | ARG | X | 360 | 66.987 | 40.866 | 59.019 | 0.00 | 0.00 |
| ATOM | 5422 | NH2  | ARG | X | 360 | 66.597 | 42.108 | 57.056 | 0.00 | 0.00 |
| ATOM | 5423 | HH21 | ARG | X | 360 | 66.359 | 42.778 | 56.338 | 0.00 | 0.00 |
| ATOM | 5424 | HH22 | ARG | X | 360 | 67.561 | 41.815 | 57.114 | 0.00 | 0.00 |
| ATOM | 5425 | C    | ARG | X | 360 | 60.415 | 41.148 | 55.296 | 0.00 | 0.00 |
| ATOM | 5426 | O    | ARG | X | 360 | 59.480 | 41.873 | 55.677 | 0.00 | 0.00 |
| ATOM | 5427 | N    | VAL | X | 361 | 60.880 | 41.135 | 54.005 | 0.00 | 0.00 |
| ATOM | 5428 | H    | VAL | X | 361 | 61.633 | 40.523 | 53.726 | 0.00 | 0.00 |
| ATOM | 5429 | CA   | VAL | X | 361 | 60.205 | 41.984 | 52.996 | 0.00 | 0.00 |
| ATOM | 5430 | HA   | VAL | X | 361 | 59.845 | 42.901 | 53.461 | 0.00 | 0.00 |
| ATOM | 5431 | CB   | VAL | X | 361 | 61.198 | 42.409 | 51.818 | 0.00 | 0.00 |
| ATOM | 5432 | HB   | VAL | X | 361 | 60.709 | 43.192 | 51.239 | 0.00 | 0.00 |
| ATOM | 5433 | CG1  | VAL | X | 361 | 62.552 | 43.039 | 52.288 | 0.00 | 0.00 |
| ATOM | 5434 | HG11 | VAL | X | 361 | 63.237 | 42.403 | 52.848 | 0.00 | 0.00 |
| ATOM | 5435 | HG12 | VAL | X | 361 | 63.089 | 43.514 | 51.466 | 0.00 | 0.00 |
| ATOM | 5436 | HG13 | VAL | X | 361 | 62.223 | 43.790 | 53.006 | 0.00 | 0.00 |
| ATOM | 5437 | CG2  | VAL | X | 361 | 61.538 | 41.249 | 50.872 | 0.00 | 0.00 |
| ATOM | 5438 | HG21 | VAL | X | 361 | 62.246 | 40.608 | 51.398 | 0.00 | 0.00 |



|      |      |      |     |   |     |        |        |        |      |      |
|------|------|------|-----|---|-----|--------|--------|--------|------|------|
| ATOM | 5439 | HG22 | VAL | X | 361 | 61.892 | 41.735 | 49.962 | 0.00 | 0.00 |
| ATOM | 5440 | HG23 | VAL | X | 361 | 60.646 | 40.696 | 50.576 | 0.00 | 0.00 |
| ATOM | 5441 | C    | VAL | X | 361 | 58.897 | 41.319 | 52.591 | 0.00 | 0.00 |
| ATOM | 5442 | O    | VAL | X | 361 | 58.085 | 41.934 | 51.978 | 0.00 | 0.00 |
| ATOM | 5443 | N    | GLY | X | 362 | 58.767 | 39.962 | 52.851 | 0.00 | 0.00 |
| ATOM | 5444 | H    | GLY | X | 362 | 59.522 | 39.374 | 53.175 | 0.00 | 0.00 |
| ATOM | 5445 | CA   | GLY | X | 362 | 57.546 | 39.211 | 52.302 | 0.00 | 0.00 |
| ATOM | 5446 | HA2  | GLY | X | 362 | 57.374 | 39.483 | 51.261 | 0.00 | 0.00 |
| ATOM | 5447 | HA3  | GLY | X | 362 | 57.725 | 38.148 | 52.464 | 0.00 | 0.00 |
| ATOM | 5448 | C    | GLY | X | 362 | 56.301 | 39.493 | 53.248 | 0.00 | 0.00 |
| ATOM | 5449 | O    | GLY | X | 362 | 55.161 | 39.474 | 52.815 | 0.00 | 0.00 |
| ATOM | 5450 | N    | VAL | X | 363 | 56.621 | 39.818 | 54.459 | 0.00 | 0.00 |
| ATOM | 5451 | H    | VAL | X | 363 | 57.571 | 39.653 | 54.759 | 0.00 | 0.00 |
| ATOM | 5452 | CA   | VAL | X | 363 | 55.619 | 40.155 | 55.560 | 0.00 | 0.00 |
| ATOM | 5453 | HA   | VAL | X | 363 | 54.563 | 40.177 | 55.288 | 0.00 | 0.00 |
| ATOM | 5454 | CB   | VAL | X | 363 | 55.555 | 39.069 | 56.692 | 0.00 | 0.00 |
| ATOM | 5455 | HB   | VAL | X | 363 | 56.514 | 39.218 | 57.188 | 0.00 | 0.00 |
| ATOM | 5456 | CG1  | VAL | X | 363 | 54.345 | 39.285 | 57.647 | 0.00 | 0.00 |
| ATOM | 5457 | HG11 | VAL | X | 363 | 53.848 | 38.323 | 57.774 | 0.00 | 0.00 |
| ATOM | 5458 | HG12 | VAL | X | 363 | 54.660 | 39.589 | 58.646 | 0.00 | 0.00 |
| ATOM | 5459 | HG13 | VAL | X | 363 | 53.639 | 39.996 | 57.219 | 0.00 | 0.00 |
| ATOM | 5460 | CG2  | VAL | X | 363 | 55.627 | 37.664 | 56.084 | 0.00 | 0.00 |
| ATOM | 5461 | HG21 | VAL | X | 363 | 54.793 | 37.394 | 55.436 | 0.00 | 0.00 |
| ATOM | 5462 | HG22 | VAL | X | 363 | 55.662 | 36.835 | 56.791 | 0.00 | 0.00 |
| ATOM | 5463 | HG23 | VAL | X | 363 | 56.595 | 37.458 | 55.628 | 0.00 | 0.00 |
| ATOM | 5464 | C    | VAL | X | 363 | 55.862 | 41.584 | 56.114 | 0.00 | 0.00 |
| ATOM | 5465 | O    | VAL | X | 363 | 56.413 | 41.787 | 57.185 | 0.00 | 0.00 |
| ATOM | 5466 | N    | PRO | X | 364 | 55.402 | 42.670 | 55.361 | 0.00 | 0.00 |
| ATOM | 5467 | CD   | PRO | X | 364 | 55.078 | 42.504 | 53.925 | 0.00 | 0.00 |
| ATOM | 5468 | HD2  | PRO | X | 364 | 54.127 | 42.033 | 53.679 | 0.00 | 0.00 |
| ATOM | 5469 | HD3  | PRO | X | 364 | 55.840 | 41.928 | 53.401 | 0.00 | 0.00 |
| ATOM | 5470 | CG   | PRO | X | 364 | 55.108 | 43.876 | 53.361 | 0.00 | 0.00 |
| ATOM | 5471 | HG2  | PRO | X | 364 | 54.168 | 44.148 | 52.879 | 0.00 | 0.00 |
| ATOM | 5472 | HG3  | PRO | X | 364 | 55.969 | 43.894 | 52.694 | 0.00 | 0.00 |
| ATOM | 5473 | CB   | PRO | X | 364 | 55.280 | 44.876 | 54.468 | 0.00 | 0.00 |
| ATOM | 5474 | HB2  | PRO | X | 364 | 54.288 | 45.300 | 54.622 | 0.00 | 0.00 |
| ATOM | 5475 | HB3  | PRO | X | 364 | 56.003 | 45.579 | 54.056 | 0.00 | 0.00 |
| ATOM | 5476 | CA   | PRO | X | 364 | 55.654 | 44.064 | 55.709 | 0.00 | 0.00 |
| ATOM | 5477 | HA   | PRO | X | 364 | 56.688 | 44.377 | 55.855 | 0.00 | 0.00 |
| ATOM | 5478 | C    | PRO | X | 364 | 54.913 | 44.565 | 56.938 | 0.00 | 0.00 |
| ATOM | 5479 | O    | PRO | X | 364 | 54.017 | 43.880 | 57.401 | 0.00 | 0.00 |
| ATOM | 5480 | N    | GLN | X | 365 | 55.458 | 45.587 | 57.622 | 0.00 | 0.00 |
| ATOM | 5481 | H    | GLN | X | 365 | 56.219 | 46.164 | 57.291 | 0.00 | 0.00 |
| ATOM | 5482 | CA   | GLN | X | 365 | 54.893 | 46.216 | 58.848 | 0.00 | 0.00 |
| ATOM | 5483 | HA   | GLN | X | 365 | 55.550 | 47.068 | 59.023 | 0.00 | 0.00 |
| ATOM | 5484 | CB   | GLN | X | 365 | 53.429 | 46.692 | 58.567 | 0.00 | 0.00 |
| ATOM | 5485 | HB2  | GLN | X | 365 | 52.668 | 45.955 | 58.312 | 0.00 | 0.00 |
| ATOM | 5486 | HB3  | GLN | X | 365 | 53.102 | 47.062 | 59.539 | 0.00 | 0.00 |
| ATOM | 5487 | CG   | GLN | X | 365 | 53.488 | 48.011 | 57.692 | 0.00 | 0.00 |
| ATOM | 5488 | HG2  | GLN | X | 365 | 54.183 | 48.689 | 58.186 | 0.00 | 0.00 |
| ATOM | 5489 | HG3  | GLN | X | 365 | 53.754 | 47.749 | 56.668 | 0.00 | 0.00 |
| ATOM | 5490 | CD   | GLN | X | 365 | 52.103 | 48.694 | 57.569 | 0.00 | 0.00 |
| ATOM | 5491 | OE1  | GLN | X | 365 | 51.328 | 48.581 | 56.655 | 0.00 | 0.00 |
| ATOM | 5492 | NE2  | GLN | X | 365 | 51.683 | 49.351 | 58.576 | 0.00 | 0.00 |
| ATOM | 5493 | HE21 | GLN | X | 365 | 50.729 | 49.682 | 58.589 | 0.00 | 0.00 |
| ATOM | 5494 | HE22 | GLN | X | 365 | 52.238 | 49.422 | 59.417 | 0.00 | 0.00 |
| ATOM | 5495 | C    | GLN | X | 365 | 55.025 | 45.270 | 60.061 | 0.00 | 0.00 |
| ATOM | 5496 | O    | GLN | X | 365 | 54.774 | 45.768 | 61.209 | 0.00 | 0.00 |
| ATOM | 5497 | N    | VAL | X | 366 | 55.504 | 44.051 | 59.938 | 0.00 | 0.00 |
| ATOM | 5498 | H    | VAL | X | 366 | 55.678 | 43.762 | 58.985 | 0.00 | 0.00 |
| ATOM | 5499 | CA   | VAL | X | 366 | 55.643 | 43.072 | 61.021 | 0.00 | 0.00 |
| ATOM | 5500 | HA   | VAL | X | 366 | 55.138 | 43.379 | 61.936 | 0.00 | 0.00 |
| ATOM | 5501 | CB   | VAL | X | 366 | 55.013 | 41.720 | 60.607 | 0.00 | 0.00 |
| ATOM | 5502 | HB   | VAL | X | 366 | 55.442 | 41.437 | 59.645 | 0.00 | 0.00 |
| ATOM | 5503 | CG1  | VAL | X | 366 | 55.205 | 40.491 | 61.652 | 0.00 | 0.00 |
| ATOM | 5504 | HG11 | VAL | X | 366 | 55.031 | 40.850 | 62.666 | 0.00 | 0.00 |
| ATOM | 5505 | HG12 | VAL | X | 366 | 54.542 | 39.671 | 61.374 | 0.00 | 0.00 |

|      |      |      |     |   |     |        |        |        |      |      |
|------|------|------|-----|---|-----|--------|--------|--------|------|------|
| ATOM | 5506 | HG13 | VAL | X | 366 | 56.224 | 40.194 | 61.407 | 0.00 | 0.00 |
| ATOM | 5507 | CG2  | VAL | X | 366 | 53.465 | 41.956 | 60.426 | 0.00 | 0.00 |
| ATOM | 5508 | HG21 | VAL | X | 366 | 52.839 | 41.098 | 60.178 | 0.00 | 0.00 |
| ATOM | 5509 | HG22 | VAL | X | 366 | 53.220 | 42.658 | 59.629 | 0.00 | 0.00 |
| ATOM | 5510 | HG23 | VAL | X | 366 | 53.039 | 42.416 | 61.317 | 0.00 | 0.00 |
| ATOM | 5511 | C    | VAL | X | 366 | 57.131 | 42.959 | 61.357 | 0.00 | 0.00 |
| ATOM | 5512 | O    | VAL | X | 366 | 58.001 | 43.302 | 60.615 | 0.00 | 0.00 |
| ATOM | 5513 | N    | SER | X | 367 | 57.372 | 42.583 | 62.628 | 0.00 | 0.00 |
| ATOM | 5514 | H    | SER | X | 367 | 56.587 | 42.425 | 63.244 | 0.00 | 0.00 |
| ATOM | 5515 | CA   | SER | X | 367 | 58.653 | 42.607 | 63.277 | 0.00 | 0.00 |
| ATOM | 5516 | HA   | SER | X | 367 | 59.169 | 43.549 | 63.091 | 0.00 | 0.00 |
| ATOM | 5517 | CB   | SER | X | 367 | 58.532 | 42.501 | 64.774 | 0.00 | 0.00 |
| ATOM | 5518 | HB2  | SER | X | 367 | 59.446 | 42.686 | 65.338 | 0.00 | 0.00 |
| ATOM | 5519 | HB3  | SER | X | 367 | 57.882 | 43.276 | 65.178 | 0.00 | 0.00 |
| ATOM | 5520 | OG   | SER | X | 367 | 57.978 | 41.238 | 65.090 | 0.00 | 0.00 |
| ATOM | 5521 | HG   | SER | X | 367 | 57.714 | 41.179 | 66.011 | 0.00 | 0.00 |
| ATOM | 5522 | C    | SER | X | 367 | 59.616 | 41.513 | 62.645 | 0.00 | 0.00 |
| ATOM | 5523 | O    | SER | X | 367 | 59.213 | 40.355 | 62.290 | 0.00 | 0.00 |
| ATOM | 5524 | N    | ASP | X | 368 | 60.919 | 41.756 | 62.787 | 0.00 | 0.00 |
| ATOM | 5525 | H    | ASP | X | 368 | 61.160 | 42.706 | 63.028 | 0.00 | 0.00 |
| ATOM | 5526 | CA   | ASP | X | 368 | 62.045 | 40.850 | 62.546 | 0.00 | 0.00 |
| ATOM | 5527 | HA   | ASP | X | 368 | 62.103 | 40.499 | 61.516 | 0.00 | 0.00 |
| ATOM | 5528 | CB   | ASP | X | 368 | 63.226 | 41.714 | 62.858 | 0.00 | 0.00 |
| ATOM | 5529 | HB2  | ASP | X | 368 | 63.166 | 42.669 | 62.335 | 0.00 | 0.00 |
| ATOM | 5530 | HB3  | ASP | X | 368 | 63.333 | 41.923 | 63.922 | 0.00 | 0.00 |
| ATOM | 5531 | CG   | ASP | X | 368 | 64.549 | 41.116 | 62.443 | 0.00 | 0.00 |
| ATOM | 5532 | OD1  | ASP | X | 368 | 65.539 | 41.307 | 63.189 | 0.00 | 0.00 |
| ATOM | 5533 | OD2  | ASP | X | 368 | 64.779 | 40.706 | 61.305 | 0.00 | 0.00 |
| ATOM | 5534 | C    | ASP | X | 368 | 62.045 | 39.580 | 63.464 | 0.00 | 0.00 |
| ATOM | 5535 | O    | ASP | X | 368 | 62.559 | 38.526 | 63.021 | 0.00 | 0.00 |
| ATOM | 5536 | N    | LEU | X | 369 | 61.523 | 39.648 | 64.743 | 0.00 | 0.00 |
| ATOM | 5537 | H    | LEU | X | 369 | 61.258 | 40.576 | 65.042 | 0.00 | 0.00 |
| ATOM | 5538 | CA   | LEU | X | 369 | 61.124 | 38.507 | 65.662 | 0.00 | 0.00 |
| ATOM | 5539 | HA   | LEU | X | 369 | 61.879 | 37.727 | 65.756 | 0.00 | 0.00 |
| ATOM | 5540 | CB   | LEU | X | 369 | 60.689 | 39.090 | 67.017 | 0.00 | 0.00 |
| ATOM | 5541 | HB2  | LEU | X | 369 | 59.963 | 39.902 | 66.983 | 0.00 | 0.00 |
| ATOM | 5542 | HB3  | LEU | X | 369 | 60.182 | 38.283 | 67.546 | 0.00 | 0.00 |
| ATOM | 5543 | CG   | LEU | X | 369 | 61.815 | 39.572 | 67.897 | 0.00 | 0.00 |
| ATOM | 5544 | HG   | LEU | X | 369 | 62.606 | 38.845 | 67.714 | 0.00 | 0.00 |
| ATOM | 5545 | CD1  | LEU | X | 369 | 62.396 | 40.918 | 67.594 | 0.00 | 0.00 |
| ATOM | 5546 | HD11 | LEU | X | 369 | 61.726 | 41.725 | 67.889 | 0.00 | 0.00 |
| ATOM | 5547 | HD12 | LEU | X | 369 | 62.644 | 41.041 | 66.539 | 0.00 | 0.00 |
| ATOM | 5548 | HD13 | LEU | X | 369 | 63.264 | 40.914 | 68.254 | 0.00 | 0.00 |
| ATOM | 5549 | CD2  | LEU | X | 369 | 61.494 | 39.514 | 69.401 | 0.00 | 0.00 |
| ATOM | 5550 | HD21 | LEU | X | 369 | 61.420 | 38.477 | 69.729 | 0.00 | 0.00 |
| ATOM | 5551 | HD22 | LEU | X | 369 | 62.283 | 40.012 | 69.965 | 0.00 | 0.00 |
| ATOM | 5552 | HD23 | LEU | X | 369 | 60.512 | 39.984 | 69.456 | 0.00 | 0.00 |
| ATOM | 5553 | C    | LEU | X | 369 | 59.895 | 37.672 | 65.180 | 0.00 | 0.00 |
| ATOM | 5554 | O    | LEU | X | 369 | 59.801 | 36.467 | 65.417 | 0.00 | 0.00 |
| ATOM | 5555 | N    | ALA | X | 370 | 58.898 | 38.275 | 64.563 | 0.00 | 0.00 |
| ATOM | 5556 | H    | ALA | X | 370 | 58.903 | 39.283 | 64.499 | 0.00 | 0.00 |
| ATOM | 5557 | CA   | ALA | X | 370 | 57.754 | 37.551 | 64.011 | 0.00 | 0.00 |
| ATOM | 5558 | HA   | ALA | X | 370 | 57.278 | 36.869 | 64.715 | 0.00 | 0.00 |
| ATOM | 5559 | CB   | ALA | X | 370 | 56.622 | 38.600 | 63.842 | 0.00 | 0.00 |
| ATOM | 5560 | HB1  | ALA | X | 370 | 56.349 | 38.800 | 64.879 | 0.00 | 0.00 |
| ATOM | 5561 | HB2  | ALA | X | 370 | 55.816 | 38.068 | 63.338 | 0.00 | 0.00 |
| ATOM | 5562 | HB3  | ALA | X | 370 | 56.980 | 39.488 | 63.321 | 0.00 | 0.00 |
| ATOM | 5563 | C    | ALA | X | 370 | 58.059 | 36.892 | 62.681 | 0.00 | 0.00 |
| ATOM | 5564 | O    | ALA | X | 370 | 57.719 | 35.731 | 62.513 | 0.00 | 0.00 |
| ATOM | 5565 | N    | ALA | X | 371 | 58.950 | 37.509 | 61.921 | 0.00 | 0.00 |
| ATOM | 5566 | H    | ALA | X | 371 | 59.199 | 38.437 | 62.233 | 0.00 | 0.00 |
| ATOM | 5567 | CA   | ALA | X | 371 | 59.530 | 36.941 | 60.741 | 0.00 | 0.00 |
| ATOM | 5568 | HA   | ALA | X | 371 | 58.683 | 36.694 | 60.101 | 0.00 | 0.00 |
| ATOM | 5569 | CB   | ALA | X | 371 | 60.265 | 38.105 | 60.098 | 0.00 | 0.00 |
| ATOM | 5570 | HB1  | ALA | X | 371 | 61.114 | 38.403 | 60.714 | 0.00 | 0.00 |
| ATOM | 5571 | HB2  | ALA | X | 371 | 59.549 | 38.910 | 59.934 | 0.00 | 0.00 |
| ATOM | 5572 | HB3  | ALA | X | 371 | 60.557 | 37.749 | 59.111 | 0.00 | 0.00 |

|      |      |      |     |   |     |        |        |        |      |      |
|------|------|------|-----|---|-----|--------|--------|--------|------|------|
| ATOM | 5573 | C    | ALA | X | 371 | 60.457 | 35.687 | 61.060 | 0.00 | 0.00 |
| ATOM | 5574 | O    | ALA | X | 371 | 60.281 | 34.632 | 60.462 | 0.00 | 0.00 |
| ATOM | 5575 | N    | GLU | X | 372 | 61.299 | 35.682 | 62.127 | 0.00 | 0.00 |
| ATOM | 5576 | H    | GLU | X | 372 | 61.567 | 36.576 | 62.514 | 0.00 | 0.00 |
| ATOM | 5577 | CA   | GLU | X | 372 | 61.937 | 34.452 | 62.587 | 0.00 | 0.00 |
| ATOM | 5578 | HA   | GLU | X | 372 | 62.486 | 34.022 | 61.749 | 0.00 | 0.00 |
| ATOM | 5579 | CB   | GLU | X | 372 | 63.077 | 34.770 | 63.561 | 0.00 | 0.00 |
| ATOM | 5580 | HB2  | GLU | X | 372 | 63.745 | 35.368 | 62.940 | 0.00 | 0.00 |
| ATOM | 5581 | HB3  | GLU | X | 372 | 62.661 | 35.356 | 64.380 | 0.00 | 0.00 |
| ATOM | 5582 | CG   | GLU | X | 372 | 63.863 | 33.532 | 64.017 | 0.00 | 0.00 |
| ATOM | 5583 | HG2  | GLU | X | 372 | 63.273 | 32.880 | 64.660 | 0.00 | 0.00 |
| ATOM | 5584 | HG3  | GLU | X | 372 | 64.159 | 32.869 | 63.204 | 0.00 | 0.00 |
| ATOM | 5585 | CD   | GLU | X | 372 | 65.153 | 33.947 | 64.702 | 0.00 | 0.00 |
| ATOM | 5586 | OE1  | GLU | X | 372 | 66.265 | 33.515 | 64.297 | 0.00 | 0.00 |
| ATOM | 5587 | OE2  | GLU | X | 372 | 65.065 | 34.736 | 65.659 | 0.00 | 0.00 |
| ATOM | 5588 | C    | GLU | X | 372 | 60.953 | 33.396 | 63.163 | 0.00 | 0.00 |
| ATOM | 5589 | O    | GLU | X | 372 | 61.181 | 32.218 | 63.093 | 0.00 | 0.00 |
| ATOM | 5590 | N    | ALA | X | 373 | 59.782 | 33.826 | 63.663 | 0.00 | 0.00 |
| ATOM | 5591 | H    | ALA | X | 373 | 59.572 | 34.814 | 63.657 | 0.00 | 0.00 |
| ATOM | 5592 | CA   | ALA | X | 373 | 58.655 | 32.982 | 64.049 | 0.00 | 0.00 |
| ATOM | 5593 | HA   | ALA | X | 373 | 58.908 | 32.093 | 64.626 | 0.00 | 0.00 |
| ATOM | 5594 | CB   | ALA | X | 373 | 57.686 | 33.786 | 64.949 | 0.00 | 0.00 |
| ATOM | 5595 | HB1  | ALA | X | 373 | 57.003 | 33.086 | 65.431 | 0.00 | 0.00 |
| ATOM | 5596 | HB2  | ALA | X | 373 | 57.023 | 34.414 | 64.354 | 0.00 | 0.00 |
| ATOM | 5597 | HB3  | ALA | X | 373 | 58.259 | 34.376 | 65.663 | 0.00 | 0.00 |
| ATOM | 5598 | C    | ALA | X | 373 | 57.901 | 32.349 | 62.856 | 0.00 | 0.00 |
| ATOM | 5599 | O    | ALA | X | 373 | 57.437 | 31.195 | 62.969 | 0.00 | 0.00 |
| ATOM | 5600 | N    | VAL | X | 374 | 57.865 | 32.984 | 61.718 | 0.00 | 0.00 |
| ATOM | 5601 | H    | VAL | X | 374 | 58.221 | 33.928 | 61.767 | 0.00 | 0.00 |
| ATOM | 5602 | CA   | VAL | X | 374 | 57.459 | 32.463 | 60.392 | 0.00 | 0.00 |
| ATOM | 5603 | HA   | VAL | X | 374 | 56.605 | 31.806 | 60.549 | 0.00 | 0.00 |
| ATOM | 5604 | CB   | VAL | X | 374 | 57.109 | 33.566 | 59.382 | 0.00 | 0.00 |
| ATOM | 5605 | HB   | VAL | X | 374 | 58.061 | 34.058 | 59.182 | 0.00 | 0.00 |
| ATOM | 5606 | CG1  | VAL | X | 374 | 56.579 | 32.959 | 57.993 | 0.00 | 0.00 |
| ATOM | 5607 | HG11 | VAL | X | 374 | 57.460 | 32.517 | 57.527 | 0.00 | 0.00 |
| ATOM | 5608 | HG12 | VAL | X | 374 | 55.728 | 32.291 | 58.125 | 0.00 | 0.00 |
| ATOM | 5609 | HG13 | VAL | X | 374 | 56.236 | 33.764 | 57.343 | 0.00 | 0.00 |
| ATOM | 5610 | CG2  | VAL | X | 374 | 56.016 | 34.489 | 59.895 | 0.00 | 0.00 |
| ATOM | 5611 | HG21 | VAL | X | 374 | 55.938 | 35.485 | 59.458 | 0.00 | 0.00 |
| ATOM | 5612 | HG22 | VAL | X | 374 | 56.112 | 34.665 | 60.966 | 0.00 | 0.00 |
| ATOM | 5613 | HG23 | VAL | X | 374 | 55.037 | 34.044 | 59.720 | 0.00 | 0.00 |
| ATOM | 5614 | C    | VAL | X | 374 | 58.438 | 31.507 | 59.757 | 0.00 | 0.00 |
| ATOM | 5615 | O    | VAL | X | 374 | 58.105 | 30.363 | 59.476 | 0.00 | 0.00 |
| ATOM | 5616 | N    | VAL | X | 375 | 59.750 | 31.851 | 59.697 | 0.00 | 0.00 |
| ATOM | 5617 | H    | VAL | X | 375 | 59.994 | 32.760 | 60.064 | 0.00 | 0.00 |
| ATOM | 5618 | CA   | VAL | X | 375 | 60.881 | 31.040 | 59.221 | 0.00 | 0.00 |
| ATOM | 5619 | HA   | VAL | X | 375 | 60.817 | 31.019 | 58.133 | 0.00 | 0.00 |
| ATOM | 5620 | CB   | VAL | X | 375 | 62.288 | 31.645 | 59.565 | 0.00 | 0.00 |
| ATOM | 5621 | HB   | VAL | X | 375 | 62.142 | 32.049 | 60.567 | 0.00 | 0.00 |
| ATOM | 5622 | CG1  | VAL | X | 375 | 63.485 | 30.671 | 59.606 | 0.00 | 0.00 |
| ATOM | 5623 | HG11 | VAL | X | 375 | 64.403 | 31.209 | 59.839 | 0.00 | 0.00 |
| ATOM | 5624 | HG12 | VAL | X | 375 | 63.239 | 30.034 | 60.456 | 0.00 | 0.00 |
| ATOM | 5625 | HG13 | VAL | X | 375 | 63.694 | 30.127 | 58.684 | 0.00 | 0.00 |
| ATOM | 5626 | CG2  | VAL | X | 375 | 62.682 | 32.855 | 58.602 | 0.00 | 0.00 |
| ATOM | 5627 | HG21 | VAL | X | 375 | 63.437 | 33.463 | 59.099 | 0.00 | 0.00 |
| ATOM | 5628 | HG22 | VAL | X | 375 | 61.809 | 33.477 | 58.400 | 0.00 | 0.00 |
| ATOM | 5629 | HG23 | VAL | X | 375 | 63.130 | 32.450 | 57.694 | 0.00 | 0.00 |
| ATOM | 5630 | C    | VAL | X | 375 | 60.849 | 29.699 | 59.868 | 0.00 | 0.00 |
| ATOM | 5631 | O    | VAL | X | 375 | 61.226 | 28.689 | 59.249 | 0.00 | 0.00 |
| ATOM | 5632 | N    | LEU | X | 376 | 60.588 | 29.556 | 61.112 | 0.00 | 0.00 |
| ATOM | 5633 | H    | LEU | X | 376 | 60.442 | 30.346 | 61.723 | 0.00 | 0.00 |
| ATOM | 5634 | CA   | LEU | X | 376 | 60.562 | 28.302 | 61.859 | 0.00 | 0.00 |
| ATOM | 5635 | HA   | LEU | X | 376 | 61.348 | 27.598 | 61.583 | 0.00 | 0.00 |
| ATOM | 5636 | CB   | LEU | X | 376 | 60.503 | 28.681 | 63.371 | 0.00 | 0.00 |
| ATOM | 5637 | HB2  | LEU | X | 376 | 60.286 | 29.716 | 63.635 | 0.00 | 0.00 |
| ATOM | 5638 | HB3  | LEU | X | 376 | 59.759 | 28.120 | 63.936 | 0.00 | 0.00 |
| ATOM | 5639 | CG   | LEU | X | 376 | 61.782 | 28.452 | 64.196 | 0.00 | 0.00 |

|      |      |      |     |   |     |        |        |        |      |      |
|------|------|------|-----|---|-----|--------|--------|--------|------|------|
| ATOM | 5640 | HG   | LEU | X | 376 | 61.524 | 28.857 | 65.175 | 0.00 | 0.00 |
| ATOM | 5641 | CD1  | LEU | X | 376 | 62.059 | 26.948 | 64.477 | 0.00 | 0.00 |
| ATOM | 5642 | HD11 | LEU | X | 376 | 61.145 | 26.413 | 64.733 | 0.00 | 0.00 |
| ATOM | 5643 | HD12 | LEU | X | 376 | 62.813 | 26.741 | 65.237 | 0.00 | 0.00 |
| ATOM | 5644 | HD13 | LEU | X | 376 | 62.571 | 26.504 | 63.623 | 0.00 | 0.00 |
| ATOM | 5645 | CD2  | LEU | X | 376 | 62.996 | 29.136 | 63.545 | 0.00 | 0.00 |
| ATOM | 5646 | HD21 | LEU | X | 376 | 63.855 | 28.926 | 64.182 | 0.00 | 0.00 |
| ATOM | 5647 | HD22 | LEU | X | 376 | 63.290 | 28.788 | 62.555 | 0.00 | 0.00 |
| ATOM | 5648 | HD23 | LEU | X | 376 | 62.914 | 30.223 | 63.561 | 0.00 | 0.00 |
| ATOM | 5649 | C    | LEU | X | 376 | 59.288 | 27.506 | 61.525 | 0.00 | 0.00 |
| ATOM | 5650 | O    | LEU | X | 376 | 59.440 | 26.293 | 61.281 | 0.00 | 0.00 |
| ATOM | 5651 | N    | HIE | X | 377 | 58.117 | 28.000 | 61.329 | 0.00 | 0.00 |
| ATOM | 5652 | H    | HIE | X | 377 | 57.987 | 28.991 | 61.179 | 0.00 | 0.00 |
| ATOM | 5653 | CA   | HIE | X | 377 | 56.982 | 27.258 | 60.867 | 0.00 | 0.00 |
| ATOM | 5654 | HA   | HIE | X | 377 | 56.954 | 26.337 | 61.449 | 0.00 | 0.00 |
| ATOM | 5655 | CB   | HIE | X | 377 | 55.796 | 28.207 | 61.158 | 0.00 | 0.00 |
| ATOM | 5656 | HB2  | HIE | X | 377 | 55.849 | 28.660 | 62.147 | 0.00 | 0.00 |
| ATOM | 5657 | HB3  | HIE | X | 377 | 55.775 | 29.126 | 60.572 | 0.00 | 0.00 |
| ATOM | 5658 | CG   | HIE | X | 377 | 54.431 | 27.567 | 60.816 | 0.00 | 0.00 |
| ATOM | 5659 | ND1  | HIE | X | 377 | 53.770 | 26.532 | 61.481 | 0.00 | 0.00 |
| ATOM | 5660 | CE1  | HIE | X | 377 | 52.711 | 26.285 | 60.752 | 0.00 | 0.00 |
| ATOM | 5661 | HE1  | HIE | X | 377 | 51.943 | 25.586 | 61.050 | 0.00 | 0.00 |
| ATOM | 5662 | NE2  | HIE | X | 377 | 52.619 | 27.177 | 59.755 | 0.00 | 0.00 |
| ATOM | 5663 | HE2  | HIE | X | 377 | 51.945 | 27.200 | 59.003 | 0.00 | 0.00 |
| ATOM | 5664 | CD2  | HIE | X | 377 | 53.695 | 27.996 | 59.736 | 0.00 | 0.00 |
| ATOM | 5665 | HD2  | HIE | X | 377 | 53.844 | 28.849 | 59.091 | 0.00 | 0.00 |
| ATOM | 5666 | C    | HIE | X | 377 | 57.114 | 26.863 | 59.364 | 0.00 | 0.00 |
| ATOM | 5667 | O    | HIE | X | 377 | 56.682 | 25.801 | 58.972 | 0.00 | 0.00 |
| ATOM | 5668 | N    | TYR | X | 378 | 57.887 | 27.613 | 58.582 | 0.00 | 0.00 |
| ATOM | 5669 | H    | TYR | X | 378 | 58.263 | 28.476 | 58.948 | 0.00 | 0.00 |
| ATOM | 5670 | CA   | TYR | X | 378 | 58.137 | 27.414 | 57.116 | 0.00 | 0.00 |
| ATOM | 5671 | HA   | TYR | X | 378 | 57.372 | 26.689 | 56.839 | 0.00 | 0.00 |
| ATOM | 5672 | CB   | TYR | X | 378 | 57.969 | 28.760 | 56.368 | 0.00 | 0.00 |
| ATOM | 5673 | HB2  | TYR | X | 378 | 58.406 | 29.613 | 56.887 | 0.00 | 0.00 |
| ATOM | 5674 | HB3  | TYR | X | 378 | 58.418 | 28.618 | 55.385 | 0.00 | 0.00 |
| ATOM | 5675 | CG   | TYR | X | 378 | 56.479 | 29.137 | 56.092 | 0.00 | 0.00 |
| ATOM | 5676 | CD1  | TYR | X | 378 | 55.803 | 28.841 | 54.941 | 0.00 | 0.00 |
| ATOM | 5677 | HD1  | TYR | X | 378 | 56.345 | 28.446 | 54.094 | 0.00 | 0.00 |
| ATOM | 5678 | CE1  | TYR | X | 378 | 54.465 | 29.139 | 54.736 | 0.00 | 0.00 |
| ATOM | 5679 | HE1  | TYR | X | 378 | 54.015 | 28.801 | 53.814 | 0.00 | 0.00 |
| ATOM | 5680 | CZ   | TYR | X | 378 | 53.690 | 29.812 | 55.684 | 0.00 | 0.00 |
| ATOM | 5681 | OH   | TYR | X | 378 | 52.389 | 30.278 | 55.503 | 0.00 | 0.00 |
| ATOM | 5682 | HH   | TYR | X | 378 | 51.999 | 30.225 | 54.627 | 0.00 | 0.00 |
| ATOM | 5683 | CE2  | TYR | X | 378 | 54.350 | 30.058 | 56.958 | 0.00 | 0.00 |
| ATOM | 5684 | HE2  | TYR | X | 378 | 53.815 | 30.500 | 57.786 | 0.00 | 0.00 |
| ATOM | 5685 | CD2  | TYR | X | 378 | 55.701 | 29.724 | 57.186 | 0.00 | 0.00 |
| ATOM | 5686 | HD2  | TYR | X | 378 | 56.114 | 29.939 | 58.160 | 0.00 | 0.00 |
| ATOM | 5687 | C    | TYR | X | 378 | 59.501 | 26.813 | 56.809 | 0.00 | 0.00 |
| ATOM | 5688 | O    | TYR | X | 378 | 59.873 | 26.634 | 55.655 | 0.00 | 0.00 |
| ATOM | 5689 | N    | THR | X | 379 | 60.225 | 26.333 | 57.812 | 0.00 | 0.00 |
| ATOM | 5690 | H    | THR | X | 379 | 59.683 | 26.363 | 58.664 | 0.00 | 0.00 |
| ATOM | 5691 | CA   | THR | X | 379 | 61.427 | 25.422 | 57.632 | 0.00 | 0.00 |
| ATOM | 5692 | HA   | THR | X | 379 | 62.044 | 25.882 | 56.859 | 0.00 | 0.00 |
| ATOM | 5693 | CB   | THR | X | 379 | 62.366 | 25.559 | 58.824 | 0.00 | 0.00 |
| ATOM | 5694 | HB   | THR | X | 379 | 61.712 | 25.398 | 59.681 | 0.00 | 0.00 |
| ATOM | 5695 | CG2  | THR | X | 379 | 63.513 | 24.547 | 58.781 | 0.00 | 0.00 |
| ATOM | 5696 | HG21 | THR | X | 379 | 63.853 | 24.458 | 57.749 | 0.00 | 0.00 |
| ATOM | 5697 | HG22 | THR | X | 379 | 63.118 | 23.590 | 59.122 | 0.00 | 0.00 |
| ATOM | 5698 | HG23 | THR | X | 379 | 64.338 | 24.803 | 59.446 | 0.00 | 0.00 |
| ATOM | 5699 | OG1  | THR | X | 379 | 62.993 | 26.821 | 58.801 | 0.00 | 0.00 |
| ATOM | 5700 | HG1  | THR | X | 379 | 62.357 | 27.498 | 59.045 | 0.00 | 0.00 |
| ATOM | 5701 | C    | THR | X | 379 | 61.027 | 23.973 | 57.250 | 0.00 | 0.00 |
| ATOM | 5702 | O    | THR | X | 379 | 60.089 | 23.375 | 57.746 | 0.00 | 0.00 |
| ATOM | 5703 | N    | ASP | X | 380 | 61.856 | 23.353 | 56.435 | 0.00 | 0.00 |
| ATOM | 5704 | H    | ASP | X | 380 | 62.659 | 23.850 | 56.078 | 0.00 | 0.00 |
| ATOM | 5705 | CA   | ASP | X | 380 | 61.763 | 21.933 | 56.097 | 0.00 | 0.00 |
| ATOM | 5706 | HA   | ASP | X | 380 | 60.728 | 21.593 | 56.063 | 0.00 | 0.00 |

|      |      |      |     |   |     |        |        |        |      |      |
|------|------|------|-----|---|-----|--------|--------|--------|------|------|
| ATOM | 5707 | CB   | ASP | X | 380 | 62.488 | 21.790 | 54.758 | 0.00 | 0.00 |
| ATOM | 5708 | HB2  | ASP | X | 380 | 62.122 | 22.549 | 54.067 | 0.00 | 0.00 |
| ATOM | 5709 | HB3  | ASP | X | 380 | 63.564 | 21.958 | 54.817 | 0.00 | 0.00 |
| ATOM | 5710 | CG   | ASP | X | 380 | 62.328 | 20.419 | 54.167 | 0.00 | 0.00 |
| ATOM | 5711 | OD1  | ASP | X | 380 | 63.279 | 19.633 | 54.154 | 0.00 | 0.00 |
| ATOM | 5712 | OD2  | ASP | X | 380 | 61.237 | 20.080 | 53.600 | 0.00 | 0.00 |
| ATOM | 5713 | C    | ASP | X | 380 | 62.463 | 21.077 | 57.227 | 0.00 | 0.00 |
| ATOM | 5714 | O    | ASP | X | 380 | 63.396 | 21.451 | 57.850 | 0.00 | 0.00 |
| ATOM | 5715 | N    | TRP | X | 381 | 61.853 | 19.914 | 57.486 | 0.00 | 0.00 |
| ATOM | 5716 | H    | TRP | X | 381 | 61.071 | 19.611 | 56.923 | 0.00 | 0.00 |
| ATOM | 5717 | CA   | TRP | X | 381 | 62.142 | 19.010 | 58.687 | 0.00 | 0.00 |
| ATOM | 5718 | HA   | TRP | X | 381 | 62.118 | 19.562 | 59.626 | 0.00 | 0.00 |
| ATOM | 5719 | CB   | TRP | X | 381 | 60.922 | 18.046 | 58.688 | 0.00 | 0.00 |
| ATOM | 5720 | HB2  | TRP | X | 381 | 61.046 | 17.404 | 57.815 | 0.00 | 0.00 |
| ATOM | 5721 | HB3  | TRP | X | 381 | 61.103 | 17.427 | 59.567 | 0.00 | 0.00 |
| ATOM | 5722 | CG   | TRP | X | 381 | 59.641 | 18.788 | 58.758 | 0.00 | 0.00 |
| ATOM | 5723 | CD1  | TRP | X | 381 | 58.844 | 19.005 | 57.681 | 0.00 | 0.00 |
| ATOM | 5724 | HD1  | TRP | X | 381 | 59.007 | 18.492 | 56.744 | 0.00 | 0.00 |
| ATOM | 5725 | NE1  | TRP | X | 381 | 57.741 | 19.771 | 58.106 | 0.00 | 0.00 |
| ATOM | 5726 | HE1  | TRP | X | 381 | 56.857 | 19.908 | 57.636 | 0.00 | 0.00 |
| ATOM | 5727 | CE2  | TRP | X | 381 | 57.866 | 20.120 | 59.434 | 0.00 | 0.00 |
| ATOM | 5728 | CZ2  | TRP | X | 381 | 57.141 | 20.898 | 60.387 | 0.00 | 0.00 |
| ATOM | 5729 | HZ2  | TRP | X | 381 | 56.312 | 21.464 | 59.988 | 0.00 | 0.00 |
| ATOM | 5730 | CH2  | TRP | X | 381 | 57.610 | 20.964 | 61.745 | 0.00 | 0.00 |
| ATOM | 5731 | HH2  | TRP | X | 381 | 57.087 | 21.624 | 62.421 | 0.00 | 0.00 |
| ATOM | 5732 | CZ3  | TRP | X | 381 | 58.868 | 20.500 | 62.064 | 0.00 | 0.00 |
| ATOM | 5733 | HZ3  | TRP | X | 381 | 59.258 | 20.708 | 63.049 | 0.00 | 0.00 |
| ATOM | 5734 | CE3  | TRP | X | 381 | 59.583 | 19.839 | 61.141 | 0.00 | 0.00 |
| ATOM | 5735 | HE3  | TRP | X | 381 | 60.509 | 19.376 | 61.447 | 0.00 | 0.00 |
| ATOM | 5736 | CD2  | TRP | X | 381 | 59.112 | 19.627 | 59.784 | 0.00 | 0.00 |
| ATOM | 5737 | C    | TRP | X | 381 | 63.438 | 18.181 | 58.568 | 0.00 | 0.00 |
| ATOM | 5738 | O    | TRP | X | 381 | 63.874 | 17.475 | 59.484 | 0.00 | 0.00 |
| ATOM | 5739 | N    | LEU | X | 382 | 64.116 | 18.236 | 57.390 | 0.00 | 0.00 |
| ATOM | 5740 | H    | LEU | X | 382 | 63.707 | 18.863 | 56.713 | 0.00 | 0.00 |
| ATOM | 5741 | CA   | LEU | X | 382 | 65.104 | 17.221 | 56.936 | 0.00 | 0.00 |
| ATOM | 5742 | HA   | LEU | X | 382 | 65.629 | 16.801 | 57.794 | 0.00 | 0.00 |
| ATOM | 5743 | CB   | LEU | X | 382 | 64.330 | 16.036 | 56.331 | 0.00 | 0.00 |
| ATOM | 5744 | HB2  | LEU | X | 382 | 63.472 | 15.824 | 56.969 | 0.00 | 0.00 |
| ATOM | 5745 | HB3  | LEU | X | 382 | 64.017 | 16.303 | 55.322 | 0.00 | 0.00 |
| ATOM | 5746 | CG   | LEU | X | 382 | 65.231 | 14.750 | 56.233 | 0.00 | 0.00 |
| ATOM | 5747 | HG   | LEU | X | 382 | 66.187 | 14.948 | 55.747 | 0.00 | 0.00 |
| ATOM | 5748 | CD1  | LEU | X | 382 | 65.470 | 14.152 | 57.679 | 0.00 | 0.00 |
| ATOM | 5749 | HD11 | LEU | X | 382 | 65.839 | 14.902 | 58.378 | 0.00 | 0.00 |
| ATOM | 5750 | HD12 | LEU | X | 382 | 66.187 | 13.330 | 57.668 | 0.00 | 0.00 |
| ATOM | 5751 | HD13 | LEU | X | 382 | 64.590 | 13.669 | 58.104 | 0.00 | 0.00 |
| ATOM | 5752 | CD2  | LEU | X | 382 | 64.636 | 13.697 | 55.223 | 0.00 | 0.00 |
| ATOM | 5753 | HD21 | LEU | X | 382 | 64.624 | 14.119 | 54.218 | 0.00 | 0.00 |
| ATOM | 5754 | HD22 | LEU | X | 382 | 65.305 | 12.836 | 55.223 | 0.00 | 0.00 |
| ATOM | 5755 | HD23 | LEU | X | 382 | 63.626 | 13.376 | 55.476 | 0.00 | 0.00 |
| ATOM | 5756 | C    | LEU | X | 382 | 66.129 | 17.984 | 55.992 | 0.00 | 0.00 |
| ATOM | 5757 | O    | LEU | X | 382 | 67.334 | 17.499 | 55.960 | 0.00 | 0.00 |
| ATOM | 5758 | N    | HIE | X | 383 | 65.817 | 19.091 | 55.331 | 0.00 | 0.00 |
| ATOM | 5759 | H    | HIE | X | 383 | 64.880 | 19.462 | 55.389 | 0.00 | 0.00 |
| ATOM | 5760 | CA   | HIE | X | 383 | 66.838 | 19.828 | 54.642 | 0.00 | 0.00 |
| ATOM | 5761 | HA   | HIE | X | 383 | 67.826 | 19.555 | 55.014 | 0.00 | 0.00 |
| ATOM | 5762 | CB   | HIE | X | 383 | 66.842 | 19.477 | 53.157 | 0.00 | 0.00 |
| ATOM | 5763 | HB2  | HIE | X | 383 | 65.901 | 19.296 | 52.637 | 0.00 | 0.00 |
| ATOM | 5764 | HB3  | HIE | X | 383 | 67.422 | 20.255 | 52.661 | 0.00 | 0.00 |
| ATOM | 5765 | CG   | HIE | X | 383 | 67.667 | 18.195 | 52.945 | 0.00 | 0.00 |
| ATOM | 5766 | ND1  | HIE | X | 383 | 69.045 | 18.122 | 53.213 | 0.00 | 0.00 |
| ATOM | 5767 | CE1  | HIE | X | 383 | 69.416 | 16.948 | 52.736 | 0.00 | 0.00 |
| ATOM | 5768 | HE1  | HIE | X | 383 | 70.426 | 16.596 | 52.885 | 0.00 | 0.00 |
| ATOM | 5769 | NE2  | HIE | X | 383 | 68.427 | 16.202 | 52.329 | 0.00 | 0.00 |
| ATOM | 5770 | HE2  | HIE | X | 383 | 68.450 | 15.229 | 52.059 | 0.00 | 0.00 |
| ATOM | 5771 | CD2  | HIE | X | 383 | 67.299 | 17.013 | 52.407 | 0.00 | 0.00 |
| ATOM | 5772 | HD2  | HIE | X | 383 | 66.304 | 16.822 | 52.033 | 0.00 | 0.00 |
| ATOM | 5773 | C    | HIE | X | 383 | 66.708 | 21.378 | 54.810 | 0.00 | 0.00 |

|      |      |     |     |   |     |        |        |        |      |      |
|------|------|-----|-----|---|-----|--------|--------|--------|------|------|
| ATOM | 5774 | O   | HIE | X | 383 | 66.447 | 22.181 | 53.939 | 0.00 | 0.00 |
| ATOM | 5775 | N   | PRO | X | 384 | 67.001 | 21.840 | 56.031 | 0.00 | 0.00 |
| ATOM | 5776 | CD  | PRO | X | 384 | 67.477 | 21.158 | 57.238 | 0.00 | 0.00 |
| ATOM | 5777 | HD2 | PRO | X | 384 | 68.341 | 20.531 | 57.018 | 0.00 | 0.00 |
| ATOM | 5778 | HD3 | PRO | X | 384 | 66.646 | 20.620 | 57.694 | 0.00 | 0.00 |
| ATOM | 5779 | CG  | PRO | X | 384 | 67.870 | 22.209 | 58.278 | 0.00 | 0.00 |
| ATOM | 5780 | HG2 | PRO | X | 384 | 68.909 | 22.495 | 58.117 | 0.00 | 0.00 |
| ATOM | 5781 | HG3 | PRO | X | 384 | 67.717 | 21.840 | 59.292 | 0.00 | 0.00 |
| ATOM | 5782 | CB  | PRO | X | 384 | 67.022 | 23.349 | 57.869 | 0.00 | 0.00 |
| ATOM | 5783 | HB2 | PRO | X | 384 | 67.571 | 24.233 | 58.193 | 0.00 | 0.00 |
| ATOM | 5784 | HB3 | PRO | X | 384 | 66.045 | 23.207 | 58.330 | 0.00 | 0.00 |
| ATOM | 5785 | CA  | PRO | X | 384 | 66.826 | 23.248 | 56.357 | 0.00 | 0.00 |
| ATOM | 5786 | HA  | PRO | X | 384 | 65.805 | 23.552 | 56.128 | 0.00 | 0.00 |
| ATOM | 5787 | C   | PRO | X | 384 | 67.728 | 24.213 | 55.526 | 0.00 | 0.00 |
| ATOM | 5788 | O   | PRO | X | 384 | 67.348 | 25.387 | 55.328 | 0.00 | 0.00 |
| ATOM | 5789 | N   | GLU | X | 385 | 68.814 | 23.727 | 54.896 | 0.00 | 0.00 |
| ATOM | 5790 | H   | GLU | X | 385 | 69.121 | 22.824 | 55.230 | 0.00 | 0.00 |
| ATOM | 5791 | CA  | GLU | X | 385 | 69.742 | 24.550 | 54.072 | 0.00 | 0.00 |
| ATOM | 5792 | HA  | GLU | X | 385 | 69.735 | 25.587 | 54.407 | 0.00 | 0.00 |
| ATOM | 5793 | CB  | GLU | X | 385 | 71.146 | 24.013 | 54.199 | 0.00 | 0.00 |
| ATOM | 5794 | HB2 | GLU | X | 385 | 71.167 | 23.005 | 53.785 | 0.00 | 0.00 |
| ATOM | 5795 | HB3 | GLU | X | 385 | 71.735 | 24.737 | 53.635 | 0.00 | 0.00 |
| ATOM | 5796 | CG  | GLU | X | 385 | 71.535 | 23.808 | 55.681 | 0.00 | 0.00 |
| ATOM | 5797 | HG2 | GLU | X | 385 | 71.731 | 24.791 | 56.109 | 0.00 | 0.00 |
| ATOM | 5798 | HG3 | GLU | X | 385 | 70.709 | 23.318 | 56.198 | 0.00 | 0.00 |
| ATOM | 5799 | CD  | GLU | X | 385 | 72.798 | 22.992 | 55.827 | 0.00 | 0.00 |
| ATOM | 5800 | OE1 | GLU | X | 385 | 72.801 | 21.836 | 55.508 | 0.00 | 0.00 |
| ATOM | 5801 | OE2 | GLU | X | 385 | 73.667 | 23.267 | 56.733 | 0.00 | 0.00 |
| ATOM | 5802 | C   | GLU | X | 385 | 69.352 | 24.527 | 52.621 | 0.00 | 0.00 |
| ATOM | 5803 | O   | GLU | X | 385 | 69.821 | 25.404 | 51.853 | 0.00 | 0.00 |
| ATOM | 5804 | N   | ASP | X | 386 | 68.494 | 23.605 | 52.105 | 0.00 | 0.00 |
| ATOM | 5805 | H   | ASP | X | 386 | 68.043 | 22.991 | 52.768 | 0.00 | 0.00 |
| ATOM | 5806 | CA  | ASP | X | 386 | 68.345 | 23.474 | 50.654 | 0.00 | 0.00 |
| ATOM | 5807 | HA  | ASP | X | 386 | 69.336 | 23.235 | 50.268 | 0.00 | 0.00 |
| ATOM | 5808 | CB  | ASP | X | 386 | 67.442 | 22.281 | 50.358 | 0.00 | 0.00 |
| ATOM | 5809 | HB2 | ASP | X | 386 | 67.908 | 21.413 | 50.826 | 0.00 | 0.00 |
| ATOM | 5810 | HB3 | ASP | X | 386 | 66.501 | 22.482 | 50.869 | 0.00 | 0.00 |
| ATOM | 5811 | CG  | ASP | X | 386 | 67.258 | 22.182 | 48.789 | 0.00 | 0.00 |
| ATOM | 5812 | OD1 | ASP | X | 386 | 66.433 | 22.894 | 48.246 | 0.00 | 0.00 |
| ATOM | 5813 | OD2 | ASP | X | 386 | 67.712 | 21.157 | 48.185 | 0.00 | 0.00 |
| ATOM | 5814 | C   | ASP | X | 386 | 67.711 | 24.733 | 50.012 | 0.00 | 0.00 |
| ATOM | 5815 | O   | ASP | X | 386 | 66.729 | 25.187 | 50.559 | 0.00 | 0.00 |
| ATOM | 5816 | N   | PRO | X | 387 | 68.290 | 25.234 | 48.922 | 0.00 | 0.00 |
| ATOM | 5817 | CD  | PRO | X | 387 | 69.436 | 24.636 | 48.249 | 0.00 | 0.00 |
| ATOM | 5818 | HD2 | PRO | X | 387 | 69.047 | 23.652 | 47.989 | 0.00 | 0.00 |
| ATOM | 5819 | HD3 | PRO | X | 387 | 70.279 | 24.527 | 48.931 | 0.00 | 0.00 |
| ATOM | 5820 | CG  | PRO | X | 387 | 69.708 | 25.504 | 47.033 | 0.00 | 0.00 |
| ATOM | 5821 | HG2 | PRO | X | 387 | 69.112 | 25.131 | 46.201 | 0.00 | 0.00 |
| ATOM | 5822 | HG3 | PRO | X | 387 | 70.760 | 25.590 | 46.759 | 0.00 | 0.00 |
| ATOM | 5823 | CB  | PRO | X | 387 | 69.138 | 26.858 | 47.421 | 0.00 | 0.00 |
| ATOM | 5824 | HB2 | PRO | X | 387 | 68.743 | 27.464 | 46.606 | 0.00 | 0.00 |
| ATOM | 5825 | HB3 | PRO | X | 387 | 69.892 | 27.399 | 47.993 | 0.00 | 0.00 |
| ATOM | 5826 | CA  | PRO | X | 387 | 67.970 | 26.568 | 48.360 | 0.00 | 0.00 |
| ATOM | 5827 | HA  | PRO | X | 387 | 67.978 | 27.270 | 49.193 | 0.00 | 0.00 |
| ATOM | 5828 | C   | PRO | X | 387 | 66.587 | 26.542 | 47.682 | 0.00 | 0.00 |
| ATOM | 5829 | O   | PRO | X | 387 | 65.953 | 27.545 | 47.622 | 0.00 | 0.00 |
| ATOM | 5830 | N   | ALA | X | 388 | 66.228 | 25.368 | 47.145 | 0.00 | 0.00 |
| ATOM | 5831 | H   | ALA | X | 388 | 66.750 | 24.508 | 47.059 | 0.00 | 0.00 |
| ATOM | 5832 | CA  | ALA | X | 388 | 64.896 | 25.261 | 46.505 | 0.00 | 0.00 |
| ATOM | 5833 | HA  | ALA | X | 388 | 64.554 | 26.203 | 46.078 | 0.00 | 0.00 |
| ATOM | 5834 | CB  | ALA | X | 388 | 64.821 | 24.128 | 45.507 | 0.00 | 0.00 |
| ATOM | 5835 | HB1 | ALA | X | 388 | 65.129 | 23.224 | 46.033 | 0.00 | 0.00 |
| ATOM | 5836 | HB2 | ALA | X | 388 | 65.466 | 24.306 | 44.646 | 0.00 | 0.00 |
| ATOM | 5837 | HB3 | ALA | X | 388 | 63.802 | 23.980 | 45.150 | 0.00 | 0.00 |
| ATOM | 5838 | C   | ALA | X | 388 | 63.785 | 25.075 | 47.573 | 0.00 | 0.00 |
| ATOM | 5839 | O   | ALA | X | 388 | 62.727 | 25.690 | 47.413 | 0.00 | 0.00 |
| ATOM | 5840 | N   | ARG | X | 389 | 64.006 | 24.421 | 48.718 | 0.00 | 0.00 |

|      |      |      |     |   |     |        |        |        |      |      |
|------|------|------|-----|---|-----|--------|--------|--------|------|------|
| ATOM | 5841 | H    | ARG | X | 389 | 64.940 | 24.078 | 48.893 | 0.00 | 0.00 |
| ATOM | 5842 | CA   | ARG | X | 389 | 63.031 | 24.346 | 49.824 | 0.00 | 0.00 |
| ATOM | 5843 | HA   | ARG | X | 389 | 62.118 | 23.966 | 49.367 | 0.00 | 0.00 |
| ATOM | 5844 | CB   | ARG | X | 389 | 63.473 | 23.311 | 50.888 | 0.00 | 0.00 |
| ATOM | 5845 | HB2  | ARG | X | 389 | 64.393 | 23.759 | 51.263 | 0.00 | 0.00 |
| ATOM | 5846 | HB3  | ARG | X | 389 | 62.662 | 23.238 | 51.613 | 0.00 | 0.00 |
| ATOM | 5847 | CG   | ARG | X | 389 | 63.633 | 21.970 | 50.175 | 0.00 | 0.00 |
| ATOM | 5848 | HG2  | ARG | X | 389 | 62.772 | 21.880 | 49.513 | 0.00 | 0.00 |
| ATOM | 5849 | HG3  | ARG | X | 389 | 64.490 | 22.134 | 49.521 | 0.00 | 0.00 |
| ATOM | 5850 | CD   | ARG | X | 389 | 63.724 | 20.673 | 51.008 | 0.00 | 0.00 |
| ATOM | 5851 | HD2  | ARG | X | 389 | 64.599 | 20.834 | 51.638 | 0.00 | 0.00 |
| ATOM | 5852 | HD3  | ARG | X | 389 | 62.844 | 20.623 | 51.649 | 0.00 | 0.00 |
| ATOM | 5853 | NE   | ARG | X | 389 | 63.898 | 19.443 | 50.187 | 0.00 | 0.00 |
| ATOM | 5854 | HE   | ARG | X | 389 | 64.302 | 19.493 | 49.263 | 0.00 | 0.00 |
| ATOM | 5855 | CZ   | ARG | X | 389 | 63.804 | 18.169 | 50.721 | 0.00 | 0.00 |
| ATOM | 5856 | NH1  | ARG | X | 389 | 63.361 | 17.934 | 51.933 | 0.00 | 0.00 |
| ATOM | 5857 | HH11 | ARG | X | 389 | 63.185 | 18.681 | 52.589 | 0.00 | 0.00 |
| ATOM | 5858 | HH12 | ARG | X | 389 | 63.444 | 16.982 | 52.260 | 0.00 | 0.00 |
| ATOM | 5859 | NH2  | ARG | X | 389 | 64.092 | 17.118 | 49.992 | 0.00 | 0.00 |
| ATOM | 5860 | HH21 | ARG | X | 389 | 64.630 | 17.242 | 49.147 | 0.00 | 0.00 |
| ATOM | 5861 | HH22 | ARG | X | 389 | 63.956 | 16.203 | 50.397 | 0.00 | 0.00 |
| ATOM | 5862 | C    | ARG | X | 389 | 62.773 | 25.747 | 50.450 | 0.00 | 0.00 |
| ATOM | 5863 | O    | ARG | X | 389 | 61.623 | 26.129 | 50.553 | 0.00 | 0.00 |
| ATOM | 5864 | N    | LEU | X | 390 | 63.858 | 26.538 | 50.611 | 0.00 | 0.00 |
| ATOM | 5865 | H    | LEU | X | 390 | 64.775 | 26.145 | 50.454 | 0.00 | 0.00 |
| ATOM | 5866 | CA   | LEU | X | 390 | 63.714 | 27.985 | 50.870 | 0.00 | 0.00 |
| ATOM | 5867 | HA   | LEU | X | 390 | 62.985 | 27.940 | 51.678 | 0.00 | 0.00 |
| ATOM | 5868 | CB   | LEU | X | 390 | 65.139 | 28.581 | 51.231 | 0.00 | 0.00 |
| ATOM | 5869 | HB2  | LEU | X | 390 | 65.716 | 28.529 | 50.308 | 0.00 | 0.00 |
| ATOM | 5870 | HB3  | LEU | X | 390 | 64.984 | 29.646 | 51.405 | 0.00 | 0.00 |
| ATOM | 5871 | CG   | LEU | X | 390 | 65.885 | 27.942 | 52.396 | 0.00 | 0.00 |
| ATOM | 5872 | HG   | LEU | X | 390 | 65.828 | 26.860 | 52.278 | 0.00 | 0.00 |
| ATOM | 5873 | CD1  | LEU | X | 390 | 67.346 | 28.192 | 52.324 | 0.00 | 0.00 |
| ATOM | 5874 | HD11 | LEU | X | 390 | 67.913 | 27.652 | 53.082 | 0.00 | 0.00 |
| ATOM | 5875 | HD12 | LEU | X | 390 | 67.588 | 29.249 | 52.432 | 0.00 | 0.00 |
| ATOM | 5876 | HD13 | LEU | X | 390 | 67.799 | 27.792 | 51.416 | 0.00 | 0.00 |
| ATOM | 5877 | CD2  | LEU | X | 390 | 65.369 | 28.224 | 53.796 | 0.00 | 0.00 |
| ATOM | 5878 | HD21 | LEU | X | 390 | 65.802 | 29.114 | 54.253 | 0.00 | 0.00 |
| ATOM | 5879 | HD22 | LEU | X | 390 | 64.281 | 28.247 | 53.856 | 0.00 | 0.00 |
| ATOM | 5880 | HD23 | LEU | X | 390 | 65.698 | 27.406 | 54.437 | 0.00 | 0.00 |
| ATOM | 5881 | C    | LEU | X | 390 | 63.031 | 28.785 | 49.739 | 0.00 | 0.00 |
| ATOM | 5882 | O    | LEU | X | 390 | 62.199 | 29.575 | 50.100 | 0.00 | 0.00 |
| ATOM | 5883 | N    | ARG | X | 391 | 63.359 | 28.625 | 48.449 | 0.00 | 0.00 |
| ATOM | 5884 | H    | ARG | X | 391 | 64.280 | 28.278 | 48.224 | 0.00 | 0.00 |
| ATOM | 5885 | CA   | ARG | X | 391 | 62.851 | 29.539 | 47.412 | 0.00 | 0.00 |
| ATOM | 5886 | HA   | ARG | X | 391 | 63.019 | 30.564 | 47.740 | 0.00 | 0.00 |
| ATOM | 5887 | CB   | ARG | X | 391 | 63.568 | 29.321 | 46.085 | 0.00 | 0.00 |
| ATOM | 5888 | HB2  | ARG | X | 391 | 64.642 | 29.139 | 46.128 | 0.00 | 0.00 |
| ATOM | 5889 | HB3  | ARG | X | 391 | 63.169 | 28.329 | 45.872 | 0.00 | 0.00 |
| ATOM | 5890 | CG   | ARG | X | 391 | 63.226 | 30.489 | 45.156 | 0.00 | 0.00 |
| ATOM | 5891 | HG2  | ARG | X | 391 | 62.350 | 31.051 | 45.479 | 0.00 | 0.00 |
| ATOM | 5892 | HG3  | ARG | X | 391 | 63.983 | 31.269 | 45.235 | 0.00 | 0.00 |
| ATOM | 5893 | CD   | ARG | X | 391 | 63.183 | 30.087 | 43.685 | 0.00 | 0.00 |
| ATOM | 5894 | HD2  | ARG | X | 391 | 62.198 | 29.834 | 43.292 | 0.00 | 0.00 |
| ATOM | 5895 | HD3  | ARG | X | 391 | 63.432 | 31.005 | 43.152 | 0.00 | 0.00 |
| ATOM | 5896 | NE   | ARG | X | 391 | 64.253 | 29.186 | 43.279 | 0.00 | 0.00 |
| ATOM | 5897 | HE   | ARG | X | 391 | 65.070 | 29.695 | 42.971 | 0.00 | 0.00 |
| ATOM | 5898 | CZ   | ARG | X | 391 | 64.307 | 27.875 | 43.153 | 0.00 | 0.00 |
| ATOM | 5899 | NH1  | ARG | X | 391 | 63.466 | 27.015 | 43.624 | 0.00 | 0.00 |
| ATOM | 5900 | HH11 | ARG | X | 391 | 62.653 | 27.414 | 44.072 | 0.00 | 0.00 |
| ATOM | 5901 | HH12 | ARG | X | 391 | 63.391 | 26.110 | 43.181 | 0.00 | 0.00 |
| ATOM | 5902 | NH2  | ARG | X | 391 | 65.404 | 27.400 | 42.593 | 0.00 | 0.00 |
| ATOM | 5903 | HH21 | ARG | X | 391 | 66.029 | 28.076 | 42.177 | 0.00 | 0.00 |
| ATOM | 5904 | HH22 | ARG | X | 391 | 65.420 | 26.462 | 42.217 | 0.00 | 0.00 |
| ATOM | 5905 | C    | ARG | X | 391 | 61.317 | 29.314 | 47.359 | 0.00 | 0.00 |
| ATOM | 5906 | O    | ARG | X | 391 | 60.547 | 30.328 | 47.251 | 0.00 | 0.00 |
| ATOM | 5907 | N    | GLU | X | 392 | 60.849 | 28.077 | 47.469 | 0.00 | 0.00 |

|      |      |      |     |   |     |        |        |        |      |      |
|------|------|------|-----|---|-----|--------|--------|--------|------|------|
| ATOM | 5908 | H    | GLU | X | 392 | 61.521 | 27.347 | 47.282 | 0.00 | 0.00 |
| ATOM | 5909 | CA   | GLU | X | 392 | 59.377 | 27.851 | 47.343 | 0.00 | 0.00 |
| ATOM | 5910 | HA   | GLU | X | 392 | 58.997 | 28.316 | 46.434 | 0.00 | 0.00 |
| ATOM | 5911 | CB   | GLU | X | 392 | 59.113 | 26.341 | 47.086 | 0.00 | 0.00 |
| ATOM | 5912 | HB2  | GLU | X | 392 | 58.028 | 26.384 | 46.990 | 0.00 | 0.00 |
| ATOM | 5913 | HB3  | GLU | X | 392 | 59.737 | 26.033 | 46.246 | 0.00 | 0.00 |
| ATOM | 5914 | CG   | GLU | X | 392 | 59.239 | 25.383 | 48.346 | 0.00 | 0.00 |
| ATOM | 5915 | HG2  | GLU | X | 392 | 60.246 | 25.258 | 48.744 | 0.00 | 0.00 |
| ATOM | 5916 | HG3  | GLU | X | 392 | 58.564 | 25.702 | 49.140 | 0.00 | 0.00 |
| ATOM | 5917 | CD   | GLU | X | 392 | 58.841 | 23.949 | 48.076 | 0.00 | 0.00 |
| ATOM | 5918 | OE1  | GLU | X | 392 | 59.414 | 23.236 | 47.219 | 0.00 | 0.00 |
| ATOM | 5919 | OE2  | GLU | X | 392 | 57.919 | 23.562 | 48.824 | 0.00 | 0.00 |
| ATOM | 5920 | C    | GLU | X | 392 | 58.612 | 28.386 | 48.558 | 0.00 | 0.00 |
| ATOM | 5921 | O    | GLU | X | 392 | 57.606 | 29.019 | 48.467 | 0.00 | 0.00 |
| ATOM | 5922 | N    | ALA | X | 393 | 59.116 | 28.156 | 49.795 | 0.00 | 0.00 |
| ATOM | 5923 | H    | ALA | X | 393 | 59.997 | 27.667 | 49.859 | 0.00 | 0.00 |
| ATOM | 5924 | CA   | ALA | X | 393 | 58.489 | 28.585 | 51.013 | 0.00 | 0.00 |
| ATOM | 5925 | HA   | ALA | X | 393 | 57.461 | 28.231 | 51.098 | 0.00 | 0.00 |
| ATOM | 5926 | CB   | ALA | X | 393 | 59.281 | 27.990 | 52.112 | 0.00 | 0.00 |
| ATOM | 5927 | HB1  | ALA | X | 393 | 58.834 | 28.256 | 53.071 | 0.00 | 0.00 |
| ATOM | 5928 | HB2  | ALA | X | 393 | 60.303 | 28.365 | 52.164 | 0.00 | 0.00 |
| ATOM | 5929 | HB3  | ALA | X | 393 | 59.193 | 26.911 | 51.985 | 0.00 | 0.00 |
| ATOM | 5930 | C    | ALA | X | 393 | 58.503 | 30.060 | 51.129 | 0.00 | 0.00 |
| ATOM | 5931 | O    | ALA | X | 393 | 57.565 | 30.593 | 51.643 | 0.00 | 0.00 |
| ATOM | 5932 | N    | LEU | X | 394 | 59.332 | 30.759 | 50.377 | 0.00 | 0.00 |
| ATOM | 5933 | H    | LEU | X | 394 | 60.079 | 30.232 | 49.946 | 0.00 | 0.00 |
| ATOM | 5934 | CA   | LEU | X | 394 | 59.187 | 32.202 | 50.053 | 0.00 | 0.00 |
| ATOM | 5935 | HA   | LEU | X | 394 | 59.106 | 32.606 | 51.062 | 0.00 | 0.00 |
| ATOM | 5936 | CB   | LEU | X | 394 | 60.434 | 32.768 | 49.402 | 0.00 | 0.00 |
| ATOM | 5937 | HB2  | LEU | X | 394 | 61.335 | 32.387 | 49.883 | 0.00 | 0.00 |
| ATOM | 5938 | HB3  | LEU | X | 394 | 60.488 | 32.439 | 48.364 | 0.00 | 0.00 |
| ATOM | 5939 | CG   | LEU | X | 394 | 60.606 | 34.326 | 49.482 | 0.00 | 0.00 |
| ATOM | 5940 | HG   | LEU | X | 394 | 59.825 | 34.761 | 48.859 | 0.00 | 0.00 |
| ATOM | 5941 | CD1  | LEU | X | 394 | 60.341 | 34.870 | 50.887 | 0.00 | 0.00 |
| ATOM | 5942 | HD11 | LEU | X | 394 | 60.258 | 35.956 | 50.846 | 0.00 | 0.00 |
| ATOM | 5943 | HD12 | LEU | X | 394 | 61.192 | 34.595 | 51.510 | 0.00 | 0.00 |
| ATOM | 5944 | HD13 | LEU | X | 394 | 59.425 | 34.473 | 51.325 | 0.00 | 0.00 |
| ATOM | 5945 | CD2  | LEU | X | 394 | 61.882 | 34.883 | 49.084 | 0.00 | 0.00 |
| ATOM | 5946 | HD21 | LEU | X | 394 | 61.824 | 35.964 | 49.212 | 0.00 | 0.00 |
| ATOM | 5947 | HD22 | LEU | X | 394 | 62.721 | 34.538 | 49.687 | 0.00 | 0.00 |
| ATOM | 5948 | HD23 | LEU | X | 394 | 62.065 | 34.578 | 48.054 | 0.00 | 0.00 |
| ATOM | 5949 | C    | LEU | X | 394 | 57.887 | 32.456 | 49.268 | 0.00 | 0.00 |
| ATOM | 5950 | O    | LEU | X | 394 | 57.022 | 33.185 | 49.747 | 0.00 | 0.00 |
| ATOM | 5951 | N    | SER | X | 395 | 57.750 | 31.894 | 48.068 | 0.00 | 0.00 |
| ATOM | 5952 | H    | SER | X | 395 | 58.497 | 31.323 | 47.699 | 0.00 | 0.00 |
| ATOM | 5953 | CA   | SER | X | 395 | 56.608 | 31.964 | 47.224 | 0.00 | 0.00 |
| ATOM | 5954 | HA   | SER | X | 395 | 56.433 | 32.999 | 46.928 | 0.00 | 0.00 |
| ATOM | 5955 | CB   | SER | X | 395 | 56.761 | 31.103 | 45.943 | 0.00 | 0.00 |
| ATOM | 5956 | HB2  | SER | X | 395 | 56.858 | 30.068 | 46.270 | 0.00 | 0.00 |
| ATOM | 5957 | HB3  | SER | X | 395 | 55.859 | 31.175 | 45.335 | 0.00 | 0.00 |
| ATOM | 5958 | OG   | SER | X | 395 | 57.925 | 31.339 | 45.186 | 0.00 | 0.00 |
| ATOM | 5959 | HG   | SER | X | 395 | 58.058 | 30.575 | 44.620 | 0.00 | 0.00 |
| ATOM | 5960 | C    | SER | X | 395 | 55.353 | 31.584 | 47.952 | 0.00 | 0.00 |
| ATOM | 5961 | O    | SER | X | 395 | 54.299 | 32.112 | 47.811 | 0.00 | 0.00 |
| ATOM | 5962 | N    | ASP | X | 396 | 55.357 | 30.600 | 48.899 | 0.00 | 0.00 |
| ATOM | 5963 | H    | ASP | X | 396 | 56.205 | 30.064 | 49.016 | 0.00 | 0.00 |
| ATOM | 5964 | CA   | ASP | X | 396 | 54.248 | 30.147 | 49.754 | 0.00 | 0.00 |
| ATOM | 5965 | HA   | ASP | X | 396 | 53.409 | 29.905 | 49.102 | 0.00 | 0.00 |
| ATOM | 5966 | CB   | ASP | X | 396 | 54.563 | 28.953 | 50.656 | 0.00 | 0.00 |
| ATOM | 5967 | HB2  | ASP | X | 396 | 55.558 | 29.104 | 51.074 | 0.00 | 0.00 |
| ATOM | 5968 | HB3  | ASP | X | 396 | 53.920 | 28.864 | 51.532 | 0.00 | 0.00 |
| ATOM | 5969 | CG   | ASP | X | 396 | 54.518 | 27.592 | 49.958 | 0.00 | 0.00 |
| ATOM | 5970 | OD1  | ASP | X | 396 | 55.614 | 26.965 | 49.828 | 0.00 | 0.00 |
| ATOM | 5971 | OD2  | ASP | X | 396 | 53.470 | 27.150 | 49.572 | 0.00 | 0.00 |
| ATOM | 5972 | C    | ASP | X | 396 | 53.837 | 31.361 | 50.739 | 0.00 | 0.00 |
| ATOM | 5973 | O    | ASP | X | 396 | 52.678 | 31.770 | 50.749 | 0.00 | 0.00 |
| ATOM | 5974 | N    | VAL | X | 397 | 54.823 | 31.831 | 51.493 | 0.00 | 0.00 |



|      |      |      |     |   |     |        |        |        |      |      |
|------|------|------|-----|---|-----|--------|--------|--------|------|------|
| ATOM | 5975 | H    | VAL | X | 397 | 55.756 | 31.456 | 51.398 | 0.00 | 0.00 |
| ATOM | 5976 | CA   | VAL | X | 397 | 54.547 | 32.902 | 52.523 | 0.00 | 0.00 |
| ATOM | 5977 | HA   | VAL | X | 397 | 53.850 | 32.569 | 53.293 | 0.00 | 0.00 |
| ATOM | 5978 | CB   | VAL | X | 397 | 55.858 | 33.338 | 53.308 | 0.00 | 0.00 |
| ATOM | 5979 | HB   | VAL | X | 397 | 56.651 | 33.511 | 52.580 | 0.00 | 0.00 |
| ATOM | 5980 | CG1  | VAL | X | 397 | 55.710 | 34.549 | 54.196 | 0.00 | 0.00 |
| ATOM | 5981 | HG11 | VAL | X | 397 | 55.226 | 35.396 | 53.709 | 0.00 | 0.00 |
| ATOM | 5982 | HG12 | VAL | X | 397 | 55.166 | 34.346 | 55.118 | 0.00 | 0.00 |
| ATOM | 5983 | HG13 | VAL | X | 397 | 56.736 | 34.798 | 54.464 | 0.00 | 0.00 |
| ATOM | 5984 | CG2  | VAL | X | 397 | 56.310 | 32.202 | 54.168 | 0.00 | 0.00 |
| ATOM | 5985 | HG21 | VAL | X | 397 | 55.534 | 32.190 | 54.933 | 0.00 | 0.00 |
| ATOM | 5986 | HG22 | VAL | X | 397 | 57.208 | 32.371 | 54.762 | 0.00 | 0.00 |
| ATOM | 5987 | HG23 | VAL | X | 397 | 56.445 | 31.275 | 53.609 | 0.00 | 0.00 |
| ATOM | 5988 | C    | VAL | X | 397 | 54.054 | 34.150 | 51.882 | 0.00 | 0.00 |
| ATOM | 5989 | O    | VAL | X | 397 | 53.074 | 34.776 | 52.384 | 0.00 | 0.00 |
| ATOM | 5990 | N    | VAL | X | 398 | 54.683 | 34.529 | 50.774 | 0.00 | 0.00 |
| ATOM | 5991 | H    | VAL | X | 398 | 55.451 | 33.979 | 50.415 | 0.00 | 0.00 |
| ATOM | 5992 | CA   | VAL | X | 398 | 54.331 | 35.702 | 49.995 | 0.00 | 0.00 |
| ATOM | 5993 | HA   | VAL | X | 398 | 54.179 | 36.503 | 50.718 | 0.00 | 0.00 |
| ATOM | 5994 | CB   | VAL | X | 398 | 55.377 | 36.064 | 48.917 | 0.00 | 0.00 |
| ATOM | 5995 | HB   | VAL | X | 398 | 55.549 | 35.103 | 48.433 | 0.00 | 0.00 |
| ATOM | 5996 | CG1  | VAL | X | 398 | 55.013 | 37.196 | 47.949 | 0.00 | 0.00 |
| ATOM | 5997 | HG11 | VAL | X | 398 | 54.226 | 36.937 | 47.240 | 0.00 | 0.00 |
| ATOM | 5998 | HG12 | VAL | X | 398 | 54.641 | 38.029 | 48.546 | 0.00 | 0.00 |
| ATOM | 5999 | HG13 | VAL | X | 398 | 55.864 | 37.577 | 47.384 | 0.00 | 0.00 |
| ATOM | 6000 | CG2  | VAL | X | 398 | 56.618 | 36.481 | 49.758 | 0.00 | 0.00 |
| ATOM | 6001 | HG21 | VAL | X | 398 | 57.372 | 37.023 | 49.188 | 0.00 | 0.00 |
| ATOM | 6002 | HG22 | VAL | X | 398 | 57.128 | 35.530 | 49.914 | 0.00 | 0.00 |
| ATOM | 6003 | HG23 | VAL | X | 398 | 56.324 | 36.989 | 50.677 | 0.00 | 0.00 |
| ATOM | 6004 | C    | VAL | X | 398 | 52.977 | 35.526 | 49.290 | 0.00 | 0.00 |
| ATOM | 6005 | O    | VAL | X | 398 | 52.343 | 36.513 | 49.081 | 0.00 | 0.00 |
| ATOM | 6006 | N    | GLY | X | 399 | 52.428 | 34.309 | 49.113 | 0.00 | 0.00 |
| ATOM | 6007 | H    | GLY | X | 399 | 52.866 | 33.426 | 49.332 | 0.00 | 0.00 |
| ATOM | 6008 | CA   | GLY | X | 399 | 51.085 | 34.262 | 48.666 | 0.00 | 0.00 |
| ATOM | 6009 | HA2  | GLY | X | 399 | 50.790 | 35.080 | 48.009 | 0.00 | 0.00 |
| ATOM | 6010 | HA3  | GLY | X | 399 | 50.882 | 33.398 | 48.033 | 0.00 | 0.00 |
| ATOM | 6011 | C    | GLY | X | 399 | 50.108 | 34.171 | 49.790 | 0.00 | 0.00 |
| ATOM | 6012 | O    | GLY | X | 399 | 49.035 | 34.803 | 49.782 | 0.00 | 0.00 |
| ATOM | 6013 | N    | ASP | X | 400 | 50.529 | 33.618 | 50.968 | 0.00 | 0.00 |
| ATOM | 6014 | H    | ASP | X | 400 | 51.447 | 33.196 | 50.971 | 0.00 | 0.00 |
| ATOM | 6015 | CA   | ASP | X | 400 | 49.633 | 33.135 | 52.006 | 0.00 | 0.00 |
| ATOM | 6016 | HA   | ASP | X | 400 | 48.893 | 32.573 | 51.435 | 0.00 | 0.00 |
| ATOM | 6017 | CB   | ASP | X | 400 | 50.391 | 32.125 | 52.933 | 0.00 | 0.00 |
| ATOM | 6018 | HB2  | ASP | X | 400 | 51.300 | 32.611 | 53.288 | 0.00 | 0.00 |
| ATOM | 6019 | HB3  | ASP | X | 400 | 49.688 | 32.071 | 53.764 | 0.00 | 0.00 |
| ATOM | 6020 | CG   | ASP | X | 400 | 50.425 | 30.758 | 52.339 | 0.00 | 0.00 |
| ATOM | 6021 | OD1  | ASP | X | 400 | 50.074 | 30.531 | 51.146 | 0.00 | 0.00 |
| ATOM | 6022 | OD2  | ASP | X | 400 | 50.825 | 29.795 | 53.024 | 0.00 | 0.00 |
| ATOM | 6023 | C    | ASP | X | 400 | 48.847 | 34.170 | 52.680 | 0.00 | 0.00 |
| ATOM | 6024 | O    | ASP | X | 400 | 47.662 | 34.340 | 52.400 | 0.00 | 0.00 |
| ATOM | 6025 | N    | HIE | X | 401 | 49.487 | 35.065 | 53.463 | 0.00 | 0.00 |
| ATOM | 6026 | H    | HIE | X | 401 | 50.461 | 34.947 | 53.703 | 0.00 | 0.00 |
| ATOM | 6027 | CA   | HIE | X | 401 | 48.849 | 36.254 | 54.031 | 0.00 | 0.00 |
| ATOM | 6028 | HA   | HIE | X | 401 | 47.999 | 35.761 | 54.501 | 0.00 | 0.00 |
| ATOM | 6029 | CB   | HIE | X | 401 | 49.600 | 36.934 | 55.162 | 0.00 | 0.00 |
| ATOM | 6030 | HB2  | HIE | X | 401 | 48.883 | 37.561 | 55.693 | 0.00 | 0.00 |
| ATOM | 6031 | HB3  | HIE | X | 401 | 50.019 | 36.185 | 55.834 | 0.00 | 0.00 |
| ATOM | 6032 | CG   | HIE | X | 401 | 50.802 | 37.747 | 54.683 | 0.00 | 0.00 |
| ATOM | 6033 | ND1  | HIE | X | 401 | 50.920 | 39.125 | 54.328 | 0.00 | 0.00 |
| ATOM | 6034 | CE1  | HIE | X | 401 | 52.160 | 39.322 | 53.883 | 0.00 | 0.00 |
| ATOM | 6035 | HE1  | HIE | X | 401 | 52.622 | 40.263 | 53.624 | 0.00 | 0.00 |
| ATOM | 6036 | NE2  | HIE | X | 401 | 52.867 | 38.151 | 54.019 | 0.00 | 0.00 |
| ATOM | 6037 | HE2  | HIE | X | 401 | 53.821 | 38.024 | 53.711 | 0.00 | 0.00 |
| ATOM | 6038 | CD2  | HIE | X | 401 | 52.027 | 37.171 | 54.519 | 0.00 | 0.00 |
| ATOM | 6039 | HD2  | HIE | X | 401 | 52.266 | 36.133 | 54.699 | 0.00 | 0.00 |
| ATOM | 6040 | C    | HIE | X | 401 | 48.248 | 37.311 | 53.006 | 0.00 | 0.00 |
| ATOM | 6041 | O    | HIE | X | 401 | 47.414 | 38.199 | 53.390 | 0.00 | 0.00 |

|      |      |      |     |   |     |        |        |        |      |      |
|------|------|------|-----|---|-----|--------|--------|--------|------|------|
| ATOM | 6042 | N    | ASN | X | 402 | 48.737 | 37.303 | 51.737 | 0.00 | 0.00 |
| ATOM | 6043 | H    | ASN | X | 402 | 49.482 | 36.642 | 51.569 | 0.00 | 0.00 |
| ATOM | 6044 | CA   | ASN | X | 402 | 48.602 | 38.443 | 50.782 | 0.00 | 0.00 |
| ATOM | 6045 | HA   | ASN | X | 402 | 48.424 | 39.380 | 51.309 | 0.00 | 0.00 |
| ATOM | 6046 | CB   | ASN | X | 402 | 49.868 | 38.566 | 49.863 | 0.00 | 0.00 |
| ATOM | 6047 | HB2  | ASN | X | 402 | 50.257 | 37.571 | 49.646 | 0.00 | 0.00 |
| ATOM | 6048 | HB3  | ASN | X | 402 | 49.516 | 39.043 | 48.948 | 0.00 | 0.00 |
| ATOM | 6049 | CG   | ASN | X | 402 | 50.933 | 39.505 | 50.403 | 0.00 | 0.00 |
| ATOM | 6050 | OD1  | ASN | X | 402 | 50.779 | 40.650 | 50.746 | 0.00 | 0.00 |
| ATOM | 6051 | ND2  | ASN | X | 402 | 52.091 | 38.886 | 50.621 | 0.00 | 0.00 |
| ATOM | 6052 | HD21 | ASN | X | 402 | 52.782 | 39.408 | 51.142 | 0.00 | 0.00 |
| ATOM | 6053 | HD22 | ASN | X | 402 | 52.275 | 37.956 | 50.272 | 0.00 | 0.00 |
| ATOM | 6054 | C    | ASN | X | 402 | 47.451 | 38.240 | 49.859 | 0.00 | 0.00 |
| ATOM | 6055 | O    | ASN | X | 402 | 46.778 | 39.173 | 49.634 | 0.00 | 0.00 |
| ATOM | 6056 | N    | VAL | X | 403 | 47.249 | 36.979 | 49.368 | 0.00 | 0.00 |
| ATOM | 6057 | H    | VAL | X | 403 | 47.896 | 36.305 | 49.752 | 0.00 | 0.00 |
| ATOM | 6058 | CA   | VAL | X | 403 | 46.144 | 36.571 | 48.502 | 0.00 | 0.00 |
| ATOM | 6059 | HA   | VAL | X | 403 | 45.431 | 37.395 | 48.477 | 0.00 | 0.00 |
| ATOM | 6060 | CB   | VAL | X | 403 | 46.693 | 36.169 | 47.138 | 0.00 | 0.00 |
| ATOM | 6061 | HB   | VAL | X | 403 | 47.197 | 35.209 | 47.243 | 0.00 | 0.00 |
| ATOM | 6062 | CG1  | VAL | X | 403 | 45.563 | 35.924 | 46.149 | 0.00 | 0.00 |
| ATOM | 6063 | HG11 | VAL | X | 403 | 44.917 | 35.115 | 46.490 | 0.00 | 0.00 |
| ATOM | 6064 | HG12 | VAL | X | 403 | 44.854 | 36.752 | 46.145 | 0.00 | 0.00 |
| ATOM | 6065 | HG13 | VAL | X | 403 | 46.052 | 35.626 | 45.222 | 0.00 | 0.00 |
| ATOM | 6066 | CG2  | VAL | X | 403 | 47.546 | 37.282 | 46.495 | 0.00 | 0.00 |
| ATOM | 6067 | HG21 | VAL | X | 403 | 47.761 | 36.961 | 45.476 | 0.00 | 0.00 |
| ATOM | 6068 | HG22 | VAL | X | 403 | 48.480 | 37.267 | 47.056 | 0.00 | 0.00 |
| ATOM | 6069 | HG23 | VAL | X | 403 | 47.132 | 38.282 | 46.630 | 0.00 | 0.00 |
| ATOM | 6070 | C    | VAL | X | 403 | 45.486 | 35.306 | 49.197 | 0.00 | 0.00 |
| ATOM | 6071 | O    | VAL | X | 403 | 44.255 | 35.381 | 49.394 | 0.00 | 0.00 |
| ATOM | 6072 | N    | VAL | X | 404 | 46.186 | 34.253 | 49.528 | 0.00 | 0.00 |
| ATOM | 6073 | H    | VAL | X | 404 | 47.191 | 34.213 | 49.438 | 0.00 | 0.00 |
| ATOM | 6074 | CA   | VAL | X | 404 | 45.514 | 32.898 | 49.625 | 0.00 | 0.00 |
| ATOM | 6075 | HA   | VAL | X | 404 | 44.859 | 32.942 | 48.754 | 0.00 | 0.00 |
| ATOM | 6076 | CB   | VAL | X | 404 | 46.480 | 31.707 | 49.290 | 0.00 | 0.00 |
| ATOM | 6077 | HB   | VAL | X | 404 | 46.980 | 31.465 | 50.228 | 0.00 | 0.00 |
| ATOM | 6078 | CG1  | VAL | X | 404 | 45.642 | 30.498 | 48.852 | 0.00 | 0.00 |
| ATOM | 6079 | HG11 | VAL | X | 404 | 46.314 | 29.727 | 48.476 | 0.00 | 0.00 |
| ATOM | 6080 | HG12 | VAL | X | 404 | 44.892 | 30.184 | 49.578 | 0.00 | 0.00 |
| ATOM | 6081 | HG13 | VAL | X | 404 | 45.037 | 30.735 | 47.977 | 0.00 | 0.00 |
| ATOM | 6082 | CG2  | VAL | X | 404 | 47.591 | 32.065 | 48.230 | 0.00 | 0.00 |
| ATOM | 6083 | HG21 | VAL | X | 404 | 47.256 | 32.511 | 47.294 | 0.00 | 0.00 |
| ATOM | 6084 | HG22 | VAL | X | 404 | 48.265 | 31.219 | 48.097 | 0.00 | 0.00 |
| ATOM | 6085 | HG23 | VAL | X | 404 | 48.306 | 32.756 | 48.676 | 0.00 | 0.00 |
| ATOM | 6086 | C    | VAL | X | 404 | 44.678 | 32.761 | 50.877 | 0.00 | 0.00 |
| ATOM | 6087 | O    | VAL | X | 404 | 43.542 | 32.370 | 50.836 | 0.00 | 0.00 |
| ATOM | 6088 | N    | CYX | X | 405 | 45.161 | 33.187 | 52.019 | 0.00 | 0.00 |
| ATOM | 6089 | H    | CYX | X | 405 | 46.161 | 33.303 | 52.110 | 0.00 | 0.00 |
| ATOM | 6090 | CA   | CYX | X | 405 | 44.328 | 33.356 | 53.216 | 0.00 | 0.00 |
| ATOM | 6091 | HA   | CYX | X | 405 | 43.784 | 32.416 | 53.312 | 0.00 | 0.00 |
| ATOM | 6092 | CB   | CYX | X | 405 | 45.290 | 33.464 | 54.495 | 0.00 | 0.00 |
| ATOM | 6093 | HB2  | CYX | X | 405 | 45.982 | 34.291 | 54.336 | 0.00 | 0.00 |
| ATOM | 6094 | HB3  | CYX | X | 405 | 44.759 | 33.716 | 55.412 | 0.00 | 0.00 |
| ATOM | 6095 | SG   | CYX | X | 405 | 46.225 | 31.873 | 54.679 | 0.00 | 0.00 |
| ATOM | 6096 | C    | CYX | X | 405 | 43.175 | 34.366 | 53.171 | 0.00 | 0.00 |
| ATOM | 6097 | O    | CYX | X | 405 | 42.036 | 33.801 | 53.343 | 0.00 | 0.00 |
| ATOM | 6098 | N    | PRO | X | 406 | 43.423 | 35.626 | 52.694 | 0.00 | 0.00 |
| ATOM | 6099 | CD   | PRO | X | 406 | 44.765 | 36.211 | 52.570 | 0.00 | 0.00 |
| ATOM | 6100 | HD2  | PRO | X | 406 | 45.301 | 35.813 | 51.708 | 0.00 | 0.00 |
| ATOM | 6101 | HD3  | PRO | X | 406 | 45.271 | 36.021 | 53.516 | 0.00 | 0.00 |
| ATOM | 6102 | CG   | PRO | X | 406 | 44.474 | 37.709 | 52.408 | 0.00 | 0.00 |
| ATOM | 6103 | HG2  | PRO | X | 406 | 45.251 | 38.140 | 51.776 | 0.00 | 0.00 |
| ATOM | 6104 | HG3  | PRO | X | 406 | 44.451 | 38.073 | 53.435 | 0.00 | 0.00 |
| ATOM | 6105 | CB   | PRO | X | 406 | 43.095 | 37.787 | 51.686 | 0.00 | 0.00 |
| ATOM | 6106 | HB2  | PRO | X | 406 | 43.298 | 37.657 | 50.623 | 0.00 | 0.00 |
| ATOM | 6107 | HB3  | PRO | X | 406 | 42.544 | 38.702 | 51.906 | 0.00 | 0.00 |
| ATOM | 6108 | CA   | PRO | X | 406 | 42.373 | 36.565 | 52.310 | 0.00 | 0.00 |

|      |      |      |     |   |     |        |        |        |      |      |
|------|------|------|-----|---|-----|--------|--------|--------|------|------|
| ATOM | 6109 | HA   | PRO | X | 406 | 41.886 | 36.889 | 53.230 | 0.00 | 0.00 |
| ATOM | 6110 | C    | PRO | X | 406 | 41.261 | 35.985 | 51.412 | 0.00 | 0.00 |
| ATOM | 6111 | O    | PRO | X | 406 | 40.100 | 36.244 | 51.753 | 0.00 | 0.00 |
| ATOM | 6112 | N    | VAL | X | 407 | 41.558 | 35.244 | 50.348 | 0.00 | 0.00 |
| ATOM | 6113 | H    | VAL | X | 407 | 42.511 | 35.192 | 50.017 | 0.00 | 0.00 |
| ATOM | 6114 | CA   | VAL | X | 407 | 40.471 | 34.825 | 49.412 | 0.00 | 0.00 |
| ATOM | 6115 | HA   | VAL | X | 407 | 39.747 | 35.586 | 49.120 | 0.00 | 0.00 |
| ATOM | 6116 | CB   | VAL | X | 407 | 41.206 | 34.302 | 48.153 | 0.00 | 0.00 |
| ATOM | 6117 | HB   | VAL | X | 407 | 41.953 | 33.620 | 48.557 | 0.00 | 0.00 |
| ATOM | 6118 | CG1  | VAL | X | 407 | 40.254 | 33.668 | 47.153 | 0.00 | 0.00 |
| ATOM | 6119 | HG11 | VAL | X | 407 | 39.691 | 32.898 | 47.681 | 0.00 | 0.00 |
| ATOM | 6120 | HG12 | VAL | X | 407 | 39.568 | 34.448 | 46.822 | 0.00 | 0.00 |
| ATOM | 6121 | HG13 | VAL | X | 407 | 40.762 | 33.214 | 46.303 | 0.00 | 0.00 |
| ATOM | 6122 | CG2  | VAL | X | 407 | 41.867 | 35.475 | 47.302 | 0.00 | 0.00 |
| ATOM | 6123 | HG21 | VAL | X | 407 | 41.066 | 36.026 | 46.810 | 0.00 | 0.00 |
| ATOM | 6124 | HG22 | VAL | X | 407 | 42.546 | 35.125 | 46.524 | 0.00 | 0.00 |
| ATOM | 6125 | HG23 | VAL | X | 407 | 42.330 | 36.219 | 47.950 | 0.00 | 0.00 |
| ATOM | 6126 | C    | VAL | X | 407 | 39.550 | 33.843 | 50.062 | 0.00 | 0.00 |
| ATOM | 6127 | O    | VAL | X | 407 | 38.347 | 33.923 | 49.925 | 0.00 | 0.00 |
| ATOM | 6128 | N    | ALA | X | 408 | 40.080 | 33.035 | 50.960 | 0.00 | 0.00 |
| ATOM | 6129 | H    | ALA | X | 408 | 41.089 | 33.021 | 51.007 | 0.00 | 0.00 |
| ATOM | 6130 | CA   | ALA | X | 408 | 39.355 | 32.007 | 51.718 | 0.00 | 0.00 |
| ATOM | 6131 | HA   | ALA | X | 408 | 38.545 | 31.470 | 51.225 | 0.00 | 0.00 |
| ATOM | 6132 | CB   | ALA | X | 408 | 40.429 | 31.068 | 52.156 | 0.00 | 0.00 |
| ATOM | 6133 | HB1  | ALA | X | 408 | 39.993 | 30.251 | 52.732 | 0.00 | 0.00 |
| ATOM | 6134 | HB2  | ALA | X | 408 | 41.027 | 31.587 | 52.905 | 0.00 | 0.00 |
| ATOM | 6135 | HB3  | ALA | X | 408 | 41.067 | 30.687 | 51.359 | 0.00 | 0.00 |
| ATOM | 6136 | C    | ALA | X | 408 | 38.640 | 32.662 | 52.967 | 0.00 | 0.00 |
| ATOM | 6137 | O    | ALA | X | 408 | 37.483 | 32.336 | 53.319 | 0.00 | 0.00 |
| ATOM | 6138 | N    | GLN | X | 409 | 39.254 | 33.653 | 53.642 | 0.00 | 0.00 |
| ATOM | 6139 | H    | GLN | X | 409 | 40.122 | 33.936 | 53.209 | 0.00 | 0.00 |
| ATOM | 6140 | CA   | GLN | X | 409 | 38.681 | 34.340 | 54.801 | 0.00 | 0.00 |
| ATOM | 6141 | HA   | GLN | X | 409 | 38.252 | 33.644 | 55.521 | 0.00 | 0.00 |
| ATOM | 6142 | CB   | GLN | X | 409 | 39.703 | 35.136 | 55.467 | 0.00 | 0.00 |
| ATOM | 6143 | HB2  | GLN | X | 409 | 40.607 | 34.574 | 55.701 | 0.00 | 0.00 |
| ATOM | 6144 | HB3  | GLN | X | 409 | 40.003 | 35.839 | 54.690 | 0.00 | 0.00 |
| ATOM | 6145 | CG   | GLN | X | 409 | 39.328 | 35.870 | 56.772 | 0.00 | 0.00 |
| ATOM | 6146 | HG2  | GLN | X | 409 | 40.252 | 36.312 | 57.145 | 0.00 | 0.00 |
| ATOM | 6147 | HG3  | GLN | X | 409 | 38.567 | 36.600 | 56.497 | 0.00 | 0.00 |
| ATOM | 6148 | CD   | GLN | X | 409 | 38.801 | 35.051 | 57.965 | 0.00 | 0.00 |
| ATOM | 6149 | OE1  | GLN | X | 409 | 37.649 | 34.635 | 58.133 | 0.00 | 0.00 |
| ATOM | 6150 | NE2  | GLN | X | 409 | 39.732 | 34.775 | 58.869 | 0.00 | 0.00 |
| ATOM | 6151 | HE21 | GLN | X | 409 | 39.408 | 34.316 | 59.708 | 0.00 | 0.00 |
| ATOM | 6152 | HE22 | GLN | X | 409 | 40.648 | 35.190 | 58.778 | 0.00 | 0.00 |
| ATOM | 6153 | C    | GLN | X | 409 | 37.463 | 35.218 | 54.358 | 0.00 | 0.00 |
| ATOM | 6154 | O    | GLN | X | 409 | 36.363 | 35.055 | 54.946 | 0.00 | 0.00 |
| ATOM | 6155 | N    | LEU | X | 410 | 37.608 | 35.860 | 53.207 | 0.00 | 0.00 |
| ATOM | 6156 | H    | LEU | X | 410 | 38.551 | 36.093 | 52.931 | 0.00 | 0.00 |
| ATOM | 6157 | CA   | LEU | X | 410 | 36.515 | 36.406 | 52.393 | 0.00 | 0.00 |
| ATOM | 6158 | HA   | LEU | X | 410 | 35.972 | 37.179 | 52.937 | 0.00 | 0.00 |
| ATOM | 6159 | CB   | LEU | X | 410 | 37.159 | 36.896 | 51.073 | 0.00 | 0.00 |
| ATOM | 6160 | HB2  | LEU | X | 410 | 37.981 | 37.572 | 51.309 | 0.00 | 0.00 |
| ATOM | 6161 | HB3  | LEU | X | 410 | 37.580 | 36.089 | 50.472 | 0.00 | 0.00 |
| ATOM | 6162 | CG   | LEU | X | 410 | 36.197 | 37.748 | 50.172 | 0.00 | 0.00 |
| ATOM | 6163 | HG   | LEU | X | 410 | 35.258 | 37.226 | 49.989 | 0.00 | 0.00 |
| ATOM | 6164 | CD1  | LEU | X | 410 | 35.808 | 39.038 | 50.822 | 0.00 | 0.00 |
| ATOM | 6165 | HD11 | LEU | X | 410 | 36.579 | 39.450 | 51.472 | 0.00 | 0.00 |
| ATOM | 6166 | HD12 | LEU | X | 410 | 34.867 | 38.980 | 51.368 | 0.00 | 0.00 |
| ATOM | 6167 | HD13 | LEU | X | 410 | 35.535 | 39.785 | 50.076 | 0.00 | 0.00 |
| ATOM | 6168 | CD2  | LEU | X | 410 | 36.889 | 38.026 | 48.848 | 0.00 | 0.00 |
| ATOM | 6169 | HD21 | LEU | X | 410 | 36.222 | 38.575 | 48.183 | 0.00 | 0.00 |
| ATOM | 6170 | HD22 | LEU | X | 410 | 37.884 | 38.443 | 48.999 | 0.00 | 0.00 |
| ATOM | 6171 | HD23 | LEU | X | 410 | 36.991 | 37.044 | 48.386 | 0.00 | 0.00 |
| ATOM | 6172 | C    | LEU | X | 410 | 35.406 | 35.390 | 52.075 | 0.00 | 0.00 |
| ATOM | 6173 | O    | LEU | X | 410 | 34.330 | 35.583 | 52.523 | 0.00 | 0.00 |
| ATOM | 6174 | N    | ALA | X | 411 | 35.773 | 34.310 | 51.357 | 0.00 | 0.00 |
| ATOM | 6175 | H    | ALA | X | 411 | 36.724 | 34.189 | 51.038 | 0.00 | 0.00 |

|      |      |      |     |   |     |        |        |        |      |      |
|------|------|------|-----|---|-----|--------|--------|--------|------|------|
| ATOM | 6176 | CA   | ALA | X | 411 | 34.753 | 33.366 | 50.785 | 0.00 | 0.00 |
| ATOM | 6177 | HA   | ALA | X | 411 | 34.035 | 33.889 | 50.153 | 0.00 | 0.00 |
| ATOM | 6178 | CB   | ALA | X | 411 | 35.367 | 32.384 | 49.883 | 0.00 | 0.00 |
| ATOM | 6179 | HB1  | ALA | X | 411 | 34.655 | 31.695 | 49.429 | 0.00 | 0.00 |
| ATOM | 6180 | HB2  | ALA | X | 411 | 36.101 | 31.873 | 50.507 | 0.00 | 0.00 |
| ATOM | 6181 | HB3  | ALA | X | 411 | 35.888 | 32.819 | 49.030 | 0.00 | 0.00 |
| ATOM | 6182 | C    | ALA | X | 411 | 33.962 | 32.751 | 51.934 | 0.00 | 0.00 |
| ATOM | 6183 | O    | ALA | X | 411 | 32.771 | 32.772 | 51.842 | 0.00 | 0.00 |
| ATOM | 6184 | N    | GLY | X | 412 | 34.590 | 32.291 | 53.105 | 0.00 | 0.00 |
| ATOM | 6185 | H    | GLY | X | 412 | 35.588 | 32.421 | 53.196 | 0.00 | 0.00 |
| ATOM | 6186 | CA   | GLY | X | 412 | 33.802 | 31.671 | 54.176 | 0.00 | 0.00 |
| ATOM | 6187 | HA2  | GLY | X | 412 | 33.140 | 30.925 | 53.736 | 0.00 | 0.00 |
| ATOM | 6188 | HA3  | GLY | X | 412 | 34.380 | 31.054 | 54.864 | 0.00 | 0.00 |
| ATOM | 6189 | C    | GLY | X | 412 | 33.039 | 32.591 | 55.020 | 0.00 | 0.00 |
| ATOM | 6190 | O    | GLY | X | 412 | 32.029 | 32.135 | 55.588 | 0.00 | 0.00 |
| ATOM | 6191 | N    | ARG | X | 413 | 33.402 | 33.888 | 55.074 | 0.00 | 0.00 |
| ATOM | 6192 | H    | ARG | X | 413 | 34.124 | 34.215 | 54.449 | 0.00 | 0.00 |
| ATOM | 6193 | CA   | ARG | X | 413 | 32.515 | 34.866 | 55.761 | 0.00 | 0.00 |
| ATOM | 6194 | HA   | ARG | X | 413 | 32.155 | 34.400 | 56.678 | 0.00 | 0.00 |
| ATOM | 6195 | CB   | ARG | X | 413 | 33.390 | 36.000 | 56.286 | 0.00 | 0.00 |
| ATOM | 6196 | HB2  | ARG | X | 413 | 34.122 | 35.576 | 56.973 | 0.00 | 0.00 |
| ATOM | 6197 | HB3  | ARG | X | 413 | 33.892 | 36.543 | 55.486 | 0.00 | 0.00 |
| ATOM | 6198 | CG   | ARG | X | 413 | 32.544 | 37.012 | 57.145 | 0.00 | 0.00 |
| ATOM | 6199 | HG2  | ARG | X | 413 | 33.180 | 37.725 | 57.670 | 0.00 | 0.00 |
| ATOM | 6200 | HG3  | ARG | X | 413 | 32.035 | 37.620 | 56.397 | 0.00 | 0.00 |
| ATOM | 6201 | CD   | ARG | X | 413 | 31.672 | 36.276 | 58.186 | 0.00 | 0.00 |
| ATOM | 6202 | HD2  | ARG | X | 413 | 31.085 | 35.476 | 57.735 | 0.00 | 0.00 |
| ATOM | 6203 | HD3  | ARG | X | 413 | 32.374 | 35.789 | 58.864 | 0.00 | 0.00 |
| ATOM | 6204 | NE   | ARG | X | 413 | 30.858 | 37.291 | 58.883 | 0.00 | 0.00 |
| ATOM | 6205 | HE   | ARG | X | 413 | 30.869 | 38.262 | 58.604 | 0.00 | 0.00 |
| ATOM | 6206 | CZ   | ARG | X | 413 | 30.090 | 36.927 | 59.913 | 0.00 | 0.00 |
| ATOM | 6207 | NH1  | ARG | X | 413 | 29.968 | 35.673 | 60.323 | 0.00 | 0.00 |
| ATOM | 6208 | HH11 | ARG | X | 413 | 30.495 | 34.917 | 59.908 | 0.00 | 0.00 |
| ATOM | 6209 | HH12 | ARG | X | 413 | 29.681 | 35.558 | 61.285 | 0.00 | 0.00 |
| ATOM | 6210 | NH2  | ARG | X | 413 | 29.517 | 37.835 | 60.670 | 0.00 | 0.00 |
| ATOM | 6211 | HH21 | ARG | X | 413 | 29.708 | 38.781 | 60.372 | 0.00 | 0.00 |
| ATOM | 6212 | HH22 | ARG | X | 413 | 29.242 | 37.615 | 61.617 | 0.00 | 0.00 |
| ATOM | 6213 | C    | ARG | X | 413 | 31.398 | 35.346 | 54.797 | 0.00 | 0.00 |
| ATOM | 6214 | O    | ARG | X | 413 | 30.319 | 35.651 | 55.355 | 0.00 | 0.00 |
| ATOM | 6215 | N    | LEU | X | 414 | 31.571 | 35.360 | 53.433 | 0.00 | 0.00 |
| ATOM | 6216 | H    | LEU | X | 414 | 32.410 | 34.985 | 53.014 | 0.00 | 0.00 |
| ATOM | 6217 | CA   | LEU | X | 414 | 30.421 | 35.578 | 52.552 | 0.00 | 0.00 |
| ATOM | 6218 | HA   | LEU | X | 414 | 29.949 | 36.521 | 52.829 | 0.00 | 0.00 |
| ATOM | 6219 | CB   | LEU | X | 414 | 30.879 | 35.875 | 51.111 | 0.00 | 0.00 |
| ATOM | 6220 | HB2  | LEU | X | 414 | 31.384 | 35.024 | 50.653 | 0.00 | 0.00 |
| ATOM | 6221 | HB3  | LEU | X | 414 | 29.965 | 36.016 | 50.534 | 0.00 | 0.00 |
| ATOM | 6222 | CG   | LEU | X | 414 | 31.787 | 37.098 | 50.916 | 0.00 | 0.00 |
| ATOM | 6223 | HG   | LEU | X | 414 | 32.602 | 37.001 | 51.634 | 0.00 | 0.00 |
| ATOM | 6224 | CD1  | LEU | X | 414 | 32.197 | 37.225 | 49.473 | 0.00 | 0.00 |
| ATOM | 6225 | HD11 | LEU | X | 414 | 31.418 | 37.216 | 48.711 | 0.00 | 0.00 |
| ATOM | 6226 | HD12 | LEU | X | 414 | 32.748 | 36.319 | 49.223 | 0.00 | 0.00 |
| ATOM | 6227 | HD13 | LEU | X | 414 | 32.838 | 38.094 | 49.325 | 0.00 | 0.00 |
| ATOM | 6228 | CD2  | LEU | X | 414 | 31.004 | 38.391 | 51.257 | 0.00 | 0.00 |
| ATOM | 6229 | HD21 | LEU | X | 414 | 30.706 | 38.495 | 52.300 | 0.00 | 0.00 |
| ATOM | 6230 | HD22 | LEU | X | 414 | 31.648 | 39.235 | 51.010 | 0.00 | 0.00 |
| ATOM | 6231 | HD23 | LEU | X | 414 | 30.160 | 38.537 | 50.584 | 0.00 | 0.00 |
| ATOM | 6232 | C    | LEU | X | 414 | 29.459 | 34.414 | 52.669 | 0.00 | 0.00 |
| ATOM | 6233 | O    | LEU | X | 414 | 28.339 | 34.632 | 53.015 | 0.00 | 0.00 |
| ATOM | 6234 | N    | ALA | X | 415 | 29.956 | 33.156 | 52.440 | 0.00 | 0.00 |
| ATOM | 6235 | H    | ALA | X | 415 | 30.884 | 32.992 | 52.076 | 0.00 | 0.00 |
| ATOM | 6236 | CA   | ALA | X | 415 | 28.973 | 32.027 | 52.632 | 0.00 | 0.00 |
| ATOM | 6237 | HA   | ALA | X | 415 | 28.258 | 32.142 | 51.817 | 0.00 | 0.00 |
| ATOM | 6238 | CB   | ALA | X | 415 | 29.651 | 30.703 | 52.283 | 0.00 | 0.00 |
| ATOM | 6239 | HB1  | ALA | X | 415 | 28.878 | 29.939 | 52.189 | 0.00 | 0.00 |
| ATOM | 6240 | HB2  | ALA | X | 415 | 30.420 | 30.495 | 53.027 | 0.00 | 0.00 |
| ATOM | 6241 | HB3  | ALA | X | 415 | 30.257 | 30.792 | 51.382 | 0.00 | 0.00 |
| ATOM | 6242 | C    | ALA | X | 415 | 28.190 | 31.890 | 53.949 | 0.00 | 0.00 |

|      |      |      |     |   |     |        |        |        |      |      |
|------|------|------|-----|---|-----|--------|--------|--------|------|------|
| ATOM | 6243 | O    | ALA | X | 415 | 26.987 | 31.727 | 53.872 | 0.00 | 0.00 |
| ATOM | 6244 | N    | ALA | X | 416 | 28.821 | 32.169 | 55.125 | 0.00 | 0.00 |
| ATOM | 6245 | H    | ALA | X | 416 | 29.830 | 32.121 | 55.104 | 0.00 | 0.00 |
| ATOM | 6246 | CA   | ALA | X | 416 | 28.175 | 32.286 | 56.440 | 0.00 | 0.00 |
| ATOM | 6247 | HA   | ALA | X | 416 | 27.711 | 31.323 | 56.655 | 0.00 | 0.00 |
| ATOM | 6248 | CB   | ALA | X | 416 | 29.207 | 32.434 | 57.525 | 0.00 | 0.00 |
| ATOM | 6249 | HB1  | ALA | X | 416 | 29.912 | 33.246 | 57.349 | 0.00 | 0.00 |
| ATOM | 6250 | HB2  | ALA | X | 416 | 29.824 | 31.542 | 57.410 | 0.00 | 0.00 |
| ATOM | 6251 | HB3  | ALA | X | 416 | 28.843 | 32.406 | 58.552 | 0.00 | 0.00 |
| ATOM | 6252 | C    | ALA | X | 416 | 27.114 | 33.428 | 56.497 | 0.00 | 0.00 |
| ATOM | 6253 | O    | ALA | X | 416 | 25.975 | 33.117 | 56.878 | 0.00 | 0.00 |
| ATOM | 6254 | N    | GLN | X | 417 | 27.364 | 34.603 | 56.012 | 0.00 | 0.00 |
| ATOM | 6255 | H    | GLN | X | 417 | 28.336 | 34.791 | 55.813 | 0.00 | 0.00 |
| ATOM | 6256 | CA   | GLN | X | 417 | 26.502 | 35.701 | 55.834 | 0.00 | 0.00 |
| ATOM | 6257 | HA   | GLN | X | 417 | 25.779 | 35.680 | 56.649 | 0.00 | 0.00 |
| ATOM | 6258 | CB   | GLN | X | 417 | 27.361 | 36.943 | 55.785 | 0.00 | 0.00 |
| ATOM | 6259 | HB2  | GLN | X | 417 | 28.230 | 36.828 | 55.137 | 0.00 | 0.00 |
| ATOM | 6260 | HB3  | GLN | X | 417 | 26.773 | 37.729 | 55.312 | 0.00 | 0.00 |
| ATOM | 6261 | CG   | GLN | X | 417 | 27.978 | 37.333 | 57.118 | 0.00 | 0.00 |
| ATOM | 6262 | HG2  | GLN | X | 417 | 28.668 | 36.536 | 57.393 | 0.00 | 0.00 |
| ATOM | 6263 | HG3  | GLN | X | 417 | 28.445 | 38.307 | 56.973 | 0.00 | 0.00 |
| ATOM | 6264 | CD   | GLN | X | 417 | 26.880 | 37.410 | 58.228 | 0.00 | 0.00 |
| ATOM | 6265 | OE1  | GLN | X | 417 | 26.625 | 36.488 | 58.967 | 0.00 | 0.00 |
| ATOM | 6266 | NE2  | GLN | X | 417 | 26.440 | 38.636 | 58.468 | 0.00 | 0.00 |
| ATOM | 6267 | HE21 | GLN | X | 417 | 25.879 | 38.877 | 59.272 | 0.00 | 0.00 |
| ATOM | 6268 | HE22 | GLN | X | 417 | 26.932 | 39.374 | 57.985 | 0.00 | 0.00 |
| ATOM | 6269 | C    | GLN | X | 417 | 25.547 | 35.603 | 54.622 | 0.00 | 0.00 |
| ATOM | 6270 | O    | GLN | X | 417 | 24.630 | 36.379 | 54.381 | 0.00 | 0.00 |
| ATOM | 6271 | N    | GLY | X | 418 | 25.658 | 34.560 | 53.875 | 0.00 | 0.00 |
| ATOM | 6272 | H    | GLY | X | 418 | 26.490 | 33.992 | 53.942 | 0.00 | 0.00 |
| ATOM | 6273 | CA   | GLY | X | 418 | 24.522 | 33.868 | 53.169 | 0.00 | 0.00 |
| ATOM | 6274 | HA2  | GLY | X | 418 | 24.627 | 32.806 | 53.388 | 0.00 | 0.00 |
| ATOM | 6275 | HA3  | GLY | X | 418 | 23.524 | 34.138 | 53.514 | 0.00 | 0.00 |
| ATOM | 6276 | C    | GLY | X | 418 | 24.614 | 33.905 | 51.583 | 0.00 | 0.00 |
| ATOM | 6277 | O    | GLY | X | 418 | 23.682 | 33.486 | 50.893 | 0.00 | 0.00 |
| ATOM | 6278 | N    | ALA | X | 419 | 25.745 | 34.359 | 51.047 | 0.00 | 0.00 |
| ATOM | 6279 | H    | ALA | X | 419 | 26.446 | 34.836 | 51.597 | 0.00 | 0.00 |
| ATOM | 6280 | CA   | ALA | X | 419 | 25.993 | 34.358 | 49.601 | 0.00 | 0.00 |
| ATOM | 6281 | HA   | ALA | X | 419 | 25.187 | 34.866 | 49.073 | 0.00 | 0.00 |
| ATOM | 6282 | CB   | ALA | X | 419 | 27.229 | 35.279 | 49.443 | 0.00 | 0.00 |
| ATOM | 6283 | HB1  | ALA | X | 419 | 28.116 | 34.754 | 49.797 | 0.00 | 0.00 |
| ATOM | 6284 | HB2  | ALA | X | 419 | 27.097 | 36.200 | 50.011 | 0.00 | 0.00 |
| ATOM | 6285 | HB3  | ALA | X | 419 | 27.326 | 35.533 | 48.387 | 0.00 | 0.00 |
| ATOM | 6286 | C    | ALA | X | 419 | 26.303 | 32.962 | 49.095 | 0.00 | 0.00 |
| ATOM | 6287 | O    | ALA | X | 419 | 26.646 | 32.141 | 49.920 | 0.00 | 0.00 |
| ATOM | 6288 | N    | ARG | X | 420 | 26.104 | 32.691 | 47.827 | 0.00 | 0.00 |
| ATOM | 6289 | H    | ARG | X | 420 | 25.834 | 33.406 | 47.167 | 0.00 | 0.00 |
| ATOM | 6290 | CA   | ARG | X | 420 | 26.384 | 31.409 | 47.164 | 0.00 | 0.00 |
| ATOM | 6291 | HA   | ARG | X | 420 | 26.461 | 30.626 | 47.918 | 0.00 | 0.00 |
| ATOM | 6292 | CB   | ARG | X | 420 | 25.168 | 31.025 | 46.371 | 0.00 | 0.00 |
| ATOM | 6293 | HB2  | ARG | X | 420 | 24.259 | 31.016 | 46.974 | 0.00 | 0.00 |
| ATOM | 6294 | HB3  | ARG | X | 420 | 24.936 | 31.807 | 45.648 | 0.00 | 0.00 |
| ATOM | 6295 | CG   | ARG | X | 420 | 25.430 | 29.679 | 45.721 | 0.00 | 0.00 |
| ATOM | 6296 | HG2  | ARG | X | 420 | 26.269 | 29.670 | 45.025 | 0.00 | 0.00 |
| ATOM | 6297 | HG3  | ARG | X | 420 | 25.715 | 28.955 | 46.484 | 0.00 | 0.00 |
| ATOM | 6298 | CD   | ARG | X | 420 | 24.120 | 29.045 | 45.011 | 0.00 | 0.00 |
| ATOM | 6299 | HD2  | ARG | X | 420 | 23.214 | 29.013 | 45.617 | 0.00 | 0.00 |
| ATOM | 6300 | HD3  | ARG | X | 420 | 23.854 | 29.681 | 44.166 | 0.00 | 0.00 |
| ATOM | 6301 | NE   | ARG | X | 420 | 24.284 | 27.709 | 44.594 | 0.00 | 0.00 |
| ATOM | 6302 | HE   | ARG | X | 420 | 24.388 | 27.646 | 43.591 | 0.00 | 0.00 |
| ATOM | 6303 | CZ   | ARG | X | 420 | 24.168 | 26.654 | 45.267 | 0.00 | 0.00 |
| ATOM | 6304 | NH1  | ARG | X | 420 | 23.938 | 26.695 | 46.560 | 0.00 | 0.00 |
| ATOM | 6305 | HH11 | ARG | X | 420 | 23.766 | 27.588 | 46.999 | 0.00 | 0.00 |
| ATOM | 6306 | HH12 | ARG | X | 420 | 23.653 | 25.907 | 47.125 | 0.00 | 0.00 |
| ATOM | 6307 | NH2  | ARG | X | 420 | 24.231 | 25.434 | 44.739 | 0.00 | 0.00 |
| ATOM | 6308 | HH21 | ARG | X | 420 | 24.485 | 25.222 | 43.785 | 0.00 | 0.00 |
| ATOM | 6309 | HH22 | ARG | X | 420 | 24.077 | 24.613 | 45.307 | 0.00 | 0.00 |

|      |      |      |     |   |     |        |        |        |      |      |
|------|------|------|-----|---|-----|--------|--------|--------|------|------|
| ATOM | 6310 | C    | ARG | X | 420 | 27.707 | 31.543 | 46.377 | 0.00 | 0.00 |
| ATOM | 6311 | O    | ARG | X | 420 | 27.838 | 32.397 | 45.468 | 0.00 | 0.00 |
| ATOM | 6312 | N    | VAL | X | 421 | 28.774 | 30.958 | 46.936 | 0.00 | 0.00 |
| ATOM | 6313 | H    | VAL | X | 421 | 28.603 | 30.386 | 47.750 | 0.00 | 0.00 |
| ATOM | 6314 | CA   | VAL | X | 421 | 30.180 | 31.146 | 46.421 | 0.00 | 0.00 |
| ATOM | 6315 | HA   | VAL | X | 421 | 30.223 | 31.994 | 45.737 | 0.00 | 0.00 |
| ATOM | 6316 | CB   | VAL | X | 421 | 31.176 | 31.481 | 47.571 | 0.00 | 0.00 |
| ATOM | 6317 | HB   | VAL | X | 421 | 31.181 | 30.701 | 48.333 | 0.00 | 0.00 |
| ATOM | 6318 | CG1  | VAL | X | 421 | 32.596 | 31.730 | 47.043 | 0.00 | 0.00 |
| ATOM | 6319 | HG11 | VAL | X | 421 | 33.196 | 32.329 | 47.728 | 0.00 | 0.00 |
| ATOM | 6320 | HG12 | VAL | X | 421 | 32.995 | 30.747 | 46.797 | 0.00 | 0.00 |
| ATOM | 6321 | HG13 | VAL | X | 421 | 32.340 | 32.351 | 46.184 | 0.00 | 0.00 |
| ATOM | 6322 | CG2  | VAL | X | 421 | 30.721 | 32.713 | 48.349 | 0.00 | 0.00 |
| ATOM | 6323 | HG21 | VAL | X | 421 | 31.465 | 33.175 | 48.998 | 0.00 | 0.00 |
| ATOM | 6324 | HG22 | VAL | X | 421 | 29.917 | 32.381 | 49.005 | 0.00 | 0.00 |
| ATOM | 6325 | HG23 | VAL | X | 421 | 30.195 | 33.418 | 47.705 | 0.00 | 0.00 |
| ATOM | 6326 | C    | VAL | X | 421 | 30.586 | 29.891 | 45.621 | 0.00 | 0.00 |
| ATOM | 6327 | O    | VAL | X | 421 | 30.322 | 28.801 | 46.123 | 0.00 | 0.00 |
| ATOM | 6328 | N    | TYR | X | 422 | 31.436 | 29.954 | 44.622 | 0.00 | 0.00 |
| ATOM | 6329 | H    | TYR | X | 422 | 31.671 | 30.859 | 44.240 | 0.00 | 0.00 |
| ATOM | 6330 | CA   | TYR | X | 422 | 32.176 | 28.912 | 43.871 | 0.00 | 0.00 |
| ATOM | 6331 | HA   | TYR | X | 422 | 32.088 | 27.960 | 44.396 | 0.00 | 0.00 |
| ATOM | 6332 | CB   | TYR | X | 422 | 31.574 | 28.753 | 42.500 | 0.00 | 0.00 |
| ATOM | 6333 | HB2  | TYR | X | 422 | 31.615 | 29.705 | 41.970 | 0.00 | 0.00 |
| ATOM | 6334 | HB3  | TYR | X | 422 | 32.102 | 27.973 | 41.952 | 0.00 | 0.00 |
| ATOM | 6335 | CG   | TYR | X | 422 | 30.132 | 28.270 | 42.490 | 0.00 | 0.00 |
| ATOM | 6336 | CD1  | TYR | X | 422 | 29.940 | 26.876 | 42.420 | 0.00 | 0.00 |
| ATOM | 6337 | HD1  | TYR | X | 422 | 30.745 | 26.169 | 42.554 | 0.00 | 0.00 |
| ATOM | 6338 | CE1  | TYR | X | 422 | 28.589 | 26.360 | 42.397 | 0.00 | 0.00 |
| ATOM | 6339 | HE1  | TYR | X | 422 | 28.362 | 25.309 | 42.295 | 0.00 | 0.00 |
| ATOM | 6340 | CZ   | TYR | X | 422 | 27.498 | 27.216 | 42.295 | 0.00 | 0.00 |
| ATOM | 6341 | OH   | TYR | X | 422 | 26.202 | 26.796 | 42.115 | 0.00 | 0.00 |
| ATOM | 6342 | HH   | TYR | X | 422 | 26.067 | 25.875 | 41.882 | 0.00 | 0.00 |
| ATOM | 6343 | CE2  | TYR | X | 422 | 27.738 | 28.626 | 42.248 | 0.00 | 0.00 |
| ATOM | 6344 | HE2  | TYR | X | 422 | 26.921 | 29.324 | 42.137 | 0.00 | 0.00 |
| ATOM | 6345 | CD2  | TYR | X | 422 | 29.084 | 29.166 | 42.351 | 0.00 | 0.00 |
| ATOM | 6346 | HD2  | TYR | X | 422 | 29.246 | 30.227 | 42.230 | 0.00 | 0.00 |
| ATOM | 6347 | C    | TYR | X | 422 | 33.689 | 29.258 | 43.852 | 0.00 | 0.00 |
| ATOM | 6348 | O    | TYR | X | 422 | 34.102 | 30.339 | 43.455 | 0.00 | 0.00 |
| ATOM | 6349 | N    | ALA | X | 423 | 34.542 | 28.303 | 44.319 | 0.00 | 0.00 |
| ATOM | 6350 | H    | ALA | X | 423 | 34.057 | 27.419 | 44.379 | 0.00 | 0.00 |
| ATOM | 6351 | CA   | ALA | X | 423 | 35.969 | 28.433 | 44.539 | 0.00 | 0.00 |
| ATOM | 6352 | HA   | ALA | X | 423 | 36.228 | 29.485 | 44.416 | 0.00 | 0.00 |
| ATOM | 6353 | CB   | ALA | X | 423 | 36.237 | 28.139 | 46.024 | 0.00 | 0.00 |
| ATOM | 6354 | HB1  | ALA | X | 423 | 35.968 | 27.123 | 46.313 | 0.00 | 0.00 |
| ATOM | 6355 | HB2  | ALA | X | 423 | 35.688 | 28.814 | 46.681 | 0.00 | 0.00 |
| ATOM | 6356 | HB3  | ALA | X | 423 | 37.283 | 28.286 | 46.292 | 0.00 | 0.00 |
| ATOM | 6357 | C    | ALA | X | 423 | 36.878 | 27.563 | 43.568 | 0.00 | 0.00 |
| ATOM | 6358 | O    | ALA | X | 423 | 36.528 | 26.440 | 43.213 | 0.00 | 0.00 |
| ATOM | 6359 | N    | TYR | X | 424 | 38.050 | 28.114 | 43.238 | 0.00 | 0.00 |
| ATOM | 6360 | H    | TYR | X | 424 | 38.369 | 29.055 | 43.422 | 0.00 | 0.00 |
| ATOM | 6361 | CA   | TYR | X | 424 | 38.938 | 27.441 | 42.384 | 0.00 | 0.00 |
| ATOM | 6362 | HA   | TYR | X | 424 | 38.861 | 26.395 | 42.681 | 0.00 | 0.00 |
| ATOM | 6363 | CB   | TYR | X | 424 | 38.560 | 27.561 | 40.878 | 0.00 | 0.00 |
| ATOM | 6364 | HB2  | TYR | X | 424 | 39.029 | 26.769 | 40.294 | 0.00 | 0.00 |
| ATOM | 6365 | HB3  | TYR | X | 424 | 37.493 | 27.391 | 40.731 | 0.00 | 0.00 |
| ATOM | 6366 | CG   | TYR | X | 424 | 38.986 | 28.876 | 40.252 | 0.00 | 0.00 |
| ATOM | 6367 | CD1  | TYR | X | 424 | 40.281 | 28.959 | 39.743 | 0.00 | 0.00 |
| ATOM | 6368 | HD1  | TYR | X | 424 | 40.787 | 28.006 | 39.770 | 0.00 | 0.00 |
| ATOM | 6369 | CE1  | TYR | X | 424 | 40.867 | 30.180 | 39.324 | 0.00 | 0.00 |
| ATOM | 6370 | HE1  | TYR | X | 424 | 41.932 | 30.175 | 39.142 | 0.00 | 0.00 |
| ATOM | 6371 | CZ   | TYR | X | 424 | 40.088 | 31.314 | 39.366 | 0.00 | 0.00 |
| ATOM | 6372 | OH   | TYR | X | 424 | 40.679 | 32.505 | 39.015 | 0.00 | 0.00 |
| ATOM | 6373 | HH   | TYR | X | 424 | 41.616 | 32.559 | 38.813 | 0.00 | 0.00 |
| ATOM | 6374 | CE2  | TYR | X | 424 | 38.741 | 31.218 | 39.831 | 0.00 | 0.00 |
| ATOM | 6375 | HE2  | TYR | X | 424 | 38.130 | 32.089 | 40.019 | 0.00 | 0.00 |
| ATOM | 6376 | CD2  | TYR | X | 424 | 38.147 | 29.968 | 40.226 | 0.00 | 0.00 |

|      |      |      |     |   |     |        |        |        |      |      |
|------|------|------|-----|---|-----|--------|--------|--------|------|------|
| ATOM | 6377 | HD2  | TYR | X | 424 | 37.150 | 29.980 | 40.642 | 0.00 | 0.00 |
| ATOM | 6378 | C    | TYR | X | 424 | 40.447 | 27.671 | 42.674 | 0.00 | 0.00 |
| ATOM | 6379 | O    | TYR | X | 424 | 40.822 | 28.707 | 43.236 | 0.00 | 0.00 |
| ATOM | 6380 | N    | VAL | X | 425 | 41.284 | 26.721 | 42.262 | 0.00 | 0.00 |
| ATOM | 6381 | H    | VAL | X | 425 | 40.865 | 25.921 | 41.809 | 0.00 | 0.00 |
| ATOM | 6382 | CA   | VAL | X | 425 | 42.710 | 26.825 | 42.090 | 0.00 | 0.00 |
| ATOM | 6383 | HA   | VAL | X | 425 | 43.029 | 27.866 | 42.132 | 0.00 | 0.00 |
| ATOM | 6384 | CB   | VAL | X | 425 | 43.564 | 26.079 | 43.103 | 0.00 | 0.00 |
| ATOM | 6385 | HB   | VAL | X | 425 | 43.295 | 25.029 | 42.988 | 0.00 | 0.00 |
| ATOM | 6386 | CG1  | VAL | X | 425 | 45.033 | 26.145 | 42.843 | 0.00 | 0.00 |
| ATOM | 6387 | HG11 | VAL | X | 425 | 45.614 | 25.824 | 43.708 | 0.00 | 0.00 |
| ATOM | 6388 | HG12 | VAL | X | 425 | 45.241 | 25.530 | 41.968 | 0.00 | 0.00 |
| ATOM | 6389 | HG13 | VAL | X | 425 | 45.239 | 27.192 | 42.622 | 0.00 | 0.00 |
| ATOM | 6390 | CG2  | VAL | X | 425 | 43.325 | 26.376 | 44.607 | 0.00 | 0.00 |
| ATOM | 6391 | HG21 | VAL | X | 425 | 43.729 | 25.622 | 45.283 | 0.00 | 0.00 |
| ATOM | 6392 | HG22 | VAL | X | 425 | 42.238 | 26.409 | 44.683 | 0.00 | 0.00 |
| ATOM | 6393 | HG23 | VAL | X | 425 | 43.736 | 27.338 | 44.914 | 0.00 | 0.00 |
| ATOM | 6394 | C    | VAL | X | 425 | 42.943 | 26.270 | 40.656 | 0.00 | 0.00 |
| ATOM | 6395 | O    | VAL | X | 425 | 42.366 | 25.278 | 40.346 | 0.00 | 0.00 |
| ATOM | 6396 | N    | PHE | X | 426 | 43.822 | 26.979 | 39.889 | 0.00 | 0.00 |
| ATOM | 6397 | H    | PHE | X | 426 | 44.145 | 27.842 | 40.302 | 0.00 | 0.00 |
| ATOM | 6398 | CA   | PHE | X | 426 | 44.358 | 26.719 | 38.532 | 0.00 | 0.00 |
| ATOM | 6399 | HA   | PHE | X | 426 | 43.589 | 26.122 | 38.042 | 0.00 | 0.00 |
| ATOM | 6400 | CB   | PHE | X | 426 | 44.230 | 28.056 | 37.654 | 0.00 | 0.00 |
| ATOM | 6401 | HB2  | PHE | X | 426 | 43.209 | 28.404 | 37.498 | 0.00 | 0.00 |
| ATOM | 6402 | HB3  | PHE | X | 426 | 44.848 | 28.786 | 38.178 | 0.00 | 0.00 |
| ATOM | 6403 | CG   | PHE | X | 426 | 44.849 | 27.933 | 36.283 | 0.00 | 0.00 |
| ATOM | 6404 | CD1  | PHE | X | 426 | 43.950 | 27.677 | 35.237 | 0.00 | 0.00 |
| ATOM | 6405 | HD1  | PHE | X | 426 | 42.886 | 27.544 | 35.372 | 0.00 | 0.00 |
| ATOM | 6406 | CE1  | PHE | X | 426 | 44.418 | 27.697 | 33.934 | 0.00 | 0.00 |
| ATOM | 6407 | HE1  | PHE | X | 426 | 43.807 | 27.502 | 33.065 | 0.00 | 0.00 |
| ATOM | 6408 | CZ   | PHE | X | 426 | 45.734 | 27.698 | 33.643 | 0.00 | 0.00 |
| ATOM | 6409 | HZ   | PHE | X | 426 | 46.083 | 27.579 | 32.628 | 0.00 | 0.00 |
| ATOM | 6410 | CE2  | PHE | X | 426 | 46.639 | 28.048 | 34.736 | 0.00 | 0.00 |
| ATOM | 6411 | HE2  | PHE | X | 426 | 47.673 | 28.210 | 34.468 | 0.00 | 0.00 |
| ATOM | 6412 | CD2  | PHE | X | 426 | 46.199 | 28.059 | 36.030 | 0.00 | 0.00 |
| ATOM | 6413 | HD2  | PHE | X | 426 | 46.842 | 28.385 | 36.835 | 0.00 | 0.00 |
| ATOM | 6414 | C    | PHE | X | 426 | 45.727 | 26.109 | 38.490 | 0.00 | 0.00 |
| ATOM | 6415 | O    | PHE | X | 426 | 46.605 | 26.506 | 39.215 | 0.00 | 0.00 |
| ATOM | 6416 | N    | GLU | X | 427 | 45.907 | 25.028 | 37.659 | 0.00 | 0.00 |
| ATOM | 6417 | H    | GLU | X | 427 | 45.154 | 24.710 | 37.066 | 0.00 | 0.00 |
| ATOM | 6418 | CA   | GLU | X | 427 | 47.162 | 24.147 | 37.703 | 0.00 | 0.00 |
| ATOM | 6419 | HA   | GLU | X | 427 | 47.783 | 24.488 | 38.531 | 0.00 | 0.00 |
| ATOM | 6420 | CB   | GLU | X | 427 | 46.713 | 22.728 | 38.022 | 0.00 | 0.00 |
| ATOM | 6421 | HB2  | GLU | X | 427 | 45.963 | 22.543 | 37.252 | 0.00 | 0.00 |
| ATOM | 6422 | HB3  | GLU | X | 427 | 47.597 | 22.095 | 38.092 | 0.00 | 0.00 |
| ATOM | 6423 | CG   | GLU | X | 427 | 46.061 | 22.652 | 39.412 | 0.00 | 0.00 |
| ATOM | 6424 | HG2  | GLU | X | 427 | 46.800 | 23.067 | 40.098 | 0.00 | 0.00 |
| ATOM | 6425 | HG3  | GLU | X | 427 | 45.103 | 23.167 | 39.342 | 0.00 | 0.00 |
| ATOM | 6426 | CD   | GLU | X | 427 | 46.100 | 21.228 | 39.993 | 0.00 | 0.00 |
| ATOM | 6427 | OE1  | GLU | X | 427 | 46.831 | 20.927 | 40.951 | 0.00 | 0.00 |
| ATOM | 6428 | OE2  | GLU | X | 427 | 45.316 | 20.441 | 39.435 | 0.00 | 0.00 |
| ATOM | 6429 | C    | GLU | X | 427 | 48.156 | 24.092 | 36.533 | 0.00 | 0.00 |
| ATOM | 6430 | O    | GLU | X | 427 | 49.304 | 23.654 | 36.774 | 0.00 | 0.00 |
| ATOM | 6431 | N    | HIE | X | 428 | 47.772 | 24.445 | 35.295 | 0.00 | 0.00 |
| ATOM | 6432 | H    | HIE | X | 428 | 46.844 | 24.821 | 35.158 | 0.00 | 0.00 |
| ATOM | 6433 | CA   | HIE | X | 428 | 48.510 | 24.220 | 34.071 | 0.00 | 0.00 |
| ATOM | 6434 | HA   | HIE | X | 428 | 49.058 | 23.286 | 34.192 | 0.00 | 0.00 |
| ATOM | 6435 | CB   | HIE | X | 428 | 47.524 | 23.940 | 32.921 | 0.00 | 0.00 |
| ATOM | 6436 | HB2  | HIE | X | 428 | 46.865 | 23.097 | 33.126 | 0.00 | 0.00 |
| ATOM | 6437 | HB3  | HIE | X | 428 | 46.941 | 24.861 | 32.938 | 0.00 | 0.00 |
| ATOM | 6438 | CG   | HIE | X | 428 | 48.265 | 23.550 | 31.659 | 0.00 | 0.00 |
| ATOM | 6439 | ND1  | HIE | X | 428 | 49.247 | 22.510 | 31.512 | 0.00 | 0.00 |
| ATOM | 6440 | CE1  | HIE | X | 428 | 49.679 | 22.487 | 30.248 | 0.00 | 0.00 |
| ATOM | 6441 | HE1  | HIE | X | 428 | 50.351 | 21.766 | 29.806 | 0.00 | 0.00 |
| ATOM | 6442 | NE2  | HIE | X | 428 | 49.020 | 23.430 | 29.582 | 0.00 | 0.00 |
| ATOM | 6443 | HE2  | HIE | X | 428 | 49.063 | 23.463 | 28.573 | 0.00 | 0.00 |

|      |      |      |     |   |     |        |        |        |      |      |
|------|------|------|-----|---|-----|--------|--------|--------|------|------|
| ATOM | 6444 | CD2  | HIE | X | 428 | 48.131 | 24.083 | 30.414 | 0.00 | 0.00 |
| ATOM | 6445 | HD2  | HIE | X | 428 | 47.445 | 24.895 | 30.225 | 0.00 | 0.00 |
| ATOM | 6446 | C    | HIE | X | 428 | 49.599 | 25.263 | 33.747 | 0.00 | 0.00 |
| ATOM | 6447 | O    | HIE | X | 428 | 49.260 | 26.407 | 33.486 | 0.00 | 0.00 |
| ATOM | 6448 | N    | ARG | X | 429 | 50.839 | 24.875 | 33.690 | 0.00 | 0.00 |
| ATOM | 6449 | H    | ARG | X | 429 | 51.104 | 23.945 | 33.981 | 0.00 | 0.00 |
| ATOM | 6450 | CA   | ARG | X | 429 | 51.944 | 25.722 | 33.171 | 0.00 | 0.00 |
| ATOM | 6451 | HA   | ARG | X | 429 | 51.714 | 26.752 | 33.442 | 0.00 | 0.00 |
| ATOM | 6452 | CB   | ARG | X | 429 | 53.274 | 25.258 | 33.762 | 0.00 | 0.00 |
| ATOM | 6453 | HB2  | ARG | X | 429 | 53.139 | 24.970 | 34.804 | 0.00 | 0.00 |
| ATOM | 6454 | HB3  | ARG | X | 429 | 53.663 | 24.389 | 33.231 | 0.00 | 0.00 |
| ATOM | 6455 | CG   | ARG | X | 429 | 54.290 | 26.462 | 33.652 | 0.00 | 0.00 |
| ATOM | 6456 | HG2  | ARG | X | 429 | 54.256 | 26.801 | 32.616 | 0.00 | 0.00 |
| ATOM | 6457 | HG3  | ARG | X | 429 | 53.985 | 27.243 | 34.348 | 0.00 | 0.00 |
| ATOM | 6458 | CD   | ARG | X | 429 | 55.749 | 25.905 | 33.875 | 0.00 | 0.00 |
| ATOM | 6459 | HD2  | ARG | X | 429 | 55.913 | 25.530 | 34.885 | 0.00 | 0.00 |
| ATOM | 6460 | HD3  | ARG | X | 429 | 55.935 | 25.140 | 33.121 | 0.00 | 0.00 |
| ATOM | 6461 | NE   | ARG | X | 429 | 56.798 | 26.944 | 33.553 | 0.00 | 0.00 |
| ATOM | 6462 | HE   | ARG | X | 429 | 56.642 | 27.798 | 34.070 | 0.00 | 0.00 |
| ATOM | 6463 | CZ   | ARG | X | 429 | 57.879 | 26.730 | 32.801 | 0.00 | 0.00 |
| ATOM | 6464 | NH1  | ARG | X | 429 | 58.338 | 25.497 | 32.643 | 0.00 | 0.00 |
| ATOM | 6465 | HH11 | ARG | X | 429 | 57.696 | 24.730 | 32.786 | 0.00 | 0.00 |
| ATOM | 6466 | HH12 | ARG | X | 429 | 59.222 | 25.333 | 32.183 | 0.00 | 0.00 |
| ATOM | 6467 | NH2  | ARG | X | 429 | 58.736 | 27.660 | 32.358 | 0.00 | 0.00 |
| ATOM | 6468 | HH21 | ARG | X | 429 | 58.762 | 28.636 | 32.616 | 0.00 | 0.00 |
| ATOM | 6469 | HH22 | ARG | X | 429 | 59.582 | 27.362 | 31.894 | 0.00 | 0.00 |
| ATOM | 6470 | C    | ARG | X | 429 | 51.903 | 25.631 | 31.617 | 0.00 | 0.00 |
| ATOM | 6471 | O    | ARG | X | 429 | 52.016 | 24.550 | 31.005 | 0.00 | 0.00 |
| ATOM | 6472 | N    | ALA | X | 430 | 51.473 | 26.691 | 30.921 | 0.00 | 0.00 |
| ATOM | 6473 | H    | ALA | X | 430 | 51.229 | 27.521 | 31.443 | 0.00 | 0.00 |
| ATOM | 6474 | CA   | ALA | X | 430 | 51.102 | 26.627 | 29.539 | 0.00 | 0.00 |
| ATOM | 6475 | HA   | ALA | X | 430 | 50.494 | 25.737 | 29.369 | 0.00 | 0.00 |
| ATOM | 6476 | CB   | ALA | X | 430 | 50.329 | 27.941 | 29.187 | 0.00 | 0.00 |
| ATOM | 6477 | HB1  | ALA | X | 430 | 50.160 | 27.991 | 28.111 | 0.00 | 0.00 |
| ATOM | 6478 | HB2  | ALA | X | 430 | 50.919 | 28.768 | 29.581 | 0.00 | 0.00 |
| ATOM | 6479 | HB3  | ALA | X | 430 | 49.388 | 27.947 | 29.736 | 0.00 | 0.00 |
| ATOM | 6480 | C    | ALA | X | 430 | 52.439 | 26.454 | 28.739 | 0.00 | 0.00 |
| ATOM | 6481 | O    | ALA | X | 430 | 53.584 | 26.833 | 29.036 | 0.00 | 0.00 |
| ATOM | 6482 | N    | SER | X | 431 | 52.270 | 25.825 | 27.558 | 0.00 | 0.00 |
| ATOM | 6483 | H    | SER | X | 431 | 51.323 | 25.560 | 27.325 | 0.00 | 0.00 |
| ATOM | 6484 | CA   | SER | X | 431 | 53.417 | 25.560 | 26.556 | 0.00 | 0.00 |
| ATOM | 6485 | HA   | SER | X | 431 | 54.115 | 24.919 | 27.094 | 0.00 | 0.00 |
| ATOM | 6486 | CB   | SER | X | 431 | 52.871 | 24.824 | 25.339 | 0.00 | 0.00 |
| ATOM | 6487 | HB2  | SER | X | 431 | 53.768 | 24.547 | 24.785 | 0.00 | 0.00 |
| ATOM | 6488 | HB3  | SER | X | 431 | 52.373 | 23.899 | 25.630 | 0.00 | 0.00 |
| ATOM | 6489 | OG   | SER | X | 431 | 51.972 | 25.477 | 24.437 | 0.00 | 0.00 |
| ATOM | 6490 | HG   | SER | X | 431 | 51.055 | 25.337 | 24.682 | 0.00 | 0.00 |
| ATOM | 6491 | C    | SER | X | 431 | 54.195 | 26.803 | 26.138 | 0.00 | 0.00 |
| ATOM | 6492 | O    | SER | X | 431 | 55.431 | 26.734 | 25.903 | 0.00 | 0.00 |
| ATOM | 6493 | N    | THR | X | 432 | 53.494 | 27.981 | 26.145 | 0.00 | 0.00 |
| ATOM | 6494 | H    | THR | X | 432 | 52.487 | 27.932 | 26.208 | 0.00 | 0.00 |
| ATOM | 6495 | CA   | THR | X | 432 | 54.009 | 29.255 | 25.704 | 0.00 | 0.00 |
| ATOM | 6496 | HA   | THR | X | 432 | 54.744 | 29.252 | 24.899 | 0.00 | 0.00 |
| ATOM | 6497 | CB   | THR | X | 432 | 52.701 | 30.004 | 25.202 | 0.00 | 0.00 |
| ATOM | 6498 | HB   | THR | X | 432 | 52.860 | 31.066 | 25.017 | 0.00 | 0.00 |
| ATOM | 6499 | CG2  | THR | X | 432 | 52.210 | 29.343 | 23.928 | 0.00 | 0.00 |
| ATOM | 6500 | HG21 | THR | X | 432 | 51.304 | 29.851 | 23.598 | 0.00 | 0.00 |
| ATOM | 6501 | HG22 | THR | X | 432 | 52.056 | 28.268 | 24.020 | 0.00 | 0.00 |
| ATOM | 6502 | HG23 | THR | X | 432 | 52.894 | 29.571 | 23.111 | 0.00 | 0.00 |
| ATOM | 6503 | OG1  | THR | X | 432 | 51.622 | 29.998 | 26.107 | 0.00 | 0.00 |
| ATOM | 6504 | HG1  | THR | X | 432 | 51.757 | 30.706 | 26.742 | 0.00 | 0.00 |
| ATOM | 6505 | C    | THR | X | 432 | 54.511 | 30.148 | 26.838 | 0.00 | 0.00 |
| ATOM | 6506 | O    | THR | X | 432 | 55.119 | 31.133 | 26.536 | 0.00 | 0.00 |
| ATOM | 6507 | N    | LEU | X | 433 | 54.346 | 29.731 | 28.093 | 0.00 | 0.00 |
| ATOM | 6508 | H    | LEU | X | 433 | 53.942 | 28.810 | 28.188 | 0.00 | 0.00 |
| ATOM | 6509 | CA   | LEU | X | 433 | 54.670 | 30.580 | 29.271 | 0.00 | 0.00 |
| ATOM | 6510 | HA   | LEU | X | 433 | 54.215 | 31.562 | 29.138 | 0.00 | 0.00 |



|      |      |      |     |   |     |        |        |        |      |      |
|------|------|------|-----|---|-----|--------|--------|--------|------|------|
| ATOM | 6511 | CB   | LEU | X | 433 | 54.174 | 29.822 | 30.502 | 0.00 | 0.00 |
| ATOM | 6512 | HB2  | LEU | X | 433 | 53.128 | 29.559 | 30.347 | 0.00 | 0.00 |
| ATOM | 6513 | HB3  | LEU | X | 433 | 54.742 | 28.898 | 30.614 | 0.00 | 0.00 |
| ATOM | 6514 | CG   | LEU | X | 433 | 54.315 | 30.667 | 31.768 | 0.00 | 0.00 |
| ATOM | 6515 | HG   | LEU | X | 433 | 55.368 | 30.930 | 31.872 | 0.00 | 0.00 |
| ATOM | 6516 | CD1  | LEU | X | 433 | 53.431 | 31.963 | 31.867 | 0.00 | 0.00 |
| ATOM | 6517 | HD11 | LEU | X | 433 | 52.369 | 31.722 | 31.838 | 0.00 | 0.00 |
| ATOM | 6518 | HD12 | LEU | X | 433 | 53.602 | 32.617 | 31.012 | 0.00 | 0.00 |
| ATOM | 6519 | HD13 | LEU | X | 433 | 53.633 | 32.489 | 32.800 | 0.00 | 0.00 |
| ATOM | 6520 | CD2  | LEU | X | 433 | 54.139 | 29.767 | 33.036 | 0.00 | 0.00 |
| ATOM | 6521 | HD21 | LEU | X | 433 | 55.011 | 29.126 | 33.165 | 0.00 | 0.00 |
| ATOM | 6522 | HD22 | LEU | X | 433 | 54.052 | 30.425 | 33.900 | 0.00 | 0.00 |
| ATOM | 6523 | HD23 | LEU | X | 433 | 53.233 | 29.166 | 32.958 | 0.00 | 0.00 |
| ATOM | 6524 | C    | LEU | X | 433 | 56.207 | 30.823 | 29.226 | 0.00 | 0.00 |
| ATOM | 6525 | O    | LEU | X | 433 | 57.003 | 29.897 | 29.228 | 0.00 | 0.00 |
| ATOM | 6526 | N    | SER | X | 434 | 56.554 | 32.150 | 29.278 | 0.00 | 0.00 |
| ATOM | 6527 | H    | SER | X | 434 | 55.861 | 32.877 | 29.390 | 0.00 | 0.00 |
| ATOM | 6528 | CA   | SER | X | 434 | 57.998 | 32.448 | 29.254 | 0.00 | 0.00 |
| ATOM | 6529 | HA   | SER | X | 434 | 58.599 | 31.672 | 28.781 | 0.00 | 0.00 |
| ATOM | 6530 | CB   | SER | X | 434 | 58.242 | 33.680 | 28.393 | 0.00 | 0.00 |
| ATOM | 6531 | HB2  | SER | X | 434 | 59.297 | 33.904 | 28.238 | 0.00 | 0.00 |
| ATOM | 6532 | HB3  | SER | X | 434 | 57.741 | 33.551 | 27.433 | 0.00 | 0.00 |
| ATOM | 6533 | OG   | SER | X | 434 | 57.576 | 34.758 | 29.052 | 0.00 | 0.00 |
| ATOM | 6534 | HG   | SER | X | 434 | 56.640 | 34.595 | 28.917 | 0.00 | 0.00 |
| ATOM | 6535 | C    | SER | X | 434 | 58.638 | 32.651 | 30.626 | 0.00 | 0.00 |
| ATOM | 6536 | O    | SER | X | 434 | 59.870 | 32.752 | 30.752 | 0.00 | 0.00 |
| ATOM | 6537 | N    | TRP | X | 435 | 57.830 | 32.811 | 31.716 | 0.00 | 0.00 |
| ATOM | 6538 | H    | TRP | X | 435 | 56.829 | 32.734 | 31.611 | 0.00 | 0.00 |
| ATOM | 6539 | CA   | TRP | X | 435 | 58.388 | 32.724 | 33.100 | 0.00 | 0.00 |
| ATOM | 6540 | HA   | TRP | X | 435 | 59.150 | 33.503 | 33.139 | 0.00 | 0.00 |
| ATOM | 6541 | CB   | TRP | X | 435 | 57.305 | 33.121 | 34.128 | 0.00 | 0.00 |
| ATOM | 6542 | HB2  | TRP | X | 435 | 56.348 | 32.602 | 34.062 | 0.00 | 0.00 |
| ATOM | 6543 | HB3  | TRP | X | 435 | 57.678 | 32.828 | 35.109 | 0.00 | 0.00 |
| ATOM | 6544 | CG   | TRP | X | 435 | 57.009 | 34.607 | 34.226 | 0.00 | 0.00 |
| ATOM | 6545 | CD1  | TRP | X | 435 | 55.840 | 35.173 | 33.797 | 0.00 | 0.00 |
| ATOM | 6546 | HD1  | TRP | X | 435 | 54.960 | 34.641 | 33.467 | 0.00 | 0.00 |
| ATOM | 6547 | NE1  | TRP | X | 435 | 55.846 | 36.525 | 34.003 | 0.00 | 0.00 |
| ATOM | 6548 | HE1  | TRP | X | 435 | 55.016 | 37.097 | 33.936 | 0.00 | 0.00 |
| ATOM | 6549 | CE2  | TRP | X | 435 | 57.075 | 36.938 | 34.566 | 0.00 | 0.00 |
| ATOM | 6550 | CZ2  | TRP | X | 435 | 57.548 | 38.189 | 35.009 | 0.00 | 0.00 |
| ATOM | 6551 | HZ2  | TRP | X | 435 | 56.951 | 39.057 | 34.771 | 0.00 | 0.00 |
| ATOM | 6552 | CH2  | TRP | X | 435 | 58.857 | 38.286 | 35.523 | 0.00 | 0.00 |
| ATOM | 6553 | HH2  | TRP | X | 435 | 59.170 | 39.281 | 35.804 | 0.00 | 0.00 |
| ATOM | 6554 | CZ3  | TRP | X | 435 | 59.643 | 37.118 | 35.628 | 0.00 | 0.00 |
| ATOM | 6555 | HZ3  | TRP | X | 435 | 60.573 | 37.175 | 36.175 | 0.00 | 0.00 |
| ATOM | 6556 | CE3  | TRP | X | 435 | 59.122 | 35.855 | 35.231 | 0.00 | 0.00 |
| ATOM | 6557 | HE3  | TRP | X | 435 | 59.638 | 34.942 | 35.488 | 0.00 | 0.00 |
| ATOM | 6558 | CD2  | TRP | X | 435 | 57.802 | 35.721 | 34.709 | 0.00 | 0.00 |
| ATOM | 6559 | C    | TRP | X | 435 | 59.017 | 31.304 | 33.402 | 0.00 | 0.00 |
| ATOM | 6560 | O    | TRP | X | 435 | 58.525 | 30.354 | 32.812 | 0.00 | 0.00 |
| ATOM | 6561 | N    | PRO | X | 436 | 59.936 | 31.180 | 34.416 | 0.00 | 0.00 |
| ATOM | 6562 | CD   | PRO | X | 436 | 60.506 | 32.337 | 35.138 | 0.00 | 0.00 |
| ATOM | 6563 | HD2  | PRO | X | 436 | 59.809 | 32.808 | 35.830 | 0.00 | 0.00 |
| ATOM | 6564 | HD3  | PRO | X | 436 | 61.026 | 33.099 | 34.558 | 0.00 | 0.00 |
| ATOM | 6565 | CG   | PRO | X | 436 | 61.599 | 31.841 | 36.030 | 0.00 | 0.00 |
| ATOM | 6566 | HG2  | PRO | X | 436 | 61.219 | 31.465 | 36.980 | 0.00 | 0.00 |
| ATOM | 6567 | HG3  | PRO | X | 436 | 62.382 | 32.583 | 36.184 | 0.00 | 0.00 |
| ATOM | 6568 | CB   | PRO | X | 436 | 62.095 | 30.682 | 35.276 | 0.00 | 0.00 |
| ATOM | 6569 | HB2  | PRO | X | 436 | 62.624 | 29.936 | 35.869 | 0.00 | 0.00 |
| ATOM | 6570 | HB3  | PRO | X | 436 | 62.732 | 31.110 | 34.503 | 0.00 | 0.00 |
| ATOM | 6571 | CA   | PRO | X | 436 | 60.837 | 30.054 | 34.694 | 0.00 | 0.00 |
| ATOM | 6572 | HA   | PRO | X | 436 | 61.064 | 29.604 | 33.727 | 0.00 | 0.00 |
| ATOM | 6573 | C    | PRO | X | 436 | 60.201 | 28.941 | 35.516 | 0.00 | 0.00 |
| ATOM | 6574 | O    | PRO | X | 436 | 59.194 | 29.177 | 36.215 | 0.00 | 0.00 |
| ATOM | 6575 | N    | LEU | X | 437 | 60.789 | 27.725 | 35.364 | 0.00 | 0.00 |
| ATOM | 6576 | H    | LEU | X | 437 | 61.614 | 27.595 | 34.796 | 0.00 | 0.00 |
| ATOM | 6577 | CA   | LEU | X | 437 | 60.282 | 26.529 | 36.079 | 0.00 | 0.00 |

|      |      |      |     |   |     |        |        |        |      |      |
|------|------|------|-----|---|-----|--------|--------|--------|------|------|
| ATOM | 6578 | HA   | LEU | X | 437 | 59.275 | 26.396 | 35.682 | 0.00 | 0.00 |
| ATOM | 6579 | CB   | LEU | X | 437 | 61.120 | 25.384 | 35.612 | 0.00 | 0.00 |
| ATOM | 6580 | HB2  | LEU | X | 437 | 60.981 | 25.393 | 34.531 | 0.00 | 0.00 |
| ATOM | 6581 | HB3  | LEU | X | 437 | 62.166 | 25.565 | 35.858 | 0.00 | 0.00 |
| ATOM | 6582 | CG   | LEU | X | 437 | 60.711 | 23.987 | 36.139 | 0.00 | 0.00 |
| ATOM | 6583 | HG   | LEU | X | 437 | 60.651 | 23.947 | 37.227 | 0.00 | 0.00 |
| ATOM | 6584 | CD1  | LEU | X | 437 | 59.326 | 23.598 | 35.735 | 0.00 | 0.00 |
| ATOM | 6585 | HD11 | LEU | X | 437 | 59.242 | 23.644 | 34.650 | 0.00 | 0.00 |
| ATOM | 6586 | HD12 | LEU | X | 437 | 58.671 | 24.397 | 36.083 | 0.00 | 0.00 |
| ATOM | 6587 | HD13 | LEU | X | 437 | 59.132 | 22.614 | 36.162 | 0.00 | 0.00 |
| ATOM | 6588 | CD2  | LEU | X | 437 | 61.853 | 23.042 | 35.794 | 0.00 | 0.00 |
| ATOM | 6589 | HD21 | LEU | X | 437 | 62.708 | 23.346 | 36.399 | 0.00 | 0.00 |
| ATOM | 6590 | HD22 | LEU | X | 437 | 61.584 | 22.023 | 36.070 | 0.00 | 0.00 |
| ATOM | 6591 | HD23 | LEU | X | 437 | 62.117 | 23.087 | 34.738 | 0.00 | 0.00 |
| ATOM | 6592 | C    | LEU | X | 437 | 60.174 | 26.622 | 37.653 | 0.00 | 0.00 |
| ATOM | 6593 | O    | LEU | X | 437 | 59.215 | 26.021 | 38.208 | 0.00 | 0.00 |
| ATOM | 6594 | N    | TRP | X | 438 | 60.984 | 27.361 | 38.364 | 0.00 | 0.00 |
| ATOM | 6595 | H    | TRP | X | 438 | 61.768 | 27.882 | 37.997 | 0.00 | 0.00 |
| ATOM | 6596 | CA   | TRP | X | 438 | 60.845 | 27.559 | 39.817 | 0.00 | 0.00 |
| ATOM | 6597 | HA   | TRP | X | 438 | 60.763 | 26.602 | 40.333 | 0.00 | 0.00 |
| ATOM | 6598 | CB   | TRP | X | 438 | 62.098 | 28.240 | 40.349 | 0.00 | 0.00 |
| ATOM | 6599 | HB2  | TRP | X | 438 | 62.049 | 28.192 | 41.436 | 0.00 | 0.00 |
| ATOM | 6600 | HB3  | TRP | X | 438 | 62.939 | 27.567 | 40.179 | 0.00 | 0.00 |
| ATOM | 6601 | CG   | TRP | X | 438 | 62.465 | 29.593 | 39.883 | 0.00 | 0.00 |
| ATOM | 6602 | CD1  | TRP | X | 438 | 63.497 | 29.958 | 39.004 | 0.00 | 0.00 |
| ATOM | 6603 | HD1  | TRP | X | 438 | 64.206 | 29.270 | 38.568 | 0.00 | 0.00 |
| ATOM | 6604 | NE1  | TRP | X | 438 | 63.558 | 31.317 | 38.829 | 0.00 | 0.00 |
| ATOM | 6605 | HE1  | TRP | X | 438 | 64.237 | 31.862 | 38.317 | 0.00 | 0.00 |
| ATOM | 6606 | CE2  | TRP | X | 438 | 62.577 | 31.912 | 39.598 | 0.00 | 0.00 |
| ATOM | 6607 | CZ2  | TRP | X | 438 | 62.205 | 33.271 | 39.670 | 0.00 | 0.00 |
| ATOM | 6608 | HZ2  | TRP | X | 438 | 62.839 | 33.997 | 39.183 | 0.00 | 0.00 |
| ATOM | 6609 | CH2  | TRP | X | 438 | 61.213 | 33.616 | 40.592 | 0.00 | 0.00 |
| ATOM | 6610 | HH2  | TRP | X | 438 | 60.991 | 34.669 | 40.685 | 0.00 | 0.00 |
| ATOM | 6611 | CZ3  | TRP | X | 438 | 60.416 | 32.618 | 41.246 | 0.00 | 0.00 |
| ATOM | 6612 | HZ3  | TRP | X | 438 | 59.591 | 32.793 | 41.920 | 0.00 | 0.00 |
| ATOM | 6613 | CE3  | TRP | X | 438 | 60.857 | 31.248 | 41.169 | 0.00 | 0.00 |
| ATOM | 6614 | HE3  | TRP | X | 438 | 60.253 | 30.462 | 41.598 | 0.00 | 0.00 |
| ATOM | 6615 | CD2  | TRP | X | 438 | 61.956 | 30.881 | 40.330 | 0.00 | 0.00 |
| ATOM | 6616 | C    | TRP | X | 438 | 59.601 | 28.372 | 40.152 | 0.00 | 0.00 |
| ATOM | 6617 | O    | TRP | X | 438 | 59.008 | 28.155 | 41.241 | 0.00 | 0.00 |
| ATOM | 6618 | N    | MET | X | 439 | 59.127 | 29.290 | 39.322 | 0.00 | 0.00 |
| ATOM | 6619 | H    | MET | X | 439 | 59.592 | 29.363 | 38.428 | 0.00 | 0.00 |
| ATOM | 6620 | CA   | MET | X | 439 | 57.982 | 30.209 | 39.546 | 0.00 | 0.00 |
| ATOM | 6621 | HA   | MET | X | 439 | 58.074 | 30.537 | 40.581 | 0.00 | 0.00 |
| ATOM | 6622 | CB   | MET | X | 439 | 58.177 | 31.426 | 38.565 | 0.00 | 0.00 |
| ATOM | 6623 | HB2  | MET | X | 439 | 59.211 | 31.758 | 38.656 | 0.00 | 0.00 |
| ATOM | 6624 | HB3  | MET | X | 439 | 58.114 | 31.065 | 37.538 | 0.00 | 0.00 |
| ATOM | 6625 | CG   | MET | X | 439 | 57.282 | 32.599 | 38.910 | 0.00 | 0.00 |
| ATOM | 6626 | HG2  | MET | X | 439 | 56.262 | 32.255 | 38.738 | 0.00 | 0.00 |
| ATOM | 6627 | HG3  | MET | X | 439 | 57.459 | 32.888 | 39.946 | 0.00 | 0.00 |
| ATOM | 6628 | SD   | MET | X | 439 | 57.460 | 34.068 | 37.872 | 0.00 | 0.00 |
| ATOM | 6629 | CE   | MET | X | 439 | 59.160 | 34.644 | 38.282 | 0.00 | 0.00 |
| ATOM | 6630 | HE1  | MET | X | 439 | 59.914 | 33.983 | 37.853 | 0.00 | 0.00 |
| ATOM | 6631 | HE2  | MET | X | 439 | 59.372 | 35.610 | 37.824 | 0.00 | 0.00 |
| ATOM | 6632 | HE3  | MET | X | 439 | 59.208 | 34.800 | 39.360 | 0.00 | 0.00 |
| ATOM | 6633 | C    | MET | X | 439 | 56.604 | 29.456 | 39.367 | 0.00 | 0.00 |
| ATOM | 6634 | O    | MET | X | 439 | 55.568 | 29.926 | 39.844 | 0.00 | 0.00 |
| ATOM | 6635 | N    | GLY | X | 440 | 56.609 | 28.410 | 38.495 | 0.00 | 0.00 |
| ATOM | 6636 | H    | GLY | X | 440 | 57.454 | 28.358 | 37.944 | 0.00 | 0.00 |
| ATOM | 6637 | CA   | GLY | X | 440 | 55.490 | 27.586 | 37.978 | 0.00 | 0.00 |
| ATOM | 6638 | HA2  | GLY | X | 440 | 55.738 | 26.684 | 37.419 | 0.00 | 0.00 |
| ATOM | 6639 | HA3  | GLY | X | 440 | 54.963 | 27.198 | 38.850 | 0.00 | 0.00 |
| ATOM | 6640 | C    | GLY | X | 440 | 54.471 | 28.389 | 37.168 | 0.00 | 0.00 |
| ATOM | 6641 | O    | GLY | X | 440 | 54.864 | 28.853 | 36.098 | 0.00 | 0.00 |
| ATOM | 6642 | N    | VAL | X | 441 | 53.182 | 28.492 | 37.614 | 0.00 | 0.00 |
| ATOM | 6643 | H    | VAL | X | 441 | 53.012 | 28.113 | 38.534 | 0.00 | 0.00 |
| ATOM | 6644 | CA   | VAL | X | 441 | 52.156 | 29.455 | 37.142 | 0.00 | 0.00 |

|      |      |      |     |   |     |        |        |        |      |      |
|------|------|------|-----|---|-----|--------|--------|--------|------|------|
| ATOM | 6645 | HA   | VAL | X | 441 | 52.398 | 29.748 | 36.121 | 0.00 | 0.00 |
| ATOM | 6646 | CB   | VAL | X | 441 | 50.727 | 28.817 | 37.058 | 0.00 | 0.00 |
| ATOM | 6647 | HB   | VAL | X | 441 | 50.388 | 28.599 | 38.071 | 0.00 | 0.00 |
| ATOM | 6648 | CG1  | VAL | X | 441 | 49.790 | 29.903 | 36.483 | 0.00 | 0.00 |
| ATOM | 6649 | HG11 | VAL | X | 441 | 49.870 | 30.813 | 37.079 | 0.00 | 0.00 |
| ATOM | 6650 | HG12 | VAL | X | 441 | 50.031 | 30.126 | 35.444 | 0.00 | 0.00 |
| ATOM | 6651 | HG13 | VAL | X | 441 | 48.733 | 29.643 | 36.529 | 0.00 | 0.00 |
| ATOM | 6652 | CG2  | VAL | X | 441 | 50.627 | 27.538 | 36.215 | 0.00 | 0.00 |
| ATOM | 6653 | HG21 | VAL | X | 441 | 50.776 | 27.835 | 35.177 | 0.00 | 0.00 |
| ATOM | 6654 | HG22 | VAL | X | 441 | 49.626 | 27.115 | 36.132 | 0.00 | 0.00 |
| ATOM | 6655 | HG23 | VAL | X | 441 | 51.307 | 26.774 | 36.593 | 0.00 | 0.00 |
| ATOM | 6656 | C    | VAL | X | 441 | 52.071 | 30.723 | 38.040 | 0.00 | 0.00 |
| ATOM | 6657 | O    | VAL | X | 441 | 51.575 | 30.633 | 39.149 | 0.00 | 0.00 |
| ATOM | 6658 | N    | PRO | X | 442 | 52.627 | 31.869 | 37.585 | 0.00 | 0.00 |
| ATOM | 6659 | CD   | PRO | X | 442 | 53.409 | 31.955 | 36.414 | 0.00 | 0.00 |
| ATOM | 6660 | HD2  | PRO | X | 442 | 52.875 | 31.693 | 35.501 | 0.00 | 0.00 |
| ATOM | 6661 | HD3  | PRO | X | 442 | 54.292 | 31.353 | 36.633 | 0.00 | 0.00 |
| ATOM | 6662 | CG   | PRO | X | 442 | 53.843 | 33.338 | 36.242 | 0.00 | 0.00 |
| ATOM | 6663 | HG2  | PRO | X | 442 | 53.318 | 33.882 | 35.456 | 0.00 | 0.00 |
| ATOM | 6664 | HG3  | PRO | X | 442 | 54.889 | 33.278 | 35.940 | 0.00 | 0.00 |
| ATOM | 6665 | CB   | PRO | X | 442 | 53.652 | 33.992 | 37.614 | 0.00 | 0.00 |
| ATOM | 6666 | HB2  | PRO | X | 442 | 53.356 | 35.040 | 37.575 | 0.00 | 0.00 |
| ATOM | 6667 | HB3  | PRO | X | 442 | 54.618 | 34.032 | 38.118 | 0.00 | 0.00 |
| ATOM | 6668 | CA   | PRO | X | 442 | 52.682 | 33.151 | 38.253 | 0.00 | 0.00 |
| ATOM | 6669 | HA   | PRO | X | 442 | 53.053 | 32.935 | 39.254 | 0.00 | 0.00 |
| ATOM | 6670 | C    | PRO | X | 442 | 51.307 | 33.844 | 38.379 | 0.00 | 0.00 |
| ATOM | 6671 | O    | PRO | X | 442 | 50.395 | 33.573 | 37.635 | 0.00 | 0.00 |
| ATOM | 6672 | N    | HIP | X | 443 | 51.190 | 34.621 | 39.401 | 0.00 | 0.00 |
| ATOM | 6673 | H    | HIP | X | 443 | 51.829 | 34.481 | 40.170 | 0.00 | 0.00 |
| ATOM | 6674 | CA   | HIP | X | 443 | 50.010 | 35.425 | 39.893 | 0.00 | 0.00 |
| ATOM | 6675 | HA   | HIP | X | 443 | 49.392 | 34.900 | 40.622 | 0.00 | 0.00 |
| ATOM | 6676 | CB   | HIP | X | 443 | 50.633 | 36.631 | 40.625 | 0.00 | 0.00 |
| ATOM | 6677 | HB2  | HIP | X | 443 | 51.134 | 36.351 | 41.552 | 0.00 | 0.00 |
| ATOM | 6678 | HB3  | HIP | X | 443 | 51.425 | 37.043 | 40.000 | 0.00 | 0.00 |
| ATOM | 6679 | CG   | HIP | X | 443 | 49.626 | 37.576 | 41.005 | 0.00 | 0.00 |
| ATOM | 6680 | ND1  | HIP | X | 443 | 48.561 | 37.376 | 41.822 | 0.00 | 0.00 |
| ATOM | 6681 | HD1  | HIP | X | 443 | 48.187 | 36.455 | 41.999 | 0.00 | 0.00 |
| ATOM | 6682 | CE1  | HIP | X | 443 | 47.843 | 38.551 | 41.990 | 0.00 | 0.00 |
| ATOM | 6683 | HE1  | HIP | X | 443 | 47.047 | 38.725 | 42.699 | 0.00 | 0.00 |
| ATOM | 6684 | NE2  | HIP | X | 443 | 48.459 | 39.403 | 41.163 | 0.00 | 0.00 |
| ATOM | 6685 | HE2  | HIP | X | 443 | 48.113 | 40.351 | 41.139 | 0.00 | 0.00 |
| ATOM | 6686 | CD2  | HIP | X | 443 | 49.522 | 38.880 | 40.536 | 0.00 | 0.00 |
| ATOM | 6687 | HD2  | HIP | X | 443 | 50.190 | 39.455 | 39.911 | 0.00 | 0.00 |
| ATOM | 6688 | C    | HIP | X | 443 | 49.072 | 36.000 | 38.774 | 0.00 | 0.00 |
| ATOM | 6689 | O    | HIP | X | 443 | 49.479 | 36.917 | 38.103 | 0.00 | 0.00 |
| ATOM | 6690 | N    | GLY | X | 444 | 47.854 | 35.422 | 38.547 | 0.00 | 0.00 |
| ATOM | 6691 | H    | GLY | X | 444 | 47.474 | 34.757 | 39.204 | 0.00 | 0.00 |
| ATOM | 6692 | CA   | GLY | X | 444 | 46.893 | 35.796 | 37.536 | 0.00 | 0.00 |
| ATOM | 6693 | HA2  | GLY | X | 444 | 46.084 | 35.065 | 37.548 | 0.00 | 0.00 |
| ATOM | 6694 | HA3  | GLY | X | 444 | 46.369 | 36.651 | 37.964 | 0.00 | 0.00 |
| ATOM | 6695 | C    | GLY | X | 444 | 47.345 | 35.706 | 36.083 | 0.00 | 0.00 |
| ATOM | 6696 | O    | GLY | X | 444 | 47.253 | 36.634 | 35.319 | 0.00 | 0.00 |
| ATOM | 6697 | N    | TYR | X | 445 | 47.917 | 34.566 | 35.673 | 0.00 | 0.00 |
| ATOM | 6698 | H    | TYR | X | 445 | 48.086 | 33.813 | 36.325 | 0.00 | 0.00 |
| ATOM | 6699 | CA   | TYR | X | 445 | 48.254 | 34.274 | 34.262 | 0.00 | 0.00 |
| ATOM | 6700 | HA   | TYR | X | 445 | 48.090 | 35.107 | 33.579 | 0.00 | 0.00 |
| ATOM | 6701 | CB   | TYR | X | 445 | 49.751 | 33.913 | 34.109 | 0.00 | 0.00 |
| ATOM | 6702 | HB2  | TYR | X | 445 | 50.041 | 33.227 | 34.905 | 0.00 | 0.00 |
| ATOM | 6703 | HB3  | TYR | X | 445 | 49.811 | 33.395 | 33.152 | 0.00 | 0.00 |
| ATOM | 6704 | CG   | TYR | X | 445 | 50.696 | 35.124 | 34.115 | 0.00 | 0.00 |
| ATOM | 6705 | CD1  | TYR | X | 445 | 51.419 | 35.352 | 32.917 | 0.00 | 0.00 |
| ATOM | 6706 | HD1  | TYR | X | 445 | 51.247 | 34.652 | 32.112 | 0.00 | 0.00 |
| ATOM | 6707 | CE1  | TYR | X | 445 | 52.411 | 36.340 | 32.880 | 0.00 | 0.00 |
| ATOM | 6708 | HE1  | TYR | X | 445 | 53.012 | 36.521 | 32.001 | 0.00 | 0.00 |
| ATOM | 6709 | CZ   | TYR | X | 445 | 52.602 | 37.181 | 34.035 | 0.00 | 0.00 |
| ATOM | 6710 | OH   | TYR | X | 445 | 53.546 | 38.138 | 33.930 | 0.00 | 0.00 |
| ATOM | 6711 | HH   | TYR | X | 445 | 53.861 | 38.299 | 33.038 | 0.00 | 0.00 |

|      |      |      |     |   |     |        |        |        |      |      |
|------|------|------|-----|---|-----|--------|--------|--------|------|------|
| ATOM | 6712 | CE2  | TYR | X | 445 | 51.901 | 36.921 | 35.222 | 0.00 | 0.00 |
| ATOM | 6713 | HE2  | TYR | X | 445 | 52.030 | 37.484 | 36.135 | 0.00 | 0.00 |
| ATOM | 6714 | CD2  | TYR | X | 445 | 50.978 | 35.849 | 35.256 | 0.00 | 0.00 |
| ATOM | 6715 | HD2  | TYR | X | 445 | 50.410 | 35.672 | 36.158 | 0.00 | 0.00 |
| ATOM | 6716 | C    | TYR | X | 445 | 47.351 | 33.184 | 33.705 | 0.00 | 0.00 |
| ATOM | 6717 | O    | TYR | X | 445 | 47.522 | 32.690 | 32.656 | 0.00 | 0.00 |
| ATOM | 6718 | N    | GLU | X | 446 | 46.286 | 32.776 | 34.472 | 0.00 | 0.00 |
| ATOM | 6719 | H    | GLU | X | 446 | 46.145 | 33.164 | 35.394 | 0.00 | 0.00 |
| ATOM | 6720 | CA   | GLU | X | 446 | 45.157 | 31.995 | 33.907 | 0.00 | 0.00 |
| ATOM | 6721 | HA   | GLU | X | 446 | 45.568 | 31.220 | 33.260 | 0.00 | 0.00 |
| ATOM | 6722 | CB   | GLU | X | 446 | 44.417 | 31.189 | 35.026 | 0.00 | 0.00 |
| ATOM | 6723 | HB2  | GLU | X | 446 | 44.040 | 30.343 | 34.452 | 0.00 | 0.00 |
| ATOM | 6724 | HB3  | GLU | X | 446 | 45.120 | 30.945 | 35.823 | 0.00 | 0.00 |
| ATOM | 6725 | CG   | GLU | X | 446 | 43.291 | 31.898 | 35.825 | 0.00 | 0.00 |
| ATOM | 6726 | HG2  | GLU | X | 446 | 42.615 | 32.208 | 35.028 | 0.00 | 0.00 |
| ATOM | 6727 | HG3  | GLU | X | 446 | 42.848 | 31.187 | 36.523 | 0.00 | 0.00 |
| ATOM | 6728 | CD   | GLU | X | 446 | 43.653 | 33.105 | 36.666 | 0.00 | 0.00 |
| ATOM | 6729 | OE1  | GLU | X | 446 | 44.718 | 33.664 | 36.333 | 0.00 | 0.00 |
| ATOM | 6730 | OE2  | GLU | X | 446 | 42.869 | 33.467 | 37.585 | 0.00 | 0.00 |
| ATOM | 6731 | C    | GLU | X | 446 | 44.163 | 32.653 | 33.013 | 0.00 | 0.00 |
| ATOM | 6732 | O    | GLU | X | 446 | 43.460 | 32.033 | 32.213 | 0.00 | 0.00 |
| ATOM | 6733 | N    | ILE | X | 447 | 44.083 | 33.969 | 33.092 | 0.00 | 0.00 |
| ATOM | 6734 | H    | ILE | X | 447 | 44.588 | 34.401 | 33.853 | 0.00 | 0.00 |
| ATOM | 6735 | CA   | ILE | X | 447 | 43.229 | 34.843 | 32.269 | 0.00 | 0.00 |
| ATOM | 6736 | HA   | ILE | X | 447 | 42.220 | 34.715 | 32.662 | 0.00 | 0.00 |
| ATOM | 6737 | CB   | ILE | X | 447 | 43.501 | 36.370 | 32.653 | 0.00 | 0.00 |
| ATOM | 6738 | HB   | ILE | X | 447 | 42.981 | 37.053 | 31.981 | 0.00 | 0.00 |
| ATOM | 6739 | CG2  | ILE | X | 447 | 43.010 | 36.716 | 34.062 | 0.00 | 0.00 |
| ATOM | 6740 | HG21 | ILE | X | 447 | 43.617 | 36.172 | 34.786 | 0.00 | 0.00 |
| ATOM | 6741 | HG22 | ILE | X | 447 | 41.975 | 36.415 | 34.224 | 0.00 | 0.00 |
| ATOM | 6742 | HG23 | ILE | X | 447 | 43.126 | 37.770 | 34.316 | 0.00 | 0.00 |
| ATOM | 6743 | CG1  | ILE | X | 447 | 45.024 | 36.720 | 32.398 | 0.00 | 0.00 |
| ATOM | 6744 | HG12 | ILE | X | 447 | 45.654 | 36.121 | 33.056 | 0.00 | 0.00 |
| ATOM | 6745 | HG13 | ILE | X | 447 | 45.173 | 36.581 | 31.328 | 0.00 | 0.00 |
| ATOM | 6746 | CD1  | ILE | X | 447 | 45.403 | 38.219 | 32.726 | 0.00 | 0.00 |
| ATOM | 6747 | HD11 | ILE | X | 447 | 44.827 | 38.988 | 32.210 | 0.00 | 0.00 |
| ATOM | 6748 | HD12 | ILE | X | 447 | 46.373 | 38.368 | 32.252 | 0.00 | 0.00 |
| ATOM | 6749 | HD13 | ILE | X | 447 | 45.458 | 38.311 | 33.811 | 0.00 | 0.00 |
| ATOM | 6750 | C    | ILE | X | 447 | 43.210 | 34.507 | 30.743 | 0.00 | 0.00 |
| ATOM | 6751 | O    | ILE | X | 447 | 42.153 | 34.491 | 30.145 | 0.00 | 0.00 |
| ATOM | 6752 | N    | GLU | X | 448 | 44.356 | 34.079 | 30.242 | 0.00 | 0.00 |
| ATOM | 6753 | H    | GLU | X | 448 | 45.110 | 34.223 | 30.898 | 0.00 | 0.00 |
| ATOM | 6754 | CA   | GLU | X | 448 | 44.551 | 33.603 | 28.875 | 0.00 | 0.00 |
| ATOM | 6755 | HA   | GLU | X | 448 | 44.441 | 34.488 | 28.249 | 0.00 | 0.00 |
| ATOM | 6756 | CB   | GLU | X | 448 | 45.946 | 33.008 | 28.787 | 0.00 | 0.00 |
| ATOM | 6757 | HB2  | GLU | X | 448 | 46.020 | 32.107 | 29.396 | 0.00 | 0.00 |
| ATOM | 6758 | HB3  | GLU | X | 448 | 46.075 | 32.704 | 27.748 | 0.00 | 0.00 |
| ATOM | 6759 | CG   | GLU | X | 448 | 47.028 | 34.055 | 29.089 | 0.00 | 0.00 |
| ATOM | 6760 | HG2  | GLU | X | 448 | 46.818 | 34.999 | 28.586 | 0.00 | 0.00 |
| ATOM | 6761 | HG3  | GLU | X | 448 | 47.038 | 34.291 | 30.153 | 0.00 | 0.00 |
| ATOM | 6762 | CD   | GLU | X | 448 | 48.484 | 33.497 | 28.841 | 0.00 | 0.00 |
| ATOM | 6763 | OE1  | GLU | X | 448 | 49.417 | 34.329 | 28.828 | 0.00 | 0.00 |
| ATOM | 6764 | OE2  | GLU | X | 448 | 48.563 | 32.336 | 28.449 | 0.00 | 0.00 |
| ATOM | 6765 | C    | GLU | X | 448 | 43.499 | 32.453 | 28.482 | 0.00 | 0.00 |
| ATOM | 6766 | O    | GLU | X | 448 | 42.928 | 32.626 | 27.396 | 0.00 | 0.00 |
| ATOM | 6767 | N    | PHE | X | 449 | 43.171 | 31.483 | 29.353 | 0.00 | 0.00 |
| ATOM | 6768 | H    | PHE | X | 449 | 43.511 | 31.584 | 30.298 | 0.00 | 0.00 |
| ATOM | 6769 | CA   | PHE | X | 449 | 42.196 | 30.380 | 29.131 | 0.00 | 0.00 |
| ATOM | 6770 | HA   | PHE | X | 449 | 42.264 | 30.081 | 28.085 | 0.00 | 0.00 |
| ATOM | 6771 | CB   | PHE | X | 449 | 42.438 | 29.213 | 30.139 | 0.00 | 0.00 |
| ATOM | 6772 | HB2  | PHE | X | 449 | 42.449 | 29.633 | 31.145 | 0.00 | 0.00 |
| ATOM | 6773 | HB3  | PHE | X | 449 | 41.534 | 28.606 | 30.089 | 0.00 | 0.00 |
| ATOM | 6774 | CG   | PHE | X | 449 | 43.686 | 28.528 | 29.781 | 0.00 | 0.00 |
| ATOM | 6775 | CD1  | PHE | X | 449 | 44.896 | 28.968 | 30.333 | 0.00 | 0.00 |
| ATOM | 6776 | HD1  | PHE | X | 449 | 44.793 | 29.618 | 31.189 | 0.00 | 0.00 |
| ATOM | 6777 | CE1  | PHE | X | 449 | 46.171 | 28.509 | 29.863 | 0.00 | 0.00 |
| ATOM | 6778 | HE1  | PHE | X | 449 | 47.085 | 28.913 | 30.273 | 0.00 | 0.00 |

|      |      |      |     |   |     |        |        |        |      |      |
|------|------|------|-----|---|-----|--------|--------|--------|------|------|
| ATOM | 6779 | CZ   | PHE | X | 449 | 46.263 | 27.552 | 28.818 | 0.00 | 0.00 |
| ATOM | 6780 | HZ   | PHE | X | 449 | 47.215 | 27.135 | 28.524 | 0.00 | 0.00 |
| ATOM | 6781 | CE2  | PHE | X | 449 | 45.045 | 27.149 | 28.215 | 0.00 | 0.00 |
| ATOM | 6782 | HE2  | PHE | X | 449 | 45.206 | 26.545 | 27.334 | 0.00 | 0.00 |
| ATOM | 6783 | CD2  | PHE | X | 449 | 43.760 | 27.577 | 28.700 | 0.00 | 0.00 |
| ATOM | 6784 | HD2  | PHE | X | 449 | 42.816 | 27.283 | 28.265 | 0.00 | 0.00 |
| ATOM | 6785 | C    | PHE | X | 449 | 40.776 | 30.909 | 29.263 | 0.00 | 0.00 |
| ATOM | 6786 | O    | PHE | X | 449 | 39.914 | 30.192 | 28.722 | 0.00 | 0.00 |
| ATOM | 6787 | N    | ILE | X | 450 | 40.533 | 32.039 | 29.947 | 0.00 | 0.00 |
| ATOM | 6788 | H    | ILE | X | 450 | 41.311 | 32.549 | 30.341 | 0.00 | 0.00 |
| ATOM | 6789 | CA   | ILE | X | 450 | 39.190 | 32.630 | 29.980 | 0.00 | 0.00 |
| ATOM | 6790 | HA   | ILE | X | 450 | 38.435 | 31.852 | 29.864 | 0.00 | 0.00 |
| ATOM | 6791 | CB   | ILE | X | 450 | 39.017 | 33.372 | 31.387 | 0.00 | 0.00 |
| ATOM | 6792 | HB   | ILE | X | 450 | 39.411 | 34.376 | 31.227 | 0.00 | 0.00 |
| ATOM | 6793 | CG2  | ILE | X | 450 | 37.515 | 33.446 | 31.564 | 0.00 | 0.00 |
| ATOM | 6794 | HG21 | ILE | X | 450 | 36.993 | 33.964 | 30.759 | 0.00 | 0.00 |
| ATOM | 6795 | HG22 | ILE | X | 450 | 37.161 | 33.882 | 32.498 | 0.00 | 0.00 |
| ATOM | 6796 | HG23 | ILE | X | 450 | 37.052 | 32.460 | 31.616 | 0.00 | 0.00 |
| ATOM | 6797 | CG1  | ILE | X | 450 | 39.639 | 32.845 | 32.747 | 0.00 | 0.00 |
| ATOM | 6798 | HG12 | ILE | X | 450 | 40.582 | 33.364 | 32.920 | 0.00 | 0.00 |
| ATOM | 6799 | HG13 | ILE | X | 450 | 39.036 | 33.196 | 33.585 | 0.00 | 0.00 |
| ATOM | 6800 | CD1  | ILE | X | 450 | 39.747 | 31.331 | 33.006 | 0.00 | 0.00 |
| ATOM | 6801 | HD11 | ILE | X | 450 | 40.415 | 30.786 | 32.339 | 0.00 | 0.00 |
| ATOM | 6802 | HD12 | ILE | X | 450 | 38.814 | 30.767 | 32.989 | 0.00 | 0.00 |
| ATOM | 6803 | HD13 | ILE | X | 450 | 40.246 | 31.223 | 33.968 | 0.00 | 0.00 |
| ATOM | 6804 | C    | ILE | X | 450 | 38.928 | 33.550 | 28.783 | 0.00 | 0.00 |
| ATOM | 6805 | O    | ILE | X | 450 | 37.841 | 33.501 | 28.210 | 0.00 | 0.00 |
| ATOM | 6806 | N    | PHE | X | 451 | 39.851 | 34.388 | 28.372 | 0.00 | 0.00 |
| ATOM | 6807 | H    | PHE | X | 451 | 40.734 | 34.382 | 28.863 | 0.00 | 0.00 |
| ATOM | 6808 | CA   | PHE | X | 451 | 39.740 | 35.211 | 27.199 | 0.00 | 0.00 |
| ATOM | 6809 | HA   | PHE | X | 451 | 38.679 | 35.458 | 27.222 | 0.00 | 0.00 |
| ATOM | 6810 | CB   | PHE | X | 451 | 40.653 | 36.469 | 27.326 | 0.00 | 0.00 |
| ATOM | 6811 | HB2  | PHE | X | 451 | 41.651 | 36.311 | 27.735 | 0.00 | 0.00 |
| ATOM | 6812 | HB3  | PHE | X | 451 | 40.703 | 36.926 | 26.338 | 0.00 | 0.00 |
| ATOM | 6813 | CG   | PHE | X | 451 | 40.043 | 37.752 | 28.059 | 0.00 | 0.00 |
| ATOM | 6814 | CD1  | PHE | X | 451 | 40.604 | 38.095 | 29.350 | 0.00 | 0.00 |
| ATOM | 6815 | HD1  | PHE | X | 451 | 41.324 | 37.424 | 29.796 | 0.00 | 0.00 |
| ATOM | 6816 | CE1  | PHE | X | 451 | 40.240 | 39.302 | 29.943 | 0.00 | 0.00 |
| ATOM | 6817 | HE1  | PHE | X | 451 | 40.696 | 39.600 | 30.876 | 0.00 | 0.00 |
| ATOM | 6818 | CZ   | PHE | X | 451 | 39.303 | 40.081 | 29.366 | 0.00 | 0.00 |
| ATOM | 6819 | HZ   | PHE | X | 451 | 38.923 | 40.957 | 29.870 | 0.00 | 0.00 |
| ATOM | 6820 | CE2  | PHE | X | 451 | 38.809 | 39.817 | 28.037 | 0.00 | 0.00 |
| ATOM | 6821 | HE2  | PHE | X | 451 | 38.118 | 40.531 | 27.615 | 0.00 | 0.00 |
| ATOM | 6822 | CD2  | PHE | X | 451 | 39.162 | 38.657 | 27.382 | 0.00 | 0.00 |
| ATOM | 6823 | HD2  | PHE | X | 451 | 38.834 | 38.448 | 26.375 | 0.00 | 0.00 |
| ATOM | 6824 | C    | PHE | X | 451 | 39.938 | 34.433 | 25.867 | 0.00 | 0.00 |
| ATOM | 6825 | O    | PHE | X | 451 | 39.825 | 35.017 | 24.804 | 0.00 | 0.00 |
| ATOM | 6826 | N    | GLY | X | 452 | 40.209 | 33.153 | 25.915 | 0.00 | 0.00 |
| ATOM | 6827 | H    | GLY | X | 452 | 40.373 | 32.708 | 26.807 | 0.00 | 0.00 |
| ATOM | 6828 | CA   | GLY | X | 452 | 40.393 | 32.305 | 24.737 | 0.00 | 0.00 |
| ATOM | 6829 | HA2  | GLY | X | 452 | 40.410 | 31.253 | 25.021 | 0.00 | 0.00 |
| ATOM | 6830 | HA3  | GLY | X | 452 | 39.547 | 32.334 | 24.050 | 0.00 | 0.00 |
| ATOM | 6831 | C    | GLY | X | 452 | 41.553 | 32.675 | 23.911 | 0.00 | 0.00 |
| ATOM | 6832 | O    | GLY | X | 452 | 41.521 | 32.563 | 22.679 | 0.00 | 0.00 |
| ATOM | 6833 | N    | ILE | X | 453 | 42.580 | 33.253 | 24.546 | 0.00 | 0.00 |
| ATOM | 6834 | H    | ILE | X | 453 | 42.543 | 33.206 | 25.554 | 0.00 | 0.00 |
| ATOM | 6835 | CA   | ILE | X | 453 | 43.959 | 33.537 | 23.956 | 0.00 | 0.00 |
| ATOM | 6836 | HA   | ILE | X | 453 | 43.976 | 34.279 | 23.158 | 0.00 | 0.00 |
| ATOM | 6837 | CB   | ILE | X | 453 | 44.929 | 34.097 | 24.992 | 0.00 | 0.00 |
| ATOM | 6838 | HB   | ILE | X | 453 | 45.036 | 33.373 | 25.800 | 0.00 | 0.00 |
| ATOM | 6839 | CG2  | ILE | X | 453 | 46.350 | 34.481 | 24.361 | 0.00 | 0.00 |
| ATOM | 6840 | HG21 | ILE | X | 453 | 46.998 | 35.045 | 25.031 | 0.00 | 0.00 |
| ATOM | 6841 | HG22 | ILE | X | 453 | 46.170 | 35.031 | 23.437 | 0.00 | 0.00 |
| ATOM | 6842 | HG23 | ILE | X | 453 | 46.759 | 33.513 | 24.070 | 0.00 | 0.00 |
| ATOM | 6843 | CG1  | ILE | X | 453 | 44.362 | 35.334 | 25.741 | 0.00 | 0.00 |
| ATOM | 6844 | HG12 | ILE | X | 453 | 43.428 | 35.014 | 26.204 | 0.00 | 0.00 |
| ATOM | 6845 | HG13 | ILE | X | 453 | 44.966 | 35.560 | 26.620 | 0.00 | 0.00 |

|      |      |      |     |   |     |        |        |        |      |      |
|------|------|------|-----|---|-----|--------|--------|--------|------|------|
| ATOM | 6846 | CD1  | ILE | X | 453 | 43.996 | 36.559 | 24.797 | 0.00 | 0.00 |
| ATOM | 6847 | HD11 | ILE | X | 453 | 43.668 | 37.387 | 25.425 | 0.00 | 0.00 |
| ATOM | 6848 | HD12 | ILE | X | 453 | 43.387 | 36.237 | 23.952 | 0.00 | 0.00 |
| ATOM | 6849 | HD13 | ILE | X | 453 | 44.886 | 36.924 | 24.286 | 0.00 | 0.00 |
| ATOM | 6850 | C    | ILE | X | 453 | 44.467 | 32.279 | 23.251 | 0.00 | 0.00 |
| ATOM | 6851 | O    | ILE | X | 453 | 44.933 | 32.394 | 22.110 | 0.00 | 0.00 |
| ATOM | 6852 | N    | PRO | X | 454 | 44.423 | 31.061 | 23.780 | 0.00 | 0.00 |
| ATOM | 6853 | CD   | PRO | X | 454 | 44.101 | 30.679 | 25.141 | 0.00 | 0.00 |
| ATOM | 6854 | HD2  | PRO | X | 454 | 43.018 | 30.652 | 25.256 | 0.00 | 0.00 |
| ATOM | 6855 | HD3  | PRO | X | 454 | 44.452 | 31.288 | 25.974 | 0.00 | 0.00 |
| ATOM | 6856 | CG   | PRO | X | 454 | 44.611 | 29.280 | 25.316 | 0.00 | 0.00 |
| ATOM | 6857 | HG2  | PRO | X | 454 | 44.046 | 28.754 | 26.086 | 0.00 | 0.00 |
| ATOM | 6858 | HG3  | PRO | X | 454 | 45.669 | 29.295 | 25.576 | 0.00 | 0.00 |
| ATOM | 6859 | CB   | PRO | X | 454 | 44.302 | 28.766 | 23.886 | 0.00 | 0.00 |
| ATOM | 6860 | HB2  | PRO | X | 454 | 43.237 | 28.585 | 23.741 | 0.00 | 0.00 |
| ATOM | 6861 | HB3  | PRO | X | 454 | 44.850 | 27.848 | 23.672 | 0.00 | 0.00 |
| ATOM | 6862 | CA   | PRO | X | 454 | 44.722 | 29.866 | 23.007 | 0.00 | 0.00 |
| ATOM | 6863 | HA   | PRO | X | 454 | 45.806 | 29.785 | 22.936 | 0.00 | 0.00 |
| ATOM | 6864 | C    | PRO | X | 454 | 44.073 | 29.790 | 21.665 | 0.00 | 0.00 |
| ATOM | 6865 | O    | PRO | X | 454 | 44.473 | 29.029 | 20.790 | 0.00 | 0.00 |
| ATOM | 6866 | N    | LEU | X | 455 | 42.893 | 30.483 | 21.419 | 0.00 | 0.00 |
| ATOM | 6867 | H    | LEU | X | 455 | 42.540 | 31.150 | 22.089 | 0.00 | 0.00 |
| ATOM | 6868 | CA   | LEU | X | 455 | 42.112 | 30.317 | 20.183 | 0.00 | 0.00 |
| ATOM | 6869 | HA   | LEU | X | 455 | 42.158 | 29.275 | 19.868 | 0.00 | 0.00 |
| ATOM | 6870 | CB   | LEU | X | 455 | 40.569 | 30.544 | 20.435 | 0.00 | 0.00 |
| ATOM | 6871 | HB2  | LEU | X | 455 | 40.342 | 31.593 | 20.623 | 0.00 | 0.00 |
| ATOM | 6872 | HB3  | LEU | X | 455 | 39.937 | 30.363 | 19.566 | 0.00 | 0.00 |
| ATOM | 6873 | CG   | LEU | X | 455 | 39.836 | 29.692 | 21.604 | 0.00 | 0.00 |
| ATOM | 6874 | HG   | LEU | X | 455 | 40.260 | 29.868 | 22.593 | 0.00 | 0.00 |
| ATOM | 6875 | CD1  | LEU | X | 455 | 38.321 | 29.884 | 21.615 | 0.00 | 0.00 |
| ATOM | 6876 | HD11 | LEU | X | 455 | 38.003 | 30.925 | 21.578 | 0.00 | 0.00 |
| ATOM | 6877 | HD12 | LEU | X | 455 | 37.851 | 29.372 | 22.455 | 0.00 | 0.00 |
| ATOM | 6878 | HD13 | LEU | X | 455 | 37.907 | 29.477 | 20.693 | 0.00 | 0.00 |
| ATOM | 6879 | CD2  | LEU | X | 455 | 40.077 | 28.186 | 21.428 | 0.00 | 0.00 |
| ATOM | 6880 | HD21 | LEU | X | 455 | 39.423 | 27.683 | 20.716 | 0.00 | 0.00 |
| ATOM | 6881 | HD22 | LEU | X | 455 | 41.109 | 27.951 | 21.169 | 0.00 | 0.00 |
| ATOM | 6882 | HD23 | LEU | X | 455 | 40.062 | 27.696 | 22.401 | 0.00 | 0.00 |
| ATOM | 6883 | C    | LEU | X | 455 | 42.649 | 31.141 | 18.978 | 0.00 | 0.00 |
| ATOM | 6884 | O    | LEU | X | 455 | 42.388 | 30.908 | 17.770 | 0.00 | 0.00 |
| ATOM | 6885 | N    | ASP | X | 456 | 43.506 | 32.063 | 19.279 | 0.00 | 0.00 |
| ATOM | 6886 | H    | ASP | X | 456 | 43.886 | 31.983 | 20.211 | 0.00 | 0.00 |
| ATOM | 6887 | CA   | ASP | X | 456 | 44.264 | 33.043 | 18.415 | 0.00 | 0.00 |
| ATOM | 6888 | HA   | ASP | X | 456 | 43.542 | 33.718 | 17.955 | 0.00 | 0.00 |
| ATOM | 6889 | CB   | ASP | X | 456 | 45.029 | 34.040 | 19.253 | 0.00 | 0.00 |
| ATOM | 6890 | HB2  | ASP | X | 456 | 44.365 | 34.467 | 20.005 | 0.00 | 0.00 |
| ATOM | 6891 | HB3  | ASP | X | 456 | 45.688 | 33.543 | 19.966 | 0.00 | 0.00 |
| ATOM | 6892 | CG   | ASP | X | 456 | 45.784 | 35.109 | 18.509 | 0.00 | 0.00 |
| ATOM | 6893 | OD1  | ASP | X | 456 | 45.813 | 36.255 | 19.064 | 0.00 | 0.00 |
| ATOM | 6894 | OD2  | ASP | X | 456 | 46.404 | 34.866 | 17.451 | 0.00 | 0.00 |
| ATOM | 6895 | C    | ASP | X | 456 | 45.124 | 32.269 | 17.339 | 0.00 | 0.00 |
| ATOM | 6896 | O    | ASP | X | 456 | 46.069 | 31.535 | 17.627 | 0.00 | 0.00 |
| ATOM | 6897 | N    | PRO | X | 457 | 44.881 | 32.433 | 15.967 | 0.00 | 0.00 |
| ATOM | 6898 | CD   | PRO | X | 457 | 44.024 | 33.482 | 15.322 | 0.00 | 0.00 |
| ATOM | 6899 | HD2  | PRO | X | 457 | 44.151 | 34.469 | 15.767 | 0.00 | 0.00 |
| ATOM | 6900 | HD3  | PRO | X | 457 | 43.017 | 33.075 | 15.413 | 0.00 | 0.00 |
| ATOM | 6901 | CG   | PRO | X | 457 | 44.429 | 33.545 | 13.893 | 0.00 | 0.00 |
| ATOM | 6902 | HG2  | PRO | X | 457 | 45.100 | 34.369 | 13.653 | 0.00 | 0.00 |
| ATOM | 6903 | HG3  | PRO | X | 457 | 43.504 | 33.760 | 13.358 | 0.00 | 0.00 |
| ATOM | 6904 | CB   | PRO | X | 457 | 44.926 | 32.152 | 13.653 | 0.00 | 0.00 |
| ATOM | 6905 | HB2  | PRO | X | 457 | 45.605 | 32.053 | 12.807 | 0.00 | 0.00 |
| ATOM | 6906 | HB3  | PRO | X | 457 | 44.093 | 31.481 | 13.444 | 0.00 | 0.00 |
| ATOM | 6907 | CA   | PRO | X | 457 | 45.655 | 31.754 | 14.958 | 0.00 | 0.00 |
| ATOM | 6908 | HA   | PRO | X | 457 | 45.641 | 30.671 | 15.075 | 0.00 | 0.00 |
| ATOM | 6909 | C    | PRO | X | 457 | 47.128 | 32.185 | 14.896 | 0.00 | 0.00 |
| ATOM | 6910 | O    | PRO | X | 457 | 47.935 | 31.577 | 14.164 | 0.00 | 0.00 |
| ATOM | 6911 | N    | SER | X | 458 | 47.566 | 33.277 | 15.499 | 0.00 | 0.00 |
| ATOM | 6912 | H    | SER | X | 458 | 46.902 | 33.859 | 15.989 | 0.00 | 0.00 |

|      |      |      |     |   |     |        |        |        |      |      |
|------|------|------|-----|---|-----|--------|--------|--------|------|------|
| ATOM | 6913 | CA   | SER | X | 458 | 48.918 | 33.756 | 15.314 | 0.00 | 0.00 |
| ATOM | 6914 | HA   | SER | X | 458 | 49.337 | 33.435 | 14.360 | 0.00 | 0.00 |
| ATOM | 6915 | CB   | SER | X | 458 | 49.076 | 35.267 | 15.311 | 0.00 | 0.00 |
| ATOM | 6916 | HB2  | SER | X | 458 | 50.066 | 35.522 | 14.931 | 0.00 | 0.00 |
| ATOM | 6917 | HB3  | SER | X | 458 | 48.406 | 35.751 | 14.600 | 0.00 | 0.00 |
| ATOM | 6918 | OG   | SER | X | 458 | 48.850 | 35.893 | 16.594 | 0.00 | 0.00 |
| ATOM | 6919 | HG   | SER | X | 458 | 47.930 | 35.749 | 16.827 | 0.00 | 0.00 |
| ATOM | 6920 | C    | SER | X | 458 | 49.854 | 33.224 | 16.434 | 0.00 | 0.00 |
| ATOM | 6921 | O    | SER | X | 458 | 51.078 | 33.233 | 16.219 | 0.00 | 0.00 |
| ATOM | 6922 | N    | ARG | X | 459 | 49.320 | 32.768 | 17.626 | 0.00 | 0.00 |
| ATOM | 6923 | H    | ARG | X | 459 | 48.327 | 32.584 | 17.660 | 0.00 | 0.00 |
| ATOM | 6924 | CA   | ARG | X | 459 | 50.092 | 32.341 | 18.756 | 0.00 | 0.00 |
| ATOM | 6925 | HA   | ARG | X | 459 | 51.061 | 32.839 | 18.724 | 0.00 | 0.00 |
| ATOM | 6926 | CB   | ARG | X | 459 | 49.283 | 32.792 | 19.980 | 0.00 | 0.00 |
| ATOM | 6927 | HB2  | ARG | X | 459 | 48.342 | 32.294 | 19.748 | 0.00 | 0.00 |
| ATOM | 6928 | HB3  | ARG | X | 459 | 49.643 | 32.229 | 20.841 | 0.00 | 0.00 |
| ATOM | 6929 | CG   | ARG | X | 459 | 49.112 | 34.332 | 20.118 | 0.00 | 0.00 |
| ATOM | 6930 | HG2  | ARG | X | 459 | 50.114 | 34.759 | 20.066 | 0.00 | 0.00 |
| ATOM | 6931 | HG3  | ARG | X | 459 | 48.424 | 34.764 | 19.392 | 0.00 | 0.00 |
| ATOM | 6932 | CD   | ARG | X | 459 | 48.482 | 34.626 | 21.481 | 0.00 | 0.00 |
| ATOM | 6933 | HD2  | ARG | X | 459 | 47.456 | 34.268 | 21.566 | 0.00 | 0.00 |
| ATOM | 6934 | HD3  | ARG | X | 459 | 49.006 | 34.173 | 22.323 | 0.00 | 0.00 |
| ATOM | 6935 | NE   | ARG | X | 459 | 48.307 | 36.061 | 21.607 | 0.00 | 0.00 |
| ATOM | 6936 | HE   | ARG | X | 459 | 47.337 | 36.264 | 21.413 | 0.00 | 0.00 |
| ATOM | 6937 | CZ   | ARG | X | 459 | 49.125 | 36.997 | 22.040 | 0.00 | 0.00 |
| ATOM | 6938 | NH1  | ARG | X | 459 | 50.351 | 36.832 | 22.414 | 0.00 | 0.00 |
| ATOM | 6939 | HH11 | ARG | X | 459 | 50.731 | 35.897 | 22.393 | 0.00 | 0.00 |
| ATOM | 6940 | HH12 | ARG | X | 459 | 50.890 | 37.542 | 22.888 | 0.00 | 0.00 |
| ATOM | 6941 | NH2  | ARG | X | 459 | 48.655 | 38.209 | 22.068 | 0.00 | 0.00 |
| ATOM | 6942 | HH21 | ARG | X | 459 | 47.663 | 38.291 | 21.899 | 0.00 | 0.00 |
| ATOM | 6943 | HH22 | ARG | X | 459 | 49.277 | 38.948 | 22.364 | 0.00 | 0.00 |
| ATOM | 6944 | C    | ARG | X | 459 | 50.400 | 30.806 | 18.635 | 0.00 | 0.00 |
| ATOM | 6945 | O    | ARG | X | 459 | 50.106 | 30.114 | 17.649 | 0.00 | 0.00 |
| ATOM | 6946 | N    | ASN | X | 460 | 51.097 | 30.279 | 19.684 | 0.00 | 0.00 |
| ATOM | 6947 | H    | ASN | X | 460 | 51.327 | 30.860 | 20.478 | 0.00 | 0.00 |
| ATOM | 6948 | CA   | ASN | X | 460 | 51.832 | 29.031 | 19.680 | 0.00 | 0.00 |
| ATOM | 6949 | HA   | ASN | X | 460 | 51.745 | 28.754 | 18.629 | 0.00 | 0.00 |
| ATOM | 6950 | CB   | ASN | X | 460 | 53.340 | 29.239 | 20.007 | 0.00 | 0.00 |
| ATOM | 6951 | HB2  | ASN | X | 460 | 53.624 | 30.026 | 19.309 | 0.00 | 0.00 |
| ATOM | 6952 | HB3  | ASN | X | 460 | 53.487 | 29.574 | 21.034 | 0.00 | 0.00 |
| ATOM | 6953 | CG   | ASN | X | 460 | 54.236 | 28.007 | 19.679 | 0.00 | 0.00 |
| ATOM | 6954 | OD1  | ASN | X | 460 | 53.818 | 27.140 | 18.880 | 0.00 | 0.00 |
| ATOM | 6955 | ND2  | ASN | X | 460 | 55.395 | 27.857 | 20.249 | 0.00 | 0.00 |
| ATOM | 6956 | HD21 | ASN | X | 460 | 55.786 | 26.940 | 20.091 | 0.00 | 0.00 |
| ATOM | 6957 | HD22 | ASN | X | 460 | 55.693 | 28.490 | 20.978 | 0.00 | 0.00 |
| ATOM | 6958 | C    | ASN | X | 460 | 51.135 | 27.995 | 20.643 | 0.00 | 0.00 |
| ATOM | 6959 | O    | ASN | X | 460 | 51.797 | 27.026 | 21.132 | 0.00 | 0.00 |
| ATOM | 6960 | N    | TYR | X | 461 | 49.892 | 28.140 | 21.199 | 0.00 | 0.00 |
| ATOM | 6961 | H    | TYR | X | 461 | 49.278 | 28.870 | 20.864 | 0.00 | 0.00 |
| ATOM | 6962 | CA   | TYR | X | 461 | 49.230 | 27.176 | 22.104 | 0.00 | 0.00 |
| ATOM | 6963 | HA   | TYR | X | 461 | 49.937 | 26.888 | 22.883 | 0.00 | 0.00 |
| ATOM | 6964 | CB   | TYR | X | 461 | 47.979 | 27.686 | 22.835 | 0.00 | 0.00 |
| ATOM | 6965 | HB2  | TYR | X | 461 | 47.243 | 27.913 | 22.063 | 0.00 | 0.00 |
| ATOM | 6966 | HB3  | TYR | X | 461 | 47.688 | 26.827 | 23.439 | 0.00 | 0.00 |
| ATOM | 6967 | CG   | TYR | X | 461 | 48.300 | 28.864 | 23.700 | 0.00 | 0.00 |
| ATOM | 6968 | CD1  | TYR | X | 461 | 48.272 | 30.134 | 23.031 | 0.00 | 0.00 |
| ATOM | 6969 | HD1  | TYR | X | 461 | 48.000 | 30.259 | 21.993 | 0.00 | 0.00 |
| ATOM | 6970 | CE1  | TYR | X | 461 | 48.470 | 31.292 | 23.732 | 0.00 | 0.00 |
| ATOM | 6971 | HE1  | TYR | X | 461 | 48.357 | 32.224 | 23.197 | 0.00 | 0.00 |
| ATOM | 6972 | CZ   | TYR | X | 461 | 48.692 | 31.247 | 25.088 | 0.00 | 0.00 |
| ATOM | 6973 | OH   | TYR | X | 461 | 48.923 | 32.432 | 25.705 | 0.00 | 0.00 |
| ATOM | 6974 | HH   | TYR | X | 461 | 48.857 | 32.368 | 26.660 | 0.00 | 0.00 |
| ATOM | 6975 | CE2  | TYR | X | 461 | 48.547 | 30.027 | 25.832 | 0.00 | 0.00 |
| ATOM | 6976 | HE2  | TYR | X | 461 | 48.641 | 29.916 | 26.902 | 0.00 | 0.00 |
| ATOM | 6977 | CD2  | TYR | X | 461 | 48.393 | 28.796 | 25.114 | 0.00 | 0.00 |
| ATOM | 6978 | HD2  | TYR | X | 461 | 48.356 | 27.850 | 25.634 | 0.00 | 0.00 |
| ATOM | 6979 | C    | TYR | X | 461 | 48.759 | 25.868 | 21.392 | 0.00 | 0.00 |

|      |      |      |     |   |     |        |        |        |      |      |
|------|------|------|-----|---|-----|--------|--------|--------|------|------|
| ATOM | 6980 | O    | TYR | X | 461 | 48.392 | 25.897 | 20.214 | 0.00 | 0.00 |
| ATOM | 6981 | N    | THR | X | 462 | 48.909 | 24.744 | 22.030 | 0.00 | 0.00 |
| ATOM | 6982 | H    | THR | X | 462 | 49.309 | 24.767 | 22.957 | 0.00 | 0.00 |
| ATOM | 6983 | CA   | THR | X | 462 | 48.641 | 23.384 | 21.405 | 0.00 | 0.00 |
| ATOM | 6984 | HA   | THR | X | 462 | 48.854 | 23.454 | 20.338 | 0.00 | 0.00 |
| ATOM | 6985 | CB   | THR | X | 462 | 49.571 | 22.334 | 22.021 | 0.00 | 0.00 |
| ATOM | 6986 | HB   | THR | X | 462 | 49.290 | 21.329 | 21.707 | 0.00 | 0.00 |
| ATOM | 6987 | CG2  | THR | X | 462 | 51.081 | 22.617 | 21.769 | 0.00 | 0.00 |
| ATOM | 6988 | HG21 | THR | X | 462 | 51.501 | 22.783 | 22.761 | 0.00 | 0.00 |
| ATOM | 6989 | HG22 | THR | X | 462 | 51.171 | 23.534 | 21.188 | 0.00 | 0.00 |
| ATOM | 6990 | HG23 | THR | X | 462 | 51.612 | 21.829 | 21.235 | 0.00 | 0.00 |
| ATOM | 6991 | OG1  | THR | X | 462 | 49.497 | 22.342 | 23.410 | 0.00 | 0.00 |
| ATOM | 6992 | HG1  | THR | X | 462 | 49.417 | 23.255 | 23.696 | 0.00 | 0.00 |
| ATOM | 6993 | C    | THR | X | 462 | 47.156 | 22.916 | 21.589 | 0.00 | 0.00 |
| ATOM | 6994 | O    | THR | X | 462 | 46.428 | 23.502 | 22.424 | 0.00 | 0.00 |
| ATOM | 6995 | N    | ALA | X | 463 | 46.681 | 22.016 | 20.780 | 0.00 | 0.00 |
| ATOM | 6996 | H    | ALA | X | 463 | 47.266 | 21.496 | 20.141 | 0.00 | 0.00 |
| ATOM | 6997 | CA   | ALA | X | 463 | 45.231 | 21.770 | 20.596 | 0.00 | 0.00 |
| ATOM | 6998 | HA   | ALA | X | 463 | 44.767 | 22.723 | 20.339 | 0.00 | 0.00 |
| ATOM | 6999 | CB   | ALA | X | 463 | 45.024 | 20.812 | 19.451 | 0.00 | 0.00 |
| ATOM | 7000 | HB1  | ALA | X | 463 | 43.984 | 20.715 | 19.137 | 0.00 | 0.00 |
| ATOM | 7001 | HB2  | ALA | X | 463 | 45.387 | 19.810 | 19.677 | 0.00 | 0.00 |
| ATOM | 7002 | HB3  | ALA | X | 463 | 45.542 | 21.127 | 18.545 | 0.00 | 0.00 |
| ATOM | 7003 | C    | ALA | X | 463 | 44.469 | 21.283 | 21.850 | 0.00 | 0.00 |
| ATOM | 7004 | O    | ALA | X | 463 | 43.269 | 21.600 | 22.086 | 0.00 | 0.00 |
| ATOM | 7005 | N    | GLU | X | 464 | 45.186 | 20.552 | 22.722 | 0.00 | 0.00 |
| ATOM | 7006 | H    | GLU | X | 464 | 46.105 | 20.202 | 22.491 | 0.00 | 0.00 |
| ATOM | 7007 | CA   | GLU | X | 464 | 44.683 | 20.145 | 24.025 | 0.00 | 0.00 |
| ATOM | 7008 | HA   | GLU | X | 464 | 43.680 | 19.742 | 23.884 | 0.00 | 0.00 |
| ATOM | 7009 | CB   | GLU | X | 464 | 45.575 | 19.068 | 24.674 | 0.00 | 0.00 |
| ATOM | 7010 | HB2  | GLU | X | 464 | 45.064 | 18.611 | 25.522 | 0.00 | 0.00 |
| ATOM | 7011 | HB3  | GLU | X | 464 | 45.603 | 18.253 | 23.950 | 0.00 | 0.00 |
| ATOM | 7012 | CG   | GLU | X | 464 | 46.944 | 19.529 | 25.104 | 0.00 | 0.00 |
| ATOM | 7013 | HG2  | GLU | X | 464 | 47.382 | 20.363 | 24.555 | 0.00 | 0.00 |
| ATOM | 7014 | HG3  | GLU | X | 464 | 46.858 | 20.017 | 26.074 | 0.00 | 0.00 |
| ATOM | 7015 | CD   | GLU | X | 464 | 47.963 | 18.314 | 25.125 | 0.00 | 0.00 |
| ATOM | 7016 | OE1  | GLU | X | 464 | 47.680 | 17.381 | 25.889 | 0.00 | 0.00 |
| ATOM | 7017 | OE2  | GLU | X | 464 | 49.015 | 18.325 | 24.376 | 0.00 | 0.00 |
| ATOM | 7018 | C    | GLU | X | 464 | 44.636 | 21.306 | 25.055 | 0.00 | 0.00 |
| ATOM | 7019 | O    | GLU | X | 464 | 43.935 | 21.182 | 26.045 | 0.00 | 0.00 |
| ATOM | 7020 | N    | GLU | X | 465 | 45.335 | 22.426 | 24.762 | 0.00 | 0.00 |
| ATOM | 7021 | H    | GLU | X | 465 | 45.896 | 22.408 | 23.922 | 0.00 | 0.00 |
| ATOM | 7022 | CA   | GLU | X | 465 | 45.261 | 23.684 | 25.452 | 0.00 | 0.00 |
| ATOM | 7023 | HA   | GLU | X | 465 | 45.037 | 23.477 | 26.499 | 0.00 | 0.00 |
| ATOM | 7024 | CB   | GLU | X | 465 | 46.564 | 24.486 | 25.411 | 0.00 | 0.00 |
| ATOM | 7025 | HB2  | GLU | X | 465 | 46.845 | 24.789 | 24.403 | 0.00 | 0.00 |
| ATOM | 7026 | HB3  | GLU | X | 465 | 46.398 | 25.476 | 25.836 | 0.00 | 0.00 |
| ATOM | 7027 | CG   | GLU | X | 465 | 47.738 | 23.797 | 26.066 | 0.00 | 0.00 |
| ATOM | 7028 | HG2  | GLU | X | 465 | 47.540 | 23.910 | 27.132 | 0.00 | 0.00 |
| ATOM | 7029 | HG3  | GLU | X | 465 | 47.680 | 22.755 | 25.752 | 0.00 | 0.00 |
| ATOM | 7030 | CD   | GLU | X | 465 | 49.064 | 24.487 | 25.906 | 0.00 | 0.00 |
| ATOM | 7031 | OE1  | GLU | X | 465 | 49.490 | 24.685 | 24.749 | 0.00 | 0.00 |
| ATOM | 7032 | OE2  | GLU | X | 465 | 49.805 | 24.680 | 26.916 | 0.00 | 0.00 |
| ATOM | 7033 | C    | GLU | X | 465 | 44.073 | 24.562 | 24.895 | 0.00 | 0.00 |
| ATOM | 7034 | O    | GLU | X | 465 | 43.524 | 25.365 | 25.630 | 0.00 | 0.00 |
| ATOM | 7035 | N    | LYS | X | 466 | 43.647 | 24.365 | 23.622 | 0.00 | 0.00 |
| ATOM | 7036 | H    | LYS | X | 466 | 43.964 | 23.540 | 23.133 | 0.00 | 0.00 |
| ATOM | 7037 | CA   | LYS | X | 466 | 42.501 | 25.136 | 23.013 | 0.00 | 0.00 |
| ATOM | 7038 | HA   | LYS | X | 466 | 42.440 | 26.140 | 23.431 | 0.00 | 0.00 |
| ATOM | 7039 | CB   | LYS | X | 466 | 42.781 | 25.060 | 21.536 | 0.00 | 0.00 |
| ATOM | 7040 | HB2  | LYS | X | 466 | 42.846 | 23.998 | 21.300 | 0.00 | 0.00 |
| ATOM | 7041 | HB3  | LYS | X | 466 | 41.869 | 25.525 | 21.159 | 0.00 | 0.00 |
| ATOM | 7042 | CG   | LYS | X | 466 | 44.067 | 25.667 | 21.052 | 0.00 | 0.00 |
| ATOM | 7043 | HG2  | LYS | X | 466 | 44.150 | 26.640 | 21.538 | 0.00 | 0.00 |
| ATOM | 7044 | HG3  | LYS | X | 466 | 44.931 | 25.077 | 21.357 | 0.00 | 0.00 |
| ATOM | 7045 | CD   | LYS | X | 466 | 44.131 | 25.743 | 19.552 | 0.00 | 0.00 |
| ATOM | 7046 | HD2  | LYS | X | 466 | 44.043 | 24.698 | 19.255 | 0.00 | 0.00 |



|      |      |      |     |   |     |        |        |        |      |      |
|------|------|------|-----|---|-----|--------|--------|--------|------|------|
| ATOM | 7047 | HD3  | LYS | X | 466 | 43.344 | 26.402 | 19.184 | 0.00 | 0.00 |
| ATOM | 7048 | CE   | LYS | X | 466 | 45.548 | 26.217 | 19.149 | 0.00 | 0.00 |
| ATOM | 7049 | HE2  | LYS | X | 466 | 46.007 | 26.909 | 19.855 | 0.00 | 0.00 |
| ATOM | 7050 | HE3  | LYS | X | 466 | 46.152 | 25.309 | 19.136 | 0.00 | 0.00 |
| ATOM | 7051 | NZ   | LYS | X | 466 | 45.632 | 26.909 | 17.835 | 0.00 | 0.00 |
| ATOM | 7052 | HZ1  | LYS | X | 466 | 46.598 | 27.094 | 17.603 | 0.00 | 0.00 |
| ATOM | 7053 | HZ2  | LYS | X | 466 | 45.114 | 26.473 | 17.086 | 0.00 | 0.00 |
| ATOM | 7054 | HZ3  | LYS | X | 466 | 45.412 | 27.894 | 17.869 | 0.00 | 0.00 |
| ATOM | 7055 | C    | LYS | X | 466 | 41.144 | 24.471 | 23.468 | 0.00 | 0.00 |
| ATOM | 7056 | O    | LYS | X | 466 | 40.209 | 25.125 | 23.973 | 0.00 | 0.00 |
| ATOM | 7057 | N    | ILE | X | 467 | 41.067 | 23.168 | 23.572 | 0.00 | 0.00 |
| ATOM | 7058 | H    | ILE | X | 467 | 41.849 | 22.631 | 23.225 | 0.00 | 0.00 |
| ATOM | 7059 | CA   | ILE | X | 467 | 39.892 | 22.402 | 24.103 | 0.00 | 0.00 |
| ATOM | 7060 | HA   | ILE | X | 467 | 38.979 | 22.823 | 23.681 | 0.00 | 0.00 |
| ATOM | 7061 | CB   | ILE | X | 467 | 39.978 | 20.909 | 23.730 | 0.00 | 0.00 |
| ATOM | 7062 | HB   | ILE | X | 467 | 40.370 | 20.810 | 22.718 | 0.00 | 0.00 |
| ATOM | 7063 | CG2  | ILE | X | 467 | 40.897 | 20.065 | 24.597 | 0.00 | 0.00 |
| ATOM | 7064 | HG21 | ILE | X | 467 | 41.005 | 19.103 | 24.096 | 0.00 | 0.00 |
| ATOM | 7065 | HG22 | ILE | X | 467 | 40.455 | 19.918 | 25.582 | 0.00 | 0.00 |
| ATOM | 7066 | HG23 | ILE | X | 467 | 41.919 | 20.441 | 24.653 | 0.00 | 0.00 |
| ATOM | 7067 | CG1  | ILE | X | 467 | 38.540 | 20.259 | 23.812 | 0.00 | 0.00 |
| ATOM | 7068 | HG12 | ILE | X | 467 | 38.291 | 20.097 | 24.861 | 0.00 | 0.00 |
| ATOM | 7069 | HG13 | ILE | X | 467 | 37.813 | 20.913 | 23.331 | 0.00 | 0.00 |
| ATOM | 7070 | CD1  | ILE | X | 467 | 38.419 | 18.876 | 23.085 | 0.00 | 0.00 |
| ATOM | 7071 | HD11 | ILE | X | 467 | 37.425 | 18.431 | 23.122 | 0.00 | 0.00 |
| ATOM | 7072 | HD12 | ILE | X | 467 | 39.065 | 18.099 | 23.493 | 0.00 | 0.00 |
| ATOM | 7073 | HD13 | ILE | X | 467 | 38.553 | 19.151 | 22.038 | 0.00 | 0.00 |
| ATOM | 7074 | C    | ILE | X | 467 | 39.656 | 22.752 | 25.618 | 0.00 | 0.00 |
| ATOM | 7075 | O    | ILE | X | 467 | 38.506 | 23.077 | 25.947 | 0.00 | 0.00 |
| ATOM | 7076 | N    | PHE | X | 468 | 40.790 | 22.737 | 26.403 | 0.00 | 0.00 |
| ATOM | 7077 | H    | PHE | X | 468 | 41.686 | 22.422 | 26.059 | 0.00 | 0.00 |
| ATOM | 7078 | CA   | PHE | X | 468 | 40.792 | 23.264 | 27.746 | 0.00 | 0.00 |
| ATOM | 7079 | HA   | PHE | X | 468 | 40.217 | 22.586 | 28.377 | 0.00 | 0.00 |
| ATOM | 7080 | CB   | PHE | X | 468 | 42.240 | 23.289 | 28.273 | 0.00 | 0.00 |
| ATOM | 7081 | HB2  | PHE | X | 468 | 42.806 | 22.389 | 28.035 | 0.00 | 0.00 |
| ATOM | 7082 | HB3  | PHE | X | 468 | 42.787 | 24.073 | 27.749 | 0.00 | 0.00 |
| ATOM | 7083 | CG   | PHE | X | 468 | 42.296 | 23.624 | 29.724 | 0.00 | 0.00 |
| ATOM | 7084 | CD1  | PHE | X | 468 | 41.532 | 23.045 | 30.731 | 0.00 | 0.00 |
| ATOM | 7085 | HD1  | PHE | X | 468 | 40.803 | 22.282 | 30.500 | 0.00 | 0.00 |
| ATOM | 7086 | CE1  | PHE | X | 468 | 41.634 | 23.492 | 32.045 | 0.00 | 0.00 |
| ATOM | 7087 | HE1  | PHE | X | 468 | 41.102 | 22.966 | 32.824 | 0.00 | 0.00 |
| ATOM | 7088 | CZ   | PHE | X | 468 | 42.707 | 24.377 | 32.440 | 0.00 | 0.00 |
| ATOM | 7089 | HZ   | PHE | X | 468 | 42.812 | 24.596 | 33.493 | 0.00 | 0.00 |
| ATOM | 7090 | CE2  | PHE | X | 468 | 43.498 | 24.960 | 31.454 | 0.00 | 0.00 |
| ATOM | 7091 | HE2  | PHE | X | 468 | 44.357 | 25.553 | 31.733 | 0.00 | 0.00 |
| ATOM | 7092 | CD2  | PHE | X | 468 | 43.277 | 24.559 | 30.114 | 0.00 | 0.00 |
| ATOM | 7093 | HD2  | PHE | X | 468 | 43.993 | 25.012 | 29.444 | 0.00 | 0.00 |
| ATOM | 7094 | C    | PHE | X | 468 | 40.240 | 24.654 | 27.895 | 0.00 | 0.00 |
| ATOM | 7095 | O    | PHE | X | 468 | 39.355 | 24.898 | 28.750 | 0.00 | 0.00 |
| ATOM | 7096 | N    | ALA | X | 469 | 40.667 | 25.596 | 27.023 | 0.00 | 0.00 |
| ATOM | 7097 | H    | ALA | X | 469 | 41.455 | 25.253 | 26.492 | 0.00 | 0.00 |
| ATOM | 7098 | CA   | ALA | X | 469 | 40.100 | 27.011 | 26.868 | 0.00 | 0.00 |
| ATOM | 7099 | HA   | ALA | X | 469 | 40.402 | 27.631 | 27.712 | 0.00 | 0.00 |
| ATOM | 7100 | CB   | ALA | X | 469 | 40.761 | 27.703 | 25.575 | 0.00 | 0.00 |
| ATOM | 7101 | HB1  | ALA | X | 469 | 41.813 | 27.421 | 25.631 | 0.00 | 0.00 |
| ATOM | 7102 | HB2  | ALA | X | 469 | 40.736 | 28.770 | 25.795 | 0.00 | 0.00 |
| ATOM | 7103 | HB3  | ALA | X | 469 | 40.356 | 27.475 | 24.589 | 0.00 | 0.00 |
| ATOM | 7104 | C    | ALA | X | 469 | 38.571 | 26.968 | 26.911 | 0.00 | 0.00 |
| ATOM | 7105 | O    | ALA | X | 469 | 37.900 | 27.550 | 27.743 | 0.00 | 0.00 |
| ATOM | 7106 | N    | GLN | X | 470 | 38.052 | 26.228 | 25.958 | 0.00 | 0.00 |
| ATOM | 7107 | H    | GLN | X | 470 | 38.682 | 25.661 | 25.409 | 0.00 | 0.00 |
| ATOM | 7108 | CA   | GLN | X | 470 | 36.623 | 26.141 | 25.769 | 0.00 | 0.00 |
| ATOM | 7109 | HA   | GLN | X | 470 | 36.335 | 27.141 | 25.444 | 0.00 | 0.00 |
| ATOM | 7110 | CB   | GLN | X | 470 | 36.269 | 25.247 | 24.605 | 0.00 | 0.00 |
| ATOM | 7111 | HB2  | GLN | X | 470 | 36.588 | 24.253 | 24.918 | 0.00 | 0.00 |
| ATOM | 7112 | HB3  | GLN | X | 470 | 35.198 | 25.111 | 24.454 | 0.00 | 0.00 |
| ATOM | 7113 | CG   | GLN | X | 470 | 36.922 | 25.680 | 23.296 | 0.00 | 0.00 |

|      |      |      |     |   |     |        |        |        |      |      |
|------|------|------|-----|---|-----|--------|--------|--------|------|------|
| ATOM | 7114 | HG2  | GLN | X | 470 | 36.490 | 26.637 | 23.004 | 0.00 | 0.00 |
| ATOM | 7115 | HG3  | GLN | X | 470 | 38.003 | 25.772 | 23.398 | 0.00 | 0.00 |
| ATOM | 7116 | CD   | GLN | X | 470 | 36.749 | 24.681 | 22.199 | 0.00 | 0.00 |
| ATOM | 7117 | OE1  | GLN | X | 470 | 37.395 | 23.658 | 22.093 | 0.00 | 0.00 |
| ATOM | 7118 | NE2  | GLN | X | 470 | 35.800 | 24.985 | 21.313 | 0.00 | 0.00 |
| ATOM | 7119 | HE21 | GLN | X | 470 | 35.554 | 24.237 | 20.681 | 0.00 | 0.00 |
| ATOM | 7120 | HE22 | GLN | X | 470 | 35.155 | 25.705 | 21.605 | 0.00 | 0.00 |
| ATOM | 7121 | C    | GLN | X | 470 | 35.900 | 25.775 | 27.049 | 0.00 | 0.00 |
| ATOM | 7122 | O    | GLN | X | 470 | 34.813 | 26.325 | 27.285 | 0.00 | 0.00 |
| ATOM | 7123 | N    | ARG | X | 471 | 36.479 | 24.957 | 27.953 | 0.00 | 0.00 |
| ATOM | 7124 | H    | ARG | X | 471 | 37.417 | 24.662 | 27.724 | 0.00 | 0.00 |
| ATOM | 7125 | CA   | ARG | X | 471 | 35.846 | 24.571 | 29.275 | 0.00 | 0.00 |
| ATOM | 7126 | HA   | ARG | X | 471 | 34.809 | 24.316 | 29.053 | 0.00 | 0.00 |
| ATOM | 7127 | CB   | ARG | X | 471 | 36.546 | 23.321 | 29.938 | 0.00 | 0.00 |
| ATOM | 7128 | HB2  | ARG | X | 471 | 37.629 | 23.446 | 29.965 | 0.00 | 0.00 |
| ATOM | 7129 | HB3  | ARG | X | 471 | 36.271 | 23.169 | 30.981 | 0.00 | 0.00 |
| ATOM | 7130 | CG   | ARG | X | 471 | 36.255 | 22.036 | 29.208 | 0.00 | 0.00 |
| ATOM | 7131 | HG2  | ARG | X | 471 | 35.184 | 21.849 | 29.282 | 0.00 | 0.00 |
| ATOM | 7132 | HG3  | ARG | X | 471 | 36.499 | 22.258 | 28.169 | 0.00 | 0.00 |
| ATOM | 7133 | CD   | ARG | X | 471 | 37.038 | 20.784 | 29.677 | 0.00 | 0.00 |
| ATOM | 7134 | HD2  | ARG | X | 471 | 36.684 | 19.898 | 29.149 | 0.00 | 0.00 |
| ATOM | 7135 | HD3  | ARG | X | 471 | 38.116 | 20.814 | 29.521 | 0.00 | 0.00 |
| ATOM | 7136 | NE   | ARG | X | 471 | 36.691 | 20.530 | 31.120 | 0.00 | 0.00 |
| ATOM | 7137 | HE   | ARG | X | 471 | 35.708 | 20.450 | 31.336 | 0.00 | 0.00 |
| ATOM | 7138 | CZ   | ARG | X | 471 | 37.608 | 20.443 | 32.129 | 0.00 | 0.00 |
| ATOM | 7139 | NH1  | ARG | X | 471 | 38.866 | 20.465 | 31.863 | 0.00 | 0.00 |
| ATOM | 7140 | HH11 | ARG | X | 471 | 39.255 | 20.469 | 30.931 | 0.00 | 0.00 |
| ATOM | 7141 | HH12 | ARG | X | 471 | 39.551 | 20.281 | 32.583 | 0.00 | 0.00 |
| ATOM | 7142 | NH2  | ARG | X | 471 | 37.228 | 20.440 | 33.377 | 0.00 | 0.00 |
| ATOM | 7143 | HH21 | ARG | X | 471 | 36.322 | 20.104 | 33.668 | 0.00 | 0.00 |
| ATOM | 7144 | HH22 | ARG | X | 471 | 37.983 | 20.363 | 34.044 | 0.00 | 0.00 |
| ATOM | 7145 | C    | ARG | X | 471 | 35.883 | 25.635 | 30.358 | 0.00 | 0.00 |
| ATOM | 7146 | O    | ARG | X | 471 | 34.836 | 25.965 | 30.844 | 0.00 | 0.00 |
| ATOM | 7147 | N    | LEU | X | 472 | 36.986 | 26.310 | 30.486 | 0.00 | 0.00 |
| ATOM | 7148 | H    | LEU | X | 472 | 37.812 | 25.999 | 29.994 | 0.00 | 0.00 |
| ATOM | 7149 | CA   | LEU | X | 472 | 37.109 | 27.437 | 31.402 | 0.00 | 0.00 |
| ATOM | 7150 | HA   | LEU | X | 472 | 36.609 | 27.266 | 32.356 | 0.00 | 0.00 |
| ATOM | 7151 | CB   | LEU | X | 472 | 38.595 | 27.764 | 31.614 | 0.00 | 0.00 |
| ATOM | 7152 | HB2  | LEU | X | 472 | 39.246 | 27.541 | 30.769 | 0.00 | 0.00 |
| ATOM | 7153 | HB3  | LEU | X | 472 | 38.626 | 28.807 | 31.931 | 0.00 | 0.00 |
| ATOM | 7154 | CG   | LEU | X | 472 | 39.106 | 27.003 | 32.895 | 0.00 | 0.00 |
| ATOM | 7155 | HG   | LEU | X | 472 | 38.506 | 27.337 | 33.742 | 0.00 | 0.00 |
| ATOM | 7156 | CD1  | LEU | X | 472 | 39.022 | 25.548 | 32.692 | 0.00 | 0.00 |
| ATOM | 7157 | HD11 | LEU | X | 472 | 39.440 | 25.138 | 33.611 | 0.00 | 0.00 |
| ATOM | 7158 | HD12 | LEU | X | 472 | 39.486 | 25.229 | 31.759 | 0.00 | 0.00 |
| ATOM | 7159 | HD13 | LEU | X | 472 | 37.981 | 25.227 | 32.701 | 0.00 | 0.00 |
| ATOM | 7160 | CD2  | LEU | X | 472 | 40.563 | 27.459 | 33.138 | 0.00 | 0.00 |
| ATOM | 7161 | HD21 | LEU | X | 472 | 40.556 | 28.546 | 33.219 | 0.00 | 0.00 |
| ATOM | 7162 | HD22 | LEU | X | 472 | 40.845 | 27.015 | 34.094 | 0.00 | 0.00 |
| ATOM | 7163 | HD23 | LEU | X | 472 | 41.202 | 27.117 | 32.324 | 0.00 | 0.00 |
| ATOM | 7164 | C    | LEU | X | 472 | 36.183 | 28.630 | 30.945 | 0.00 | 0.00 |
| ATOM | 7165 | O    | LEU | X | 472 | 35.362 | 29.085 | 31.727 | 0.00 | 0.00 |
| ATOM | 7166 | N    | MET | X | 473 | 36.324 | 28.993 | 29.659 | 0.00 | 0.00 |
| ATOM | 7167 | H    | MET | X | 473 | 37.036 | 28.526 | 29.116 | 0.00 | 0.00 |
| ATOM | 7168 | CA   | MET | X | 473 | 35.270 | 29.815 | 29.020 | 0.00 | 0.00 |
| ATOM | 7169 | HA   | MET | X | 473 | 35.306 | 30.823 | 29.432 | 0.00 | 0.00 |
| ATOM | 7170 | CB   | MET | X | 473 | 35.460 | 29.779 | 27.473 | 0.00 | 0.00 |
| ATOM | 7171 | HB2  | MET | X | 473 | 35.458 | 28.744 | 27.132 | 0.00 | 0.00 |
| ATOM | 7172 | HB3  | MET | X | 473 | 34.727 | 30.409 | 26.968 | 0.00 | 0.00 |
| ATOM | 7173 | CG   | MET | X | 473 | 36.849 | 30.416 | 27.062 | 0.00 | 0.00 |
| ATOM | 7174 | HG2  | MET | X | 473 | 36.935 | 31.462 | 27.356 | 0.00 | 0.00 |
| ATOM | 7175 | HG3  | MET | X | 473 | 37.719 | 30.033 | 27.595 | 0.00 | 0.00 |
| ATOM | 7176 | SD   | MET | X | 473 | 37.237 | 30.072 | 25.294 | 0.00 | 0.00 |
| ATOM | 7177 | CE   | MET | X | 473 | 36.549 | 31.615 | 24.816 | 0.00 | 0.00 |
| ATOM | 7178 | HE1  | MET | X | 473 | 36.917 | 31.867 | 23.822 | 0.00 | 0.00 |
| ATOM | 7179 | HE2  | MET | X | 473 | 35.461 | 31.607 | 24.892 | 0.00 | 0.00 |
| ATOM | 7180 | HE3  | MET | X | 473 | 36.887 | 32.433 | 25.452 | 0.00 | 0.00 |

|      |      |      |     |   |     |        |        |        |      |      |
|------|------|------|-----|---|-----|--------|--------|--------|------|------|
| ATOM | 7181 | C    | MET | X | 473 | 33.847 | 29.354 | 29.386 | 0.00 | 0.00 |
| ATOM | 7182 | O    | MET | X | 473 | 33.043 | 30.177 | 29.668 | 0.00 | 0.00 |
| ATOM | 7183 | N    | ARG | X | 474 | 33.543 | 28.019 | 29.218 | 0.00 | 0.00 |
| ATOM | 7184 | H    | ARG | X | 474 | 34.233 | 27.345 | 28.918 | 0.00 | 0.00 |
| ATOM | 7185 | CA   | ARG | X | 474 | 32.184 | 27.545 | 29.475 | 0.00 | 0.00 |
| ATOM | 7186 | HA   | ARG | X | 474 | 31.493 | 28.221 | 28.972 | 0.00 | 0.00 |
| ATOM | 7187 | CB   | ARG | X | 474 | 31.905 | 26.127 | 28.816 | 0.00 | 0.00 |
| ATOM | 7188 | HB2  | ARG | X | 474 | 32.236 | 26.166 | 27.778 | 0.00 | 0.00 |
| ATOM | 7189 | HB3  | ARG | X | 474 | 32.526 | 25.389 | 29.324 | 0.00 | 0.00 |
| ATOM | 7190 | CG   | ARG | X | 474 | 30.446 | 25.682 | 28.810 | 0.00 | 0.00 |
| ATOM | 7191 | HG2  | ARG | X | 474 | 30.432 | 24.755 | 28.236 | 0.00 | 0.00 |
| ATOM | 7192 | HG3  | ARG | X | 474 | 30.019 | 25.522 | 29.800 | 0.00 | 0.00 |
| ATOM | 7193 | CD   | ARG | X | 474 | 29.573 | 26.672 | 28.037 | 0.00 | 0.00 |
| ATOM | 7194 | HD2  | ARG | X | 474 | 29.396 | 27.661 | 28.460 | 0.00 | 0.00 |
| ATOM | 7195 | HD3  | ARG | X | 474 | 29.966 | 26.736 | 27.022 | 0.00 | 0.00 |
| ATOM | 7196 | NE   | ARG | X | 474 | 28.282 | 26.088 | 27.753 | 0.00 | 0.00 |
| ATOM | 7197 | HE   | ARG | X | 474 | 27.995 | 25.318 | 28.340 | 0.00 | 0.00 |
| ATOM | 7198 | CZ   | ARG | X | 474 | 27.405 | 26.463 | 26.830 | 0.00 | 0.00 |
| ATOM | 7199 | NH1  | ARG | X | 474 | 27.531 | 27.524 | 26.059 | 0.00 | 0.00 |
| ATOM | 7200 | HH11 | ARG | X | 474 | 28.275 | 28.175 | 26.268 | 0.00 | 0.00 |
| ATOM | 7201 | HH12 | ARG | X | 474 | 26.794 | 27.640 | 25.379 | 0.00 | 0.00 |
| ATOM | 7202 | NH2  | ARG | X | 474 | 26.323 | 25.808 | 26.670 | 0.00 | 0.00 |
| ATOM | 7203 | HH21 | ARG | X | 474 | 26.280 | 24.924 | 27.157 | 0.00 | 0.00 |
| ATOM | 7204 | HH22 | ARG | X | 474 | 25.634 | 26.098 | 25.990 | 0.00 | 0.00 |
| ATOM | 7205 | C    | ARG | X | 474 | 31.734 | 27.644 | 30.859 | 0.00 | 0.00 |
| ATOM | 7206 | O    | ARG | X | 474 | 30.610 | 28.042 | 31.099 | 0.00 | 0.00 |
| ATOM | 7207 | N    | TYR | X | 475 | 32.624 | 27.423 | 31.828 | 0.00 | 0.00 |
| ATOM | 7208 | H    | TYR | X | 475 | 33.502 | 27.029 | 31.520 | 0.00 | 0.00 |
| ATOM | 7209 | CA   | TYR | X | 475 | 32.249 | 27.496 | 33.246 | 0.00 | 0.00 |
| ATOM | 7210 | HA   | TYR | X | 475 | 31.356 | 26.913 | 33.473 | 0.00 | 0.00 |
| ATOM | 7211 | CB   | TYR | X | 475 | 33.482 | 26.865 | 33.964 | 0.00 | 0.00 |
| ATOM | 7212 | HB2  | TYR | X | 475 | 34.408 | 27.266 | 33.550 | 0.00 | 0.00 |
| ATOM | 7213 | HB3  | TYR | X | 475 | 33.355 | 27.144 | 35.010 | 0.00 | 0.00 |
| ATOM | 7214 | CG   | TYR | X | 475 | 33.626 | 25.348 | 33.956 | 0.00 | 0.00 |
| ATOM | 7215 | CD1  | TYR | X | 475 | 32.553 | 24.464 | 33.886 | 0.00 | 0.00 |
| ATOM | 7216 | HD1  | TYR | X | 475 | 31.529 | 24.807 | 33.909 | 0.00 | 0.00 |
| ATOM | 7217 | CE1  | TYR | X | 475 | 32.767 | 23.080 | 33.783 | 0.00 | 0.00 |
| ATOM | 7218 | HE1  | TYR | X | 475 | 31.922 | 22.408 | 33.809 | 0.00 | 0.00 |
| ATOM | 7219 | CZ   | TYR | X | 475 | 34.057 | 22.575 | 33.769 | 0.00 | 0.00 |
| ATOM | 7220 | OH   | TYR | X | 475 | 34.267 | 21.260 | 33.655 | 0.00 | 0.00 |
| ATOM | 7221 | HH   | TYR | X | 475 | 33.432 | 20.790 | 33.721 | 0.00 | 0.00 |
| ATOM | 7222 | CE2  | TYR | X | 475 | 35.162 | 23.454 | 33.800 | 0.00 | 0.00 |
| ATOM | 7223 | HE2  | TYR | X | 475 | 36.159 | 23.095 | 33.592 | 0.00 | 0.00 |
| ATOM | 7224 | CD2  | TYR | X | 475 | 34.970 | 24.812 | 33.898 | 0.00 | 0.00 |
| ATOM | 7225 | HD2  | TYR | X | 475 | 35.788 | 25.513 | 33.821 | 0.00 | 0.00 |
| ATOM | 7226 | C    | TYR | X | 475 | 32.018 | 28.975 | 33.752 | 0.00 | 0.00 |
| ATOM | 7227 | O    | TYR | X | 475 | 31.100 | 29.195 | 34.585 | 0.00 | 0.00 |
| ATOM | 7228 | N    | TRP | X | 476 | 32.758 | 30.021 | 33.209 | 0.00 | 0.00 |
| ATOM | 7229 | H    | TRP | X | 476 | 33.397 | 29.745 | 32.478 | 0.00 | 0.00 |
| ATOM | 7230 | CA   | TRP | X | 476 | 32.641 | 31.470 | 33.558 | 0.00 | 0.00 |
| ATOM | 7231 | HA   | TRP | X | 476 | 32.551 | 31.614 | 34.635 | 0.00 | 0.00 |
| ATOM | 7232 | CB   | TRP | X | 476 | 33.775 | 32.365 | 33.049 | 0.00 | 0.00 |
| ATOM | 7233 | HB2  | TRP | X | 476 | 34.212 | 31.871 | 32.181 | 0.00 | 0.00 |
| ATOM | 7234 | HB3  | TRP | X | 476 | 33.433 | 33.296 | 32.599 | 0.00 | 0.00 |
| ATOM | 7235 | CG   | TRP | X | 476 | 34.795 | 32.666 | 34.061 | 0.00 | 0.00 |
| ATOM | 7236 | CD1  | TRP | X | 476 | 35.372 | 33.896 | 34.373 | 0.00 | 0.00 |
| ATOM | 7237 | HD1  | TRP | X | 476 | 35.013 | 34.805 | 33.913 | 0.00 | 0.00 |
| ATOM | 7238 | NE1  | TRP | X | 476 | 36.298 | 33.743 | 35.395 | 0.00 | 0.00 |
| ATOM | 7239 | HE1  | TRP | X | 476 | 36.910 | 34.480 | 35.717 | 0.00 | 0.00 |
| ATOM | 7240 | CE2  | TRP | X | 476 | 36.557 | 32.429 | 35.621 | 0.00 | 0.00 |
| ATOM | 7241 | CZ2  | TRP | X | 476 | 37.472 | 31.825 | 36.469 | 0.00 | 0.00 |
| ATOM | 7242 | HZ2  | TRP | X | 476 | 38.132 | 32.462 | 37.038 | 0.00 | 0.00 |
| ATOM | 7243 | CH2  | TRP | X | 476 | 37.475 | 30.439 | 36.610 | 0.00 | 0.00 |
| ATOM | 7244 | HH2  | TRP | X | 476 | 38.190 | 30.027 | 37.306 | 0.00 | 0.00 |
| ATOM | 7245 | CZ3  | TRP | X | 476 | 36.601 | 29.679 | 35.778 | 0.00 | 0.00 |
| ATOM | 7246 | HZ3  | TRP | X | 476 | 36.676 | 28.608 | 35.898 | 0.00 | 0.00 |
| ATOM | 7247 | CE3  | TRP | X | 476 | 35.644 | 30.304 | 34.978 | 0.00 | 0.00 |

|      |      |      |     |   |     |        |        |        |      |      |
|------|------|------|-----|---|-----|--------|--------|--------|------|------|
| ATOM | 7248 | HE3  | TRP | X | 476 | 34.969 | 29.642 | 34.456 | 0.00 | 0.00 |
| ATOM | 7249 | CD2  | TRP | X | 476 | 35.615 | 31.675 | 34.771 | 0.00 | 0.00 |
| ATOM | 7250 | C    | TRP | X | 476 | 31.315 | 31.969 | 33.026 | 0.00 | 0.00 |
| ATOM | 7251 | O    | TRP | X | 476 | 30.566 | 32.600 | 33.754 | 0.00 | 0.00 |
| ATOM | 7252 | N    | ALA | X | 477 | 31.069 | 31.754 | 31.745 | 0.00 | 0.00 |
| ATOM | 7253 | H    | ALA | X | 477 | 31.783 | 31.264 | 31.226 | 0.00 | 0.00 |
| ATOM | 7254 | CA   | ALA | X | 477 | 29.856 | 32.205 | 31.000 | 0.00 | 0.00 |
| ATOM | 7255 | HA   | ALA | X | 477 | 29.664 | 33.277 | 31.040 | 0.00 | 0.00 |
| ATOM | 7256 | CB   | ALA | X | 477 | 30.156 | 31.838 | 29.529 | 0.00 | 0.00 |
| ATOM | 7257 | HB1  | ALA | X | 477 | 29.303 | 32.162 | 28.933 | 0.00 | 0.00 |
| ATOM | 7258 | HB2  | ALA | X | 477 | 30.354 | 30.766 | 29.531 | 0.00 | 0.00 |
| ATOM | 7259 | HB3  | ALA | X | 477 | 31.015 | 32.350 | 29.093 | 0.00 | 0.00 |
| ATOM | 7260 | C    | ALA | X | 477 | 28.617 | 31.430 | 31.548 | 0.00 | 0.00 |
| ATOM | 7261 | O    | ALA | X | 477 | 27.584 | 32.074 | 31.538 | 0.00 | 0.00 |
| ATOM | 7262 | N    | ASN | X | 478 | 28.696 | 30.193 | 32.029 | 0.00 | 0.00 |
| ATOM | 7263 | H    | ASN | X | 478 | 29.418 | 29.595 | 31.654 | 0.00 | 0.00 |
| ATOM | 7264 | CA   | ASN | X | 478 | 27.638 | 29.584 | 32.891 | 0.00 | 0.00 |
| ATOM | 7265 | HA   | ASN | X | 478 | 26.700 | 29.808 | 32.381 | 0.00 | 0.00 |
| ATOM | 7266 | CB   | ASN | X | 478 | 27.844 | 28.059 | 32.926 | 0.00 | 0.00 |
| ATOM | 7267 | HB2  | ASN | X | 478 | 28.831 | 27.884 | 33.354 | 0.00 | 0.00 |
| ATOM | 7268 | HB3  | ASN | X | 478 | 27.097 | 27.696 | 33.632 | 0.00 | 0.00 |
| ATOM | 7269 | CG   | ASN | X | 478 | 27.586 | 27.386 | 31.591 | 0.00 | 0.00 |
| ATOM | 7270 | OD1  | ASN | X | 478 | 27.422 | 27.977 | 30.565 | 0.00 | 0.00 |
| ATOM | 7271 | ND2  | ASN | X | 478 | 27.531 | 26.035 | 31.627 | 0.00 | 0.00 |
| ATOM | 7272 | HD21 | ASN | X | 478 | 27.409 | 25.473 | 30.796 | 0.00 | 0.00 |
| ATOM | 7273 | HD22 | ASN | X | 478 | 27.830 | 25.493 | 32.425 | 0.00 | 0.00 |
| ATOM | 7274 | C    | ASN | X | 478 | 27.380 | 30.231 | 34.234 | 0.00 | 0.00 |
| ATOM | 7275 | O    | ASN | X | 478 | 26.231 | 30.437 | 34.677 | 0.00 | 0.00 |
| ATOM | 7276 | N    | PHE | X | 479 | 28.392 | 30.698 | 34.938 | 0.00 | 0.00 |
| ATOM | 7277 | H    | PHE | X | 479 | 29.314 | 30.332 | 34.745 | 0.00 | 0.00 |
| ATOM | 7278 | CA   | PHE | X | 479 | 28.246 | 31.579 | 36.025 | 0.00 | 0.00 |
| ATOM | 7279 | HA   | PHE | X | 479 | 27.485 | 31.070 | 36.616 | 0.00 | 0.00 |
| ATOM | 7280 | CB   | PHE | X | 479 | 29.609 | 31.687 | 36.741 | 0.00 | 0.00 |
| ATOM | 7281 | HB2  | PHE | X | 479 | 29.895 | 30.694 | 37.088 | 0.00 | 0.00 |
| ATOM | 7282 | HB3  | PHE | X | 479 | 30.334 | 32.016 | 35.996 | 0.00 | 0.00 |
| ATOM | 7283 | CG   | PHE | X | 479 | 29.530 | 32.592 | 38.044 | 0.00 | 0.00 |
| ATOM | 7284 | CD1  | PHE | X | 479 | 29.079 | 32.140 | 39.274 | 0.00 | 0.00 |
| ATOM | 7285 | HD1  | PHE | X | 479 | 28.940 | 31.070 | 39.319 | 0.00 | 0.00 |
| ATOM | 7286 | CE1  | PHE | X | 479 | 28.860 | 32.937 | 40.369 | 0.00 | 0.00 |
| ATOM | 7287 | HE1  | PHE | X | 479 | 28.445 | 32.496 | 41.263 | 0.00 | 0.00 |
| ATOM | 7288 | CZ   | PHE | X | 479 | 29.346 | 34.254 | 40.250 | 0.00 | 0.00 |
| ATOM | 7289 | HZ   | PHE | X | 479 | 29.420 | 34.895 | 41.117 | 0.00 | 0.00 |
| ATOM | 7290 | CE2  | PHE | X | 479 | 29.863 | 34.750 | 38.996 | 0.00 | 0.00 |
| ATOM | 7291 | HE2  | PHE | X | 479 | 30.366 | 35.704 | 39.047 | 0.00 | 0.00 |
| ATOM | 7292 | CD2  | PHE | X | 479 | 29.889 | 33.899 | 37.924 | 0.00 | 0.00 |
| ATOM | 7293 | HD2  | PHE | X | 479 | 30.396 | 34.152 | 37.004 | 0.00 | 0.00 |
| ATOM | 7294 | C    | PHE | X | 479 | 27.592 | 32.997 | 35.741 | 0.00 | 0.00 |
| ATOM | 7295 | O    | PHE | X | 479 | 26.647 | 33.439 | 36.397 | 0.00 | 0.00 |
| ATOM | 7296 | N    | ALA | X | 480 | 27.972 | 33.645 | 34.564 | 0.00 | 0.00 |
| ATOM | 7297 | H    | ALA | X | 480 | 28.805 | 33.332 | 34.085 | 0.00 | 0.00 |
| ATOM | 7298 | CA   | ALA | X | 480 | 27.298 | 34.830 | 34.034 | 0.00 | 0.00 |
| ATOM | 7299 | HA   | ALA | X | 480 | 27.424 | 35.630 | 34.764 | 0.00 | 0.00 |
| ATOM | 7300 | CB   | ALA | X | 480 | 28.072 | 35.238 | 32.782 | 0.00 | 0.00 |
| ATOM | 7301 | HB1  | ALA | X | 480 | 27.710 | 36.185 | 32.382 | 0.00 | 0.00 |
| ATOM | 7302 | HB2  | ALA | X | 480 | 28.034 | 34.382 | 32.108 | 0.00 | 0.00 |
| ATOM | 7303 | HB3  | ALA | X | 480 | 29.147 | 35.323 | 32.936 | 0.00 | 0.00 |
| ATOM | 7304 | C    | ALA | X | 480 | 25.784 | 34.584 | 33.765 | 0.00 | 0.00 |
| ATOM | 7305 | O    | ALA | X | 480 | 24.863 | 35.369 | 34.053 | 0.00 | 0.00 |
| ATOM | 7306 | N    | ARG | X | 481 | 25.430 | 33.455 | 33.105 | 0.00 | 0.00 |
| ATOM | 7307 | H    | ARG | X | 481 | 26.151 | 32.987 | 32.575 | 0.00 | 0.00 |
| ATOM | 7308 | CA   | ARG | X | 481 | 24.066 | 33.064 | 32.680 | 0.00 | 0.00 |
| ATOM | 7309 | HA   | ARG | X | 481 | 23.715 | 33.862 | 32.025 | 0.00 | 0.00 |
| ATOM | 7310 | CB   | ARG | X | 481 | 24.139 | 31.837 | 31.818 | 0.00 | 0.00 |
| ATOM | 7311 | HB2  | ARG | X | 481 | 24.634 | 31.043 | 32.377 | 0.00 | 0.00 |
| ATOM | 7312 | HB3  | ARG | X | 481 | 23.153 | 31.490 | 31.507 | 0.00 | 0.00 |
| ATOM | 7313 | CG   | ARG | X | 481 | 24.639 | 32.171 | 30.437 | 0.00 | 0.00 |
| ATOM | 7314 | HG2  | ARG | X | 481 | 23.925 | 32.812 | 29.919 | 0.00 | 0.00 |

|      |      |      |     |   |     |        |        |        |      |      |
|------|------|------|-----|---|-----|--------|--------|--------|------|------|
| ATOM | 7315 | HG3  | ARG | X | 481 | 25.576 | 32.729 | 30.431 | 0.00 | 0.00 |
| ATOM | 7316 | CD   | ARG | X | 481 | 24.843 | 30.973 | 29.559 | 0.00 | 0.00 |
| ATOM | 7317 | HD2  | ARG | X | 481 | 25.340 | 30.196 | 30.140 | 0.00 | 0.00 |
| ATOM | 7318 | HD3  | ARG | X | 481 | 23.883 | 30.480 | 29.404 | 0.00 | 0.00 |
| ATOM | 7319 | NE   | ARG | X | 481 | 25.453 | 31.350 | 28.290 | 0.00 | 0.00 |
| ATOM | 7320 | HE   | ARG | X | 481 | 24.935 | 31.922 | 27.638 | 0.00 | 0.00 |
| ATOM | 7321 | CZ   | ARG | X | 481 | 26.573 | 30.885 | 27.835 | 0.00 | 0.00 |
| ATOM | 7322 | NH1  | ARG | X | 481 | 27.291 | 29.893 | 28.367 | 0.00 | 0.00 |
| ATOM | 7323 | HH11 | ARG | X | 481 | 27.036 | 29.652 | 29.314 | 0.00 | 0.00 |
| ATOM | 7324 | HH12 | ARG | X | 481 | 28.258 | 29.879 | 28.076 | 0.00 | 0.00 |
| ATOM | 7325 | NH2  | ARG | X | 481 | 27.051 | 31.308 | 26.683 | 0.00 | 0.00 |
| ATOM | 7326 | HH21 | ARG | X | 481 | 26.425 | 31.730 | 26.012 | 0.00 | 0.00 |
| ATOM | 7327 | HH22 | ARG | X | 481 | 27.819 | 30.776 | 26.301 | 0.00 | 0.00 |
| ATOM | 7328 | C    | ARG | X | 481 | 23.044 | 32.829 | 33.776 | 0.00 | 0.00 |
| ATOM | 7329 | O    | ARG | X | 481 | 21.955 | 33.400 | 33.792 | 0.00 | 0.00 |
| ATOM | 7330 | N    | THR | X | 482 | 23.385 | 31.951 | 34.727 | 0.00 | 0.00 |
| ATOM | 7331 | H    | THR | X | 482 | 24.282 | 31.486 | 34.707 | 0.00 | 0.00 |
| ATOM | 7332 | CA   | THR | X | 482 | 22.469 | 31.668 | 35.835 | 0.00 | 0.00 |
| ATOM | 7333 | HA   | THR | X | 482 | 21.568 | 32.281 | 35.813 | 0.00 | 0.00 |
| ATOM | 7334 | CB   | THR | X | 482 | 21.977 | 30.183 | 35.626 | 0.00 | 0.00 |
| ATOM | 7335 | HB   | THR | X | 482 | 21.425 | 29.918 | 36.528 | 0.00 | 0.00 |
| ATOM | 7336 | CG2  | THR | X | 482 | 21.163 | 29.885 | 34.362 | 0.00 | 0.00 |
| ATOM | 7337 | HG21 | THR | X | 482 | 20.233 | 30.450 | 34.305 | 0.00 | 0.00 |
| ATOM | 7338 | HG22 | THR | X | 482 | 20.949 | 28.816 | 34.340 | 0.00 | 0.00 |
| ATOM | 7339 | HG23 | THR | X | 482 | 21.795 | 29.908 | 33.474 | 0.00 | 0.00 |
| ATOM | 7340 | OG1  | THR | X | 482 | 23.136 | 29.381 | 35.593 | 0.00 | 0.00 |
| ATOM | 7341 | HG1  | THR | X | 482 | 22.835 | 28.469 | 35.600 | 0.00 | 0.00 |
| ATOM | 7342 | C    | THR | X | 482 | 23.109 | 31.792 | 37.192 | 0.00 | 0.00 |
| ATOM | 7343 | O    | THR | X | 482 | 22.449 | 31.485 | 38.188 | 0.00 | 0.00 |
| ATOM | 7344 | N    | GLY | X | 483 | 24.452 | 32.037 | 37.324 | 0.00 | 0.00 |
| ATOM | 7345 | H    | GLY | X | 483 | 25.007 | 32.117 | 36.484 | 0.00 | 0.00 |
| ATOM | 7346 | CA   | GLY | X | 483 | 25.119 | 31.938 | 38.600 | 0.00 | 0.00 |
| ATOM | 7347 | HA2  | GLY | X | 483 | 26.021 | 32.547 | 38.538 | 0.00 | 0.00 |
| ATOM | 7348 | HA3  | GLY | X | 483 | 24.544 | 32.348 | 39.430 | 0.00 | 0.00 |
| ATOM | 7349 | C    | GLY | X | 483 | 25.492 | 30.553 | 39.026 | 0.00 | 0.00 |
| ATOM | 7350 | O    | GLY | X | 483 | 26.121 | 30.412 | 40.072 | 0.00 | 0.00 |
| ATOM | 7351 | N    | ASP | X | 484 | 25.231 | 29.532 | 38.195 | 0.00 | 0.00 |
| ATOM | 7352 | H    | ASP | X | 484 | 24.629 | 29.728 | 37.408 | 0.00 | 0.00 |
| ATOM | 7353 | CA   | ASP | X | 484 | 25.578 | 28.094 | 38.330 | 0.00 | 0.00 |
| ATOM | 7354 | HA   | ASP | X | 484 | 26.160 | 27.994 | 39.246 | 0.00 | 0.00 |
| ATOM | 7355 | CB   | ASP | X | 484 | 24.305 | 27.306 | 38.392 | 0.00 | 0.00 |
| ATOM | 7356 | HB2  | ASP | X | 484 | 23.941 | 27.292 | 39.420 | 0.00 | 0.00 |
| ATOM | 7357 | HB3  | ASP | X | 484 | 23.491 | 27.764 | 37.830 | 0.00 | 0.00 |
| ATOM | 7358 | CG   | ASP | X | 484 | 24.456 | 25.812 | 37.918 | 0.00 | 0.00 |
| ATOM | 7359 | OD1  | ASP | X | 484 | 25.432 | 25.193 | 38.422 | 0.00 | 0.00 |
| ATOM | 7360 | OD2  | ASP | X | 484 | 23.516 | 25.315 | 37.223 | 0.00 | 0.00 |
| ATOM | 7361 | C    | ASP | X | 484 | 26.434 | 27.702 | 37.116 | 0.00 | 0.00 |
| ATOM | 7362 | O    | ASP | X | 484 | 26.010 | 27.945 | 35.977 | 0.00 | 0.00 |
| ATOM | 7363 | N    | PRO | X | 485 | 27.697 | 27.221 | 37.290 | 0.00 | 0.00 |
| ATOM | 7364 | CD   | PRO | X | 485 | 28.374 | 27.151 | 38.570 | 0.00 | 0.00 |
| ATOM | 7365 | HD2  | PRO | X | 485 | 27.709 | 26.502 | 39.141 | 0.00 | 0.00 |
| ATOM | 7366 | HD3  | PRO | X | 485 | 28.504 | 28.178 | 38.909 | 0.00 | 0.00 |
| ATOM | 7367 | CG   | PRO | X | 485 | 29.758 | 26.572 | 38.320 | 0.00 | 0.00 |
| ATOM | 7368 | HG2  | PRO | X | 485 | 29.627 | 25.490 | 38.301 | 0.00 | 0.00 |
| ATOM | 7369 | HG3  | PRO | X | 485 | 30.425 | 26.877 | 39.127 | 0.00 | 0.00 |
| ATOM | 7370 | CB   | PRO | X | 485 | 30.034 | 27.154 | 36.950 | 0.00 | 0.00 |
| ATOM | 7371 | HB2  | PRO | X | 485 | 30.800 | 26.521 | 36.501 | 0.00 | 0.00 |
| ATOM | 7372 | HB3  | PRO | X | 485 | 30.340 | 28.200 | 36.939 | 0.00 | 0.00 |
| ATOM | 7373 | CA   | PRO | X | 485 | 28.690 | 26.933 | 36.265 | 0.00 | 0.00 |
| ATOM | 7374 | HA   | PRO | X | 485 | 28.580 | 27.621 | 35.426 | 0.00 | 0.00 |
| ATOM | 7375 | C    | PRO | X | 485 | 28.554 | 25.499 | 35.604 | 0.00 | 0.00 |
| ATOM | 7376 | O    | PRO | X | 485 | 29.035 | 25.261 | 34.531 | 0.00 | 0.00 |
| ATOM | 7377 | N    | ASN | X | 486 | 27.571 | 24.732 | 36.068 | 0.00 | 0.00 |
| ATOM | 7378 | H    | ASN | X | 486 | 27.010 | 25.072 | 36.836 | 0.00 | 0.00 |
| ATOM | 7379 | CA   | ASN | X | 486 | 27.072 | 23.484 | 35.445 | 0.00 | 0.00 |
| ATOM | 7380 | HA   | ASN | X | 486 | 27.976 | 22.970 | 35.120 | 0.00 | 0.00 |
| ATOM | 7381 | CB   | ASN | X | 486 | 26.236 | 22.731 | 36.509 | 0.00 | 0.00 |

|      |      |      |     |   |     |        |        |        |      |      |
|------|------|------|-----|---|-----|--------|--------|--------|------|------|
| ATOM | 7382 | HB2  | ASN | X | 486 | 26.797 | 22.795 | 37.441 | 0.00 | 0.00 |
| ATOM | 7383 | HB3  | ASN | X | 486 | 25.355 | 23.340 | 36.709 | 0.00 | 0.00 |
| ATOM | 7384 | CG   | ASN | X | 486 | 25.913 | 21.299 | 36.305 | 0.00 | 0.00 |
| ATOM | 7385 | OD1  | ASN | X | 486 | 26.168 | 20.765 | 35.246 | 0.00 | 0.00 |
| ATOM | 7386 | ND2  | ASN | X | 486 | 25.222 | 20.754 | 37.244 | 0.00 | 0.00 |
| ATOM | 7387 | HD21 | ASN | X | 486 | 24.737 | 19.888 | 37.058 | 0.00 | 0.00 |
| ATOM | 7388 | HD22 | ASN | X | 486 | 25.086 | 21.231 | 38.124 | 0.00 | 0.00 |
| ATOM | 7389 | C    | ASN | X | 486 | 26.223 | 23.865 | 34.189 | 0.00 | 0.00 |
| ATOM | 7390 | O    | ASN | X | 486 | 25.503 | 24.898 | 34.271 | 0.00 | 0.00 |
| ATOM | 7391 | N    | GLU | X | 487 | 26.244 | 23.085 | 33.090 | 0.00 | 0.00 |
| ATOM | 7392 | H    | GLU | X | 487 | 26.872 | 22.295 | 33.058 | 0.00 | 0.00 |
| ATOM | 7393 | CA   | GLU | X | 487 | 25.137 | 23.050 | 32.159 | 0.00 | 0.00 |
| ATOM | 7394 | HA   | GLU | X | 487 | 25.145 | 23.975 | 31.582 | 0.00 | 0.00 |
| ATOM | 7395 | CB   | GLU | X | 487 | 25.341 | 21.941 | 31.130 | 0.00 | 0.00 |
| ATOM | 7396 | HB2  | GLU | X | 487 | 25.533 | 21.008 | 31.661 | 0.00 | 0.00 |
| ATOM | 7397 | HB3  | GLU | X | 487 | 24.395 | 21.734 | 30.630 | 0.00 | 0.00 |
| ATOM | 7398 | CG   | GLU | X | 487 | 26.408 | 22.115 | 30.048 | 0.00 | 0.00 |
| ATOM | 7399 | HG2  | GLU | X | 487 | 27.422 | 21.979 | 30.423 | 0.00 | 0.00 |
| ATOM | 7400 | HG3  | GLU | X | 487 | 26.339 | 21.333 | 29.292 | 0.00 | 0.00 |
| ATOM | 7401 | CD   | GLU | X | 487 | 26.358 | 23.453 | 29.422 | 0.00 | 0.00 |
| ATOM | 7402 | OE1  | GLU | X | 487 | 27.379 | 24.186 | 29.506 | 0.00 | 0.00 |
| ATOM | 7403 | OE2  | GLU | X | 487 | 25.328 | 23.785 | 28.791 | 0.00 | 0.00 |
| ATOM | 7404 | C    | GLU | X | 487 | 23.795 | 22.918 | 32.909 | 0.00 | 0.00 |
| ATOM | 7405 | O    | GLU | X | 487 | 23.677 | 22.032 | 33.760 | 0.00 | 0.00 |
| ATOM | 7406 | N    | PRO | X | 488 | 22.735 | 23.583 | 32.484 | 0.00 | 0.00 |
| ATOM | 7407 | CD   | PRO | X | 488 | 22.791 | 24.487 | 31.313 | 0.00 | 0.00 |
| ATOM | 7408 | HD2  | PRO | X | 488 | 23.317 | 23.961 | 30.516 | 0.00 | 0.00 |
| ATOM | 7409 | HD3  | PRO | X | 488 | 23.165 | 25.442 | 31.680 | 0.00 | 0.00 |
| ATOM | 7410 | CG   | PRO | X | 488 | 21.316 | 24.579 | 30.955 | 0.00 | 0.00 |
| ATOM | 7411 | HG2  | PRO | X | 488 | 21.045 | 23.631 | 30.492 | 0.00 | 0.00 |
| ATOM | 7412 | HG3  | PRO | X | 488 | 21.062 | 25.458 | 30.362 | 0.00 | 0.00 |
| ATOM | 7413 | CB   | PRO | X | 488 | 20.640 | 24.705 | 32.292 | 0.00 | 0.00 |
| ATOM | 7414 | HB2  | PRO | X | 488 | 19.613 | 24.358 | 32.176 | 0.00 | 0.00 |
| ATOM | 7415 | HB3  | PRO | X | 488 | 20.812 | 25.661 | 32.785 | 0.00 | 0.00 |
| ATOM | 7416 | CA   | PRO | X | 488 | 21.393 | 23.620 | 33.066 | 0.00 | 0.00 |
| ATOM | 7417 | HA   | PRO | X | 488 | 21.573 | 23.881 | 34.109 | 0.00 | 0.00 |
| ATOM | 7418 | C    | PRO | X | 488 | 20.598 | 22.263 | 33.084 | 0.00 | 0.00 |
| ATOM | 7419 | O    | PRO | X | 488 | 19.608 | 22.248 | 33.802 | 0.00 | 0.00 |
| ATOM | 7420 | N    | ARG | X | 489 | 20.998 | 21.240 | 32.284 | 0.00 | 0.00 |
| ATOM | 7421 | H    | ARG | X | 489 | 21.859 | 21.319 | 31.763 | 0.00 | 0.00 |
| ATOM | 7422 | CA   | ARG | X | 489 | 20.320 | 19.921 | 32.156 | 0.00 | 0.00 |
| ATOM | 7423 | HA   | ARG | X | 489 | 19.291 | 20.114 | 32.461 | 0.00 | 0.00 |
| ATOM | 7424 | CB   | ARG | X | 489 | 20.449 | 19.486 | 30.670 | 0.00 | 0.00 |
| ATOM | 7425 | HB2  | ARG | X | 489 | 19.893 | 18.557 | 30.543 | 0.00 | 0.00 |
| ATOM | 7426 | HB3  | ARG | X | 489 | 19.974 | 20.273 | 30.083 | 0.00 | 0.00 |
| ATOM | 7427 | CG   | ARG | X | 489 | 21.852 | 19.135 | 30.237 | 0.00 | 0.00 |
| ATOM | 7428 | HG2  | ARG | X | 489 | 22.580 | 19.923 | 30.433 | 0.00 | 0.00 |
| ATOM | 7429 | HG3  | ARG | X | 489 | 22.243 | 18.277 | 30.784 | 0.00 | 0.00 |
| ATOM | 7430 | CD   | ARG | X | 489 | 22.018 | 18.688 | 28.763 | 0.00 | 0.00 |
| ATOM | 7431 | HD2  | ARG | X | 489 | 21.394 | 17.797 | 28.693 | 0.00 | 0.00 |
| ATOM | 7432 | HD3  | ARG | X | 489 | 21.690 | 19.520 | 28.139 | 0.00 | 0.00 |
| ATOM | 7433 | NE   | ARG | X | 489 | 23.374 | 18.344 | 28.364 | 0.00 | 0.00 |
| ATOM | 7434 | HE   | ARG | X | 489 | 23.848 | 19.069 | 27.846 | 0.00 | 0.00 |
| ATOM | 7435 | CZ   | ARG | X | 489 | 23.963 | 17.118 | 28.421 | 0.00 | 0.00 |
| ATOM | 7436 | NH1  | ARG | X | 489 | 25.179 | 16.853 | 27.976 | 0.00 | 0.00 |
| ATOM | 7437 | HH11 | ARG | X | 489 | 25.642 | 17.621 | 27.511 | 0.00 | 0.00 |
| ATOM | 7438 | HH12 | ARG | X | 489 | 25.566 | 15.920 | 27.993 | 0.00 | 0.00 |
| ATOM | 7439 | NH2  | ARG | X | 489 | 23.352 | 16.054 | 28.915 | 0.00 | 0.00 |
| ATOM | 7440 | HH21 | ARG | X | 489 | 22.464 | 16.233 | 29.362 | 0.00 | 0.00 |
| ATOM | 7441 | HH22 | ARG | X | 489 | 23.809 | 15.167 | 28.762 | 0.00 | 0.00 |
| ATOM | 7442 | C    | ARG | X | 489 | 20.992 | 18.922 | 33.108 | 0.00 | 0.00 |
| ATOM | 7443 | O    | ARG | X | 489 | 20.622 | 17.723 | 33.019 | 0.00 | 0.00 |
| ATOM | 7444 | N    | ASP | X | 490 | 22.061 | 19.364 | 33.779 | 0.00 | 0.00 |
| ATOM | 7445 | H    | ASP | X | 490 | 22.269 | 20.352 | 33.809 | 0.00 | 0.00 |
| ATOM | 7446 | CA   | ASP | X | 490 | 22.753 | 18.607 | 34.751 | 0.00 | 0.00 |
| ATOM | 7447 | HA   | ASP | X | 490 | 23.520 | 19.315 | 35.067 | 0.00 | 0.00 |
| ATOM | 7448 | CB   | ASP | X | 490 | 21.734 | 18.459 | 35.912 | 0.00 | 0.00 |

|      |      |     |     |   |     |        |        |        |      |      |
|------|------|-----|-----|---|-----|--------|--------|--------|------|------|
| ATOM | 7449 | HB2 | ASP | X | 490 | 21.283 | 19.404 | 36.216 | 0.00 | 0.00 |
| ATOM | 7450 | HB3 | ASP | X | 490 | 20.857 | 17.892 | 35.601 | 0.00 | 0.00 |
| ATOM | 7451 | CG  | ASP | X | 490 | 22.419 | 17.826 | 37.159 | 0.00 | 0.00 |
| ATOM | 7452 | OD1 | ASP | X | 490 | 21.832 | 16.976 | 37.861 | 0.00 | 0.00 |
| ATOM | 7453 | OD2 | ASP | X | 490 | 23.552 | 18.400 | 37.480 | 0.00 | 0.00 |
| ATOM | 7454 | C   | ASP | X | 490 | 23.384 | 17.280 | 34.209 | 0.00 | 0.00 |
| ATOM | 7455 | O   | ASP | X | 490 | 22.811 | 16.239 | 34.464 | 0.00 | 0.00 |
| ATOM | 7456 | N   | PRO | X | 491 | 24.430 | 17.366 | 33.382 | 0.00 | 0.00 |
| ATOM | 7457 | CD  | PRO | X | 491 | 25.283 | 18.559 | 33.168 | 0.00 | 0.00 |
| ATOM | 7458 | HD2 | PRO | X | 491 | 25.975 | 18.490 | 34.007 | 0.00 | 0.00 |
| ATOM | 7459 | HD3 | PRO | X | 491 | 24.706 | 19.473 | 33.025 | 0.00 | 0.00 |
| ATOM | 7460 | CG  | PRO | X | 491 | 26.116 | 18.344 | 31.876 | 0.00 | 0.00 |
| ATOM | 7461 | HG2 | PRO | X | 491 | 27.093 | 18.823 | 31.813 | 0.00 | 0.00 |
| ATOM | 7462 | HG3 | PRO | X | 491 | 25.519 | 18.737 | 31.053 | 0.00 | 0.00 |
| ATOM | 7463 | CB  | PRO | X | 491 | 26.230 | 16.845 | 31.842 | 0.00 | 0.00 |
| ATOM | 7464 | HB2 | PRO | X | 491 | 27.251 | 16.540 | 32.070 | 0.00 | 0.00 |
| ATOM | 7465 | HB3 | PRO | X | 491 | 26.089 | 16.546 | 30.803 | 0.00 | 0.00 |
| ATOM | 7466 | CA  | PRO | X | 491 | 25.116 | 16.222 | 32.747 | 0.00 | 0.00 |
| ATOM | 7467 | HA  | PRO | X | 491 | 24.413 | 15.621 | 32.171 | 0.00 | 0.00 |
| ATOM | 7468 | C   | PRO | X | 491 | 25.722 | 15.296 | 33.797 | 0.00 | 0.00 |
| ATOM | 7469 | O   | PRO | X | 491 | 26.088 | 15.684 | 34.921 | 0.00 | 0.00 |
| ATOM | 7470 | N   | LYS | X | 492 | 25.760 | 14.013 | 33.456 | 0.00 | 0.00 |
| ATOM | 7471 | H   | LYS | X | 492 | 25.375 | 13.798 | 32.547 | 0.00 | 0.00 |
| ATOM | 7472 | CA  | LYS | X | 492 | 26.048 | 12.879 | 34.330 | 0.00 | 0.00 |
| ATOM | 7473 | HA  | LYS | X | 492 | 25.638 | 13.092 | 35.317 | 0.00 | 0.00 |
| ATOM | 7474 | CB  | LYS | X | 492 | 25.418 | 11.639 | 33.630 | 0.00 | 0.00 |
| ATOM | 7475 | HB2 | LYS | X | 492 | 24.354 | 11.821 | 33.477 | 0.00 | 0.00 |
| ATOM | 7476 | HB3 | LYS | X | 492 | 25.889 | 11.564 | 32.650 | 0.00 | 0.00 |
| ATOM | 7477 | CG  | LYS | X | 492 | 25.416 | 10.393 | 34.470 | 0.00 | 0.00 |
| ATOM | 7478 | HG2 | LYS | X | 492 | 26.455 | 10.086 | 34.591 | 0.00 | 0.00 |
| ATOM | 7479 | HG3 | LYS | X | 492 | 25.078 | 10.750 | 35.442 | 0.00 | 0.00 |
| ATOM | 7480 | CD  | LYS | X | 492 | 24.577 | 9.174  | 34.309 | 0.00 | 0.00 |
| ATOM | 7481 | HD2 | LYS | X | 492 | 24.840 | 8.389  | 35.018 | 0.00 | 0.00 |
| ATOM | 7482 | HD3 | LYS | X | 492 | 23.548 | 9.362  | 34.614 | 0.00 | 0.00 |
| ATOM | 7483 | CE  | LYS | X | 492 | 24.538 | 8.564  | 32.851 | 0.00 | 0.00 |
| ATOM | 7484 | HE2 | LYS | X | 492 | 23.681 | 7.895  | 32.929 | 0.00 | 0.00 |
| ATOM | 7485 | HE3 | LYS | X | 492 | 24.344 | 9.263  | 32.037 | 0.00 | 0.00 |
| ATOM | 7486 | NZ  | LYS | X | 492 | 25.854 | 7.858  | 32.451 | 0.00 | 0.00 |
| ATOM | 7487 | HZ1 | LYS | X | 492 | 26.574 | 8.544  | 32.274 | 0.00 | 0.00 |
| ATOM | 7488 | HZ2 | LYS | X | 492 | 26.170 | 7.256  | 33.198 | 0.00 | 0.00 |
| ATOM | 7489 | HZ3 | LYS | X | 492 | 25.693 | 7.277  | 31.641 | 0.00 | 0.00 |
| ATOM | 7490 | C   | LYS | X | 492 | 27.556 | 12.751 | 34.649 | 0.00 | 0.00 |
| ATOM | 7491 | O   | LYS | X | 492 | 27.857 | 12.102 | 35.635 | 0.00 | 0.00 |
| ATOM | 7492 | N   | ALA | X | 493 | 28.467 | 13.369 | 33.855 | 0.00 | 0.00 |
| ATOM | 7493 | H   | ALA | X | 493 | 27.975 | 13.919 | 33.164 | 0.00 | 0.00 |
| ATOM | 7494 | CA  | ALA | X | 493 | 29.800 | 13.740 | 34.231 | 0.00 | 0.00 |
| ATOM | 7495 | HA  | ALA | X | 493 | 30.413 | 12.843 | 34.318 | 0.00 | 0.00 |
| ATOM | 7496 | CB  | ALA | X | 493 | 30.390 | 14.484 | 33.006 | 0.00 | 0.00 |
| ATOM | 7497 | HB1 | ALA | X | 493 | 29.752 | 15.329 | 32.748 | 0.00 | 0.00 |
| ATOM | 7498 | HB2 | ALA | X | 493 | 30.443 | 13.840 | 32.128 | 0.00 | 0.00 |
| ATOM | 7499 | HB3 | ALA | X | 493 | 31.384 | 14.841 | 33.275 | 0.00 | 0.00 |
| ATOM | 7500 | C   | ALA | X | 493 | 29.927 | 14.675 | 35.479 | 0.00 | 0.00 |
| ATOM | 7501 | O   | ALA | X | 493 | 28.987 | 15.408 | 35.788 | 0.00 | 0.00 |
| ATOM | 7502 | N   | PRO | X | 494 | 31.124 | 14.634 | 36.170 | 0.00 | 0.00 |
| ATOM | 7503 | CD  | PRO | X | 494 | 32.316 | 13.721 | 35.917 | 0.00 | 0.00 |
| ATOM | 7504 | HD2 | PRO | X | 494 | 32.862 | 14.187 | 35.096 | 0.00 | 0.00 |
| ATOM | 7505 | HD3 | PRO | X | 494 | 32.048 | 12.684 | 35.714 | 0.00 | 0.00 |
| ATOM | 7506 | CG  | PRO | X | 494 | 32.993 | 13.714 | 37.311 | 0.00 | 0.00 |
| ATOM | 7507 | HG2 | PRO | X | 494 | 34.039 | 13.615 | 37.020 | 0.00 | 0.00 |
| ATOM | 7508 | HG3 | PRO | X | 494 | 32.549 | 12.906 | 37.893 | 0.00 | 0.00 |
| ATOM | 7509 | CB  | PRO | X | 494 | 32.591 | 15.033 | 37.968 | 0.00 | 0.00 |
| ATOM | 7510 | HB2 | PRO | X | 494 | 33.259 | 15.831 | 37.642 | 0.00 | 0.00 |
| ATOM | 7511 | HB3 | PRO | X | 494 | 32.554 | 14.983 | 39.056 | 0.00 | 0.00 |
| ATOM | 7512 | CA  | PRO | X | 494 | 31.219 | 15.340 | 37.465 | 0.00 | 0.00 |
| ATOM | 7513 | HA  | PRO | X | 494 | 30.457 | 14.911 | 38.116 | 0.00 | 0.00 |
| ATOM | 7514 | C   | PRO | X | 494 | 31.057 | 16.839 | 37.316 | 0.00 | 0.00 |
| ATOM | 7515 | O   | PRO | X | 494 | 31.418 | 17.357 | 36.238 | 0.00 | 0.00 |

|      |      |      |     |   |     |        |        |        |      |      |
|------|------|------|-----|---|-----|--------|--------|--------|------|------|
| ATOM | 7516 | N    | GLN | X | 495 | 30.546 | 17.602 | 38.316 | 0.00 | 0.00 |
| ATOM | 7517 | H    | GLN | X | 495 | 30.504 | 17.125 | 39.206 | 0.00 | 0.00 |
| ATOM | 7518 | CA   | GLN | X | 495 | 30.327 | 19.055 | 38.237 | 0.00 | 0.00 |
| ATOM | 7519 | HA   | GLN | X | 495 | 30.970 | 19.518 | 37.489 | 0.00 | 0.00 |
| ATOM | 7520 | CB   | GLN | X | 495 | 28.826 | 19.249 | 37.975 | 0.00 | 0.00 |
| ATOM | 7521 | HB2  | GLN | X | 495 | 28.241 | 18.879 | 38.818 | 0.00 | 0.00 |
| ATOM | 7522 | HB3  | GLN | X | 495 | 28.537 | 20.299 | 37.949 | 0.00 | 0.00 |
| ATOM | 7523 | CG   | GLN | X | 495 | 28.209 | 18.555 | 36.738 | 0.00 | 0.00 |
| ATOM | 7524 | HG2  | GLN | X | 495 | 28.232 | 17.476 | 36.888 | 0.00 | 0.00 |
| ATOM | 7525 | HG3  | GLN | X | 495 | 27.159 | 18.842 | 36.783 | 0.00 | 0.00 |
| ATOM | 7526 | CD   | GLN | X | 495 | 28.840 | 18.929 | 35.415 | 0.00 | 0.00 |
| ATOM | 7527 | OE1  | GLN | X | 495 | 29.345 | 20.032 | 35.247 | 0.00 | 0.00 |
| ATOM | 7528 | NE2  | GLN | X | 495 | 29.014 | 18.066 | 34.447 | 0.00 | 0.00 |
| ATOM | 7529 | HE21 | GLN | X | 495 | 29.571 | 18.234 | 33.621 | 0.00 | 0.00 |
| ATOM | 7530 | HE22 | GLN | X | 495 | 28.772 | 17.142 | 34.775 | 0.00 | 0.00 |
| ATOM | 7531 | C    | GLN | X | 495 | 30.582 | 19.787 | 39.587 | 0.00 | 0.00 |
| ATOM | 7532 | O    | GLN | X | 495 | 30.408 | 19.177 | 40.645 | 0.00 | 0.00 |
| ATOM | 7533 | N    | TRP | X | 496 | 30.908 | 21.122 | 39.536 | 0.00 | 0.00 |
| ATOM | 7534 | H    | TRP | X | 496 | 30.875 | 21.548 | 38.620 | 0.00 | 0.00 |
| ATOM | 7535 | CA   | TRP | X | 496 | 31.391 | 21.999 | 40.586 | 0.00 | 0.00 |
| ATOM | 7536 | HA   | TRP | X | 496 | 32.275 | 21.571 | 41.058 | 0.00 | 0.00 |
| ATOM | 7537 | CB   | TRP | X | 496 | 31.834 | 23.239 | 39.908 | 0.00 | 0.00 |
| ATOM | 7538 | HB2  | TRP | X | 496 | 32.551 | 22.970 | 39.133 | 0.00 | 0.00 |
| ATOM | 7539 | HB3  | TRP | X | 496 | 30.994 | 23.613 | 39.322 | 0.00 | 0.00 |
| ATOM | 7540 | CG   | TRP | X | 496 | 32.489 | 24.353 | 40.624 | 0.00 | 0.00 |
| ATOM | 7541 | CD1  | TRP | X | 496 | 32.845 | 24.450 | 41.905 | 0.00 | 0.00 |
| ATOM | 7542 | HD1  | TRP | X | 496 | 32.673 | 23.700 | 42.663 | 0.00 | 0.00 |
| ATOM | 7543 | NE1  | TRP | X | 496 | 33.549 | 25.633 | 42.133 | 0.00 | 0.00 |
| ATOM | 7544 | HE1  | TRP | X | 496 | 33.858 | 25.962 | 43.037 | 0.00 | 0.00 |
| ATOM | 7545 | CE2  | TRP | X | 496 | 33.776 | 26.264 | 40.986 | 0.00 | 0.00 |
| ATOM | 7546 | CZ2  | TRP | X | 496 | 34.449 | 27.433 | 40.632 | 0.00 | 0.00 |
| ATOM | 7547 | HZ2  | TRP | X | 496 | 35.045 | 27.922 | 41.388 | 0.00 | 0.00 |
| ATOM | 7548 | CH2  | TRP | X | 496 | 34.494 | 27.908 | 39.316 | 0.00 | 0.00 |
| ATOM | 7549 | HH2  | TRP | X | 496 | 35.081 | 28.777 | 39.060 | 0.00 | 0.00 |
| ATOM | 7550 | CZ3  | TRP | X | 496 | 33.946 | 27.112 | 38.317 | 0.00 | 0.00 |
| ATOM | 7551 | HZ3  | TRP | X | 496 | 34.140 | 27.406 | 37.296 | 0.00 | 0.00 |
| ATOM | 7552 | CE3  | TRP | X | 496 | 33.281 | 25.943 | 38.656 | 0.00 | 0.00 |
| ATOM | 7553 | HE3  | TRP | X | 496 | 32.869 | 25.327 | 37.871 | 0.00 | 0.00 |
| ATOM | 7554 | CD2  | TRP | X | 496 | 33.088 | 25.511 | 39.976 | 0.00 | 0.00 |
| ATOM | 7555 | C    | TRP | X | 496 | 30.310 | 22.321 | 41.723 | 0.00 | 0.00 |
| ATOM | 7556 | O    | TRP | X | 496 | 29.188 | 22.923 | 41.497 | 0.00 | 0.00 |
| ATOM | 7557 | N    | PRO | X | 497 | 30.549 | 21.990 | 43.017 | 0.00 | 0.00 |
| ATOM | 7558 | CD   | PRO | X | 497 | 31.629 | 21.091 | 43.518 | 0.00 | 0.00 |
| ATOM | 7559 | HD2  | PRO | X | 497 | 32.598 | 21.584 | 43.441 | 0.00 | 0.00 |
| ATOM | 7560 | HD3  | PRO | X | 497 | 31.521 | 20.161 | 42.959 | 0.00 | 0.00 |
| ATOM | 7561 | CG   | PRO | X | 497 | 31.350 | 20.853 | 44.956 | 0.00 | 0.00 |
| ATOM | 7562 | HG2  | PRO | X | 497 | 31.929 | 21.547 | 45.565 | 0.00 | 0.00 |
| ATOM | 7563 | HG3  | PRO | X | 497 | 31.589 | 19.831 | 45.249 | 0.00 | 0.00 |
| ATOM | 7564 | CB   | PRO | X | 497 | 29.848 | 21.197 | 45.174 | 0.00 | 0.00 |
| ATOM | 7565 | HB2  | PRO | X | 497 | 29.669 | 21.609 | 46.167 | 0.00 | 0.00 |
| ATOM | 7566 | HB3  | PRO | X | 497 | 29.232 | 20.326 | 44.949 | 0.00 | 0.00 |
| ATOM | 7567 | CA   | PRO | X | 497 | 29.578 | 22.237 | 44.110 | 0.00 | 0.00 |
| ATOM | 7568 | HA   | PRO | X | 497 | 28.584 | 22.077 | 43.692 | 0.00 | 0.00 |
| ATOM | 7569 | C    | PRO | X | 497 | 29.790 | 23.703 | 44.599 | 0.00 | 0.00 |
| ATOM | 7570 | O    | PRO | X | 497 | 30.952 | 24.199 | 44.366 | 0.00 | 0.00 |
| ATOM | 7571 | N    | PRO | X | 498 | 28.906 | 24.256 | 45.379 | 0.00 | 0.00 |
| ATOM | 7572 | CD   | PRO | X | 498 | 27.613 | 23.764 | 45.773 | 0.00 | 0.00 |
| ATOM | 7573 | HD2  | PRO | X | 498 | 27.729 | 22.733 | 46.106 | 0.00 | 0.00 |
| ATOM | 7574 | HD3  | PRO | X | 498 | 26.976 | 23.888 | 44.897 | 0.00 | 0.00 |
| ATOM | 7575 | CG   | PRO | X | 498 | 27.161 | 24.577 | 46.960 | 0.00 | 0.00 |
| ATOM | 7576 | HG2  | PRO | X | 498 | 27.453 | 24.076 | 47.883 | 0.00 | 0.00 |
| ATOM | 7577 | HG3  | PRO | X | 498 | 26.081 | 24.723 | 46.954 | 0.00 | 0.00 |
| ATOM | 7578 | CB   | PRO | X | 498 | 27.864 | 25.902 | 46.704 | 0.00 | 0.00 |
| ATOM | 7579 | HB2  | PRO | X | 498 | 28.018 | 26.447 | 47.635 | 0.00 | 0.00 |
| ATOM | 7580 | HB3  | PRO | X | 498 | 27.352 | 26.583 | 46.025 | 0.00 | 0.00 |
| ATOM | 7581 | CA   | PRO | X | 498 | 29.241 | 25.481 | 46.119 | 0.00 | 0.00 |
| ATOM | 7582 | HA   | PRO | X | 498 | 29.680 | 26.272 | 45.511 | 0.00 | 0.00 |



|      |      |      |     |   |     |        |        |        |      |      |
|------|------|------|-----|---|-----|--------|--------|--------|------|------|
| ATOM | 7583 | C    | PRO | X | 498 | 30.267 | 25.301 | 47.234 | 0.00 | 0.00 |
| ATOM | 7584 | O    | PRO | X | 498 | 30.312 | 24.238 | 47.871 | 0.00 | 0.00 |
| ATOM | 7585 | N    | TYR | X | 499 | 31.032 | 26.356 | 47.571 | 0.00 | 0.00 |
| ATOM | 7586 | H    | TYR | X | 499 | 30.650 | 27.185 | 47.137 | 0.00 | 0.00 |
| ATOM | 7587 | CA   | TYR | X | 499 | 32.108 | 26.486 | 48.575 | 0.00 | 0.00 |
| ATOM | 7588 | HA   | TYR | X | 499 | 32.638 | 25.537 | 48.663 | 0.00 | 0.00 |
| ATOM | 7589 | CB   | TYR | X | 499 | 33.105 | 27.518 | 48.012 | 0.00 | 0.00 |
| ATOM | 7590 | HB2  | TYR | X | 499 | 33.440 | 27.185 | 47.029 | 0.00 | 0.00 |
| ATOM | 7591 | HB3  | TYR | X | 499 | 32.553 | 28.449 | 47.884 | 0.00 | 0.00 |
| ATOM | 7592 | CG   | TYR | X | 499 | 34.246 | 27.807 | 49.054 | 0.00 | 0.00 |
| ATOM | 7593 | CD1  | TYR | X | 499 | 34.036 | 28.802 | 50.041 | 0.00 | 0.00 |
| ATOM | 7594 | HD1  | TYR | X | 499 | 33.051 | 29.227 | 50.161 | 0.00 | 0.00 |
| ATOM | 7595 | CE1  | TYR | X | 499 | 34.956 | 29.060 | 51.062 | 0.00 | 0.00 |
| ATOM | 7596 | HE1  | TYR | X | 499 | 34.803 | 29.930 | 51.684 | 0.00 | 0.00 |
| ATOM | 7597 | CZ   | TYR | X | 499 | 36.267 | 28.429 | 51.004 | 0.00 | 0.00 |
| ATOM | 7598 | OH   | TYR | X | 499 | 37.293 | 28.866 | 51.733 | 0.00 | 0.00 |
| ATOM | 7599 | HH   | TYR | X | 499 | 36.911 | 29.528 | 52.313 | 0.00 | 0.00 |
| ATOM | 7600 | CE2  | TYR | X | 499 | 36.494 | 27.447 | 49.991 | 0.00 | 0.00 |
| ATOM | 7601 | HE2  | TYR | X | 499 | 37.481 | 27.059 | 49.789 | 0.00 | 0.00 |
| ATOM | 7602 | CD2  | TYR | X | 499 | 35.480 | 27.105 | 49.107 | 0.00 | 0.00 |
| ATOM | 7603 | HD2  | TYR | X | 499 | 35.596 | 26.366 | 48.327 | 0.00 | 0.00 |
| ATOM | 7604 | C    | TYR | X | 499 | 31.425 | 26.868 | 49.892 | 0.00 | 0.00 |
| ATOM | 7605 | O    | TYR | X | 499 | 30.548 | 27.790 | 49.902 | 0.00 | 0.00 |
| ATOM | 7606 | N    | THR | X | 500 | 31.655 | 26.245 | 51.059 | 0.00 | 0.00 |
| ATOM | 7607 | H    | THR | X | 500 | 32.342 | 25.504 | 51.076 | 0.00 | 0.00 |
| ATOM | 7608 | CA   | THR | X | 500 | 31.097 | 26.657 | 52.337 | 0.00 | 0.00 |
| ATOM | 7609 | HA   | THR | X | 500 | 30.613 | 27.626 | 52.210 | 0.00 | 0.00 |
| ATOM | 7610 | CB   | THR | X | 500 | 29.995 | 25.694 | 52.743 | 0.00 | 0.00 |
| ATOM | 7611 | HB   | THR | X | 500 | 29.609 | 26.017 | 53.710 | 0.00 | 0.00 |
| ATOM | 7612 | CG2  | THR | X | 500 | 28.797 | 25.729 | 51.802 | 0.00 | 0.00 |
| ATOM | 7613 | HG21 | THR | X | 500 | 29.154 | 25.501 | 50.798 | 0.00 | 0.00 |
| ATOM | 7614 | HG22 | THR | X | 500 | 28.280 | 26.689 | 51.815 | 0.00 | 0.00 |
| ATOM | 7615 | HG23 | THR | X | 500 | 28.106 | 24.925 | 52.055 | 0.00 | 0.00 |
| ATOM | 7616 | OG1  | THR | X | 500 | 30.519 | 24.377 | 52.902 | 0.00 | 0.00 |
| ATOM | 7617 | HG1  | THR | X | 500 | 29.927 | 23.973 | 53.541 | 0.00 | 0.00 |
| ATOM | 7618 | C    | THR | X | 500 | 32.192 | 26.810 | 53.444 | 0.00 | 0.00 |
| ATOM | 7619 | O    | THR | X | 500 | 33.214 | 26.137 | 53.296 | 0.00 | 0.00 |
| ATOM | 7620 | N    | ALA | X | 501 | 31.941 | 27.464 | 54.563 | 0.00 | 0.00 |
| ATOM | 7621 | H    | ALA | X | 501 | 31.006 | 27.846 | 54.576 | 0.00 | 0.00 |
| ATOM | 7622 | CA   | ALA | X | 501 | 32.983 | 27.586 | 55.657 | 0.00 | 0.00 |
| ATOM | 7623 | HA   | ALA | X | 501 | 33.915 | 27.864 | 55.164 | 0.00 | 0.00 |
| ATOM | 7624 | CB   | ALA | X | 501 | 32.435 | 28.647 | 56.619 | 0.00 | 0.00 |
| ATOM | 7625 | HB1  | ALA | X | 501 | 31.962 | 29.458 | 56.065 | 0.00 | 0.00 |
| ATOM | 7626 | HB2  | ALA | X | 501 | 33.248 | 29.126 | 57.164 | 0.00 | 0.00 |
| ATOM | 7627 | HB3  | ALA | X | 501 | 31.721 | 28.191 | 57.304 | 0.00 | 0.00 |
| ATOM | 7628 | C    | ALA | X | 501 | 33.168 | 26.201 | 56.347 | 0.00 | 0.00 |
| ATOM | 7629 | O    | ALA | X | 501 | 34.252 | 25.890 | 56.802 | 0.00 | 0.00 |
| ATOM | 7630 | N    | GLY | X | 502 | 32.166 | 25.352 | 56.297 | 0.00 | 0.00 |
| ATOM | 7631 | H    | GLY | X | 502 | 31.330 | 25.755 | 55.898 | 0.00 | 0.00 |
| ATOM | 7632 | CA   | GLY | X | 502 | 32.167 | 23.927 | 56.729 | 0.00 | 0.00 |
| ATOM | 7633 | HA2  | GLY | X | 502 | 32.373 | 24.023 | 57.795 | 0.00 | 0.00 |
| ATOM | 7634 | HA3  | GLY | X | 502 | 31.201 | 23.424 | 56.676 | 0.00 | 0.00 |
| ATOM | 7635 | C    | GLY | X | 502 | 33.211 | 23.105 | 55.937 | 0.00 | 0.00 |
| ATOM | 7636 | O    | GLY | X | 502 | 34.309 | 22.975 | 56.467 | 0.00 | 0.00 |
| ATOM | 7637 | N    | ALA | X | 503 | 32.850 | 22.683 | 54.770 | 0.00 | 0.00 |
| ATOM | 7638 | H    | ALA | X | 503 | 31.879 | 22.793 | 54.514 | 0.00 | 0.00 |
| ATOM | 7639 | CA   | ALA | X | 503 | 33.664 | 21.769 | 54.008 | 0.00 | 0.00 |
| ATOM | 7640 | HA   | ALA | X | 503 | 34.028 | 21.034 | 54.725 | 0.00 | 0.00 |
| ATOM | 7641 | CB   | ALA | X | 503 | 32.713 | 20.990 | 53.084 | 0.00 | 0.00 |
| ATOM | 7642 | HB1  | ALA | X | 503 | 32.340 | 21.750 | 52.397 | 0.00 | 0.00 |
| ATOM | 7643 | HB2  | ALA | X | 503 | 32.003 | 20.381 | 53.643 | 0.00 | 0.00 |
| ATOM | 7644 | HB3  | ALA | X | 503 | 33.337 | 20.307 | 52.507 | 0.00 | 0.00 |
| ATOM | 7645 | C    | ALA | X | 503 | 34.818 | 22.550 | 53.233 | 0.00 | 0.00 |
| ATOM | 7646 | O    | ALA | X | 503 | 35.923 | 21.951 | 53.188 | 0.00 | 0.00 |
| ATOM | 7647 | N    | GLN | X | 504 | 34.625 | 23.776 | 52.682 | 0.00 | 0.00 |
| ATOM | 7648 | H    | GLN | X | 504 | 33.773 | 24.245 | 52.957 | 0.00 | 0.00 |
| ATOM | 7649 | CA   | GLN | X | 504 | 35.565 | 24.518 | 51.811 | 0.00 | 0.00 |

|      |      |      |     |   |     |        |        |        |      |      |
|------|------|------|-----|---|-----|--------|--------|--------|------|------|
| ATOM | 7650 | HA   | GLN | X | 504 | 35.120 | 25.447 | 51.454 | 0.00 | 0.00 |
| ATOM | 7651 | CB   | GLN | X | 504 | 36.814 | 24.960 | 52.676 | 0.00 | 0.00 |
| ATOM | 7652 | HB2  | GLN | X | 504 | 37.280 | 24.037 | 53.018 | 0.00 | 0.00 |
| ATOM | 7653 | HB3  | GLN | X | 504 | 37.549 | 25.459 | 52.045 | 0.00 | 0.00 |
| ATOM | 7654 | CG   | GLN | X | 504 | 36.585 | 25.833 | 53.938 | 0.00 | 0.00 |
| ATOM | 7655 | HG2  | GLN | X | 504 | 36.092 | 26.737 | 53.582 | 0.00 | 0.00 |
| ATOM | 7656 | HG3  | GLN | X | 504 | 35.964 | 25.350 | 54.691 | 0.00 | 0.00 |
| ATOM | 7657 | CD   | GLN | X | 504 | 37.903 | 26.097 | 54.686 | 0.00 | 0.00 |
| ATOM | 7658 | OE1  | GLN | X | 504 | 38.421 | 25.302 | 55.476 | 0.00 | 0.00 |
| ATOM | 7659 | NE2  | GLN | X | 504 | 38.409 | 27.237 | 54.538 | 0.00 | 0.00 |
| ATOM | 7660 | HE21 | GLN | X | 504 | 39.107 | 27.540 | 55.202 | 0.00 | 0.00 |
| ATOM | 7661 | HE22 | GLN | X | 504 | 37.890 | 27.969 | 54.074 | 0.00 | 0.00 |
| ATOM | 7662 | C    | GLN | X | 504 | 36.025 | 23.720 | 50.568 | 0.00 | 0.00 |
| ATOM | 7663 | O    | GLN | X | 504 | 37.185 | 23.455 | 50.264 | 0.00 | 0.00 |
| ATOM | 7664 | N    | GLN | X | 505 | 34.991 | 23.241 | 49.814 | 0.00 | 0.00 |
| ATOM | 7665 | H    | GLN | X | 505 | 34.080 | 23.203 | 50.248 | 0.00 | 0.00 |
| ATOM | 7666 | CA   | GLN | X | 505 | 35.013 | 22.618 | 48.498 | 0.00 | 0.00 |
| ATOM | 7667 | HA   | GLN | X | 505 | 35.769 | 21.836 | 48.422 | 0.00 | 0.00 |
| ATOM | 7668 | CB   | GLN | X | 505 | 33.725 | 21.830 | 48.242 | 0.00 | 0.00 |
| ATOM | 7669 | HB2  | GLN | X | 505 | 32.866 | 22.393 | 47.875 | 0.00 | 0.00 |
| ATOM | 7670 | HB3  | GLN | X | 505 | 33.817 | 21.261 | 47.317 | 0.00 | 0.00 |
| ATOM | 7671 | CG   | GLN | X | 505 | 33.471 | 20.699 | 49.243 | 0.00 | 0.00 |
| ATOM | 7672 | HG2  | GLN | X | 505 | 34.369 | 20.095 | 49.373 | 0.00 | 0.00 |
| ATOM | 7673 | HG3  | GLN | X | 505 | 33.221 | 21.144 | 50.206 | 0.00 | 0.00 |
| ATOM | 7674 | CD   | GLN | X | 505 | 32.310 | 19.835 | 48.725 | 0.00 | 0.00 |
| ATOM | 7675 | OE1  | GLN | X | 505 | 31.136 | 20.249 | 48.846 | 0.00 | 0.00 |
| ATOM | 7676 | NE2  | GLN | X | 505 | 32.589 | 18.731 | 48.083 | 0.00 | 0.00 |
| ATOM | 7677 | HE21 | GLN | X | 505 | 31.834 | 18.340 | 47.539 | 0.00 | 0.00 |
| ATOM | 7678 | HE22 | GLN | X | 505 | 33.514 | 18.331 | 48.150 | 0.00 | 0.00 |
| ATOM | 7679 | C    | GLN | X | 505 | 35.340 | 23.592 | 47.362 | 0.00 | 0.00 |
| ATOM | 7680 | O    | GLN | X | 505 | 34.619 | 24.575 | 47.265 | 0.00 | 0.00 |
| ATOM | 7681 | N    | TYR | X | 506 | 36.347 | 23.276 | 46.490 | 0.00 | 0.00 |
| ATOM | 7682 | H    | TYR | X | 506 | 37.011 | 22.582 | 46.802 | 0.00 | 0.00 |
| ATOM | 7683 | CA   | TYR | X | 506 | 36.805 | 24.084 | 45.389 | 0.00 | 0.00 |
| ATOM | 7684 | HA   | TYR | X | 506 | 36.008 | 24.743 | 45.045 | 0.00 | 0.00 |
| ATOM | 7685 | CB   | TYR | X | 506 | 37.958 | 25.017 | 45.830 | 0.00 | 0.00 |
| ATOM | 7686 | HB2  | TYR | X | 506 | 38.178 | 25.719 | 45.025 | 0.00 | 0.00 |
| ATOM | 7687 | HB3  | TYR | X | 506 | 37.584 | 25.581 | 46.684 | 0.00 | 0.00 |
| ATOM | 7688 | CG   | TYR | X | 506 | 39.265 | 24.331 | 46.178 | 0.00 | 0.00 |
| ATOM | 7689 | CD1  | TYR | X | 506 | 39.537 | 24.040 | 47.541 | 0.00 | 0.00 |
| ATOM | 7690 | HD1  | TYR | X | 506 | 38.840 | 24.395 | 48.285 | 0.00 | 0.00 |
| ATOM | 7691 | CE1  | TYR | X | 506 | 40.734 | 23.482 | 47.878 | 0.00 | 0.00 |
| ATOM | 7692 | HE1  | TYR | X | 506 | 41.089 | 23.308 | 48.883 | 0.00 | 0.00 |
| ATOM | 7693 | CZ   | TYR | X | 506 | 41.662 | 23.106 | 46.863 | 0.00 | 0.00 |
| ATOM | 7694 | OH   | TYR | X | 506 | 42.740 | 22.364 | 47.271 | 0.00 | 0.00 |
| ATOM | 7695 | HH   | TYR | X | 506 | 42.867 | 22.401 | 48.222 | 0.00 | 0.00 |
| ATOM | 7696 | CE2  | TYR | X | 506 | 41.354 | 23.302 | 45.463 | 0.00 | 0.00 |
| ATOM | 7697 | HE2  | TYR | X | 506 | 41.924 | 22.887 | 44.645 | 0.00 | 0.00 |
| ATOM | 7698 | CD2  | TYR | X | 506 | 40.209 | 24.040 | 45.161 | 0.00 | 0.00 |
| ATOM | 7699 | HD2  | TYR | X | 506 | 39.966 | 24.253 | 44.131 | 0.00 | 0.00 |
| ATOM | 7700 | C    | TYR | X | 506 | 37.215 | 23.224 | 44.139 | 0.00 | 0.00 |
| ATOM | 7701 | O    | TYR | X | 506 | 37.515 | 22.053 | 44.346 | 0.00 | 0.00 |
| ATOM | 7702 | N    | VAL | X | 507 | 37.190 | 23.722 | 42.879 | 0.00 | 0.00 |
| ATOM | 7703 | H    | VAL | X | 507 | 36.949 | 24.697 | 42.772 | 0.00 | 0.00 |
| ATOM | 7704 | CA   | VAL | X | 507 | 37.582 | 22.911 | 41.640 | 0.00 | 0.00 |
| ATOM | 7705 | HA   | VAL | X | 507 | 37.476 | 21.842 | 41.824 | 0.00 | 0.00 |
| ATOM | 7706 | CB   | VAL | X | 507 | 36.722 | 23.191 | 40.351 | 0.00 | 0.00 |
| ATOM | 7707 | HB   | VAL | X | 507 | 37.279 | 22.689 | 39.560 | 0.00 | 0.00 |
| ATOM | 7708 | CG1  | VAL | X | 507 | 35.315 | 22.594 | 40.473 | 0.00 | 0.00 |
| ATOM | 7709 | HG11 | VAL | X | 507 | 34.773 | 22.993 | 41.330 | 0.00 | 0.00 |
| ATOM | 7710 | HG12 | VAL | X | 507 | 34.831 | 22.917 | 39.551 | 0.00 | 0.00 |
| ATOM | 7711 | HG13 | VAL | X | 507 | 35.396 | 21.508 | 40.529 | 0.00 | 0.00 |
| ATOM | 7712 | CG2  | VAL | X | 507 | 36.637 | 24.636 | 40.000 | 0.00 | 0.00 |
| ATOM | 7713 | HG21 | VAL | X | 507 | 37.572 | 25.021 | 39.593 | 0.00 | 0.00 |
| ATOM | 7714 | HG22 | VAL | X | 507 | 36.403 | 25.210 | 40.896 | 0.00 | 0.00 |
| ATOM | 7715 | HG23 | VAL | X | 507 | 35.905 | 24.821 | 39.213 | 0.00 | 0.00 |
| ATOM | 7716 | C    | VAL | X | 507 | 39.104 | 23.199 | 41.404 | 0.00 | 0.00 |

|      |      |      |     |   |     |        |        |        |      |      |
|------|------|------|-----|---|-----|--------|--------|--------|------|------|
| ATOM | 7717 | O    | VAL | X | 507 | 39.542 | 24.284 | 41.417 | 0.00 | 0.00 |
| ATOM | 7718 | N    | SER | X | 508 | 39.894 | 22.164 | 41.013 | 0.00 | 0.00 |
| ATOM | 7719 | H    | SER | X | 508 | 39.377 | 21.302 | 40.910 | 0.00 | 0.00 |
| ATOM | 7720 | CA   | SER | X | 508 | 41.220 | 22.269 | 40.374 | 0.00 | 0.00 |
| ATOM | 7721 | HA   | SER | X | 508 | 41.662 | 23.220 | 40.672 | 0.00 | 0.00 |
| ATOM | 7722 | CB   | SER | X | 508 | 42.145 | 21.261 | 40.966 | 0.00 | 0.00 |
| ATOM | 7723 | HB2  | SER | X | 508 | 43.133 | 21.433 | 40.538 | 0.00 | 0.00 |
| ATOM | 7724 | HB3  | SER | X | 508 | 42.293 | 21.383 | 42.039 | 0.00 | 0.00 |
| ATOM | 7725 | OG   | SER | X | 508 | 41.691 | 19.958 | 40.825 | 0.00 | 0.00 |
| ATOM | 7726 | HG   | SER | X | 508 | 40.752 | 19.786 | 40.929 | 0.00 | 0.00 |
| ATOM | 7727 | C    | SER | X | 508 | 41.058 | 22.341 | 38.821 | 0.00 | 0.00 |
| ATOM | 7728 | O    | SER | X | 508 | 40.081 | 21.693 | 38.383 | 0.00 | 0.00 |
| ATOM | 7729 | N    | LEU | X | 509 | 41.846 | 23.044 | 38.054 | 0.00 | 0.00 |
| ATOM | 7730 | H    | LEU | X | 509 | 42.672 | 23.474 | 38.448 | 0.00 | 0.00 |
| ATOM | 7731 | CA   | LEU | X | 509 | 41.495 | 23.334 | 36.693 | 0.00 | 0.00 |
| ATOM | 7732 | HA   | LEU | X | 509 | 40.858 | 22.567 | 36.251 | 0.00 | 0.00 |
| ATOM | 7733 | CB   | LEU | X | 509 | 40.970 | 24.801 | 36.625 | 0.00 | 0.00 |
| ATOM | 7734 | HB2  | LEU | X | 509 | 41.755 | 25.415 | 37.066 | 0.00 | 0.00 |
| ATOM | 7735 | HB3  | LEU | X | 509 | 40.802 | 25.022 | 35.571 | 0.00 | 0.00 |
| ATOM | 7736 | CG   | LEU | X | 509 | 39.666 | 25.087 | 37.417 | 0.00 | 0.00 |
| ATOM | 7737 | HG   | LEU | X | 509 | 39.875 | 24.870 | 38.465 | 0.00 | 0.00 |
| ATOM | 7738 | CD1  | LEU | X | 509 | 39.343 | 26.560 | 37.280 | 0.00 | 0.00 |
| ATOM | 7739 | HD11 | LEU | X | 509 | 38.396 | 26.774 | 37.777 | 0.00 | 0.00 |
| ATOM | 7740 | HD12 | LEU | X | 509 | 39.292 | 26.975 | 36.273 | 0.00 | 0.00 |
| ATOM | 7741 | HD13 | LEU | X | 509 | 40.069 | 27.150 | 37.839 | 0.00 | 0.00 |
| ATOM | 7742 | CD2  | LEU | X | 509 | 38.485 | 24.241 | 36.957 | 0.00 | 0.00 |
| ATOM | 7743 | HD21 | LEU | X | 509 | 38.541 | 23.206 | 37.294 | 0.00 | 0.00 |
| ATOM | 7744 | HD22 | LEU | X | 509 | 37.628 | 24.738 | 37.411 | 0.00 | 0.00 |
| ATOM | 7745 | HD23 | LEU | X | 509 | 38.356 | 24.072 | 35.888 | 0.00 | 0.00 |
| ATOM | 7746 | C    | LEU | X | 509 | 42.807 | 23.155 | 35.991 | 0.00 | 0.00 |
| ATOM | 7747 | O    | LEU | X | 509 | 43.827 | 23.680 | 36.397 | 0.00 | 0.00 |
| ATOM | 7748 | N    | ASP | X | 510 | 42.780 | 22.305 | 34.988 | 0.00 | 0.00 |
| ATOM | 7749 | H    | ASP | X | 510 | 41.888 | 21.890 | 34.758 | 0.00 | 0.00 |
| ATOM | 7750 | CA   | ASP | X | 510 | 43.876 | 21.640 | 34.387 | 0.00 | 0.00 |
| ATOM | 7751 | HA   | ASP | X | 510 | 44.607 | 22.391 | 34.091 | 0.00 | 0.00 |
| ATOM | 7752 | CB   | ASP | X | 510 | 44.450 | 20.611 | 35.356 | 0.00 | 0.00 |
| ATOM | 7753 | HB2  | ASP | X | 510 | 44.551 | 20.974 | 36.379 | 0.00 | 0.00 |
| ATOM | 7754 | HB3  | ASP | X | 510 | 43.726 | 19.802 | 35.461 | 0.00 | 0.00 |
| ATOM | 7755 | CG   | ASP | X | 510 | 45.844 | 20.068 | 35.051 | 0.00 | 0.00 |
| ATOM | 7756 | OD1  | ASP | X | 510 | 46.314 | 19.170 | 35.809 | 0.00 | 0.00 |
| ATOM | 7757 | OD2  | ASP | X | 510 | 46.545 | 20.591 | 34.174 | 0.00 | 0.00 |
| ATOM | 7758 | C    | ASP | X | 510 | 43.379 | 20.924 | 33.074 | 0.00 | 0.00 |
| ATOM | 7759 | O    | ASP | X | 510 | 42.152 | 20.651 | 32.937 | 0.00 | 0.00 |
| ATOM | 7760 | N    | LEU | X | 511 | 44.334 | 20.417 | 32.312 | 0.00 | 0.00 |
| ATOM | 7761 | H    | LEU | X | 511 | 45.224 | 20.725 | 32.677 | 0.00 | 0.00 |
| ATOM | 7762 | CA   | LEU | X | 511 | 44.047 | 19.698 | 31.093 | 0.00 | 0.00 |
| ATOM | 7763 | HA   | LEU | X | 511 | 43.430 | 20.266 | 30.397 | 0.00 | 0.00 |
| ATOM | 7764 | CB   | LEU | X | 511 | 45.371 | 19.249 | 30.540 | 0.00 | 0.00 |
| ATOM | 7765 | HB2  | LEU | X | 511 | 45.900 | 18.745 | 31.349 | 0.00 | 0.00 |
| ATOM | 7766 | HB3  | LEU | X | 511 | 45.154 | 18.510 | 29.768 | 0.00 | 0.00 |
| ATOM | 7767 | CG   | LEU | X | 511 | 46.254 | 20.369 | 30.111 | 0.00 | 0.00 |
| ATOM | 7768 | HG   | LEU | X | 511 | 46.613 | 20.977 | 30.941 | 0.00 | 0.00 |
| ATOM | 7769 | CD1  | LEU | X | 511 | 47.436 | 19.780 | 29.337 | 0.00 | 0.00 |
| ATOM | 7770 | HD11 | LEU | X | 511 | 47.022 | 19.267 | 28.469 | 0.00 | 0.00 |
| ATOM | 7771 | HD12 | LEU | X | 511 | 47.894 | 19.200 | 30.138 | 0.00 | 0.00 |
| ATOM | 7772 | HD13 | LEU | X | 511 | 48.137 | 20.554 | 29.025 | 0.00 | 0.00 |
| ATOM | 7773 | CD2  | LEU | X | 511 | 45.514 | 21.294 | 29.131 | 0.00 | 0.00 |
| ATOM | 7774 | HD21 | LEU | X | 511 | 44.810 | 21.916 | 29.683 | 0.00 | 0.00 |
| ATOM | 7775 | HD22 | LEU | X | 511 | 46.274 | 22.015 | 28.828 | 0.00 | 0.00 |
| ATOM | 7776 | HD23 | LEU | X | 511 | 45.051 | 20.837 | 28.256 | 0.00 | 0.00 |
| ATOM | 7777 | C    | LEU | X | 511 | 43.166 | 18.452 | 31.362 | 0.00 | 0.00 |
| ATOM | 7778 | O    | LEU | X | 511 | 42.255 | 18.277 | 30.596 | 0.00 | 0.00 |
| ATOM | 7779 | N    | ARG | X | 512 | 43.371 | 17.739 | 32.491 | 0.00 | 0.00 |
| ATOM | 7780 | H    | ARG | X | 512 | 44.108 | 18.092 | 33.085 | 0.00 | 0.00 |
| ATOM | 7781 | CA   | ARG | X | 512 | 42.456 | 16.738 | 32.963 | 0.00 | 0.00 |
| ATOM | 7782 | HA   | ARG | X | 512 | 42.639 | 15.888 | 32.305 | 0.00 | 0.00 |
| ATOM | 7783 | CB   | ARG | X | 512 | 42.864 | 16.411 | 34.426 | 0.00 | 0.00 |

|      |      |      |     |   |     |        |        |        |      |      |
|------|------|------|-----|---|-----|--------|--------|--------|------|------|
| ATOM | 7784 | HB2  | ARG | X | 512 | 42.738 | 17.302 | 35.041 | 0.00 | 0.00 |
| ATOM | 7785 | HB3  | ARG | X | 512 | 42.287 | 15.566 | 34.801 | 0.00 | 0.00 |
| ATOM | 7786 | CG   | ARG | X | 512 | 44.343 | 15.952 | 34.691 | 0.00 | 0.00 |
| ATOM | 7787 | HG2  | ARG | X | 512 | 44.558 | 15.021 | 34.168 | 0.00 | 0.00 |
| ATOM | 7788 | HG3  | ARG | X | 512 | 45.000 | 16.735 | 34.314 | 0.00 | 0.00 |
| ATOM | 7789 | CD   | ARG | X | 512 | 44.761 | 15.864 | 36.131 | 0.00 | 0.00 |
| ATOM | 7790 | HD2  | ARG | X | 512 | 45.752 | 15.437 | 36.283 | 0.00 | 0.00 |
| ATOM | 7791 | HD3  | ARG | X | 512 | 44.648 | 16.888 | 36.488 | 0.00 | 0.00 |
| ATOM | 7792 | NE   | ARG | X | 512 | 43.895 | 15.036 | 36.933 | 0.00 | 0.00 |
| ATOM | 7793 | HE   | ARG | X | 512 | 43.310 | 14.436 | 36.370 | 0.00 | 0.00 |
| ATOM | 7794 | CZ   | ARG | X | 512 | 43.645 | 15.021 | 38.248 | 0.00 | 0.00 |
| ATOM | 7795 | NH1  | ARG | X | 512 | 44.159 | 15.803 | 39.094 | 0.00 | 0.00 |
| ATOM | 7796 | HH11 | ARG | X | 512 | 44.981 | 16.372 | 38.951 | 0.00 | 0.00 |
| ATOM | 7797 | HH12 | ARG | X | 512 | 43.681 | 15.780 | 39.984 | 0.00 | 0.00 |
| ATOM | 7798 | NH2  | ARG | X | 512 | 42.803 | 14.138 | 38.667 | 0.00 | 0.00 |
| ATOM | 7799 | HH21 | ARG | X | 512 | 42.341 | 13.558 | 37.982 | 0.00 | 0.00 |
| ATOM | 7800 | HH22 | ARG | X | 512 | 42.294 | 14.181 | 39.539 | 0.00 | 0.00 |
| ATOM | 7801 | C    | ARG | X | 512 | 40.945 | 17.130 | 33.010 | 0.00 | 0.00 |
| ATOM | 7802 | O    | ARG | X | 512 | 40.687 | 18.311 | 33.123 | 0.00 | 0.00 |
| ATOM | 7803 | N    | PRO | X | 513 | 40.037 | 16.127 | 33.007 | 0.00 | 0.00 |
| ATOM | 7804 | CD   | PRO | X | 513 | 40.187 | 14.681 | 32.830 | 0.00 | 0.00 |
| ATOM | 7805 | HD2  | PRO | X | 513 | 40.976 | 14.435 | 33.540 | 0.00 | 0.00 |
| ATOM | 7806 | HD3  | PRO | X | 513 | 40.486 | 14.420 | 31.814 | 0.00 | 0.00 |
| ATOM | 7807 | CG   | PRO | X | 513 | 38.852 | 13.997 | 33.217 | 0.00 | 0.00 |
| ATOM | 7808 | HG2  | PRO | X | 513 | 38.924 | 13.792 | 34.285 | 0.00 | 0.00 |
| ATOM | 7809 | HG3  | PRO | X | 513 | 38.655 | 13.058 | 32.700 | 0.00 | 0.00 |
| ATOM | 7810 | CB   | PRO | X | 513 | 37.861 | 15.093 | 32.947 | 0.00 | 0.00 |
| ATOM | 7811 | HB2  | PRO | X | 513 | 37.031 | 14.858 | 33.613 | 0.00 | 0.00 |
| ATOM | 7812 | HB3  | PRO | X | 513 | 37.669 | 15.127 | 31.874 | 0.00 | 0.00 |
| ATOM | 7813 | CA   | PRO | X | 513 | 38.695 | 16.367 | 33.326 | 0.00 | 0.00 |
| ATOM | 7814 | HA   | PRO | X | 513 | 38.244 | 17.197 | 32.783 | 0.00 | 0.00 |
| ATOM | 7815 | C    | PRO | X | 513 | 38.565 | 16.766 | 34.820 | 0.00 | 0.00 |
| ATOM | 7816 | O    | PRO | X | 513 | 39.435 | 16.444 | 35.643 | 0.00 | 0.00 |
| ATOM | 7817 | N    | LEU | X | 514 | 37.474 | 17.543 | 35.110 | 0.00 | 0.00 |
| ATOM | 7818 | H    | LEU | X | 514 | 36.956 | 17.871 | 34.307 | 0.00 | 0.00 |
| ATOM | 7819 | CA   | LEU | X | 514 | 37.166 | 18.200 | 36.417 | 0.00 | 0.00 |
| ATOM | 7820 | HA   | LEU | X | 514 | 37.804 | 19.072 | 36.560 | 0.00 | 0.00 |
| ATOM | 7821 | CB   | LEU | X | 514 | 35.649 | 18.609 | 36.330 | 0.00 | 0.00 |
| ATOM | 7822 | HB2  | LEU | X | 514 | 35.386 | 19.124 | 35.406 | 0.00 | 0.00 |
| ATOM | 7823 | HB3  | LEU | X | 514 | 35.076 | 17.705 | 36.537 | 0.00 | 0.00 |
| ATOM | 7824 | CG   | LEU | X | 514 | 35.342 | 19.588 | 37.461 | 0.00 | 0.00 |
| ATOM | 7825 | HG   | LEU | X | 514 | 35.859 | 19.370 | 38.395 | 0.00 | 0.00 |
| ATOM | 7826 | CD1  | LEU | X | 514 | 35.819 | 21.013 | 37.078 | 0.00 | 0.00 |
| ATOM | 7827 | HD11 | LEU | X | 514 | 35.274 | 21.364 | 36.201 | 0.00 | 0.00 |
| ATOM | 7828 | HD12 | LEU | X | 514 | 36.845 | 20.982 | 36.710 | 0.00 | 0.00 |
| ATOM | 7829 | HD13 | LEU | X | 514 | 35.787 | 21.723 | 37.904 | 0.00 | 0.00 |
| ATOM | 7830 | CD2  | LEU | X | 514 | 33.865 | 19.611 | 37.772 | 0.00 | 0.00 |
| ATOM | 7831 | HD21 | LEU | X | 514 | 33.575 | 20.487 | 38.353 | 0.00 | 0.00 |
| ATOM | 7832 | HD22 | LEU | X | 514 | 33.322 | 19.699 | 36.831 | 0.00 | 0.00 |
| ATOM | 7833 | HD23 | LEU | X | 514 | 33.503 | 18.825 | 38.435 | 0.00 | 0.00 |
| ATOM | 7834 | C    | LEU | X | 514 | 37.536 | 17.401 | 37.727 | 0.00 | 0.00 |
| ATOM | 7835 | O    | LEU | X | 514 | 37.007 | 16.317 | 37.963 | 0.00 | 0.00 |
| ATOM | 7836 | N    | GLU | X | 515 | 38.207 | 17.976 | 38.743 | 0.00 | 0.00 |
| ATOM | 7837 | H    | GLU | X | 515 | 38.657 | 18.864 | 38.575 | 0.00 | 0.00 |
| ATOM | 7838 | CA   | GLU | X | 515 | 38.582 | 17.430 | 40.065 | 0.00 | 0.00 |
| ATOM | 7839 | HA   | GLU | X | 515 | 37.904 | 16.586 | 40.192 | 0.00 | 0.00 |
| ATOM | 7840 | CB   | GLU | X | 515 | 40.022 | 16.811 | 40.123 | 0.00 | 0.00 |
| ATOM | 7841 | HB2  | GLU | X | 515 | 40.108 | 15.972 | 39.433 | 0.00 | 0.00 |
| ATOM | 7842 | HB3  | GLU | X | 515 | 40.770 | 17.582 | 39.937 | 0.00 | 0.00 |
| ATOM | 7843 | CG   | GLU | X | 515 | 40.317 | 16.157 | 41.516 | 0.00 | 0.00 |
| ATOM | 7844 | HG2  | GLU | X | 515 | 40.218 | 16.945 | 42.262 | 0.00 | 0.00 |
| ATOM | 7845 | HG3  | GLU | X | 515 | 39.445 | 15.560 | 41.780 | 0.00 | 0.00 |
| ATOM | 7846 | CD   | GLU | X | 515 | 41.677 | 15.490 | 41.632 | 0.00 | 0.00 |
| ATOM | 7847 | OE1  | GLU | X | 515 | 41.794 | 14.439 | 41.080 | 0.00 | 0.00 |
| ATOM | 7848 | OE2  | GLU | X | 515 | 42.670 | 16.086 | 42.074 | 0.00 | 0.00 |
| ATOM | 7849 | C    | GLU | X | 515 | 38.354 | 18.485 | 41.101 | 0.00 | 0.00 |
| ATOM | 7850 | O    | GLU | X | 515 | 38.893 | 19.595 | 40.989 | 0.00 | 0.00 |

|      |      |      |     |   |     |        |        |        |      |      |
|------|------|------|-----|---|-----|--------|--------|--------|------|------|
| ATOM | 7851 | N    | VAL | X | 516 | 37.621 | 18.063 | 42.161 | 0.00 | 0.00 |
| ATOM | 7852 | H    | VAL | X | 516 | 37.303 | 17.105 | 42.155 | 0.00 | 0.00 |
| ATOM | 7853 | CA   | VAL | X | 516 | 37.196 | 18.846 | 43.365 | 0.00 | 0.00 |
| ATOM | 7854 | HA   | VAL | X | 516 | 37.218 | 19.896 | 43.073 | 0.00 | 0.00 |
| ATOM | 7855 | CB   | VAL | X | 516 | 35.707 | 18.533 | 43.662 | 0.00 | 0.00 |
| ATOM | 7856 | HB   | VAL | X | 516 | 35.576 | 17.489 | 43.947 | 0.00 | 0.00 |
| ATOM | 7857 | CG1  | VAL | X | 516 | 35.258 | 19.380 | 44.903 | 0.00 | 0.00 |
| ATOM | 7858 | HG11 | VAL | X | 516 | 35.439 | 20.444 | 44.750 | 0.00 | 0.00 |
| ATOM | 7859 | HG12 | VAL | X | 516 | 34.245 | 19.069 | 45.158 | 0.00 | 0.00 |
| ATOM | 7860 | HG13 | VAL | X | 516 | 35.903 | 19.113 | 45.741 | 0.00 | 0.00 |
| ATOM | 7861 | CG2  | VAL | X | 516 | 34.709 | 18.769 | 42.539 | 0.00 | 0.00 |
| ATOM | 7862 | HG21 | VAL | X | 516 | 34.865 | 19.789 | 42.188 | 0.00 | 0.00 |
| ATOM | 7863 | HG22 | VAL | X | 516 | 33.712 | 18.676 | 42.969 | 0.00 | 0.00 |
| ATOM | 7864 | HG23 | VAL | X | 516 | 34.820 | 18.071 | 41.709 | 0.00 | 0.00 |
| ATOM | 7865 | C    | VAL | X | 516 | 38.067 | 18.530 | 44.600 | 0.00 | 0.00 |
| ATOM | 7866 | O    | VAL | X | 516 | 38.222 | 17.342 | 44.943 | 0.00 | 0.00 |
| ATOM | 7867 | N    | ARG | X | 517 | 38.572 | 19.519 | 45.329 | 0.00 | 0.00 |
| ATOM | 7868 | H    | ARG | X | 517 | 38.230 | 20.465 | 45.236 | 0.00 | 0.00 |
| ATOM | 7869 | CA   | ARG | X | 517 | 39.501 | 19.372 | 46.466 | 0.00 | 0.00 |
| ATOM | 7870 | HA   | ARG | X | 517 | 39.431 | 18.342 | 46.816 | 0.00 | 0.00 |
| ATOM | 7871 | CB   | ARG | X | 517 | 40.981 | 19.675 | 46.061 | 0.00 | 0.00 |
| ATOM | 7872 | HB2  | ARG | X | 517 | 40.968 | 20.650 | 45.573 | 0.00 | 0.00 |
| ATOM | 7873 | HB3  | ARG | X | 517 | 41.612 | 19.747 | 46.947 | 0.00 | 0.00 |
| ATOM | 7874 | CG   | ARG | X | 517 | 41.654 | 18.740 | 45.057 | 0.00 | 0.00 |
| ATOM | 7875 | HG2  | ARG | X | 517 | 41.684 | 17.711 | 45.414 | 0.00 | 0.00 |
| ATOM | 7876 | HG3  | ARG | X | 517 | 41.045 | 18.746 | 44.152 | 0.00 | 0.00 |
| ATOM | 7877 | CD   | ARG | X | 517 | 43.057 | 19.157 | 44.639 | 0.00 | 0.00 |
| ATOM | 7878 | HD2  | ARG | X | 517 | 43.122 | 20.230 | 44.464 | 0.00 | 0.00 |
| ATOM | 7879 | HD3  | ARG | X | 517 | 43.775 | 19.002 | 45.445 | 0.00 | 0.00 |
| ATOM | 7880 | NE   | ARG | X | 517 | 43.484 | 18.544 | 43.365 | 0.00 | 0.00 |
| ATOM | 7881 | HE   | ARG | X | 517 | 43.171 | 17.615 | 43.122 | 0.00 | 0.00 |
| ATOM | 7882 | CZ   | ARG | X | 517 | 44.397 | 18.980 | 42.572 | 0.00 | 0.00 |
| ATOM | 7883 | NH1  | ARG | X | 517 | 45.026 | 20.050 | 42.864 | 0.00 | 0.00 |
| ATOM | 7884 | HH11 | ARG | X | 517 | 45.040 | 20.505 | 43.766 | 0.00 | 0.00 |
| ATOM | 7885 | HH12 | ARG | X | 517 | 45.769 | 20.278 | 42.219 | 0.00 | 0.00 |
| ATOM | 7886 | NH2  | ARG | X | 517 | 44.561 | 18.385 | 41.449 | 0.00 | 0.00 |
| ATOM | 7887 | HH21 | ARG | X | 517 | 43.811 | 17.735 | 41.261 | 0.00 | 0.00 |
| ATOM | 7888 | HH22 | ARG | X | 517 | 45.285 | 18.571 | 40.770 | 0.00 | 0.00 |
| ATOM | 7889 | C    | ARG | X | 517 | 38.980 | 20.237 | 47.666 | 0.00 | 0.00 |
| ATOM | 7890 | O    | ARG | X | 517 | 38.101 | 21.094 | 47.511 | 0.00 | 0.00 |
| ATOM | 7891 | N    | ARG | X | 518 | 39.326 | 19.766 | 48.919 | 0.00 | 0.00 |
| ATOM | 7892 | H    | ARG | X | 518 | 40.093 | 19.123 | 49.053 | 0.00 | 0.00 |
| ATOM | 7893 | CA   | ARG | X | 518 | 38.599 | 20.132 | 50.151 | 0.00 | 0.00 |
| ATOM | 7894 | HA   | ARG | X | 518 | 37.767 | 20.780 | 49.875 | 0.00 | 0.00 |
| ATOM | 7895 | CB   | ARG | X | 518 | 37.980 | 18.870 | 50.750 | 0.00 | 0.00 |
| ATOM | 7896 | HB2  | ARG | X | 518 | 37.462 | 18.277 | 49.995 | 0.00 | 0.00 |
| ATOM | 7897 | HB3  | ARG | X | 518 | 38.816 | 18.296 | 51.149 | 0.00 | 0.00 |
| ATOM | 7898 | CG   | ARG | X | 518 | 36.892 | 19.072 | 51.851 | 0.00 | 0.00 |
| ATOM | 7899 | HG2  | ARG | X | 518 | 37.365 | 19.434 | 52.764 | 0.00 | 0.00 |
| ATOM | 7900 | HG3  | ARG | X | 518 | 36.102 | 19.729 | 51.487 | 0.00 | 0.00 |
| ATOM | 7901 | CD   | ARG | X | 518 | 36.289 | 17.732 | 52.248 | 0.00 | 0.00 |
| ATOM | 7902 | HD2  | ARG | X | 518 | 35.782 | 17.909 | 53.196 | 0.00 | 0.00 |
| ATOM | 7903 | HD3  | ARG | X | 518 | 35.532 | 17.319 | 51.581 | 0.00 | 0.00 |
| ATOM | 7904 | NE   | ARG | X | 518 | 37.342 | 16.770 | 52.501 | 0.00 | 0.00 |
| ATOM | 7905 | HE   | ARG | X | 518 | 37.518 | 15.988 | 51.886 | 0.00 | 0.00 |
| ATOM | 7906 | CZ   | ARG | X | 518 | 37.961 | 16.628 | 53.667 | 0.00 | 0.00 |
| ATOM | 7907 | NH1  | ARG | X | 518 | 37.740 | 17.466 | 54.636 | 0.00 | 0.00 |
| ATOM | 7908 | HH11 | ARG | X | 518 | 37.037 | 18.185 | 54.542 | 0.00 | 0.00 |
| ATOM | 7909 | HH12 | ARG | X | 518 | 37.955 | 17.173 | 55.578 | 0.00 | 0.00 |
| ATOM | 7910 | NH2  | ARG | X | 518 | 38.830 | 15.640 | 53.709 | 0.00 | 0.00 |
| ATOM | 7911 | HH21 | ARG | X | 518 | 39.029 | 15.022 | 52.935 | 0.00 | 0.00 |
| ATOM | 7912 | HH22 | ARG | X | 518 | 39.374 | 15.483 | 54.546 | 0.00 | 0.00 |
| ATOM | 7913 | C    | ARG | X | 518 | 39.507 | 20.846 | 51.073 | 0.00 | 0.00 |
| ATOM | 7914 | O    | ARG | X | 518 | 40.691 | 20.573 | 51.028 | 0.00 | 0.00 |
| ATOM | 7915 | N    | GLY | X | 519 | 39.010 | 21.802 | 51.852 | 0.00 | 0.00 |
| ATOM | 7916 | H    | GLY | X | 519 | 38.026 | 21.984 | 51.714 | 0.00 | 0.00 |
| ATOM | 7917 | CA   | GLY | X | 519 | 39.808 | 22.629 | 52.756 | 0.00 | 0.00 |

|      |      |      |     |   |     |        |        |        |      |      |
|------|------|------|-----|---|-----|--------|--------|--------|------|------|
| ATOM | 7918 | HA2  | GLY | X | 519 | 39.030 | 23.099 | 53.357 | 0.00 | 0.00 |
| ATOM | 7919 | HA3  | GLY | X | 519 | 40.405 | 22.034 | 53.448 | 0.00 | 0.00 |
| ATOM | 7920 | C    | GLY | X | 519 | 40.717 | 23.679 | 52.095 | 0.00 | 0.00 |
| ATOM | 7921 | O    | GLY | X | 519 | 41.932 | 23.569 | 52.167 | 0.00 | 0.00 |
| ATOM | 7922 | N    | LEU | X | 520 | 40.220 | 24.831 | 51.563 | 0.00 | 0.00 |
| ATOM | 7923 | H    | LEU | X | 520 | 39.210 | 24.821 | 51.543 | 0.00 | 0.00 |
| ATOM | 7924 | CA   | LEU | X | 520 | 40.970 | 25.902 | 50.836 | 0.00 | 0.00 |
| ATOM | 7925 | HA   | LEU | X | 520 | 41.608 | 25.408 | 50.104 | 0.00 | 0.00 |
| ATOM | 7926 | CB   | LEU | X | 520 | 40.114 | 26.860 | 49.990 | 0.00 | 0.00 |
| ATOM | 7927 | HB2  | LEU | X | 520 | 39.487 | 26.267 | 49.325 | 0.00 | 0.00 |
| ATOM | 7928 | HB3  | LEU | X | 520 | 39.535 | 27.338 | 50.781 | 0.00 | 0.00 |
| ATOM | 7929 | CG   | LEU | X | 520 | 40.949 | 27.908 | 49.246 | 0.00 | 0.00 |
| ATOM | 7930 | HG   | LEU | X | 520 | 41.588 | 28.397 | 49.981 | 0.00 | 0.00 |
| ATOM | 7931 | CD1  | LEU | X | 520 | 41.795 | 27.314 | 48.197 | 0.00 | 0.00 |
| ATOM | 7932 | HD11 | LEU | X | 520 | 42.557 | 28.034 | 47.899 | 0.00 | 0.00 |
| ATOM | 7933 | HD12 | LEU | X | 520 | 41.195 | 27.070 | 47.320 | 0.00 | 0.00 |
| ATOM | 7934 | HD13 | LEU | X | 520 | 42.343 | 26.415 | 48.482 | 0.00 | 0.00 |
| ATOM | 7935 | CD2  | LEU | X | 520 | 39.915 | 28.943 | 48.675 | 0.00 | 0.00 |
| ATOM | 7936 | HD21 | LEU | X | 520 | 39.159 | 29.151 | 49.432 | 0.00 | 0.00 |
| ATOM | 7937 | HD22 | LEU | X | 520 | 40.418 | 29.846 | 48.328 | 0.00 | 0.00 |
| ATOM | 7938 | HD23 | LEU | X | 520 | 39.454 | 28.455 | 47.816 | 0.00 | 0.00 |
| ATOM | 7939 | C    | LEU | X | 520 | 41.917 | 26.499 | 51.895 | 0.00 | 0.00 |
| ATOM | 7940 | O    | LEU | X | 520 | 41.617 | 27.293 | 52.785 | 0.00 | 0.00 |
| ATOM | 7941 | N    | ARG | X | 521 | 43.191 | 26.202 | 51.604 | 0.00 | 0.00 |
| ATOM | 7942 | H    | ARG | X | 521 | 43.293 | 25.521 | 50.865 | 0.00 | 0.00 |
| ATOM | 7943 | CA   | ARG | X | 521 | 44.472 | 26.551 | 52.300 | 0.00 | 0.00 |
| ATOM | 7944 | HA   | ARG | X | 521 | 45.126 | 25.700 | 52.111 | 0.00 | 0.00 |
| ATOM | 7945 | CB   | ARG | X | 521 | 44.948 | 27.894 | 51.781 | 0.00 | 0.00 |
| ATOM | 7946 | HB2  | ARG | X | 521 | 44.932 | 27.984 | 50.695 | 0.00 | 0.00 |
| ATOM | 7947 | HB3  | ARG | X | 521 | 44.372 | 28.700 | 52.236 | 0.00 | 0.00 |
| ATOM | 7948 | CG   | ARG | X | 521 | 46.418 | 28.211 | 52.156 | 0.00 | 0.00 |
| ATOM | 7949 | HG2  | ARG | X | 521 | 46.517 | 29.253 | 51.854 | 0.00 | 0.00 |
| ATOM | 7950 | HG3  | ARG | X | 521 | 46.739 | 28.241 | 53.197 | 0.00 | 0.00 |
| ATOM | 7951 | CD   | ARG | X | 521 | 47.403 | 27.338 | 51.355 | 0.00 | 0.00 |
| ATOM | 7952 | HD2  | ARG | X | 521 | 47.342 | 26.312 | 51.718 | 0.00 | 0.00 |
| ATOM | 7953 | HD3  | ARG | X | 521 | 46.982 | 27.350 | 50.350 | 0.00 | 0.00 |
| ATOM | 7954 | NE   | ARG | X | 521 | 48.797 | 27.840 | 51.342 | 0.00 | 0.00 |
| ATOM | 7955 | HE   | ARG | X | 521 | 48.934 | 28.730 | 51.798 | 0.00 | 0.00 |
| ATOM | 7956 | CZ   | ARG | X | 521 | 49.868 | 27.218 | 50.817 | 0.00 | 0.00 |
| ATOM | 7957 | NH1  | ARG | X | 521 | 49.847 | 26.007 | 50.144 | 0.00 | 0.00 |
| ATOM | 7958 | HH11 | ARG | X | 521 | 49.027 | 25.421 | 50.213 | 0.00 | 0.00 |
| ATOM | 7959 | HH12 | ARG | X | 521 | 50.671 | 25.494 | 49.865 | 0.00 | 0.00 |
| ATOM | 7960 | NH2  | ARG | X | 521 | 50.956 | 27.821 | 50.851 | 0.00 | 0.00 |
| ATOM | 7961 | HH21 | ARG | X | 521 | 51.001 | 28.791 | 51.127 | 0.00 | 0.00 |
| ATOM | 7962 | HH22 | ARG | X | 521 | 51.797 | 27.348 | 50.556 | 0.00 | 0.00 |
| ATOM | 7963 | C    | ARG | X | 521 | 44.270 | 26.488 | 53.827 | 0.00 | 0.00 |
| ATOM | 7964 | O    | ARG | X | 521 | 44.742 | 27.370 | 54.588 | 0.00 | 0.00 |
| ATOM | 7965 | N    | ALA | X | 522 | 43.422 | 25.515 | 54.246 | 0.00 | 0.00 |
| ATOM | 7966 | H    | ALA | X | 522 | 43.167 | 24.838 | 53.542 | 0.00 | 0.00 |
| ATOM | 7967 | CA   | ALA | X | 522 | 42.756 | 25.565 | 55.530 | 0.00 | 0.00 |
| ATOM | 7968 | HA   | ALA | X | 522 | 42.124 | 26.453 | 55.484 | 0.00 | 0.00 |
| ATOM | 7969 | CB   | ALA | X | 522 | 41.757 | 24.377 | 55.550 | 0.00 | 0.00 |
| ATOM | 7970 | HB1  | ALA | X | 522 | 42.291 | 23.439 | 55.396 | 0.00 | 0.00 |
| ATOM | 7971 | HB2  | ALA | X | 522 | 41.144 | 24.415 | 54.650 | 0.00 | 0.00 |
| ATOM | 7972 | HB3  | ALA | X | 522 | 41.203 | 24.394 | 56.488 | 0.00 | 0.00 |
| ATOM | 7973 | C    | ALA | X | 522 | 43.621 | 25.436 | 56.818 | 0.00 | 0.00 |
| ATOM | 7974 | O    | ALA | X | 522 | 43.114 | 25.997 | 57.772 | 0.00 | 0.00 |
| ATOM | 7975 | N    | GLN | X | 523 | 44.785 | 24.719 | 56.915 | 0.00 | 0.00 |
| ATOM | 7976 | H    | GLN | X | 523 | 45.254 | 24.583 | 56.031 | 0.00 | 0.00 |
| ATOM | 7977 | CA   | GLN | X | 523 | 45.552 | 24.703 | 58.101 | 0.00 | 0.00 |
| ATOM | 7978 | HA   | GLN | X | 523 | 44.821 | 24.653 | 58.908 | 0.00 | 0.00 |
| ATOM | 7979 | CB   | GLN | X | 523 | 46.327 | 23.354 | 58.124 | 0.00 | 0.00 |
| ATOM | 7980 | HB2  | GLN | X | 523 | 46.808 | 23.329 | 57.146 | 0.00 | 0.00 |
| ATOM | 7981 | HB3  | GLN | X | 523 | 47.032 | 23.415 | 58.953 | 0.00 | 0.00 |
| ATOM | 7982 | CG   | GLN | X | 523 | 45.372 | 22.192 | 58.489 | 0.00 | 0.00 |
| ATOM | 7983 | HG2  | GLN | X | 523 | 44.996 | 22.298 | 59.507 | 0.00 | 0.00 |
| ATOM | 7984 | HG3  | GLN | X | 523 | 44.524 | 22.105 | 57.810 | 0.00 | 0.00 |

|      |      |      |     |   |     |        |        |        |      |      |
|------|------|------|-----|---|-----|--------|--------|--------|------|------|
| ATOM | 7985 | CD   | GLN | X | 523 | 46.118 | 20.807 | 58.544 | 0.00 | 0.00 |
| ATOM | 7986 | OE1  | GLN | X | 523 | 47.189 | 20.623 | 57.948 | 0.00 | 0.00 |
| ATOM | 7987 | NE2  | GLN | X | 523 | 45.597 | 19.854 | 59.260 | 0.00 | 0.00 |
| ATOM | 7988 | HE21 | GLN | X | 523 | 45.973 | 18.930 | 59.107 | 0.00 | 0.00 |
| ATOM | 7989 | HE22 | GLN | X | 523 | 44.689 | 20.021 | 59.671 | 0.00 | 0.00 |
| ATOM | 7990 | C    | GLN | X | 523 | 46.557 | 25.858 | 58.234 | 0.00 | 0.00 |
| ATOM | 7991 | O    | GLN | X | 523 | 46.552 | 26.478 | 59.296 | 0.00 | 0.00 |
| ATOM | 7992 | N    | ALA | X | 524 | 47.173 | 26.243 | 57.092 | 0.00 | 0.00 |
| ATOM | 7993 | H    | ALA | X | 524 | 47.184 | 25.647 | 56.277 | 0.00 | 0.00 |
| ATOM | 7994 | CA   | ALA | X | 524 | 48.201 | 27.280 | 57.097 | 0.00 | 0.00 |
| ATOM | 7995 | HA   | ALA | X | 524 | 49.092 | 26.995 | 57.657 | 0.00 | 0.00 |
| ATOM | 7996 | CB   | ALA | X | 524 | 48.625 | 27.458 | 55.580 | 0.00 | 0.00 |
| ATOM | 7997 | HB1  | ALA | X | 524 | 47.854 | 27.520 | 54.812 | 0.00 | 0.00 |
| ATOM | 7998 | HB2  | ALA | X | 524 | 49.374 | 26.739 | 55.247 | 0.00 | 0.00 |
| ATOM | 7999 | HB3  | ALA | X | 524 | 49.205 | 28.378 | 55.516 | 0.00 | 0.00 |
| ATOM | 8000 | C    | ALA | X | 524 | 47.564 | 28.560 | 57.762 | 0.00 | 0.00 |
| ATOM | 8001 | O    | ALA | X | 524 | 47.985 | 29.120 | 58.759 | 0.00 | 0.00 |
| ATOM | 8002 | N    | CYX | X | 525 | 46.491 | 29.056 | 57.128 | 0.00 | 0.00 |
| ATOM | 8003 | H    | CYX | X | 525 | 46.302 | 28.672 | 56.213 | 0.00 | 0.00 |
| ATOM | 8004 | CA   | CYX | X | 525 | 45.716 | 30.156 | 57.533 | 0.00 | 0.00 |
| ATOM | 8005 | HA   | CYX | X | 525 | 46.299 | 31.058 | 57.346 | 0.00 | 0.00 |
| ATOM | 8006 | CB   | CYX | X | 525 | 44.485 | 30.259 | 56.553 | 0.00 | 0.00 |
| ATOM | 8007 | HB2  | CYX | X | 525 | 43.954 | 29.315 | 56.674 | 0.00 | 0.00 |
| ATOM | 8008 | HB3  | CYX | X | 525 | 43.788 | 30.981 | 56.979 | 0.00 | 0.00 |
| ATOM | 8009 | SG   | CYX | X | 525 | 44.825 | 30.500 | 54.860 | 0.00 | 0.00 |
| ATOM | 8010 | C    | CYX | X | 525 | 45.316 | 30.243 | 59.041 | 0.00 | 0.00 |
| ATOM | 8011 | O    | CYX | X | 525 | 45.168 | 31.370 | 59.473 | 0.00 | 0.00 |
| ATOM | 8012 | N    | ALA | X | 526 | 45.283 | 29.165 | 59.857 | 0.00 | 0.00 |
| ATOM | 8013 | H    | ALA | X | 526 | 45.473 | 28.235 | 59.511 | 0.00 | 0.00 |
| ATOM | 8014 | CA   | ALA | X | 526 | 45.148 | 29.181 | 61.356 | 0.00 | 0.00 |
| ATOM | 8015 | HA   | ALA | X | 526 | 44.156 | 29.579 | 61.570 | 0.00 | 0.00 |
| ATOM | 8016 | CB   | ALA | X | 526 | 45.331 | 27.749 | 61.833 | 0.00 | 0.00 |
| ATOM | 8017 | HB1  | ALA | X | 526 | 45.174 | 27.741 | 62.911 | 0.00 | 0.00 |
| ATOM | 8018 | HB2  | ALA | X | 526 | 46.336 | 27.365 | 61.657 | 0.00 | 0.00 |
| ATOM | 8019 | HB3  | ALA | X | 526 | 44.575 | 27.145 | 61.331 | 0.00 | 0.00 |
| ATOM | 8020 | C    | ALA | X | 526 | 46.235 | 30.004 | 61.953 | 0.00 | 0.00 |
| ATOM | 8021 | O    | ALA | X | 526 | 46.055 | 30.728 | 62.959 | 0.00 | 0.00 |
| ATOM | 8022 | N    | PHE | X | 527 | 47.475 | 29.790 | 61.541 | 0.00 | 0.00 |
| ATOM | 8023 | H    | PHE | X | 527 | 47.515 | 29.199 | 60.723 | 0.00 | 0.00 |
| ATOM | 8024 | CA   | PHE | X | 527 | 48.629 | 30.516 | 61.968 | 0.00 | 0.00 |
| ATOM | 8025 | HA   | PHE | X | 527 | 48.700 | 30.361 | 63.045 | 0.00 | 0.00 |
| ATOM | 8026 | CB   | PHE | X | 527 | 49.881 | 30.035 | 61.253 | 0.00 | 0.00 |
| ATOM | 8027 | HB2  | PHE | X | 527 | 50.001 | 28.982 | 61.509 | 0.00 | 0.00 |
| ATOM | 8028 | HB3  | PHE | X | 527 | 49.810 | 30.163 | 60.173 | 0.00 | 0.00 |
| ATOM | 8029 | CG   | PHE | X | 527 | 51.243 | 30.636 | 61.620 | 0.00 | 0.00 |
| ATOM | 8030 | CD1  | PHE | X | 527 | 52.025 | 30.087 | 62.735 | 0.00 | 0.00 |
| ATOM | 8031 | HD1  | PHE | X | 527 | 51.490 | 29.365 | 63.334 | 0.00 | 0.00 |
| ATOM | 8032 | CE1  | PHE | X | 527 | 53.345 | 30.472 | 62.991 | 0.00 | 0.00 |
| ATOM | 8033 | HE1  | PHE | X | 527 | 53.955 | 30.044 | 63.773 | 0.00 | 0.00 |
| ATOM | 8034 | CZ   | PHE | X | 527 | 53.880 | 31.437 | 62.099 | 0.00 | 0.00 |
| ATOM | 8035 | HZ   | PHE | X | 527 | 54.876 | 31.841 | 62.206 | 0.00 | 0.00 |
| ATOM | 8036 | CE2  | PHE | X | 527 | 53.101 | 32.037 | 61.013 | 0.00 | 0.00 |
| ATOM | 8037 | HE2  | PHE | X | 527 | 53.731 | 32.490 | 60.261 | 0.00 | 0.00 |
| ATOM | 8038 | CD2  | PHE | X | 527 | 51.747 | 31.669 | 60.857 | 0.00 | 0.00 |
| ATOM | 8039 | HD2  | PHE | X | 527 | 51.273 | 31.995 | 59.944 | 0.00 | 0.00 |
| ATOM | 8040 | C    | PHE | X | 527 | 48.427 | 32.003 | 61.647 | 0.00 | 0.00 |
| ATOM | 8041 | O    | PHE | X | 527 | 48.625 | 32.854 | 62.568 | 0.00 | 0.00 |
| ATOM | 8042 | N    | TRP | X | 528 | 48.080 | 32.408 | 60.401 | 0.00 | 0.00 |
| ATOM | 8043 | H    | TRP | X | 528 | 48.048 | 31.721 | 59.662 | 0.00 | 0.00 |
| ATOM | 8044 | CA   | TRP | X | 528 | 47.956 | 33.833 | 60.113 | 0.00 | 0.00 |
| ATOM | 8045 | HA   | TRP | X | 528 | 48.882 | 34.362 | 60.342 | 0.00 | 0.00 |
| ATOM | 8046 | CB   | TRP | X | 528 | 47.710 | 33.987 | 58.640 | 0.00 | 0.00 |
| ATOM | 8047 | HB2  | TRP | X | 528 | 47.024 | 33.281 | 58.171 | 0.00 | 0.00 |
| ATOM | 8048 | HB3  | TRP | X | 528 | 47.363 | 34.956 | 58.283 | 0.00 | 0.00 |
| ATOM | 8049 | CG   | TRP | X | 528 | 48.992 | 33.661 | 57.896 | 0.00 | 0.00 |
| ATOM | 8050 | CD1  | TRP | X | 528 | 49.251 | 32.591 | 57.198 | 0.00 | 0.00 |
| ATOM | 8051 | HD1  | TRP | X | 528 | 48.462 | 31.892 | 56.963 | 0.00 | 0.00 |

|      |      |      |     |   |     |        |        |        |      |      |
|------|------|------|-----|---|-----|--------|--------|--------|------|------|
| ATOM | 8052 | NE1  | TRP | X | 528 | 50.559 | 32.419 | 56.788 | 0.00 | 0.00 |
| ATOM | 8053 | HE1  | TRP | X | 528 | 50.914 | 31.674 | 56.205 | 0.00 | 0.00 |
| ATOM | 8054 | CE2  | TRP | X | 528 | 51.304 | 33.418 | 57.274 | 0.00 | 0.00 |
| ATOM | 8055 | CZ2  | TRP | X | 528 | 52.715 | 33.637 | 57.224 | 0.00 | 0.00 |
| ATOM | 8056 | HZ2  | TRP | X | 528 | 53.365 | 32.971 | 56.676 | 0.00 | 0.00 |
| ATOM | 8057 | CH2  | TRP | X | 528 | 53.201 | 34.795 | 57.795 | 0.00 | 0.00 |
| ATOM | 8058 | HH2  | TRP | X | 528 | 54.225 | 35.124 | 57.695 | 0.00 | 0.00 |
| ATOM | 8059 | CZ3  | TRP | X | 528 | 52.332 | 35.692 | 58.513 | 0.00 | 0.00 |
| ATOM | 8060 | HZ3  | TRP | X | 528 | 52.670 | 36.595 | 59.000 | 0.00 | 0.00 |
| ATOM | 8061 | CE3  | TRP | X | 528 | 50.942 | 35.443 | 58.563 | 0.00 | 0.00 |
| ATOM | 8062 | HE3  | TRP | X | 528 | 50.344 | 35.994 | 59.274 | 0.00 | 0.00 |
| ATOM | 8063 | CD2  | TRP | X | 528 | 50.387 | 34.269 | 58.021 | 0.00 | 0.00 |
| ATOM | 8064 | C    | TRP | X | 528 | 46.808 | 34.595 | 60.800 | 0.00 | 0.00 |
| ATOM | 8065 | O    | TRP | X | 528 | 46.968 | 35.797 | 61.115 | 0.00 | 0.00 |
| ATOM | 8066 | N    | ASN | X | 529 | 45.771 | 33.798 | 61.150 | 0.00 | 0.00 |
| ATOM | 8067 | H    | ASN | X | 529 | 45.939 | 32.837 | 60.887 | 0.00 | 0.00 |
| ATOM | 8068 | CA   | ASN | X | 529 | 44.649 | 34.228 | 61.970 | 0.00 | 0.00 |
| ATOM | 8069 | HA   | ASN | X | 529 | 44.293 | 35.247 | 61.815 | 0.00 | 0.00 |
| ATOM | 8070 | CB   | ASN | X | 529 | 43.452 | 33.373 | 61.590 | 0.00 | 0.00 |
| ATOM | 8071 | HB2  | ASN | X | 529 | 43.802 | 32.358 | 61.778 | 0.00 | 0.00 |
| ATOM | 8072 | HB3  | ASN | X | 529 | 42.622 | 33.628 | 62.249 | 0.00 | 0.00 |
| ATOM | 8073 | CG   | ASN | X | 529 | 43.003 | 33.397 | 60.147 | 0.00 | 0.00 |
| ATOM | 8074 | OD1  | ASN | X | 529 | 43.358 | 34.137 | 59.259 | 0.00 | 0.00 |
| ATOM | 8075 | ND2  | ASN | X | 529 | 41.975 | 32.610 | 59.893 | 0.00 | 0.00 |
| ATOM | 8076 | HD21 | ASN | X | 529 | 41.595 | 32.581 | 58.958 | 0.00 | 0.00 |
| ATOM | 8077 | HD22 | ASN | X | 529 | 41.822 | 31.909 | 60.604 | 0.00 | 0.00 |
| ATOM | 8078 | C    | ASN | X | 529 | 44.818 | 34.164 | 63.487 | 0.00 | 0.00 |
| ATOM | 8079 | O    | ASN | X | 529 | 44.253 | 35.087 | 64.083 | 0.00 | 0.00 |
| ATOM | 8080 | N    | ARG | X | 530 | 45.690 | 33.295 | 64.068 | 0.00 | 0.00 |
| ATOM | 8081 | H    | ARG | X | 530 | 46.259 | 32.671 | 63.514 | 0.00 | 0.00 |
| ATOM | 8082 | CA   | ARG | X | 530 | 45.719 | 33.143 | 65.535 | 0.00 | 0.00 |
| ATOM | 8083 | HA   | ARG | X | 530 | 45.518 | 34.103 | 66.011 | 0.00 | 0.00 |
| ATOM | 8084 | CB   | ARG | X | 530 | 44.858 | 32.035 | 66.145 | 0.00 | 0.00 |
| ATOM | 8085 | HB2  | ARG | X | 530 | 45.184 | 31.150 | 65.598 | 0.00 | 0.00 |
| ATOM | 8086 | HB3  | ARG | X | 530 | 45.250 | 31.982 | 67.161 | 0.00 | 0.00 |
| ATOM | 8087 | CG   | ARG | X | 530 | 43.356 | 32.265 | 66.042 | 0.00 | 0.00 |
| ATOM | 8088 | HG2  | ARG | X | 530 | 43.146 | 33.053 | 66.766 | 0.00 | 0.00 |
| ATOM | 8089 | HG3  | ARG | X | 530 | 43.042 | 32.534 | 65.033 | 0.00 | 0.00 |
| ATOM | 8090 | CD   | ARG | X | 530 | 42.492 | 31.021 | 66.447 | 0.00 | 0.00 |
| ATOM | 8091 | HD2  | ARG | X | 530 | 42.889 | 30.713 | 67.415 | 0.00 | 0.00 |
| ATOM | 8092 | HD3  | ARG | X | 530 | 41.442 | 31.284 | 66.570 | 0.00 | 0.00 |
| ATOM | 8093 | NE   | ARG | X | 530 | 42.539 | 30.037 | 65.367 | 0.00 | 0.00 |
| ATOM | 8094 | HE   | ARG | X | 530 | 41.925 | 30.236 | 64.590 | 0.00 | 0.00 |
| ATOM | 8095 | CZ   | ARG | X | 530 | 42.970 | 28.752 | 65.396 | 0.00 | 0.00 |
| ATOM | 8096 | NH1  | ARG | X | 530 | 43.789 | 28.415 | 66.351 | 0.00 | 0.00 |
| ATOM | 8097 | HH11 | ARG | X | 530 | 43.899 | 28.958 | 67.195 | 0.00 | 0.00 |
| ATOM | 8098 | HH12 | ARG | X | 530 | 44.157 | 27.475 | 66.383 | 0.00 | 0.00 |
| ATOM | 8099 | NH2  | ARG | X | 530 | 42.775 | 27.941 | 64.432 | 0.00 | 0.00 |
| ATOM | 8100 | HH21 | ARG | X | 530 | 41.983 | 28.146 | 63.839 | 0.00 | 0.00 |
| ATOM | 8101 | HH22 | ARG | X | 530 | 43.270 | 27.066 | 64.334 | 0.00 | 0.00 |
| ATOM | 8102 | C    | ARG | X | 530 | 47.190 | 33.014 | 66.053 | 0.00 | 0.00 |
| ATOM | 8103 | O    | ARG | X | 530 | 47.576 | 33.880 | 66.876 | 0.00 | 0.00 |
| ATOM | 8104 | N    | PHE | X | 531 | 47.877 | 31.964 | 65.727 | 0.00 | 0.00 |
| ATOM | 8105 | H    | PHE | X | 531 | 47.319 | 31.303 | 65.204 | 0.00 | 0.00 |
| ATOM | 8106 | CA   | PHE | X | 531 | 49.158 | 31.612 | 66.283 | 0.00 | 0.00 |
| ATOM | 8107 | HA   | PHE | X | 531 | 49.035 | 31.350 | 67.333 | 0.00 | 0.00 |
| ATOM | 8108 | CB   | PHE | X | 531 | 49.603 | 30.328 | 65.594 | 0.00 | 0.00 |
| ATOM | 8109 | HB2  | PHE | X | 531 | 48.761 | 29.637 | 65.585 | 0.00 | 0.00 |
| ATOM | 8110 | HB3  | PHE | X | 531 | 49.845 | 30.569 | 64.558 | 0.00 | 0.00 |
| ATOM | 8111 | CG   | PHE | X | 531 | 50.846 | 29.632 | 66.014 | 0.00 | 0.00 |
| ATOM | 8112 | CD1  | PHE | X | 531 | 52.120 | 30.193 | 66.026 | 0.00 | 0.00 |
| ATOM | 8113 | HD1  | PHE | X | 531 | 52.333 | 31.218 | 65.762 | 0.00 | 0.00 |
| ATOM | 8114 | CE1  | PHE | X | 531 | 53.242 | 29.481 | 66.438 | 0.00 | 0.00 |
| ATOM | 8115 | HE1  | PHE | X | 531 | 54.244 | 29.861 | 66.303 | 0.00 | 0.00 |
| ATOM | 8116 | CZ   | PHE | X | 531 | 53.105 | 28.205 | 66.927 | 0.00 | 0.00 |
| ATOM | 8117 | HZ   | PHE | X | 531 | 53.948 | 27.570 | 67.158 | 0.00 | 0.00 |
| ATOM | 8118 | CE2  | PHE | X | 531 | 51.801 | 27.625 | 67.102 | 0.00 | 0.00 |



|      |      |      |     |   |     |        |        |        |      |      |
|------|------|------|-----|---|-----|--------|--------|--------|------|------|
| ATOM | 8119 | HE2  | PHE | X | 531 | 51.623 | 26.639 | 67.504 | 0.00 | 0.00 |
| ATOM | 8120 | CD2  | PHE | X | 531 | 50.729 | 28.346 | 66.649 | 0.00 | 0.00 |
| ATOM | 8121 | HD2  | PHE | X | 531 | 49.790 | 27.815 | 66.694 | 0.00 | 0.00 |
| ATOM | 8122 | C    | PHE | X | 531 | 50.191 | 32.772 | 66.106 | 0.00 | 0.00 |
| ATOM | 8123 | O    | PHE | X | 531 | 50.880 | 33.078 | 67.020 | 0.00 | 0.00 |
| ATOM | 8124 | N    | LEU | X | 532 | 50.281 | 33.403 | 64.919 | 0.00 | 0.00 |
| ATOM | 8125 | H    | LEU | X | 532 | 49.798 | 33.190 | 64.058 | 0.00 | 0.00 |
| ATOM | 8126 | CA   | LEU | X | 532 | 51.359 | 34.464 | 64.687 | 0.00 | 0.00 |
| ATOM | 8127 | HA   | LEU | X | 532 | 52.102 | 34.169 | 65.428 | 0.00 | 0.00 |
| ATOM | 8128 | CB   | LEU | X | 532 | 51.737 | 34.280 | 63.205 | 0.00 | 0.00 |
| ATOM | 8129 | HB2  | LEU | X | 532 | 51.980 | 33.222 | 63.108 | 0.00 | 0.00 |
| ATOM | 8130 | HB3  | LEU | X | 532 | 50.860 | 34.540 | 62.611 | 0.00 | 0.00 |
| ATOM | 8131 | CG   | LEU | X | 532 | 52.906 | 35.168 | 62.622 | 0.00 | 0.00 |
| ATOM | 8132 | HG   | LEU | X | 532 | 53.027 | 34.858 | 61.584 | 0.00 | 0.00 |
| ATOM | 8133 | CD1  | LEU | X | 532 | 52.564 | 36.695 | 62.385 | 0.00 | 0.00 |
| ATOM | 8134 | HD11 | LEU | X | 532 | 51.869 | 36.715 | 61.545 | 0.00 | 0.00 |
| ATOM | 8135 | HD12 | LEU | X | 532 | 53.441 | 37.264 | 62.077 | 0.00 | 0.00 |
| ATOM | 8136 | HD13 | LEU | X | 532 | 52.206 | 37.195 | 63.285 | 0.00 | 0.00 |
| ATOM | 8137 | CD2  | LEU | X | 532 | 54.286 | 34.998 | 63.276 | 0.00 | 0.00 |
| ATOM | 8138 | HD21 | LEU | X | 532 | 54.186 | 35.220 | 64.338 | 0.00 | 0.00 |
| ATOM | 8139 | HD22 | LEU | X | 532 | 54.624 | 33.966 | 63.178 | 0.00 | 0.00 |
| ATOM | 8140 | HD23 | LEU | X | 532 | 55.011 | 35.617 | 62.747 | 0.00 | 0.00 |
| ATOM | 8141 | C    | LEU | X | 532 | 50.962 | 35.813 | 65.204 | 0.00 | 0.00 |
| ATOM | 8142 | O    | LEU | X | 532 | 51.808 | 36.401 | 65.874 | 0.00 | 0.00 |
| ATOM | 8143 | N    | PRO | X | 533 | 49.780 | 36.375 | 64.936 | 0.00 | 0.00 |
| ATOM | 8144 | CD   | PRO | X | 533 | 48.702 | 35.983 | 64.014 | 0.00 | 0.00 |
| ATOM | 8145 | HD2  | PRO | X | 533 | 48.149 | 35.145 | 64.438 | 0.00 | 0.00 |
| ATOM | 8146 | HD3  | PRO | X | 533 | 49.222 | 35.728 | 63.090 | 0.00 | 0.00 |
| ATOM | 8147 | CG   | PRO | X | 533 | 47.824 | 37.132 | 63.836 | 0.00 | 0.00 |
| ATOM | 8148 | HG2  | PRO | X | 533 | 46.789 | 36.832 | 63.669 | 0.00 | 0.00 |
| ATOM | 8149 | HG3  | PRO | X | 533 | 47.983 | 37.800 | 62.989 | 0.00 | 0.00 |
| ATOM | 8150 | CB   | PRO | X | 533 | 47.908 | 37.959 | 65.118 | 0.00 | 0.00 |
| ATOM | 8151 | HB2  | PRO | X | 533 | 47.146 | 37.653 | 65.835 | 0.00 | 0.00 |
| ATOM | 8152 | HB3  | PRO | X | 533 | 47.877 | 39.013 | 64.843 | 0.00 | 0.00 |
| ATOM | 8153 | CA   | PRO | X | 533 | 49.337 | 37.656 | 65.561 | 0.00 | 0.00 |
| ATOM | 8154 | HA   | PRO | X | 533 | 49.981 | 38.483 | 65.261 | 0.00 | 0.00 |
| ATOM | 8155 | C    | PRO | X | 533 | 49.570 | 37.621 | 67.116 | 0.00 | 0.00 |
| ATOM | 8156 | O    | PRO | X | 533 | 49.913 | 38.651 | 67.693 | 0.00 | 0.00 |
| ATOM | 8157 | N    | LYS | X | 534 | 49.380 | 36.481 | 67.800 | 0.00 | 0.00 |
| ATOM | 8158 | H    | LYS | X | 534 | 48.982 | 35.691 | 67.314 | 0.00 | 0.00 |
| ATOM | 8159 | CA   | LYS | X | 534 | 49.575 | 36.420 | 69.269 | 0.00 | 0.00 |
| ATOM | 8160 | HA   | LYS | X | 534 | 49.025 | 37.261 | 69.689 | 0.00 | 0.00 |
| ATOM | 8161 | CB   | LYS | X | 534 | 48.956 | 35.077 | 69.754 | 0.00 | 0.00 |
| ATOM | 8162 | HB2  | LYS | X | 534 | 47.868 | 35.059 | 69.694 | 0.00 | 0.00 |
| ATOM | 8163 | HB3  | LYS | X | 534 | 49.402 | 34.267 | 69.177 | 0.00 | 0.00 |
| ATOM | 8164 | CG   | LYS | X | 534 | 49.345 | 34.852 | 71.233 | 0.00 | 0.00 |
| ATOM | 8165 | HG2  | LYS | X | 534 | 50.419 | 34.766 | 71.396 | 0.00 | 0.00 |
| ATOM | 8166 | HG3  | LYS | X | 534 | 49.029 | 35.728 | 71.800 | 0.00 | 0.00 |
| ATOM | 8167 | CD   | LYS | X | 534 | 48.430 | 33.676 | 71.796 | 0.00 | 0.00 |
| ATOM | 8168 | HD2  | LYS | X | 534 | 47.403 | 34.038 | 71.755 | 0.00 | 0.00 |
| ATOM | 8169 | HD3  | LYS | X | 534 | 48.427 | 32.767 | 71.195 | 0.00 | 0.00 |
| ATOM | 8170 | CE   | LYS | X | 534 | 48.868 | 33.338 | 73.200 | 0.00 | 0.00 |
| ATOM | 8171 | HE2  | LYS | X | 534 | 48.244 | 32.579 | 73.670 | 0.00 | 0.00 |
| ATOM | 8172 | HE3  | LYS | X | 534 | 49.868 | 32.905 | 73.156 | 0.00 | 0.00 |
| ATOM | 8173 | NZ   | LYS | X | 534 | 48.775 | 34.529 | 74.106 | 0.00 | 0.00 |
| ATOM | 8174 | HZ1  | LYS | X | 534 | 49.566 | 35.110 | 73.870 | 0.00 | 0.00 |
| ATOM | 8175 | HZ2  | LYS | X | 534 | 47.864 | 34.928 | 73.929 | 0.00 | 0.00 |
| ATOM | 8176 | HZ3  | LYS | X | 534 | 48.902 | 34.372 | 75.096 | 0.00 | 0.00 |
| ATOM | 8177 | C    | LYS | X | 534 | 50.991 | 36.779 | 69.716 | 0.00 | 0.00 |
| ATOM | 8178 | O    | LYS | X | 534 | 51.108 | 37.561 | 70.695 | 0.00 | 0.00 |
| ATOM | 8179 | N    | LEU | X | 535 | 51.992 | 36.479 | 68.885 | 0.00 | 0.00 |
| ATOM | 8180 | H    | LEU | X | 535 | 51.747 | 35.971 | 68.047 | 0.00 | 0.00 |
| ATOM | 8181 | CA   | LEU | X | 535 | 53.292 | 36.890 | 69.087 | 0.00 | 0.00 |
| ATOM | 8182 | HA   | LEU | X | 535 | 53.486 | 36.695 | 70.142 | 0.00 | 0.00 |
| ATOM | 8183 | CB   | LEU | X | 535 | 54.284 | 36.157 | 68.170 | 0.00 | 0.00 |
| ATOM | 8184 | HB2  | LEU | X | 535 | 53.968 | 36.190 | 67.128 | 0.00 | 0.00 |
| ATOM | 8185 | HB3  | LEU | X | 535 | 55.293 | 36.563 | 68.250 | 0.00 | 0.00 |

|      |      |      |     |   |     |        |        |        |      |      |
|------|------|------|-----|---|-----|--------|--------|--------|------|------|
| ATOM | 8186 | CG   | LEU | X | 535 | 54.495 | 34.629 | 68.442 | 0.00 | 0.00 |
| ATOM | 8187 | HG   | LEU | X | 535 | 53.589 | 34.125 | 68.106 | 0.00 | 0.00 |
| ATOM | 8188 | CD1  | LEU | X | 535 | 55.751 | 33.973 | 67.868 | 0.00 | 0.00 |
| ATOM | 8189 | HD11 | LEU | X | 535 | 55.792 | 34.205 | 66.803 | 0.00 | 0.00 |
| ATOM | 8190 | HD12 | LEU | X | 535 | 55.639 | 32.890 | 67.924 | 0.00 | 0.00 |
| ATOM | 8191 | HD13 | LEU | X | 535 | 56.657 | 34.403 | 68.296 | 0.00 | 0.00 |
| ATOM | 8192 | CD2  | LEU | X | 535 | 54.641 | 34.379 | 69.951 | 0.00 | 0.00 |
| ATOM | 8193 | HD21 | LEU | X | 535 | 55.586 | 34.734 | 70.363 | 0.00 | 0.00 |
| ATOM | 8194 | HD22 | LEU | X | 535 | 53.867 | 34.743 | 70.628 | 0.00 | 0.00 |
| ATOM | 8195 | HD23 | LEU | X | 535 | 54.585 | 33.296 | 70.056 | 0.00 | 0.00 |
| ATOM | 8196 | C    | LEU | X | 535 | 53.609 | 38.386 | 68.768 | 0.00 | 0.00 |
| ATOM | 8197 | O    | LEU | X | 535 | 54.444 | 39.039 | 69.362 | 0.00 | 0.00 |
| ATOM | 8198 | N    | LEU | X | 536 | 52.878 | 38.876 | 67.752 | 0.00 | 0.00 |
| ATOM | 8199 | H    | LEU | X | 536 | 52.214 | 38.285 | 67.274 | 0.00 | 0.00 |
| ATOM | 8200 | CA   | LEU | X | 536 | 52.945 | 40.283 | 67.166 | 0.00 | 0.00 |
| ATOM | 8201 | HA   | LEU | X | 536 | 53.972 | 40.538 | 66.906 | 0.00 | 0.00 |
| ATOM | 8202 | CB   | LEU | X | 536 | 52.224 | 40.304 | 65.810 | 0.00 | 0.00 |
| ATOM | 8203 | HB2  | LEU | X | 536 | 52.833 | 39.564 | 65.290 | 0.00 | 0.00 |
| ATOM | 8204 | HB3  | LEU | X | 536 | 51.165 | 40.046 | 65.820 | 0.00 | 0.00 |
| ATOM | 8205 | CG   | LEU | X | 536 | 52.232 | 41.713 | 65.101 | 0.00 | 0.00 |
| ATOM | 8206 | HG   | LEU | X | 536 | 51.677 | 42.461 | 65.667 | 0.00 | 0.00 |
| ATOM | 8207 | CD1  | LEU | X | 536 | 53.615 | 42.317 | 64.809 | 0.00 | 0.00 |
| ATOM | 8208 | HD11 | LEU | X | 536 | 54.198 | 41.484 | 64.417 | 0.00 | 0.00 |
| ATOM | 8209 | HD12 | LEU | X | 536 | 54.156 | 42.735 | 65.658 | 0.00 | 0.00 |
| ATOM | 8210 | HD13 | LEU | X | 536 | 53.503 | 42.992 | 63.960 | 0.00 | 0.00 |
| ATOM | 8211 | CD2  | LEU | X | 536 | 51.448 | 41.550 | 63.772 | 0.00 | 0.00 |
| ATOM | 8212 | HD21 | LEU | X | 536 | 50.497 | 41.088 | 64.038 | 0.00 | 0.00 |
| ATOM | 8213 | HD22 | LEU | X | 536 | 51.345 | 42.434 | 63.143 | 0.00 | 0.00 |
| ATOM | 8214 | HD23 | LEU | X | 536 | 52.025 | 40.918 | 63.097 | 0.00 | 0.00 |
| ATOM | 8215 | C    | LEU | X | 536 | 52.414 | 41.211 | 68.208 | 0.00 | 0.00 |
| ATOM | 8216 | O    | LEU | X | 536 | 52.918 | 42.308 | 68.323 | 0.00 | 0.00 |
| ATOM | 8217 | N    | SER | X | 537 | 51.362 | 40.793 | 68.905 | 0.00 | 0.00 |
| ATOM | 8218 | H    | SER | X | 537 | 50.886 | 39.963 | 68.582 | 0.00 | 0.00 |
| ATOM | 8219 | CA   | SER | X | 537 | 50.742 | 41.485 | 70.064 | 0.00 | 0.00 |
| ATOM | 8220 | HA   | SER | X | 537 | 50.503 | 42.532 | 69.878 | 0.00 | 0.00 |
| ATOM | 8221 | CB   | SER | X | 537 | 49.440 | 40.806 | 70.382 | 0.00 | 0.00 |
| ATOM | 8222 | HB2  | SER | X | 537 | 49.595 | 39.729 | 70.451 | 0.00 | 0.00 |
| ATOM | 8223 | HB3  | SER | X | 537 | 49.155 | 41.127 | 71.384 | 0.00 | 0.00 |
| ATOM | 8224 | OG   | SER | X | 537 | 48.315 | 41.083 | 69.522 | 0.00 | 0.00 |
| ATOM | 8225 | HG   | SER | X | 537 | 47.977 | 41.932 | 69.816 | 0.00 | 0.00 |
| ATOM | 8226 | C    | SER | X | 537 | 51.510 | 41.562 | 71.367 | 0.00 | 0.00 |
| ATOM | 8227 | O    | SER | X | 537 | 51.747 | 42.654 | 71.798 | 0.00 | 0.00 |
| ATOM | 8228 | N    | ALA | X | 538 | 52.140 | 40.429 | 71.757 | 0.00 | 0.00 |
| ATOM | 8229 | H    | ALA | X | 538 | 51.877 | 39.587 | 71.266 | 0.00 | 0.00 |
| ATOM | 8230 | CA   | ALA | X | 538 | 53.313 | 40.326 | 72.670 | 0.00 | 0.00 |
| ATOM | 8231 | HA   | ALA | X | 538 | 53.962 | 41.165 | 72.420 | 0.00 | 0.00 |
| ATOM | 8232 | CB   | ALA | X | 538 | 52.908 | 40.496 | 74.136 | 0.00 | 0.00 |
| ATOM | 8233 | HB1  | ALA | X | 538 | 53.864 | 40.574 | 74.653 | 0.00 | 0.00 |
| ATOM | 8234 | HB2  | ALA | X | 538 | 52.261 | 39.687 | 74.474 | 0.00 | 0.00 |
| ATOM | 8235 | HB3  | ALA | X | 538 | 52.479 | 41.498 | 74.130 | 0.00 | 0.00 |
| ATOM | 8236 | C    | ALA | X | 538 | 54.009 | 38.971 | 72.491 | 0.00 | 0.00 |
| ATOM | 8237 | O    | ALA | X | 538 | 53.380 | 37.921 | 72.454 | 0.00 | 0.00 |
| ATOM | 8238 | N    | THR | X | 539 | 55.352 | 39.049 | 72.378 | 0.00 | 0.00 |
| ATOM | 8239 | H    | THR | X | 539 | 55.786 | 39.952 | 72.507 | 0.00 | 0.00 |
| ATOM | 8240 | CA   | THR | X | 539 | 56.248 | 37.891 | 72.055 | 0.00 | 0.00 |
| ATOM | 8241 | HA   | THR | X | 539 | 55.633 | 37.108 | 71.612 | 0.00 | 0.00 |
| ATOM | 8242 | CB   | THR | X | 539 | 57.314 | 38.298 | 71.072 | 0.00 | 0.00 |
| ATOM | 8243 | HB   | THR | X | 539 | 58.110 | 38.837 | 71.585 | 0.00 | 0.00 |
| ATOM | 8244 | CG2  | THR | X | 539 | 57.780 | 37.086 | 70.274 | 0.00 | 0.00 |
| ATOM | 8245 | HG21 | THR | X | 539 | 58.649 | 37.386 | 69.689 | 0.00 | 0.00 |
| ATOM | 8246 | HG22 | THR | X | 539 | 56.953 | 36.749 | 69.649 | 0.00 | 0.00 |
| ATOM | 8247 | HG23 | THR | X | 539 | 58.076 | 36.313 | 70.983 | 0.00 | 0.00 |
| ATOM | 8248 | OG1  | THR | X | 539 | 56.932 | 39.258 | 70.154 | 0.00 | 0.00 |
| ATOM | 8249 | HG1  | THR | X | 539 | 56.014 | 39.055 | 69.957 | 0.00 | 0.00 |
| ATOM | 8250 | C    | THR | X | 539 | 56.817 | 37.324 | 73.390 | 0.00 | 0.00 |
| ATOM | 8251 | O    | THR | X | 539 | 57.326 | 38.164 | 74.192 | 0.00 | 0.00 |
| ATOM | 8252 | OXT  | THR | X | 539 | 56.746 | 36.085 | 73.524 | 0.00 | 0.00 |

END

#-----  
# 1B41 Production MD Frame 1400  
#-----

|        |        |        |        |       |        |        |        |      |      |
|--------|--------|--------|--------|-------|--------|--------|--------|------|------|
| CRYST1 | 82.065 | 82.065 | 82.065 | 90.00 | 90.00  | 90.00  | P 1    |      | 1    |
| ATOM   | 1      | N      | ASP X  | 1     | 29.749 | 47.072 | 6.147  | 0.00 | 0.00 |
| ATOM   | 2      | H1     | ASP X  | 1     | 29.179 | 47.514 | 5.440  | 0.00 | 0.00 |
| ATOM   | 3      | H2     | ASP X  | 1     | 29.195 | 46.339 | 6.567  | 0.00 | 0.00 |
| ATOM   | 4      | H3     | ASP X  | 1     | 30.463 | 46.714 | 5.530  | 0.00 | 0.00 |
| ATOM   | 5      | CA     | ASP X  | 1     | 30.390 | 47.979 | 7.156  | 0.00 | 0.00 |
| ATOM   | 6      | HA     | ASP X  | 1     | 31.158 | 47.517 | 7.776  | 0.00 | 0.00 |
| ATOM   | 7      | CB     | ASP X  | 1     | 31.277 | 48.964 | 6.372  | 0.00 | 0.00 |
| ATOM   | 8      | HB2    | ASP X  | 1     | 31.934 | 48.415 | 5.698  | 0.00 | 0.00 |
| ATOM   | 9      | HB3    | ASP X  | 1     | 30.742 | 49.558 | 5.631  | 0.00 | 0.00 |
| ATOM   | 10     | CG     | ASP X  | 1     | 32.010 | 49.956 | 7.178  | 0.00 | 0.00 |
| ATOM   | 11     | OD1    | ASP X  | 1     | 31.758 | 51.165 | 7.026  | 0.00 | 0.00 |
| ATOM   | 12     | OD2    | ASP X  | 1     | 33.003 | 49.596 | 7.796  | 0.00 | 0.00 |
| ATOM   | 13     | C      | ASP X  | 1     | 29.550 | 48.839 | 7.985  | 0.00 | 0.00 |
| ATOM   | 14     | O      | ASP X  | 1     | 29.829 | 48.861 | 9.157  | 0.00 | 0.00 |
| ATOM   | 15     | N      | ALA X  | 2     | 28.514 | 49.507 | 7.393  | 0.00 | 0.00 |
| ATOM   | 16     | H      | ALA X  | 2     | 28.375 | 49.427 | 6.396  | 0.00 | 0.00 |
| ATOM   | 17     | CA     | ALA X  | 2     | 27.623 | 50.362 | 8.184  | 0.00 | 0.00 |
| ATOM   | 18     | HA     | ALA X  | 2     | 28.152 | 51.254 | 8.520  | 0.00 | 0.00 |
| ATOM   | 19     | CB     | ALA X  | 2     | 26.475 | 50.801 | 7.232  | 0.00 | 0.00 |
| ATOM   | 20     | HB1    | ALA X  | 2     | 26.067 | 50.050 | 6.555  | 0.00 | 0.00 |
| ATOM   | 21     | HB2    | ALA X  | 2     | 26.799 | 51.695 | 6.700  | 0.00 | 0.00 |
| ATOM   | 22     | HB3    | ALA X  | 2     | 25.616 | 51.139 | 7.812  | 0.00 | 0.00 |
| ATOM   | 23     | C      | ALA X  | 2     | 27.123 | 49.700 | 9.517  | 0.00 | 0.00 |
| ATOM   | 24     | O      | ALA X  | 2     | 26.996 | 50.329 | 10.537 | 0.00 | 0.00 |
| ATOM   | 25     | N      | GLU X  | 3     | 27.057 | 48.366 | 9.442  | 0.00 | 0.00 |
| ATOM   | 26     | H      | GLU X  | 3     | 27.173 | 48.012 | 8.503  | 0.00 | 0.00 |
| ATOM   | 27     | CA     | GLU X  | 3     | 26.820 | 47.325 | 10.544 | 0.00 | 0.00 |
| ATOM   | 28     | HA     | GLU X  | 3     | 25.769 | 47.320 | 10.832 | 0.00 | 0.00 |
| ATOM   | 29     | CB     | GLU X  | 3     | 27.115 | 45.852 | 10.135 | 0.00 | 0.00 |
| ATOM   | 30     | HB2    | GLU X  | 3     | 28.194 | 45.708 | 10.187 | 0.00 | 0.00 |
| ATOM   | 31     | HB3    | GLU X  | 3     | 26.687 | 45.326 | 10.989 | 0.00 | 0.00 |
| ATOM   | 32     | CG     | GLU X  | 3     | 26.365 | 45.396 | 8.948  | 0.00 | 0.00 |
| ATOM   | 33     | HG2    | GLU X  | 3     | 26.135 | 44.350 | 9.155  | 0.00 | 0.00 |
| ATOM   | 34     | HG3    | GLU X  | 3     | 25.411 | 45.913 | 8.847  | 0.00 | 0.00 |
| ATOM   | 35     | CD     | GLU X  | 3     | 27.093 | 45.594 | 7.566  | 0.00 | 0.00 |
| ATOM   | 36     | OE1    | GLU X  | 3     | 27.504 | 44.569 | 6.994  | 0.00 | 0.00 |
| ATOM   | 37     | OE2    | GLU X  | 3     | 27.389 | 46.771 | 7.233  | 0.00 | 0.00 |
| ATOM   | 38     | C      | GLU X  | 3     | 27.636 | 47.651 | 11.897 | 0.00 | 0.00 |
| ATOM   | 39     | O      | GLU X  | 3     | 27.191 | 47.448 | 13.030 | 0.00 | 0.00 |
| ATOM   | 40     | N      | LEU X  | 4     | 28.910 | 48.082 | 11.739 | 0.00 | 0.00 |
| ATOM   | 41     | H      | LEU X  | 4     | 29.297 | 48.167 | 10.810 | 0.00 | 0.00 |
| ATOM   | 42     | CA     | LEU X  | 4     | 29.835 | 48.126 | 12.913 | 0.00 | 0.00 |
| ATOM   | 43     | HA     | LEU X  | 4     | 29.618 | 47.353 | 13.650 | 0.00 | 0.00 |
| ATOM   | 44     | CB     | LEU X  | 4     | 31.295 | 47.869 | 12.290 | 0.00 | 0.00 |
| ATOM   | 45     | HB2    | LEU X  | 4     | 31.505 | 48.567 | 11.480 | 0.00 | 0.00 |
| ATOM   | 46     | HB3    | LEU X  | 4     | 32.050 | 48.033 | 13.060 | 0.00 | 0.00 |
| ATOM   | 47     | CG     | LEU X  | 4     | 31.630 | 46.460 | 11.678 | 0.00 | 0.00 |
| ATOM   | 48     | HG     | LEU X  | 4     | 30.779 | 46.199 | 11.049 | 0.00 | 0.00 |
| ATOM   | 49     | CD1    | LEU X  | 4     | 32.926 | 46.525 | 10.837 | 0.00 | 0.00 |
| ATOM   | 50     | HD11   | LEU X  | 4     | 32.733 | 47.110 | 9.937  | 0.00 | 0.00 |
| ATOM   | 51     | HD12   | LEU X  | 4     | 33.302 | 45.536 | 10.576 | 0.00 | 0.00 |
| ATOM   | 52     | HD13   | LEU X  | 4     | 33.739 | 47.032 | 11.356 | 0.00 | 0.00 |
| ATOM   | 53     | CD2    | LEU X  | 4     | 31.851 | 45.457 | 12.790 | 0.00 | 0.00 |
| ATOM   | 54     | HD21   | LEU X  | 4     | 31.877 | 44.496 | 12.275 | 0.00 | 0.00 |
| ATOM   | 55     | HD22   | LEU X  | 4     | 32.784 | 45.754 | 13.269 | 0.00 | 0.00 |
| ATOM   | 56     | HD23   | LEU X  | 4     | 30.980 | 45.438 | 13.445 | 0.00 | 0.00 |
| ATOM   | 57     | C      | LEU X  | 4     | 29.719 | 49.510 | 13.612 | 0.00 | 0.00 |
| ATOM   | 58     | O      | LEU X  | 4     | 30.265 | 49.838 | 14.678 | 0.00 | 0.00 |

|      |     |      |     |   |   |        |        |        |      |      |
|------|-----|------|-----|---|---|--------|--------|--------|------|------|
| ATOM | 59  | N    | LEU | X | 5 | 28.860 | 50.427 | 13.112 | 0.00 | 0.00 |
| ATOM | 60  | H    | LEU | X | 5 | 28.260 | 50.142 | 12.352 | 0.00 | 0.00 |
| ATOM | 61  | CA   | LEU | X | 5 | 28.521 | 51.577 | 13.945 | 0.00 | 0.00 |
| ATOM | 62  | HA   | LEU | X | 5 | 29.343 | 51.955 | 14.553 | 0.00 | 0.00 |
| ATOM | 63  | CB   | LEU | X | 5 | 28.076 | 52.697 | 13.009 | 0.00 | 0.00 |
| ATOM | 64  | HB2  | LEU | X | 5 | 27.281 | 52.357 | 12.346 | 0.00 | 0.00 |
| ATOM | 65  | HB3  | LEU | X | 5 | 27.539 | 53.434 | 13.606 | 0.00 | 0.00 |
| ATOM | 66  | CG   | LEU | X | 5 | 29.184 | 53.399 | 12.225 | 0.00 | 0.00 |
| ATOM | 67  | HG   | LEU | X | 5 | 30.095 | 53.343 | 12.822 | 0.00 | 0.00 |
| ATOM | 68  | CD1  | LEU | X | 5 | 29.541 | 52.800 | 10.905 | 0.00 | 0.00 |
| ATOM | 69  | HD11 | LEU | X | 5 | 28.605 | 52.877 | 10.353 | 0.00 | 0.00 |
| ATOM | 70  | HD12 | LEU | X | 5 | 29.813 | 51.746 | 10.966 | 0.00 | 0.00 |
| ATOM | 71  | HD13 | LEU | X | 5 | 30.355 | 53.280 | 10.361 | 0.00 | 0.00 |
| ATOM | 72  | CD2  | LEU | X | 5 | 28.898 | 54.940 | 12.238 | 0.00 | 0.00 |
| ATOM | 73  | HD21 | LEU | X | 5 | 29.626 | 55.494 | 11.644 | 0.00 | 0.00 |
| ATOM | 74  | HD22 | LEU | X | 5 | 27.912 | 55.232 | 11.876 | 0.00 | 0.00 |
| ATOM | 75  | HD23 | LEU | X | 5 | 28.872 | 55.357 | 13.245 | 0.00 | 0.00 |
| ATOM | 76  | C    | LEU | X | 5 | 27.357 | 51.267 | 14.918 | 0.00 | 0.00 |
| ATOM | 77  | O    | LEU | X | 5 | 26.540 | 50.420 | 14.692 | 0.00 | 0.00 |
| ATOM | 78  | N    | VAL | X | 6 | 27.264 | 52.017 | 16.028 | 0.00 | 0.00 |
| ATOM | 79  | H    | VAL | X | 6 | 27.961 | 52.738 | 16.152 | 0.00 | 0.00 |
| ATOM | 80  | CA   | VAL | X | 6 | 26.303 | 51.818 | 17.125 | 0.00 | 0.00 |
| ATOM | 81  | HA   | VAL | X | 6 | 25.378 | 51.448 | 16.683 | 0.00 | 0.00 |
| ATOM | 82  | CB   | VAL | X | 6 | 26.889 | 50.756 | 18.059 | 0.00 | 0.00 |
| ATOM | 83  | HB   | VAL | X | 6 | 27.120 | 49.900 | 17.425 | 0.00 | 0.00 |
| ATOM | 84  | CG1  | VAL | X | 6 | 28.196 | 51.171 | 18.829 | 0.00 | 0.00 |
| ATOM | 85  | HG11 | VAL | X | 6 | 28.922 | 51.622 | 18.152 | 0.00 | 0.00 |
| ATOM | 86  | HG12 | VAL | X | 6 | 27.990 | 51.910 | 19.603 | 0.00 | 0.00 |
| ATOM | 87  | HG13 | VAL | X | 6 | 28.665 | 50.296 | 19.279 | 0.00 | 0.00 |
| ATOM | 88  | CG2  | VAL | X | 6 | 25.888 | 50.352 | 19.064 | 0.00 | 0.00 |
| ATOM | 89  | HG21 | VAL | X | 6 | 25.840 | 50.928 | 19.988 | 0.00 | 0.00 |
| ATOM | 90  | HG22 | VAL | X | 6 | 26.159 | 49.380 | 19.478 | 0.00 | 0.00 |
| ATOM | 91  | HG23 | VAL | X | 6 | 24.927 | 50.278 | 18.555 | 0.00 | 0.00 |
| ATOM | 92  | C    | VAL | X | 6 | 26.021 | 53.073 | 17.878 | 0.00 | 0.00 |
| ATOM | 93  | O    | VAL | X | 6 | 26.893 | 53.966 | 17.846 | 0.00 | 0.00 |
| ATOM | 94  | N    | THR | X | 7 | 24.916 | 53.245 | 18.594 | 0.00 | 0.00 |
| ATOM | 95  | H    | THR | X | 7 | 24.286 | 52.455 | 18.608 | 0.00 | 0.00 |
| ATOM | 96  | CA   | THR | X | 7 | 24.515 | 54.543 | 19.171 | 0.00 | 0.00 |
| ATOM | 97  | HA   | THR | X | 7 | 25.318 | 55.275 | 19.098 | 0.00 | 0.00 |
| ATOM | 98  | CB   | THR | X | 7 | 23.330 | 55.182 | 18.423 | 0.00 | 0.00 |
| ATOM | 99  | HB   | THR | X | 7 | 22.468 | 54.547 | 18.631 | 0.00 | 0.00 |
| ATOM | 100 | CG2  | THR | X | 7 | 22.890 | 56.622 | 18.817 | 0.00 | 0.00 |
| ATOM | 101 | HG21 | THR | X | 7 | 22.514 | 56.669 | 19.839 | 0.00 | 0.00 |
| ATOM | 102 | HG22 | THR | X | 7 | 22.102 | 56.948 | 18.137 | 0.00 | 0.00 |
| ATOM | 103 | HG23 | THR | X | 7 | 23.739 | 57.298 | 18.726 | 0.00 | 0.00 |
| ATOM | 104 | OG1  | THR | X | 7 | 23.583 | 55.228 | 17.020 | 0.00 | 0.00 |
| ATOM | 105 | HG1  | THR | X | 7 | 22.780 | 55.520 | 16.581 | 0.00 | 0.00 |
| ATOM | 106 | C    | THR | X | 7 | 24.220 | 54.432 | 20.601 | 0.00 | 0.00 |
| ATOM | 107 | O    | THR | X | 7 | 23.719 | 53.351 | 21.077 | 0.00 | 0.00 |
| ATOM | 108 | N    | VAL | X | 8 | 24.519 | 55.429 | 21.429 | 0.00 | 0.00 |
| ATOM | 109 | H    | VAL | X | 8 | 24.886 | 56.262 | 20.991 | 0.00 | 0.00 |
| ATOM | 110 | CA   | VAL | X | 8 | 24.483 | 55.409 | 22.925 | 0.00 | 0.00 |
| ATOM | 111 | HA   | VAL | X | 8 | 23.723 | 54.692 | 23.234 | 0.00 | 0.00 |
| ATOM | 112 | CB   | VAL | X | 8 | 25.892 | 55.143 | 23.517 | 0.00 | 0.00 |
| ATOM | 113 | HB   | VAL | X | 8 | 25.859 | 55.226 | 24.604 | 0.00 | 0.00 |
| ATOM | 114 | CG1  | VAL | X | 8 | 26.310 | 53.694 | 23.234 | 0.00 | 0.00 |
| ATOM | 115 | HG11 | VAL | X | 8 | 27.274 | 53.590 | 23.733 | 0.00 | 0.00 |
| ATOM | 116 | HG12 | VAL | X | 8 | 25.534 | 53.011 | 23.577 | 0.00 | 0.00 |
| ATOM | 117 | HG13 | VAL | X | 8 | 26.537 | 53.446 | 22.197 | 0.00 | 0.00 |
| ATOM | 118 | CG2  | VAL | X | 8 | 26.904 | 56.143 | 22.897 | 0.00 | 0.00 |
| ATOM | 119 | HG21 | VAL | X | 8 | 27.920 | 55.964 | 23.247 | 0.00 | 0.00 |
| ATOM | 120 | HG22 | VAL | X | 8 | 26.632 | 57.146 | 23.225 | 0.00 | 0.00 |
| ATOM | 121 | HG23 | VAL | X | 8 | 26.981 | 56.068 | 21.813 | 0.00 | 0.00 |
| ATOM | 122 | C    | VAL | X | 8 | 23.958 | 56.753 | 23.465 | 0.00 | 0.00 |
| ATOM | 123 | O    | VAL | X | 8 | 23.788 | 57.670 | 22.665 | 0.00 | 0.00 |
| ATOM | 124 | N    | ARG | X | 9 | 23.790 | 56.899 | 24.817 | 0.00 | 0.00 |
| ATOM | 125 | H    | ARG | X | 9 | 24.070 | 56.106 | 25.376 | 0.00 | 0.00 |

|      |     |      |     |   |    |        |        |        |      |      |
|------|-----|------|-----|---|----|--------|--------|--------|------|------|
| ATOM | 126 | CA   | ARG | X | 9  | 23.249 | 58.145 | 25.501 | 0.00 | 0.00 |
| ATOM | 127 | HA   | ARG | X | 9  | 22.198 | 58.233 | 25.226 | 0.00 | 0.00 |
| ATOM | 128 | CB   | ARG | X | 9  | 23.261 | 57.982 | 27.013 | 0.00 | 0.00 |
| ATOM | 129 | HB2  | ARG | X | 9  | 22.597 | 57.143 | 27.222 | 0.00 | 0.00 |
| ATOM | 130 | HB3  | ARG | X | 9  | 24.241 | 57.701 | 27.399 | 0.00 | 0.00 |
| ATOM | 131 | CG   | ARG | X | 9  | 22.612 | 59.145 | 27.662 | 0.00 | 0.00 |
| ATOM | 132 | HG2  | ARG | X | 9  | 23.298 | 59.986 | 27.567 | 0.00 | 0.00 |
| ATOM | 133 | HG3  | ARG | X | 9  | 21.671 | 59.350 | 27.152 | 0.00 | 0.00 |
| ATOM | 134 | CD   | ARG | X | 9  | 22.311 | 58.926 | 29.150 | 0.00 | 0.00 |
| ATOM | 135 | HD2  | ARG | X | 9  | 21.746 | 58.005 | 29.298 | 0.00 | 0.00 |
| ATOM | 136 | HD3  | ARG | X | 9  | 23.238 | 58.888 | 29.722 | 0.00 | 0.00 |
| ATOM | 137 | NE   | ARG | X | 9  | 21.458 | 59.979 | 29.762 | 0.00 | 0.00 |
| ATOM | 138 | HE   | ARG | X | 9  | 20.982 | 60.570 | 29.095 | 0.00 | 0.00 |
| ATOM | 139 | CZ   | ARG | X | 9  | 21.259 | 60.280 | 31.031 | 0.00 | 0.00 |
| ATOM | 140 | NH1  | ARG | X | 9  | 21.743 | 59.637 | 32.068 | 0.00 | 0.00 |
| ATOM | 141 | HH11 | ARG | X | 9  | 22.318 | 58.809 | 32.003 | 0.00 | 0.00 |
| ATOM | 142 | HH12 | ARG | X | 9  | 21.632 | 60.051 | 32.982 | 0.00 | 0.00 |
| ATOM | 143 | NH2  | ARG | X | 9  | 20.579 | 61.312 | 31.276 | 0.00 | 0.00 |
| ATOM | 144 | HH21 | ARG | X | 9  | 20.030 | 61.746 | 30.547 | 0.00 | 0.00 |
| ATOM | 145 | HH22 | ARG | X | 9  | 20.415 | 61.552 | 32.243 | 0.00 | 0.00 |
| ATOM | 146 | C    | ARG | X | 9  | 23.820 | 59.469 | 25.055 | 0.00 | 0.00 |
| ATOM | 147 | O    | ARG | X | 9  | 22.981 | 60.401 | 24.824 | 0.00 | 0.00 |
| ATOM | 148 | N    | GLY | X | 10 | 25.145 | 59.612 | 24.744 | 0.00 | 0.00 |
| ATOM | 149 | H    | GLY | X | 10 | 25.687 | 58.765 | 24.837 | 0.00 | 0.00 |
| ATOM | 150 | CA   | GLY | X | 10 | 25.848 | 60.824 | 24.235 | 0.00 | 0.00 |
| ATOM | 151 | HA2  | GLY | X | 10 | 25.200 | 61.665 | 24.485 | 0.00 | 0.00 |
| ATOM | 152 | HA3  | GLY | X | 10 | 26.795 | 60.921 | 24.766 | 0.00 | 0.00 |
| ATOM | 153 | C    | GLY | X | 10 | 26.117 | 60.985 | 22.723 | 0.00 | 0.00 |
| ATOM | 154 | O    | GLY | X | 10 | 26.466 | 62.030 | 22.286 | 0.00 | 0.00 |
| ATOM | 155 | N    | GLY | X | 11 | 25.920 | 59.961 | 21.932 | 0.00 | 0.00 |
| ATOM | 156 | H    | GLY | X | 11 | 25.612 | 59.117 | 22.392 | 0.00 | 0.00 |
| ATOM | 157 | CA   | GLY | X | 11 | 25.939 | 59.908 | 20.459 | 0.00 | 0.00 |
| ATOM | 158 | HA2  | GLY | X | 11 | 25.004 | 60.283 | 20.044 | 0.00 | 0.00 |
| ATOM | 159 | HA3  | GLY | X | 11 | 26.615 | 60.658 | 20.049 | 0.00 | 0.00 |
| ATOM | 160 | C    | GLY | X | 11 | 26.240 | 58.594 | 19.817 | 0.00 | 0.00 |
| ATOM | 161 | O    | GLY | X | 11 | 25.851 | 57.568 | 20.291 | 0.00 | 0.00 |
| ATOM | 162 | N    | ARG | X | 12 | 26.838 | 58.712 | 18.613 | 0.00 | 0.00 |
| ATOM | 163 | H    | ARG | X | 12 | 27.079 | 59.601 | 18.198 | 0.00 | 0.00 |
| ATOM | 164 | CA   | ARG | X | 12 | 27.145 | 57.574 | 17.769 | 0.00 | 0.00 |
| ATOM | 165 | HA   | ARG | X | 12 | 26.514 | 56.814 | 18.230 | 0.00 | 0.00 |
| ATOM | 166 | CB   | ARG | X | 12 | 26.720 | 57.965 | 16.300 | 0.00 | 0.00 |
| ATOM | 167 | HB2  | ARG | X | 12 | 25.858 | 58.627 | 16.374 | 0.00 | 0.00 |
| ATOM | 168 | HB3  | ARG | X | 12 | 27.579 | 58.427 | 15.812 | 0.00 | 0.00 |
| ATOM | 169 | CG   | ARG | X | 12 | 26.432 | 56.716 | 15.472 | 0.00 | 0.00 |
| ATOM | 170 | HG2  | ARG | X | 12 | 27.357 | 56.444 | 14.963 | 0.00 | 0.00 |
| ATOM | 171 | HG3  | ARG | X | 12 | 25.952 | 55.923 | 16.045 | 0.00 | 0.00 |
| ATOM | 172 | CD   | ARG | X | 12 | 25.445 | 56.806 | 14.321 | 0.00 | 0.00 |
| ATOM | 173 | HD2  | ARG | X | 12 | 24.515 | 57.303 | 14.598 | 0.00 | 0.00 |
| ATOM | 174 | HD3  | ARG | X | 12 | 25.875 | 57.395 | 13.511 | 0.00 | 0.00 |
| ATOM | 175 | NE   | ARG | X | 12 | 24.892 | 55.501 | 13.882 | 0.00 | 0.00 |
| ATOM | 176 | HE   | ARG | X | 12 | 24.837 | 54.666 | 14.447 | 0.00 | 0.00 |
| ATOM | 177 | CZ   | ARG | X | 12 | 24.512 | 55.173 | 12.662 | 0.00 | 0.00 |
| ATOM | 178 | NH1  | ARG | X | 12 | 24.594 | 56.016 | 11.683 | 0.00 | 0.00 |
| ATOM | 179 | HH11 | ARG | X | 12 | 24.850 | 56.964 | 11.920 | 0.00 | 0.00 |
| ATOM | 180 | HH12 | ARG | X | 12 | 24.216 | 55.760 | 10.783 | 0.00 | 0.00 |
| ATOM | 181 | NH2  | ARG | X | 12 | 23.986 | 54.011 | 12.480 | 0.00 | 0.00 |
| ATOM | 182 | HH21 | ARG | X | 12 | 23.791 | 53.430 | 13.283 | 0.00 | 0.00 |
| ATOM | 183 | HH22 | ARG | X | 12 | 23.651 | 53.782 | 11.556 | 0.00 | 0.00 |
| ATOM | 184 | C    | ARG | X | 12 | 28.683 | 57.146 | 17.852 | 0.00 | 0.00 |
| ATOM | 185 | O    | ARG | X | 12 | 29.554 | 57.967 | 18.129 | 0.00 | 0.00 |
| ATOM | 186 | N    | LEU | X | 13 | 28.966 | 55.845 | 17.704 | 0.00 | 0.00 |
| ATOM | 187 | H    | LEU | X | 13 | 28.222 | 55.226 | 17.418 | 0.00 | 0.00 |
| ATOM | 188 | CA   | LEU | X | 13 | 30.285 | 55.189 | 17.825 | 0.00 | 0.00 |
| ATOM | 189 | HA   | LEU | X | 13 | 31.138 | 55.865 | 17.756 | 0.00 | 0.00 |
| ATOM | 190 | CB   | LEU | X | 13 | 30.176 | 54.403 | 19.150 | 0.00 | 0.00 |
| ATOM | 191 | HB2  | LEU | X | 13 | 29.273 | 53.791 | 19.143 | 0.00 | 0.00 |
| ATOM | 192 | HB3  | LEU | X | 13 | 30.991 | 53.688 | 19.263 | 0.00 | 0.00 |

|      |     |      |     |   |    |        |        |        |      |      |
|------|-----|------|-----|---|----|--------|--------|--------|------|------|
| ATOM | 193 | CG   | LEU | X | 13 | 30.145 | 55.340 | 20.372 | 0.00 | 0.00 |
| ATOM | 194 | HG   | LEU | X | 13 | 29.337 | 56.071 | 20.393 | 0.00 | 0.00 |
| ATOM | 195 | CD1  | LEU | X | 13 | 29.865 | 54.571 | 21.617 | 0.00 | 0.00 |
| ATOM | 196 | HD11 | LEU | X | 13 | 29.753 | 55.280 | 22.438 | 0.00 | 0.00 |
| ATOM | 197 | HD12 | LEU | X | 13 | 30.672 | 53.840 | 21.669 | 0.00 | 0.00 |
| ATOM | 198 | HD13 | LEU | X | 13 | 28.977 | 53.941 | 21.568 | 0.00 | 0.00 |
| ATOM | 199 | CD2  | LEU | X | 13 | 31.309 | 56.319 | 20.578 | 0.00 | 0.00 |
| ATOM | 200 | HD21 | LEU | X | 13 | 31.630 | 56.842 | 19.678 | 0.00 | 0.00 |
| ATOM | 201 | HD22 | LEU | X | 13 | 30.994 | 57.164 | 21.190 | 0.00 | 0.00 |
| ATOM | 202 | HD23 | LEU | X | 13 | 32.167 | 55.741 | 20.921 | 0.00 | 0.00 |
| ATOM | 203 | C    | LEU | X | 13 | 30.501 | 54.224 | 16.707 | 0.00 | 0.00 |
| ATOM | 204 | O    | LEU | X | 13 | 29.503 | 53.756 | 16.180 | 0.00 | 0.00 |
| ATOM | 205 | N    | ARG | X | 14 | 31.817 | 53.871 | 16.436 | 0.00 | 0.00 |
| ATOM | 206 | H    | ARG | X | 14 | 32.533 | 54.333 | 16.980 | 0.00 | 0.00 |
| ATOM | 207 | CA   | ARG | X | 14 | 32.168 | 53.044 | 15.298 | 0.00 | 0.00 |
| ATOM | 208 | HA   | ARG | X | 14 | 31.328 | 52.448 | 14.943 | 0.00 | 0.00 |
| ATOM | 209 | CB   | ARG | X | 14 | 32.759 | 53.997 | 14.187 | 0.00 | 0.00 |
| ATOM | 210 | HB2  | ARG | X | 14 | 32.115 | 54.860 | 14.016 | 0.00 | 0.00 |
| ATOM | 211 | HB3  | ARG | X | 14 | 33.632 | 54.518 | 14.580 | 0.00 | 0.00 |
| ATOM | 212 | CG   | ARG | X | 14 | 33.168 | 53.206 | 12.852 | 0.00 | 0.00 |
| ATOM | 213 | HG2  | ARG | X | 14 | 33.972 | 52.472 | 12.901 | 0.00 | 0.00 |
| ATOM | 214 | HG3  | ARG | X | 14 | 32.310 | 52.658 | 12.462 | 0.00 | 0.00 |
| ATOM | 215 | CD   | ARG | X | 14 | 33.661 | 54.100 | 11.712 | 0.00 | 0.00 |
| ATOM | 216 | HD2  | ARG | X | 14 | 34.643 | 54.419 | 12.062 | 0.00 | 0.00 |
| ATOM | 217 | HD3  | ARG | X | 14 | 33.834 | 53.563 | 10.780 | 0.00 | 0.00 |
| ATOM | 218 | NE   | ARG | X | 14 | 32.694 | 55.218 | 11.357 | 0.00 | 0.00 |
| ATOM | 219 | HE   | ARG | X | 14 | 31.873 | 54.957 | 10.829 | 0.00 | 0.00 |
| ATOM | 220 | CZ   | ARG | X | 14 | 32.755 | 56.432 | 11.770 | 0.00 | 0.00 |
| ATOM | 221 | NH1  | ARG | X | 14 | 33.703 | 56.816 | 12.610 | 0.00 | 0.00 |
| ATOM | 222 | HH11 | ARG | X | 14 | 34.333 | 56.163 | 13.054 | 0.00 | 0.00 |
| ATOM | 223 | HH12 | ARG | X | 14 | 33.796 | 57.806 | 12.789 | 0.00 | 0.00 |
| ATOM | 224 | NH2  | ARG | X | 14 | 31.895 | 57.286 | 11.280 | 0.00 | 0.00 |
| ATOM | 225 | HH21 | ARG | X | 14 | 31.238 | 56.996 | 10.569 | 0.00 | 0.00 |
| ATOM | 226 | HH22 | ARG | X | 14 | 32.031 | 58.272 | 11.451 | 0.00 | 0.00 |
| ATOM | 227 | C    | ARG | X | 14 | 33.278 | 52.094 | 15.593 | 0.00 | 0.00 |
| ATOM | 228 | O    | ARG | X | 14 | 34.410 | 52.528 | 15.762 | 0.00 | 0.00 |
| ATOM | 229 | N    | GLY | X | 15 | 32.978 | 50.770 | 15.710 | 0.00 | 0.00 |
| ATOM | 230 | H    | GLY | X | 15 | 32.020 | 50.450 | 15.692 | 0.00 | 0.00 |
| ATOM | 231 | CA   | GLY | X | 15 | 33.933 | 49.749 | 16.119 | 0.00 | 0.00 |
| ATOM | 232 | HA2  | GLY | X | 15 | 34.806 | 50.114 | 16.661 | 0.00 | 0.00 |
| ATOM | 233 | HA3  | GLY | X | 15 | 33.476 | 49.094 | 16.860 | 0.00 | 0.00 |
| ATOM | 234 | C    | GLY | X | 15 | 34.517 | 48.979 | 14.910 | 0.00 | 0.00 |
| ATOM | 235 | O    | GLY | X | 15 | 34.573 | 49.536 | 13.826 | 0.00 | 0.00 |
| ATOM | 236 | N    | ILE | X | 16 | 34.964 | 47.770 | 15.150 | 0.00 | 0.00 |
| ATOM | 237 | H    | ILE | X | 16 | 35.022 | 47.456 | 16.109 | 0.00 | 0.00 |
| ATOM | 238 | CA   | ILE | X | 16 | 35.664 | 46.892 | 14.084 | 0.00 | 0.00 |
| ATOM | 239 | HA   | ILE | X | 16 | 35.556 | 47.302 | 13.080 | 0.00 | 0.00 |
| ATOM | 240 | CB   | ILE | X | 16 | 37.208 | 47.019 | 14.145 | 0.00 | 0.00 |
| ATOM | 241 | HB   | ILE | X | 16 | 37.650 | 46.341 | 13.414 | 0.00 | 0.00 |
| ATOM | 242 | CG2  | ILE | X | 16 | 37.700 | 48.379 | 13.818 | 0.00 | 0.00 |
| ATOM | 243 | HG21 | ILE | X | 16 | 37.311 | 48.967 | 14.649 | 0.00 | 0.00 |
| ATOM | 244 | HG22 | ILE | X | 16 | 37.209 | 48.839 | 12.960 | 0.00 | 0.00 |
| ATOM | 245 | HG23 | ILE | X | 16 | 38.760 | 48.515 | 13.602 | 0.00 | 0.00 |
| ATOM | 246 | CG1  | ILE | X | 16 | 37.664 | 46.444 | 15.498 | 0.00 | 0.00 |
| ATOM | 247 | HG12 | ILE | X | 16 | 37.404 | 47.231 | 16.206 | 0.00 | 0.00 |
| ATOM | 248 | HG13 | ILE | X | 16 | 37.261 | 45.442 | 15.644 | 0.00 | 0.00 |
| ATOM | 249 | CD1  | ILE | X | 16 | 39.185 | 46.153 | 15.633 | 0.00 | 0.00 |
| ATOM | 250 | HD11 | ILE | X | 16 | 39.746 | 46.908 | 15.083 | 0.00 | 0.00 |
| ATOM | 251 | HD12 | ILE | X | 16 | 39.432 | 45.189 | 15.187 | 0.00 | 0.00 |
| ATOM | 252 | HD13 | ILE | X | 16 | 39.445 | 46.006 | 16.681 | 0.00 | 0.00 |
| ATOM | 253 | C    | ILE | X | 16 | 35.182 | 45.413 | 14.112 | 0.00 | 0.00 |
| ATOM | 254 | O    | ILE | X | 16 | 34.848 | 44.884 | 15.203 | 0.00 | 0.00 |
| ATOM | 255 | N    | ARG | X | 17 | 35.348 | 44.705 | 12.968 | 0.00 | 0.00 |
| ATOM | 256 | H    | ARG | X | 17 | 35.864 | 45.239 | 12.283 | 0.00 | 0.00 |
| ATOM | 257 | CA   | ARG | X | 17 | 35.271 | 43.277 | 12.873 | 0.00 | 0.00 |
| ATOM | 258 | HA   | ARG | X | 17 | 34.456 | 42.874 | 13.474 | 0.00 | 0.00 |
| ATOM | 259 | CB   | ARG | X | 17 | 34.979 | 42.900 | 11.441 | 0.00 | 0.00 |

|      |     |      |     |   |    |        |        |        |      |      |
|------|-----|------|-----|---|----|--------|--------|--------|------|------|
| ATOM | 260 | HB2  | ARG | X | 17 | 33.998 | 43.324 | 11.227 | 0.00 | 0.00 |
| ATOM | 261 | HB3  | ARG | X | 17 | 35.678 | 43.432 | 10.795 | 0.00 | 0.00 |
| ATOM | 262 | CG   | ARG | X | 17 | 34.828 | 41.407 | 11.065 | 0.00 | 0.00 |
| ATOM | 263 | HG2  | ARG | X | 17 | 35.734 | 40.851 | 11.309 | 0.00 | 0.00 |
| ATOM | 264 | HG3  | ARG | X | 17 | 33.973 | 41.005 | 11.609 | 0.00 | 0.00 |
| ATOM | 265 | CD   | ARG | X | 17 | 34.661 | 41.255 | 9.585  | 0.00 | 0.00 |
| ATOM | 266 | HD2  | ARG | X | 17 | 33.912 | 41.940 | 9.188  | 0.00 | 0.00 |
| ATOM | 267 | HD3  | ARG | X | 17 | 35.585 | 41.531 | 9.076  | 0.00 | 0.00 |
| ATOM | 268 | NE   | ARG | X | 17 | 34.312 | 39.860 | 9.145  | 0.00 | 0.00 |
| ATOM | 269 | HE   | ARG | X | 17 | 33.357 | 39.737 | 8.840  | 0.00 | 0.00 |
| ATOM | 270 | CZ   | ARG | X | 17 | 35.058 | 38.796 | 8.877  | 0.00 | 0.00 |
| ATOM | 271 | NH1  | ARG | X | 17 | 36.298 | 38.709 | 9.224  | 0.00 | 0.00 |
| ATOM | 272 | HH11 | ARG | X | 17 | 36.853 | 39.286 | 9.840  | 0.00 | 0.00 |
| ATOM | 273 | HH12 | ARG | X | 17 | 36.686 | 37.846 | 8.871  | 0.00 | 0.00 |
| ATOM | 274 | NH2  | ARG | X | 17 | 34.594 | 37.808 | 8.179  | 0.00 | 0.00 |
| ATOM | 275 | HH21 | ARG | X | 17 | 33.606 | 37.688 | 8.009  | 0.00 | 0.00 |
| ATOM | 276 | HH22 | ARG | X | 17 | 35.176 | 37.067 | 7.815  | 0.00 | 0.00 |
| ATOM | 277 | C    | ARG | X | 17 | 36.633 | 42.665 | 13.404 | 0.00 | 0.00 |
| ATOM | 278 | O    | ARG | X | 17 | 37.655 | 43.364 | 13.397 | 0.00 | 0.00 |
| ATOM | 279 | N    | LEU | X | 18 | 36.506 | 41.444 | 13.980 | 0.00 | 0.00 |
| ATOM | 280 | H    | LEU | X | 18 | 35.585 | 41.037 | 14.057 | 0.00 | 0.00 |
| ATOM | 281 | CA   | LEU | X | 18 | 37.565 | 40.627 | 14.507 | 0.00 | 0.00 |
| ATOM | 282 | HA   | LEU | X | 18 | 38.517 | 40.748 | 13.990 | 0.00 | 0.00 |
| ATOM | 283 | CB   | LEU | X | 18 | 37.758 | 41.081 | 15.955 | 0.00 | 0.00 |
| ATOM | 284 | HB2  | LEU | X | 18 | 37.136 | 41.951 | 16.165 | 0.00 | 0.00 |
| ATOM | 285 | HB3  | LEU | X | 18 | 37.412 | 40.329 | 16.665 | 0.00 | 0.00 |
| ATOM | 286 | CG   | LEU | X | 18 | 39.308 | 41.360 | 16.245 | 0.00 | 0.00 |
| ATOM | 287 | HG   | LEU | X | 18 | 39.587 | 42.108 | 15.502 | 0.00 | 0.00 |
| ATOM | 288 | CD1  | LEU | X | 18 | 39.584 | 42.057 | 17.577 | 0.00 | 0.00 |
| ATOM | 289 | HD11 | LEU | X | 18 | 39.302 | 41.480 | 18.457 | 0.00 | 0.00 |
| ATOM | 290 | HD12 | LEU | X | 18 | 39.182 | 43.067 | 17.497 | 0.00 | 0.00 |
| ATOM | 291 | HD13 | LEU | X | 18 | 40.666 | 42.184 | 17.616 | 0.00 | 0.00 |
| ATOM | 292 | CD2  | LEU | X | 18 | 40.262 | 40.150 | 16.071 | 0.00 | 0.00 |
| ATOM | 293 | HD21 | LEU | X | 18 | 40.060 | 39.401 | 16.836 | 0.00 | 0.00 |
| ATOM | 294 | HD22 | LEU | X | 18 | 40.030 | 39.648 | 15.131 | 0.00 | 0.00 |
| ATOM | 295 | HD23 | LEU | X | 18 | 41.321 | 40.403 | 16.106 | 0.00 | 0.00 |
| ATOM | 296 | C    | LEU | X | 18 | 37.122 | 39.169 | 14.416 | 0.00 | 0.00 |
| ATOM | 297 | O    | LEU | X | 18 | 35.992 | 38.910 | 14.254 | 0.00 | 0.00 |
| ATOM | 298 | N    | LYS | X | 19 | 38.022 | 38.204 | 14.750 | 0.00 | 0.00 |
| ATOM | 299 | H    | LYS | X | 19 | 38.973 | 38.463 | 14.970 | 0.00 | 0.00 |
| ATOM | 300 | CA   | LYS | X | 19 | 37.741 | 36.795 | 14.688 | 0.00 | 0.00 |
| ATOM | 301 | HA   | LYS | X | 19 | 36.745 | 36.717 | 15.123 | 0.00 | 0.00 |
| ATOM | 302 | CB   | LYS | X | 19 | 37.698 | 36.383 | 13.175 | 0.00 | 0.00 |
| ATOM | 303 | HB2  | LYS | X | 19 | 37.086 | 35.481 | 13.157 | 0.00 | 0.00 |
| ATOM | 304 | HB3  | LYS | X | 19 | 37.025 | 36.963 | 12.544 | 0.00 | 0.00 |
| ATOM | 305 | CG   | LYS | X | 19 | 39.027 | 36.142 | 12.453 | 0.00 | 0.00 |
| ATOM | 306 | HG2  | LYS | X | 19 | 39.625 | 37.051 | 12.520 | 0.00 | 0.00 |
| ATOM | 307 | HG3  | LYS | X | 19 | 39.486 | 35.255 | 12.891 | 0.00 | 0.00 |
| ATOM | 308 | CD   | LYS | X | 19 | 38.812 | 35.809 | 10.991 | 0.00 | 0.00 |
| ATOM | 309 | HD2  | LYS | X | 19 | 37.849 | 35.310 | 10.889 | 0.00 | 0.00 |
| ATOM | 310 | HD3  | LYS | X | 19 | 38.694 | 36.707 | 10.384 | 0.00 | 0.00 |
| ATOM | 311 | CE   | LYS | X | 19 | 39.899 | 34.948 | 10.392 | 0.00 | 0.00 |
| ATOM | 312 | HE2  | LYS | X | 19 | 40.839 | 35.498 | 10.439 | 0.00 | 0.00 |
| ATOM | 313 | HE3  | LYS | X | 19 | 40.158 | 34.202 | 11.144 | 0.00 | 0.00 |
| ATOM | 314 | NZ   | LYS | X | 19 | 39.531 | 34.309 | 9.068  | 0.00 | 0.00 |
| ATOM | 315 | HZ1  | LYS | X | 19 | 38.677 | 33.794 | 9.226  | 0.00 | 0.00 |
| ATOM | 316 | HZ2  | LYS | X | 19 | 39.465 | 35.054 | 8.390  | 0.00 | 0.00 |
| ATOM | 317 | HZ3  | LYS | X | 19 | 40.175 | 33.679 | 8.611  | 0.00 | 0.00 |
| ATOM | 318 | C    | LYS | X | 19 | 38.688 | 36.029 | 15.552 | 0.00 | 0.00 |
| ATOM | 319 | O    | LYS | X | 19 | 39.719 | 36.531 | 15.939 | 0.00 | 0.00 |
| ATOM | 320 | N    | THR | X | 20 | 38.335 | 34.767 | 15.768 | 0.00 | 0.00 |
| ATOM | 321 | H    | THR | X | 20 | 37.381 | 34.453 | 15.665 | 0.00 | 0.00 |
| ATOM | 322 | CA   | THR | X | 20 | 39.366 | 33.734 | 16.293 | 0.00 | 0.00 |
| ATOM | 323 | HA   | THR | X | 20 | 40.300 | 34.295 | 16.268 | 0.00 | 0.00 |
| ATOM | 324 | CB   | THR | X | 20 | 39.038 | 33.431 | 17.736 | 0.00 | 0.00 |
| ATOM | 325 | HB   | THR | X | 20 | 39.855 | 32.903 | 18.228 | 0.00 | 0.00 |
| ATOM | 326 | CG2  | THR | X | 20 | 38.791 | 34.709 | 18.541 | 0.00 | 0.00 |

|      |     |      |     |   |    |        |        |        |      |      |
|------|-----|------|-----|---|----|--------|--------|--------|------|------|
| ATOM | 327 | HG21 | THR | X | 20 | 39.523 | 35.472 | 18.274 | 0.00 | 0.00 |
| ATOM | 328 | HG22 | THR | X | 20 | 38.917 | 34.553 | 19.612 | 0.00 | 0.00 |
| ATOM | 329 | HG23 | THR | X | 20 | 37.825 | 35.213 | 18.499 | 0.00 | 0.00 |
| ATOM | 330 | OG1  | THR | X | 20 | 37.906 | 32.644 | 17.864 | 0.00 | 0.00 |
| ATOM | 331 | HG1  | THR | X | 20 | 38.231 | 31.842 | 18.281 | 0.00 | 0.00 |
| ATOM | 332 | C    | THR | X | 20 | 39.349 | 32.571 | 15.279 | 0.00 | 0.00 |
| ATOM | 333 | O    | THR | X | 20 | 38.653 | 32.684 | 14.279 | 0.00 | 0.00 |
| ATOM | 334 | N    | PRO | X | 21 | 40.174 | 31.489 | 15.351 | 0.00 | 0.00 |
| ATOM | 335 | CD   | PRO | X | 21 | 41.385 | 31.362 | 16.174 | 0.00 | 0.00 |
| ATOM | 336 | HD2  | PRO | X | 21 | 41.128 | 31.111 | 17.203 | 0.00 | 0.00 |
| ATOM | 337 | HD3  | PRO | X | 21 | 41.973 | 32.278 | 16.117 | 0.00 | 0.00 |
| ATOM | 338 | CG   | PRO | X | 21 | 42.112 | 30.246 | 15.591 | 0.00 | 0.00 |
| ATOM | 339 | HG2  | PRO | X | 21 | 42.670 | 29.787 | 16.407 | 0.00 | 0.00 |
| ATOM | 340 | HG3  | PRO | X | 21 | 42.796 | 30.541 | 14.796 | 0.00 | 0.00 |
| ATOM | 341 | CB   | PRO | X | 21 | 40.987 | 29.308 | 15.059 | 0.00 | 0.00 |
| ATOM | 342 | HB2  | PRO | X | 21 | 40.490 | 28.748 | 15.851 | 0.00 | 0.00 |
| ATOM | 343 | HB3  | PRO | X | 21 | 41.473 | 28.682 | 14.310 | 0.00 | 0.00 |
| ATOM | 344 | CA   | PRO | X | 21 | 40.024 | 30.346 | 14.448 | 0.00 | 0.00 |
| ATOM | 345 | HA   | PRO | X | 21 | 40.324 | 30.562 | 13.423 | 0.00 | 0.00 |
| ATOM | 346 | C    | PRO | X | 21 | 38.594 | 29.826 | 14.362 | 0.00 | 0.00 |
| ATOM | 347 | O    | PRO | X | 21 | 38.166 | 29.512 | 13.271 | 0.00 | 0.00 |
| ATOM | 348 | N    | GLY | X | 22 | 37.751 | 29.867 | 15.401 | 0.00 | 0.00 |
| ATOM | 349 | H    | GLY | X | 22 | 38.199 | 30.163 | 16.256 | 0.00 | 0.00 |
| ATOM | 350 | CA   | GLY | X | 22 | 36.384 | 29.393 | 15.387 | 0.00 | 0.00 |
| ATOM | 351 | HA2  | GLY | X | 22 | 36.305 | 28.479 | 14.798 | 0.00 | 0.00 |
| ATOM | 352 | HA3  | GLY | X | 22 | 35.985 | 29.249 | 16.391 | 0.00 | 0.00 |
| ATOM | 353 | C    | GLY | X | 22 | 35.317 | 30.261 | 14.747 | 0.00 | 0.00 |
| ATOM | 354 | O    | GLY | X | 22 | 34.129 | 29.774 | 14.612 | 0.00 | 0.00 |
| ATOM | 355 | N    | GLY | X | 23 | 35.582 | 31.549 | 14.510 | 0.00 | 0.00 |
| ATOM | 356 | H    | GLY | X | 23 | 36.543 | 31.847 | 14.592 | 0.00 | 0.00 |
| ATOM | 357 | CA   | GLY | X | 23 | 34.605 | 32.454 | 13.892 | 0.00 | 0.00 |
| ATOM | 358 | HA2  | GLY | X | 23 | 34.627 | 32.252 | 12.822 | 0.00 | 0.00 |
| ATOM | 359 | HA3  | GLY | X | 23 | 33.632 | 32.064 | 14.189 | 0.00 | 0.00 |
| ATOM | 360 | C    | GLY | X | 23 | 34.661 | 33.947 | 14.228 | 0.00 | 0.00 |
| ATOM | 361 | O    | GLY | X | 23 | 35.532 | 34.352 | 14.964 | 0.00 | 0.00 |
| ATOM | 362 | N    | PRO | X | 24 | 33.828 | 34.769 | 13.531 | 0.00 | 0.00 |
| ATOM | 363 | CD   | PRO | X | 24 | 32.885 | 34.480 | 12.492 | 0.00 | 0.00 |
| ATOM | 364 | HD2  | PRO | X | 24 | 32.059 | 33.867 | 12.854 | 0.00 | 0.00 |
| ATOM | 365 | HD3  | PRO | X | 24 | 33.352 | 33.991 | 11.637 | 0.00 | 0.00 |
| ATOM | 366 | CG   | PRO | X | 24 | 32.295 | 35.784 | 11.882 | 0.00 | 0.00 |
| ATOM | 367 | HG2  | PRO | X | 24 | 31.379 | 35.995 | 12.433 | 0.00 | 0.00 |
| ATOM | 368 | HG3  | PRO | X | 24 | 32.113 | 35.655 | 10.815 | 0.00 | 0.00 |
| ATOM | 369 | CB   | PRO | X | 24 | 33.464 | 36.680 | 12.215 | 0.00 | 0.00 |
| ATOM | 370 | HB2  | PRO | X | 24 | 33.126 | 37.709 | 12.334 | 0.00 | 0.00 |
| ATOM | 371 | HB3  | PRO | X | 24 | 34.347 | 36.670 | 11.576 | 0.00 | 0.00 |
| ATOM | 372 | CA   | PRO | X | 24 | 33.960 | 36.255 | 13.542 | 0.00 | 0.00 |
| ATOM | 373 | HA   | PRO | X | 24 | 34.999 | 36.576 | 13.628 | 0.00 | 0.00 |
| ATOM | 374 | C    | PRO | X | 24 | 33.047 | 36.882 | 14.593 | 0.00 | 0.00 |
| ATOM | 375 | O    | PRO | X | 24 | 31.982 | 36.356 | 14.967 | 0.00 | 0.00 |
| ATOM | 376 | N    | VAL | X | 25 | 33.532 | 38.033 | 15.080 | 0.00 | 0.00 |
| ATOM | 377 | H    | VAL | X | 25 | 34.341 | 38.389 | 14.592 | 0.00 | 0.00 |
| ATOM | 378 | CA   | VAL | X | 25 | 32.942 | 38.913 | 16.111 | 0.00 | 0.00 |
| ATOM | 379 | HA   | VAL | X | 25 | 31.862 | 38.773 | 16.163 | 0.00 | 0.00 |
| ATOM | 380 | CB   | VAL | X | 25 | 33.388 | 38.503 | 17.575 | 0.00 | 0.00 |
| ATOM | 381 | HB   | VAL | X | 25 | 32.800 | 39.102 | 18.271 | 0.00 | 0.00 |
| ATOM | 382 | CG1  | VAL | X | 25 | 33.246 | 37.016 | 18.003 | 0.00 | 0.00 |
| ATOM | 383 | HG11 | VAL | X | 25 | 33.508 | 36.816 | 19.042 | 0.00 | 0.00 |
| ATOM | 384 | HG12 | VAL | X | 25 | 32.249 | 36.790 | 17.624 | 0.00 | 0.00 |
| ATOM | 385 | HG13 | VAL | X | 25 | 33.834 | 36.405 | 17.318 | 0.00 | 0.00 |
| ATOM | 386 | CG2  | VAL | X | 25 | 34.866 | 38.839 | 17.745 | 0.00 | 0.00 |
| ATOM | 387 | HG21 | VAL | X | 25 | 35.466 | 38.240 | 17.060 | 0.00 | 0.00 |
| ATOM | 388 | HG22 | VAL | X | 25 | 35.077 | 38.594 | 18.786 | 0.00 | 0.00 |
| ATOM | 389 | HG23 | VAL | X | 25 | 35.123 | 39.888 | 17.598 | 0.00 | 0.00 |
| ATOM | 390 | C    | VAL | X | 25 | 33.252 | 40.400 | 15.804 | 0.00 | 0.00 |
| ATOM | 391 | O    | VAL | X | 25 | 33.824 | 40.749 | 14.812 | 0.00 | 0.00 |
| ATOM | 392 | N    | SER | X | 26 | 32.974 | 41.220 | 16.816 | 0.00 | 0.00 |
| ATOM | 393 | H    | SER | X | 26 | 32.601 | 40.861 | 17.683 | 0.00 | 0.00 |



|      |     |      |     |   |    |        |        |        |      |      |
|------|-----|------|-----|---|----|--------|--------|--------|------|------|
| ATOM | 394 | CA   | SER | X | 26 | 33.312 | 42.600 | 16.882 | 0.00 | 0.00 |
| ATOM | 395 | HA   | SER | X | 26 | 34.141 | 42.778 | 16.197 | 0.00 | 0.00 |
| ATOM | 396 | CB   | SER | X | 26 | 32.125 | 43.478 | 16.367 | 0.00 | 0.00 |
| ATOM | 397 | HB2  | SER | X | 26 | 32.404 | 44.479 | 16.039 | 0.00 | 0.00 |
| ATOM | 398 | HB3  | SER | X | 26 | 31.826 | 43.013 | 15.428 | 0.00 | 0.00 |
| ATOM | 399 | OG   | SER | X | 26 | 31.008 | 43.472 | 17.199 | 0.00 | 0.00 |
| ATOM | 400 | HG   | SER | X | 26 | 31.157 | 42.707 | 17.759 | 0.00 | 0.00 |
| ATOM | 401 | C    | SER | X | 26 | 33.908 | 43.089 | 18.207 | 0.00 | 0.00 |
| ATOM | 402 | O    | SER | X | 26 | 33.575 | 42.669 | 19.316 | 0.00 | 0.00 |
| ATOM | 403 | N    | ALA | X | 27 | 34.830 | 44.121 | 18.039 | 0.00 | 0.00 |
| ATOM | 404 | H    | ALA | X | 27 | 35.069 | 44.315 | 17.077 | 0.00 | 0.00 |
| ATOM | 405 | CA   | ALA | X | 27 | 35.272 | 45.047 | 19.140 | 0.00 | 0.00 |
| ATOM | 406 | HA   | ALA | X | 27 | 34.809 | 44.806 | 20.097 | 0.00 | 0.00 |
| ATOM | 407 | CB   | ALA | X | 27 | 36.823 | 44.931 | 19.309 | 0.00 | 0.00 |
| ATOM | 408 | HB1  | ALA | X | 27 | 37.086 | 43.984 | 19.780 | 0.00 | 0.00 |
| ATOM | 409 | HB2  | ALA | X | 27 | 37.250 | 45.712 | 19.938 | 0.00 | 0.00 |
| ATOM | 410 | HB3  | ALA | X | 27 | 37.188 | 44.991 | 18.284 | 0.00 | 0.00 |
| ATOM | 411 | C    | ALA | X | 27 | 34.921 | 46.564 | 18.945 | 0.00 | 0.00 |
| ATOM | 412 | O    | ALA | X | 27 | 34.868 | 46.978 | 17.792 | 0.00 | 0.00 |
| ATOM | 413 | N    | PHE | X | 28 | 34.790 | 47.241 | 20.042 | 0.00 | 0.00 |
| ATOM | 414 | H    | PHE | X | 28 | 34.860 | 46.731 | 20.910 | 0.00 | 0.00 |
| ATOM | 415 | CA   | PHE | X | 28 | 34.475 | 48.610 | 20.235 | 0.00 | 0.00 |
| ATOM | 416 | HA   | PHE | X | 28 | 34.807 | 49.066 | 19.303 | 0.00 | 0.00 |
| ATOM | 417 | CB   | PHE | X | 28 | 32.989 | 48.814 | 20.631 | 0.00 | 0.00 |
| ATOM | 418 | HB2  | PHE | X | 28 | 32.847 | 48.221 | 21.535 | 0.00 | 0.00 |
| ATOM | 419 | HB3  | PHE | X | 28 | 32.787 | 49.872 | 20.798 | 0.00 | 0.00 |
| ATOM | 420 | CG   | PHE | X | 28 | 32.000 | 48.442 | 19.592 | 0.00 | 0.00 |
| ATOM | 421 | CD1  | PHE | X | 28 | 31.488 | 47.133 | 19.555 | 0.00 | 0.00 |
| ATOM | 422 | HD1  | PHE | X | 28 | 31.809 | 46.442 | 20.320 | 0.00 | 0.00 |
| ATOM | 423 | CE1  | PHE | X | 28 | 30.698 | 46.802 | 18.440 | 0.00 | 0.00 |
| ATOM | 424 | HE1  | PHE | X | 28 | 30.389 | 45.779 | 18.288 | 0.00 | 0.00 |
| ATOM | 425 | CZ   | PHE | X | 28 | 30.382 | 47.646 | 17.434 | 0.00 | 0.00 |
| ATOM | 426 | HZ   | PHE | X | 28 | 29.867 | 47.279 | 16.559 | 0.00 | 0.00 |
| ATOM | 427 | CE2  | PHE | X | 28 | 30.816 | 48.967 | 17.576 | 0.00 | 0.00 |
| ATOM | 428 | HE2  | PHE | X | 28 | 30.525 | 49.783 | 16.931 | 0.00 | 0.00 |
| ATOM | 429 | CD2  | PHE | X | 28 | 31.734 | 49.347 | 18.583 | 0.00 | 0.00 |
| ATOM | 430 | HD2  | PHE | X | 28 | 32.101 | 50.362 | 18.601 | 0.00 | 0.00 |
| ATOM | 431 | C    | PHE | X | 28 | 35.453 | 49.137 | 21.405 | 0.00 | 0.00 |
| ATOM | 432 | O    | PHE | X | 28 | 35.115 | 48.783 | 22.537 | 0.00 | 0.00 |
| ATOM | 433 | N    | LEU | X | 29 | 36.544 | 49.883 | 21.120 | 0.00 | 0.00 |
| ATOM | 434 | H    | LEU | X | 29 | 36.760 | 50.186 | 20.182 | 0.00 | 0.00 |
| ATOM | 435 | CA   | LEU | X | 29 | 37.721 | 50.188 | 21.960 | 0.00 | 0.00 |
| ATOM | 436 | HA   | LEU | X | 29 | 37.499 | 49.836 | 22.967 | 0.00 | 0.00 |
| ATOM | 437 | CB   | LEU | X | 29 | 38.964 | 49.367 | 21.420 | 0.00 | 0.00 |
| ATOM | 438 | HB2  | LEU | X | 29 | 39.122 | 49.678 | 20.388 | 0.00 | 0.00 |
| ATOM | 439 | HB3  | LEU | X | 29 | 39.868 | 49.610 | 21.979 | 0.00 | 0.00 |
| ATOM | 440 | CG   | LEU | X | 29 | 38.824 | 47.807 | 21.247 | 0.00 | 0.00 |
| ATOM | 441 | HG   | LEU | X | 29 | 38.149 | 47.718 | 20.396 | 0.00 | 0.00 |
| ATOM | 442 | CD1  | LEU | X | 29 | 40.211 | 47.242 | 20.811 | 0.00 | 0.00 |
| ATOM | 443 | HD11 | LEU | X | 29 | 40.392 | 47.690 | 19.834 | 0.00 | 0.00 |
| ATOM | 444 | HD12 | LEU | X | 29 | 40.208 | 46.153 | 20.776 | 0.00 | 0.00 |
| ATOM | 445 | HD13 | LEU | X | 29 | 40.869 | 47.642 | 21.583 | 0.00 | 0.00 |
| ATOM | 446 | CD2  | LEU | X | 29 | 38.370 | 47.046 | 22.525 | 0.00 | 0.00 |
| ATOM | 447 | HD21 | LEU | X | 29 | 38.283 | 45.980 | 22.314 | 0.00 | 0.00 |
| ATOM | 448 | HD22 | LEU | X | 29 | 39.152 | 47.231 | 23.261 | 0.00 | 0.00 |
| ATOM | 449 | HD23 | LEU | X | 29 | 37.449 | 47.374 | 23.006 | 0.00 | 0.00 |
| ATOM | 450 | C    | LEU | X | 29 | 37.964 | 51.668 | 21.986 | 0.00 | 0.00 |
| ATOM | 451 | O    | LEU | X | 29 | 37.598 | 52.379 | 21.118 | 0.00 | 0.00 |
| ATOM | 452 | N    | GLY | X | 30 | 38.457 | 52.160 | 23.088 | 0.00 | 0.00 |
| ATOM | 453 | H    | GLY | X | 30 | 38.795 | 51.517 | 23.790 | 0.00 | 0.00 |
| ATOM | 454 | CA   | GLY | X | 30 | 38.675 | 53.567 | 23.364 | 0.00 | 0.00 |
| ATOM | 455 | HA2  | GLY | X | 30 | 39.154 | 53.669 | 24.338 | 0.00 | 0.00 |
| ATOM | 456 | HA3  | GLY | X | 30 | 39.339 | 53.999 | 22.617 | 0.00 | 0.00 |
| ATOM | 457 | C    | GLY | X | 30 | 37.426 | 54.551 | 23.356 | 0.00 | 0.00 |
| ATOM | 458 | O    | GLY | X | 30 | 37.593 | 55.699 | 22.961 | 0.00 | 0.00 |
| ATOM | 459 | N    | ILE | X | 31 | 36.287 | 54.102 | 23.876 | 0.00 | 0.00 |
| ATOM | 460 | H    | ILE | X | 31 | 36.312 | 53.225 | 24.376 | 0.00 | 0.00 |

|      |     |      |     |   |    |        |        |        |      |      |
|------|-----|------|-----|---|----|--------|--------|--------|------|------|
| ATOM | 461 | CA   | ILE | X | 31 | 35.036 | 54.829 | 24.042 | 0.00 | 0.00 |
| ATOM | 462 | HA   | ILE | X | 31 | 34.993 | 55.435 | 23.137 | 0.00 | 0.00 |
| ATOM | 463 | CB   | ILE | X | 31 | 33.757 | 53.919 | 24.210 | 0.00 | 0.00 |
| ATOM | 464 | HB   | ILE | X | 31 | 33.791 | 53.534 | 25.230 | 0.00 | 0.00 |
| ATOM | 465 | CG2  | ILE | X | 31 | 32.535 | 54.811 | 24.244 | 0.00 | 0.00 |
| ATOM | 466 | HG21 | ILE | X | 31 | 31.619 | 54.286 | 24.516 | 0.00 | 0.00 |
| ATOM | 467 | HG22 | ILE | X | 31 | 32.537 | 55.382 | 23.316 | 0.00 | 0.00 |
| ATOM | 468 | HG23 | ILE | X | 31 | 32.643 | 55.547 | 25.040 | 0.00 | 0.00 |
| ATOM | 469 | CG1  | ILE | X | 31 | 33.431 | 52.763 | 23.244 | 0.00 | 0.00 |
| ATOM | 470 | HG12 | ILE | X | 31 | 32.922 | 53.242 | 22.408 | 0.00 | 0.00 |
| ATOM | 471 | HG13 | ILE | X | 31 | 34.337 | 52.296 | 22.857 | 0.00 | 0.00 |
| ATOM | 472 | CD1  | ILE | X | 31 | 32.487 | 51.662 | 23.692 | 0.00 | 0.00 |
| ATOM | 473 | HD11 | ILE | X | 31 | 32.491 | 50.920 | 22.893 | 0.00 | 0.00 |
| ATOM | 474 | HD12 | ILE | X | 31 | 31.495 | 52.045 | 23.932 | 0.00 | 0.00 |
| ATOM | 475 | HD13 | ILE | X | 31 | 32.864 | 51.176 | 24.591 | 0.00 | 0.00 |
| ATOM | 476 | C    | ILE | X | 31 | 35.063 | 55.754 | 25.269 | 0.00 | 0.00 |
| ATOM | 477 | O    | ILE | X | 31 | 35.032 | 55.214 | 26.346 | 0.00 | 0.00 |
| ATOM | 478 | N    | PRO | X | 32 | 35.133 | 57.084 | 25.150 | 0.00 | 0.00 |
| ATOM | 479 | CD   | PRO | X | 32 | 35.207 | 57.851 | 23.903 | 0.00 | 0.00 |
| ATOM | 480 | HD2  | PRO | X | 32 | 34.318 | 57.624 | 23.315 | 0.00 | 0.00 |
| ATOM | 481 | HD3  | PRO | X | 32 | 36.084 | 57.548 | 23.332 | 0.00 | 0.00 |
| ATOM | 482 | CG   | PRO | X | 32 | 35.100 | 59.337 | 24.225 | 0.00 | 0.00 |
| ATOM | 483 | HG2  | PRO | X | 32 | 34.066 | 59.677 | 24.172 | 0.00 | 0.00 |
| ATOM | 484 | HG3  | PRO | X | 32 | 35.635 | 60.036 | 23.582 | 0.00 | 0.00 |
| ATOM | 485 | CB   | PRO | X | 32 | 35.497 | 59.412 | 25.719 | 0.00 | 0.00 |
| ATOM | 486 | HB2  | PRO | X | 32 | 35.111 | 60.306 | 26.209 | 0.00 | 0.00 |
| ATOM | 487 | HB3  | PRO | X | 32 | 36.580 | 59.508 | 25.653 | 0.00 | 0.00 |
| ATOM | 488 | CA   | PRO | X | 32 | 35.148 | 57.942 | 26.312 | 0.00 | 0.00 |
| ATOM | 489 | HA   | PRO | X | 32 | 35.918 | 57.508 | 26.950 | 0.00 | 0.00 |
| ATOM | 490 | C    | PRO | X | 32 | 33.773 | 57.992 | 27.060 | 0.00 | 0.00 |
| ATOM | 491 | O    | PRO | X | 32 | 32.711 | 58.155 | 26.493 | 0.00 | 0.00 |
| ATOM | 492 | N    | PHE | X | 33 | 33.757 | 57.681 | 28.406 | 0.00 | 0.00 |
| ATOM | 493 | H    | PHE | X | 33 | 34.593 | 57.388 | 28.890 | 0.00 | 0.00 |
| ATOM | 494 | CA   | PHE | X | 33 | 32.571 | 57.564 | 29.178 | 0.00 | 0.00 |
| ATOM | 495 | HA   | PHE | X | 33 | 31.666 | 57.733 | 28.595 | 0.00 | 0.00 |
| ATOM | 496 | CB   | PHE | X | 33 | 32.566 | 56.182 | 29.684 | 0.00 | 0.00 |
| ATOM | 497 | HB2  | PHE | X | 33 | 31.553 | 56.033 | 30.057 | 0.00 | 0.00 |
| ATOM | 498 | HB3  | PHE | X | 33 | 32.711 | 55.525 | 28.827 | 0.00 | 0.00 |
| ATOM | 499 | CG   | PHE | X | 33 | 33.490 | 55.957 | 30.924 | 0.00 | 0.00 |
| ATOM | 500 | CD1  | PHE | X | 33 | 32.954 | 56.177 | 32.234 | 0.00 | 0.00 |
| ATOM | 501 | HD1  | PHE | X | 33 | 31.945 | 56.504 | 32.437 | 0.00 | 0.00 |
| ATOM | 502 | CE1  | PHE | X | 33 | 33.819 | 55.988 | 33.374 | 0.00 | 0.00 |
| ATOM | 503 | HE1  | PHE | X | 33 | 33.479 | 56.268 | 34.360 | 0.00 | 0.00 |
| ATOM | 504 | CZ   | PHE | X | 33 | 35.116 | 55.745 | 33.113 | 0.00 | 0.00 |
| ATOM | 505 | HZ   | PHE | X | 33 | 35.778 | 55.727 | 33.966 | 0.00 | 0.00 |
| ATOM | 506 | CE2  | PHE | X | 33 | 35.590 | 55.367 | 31.843 | 0.00 | 0.00 |
| ATOM | 507 | HE2  | PHE | X | 33 | 36.613 | 55.021 | 31.817 | 0.00 | 0.00 |
| ATOM | 508 | CD2  | PHE | X | 33 | 34.848 | 55.609 | 30.695 | 0.00 | 0.00 |
| ATOM | 509 | HD2  | PHE | X | 33 | 35.286 | 55.491 | 29.715 | 0.00 | 0.00 |
| ATOM | 510 | C    | PHE | X | 33 | 32.467 | 58.625 | 30.284 | 0.00 | 0.00 |
| ATOM | 511 | O    | PHE | X | 33 | 31.345 | 58.867 | 30.796 | 0.00 | 0.00 |
| ATOM | 512 | N    | ALA | X | 34 | 33.579 | 59.307 | 30.577 | 0.00 | 0.00 |
| ATOM | 513 | H    | ALA | X | 34 | 34.402 | 59.053 | 30.049 | 0.00 | 0.00 |
| ATOM | 514 | CA   | ALA | X | 34 | 33.771 | 60.415 | 31.486 | 0.00 | 0.00 |
| ATOM | 515 | HA   | ALA | X | 34 | 32.804 | 60.725 | 31.883 | 0.00 | 0.00 |
| ATOM | 516 | CB   | ALA | X | 34 | 34.586 | 59.801 | 32.641 | 0.00 | 0.00 |
| ATOM | 517 | HB1  | ALA | X | 34 | 35.046 | 60.490 | 33.350 | 0.00 | 0.00 |
| ATOM | 518 | HB2  | ALA | X | 34 | 35.356 | 59.129 | 32.260 | 0.00 | 0.00 |
| ATOM | 519 | HB3  | ALA | X | 34 | 33.874 | 59.209 | 33.215 | 0.00 | 0.00 |
| ATOM | 520 | C    | ALA | X | 34 | 34.490 | 61.637 | 30.900 | 0.00 | 0.00 |
| ATOM | 521 | O    | ALA | X | 34 | 35.119 | 61.482 | 29.834 | 0.00 | 0.00 |
| ATOM | 522 | N    | GLU | X | 35 | 34.474 | 62.786 | 31.654 | 0.00 | 0.00 |
| ATOM | 523 | H    | GLU | X | 35 | 33.962 | 62.735 | 32.522 | 0.00 | 0.00 |
| ATOM | 524 | CA   | GLU | X | 35 | 35.303 | 63.958 | 31.367 | 0.00 | 0.00 |
| ATOM | 525 | HA   | GLU | X | 35 | 35.271 | 64.057 | 30.282 | 0.00 | 0.00 |
| ATOM | 526 | CB   | GLU | X | 35 | 34.769 | 65.180 | 32.097 | 0.00 | 0.00 |
| ATOM | 527 | HB2  | GLU | X | 35 | 34.774 | 64.912 | 33.153 | 0.00 | 0.00 |

|      |     |     |     |   |    |        |        |        |      |      |
|------|-----|-----|-----|---|----|--------|--------|--------|------|------|
| ATOM | 528 | HB3 | GLU | X | 35 | 35.276 | 66.143 | 32.028 | 0.00 | 0.00 |
| ATOM | 529 | CG  | GLU | X | 35 | 33.386 | 65.515 | 31.541 | 0.00 | 0.00 |
| ATOM | 530 | HG2 | GLU | X | 35 | 32.648 | 64.718 | 31.631 | 0.00 | 0.00 |
| ATOM | 531 | HG3 | GLU | X | 35 | 32.932 | 66.257 | 32.198 | 0.00 | 0.00 |
| ATOM | 532 | CD  | GLU | X | 35 | 33.417 | 66.143 | 30.193 | 0.00 | 0.00 |
| ATOM | 533 | OE1 | GLU | X | 35 | 33.325 | 65.378 | 29.227 | 0.00 | 0.00 |
| ATOM | 534 | OE2 | GLU | X | 35 | 33.718 | 67.388 | 30.021 | 0.00 | 0.00 |
| ATOM | 535 | C   | GLU | X | 35 | 36.773 | 63.752 | 31.780 | 0.00 | 0.00 |
| ATOM | 536 | O   | GLU | X | 35 | 37.089 | 62.966 | 32.720 | 0.00 | 0.00 |
| ATOM | 537 | N   | PRO | X | 36 | 37.751 | 64.483 | 31.217 | 0.00 | 0.00 |
| ATOM | 538 | CD  | PRO | X | 36 | 37.600 | 65.503 | 30.232 | 0.00 | 0.00 |
| ATOM | 539 | HD2 | PRO | X | 36 | 36.864 | 66.243 | 30.548 | 0.00 | 0.00 |
| ATOM | 540 | HD3 | PRO | X | 36 | 37.203 | 65.048 | 29.324 | 0.00 | 0.00 |
| ATOM | 541 | CG  | PRO | X | 36 | 38.981 | 66.126 | 29.978 | 0.00 | 0.00 |
| ATOM | 542 | HG2 | PRO | X | 36 | 39.081 | 67.029 | 30.581 | 0.00 | 0.00 |
| ATOM | 543 | HG3 | PRO | X | 36 | 39.190 | 66.311 | 28.925 | 0.00 | 0.00 |
| ATOM | 544 | CB  | PRO | X | 36 | 39.931 | 64.966 | 30.371 | 0.00 | 0.00 |
| ATOM | 545 | HB2 | PRO | X | 36 | 40.839 | 65.424 | 30.763 | 0.00 | 0.00 |
| ATOM | 546 | HB3 | PRO | X | 36 | 40.104 | 64.272 | 29.548 | 0.00 | 0.00 |
| ATOM | 547 | CA  | PRO | X | 36 | 39.158 | 64.206 | 31.399 | 0.00 | 0.00 |
| ATOM | 548 | HA  | PRO | X | 36 | 39.287 | 63.136 | 31.239 | 0.00 | 0.00 |
| ATOM | 549 | C   | PRO | X | 36 | 39.655 | 64.625 | 32.777 | 0.00 | 0.00 |
| ATOM | 550 | O   | PRO | X | 36 | 39.457 | 65.769 | 33.144 | 0.00 | 0.00 |
| ATOM | 551 | N   | PRO | X | 37 | 40.204 | 63.730 | 33.592 | 0.00 | 0.00 |
| ATOM | 552 | CD  | PRO | X | 37 | 40.118 | 62.340 | 33.371 | 0.00 | 0.00 |
| ATOM | 553 | HD2 | PRO | X | 37 | 40.609 | 62.120 | 32.423 | 0.00 | 0.00 |
| ATOM | 554 | HD3 | PRO | X | 37 | 39.077 | 62.022 | 33.333 | 0.00 | 0.00 |
| ATOM | 555 | CG  | PRO | X | 37 | 40.816 | 61.689 | 34.469 | 0.00 | 0.00 |
| ATOM | 556 | HG2 | PRO | X | 37 | 41.885 | 61.792 | 34.283 | 0.00 | 0.00 |
| ATOM | 557 | HG3 | PRO | X | 37 | 40.568 | 60.644 | 34.659 | 0.00 | 0.00 |
| ATOM | 558 | CB  | PRO | X | 37 | 40.605 | 62.600 | 35.655 | 0.00 | 0.00 |
| ATOM | 559 | HB2 | PRO | X | 37 | 41.401 | 62.561 | 36.399 | 0.00 | 0.00 |
| ATOM | 560 | HB3 | PRO | X | 37 | 39.736 | 62.224 | 36.195 | 0.00 | 0.00 |
| ATOM | 561 | CA  | PRO | X | 37 | 40.516 | 63.994 | 35.039 | 0.00 | 0.00 |
| ATOM | 562 | HA  | PRO | X | 37 | 39.788 | 64.639 | 35.532 | 0.00 | 0.00 |
| ATOM | 563 | C   | PRO | X | 37 | 41.829 | 64.760 | 35.255 | 0.00 | 0.00 |
| ATOM | 564 | O   | PRO | X | 37 | 42.350 | 64.909 | 36.388 | 0.00 | 0.00 |
| ATOM | 565 | N   | MET | X | 38 | 42.335 | 65.359 | 34.215 | 0.00 | 0.00 |
| ATOM | 566 | H   | MET | X | 38 | 41.920 | 65.085 | 33.337 | 0.00 | 0.00 |
| ATOM | 567 | CA  | MET | X | 38 | 43.435 | 66.386 | 34.250 | 0.00 | 0.00 |
| ATOM | 568 | HA  | MET | X | 38 | 44.280 | 65.940 | 34.775 | 0.00 | 0.00 |
| ATOM | 569 | CB  | MET | X | 38 | 43.897 | 66.726 | 32.818 | 0.00 | 0.00 |
| ATOM | 570 | HB2 | MET | X | 38 | 44.751 | 67.395 | 32.715 | 0.00 | 0.00 |
| ATOM | 571 | HB3 | MET | X | 38 | 44.274 | 65.750 | 32.512 | 0.00 | 0.00 |
| ATOM | 572 | CG  | MET | X | 38 | 42.907 | 67.442 | 31.870 | 0.00 | 0.00 |
| ATOM | 573 | HG2 | MET | X | 38 | 41.917 | 67.092 | 32.162 | 0.00 | 0.00 |
| ATOM | 574 | HG3 | MET | X | 38 | 42.917 | 68.494 | 32.153 | 0.00 | 0.00 |
| ATOM | 575 | SD  | MET | X | 38 | 43.319 | 67.054 | 30.074 | 0.00 | 0.00 |
| ATOM | 576 | CE  | MET | X | 38 | 42.196 | 68.130 | 29.106 | 0.00 | 0.00 |
| ATOM | 577 | HE1 | MET | X | 38 | 42.687 | 69.003 | 28.676 | 0.00 | 0.00 |
| ATOM | 578 | HE2 | MET | X | 38 | 41.732 | 67.631 | 28.255 | 0.00 | 0.00 |
| ATOM | 579 | HE3 | MET | X | 38 | 41.286 | 68.383 | 29.649 | 0.00 | 0.00 |
| ATOM | 580 | C   | MET | X | 38 | 43.184 | 67.642 | 34.995 | 0.00 | 0.00 |
| ATOM | 581 | O   | MET | X | 38 | 42.046 | 68.109 | 35.181 | 0.00 | 0.00 |
| ATOM | 582 | N   | GLY | X | 39 | 44.233 | 68.205 | 35.620 | 0.00 | 0.00 |
| ATOM | 583 | H   | GLY | X | 39 | 45.138 | 67.759 | 35.569 | 0.00 | 0.00 |
| ATOM | 584 | CA  | GLY | X | 39 | 44.233 | 69.498 | 36.311 | 0.00 | 0.00 |
| ATOM | 585 | HA2 | GLY | X | 39 | 45.214 | 69.938 | 36.491 | 0.00 | 0.00 |
| ATOM | 586 | HA3 | GLY | X | 39 | 43.839 | 70.152 | 35.532 | 0.00 | 0.00 |
| ATOM | 587 | C   | GLY | X | 39 | 43.463 | 69.510 | 37.615 | 0.00 | 0.00 |
| ATOM | 588 | O   | GLY | X | 39 | 43.789 | 68.675 | 38.443 | 0.00 | 0.00 |
| ATOM | 589 | N   | PRO | X | 40 | 42.408 | 70.354 | 37.822 | 0.00 | 0.00 |
| ATOM | 590 | CD  | PRO | X | 40 | 41.824 | 71.317 | 36.783 | 0.00 | 0.00 |
| ATOM | 591 | HD2 | PRO | X | 40 | 41.281 | 70.793 | 35.996 | 0.00 | 0.00 |
| ATOM | 592 | HD3 | PRO | X | 40 | 42.618 | 71.917 | 36.339 | 0.00 | 0.00 |
| ATOM | 593 | CG  | PRO | X | 40 | 40.863 | 72.228 | 37.615 | 0.00 | 0.00 |
| ATOM | 594 | HG2 | PRO | X | 40 | 40.045 | 72.543 | 36.968 | 0.00 | 0.00 |

|      |     |      |     |   |    |        |        |        |      |      |
|------|-----|------|-----|---|----|--------|--------|--------|------|------|
| ATOM | 595 | HG3  | PRO | X | 40 | 41.511 | 73.030 | 37.969 | 0.00 | 0.00 |
| ATOM | 596 | CB   | PRO | X | 40 | 40.493 | 71.426 | 38.859 | 0.00 | 0.00 |
| ATOM | 597 | HB2  | PRO | X | 40 | 39.593 | 70.867 | 38.604 | 0.00 | 0.00 |
| ATOM | 598 | HB3  | PRO | X | 40 | 40.261 | 72.031 | 39.736 | 0.00 | 0.00 |
| ATOM | 599 | CA   | PRO | X | 40 | 41.662 | 70.359 | 39.055 | 0.00 | 0.00 |
| ATOM | 600 | HA   | PRO | X | 40 | 42.246 | 70.808 | 39.858 | 0.00 | 0.00 |
| ATOM | 601 | C    | PRO | X | 40 | 41.112 | 69.064 | 39.495 | 0.00 | 0.00 |
| ATOM | 602 | O    | PRO | X | 40 | 41.178 | 68.707 | 40.704 | 0.00 | 0.00 |
| ATOM | 603 | N    | ARG | X | 41 | 40.704 | 68.244 | 38.516 | 0.00 | 0.00 |
| ATOM | 604 | H    | ARG | X | 41 | 40.613 | 68.625 | 37.585 | 0.00 | 0.00 |
| ATOM | 605 | CA   | ARG | X | 41 | 40.027 | 67.020 | 38.773 | 0.00 | 0.00 |
| ATOM | 606 | HA   | ARG | X | 41 | 39.328 | 67.027 | 39.610 | 0.00 | 0.00 |
| ATOM | 607 | CB   | ARG | X | 41 | 39.353 | 66.453 | 37.485 | 0.00 | 0.00 |
| ATOM | 608 | HB2  | ARG | X | 41 | 40.094 | 66.631 | 36.706 | 0.00 | 0.00 |
| ATOM | 609 | HB3  | ARG | X | 41 | 39.091 | 65.399 | 37.582 | 0.00 | 0.00 |
| ATOM | 610 | CG   | ARG | X | 41 | 38.037 | 67.337 | 37.229 | 0.00 | 0.00 |
| ATOM | 611 | HG2  | ARG | X | 41 | 37.325 | 67.122 | 38.025 | 0.00 | 0.00 |
| ATOM | 612 | HG3  | ARG | X | 41 | 38.291 | 68.395 | 37.152 | 0.00 | 0.00 |
| ATOM | 613 | CD   | ARG | X | 41 | 37.511 | 66.683 | 35.949 | 0.00 | 0.00 |
| ATOM | 614 | HD2  | ARG | X | 41 | 38.293 | 66.831 | 35.204 | 0.00 | 0.00 |
| ATOM | 615 | HD3  | ARG | X | 41 | 37.329 | 65.633 | 36.179 | 0.00 | 0.00 |
| ATOM | 616 | NE   | ARG | X | 41 | 36.251 | 67.243 | 35.461 | 0.00 | 0.00 |
| ATOM | 617 | HE   | ARG | X | 41 | 35.454 | 67.086 | 36.060 | 0.00 | 0.00 |
| ATOM | 618 | CZ   | ARG | X | 41 | 36.022 | 68.091 | 34.398 | 0.00 | 0.00 |
| ATOM | 619 | NH1  | ARG | X | 41 | 36.956 | 68.558 | 33.673 | 0.00 | 0.00 |
| ATOM | 620 | HH11 | ARG | X | 41 | 37.905 | 68.266 | 33.859 | 0.00 | 0.00 |
| ATOM | 621 | HH12 | ARG | X | 41 | 36.767 | 69.207 | 32.923 | 0.00 | 0.00 |
| ATOM | 622 | NH2  | ARG | X | 41 | 34.841 | 68.450 | 34.083 | 0.00 | 0.00 |
| ATOM | 623 | HH21 | ARG | X | 41 | 34.047 | 68.044 | 34.559 | 0.00 | 0.00 |
| ATOM | 624 | HH22 | ARG | X | 41 | 34.684 | 69.178 | 33.401 | 0.00 | 0.00 |
| ATOM | 625 | C    | ARG | X | 41 | 41.135 | 65.931 | 39.190 | 0.00 | 0.00 |
| ATOM | 626 | O    | ARG | X | 41 | 40.737 | 64.715 | 39.431 | 0.00 | 0.00 |
| ATOM | 627 | N    | ARG | X | 42 | 42.439 | 66.257 | 39.253 | 0.00 | 0.00 |
| ATOM | 628 | H    | ARG | X | 42 | 42.711 | 67.221 | 39.122 | 0.00 | 0.00 |
| ATOM | 629 | CA   | ARG | X | 42 | 43.515 | 65.275 | 39.566 | 0.00 | 0.00 |
| ATOM | 630 | HA   | ARG | X | 42 | 43.436 | 64.435 | 38.877 | 0.00 | 0.00 |
| ATOM | 631 | CB   | ARG | X | 42 | 44.903 | 65.942 | 39.391 | 0.00 | 0.00 |
| ATOM | 632 | HB2  | ARG | X | 42 | 44.978 | 66.350 | 38.383 | 0.00 | 0.00 |
| ATOM | 633 | HB3  | ARG | X | 42 | 44.969 | 66.713 | 40.159 | 0.00 | 0.00 |
| ATOM | 634 | CG   | ARG | X | 42 | 45.997 | 64.850 | 39.648 | 0.00 | 0.00 |
| ATOM | 635 | HG2  | ARG | X | 42 | 45.879 | 64.580 | 40.698 | 0.00 | 0.00 |
| ATOM | 636 | HG3  | ARG | X | 42 | 45.810 | 64.010 | 38.979 | 0.00 | 0.00 |
| ATOM | 637 | CD   | ARG | X | 42 | 47.478 | 65.249 | 39.379 | 0.00 | 0.00 |
| ATOM | 638 | HD2  | ARG | X | 42 | 47.851 | 65.947 | 40.127 | 0.00 | 0.00 |
| ATOM | 639 | HD3  | ARG | X | 42 | 48.120 | 64.385 | 39.548 | 0.00 | 0.00 |
| ATOM | 640 | NE   | ARG | X | 42 | 47.607 | 65.762 | 38.075 | 0.00 | 0.00 |
| ATOM | 641 | HE   | ARG | X | 42 | 46.885 | 65.551 | 37.401 | 0.00 | 0.00 |
| ATOM | 642 | CZ   | ARG | X | 42 | 48.474 | 66.702 | 37.677 | 0.00 | 0.00 |
| ATOM | 643 | NH1  | ARG | X | 42 | 49.374 | 67.169 | 38.480 | 0.00 | 0.00 |
| ATOM | 644 | HH11 | ARG | X | 42 | 49.549 | 66.755 | 39.384 | 0.00 | 0.00 |
| ATOM | 645 | HH12 | ARG | X | 42 | 50.029 | 67.921 | 38.324 | 0.00 | 0.00 |
| ATOM | 646 | NH2  | ARG | X | 42 | 48.332 | 67.164 | 36.471 | 0.00 | 0.00 |
| ATOM | 647 | HH21 | ARG | X | 42 | 47.903 | 66.571 | 35.775 | 0.00 | 0.00 |
| ATOM | 648 | HH22 | ARG | X | 42 | 49.028 | 67.836 | 36.182 | 0.00 | 0.00 |
| ATOM | 649 | C    | ARG | X | 42 | 43.250 | 64.860 | 41.046 | 0.00 | 0.00 |
| ATOM | 650 | O    | ARG | X | 42 | 43.224 | 65.785 | 41.932 | 0.00 | 0.00 |
| ATOM | 651 | N    | PHE | X | 43 | 43.085 | 63.591 | 41.401 | 0.00 | 0.00 |
| ATOM | 652 | H    | PHE | X | 43 | 43.360 | 62.898 | 40.720 | 0.00 | 0.00 |
| ATOM | 653 | CA   | PHE | X | 43 | 42.767 | 62.951 | 42.750 | 0.00 | 0.00 |
| ATOM | 654 | HA   | PHE | X | 43 | 42.974 | 61.881 | 42.729 | 0.00 | 0.00 |
| ATOM | 655 | CB   | PHE | X | 43 | 43.714 | 63.557 | 43.895 | 0.00 | 0.00 |
| ATOM | 656 | HB2  | PHE | X | 43 | 43.238 | 64.530 | 44.021 | 0.00 | 0.00 |
| ATOM | 657 | HB3  | PHE | X | 43 | 43.652 | 62.893 | 44.757 | 0.00 | 0.00 |
| ATOM | 658 | CG   | PHE | X | 43 | 45.178 | 63.796 | 43.517 | 0.00 | 0.00 |
| ATOM | 659 | CD1  | PHE | X | 43 | 45.921 | 62.751 | 42.955 | 0.00 | 0.00 |
| ATOM | 660 | HD1  | PHE | X | 43 | 45.406 | 61.803 | 42.900 | 0.00 | 0.00 |
| ATOM | 661 | CE1  | PHE | X | 43 | 47.277 | 62.877 | 42.584 | 0.00 | 0.00 |

|      |     |      |     |   |    |        |        |        |      |      |
|------|-----|------|-----|---|----|--------|--------|--------|------|------|
| ATOM | 662 | HE1  | PHE | X | 43 | 47.858 | 62.089 | 42.129 | 0.00 | 0.00 |
| ATOM | 663 | CZ   | PHE | X | 43 | 47.912 | 64.155 | 42.733 | 0.00 | 0.00 |
| ATOM | 664 | HZ   | PHE | X | 43 | 48.935 | 64.427 | 42.517 | 0.00 | 0.00 |
| ATOM | 665 | CE2  | PHE | X | 43 | 47.146 | 65.238 | 43.294 | 0.00 | 0.00 |
| ATOM | 666 | HE2  | PHE | X | 43 | 47.586 | 66.224 | 43.327 | 0.00 | 0.00 |
| ATOM | 667 | CD2  | PHE | X | 43 | 45.778 | 65.114 | 43.633 | 0.00 | 0.00 |
| ATOM | 668 | HD2  | PHE | X | 43 | 45.184 | 65.985 | 43.867 | 0.00 | 0.00 |
| ATOM | 669 | C    | PHE | X | 43 | 41.303 | 63.143 | 43.197 | 0.00 | 0.00 |
| ATOM | 670 | O    | PHE | X | 43 | 41.095 | 62.815 | 44.375 | 0.00 | 0.00 |
| ATOM | 671 | N    | LEU | X | 44 | 40.441 | 63.794 | 42.384 | 0.00 | 0.00 |
| ATOM | 672 | H    | LEU | X | 44 | 40.778 | 63.896 | 41.437 | 0.00 | 0.00 |
| ATOM | 673 | CA   | LEU | X | 44 | 39.088 | 64.212 | 42.755 | 0.00 | 0.00 |
| ATOM | 674 | HA   | LEU | X | 44 | 39.000 | 64.027 | 43.826 | 0.00 | 0.00 |
| ATOM | 675 | CB   | LEU | X | 44 | 38.911 | 65.706 | 42.502 | 0.00 | 0.00 |
| ATOM | 676 | HB2  | LEU | X | 44 | 39.191 | 65.821 | 41.455 | 0.00 | 0.00 |
| ATOM | 677 | HB3  | LEU | X | 44 | 37.869 | 66.009 | 42.605 | 0.00 | 0.00 |
| ATOM | 678 | CG   | LEU | X | 44 | 39.697 | 66.737 | 43.316 | 0.00 | 0.00 |
| ATOM | 679 | HG   | LEU | X | 44 | 40.755 | 66.779 | 43.060 | 0.00 | 0.00 |
| ATOM | 680 | CD1  | LEU | X | 44 | 39.005 | 68.075 | 43.127 | 0.00 | 0.00 |
| ATOM | 681 | HD11 | LEU | X | 44 | 38.764 | 68.189 | 42.070 | 0.00 | 0.00 |
| ATOM | 682 | HD12 | LEU | X | 44 | 39.662 | 68.884 | 43.446 | 0.00 | 0.00 |
| ATOM | 683 | HD13 | LEU | X | 44 | 38.092 | 68.164 | 43.715 | 0.00 | 0.00 |
| ATOM | 684 | CD2  | LEU | X | 44 | 39.600 | 66.491 | 44.874 | 0.00 | 0.00 |
| ATOM | 685 | HD21 | LEU | X | 44 | 40.055 | 67.346 | 45.374 | 0.00 | 0.00 |
| ATOM | 686 | HD22 | LEU | X | 44 | 38.607 | 66.248 | 45.253 | 0.00 | 0.00 |
| ATOM | 687 | HD23 | LEU | X | 44 | 40.098 | 65.575 | 45.191 | 0.00 | 0.00 |
| ATOM | 688 | C    | LEU | X | 44 | 38.019 | 63.402 | 41.986 | 0.00 | 0.00 |
| ATOM | 689 | O    | LEU | X | 44 | 38.294 | 62.932 | 40.878 | 0.00 | 0.00 |
| ATOM | 690 | N    | PRO | X | 45 | 36.764 | 63.270 | 42.483 | 0.00 | 0.00 |
| ATOM | 691 | CD   | PRO | X | 45 | 36.358 | 63.685 | 43.825 | 0.00 | 0.00 |
| ATOM | 692 | HD2  | PRO | X | 45 | 36.078 | 64.738 | 43.780 | 0.00 | 0.00 |
| ATOM | 693 | HD3  | PRO | X | 45 | 37.184 | 63.555 | 44.523 | 0.00 | 0.00 |
| ATOM | 694 | CG   | PRO | X | 45 | 35.051 | 62.896 | 44.027 | 0.00 | 0.00 |
| ATOM | 695 | HG2  | PRO | X | 45 | 34.333 | 63.338 | 44.717 | 0.00 | 0.00 |
| ATOM | 696 | HG3  | PRO | X | 45 | 35.246 | 61.874 | 44.353 | 0.00 | 0.00 |
| ATOM | 697 | CB   | PRO | X | 45 | 34.469 | 62.681 | 42.646 | 0.00 | 0.00 |
| ATOM | 698 | HB2  | PRO | X | 45 | 33.886 | 63.561 | 42.376 | 0.00 | 0.00 |
| ATOM | 699 | HB3  | PRO | X | 45 | 33.819 | 61.808 | 42.590 | 0.00 | 0.00 |
| ATOM | 700 | CA   | PRO | X | 45 | 35.735 | 62.430 | 41.794 | 0.00 | 0.00 |
| ATOM | 701 | HA   | PRO | X | 45 | 36.075 | 61.402 | 41.914 | 0.00 | 0.00 |
| ATOM | 702 | C    | PRO | X | 45 | 35.445 | 62.718 | 40.307 | 0.00 | 0.00 |
| ATOM | 703 | O    | PRO | X | 45 | 35.587 | 63.880 | 39.885 | 0.00 | 0.00 |
| ATOM | 704 | N    | PRO | X | 46 | 34.976 | 61.756 | 39.510 | 0.00 | 0.00 |
| ATOM | 705 | CD   | PRO | X | 46 | 35.230 | 60.339 | 39.720 | 0.00 | 0.00 |
| ATOM | 706 | HD2  | PRO | X | 46 | 34.757 | 60.053 | 40.659 | 0.00 | 0.00 |
| ATOM | 707 | HD3  | PRO | X | 46 | 36.288 | 60.093 | 39.627 | 0.00 | 0.00 |
| ATOM | 708 | CG   | PRO | X | 46 | 34.523 | 59.596 | 38.520 | 0.00 | 0.00 |
| ATOM | 709 | HG2  | PRO | X | 46 | 33.447 | 59.709 | 38.395 | 0.00 | 0.00 |
| ATOM | 710 | HG3  | PRO | X | 46 | 34.893 | 58.581 | 38.370 | 0.00 | 0.00 |
| ATOM | 711 | CB   | PRO | X | 46 | 34.984 | 60.516 | 37.439 | 0.00 | 0.00 |
| ATOM | 712 | HB2  | PRO | X | 46 | 34.439 | 60.325 | 36.514 | 0.00 | 0.00 |
| ATOM | 713 | HB3  | PRO | X | 46 | 36.046 | 60.407 | 37.219 | 0.00 | 0.00 |
| ATOM | 714 | CA   | PRO | X | 46 | 34.713 | 61.943 | 38.056 | 0.00 | 0.00 |
| ATOM | 715 | HA   | PRO | X | 46 | 35.244 | 62.752 | 37.554 | 0.00 | 0.00 |
| ATOM | 716 | C    | PRO | X | 46 | 33.213 | 62.335 | 37.852 | 0.00 | 0.00 |
| ATOM | 717 | O    | PRO | X | 46 | 32.505 | 62.702 | 38.804 | 0.00 | 0.00 |
| ATOM | 718 | N    | GLU | X | 47 | 32.781 | 62.396 | 36.602 | 0.00 | 0.00 |
| ATOM | 719 | H    | GLU | X | 47 | 33.306 | 61.760 | 36.019 | 0.00 | 0.00 |
| ATOM | 720 | CA   | GLU | X | 47 | 31.533 | 62.905 | 36.091 | 0.00 | 0.00 |
| ATOM | 721 | HA   | GLU | X | 47 | 30.639 | 62.607 | 36.639 | 0.00 | 0.00 |
| ATOM | 722 | CB   | GLU | X | 47 | 31.616 | 64.459 | 36.341 | 0.00 | 0.00 |
| ATOM | 723 | HB2  | GLU | X | 47 | 30.664 | 64.866 | 36.000 | 0.00 | 0.00 |
| ATOM | 724 | HB3  | GLU | X | 47 | 31.746 | 64.663 | 37.404 | 0.00 | 0.00 |
| ATOM | 725 | CG   | GLU | X | 47 | 32.688 | 65.094 | 35.353 | 0.00 | 0.00 |
| ATOM | 726 | HG2  | GLU | X | 47 | 33.528 | 64.404 | 35.433 | 0.00 | 0.00 |
| ATOM | 727 | HG3  | GLU | X | 47 | 32.239 | 65.063 | 34.361 | 0.00 | 0.00 |
| ATOM | 728 | CD   | GLU | X | 47 | 33.027 | 66.508 | 35.778 | 0.00 | 0.00 |

|      |     |      |     |   |    |        |        |        |      |      |
|------|-----|------|-----|---|----|--------|--------|--------|------|------|
| ATOM | 729 | OE1  | GLU | X | 47 | 32.478 | 67.434 | 35.143 | 0.00 | 0.00 |
| ATOM | 730 | OE2  | GLU | X | 47 | 33.857 | 66.669 | 36.701 | 0.00 | 0.00 |
| ATOM | 731 | C    | GLU | X | 47 | 31.442 | 62.536 | 34.558 | 0.00 | 0.00 |
| ATOM | 732 | O    | GLU | X | 47 | 32.523 | 62.453 | 33.938 | 0.00 | 0.00 |
| ATOM | 733 | N    | PRO | X | 48 | 30.240 | 62.509 | 33.958 | 0.00 | 0.00 |
| ATOM | 734 | CD   | PRO | X | 48 | 28.980 | 62.998 | 34.452 | 0.00 | 0.00 |
| ATOM | 735 | HD2  | PRO | X | 48 | 28.802 | 64.062 | 34.293 | 0.00 | 0.00 |
| ATOM | 736 | HD3  | PRO | X | 48 | 28.781 | 62.715 | 35.486 | 0.00 | 0.00 |
| ATOM | 737 | CG   | PRO | X | 48 | 27.874 | 62.291 | 33.577 | 0.00 | 0.00 |
| ATOM | 738 | HG2  | PRO | X | 48 | 27.342 | 63.072 | 33.035 | 0.00 | 0.00 |
| ATOM | 739 | HG3  | PRO | X | 48 | 27.129 | 61.695 | 34.104 | 0.00 | 0.00 |
| ATOM | 740 | CB   | PRO | X | 48 | 28.555 | 61.367 | 32.618 | 0.00 | 0.00 |
| ATOM | 741 | HB2  | PRO | X | 48 | 28.040 | 61.371 | 31.657 | 0.00 | 0.00 |
| ATOM | 742 | HB3  | PRO | X | 48 | 28.522 | 60.358 | 33.031 | 0.00 | 0.00 |
| ATOM | 743 | CA   | PRO | X | 48 | 30.021 | 61.933 | 32.604 | 0.00 | 0.00 |
| ATOM | 744 | HA   | PRO | X | 48 | 30.759 | 61.134 | 32.529 | 0.00 | 0.00 |
| ATOM | 745 | C    | PRO | X | 48 | 30.326 | 62.764 | 31.407 | 0.00 | 0.00 |
| ATOM | 746 | O    | PRO | X | 48 | 30.020 | 64.000 | 31.403 | 0.00 | 0.00 |
| ATOM | 747 | N    | LYS | X | 49 | 30.965 | 62.127 | 30.408 | 0.00 | 0.00 |
| ATOM | 748 | H    | LYS | X | 49 | 31.313 | 61.210 | 30.651 | 0.00 | 0.00 |
| ATOM | 749 | CA   | LYS | X | 49 | 31.307 | 62.687 | 29.083 | 0.00 | 0.00 |
| ATOM | 750 | HA   | LYS | X | 49 | 32.115 | 63.404 | 29.228 | 0.00 | 0.00 |
| ATOM | 751 | CB   | LYS | X | 49 | 31.749 | 61.542 | 28.149 | 0.00 | 0.00 |
| ATOM | 752 | HB2  | LYS | X | 49 | 32.522 | 61.024 | 28.716 | 0.00 | 0.00 |
| ATOM | 753 | HB3  | LYS | X | 49 | 30.938 | 60.814 | 28.154 | 0.00 | 0.00 |
| ATOM | 754 | CG   | LYS | X | 49 | 32.301 | 61.954 | 26.731 | 0.00 | 0.00 |
| ATOM | 755 | HG2  | LYS | X | 49 | 32.855 | 61.073 | 26.406 | 0.00 | 0.00 |
| ATOM | 756 | HG3  | LYS | X | 49 | 31.458 | 62.135 | 26.065 | 0.00 | 0.00 |
| ATOM | 757 | CD   | LYS | X | 49 | 33.281 | 63.143 | 26.584 | 0.00 | 0.00 |
| ATOM | 758 | HD2  | LYS | X | 49 | 33.702 | 63.149 | 25.579 | 0.00 | 0.00 |
| ATOM | 759 | HD3  | LYS | X | 49 | 32.725 | 64.053 | 26.807 | 0.00 | 0.00 |
| ATOM | 760 | CE   | LYS | X | 49 | 34.423 | 63.018 | 27.556 | 0.00 | 0.00 |
| ATOM | 761 | HE2  | LYS | X | 49 | 34.064 | 62.992 | 28.585 | 0.00 | 0.00 |
| ATOM | 762 | HE3  | LYS | X | 49 | 34.838 | 62.035 | 27.337 | 0.00 | 0.00 |
| ATOM | 763 | NZ   | LYS | X | 49 | 35.279 | 64.170 | 27.284 | 0.00 | 0.00 |
| ATOM | 764 | HZ1  | LYS | X | 49 | 34.767 | 64.964 | 27.641 | 0.00 | 0.00 |
| ATOM | 765 | HZ2  | LYS | X | 49 | 36.210 | 64.027 | 27.648 | 0.00 | 0.00 |
| ATOM | 766 | HZ3  | LYS | X | 49 | 35.331 | 64.271 | 26.281 | 0.00 | 0.00 |
| ATOM | 767 | C    | LYS | X | 49 | 30.189 | 63.585 | 28.454 | 0.00 | 0.00 |
| ATOM | 768 | O    | LYS | X | 49 | 29.031 | 63.153 | 28.220 | 0.00 | 0.00 |
| ATOM | 769 | N    | GLN | X | 50 | 30.447 | 64.864 | 28.198 | 0.00 | 0.00 |
| ATOM | 770 | H    | GLN | X | 50 | 31.366 | 65.241 | 28.379 | 0.00 | 0.00 |
| ATOM | 771 | CA   | GLN | X | 50 | 29.632 | 65.788 | 27.423 | 0.00 | 0.00 |
| ATOM | 772 | HA   | GLN | X | 50 | 28.801 | 65.975 | 28.103 | 0.00 | 0.00 |
| ATOM | 773 | CB   | GLN | X | 50 | 30.394 | 67.104 | 27.176 | 0.00 | 0.00 |
| ATOM | 774 | HB2  | GLN | X | 50 | 31.042 | 67.197 | 28.047 | 0.00 | 0.00 |
| ATOM | 775 | HB3  | GLN | X | 50 | 31.041 | 66.979 | 26.307 | 0.00 | 0.00 |
| ATOM | 776 | CG   | GLN | X | 50 | 29.469 | 68.303 | 26.979 | 0.00 | 0.00 |
| ATOM | 777 | HG2  | GLN | X | 50 | 28.770 | 68.018 | 26.193 | 0.00 | 0.00 |
| ATOM | 778 | HG3  | GLN | X | 50 | 28.931 | 68.505 | 27.905 | 0.00 | 0.00 |
| ATOM | 779 | CD   | GLN | X | 50 | 30.158 | 69.536 | 26.328 | 0.00 | 0.00 |
| ATOM | 780 | OE1  | GLN | X | 50 | 30.182 | 69.616 | 25.154 | 0.00 | 0.00 |
| ATOM | 781 | NE2  | GLN | X | 50 | 30.613 | 70.428 | 27.116 | 0.00 | 0.00 |
| ATOM | 782 | HE21 | GLN | X | 50 | 30.905 | 71.300 | 26.697 | 0.00 | 0.00 |
| ATOM | 783 | HE22 | GLN | X | 50 | 30.552 | 70.330 | 28.119 | 0.00 | 0.00 |
| ATOM | 784 | C    | GLN | X | 50 | 29.202 | 65.178 | 26.062 | 0.00 | 0.00 |
| ATOM | 785 | O    | GLN | X | 50 | 30.105 | 64.692 | 25.361 | 0.00 | 0.00 |
| ATOM | 786 | N    | PRO | X | 51 | 27.918 | 65.339 | 25.664 | 0.00 | 0.00 |
| ATOM | 787 | CD   | PRO | X | 51 | 26.796 | 65.865 | 26.349 | 0.00 | 0.00 |
| ATOM | 788 | HD2  | PRO | X | 51 | 26.957 | 66.908 | 26.623 | 0.00 | 0.00 |
| ATOM | 789 | HD3  | PRO | X | 51 | 26.644 | 65.282 | 27.257 | 0.00 | 0.00 |
| ATOM | 790 | CG   | PRO | X | 51 | 25.653 | 65.730 | 25.424 | 0.00 | 0.00 |
| ATOM | 791 | HG2  | PRO | X | 51 | 25.498 | 66.629 | 24.828 | 0.00 | 0.00 |
| ATOM | 792 | HG3  | PRO | X | 51 | 24.733 | 65.558 | 25.983 | 0.00 | 0.00 |
| ATOM | 793 | CB   | PRO | X | 51 | 25.941 | 64.564 | 24.565 | 0.00 | 0.00 |
| ATOM | 794 | HB2  | PRO | X | 51 | 25.377 | 64.599 | 23.633 | 0.00 | 0.00 |
| ATOM | 795 | HB3  | PRO | X | 51 | 25.662 | 63.650 | 25.089 | 0.00 | 0.00 |

|      |     |      |     |   |    |        |        |        |      |      |
|------|-----|------|-----|---|----|--------|--------|--------|------|------|
| ATOM | 796 | CA   | PRO | X | 51 | 27.499 | 64.591 | 24.484 | 0.00 | 0.00 |
| ATOM | 797 | HA   | PRO | X | 51 | 27.787 | 63.553 | 24.646 | 0.00 | 0.00 |
| ATOM | 798 | C    | PRO | X | 51 | 27.992 | 65.207 | 23.168 | 0.00 | 0.00 |
| ATOM | 799 | O    | PRO | X | 51 | 28.375 | 66.369 | 23.145 | 0.00 | 0.00 |
| ATOM | 800 | N    | TRP | X | 52 | 27.988 | 64.416 | 22.079 | 0.00 | 0.00 |
| ATOM | 801 | H    | TRP | X | 52 | 27.662 | 63.464 | 22.157 | 0.00 | 0.00 |
| ATOM | 802 | CA   | TRP | X | 52 | 28.600 | 64.907 | 20.804 | 0.00 | 0.00 |
| ATOM | 803 | HA   | TRP | X | 52 | 28.822 | 65.970 | 20.898 | 0.00 | 0.00 |
| ATOM | 804 | CB   | TRP | X | 52 | 29.869 | 64.116 | 20.400 | 0.00 | 0.00 |
| ATOM | 805 | HB2  | TRP | X | 52 | 30.164 | 64.469 | 19.411 | 0.00 | 0.00 |
| ATOM | 806 | HB3  | TRP | X | 52 | 30.730 | 64.307 | 21.040 | 0.00 | 0.00 |
| ATOM | 807 | CG   | TRP | X | 52 | 29.695 | 62.604 | 20.277 | 0.00 | 0.00 |
| ATOM | 808 | CD1  | TRP | X | 52 | 29.407 | 61.919 | 19.171 | 0.00 | 0.00 |
| ATOM | 809 | HD1  | TRP | X | 52 | 29.307 | 62.365 | 18.192 | 0.00 | 0.00 |
| ATOM | 810 | NE1  | TRP | X | 52 | 29.119 | 60.644 | 19.550 | 0.00 | 0.00 |
| ATOM | 811 | HE1  | TRP | X | 52 | 28.928 | 59.887 | 18.909 | 0.00 | 0.00 |
| ATOM | 812 | CE2  | TRP | X | 52 | 29.369 | 60.404 | 20.850 | 0.00 | 0.00 |
| ATOM | 813 | CZ2  | TRP | X | 52 | 29.220 | 59.259 | 21.563 | 0.00 | 0.00 |
| ATOM | 814 | HZ2  | TRP | X | 52 | 28.969 | 58.365 | 21.011 | 0.00 | 0.00 |
| ATOM | 815 | CH2  | TRP | X | 52 | 29.441 | 59.304 | 22.944 | 0.00 | 0.00 |
| ATOM | 816 | HH2  | TRP | X | 52 | 29.240 | 58.449 | 23.573 | 0.00 | 0.00 |
| ATOM | 817 | CZ3  | TRP | X | 52 | 29.767 | 60.521 | 23.534 | 0.00 | 0.00 |
| ATOM | 818 | HZ3  | TRP | X | 52 | 29.995 | 60.596 | 24.587 | 0.00 | 0.00 |
| ATOM | 819 | CE3  | TRP | X | 52 | 29.900 | 61.715 | 22.800 | 0.00 | 0.00 |
| ATOM | 820 | HE3  | TRP | X | 52 | 30.122 | 62.672 | 23.248 | 0.00 | 0.00 |
| ATOM | 821 | CD2  | TRP | X | 52 | 29.652 | 61.651 | 21.417 | 0.00 | 0.00 |
| ATOM | 822 | C    | TRP | X | 52 | 27.732 | 64.912 | 19.528 | 0.00 | 0.00 |
| ATOM | 823 | O    | TRP | X | 52 | 26.696 | 64.315 | 19.432 | 0.00 | 0.00 |
| ATOM | 824 | N    | SER | X | 53 | 28.253 | 65.656 | 18.513 | 0.00 | 0.00 |
| ATOM | 825 | H    | SER | X | 53 | 29.058 | 66.217 | 18.753 | 0.00 | 0.00 |
| ATOM | 826 | CA   | SER | X | 53 | 27.747 | 65.644 | 17.130 | 0.00 | 0.00 |
| ATOM | 827 | HA   | SER | X | 53 | 26.706 | 65.338 | 17.021 | 0.00 | 0.00 |
| ATOM | 828 | CB   | SER | X | 53 | 27.710 | 67.047 | 16.514 | 0.00 | 0.00 |
| ATOM | 829 | HB2  | SER | X | 53 | 28.742 | 67.394 | 16.466 | 0.00 | 0.00 |
| ATOM | 830 | HB3  | SER | X | 53 | 27.417 | 66.993 | 15.466 | 0.00 | 0.00 |
| ATOM | 831 | OG   | SER | X | 53 | 26.929 | 68.018 | 17.178 | 0.00 | 0.00 |
| ATOM | 832 | HG   | SER | X | 53 | 27.437 | 68.798 | 17.413 | 0.00 | 0.00 |
| ATOM | 833 | C    | SER | X | 53 | 28.607 | 64.770 | 16.179 | 0.00 | 0.00 |
| ATOM | 834 | O    | SER | X | 53 | 29.827 | 64.722 | 16.331 | 0.00 | 0.00 |
| ATOM | 835 | N    | GLY | X | 54 | 27.926 | 64.006 | 15.273 | 0.00 | 0.00 |
| ATOM | 836 | H    | GLY | X | 54 | 26.920 | 64.059 | 15.348 | 0.00 | 0.00 |
| ATOM | 837 | CA   | GLY | X | 54 | 28.479 | 62.872 | 14.467 | 0.00 | 0.00 |
| ATOM | 838 | HA2  | GLY | X | 54 | 27.713 | 62.641 | 13.727 | 0.00 | 0.00 |
| ATOM | 839 | HA3  | GLY | X | 54 | 29.384 | 63.276 | 14.013 | 0.00 | 0.00 |
| ATOM | 840 | C    | GLY | X | 54 | 28.810 | 61.610 | 15.283 | 0.00 | 0.00 |
| ATOM | 841 | O    | GLY | X | 54 | 28.113 | 61.194 | 16.184 | 0.00 | 0.00 |
| ATOM | 842 | N    | VAL | X | 55 | 29.922 | 61.033 | 14.837 | 0.00 | 0.00 |
| ATOM | 843 | H    | VAL | X | 55 | 30.362 | 61.379 | 13.996 | 0.00 | 0.00 |
| ATOM | 844 | CA   | VAL | X | 55 | 30.436 | 59.794 | 15.357 | 0.00 | 0.00 |
| ATOM | 845 | HA   | VAL | X | 55 | 29.739 | 59.421 | 16.107 | 0.00 | 0.00 |
| ATOM | 846 | CB   | VAL | X | 55 | 30.667 | 58.652 | 14.284 | 0.00 | 0.00 |
| ATOM | 847 | HB   | VAL | X | 55 | 31.573 | 58.859 | 13.715 | 0.00 | 0.00 |
| ATOM | 848 | CG1  | VAL | X | 55 | 30.782 | 57.247 | 14.913 | 0.00 | 0.00 |
| ATOM | 849 | HG11 | VAL | X | 55 | 29.953 | 56.928 | 15.545 | 0.00 | 0.00 |
| ATOM | 850 | HG12 | VAL | X | 55 | 30.963 | 56.570 | 14.078 | 0.00 | 0.00 |
| ATOM | 851 | HG13 | VAL | X | 55 | 31.668 | 57.089 | 15.528 | 0.00 | 0.00 |
| ATOM | 852 | CG2  | VAL | X | 55 | 29.442 | 58.601 | 13.277 | 0.00 | 0.00 |
| ATOM | 853 | HG21 | VAL | X | 55 | 29.406 | 59.577 | 12.795 | 0.00 | 0.00 |
| ATOM | 854 | HG22 | VAL | X | 55 | 28.641 | 58.417 | 13.993 | 0.00 | 0.00 |
| ATOM | 855 | HG23 | VAL | X | 55 | 29.533 | 57.882 | 12.462 | 0.00 | 0.00 |
| ATOM | 856 | C    | VAL | X | 55 | 31.796 | 59.959 | 16.013 | 0.00 | 0.00 |
| ATOM | 857 | O    | VAL | X | 55 | 32.611 | 60.622 | 15.367 | 0.00 | 0.00 |
| ATOM | 858 | N    | VAL | X | 56 | 31.865 | 59.435 | 17.253 | 0.00 | 0.00 |
| ATOM | 859 | H    | VAL | X | 56 | 31.095 | 58.871 | 17.584 | 0.00 | 0.00 |
| ATOM | 860 | CA   | VAL | X | 56 | 33.118 | 59.394 | 18.034 | 0.00 | 0.00 |
| ATOM | 861 | HA   | VAL | X | 56 | 33.756 | 60.203 | 17.678 | 0.00 | 0.00 |
| ATOM | 862 | CB   | VAL | X | 56 | 32.889 | 59.651 | 19.578 | 0.00 | 0.00 |

|      |     |      |     |   |    |        |        |        |      |      |
|------|-----|------|-----|---|----|--------|--------|--------|------|------|
| ATOM | 863 | HB   | VAL | X | 56 | 32.010 | 59.079 | 19.875 | 0.00 | 0.00 |
| ATOM | 864 | CG1  | VAL | X | 56 | 34.071 | 59.234 | 20.555 | 0.00 | 0.00 |
| ATOM | 865 | HG11 | VAL | X | 56 | 34.105 | 58.145 | 20.557 | 0.00 | 0.00 |
| ATOM | 866 | HG12 | VAL | X | 56 | 35.018 | 59.738 | 20.363 | 0.00 | 0.00 |
| ATOM | 867 | HG13 | VAL | X | 56 | 33.652 | 59.559 | 21.508 | 0.00 | 0.00 |
| ATOM | 868 | CG2  | VAL | X | 56 | 32.673 | 61.165 | 19.734 | 0.00 | 0.00 |
| ATOM | 869 | HG21 | VAL | X | 56 | 32.297 | 61.505 | 20.699 | 0.00 | 0.00 |
| ATOM | 870 | HG22 | VAL | X | 56 | 31.843 | 61.383 | 19.062 | 0.00 | 0.00 |
| ATOM | 871 | HG23 | VAL | X | 56 | 33.585 | 61.723 | 19.519 | 0.00 | 0.00 |
| ATOM | 872 | C    | VAL | X | 56 | 33.846 | 58.084 | 17.625 | 0.00 | 0.00 |
| ATOM | 873 | O    | VAL | X | 56 | 33.210 | 57.036 | 17.312 | 0.00 | 0.00 |
| ATOM | 874 | N    | ASP | X | 57 | 35.160 | 58.151 | 17.565 | 0.00 | 0.00 |
| ATOM | 875 | H    | ASP | X | 57 | 35.630 | 59.026 | 17.750 | 0.00 | 0.00 |
| ATOM | 876 | CA   | ASP | X | 57 | 35.974 | 57.010 | 17.038 | 0.00 | 0.00 |
| ATOM | 877 | HA   | ASP | X | 57 | 35.614 | 56.613 | 16.089 | 0.00 | 0.00 |
| ATOM | 878 | CB   | ASP | X | 57 | 37.314 | 57.578 | 16.727 | 0.00 | 0.00 |
| ATOM | 879 | HB2  | ASP | X | 57 | 37.132 | 58.332 | 15.962 | 0.00 | 0.00 |
| ATOM | 880 | HB3  | ASP | X | 57 | 37.676 | 58.157 | 17.577 | 0.00 | 0.00 |
| ATOM | 881 | CG   | ASP | X | 57 | 38.347 | 56.591 | 16.161 | 0.00 | 0.00 |
| ATOM | 882 | OD1  | ASP | X | 57 | 37.946 | 55.458 | 15.786 | 0.00 | 0.00 |
| ATOM | 883 | OD2  | ASP | X | 57 | 39.549 | 56.988 | 16.294 | 0.00 | 0.00 |
| ATOM | 884 | C    | ASP | X | 57 | 36.024 | 55.871 | 18.062 | 0.00 | 0.00 |
| ATOM | 885 | O    | ASP | X | 57 | 36.403 | 56.134 | 19.206 | 0.00 | 0.00 |
| ATOM | 886 | N    | ALA | X | 58 | 35.529 | 54.651 | 17.847 | 0.00 | 0.00 |
| ATOM | 887 | H    | ALA | X | 58 | 35.180 | 54.427 | 16.926 | 0.00 | 0.00 |
| ATOM | 888 | CA   | ALA | X | 58 | 35.639 | 53.522 | 18.827 | 0.00 | 0.00 |
| ATOM | 889 | HA   | ALA | X | 58 | 36.170 | 53.818 | 19.732 | 0.00 | 0.00 |
| ATOM | 890 | CB   | ALA | X | 58 | 34.209 | 53.134 | 19.292 | 0.00 | 0.00 |
| ATOM | 891 | HB1  | ALA | X | 58 | 33.678 | 54.003 | 19.682 | 0.00 | 0.00 |
| ATOM | 892 | HB2  | ALA | X | 58 | 34.406 | 52.397 | 20.070 | 0.00 | 0.00 |
| ATOM | 893 | HB3  | ALA | X | 58 | 33.630 | 52.670 | 18.494 | 0.00 | 0.00 |
| ATOM | 894 | C    | ALA | X | 58 | 36.553 | 52.325 | 18.317 | 0.00 | 0.00 |
| ATOM | 895 | O    | ALA | X | 58 | 36.108 | 51.129 | 18.449 | 0.00 | 0.00 |
| ATOM | 896 | N    | THR | X | 59 | 37.689 | 52.510 | 17.642 | 0.00 | 0.00 |
| ATOM | 897 | H    | THR | X | 59 | 37.955 | 53.472 | 17.492 | 0.00 | 0.00 |
| ATOM | 898 | CA   | THR | X | 59 | 38.277 | 51.452 | 16.792 | 0.00 | 0.00 |
| ATOM | 899 | HA   | THR | X | 59 | 37.571 | 50.630 | 16.669 | 0.00 | 0.00 |
| ATOM | 900 | CB   | THR | X | 59 | 38.868 | 51.932 | 15.486 | 0.00 | 0.00 |
| ATOM | 901 | HB   | THR | X | 59 | 39.591 | 51.210 | 15.107 | 0.00 | 0.00 |
| ATOM | 902 | CG2  | THR | X | 59 | 37.941 | 52.242 | 14.354 | 0.00 | 0.00 |
| ATOM | 903 | HG21 | THR | X | 59 | 38.525 | 52.472 | 13.463 | 0.00 | 0.00 |
| ATOM | 904 | HG22 | THR | X | 59 | 37.405 | 53.168 | 14.560 | 0.00 | 0.00 |
| ATOM | 905 | HG23 | THR | X | 59 | 37.208 | 51.446 | 14.220 | 0.00 | 0.00 |
| ATOM | 906 | OG1  | THR | X | 59 | 39.571 | 53.153 | 15.687 | 0.00 | 0.00 |
| ATOM | 907 | HG1  | THR | X | 59 | 38.940 | 53.876 | 15.708 | 0.00 | 0.00 |
| ATOM | 908 | C    | THR | X | 59 | 39.458 | 50.751 | 17.521 | 0.00 | 0.00 |
| ATOM | 909 | O    | THR | X | 59 | 39.760 | 49.599 | 17.243 | 0.00 | 0.00 |
| ATOM | 910 | N    | THR | X | 60 | 40.083 | 51.488 | 18.470 | 0.00 | 0.00 |
| ATOM | 911 | H    | THR | X | 60 | 39.799 | 52.453 | 18.559 | 0.00 | 0.00 |
| ATOM | 912 | CA   | THR | X | 60 | 41.288 | 51.109 | 19.187 | 0.00 | 0.00 |
| ATOM | 913 | HA   | THR | X | 60 | 41.096 | 50.083 | 19.500 | 0.00 | 0.00 |
| ATOM | 914 | CB   | THR | X | 60 | 42.497 | 51.032 | 18.283 | 0.00 | 0.00 |
| ATOM | 915 | HB   | THR | X | 60 | 42.322 | 50.308 | 17.487 | 0.00 | 0.00 |
| ATOM | 916 | CG2  | THR | X | 60 | 42.854 | 52.373 | 17.816 | 0.00 | 0.00 |
| ATOM | 917 | HG21 | THR | X | 60 | 41.999 | 52.723 | 17.237 | 0.00 | 0.00 |
| ATOM | 918 | HG22 | THR | X | 60 | 43.830 | 52.303 | 17.337 | 0.00 | 0.00 |
| ATOM | 919 | HG23 | THR | X | 60 | 42.971 | 52.986 | 18.709 | 0.00 | 0.00 |
| ATOM | 920 | OG1  | THR | X | 60 | 43.687 | 50.575 | 18.929 | 0.00 | 0.00 |
| ATOM | 921 | HG1  | THR | X | 60 | 43.648 | 49.636 | 19.124 | 0.00 | 0.00 |
| ATOM | 922 | C    | THR | X | 60 | 41.443 | 52.053 | 20.428 | 0.00 | 0.00 |
| ATOM | 923 | O    | THR | X | 60 | 40.744 | 53.056 | 20.429 | 0.00 | 0.00 |
| ATOM | 924 | N    | PHE | X | 61 | 42.253 | 51.651 | 21.411 | 0.00 | 0.00 |
| ATOM | 925 | H    | PHE | X | 61 | 42.645 | 50.723 | 21.343 | 0.00 | 0.00 |
| ATOM | 926 | CA   | PHE | X | 61 | 42.668 | 52.470 | 22.510 | 0.00 | 0.00 |
| ATOM | 927 | HA   | PHE | X | 61 | 41.798 | 52.906 | 23.001 | 0.00 | 0.00 |
| ATOM | 928 | CB   | PHE | X | 61 | 43.460 | 51.609 | 23.529 | 0.00 | 0.00 |
| ATOM | 929 | HB2  | PHE | X | 61 | 44.441 | 51.417 | 23.093 | 0.00 | 0.00 |



|      |     |      |     |   |    |        |        |        |      |      |
|------|-----|------|-----|---|----|--------|--------|--------|------|------|
| ATOM | 930 | HB3  | PHE | X | 61 | 43.503 | 52.098 | 24.502 | 0.00 | 0.00 |
| ATOM | 931 | CG   | PHE | X | 61 | 42.840 | 50.165 | 23.680 | 0.00 | 0.00 |
| ATOM | 932 | CD1  | PHE | X | 61 | 41.903 | 49.901 | 24.648 | 0.00 | 0.00 |
| ATOM | 933 | HD1  | PHE | X | 61 | 41.662 | 50.647 | 25.392 | 0.00 | 0.00 |
| ATOM | 934 | CE1  | PHE | X | 61 | 41.470 | 48.601 | 24.876 | 0.00 | 0.00 |
| ATOM | 935 | HE1  | PHE | X | 61 | 40.731 | 48.418 | 25.643 | 0.00 | 0.00 |
| ATOM | 936 | CZ   | PHE | X | 61 | 41.978 | 47.549 | 24.179 | 0.00 | 0.00 |
| ATOM | 937 | HZ   | PHE | X | 61 | 41.585 | 46.562 | 24.374 | 0.00 | 0.00 |
| ATOM | 938 | CE2  | PHE | X | 61 | 42.991 | 47.763 | 23.195 | 0.00 | 0.00 |
| ATOM | 939 | HE2  | PHE | X | 61 | 43.413 | 46.878 | 22.742 | 0.00 | 0.00 |
| ATOM | 940 | CD2  | PHE | X | 61 | 43.494 | 49.034 | 22.985 | 0.00 | 0.00 |
| ATOM | 941 | HD2  | PHE | X | 61 | 44.211 | 49.180 | 22.190 | 0.00 | 0.00 |
| ATOM | 942 | C    | PHE | X | 61 | 43.467 | 53.732 | 22.185 | 0.00 | 0.00 |
| ATOM | 943 | O    | PHE | X | 61 | 44.220 | 53.868 | 21.228 | 0.00 | 0.00 |
| ATOM | 944 | N    | GLN | X | 62 | 43.163 | 54.752 | 22.954 | 0.00 | 0.00 |
| ATOM | 945 | H    | GLN | X | 62 | 42.450 | 54.631 | 23.659 | 0.00 | 0.00 |
| ATOM | 946 | CA   | GLN | X | 62 | 43.565 | 56.139 | 22.803 | 0.00 | 0.00 |
| ATOM | 947 | HA   | GLN | X | 62 | 43.968 | 56.290 | 21.802 | 0.00 | 0.00 |
| ATOM | 948 | CB   | GLN | X | 62 | 42.265 | 56.977 | 23.043 | 0.00 | 0.00 |
| ATOM | 949 | HB2  | GLN | X | 62 | 41.913 | 56.396 | 23.895 | 0.00 | 0.00 |
| ATOM | 950 | HB3  | GLN | X | 62 | 42.518 | 58.024 | 23.209 | 0.00 | 0.00 |
| ATOM | 951 | CG   | GLN | X | 62 | 41.186 | 56.918 | 21.942 | 0.00 | 0.00 |
| ATOM | 952 | HG2  | GLN | X | 62 | 40.871 | 55.896 | 21.733 | 0.00 | 0.00 |
| ATOM | 953 | HG3  | GLN | X | 62 | 40.343 | 57.449 | 22.386 | 0.00 | 0.00 |
| ATOM | 954 | CD   | GLN | X | 62 | 41.581 | 57.617 | 20.692 | 0.00 | 0.00 |
| ATOM | 955 | OE1  | GLN | X | 62 | 42.771 | 57.837 | 20.469 | 0.00 | 0.00 |
| ATOM | 956 | NE2  | GLN | X | 62 | 40.654 | 57.998 | 19.856 | 0.00 | 0.00 |
| ATOM | 957 | HE21 | GLN | X | 62 | 40.923 | 58.093 | 18.887 | 0.00 | 0.00 |
| ATOM | 958 | HE22 | GLN | X | 62 | 39.665 | 57.870 | 20.017 | 0.00 | 0.00 |
| ATOM | 959 | C    | GLN | X | 62 | 44.660 | 56.536 | 23.857 | 0.00 | 0.00 |
| ATOM | 960 | O    | GLN | X | 62 | 45.719 | 57.083 | 23.479 | 0.00 | 0.00 |
| ATOM | 961 | N    | SER | X | 63 | 44.485 | 56.192 | 25.125 | 0.00 | 0.00 |
| ATOM | 962 | H    | SER | X | 63 | 43.558 | 55.902 | 25.402 | 0.00 | 0.00 |
| ATOM | 963 | CA   | SER | X | 63 | 45.519 | 56.420 | 26.162 | 0.00 | 0.00 |
| ATOM | 964 | HA   | SER | X | 63 | 46.396 | 55.957 | 25.710 | 0.00 | 0.00 |
| ATOM | 965 | CB   | SER | X | 63 | 45.663 | 57.885 | 26.476 | 0.00 | 0.00 |
| ATOM | 966 | HB2  | SER | X | 63 | 46.492 | 57.987 | 27.177 | 0.00 | 0.00 |
| ATOM | 967 | HB3  | SER | X | 63 | 46.014 | 58.378 | 25.570 | 0.00 | 0.00 |
| ATOM | 968 | OG   | SER | X | 63 | 44.469 | 58.377 | 27.064 | 0.00 | 0.00 |
| ATOM | 969 | HG   | SER | X | 63 | 44.437 | 59.328 | 26.938 | 0.00 | 0.00 |
| ATOM | 970 | C    | SER | X | 63 | 45.122 | 55.605 | 27.320 | 0.00 | 0.00 |
| ATOM | 971 | O    | SER | X | 63 | 43.951 | 55.233 | 27.554 | 0.00 | 0.00 |
| ATOM | 972 | N    | VAL | X | 64 | 46.069 | 55.460 | 28.234 | 0.00 | 0.00 |
| ATOM | 973 | H    | VAL | X | 64 | 46.927 | 55.987 | 28.152 | 0.00 | 0.00 |
| ATOM | 974 | CA   | VAL | X | 64 | 45.862 | 54.787 | 29.550 | 0.00 | 0.00 |
| ATOM | 975 | HA   | VAL | X | 64 | 44.792 | 54.637 | 29.691 | 0.00 | 0.00 |
| ATOM | 976 | CB   | VAL | X | 64 | 46.492 | 53.460 | 29.604 | 0.00 | 0.00 |
| ATOM | 977 | HB   | VAL | X | 64 | 46.288 | 52.955 | 30.548 | 0.00 | 0.00 |
| ATOM | 978 | CG1  | VAL | X | 64 | 45.892 | 52.553 | 28.520 | 0.00 | 0.00 |
| ATOM | 979 | HG11 | VAL | X | 64 | 46.371 | 51.577 | 28.430 | 0.00 | 0.00 |
| ATOM | 980 | HG12 | VAL | X | 64 | 44.844 | 52.444 | 28.800 | 0.00 | 0.00 |
| ATOM | 981 | HG13 | VAL | X | 64 | 45.922 | 53.046 | 27.548 | 0.00 | 0.00 |
| ATOM | 982 | CG2  | VAL | X | 64 | 48.019 | 53.364 | 29.353 | 0.00 | 0.00 |
| ATOM | 983 | HG21 | VAL | X | 64 | 48.135 | 53.875 | 28.398 | 0.00 | 0.00 |
| ATOM | 984 | HG22 | VAL | X | 64 | 48.343 | 52.323 | 29.334 | 0.00 | 0.00 |
| ATOM | 985 | HG23 | VAL | X | 64 | 48.466 | 53.815 | 30.240 | 0.00 | 0.00 |
| ATOM | 986 | C    | VAL | X | 64 | 46.367 | 55.799 | 30.635 | 0.00 | 0.00 |
| ATOM | 987 | O    | VAL | X | 64 | 47.004 | 56.809 | 30.334 | 0.00 | 0.00 |
| ATOM | 988 | N    | CYX | X | 65 | 46.105 | 55.457 | 31.932 | 0.00 | 0.00 |
| ATOM | 989 | H    | CYX | X | 65 | 45.482 | 54.698 | 32.169 | 0.00 | 0.00 |
| ATOM | 990 | CA   | CYX | X | 65 | 46.266 | 56.421 | 33.036 | 0.00 | 0.00 |
| ATOM | 991 | HA   | CYX | X | 65 | 46.135 | 57.451 | 32.706 | 0.00 | 0.00 |
| ATOM | 992 | CB   | CYX | X | 65 | 45.223 | 56.105 | 34.152 | 0.00 | 0.00 |
| ATOM | 993 | HB2  | CYX | X | 65 | 45.269 | 55.077 | 34.513 | 0.00 | 0.00 |
| ATOM | 994 | HB3  | CYX | X | 65 | 45.449 | 56.811 | 34.951 | 0.00 | 0.00 |
| ATOM | 995 | SG   | CYX | X | 65 | 43.500 | 56.347 | 33.635 | 0.00 | 0.00 |
| ATOM | 996 | C    | CYX | X | 65 | 47.690 | 56.342 | 33.545 | 0.00 | 0.00 |

|      |      |      |     |   |    |        |        |        |      |      |
|------|------|------|-----|---|----|--------|--------|--------|------|------|
| ATOM | 997  | O    | CYX | X | 65 | 48.170 | 55.224 | 33.801 | 0.00 | 0.00 |
| ATOM | 998  | N    | TYR | X | 66 | 48.247 | 57.560 | 33.851 | 0.00 | 0.00 |
| ATOM | 999  | H    | TYR | X | 66 | 47.742 | 58.425 | 33.718 | 0.00 | 0.00 |
| ATOM | 1000 | CA   | TYR | X | 66 | 49.631 | 57.730 | 34.220 | 0.00 | 0.00 |
| ATOM | 1001 | HA   | TYR | X | 66 | 50.198 | 57.470 | 33.326 | 0.00 | 0.00 |
| ATOM | 1002 | CB   | TYR | X | 66 | 49.818 | 59.259 | 34.455 | 0.00 | 0.00 |
| ATOM | 1003 | HB2  | TYR | X | 66 | 48.879 | 59.774 | 34.658 | 0.00 | 0.00 |
| ATOM | 1004 | HB3  | TYR | X | 66 | 50.414 | 59.512 | 35.331 | 0.00 | 0.00 |
| ATOM | 1005 | CG   | TYR | X | 66 | 50.619 | 59.966 | 33.380 | 0.00 | 0.00 |
| ATOM | 1006 | CD1  | TYR | X | 66 | 50.002 | 61.129 | 32.762 | 0.00 | 0.00 |
| ATOM | 1007 | HD1  | TYR | X | 66 | 49.035 | 61.429 | 33.139 | 0.00 | 0.00 |
| ATOM | 1008 | CE1  | TYR | X | 66 | 50.745 | 61.906 | 31.855 | 0.00 | 0.00 |
| ATOM | 1009 | HE1  | TYR | X | 66 | 50.282 | 62.784 | 31.428 | 0.00 | 0.00 |
| ATOM | 1010 | CZ   | TYR | X | 66 | 52.082 | 61.558 | 31.536 | 0.00 | 0.00 |
| ATOM | 1011 | OH   | TYR | X | 66 | 52.777 | 62.414 | 30.689 | 0.00 | 0.00 |
| ATOM | 1012 | HH   | TYR | X | 66 | 52.217 | 63.062 | 30.256 | 0.00 | 0.00 |
| ATOM | 1013 | CE2  | TYR | X | 66 | 52.681 | 60.342 | 32.059 | 0.00 | 0.00 |
| ATOM | 1014 | HE2  | TYR | X | 66 | 53.711 | 60.113 | 31.830 | 0.00 | 0.00 |
| ATOM | 1015 | CD2  | TYR | X | 66 | 51.943 | 59.555 | 32.941 | 0.00 | 0.00 |
| ATOM | 1016 | HD2  | TYR | X | 66 | 52.344 | 58.592 | 33.222 | 0.00 | 0.00 |
| ATOM | 1017 | C    | TYR | X | 66 | 50.143 | 56.876 | 35.374 | 0.00 | 0.00 |
| ATOM | 1018 | O    | TYR | X | 66 | 49.494 | 56.914 | 36.420 | 0.00 | 0.00 |
| ATOM | 1019 | N    | GLN | X | 67 | 51.160 | 56.054 | 35.128 | 0.00 | 0.00 |
| ATOM | 1020 | H    | GLN | X | 67 | 51.746 | 56.121 | 34.308 | 0.00 | 0.00 |
| ATOM | 1021 | CA   | GLN | X | 67 | 51.435 | 54.899 | 36.044 | 0.00 | 0.00 |
| ATOM | 1022 | HA   | GLN | X | 67 | 51.289 | 55.227 | 37.073 | 0.00 | 0.00 |
| ATOM | 1023 | CB   | GLN | X | 67 | 50.539 | 53.716 | 35.823 | 0.00 | 0.00 |
| ATOM | 1024 | HB2  | GLN | X | 67 | 50.799 | 53.069 | 36.660 | 0.00 | 0.00 |
| ATOM | 1025 | HB3  | GLN | X | 67 | 49.528 | 54.044 | 36.065 | 0.00 | 0.00 |
| ATOM | 1026 | CG   | GLN | X | 67 | 50.674 | 53.028 | 34.491 | 0.00 | 0.00 |
| ATOM | 1027 | HG2  | GLN | X | 67 | 50.480 | 53.826 | 33.775 | 0.00 | 0.00 |
| ATOM | 1028 | HG3  | GLN | X | 67 | 51.555 | 52.392 | 34.408 | 0.00 | 0.00 |
| ATOM | 1029 | CD   | GLN | X | 67 | 49.544 | 51.951 | 34.372 | 0.00 | 0.00 |
| ATOM | 1030 | OE1  | GLN | X | 67 | 49.741 | 50.768 | 34.283 | 0.00 | 0.00 |
| ATOM | 1031 | NE2  | GLN | X | 67 | 48.342 | 52.462 | 34.336 | 0.00 | 0.00 |
| ATOM | 1032 | HE21 | GLN | X | 67 | 47.656 | 51.738 | 34.491 | 0.00 | 0.00 |
| ATOM | 1033 | HE22 | GLN | X | 67 | 48.108 | 53.425 | 34.139 | 0.00 | 0.00 |
| ATOM | 1034 | C    | GLN | X | 67 | 52.911 | 54.541 | 35.887 | 0.00 | 0.00 |
| ATOM | 1035 | O    | GLN | X | 67 | 53.559 | 54.713 | 34.812 | 0.00 | 0.00 |
| ATOM | 1036 | N    | TYR | X | 68 | 53.342 | 53.861 | 36.945 | 0.00 | 0.00 |
| ATOM | 1037 | H    | TYR | X | 68 | 52.781 | 53.771 | 37.780 | 0.00 | 0.00 |
| ATOM | 1038 | CA   | TYR | X | 68 | 54.616 | 53.244 | 36.965 | 0.00 | 0.00 |
| ATOM | 1039 | HA   | TYR | X | 68 | 55.386 | 53.903 | 36.563 | 0.00 | 0.00 |
| ATOM | 1040 | CB   | TYR | X | 68 | 55.013 | 52.957 | 38.437 | 0.00 | 0.00 |
| ATOM | 1041 | HB2  | TYR | X | 68 | 55.169 | 53.893 | 38.973 | 0.00 | 0.00 |
| ATOM | 1042 | HB3  | TYR | X | 68 | 54.165 | 52.531 | 38.974 | 0.00 | 0.00 |
| ATOM | 1043 | CG   | TYR | X | 68 | 56.182 | 52.072 | 38.577 | 0.00 | 0.00 |
| ATOM | 1044 | CD1  | TYR | X | 68 | 57.542 | 52.571 | 38.609 | 0.00 | 0.00 |
| ATOM | 1045 | HD1  | TYR | X | 68 | 57.726 | 53.634 | 38.580 | 0.00 | 0.00 |
| ATOM | 1046 | CE1  | TYR | X | 68 | 58.607 | 51.632 | 38.614 | 0.00 | 0.00 |
| ATOM | 1047 | HE1  | TYR | X | 68 | 59.624 | 51.981 | 38.714 | 0.00 | 0.00 |
| ATOM | 1048 | CZ   | TYR | X | 68 | 58.381 | 50.251 | 38.840 | 0.00 | 0.00 |
| ATOM | 1049 | OH   | TYR | X | 68 | 59.413 | 49.417 | 39.083 | 0.00 | 0.00 |
| ATOM | 1050 | HH   | TYR | X | 68 | 60.239 | 49.873 | 39.261 | 0.00 | 0.00 |
| ATOM | 1051 | CE2  | TYR | X | 68 | 57.043 | 49.778 | 38.843 | 0.00 | 0.00 |
| ATOM | 1052 | HE2  | TYR | X | 68 | 56.786 | 48.751 | 39.055 | 0.00 | 0.00 |
| ATOM | 1053 | CD2  | TYR | X | 68 | 55.951 | 50.656 | 38.647 | 0.00 | 0.00 |
| ATOM | 1054 | HD2  | TYR | X | 68 | 54.940 | 50.296 | 38.771 | 0.00 | 0.00 |
| ATOM | 1055 | C    | TYR | X | 68 | 54.501 | 51.912 | 36.102 | 0.00 | 0.00 |
| ATOM | 1056 | O    | TYR | X | 68 | 53.460 | 51.300 | 36.109 | 0.00 | 0.00 |
| ATOM | 1057 | N    | VAL | X | 69 | 55.553 | 51.558 | 35.360 | 0.00 | 0.00 |
| ATOM | 1058 | H    | VAL | X | 69 | 56.235 | 52.303 | 35.400 | 0.00 | 0.00 |
| ATOM | 1059 | CA   | VAL | X | 69 | 55.734 | 50.301 | 34.668 | 0.00 | 0.00 |
| ATOM | 1060 | HA   | VAL | X | 69 | 54.950 | 49.626 | 35.010 | 0.00 | 0.00 |
| ATOM | 1061 | CB   | VAL | X | 69 | 55.795 | 50.430 | 33.103 | 0.00 | 0.00 |
| ATOM | 1062 | HB   | VAL | X | 69 | 56.055 | 49.481 | 32.634 | 0.00 | 0.00 |
| ATOM | 1063 | CG1  | VAL | X | 69 | 54.396 | 50.750 | 32.602 | 0.00 | 0.00 |

|      |      |      |     |   |    |        |        |        |      |      |
|------|------|------|-----|---|----|--------|--------|--------|------|------|
| ATOM | 1064 | HG11 | VAL | X | 69 | 54.470 | 50.703 | 31.516 | 0.00 | 0.00 |
| ATOM | 1065 | HG12 | VAL | X | 69 | 53.760 | 49.931 | 32.940 | 0.00 | 0.00 |
| ATOM | 1066 | HG13 | VAL | X | 69 | 53.980 | 51.704 | 32.927 | 0.00 | 0.00 |
| ATOM | 1067 | CG2  | VAL | X | 69 | 56.732 | 51.510 | 32.614 | 0.00 | 0.00 |
| ATOM | 1068 | HG21 | VAL | X | 69 | 56.457 | 52.549 | 32.799 | 0.00 | 0.00 |
| ATOM | 1069 | HG22 | VAL | X | 69 | 56.866 | 51.391 | 31.539 | 0.00 | 0.00 |
| ATOM | 1070 | HG23 | VAL | X | 69 | 57.706 | 51.332 | 33.070 | 0.00 | 0.00 |
| ATOM | 1071 | C    | VAL | X | 69 | 57.024 | 49.628 | 35.167 | 0.00 | 0.00 |
| ATOM | 1072 | O    | VAL | X | 69 | 57.986 | 50.379 | 35.411 | 0.00 | 0.00 |
| ATOM | 1073 | N    | ASP | X | 70 | 57.087 | 48.267 | 35.268 | 0.00 | 0.00 |
| ATOM | 1074 | H    | ASP | X | 70 | 56.306 | 47.695 | 34.983 | 0.00 | 0.00 |
| ATOM | 1075 | CA   | ASP | X | 70 | 58.213 | 47.666 | 35.943 | 0.00 | 0.00 |
| ATOM | 1076 | HA   | ASP | X | 70 | 58.214 | 48.135 | 36.927 | 0.00 | 0.00 |
| ATOM | 1077 | CB   | ASP | X | 70 | 57.944 | 46.180 | 36.142 | 0.00 | 0.00 |
| ATOM | 1078 | HB2  | ASP | X | 70 | 56.881 | 46.026 | 36.331 | 0.00 | 0.00 |
| ATOM | 1079 | HB3  | ASP | X | 70 | 58.070 | 45.757 | 35.145 | 0.00 | 0.00 |
| ATOM | 1080 | CG   | ASP | X | 70 | 58.991 | 45.559 | 37.116 | 0.00 | 0.00 |
| ATOM | 1081 | OD1  | ASP | X | 70 | 60.099 | 45.198 | 36.730 | 0.00 | 0.00 |
| ATOM | 1082 | OD2  | ASP | X | 70 | 58.659 | 45.606 | 38.345 | 0.00 | 0.00 |
| ATOM | 1083 | C    | ASP | X | 70 | 59.629 | 47.998 | 35.359 | 0.00 | 0.00 |
| ATOM | 1084 | O    | ASP | X | 70 | 59.824 | 47.917 | 34.121 | 0.00 | 0.00 |
| ATOM | 1085 | N    | THR | X | 71 | 60.487 | 48.569 | 36.265 | 0.00 | 0.00 |
| ATOM | 1086 | H    | THR | X | 71 | 60.223 | 48.516 | 37.239 | 0.00 | 0.00 |
| ATOM | 1087 | CA   | THR | X | 71 | 61.835 | 49.002 | 35.928 | 0.00 | 0.00 |
| ATOM | 1088 | HA   | THR | X | 71 | 61.919 | 49.110 | 34.847 | 0.00 | 0.00 |
| ATOM | 1089 | CB   | THR | X | 71 | 62.321 | 50.292 | 36.645 | 0.00 | 0.00 |
| ATOM | 1090 | HB   | THR | X | 71 | 63.368 | 50.444 | 36.381 | 0.00 | 0.00 |
| ATOM | 1091 | CG2  | THR | X | 71 | 61.650 | 51.597 | 36.238 | 0.00 | 0.00 |
| ATOM | 1092 | HG21 | THR | X | 71 | 61.792 | 52.254 | 37.096 | 0.00 | 0.00 |
| ATOM | 1093 | HG22 | THR | X | 71 | 60.585 | 51.425 | 36.081 | 0.00 | 0.00 |
| ATOM | 1094 | HG23 | THR | X | 71 | 61.961 | 52.030 | 35.287 | 0.00 | 0.00 |
| ATOM | 1095 | OG1  | THR | X | 71 | 62.096 | 50.021 | 37.998 | 0.00 | 0.00 |
| ATOM | 1096 | HG1  | THR | X | 71 | 62.652 | 50.674 | 38.429 | 0.00 | 0.00 |
| ATOM | 1097 | C    | THR | X | 71 | 62.952 | 47.917 | 36.192 | 0.00 | 0.00 |
| ATOM | 1098 | O    | THR | X | 71 | 64.039 | 48.126 | 35.644 | 0.00 | 0.00 |
| ATOM | 1099 | N    | LEU | X | 72 | 62.728 | 46.899 | 36.975 | 0.00 | 0.00 |
| ATOM | 1100 | H    | LEU | X | 72 | 61.784 | 46.650 | 37.235 | 0.00 | 0.00 |
| ATOM | 1101 | CA   | LEU | X | 72 | 63.823 | 46.086 | 37.505 | 0.00 | 0.00 |
| ATOM | 1102 | HA   | LEU | X | 72 | 64.689 | 46.707 | 37.737 | 0.00 | 0.00 |
| ATOM | 1103 | CB   | LEU | X | 72 | 63.249 | 45.334 | 38.747 | 0.00 | 0.00 |
| ATOM | 1104 | HB2  | LEU | X | 72 | 62.685 | 45.994 | 39.406 | 0.00 | 0.00 |
| ATOM | 1105 | HB3  | LEU | X | 72 | 62.572 | 44.598 | 38.313 | 0.00 | 0.00 |
| ATOM | 1106 | CG   | LEU | X | 72 | 64.323 | 44.462 | 39.469 | 0.00 | 0.00 |
| ATOM | 1107 | HG   | LEU | X | 72 | 64.982 | 43.950 | 38.768 | 0.00 | 0.00 |
| ATOM | 1108 | CD1  | LEU | X | 72 | 65.311 | 45.472 | 40.139 | 0.00 | 0.00 |
| ATOM | 1109 | HD11 | LEU | X | 72 | 65.876 | 45.094 | 40.991 | 0.00 | 0.00 |
| ATOM | 1110 | HD12 | LEU | X | 72 | 64.834 | 46.409 | 40.426 | 0.00 | 0.00 |
| ATOM | 1111 | HD13 | LEU | X | 72 | 66.096 | 45.725 | 39.426 | 0.00 | 0.00 |
| ATOM | 1112 | CD2  | LEU | X | 72 | 63.723 | 43.657 | 40.618 | 0.00 | 0.00 |
| ATOM | 1113 | HD21 | LEU | X | 72 | 63.027 | 42.924 | 40.211 | 0.00 | 0.00 |
| ATOM | 1114 | HD22 | LEU | X | 72 | 64.543 | 43.152 | 41.128 | 0.00 | 0.00 |
| ATOM | 1115 | HD23 | LEU | X | 72 | 63.178 | 44.342 | 41.268 | 0.00 | 0.00 |
| ATOM | 1116 | C    | LEU | X | 72 | 64.322 | 45.239 | 36.348 | 0.00 | 0.00 |
| ATOM | 1117 | O    | LEU | X | 72 | 65.502 | 45.093 | 36.191 | 0.00 | 0.00 |
| ATOM | 1118 | N    | TYR | X | 73 | 63.431 | 44.573 | 35.577 | 0.00 | 0.00 |
| ATOM | 1119 | H    | TYR | X | 73 | 62.455 | 44.723 | 35.790 | 0.00 | 0.00 |
| ATOM | 1120 | CA   | TYR | X | 73 | 63.828 | 43.623 | 34.512 | 0.00 | 0.00 |
| ATOM | 1121 | HA   | TYR | X | 73 | 64.886 | 43.369 | 34.448 | 0.00 | 0.00 |
| ATOM | 1122 | CB   | TYR | X | 73 | 63.205 | 42.314 | 34.815 | 0.00 | 0.00 |
| ATOM | 1123 | HB2  | TYR | X | 73 | 62.116 | 42.351 | 34.801 | 0.00 | 0.00 |
| ATOM | 1124 | HB3  | TYR | X | 73 | 63.671 | 41.687 | 34.055 | 0.00 | 0.00 |
| ATOM | 1125 | CG   | TYR | X | 73 | 63.489 | 41.661 | 36.147 | 0.00 | 0.00 |
| ATOM | 1126 | CD1  | TYR | X | 73 | 64.766 | 41.683 | 36.765 | 0.00 | 0.00 |
| ATOM | 1127 | HD1  | TYR | X | 73 | 65.575 | 42.218 | 36.290 | 0.00 | 0.00 |
| ATOM | 1128 | CE1  | TYR | X | 73 | 64.964 | 41.181 | 38.038 | 0.00 | 0.00 |
| ATOM | 1129 | HE1  | TYR | X | 73 | 65.944 | 41.201 | 38.492 | 0.00 | 0.00 |
| ATOM | 1130 | CZ   | TYR | X | 73 | 63.868 | 40.686 | 38.767 | 0.00 | 0.00 |

|      |      |     |     |   |    |        |        |        |      |      |
|------|------|-----|-----|---|----|--------|--------|--------|------|------|
| ATOM | 1131 | OH  | TYR | X | 73 | 64.159 | 40.211 | 40.014 | 0.00 | 0.00 |
| ATOM | 1132 | HH  | TYR | X | 73 | 63.308 | 40.146 | 40.453 | 0.00 | 0.00 |
| ATOM | 1133 | CE2 | TYR | X | 73 | 62.606 | 40.595 | 38.178 | 0.00 | 0.00 |
| ATOM | 1134 | HE2 | TYR | X | 73 | 61.744 | 40.121 | 38.624 | 0.00 | 0.00 |
| ATOM | 1135 | CD2 | TYR | X | 73 | 62.472 | 41.113 | 36.875 | 0.00 | 0.00 |
| ATOM | 1136 | HD2 | TYR | X | 73 | 61.506 | 41.012 | 36.403 | 0.00 | 0.00 |
| ATOM | 1137 | C   | TYR | X | 73 | 63.428 | 44.119 | 33.061 | 0.00 | 0.00 |
| ATOM | 1138 | O   | TYR | X | 73 | 62.675 | 43.474 | 32.385 | 0.00 | 0.00 |
| ATOM | 1139 | N   | PRO | X | 74 | 64.014 | 45.244 | 32.600 | 0.00 | 0.00 |
| ATOM | 1140 | CD  | PRO | X | 74 | 65.127 | 45.889 | 33.238 | 0.00 | 0.00 |
| ATOM | 1141 | HD2 | PRO | X | 74 | 65.947 | 45.263 | 33.591 | 0.00 | 0.00 |
| ATOM | 1142 | HD3 | PRO | X | 74 | 64.744 | 46.384 | 34.130 | 0.00 | 0.00 |
| ATOM | 1143 | CG  | PRO | X | 74 | 65.628 | 46.916 | 32.198 | 0.00 | 0.00 |
| ATOM | 1144 | HG2 | PRO | X | 74 | 66.286 | 46.383 | 31.511 | 0.00 | 0.00 |
| ATOM | 1145 | HG3 | PRO | X | 74 | 66.144 | 47.801 | 32.569 | 0.00 | 0.00 |
| ATOM | 1146 | CB  | PRO | X | 74 | 64.281 | 47.259 | 31.454 | 0.00 | 0.00 |
| ATOM | 1147 | HB2 | PRO | X | 74 | 64.418 | 47.691 | 30.462 | 0.00 | 0.00 |
| ATOM | 1148 | HB3 | PRO | X | 74 | 63.871 | 48.019 | 32.119 | 0.00 | 0.00 |
| ATOM | 1149 | CA  | PRO | X | 74 | 63.595 | 45.882 | 31.368 | 0.00 | 0.00 |
| ATOM | 1150 | HA  | PRO | X | 74 | 62.532 | 46.108 | 31.457 | 0.00 | 0.00 |
| ATOM | 1151 | C   | PRO | X | 74 | 63.887 | 45.045 | 30.114 | 0.00 | 0.00 |
| ATOM | 1152 | O   | PRO | X | 74 | 65.027 | 44.725 | 29.799 | 0.00 | 0.00 |
| ATOM | 1153 | N   | GLY | X | 75 | 62.779 | 44.670 | 29.436 | 0.00 | 0.00 |
| ATOM | 1154 | H   | GLY | X | 75 | 61.918 | 44.779 | 29.953 | 0.00 | 0.00 |
| ATOM | 1155 | CA  | GLY | X | 75 | 62.767 | 43.927 | 28.180 | 0.00 | 0.00 |
| ATOM | 1156 | HA2 | GLY | X | 75 | 61.910 | 44.284 | 27.610 | 0.00 | 0.00 |
| ATOM | 1157 | HA3 | GLY | X | 75 | 63.581 | 44.243 | 27.527 | 0.00 | 0.00 |
| ATOM | 1158 | C   | GLY | X | 75 | 62.574 | 42.405 | 28.338 | 0.00 | 0.00 |
| ATOM | 1159 | O   | GLY | X | 75 | 62.806 | 41.649 | 27.343 | 0.00 | 0.00 |
| ATOM | 1160 | N   | PHE | X | 76 | 62.273 | 41.892 | 29.550 | 0.00 | 0.00 |
| ATOM | 1161 | H   | PHE | X | 76 | 62.095 | 42.462 | 30.365 | 0.00 | 0.00 |
| ATOM | 1162 | CA  | PHE | X | 76 | 62.026 | 40.412 | 29.800 | 0.00 | 0.00 |
| ATOM | 1163 | HA  | PHE | X | 76 | 62.510 | 39.870 | 28.988 | 0.00 | 0.00 |
| ATOM | 1164 | CB  | PHE | X | 76 | 62.705 | 40.131 | 31.152 | 0.00 | 0.00 |
| ATOM | 1165 | HB2 | PHE | X | 76 | 63.737 | 39.928 | 30.866 | 0.00 | 0.00 |
| ATOM | 1166 | HB3 | PHE | X | 76 | 62.670 | 41.027 | 31.770 | 0.00 | 0.00 |
| ATOM | 1167 | CG  | PHE | X | 76 | 62.113 | 39.028 | 32.006 | 0.00 | 0.00 |
| ATOM | 1168 | CD1 | PHE | X | 76 | 62.172 | 37.709 | 31.587 | 0.00 | 0.00 |
| ATOM | 1169 | HD1 | PHE | X | 76 | 62.609 | 37.450 | 30.634 | 0.00 | 0.00 |
| ATOM | 1170 | CE1 | PHE | X | 76 | 61.566 | 36.728 | 32.427 | 0.00 | 0.00 |
| ATOM | 1171 | HE1 | PHE | X | 76 | 61.568 | 35.673 | 32.196 | 0.00 | 0.00 |
| ATOM | 1172 | CZ  | PHE | X | 76 | 60.899 | 37.121 | 33.653 | 0.00 | 0.00 |
| ATOM | 1173 | HZ  | PHE | X | 76 | 60.473 | 36.444 | 34.379 | 0.00 | 0.00 |
| ATOM | 1174 | CE2 | PHE | X | 76 | 60.912 | 38.459 | 34.033 | 0.00 | 0.00 |
| ATOM | 1175 | HE2 | PHE | X | 76 | 60.410 | 38.820 | 34.919 | 0.00 | 0.00 |
| ATOM | 1176 | CD2 | PHE | X | 76 | 61.465 | 39.438 | 33.158 | 0.00 | 0.00 |
| ATOM | 1177 | HD2 | PHE | X | 76 | 61.219 | 40.454 | 33.429 | 0.00 | 0.00 |
| ATOM | 1178 | C   | PHE | X | 76 | 60.534 | 40.113 | 29.739 | 0.00 | 0.00 |
| ATOM | 1179 | O   | PHE | X | 76 | 59.655 | 40.860 | 30.199 | 0.00 | 0.00 |
| ATOM | 1180 | N   | GLU | X | 77 | 60.207 | 38.898 | 29.343 | 0.00 | 0.00 |
| ATOM | 1181 | H   | GLU | X | 77 | 60.978 | 38.322 | 29.037 | 0.00 | 0.00 |
| ATOM | 1182 | CA  | GLU | X | 77 | 58.847 | 38.383 | 29.040 | 0.00 | 0.00 |
| ATOM | 1183 | HA  | GLU | X | 77 | 58.520 | 38.940 | 28.162 | 0.00 | 0.00 |
| ATOM | 1184 | CB  | GLU | X | 77 | 58.936 | 36.874 | 28.683 | 0.00 | 0.00 |
| ATOM | 1185 | HB2 | GLU | X | 77 | 59.617 | 36.367 | 29.367 | 0.00 | 0.00 |
| ATOM | 1186 | HB3 | GLU | X | 77 | 58.025 | 36.391 | 29.035 | 0.00 | 0.00 |
| ATOM | 1187 | CG  | GLU | X | 77 | 59.316 | 36.506 | 27.266 | 0.00 | 0.00 |
| ATOM | 1188 | HG2 | GLU | X | 77 | 59.643 | 35.475 | 27.137 | 0.00 | 0.00 |
| ATOM | 1189 | HG3 | GLU | X | 77 | 58.430 | 36.721 | 26.669 | 0.00 | 0.00 |
| ATOM | 1190 | CD  | GLU | X | 77 | 60.531 | 37.269 | 26.767 | 0.00 | 0.00 |
| ATOM | 1191 | OE1 | GLU | X | 77 | 60.453 | 38.031 | 25.748 | 0.00 | 0.00 |
| ATOM | 1192 | OE2 | GLU | X | 77 | 61.568 | 37.193 | 27.438 | 0.00 | 0.00 |
| ATOM | 1193 | C   | GLU | X | 77 | 57.808 | 38.525 | 30.142 | 0.00 | 0.00 |
| ATOM | 1194 | O   | GLU | X | 77 | 56.655 | 38.923 | 29.854 | 0.00 | 0.00 |
| ATOM | 1195 | N   | GLY | X | 78 | 58.197 | 38.174 | 31.373 | 0.00 | 0.00 |
| ATOM | 1196 | H   | GLY | X | 78 | 59.179 | 37.976 | 31.496 | 0.00 | 0.00 |
| ATOM | 1197 | CA  | GLY | X | 78 | 57.313 | 38.160 | 32.530 | 0.00 | 0.00 |

|      |      |      |     |   |    |        |        |        |      |      |
|------|------|------|-----|---|----|--------|--------|--------|------|------|
| ATOM | 1198 | HA2  | GLY | X | 78 | 56.441 | 37.520 | 32.397 | 0.00 | 0.00 |
| ATOM | 1199 | HA3  | GLY | X | 78 | 57.912 | 37.779 | 33.358 | 0.00 | 0.00 |
| ATOM | 1200 | C    | GLY | X | 78 | 56.895 | 39.590 | 33.038 | 0.00 | 0.00 |
| ATOM | 1201 | O    | GLY | X | 78 | 56.023 | 39.635 | 33.891 | 0.00 | 0.00 |
| ATOM | 1202 | N    | THR | X | 79 | 57.541 | 40.619 | 32.479 | 0.00 | 0.00 |
| ATOM | 1203 | H    | THR | X | 79 | 58.313 | 40.404 | 31.865 | 0.00 | 0.00 |
| ATOM | 1204 | CA   | THR | X | 79 | 57.265 | 42.021 | 32.876 | 0.00 | 0.00 |
| ATOM | 1205 | HA   | THR | X | 79 | 56.563 | 42.081 | 33.708 | 0.00 | 0.00 |
| ATOM | 1206 | CB   | THR | X | 79 | 58.526 | 42.738 | 33.466 | 0.00 | 0.00 |
| ATOM | 1207 | HB   | THR | X | 79 | 58.270 | 43.788 | 33.611 | 0.00 | 0.00 |
| ATOM | 1208 | CG2  | THR | X | 79 | 58.804 | 42.046 | 34.909 | 0.00 | 0.00 |
| ATOM | 1209 | HG21 | THR | X | 79 | 59.830 | 42.322 | 35.152 | 0.00 | 0.00 |
| ATOM | 1210 | HG22 | THR | X | 79 | 58.715 | 40.961 | 34.860 | 0.00 | 0.00 |
| ATOM | 1211 | HG23 | THR | X | 79 | 58.148 | 42.556 | 35.614 | 0.00 | 0.00 |
| ATOM | 1212 | OG1  | THR | X | 79 | 59.647 | 42.602 | 32.683 | 0.00 | 0.00 |
| ATOM | 1213 | HG1  | THR | X | 79 | 60.422 | 43.007 | 33.079 | 0.00 | 0.00 |
| ATOM | 1214 | C    | THR | X | 79 | 56.667 | 42.791 | 31.644 | 0.00 | 0.00 |
| ATOM | 1215 | O    | THR | X | 79 | 55.558 | 43.324 | 31.822 | 0.00 | 0.00 |
| ATOM | 1216 | N    | GLU | X | 80 | 57.317 | 42.736 | 30.528 | 0.00 | 0.00 |
| ATOM | 1217 | H    | GLU | X | 80 | 58.239 | 42.328 | 30.465 | 0.00 | 0.00 |
| ATOM | 1218 | CA   | GLU | X | 80 | 56.876 | 43.416 | 29.292 | 0.00 | 0.00 |
| ATOM | 1219 | HA   | GLU | X | 80 | 56.713 | 44.477 | 29.482 | 0.00 | 0.00 |
| ATOM | 1220 | CB   | GLU | X | 80 | 57.910 | 43.312 | 28.143 | 0.00 | 0.00 |
| ATOM | 1221 | HB2  | GLU | X | 80 | 57.758 | 44.176 | 27.495 | 0.00 | 0.00 |
| ATOM | 1222 | HB3  | GLU | X | 80 | 58.861 | 43.290 | 28.677 | 0.00 | 0.00 |
| ATOM | 1223 | CG   | GLU | X | 80 | 57.772 | 42.048 | 27.295 | 0.00 | 0.00 |
| ATOM | 1224 | HG2  | GLU | X | 80 | 57.849 | 41.208 | 27.985 | 0.00 | 0.00 |
| ATOM | 1225 | HG3  | GLU | X | 80 | 56.756 | 41.995 | 26.903 | 0.00 | 0.00 |
| ATOM | 1226 | CD   | GLU | X | 80 | 58.708 | 42.044 | 26.127 | 0.00 | 0.00 |
| ATOM | 1227 | OE1  | GLU | X | 80 | 59.330 | 40.999 | 25.755 | 0.00 | 0.00 |
| ATOM | 1228 | OE2  | GLU | X | 80 | 58.969 | 43.116 | 25.567 | 0.00 | 0.00 |
| ATOM | 1229 | C    | GLU | X | 80 | 55.432 | 43.088 | 28.865 | 0.00 | 0.00 |
| ATOM | 1230 | O    | GLU | X | 80 | 54.776 | 43.974 | 28.316 | 0.00 | 0.00 |
| ATOM | 1231 | N    | MET | X | 81 | 54.830 | 41.922 | 29.185 | 0.00 | 0.00 |
| ATOM | 1232 | H    | MET | X | 81 | 55.386 | 41.171 | 29.569 | 0.00 | 0.00 |
| ATOM | 1233 | CA   | MET | X | 81 | 53.402 | 41.673 | 28.832 | 0.00 | 0.00 |
| ATOM | 1234 | HA   | MET | X | 81 | 53.249 | 41.976 | 27.796 | 0.00 | 0.00 |
| ATOM | 1235 | CB   | MET | X | 81 | 53.072 | 40.150 | 28.955 | 0.00 | 0.00 |
| ATOM | 1236 | HB2  | MET | X | 81 | 52.032 | 39.946 | 28.703 | 0.00 | 0.00 |
| ATOM | 1237 | HB3  | MET | X | 81 | 53.565 | 39.531 | 28.206 | 0.00 | 0.00 |
| ATOM | 1238 | CG   | MET | X | 81 | 53.314 | 39.690 | 30.432 | 0.00 | 0.00 |
| ATOM | 1239 | HG2  | MET | X | 81 | 54.375 | 39.768 | 30.671 | 0.00 | 0.00 |
| ATOM | 1240 | HG3  | MET | X | 81 | 52.677 | 40.330 | 31.043 | 0.00 | 0.00 |
| ATOM | 1241 | SD   | MET | X | 81 | 52.790 | 37.893 | 30.678 | 0.00 | 0.00 |
| ATOM | 1242 | CE   | MET | X | 81 | 50.960 | 38.033 | 30.435 | 0.00 | 0.00 |
| ATOM | 1243 | HE1  | MET | X | 81 | 50.437 | 37.079 | 30.512 | 0.00 | 0.00 |
| ATOM | 1244 | HE2  | MET | X | 81 | 50.551 | 38.795 | 31.098 | 0.00 | 0.00 |
| ATOM | 1245 | HE3  | MET | X | 81 | 50.658 | 38.384 | 29.448 | 0.00 | 0.00 |
| ATOM | 1246 | C    | MET | X | 81 | 52.452 | 42.528 | 29.638 | 0.00 | 0.00 |
| ATOM | 1247 | O    | MET | X | 81 | 51.300 | 42.643 | 29.192 | 0.00 | 0.00 |
| ATOM | 1248 | N    | TRP | X | 82 | 52.853 | 42.998 | 30.798 | 0.00 | 0.00 |
| ATOM | 1249 | H    | TRP | X | 82 | 53.753 | 42.710 | 31.154 | 0.00 | 0.00 |
| ATOM | 1250 | CA   | TRP | X | 82 | 52.012 | 43.903 | 31.602 | 0.00 | 0.00 |
| ATOM | 1251 | HA   | TRP | X | 82 | 50.993 | 43.591 | 31.372 | 0.00 | 0.00 |
| ATOM | 1252 | CB   | TRP | X | 82 | 52.227 | 43.581 | 33.125 | 0.00 | 0.00 |
| ATOM | 1253 | HB2  | TRP | X | 82 | 53.131 | 44.138 | 33.373 | 0.00 | 0.00 |
| ATOM | 1254 | HB3  | TRP | X | 82 | 51.404 | 44.022 | 33.686 | 0.00 | 0.00 |
| ATOM | 1255 | CG   | TRP | X | 82 | 52.302 | 42.134 | 33.481 | 0.00 | 0.00 |
| ATOM | 1256 | CD1  | TRP | X | 82 | 53.379 | 41.421 | 33.819 | 0.00 | 0.00 |
| ATOM | 1257 | HD1  | TRP | X | 82 | 54.366 | 41.860 | 33.817 | 0.00 | 0.00 |
| ATOM | 1258 | NE1  | TRP | X | 82 | 53.065 | 40.116 | 34.018 | 0.00 | 0.00 |
| ATOM | 1259 | HE1  | TRP | X | 82 | 53.745 | 39.395 | 34.212 | 0.00 | 0.00 |
| ATOM | 1260 | CE2  | TRP | X | 82 | 51.701 | 39.934 | 33.799 | 0.00 | 0.00 |
| ATOM | 1261 | CZ2  | TRP | X | 82 | 50.893 | 38.779 | 33.807 | 0.00 | 0.00 |
| ATOM | 1262 | HZ2  | TRP | X | 82 | 51.376 | 37.843 | 34.044 | 0.00 | 0.00 |
| ATOM | 1263 | CH2  | TRP | X | 82 | 49.554 | 38.944 | 33.581 | 0.00 | 0.00 |
| ATOM | 1264 | HH2  | TRP | X | 82 | 48.850 | 38.132 | 33.687 | 0.00 | 0.00 |

|      |      |      |     |   |    |        |        |        |      |      |
|------|------|------|-----|---|----|--------|--------|--------|------|------|
| ATOM | 1265 | CZ3  | TRP | X | 82 | 48.985 | 40.203 | 33.213 | 0.00 | 0.00 |
| ATOM | 1266 | HZ3  | TRP | X | 82 | 47.932 | 40.302 | 32.997 | 0.00 | 0.00 |
| ATOM | 1267 | CE3  | TRP | X | 82 | 49.819 | 41.315 | 33.143 | 0.00 | 0.00 |
| ATOM | 1268 | HE3  | TRP | X | 82 | 49.441 | 42.277 | 32.830 | 0.00 | 0.00 |
| ATOM | 1269 | CD2  | TRP | X | 82 | 51.202 | 41.225 | 33.507 | 0.00 | 0.00 |
| ATOM | 1270 | C    | TRP | X | 82 | 52.249 | 45.400 | 31.241 | 0.00 | 0.00 |
| ATOM | 1271 | O    | TRP | X | 82 | 51.374 | 46.294 | 31.590 | 0.00 | 0.00 |
| ATOM | 1272 | N    | ASN | X | 83 | 53.329 | 45.705 | 30.540 | 0.00 | 0.00 |
| ATOM | 1273 | H    | ASN | X | 83 | 53.655 | 44.935 | 29.974 | 0.00 | 0.00 |
| ATOM | 1274 | CA   | ASN | X | 83 | 53.574 | 47.065 | 30.014 | 0.00 | 0.00 |
| ATOM | 1275 | HA   | ASN | X | 83 | 53.352 | 47.857 | 30.730 | 0.00 | 0.00 |
| ATOM | 1276 | CB   | ASN | X | 83 | 55.114 | 47.104 | 29.566 | 0.00 | 0.00 |
| ATOM | 1277 | HB2  | ASN | X | 83 | 55.799 | 46.628 | 30.268 | 0.00 | 0.00 |
| ATOM | 1278 | HB3  | ASN | X | 83 | 55.212 | 46.489 | 28.672 | 0.00 | 0.00 |
| ATOM | 1279 | CG   | ASN | X | 83 | 55.695 | 48.486 | 29.367 | 0.00 | 0.00 |
| ATOM | 1280 | OD1  | ASN | X | 83 | 54.994 | 49.402 | 29.009 | 0.00 | 0.00 |
| ATOM | 1281 | ND2  | ASN | X | 83 | 56.943 | 48.676 | 29.690 | 0.00 | 0.00 |
| ATOM | 1282 | HD21 | ASN | X | 83 | 57.326 | 49.601 | 29.559 | 0.00 | 0.00 |
| ATOM | 1283 | HD22 | ASN | X | 83 | 57.578 | 47.964 | 30.021 | 0.00 | 0.00 |
| ATOM | 1284 | C    | ASN | X | 83 | 52.671 | 47.379 | 28.776 | 0.00 | 0.00 |
| ATOM | 1285 | O    | ASN | X | 83 | 52.571 | 46.606 | 27.859 | 0.00 | 0.00 |
| ATOM | 1286 | N    | PRO | X | 84 | 51.999 | 48.583 | 28.719 | 0.00 | 0.00 |
| ATOM | 1287 | CD   | PRO | X | 84 | 51.824 | 49.506 | 29.863 | 0.00 | 0.00 |
| ATOM | 1288 | HD2  | PRO | X | 84 | 52.754 | 50.045 | 30.044 | 0.00 | 0.00 |
| ATOM | 1289 | HD3  | PRO | X | 84 | 51.596 | 48.863 | 30.713 | 0.00 | 0.00 |
| ATOM | 1290 | CG   | PRO | X | 84 | 50.624 | 50.373 | 29.522 | 0.00 | 0.00 |
| ATOM | 1291 | HG2  | PRO | X | 84 | 51.017 | 51.355 | 29.259 | 0.00 | 0.00 |
| ATOM | 1292 | HG3  | PRO | X | 84 | 49.970 | 50.335 | 30.394 | 0.00 | 0.00 |
| ATOM | 1293 | CB   | PRO | X | 84 | 49.975 | 49.693 | 28.382 | 0.00 | 0.00 |
| ATOM | 1294 | HB2  | PRO | X | 84 | 49.596 | 50.468 | 27.716 | 0.00 | 0.00 |
| ATOM | 1295 | HB3  | PRO | X | 84 | 49.160 | 49.031 | 28.675 | 0.00 | 0.00 |
| ATOM | 1296 | CA   | PRO | X | 84 | 51.115 | 48.931 | 27.693 | 0.00 | 0.00 |
| ATOM | 1297 | HA   | PRO | X | 84 | 50.565 | 48.089 | 27.273 | 0.00 | 0.00 |
| ATOM | 1298 | C    | PRO | X | 84 | 51.870 | 49.624 | 26.507 | 0.00 | 0.00 |
| ATOM | 1299 | O    | PRO | X | 84 | 52.947 | 50.197 | 26.715 | 0.00 | 0.00 |
| ATOM | 1300 | N    | ASN | X | 85 | 51.395 | 49.509 | 25.257 | 0.00 | 0.00 |
| ATOM | 1301 | H    | ASN | X | 85 | 50.562 | 48.939 | 25.228 | 0.00 | 0.00 |
| ATOM | 1302 | CA   | ASN | X | 85 | 51.904 | 50.150 | 24.054 | 0.00 | 0.00 |
| ATOM | 1303 | HA   | ASN | X | 85 | 52.964 | 50.393 | 24.123 | 0.00 | 0.00 |
| ATOM | 1304 | CB   | ASN | X | 85 | 51.707 | 49.196 | 22.844 | 0.00 | 0.00 |
| ATOM | 1305 | HB2  | ASN | X | 85 | 52.123 | 49.659 | 21.949 | 0.00 | 0.00 |
| ATOM | 1306 | HB3  | ASN | X | 85 | 52.274 | 48.285 | 23.038 | 0.00 | 0.00 |
| ATOM | 1307 | CG   | ASN | X | 85 | 50.301 | 48.764 | 22.515 | 0.00 | 0.00 |
| ATOM | 1308 | OD1  | ASN | X | 85 | 49.343 | 49.115 | 23.190 | 0.00 | 0.00 |
| ATOM | 1309 | ND2  | ASN | X | 85 | 50.206 | 47.984 | 21.508 | 0.00 | 0.00 |
| ATOM | 1310 | HD21 | ASN | X | 85 | 49.294 | 47.689 | 21.188 | 0.00 | 0.00 |
| ATOM | 1311 | HD22 | ASN | X | 85 | 50.989 | 47.757 | 20.912 | 0.00 | 0.00 |
| ATOM | 1312 | C    | ASN | X | 85 | 51.257 | 51.504 | 23.713 | 0.00 | 0.00 |
| ATOM | 1313 | O    | ASN | X | 85 | 51.231 | 51.909 | 22.509 | 0.00 | 0.00 |
| ATOM | 1314 | N    | ARG | X | 86 | 50.560 | 52.107 | 24.679 | 0.00 | 0.00 |
| ATOM | 1315 | H    | ARG | X | 86 | 50.757 | 51.698 | 25.581 | 0.00 | 0.00 |
| ATOM | 1316 | CA   | ARG | X | 86 | 49.715 | 53.260 | 24.568 | 0.00 | 0.00 |
| ATOM | 1317 | HA   | ARG | X | 86 | 49.721 | 53.522 | 23.510 | 0.00 | 0.00 |
| ATOM | 1318 | CB   | ARG | X | 86 | 48.272 | 52.978 | 25.108 | 0.00 | 0.00 |
| ATOM | 1319 | HB2  | ARG | X | 86 | 48.346 | 52.682 | 26.155 | 0.00 | 0.00 |
| ATOM | 1320 | HB3  | ARG | X | 86 | 47.515 | 53.749 | 24.967 | 0.00 | 0.00 |
| ATOM | 1321 | CG   | ARG | X | 86 | 47.688 | 51.806 | 24.368 | 0.00 | 0.00 |
| ATOM | 1322 | HG2  | ARG | X | 86 | 48.338 | 50.954 | 24.564 | 0.00 | 0.00 |
| ATOM | 1323 | HG3  | ARG | X | 86 | 46.723 | 51.524 | 24.788 | 0.00 | 0.00 |
| ATOM | 1324 | CD   | ARG | X | 86 | 47.296 | 52.093 | 22.906 | 0.00 | 0.00 |
| ATOM | 1325 | HD2  | ARG | X | 86 | 46.468 | 52.789 | 22.774 | 0.00 | 0.00 |
| ATOM | 1326 | HD3  | ARG | X | 86 | 48.201 | 52.436 | 22.404 | 0.00 | 0.00 |
| ATOM | 1327 | NE   | ARG | X | 86 | 47.058 | 50.831 | 22.185 | 0.00 | 0.00 |
| ATOM | 1328 | HE   | ARG | X | 86 | 47.640 | 50.102 | 22.574 | 0.00 | 0.00 |
| ATOM | 1329 | CZ   | ARG | X | 86 | 46.476 | 50.620 | 20.998 | 0.00 | 0.00 |
| ATOM | 1330 | NH1  | ARG | X | 86 | 45.930 | 51.647 | 20.286 | 0.00 | 0.00 |
| ATOM | 1331 | HH11 | ARG | X | 86 | 45.601 | 52.508 | 20.698 | 0.00 | 0.00 |

|      |      |      |     |   |    |        |        |        |      |      |
|------|------|------|-----|---|----|--------|--------|--------|------|------|
| ATOM | 1332 | HH12 | ARG | X | 86 | 45.360 | 51.399 | 19.490 | 0.00 | 0.00 |
| ATOM | 1333 | NH2  | ARG | X | 86 | 46.437 | 49.413 | 20.499 | 0.00 | 0.00 |
| ATOM | 1334 | HH21 | ARG | X | 86 | 46.900 | 48.695 | 21.036 | 0.00 | 0.00 |
| ATOM | 1335 | HH22 | ARG | X | 86 | 45.964 | 49.217 | 19.628 | 0.00 | 0.00 |
| ATOM | 1336 | C    | ARG | X | 86 | 50.391 | 54.423 | 25.331 | 0.00 | 0.00 |
| ATOM | 1337 | O    | ARG | X | 86 | 51.377 | 54.326 | 26.121 | 0.00 | 0.00 |
| ATOM | 1338 | N    | GLU | X | 87 | 49.709 | 55.539 | 25.147 | 0.00 | 0.00 |
| ATOM | 1339 | H    | GLU | X | 87 | 49.062 | 55.639 | 24.378 | 0.00 | 0.00 |
| ATOM | 1340 | CA   | GLU | X | 87 | 50.195 | 56.750 | 25.734 | 0.00 | 0.00 |
| ATOM | 1341 | HA   | GLU | X | 87 | 51.279 | 56.864 | 25.738 | 0.00 | 0.00 |
| ATOM | 1342 | CB   | GLU | X | 87 | 49.632 | 57.986 | 25.052 | 0.00 | 0.00 |
| ATOM | 1343 | HB2  | GLU | X | 87 | 49.980 | 57.944 | 24.020 | 0.00 | 0.00 |
| ATOM | 1344 | HB3  | GLU | X | 87 | 48.549 | 58.068 | 24.966 | 0.00 | 0.00 |
| ATOM | 1345 | CG   | GLU | X | 87 | 50.236 | 59.335 | 25.525 | 0.00 | 0.00 |
| ATOM | 1346 | HG2  | GLU | X | 87 | 49.683 | 59.681 | 26.398 | 0.00 | 0.00 |
| ATOM | 1347 | HG3  | GLU | X | 87 | 51.263 | 59.221 | 25.873 | 0.00 | 0.00 |
| ATOM | 1348 | CD   | GLU | X | 87 | 50.065 | 60.384 | 24.430 | 0.00 | 0.00 |
| ATOM | 1349 | OE1  | GLU | X | 87 | 48.963 | 60.511 | 23.754 | 0.00 | 0.00 |
| ATOM | 1350 | OE2  | GLU | X | 87 | 51.014 | 61.108 | 24.103 | 0.00 | 0.00 |
| ATOM | 1351 | C    | GLU | X | 87 | 49.723 | 56.831 | 27.197 | 0.00 | 0.00 |
| ATOM | 1352 | O    | GLU | X | 87 | 48.524 | 56.574 | 27.525 | 0.00 | 0.00 |
| ATOM | 1353 | N    | LEU | X | 88 | 50.635 | 57.021 | 28.125 | 0.00 | 0.00 |
| ATOM | 1354 | H    | LEU | X | 88 | 51.624 | 56.997 | 27.921 | 0.00 | 0.00 |
| ATOM | 1355 | CA   | LEU | X | 88 | 50.323 | 57.355 | 29.503 | 0.00 | 0.00 |
| ATOM | 1356 | HA   | LEU | X | 88 | 49.477 | 56.764 | 29.855 | 0.00 | 0.00 |
| ATOM | 1357 | CB   | LEU | X | 88 | 51.521 | 57.131 | 30.434 | 0.00 | 0.00 |
| ATOM | 1358 | HB2  | LEU | X | 88 | 52.431 | 57.679 | 30.186 | 0.00 | 0.00 |
| ATOM | 1359 | HB3  | LEU | X | 88 | 51.239 | 57.445 | 31.439 | 0.00 | 0.00 |
| ATOM | 1360 | CG   | LEU | X | 88 | 52.102 | 55.688 | 30.688 | 0.00 | 0.00 |
| ATOM | 1361 | HG   | LEU | X | 88 | 52.543 | 55.307 | 29.767 | 0.00 | 0.00 |
| ATOM | 1362 | CD1  | LEU | X | 88 | 53.303 | 55.836 | 31.663 | 0.00 | 0.00 |
| ATOM | 1363 | HD11 | LEU | X | 88 | 54.105 | 56.399 | 31.187 | 0.00 | 0.00 |
| ATOM | 1364 | HD12 | LEU | X | 88 | 53.752 | 54.858 | 31.840 | 0.00 | 0.00 |
| ATOM | 1365 | HD13 | LEU | X | 88 | 53.149 | 56.288 | 32.642 | 0.00 | 0.00 |
| ATOM | 1366 | CD2  | LEU | X | 88 | 51.081 | 54.657 | 31.212 | 0.00 | 0.00 |
| ATOM | 1367 | HD21 | LEU | X | 88 | 50.371 | 55.052 | 31.938 | 0.00 | 0.00 |
| ATOM | 1368 | HD22 | LEU | X | 88 | 50.565 | 54.261 | 30.338 | 0.00 | 0.00 |
| ATOM | 1369 | HD23 | LEU | X | 88 | 51.528 | 53.818 | 31.745 | 0.00 | 0.00 |
| ATOM | 1370 | C    | LEU | X | 88 | 49.851 | 58.835 | 29.579 | 0.00 | 0.00 |
| ATOM | 1371 | O    | LEU | X | 88 | 50.647 | 59.737 | 29.330 | 0.00 | 0.00 |
| ATOM | 1372 | N    | SER | X | 89 | 48.616 | 59.135 | 29.939 | 0.00 | 0.00 |
| ATOM | 1373 | H    | SER | X | 89 | 48.111 | 58.415 | 30.436 | 0.00 | 0.00 |
| ATOM | 1374 | CA   | SER | X | 89 | 48.081 | 60.514 | 29.883 | 0.00 | 0.00 |
| ATOM | 1375 | HA   | SER | X | 89 | 48.853 | 61.282 | 29.921 | 0.00 | 0.00 |
| ATOM | 1376 | CB   | SER | X | 89 | 47.367 | 60.550 | 28.530 | 0.00 | 0.00 |
| ATOM | 1377 | HB2  | SER | X | 89 | 48.101 | 60.527 | 27.725 | 0.00 | 0.00 |
| ATOM | 1378 | HB3  | SER | X | 89 | 46.715 | 59.686 | 28.394 | 0.00 | 0.00 |
| ATOM | 1379 | OG   | SER | X | 89 | 46.604 | 61.741 | 28.191 | 0.00 | 0.00 |
| ATOM | 1380 | HG   | SER | X | 89 | 46.019 | 61.464 | 27.482 | 0.00 | 0.00 |
| ATOM | 1381 | C    | SER | X | 89 | 47.082 | 60.762 | 31.043 | 0.00 | 0.00 |
| ATOM | 1382 | O    | SER | X | 89 | 46.981 | 59.915 | 31.945 | 0.00 | 0.00 |
| ATOM | 1383 | N    | GLU | X | 90 | 46.455 | 61.981 | 31.124 | 0.00 | 0.00 |
| ATOM | 1384 | H    | GLU | X | 90 | 46.455 | 62.680 | 30.395 | 0.00 | 0.00 |
| ATOM | 1385 | CA   | GLU | X | 90 | 45.457 | 62.308 | 32.089 | 0.00 | 0.00 |
| ATOM | 1386 | HA   | GLU | X | 90 | 45.327 | 61.560 | 32.871 | 0.00 | 0.00 |
| ATOM | 1387 | CB   | GLU | X | 90 | 45.885 | 63.631 | 32.740 | 0.00 | 0.00 |
| ATOM | 1388 | HB2  | GLU | X | 90 | 45.965 | 64.462 | 32.039 | 0.00 | 0.00 |
| ATOM | 1389 | HB3  | GLU | X | 90 | 45.163 | 63.813 | 33.535 | 0.00 | 0.00 |
| ATOM | 1390 | CG   | GLU | X | 90 | 47.230 | 63.725 | 33.434 | 0.00 | 0.00 |
| ATOM | 1391 | HG2  | GLU | X | 90 | 47.496 | 62.779 | 33.906 | 0.00 | 0.00 |
| ATOM | 1392 | HG3  | GLU | X | 90 | 48.047 | 63.832 | 32.720 | 0.00 | 0.00 |
| ATOM | 1393 | CD   | GLU | X | 90 | 47.349 | 64.978 | 34.415 | 0.00 | 0.00 |
| ATOM | 1394 | OE1  | GLU | X | 90 | 46.907 | 64.824 | 35.594 | 0.00 | 0.00 |
| ATOM | 1395 | OE2  | GLU | X | 90 | 47.890 | 65.988 | 33.921 | 0.00 | 0.00 |
| ATOM | 1396 | C    | GLU | X | 90 | 44.135 | 62.425 | 31.282 | 0.00 | 0.00 |
| ATOM | 1397 | O    | GLU | X | 90 | 43.149 | 62.591 | 31.980 | 0.00 | 0.00 |
| ATOM | 1398 | N    | ASP | X | 91 | 44.041 | 62.154 | 29.980 | 0.00 | 0.00 |

|      |      |      |     |   |    |        |        |        |      |      |
|------|------|------|-----|---|----|--------|--------|--------|------|------|
| ATOM | 1399 | H    | ASP | X | 91 | 44.883 | 62.060 | 29.429 | 0.00 | 0.00 |
| ATOM | 1400 | CA   | ASP | X | 91 | 42.729 | 62.093 | 29.348 | 0.00 | 0.00 |
| ATOM | 1401 | HA   | ASP | X | 91 | 42.056 | 62.631 | 30.015 | 0.00 | 0.00 |
| ATOM | 1402 | CB   | ASP | X | 91 | 42.825 | 62.674 | 27.862 | 0.00 | 0.00 |
| ATOM | 1403 | HB2  | ASP | X | 91 | 41.858 | 63.133 | 27.654 | 0.00 | 0.00 |
| ATOM | 1404 | HB3  | ASP | X | 91 | 43.578 | 63.452 | 27.736 | 0.00 | 0.00 |
| ATOM | 1405 | CG   | ASP | X | 91 | 43.242 | 61.644 | 26.776 | 0.00 | 0.00 |
| ATOM | 1406 | OD1  | ASP | X | 91 | 44.362 | 61.104 | 26.896 | 0.00 | 0.00 |
| ATOM | 1407 | OD2  | ASP | X | 91 | 42.360 | 61.397 | 25.931 | 0.00 | 0.00 |
| ATOM | 1408 | C    | ASP | X | 91 | 42.140 | 60.715 | 29.400 | 0.00 | 0.00 |
| ATOM | 1409 | O    | ASP | X | 91 | 41.021 | 60.451 | 29.031 | 0.00 | 0.00 |
| ATOM | 1410 | N    | CYX | X | 92 | 42.830 | 59.777 | 30.053 | 0.00 | 0.00 |
| ATOM | 1411 | H    | CYX | X | 92 | 43.614 | 60.101 | 30.602 | 0.00 | 0.00 |
| ATOM | 1412 | CA   | CYX | X | 92 | 42.728 | 58.298 | 29.983 | 0.00 | 0.00 |
| ATOM | 1413 | HA   | CYX | X | 92 | 43.027 | 57.916 | 29.008 | 0.00 | 0.00 |
| ATOM | 1414 | CB   | CYX | X | 92 | 43.830 | 57.871 | 30.958 | 0.00 | 0.00 |
| ATOM | 1415 | HB2  | CYX | X | 92 | 44.022 | 56.831 | 30.692 | 0.00 | 0.00 |
| ATOM | 1416 | HB3  | CYX | X | 92 | 44.754 | 58.386 | 30.697 | 0.00 | 0.00 |
| ATOM | 1417 | SG   | CYX | X | 92 | 43.509 | 58.204 | 32.764 | 0.00 | 0.00 |
| ATOM | 1418 | C    | CYX | X | 92 | 41.421 | 57.569 | 30.254 | 0.00 | 0.00 |
| ATOM | 1419 | O    | CYX | X | 92 | 41.452 | 56.313 | 30.143 | 0.00 | 0.00 |
| ATOM | 1420 | N    | LEU | X | 93 | 40.320 | 58.144 | 30.753 | 0.00 | 0.00 |
| ATOM | 1421 | H    | LEU | X | 93 | 40.332 | 59.139 | 30.929 | 0.00 | 0.00 |
| ATOM | 1422 | CA   | LEU | X | 93 | 39.169 | 57.374 | 31.110 | 0.00 | 0.00 |
| ATOM | 1423 | HA   | LEU | X | 93 | 39.434 | 56.513 | 31.724 | 0.00 | 0.00 |
| ATOM | 1424 | CB   | LEU | X | 93 | 38.340 | 58.318 | 32.082 | 0.00 | 0.00 |
| ATOM | 1425 | HB2  | LEU | X | 93 | 38.108 | 59.239 | 31.547 | 0.00 | 0.00 |
| ATOM | 1426 | HB3  | LEU | X | 93 | 37.448 | 57.729 | 32.298 | 0.00 | 0.00 |
| ATOM | 1427 | CG   | LEU | X | 93 | 38.999 | 58.608 | 33.438 | 0.00 | 0.00 |
| ATOM | 1428 | HG   | LEU | X | 93 | 39.783 | 59.326 | 33.197 | 0.00 | 0.00 |
| ATOM | 1429 | CD1  | LEU | X | 93 | 37.949 | 59.313 | 34.408 | 0.00 | 0.00 |
| ATOM | 1430 | HD11 | LEU | X | 93 | 37.189 | 58.554 | 34.592 | 0.00 | 0.00 |
| ATOM | 1431 | HD12 | LEU | X | 93 | 37.610 | 60.202 | 33.875 | 0.00 | 0.00 |
| ATOM | 1432 | HD13 | LEU | X | 93 | 38.400 | 59.574 | 35.366 | 0.00 | 0.00 |
| ATOM | 1433 | CD2  | LEU | X | 93 | 39.705 | 57.403 | 34.142 | 0.00 | 0.00 |
| ATOM | 1434 | HD21 | LEU | X | 93 | 39.073 | 56.523 | 34.017 | 0.00 | 0.00 |
| ATOM | 1435 | HD22 | LEU | X | 93 | 40.663 | 57.177 | 33.675 | 0.00 | 0.00 |
| ATOM | 1436 | HD23 | LEU | X | 93 | 39.940 | 57.603 | 35.188 | 0.00 | 0.00 |
| ATOM | 1437 | C    | LEU | X | 93 | 38.439 | 56.894 | 29.814 | 0.00 | 0.00 |
| ATOM | 1438 | O    | LEU | X | 93 | 37.680 | 57.653 | 29.178 | 0.00 | 0.00 |
| ATOM | 1439 | N    | TYR | X | 94 | 38.652 | 55.597 | 29.398 | 0.00 | 0.00 |
| ATOM | 1440 | H    | TYR | X | 94 | 39.357 | 55.080 | 29.904 | 0.00 | 0.00 |
| ATOM | 1441 | CA   | TYR | X | 94 | 38.015 | 54.967 | 28.211 | 0.00 | 0.00 |
| ATOM | 1442 | HA   | TYR | X | 94 | 37.249 | 55.613 | 27.783 | 0.00 | 0.00 |
| ATOM | 1443 | CB   | TYR | X | 94 | 39.037 | 54.861 | 27.069 | 0.00 | 0.00 |
| ATOM | 1444 | HB2  | TYR | X | 94 | 39.897 | 54.318 | 27.460 | 0.00 | 0.00 |
| ATOM | 1445 | HB3  | TYR | X | 94 | 38.639 | 54.173 | 26.324 | 0.00 | 0.00 |
| ATOM | 1446 | CG   | TYR | X | 94 | 39.402 | 56.240 | 26.550 | 0.00 | 0.00 |
| ATOM | 1447 | CD1  | TYR | X | 94 | 38.544 | 56.883 | 25.643 | 0.00 | 0.00 |
| ATOM | 1448 | HD1  | TYR | X | 94 | 37.634 | 56.417 | 25.295 | 0.00 | 0.00 |
| ATOM | 1449 | CE1  | TYR | X | 94 | 38.883 | 58.094 | 25.053 | 0.00 | 0.00 |
| ATOM | 1450 | HE1  | TYR | X | 94 | 38.339 | 58.544 | 24.236 | 0.00 | 0.00 |
| ATOM | 1451 | CZ   | TYR | X | 94 | 40.141 | 58.640 | 25.276 | 0.00 | 0.00 |
| ATOM | 1452 | OH   | TYR | X | 94 | 40.564 | 59.662 | 24.554 | 0.00 | 0.00 |
| ATOM | 1453 | HH   | TYR | X | 94 | 41.347 | 60.125 | 24.862 | 0.00 | 0.00 |
| ATOM | 1454 | CE2  | TYR | X | 94 | 40.919 | 58.086 | 26.326 | 0.00 | 0.00 |
| ATOM | 1455 | HE2  | TYR | X | 94 | 41.797 | 58.630 | 26.642 | 0.00 | 0.00 |
| ATOM | 1456 | CD2  | TYR | X | 94 | 40.595 | 56.833 | 26.904 | 0.00 | 0.00 |
| ATOM | 1457 | HD2  | TYR | X | 94 | 41.344 | 56.352 | 27.516 | 0.00 | 0.00 |
| ATOM | 1458 | C    | TYR | X | 94 | 37.373 | 53.652 | 28.628 | 0.00 | 0.00 |
| ATOM | 1459 | O    | TYR | X | 94 | 37.919 | 52.949 | 29.409 | 0.00 | 0.00 |
| ATOM | 1460 | N    | LEU | X | 95 | 36.225 | 53.381 | 28.114 | 0.00 | 0.00 |
| ATOM | 1461 | H    | LEU | X | 95 | 35.734 | 54.113 | 27.621 | 0.00 | 0.00 |
| ATOM | 1462 | CA   | LEU | X | 95 | 35.534 | 52.083 | 28.118 | 0.00 | 0.00 |
| ATOM | 1463 | HA   | LEU | X | 95 | 35.972 | 51.502 | 28.930 | 0.00 | 0.00 |
| ATOM | 1464 | CB   | LEU | X | 95 | 34.066 | 52.500 | 28.622 | 0.00 | 0.00 |
| ATOM | 1465 | HB2  | LEU | X | 95 | 34.149 | 52.982 | 29.596 | 0.00 | 0.00 |



|      |      |      |     |   |    |        |        |        |      |      |
|------|------|------|-----|---|----|--------|--------|--------|------|------|
| ATOM | 1466 | HB3  | LEU | X | 95 | 33.621 | 53.122 | 27.845 | 0.00 | 0.00 |
| ATOM | 1467 | CG   | LEU | X | 95 | 33.229 | 51.252 | 28.883 | 0.00 | 0.00 |
| ATOM | 1468 | HG   | LEU | X | 95 | 33.927 | 50.453 | 29.135 | 0.00 | 0.00 |
| ATOM | 1469 | CD1  | LEU | X | 95 | 32.231 | 51.531 | 30.067 | 0.00 | 0.00 |
| ATOM | 1470 | HD11 | LEU | X | 95 | 31.452 | 52.196 | 29.694 | 0.00 | 0.00 |
| ATOM | 1471 | HD12 | LEU | X | 95 | 32.798 | 51.949 | 30.899 | 0.00 | 0.00 |
| ATOM | 1472 | HD13 | LEU | X | 95 | 31.758 | 50.610 | 30.407 | 0.00 | 0.00 |
| ATOM | 1473 | CD2  | LEU | X | 95 | 32.439 | 50.834 | 27.657 | 0.00 | 0.00 |
| ATOM | 1474 | HD21 | LEU | X | 95 | 31.638 | 51.545 | 27.453 | 0.00 | 0.00 |
| ATOM | 1475 | HD22 | LEU | X | 95 | 33.127 | 50.756 | 26.815 | 0.00 | 0.00 |
| ATOM | 1476 | HD23 | LEU | X | 95 | 32.124 | 49.841 | 27.976 | 0.00 | 0.00 |
| ATOM | 1477 | C    | LEU | X | 95 | 35.674 | 51.282 | 26.770 | 0.00 | 0.00 |
| ATOM | 1478 | O    | LEU | X | 95 | 35.916 | 51.926 | 25.727 | 0.00 | 0.00 |
| ATOM | 1479 | N    | ASN | X | 96 | 35.478 | 49.935 | 26.809 | 0.00 | 0.00 |
| ATOM | 1480 | H    | ASN | X | 96 | 35.632 | 49.540 | 27.726 | 0.00 | 0.00 |
| ATOM | 1481 | CA   | ASN | X | 96 | 35.679 | 48.959 | 25.683 | 0.00 | 0.00 |
| ATOM | 1482 | HA   | ASN | X | 96 | 35.655 | 49.427 | 24.699 | 0.00 | 0.00 |
| ATOM | 1483 | CB   | ASN | X | 96 | 37.087 | 48.360 | 25.927 | 0.00 | 0.00 |
| ATOM | 1484 | HB2  | ASN | X | 96 | 37.043 | 47.717 | 26.806 | 0.00 | 0.00 |
| ATOM | 1485 | HB3  | ASN | X | 96 | 37.343 | 47.697 | 25.101 | 0.00 | 0.00 |
| ATOM | 1486 | CG   | ASN | X | 96 | 38.180 | 49.419 | 26.081 | 0.00 | 0.00 |
| ATOM | 1487 | OD1  | ASN | X | 96 | 38.575 | 50.110 | 25.184 | 0.00 | 0.00 |
| ATOM | 1488 | ND2  | ASN | X | 96 | 38.642 | 49.695 | 27.273 | 0.00 | 0.00 |
| ATOM | 1489 | HD21 | ASN | X | 96 | 39.163 | 50.547 | 27.426 | 0.00 | 0.00 |
| ATOM | 1490 | HD22 | ASN | X | 96 | 38.299 | 49.138 | 28.042 | 0.00 | 0.00 |
| ATOM | 1491 | C    | ASN | X | 96 | 34.727 | 47.744 | 25.793 | 0.00 | 0.00 |
| ATOM | 1492 | O    | ASN | X | 96 | 34.523 | 47.273 | 26.923 | 0.00 | 0.00 |
| ATOM | 1493 | N    | VAL | X | 97 | 34.154 | 47.343 | 24.676 | 0.00 | 0.00 |
| ATOM | 1494 | H    | VAL | X | 97 | 34.418 | 47.882 | 23.865 | 0.00 | 0.00 |
| ATOM | 1495 | CA   | VAL | X | 97 | 33.200 | 46.213 | 24.647 | 0.00 | 0.00 |
| ATOM | 1496 | HA   | VAL | X | 97 | 33.381 | 45.712 | 25.598 | 0.00 | 0.00 |
| ATOM | 1497 | CB   | VAL | X | 97 | 31.706 | 46.741 | 24.541 | 0.00 | 0.00 |
| ATOM | 1498 | HB   | VAL | X | 97 | 31.445 | 47.049 | 23.529 | 0.00 | 0.00 |
| ATOM | 1499 | CG1  | VAL | X | 97 | 30.705 | 45.661 | 25.063 | 0.00 | 0.00 |
| ATOM | 1500 | HG11 | VAL | X | 97 | 31.163 | 45.254 | 25.964 | 0.00 | 0.00 |
| ATOM | 1501 | HG12 | VAL | X | 97 | 29.709 | 46.080 | 25.205 | 0.00 | 0.00 |
| ATOM | 1502 | HG13 | VAL | X | 97 | 30.499 | 44.924 | 24.287 | 0.00 | 0.00 |
| ATOM | 1503 | CG2  | VAL | X | 97 | 31.283 | 47.963 | 25.410 | 0.00 | 0.00 |
| ATOM | 1504 | HG21 | VAL | X | 97 | 31.207 | 47.746 | 26.476 | 0.00 | 0.00 |
| ATOM | 1505 | HG22 | VAL | X | 97 | 30.298 | 48.298 | 25.085 | 0.00 | 0.00 |
| ATOM | 1506 | HG23 | VAL | X | 97 | 32.024 | 48.738 | 25.212 | 0.00 | 0.00 |
| ATOM | 1507 | C    | VAL | X | 97 | 33.487 | 45.322 | 23.461 | 0.00 | 0.00 |
| ATOM | 1508 | O    | VAL | X | 97 | 33.755 | 45.674 | 22.283 | 0.00 | 0.00 |
| ATOM | 1509 | N    | TRP | X | 98 | 33.597 | 44.043 | 23.776 | 0.00 | 0.00 |
| ATOM | 1510 | H    | TRP | X | 98 | 33.468 | 43.797 | 24.748 | 0.00 | 0.00 |
| ATOM | 1511 | CA   | TRP | X | 98 | 33.700 | 42.936 | 22.812 | 0.00 | 0.00 |
| ATOM | 1512 | HA   | TRP | X | 98 | 33.999 | 43.195 | 21.796 | 0.00 | 0.00 |
| ATOM | 1513 | CB   | TRP | X | 98 | 34.734 | 41.951 | 23.278 | 0.00 | 0.00 |
| ATOM | 1514 | HB2  | TRP | X | 98 | 34.474 | 41.689 | 24.303 | 0.00 | 0.00 |
| ATOM | 1515 | HB3  | TRP | X | 98 | 34.757 | 41.093 | 22.606 | 0.00 | 0.00 |
| ATOM | 1516 | CG   | TRP | X | 98 | 36.142 | 42.412 | 23.305 | 0.00 | 0.00 |
| ATOM | 1517 | CD1  | TRP | X | 98 | 37.072 | 42.056 | 22.345 | 0.00 | 0.00 |
| ATOM | 1518 | HD1  | TRP | X | 98 | 36.850 | 41.330 | 21.577 | 0.00 | 0.00 |
| ATOM | 1519 | NE1  | TRP | X | 98 | 38.255 | 42.655 | 22.625 | 0.00 | 0.00 |
| ATOM | 1520 | HE1  | TRP | X | 98 | 39.098 | 42.456 | 22.105 | 0.00 | 0.00 |
| ATOM | 1521 | CE2  | TRP | X | 98 | 38.189 | 43.455 | 23.778 | 0.00 | 0.00 |
| ATOM | 1522 | CZ2  | TRP | X | 98 | 39.156 | 44.185 | 24.456 | 0.00 | 0.00 |
| ATOM | 1523 | HZ2  | TRP | X | 98 | 40.177 | 44.224 | 24.107 | 0.00 | 0.00 |
| ATOM | 1524 | CH2  | TRP | X | 98 | 38.803 | 44.846 | 25.701 | 0.00 | 0.00 |
| ATOM | 1525 | HH2  | TRP | X | 98 | 39.596 | 45.379 | 26.204 | 0.00 | 0.00 |
| ATOM | 1526 | CZ3  | TRP | X | 98 | 37.526 | 44.713 | 26.126 | 0.00 | 0.00 |
| ATOM | 1527 | HZ3  | TRP | X | 98 | 37.162 | 45.219 | 27.008 | 0.00 | 0.00 |
| ATOM | 1528 | CE3  | TRP | X | 98 | 36.521 | 43.978 | 25.377 | 0.00 | 0.00 |
| ATOM | 1529 | HE3  | TRP | X | 98 | 35.509 | 43.955 | 25.754 | 0.00 | 0.00 |
| ATOM | 1530 | CD2  | TRP | X | 98 | 36.857 | 43.289 | 24.192 | 0.00 | 0.00 |
| ATOM | 1531 | C    | TRP | X | 98 | 32.331 | 42.222 | 22.683 | 0.00 | 0.00 |
| ATOM | 1532 | O    | TRP | X | 98 | 31.756 | 41.889 | 23.794 | 0.00 | 0.00 |

|      |      |      |     |   |     |        |        |        |      |      |
|------|------|------|-----|---|-----|--------|--------|--------|------|------|
| ATOM | 1533 | N    | THR | X | 99  | 31.700 | 42.051 | 21.479 | 0.00 | 0.00 |
| ATOM | 1534 | H    | THR | X | 99  | 32.045 | 42.462 | 20.623 | 0.00 | 0.00 |
| ATOM | 1535 | CA   | THR | X | 99  | 30.392 | 41.531 | 21.184 | 0.00 | 0.00 |
| ATOM | 1536 | HA   | THR | X | 99  | 30.125 | 40.841 | 21.984 | 0.00 | 0.00 |
| ATOM | 1537 | CB   | THR | X | 99  | 29.268 | 42.645 | 21.281 | 0.00 | 0.00 |
| ATOM | 1538 | HB   | THR | X | 99  | 29.270 | 43.060 | 22.289 | 0.00 | 0.00 |
| ATOM | 1539 | CG2  | THR | X | 99  | 29.578 | 43.798 | 20.359 | 0.00 | 0.00 |
| ATOM | 1540 | HG21 | THR | X | 99  | 28.815 | 44.556 | 20.541 | 0.00 | 0.00 |
| ATOM | 1541 | HG22 | THR | X | 99  | 29.505 | 43.695 | 19.276 | 0.00 | 0.00 |
| ATOM | 1542 | HG23 | THR | X | 99  | 30.560 | 44.234 | 20.542 | 0.00 | 0.00 |
| ATOM | 1543 | OG1  | THR | X | 99  | 27.986 | 42.064 | 20.953 | 0.00 | 0.00 |
| ATOM | 1544 | HG1  | THR | X | 99  | 27.324 | 42.726 | 21.165 | 0.00 | 0.00 |
| ATOM | 1545 | C    | THR | X | 99  | 30.374 | 40.737 | 19.848 | 0.00 | 0.00 |
| ATOM | 1546 | O    | THR | X | 99  | 30.977 | 41.281 | 18.864 | 0.00 | 0.00 |
| ATOM | 1547 | N    | PRO | X | 100 | 29.610 | 39.616 | 19.688 | 0.00 | 0.00 |
| ATOM | 1548 | CD   | PRO | X | 100 | 29.032 | 38.810 | 20.782 | 0.00 | 0.00 |
| ATOM | 1549 | HD2  | PRO | X | 100 | 28.395 | 39.474 | 21.366 | 0.00 | 0.00 |
| ATOM | 1550 | HD3  | PRO | X | 100 | 29.797 | 38.383 | 21.431 | 0.00 | 0.00 |
| ATOM | 1551 | CG   | PRO | X | 100 | 28.129 | 37.710 | 20.149 | 0.00 | 0.00 |
| ATOM | 1552 | HG2  | PRO | X | 100 | 27.160 | 38.190 | 20.013 | 0.00 | 0.00 |
| ATOM | 1553 | HG3  | PRO | X | 100 | 28.110 | 36.771 | 20.702 | 0.00 | 0.00 |
| ATOM | 1554 | CB   | PRO | X | 100 | 28.834 | 37.405 | 18.861 | 0.00 | 0.00 |
| ATOM | 1555 | HB2  | PRO | X | 100 | 28.098 | 37.018 | 18.157 | 0.00 | 0.00 |
| ATOM | 1556 | HB3  | PRO | X | 100 | 29.575 | 36.641 | 19.098 | 0.00 | 0.00 |
| ATOM | 1557 | CA   | PRO | X | 100 | 29.501 | 38.756 | 18.439 | 0.00 | 0.00 |
| ATOM | 1558 | HA   | PRO | X | 100 | 30.550 | 38.627 | 18.173 | 0.00 | 0.00 |
| ATOM | 1559 | C    | PRO | X | 100 | 28.838 | 39.395 | 17.212 | 0.00 | 0.00 |
| ATOM | 1560 | O    | PRO | X | 100 | 28.134 | 40.389 | 17.384 | 0.00 | 0.00 |
| ATOM | 1561 | N    | TYR | X | 101 | 29.219 | 38.917 | 15.971 | 0.00 | 0.00 |
| ATOM | 1562 | H    | TYR | X | 101 | 29.783 | 38.082 | 16.040 | 0.00 | 0.00 |
| ATOM | 1563 | CA   | TYR | X | 101 | 28.848 | 39.570 | 14.693 | 0.00 | 0.00 |
| ATOM | 1564 | HA   | TYR | X | 101 | 28.453 | 40.570 | 14.872 | 0.00 | 0.00 |
| ATOM | 1565 | CB   | TYR | X | 101 | 30.180 | 39.714 | 14.028 | 0.00 | 0.00 |
| ATOM | 1566 | HB2  | TYR | X | 101 | 30.937 | 40.042 | 14.740 | 0.00 | 0.00 |
| ATOM | 1567 | HB3  | TYR | X | 101 | 30.335 | 38.720 | 13.607 | 0.00 | 0.00 |
| ATOM | 1568 | CG   | TYR | X | 101 | 30.090 | 40.684 | 12.911 | 0.00 | 0.00 |
| ATOM | 1569 | CD1  | TYR | X | 101 | 30.005 | 40.160 | 11.620 | 0.00 | 0.00 |
| ATOM | 1570 | HD1  | TYR | X | 101 | 30.159 | 39.117 | 11.385 | 0.00 | 0.00 |
| ATOM | 1571 | CE1  | TYR | X | 101 | 29.763 | 40.975 | 10.514 | 0.00 | 0.00 |
| ATOM | 1572 | HE1  | TYR | X | 101 | 29.747 | 40.479 | 9.554  | 0.00 | 0.00 |
| ATOM | 1573 | CZ   | TYR | X | 101 | 29.609 | 42.393 | 10.720 | 0.00 | 0.00 |
| ATOM | 1574 | OH   | TYR | X | 101 | 29.260 | 43.123 | 9.658  | 0.00 | 0.00 |
| ATOM | 1575 | HH   | TYR | X | 101 | 28.927 | 42.568 | 8.949  | 0.00 | 0.00 |
| ATOM | 1576 | CE2  | TYR | X | 101 | 29.620 | 42.912 | 12.046 | 0.00 | 0.00 |
| ATOM | 1577 | HE2  | TYR | X | 101 | 29.450 | 43.968 | 12.195 | 0.00 | 0.00 |
| ATOM | 1578 | CD2  | TYR | X | 101 | 29.854 | 42.019 | 13.123 | 0.00 | 0.00 |
| ATOM | 1579 | HD2  | TYR | X | 101 | 29.914 | 42.353 | 14.148 | 0.00 | 0.00 |
| ATOM | 1580 | C    | TYR | X | 101 | 27.836 | 38.806 | 13.845 | 0.00 | 0.00 |
| ATOM | 1581 | O    | TYR | X | 101 | 28.166 | 37.663 | 13.576 | 0.00 | 0.00 |
| ATOM | 1582 | N    | PRO | X | 102 | 26.729 | 39.364 | 13.391 | 0.00 | 0.00 |
| ATOM | 1583 | CD   | PRO | X | 102 | 25.968 | 38.792 | 12.296 | 0.00 | 0.00 |
| ATOM | 1584 | HD2  | PRO | X | 102 | 25.884 | 37.706 | 12.302 | 0.00 | 0.00 |
| ATOM | 1585 | HD3  | PRO | X | 102 | 26.416 | 39.037 | 11.333 | 0.00 | 0.00 |
| ATOM | 1586 | CG   | PRO | X | 102 | 24.594 | 39.478 | 12.351 | 0.00 | 0.00 |
| ATOM | 1587 | HG2  | PRO | X | 102 | 23.887 | 38.928 | 12.972 | 0.00 | 0.00 |
| ATOM | 1588 | HG3  | PRO | X | 102 | 24.067 | 39.587 | 11.403 | 0.00 | 0.00 |
| ATOM | 1589 | CB   | PRO | X | 102 | 25.041 | 40.815 | 12.939 | 0.00 | 0.00 |
| ATOM | 1590 | HB2  | PRO | X | 102 | 24.233 | 41.282 | 13.503 | 0.00 | 0.00 |
| ATOM | 1591 | HB3  | PRO | X | 102 | 25.298 | 41.356 | 12.028 | 0.00 | 0.00 |
| ATOM | 1592 | CA   | PRO | X | 102 | 26.142 | 40.635 | 13.891 | 0.00 | 0.00 |
| ATOM | 1593 | HA   | PRO | X | 102 | 26.849 | 41.460 | 13.806 | 0.00 | 0.00 |
| ATOM | 1594 | C    | PRO | X | 102 | 25.556 | 40.415 | 15.370 | 0.00 | 0.00 |
| ATOM | 1595 | O    | PRO | X | 102 | 25.318 | 39.314 | 15.875 | 0.00 | 0.00 |
| ATOM | 1596 | N    | ARG | X | 103 | 25.275 | 41.539 | 16.074 | 0.00 | 0.00 |
| ATOM | 1597 | H    | ARG | X | 103 | 25.600 | 42.405 | 15.669 | 0.00 | 0.00 |
| ATOM | 1598 | CA   | ARG | X | 103 | 24.821 | 41.703 | 17.449 | 0.00 | 0.00 |
| ATOM | 1599 | HA   | ARG | X | 103 | 25.741 | 41.595 | 18.024 | 0.00 | 0.00 |

|      |      |      |     |   |     |        |        |        |      |      |
|------|------|------|-----|---|-----|--------|--------|--------|------|------|
| ATOM | 1600 | CB   | ARG | X | 103 | 24.168 | 43.045 | 17.666 | 0.00 | 0.00 |
| ATOM | 1601 | HB2  | ARG | X | 103 | 23.796 | 43.347 | 16.687 | 0.00 | 0.00 |
| ATOM | 1602 | HB3  | ARG | X | 103 | 23.403 | 42.906 | 18.431 | 0.00 | 0.00 |
| ATOM | 1603 | CG   | ARG | X | 103 | 25.070 | 44.175 | 18.242 | 0.00 | 0.00 |
| ATOM | 1604 | HG2  | ARG | X | 103 | 25.448 | 43.878 | 19.220 | 0.00 | 0.00 |
| ATOM | 1605 | HG3  | ARG | X | 103 | 25.838 | 44.408 | 17.504 | 0.00 | 0.00 |
| ATOM | 1606 | CD   | ARG | X | 103 | 24.259 | 45.451 | 18.515 | 0.00 | 0.00 |
| ATOM | 1607 | HD2  | ARG | X | 103 | 23.363 | 45.250 | 19.103 | 0.00 | 0.00 |
| ATOM | 1608 | HD3  | ARG | X | 103 | 24.930 | 46.163 | 18.996 | 0.00 | 0.00 |
| ATOM | 1609 | NE   | ARG | X | 103 | 23.836 | 46.009 | 17.255 | 0.00 | 0.00 |
| ATOM | 1610 | HE   | ARG | X | 103 | 24.223 | 45.647 | 16.396 | 0.00 | 0.00 |
| ATOM | 1611 | CZ   | ARG | X | 103 | 22.866 | 46.843 | 17.143 | 0.00 | 0.00 |
| ATOM | 1612 | NH1  | ARG | X | 103 | 22.090 | 47.153 | 18.133 | 0.00 | 0.00 |
| ATOM | 1613 | HH11 | ARG | X | 103 | 22.448 | 46.962 | 19.058 | 0.00 | 0.00 |
| ATOM | 1614 | HH12 | ARG | X | 103 | 21.358 | 47.847 | 18.087 | 0.00 | 0.00 |
| ATOM | 1615 | NH2  | ARG | X | 103 | 22.534 | 47.478 | 16.021 | 0.00 | 0.00 |
| ATOM | 1616 | HH21 | ARG | X | 103 | 23.239 | 47.632 | 15.315 | 0.00 | 0.00 |
| ATOM | 1617 | HH22 | ARG | X | 103 | 21.770 | 48.138 | 16.013 | 0.00 | 0.00 |
| ATOM | 1618 | C    | ARG | X | 103 | 23.895 | 40.595 | 17.843 | 0.00 | 0.00 |
| ATOM | 1619 | O    | ARG | X | 103 | 22.977 | 40.393 | 17.031 | 0.00 | 0.00 |
| ATOM | 1620 | N    | PRO | X | 104 | 24.107 | 39.932 | 19.010 | 0.00 | 0.00 |
| ATOM | 1621 | CD   | PRO | X | 104 | 24.951 | 40.250 | 20.174 | 0.00 | 0.00 |
| ATOM | 1622 | HD2  | PRO | X | 104 | 24.778 | 41.262 | 20.542 | 0.00 | 0.00 |
| ATOM | 1623 | HD3  | PRO | X | 104 | 25.966 | 40.051 | 19.832 | 0.00 | 0.00 |
| ATOM | 1624 | CG   | PRO | X | 104 | 24.575 | 39.257 | 21.270 | 0.00 | 0.00 |
| ATOM | 1625 | HG2  | PRO | X | 104 | 23.761 | 39.724 | 21.825 | 0.00 | 0.00 |
| ATOM | 1626 | HG3  | PRO | X | 104 | 25.354 | 38.882 | 21.934 | 0.00 | 0.00 |
| ATOM | 1627 | CB   | PRO | X | 104 | 23.946 | 38.084 | 20.540 | 0.00 | 0.00 |
| ATOM | 1628 | HB2  | PRO | X | 104 | 23.179 | 37.618 | 21.160 | 0.00 | 0.00 |
| ATOM | 1629 | HB3  | PRO | X | 104 | 24.764 | 37.474 | 20.157 | 0.00 | 0.00 |
| ATOM | 1630 | CA   | PRO | X | 104 | 23.291 | 38.739 | 19.310 | 0.00 | 0.00 |
| ATOM | 1631 | HA   | PRO | X | 104 | 23.402 | 37.980 | 18.535 | 0.00 | 0.00 |
| ATOM | 1632 | C    | PRO | X | 104 | 21.805 | 39.036 | 19.575 | 0.00 | 0.00 |
| ATOM | 1633 | O    | PRO | X | 104 | 21.470 | 39.910 | 20.387 | 0.00 | 0.00 |
| ATOM | 1634 | N    | THR | X | 105 | 20.906 | 38.251 | 18.988 | 0.00 | 0.00 |
| ATOM | 1635 | H    | THR | X | 105 | 21.207 | 37.774 | 18.151 | 0.00 | 0.00 |
| ATOM | 1636 | CA   | THR | X | 105 | 19.458 | 38.284 | 19.304 | 0.00 | 0.00 |
| ATOM | 1637 | HA   | THR | X | 105 | 19.253 | 39.328 | 19.540 | 0.00 | 0.00 |
| ATOM | 1638 | CB   | THR | X | 105 | 18.504 | 37.999 | 18.072 | 0.00 | 0.00 |
| ATOM | 1639 | HB   | THR | X | 105 | 17.499 | 37.914 | 18.484 | 0.00 | 0.00 |
| ATOM | 1640 | CG2  | THR | X | 105 | 18.429 | 39.128 | 17.058 | 0.00 | 0.00 |
| ATOM | 1641 | HG21 | THR | X | 105 | 17.722 | 38.689 | 16.353 | 0.00 | 0.00 |
| ATOM | 1642 | HG22 | THR | X | 105 | 19.392 | 39.329 | 16.589 | 0.00 | 0.00 |
| ATOM | 1643 | HG23 | THR | X | 105 | 18.110 | 40.066 | 17.513 | 0.00 | 0.00 |
| ATOM | 1644 | OG1  | THR | X | 105 | 18.979 | 36.953 | 17.306 | 0.00 | 0.00 |
| ATOM | 1645 | HG1  | THR | X | 105 | 18.534 | 36.169 | 17.636 | 0.00 | 0.00 |
| ATOM | 1646 | C    | THR | X | 105 | 19.103 | 37.318 | 20.495 | 0.00 | 0.00 |
| ATOM | 1647 | O    | THR | X | 105 | 18.156 | 37.572 | 21.231 | 0.00 | 0.00 |
| ATOM | 1648 | N    | SER | X | 106 | 19.798 | 36.149 | 20.538 | 0.00 | 0.00 |
| ATOM | 1649 | H    | SER | X | 106 | 20.565 | 36.049 | 19.888 | 0.00 | 0.00 |
| ATOM | 1650 | CA   | SER | X | 106 | 19.668 | 35.211 | 21.753 | 0.00 | 0.00 |
| ATOM | 1651 | HA   | SER | X | 106 | 18.618 | 35.041 | 21.991 | 0.00 | 0.00 |
| ATOM | 1652 | CB   | SER | X | 106 | 20.356 | 33.974 | 21.302 | 0.00 | 0.00 |
| ATOM | 1653 | HB2  | SER | X | 106 | 21.362 | 34.144 | 20.919 | 0.00 | 0.00 |
| ATOM | 1654 | HB3  | SER | X | 106 | 20.453 | 33.296 | 22.149 | 0.00 | 0.00 |
| ATOM | 1655 | OG   | SER | X | 106 | 19.602 | 33.368 | 20.277 | 0.00 | 0.00 |
| ATOM | 1656 | HG   | SER | X | 106 | 19.844 | 32.448 | 20.153 | 0.00 | 0.00 |
| ATOM | 1657 | C    | SER | X | 106 | 20.329 | 35.783 | 23.046 | 0.00 | 0.00 |
| ATOM | 1658 | O    | SER | X | 106 | 21.421 | 36.340 | 22.989 | 0.00 | 0.00 |
| ATOM | 1659 | N    | PRO | X | 107 | 19.569 | 35.909 | 24.179 | 0.00 | 0.00 |
| ATOM | 1660 | CD   | PRO | X | 107 | 18.182 | 35.494 | 24.293 | 0.00 | 0.00 |
| ATOM | 1661 | HD2  | PRO | X | 107 | 18.060 | 34.420 | 24.155 | 0.00 | 0.00 |
| ATOM | 1662 | HD3  | PRO | X | 107 | 17.577 | 36.091 | 23.610 | 0.00 | 0.00 |
| ATOM | 1663 | CG   | PRO | X | 107 | 17.851 | 35.732 | 25.733 | 0.00 | 0.00 |
| ATOM | 1664 | HG2  | PRO | X | 107 | 17.988 | 34.833 | 26.334 | 0.00 | 0.00 |
| ATOM | 1665 | HG3  | PRO | X | 107 | 16.781 | 35.932 | 25.793 | 0.00 | 0.00 |
| ATOM | 1666 | CB   | PRO | X | 107 | 18.803 | 36.840 | 26.244 | 0.00 | 0.00 |

|      |      |      |     |   |     |        |        |        |      |      |
|------|------|------|-----|---|-----|--------|--------|--------|------|------|
| ATOM | 1667 | HB2  | PRO | X | 107 | 19.120 | 36.640 | 27.267 | 0.00 | 0.00 |
| ATOM | 1668 | HB3  | PRO | X | 107 | 18.428 | 37.858 | 26.139 | 0.00 | 0.00 |
| ATOM | 1669 | CA   | PRO | X | 107 | 19.986 | 36.652 | 25.276 | 0.00 | 0.00 |
| ATOM | 1670 | HA   | PRO | X | 107 | 20.291 | 37.631 | 24.908 | 0.00 | 0.00 |
| ATOM | 1671 | C    | PRO | X | 107 | 21.122 | 35.948 | 26.067 | 0.00 | 0.00 |
| ATOM | 1672 | O    | PRO | X | 107 | 21.247 | 34.710 | 26.037 | 0.00 | 0.00 |
| ATOM | 1673 | N    | THR | X | 108 | 21.900 | 36.699 | 26.795 | 0.00 | 0.00 |
| ATOM | 1674 | H    | THR | X | 108 | 21.725 | 37.686 | 26.919 | 0.00 | 0.00 |
| ATOM | 1675 | CA   | THR | X | 108 | 23.264 | 36.321 | 27.208 | 0.00 | 0.00 |
| ATOM | 1676 | HA   | THR | X | 108 | 23.399 | 35.343 | 27.669 | 0.00 | 0.00 |
| ATOM | 1677 | CB   | THR | X | 108 | 24.212 | 36.164 | 25.979 | 0.00 | 0.00 |
| ATOM | 1678 | HB   | THR | X | 108 | 23.812 | 35.457 | 25.252 | 0.00 | 0.00 |
| ATOM | 1679 | CG2  | THR | X | 108 | 24.396 | 37.467 | 25.273 | 0.00 | 0.00 |
| ATOM | 1680 | HG21 | THR | X | 108 | 24.727 | 38.239 | 25.967 | 0.00 | 0.00 |
| ATOM | 1681 | HG22 | THR | X | 108 | 23.436 | 37.692 | 24.808 | 0.00 | 0.00 |
| ATOM | 1682 | HG23 | THR | X | 108 | 25.084 | 37.384 | 24.432 | 0.00 | 0.00 |
| ATOM | 1683 | OG1  | THR | X | 108 | 25.421 | 35.750 | 26.417 | 0.00 | 0.00 |
| ATOM | 1684 | HG1  | THR | X | 108 | 26.101 | 35.958 | 25.772 | 0.00 | 0.00 |
| ATOM | 1685 | C    | THR | X | 108 | 23.746 | 37.410 | 28.247 | 0.00 | 0.00 |
| ATOM | 1686 | O    | THR | X | 108 | 23.285 | 38.595 | 28.199 | 0.00 | 0.00 |
| ATOM | 1687 | N    | PRO | X | 109 | 24.522 | 36.965 | 29.243 | 0.00 | 0.00 |
| ATOM | 1688 | CD   | PRO | X | 109 | 25.056 | 35.649 | 29.487 | 0.00 | 0.00 |
| ATOM | 1689 | HD2  | PRO | X | 109 | 25.725 | 35.169 | 28.773 | 0.00 | 0.00 |
| ATOM | 1690 | HD3  | PRO | X | 109 | 24.176 | 35.007 | 29.534 | 0.00 | 0.00 |
| ATOM | 1691 | CG   | PRO | X | 109 | 25.774 | 35.717 | 30.873 | 0.00 | 0.00 |
| ATOM | 1692 | HG2  | PRO | X | 109 | 26.848 | 35.749 | 30.684 | 0.00 | 0.00 |
| ATOM | 1693 | HG3  | PRO | X | 109 | 25.392 | 34.886 | 31.466 | 0.00 | 0.00 |
| ATOM | 1694 | CB   | PRO | X | 109 | 25.409 | 37.022 | 31.459 | 0.00 | 0.00 |
| ATOM | 1695 | HB2  | PRO | X | 109 | 26.249 | 37.518 | 31.946 | 0.00 | 0.00 |
| ATOM | 1696 | HB3  | PRO | X | 109 | 24.569 | 36.754 | 32.100 | 0.00 | 0.00 |
| ATOM | 1697 | CA   | PRO | X | 109 | 25.013 | 37.894 | 30.311 | 0.00 | 0.00 |
| ATOM | 1698 | HA   | PRO | X | 109 | 24.127 | 38.474 | 30.569 | 0.00 | 0.00 |
| ATOM | 1699 | C    | PRO | X | 109 | 26.090 | 38.851 | 29.759 | 0.00 | 0.00 |
| ATOM | 1700 | O    | PRO | X | 109 | 26.743 | 38.580 | 28.747 | 0.00 | 0.00 |
| ATOM | 1701 | N    | VAL | X | 110 | 26.243 | 39.913 | 30.569 | 0.00 | 0.00 |
| ATOM | 1702 | H    | VAL | X | 110 | 25.740 | 39.857 | 31.443 | 0.00 | 0.00 |
| ATOM | 1703 | CA   | VAL | X | 110 | 27.316 | 40.918 | 30.474 | 0.00 | 0.00 |
| ATOM | 1704 | HA   | VAL | X | 110 | 27.723 | 40.784 | 29.472 | 0.00 | 0.00 |
| ATOM | 1705 | CB   | VAL | X | 110 | 26.899 | 42.418 | 30.508 | 0.00 | 0.00 |
| ATOM | 1706 | HB   | VAL | X | 110 | 26.314 | 42.578 | 31.414 | 0.00 | 0.00 |
| ATOM | 1707 | CG1  | VAL | X | 110 | 28.093 | 43.347 | 30.696 | 0.00 | 0.00 |
| ATOM | 1708 | HG11 | VAL | X | 110 | 28.492 | 43.560 | 31.688 | 0.00 | 0.00 |
| ATOM | 1709 | HG12 | VAL | X | 110 | 28.849 | 43.247 | 29.918 | 0.00 | 0.00 |
| ATOM | 1710 | HG13 | VAL | X | 110 | 27.845 | 44.407 | 30.732 | 0.00 | 0.00 |
| ATOM | 1711 | CG2  | VAL | X | 110 | 26.144 | 42.793 | 29.229 | 0.00 | 0.00 |
| ATOM | 1712 | HG21 | VAL | X | 110 | 25.430 | 42.038 | 28.899 | 0.00 | 0.00 |
| ATOM | 1713 | HG22 | VAL | X | 110 | 26.897 | 42.931 | 28.453 | 0.00 | 0.00 |
| ATOM | 1714 | HG23 | VAL | X | 110 | 25.497 | 43.652 | 29.408 | 0.00 | 0.00 |
| ATOM | 1715 | C    | VAL | X | 110 | 28.397 | 40.774 | 31.514 | 0.00 | 0.00 |
| ATOM | 1716 | O    | VAL | X | 110 | 28.098 | 40.664 | 32.720 | 0.00 | 0.00 |
| ATOM | 1717 | N    | LEU | X | 111 | 29.652 | 40.804 | 31.094 | 0.00 | 0.00 |
| ATOM | 1718 | H    | LEU | X | 111 | 29.828 | 40.775 | 30.100 | 0.00 | 0.00 |
| ATOM | 1719 | CA   | LEU | X | 111 | 30.734 | 40.685 | 32.029 | 0.00 | 0.00 |
| ATOM | 1720 | HA   | LEU | X | 111 | 30.300 | 40.499 | 33.012 | 0.00 | 0.00 |
| ATOM | 1721 | CB   | LEU | X | 111 | 31.606 | 39.489 | 31.685 | 0.00 | 0.00 |
| ATOM | 1722 | HB2  | LEU | X | 111 | 31.617 | 39.413 | 30.597 | 0.00 | 0.00 |
| ATOM | 1723 | HB3  | LEU | X | 111 | 32.592 | 39.654 | 32.120 | 0.00 | 0.00 |
| ATOM | 1724 | CG   | LEU | X | 111 | 31.137 | 38.117 | 32.263 | 0.00 | 0.00 |
| ATOM | 1725 | HG   | LEU | X | 111 | 30.856 | 38.211 | 33.312 | 0.00 | 0.00 |
| ATOM | 1726 | CD1  | LEU | X | 111 | 29.904 | 37.495 | 31.435 | 0.00 | 0.00 |
| ATOM | 1727 | HD11 | LEU | X | 111 | 29.571 | 36.582 | 31.928 | 0.00 | 0.00 |
| ATOM | 1728 | HD12 | LEU | X | 111 | 30.247 | 37.264 | 30.426 | 0.00 | 0.00 |
| ATOM | 1729 | HD13 | LEU | X | 111 | 29.079 | 38.200 | 31.331 | 0.00 | 0.00 |
| ATOM | 1730 | CD2  | LEU | X | 111 | 32.394 | 37.298 | 32.062 | 0.00 | 0.00 |
| ATOM | 1731 | HD21 | LEU | X | 111 | 32.771 | 37.360 | 31.041 | 0.00 | 0.00 |
| ATOM | 1732 | HD22 | LEU | X | 111 | 33.134 | 37.540 | 32.825 | 0.00 | 0.00 |
| ATOM | 1733 | HD23 | LEU | X | 111 | 32.094 | 36.300 | 32.381 | 0.00 | 0.00 |

|      |      |      |     |   |     |        |        |        |      |      |
|------|------|------|-----|---|-----|--------|--------|--------|------|------|
| ATOM | 1734 | C    | LEU | X | 111 | 31.595 | 41.992 | 31.958 | 0.00 | 0.00 |
| ATOM | 1735 | O    | LEU | X | 111 | 32.161 | 42.273 | 30.894 | 0.00 | 0.00 |
| ATOM | 1736 | N    | VAL | X | 112 | 31.683 | 42.653 | 33.080 | 0.00 | 0.00 |
| ATOM | 1737 | H    | VAL | X | 112 | 31.354 | 42.260 | 33.950 | 0.00 | 0.00 |
| ATOM | 1738 | CA   | VAL | X | 112 | 32.590 | 43.817 | 33.232 | 0.00 | 0.00 |
| ATOM | 1739 | HA   | VAL | X | 112 | 32.762 | 44.268 | 32.255 | 0.00 | 0.00 |
| ATOM | 1740 | CB   | VAL | X | 112 | 31.922 | 44.917 | 34.056 | 0.00 | 0.00 |
| ATOM | 1741 | HB   | VAL | X | 112 | 31.872 | 44.627 | 35.106 | 0.00 | 0.00 |
| ATOM | 1742 | CG1  | VAL | X | 112 | 32.773 | 46.159 | 34.132 | 0.00 | 0.00 |
| ATOM | 1743 | HG11 | VAL | X | 112 | 33.720 | 45.922 | 34.617 | 0.00 | 0.00 |
| ATOM | 1744 | HG12 | VAL | X | 112 | 32.887 | 46.625 | 33.154 | 0.00 | 0.00 |
| ATOM | 1745 | HG13 | VAL | X | 112 | 32.389 | 46.840 | 34.891 | 0.00 | 0.00 |
| ATOM | 1746 | CG2  | VAL | X | 112 | 30.546 | 45.181 | 33.447 | 0.00 | 0.00 |
| ATOM | 1747 | HG21 | VAL | X | 112 | 30.081 | 46.073 | 33.866 | 0.00 | 0.00 |
| ATOM | 1748 | HG22 | VAL | X | 112 | 29.894 | 44.312 | 33.539 | 0.00 | 0.00 |
| ATOM | 1749 | HG23 | VAL | X | 112 | 30.626 | 45.451 | 32.394 | 0.00 | 0.00 |
| ATOM | 1750 | C    | VAL | X | 112 | 33.911 | 43.425 | 33.884 | 0.00 | 0.00 |
| ATOM | 1751 | O    | VAL | X | 112 | 33.743 | 42.831 | 34.943 | 0.00 | 0.00 |
| ATOM | 1752 | N    | TRP | X | 113 | 35.098 | 43.719 | 33.283 | 0.00 | 0.00 |
| ATOM | 1753 | H    | TRP | X | 113 | 35.073 | 44.292 | 32.452 | 0.00 | 0.00 |
| ATOM | 1754 | CA   | TRP | X | 113 | 36.433 | 43.309 | 33.706 | 0.00 | 0.00 |
| ATOM | 1755 | HA   | TRP | X | 113 | 36.422 | 42.512 | 34.450 | 0.00 | 0.00 |
| ATOM | 1756 | CB   | TRP | X | 113 | 37.287 | 42.922 | 32.470 | 0.00 | 0.00 |
| ATOM | 1757 | HB2  | TRP | X | 113 | 36.855 | 42.065 | 31.955 | 0.00 | 0.00 |
| ATOM | 1758 | HB3  | TRP | X | 113 | 37.164 | 43.757 | 31.779 | 0.00 | 0.00 |
| ATOM | 1759 | CG   | TRP | X | 113 | 38.740 | 42.583 | 32.851 | 0.00 | 0.00 |
| ATOM | 1760 | CD1  | TRP | X | 113 | 39.791 | 43.401 | 32.677 | 0.00 | 0.00 |
| ATOM | 1761 | HD1  | TRP | X | 113 | 39.700 | 44.369 | 32.206 | 0.00 | 0.00 |
| ATOM | 1762 | NE1  | TRP | X | 113 | 40.934 | 42.838 | 33.228 | 0.00 | 0.00 |
| ATOM | 1763 | HE1  | TRP | X | 113 | 41.868 | 43.203 | 33.104 | 0.00 | 0.00 |
| ATOM | 1764 | CE2  | TRP | X | 113 | 40.522 | 41.686 | 33.896 | 0.00 | 0.00 |
| ATOM | 1765 | CZ2  | TRP | X | 113 | 41.231 | 40.730 | 34.580 | 0.00 | 0.00 |
| ATOM | 1766 | HZ2  | TRP | X | 113 | 42.308 | 40.796 | 34.625 | 0.00 | 0.00 |
| ATOM | 1767 | CH2  | TRP | X | 113 | 40.663 | 39.542 | 35.028 | 0.00 | 0.00 |
| ATOM | 1768 | HH2  | TRP | X | 113 | 41.308 | 38.910 | 35.621 | 0.00 | 0.00 |
| ATOM | 1769 | CZ3  | TRP | X | 113 | 39.271 | 39.397 | 34.921 | 0.00 | 0.00 |
| ATOM | 1770 | HZ3  | TRP | X | 113 | 38.724 | 38.515 | 35.220 | 0.00 | 0.00 |
| ATOM | 1771 | CE3  | TRP | X | 113 | 38.515 | 40.331 | 34.190 | 0.00 | 0.00 |
| ATOM | 1772 | HE3  | TRP | X | 113 | 37.448 | 40.217 | 34.067 | 0.00 | 0.00 |
| ATOM | 1773 | CD2  | TRP | X | 113 | 39.147 | 41.426 | 33.613 | 0.00 | 0.00 |
| ATOM | 1774 | C    | TRP | X | 113 | 37.106 | 44.457 | 34.443 | 0.00 | 0.00 |
| ATOM | 1775 | O    | TRP | X | 113 | 37.035 | 45.612 | 33.994 | 0.00 | 0.00 |
| ATOM | 1776 | N    | ILE | X | 114 | 37.963 | 44.203 | 35.399 | 0.00 | 0.00 |
| ATOM | 1777 | H    | ILE | X | 114 | 37.925 | 43.248 | 35.725 | 0.00 | 0.00 |
| ATOM | 1778 | CA   | ILE | X | 114 | 38.549 | 45.146 | 36.326 | 0.00 | 0.00 |
| ATOM | 1779 | HA   | ILE | X | 114 | 38.758 | 46.106 | 35.854 | 0.00 | 0.00 |
| ATOM | 1780 | CB   | ILE | X | 114 | 37.600 | 45.260 | 37.488 | 0.00 | 0.00 |
| ATOM | 1781 | HB   | ILE | X | 114 | 37.531 | 44.267 | 37.933 | 0.00 | 0.00 |
| ATOM | 1782 | CG2  | ILE | X | 114 | 38.217 | 46.320 | 38.434 | 0.00 | 0.00 |
| ATOM | 1783 | HG21 | ILE | X | 114 | 37.814 | 46.314 | 39.447 | 0.00 | 0.00 |
| ATOM | 1784 | HG22 | ILE | X | 114 | 38.194 | 47.255 | 37.875 | 0.00 | 0.00 |
| ATOM | 1785 | HG23 | ILE | X | 114 | 39.216 | 45.972 | 38.698 | 0.00 | 0.00 |
| ATOM | 1786 | CG1  | ILE | X | 114 | 36.137 | 45.558 | 37.135 | 0.00 | 0.00 |
| ATOM | 1787 | HG12 | ILE | X | 114 | 36.101 | 46.250 | 36.293 | 0.00 | 0.00 |
| ATOM | 1788 | HG13 | ILE | X | 114 | 35.696 | 44.619 | 36.800 | 0.00 | 0.00 |
| ATOM | 1789 | CD1  | ILE | X | 114 | 35.143 | 46.076 | 38.250 | 0.00 | 0.00 |
| ATOM | 1790 | HD11 | ILE | X | 114 | 35.444 | 45.633 | 39.199 | 0.00 | 0.00 |
| ATOM | 1791 | HD12 | ILE | X | 114 | 34.189 | 45.699 | 37.882 | 0.00 | 0.00 |
| ATOM | 1792 | HD13 | ILE | X | 114 | 35.173 | 47.159 | 38.370 | 0.00 | 0.00 |
| ATOM | 1793 | C    | ILE | X | 114 | 39.890 | 44.515 | 36.633 | 0.00 | 0.00 |
| ATOM | 1794 | O    | ILE | X | 114 | 40.069 | 43.331 | 36.956 | 0.00 | 0.00 |
| ATOM | 1795 | N    | TYR | X | 115 | 40.950 | 45.245 | 36.298 | 0.00 | 0.00 |
| ATOM | 1796 | H    | TYR | X | 115 | 40.938 | 46.248 | 36.178 | 0.00 | 0.00 |
| ATOM | 1797 | CA   | TYR | X | 115 | 42.325 | 44.783 | 36.127 | 0.00 | 0.00 |
| ATOM | 1798 | HA   | TYR | X | 115 | 42.380 | 43.729 | 35.854 | 0.00 | 0.00 |
| ATOM | 1799 | CB   | TYR | X | 115 | 43.091 | 45.495 | 34.967 | 0.00 | 0.00 |
| ATOM | 1800 | HB2  | TYR | X | 115 | 44.141 | 45.214 | 35.035 | 0.00 | 0.00 |

|      |      |     |     |   |     |        |        |        |      |      |
|------|------|-----|-----|---|-----|--------|--------|--------|------|------|
| ATOM | 1801 | HB3 | TYR | X | 115 | 42.659 | 45.124 | 34.037 | 0.00 | 0.00 |
| ATOM | 1802 | CG  | TYR | X | 115 | 43.089 | 47.013 | 34.937 | 0.00 | 0.00 |
| ATOM | 1803 | CD1 | TYR | X | 115 | 43.748 | 47.787 | 35.885 | 0.00 | 0.00 |
| ATOM | 1804 | HD1 | TYR | X | 115 | 44.448 | 47.309 | 36.554 | 0.00 | 0.00 |
| ATOM | 1805 | CE1 | TYR | X | 115 | 43.827 | 49.208 | 35.715 | 0.00 | 0.00 |
| ATOM | 1806 | HE1 | TYR | X | 115 | 44.373 | 49.873 | 36.368 | 0.00 | 0.00 |
| ATOM | 1807 | CZ  | TYR | X | 115 | 43.143 | 49.890 | 34.636 | 0.00 | 0.00 |
| ATOM | 1808 | OH  | TYR | X | 115 | 43.276 | 51.236 | 34.380 | 0.00 | 0.00 |
| ATOM | 1809 | HH  | TYR | X | 115 | 43.886 | 51.526 | 35.063 | 0.00 | 0.00 |
| ATOM | 1810 | CE2 | TYR | X | 115 | 42.490 | 48.996 | 33.697 | 0.00 | 0.00 |
| ATOM | 1811 | HE2 | TYR | X | 115 | 42.104 | 49.383 | 32.765 | 0.00 | 0.00 |
| ATOM | 1812 | CD2 | TYR | X | 115 | 42.333 | 47.618 | 33.936 | 0.00 | 0.00 |
| ATOM | 1813 | HD2 | TYR | X | 115 | 41.791 | 47.027 | 33.212 | 0.00 | 0.00 |
| ATOM | 1814 | C   | TYR | X | 115 | 43.109 | 44.962 | 37.466 | 0.00 | 0.00 |
| ATOM | 1815 | O   | TYR | X | 115 | 42.974 | 45.886 | 38.181 | 0.00 | 0.00 |
| ATOM | 1816 | N   | GLY | X | 116 | 44.039 | 44.001 | 37.597 | 0.00 | 0.00 |
| ATOM | 1817 | H   | GLY | X | 116 | 44.019 | 43.330 | 36.842 | 0.00 | 0.00 |
| ATOM | 1818 | CA  | GLY | X | 116 | 45.115 | 43.967 | 38.553 | 0.00 | 0.00 |
| ATOM | 1819 | HA2 | GLY | X | 116 | 44.782 | 44.273 | 39.545 | 0.00 | 0.00 |
| ATOM | 1820 | HA3 | GLY | X | 116 | 45.458 | 42.932 | 38.556 | 0.00 | 0.00 |
| ATOM | 1821 | C   | GLY | X | 116 | 46.327 | 44.808 | 38.157 | 0.00 | 0.00 |
| ATOM | 1822 | O   | GLY | X | 116 | 46.249 | 45.505 | 37.145 | 0.00 | 0.00 |
| ATOM | 1823 | N   | GLY | X | 117 | 47.299 | 44.845 | 39.074 | 0.00 | 0.00 |
| ATOM | 1824 | H   | GLY | X | 117 | 47.155 | 44.323 | 39.927 | 0.00 | 0.00 |
| ATOM | 1825 | CA  | GLY | X | 117 | 48.489 | 45.730 | 38.900 | 0.00 | 0.00 |
| ATOM | 1826 | HA2 | GLY | X | 117 | 49.346 | 45.106 | 38.646 | 0.00 | 0.00 |
| ATOM | 1827 | HA3 | GLY | X | 117 | 48.323 | 46.450 | 38.098 | 0.00 | 0.00 |
| ATOM | 1828 | C   | GLY | X | 117 | 48.799 | 46.450 | 40.202 | 0.00 | 0.00 |
| ATOM | 1829 | O   | GLY | X | 117 | 49.361 | 47.562 | 40.131 | 0.00 | 0.00 |
| ATOM | 1830 | N   | GLY | X | 118 | 48.327 | 45.949 | 41.385 | 0.00 | 0.00 |
| ATOM | 1831 | H   | GLY | X | 118 | 47.826 | 45.077 | 41.297 | 0.00 | 0.00 |
| ATOM | 1832 | CA  | GLY | X | 118 | 48.676 | 46.464 | 42.729 | 0.00 | 0.00 |
| ATOM | 1833 | HA2 | GLY | X | 118 | 48.475 | 45.656 | 43.433 | 0.00 | 0.00 |
| ATOM | 1834 | HA3 | GLY | X | 118 | 49.761 | 46.551 | 42.774 | 0.00 | 0.00 |
| ATOM | 1835 | C   | GLY | X | 118 | 47.952 | 47.758 | 43.151 | 0.00 | 0.00 |
| ATOM | 1836 | O   | GLY | X | 118 | 48.310 | 48.250 | 44.213 | 0.00 | 0.00 |
| ATOM | 1837 | N   | PHE | X | 119 | 47.043 | 48.209 | 42.361 | 0.00 | 0.00 |
| ATOM | 1838 | H   | PHE | X | 119 | 46.749 | 47.618 | 41.597 | 0.00 | 0.00 |
| ATOM | 1839 | CA  | PHE | X | 119 | 46.473 | 49.575 | 42.395 | 0.00 | 0.00 |
| ATOM | 1840 | HA  | PHE | X | 119 | 45.739 | 49.692 | 41.597 | 0.00 | 0.00 |
| ATOM | 1841 | CB  | PHE | X | 119 | 45.814 | 49.898 | 43.780 | 0.00 | 0.00 |
| ATOM | 1842 | HB2 | PHE | X | 119 | 46.567 | 49.779 | 44.559 | 0.00 | 0.00 |
| ATOM | 1843 | HB3 | PHE | X | 119 | 45.398 | 50.904 | 43.840 | 0.00 | 0.00 |
| ATOM | 1844 | CG  | PHE | X | 119 | 44.767 | 48.895 | 44.252 | 0.00 | 0.00 |
| ATOM | 1845 | CD1 | PHE | X | 119 | 43.378 | 49.084 | 44.069 | 0.00 | 0.00 |
| ATOM | 1846 | HD1 | PHE | X | 119 | 42.990 | 49.831 | 43.393 | 0.00 | 0.00 |
| ATOM | 1847 | CE1 | PHE | X | 119 | 42.392 | 48.274 | 44.599 | 0.00 | 0.00 |
| ATOM | 1848 | HE1 | PHE | X | 119 | 41.326 | 48.406 | 44.479 | 0.00 | 0.00 |
| ATOM | 1849 | CZ  | PHE | X | 119 | 42.876 | 47.177 | 45.326 | 0.00 | 0.00 |
| ATOM | 1850 | HZ  | PHE | X | 119 | 42.154 | 46.522 | 45.791 | 0.00 | 0.00 |
| ATOM | 1851 | CE2 | PHE | X | 119 | 44.248 | 46.909 | 45.553 | 0.00 | 0.00 |
| ATOM | 1852 | HE2 | PHE | X | 119 | 44.404 | 45.990 | 46.099 | 0.00 | 0.00 |
| ATOM | 1853 | CD2 | PHE | X | 119 | 45.147 | 47.811 | 45.046 | 0.00 | 0.00 |
| ATOM | 1854 | HD2 | PHE | X | 119 | 46.173 | 47.560 | 45.272 | 0.00 | 0.00 |
| ATOM | 1855 | C   | PHE | X | 119 | 47.585 | 50.673 | 42.038 | 0.00 | 0.00 |
| ATOM | 1856 | O   | PHE | X | 119 | 47.154 | 51.843 | 41.790 | 0.00 | 0.00 |
| ATOM | 1857 | N   | TYR | X | 120 | 48.865 | 50.314 | 41.833 | 0.00 | 0.00 |
| ATOM | 1858 | H   | TYR | X | 120 | 49.111 | 49.381 | 42.131 | 0.00 | 0.00 |
| ATOM | 1859 | CA  | TYR | X | 120 | 49.839 | 51.276 | 41.421 | 0.00 | 0.00 |
| ATOM | 1860 | HA  | TYR | X | 120 | 49.434 | 52.287 | 41.459 | 0.00 | 0.00 |
| ATOM | 1861 | CB  | TYR | X | 120 | 50.999 | 51.303 | 42.355 | 0.00 | 0.00 |
| ATOM | 1862 | HB2 | TYR | X | 120 | 51.430 | 52.294 | 42.214 | 0.00 | 0.00 |
| ATOM | 1863 | HB3 | TYR | X | 120 | 50.651 | 51.156 | 43.378 | 0.00 | 0.00 |
| ATOM | 1864 | CG  | TYR | X | 120 | 52.070 | 50.204 | 42.196 | 0.00 | 0.00 |
| ATOM | 1865 | CD1 | TYR | X | 120 | 53.448 | 50.497 | 41.948 | 0.00 | 0.00 |
| ATOM | 1866 | HD1 | TYR | X | 120 | 53.742 | 51.533 | 42.027 | 0.00 | 0.00 |
| ATOM | 1867 | CE1 | TYR | X | 120 | 54.405 | 49.489 | 41.692 | 0.00 | 0.00 |

|      |      |     |     |   |     |        |        |        |      |      |
|------|------|-----|-----|---|-----|--------|--------|--------|------|------|
| ATOM | 1868 | HE1 | TYR | X | 120 | 55.448 | 49.761 | 41.622 | 0.00 | 0.00 |
| ATOM | 1869 | CZ  | TYR | X | 120 | 53.994 | 48.136 | 41.526 | 0.00 | 0.00 |
| ATOM | 1870 | OH  | TYR | X | 120 | 54.885 | 47.139 | 41.350 | 0.00 | 0.00 |
| ATOM | 1871 | HH  | TYR | X | 120 | 54.450 | 46.284 | 41.387 | 0.00 | 0.00 |
| ATOM | 1872 | CE2 | TYR | X | 120 | 52.626 | 47.864 | 41.767 | 0.00 | 0.00 |
| ATOM | 1873 | HE2 | TYR | X | 120 | 52.275 | 46.853 | 41.618 | 0.00 | 0.00 |
| ATOM | 1874 | CD2 | TYR | X | 120 | 51.716 | 48.848 | 42.156 | 0.00 | 0.00 |
| ATOM | 1875 | HD2 | TYR | X | 120 | 50.662 | 48.643 | 42.278 | 0.00 | 0.00 |
| ATOM | 1876 | C   | TYR | X | 120 | 50.237 | 51.113 | 39.965 | 0.00 | 0.00 |
| ATOM | 1877 | O   | TYR | X | 120 | 51.161 | 51.819 | 39.507 | 0.00 | 0.00 |
| ATOM | 1878 | N   | SER | X | 121 | 49.486 | 50.347 | 39.165 | 0.00 | 0.00 |
| ATOM | 1879 | H   | SER | X | 121 | 48.722 | 49.898 | 39.650 | 0.00 | 0.00 |
| ATOM | 1880 | CA  | SER | X | 121 | 49.600 | 50.158 | 37.720 | 0.00 | 0.00 |
| ATOM | 1881 | HA  | SER | X | 121 | 49.463 | 51.092 | 37.175 | 0.00 | 0.00 |
| ATOM | 1882 | CB  | SER | X | 121 | 50.937 | 49.524 | 37.267 | 0.00 | 0.00 |
| ATOM | 1883 | HB2 | SER | X | 121 | 51.026 | 49.492 | 36.181 | 0.00 | 0.00 |
| ATOM | 1884 | HB3 | SER | X | 121 | 51.758 | 50.110 | 37.680 | 0.00 | 0.00 |
| ATOM | 1885 | OG  | SER | X | 121 | 50.988 | 48.192 | 37.858 | 0.00 | 0.00 |
| ATOM | 1886 | HG  | SER | X | 121 | 50.636 | 48.273 | 38.747 | 0.00 | 0.00 |
| ATOM | 1887 | C   | SER | X | 121 | 48.307 | 49.289 | 37.257 | 0.00 | 0.00 |
| ATOM | 1888 | O   | SER | X | 121 | 47.402 | 49.012 | 38.111 | 0.00 | 0.00 |
| ATOM | 1889 | N   | GLY | X | 122 | 48.243 | 48.988 | 35.946 | 0.00 | 0.00 |
| ATOM | 1890 | H   | GLY | X | 122 | 49.049 | 49.168 | 35.365 | 0.00 | 0.00 |
| ATOM | 1891 | CA  | GLY | X | 122 | 47.123 | 48.393 | 35.286 | 0.00 | 0.00 |
| ATOM | 1892 | HA2 | GLY | X | 122 | 47.545 | 47.438 | 34.974 | 0.00 | 0.00 |
| ATOM | 1893 | HA3 | GLY | X | 122 | 46.335 | 48.126 | 35.990 | 0.00 | 0.00 |
| ATOM | 1894 | C   | GLY | X | 122 | 46.606 | 49.104 | 33.971 | 0.00 | 0.00 |
| ATOM | 1895 | O   | GLY | X | 122 | 46.708 | 50.309 | 33.835 | 0.00 | 0.00 |
| ATOM | 1896 | N   | ALA | X | 123 | 46.032 | 48.303 | 33.052 | 0.00 | 0.00 |
| ATOM | 1897 | H   | ALA | X | 123 | 46.004 | 47.301 | 33.172 | 0.00 | 0.00 |
| ATOM | 1898 | CA  | ALA | X | 123 | 45.439 | 48.851 | 31.786 | 0.00 | 0.00 |
| ATOM | 1899 | HA  | ALA | X | 123 | 44.984 | 49.820 | 31.986 | 0.00 | 0.00 |
| ATOM | 1900 | CB  | ALA | X | 123 | 46.565 | 49.186 | 30.780 | 0.00 | 0.00 |
| ATOM | 1901 | HB1 | ALA | X | 123 | 45.999 | 49.715 | 30.014 | 0.00 | 0.00 |
| ATOM | 1902 | HB2 | ALA | X | 123 | 46.914 | 48.306 | 30.239 | 0.00 | 0.00 |
| ATOM | 1903 | HB3 | ALA | X | 123 | 47.467 | 49.640 | 31.189 | 0.00 | 0.00 |
| ATOM | 1904 | C   | ALA | X | 123 | 44.363 | 48.012 | 31.100 | 0.00 | 0.00 |
| ATOM | 1905 | O   | ALA | X | 123 | 44.501 | 46.800 | 31.115 | 0.00 | 0.00 |
| ATOM | 1906 | N   | SER | X | 124 | 43.370 | 48.590 | 30.427 | 0.00 | 0.00 |
| ATOM | 1907 | H   | SER | X | 124 | 43.314 | 49.593 | 30.323 | 0.00 | 0.00 |
| ATOM | 1908 | CA  | SER | X | 124 | 42.308 | 47.810 | 29.699 | 0.00 | 0.00 |
| ATOM | 1909 | HA  | SER | X | 124 | 42.007 | 46.870 | 30.159 | 0.00 | 0.00 |
| ATOM | 1910 | CB  | SER | X | 124 | 41.010 | 48.595 | 29.557 | 0.00 | 0.00 |
| ATOM | 1911 | HB2 | SER | X | 124 | 40.294 | 47.976 | 29.016 | 0.00 | 0.00 |
| ATOM | 1912 | HB3 | SER | X | 124 | 40.619 | 48.770 | 30.559 | 0.00 | 0.00 |
| ATOM | 1913 | OG  | SER | X | 124 | 41.200 | 49.849 | 28.853 | 0.00 | 0.00 |
| ATOM | 1914 | HG  | SER | X | 124 | 41.689 | 50.440 | 29.431 | 0.00 | 0.00 |
| ATOM | 1915 | C   | SER | X | 124 | 42.820 | 47.310 | 28.366 | 0.00 | 0.00 |
| ATOM | 1916 | O   | SER | X | 124 | 42.250 | 46.409 | 27.791 | 0.00 | 0.00 |
| ATOM | 1917 | N   | SER | X | 125 | 43.900 | 47.964 | 27.863 | 0.00 | 0.00 |
| ATOM | 1918 | H   | SER | X | 125 | 44.304 | 48.745 | 28.360 | 0.00 | 0.00 |
| ATOM | 1919 | CA  | SER | X | 125 | 44.520 | 47.794 | 26.570 | 0.00 | 0.00 |
| ATOM | 1920 | HA  | SER | X | 125 | 43.598 | 47.697 | 25.998 | 0.00 | 0.00 |
| ATOM | 1921 | CB  | SER | X | 125 | 45.226 | 49.166 | 26.288 | 0.00 | 0.00 |
| ATOM | 1922 | HB2 | SER | X | 125 | 45.626 | 49.173 | 25.275 | 0.00 | 0.00 |
| ATOM | 1923 | HB3 | SER | X | 125 | 44.411 | 49.881 | 26.407 | 0.00 | 0.00 |
| ATOM | 1924 | OG  | SER | X | 125 | 46.251 | 49.448 | 27.197 | 0.00 | 0.00 |
| ATOM | 1925 | HG  | SER | X | 125 | 46.998 | 48.926 | 26.895 | 0.00 | 0.00 |
| ATOM | 1926 | C   | SER | X | 125 | 45.388 | 46.594 | 26.274 | 0.00 | 0.00 |
| ATOM | 1927 | O   | SER | X | 125 | 45.738 | 46.485 | 25.076 | 0.00 | 0.00 |
| ATOM | 1928 | N   | LEU | X | 126 | 45.635 | 45.710 | 27.284 | 0.00 | 0.00 |
| ATOM | 1929 | H   | LEU | X | 126 | 45.069 | 45.784 | 28.117 | 0.00 | 0.00 |
| ATOM | 1930 | CA  | LEU | X | 126 | 46.460 | 44.548 | 27.269 | 0.00 | 0.00 |
| ATOM | 1931 | HA  | LEU | X | 126 | 47.277 | 44.835 | 26.606 | 0.00 | 0.00 |
| ATOM | 1932 | CB  | LEU | X | 126 | 47.020 | 44.204 | 28.690 | 0.00 | 0.00 |
| ATOM | 1933 | HB2 | LEU | X | 126 | 46.232 | 43.642 | 29.191 | 0.00 | 0.00 |
| ATOM | 1934 | HB3 | LEU | X | 126 | 47.834 | 43.485 | 28.600 | 0.00 | 0.00 |

|      |      |      |     |   |     |        |        |        |      |      |
|------|------|------|-----|---|-----|--------|--------|--------|------|------|
| ATOM | 1935 | CG   | LEU | X | 126 | 47.531 | 45.365 | 29.556 | 0.00 | 0.00 |
| ATOM | 1936 | HG   | LEU | X | 126 | 46.707 | 46.061 | 29.718 | 0.00 | 0.00 |
| ATOM | 1937 | CD1  | LEU | X | 126 | 48.048 | 44.844 | 30.894 | 0.00 | 0.00 |
| ATOM | 1938 | HD11 | LEU | X | 126 | 48.233 | 45.615 | 31.643 | 0.00 | 0.00 |
| ATOM | 1939 | HD12 | LEU | X | 126 | 48.856 | 44.192 | 30.564 | 0.00 | 0.00 |
| ATOM | 1940 | HD13 | LEU | X | 126 | 47.284 | 44.177 | 31.293 | 0.00 | 0.00 |
| ATOM | 1941 | CD2  | LEU | X | 126 | 48.678 | 46.164 | 29.078 | 0.00 | 0.00 |
| ATOM | 1942 | HD21 | LEU | X | 126 | 48.763 | 46.966 | 29.812 | 0.00 | 0.00 |
| ATOM | 1943 | HD22 | LEU | X | 126 | 49.562 | 45.526 | 29.080 | 0.00 | 0.00 |
| ATOM | 1944 | HD23 | LEU | X | 126 | 48.515 | 46.578 | 28.083 | 0.00 | 0.00 |
| ATOM | 1945 | C    | LEU | X | 126 | 45.803 | 43.264 | 26.736 | 0.00 | 0.00 |
| ATOM | 1946 | O    | LEU | X | 126 | 44.689 | 42.818 | 27.064 | 0.00 | 0.00 |
| ATOM | 1947 | N    | ASP | X | 127 | 46.610 | 42.569 | 25.956 | 0.00 | 0.00 |
| ATOM | 1948 | H    | ASP | X | 127 | 47.479 | 43.008 | 25.687 | 0.00 | 0.00 |
| ATOM | 1949 | CA   | ASP | X | 127 | 46.261 | 41.338 | 25.245 | 0.00 | 0.00 |
| ATOM | 1950 | HA   | ASP | X | 127 | 45.289 | 41.597 | 24.826 | 0.00 | 0.00 |
| ATOM | 1951 | CB   | ASP | X | 127 | 47.158 | 41.020 | 24.077 | 0.00 | 0.00 |
| ATOM | 1952 | HB2  | ASP | X | 127 | 46.834 | 40.113 | 23.567 | 0.00 | 0.00 |
| ATOM | 1953 | HB3  | ASP | X | 127 | 47.162 | 41.761 | 23.278 | 0.00 | 0.00 |
| ATOM | 1954 | CG   | ASP | X | 127 | 48.568 | 40.820 | 24.478 | 0.00 | 0.00 |
| ATOM | 1955 | OD1  | ASP | X | 127 | 48.980 | 39.631 | 24.605 | 0.00 | 0.00 |
| ATOM | 1956 | OD2  | ASP | X | 127 | 49.247 | 41.863 | 24.448 | 0.00 | 0.00 |
| ATOM | 1957 | C    | ASP | X | 127 | 46.020 | 40.038 | 25.955 | 0.00 | 0.00 |
| ATOM | 1958 | O    | ASP | X | 127 | 45.113 | 39.228 | 25.626 | 0.00 | 0.00 |
| ATOM | 1959 | N    | VAL | X | 128 | 46.646 | 39.953 | 27.112 | 0.00 | 0.00 |
| ATOM | 1960 | H    | VAL | X | 128 | 47.412 | 40.572 | 27.335 | 0.00 | 0.00 |
| ATOM | 1961 | CA   | VAL | X | 128 | 46.162 | 38.935 | 28.099 | 0.00 | 0.00 |
| ATOM | 1962 | HA   | VAL | X | 128 | 46.215 | 38.008 | 27.529 | 0.00 | 0.00 |
| ATOM | 1963 | CB   | VAL | X | 128 | 47.223 | 38.818 | 29.241 | 0.00 | 0.00 |
| ATOM | 1964 | HB   | VAL | X | 128 | 48.256 | 38.733 | 28.903 | 0.00 | 0.00 |
| ATOM | 1965 | CG1  | VAL | X | 128 | 47.406 | 40.062 | 30.084 | 0.00 | 0.00 |
| ATOM | 1966 | HG11 | VAL | X | 128 | 46.596 | 40.225 | 30.794 | 0.00 | 0.00 |
| ATOM | 1967 | HG12 | VAL | X | 128 | 48.302 | 39.923 | 30.689 | 0.00 | 0.00 |
| ATOM | 1968 | HG13 | VAL | X | 128 | 47.483 | 40.977 | 29.497 | 0.00 | 0.00 |
| ATOM | 1969 | CG2  | VAL | X | 128 | 46.993 | 37.492 | 30.026 | 0.00 | 0.00 |
| ATOM | 1970 | HG21 | VAL | X | 128 | 46.105 | 37.494 | 30.659 | 0.00 | 0.00 |
| ATOM | 1971 | HG22 | VAL | X | 128 | 47.819 | 37.295 | 30.708 | 0.00 | 0.00 |
| ATOM | 1972 | HG23 | VAL | X | 128 | 46.945 | 36.625 | 29.367 | 0.00 | 0.00 |
| ATOM | 1973 | C    | VAL | X | 128 | 44.706 | 39.023 | 28.626 | 0.00 | 0.00 |
| ATOM | 1974 | O    | VAL | X | 128 | 44.101 | 37.972 | 28.990 | 0.00 | 0.00 |
| ATOM | 1975 | N    | TYR | X | 129 | 44.108 | 40.234 | 28.650 | 0.00 | 0.00 |
| ATOM | 1976 | H    | TYR | X | 129 | 44.589 | 41.059 | 28.322 | 0.00 | 0.00 |
| ATOM | 1977 | CA   | TYR | X | 129 | 42.717 | 40.580 | 28.951 | 0.00 | 0.00 |
| ATOM | 1978 | HA   | TYR | X | 129 | 42.448 | 39.734 | 29.585 | 0.00 | 0.00 |
| ATOM | 1979 | CB   | TYR | X | 129 | 42.679 | 41.926 | 29.738 | 0.00 | 0.00 |
| ATOM | 1980 | HB2  | TYR | X | 129 | 42.851 | 42.750 | 29.046 | 0.00 | 0.00 |
| ATOM | 1981 | HB3  | TYR | X | 129 | 41.621 | 41.929 | 30.000 | 0.00 | 0.00 |
| ATOM | 1982 | CG   | TYR | X | 129 | 43.502 | 42.130 | 30.976 | 0.00 | 0.00 |
| ATOM | 1983 | CD1  | TYR | X | 129 | 43.677 | 41.054 | 31.892 | 0.00 | 0.00 |
| ATOM | 1984 | HD1  | TYR | X | 129 | 43.286 | 40.068 | 31.685 | 0.00 | 0.00 |
| ATOM | 1985 | CE1  | TYR | X | 129 | 44.310 | 41.289 | 33.082 | 0.00 | 0.00 |
| ATOM | 1986 | HE1  | TYR | X | 129 | 44.483 | 40.468 | 33.762 | 0.00 | 0.00 |
| ATOM | 1987 | CZ   | TYR | X | 129 | 44.839 | 42.587 | 33.440 | 0.00 | 0.00 |
| ATOM | 1988 | OH   | TYR | X | 129 | 45.302 | 42.870 | 34.724 | 0.00 | 0.00 |
| ATOM | 1989 | HH   | TYR | X | 129 | 45.215 | 42.160 | 35.364 | 0.00 | 0.00 |
| ATOM | 1990 | CE2  | TYR | X | 129 | 44.718 | 43.600 | 32.484 | 0.00 | 0.00 |
| ATOM | 1991 | HE2  | TYR | X | 129 | 45.123 | 44.577 | 32.701 | 0.00 | 0.00 |
| ATOM | 1992 | CD2  | TYR | X | 129 | 44.006 | 43.362 | 31.249 | 0.00 | 0.00 |
| ATOM | 1993 | HD2  | TYR | X | 129 | 43.784 | 44.249 | 30.674 | 0.00 | 0.00 |
| ATOM | 1994 | C    | TYR | X | 129 | 41.747 | 40.732 | 27.736 | 0.00 | 0.00 |
| ATOM | 1995 | O    | TYR | X | 129 | 40.542 | 41.057 | 27.862 | 0.00 | 0.00 |
| ATOM | 1996 | N    | ASP | X | 130 | 42.242 | 40.707 | 26.498 | 0.00 | 0.00 |
| ATOM | 1997 | H    | ASP | X | 130 | 43.132 | 40.276 | 26.290 | 0.00 | 0.00 |
| ATOM | 1998 | CA   | ASP | X | 130 | 41.404 | 40.920 | 25.271 | 0.00 | 0.00 |
| ATOM | 1999 | HA   | ASP | X | 130 | 40.807 | 41.832 | 25.309 | 0.00 | 0.00 |
| ATOM | 2000 | CB   | ASP | X | 130 | 42.261 | 41.070 | 24.056 | 0.00 | 0.00 |
| ATOM | 2001 | HB2  | ASP | X | 130 | 42.860 | 41.980 | 24.077 | 0.00 | 0.00 |



|      |      |      |     |   |     |        |        |        |      |      |
|------|------|------|-----|---|-----|--------|--------|--------|------|------|
| ATOM | 2002 | HB3  | ASP | X | 130 | 42.987 | 40.258 | 24.098 | 0.00 | 0.00 |
| ATOM | 2003 | CG   | ASP | X | 130 | 41.414 | 41.085 | 22.802 | 0.00 | 0.00 |
| ATOM | 2004 | OD1  | ASP | X | 130 | 40.912 | 40.049 | 22.326 | 0.00 | 0.00 |
| ATOM | 2005 | OD2  | ASP | X | 130 | 41.239 | 42.211 | 22.246 | 0.00 | 0.00 |
| ATOM | 2006 | C    | ASP | X | 130 | 40.417 | 39.755 | 25.330 | 0.00 | 0.00 |
| ATOM | 2007 | O    | ASP | X | 130 | 40.878 | 38.620 | 25.492 | 0.00 | 0.00 |
| ATOM | 2008 | N    | GLY | X | 131 | 39.050 | 39.981 | 25.119 | 0.00 | 0.00 |
| ATOM | 2009 | H    | GLY | X | 131 | 38.785 | 40.940 | 24.945 | 0.00 | 0.00 |
| ATOM | 2010 | CA   | GLY | X | 131 | 38.065 | 38.904 | 25.237 | 0.00 | 0.00 |
| ATOM | 2011 | HA2  | GLY | X | 131 | 38.391 | 38.125 | 25.927 | 0.00 | 0.00 |
| ATOM | 2012 | HA3  | GLY | X | 131 | 37.083 | 39.304 | 25.492 | 0.00 | 0.00 |
| ATOM | 2013 | C    | GLY | X | 131 | 37.777 | 38.132 | 23.975 | 0.00 | 0.00 |
| ATOM | 2014 | O    | GLY | X | 131 | 36.882 | 37.275 | 23.944 | 0.00 | 0.00 |
| ATOM | 2015 | N    | ARG | X | 132 | 38.469 | 38.382 | 22.854 | 0.00 | 0.00 |
| ATOM | 2016 | H    | ARG | X | 132 | 39.171 | 39.109 | 22.870 | 0.00 | 0.00 |
| ATOM | 2017 | CA   | ARG | X | 132 | 38.059 | 37.832 | 21.574 | 0.00 | 0.00 |
| ATOM | 2018 | HA   | ARG | X | 132 | 37.078 | 38.280 | 21.409 | 0.00 | 0.00 |
| ATOM | 2019 | CB   | ARG | X | 132 | 39.004 | 38.202 | 20.352 | 0.00 | 0.00 |
| ATOM | 2020 | HB2  | ARG | X | 132 | 38.427 | 38.036 | 19.443 | 0.00 | 0.00 |
| ATOM | 2021 | HB3  | ARG | X | 132 | 39.189 | 39.272 | 20.450 | 0.00 | 0.00 |
| ATOM | 2022 | CG   | ARG | X | 132 | 40.305 | 37.445 | 20.415 | 0.00 | 0.00 |
| ATOM | 2023 | HG2  | ARG | X | 132 | 40.769 | 37.539 | 21.396 | 0.00 | 0.00 |
| ATOM | 2024 | HG3  | ARG | X | 132 | 40.174 | 36.383 | 20.203 | 0.00 | 0.00 |
| ATOM | 2025 | CD   | ARG | X | 132 | 41.338 | 38.092 | 19.443 | 0.00 | 0.00 |
| ATOM | 2026 | HD2  | ARG | X | 132 | 42.209 | 37.448 | 19.560 | 0.00 | 0.00 |
| ATOM | 2027 | HD3  | ARG | X | 132 | 40.935 | 38.135 | 18.431 | 0.00 | 0.00 |
| ATOM | 2028 | NE   | ARG | X | 132 | 41.679 | 39.386 | 19.824 | 0.00 | 0.00 |
| ATOM | 2029 | HE   | ARG | X | 132 | 41.258 | 39.649 | 20.704 | 0.00 | 0.00 |
| ATOM | 2030 | CZ   | ARG | X | 132 | 42.464 | 40.205 | 19.196 | 0.00 | 0.00 |
| ATOM | 2031 | NH1  | ARG | X | 132 | 43.022 | 39.940 | 18.029 | 0.00 | 0.00 |
| ATOM | 2032 | HH11 | ARG | X | 132 | 42.649 | 39.088 | 17.635 | 0.00 | 0.00 |
| ATOM | 2033 | HH12 | ARG | X | 132 | 43.581 | 40.560 | 17.461 | 0.00 | 0.00 |
| ATOM | 2034 | NH2  | ARG | X | 132 | 42.645 | 41.353 | 19.769 | 0.00 | 0.00 |
| ATOM | 2035 | HH21 | ARG | X | 132 | 42.054 | 41.672 | 20.523 | 0.00 | 0.00 |
| ATOM | 2036 | HH22 | ARG | X | 132 | 43.267 | 41.994 | 19.298 | 0.00 | 0.00 |
| ATOM | 2037 | C    | ARG | X | 132 | 37.785 | 36.320 | 21.587 | 0.00 | 0.00 |
| ATOM | 2038 | O    | ARG | X | 132 | 36.828 | 35.925 | 20.985 | 0.00 | 0.00 |
| ATOM | 2039 | N    | PHE | X | 133 | 38.464 | 35.492 | 22.328 | 0.00 | 0.00 |
| ATOM | 2040 | H    | PHE | X | 133 | 39.221 | 35.918 | 22.843 | 0.00 | 0.00 |
| ATOM | 2041 | CA   | PHE | X | 133 | 38.317 | 34.005 | 22.421 | 0.00 | 0.00 |
| ATOM | 2042 | HA   | PHE | X | 133 | 38.169 | 33.687 | 21.389 | 0.00 | 0.00 |
| ATOM | 2043 | CB   | PHE | X | 133 | 39.645 | 33.346 | 22.927 | 0.00 | 0.00 |
| ATOM | 2044 | HB2  | PHE | X | 133 | 39.883 | 33.572 | 23.967 | 0.00 | 0.00 |
| ATOM | 2045 | HB3  | PHE | X | 133 | 39.394 | 32.285 | 22.952 | 0.00 | 0.00 |
| ATOM | 2046 | CG   | PHE | X | 133 | 40.836 | 33.487 | 22.040 | 0.00 | 0.00 |
| ATOM | 2047 | CD1  | PHE | X | 133 | 41.702 | 34.557 | 22.129 | 0.00 | 0.00 |
| ATOM | 2048 | HD1  | PHE | X | 133 | 41.790 | 35.075 | 23.073 | 0.00 | 0.00 |
| ATOM | 2049 | CE1  | PHE | X | 133 | 42.614 | 34.875 | 21.115 | 0.00 | 0.00 |
| ATOM | 2050 | HE1  | PHE | X | 133 | 43.108 | 35.833 | 21.182 | 0.00 | 0.00 |
| ATOM | 2051 | CZ   | PHE | X | 133 | 42.796 | 33.960 | 20.050 | 0.00 | 0.00 |
| ATOM | 2052 | HZ   | PHE | X | 133 | 43.589 | 34.172 | 19.348 | 0.00 | 0.00 |
| ATOM | 2053 | CE2  | PHE | X | 133 | 42.106 | 32.719 | 20.037 | 0.00 | 0.00 |
| ATOM | 2054 | HE2  | PHE | X | 133 | 42.203 | 32.068 | 19.181 | 0.00 | 0.00 |
| ATOM | 2055 | CD2  | PHE | X | 133 | 41.019 | 32.627 | 20.912 | 0.00 | 0.00 |
| ATOM | 2056 | HD2  | PHE | X | 133 | 40.236 | 31.956 | 20.591 | 0.00 | 0.00 |
| ATOM | 2057 | C    | PHE | X | 133 | 37.094 | 33.552 | 23.286 | 0.00 | 0.00 |
| ATOM | 2058 | O    | PHE | X | 133 | 36.186 | 32.813 | 22.824 | 0.00 | 0.00 |
| ATOM | 2059 | N    | LEU | X | 134 | 37.075 | 34.015 | 24.590 | 0.00 | 0.00 |
| ATOM | 2060 | H    | LEU | X | 134 | 37.797 | 34.628 | 24.939 | 0.00 | 0.00 |
| ATOM | 2061 | CA   | LEU | X | 134 | 35.904 | 33.865 | 25.430 | 0.00 | 0.00 |
| ATOM | 2062 | HA   | LEU | X | 134 | 35.856 | 32.780 | 25.515 | 0.00 | 0.00 |
| ATOM | 2063 | CB   | LEU | X | 134 | 36.270 | 34.336 | 26.822 | 0.00 | 0.00 |
| ATOM | 2064 | HB2  | LEU | X | 134 | 36.936 | 33.631 | 27.320 | 0.00 | 0.00 |
| ATOM | 2065 | HB3  | LEU | X | 134 | 36.795 | 35.288 | 26.741 | 0.00 | 0.00 |
| ATOM | 2066 | CG   | LEU | X | 134 | 35.119 | 34.492 | 27.837 | 0.00 | 0.00 |
| ATOM | 2067 | HG   | LEU | X | 134 | 34.397 | 35.182 | 27.401 | 0.00 | 0.00 |
| ATOM | 2068 | CD1  | LEU | X | 134 | 34.387 | 33.124 | 28.056 | 0.00 | 0.00 |

|      |      |      |     |   |     |        |        |        |      |      |
|------|------|------|-----|---|-----|--------|--------|--------|------|------|
| ATOM | 2069 | HD11 | LEU | X | 134 | 34.095 | 32.834 | 27.047 | 0.00 | 0.00 |
| ATOM | 2070 | HD12 | LEU | X | 134 | 33.464 | 33.185 | 28.634 | 0.00 | 0.00 |
| ATOM | 2071 | HD13 | LEU | X | 134 | 35.058 | 32.415 | 28.541 | 0.00 | 0.00 |
| ATOM | 2072 | CD2  | LEU | X | 134 | 35.684 | 35.026 | 29.147 | 0.00 | 0.00 |
| ATOM | 2073 | HD21 | LEU | X | 134 | 34.916 | 35.390 | 29.829 | 0.00 | 0.00 |
| ATOM | 2074 | HD22 | LEU | X | 134 | 36.100 | 34.158 | 29.658 | 0.00 | 0.00 |
| ATOM | 2075 | HD23 | LEU | X | 134 | 36.570 | 35.641 | 28.986 | 0.00 | 0.00 |
| ATOM | 2076 | C    | LEU | X | 134 | 34.595 | 34.438 | 24.840 | 0.00 | 0.00 |
| ATOM | 2077 | O    | LEU | X | 134 | 33.630 | 33.654 | 24.785 | 0.00 | 0.00 |
| ATOM | 2078 | N    | VAL | X | 135 | 34.582 | 35.605 | 24.212 | 0.00 | 0.00 |
| ATOM | 2079 | H    | VAL | X | 135 | 35.448 | 36.122 | 24.264 | 0.00 | 0.00 |
| ATOM | 2080 | CA   | VAL | X | 135 | 33.383 | 36.172 | 23.509 | 0.00 | 0.00 |
| ATOM | 2081 | HA   | VAL | X | 135 | 32.558 | 36.232 | 24.219 | 0.00 | 0.00 |
| ATOM | 2082 | CB   | VAL | X | 135 | 33.702 | 37.673 | 23.073 | 0.00 | 0.00 |
| ATOM | 2083 | HB   | VAL | X | 135 | 34.624 | 37.673 | 22.492 | 0.00 | 0.00 |
| ATOM | 2084 | CG1  | VAL | X | 135 | 32.596 | 38.390 | 22.285 | 0.00 | 0.00 |
| ATOM | 2085 | HG11 | VAL | X | 135 | 32.437 | 37.878 | 21.336 | 0.00 | 0.00 |
| ATOM | 2086 | HG12 | VAL | X | 135 | 31.680 | 38.345 | 22.874 | 0.00 | 0.00 |
| ATOM | 2087 | HG13 | VAL | X | 135 | 32.804 | 39.447 | 22.122 | 0.00 | 0.00 |
| ATOM | 2088 | CG2  | VAL | X | 135 | 33.907 | 38.380 | 24.438 | 0.00 | 0.00 |
| ATOM | 2089 | HG21 | VAL | X | 135 | 34.741 | 37.979 | 25.015 | 0.00 | 0.00 |
| ATOM | 2090 | HG22 | VAL | X | 135 | 33.014 | 38.290 | 25.056 | 0.00 | 0.00 |
| ATOM | 2091 | HG23 | VAL | X | 135 | 34.204 | 39.422 | 24.320 | 0.00 | 0.00 |
| ATOM | 2092 | C    | VAL | X | 135 | 32.925 | 35.309 | 22.390 | 0.00 | 0.00 |
| ATOM | 2093 | O    | VAL | X | 135 | 31.703 | 35.023 | 22.327 | 0.00 | 0.00 |
| ATOM | 2094 | N    | GLN | X | 136 | 33.826 | 34.819 | 21.511 | 0.00 | 0.00 |
| ATOM | 2095 | H    | GLN | X | 136 | 34.808 | 34.952 | 21.703 | 0.00 | 0.00 |
| ATOM | 2096 | CA   | GLN | X | 136 | 33.506 | 33.858 | 20.412 | 0.00 | 0.00 |
| ATOM | 2097 | HA   | GLN | X | 136 | 32.726 | 34.391 | 19.868 | 0.00 | 0.00 |
| ATOM | 2098 | CB   | GLN | X | 136 | 34.734 | 33.893 | 19.485 | 0.00 | 0.00 |
| ATOM | 2099 | HB2  | GLN | X | 136 | 34.746 | 34.906 | 19.082 | 0.00 | 0.00 |
| ATOM | 2100 | HB3  | GLN | X | 136 | 35.635 | 33.524 | 19.975 | 0.00 | 0.00 |
| ATOM | 2101 | CG   | GLN | X | 136 | 34.454 | 33.017 | 18.253 | 0.00 | 0.00 |
| ATOM | 2102 | HG2  | GLN | X | 136 | 33.445 | 33.252 | 17.914 | 0.00 | 0.00 |
| ATOM | 2103 | HG3  | GLN | X | 136 | 35.146 | 33.124 | 17.418 | 0.00 | 0.00 |
| ATOM | 2104 | CD   | GLN | X | 136 | 34.474 | 31.509 | 18.506 | 0.00 | 0.00 |
| ATOM | 2105 | OE1  | GLN | X | 136 | 35.363 | 31.004 | 19.174 | 0.00 | 0.00 |
| ATOM | 2106 | NE2  | GLN | X | 136 | 33.579 | 30.779 | 17.884 | 0.00 | 0.00 |
| ATOM | 2107 | HE21 | GLN | X | 136 | 33.701 | 29.779 | 17.809 | 0.00 | 0.00 |
| ATOM | 2108 | HE22 | GLN | X | 136 | 32.827 | 31.153 | 17.323 | 0.00 | 0.00 |
| ATOM | 2109 | C    | GLN | X | 136 | 32.896 | 32.516 | 20.900 | 0.00 | 0.00 |
| ATOM | 2110 | O    | GLN | X | 136 | 31.893 | 32.076 | 20.281 | 0.00 | 0.00 |
| ATOM | 2111 | N    | ALA | X | 137 | 33.610 | 31.809 | 21.831 | 0.00 | 0.00 |
| ATOM | 2112 | H    | ALA | X | 137 | 34.546 | 32.122 | 22.045 | 0.00 | 0.00 |
| ATOM | 2113 | CA   | ALA | X | 137 | 33.139 | 30.526 | 22.282 | 0.00 | 0.00 |
| ATOM | 2114 | HA   | ALA | X | 137 | 33.037 | 29.990 | 21.338 | 0.00 | 0.00 |
| ATOM | 2115 | CB   | ALA | X | 137 | 34.181 | 29.797 | 23.167 | 0.00 | 0.00 |
| ATOM | 2116 | HB1  | ALA | X | 137 | 33.807 | 28.831 | 23.509 | 0.00 | 0.00 |
| ATOM | 2117 | HB2  | ALA | X | 137 | 34.503 | 30.405 | 24.013 | 0.00 | 0.00 |
| ATOM | 2118 | HB3  | ALA | X | 137 | 35.076 | 29.608 | 22.575 | 0.00 | 0.00 |
| ATOM | 2119 | C    | ALA | X | 137 | 31.785 | 30.687 | 23.015 | 0.00 | 0.00 |
| ATOM | 2120 | O    | ALA | X | 137 | 30.831 | 29.951 | 22.768 | 0.00 | 0.00 |
| ATOM | 2121 | N    | GLU | X | 138 | 31.742 | 31.582 | 23.985 | 0.00 | 0.00 |
| ATOM | 2122 | H    | GLU | X | 138 | 32.584 | 32.056 | 24.279 | 0.00 | 0.00 |
| ATOM | 2123 | CA   | GLU | X | 138 | 30.639 | 31.657 | 24.926 | 0.00 | 0.00 |
| ATOM | 2124 | HA   | GLU | X | 138 | 30.289 | 30.625 | 24.964 | 0.00 | 0.00 |
| ATOM | 2125 | CB   | GLU | X | 138 | 31.261 | 31.932 | 26.330 | 0.00 | 0.00 |
| ATOM | 2126 | HB2  | GLU | X | 138 | 31.860 | 32.842 | 26.369 | 0.00 | 0.00 |
| ATOM | 2127 | HB3  | GLU | X | 138 | 30.458 | 32.118 | 27.043 | 0.00 | 0.00 |
| ATOM | 2128 | CG   | GLU | X | 138 | 32.241 | 30.741 | 26.829 | 0.00 | 0.00 |
| ATOM | 2129 | HG2  | GLU | X | 138 | 33.174 | 30.733 | 26.265 | 0.00 | 0.00 |
| ATOM | 2130 | HG3  | GLU | X | 138 | 32.544 | 30.860 | 27.870 | 0.00 | 0.00 |
| ATOM | 2131 | CD   | GLU | X | 138 | 31.650 | 29.356 | 26.601 | 0.00 | 0.00 |
| ATOM | 2132 | OE1  | GLU | X | 138 | 30.499 | 29.156 | 27.020 | 0.00 | 0.00 |
| ATOM | 2133 | OE2  | GLU | X | 138 | 32.401 | 28.507 | 26.092 | 0.00 | 0.00 |
| ATOM | 2134 | C    | GLU | X | 138 | 29.500 | 32.584 | 24.554 | 0.00 | 0.00 |
| ATOM | 2135 | O    | GLU | X | 138 | 28.480 | 32.571 | 25.268 | 0.00 | 0.00 |

|      |      |      |     |   |     |        |        |        |      |      |
|------|------|------|-----|---|-----|--------|--------|--------|------|------|
| ATOM | 2136 | N    | ARG | X | 139 | 29.622 | 33.437 | 23.520 | 0.00 | 0.00 |
| ATOM | 2137 | H    | ARG | X | 139 | 30.496 | 33.461 | 23.013 | 0.00 | 0.00 |
| ATOM | 2138 | CA   | ARG | X | 139 | 28.651 | 34.431 | 23.147 | 0.00 | 0.00 |
| ATOM | 2139 | HA   | ARG | X | 139 | 29.077 | 35.121 | 22.417 | 0.00 | 0.00 |
| ATOM | 2140 | CB   | ARG | X | 139 | 27.439 | 33.753 | 22.591 | 0.00 | 0.00 |
| ATOM | 2141 | HB2  | ARG | X | 139 | 27.122 | 32.980 | 23.291 | 0.00 | 0.00 |
| ATOM | 2142 | HB3  | ARG | X | 139 | 26.623 | 34.475 | 22.598 | 0.00 | 0.00 |
| ATOM | 2143 | CG   | ARG | X | 139 | 27.663 | 33.189 | 21.220 | 0.00 | 0.00 |
| ATOM | 2144 | HG2  | ARG | X | 139 | 27.768 | 34.115 | 20.655 | 0.00 | 0.00 |
| ATOM | 2145 | HG3  | ARG | X | 139 | 28.655 | 32.762 | 21.071 | 0.00 | 0.00 |
| ATOM | 2146 | CD   | ARG | X | 139 | 26.531 | 32.453 | 20.466 | 0.00 | 0.00 |
| ATOM | 2147 | HD2  | ARG | X | 139 | 26.962 | 32.092 | 19.532 | 0.00 | 0.00 |
| ATOM | 2148 | HD3  | ARG | X | 139 | 26.206 | 31.576 | 21.026 | 0.00 | 0.00 |
| ATOM | 2149 | NE   | ARG | X | 139 | 25.339 | 33.246 | 20.122 | 0.00 | 0.00 |
| ATOM | 2150 | HE   | ARG | X | 139 | 24.629 | 33.312 | 20.837 | 0.00 | 0.00 |
| ATOM | 2151 | CZ   | ARG | X | 139 | 25.216 | 34.079 | 19.152 | 0.00 | 0.00 |
| ATOM | 2152 | NH1  | ARG | X | 139 | 26.059 | 34.086 | 18.107 | 0.00 | 0.00 |
| ATOM | 2153 | HH11 | ARG | X | 139 | 26.802 | 33.424 | 17.939 | 0.00 | 0.00 |
| ATOM | 2154 | HH12 | ARG | X | 139 | 25.935 | 34.861 | 17.471 | 0.00 | 0.00 |
| ATOM | 2155 | NH2  | ARG | X | 139 | 24.176 | 34.896 | 19.194 | 0.00 | 0.00 |
| ATOM | 2156 | HH21 | ARG | X | 139 | 23.653 | 34.909 | 20.058 | 0.00 | 0.00 |
| ATOM | 2157 | HH22 | ARG | X | 139 | 23.834 | 35.420 | 18.401 | 0.00 | 0.00 |
| ATOM | 2158 | C    | ARG | X | 139 | 28.314 | 35.375 | 24.354 | 0.00 | 0.00 |
| ATOM | 2159 | O    | ARG | X | 139 | 27.303 | 36.083 | 24.415 | 0.00 | 0.00 |
| ATOM | 2160 | N    | THR | X | 140 | 29.104 | 35.379 | 25.427 | 0.00 | 0.00 |
| ATOM | 2161 | H    | THR | X | 140 | 29.900 | 34.804 | 25.661 | 0.00 | 0.00 |
| ATOM | 2162 | CA   | THR | X | 140 | 28.915 | 36.464 | 26.449 | 0.00 | 0.00 |
| ATOM | 2163 | HA   | THR | X | 140 | 27.898 | 36.574 | 26.826 | 0.00 | 0.00 |
| ATOM | 2164 | CB   | THR | X | 140 | 29.771 | 36.128 | 27.700 | 0.00 | 0.00 |
| ATOM | 2165 | HB   | THR | X | 140 | 29.707 | 36.946 | 28.418 | 0.00 | 0.00 |
| ATOM | 2166 | CG2  | THR | X | 140 | 29.227 | 34.870 | 28.308 | 0.00 | 0.00 |
| ATOM | 2167 | HG21 | THR | X | 140 | 29.006 | 34.105 | 27.564 | 0.00 | 0.00 |
| ATOM | 2168 | HG22 | THR | X | 140 | 28.323 | 35.144 | 28.852 | 0.00 | 0.00 |
| ATOM | 2169 | HG23 | THR | X | 140 | 30.038 | 34.504 | 28.938 | 0.00 | 0.00 |
| ATOM | 2170 | OG1  | THR | X | 140 | 31.069 | 35.902 | 27.310 | 0.00 | 0.00 |
| ATOM | 2171 | HG1  | THR | X | 140 | 31.381 | 36.685 | 26.851 | 0.00 | 0.00 |
| ATOM | 2172 | C    | THR | X | 140 | 29.412 | 37.808 | 25.809 | 0.00 | 0.00 |
| ATOM | 2173 | O    | THR | X | 140 | 30.214 | 37.810 | 24.855 | 0.00 | 0.00 |
| ATOM | 2174 | N    | VAL | X | 141 | 28.912 | 38.888 | 26.336 | 0.00 | 0.00 |
| ATOM | 2175 | H    | VAL | X | 141 | 28.225 | 38.917 | 27.076 | 0.00 | 0.00 |
| ATOM | 2176 | CA   | VAL | X | 141 | 29.495 | 40.222 | 26.024 | 0.00 | 0.00 |
| ATOM | 2177 | HA   | VAL | X | 141 | 30.143 | 40.131 | 25.152 | 0.00 | 0.00 |
| ATOM | 2178 | CB   | VAL | X | 141 | 28.463 | 41.366 | 25.757 | 0.00 | 0.00 |
| ATOM | 2179 | HB   | VAL | X | 141 | 27.764 | 41.329 | 26.592 | 0.00 | 0.00 |
| ATOM | 2180 | CG1  | VAL | X | 141 | 29.141 | 42.765 | 25.803 | 0.00 | 0.00 |
| ATOM | 2181 | HG11 | VAL | X | 141 | 29.917 | 42.761 | 25.037 | 0.00 | 0.00 |
| ATOM | 2182 | HG12 | VAL | X | 141 | 28.570 | 43.614 | 25.425 | 0.00 | 0.00 |
| ATOM | 2183 | HG13 | VAL | X | 141 | 29.531 | 43.036 | 26.784 | 0.00 | 0.00 |
| ATOM | 2184 | CG2  | VAL | X | 141 | 27.642 | 41.108 | 24.472 | 0.00 | 0.00 |
| ATOM | 2185 | HG21 | VAL | X | 141 | 28.413 | 40.895 | 23.732 | 0.00 | 0.00 |
| ATOM | 2186 | HG22 | VAL | X | 141 | 27.050 | 41.986 | 24.215 | 0.00 | 0.00 |
| ATOM | 2187 | HG23 | VAL | X | 141 | 26.959 | 40.258 | 24.466 | 0.00 | 0.00 |
| ATOM | 2188 | C    | VAL | X | 141 | 30.517 | 40.528 | 27.086 | 0.00 | 0.00 |
| ATOM | 2189 | O    | VAL | X | 141 | 30.294 | 40.423 | 28.266 | 0.00 | 0.00 |
| ATOM | 2190 | N    | LEU | X | 142 | 31.682 | 41.004 | 26.692 | 0.00 | 0.00 |
| ATOM | 2191 | H    | LEU | X | 142 | 31.896 | 41.128 | 25.712 | 0.00 | 0.00 |
| ATOM | 2192 | CA   | LEU | X | 142 | 32.664 | 41.479 | 27.627 | 0.00 | 0.00 |
| ATOM | 2193 | HA   | LEU | X | 142 | 32.328 | 41.305 | 28.649 | 0.00 | 0.00 |
| ATOM | 2194 | CB   | LEU | X | 142 | 33.992 | 40.667 | 27.541 | 0.00 | 0.00 |
| ATOM | 2195 | HB2  | LEU | X | 142 | 33.800 | 39.594 | 27.548 | 0.00 | 0.00 |
| ATOM | 2196 | HB3  | LEU | X | 142 | 34.471 | 40.934 | 26.598 | 0.00 | 0.00 |
| ATOM | 2197 | CG   | LEU | X | 142 | 34.897 | 41.007 | 28.849 | 0.00 | 0.00 |
| ATOM | 2198 | HG   | LEU | X | 142 | 34.312 | 41.625 | 29.530 | 0.00 | 0.00 |
| ATOM | 2199 | CD1  | LEU | X | 142 | 35.490 | 39.813 | 29.605 | 0.00 | 0.00 |
| ATOM | 2200 | HD11 | LEU | X | 142 | 36.259 | 39.299 | 29.028 | 0.00 | 0.00 |
| ATOM | 2201 | HD12 | LEU | X | 142 | 34.644 | 39.265 | 30.020 | 0.00 | 0.00 |
| ATOM | 2202 | HD13 | LEU | X | 142 | 36.039 | 40.120 | 30.495 | 0.00 | 0.00 |

|      |      |      |     |   |     |        |        |        |      |      |
|------|------|------|-----|---|-----|--------|--------|--------|------|------|
| ATOM | 2203 | CD2  | LEU | X | 142 | 36.087 | 41.790 | 28.418 | 0.00 | 0.00 |
| ATOM | 2204 | HD21 | LEU | X | 142 | 35.716 | 42.792 | 28.204 | 0.00 | 0.00 |
| ATOM | 2205 | HD22 | LEU | X | 142 | 36.716 | 41.893 | 29.302 | 0.00 | 0.00 |
| ATOM | 2206 | HD23 | LEU | X | 142 | 36.628 | 41.484 | 27.523 | 0.00 | 0.00 |
| ATOM | 2207 | C    | LEU | X | 142 | 32.833 | 43.037 | 27.526 | 0.00 | 0.00 |
| ATOM | 2208 | O    | LEU | X | 142 | 33.066 | 43.541 | 26.437 | 0.00 | 0.00 |
| ATOM | 2209 | N    | VAL | X | 143 | 32.867 | 43.713 | 28.680 | 0.00 | 0.00 |
| ATOM | 2210 | H    | VAL | X | 143 | 32.826 | 43.166 | 29.527 | 0.00 | 0.00 |
| ATOM | 2211 | CA   | VAL | X | 143 | 33.296 | 45.085 | 28.902 | 0.00 | 0.00 |
| ATOM | 2212 | HA   | VAL | X | 143 | 33.363 | 45.673 | 27.986 | 0.00 | 0.00 |
| ATOM | 2213 | CB   | VAL | X | 143 | 32.209 | 45.887 | 29.700 | 0.00 | 0.00 |
| ATOM | 2214 | HB   | VAL | X | 143 | 32.258 | 45.650 | 30.763 | 0.00 | 0.00 |
| ATOM | 2215 | CG1  | VAL | X | 143 | 32.514 | 47.395 | 29.771 | 0.00 | 0.00 |
| ATOM | 2216 | HG11 | VAL | X | 143 | 31.694 | 47.996 | 30.163 | 0.00 | 0.00 |
| ATOM | 2217 | HG12 | VAL | X | 143 | 33.377 | 47.739 | 30.340 | 0.00 | 0.00 |
| ATOM | 2218 | HG13 | VAL | X | 143 | 32.607 | 47.663 | 28.718 | 0.00 | 0.00 |
| ATOM | 2219 | CG2  | VAL | X | 143 | 30.810 | 45.811 | 29.159 | 0.00 | 0.00 |
| ATOM | 2220 | HG21 | VAL | X | 143 | 30.598 | 46.499 | 28.341 | 0.00 | 0.00 |
| ATOM | 2221 | HG22 | VAL | X | 143 | 30.111 | 46.049 | 29.960 | 0.00 | 0.00 |
| ATOM | 2222 | HG23 | VAL | X | 143 | 30.625 | 44.838 | 28.704 | 0.00 | 0.00 |
| ATOM | 2223 | C    | VAL | X | 143 | 34.685 | 45.090 | 29.601 | 0.00 | 0.00 |
| ATOM | 2224 | O    | VAL | X | 143 | 34.972 | 44.230 | 30.391 | 0.00 | 0.00 |
| ATOM | 2225 | N    | SER | X | 144 | 35.419 | 46.156 | 29.450 | 0.00 | 0.00 |
| ATOM | 2226 | H    | SER | X | 144 | 35.005 | 46.854 | 28.849 | 0.00 | 0.00 |
| ATOM | 2227 | CA   | SER | X | 144 | 36.661 | 46.547 | 30.174 | 0.00 | 0.00 |
| ATOM | 2228 | HA   | SER | X | 144 | 36.413 | 46.204 | 31.178 | 0.00 | 0.00 |
| ATOM | 2229 | CB   | SER | X | 144 | 37.796 | 45.703 | 29.719 | 0.00 | 0.00 |
| ATOM | 2230 | HB2  | SER | X | 144 | 37.350 | 44.715 | 29.607 | 0.00 | 0.00 |
| ATOM | 2231 | HB3  | SER | X | 144 | 38.190 | 45.987 | 28.743 | 0.00 | 0.00 |
| ATOM | 2232 | OG   | SER | X | 144 | 38.904 | 45.565 | 30.470 | 0.00 | 0.00 |
| ATOM | 2233 | HG   | SER | X | 144 | 39.379 | 44.827 | 30.080 | 0.00 | 0.00 |
| ATOM | 2234 | C    | SER | X | 144 | 36.926 | 48.030 | 30.113 | 0.00 | 0.00 |
| ATOM | 2235 | O    | SER | X | 144 | 36.627 | 48.731 | 29.159 | 0.00 | 0.00 |
| ATOM | 2236 | N    | MET | X | 145 | 37.458 | 48.552 | 31.195 | 0.00 | 0.00 |
| ATOM | 2237 | H    | MET | X | 145 | 37.628 | 47.966 | 32.000 | 0.00 | 0.00 |
| ATOM | 2238 | CA   | MET | X | 145 | 37.626 | 50.026 | 31.381 | 0.00 | 0.00 |
| ATOM | 2239 | HA   | MET | X | 145 | 37.625 | 50.467 | 30.383 | 0.00 | 0.00 |
| ATOM | 2240 | CB   | MET | X | 145 | 36.397 | 50.654 | 32.033 | 0.00 | 0.00 |
| ATOM | 2241 | HB2  | MET | X | 145 | 36.284 | 51.728 | 31.889 | 0.00 | 0.00 |
| ATOM | 2242 | HB3  | MET | X | 145 | 35.488 | 50.296 | 31.549 | 0.00 | 0.00 |
| ATOM | 2243 | CG   | MET | X | 145 | 36.228 | 50.325 | 33.561 | 0.00 | 0.00 |
| ATOM | 2244 | HG2  | MET | X | 145 | 37.177 | 50.322 | 34.097 | 0.00 | 0.00 |
| ATOM | 2245 | HG3  | MET | X | 145 | 35.567 | 51.062 | 34.016 | 0.00 | 0.00 |
| ATOM | 2246 | SD   | MET | X | 145 | 35.223 | 48.870 | 33.709 | 0.00 | 0.00 |
| ATOM | 2247 | CE   | MET | X | 145 | 35.052 | 49.094 | 35.499 | 0.00 | 0.00 |
| ATOM | 2248 | HE1  | MET | X | 145 | 34.915 | 48.197 | 36.104 | 0.00 | 0.00 |
| ATOM | 2249 | HE2  | MET | X | 145 | 36.003 | 49.537 | 35.794 | 0.00 | 0.00 |
| ATOM | 2250 | HE3  | MET | X | 145 | 34.310 | 49.854 | 35.746 | 0.00 | 0.00 |
| ATOM | 2251 | C    | MET | X | 145 | 38.887 | 50.530 | 32.052 | 0.00 | 0.00 |
| ATOM | 2252 | O    | MET | X | 145 | 39.414 | 49.973 | 33.007 | 0.00 | 0.00 |
| ATOM | 2253 | N    | ASN | X | 146 | 39.370 | 51.604 | 31.514 | 0.00 | 0.00 |
| ATOM | 2254 | H    | ASN | X | 146 | 38.771 | 52.098 | 30.869 | 0.00 | 0.00 |
| ATOM | 2255 | CA   | ASN | X | 146 | 40.470 | 52.366 | 32.240 | 0.00 | 0.00 |
| ATOM | 2256 | HA   | ASN | X | 146 | 41.269 | 51.766 | 32.675 | 0.00 | 0.00 |
| ATOM | 2257 | CB   | ASN | X | 146 | 41.079 | 53.429 | 31.293 | 0.00 | 0.00 |
| ATOM | 2258 | HB2  | ASN | X | 146 | 40.254 | 53.977 | 30.838 | 0.00 | 0.00 |
| ATOM | 2259 | HB3  | ASN | X | 146 | 41.661 | 54.144 | 31.876 | 0.00 | 0.00 |
| ATOM | 2260 | CG   | ASN | X | 146 | 41.990 | 52.780 | 30.213 | 0.00 | 0.00 |
| ATOM | 2261 | OD1  | ASN | X | 146 | 42.418 | 51.626 | 30.284 | 0.00 | 0.00 |
| ATOM | 2262 | ND2  | ASN | X | 146 | 42.378 | 53.529 | 29.173 | 0.00 | 0.00 |
| ATOM | 2263 | HD21 | ASN | X | 146 | 43.170 | 53.406 | 28.559 | 0.00 | 0.00 |
| ATOM | 2264 | HD22 | ASN | X | 146 | 41.895 | 54.416 | 29.169 | 0.00 | 0.00 |
| ATOM | 2265 | C    | ASN | X | 146 | 39.870 | 53.234 | 33.383 | 0.00 | 0.00 |
| ATOM | 2266 | O    | ASN | X | 146 | 38.754 | 53.694 | 33.309 | 0.00 | 0.00 |
| ATOM | 2267 | N    | TYR | X | 147 | 40.667 | 53.397 | 34.443 | 0.00 | 0.00 |
| ATOM | 2268 | H    | TYR | X | 147 | 41.545 | 52.904 | 34.359 | 0.00 | 0.00 |
| ATOM | 2269 | CA   | TYR | X | 147 | 40.504 | 54.100 | 35.719 | 0.00 | 0.00 |

|      |      |      |     |   |     |        |        |        |      |      |
|------|------|------|-----|---|-----|--------|--------|--------|------|------|
| ATOM | 2270 | HA   | TYR | X | 147 | 40.017 | 55.069 | 35.611 | 0.00 | 0.00 |
| ATOM | 2271 | CB   | TYR | X | 147 | 39.548 | 53.209 | 36.693 | 0.00 | 0.00 |
| ATOM | 2272 | HB2  | TYR | X | 147 | 39.632 | 53.690 | 37.667 | 0.00 | 0.00 |
| ATOM | 2273 | HB3  | TYR | X | 147 | 38.512 | 53.220 | 36.354 | 0.00 | 0.00 |
| ATOM | 2274 | CG   | TYR | X | 147 | 40.120 | 51.834 | 36.781 | 0.00 | 0.00 |
| ATOM | 2275 | CD1  | TYR | X | 147 | 39.529 | 50.797 | 36.042 | 0.00 | 0.00 |
| ATOM | 2276 | HD1  | TYR | X | 147 | 38.780 | 51.029 | 35.299 | 0.00 | 0.00 |
| ATOM | 2277 | CE1  | TYR | X | 147 | 39.750 | 49.472 | 36.356 | 0.00 | 0.00 |
| ATOM | 2278 | HE1  | TYR | X | 147 | 39.230 | 48.686 | 35.829 | 0.00 | 0.00 |
| ATOM | 2279 | CZ   | TYR | X | 147 | 40.815 | 49.159 | 37.260 | 0.00 | 0.00 |
| ATOM | 2280 | OH   | TYR | X | 147 | 41.080 | 47.872 | 37.495 | 0.00 | 0.00 |
| ATOM | 2281 | HH   | TYR | X | 147 | 41.919 | 47.802 | 37.957 | 0.00 | 0.00 |
| ATOM | 2282 | CE2  | TYR | X | 147 | 41.521 | 50.202 | 37.958 | 0.00 | 0.00 |
| ATOM | 2283 | HE2  | TYR | X | 147 | 42.218 | 49.979 | 38.753 | 0.00 | 0.00 |
| ATOM | 2284 | CD2  | TYR | X | 147 | 41.105 | 51.502 | 37.748 | 0.00 | 0.00 |
| ATOM | 2285 | HD2  | TYR | X | 147 | 41.552 | 52.333 | 38.274 | 0.00 | 0.00 |
| ATOM | 2286 | C    | TYR | X | 147 | 41.872 | 54.393 | 36.385 | 0.00 | 0.00 |
| ATOM | 2287 | O    | TYR | X | 147 | 42.894 | 53.784 | 36.036 | 0.00 | 0.00 |
| ATOM | 2288 | N    | ARG | X | 148 | 41.921 | 55.350 | 37.283 | 0.00 | 0.00 |
| ATOM | 2289 | H    | ARG | X | 148 | 41.075 | 55.874 | 37.454 | 0.00 | 0.00 |
| ATOM | 2290 | CA   | ARG | X | 148 | 43.180 | 55.959 | 37.781 | 0.00 | 0.00 |
| ATOM | 2291 | HA   | ARG | X | 148 | 43.881 | 56.039 | 36.950 | 0.00 | 0.00 |
| ATOM | 2292 | CB   | ARG | X | 148 | 42.934 | 57.319 | 38.364 | 0.00 | 0.00 |
| ATOM | 2293 | HB2  | ARG | X | 148 | 42.114 | 57.215 | 39.075 | 0.00 | 0.00 |
| ATOM | 2294 | HB3  | ARG | X | 148 | 43.856 | 57.603 | 38.872 | 0.00 | 0.00 |
| ATOM | 2295 | CG   | ARG | X | 148 | 42.638 | 58.323 | 37.232 | 0.00 | 0.00 |
| ATOM | 2296 | HG2  | ARG | X | 148 | 43.545 | 58.717 | 36.774 | 0.00 | 0.00 |
| ATOM | 2297 | HG3  | ARG | X | 148 | 42.067 | 57.792 | 36.471 | 0.00 | 0.00 |
| ATOM | 2298 | CD   | ARG | X | 148 | 41.902 | 59.619 | 37.856 | 0.00 | 0.00 |
| ATOM | 2299 | HD2  | ARG | X | 148 | 42.405 | 60.049 | 38.722 | 0.00 | 0.00 |
| ATOM | 2300 | HD3  | ARG | X | 148 | 42.034 | 60.334 | 37.044 | 0.00 | 0.00 |
| ATOM | 2301 | NE   | ARG | X | 148 | 40.431 | 59.514 | 38.143 | 0.00 | 0.00 |
| ATOM | 2302 | HE   | ARG | X | 148 | 40.028 | 58.589 | 38.088 | 0.00 | 0.00 |
| ATOM | 2303 | CZ   | ARG | X | 148 | 39.700 | 60.538 | 38.674 | 0.00 | 0.00 |
| ATOM | 2304 | NH1  | ARG | X | 148 | 40.188 | 61.785 | 38.844 | 0.00 | 0.00 |
| ATOM | 2305 | HH11 | ARG | X | 148 | 41.176 | 61.979 | 38.922 | 0.00 | 0.00 |
| ATOM | 2306 | HH12 | ARG | X | 148 | 39.546 | 62.550 | 38.996 | 0.00 | 0.00 |
| ATOM | 2307 | NH2  | ARG | X | 148 | 38.503 | 60.336 | 39.118 | 0.00 | 0.00 |
| ATOM | 2308 | HH21 | ARG | X | 148 | 37.925 | 59.567 | 38.810 | 0.00 | 0.00 |
| ATOM | 2309 | HH22 | ARG | X | 148 | 37.969 | 61.125 | 39.455 | 0.00 | 0.00 |
| ATOM | 2310 | C    | ARG | X | 148 | 43.856 | 55.069 | 38.834 | 0.00 | 0.00 |
| ATOM | 2311 | O    | ARG | X | 148 | 43.186 | 54.456 | 39.651 | 0.00 | 0.00 |
| ATOM | 2312 | N    | VAL | X | 149 | 45.217 | 55.158 | 38.910 | 0.00 | 0.00 |
| ATOM | 2313 | H    | VAL | X | 149 | 45.732 | 55.868 | 38.410 | 0.00 | 0.00 |
| ATOM | 2314 | CA   | VAL | X | 149 | 46.145 | 54.316 | 39.781 | 0.00 | 0.00 |
| ATOM | 2315 | HA   | VAL | X | 149 | 45.595 | 54.074 | 40.690 | 0.00 | 0.00 |
| ATOM | 2316 | CB   | VAL | X | 149 | 46.470 | 53.017 | 39.067 | 0.00 | 0.00 |
| ATOM | 2317 | HB   | VAL | X | 149 | 47.341 | 52.523 | 39.496 | 0.00 | 0.00 |
| ATOM | 2318 | CG1  | VAL | X | 149 | 45.437 | 51.879 | 39.102 | 0.00 | 0.00 |
| ATOM | 2319 | HG11 | VAL | X | 149 | 45.095 | 51.772 | 40.132 | 0.00 | 0.00 |
| ATOM | 2320 | HG12 | VAL | X | 149 | 44.601 | 52.179 | 38.470 | 0.00 | 0.00 |
| ATOM | 2321 | HG13 | VAL | X | 149 | 45.921 | 50.935 | 38.852 | 0.00 | 0.00 |
| ATOM | 2322 | CG2  | VAL | X | 149 | 46.837 | 53.218 | 37.619 | 0.00 | 0.00 |
| ATOM | 2323 | HG21 | VAL | X | 149 | 47.594 | 53.978 | 37.425 | 0.00 | 0.00 |
| ATOM | 2324 | HG22 | VAL | X | 149 | 45.959 | 53.549 | 37.066 | 0.00 | 0.00 |
| ATOM | 2325 | HG23 | VAL | X | 149 | 47.046 | 52.221 | 37.230 | 0.00 | 0.00 |
| ATOM | 2326 | C    | VAL | X | 149 | 47.344 | 55.057 | 40.364 | 0.00 | 0.00 |
| ATOM | 2327 | O    | VAL | X | 149 | 47.664 | 56.157 | 39.912 | 0.00 | 0.00 |
| ATOM | 2328 | N    | GLY | X | 150 | 47.958 | 54.478 | 41.420 | 0.00 | 0.00 |
| ATOM | 2329 | H    | GLY | X | 150 | 47.786 | 53.502 | 41.615 | 0.00 | 0.00 |
| ATOM | 2330 | CA   | GLY | X | 150 | 49.072 | 55.117 | 42.126 | 0.00 | 0.00 |
| ATOM | 2331 | HA2  | GLY | X | 150 | 49.575 | 54.438 | 42.815 | 0.00 | 0.00 |
| ATOM | 2332 | HA3  | GLY | X | 150 | 49.797 | 55.338 | 41.342 | 0.00 | 0.00 |
| ATOM | 2333 | C    | GLY | X | 150 | 48.463 | 56.394 | 42.817 | 0.00 | 0.00 |
| ATOM | 2334 | O    | GLY | X | 150 | 47.308 | 56.380 | 43.273 | 0.00 | 0.00 |
| ATOM | 2335 | N    | ALA | X | 151 | 49.150 | 57.501 | 42.775 | 0.00 | 0.00 |
| ATOM | 2336 | H    | ALA | X | 151 | 50.074 | 57.406 | 42.380 | 0.00 | 0.00 |

|      |      |      |     |   |     |        |        |        |      |      |
|------|------|------|-----|---|-----|--------|--------|--------|------|------|
| ATOM | 2337 | CA   | ALA | X | 151 | 48.705 | 58.776 | 43.445 | 0.00 | 0.00 |
| ATOM | 2338 | HA   | ALA | X | 151 | 48.395 | 58.618 | 44.478 | 0.00 | 0.00 |
| ATOM | 2339 | CB   | ALA | X | 151 | 49.767 | 59.853 | 43.536 | 0.00 | 0.00 |
| ATOM | 2340 | HB1  | ALA | X | 151 | 49.380 | 60.867 | 43.641 | 0.00 | 0.00 |
| ATOM | 2341 | HB2  | ALA | X | 151 | 50.316 | 59.899 | 42.595 | 0.00 | 0.00 |
| ATOM | 2342 | HB3  | ALA | X | 151 | 50.489 | 59.566 | 44.300 | 0.00 | 0.00 |
| ATOM | 2343 | C    | ALA | X | 151 | 47.429 | 59.366 | 42.722 | 0.00 | 0.00 |
| ATOM | 2344 | O    | ALA | X | 151 | 46.511 | 59.768 | 43.414 | 0.00 | 0.00 |
| ATOM | 2345 | N    | PHE | X | 152 | 47.464 | 59.340 | 41.417 | 0.00 | 0.00 |
| ATOM | 2346 | H    | PHE | X | 152 | 48.291 | 58.905 | 41.032 | 0.00 | 0.00 |
| ATOM | 2347 | CA   | PHE | X | 152 | 46.409 | 59.809 | 40.501 | 0.00 | 0.00 |
| ATOM | 2348 | HA   | PHE | X | 152 | 46.354 | 60.892 | 40.606 | 0.00 | 0.00 |
| ATOM | 2349 | CB   | PHE | X | 152 | 46.782 | 59.514 | 39.037 | 0.00 | 0.00 |
| ATOM | 2350 | HB2  | PHE | X | 152 | 47.850 | 59.720 | 38.967 | 0.00 | 0.00 |
| ATOM | 2351 | HB3  | PHE | X | 152 | 46.650 | 58.446 | 38.863 | 0.00 | 0.00 |
| ATOM | 2352 | CG   | PHE | X | 152 | 45.989 | 60.253 | 37.939 | 0.00 | 0.00 |
| ATOM | 2353 | CD1  | PHE | X | 152 | 46.174 | 59.902 | 36.599 | 0.00 | 0.00 |
| ATOM | 2354 | HD1  | PHE | X | 152 | 46.907 | 59.195 | 36.238 | 0.00 | 0.00 |
| ATOM | 2355 | CE1  | PHE | X | 152 | 45.404 | 60.510 | 35.587 | 0.00 | 0.00 |
| ATOM | 2356 | HE1  | PHE | X | 152 | 45.653 | 60.421 | 34.539 | 0.00 | 0.00 |
| ATOM | 2357 | CZ   | PHE | X | 152 | 44.535 | 61.503 | 35.980 | 0.00 | 0.00 |
| ATOM | 2358 | HZ   | PHE | X | 152 | 43.982 | 62.013 | 35.205 | 0.00 | 0.00 |
| ATOM | 2359 | CE2  | PHE | X | 152 | 44.436 | 62.039 | 37.257 | 0.00 | 0.00 |
| ATOM | 2360 | HE2  | PHE | X | 152 | 43.778 | 62.883 | 37.403 | 0.00 | 0.00 |
| ATOM | 2361 | CD2  | PHE | X | 152 | 45.101 | 61.340 | 38.315 | 0.00 | 0.00 |
| ATOM | 2362 | HD2  | PHE | X | 152 | 45.099 | 61.775 | 39.303 | 0.00 | 0.00 |
| ATOM | 2363 | C    | PHE | X | 152 | 45.040 | 59.267 | 40.961 | 0.00 | 0.00 |
| ATOM | 2364 | O    | PHE | X | 152 | 44.018 | 59.893 | 40.688 | 0.00 | 0.00 |
| ATOM | 2365 | N    | GLY | X | 153 | 44.940 | 57.957 | 41.443 | 0.00 | 0.00 |
| ATOM | 2366 | H    | GLY | X | 153 | 45.737 | 57.384 | 41.678 | 0.00 | 0.00 |
| ATOM | 2367 | CA   | GLY | X | 153 | 43.692 | 57.371 | 41.917 | 0.00 | 0.00 |
| ATOM | 2368 | HA2  | GLY | X | 153 | 42.885 | 58.015 | 41.567 | 0.00 | 0.00 |
| ATOM | 2369 | HA3  | GLY | X | 153 | 43.675 | 56.371 | 41.484 | 0.00 | 0.00 |
| ATOM | 2370 | C    | GLY | X | 153 | 43.515 | 57.276 | 43.414 | 0.00 | 0.00 |
| ATOM | 2371 | O    | GLY | X | 153 | 42.396 | 57.161 | 43.832 | 0.00 | 0.00 |
| ATOM | 2372 | N    | PHE | X | 154 | 44.570 | 57.321 | 44.250 | 0.00 | 0.00 |
| ATOM | 2373 | H    | PHE | X | 154 | 45.498 | 57.337 | 43.852 | 0.00 | 0.00 |
| ATOM | 2374 | CA   | PHE | X | 154 | 44.514 | 56.787 | 45.621 | 0.00 | 0.00 |
| ATOM | 2375 | HA   | PHE | X | 154 | 43.451 | 56.721 | 45.850 | 0.00 | 0.00 |
| ATOM | 2376 | CB   | PHE | X | 154 | 45.017 | 55.309 | 45.530 | 0.00 | 0.00 |
| ATOM | 2377 | HB2  | PHE | X | 154 | 46.015 | 55.345 | 45.094 | 0.00 | 0.00 |
| ATOM | 2378 | HB3  | PHE | X | 154 | 45.085 | 54.892 | 46.535 | 0.00 | 0.00 |
| ATOM | 2379 | CG   | PHE | X | 154 | 44.047 | 54.463 | 44.838 | 0.00 | 0.00 |
| ATOM | 2380 | CD1  | PHE | X | 154 | 44.274 | 54.023 | 43.505 | 0.00 | 0.00 |
| ATOM | 2381 | HD1  | PHE | X | 154 | 45.194 | 54.374 | 43.061 | 0.00 | 0.00 |
| ATOM | 2382 | CE1  | PHE | X | 154 | 43.327 | 53.230 | 42.892 | 0.00 | 0.00 |
| ATOM | 2383 | HE1  | PHE | X | 154 | 43.476 | 52.936 | 41.863 | 0.00 | 0.00 |
| ATOM | 2384 | CZ   | PHE | X | 154 | 42.162 | 52.883 | 43.522 | 0.00 | 0.00 |
| ATOM | 2385 | HZ   | PHE | X | 154 | 41.446 | 52.219 | 43.061 | 0.00 | 0.00 |
| ATOM | 2386 | CE2  | PHE | X | 154 | 41.929 | 53.354 | 44.794 | 0.00 | 0.00 |
| ATOM | 2387 | HE2  | PHE | X | 154 | 40.944 | 53.127 | 45.174 | 0.00 | 0.00 |
| ATOM | 2388 | CD2  | PHE | X | 154 | 42.886 | 54.122 | 45.528 | 0.00 | 0.00 |
| ATOM | 2389 | HD2  | PHE | X | 154 | 42.625 | 54.470 | 46.517 | 0.00 | 0.00 |
| ATOM | 2390 | C    | PHE | X | 154 | 45.310 | 57.500 | 46.753 | 0.00 | 0.00 |
| ATOM | 2391 | O    | PHE | X | 154 | 45.310 | 57.040 | 47.906 | 0.00 | 0.00 |
| ATOM | 2392 | N    | LEU | X | 155 | 45.883 | 58.694 | 46.400 | 0.00 | 0.00 |
| ATOM | 2393 | H    | LEU | X | 155 | 45.787 | 59.098 | 45.479 | 0.00 | 0.00 |
| ATOM | 2394 | CA   | LEU | X | 155 | 46.610 | 59.570 | 47.359 | 0.00 | 0.00 |
| ATOM | 2395 | HA   | LEU | X | 155 | 47.127 | 58.861 | 48.007 | 0.00 | 0.00 |
| ATOM | 2396 | CB   | LEU | X | 155 | 47.569 | 60.496 | 46.663 | 0.00 | 0.00 |
| ATOM | 2397 | HB2  | LEU | X | 155 | 48.258 | 59.808 | 46.172 | 0.00 | 0.00 |
| ATOM | 2398 | HB3  | LEU | X | 155 | 47.022 | 61.082 | 45.924 | 0.00 | 0.00 |
| ATOM | 2399 | CG   | LEU | X | 155 | 48.416 | 61.437 | 47.570 | 0.00 | 0.00 |
| ATOM | 2400 | HG   | LEU | X | 155 | 48.837 | 60.858 | 48.392 | 0.00 | 0.00 |
| ATOM | 2401 | CD1  | LEU | X | 155 | 49.529 | 61.918 | 46.582 | 0.00 | 0.00 |
| ATOM | 2402 | HD11 | LEU | X | 155 | 49.973 | 62.824 | 46.996 | 0.00 | 0.00 |
| ATOM | 2403 | HD12 | LEU | X | 155 | 49.182 | 62.148 | 45.575 | 0.00 | 0.00 |

|      |      |      |     |   |     |        |        |        |      |      |
|------|------|------|-----|---|-----|--------|--------|--------|------|------|
| ATOM | 2404 | HD13 | LEU | X | 155 | 50.145 | 61.050 | 46.347 | 0.00 | 0.00 |
| ATOM | 2405 | CD2  | LEU | X | 155 | 47.646 | 62.668 | 47.969 | 0.00 | 0.00 |
| ATOM | 2406 | HD21 | LEU | X | 155 | 48.385 | 63.377 | 48.341 | 0.00 | 0.00 |
| ATOM | 2407 | HD22 | LEU | X | 155 | 47.145 | 63.120 | 47.113 | 0.00 | 0.00 |
| ATOM | 2408 | HD23 | LEU | X | 155 | 47.025 | 62.383 | 48.818 | 0.00 | 0.00 |
| ATOM | 2409 | C    | LEU | X | 155 | 45.521 | 60.350 | 48.134 | 0.00 | 0.00 |
| ATOM | 2410 | O    | LEU | X | 155 | 44.651 | 60.966 | 47.573 | 0.00 | 0.00 |
| ATOM | 2411 | N    | ALA | X | 156 | 45.576 | 60.374 | 49.474 | 0.00 | 0.00 |
| ATOM | 2412 | H    | ALA | X | 156 | 46.315 | 59.813 | 49.873 | 0.00 | 0.00 |
| ATOM | 2413 | CA   | ALA | X | 156 | 44.573 | 60.980 | 50.305 | 0.00 | 0.00 |
| ATOM | 2414 | HA   | ALA | X | 156 | 43.954 | 61.659 | 49.718 | 0.00 | 0.00 |
| ATOM | 2415 | CB   | ALA | X | 156 | 43.716 | 59.832 | 50.814 | 0.00 | 0.00 |
| ATOM | 2416 | HB1  | ALA | X | 156 | 44.232 | 59.234 | 51.565 | 0.00 | 0.00 |
| ATOM | 2417 | HB2  | ALA | X | 156 | 43.389 | 59.312 | 49.914 | 0.00 | 0.00 |
| ATOM | 2418 | HB3  | ALA | X | 156 | 42.781 | 60.215 | 51.222 | 0.00 | 0.00 |
| ATOM | 2419 | C    | ALA | X | 156 | 45.276 | 61.837 | 51.479 | 0.00 | 0.00 |
| ATOM | 2420 | O    | ALA | X | 156 | 46.381 | 61.675 | 51.907 | 0.00 | 0.00 |
| ATOM | 2421 | N    | LEU | X | 157 | 44.602 | 62.860 | 51.989 | 0.00 | 0.00 |
| ATOM | 2422 | H    | LEU | X | 157 | 43.726 | 63.025 | 51.515 | 0.00 | 0.00 |
| ATOM | 2423 | CA   | LEU | X | 157 | 44.958 | 63.786 | 53.058 | 0.00 | 0.00 |
| ATOM | 2424 | HA   | LEU | X | 157 | 45.800 | 63.385 | 53.622 | 0.00 | 0.00 |
| ATOM | 2425 | CB   | LEU | X | 157 | 45.389 | 65.124 | 52.561 | 0.00 | 0.00 |
| ATOM | 2426 | HB2  | LEU | X | 157 | 44.616 | 65.443 | 51.862 | 0.00 | 0.00 |
| ATOM | 2427 | HB3  | LEU | X | 157 | 45.455 | 65.812 | 53.405 | 0.00 | 0.00 |
| ATOM | 2428 | CG   | LEU | X | 157 | 46.809 | 65.103 | 51.854 | 0.00 | 0.00 |
| ATOM | 2429 | HG   | LEU | X | 157 | 46.819 | 64.223 | 51.211 | 0.00 | 0.00 |
| ATOM | 2430 | CD1  | LEU | X | 157 | 46.989 | 66.274 | 50.834 | 0.00 | 0.00 |
| ATOM | 2431 | HD11 | LEU | X | 157 | 47.345 | 65.882 | 49.882 | 0.00 | 0.00 |
| ATOM | 2432 | HD12 | LEU | X | 157 | 47.623 | 67.062 | 51.242 | 0.00 | 0.00 |
| ATOM | 2433 | HD13 | LEU | X | 157 | 46.091 | 66.837 | 50.580 | 0.00 | 0.00 |
| ATOM | 2434 | CD2  | LEU | X | 157 | 48.011 | 64.930 | 52.766 | 0.00 | 0.00 |
| ATOM | 2435 | HD21 | LEU | X | 157 | 48.915 | 64.887 | 52.158 | 0.00 | 0.00 |
| ATOM | 2436 | HD22 | LEU | X | 157 | 48.248 | 65.783 | 53.403 | 0.00 | 0.00 |
| ATOM | 2437 | HD23 | LEU | X | 157 | 47.945 | 64.032 | 53.379 | 0.00 | 0.00 |
| ATOM | 2438 | C    | LEU | X | 157 | 43.632 | 63.898 | 53.877 | 0.00 | 0.00 |
| ATOM | 2439 | O    | LEU | X | 157 | 42.537 | 64.049 | 53.331 | 0.00 | 0.00 |
| ATOM | 2440 | N    | PRO | X | 158 | 43.720 | 64.006 | 55.287 | 0.00 | 0.00 |
| ATOM | 2441 | CD   | PRO | X | 158 | 45.029 | 63.910 | 55.979 | 0.00 | 0.00 |
| ATOM | 2442 | HD2  | PRO | X | 158 | 45.839 | 64.523 | 55.582 | 0.00 | 0.00 |
| ATOM | 2443 | HD3  | PRO | X | 158 | 45.367 | 62.882 | 56.110 | 0.00 | 0.00 |
| ATOM | 2444 | CG   | PRO | X | 158 | 44.712 | 64.411 | 57.417 | 0.00 | 0.00 |
| ATOM | 2445 | HG2  | PRO | X | 158 | 44.779 | 65.491 | 57.549 | 0.00 | 0.00 |
| ATOM | 2446 | HG3  | PRO | X | 158 | 45.278 | 63.932 | 58.216 | 0.00 | 0.00 |
| ATOM | 2447 | CB   | PRO | X | 158 | 43.204 | 63.875 | 57.581 | 0.00 | 0.00 |
| ATOM | 2448 | HB2  | PRO | X | 158 | 42.576 | 64.295 | 58.366 | 0.00 | 0.00 |
| ATOM | 2449 | HB3  | PRO | X | 158 | 43.257 | 62.806 | 57.786 | 0.00 | 0.00 |
| ATOM | 2450 | CA   | PRO | X | 158 | 42.644 | 64.276 | 56.187 | 0.00 | 0.00 |
| ATOM | 2451 | HA   | PRO | X | 158 | 41.772 | 63.655 | 55.981 | 0.00 | 0.00 |
| ATOM | 2452 | C    | PRO | X | 158 | 42.215 | 65.804 | 56.204 | 0.00 | 0.00 |
| ATOM | 2453 | O    | PRO | X | 158 | 42.667 | 66.554 | 55.302 | 0.00 | 0.00 |
| ATOM | 2454 | N    | GLY | X | 159 | 41.423 | 66.320 | 57.158 | 0.00 | 0.00 |
| ATOM | 2455 | H    | GLY | X | 159 | 40.868 | 65.626 | 57.638 | 0.00 | 0.00 |
| ATOM | 2456 | CA   | GLY | X | 159 | 41.274 | 67.788 | 57.329 | 0.00 | 0.00 |
| ATOM | 2457 | HA2  | GLY | X | 159 | 40.974 | 67.894 | 58.371 | 0.00 | 0.00 |
| ATOM | 2458 | HA3  | GLY | X | 159 | 42.258 | 68.251 | 57.256 | 0.00 | 0.00 |
| ATOM | 2459 | C    | GLY | X | 159 | 40.324 | 68.544 | 56.341 | 0.00 | 0.00 |
| ATOM | 2460 | O    | GLY | X | 159 | 39.616 | 69.498 | 56.673 | 0.00 | 0.00 |
| ATOM | 2461 | N    | SER | X | 160 | 40.307 | 68.148 | 55.086 | 0.00 | 0.00 |
| ATOM | 2462 | H    | SER | X | 160 | 40.986 | 67.422 | 54.909 | 0.00 | 0.00 |
| ATOM | 2463 | CA   | SER | X | 160 | 39.472 | 68.658 | 53.993 | 0.00 | 0.00 |
| ATOM | 2464 | HA   | SER | X | 160 | 38.572 | 69.028 | 54.484 | 0.00 | 0.00 |
| ATOM | 2465 | CB   | SER | X | 160 | 40.179 | 69.838 | 53.348 | 0.00 | 0.00 |
| ATOM | 2466 | HB2  | SER | X | 160 | 39.485 | 70.593 | 52.977 | 0.00 | 0.00 |
| ATOM | 2467 | HB3  | SER | X | 160 | 40.676 | 70.304 | 54.199 | 0.00 | 0.00 |
| ATOM | 2468 | OG   | SER | X | 160 | 41.104 | 69.330 | 52.362 | 0.00 | 0.00 |
| ATOM | 2469 | HG   | SER | X | 160 | 41.957 | 69.580 | 52.724 | 0.00 | 0.00 |
| ATOM | 2470 | C    | SER | X | 160 | 39.125 | 67.454 | 52.986 | 0.00 | 0.00 |

|      |      |      |     |   |     |        |        |        |      |      |
|------|------|------|-----|---|-----|--------|--------|--------|------|------|
| ATOM | 2471 | O    | SER | X | 160 | 39.338 | 66.313 | 53.371 | 0.00 | 0.00 |
| ATOM | 2472 | N    | ARG | X | 161 | 38.581 | 67.715 | 51.789 | 0.00 | 0.00 |
| ATOM | 2473 | H    | ARG | X | 161 | 38.520 | 68.668 | 51.462 | 0.00 | 0.00 |
| ATOM | 2474 | CA   | ARG | X | 161 | 38.628 | 66.754 | 50.717 | 0.00 | 0.00 |
| ATOM | 2475 | HA   | ARG | X | 161 | 39.139 | 65.851 | 51.050 | 0.00 | 0.00 |
| ATOM | 2476 | CB   | ARG | X | 161 | 37.136 | 66.398 | 50.337 | 0.00 | 0.00 |
| ATOM | 2477 | HB2  | ARG | X | 161 | 36.464 | 67.232 | 50.135 | 0.00 | 0.00 |
| ATOM | 2478 | HB3  | ARG | X | 161 | 37.063 | 65.745 | 49.467 | 0.00 | 0.00 |
| ATOM | 2479 | CG   | ARG | X | 161 | 36.477 | 65.616 | 51.568 | 0.00 | 0.00 |
| ATOM | 2480 | HG2  | ARG | X | 161 | 37.079 | 64.779 | 51.923 | 0.00 | 0.00 |
| ATOM | 2481 | HG3  | ARG | X | 161 | 36.428 | 66.300 | 52.415 | 0.00 | 0.00 |
| ATOM | 2482 | CD   | ARG | X | 161 | 35.095 | 64.976 | 51.349 | 0.00 | 0.00 |
| ATOM | 2483 | HD2  | ARG | X | 161 | 35.122 | 64.115 | 50.681 | 0.00 | 0.00 |
| ATOM | 2484 | HD3  | ARG | X | 161 | 34.820 | 64.723 | 52.373 | 0.00 | 0.00 |
| ATOM | 2485 | NE   | ARG | X | 161 | 34.180 | 65.930 | 50.708 | 0.00 | 0.00 |
| ATOM | 2486 | HE   | ARG | X | 161 | 34.504 | 66.502 | 49.941 | 0.00 | 0.00 |
| ATOM | 2487 | CZ   | ARG | X | 161 | 32.853 | 65.975 | 50.798 | 0.00 | 0.00 |
| ATOM | 2488 | NH1  | ARG | X | 161 | 32.111 | 65.191 | 51.572 | 0.00 | 0.00 |
| ATOM | 2489 | HH11 | ARG | X | 161 | 32.533 | 64.405 | 52.047 | 0.00 | 0.00 |
| ATOM | 2490 | HH12 | ARG | X | 161 | 31.155 | 65.095 | 51.262 | 0.00 | 0.00 |
| ATOM | 2491 | NH2  | ARG | X | 161 | 32.301 | 66.978 | 50.245 | 0.00 | 0.00 |
| ATOM | 2492 | HH21 | ARG | X | 161 | 32.797 | 67.640 | 49.666 | 0.00 | 0.00 |
| ATOM | 2493 | HH22 | ARG | X | 161 | 31.312 | 67.063 | 50.058 | 0.00 | 0.00 |
| ATOM | 2494 | C    | ARG | X | 161 | 39.382 | 67.260 | 49.491 | 0.00 | 0.00 |
| ATOM | 2495 | O    | ARG | X | 161 | 38.864 | 67.012 | 48.385 | 0.00 | 0.00 |
| ATOM | 2496 | N    | GLU | X | 162 | 40.513 | 67.837 | 49.654 | 0.00 | 0.00 |
| ATOM | 2497 | H    | GLU | X | 162 | 40.801 | 67.944 | 50.616 | 0.00 | 0.00 |
| ATOM | 2498 | CA   | GLU | X | 162 | 41.296 | 68.271 | 48.577 | 0.00 | 0.00 |
| ATOM | 2499 | HA   | GLU | X | 162 | 40.635 | 68.748 | 47.853 | 0.00 | 0.00 |
| ATOM | 2500 | CB   | GLU | X | 162 | 42.293 | 69.334 | 48.976 | 0.00 | 0.00 |
| ATOM | 2501 | HB2  | GLU | X | 162 | 42.778 | 69.052 | 49.911 | 0.00 | 0.00 |
| ATOM | 2502 | HB3  | GLU | X | 162 | 43.125 | 69.349 | 48.273 | 0.00 | 0.00 |
| ATOM | 2503 | CG   | GLU | X | 162 | 41.853 | 70.774 | 49.280 | 0.00 | 0.00 |
| ATOM | 2504 | HG2  | GLU | X | 162 | 40.965 | 70.556 | 49.874 | 0.00 | 0.00 |
| ATOM | 2505 | HG3  | GLU | X | 162 | 42.592 | 71.322 | 49.863 | 0.00 | 0.00 |
| ATOM | 2506 | CD   | GLU | X | 162 | 41.339 | 71.502 | 48.006 | 0.00 | 0.00 |
| ATOM | 2507 | OE1  | GLU | X | 162 | 42.143 | 71.648 | 47.094 | 0.00 | 0.00 |
| ATOM | 2508 | OE2  | GLU | X | 162 | 40.152 | 71.903 | 47.914 | 0.00 | 0.00 |
| ATOM | 2509 | C    | GLU | X | 162 | 42.029 | 67.001 | 48.031 | 0.00 | 0.00 |
| ATOM | 2510 | O    | GLU | X | 162 | 42.157 | 66.956 | 46.794 | 0.00 | 0.00 |
| ATOM | 2511 | N    | ALA | X | 163 | 42.382 | 65.973 | 48.841 | 0.00 | 0.00 |
| ATOM | 2512 | H    | ALA | X | 163 | 42.156 | 65.977 | 49.826 | 0.00 | 0.00 |
| ATOM | 2513 | CA   | ALA | X | 163 | 42.882 | 64.645 | 48.436 | 0.00 | 0.00 |
| ATOM | 2514 | HA   | ALA | X | 163 | 42.761 | 64.653 | 47.352 | 0.00 | 0.00 |
| ATOM | 2515 | CB   | ALA | X | 163 | 44.352 | 64.495 | 48.903 | 0.00 | 0.00 |
| ATOM | 2516 | HB1  | ALA | X | 163 | 44.854 | 63.700 | 48.351 | 0.00 | 0.00 |
| ATOM | 2517 | HB2  | ALA | X | 163 | 44.527 | 64.335 | 49.967 | 0.00 | 0.00 |
| ATOM | 2518 | HB3  | ALA | X | 163 | 44.964 | 65.344 | 48.598 | 0.00 | 0.00 |
| ATOM | 2519 | C    | ALA | X | 163 | 41.976 | 63.646 | 49.213 | 0.00 | 0.00 |
| ATOM | 2520 | O    | ALA | X | 163 | 42.422 | 63.312 | 50.310 | 0.00 | 0.00 |
| ATOM | 2521 | N    | PRO | X | 164 | 40.787 | 63.261 | 48.720 | 0.00 | 0.00 |
| ATOM | 2522 | CD   | PRO | X | 164 | 40.099 | 63.803 | 47.601 | 0.00 | 0.00 |
| ATOM | 2523 | HD2  | PRO | X | 164 | 40.570 | 63.656 | 46.629 | 0.00 | 0.00 |
| ATOM | 2524 | HD3  | PRO | X | 164 | 40.060 | 64.834 | 47.951 | 0.00 | 0.00 |
| ATOM | 2525 | CG   | PRO | X | 164 | 38.682 | 63.326 | 47.609 | 0.00 | 0.00 |
| ATOM | 2526 | HG2  | PRO | X | 164 | 38.575 | 62.447 | 46.975 | 0.00 | 0.00 |
| ATOM | 2527 | HG3  | PRO | X | 164 | 38.023 | 64.105 | 47.226 | 0.00 | 0.00 |
| ATOM | 2528 | CB   | PRO | X | 164 | 38.493 | 62.944 | 49.095 | 0.00 | 0.00 |
| ATOM | 2529 | HB2  | PRO | X | 164 | 37.749 | 62.183 | 49.330 | 0.00 | 0.00 |
| ATOM | 2530 | HB3  | PRO | X | 164 | 38.141 | 63.860 | 49.570 | 0.00 | 0.00 |
| ATOM | 2531 | CA   | PRO | X | 164 | 39.837 | 62.537 | 49.554 | 0.00 | 0.00 |
| ATOM | 2532 | HA   | PRO | X | 164 | 39.985 | 62.831 | 50.593 | 0.00 | 0.00 |
| ATOM | 2533 | C    | PRO | X | 164 | 40.107 | 61.050 | 49.481 | 0.00 | 0.00 |
| ATOM | 2534 | O    | PRO | X | 164 | 39.810 | 60.288 | 50.418 | 0.00 | 0.00 |
| ATOM | 2535 | N    | GLY | X | 165 | 40.694 | 60.583 | 48.389 | 0.00 | 0.00 |
| ATOM | 2536 | H    | GLY | X | 165 | 40.810 | 61.221 | 47.615 | 0.00 | 0.00 |
| ATOM | 2537 | CA   | GLY | X | 165 | 41.087 | 59.180 | 48.157 | 0.00 | 0.00 |



|      |      |      |     |   |     |        |        |        |      |      |
|------|------|------|-----|---|-----|--------|--------|--------|------|------|
| ATOM | 2538 | HA2  | GLY | X | 165 | 42.046 | 59.126 | 47.642 | 0.00 | 0.00 |
| ATOM | 2539 | HA3  | GLY | X | 165 | 41.140 | 58.669 | 49.119 | 0.00 | 0.00 |
| ATOM | 2540 | C    | GLY | X | 165 | 40.087 | 58.466 | 47.238 | 0.00 | 0.00 |
| ATOM | 2541 | O    | GLY | X | 165 | 38.936 | 58.854 | 47.014 | 0.00 | 0.00 |
| ATOM | 2542 | N    | ASN | X | 166 | 40.513 | 57.293 | 46.718 | 0.00 | 0.00 |
| ATOM | 2543 | H    | ASN | X | 166 | 41.438 | 56.974 | 46.971 | 0.00 | 0.00 |
| ATOM | 2544 | CA   | ASN | X | 166 | 39.624 | 56.229 | 46.225 | 0.00 | 0.00 |
| ATOM | 2545 | HA   | ASN | X | 166 | 40.215 | 55.320 | 46.119 | 0.00 | 0.00 |
| ATOM | 2546 | CB   | ASN | X | 166 | 38.437 | 55.969 | 47.219 | 0.00 | 0.00 |
| ATOM | 2547 | HB2  | ASN | X | 166 | 37.748 | 56.808 | 47.316 | 0.00 | 0.00 |
| ATOM | 2548 | HB3  | ASN | X | 166 | 37.729 | 55.248 | 46.811 | 0.00 | 0.00 |
| ATOM | 2549 | CG   | ASN | X | 166 | 39.068 | 55.560 | 48.573 | 0.00 | 0.00 |
| ATOM | 2550 | OD1  | ASN | X | 166 | 40.032 | 54.752 | 48.585 | 0.00 | 0.00 |
| ATOM | 2551 | ND2  | ASN | X | 166 | 38.600 | 56.071 | 49.704 | 0.00 | 0.00 |
| ATOM | 2552 | HD21 | ASN | X | 166 | 38.833 | 55.750 | 50.633 | 0.00 | 0.00 |
| ATOM | 2553 | HD22 | ASN | X | 166 | 37.772 | 56.643 | 49.629 | 0.00 | 0.00 |
| ATOM | 2554 | C    | ASN | X | 166 | 39.120 | 56.549 | 44.813 | 0.00 | 0.00 |
| ATOM | 2555 | O    | ASN | X | 166 | 38.165 | 55.808 | 44.347 | 0.00 | 0.00 |
| ATOM | 2556 | N    | VAL | X | 167 | 39.582 | 57.512 | 44.069 | 0.00 | 0.00 |
| ATOM | 2557 | H    | VAL | X | 167 | 40.509 | 57.873 | 44.244 | 0.00 | 0.00 |
| ATOM | 2558 | CA   | VAL | X | 167 | 38.890 | 57.995 | 42.932 | 0.00 | 0.00 |
| ATOM | 2559 | HA   | VAL | X | 167 | 37.818 | 57.858 | 43.076 | 0.00 | 0.00 |
| ATOM | 2560 | CB   | VAL | X | 167 | 39.089 | 59.461 | 42.638 | 0.00 | 0.00 |
| ATOM | 2561 | HB   | VAL | X | 167 | 38.368 | 59.751 | 41.874 | 0.00 | 0.00 |
| ATOM | 2562 | CG1  | VAL | X | 167 | 38.755 | 60.231 | 43.873 | 0.00 | 0.00 |
| ATOM | 2563 | HG11 | VAL | X | 167 | 38.605 | 61.294 | 43.683 | 0.00 | 0.00 |
| ATOM | 2564 | HG12 | VAL | X | 167 | 37.807 | 59.893 | 44.290 | 0.00 | 0.00 |
| ATOM | 2565 | HG13 | VAL | X | 167 | 39.595 | 60.157 | 44.564 | 0.00 | 0.00 |
| ATOM | 2566 | CG2  | VAL | X | 167 | 40.459 | 59.808 | 42.107 | 0.00 | 0.00 |
| ATOM | 2567 | HG21 | VAL | X | 167 | 40.447 | 60.793 | 41.640 | 0.00 | 0.00 |
| ATOM | 2568 | HG22 | VAL | X | 167 | 40.725 | 59.140 | 41.287 | 0.00 | 0.00 |
| ATOM | 2569 | HG23 | VAL | X | 167 | 41.106 | 59.636 | 42.967 | 0.00 | 0.00 |
| ATOM | 2570 | C    | VAL | X | 167 | 39.005 | 57.110 | 41.739 | 0.00 | 0.00 |
| ATOM | 2571 | O    | VAL | X | 167 | 38.193 | 56.951 | 40.860 | 0.00 | 0.00 |
| ATOM | 2572 | N    | GLY | X | 168 | 40.115 | 56.289 | 41.736 | 0.00 | 0.00 |
| ATOM | 2573 | H    | GLY | X | 168 | 40.709 | 56.338 | 42.551 | 0.00 | 0.00 |
| ATOM | 2574 | CA   | GLY | X | 168 | 40.268 | 55.104 | 40.839 | 0.00 | 0.00 |
| ATOM | 2575 | HA2  | GLY | X | 168 | 40.259 | 55.439 | 39.802 | 0.00 | 0.00 |
| ATOM | 2576 | HA3  | GLY | X | 168 | 41.196 | 54.586 | 41.081 | 0.00 | 0.00 |
| ATOM | 2577 | C    | GLY | X | 168 | 39.145 | 54.093 | 41.022 | 0.00 | 0.00 |
| ATOM | 2578 | O    | GLY | X | 168 | 38.800 | 53.359 | 40.096 | 0.00 | 0.00 |
| ATOM | 2579 | N    | LEU | X | 169 | 38.470 | 54.034 | 42.143 | 0.00 | 0.00 |
| ATOM | 2580 | H    | LEU | X | 169 | 38.588 | 54.745 | 42.851 | 0.00 | 0.00 |
| ATOM | 2581 | CA   | LEU | X | 169 | 37.345 | 53.057 | 42.311 | 0.00 | 0.00 |
| ATOM | 2582 | HA   | LEU | X | 169 | 37.429 | 52.254 | 41.578 | 0.00 | 0.00 |
| ATOM | 2583 | CB   | LEU | X | 169 | 37.479 | 52.327 | 43.628 | 0.00 | 0.00 |
| ATOM | 2584 | HB2  | LEU | X | 169 | 37.496 | 52.992 | 44.491 | 0.00 | 0.00 |
| ATOM | 2585 | HB3  | LEU | X | 169 | 36.549 | 51.764 | 43.702 | 0.00 | 0.00 |
| ATOM | 2586 | CG   | LEU | X | 169 | 38.591 | 51.294 | 43.926 | 0.00 | 0.00 |
| ATOM | 2587 | HG   | LEU | X | 169 | 39.492 | 51.880 | 44.107 | 0.00 | 0.00 |
| ATOM | 2588 | CD1  | LEU | X | 169 | 38.252 | 50.627 | 45.264 | 0.00 | 0.00 |
| ATOM | 2589 | HD11 | LEU | X | 169 | 38.446 | 51.433 | 45.972 | 0.00 | 0.00 |
| ATOM | 2590 | HD12 | LEU | X | 169 | 38.974 | 49.895 | 45.626 | 0.00 | 0.00 |
| ATOM | 2591 | HD13 | LEU | X | 169 | 37.266 | 50.164 | 45.289 | 0.00 | 0.00 |
| ATOM | 2592 | CD2  | LEU | X | 169 | 38.780 | 50.281 | 42.868 | 0.00 | 0.00 |
| ATOM | 2593 | HD21 | LEU | X | 169 | 39.067 | 50.832 | 41.973 | 0.00 | 0.00 |
| ATOM | 2594 | HD22 | LEU | X | 169 | 39.658 | 49.693 | 43.138 | 0.00 | 0.00 |
| ATOM | 2595 | HD23 | LEU | X | 169 | 37.881 | 49.671 | 42.783 | 0.00 | 0.00 |
| ATOM | 2596 | C    | LEU | X | 169 | 35.941 | 53.651 | 42.154 | 0.00 | 0.00 |
| ATOM | 2597 | O    | LEU | X | 169 | 34.927 | 52.924 | 42.180 | 0.00 | 0.00 |
| ATOM | 2598 | N    | LEU | X | 170 | 35.842 | 54.948 | 41.995 | 0.00 | 0.00 |
| ATOM | 2599 | H    | LEU | X | 170 | 36.664 | 55.518 | 42.139 | 0.00 | 0.00 |
| ATOM | 2600 | CA   | LEU | X | 170 | 34.717 | 55.697 | 41.579 | 0.00 | 0.00 |
| ATOM | 2601 | HA   | LEU | X | 170 | 33.851 | 55.135 | 41.929 | 0.00 | 0.00 |
| ATOM | 2602 | CB   | LEU | X | 170 | 34.848 | 57.102 | 42.153 | 0.00 | 0.00 |
| ATOM | 2603 | HB2  | LEU | X | 170 | 35.850 | 57.531 | 42.145 | 0.00 | 0.00 |
| ATOM | 2604 | HB3  | LEU | X | 170 | 34.312 | 57.757 | 41.467 | 0.00 | 0.00 |

|      |      |      |     |   |     |        |        |        |      |      |
|------|------|------|-----|---|-----|--------|--------|--------|------|------|
| ATOM | 2605 | CG   | LEU | X | 170 | 34.209 | 57.011 | 43.578 | 0.00 | 0.00 |
| ATOM | 2606 | HG   | LEU | X | 170 | 34.608 | 56.218 | 44.212 | 0.00 | 0.00 |
| ATOM | 2607 | CD1  | LEU | X | 170 | 34.575 | 58.333 | 44.226 | 0.00 | 0.00 |
| ATOM | 2608 | HD11 | LEU | X | 170 | 34.316 | 58.317 | 45.285 | 0.00 | 0.00 |
| ATOM | 2609 | HD12 | LEU | X | 170 | 34.106 | 59.124 | 43.641 | 0.00 | 0.00 |
| ATOM | 2610 | HD13 | LEU | X | 170 | 35.665 | 58.344 | 44.226 | 0.00 | 0.00 |
| ATOM | 2611 | CD2  | LEU | X | 170 | 32.673 | 56.715 | 43.697 | 0.00 | 0.00 |
| ATOM | 2612 | HD21 | LEU | X | 170 | 32.485 | 55.703 | 43.338 | 0.00 | 0.00 |
| ATOM | 2613 | HD22 | LEU | X | 170 | 32.313 | 56.921 | 44.705 | 0.00 | 0.00 |
| ATOM | 2614 | HD23 | LEU | X | 170 | 32.171 | 57.461 | 43.082 | 0.00 | 0.00 |
| ATOM | 2615 | C    | LEU | X | 170 | 34.661 | 55.872 | 40.037 | 0.00 | 0.00 |
| ATOM | 2616 | O    | LEU | X | 170 | 33.561 | 55.870 | 39.455 | 0.00 | 0.00 |
| ATOM | 2617 | N    | ASP | X | 171 | 35.771 | 55.904 | 39.343 | 0.00 | 0.00 |
| ATOM | 2618 | H    | ASP | X | 171 | 36.658 | 56.043 | 39.806 | 0.00 | 0.00 |
| ATOM | 2619 | CA   | ASP | X | 171 | 35.778 | 55.763 | 37.855 | 0.00 | 0.00 |
| ATOM | 2620 | HA   | ASP | X | 171 | 35.218 | 56.572 | 37.386 | 0.00 | 0.00 |
| ATOM | 2621 | CB   | ASP | X | 171 | 37.174 | 55.832 | 37.253 | 0.00 | 0.00 |
| ATOM | 2622 | HB2  | ASP | X | 171 | 37.668 | 54.950 | 37.659 | 0.00 | 0.00 |
| ATOM | 2623 | HB3  | ASP | X | 171 | 37.166 | 55.682 | 36.173 | 0.00 | 0.00 |
| ATOM | 2624 | CG   | ASP | X | 171 | 38.015 | 57.070 | 37.562 | 0.00 | 0.00 |
| ATOM | 2625 | OD1  | ASP | X | 171 | 37.528 | 58.216 | 37.436 | 0.00 | 0.00 |
| ATOM | 2626 | OD2  | ASP | X | 171 | 39.278 | 56.892 | 37.830 | 0.00 | 0.00 |
| ATOM | 2627 | C    | ASP | X | 171 | 35.022 | 54.462 | 37.401 | 0.00 | 0.00 |
| ATOM | 2628 | O    | ASP | X | 171 | 34.153 | 54.599 | 36.527 | 0.00 | 0.00 |
| ATOM | 2629 | N    | GLN | X | 172 | 35.351 | 53.345 | 38.038 | 0.00 | 0.00 |
| ATOM | 2630 | H    | GLN | X | 172 | 36.087 | 53.310 | 38.729 | 0.00 | 0.00 |
| ATOM | 2631 | CA   | GLN | X | 172 | 34.725 | 52.084 | 37.792 | 0.00 | 0.00 |
| ATOM | 2632 | HA   | GLN | X | 172 | 34.928 | 51.780 | 36.765 | 0.00 | 0.00 |
| ATOM | 2633 | CB   | GLN | X | 172 | 35.386 | 51.035 | 38.691 | 0.00 | 0.00 |
| ATOM | 2634 | HB2  | GLN | X | 172 | 35.419 | 51.426 | 39.708 | 0.00 | 0.00 |
| ATOM | 2635 | HB3  | GLN | X | 172 | 34.838 | 50.095 | 38.754 | 0.00 | 0.00 |
| ATOM | 2636 | CG   | GLN | X | 172 | 36.862 | 50.648 | 38.374 | 0.00 | 0.00 |
| ATOM | 2637 | HG2  | GLN | X | 172 | 37.085 | 50.249 | 37.385 | 0.00 | 0.00 |
| ATOM | 2638 | HG3  | GLN | X | 172 | 37.447 | 51.568 | 38.376 | 0.00 | 0.00 |
| ATOM | 2639 | CD   | GLN | X | 172 | 37.513 | 49.660 | 39.400 | 0.00 | 0.00 |
| ATOM | 2640 | OE1  | GLN | X | 172 | 36.903 | 48.858 | 40.090 | 0.00 | 0.00 |
| ATOM | 2641 | NE2  | GLN | X | 172 | 38.841 | 49.754 | 39.655 | 0.00 | 0.00 |
| ATOM | 2642 | HE21 | GLN | X | 172 | 39.264 | 49.063 | 40.259 | 0.00 | 0.00 |
| ATOM | 2643 | HE22 | GLN | X | 172 | 39.352 | 50.414 | 39.087 | 0.00 | 0.00 |
| ATOM | 2644 | C    | GLN | X | 172 | 33.245 | 52.189 | 38.042 | 0.00 | 0.00 |
| ATOM | 2645 | O    | GLN | X | 172 | 32.534 | 51.869 | 37.144 | 0.00 | 0.00 |
| ATOM | 2646 | N    | ARG | X | 173 | 32.811 | 52.692 | 39.236 | 0.00 | 0.00 |
| ATOM | 2647 | H    | ARG | X | 173 | 33.405 | 53.188 | 39.884 | 0.00 | 0.00 |
| ATOM | 2648 | CA   | ARG | X | 173 | 31.390 | 52.892 | 39.509 | 0.00 | 0.00 |
| ATOM | 2649 | HA   | ARG | X | 173 | 30.928 | 51.906 | 39.556 | 0.00 | 0.00 |
| ATOM | 2650 | CB   | ARG | X | 173 | 31.240 | 53.459 | 40.897 | 0.00 | 0.00 |
| ATOM | 2651 | HB2  | ARG | X | 173 | 31.824 | 52.910 | 41.637 | 0.00 | 0.00 |
| ATOM | 2652 | HB3  | ARG | X | 173 | 31.483 | 54.515 | 41.013 | 0.00 | 0.00 |
| ATOM | 2653 | CG   | ARG | X | 173 | 29.765 | 53.387 | 41.388 | 0.00 | 0.00 |
| ATOM | 2654 | HG2  | ARG | X | 173 | 29.119 | 54.000 | 40.759 | 0.00 | 0.00 |
| ATOM | 2655 | HG3  | ARG | X | 173 | 29.406 | 52.358 | 41.405 | 0.00 | 0.00 |
| ATOM | 2656 | CD   | ARG | X | 173 | 29.631 | 53.946 | 42.785 | 0.00 | 0.00 |
| ATOM | 2657 | HD2  | ARG | X | 173 | 30.034 | 54.959 | 42.765 | 0.00 | 0.00 |
| ATOM | 2658 | HD3  | ARG | X | 173 | 28.576 | 54.063 | 43.034 | 0.00 | 0.00 |
| ATOM | 2659 | NE   | ARG | X | 173 | 30.073 | 53.103 | 43.823 | 0.00 | 0.00 |
| ATOM | 2660 | HE   | ARG | X | 173 | 29.992 | 52.113 | 43.639 | 0.00 | 0.00 |
| ATOM | 2661 | CZ   | ARG | X | 173 | 30.340 | 53.347 | 45.137 | 0.00 | 0.00 |
| ATOM | 2662 | NH1  | ARG | X | 173 | 30.327 | 54.483 | 45.742 | 0.00 | 0.00 |
| ATOM | 2663 | HH11 | ARG | X | 173 | 29.908 | 55.243 | 45.227 | 0.00 | 0.00 |
| ATOM | 2664 | HH12 | ARG | X | 173 | 30.651 | 54.535 | 46.697 | 0.00 | 0.00 |
| ATOM | 2665 | NH2  | ARG | X | 173 | 30.744 | 52.366 | 45.961 | 0.00 | 0.00 |
| ATOM | 2666 | HH21 | ARG | X | 173 | 30.754 | 51.425 | 45.595 | 0.00 | 0.00 |
| ATOM | 2667 | HH22 | ARG | X | 173 | 31.371 | 52.552 | 46.731 | 0.00 | 0.00 |
| ATOM | 2668 | C    | ARG | X | 173 | 30.555 | 53.734 | 38.405 | 0.00 | 0.00 |
| ATOM | 2669 | O    | ARG | X | 173 | 29.495 | 53.239 | 37.977 | 0.00 | 0.00 |
| ATOM | 2670 | N    | LEU | X | 174 | 31.127 | 54.783 | 37.845 | 0.00 | 0.00 |
| ATOM | 2671 | H    | LEU | X | 174 | 32.065 | 55.071 | 38.085 | 0.00 | 0.00 |

|      |      |      |     |   |     |        |        |        |      |      |
|------|------|------|-----|---|-----|--------|--------|--------|------|------|
| ATOM | 2672 | CA   | LEU | X | 174 | 30.534 | 55.550 | 36.728 | 0.00 | 0.00 |
| ATOM | 2673 | HA   | LEU | X | 174 | 29.521 | 55.868 | 36.973 | 0.00 | 0.00 |
| ATOM | 2674 | CB   | LEU | X | 174 | 31.312 | 56.891 | 36.648 | 0.00 | 0.00 |
| ATOM | 2675 | HB2  | LEU | X | 174 | 31.016 | 57.403 | 37.563 | 0.00 | 0.00 |
| ATOM | 2676 | HB3  | LEU | X | 174 | 32.379 | 56.679 | 36.713 | 0.00 | 0.00 |
| ATOM | 2677 | CG   | LEU | X | 174 | 30.923 | 57.906 | 35.496 | 0.00 | 0.00 |
| ATOM | 2678 | HG   | LEU | X | 174 | 30.858 | 57.322 | 34.578 | 0.00 | 0.00 |
| ATOM | 2679 | CD1  | LEU | X | 174 | 29.612 | 58.669 | 35.684 | 0.00 | 0.00 |
| ATOM | 2680 | HD11 | LEU | X | 174 | 29.309 | 59.325 | 34.869 | 0.00 | 0.00 |
| ATOM | 2681 | HD12 | LEU | X | 174 | 29.593 | 59.229 | 36.619 | 0.00 | 0.00 |
| ATOM | 2682 | HD13 | LEU | X | 174 | 28.880 | 57.878 | 35.848 | 0.00 | 0.00 |
| ATOM | 2683 | CD2  | LEU | X | 174 | 32.031 | 58.883 | 35.277 | 0.00 | 0.00 |
| ATOM | 2684 | HD21 | LEU | X | 174 | 31.859 | 59.499 | 34.394 | 0.00 | 0.00 |
| ATOM | 2685 | HD22 | LEU | X | 174 | 31.989 | 59.568 | 36.124 | 0.00 | 0.00 |
| ATOM | 2686 | HD23 | LEU | X | 174 | 32.963 | 58.333 | 35.147 | 0.00 | 0.00 |
| ATOM | 2687 | C    | LEU | X | 174 | 30.523 | 54.748 | 35.391 | 0.00 | 0.00 |
| ATOM | 2688 | O    | LEU | X | 174 | 29.685 | 55.051 | 34.550 | 0.00 | 0.00 |
| ATOM | 2689 | N    | ALA | X | 175 | 31.428 | 53.850 | 35.220 | 0.00 | 0.00 |
| ATOM | 2690 | H    | ALA | X | 175 | 32.112 | 53.777 | 35.959 | 0.00 | 0.00 |
| ATOM | 2691 | CA   | ALA | X | 175 | 31.445 | 52.905 | 34.101 | 0.00 | 0.00 |
| ATOM | 2692 | HA   | ALA | X | 175 | 31.093 | 53.400 | 33.196 | 0.00 | 0.00 |
| ATOM | 2693 | CB   | ALA | X | 175 | 32.900 | 52.335 | 33.918 | 0.00 | 0.00 |
| ATOM | 2694 | HB1  | ALA | X | 175 | 33.530 | 53.133 | 33.524 | 0.00 | 0.00 |
| ATOM | 2695 | HB2  | ALA | X | 175 | 32.878 | 51.486 | 33.234 | 0.00 | 0.00 |
| ATOM | 2696 | HB3  | ALA | X | 175 | 33.325 | 52.052 | 34.881 | 0.00 | 0.00 |
| ATOM | 2697 | C    | ALA | X | 175 | 30.424 | 51.725 | 34.327 | 0.00 | 0.00 |
| ATOM | 2698 | O    | ALA | X | 175 | 29.736 | 51.321 | 33.385 | 0.00 | 0.00 |
| ATOM | 2699 | N    | LEU | X | 176 | 30.156 | 51.307 | 35.506 | 0.00 | 0.00 |
| ATOM | 2700 | H    | LEU | X | 176 | 30.909 | 51.465 | 36.161 | 0.00 | 0.00 |
| ATOM | 2701 | CA   | LEU | X | 176 | 29.043 | 50.437 | 35.843 | 0.00 | 0.00 |
| ATOM | 2702 | HA   | LEU | X | 176 | 29.108 | 49.677 | 35.065 | 0.00 | 0.00 |
| ATOM | 2703 | CB   | LEU | X | 176 | 29.089 | 49.923 | 37.293 | 0.00 | 0.00 |
| ATOM | 2704 | HB2  | LEU | X | 176 | 28.715 | 50.699 | 37.962 | 0.00 | 0.00 |
| ATOM | 2705 | HB3  | LEU | X | 176 | 28.361 | 49.115 | 37.360 | 0.00 | 0.00 |
| ATOM | 2706 | CG   | LEU | X | 176 | 30.462 | 49.325 | 37.791 | 0.00 | 0.00 |
| ATOM | 2707 | HG   | LEU | X | 176 | 31.138 | 50.181 | 37.797 | 0.00 | 0.00 |
| ATOM | 2708 | CD1  | LEU | X | 176 | 30.507 | 48.699 | 39.190 | 0.00 | 0.00 |
| ATOM | 2709 | HD11 | LEU | X | 176 | 30.176 | 49.413 | 39.943 | 0.00 | 0.00 |
| ATOM | 2710 | HD12 | LEU | X | 176 | 31.531 | 48.407 | 39.423 | 0.00 | 0.00 |
| ATOM | 2711 | HD13 | LEU | X | 176 | 29.770 | 47.902 | 39.291 | 0.00 | 0.00 |
| ATOM | 2712 | CD2  | LEU | X | 176 | 30.903 | 48.216 | 36.737 | 0.00 | 0.00 |
| ATOM | 2713 | HD21 | LEU | X | 176 | 31.017 | 48.693 | 35.764 | 0.00 | 0.00 |
| ATOM | 2714 | HD22 | LEU | X | 176 | 31.866 | 47.822 | 37.063 | 0.00 | 0.00 |
| ATOM | 2715 | HD23 | LEU | X | 176 | 30.252 | 47.347 | 36.641 | 0.00 | 0.00 |
| ATOM | 2716 | C    | LEU | X | 176 | 27.718 | 51.223 | 35.563 | 0.00 | 0.00 |
| ATOM | 2717 | O    | LEU | X | 176 | 26.895 | 50.712 | 34.836 | 0.00 | 0.00 |
| ATOM | 2718 | N    | GLN | X | 177 | 27.634 | 52.499 | 35.927 | 0.00 | 0.00 |
| ATOM | 2719 | H    | GLN | X | 177 | 28.388 | 52.845 | 36.504 | 0.00 | 0.00 |
| ATOM | 2720 | CA   | GLN | X | 177 | 26.510 | 53.399 | 35.539 | 0.00 | 0.00 |
| ATOM | 2721 | HA   | GLN | X | 177 | 25.573 | 52.952 | 35.872 | 0.00 | 0.00 |
| ATOM | 2722 | CB   | GLN | X | 177 | 26.714 | 54.756 | 36.232 | 0.00 | 0.00 |
| ATOM | 2723 | HB2  | GLN | X | 177 | 27.748 | 55.075 | 36.106 | 0.00 | 0.00 |
| ATOM | 2724 | HB3  | GLN | X | 177 | 25.972 | 55.428 | 35.800 | 0.00 | 0.00 |
| ATOM | 2725 | CG   | GLN | X | 177 | 26.510 | 54.746 | 37.742 | 0.00 | 0.00 |
| ATOM | 2726 | HG2  | GLN | X | 177 | 25.589 | 54.348 | 38.168 | 0.00 | 0.00 |
| ATOM | 2727 | HG3  | GLN | X | 177 | 27.314 | 54.094 | 38.081 | 0.00 | 0.00 |
| ATOM | 2728 | CD   | GLN | X | 177 | 26.585 | 56.144 | 38.342 | 0.00 | 0.00 |
| ATOM | 2729 | OE1  | GLN | X | 177 | 27.593 | 56.833 | 38.201 | 0.00 | 0.00 |
| ATOM | 2730 | NE2  | GLN | X | 177 | 25.543 | 56.650 | 38.964 | 0.00 | 0.00 |
| ATOM | 2731 | HE21 | GLN | X | 177 | 25.686 | 57.626 | 39.179 | 0.00 | 0.00 |
| ATOM | 2732 | HE22 | GLN | X | 177 | 24.602 | 56.294 | 38.875 | 0.00 | 0.00 |
| ATOM | 2733 | C    | GLN | X | 177 | 26.350 | 53.499 | 34.042 | 0.00 | 0.00 |
| ATOM | 2734 | O    | GLN | X | 177 | 25.242 | 53.546 | 33.606 | 0.00 | 0.00 |
| ATOM | 2735 | N    | TRP | X | 178 | 27.445 | 53.474 | 33.283 | 0.00 | 0.00 |
| ATOM | 2736 | H    | TRP | X | 178 | 28.357 | 53.452 | 33.717 | 0.00 | 0.00 |
| ATOM | 2737 | CA   | TRP | X | 178 | 27.469 | 53.671 | 31.824 | 0.00 | 0.00 |
| ATOM | 2738 | HA   | TRP | X | 178 | 26.724 | 54.419 | 31.553 | 0.00 | 0.00 |

|      |      |      |     |   |     |        |        |        |      |      |
|------|------|------|-----|---|-----|--------|--------|--------|------|------|
| ATOM | 2739 | CB   | TRP | X | 178 | 28.830 | 54.149 | 31.370 | 0.00 | 0.00 |
| ATOM | 2740 | HB2  | TRP | X | 178 | 29.043 | 55.023 | 31.986 | 0.00 | 0.00 |
| ATOM | 2741 | HB3  | TRP | X | 178 | 29.596 | 53.417 | 31.623 | 0.00 | 0.00 |
| ATOM | 2742 | CG   | TRP | X | 178 | 28.951 | 54.483 | 29.937 | 0.00 | 0.00 |
| ATOM | 2743 | CD1  | TRP | X | 178 | 28.934 | 55.779 | 29.499 | 0.00 | 0.00 |
| ATOM | 2744 | HD1  | TRP | X | 178 | 29.010 | 56.637 | 30.151 | 0.00 | 0.00 |
| ATOM | 2745 | NE1  | TRP | X | 178 | 29.172 | 55.760 | 28.136 | 0.00 | 0.00 |
| ATOM | 2746 | HE1  | TRP | X | 178 | 29.322 | 56.646 | 27.674 | 0.00 | 0.00 |
| ATOM | 2747 | CE2  | TRP | X | 178 | 28.978 | 54.510 | 27.624 | 0.00 | 0.00 |
| ATOM | 2748 | CZ2  | TRP | X | 178 | 28.914 | 54.029 | 26.292 | 0.00 | 0.00 |
| ATOM | 2749 | HZ2  | TRP | X | 178 | 28.927 | 54.668 | 25.421 | 0.00 | 0.00 |
| ATOM | 2750 | CH2  | TRP | X | 178 | 28.884 | 52.675 | 26.054 | 0.00 | 0.00 |
| ATOM | 2751 | HH2  | TRP | X | 178 | 28.929 | 52.274 | 25.053 | 0.00 | 0.00 |
| ATOM | 2752 | CZ3  | TRP | X | 178 | 28.922 | 51.755 | 27.137 | 0.00 | 0.00 |
| ATOM | 2753 | HZ3  | TRP | X | 178 | 28.863 | 50.696 | 26.935 | 0.00 | 0.00 |
| ATOM | 2754 | CE3  | TRP | X | 178 | 28.887 | 52.285 | 28.462 | 0.00 | 0.00 |
| ATOM | 2755 | HE3  | TRP | X | 178 | 28.798 | 51.531 | 29.231 | 0.00 | 0.00 |
| ATOM | 2756 | CD2  | TRP | X | 178 | 28.934 | 53.654 | 28.800 | 0.00 | 0.00 |
| ATOM | 2757 | C    | TRP | X | 178 | 27.018 | 52.395 | 31.138 | 0.00 | 0.00 |
| ATOM | 2758 | O    | TRP | X | 178 | 26.227 | 52.398 | 30.170 | 0.00 | 0.00 |
| ATOM | 2759 | N    | VAL | X | 179 | 27.482 | 51.274 | 31.606 | 0.00 | 0.00 |
| ATOM | 2760 | H    | VAL | X | 179 | 28.174 | 51.417 | 32.329 | 0.00 | 0.00 |
| ATOM | 2761 | CA   | VAL | X | 179 | 27.129 | 49.902 | 31.165 | 0.00 | 0.00 |
| ATOM | 2762 | HA   | VAL | X | 179 | 27.335 | 49.813 | 30.098 | 0.00 | 0.00 |
| ATOM | 2763 | CB   | VAL | X | 179 | 28.081 | 48.896 | 31.817 | 0.00 | 0.00 |
| ATOM | 2764 | HB   | VAL | X | 179 | 28.061 | 48.983 | 32.904 | 0.00 | 0.00 |
| ATOM | 2765 | CG1  | VAL | X | 179 | 27.713 | 47.356 | 31.630 | 0.00 | 0.00 |
| ATOM | 2766 | HG11 | VAL | X | 179 | 26.781 | 47.207 | 32.175 | 0.00 | 0.00 |
| ATOM | 2767 | HG12 | VAL | X | 179 | 27.810 | 47.019 | 30.598 | 0.00 | 0.00 |
| ATOM | 2768 | HG13 | VAL | X | 179 | 28.424 | 46.771 | 32.213 | 0.00 | 0.00 |
| ATOM | 2769 | CG2  | VAL | X | 179 | 29.521 | 49.110 | 31.300 | 0.00 | 0.00 |
| ATOM | 2770 | HG21 | VAL | X | 179 | 29.852 | 50.147 | 31.335 | 0.00 | 0.00 |
| ATOM | 2771 | HG22 | VAL | X | 179 | 29.520 | 48.679 | 30.298 | 0.00 | 0.00 |
| ATOM | 2772 | HG23 | VAL | X | 179 | 30.221 | 48.484 | 31.854 | 0.00 | 0.00 |
| ATOM | 2773 | C    | VAL | X | 179 | 25.670 | 49.593 | 31.414 | 0.00 | 0.00 |
| ATOM | 2774 | O    | VAL | X | 179 | 24.917 | 49.422 | 30.474 | 0.00 | 0.00 |
| ATOM | 2775 | N    | GLN | X | 180 | 25.178 | 49.718 | 32.690 | 0.00 | 0.00 |
| ATOM | 2776 | H    | GLN | X | 180 | 25.845 | 50.025 | 33.383 | 0.00 | 0.00 |
| ATOM | 2777 | CA   | GLN | X | 180 | 23.745 | 49.749 | 33.010 | 0.00 | 0.00 |
| ATOM | 2778 | HA   | GLN | X | 180 | 23.368 | 48.742 | 32.829 | 0.00 | 0.00 |
| ATOM | 2779 | CB   | GLN | X | 180 | 23.544 | 50.091 | 34.536 | 0.00 | 0.00 |
| ATOM | 2780 | HB2  | GLN | X | 180 | 24.047 | 49.308 | 35.104 | 0.00 | 0.00 |
| ATOM | 2781 | HB3  | GLN | X | 180 | 24.027 | 51.045 | 34.745 | 0.00 | 0.00 |
| ATOM | 2782 | CG   | GLN | X | 180 | 22.062 | 50.058 | 34.907 | 0.00 | 0.00 |
| ATOM | 2783 | HG2  | GLN | X | 180 | 21.516 | 50.732 | 34.247 | 0.00 | 0.00 |
| ATOM | 2784 | HG3  | GLN | X | 180 | 21.798 | 49.008 | 34.775 | 0.00 | 0.00 |
| ATOM | 2785 | CD   | GLN | X | 180 | 21.759 | 50.292 | 36.323 | 0.00 | 0.00 |
| ATOM | 2786 | OE1  | GLN | X | 180 | 21.379 | 51.326 | 36.767 | 0.00 | 0.00 |
| ATOM | 2787 | NE2  | GLN | X | 180 | 22.020 | 49.331 | 37.208 | 0.00 | 0.00 |
| ATOM | 2788 | HE21 | GLN | X | 180 | 21.827 | 49.459 | 38.191 | 0.00 | 0.00 |
| ATOM | 2789 | HE22 | GLN | X | 180 | 22.345 | 48.453 | 36.830 | 0.00 | 0.00 |
| ATOM | 2790 | C    | GLN | X | 180 | 22.985 | 50.726 | 32.081 | 0.00 | 0.00 |
| ATOM | 2791 | O    | GLN | X | 180 | 21.928 | 50.310 | 31.634 | 0.00 | 0.00 |
| ATOM | 2792 | N    | GLU | X | 181 | 23.584 | 51.887 | 31.797 | 0.00 | 0.00 |
| ATOM | 2793 | H    | GLU | X | 181 | 24.439 | 52.194 | 32.239 | 0.00 | 0.00 |
| ATOM | 2794 | CA   | GLU | X | 181 | 22.906 | 52.892 | 30.965 | 0.00 | 0.00 |
| ATOM | 2795 | HA   | GLU | X | 181 | 21.839 | 52.922 | 31.185 | 0.00 | 0.00 |
| ATOM | 2796 | CB   | GLU | X | 181 | 23.559 | 54.251 | 31.194 | 0.00 | 0.00 |
| ATOM | 2797 | HB2  | GLU | X | 181 | 23.366 | 54.518 | 32.232 | 0.00 | 0.00 |
| ATOM | 2798 | HB3  | GLU | X | 181 | 24.633 | 54.098 | 31.084 | 0.00 | 0.00 |
| ATOM | 2799 | CG   | GLU | X | 181 | 23.092 | 55.370 | 30.332 | 0.00 | 0.00 |
| ATOM | 2800 | HG2  | GLU | X | 181 | 23.361 | 55.367 | 29.276 | 0.00 | 0.00 |
| ATOM | 2801 | HG3  | GLU | X | 181 | 22.014 | 55.297 | 30.188 | 0.00 | 0.00 |
| ATOM | 2802 | CD   | GLU | X | 181 | 23.448 | 56.673 | 31.020 | 0.00 | 0.00 |
| ATOM | 2803 | OE1  | GLU | X | 181 | 22.749 | 57.146 | 31.970 | 0.00 | 0.00 |
| ATOM | 2804 | OE2  | GLU | X | 181 | 24.607 | 57.179 | 30.823 | 0.00 | 0.00 |
| ATOM | 2805 | C    | GLU | X | 181 | 22.908 | 52.590 | 29.409 | 0.00 | 0.00 |

|      |      |      |     |   |     |        |        |        |      |      |
|------|------|------|-----|---|-----|--------|--------|--------|------|------|
| ATOM | 2806 | O    | GLU | X | 181 | 22.053 | 53.079 | 28.680 | 0.00 | 0.00 |
| ATOM | 2807 | N    | ASN | X | 182 | 23.788 | 51.702 | 28.861 | 0.00 | 0.00 |
| ATOM | 2808 | H    | ASN | X | 182 | 24.499 | 51.318 | 29.466 | 0.00 | 0.00 |
| ATOM | 2809 | CA   | ASN | X | 182 | 24.050 | 51.566 | 27.377 | 0.00 | 0.00 |
| ATOM | 2810 | HA   | ASN | X | 182 | 23.173 | 51.862 | 26.801 | 0.00 | 0.00 |
| ATOM | 2811 | CB   | ASN | X | 182 | 25.170 | 52.534 | 26.894 | 0.00 | 0.00 |
| ATOM | 2812 | HB2  | ASN | X | 182 | 25.999 | 52.325 | 27.569 | 0.00 | 0.00 |
| ATOM | 2813 | HB3  | ASN | X | 182 | 25.499 | 52.243 | 25.896 | 0.00 | 0.00 |
| ATOM | 2814 | CG   | ASN | X | 182 | 24.907 | 54.012 | 27.058 | 0.00 | 0.00 |
| ATOM | 2815 | OD1  | ASN | X | 182 | 23.985 | 54.583 | 26.407 | 0.00 | 0.00 |
| ATOM | 2816 | ND2  | ASN | X | 182 | 25.534 | 54.631 | 28.022 | 0.00 | 0.00 |
| ATOM | 2817 | HD21 | ASN | X | 182 | 25.319 | 55.606 | 28.175 | 0.00 | 0.00 |
| ATOM | 2818 | HD22 | ASN | X | 182 | 26.105 | 54.069 | 28.637 | 0.00 | 0.00 |
| ATOM | 2819 | C    | ASN | X | 182 | 24.304 | 50.173 | 26.828 | 0.00 | 0.00 |
| ATOM | 2820 | O    | ASN | X | 182 | 24.322 | 50.053 | 25.589 | 0.00 | 0.00 |
| ATOM | 2821 | N    | VAL | X | 183 | 24.380 | 49.097 | 27.643 | 0.00 | 0.00 |
| ATOM | 2822 | H    | VAL | X | 183 | 24.461 | 49.330 | 28.622 | 0.00 | 0.00 |
| ATOM | 2823 | CA   | VAL | X | 183 | 24.890 | 47.783 | 27.193 | 0.00 | 0.00 |
| ATOM | 2824 | HA   | VAL | X | 183 | 25.799 | 48.017 | 26.639 | 0.00 | 0.00 |
| ATOM | 2825 | CB   | VAL | X | 183 | 25.470 | 46.951 | 28.343 | 0.00 | 0.00 |
| ATOM | 2826 | HB   | VAL | X | 183 | 26.067 | 47.685 | 28.883 | 0.00 | 0.00 |
| ATOM | 2827 | CG1  | VAL | X | 183 | 24.384 | 46.429 | 29.292 | 0.00 | 0.00 |
| ATOM | 2828 | HG11 | VAL | X | 183 | 24.804 | 45.998 | 30.201 | 0.00 | 0.00 |
| ATOM | 2829 | HG12 | VAL | X | 183 | 23.854 | 47.287 | 29.706 | 0.00 | 0.00 |
| ATOM | 2830 | HG13 | VAL | X | 183 | 23.712 | 45.758 | 28.757 | 0.00 | 0.00 |
| ATOM | 2831 | CG2  | VAL | X | 183 | 26.561 | 45.950 | 27.839 | 0.00 | 0.00 |
| ATOM | 2832 | HG21 | VAL | X | 183 | 27.377 | 46.442 | 27.311 | 0.00 | 0.00 |
| ATOM | 2833 | HG22 | VAL | X | 183 | 26.129 | 45.185 | 27.193 | 0.00 | 0.00 |
| ATOM | 2834 | HG23 | VAL | X | 183 | 26.995 | 45.475 | 28.719 | 0.00 | 0.00 |
| ATOM | 2835 | C    | VAL | X | 183 | 23.883 | 47.111 | 26.316 | 0.00 | 0.00 |
| ATOM | 2836 | O    | VAL | X | 183 | 24.289 | 46.393 | 25.413 | 0.00 | 0.00 |
| ATOM | 2837 | N    | ALA | X | 184 | 22.559 | 47.413 | 26.367 | 0.00 | 0.00 |
| ATOM | 2838 | H    | ALA | X | 184 | 22.170 | 47.941 | 27.134 | 0.00 | 0.00 |
| ATOM | 2839 | CA   | ALA | X | 184 | 21.612 | 47.019 | 25.326 | 0.00 | 0.00 |
| ATOM | 2840 | HA   | ALA | X | 184 | 21.541 | 45.932 | 25.366 | 0.00 | 0.00 |
| ATOM | 2841 | CB   | ALA | X | 184 | 20.338 | 47.774 | 25.655 | 0.00 | 0.00 |
| ATOM | 2842 | HB1  | ALA | X | 184 | 19.565 | 47.381 | 24.994 | 0.00 | 0.00 |
| ATOM | 2843 | HB2  | ALA | X | 184 | 20.391 | 48.847 | 25.470 | 0.00 | 0.00 |
| ATOM | 2844 | HB3  | ALA | X | 184 | 20.065 | 47.655 | 26.703 | 0.00 | 0.00 |
| ATOM | 2845 | C    | ALA | X | 184 | 21.956 | 47.313 | 23.892 | 0.00 | 0.00 |
| ATOM | 2846 | O    | ALA | X | 184 | 21.703 | 46.530 | 23.006 | 0.00 | 0.00 |
| ATOM | 2847 | N    | ALA | X | 185 | 22.735 | 48.389 | 23.672 | 0.00 | 0.00 |
| ATOM | 2848 | H    | ALA | X | 185 | 22.999 | 48.909 | 24.497 | 0.00 | 0.00 |
| ATOM | 2849 | CA   | ALA | X | 185 | 23.183 | 48.805 | 22.351 | 0.00 | 0.00 |
| ATOM | 2850 | HA   | ALA | X | 185 | 22.280 | 48.899 | 21.749 | 0.00 | 0.00 |
| ATOM | 2851 | CB   | ALA | X | 185 | 23.819 | 50.221 | 22.466 | 0.00 | 0.00 |
| ATOM | 2852 | HB1  | ALA | X | 185 | 23.898 | 50.550 | 21.429 | 0.00 | 0.00 |
| ATOM | 2853 | HB2  | ALA | X | 185 | 24.855 | 50.252 | 22.805 | 0.00 | 0.00 |
| ATOM | 2854 | HB3  | ALA | X | 185 | 23.256 | 50.947 | 23.052 | 0.00 | 0.00 |
| ATOM | 2855 | C    | ALA | X | 185 | 24.024 | 47.717 | 21.696 | 0.00 | 0.00 |
| ATOM | 2856 | O    | ALA | X | 185 | 23.846 | 47.462 | 20.519 | 0.00 | 0.00 |
| ATOM | 2857 | N    | PHE | X | 186 | 24.908 | 47.131 | 22.478 | 0.00 | 0.00 |
| ATOM | 2858 | H    | PHE | X | 186 | 24.894 | 47.456 | 23.434 | 0.00 | 0.00 |
| ATOM | 2859 | CA   | PHE | X | 186 | 25.791 | 46.063 | 22.105 | 0.00 | 0.00 |
| ATOM | 2860 | HA   | PHE | X | 186 | 26.137 | 46.355 | 21.113 | 0.00 | 0.00 |
| ATOM | 2861 | CB   | PHE | X | 186 | 26.996 | 46.159 | 23.082 | 0.00 | 0.00 |
| ATOM | 2862 | HB2  | PHE | X | 186 | 26.661 | 46.015 | 24.110 | 0.00 | 0.00 |
| ATOM | 2863 | HB3  | PHE | X | 186 | 27.675 | 45.310 | 23.008 | 0.00 | 0.00 |
| ATOM | 2864 | CG   | PHE | X | 186 | 27.709 | 47.419 | 23.089 | 0.00 | 0.00 |
| ATOM | 2865 | CD1  | PHE | X | 186 | 27.242 | 48.462 | 23.931 | 0.00 | 0.00 |
| ATOM | 2866 | HD1  | PHE | X | 186 | 26.295 | 48.446 | 24.449 | 0.00 | 0.00 |
| ATOM | 2867 | CE1  | PHE | X | 186 | 27.858 | 49.701 | 23.936 | 0.00 | 0.00 |
| ATOM | 2868 | HE1  | PHE | X | 186 | 27.341 | 50.520 | 24.413 | 0.00 | 0.00 |
| ATOM | 2869 | CZ   | PHE | X | 186 | 28.963 | 49.947 | 23.198 | 0.00 | 0.00 |
| ATOM | 2870 | HZ   | PHE | X | 186 | 29.470 | 50.899 | 23.149 | 0.00 | 0.00 |
| ATOM | 2871 | CE2  | PHE | X | 186 | 29.502 | 48.934 | 22.386 | 0.00 | 0.00 |
| ATOM | 2872 | HE2  | PHE | X | 186 | 30.378 | 49.146 | 21.792 | 0.00 | 0.00 |

|      |      |      |     |   |     |        |        |        |      |      |
|------|------|------|-----|---|-----|--------|--------|--------|------|------|
| ATOM | 2873 | CD2  | PHE | X | 186 | 28.919 | 47.674 | 22.400 | 0.00 | 0.00 |
| ATOM | 2874 | HD2  | PHE | X | 186 | 29.322 | 46.872 | 21.799 | 0.00 | 0.00 |
| ATOM | 2875 | C    | PHE | X | 186 | 25.134 | 44.652 | 22.030 | 0.00 | 0.00 |
| ATOM | 2876 | O    | PHE | X | 186 | 25.846 | 43.680 | 21.715 | 0.00 | 0.00 |
| ATOM | 2877 | N    | GLY | X | 187 | 23.864 | 44.463 | 22.517 | 0.00 | 0.00 |
| ATOM | 2878 | H    | GLY | X | 187 | 23.276 | 45.203 | 22.872 | 0.00 | 0.00 |
| ATOM | 2879 | CA   | GLY | X | 187 | 23.215 | 43.176 | 22.636 | 0.00 | 0.00 |
| ATOM | 2880 | HA2  | GLY | X | 187 | 22.162 | 43.347 | 22.410 | 0.00 | 0.00 |
| ATOM | 2881 | HA3  | GLY | X | 187 | 23.689 | 42.512 | 21.912 | 0.00 | 0.00 |
| ATOM | 2882 | C    | GLY | X | 187 | 23.441 | 42.243 | 23.879 | 0.00 | 0.00 |
| ATOM | 2883 | O    | GLY | X | 187 | 22.757 | 41.225 | 23.988 | 0.00 | 0.00 |
| ATOM | 2884 | N    | GLY | X | 188 | 24.221 | 42.758 | 24.845 | 0.00 | 0.00 |
| ATOM | 2885 | H    | GLY | X | 188 | 24.680 | 43.648 | 24.716 | 0.00 | 0.00 |
| ATOM | 2886 | CA   | GLY | X | 188 | 24.246 | 42.249 | 26.215 | 0.00 | 0.00 |
| ATOM | 2887 | HA2  | GLY | X | 188 | 24.076 | 41.175 | 26.148 | 0.00 | 0.00 |
| ATOM | 2888 | HA3  | GLY | X | 188 | 25.206 | 42.548 | 26.636 | 0.00 | 0.00 |
| ATOM | 2889 | C    | GLY | X | 188 | 23.076 | 42.759 | 27.033 | 0.00 | 0.00 |
| ATOM | 2890 | O    | GLY | X | 188 | 22.450 | 43.778 | 26.622 | 0.00 | 0.00 |
| ATOM | 2891 | N    | ASP | X | 189 | 22.782 | 42.114 | 28.196 | 0.00 | 0.00 |
| ATOM | 2892 | H    | ASP | X | 189 | 23.340 | 41.316 | 28.463 | 0.00 | 0.00 |
| ATOM | 2893 | CA   | ASP | X | 189 | 21.584 | 42.490 | 29.022 | 0.00 | 0.00 |
| ATOM | 2894 | HA   | ASP | X | 189 | 21.013 | 43.209 | 28.435 | 0.00 | 0.00 |
| ATOM | 2895 | CB   | ASP | X | 189 | 20.724 | 41.260 | 29.271 | 0.00 | 0.00 |
| ATOM | 2896 | HB2  | ASP | X | 189 | 20.573 | 40.724 | 28.334 | 0.00 | 0.00 |
| ATOM | 2897 | HB3  | ASP | X | 189 | 21.225 | 40.474 | 29.836 | 0.00 | 0.00 |
| ATOM | 2898 | CG   | ASP | X | 189 | 19.216 | 41.567 | 29.674 | 0.00 | 0.00 |
| ATOM | 2899 | OD1  | ASP | X | 189 | 18.281 | 41.035 | 29.004 | 0.00 | 0.00 |
| ATOM | 2900 | OD2  | ASP | X | 189 | 18.984 | 42.277 | 30.665 | 0.00 | 0.00 |
| ATOM | 2901 | C    | ASP | X | 189 | 22.036 | 43.139 | 30.286 | 0.00 | 0.00 |
| ATOM | 2902 | O    | ASP | X | 189 | 22.890 | 42.556 | 30.954 | 0.00 | 0.00 |
| ATOM | 2903 | N    | PRO | X | 190 | 21.531 | 44.362 | 30.603 | 0.00 | 0.00 |
| ATOM | 2904 | CD   | PRO | X | 190 | 20.540 | 45.060 | 29.851 | 0.00 | 0.00 |
| ATOM | 2905 | HD2  | PRO | X | 190 | 19.742 | 44.328 | 29.734 | 0.00 | 0.00 |
| ATOM | 2906 | HD3  | PRO | X | 190 | 20.947 | 45.374 | 28.890 | 0.00 | 0.00 |
| ATOM | 2907 | CG   | PRO | X | 190 | 20.150 | 46.225 | 30.654 | 0.00 | 0.00 |
| ATOM | 2908 | HG2  | PRO | X | 190 | 19.259 | 46.002 | 31.241 | 0.00 | 0.00 |
| ATOM | 2909 | HG3  | PRO | X | 190 | 19.911 | 47.079 | 30.021 | 0.00 | 0.00 |
| ATOM | 2910 | CB   | PRO | X | 190 | 21.298 | 46.554 | 31.564 | 0.00 | 0.00 |
| ATOM | 2911 | HB2  | PRO | X | 190 | 21.077 | 47.076 | 32.496 | 0.00 | 0.00 |
| ATOM | 2912 | HB3  | PRO | X | 190 | 22.066 | 47.133 | 31.051 | 0.00 | 0.00 |
| ATOM | 2913 | CA   | PRO | X | 190 | 21.869 | 45.164 | 31.746 | 0.00 | 0.00 |
| ATOM | 2914 | HA   | PRO | X | 190 | 22.945 | 45.159 | 31.922 | 0.00 | 0.00 |
| ATOM | 2915 | C    | PRO | X | 190 | 21.339 | 44.571 | 33.070 | 0.00 | 0.00 |
| ATOM | 2916 | O    | PRO | X | 190 | 21.785 | 44.984 | 34.171 | 0.00 | 0.00 |
| ATOM | 2917 | N    | THR | X | 191 | 20.318 | 43.660 | 33.051 | 0.00 | 0.00 |
| ATOM | 2918 | H    | THR | X | 191 | 19.947 | 43.468 | 32.132 | 0.00 | 0.00 |
| ATOM | 2919 | CA   | THR | X | 191 | 19.778 | 42.837 | 34.092 | 0.00 | 0.00 |
| ATOM | 2920 | HA   | THR | X | 191 | 19.926 | 43.436 | 34.990 | 0.00 | 0.00 |
| ATOM | 2921 | CB   | THR | X | 191 | 18.266 | 42.519 | 33.955 | 0.00 | 0.00 |
| ATOM | 2922 | HB   | THR | X | 191 | 17.924 | 42.116 | 34.908 | 0.00 | 0.00 |
| ATOM | 2923 | CG2  | THR | X | 191 | 17.513 | 43.864 | 33.750 | 0.00 | 0.00 |
| ATOM | 2924 | HG21 | THR | X | 191 | 16.440 | 43.778 | 33.920 | 0.00 | 0.00 |
| ATOM | 2925 | HG22 | THR | X | 191 | 17.720 | 44.263 | 32.757 | 0.00 | 0.00 |
| ATOM | 2926 | HG23 | THR | X | 191 | 17.829 | 44.575 | 34.514 | 0.00 | 0.00 |
| ATOM | 2927 | OG1  | THR | X | 191 | 17.881 | 41.631 | 32.960 | 0.00 | 0.00 |
| ATOM | 2928 | HG1  | THR | X | 191 | 18.305 | 41.953 | 32.160 | 0.00 | 0.00 |
| ATOM | 2929 | C    | THR | X | 191 | 20.556 | 41.610 | 34.404 | 0.00 | 0.00 |
| ATOM | 2930 | O    | THR | X | 191 | 20.315 | 40.841 | 35.318 | 0.00 | 0.00 |
| ATOM | 2931 | N    | SER | X | 192 | 21.632 | 41.394 | 33.654 | 0.00 | 0.00 |
| ATOM | 2932 | H    | SER | X | 192 | 21.863 | 41.955 | 32.846 | 0.00 | 0.00 |
| ATOM | 2933 | CA   | SER | X | 192 | 22.512 | 40.212 | 33.861 | 0.00 | 0.00 |
| ATOM | 2934 | HA   | SER | X | 192 | 22.266 | 39.764 | 34.824 | 0.00 | 0.00 |
| ATOM | 2935 | CB   | SER | X | 192 | 22.077 | 39.203 | 32.767 | 0.00 | 0.00 |
| ATOM | 2936 | HB2  | SER | X | 192 | 22.098 | 39.739 | 31.817 | 0.00 | 0.00 |
| ATOM | 2937 | HB3  | SER | X | 192 | 22.714 | 38.323 | 32.674 | 0.00 | 0.00 |
| ATOM | 2938 | OG   | SER | X | 192 | 20.791 | 38.795 | 33.016 | 0.00 | 0.00 |
| ATOM | 2939 | HG   | SER | X | 192 | 20.539 | 38.580 | 32.114 | 0.00 | 0.00 |

|      |      |      |     |   |     |        |        |        |      |      |
|------|------|------|-----|---|-----|--------|--------|--------|------|------|
| ATOM | 2940 | C    | SER | X | 192 | 23.975 | 40.567 | 33.941 | 0.00 | 0.00 |
| ATOM | 2941 | O    | SER | X | 192 | 24.847 | 39.877 | 33.359 | 0.00 | 0.00 |
| ATOM | 2942 | N    | VAL | X | 193 | 24.341 | 41.651 | 34.602 | 0.00 | 0.00 |
| ATOM | 2943 | H    | VAL | X | 193 | 23.721 | 42.114 | 35.252 | 0.00 | 0.00 |
| ATOM | 2944 | CA   | VAL | X | 193 | 25.703 | 42.159 | 34.724 | 0.00 | 0.00 |
| ATOM | 2945 | HA   | VAL | X | 193 | 26.229 | 41.970 | 33.787 | 0.00 | 0.00 |
| ATOM | 2946 | CB   | VAL | X | 193 | 25.805 | 43.643 | 34.939 | 0.00 | 0.00 |
| ATOM | 2947 | HB   | VAL | X | 193 | 25.435 | 43.888 | 35.935 | 0.00 | 0.00 |
| ATOM | 2948 | CG1  | VAL | X | 193 | 27.318 | 44.110 | 34.890 | 0.00 | 0.00 |
| ATOM | 2949 | HG11 | VAL | X | 193 | 27.339 | 45.145 | 34.550 | 0.00 | 0.00 |
| ATOM | 2950 | HG12 | VAL | X | 193 | 27.817 | 43.883 | 35.833 | 0.00 | 0.00 |
| ATOM | 2951 | HG13 | VAL | X | 193 | 27.830 | 43.571 | 34.093 | 0.00 | 0.00 |
| ATOM | 2952 | CG2  | VAL | X | 193 | 25.007 | 44.458 | 33.998 | 0.00 | 0.00 |
| ATOM | 2953 | HG21 | VAL | X | 193 | 23.978 | 44.279 | 34.308 | 0.00 | 0.00 |
| ATOM | 2954 | HG22 | VAL | X | 193 | 25.177 | 44.158 | 32.964 | 0.00 | 0.00 |
| ATOM | 2955 | HG23 | VAL | X | 193 | 25.152 | 45.535 | 34.087 | 0.00 | 0.00 |
| ATOM | 2956 | C    | VAL | X | 193 | 26.469 | 41.438 | 35.835 | 0.00 | 0.00 |
| ATOM | 2957 | O    | VAL | X | 193 | 25.998 | 41.282 | 36.897 | 0.00 | 0.00 |
| ATOM | 2958 | N    | THR | X | 194 | 27.669 | 40.975 | 35.505 | 0.00 | 0.00 |
| ATOM | 2959 | H    | THR | X | 194 | 27.973 | 41.126 | 34.554 | 0.00 | 0.00 |
| ATOM | 2960 | CA   | THR | X | 194 | 28.653 | 40.269 | 36.357 | 0.00 | 0.00 |
| ATOM | 2961 | HA   | THR | X | 194 | 28.305 | 40.266 | 37.390 | 0.00 | 0.00 |
| ATOM | 2962 | CB   | THR | X | 194 | 28.941 | 38.850 | 35.849 | 0.00 | 0.00 |
| ATOM | 2963 | HB   | THR | X | 194 | 29.027 | 38.841 | 34.763 | 0.00 | 0.00 |
| ATOM | 2964 | CG2  | THR | X | 194 | 30.201 | 38.099 | 36.404 | 0.00 | 0.00 |
| ATOM | 2965 | HG21 | THR | X | 194 | 30.144 | 37.826 | 37.458 | 0.00 | 0.00 |
| ATOM | 2966 | HG22 | THR | X | 194 | 31.027 | 38.809 | 36.372 | 0.00 | 0.00 |
| ATOM | 2967 | HG23 | THR | X | 194 | 30.495 | 37.224 | 35.825 | 0.00 | 0.00 |
| ATOM | 2968 | OG1  | THR | X | 194 | 27.995 | 37.946 | 36.224 | 0.00 | 0.00 |
| ATOM | 2969 | HG1  | THR | X | 194 | 27.148 | 38.171 | 35.833 | 0.00 | 0.00 |
| ATOM | 2970 | C    | THR | X | 194 | 29.942 | 41.072 | 36.414 | 0.00 | 0.00 |
| ATOM | 2971 | O    | THR | X | 194 | 30.494 | 41.341 | 35.356 | 0.00 | 0.00 |
| ATOM | 2972 | N    | LEU | X | 195 | 30.474 | 41.405 | 37.622 | 0.00 | 0.00 |
| ATOM | 2973 | H    | LEU | X | 195 | 30.017 | 40.992 | 38.423 | 0.00 | 0.00 |
| ATOM | 2974 | CA   | LEU | X | 195 | 31.850 | 41.982 | 37.797 | 0.00 | 0.00 |
| ATOM | 2975 | HA   | LEU | X | 195 | 32.064 | 42.522 | 36.875 | 0.00 | 0.00 |
| ATOM | 2976 | CB   | LEU | X | 195 | 31.881 | 42.903 | 39.071 | 0.00 | 0.00 |
| ATOM | 2977 | HB2  | LEU | X | 195 | 31.908 | 42.265 | 39.955 | 0.00 | 0.00 |
| ATOM | 2978 | HB3  | LEU | X | 195 | 32.892 | 43.302 | 38.990 | 0.00 | 0.00 |
| ATOM | 2979 | CG   | LEU | X | 195 | 30.850 | 44.025 | 39.193 | 0.00 | 0.00 |
| ATOM | 2980 | HG   | LEU | X | 195 | 29.926 | 43.527 | 39.487 | 0.00 | 0.00 |
| ATOM | 2981 | CD1  | LEU | X | 195 | 31.388 | 45.096 | 40.134 | 0.00 | 0.00 |
| ATOM | 2982 | HD11 | LEU | X | 195 | 31.752 | 44.592 | 41.029 | 0.00 | 0.00 |
| ATOM | 2983 | HD12 | LEU | X | 195 | 30.565 | 45.732 | 40.460 | 0.00 | 0.00 |
| ATOM | 2984 | HD13 | LEU | X | 195 | 32.110 | 45.730 | 39.620 | 0.00 | 0.00 |
| ATOM | 2985 | CD2  | LEU | X | 195 | 30.611 | 44.627 | 37.827 | 0.00 | 0.00 |
| ATOM | 2986 | HD21 | LEU | X | 195 | 29.924 | 45.466 | 37.940 | 0.00 | 0.00 |
| ATOM | 2987 | HD22 | LEU | X | 195 | 31.537 | 44.975 | 37.371 | 0.00 | 0.00 |
| ATOM | 2988 | HD23 | LEU | X | 195 | 30.170 | 43.950 | 37.095 | 0.00 | 0.00 |
| ATOM | 2989 | C    | LEU | X | 195 | 32.967 | 40.899 | 37.924 | 0.00 | 0.00 |
| ATOM | 2990 | O    | LEU | X | 195 | 32.554 | 39.849 | 38.383 | 0.00 | 0.00 |
| ATOM | 2991 | N    | PHE | X | 196 | 34.250 | 41.194 | 37.602 | 0.00 | 0.00 |
| ATOM | 2992 | H    | PHE | X | 196 | 34.567 | 42.117 | 37.340 | 0.00 | 0.00 |
| ATOM | 2993 | CA   | PHE | X | 196 | 35.205 | 40.133 | 37.265 | 0.00 | 0.00 |
| ATOM | 2994 | HA   | PHE | X | 196 | 35.173 | 39.295 | 37.962 | 0.00 | 0.00 |
| ATOM | 2995 | CB   | PHE | X | 196 | 34.739 | 39.636 | 35.798 | 0.00 | 0.00 |
| ATOM | 2996 | HB2  | PHE | X | 196 | 33.729 | 39.227 | 35.781 | 0.00 | 0.00 |
| ATOM | 2997 | HB3  | PHE | X | 196 | 34.675 | 40.466 | 35.095 | 0.00 | 0.00 |
| ATOM | 2998 | CG   | PHE | X | 196 | 35.578 | 38.567 | 35.105 | 0.00 | 0.00 |
| ATOM | 2999 | CD1  | PHE | X | 196 | 35.512 | 38.580 | 33.728 | 0.00 | 0.00 |
| ATOM | 3000 | HD1  | PHE | X | 196 | 34.851 | 39.298 | 33.268 | 0.00 | 0.00 |
| ATOM | 3001 | CE1  | PHE | X | 196 | 36.188 | 37.558 | 33.007 | 0.00 | 0.00 |
| ATOM | 3002 | HE1  | PHE | X | 196 | 36.173 | 37.537 | 31.927 | 0.00 | 0.00 |
| ATOM | 3003 | CZ   | PHE | X | 196 | 36.912 | 36.655 | 33.684 | 0.00 | 0.00 |
| ATOM | 3004 | HZ   | PHE | X | 196 | 37.471 | 35.894 | 33.159 | 0.00 | 0.00 |
| ATOM | 3005 | CE2  | PHE | X | 196 | 36.952 | 36.624 | 35.111 | 0.00 | 0.00 |
| ATOM | 3006 | HE2  | PHE | X | 196 | 37.438 | 35.818 | 35.640 | 0.00 | 0.00 |

|      |      |     |     |   |     |        |        |        |      |      |
|------|------|-----|-----|---|-----|--------|--------|--------|------|------|
| ATOM | 3007 | CD2 | PHE | X | 196 | 36.230 | 37.549 | 35.809 | 0.00 | 0.00 |
| ATOM | 3008 | HD2 | PHE | X | 196 | 36.270 | 37.553 | 36.888 | 0.00 | 0.00 |
| ATOM | 3009 | C   | PHE | X | 196 | 36.646 | 40.778 | 37.253 | 0.00 | 0.00 |
| ATOM | 3010 | O   | PHE | X | 196 | 36.898 | 41.820 | 36.628 | 0.00 | 0.00 |
| ATOM | 3011 | N   | GLY | X | 197 | 37.556 | 40.167 | 38.017 | 0.00 | 0.00 |
| ATOM | 3012 | H   | GLY | X | 197 | 37.317 | 39.348 | 38.558 | 0.00 | 0.00 |
| ATOM | 3013 | CA  | GLY | X | 197 | 38.978 | 40.569 | 37.996 | 0.00 | 0.00 |
| ATOM | 3014 | HA2 | GLY | X | 197 | 39.426 | 40.753 | 37.019 | 0.00 | 0.00 |
| ATOM | 3015 | HA3 | GLY | X | 197 | 39.159 | 41.438 | 38.628 | 0.00 | 0.00 |
| ATOM | 3016 | C   | GLY | X | 197 | 39.996 | 39.602 | 38.568 | 0.00 | 0.00 |
| ATOM | 3017 | O   | GLY | X | 197 | 39.595 | 38.864 | 39.437 | 0.00 | 0.00 |
| ATOM | 3018 | N   | GLU | X | 198 | 41.261 | 39.953 | 38.367 | 0.00 | 0.00 |
| ATOM | 3019 | H   | GLU | X | 198 | 41.286 | 40.759 | 37.758 | 0.00 | 0.00 |
| ATOM | 3020 | CA  | GLU | X | 198 | 42.389 | 39.334 | 39.118 | 0.00 | 0.00 |
| ATOM | 3021 | HA  | GLU | X | 198 | 42.009 | 38.556 | 39.781 | 0.00 | 0.00 |
| ATOM | 3022 | CB  | GLU | X | 198 | 43.405 | 38.482 | 38.374 | 0.00 | 0.00 |
| ATOM | 3023 | HB2 | GLU | X | 198 | 44.205 | 38.270 | 39.083 | 0.00 | 0.00 |
| ATOM | 3024 | HB3 | GLU | X | 198 | 43.034 | 37.487 | 38.128 | 0.00 | 0.00 |
| ATOM | 3025 | CG  | GLU | X | 198 | 44.053 | 39.144 | 37.213 | 0.00 | 0.00 |
| ATOM | 3026 | HG2 | GLU | X | 198 | 44.687 | 38.352 | 36.814 | 0.00 | 0.00 |
| ATOM | 3027 | HG3 | GLU | X | 198 | 43.259 | 39.466 | 36.539 | 0.00 | 0.00 |
| ATOM | 3028 | CD  | GLU | X | 198 | 45.007 | 40.396 | 37.556 | 0.00 | 0.00 |
| ATOM | 3029 | OE1 | GLU | X | 198 | 44.752 | 41.371 | 36.814 | 0.00 | 0.00 |
| ATOM | 3030 | OE2 | GLU | X | 198 | 45.870 | 40.212 | 38.417 | 0.00 | 0.00 |
| ATOM | 3031 | C   | GLU | X | 198 | 43.015 | 40.308 | 40.126 | 0.00 | 0.00 |
| ATOM | 3032 | O   | GLU | X | 198 | 42.989 | 41.488 | 39.916 | 0.00 | 0.00 |
| ATOM | 3033 | N   | XA1 | X | 199 | 43.552 | 39.766 | 41.228 | 0.00 | 0.00 |
| ATOM | 3034 | CA  | XA1 | X | 199 | 44.531 | 40.463 | 42.154 | 0.00 | 0.00 |
| ATOM | 3035 | C   | XA1 | X | 199 | 43.942 | 41.738 | 42.769 | 0.00 | 0.00 |
| ATOM | 3036 | O   | XA1 | X | 199 | 42.916 | 41.787 | 43.484 | 0.00 | 0.00 |
| ATOM | 3037 | CB  | XA1 | X | 199 | 45.882 | 40.750 | 41.513 | 0.00 | 0.00 |
| ATOM | 3038 | OG  | XA1 | X | 199 | 46.809 | 41.167 | 42.530 | 0.00 | 0.00 |
| ATOM | 3039 | P1  | XA1 | X | 199 | 47.917 | 42.262 | 42.160 | 0.00 | 0.00 |
| ATOM | 3040 | O1  | XA1 | X | 199 | 47.368 | 43.256 | 41.363 | 0.00 | 0.00 |
| ATOM | 3041 | O2  | XA1 | X | 199 | 49.081 | 41.645 | 41.529 | 0.00 | 0.00 |
| ATOM | 3042 | C1  | XA1 | X | 199 | 48.338 | 42.832 | 43.838 | 0.00 | 0.00 |
| ATOM | 3043 | H   | XA1 | X | 199 | 43.521 | 38.757 | 41.204 | 0.00 | 0.00 |
| ATOM | 3044 | HA  | XA1 | X | 199 | 44.686 | 39.700 | 42.917 | 0.00 | 0.00 |
| ATOM | 3045 | HB2 | XA1 | X | 199 | 46.261 | 39.903 | 40.936 | 0.00 | 0.00 |
| ATOM | 3046 | HB3 | XA1 | X | 199 | 45.666 | 41.549 | 40.800 | 0.00 | 0.00 |
| ATOM | 3047 | H11 | XA1 | X | 199 | 47.582 | 43.586 | 44.066 | 0.00 | 0.00 |
| ATOM | 3048 | H12 | XA1 | X | 199 | 48.284 | 42.108 | 44.654 | 0.00 | 0.00 |
| ATOM | 3049 | H13 | XA1 | X | 199 | 49.339 | 43.266 | 43.784 | 0.00 | 0.00 |
| ATOM | 3050 | N   | ALA | X | 200 | 44.554 | 42.900 | 42.386 | 0.00 | 0.00 |
| ATOM | 3051 | H   | ALA | X | 200 | 45.402 | 42.814 | 41.844 | 0.00 | 0.00 |
| ATOM | 3052 | CA  | ALA | X | 200 | 44.012 | 44.205 | 42.736 | 0.00 | 0.00 |
| ATOM | 3053 | HA  | ALA | X | 200 | 43.958 | 44.266 | 43.823 | 0.00 | 0.00 |
| ATOM | 3054 | CB  | ALA | X | 200 | 45.028 | 45.256 | 42.374 | 0.00 | 0.00 |
| ATOM | 3055 | HB1 | ALA | X | 200 | 45.371 | 45.146 | 41.345 | 0.00 | 0.00 |
| ATOM | 3056 | HB2 | ALA | X | 200 | 45.873 | 45.094 | 43.043 | 0.00 | 0.00 |
| ATOM | 3057 | HB3 | ALA | X | 200 | 44.666 | 46.266 | 42.566 | 0.00 | 0.00 |
| ATOM | 3058 | C   | ALA | X | 200 | 42.640 | 44.557 | 42.113 | 0.00 | 0.00 |
| ATOM | 3059 | O   | ALA | X | 200 | 41.842 | 45.275 | 42.687 | 0.00 | 0.00 |
| ATOM | 3060 | N   | GLY | X | 201 | 42.336 | 43.984 | 40.922 | 0.00 | 0.00 |
| ATOM | 3061 | H   | GLY | X | 201 | 42.990 | 43.346 | 40.490 | 0.00 | 0.00 |
| ATOM | 3062 | CA  | GLY | X | 201 | 40.939 | 43.955 | 40.375 | 0.00 | 0.00 |
| ATOM | 3063 | HA2 | GLY | X | 201 | 40.556 | 44.976 | 40.364 | 0.00 | 0.00 |
| ATOM | 3064 | HA3 | GLY | X | 201 | 41.049 | 43.629 | 39.340 | 0.00 | 0.00 |
| ATOM | 3065 | C   | GLY | X | 201 | 39.986 | 43.046 | 41.117 | 0.00 | 0.00 |
| ATOM | 3066 | O   | GLY | X | 201 | 38.865 | 43.422 | 41.411 | 0.00 | 0.00 |
| ATOM | 3067 | N   | ALA | X | 202 | 40.502 | 41.889 | 41.554 | 0.00 | 0.00 |
| ATOM | 3068 | H   | ALA | X | 202 | 41.502 | 41.758 | 41.504 | 0.00 | 0.00 |
| ATOM | 3069 | CA  | ALA | X | 202 | 39.677 | 41.008 | 42.281 | 0.00 | 0.00 |
| ATOM | 3070 | HA  | ALA | X | 202 | 38.687 | 40.788 | 41.883 | 0.00 | 0.00 |
| ATOM | 3071 | CB  | ALA | X | 202 | 40.515 | 39.728 | 42.621 | 0.00 | 0.00 |
| ATOM | 3072 | HB1 | ALA | X | 202 | 40.730 | 39.183 | 41.702 | 0.00 | 0.00 |
| ATOM | 3073 | HB2 | ALA | X | 202 | 39.892 | 39.068 | 43.225 | 0.00 | 0.00 |



|      |      |      |     |   |     |        |        |        |      |      |
|------|------|------|-----|---|-----|--------|--------|--------|------|------|
| ATOM | 3074 | HB3  | ALA | X | 202 | 41.504 | 39.747 | 43.078 | 0.00 | 0.00 |
| ATOM | 3075 | C    | ALA | X | 202 | 39.364 | 41.687 | 43.663 | 0.00 | 0.00 |
| ATOM | 3076 | O    | ALA | X | 202 | 38.185 | 41.787 | 44.000 | 0.00 | 0.00 |
| ATOM | 3077 | N    | ALA | X | 203 | 40.334 | 42.285 | 44.350 | 0.00 | 0.00 |
| ATOM | 3078 | H    | ALA | X | 203 | 41.287 | 42.165 | 44.037 | 0.00 | 0.00 |
| ATOM | 3079 | CA   | ALA | X | 203 | 40.046 | 43.073 | 45.558 | 0.00 | 0.00 |
| ATOM | 3080 | HA   | ALA | X | 203 | 39.540 | 42.370 | 46.219 | 0.00 | 0.00 |
| ATOM | 3081 | CB   | ALA | X | 203 | 41.436 | 43.414 | 46.108 | 0.00 | 0.00 |
| ATOM | 3082 | HB1  | ALA | X | 203 | 42.002 | 44.014 | 45.396 | 0.00 | 0.00 |
| ATOM | 3083 | HB2  | ALA | X | 203 | 41.968 | 42.485 | 46.314 | 0.00 | 0.00 |
| ATOM | 3084 | HB3  | ALA | X | 203 | 41.350 | 43.934 | 47.062 | 0.00 | 0.00 |
| ATOM | 3085 | C    | ALA | X | 203 | 39.140 | 44.279 | 45.327 | 0.00 | 0.00 |
| ATOM | 3086 | O    | ALA | X | 203 | 38.223 | 44.559 | 46.050 | 0.00 | 0.00 |
| ATOM | 3087 | N    | SER | X | 204 | 39.327 | 45.013 | 44.296 | 0.00 | 0.00 |
| ATOM | 3088 | H    | SER | X | 204 | 40.157 | 44.747 | 43.785 | 0.00 | 0.00 |
| ATOM | 3089 | CA   | SER | X | 204 | 38.526 | 46.073 | 43.738 | 0.00 | 0.00 |
| ATOM | 3090 | HA   | SER | X | 204 | 38.491 | 46.886 | 44.464 | 0.00 | 0.00 |
| ATOM | 3091 | CB   | SER | X | 204 | 39.038 | 46.659 | 42.377 | 0.00 | 0.00 |
| ATOM | 3092 | HB2  | SER | X | 204 | 39.199 | 45.759 | 41.784 | 0.00 | 0.00 |
| ATOM | 3093 | HB3  | SER | X | 204 | 38.371 | 47.422 | 41.976 | 0.00 | 0.00 |
| ATOM | 3094 | OG   | SER | X | 204 | 40.285 | 47.355 | 42.384 | 0.00 | 0.00 |
| ATOM | 3095 | HG   | SER | X | 204 | 40.996 | 46.711 | 42.427 | 0.00 | 0.00 |
| ATOM | 3096 | C    | SER | X | 204 | 37.079 | 45.662 | 43.557 | 0.00 | 0.00 |
| ATOM | 3097 | O    | SER | X | 204 | 36.226 | 46.388 | 43.999 | 0.00 | 0.00 |
| ATOM | 3098 | N    | VAL | X | 205 | 36.826 | 44.503 | 42.978 | 0.00 | 0.00 |
| ATOM | 3099 | H    | VAL | X | 205 | 37.641 | 43.973 | 42.703 | 0.00 | 0.00 |
| ATOM | 3100 | CA   | VAL | X | 205 | 35.549 | 43.786 | 42.761 | 0.00 | 0.00 |
| ATOM | 3101 | HA   | VAL | X | 205 | 34.802 | 44.426 | 42.290 | 0.00 | 0.00 |
| ATOM | 3102 | CB   | VAL | X | 205 | 35.760 | 42.540 | 41.919 | 0.00 | 0.00 |
| ATOM | 3103 | HB   | VAL | X | 205 | 36.620 | 41.974 | 42.277 | 0.00 | 0.00 |
| ATOM | 3104 | CG1  | VAL | X | 205 | 34.427 | 41.755 | 41.901 | 0.00 | 0.00 |
| ATOM | 3105 | HG11 | VAL | X | 205 | 34.113 | 41.471 | 42.904 | 0.00 | 0.00 |
| ATOM | 3106 | HG12 | VAL | X | 205 | 33.637 | 42.340 | 41.429 | 0.00 | 0.00 |
| ATOM | 3107 | HG13 | VAL | X | 205 | 34.596 | 40.888 | 41.262 | 0.00 | 0.00 |
| ATOM | 3108 | CG2  | VAL | X | 205 | 35.956 | 42.925 | 40.436 | 0.00 | 0.00 |
| ATOM | 3109 | HG21 | VAL | X | 205 | 36.253 | 41.993 | 39.956 | 0.00 | 0.00 |
| ATOM | 3110 | HG22 | VAL | X | 205 | 36.687 | 43.726 | 40.322 | 0.00 | 0.00 |
| ATOM | 3111 | HG23 | VAL | X | 205 | 35.024 | 43.170 | 39.926 | 0.00 | 0.00 |
| ATOM | 3112 | C    | VAL | X | 205 | 34.927 | 43.518 | 44.105 | 0.00 | 0.00 |
| ATOM | 3113 | O    | VAL | X | 205 | 33.728 | 43.703 | 44.325 | 0.00 | 0.00 |
| ATOM | 3114 | N    | GLY | X | 206 | 35.714 | 43.277 | 45.133 | 0.00 | 0.00 |
| ATOM | 3115 | H    | GLY | X | 206 | 36.691 | 43.227 | 44.880 | 0.00 | 0.00 |
| ATOM | 3116 | CA   | GLY | X | 206 | 35.234 | 43.149 | 46.456 | 0.00 | 0.00 |
| ATOM | 3117 | HA2  | GLY | X | 206 | 34.240 | 42.703 | 46.415 | 0.00 | 0.00 |
| ATOM | 3118 | HA3  | GLY | X | 206 | 35.877 | 42.562 | 47.113 | 0.00 | 0.00 |
| ATOM | 3119 | C    | GLY | X | 206 | 35.145 | 44.497 | 47.239 | 0.00 | 0.00 |
| ATOM | 3120 | O    | GLY | X | 206 | 34.449 | 44.409 | 48.241 | 0.00 | 0.00 |
| ATOM | 3121 | N    | MET | X | 207 | 35.671 | 45.604 | 46.757 | 0.00 | 0.00 |
| ATOM | 3122 | H    | MET | X | 207 | 36.202 | 45.613 | 45.897 | 0.00 | 0.00 |
| ATOM | 3123 | CA   | MET | X | 207 | 35.190 | 46.895 | 47.284 | 0.00 | 0.00 |
| ATOM | 3124 | HA   | MET | X | 207 | 35.142 | 46.904 | 48.373 | 0.00 | 0.00 |
| ATOM | 3125 | CB   | MET | X | 207 | 36.148 | 48.068 | 46.951 | 0.00 | 0.00 |
| ATOM | 3126 | HB2  | MET | X | 207 | 36.184 | 48.270 | 45.881 | 0.00 | 0.00 |
| ATOM | 3127 | HB3  | MET | X | 207 | 35.873 | 49.014 | 47.416 | 0.00 | 0.00 |
| ATOM | 3128 | CG   | MET | X | 207 | 37.563 | 47.576 | 47.396 | 0.00 | 0.00 |
| ATOM | 3129 | HG2  | MET | X | 207 | 37.992 | 46.735 | 46.851 | 0.00 | 0.00 |
| ATOM | 3130 | HG3  | MET | X | 207 | 38.271 | 48.369 | 47.153 | 0.00 | 0.00 |
| ATOM | 3131 | SD   | MET | X | 207 | 37.740 | 47.186 | 49.096 | 0.00 | 0.00 |
| ATOM | 3132 | CE   | MET | X | 207 | 39.551 | 46.848 | 49.186 | 0.00 | 0.00 |
| ATOM | 3133 | HE1  | MET | X | 207 | 39.828 | 46.889 | 50.239 | 0.00 | 0.00 |
| ATOM | 3134 | HE2  | MET | X | 207 | 39.749 | 45.890 | 48.705 | 0.00 | 0.00 |
| ATOM | 3135 | HE3  | MET | X | 207 | 40.103 | 47.604 | 48.627 | 0.00 | 0.00 |
| ATOM | 3136 | C    | MET | X | 207 | 33.698 | 47.193 | 46.838 | 0.00 | 0.00 |
| ATOM | 3137 | O    | MET | X | 207 | 32.790 | 47.625 | 47.570 | 0.00 | 0.00 |
| ATOM | 3138 | N    | HIE | X | 208 | 33.404 | 46.938 | 45.576 | 0.00 | 0.00 |
| ATOM | 3139 | H    | HIE | X | 208 | 34.123 | 46.680 | 44.915 | 0.00 | 0.00 |
| ATOM | 3140 | CA   | HIE | X | 208 | 32.056 | 46.937 | 44.994 | 0.00 | 0.00 |

|      |      |      |     |   |     |        |        |        |      |      |
|------|------|------|-----|---|-----|--------|--------|--------|------|------|
| ATOM | 3141 | HA   | HIE | X | 208 | 31.777 | 47.988 | 45.071 | 0.00 | 0.00 |
| ATOM | 3142 | CB   | HIE | X | 208 | 32.099 | 46.605 | 43.524 | 0.00 | 0.00 |
| ATOM | 3143 | HB2  | HIE | X | 208 | 32.499 | 45.614 | 43.311 | 0.00 | 0.00 |
| ATOM | 3144 | HB3  | HIE | X | 208 | 31.140 | 46.602 | 43.007 | 0.00 | 0.00 |
| ATOM | 3145 | CG   | HIE | X | 208 | 32.869 | 47.673 | 42.812 | 0.00 | 0.00 |
| ATOM | 3146 | ND1  | HIE | X | 208 | 32.608 | 49.087 | 42.737 | 0.00 | 0.00 |
| ATOM | 3147 | CE1  | HIE | X | 208 | 33.512 | 49.526 | 41.820 | 0.00 | 0.00 |
| ATOM | 3148 | HE1  | HIE | X | 208 | 33.550 | 50.556 | 41.498 | 0.00 | 0.00 |
| ATOM | 3149 | NE2  | HIE | X | 208 | 34.313 | 48.539 | 41.428 | 0.00 | 0.00 |
| ATOM | 3150 | HE2  | HIE | X | 208 | 35.134 | 48.587 | 40.840 | 0.00 | 0.00 |
| ATOM | 3151 | CD2  | HIE | X | 208 | 33.976 | 47.358 | 42.082 | 0.00 | 0.00 |
| ATOM | 3152 | HD2  | HIE | X | 208 | 34.540 | 46.442 | 41.989 | 0.00 | 0.00 |
| ATOM | 3153 | C    | HIE | X | 208 | 31.028 | 46.101 | 45.792 | 0.00 | 0.00 |
| ATOM | 3154 | O    | HIE | X | 208 | 29.841 | 46.397 | 45.889 | 0.00 | 0.00 |
| ATOM | 3155 | N    | LEU | X | 209 | 31.499 | 44.969 | 46.255 | 0.00 | 0.00 |
| ATOM | 3156 | H    | LEU | X | 209 | 32.417 | 44.773 | 45.882 | 0.00 | 0.00 |
| ATOM | 3157 | CA   | LEU | X | 209 | 30.696 | 43.997 | 46.985 | 0.00 | 0.00 |
| ATOM | 3158 | HA   | LEU | X | 209 | 29.744 | 43.812 | 46.487 | 0.00 | 0.00 |
| ATOM | 3159 | CB   | LEU | X | 209 | 31.538 | 42.694 | 47.037 | 0.00 | 0.00 |
| ATOM | 3160 | HB2  | LEU | X | 209 | 31.837 | 42.460 | 46.015 | 0.00 | 0.00 |
| ATOM | 3161 | HB3  | LEU | X | 209 | 32.461 | 42.920 | 47.571 | 0.00 | 0.00 |
| ATOM | 3162 | CG   | LEU | X | 209 | 30.796 | 41.475 | 47.704 | 0.00 | 0.00 |
| ATOM | 3163 | HG   | LEU | X | 209 | 30.350 | 41.819 | 48.637 | 0.00 | 0.00 |
| ATOM | 3164 | CD1  | LEU | X | 209 | 29.676 | 40.979 | 46.887 | 0.00 | 0.00 |
| ATOM | 3165 | HD11 | LEU | X | 209 | 30.080 | 40.736 | 45.904 | 0.00 | 0.00 |
| ATOM | 3166 | HD12 | LEU | X | 209 | 28.891 | 41.732 | 46.950 | 0.00 | 0.00 |
| ATOM | 3167 | HD13 | LEU | X | 209 | 29.374 | 39.995 | 47.246 | 0.00 | 0.00 |
| ATOM | 3168 | CD2  | LEU | X | 209 | 31.766 | 40.300 | 47.889 | 0.00 | 0.00 |
| ATOM | 3169 | HD21 | LEU | X | 209 | 32.223 | 39.978 | 46.953 | 0.00 | 0.00 |
| ATOM | 3170 | HD22 | LEU | X | 209 | 32.533 | 40.621 | 48.593 | 0.00 | 0.00 |
| ATOM | 3171 | HD23 | LEU | X | 209 | 31.191 | 39.531 | 48.406 | 0.00 | 0.00 |
| ATOM | 3172 | C    | LEU | X | 209 | 30.388 | 44.618 | 48.407 | 0.00 | 0.00 |
| ATOM | 3173 | O    | LEU | X | 209 | 29.289 | 44.456 | 48.834 | 0.00 | 0.00 |
| ATOM | 3174 | N    | LEU | X | 210 | 31.341 | 45.341 | 49.008 | 0.00 | 0.00 |
| ATOM | 3175 | H    | LEU | X | 210 | 32.221 | 45.413 | 48.518 | 0.00 | 0.00 |
| ATOM | 3176 | CA   | LEU | X | 210 | 31.227 | 45.891 | 50.326 | 0.00 | 0.00 |
| ATOM | 3177 | HA   | LEU | X | 210 | 30.476 | 45.354 | 50.904 | 0.00 | 0.00 |
| ATOM | 3178 | CB   | LEU | X | 210 | 32.613 | 45.634 | 50.946 | 0.00 | 0.00 |
| ATOM | 3179 | HB2  | LEU | X | 210 | 33.456 | 45.703 | 50.258 | 0.00 | 0.00 |
| ATOM | 3180 | HB3  | LEU | X | 210 | 32.798 | 46.464 | 51.627 | 0.00 | 0.00 |
| ATOM | 3181 | CG   | LEU | X | 210 | 32.659 | 44.309 | 51.676 | 0.00 | 0.00 |
| ATOM | 3182 | HG   | LEU | X | 210 | 31.787 | 44.355 | 52.328 | 0.00 | 0.00 |
| ATOM | 3183 | CD1  | LEU | X | 210 | 32.467 | 43.120 | 50.764 | 0.00 | 0.00 |
| ATOM | 3184 | HD11 | LEU | X | 210 | 32.733 | 42.233 | 51.338 | 0.00 | 0.00 |
| ATOM | 3185 | HD12 | LEU | X | 210 | 33.153 | 43.193 | 49.919 | 0.00 | 0.00 |
| ATOM | 3186 | HD13 | LEU | X | 210 | 31.442 | 42.989 | 50.418 | 0.00 | 0.00 |
| ATOM | 3187 | CD2  | LEU | X | 210 | 33.925 | 44.263 | 52.542 | 0.00 | 0.00 |
| ATOM | 3188 | HD21 | LEU | X | 210 | 34.230 | 45.260 | 52.859 | 0.00 | 0.00 |
| ATOM | 3189 | HD22 | LEU | X | 210 | 33.747 | 43.663 | 53.434 | 0.00 | 0.00 |
| ATOM | 3190 | HD23 | LEU | X | 210 | 34.713 | 43.759 | 51.983 | 0.00 | 0.00 |
| ATOM | 3191 | C    | LEU | X | 210 | 30.746 | 47.382 | 50.344 | 0.00 | 0.00 |
| ATOM | 3192 | O    | LEU | X | 210 | 30.376 | 47.888 | 51.444 | 0.00 | 0.00 |
| ATOM | 3193 | N    | SER | X | 211 | 30.578 | 48.067 | 49.234 | 0.00 | 0.00 |
| ATOM | 3194 | H    | SER | X | 211 | 30.834 | 47.534 | 48.416 | 0.00 | 0.00 |
| ATOM | 3195 | CA   | SER | X | 211 | 30.106 | 49.474 | 49.216 | 0.00 | 0.00 |
| ATOM | 3196 | HA   | SER | X | 211 | 30.076 | 49.964 | 50.189 | 0.00 | 0.00 |
| ATOM | 3197 | CB   | SER | X | 211 | 31.200 | 50.305 | 48.538 | 0.00 | 0.00 |
| ATOM | 3198 | HB2  | SER | X | 211 | 30.731 | 51.289 | 48.548 | 0.00 | 0.00 |
| ATOM | 3199 | HB3  | SER | X | 211 | 32.102 | 50.357 | 49.148 | 0.00 | 0.00 |
| ATOM | 3200 | OG   | SER | X | 211 | 31.554 | 49.805 | 47.210 | 0.00 | 0.00 |
| ATOM | 3201 | HG   | SER | X | 211 | 32.072 | 49.040 | 47.473 | 0.00 | 0.00 |
| ATOM | 3202 | C    | SER | X | 211 | 28.743 | 49.450 | 48.509 | 0.00 | 0.00 |
| ATOM | 3203 | O    | SER | X | 211 | 28.629 | 49.150 | 47.344 | 0.00 | 0.00 |
| ATOM | 3204 | N    | PRO | X | 212 | 27.611 | 49.721 | 49.219 | 0.00 | 0.00 |
| ATOM | 3205 | CD   | PRO | X | 212 | 27.495 | 50.182 | 50.562 | 0.00 | 0.00 |
| ATOM | 3206 | HD2  | PRO | X | 212 | 27.921 | 51.185 | 50.531 | 0.00 | 0.00 |
| ATOM | 3207 | HD3  | PRO | X | 212 | 28.183 | 49.592 | 51.168 | 0.00 | 0.00 |

|      |      |      |     |   |     |        |        |        |      |      |
|------|------|------|-----|---|-----|--------|--------|--------|------|------|
| ATOM | 3208 | CG   | PRO | X | 212 | 26.062 | 50.099 | 51.039 | 0.00 | 0.00 |
| ATOM | 3209 | HG2  | PRO | X | 212 | 25.783 | 50.923 | 51.695 | 0.00 | 0.00 |
| ATOM | 3210 | HG3  | PRO | X | 212 | 25.877 | 49.163 | 51.564 | 0.00 | 0.00 |
| ATOM | 3211 | CB   | PRO | X | 212 | 25.273 | 49.930 | 49.785 | 0.00 | 0.00 |
| ATOM | 3212 | HB2  | PRO | X | 212 | 24.919 | 50.911 | 49.467 | 0.00 | 0.00 |
| ATOM | 3213 | HB3  | PRO | X | 212 | 24.426 | 49.258 | 49.924 | 0.00 | 0.00 |
| ATOM | 3214 | CA   | PRO | X | 212 | 26.275 | 49.531 | 48.663 | 0.00 | 0.00 |
| ATOM | 3215 | HA   | PRO | X | 212 | 26.185 | 48.456 | 48.508 | 0.00 | 0.00 |
| ATOM | 3216 | C    | PRO | X | 212 | 26.026 | 50.319 | 47.395 | 0.00 | 0.00 |
| ATOM | 3217 | O    | PRO | X | 212 | 25.366 | 49.799 | 46.465 | 0.00 | 0.00 |
| ATOM | 3218 | N    | PRO | X | 213 | 26.638 | 51.561 | 47.251 | 0.00 | 0.00 |
| ATOM | 3219 | CD   | PRO | X | 213 | 27.373 | 52.439 | 48.162 | 0.00 | 0.00 |
| ATOM | 3220 | HD2  | PRO | X | 213 | 28.447 | 52.257 | 48.179 | 0.00 | 0.00 |
| ATOM | 3221 | HD3  | PRO | X | 213 | 26.957 | 52.214 | 49.144 | 0.00 | 0.00 |
| ATOM | 3222 | CG   | PRO | X | 213 | 27.111 | 53.883 | 47.803 | 0.00 | 0.00 |
| ATOM | 3223 | HG2  | PRO | X | 213 | 27.867 | 54.663 | 47.897 | 0.00 | 0.00 |
| ATOM | 3224 | HG3  | PRO | X | 213 | 26.211 | 54.253 | 48.295 | 0.00 | 0.00 |
| ATOM | 3225 | CB   | PRO | X | 213 | 26.763 | 53.740 | 46.316 | 0.00 | 0.00 |
| ATOM | 3226 | HB2  | PRO | X | 213 | 27.623 | 54.004 | 45.701 | 0.00 | 0.00 |
| ATOM | 3227 | HB3  | PRO | X | 213 | 25.987 | 54.427 | 45.979 | 0.00 | 0.00 |
| ATOM | 3228 | CA   | PRO | X | 213 | 26.378 | 52.325 | 46.026 | 0.00 | 0.00 |
| ATOM | 3229 | HA   | PRO | X | 213 | 25.290 | 52.288 | 45.966 | 0.00 | 0.00 |
| ATOM | 3230 | C    | PRO | X | 213 | 26.994 | 51.674 | 44.770 | 0.00 | 0.00 |
| ATOM | 3231 | O    | PRO | X | 213 | 26.870 | 52.241 | 43.688 | 0.00 | 0.00 |
| ATOM | 3232 | N    | SER | X | 214 | 27.629 | 50.494 | 44.941 | 0.00 | 0.00 |
| ATOM | 3233 | H    | SER | X | 214 | 27.781 | 50.063 | 45.841 | 0.00 | 0.00 |
| ATOM | 3234 | CA   | SER | X | 214 | 27.936 | 49.577 | 43.837 | 0.00 | 0.00 |
| ATOM | 3235 | HA   | SER | X | 214 | 27.880 | 50.150 | 42.912 | 0.00 | 0.00 |
| ATOM | 3236 | CB   | SER | X | 214 | 29.364 | 49.149 | 43.847 | 0.00 | 0.00 |
| ATOM | 3237 | HB2  | SER | X | 214 | 29.652 | 48.415 | 44.600 | 0.00 | 0.00 |
| ATOM | 3238 | HB3  | SER | X | 214 | 29.482 | 48.684 | 42.868 | 0.00 | 0.00 |
| ATOM | 3239 | OG   | SER | X | 214 | 30.252 | 50.257 | 43.891 | 0.00 | 0.00 |
| ATOM | 3240 | HG   | SER | X | 214 | 31.135 | 50.041 | 43.581 | 0.00 | 0.00 |
| ATOM | 3241 | C    | SER | X | 214 | 26.922 | 48.399 | 43.631 | 0.00 | 0.00 |
| ATOM | 3242 | O    | SER | X | 214 | 26.675 | 48.194 | 42.490 | 0.00 | 0.00 |
| ATOM | 3243 | N    | ARG | X | 215 | 26.347 | 47.735 | 44.687 | 0.00 | 0.00 |
| ATOM | 3244 | H    | ARG | X | 215 | 26.615 | 47.970 | 45.632 | 0.00 | 0.00 |
| ATOM | 3245 | CA   | ARG | X | 215 | 25.566 | 46.534 | 44.422 | 0.00 | 0.00 |
| ATOM | 3246 | HA   | ARG | X | 215 | 26.220 | 45.906 | 43.818 | 0.00 | 0.00 |
| ATOM | 3247 | CB   | ARG | X | 215 | 25.342 | 45.789 | 45.732 | 0.00 | 0.00 |
| ATOM | 3248 | HB2  | ARG | X | 215 | 24.641 | 46.329 | 46.368 | 0.00 | 0.00 |
| ATOM | 3249 | HB3  | ARG | X | 215 | 24.849 | 44.859 | 45.447 | 0.00 | 0.00 |
| ATOM | 3250 | CG   | ARG | X | 215 | 26.543 | 45.472 | 46.598 | 0.00 | 0.00 |
| ATOM | 3251 | HG2  | ARG | X | 215 | 27.262 | 45.009 | 45.921 | 0.00 | 0.00 |
| ATOM | 3252 | HG3  | ARG | X | 215 | 26.946 | 46.404 | 46.994 | 0.00 | 0.00 |
| ATOM | 3253 | CD   | ARG | X | 215 | 26.251 | 44.532 | 47.803 | 0.00 | 0.00 |
| ATOM | 3254 | HD2  | ARG | X | 215 | 25.817 | 43.612 | 47.410 | 0.00 | 0.00 |
| ATOM | 3255 | HD3  | ARG | X | 215 | 27.263 | 44.241 | 48.086 | 0.00 | 0.00 |
| ATOM | 3256 | NE   | ARG | X | 215 | 25.431 | 45.074 | 48.940 | 0.00 | 0.00 |
| ATOM | 3257 | HE   | ARG | X | 215 | 24.428 | 44.961 | 48.911 | 0.00 | 0.00 |
| ATOM | 3258 | CZ   | ARG | X | 215 | 25.847 | 45.692 | 49.996 | 0.00 | 0.00 |
| ATOM | 3259 | NH1  | ARG | X | 215 | 27.108 | 45.780 | 50.355 | 0.00 | 0.00 |
| ATOM | 3260 | HH11 | ARG | X | 215 | 27.788 | 45.403 | 49.711 | 0.00 | 0.00 |
| ATOM | 3261 | HH12 | ARG | X | 215 | 27.262 | 46.195 | 51.263 | 0.00 | 0.00 |
| ATOM | 3262 | NH2  | ARG | X | 215 | 25.008 | 46.256 | 50.881 | 0.00 | 0.00 |
| ATOM | 3263 | HH21 | ARG | X | 215 | 24.035 | 45.986 | 50.890 | 0.00 | 0.00 |
| ATOM | 3264 | HH22 | ARG | X | 215 | 25.311 | 46.783 | 51.688 | 0.00 | 0.00 |
| ATOM | 3265 | C    | ARG | X | 215 | 24.236 | 46.660 | 43.636 | 0.00 | 0.00 |
| ATOM | 3266 | O    | ARG | X | 215 | 23.650 | 45.645 | 43.272 | 0.00 | 0.00 |
| ATOM | 3267 | N    | GLY | X | 216 | 23.797 | 47.846 | 43.342 | 0.00 | 0.00 |
| ATOM | 3268 | H    | GLY | X | 216 | 24.348 | 48.595 | 43.736 | 0.00 | 0.00 |
| ATOM | 3269 | CA   | GLY | X | 216 | 22.569 | 48.143 | 42.590 | 0.00 | 0.00 |
| ATOM | 3270 | HA2  | GLY | X | 216 | 21.826 | 47.353 | 42.703 | 0.00 | 0.00 |
| ATOM | 3271 | HA3  | GLY | X | 216 | 22.083 | 49.074 | 42.883 | 0.00 | 0.00 |
| ATOM | 3272 | C    | GLY | X | 216 | 22.806 | 48.129 | 41.091 | 0.00 | 0.00 |
| ATOM | 3273 | O    | GLY | X | 216 | 21.903 | 48.523 | 40.334 | 0.00 | 0.00 |
| ATOM | 3274 | N    | LEU | X | 217 | 24.085 | 47.878 | 40.686 | 0.00 | 0.00 |

|      |      |      |     |   |     |        |        |        |      |      |
|------|------|------|-----|---|-----|--------|--------|--------|------|------|
| ATOM | 3275 | H    | LEU | X | 217 | 24.688 | 47.657 | 41.466 | 0.00 | 0.00 |
| ATOM | 3276 | CA   | LEU | X | 217 | 24.645 | 47.958 | 39.337 | 0.00 | 0.00 |
| ATOM | 3277 | HA   | LEU | X | 217 | 23.862 | 48.349 | 38.687 | 0.00 | 0.00 |
| ATOM | 3278 | CB   | LEU | X | 217 | 25.790 | 48.950 | 39.227 | 0.00 | 0.00 |
| ATOM | 3279 | HB2  | LEU | X | 217 | 26.710 | 48.463 | 39.551 | 0.00 | 0.00 |
| ATOM | 3280 | HB3  | LEU | X | 217 | 25.932 | 49.177 | 38.171 | 0.00 | 0.00 |
| ATOM | 3281 | CG   | LEU | X | 217 | 25.561 | 50.309 | 39.861 | 0.00 | 0.00 |
| ATOM | 3282 | HG   | LEU | X | 217 | 25.347 | 50.101 | 40.909 | 0.00 | 0.00 |
| ATOM | 3283 | CD1  | LEU | X | 217 | 26.837 | 51.200 | 39.852 | 0.00 | 0.00 |
| ATOM | 3284 | HD11 | LEU | X | 217 | 26.769 | 52.109 | 40.450 | 0.00 | 0.00 |
| ATOM | 3285 | HD12 | LEU | X | 217 | 27.025 | 51.433 | 38.804 | 0.00 | 0.00 |
| ATOM | 3286 | HD13 | LEU | X | 217 | 27.729 | 50.658 | 40.164 | 0.00 | 0.00 |
| ATOM | 3287 | CD2  | LEU | X | 217 | 24.422 | 51.051 | 39.181 | 0.00 | 0.00 |
| ATOM | 3288 | HD21 | LEU | X | 217 | 23.437 | 50.631 | 39.385 | 0.00 | 0.00 |
| ATOM | 3289 | HD22 | LEU | X | 217 | 24.342 | 52.003 | 39.705 | 0.00 | 0.00 |
| ATOM | 3290 | HD23 | LEU | X | 217 | 24.613 | 51.292 | 38.135 | 0.00 | 0.00 |
| ATOM | 3291 | C    | LEU | X | 217 | 25.031 | 46.629 | 38.734 | 0.00 | 0.00 |
| ATOM | 3292 | O    | LEU | X | 217 | 25.282 | 46.554 | 37.512 | 0.00 | 0.00 |
| ATOM | 3293 | N    | PHE | X | 218 | 25.224 | 45.646 | 39.580 | 0.00 | 0.00 |
| ATOM | 3294 | H    | PHE | X | 218 | 24.811 | 45.680 | 40.501 | 0.00 | 0.00 |
| ATOM | 3295 | CA   | PHE | X | 218 | 25.655 | 44.293 | 39.240 | 0.00 | 0.00 |
| ATOM | 3296 | HA   | PHE | X | 218 | 25.225 | 44.131 | 38.252 | 0.00 | 0.00 |
| ATOM | 3297 | CB   | PHE | X | 218 | 27.235 | 44.185 | 39.309 | 0.00 | 0.00 |
| ATOM | 3298 | HB2  | PHE | X | 218 | 27.535 | 43.282 | 38.777 | 0.00 | 0.00 |
| ATOM | 3299 | HB3  | PHE | X | 218 | 27.712 | 44.974 | 38.727 | 0.00 | 0.00 |
| ATOM | 3300 | CG   | PHE | X | 218 | 27.754 | 44.242 | 40.719 | 0.00 | 0.00 |
| ATOM | 3301 | CD1  | PHE | X | 218 | 28.066 | 45.485 | 41.232 | 0.00 | 0.00 |
| ATOM | 3302 | HD1  | PHE | X | 218 | 27.962 | 46.411 | 40.685 | 0.00 | 0.00 |
| ATOM | 3303 | CE1  | PHE | X | 218 | 28.675 | 45.548 | 42.514 | 0.00 | 0.00 |
| ATOM | 3304 | HE1  | PHE | X | 218 | 28.881 | 46.532 | 42.909 | 0.00 | 0.00 |
| ATOM | 3305 | CZ   | PHE | X | 218 | 28.906 | 44.329 | 43.243 | 0.00 | 0.00 |
| ATOM | 3306 | HZ   | PHE | X | 218 | 29.307 | 44.291 | 44.246 | 0.00 | 0.00 |
| ATOM | 3307 | CE2  | PHE | X | 218 | 28.528 | 43.085 | 42.768 | 0.00 | 0.00 |
| ATOM | 3308 | HE2  | PHE | X | 218 | 28.797 | 42.145 | 43.227 | 0.00 | 0.00 |
| ATOM | 3309 | CD2  | PHE | X | 218 | 27.992 | 43.019 | 41.473 | 0.00 | 0.00 |
| ATOM | 3310 | HD2  | PHE | X | 218 | 27.719 | 42.037 | 41.116 | 0.00 | 0.00 |
| ATOM | 3311 | C    | PHE | X | 218 | 24.941 | 43.286 | 40.175 | 0.00 | 0.00 |
| ATOM | 3312 | O    | PHE | X | 218 | 24.580 | 43.568 | 41.329 | 0.00 | 0.00 |
| ATOM | 3313 | N    | HIE | X | 219 | 24.720 | 42.083 | 39.620 | 0.00 | 0.00 |
| ATOM | 3314 | H    | HIE | X | 219 | 24.912 | 42.005 | 38.632 | 0.00 | 0.00 |
| ATOM | 3315 | CA   | HIE | X | 219 | 23.929 | 40.979 | 40.114 | 0.00 | 0.00 |
| ATOM | 3316 | HA   | HIE | X | 219 | 23.365 | 41.313 | 40.985 | 0.00 | 0.00 |
| ATOM | 3317 | CB   | HIE | X | 219 | 22.954 | 40.500 | 38.960 | 0.00 | 0.00 |
| ATOM | 3318 | HB2  | HIE | X | 219 | 23.448 | 39.920 | 38.180 | 0.00 | 0.00 |
| ATOM | 3319 | HB3  | HIE | X | 219 | 22.194 | 39.902 | 39.463 | 0.00 | 0.00 |
| ATOM | 3320 | CG   | HIE | X | 219 | 22.182 | 41.565 | 38.273 | 0.00 | 0.00 |
| ATOM | 3321 | ND1  | HIE | X | 219 | 22.626 | 42.245 | 37.092 | 0.00 | 0.00 |
| ATOM | 3322 | CE1  | HIE | X | 219 | 21.851 | 43.374 | 37.049 | 0.00 | 0.00 |
| ATOM | 3323 | HE1  | HIE | X | 219 | 22.036 | 44.247 | 36.441 | 0.00 | 0.00 |
| ATOM | 3324 | NE2  | HIE | X | 219 | 20.909 | 43.335 | 38.014 | 0.00 | 0.00 |
| ATOM | 3325 | HE2  | HIE | X | 219 | 20.244 | 44.052 | 38.267 | 0.00 | 0.00 |
| ATOM | 3326 | CD2  | HIE | X | 219 | 21.142 | 42.256 | 38.841 | 0.00 | 0.00 |
| ATOM | 3327 | HD2  | HIE | X | 219 | 20.722 | 42.101 | 39.824 | 0.00 | 0.00 |
| ATOM | 3328 | C    | HIE | X | 219 | 24.800 | 39.862 | 40.712 | 0.00 | 0.00 |
| ATOM | 3329 | O    | HIE | X | 219 | 24.239 | 38.946 | 41.280 | 0.00 | 0.00 |
| ATOM | 3330 | N    | ARG | X | 220 | 26.113 | 39.877 | 40.413 | 0.00 | 0.00 |
| ATOM | 3331 | H    | ARG | X | 220 | 26.444 | 40.721 | 39.968 | 0.00 | 0.00 |
| ATOM | 3332 | CA   | ARG | X | 220 | 27.009 | 38.756 | 40.566 | 0.00 | 0.00 |
| ATOM | 3333 | HA   | ARG | X | 220 | 26.881 | 38.360 | 41.573 | 0.00 | 0.00 |
| ATOM | 3334 | CB   | ARG | X | 220 | 26.629 | 37.664 | 39.556 | 0.00 | 0.00 |
| ATOM | 3335 | HB2  | ARG | X | 220 | 25.574 | 37.453 | 39.733 | 0.00 | 0.00 |
| ATOM | 3336 | HB3  | ARG | X | 220 | 26.751 | 38.162 | 38.594 | 0.00 | 0.00 |
| ATOM | 3337 | CG   | ARG | X | 220 | 27.444 | 36.343 | 39.669 | 0.00 | 0.00 |
| ATOM | 3338 | HG2  | ARG | X | 220 | 28.461 | 36.434 | 39.288 | 0.00 | 0.00 |
| ATOM | 3339 | HG3  | ARG | X | 220 | 27.429 | 35.980 | 40.697 | 0.00 | 0.00 |
| ATOM | 3340 | CD   | ARG | X | 220 | 26.802 | 35.227 | 38.779 | 0.00 | 0.00 |
| ATOM | 3341 | HD2  | ARG | X | 220 | 26.911 | 35.577 | 37.753 | 0.00 | 0.00 |

|      |      |      |     |   |     |        |        |        |      |      |
|------|------|------|-----|---|-----|--------|--------|--------|------|------|
| ATOM | 3342 | HD3  | ARG | X | 220 | 27.364 | 34.331 | 39.041 | 0.00 | 0.00 |
| ATOM | 3343 | NE   | ARG | X | 220 | 25.397 | 34.998 | 39.090 | 0.00 | 0.00 |
| ATOM | 3344 | HE   | ARG | X | 220 | 25.234 | 34.615 | 40.010 | 0.00 | 0.00 |
| ATOM | 3345 | CZ   | ARG | X | 220 | 24.302 | 35.225 | 38.352 | 0.00 | 0.00 |
| ATOM | 3346 | NH1  | ARG | X | 220 | 24.398 | 36.012 | 37.314 | 0.00 | 0.00 |
| ATOM | 3347 | HH11 | ARG | X | 220 | 25.346 | 36.247 | 37.058 | 0.00 | 0.00 |
| ATOM | 3348 | HH12 | ARG | X | 220 | 23.674 | 35.949 | 36.612 | 0.00 | 0.00 |
| ATOM | 3349 | NH2  | ARG | X | 220 | 23.063 | 34.827 | 38.855 | 0.00 | 0.00 |
| ATOM | 3350 | HH21 | ARG | X | 220 | 23.151 | 34.306 | 39.716 | 0.00 | 0.00 |
| ATOM | 3351 | HH22 | ARG | X | 220 | 22.201 | 35.134 | 38.428 | 0.00 | 0.00 |
| ATOM | 3352 | C    | ARG | X | 220 | 28.457 | 39.220 | 40.350 | 0.00 | 0.00 |
| ATOM | 3353 | O    | ARG | X | 220 | 28.639 | 40.187 | 39.643 | 0.00 | 0.00 |
| ATOM | 3354 | N    | ALA | X | 221 | 29.484 | 38.625 | 41.000 | 0.00 | 0.00 |
| ATOM | 3355 | H    | ALA | X | 221 | 29.173 | 37.894 | 41.625 | 0.00 | 0.00 |
| ATOM | 3356 | CA   | ALA | X | 221 | 30.880 | 39.102 | 41.080 | 0.00 | 0.00 |
| ATOM | 3357 | HA   | ALA | X | 221 | 31.070 | 39.673 | 40.171 | 0.00 | 0.00 |
| ATOM | 3358 | CB   | ALA | X | 221 | 31.036 | 39.926 | 42.293 | 0.00 | 0.00 |
| ATOM | 3359 | HB1  | ALA | X | 221 | 30.885 | 39.211 | 43.102 | 0.00 | 0.00 |
| ATOM | 3360 | HB2  | ALA | X | 221 | 30.246 | 40.677 | 42.274 | 0.00 | 0.00 |
| ATOM | 3361 | HB3  | ALA | X | 221 | 32.021 | 40.388 | 42.359 | 0.00 | 0.00 |
| ATOM | 3362 | C    | ALA | X | 221 | 31.854 | 37.794 | 41.052 | 0.00 | 0.00 |
| ATOM | 3363 | O    | ALA | X | 221 | 31.481 | 36.702 | 41.463 | 0.00 | 0.00 |
| ATOM | 3364 | N    | VAL | X | 222 | 33.121 | 38.001 | 40.552 | 0.00 | 0.00 |
| ATOM | 3365 | H    | VAL | X | 222 | 33.292 | 38.882 | 40.090 | 0.00 | 0.00 |
| ATOM | 3366 | CA   | VAL | X | 222 | 34.171 | 36.986 | 40.505 | 0.00 | 0.00 |
| ATOM | 3367 | HA   | VAL | X | 222 | 34.029 | 36.104 | 41.129 | 0.00 | 0.00 |
| ATOM | 3368 | CB   | VAL | X | 222 | 34.278 | 36.437 | 39.080 | 0.00 | 0.00 |
| ATOM | 3369 | HB   | VAL | X | 222 | 34.549 | 37.236 | 38.390 | 0.00 | 0.00 |
| ATOM | 3370 | CG1  | VAL | X | 222 | 35.497 | 35.465 | 38.931 | 0.00 | 0.00 |
| ATOM | 3371 | HG11 | VAL | X | 222 | 35.443 | 34.987 | 37.953 | 0.00 | 0.00 |
| ATOM | 3372 | HG12 | VAL | X | 222 | 36.486 | 35.915 | 39.025 | 0.00 | 0.00 |
| ATOM | 3373 | HG13 | VAL | X | 222 | 35.564 | 34.819 | 39.806 | 0.00 | 0.00 |
| ATOM | 3374 | CG2  | VAL | X | 222 | 33.018 | 35.682 | 38.642 | 0.00 | 0.00 |
| ATOM | 3375 | HG21 | VAL | X | 222 | 33.206 | 35.194 | 37.685 | 0.00 | 0.00 |
| ATOM | 3376 | HG22 | VAL | X | 222 | 32.144 | 36.329 | 38.567 | 0.00 | 0.00 |
| ATOM | 3377 | HG23 | VAL | X | 222 | 32.845 | 34.890 | 39.370 | 0.00 | 0.00 |
| ATOM | 3378 | C    | VAL | X | 222 | 35.430 | 37.701 | 40.875 | 0.00 | 0.00 |
| ATOM | 3379 | O    | VAL | X | 222 | 35.797 | 38.702 | 40.278 | 0.00 | 0.00 |
| ATOM | 3380 | N    | LEU | X | 223 | 36.149 | 37.111 | 41.851 | 0.00 | 0.00 |
| ATOM | 3381 | H    | LEU | X | 223 | 35.610 | 36.449 | 42.390 | 0.00 | 0.00 |
| ATOM | 3382 | CA   | LEU | X | 223 | 37.436 | 37.611 | 42.344 | 0.00 | 0.00 |
| ATOM | 3383 | HA   | LEU | X | 223 | 37.761 | 38.480 | 41.772 | 0.00 | 0.00 |
| ATOM | 3384 | CB   | LEU | X | 223 | 37.305 | 37.953 | 43.866 | 0.00 | 0.00 |
| ATOM | 3385 | HB2  | LEU | X | 223 | 36.934 | 37.057 | 44.363 | 0.00 | 0.00 |
| ATOM | 3386 | HB3  | LEU | X | 223 | 38.288 | 38.140 | 44.298 | 0.00 | 0.00 |
| ATOM | 3387 | CG   | LEU | X | 223 | 36.300 | 39.113 | 44.195 | 0.00 | 0.00 |
| ATOM | 3388 | HG   | LEU | X | 223 | 36.450 | 39.910 | 43.467 | 0.00 | 0.00 |
| ATOM | 3389 | CD1  | LEU | X | 223 | 34.768 | 38.692 | 44.185 | 0.00 | 0.00 |
| ATOM | 3390 | HD11 | LEU | X | 223 | 34.137 | 39.556 | 44.393 | 0.00 | 0.00 |
| ATOM | 3391 | HD12 | LEU | X | 223 | 34.548 | 37.891 | 44.891 | 0.00 | 0.00 |
| ATOM | 3392 | HD13 | LEU | X | 223 | 34.474 | 38.280 | 43.220 | 0.00 | 0.00 |
| ATOM | 3393 | CD2  | LEU | X | 223 | 36.599 | 39.778 | 45.548 | 0.00 | 0.00 |
| ATOM | 3394 | HD21 | LEU | X | 223 | 37.635 | 40.022 | 45.783 | 0.00 | 0.00 |
| ATOM | 3395 | HD22 | LEU | X | 223 | 35.905 | 40.611 | 45.663 | 0.00 | 0.00 |
| ATOM | 3396 | HD23 | LEU | X | 223 | 36.288 | 39.090 | 46.334 | 0.00 | 0.00 |
| ATOM | 3397 | C    | LEU | X | 223 | 38.462 | 36.502 | 42.305 | 0.00 | 0.00 |
| ATOM | 3398 | O    | LEU | X | 223 | 38.278 | 35.375 | 42.749 | 0.00 | 0.00 |
| ATOM | 3399 | N    | GLN | X | 224 | 39.621 | 36.833 | 41.759 | 0.00 | 0.00 |
| ATOM | 3400 | H    | GLN | X | 224 | 39.912 | 37.746 | 41.442 | 0.00 | 0.00 |
| ATOM | 3401 | CA   | GLN | X | 224 | 40.690 | 35.826 | 41.536 | 0.00 | 0.00 |
| ATOM | 3402 | HA   | GLN | X | 224 | 40.385 | 34.902 | 42.027 | 0.00 | 0.00 |
| ATOM | 3403 | CB   | GLN | X | 224 | 40.793 | 35.524 | 39.995 | 0.00 | 0.00 |
| ATOM | 3404 | HB2  | GLN | X | 224 | 41.236 | 36.394 | 39.509 | 0.00 | 0.00 |
| ATOM | 3405 | HB3  | GLN | X | 224 | 41.630 | 34.826 | 39.978 | 0.00 | 0.00 |
| ATOM | 3406 | CG   | GLN | X | 224 | 39.518 | 34.855 | 39.359 | 0.00 | 0.00 |
| ATOM | 3407 | HG2  | GLN | X | 224 | 39.223 | 34.013 | 39.985 | 0.00 | 0.00 |
| ATOM | 3408 | HG3  | GLN | X | 224 | 38.694 | 35.564 | 39.281 | 0.00 | 0.00 |

|      |      |      |     |   |     |        |        |        |      |      |
|------|------|------|-----|---|-----|--------|--------|--------|------|------|
| ATOM | 3409 | CD   | GLN | X | 224 | 39.673 | 34.350 | 37.962 | 0.00 | 0.00 |
| ATOM | 3410 | OE1  | GLN | X | 224 | 39.057 | 34.799 | 37.004 | 0.00 | 0.00 |
| ATOM | 3411 | NE2  | GLN | X | 224 | 40.582 | 33.473 | 37.697 | 0.00 | 0.00 |
| ATOM | 3412 | HE21 | GLN | X | 224 | 40.817 | 33.134 | 36.776 | 0.00 | 0.00 |
| ATOM | 3413 | HE22 | GLN | X | 224 | 41.111 | 33.165 | 38.500 | 0.00 | 0.00 |
| ATOM | 3414 | C    | GLN | X | 224 | 42.028 | 36.291 | 42.034 | 0.00 | 0.00 |
| ATOM | 3415 | O    | GLN | X | 224 | 42.511 | 37.392 | 41.746 | 0.00 | 0.00 |
| ATOM | 3416 | N    | SER | X | 225 | 42.683 | 35.502 | 42.863 | 0.00 | 0.00 |
| ATOM | 3417 | H    | SER | X | 225 | 42.140 | 34.752 | 43.265 | 0.00 | 0.00 |
| ATOM | 3418 | CA   | SER | X | 225 | 44.094 | 35.688 | 43.285 | 0.00 | 0.00 |
| ATOM | 3419 | HA   | SER | X | 225 | 44.284 | 34.906 | 44.020 | 0.00 | 0.00 |
| ATOM | 3420 | CB   | SER | X | 225 | 45.094 | 35.386 | 42.120 | 0.00 | 0.00 |
| ATOM | 3421 | HB2  | SER | X | 225 | 44.716 | 34.432 | 41.753 | 0.00 | 0.00 |
| ATOM | 3422 | HB3  | SER | X | 225 | 45.016 | 36.256 | 41.467 | 0.00 | 0.00 |
| ATOM | 3423 | OG   | SER | X | 225 | 46.430 | 35.153 | 42.483 | 0.00 | 0.00 |
| ATOM | 3424 | HG   | SER | X | 225 | 46.420 | 34.441 | 43.127 | 0.00 | 0.00 |
| ATOM | 3425 | C    | SER | X | 225 | 44.371 | 37.002 | 44.076 | 0.00 | 0.00 |
| ATOM | 3426 | O    | SER | X | 225 | 45.511 | 37.397 | 44.320 | 0.00 | 0.00 |
| ATOM | 3427 | N    | GLY | X | 226 | 43.297 | 37.639 | 44.413 | 0.00 | 0.00 |
| ATOM | 3428 | H    | GLY | X | 226 | 42.414 | 37.220 | 44.160 | 0.00 | 0.00 |
| ATOM | 3429 | CA   | GLY | X | 226 | 43.255 | 38.772 | 45.392 | 0.00 | 0.00 |
| ATOM | 3430 | HA2  | GLY | X | 226 | 43.972 | 38.539 | 46.178 | 0.00 | 0.00 |
| ATOM | 3431 | HA3  | GLY | X | 226 | 43.511 | 39.762 | 45.014 | 0.00 | 0.00 |
| ATOM | 3432 | C    | GLY | X | 226 | 41.880 | 38.969 | 46.059 | 0.00 | 0.00 |
| ATOM | 3433 | O    | GLY | X | 226 | 40.885 | 38.407 | 45.636 | 0.00 | 0.00 |
| ATOM | 3434 | N    | ALA | X | 227 | 41.911 | 39.660 | 47.200 | 0.00 | 0.00 |
| ATOM | 3435 | H    | ALA | X | 227 | 42.788 | 39.766 | 47.690 | 0.00 | 0.00 |
| ATOM | 3436 | CA   | ALA | X | 227 | 40.656 | 39.891 | 48.029 | 0.00 | 0.00 |
| ATOM | 3437 | HA   | ALA | X | 227 | 39.819 | 39.809 | 47.335 | 0.00 | 0.00 |
| ATOM | 3438 | CB   | ALA | X | 227 | 40.778 | 38.704 | 49.015 | 0.00 | 0.00 |
| ATOM | 3439 | HB1  | ALA | X | 227 | 40.691 | 37.744 | 48.507 | 0.00 | 0.00 |
| ATOM | 3440 | HB2  | ALA | X | 227 | 39.875 | 38.695 | 49.624 | 0.00 | 0.00 |
| ATOM | 3441 | HB3  | ALA | X | 227 | 41.665 | 38.880 | 49.624 | 0.00 | 0.00 |
| ATOM | 3442 | C    | ALA | X | 227 | 40.654 | 41.248 | 48.771 | 0.00 | 0.00 |
| ATOM | 3443 | O    | ALA | X | 227 | 41.703 | 41.652 | 49.201 | 0.00 | 0.00 |
| ATOM | 3444 | N    | PRO | X | 228 | 39.426 | 41.816 | 48.973 | 0.00 | 0.00 |
| ATOM | 3445 | CD   | PRO | X | 228 | 38.108 | 41.268 | 48.556 | 0.00 | 0.00 |
| ATOM | 3446 | HD2  | PRO | X | 228 | 37.998 | 40.194 | 48.701 | 0.00 | 0.00 |
| ATOM | 3447 | HD3  | PRO | X | 228 | 37.962 | 41.551 | 47.514 | 0.00 | 0.00 |
| ATOM | 3448 | CG   | PRO | X | 228 | 37.120 | 42.015 | 49.476 | 0.00 | 0.00 |
| ATOM | 3449 | HG2  | PRO | X | 228 | 37.171 | 41.624 | 50.492 | 0.00 | 0.00 |
| ATOM | 3450 | HG3  | PRO | X | 228 | 36.105 | 42.001 | 49.079 | 0.00 | 0.00 |
| ATOM | 3451 | CB   | PRO | X | 228 | 37.766 | 43.383 | 49.603 | 0.00 | 0.00 |
| ATOM | 3452 | HB2  | PRO | X | 228 | 37.402 | 43.905 | 50.488 | 0.00 | 0.00 |
| ATOM | 3453 | HB3  | PRO | X | 228 | 37.477 | 44.032 | 48.777 | 0.00 | 0.00 |
| ATOM | 3454 | CA   | PRO | X | 228 | 39.282 | 43.118 | 49.641 | 0.00 | 0.00 |
| ATOM | 3455 | HA   | PRO | X | 228 | 39.800 | 43.823 | 48.990 | 0.00 | 0.00 |
| ATOM | 3456 | C    | PRO | X | 228 | 39.881 | 43.193 | 51.035 | 0.00 | 0.00 |
| ATOM | 3457 | O    | PRO | X | 228 | 40.431 | 44.231 | 51.367 | 0.00 | 0.00 |
| ATOM | 3458 | N    | ASN | X | 229 | 39.807 | 42.121 | 51.866 | 0.00 | 0.00 |
| ATOM | 3459 | H    | ASN | X | 229 | 39.560 | 41.291 | 51.347 | 0.00 | 0.00 |
| ATOM | 3460 | CA   | ASN | X | 229 | 40.239 | 41.943 | 53.210 | 0.00 | 0.00 |
| ATOM | 3461 | HA   | ASN | X | 229 | 40.301 | 42.906 | 53.717 | 0.00 | 0.00 |
| ATOM | 3462 | CB   | ASN | X | 229 | 39.234 | 41.002 | 53.927 | 0.00 | 0.00 |
| ATOM | 3463 | HB2  | ASN | X | 229 | 39.342 | 40.987 | 55.011 | 0.00 | 0.00 |
| ATOM | 3464 | HB3  | ASN | X | 229 | 38.269 | 41.445 | 53.681 | 0.00 | 0.00 |
| ATOM | 3465 | CG   | ASN | X | 229 | 39.321 | 39.529 | 53.440 | 0.00 | 0.00 |
| ATOM | 3466 | OD1  | ASN | X | 229 | 39.392 | 39.226 | 52.221 | 0.00 | 0.00 |
| ATOM | 3467 | ND2  | ASN | X | 229 | 39.321 | 38.584 | 54.365 | 0.00 | 0.00 |
| ATOM | 3468 | HD21 | ASN | X | 229 | 39.428 | 37.661 | 53.969 | 0.00 | 0.00 |
| ATOM | 3469 | HD22 | ASN | X | 229 | 39.471 | 38.846 | 55.329 | 0.00 | 0.00 |
| ATOM | 3470 | C    | ASN | X | 229 | 41.577 | 41.227 | 53.258 | 0.00 | 0.00 |
| ATOM | 3471 | O    | ASN | X | 229 | 42.072 | 40.844 | 54.332 | 0.00 | 0.00 |
| ATOM | 3472 | N    | GLY | X | 230 | 42.322 | 41.138 | 52.170 | 0.00 | 0.00 |
| ATOM | 3473 | H    | GLY | X | 230 | 41.953 | 41.484 | 51.296 | 0.00 | 0.00 |
| ATOM | 3474 | CA   | GLY | X | 230 | 43.772 | 40.902 | 52.136 | 0.00 | 0.00 |
| ATOM | 3475 | HA2  | GLY | X | 230 | 43.960 | 40.148 | 52.900 | 0.00 | 0.00 |

|      |      |      |     |   |     |        |        |        |      |      |
|------|------|------|-----|---|-----|--------|--------|--------|------|------|
| ATOM | 3476 | HA3  | GLY | X | 230 | 44.046 | 40.547 | 51.143 | 0.00 | 0.00 |
| ATOM | 3477 | C    | GLY | X | 230 | 44.429 | 42.187 | 52.590 | 0.00 | 0.00 |
| ATOM | 3478 | O    | GLY | X | 230 | 44.051 | 43.204 | 51.951 | 0.00 | 0.00 |
| ATOM | 3479 | N    | PRO | X | 231 | 45.204 | 42.201 | 53.706 | 0.00 | 0.00 |
| ATOM | 3480 | CD   | PRO | X | 231 | 45.496 | 41.025 | 54.533 | 0.00 | 0.00 |
| ATOM | 3481 | HD2  | PRO | X | 231 | 46.243 | 40.358 | 54.104 | 0.00 | 0.00 |
| ATOM | 3482 | HD3  | PRO | X | 231 | 44.568 | 40.491 | 54.738 | 0.00 | 0.00 |
| ATOM | 3483 | CG   | PRO | X | 231 | 45.920 | 41.525 | 55.828 | 0.00 | 0.00 |
| ATOM | 3484 | HG2  | PRO | X | 231 | 46.686 | 40.887 | 56.269 | 0.00 | 0.00 |
| ATOM | 3485 | HG3  | PRO | X | 231 | 45.057 | 41.562 | 56.494 | 0.00 | 0.00 |
| ATOM | 3486 | CB   | PRO | X | 231 | 46.463 | 42.936 | 55.501 | 0.00 | 0.00 |
| ATOM | 3487 | HB2  | PRO | X | 231 | 47.459 | 42.846 | 55.069 | 0.00 | 0.00 |
| ATOM | 3488 | HB3  | PRO | X | 231 | 46.400 | 43.544 | 56.404 | 0.00 | 0.00 |
| ATOM | 3489 | CA   | PRO | X | 231 | 45.577 | 43.462 | 54.411 | 0.00 | 0.00 |
| ATOM | 3490 | HA   | PRO | X | 231 | 44.696 | 43.962 | 54.814 | 0.00 | 0.00 |
| ATOM | 3491 | C    | PRO | X | 231 | 46.217 | 44.511 | 53.416 | 0.00 | 0.00 |
| ATOM | 3492 | O    | PRO | X | 231 | 45.863 | 45.697 | 53.455 | 0.00 | 0.00 |
| ATOM | 3493 | N    | TRP | X | 232 | 47.013 | 44.126 | 52.423 | 0.00 | 0.00 |
| ATOM | 3494 | H    | TRP | X | 232 | 47.263 | 43.150 | 52.351 | 0.00 | 0.00 |
| ATOM | 3495 | CA   | TRP | X | 232 | 47.546 | 44.918 | 51.312 | 0.00 | 0.00 |
| ATOM | 3496 | HA   | TRP | X | 232 | 48.292 | 45.575 | 51.760 | 0.00 | 0.00 |
| ATOM | 3497 | CB   | TRP | X | 232 | 48.252 | 43.889 | 50.450 | 0.00 | 0.00 |
| ATOM | 3498 | HB2  | TRP | X | 232 | 48.703 | 44.412 | 49.607 | 0.00 | 0.00 |
| ATOM | 3499 | HB3  | TRP | X | 232 | 49.030 | 43.517 | 51.116 | 0.00 | 0.00 |
| ATOM | 3500 | CG   | TRP | X | 232 | 47.469 | 42.792 | 49.963 | 0.00 | 0.00 |
| ATOM | 3501 | CD1  | TRP | X | 232 | 47.246 | 41.602 | 50.504 | 0.00 | 0.00 |
| ATOM | 3502 | HD1  | TRP | X | 232 | 47.724 | 41.125 | 51.347 | 0.00 | 0.00 |
| ATOM | 3503 | NE1  | TRP | X | 232 | 46.414 | 40.918 | 49.654 | 0.00 | 0.00 |
| ATOM | 3504 | HE1  | TRP | X | 232 | 45.968 | 40.045 | 49.897 | 0.00 | 0.00 |
| ATOM | 3505 | CE2  | TRP | X | 232 | 46.110 | 41.599 | 48.497 | 0.00 | 0.00 |
| ATOM | 3506 | CZ2  | TRP | X | 232 | 45.548 | 41.188 | 47.318 | 0.00 | 0.00 |
| ATOM | 3507 | HZ2  | TRP | X | 232 | 45.304 | 40.144 | 47.189 | 0.00 | 0.00 |
| ATOM | 3508 | CH2  | TRP | X | 232 | 45.513 | 42.053 | 46.144 | 0.00 | 0.00 |
| ATOM | 3509 | HH2  | TRP | X | 232 | 45.046 | 41.770 | 45.212 | 0.00 | 0.00 |
| ATOM | 3510 | CZ3  | TRP | X | 232 | 45.937 | 43.377 | 46.449 | 0.00 | 0.00 |
| ATOM | 3511 | HZ3  | TRP | X | 232 | 45.913 | 44.162 | 45.707 | 0.00 | 0.00 |
| ATOM | 3512 | CE3  | TRP | X | 232 | 46.457 | 43.770 | 47.737 | 0.00 | 0.00 |
| ATOM | 3513 | HE3  | TRP | X | 232 | 46.947 | 44.721 | 47.883 | 0.00 | 0.00 |
| ATOM | 3514 | CD2  | TRP | X | 232 | 46.616 | 42.856 | 48.740 | 0.00 | 0.00 |
| ATOM | 3515 | C    | TRP | X | 232 | 46.504 | 45.683 | 50.477 | 0.00 | 0.00 |
| ATOM | 3516 | O    | TRP | X | 232 | 46.918 | 46.582 | 49.737 | 0.00 | 0.00 |
| ATOM | 3517 | N    | ALA | X | 233 | 45.253 | 45.271 | 50.394 | 0.00 | 0.00 |
| ATOM | 3518 | H    | ALA | X | 233 | 44.963 | 44.441 | 50.890 | 0.00 | 0.00 |
| ATOM | 3519 | CA   | ALA | X | 233 | 44.305 | 45.998 | 49.504 | 0.00 | 0.00 |
| ATOM | 3520 | HA   | ALA | X | 233 | 44.882 | 46.236 | 48.610 | 0.00 | 0.00 |
| ATOM | 3521 | CB   | ALA | X | 233 | 43.104 | 45.084 | 49.156 | 0.00 | 0.00 |
| ATOM | 3522 | HB1  | ALA | X | 233 | 43.436 | 44.232 | 48.562 | 0.00 | 0.00 |
| ATOM | 3523 | HB2  | ALA | X | 233 | 42.402 | 45.728 | 48.626 | 0.00 | 0.00 |
| ATOM | 3524 | HB3  | ALA | X | 233 | 42.525 | 44.741 | 50.014 | 0.00 | 0.00 |
| ATOM | 3525 | C    | ALA | X | 233 | 43.742 | 47.324 | 50.104 | 0.00 | 0.00 |
| ATOM | 3526 | O    | ALA | X | 233 | 42.852 | 47.990 | 49.587 | 0.00 | 0.00 |
| ATOM | 3527 | N    | THR | X | 234 | 44.122 | 47.684 | 51.336 | 0.00 | 0.00 |
| ATOM | 3528 | H    | THR | X | 234 | 44.787 | 47.150 | 51.877 | 0.00 | 0.00 |
| ATOM | 3529 | CA   | THR | X | 234 | 43.866 | 48.998 | 51.986 | 0.00 | 0.00 |
| ATOM | 3530 | HA   | THR | X | 234 | 43.540 | 49.677 | 51.197 | 0.00 | 0.00 |
| ATOM | 3531 | CB   | THR | X | 234 | 42.749 | 49.008 | 53.096 | 0.00 | 0.00 |
| ATOM | 3532 | HB   | THR | X | 234 | 42.712 | 50.017 | 53.506 | 0.00 | 0.00 |
| ATOM | 3533 | CG2  | THR | X | 234 | 41.451 | 48.756 | 52.448 | 0.00 | 0.00 |
| ATOM | 3534 | HG21 | THR | X | 234 | 40.704 | 49.093 | 53.167 | 0.00 | 0.00 |
| ATOM | 3535 | HG22 | THR | X | 234 | 41.234 | 47.695 | 52.318 | 0.00 | 0.00 |
| ATOM | 3536 | HG23 | THR | X | 234 | 41.416 | 49.484 | 51.638 | 0.00 | 0.00 |
| ATOM | 3537 | OG1  | THR | X | 234 | 43.038 | 48.053 | 54.043 | 0.00 | 0.00 |
| ATOM | 3538 | HG1  | THR | X | 234 | 42.872 | 47.229 | 53.578 | 0.00 | 0.00 |
| ATOM | 3539 | C    | THR | X | 234 | 45.033 | 49.676 | 52.586 | 0.00 | 0.00 |
| ATOM | 3540 | O    | THR | X | 234 | 45.998 | 49.056 | 53.038 | 0.00 | 0.00 |
| ATOM | 3541 | N    | VAL | X | 235 | 44.982 | 51.006 | 52.694 | 0.00 | 0.00 |
| ATOM | 3542 | H    | VAL | X | 235 | 44.268 | 51.568 | 52.252 | 0.00 | 0.00 |

|      |      |      |     |   |     |        |        |        |      |      |
|------|------|------|-----|---|-----|--------|--------|--------|------|------|
| ATOM | 3543 | CA   | VAL | X | 235 | 45.975 | 51.744 | 53.511 | 0.00 | 0.00 |
| ATOM | 3544 | HA   | VAL | X | 235 | 46.344 | 51.054 | 54.270 | 0.00 | 0.00 |
| ATOM | 3545 | CB   | VAL | X | 235 | 47.166 | 52.207 | 52.648 | 0.00 | 0.00 |
| ATOM | 3546 | HB   | VAL | X | 235 | 47.166 | 51.452 | 51.862 | 0.00 | 0.00 |
| ATOM | 3547 | CG1  | VAL | X | 235 | 46.851 | 53.517 | 51.881 | 0.00 | 0.00 |
| ATOM | 3548 | HG11 | VAL | X | 235 | 46.840 | 54.424 | 52.485 | 0.00 | 0.00 |
| ATOM | 3549 | HG12 | VAL | X | 235 | 47.606 | 53.620 | 51.101 | 0.00 | 0.00 |
| ATOM | 3550 | HG13 | VAL | X | 235 | 45.899 | 53.428 | 51.358 | 0.00 | 0.00 |
| ATOM | 3551 | CG2  | VAL | X | 235 | 48.483 | 52.444 | 53.331 | 0.00 | 0.00 |
| ATOM | 3552 | HG21 | VAL | X | 235 | 49.305 | 52.601 | 52.632 | 0.00 | 0.00 |
| ATOM | 3553 | HG22 | VAL | X | 235 | 48.738 | 51.594 | 53.964 | 0.00 | 0.00 |
| ATOM | 3554 | HG23 | VAL | X | 235 | 48.448 | 53.376 | 53.896 | 0.00 | 0.00 |
| ATOM | 3555 | C    | VAL | X | 235 | 45.283 | 52.834 | 54.365 | 0.00 | 0.00 |
| ATOM | 3556 | O    | VAL | X | 235 | 44.255 | 53.342 | 54.038 | 0.00 | 0.00 |
| ATOM | 3557 | N    | GLY | X | 236 | 45.932 | 53.193 | 55.473 | 0.00 | 0.00 |
| ATOM | 3558 | H    | GLY | X | 236 | 46.767 | 52.656 | 55.660 | 0.00 | 0.00 |
| ATOM | 3559 | CA   | GLY | X | 236 | 45.493 | 54.207 | 56.469 | 0.00 | 0.00 |
| ATOM | 3560 | HA2  | GLY | X | 236 | 44.407 | 54.191 | 56.565 | 0.00 | 0.00 |
| ATOM | 3561 | HA3  | GLY | X | 236 | 45.975 | 54.162 | 57.445 | 0.00 | 0.00 |
| ATOM | 3562 | C    | GLY | X | 236 | 45.848 | 55.619 | 55.994 | 0.00 | 0.00 |
| ATOM | 3563 | O    | GLY | X | 236 | 46.953 | 56.013 | 55.483 | 0.00 | 0.00 |
| ATOM | 3564 | N    | MET | X | 237 | 44.923 | 56.510 | 56.209 | 0.00 | 0.00 |
| ATOM | 3565 | H    | MET | X | 237 | 44.029 | 56.189 | 56.552 | 0.00 | 0.00 |
| ATOM | 3566 | CA   | MET | X | 237 | 44.892 | 57.992 | 55.921 | 0.00 | 0.00 |
| ATOM | 3567 | HA   | MET | X | 237 | 44.938 | 58.229 | 54.858 | 0.00 | 0.00 |
| ATOM | 3568 | CB   | MET | X | 237 | 43.683 | 58.629 | 56.632 | 0.00 | 0.00 |
| ATOM | 3569 | HB2  | MET | X | 237 | 42.852 | 58.067 | 56.205 | 0.00 | 0.00 |
| ATOM | 3570 | HB3  | MET | X | 237 | 43.645 | 58.490 | 57.713 | 0.00 | 0.00 |
| ATOM | 3571 | CG   | MET | X | 237 | 43.355 | 60.123 | 56.396 | 0.00 | 0.00 |
| ATOM | 3572 | HG2  | MET | X | 237 | 42.335 | 60.342 | 56.712 | 0.00 | 0.00 |
| ATOM | 3573 | HG3  | MET | X | 237 | 44.025 | 60.745 | 56.990 | 0.00 | 0.00 |
| ATOM | 3574 | SD   | MET | X | 237 | 43.589 | 60.770 | 54.706 | 0.00 | 0.00 |
| ATOM | 3575 | CE   | MET | X | 237 | 41.876 | 60.694 | 54.070 | 0.00 | 0.00 |
| ATOM | 3576 | HE1  | MET | X | 237 | 41.865 | 60.934 | 53.007 | 0.00 | 0.00 |
| ATOM | 3577 | HE2  | MET | X | 237 | 41.444 | 59.694 | 54.119 | 0.00 | 0.00 |
| ATOM | 3578 | HE3  | MET | X | 237 | 41.179 | 61.308 | 54.640 | 0.00 | 0.00 |
| ATOM | 3579 | C    | MET | X | 237 | 46.227 | 58.635 | 56.472 | 0.00 | 0.00 |
| ATOM | 3580 | O    | MET | X | 237 | 46.843 | 59.507 | 55.835 | 0.00 | 0.00 |
| ATOM | 3581 | N    | GLY | X | 238 | 46.684 | 58.202 | 57.659 | 0.00 | 0.00 |
| ATOM | 3582 | H    | GLY | X | 238 | 46.210 | 57.526 | 58.242 | 0.00 | 0.00 |
| ATOM | 3583 | CA   | GLY | X | 238 | 48.048 | 58.760 | 58.095 | 0.00 | 0.00 |
| ATOM | 3584 | HA2  | GLY | X | 238 | 48.002 | 59.832 | 57.903 | 0.00 | 0.00 |
| ATOM | 3585 | HA3  | GLY | X | 238 | 48.252 | 58.479 | 59.128 | 0.00 | 0.00 |
| ATOM | 3586 | C    | GLY | X | 238 | 49.246 | 58.242 | 57.332 | 0.00 | 0.00 |
| ATOM | 3587 | O    | GLY | X | 238 | 50.105 | 59.031 | 57.009 | 0.00 | 0.00 |
| ATOM | 3588 | N    | GLU | X | 239 | 49.251 | 56.941 | 57.026 | 0.00 | 0.00 |
| ATOM | 3589 | H    | GLU | X | 239 | 48.428 | 56.406 | 57.262 | 0.00 | 0.00 |
| ATOM | 3590 | CA   | GLU | X | 239 | 50.189 | 56.372 | 56.021 | 0.00 | 0.00 |
| ATOM | 3591 | HA   | GLU | X | 239 | 51.207 | 56.626 | 56.318 | 0.00 | 0.00 |
| ATOM | 3592 | CB   | GLU | X | 239 | 50.115 | 54.816 | 55.982 | 0.00 | 0.00 |
| ATOM | 3593 | HB2  | GLU | X | 239 | 49.099 | 54.542 | 56.265 | 0.00 | 0.00 |
| ATOM | 3594 | HB3  | GLU | X | 239 | 50.401 | 54.382 | 55.023 | 0.00 | 0.00 |
| ATOM | 3595 | CG   | GLU | X | 239 | 51.169 | 54.125 | 56.977 | 0.00 | 0.00 |
| ATOM | 3596 | HG2  | GLU | X | 239 | 51.187 | 54.695 | 57.906 | 0.00 | 0.00 |
| ATOM | 3597 | HG3  | GLU | X | 239 | 50.872 | 53.108 | 57.232 | 0.00 | 0.00 |
| ATOM | 3598 | CD   | GLU | X | 239 | 52.498 | 53.839 | 56.264 | 0.00 | 0.00 |
| ATOM | 3599 | OE1  | GLU | X | 239 | 52.658 | 53.170 | 55.237 | 0.00 | 0.00 |
| ATOM | 3600 | OE2  | GLU | X | 239 | 53.520 | 54.241 | 56.805 | 0.00 | 0.00 |
| ATOM | 3601 | C    | GLU | X | 239 | 50.142 | 56.964 | 54.588 | 0.00 | 0.00 |
| ATOM | 3602 | O    | GLU | X | 239 | 51.175 | 57.230 | 54.045 | 0.00 | 0.00 |
| ATOM | 3603 | N    | ALA | X | 240 | 49.004 | 57.277 | 54.081 | 0.00 | 0.00 |
| ATOM | 3604 | H    | ALA | X | 240 | 48.185 | 56.883 | 54.521 | 0.00 | 0.00 |
| ATOM | 3605 | CA   | ALA | X | 240 | 48.788 | 57.966 | 52.822 | 0.00 | 0.00 |
| ATOM | 3606 | HA   | ALA | X | 240 | 49.315 | 57.400 | 52.055 | 0.00 | 0.00 |
| ATOM | 3607 | CB   | ALA | X | 240 | 47.256 | 57.838 | 52.493 | 0.00 | 0.00 |
| ATOM | 3608 | HB1  | ALA | X | 240 | 46.547 | 58.308 | 53.175 | 0.00 | 0.00 |
| ATOM | 3609 | HB2  | ALA | X | 240 | 47.000 | 56.778 | 52.467 | 0.00 | 0.00 |



|      |      |      |     |   |     |        |        |        |      |      |
|------|------|------|-----|---|-----|--------|--------|--------|------|------|
| ATOM | 3610 | HB3  | ALA | X | 240 | 47.178 | 58.103 | 51.439 | 0.00 | 0.00 |
| ATOM | 3611 | C    | ALA | X | 240 | 49.308 | 59.439 | 52.861 | 0.00 | 0.00 |
| ATOM | 3612 | O    | ALA | X | 240 | 50.081 | 59.734 | 51.995 | 0.00 | 0.00 |
| ATOM | 3613 | N    | ARG | X | 241 | 49.025 | 60.140 | 54.012 | 0.00 | 0.00 |
| ATOM | 3614 | H    | ARG | X | 241 | 48.481 | 59.613 | 54.680 | 0.00 | 0.00 |
| ATOM | 3615 | CA   | ARG | X | 241 | 49.586 | 61.487 | 54.322 | 0.00 | 0.00 |
| ATOM | 3616 | HA   | ARG | X | 241 | 49.222 | 62.242 | 53.625 | 0.00 | 0.00 |
| ATOM | 3617 | CB   | ARG | X | 241 | 49.108 | 61.929 | 55.703 | 0.00 | 0.00 |
| ATOM | 3618 | HB2  | ARG | X | 241 | 48.019 | 61.878 | 55.711 | 0.00 | 0.00 |
| ATOM | 3619 | HB3  | ARG | X | 241 | 49.633 | 61.396 | 56.495 | 0.00 | 0.00 |
| ATOM | 3620 | CG   | ARG | X | 241 | 49.549 | 63.382 | 55.895 | 0.00 | 0.00 |
| ATOM | 3621 | HG2  | ARG | X | 241 | 50.632 | 63.357 | 56.014 | 0.00 | 0.00 |
| ATOM | 3622 | HG3  | ARG | X | 241 | 49.324 | 64.041 | 55.057 | 0.00 | 0.00 |
| ATOM | 3623 | CD   | ARG | X | 241 | 48.934 | 63.847 | 57.271 | 0.00 | 0.00 |
| ATOM | 3624 | HD2  | ARG | X | 241 | 47.938 | 63.426 | 57.406 | 0.00 | 0.00 |
| ATOM | 3625 | HD3  | ARG | X | 241 | 49.577 | 63.450 | 58.056 | 0.00 | 0.00 |
| ATOM | 3626 | NE   | ARG | X | 241 | 48.782 | 65.296 | 57.420 | 0.00 | 0.00 |
| ATOM | 3627 | HE   | ARG | X | 241 | 48.996 | 65.860 | 56.610 | 0.00 | 0.00 |
| ATOM | 3628 | CZ   | ARG | X | 241 | 48.418 | 65.925 | 58.543 | 0.00 | 0.00 |
| ATOM | 3629 | NH1  | ARG | X | 241 | 48.066 | 65.301 | 59.598 | 0.00 | 0.00 |
| ATOM | 3630 | HH11 | ARG | X | 241 | 48.034 | 64.295 | 59.681 | 0.00 | 0.00 |
| ATOM | 3631 | HH12 | ARG | X | 241 | 47.772 | 65.882 | 60.370 | 0.00 | 0.00 |
| ATOM | 3632 | NH2  | ARG | X | 241 | 48.284 | 67.213 | 58.515 | 0.00 | 0.00 |
| ATOM | 3633 | HH21 | ARG | X | 241 | 48.573 | 67.803 | 57.749 | 0.00 | 0.00 |
| ATOM | 3634 | HH22 | ARG | X | 241 | 47.921 | 67.623 | 59.364 | 0.00 | 0.00 |
| ATOM | 3635 | C    | ARG | X | 241 | 51.120 | 61.468 | 54.201 | 0.00 | 0.00 |
| ATOM | 3636 | O    | ARG | X | 241 | 51.764 | 62.216 | 53.443 | 0.00 | 0.00 |
| ATOM | 3637 | N    | ARG | X | 242 | 51.801 | 60.580 | 54.956 | 0.00 | 0.00 |
| ATOM | 3638 | H    | ARG | X | 242 | 51.374 | 60.003 | 55.667 | 0.00 | 0.00 |
| ATOM | 3639 | CA   | ARG | X | 242 | 53.215 | 60.346 | 54.776 | 0.00 | 0.00 |
| ATOM | 3640 | HA   | ARG | X | 242 | 53.653 | 61.236 | 55.228 | 0.00 | 0.00 |
| ATOM | 3641 | CB   | ARG | X | 242 | 53.702 | 59.180 | 55.722 | 0.00 | 0.00 |
| ATOM | 3642 | HB2  | ARG | X | 242 | 53.535 | 59.417 | 56.773 | 0.00 | 0.00 |
| ATOM | 3643 | HB3  | ARG | X | 242 | 53.095 | 58.296 | 55.527 | 0.00 | 0.00 |
| ATOM | 3644 | CG   | ARG | X | 242 | 55.120 | 58.778 | 55.539 | 0.00 | 0.00 |
| ATOM | 3645 | HG2  | ARG | X | 242 | 55.525 | 58.554 | 54.552 | 0.00 | 0.00 |
| ATOM | 3646 | HG3  | ARG | X | 242 | 55.759 | 59.534 | 55.995 | 0.00 | 0.00 |
| ATOM | 3647 | CD   | ARG | X | 242 | 55.534 | 57.598 | 56.368 | 0.00 | 0.00 |
| ATOM | 3648 | HD2  | ARG | X | 242 | 56.586 | 57.570 | 56.649 | 0.00 | 0.00 |
| ATOM | 3649 | HD3  | ARG | X | 242 | 55.019 | 57.696 | 57.324 | 0.00 | 0.00 |
| ATOM | 3650 | NE   | ARG | X | 242 | 55.161 | 56.243 | 55.795 | 0.00 | 0.00 |
| ATOM | 3651 | HE   | ARG | X | 242 | 54.591 | 55.623 | 56.353 | 0.00 | 0.00 |
| ATOM | 3652 | CZ   | ARG | X | 242 | 55.714 | 55.623 | 54.727 | 0.00 | 0.00 |
| ATOM | 3653 | NH1  | ARG | X | 242 | 56.827 | 56.046 | 54.135 | 0.00 | 0.00 |
| ATOM | 3654 | HH11 | ARG | X | 242 | 57.261 | 56.872 | 54.523 | 0.00 | 0.00 |
| ATOM | 3655 | HH12 | ARG | X | 242 | 57.218 | 55.728 | 53.260 | 0.00 | 0.00 |
| ATOM | 3656 | NH2  | ARG | X | 242 | 55.186 | 54.537 | 54.294 | 0.00 | 0.00 |
| ATOM | 3657 | HH21 | ARG | X | 242 | 54.303 | 54.226 | 54.674 | 0.00 | 0.00 |
| ATOM | 3658 | HH22 | ARG | X | 242 | 55.700 | 53.847 | 53.765 | 0.00 | 0.00 |
| ATOM | 3659 | C    | ARG | X | 242 | 53.651 | 60.027 | 53.379 | 0.00 | 0.00 |
| ATOM | 3660 | O    | ARG | X | 242 | 54.418 | 60.819 | 52.850 | 0.00 | 0.00 |
| ATOM | 3661 | N    | ARG | X | 243 | 53.047 | 59.020 | 52.677 | 0.00 | 0.00 |
| ATOM | 3662 | H    | ARG | X | 243 | 52.340 | 58.488 | 53.164 | 0.00 | 0.00 |
| ATOM | 3663 | CA   | ARG | X | 243 | 53.435 | 58.725 | 51.243 | 0.00 | 0.00 |
| ATOM | 3664 | HA   | ARG | X | 243 | 54.466 | 58.370 | 51.229 | 0.00 | 0.00 |
| ATOM | 3665 | CB   | ARG | X | 243 | 52.558 | 57.499 | 50.752 | 0.00 | 0.00 |
| ATOM | 3666 | HB2  | ARG | X | 243 | 51.511 | 57.797 | 50.810 | 0.00 | 0.00 |
| ATOM | 3667 | HB3  | ARG | X | 243 | 52.854 | 57.338 | 49.715 | 0.00 | 0.00 |
| ATOM | 3668 | CG   | ARG | X | 243 | 52.946 | 56.194 | 51.549 | 0.00 | 0.00 |
| ATOM | 3669 | HG2  | ARG | X | 243 | 53.888 | 55.779 | 51.191 | 0.00 | 0.00 |
| ATOM | 3670 | HG3  | ARG | X | 243 | 53.089 | 56.335 | 52.620 | 0.00 | 0.00 |
| ATOM | 3671 | CD   | ARG | X | 243 | 51.753 | 55.241 | 51.563 | 0.00 | 0.00 |
| ATOM | 3672 | HD2  | ARG | X | 243 | 50.858 | 55.697 | 51.985 | 0.00 | 0.00 |
| ATOM | 3673 | HD3  | ARG | X | 243 | 51.545 | 55.001 | 50.520 | 0.00 | 0.00 |
| ATOM | 3674 | NE   | ARG | X | 243 | 52.006 | 54.001 | 52.416 | 0.00 | 0.00 |
| ATOM | 3675 | HE   | ARG | X | 243 | 52.287 | 54.130 | 53.378 | 0.00 | 0.00 |
| ATOM | 3676 | CZ   | ARG | X | 243 | 52.035 | 52.733 | 51.937 | 0.00 | 0.00 |

|      |      |      |     |   |     |        |        |        |      |      |
|------|------|------|-----|---|-----|--------|--------|--------|------|------|
| ATOM | 3677 | NH1  | ARG | X | 243 | 51.845 | 52.430 | 50.696 | 0.00 | 0.00 |
| ATOM | 3678 | HH11 | ARG | X | 243 | 51.697 | 53.206 | 50.068 | 0.00 | 0.00 |
| ATOM | 3679 | HH12 | ARG | X | 243 | 51.850 | 51.485 | 50.338 | 0.00 | 0.00 |
| ATOM | 3680 | NH2  | ARG | X | 243 | 52.377 | 51.693 | 52.697 | 0.00 | 0.00 |
| ATOM | 3681 | HH21 | ARG | X | 243 | 52.425 | 51.803 | 53.700 | 0.00 | 0.00 |
| ATOM | 3682 | HH22 | ARG | X | 243 | 52.338 | 50.770 | 52.288 | 0.00 | 0.00 |
| ATOM | 3683 | C    | ARG | X | 243 | 53.299 | 59.935 | 50.274 | 0.00 | 0.00 |
| ATOM | 3684 | O    | ARG | X | 243 | 54.254 | 60.181 | 49.486 | 0.00 | 0.00 |
| ATOM | 3685 | N    | ALA | X | 244 | 52.230 | 60.699 | 50.414 | 0.00 | 0.00 |
| ATOM | 3686 | H    | ALA | X | 244 | 51.599 | 60.507 | 51.178 | 0.00 | 0.00 |
| ATOM | 3687 | CA   | ALA | X | 244 | 52.074 | 61.959 | 49.682 | 0.00 | 0.00 |
| ATOM | 3688 | HA   | ALA | X | 244 | 52.155 | 61.902 | 48.597 | 0.00 | 0.00 |
| ATOM | 3689 | CB   | ALA | X | 244 | 50.805 | 62.603 | 50.095 | 0.00 | 0.00 |
| ATOM | 3690 | HB1  | ALA | X | 244 | 50.567 | 63.449 | 49.449 | 0.00 | 0.00 |
| ATOM | 3691 | HB2  | ALA | X | 244 | 50.706 | 63.017 | 51.098 | 0.00 | 0.00 |
| ATOM | 3692 | HB3  | ALA | X | 244 | 49.934 | 61.947 | 50.092 | 0.00 | 0.00 |
| ATOM | 3693 | C    | ALA | X | 244 | 53.186 | 62.932 | 50.052 | 0.00 | 0.00 |
| ATOM | 3694 | O    | ALA | X | 244 | 53.723 | 63.668 | 49.156 | 0.00 | 0.00 |
| ATOM | 3695 | N    | THR | X | 245 | 53.497 | 63.115 | 51.317 | 0.00 | 0.00 |
| ATOM | 3696 | H    | THR | X | 245 | 53.060 | 62.572 | 52.048 | 0.00 | 0.00 |
| ATOM | 3697 | CA   | THR | X | 245 | 54.548 | 63.961 | 51.732 | 0.00 | 0.00 |
| ATOM | 3698 | HA   | THR | X | 245 | 54.379 | 64.979 | 51.382 | 0.00 | 0.00 |
| ATOM | 3699 | CB   | THR | X | 245 | 54.575 | 64.047 | 53.269 | 0.00 | 0.00 |
| ATOM | 3700 | HB   | THR | X | 245 | 54.590 | 63.053 | 53.716 | 0.00 | 0.00 |
| ATOM | 3701 | CG2  | THR | X | 245 | 55.833 | 64.583 | 53.809 | 0.00 | 0.00 |
| ATOM | 3702 | HG21 | THR | X | 245 | 55.630 | 64.815 | 54.854 | 0.00 | 0.00 |
| ATOM | 3703 | HG22 | THR | X | 245 | 56.030 | 65.481 | 53.223 | 0.00 | 0.00 |
| ATOM | 3704 | HG23 | THR | X | 245 | 56.552 | 63.798 | 53.573 | 0.00 | 0.00 |
| ATOM | 3705 | OG1  | THR | X | 245 | 53.450 | 64.930 | 53.493 | 0.00 | 0.00 |
| ATOM | 3706 | HG1  | THR | X | 245 | 53.138 | 64.919 | 54.400 | 0.00 | 0.00 |
| ATOM | 3707 | C    | THR | X | 245 | 55.898 | 63.594 | 51.185 | 0.00 | 0.00 |
| ATOM | 3708 | O    | THR | X | 245 | 56.641 | 64.461 | 50.711 | 0.00 | 0.00 |
| ATOM | 3709 | N    | GLN | X | 246 | 56.295 | 62.270 | 51.321 | 0.00 | 0.00 |
| ATOM | 3710 | H    | GLN | X | 246 | 55.697 | 61.709 | 51.910 | 0.00 | 0.00 |
| ATOM | 3711 | CA   | GLN | X | 246 | 57.604 | 61.742 | 50.865 | 0.00 | 0.00 |
| ATOM | 3712 | HA   | GLN | X | 246 | 58.411 | 62.320 | 51.315 | 0.00 | 0.00 |
| ATOM | 3713 | CB   | GLN | X | 246 | 57.758 | 60.289 | 51.326 | 0.00 | 0.00 |
| ATOM | 3714 | HB2  | GLN | X | 246 | 56.870 | 59.745 | 51.003 | 0.00 | 0.00 |
| ATOM | 3715 | HB3  | GLN | X | 246 | 58.600 | 59.963 | 50.715 | 0.00 | 0.00 |
| ATOM | 3716 | CG   | GLN | X | 246 | 58.096 | 60.207 | 52.806 | 0.00 | 0.00 |
| ATOM | 3717 | HG2  | GLN | X | 246 | 58.775 | 61.011 | 53.089 | 0.00 | 0.00 |
| ATOM | 3718 | HG3  | GLN | X | 246 | 57.214 | 60.417 | 53.411 | 0.00 | 0.00 |
| ATOM | 3719 | CD   | GLN | X | 246 | 58.655 | 58.925 | 53.331 | 0.00 | 0.00 |
| ATOM | 3720 | OE1  | GLN | X | 246 | 58.314 | 58.481 | 54.407 | 0.00 | 0.00 |
| ATOM | 3721 | NE2  | GLN | X | 246 | 59.468 | 58.233 | 52.603 | 0.00 | 0.00 |
| ATOM | 3722 | HE21 | GLN | X | 246 | 59.771 | 57.339 | 52.960 | 0.00 | 0.00 |
| ATOM | 3723 | HE22 | GLN | X | 246 | 59.938 | 58.597 | 51.786 | 0.00 | 0.00 |
| ATOM | 3724 | C    | GLN | X | 246 | 57.765 | 61.942 | 49.333 | 0.00 | 0.00 |
| ATOM | 3725 | O    | GLN | X | 246 | 58.894 | 62.196 | 48.848 | 0.00 | 0.00 |
| ATOM | 3726 | N    | LEU | X | 247 | 56.682 | 61.789 | 48.597 | 0.00 | 0.00 |
| ATOM | 3727 | H    | LEU | X | 247 | 55.832 | 61.443 | 49.018 | 0.00 | 0.00 |
| ATOM | 3728 | CA   | LEU | X | 247 | 56.532 | 62.112 | 47.179 | 0.00 | 0.00 |
| ATOM | 3729 | HA   | LEU | X | 247 | 57.301 | 61.552 | 46.648 | 0.00 | 0.00 |
| ATOM | 3730 | CB   | LEU | X | 247 | 55.125 | 61.670 | 46.583 | 0.00 | 0.00 |
| ATOM | 3731 | HB2  | LEU | X | 247 | 54.996 | 60.591 | 46.676 | 0.00 | 0.00 |
| ATOM | 3732 | HB3  | LEU | X | 247 | 54.288 | 62.042 | 47.173 | 0.00 | 0.00 |
| ATOM | 3733 | CG   | LEU | X | 247 | 54.908 | 62.001 | 45.112 | 0.00 | 0.00 |
| ATOM | 3734 | HG   | LEU | X | 247 | 55.096 | 63.069 | 45.006 | 0.00 | 0.00 |
| ATOM | 3735 | CD1  | LEU | X | 247 | 55.807 | 61.275 | 44.080 | 0.00 | 0.00 |
| ATOM | 3736 | HD11 | LEU | X | 247 | 55.475 | 60.244 | 43.957 | 0.00 | 0.00 |
| ATOM | 3737 | HD12 | LEU | X | 247 | 56.806 | 61.371 | 44.506 | 0.00 | 0.00 |
| ATOM | 3738 | HD13 | LEU | X | 247 | 55.882 | 61.789 | 43.122 | 0.00 | 0.00 |
| ATOM | 3739 | CD2  | LEU | X | 247 | 53.506 | 61.678 | 44.669 | 0.00 | 0.00 |
| ATOM | 3740 | HD21 | LEU | X | 247 | 53.290 | 61.908 | 43.626 | 0.00 | 0.00 |
| ATOM | 3741 | HD22 | LEU | X | 247 | 53.258 | 60.622 | 44.783 | 0.00 | 0.00 |
| ATOM | 3742 | HD23 | LEU | X | 247 | 52.730 | 62.182 | 45.246 | 0.00 | 0.00 |
| ATOM | 3743 | C    | LEU | X | 247 | 56.733 | 63.625 | 46.982 | 0.00 | 0.00 |

|      |      |      |     |   |     |        |        |        |      |      |
|------|------|------|-----|---|-----|--------|--------|--------|------|------|
| ATOM | 3744 | O    | LEU | X | 247 | 57.597 | 64.041 | 46.140 | 0.00 | 0.00 |
| ATOM | 3745 | N    | ALA | X | 248 | 55.981 | 64.452 | 47.740 | 0.00 | 0.00 |
| ATOM | 3746 | H    | ALA | X | 248 | 55.334 | 64.025 | 48.388 | 0.00 | 0.00 |
| ATOM | 3747 | CA   | ALA | X | 248 | 56.038 | 65.926 | 47.569 | 0.00 | 0.00 |
| ATOM | 3748 | HA   | ALA | X | 248 | 55.849 | 66.114 | 46.513 | 0.00 | 0.00 |
| ATOM | 3749 | CB   | ALA | X | 248 | 54.840 | 66.468 | 48.417 | 0.00 | 0.00 |
| ATOM | 3750 | HB1  | ALA | X | 248 | 54.774 | 66.328 | 49.496 | 0.00 | 0.00 |
| ATOM | 3751 | HB2  | ALA | X | 248 | 53.900 | 66.062 | 48.046 | 0.00 | 0.00 |
| ATOM | 3752 | HB3  | ALA | X | 248 | 54.778 | 67.545 | 48.263 | 0.00 | 0.00 |
| ATOM | 3753 | C    | ALA | X | 248 | 57.391 | 66.599 | 47.885 | 0.00 | 0.00 |
| ATOM | 3754 | O    | ALA | X | 248 | 57.731 | 67.704 | 47.340 | 0.00 | 0.00 |
| ATOM | 3755 | N    | HIE | X | 249 | 58.134 | 66.001 | 48.768 | 0.00 | 0.00 |
| ATOM | 3756 | H    | HIE | X | 249 | 57.777 | 65.165 | 49.208 | 0.00 | 0.00 |
| ATOM | 3757 | CA   | HIE | X | 249 | 59.551 | 66.415 | 48.969 | 0.00 | 0.00 |
| ATOM | 3758 | HA   | HIE | X | 249 | 59.565 | 67.487 | 49.166 | 0.00 | 0.00 |
| ATOM | 3759 | CB   | HIE | X | 249 | 59.955 | 65.594 | 50.206 | 0.00 | 0.00 |
| ATOM | 3760 | HB2  | HIE | X | 249 | 59.172 | 65.740 | 50.950 | 0.00 | 0.00 |
| ATOM | 3761 | HB3  | HIE | X | 249 | 59.805 | 64.531 | 50.023 | 0.00 | 0.00 |
| ATOM | 3762 | CG   | HIE | X | 249 | 61.400 | 65.828 | 50.680 | 0.00 | 0.00 |
| ATOM | 3763 | ND1  | HIE | X | 249 | 62.388 | 66.559 | 49.970 | 0.00 | 0.00 |
| ATOM | 3764 | CE1  | HIE | X | 249 | 63.357 | 66.746 | 50.859 | 0.00 | 0.00 |
| ATOM | 3765 | HE1  | HIE | X | 249 | 64.196 | 67.404 | 50.685 | 0.00 | 0.00 |
| ATOM | 3766 | NE2  | HIE | X | 249 | 62.999 | 66.262 | 52.040 | 0.00 | 0.00 |
| ATOM | 3767 | HE2  | HIE | X | 249 | 63.621 | 66.369 | 52.828 | 0.00 | 0.00 |
| ATOM | 3768 | CD2  | HIE | X | 249 | 61.795 | 65.687 | 51.967 | 0.00 | 0.00 |
| ATOM | 3769 | HD2  | HIE | X | 249 | 61.258 | 65.209 | 52.774 | 0.00 | 0.00 |
| ATOM | 3770 | C    | HIE | X | 249 | 60.519 | 66.135 | 47.763 | 0.00 | 0.00 |
| ATOM | 3771 | O    | HIE | X | 249 | 61.223 | 67.041 | 47.337 | 0.00 | 0.00 |
| ATOM | 3772 | N    | LEU | X | 250 | 60.402 | 64.948 | 47.065 | 0.00 | 0.00 |
| ATOM | 3773 | H    | LEU | X | 250 | 59.783 | 64.220 | 47.391 | 0.00 | 0.00 |
| ATOM | 3774 | CA   | LEU | X | 250 | 61.099 | 64.568 | 45.783 | 0.00 | 0.00 |
| ATOM | 3775 | HA   | LEU | X | 250 | 62.165 | 64.752 | 45.918 | 0.00 | 0.00 |
| ATOM | 3776 | CB   | LEU | X | 250 | 60.989 | 63.005 | 45.570 | 0.00 | 0.00 |
| ATOM | 3777 | HB2  | LEU | X | 250 | 60.019 | 62.690 | 45.953 | 0.00 | 0.00 |
| ATOM | 3778 | HB3  | LEU | X | 250 | 60.822 | 62.917 | 44.497 | 0.00 | 0.00 |
| ATOM | 3779 | CG   | LEU | X | 250 | 62.241 | 62.144 | 45.969 | 0.00 | 0.00 |
| ATOM | 3780 | HG   | LEU | X | 250 | 63.091 | 62.404 | 45.339 | 0.00 | 0.00 |
| ATOM | 3781 | CD1  | LEU | X | 250 | 62.734 | 62.319 | 47.419 | 0.00 | 0.00 |
| ATOM | 3782 | HD11 | LEU | X | 250 | 63.588 | 61.654 | 47.550 | 0.00 | 0.00 |
| ATOM | 3783 | HD12 | LEU | X | 250 | 61.904 | 62.212 | 48.117 | 0.00 | 0.00 |
| ATOM | 3784 | HD13 | LEU | X | 250 | 63.079 | 63.352 | 47.466 | 0.00 | 0.00 |
| ATOM | 3785 | CD2  | LEU | X | 250 | 61.927 | 60.627 | 45.804 | 0.00 | 0.00 |
| ATOM | 3786 | HD21 | LEU | X | 250 | 62.799 | 60.038 | 46.088 | 0.00 | 0.00 |
| ATOM | 3787 | HD22 | LEU | X | 250 | 61.092 | 60.354 | 46.449 | 0.00 | 0.00 |
| ATOM | 3788 | HD23 | LEU | X | 250 | 61.602 | 60.504 | 44.771 | 0.00 | 0.00 |
| ATOM | 3789 | C    | LEU | X | 250 | 60.618 | 65.395 | 44.584 | 0.00 | 0.00 |
| ATOM | 3790 | O    | LEU | X | 250 | 61.374 | 65.874 | 43.754 | 0.00 | 0.00 |
| ATOM | 3791 | N    | VAL | X | 251 | 59.339 | 65.609 | 44.525 | 0.00 | 0.00 |
| ATOM | 3792 | H    | VAL | X | 251 | 58.746 | 65.050 | 45.121 | 0.00 | 0.00 |
| ATOM | 3793 | CA   | VAL | X | 251 | 58.692 | 66.458 | 43.461 | 0.00 | 0.00 |
| ATOM | 3794 | HA   | VAL | X | 251 | 59.037 | 66.050 | 42.511 | 0.00 | 0.00 |
| ATOM | 3795 | CB   | VAL | X | 251 | 57.173 | 66.175 | 43.575 | 0.00 | 0.00 |
| ATOM | 3796 | HB   | VAL | X | 251 | 57.016 | 66.392 | 44.631 | 0.00 | 0.00 |
| ATOM | 3797 | CG1  | VAL | X | 251 | 56.276 | 67.073 | 42.672 | 0.00 | 0.00 |
| ATOM | 3798 | HG11 | VAL | X | 251 | 55.225 | 66.802 | 42.779 | 0.00 | 0.00 |
| ATOM | 3799 | HG12 | VAL | X | 251 | 56.359 | 68.130 | 42.924 | 0.00 | 0.00 |
| ATOM | 3800 | HG13 | VAL | X | 251 | 56.502 | 66.917 | 41.618 | 0.00 | 0.00 |
| ATOM | 3801 | CG2  | VAL | X | 251 | 56.730 | 64.741 | 43.276 | 0.00 | 0.00 |
| ATOM | 3802 | HG21 | VAL | X | 251 | 57.317 | 64.008 | 43.829 | 0.00 | 0.00 |
| ATOM | 3803 | HG22 | VAL | X | 251 | 56.574 | 64.584 | 42.208 | 0.00 | 0.00 |
| ATOM | 3804 | HG23 | VAL | X | 251 | 55.747 | 64.689 | 43.744 | 0.00 | 0.00 |
| ATOM | 3805 | C    | VAL | X | 251 | 58.972 | 67.943 | 43.693 | 0.00 | 0.00 |
| ATOM | 3806 | O    | VAL | X | 251 | 59.177 | 68.651 | 42.675 | 0.00 | 0.00 |
| ATOM | 3807 | N    | GLY | X | 252 | 59.054 | 68.421 | 44.907 | 0.00 | 0.00 |
| ATOM | 3808 | H    | GLY | X | 252 | 58.925 | 67.824 | 45.711 | 0.00 | 0.00 |
| ATOM | 3809 | CA   | GLY | X | 252 | 59.296 | 69.905 | 45.161 | 0.00 | 0.00 |
| ATOM | 3810 | HA2  | GLY | X | 252 | 59.982 | 70.145 | 45.974 | 0.00 | 0.00 |

|      |      |      |     |   |     |        |        |        |      |      |
|------|------|------|-----|---|-----|--------|--------|--------|------|------|
| ATOM | 3811 | HA3  | GLY | X | 252 | 59.792 | 70.216 | 44.241 | 0.00 | 0.00 |
| ATOM | 3812 | C    | GLY | X | 252 | 58.017 | 70.694 | 45.437 | 0.00 | 0.00 |
| ATOM | 3813 | O    | GLY | X | 252 | 57.778 | 71.695 | 44.770 | 0.00 | 0.00 |
| ATOM | 3814 | N    | CYX | X | 253 | 57.177 | 70.296 | 46.408 | 0.00 | 0.00 |
| ATOM | 3815 | H    | CYX | X | 253 | 57.448 | 69.482 | 46.941 | 0.00 | 0.00 |
| ATOM | 3816 | CA   | CYX | X | 253 | 55.923 | 70.922 | 46.854 | 0.00 | 0.00 |
| ATOM | 3817 | HA   | CYX | X | 253 | 55.927 | 71.902 | 46.376 | 0.00 | 0.00 |
| ATOM | 3818 | CB   | CYX | X | 253 | 54.823 | 70.031 | 46.362 | 0.00 | 0.00 |
| ATOM | 3819 | HB2  | CYX | X | 253 | 55.102 | 69.005 | 46.602 | 0.00 | 0.00 |
| ATOM | 3820 | HB3  | CYX | X | 253 | 53.880 | 70.026 | 46.908 | 0.00 | 0.00 |
| ATOM | 3821 | SG   | CYX | X | 253 | 54.372 | 70.376 | 44.600 | 0.00 | 0.00 |
| ATOM | 3822 | C    | CYX | X | 253 | 55.824 | 71.011 | 48.374 | 0.00 | 0.00 |
| ATOM | 3823 | O    | CYX | X | 253 | 56.471 | 70.184 | 49.056 | 0.00 | 0.00 |
| ATOM | 3824 | N    | PRO | X | 254 | 55.139 | 72.035 | 48.979 | 0.00 | 0.00 |
| ATOM | 3825 | CD   | PRO | X | 254 | 54.956 | 72.027 | 50.448 | 0.00 | 0.00 |
| ATOM | 3826 | HD2  | PRO | X | 254 | 55.954 | 71.713 | 50.754 | 0.00 | 0.00 |
| ATOM | 3827 | HD3  | PRO | X | 254 | 54.198 | 71.353 | 50.847 | 0.00 | 0.00 |
| ATOM | 3828 | CG   | PRO | X | 254 | 54.596 | 73.472 | 50.878 | 0.00 | 0.00 |
| ATOM | 3829 | HG2  | PRO | X | 254 | 55.540 | 74.003 | 51.000 | 0.00 | 0.00 |
| ATOM | 3830 | HG3  | PRO | X | 254 | 54.061 | 73.516 | 51.827 | 0.00 | 0.00 |
| ATOM | 3831 | CB   | PRO | X | 254 | 53.864 | 74.038 | 49.654 | 0.00 | 0.00 |
| ATOM | 3832 | HB2  | PRO | X | 254 | 54.097 | 75.102 | 49.645 | 0.00 | 0.00 |
| ATOM | 3833 | HB3  | PRO | X | 254 | 52.786 | 73.921 | 49.759 | 0.00 | 0.00 |
| ATOM | 3834 | CA   | PRO | X | 254 | 54.438 | 73.229 | 48.464 | 0.00 | 0.00 |
| ATOM | 3835 | HA   | PRO | X | 254 | 53.637 | 72.920 | 47.792 | 0.00 | 0.00 |
| ATOM | 3836 | C    | PRO | X | 254 | 55.522 | 74.123 | 47.636 | 0.00 | 0.00 |
| ATOM | 3837 | O    | PRO | X | 254 | 56.721 | 73.764 | 47.650 | 0.00 | 0.00 |
| ATOM | 3838 | N    | PRO | X | 255 | 55.137 | 75.222 | 46.976 | 0.00 | 0.00 |
| ATOM | 3839 | CD   | PRO | X | 255 | 53.893 | 76.023 | 47.033 | 0.00 | 0.00 |
| ATOM | 3840 | HD2  | PRO | X | 255 | 53.981 | 76.672 | 47.904 | 0.00 | 0.00 |
| ATOM | 3841 | HD3  | PRO | X | 255 | 52.993 | 75.414 | 47.111 | 0.00 | 0.00 |
| ATOM | 3842 | CG   | PRO | X | 255 | 53.804 | 77.034 | 45.880 | 0.00 | 0.00 |
| ATOM | 3843 | HG2  | PRO | X | 255 | 54.104 | 78.010 | 46.262 | 0.00 | 0.00 |
| ATOM | 3844 | HG3  | PRO | X | 255 | 52.812 | 77.114 | 45.437 | 0.00 | 0.00 |
| ATOM | 3845 | CB   | PRO | X | 255 | 54.902 | 76.511 | 44.896 | 0.00 | 0.00 |
| ATOM | 3846 | HB2  | PRO | X | 255 | 55.339 | 77.365 | 44.379 | 0.00 | 0.00 |
| ATOM | 3847 | HB3  | PRO | X | 255 | 54.517 | 75.810 | 44.155 | 0.00 | 0.00 |
| ATOM | 3848 | CA   | PRO | X | 255 | 55.887 | 75.677 | 45.789 | 0.00 | 0.00 |
| ATOM | 3849 | HA   | PRO | X | 255 | 56.206 | 74.803 | 45.220 | 0.00 | 0.00 |
| ATOM | 3850 | C    | PRO | X | 255 | 57.088 | 76.481 | 46.254 | 0.00 | 0.00 |
| ATOM | 3851 | O    | PRO | X | 255 | 56.978 | 77.441 | 46.965 | 0.00 | 0.00 |
| ATOM | 3852 | N    | GLY | X | 256 | 58.238 | 75.975 | 45.820 | 0.00 | 0.00 |
| ATOM | 3853 | H    | GLY | X | 256 | 58.159 | 75.187 | 45.193 | 0.00 | 0.00 |
| ATOM | 3854 | CA   | GLY | X | 256 | 59.606 | 76.622 | 46.066 | 0.00 | 0.00 |
| ATOM | 3855 | HA2  | GLY | X | 256 | 60.320 | 76.313 | 45.302 | 0.00 | 0.00 |
| ATOM | 3856 | HA3  | GLY | X | 256 | 59.502 | 77.706 | 46.105 | 0.00 | 0.00 |
| ATOM | 3857 | C    | GLY | X | 256 | 60.074 | 76.267 | 47.518 | 0.00 | 0.00 |
| ATOM | 3858 | O    | GLY | X | 256 | 61.112 | 76.831 | 47.971 | 0.00 | 0.00 |
| ATOM | 3859 | N    | GLY | X | 257 | 59.474 | 75.302 | 48.180 | 0.00 | 0.00 |
| ATOM | 3860 | H    | GLY | X | 257 | 58.638 | 74.858 | 47.829 | 0.00 | 0.00 |
| ATOM | 3861 | CA   | GLY | X | 257 | 60.134 | 74.462 | 49.276 | 0.00 | 0.00 |
| ATOM | 3862 | HA2  | GLY | X | 257 | 61.207 | 74.643 | 49.340 | 0.00 | 0.00 |
| ATOM | 3863 | HA3  | GLY | X | 257 | 59.634 | 74.771 | 50.194 | 0.00 | 0.00 |
| ATOM | 3864 | C    | GLY | X | 257 | 59.892 | 72.990 | 49.018 | 0.00 | 0.00 |
| ATOM | 3865 | O    | GLY | X | 257 | 59.766 | 72.469 | 47.905 | 0.00 | 0.00 |
| ATOM | 3866 | N    | THR | X | 258 | 59.898 | 72.212 | 50.153 | 0.00 | 0.00 |
| ATOM | 3867 | H    | THR | X | 258 | 60.086 | 72.732 | 50.998 | 0.00 | 0.00 |
| ATOM | 3868 | CA   | THR | X | 258 | 59.746 | 70.736 | 50.181 | 0.00 | 0.00 |
| ATOM | 3869 | HA   | THR | X | 258 | 59.061 | 70.495 | 49.368 | 0.00 | 0.00 |
| ATOM | 3870 | CB   | THR | X | 258 | 61.143 | 70.113 | 49.996 | 0.00 | 0.00 |
| ATOM | 3871 | HB   | THR | X | 258 | 61.173 | 69.118 | 50.441 | 0.00 | 0.00 |
| ATOM | 3872 | CG2  | THR | X | 258 | 61.774 | 70.098 | 48.585 | 0.00 | 0.00 |
| ATOM | 3873 | HG21 | THR | X | 258 | 62.638 | 69.434 | 48.571 | 0.00 | 0.00 |
| ATOM | 3874 | HG22 | THR | X | 258 | 62.114 | 71.074 | 48.238 | 0.00 | 0.00 |
| ATOM | 3875 | HG23 | THR | X | 258 | 61.021 | 69.812 | 47.850 | 0.00 | 0.00 |
| ATOM | 3876 | OG1  | THR | X | 258 | 62.068 | 70.847 | 50.814 | 0.00 | 0.00 |
| ATOM | 3877 | HG1  | THR | X | 258 | 61.841 | 70.659 | 51.728 | 0.00 | 0.00 |

|      |      |      |     |   |     |        |        |        |      |      |
|------|------|------|-----|---|-----|--------|--------|--------|------|------|
| ATOM | 3878 | C    | THR | X | 258 | 59.156 | 70.289 | 51.491 | 0.00 | 0.00 |
| ATOM | 3879 | O    | THR | X | 258 | 59.854 | 70.482 | 52.540 | 0.00 | 0.00 |
| ATOM | 3880 | N    | GLY | X | 259 | 58.013 | 69.615 | 51.467 | 0.00 | 0.00 |
| ATOM | 3881 | H    | GLY | X | 259 | 57.530 | 69.500 | 50.588 | 0.00 | 0.00 |
| ATOM | 3882 | CA   | GLY | X | 259 | 57.195 | 69.328 | 52.677 | 0.00 | 0.00 |
| ATOM | 3883 | HA2  | GLY | X | 259 | 56.470 | 68.554 | 52.427 | 0.00 | 0.00 |
| ATOM | 3884 | HA3  | GLY | X | 259 | 57.851 | 68.908 | 53.439 | 0.00 | 0.00 |
| ATOM | 3885 | C    | GLY | X | 259 | 56.403 | 70.501 | 53.332 | 0.00 | 0.00 |
| ATOM | 3886 | O    | GLY | X | 259 | 56.696 | 71.617 | 53.031 | 0.00 | 0.00 |
| ATOM | 3887 | N    | GLY | X | 260 | 55.383 | 70.188 | 54.088 | 0.00 | 0.00 |
| ATOM | 3888 | H    | GLY | X | 260 | 55.022 | 69.245 | 54.117 | 0.00 | 0.00 |
| ATOM | 3889 | CA   | GLY | X | 260 | 54.778 | 71.189 | 55.035 | 0.00 | 0.00 |
| ATOM | 3890 | HA2  | GLY | X | 260 | 55.152 | 70.988 | 56.039 | 0.00 | 0.00 |
| ATOM | 3891 | HA3  | GLY | X | 260 | 55.092 | 72.206 | 54.801 | 0.00 | 0.00 |
| ATOM | 3892 | C    | GLY | X | 260 | 53.309 | 71.153 | 55.245 | 0.00 | 0.00 |
| ATOM | 3893 | O    | GLY | X | 260 | 52.817 | 70.125 | 55.717 | 0.00 | 0.00 |
| ATOM | 3894 | N    | ASN | X | 261 | 52.632 | 72.238 | 54.923 | 0.00 | 0.00 |
| ATOM | 3895 | H    | ASN | X | 261 | 53.127 | 72.997 | 54.477 | 0.00 | 0.00 |
| ATOM | 3896 | CA   | ASN | X | 261 | 51.165 | 72.386 | 54.922 | 0.00 | 0.00 |
| ATOM | 3897 | HA   | ASN | X | 261 | 50.759 | 71.961 | 55.839 | 0.00 | 0.00 |
| ATOM | 3898 | CB   | ASN | X | 261 | 50.795 | 73.800 | 55.003 | 0.00 | 0.00 |
| ATOM | 3899 | HB2  | ASN | X | 261 | 51.083 | 74.179 | 55.983 | 0.00 | 0.00 |
| ATOM | 3900 | HB3  | ASN | X | 261 | 51.342 | 74.347 | 54.235 | 0.00 | 0.00 |
| ATOM | 3901 | CG   | ASN | X | 261 | 49.358 | 74.162 | 54.945 | 0.00 | 0.00 |
| ATOM | 3902 | OD1  | ASN | X | 261 | 48.428 | 73.422 | 55.305 | 0.00 | 0.00 |
| ATOM | 3903 | ND2  | ASN | X | 261 | 49.082 | 75.437 | 54.435 | 0.00 | 0.00 |
| ATOM | 3904 | HD21 | ASN | X | 261 | 48.105 | 75.694 | 54.448 | 0.00 | 0.00 |
| ATOM | 3905 | HD22 | ASN | X | 261 | 49.816 | 75.941 | 53.958 | 0.00 | 0.00 |
| ATOM | 3906 | C    | ASN | X | 261 | 50.482 | 71.637 | 53.807 | 0.00 | 0.00 |
| ATOM | 3907 | O    | ASN | X | 261 | 50.825 | 71.815 | 52.599 | 0.00 | 0.00 |
| ATOM | 3908 | N    | ASP | X | 262 | 49.457 | 70.843 | 54.154 | 0.00 | 0.00 |
| ATOM | 3909 | H    | ASP | X | 262 | 49.323 | 70.684 | 55.142 | 0.00 | 0.00 |
| ATOM | 3910 | CA   | ASP | X | 262 | 48.720 | 69.901 | 53.316 | 0.00 | 0.00 |
| ATOM | 3911 | HA   | ASP | X | 262 | 49.422 | 69.208 | 52.853 | 0.00 | 0.00 |
| ATOM | 3912 | CB   | ASP | X | 262 | 47.845 | 69.009 | 54.257 | 0.00 | 0.00 |
| ATOM | 3913 | HB2  | ASP | X | 262 | 47.198 | 69.694 | 54.805 | 0.00 | 0.00 |
| ATOM | 3914 | HB3  | ASP | X | 262 | 47.168 | 68.404 | 53.653 | 0.00 | 0.00 |
| ATOM | 3915 | CG   | ASP | X | 262 | 48.719 | 68.228 | 55.283 | 0.00 | 0.00 |
| ATOM | 3916 | OD1  | ASP | X | 262 | 49.255 | 67.159 | 55.056 | 0.00 | 0.00 |
| ATOM | 3917 | OD2  | ASP | X | 262 | 48.894 | 68.895 | 56.328 | 0.00 | 0.00 |
| ATOM | 3918 | C    | ASP | X | 262 | 47.929 | 70.549 | 52.131 | 0.00 | 0.00 |
| ATOM | 3919 | O    | ASP | X | 262 | 47.989 | 70.084 | 50.967 | 0.00 | 0.00 |
| ATOM | 3920 | N    | THR | X | 263 | 47.332 | 71.693 | 52.390 | 0.00 | 0.00 |
| ATOM | 3921 | H    | THR | X | 263 | 47.349 | 71.997 | 53.353 | 0.00 | 0.00 |
| ATOM | 3922 | CA   | THR | X | 263 | 46.500 | 72.431 | 51.466 | 0.00 | 0.00 |
| ATOM | 3923 | HA   | THR | X | 263 | 45.855 | 71.728 | 50.939 | 0.00 | 0.00 |
| ATOM | 3924 | CB   | THR | X | 263 | 45.609 | 73.535 | 52.126 | 0.00 | 0.00 |
| ATOM | 3925 | HB   | THR | X | 263 | 45.044 | 74.124 | 51.403 | 0.00 | 0.00 |
| ATOM | 3926 | CG2  | THR | X | 263 | 44.659 | 72.808 | 53.081 | 0.00 | 0.00 |
| ATOM | 3927 | HG21 | THR | X | 263 | 44.058 | 73.565 | 53.584 | 0.00 | 0.00 |
| ATOM | 3928 | HG22 | THR | X | 263 | 45.270 | 72.284 | 53.816 | 0.00 | 0.00 |
| ATOM | 3929 | HG23 | THR | X | 263 | 44.073 | 72.054 | 52.555 | 0.00 | 0.00 |
| ATOM | 3930 | OG1  | THR | X | 263 | 46.424 | 74.356 | 52.918 | 0.00 | 0.00 |
| ATOM | 3931 | HG1  | THR | X | 263 | 46.076 | 75.240 | 52.780 | 0.00 | 0.00 |
| ATOM | 3932 | C    | THR | X | 263 | 47.330 | 73.196 | 50.435 | 0.00 | 0.00 |
| ATOM | 3933 | O    | THR | X | 263 | 47.041 | 73.133 | 49.262 | 0.00 | 0.00 |
| ATOM | 3934 | N    | GLU | X | 264 | 48.346 | 73.951 | 50.897 | 0.00 | 0.00 |
| ATOM | 3935 | H    | GLU | X | 264 | 48.398 | 74.098 | 51.895 | 0.00 | 0.00 |
| ATOM | 3936 | CA   | GLU | X | 264 | 49.340 | 74.519 | 50.003 | 0.00 | 0.00 |
| ATOM | 3937 | HA   | GLU | X | 264 | 48.735 | 75.193 | 49.397 | 0.00 | 0.00 |
| ATOM | 3938 | CB   | GLU | X | 264 | 50.346 | 75.468 | 50.757 | 0.00 | 0.00 |
| ATOM | 3939 | HB2  | GLU | X | 264 | 50.885 | 74.907 | 51.520 | 0.00 | 0.00 |
| ATOM | 3940 | HB3  | GLU | X | 264 | 50.995 | 75.900 | 49.995 | 0.00 | 0.00 |
| ATOM | 3941 | CG   | GLU | X | 264 | 49.499 | 76.637 | 51.370 | 0.00 | 0.00 |
| ATOM | 3942 | HG2  | GLU | X | 264 | 49.011 | 77.165 | 50.551 | 0.00 | 0.00 |
| ATOM | 3943 | HG3  | GLU | X | 264 | 48.681 | 76.294 | 52.004 | 0.00 | 0.00 |
| ATOM | 3944 | CD   | GLU | X | 264 | 50.362 | 77.600 | 52.227 | 0.00 | 0.00 |

|      |      |      |     |   |     |        |        |        |      |      |
|------|------|------|-----|---|-----|--------|--------|--------|------|------|
| ATOM | 3945 | OE1  | GLU | X | 264 | 51.096 | 77.116 | 53.153 | 0.00 | 0.00 |
| ATOM | 3946 | OE2  | GLU | X | 264 | 50.408 | 78.807 | 51.893 | 0.00 | 0.00 |
| ATOM | 3947 | C    | GLU | X | 264 | 50.091 | 73.431 | 49.174 | 0.00 | 0.00 |
| ATOM | 3948 | O    | GLU | X | 264 | 50.618 | 73.614 | 48.046 | 0.00 | 0.00 |
| ATOM | 3949 | N    | LEU | X | 265 | 50.258 | 72.258 | 49.757 | 0.00 | 0.00 |
| ATOM | 3950 | H    | LEU | X | 265 | 49.973 | 72.054 | 50.704 | 0.00 | 0.00 |
| ATOM | 3951 | CA   | LEU | X | 265 | 51.104 | 71.138 | 49.271 | 0.00 | 0.00 |
| ATOM | 3952 | HA   | LEU | X | 265 | 51.982 | 71.569 | 48.790 | 0.00 | 0.00 |
| ATOM | 3953 | CB   | LEU | X | 265 | 51.495 | 70.144 | 50.394 | 0.00 | 0.00 |
| ATOM | 3954 | HB2  | LEU | X | 265 | 52.351 | 70.585 | 50.905 | 0.00 | 0.00 |
| ATOM | 3955 | HB3  | LEU | X | 265 | 50.647 | 69.927 | 51.045 | 0.00 | 0.00 |
| ATOM | 3956 | CG   | LEU | X | 265 | 52.096 | 68.720 | 50.112 | 0.00 | 0.00 |
| ATOM | 3957 | HG   | LEU | X | 265 | 52.922 | 68.874 | 49.417 | 0.00 | 0.00 |
| ATOM | 3958 | CD1  | LEU | X | 265 | 52.739 | 68.244 | 51.446 | 0.00 | 0.00 |
| ATOM | 3959 | HD11 | LEU | X | 265 | 53.279 | 67.306 | 51.316 | 0.00 | 0.00 |
| ATOM | 3960 | HD12 | LEU | X | 265 | 51.936 | 68.189 | 52.180 | 0.00 | 0.00 |
| ATOM | 3961 | HD13 | LEU | X | 265 | 53.625 | 68.766 | 51.807 | 0.00 | 0.00 |
| ATOM | 3962 | CD2  | LEU | X | 265 | 51.182 | 67.628 | 49.531 | 0.00 | 0.00 |
| ATOM | 3963 | HD21 | LEU | X | 265 | 50.697 | 68.009 | 48.632 | 0.00 | 0.00 |
| ATOM | 3964 | HD22 | LEU | X | 265 | 51.755 | 66.710 | 49.404 | 0.00 | 0.00 |
| ATOM | 3965 | HD23 | LEU | X | 265 | 50.291 | 67.495 | 50.145 | 0.00 | 0.00 |
| ATOM | 3966 | C    | LEU | X | 265 | 50.290 | 70.544 | 48.146 | 0.00 | 0.00 |
| ATOM | 3967 | O    | LEU | X | 265 | 50.853 | 70.343 | 47.114 | 0.00 | 0.00 |
| ATOM | 3968 | N    | VAL | X | 266 | 48.984 | 70.299 | 48.305 | 0.00 | 0.00 |
| ATOM | 3969 | H    | VAL | X | 266 | 48.642 | 70.546 | 49.222 | 0.00 | 0.00 |
| ATOM | 3970 | CA   | VAL | X | 266 | 48.138 | 69.582 | 47.335 | 0.00 | 0.00 |
| ATOM | 3971 | HA   | VAL | X | 266 | 48.794 | 68.758 | 47.056 | 0.00 | 0.00 |
| ATOM | 3972 | CB   | VAL | X | 266 | 46.945 | 68.983 | 48.012 | 0.00 | 0.00 |
| ATOM | 3973 | HB   | VAL | X | 266 | 47.269 | 68.514 | 48.942 | 0.00 | 0.00 |
| ATOM | 3974 | CG1  | VAL | X | 266 | 45.894 | 70.014 | 48.331 | 0.00 | 0.00 |
| ATOM | 3975 | HG11 | VAL | X | 266 | 45.172 | 69.601 | 49.036 | 0.00 | 0.00 |
| ATOM | 3976 | HG12 | VAL | X | 266 | 46.348 | 70.833 | 48.890 | 0.00 | 0.00 |
| ATOM | 3977 | HG13 | VAL | X | 266 | 45.284 | 70.377 | 47.505 | 0.00 | 0.00 |
| ATOM | 3978 | CG2  | VAL | X | 266 | 46.418 | 67.770 | 47.202 | 0.00 | 0.00 |
| ATOM | 3979 | HG21 | VAL | X | 266 | 45.961 | 68.137 | 46.283 | 0.00 | 0.00 |
| ATOM | 3980 | HG22 | VAL | X | 266 | 45.736 | 67.242 | 47.869 | 0.00 | 0.00 |
| ATOM | 3981 | HG23 | VAL | X | 266 | 47.158 | 67.021 | 46.918 | 0.00 | 0.00 |
| ATOM | 3982 | C    | VAL | X | 266 | 47.761 | 70.487 | 46.145 | 0.00 | 0.00 |
| ATOM | 3983 | O    | VAL | X | 266 | 47.668 | 70.029 | 45.011 | 0.00 | 0.00 |
| ATOM | 3984 | N    | ALA | X | 267 | 47.708 | 71.845 | 46.310 | 0.00 | 0.00 |
| ATOM | 3985 | H    | ALA | X | 267 | 47.749 | 72.131 | 47.277 | 0.00 | 0.00 |
| ATOM | 3986 | CA   | ALA | X | 267 | 47.774 | 72.880 | 45.319 | 0.00 | 0.00 |
| ATOM | 3987 | HA   | ALA | X | 267 | 46.902 | 72.799 | 44.670 | 0.00 | 0.00 |
| ATOM | 3988 | CB   | ALA | X | 267 | 47.665 | 74.161 | 46.129 | 0.00 | 0.00 |
| ATOM | 3989 | HB1  | ALA | X | 267 | 46.667 | 74.272 | 46.553 | 0.00 | 0.00 |
| ATOM | 3990 | HB2  | ALA | X | 267 | 47.878 | 75.039 | 45.520 | 0.00 | 0.00 |
| ATOM | 3991 | HB3  | ALA | X | 267 | 48.433 | 74.141 | 46.902 | 0.00 | 0.00 |
| ATOM | 3992 | C    | ALA | X | 267 | 49.043 | 72.796 | 44.448 | 0.00 | 0.00 |
| ATOM | 3993 | O    | ALA | X | 267 | 48.896 | 72.833 | 43.201 | 0.00 | 0.00 |
| ATOM | 3994 | N    | CYX | X | 268 | 50.197 | 72.608 | 45.057 | 0.00 | 0.00 |
| ATOM | 3995 | H    | CYX | X | 268 | 50.203 | 72.524 | 46.064 | 0.00 | 0.00 |
| ATOM | 3996 | CA   | CYX | X | 268 | 51.454 | 72.597 | 44.297 | 0.00 | 0.00 |
| ATOM | 3997 | HA   | CYX | X | 268 | 51.456 | 73.470 | 43.645 | 0.00 | 0.00 |
| ATOM | 3998 | CB   | CYX | X | 268 | 52.564 | 72.765 | 45.288 | 0.00 | 0.00 |
| ATOM | 3999 | HB2  | CYX | X | 268 | 52.639 | 73.801 | 45.620 | 0.00 | 0.00 |
| ATOM | 4000 | HB3  | CYX | X | 268 | 52.384 | 72.146 | 46.167 | 0.00 | 0.00 |
| ATOM | 4001 | SG   | CYX | X | 268 | 54.119 | 72.345 | 44.553 | 0.00 | 0.00 |
| ATOM | 4002 | C    | CYX | X | 268 | 51.467 | 71.312 | 43.543 | 0.00 | 0.00 |
| ATOM | 4003 | O    | CYX | X | 268 | 51.870 | 71.274 | 42.361 | 0.00 | 0.00 |
| ATOM | 4004 | N    | LEU | X | 269 | 50.994 | 70.158 | 44.206 | 0.00 | 0.00 |
| ATOM | 4005 | H    | LEU | X | 269 | 50.701 | 70.249 | 45.168 | 0.00 | 0.00 |
| ATOM | 4006 | CA   | LEU | X | 269 | 50.903 | 68.800 | 43.649 | 0.00 | 0.00 |
| ATOM | 4007 | HA   | LEU | X | 269 | 51.874 | 68.450 | 43.297 | 0.00 | 0.00 |
| ATOM | 4008 | CB   | LEU | X | 269 | 50.537 | 67.939 | 44.869 | 0.00 | 0.00 |
| ATOM | 4009 | HB2  | LEU | X | 269 | 51.266 | 68.249 | 45.618 | 0.00 | 0.00 |
| ATOM | 4010 | HB3  | LEU | X | 269 | 49.522 | 68.150 | 45.203 | 0.00 | 0.00 |
| ATOM | 4011 | CG   | LEU | X | 269 | 50.660 | 66.409 | 44.682 | 0.00 | 0.00 |

|      |      |      |     |   |     |        |        |        |      |      |
|------|------|------|-----|---|-----|--------|--------|--------|------|------|
| ATOM | 4012 | HG   | LEU | X | 269 | 49.840 | 65.985 | 44.103 | 0.00 | 0.00 |
| ATOM | 4013 | CD1  | LEU | X | 269 | 52.082 | 65.991 | 44.143 | 0.00 | 0.00 |
| ATOM | 4014 | HD11 | LEU | X | 269 | 52.347 | 66.484 | 43.207 | 0.00 | 0.00 |
| ATOM | 4015 | HD12 | LEU | X | 269 | 52.121 | 64.923 | 43.929 | 0.00 | 0.00 |
| ATOM | 4016 | HD13 | LEU | X | 269 | 52.860 | 66.211 | 44.874 | 0.00 | 0.00 |
| ATOM | 4017 | CD2  | LEU | X | 269 | 50.534 | 65.725 | 46.144 | 0.00 | 0.00 |
| ATOM | 4018 | HD21 | LEU | X | 269 | 50.830 | 64.677 | 46.085 | 0.00 | 0.00 |
| ATOM | 4019 | HD22 | LEU | X | 269 | 51.205 | 66.196 | 46.862 | 0.00 | 0.00 |
| ATOM | 4020 | HD23 | LEU | X | 269 | 49.565 | 65.819 | 46.632 | 0.00 | 0.00 |
| ATOM | 4021 | C    | LEU | X | 269 | 49.950 | 68.653 | 42.478 | 0.00 | 0.00 |
| ATOM | 4022 | O    | LEU | X | 269 | 50.032 | 67.589 | 41.832 | 0.00 | 0.00 |
| ATOM | 4023 | N    | ARG | X | 270 | 49.016 | 69.668 | 42.248 | 0.00 | 0.00 |
| ATOM | 4024 | H    | ARG | X | 270 | 48.802 | 70.141 | 43.115 | 0.00 | 0.00 |
| ATOM | 4025 | CA   | ARG | X | 270 | 48.276 | 69.646 | 41.000 | 0.00 | 0.00 |
| ATOM | 4026 | HA   | ARG | X | 270 | 48.277 | 68.653 | 40.550 | 0.00 | 0.00 |
| ATOM | 4027 | CB   | ARG | X | 270 | 46.786 | 70.063 | 41.136 | 0.00 | 0.00 |
| ATOM | 4028 | HB2  | ARG | X | 270 | 46.672 | 71.064 | 41.551 | 0.00 | 0.00 |
| ATOM | 4029 | HB3  | ARG | X | 270 | 46.375 | 70.130 | 40.129 | 0.00 | 0.00 |
| ATOM | 4030 | CG   | ARG | X | 270 | 45.882 | 69.095 | 41.895 | 0.00 | 0.00 |
| ATOM | 4031 | HG2  | ARG | X | 270 | 46.021 | 68.080 | 41.525 | 0.00 | 0.00 |
| ATOM | 4032 | HG3  | ARG | X | 270 | 46.164 | 69.006 | 42.944 | 0.00 | 0.00 |
| ATOM | 4033 | CD   | ARG | X | 270 | 44.345 | 69.395 | 41.919 | 0.00 | 0.00 |
| ATOM | 4034 | HD2  | ARG | X | 270 | 44.065 | 70.090 | 41.127 | 0.00 | 0.00 |
| ATOM | 4035 | HD3  | ARG | X | 270 | 43.767 | 68.525 | 41.609 | 0.00 | 0.00 |
| ATOM | 4036 | NE   | ARG | X | 270 | 43.751 | 69.821 | 43.216 | 0.00 | 0.00 |
| ATOM | 4037 | HE   | ARG | X | 270 | 43.875 | 70.805 | 43.404 | 0.00 | 0.00 |
| ATOM | 4038 | CZ   | ARG | X | 270 | 43.142 | 69.055 | 44.120 | 0.00 | 0.00 |
| ATOM | 4039 | NH1  | ARG | X | 270 | 42.898 | 67.765 | 44.008 | 0.00 | 0.00 |
| ATOM | 4040 | HH11 | ARG | X | 270 | 42.991 | 67.374 | 43.082 | 0.00 | 0.00 |
| ATOM | 4041 | HH12 | ARG | X | 270 | 42.357 | 67.295 | 44.720 | 0.00 | 0.00 |
| ATOM | 4042 | NH2  | ARG | X | 270 | 42.869 | 69.535 | 45.282 | 0.00 | 0.00 |
| ATOM | 4043 | HH21 | ARG | X | 270 | 42.766 | 70.523 | 45.463 | 0.00 | 0.00 |
| ATOM | 4044 | HH22 | ARG | X | 270 | 42.355 | 68.961 | 45.935 | 0.00 | 0.00 |
| ATOM | 4045 | C    | ARG | X | 270 | 48.914 | 70.489 | 39.897 | 0.00 | 0.00 |
| ATOM | 4046 | O    | ARG | X | 270 | 48.632 | 70.199 | 38.710 | 0.00 | 0.00 |
| ATOM | 4047 | N    | THR | X | 271 | 49.682 | 71.549 | 40.273 | 0.00 | 0.00 |
| ATOM | 4048 | H    | THR | X | 271 | 49.704 | 71.809 | 41.249 | 0.00 | 0.00 |
| ATOM | 4049 | CA   | THR | X | 271 | 50.442 | 72.398 | 39.313 | 0.00 | 0.00 |
| ATOM | 4050 | HA   | THR | X | 271 | 49.870 | 72.608 | 38.408 | 0.00 | 0.00 |
| ATOM | 4051 | CB   | THR | X | 271 | 50.756 | 73.717 | 40.033 | 0.00 | 0.00 |
| ATOM | 4052 | HB   | THR | X | 271 | 51.406 | 73.437 | 40.862 | 0.00 | 0.00 |
| ATOM | 4053 | CG2  | THR | X | 271 | 51.459 | 74.921 | 39.487 | 0.00 | 0.00 |
| ATOM | 4054 | HG21 | THR | X | 271 | 50.902 | 75.333 | 38.645 | 0.00 | 0.00 |
| ATOM | 4055 | HG22 | THR | X | 271 | 52.450 | 74.661 | 39.117 | 0.00 | 0.00 |
| ATOM | 4056 | HG23 | THR | X | 271 | 51.560 | 75.650 | 40.291 | 0.00 | 0.00 |
| ATOM | 4057 | OG1  | THR | X | 271 | 49.568 | 74.249 | 40.551 | 0.00 | 0.00 |
| ATOM | 4058 | HG1  | THR | X | 271 | 49.743 | 75.188 | 40.458 | 0.00 | 0.00 |
| ATOM | 4059 | C    | THR | X | 271 | 51.665 | 71.653 | 38.869 | 0.00 | 0.00 |
| ATOM | 4060 | O    | THR | X | 271 | 51.946 | 71.744 | 37.672 | 0.00 | 0.00 |
| ATOM | 4061 | N    | ARG | X | 272 | 52.351 | 70.800 | 39.669 | 0.00 | 0.00 |
| ATOM | 4062 | H    | ARG | X | 272 | 52.162 | 70.696 | 40.656 | 0.00 | 0.00 |
| ATOM | 4063 | CA   | ARG | X | 272 | 53.480 | 69.995 | 39.151 | 0.00 | 0.00 |
| ATOM | 4064 | HA   | ARG | X | 272 | 54.131 | 70.742 | 38.696 | 0.00 | 0.00 |
| ATOM | 4065 | CB   | ARG | X | 272 | 54.172 | 69.236 | 40.322 | 0.00 | 0.00 |
| ATOM | 4066 | HB2  | ARG | X | 272 | 53.390 | 68.772 | 40.923 | 0.00 | 0.00 |
| ATOM | 4067 | HB3  | ARG | X | 272 | 54.871 | 68.491 | 39.944 | 0.00 | 0.00 |
| ATOM | 4068 | CG   | ARG | X | 272 | 54.956 | 70.210 | 41.239 | 0.00 | 0.00 |
| ATOM | 4069 | HG2  | ARG | X | 272 | 54.395 | 71.140 | 41.328 | 0.00 | 0.00 |
| ATOM | 4070 | HG3  | ARG | X | 272 | 55.096 | 69.645 | 42.161 | 0.00 | 0.00 |
| ATOM | 4071 | CD   | ARG | X | 272 | 56.389 | 70.438 | 40.822 | 0.00 | 0.00 |
| ATOM | 4072 | HD2  | ARG | X | 272 | 56.997 | 69.534 | 40.815 | 0.00 | 0.00 |
| ATOM | 4073 | HD3  | ARG | X | 272 | 56.402 | 70.848 | 39.812 | 0.00 | 0.00 |
| ATOM | 4074 | NE   | ARG | X | 272 | 57.025 | 71.412 | 41.758 | 0.00 | 0.00 |
| ATOM | 4075 | HE   | ARG | X | 272 | 57.418 | 71.003 | 42.594 | 0.00 | 0.00 |
| ATOM | 4076 | CZ   | ARG | X | 272 | 56.928 | 72.694 | 41.644 | 0.00 | 0.00 |
| ATOM | 4077 | NH1  | ARG | X | 272 | 56.506 | 73.338 | 40.562 | 0.00 | 0.00 |
| ATOM | 4078 | HH11 | ARG | X | 272 | 56.232 | 72.935 | 39.677 | 0.00 | 0.00 |

|      |      |      |     |   |     |        |        |        |      |      |
|------|------|------|-----|---|-----|--------|--------|--------|------|------|
| ATOM | 4079 | HH12 | ARG | X | 272 | 56.758 | 74.315 | 40.575 | 0.00 | 0.00 |
| ATOM | 4080 | NH2  | ARG | X | 272 | 57.387 | 73.463 | 42.625 | 0.00 | 0.00 |
| ATOM | 4081 | HH21 | ARG | X | 272 | 57.773 | 73.123 | 43.494 | 0.00 | 0.00 |
| ATOM | 4082 | HH22 | ARG | X | 272 | 57.441 | 74.450 | 42.418 | 0.00 | 0.00 |
| ATOM | 4083 | C    | ARG | X | 272 | 52.985 | 68.956 | 38.134 | 0.00 | 0.00 |
| ATOM | 4084 | O    | ARG | X | 272 | 51.843 | 68.486 | 38.286 | 0.00 | 0.00 |
| ATOM | 4085 | N    | PRO | X | 273 | 53.831 | 68.664 | 37.085 | 0.00 | 0.00 |
| ATOM | 4086 | CD   | PRO | X | 273 | 55.098 | 69.265 | 36.742 | 0.00 | 0.00 |
| ATOM | 4087 | HD2  | PRO | X | 273 | 55.678 | 69.454 | 37.645 | 0.00 | 0.00 |
| ATOM | 4088 | HD3  | PRO | X | 273 | 54.841 | 70.184 | 36.216 | 0.00 | 0.00 |
| ATOM | 4089 | CG   | PRO | X | 273 | 55.764 | 68.515 | 35.602 | 0.00 | 0.00 |
| ATOM | 4090 | HG2  | PRO | X | 273 | 56.429 | 67.768 | 36.035 | 0.00 | 0.00 |
| ATOM | 4091 | HG3  | PRO | X | 273 | 56.285 | 69.105 | 34.847 | 0.00 | 0.00 |
| ATOM | 4092 | CB   | PRO | X | 273 | 54.548 | 67.880 | 34.878 | 0.00 | 0.00 |
| ATOM | 4093 | HB2  | PRO | X | 273 | 54.804 | 66.901 | 34.473 | 0.00 | 0.00 |
| ATOM | 4094 | HB3  | PRO | X | 273 | 54.255 | 68.482 | 34.018 | 0.00 | 0.00 |
| ATOM | 4095 | CA   | PRO | X | 273 | 53.462 | 67.703 | 36.069 | 0.00 | 0.00 |
| ATOM | 4096 | HA   | PRO | X | 273 | 52.473 | 68.073 | 35.795 | 0.00 | 0.00 |
| ATOM | 4097 | C    | PRO | X | 273 | 53.425 | 66.191 | 36.393 | 0.00 | 0.00 |
| ATOM | 4098 | O    | PRO | X | 273 | 54.387 | 65.665 | 36.923 | 0.00 | 0.00 |
| ATOM | 4099 | N    | ALA | X | 274 | 52.282 | 65.537 | 36.013 | 0.00 | 0.00 |
| ATOM | 4100 | H    | ALA | X | 274 | 51.515 | 66.035 | 35.584 | 0.00 | 0.00 |
| ATOM | 4101 | CA   | ALA | X | 274 | 52.049 | 64.070 | 36.230 | 0.00 | 0.00 |
| ATOM | 4102 | HA   | ALA | X | 274 | 51.891 | 63.821 | 37.279 | 0.00 | 0.00 |
| ATOM | 4103 | CB   | ALA | X | 274 | 50.821 | 63.795 | 35.368 | 0.00 | 0.00 |
| ATOM | 4104 | HB1  | ALA | X | 274 | 50.476 | 62.788 | 35.604 | 0.00 | 0.00 |
| ATOM | 4105 | HB2  | ALA | X | 274 | 51.010 | 63.741 | 34.295 | 0.00 | 0.00 |
| ATOM | 4106 | HB3  | ALA | X | 274 | 50.061 | 64.547 | 35.577 | 0.00 | 0.00 |
| ATOM | 4107 | C    | ALA | X | 274 | 53.247 | 63.185 | 35.953 | 0.00 | 0.00 |
| ATOM | 4108 | O    | ALA | X | 274 | 53.507 | 62.209 | 36.682 | 0.00 | 0.00 |
| ATOM | 4109 | N    | GLN | X | 275 | 53.993 | 63.531 | 34.921 | 0.00 | 0.00 |
| ATOM | 4110 | H    | GLN | X | 275 | 53.753 | 64.324 | 34.343 | 0.00 | 0.00 |
| ATOM | 4111 | CA   | GLN | X | 275 | 55.030 | 62.667 | 34.412 | 0.00 | 0.00 |
| ATOM | 4112 | HA   | GLN | X | 275 | 54.516 | 61.714 | 34.292 | 0.00 | 0.00 |
| ATOM | 4113 | CB   | GLN | X | 275 | 55.474 | 63.165 | 33.037 | 0.00 | 0.00 |
| ATOM | 4114 | HB2  | GLN | X | 275 | 54.542 | 63.388 | 32.517 | 0.00 | 0.00 |
| ATOM | 4115 | HB3  | GLN | X | 275 | 56.070 | 64.066 | 33.185 | 0.00 | 0.00 |
| ATOM | 4116 | CG   | GLN | X | 275 | 56.201 | 62.097 | 32.181 | 0.00 | 0.00 |
| ATOM | 4117 | HG2  | GLN | X | 275 | 56.726 | 61.401 | 32.836 | 0.00 | 0.00 |
| ATOM | 4118 | HG3  | GLN | X | 275 | 55.472 | 61.454 | 31.688 | 0.00 | 0.00 |
| ATOM | 4119 | CD   | GLN | X | 275 | 57.012 | 62.678 | 31.059 | 0.00 | 0.00 |
| ATOM | 4120 | OE1  | GLN | X | 275 | 56.707 | 62.408 | 29.944 | 0.00 | 0.00 |
| ATOM | 4121 | NE2  | GLN | X | 275 | 57.980 | 63.471 | 31.353 | 0.00 | 0.00 |
| ATOM | 4122 | HE21 | GLN | X | 275 | 58.223 | 64.265 | 30.778 | 0.00 | 0.00 |
| ATOM | 4123 | HE22 | GLN | X | 275 | 58.157 | 63.530 | 32.346 | 0.00 | 0.00 |
| ATOM | 4124 | C    | GLN | X | 275 | 56.235 | 62.593 | 35.487 | 0.00 | 0.00 |
| ATOM | 4125 | O    | GLN | X | 275 | 56.929 | 61.620 | 35.594 | 0.00 | 0.00 |
| ATOM | 4126 | N    | VAL | X | 276 | 56.385 | 63.665 | 36.325 | 0.00 | 0.00 |
| ATOM | 4127 | H    | VAL | X | 276 | 55.721 | 64.421 | 36.233 | 0.00 | 0.00 |
| ATOM | 4128 | CA   | VAL | X | 276 | 57.277 | 63.748 | 37.527 | 0.00 | 0.00 |
| ATOM | 4129 | HA   | VAL | X | 276 | 58.228 | 63.305 | 37.232 | 0.00 | 0.00 |
| ATOM | 4130 | CB   | VAL | X | 276 | 57.519 | 65.251 | 37.992 | 0.00 | 0.00 |
| ATOM | 4131 | HB   | VAL | X | 276 | 56.601 | 65.833 | 38.069 | 0.00 | 0.00 |
| ATOM | 4132 | CG1  | VAL | X | 276 | 58.147 | 65.306 | 39.435 | 0.00 | 0.00 |
| ATOM | 4133 | HG11 | VAL | X | 276 | 57.415 | 64.888 | 40.127 | 0.00 | 0.00 |
| ATOM | 4134 | HG12 | VAL | X | 276 | 59.029 | 64.667 | 39.418 | 0.00 | 0.00 |
| ATOM | 4135 | HG13 | VAL | X | 276 | 58.402 | 66.298 | 39.808 | 0.00 | 0.00 |
| ATOM | 4136 | CG2  | VAL | X | 276 | 58.557 | 65.950 | 37.062 | 0.00 | 0.00 |
| ATOM | 4137 | HG21 | VAL | X | 276 | 59.401 | 65.272 | 36.934 | 0.00 | 0.00 |
| ATOM | 4138 | HG22 | VAL | X | 276 | 58.892 | 66.883 | 37.517 | 0.00 | 0.00 |
| ATOM | 4139 | HG23 | VAL | X | 276 | 58.238 | 66.148 | 36.039 | 0.00 | 0.00 |
| ATOM | 4140 | C    | VAL | X | 276 | 56.691 | 62.897 | 38.692 | 0.00 | 0.00 |
| ATOM | 4141 | O    | VAL | X | 276 | 57.435 | 62.276 | 39.430 | 0.00 | 0.00 |
| ATOM | 4142 | N    | LEU | X | 277 | 55.337 | 62.977 | 38.859 | 0.00 | 0.00 |
| ATOM | 4143 | H    | LEU | X | 277 | 54.782 | 63.456 | 38.165 | 0.00 | 0.00 |
| ATOM | 4144 | CA   | LEU | X | 277 | 54.724 | 62.357 | 39.959 | 0.00 | 0.00 |
| ATOM | 4145 | HA   | LEU | X | 277 | 55.206 | 62.705 | 40.873 | 0.00 | 0.00 |



|      |      |      |     |   |     |        |        |        |      |      |
|------|------|------|-----|---|-----|--------|--------|--------|------|------|
| ATOM | 4146 | CB   | LEU | X | 277 | 53.189 | 62.826 | 40.077 | 0.00 | 0.00 |
| ATOM | 4147 | HB2  | LEU | X | 277 | 52.650 | 62.335 | 39.267 | 0.00 | 0.00 |
| ATOM | 4148 | HB3  | LEU | X | 277 | 52.692 | 62.545 | 41.006 | 0.00 | 0.00 |
| ATOM | 4149 | CG   | LEU | X | 277 | 52.858 | 64.380 | 39.990 | 0.00 | 0.00 |
| ATOM | 4150 | HG   | LEU | X | 277 | 53.189 | 64.763 | 39.024 | 0.00 | 0.00 |
| ATOM | 4151 | CD1  | LEU | X | 277 | 51.390 | 64.796 | 40.235 | 0.00 | 0.00 |
| ATOM | 4152 | HD11 | LEU | X | 277 | 50.751 | 64.274 | 39.522 | 0.00 | 0.00 |
| ATOM | 4153 | HD12 | LEU | X | 277 | 51.250 | 65.867 | 40.093 | 0.00 | 0.00 |
| ATOM | 4154 | HD13 | LEU | X | 277 | 51.045 | 64.493 | 41.223 | 0.00 | 0.00 |
| ATOM | 4155 | CD2  | LEU | X | 277 | 53.785 | 65.121 | 40.919 | 0.00 | 0.00 |
| ATOM | 4156 | HD21 | LEU | X | 277 | 54.857 | 64.949 | 40.823 | 0.00 | 0.00 |
| ATOM | 4157 | HD22 | LEU | X | 277 | 53.654 | 66.203 | 40.965 | 0.00 | 0.00 |
| ATOM | 4158 | HD23 | LEU | X | 277 | 53.535 | 64.758 | 41.915 | 0.00 | 0.00 |
| ATOM | 4159 | C    | LEU | X | 277 | 54.758 | 60.883 | 39.851 | 0.00 | 0.00 |
| ATOM | 4160 | O    | LEU | X | 277 | 55.164 | 60.202 | 40.746 | 0.00 | 0.00 |
| ATOM | 4161 | N    | VAL | X | 278 | 54.565 | 60.345 | 38.675 | 0.00 | 0.00 |
| ATOM | 4162 | H    | VAL | X | 278 | 54.190 | 60.837 | 37.876 | 0.00 | 0.00 |
| ATOM | 4163 | CA   | VAL | X | 278 | 54.904 | 58.940 | 38.346 | 0.00 | 0.00 |
| ATOM | 4164 | HA   | VAL | X | 278 | 54.395 | 58.259 | 39.028 | 0.00 | 0.00 |
| ATOM | 4165 | CB   | VAL | X | 278 | 54.484 | 58.725 | 36.858 | 0.00 | 0.00 |
| ATOM | 4166 | HB   | VAL | X | 278 | 54.949 | 59.412 | 36.151 | 0.00 | 0.00 |
| ATOM | 4167 | CG1  | VAL | X | 278 | 54.769 | 57.263 | 36.358 | 0.00 | 0.00 |
| ATOM | 4168 | HG11 | VAL | X | 278 | 55.823 | 57.056 | 36.544 | 0.00 | 0.00 |
| ATOM | 4169 | HG12 | VAL | X | 278 | 54.129 | 56.549 | 36.876 | 0.00 | 0.00 |
| ATOM | 4170 | HG13 | VAL | X | 278 | 54.572 | 57.353 | 35.289 | 0.00 | 0.00 |
| ATOM | 4171 | CG2  | VAL | X | 278 | 52.991 | 58.820 | 36.708 | 0.00 | 0.00 |
| ATOM | 4172 | HG21 | VAL | X | 278 | 52.683 | 58.782 | 35.663 | 0.00 | 0.00 |
| ATOM | 4173 | HG22 | VAL | X | 278 | 52.695 | 59.773 | 37.148 | 0.00 | 0.00 |
| ATOM | 4174 | HG23 | VAL | X | 278 | 52.539 | 58.097 | 37.387 | 0.00 | 0.00 |
| ATOM | 4175 | C    | VAL | X | 278 | 56.405 | 58.649 | 38.477 | 0.00 | 0.00 |
| ATOM | 4176 | O    | VAL | X | 278 | 56.782 | 57.649 | 38.972 | 0.00 | 0.00 |
| ATOM | 4177 | N    | ASN | X | 279 | 57.345 | 59.569 | 38.120 | 0.00 | 0.00 |
| ATOM | 4178 | H    | ASN | X | 279 | 57.074 | 60.448 | 37.703 | 0.00 | 0.00 |
| ATOM | 4179 | CA   | ASN | X | 279 | 58.784 | 59.201 | 38.217 | 0.00 | 0.00 |
| ATOM | 4180 | HA   | ASN | X | 279 | 59.074 | 58.304 | 37.671 | 0.00 | 0.00 |
| ATOM | 4181 | CB   | ASN | X | 279 | 59.673 | 60.341 | 37.618 | 0.00 | 0.00 |
| ATOM | 4182 | HB2  | ASN | X | 279 | 59.573 | 60.369 | 36.533 | 0.00 | 0.00 |
| ATOM | 4183 | HB3  | ASN | X | 279 | 59.450 | 61.329 | 38.021 | 0.00 | 0.00 |
| ATOM | 4184 | CG   | ASN | X | 279 | 61.122 | 60.044 | 37.862 | 0.00 | 0.00 |
| ATOM | 4185 | OD1  | ASN | X | 279 | 61.672 | 60.310 | 38.880 | 0.00 | 0.00 |
| ATOM | 4186 | ND2  | ASN | X | 279 | 61.788 | 59.358 | 36.895 | 0.00 | 0.00 |
| ATOM | 4187 | HD21 | ASN | X | 279 | 62.777 | 59.186 | 37.010 | 0.00 | 0.00 |
| ATOM | 4188 | HD22 | ASN | X | 279 | 61.265 | 59.154 | 36.056 | 0.00 | 0.00 |
| ATOM | 4189 | C    | ASN | X | 279 | 59.196 | 58.938 | 39.706 | 0.00 | 0.00 |
| ATOM | 4190 | O    | ASN | X | 279 | 59.864 | 57.943 | 40.025 | 0.00 | 0.00 |
| ATOM | 4191 | N    | HIE | X | 280 | 58.772 | 59.812 | 40.606 | 0.00 | 0.00 |
| ATOM | 4192 | H    | HIE | X | 280 | 58.129 | 60.553 | 40.365 | 0.00 | 0.00 |
| ATOM | 4193 | CA   | HIE | X | 280 | 59.049 | 59.818 | 42.039 | 0.00 | 0.00 |
| ATOM | 4194 | HA   | HIE | X | 280 | 60.066 | 59.466 | 42.214 | 0.00 | 0.00 |
| ATOM | 4195 | CB   | HIE | X | 280 | 59.043 | 61.284 | 42.544 | 0.00 | 0.00 |
| ATOM | 4196 | HB2  | HIE | X | 280 | 58.164 | 61.904 | 42.368 | 0.00 | 0.00 |
| ATOM | 4197 | HB3  | HIE | X | 280 | 59.126 | 61.258 | 43.631 | 0.00 | 0.00 |
| ATOM | 4198 | CG   | HIE | X | 280 | 60.215 | 62.065 | 41.990 | 0.00 | 0.00 |
| ATOM | 4199 | ND1  | HIE | X | 280 | 61.517 | 61.663 | 41.950 | 0.00 | 0.00 |
| ATOM | 4200 | CE1  | HIE | X | 280 | 62.216 | 62.764 | 41.738 | 0.00 | 0.00 |
| ATOM | 4201 | HE1  | HIE | X | 280 | 63.291 | 62.846 | 41.665 | 0.00 | 0.00 |
| ATOM | 4202 | NE2  | HIE | X | 280 | 61.436 | 63.809 | 41.496 | 0.00 | 0.00 |
| ATOM | 4203 | HE2  | HIE | X | 280 | 61.741 | 64.716 | 41.174 | 0.00 | 0.00 |
| ATOM | 4204 | CD2  | HIE | X | 280 | 60.127 | 63.413 | 41.706 | 0.00 | 0.00 |
| ATOM | 4205 | HD2  | HIE | X | 280 | 59.231 | 64.009 | 41.802 | 0.00 | 0.00 |
| ATOM | 4206 | C    | HIE | X | 280 | 58.258 | 58.919 | 42.903 | 0.00 | 0.00 |
| ATOM | 4207 | O    | HIE | X | 280 | 58.615 | 58.770 | 44.049 | 0.00 | 0.00 |
| ATOM | 4208 | N    | GLU | X | 281 | 57.155 | 58.298 | 42.457 | 0.00 | 0.00 |
| ATOM | 4209 | H    | GLU | X | 281 | 56.892 | 58.487 | 41.501 | 0.00 | 0.00 |
| ATOM | 4210 | CA   | GLU | X | 281 | 56.281 | 57.446 | 43.224 | 0.00 | 0.00 |
| ATOM | 4211 | HA   | GLU | X | 281 | 55.924 | 57.950 | 44.122 | 0.00 | 0.00 |
| ATOM | 4212 | CB   | GLU | X | 281 | 54.980 | 56.963 | 42.448 | 0.00 | 0.00 |

|      |      |      |     |   |     |        |        |        |      |      |
|------|------|------|-----|---|-----|--------|--------|--------|------|------|
| ATOM | 4213 | HB2  | GLU | X | 281 | 54.502 | 57.682 | 41.782 | 0.00 | 0.00 |
| ATOM | 4214 | HB3  | GLU | X | 281 | 55.317 | 56.094 | 41.882 | 0.00 | 0.00 |
| ATOM | 4215 | CG   | GLU | X | 281 | 53.949 | 56.394 | 43.442 | 0.00 | 0.00 |
| ATOM | 4216 | HG2  | GLU | X | 281 | 54.338 | 55.493 | 43.915 | 0.00 | 0.00 |
| ATOM | 4217 | HG3  | GLU | X | 281 | 53.709 | 57.091 | 44.245 | 0.00 | 0.00 |
| ATOM | 4218 | CD   | GLU | X | 281 | 52.633 | 56.042 | 42.729 | 0.00 | 0.00 |
| ATOM | 4219 | OE1  | GLU | X | 281 | 52.010 | 56.897 | 42.090 | 0.00 | 0.00 |
| ATOM | 4220 | OE2  | GLU | X | 281 | 52.403 | 54.843 | 42.753 | 0.00 | 0.00 |
| ATOM | 4221 | C    | GLU | X | 281 | 56.993 | 56.210 | 43.681 | 0.00 | 0.00 |
| ATOM | 4222 | O    | GLU | X | 281 | 56.697 | 55.761 | 44.789 | 0.00 | 0.00 |
| ATOM | 4223 | N    | TRP | X | 282 | 57.887 | 55.681 | 42.841 | 0.00 | 0.00 |
| ATOM | 4224 | H    | TRP | X | 282 | 58.120 | 56.071 | 41.939 | 0.00 | 0.00 |
| ATOM | 4225 | CA   | TRP | X | 282 | 58.481 | 54.362 | 43.133 | 0.00 | 0.00 |
| ATOM | 4226 | HA   | TRP | X | 282 | 57.652 | 53.665 | 43.258 | 0.00 | 0.00 |
| ATOM | 4227 | CB   | TRP | X | 282 | 59.230 | 53.842 | 41.902 | 0.00 | 0.00 |
| ATOM | 4228 | HB2  | TRP | X | 282 | 58.490 | 53.822 | 41.102 | 0.00 | 0.00 |
| ATOM | 4229 | HB3  | TRP | X | 282 | 60.102 | 54.454 | 41.672 | 0.00 | 0.00 |
| ATOM | 4230 | CG   | TRP | X | 282 | 59.746 | 52.363 | 42.096 | 0.00 | 0.00 |
| ATOM | 4231 | CD1  | TRP | X | 282 | 58.976 | 51.332 | 42.085 | 0.00 | 0.00 |
| ATOM | 4232 | HD1  | TRP | X | 282 | 57.914 | 51.350 | 41.888 | 0.00 | 0.00 |
| ATOM | 4233 | NE1  | TRP | X | 282 | 59.706 | 50.121 | 42.098 | 0.00 | 0.00 |
| ATOM | 4234 | HE1  | TRP | X | 282 | 59.312 | 49.198 | 41.982 | 0.00 | 0.00 |
| ATOM | 4235 | CE2  | TRP | X | 282 | 61.015 | 50.412 | 42.290 | 0.00 | 0.00 |
| ATOM | 4236 | CZ2  | TRP | X | 282 | 62.104 | 49.569 | 42.633 | 0.00 | 0.00 |
| ATOM | 4237 | HZ2  | TRP | X | 282 | 61.982 | 48.498 | 42.699 | 0.00 | 0.00 |
| ATOM | 4238 | CH2  | TRP | X | 282 | 63.349 | 50.114 | 42.758 | 0.00 | 0.00 |
| ATOM | 4239 | HH2  | TRP | X | 282 | 64.182 | 49.445 | 42.916 | 0.00 | 0.00 |
| ATOM | 4240 | CZ3  | TRP | X | 282 | 63.470 | 51.504 | 42.794 | 0.00 | 0.00 |
| ATOM | 4241 | HZ3  | TRP | X | 282 | 64.456 | 51.875 | 43.030 | 0.00 | 0.00 |
| ATOM | 4242 | CE3  | TRP | X | 282 | 62.361 | 52.362 | 42.673 | 0.00 | 0.00 |
| ATOM | 4243 | HE3  | TRP | X | 282 | 62.601 | 53.415 | 42.633 | 0.00 | 0.00 |
| ATOM | 4244 | CD2  | TRP | X | 282 | 61.083 | 51.825 | 42.367 | 0.00 | 0.00 |
| ATOM | 4245 | C    | TRP | X | 282 | 59.339 | 54.353 | 44.451 | 0.00 | 0.00 |
| ATOM | 4246 | O    | TRP | X | 282 | 59.569 | 53.254 | 44.987 | 0.00 | 0.00 |
| ATOM | 4247 | N    | HIE | X | 283 | 59.677 | 55.502 | 44.949 | 0.00 | 0.00 |
| ATOM | 4248 | H    | HIE | X | 283 | 59.302 | 56.323 | 44.497 | 0.00 | 0.00 |
| ATOM | 4249 | CA   | HIE | X | 283 | 60.286 | 55.697 | 46.324 | 0.00 | 0.00 |
| ATOM | 4250 | HA   | HIE | X | 283 | 60.945 | 54.839 | 46.462 | 0.00 | 0.00 |
| ATOM | 4251 | CB   | HIE | X | 283 | 61.085 | 57.045 | 46.275 | 0.00 | 0.00 |
| ATOM | 4252 | HB2  | HIE | X | 283 | 60.353 | 57.851 | 46.218 | 0.00 | 0.00 |
| ATOM | 4253 | HB3  | HIE | X | 283 | 61.454 | 57.096 | 47.300 | 0.00 | 0.00 |
| ATOM | 4254 | CG   | HIE | X | 283 | 62.126 | 57.047 | 45.300 | 0.00 | 0.00 |
| ATOM | 4255 | ND1  | HIE | X | 283 | 63.307 | 56.310 | 45.282 | 0.00 | 0.00 |
| ATOM | 4256 | CE1  | HIE | X | 283 | 63.975 | 56.517 | 44.092 | 0.00 | 0.00 |
| ATOM | 4257 | HE1  | HIE | X | 283 | 64.979 | 56.160 | 43.914 | 0.00 | 0.00 |
| ATOM | 4258 | NE2  | HIE | X | 283 | 63.249 | 57.300 | 43.328 | 0.00 | 0.00 |
| ATOM | 4259 | HE2  | HIE | X | 283 | 63.430 | 57.648 | 42.397 | 0.00 | 0.00 |
| ATOM | 4260 | CD2  | HIE | X | 283 | 62.120 | 57.676 | 44.063 | 0.00 | 0.00 |
| ATOM | 4261 | HD2  | HIE | X | 283 | 61.258 | 58.239 | 43.737 | 0.00 | 0.00 |
| ATOM | 4262 | C    | HIE | X | 283 | 59.275 | 55.817 | 47.476 | 0.00 | 0.00 |
| ATOM | 4263 | O    | HIE | X | 283 | 59.798 | 55.757 | 48.594 | 0.00 | 0.00 |
| ATOM | 4264 | N    | VAL | X | 284 | 57.971 | 55.940 | 47.272 | 0.00 | 0.00 |
| ATOM | 4265 | H    | VAL | X | 284 | 57.561 | 55.941 | 46.349 | 0.00 | 0.00 |
| ATOM | 4266 | CA   | VAL | X | 284 | 56.973 | 55.817 | 48.300 | 0.00 | 0.00 |
| ATOM | 4267 | HA   | VAL | X | 284 | 57.504 | 55.929 | 49.245 | 0.00 | 0.00 |
| ATOM | 4268 | CB   | VAL | X | 284 | 56.075 | 56.991 | 48.358 | 0.00 | 0.00 |
| ATOM | 4269 | HB   | VAL | X | 284 | 55.335 | 56.979 | 49.159 | 0.00 | 0.00 |
| ATOM | 4270 | CG1  | VAL | X | 284 | 56.928 | 58.260 | 48.548 | 0.00 | 0.00 |
| ATOM | 4271 | HG11 | VAL | X | 284 | 57.488 | 58.501 | 47.644 | 0.00 | 0.00 |
| ATOM | 4272 | HG12 | VAL | X | 284 | 56.379 | 59.161 | 48.820 | 0.00 | 0.00 |
| ATOM | 4273 | HG13 | VAL | X | 284 | 57.657 | 58.223 | 49.357 | 0.00 | 0.00 |
| ATOM | 4274 | CG2  | VAL | X | 284 | 55.180 | 57.147 | 47.128 | 0.00 | 0.00 |
| ATOM | 4275 | HG21 | VAL | X | 284 | 55.767 | 57.551 | 46.303 | 0.00 | 0.00 |
| ATOM | 4276 | HG22 | VAL | X | 284 | 54.487 | 57.937 | 47.414 | 0.00 | 0.00 |
| ATOM | 4277 | HG23 | VAL | X | 284 | 54.548 | 56.287 | 46.906 | 0.00 | 0.00 |
| ATOM | 4278 | C    | VAL | X | 284 | 56.198 | 54.494 | 48.448 | 0.00 | 0.00 |
| ATOM | 4279 | O    | VAL | X | 284 | 55.232 | 54.410 | 49.197 | 0.00 | 0.00 |

|      |      |      |     |   |     |        |        |        |      |      |
|------|------|------|-----|---|-----|--------|--------|--------|------|------|
| ATOM | 4280 | N    | LEU | X | 285 | 56.672 | 53.474 | 47.754 | 0.00 | 0.00 |
| ATOM | 4281 | H    | LEU | X | 285 | 57.533 | 53.645 | 47.255 | 0.00 | 0.00 |
| ATOM | 4282 | CA   | LEU | X | 285 | 56.307 | 52.060 | 47.977 | 0.00 | 0.00 |
| ATOM | 4283 | HA   | LEU | X | 285 | 55.267 | 52.050 | 48.304 | 0.00 | 0.00 |
| ATOM | 4284 | CB   | LEU | X | 285 | 56.413 | 51.393 | 46.612 | 0.00 | 0.00 |
| ATOM | 4285 | HB2  | LEU | X | 285 | 55.834 | 52.015 | 45.930 | 0.00 | 0.00 |
| ATOM | 4286 | HB3  | LEU | X | 285 | 57.411 | 51.510 | 46.191 | 0.00 | 0.00 |
| ATOM | 4287 | CG   | LEU | X | 285 | 56.062 | 49.882 | 46.619 | 0.00 | 0.00 |
| ATOM | 4288 | HG   | LEU | X | 285 | 55.228 | 49.706 | 47.298 | 0.00 | 0.00 |
| ATOM | 4289 | CD1  | LEU | X | 285 | 55.758 | 49.584 | 45.128 | 0.00 | 0.00 |
| ATOM | 4290 | HD11 | LEU | X | 285 | 54.878 | 50.100 | 44.743 | 0.00 | 0.00 |
| ATOM | 4291 | HD12 | LEU | X | 285 | 55.506 | 48.529 | 45.029 | 0.00 | 0.00 |
| ATOM | 4292 | HD13 | LEU | X | 285 | 56.594 | 49.886 | 44.498 | 0.00 | 0.00 |
| ATOM | 4293 | CD2  | LEU | X | 285 | 57.084 | 48.860 | 47.201 | 0.00 | 0.00 |
| ATOM | 4294 | HD21 | LEU | X | 285 | 56.774 | 47.816 | 47.152 | 0.00 | 0.00 |
| ATOM | 4295 | HD22 | LEU | X | 285 | 58.010 | 48.880 | 46.626 | 0.00 | 0.00 |
| ATOM | 4296 | HD23 | LEU | X | 285 | 57.222 | 48.955 | 48.278 | 0.00 | 0.00 |
| ATOM | 4297 | C    | LEU | X | 285 | 57.267 | 51.452 | 49.054 | 0.00 | 0.00 |
| ATOM | 4298 | O    | LEU | X | 285 | 58.486 | 51.682 | 48.871 | 0.00 | 0.00 |
| ATOM | 4299 | N    | PRO | X | 286 | 56.802 | 50.793 | 50.148 | 0.00 | 0.00 |
| ATOM | 4300 | CD   | PRO | X | 286 | 55.491 | 50.339 | 50.275 | 0.00 | 0.00 |
| ATOM | 4301 | HD2  | PRO | X | 286 | 55.078 | 49.668 | 49.522 | 0.00 | 0.00 |
| ATOM | 4302 | HD3  | PRO | X | 286 | 54.892 | 51.239 | 50.419 | 0.00 | 0.00 |
| ATOM | 4303 | CG   | PRO | X | 286 | 55.523 | 49.524 | 51.598 | 0.00 | 0.00 |
| ATOM | 4304 | HG2  | PRO | X | 286 | 55.883 | 48.505 | 51.452 | 0.00 | 0.00 |
| ATOM | 4305 | HG3  | PRO | X | 286 | 54.572 | 49.465 | 52.127 | 0.00 | 0.00 |
| ATOM | 4306 | CB   | PRO | X | 286 | 56.568 | 50.274 | 52.379 | 0.00 | 0.00 |
| ATOM | 4307 | HB2  | PRO | X | 286 | 57.058 | 49.611 | 53.092 | 0.00 | 0.00 |
| ATOM | 4308 | HB3  | PRO | X | 286 | 56.144 | 51.158 | 52.855 | 0.00 | 0.00 |
| ATOM | 4309 | CA   | PRO | X | 286 | 57.585 | 50.697 | 51.337 | 0.00 | 0.00 |
| ATOM | 4310 | HA   | PRO | X | 286 | 57.998 | 51.654 | 51.656 | 0.00 | 0.00 |
| ATOM | 4311 | C    | PRO | X | 286 | 58.833 | 49.884 | 51.102 | 0.00 | 0.00 |
| ATOM | 4312 | O    | PRO | X | 286 | 58.963 | 49.060 | 50.136 | 0.00 | 0.00 |
| ATOM | 4313 | N    | GLN | X | 287 | 59.648 | 49.831 | 52.118 | 0.00 | 0.00 |
| ATOM | 4314 | H    | GLN | X | 287 | 59.624 | 50.489 | 52.885 | 0.00 | 0.00 |
| ATOM | 4315 | CA   | GLN | X | 287 | 60.918 | 49.053 | 52.181 | 0.00 | 0.00 |
| ATOM | 4316 | HA   | GLN | X | 287 | 61.122 | 48.488 | 51.271 | 0.00 | 0.00 |
| ATOM | 4317 | CB   | GLN | X | 287 | 62.026 | 49.994 | 52.593 | 0.00 | 0.00 |
| ATOM | 4318 | HB2  | GLN | X | 287 | 61.752 | 50.401 | 53.566 | 0.00 | 0.00 |
| ATOM | 4319 | HB3  | GLN | X | 287 | 62.983 | 49.487 | 52.717 | 0.00 | 0.00 |
| ATOM | 4320 | CG   | GLN | X | 287 | 62.308 | 51.285 | 51.732 | 0.00 | 0.00 |
| ATOM | 4321 | HG2  | GLN | X | 287 | 62.421 | 50.895 | 50.720 | 0.00 | 0.00 |
| ATOM | 4322 | HG3  | GLN | X | 287 | 61.421 | 51.919 | 51.717 | 0.00 | 0.00 |
| ATOM | 4323 | CD   | GLN | X | 287 | 63.521 | 52.143 | 52.136 | 0.00 | 0.00 |
| ATOM | 4324 | OE1  | GLN | X | 287 | 64.371 | 51.680 | 52.896 | 0.00 | 0.00 |
| ATOM | 4325 | NE2  | GLN | X | 287 | 63.724 | 53.351 | 51.717 | 0.00 | 0.00 |
| ATOM | 4326 | HE21 | GLN | X | 287 | 64.419 | 53.980 | 52.093 | 0.00 | 0.00 |
| ATOM | 4327 | HE22 | GLN | X | 287 | 63.102 | 53.663 | 50.986 | 0.00 | 0.00 |
| ATOM | 4328 | C    | GLN | X | 287 | 60.914 | 48.052 | 53.330 | 0.00 | 0.00 |
| ATOM | 4329 | O    | GLN | X | 287 | 60.233 | 48.287 | 54.309 | 0.00 | 0.00 |
| ATOM | 4330 | N    | GLU | X | 288 | 61.686 | 46.940 | 53.322 | 0.00 | 0.00 |
| ATOM | 4331 | H    | GLU | X | 288 | 62.288 | 46.701 | 52.546 | 0.00 | 0.00 |
| ATOM | 4332 | CA   | GLU | X | 288 | 61.622 | 45.906 | 54.416 | 0.00 | 0.00 |
| ATOM | 4333 | HA   | GLU | X | 288 | 62.471 | 45.241 | 54.255 | 0.00 | 0.00 |
| ATOM | 4334 | CB   | GLU | X | 288 | 61.944 | 46.472 | 55.858 | 0.00 | 0.00 |
| ATOM | 4335 | HB2  | GLU | X | 288 | 61.079 | 47.013 | 56.241 | 0.00 | 0.00 |
| ATOM | 4336 | HB3  | GLU | X | 288 | 62.076 | 45.539 | 56.407 | 0.00 | 0.00 |
| ATOM | 4337 | CG   | GLU | X | 288 | 63.168 | 47.374 | 55.967 | 0.00 | 0.00 |
| ATOM | 4338 | HG2  | GLU | X | 288 | 64.072 | 46.972 | 55.509 | 0.00 | 0.00 |
| ATOM | 4339 | HG3  | GLU | X | 288 | 62.908 | 48.275 | 55.412 | 0.00 | 0.00 |
| ATOM | 4340 | CD   | GLU | X | 288 | 63.544 | 47.543 | 57.395 | 0.00 | 0.00 |
| ATOM | 4341 | OE1  | GLU | X | 288 | 62.923 | 48.521 | 57.988 | 0.00 | 0.00 |
| ATOM | 4342 | OE2  | GLU | X | 288 | 64.358 | 46.735 | 57.906 | 0.00 | 0.00 |
| ATOM | 4343 | C    | GLU | X | 288 | 60.269 | 45.148 | 54.361 | 0.00 | 0.00 |
| ATOM | 4344 | O    | GLU | X | 288 | 59.618 | 44.790 | 55.374 | 0.00 | 0.00 |
| ATOM | 4345 | N    | SER | X | 289 | 59.735 | 45.075 | 53.148 | 0.00 | 0.00 |
| ATOM | 4346 | H    | SER | X | 289 | 60.334 | 45.060 | 52.335 | 0.00 | 0.00 |

|      |      |      |     |   |     |        |        |        |      |      |
|------|------|------|-----|---|-----|--------|--------|--------|------|------|
| ATOM | 4347 | CA   | SER | X | 289 | 58.241 | 44.761 | 52.883 | 0.00 | 0.00 |
| ATOM | 4348 | HA   | SER | X | 289 | 57.866 | 44.169 | 53.718 | 0.00 | 0.00 |
| ATOM | 4349 | CB   | SER | X | 289 | 57.564 | 46.085 | 52.641 | 0.00 | 0.00 |
| ATOM | 4350 | HB2  | SER | X | 289 | 57.945 | 46.602 | 51.761 | 0.00 | 0.00 |
| ATOM | 4351 | HB3  | SER | X | 289 | 56.523 | 45.973 | 52.339 | 0.00 | 0.00 |
| ATOM | 4352 | OG   | SER | X | 289 | 57.646 | 47.002 | 53.670 | 0.00 | 0.00 |
| ATOM | 4353 | HG   | SER | X | 289 | 58.396 | 46.804 | 54.236 | 0.00 | 0.00 |
| ATOM | 4354 | C    | SER | X | 289 | 57.932 | 43.763 | 51.681 | 0.00 | 0.00 |
| ATOM | 4355 | O    | SER | X | 289 | 58.647 | 43.883 | 50.657 | 0.00 | 0.00 |
| ATOM | 4356 | N    | VAL | X | 290 | 56.954 | 42.918 | 51.729 | 0.00 | 0.00 |
| ATOM | 4357 | H    | VAL | X | 290 | 56.451 | 42.841 | 52.601 | 0.00 | 0.00 |
| ATOM | 4358 | CA   | VAL | X | 290 | 56.546 | 42.051 | 50.610 | 0.00 | 0.00 |
| ATOM | 4359 | HA   | VAL | X | 290 | 56.884 | 42.465 | 49.660 | 0.00 | 0.00 |
| ATOM | 4360 | CB   | VAL | X | 290 | 57.168 | 40.621 | 50.863 | 0.00 | 0.00 |
| ATOM | 4361 | HB   | VAL | X | 290 | 56.681 | 40.112 | 51.695 | 0.00 | 0.00 |
| ATOM | 4362 | CG1  | VAL | X | 290 | 56.983 | 39.777 | 49.646 | 0.00 | 0.00 |
| ATOM | 4363 | HG11 | VAL | X | 290 | 57.366 | 40.285 | 48.760 | 0.00 | 0.00 |
| ATOM | 4364 | HG12 | VAL | X | 290 | 57.518 | 38.828 | 49.695 | 0.00 | 0.00 |
| ATOM | 4365 | HG13 | VAL | X | 290 | 55.932 | 39.714 | 49.365 | 0.00 | 0.00 |
| ATOM | 4366 | CG2  | VAL | X | 290 | 58.715 | 40.672 | 51.195 | 0.00 | 0.00 |
| ATOM | 4367 | HG21 | VAL | X | 290 | 59.102 | 39.669 | 51.017 | 0.00 | 0.00 |
| ATOM | 4368 | HG22 | VAL | X | 290 | 58.889 | 41.059 | 52.198 | 0.00 | 0.00 |
| ATOM | 4369 | HG23 | VAL | X | 290 | 59.227 | 41.333 | 50.496 | 0.00 | 0.00 |
| ATOM | 4370 | C    | VAL | X | 290 | 55.004 | 42.043 | 50.473 | 0.00 | 0.00 |
| ATOM | 4371 | O    | VAL | X | 290 | 54.243 | 41.720 | 51.402 | 0.00 | 0.00 |
| ATOM | 4372 | N    | PHE | X | 291 | 54.549 | 42.101 | 49.164 | 0.00 | 0.00 |
| ATOM | 4373 | H    | PHE | X | 291 | 55.204 | 42.294 | 48.419 | 0.00 | 0.00 |
| ATOM | 4374 | CA   | PHE | X | 291 | 53.082 | 42.072 | 48.815 | 0.00 | 0.00 |
| ATOM | 4375 | HA   | PHE | X | 291 | 53.098 | 41.911 | 47.737 | 0.00 | 0.00 |
| ATOM | 4376 | CB   | PHE | X | 291 | 52.261 | 40.953 | 49.449 | 0.00 | 0.00 |
| ATOM | 4377 | HB2  | PHE | X | 291 | 52.905 | 40.198 | 49.900 | 0.00 | 0.00 |
| ATOM | 4378 | HB3  | PHE | X | 291 | 51.657 | 41.356 | 50.262 | 0.00 | 0.00 |
| ATOM | 4379 | CG   | PHE | X | 291 | 51.343 | 40.192 | 48.540 | 0.00 | 0.00 |
| ATOM | 4380 | CD1  | PHE | X | 291 | 50.093 | 40.691 | 48.124 | 0.00 | 0.00 |
| ATOM | 4381 | HD1  | PHE | X | 291 | 49.675 | 41.643 | 48.417 | 0.00 | 0.00 |
| ATOM | 4382 | CE1  | PHE | X | 291 | 49.218 | 39.899 | 47.402 | 0.00 | 0.00 |
| ATOM | 4383 | HE1  | PHE | X | 291 | 48.261 | 40.328 | 47.142 | 0.00 | 0.00 |
| ATOM | 4384 | CZ   | PHE | X | 291 | 49.568 | 38.546 | 47.083 | 0.00 | 0.00 |
| ATOM | 4385 | HZ   | PHE | X | 291 | 48.816 | 37.975 | 46.561 | 0.00 | 0.00 |
| ATOM | 4386 | CE2  | PHE | X | 291 | 50.782 | 38.004 | 47.611 | 0.00 | 0.00 |
| ATOM | 4387 | HE2  | PHE | X | 291 | 51.064 | 37.002 | 47.323 | 0.00 | 0.00 |
| ATOM | 4388 | CD2  | PHE | X | 291 | 51.738 | 38.872 | 48.173 | 0.00 | 0.00 |
| ATOM | 4389 | HD2  | PHE | X | 291 | 52.655 | 38.550 | 48.644 | 0.00 | 0.00 |
| ATOM | 4390 | C    | PHE | X | 291 | 52.465 | 43.507 | 48.918 | 0.00 | 0.00 |
| ATOM | 4391 | O    | PHE | X | 291 | 51.249 | 43.518 | 49.023 | 0.00 | 0.00 |
| ATOM | 4392 | N    | ARG | X | 292 | 53.220 | 44.635 | 48.874 | 0.00 | 0.00 |
| ATOM | 4393 | H    | ARG | X | 292 | 54.157 | 44.566 | 48.504 | 0.00 | 0.00 |
| ATOM | 4394 | CA   | ARG | X | 292 | 52.804 | 45.915 | 49.383 | 0.00 | 0.00 |
| ATOM | 4395 | HA   | ARG | X | 292 | 51.715 | 45.902 | 49.342 | 0.00 | 0.00 |
| ATOM | 4396 | CB   | ARG | X | 292 | 53.300 | 46.125 | 50.833 | 0.00 | 0.00 |
| ATOM | 4397 | HB2  | ARG | X | 292 | 54.358 | 46.335 | 50.988 | 0.00 | 0.00 |
| ATOM | 4398 | HB3  | ARG | X | 292 | 52.945 | 47.116 | 51.118 | 0.00 | 0.00 |
| ATOM | 4399 | CG   | ARG | X | 292 | 52.818 | 45.119 | 51.929 | 0.00 | 0.00 |
| ATOM | 4400 | HG2  | ARG | X | 292 | 52.979 | 44.116 | 51.535 | 0.00 | 0.00 |
| ATOM | 4401 | HG3  | ARG | X | 292 | 53.457 | 45.315 | 52.790 | 0.00 | 0.00 |
| ATOM | 4402 | CD   | ARG | X | 292 | 51.372 | 45.296 | 52.356 | 0.00 | 0.00 |
| ATOM | 4403 | HD2  | ARG | X | 292 | 51.327 | 46.172 | 53.004 | 0.00 | 0.00 |
| ATOM | 4404 | HD3  | ARG | X | 292 | 50.717 | 45.416 | 51.493 | 0.00 | 0.00 |
| ATOM | 4405 | NE   | ARG | X | 292 | 50.800 | 44.127 | 53.093 | 0.00 | 0.00 |
| ATOM | 4406 | HE   | ARG | X | 292 | 50.849 | 43.308 | 52.505 | 0.00 | 0.00 |
| ATOM | 4407 | CZ   | ARG | X | 292 | 50.362 | 44.034 | 54.324 | 0.00 | 0.00 |
| ATOM | 4408 | NH1  | ARG | X | 292 | 50.240 | 44.984 | 55.211 | 0.00 | 0.00 |
| ATOM | 4409 | HH11 | ARG | X | 292 | 50.507 | 45.932 | 54.990 | 0.00 | 0.00 |
| ATOM | 4410 | HH12 | ARG | X | 292 | 49.851 | 44.874 | 56.136 | 0.00 | 0.00 |
| ATOM | 4411 | NH2  | ARG | X | 292 | 49.970 | 42.801 | 54.753 | 0.00 | 0.00 |
| ATOM | 4412 | HH21 | ARG | X | 292 | 50.136 | 41.986 | 54.179 | 0.00 | 0.00 |
| ATOM | 4413 | HH22 | ARG | X | 292 | 49.556 | 42.680 | 55.666 | 0.00 | 0.00 |

|      |      |      |     |   |     |        |        |        |      |      |
|------|------|------|-----|---|-----|--------|--------|--------|------|------|
| ATOM | 4414 | C    | ARG | X | 292 | 53.240 | 47.092 | 48.539 | 0.00 | 0.00 |
| ATOM | 4415 | O    | ARG | X | 292 | 54.410 | 47.295 | 48.254 | 0.00 | 0.00 |
| ATOM | 4416 | N    | PHE | X | 293 | 52.321 | 47.960 | 48.195 | 0.00 | 0.00 |
| ATOM | 4417 | H    | PHE | X | 293 | 51.384 | 47.756 | 48.511 | 0.00 | 0.00 |
| ATOM | 4418 | CA   | PHE | X | 293 | 52.493 | 48.825 | 47.025 | 0.00 | 0.00 |
| ATOM | 4419 | HA   | PHE | X | 293 | 53.436 | 48.667 | 46.502 | 0.00 | 0.00 |
| ATOM | 4420 | CB   | PHE | X | 293 | 51.332 | 48.534 | 46.038 | 0.00 | 0.00 |
| ATOM | 4421 | HB2  | PHE | X | 293 | 50.363 | 48.751 | 46.487 | 0.00 | 0.00 |
| ATOM | 4422 | HB3  | PHE | X | 293 | 51.333 | 49.218 | 45.190 | 0.00 | 0.00 |
| ATOM | 4423 | CG   | PHE | X | 293 | 51.305 | 47.063 | 45.633 | 0.00 | 0.00 |
| ATOM | 4424 | CD1  | PHE | X | 293 | 52.374 | 46.434 | 44.960 | 0.00 | 0.00 |
| ATOM | 4425 | HD1  | PHE | X | 293 | 53.236 | 47.044 | 44.737 | 0.00 | 0.00 |
| ATOM | 4426 | CE1  | PHE | X | 293 | 52.186 | 45.084 | 44.596 | 0.00 | 0.00 |
| ATOM | 4427 | HE1  | PHE | X | 293 | 52.916 | 44.585 | 43.975 | 0.00 | 0.00 |
| ATOM | 4428 | CZ   | PHE | X | 293 | 51.118 | 44.357 | 45.096 | 0.00 | 0.00 |
| ATOM | 4429 | HZ   | PHE | X | 293 | 50.986 | 43.297 | 44.939 | 0.00 | 0.00 |
| ATOM | 4430 | CE2  | PHE | X | 293 | 50.064 | 44.999 | 45.810 | 0.00 | 0.00 |
| ATOM | 4431 | HE2  | PHE | X | 293 | 49.226 | 44.362 | 46.049 | 0.00 | 0.00 |
| ATOM | 4432 | CD2  | PHE | X | 293 | 50.185 | 46.384 | 46.065 | 0.00 | 0.00 |
| ATOM | 4433 | HD2  | PHE | X | 293 | 49.313 | 46.858 | 46.491 | 0.00 | 0.00 |
| ATOM | 4434 | C    | PHE | X | 293 | 52.421 | 50.280 | 47.457 | 0.00 | 0.00 |
| ATOM | 4435 | O    | PHE | X | 293 | 52.374 | 50.555 | 48.646 | 0.00 | 0.00 |
| ATOM | 4436 | N    | SER | X | 294 | 52.537 | 51.268 | 46.529 | 0.00 | 0.00 |
| ATOM | 4437 | H    | SER | X | 294 | 52.692 | 51.086 | 45.548 | 0.00 | 0.00 |
| ATOM | 4438 | CA   | SER | X | 294 | 52.747 | 52.675 | 46.919 | 0.00 | 0.00 |
| ATOM | 4439 | HA   | SER | X | 294 | 53.366 | 52.819 | 47.804 | 0.00 | 0.00 |
| ATOM | 4440 | CB   | SER | X | 294 | 53.440 | 53.439 | 45.746 | 0.00 | 0.00 |
| ATOM | 4441 | HB2  | SER | X | 294 | 53.253 | 54.506 | 45.868 | 0.00 | 0.00 |
| ATOM | 4442 | HB3  | SER | X | 294 | 54.519 | 53.279 | 45.753 | 0.00 | 0.00 |
| ATOM | 4443 | OG   | SER | X | 294 | 52.974 | 52.927 | 44.536 | 0.00 | 0.00 |
| ATOM | 4444 | HG   | SER | X | 294 | 52.811 | 53.574 | 43.846 | 0.00 | 0.00 |
| ATOM | 4445 | C    | SER | X | 294 | 51.417 | 53.441 | 47.244 | 0.00 | 0.00 |
| ATOM | 4446 | O    | SER | X | 294 | 51.462 | 54.175 | 48.226 | 0.00 | 0.00 |
| ATOM | 4447 | N    | PHE | X | 295 | 50.275 | 53.278 | 46.589 | 0.00 | 0.00 |
| ATOM | 4448 | H    | PHE | X | 295 | 50.287 | 52.593 | 45.847 | 0.00 | 0.00 |
| ATOM | 4449 | CA   | PHE | X | 295 | 49.074 | 54.029 | 46.806 | 0.00 | 0.00 |
| ATOM | 4450 | HA   | PHE | X | 295 | 48.979 | 54.312 | 47.854 | 0.00 | 0.00 |
| ATOM | 4451 | CB   | PHE | X | 295 | 48.989 | 55.327 | 45.995 | 0.00 | 0.00 |
| ATOM | 4452 | HB2  | PHE | X | 295 | 49.259 | 55.033 | 44.981 | 0.00 | 0.00 |
| ATOM | 4453 | HB3  | PHE | X | 295 | 47.976 | 55.713 | 46.111 | 0.00 | 0.00 |
| ATOM | 4454 | CG   | PHE | X | 295 | 49.902 | 56.497 | 46.380 | 0.00 | 0.00 |
| ATOM | 4455 | CD1  | PHE | X | 295 | 49.490 | 57.215 | 47.569 | 0.00 | 0.00 |
| ATOM | 4456 | HD1  | PHE | X | 295 | 48.562 | 56.946 | 48.051 | 0.00 | 0.00 |
| ATOM | 4457 | CE1  | PHE | X | 295 | 50.322 | 58.261 | 48.076 | 0.00 | 0.00 |
| ATOM | 4458 | HE1  | PHE | X | 295 | 49.970 | 58.842 | 48.916 | 0.00 | 0.00 |
| ATOM | 4459 | CZ   | PHE | X | 295 | 51.410 | 58.658 | 47.267 | 0.00 | 0.00 |
| ATOM | 4460 | HZ   | PHE | X | 295 | 51.843 | 59.556 | 47.682 | 0.00 | 0.00 |
| ATOM | 4461 | CE2  | PHE | X | 295 | 51.773 | 57.940 | 46.157 | 0.00 | 0.00 |
| ATOM | 4462 | HE2  | PHE | X | 295 | 52.630 | 58.199 | 45.554 | 0.00 | 0.00 |
| ATOM | 4463 | CD2  | PHE | X | 295 | 51.008 | 56.865 | 45.674 | 0.00 | 0.00 |
| ATOM | 4464 | HD2  | PHE | X | 295 | 51.163 | 56.338 | 44.744 | 0.00 | 0.00 |
| ATOM | 4465 | C    | PHE | X | 295 | 47.892 | 53.173 | 46.423 | 0.00 | 0.00 |
| ATOM | 4466 | O    | PHE | X | 295 | 47.824 | 52.489 | 45.386 | 0.00 | 0.00 |
| ATOM | 4467 | N    | VAL | X | 296 | 46.991 | 53.162 | 47.413 | 0.00 | 0.00 |
| ATOM | 4468 | H    | VAL | X | 296 | 47.198 | 53.745 | 48.211 | 0.00 | 0.00 |
| ATOM | 4469 | CA   | VAL | X | 296 | 46.038 | 52.046 | 47.676 | 0.00 | 0.00 |
| ATOM | 4470 | HA   | VAL | X | 296 | 45.891 | 51.433 | 46.786 | 0.00 | 0.00 |
| ATOM | 4471 | CB   | VAL | X | 296 | 46.767 | 51.166 | 48.710 | 0.00 | 0.00 |
| ATOM | 4472 | HB   | VAL | X | 296 | 47.292 | 51.770 | 49.451 | 0.00 | 0.00 |
| ATOM | 4473 | CG1  | VAL | X | 296 | 45.786 | 50.139 | 49.402 | 0.00 | 0.00 |
| ATOM | 4474 | HG11 | VAL | X | 296 | 45.002 | 50.714 | 49.895 | 0.00 | 0.00 |
| ATOM | 4475 | HG12 | VAL | X | 296 | 45.257 | 49.469 | 48.725 | 0.00 | 0.00 |
| ATOM | 4476 | HG13 | VAL | X | 296 | 46.257 | 49.457 | 50.109 | 0.00 | 0.00 |
| ATOM | 4477 | CG2  | VAL | X | 296 | 47.766 | 50.229 | 48.028 | 0.00 | 0.00 |
| ATOM | 4478 | HG21 | VAL | X | 296 | 48.534 | 50.778 | 47.483 | 0.00 | 0.00 |
| ATOM | 4479 | HG22 | VAL | X | 296 | 47.273 | 49.545 | 47.337 | 0.00 | 0.00 |
| ATOM | 4480 | HG23 | VAL | X | 296 | 48.271 | 49.579 | 48.742 | 0.00 | 0.00 |

|      |      |      |     |   |     |        |        |        |      |      |
|------|------|------|-----|---|-----|--------|--------|--------|------|------|
| ATOM | 4481 | C    | VAL | X | 296 | 44.688 | 52.578 | 48.185 | 0.00 | 0.00 |
| ATOM | 4482 | O    | VAL | X | 296 | 44.659 | 53.742 | 48.663 | 0.00 | 0.00 |
| ATOM | 4483 | N    | PRO | X | 297 | 43.563 | 51.773 | 48.120 | 0.00 | 0.00 |
| ATOM | 4484 | CD   | PRO | X | 297 | 43.398 | 50.672 | 47.162 | 0.00 | 0.00 |
| ATOM | 4485 | HD2  | PRO | X | 297 | 44.140 | 49.889 | 47.312 | 0.00 | 0.00 |
| ATOM | 4486 | HD3  | PRO | X | 297 | 43.668 | 51.040 | 46.172 | 0.00 | 0.00 |
| ATOM | 4487 | CG   | PRO | X | 297 | 41.911 | 50.377 | 47.270 | 0.00 | 0.00 |
| ATOM | 4488 | HG2  | PRO | X | 297 | 41.806 | 49.299 | 47.393 | 0.00 | 0.00 |
| ATOM | 4489 | HG3  | PRO | X | 297 | 41.599 | 50.748 | 46.294 | 0.00 | 0.00 |
| ATOM | 4490 | CB   | PRO | X | 297 | 41.336 | 51.102 | 48.385 | 0.00 | 0.00 |
| ATOM | 4491 | HB2  | PRO | X | 297 | 41.247 | 50.417 | 49.229 | 0.00 | 0.00 |
| ATOM | 4492 | HB3  | PRO | X | 297 | 40.362 | 51.492 | 48.090 | 0.00 | 0.00 |
| ATOM | 4493 | CA   | PRO | X | 297 | 42.298 | 52.243 | 48.687 | 0.00 | 0.00 |
| ATOM | 4494 | HA   | PRO | X | 297 | 42.010 | 53.133 | 48.127 | 0.00 | 0.00 |
| ATOM | 4495 | C    | PRO | X | 297 | 42.406 | 52.561 | 50.190 | 0.00 | 0.00 |
| ATOM | 4496 | O    | PRO | X | 297 | 43.159 | 51.967 | 50.931 | 0.00 | 0.00 |
| ATOM | 4497 | N    | VAL | X | 298 | 41.686 | 53.579 | 50.608 | 0.00 | 0.00 |
| ATOM | 4498 | H    | VAL | X | 298 | 41.039 | 54.020 | 49.969 | 0.00 | 0.00 |
| ATOM | 4499 | CA   | VAL | X | 298 | 41.717 | 54.196 | 51.948 | 0.00 | 0.00 |
| ATOM | 4500 | HA   | VAL | X | 298 | 42.356 | 53.603 | 52.603 | 0.00 | 0.00 |
| ATOM | 4501 | CB   | VAL | X | 298 | 42.237 | 55.633 | 51.887 | 0.00 | 0.00 |
| ATOM | 4502 | HB   | VAL | X | 298 | 41.445 | 56.235 | 51.441 | 0.00 | 0.00 |
| ATOM | 4503 | CG1  | VAL | X | 298 | 42.425 | 56.332 | 53.208 | 0.00 | 0.00 |
| ATOM | 4504 | HG11 | VAL | X | 298 | 42.809 | 57.332 | 53.006 | 0.00 | 0.00 |
| ATOM | 4505 | HG12 | VAL | X | 298 | 41.466 | 56.427 | 53.718 | 0.00 | 0.00 |
| ATOM | 4506 | HG13 | VAL | X | 298 | 43.178 | 55.782 | 53.773 | 0.00 | 0.00 |
| ATOM | 4507 | CG2  | VAL | X | 298 | 43.535 | 55.745 | 51.029 | 0.00 | 0.00 |
| ATOM | 4508 | HG21 | VAL | X | 298 | 44.356 | 55.238 | 51.537 | 0.00 | 0.00 |
| ATOM | 4509 | HG22 | VAL | X | 298 | 43.736 | 56.799 | 50.837 | 0.00 | 0.00 |
| ATOM | 4510 | HG23 | VAL | X | 298 | 43.267 | 55.223 | 50.111 | 0.00 | 0.00 |
| ATOM | 4511 | C    | VAL | X | 298 | 40.323 | 54.162 | 52.578 | 0.00 | 0.00 |
| ATOM | 4512 | O    | VAL | X | 298 | 39.319 | 54.256 | 51.859 | 0.00 | 0.00 |
| ATOM | 4513 | N    | VAL | X | 299 | 40.293 | 53.928 | 53.916 | 0.00 | 0.00 |
| ATOM | 4514 | H    | VAL | X | 299 | 41.181 | 53.756 | 54.364 | 0.00 | 0.00 |
| ATOM | 4515 | CA   | VAL | X | 299 | 39.116 | 54.135 | 54.823 | 0.00 | 0.00 |
| ATOM | 4516 | HA   | VAL | X | 299 | 38.242 | 53.867 | 54.229 | 0.00 | 0.00 |
| ATOM | 4517 | CB   | VAL | X | 299 | 39.162 | 53.251 | 56.144 | 0.00 | 0.00 |
| ATOM | 4518 | HB   | VAL | X | 299 | 40.070 | 53.503 | 56.692 | 0.00 | 0.00 |
| ATOM | 4519 | CG1  | VAL | X | 299 | 37.961 | 53.586 | 57.069 | 0.00 | 0.00 |
| ATOM | 4520 | HG11 | VAL | X | 299 | 38.053 | 53.088 | 58.035 | 0.00 | 0.00 |
| ATOM | 4521 | HG12 | VAL | X | 299 | 37.969 | 54.618 | 57.419 | 0.00 | 0.00 |
| ATOM | 4522 | HG13 | VAL | X | 299 | 37.005 | 53.478 | 56.558 | 0.00 | 0.00 |
| ATOM | 4523 | CG2  | VAL | X | 299 | 39.066 | 51.707 | 55.985 | 0.00 | 0.00 |
| ATOM | 4524 | HG21 | VAL | X | 299 | 39.109 | 51.278 | 56.986 | 0.00 | 0.00 |
| ATOM | 4525 | HG22 | VAL | X | 299 | 39.864 | 51.205 | 55.438 | 0.00 | 0.00 |
| ATOM | 4526 | HG23 | VAL | X | 299 | 38.095 | 51.502 | 55.534 | 0.00 | 0.00 |
| ATOM | 4527 | C    | VAL | X | 299 | 38.988 | 55.614 | 55.038 | 0.00 | 0.00 |
| ATOM | 4528 | O    | VAL | X | 299 | 39.682 | 56.160 | 55.855 | 0.00 | 0.00 |
| ATOM | 4529 | N    | ASP | X | 300 | 38.305 | 56.324 | 54.130 | 0.00 | 0.00 |
| ATOM | 4530 | H    | ASP | X | 300 | 37.752 | 55.863 | 53.422 | 0.00 | 0.00 |
| ATOM | 4531 | CA   | ASP | X | 300 | 38.371 | 57.743 | 54.039 | 0.00 | 0.00 |
| ATOM | 4532 | HA   | ASP | X | 300 | 39.361 | 58.151 | 54.244 | 0.00 | 0.00 |
| ATOM | 4533 | CB   | ASP | X | 300 | 38.293 | 58.162 | 52.563 | 0.00 | 0.00 |
| ATOM | 4534 | HB2  | ASP | X | 300 | 38.533 | 59.208 | 52.374 | 0.00 | 0.00 |
| ATOM | 4535 | HB3  | ASP | X | 300 | 39.060 | 57.560 | 52.075 | 0.00 | 0.00 |
| ATOM | 4536 | CG   | ASP | X | 300 | 36.987 | 57.900 | 51.944 | 0.00 | 0.00 |
| ATOM | 4537 | OD1  | ASP | X | 300 | 36.423 | 56.795 | 51.928 | 0.00 | 0.00 |
| ATOM | 4538 | OD2  | ASP | X | 300 | 36.481 | 58.809 | 51.272 | 0.00 | 0.00 |
| ATOM | 4539 | C    | ASP | X | 300 | 37.285 | 58.501 | 54.783 | 0.00 | 0.00 |
| ATOM | 4540 | O    | ASP | X | 300 | 37.469 | 59.649 | 55.274 | 0.00 | 0.00 |
| ATOM | 4541 | N    | GLY | X | 301 | 36.179 | 57.798 | 54.949 | 0.00 | 0.00 |
| ATOM | 4542 | H    | GLY | X | 301 | 36.192 | 56.853 | 54.591 | 0.00 | 0.00 |
| ATOM | 4543 | CA   | GLY | X | 301 | 34.959 | 58.277 | 55.627 | 0.00 | 0.00 |
| ATOM | 4544 | HA2  | GLY | X | 301 | 34.889 | 57.613 | 56.489 | 0.00 | 0.00 |
| ATOM | 4545 | HA3  | GLY | X | 301 | 35.141 | 59.319 | 55.888 | 0.00 | 0.00 |
| ATOM | 4546 | C    | GLY | X | 301 | 33.618 | 58.161 | 54.796 | 0.00 | 0.00 |
| ATOM | 4547 | O    | GLY | X | 301 | 32.530 | 58.408 | 55.336 | 0.00 | 0.00 |

|      |      |      |     |   |     |        |        |        |      |      |
|------|------|------|-----|---|-----|--------|--------|--------|------|------|
| ATOM | 4548 | N    | ASP | X | 302 | 33.798 | 57.913 | 53.524 | 0.00 | 0.00 |
| ATOM | 4549 | H    | ASP | X | 302 | 34.698 | 57.625 | 53.167 | 0.00 | 0.00 |
| ATOM | 4550 | CA   | ASP | X | 302 | 32.702 | 58.156 | 52.629 | 0.00 | 0.00 |
| ATOM | 4551 | HA   | ASP | X | 302 | 31.759 | 58.059 | 53.167 | 0.00 | 0.00 |
| ATOM | 4552 | CB   | ASP | X | 302 | 32.770 | 59.594 | 52.130 | 0.00 | 0.00 |
| ATOM | 4553 | HB2  | ASP | X | 302 | 32.988 | 60.256 | 52.967 | 0.00 | 0.00 |
| ATOM | 4554 | HB3  | ASP | X | 302 | 33.706 | 59.635 | 51.572 | 0.00 | 0.00 |
| ATOM | 4555 | CG   | ASP | X | 302 | 31.559 | 60.047 | 51.308 | 0.00 | 0.00 |
| ATOM | 4556 | OD1  | ASP | X | 302 | 31.717 | 61.089 | 50.598 | 0.00 | 0.00 |
| ATOM | 4557 | OD2  | ASP | X | 302 | 30.501 | 59.453 | 51.452 | 0.00 | 0.00 |
| ATOM | 4558 | C    | ASP | X | 302 | 32.640 | 57.112 | 51.528 | 0.00 | 0.00 |
| ATOM | 4559 | O    | ASP | X | 302 | 31.591 | 56.548 | 51.163 | 0.00 | 0.00 |
| ATOM | 4560 | N    | PHE | X | 303 | 33.830 | 56.758 | 50.890 | 0.00 | 0.00 |
| ATOM | 4561 | H    | PHE | X | 303 | 34.659 | 57.241 | 51.206 | 0.00 | 0.00 |
| ATOM | 4562 | CA   | PHE | X | 303 | 34.012 | 55.507 | 50.067 | 0.00 | 0.00 |
| ATOM | 4563 | HA   | PHE | X | 303 | 33.146 | 55.509 | 49.405 | 0.00 | 0.00 |
| ATOM | 4564 | CB   | PHE | X | 303 | 35.352 | 55.550 | 49.258 | 0.00 | 0.00 |
| ATOM | 4565 | HB2  | PHE | X | 303 | 35.636 | 56.523 | 48.857 | 0.00 | 0.00 |
| ATOM | 4566 | HB3  | PHE | X | 303 | 36.086 | 55.162 | 49.964 | 0.00 | 0.00 |
| ATOM | 4567 | CG   | PHE | X | 303 | 35.339 | 54.632 | 48.076 | 0.00 | 0.00 |
| ATOM | 4568 | CD1  | PHE | X | 303 | 35.842 | 53.283 | 48.147 | 0.00 | 0.00 |
| ATOM | 4569 | HD1  | PHE | X | 303 | 36.503 | 52.928 | 48.924 | 0.00 | 0.00 |
| ATOM | 4570 | CE1  | PHE | X | 303 | 35.562 | 52.362 | 47.106 | 0.00 | 0.00 |
| ATOM | 4571 | HE1  | PHE | X | 303 | 35.917 | 51.346 | 47.197 | 0.00 | 0.00 |
| ATOM | 4572 | CZ   | PHE | X | 303 | 34.799 | 52.659 | 45.977 | 0.00 | 0.00 |
| ATOM | 4573 | HZ   | PHE | X | 303 | 34.791 | 51.926 | 45.184 | 0.00 | 0.00 |
| ATOM | 4574 | CE2  | PHE | X | 303 | 34.331 | 53.979 | 45.913 | 0.00 | 0.00 |
| ATOM | 4575 | HE2  | PHE | X | 303 | 33.848 | 54.269 | 44.992 | 0.00 | 0.00 |
| ATOM | 4576 | CD2  | PHE | X | 303 | 34.503 | 54.914 | 46.966 | 0.00 | 0.00 |
| ATOM | 4577 | HD2  | PHE | X | 303 | 34.156 | 55.935 | 46.894 | 0.00 | 0.00 |
| ATOM | 4578 | C    | PHE | X | 303 | 33.971 | 54.289 | 51.019 | 0.00 | 0.00 |
| ATOM | 4579 | O    | PHE | X | 303 | 33.378 | 53.281 | 50.631 | 0.00 | 0.00 |
| ATOM | 4580 | N    | LEU | X | 304 | 34.584 | 54.328 | 52.172 | 0.00 | 0.00 |
| ATOM | 4581 | H    | LEU | X | 304 | 35.030 | 55.210 | 52.382 | 0.00 | 0.00 |
| ATOM | 4582 | CA   | LEU | X | 304 | 34.610 | 53.291 | 53.174 | 0.00 | 0.00 |
| ATOM | 4583 | HA   | LEU | X | 304 | 33.803 | 52.595 | 52.944 | 0.00 | 0.00 |
| ATOM | 4584 | CB   | LEU | X | 304 | 35.975 | 52.551 | 52.982 | 0.00 | 0.00 |
| ATOM | 4585 | HB2  | LEU | X | 304 | 36.764 | 53.287 | 52.823 | 0.00 | 0.00 |
| ATOM | 4586 | HB3  | LEU | X | 304 | 36.108 | 51.940 | 53.875 | 0.00 | 0.00 |
| ATOM | 4587 | CG   | LEU | X | 304 | 36.019 | 51.601 | 51.758 | 0.00 | 0.00 |
| ATOM | 4588 | HG   | LEU | X | 304 | 35.576 | 52.059 | 50.873 | 0.00 | 0.00 |
| ATOM | 4589 | CD1  | LEU | X | 304 | 37.464 | 51.188 | 51.593 | 0.00 | 0.00 |
| ATOM | 4590 | HD11 | LEU | X | 304 | 37.584 | 50.644 | 50.656 | 0.00 | 0.00 |
| ATOM | 4591 | HD12 | LEU | X | 304 | 37.733 | 50.635 | 52.493 | 0.00 | 0.00 |
| ATOM | 4592 | HD13 | LEU | X | 304 | 38.069 | 52.094 | 51.570 | 0.00 | 0.00 |
| ATOM | 4593 | CD2  | LEU | X | 304 | 35.215 | 50.335 | 52.169 | 0.00 | 0.00 |
| ATOM | 4594 | HD21 | LEU | X | 304 | 35.712 | 49.814 | 52.988 | 0.00 | 0.00 |
| ATOM | 4595 | HD22 | LEU | X | 304 | 34.189 | 50.643 | 52.370 | 0.00 | 0.00 |
| ATOM | 4596 | HD23 | LEU | X | 304 | 35.087 | 49.704 | 51.290 | 0.00 | 0.00 |
| ATOM | 4597 | C    | LEU | X | 304 | 34.273 | 53.773 | 54.588 | 0.00 | 0.00 |
| ATOM | 4598 | O    | LEU | X | 304 | 34.449 | 54.945 | 54.895 | 0.00 | 0.00 |
| ATOM | 4599 | N    | SER | X | 305 | 33.676 | 52.916 | 55.447 | 0.00 | 0.00 |
| ATOM | 4600 | H    | SER | X | 305 | 33.330 | 52.022 | 55.128 | 0.00 | 0.00 |
| ATOM | 4601 | CA   | SER | X | 305 | 33.364 | 53.290 | 56.836 | 0.00 | 0.00 |
| ATOM | 4602 | HA   | SER | X | 305 | 33.538 | 54.360 | 56.956 | 0.00 | 0.00 |
| ATOM | 4603 | CB   | SER | X | 305 | 31.890 | 52.905 | 57.067 | 0.00 | 0.00 |
| ATOM | 4604 | HB2  | SER | X | 305 | 31.736 | 53.340 | 58.054 | 0.00 | 0.00 |
| ATOM | 4605 | HB3  | SER | X | 305 | 31.176 | 53.320 | 56.356 | 0.00 | 0.00 |
| ATOM | 4606 | OG   | SER | X | 305 | 31.642 | 51.493 | 57.276 | 0.00 | 0.00 |
| ATOM | 4607 | HG   | SER | X | 305 | 31.650 | 51.354 | 58.225 | 0.00 | 0.00 |
| ATOM | 4608 | C    | SER | X | 305 | 34.254 | 52.686 | 57.818 | 0.00 | 0.00 |
| ATOM | 4609 | O    | SER | X | 305 | 34.397 | 53.186 | 58.963 | 0.00 | 0.00 |
| ATOM | 4610 | N    | ASP | X | 306 | 34.989 | 51.595 | 57.493 | 0.00 | 0.00 |
| ATOM | 4611 | H    | ASP | X | 306 | 34.756 | 51.276 | 56.563 | 0.00 | 0.00 |
| ATOM | 4612 | CA   | ASP | X | 306 | 36.002 | 50.755 | 58.202 | 0.00 | 0.00 |
| ATOM | 4613 | HA   | ASP | X | 306 | 36.779 | 51.376 | 58.646 | 0.00 | 0.00 |
| ATOM | 4614 | CB   | ASP | X | 306 | 35.236 | 50.093 | 59.350 | 0.00 | 0.00 |

|      |      |      |     |   |     |        |        |        |      |      |
|------|------|------|-----|---|-----|--------|--------|--------|------|------|
| ATOM | 4615 | HB2  | ASP | X | 306 | 34.597 | 50.810 | 59.867 | 0.00 | 0.00 |
| ATOM | 4616 | HB3  | ASP | X | 306 | 34.460 | 49.465 | 58.912 | 0.00 | 0.00 |
| ATOM | 4617 | CG   | ASP | X | 306 | 35.943 | 49.313 | 60.373 | 0.00 | 0.00 |
| ATOM | 4618 | OD1  | ASP | X | 306 | 35.162 | 48.749 | 61.193 | 0.00 | 0.00 |
| ATOM | 4619 | OD2  | ASP | X | 306 | 37.196 | 49.198 | 60.454 | 0.00 | 0.00 |
| ATOM | 4620 | C    | ASP | X | 306 | 36.621 | 49.809 | 57.219 | 0.00 | 0.00 |
| ATOM | 4621 | O    | ASP | X | 306 | 36.243 | 49.724 | 56.070 | 0.00 | 0.00 |
| ATOM | 4622 | N    | THR | X | 307 | 37.616 | 49.005 | 57.619 | 0.00 | 0.00 |
| ATOM | 4623 | H    | THR | X | 307 | 37.936 | 49.008 | 58.577 | 0.00 | 0.00 |
| ATOM | 4624 | CA   | THR | X | 307 | 38.405 | 48.172 | 56.751 | 0.00 | 0.00 |
| ATOM | 4625 | HA   | THR | X | 307 | 38.753 | 48.794 | 55.927 | 0.00 | 0.00 |
| ATOM | 4626 | CB   | THR | X | 307 | 39.652 | 47.798 | 57.479 | 0.00 | 0.00 |
| ATOM | 4627 | HB   | THR | X | 307 | 40.235 | 47.033 | 56.967 | 0.00 | 0.00 |
| ATOM | 4628 | CG2  | THR | X | 307 | 40.640 | 48.965 | 57.748 | 0.00 | 0.00 |
| ATOM | 4629 | HG21 | THR | X | 307 | 40.949 | 49.365 | 56.782 | 0.00 | 0.00 |
| ATOM | 4630 | HG22 | THR | X | 307 | 41.455 | 48.501 | 58.303 | 0.00 | 0.00 |
| ATOM | 4631 | HG23 | THR | X | 307 | 40.213 | 49.738 | 58.387 | 0.00 | 0.00 |
| ATOM | 4632 | OG1  | THR | X | 307 | 39.290 | 47.114 | 58.635 | 0.00 | 0.00 |
| ATOM | 4633 | HG1  | THR | X | 307 | 40.057 | 46.642 | 58.967 | 0.00 | 0.00 |
| ATOM | 4634 | C    | THR | X | 307 | 37.629 | 46.946 | 56.333 | 0.00 | 0.00 |
| ATOM | 4635 | O    | THR | X | 307 | 36.811 | 46.428 | 57.049 | 0.00 | 0.00 |
| ATOM | 4636 | N    | PRO | X | 308 | 37.751 | 46.449 | 55.068 | 0.00 | 0.00 |
| ATOM | 4637 | CD   | PRO | X | 308 | 38.509 | 47.134 | 54.018 | 0.00 | 0.00 |
| ATOM | 4638 | HD2  | PRO | X | 308 | 39.562 | 47.126 | 54.299 | 0.00 | 0.00 |
| ATOM | 4639 | HD3  | PRO | X | 308 | 38.098 | 48.143 | 54.064 | 0.00 | 0.00 |
| ATOM | 4640 | CG   | PRO | X | 308 | 38.118 | 46.379 | 52.766 | 0.00 | 0.00 |
| ATOM | 4641 | HG2  | PRO | X | 308 | 38.895 | 46.393 | 52.001 | 0.00 | 0.00 |
| ATOM | 4642 | HG3  | PRO | X | 308 | 37.240 | 46.803 | 52.279 | 0.00 | 0.00 |
| ATOM | 4643 | CB   | PRO | X | 308 | 37.855 | 44.928 | 53.237 | 0.00 | 0.00 |
| ATOM | 4644 | HB2  | PRO | X | 308 | 38.800 | 44.476 | 53.539 | 0.00 | 0.00 |
| ATOM | 4645 | HB3  | PRO | X | 308 | 37.266 | 44.454 | 52.452 | 0.00 | 0.00 |
| ATOM | 4646 | CA   | PRO | X | 308 | 37.090 | 45.220 | 54.525 | 0.00 | 0.00 |
| ATOM | 4647 | HA   | PRO | X | 308 | 36.103 | 45.516 | 54.171 | 0.00 | 0.00 |
| ATOM | 4648 | C    | PRO | X | 308 | 37.159 | 43.975 | 55.436 | 0.00 | 0.00 |
| ATOM | 4649 | O    | PRO | X | 308 | 36.116 | 43.319 | 55.487 | 0.00 | 0.00 |
| ATOM | 4650 | N    | GLU | X | 309 | 38.219 | 43.737 | 56.242 | 0.00 | 0.00 |
| ATOM | 4651 | H    | GLU | X | 309 | 39.057 | 44.286 | 56.112 | 0.00 | 0.00 |
| ATOM | 4652 | CA   | GLU | X | 309 | 38.342 | 42.809 | 57.339 | 0.00 | 0.00 |
| ATOM | 4653 | HA   | GLU | X | 309 | 38.070 | 41.827 | 56.953 | 0.00 | 0.00 |
| ATOM | 4654 | CB   | GLU | X | 309 | 39.785 | 42.833 | 57.805 | 0.00 | 0.00 |
| ATOM | 4655 | HB2  | GLU | X | 309 | 40.352 | 42.486 | 56.941 | 0.00 | 0.00 |
| ATOM | 4656 | HB3  | GLU | X | 309 | 40.034 | 43.877 | 57.998 | 0.00 | 0.00 |
| ATOM | 4657 | CG   | GLU | X | 309 | 40.038 | 41.895 | 58.951 | 0.00 | 0.00 |
| ATOM | 4658 | HG2  | GLU | X | 309 | 39.507 | 42.192 | 59.855 | 0.00 | 0.00 |
| ATOM | 4659 | HG3  | GLU | X | 309 | 39.906 | 40.872 | 58.597 | 0.00 | 0.00 |
| ATOM | 4660 | CD   | GLU | X | 309 | 41.530 | 42.073 | 59.364 | 0.00 | 0.00 |
| ATOM | 4661 | OE1  | GLU | X | 309 | 42.406 | 41.468 | 58.682 | 0.00 | 0.00 |
| ATOM | 4662 | OE2  | GLU | X | 309 | 41.781 | 42.993 | 60.172 | 0.00 | 0.00 |
| ATOM | 4663 | C    | GLU | X | 309 | 37.398 | 43.004 | 58.454 | 0.00 | 0.00 |
| ATOM | 4664 | O    | GLU | X | 309 | 37.010 | 42.007 | 59.067 | 0.00 | 0.00 |
| ATOM | 4665 | N    | ALA | X | 310 | 37.055 | 44.228 | 58.768 | 0.00 | 0.00 |
| ATOM | 4666 | H    | ALA | X | 310 | 37.134 | 44.913 | 58.031 | 0.00 | 0.00 |
| ATOM | 4667 | CA   | ALA | X | 310 | 36.070 | 44.627 | 59.791 | 0.00 | 0.00 |
| ATOM | 4668 | HA   | ALA | X | 310 | 36.059 | 43.905 | 60.607 | 0.00 | 0.00 |
| ATOM | 4669 | CB   | ALA | X | 310 | 36.544 | 45.956 | 60.424 | 0.00 | 0.00 |
| ATOM | 4670 | HB1  | ALA | X | 310 | 36.489 | 46.741 | 59.669 | 0.00 | 0.00 |
| ATOM | 4671 | HB2  | ALA | X | 310 | 37.535 | 45.996 | 60.874 | 0.00 | 0.00 |
| ATOM | 4672 | HB3  | ALA | X | 310 | 35.826 | 46.264 | 61.184 | 0.00 | 0.00 |
| ATOM | 4673 | C    | ALA | X | 310 | 34.656 | 44.835 | 59.326 | 0.00 | 0.00 |
| ATOM | 4674 | O    | ALA | X | 310 | 33.650 | 44.588 | 60.028 | 0.00 | 0.00 |
| ATOM | 4675 | N    | LEU | X | 311 | 34.521 | 45.190 | 58.002 | 0.00 | 0.00 |
| ATOM | 4676 | H    | LEU | X | 311 | 35.348 | 45.332 | 57.441 | 0.00 | 0.00 |
| ATOM | 4677 | CA   | LEU | X | 311 | 33.282 | 45.254 | 57.204 | 0.00 | 0.00 |
| ATOM | 4678 | HA   | LEU | X | 311 | 32.575 | 45.860 | 57.771 | 0.00 | 0.00 |
| ATOM | 4679 | CB   | LEU | X | 311 | 33.571 | 46.069 | 55.880 | 0.00 | 0.00 |
| ATOM | 4680 | HB2  | LEU | X | 311 | 34.379 | 45.487 | 55.438 | 0.00 | 0.00 |
| ATOM | 4681 | HB3  | LEU | X | 311 | 32.649 | 45.980 | 55.305 | 0.00 | 0.00 |



|      |      |      |     |   |     |        |        |        |      |      |
|------|------|------|-----|---|-----|--------|--------|--------|------|------|
| ATOM | 4682 | CG   | LEU | X | 311 | 33.831 | 47.561 | 55.859 | 0.00 | 0.00 |
| ATOM | 4683 | HG   | LEU | X | 311 | 34.742 | 47.837 | 56.389 | 0.00 | 0.00 |
| ATOM | 4684 | CD1  | LEU | X | 311 | 34.079 | 48.051 | 54.462 | 0.00 | 0.00 |
| ATOM | 4685 | HD11 | LEU | X | 311 | 33.202 | 47.974 | 53.819 | 0.00 | 0.00 |
| ATOM | 4686 | HD12 | LEU | X | 311 | 34.894 | 47.537 | 53.953 | 0.00 | 0.00 |
| ATOM | 4687 | HD13 | LEU | X | 311 | 34.229 | 49.127 | 54.556 | 0.00 | 0.00 |
| ATOM | 4688 | CD2  | LEU | X | 311 | 32.739 | 48.383 | 56.546 | 0.00 | 0.00 |
| ATOM | 4689 | HD21 | LEU | X | 311 | 31.721 | 48.029 | 56.385 | 0.00 | 0.00 |
| ATOM | 4690 | HD22 | LEU | X | 311 | 33.002 | 48.439 | 57.602 | 0.00 | 0.00 |
| ATOM | 4691 | HD23 | LEU | X | 311 | 32.812 | 49.431 | 56.256 | 0.00 | 0.00 |
| ATOM | 4692 | C    | LEU | X | 311 | 32.679 | 43.857 | 56.904 | 0.00 | 0.00 |
| ATOM | 4693 | O    | LEU | X | 311 | 31.465 | 43.627 | 57.054 | 0.00 | 0.00 |
| ATOM | 4694 | N    | ILE | X | 312 | 33.470 | 42.892 | 56.473 | 0.00 | 0.00 |
| ATOM | 4695 | H    | ILE | X | 312 | 34.438 | 43.148 | 56.337 | 0.00 | 0.00 |
| ATOM | 4696 | CA   | ILE | X | 312 | 33.012 | 41.517 | 56.404 | 0.00 | 0.00 |
| ATOM | 4697 | HA   | ILE | X | 312 | 32.062 | 41.598 | 55.874 | 0.00 | 0.00 |
| ATOM | 4698 | CB   | ILE | X | 312 | 34.093 | 40.624 | 55.687 | 0.00 | 0.00 |
| ATOM | 4699 | HB   | ILE | X | 312 | 34.582 | 41.305 | 54.991 | 0.00 | 0.00 |
| ATOM | 4700 | CG2  | ILE | X | 312 | 35.294 | 40.034 | 56.505 | 0.00 | 0.00 |
| ATOM | 4701 | HG21 | ILE | X | 312 | 35.797 | 40.828 | 57.056 | 0.00 | 0.00 |
| ATOM | 4702 | HG22 | ILE | X | 312 | 36.005 | 39.497 | 55.877 | 0.00 | 0.00 |
| ATOM | 4703 | HG23 | ILE | X | 312 | 34.879 | 39.315 | 57.212 | 0.00 | 0.00 |
| ATOM | 4704 | CG1  | ILE | X | 312 | 33.348 | 39.491 | 54.926 | 0.00 | 0.00 |
| ATOM | 4705 | HG12 | ILE | X | 312 | 34.084 | 38.776 | 54.560 | 0.00 | 0.00 |
| ATOM | 4706 | HG13 | ILE | X | 312 | 32.597 | 39.037 | 55.572 | 0.00 | 0.00 |
| ATOM | 4707 | CD1  | ILE | X | 312 | 32.724 | 40.098 | 53.634 | 0.00 | 0.00 |
| ATOM | 4708 | HD11 | ILE | X | 312 | 32.080 | 40.965 | 53.778 | 0.00 | 0.00 |
| ATOM | 4709 | HD12 | ILE | X | 312 | 32.112 | 39.335 | 53.153 | 0.00 | 0.00 |
| ATOM | 4710 | HD13 | ILE | X | 312 | 33.522 | 40.382 | 52.948 | 0.00 | 0.00 |
| ATOM | 4711 | C    | ILE | X | 312 | 32.633 | 40.813 | 57.742 | 0.00 | 0.00 |
| ATOM | 4712 | O    | ILE | X | 312 | 31.543 | 40.310 | 57.862 | 0.00 | 0.00 |
| ATOM | 4713 | N    | ASN | X | 313 | 33.469 | 41.038 | 58.770 | 0.00 | 0.00 |
| ATOM | 4714 | H    | ASN | X | 313 | 34.391 | 41.420 | 58.618 | 0.00 | 0.00 |
| ATOM | 4715 | CA   | ASN | X | 313 | 33.200 | 40.527 | 60.150 | 0.00 | 0.00 |
| ATOM | 4716 | HA   | ASN | X | 313 | 33.142 | 39.439 | 60.141 | 0.00 | 0.00 |
| ATOM | 4717 | CB   | ASN | X | 313 | 34.461 | 40.766 | 61.002 | 0.00 | 0.00 |
| ATOM | 4718 | HB2  | ASN | X | 313 | 35.210 | 40.079 | 60.608 | 0.00 | 0.00 |
| ATOM | 4719 | HB3  | ASN | X | 313 | 34.869 | 41.761 | 60.828 | 0.00 | 0.00 |
| ATOM | 4720 | CG   | ASN | X | 313 | 34.225 | 40.435 | 62.537 | 0.00 | 0.00 |
| ATOM | 4721 | OD1  | ASN | X | 313 | 33.805 | 41.251 | 63.342 | 0.00 | 0.00 |
| ATOM | 4722 | ND2  | ASN | X | 313 | 34.569 | 39.224 | 62.962 | 0.00 | 0.00 |
| ATOM | 4723 | HD21 | ASN | X | 313 | 34.562 | 39.137 | 63.968 | 0.00 | 0.00 |
| ATOM | 4724 | HD22 | ASN | X | 313 | 34.709 | 38.437 | 62.344 | 0.00 | 0.00 |
| ATOM | 4725 | C    | ASN | X | 313 | 31.934 | 41.102 | 60.771 | 0.00 | 0.00 |
| ATOM | 4726 | O    | ASN | X | 313 | 31.384 | 40.379 | 61.615 | 0.00 | 0.00 |
| ATOM | 4727 | N    | ALA | X | 314 | 31.534 | 42.296 | 60.478 | 0.00 | 0.00 |
| ATOM | 4728 | H    | ALA | X | 314 | 32.069 | 42.958 | 59.934 | 0.00 | 0.00 |
| ATOM | 4729 | CA   | ALA | X | 314 | 30.249 | 42.793 | 60.949 | 0.00 | 0.00 |
| ATOM | 4730 | HA   | ALA | X | 314 | 29.970 | 42.134 | 61.771 | 0.00 | 0.00 |
| ATOM | 4731 | CB   | ALA | X | 314 | 30.558 | 44.222 | 61.425 | 0.00 | 0.00 |
| ATOM | 4732 | HB1  | ALA | X | 314 | 29.686 | 44.683 | 61.889 | 0.00 | 0.00 |
| ATOM | 4733 | HB2  | ALA | X | 314 | 30.820 | 44.883 | 60.599 | 0.00 | 0.00 |
| ATOM | 4734 | HB3  | ALA | X | 314 | 31.357 | 44.178 | 62.166 | 0.00 | 0.00 |
| ATOM | 4735 | C    | ALA | X | 314 | 29.049 | 42.682 | 59.968 | 0.00 | 0.00 |
| ATOM | 4736 | O    | ALA | X | 314 | 27.895 | 42.740 | 60.382 | 0.00 | 0.00 |
| ATOM | 4737 | N    | GLY | X | 315 | 29.323 | 42.392 | 58.672 | 0.00 | 0.00 |
| ATOM | 4738 | H    | GLY | X | 315 | 30.314 | 42.386 | 58.476 | 0.00 | 0.00 |
| ATOM | 4739 | CA   | GLY | X | 315 | 28.378 | 42.506 | 57.571 | 0.00 | 0.00 |
| ATOM | 4740 | HA2  | GLY | X | 315 | 27.822 | 43.443 | 57.583 | 0.00 | 0.00 |
| ATOM | 4741 | HA3  | GLY | X | 315 | 28.872 | 42.516 | 56.599 | 0.00 | 0.00 |
| ATOM | 4742 | C    | GLY | X | 315 | 27.412 | 41.328 | 57.388 | 0.00 | 0.00 |
| ATOM | 4743 | O    | GLY | X | 315 | 27.681 | 40.120 | 57.664 | 0.00 | 0.00 |
| ATOM | 4744 | N    | ASP | X | 316 | 26.227 | 41.666 | 56.824 | 0.00 | 0.00 |
| ATOM | 4745 | H    | ASP | X | 316 | 25.944 | 42.631 | 56.731 | 0.00 | 0.00 |
| ATOM | 4746 | CA   | ASP | X | 316 | 25.281 | 40.719 | 56.146 | 0.00 | 0.00 |
| ATOM | 4747 | HA   | ASP | X | 316 | 25.645 | 39.733 | 56.435 | 0.00 | 0.00 |
| ATOM | 4748 | CB   | ASP | X | 316 | 23.780 | 40.862 | 56.681 | 0.00 | 0.00 |

|      |      |      |     |   |     |        |        |        |      |      |
|------|------|------|-----|---|-----|--------|--------|--------|------|------|
| ATOM | 4749 | HB2  | ASP | X | 316 | 23.848 | 40.895 | 57.768 | 0.00 | 0.00 |
| ATOM | 4750 | HB3  | ASP | X | 316 | 23.353 | 41.827 | 56.404 | 0.00 | 0.00 |
| ATOM | 4751 | CG   | ASP | X | 316 | 22.905 | 39.652 | 56.353 | 0.00 | 0.00 |
| ATOM | 4752 | OD1  | ASP | X | 316 | 22.417 | 39.620 | 55.196 | 0.00 | 0.00 |
| ATOM | 4753 | OD2  | ASP | X | 316 | 22.800 | 38.696 | 57.147 | 0.00 | 0.00 |
| ATOM | 4754 | C    | ASP | X | 316 | 25.342 | 40.823 | 54.636 | 0.00 | 0.00 |
| ATOM | 4755 | O    | ASP | X | 316 | 25.394 | 41.881 | 54.005 | 0.00 | 0.00 |
| ATOM | 4756 | N    | PHE | X | 317 | 25.295 | 39.660 | 53.961 | 0.00 | 0.00 |
| ATOM | 4757 | H    | PHE | X | 317 | 25.015 | 38.789 | 54.389 | 0.00 | 0.00 |
| ATOM | 4758 | CA   | PHE | X | 317 | 25.440 | 39.548 | 52.489 | 0.00 | 0.00 |
| ATOM | 4759 | HA   | PHE | X | 317 | 25.388 | 40.505 | 51.970 | 0.00 | 0.00 |
| ATOM | 4760 | CB   | PHE | X | 317 | 26.892 | 38.906 | 52.213 | 0.00 | 0.00 |
| ATOM | 4761 | HB2  | PHE | X | 317 | 26.919 | 37.919 | 52.675 | 0.00 | 0.00 |
| ATOM | 4762 | HB3  | PHE | X | 317 | 26.988 | 38.734 | 51.141 | 0.00 | 0.00 |
| ATOM | 4763 | CG   | PHE | X | 317 | 28.013 | 39.777 | 52.718 | 0.00 | 0.00 |
| ATOM | 4764 | CD1  | PHE | X | 317 | 28.345 | 40.998 | 52.027 | 0.00 | 0.00 |
| ATOM | 4765 | HD1  | PHE | X | 317 | 27.856 | 41.307 | 51.116 | 0.00 | 0.00 |
| ATOM | 4766 | CE1  | PHE | X | 317 | 29.113 | 41.947 | 52.751 | 0.00 | 0.00 |
| ATOM | 4767 | HE1  | PHE | X | 317 | 29.276 | 42.924 | 52.322 | 0.00 | 0.00 |
| ATOM | 4768 | CZ   | PHE | X | 317 | 29.512 | 41.710 | 54.069 | 0.00 | 0.00 |
| ATOM | 4769 | HZ   | PHE | X | 317 | 30.124 | 42.442 | 54.575 | 0.00 | 0.00 |
| ATOM | 4770 | CE2  | PHE | X | 317 | 29.381 | 40.427 | 54.641 | 0.00 | 0.00 |
| ATOM | 4771 | HE2  | PHE | X | 317 | 29.742 | 40.234 | 55.640 | 0.00 | 0.00 |
| ATOM | 4772 | CD2  | PHE | X | 317 | 28.638 | 39.492 | 53.987 | 0.00 | 0.00 |
| ATOM | 4773 | HD2  | PHE | X | 317 | 28.365 | 38.565 | 54.470 | 0.00 | 0.00 |
| ATOM | 4774 | C    | PHE | X | 317 | 24.284 | 38.706 | 51.828 | 0.00 | 0.00 |
| ATOM | 4775 | O    | PHE | X | 317 | 24.584 | 38.051 | 50.816 | 0.00 | 0.00 |
| ATOM | 4776 | N    | HIE | X | 318 | 23.139 | 38.533 | 52.388 | 0.00 | 0.00 |
| ATOM | 4777 | H    | HIE | X | 318 | 22.938 | 39.093 | 53.204 | 0.00 | 0.00 |
| ATOM | 4778 | CA   | HIE | X | 318 | 22.084 | 37.505 | 51.926 | 0.00 | 0.00 |
| ATOM | 4779 | HA   | HIE | X | 318 | 22.452 | 36.501 | 52.137 | 0.00 | 0.00 |
| ATOM | 4780 | CB   | HIE | X | 318 | 20.818 | 37.616 | 52.770 | 0.00 | 0.00 |
| ATOM | 4781 | HB2  | HIE | X | 318 | 21.033 | 37.571 | 53.837 | 0.00 | 0.00 |
| ATOM | 4782 | HB3  | HIE | X | 318 | 20.427 | 38.604 | 52.530 | 0.00 | 0.00 |
| ATOM | 4783 | CG   | HIE | X | 318 | 19.858 | 36.507 | 52.420 | 0.00 | 0.00 |
| ATOM | 4784 | ND1  | HIE | X | 318 | 20.126 | 35.139 | 52.532 | 0.00 | 0.00 |
| ATOM | 4785 | CE1  | HIE | X | 318 | 19.090 | 34.492 | 51.994 | 0.00 | 0.00 |
| ATOM | 4786 | HE1  | HIE | X | 318 | 18.944 | 33.423 | 52.044 | 0.00 | 0.00 |
| ATOM | 4787 | NE2  | HIE | X | 318 | 18.279 | 35.370 | 51.420 | 0.00 | 0.00 |
| ATOM | 4788 | HE2  | HIE | X | 318 | 17.477 | 35.249 | 50.819 | 0.00 | 0.00 |
| ATOM | 4789 | CD2  | HIE | X | 318 | 18.693 | 36.620 | 51.729 | 0.00 | 0.00 |
| ATOM | 4790 | HD2  | HIE | X | 318 | 18.214 | 37.513 | 51.356 | 0.00 | 0.00 |
| ATOM | 4791 | C    | HIE | X | 318 | 21.638 | 37.574 | 50.479 | 0.00 | 0.00 |
| ATOM | 4792 | O    | HIE | X | 318 | 21.210 | 38.683 | 50.042 | 0.00 | 0.00 |
| ATOM | 4793 | N    | GLY | X | 319 | 21.737 | 36.434 | 49.687 | 0.00 | 0.00 |
| ATOM | 4794 | H    | GLY | X | 319 | 22.110 | 35.656 | 50.212 | 0.00 | 0.00 |
| ATOM | 4795 | CA   | GLY | X | 319 | 21.454 | 36.369 | 48.300 | 0.00 | 0.00 |
| ATOM | 4796 | HA2  | GLY | X | 319 | 21.411 | 35.336 | 47.955 | 0.00 | 0.00 |
| ATOM | 4797 | HA3  | GLY | X | 319 | 20.463 | 36.788 | 48.121 | 0.00 | 0.00 |
| ATOM | 4798 | C    | GLY | X | 319 | 22.501 | 37.050 | 47.376 | 0.00 | 0.00 |
| ATOM | 4799 | O    | GLY | X | 319 | 22.437 | 36.965 | 46.136 | 0.00 | 0.00 |
| ATOM | 4800 | N    | LEU | X | 320 | 23.568 | 37.664 | 47.960 | 0.00 | 0.00 |
| ATOM | 4801 | H    | LEU | X | 320 | 23.541 | 37.712 | 48.968 | 0.00 | 0.00 |
| ATOM | 4802 | CA   | LEU | X | 320 | 24.785 | 37.896 | 47.152 | 0.00 | 0.00 |
| ATOM | 4803 | HA   | LEU | X | 320 | 24.325 | 38.402 | 46.303 | 0.00 | 0.00 |
| ATOM | 4804 | CB   | LEU | X | 320 | 25.814 | 38.836 | 47.788 | 0.00 | 0.00 |
| ATOM | 4805 | HB2  | LEU | X | 320 | 26.362 | 38.364 | 48.604 | 0.00 | 0.00 |
| ATOM | 4806 | HB3  | LEU | X | 320 | 26.523 | 39.069 | 46.994 | 0.00 | 0.00 |
| ATOM | 4807 | CG   | LEU | X | 320 | 25.222 | 40.147 | 48.220 | 0.00 | 0.00 |
| ATOM | 4808 | HG   | LEU | X | 320 | 24.494 | 39.893 | 48.990 | 0.00 | 0.00 |
| ATOM | 4809 | CD1  | LEU | X | 320 | 26.251 | 41.044 | 48.748 | 0.00 | 0.00 |
| ATOM | 4810 | HD11 | LEU | X | 320 | 25.935 | 41.950 | 49.264 | 0.00 | 0.00 |
| ATOM | 4811 | HD12 | LEU | X | 320 | 27.022 | 41.212 | 47.996 | 0.00 | 0.00 |
| ATOM | 4812 | HD13 | LEU | X | 320 | 26.766 | 40.557 | 49.577 | 0.00 | 0.00 |
| ATOM | 4813 | CD2  | LEU | X | 320 | 24.381 | 40.846 | 47.122 | 0.00 | 0.00 |
| ATOM | 4814 | HD21 | LEU | X | 320 | 24.235 | 41.882 | 47.430 | 0.00 | 0.00 |
| ATOM | 4815 | HD22 | LEU | X | 320 | 24.846 | 40.962 | 46.143 | 0.00 | 0.00 |

|      |      |      |     |   |     |        |        |        |      |      |
|------|------|------|-----|---|-----|--------|--------|--------|------|------|
| ATOM | 4816 | HD23 | LEU | X | 320 | 23.418 | 40.345 | 47.030 | 0.00 | 0.00 |
| ATOM | 4817 | C    | LEU | X | 320 | 25.572 | 36.593 | 46.610 | 0.00 | 0.00 |
| ATOM | 4818 | O    | LEU | X | 320 | 25.720 | 35.567 | 47.310 | 0.00 | 0.00 |
| ATOM | 4819 | N    | GLN | X | 321 | 25.913 | 36.698 | 45.313 | 0.00 | 0.00 |
| ATOM | 4820 | H    | GLN | X | 321 | 25.686 | 37.580 | 44.877 | 0.00 | 0.00 |
| ATOM | 4821 | CA   | GLN | X | 321 | 26.449 | 35.573 | 44.563 | 0.00 | 0.00 |
| ATOM | 4822 | HA   | GLN | X | 321 | 26.393 | 34.659 | 45.154 | 0.00 | 0.00 |
| ATOM | 4823 | CB   | GLN | X | 321 | 25.632 | 35.264 | 43.278 | 0.00 | 0.00 |
| ATOM | 4824 | HB2  | GLN | X | 321 | 25.447 | 36.198 | 42.748 | 0.00 | 0.00 |
| ATOM | 4825 | HB3  | GLN | X | 321 | 26.354 | 34.703 | 42.685 | 0.00 | 0.00 |
| ATOM | 4826 | CG   | GLN | X | 321 | 24.218 | 34.700 | 43.566 | 0.00 | 0.00 |
| ATOM | 4827 | HG2  | GLN | X | 321 | 24.377 | 33.915 | 44.305 | 0.00 | 0.00 |
| ATOM | 4828 | HG3  | GLN | X | 321 | 23.619 | 35.336 | 44.217 | 0.00 | 0.00 |
| ATOM | 4829 | CD   | GLN | X | 321 | 23.488 | 33.861 | 42.543 | 0.00 | 0.00 |
| ATOM | 4830 | OE1  | GLN | X | 321 | 23.894 | 33.853 | 41.410 | 0.00 | 0.00 |
| ATOM | 4831 | NE2  | GLN | X | 321 | 22.422 | 33.223 | 42.854 | 0.00 | 0.00 |
| ATOM | 4832 | HE21 | GLN | X | 321 | 21.940 | 32.609 | 42.213 | 0.00 | 0.00 |
| ATOM | 4833 | HE22 | GLN | X | 321 | 22.322 | 33.067 | 43.847 | 0.00 | 0.00 |
| ATOM | 4834 | C    | GLN | X | 321 | 27.825 | 35.965 | 44.086 | 0.00 | 0.00 |
| ATOM | 4835 | O    | GLN | X | 321 | 27.990 | 36.758 | 43.239 | 0.00 | 0.00 |
| ATOM | 4836 | N    | VAL | X | 322 | 28.819 | 35.275 | 44.732 | 0.00 | 0.00 |
| ATOM | 4837 | H    | VAL | X | 322 | 28.571 | 34.621 | 45.462 | 0.00 | 0.00 |
| ATOM | 4838 | CA   | VAL | X | 322 | 30.252 | 35.614 | 44.574 | 0.00 | 0.00 |
| ATOM | 4839 | HA   | VAL | X | 322 | 30.396 | 36.339 | 43.772 | 0.00 | 0.00 |
| ATOM | 4840 | CB   | VAL | X | 322 | 30.622 | 36.324 | 45.935 | 0.00 | 0.00 |
| ATOM | 4841 | HB   | VAL | X | 322 | 30.733 | 35.669 | 46.799 | 0.00 | 0.00 |
| ATOM | 4842 | CG1  | VAL | X | 322 | 31.924 | 37.062 | 45.716 | 0.00 | 0.00 |
| ATOM | 4843 | HG11 | VAL | X | 322 | 31.854 | 37.860 | 44.977 | 0.00 | 0.00 |
| ATOM | 4844 | HG12 | VAL | X | 322 | 32.245 | 37.599 | 46.608 | 0.00 | 0.00 |
| ATOM | 4845 | HG13 | VAL | X | 322 | 32.739 | 36.382 | 45.469 | 0.00 | 0.00 |
| ATOM | 4846 | CG2  | VAL | X | 322 | 29.632 | 37.438 | 46.529 | 0.00 | 0.00 |
| ATOM | 4847 | HG21 | VAL | X | 322 | 29.300 | 38.041 | 45.684 | 0.00 | 0.00 |
| ATOM | 4848 | HG22 | VAL | X | 322 | 30.035 | 37.923 | 47.418 | 0.00 | 0.00 |
| ATOM | 4849 | HG23 | VAL | X | 322 | 28.751 | 36.959 | 46.957 | 0.00 | 0.00 |
| ATOM | 4850 | C    | VAL | X | 322 | 31.056 | 34.350 | 44.268 | 0.00 | 0.00 |
| ATOM | 4851 | O    | VAL | X | 322 | 30.754 | 33.226 | 44.810 | 0.00 | 0.00 |
| ATOM | 4852 | N    | LEU | X | 323 | 32.094 | 34.495 | 43.417 | 0.00 | 0.00 |
| ATOM | 4853 | H    | LEU | X | 323 | 32.143 | 35.389 | 42.950 | 0.00 | 0.00 |
| ATOM | 4854 | CA   | LEU | X | 323 | 33.210 | 33.501 | 43.144 | 0.00 | 0.00 |
| ATOM | 4855 | HA   | LEU | X | 323 | 32.929 | 32.539 | 43.574 | 0.00 | 0.00 |
| ATOM | 4856 | CB   | LEU | X | 323 | 33.375 | 33.304 | 41.632 | 0.00 | 0.00 |
| ATOM | 4857 | HB2  | LEU | X | 323 | 32.325 | 33.230 | 41.348 | 0.00 | 0.00 |
| ATOM | 4858 | HB3  | LEU | X | 323 | 33.792 | 34.229 | 41.236 | 0.00 | 0.00 |
| ATOM | 4859 | CG   | LEU | X | 323 | 34.150 | 32.026 | 41.095 | 0.00 | 0.00 |
| ATOM | 4860 | HG   | LEU | X | 323 | 34.103 | 31.212 | 41.820 | 0.00 | 0.00 |
| ATOM | 4861 | CD1  | LEU | X | 323 | 33.406 | 31.505 | 39.832 | 0.00 | 0.00 |
| ATOM | 4862 | HD11 | LEU | X | 323 | 32.473 | 30.984 | 40.046 | 0.00 | 0.00 |
| ATOM | 4863 | HD12 | LEU | X | 323 | 33.942 | 30.724 | 39.293 | 0.00 | 0.00 |
| ATOM | 4864 | HD13 | LEU | X | 323 | 33.168 | 32.250 | 39.073 | 0.00 | 0.00 |
| ATOM | 4865 | CD2  | LEU | X | 323 | 35.631 | 32.235 | 40.795 | 0.00 | 0.00 |
| ATOM | 4866 | HD21 | LEU | X | 323 | 35.684 | 32.594 | 39.767 | 0.00 | 0.00 |
| ATOM | 4867 | HD22 | LEU | X | 323 | 36.135 | 32.986 | 41.403 | 0.00 | 0.00 |
| ATOM | 4868 | HD23 | LEU | X | 323 | 36.153 | 31.278 | 40.830 | 0.00 | 0.00 |
| ATOM | 4869 | C    | LEU | X | 323 | 34.470 | 34.040 | 43.742 | 0.00 | 0.00 |
| ATOM | 4870 | O    | LEU | X | 323 | 34.652 | 35.288 | 43.552 | 0.00 | 0.00 |
| ATOM | 4871 | N    | VAL | X | 324 | 35.358 | 33.211 | 44.222 | 0.00 | 0.00 |
| ATOM | 4872 | H    | VAL | X | 324 | 35.158 | 32.227 | 44.112 | 0.00 | 0.00 |
| ATOM | 4873 | CA   | VAL | X | 324 | 36.666 | 33.529 | 44.833 | 0.00 | 0.00 |
| ATOM | 4874 | HA   | VAL | X | 324 | 37.045 | 34.429 | 44.350 | 0.00 | 0.00 |
| ATOM | 4875 | CB   | VAL | X | 324 | 36.576 | 33.842 | 46.360 | 0.00 | 0.00 |
| ATOM | 4876 | HB   | VAL | X | 324 | 37.598 | 33.897 | 46.736 | 0.00 | 0.00 |
| ATOM | 4877 | CG1  | VAL | X | 324 | 36.002 | 35.136 | 46.763 | 0.00 | 0.00 |
| ATOM | 4878 | HG11 | VAL | X | 324 | 34.976 | 35.091 | 46.399 | 0.00 | 0.00 |
| ATOM | 4879 | HG12 | VAL | X | 324 | 35.699 | 35.185 | 47.809 | 0.00 | 0.00 |
| ATOM | 4880 | HG13 | VAL | X | 324 | 36.396 | 36.041 | 46.302 | 0.00 | 0.00 |
| ATOM | 4881 | CG2  | VAL | X | 324 | 35.955 | 32.749 | 47.171 | 0.00 | 0.00 |
| ATOM | 4882 | HG21 | VAL | X | 324 | 36.170 | 31.811 | 46.660 | 0.00 | 0.00 |

|      |      |      |     |   |     |        |        |        |      |      |
|------|------|------|-----|---|-----|--------|--------|--------|------|------|
| ATOM | 4883 | HG22 | VAL | X | 324 | 34.872 | 32.840 | 47.091 | 0.00 | 0.00 |
| ATOM | 4884 | HG23 | VAL | X | 324 | 36.257 | 32.713 | 48.217 | 0.00 | 0.00 |
| ATOM | 4885 | C    | VAL | X | 324 | 37.556 | 32.359 | 44.588 | 0.00 | 0.00 |
| ATOM | 4886 | O    | VAL | X | 324 | 37.095 | 31.281 | 44.228 | 0.00 | 0.00 |
| ATOM | 4887 | N    | GLY | X | 325 | 38.873 | 32.558 | 44.841 | 0.00 | 0.00 |
| ATOM | 4888 | H    | GLY | X | 325 | 39.109 | 33.472 | 45.200 | 0.00 | 0.00 |
| ATOM | 4889 | CA   | GLY | X | 325 | 39.919 | 31.489 | 44.712 | 0.00 | 0.00 |
| ATOM | 4890 | HA2  | GLY | X | 325 | 39.986 | 30.845 | 45.590 | 0.00 | 0.00 |
| ATOM | 4891 | HA3  | GLY | X | 325 | 39.621 | 30.832 | 43.895 | 0.00 | 0.00 |
| ATOM | 4892 | C    | GLY | X | 325 | 41.245 | 32.034 | 44.401 | 0.00 | 0.00 |
| ATOM | 4893 | O    | GLY | X | 325 | 41.410 | 33.234 | 44.254 | 0.00 | 0.00 |
| ATOM | 4894 | N    | VAL | X | 326 | 42.270 | 31.198 | 44.439 | 0.00 | 0.00 |
| ATOM | 4895 | H    | VAL | X | 326 | 42.089 | 30.205 | 44.405 | 0.00 | 0.00 |
| ATOM | 4896 | CA   | VAL | X | 326 | 43.719 | 31.550 | 44.337 | 0.00 | 0.00 |
| ATOM | 4897 | HA   | VAL | X | 326 | 43.853 | 32.542 | 43.905 | 0.00 | 0.00 |
| ATOM | 4898 | CB   | VAL | X | 326 | 44.345 | 31.423 | 45.764 | 0.00 | 0.00 |
| ATOM | 4899 | HB   | VAL | X | 326 | 45.412 | 31.609 | 45.641 | 0.00 | 0.00 |
| ATOM | 4900 | CG1  | VAL | X | 326 | 43.811 | 32.563 | 46.647 | 0.00 | 0.00 |
| ATOM | 4901 | HG11 | VAL | X | 326 | 44.038 | 33.482 | 46.106 | 0.00 | 0.00 |
| ATOM | 4902 | HG12 | VAL | X | 326 | 42.752 | 32.380 | 46.829 | 0.00 | 0.00 |
| ATOM | 4903 | HG13 | VAL | X | 326 | 44.291 | 32.699 | 47.616 | 0.00 | 0.00 |
| ATOM | 4904 | CG2  | VAL | X | 326 | 44.051 | 30.045 | 46.363 | 0.00 | 0.00 |
| ATOM | 4905 | HG21 | VAL | X | 326 | 44.471 | 29.840 | 47.348 | 0.00 | 0.00 |
| ATOM | 4906 | HG22 | VAL | X | 326 | 44.565 | 29.285 | 45.775 | 0.00 | 0.00 |
| ATOM | 4907 | HG23 | VAL | X | 326 | 42.977 | 29.859 | 46.368 | 0.00 | 0.00 |
| ATOM | 4908 | C    | VAL | X | 326 | 44.467 | 30.596 | 43.343 | 0.00 | 0.00 |
| ATOM | 4909 | O    | VAL | X | 326 | 43.884 | 29.634 | 42.891 | 0.00 | 0.00 |
| ATOM | 4910 | N    | VAL | X | 327 | 45.799 | 30.788 | 43.119 | 0.00 | 0.00 |
| ATOM | 4911 | H    | VAL | X | 327 | 46.296 | 31.644 | 43.318 | 0.00 | 0.00 |
| ATOM | 4912 | CA   | VAL | X | 327 | 46.681 | 29.735 | 42.529 | 0.00 | 0.00 |
| ATOM | 4913 | HA   | VAL | X | 327 | 46.092 | 28.970 | 42.022 | 0.00 | 0.00 |
| ATOM | 4914 | CB   | VAL | X | 327 | 47.562 | 30.261 | 41.361 | 0.00 | 0.00 |
| ATOM | 4915 | HB   | VAL | X | 327 | 48.110 | 29.415 | 40.946 | 0.00 | 0.00 |
| ATOM | 4916 | CG1  | VAL | X | 327 | 46.957 | 30.931 | 40.134 | 0.00 | 0.00 |
| ATOM | 4917 | HG11 | VAL | X | 327 | 46.335 | 31.769 | 40.449 | 0.00 | 0.00 |
| ATOM | 4918 | HG12 | VAL | X | 327 | 47.685 | 31.272 | 39.398 | 0.00 | 0.00 |
| ATOM | 4919 | HG13 | VAL | X | 327 | 46.316 | 30.213 | 39.622 | 0.00 | 0.00 |
| ATOM | 4920 | CG2  | VAL | X | 327 | 48.616 | 31.272 | 41.966 | 0.00 | 0.00 |
| ATOM | 4921 | HG21 | VAL | X | 327 | 49.352 | 31.560 | 41.215 | 0.00 | 0.00 |
| ATOM | 4922 | HG22 | VAL | X | 327 | 49.104 | 30.907 | 42.869 | 0.00 | 0.00 |
| ATOM | 4923 | HG23 | VAL | X | 327 | 48.057 | 32.137 | 42.326 | 0.00 | 0.00 |
| ATOM | 4924 | C    | VAL | X | 327 | 47.558 | 28.976 | 43.543 | 0.00 | 0.00 |
| ATOM | 4925 | O    | VAL | X | 327 | 47.737 | 29.325 | 44.699 | 0.00 | 0.00 |
| ATOM | 4926 | N    | LYS | X | 328 | 48.054 | 27.800 | 43.153 | 0.00 | 0.00 |
| ATOM | 4927 | H    | LYS | X | 328 | 47.882 | 27.480 | 42.211 | 0.00 | 0.00 |
| ATOM | 4928 | CA   | LYS | X | 328 | 48.726 | 26.827 | 43.934 | 0.00 | 0.00 |
| ATOM | 4929 | HA   | LYS | X | 328 | 48.054 | 26.458 | 44.708 | 0.00 | 0.00 |
| ATOM | 4930 | CB   | LYS | X | 328 | 49.222 | 25.718 | 43.055 | 0.00 | 0.00 |
| ATOM | 4931 | HB2  | LYS | X | 328 | 48.314 | 25.278 | 42.644 | 0.00 | 0.00 |
| ATOM | 4932 | HB3  | LYS | X | 328 | 49.866 | 26.089 | 42.258 | 0.00 | 0.00 |
| ATOM | 4933 | CG   | LYS | X | 328 | 49.926 | 24.642 | 43.783 | 0.00 | 0.00 |
| ATOM | 4934 | HG2  | LYS | X | 328 | 50.874 | 24.960 | 44.217 | 0.00 | 0.00 |
| ATOM | 4935 | HG3  | LYS | X | 328 | 49.305 | 24.301 | 44.612 | 0.00 | 0.00 |
| ATOM | 4936 | CD   | LYS | X | 328 | 50.159 | 23.454 | 42.915 | 0.00 | 0.00 |
| ATOM | 4937 | HD2  | LYS | X | 328 | 50.523 | 22.626 | 43.523 | 0.00 | 0.00 |
| ATOM | 4938 | HD3  | LYS | X | 328 | 49.207 | 23.181 | 42.460 | 0.00 | 0.00 |
| ATOM | 4939 | CE   | LYS | X | 328 | 51.176 | 23.685 | 41.764 | 0.00 | 0.00 |
| ATOM | 4940 | HE2  | LYS | X | 328 | 51.106 | 22.754 | 41.202 | 0.00 | 0.00 |
| ATOM | 4941 | HE3  | LYS | X | 328 | 50.856 | 24.472 | 41.082 | 0.00 | 0.00 |
| ATOM | 4942 | NZ   | LYS | X | 328 | 52.573 | 23.960 | 42.234 | 0.00 | 0.00 |
| ATOM | 4943 | HZ1  | LYS | X | 328 | 52.615 | 24.926 | 42.525 | 0.00 | 0.00 |
| ATOM | 4944 | HZ2  | LYS | X | 328 | 52.907 | 23.414 | 43.015 | 0.00 | 0.00 |
| ATOM | 4945 | HZ3  | LYS | X | 328 | 53.286 | 24.020 | 41.522 | 0.00 | 0.00 |
| ATOM | 4946 | C    | LYS | X | 328 | 49.794 | 27.424 | 44.820 | 0.00 | 0.00 |
| ATOM | 4947 | O    | LYS | X | 328 | 49.768 | 27.061 | 46.013 | 0.00 | 0.00 |
| ATOM | 4948 | N    | ASP | X | 329 | 50.622 | 28.387 | 44.361 | 0.00 | 0.00 |
| ATOM | 4949 | H    | ASP | X | 329 | 50.451 | 28.559 | 43.380 | 0.00 | 0.00 |

|      |      |     |     |   |     |        |        |        |      |      |
|------|------|-----|-----|---|-----|--------|--------|--------|------|------|
| ATOM | 4950 | CA  | ASP | X | 329 | 51.774 | 28.876 | 45.044 | 0.00 | 0.00 |
| ATOM | 4951 | HA  | ASP | X | 329 | 51.898 | 28.304 | 45.963 | 0.00 | 0.00 |
| ATOM | 4952 | CB  | ASP | X | 329 | 53.036 | 28.557 | 44.167 | 0.00 | 0.00 |
| ATOM | 4953 | HB2 | ASP | X | 329 | 53.068 | 29.126 | 43.238 | 0.00 | 0.00 |
| ATOM | 4954 | HB3 | ASP | X | 329 | 53.966 | 28.820 | 44.671 | 0.00 | 0.00 |
| ATOM | 4955 | CG  | ASP | X | 329 | 53.113 | 27.082 | 43.705 | 0.00 | 0.00 |
| ATOM | 4956 | OD1 | ASP | X | 329 | 53.760 | 26.182 | 44.376 | 0.00 | 0.00 |
| ATOM | 4957 | OD2 | ASP | X | 329 | 52.553 | 26.774 | 42.652 | 0.00 | 0.00 |
| ATOM | 4958 | C   | ASP | X | 329 | 51.716 | 30.364 | 45.350 | 0.00 | 0.00 |
| ATOM | 4959 | O   | ASP | X | 329 | 52.329 | 30.797 | 46.332 | 0.00 | 0.00 |
| ATOM | 4960 | N   | GLU | X | 330 | 51.108 | 31.264 | 44.531 | 0.00 | 0.00 |
| ATOM | 4961 | H   | GLU | X | 330 | 50.880 | 30.939 | 43.603 | 0.00 | 0.00 |
| ATOM | 4962 | CA  | GLU | X | 330 | 50.739 | 32.654 | 44.888 | 0.00 | 0.00 |
| ATOM | 4963 | HA  | GLU | X | 330 | 50.253 | 33.053 | 43.997 | 0.00 | 0.00 |
| ATOM | 4964 | CB  | GLU | X | 330 | 49.739 | 32.655 | 46.102 | 0.00 | 0.00 |
| ATOM | 4965 | HB2 | GLU | X | 330 | 49.992 | 31.829 | 46.766 | 0.00 | 0.00 |
| ATOM | 4966 | HB3 | GLU | X | 330 | 49.811 | 33.622 | 46.600 | 0.00 | 0.00 |
| ATOM | 4967 | CG  | GLU | X | 330 | 48.282 | 32.478 | 45.775 | 0.00 | 0.00 |
| ATOM | 4968 | HG2 | GLU | X | 330 | 48.134 | 31.561 | 45.206 | 0.00 | 0.00 |
| ATOM | 4969 | HG3 | GLU | X | 330 | 47.869 | 32.324 | 46.772 | 0.00 | 0.00 |
| ATOM | 4970 | CD  | GLU | X | 330 | 47.605 | 33.567 | 45.076 | 0.00 | 0.00 |
| ATOM | 4971 | OE1 | GLU | X | 330 | 47.903 | 34.780 | 45.256 | 0.00 | 0.00 |
| ATOM | 4972 | OE2 | GLU | X | 330 | 46.815 | 33.186 | 44.201 | 0.00 | 0.00 |
| ATOM | 4973 | C   | GLU | X | 330 | 52.026 | 33.481 | 45.210 | 0.00 | 0.00 |
| ATOM | 4974 | O   | GLU | X | 330 | 52.606 | 34.054 | 44.247 | 0.00 | 0.00 |
| ATOM | 4975 | N   | GLY | X | 331 | 52.439 | 33.621 | 46.501 | 0.00 | 0.00 |
| ATOM | 4976 | H   | GLY | X | 331 | 52.087 | 32.920 | 47.137 | 0.00 | 0.00 |
| ATOM | 4977 | CA  | GLY | X | 331 | 53.506 | 34.480 | 47.000 | 0.00 | 0.00 |
| ATOM | 4978 | HA2 | GLY | X | 331 | 53.311 | 35.509 | 46.700 | 0.00 | 0.00 |
| ATOM | 4979 | HA3 | GLY | X | 331 | 53.417 | 34.407 | 48.084 | 0.00 | 0.00 |
| ATOM | 4980 | C   | GLY | X | 331 | 54.942 | 34.098 | 46.566 | 0.00 | 0.00 |
| ATOM | 4981 | O   | GLY | X | 331 | 55.921 | 34.744 | 46.959 | 0.00 | 0.00 |
| ATOM | 4982 | N   | SER | X | 332 | 55.114 | 33.110 | 45.752 | 0.00 | 0.00 |
| ATOM | 4983 | H   | SER | X | 332 | 54.292 | 32.630 | 45.416 | 0.00 | 0.00 |
| ATOM | 4984 | CA  | SER | X | 332 | 56.321 | 32.844 | 44.972 | 0.00 | 0.00 |
| ATOM | 4985 | HA  | SER | X | 332 | 57.185 | 32.912 | 45.633 | 0.00 | 0.00 |
| ATOM | 4986 | CB  | SER | X | 332 | 56.129 | 31.413 | 44.345 | 0.00 | 0.00 |
| ATOM | 4987 | HB2 | SER | X | 332 | 57.033 | 30.978 | 43.918 | 0.00 | 0.00 |
| ATOM | 4988 | HB3 | SER | X | 332 | 55.910 | 30.677 | 45.118 | 0.00 | 0.00 |
| ATOM | 4989 | OG  | SER | X | 332 | 55.024 | 31.343 | 43.501 | 0.00 | 0.00 |
| ATOM | 4990 | HG  | SER | X | 332 | 55.119 | 30.575 | 42.933 | 0.00 | 0.00 |
| ATOM | 4991 | C   | SER | X | 332 | 56.520 | 33.865 | 43.761 | 0.00 | 0.00 |
| ATOM | 4992 | O   | SER | X | 332 | 57.621 | 34.158 | 43.445 | 0.00 | 0.00 |
| ATOM | 4993 | N   | TYR | X | 333 | 55.415 | 34.491 | 43.318 | 0.00 | 0.00 |
| ATOM | 4994 | H   | TYR | X | 333 | 54.494 | 34.273 | 43.669 | 0.00 | 0.00 |
| ATOM | 4995 | CA  | TYR | X | 333 | 55.524 | 35.649 | 42.422 | 0.00 | 0.00 |
| ATOM | 4996 | HA  | TYR | X | 333 | 56.079 | 35.383 | 41.522 | 0.00 | 0.00 |
| ATOM | 4997 | CB  | TYR | X | 333 | 54.066 | 36.069 | 42.073 | 0.00 | 0.00 |
| ATOM | 4998 | HB2 | TYR | X | 333 | 53.644 | 35.322 | 41.400 | 0.00 | 0.00 |
| ATOM | 4999 | HB3 | TYR | X | 333 | 53.443 | 36.071 | 42.967 | 0.00 | 0.00 |
| ATOM | 5000 | CG  | TYR | X | 333 | 54.059 | 37.378 | 41.311 | 0.00 | 0.00 |
| ATOM | 5001 | CD1 | TYR | X | 333 | 54.739 | 37.445 | 40.145 | 0.00 | 0.00 |
| ATOM | 5002 | HD1 | TYR | X | 333 | 55.272 | 36.603 | 39.729 | 0.00 | 0.00 |
| ATOM | 5003 | CE1 | TYR | X | 333 | 54.629 | 38.597 | 39.323 | 0.00 | 0.00 |
| ATOM | 5004 | HE1 | TYR | X | 333 | 55.208 | 38.606 | 38.412 | 0.00 | 0.00 |
| ATOM | 5005 | CZ  | TYR | X | 333 | 53.774 | 39.718 | 39.601 | 0.00 | 0.00 |
| ATOM | 5006 | OH  | TYR | X | 333 | 53.483 | 40.735 | 38.761 | 0.00 | 0.00 |
| ATOM | 5007 | HH  | TYR | X | 333 | 53.997 | 40.789 | 37.952 | 0.00 | 0.00 |
| ATOM | 5008 | CE2 | TYR | X | 333 | 53.148 | 39.663 | 40.833 | 0.00 | 0.00 |
| ATOM | 5009 | HE2 | TYR | X | 333 | 52.549 | 40.470 | 41.229 | 0.00 | 0.00 |
| ATOM | 5010 | CD2 | TYR | X | 333 | 53.294 | 38.498 | 41.668 | 0.00 | 0.00 |
| ATOM | 5011 | HD2 | TYR | X | 333 | 52.923 | 38.432 | 42.680 | 0.00 | 0.00 |
| ATOM | 5012 | C   | TYR | X | 333 | 56.264 | 36.821 | 43.149 | 0.00 | 0.00 |
| ATOM | 5013 | O   | TYR | X | 333 | 56.994 | 37.545 | 42.455 | 0.00 | 0.00 |
| ATOM | 5014 | N   | PHE | X | 334 | 56.133 | 37.058 | 44.437 | 0.00 | 0.00 |
| ATOM | 5015 | H   | PHE | X | 334 | 55.730 | 36.321 | 44.996 | 0.00 | 0.00 |
| ATOM | 5016 | CA  | PHE | X | 334 | 56.687 | 38.232 | 45.086 | 0.00 | 0.00 |

|      |      |      |     |   |     |        |        |        |      |      |
|------|------|------|-----|---|-----|--------|--------|--------|------|------|
| ATOM | 5017 | HA   | PHE | X | 334 | 56.697 | 39.040 | 44.355 | 0.00 | 0.00 |
| ATOM | 5018 | CB   | PHE | X | 334 | 55.582 | 38.720 | 46.035 | 0.00 | 0.00 |
| ATOM | 5019 | HB2  | PHE | X | 334 | 55.127 | 37.857 | 46.522 | 0.00 | 0.00 |
| ATOM | 5020 | HB3  | PHE | X | 334 | 56.014 | 39.391 | 46.777 | 0.00 | 0.00 |
| ATOM | 5021 | CG   | PHE | X | 334 | 54.412 | 39.418 | 45.383 | 0.00 | 0.00 |
| ATOM | 5022 | CD1  | PHE | X | 334 | 53.090 | 38.807 | 45.334 | 0.00 | 0.00 |
| ATOM | 5023 | HD1  | PHE | X | 334 | 52.885 | 37.796 | 45.654 | 0.00 | 0.00 |
| ATOM | 5024 | CE1  | PHE | X | 334 | 52.033 | 39.506 | 44.710 | 0.00 | 0.00 |
| ATOM | 5025 | HE1  | PHE | X | 334 | 51.073 | 39.017 | 44.636 | 0.00 | 0.00 |
| ATOM | 5026 | CZ   | PHE | X | 334 | 52.179 | 40.799 | 44.272 | 0.00 | 0.00 |
| ATOM | 5027 | HZ   | PHE | X | 334 | 51.333 | 41.341 | 43.877 | 0.00 | 0.00 |
| ATOM | 5028 | CE2  | PHE | X | 334 | 53.448 | 41.398 | 44.343 | 0.00 | 0.00 |
| ATOM | 5029 | HE2  | PHE | X | 334 | 53.621 | 42.433 | 44.088 | 0.00 | 0.00 |
| ATOM | 5030 | CD2  | PHE | X | 334 | 54.549 | 40.695 | 44.879 | 0.00 | 0.00 |
| ATOM | 5031 | HD2  | PHE | X | 334 | 55.548 | 41.102 | 44.929 | 0.00 | 0.00 |
| ATOM | 5032 | C    | PHE | X | 334 | 58.017 | 38.155 | 45.701 | 0.00 | 0.00 |
| ATOM | 5033 | O    | PHE | X | 334 | 58.643 | 39.218 | 46.012 | 0.00 | 0.00 |
| ATOM | 5034 | N    | LEU | X | 335 | 58.687 | 36.998 | 45.788 | 0.00 | 0.00 |
| ATOM | 5035 | H    | LEU | X | 335 | 58.262 | 36.130 | 45.496 | 0.00 | 0.00 |
| ATOM | 5036 | CA   | LEU | X | 335 | 60.033 | 36.926 | 46.353 | 0.00 | 0.00 |
| ATOM | 5037 | HA   | LEU | X | 335 | 60.075 | 37.345 | 47.359 | 0.00 | 0.00 |
| ATOM | 5038 | CB   | LEU | X | 335 | 60.631 | 35.514 | 46.433 | 0.00 | 0.00 |
| ATOM | 5039 | HB2  | LEU | X | 335 | 60.891 | 34.978 | 45.520 | 0.00 | 0.00 |
| ATOM | 5040 | HB3  | LEU | X | 335 | 61.504 | 35.590 | 47.081 | 0.00 | 0.00 |
| ATOM | 5041 | CG   | LEU | X | 335 | 59.545 | 34.581 | 47.122 | 0.00 | 0.00 |
| ATOM | 5042 | HG   | LEU | X | 335 | 58.793 | 34.210 | 46.426 | 0.00 | 0.00 |
| ATOM | 5043 | CD1  | LEU | X | 335 | 60.309 | 33.404 | 47.720 | 0.00 | 0.00 |
| ATOM | 5044 | HD11 | LEU | X | 335 | 59.517 | 32.781 | 48.135 | 0.00 | 0.00 |
| ATOM | 5045 | HD12 | LEU | X | 335 | 60.939 | 33.611 | 48.584 | 0.00 | 0.00 |
| ATOM | 5046 | HD13 | LEU | X | 335 | 60.804 | 32.894 | 46.893 | 0.00 | 0.00 |
| ATOM | 5047 | CD2  | LEU | X | 335 | 58.916 | 35.131 | 48.367 | 0.00 | 0.00 |
| ATOM | 5048 | HD21 | LEU | X | 335 | 58.381 | 34.342 | 48.896 | 0.00 | 0.00 |
| ATOM | 5049 | HD22 | LEU | X | 335 | 59.674 | 35.439 | 49.088 | 0.00 | 0.00 |
| ATOM | 5050 | HD23 | LEU | X | 335 | 58.153 | 35.862 | 48.100 | 0.00 | 0.00 |
| ATOM | 5051 | C    | LEU | X | 335 | 61.126 | 37.704 | 45.606 | 0.00 | 0.00 |
| ATOM | 5052 | O    | LEU | X | 335 | 61.889 | 38.395 | 46.326 | 0.00 | 0.00 |
| ATOM | 5053 | N    | VAL | X | 336 | 61.267 | 37.608 | 44.284 | 0.00 | 0.00 |
| ATOM | 5054 | H    | VAL | X | 336 | 60.691 | 36.949 | 43.779 | 0.00 | 0.00 |
| ATOM | 5055 | CA   | VAL | X | 336 | 62.230 | 38.385 | 43.558 | 0.00 | 0.00 |
| ATOM | 5056 | HA   | VAL | X | 336 | 63.226 | 38.192 | 43.957 | 0.00 | 0.00 |
| ATOM | 5057 | CB   | VAL | X | 336 | 62.387 | 37.851 | 42.104 | 0.00 | 0.00 |
| ATOM | 5058 | HB   | VAL | X | 336 | 63.223 | 38.366 | 41.631 | 0.00 | 0.00 |
| ATOM | 5059 | CG1  | VAL | X | 336 | 62.827 | 36.318 | 42.026 | 0.00 | 0.00 |
| ATOM | 5060 | HG11 | VAL | X | 336 | 62.044 | 35.654 | 42.391 | 0.00 | 0.00 |
| ATOM | 5061 | HG12 | VAL | X | 336 | 63.021 | 35.979 | 41.008 | 0.00 | 0.00 |
| ATOM | 5062 | HG13 | VAL | X | 336 | 63.726 | 36.138 | 42.616 | 0.00 | 0.00 |
| ATOM | 5063 | CG2  | VAL | X | 336 | 61.137 | 38.059 | 41.188 | 0.00 | 0.00 |
| ATOM | 5064 | HG21 | VAL | X | 336 | 60.868 | 39.103 | 41.027 | 0.00 | 0.00 |
| ATOM | 5065 | HG22 | VAL | X | 336 | 60.239 | 37.517 | 41.484 | 0.00 | 0.00 |
| ATOM | 5066 | HG23 | VAL | X | 336 | 61.447 | 37.789 | 40.178 | 0.00 | 0.00 |
| ATOM | 5067 | C    | VAL | X | 336 | 62.005 | 39.911 | 43.576 | 0.00 | 0.00 |
| ATOM | 5068 | O    | VAL | X | 336 | 62.744 | 40.685 | 42.929 | 0.00 | 0.00 |
| ATOM | 5069 | N    | TYR | X | 337 | 60.980 | 40.369 | 44.357 | 0.00 | 0.00 |
| ATOM | 5070 | H    | TYR | X | 337 | 60.478 | 39.757 | 44.985 | 0.00 | 0.00 |
| ATOM | 5071 | CA   | TYR | X | 337 | 60.681 | 41.821 | 44.451 | 0.00 | 0.00 |
| ATOM | 5072 | HA   | TYR | X | 337 | 61.504 | 42.437 | 44.090 | 0.00 | 0.00 |
| ATOM | 5073 | CB   | TYR | X | 337 | 59.425 | 42.172 | 43.663 | 0.00 | 0.00 |
| ATOM | 5074 | HB2  | TYR | X | 337 | 58.563 | 41.558 | 43.923 | 0.00 | 0.00 |
| ATOM | 5075 | HB3  | TYR | X | 337 | 59.216 | 43.200 | 43.957 | 0.00 | 0.00 |
| ATOM | 5076 | CG   | TYR | X | 337 | 59.593 | 42.200 | 42.144 | 0.00 | 0.00 |
| ATOM | 5077 | CD1  | TYR | X | 337 | 60.253 | 43.261 | 41.519 | 0.00 | 0.00 |
| ATOM | 5078 | HD1  | TYR | X | 337 | 60.641 | 44.082 | 42.103 | 0.00 | 0.00 |
| ATOM | 5079 | CE1  | TYR | X | 337 | 60.242 | 43.361 | 40.133 | 0.00 | 0.00 |
| ATOM | 5080 | HE1  | TYR | X | 337 | 60.806 | 44.185 | 39.721 | 0.00 | 0.00 |
| ATOM | 5081 | CZ   | TYR | X | 337 | 59.505 | 42.439 | 39.312 | 0.00 | 0.00 |
| ATOM | 5082 | OH   | TYR | X | 337 | 59.489 | 42.672 | 37.948 | 0.00 | 0.00 |
| ATOM | 5083 | HH   | TYR | X | 337 | 59.511 | 43.618 | 37.782 | 0.00 | 0.00 |

|      |      |     |     |   |     |        |        |        |      |      |
|------|------|-----|-----|---|-----|--------|--------|--------|------|------|
| ATOM | 5084 | CE2 | TYR | X | 337 | 59.059 | 41.252 | 39.979 | 0.00 | 0.00 |
| ATOM | 5085 | HE2 | TYR | X | 337 | 58.561 | 40.506 | 39.376 | 0.00 | 0.00 |
| ATOM | 5086 | CD2 | TYR | X | 337 | 59.010 | 41.177 | 41.349 | 0.00 | 0.00 |
| ATOM | 5087 | HD2 | TYR | X | 337 | 58.478 | 40.391 | 41.863 | 0.00 | 0.00 |
| ATOM | 5088 | C   | TYR | X | 337 | 60.627 | 42.240 | 45.964 | 0.00 | 0.00 |
| ATOM | 5089 | O   | TYR | X | 337 | 60.378 | 43.463 | 46.150 | 0.00 | 0.00 |
| ATOM | 5090 | N   | GLY | X | 338 | 60.956 | 41.347 | 46.954 | 0.00 | 0.00 |
| ATOM | 5091 | H   | GLY | X | 338 | 61.159 | 40.370 | 46.803 | 0.00 | 0.00 |
| ATOM | 5092 | CA  | GLY | X | 338 | 61.395 | 41.955 | 48.214 | 0.00 | 0.00 |
| ATOM | 5093 | HA2 | GLY | X | 338 | 62.029 | 42.814 | 47.999 | 0.00 | 0.00 |
| ATOM | 5094 | HA3 | GLY | X | 338 | 60.561 | 42.456 | 48.706 | 0.00 | 0.00 |
| ATOM | 5095 | C   | GLY | X | 338 | 62.251 | 41.068 | 49.146 | 0.00 | 0.00 |
| ATOM | 5096 | O   | GLY | X | 338 | 62.659 | 41.624 | 50.146 | 0.00 | 0.00 |
| ATOM | 5097 | N   | ALA | X | 339 | 62.355 | 39.736 | 48.898 | 0.00 | 0.00 |
| ATOM | 5098 | H   | ALA | X | 339 | 61.927 | 39.338 | 48.074 | 0.00 | 0.00 |
| ATOM | 5099 | CA  | ALA | X | 339 | 63.174 | 38.872 | 49.784 | 0.00 | 0.00 |
| ATOM | 5100 | HA  | ALA | X | 339 | 63.002 | 39.171 | 50.818 | 0.00 | 0.00 |
| ATOM | 5101 | CB  | ALA | X | 339 | 62.628 | 37.441 | 49.660 | 0.00 | 0.00 |
| ATOM | 5102 | HB1 | ALA | X | 339 | 61.579 | 37.424 | 49.366 | 0.00 | 0.00 |
| ATOM | 5103 | HB2 | ALA | X | 339 | 62.781 | 36.938 | 50.615 | 0.00 | 0.00 |
| ATOM | 5104 | HB3 | ALA | X | 339 | 63.186 | 36.970 | 48.851 | 0.00 | 0.00 |
| ATOM | 5105 | C   | ALA | X | 339 | 64.637 | 39.120 | 49.584 | 0.00 | 0.00 |
| ATOM | 5106 | O   | ALA | X | 339 | 65.143 | 39.521 | 48.535 | 0.00 | 0.00 |
| ATOM | 5107 | N   | PRO | X | 340 | 65.416 | 38.949 | 50.678 | 0.00 | 0.00 |
| ATOM | 5108 | CD  | PRO | X | 340 | 65.025 | 38.284 | 51.949 | 0.00 | 0.00 |
| ATOM | 5109 | HD2 | PRO | X | 340 | 64.811 | 37.266 | 51.622 | 0.00 | 0.00 |
| ATOM | 5110 | HD3 | PRO | X | 340 | 64.175 | 38.763 | 52.435 | 0.00 | 0.00 |
| ATOM | 5111 | CG  | PRO | X | 340 | 66.250 | 38.316 | 52.921 | 0.00 | 0.00 |
| ATOM | 5112 | HG2 | PRO | X | 340 | 66.835 | 37.401 | 52.826 | 0.00 | 0.00 |
| ATOM | 5113 | HG3 | PRO | X | 340 | 66.054 | 38.710 | 53.918 | 0.00 | 0.00 |
| ATOM | 5114 | CB  | PRO | X | 340 | 67.167 | 39.345 | 52.202 | 0.00 | 0.00 |
| ATOM | 5115 | HB2 | PRO | X | 340 | 68.216 | 39.055 | 52.270 | 0.00 | 0.00 |
| ATOM | 5116 | HB3 | PRO | X | 340 | 67.082 | 40.337 | 52.646 | 0.00 | 0.00 |
| ATOM | 5117 | CA  | PRO | X | 340 | 66.828 | 39.352 | 50.740 | 0.00 | 0.00 |
| ATOM | 5118 | HA  | PRO | X | 340 | 66.970 | 40.342 | 50.306 | 0.00 | 0.00 |
| ATOM | 5119 | C   | PRO | X | 340 | 67.676 | 38.478 | 49.797 | 0.00 | 0.00 |
| ATOM | 5120 | O   | PRO | X | 340 | 67.717 | 37.249 | 49.983 | 0.00 | 0.00 |
| ATOM | 5121 | N   | GLY | X | 341 | 68.310 | 39.112 | 48.764 | 0.00 | 0.00 |
| ATOM | 5122 | H   | GLY | X | 341 | 68.113 | 40.086 | 48.586 | 0.00 | 0.00 |
| ATOM | 5123 | CA  | GLY | X | 341 | 69.220 | 38.349 | 47.844 | 0.00 | 0.00 |
| ATOM | 5124 | HA2 | GLY | X | 341 | 69.943 | 39.027 | 47.389 | 0.00 | 0.00 |
| ATOM | 5125 | HA3 | GLY | X | 341 | 69.694 | 37.532 | 48.387 | 0.00 | 0.00 |
| ATOM | 5126 | C   | GLY | X | 341 | 68.514 | 37.638 | 46.706 | 0.00 | 0.00 |
| ATOM | 5127 | O   | GLY | X | 341 | 69.157 | 37.012 | 45.853 | 0.00 | 0.00 |
| ATOM | 5128 | N   | PHE | X | 342 | 67.152 | 37.724 | 46.612 | 0.00 | 0.00 |
| ATOM | 5129 | H   | PHE | X | 342 | 66.525 | 38.163 | 47.271 | 0.00 | 0.00 |
| ATOM | 5130 | CA  | PHE | X | 342 | 66.433 | 37.186 | 45.469 | 0.00 | 0.00 |
| ATOM | 5131 | HA  | PHE | X | 342 | 66.924 | 36.251 | 45.198 | 0.00 | 0.00 |
| ATOM | 5132 | CB  | PHE | X | 342 | 64.952 | 36.856 | 45.864 | 0.00 | 0.00 |
| ATOM | 5133 | HB2 | PHE | X | 342 | 64.452 | 37.598 | 46.486 | 0.00 | 0.00 |
| ATOM | 5134 | HB3 | PHE | X | 342 | 64.362 | 36.778 | 44.951 | 0.00 | 0.00 |
| ATOM | 5135 | CG  | PHE | X | 342 | 64.866 | 35.497 | 46.625 | 0.00 | 0.00 |
| ATOM | 5136 | CD1 | PHE | X | 342 | 64.411 | 34.335 | 45.998 | 0.00 | 0.00 |
| ATOM | 5137 | HD1 | PHE | X | 342 | 64.144 | 34.381 | 44.952 | 0.00 | 0.00 |
| ATOM | 5138 | CE1 | PHE | X | 342 | 64.193 | 33.194 | 46.829 | 0.00 | 0.00 |
| ATOM | 5139 | HE1 | PHE | X | 342 | 63.697 | 32.299 | 46.486 | 0.00 | 0.00 |
| ATOM | 5140 | CZ  | PHE | X | 342 | 64.689 | 33.170 | 48.157 | 0.00 | 0.00 |
| ATOM | 5141 | HZ  | PHE | X | 342 | 64.472 | 32.329 | 48.799 | 0.00 | 0.00 |
| ATOM | 5142 | CE2 | PHE | X | 342 | 65.373 | 34.283 | 48.675 | 0.00 | 0.00 |
| ATOM | 5143 | HE2 | PHE | X | 342 | 65.628 | 34.222 | 49.722 | 0.00 | 0.00 |
| ATOM | 5144 | CD2 | PHE | X | 342 | 65.319 | 35.442 | 47.923 | 0.00 | 0.00 |
| ATOM | 5145 | HD2 | PHE | X | 342 | 65.695 | 36.347 | 48.377 | 0.00 | 0.00 |
| ATOM | 5146 | C   | PHE | X | 342 | 66.454 | 38.029 | 44.197 | 0.00 | 0.00 |
| ATOM | 5147 | O   | PHE | X | 342 | 66.213 | 39.199 | 44.189 | 0.00 | 0.00 |
| ATOM | 5148 | N   | SER | X | 343 | 66.331 | 37.377 | 43.055 | 0.00 | 0.00 |
| ATOM | 5149 | H   | SER | X | 343 | 66.415 | 36.371 | 43.030 | 0.00 | 0.00 |
| ATOM | 5150 | CA  | SER | X | 343 | 66.174 | 37.910 | 41.690 | 0.00 | 0.00 |

|      |      |      |     |   |     |        |        |        |      |      |
|------|------|------|-----|---|-----|--------|--------|--------|------|------|
| ATOM | 5151 | HA   | SER | X | 343 | 65.395 | 38.669 | 41.752 | 0.00 | 0.00 |
| ATOM | 5152 | CB   | SER | X | 343 | 67.468 | 38.616 | 41.219 | 0.00 | 0.00 |
| ATOM | 5153 | HB2  | SER | X | 343 | 67.192 | 39.263 | 40.387 | 0.00 | 0.00 |
| ATOM | 5154 | HB3  | SER | X | 343 | 67.930 | 39.254 | 41.973 | 0.00 | 0.00 |
| ATOM | 5155 | OG   | SER | X | 343 | 68.499 | 37.819 | 40.817 | 0.00 | 0.00 |
| ATOM | 5156 | HG   | SER | X | 343 | 68.914 | 38.207 | 40.042 | 0.00 | 0.00 |
| ATOM | 5157 | C    | SER | X | 343 | 65.764 | 36.830 | 40.684 | 0.00 | 0.00 |
| ATOM | 5158 | O    | SER | X | 343 | 65.905 | 35.628 | 41.022 | 0.00 | 0.00 |
| ATOM | 5159 | N    | LYS | X | 344 | 65.259 | 37.231 | 39.516 | 0.00 | 0.00 |
| ATOM | 5160 | H    | LYS | X | 344 | 65.113 | 38.220 | 39.369 | 0.00 | 0.00 |
| ATOM | 5161 | CA   | LYS | X | 344 | 64.566 | 36.313 | 38.598 | 0.00 | 0.00 |
| ATOM | 5162 | HA   | LYS | X | 344 | 63.654 | 35.961 | 39.080 | 0.00 | 0.00 |
| ATOM | 5163 | CB   | LYS | X | 344 | 63.979 | 37.029 | 37.400 | 0.00 | 0.00 |
| ATOM | 5164 | HB2  | LYS | X | 344 | 63.544 | 36.310 | 36.706 | 0.00 | 0.00 |
| ATOM | 5165 | HB3  | LYS | X | 344 | 63.279 | 37.807 | 37.704 | 0.00 | 0.00 |
| ATOM | 5166 | CG   | LYS | X | 344 | 64.974 | 37.744 | 36.452 | 0.00 | 0.00 |
| ATOM | 5167 | HG2  | LYS | X | 344 | 65.346 | 38.621 | 36.981 | 0.00 | 0.00 |
| ATOM | 5168 | HG3  | LYS | X | 344 | 65.830 | 37.099 | 36.254 | 0.00 | 0.00 |
| ATOM | 5169 | CD   | LYS | X | 344 | 64.310 | 38.121 | 35.123 | 0.00 | 0.00 |
| ATOM | 5170 | HD2  | LYS | X | 344 | 64.080 | 37.266 | 34.487 | 0.00 | 0.00 |
| ATOM | 5171 | HD3  | LYS | X | 344 | 63.376 | 38.651 | 35.307 | 0.00 | 0.00 |
| ATOM | 5172 | CE   | LYS | X | 344 | 65.319 | 39.000 | 34.279 | 0.00 | 0.00 |
| ATOM | 5173 | HE2  | LYS | X | 344 | 64.962 | 39.123 | 33.256 | 0.00 | 0.00 |
| ATOM | 5174 | HE3  | LYS | X | 344 | 65.403 | 39.998 | 34.708 | 0.00 | 0.00 |
| ATOM | 5175 | NZ   | LYS | X | 344 | 66.696 | 38.425 | 34.271 | 0.00 | 0.00 |
| ATOM | 5176 | HZ1  | LYS | X | 344 | 67.233 | 38.952 | 33.598 | 0.00 | 0.00 |
| ATOM | 5177 | HZ2  | LYS | X | 344 | 67.085 | 38.336 | 35.199 | 0.00 | 0.00 |
| ATOM | 5178 | HZ3  | LYS | X | 344 | 66.666 | 37.477 | 33.922 | 0.00 | 0.00 |
| ATOM | 5179 | C    | LYS | X | 344 | 65.328 | 35.099 | 38.109 | 0.00 | 0.00 |
| ATOM | 5180 | O    | LYS | X | 344 | 64.709 | 33.995 | 37.917 | 0.00 | 0.00 |
| ATOM | 5181 | N    | ASP | X | 345 | 66.658 | 35.263 | 37.947 | 0.00 | 0.00 |
| ATOM | 5182 | H    | ASP | X | 345 | 66.992 | 36.189 | 38.172 | 0.00 | 0.00 |
| ATOM | 5183 | CA   | ASP | X | 345 | 67.589 | 34.341 | 37.450 | 0.00 | 0.00 |
| ATOM | 5184 | HA   | ASP | X | 345 | 66.958 | 33.705 | 36.829 | 0.00 | 0.00 |
| ATOM | 5185 | CB   | ASP | X | 345 | 68.481 | 34.992 | 36.402 | 0.00 | 0.00 |
| ATOM | 5186 | HB2  | ASP | X | 345 | 68.680 | 34.241 | 35.637 | 0.00 | 0.00 |
| ATOM | 5187 | HB3  | ASP | X | 345 | 68.007 | 35.833 | 35.895 | 0.00 | 0.00 |
| ATOM | 5188 | CG   | ASP | X | 345 | 69.812 | 35.606 | 36.933 | 0.00 | 0.00 |
| ATOM | 5189 | OD1  | ASP | X | 345 | 69.790 | 36.512 | 37.719 | 0.00 | 0.00 |
| ATOM | 5190 | OD2  | ASP | X | 345 | 70.876 | 35.078 | 36.561 | 0.00 | 0.00 |
| ATOM | 5191 | C    | ASP | X | 345 | 68.399 | 33.655 | 38.554 | 0.00 | 0.00 |
| ATOM | 5192 | O    | ASP | X | 345 | 68.997 | 32.607 | 38.253 | 0.00 | 0.00 |
| ATOM | 5193 | N    | ASN | X | 346 | 68.478 | 34.176 | 39.786 | 0.00 | 0.00 |
| ATOM | 5194 | H    | ASN | X | 346 | 67.880 | 34.944 | 40.053 | 0.00 | 0.00 |
| ATOM | 5195 | CA   | ASN | X | 346 | 69.309 | 33.526 | 40.837 | 0.00 | 0.00 |
| ATOM | 5196 | HA   | ASN | X | 346 | 70.289 | 33.183 | 40.505 | 0.00 | 0.00 |
| ATOM | 5197 | CB   | ASN | X | 346 | 69.437 | 34.611 | 41.872 | 0.00 | 0.00 |
| ATOM | 5198 | HB2  | ASN | X | 346 | 69.914 | 35.514 | 41.490 | 0.00 | 0.00 |
| ATOM | 5199 | HB3  | ASN | X | 346 | 68.416 | 34.764 | 42.222 | 0.00 | 0.00 |
| ATOM | 5200 | CG   | ASN | X | 346 | 70.318 | 34.101 | 43.050 | 0.00 | 0.00 |
| ATOM | 5201 | OD1  | ASN | X | 346 | 70.822 | 32.986 | 43.027 | 0.00 | 0.00 |
| ATOM | 5202 | ND2  | ASN | X | 346 | 70.504 | 34.929 | 44.092 | 0.00 | 0.00 |
| ATOM | 5203 | HD21 | ASN | X | 346 | 70.580 | 34.468 | 44.987 | 0.00 | 0.00 |
| ATOM | 5204 | HD22 | ASN | X | 346 | 70.185 | 35.885 | 44.016 | 0.00 | 0.00 |
| ATOM | 5205 | C    | ASN | X | 346 | 68.496 | 32.306 | 41.386 | 0.00 | 0.00 |
| ATOM | 5206 | O    | ASN | X | 346 | 67.216 | 32.325 | 41.479 | 0.00 | 0.00 |
| ATOM | 5207 | N    | GLU | X | 347 | 69.191 | 31.210 | 41.681 | 0.00 | 0.00 |
| ATOM | 5208 | H    | GLU | X | 347 | 70.126 | 31.313 | 41.313 | 0.00 | 0.00 |
| ATOM | 5209 | CA   | GLU | X | 347 | 68.819 | 29.984 | 42.407 | 0.00 | 0.00 |
| ATOM | 5210 | HA   | GLU | X | 347 | 67.788 | 29.779 | 42.117 | 0.00 | 0.00 |
| ATOM | 5211 | CB   | GLU | X | 347 | 69.814 | 28.863 | 42.002 | 0.00 | 0.00 |
| ATOM | 5212 | HB2  | GLU | X | 347 | 70.200 | 29.060 | 41.002 | 0.00 | 0.00 |
| ATOM | 5213 | HB3  | GLU | X | 347 | 70.682 | 28.843 | 42.660 | 0.00 | 0.00 |
| ATOM | 5214 | CG   | GLU | X | 347 | 69.093 | 27.555 | 42.015 | 0.00 | 0.00 |
| ATOM | 5215 | HG2  | GLU | X | 347 | 69.167 | 27.145 | 43.022 | 0.00 | 0.00 |
| ATOM | 5216 | HG3  | GLU | X | 347 | 68.062 | 27.628 | 41.669 | 0.00 | 0.00 |
| ATOM | 5217 | CD   | GLU | X | 347 | 69.691 | 26.554 | 41.022 | 0.00 | 0.00 |



|      |      |      |     |   |     |        |        |        |      |      |
|------|------|------|-----|---|-----|--------|--------|--------|------|------|
| ATOM | 5218 | OE1  | GLU | X | 347 | 70.437 | 25.666 | 41.415 | 0.00 | 0.00 |
| ATOM | 5219 | OE2  | GLU | X | 347 | 69.437 | 26.650 | 39.804 | 0.00 | 0.00 |
| ATOM | 5220 | C    | GLU | X | 347 | 68.707 | 30.193 | 43.916 | 0.00 | 0.00 |
| ATOM | 5221 | O    | GLU | X | 347 | 68.061 | 29.415 | 44.529 | 0.00 | 0.00 |
| ATOM | 5222 | N    | SER | X | 348 | 69.198 | 31.270 | 44.532 | 0.00 | 0.00 |
| ATOM | 5223 | H    | SER | X | 348 | 69.668 | 31.952 | 43.953 | 0.00 | 0.00 |
| ATOM | 5224 | CA   | SER | X | 348 | 68.812 | 31.649 | 45.931 | 0.00 | 0.00 |
| ATOM | 5225 | HA   | SER | X | 348 | 69.639 | 32.207 | 46.371 | 0.00 | 0.00 |
| ATOM | 5226 | CB   | SER | X | 348 | 67.487 | 32.451 | 46.033 | 0.00 | 0.00 |
| ATOM | 5227 | HB2  | SER | X | 348 | 66.788 | 31.821 | 45.482 | 0.00 | 0.00 |
| ATOM | 5228 | HB3  | SER | X | 348 | 67.224 | 32.557 | 47.085 | 0.00 | 0.00 |
| ATOM | 5229 | OG   | SER | X | 348 | 67.826 | 33.741 | 45.443 | 0.00 | 0.00 |
| ATOM | 5230 | HG   | SER | X | 348 | 67.008 | 33.893 | 44.963 | 0.00 | 0.00 |
| ATOM | 5231 | C    | SER | X | 348 | 68.873 | 30.456 | 46.901 | 0.00 | 0.00 |
| ATOM | 5232 | O    | SER | X | 348 | 67.926 | 29.994 | 47.478 | 0.00 | 0.00 |
| ATOM | 5233 | N    | LEU | X | 349 | 70.097 | 30.017 | 47.236 | 0.00 | 0.00 |
| ATOM | 5234 | H    | LEU | X | 349 | 70.906 | 30.420 | 46.787 | 0.00 | 0.00 |
| ATOM | 5235 | CA   | LEU | X | 349 | 70.406 | 28.809 | 47.974 | 0.00 | 0.00 |
| ATOM | 5236 | HA   | LEU | X | 349 | 69.551 | 28.136 | 47.911 | 0.00 | 0.00 |
| ATOM | 5237 | CB   | LEU | X | 349 | 71.745 | 28.144 | 47.497 | 0.00 | 0.00 |
| ATOM | 5238 | HB2  | LEU | X | 349 | 72.607 | 28.775 | 47.717 | 0.00 | 0.00 |
| ATOM | 5239 | HB3  | LEU | X | 349 | 71.991 | 27.267 | 48.096 | 0.00 | 0.00 |
| ATOM | 5240 | CG   | LEU | X | 349 | 71.736 | 27.769 | 46.043 | 0.00 | 0.00 |
| ATOM | 5241 | HG   | LEU | X | 349 | 71.412 | 28.652 | 45.492 | 0.00 | 0.00 |
| ATOM | 5242 | CD1  | LEU | X | 349 | 73.108 | 27.260 | 45.499 | 0.00 | 0.00 |
| ATOM | 5243 | HD11 | LEU | X | 349 | 73.406 | 26.291 | 45.900 | 0.00 | 0.00 |
| ATOM | 5244 | HD12 | LEU | X | 349 | 73.848 | 28.033 | 45.708 | 0.00 | 0.00 |
| ATOM | 5245 | HD13 | LEU | X | 349 | 73.027 | 27.206 | 44.414 | 0.00 | 0.00 |
| ATOM | 5246 | CD2  | LEU | X | 349 | 70.713 | 26.782 | 45.779 | 0.00 | 0.00 |
| ATOM | 5247 | HD21 | LEU | X | 349 | 70.887 | 25.904 | 46.402 | 0.00 | 0.00 |
| ATOM | 5248 | HD22 | LEU | X | 349 | 69.742 | 27.257 | 45.922 | 0.00 | 0.00 |
| ATOM | 5249 | HD23 | LEU | X | 349 | 70.696 | 26.454 | 44.740 | 0.00 | 0.00 |
| ATOM | 5250 | C    | LEU | X | 349 | 70.489 | 29.196 | 49.455 | 0.00 | 0.00 |
| ATOM | 5251 | O    | LEU | X | 349 | 71.456 | 28.933 | 50.101 | 0.00 | 0.00 |
| ATOM | 5252 | N    | ILE | X | 350 | 69.475 | 29.877 | 49.963 | 0.00 | 0.00 |
| ATOM | 5253 | H    | ILE | X | 350 | 68.695 | 29.981 | 49.330 | 0.00 | 0.00 |
| ATOM | 5254 | CA   | ILE | X | 350 | 69.429 | 30.663 | 51.259 | 0.00 | 0.00 |
| ATOM | 5255 | HA   | ILE | X | 350 | 70.380 | 31.194 | 51.292 | 0.00 | 0.00 |
| ATOM | 5256 | CB   | ILE | X | 350 | 68.151 | 31.554 | 51.379 | 0.00 | 0.00 |
| ATOM | 5257 | HB   | ILE | X | 350 | 67.904 | 31.839 | 52.401 | 0.00 | 0.00 |
| ATOM | 5258 | CG2  | ILE | X | 350 | 68.280 | 32.763 | 50.380 | 0.00 | 0.00 |
| ATOM | 5259 | HG21 | ILE | X | 350 | 67.392 | 33.365 | 50.570 | 0.00 | 0.00 |
| ATOM | 5260 | HG22 | ILE | X | 350 | 68.368 | 32.404 | 49.354 | 0.00 | 0.00 |
| ATOM | 5261 | HG23 | ILE | X | 350 | 69.168 | 33.352 | 50.608 | 0.00 | 0.00 |
| ATOM | 5262 | CG1  | ILE | X | 350 | 66.938 | 30.764 | 50.955 | 0.00 | 0.00 |
| ATOM | 5263 | HG12 | ILE | X | 350 | 66.885 | 30.700 | 49.869 | 0.00 | 0.00 |
| ATOM | 5264 | HG13 | ILE | X | 350 | 67.042 | 29.736 | 51.304 | 0.00 | 0.00 |
| ATOM | 5265 | CD1  | ILE | X | 350 | 65.609 | 31.405 | 51.470 | 0.00 | 0.00 |
| ATOM | 5266 | HD11 | ILE | X | 350 | 65.456 | 32.377 | 51.000 | 0.00 | 0.00 |
| ATOM | 5267 | HD12 | ILE | X | 350 | 65.620 | 31.536 | 52.552 | 0.00 | 0.00 |
| ATOM | 5268 | HD13 | ILE | X | 350 | 64.694 | 30.864 | 51.231 | 0.00 | 0.00 |
| ATOM | 5269 | C    | ILE | X | 350 | 69.536 | 29.811 | 52.529 | 0.00 | 0.00 |
| ATOM | 5270 | O    | ILE | X | 350 | 69.152 | 28.656 | 52.482 | 0.00 | 0.00 |
| ATOM | 5271 | N    | SER | X | 351 | 70.066 | 30.328 | 53.654 | 0.00 | 0.00 |
| ATOM | 5272 | H    | SER | X | 351 | 70.501 | 31.237 | 53.587 | 0.00 | 0.00 |
| ATOM | 5273 | CA   | SER | X | 351 | 70.133 | 29.593 | 54.895 | 0.00 | 0.00 |
| ATOM | 5274 | HA   | SER | X | 351 | 70.234 | 28.538 | 54.642 | 0.00 | 0.00 |
| ATOM | 5275 | CB   | SER | X | 351 | 71.328 | 30.012 | 55.772 | 0.00 | 0.00 |
| ATOM | 5276 | HB2  | SER | X | 351 | 71.366 | 29.479 | 56.722 | 0.00 | 0.00 |
| ATOM | 5277 | HB3  | SER | X | 351 | 72.213 | 29.761 | 55.187 | 0.00 | 0.00 |
| ATOM | 5278 | OG   | SER | X | 351 | 71.305 | 31.399 | 55.953 | 0.00 | 0.00 |
| ATOM | 5279 | HG   | SER | X | 351 | 71.457 | 31.828 | 55.108 | 0.00 | 0.00 |
| ATOM | 5280 | C    | SER | X | 351 | 68.904 | 30.007 | 55.813 | 0.00 | 0.00 |
| ATOM | 5281 | O    | SER | X | 351 | 68.103 | 30.873 | 55.509 | 0.00 | 0.00 |
| ATOM | 5282 | N    | ARG | X | 352 | 68.817 | 29.500 | 57.031 | 0.00 | 0.00 |
| ATOM | 5283 | H    | ARG | X | 352 | 69.372 | 28.689 | 57.267 | 0.00 | 0.00 |
| ATOM | 5284 | CA   | ARG | X | 352 | 67.727 | 29.713 | 57.966 | 0.00 | 0.00 |

|      |      |      |     |   |     |        |        |        |      |      |
|------|------|------|-----|---|-----|--------|--------|--------|------|------|
| ATOM | 5285 | HA   | ARG | X | 352 | 66.802 | 29.660 | 57.391 | 0.00 | 0.00 |
| ATOM | 5286 | CB   | ARG | X | 352 | 67.747 | 28.595 | 59.023 | 0.00 | 0.00 |
| ATOM | 5287 | HB2  | ARG | X | 352 | 68.725 | 28.573 | 59.504 | 0.00 | 0.00 |
| ATOM | 5288 | HB3  | ARG | X | 352 | 66.958 | 28.877 | 59.720 | 0.00 | 0.00 |
| ATOM | 5289 | CG   | ARG | X | 352 | 67.523 | 27.184 | 58.483 | 0.00 | 0.00 |
| ATOM | 5290 | HG2  | ARG | X | 352 | 66.602 | 27.007 | 57.927 | 0.00 | 0.00 |
| ATOM | 5291 | HG3  | ARG | X | 352 | 68.302 | 26.969 | 57.752 | 0.00 | 0.00 |
| ATOM | 5292 | CD   | ARG | X | 352 | 67.681 | 26.214 | 59.573 | 0.00 | 0.00 |
| ATOM | 5293 | HD2  | ARG | X | 352 | 67.537 | 25.208 | 59.180 | 0.00 | 0.00 |
| ATOM | 5294 | HD3  | ARG | X | 352 | 68.712 | 26.153 | 59.923 | 0.00 | 0.00 |
| ATOM | 5295 | NE   | ARG | X | 352 | 66.700 | 26.500 | 60.636 | 0.00 | 0.00 |
| ATOM | 5296 | HE   | ARG | X | 352 | 67.034 | 26.881 | 61.510 | 0.00 | 0.00 |
| ATOM | 5297 | CZ   | ARG | X | 352 | 65.443 | 26.317 | 60.674 | 0.00 | 0.00 |
| ATOM | 5298 | NH1  | ARG | X | 352 | 64.790 | 25.895 | 59.630 | 0.00 | 0.00 |
| ATOM | 5299 | HH11 | ARG | X | 352 | 65.213 | 25.726 | 58.729 | 0.00 | 0.00 |
| ATOM | 5300 | HH12 | ARG | X | 352 | 63.802 | 25.704 | 59.726 | 0.00 | 0.00 |
| ATOM | 5301 | NH2  | ARG | X | 352 | 64.788 | 26.589 | 61.803 | 0.00 | 0.00 |
| ATOM | 5302 | HH21 | ARG | X | 352 | 65.303 | 27.163 | 62.456 | 0.00 | 0.00 |
| ATOM | 5303 | HH22 | ARG | X | 352 | 63.784 | 26.510 | 61.879 | 0.00 | 0.00 |
| ATOM | 5304 | C    | ARG | X | 352 | 67.696 | 31.159 | 58.542 | 0.00 | 0.00 |
| ATOM | 5305 | O    | ARG | X | 352 | 66.608 | 31.621 | 58.847 | 0.00 | 0.00 |
| ATOM | 5306 | N    | ALA | X | 353 | 68.866 | 31.861 | 58.573 | 0.00 | 0.00 |
| ATOM | 5307 | H    | ALA | X | 353 | 69.697 | 31.342 | 58.330 | 0.00 | 0.00 |
| ATOM | 5308 | CA   | ALA | X | 353 | 69.014 | 33.282 | 58.999 | 0.00 | 0.00 |
| ATOM | 5309 | HA   | ALA | X | 353 | 68.336 | 33.419 | 59.841 | 0.00 | 0.00 |
| ATOM | 5310 | CB   | ALA | X | 353 | 70.543 | 33.570 | 59.382 | 0.00 | 0.00 |
| ATOM | 5311 | HB1  | ALA | X | 353 | 70.873 | 32.945 | 60.212 | 0.00 | 0.00 |
| ATOM | 5312 | HB2  | ALA | X | 353 | 70.521 | 34.614 | 59.695 | 0.00 | 0.00 |
| ATOM | 5313 | HB3  | ALA | X | 353 | 71.055 | 33.406 | 58.433 | 0.00 | 0.00 |
| ATOM | 5314 | C    | ALA | X | 353 | 68.602 | 34.257 | 57.845 | 0.00 | 0.00 |
| ATOM | 5315 | O    | ALA | X | 353 | 68.127 | 35.360 | 58.073 | 0.00 | 0.00 |
| ATOM | 5316 | N    | GLU | X | 354 | 68.835 | 33.827 | 56.645 | 0.00 | 0.00 |
| ATOM | 5317 | H    | GLU | X | 354 | 69.273 | 32.931 | 56.485 | 0.00 | 0.00 |
| ATOM | 5318 | CA   | GLU | X | 354 | 68.453 | 34.496 | 55.460 | 0.00 | 0.00 |
| ATOM | 5319 | HA   | GLU | X | 354 | 68.693 | 35.549 | 55.605 | 0.00 | 0.00 |
| ATOM | 5320 | CB   | GLU | X | 354 | 69.221 | 33.879 | 54.315 | 0.00 | 0.00 |
| ATOM | 5321 | HB2  | GLU | X | 354 | 69.302 | 32.793 | 54.360 | 0.00 | 0.00 |
| ATOM | 5322 | HB3  | GLU | X | 354 | 68.655 | 34.013 | 53.394 | 0.00 | 0.00 |
| ATOM | 5323 | CG   | GLU | X | 354 | 70.643 | 34.582 | 54.317 | 0.00 | 0.00 |
| ATOM | 5324 | HG2  | GLU | X | 354 | 70.487 | 35.630 | 54.063 | 0.00 | 0.00 |
| ATOM | 5325 | HG3  | GLU | X | 354 | 71.113 | 34.625 | 55.299 | 0.00 | 0.00 |
| ATOM | 5326 | CD   | GLU | X | 354 | 71.545 | 33.834 | 53.324 | 0.00 | 0.00 |
| ATOM | 5327 | OE1  | GLU | X | 354 | 71.946 | 32.727 | 53.640 | 0.00 | 0.00 |
| ATOM | 5328 | OE2  | GLU | X | 354 | 71.911 | 34.389 | 52.273 | 0.00 | 0.00 |
| ATOM | 5329 | C    | GLU | X | 354 | 66.991 | 34.285 | 55.205 | 0.00 | 0.00 |
| ATOM | 5330 | O    | GLU | X | 354 | 66.320 | 35.141 | 54.674 | 0.00 | 0.00 |
| ATOM | 5331 | N    | PHE | X | 355 | 66.375 | 33.132 | 55.628 | 0.00 | 0.00 |
| ATOM | 5332 | H    | PHE | X | 355 | 66.944 | 32.477 | 56.145 | 0.00 | 0.00 |
| ATOM | 5333 | CA   | PHE | X | 355 | 64.963 | 32.938 | 55.773 | 0.00 | 0.00 |
| ATOM | 5334 | HA   | PHE | X | 355 | 64.406 | 33.281 | 54.901 | 0.00 | 0.00 |
| ATOM | 5335 | CB   | PHE | X | 355 | 64.749 | 31.490 | 55.966 | 0.00 | 0.00 |
| ATOM | 5336 | HB2  | PHE | X | 355 | 65.066 | 30.982 | 55.055 | 0.00 | 0.00 |
| ATOM | 5337 | HB3  | PHE | X | 355 | 65.533 | 31.158 | 56.645 | 0.00 | 0.00 |
| ATOM | 5338 | CG   | PHE | X | 355 | 63.357 | 31.010 | 56.293 | 0.00 | 0.00 |
| ATOM | 5339 | CD1  | PHE | X | 355 | 62.355 | 31.266 | 55.380 | 0.00 | 0.00 |
| ATOM | 5340 | HD1  | PHE | X | 355 | 62.570 | 31.839 | 54.490 | 0.00 | 0.00 |
| ATOM | 5341 | CE1  | PHE | X | 355 | 61.090 | 30.609 | 55.546 | 0.00 | 0.00 |
| ATOM | 5342 | HE1  | PHE | X | 355 | 60.318 | 30.754 | 54.805 | 0.00 | 0.00 |
| ATOM | 5343 | CZ   | PHE | X | 355 | 60.826 | 29.980 | 56.762 | 0.00 | 0.00 |
| ATOM | 5344 | HZ   | PHE | X | 355 | 59.867 | 29.504 | 56.902 | 0.00 | 0.00 |
| ATOM | 5345 | CE2  | PHE | X | 355 | 61.820 | 29.868 | 57.779 | 0.00 | 0.00 |
| ATOM | 5346 | HE2  | PHE | X | 355 | 61.540 | 29.393 | 58.708 | 0.00 | 0.00 |
| ATOM | 5347 | CD2  | PHE | X | 355 | 63.063 | 30.421 | 57.502 | 0.00 | 0.00 |
| ATOM | 5348 | HD2  | PHE | X | 355 | 63.896 | 30.136 | 58.128 | 0.00 | 0.00 |
| ATOM | 5349 | C    | PHE | X | 355 | 64.426 | 33.798 | 56.982 | 0.00 | 0.00 |
| ATOM | 5350 | O    | PHE | X | 355 | 63.368 | 34.435 | 56.833 | 0.00 | 0.00 |
| ATOM | 5351 | N    | LEU | X | 356 | 65.099 | 33.912 | 58.124 | 0.00 | 0.00 |

|      |      |      |     |   |     |        |        |        |      |      |
|------|------|------|-----|---|-----|--------|--------|--------|------|------|
| ATOM | 5352 | H    | LEU | X | 356 | 65.863 | 33.267 | 58.267 | 0.00 | 0.00 |
| ATOM | 5353 | CA   | LEU | X | 356 | 64.702 | 34.765 | 59.237 | 0.00 | 0.00 |
| ATOM | 5354 | HA   | LEU | X | 356 | 63.693 | 34.484 | 59.541 | 0.00 | 0.00 |
| ATOM | 5355 | CB   | LEU | X | 356 | 65.681 | 34.545 | 60.416 | 0.00 | 0.00 |
| ATOM | 5356 | HB2  | LEU | X | 356 | 65.732 | 33.487 | 60.675 | 0.00 | 0.00 |
| ATOM | 5357 | HB3  | LEU | X | 356 | 66.646 | 34.901 | 60.056 | 0.00 | 0.00 |
| ATOM | 5358 | CG   | LEU | X | 356 | 65.275 | 35.441 | 61.599 | 0.00 | 0.00 |
| ATOM | 5359 | HG   | LEU | X | 356 | 65.350 | 36.469 | 61.247 | 0.00 | 0.00 |
| ATOM | 5360 | CD1  | LEU | X | 356 | 63.950 | 35.271 | 62.319 | 0.00 | 0.00 |
| ATOM | 5361 | HD11 | LEU | X | 356 | 63.049 | 35.310 | 61.707 | 0.00 | 0.00 |
| ATOM | 5362 | HD12 | LEU | X | 356 | 63.959 | 36.048 | 63.084 | 0.00 | 0.00 |
| ATOM | 5363 | HD13 | LEU | X | 356 | 64.052 | 34.322 | 62.846 | 0.00 | 0.00 |
| ATOM | 5364 | CD2  | LEU | X | 356 | 66.348 | 35.340 | 62.644 | 0.00 | 0.00 |
| ATOM | 5365 | HD21 | LEU | X | 356 | 66.205 | 35.989 | 63.509 | 0.00 | 0.00 |
| ATOM | 5366 | HD22 | LEU | X | 356 | 66.462 | 34.326 | 63.028 | 0.00 | 0.00 |
| ATOM | 5367 | HD23 | LEU | X | 356 | 67.323 | 35.537 | 62.198 | 0.00 | 0.00 |
| ATOM | 5368 | C    | LEU | X | 356 | 64.525 | 36.214 | 58.824 | 0.00 | 0.00 |
| ATOM | 5369 | O    | LEU | X | 356 | 63.526 | 36.820 | 59.249 | 0.00 | 0.00 |
| ATOM | 5370 | N    | ALA | X | 357 | 65.377 | 36.661 | 57.883 | 0.00 | 0.00 |
| ATOM | 5371 | H    | ALA | X | 357 | 66.173 | 36.122 | 57.574 | 0.00 | 0.00 |
| ATOM | 5372 | CA   | ALA | X | 357 | 65.241 | 38.012 | 57.402 | 0.00 | 0.00 |
| ATOM | 5373 | HA   | ALA | X | 357 | 64.998 | 38.737 | 58.179 | 0.00 | 0.00 |
| ATOM | 5374 | CB   | ALA | X | 357 | 66.619 | 38.259 | 56.787 | 0.00 | 0.00 |
| ATOM | 5375 | HB1  | ALA | X | 357 | 67.405 | 38.168 | 57.536 | 0.00 | 0.00 |
| ATOM | 5376 | HB2  | ALA | X | 357 | 66.621 | 39.211 | 56.256 | 0.00 | 0.00 |
| ATOM | 5377 | HB3  | ALA | X | 357 | 66.873 | 37.492 | 56.055 | 0.00 | 0.00 |
| ATOM | 5378 | C    | ALA | X | 357 | 63.979 | 38.078 | 56.418 | 0.00 | 0.00 |
| ATOM | 5379 | O    | ALA | X | 357 | 63.193 | 39.036 | 56.500 | 0.00 | 0.00 |
| ATOM | 5380 | N    | GLY | X | 358 | 63.810 | 37.051 | 55.601 | 0.00 | 0.00 |
| ATOM | 5381 | H    | GLY | X | 358 | 64.481 | 36.297 | 55.638 | 0.00 | 0.00 |
| ATOM | 5382 | CA   | GLY | X | 358 | 62.642 | 36.940 | 54.704 | 0.00 | 0.00 |
| ATOM | 5383 | HA2  | GLY | X | 358 | 62.611 | 37.788 | 54.019 | 0.00 | 0.00 |
| ATOM | 5384 | HA3  | GLY | X | 358 | 62.751 | 36.057 | 54.074 | 0.00 | 0.00 |
| ATOM | 5385 | C    | GLY | X | 358 | 61.302 | 36.777 | 55.447 | 0.00 | 0.00 |
| ATOM | 5386 | O    | GLY | X | 358 | 60.341 | 37.418 | 55.010 | 0.00 | 0.00 |
| ATOM | 5387 | N    | VAL | X | 359 | 61.265 | 36.069 | 56.591 | 0.00 | 0.00 |
| ATOM | 5388 | H    | VAL | X | 359 | 62.048 | 35.515 | 56.905 | 0.00 | 0.00 |
| ATOM | 5389 | CA   | VAL | X | 359 | 60.077 | 35.944 | 57.448 | 0.00 | 0.00 |
| ATOM | 5390 | HA   | VAL | X | 359 | 59.192 | 35.686 | 56.866 | 0.00 | 0.00 |
| ATOM | 5391 | CB   | VAL | X | 359 | 60.337 | 34.774 | 58.435 | 0.00 | 0.00 |
| ATOM | 5392 | HB   | VAL | X | 359 | 61.396 | 34.800 | 58.690 | 0.00 | 0.00 |
| ATOM | 5393 | CG1  | VAL | X | 359 | 59.335 | 34.953 | 59.626 | 0.00 | 0.00 |
| ATOM | 5394 | HG11 | VAL | X | 359 | 59.188 | 34.022 | 60.173 | 0.00 | 0.00 |
| ATOM | 5395 | HG12 | VAL | X | 359 | 59.733 | 35.601 | 60.407 | 0.00 | 0.00 |
| ATOM | 5396 | HG13 | VAL | X | 359 | 58.302 | 35.130 | 59.329 | 0.00 | 0.00 |
| ATOM | 5397 | CG2  | VAL | X | 359 | 60.131 | 33.475 | 57.793 | 0.00 | 0.00 |
| ATOM | 5398 | HG21 | VAL | X | 359 | 59.121 | 33.437 | 57.386 | 0.00 | 0.00 |
| ATOM | 5399 | HG22 | VAL | X | 359 | 60.362 | 32.682 | 58.505 | 0.00 | 0.00 |
| ATOM | 5400 | HG23 | VAL | X | 359 | 60.861 | 33.435 | 56.984 | 0.00 | 0.00 |
| ATOM | 5401 | C    | VAL | X | 359 | 59.863 | 37.316 | 58.106 | 0.00 | 0.00 |
| ATOM | 5402 | O    | VAL | X | 359 | 58.725 | 37.838 | 58.037 | 0.00 | 0.00 |
| ATOM | 5403 | N    | ARG | X | 360 | 60.979 | 38.005 | 58.575 | 0.00 | 0.00 |
| ATOM | 5404 | H    | ARG | X | 360 | 61.872 | 37.538 | 58.507 | 0.00 | 0.00 |
| ATOM | 5405 | CA   | ARG | X | 360 | 60.885 | 39.326 | 59.235 | 0.00 | 0.00 |
| ATOM | 5406 | HA   | ARG | X | 360 | 60.118 | 39.286 | 60.009 | 0.00 | 0.00 |
| ATOM | 5407 | CB   | ARG | X | 360 | 62.224 | 39.742 | 59.821 | 0.00 | 0.00 |
| ATOM | 5408 | HB2  | ARG | X | 360 | 62.549 | 38.862 | 60.375 | 0.00 | 0.00 |
| ATOM | 5409 | HB3  | ARG | X | 360 | 62.954 | 39.925 | 59.032 | 0.00 | 0.00 |
| ATOM | 5410 | CG   | ARG | X | 360 | 62.168 | 40.893 | 60.767 | 0.00 | 0.00 |
| ATOM | 5411 | HG2  | ARG | X | 360 | 61.792 | 41.724 | 60.169 | 0.00 | 0.00 |
| ATOM | 5412 | HG3  | ARG | X | 360 | 61.381 | 40.693 | 61.494 | 0.00 | 0.00 |
| ATOM | 5413 | CD   | ARG | X | 360 | 63.491 | 41.211 | 61.380 | 0.00 | 0.00 |
| ATOM | 5414 | HD2  | ARG | X | 360 | 63.331 | 41.896 | 62.213 | 0.00 | 0.00 |
| ATOM | 5415 | HD3  | ARG | X | 360 | 63.973 | 40.376 | 61.889 | 0.00 | 0.00 |
| ATOM | 5416 | NE   | ARG | X | 360 | 64.296 | 41.775 | 60.343 | 0.00 | 0.00 |
| ATOM | 5417 | HE   | ARG | X | 360 | 63.846 | 42.548 | 59.875 | 0.00 | 0.00 |
| ATOM | 5418 | CZ   | ARG | X | 360 | 65.365 | 41.138 | 59.820 | 0.00 | 0.00 |

|      |      |      |     |   |     |        |        |        |      |      |
|------|------|------|-----|---|-----|--------|--------|--------|------|------|
| ATOM | 5419 | NH1  | ARG | X | 360 | 65.997 | 40.202 | 60.521 | 0.00 | 0.00 |
| ATOM | 5420 | HH11 | ARG | X | 360 | 65.788 | 40.066 | 61.499 | 0.00 | 0.00 |
| ATOM | 5421 | HH12 | ARG | X | 360 | 66.737 | 39.658 | 60.100 | 0.00 | 0.00 |
| ATOM | 5422 | NH2  | ARG | X | 360 | 65.922 | 41.560 | 58.692 | 0.00 | 0.00 |
| ATOM | 5423 | HH21 | ARG | X | 360 | 65.414 | 42.236 | 58.141 | 0.00 | 0.00 |
| ATOM | 5424 | HH22 | ARG | X | 360 | 66.820 | 41.160 | 58.459 | 0.00 | 0.00 |
| ATOM | 5425 | C    | ARG | X | 360 | 60.220 | 40.308 | 58.239 | 0.00 | 0.00 |
| ATOM | 5426 | O    | ARG | X | 360 | 59.104 | 40.759 | 58.464 | 0.00 | 0.00 |
| ATOM | 5427 | N    | VAL | X | 361 | 60.836 | 40.548 | 57.049 | 0.00 | 0.00 |
| ATOM | 5428 | H    | VAL | X | 361 | 61.687 | 40.037 | 56.859 | 0.00 | 0.00 |
| ATOM | 5429 | CA   | VAL | X | 361 | 60.362 | 41.491 | 56.041 | 0.00 | 0.00 |
| ATOM | 5430 | HA   | VAL | X | 361 | 60.088 | 42.360 | 56.640 | 0.00 | 0.00 |
| ATOM | 5431 | CB   | VAL | X | 361 | 61.405 | 41.924 | 54.942 | 0.00 | 0.00 |
| ATOM | 5432 | HB   | VAL | X | 361 | 60.981 | 42.763 | 54.390 | 0.00 | 0.00 |
| ATOM | 5433 | CG1  | VAL | X | 361 | 62.722 | 42.456 | 55.640 | 0.00 | 0.00 |
| ATOM | 5434 | HG11 | VAL | X | 361 | 62.428 | 43.276 | 56.295 | 0.00 | 0.00 |
| ATOM | 5435 | HG12 | VAL | X | 361 | 63.193 | 41.712 | 56.282 | 0.00 | 0.00 |
| ATOM | 5436 | HG13 | VAL | X | 361 | 63.371 | 42.728 | 54.807 | 0.00 | 0.00 |
| ATOM | 5437 | CG2  | VAL | X | 361 | 61.677 | 40.773 | 53.953 | 0.00 | 0.00 |
| ATOM | 5438 | HG21 | VAL | X | 361 | 60.738 | 40.441 | 53.509 | 0.00 | 0.00 |
| ATOM | 5439 | HG22 | VAL | X | 361 | 62.014 | 39.858 | 54.441 | 0.00 | 0.00 |
| ATOM | 5440 | HG23 | VAL | X | 361 | 62.447 | 41.116 | 53.263 | 0.00 | 0.00 |
| ATOM | 5441 | C    | VAL | X | 361 | 59.006 | 41.054 | 55.382 | 0.00 | 0.00 |
| ATOM | 5442 | O    | VAL | X | 361 | 58.146 | 41.864 | 55.135 | 0.00 | 0.00 |
| ATOM | 5443 | N    | GLY | X | 362 | 58.748 | 39.766 | 55.214 | 0.00 | 0.00 |
| ATOM | 5444 | H    | GLY | X | 362 | 59.518 | 39.212 | 55.558 | 0.00 | 0.00 |
| ATOM | 5445 | CA   | GLY | X | 362 | 57.632 | 39.082 | 54.605 | 0.00 | 0.00 |
| ATOM | 5446 | HA2  | GLY | X | 362 | 57.397 | 39.448 | 53.606 | 0.00 | 0.00 |
| ATOM | 5447 | HA3  | GLY | X | 362 | 57.951 | 38.041 | 54.548 | 0.00 | 0.00 |
| ATOM | 5448 | C    | GLY | X | 362 | 56.354 | 39.126 | 55.437 | 0.00 | 0.00 |
| ATOM | 5449 | O    | GLY | X | 362 | 55.265 | 39.013 | 54.814 | 0.00 | 0.00 |
| ATOM | 5450 | N    | VAL | X | 363 | 56.461 | 39.372 | 56.744 | 0.00 | 0.00 |
| ATOM | 5451 | H    | VAL | X | 363 | 57.379 | 39.254 | 57.150 | 0.00 | 0.00 |
| ATOM | 5452 | CA   | VAL | X | 363 | 55.323 | 39.670 | 57.596 | 0.00 | 0.00 |
| ATOM | 5453 | HA   | VAL | X | 363 | 54.395 | 39.775 | 57.034 | 0.00 | 0.00 |
| ATOM | 5454 | CB   | VAL | X | 363 | 55.264 | 38.577 | 58.651 | 0.00 | 0.00 |
| ATOM | 5455 | HB   | VAL | X | 363 | 56.122 | 38.755 | 59.299 | 0.00 | 0.00 |
| ATOM | 5456 | CG1  | VAL | X | 363 | 53.946 | 38.736 | 59.422 | 0.00 | 0.00 |
| ATOM | 5457 | HG11 | VAL | X | 363 | 53.742 | 37.888 | 60.075 | 0.00 | 0.00 |
| ATOM | 5458 | HG12 | VAL | X | 363 | 53.903 | 39.666 | 59.988 | 0.00 | 0.00 |
| ATOM | 5459 | HG13 | VAL | X | 363 | 53.093 | 38.763 | 58.744 | 0.00 | 0.00 |
| ATOM | 5460 | CG2  | VAL | X | 363 | 55.185 | 37.115 | 58.171 | 0.00 | 0.00 |
| ATOM | 5461 | HG21 | VAL | X | 363 | 55.423 | 36.429 | 58.984 | 0.00 | 0.00 |
| ATOM | 5462 | HG22 | VAL | X | 363 | 55.932 | 36.969 | 57.391 | 0.00 | 0.00 |
| ATOM | 5463 | HG23 | VAL | X | 363 | 54.250 | 36.804 | 57.705 | 0.00 | 0.00 |
| ATOM | 5464 | C    | VAL | X | 363 | 55.473 | 41.045 | 58.267 | 0.00 | 0.00 |
| ATOM | 5465 | O    | VAL | X | 363 | 56.332 | 41.227 | 59.090 | 0.00 | 0.00 |
| ATOM | 5466 | N    | PRO | X | 364 | 54.599 | 42.057 | 58.050 | 0.00 | 0.00 |
| ATOM | 5467 | CD   | PRO | X | 364 | 53.845 | 42.230 | 56.767 | 0.00 | 0.00 |
| ATOM | 5468 | HD2  | PRO | X | 364 | 53.052 | 41.484 | 56.718 | 0.00 | 0.00 |
| ATOM | 5469 | HD3  | PRO | X | 364 | 54.582 | 42.096 | 55.975 | 0.00 | 0.00 |
| ATOM | 5470 | CG   | PRO | X | 364 | 53.421 | 43.742 | 56.717 | 0.00 | 0.00 |
| ATOM | 5471 | HG2  | PRO | X | 364 | 52.401 | 43.818 | 56.339 | 0.00 | 0.00 |
| ATOM | 5472 | HG3  | PRO | X | 364 | 54.039 | 44.356 | 56.061 | 0.00 | 0.00 |
| ATOM | 5473 | CB   | PRO | X | 364 | 53.528 | 44.092 | 58.165 | 0.00 | 0.00 |
| ATOM | 5474 | HB2  | PRO | X | 364 | 52.556 | 43.792 | 58.556 | 0.00 | 0.00 |
| ATOM | 5475 | HB3  | PRO | X | 364 | 53.632 | 45.169 | 58.300 | 0.00 | 0.00 |
| ATOM | 5476 | CA   | PRO | X | 364 | 54.610 | 43.307 | 58.825 | 0.00 | 0.00 |
| ATOM | 5477 | HA   | PRO | X | 364 | 55.540 | 43.847 | 58.653 | 0.00 | 0.00 |
| ATOM | 5478 | C    | PRO | X | 364 | 54.289 | 43.077 | 60.277 | 0.00 | 0.00 |
| ATOM | 5479 | O    | PRO | X | 364 | 53.671 | 42.101 | 60.714 | 0.00 | 0.00 |
| ATOM | 5480 | N    | GLN | X | 365 | 54.631 | 44.066 | 61.119 | 0.00 | 0.00 |
| ATOM | 5481 | H    | GLN | X | 365 | 55.246 | 44.773 | 60.742 | 0.00 | 0.00 |
| ATOM | 5482 | CA   | GLN | X | 365 | 54.358 | 44.180 | 62.520 | 0.00 | 0.00 |
| ATOM | 5483 | HA   | GLN | X | 365 | 54.571 | 45.226 | 62.742 | 0.00 | 0.00 |
| ATOM | 5484 | CB   | GLN | X | 365 | 52.727 | 44.122 | 62.708 | 0.00 | 0.00 |
| ATOM | 5485 | HB2  | GLN | X | 365 | 52.154 | 44.129 | 61.781 | 0.00 | 0.00 |

|      |      |      |     |   |     |        |        |        |      |      |
|------|------|------|-----|---|-----|--------|--------|--------|------|------|
| ATOM | 5486 | HB3  | GLN | X | 365 | 52.498 | 43.184 | 63.214 | 0.00 | 0.00 |
| ATOM | 5487 | CG   | GLN | X | 365 | 52.333 | 45.373 | 63.570 | 0.00 | 0.00 |
| ATOM | 5488 | HG2  | GLN | X | 365 | 53.142 | 45.459 | 64.295 | 0.00 | 0.00 |
| ATOM | 5489 | HG3  | GLN | X | 365 | 52.277 | 46.319 | 63.031 | 0.00 | 0.00 |
| ATOM | 5490 | CD   | GLN | X | 365 | 50.970 | 45.242 | 64.219 | 0.00 | 0.00 |
| ATOM | 5491 | OE1  | GLN | X | 365 | 49.956 | 45.573 | 63.659 | 0.00 | 0.00 |
| ATOM | 5492 | NE2  | GLN | X | 365 | 50.879 | 44.777 | 65.437 | 0.00 | 0.00 |
| ATOM | 5493 | HE21 | GLN | X | 365 | 49.918 | 44.733 | 65.742 | 0.00 | 0.00 |
| ATOM | 5494 | HE22 | GLN | X | 365 | 51.579 | 44.555 | 66.130 | 0.00 | 0.00 |
| ATOM | 5495 | C    | GLN | X | 365 | 55.234 | 43.361 | 63.530 | 0.00 | 0.00 |
| ATOM | 5496 | O    | GLN | X | 365 | 55.688 | 43.841 | 64.578 | 0.00 | 0.00 |
| ATOM | 5497 | N    | VAL | X | 366 | 55.617 | 42.247 | 62.976 | 0.00 | 0.00 |
| ATOM | 5498 | H    | VAL | X | 366 | 55.240 | 42.027 | 62.065 | 0.00 | 0.00 |
| ATOM | 5499 | CA   | VAL | X | 366 | 56.304 | 41.150 | 63.563 | 0.00 | 0.00 |
| ATOM | 5500 | HA   | VAL | X | 366 | 55.875 | 40.990 | 64.553 | 0.00 | 0.00 |
| ATOM | 5501 | CB   | VAL | X | 366 | 56.100 | 39.882 | 62.753 | 0.00 | 0.00 |
| ATOM | 5502 | HB   | VAL | X | 366 | 56.223 | 40.217 | 61.723 | 0.00 | 0.00 |
| ATOM | 5503 | CG1  | VAL | X | 366 | 57.054 | 38.735 | 62.998 | 0.00 | 0.00 |
| ATOM | 5504 | HG11 | VAL | X | 366 | 57.242 | 38.578 | 64.061 | 0.00 | 0.00 |
| ATOM | 5505 | HG12 | VAL | X | 366 | 56.762 | 37.813 | 62.495 | 0.00 | 0.00 |
| ATOM | 5506 | HG13 | VAL | X | 366 | 57.984 | 39.020 | 62.507 | 0.00 | 0.00 |
| ATOM | 5507 | CG2  | VAL | X | 366 | 54.697 | 39.345 | 63.006 | 0.00 | 0.00 |
| ATOM | 5508 | HG21 | VAL | X | 366 | 54.018 | 40.168 | 62.784 | 0.00 | 0.00 |
| ATOM | 5509 | HG22 | VAL | X | 366 | 54.636 | 39.044 | 64.052 | 0.00 | 0.00 |
| ATOM | 5510 | HG23 | VAL | X | 366 | 54.487 | 38.402 | 62.503 | 0.00 | 0.00 |
| ATOM | 5511 | C    | VAL | X | 366 | 57.835 | 41.531 | 63.835 | 0.00 | 0.00 |
| ATOM | 5512 | O    | VAL | X | 366 | 58.566 | 41.860 | 62.929 | 0.00 | 0.00 |
| ATOM | 5513 | N    | SER | X | 367 | 58.233 | 41.448 | 65.114 | 0.00 | 0.00 |
| ATOM | 5514 | H    | SER | X | 367 | 57.558 | 41.270 | 65.843 | 0.00 | 0.00 |
| ATOM | 5515 | CA   | SER | X | 367 | 59.671 | 41.766 | 65.406 | 0.00 | 0.00 |
| ATOM | 5516 | HA   | SER | X | 367 | 59.991 | 42.642 | 64.842 | 0.00 | 0.00 |
| ATOM | 5517 | CB   | SER | X | 367 | 59.857 | 42.055 | 66.920 | 0.00 | 0.00 |
| ATOM | 5518 | HB2  | SER | X | 367 | 60.821 | 42.549 | 67.039 | 0.00 | 0.00 |
| ATOM | 5519 | HB3  | SER | X | 367 | 59.135 | 42.792 | 67.272 | 0.00 | 0.00 |
| ATOM | 5520 | OG   | SER | X | 367 | 59.799 | 40.843 | 67.661 | 0.00 | 0.00 |
| ATOM | 5521 | HG   | SER | X | 367 | 59.797 | 41.066 | 68.595 | 0.00 | 0.00 |
| ATOM | 5522 | C    | SER | X | 367 | 60.567 | 40.623 | 64.988 | 0.00 | 0.00 |
| ATOM | 5523 | O    | SER | X | 367 | 60.044 | 39.560 | 64.624 | 0.00 | 0.00 |
| ATOM | 5524 | N    | ASP | X | 368 | 61.879 | 40.885 | 65.091 | 0.00 | 0.00 |
| ATOM | 5525 | H    | ASP | X | 368 | 62.134 | 41.838 | 65.310 | 0.00 | 0.00 |
| ATOM | 5526 | CA   | ASP | X | 368 | 62.906 | 39.998 | 64.809 | 0.00 | 0.00 |
| ATOM | 5527 | HA   | ASP | X | 368 | 62.827 | 39.620 | 63.790 | 0.00 | 0.00 |
| ATOM | 5528 | CB   | ASP | X | 368 | 64.181 | 40.798 | 64.973 | 0.00 | 0.00 |
| ATOM | 5529 | HB2  | ASP | X | 368 | 64.214 | 41.609 | 64.245 | 0.00 | 0.00 |
| ATOM | 5530 | HB3  | ASP | X | 368 | 64.145 | 41.172 | 65.996 | 0.00 | 0.00 |
| ATOM | 5531 | CG   | ASP | X | 368 | 65.403 | 39.988 | 64.826 | 0.00 | 0.00 |
| ATOM | 5532 | OD1  | ASP | X | 368 | 65.963 | 39.617 | 65.904 | 0.00 | 0.00 |
| ATOM | 5533 | OD2  | ASP | X | 368 | 65.892 | 39.848 | 63.727 | 0.00 | 0.00 |
| ATOM | 5534 | C    | ASP | X | 368 | 62.792 | 38.745 | 65.758 | 0.00 | 0.00 |
| ATOM | 5535 | O    | ASP | X | 368 | 63.116 | 37.609 | 65.290 | 0.00 | 0.00 |
| ATOM | 5536 | N    | LEU | X | 369 | 62.227 | 38.988 | 66.956 | 0.00 | 0.00 |
| ATOM | 5537 | H    | LEU | X | 369 | 62.002 | 39.911 | 67.299 | 0.00 | 0.00 |
| ATOM | 5538 | CA   | LEU | X | 369 | 62.128 | 37.965 | 67.939 | 0.00 | 0.00 |
| ATOM | 5539 | HA   | LEU | X | 369 | 62.949 | 37.253 | 67.853 | 0.00 | 0.00 |
| ATOM | 5540 | CB   | LEU | X | 369 | 62.168 | 38.632 | 69.286 | 0.00 | 0.00 |
| ATOM | 5541 | HB2  | LEU | X | 369 | 62.983 | 39.353 | 69.351 | 0.00 | 0.00 |
| ATOM | 5542 | HB3  | LEU | X | 369 | 61.228 | 39.146 | 69.488 | 0.00 | 0.00 |
| ATOM | 5543 | CG   | LEU | X | 369 | 62.281 | 37.597 | 70.491 | 0.00 | 0.00 |
| ATOM | 5544 | HG   | LEU | X | 369 | 61.422 | 36.928 | 70.435 | 0.00 | 0.00 |
| ATOM | 5545 | CD1  | LEU | X | 369 | 63.555 | 36.740 | 70.460 | 0.00 | 0.00 |
| ATOM | 5546 | HD11 | LEU | X | 369 | 64.391 | 37.440 | 70.447 | 0.00 | 0.00 |
| ATOM | 5547 | HD12 | LEU | X | 369 | 63.691 | 36.152 | 69.553 | 0.00 | 0.00 |
| ATOM | 5548 | HD13 | LEU | X | 369 | 63.566 | 36.190 | 71.401 | 0.00 | 0.00 |
| ATOM | 5549 | CD2  | LEU | X | 369 | 62.253 | 38.483 | 71.847 | 0.00 | 0.00 |
| ATOM | 5550 | HD21 | LEU | X | 369 | 63.105 | 39.160 | 71.914 | 0.00 | 0.00 |
| ATOM | 5551 | HD22 | LEU | X | 369 | 61.321 | 39.044 | 71.909 | 0.00 | 0.00 |
| ATOM | 5552 | HD23 | LEU | X | 369 | 62.252 | 37.822 | 72.714 | 0.00 | 0.00 |

|      |      |      |     |   |     |        |        |        |      |      |
|------|------|------|-----|---|-----|--------|--------|--------|------|------|
| ATOM | 5553 | C    | LEU | X | 369 | 60.814 | 37.169 | 67.817 | 0.00 | 0.00 |
| ATOM | 5554 | O    | LEU | X | 369 | 60.849 | 35.923 | 67.936 | 0.00 | 0.00 |
| ATOM | 5555 | N    | ALA | X | 370 | 59.704 | 37.823 | 67.493 | 0.00 | 0.00 |
| ATOM | 5556 | H    | ALA | X | 370 | 59.700 | 38.829 | 67.590 | 0.00 | 0.00 |
| ATOM | 5557 | CA   | ALA | X | 370 | 58.584 | 37.019 | 67.013 | 0.00 | 0.00 |
| ATOM | 5558 | HA   | ALA | X | 370 | 58.228 | 36.248 | 67.696 | 0.00 | 0.00 |
| ATOM | 5559 | CB   | ALA | X | 370 | 57.497 | 38.038 | 66.854 | 0.00 | 0.00 |
| ATOM | 5560 | HB1  | ALA | X | 370 | 57.150 | 38.475 | 67.791 | 0.00 | 0.00 |
| ATOM | 5561 | HB2  | ALA | X | 370 | 56.727 | 37.494 | 66.306 | 0.00 | 0.00 |
| ATOM | 5562 | HB3  | ALA | X | 370 | 57.871 | 38.860 | 66.244 | 0.00 | 0.00 |
| ATOM | 5563 | C    | ALA | X | 370 | 58.883 | 36.280 | 65.704 | 0.00 | 0.00 |
| ATOM | 5564 | O    | ALA | X | 370 | 58.608 | 35.100 | 65.656 | 0.00 | 0.00 |
| ATOM | 5565 | N    | ALA | X | 371 | 59.583 | 36.826 | 64.706 | 0.00 | 0.00 |
| ATOM | 5566 | H    | ALA | X | 371 | 59.734 | 37.825 | 64.715 | 0.00 | 0.00 |
| ATOM | 5567 | CA   | ALA | X | 371 | 60.003 | 36.115 | 63.464 | 0.00 | 0.00 |
| ATOM | 5568 | HA   | ALA | X | 371 | 59.171 | 35.847 | 62.812 | 0.00 | 0.00 |
| ATOM | 5569 | CB   | ALA | X | 371 | 60.783 | 37.168 | 62.614 | 0.00 | 0.00 |
| ATOM | 5570 | HB1  | ALA | X | 371 | 61.600 | 37.623 | 63.175 | 0.00 | 0.00 |
| ATOM | 5571 | HB2  | ALA | X | 371 | 60.104 | 37.965 | 62.313 | 0.00 | 0.00 |
| ATOM | 5572 | HB3  | ALA | X | 371 | 61.240 | 36.683 | 61.751 | 0.00 | 0.00 |
| ATOM | 5573 | C    | ALA | X | 371 | 60.935 | 34.925 | 63.798 | 0.00 | 0.00 |
| ATOM | 5574 | O    | ALA | X | 371 | 60.573 | 33.842 | 63.371 | 0.00 | 0.00 |
| ATOM | 5575 | N    | GLU | X | 372 | 61.885 | 35.011 | 64.744 | 0.00 | 0.00 |
| ATOM | 5576 | H    | GLU | X | 372 | 62.162 | 35.907 | 65.120 | 0.00 | 0.00 |
| ATOM | 5577 | CA   | GLU | X | 372 | 62.557 | 33.775 | 65.231 | 0.00 | 0.00 |
| ATOM | 5578 | HA   | GLU | X | 372 | 63.270 | 33.338 | 64.532 | 0.00 | 0.00 |
| ATOM | 5579 | CB   | GLU | X | 372 | 63.428 | 34.162 | 66.437 | 0.00 | 0.00 |
| ATOM | 5580 | HB2  | GLU | X | 372 | 64.260 | 34.821 | 66.189 | 0.00 | 0.00 |
| ATOM | 5581 | HB3  | GLU | X | 372 | 62.847 | 34.498 | 67.296 | 0.00 | 0.00 |
| ATOM | 5582 | CG   | GLU | X | 372 | 64.188 | 32.856 | 66.928 | 0.00 | 0.00 |
| ATOM | 5583 | HG2  | GLU | X | 372 | 63.469 | 32.121 | 67.289 | 0.00 | 0.00 |
| ATOM | 5584 | HG3  | GLU | X | 372 | 64.769 | 32.368 | 66.146 | 0.00 | 0.00 |
| ATOM | 5585 | CD   | GLU | X | 372 | 65.138 | 33.141 | 68.091 | 0.00 | 0.00 |
| ATOM | 5586 | OE1  | GLU | X | 372 | 64.680 | 33.221 | 69.271 | 0.00 | 0.00 |
| ATOM | 5587 | OE2  | GLU | X | 372 | 66.382 | 33.144 | 67.842 | 0.00 | 0.00 |
| ATOM | 5588 | C    | GLU | X | 372 | 61.543 | 32.713 | 65.637 | 0.00 | 0.00 |
| ATOM | 5589 | O    | GLU | X | 372 | 61.817 | 31.558 | 65.297 | 0.00 | 0.00 |
| ATOM | 5590 | N    | ALA | X | 373 | 60.443 | 33.067 | 66.316 | 0.00 | 0.00 |
| ATOM | 5591 | H    | ALA | X | 373 | 60.229 | 34.034 | 66.513 | 0.00 | 0.00 |
| ATOM | 5592 | CA   | ALA | X | 373 | 59.508 | 32.112 | 66.750 | 0.00 | 0.00 |
| ATOM | 5593 | HA   | ALA | X | 373 | 60.026 | 31.247 | 67.163 | 0.00 | 0.00 |
| ATOM | 5594 | CB   | ALA | X | 373 | 58.720 | 32.710 | 67.909 | 0.00 | 0.00 |
| ATOM | 5595 | HB1  | ALA | X | 373 | 58.438 | 33.738 | 67.682 | 0.00 | 0.00 |
| ATOM | 5596 | HB2  | ALA | X | 373 | 59.223 | 32.621 | 68.871 | 0.00 | 0.00 |
| ATOM | 5597 | HB3  | ALA | X | 373 | 57.814 | 32.111 | 68.008 | 0.00 | 0.00 |
| ATOM | 5598 | C    | ALA | X | 373 | 58.627 | 31.606 | 65.555 | 0.00 | 0.00 |
| ATOM | 5599 | O    | ALA | X | 373 | 58.168 | 30.501 | 65.546 | 0.00 | 0.00 |
| ATOM | 5600 | N    | VAL | X | 374 | 58.429 | 32.386 | 64.524 | 0.00 | 0.00 |
| ATOM | 5601 | H    | VAL | X | 374 | 58.970 | 33.235 | 64.444 | 0.00 | 0.00 |
| ATOM | 5602 | CA   | VAL | X | 374 | 57.603 | 32.002 | 63.324 | 0.00 | 0.00 |
| ATOM | 5603 | HA   | VAL | X | 374 | 56.799 | 31.374 | 63.708 | 0.00 | 0.00 |
| ATOM | 5604 | CB   | VAL | X | 374 | 57.121 | 33.296 | 62.617 | 0.00 | 0.00 |
| ATOM | 5605 | HB   | VAL | X | 374 | 57.997 | 33.915 | 62.425 | 0.00 | 0.00 |
| ATOM | 5606 | CG1  | VAL | X | 374 | 56.330 | 32.932 | 61.311 | 0.00 | 0.00 |
| ATOM | 5607 | HG11 | VAL | X | 374 | 55.545 | 32.227 | 61.583 | 0.00 | 0.00 |
| ATOM | 5608 | HG12 | VAL | X | 374 | 55.868 | 33.758 | 60.771 | 0.00 | 0.00 |
| ATOM | 5609 | HG13 | VAL | X | 374 | 57.020 | 32.517 | 60.575 | 0.00 | 0.00 |
| ATOM | 5610 | CG2  | VAL | X | 374 | 56.078 | 34.095 | 63.429 | 0.00 | 0.00 |
| ATOM | 5611 | HG21 | VAL | X | 374 | 55.707 | 35.037 | 63.023 | 0.00 | 0.00 |
| ATOM | 5612 | HG22 | VAL | X | 374 | 56.448 | 34.315 | 64.431 | 0.00 | 0.00 |
| ATOM | 5613 | HG23 | VAL | X | 374 | 55.249 | 33.395 | 63.531 | 0.00 | 0.00 |
| ATOM | 5614 | C    | VAL | X | 374 | 58.453 | 31.143 | 62.358 | 0.00 | 0.00 |
| ATOM | 5615 | O    | VAL | X | 374 | 57.976 | 30.172 | 61.791 | 0.00 | 0.00 |
| ATOM | 5616 | N    | VAL | X | 375 | 59.764 | 31.391 | 62.289 | 0.00 | 0.00 |
| ATOM | 5617 | H    | VAL | X | 375 | 60.128 | 32.258 | 62.657 | 0.00 | 0.00 |
| ATOM | 5618 | CA   | VAL | X | 375 | 60.740 | 30.468 | 61.693 | 0.00 | 0.00 |
| ATOM | 5619 | HA   | VAL | X | 375 | 60.418 | 30.437 | 60.652 | 0.00 | 0.00 |

|      |      |      |     |   |     |        |        |        |      |      |
|------|------|------|-----|---|-----|--------|--------|--------|------|------|
| ATOM | 5620 | CB   | VAL | X | 375 | 62.176 | 31.133 | 61.741 | 0.00 | 0.00 |
| ATOM | 5621 | HB   | VAL | X | 375 | 62.408 | 31.568 | 62.713 | 0.00 | 0.00 |
| ATOM | 5622 | CG1  | VAL | X | 375 | 63.315 | 30.165 | 61.320 | 0.00 | 0.00 |
| ATOM | 5623 | HG11 | VAL | X | 375 | 64.301 | 30.628 | 61.272 | 0.00 | 0.00 |
| ATOM | 5624 | HG12 | VAL | X | 375 | 63.455 | 29.445 | 62.126 | 0.00 | 0.00 |
| ATOM | 5625 | HG13 | VAL | X | 375 | 63.085 | 29.617 | 60.406 | 0.00 | 0.00 |
| ATOM | 5626 | CG2  | VAL | X | 375 | 62.220 | 32.284 | 60.751 | 0.00 | 0.00 |
| ATOM | 5627 | HG21 | VAL | X | 375 | 63.227 | 32.703 | 60.762 | 0.00 | 0.00 |
| ATOM | 5628 | HG22 | VAL | X | 375 | 61.513 | 33.078 | 60.990 | 0.00 | 0.00 |
| ATOM | 5629 | HG23 | VAL | X | 375 | 62.011 | 31.910 | 59.748 | 0.00 | 0.00 |
| ATOM | 5630 | C    | VAL | X | 375 | 60.712 | 29.089 | 62.317 | 0.00 | 0.00 |
| ATOM | 5631 | O    | VAL | X | 375 | 60.668 | 28.015 | 61.623 | 0.00 | 0.00 |
| ATOM | 5632 | N    | LEU | X | 376 | 60.825 | 29.100 | 63.648 | 0.00 | 0.00 |
| ATOM | 5633 | H    | LEU | X | 376 | 60.920 | 29.966 | 64.159 | 0.00 | 0.00 |
| ATOM | 5634 | CA   | LEU | X | 376 | 60.549 | 27.868 | 64.390 | 0.00 | 0.00 |
| ATOM | 5635 | HA   | LEU | X | 376 | 61.367 | 27.200 | 64.120 | 0.00 | 0.00 |
| ATOM | 5636 | CB   | LEU | X | 376 | 60.674 | 28.252 | 65.902 | 0.00 | 0.00 |
| ATOM | 5637 | HB2  | LEU | X | 376 | 61.688 | 28.644 | 65.974 | 0.00 | 0.00 |
| ATOM | 5638 | HB3  | LEU | X | 376 | 60.083 | 29.150 | 66.084 | 0.00 | 0.00 |
| ATOM | 5639 | CG   | LEU | X | 376 | 60.512 | 27.166 | 67.058 | 0.00 | 0.00 |
| ATOM | 5640 | HG   | LEU | X | 376 | 60.887 | 27.632 | 67.970 | 0.00 | 0.00 |
| ATOM | 5641 | CD1  | LEU | X | 376 | 59.109 | 26.597 | 67.371 | 0.00 | 0.00 |
| ATOM | 5642 | HD11 | LEU | X | 376 | 58.419 | 27.392 | 67.652 | 0.00 | 0.00 |
| ATOM | 5643 | HD12 | LEU | X | 376 | 59.308 | 25.943 | 68.219 | 0.00 | 0.00 |
| ATOM | 5644 | HD13 | LEU | X | 376 | 58.696 | 25.893 | 66.648 | 0.00 | 0.00 |
| ATOM | 5645 | CD2  | LEU | X | 376 | 61.500 | 26.060 | 66.725 | 0.00 | 0.00 |
| ATOM | 5646 | HD21 | LEU | X | 376 | 62.518 | 26.437 | 66.819 | 0.00 | 0.00 |
| ATOM | 5647 | HD22 | LEU | X | 376 | 61.441 | 25.209 | 67.403 | 0.00 | 0.00 |
| ATOM | 5648 | HD23 | LEU | X | 376 | 61.301 | 25.615 | 65.751 | 0.00 | 0.00 |
| ATOM | 5649 | C    | LEU | X | 376 | 59.198 | 27.157 | 64.103 | 0.00 | 0.00 |
| ATOM | 5650 | O    | LEU | X | 376 | 59.258 | 25.930 | 63.819 | 0.00 | 0.00 |
| ATOM | 5651 | N    | HIE | X | 377 | 57.978 | 27.808 | 63.965 | 0.00 | 0.00 |
| ATOM | 5652 | H    | HIE | X | 377 | 58.013 | 28.815 | 64.033 | 0.00 | 0.00 |
| ATOM | 5653 | CA   | HIE | X | 377 | 56.694 | 27.200 | 63.554 | 0.00 | 0.00 |
| ATOM | 5654 | HA   | HIE | X | 377 | 56.412 | 26.424 | 64.264 | 0.00 | 0.00 |
| ATOM | 5655 | CB   | HIE | X | 377 | 55.573 | 28.230 | 63.604 | 0.00 | 0.00 |
| ATOM | 5656 | HB2  | HIE | X | 377 | 55.459 | 28.417 | 64.671 | 0.00 | 0.00 |
| ATOM | 5657 | HB3  | HIE | X | 377 | 55.903 | 29.089 | 63.020 | 0.00 | 0.00 |
| ATOM | 5658 | CG   | HIE | X | 377 | 54.245 | 27.845 | 63.034 | 0.00 | 0.00 |
| ATOM | 5659 | ND1  | HIE | X | 377 | 53.138 | 27.164 | 63.582 | 0.00 | 0.00 |
| ATOM | 5660 | CE1  | HIE | X | 377 | 52.165 | 27.226 | 62.606 | 0.00 | 0.00 |
| ATOM | 5661 | HE1  | HIE | X | 377 | 51.140 | 26.920 | 62.754 | 0.00 | 0.00 |
| ATOM | 5662 | NE2  | HIE | X | 377 | 52.581 | 27.921 | 61.578 | 0.00 | 0.00 |
| ATOM | 5663 | HE2  | HIE | X | 377 | 52.060 | 28.049 | 60.722 | 0.00 | 0.00 |
| ATOM | 5664 | CD2  | HIE | X | 377 | 53.872 | 28.331 | 61.824 | 0.00 | 0.00 |
| ATOM | 5665 | HD2  | HIE | X | 377 | 54.481 | 29.008 | 61.244 | 0.00 | 0.00 |
| ATOM | 5666 | C    | HIE | X | 377 | 56.749 | 26.548 | 62.118 | 0.00 | 0.00 |
| ATOM | 5667 | O    | HIE | X | 377 | 56.145 | 25.504 | 61.896 | 0.00 | 0.00 |
| ATOM | 5668 | N    | TYR | X | 378 | 57.560 | 27.153 | 61.193 | 0.00 | 0.00 |
| ATOM | 5669 | H    | TYR | X | 378 | 57.846 | 28.099 | 61.404 | 0.00 | 0.00 |
| ATOM | 5670 | CA   | TYR | X | 378 | 57.821 | 26.542 | 59.912 | 0.00 | 0.00 |
| ATOM | 5671 | HA   | TYR | X | 378 | 56.867 | 26.163 | 59.545 | 0.00 | 0.00 |
| ATOM | 5672 | CB   | TYR | X | 378 | 58.275 | 27.651 | 58.942 | 0.00 | 0.00 |
| ATOM | 5673 | HB2  | TYR | X | 378 | 58.910 | 28.346 | 59.491 | 0.00 | 0.00 |
| ATOM | 5674 | HB3  | TYR | X | 378 | 58.836 | 27.160 | 58.146 | 0.00 | 0.00 |
| ATOM | 5675 | CG   | TYR | X | 378 | 57.103 | 28.228 | 58.218 | 0.00 | 0.00 |
| ATOM | 5676 | CD1  | TYR | X | 378 | 56.768 | 27.721 | 56.971 | 0.00 | 0.00 |
| ATOM | 5677 | HD1  | TYR | X | 378 | 57.426 | 26.986 | 56.532 | 0.00 | 0.00 |
| ATOM | 5678 | CE1  | TYR | X | 378 | 55.701 | 28.252 | 56.275 | 0.00 | 0.00 |
| ATOM | 5679 | HE1  | TYR | X | 378 | 55.530 | 27.937 | 55.256 | 0.00 | 0.00 |
| ATOM | 5680 | CZ   | TYR | X | 378 | 54.756 | 29.095 | 56.961 | 0.00 | 0.00 |
| ATOM | 5681 | OH   | TYR | X | 378 | 53.549 | 29.449 | 56.429 | 0.00 | 0.00 |
| ATOM | 5682 | HH   | TYR | X | 378 | 53.540 | 29.141 | 55.520 | 0.00 | 0.00 |
| ATOM | 5683 | CE2  | TYR | X | 378 | 55.123 | 29.579 | 58.249 | 0.00 | 0.00 |
| ATOM | 5684 | HE2  | TYR | X | 378 | 54.471 | 30.304 | 58.712 | 0.00 | 0.00 |
| ATOM | 5685 | CD2  | TYR | X | 378 | 56.338 | 29.156 | 58.867 | 0.00 | 0.00 |
| ATOM | 5686 | HD2  | TYR | X | 378 | 56.621 | 29.454 | 59.866 | 0.00 | 0.00 |

|      |      |      |     |   |     |        |        |        |      |      |
|------|------|------|-----|---|-----|--------|--------|--------|------|------|
| ATOM | 5687 | C    | TYR | X | 378 | 58.805 | 25.326 | 59.857 | 0.00 | 0.00 |
| ATOM | 5688 | O    | TYR | X | 378 | 58.607 | 24.475 | 58.959 | 0.00 | 0.00 |
| ATOM | 5689 | N    | THR | X | 379 | 59.574 | 25.179 | 60.918 | 0.00 | 0.00 |
| ATOM | 5690 | H    | THR | X | 379 | 59.534 | 25.863 | 61.660 | 0.00 | 0.00 |
| ATOM | 5691 | CA   | THR | X | 379 | 60.541 | 24.121 | 60.935 | 0.00 | 0.00 |
| ATOM | 5692 | HA   | THR | X | 379 | 61.085 | 24.070 | 59.992 | 0.00 | 0.00 |
| ATOM | 5693 | CB   | THR | X | 379 | 61.604 | 24.357 | 62.060 | 0.00 | 0.00 |
| ATOM | 5694 | HB   | THR | X | 379 | 61.069 | 24.223 | 63.000 | 0.00 | 0.00 |
| ATOM | 5695 | CG2  | THR | X | 379 | 62.735 | 23.349 | 62.040 | 0.00 | 0.00 |
| ATOM | 5696 | HG21 | THR | X | 379 | 63.225 | 23.170 | 61.083 | 0.00 | 0.00 |
| ATOM | 5697 | HG22 | THR | X | 379 | 62.313 | 22.424 | 62.432 | 0.00 | 0.00 |
| ATOM | 5698 | HG23 | THR | X | 379 | 63.581 | 23.606 | 62.677 | 0.00 | 0.00 |
| ATOM | 5699 | OG1  | THR | X | 379 | 62.188 | 25.631 | 61.984 | 0.00 | 0.00 |
| ATOM | 5700 | HG1  | THR | X | 379 | 61.538 | 26.163 | 61.519 | 0.00 | 0.00 |
| ATOM | 5701 | C    | THR | X | 379 | 59.787 | 22.811 | 60.962 | 0.00 | 0.00 |
| ATOM | 5702 | O    | THR | X | 379 | 58.890 | 22.517 | 61.736 | 0.00 | 0.00 |
| ATOM | 5703 | N    | ASP | X | 380 | 60.114 | 21.990 | 60.028 | 0.00 | 0.00 |
| ATOM | 5704 | H    | ASP | X | 380 | 60.808 | 22.436 | 59.445 | 0.00 | 0.00 |
| ATOM | 5705 | CA   | ASP | X | 380 | 59.973 | 20.574 | 60.042 | 0.00 | 0.00 |
| ATOM | 5706 | HA   | ASP | X | 380 | 59.325 | 20.250 | 60.857 | 0.00 | 0.00 |
| ATOM | 5707 | CB   | ASP | X | 380 | 59.151 | 20.199 | 58.831 | 0.00 | 0.00 |
| ATOM | 5708 | HB2  | ASP | X | 380 | 58.248 | 20.805 | 58.906 | 0.00 | 0.00 |
| ATOM | 5709 | HB3  | ASP | X | 380 | 59.604 | 20.583 | 57.917 | 0.00 | 0.00 |
| ATOM | 5710 | CG   | ASP | X | 380 | 58.817 | 18.715 | 58.757 | 0.00 | 0.00 |
| ATOM | 5711 | OD1  | ASP | X | 380 | 57.892 | 18.243 | 59.447 | 0.00 | 0.00 |
| ATOM | 5712 | OD2  | ASP | X | 380 | 59.698 | 18.055 | 58.163 | 0.00 | 0.00 |
| ATOM | 5713 | C    | ASP | X | 380 | 61.375 | 19.900 | 60.139 | 0.00 | 0.00 |
| ATOM | 5714 | O    | ASP | X | 380 | 62.403 | 20.417 | 59.690 | 0.00 | 0.00 |
| ATOM | 5715 | N    | TRP | X | 381 | 61.314 | 18.740 | 60.779 | 0.00 | 0.00 |
| ATOM | 5716 | H    | TRP | X | 381 | 60.419 | 18.354 | 61.043 | 0.00 | 0.00 |
| ATOM | 5717 | CA   | TRP | X | 381 | 62.551 | 18.094 | 61.362 | 0.00 | 0.00 |
| ATOM | 5718 | HA   | TRP | X | 381 | 63.305 | 18.877 | 61.446 | 0.00 | 0.00 |
| ATOM | 5719 | CB   | TRP | X | 381 | 62.350 | 17.428 | 62.707 | 0.00 | 0.00 |
| ATOM | 5720 | HB2  | TRP | X | 381 | 61.507 | 16.741 | 62.641 | 0.00 | 0.00 |
| ATOM | 5721 | HB3  | TRP | X | 381 | 63.242 | 16.846 | 62.936 | 0.00 | 0.00 |
| ATOM | 5722 | CG   | TRP | X | 381 | 62.148 | 18.361 | 63.825 | 0.00 | 0.00 |
| ATOM | 5723 | CD1  | TRP | X | 381 | 61.356 | 19.469 | 63.873 | 0.00 | 0.00 |
| ATOM | 5724 | HD1  | TRP | X | 381 | 60.948 | 19.939 | 62.991 | 0.00 | 0.00 |
| ATOM | 5725 | NE1  | TRP | X | 381 | 61.407 | 20.019 | 65.166 | 0.00 | 0.00 |
| ATOM | 5726 | HE1  | TRP | X | 381 | 61.168 | 20.995 | 65.264 | 0.00 | 0.00 |
| ATOM | 5727 | CE2  | TRP | X | 381 | 61.948 | 19.208 | 66.109 | 0.00 | 0.00 |
| ATOM | 5728 | CZ2  | TRP | X | 381 | 62.117 | 19.264 | 67.502 | 0.00 | 0.00 |
| ATOM | 5729 | HZ2  | TRP | X | 381 | 61.794 | 20.125 | 68.067 | 0.00 | 0.00 |
| ATOM | 5730 | CH2  | TRP | X | 381 | 62.921 | 18.361 | 68.092 | 0.00 | 0.00 |
| ATOM | 5731 | HH2  | TRP | X | 381 | 63.138 | 18.363 | 69.149 | 0.00 | 0.00 |
| ATOM | 5732 | CZ3  | TRP | X | 381 | 63.475 | 17.338 | 67.282 | 0.00 | 0.00 |
| ATOM | 5733 | HZ3  | TRP | X | 381 | 64.097 | 16.596 | 67.759 | 0.00 | 0.00 |
| ATOM | 5734 | CE3  | TRP | X | 381 | 63.229 | 17.209 | 65.941 | 0.00 | 0.00 |
| ATOM | 5735 | HE3  | TRP | X | 381 | 63.642 | 16.367 | 65.405 | 0.00 | 0.00 |
| ATOM | 5736 | CD2  | TRP | X | 381 | 62.461 | 18.139 | 65.276 | 0.00 | 0.00 |
| ATOM | 5737 | C    | TRP | X | 381 | 63.337 | 17.180 | 60.407 | 0.00 | 0.00 |
| ATOM | 5738 | O    | TRP | X | 381 | 64.429 | 16.661 | 60.726 | 0.00 | 0.00 |
| ATOM | 5739 | N    | LEU | X | 382 | 62.667 | 16.857 | 59.302 | 0.00 | 0.00 |
| ATOM | 5740 | H    | LEU | X | 382 | 61.703 | 17.151 | 59.230 | 0.00 | 0.00 |
| ATOM | 5741 | CA   | LEU | X | 382 | 63.163 | 16.037 | 58.163 | 0.00 | 0.00 |
| ATOM | 5742 | HA   | LEU | X | 382 | 63.401 | 15.063 | 58.590 | 0.00 | 0.00 |
| ATOM | 5743 | CB   | LEU | X | 382 | 62.046 | 15.831 | 57.078 | 0.00 | 0.00 |
| ATOM | 5744 | HB2  | LEU | X | 382 | 61.190 | 15.562 | 57.697 | 0.00 | 0.00 |
| ATOM | 5745 | HB3  | LEU | X | 382 | 61.814 | 16.782 | 56.597 | 0.00 | 0.00 |
| ATOM | 5746 | CG   | LEU | X | 382 | 62.291 | 14.766 | 55.902 | 0.00 | 0.00 |
| ATOM | 5747 | HG   | LEU | X | 382 | 62.607 | 13.848 | 56.397 | 0.00 | 0.00 |
| ATOM | 5748 | CD1  | LEU | X | 382 | 60.970 | 14.554 | 55.175 | 0.00 | 0.00 |
| ATOM | 5749 | HD11 | LEU | X | 382 | 60.637 | 15.457 | 54.663 | 0.00 | 0.00 |
| ATOM | 5750 | HD12 | LEU | X | 382 | 60.374 | 14.181 | 56.009 | 0.00 | 0.00 |
| ATOM | 5751 | HD13 | LEU | X | 382 | 61.019 | 13.768 | 54.423 | 0.00 | 0.00 |
| ATOM | 5752 | CD2  | LEU | X | 382 | 63.309 | 15.241 | 54.868 | 0.00 | 0.00 |
| ATOM | 5753 | HD21 | LEU | X | 382 | 63.332 | 14.553 | 54.022 | 0.00 | 0.00 |



|      |      |      |     |   |     |        |        |        |      |      |
|------|------|------|-----|---|-----|--------|--------|--------|------|------|
| ATOM | 5754 | HD22 | LEU | X | 382 | 62.915 | 16.199 | 54.528 | 0.00 | 0.00 |
| ATOM | 5755 | HD23 | LEU | X | 382 | 64.280 | 15.333 | 55.355 | 0.00 | 0.00 |
| ATOM | 5756 | C    | LEU | X | 382 | 64.454 | 16.657 | 57.569 | 0.00 | 0.00 |
| ATOM | 5757 | O    | LEU | X | 382 | 65.525 | 16.009 | 57.619 | 0.00 | 0.00 |
| ATOM | 5758 | N    | HIE | X | 383 | 64.338 | 17.934 | 57.168 | 0.00 | 0.00 |
| ATOM | 5759 | H    | HIE | X | 383 | 63.438 | 18.390 | 57.220 | 0.00 | 0.00 |
| ATOM | 5760 | CA   | HIE | X | 383 | 65.478 | 18.644 | 56.633 | 0.00 | 0.00 |
| ATOM | 5761 | HA   | HIE | X | 383 | 66.414 | 18.272 | 57.051 | 0.00 | 0.00 |
| ATOM | 5762 | CB   | HIE | X | 383 | 65.588 | 18.347 | 55.117 | 0.00 | 0.00 |
| ATOM | 5763 | HB2  | HIE | X | 383 | 65.578 | 17.264 | 54.997 | 0.00 | 0.00 |
| ATOM | 5764 | HB3  | HIE | X | 383 | 64.735 | 18.784 | 54.598 | 0.00 | 0.00 |
| ATOM | 5765 | CG   | HIE | X | 383 | 66.866 | 18.830 | 54.522 | 0.00 | 0.00 |
| ATOM | 5766 | ND1  | HIE | X | 383 | 67.564 | 19.918 | 55.044 | 0.00 | 0.00 |
| ATOM | 5767 | CE1  | HIE | X | 383 | 68.685 | 20.064 | 54.349 | 0.00 | 0.00 |
| ATOM | 5768 | HE1  | HIE | X | 383 | 69.406 | 20.839 | 54.561 | 0.00 | 0.00 |
| ATOM | 5769 | NE2  | HIE | X | 383 | 68.745 | 19.118 | 53.449 | 0.00 | 0.00 |
| ATOM | 5770 | HE2  | HIE | X | 383 | 69.430 | 19.178 | 52.709 | 0.00 | 0.00 |
| ATOM | 5771 | CD2  | HIE | X | 383 | 67.595 | 18.341 | 53.503 | 0.00 | 0.00 |
| ATOM | 5772 | HD2  | HIE | X | 383 | 67.225 | 17.593 | 52.818 | 0.00 | 0.00 |
| ATOM | 5773 | C    | HIE | X | 383 | 65.323 | 20.161 | 56.842 | 0.00 | 0.00 |
| ATOM | 5774 | O    | HIE | X | 383 | 64.670 | 20.860 | 56.044 | 0.00 | 0.00 |
| ATOM | 5775 | N    | PRO | X | 384 | 65.768 | 20.617 | 58.035 | 0.00 | 0.00 |
| ATOM | 5776 | CD   | PRO | X | 384 | 65.942 | 19.811 | 59.168 | 0.00 | 0.00 |
| ATOM | 5777 | HD2  | PRO | X | 384 | 66.951 | 19.401 | 59.120 | 0.00 | 0.00 |
| ATOM | 5778 | HD3  | PRO | X | 384 | 65.259 | 18.971 | 59.298 | 0.00 | 0.00 |
| ATOM | 5779 | CG   | PRO | X | 384 | 65.807 | 20.809 | 60.394 | 0.00 | 0.00 |
| ATOM | 5780 | HG2  | PRO | X | 384 | 66.416 | 20.484 | 61.237 | 0.00 | 0.00 |
| ATOM | 5781 | HG3  | PRO | X | 384 | 64.833 | 20.864 | 60.881 | 0.00 | 0.00 |
| ATOM | 5782 | CB   | PRO | X | 384 | 66.128 | 22.213 | 59.807 | 0.00 | 0.00 |
| ATOM | 5783 | HB2  | PRO | X | 384 | 67.193 | 22.440 | 59.856 | 0.00 | 0.00 |
| ATOM | 5784 | HB3  | PRO | X | 384 | 65.609 | 22.979 | 60.384 | 0.00 | 0.00 |
| ATOM | 5785 | CA   | PRO | X | 384 | 65.576 | 22.068 | 58.424 | 0.00 | 0.00 |
| ATOM | 5786 | HA   | PRO | X | 384 | 64.526 | 22.343 | 58.330 | 0.00 | 0.00 |
| ATOM | 5787 | C    | PRO | X | 384 | 66.323 | 23.125 | 57.593 | 0.00 | 0.00 |
| ATOM | 5788 | O    | PRO | X | 384 | 65.830 | 24.247 | 57.635 | 0.00 | 0.00 |
| ATOM | 5789 | N    | GLU | X | 385 | 67.416 | 22.840 | 56.866 | 0.00 | 0.00 |
| ATOM | 5790 | H    | GLU | X | 385 | 67.795 | 21.918 | 57.027 | 0.00 | 0.00 |
| ATOM | 5791 | CA   | GLU | X | 385 | 68.200 | 23.779 | 56.092 | 0.00 | 0.00 |
| ATOM | 5792 | HA   | GLU | X | 385 | 67.844 | 24.786 | 56.311 | 0.00 | 0.00 |
| ATOM | 5793 | CB   | GLU | X | 385 | 69.670 | 23.717 | 56.454 | 0.00 | 0.00 |
| ATOM | 5794 | HB2  | GLU | X | 385 | 70.131 | 22.739 | 56.316 | 0.00 | 0.00 |
| ATOM | 5795 | HB3  | GLU | X | 385 | 70.178 | 24.279 | 55.670 | 0.00 | 0.00 |
| ATOM | 5796 | CG   | GLU | X | 385 | 70.017 | 24.385 | 57.741 | 0.00 | 0.00 |
| ATOM | 5797 | HG2  | GLU | X | 385 | 69.643 | 25.407 | 57.680 | 0.00 | 0.00 |
| ATOM | 5798 | HG3  | GLU | X | 385 | 69.400 | 23.859 | 58.470 | 0.00 | 0.00 |
| ATOM | 5799 | CD   | GLU | X | 385 | 71.447 | 24.359 | 58.067 | 0.00 | 0.00 |
| ATOM | 5800 | OE1  | GLU | X | 385 | 71.717 | 24.919 | 59.166 | 0.00 | 0.00 |
| ATOM | 5801 | OE2  | GLU | X | 385 | 72.301 | 23.632 | 57.479 | 0.00 | 0.00 |
| ATOM | 5802 | C    | GLU | X | 385 | 67.964 | 23.686 | 54.549 | 0.00 | 0.00 |
| ATOM | 5803 | O    | GLU | X | 385 | 68.479 | 24.501 | 53.849 | 0.00 | 0.00 |
| ATOM | 5804 | N    | ASP | X | 386 | 67.041 | 22.802 | 54.007 | 0.00 | 0.00 |
| ATOM | 5805 | H    | ASP | X | 386 | 66.590 | 22.134 | 54.615 | 0.00 | 0.00 |
| ATOM | 5806 | CA   | ASP | X | 386 | 66.847 | 22.599 | 52.599 | 0.00 | 0.00 |
| ATOM | 5807 | HA   | ASP | X | 386 | 67.842 | 22.278 | 52.291 | 0.00 | 0.00 |
| ATOM | 5808 | CB   | ASP | X | 386 | 65.841 | 21.501 | 52.312 | 0.00 | 0.00 |
| ATOM | 5809 | HB2  | ASP | X | 386 | 66.086 | 20.626 | 52.914 | 0.00 | 0.00 |
| ATOM | 5810 | HB3  | ASP | X | 386 | 64.846 | 21.845 | 52.596 | 0.00 | 0.00 |
| ATOM | 5811 | CG   | ASP | X | 386 | 65.963 | 21.025 | 50.873 | 0.00 | 0.00 |
| ATOM | 5812 | OD1  | ASP | X | 386 | 65.067 | 21.543 | 50.187 | 0.00 | 0.00 |
| ATOM | 5813 | OD2  | ASP | X | 386 | 66.904 | 20.279 | 50.464 | 0.00 | 0.00 |
| ATOM | 5814 | C    | ASP | X | 386 | 66.343 | 23.915 | 51.911 | 0.00 | 0.00 |
| ATOM | 5815 | O    | ASP | X | 386 | 65.249 | 24.419 | 52.304 | 0.00 | 0.00 |
| ATOM | 5816 | N    | PRO | X | 387 | 67.133 | 24.485 | 50.960 | 0.00 | 0.00 |
| ATOM | 5817 | CD   | PRO | X | 387 | 68.492 | 23.958 | 50.593 | 0.00 | 0.00 |
| ATOM | 5818 | HD2  | PRO | X | 387 | 68.324 | 22.959 | 50.193 | 0.00 | 0.00 |
| ATOM | 5819 | HD3  | PRO | X | 387 | 69.181 | 24.157 | 51.414 | 0.00 | 0.00 |
| ATOM | 5820 | CG   | PRO | X | 387 | 68.862 | 24.884 | 49.462 | 0.00 | 0.00 |

|      |      |      |     |   |     |        |        |        |      |      |
|------|------|------|-----|---|-----|--------|--------|--------|------|------|
| ATOM | 5821 | HG2  | PRO | X | 387 | 68.526 | 24.387 | 48.553 | 0.00 | 0.00 |
| ATOM | 5822 | HG3  | PRO | X | 387 | 69.948 | 24.937 | 49.383 | 0.00 | 0.00 |
| ATOM | 5823 | CB   | PRO | X | 387 | 68.141 | 26.209 | 49.593 | 0.00 | 0.00 |
| ATOM | 5824 | HB2  | PRO | X | 387 | 67.821 | 26.533 | 48.603 | 0.00 | 0.00 |
| ATOM | 5825 | HB3  | PRO | X | 387 | 68.677 | 26.995 | 50.126 | 0.00 | 0.00 |
| ATOM | 5826 | CA   | PRO | X | 387 | 66.904 | 25.795 | 50.417 | 0.00 | 0.00 |
| ATOM | 5827 | HA   | PRO | X | 387 | 66.848 | 26.559 | 51.192 | 0.00 | 0.00 |
| ATOM | 5828 | C    | PRO | X | 387 | 65.590 | 25.872 | 49.642 | 0.00 | 0.00 |
| ATOM | 5829 | O    | PRO | X | 387 | 64.961 | 26.921 | 49.653 | 0.00 | 0.00 |
| ATOM | 5830 | N    | ALA | X | 388 | 65.227 | 24.760 | 49.018 | 0.00 | 0.00 |
| ATOM | 5831 | H    | ALA | X | 388 | 65.818 | 23.945 | 49.107 | 0.00 | 0.00 |
| ATOM | 5832 | CA   | ALA | X | 388 | 63.959 | 24.564 | 48.346 | 0.00 | 0.00 |
| ATOM | 5833 | HA   | ALA | X | 388 | 63.793 | 25.329 | 47.587 | 0.00 | 0.00 |
| ATOM | 5834 | CB   | ALA | X | 388 | 63.881 | 23.320 | 47.552 | 0.00 | 0.00 |
| ATOM | 5835 | HB1  | ALA | X | 388 | 62.972 | 23.353 | 46.952 | 0.00 | 0.00 |
| ATOM | 5836 | HB2  | ALA | X | 388 | 63.813 | 22.499 | 48.266 | 0.00 | 0.00 |
| ATOM | 5837 | HB3  | ALA | X | 388 | 64.816 | 23.254 | 46.996 | 0.00 | 0.00 |
| ATOM | 5838 | C    | ALA | X | 388 | 62.827 | 24.732 | 49.313 | 0.00 | 0.00 |
| ATOM | 5839 | O    | ALA | X | 388 | 61.953 | 25.538 | 49.031 | 0.00 | 0.00 |
| ATOM | 5840 | N    | ARG | X | 389 | 62.835 | 23.923 | 50.375 | 0.00 | 0.00 |
| ATOM | 5841 | H    | ARG | X | 389 | 63.640 | 23.326 | 50.494 | 0.00 | 0.00 |
| ATOM | 5842 | CA   | ARG | X | 389 | 61.871 | 23.980 | 51.466 | 0.00 | 0.00 |
| ATOM | 5843 | HA   | ARG | X | 389 | 60.916 | 23.864 | 50.954 | 0.00 | 0.00 |
| ATOM | 5844 | CB   | ARG | X | 389 | 62.058 | 22.802 | 52.457 | 0.00 | 0.00 |
| ATOM | 5845 | HB2  | ARG | X | 389 | 63.101 | 22.883 | 52.762 | 0.00 | 0.00 |
| ATOM | 5846 | HB3  | ARG | X | 389 | 61.421 | 23.032 | 53.311 | 0.00 | 0.00 |
| ATOM | 5847 | CG   | ARG | X | 389 | 61.821 | 21.410 | 51.858 | 0.00 | 0.00 |
| ATOM | 5848 | HG2  | ARG | X | 389 | 60.814 | 21.333 | 51.448 | 0.00 | 0.00 |
| ATOM | 5849 | HG3  | ARG | X | 389 | 62.425 | 21.408 | 50.950 | 0.00 | 0.00 |
| ATOM | 5850 | CD   | ARG | X | 389 | 62.185 | 20.184 | 52.716 | 0.00 | 0.00 |
| ATOM | 5851 | HD2  | ARG | X | 389 | 63.269 | 20.165 | 52.609 | 0.00 | 0.00 |
| ATOM | 5852 | HD3  | ARG | X | 389 | 62.024 | 20.317 | 53.785 | 0.00 | 0.00 |
| ATOM | 5853 | NE   | ARG | X | 389 | 61.880 | 18.849 | 52.175 | 0.00 | 0.00 |
| ATOM | 5854 | HE   | ARG | X | 389 | 62.206 | 18.773 | 51.222 | 0.00 | 0.00 |
| ATOM | 5855 | CZ   | ARG | X | 389 | 61.227 | 17.824 | 52.703 | 0.00 | 0.00 |
| ATOM | 5856 | NH1  | ARG | X | 389 | 60.718 | 17.902 | 53.883 | 0.00 | 0.00 |
| ATOM | 5857 | HH11 | ARG | X | 389 | 60.757 | 18.797 | 54.351 | 0.00 | 0.00 |
| ATOM | 5858 | HH12 | ARG | X | 389 | 60.273 | 17.081 | 54.268 | 0.00 | 0.00 |
| ATOM | 5859 | NH2  | ARG | X | 389 | 61.203 | 16.703 | 52.045 | 0.00 | 0.00 |
| ATOM | 5860 | HH21 | ARG | X | 389 | 61.694 | 16.808 | 51.169 | 0.00 | 0.00 |
| ATOM | 5861 | HH22 | ARG | X | 389 | 60.832 | 15.851 | 52.442 | 0.00 | 0.00 |
| ATOM | 5862 | C    | ARG | X | 389 | 61.887 | 25.341 | 52.242 | 0.00 | 0.00 |
| ATOM | 5863 | O    | ARG | X | 389 | 60.843 | 25.935 | 52.468 | 0.00 | 0.00 |
| ATOM | 5864 | N    | LEU | X | 390 | 63.066 | 26.036 | 52.300 | 0.00 | 0.00 |
| ATOM | 5865 | H    | LEU | X | 390 | 63.871 | 25.427 | 52.258 | 0.00 | 0.00 |
| ATOM | 5866 | CA   | LEU | X | 390 | 63.136 | 27.432 | 52.826 | 0.00 | 0.00 |
| ATOM | 5867 | HA   | LEU | X | 390 | 62.426 | 27.497 | 53.651 | 0.00 | 0.00 |
| ATOM | 5868 | CB   | LEU | X | 390 | 64.556 | 27.777 | 53.211 | 0.00 | 0.00 |
| ATOM | 5869 | HB2  | LEU | X | 390 | 65.171 | 27.648 | 52.320 | 0.00 | 0.00 |
| ATOM | 5870 | HB3  | LEU | X | 390 | 64.702 | 28.847 | 53.363 | 0.00 | 0.00 |
| ATOM | 5871 | CG   | LEU | X | 390 | 65.011 | 27.037 | 54.548 | 0.00 | 0.00 |
| ATOM | 5872 | HG   | LEU | X | 390 | 64.825 | 25.980 | 54.362 | 0.00 | 0.00 |
| ATOM | 5873 | CD1  | LEU | X | 390 | 66.512 | 27.276 | 54.671 | 0.00 | 0.00 |
| ATOM | 5874 | HD11 | LEU | X | 390 | 67.033 | 26.880 | 53.799 | 0.00 | 0.00 |
| ATOM | 5875 | HD12 | LEU | X | 390 | 66.895 | 26.751 | 55.546 | 0.00 | 0.00 |
| ATOM | 5876 | HD13 | LEU | X | 390 | 66.720 | 28.341 | 54.771 | 0.00 | 0.00 |
| ATOM | 5877 | CD2  | LEU | X | 390 | 64.164 | 27.426 | 55.816 | 0.00 | 0.00 |
| ATOM | 5878 | HD21 | LEU | X | 390 | 64.167 | 28.496 | 56.024 | 0.00 | 0.00 |
| ATOM | 5879 | HD22 | LEU | X | 390 | 63.204 | 26.910 | 55.792 | 0.00 | 0.00 |
| ATOM | 5880 | HD23 | LEU | X | 390 | 64.591 | 27.018 | 56.732 | 0.00 | 0.00 |
| ATOM | 5881 | C    | LEU | X | 390 | 62.534 | 28.414 | 51.869 | 0.00 | 0.00 |
| ATOM | 5882 | O    | LEU | X | 390 | 61.664 | 29.176 | 52.312 | 0.00 | 0.00 |
| ATOM | 5883 | N    | ARG | X | 391 | 62.873 | 28.518 | 50.578 | 0.00 | 0.00 |
| ATOM | 5884 | H    | ARG | X | 391 | 63.638 | 27.931 | 50.277 | 0.00 | 0.00 |
| ATOM | 5885 | CA   | ARG | X | 391 | 62.185 | 29.364 | 49.553 | 0.00 | 0.00 |
| ATOM | 5886 | HA   | ARG | X | 391 | 62.193 | 30.382 | 49.944 | 0.00 | 0.00 |
| ATOM | 5887 | CB   | ARG | X | 391 | 62.911 | 29.470 | 48.253 | 0.00 | 0.00 |

|      |      |      |     |   |     |        |        |        |      |      |
|------|------|------|-----|---|-----|--------|--------|--------|------|------|
| ATOM | 5888 | HB2  | ARG | X | 391 | 62.597 | 30.412 | 47.801 | 0.00 | 0.00 |
| ATOM | 5889 | HB3  | ARG | X | 391 | 63.981 | 29.530 | 48.449 | 0.00 | 0.00 |
| ATOM | 5890 | CG   | ARG | X | 391 | 62.656 | 28.372 | 47.184 | 0.00 | 0.00 |
| ATOM | 5891 | HG2  | ARG | X | 391 | 62.800 | 27.366 | 47.576 | 0.00 | 0.00 |
| ATOM | 5892 | HG3  | ARG | X | 391 | 61.625 | 28.404 | 46.831 | 0.00 | 0.00 |
| ATOM | 5893 | CD   | ARG | X | 391 | 63.494 | 28.542 | 45.869 | 0.00 | 0.00 |
| ATOM | 5894 | HD2  | ARG | X | 391 | 63.197 | 27.786 | 45.142 | 0.00 | 0.00 |
| ATOM | 5895 | HD3  | ARG | X | 391 | 63.228 | 29.535 | 45.508 | 0.00 | 0.00 |
| ATOM | 5896 | NE   | ARG | X | 391 | 64.974 | 28.362 | 46.004 | 0.00 | 0.00 |
| ATOM | 5897 | HE   | ARG | X | 391 | 65.522 | 29.171 | 46.258 | 0.00 | 0.00 |
| ATOM | 5898 | CZ   | ARG | X | 391 | 65.671 | 27.234 | 45.874 | 0.00 | 0.00 |
| ATOM | 5899 | NH1  | ARG | X | 391 | 65.099 | 26.062 | 45.722 | 0.00 | 0.00 |
| ATOM | 5900 | HH11 | ARG | X | 391 | 64.140 | 25.981 | 45.415 | 0.00 | 0.00 |
| ATOM | 5901 | HH12 | ARG | X | 391 | 65.672 | 25.247 | 45.888 | 0.00 | 0.00 |
| ATOM | 5902 | NH2  | ARG | X | 391 | 67.005 | 27.302 | 45.886 | 0.00 | 0.00 |
| ATOM | 5903 | HH21 | ARG | X | 391 | 67.489 | 28.188 | 45.860 | 0.00 | 0.00 |
| ATOM | 5904 | HH22 | ARG | X | 391 | 67.606 | 26.493 | 45.817 | 0.00 | 0.00 |
| ATOM | 5905 | C    | ARG | X | 391 | 60.685 | 29.072 | 49.374 | 0.00 | 0.00 |
| ATOM | 5906 | O    | ARG | X | 391 | 59.796 | 29.926 | 49.371 | 0.00 | 0.00 |
| ATOM | 5907 | N    | GLU | X | 392 | 60.418 | 27.747 | 49.388 | 0.00 | 0.00 |
| ATOM | 5908 | H    | GLU | X | 392 | 61.200 | 27.108 | 49.395 | 0.00 | 0.00 |
| ATOM | 5909 | CA   | GLU | X | 392 | 59.038 | 27.303 | 49.364 | 0.00 | 0.00 |
| ATOM | 5910 | HA   | GLU | X | 392 | 58.476 | 27.766 | 48.553 | 0.00 | 0.00 |
| ATOM | 5911 | CB   | GLU | X | 392 | 58.949 | 25.769 | 49.007 | 0.00 | 0.00 |
| ATOM | 5912 | HB2  | GLU | X | 392 | 59.626 | 25.144 | 49.590 | 0.00 | 0.00 |
| ATOM | 5913 | HB3  | GLU | X | 392 | 57.969 | 25.333 | 49.197 | 0.00 | 0.00 |
| ATOM | 5914 | CG   | GLU | X | 392 | 59.105 | 25.568 | 47.520 | 0.00 | 0.00 |
| ATOM | 5915 | HG2  | GLU | X | 392 | 58.229 | 25.969 | 47.010 | 0.00 | 0.00 |
| ATOM | 5916 | HG3  | GLU | X | 392 | 60.002 | 26.035 | 47.113 | 0.00 | 0.00 |
| ATOM | 5917 | CD   | GLU | X | 392 | 59.224 | 24.089 | 47.166 | 0.00 | 0.00 |
| ATOM | 5918 | OE1  | GLU | X | 392 | 60.337 | 23.655 | 46.665 | 0.00 | 0.00 |
| ATOM | 5919 | OE2  | GLU | X | 392 | 58.179 | 23.424 | 47.187 | 0.00 | 0.00 |
| ATOM | 5920 | C    | GLU | X | 392 | 58.255 | 27.575 | 50.644 | 0.00 | 0.00 |
| ATOM | 5921 | O    | GLU | X | 392 | 57.028 | 27.903 | 50.551 | 0.00 | 0.00 |
| ATOM | 5922 | N    | ALA | X | 393 | 58.804 | 27.658 | 51.809 | 0.00 | 0.00 |
| ATOM | 5923 | H    | ALA | X | 393 | 59.754 | 27.319 | 51.856 | 0.00 | 0.00 |
| ATOM | 5924 | CA   | ALA | X | 393 | 58.153 | 28.213 | 52.991 | 0.00 | 0.00 |
| ATOM | 5925 | HA   | ALA | X | 393 | 57.173 | 27.745 | 53.086 | 0.00 | 0.00 |
| ATOM | 5926 | CB   | ALA | X | 393 | 59.098 | 27.885 | 54.187 | 0.00 | 0.00 |
| ATOM | 5927 | HB1  | ALA | X | 393 | 60.131 | 28.230 | 54.232 | 0.00 | 0.00 |
| ATOM | 5928 | HB2  | ALA | X | 393 | 59.074 | 26.816 | 54.398 | 0.00 | 0.00 |
| ATOM | 5929 | HB3  | ALA | X | 393 | 58.728 | 28.479 | 55.023 | 0.00 | 0.00 |
| ATOM | 5930 | C    | ALA | X | 393 | 57.908 | 29.701 | 52.786 | 0.00 | 0.00 |
| ATOM | 5931 | O    | ALA | X | 393 | 56.881 | 30.264 | 53.248 | 0.00 | 0.00 |
| ATOM | 5932 | N    | LEU | X | 394 | 58.894 | 30.442 | 52.262 | 0.00 | 0.00 |
| ATOM | 5933 | H    | LEU | X | 394 | 59.783 | 30.005 | 52.063 | 0.00 | 0.00 |
| ATOM | 5934 | CA   | LEU | X | 394 | 58.738 | 31.876 | 52.159 | 0.00 | 0.00 |
| ATOM | 5935 | HA   | LEU | X | 394 | 58.419 | 32.317 | 53.103 | 0.00 | 0.00 |
| ATOM | 5936 | CB   | LEU | X | 394 | 60.149 | 32.460 | 51.881 | 0.00 | 0.00 |
| ATOM | 5937 | HB2  | LEU | X | 394 | 60.877 | 32.212 | 52.654 | 0.00 | 0.00 |
| ATOM | 5938 | HB3  | LEU | X | 394 | 60.584 | 32.119 | 50.942 | 0.00 | 0.00 |
| ATOM | 5939 | CG   | LEU | X | 394 | 60.186 | 33.993 | 51.931 | 0.00 | 0.00 |
| ATOM | 5940 | HG   | LEU | X | 394 | 59.642 | 34.383 | 51.071 | 0.00 | 0.00 |
| ATOM | 5941 | CD1  | LEU | X | 394 | 59.668 | 34.555 | 53.259 | 0.00 | 0.00 |
| ATOM | 5942 | HD11 | LEU | X | 394 | 59.811 | 35.633 | 53.332 | 0.00 | 0.00 |
| ATOM | 5943 | HD12 | LEU | X | 394 | 60.288 | 34.052 | 54.001 | 0.00 | 0.00 |
| ATOM | 5944 | HD13 | LEU | X | 394 | 58.594 | 34.387 | 53.335 | 0.00 | 0.00 |
| ATOM | 5945 | CD2  | LEU | X | 394 | 61.623 | 34.494 | 51.705 | 0.00 | 0.00 |
| ATOM | 5946 | HD21 | LEU | X | 394 | 61.856 | 34.309 | 50.656 | 0.00 | 0.00 |
| ATOM | 5947 | HD22 | LEU | X | 394 | 61.606 | 35.571 | 51.869 | 0.00 | 0.00 |
| ATOM | 5948 | HD23 | LEU | X | 394 | 62.288 | 33.944 | 52.372 | 0.00 | 0.00 |
| ATOM | 5949 | C    | LEU | X | 394 | 57.642 | 32.138 | 51.119 | 0.00 | 0.00 |
| ATOM | 5950 | O    | LEU | X | 394 | 56.746 | 32.889 | 51.372 | 0.00 | 0.00 |
| ATOM | 5951 | N    | SER | X | 395 | 57.577 | 31.415 | 49.969 | 0.00 | 0.00 |
| ATOM | 5952 | H    | SER | X | 395 | 58.322 | 30.817 | 49.641 | 0.00 | 0.00 |
| ATOM | 5953 | CA   | SER | X | 395 | 56.568 | 31.551 | 48.983 | 0.00 | 0.00 |
| ATOM | 5954 | HA   | SER | X | 395 | 56.645 | 32.581 | 48.635 | 0.00 | 0.00 |

|      |      |      |     |   |     |        |        |        |      |      |
|------|------|------|-----|---|-----|--------|--------|--------|------|------|
| ATOM | 5955 | CB   | SER | X | 395 | 56.837 | 30.500 | 47.896 | 0.00 | 0.00 |
| ATOM | 5956 | HB2  | SER | X | 395 | 57.130 | 29.562 | 48.368 | 0.00 | 0.00 |
| ATOM | 5957 | HB3  | SER | X | 395 | 55.906 | 30.374 | 47.342 | 0.00 | 0.00 |
| ATOM | 5958 | OG   | SER | X | 395 | 57.833 | 30.855 | 47.030 | 0.00 | 0.00 |
| ATOM | 5959 | HG   | SER | X | 395 | 58.006 | 30.050 | 46.536 | 0.00 | 0.00 |
| ATOM | 5960 | C    | SER | X | 395 | 55.130 | 31.265 | 49.522 | 0.00 | 0.00 |
| ATOM | 5961 | O    | SER | X | 395 | 54.128 | 31.920 | 49.238 | 0.00 | 0.00 |
| ATOM | 5962 | N    | ASP | X | 396 | 55.086 | 30.307 | 50.450 | 0.00 | 0.00 |
| ATOM | 5963 | H    | ASP | X | 396 | 55.922 | 29.853 | 50.790 | 0.00 | 0.00 |
| ATOM | 5964 | CA   | ASP | X | 396 | 53.846 | 29.994 | 51.162 | 0.00 | 0.00 |
| ATOM | 5965 | HA   | ASP | X | 396 | 53.062 | 29.741 | 50.448 | 0.00 | 0.00 |
| ATOM | 5966 | CB   | ASP | X | 396 | 54.049 | 28.684 | 51.928 | 0.00 | 0.00 |
| ATOM | 5967 | HB2  | ASP | X | 396 | 54.371 | 27.870 | 51.278 | 0.00 | 0.00 |
| ATOM | 5968 | HB3  | ASP | X | 396 | 54.894 | 28.843 | 52.598 | 0.00 | 0.00 |
| ATOM | 5969 | CG   | ASP | X | 396 | 52.762 | 28.339 | 52.683 | 0.00 | 0.00 |
| ATOM | 5970 | OD1  | ASP | X | 396 | 52.772 | 28.556 | 53.943 | 0.00 | 0.00 |
| ATOM | 5971 | OD2  | ASP | X | 396 | 51.702 | 28.090 | 52.066 | 0.00 | 0.00 |
| ATOM | 5972 | C    | ASP | X | 396 | 53.460 | 31.150 | 52.106 | 0.00 | 0.00 |
| ATOM | 5973 | O    | ASP | X | 396 | 52.420 | 31.795 | 51.924 | 0.00 | 0.00 |
| ATOM | 5974 | N    | VAL | X | 397 | 54.444 | 31.563 | 52.938 | 0.00 | 0.00 |
| ATOM | 5975 | H    | VAL | X | 397 | 55.176 | 30.880 | 53.070 | 0.00 | 0.00 |
| ATOM | 5976 | CA   | VAL | X | 397 | 54.121 | 32.476 | 54.017 | 0.00 | 0.00 |
| ATOM | 5977 | HA   | VAL | X | 397 | 53.213 | 32.070 | 54.464 | 0.00 | 0.00 |
| ATOM | 5978 | CB   | VAL | X | 397 | 55.093 | 32.397 | 55.165 | 0.00 | 0.00 |
| ATOM | 5979 | HB   | VAL | X | 397 | 55.465 | 31.373 | 55.212 | 0.00 | 0.00 |
| ATOM | 5980 | CG1  | VAL | X | 397 | 56.340 | 33.350 | 55.007 | 0.00 | 0.00 |
| ATOM | 5981 | HG11 | VAL | X | 397 | 57.148 | 32.926 | 55.604 | 0.00 | 0.00 |
| ATOM | 5982 | HG12 | VAL | X | 397 | 56.564 | 33.444 | 53.944 | 0.00 | 0.00 |
| ATOM | 5983 | HG13 | VAL | X | 397 | 56.014 | 34.328 | 55.361 | 0.00 | 0.00 |
| ATOM | 5984 | CG2  | VAL | X | 397 | 54.501 | 32.771 | 56.540 | 0.00 | 0.00 |
| ATOM | 5985 | HG21 | VAL | X | 397 | 54.334 | 33.839 | 56.682 | 0.00 | 0.00 |
| ATOM | 5986 | HG22 | VAL | X | 397 | 55.136 | 32.409 | 57.348 | 0.00 | 0.00 |
| ATOM | 5987 | HG23 | VAL | X | 397 | 53.575 | 32.211 | 56.672 | 0.00 | 0.00 |
| ATOM | 5988 | C    | VAL | X | 397 | 53.857 | 33.887 | 53.587 | 0.00 | 0.00 |
| ATOM | 5989 | O    | VAL | X | 397 | 52.943 | 34.508 | 54.106 | 0.00 | 0.00 |
| ATOM | 5990 | N    | VAL | X | 398 | 54.625 | 34.348 | 52.623 | 0.00 | 0.00 |
| ATOM | 5991 | H    | VAL | X | 398 | 55.301 | 33.753 | 52.166 | 0.00 | 0.00 |
| ATOM | 5992 | CA   | VAL | X | 398 | 54.321 | 35.653 | 51.927 | 0.00 | 0.00 |
| ATOM | 5993 | HA   | VAL | X | 398 | 54.618 | 36.365 | 52.696 | 0.00 | 0.00 |
| ATOM | 5994 | CB   | VAL | X | 398 | 55.277 | 35.828 | 50.709 | 0.00 | 0.00 |
| ATOM | 5995 | HB   | VAL | X | 398 | 55.383 | 34.913 | 50.127 | 0.00 | 0.00 |
| ATOM | 5996 | CG1  | VAL | X | 398 | 54.906 | 36.889 | 49.632 | 0.00 | 0.00 |
| ATOM | 5997 | HG11 | VAL | X | 398 | 54.246 | 36.471 | 48.872 | 0.00 | 0.00 |
| ATOM | 5998 | HG12 | VAL | X | 398 | 54.404 | 37.743 | 50.086 | 0.00 | 0.00 |
| ATOM | 5999 | HG13 | VAL | X | 398 | 55.816 | 37.056 | 49.057 | 0.00 | 0.00 |
| ATOM | 6000 | CG2  | VAL | X | 398 | 56.681 | 36.120 | 51.355 | 0.00 | 0.00 |
| ATOM | 6001 | HG21 | VAL | X | 398 | 56.569 | 37.103 | 51.812 | 0.00 | 0.00 |
| ATOM | 6002 | HG22 | VAL | X | 398 | 57.421 | 36.401 | 50.605 | 0.00 | 0.00 |
| ATOM | 6003 | HG23 | VAL | X | 398 | 57.082 | 35.369 | 52.036 | 0.00 | 0.00 |
| ATOM | 6004 | C    | VAL | X | 398 | 52.902 | 35.783 | 51.399 | 0.00 | 0.00 |
| ATOM | 6005 | O    | VAL | X | 398 | 52.309 | 36.852 | 51.507 | 0.00 | 0.00 |
| ATOM | 6006 | N    | GLY | X | 399 | 52.267 | 34.686 | 50.945 | 0.00 | 0.00 |
| ATOM | 6007 | H    | GLY | X | 399 | 52.730 | 33.809 | 51.138 | 0.00 | 0.00 |
| ATOM | 6008 | CA   | GLY | X | 399 | 50.839 | 34.671 | 50.518 | 0.00 | 0.00 |
| ATOM | 6009 | HA2  | GLY | X | 399 | 50.450 | 35.599 | 50.100 | 0.00 | 0.00 |
| ATOM | 6010 | HA3  | GLY | X | 399 | 50.688 | 33.931 | 49.732 | 0.00 | 0.00 |
| ATOM | 6011 | C    | GLY | X | 399 | 49.795 | 34.335 | 51.596 | 0.00 | 0.00 |
| ATOM | 6012 | O    | GLY | X | 399 | 48.678 | 34.901 | 51.575 | 0.00 | 0.00 |
| ATOM | 6013 | N    | ASP | X | 400 | 50.097 | 33.440 | 52.492 | 0.00 | 0.00 |
| ATOM | 6014 | H    | ASP | X | 400 | 51.000 | 33.011 | 52.346 | 0.00 | 0.00 |
| ATOM | 6015 | CA   | ASP | X | 400 | 49.198 | 32.904 | 53.495 | 0.00 | 0.00 |
| ATOM | 6016 | HA   | ASP | X | 400 | 48.440 | 32.310 | 52.985 | 0.00 | 0.00 |
| ATOM | 6017 | CB   | ASP | X | 400 | 49.969 | 31.908 | 54.418 | 0.00 | 0.00 |
| ATOM | 6018 | HB2  | ASP | X | 400 | 50.669 | 31.301 | 53.844 | 0.00 | 0.00 |
| ATOM | 6019 | HB3  | ASP | X | 400 | 50.612 | 32.505 | 55.066 | 0.00 | 0.00 |
| ATOM | 6020 | CG   | ASP | X | 400 | 49.010 | 31.003 | 55.306 | 0.00 | 0.00 |
| ATOM | 6021 | OD1  | ASP | X | 400 | 47.923 | 30.718 | 54.821 | 0.00 | 0.00 |

|      |      |      |     |   |     |        |        |        |      |      |
|------|------|------|-----|---|-----|--------|--------|--------|------|------|
| ATOM | 6022 | OD2  | ASP | X | 400 | 49.461 | 30.420 | 56.321 | 0.00 | 0.00 |
| ATOM | 6023 | C    | ASP | X | 400 | 48.460 | 34.044 | 54.240 | 0.00 | 0.00 |
| ATOM | 6024 | O    | ASP | X | 400 | 47.291 | 34.332 | 53.914 | 0.00 | 0.00 |
| ATOM | 6025 | N    | HIE | X | 401 | 49.206 | 34.789 | 55.098 | 0.00 | 0.00 |
| ATOM | 6026 | H    | HIE | X | 401 | 50.137 | 34.491 | 55.352 | 0.00 | 0.00 |
| ATOM | 6027 | CA   | HIE | X | 401 | 48.721 | 35.959 | 55.783 | 0.00 | 0.00 |
| ATOM | 6028 | HA   | HIE | X | 401 | 47.886 | 35.566 | 56.364 | 0.00 | 0.00 |
| ATOM | 6029 | CB   | HIE | X | 401 | 49.728 | 36.371 | 56.869 | 0.00 | 0.00 |
| ATOM | 6030 | HB2  | HIE | X | 401 | 49.150 | 36.643 | 57.752 | 0.00 | 0.00 |
| ATOM | 6031 | HB3  | HIE | X | 401 | 50.375 | 35.535 | 57.135 | 0.00 | 0.00 |
| ATOM | 6032 | CG   | HIE | X | 401 | 50.633 | 37.398 | 56.400 | 0.00 | 0.00 |
| ATOM | 6033 | ND1  | HIE | X | 401 | 50.403 | 38.781 | 56.157 | 0.00 | 0.00 |
| ATOM | 6034 | CE1  | HIE | X | 401 | 51.569 | 39.181 | 55.682 | 0.00 | 0.00 |
| ATOM | 6035 | HE1  | HIE | X | 401 | 51.747 | 40.195 | 55.356 | 0.00 | 0.00 |
| ATOM | 6036 | NE2  | HIE | X | 401 | 52.392 | 38.179 | 55.434 | 0.00 | 0.00 |
| ATOM | 6037 | HE2  | HIE | X | 401 | 53.338 | 38.264 | 55.092 | 0.00 | 0.00 |
| ATOM | 6038 | CD2  | HIE | X | 401 | 51.840 | 37.078 | 55.942 | 0.00 | 0.00 |
| ATOM | 6039 | HD2  | HIE | X | 401 | 52.348 | 36.130 | 56.038 | 0.00 | 0.00 |
| ATOM | 6040 | C    | HIE | X | 401 | 48.239 | 37.149 | 54.961 | 0.00 | 0.00 |
| ATOM | 6041 | O    | HIE | X | 401 | 47.184 | 37.770 | 55.355 | 0.00 | 0.00 |
| ATOM | 6042 | N    | ASN | X | 402 | 48.898 | 37.380 | 53.804 | 0.00 | 0.00 |
| ATOM | 6043 | H    | ASN | X | 402 | 49.809 | 36.958 | 53.695 | 0.00 | 0.00 |
| ATOM | 6044 | CA   | ASN | X | 402 | 48.419 | 38.398 | 52.894 | 0.00 | 0.00 |
| ATOM | 6045 | HA   | ASN | X | 402 | 48.276 | 39.318 | 53.460 | 0.00 | 0.00 |
| ATOM | 6046 | CB   | ASN | X | 402 | 49.596 | 38.657 | 51.964 | 0.00 | 0.00 |
| ATOM | 6047 | HB2  | ASN | X | 402 | 50.141 | 37.731 | 51.777 | 0.00 | 0.00 |
| ATOM | 6048 | HB3  | ASN | X | 402 | 49.221 | 38.880 | 50.965 | 0.00 | 0.00 |
| ATOM | 6049 | CG   | ASN | X | 402 | 50.526 | 39.746 | 52.514 | 0.00 | 0.00 |
| ATOM | 6050 | OD1  | ASN | X | 402 | 50.099 | 40.772 | 52.928 | 0.00 | 0.00 |
| ATOM | 6051 | ND2  | ASN | X | 402 | 51.803 | 39.517 | 52.403 | 0.00 | 0.00 |
| ATOM | 6052 | HD21 | ASN | X | 402 | 52.368 | 40.260 | 52.788 | 0.00 | 0.00 |
| ATOM | 6053 | HD22 | ASN | X | 402 | 52.068 | 38.613 | 52.039 | 0.00 | 0.00 |
| ATOM | 6054 | C    | ASN | X | 402 | 47.088 | 38.133 | 52.076 | 0.00 | 0.00 |
| ATOM | 6055 | O    | ASN | X | 402 | 46.364 | 39.115 | 51.903 | 0.00 | 0.00 |
| ATOM | 6056 | N    | VAL | X | 403 | 46.883 | 36.871 | 51.600 | 0.00 | 0.00 |
| ATOM | 6057 | H    | VAL | X | 403 | 47.606 | 36.181 | 51.744 | 0.00 | 0.00 |
| ATOM | 6058 | CA   | VAL | X | 403 | 45.785 | 36.490 | 50.590 | 0.00 | 0.00 |
| ATOM | 6059 | HA   | VAL | X | 403 | 45.006 | 37.246 | 50.693 | 0.00 | 0.00 |
| ATOM | 6060 | CB   | VAL | X | 403 | 46.329 | 36.684 | 49.128 | 0.00 | 0.00 |
| ATOM | 6061 | HB   | VAL | X | 403 | 46.917 | 37.601 | 49.186 | 0.00 | 0.00 |
| ATOM | 6062 | CG1  | VAL | X | 403 | 47.285 | 35.610 | 48.650 | 0.00 | 0.00 |
| ATOM | 6063 | HG11 | VAL | X | 403 | 47.605 | 35.876 | 47.642 | 0.00 | 0.00 |
| ATOM | 6064 | HG12 | VAL | X | 403 | 48.128 | 35.464 | 49.326 | 0.00 | 0.00 |
| ATOM | 6065 | HG13 | VAL | X | 403 | 46.675 | 34.714 | 48.537 | 0.00 | 0.00 |
| ATOM | 6066 | CG2  | VAL | X | 403 | 45.143 | 36.953 | 48.151 | 0.00 | 0.00 |
| ATOM | 6067 | HG21 | VAL | X | 403 | 44.470 | 36.095 | 48.177 | 0.00 | 0.00 |
| ATOM | 6068 | HG22 | VAL | X | 403 | 45.632 | 37.032 | 47.180 | 0.00 | 0.00 |
| ATOM | 6069 | HG23 | VAL | X | 403 | 44.648 | 37.872 | 48.463 | 0.00 | 0.00 |
| ATOM | 6070 | C    | VAL | X | 403 | 45.054 | 35.151 | 50.752 | 0.00 | 0.00 |
| ATOM | 6071 | O    | VAL | X | 403 | 43.843 | 35.187 | 50.693 | 0.00 | 0.00 |
| ATOM | 6072 | N    | VAL | X | 404 | 45.780 | 34.107 | 51.016 | 0.00 | 0.00 |
| ATOM | 6073 | H    | VAL | X | 404 | 46.769 | 34.016 | 50.830 | 0.00 | 0.00 |
| ATOM | 6074 | CA   | VAL | X | 404 | 45.110 | 32.794 | 50.884 | 0.00 | 0.00 |
| ATOM | 6075 | HA   | VAL | X | 404 | 44.586 | 32.872 | 49.932 | 0.00 | 0.00 |
| ATOM | 6076 | CB   | VAL | X | 404 | 46.120 | 31.570 | 50.768 | 0.00 | 0.00 |
| ATOM | 6077 | HB   | VAL | X | 404 | 46.508 | 31.274 | 51.743 | 0.00 | 0.00 |
| ATOM | 6078 | CG1  | VAL | X | 404 | 45.449 | 30.414 | 50.187 | 0.00 | 0.00 |
| ATOM | 6079 | HG11 | VAL | X | 404 | 46.203 | 29.859 | 49.629 | 0.00 | 0.00 |
| ATOM | 6080 | HG12 | VAL | X | 404 | 45.005 | 29.742 | 50.921 | 0.00 | 0.00 |
| ATOM | 6081 | HG13 | VAL | X | 404 | 44.673 | 30.731 | 49.491 | 0.00 | 0.00 |
| ATOM | 6082 | CG2  | VAL | X | 404 | 47.272 | 31.999 | 49.856 | 0.00 | 0.00 |
| ATOM | 6083 | HG21 | VAL | X | 404 | 47.767 | 32.934 | 50.118 | 0.00 | 0.00 |
| ATOM | 6084 | HG22 | VAL | X | 404 | 46.862 | 32.003 | 48.846 | 0.00 | 0.00 |
| ATOM | 6085 | HG23 | VAL | X | 404 | 48.050 | 31.236 | 49.891 | 0.00 | 0.00 |
| ATOM | 6086 | C    | VAL | X | 404 | 44.112 | 32.538 | 52.032 | 0.00 | 0.00 |
| ATOM | 6087 | O    | VAL | X | 404 | 42.919 | 32.314 | 51.823 | 0.00 | 0.00 |
| ATOM | 6088 | N    | CYX | X | 405 | 44.502 | 32.749 | 53.277 | 0.00 | 0.00 |

|      |      |      |     |   |     |        |        |        |      |      |
|------|------|------|-----|---|-----|--------|--------|--------|------|------|
| ATOM | 6089 | H    | CYX | X | 405 | 45.436 | 33.079 | 53.473 | 0.00 | 0.00 |
| ATOM | 6090 | CA   | CYX | X | 405 | 43.585 | 32.814 | 54.469 | 0.00 | 0.00 |
| ATOM | 6091 | HA   | CYX | X | 405 | 42.953 | 31.928 | 54.420 | 0.00 | 0.00 |
| ATOM | 6092 | CB   | CYX | X | 405 | 44.327 | 32.749 | 55.810 | 0.00 | 0.00 |
| ATOM | 6093 | HB2  | CYX | X | 405 | 45.097 | 33.519 | 55.840 | 0.00 | 0.00 |
| ATOM | 6094 | HB3  | CYX | X | 405 | 43.797 | 33.027 | 56.720 | 0.00 | 0.00 |
| ATOM | 6095 | SG   | CYX | X | 405 | 44.989 | 31.169 | 56.145 | 0.00 | 0.00 |
| ATOM | 6096 | C    | CYX | X | 405 | 42.515 | 33.906 | 54.457 | 0.00 | 0.00 |
| ATOM | 6097 | O    | CYX | X | 405 | 41.341 | 33.586 | 54.740 | 0.00 | 0.00 |
| ATOM | 6098 | N    | PRO | X | 406 | 42.852 | 35.190 | 54.121 | 0.00 | 0.00 |
| ATOM | 6099 | CD   | PRO | X | 406 | 44.219 | 35.776 | 54.082 | 0.00 | 0.00 |
| ATOM | 6100 | HD2  | PRO | X | 406 | 44.755 | 35.295 | 53.264 | 0.00 | 0.00 |
| ATOM | 6101 | HD3  | PRO | X | 406 | 44.805 | 35.514 | 54.962 | 0.00 | 0.00 |
| ATOM | 6102 | CG   | PRO | X | 406 | 43.999 | 37.294 | 54.015 | 0.00 | 0.00 |
| ATOM | 6103 | HG2  | PRO | X | 406 | 44.807 | 37.728 | 53.426 | 0.00 | 0.00 |
| ATOM | 6104 | HG3  | PRO | X | 406 | 43.927 | 37.768 | 54.994 | 0.00 | 0.00 |
| ATOM | 6105 | CB   | PRO | X | 406 | 42.682 | 37.378 | 53.245 | 0.00 | 0.00 |
| ATOM | 6106 | HB2  | PRO | X | 406 | 42.941 | 37.226 | 52.198 | 0.00 | 0.00 |
| ATOM | 6107 | HB3  | PRO | X | 406 | 42.086 | 38.268 | 53.447 | 0.00 | 0.00 |
| ATOM | 6108 | CA   | PRO | X | 406 | 41.880 | 36.195 | 53.795 | 0.00 | 0.00 |
| ATOM | 6109 | HA   | PRO | X | 406 | 41.402 | 36.585 | 54.694 | 0.00 | 0.00 |
| ATOM | 6110 | C    | PRO | X | 406 | 40.820 | 35.720 | 52.785 | 0.00 | 0.00 |
| ATOM | 6111 | O    | PRO | X | 406 | 39.679 | 35.851 | 53.178 | 0.00 | 0.00 |
| ATOM | 6112 | N    | VAL | X | 407 | 41.098 | 35.098 | 51.639 | 0.00 | 0.00 |
| ATOM | 6113 | H    | VAL | X | 407 | 42.049 | 34.915 | 51.350 | 0.00 | 0.00 |
| ATOM | 6114 | CA   | VAL | X | 407 | 40.048 | 34.605 | 50.758 | 0.00 | 0.00 |
| ATOM | 6115 | HA   | VAL | X | 407 | 39.424 | 35.460 | 50.498 | 0.00 | 0.00 |
| ATOM | 6116 | CB   | VAL | X | 407 | 40.658 | 33.988 | 49.471 | 0.00 | 0.00 |
| ATOM | 6117 | HB   | VAL | X | 407 | 41.637 | 33.628 | 49.786 | 0.00 | 0.00 |
| ATOM | 6118 | CG1  | VAL | X | 407 | 39.911 | 32.870 | 48.699 | 0.00 | 0.00 |
| ATOM | 6119 | HG11 | VAL | X | 407 | 40.517 | 32.629 | 47.826 | 0.00 | 0.00 |
| ATOM | 6120 | HG12 | VAL | X | 407 | 39.928 | 32.002 | 49.358 | 0.00 | 0.00 |
| ATOM | 6121 | HG13 | VAL | X | 407 | 38.873 | 33.159 | 48.539 | 0.00 | 0.00 |
| ATOM | 6122 | CG2  | VAL | X | 407 | 40.894 | 35.109 | 48.543 | 0.00 | 0.00 |
| ATOM | 6123 | HG21 | VAL | X | 407 | 39.934 | 35.601 | 48.392 | 0.00 | 0.00 |
| ATOM | 6124 | HG22 | VAL | X | 407 | 41.328 | 34.722 | 47.621 | 0.00 | 0.00 |
| ATOM | 6125 | HG23 | VAL | X | 407 | 41.540 | 35.775 | 49.116 | 0.00 | 0.00 |
| ATOM | 6126 | C    | VAL | X | 407 | 39.088 | 33.575 | 51.396 | 0.00 | 0.00 |
| ATOM | 6127 | O    | VAL | X | 407 | 37.891 | 33.529 | 51.107 | 0.00 | 0.00 |
| ATOM | 6128 | N    | ALA | X | 408 | 39.675 | 32.696 | 52.243 | 0.00 | 0.00 |
| ATOM | 6129 | H    | ALA | X | 408 | 40.584 | 32.928 | 52.616 | 0.00 | 0.00 |
| ATOM | 6130 | CA   | ALA | X | 408 | 38.964 | 31.602 | 52.863 | 0.00 | 0.00 |
| ATOM | 6131 | HA   | ALA | X | 408 | 38.291 | 31.191 | 52.111 | 0.00 | 0.00 |
| ATOM | 6132 | CB   | ALA | X | 408 | 39.846 | 30.449 | 53.364 | 0.00 | 0.00 |
| ATOM | 6133 | HB1  | ALA | X | 408 | 40.640 | 30.159 | 52.676 | 0.00 | 0.00 |
| ATOM | 6134 | HB2  | ALA | X | 408 | 39.230 | 29.579 | 53.593 | 0.00 | 0.00 |
| ATOM | 6135 | HB3  | ALA | X | 408 | 40.409 | 30.647 | 54.276 | 0.00 | 0.00 |
| ATOM | 6136 | C    | ALA | X | 408 | 38.001 | 32.115 | 53.967 | 0.00 | 0.00 |
| ATOM | 6137 | O    | ALA | X | 408 | 36.991 | 31.474 | 54.126 | 0.00 | 0.00 |
| ATOM | 6138 | N    | GLN | X | 409 | 38.330 | 33.208 | 54.710 | 0.00 | 0.00 |
| ATOM | 6139 | H    | GLN | X | 409 | 39.258 | 33.572 | 54.550 | 0.00 | 0.00 |
| ATOM | 6140 | CA   | GLN | X | 409 | 37.631 | 33.789 | 55.853 | 0.00 | 0.00 |
| ATOM | 6141 | HA   | GLN | X | 409 | 37.132 | 33.059 | 56.490 | 0.00 | 0.00 |
| ATOM | 6142 | CB   | GLN | X | 409 | 38.608 | 34.633 | 56.723 | 0.00 | 0.00 |
| ATOM | 6143 | HB2  | GLN | X | 409 | 39.296 | 35.251 | 56.147 | 0.00 | 0.00 |
| ATOM | 6144 | HB3  | GLN | X | 409 | 38.084 | 35.361 | 57.343 | 0.00 | 0.00 |
| ATOM | 6145 | CG   | GLN | X | 409 | 39.488 | 33.672 | 57.537 | 0.00 | 0.00 |
| ATOM | 6146 | HG2  | GLN | X | 409 | 38.762 | 33.272 | 58.244 | 0.00 | 0.00 |
| ATOM | 6147 | HG3  | GLN | X | 409 | 39.888 | 32.912 | 56.865 | 0.00 | 0.00 |
| ATOM | 6148 | CD   | GLN | X | 409 | 40.763 | 34.373 | 58.164 | 0.00 | 0.00 |
| ATOM | 6149 | OE1  | GLN | X | 409 | 40.986 | 35.557 | 57.883 | 0.00 | 0.00 |
| ATOM | 6150 | NE2  | GLN | X | 409 | 41.377 | 33.851 | 59.236 | 0.00 | 0.00 |
| ATOM | 6151 | HE21 | GLN | X | 409 | 42.215 | 34.279 | 59.604 | 0.00 | 0.00 |
| ATOM | 6152 | HE22 | GLN | X | 409 | 40.982 | 33.052 | 59.711 | 0.00 | 0.00 |
| ATOM | 6153 | C    | GLN | X | 409 | 36.619 | 34.883 | 55.347 | 0.00 | 0.00 |
| ATOM | 6154 | O    | GLN | X | 409 | 35.582 | 35.152 | 55.864 | 0.00 | 0.00 |
| ATOM | 6155 | N    | LEU | X | 410 | 36.962 | 35.540 | 54.298 | 0.00 | 0.00 |

|      |      |      |     |   |     |        |        |        |      |      |
|------|------|------|-----|---|-----|--------|--------|--------|------|------|
| ATOM | 6156 | H    | LEU | X | 410 | 37.889 | 35.380 | 53.930 | 0.00 | 0.00 |
| ATOM | 6157 | CA   | LEU | X | 410 | 35.935 | 36.183 | 53.438 | 0.00 | 0.00 |
| ATOM | 6158 | HA   | LEU | X | 410 | 35.455 | 37.002 | 53.974 | 0.00 | 0.00 |
| ATOM | 6159 | CB   | LEU | X | 410 | 36.605 | 36.766 | 52.228 | 0.00 | 0.00 |
| ATOM | 6160 | HB2  | LEU | X | 410 | 37.158 | 37.593 | 52.673 | 0.00 | 0.00 |
| ATOM | 6161 | HB3  | LEU | X | 410 | 37.301 | 35.999 | 51.889 | 0.00 | 0.00 |
| ATOM | 6162 | CG   | LEU | X | 410 | 35.800 | 37.373 | 50.982 | 0.00 | 0.00 |
| ATOM | 6163 | HG   | LEU | X | 410 | 35.314 | 36.655 | 50.321 | 0.00 | 0.00 |
| ATOM | 6164 | CD1  | LEU | X | 410 | 34.743 | 38.292 | 51.586 | 0.00 | 0.00 |
| ATOM | 6165 | HD11 | LEU | X | 410 | 34.175 | 38.779 | 50.794 | 0.00 | 0.00 |
| ATOM | 6166 | HD12 | LEU | X | 410 | 35.205 | 39.035 | 52.236 | 0.00 | 0.00 |
| ATOM | 6167 | HD13 | LEU | X | 410 | 34.156 | 37.586 | 52.173 | 0.00 | 0.00 |
| ATOM | 6168 | CD2  | LEU | X | 410 | 36.792 | 38.256 | 50.171 | 0.00 | 0.00 |
| ATOM | 6169 | HD21 | LEU | X | 410 | 37.172 | 39.101 | 50.745 | 0.00 | 0.00 |
| ATOM | 6170 | HD22 | LEU | X | 410 | 37.636 | 37.622 | 49.901 | 0.00 | 0.00 |
| ATOM | 6171 | HD23 | LEU | X | 410 | 36.277 | 38.678 | 49.308 | 0.00 | 0.00 |
| ATOM | 6172 | C    | LEU | X | 410 | 34.940 | 35.097 | 52.970 | 0.00 | 0.00 |
| ATOM | 6173 | O    | LEU | X | 410 | 33.823 | 35.155 | 53.397 | 0.00 | 0.00 |
| ATOM | 6174 | N    | ALA | X | 411 | 35.398 | 34.048 | 52.233 | 0.00 | 0.00 |
| ATOM | 6175 | H    | ALA | X | 411 | 36.303 | 34.111 | 51.789 | 0.00 | 0.00 |
| ATOM | 6176 | CA   | ALA | X | 411 | 34.525 | 32.995 | 51.883 | 0.00 | 0.00 |
| ATOM | 6177 | HA   | ALA | X | 411 | 33.824 | 33.406 | 51.157 | 0.00 | 0.00 |
| ATOM | 6178 | CB   | ALA | X | 411 | 35.249 | 31.909 | 51.116 | 0.00 | 0.00 |
| ATOM | 6179 | HB1  | ALA | X | 411 | 36.061 | 31.495 | 51.713 | 0.00 | 0.00 |
| ATOM | 6180 | HB2  | ALA | X | 411 | 35.634 | 32.349 | 50.196 | 0.00 | 0.00 |
| ATOM | 6181 | HB3  | ALA | X | 411 | 34.628 | 31.034 | 50.923 | 0.00 | 0.00 |
| ATOM | 6182 | C    | ALA | X | 411 | 33.602 | 32.443 | 52.948 | 0.00 | 0.00 |
| ATOM | 6183 | O    | ALA | X | 411 | 32.432 | 32.177 | 52.723 | 0.00 | 0.00 |
| ATOM | 6184 | N    | GLY | X | 412 | 34.174 | 32.181 | 54.143 | 0.00 | 0.00 |
| ATOM | 6185 | H    | GLY | X | 412 | 35.170 | 32.345 | 54.158 | 0.00 | 0.00 |
| ATOM | 6186 | CA   | GLY | X | 412 | 33.366 | 31.490 | 55.157 | 0.00 | 0.00 |
| ATOM | 6187 | HA2  | GLY | X | 412 | 32.753 | 30.660 | 54.804 | 0.00 | 0.00 |
| ATOM | 6188 | HA3  | GLY | X | 412 | 34.063 | 31.102 | 55.900 | 0.00 | 0.00 |
| ATOM | 6189 | C    | GLY | X | 412 | 32.406 | 32.388 | 55.882 | 0.00 | 0.00 |
| ATOM | 6190 | O    | GLY | X | 412 | 31.297 | 31.930 | 56.183 | 0.00 | 0.00 |
| ATOM | 6191 | N    | ARG | X | 413 | 32.791 | 33.695 | 56.148 | 0.00 | 0.00 |
| ATOM | 6192 | H    | ARG | X | 413 | 33.716 | 33.941 | 55.825 | 0.00 | 0.00 |
| ATOM | 6193 | CA   | ARG | X | 413 | 31.907 | 34.708 | 56.698 | 0.00 | 0.00 |
| ATOM | 6194 | HA   | ARG | X | 413 | 31.307 | 34.202 | 57.454 | 0.00 | 0.00 |
| ATOM | 6195 | CB   | ARG | X | 413 | 32.761 | 35.906 | 57.199 | 0.00 | 0.00 |
| ATOM | 6196 | HB2  | ARG | X | 413 | 33.420 | 35.496 | 57.964 | 0.00 | 0.00 |
| ATOM | 6197 | HB3  | ARG | X | 413 | 33.237 | 36.250 | 56.281 | 0.00 | 0.00 |
| ATOM | 6198 | CG   | ARG | X | 413 | 31.883 | 36.993 | 57.887 | 0.00 | 0.00 |
| ATOM | 6199 | HG2  | ARG | X | 413 | 32.664 | 37.651 | 58.265 | 0.00 | 0.00 |
| ATOM | 6200 | HG3  | ARG | X | 413 | 31.263 | 37.566 | 57.197 | 0.00 | 0.00 |
| ATOM | 6201 | CD   | ARG | X | 413 | 31.004 | 36.632 | 59.063 | 0.00 | 0.00 |
| ATOM | 6202 | HD2  | ARG | X | 413 | 30.311 | 35.891 | 58.666 | 0.00 | 0.00 |
| ATOM | 6203 | HD3  | ARG | X | 413 | 31.549 | 36.239 | 59.922 | 0.00 | 0.00 |
| ATOM | 6204 | NE   | ARG | X | 413 | 30.334 | 37.868 | 59.400 | 0.00 | 0.00 |
| ATOM | 6205 | HE   | ARG | X | 413 | 30.449 | 38.674 | 58.802 | 0.00 | 0.00 |
| ATOM | 6206 | CZ   | ARG | X | 413 | 29.315 | 38.078 | 60.248 | 0.00 | 0.00 |
| ATOM | 6207 | NH1  | ARG | X | 413 | 28.760 | 37.189 | 61.029 | 0.00 | 0.00 |
| ATOM | 6208 | HH11 | ARG | X | 413 | 29.210 | 36.288 | 61.099 | 0.00 | 0.00 |
| ATOM | 6209 | HH12 | ARG | X | 413 | 27.870 | 37.314 | 61.489 | 0.00 | 0.00 |
| ATOM | 6210 | NH2  | ARG | X | 413 | 28.793 | 39.303 | 60.293 | 0.00 | 0.00 |
| ATOM | 6211 | HH21 | ARG | X | 413 | 28.799 | 39.821 | 59.427 | 0.00 | 0.00 |
| ATOM | 6212 | HH22 | ARG | X | 413 | 28.094 | 39.562 | 60.974 | 0.00 | 0.00 |
| ATOM | 6213 | C    | ARG | X | 413 | 30.844 | 35.118 | 55.651 | 0.00 | 0.00 |
| ATOM | 6214 | O    | ARG | X | 413 | 29.742 | 35.470 | 56.058 | 0.00 | 0.00 |
| ATOM | 6215 | N    | LEU | X | 414 | 31.116 | 35.085 | 54.360 | 0.00 | 0.00 |
| ATOM | 6216 | H    | LEU | X | 414 | 32.076 | 34.867 | 54.134 | 0.00 | 0.00 |
| ATOM | 6217 | CA   | LEU | X | 414 | 30.139 | 35.249 | 53.284 | 0.00 | 0.00 |
| ATOM | 6218 | HA   | LEU | X | 414 | 29.584 | 36.186 | 53.324 | 0.00 | 0.00 |
| ATOM | 6219 | CB   | LEU | X | 414 | 30.841 | 35.301 | 51.867 | 0.00 | 0.00 |
| ATOM | 6220 | HB2  | LEU | X | 414 | 31.669 | 34.595 | 51.806 | 0.00 | 0.00 |
| ATOM | 6221 | HB3  | LEU | X | 414 | 30.092 | 35.008 | 51.131 | 0.00 | 0.00 |
| ATOM | 6222 | CG   | LEU | X | 414 | 31.464 | 36.523 | 51.268 | 0.00 | 0.00 |

|      |      |      |     |   |     |        |        |        |      |      |
|------|------|------|-----|---|-----|--------|--------|--------|------|------|
| ATOM | 6223 | HG   | LEU | X | 414 | 32.215 | 36.937 | 51.940 | 0.00 | 0.00 |
| ATOM | 6224 | CD1  | LEU | X | 414 | 32.021 | 36.357 | 49.857 | 0.00 | 0.00 |
| ATOM | 6225 | HD11 | LEU | X | 414 | 32.307 | 37.317 | 49.428 | 0.00 | 0.00 |
| ATOM | 6226 | HD12 | LEU | X | 414 | 31.325 | 35.803 | 49.227 | 0.00 | 0.00 |
| ATOM | 6227 | HD13 | LEU | X | 414 | 32.922 | 35.744 | 49.896 | 0.00 | 0.00 |
| ATOM | 6228 | CD2  | LEU | X | 414 | 30.487 | 37.688 | 51.127 | 0.00 | 0.00 |
| ATOM | 6229 | HD21 | LEU | X | 414 | 30.254 | 38.082 | 52.117 | 0.00 | 0.00 |
| ATOM | 6230 | HD22 | LEU | X | 414 | 30.991 | 38.547 | 50.684 | 0.00 | 0.00 |
| ATOM | 6231 | HD23 | LEU | X | 414 | 29.573 | 37.535 | 50.554 | 0.00 | 0.00 |
| ATOM | 6232 | C    | LEU | X | 414 | 29.032 | 34.178 | 53.394 | 0.00 | 0.00 |
| ATOM | 6233 | O    | LEU | X | 414 | 27.855 | 34.605 | 53.488 | 0.00 | 0.00 |
| ATOM | 6234 | N    | ALA | X | 415 | 29.368 | 32.873 | 53.365 | 0.00 | 0.00 |
| ATOM | 6235 | H    | ALA | X | 415 | 30.335 | 32.674 | 53.153 | 0.00 | 0.00 |
| ATOM | 6236 | CA   | ALA | X | 415 | 28.549 | 31.716 | 53.231 | 0.00 | 0.00 |
| ATOM | 6237 | HA   | ALA | X | 415 | 27.840 | 31.817 | 52.410 | 0.00 | 0.00 |
| ATOM | 6238 | CB   | ALA | X | 415 | 29.409 | 30.479 | 53.189 | 0.00 | 0.00 |
| ATOM | 6239 | HB1  | ALA | X | 415 | 30.083 | 30.735 | 52.372 | 0.00 | 0.00 |
| ATOM | 6240 | HB2  | ALA | X | 415 | 28.795 | 29.620 | 52.915 | 0.00 | 0.00 |
| ATOM | 6241 | HB3  | ALA | X | 415 | 30.023 | 30.257 | 54.062 | 0.00 | 0.00 |
| ATOM | 6242 | C    | ALA | X | 415 | 27.511 | 31.748 | 54.455 | 0.00 | 0.00 |
| ATOM | 6243 | O    | ALA | X | 415 | 26.336 | 31.838 | 54.234 | 0.00 | 0.00 |
| ATOM | 6244 | N    | ALA | X | 416 | 28.005 | 31.782 | 55.728 | 0.00 | 0.00 |
| ATOM | 6245 | H    | ALA | X | 416 | 29.004 | 31.642 | 55.781 | 0.00 | 0.00 |
| ATOM | 6246 | CA   | ALA | X | 416 | 27.268 | 31.917 | 57.003 | 0.00 | 0.00 |
| ATOM | 6247 | HA   | ALA | X | 416 | 26.763 | 30.960 | 57.134 | 0.00 | 0.00 |
| ATOM | 6248 | CB   | ALA | X | 416 | 28.289 | 31.862 | 58.174 | 0.00 | 0.00 |
| ATOM | 6249 | HB1  | ALA | X | 416 | 27.754 | 32.003 | 59.112 | 0.00 | 0.00 |
| ATOM | 6250 | HB2  | ALA | X | 416 | 28.998 | 32.677 | 58.023 | 0.00 | 0.00 |
| ATOM | 6251 | HB3  | ALA | X | 416 | 28.827 | 30.916 | 58.118 | 0.00 | 0.00 |
| ATOM | 6252 | C    | ALA | X | 416 | 26.452 | 33.154 | 57.246 | 0.00 | 0.00 |
| ATOM | 6253 | O    | ALA | X | 416 | 25.549 | 33.116 | 58.119 | 0.00 | 0.00 |
| ATOM | 6254 | N    | GLN | X | 417 | 26.550 | 34.132 | 56.345 | 0.00 | 0.00 |
| ATOM | 6255 | H    | GLN | X | 417 | 27.223 | 33.964 | 55.611 | 0.00 | 0.00 |
| ATOM | 6256 | CA   | GLN | X | 417 | 25.669 | 35.330 | 56.260 | 0.00 | 0.00 |
| ATOM | 6257 | HA   | GLN | X | 417 | 25.061 | 35.245 | 57.161 | 0.00 | 0.00 |
| ATOM | 6258 | CB   | GLN | X | 417 | 26.558 | 36.635 | 56.529 | 0.00 | 0.00 |
| ATOM | 6259 | HB2  | GLN | X | 417 | 27.323 | 36.649 | 55.753 | 0.00 | 0.00 |
| ATOM | 6260 | HB3  | GLN | X | 417 | 25.884 | 37.477 | 56.368 | 0.00 | 0.00 |
| ATOM | 6261 | CG   | GLN | X | 417 | 27.100 | 36.743 | 57.960 | 0.00 | 0.00 |
| ATOM | 6262 | HG2  | GLN | X | 417 | 27.471 | 35.753 | 58.226 | 0.00 | 0.00 |
| ATOM | 6263 | HG3  | GLN | X | 417 | 27.939 | 37.438 | 57.986 | 0.00 | 0.00 |
| ATOM | 6264 | CD   | GLN | X | 417 | 26.013 | 37.192 | 58.962 | 0.00 | 0.00 |
| ATOM | 6265 | OE1  | GLN | X | 417 | 25.431 | 36.412 | 59.709 | 0.00 | 0.00 |
| ATOM | 6266 | NE2  | GLN | X | 417 | 25.702 | 38.509 | 59.089 | 0.00 | 0.00 |
| ATOM | 6267 | HE21 | GLN | X | 417 | 25.105 | 38.738 | 59.871 | 0.00 | 0.00 |
| ATOM | 6268 | HE22 | GLN | X | 417 | 26.204 | 39.239 | 58.604 | 0.00 | 0.00 |
| ATOM | 6269 | C    | GLN | X | 417 | 24.829 | 35.460 | 55.023 | 0.00 | 0.00 |
| ATOM | 6270 | O    | GLN | X | 417 | 24.548 | 36.563 | 54.530 | 0.00 | 0.00 |
| ATOM | 6271 | N    | GLY | X | 418 | 24.617 | 34.308 | 54.341 | 0.00 | 0.00 |
| ATOM | 6272 | H    | GLY | X | 418 | 25.125 | 33.483 | 54.626 | 0.00 | 0.00 |
| ATOM | 6273 | CA   | GLY | X | 418 | 23.578 | 34.136 | 53.288 | 0.00 | 0.00 |
| ATOM | 6274 | HA2  | GLY | X | 418 | 23.110 | 33.152 | 53.319 | 0.00 | 0.00 |
| ATOM | 6275 | HA3  | GLY | X | 418 | 22.804 | 34.874 | 53.502 | 0.00 | 0.00 |
| ATOM | 6276 | C    | GLY | X | 418 | 24.098 | 34.246 | 51.838 | 0.00 | 0.00 |
| ATOM | 6277 | O    | GLY | X | 418 | 23.261 | 34.259 | 50.937 | 0.00 | 0.00 |
| ATOM | 6278 | N    | ALA | X | 419 | 25.404 | 34.442 | 51.563 | 0.00 | 0.00 |
| ATOM | 6279 | H    | ALA | X | 419 | 26.045 | 34.239 | 52.316 | 0.00 | 0.00 |
| ATOM | 6280 | CA   | ALA | X | 419 | 25.994 | 34.428 | 50.176 | 0.00 | 0.00 |
| ATOM | 6281 | HA   | ALA | X | 419 | 25.420 | 35.116 | 49.554 | 0.00 | 0.00 |
| ATOM | 6282 | CB   | ALA | X | 419 | 27.521 | 34.889 | 50.230 | 0.00 | 0.00 |
| ATOM | 6283 | HB1  | ALA | X | 419 | 28.151 | 34.662 | 49.370 | 0.00 | 0.00 |
| ATOM | 6284 | HB2  | ALA | X | 419 | 27.922 | 34.525 | 51.176 | 0.00 | 0.00 |
| ATOM | 6285 | HB3  | ALA | X | 419 | 27.460 | 35.947 | 50.482 | 0.00 | 0.00 |
| ATOM | 6286 | C    | ALA | X | 419 | 25.957 | 33.057 | 49.526 | 0.00 | 0.00 |
| ATOM | 6287 | O    | ALA | X | 419 | 25.969 | 32.025 | 50.202 | 0.00 | 0.00 |
| ATOM | 6288 | N    | ARG | X | 420 | 26.015 | 33.005 | 48.232 | 0.00 | 0.00 |
| ATOM | 6289 | H    | ARG | X | 420 | 25.803 | 33.842 | 47.709 | 0.00 | 0.00 |



|      |      |      |     |   |     |        |        |        |      |      |
|------|------|------|-----|---|-----|--------|--------|--------|------|------|
| ATOM | 6290 | CA   | ARG | X | 420 | 26.506 | 31.843 | 47.508 | 0.00 | 0.00 |
| ATOM | 6291 | HA   | ARG | X | 420 | 26.530 | 30.957 | 48.142 | 0.00 | 0.00 |
| ATOM | 6292 | CB   | ARG | X | 420 | 25.438 | 31.562 | 46.413 | 0.00 | 0.00 |
| ATOM | 6293 | HB2  | ARG | X | 420 | 24.448 | 31.630 | 46.862 | 0.00 | 0.00 |
| ATOM | 6294 | HB3  | ARG | X | 420 | 25.541 | 32.464 | 45.808 | 0.00 | 0.00 |
| ATOM | 6295 | CG   | ARG | X | 420 | 25.721 | 30.325 | 45.675 | 0.00 | 0.00 |
| ATOM | 6296 | HG2  | ARG | X | 420 | 25.188 | 30.259 | 44.726 | 0.00 | 0.00 |
| ATOM | 6297 | HG3  | ARG | X | 420 | 26.789 | 30.236 | 45.472 | 0.00 | 0.00 |
| ATOM | 6298 | CD   | ARG | X | 420 | 25.308 | 29.143 | 46.585 | 0.00 | 0.00 |
| ATOM | 6299 | HD2  | ARG | X | 420 | 26.061 | 28.871 | 47.324 | 0.00 | 0.00 |
| ATOM | 6300 | HD3  | ARG | X | 420 | 24.452 | 29.453 | 47.185 | 0.00 | 0.00 |
| ATOM | 6301 | NE   | ARG | X | 420 | 24.968 | 28.007 | 45.767 | 0.00 | 0.00 |
| ATOM | 6302 | HE   | ARG | X | 420 | 25.017 | 28.192 | 44.776 | 0.00 | 0.00 |
| ATOM | 6303 | CZ   | ARG | X | 420 | 24.454 | 26.803 | 46.146 | 0.00 | 0.00 |
| ATOM | 6304 | NH1  | ARG | X | 420 | 24.379 | 26.522 | 47.448 | 0.00 | 0.00 |
| ATOM | 6305 | HH11 | ARG | X | 420 | 24.615 | 27.169 | 48.187 | 0.00 | 0.00 |
| ATOM | 6306 | HH12 | ARG | X | 420 | 23.962 | 25.631 | 47.678 | 0.00 | 0.00 |
| ATOM | 6307 | NH2  | ARG | X | 420 | 24.114 | 25.878 | 45.277 | 0.00 | 0.00 |
| ATOM | 6308 | HH21 | ARG | X | 420 | 24.176 | 26.000 | 44.276 | 0.00 | 0.00 |
| ATOM | 6309 | HH22 | ARG | X | 420 | 23.658 | 25.079 | 45.692 | 0.00 | 0.00 |
| ATOM | 6310 | C    | ARG | X | 420 | 27.917 | 32.132 | 47.048 | 0.00 | 0.00 |
| ATOM | 6311 | O    | ARG | X | 420 | 28.128 | 32.900 | 46.155 | 0.00 | 0.00 |
| ATOM | 6312 | N    | VAL | X | 421 | 28.851 | 31.332 | 47.563 | 0.00 | 0.00 |
| ATOM | 6313 | H    | VAL | X | 421 | 28.477 | 30.745 | 48.296 | 0.00 | 0.00 |
| ATOM | 6314 | CA   | VAL | X | 421 | 30.266 | 31.320 | 47.383 | 0.00 | 0.00 |
| ATOM | 6315 | HA   | VAL | X | 421 | 30.559 | 32.226 | 46.853 | 0.00 | 0.00 |
| ATOM | 6316 | CB   | VAL | X | 421 | 31.012 | 31.418 | 48.676 | 0.00 | 0.00 |
| ATOM | 6317 | HB   | VAL | X | 421 | 30.819 | 30.473 | 49.185 | 0.00 | 0.00 |
| ATOM | 6318 | CG1  | VAL | X | 421 | 32.540 | 31.612 | 48.321 | 0.00 | 0.00 |
| ATOM | 6319 | HG11 | VAL | X | 421 | 33.063 | 30.756 | 47.895 | 0.00 | 0.00 |
| ATOM | 6320 | HG12 | VAL | X | 421 | 32.649 | 32.428 | 47.607 | 0.00 | 0.00 |
| ATOM | 6321 | HG13 | VAL | X | 421 | 33.233 | 31.888 | 49.116 | 0.00 | 0.00 |
| ATOM | 6322 | CG2  | VAL | X | 421 | 30.544 | 32.607 | 49.523 | 0.00 | 0.00 |
| ATOM | 6323 | HG21 | VAL | X | 421 | 30.303 | 33.376 | 48.789 | 0.00 | 0.00 |
| ATOM | 6324 | HG22 | VAL | X | 421 | 31.422 | 32.871 | 50.113 | 0.00 | 0.00 |
| ATOM | 6325 | HG23 | VAL | X | 421 | 29.690 | 32.238 | 50.091 | 0.00 | 0.00 |
| ATOM | 6326 | C    | VAL | X | 421 | 30.694 | 30.136 | 46.503 | 0.00 | 0.00 |
| ATOM | 6327 | O    | VAL | X | 421 | 30.249 | 29.030 | 46.775 | 0.00 | 0.00 |
| ATOM | 6328 | N    | TYR | X | 422 | 31.666 | 30.269 | 45.645 | 0.00 | 0.00 |
| ATOM | 6329 | H    | TYR | X | 422 | 32.079 | 31.187 | 45.568 | 0.00 | 0.00 |
| ATOM | 6330 | CA   | TYR | X | 422 | 32.368 | 29.102 | 44.938 | 0.00 | 0.00 |
| ATOM | 6331 | HA   | TYR | X | 422 | 32.263 | 28.185 | 45.517 | 0.00 | 0.00 |
| ATOM | 6332 | CB   | TYR | X | 422 | 31.934 | 29.049 | 43.500 | 0.00 | 0.00 |
| ATOM | 6333 | HB2  | TYR | X | 422 | 32.005 | 29.996 | 42.963 | 0.00 | 0.00 |
| ATOM | 6334 | HB3  | TYR | X | 422 | 32.614 | 28.432 | 42.912 | 0.00 | 0.00 |
| ATOM | 6335 | CG   | TYR | X | 422 | 30.526 | 28.525 | 43.256 | 0.00 | 0.00 |
| ATOM | 6336 | CD1  | TYR | X | 422 | 30.379 | 27.125 | 43.176 | 0.00 | 0.00 |
| ATOM | 6337 | HD1  | TYR | X | 422 | 31.231 | 26.470 | 43.282 | 0.00 | 0.00 |
| ATOM | 6338 | CE1  | TYR | X | 422 | 29.085 | 26.561 | 43.068 | 0.00 | 0.00 |
| ATOM | 6339 | HE1  | TYR | X | 422 | 28.979 | 25.488 | 43.004 | 0.00 | 0.00 |
| ATOM | 6340 | CZ   | TYR | X | 422 | 27.960 | 27.417 | 42.993 | 0.00 | 0.00 |
| ATOM | 6341 | OH   | TYR | X | 422 | 26.733 | 26.870 | 42.873 | 0.00 | 0.00 |
| ATOM | 6342 | HH   | TYR | X | 422 | 26.659 | 25.914 | 42.831 | 0.00 | 0.00 |
| ATOM | 6343 | CE2  | TYR | X | 422 | 28.106 | 28.850 | 43.085 | 0.00 | 0.00 |
| ATOM | 6344 | HE2  | TYR | X | 422 | 27.259 | 29.479 | 42.854 | 0.00 | 0.00 |
| ATOM | 6345 | CD2  | TYR | X | 422 | 29.377 | 29.426 | 43.118 | 0.00 | 0.00 |
| ATOM | 6346 | HD2  | TYR | X | 422 | 29.523 | 30.495 | 43.150 | 0.00 | 0.00 |
| ATOM | 6347 | C    | TYR | X | 422 | 33.892 | 29.429 | 44.989 | 0.00 | 0.00 |
| ATOM | 6348 | O    | TYR | X | 422 | 34.296 | 30.595 | 44.913 | 0.00 | 0.00 |
| ATOM | 6349 | N    | ALA | X | 423 | 34.809 | 28.393 | 45.148 | 0.00 | 0.00 |
| ATOM | 6350 | H    | ALA | X | 423 | 34.371 | 27.510 | 45.369 | 0.00 | 0.00 |
| ATOM | 6351 | CA   | ALA | X | 423 | 36.229 | 28.368 | 45.440 | 0.00 | 0.00 |
| ATOM | 6352 | HA   | ALA | X | 423 | 36.718 | 29.299 | 45.150 | 0.00 | 0.00 |
| ATOM | 6353 | CB   | ALA | X | 423 | 36.492 | 28.225 | 46.964 | 0.00 | 0.00 |
| ATOM | 6354 | HB1  | ALA | X | 423 | 35.907 | 28.958 | 47.519 | 0.00 | 0.00 |
| ATOM | 6355 | HB2  | ALA | X | 423 | 37.496 | 28.509 | 47.279 | 0.00 | 0.00 |
| ATOM | 6356 | HB3  | ALA | X | 423 | 36.219 | 27.208 | 47.246 | 0.00 | 0.00 |

|      |      |      |     |   |     |        |        |        |      |      |
|------|------|------|-----|---|-----|--------|--------|--------|------|------|
| ATOM | 6357 | C    | ALA | X | 423 | 36.998 | 27.312 | 44.627 | 0.00 | 0.00 |
| ATOM | 6358 | O    | ALA | X | 423 | 36.519 | 26.170 | 44.382 | 0.00 | 0.00 |
| ATOM | 6359 | N    | TYR | X | 424 | 38.303 | 27.575 | 44.343 | 0.00 | 0.00 |
| ATOM | 6360 | H    | TYR | X | 424 | 38.612 | 28.515 | 44.549 | 0.00 | 0.00 |
| ATOM | 6361 | CA   | TYR | X | 424 | 39.251 | 26.702 | 43.688 | 0.00 | 0.00 |
| ATOM | 6362 | HA   | TYR | X | 424 | 38.986 | 25.698 | 44.020 | 0.00 | 0.00 |
| ATOM | 6363 | CB   | TYR | X | 424 | 39.009 | 26.899 | 42.122 | 0.00 | 0.00 |
| ATOM | 6364 | HB2  | TYR | X | 424 | 39.616 | 26.134 | 41.637 | 0.00 | 0.00 |
| ATOM | 6365 | HB3  | TYR | X | 424 | 37.983 | 26.635 | 41.864 | 0.00 | 0.00 |
| ATOM | 6366 | CG   | TYR | X | 424 | 39.494 | 28.232 | 41.595 | 0.00 | 0.00 |
| ATOM | 6367 | CD1  | TYR | X | 424 | 40.859 | 28.449 | 41.113 | 0.00 | 0.00 |
| ATOM | 6368 | HD1  | TYR | X | 424 | 41.664 | 27.731 | 41.056 | 0.00 | 0.00 |
| ATOM | 6369 | CE1  | TYR | X | 424 | 41.279 | 29.724 | 40.808 | 0.00 | 0.00 |
| ATOM | 6370 | HE1  | TYR | X | 424 | 42.304 | 29.959 | 40.562 | 0.00 | 0.00 |
| ATOM | 6371 | CZ   | TYR | X | 424 | 40.302 | 30.772 | 40.680 | 0.00 | 0.00 |
| ATOM | 6372 | OH   | TYR | X | 424 | 40.658 | 32.028 | 40.377 | 0.00 | 0.00 |
| ATOM | 6373 | HH   | TYR | X | 424 | 41.551 | 32.113 | 40.034 | 0.00 | 0.00 |
| ATOM | 6374 | CE2  | TYR | X | 424 | 39.009 | 30.622 | 41.299 | 0.00 | 0.00 |
| ATOM | 6375 | HE2  | TYR | X | 424 | 38.391 | 31.502 | 41.401 | 0.00 | 0.00 |
| ATOM | 6376 | CD2  | TYR | X | 424 | 38.628 | 29.332 | 41.759 | 0.00 | 0.00 |
| ATOM | 6377 | HD2  | TYR | X | 424 | 37.656 | 29.237 | 42.219 | 0.00 | 0.00 |
| ATOM | 6378 | C    | TYR | X | 424 | 40.765 | 27.035 | 43.998 | 0.00 | 0.00 |
| ATOM | 6379 | O    | TYR | X | 424 | 41.020 | 28.132 | 44.511 | 0.00 | 0.00 |
| ATOM | 6380 | N    | VAL | X | 425 | 41.633 | 26.017 | 43.909 | 0.00 | 0.00 |
| ATOM | 6381 | H    | VAL | X | 425 | 41.223 | 25.237 | 43.415 | 0.00 | 0.00 |
| ATOM | 6382 | CA   | VAL | X | 425 | 43.069 | 26.234 | 43.664 | 0.00 | 0.00 |
| ATOM | 6383 | HA   | VAL | X | 425 | 43.393 | 27.273 | 43.713 | 0.00 | 0.00 |
| ATOM | 6384 | CB   | VAL | X | 425 | 44.043 | 25.703 | 44.794 | 0.00 | 0.00 |
| ATOM | 6385 | HB   | VAL | X | 425 | 44.009 | 24.614 | 44.843 | 0.00 | 0.00 |
| ATOM | 6386 | CG1  | VAL | X | 425 | 45.501 | 26.032 | 44.519 | 0.00 | 0.00 |
| ATOM | 6387 | HG11 | VAL | X | 425 | 45.741 | 27.056 | 44.808 | 0.00 | 0.00 |
| ATOM | 6388 | HG12 | VAL | X | 425 | 46.128 | 25.464 | 45.206 | 0.00 | 0.00 |
| ATOM | 6389 | HG13 | VAL | X | 425 | 45.854 | 25.834 | 43.507 | 0.00 | 0.00 |
| ATOM | 6390 | CG2  | VAL | X | 425 | 43.620 | 26.186 | 46.118 | 0.00 | 0.00 |
| ATOM | 6391 | HG21 | VAL | X | 425 | 43.709 | 27.238 | 46.388 | 0.00 | 0.00 |
| ATOM | 6392 | HG22 | VAL | X | 425 | 44.251 | 25.745 | 46.890 | 0.00 | 0.00 |
| ATOM | 6393 | HG23 | VAL | X | 425 | 42.625 | 25.787 | 46.312 | 0.00 | 0.00 |
| ATOM | 6394 | C    | VAL | X | 425 | 43.498 | 25.672 | 42.280 | 0.00 | 0.00 |
| ATOM | 6395 | O    | VAL | X | 425 | 43.046 | 24.575 | 41.853 | 0.00 | 0.00 |
| ATOM | 6396 | N    | PHE | X | 426 | 44.186 | 26.506 | 41.514 | 0.00 | 0.00 |
| ATOM | 6397 | H    | PHE | X | 426 | 44.499 | 27.408 | 41.843 | 0.00 | 0.00 |
| ATOM | 6398 | CA   | PHE | X | 426 | 44.675 | 26.084 | 40.164 | 0.00 | 0.00 |
| ATOM | 6399 | HA   | PHE | X | 426 | 44.183 | 25.169 | 39.832 | 0.00 | 0.00 |
| ATOM | 6400 | CB   | PHE | X | 426 | 44.206 | 27.250 | 39.178 | 0.00 | 0.00 |
| ATOM | 6401 | HB2  | PHE | X | 426 | 43.123 | 27.256 | 39.059 | 0.00 | 0.00 |
| ATOM | 6402 | HB3  | PHE | X | 426 | 44.499 | 28.181 | 39.662 | 0.00 | 0.00 |
| ATOM | 6403 | CG   | PHE | X | 426 | 44.876 | 27.202 | 37.773 | 0.00 | 0.00 |
| ATOM | 6404 | CD1  | PHE | X | 426 | 44.157 | 26.837 | 36.564 | 0.00 | 0.00 |
| ATOM | 6405 | HD1  | PHE | X | 426 | 43.090 | 26.686 | 36.500 | 0.00 | 0.00 |
| ATOM | 6406 | CE1  | PHE | X | 426 | 44.754 | 26.992 | 35.319 | 0.00 | 0.00 |
| ATOM | 6407 | HE1  | PHE | X | 426 | 44.150 | 26.775 | 34.451 | 0.00 | 0.00 |
| ATOM | 6408 | CZ   | PHE | X | 426 | 46.074 | 27.501 | 35.210 | 0.00 | 0.00 |
| ATOM | 6409 | HZ   | PHE | X | 426 | 46.474 | 27.600 | 34.211 | 0.00 | 0.00 |
| ATOM | 6410 | CE2  | PHE | X | 426 | 46.810 | 27.978 | 36.344 | 0.00 | 0.00 |
| ATOM | 6411 | HE2  | PHE | X | 426 | 47.818 | 28.365 | 36.305 | 0.00 | 0.00 |
| ATOM | 6412 | CD2  | PHE | X | 426 | 46.178 | 27.764 | 37.636 | 0.00 | 0.00 |
| ATOM | 6413 | HD2  | PHE | X | 426 | 46.695 | 28.162 | 38.496 | 0.00 | 0.00 |
| ATOM | 6414 | C    | PHE | X | 426 | 46.198 | 25.902 | 40.162 | 0.00 | 0.00 |
| ATOM | 6415 | O    | PHE | X | 426 | 46.970 | 26.675 | 40.788 | 0.00 | 0.00 |
| ATOM | 6416 | N    | GLU | X | 427 | 46.580 | 24.705 | 39.615 | 0.00 | 0.00 |
| ATOM | 6417 | H    | GLU | X | 427 | 45.778 | 24.258 | 39.193 | 0.00 | 0.00 |
| ATOM | 6418 | CA   | GLU | X | 427 | 47.780 | 23.907 | 39.882 | 0.00 | 0.00 |
| ATOM | 6419 | HA   | GLU | X | 427 | 48.233 | 24.422 | 40.729 | 0.00 | 0.00 |
| ATOM | 6420 | CB   | GLU | X | 427 | 47.463 | 22.476 | 40.310 | 0.00 | 0.00 |
| ATOM | 6421 | HB2  | GLU | X | 427 | 47.159 | 21.886 | 39.446 | 0.00 | 0.00 |
| ATOM | 6422 | HB3  | GLU | X | 427 | 48.404 | 22.128 | 40.736 | 0.00 | 0.00 |
| ATOM | 6423 | CG   | GLU | X | 427 | 46.401 | 22.290 | 41.419 | 0.00 | 0.00 |

|      |      |      |     |   |     |        |        |        |      |      |
|------|------|------|-----|---|-----|--------|--------|--------|------|------|
| ATOM | 6424 | HG2  | GLU | X | 427 | 46.498 | 23.055 | 42.190 | 0.00 | 0.00 |
| ATOM | 6425 | HG3  | GLU | X | 427 | 45.386 | 22.340 | 41.026 | 0.00 | 0.00 |
| ATOM | 6426 | CD   | GLU | X | 427 | 46.441 | 20.894 | 41.983 | 0.00 | 0.00 |
| ATOM | 6427 | OE1  | GLU | X | 427 | 47.127 | 20.635 | 42.997 | 0.00 | 0.00 |
| ATOM | 6428 | OE2  | GLU | X | 427 | 45.683 | 20.042 | 41.537 | 0.00 | 0.00 |
| ATOM | 6429 | C    | GLU | X | 427 | 48.699 | 23.950 | 38.653 | 0.00 | 0.00 |
| ATOM | 6430 | O    | GLU | X | 427 | 49.705 | 23.294 | 38.680 | 0.00 | 0.00 |
| ATOM | 6431 | N    | HIE | X | 428 | 48.247 | 24.486 | 37.518 | 0.00 | 0.00 |
| ATOM | 6432 | H    | HIE | X | 428 | 47.401 | 25.030 | 37.433 | 0.00 | 0.00 |
| ATOM | 6433 | CA   | HIE | X | 428 | 48.849 | 24.187 | 36.230 | 0.00 | 0.00 |
| ATOM | 6434 | HA   | HIE | X | 428 | 49.311 | 23.214 | 36.396 | 0.00 | 0.00 |
| ATOM | 6435 | CB   | HIE | X | 428 | 47.820 | 23.871 | 35.164 | 0.00 | 0.00 |
| ATOM | 6436 | HB2  | HIE | X | 428 | 47.363 | 22.949 | 35.524 | 0.00 | 0.00 |
| ATOM | 6437 | HB3  | HIE | X | 428 | 47.058 | 24.649 | 35.109 | 0.00 | 0.00 |
| ATOM | 6438 | CG   | HIE | X | 428 | 48.406 | 23.657 | 33.755 | 0.00 | 0.00 |
| ATOM | 6439 | ND1  | HIE | X | 428 | 48.866 | 22.474 | 33.240 | 0.00 | 0.00 |
| ATOM | 6440 | CE1  | HIE | X | 428 | 49.431 | 22.835 | 32.062 | 0.00 | 0.00 |
| ATOM | 6441 | HE1  | HIE | X | 428 | 49.826 | 22.122 | 31.353 | 0.00 | 0.00 |
| ATOM | 6442 | NE2  | HIE | X | 428 | 49.384 | 24.181 | 31.876 | 0.00 | 0.00 |
| ATOM | 6443 | HE2  | HIE | X | 428 | 49.831 | 24.715 | 31.145 | 0.00 | 0.00 |
| ATOM | 6444 | CD2  | HIE | X | 428 | 48.715 | 24.697 | 32.981 | 0.00 | 0.00 |
| ATOM | 6445 | HD2  | HIE | X | 428 | 48.702 | 25.751 | 33.218 | 0.00 | 0.00 |
| ATOM | 6446 | C    | HIE | X | 428 | 49.798 | 25.265 | 35.833 | 0.00 | 0.00 |
| ATOM | 6447 | O    | HIE | X | 428 | 49.394 | 26.372 | 35.844 | 0.00 | 0.00 |
| ATOM | 6448 | N    | ARG | X | 429 | 50.991 | 24.911 | 35.389 | 0.00 | 0.00 |
| ATOM | 6449 | H    | ARG | X | 429 | 51.271 | 23.941 | 35.375 | 0.00 | 0.00 |
| ATOM | 6450 | CA   | ARG | X | 429 | 51.959 | 25.869 | 34.864 | 0.00 | 0.00 |
| ATOM | 6451 | HA   | ARG | X | 429 | 51.737 | 26.881 | 35.203 | 0.00 | 0.00 |
| ATOM | 6452 | CB   | ARG | X | 429 | 53.326 | 25.470 | 35.434 | 0.00 | 0.00 |
| ATOM | 6453 | HB2  | ARG | X | 429 | 53.341 | 25.573 | 36.519 | 0.00 | 0.00 |
| ATOM | 6454 | HB3  | ARG | X | 429 | 53.357 | 24.412 | 35.176 | 0.00 | 0.00 |
| ATOM | 6455 | CG   | ARG | X | 429 | 54.683 | 26.225 | 34.953 | 0.00 | 0.00 |
| ATOM | 6456 | HG2  | ARG | X | 429 | 54.922 | 25.867 | 33.951 | 0.00 | 0.00 |
| ATOM | 6457 | HG3  | ARG | X | 429 | 54.441 | 27.279 | 34.816 | 0.00 | 0.00 |
| ATOM | 6458 | CD   | ARG | X | 429 | 55.882 | 26.117 | 35.939 | 0.00 | 0.00 |
| ATOM | 6459 | HD2  | ARG | X | 429 | 55.715 | 26.560 | 36.920 | 0.00 | 0.00 |
| ATOM | 6460 | HD3  | ARG | X | 429 | 56.174 | 25.092 | 36.168 | 0.00 | 0.00 |
| ATOM | 6461 | NE   | ARG | X | 429 | 57.088 | 26.853 | 35.423 | 0.00 | 0.00 |
| ATOM | 6462 | HE   | ARG | X | 429 | 57.182 | 27.779 | 35.813 | 0.00 | 0.00 |
| ATOM | 6463 | CZ   | ARG | X | 429 | 57.958 | 26.466 | 34.463 | 0.00 | 0.00 |
| ATOM | 6464 | NH1  | ARG | X | 429 | 57.995 | 25.233 | 33.932 | 0.00 | 0.00 |
| ATOM | 6465 | HH11 | ARG | X | 429 | 57.365 | 24.506 | 34.239 | 0.00 | 0.00 |
| ATOM | 6466 | HH12 | ARG | X | 429 | 58.535 | 25.123 | 33.085 | 0.00 | 0.00 |
| ATOM | 6467 | NH2  | ARG | X | 429 | 58.806 | 27.344 | 34.016 | 0.00 | 0.00 |
| ATOM | 6468 | HH21 | ARG | X | 429 | 58.706 | 28.320 | 34.258 | 0.00 | 0.00 |
| ATOM | 6469 | HH22 | ARG | X | 429 | 59.450 | 27.003 | 33.317 | 0.00 | 0.00 |
| ATOM | 6470 | C    | ARG | X | 429 | 52.023 | 25.827 | 33.330 | 0.00 | 0.00 |
| ATOM | 6471 | O    | ARG | X | 429 | 52.125 | 24.717 | 32.743 | 0.00 | 0.00 |
| ATOM | 6472 | N    | ALA | X | 430 | 51.727 | 26.972 | 32.764 | 0.00 | 0.00 |
| ATOM | 6473 | H    | ALA | X | 430 | 51.426 | 27.691 | 33.406 | 0.00 | 0.00 |
| ATOM | 6474 | CA   | ALA | X | 430 | 51.645 | 27.126 | 31.232 | 0.00 | 0.00 |
| ATOM | 6475 | HA   | ALA | X | 430 | 50.858 | 26.423 | 30.958 | 0.00 | 0.00 |
| ATOM | 6476 | CB   | ALA | X | 430 | 51.133 | 28.574 | 30.883 | 0.00 | 0.00 |
| ATOM | 6477 | HB1  | ALA | X | 430 | 51.162 | 28.834 | 29.825 | 0.00 | 0.00 |
| ATOM | 6478 | HB2  | ALA | X | 430 | 51.754 | 29.294 | 31.416 | 0.00 | 0.00 |
| ATOM | 6479 | HB3  | ALA | X | 430 | 50.100 | 28.561 | 31.231 | 0.00 | 0.00 |
| ATOM | 6480 | C    | ALA | X | 430 | 53.011 | 26.814 | 30.590 | 0.00 | 0.00 |
| ATOM | 6481 | O    | ALA | X | 430 | 54.039 | 27.290 | 31.089 | 0.00 | 0.00 |
| ATOM | 6482 | N    | SER | X | 431 | 53.029 | 26.031 | 29.503 | 0.00 | 0.00 |
| ATOM | 6483 | H    | SER | X | 431 | 52.143 | 25.679 | 29.171 | 0.00 | 0.00 |
| ATOM | 6484 | CA   | SER | X | 431 | 54.187 | 25.724 | 28.638 | 0.00 | 0.00 |
| ATOM | 6485 | HA   | SER | X | 431 | 54.853 | 25.100 | 29.234 | 0.00 | 0.00 |
| ATOM | 6486 | CB   | SER | X | 431 | 53.790 | 24.809 | 27.453 | 0.00 | 0.00 |
| ATOM | 6487 | HB2  | SER | X | 431 | 54.692 | 24.650 | 26.862 | 0.00 | 0.00 |
| ATOM | 6488 | HB3  | SER | X | 431 | 53.567 | 23.836 | 27.890 | 0.00 | 0.00 |
| ATOM | 6489 | OG   | SER | X | 431 | 52.719 | 25.442 | 26.674 | 0.00 | 0.00 |
| ATOM | 6490 | HG   | SER | X | 431 | 51.844 | 25.166 | 26.956 | 0.00 | 0.00 |

|      |      |      |     |   |     |        |        |        |      |      |
|------|------|------|-----|---|-----|--------|--------|--------|------|------|
| ATOM | 6491 | C    | SER | X | 431 | 54.855 | 27.017 | 28.132 | 0.00 | 0.00 |
| ATOM | 6492 | O    | SER | X | 431 | 56.074 | 27.065 | 28.010 | 0.00 | 0.00 |
| ATOM | 6493 | N    | THR | X | 432 | 54.033 | 28.079 | 27.936 | 0.00 | 0.00 |
| ATOM | 6494 | H    | THR | X | 432 | 53.034 | 27.941 | 27.991 | 0.00 | 0.00 |
| ATOM | 6495 | CA   | THR | X | 432 | 54.532 | 29.331 | 27.589 | 0.00 | 0.00 |
| ATOM | 6496 | HA   | THR | X | 432 | 55.293 | 29.170 | 26.826 | 0.00 | 0.00 |
| ATOM | 6497 | CB   | THR | X | 432 | 53.391 | 30.142 | 26.931 | 0.00 | 0.00 |
| ATOM | 6498 | HB   | THR | X | 432 | 53.675 | 31.192 | 26.846 | 0.00 | 0.00 |
| ATOM | 6499 | CG2  | THR | X | 432 | 52.942 | 29.610 | 25.591 | 0.00 | 0.00 |
| ATOM | 6500 | HG21 | THR | X | 432 | 51.970 | 30.002 | 25.290 | 0.00 | 0.00 |
| ATOM | 6501 | HG22 | THR | X | 432 | 52.971 | 28.526 | 25.706 | 0.00 | 0.00 |
| ATOM | 6502 | HG23 | THR | X | 432 | 53.714 | 29.755 | 24.835 | 0.00 | 0.00 |
| ATOM | 6503 | OG1  | THR | X | 432 | 52.243 | 30.176 | 27.675 | 0.00 | 0.00 |
| ATOM | 6504 | HG1  | THR | X | 432 | 52.360 | 30.645 | 28.505 | 0.00 | 0.00 |
| ATOM | 6505 | C    | THR | X | 432 | 55.154 | 30.118 | 28.737 | 0.00 | 0.00 |
| ATOM | 6506 | O    | THR | X | 432 | 55.670 | 31.156 | 28.451 | 0.00 | 0.00 |
| ATOM | 6507 | N    | LEU | X | 433 | 55.000 | 29.766 | 29.984 | 0.00 | 0.00 |
| ATOM | 6508 | H    | LEU | X | 433 | 54.568 | 28.867 | 30.146 | 0.00 | 0.00 |
| ATOM | 6509 | CA   | LEU | X | 433 | 55.382 | 30.615 | 31.159 | 0.00 | 0.00 |
| ATOM | 6510 | HA   | LEU | X | 433 | 54.839 | 31.523 | 30.893 | 0.00 | 0.00 |
| ATOM | 6511 | CB   | LEU | X | 433 | 54.787 | 30.098 | 32.474 | 0.00 | 0.00 |
| ATOM | 6512 | HB2  | LEU | X | 433 | 53.772 | 29.762 | 32.263 | 0.00 | 0.00 |
| ATOM | 6513 | HB3  | LEU | X | 433 | 55.313 | 29.162 | 32.667 | 0.00 | 0.00 |
| ATOM | 6514 | CG   | LEU | X | 433 | 54.776 | 30.939 | 33.825 | 0.00 | 0.00 |
| ATOM | 6515 | HG   | LEU | X | 433 | 55.669 | 31.564 | 33.818 | 0.00 | 0.00 |
| ATOM | 6516 | CD1  | LEU | X | 433 | 53.627 | 31.962 | 33.873 | 0.00 | 0.00 |
| ATOM | 6517 | HD11 | LEU | X | 433 | 53.611 | 32.699 | 33.070 | 0.00 | 0.00 |
| ATOM | 6518 | HD12 | LEU | X | 433 | 53.595 | 32.505 | 34.818 | 0.00 | 0.00 |
| ATOM | 6519 | HD13 | LEU | X | 433 | 52.731 | 31.346 | 33.955 | 0.00 | 0.00 |
| ATOM | 6520 | CD2  | LEU | X | 433 | 54.858 | 30.054 | 35.023 | 0.00 | 0.00 |
| ATOM | 6521 | HD21 | LEU | X | 433 | 53.861 | 29.657 | 35.215 | 0.00 | 0.00 |
| ATOM | 6522 | HD22 | LEU | X | 433 | 55.474 | 29.163 | 34.910 | 0.00 | 0.00 |
| ATOM | 6523 | HD23 | LEU | X | 433 | 55.024 | 30.665 | 35.910 | 0.00 | 0.00 |
| ATOM | 6524 | C    | LEU | X | 433 | 56.875 | 30.839 | 31.356 | 0.00 | 0.00 |
| ATOM | 6525 | O    | LEU | X | 433 | 57.703 | 29.981 | 31.337 | 0.00 | 0.00 |
| ATOM | 6526 | N    | SER | X | 434 | 57.145 | 32.116 | 31.416 | 0.00 | 0.00 |
| ATOM | 6527 | H    | SER | X | 434 | 56.326 | 32.699 | 31.314 | 0.00 | 0.00 |
| ATOM | 6528 | CA   | SER | X | 434 | 58.435 | 32.787 | 31.729 | 0.00 | 0.00 |
| ATOM | 6529 | HA   | SER | X | 434 | 59.208 | 32.406 | 31.061 | 0.00 | 0.00 |
| ATOM | 6530 | CB   | SER | X | 434 | 58.169 | 34.272 | 31.366 | 0.00 | 0.00 |
| ATOM | 6531 | HB2  | SER | X | 434 | 59.146 | 34.717 | 31.551 | 0.00 | 0.00 |
| ATOM | 6532 | HB3  | SER | X | 434 | 57.862 | 34.443 | 30.335 | 0.00 | 0.00 |
| ATOM | 6533 | OG   | SER | X | 434 | 57.263 | 34.811 | 32.391 | 0.00 | 0.00 |
| ATOM | 6534 | HG   | SER | X | 434 | 56.342 | 34.666 | 32.164 | 0.00 | 0.00 |
| ATOM | 6535 | C    | SER | X | 434 | 59.139 | 32.701 | 33.110 | 0.00 | 0.00 |
| ATOM | 6536 | O    | SER | X | 434 | 60.315 | 32.375 | 33.272 | 0.00 | 0.00 |
| ATOM | 6537 | N    | TRP | X | 435 | 58.337 | 32.730 | 34.184 | 0.00 | 0.00 |
| ATOM | 6538 | H    | TRP | X | 435 | 57.371 | 33.025 | 34.165 | 0.00 | 0.00 |
| ATOM | 6539 | CA   | TRP | X | 435 | 58.812 | 32.365 | 35.485 | 0.00 | 0.00 |
| ATOM | 6540 | HA   | TRP | X | 435 | 59.637 | 33.030 | 35.742 | 0.00 | 0.00 |
| ATOM | 6541 | CB   | TRP | X | 435 | 57.676 | 32.639 | 36.409 | 0.00 | 0.00 |
| ATOM | 6542 | HB2  | TRP | X | 435 | 56.798 | 32.049 | 36.145 | 0.00 | 0.00 |
| ATOM | 6543 | HB3  | TRP | X | 435 | 57.901 | 32.242 | 37.399 | 0.00 | 0.00 |
| ATOM | 6544 | CG   | TRP | X | 435 | 57.221 | 34.135 | 36.455 | 0.00 | 0.00 |
| ATOM | 6545 | CD1  | TRP | X | 435 | 56.047 | 34.654 | 36.042 | 0.00 | 0.00 |
| ATOM | 6546 | HD1  | TRP | X | 435 | 55.275 | 34.035 | 35.609 | 0.00 | 0.00 |
| ATOM | 6547 | NE1  | TRP | X | 435 | 56.021 | 36.029 | 36.106 | 0.00 | 0.00 |
| ATOM | 6548 | HE1  | TRP | X | 435 | 55.367 | 36.639 | 35.637 | 0.00 | 0.00 |
| ATOM | 6549 | CE2  | TRP | X | 435 | 57.220 | 36.518 | 36.602 | 0.00 | 0.00 |
| ATOM | 6550 | CZ2  | TRP | X | 435 | 57.741 | 37.866 | 36.728 | 0.00 | 0.00 |
| ATOM | 6551 | HZ2  | TRP | X | 435 | 57.072 | 38.686 | 36.515 | 0.00 | 0.00 |
| ATOM | 6552 | CH2  | TRP | X | 435 | 59.058 | 37.983 | 37.203 | 0.00 | 0.00 |
| ATOM | 6553 | HH2  | TRP | X | 435 | 59.499 | 38.961 | 37.327 | 0.00 | 0.00 |
| ATOM | 6554 | CZ3  | TRP | X | 435 | 59.795 | 36.823 | 37.532 | 0.00 | 0.00 |
| ATOM | 6555 | HZ3  | TRP | X | 435 | 60.828 | 36.907 | 37.838 | 0.00 | 0.00 |
| ATOM | 6556 | CE3  | TRP | X | 435 | 59.282 | 35.528 | 37.281 | 0.00 | 0.00 |
| ATOM | 6557 | HE3  | TRP | X | 435 | 59.954 | 34.691 | 37.402 | 0.00 | 0.00 |

|      |      |      |     |   |     |        |        |        |      |      |
|------|------|------|-----|---|-----|--------|--------|--------|------|------|
| ATOM | 6558 | CD2  | TRP | X | 435 | 57.979 | 35.325 | 36.811 | 0.00 | 0.00 |
| ATOM | 6559 | C    | TRP | X | 435 | 59.319 | 30.914 | 35.712 | 0.00 | 0.00 |
| ATOM | 6560 | O    | TRP | X | 435 | 58.716 | 29.945 | 35.210 | 0.00 | 0.00 |
| ATOM | 6561 | N    | PRO | X | 436 | 60.387 | 30.699 | 36.451 | 0.00 | 0.00 |
| ATOM | 6562 | CD   | PRO | X | 436 | 61.253 | 31.593 | 37.086 | 0.00 | 0.00 |
| ATOM | 6563 | HD2  | PRO | X | 436 | 60.692 | 32.330 | 37.660 | 0.00 | 0.00 |
| ATOM | 6564 | HD3  | PRO | X | 436 | 61.986 | 32.146 | 36.500 | 0.00 | 0.00 |
| ATOM | 6565 | CG   | PRO | X | 436 | 62.127 | 30.837 | 38.083 | 0.00 | 0.00 |
| ATOM | 6566 | HG2  | PRO | X | 436 | 61.538 | 30.532 | 38.948 | 0.00 | 0.00 |
| ATOM | 6567 | HG3  | PRO | X | 436 | 63.019 | 31.431 | 38.281 | 0.00 | 0.00 |
| ATOM | 6568 | CB   | PRO | X | 436 | 62.291 | 29.557 | 37.267 | 0.00 | 0.00 |
| ATOM | 6569 | HB2  | PRO | X | 436 | 62.479 | 28.689 | 37.899 | 0.00 | 0.00 |
| ATOM | 6570 | HB3  | PRO | X | 436 | 63.145 | 29.646 | 36.595 | 0.00 | 0.00 |
| ATOM | 6571 | CA   | PRO | X | 436 | 61.013 | 29.358 | 36.470 | 0.00 | 0.00 |
| ATOM | 6572 | HA   | PRO | X | 436 | 61.114 | 28.960 | 35.460 | 0.00 | 0.00 |
| ATOM | 6573 | C    | PRO | X | 436 | 60.151 | 28.356 | 37.278 | 0.00 | 0.00 |
| ATOM | 6574 | O    | PRO | X | 436 | 59.242 | 28.687 | 38.048 | 0.00 | 0.00 |
| ATOM | 6575 | N    | LEU | X | 437 | 60.551 | 27.097 | 37.208 | 0.00 | 0.00 |
| ATOM | 6576 | H    | LEU | X | 437 | 61.475 | 26.973 | 36.820 | 0.00 | 0.00 |
| ATOM | 6577 | CA   | LEU | X | 437 | 59.845 | 25.995 | 37.800 | 0.00 | 0.00 |
| ATOM | 6578 | HA   | LEU | X | 437 | 58.801 | 25.962 | 37.488 | 0.00 | 0.00 |
| ATOM | 6579 | CB   | LEU | X | 437 | 60.517 | 24.785 | 37.266 | 0.00 | 0.00 |
| ATOM | 6580 | HB2  | LEU | X | 437 | 60.464 | 24.666 | 36.184 | 0.00 | 0.00 |
| ATOM | 6581 | HB3  | LEU | X | 437 | 61.599 | 24.918 | 37.264 | 0.00 | 0.00 |
| ATOM | 6582 | CG   | LEU | X | 437 | 60.067 | 23.425 | 37.770 | 0.00 | 0.00 |
| ATOM | 6583 | HG   | LEU | X | 437 | 60.236 | 23.358 | 38.844 | 0.00 | 0.00 |
| ATOM | 6584 | CD1  | LEU | X | 437 | 58.540 | 23.181 | 37.511 | 0.00 | 0.00 |
| ATOM | 6585 | HD11 | LEU | X | 437 | 57.944 | 24.056 | 37.771 | 0.00 | 0.00 |
| ATOM | 6586 | HD12 | LEU | X | 437 | 58.294 | 22.293 | 38.093 | 0.00 | 0.00 |
| ATOM | 6587 | HD13 | LEU | X | 437 | 58.365 | 23.042 | 36.444 | 0.00 | 0.00 |
| ATOM | 6588 | CD2  | LEU | X | 437 | 60.963 | 22.306 | 37.295 | 0.00 | 0.00 |
| ATOM | 6589 | HD21 | LEU | X | 437 | 61.966 | 22.660 | 37.533 | 0.00 | 0.00 |
| ATOM | 6590 | HD22 | LEU | X | 437 | 60.860 | 21.353 | 37.815 | 0.00 | 0.00 |
| ATOM | 6591 | HD23 | LEU | X | 437 | 60.906 | 22.228 | 36.210 | 0.00 | 0.00 |
| ATOM | 6592 | C    | LEU | X | 437 | 59.800 | 25.983 | 39.301 | 0.00 | 0.00 |
| ATOM | 6593 | O    | LEU | X | 437 | 58.802 | 25.517 | 39.863 | 0.00 | 0.00 |
| ATOM | 6594 | N    | TRP | X | 438 | 60.719 | 26.676 | 39.995 | 0.00 | 0.00 |
| ATOM | 6595 | H    | TRP | X | 438 | 61.430 | 27.134 | 39.443 | 0.00 | 0.00 |
| ATOM | 6596 | CA   | TRP | X | 438 | 60.757 | 26.782 | 41.442 | 0.00 | 0.00 |
| ATOM | 6597 | HA   | TRP | X | 438 | 60.649 | 25.841 | 41.982 | 0.00 | 0.00 |
| ATOM | 6598 | CB   | TRP | X | 438 | 62.121 | 27.299 | 42.004 | 0.00 | 0.00 |
| ATOM | 6599 | HB2  | TRP | X | 438 | 62.113 | 27.193 | 43.088 | 0.00 | 0.00 |
| ATOM | 6600 | HB3  | TRP | X | 438 | 62.967 | 26.665 | 41.737 | 0.00 | 0.00 |
| ATOM | 6601 | CG   | TRP | X | 438 | 62.494 | 28.726 | 41.665 | 0.00 | 0.00 |
| ATOM | 6602 | CD1  | TRP | X | 438 | 63.423 | 29.077 | 40.773 | 0.00 | 0.00 |
| ATOM | 6603 | HD1  | TRP | X | 438 | 63.928 | 28.370 | 40.132 | 0.00 | 0.00 |
| ATOM | 6604 | NE1  | TRP | X | 438 | 63.583 | 30.461 | 40.796 | 0.00 | 0.00 |
| ATOM | 6605 | HE1  | TRP | X | 438 | 64.127 | 30.905 | 40.070 | 0.00 | 0.00 |
| ATOM | 6606 | CE2  | TRP | X | 438 | 62.984 | 30.940 | 41.999 | 0.00 | 0.00 |
| ATOM | 6607 | CZ2  | TRP | X | 438 | 62.857 | 32.272 | 42.429 | 0.00 | 0.00 |
| ATOM | 6608 | HZ2  | TRP | X | 438 | 63.396 | 33.003 | 41.845 | 0.00 | 0.00 |
| ATOM | 6609 | CH2  | TRP | X | 438 | 61.991 | 32.550 | 43.511 | 0.00 | 0.00 |
| ATOM | 6610 | HH2  | TRP | X | 438 | 61.832 | 33.556 | 43.870 | 0.00 | 0.00 |
| ATOM | 6611 | CZ3  | TRP | X | 438 | 61.413 | 31.465 | 44.215 | 0.00 | 0.00 |
| ATOM | 6612 | HZ3  | TRP | X | 438 | 60.814 | 31.601 | 45.103 | 0.00 | 0.00 |
| ATOM | 6613 | CE3  | TRP | X | 438 | 61.495 | 30.188 | 43.630 | 0.00 | 0.00 |
| ATOM | 6614 | HE3  | TRP | X | 438 | 60.980 | 29.345 | 44.065 | 0.00 | 0.00 |
| ATOM | 6615 | CD2  | TRP | X | 438 | 62.187 | 29.912 | 42.477 | 0.00 | 0.00 |
| ATOM | 6616 | C    | TRP | X | 438 | 59.680 | 27.623 | 42.023 | 0.00 | 0.00 |
| ATOM | 6617 | O    | TRP | X | 438 | 59.438 | 27.519 | 43.213 | 0.00 | 0.00 |
| ATOM | 6618 | N    | MET | X | 439 | 58.997 | 28.530 | 41.236 | 0.00 | 0.00 |
| ATOM | 6619 | H    | MET | X | 439 | 59.242 | 28.636 | 40.262 | 0.00 | 0.00 |
| ATOM | 6620 | CA   | MET | X | 439 | 57.852 | 29.294 | 41.718 | 0.00 | 0.00 |
| ATOM | 6621 | HA   | MET | X | 439 | 58.174 | 29.588 | 42.717 | 0.00 | 0.00 |
| ATOM | 6622 | CB   | MET | X | 439 | 57.633 | 30.543 | 40.866 | 0.00 | 0.00 |
| ATOM | 6623 | HB2  | MET | X | 439 | 57.688 | 30.385 | 39.789 | 0.00 | 0.00 |
| ATOM | 6624 | HB3  | MET | X | 439 | 56.657 | 30.852 | 41.242 | 0.00 | 0.00 |

|      |      |      |     |   |     |        |        |        |      |      |
|------|------|------|-----|---|-----|--------|--------|--------|------|------|
| ATOM | 6625 | CG   | MET | X | 439 | 58.652 | 31.652 | 41.085 | 0.00 | 0.00 |
| ATOM | 6626 | HG2  | MET | X | 439 | 58.593 | 31.936 | 42.136 | 0.00 | 0.00 |
| ATOM | 6627 | HG3  | MET | X | 439 | 59.564 | 31.072 | 40.944 | 0.00 | 0.00 |
| ATOM | 6628 | SD   | MET | X | 439 | 58.606 | 33.155 | 40.102 | 0.00 | 0.00 |
| ATOM | 6629 | CE   | MET | X | 439 | 60.159 | 33.825 | 40.730 | 0.00 | 0.00 |
| ATOM | 6630 | HE1  | MET | X | 439 | 60.865 | 33.027 | 40.500 | 0.00 | 0.00 |
| ATOM | 6631 | HE2  | MET | X | 439 | 60.552 | 34.754 | 40.318 | 0.00 | 0.00 |
| ATOM | 6632 | HE3  | MET | X | 439 | 60.183 | 33.922 | 41.815 | 0.00 | 0.00 |
| ATOM | 6633 | C    | MET | X | 439 | 56.613 | 28.416 | 41.680 | 0.00 | 0.00 |
| ATOM | 6634 | O    | MET | X | 439 | 55.584 | 28.795 | 42.281 | 0.00 | 0.00 |
| ATOM | 6635 | N    | GLY | X | 440 | 56.623 | 27.284 | 40.966 | 0.00 | 0.00 |
| ATOM | 6636 | H    | GLY | X | 440 | 57.443 | 27.017 | 40.441 | 0.00 | 0.00 |
| ATOM | 6637 | CA   | GLY | X | 440 | 55.411 | 26.513 | 40.571 | 0.00 | 0.00 |
| ATOM | 6638 | HA2  | GLY | X | 440 | 55.840 | 25.743 | 39.931 | 0.00 | 0.00 |
| ATOM | 6639 | HA3  | GLY | X | 440 | 55.095 | 26.059 | 41.511 | 0.00 | 0.00 |
| ATOM | 6640 | C    | GLY | X | 440 | 54.426 | 27.421 | 39.795 | 0.00 | 0.00 |
| ATOM | 6641 | O    | GLY | X | 440 | 54.622 | 27.679 | 38.653 | 0.00 | 0.00 |
| ATOM | 6642 | N    | VAL | X | 441 | 53.336 | 27.880 | 40.332 | 0.00 | 0.00 |
| ATOM | 6643 | H    | VAL | X | 441 | 53.084 | 27.633 | 41.278 | 0.00 | 0.00 |
| ATOM | 6644 | CA   | VAL | X | 441 | 52.295 | 28.753 | 39.745 | 0.00 | 0.00 |
| ATOM | 6645 | HA   | VAL | X | 441 | 52.526 | 28.973 | 38.703 | 0.00 | 0.00 |
| ATOM | 6646 | CB   | VAL | X | 441 | 50.930 | 28.093 | 39.673 | 0.00 | 0.00 |
| ATOM | 6647 | HB   | VAL | X | 441 | 50.556 | 28.060 | 40.696 | 0.00 | 0.00 |
| ATOM | 6648 | CG1  | VAL | X | 441 | 50.030 | 28.920 | 38.815 | 0.00 | 0.00 |
| ATOM | 6649 | HG11 | VAL | X | 441 | 49.024 | 28.512 | 38.916 | 0.00 | 0.00 |
| ATOM | 6650 | HG12 | VAL | X | 441 | 49.968 | 29.958 | 39.139 | 0.00 | 0.00 |
| ATOM | 6651 | HG13 | VAL | X | 441 | 50.317 | 28.838 | 37.766 | 0.00 | 0.00 |
| ATOM | 6652 | CG2  | VAL | X | 441 | 50.865 | 26.643 | 39.119 | 0.00 | 0.00 |
| ATOM | 6653 | HG21 | VAL | X | 441 | 49.827 | 26.476 | 38.830 | 0.00 | 0.00 |
| ATOM | 6654 | HG22 | VAL | X | 441 | 51.236 | 25.846 | 39.764 | 0.00 | 0.00 |
| ATOM | 6655 | HG23 | VAL | X | 441 | 51.483 | 26.756 | 38.228 | 0.00 | 0.00 |
| ATOM | 6656 | C    | VAL | X | 441 | 52.305 | 30.067 | 40.491 | 0.00 | 0.00 |
| ATOM | 6657 | O    | VAL | X | 441 | 51.560 | 30.227 | 41.496 | 0.00 | 0.00 |
| ATOM | 6658 | N    | PRO | X | 442 | 53.032 | 31.103 | 40.055 | 0.00 | 0.00 |
| ATOM | 6659 | CD   | PRO | X | 442 | 53.774 | 31.101 | 38.856 | 0.00 | 0.00 |
| ATOM | 6660 | HD2  | PRO | X | 442 | 53.141 | 31.087 | 37.968 | 0.00 | 0.00 |
| ATOM | 6661 | HD3  | PRO | X | 442 | 54.410 | 30.221 | 38.760 | 0.00 | 0.00 |
| ATOM | 6662 | CG   | PRO | X | 442 | 54.653 | 32.349 | 38.868 | 0.00 | 0.00 |
| ATOM | 6663 | HG2  | PRO | X | 442 | 54.537 | 32.838 | 37.901 | 0.00 | 0.00 |
| ATOM | 6664 | HG3  | PRO | X | 442 | 55.721 | 32.187 | 39.018 | 0.00 | 0.00 |
| ATOM | 6665 | CB   | PRO | X | 442 | 54.213 | 33.189 | 40.045 | 0.00 | 0.00 |
| ATOM | 6666 | HB2  | PRO | X | 442 | 53.958 | 34.197 | 39.718 | 0.00 | 0.00 |
| ATOM | 6667 | HB3  | PRO | X | 442 | 55.078 | 33.180 | 40.707 | 0.00 | 0.00 |
| ATOM | 6668 | CA   | PRO | X | 442 | 53.089 | 32.369 | 40.719 | 0.00 | 0.00 |
| ATOM | 6669 | HA   | PRO | X | 442 | 53.367 | 32.099 | 41.738 | 0.00 | 0.00 |
| ATOM | 6670 | C    | PRO | X | 442 | 51.733 | 33.058 | 40.642 | 0.00 | 0.00 |
| ATOM | 6671 | O    | PRO | X | 442 | 50.894 | 32.738 | 39.773 | 0.00 | 0.00 |
| ATOM | 6672 | N    | HIP | X | 443 | 51.492 | 33.889 | 41.575 | 0.00 | 0.00 |
| ATOM | 6673 | H    | HIP | X | 443 | 52.187 | 33.966 | 42.304 | 0.00 | 0.00 |
| ATOM | 6674 | CA   | HIP | X | 443 | 50.257 | 34.688 | 41.714 | 0.00 | 0.00 |
| ATOM | 6675 | HA   | HIP | X | 443 | 49.535 | 34.097 | 42.277 | 0.00 | 0.00 |
| ATOM | 6676 | CB   | HIP | X | 443 | 50.692 | 35.902 | 42.554 | 0.00 | 0.00 |
| ATOM | 6677 | HB2  | HIP | X | 443 | 50.801 | 35.661 | 43.611 | 0.00 | 0.00 |
| ATOM | 6678 | HB3  | HIP | X | 443 | 51.600 | 36.347 | 42.147 | 0.00 | 0.00 |
| ATOM | 6679 | CG   | HIP | X | 443 | 49.651 | 36.944 | 42.622 | 0.00 | 0.00 |
| ATOM | 6680 | ND1  | HIP | X | 443 | 48.568 | 37.195 | 43.439 | 0.00 | 0.00 |
| ATOM | 6681 | HD1  | HIP | X | 443 | 48.199 | 36.487 | 44.059 | 0.00 | 0.00 |
| ATOM | 6682 | CE1  | HIP | X | 443 | 48.009 | 38.378 | 43.200 | 0.00 | 0.00 |
| ATOM | 6683 | HE1  | HIP | X | 443 | 47.174 | 38.808 | 43.734 | 0.00 | 0.00 |
| ATOM | 6684 | NE2  | HIP | X | 443 | 48.593 | 38.817 | 42.075 | 0.00 | 0.00 |
| ATOM | 6685 | HE2  | HIP | X | 443 | 48.451 | 39.715 | 41.636 | 0.00 | 0.00 |
| ATOM | 6686 | CD2  | HIP | X | 443 | 49.669 | 37.966 | 41.816 | 0.00 | 0.00 |
| ATOM | 6687 | HD2  | HIP | X | 443 | 50.327 | 38.033 | 40.962 | 0.00 | 0.00 |
| ATOM | 6688 | C    | HIP | X | 443 | 49.458 | 35.088 | 40.395 | 0.00 | 0.00 |
| ATOM | 6689 | O    | HIP | X | 443 | 49.958 | 35.901 | 39.607 | 0.00 | 0.00 |
| ATOM | 6690 | N    | GLY | X | 444 | 48.141 | 34.737 | 40.268 | 0.00 | 0.00 |
| ATOM | 6691 | H    | GLY | X | 444 | 47.634 | 34.325 | 41.038 | 0.00 | 0.00 |

|      |      |      |     |   |     |        |        |        |      |      |
|------|------|------|-----|---|-----|--------|--------|--------|------|------|
| ATOM | 6692 | CA   | GLY | X | 444 | 47.233 | 35.246 | 39.271 | 0.00 | 0.00 |
| ATOM | 6693 | HA2  | GLY | X | 444 | 46.319 | 34.679 | 39.454 | 0.00 | 0.00 |
| ATOM | 6694 | HA3  | GLY | X | 444 | 47.054 | 36.315 | 39.381 | 0.00 | 0.00 |
| ATOM | 6695 | C    | GLY | X | 444 | 47.662 | 35.014 | 37.811 | 0.00 | 0.00 |
| ATOM | 6696 | O    | GLY | X | 444 | 47.568 | 35.908 | 36.958 | 0.00 | 0.00 |
| ATOM | 6697 | N    | TYR | X | 445 | 48.336 | 33.853 | 37.508 | 0.00 | 0.00 |
| ATOM | 6698 | H    | TYR | X | 445 | 48.633 | 33.220 | 38.237 | 0.00 | 0.00 |
| ATOM | 6699 | CA   | TYR | X | 445 | 48.634 | 33.447 | 36.155 | 0.00 | 0.00 |
| ATOM | 6700 | HA   | TYR | X | 445 | 48.678 | 34.377 | 35.588 | 0.00 | 0.00 |
| ATOM | 6701 | CB   | TYR | X | 445 | 50.065 | 32.859 | 36.214 | 0.00 | 0.00 |
| ATOM | 6702 | HB2  | TYR | X | 445 | 50.329 | 32.613 | 37.243 | 0.00 | 0.00 |
| ATOM | 6703 | HB3  | TYR | X | 445 | 50.091 | 32.009 | 35.533 | 0.00 | 0.00 |
| ATOM | 6704 | CG   | TYR | X | 445 | 50.988 | 33.835 | 35.655 | 0.00 | 0.00 |
| ATOM | 6705 | CD1  | TYR | X | 445 | 51.008 | 34.054 | 34.255 | 0.00 | 0.00 |
| ATOM | 6706 | HD1  | TYR | X | 445 | 50.320 | 33.489 | 33.643 | 0.00 | 0.00 |
| ATOM | 6707 | CE1  | TYR | X | 445 | 51.881 | 35.048 | 33.751 | 0.00 | 0.00 |
| ATOM | 6708 | HE1  | TYR | X | 445 | 51.997 | 35.283 | 32.703 | 0.00 | 0.00 |
| ATOM | 6709 | CZ   | TYR | X | 445 | 52.697 | 35.779 | 34.602 | 0.00 | 0.00 |
| ATOM | 6710 | OH   | TYR | X | 445 | 53.613 | 36.593 | 34.033 | 0.00 | 0.00 |
| ATOM | 6711 | HH   | TYR | X | 445 | 53.631 | 36.577 | 33.073 | 0.00 | 0.00 |
| ATOM | 6712 | CE2  | TYR | X | 445 | 52.655 | 35.641 | 36.023 | 0.00 | 0.00 |
| ATOM | 6713 | HE2  | TYR | X | 445 | 53.102 | 36.318 | 36.735 | 0.00 | 0.00 |
| ATOM | 6714 | CD2  | TYR | X | 445 | 51.762 | 34.646 | 36.536 | 0.00 | 0.00 |
| ATOM | 6715 | HD2  | TYR | X | 445 | 51.613 | 34.478 | 37.593 | 0.00 | 0.00 |
| ATOM | 6716 | C    | TYR | X | 445 | 47.581 | 32.561 | 35.524 | 0.00 | 0.00 |
| ATOM | 6717 | O    | TYR | X | 445 | 47.665 | 32.388 | 34.263 | 0.00 | 0.00 |
| ATOM | 6718 | N    | GLU | X | 446 | 46.553 | 32.037 | 36.229 | 0.00 | 0.00 |
| ATOM | 6719 | H    | GLU | X | 446 | 46.512 | 32.149 | 37.232 | 0.00 | 0.00 |
| ATOM | 6720 | CA   | GLU | X | 446 | 45.475 | 31.246 | 35.658 | 0.00 | 0.00 |
| ATOM | 6721 | HA   | GLU | X | 446 | 45.928 | 30.457 | 35.057 | 0.00 | 0.00 |
| ATOM | 6722 | CB   | GLU | X | 446 | 44.547 | 30.557 | 36.805 | 0.00 | 0.00 |
| ATOM | 6723 | HB2  | GLU | X | 446 | 44.111 | 29.668 | 36.347 | 0.00 | 0.00 |
| ATOM | 6724 | HB3  | GLU | X | 446 | 45.237 | 30.256 | 37.593 | 0.00 | 0.00 |
| ATOM | 6725 | CG   | GLU | X | 446 | 43.375 | 31.470 | 37.157 | 0.00 | 0.00 |
| ATOM | 6726 | HG2  | GLU | X | 446 | 42.989 | 32.107 | 36.361 | 0.00 | 0.00 |
| ATOM | 6727 | HG3  | GLU | X | 446 | 42.523 | 30.862 | 37.463 | 0.00 | 0.00 |
| ATOM | 6728 | CD   | GLU | X | 446 | 43.772 | 32.461 | 38.262 | 0.00 | 0.00 |
| ATOM | 6729 | OE1  | GLU | X | 446 | 44.892 | 32.930 | 38.213 | 0.00 | 0.00 |
| ATOM | 6730 | OE2  | GLU | X | 446 | 42.879 | 32.830 | 39.042 | 0.00 | 0.00 |
| ATOM | 6731 | C    | GLU | X | 446 | 44.661 | 31.973 | 34.608 | 0.00 | 0.00 |
| ATOM | 6732 | O    | GLU | X | 446 | 44.074 | 31.323 | 33.767 | 0.00 | 0.00 |
| ATOM | 6733 | N    | ILE | X | 447 | 44.622 | 33.286 | 34.638 | 0.00 | 0.00 |
| ATOM | 6734 | H    | ILE | X | 447 | 45.063 | 33.761 | 35.412 | 0.00 | 0.00 |
| ATOM | 6735 | CA   | ILE | X | 447 | 43.634 | 34.081 | 33.892 | 0.00 | 0.00 |
| ATOM | 6736 | HA   | ILE | X | 447 | 42.684 | 33.683 | 34.250 | 0.00 | 0.00 |
| ATOM | 6737 | CB   | ILE | X | 447 | 43.633 | 35.678 | 34.066 | 0.00 | 0.00 |
| ATOM | 6738 | HB   | ILE | X | 447 | 42.954 | 36.129 | 33.342 | 0.00 | 0.00 |
| ATOM | 6739 | CG2  | ILE | X | 447 | 43.172 | 36.017 | 35.522 | 0.00 | 0.00 |
| ATOM | 6740 | HG21 | ILE | X | 447 | 43.913 | 35.714 | 36.261 | 0.00 | 0.00 |
| ATOM | 6741 | HG22 | ILE | X | 447 | 42.221 | 35.521 | 35.715 | 0.00 | 0.00 |
| ATOM | 6742 | HG23 | ILE | X | 447 | 43.107 | 37.099 | 35.639 | 0.00 | 0.00 |
| ATOM | 6743 | CG1  | ILE | X | 447 | 45.089 | 36.254 | 33.822 | 0.00 | 0.00 |
| ATOM | 6744 | HG12 | ILE | X | 447 | 45.655 | 36.040 | 34.729 | 0.00 | 0.00 |
| ATOM | 6745 | HG13 | ILE | X | 447 | 45.546 | 35.678 | 33.017 | 0.00 | 0.00 |
| ATOM | 6746 | CD1  | ILE | X | 447 | 45.085 | 37.740 | 33.613 | 0.00 | 0.00 |
| ATOM | 6747 | HD11 | ILE | X | 447 | 44.859 | 38.250 | 34.550 | 0.00 | 0.00 |
| ATOM | 6748 | HD12 | ILE | X | 447 | 44.394 | 38.033 | 32.823 | 0.00 | 0.00 |
| ATOM | 6749 | HD13 | ILE | X | 447 | 46.074 | 38.077 | 33.301 | 0.00 | 0.00 |
| ATOM | 6750 | C    | ILE | X | 447 | 43.624 | 33.824 | 32.405 | 0.00 | 0.00 |
| ATOM | 6751 | O    | ILE | X | 447 | 42.596 | 33.895 | 31.808 | 0.00 | 0.00 |
| ATOM | 6752 | N    | GLU | X | 448 | 44.787 | 33.457 | 31.887 | 0.00 | 0.00 |
| ATOM | 6753 | H    | GLU | X | 448 | 45.437 | 33.128 | 32.586 | 0.00 | 0.00 |
| ATOM | 6754 | CA   | GLU | X | 448 | 44.994 | 33.119 | 30.447 | 0.00 | 0.00 |
| ATOM | 6755 | HA   | GLU | X | 448 | 44.772 | 34.007 | 29.855 | 0.00 | 0.00 |
| ATOM | 6756 | CB   | GLU | X | 448 | 46.451 | 32.709 | 30.218 | 0.00 | 0.00 |
| ATOM | 6757 | HB2  | GLU | X | 448 | 46.634 | 31.999 | 31.025 | 0.00 | 0.00 |
| ATOM | 6758 | HB3  | GLU | X | 448 | 46.481 | 32.107 | 29.310 | 0.00 | 0.00 |

|      |      |      |     |   |     |        |        |        |      |      |
|------|------|------|-----|---|-----|--------|--------|--------|------|------|
| ATOM | 6759 | CG   | GLU | X | 448 | 47.448 | 33.859 | 30.289 | 0.00 | 0.00 |
| ATOM | 6760 | HG2  | GLU | X | 448 | 47.209 | 34.650 | 29.579 | 0.00 | 0.00 |
| ATOM | 6761 | HG3  | GLU | X | 448 | 47.473 | 34.331 | 31.272 | 0.00 | 0.00 |
| ATOM | 6762 | CD   | GLU | X | 448 | 48.843 | 33.463 | 29.866 | 0.00 | 0.00 |
| ATOM | 6763 | OE1  | GLU | X | 448 | 49.549 | 34.313 | 29.259 | 0.00 | 0.00 |
| ATOM | 6764 | OE2  | GLU | X | 448 | 49.266 | 32.301 | 30.149 | 0.00 | 0.00 |
| ATOM | 6765 | C    | GLU | X | 448 | 44.084 | 31.968 | 29.984 | 0.00 | 0.00 |
| ATOM | 6766 | O    | GLU | X | 448 | 43.733 | 31.971 | 28.803 | 0.00 | 0.00 |
| ATOM | 6767 | N    | PHE | X | 449 | 43.751 | 30.981 | 30.890 | 0.00 | 0.00 |
| ATOM | 6768 | H    | PHE | X | 449 | 44.105 | 30.968 | 31.836 | 0.00 | 0.00 |
| ATOM | 6769 | CA   | PHE | X | 449 | 42.887 | 29.842 | 30.657 | 0.00 | 0.00 |
| ATOM | 6770 | HA   | PHE | X | 449 | 42.914 | 29.611 | 29.592 | 0.00 | 0.00 |
| ATOM | 6771 | CB   | PHE | X | 449 | 43.451 | 28.586 | 31.421 | 0.00 | 0.00 |
| ATOM | 6772 | HB2  | PHE | X | 449 | 43.403 | 28.735 | 32.499 | 0.00 | 0.00 |
| ATOM | 6773 | HB3  | PHE | X | 449 | 42.770 | 27.763 | 31.204 | 0.00 | 0.00 |
| ATOM | 6774 | CG   | PHE | X | 449 | 44.844 | 28.152 | 31.061 | 0.00 | 0.00 |
| ATOM | 6775 | CD1  | PHE | X | 449 | 45.921 | 28.924 | 31.540 | 0.00 | 0.00 |
| ATOM | 6776 | HD1  | PHE | X | 449 | 45.797 | 29.853 | 32.078 | 0.00 | 0.00 |
| ATOM | 6777 | CE1  | PHE | X | 449 | 47.235 | 28.447 | 31.326 | 0.00 | 0.00 |
| ATOM | 6778 | HE1  | PHE | X | 449 | 48.063 | 29.013 | 31.728 | 0.00 | 0.00 |
| ATOM | 6779 | CZ   | PHE | X | 449 | 47.437 | 27.271 | 30.627 | 0.00 | 0.00 |
| ATOM | 6780 | HZ   | PHE | X | 449 | 48.431 | 26.866 | 30.505 | 0.00 | 0.00 |
| ATOM | 6781 | CE2  | PHE | X | 449 | 46.342 | 26.496 | 30.242 | 0.00 | 0.00 |
| ATOM | 6782 | HE2  | PHE | X | 449 | 46.539 | 25.515 | 29.835 | 0.00 | 0.00 |
| ATOM | 6783 | CD2  | PHE | X | 449 | 45.037 | 26.910 | 30.506 | 0.00 | 0.00 |
| ATOM | 6784 | HD2  | PHE | X | 449 | 44.193 | 26.339 | 30.146 | 0.00 | 0.00 |
| ATOM | 6785 | C    | PHE | X | 449 | 41.376 | 30.149 | 30.967 | 0.00 | 0.00 |
| ATOM | 6786 | O    | PHE | X | 449 | 40.543 | 29.373 | 30.555 | 0.00 | 0.00 |
| ATOM | 6787 | N    | ILE | X | 450 | 41.082 | 31.248 | 31.576 | 0.00 | 0.00 |
| ATOM | 6788 | H    | ILE | X | 450 | 41.836 | 31.840 | 31.893 | 0.00 | 0.00 |
| ATOM | 6789 | CA   | ILE | X | 450 | 39.686 | 31.789 | 31.731 | 0.00 | 0.00 |
| ATOM | 6790 | HA   | ILE | X | 450 | 38.958 | 30.978 | 31.745 | 0.00 | 0.00 |
| ATOM | 6791 | CB   | ILE | X | 450 | 39.479 | 32.610 | 33.040 | 0.00 | 0.00 |
| ATOM | 6792 | HB   | ILE | X | 450 | 40.011 | 33.536 | 32.825 | 0.00 | 0.00 |
| ATOM | 6793 | CG2  | ILE | X | 450 | 38.095 | 33.099 | 33.351 | 0.00 | 0.00 |
| ATOM | 6794 | HG21 | ILE | X | 450 | 37.849 | 33.893 | 32.646 | 0.00 | 0.00 |
| ATOM | 6795 | HG22 | ILE | X | 450 | 37.965 | 33.636 | 34.291 | 0.00 | 0.00 |
| ATOM | 6796 | HG23 | ILE | X | 450 | 37.408 | 32.253 | 33.339 | 0.00 | 0.00 |
| ATOM | 6797 | CG1  | ILE | X | 450 | 40.083 | 31.978 | 34.356 | 0.00 | 0.00 |
| ATOM | 6798 | HG12 | ILE | X | 450 | 41.119 | 32.292 | 34.484 | 0.00 | 0.00 |
| ATOM | 6799 | HG13 | ILE | X | 450 | 39.577 | 32.376 | 35.235 | 0.00 | 0.00 |
| ATOM | 6800 | CD1  | ILE | X | 450 | 39.998 | 30.481 | 34.597 | 0.00 | 0.00 |
| ATOM | 6801 | HD11 | ILE | X | 450 | 38.939 | 30.220 | 34.581 | 0.00 | 0.00 |
| ATOM | 6802 | HD12 | ILE | X | 450 | 40.363 | 30.273 | 35.603 | 0.00 | 0.00 |
| ATOM | 6803 | HD13 | ILE | X | 450 | 40.534 | 29.984 | 33.788 | 0.00 | 0.00 |
| ATOM | 6804 | C    | ILE | X | 450 | 39.224 | 32.711 | 30.585 | 0.00 | 0.00 |
| ATOM | 6805 | O    | ILE | X | 450 | 38.067 | 32.506 | 30.097 | 0.00 | 0.00 |
| ATOM | 6806 | N    | PHE | X | 451 | 40.190 | 33.477 | 30.043 | 0.00 | 0.00 |
| ATOM | 6807 | H    | PHE | X | 451 | 41.076 | 33.585 | 30.516 | 0.00 | 0.00 |
| ATOM | 6808 | CA   | PHE | X | 451 | 40.005 | 34.199 | 28.751 | 0.00 | 0.00 |
| ATOM | 6809 | HA   | PHE | X | 451 | 38.986 | 34.582 | 28.698 | 0.00 | 0.00 |
| ATOM | 6810 | CB   | PHE | X | 451 | 40.924 | 35.448 | 28.791 | 0.00 | 0.00 |
| ATOM | 6811 | HB2  | PHE | X | 451 | 41.846 | 35.233 | 29.330 | 0.00 | 0.00 |
| ATOM | 6812 | HB3  | PHE | X | 451 | 41.141 | 35.741 | 27.764 | 0.00 | 0.00 |
| ATOM | 6813 | CG   | PHE | X | 451 | 40.265 | 36.636 | 29.602 | 0.00 | 0.00 |
| ATOM | 6814 | CD1  | PHE | X | 451 | 40.097 | 36.613 | 30.986 | 0.00 | 0.00 |
| ATOM | 6815 | HD1  | PHE | X | 451 | 40.467 | 35.777 | 31.560 | 0.00 | 0.00 |
| ATOM | 6816 | CE1  | PHE | X | 451 | 39.645 | 37.737 | 31.658 | 0.00 | 0.00 |
| ATOM | 6817 | HE1  | PHE | X | 451 | 39.362 | 37.709 | 32.700 | 0.00 | 0.00 |
| ATOM | 6818 | CZ   | PHE | X | 451 | 39.093 | 38.822 | 30.909 | 0.00 | 0.00 |
| ATOM | 6819 | HZ   | PHE | X | 451 | 38.565 | 39.574 | 31.476 | 0.00 | 0.00 |
| ATOM | 6820 | CE2  | PHE | X | 451 | 39.116 | 38.894 | 29.569 | 0.00 | 0.00 |
| ATOM | 6821 | HE2  | PHE | X | 451 | 38.717 | 39.750 | 29.046 | 0.00 | 0.00 |
| ATOM | 6822 | CD2  | PHE | X | 451 | 39.802 | 37.808 | 28.885 | 0.00 | 0.00 |
| ATOM | 6823 | HD2  | PHE | X | 451 | 39.881 | 37.910 | 27.813 | 0.00 | 0.00 |
| ATOM | 6824 | C    | PHE | X | 451 | 40.176 | 33.222 | 27.543 | 0.00 | 0.00 |
| ATOM | 6825 | O    | PHE | X | 451 | 39.740 | 33.517 | 26.495 | 0.00 | 0.00 |



|      |      |      |     |   |     |        |        |        |      |      |
|------|------|------|-----|---|-----|--------|--------|--------|------|------|
| ATOM | 6826 | N    | GLY | X | 452 | 40.916 | 32.103 | 27.686 | 0.00 | 0.00 |
| ATOM | 6827 | H    | GLY | X | 452 | 41.206 | 31.849 | 28.620 | 0.00 | 0.00 |
| ATOM | 6828 | CA   | GLY | X | 452 | 41.165 | 31.153 | 26.614 | 0.00 | 0.00 |
| ATOM | 6829 | HA2  | GLY | X | 452 | 41.380 | 30.157 | 27.002 | 0.00 | 0.00 |
| ATOM | 6830 | HA3  | GLY | X | 452 | 40.257 | 30.996 | 26.032 | 0.00 | 0.00 |
| ATOM | 6831 | C    | GLY | X | 452 | 42.187 | 31.594 | 25.571 | 0.00 | 0.00 |
| ATOM | 6832 | O    | GLY | X | 452 | 42.128 | 31.319 | 24.358 | 0.00 | 0.00 |
| ATOM | 6833 | N    | ILE | X | 453 | 43.161 | 32.275 | 26.101 | 0.00 | 0.00 |
| ATOM | 6834 | H    | ILE | X | 453 | 43.111 | 32.397 | 27.102 | 0.00 | 0.00 |
| ATOM | 6835 | CA   | ILE | X | 453 | 44.353 | 32.763 | 25.416 | 0.00 | 0.00 |
| ATOM | 6836 | HA   | ILE | X | 453 | 43.909 | 33.268 | 24.558 | 0.00 | 0.00 |
| ATOM | 6837 | CB   | ILE | X | 453 | 45.284 | 33.708 | 26.259 | 0.00 | 0.00 |
| ATOM | 6838 | HB   | ILE | X | 453 | 45.701 | 33.129 | 27.084 | 0.00 | 0.00 |
| ATOM | 6839 | CG2  | ILE | X | 453 | 46.524 | 34.216 | 25.459 | 0.00 | 0.00 |
| ATOM | 6840 | HG21 | ILE | X | 453 | 47.205 | 33.479 | 25.033 | 0.00 | 0.00 |
| ATOM | 6841 | HG22 | ILE | X | 453 | 47.254 | 34.758 | 26.061 | 0.00 | 0.00 |
| ATOM | 6842 | HG23 | ILE | X | 453 | 46.122 | 34.821 | 24.646 | 0.00 | 0.00 |
| ATOM | 6843 | CG1  | ILE | X | 453 | 44.494 | 34.926 | 26.878 | 0.00 | 0.00 |
| ATOM | 6844 | HG12 | ILE | X | 453 | 43.661 | 34.601 | 27.500 | 0.00 | 0.00 |
| ATOM | 6845 | HG13 | ILE | X | 453 | 45.186 | 35.529 | 27.466 | 0.00 | 0.00 |
| ATOM | 6846 | CD1  | ILE | X | 453 | 43.737 | 35.928 | 25.974 | 0.00 | 0.00 |
| ATOM | 6847 | HD11 | ILE | X | 453 | 42.802 | 35.478 | 25.640 | 0.00 | 0.00 |
| ATOM | 6848 | HD12 | ILE | X | 453 | 44.409 | 36.064 | 25.127 | 0.00 | 0.00 |
| ATOM | 6849 | HD13 | ILE | X | 453 | 43.546 | 36.801 | 26.599 | 0.00 | 0.00 |
| ATOM | 6850 | C    | ILE | X | 453 | 45.102 | 31.613 | 24.746 | 0.00 | 0.00 |
| ATOM | 6851 | O    | ILE | X | 453 | 45.633 | 31.789 | 23.673 | 0.00 | 0.00 |
| ATOM | 6852 | N    | PRO | X | 454 | 45.175 | 30.379 | 25.311 | 0.00 | 0.00 |
| ATOM | 6853 | CD   | PRO | X | 454 | 45.022 | 30.088 | 26.709 | 0.00 | 0.00 |
| ATOM | 6854 | HD2  | PRO | X | 454 | 43.979 | 30.233 | 26.990 | 0.00 | 0.00 |
| ATOM | 6855 | HD3  | PRO | X | 454 | 45.644 | 30.782 | 27.275 | 0.00 | 0.00 |
| ATOM | 6856 | CG   | PRO | X | 454 | 45.378 | 28.583 | 26.895 | 0.00 | 0.00 |
| ATOM | 6857 | HG2  | PRO | X | 454 | 44.741 | 28.099 | 27.635 | 0.00 | 0.00 |
| ATOM | 6858 | HG3  | PRO | X | 454 | 46.400 | 28.431 | 27.241 | 0.00 | 0.00 |
| ATOM | 6859 | CB   | PRO | X | 454 | 45.127 | 27.968 | 25.524 | 0.00 | 0.00 |
| ATOM | 6860 | HB2  | PRO | X | 454 | 44.049 | 27.807 | 25.513 | 0.00 | 0.00 |
| ATOM | 6861 | HB3  | PRO | X | 454 | 45.648 | 27.029 | 25.335 | 0.00 | 0.00 |
| ATOM | 6862 | CA   | PRO | X | 454 | 45.621 | 29.186 | 24.602 | 0.00 | 0.00 |
| ATOM | 6863 | HA   | PRO | X | 454 | 46.709 | 29.248 | 24.591 | 0.00 | 0.00 |
| ATOM | 6864 | C    | PRO | X | 454 | 45.272 | 28.969 | 23.141 | 0.00 | 0.00 |
| ATOM | 6865 | O    | PRO | X | 454 | 45.964 | 28.344 | 22.318 | 0.00 | 0.00 |
| ATOM | 6866 | N    | LEU | X | 455 | 44.003 | 29.440 | 22.729 | 0.00 | 0.00 |
| ATOM | 6867 | H    | LEU | X | 455 | 43.435 | 30.081 | 23.264 | 0.00 | 0.00 |
| ATOM | 6868 | CA   | LEU | X | 455 | 43.400 | 29.097 | 21.396 | 0.00 | 0.00 |
| ATOM | 6869 | HA   | LEU | X | 455 | 43.486 | 28.025 | 21.219 | 0.00 | 0.00 |
| ATOM | 6870 | CB   | LEU | X | 455 | 41.926 | 29.479 | 21.496 | 0.00 | 0.00 |
| ATOM | 6871 | HB2  | LEU | X | 455 | 41.750 | 30.450 | 21.960 | 0.00 | 0.00 |
| ATOM | 6872 | HB3  | LEU | X | 455 | 41.365 | 29.350 | 20.571 | 0.00 | 0.00 |
| ATOM | 6873 | CG   | LEU | X | 455 | 41.117 | 28.452 | 22.360 | 0.00 | 0.00 |
| ATOM | 6874 | HG   | LEU | X | 455 | 41.534 | 28.378 | 23.365 | 0.00 | 0.00 |
| ATOM | 6875 | CD1  | LEU | X | 455 | 39.610 | 28.923 | 22.459 | 0.00 | 0.00 |
| ATOM | 6876 | HD11 | LEU | X | 455 | 39.200 | 28.837 | 21.452 | 0.00 | 0.00 |
| ATOM | 6877 | HD12 | LEU | X | 455 | 39.579 | 29.965 | 22.776 | 0.00 | 0.00 |
| ATOM | 6878 | HD13 | LEU | X | 455 | 39.051 | 28.270 | 23.130 | 0.00 | 0.00 |
| ATOM | 6879 | CD2  | LEU | X | 455 | 41.130 | 27.019 | 21.732 | 0.00 | 0.00 |
| ATOM | 6880 | HD21 | LEU | X | 455 | 42.069 | 26.553 | 21.433 | 0.00 | 0.00 |
| ATOM | 6881 | HD22 | LEU | X | 455 | 40.731 | 26.268 | 22.413 | 0.00 | 0.00 |
| ATOM | 6882 | HD23 | LEU | X | 455 | 40.564 | 26.942 | 20.804 | 0.00 | 0.00 |
| ATOM | 6883 | C    | LEU | X | 455 | 44.056 | 29.872 | 20.200 | 0.00 | 0.00 |
| ATOM | 6884 | O    | LEU | X | 455 | 43.716 | 29.640 | 19.050 | 0.00 | 0.00 |
| ATOM | 6885 | N    | ASP | X | 456 | 45.029 | 30.770 | 20.422 | 0.00 | 0.00 |
| ATOM | 6886 | H    | ASP | X | 456 | 45.266 | 30.964 | 21.385 | 0.00 | 0.00 |
| ATOM | 6887 | CA   | ASP | X | 456 | 45.650 | 31.570 | 19.356 | 0.00 | 0.00 |
| ATOM | 6888 | HA   | ASP | X | 456 | 44.803 | 31.898 | 18.754 | 0.00 | 0.00 |
| ATOM | 6889 | CB   | ASP | X | 456 | 46.199 | 32.892 | 20.084 | 0.00 | 0.00 |
| ATOM | 6890 | HB2  | ASP | X | 456 | 45.403 | 33.375 | 20.649 | 0.00 | 0.00 |
| ATOM | 6891 | HB3  | ASP | X | 456 | 47.065 | 32.594 | 20.675 | 0.00 | 0.00 |
| ATOM | 6892 | CG   | ASP | X | 456 | 46.732 | 33.870 | 19.081 | 0.00 | 0.00 |

|      |      |      |     |   |     |        |        |        |      |      |
|------|------|------|-----|---|-----|--------|--------|--------|------|------|
| ATOM | 6893 | OD1  | ASP | X | 456 | 45.914 | 34.839 | 18.703 | 0.00 | 0.00 |
| ATOM | 6894 | OD2  | ASP | X | 456 | 47.921 | 33.680 | 18.664 | 0.00 | 0.00 |
| ATOM | 6895 | C    | ASP | X | 456 | 46.760 | 30.869 | 18.518 | 0.00 | 0.00 |
| ATOM | 6896 | O    | ASP | X | 456 | 47.682 | 30.298 | 19.076 | 0.00 | 0.00 |
| ATOM | 6897 | N    | PRO | X | 457 | 46.632 | 30.998 | 17.172 | 0.00 | 0.00 |
| ATOM | 6898 | CD   | PRO | X | 457 | 45.632 | 31.761 | 16.444 | 0.00 | 0.00 |
| ATOM | 6899 | HD2  | PRO | X | 457 | 45.506 | 32.721 | 16.945 | 0.00 | 0.00 |
| ATOM | 6900 | HD3  | PRO | X | 457 | 44.645 | 31.304 | 16.516 | 0.00 | 0.00 |
| ATOM | 6901 | CG   | PRO | X | 457 | 46.084 | 31.883 | 14.995 | 0.00 | 0.00 |
| ATOM | 6902 | HG2  | PRO | X | 457 | 46.404 | 32.881 | 14.697 | 0.00 | 0.00 |
| ATOM | 6903 | HG3  | PRO | X | 457 | 45.213 | 31.570 | 14.418 | 0.00 | 0.00 |
| ATOM | 6904 | CB   | PRO | X | 457 | 47.085 | 30.826 | 14.814 | 0.00 | 0.00 |
| ATOM | 6905 | HB2  | PRO | X | 457 | 47.879 | 31.192 | 14.162 | 0.00 | 0.00 |
| ATOM | 6906 | HB3  | PRO | X | 457 | 46.615 | 30.000 | 14.282 | 0.00 | 0.00 |
| ATOM | 6907 | CA   | PRO | X | 457 | 47.524 | 30.354 | 16.198 | 0.00 | 0.00 |
| ATOM | 6908 | HA   | PRO | X | 457 | 47.345 | 29.283 | 16.107 | 0.00 | 0.00 |
| ATOM | 6909 | C    | PRO | X | 457 | 49.054 | 30.654 | 16.280 | 0.00 | 0.00 |
| ATOM | 6910 | O    | PRO | X | 457 | 49.935 | 29.914 | 15.831 | 0.00 | 0.00 |
| ATOM | 6911 | N    | SER | X | 458 | 49.373 | 31.851 | 16.846 | 0.00 | 0.00 |
| ATOM | 6912 | H    | SER | X | 458 | 48.631 | 32.202 | 17.435 | 0.00 | 0.00 |
| ATOM | 6913 | CA   | SER | X | 458 | 50.739 | 32.420 | 17.119 | 0.00 | 0.00 |
| ATOM | 6914 | HA   | SER | X | 458 | 51.479 | 31.821 | 16.586 | 0.00 | 0.00 |
| ATOM | 6915 | CB   | SER | X | 458 | 50.788 | 33.849 | 16.561 | 0.00 | 0.00 |
| ATOM | 6916 | HB2  | SER | X | 458 | 51.786 | 34.210 | 16.811 | 0.00 | 0.00 |
| ATOM | 6917 | HB3  | SER | X | 458 | 50.791 | 33.783 | 15.473 | 0.00 | 0.00 |
| ATOM | 6918 | OG   | SER | X | 458 | 49.711 | 34.618 | 17.206 | 0.00 | 0.00 |
| ATOM | 6919 | HG   | SER | X | 458 | 49.137 | 34.082 | 17.759 | 0.00 | 0.00 |
| ATOM | 6920 | C    | SER | X | 458 | 51.270 | 32.353 | 18.523 | 0.00 | 0.00 |
| ATOM | 6921 | O    | SER | X | 458 | 52.135 | 33.117 | 18.923 | 0.00 | 0.00 |
| ATOM | 6922 | N    | ARG | X | 459 | 50.638 | 31.550 | 19.375 | 0.00 | 0.00 |
| ATOM | 6923 | H    | ARG | X | 459 | 49.781 | 31.062 | 19.158 | 0.00 | 0.00 |
| ATOM | 6924 | CA   | ARG | X | 459 | 51.132 | 31.221 | 20.740 | 0.00 | 0.00 |
| ATOM | 6925 | HA   | ARG | X | 459 | 52.033 | 31.804 | 20.926 | 0.00 | 0.00 |
| ATOM | 6926 | CB   | ARG | X | 459 | 50.111 | 31.788 | 21.851 | 0.00 | 0.00 |
| ATOM | 6927 | HB2  | ARG | X | 459 | 49.191 | 31.208 | 21.929 | 0.00 | 0.00 |
| ATOM | 6928 | HB3  | ARG | X | 459 | 50.674 | 31.679 | 22.779 | 0.00 | 0.00 |
| ATOM | 6929 | CG   | ARG | X | 459 | 49.850 | 33.300 | 21.801 | 0.00 | 0.00 |
| ATOM | 6930 | HG2  | ARG | X | 459 | 50.758 | 33.900 | 21.747 | 0.00 | 0.00 |
| ATOM | 6931 | HG3  | ARG | X | 459 | 49.274 | 33.363 | 20.877 | 0.00 | 0.00 |
| ATOM | 6932 | CD   | ARG | X | 459 | 48.943 | 33.730 | 22.934 | 0.00 | 0.00 |
| ATOM | 6933 | HD2  | ARG | X | 459 | 48.012 | 33.175 | 22.817 | 0.00 | 0.00 |
| ATOM | 6934 | HD3  | ARG | X | 459 | 49.287 | 33.495 | 23.941 | 0.00 | 0.00 |
| ATOM | 6935 | NE   | ARG | X | 459 | 48.448 | 35.143 | 22.790 | 0.00 | 0.00 |
| ATOM | 6936 | HE   | ARG | X | 459 | 47.497 | 35.308 | 22.492 | 0.00 | 0.00 |
| ATOM | 6937 | CZ   | ARG | X | 459 | 49.141 | 36.288 | 22.907 | 0.00 | 0.00 |
| ATOM | 6938 | NH1  | ARG | X | 459 | 50.364 | 36.383 | 23.403 | 0.00 | 0.00 |
| ATOM | 6939 | HH11 | ARG | X | 459 | 50.908 | 35.547 | 23.558 | 0.00 | 0.00 |
| ATOM | 6940 | HH12 | ARG | X | 459 | 50.906 | 37.235 | 23.410 | 0.00 | 0.00 |
| ATOM | 6941 | NH2  | ARG | X | 459 | 48.441 | 37.377 | 22.639 | 0.00 | 0.00 |
| ATOM | 6942 | HH21 | ARG | X | 459 | 47.461 | 37.346 | 22.397 | 0.00 | 0.00 |
| ATOM | 6943 | HH22 | ARG | X | 459 | 48.872 | 38.279 | 22.782 | 0.00 | 0.00 |
| ATOM | 6944 | C    | ARG | X | 459 | 51.610 | 29.804 | 20.798 | 0.00 | 0.00 |
| ATOM | 6945 | O    | ARG | X | 459 | 51.149 | 28.949 | 20.101 | 0.00 | 0.00 |
| ATOM | 6946 | N    | ASN | X | 460 | 52.598 | 29.514 | 21.648 | 0.00 | 0.00 |
| ATOM | 6947 | H    | ASN | X | 460 | 52.908 | 30.292 | 22.213 | 0.00 | 0.00 |
| ATOM | 6948 | CA   | ASN | X | 460 | 53.298 | 28.231 | 21.635 | 0.00 | 0.00 |
| ATOM | 6949 | HA   | ASN | X | 460 | 53.106 | 27.763 | 20.669 | 0.00 | 0.00 |
| ATOM | 6950 | CB   | ASN | X | 460 | 54.861 | 28.402 | 21.756 | 0.00 | 0.00 |
| ATOM | 6951 | HB2  | ASN | X | 460 | 55.276 | 29.324 | 21.349 | 0.00 | 0.00 |
| ATOM | 6952 | HB3  | ASN | X | 460 | 54.958 | 28.547 | 22.832 | 0.00 | 0.00 |
| ATOM | 6953 | CG   | ASN | X | 460 | 55.763 | 27.222 | 21.375 | 0.00 | 0.00 |
| ATOM | 6954 | OD1  | ASN | X | 460 | 56.360 | 26.528 | 22.252 | 0.00 | 0.00 |
| ATOM | 6955 | ND2  | ASN | X | 460 | 55.879 | 26.936 | 20.080 | 0.00 | 0.00 |
| ATOM | 6956 | HD21 | ASN | X | 460 | 56.582 | 26.281 | 19.770 | 0.00 | 0.00 |
| ATOM | 6957 | HD22 | ASN | X | 460 | 55.728 | 27.719 | 19.461 | 0.00 | 0.00 |
| ATOM | 6958 | C    | ASN | X | 460 | 52.663 | 27.299 | 22.731 | 0.00 | 0.00 |
| ATOM | 6959 | O    | ASN | X | 460 | 53.327 | 26.487 | 23.451 | 0.00 | 0.00 |

|      |      |      |     |   |     |        |        |        |      |      |
|------|------|------|-----|---|-----|--------|--------|--------|------|------|
| ATOM | 6960 | N    | TYR | X | 461 | 51.319 | 27.425 | 22.978 | 0.00 | 0.00 |
| ATOM | 6961 | H    | TYR | X | 461 | 50.771 | 27.890 | 22.269 | 0.00 | 0.00 |
| ATOM | 6962 | CA   | TYR | X | 461 | 50.680 | 26.485 | 23.920 | 0.00 | 0.00 |
| ATOM | 6963 | HA   | TYR | X | 461 | 51.273 | 26.228 | 24.798 | 0.00 | 0.00 |
| ATOM | 6964 | CB   | TYR | X | 461 | 49.221 | 26.919 | 24.338 | 0.00 | 0.00 |
| ATOM | 6965 | HB2  | TYR | X | 461 | 48.540 | 27.066 | 23.500 | 0.00 | 0.00 |
| ATOM | 6966 | HB3  | TYR | X | 461 | 48.788 | 26.169 | 24.999 | 0.00 | 0.00 |
| ATOM | 6967 | CG   | TYR | X | 461 | 49.190 | 28.242 | 25.124 | 0.00 | 0.00 |
| ATOM | 6968 | CD1  | TYR | X | 461 | 49.199 | 29.487 | 24.474 | 0.00 | 0.00 |
| ATOM | 6969 | HD1  | TYR | X | 461 | 49.136 | 29.510 | 23.396 | 0.00 | 0.00 |
| ATOM | 6970 | CE1  | TYR | X | 461 | 49.110 | 30.607 | 25.268 | 0.00 | 0.00 |
| ATOM | 6971 | HE1  | TYR | X | 461 | 49.193 | 31.593 | 24.834 | 0.00 | 0.00 |
| ATOM | 6972 | CZ   | TYR | X | 461 | 49.004 | 30.566 | 26.673 | 0.00 | 0.00 |
| ATOM | 6973 | OH   | TYR | X | 461 | 48.885 | 31.758 | 27.286 | 0.00 | 0.00 |
| ATOM | 6974 | HH   | TYR | X | 461 | 49.007 | 31.749 | 28.239 | 0.00 | 0.00 |
| ATOM | 6975 | CE2  | TYR | X | 461 | 49.018 | 29.321 | 27.321 | 0.00 | 0.00 |
| ATOM | 6976 | HE2  | TYR | X | 461 | 48.974 | 29.249 | 28.398 | 0.00 | 0.00 |
| ATOM | 6977 | CD2  | TYR | X | 461 | 49.101 | 28.171 | 26.559 | 0.00 | 0.00 |
| ATOM | 6978 | HD2  | TYR | X | 461 | 49.122 | 27.210 | 27.052 | 0.00 | 0.00 |
| ATOM | 6979 | C    | TYR | X | 461 | 50.540 | 25.073 | 23.299 | 0.00 | 0.00 |
| ATOM | 6980 | O    | TYR | X | 461 | 50.140 | 24.952 | 22.131 | 0.00 | 0.00 |
| ATOM | 6981 | N    | THR | X | 462 | 50.586 | 23.977 | 24.075 | 0.00 | 0.00 |
| ATOM | 6982 | H    | THR | X | 462 | 50.773 | 24.058 | 25.064 | 0.00 | 0.00 |
| ATOM | 6983 | CA   | THR | X | 462 | 50.296 | 22.589 | 23.640 | 0.00 | 0.00 |
| ATOM | 6984 | HA   | THR | X | 462 | 50.669 | 22.287 | 22.662 | 0.00 | 0.00 |
| ATOM | 6985 | CB   | THR | X | 462 | 50.823 | 21.587 | 24.759 | 0.00 | 0.00 |
| ATOM | 6986 | HB   | THR | X | 462 | 50.664 | 20.606 | 24.312 | 0.00 | 0.00 |
| ATOM | 6987 | CG2  | THR | X | 462 | 52.288 | 21.600 | 24.991 | 0.00 | 0.00 |
| ATOM | 6988 | HG21 | THR | X | 462 | 52.717 | 22.587 | 25.167 | 0.00 | 0.00 |
| ATOM | 6989 | HG22 | THR | X | 462 | 52.888 | 21.190 | 24.179 | 0.00 | 0.00 |
| ATOM | 6990 | HG23 | THR | X | 462 | 52.520 | 21.139 | 25.951 | 0.00 | 0.00 |
| ATOM | 6991 | OG1  | THR | X | 462 | 50.191 | 21.643 | 26.020 | 0.00 | 0.00 |
| ATOM | 6992 | HG1  | THR | X | 462 | 50.157 | 22.577 | 26.239 | 0.00 | 0.00 |
| ATOM | 6993 | C    | THR | X | 462 | 48.840 | 22.345 | 23.604 | 0.00 | 0.00 |
| ATOM | 6994 | O    | THR | X | 462 | 48.081 | 22.924 | 24.305 | 0.00 | 0.00 |
| ATOM | 6995 | N    | ALA | X | 463 | 48.371 | 21.474 | 22.755 | 0.00 | 0.00 |
| ATOM | 6996 | H    | ALA | X | 463 | 49.062 | 21.067 | 22.141 | 0.00 | 0.00 |
| ATOM | 6997 | CA   | ALA | X | 463 | 46.964 | 21.220 | 22.556 | 0.00 | 0.00 |
| ATOM | 6998 | HA   | ALA | X | 463 | 46.474 | 22.136 | 22.225 | 0.00 | 0.00 |
| ATOM | 6999 | CB   | ALA | X | 463 | 46.801 | 20.216 | 21.404 | 0.00 | 0.00 |
| ATOM | 7000 | HB1  | ALA | X | 463 | 45.780 | 19.843 | 21.311 | 0.00 | 0.00 |
| ATOM | 7001 | HB2  | ALA | X | 463 | 47.487 | 19.379 | 21.538 | 0.00 | 0.00 |
| ATOM | 7002 | HB3  | ALA | X | 463 | 47.114 | 20.595 | 20.432 | 0.00 | 0.00 |
| ATOM | 7003 | C    | ALA | X | 463 | 46.161 | 20.805 | 23.824 | 0.00 | 0.00 |
| ATOM | 7004 | O    | ALA | X | 463 | 44.971 | 21.058 | 23.898 | 0.00 | 0.00 |
| ATOM | 7005 | N    | GLU | X | 464 | 46.878 | 20.150 | 24.687 | 0.00 | 0.00 |
| ATOM | 7006 | H    | GLU | X | 464 | 47.818 | 19.950 | 24.377 | 0.00 | 0.00 |
| ATOM | 7007 | CA   | GLU | X | 464 | 46.387 | 19.684 | 26.046 | 0.00 | 0.00 |
| ATOM | 7008 | HA   | GLU | X | 464 | 45.622 | 18.910 | 25.981 | 0.00 | 0.00 |
| ATOM | 7009 | CB   | GLU | X | 464 | 47.579 | 19.084 | 26.790 | 0.00 | 0.00 |
| ATOM | 7010 | HB2  | GLU | X | 464 | 48.335 | 19.868 | 26.758 | 0.00 | 0.00 |
| ATOM | 7011 | HB3  | GLU | X | 464 | 47.449 | 18.801 | 27.835 | 0.00 | 0.00 |
| ATOM | 7012 | CG   | GLU | X | 464 | 48.325 | 17.918 | 26.017 | 0.00 | 0.00 |
| ATOM | 7013 | HG2  | GLU | X | 464 | 47.796 | 16.966 | 26.065 | 0.00 | 0.00 |
| ATOM | 7014 | HG3  | GLU | X | 464 | 48.392 | 18.137 | 24.951 | 0.00 | 0.00 |
| ATOM | 7015 | CD   | GLU | X | 464 | 49.718 | 17.631 | 26.633 | 0.00 | 0.00 |
| ATOM | 7016 | OE1  | GLU | X | 464 | 50.717 | 18.000 | 25.979 | 0.00 | 0.00 |
| ATOM | 7017 | OE2  | GLU | X | 464 | 49.844 | 17.175 | 27.771 | 0.00 | 0.00 |
| ATOM | 7018 | C    | GLU | X | 464 | 45.787 | 20.940 | 26.786 | 0.00 | 0.00 |
| ATOM | 7019 | O    | GLU | X | 464 | 44.766 | 20.857 | 27.549 | 0.00 | 0.00 |
| ATOM | 7020 | N    | GLU | X | 465 | 46.483 | 22.021 | 26.702 | 0.00 | 0.00 |
| ATOM | 7021 | H    | GLU | X | 465 | 47.325 | 21.976 | 26.146 | 0.00 | 0.00 |
| ATOM | 7022 | CA   | GLU | X | 465 | 46.082 | 23.257 | 27.286 | 0.00 | 0.00 |
| ATOM | 7023 | HA   | GLU | X | 465 | 45.796 | 23.109 | 28.328 | 0.00 | 0.00 |
| ATOM | 7024 | CB   | GLU | X | 465 | 47.306 | 24.222 | 27.326 | 0.00 | 0.00 |
| ATOM | 7025 | HB2  | GLU | X | 465 | 47.726 | 24.371 | 26.331 | 0.00 | 0.00 |
| ATOM | 7026 | HB3  | GLU | X | 465 | 46.970 | 25.200 | 27.672 | 0.00 | 0.00 |

|      |      |      |     |   |     |        |        |        |      |      |
|------|------|------|-----|---|-----|--------|--------|--------|------|------|
| ATOM | 7027 | CG   | GLU | X | 465 | 48.407 | 23.695 | 28.395 | 0.00 | 0.00 |
| ATOM | 7028 | HG2  | GLU | X | 465 | 48.045 | 23.990 | 29.380 | 0.00 | 0.00 |
| ATOM | 7029 | HG3  | GLU | X | 465 | 48.426 | 22.605 | 28.401 | 0.00 | 0.00 |
| ATOM | 7030 | CD   | GLU | X | 465 | 49.850 | 24.210 | 28.099 | 0.00 | 0.00 |
| ATOM | 7031 | OE1  | GLU | X | 465 | 50.238 | 24.215 | 26.959 | 0.00 | 0.00 |
| ATOM | 7032 | OE2  | GLU | X | 465 | 50.589 | 24.626 | 29.017 | 0.00 | 0.00 |
| ATOM | 7033 | C    | GLU | X | 465 | 44.958 | 24.002 | 26.577 | 0.00 | 0.00 |
| ATOM | 7034 | O    | GLU | X | 465 | 44.261 | 24.800 | 27.149 | 0.00 | 0.00 |
| ATOM | 7035 | N    | LYS | X | 466 | 44.736 | 23.774 | 25.312 | 0.00 | 0.00 |
| ATOM | 7036 | H    | LYS | X | 466 | 45.410 | 23.150 | 24.893 | 0.00 | 0.00 |
| ATOM | 7037 | CA   | LYS | X | 466 | 43.706 | 24.389 | 24.500 | 0.00 | 0.00 |
| ATOM | 7038 | HA   | LYS | X | 466 | 43.717 | 25.462 | 24.690 | 0.00 | 0.00 |
| ATOM | 7039 | CB   | LYS | X | 466 | 44.045 | 24.247 | 23.022 | 0.00 | 0.00 |
| ATOM | 7040 | HB2  | LYS | X | 466 | 44.054 | 23.177 | 22.815 | 0.00 | 0.00 |
| ATOM | 7041 | HB3  | LYS | X | 466 | 43.229 | 24.586 | 22.383 | 0.00 | 0.00 |
| ATOM | 7042 | CG   | LYS | X | 466 | 45.373 | 24.942 | 22.671 | 0.00 | 0.00 |
| ATOM | 7043 | HG2  | LYS | X | 466 | 45.227 | 26.008 | 22.848 | 0.00 | 0.00 |
| ATOM | 7044 | HG3  | LYS | X | 466 | 46.157 | 24.640 | 23.366 | 0.00 | 0.00 |
| ATOM | 7045 | CD   | LYS | X | 466 | 45.829 | 24.745 | 21.207 | 0.00 | 0.00 |
| ATOM | 7046 | HD2  | LYS | X | 466 | 46.140 | 23.719 | 21.009 | 0.00 | 0.00 |
| ATOM | 7047 | HD3  | LYS | X | 466 | 44.928 | 24.936 | 20.623 | 0.00 | 0.00 |
| ATOM | 7048 | CE   | LYS | X | 466 | 46.844 | 25.704 | 20.710 | 0.00 | 0.00 |
| ATOM | 7049 | HE2  | LYS | X | 466 | 46.711 | 26.657 | 21.222 | 0.00 | 0.00 |
| ATOM | 7050 | HE3  | LYS | X | 466 | 47.802 | 25.458 | 21.169 | 0.00 | 0.00 |
| ATOM | 7051 | NZ   | LYS | X | 466 | 46.879 | 26.011 | 19.299 | 0.00 | 0.00 |
| ATOM | 7052 | HZ1  | LYS | X | 466 | 47.074 | 25.199 | 18.731 | 0.00 | 0.00 |
| ATOM | 7053 | HZ2  | LYS | X | 466 | 45.952 | 26.321 | 19.044 | 0.00 | 0.00 |
| ATOM | 7054 | HZ3  | LYS | X | 466 | 47.484 | 26.754 | 18.980 | 0.00 | 0.00 |
| ATOM | 7055 | C    | LYS | X | 466 | 42.344 | 23.710 | 24.788 | 0.00 | 0.00 |
| ATOM | 7056 | O    | LYS | X | 466 | 41.255 | 24.324 | 24.686 | 0.00 | 0.00 |
| ATOM | 7057 | N    | ILE | X | 467 | 42.343 | 22.398 | 25.076 | 0.00 | 0.00 |
| ATOM | 7058 | H    | ILE | X | 467 | 43.290 | 22.047 | 25.106 | 0.00 | 0.00 |
| ATOM | 7059 | CA   | ILE | X | 467 | 41.203 | 21.578 | 25.526 | 0.00 | 0.00 |
| ATOM | 7060 | HA   | ILE | X | 467 | 40.361 | 21.968 | 24.954 | 0.00 | 0.00 |
| ATOM | 7061 | CB   | ILE | X | 467 | 41.295 | 20.071 | 25.162 | 0.00 | 0.00 |
| ATOM | 7062 | HB   | ILE | X | 467 | 41.461 | 20.019 | 24.086 | 0.00 | 0.00 |
| ATOM | 7063 | CG2  | ILE | X | 467 | 42.489 | 19.329 | 25.813 | 0.00 | 0.00 |
| ATOM | 7064 | HG21 | ILE | X | 467 | 42.517 | 18.434 | 25.191 | 0.00 | 0.00 |
| ATOM | 7065 | HG22 | ILE | X | 467 | 42.337 | 19.110 | 26.870 | 0.00 | 0.00 |
| ATOM | 7066 | HG23 | ILE | X | 467 | 43.273 | 20.024 | 25.514 | 0.00 | 0.00 |
| ATOM | 7067 | CG1  | ILE | X | 467 | 39.955 | 19.325 | 25.291 | 0.00 | 0.00 |
| ATOM | 7068 | HG12 | ILE | X | 467 | 39.852 | 19.046 | 26.340 | 0.00 | 0.00 |
| ATOM | 7069 | HG13 | ILE | X | 467 | 39.174 | 20.025 | 24.996 | 0.00 | 0.00 |
| ATOM | 7070 | CD1  | ILE | X | 467 | 39.864 | 18.015 | 24.474 | 0.00 | 0.00 |
| ATOM | 7071 | HD11 | ILE | X | 467 | 40.757 | 17.474 | 24.787 | 0.00 | 0.00 |
| ATOM | 7072 | HD12 | ILE | X | 467 | 39.903 | 18.248 | 23.410 | 0.00 | 0.00 |
| ATOM | 7073 | HD13 | ILE | X | 467 | 38.953 | 17.526 | 24.821 | 0.00 | 0.00 |
| ATOM | 7074 | C    | ILE | X | 467 | 40.842 | 21.942 | 26.966 | 0.00 | 0.00 |
| ATOM | 7075 | O    | ILE | X | 467 | 39.653 | 22.198 | 27.257 | 0.00 | 0.00 |
| ATOM | 7076 | N    | PHE | X | 468 | 41.839 | 21.941 | 27.858 | 0.00 | 0.00 |
| ATOM | 7077 | H    | PHE | X | 468 | 42.765 | 21.728 | 27.515 | 0.00 | 0.00 |
| ATOM | 7078 | CA   | PHE | X | 468 | 41.644 | 22.316 | 29.255 | 0.00 | 0.00 |
| ATOM | 7079 | HA   | PHE | X | 468 | 41.022 | 21.560 | 29.736 | 0.00 | 0.00 |
| ATOM | 7080 | CB   | PHE | X | 468 | 43.042 | 22.202 | 29.902 | 0.00 | 0.00 |
| ATOM | 7081 | HB2  | PHE | X | 468 | 43.432 | 21.185 | 29.880 | 0.00 | 0.00 |
| ATOM | 7082 | HB3  | PHE | X | 468 | 43.702 | 22.754 | 29.233 | 0.00 | 0.00 |
| ATOM | 7083 | CG   | PHE | X | 468 | 43.136 | 22.830 | 31.273 | 0.00 | 0.00 |
| ATOM | 7084 | CD1  | PHE | X | 468 | 42.322 | 22.441 | 32.370 | 0.00 | 0.00 |
| ATOM | 7085 | HD1  | PHE | X | 468 | 41.513 | 21.777 | 32.102 | 0.00 | 0.00 |
| ATOM | 7086 | CE1  | PHE | X | 468 | 42.456 | 22.964 | 33.610 | 0.00 | 0.00 |
| ATOM | 7087 | HE1  | PHE | X | 468 | 41.775 | 22.563 | 34.346 | 0.00 | 0.00 |
| ATOM | 7088 | CZ   | PHE | X | 468 | 43.499 | 23.825 | 33.871 | 0.00 | 0.00 |
| ATOM | 7089 | HZ   | PHE | X | 468 | 43.684 | 24.105 | 34.898 | 0.00 | 0.00 |
| ATOM | 7090 | CE2  | PHE | X | 468 | 44.446 | 24.241 | 32.808 | 0.00 | 0.00 |
| ATOM | 7091 | HE2  | PHE | X | 468 | 45.214 | 24.953 | 33.070 | 0.00 | 0.00 |
| ATOM | 7092 | CD2  | PHE | X | 468 | 44.174 | 23.771 | 31.511 | 0.00 | 0.00 |
| ATOM | 7093 | HD2  | PHE | X | 468 | 44.794 | 24.032 | 30.666 | 0.00 | 0.00 |

|      |      |      |     |   |     |        |        |        |      |      |
|------|------|------|-----|---|-----|--------|--------|--------|------|------|
| ATOM | 7094 | C    | PHE | X | 468 | 41.086 | 23.735 | 29.504 | 0.00 | 0.00 |
| ATOM | 7095 | O    | PHE | X | 468 | 40.204 | 23.860 | 30.391 | 0.00 | 0.00 |
| ATOM | 7096 | N    | ALA | X | 469 | 41.500 | 24.758 | 28.758 | 0.00 | 0.00 |
| ATOM | 7097 | H    | ALA | X | 469 | 42.305 | 24.568 | 28.179 | 0.00 | 0.00 |
| ATOM | 7098 | CA   | ALA | X | 469 | 41.086 | 26.135 | 28.888 | 0.00 | 0.00 |
| ATOM | 7099 | HA   | ALA | X | 469 | 41.257 | 26.568 | 29.873 | 0.00 | 0.00 |
| ATOM | 7100 | CB   | ALA | X | 469 | 41.810 | 27.023 | 27.855 | 0.00 | 0.00 |
| ATOM | 7101 | HB1  | ALA | X | 469 | 42.875 | 27.032 | 28.089 | 0.00 | 0.00 |
| ATOM | 7102 | HB2  | ALA | X | 469 | 41.527 | 28.074 | 27.912 | 0.00 | 0.00 |
| ATOM | 7103 | HB3  | ALA | X | 469 | 41.557 | 26.720 | 26.839 | 0.00 | 0.00 |
| ATOM | 7104 | C    | ALA | X | 469 | 39.554 | 26.248 | 28.740 | 0.00 | 0.00 |
| ATOM | 7105 | O    | ALA | X | 469 | 38.916 | 27.052 | 29.367 | 0.00 | 0.00 |
| ATOM | 7106 | N    | GLN | X | 470 | 39.013 | 25.651 | 27.726 | 0.00 | 0.00 |
| ATOM | 7107 | H    | GLN | X | 470 | 39.625 | 25.080 | 27.160 | 0.00 | 0.00 |
| ATOM | 7108 | CA   | GLN | X | 470 | 37.598 | 25.729 | 27.391 | 0.00 | 0.00 |
| ATOM | 7109 | HA   | GLN | X | 470 | 37.286 | 26.769 | 27.300 | 0.00 | 0.00 |
| ATOM | 7110 | CB   | GLN | X | 470 | 37.291 | 25.030 | 26.065 | 0.00 | 0.00 |
| ATOM | 7111 | HB2  | GLN | X | 470 | 37.608 | 24.001 | 25.898 | 0.00 | 0.00 |
| ATOM | 7112 | HB3  | GLN | X | 470 | 36.214 | 25.042 | 25.896 | 0.00 | 0.00 |
| ATOM | 7113 | CG   | GLN | X | 470 | 37.948 | 25.776 | 24.961 | 0.00 | 0.00 |
| ATOM | 7114 | HG2  | GLN | X | 470 | 37.594 | 26.804 | 24.873 | 0.00 | 0.00 |
| ATOM | 7115 | HG3  | GLN | X | 470 | 38.992 | 25.925 | 25.237 | 0.00 | 0.00 |
| ATOM | 7116 | CD   | GLN | X | 470 | 37.856 | 25.121 | 23.543 | 0.00 | 0.00 |
| ATOM | 7117 | OE1  | GLN | X | 470 | 36.855 | 25.251 | 22.788 | 0.00 | 0.00 |
| ATOM | 7118 | NE2  | GLN | X | 470 | 38.868 | 24.382 | 23.113 | 0.00 | 0.00 |
| ATOM | 7119 | HE21 | GLN | X | 470 | 38.690 | 23.779 | 22.322 | 0.00 | 0.00 |
| ATOM | 7120 | HE22 | GLN | X | 470 | 39.798 | 24.523 | 23.483 | 0.00 | 0.00 |
| ATOM | 7121 | C    | GLN | X | 470 | 36.687 | 25.146 | 28.489 | 0.00 | 0.00 |
| ATOM | 7122 | O    | GLN | X | 470 | 35.519 | 25.579 | 28.534 | 0.00 | 0.00 |
| ATOM | 7123 | N    | ARG | X | 471 | 37.188 | 24.240 | 29.393 | 0.00 | 0.00 |
| ATOM | 7124 | H    | ARG | X | 471 | 38.155 | 23.957 | 29.322 | 0.00 | 0.00 |
| ATOM | 7125 | CA   | ARG | X | 471 | 36.451 | 23.859 | 30.617 | 0.00 | 0.00 |
| ATOM | 7126 | HA   | ARG | X | 471 | 35.451 | 23.535 | 30.329 | 0.00 | 0.00 |
| ATOM | 7127 | CB   | ARG | X | 471 | 37.118 | 22.760 | 31.445 | 0.00 | 0.00 |
| ATOM | 7128 | HB2  | ARG | X | 471 | 38.160 | 23.034 | 31.608 | 0.00 | 0.00 |
| ATOM | 7129 | HB3  | ARG | X | 471 | 36.538 | 22.746 | 32.368 | 0.00 | 0.00 |
| ATOM | 7130 | CG   | ARG | X | 471 | 37.010 | 21.395 | 30.845 | 0.00 | 0.00 |
| ATOM | 7131 | HG2  | ARG | X | 471 | 35.972 | 21.068 | 30.893 | 0.00 | 0.00 |
| ATOM | 7132 | HG3  | ARG | X | 471 | 37.272 | 21.476 | 29.790 | 0.00 | 0.00 |
| ATOM | 7133 | CD   | ARG | X | 471 | 37.777 | 20.220 | 31.423 | 0.00 | 0.00 |
| ATOM | 7134 | HD2  | ARG | X | 471 | 37.374 | 19.277 | 31.055 | 0.00 | 0.00 |
| ATOM | 7135 | HD3  | ARG | X | 471 | 38.816 | 20.344 | 31.117 | 0.00 | 0.00 |
| ATOM | 7136 | NE   | ARG | X | 471 | 37.722 | 20.090 | 32.868 | 0.00 | 0.00 |
| ATOM | 7137 | HE   | ARG | X | 471 | 36.813 | 19.922 | 33.274 | 0.00 | 0.00 |
| ATOM | 7138 | CZ   | ARG | X | 471 | 38.700 | 19.918 | 33.734 | 0.00 | 0.00 |
| ATOM | 7139 | NH1  | ARG | X | 471 | 39.942 | 19.533 | 33.345 | 0.00 | 0.00 |
| ATOM | 7140 | HH11 | ARG | X | 471 | 40.297 | 19.664 | 32.408 | 0.00 | 0.00 |
| ATOM | 7141 | HH12 | ARG | X | 471 | 40.517 | 19.180 | 34.096 | 0.00 | 0.00 |
| ATOM | 7142 | NH2  | ARG | X | 471 | 38.395 | 19.772 | 34.971 | 0.00 | 0.00 |
| ATOM | 7143 | HH21 | ARG | X | 471 | 37.519 | 20.068 | 35.377 | 0.00 | 0.00 |
| ATOM | 7144 | HH22 | ARG | X | 471 | 39.234 | 19.641 | 35.518 | 0.00 | 0.00 |
| ATOM | 7145 | C    | ARG | X | 471 | 36.261 | 25.113 | 31.512 | 0.00 | 0.00 |
| ATOM | 7146 | O    | ARG | X | 471 | 35.128 | 25.414 | 32.025 | 0.00 | 0.00 |
| ATOM | 7147 | N    | LEU | X | 472 | 37.361 | 25.860 | 31.752 | 0.00 | 0.00 |
| ATOM | 7148 | H    | LEU | X | 472 | 38.087 | 25.897 | 31.051 | 0.00 | 0.00 |
| ATOM | 7149 | CA   | LEU | X | 472 | 37.466 | 26.992 | 32.660 | 0.00 | 0.00 |
| ATOM | 7150 | HA   | LEU | X | 472 | 36.942 | 26.643 | 33.550 | 0.00 | 0.00 |
| ATOM | 7151 | CB   | LEU | X | 472 | 38.974 | 27.274 | 32.887 | 0.00 | 0.00 |
| ATOM | 7152 | HB2  | LEU | X | 472 | 39.491 | 26.735 | 32.093 | 0.00 | 0.00 |
| ATOM | 7153 | HB3  | LEU | X | 472 | 39.277 | 28.320 | 32.919 | 0.00 | 0.00 |
| ATOM | 7154 | CG   | LEU | X | 472 | 39.437 | 26.612 | 34.243 | 0.00 | 0.00 |
| ATOM | 7155 | HG   | LEU | X | 472 | 38.791 | 27.120 | 34.959 | 0.00 | 0.00 |
| ATOM | 7156 | CD1  | LEU | X | 472 | 39.384 | 25.106 | 34.321 | 0.00 | 0.00 |
| ATOM | 7157 | HD11 | LEU | X | 472 | 39.902 | 24.679 | 35.179 | 0.00 | 0.00 |
| ATOM | 7158 | HD12 | LEU | X | 472 | 39.738 | 24.805 | 33.335 | 0.00 | 0.00 |
| ATOM | 7159 | HD13 | LEU | X | 472 | 38.361 | 24.733 | 34.379 | 0.00 | 0.00 |
| ATOM | 7160 | CD2  | LEU | X | 472 | 40.942 | 27.061 | 34.536 | 0.00 | 0.00 |

|      |      |      |     |   |     |        |        |        |      |      |
|------|------|------|-----|---|-----|--------|--------|--------|------|------|
| ATOM | 7161 | HD21 | LEU | X | 472 | 41.382 | 27.713 | 33.781 | 0.00 | 0.00 |
| ATOM | 7162 | HD22 | LEU | X | 472 | 41.012 | 27.522 | 35.522 | 0.00 | 0.00 |
| ATOM | 7163 | HD23 | LEU | X | 472 | 41.575 | 26.175 | 34.565 | 0.00 | 0.00 |
| ATOM | 7164 | C    | LEU | X | 472 | 36.800 | 28.253 | 32.219 | 0.00 | 0.00 |
| ATOM | 7165 | O    | LEU | X | 472 | 36.102 | 28.850 | 33.037 | 0.00 | 0.00 |
| ATOM | 7166 | N    | MET | X | 473 | 36.887 | 28.542 | 30.918 | 0.00 | 0.00 |
| ATOM | 7167 | H    | MET | X | 473 | 37.528 | 28.039 | 30.322 | 0.00 | 0.00 |
| ATOM | 7168 | CA   | MET | X | 473 | 36.005 | 29.553 | 30.128 | 0.00 | 0.00 |
| ATOM | 7169 | HA   | MET | X | 473 | 36.210 | 30.508 | 30.612 | 0.00 | 0.00 |
| ATOM | 7170 | CB   | MET | X | 473 | 36.428 | 29.582 | 28.657 | 0.00 | 0.00 |
| ATOM | 7171 | HB2  | MET | X | 473 | 35.986 | 28.702 | 28.190 | 0.00 | 0.00 |
| ATOM | 7172 | HB3  | MET | X | 473 | 36.056 | 30.510 | 28.222 | 0.00 | 0.00 |
| ATOM | 7173 | CG   | MET | X | 473 | 37.852 | 29.652 | 28.224 | 0.00 | 0.00 |
| ATOM | 7174 | HG2  | MET | X | 473 | 38.042 | 30.725 | 28.197 | 0.00 | 0.00 |
| ATOM | 7175 | HG3  | MET | X | 473 | 38.436 | 29.161 | 29.002 | 0.00 | 0.00 |
| ATOM | 7176 | SD   | MET | X | 473 | 38.253 | 28.970 | 26.570 | 0.00 | 0.00 |
| ATOM | 7177 | CE   | MET | X | 473 | 37.209 | 29.903 | 25.443 | 0.00 | 0.00 |
| ATOM | 7178 | HE1  | MET | X | 473 | 37.455 | 30.961 | 25.527 | 0.00 | 0.00 |
| ATOM | 7179 | HE2  | MET | X | 473 | 37.385 | 29.688 | 24.389 | 0.00 | 0.00 |
| ATOM | 7180 | HE3  | MET | X | 473 | 36.149 | 29.695 | 25.593 | 0.00 | 0.00 |
| ATOM | 7181 | C    | MET | X | 473 | 34.488 | 29.348 | 30.358 | 0.00 | 0.00 |
| ATOM | 7182 | O    | MET | X | 473 | 33.721 | 30.234 | 30.813 | 0.00 | 0.00 |
| ATOM | 7183 | N    | ARG | X | 474 | 33.963 | 28.151 | 30.006 | 0.00 | 0.00 |
| ATOM | 7184 | H    | ARG | X | 474 | 34.661 | 27.438 | 29.845 | 0.00 | 0.00 |
| ATOM | 7185 | CA   | ARG | X | 474 | 32.585 | 27.676 | 30.237 | 0.00 | 0.00 |
| ATOM | 7186 | HA   | ARG | X | 474 | 31.857 | 28.327 | 29.755 | 0.00 | 0.00 |
| ATOM | 7187 | CB   | ARG | X | 474 | 32.435 | 26.315 | 29.657 | 0.00 | 0.00 |
| ATOM | 7188 | HB2  | ARG | X | 474 | 32.850 | 26.345 | 28.650 | 0.00 | 0.00 |
| ATOM | 7189 | HB3  | ARG | X | 474 | 32.923 | 25.581 | 30.298 | 0.00 | 0.00 |
| ATOM | 7190 | CG   | ARG | X | 474 | 31.087 | 25.757 | 29.499 | 0.00 | 0.00 |
| ATOM | 7191 | HG2  | ARG | X | 474 | 31.127 | 24.747 | 29.090 | 0.00 | 0.00 |
| ATOM | 7192 | HG3  | ARG | X | 474 | 30.518 | 25.747 | 30.428 | 0.00 | 0.00 |
| ATOM | 7193 | CD   | ARG | X | 474 | 30.288 | 26.660 | 28.527 | 0.00 | 0.00 |
| ATOM | 7194 | HD2  | ARG | X | 474 | 30.088 | 27.550 | 29.123 | 0.00 | 0.00 |
| ATOM | 7195 | HD3  | ARG | X | 474 | 30.938 | 26.858 | 27.675 | 0.00 | 0.00 |
| ATOM | 7196 | NE   | ARG | X | 474 | 29.052 | 25.988 | 28.106 | 0.00 | 0.00 |
| ATOM | 7197 | HE   | ARG | X | 474 | 28.707 | 25.312 | 28.773 | 0.00 | 0.00 |
| ATOM | 7198 | CZ   | ARG | X | 474 | 28.151 | 26.376 | 27.233 | 0.00 | 0.00 |
| ATOM | 7199 | NH1  | ARG | X | 474 | 28.468 | 27.315 | 26.346 | 0.00 | 0.00 |
| ATOM | 7200 | HH11 | ARG | X | 474 | 29.323 | 27.843 | 26.448 | 0.00 | 0.00 |
| ATOM | 7201 | HH12 | ARG | X | 474 | 27.739 | 27.566 | 25.693 | 0.00 | 0.00 |
| ATOM | 7202 | NH2  | ARG | X | 474 | 26.940 | 25.801 | 27.229 | 0.00 | 0.00 |
| ATOM | 7203 | HH21 | ARG | X | 474 | 26.834 | 25.080 | 27.928 | 0.00 | 0.00 |
| ATOM | 7204 | HH22 | ARG | X | 474 | 26.213 | 26.149 | 26.619 | 0.00 | 0.00 |
| ATOM | 7205 | C    | ARG | X | 474 | 32.140 | 27.708 | 31.706 | 0.00 | 0.00 |
| ATOM | 7206 | O    | ARG | X | 474 | 31.065 | 28.184 | 31.879 | 0.00 | 0.00 |
| ATOM | 7207 | N    | TYR | X | 475 | 32.952 | 27.385 | 32.762 | 0.00 | 0.00 |
| ATOM | 7208 | H    | TYR | X | 475 | 33.780 | 26.891 | 32.461 | 0.00 | 0.00 |
| ATOM | 7209 | CA   | TYR | X | 475 | 32.560 | 27.428 | 34.150 | 0.00 | 0.00 |
| ATOM | 7210 | HA   | TYR | X | 475 | 31.792 | 26.705 | 34.425 | 0.00 | 0.00 |
| ATOM | 7211 | CB   | TYR | X | 475 | 33.801 | 26.830 | 34.919 | 0.00 | 0.00 |
| ATOM | 7212 | HB2  | TYR | X | 475 | 34.675 | 27.347 | 34.522 | 0.00 | 0.00 |
| ATOM | 7213 | HB3  | TYR | X | 475 | 33.719 | 27.136 | 35.962 | 0.00 | 0.00 |
| ATOM | 7214 | CG   | TYR | X | 475 | 34.042 | 25.235 | 34.884 | 0.00 | 0.00 |
| ATOM | 7215 | CD1  | TYR | X | 475 | 33.224 | 24.326 | 34.181 | 0.00 | 0.00 |
| ATOM | 7216 | HD1  | TYR | X | 475 | 32.312 | 24.670 | 33.716 | 0.00 | 0.00 |
| ATOM | 7217 | CE1  | TYR | X | 475 | 33.621 | 22.960 | 34.123 | 0.00 | 0.00 |
| ATOM | 7218 | HE1  | TYR | X | 475 | 32.991 | 22.272 | 33.579 | 0.00 | 0.00 |
| ATOM | 7219 | CZ   | TYR | X | 475 | 34.727 | 22.474 | 34.835 | 0.00 | 0.00 |
| ATOM | 7220 | OH   | TYR | X | 475 | 35.109 | 21.180 | 34.693 | 0.00 | 0.00 |
| ATOM | 7221 | HH   | TYR | X | 475 | 34.399 | 20.738 | 34.222 | 0.00 | 0.00 |
| ATOM | 7222 | CE2  | TYR | X | 475 | 35.525 | 23.392 | 35.595 | 0.00 | 0.00 |
| ATOM | 7223 | HE2  | TYR | X | 475 | 36.402 | 23.106 | 36.156 | 0.00 | 0.00 |
| ATOM | 7224 | CD2  | TYR | X | 475 | 35.136 | 24.763 | 35.591 | 0.00 | 0.00 |
| ATOM | 7225 | HD2  | TYR | X | 475 | 35.790 | 25.462 | 36.093 | 0.00 | 0.00 |
| ATOM | 7226 | C    | TYR | X | 475 | 32.301 | 28.851 | 34.673 | 0.00 | 0.00 |
| ATOM | 7227 | O    | TYR | X | 475 | 31.220 | 29.196 | 35.170 | 0.00 | 0.00 |

|      |      |      |     |   |     |        |        |        |      |      |
|------|------|------|-----|---|-----|--------|--------|--------|------|------|
| ATOM | 7228 | N    | TRP | X | 476 | 33.226 | 29.708 | 34.275 | 0.00 | 0.00 |
| ATOM | 7229 | H    | TRP | X | 476 | 33.974 | 29.392 | 33.674 | 0.00 | 0.00 |
| ATOM | 7230 | CA   | TRP | X | 476 | 33.041 | 31.103 | 34.545 | 0.00 | 0.00 |
| ATOM | 7231 | HA   | TRP | X | 476 | 32.902 | 31.221 | 35.620 | 0.00 | 0.00 |
| ATOM | 7232 | CB   | TRP | X | 476 | 34.436 | 31.848 | 34.243 | 0.00 | 0.00 |
| ATOM | 7233 | HB2  | TRP | X | 476 | 35.054 | 31.421 | 33.453 | 0.00 | 0.00 |
| ATOM | 7234 | HB3  | TRP | X | 476 | 34.150 | 32.855 | 33.938 | 0.00 | 0.00 |
| ATOM | 7235 | CG   | TRP | X | 476 | 35.423 | 31.998 | 35.353 | 0.00 | 0.00 |
| ATOM | 7236 | CD1  | TRP | X | 476 | 35.753 | 33.223 | 35.912 | 0.00 | 0.00 |
| ATOM | 7237 | HD1  | TRP | X | 476 | 35.282 | 34.135 | 35.576 | 0.00 | 0.00 |
| ATOM | 7238 | NE1  | TRP | X | 476 | 36.772 | 33.059 | 36.789 | 0.00 | 0.00 |
| ATOM | 7239 | HE1  | TRP | X | 476 | 37.246 | 33.910 | 37.056 | 0.00 | 0.00 |
| ATOM | 7240 | CE2  | TRP | X | 476 | 37.131 | 31.779 | 36.974 | 0.00 | 0.00 |
| ATOM | 7241 | CZ2  | TRP | X | 476 | 38.208 | 31.161 | 37.702 | 0.00 | 0.00 |
| ATOM | 7242 | HZ2  | TRP | X | 476 | 38.890 | 31.747 | 38.300 | 0.00 | 0.00 |
| ATOM | 7243 | CH2  | TRP | X | 476 | 38.343 | 29.793 | 37.549 | 0.00 | 0.00 |
| ATOM | 7244 | HH2  | TRP | X | 476 | 39.116 | 29.353 | 38.162 | 0.00 | 0.00 |
| ATOM | 7245 | CZ3  | TRP | X | 476 | 37.386 | 29.074 | 36.851 | 0.00 | 0.00 |
| ATOM | 7246 | HZ3  | TRP | X | 476 | 37.441 | 27.995 | 36.872 | 0.00 | 0.00 |
| ATOM | 7247 | CE3  | TRP | X | 476 | 36.433 | 29.649 | 36.103 | 0.00 | 0.00 |
| ATOM | 7248 | HE3  | TRP | X | 476 | 35.798 | 28.986 | 35.534 | 0.00 | 0.00 |
| ATOM | 7249 | CD2  | TRP | X | 476 | 36.263 | 31.050 | 36.073 | 0.00 | 0.00 |
| ATOM | 7250 | C    | TRP | X | 476 | 31.902 | 31.677 | 33.730 | 0.00 | 0.00 |
| ATOM | 7251 | O    | TRP | X | 476 | 31.214 | 32.501 | 34.260 | 0.00 | 0.00 |
| ATOM | 7252 | N    | ALA | X | 477 | 31.698 | 31.347 | 32.471 | 0.00 | 0.00 |
| ATOM | 7253 | H    | ALA | X | 477 | 32.311 | 30.749 | 31.936 | 0.00 | 0.00 |
| ATOM | 7254 | CA   | ALA | X | 477 | 30.533 | 31.868 | 31.727 | 0.00 | 0.00 |
| ATOM | 7255 | HA   | ALA | X | 477 | 30.366 | 32.930 | 31.902 | 0.00 | 0.00 |
| ATOM | 7256 | CB   | ALA | X | 477 | 30.754 | 31.668 | 30.259 | 0.00 | 0.00 |
| ATOM | 7257 | HB1  | ALA | X | 477 | 29.885 | 31.976 | 29.677 | 0.00 | 0.00 |
| ATOM | 7258 | HB2  | ALA | X | 477 | 31.025 | 30.670 | 29.915 | 0.00 | 0.00 |
| ATOM | 7259 | HB3  | ALA | X | 477 | 31.595 | 32.332 | 30.059 | 0.00 | 0.00 |
| ATOM | 7260 | C    | ALA | X | 477 | 29.164 | 31.231 | 32.221 | 0.00 | 0.00 |
| ATOM | 7261 | O    | ALA | X | 477 | 28.193 | 31.962 | 32.262 | 0.00 | 0.00 |
| ATOM | 7262 | N    | ASN | X | 478 | 29.133 | 29.999 | 32.563 | 0.00 | 0.00 |
| ATOM | 7263 | H    | ASN | X | 478 | 29.933 | 29.403 | 32.405 | 0.00 | 0.00 |
| ATOM | 7264 | CA   | ASN | X | 478 | 27.971 | 29.241 | 33.197 | 0.00 | 0.00 |
| ATOM | 7265 | HA   | ASN | X | 478 | 27.085 | 29.306 | 32.565 | 0.00 | 0.00 |
| ATOM | 7266 | CB   | ASN | X | 478 | 28.248 | 27.757 | 33.444 | 0.00 | 0.00 |
| ATOM | 7267 | HB2  | ASN | X | 478 | 29.221 | 27.617 | 33.914 | 0.00 | 0.00 |
| ATOM | 7268 | HB3  | ASN | X | 478 | 27.571 | 27.292 | 34.160 | 0.00 | 0.00 |
| ATOM | 7269 | CG   | ASN | X | 478 | 28.193 | 26.988 | 32.123 | 0.00 | 0.00 |
| ATOM | 7270 | OD1  | ASN | X | 478 | 28.290 | 27.589 | 31.052 | 0.00 | 0.00 |
| ATOM | 7271 | ND2  | ASN | X | 478 | 28.186 | 25.675 | 32.156 | 0.00 | 0.00 |
| ATOM | 7272 | HD21 | ASN | X | 478 | 28.386 | 25.204 | 31.285 | 0.00 | 0.00 |
| ATOM | 7273 | HD22 | ASN | X | 478 | 28.455 | 25.349 | 33.073 | 0.00 | 0.00 |
| ATOM | 7274 | C    | ASN | X | 478 | 27.562 | 29.907 | 34.508 | 0.00 | 0.00 |
| ATOM | 7275 | O    | ASN | X | 478 | 26.336 | 30.078 | 34.735 | 0.00 | 0.00 |
| ATOM | 7276 | N    | PHE | X | 479 | 28.532 | 30.279 | 35.394 | 0.00 | 0.00 |
| ATOM | 7277 | H    | PHE | X | 479 | 29.475 | 29.948 | 35.253 | 0.00 | 0.00 |
| ATOM | 7278 | CA   | PHE | X | 479 | 28.257 | 31.040 | 36.615 | 0.00 | 0.00 |
| ATOM | 7279 | HA   | PHE | X | 479 | 27.567 | 30.437 | 37.204 | 0.00 | 0.00 |
| ATOM | 7280 | CB   | PHE | X | 479 | 29.560 | 31.408 | 37.377 | 0.00 | 0.00 |
| ATOM | 7281 | HB2  | PHE | X | 479 | 30.196 | 30.534 | 37.516 | 0.00 | 0.00 |
| ATOM | 7282 | HB3  | PHE | X | 479 | 30.247 | 31.932 | 36.713 | 0.00 | 0.00 |
| ATOM | 7283 | CG   | PHE | X | 479 | 29.367 | 32.153 | 38.719 | 0.00 | 0.00 |
| ATOM | 7284 | CD1  | PHE | X | 479 | 28.399 | 31.755 | 39.658 | 0.00 | 0.00 |
| ATOM | 7285 | HD1  | PHE | X | 479 | 28.029 | 30.742 | 39.595 | 0.00 | 0.00 |
| ATOM | 7286 | CE1  | PHE | X | 479 | 28.162 | 32.511 | 40.839 | 0.00 | 0.00 |
| ATOM | 7287 | HE1  | PHE | X | 479 | 27.476 | 32.105 | 41.568 | 0.00 | 0.00 |
| ATOM | 7288 | CZ   | PHE | X | 479 | 29.038 | 33.621 | 41.082 | 0.00 | 0.00 |
| ATOM | 7289 | HZ   | PHE | X | 479 | 28.948 | 34.289 | 41.925 | 0.00 | 0.00 |
| ATOM | 7290 | CE2  | PHE | X | 479 | 29.993 | 34.067 | 40.136 | 0.00 | 0.00 |
| ATOM | 7291 | HE2  | PHE | X | 479 | 30.450 | 35.044 | 40.193 | 0.00 | 0.00 |
| ATOM | 7292 | CD2  | PHE | X | 479 | 30.182 | 33.327 | 38.947 | 0.00 | 0.00 |
| ATOM | 7293 | HD2  | PHE | X | 479 | 30.827 | 33.698 | 38.165 | 0.00 | 0.00 |
| ATOM | 7294 | C    | PHE | X | 479 | 27.526 | 32.371 | 36.278 | 0.00 | 0.00 |

|      |      |      |     |   |     |        |        |        |      |      |
|------|------|------|-----|---|-----|--------|--------|--------|------|------|
| ATOM | 7295 | O    | PHE | X | 479 | 26.518 | 32.644 | 36.872 | 0.00 | 0.00 |
| ATOM | 7296 | N    | ALA | X | 480 | 27.977 | 33.153 | 35.311 | 0.00 | 0.00 |
| ATOM | 7297 | H    | ALA | X | 480 | 28.865 | 32.886 | 34.911 | 0.00 | 0.00 |
| ATOM | 7298 | CA   | ALA | X | 480 | 27.324 | 34.306 | 34.754 | 0.00 | 0.00 |
| ATOM | 7299 | HA   | ALA | X | 480 | 27.185 | 35.007 | 35.577 | 0.00 | 0.00 |
| ATOM | 7300 | CB   | ALA | X | 480 | 28.101 | 34.963 | 33.684 | 0.00 | 0.00 |
| ATOM | 7301 | HB1  | ALA | X | 480 | 28.150 | 34.346 | 32.787 | 0.00 | 0.00 |
| ATOM | 7302 | HB2  | ALA | X | 480 | 29.125 | 35.105 | 34.028 | 0.00 | 0.00 |
| ATOM | 7303 | HB3  | ALA | X | 480 | 27.683 | 35.942 | 33.449 | 0.00 | 0.00 |
| ATOM | 7304 | C    | ALA | X | 480 | 25.936 | 33.916 | 34.296 | 0.00 | 0.00 |
| ATOM | 7305 | O    | ALA | X | 480 | 25.011 | 34.623 | 34.688 | 0.00 | 0.00 |
| ATOM | 7306 | N    | ARG | X | 481 | 25.741 | 32.802 | 33.610 | 0.00 | 0.00 |
| ATOM | 7307 | H    | ARG | X | 481 | 26.564 | 32.296 | 33.317 | 0.00 | 0.00 |
| ATOM | 7308 | CA   | ARG | X | 481 | 24.479 | 32.447 | 33.070 | 0.00 | 0.00 |
| ATOM | 7309 | HA   | ARG | X | 481 | 24.185 | 33.293 | 32.450 | 0.00 | 0.00 |
| ATOM | 7310 | CB   | ARG | X | 481 | 24.598 | 31.242 | 32.080 | 0.00 | 0.00 |
| ATOM | 7311 | HB2  | ARG | X | 481 | 25.288 | 30.552 | 32.566 | 0.00 | 0.00 |
| ATOM | 7312 | HB3  | ARG | X | 481 | 23.623 | 30.759 | 32.143 | 0.00 | 0.00 |
| ATOM | 7313 | CG   | ARG | X | 481 | 25.062 | 31.648 | 30.640 | 0.00 | 0.00 |
| ATOM | 7314 | HG2  | ARG | X | 481 | 24.277 | 32.128 | 30.055 | 0.00 | 0.00 |
| ATOM | 7315 | HG3  | ARG | X | 481 | 25.839 | 32.408 | 30.724 | 0.00 | 0.00 |
| ATOM | 7316 | CD   | ARG | X | 481 | 25.583 | 30.498 | 29.852 | 0.00 | 0.00 |
| ATOM | 7317 | HD2  | ARG | X | 481 | 26.152 | 29.927 | 30.586 | 0.00 | 0.00 |
| ATOM | 7318 | HD3  | ARG | X | 481 | 24.706 | 29.961 | 29.492 | 0.00 | 0.00 |
| ATOM | 7319 | NE   | ARG | X | 481 | 26.436 | 30.890 | 28.693 | 0.00 | 0.00 |
| ATOM | 7320 | HE   | ARG | X | 481 | 26.107 | 31.748 | 28.274 | 0.00 | 0.00 |
| ATOM | 7321 | CZ   | ARG | X | 481 | 27.580 | 30.320 | 28.241 | 0.00 | 0.00 |
| ATOM | 7322 | NH1  | ARG | X | 481 | 28.316 | 29.381 | 28.786 | 0.00 | 0.00 |
| ATOM | 7323 | HH11 | ARG | X | 481 | 28.097 | 28.929 | 29.662 | 0.00 | 0.00 |
| ATOM | 7324 | HH12 | ARG | X | 481 | 29.164 | 29.081 | 28.325 | 0.00 | 0.00 |
| ATOM | 7325 | NH2  | ARG | X | 481 | 28.144 | 30.656 | 27.103 | 0.00 | 0.00 |
| ATOM | 7326 | HH21 | ARG | X | 481 | 27.877 | 31.498 | 26.614 | 0.00 | 0.00 |
| ATOM | 7327 | HH22 | ARG | X | 481 | 28.950 | 30.150 | 26.766 | 0.00 | 0.00 |
| ATOM | 7328 | C    | ARG | X | 481 | 23.403 | 32.132 | 34.087 | 0.00 | 0.00 |
| ATOM | 7329 | O    | ARG | X | 481 | 22.238 | 32.389 | 33.768 | 0.00 | 0.00 |
| ATOM | 7330 | N    | THR | X | 482 | 23.759 | 31.463 | 35.273 | 0.00 | 0.00 |
| ATOM | 7331 | H    | THR | X | 482 | 24.619 | 30.935 | 35.318 | 0.00 | 0.00 |
| ATOM | 7332 | CA   | THR | X | 482 | 22.719 | 30.996 | 36.150 | 0.00 | 0.00 |
| ATOM | 7333 | HA   | THR | X | 482 | 21.912 | 31.725 | 36.221 | 0.00 | 0.00 |
| ATOM | 7334 | CB   | THR | X | 482 | 21.996 | 29.653 | 35.628 | 0.00 | 0.00 |
| ATOM | 7335 | HB   | THR | X | 482 | 21.368 | 29.306 | 36.448 | 0.00 | 0.00 |
| ATOM | 7336 | CG2  | THR | X | 482 | 21.104 | 29.742 | 34.361 | 0.00 | 0.00 |
| ATOM | 7337 | HG21 | THR | X | 482 | 21.638 | 29.979 | 33.441 | 0.00 | 0.00 |
| ATOM | 7338 | HG22 | THR | X | 482 | 20.265 | 30.402 | 34.579 | 0.00 | 0.00 |
| ATOM | 7339 | HG23 | THR | X | 482 | 20.658 | 28.751 | 34.270 | 0.00 | 0.00 |
| ATOM | 7340 | OG1  | THR | X | 482 | 23.072 | 28.740 | 35.367 | 0.00 | 0.00 |
| ATOM | 7341 | HG1  | THR | X | 482 | 22.683 | 27.868 | 35.264 | 0.00 | 0.00 |
| ATOM | 7342 | C    | THR | X | 482 | 23.167 | 30.906 | 37.540 | 0.00 | 0.00 |
| ATOM | 7343 | O    | THR | X | 482 | 22.524 | 30.157 | 38.332 | 0.00 | 0.00 |
| ATOM | 7344 | N    | GLY | X | 483 | 24.165 | 31.677 | 37.959 | 0.00 | 0.00 |
| ATOM | 7345 | H    | GLY | X | 483 | 24.727 | 32.074 | 37.220 | 0.00 | 0.00 |
| ATOM | 7346 | CA   | GLY | X | 483 | 24.766 | 31.509 | 39.294 | 0.00 | 0.00 |
| ATOM | 7347 | HA2  | GLY | X | 483 | 25.467 | 32.317 | 39.500 | 0.00 | 0.00 |
| ATOM | 7348 | HA3  | GLY | X | 483 | 23.995 | 31.505 | 40.064 | 0.00 | 0.00 |
| ATOM | 7349 | C    | GLY | X | 483 | 25.410 | 30.102 | 39.536 | 0.00 | 0.00 |
| ATOM | 7350 | O    | GLY | X | 483 | 25.536 | 29.851 | 40.727 | 0.00 | 0.00 |
| ATOM | 7351 | N    | ASP | X | 484 | 25.714 | 29.261 | 38.543 | 0.00 | 0.00 |
| ATOM | 7352 | H    | ASP | X | 484 | 25.505 | 29.532 | 37.593 | 0.00 | 0.00 |
| ATOM | 7353 | CA   | ASP | X | 484 | 26.088 | 27.866 | 38.814 | 0.00 | 0.00 |
| ATOM | 7354 | HA   | ASP | X | 484 | 26.602 | 27.851 | 39.775 | 0.00 | 0.00 |
| ATOM | 7355 | CB   | ASP | X | 484 | 24.827 | 26.994 | 39.008 | 0.00 | 0.00 |
| ATOM | 7356 | HB2  | ASP | X | 484 | 24.214 | 27.429 | 39.797 | 0.00 | 0.00 |
| ATOM | 7357 | HB3  | ASP | X | 484 | 24.253 | 26.869 | 38.090 | 0.00 | 0.00 |
| ATOM | 7358 | CG   | ASP | X | 484 | 25.210 | 25.539 | 39.552 | 0.00 | 0.00 |
| ATOM | 7359 | OD1  | ASP | X | 484 | 24.467 | 24.872 | 40.325 | 0.00 | 0.00 |
| ATOM | 7360 | OD2  | ASP | X | 484 | 26.281 | 25.022 | 39.083 | 0.00 | 0.00 |
| ATOM | 7361 | C    | ASP | X | 484 | 27.030 | 27.335 | 37.686 | 0.00 | 0.00 |



|      |      |      |     |   |     |        |        |        |      |      |
|------|------|------|-----|---|-----|--------|--------|--------|------|------|
| ATOM | 7362 | O    | ASP | X | 484 | 26.568 | 27.409 | 36.551 | 0.00 | 0.00 |
| ATOM | 7363 | N    | PRO | X | 485 | 28.328 | 26.906 | 37.962 | 0.00 | 0.00 |
| ATOM | 7364 | CD   | PRO | X | 485 | 29.067 | 26.965 | 39.236 | 0.00 | 0.00 |
| ATOM | 7365 | HD2  | PRO | X | 485 | 28.849 | 26.063 | 39.807 | 0.00 | 0.00 |
| ATOM | 7366 | HD3  | PRO | X | 485 | 28.625 | 27.762 | 39.834 | 0.00 | 0.00 |
| ATOM | 7367 | CG   | PRO | X | 485 | 30.514 | 27.091 | 38.806 | 0.00 | 0.00 |
| ATOM | 7368 | HG2  | PRO | X | 485 | 31.236 | 26.759 | 39.552 | 0.00 | 0.00 |
| ATOM | 7369 | HG3  | PRO | X | 485 | 30.655 | 28.097 | 38.411 | 0.00 | 0.00 |
| ATOM | 7370 | CB   | PRO | X | 485 | 30.475 | 26.011 | 37.735 | 0.00 | 0.00 |
| ATOM | 7371 | HB2  | PRO | X | 485 | 30.326 | 25.030 | 38.188 | 0.00 | 0.00 |
| ATOM | 7372 | HB3  | PRO | X | 485 | 31.335 | 26.006 | 37.066 | 0.00 | 0.00 |
| ATOM | 7373 | CA   | PRO | X | 485 | 29.236 | 26.394 | 36.914 | 0.00 | 0.00 |
| ATOM | 7374 | HA   | PRO | X | 485 | 29.454 | 27.256 | 36.283 | 0.00 | 0.00 |
| ATOM | 7375 | C    | PRO | X | 485 | 28.707 | 25.226 | 36.061 | 0.00 | 0.00 |
| ATOM | 7376 | O    | PRO | X | 485 | 29.211 | 25.050 | 34.929 | 0.00 | 0.00 |
| ATOM | 7377 | N    | ASN | X | 486 | 27.607 | 24.535 | 36.525 | 0.00 | 0.00 |
| ATOM | 7378 | H    | ASN | X | 486 | 27.174 | 24.989 | 37.317 | 0.00 | 0.00 |
| ATOM | 7379 | CA   | ASN | X | 486 | 26.839 | 23.439 | 35.873 | 0.00 | 0.00 |
| ATOM | 7380 | HA   | ASN | X | 486 | 27.595 | 22.768 | 35.463 | 0.00 | 0.00 |
| ATOM | 7381 | CB   | ASN | X | 486 | 26.068 | 22.671 | 36.947 | 0.00 | 0.00 |
| ATOM | 7382 | HB2  | ASN | X | 486 | 26.677 | 22.371 | 37.800 | 0.00 | 0.00 |
| ATOM | 7383 | HB3  | ASN | X | 486 | 25.218 | 23.254 | 37.302 | 0.00 | 0.00 |
| ATOM | 7384 | CG   | ASN | X | 486 | 25.649 | 21.351 | 36.393 | 0.00 | 0.00 |
| ATOM | 7385 | OD1  | ASN | X | 486 | 26.146 | 20.829 | 35.444 | 0.00 | 0.00 |
| ATOM | 7386 | ND2  | ASN | X | 486 | 24.603 | 20.695 | 36.962 | 0.00 | 0.00 |
| ATOM | 7387 | HD21 | ASN | X | 486 | 24.238 | 19.820 | 36.613 | 0.00 | 0.00 |
| ATOM | 7388 | HD22 | ASN | X | 486 | 24.203 | 20.950 | 37.853 | 0.00 | 0.00 |
| ATOM | 7389 | C    | ASN | X | 486 | 26.000 | 23.975 | 34.676 | 0.00 | 0.00 |
| ATOM | 7390 | O    | ASN | X | 486 | 25.358 | 25.006 | 34.782 | 0.00 | 0.00 |
| ATOM | 7391 | N    | GLU | X | 487 | 25.898 | 23.184 | 33.616 | 0.00 | 0.00 |
| ATOM | 7392 | H    | GLU | X | 487 | 26.402 | 22.319 | 33.747 | 0.00 | 0.00 |
| ATOM | 7393 | CA   | GLU | X | 487 | 24.980 | 23.426 | 32.506 | 0.00 | 0.00 |
| ATOM | 7394 | HA   | GLU | X | 487 | 25.100 | 24.444 | 32.135 | 0.00 | 0.00 |
| ATOM | 7395 | CB   | GLU | X | 487 | 25.206 | 22.436 | 31.425 | 0.00 | 0.00 |
| ATOM | 7396 | HB2  | GLU | X | 487 | 25.042 | 21.392 | 31.694 | 0.00 | 0.00 |
| ATOM | 7397 | HB3  | GLU | X | 487 | 24.382 | 22.608 | 30.732 | 0.00 | 0.00 |
| ATOM | 7398 | CG   | GLU | X | 487 | 26.584 | 22.411 | 30.733 | 0.00 | 0.00 |
| ATOM | 7399 | HG2  | GLU | X | 487 | 27.443 | 22.341 | 31.400 | 0.00 | 0.00 |
| ATOM | 7400 | HG3  | GLU | X | 487 | 26.577 | 21.623 | 29.981 | 0.00 | 0.00 |
| ATOM | 7401 | CD   | GLU | X | 487 | 26.861 | 23.656 | 29.891 | 0.00 | 0.00 |
| ATOM | 7402 | OE1  | GLU | X | 487 | 25.989 | 24.366 | 29.368 | 0.00 | 0.00 |
| ATOM | 7403 | OE2  | GLU | X | 487 | 28.095 | 23.982 | 29.766 | 0.00 | 0.00 |
| ATOM | 7404 | C    | GLU | X | 487 | 23.587 | 23.038 | 33.015 | 0.00 | 0.00 |
| ATOM | 7405 | O    | GLU | X | 487 | 23.336 | 21.981 | 33.563 | 0.00 | 0.00 |
| ATOM | 7406 | N    | PRO | X | 488 | 22.574 | 23.886 | 32.865 | 0.00 | 0.00 |
| ATOM | 7407 | CD   | PRO | X | 488 | 22.532 | 24.928 | 31.886 | 0.00 | 0.00 |
| ATOM | 7408 | HD2  | PRO | X | 488 | 22.945 | 24.442 | 31.002 | 0.00 | 0.00 |
| ATOM | 7409 | HD3  | PRO | X | 488 | 23.157 | 25.755 | 32.222 | 0.00 | 0.00 |
| ATOM | 7410 | CG   | PRO | X | 488 | 21.051 | 25.233 | 31.589 | 0.00 | 0.00 |
| ATOM | 7411 | HG2  | PRO | X | 488 | 20.585 | 24.571 | 30.859 | 0.00 | 0.00 |
| ATOM | 7412 | HG3  | PRO | X | 488 | 20.987 | 26.283 | 31.300 | 0.00 | 0.00 |
| ATOM | 7413 | CB   | PRO | X | 488 | 20.529 | 24.983 | 32.982 | 0.00 | 0.00 |
| ATOM | 7414 | HB2  | PRO | X | 488 | 19.447 | 24.853 | 32.958 | 0.00 | 0.00 |
| ATOM | 7415 | HB3  | PRO | X | 488 | 20.718 | 25.794 | 33.685 | 0.00 | 0.00 |
| ATOM | 7416 | CA   | PRO | X | 488 | 21.266 | 23.736 | 33.420 | 0.00 | 0.00 |
| ATOM | 7417 | HA   | PRO | X | 488 | 21.336 | 23.720 | 34.508 | 0.00 | 0.00 |
| ATOM | 7418 | C    | PRO | X | 488 | 20.519 | 22.481 | 32.939 | 0.00 | 0.00 |
| ATOM | 7419 | O    | PRO | X | 488 | 19.761 | 21.934 | 33.748 | 0.00 | 0.00 |
| ATOM | 7420 | N    | ARG | X | 489 | 20.875 | 21.921 | 31.768 | 0.00 | 0.00 |
| ATOM | 7421 | H    | ARG | X | 489 | 21.552 | 22.355 | 31.157 | 0.00 | 0.00 |
| ATOM | 7422 | CA   | ARG | X | 489 | 20.444 | 20.576 | 31.377 | 0.00 | 0.00 |
| ATOM | 7423 | HA   | ARG | X | 489 | 19.387 | 20.410 | 31.582 | 0.00 | 0.00 |
| ATOM | 7424 | CB   | ARG | X | 489 | 20.571 | 20.406 | 29.848 | 0.00 | 0.00 |
| ATOM | 7425 | HB2  | ARG | X | 489 | 20.039 | 19.489 | 29.593 | 0.00 | 0.00 |
| ATOM | 7426 | HB3  | ARG | X | 489 | 20.209 | 21.320 | 29.378 | 0.00 | 0.00 |
| ATOM | 7427 | CG   | ARG | X | 489 | 22.094 | 20.170 | 29.566 | 0.00 | 0.00 |
| ATOM | 7428 | HG2  | ARG | X | 489 | 22.729 | 21.039 | 29.739 | 0.00 | 0.00 |

|      |      |      |     |   |     |        |        |        |      |      |
|------|------|------|-----|---|-----|--------|--------|--------|------|------|
| ATOM | 7429 | HG3  | ARG | X | 489 | 22.451 | 19.320 | 30.146 | 0.00 | 0.00 |
| ATOM | 7430 | CD   | ARG | X | 489 | 22.250 | 19.687 | 28.105 | 0.00 | 0.00 |
| ATOM | 7431 | HD2  | ARG | X | 489 | 21.693 | 18.757 | 27.987 | 0.00 | 0.00 |
| ATOM | 7432 | HD3  | ARG | X | 489 | 21.797 | 20.429 | 27.448 | 0.00 | 0.00 |
| ATOM | 7433 | NE   | ARG | X | 489 | 23.724 | 19.456 | 27.893 | 0.00 | 0.00 |
| ATOM | 7434 | HE   | ARG | X | 489 | 24.271 | 20.192 | 27.469 | 0.00 | 0.00 |
| ATOM | 7435 | CZ   | ARG | X | 489 | 24.350 | 18.322 | 27.881 | 0.00 | 0.00 |
| ATOM | 7436 | NH1  | ARG | X | 489 | 25.663 | 18.308 | 27.487 | 0.00 | 0.00 |
| ATOM | 7437 | HH11 | ARG | X | 489 | 26.130 | 19.139 | 27.154 | 0.00 | 0.00 |
| ATOM | 7438 | HH12 | ARG | X | 489 | 26.223 | 17.468 | 27.514 | 0.00 | 0.00 |
| ATOM | 7439 | NH2  | ARG | X | 489 | 23.759 | 17.170 | 28.161 | 0.00 | 0.00 |
| ATOM | 7440 | HH21 | ARG | X | 489 | 22.757 | 17.050 | 28.178 | 0.00 | 0.00 |
| ATOM | 7441 | HH22 | ARG | X | 489 | 24.304 | 16.322 | 28.091 | 0.00 | 0.00 |
| ATOM | 7442 | C    | ARG | X | 489 | 21.039 | 19.358 | 32.189 | 0.00 | 0.00 |
| ATOM | 7443 | O    | ARG | X | 489 | 20.627 | 18.237 | 31.927 | 0.00 | 0.00 |
| ATOM | 7444 | N    | ASP | X | 490 | 21.978 | 19.587 | 33.104 | 0.00 | 0.00 |
| ATOM | 7445 | H    | ASP | X | 490 | 22.237 | 20.528 | 33.362 | 0.00 | 0.00 |
| ATOM | 7446 | CA   | ASP | X | 490 | 22.402 | 18.541 | 33.995 | 0.00 | 0.00 |
| ATOM | 7447 | HA   | ASP | X | 490 | 23.151 | 19.063 | 34.591 | 0.00 | 0.00 |
| ATOM | 7448 | CB   | ASP | X | 490 | 21.293 | 18.162 | 34.971 | 0.00 | 0.00 |
| ATOM | 7449 | HB2  | ASP | X | 490 | 20.763 | 19.017 | 35.391 | 0.00 | 0.00 |
| ATOM | 7450 | HB3  | ASP | X | 490 | 20.529 | 17.515 | 34.541 | 0.00 | 0.00 |
| ATOM | 7451 | CG   | ASP | X | 490 | 21.822 | 17.307 | 36.144 | 0.00 | 0.00 |
| ATOM | 7452 | OD1  | ASP | X | 490 | 21.415 | 16.111 | 36.193 | 0.00 | 0.00 |
| ATOM | 7453 | OD2  | ASP | X | 490 | 22.656 | 17.771 | 36.980 | 0.00 | 0.00 |
| ATOM | 7454 | C    | ASP | X | 490 | 23.047 | 17.314 | 33.359 | 0.00 | 0.00 |
| ATOM | 7455 | O    | ASP | X | 490 | 22.508 | 16.190 | 33.358 | 0.00 | 0.00 |
| ATOM | 7456 | N    | PRO | X | 491 | 24.271 | 17.581 | 32.866 | 0.00 | 0.00 |
| ATOM | 7457 | CD   | PRO | X | 491 | 24.799 | 18.885 | 32.602 | 0.00 | 0.00 |
| ATOM | 7458 | HD2  | PRO | X | 491 | 24.853 | 19.591 | 33.431 | 0.00 | 0.00 |
| ATOM | 7459 | HD3  | PRO | X | 491 | 24.245 | 19.374 | 31.802 | 0.00 | 0.00 |
| ATOM | 7460 | CG   | PRO | X | 491 | 26.244 | 18.701 | 31.999 | 0.00 | 0.00 |
| ATOM | 7461 | HG2  | PRO | X | 491 | 26.907 | 18.644 | 32.862 | 0.00 | 0.00 |
| ATOM | 7462 | HG3  | PRO | X | 491 | 26.615 | 19.513 | 31.374 | 0.00 | 0.00 |
| ATOM | 7463 | CB   | PRO | X | 491 | 26.123 | 17.274 | 31.332 | 0.00 | 0.00 |
| ATOM | 7464 | HB2  | PRO | X | 491 | 27.039 | 16.683 | 31.352 | 0.00 | 0.00 |
| ATOM | 7465 | HB3  | PRO | X | 491 | 25.735 | 17.351 | 30.316 | 0.00 | 0.00 |
| ATOM | 7466 | CA   | PRO | X | 491 | 25.035 | 16.562 | 32.227 | 0.00 | 0.00 |
| ATOM | 7467 | HA   | PRO | X | 491 | 24.404 | 15.919 | 31.613 | 0.00 | 0.00 |
| ATOM | 7468 | C    | PRO | X | 491 | 25.845 | 15.723 | 33.221 | 0.00 | 0.00 |
| ATOM | 7469 | O    | PRO | X | 491 | 26.100 | 16.143 | 34.353 | 0.00 | 0.00 |
| ATOM | 7470 | N    | LYS | X | 492 | 26.233 | 14.514 | 32.820 | 0.00 | 0.00 |
| ATOM | 7471 | H    | LYS | X | 492 | 25.927 | 14.174 | 31.919 | 0.00 | 0.00 |
| ATOM | 7472 | CA   | LYS | X | 492 | 27.046 | 13.521 | 33.598 | 0.00 | 0.00 |
| ATOM | 7473 | HA   | LYS | X | 492 | 26.612 | 13.504 | 34.597 | 0.00 | 0.00 |
| ATOM | 7474 | CB   | LYS | X | 492 | 26.800 | 12.111 | 33.045 | 0.00 | 0.00 |
| ATOM | 7475 | HB2  | LYS | X | 492 | 26.990 | 11.377 | 33.829 | 0.00 | 0.00 |
| ATOM | 7476 | HB3  | LYS | X | 492 | 25.742 | 11.909 | 32.877 | 0.00 | 0.00 |
| ATOM | 7477 | CG   | LYS | X | 492 | 27.548 | 11.919 | 31.713 | 0.00 | 0.00 |
| ATOM | 7478 | HG2  | LYS | X | 492 | 27.113 | 12.611 | 30.993 | 0.00 | 0.00 |
| ATOM | 7479 | HG3  | LYS | X | 492 | 28.563 | 12.296 | 31.841 | 0.00 | 0.00 |
| ATOM | 7480 | CD   | LYS | X | 492 | 27.554 | 10.404 | 31.297 | 0.00 | 0.00 |
| ATOM | 7481 | HD2  | LYS | X | 492 | 26.568 | 10.010 | 31.542 | 0.00 | 0.00 |
| ATOM | 7482 | HD3  | LYS | X | 492 | 27.885 | 10.305 | 30.263 | 0.00 | 0.00 |
| ATOM | 7483 | CE   | LYS | X | 492 | 28.554 | 9.610  | 32.121 | 0.00 | 0.00 |
| ATOM | 7484 | HE2  | LYS | X | 492 | 28.364 | 9.740  | 33.186 | 0.00 | 0.00 |
| ATOM | 7485 | HE3  | LYS | X | 492 | 28.341 | 8.546  | 32.014 | 0.00 | 0.00 |
| ATOM | 7486 | NZ   | LYS | X | 492 | 29.969 | 9.925  | 31.857 | 0.00 | 0.00 |
| ATOM | 7487 | HZ1  | LYS | X | 492 | 30.203 | 10.899 | 31.734 | 0.00 | 0.00 |
| ATOM | 7488 | HZ2  | LYS | X | 492 | 30.583 | 9.567  | 32.575 | 0.00 | 0.00 |
| ATOM | 7489 | HZ3  | LYS | X | 492 | 30.319 | 9.511  | 31.004 | 0.00 | 0.00 |
| ATOM | 7490 | C    | LYS | X | 492 | 28.536 | 13.754 | 33.920 | 0.00 | 0.00 |
| ATOM | 7491 | O    | LYS | X | 492 | 29.070 | 12.934 | 34.754 | 0.00 | 0.00 |
| ATOM | 7492 | N    | ALA | X | 493 | 29.161 | 14.783 | 33.419 | 0.00 | 0.00 |
| ATOM | 7493 | H    | ALA | X | 493 | 28.602 | 15.347 | 32.794 | 0.00 | 0.00 |
| ATOM | 7494 | CA   | ALA | X | 493 | 30.405 | 15.319 | 33.915 | 0.00 | 0.00 |
| ATOM | 7495 | HA   | ALA | X | 493 | 31.074 | 14.477 | 33.739 | 0.00 | 0.00 |

|      |      |      |     |   |     |        |        |        |      |      |
|------|------|------|-----|---|-----|--------|--------|--------|------|------|
| ATOM | 7496 | CB   | ALA | X | 493 | 30.889 | 16.416 | 32.923 | 0.00 | 0.00 |
| ATOM | 7497 | HB1  | ALA | X | 493 | 30.216 | 17.273 | 32.956 | 0.00 | 0.00 |
| ATOM | 7498 | HB2  | ALA | X | 493 | 30.878 | 16.086 | 31.884 | 0.00 | 0.00 |
| ATOM | 7499 | HB3  | ALA | X | 493 | 31.850 | 16.850 | 33.198 | 0.00 | 0.00 |
| ATOM | 7500 | C    | ALA | X | 493 | 30.330 | 15.698 | 35.366 | 0.00 | 0.00 |
| ATOM | 7501 | O    | ALA | X | 493 | 29.239 | 16.098 | 35.791 | 0.00 | 0.00 |
| ATOM | 7502 | N    | PRO | X | 494 | 31.478 | 15.630 | 36.133 | 0.00 | 0.00 |
| ATOM | 7503 | CD   | PRO | X | 494 | 32.768 | 15.109 | 35.714 | 0.00 | 0.00 |
| ATOM | 7504 | HD2  | PRO | X | 494 | 32.988 | 15.495 | 34.719 | 0.00 | 0.00 |
| ATOM | 7505 | HD3  | PRO | X | 494 | 32.765 | 14.020 | 35.740 | 0.00 | 0.00 |
| ATOM | 7506 | CG   | PRO | X | 494 | 33.717 | 15.766 | 36.695 | 0.00 | 0.00 |
| ATOM | 7507 | HG2  | PRO | X | 494 | 33.964 | 16.777 | 36.371 | 0.00 | 0.00 |
| ATOM | 7508 | HG3  | PRO | X | 494 | 34.525 | 15.046 | 36.825 | 0.00 | 0.00 |
| ATOM | 7509 | CB   | PRO | X | 494 | 32.976 | 15.716 | 38.010 | 0.00 | 0.00 |
| ATOM | 7510 | HB2  | PRO | X | 494 | 33.324 | 16.344 | 38.830 | 0.00 | 0.00 |
| ATOM | 7511 | HB3  | PRO | X | 494 | 32.947 | 14.697 | 38.396 | 0.00 | 0.00 |
| ATOM | 7512 | CA   | PRO | X | 494 | 31.564 | 15.967 | 37.582 | 0.00 | 0.00 |
| ATOM | 7513 | HA   | PRO | X | 494 | 30.876 | 15.287 | 38.085 | 0.00 | 0.00 |
| ATOM | 7514 | C    | PRO | X | 494 | 31.272 | 17.494 | 37.763 | 0.00 | 0.00 |
| ATOM | 7515 | O    | PRO | X | 494 | 31.602 | 18.249 | 36.789 | 0.00 | 0.00 |
| ATOM | 7516 | N    | GLN | X | 495 | 30.788 | 17.994 | 38.913 | 0.00 | 0.00 |
| ATOM | 7517 | H    | GLN | X | 495 | 30.438 | 17.438 | 39.680 | 0.00 | 0.00 |
| ATOM | 7518 | CA   | GLN | X | 495 | 30.452 | 19.470 | 38.948 | 0.00 | 0.00 |
| ATOM | 7519 | HA   | GLN | X | 495 | 30.899 | 19.953 | 38.078 | 0.00 | 0.00 |
| ATOM | 7520 | CB   | GLN | X | 495 | 28.935 | 19.759 | 38.867 | 0.00 | 0.00 |
| ATOM | 7521 | HB2  | GLN | X | 495 | 28.629 | 19.218 | 39.763 | 0.00 | 0.00 |
| ATOM | 7522 | HB3  | GLN | X | 495 | 28.710 | 20.817 | 39.006 | 0.00 | 0.00 |
| ATOM | 7523 | CG   | GLN | X | 495 | 28.230 | 19.286 | 37.666 | 0.00 | 0.00 |
| ATOM | 7524 | HG2  | GLN | X | 495 | 28.169 | 18.199 | 37.605 | 0.00 | 0.00 |
| ATOM | 7525 | HG3  | GLN | X | 495 | 27.189 | 19.608 | 37.694 | 0.00 | 0.00 |
| ATOM | 7526 | CD   | GLN | X | 495 | 28.938 | 19.788 | 36.333 | 0.00 | 0.00 |
| ATOM | 7527 | OE1  | GLN | X | 495 | 29.313 | 20.951 | 36.167 | 0.00 | 0.00 |
| ATOM | 7528 | NE2  | GLN | X | 495 | 28.982 | 19.007 | 35.252 | 0.00 | 0.00 |
| ATOM | 7529 | HE21 | GLN | X | 495 | 29.116 | 19.427 | 34.343 | 0.00 | 0.00 |
| ATOM | 7530 | HE22 | GLN | X | 495 | 28.623 | 18.063 | 35.255 | 0.00 | 0.00 |
| ATOM | 7531 | C    | GLN | X | 495 | 31.087 | 20.164 | 40.191 | 0.00 | 0.00 |
| ATOM | 7532 | O    | GLN | X | 495 | 31.474 | 19.568 | 41.226 | 0.00 | 0.00 |
| ATOM | 7533 | N    | TRP | X | 496 | 31.252 | 21.462 | 40.163 | 0.00 | 0.00 |
| ATOM | 7534 | H    | TRP | X | 496 | 31.021 | 21.955 | 39.313 | 0.00 | 0.00 |
| ATOM | 7535 | CA   | TRP | X | 496 | 31.940 | 22.288 | 41.168 | 0.00 | 0.00 |
| ATOM | 7536 | HA   | TRP | X | 496 | 32.881 | 21.820 | 41.454 | 0.00 | 0.00 |
| ATOM | 7537 | CB   | TRP | X | 496 | 32.568 | 23.504 | 40.444 | 0.00 | 0.00 |
| ATOM | 7538 | HB2  | TRP | X | 496 | 33.257 | 23.055 | 39.729 | 0.00 | 0.00 |
| ATOM | 7539 | HB3  | TRP | X | 496 | 31.808 | 23.944 | 39.798 | 0.00 | 0.00 |
| ATOM | 7540 | CG   | TRP | X | 496 | 33.284 | 24.618 | 41.141 | 0.00 | 0.00 |
| ATOM | 7541 | CD1  | TRP | X | 496 | 33.589 | 24.630 | 42.461 | 0.00 | 0.00 |
| ATOM | 7542 | HD1  | TRP | X | 496 | 33.248 | 23.937 | 43.215 | 0.00 | 0.00 |
| ATOM | 7543 | NE1  | TRP | X | 496 | 34.085 | 25.867 | 42.769 | 0.00 | 0.00 |
| ATOM | 7544 | HE1  | TRP | X | 496 | 34.169 | 26.275 | 43.689 | 0.00 | 0.00 |
| ATOM | 7545 | CE2  | TRP | X | 496 | 34.390 | 26.587 | 41.612 | 0.00 | 0.00 |
| ATOM | 7546 | CZ2  | TRP | X | 496 | 35.122 | 27.749 | 41.433 | 0.00 | 0.00 |
| ATOM | 7547 | HZ2  | TRP | X | 496 | 35.496 | 28.231 | 42.324 | 0.00 | 0.00 |
| ATOM | 7548 | CH2  | TRP | X | 496 | 35.267 | 28.258 | 40.123 | 0.00 | 0.00 |
| ATOM | 7549 | HH2  | TRP | X | 496 | 35.692 | 29.227 | 39.905 | 0.00 | 0.00 |
| ATOM | 7550 | CZ3  | TRP | X | 496 | 34.854 | 27.442 | 39.032 | 0.00 | 0.00 |
| ATOM | 7551 | HZ3  | TRP | X | 496 | 35.005 | 27.826 | 38.034 | 0.00 | 0.00 |
| ATOM | 7552 | CE3  | TRP | X | 496 | 34.325 | 26.150 | 39.228 | 0.00 | 0.00 |
| ATOM | 7553 | HE3  | TRP | X | 496 | 34.016 | 25.529 | 38.400 | 0.00 | 0.00 |
| ATOM | 7554 | CD2  | TRP | X | 496 | 33.961 | 25.786 | 40.535 | 0.00 | 0.00 |
| ATOM | 7555 | C    | TRP | X | 496 | 31.055 | 22.597 | 42.364 | 0.00 | 0.00 |
| ATOM | 7556 | O    | TRP | X | 496 | 30.036 | 23.345 | 42.129 | 0.00 | 0.00 |
| ATOM | 7557 | N    | PRO | X | 497 | 31.320 | 22.011 | 43.573 | 0.00 | 0.00 |
| ATOM | 7558 | CD   | PRO | X | 497 | 32.401 | 21.169 | 43.948 | 0.00 | 0.00 |
| ATOM | 7559 | HD2  | PRO | X | 497 | 33.360 | 21.558 | 43.606 | 0.00 | 0.00 |
| ATOM | 7560 | HD3  | PRO | X | 497 | 32.222 | 20.142 | 43.631 | 0.00 | 0.00 |
| ATOM | 7561 | CG   | PRO | X | 497 | 32.428 | 21.167 | 45.550 | 0.00 | 0.00 |
| ATOM | 7562 | HG2  | PRO | X | 497 | 32.983 | 22.001 | 45.980 | 0.00 | 0.00 |

|      |      |      |     |   |     |        |        |        |      |      |
|------|------|------|-----|---|-----|--------|--------|--------|------|------|
| ATOM | 7563 | HG3  | PRO | X | 497 | 32.922 | 20.316 | 46.018 | 0.00 | 0.00 |
| ATOM | 7564 | CB   | PRO | X | 497 | 30.977 | 21.397 | 45.880 | 0.00 | 0.00 |
| ATOM | 7565 | HB2  | PRO | X | 497 | 30.724 | 21.813 | 46.855 | 0.00 | 0.00 |
| ATOM | 7566 | HB3  | PRO | X | 497 | 30.470 | 20.451 | 45.690 | 0.00 | 0.00 |
| ATOM | 7567 | CA   | PRO | X | 497 | 30.468 | 22.295 | 44.741 | 0.00 | 0.00 |
| ATOM | 7568 | HA   | PRO | X | 497 | 29.447 | 22.004 | 44.492 | 0.00 | 0.00 |
| ATOM | 7569 | C    | PRO | X | 497 | 30.509 | 23.782 | 45.120 | 0.00 | 0.00 |
| ATOM | 7570 | O    | PRO | X | 497 | 31.565 | 24.368 | 45.135 | 0.00 | 0.00 |
| ATOM | 7571 | N    | PRO | X | 498 | 29.427 | 24.312 | 45.649 | 0.00 | 0.00 |
| ATOM | 7572 | CD   | PRO | X | 498 | 28.104 | 23.613 | 45.686 | 0.00 | 0.00 |
| ATOM | 7573 | HD2  | PRO | X | 498 | 28.090 | 22.611 | 46.116 | 0.00 | 0.00 |
| ATOM | 7574 | HD3  | PRO | X | 498 | 27.789 | 23.625 | 44.643 | 0.00 | 0.00 |
| ATOM | 7575 | CG   | PRO | X | 498 | 27.264 | 24.588 | 46.548 | 0.00 | 0.00 |
| ATOM | 7576 | HG2  | PRO | X | 498 | 27.264 | 24.423 | 47.626 | 0.00 | 0.00 |
| ATOM | 7577 | HG3  | PRO | X | 498 | 26.187 | 24.594 | 46.380 | 0.00 | 0.00 |
| ATOM | 7578 | CB   | PRO | X | 498 | 27.872 | 25.970 | 46.301 | 0.00 | 0.00 |
| ATOM | 7579 | HB2  | PRO | X | 498 | 27.593 | 26.587 | 47.154 | 0.00 | 0.00 |
| ATOM | 7580 | HB3  | PRO | X | 498 | 27.636 | 26.411 | 45.333 | 0.00 | 0.00 |
| ATOM | 7581 | CA   | PRO | X | 498 | 29.412 | 25.612 | 46.287 | 0.00 | 0.00 |
| ATOM | 7582 | HA   | PRO | X | 498 | 29.811 | 26.514 | 45.823 | 0.00 | 0.00 |
| ATOM | 7583 | C    | PRO | X | 498 | 30.021 | 25.536 | 47.719 | 0.00 | 0.00 |
| ATOM | 7584 | O    | PRO | X | 498 | 29.682 | 24.672 | 48.538 | 0.00 | 0.00 |
| ATOM | 7585 | N    | TYR | X | 499 | 30.967 | 26.464 | 47.951 | 0.00 | 0.00 |
| ATOM | 7586 | H    | TYR | X | 499 | 31.195 | 27.120 | 47.217 | 0.00 | 0.00 |
| ATOM | 7587 | CA   | TYR | X | 499 | 31.669 | 26.588 | 49.231 | 0.00 | 0.00 |
| ATOM | 7588 | HA   | TYR | X | 499 | 32.171 | 25.648 | 49.460 | 0.00 | 0.00 |
| ATOM | 7589 | CB   | TYR | X | 499 | 32.889 | 27.449 | 49.023 | 0.00 | 0.00 |
| ATOM | 7590 | HB2  | TYR | X | 499 | 33.573 | 27.174 | 48.220 | 0.00 | 0.00 |
| ATOM | 7591 | HB3  | TYR | X | 499 | 32.584 | 28.403 | 48.593 | 0.00 | 0.00 |
| ATOM | 7592 | CG   | TYR | X | 499 | 33.704 | 27.554 | 50.336 | 0.00 | 0.00 |
| ATOM | 7593 | CD1  | TYR | X | 499 | 33.431 | 28.563 | 51.294 | 0.00 | 0.00 |
| ATOM | 7594 | HD1  | TYR | X | 499 | 32.696 | 29.311 | 51.035 | 0.00 | 0.00 |
| ATOM | 7595 | CE1  | TYR | X | 499 | 34.225 | 28.770 | 52.402 | 0.00 | 0.00 |
| ATOM | 7596 | HE1  | TYR | X | 499 | 33.976 | 29.549 | 53.108 | 0.00 | 0.00 |
| ATOM | 7597 | CZ   | TYR | X | 499 | 35.354 | 27.960 | 52.618 | 0.00 | 0.00 |
| ATOM | 7598 | OH   | TYR | X | 499 | 36.128 | 28.133 | 53.779 | 0.00 | 0.00 |
| ATOM | 7599 | HH   | TYR | X | 499 | 35.922 | 28.897 | 54.322 | 0.00 | 0.00 |
| ATOM | 7600 | CE2  | TYR | X | 499 | 35.605 | 26.897 | 51.723 | 0.00 | 0.00 |
| ATOM | 7601 | HE2  | TYR | X | 499 | 36.454 | 26.270 | 51.954 | 0.00 | 0.00 |
| ATOM | 7602 | CD2  | TYR | X | 499 | 34.761 | 26.669 | 50.672 | 0.00 | 0.00 |
| ATOM | 7603 | HD2  | TYR | X | 499 | 34.967 | 25.791 | 50.077 | 0.00 | 0.00 |
| ATOM | 7604 | C    | TYR | X | 499 | 30.741 | 27.038 | 50.418 | 0.00 | 0.00 |
| ATOM | 7605 | O    | TYR | X | 499 | 29.849 | 27.832 | 50.233 | 0.00 | 0.00 |
| ATOM | 7606 | N    | THR | X | 500 | 30.944 | 26.484 | 51.619 | 0.00 | 0.00 |
| ATOM | 7607 | H    | THR | X | 500 | 31.681 | 25.793 | 51.617 | 0.00 | 0.00 |
| ATOM | 7608 | CA   | THR | X | 500 | 30.245 | 26.667 | 52.909 | 0.00 | 0.00 |
| ATOM | 7609 | HA   | THR | X | 500 | 29.854 | 27.684 | 52.927 | 0.00 | 0.00 |
| ATOM | 7610 | CB   | THR | X | 500 | 29.122 | 25.611 | 53.186 | 0.00 | 0.00 |
| ATOM | 7611 | HB   | THR | X | 500 | 28.741 | 25.669 | 54.206 | 0.00 | 0.00 |
| ATOM | 7612 | CG2  | THR | X | 500 | 27.998 | 25.637 | 52.155 | 0.00 | 0.00 |
| ATOM | 7613 | HG21 | THR | X | 500 | 27.666 | 26.662 | 51.987 | 0.00 | 0.00 |
| ATOM | 7614 | HG22 | THR | X | 500 | 27.187 | 25.067 | 52.607 | 0.00 | 0.00 |
| ATOM | 7615 | HG23 | THR | X | 500 | 28.379 | 25.207 | 51.229 | 0.00 | 0.00 |
| ATOM | 7616 | OG1  | THR | X | 500 | 29.613 | 24.311 | 53.130 | 0.00 | 0.00 |
| ATOM | 7617 | HG1  | THR | X | 500 | 29.153 | 23.690 | 53.700 | 0.00 | 0.00 |
| ATOM | 7618 | C    | THR | X | 500 | 31.226 | 26.621 | 54.079 | 0.00 | 0.00 |
| ATOM | 7619 | O    | THR | X | 500 | 32.311 | 26.084 | 54.052 | 0.00 | 0.00 |
| ATOM | 7620 | N    | ALA | X | 501 | 30.904 | 27.290 | 55.235 | 0.00 | 0.00 |
| ATOM | 7621 | H    | ALA | X | 501 | 30.025 | 27.781 | 55.311 | 0.00 | 0.00 |
| ATOM | 7622 | CA   | ALA | X | 501 | 31.667 | 27.405 | 56.503 | 0.00 | 0.00 |
| ATOM | 7623 | HA   | ALA | X | 501 | 32.644 | 27.748 | 56.164 | 0.00 | 0.00 |
| ATOM | 7624 | CB   | ALA | X | 501 | 30.881 | 28.394 | 57.351 | 0.00 | 0.00 |
| ATOM | 7625 | HB1  | ALA | X | 501 | 29.873 | 28.033 | 57.554 | 0.00 | 0.00 |
| ATOM | 7626 | HB2  | ALA | X | 501 | 30.792 | 29.396 | 56.931 | 0.00 | 0.00 |
| ATOM | 7627 | HB3  | ALA | X | 501 | 31.414 | 28.436 | 58.301 | 0.00 | 0.00 |
| ATOM | 7628 | C    | ALA | X | 501 | 31.931 | 26.102 | 57.298 | 0.00 | 0.00 |
| ATOM | 7629 | O    | ALA | X | 501 | 32.958 | 26.063 | 57.961 | 0.00 | 0.00 |

|      |      |      |     |   |     |        |        |        |      |      |
|------|------|------|-----|---|-----|--------|--------|--------|------|------|
| ATOM | 7630 | N    | GLY | X | 502 | 31.075 | 25.112 | 57.086 | 0.00 | 0.00 |
| ATOM | 7631 | H    | GLY | X | 502 | 30.293 | 25.287 | 56.471 | 0.00 | 0.00 |
| ATOM | 7632 | CA   | GLY | X | 502 | 31.189 | 23.720 | 57.636 | 0.00 | 0.00 |
| ATOM | 7633 | HA2  | GLY | X | 502 | 31.605 | 23.726 | 58.643 | 0.00 | 0.00 |
| ATOM | 7634 | HA3  | GLY | X | 502 | 30.192 | 23.280 | 57.681 | 0.00 | 0.00 |
| ATOM | 7635 | C    | GLY | X | 502 | 32.223 | 22.828 | 56.918 | 0.00 | 0.00 |
| ATOM | 7636 | O    | GLY | X | 502 | 33.361 | 22.643 | 57.353 | 0.00 | 0.00 |
| ATOM | 7637 | N    | ALA | X | 503 | 31.825 | 22.344 | 55.748 | 0.00 | 0.00 |
| ATOM | 7638 | H    | ALA | X | 503 | 30.844 | 22.437 | 55.525 | 0.00 | 0.00 |
| ATOM | 7639 | CA   | ALA | X | 503 | 32.539 | 21.428 | 54.875 | 0.00 | 0.00 |
| ATOM | 7640 | HA   | ALA | X | 503 | 32.895 | 20.528 | 55.377 | 0.00 | 0.00 |
| ATOM | 7641 | CB   | ALA | X | 503 | 31.546 | 21.001 | 53.860 | 0.00 | 0.00 |
| ATOM | 7642 | HB1  | ALA | X | 503 | 31.967 | 20.657 | 52.915 | 0.00 | 0.00 |
| ATOM | 7643 | HB2  | ALA | X | 503 | 30.981 | 21.856 | 53.490 | 0.00 | 0.00 |
| ATOM | 7644 | HB3  | ALA | X | 503 | 30.880 | 20.284 | 54.341 | 0.00 | 0.00 |
| ATOM | 7645 | C    | ALA | X | 503 | 33.808 | 22.028 | 54.125 | 0.00 | 0.00 |
| ATOM | 7646 | O    | ALA | X | 503 | 34.815 | 21.320 | 53.979 | 0.00 | 0.00 |
| ATOM | 7647 | N    | GLN | X | 504 | 33.726 | 23.316 | 53.804 | 0.00 | 0.00 |
| ATOM | 7648 | H    | GLN | X | 504 | 32.829 | 23.733 | 54.005 | 0.00 | 0.00 |
| ATOM | 7649 | CA   | GLN | X | 504 | 34.861 | 23.990 | 53.138 | 0.00 | 0.00 |
| ATOM | 7650 | HA   | GLN | X | 504 | 34.490 | 24.976 | 52.857 | 0.00 | 0.00 |
| ATOM | 7651 | CB   | GLN | X | 504 | 35.924 | 24.341 | 54.159 | 0.00 | 0.00 |
| ATOM | 7652 | HB2  | GLN | X | 504 | 36.405 | 23.472 | 54.609 | 0.00 | 0.00 |
| ATOM | 7653 | HB3  | GLN | X | 504 | 36.691 | 24.910 | 53.634 | 0.00 | 0.00 |
| ATOM | 7654 | CG   | GLN | X | 504 | 35.390 | 25.185 | 55.365 | 0.00 | 0.00 |
| ATOM | 7655 | HG2  | GLN | X | 504 | 35.237 | 26.222 | 55.066 | 0.00 | 0.00 |
| ATOM | 7656 | HG3  | GLN | X | 504 | 34.424 | 24.796 | 55.687 | 0.00 | 0.00 |
| ATOM | 7657 | CD   | GLN | X | 504 | 36.326 | 25.252 | 56.490 | 0.00 | 0.00 |
| ATOM | 7658 | OE1  | GLN | X | 504 | 37.460 | 25.661 | 56.368 | 0.00 | 0.00 |
| ATOM | 7659 | NE2  | GLN | X | 504 | 35.952 | 24.858 | 57.671 | 0.00 | 0.00 |
| ATOM | 7660 | HE21 | GLN | X | 504 | 36.501 | 25.197 | 58.448 | 0.00 | 0.00 |
| ATOM | 7661 | HE22 | GLN | X | 504 | 35.138 | 24.315 | 57.922 | 0.00 | 0.00 |
| ATOM | 7662 | C    | GLN | X | 504 | 35.399 | 23.345 | 51.850 | 0.00 | 0.00 |
| ATOM | 7663 | O    | GLN | X | 504 | 36.602 | 23.140 | 51.739 | 0.00 | 0.00 |
| ATOM | 7664 | N    | GLN | X | 505 | 34.545 | 22.991 | 50.882 | 0.00 | 0.00 |
| ATOM | 7665 | H    | GLN | X | 505 | 33.539 | 23.080 | 50.895 | 0.00 | 0.00 |
| ATOM | 7666 | CA   | GLN | X | 505 | 35.024 | 22.301 | 49.679 | 0.00 | 0.00 |
| ATOM | 7667 | HA   | GLN | X | 505 | 35.908 | 21.735 | 49.971 | 0.00 | 0.00 |
| ATOM | 7668 | CB   | GLN | X | 505 | 33.976 | 21.346 | 49.142 | 0.00 | 0.00 |
| ATOM | 7669 | HB2  | GLN | X | 505 | 33.089 | 21.966 | 49.015 | 0.00 | 0.00 |
| ATOM | 7670 | HB3  | GLN | X | 505 | 34.447 | 21.007 | 48.219 | 0.00 | 0.00 |
| ATOM | 7671 | CG   | GLN | X | 505 | 33.713 | 20.110 | 50.054 | 0.00 | 0.00 |
| ATOM | 7672 | HG2  | GLN | X | 505 | 34.695 | 19.693 | 50.275 | 0.00 | 0.00 |
| ATOM | 7673 | HG3  | GLN | X | 505 | 33.209 | 20.349 | 50.991 | 0.00 | 0.00 |
| ATOM | 7674 | CD   | GLN | X | 505 | 32.792 | 19.138 | 49.331 | 0.00 | 0.00 |
| ATOM | 7675 | OE1  | GLN | X | 505 | 31.563 | 19.420 | 49.165 | 0.00 | 0.00 |
| ATOM | 7676 | NE2  | GLN | X | 505 | 33.246 | 17.933 | 48.985 | 0.00 | 0.00 |
| ATOM | 7677 | HE21 | GLN | X | 505 | 32.583 | 17.285 | 48.585 | 0.00 | 0.00 |
| ATOM | 7678 | HE22 | GLN | X | 505 | 34.211 | 17.643 | 49.058 | 0.00 | 0.00 |
| ATOM | 7679 | C    | GLN | X | 505 | 35.396 | 23.197 | 48.450 | 0.00 | 0.00 |
| ATOM | 7680 | O    | GLN | X | 505 | 34.712 | 24.185 | 48.247 | 0.00 | 0.00 |
| ATOM | 7681 | N    | TYR | X | 506 | 36.349 | 22.836 | 47.640 | 0.00 | 0.00 |
| ATOM | 7682 | H    | TYR | X | 506 | 36.838 | 21.954 | 47.704 | 0.00 | 0.00 |
| ATOM | 7683 | CA   | TYR | X | 506 | 37.001 | 23.672 | 46.545 | 0.00 | 0.00 |
| ATOM | 7684 | HA   | TYR | X | 506 | 36.248 | 24.348 | 46.140 | 0.00 | 0.00 |
| ATOM | 7685 | CB   | TYR | X | 506 | 38.069 | 24.588 | 47.149 | 0.00 | 0.00 |
| ATOM | 7686 | HB2  | TYR | X | 506 | 38.269 | 25.350 | 46.395 | 0.00 | 0.00 |
| ATOM | 7687 | HB3  | TYR | X | 506 | 37.658 | 25.163 | 47.979 | 0.00 | 0.00 |
| ATOM | 7688 | CG   | TYR | X | 506 | 39.297 | 23.818 | 47.671 | 0.00 | 0.00 |
| ATOM | 7689 | CD1  | TYR | X | 506 | 39.293 | 23.305 | 48.968 | 0.00 | 0.00 |
| ATOM | 7690 | HD1  | TYR | X | 506 | 38.476 | 23.545 | 49.632 | 0.00 | 0.00 |
| ATOM | 7691 | CE1  | TYR | X | 506 | 40.403 | 22.638 | 49.434 | 0.00 | 0.00 |
| ATOM | 7692 | HE1  | TYR | X | 506 | 40.430 | 22.207 | 50.423 | 0.00 | 0.00 |
| ATOM | 7693 | CZ   | TYR | X | 506 | 41.533 | 22.388 | 48.522 | 0.00 | 0.00 |
| ATOM | 7694 | OH   | TYR | X | 506 | 42.664 | 21.660 | 48.903 | 0.00 | 0.00 |
| ATOM | 7695 | HH   | TYR | X | 506 | 42.667 | 21.286 | 49.788 | 0.00 | 0.00 |
| ATOM | 7696 | CE2  | TYR | X | 506 | 41.499 | 22.802 | 47.193 | 0.00 | 0.00 |

|      |      |      |     |   |     |        |        |        |      |      |
|------|------|------|-----|---|-----|--------|--------|--------|------|------|
| ATOM | 7697 | HE2  | TYR | X | 506 | 42.322 | 22.651 | 46.510 | 0.00 | 0.00 |
| ATOM | 7698 | CD2  | TYR | X | 506 | 40.364 | 23.553 | 46.769 | 0.00 | 0.00 |
| ATOM | 7699 | HD2  | TYR | X | 506 | 40.257 | 24.016 | 45.799 | 0.00 | 0.00 |
| ATOM | 7700 | C    | TYR | X | 506 | 37.457 | 22.725 | 45.407 | 0.00 | 0.00 |
| ATOM | 7701 | O    | TYR | X | 506 | 37.914 | 21.622 | 45.631 | 0.00 | 0.00 |
| ATOM | 7702 | N    | VAL | X | 507 | 37.296 | 23.223 | 44.138 | 0.00 | 0.00 |
| ATOM | 7703 | H    | VAL | X | 507 | 37.004 | 24.184 | 44.040 | 0.00 | 0.00 |
| ATOM | 7704 | CA   | VAL | X | 507 | 37.871 | 22.519 | 42.988 | 0.00 | 0.00 |
| ATOM | 7705 | HA   | VAL | X | 507 | 37.755 | 21.444 | 43.129 | 0.00 | 0.00 |
| ATOM | 7706 | CB   | VAL | X | 507 | 37.117 | 22.547 | 41.653 | 0.00 | 0.00 |
| ATOM | 7707 | HB   | VAL | X | 507 | 37.759 | 22.082 | 40.906 | 0.00 | 0.00 |
| ATOM | 7708 | CG1  | VAL | X | 507 | 35.872 | 21.755 | 41.662 | 0.00 | 0.00 |
| ATOM | 7709 | HG11 | VAL | X | 507 | 35.298 | 22.028 | 42.548 | 0.00 | 0.00 |
| ATOM | 7710 | HG12 | VAL | X | 507 | 35.105 | 22.090 | 40.964 | 0.00 | 0.00 |
| ATOM | 7711 | HG13 | VAL | X | 507 | 36.068 | 20.683 | 41.654 | 0.00 | 0.00 |
| ATOM | 7712 | CG2  | VAL | X | 507 | 36.865 | 24.004 | 41.303 | 0.00 | 0.00 |
| ATOM | 7713 | HG21 | VAL | X | 507 | 37.781 | 24.592 | 41.364 | 0.00 | 0.00 |
| ATOM | 7714 | HG22 | VAL | X | 507 | 36.183 | 24.444 | 42.031 | 0.00 | 0.00 |
| ATOM | 7715 | HG23 | VAL | X | 507 | 36.432 | 24.175 | 40.317 | 0.00 | 0.00 |
| ATOM | 7716 | C    | VAL | X | 507 | 39.396 | 22.758 | 42.748 | 0.00 | 0.00 |
| ATOM | 7717 | O    | VAL | X | 507 | 39.890 | 23.875 | 42.798 | 0.00 | 0.00 |
| ATOM | 7718 | N    | SER | X | 508 | 40.081 | 21.836 | 42.134 | 0.00 | 0.00 |
| ATOM | 7719 | H    | SER | X | 508 | 39.567 | 20.970 | 42.052 | 0.00 | 0.00 |
| ATOM | 7720 | CA   | SER | X | 508 | 41.490 | 21.716 | 41.873 | 0.00 | 0.00 |
| ATOM | 7721 | HA   | SER | X | 508 | 41.936 | 22.572 | 42.380 | 0.00 | 0.00 |
| ATOM | 7722 | CB   | SER | X | 508 | 42.062 | 20.504 | 42.625 | 0.00 | 0.00 |
| ATOM | 7723 | HB2  | SER | X | 508 | 41.770 | 19.601 | 42.090 | 0.00 | 0.00 |
| ATOM | 7724 | HB3  | SER | X | 508 | 43.141 | 20.656 | 42.622 | 0.00 | 0.00 |
| ATOM | 7725 | OG   | SER | X | 508 | 41.550 | 20.342 | 43.975 | 0.00 | 0.00 |
| ATOM | 7726 | HG   | SER | X | 508 | 40.649 | 20.011 | 43.947 | 0.00 | 0.00 |
| ATOM | 7727 | C    | SER | X | 508 | 41.702 | 21.630 | 40.406 | 0.00 | 0.00 |
| ATOM | 7728 | O    | SER | X | 508 | 41.449 | 20.569 | 39.843 | 0.00 | 0.00 |
| ATOM | 7729 | N    | LEU | X | 509 | 42.081 | 22.804 | 39.836 | 0.00 | 0.00 |
| ATOM | 7730 | H    | LEU | X | 509 | 42.139 | 23.634 | 40.409 | 0.00 | 0.00 |
| ATOM | 7731 | CA   | LEU | X | 509 | 42.079 | 23.046 | 38.418 | 0.00 | 0.00 |
| ATOM | 7732 | HA   | LEU | X | 509 | 41.387 | 22.255 | 38.127 | 0.00 | 0.00 |
| ATOM | 7733 | CB   | LEU | X | 509 | 41.448 | 24.327 | 38.083 | 0.00 | 0.00 |
| ATOM | 7734 | HB2  | LEU | X | 509 | 42.173 | 25.092 | 38.362 | 0.00 | 0.00 |
| ATOM | 7735 | HB3  | LEU | X | 509 | 41.287 | 24.556 | 37.029 | 0.00 | 0.00 |
| ATOM | 7736 | CG   | LEU | X | 509 | 40.113 | 24.687 | 38.737 | 0.00 | 0.00 |
| ATOM | 7737 | HG   | LEU | X | 509 | 40.287 | 24.790 | 39.808 | 0.00 | 0.00 |
| ATOM | 7738 | CD1  | LEU | X | 509 | 39.634 | 26.062 | 38.240 | 0.00 | 0.00 |
| ATOM | 7739 | HD11 | LEU | X | 509 | 40.393 | 26.844 | 38.209 | 0.00 | 0.00 |
| ATOM | 7740 | HD12 | LEU | X | 509 | 38.724 | 26.455 | 38.693 | 0.00 | 0.00 |
| ATOM | 7741 | HD13 | LEU | X | 509 | 39.268 | 26.012 | 37.214 | 0.00 | 0.00 |
| ATOM | 7742 | CD2  | LEU | X | 509 | 39.013 | 23.637 | 38.394 | 0.00 | 0.00 |
| ATOM | 7743 | HD21 | LEU | X | 509 | 39.229 | 22.698 | 38.905 | 0.00 | 0.00 |
| ATOM | 7744 | HD22 | LEU | X | 509 | 38.025 | 23.904 | 38.771 | 0.00 | 0.00 |
| ATOM | 7745 | HD23 | LEU | X | 509 | 38.983 | 23.447 | 37.321 | 0.00 | 0.00 |
| ATOM | 7746 | C    | LEU | X | 509 | 43.482 | 22.741 | 37.717 | 0.00 | 0.00 |
| ATOM | 7747 | O    | LEU | X | 509 | 44.457 | 23.463 | 38.042 | 0.00 | 0.00 |
| ATOM | 7748 | N    | ASP | X | 510 | 43.534 | 21.782 | 36.806 | 0.00 | 0.00 |
| ATOM | 7749 | H    | ASP | X | 510 | 42.644 | 21.375 | 36.558 | 0.00 | 0.00 |
| ATOM | 7750 | CA   | ASP | X | 510 | 44.699 | 21.170 | 36.237 | 0.00 | 0.00 |
| ATOM | 7751 | HA   | ASP | X | 510 | 45.372 | 21.838 | 35.699 | 0.00 | 0.00 |
| ATOM | 7752 | CB   | ASP | X | 510 | 45.537 | 20.454 | 37.374 | 0.00 | 0.00 |
| ATOM | 7753 | HB2  | ASP | X | 510 | 45.916 | 21.286 | 37.968 | 0.00 | 0.00 |
| ATOM | 7754 | HB3  | ASP | X | 510 | 44.982 | 19.934 | 38.155 | 0.00 | 0.00 |
| ATOM | 7755 | CG   | ASP | X | 510 | 46.695 | 19.507 | 36.901 | 0.00 | 0.00 |
| ATOM | 7756 | OD1  | ASP | X | 510 | 47.770 | 19.962 | 36.457 | 0.00 | 0.00 |
| ATOM | 7757 | OD2  | ASP | X | 510 | 46.466 | 18.292 | 36.826 | 0.00 | 0.00 |
| ATOM | 7758 | C    | ASP | X | 510 | 44.131 | 20.150 | 35.141 | 0.00 | 0.00 |
| ATOM | 7759 | O    | ASP | X | 510 | 42.928 | 20.144 | 34.933 | 0.00 | 0.00 |
| ATOM | 7760 | N    | LEU | X | 511 | 45.051 | 19.488 | 34.408 | 0.00 | 0.00 |
| ATOM | 7761 | H    | LEU | X | 511 | 46.003 | 19.616 | 34.718 | 0.00 | 0.00 |
| ATOM | 7762 | CA   | LEU | X | 511 | 44.768 | 18.685 | 33.222 | 0.00 | 0.00 |
| ATOM | 7763 | HA   | LEU | X | 511 | 44.050 | 19.211 | 32.593 | 0.00 | 0.00 |

|      |      |      |     |   |     |        |        |        |      |      |
|------|------|------|-----|---|-----|--------|--------|--------|------|------|
| ATOM | 7764 | CB   | LEU | X | 511 | 46.063 | 18.506 | 32.412 | 0.00 | 0.00 |
| ATOM | 7765 | HB2  | LEU | X | 511 | 46.597 | 17.751 | 32.988 | 0.00 | 0.00 |
| ATOM | 7766 | HB3  | LEU | X | 511 | 45.777 | 17.945 | 31.522 | 0.00 | 0.00 |
| ATOM | 7767 | CG   | LEU | X | 511 | 46.867 | 19.695 | 32.031 | 0.00 | 0.00 |
| ATOM | 7768 | HG   | LEU | X | 511 | 47.170 | 20.190 | 32.953 | 0.00 | 0.00 |
| ATOM | 7769 | CD1  | LEU | X | 511 | 48.224 | 19.360 | 31.379 | 0.00 | 0.00 |
| ATOM | 7770 | HD11 | LEU | X | 511 | 48.557 | 20.168 | 30.727 | 0.00 | 0.00 |
| ATOM | 7771 | HD12 | LEU | X | 511 | 47.949 | 18.532 | 30.726 | 0.00 | 0.00 |
| ATOM | 7772 | HD13 | LEU | X | 511 | 48.990 | 19.189 | 32.135 | 0.00 | 0.00 |
| ATOM | 7773 | CD2  | LEU | X | 511 | 46.054 | 20.640 | 31.168 | 0.00 | 0.00 |
| ATOM | 7774 | HD21 | LEU | X | 511 | 45.960 | 20.165 | 30.191 | 0.00 | 0.00 |
| ATOM | 7775 | HD22 | LEU | X | 511 | 45.129 | 20.896 | 31.684 | 0.00 | 0.00 |
| ATOM | 7776 | HD23 | LEU | X | 511 | 46.628 | 21.566 | 31.118 | 0.00 | 0.00 |
| ATOM | 7777 | C    | LEU | X | 511 | 44.091 | 17.318 | 33.630 | 0.00 | 0.00 |
| ATOM | 7778 | O    | LEU | X | 511 | 43.421 | 16.692 | 32.760 | 0.00 | 0.00 |
| ATOM | 7779 | N    | ARG | X | 512 | 44.225 | 16.925 | 34.905 | 0.00 | 0.00 |
| ATOM | 7780 | H    | ARG | X | 512 | 44.741 | 17.533 | 35.526 | 0.00 | 0.00 |
| ATOM | 7781 | CA   | ARG | X | 512 | 43.335 | 15.927 | 35.554 | 0.00 | 0.00 |
| ATOM | 7782 | HA   | ARG | X | 512 | 43.611 | 14.991 | 35.068 | 0.00 | 0.00 |
| ATOM | 7783 | CB   | ARG | X | 512 | 43.762 | 15.784 | 37.034 | 0.00 | 0.00 |
| ATOM | 7784 | HB2  | ARG | X | 512 | 43.682 | 16.735 | 37.560 | 0.00 | 0.00 |
| ATOM | 7785 | HB3  | ARG | X | 512 | 43.085 | 15.101 | 37.547 | 0.00 | 0.00 |
| ATOM | 7786 | CG   | ARG | X | 512 | 45.256 | 15.357 | 37.087 | 0.00 | 0.00 |
| ATOM | 7787 | HG2  | ARG | X | 512 | 45.406 | 14.363 | 36.665 | 0.00 | 0.00 |
| ATOM | 7788 | HG3  | ARG | X | 512 | 45.769 | 16.105 | 36.483 | 0.00 | 0.00 |
| ATOM | 7789 | CD   | ARG | X | 512 | 45.901 | 15.373 | 38.454 | 0.00 | 0.00 |
| ATOM | 7790 | HD2  | ARG | X | 512 | 46.961 | 15.131 | 38.374 | 0.00 | 0.00 |
| ATOM | 7791 | HD3  | ARG | X | 512 | 45.999 | 16.347 | 38.932 | 0.00 | 0.00 |
| ATOM | 7792 | NE   | ARG | X | 512 | 45.192 | 14.377 | 39.360 | 0.00 | 0.00 |
| ATOM | 7793 | HE   | ARG | X | 512 | 45.304 | 13.459 | 38.955 | 0.00 | 0.00 |
| ATOM | 7794 | CZ   | ARG | X | 512 | 44.433 | 14.559 | 40.419 | 0.00 | 0.00 |
| ATOM | 7795 | NH1  | ARG | X | 512 | 44.155 | 15.786 | 40.952 | 0.00 | 0.00 |
| ATOM | 7796 | HH11 | ARG | X | 512 | 44.495 | 16.612 | 40.481 | 0.00 | 0.00 |
| ATOM | 7797 | HH12 | ARG | X | 512 | 43.508 | 15.892 | 41.720 | 0.00 | 0.00 |
| ATOM | 7798 | NH2  | ARG | X | 512 | 43.944 | 13.543 | 41.082 | 0.00 | 0.00 |
| ATOM | 7799 | HH21 | ARG | X | 512 | 44.137 | 12.597 | 40.783 | 0.00 | 0.00 |
| ATOM | 7800 | HH22 | ARG | X | 512 | 43.436 | 13.674 | 41.945 | 0.00 | 0.00 |
| ATOM | 7801 | C    | ARG | X | 512 | 41.801 | 16.365 | 35.425 | 0.00 | 0.00 |
| ATOM | 7802 | O    | ARG | X | 512 | 41.472 | 17.531 | 35.372 | 0.00 | 0.00 |
| ATOM | 7803 | N    | PRO | X | 513 | 40.927 | 15.311 | 35.340 | 0.00 | 0.00 |
| ATOM | 7804 | CD   | PRO | X | 513 | 41.226 | 13.915 | 34.936 | 0.00 | 0.00 |
| ATOM | 7805 | HD2  | PRO | X | 513 | 41.859 | 13.540 | 35.740 | 0.00 | 0.00 |
| ATOM | 7806 | HD3  | PRO | X | 513 | 41.869 | 13.854 | 34.058 | 0.00 | 0.00 |
| ATOM | 7807 | CG   | PRO | X | 513 | 39.875 | 13.169 | 34.673 | 0.00 | 0.00 |
| ATOM | 7808 | HG2  | PRO | X | 513 | 40.031 | 12.147 | 35.016 | 0.00 | 0.00 |
| ATOM | 7809 | HG3  | PRO | X | 513 | 39.520 | 13.172 | 33.642 | 0.00 | 0.00 |
| ATOM | 7810 | CB   | PRO | X | 513 | 38.861 | 13.967 | 35.529 | 0.00 | 0.00 |
| ATOM | 7811 | HB2  | PRO | X | 513 | 38.908 | 13.661 | 36.574 | 0.00 | 0.00 |
| ATOM | 7812 | HB3  | PRO | X | 513 | 37.846 | 13.839 | 35.152 | 0.00 | 0.00 |
| ATOM | 7813 | CA   | PRO | X | 513 | 39.507 | 15.375 | 35.498 | 0.00 | 0.00 |
| ATOM | 7814 | HA   | PRO | X | 513 | 39.124 | 15.977 | 34.674 | 0.00 | 0.00 |
| ATOM | 7815 | C    | PRO | X | 513 | 39.092 | 16.189 | 36.742 | 0.00 | 0.00 |
| ATOM | 7816 | O    | PRO | X | 513 | 39.780 | 16.048 | 37.741 | 0.00 | 0.00 |
| ATOM | 7817 | N    | LEU | X | 514 | 38.053 | 17.026 | 36.704 | 0.00 | 0.00 |
| ATOM | 7818 | H    | LEU | X | 514 | 37.461 | 17.018 | 35.886 | 0.00 | 0.00 |
| ATOM | 7819 | CA   | LEU | X | 514 | 37.639 | 17.854 | 37.843 | 0.00 | 0.00 |
| ATOM | 7820 | HA   | LEU | X | 514 | 38.297 | 18.710 | 37.990 | 0.00 | 0.00 |
| ATOM | 7821 | CB   | LEU | X | 514 | 36.334 | 18.505 | 37.398 | 0.00 | 0.00 |
| ATOM | 7822 | HB2  | LEU | X | 514 | 36.378 | 18.788 | 36.346 | 0.00 | 0.00 |
| ATOM | 7823 | HB3  | LEU | X | 514 | 35.556 | 17.741 | 37.402 | 0.00 | 0.00 |
| ATOM | 7824 | CG   | LEU | X | 514 | 35.887 | 19.697 | 38.209 | 0.00 | 0.00 |
| ATOM | 7825 | HG   | LEU | X | 514 | 36.084 | 19.579 | 39.274 | 0.00 | 0.00 |
| ATOM | 7826 | CD1  | LEU | X | 514 | 36.716 | 20.940 | 37.900 | 0.00 | 0.00 |
| ATOM | 7827 | HD11 | LEU | X | 514 | 36.664 | 21.174 | 36.837 | 0.00 | 0.00 |
| ATOM | 7828 | HD12 | LEU | X | 514 | 37.769 | 20.793 | 38.142 | 0.00 | 0.00 |
| ATOM | 7829 | HD13 | LEU | X | 514 | 36.396 | 21.735 | 38.573 | 0.00 | 0.00 |
| ATOM | 7830 | CD2  | LEU | X | 514 | 34.381 | 19.940 | 37.988 | 0.00 | 0.00 |

|      |      |      |     |   |     |        |        |        |      |      |
|------|------|------|-----|---|-----|--------|--------|--------|------|------|
| ATOM | 7831 | HD21 | LEU | X | 514 | 33.776 | 19.073 | 38.254 | 0.00 | 0.00 |
| ATOM | 7832 | HD22 | LEU | X | 514 | 33.801 | 20.586 | 38.648 | 0.00 | 0.00 |
| ATOM | 7833 | HD23 | LEU | X | 514 | 34.183 | 20.021 | 36.919 | 0.00 | 0.00 |
| ATOM | 7834 | C    | LEU | X | 514 | 37.573 | 17.168 | 39.157 | 0.00 | 0.00 |
| ATOM | 7835 | O    | LEU | X | 514 | 36.779 | 16.244 | 39.290 | 0.00 | 0.00 |
| ATOM | 7836 | N    | GLU | X | 515 | 38.492 | 17.491 | 40.035 | 0.00 | 0.00 |
| ATOM | 7837 | H    | GLU | X | 515 | 39.072 | 18.241 | 39.685 | 0.00 | 0.00 |
| ATOM | 7838 | CA   | GLU | X | 515 | 38.760 | 16.894 | 41.392 | 0.00 | 0.00 |
| ATOM | 7839 | HA   | GLU | X | 515 | 38.032 | 16.087 | 41.466 | 0.00 | 0.00 |
| ATOM | 7840 | CB   | GLU | X | 515 | 40.218 | 16.496 | 41.581 | 0.00 | 0.00 |
| ATOM | 7841 | HB2  | GLU | X | 515 | 40.504 | 15.775 | 40.816 | 0.00 | 0.00 |
| ATOM | 7842 | HB3  | GLU | X | 515 | 40.893 | 17.352 | 41.545 | 0.00 | 0.00 |
| ATOM | 7843 | CG   | GLU | X | 515 | 40.352 | 15.722 | 42.917 | 0.00 | 0.00 |
| ATOM | 7844 | HG2  | GLU | X | 515 | 39.951 | 16.243 | 43.786 | 0.00 | 0.00 |
| ATOM | 7845 | HG3  | GLU | X | 515 | 39.857 | 14.781 | 42.677 | 0.00 | 0.00 |
| ATOM | 7846 | CD   | GLU | X | 515 | 41.781 | 15.383 | 43.211 | 0.00 | 0.00 |
| ATOM | 7847 | OE1  | GLU | X | 515 | 42.130 | 14.186 | 43.114 | 0.00 | 0.00 |
| ATOM | 7848 | OE2  | GLU | X | 515 | 42.616 | 16.298 | 43.249 | 0.00 | 0.00 |
| ATOM | 7849 | C    | GLU | X | 515 | 38.304 | 17.959 | 42.420 | 0.00 | 0.00 |
| ATOM | 7850 | O    | GLU | X | 515 | 38.458 | 19.196 | 42.195 | 0.00 | 0.00 |
| ATOM | 7851 | N    | VAL | X | 516 | 37.830 | 17.579 | 43.589 | 0.00 | 0.00 |
| ATOM | 7852 | H    | VAL | X | 516 | 37.519 | 16.626 | 43.710 | 0.00 | 0.00 |
| ATOM | 7853 | CA   | VAL | X | 516 | 37.438 | 18.471 | 44.698 | 0.00 | 0.00 |
| ATOM | 7854 | HA   | VAL | X | 516 | 37.567 | 19.517 | 44.420 | 0.00 | 0.00 |
| ATOM | 7855 | CB   | VAL | X | 516 | 35.956 | 18.267 | 45.086 | 0.00 | 0.00 |
| ATOM | 7856 | HB   | VAL | X | 516 | 35.888 | 17.189 | 45.233 | 0.00 | 0.00 |
| ATOM | 7857 | CG1  | VAL | X | 516 | 35.524 | 18.913 | 46.438 | 0.00 | 0.00 |
| ATOM | 7858 | HG11 | VAL | X | 516 | 34.559 | 18.523 | 46.760 | 0.00 | 0.00 |
| ATOM | 7859 | HG12 | VAL | X | 516 | 36.193 | 18.703 | 47.272 | 0.00 | 0.00 |
| ATOM | 7860 | HG13 | VAL | X | 516 | 35.476 | 20.001 | 46.395 | 0.00 | 0.00 |
| ATOM | 7861 | CG2  | VAL | X | 516 | 34.959 | 18.731 | 44.048 | 0.00 | 0.00 |
| ATOM | 7862 | HG21 | VAL | X | 516 | 35.136 | 18.327 | 43.051 | 0.00 | 0.00 |
| ATOM | 7863 | HG22 | VAL | X | 516 | 34.996 | 19.820 | 44.056 | 0.00 | 0.00 |
| ATOM | 7864 | HG23 | VAL | X | 516 | 33.938 | 18.444 | 44.298 | 0.00 | 0.00 |
| ATOM | 7865 | C    | VAL | X | 516 | 38.363 | 18.123 | 45.851 | 0.00 | 0.00 |
| ATOM | 7866 | O    | VAL | X | 516 | 38.672 | 16.933 | 45.945 | 0.00 | 0.00 |
| ATOM | 7867 | N    | ARG | X | 517 | 38.647 | 19.088 | 46.707 | 0.00 | 0.00 |
| ATOM | 7868 | H    | ARG | X | 517 | 38.320 | 20.011 | 46.462 | 0.00 | 0.00 |
| ATOM | 7869 | CA   | ARG | X | 517 | 39.328 | 18.864 | 47.985 | 0.00 | 0.00 |
| ATOM | 7870 | HA   | ARG | X | 517 | 39.243 | 17.818 | 48.280 | 0.00 | 0.00 |
| ATOM | 7871 | CB   | ARG | X | 517 | 40.821 | 19.399 | 47.784 | 0.00 | 0.00 |
| ATOM | 7872 | HB2  | ARG | X | 517 | 40.816 | 20.398 | 47.348 | 0.00 | 0.00 |
| ATOM | 7873 | HB3  | ARG | X | 517 | 41.303 | 19.395 | 48.762 | 0.00 | 0.00 |
| ATOM | 7874 | CG   | ARG | X | 517 | 41.700 | 18.448 | 46.889 | 0.00 | 0.00 |
| ATOM | 7875 | HG2  | ARG | X | 517 | 41.827 | 17.449 | 47.306 | 0.00 | 0.00 |
| ATOM | 7876 | HG3  | ARG | X | 517 | 41.136 | 18.268 | 45.974 | 0.00 | 0.00 |
| ATOM | 7877 | CD   | ARG | X | 517 | 43.034 | 19.056 | 46.584 | 0.00 | 0.00 |
| ATOM | 7878 | HD2  | ARG | X | 517 | 42.843 | 20.102 | 46.342 | 0.00 | 0.00 |
| ATOM | 7879 | HD3  | ARG | X | 517 | 43.637 | 19.103 | 47.490 | 0.00 | 0.00 |
| ATOM | 7880 | NE   | ARG | X | 517 | 43.638 | 18.343 | 45.503 | 0.00 | 0.00 |
| ATOM | 7881 | HE   | ARG | X | 517 | 43.029 | 17.646 | 45.100 | 0.00 | 0.00 |
| ATOM | 7882 | CZ   | ARG | X | 517 | 44.545 | 18.980 | 44.668 | 0.00 | 0.00 |
| ATOM | 7883 | NH1  | ARG | X | 517 | 45.326 | 19.960 | 45.071 | 0.00 | 0.00 |
| ATOM | 7884 | HH11 | ARG | X | 517 | 45.429 | 20.227 | 46.039 | 0.00 | 0.00 |
| ATOM | 7885 | HH12 | ARG | X | 517 | 45.949 | 20.360 | 44.384 | 0.00 | 0.00 |
| ATOM | 7886 | NH2  | ARG | X | 517 | 44.606 | 18.573 | 43.428 | 0.00 | 0.00 |
| ATOM | 7887 | HH21 | ARG | X | 517 | 44.066 | 17.806 | 43.054 | 0.00 | 0.00 |
| ATOM | 7888 | HH22 | ARG | X | 517 | 45.044 | 19.184 | 42.755 | 0.00 | 0.00 |
| ATOM | 7889 | C    | ARG | X | 517 | 38.601 | 19.757 | 48.996 | 0.00 | 0.00 |
| ATOM | 7890 | O    | ARG | X | 517 | 37.571 | 20.308 | 48.661 | 0.00 | 0.00 |
| ATOM | 7891 | N    | ARG | X | 518 | 39.001 | 19.651 | 50.268 | 0.00 | 0.00 |
| ATOM | 7892 | H    | ARG | X | 518 | 39.762 | 19.019 | 50.470 | 0.00 | 0.00 |
| ATOM | 7893 | CA   | ARG | X | 518 | 38.164 | 20.232 | 51.436 | 0.00 | 0.00 |
| ATOM | 7894 | HA   | ARG | X | 518 | 37.557 | 21.077 | 51.114 | 0.00 | 0.00 |
| ATOM | 7895 | CB   | ARG | X | 518 | 37.140 | 19.262 | 51.911 | 0.00 | 0.00 |
| ATOM | 7896 | HB2  | ARG | X | 518 | 36.410 | 19.926 | 52.372 | 0.00 | 0.00 |
| ATOM | 7897 | HB3  | ARG | X | 518 | 36.679 | 18.920 | 50.985 | 0.00 | 0.00 |



|      |      |      |     |   |     |        |        |        |      |      |
|------|------|------|-----|---|-----|--------|--------|--------|------|------|
| ATOM | 7898 | CG   | ARG | X | 518 | 37.733 | 18.214 | 52.905 | 0.00 | 0.00 |
| ATOM | 7899 | HG2  | ARG | X | 518 | 38.585 | 17.746 | 52.412 | 0.00 | 0.00 |
| ATOM | 7900 | HG3  | ARG | X | 518 | 38.075 | 18.714 | 53.811 | 0.00 | 0.00 |
| ATOM | 7901 | CD   | ARG | X | 518 | 36.747 | 17.161 | 53.283 | 0.00 | 0.00 |
| ATOM | 7902 | HD2  | ARG | X | 518 | 36.543 | 16.518 | 52.428 | 0.00 | 0.00 |
| ATOM | 7903 | HD3  | ARG | X | 518 | 37.201 | 16.568 | 54.077 | 0.00 | 0.00 |
| ATOM | 7904 | NE   | ARG | X | 518 | 35.459 | 17.717 | 53.795 | 0.00 | 0.00 |
| ATOM | 7905 | HE   | ARG | X | 518 | 35.554 | 18.180 | 54.688 | 0.00 | 0.00 |
| ATOM | 7906 | CZ   | ARG | X | 518 | 34.238 | 17.424 | 53.455 | 0.00 | 0.00 |
| ATOM | 7907 | NH1  | ARG | X | 518 | 33.879 | 16.750 | 52.408 | 0.00 | 0.00 |
| ATOM | 7908 | HH11 | ARG | X | 518 | 34.531 | 16.276 | 51.799 | 0.00 | 0.00 |
| ATOM | 7909 | HH12 | ARG | X | 518 | 32.885 | 16.627 | 52.272 | 0.00 | 0.00 |
| ATOM | 7910 | NH2  | ARG | X | 518 | 33.278 | 17.792 | 54.229 | 0.00 | 0.00 |
| ATOM | 7911 | HH21 | ARG | X | 518 | 33.509 | 18.121 | 55.155 | 0.00 | 0.00 |
| ATOM | 7912 | HH22 | ARG | X | 518 | 32.335 | 17.556 | 53.957 | 0.00 | 0.00 |
| ATOM | 7913 | C    | ARG | X | 518 | 39.065 | 20.758 | 52.619 | 0.00 | 0.00 |
| ATOM | 7914 | O    | ARG | X | 518 | 40.288 | 20.528 | 52.699 | 0.00 | 0.00 |
| ATOM | 7915 | N    | GLY | X | 519 | 38.445 | 21.470 | 53.491 | 0.00 | 0.00 |
| ATOM | 7916 | H    | GLY | X | 519 | 37.460 | 21.630 | 53.338 | 0.00 | 0.00 |
| ATOM | 7917 | CA   | GLY | X | 519 | 39.158 | 22.198 | 54.584 | 0.00 | 0.00 |
| ATOM | 7918 | HA2  | GLY | X | 519 | 38.486 | 22.571 | 55.357 | 0.00 | 0.00 |
| ATOM | 7919 | HA3  | GLY | X | 519 | 39.784 | 21.594 | 55.241 | 0.00 | 0.00 |
| ATOM | 7920 | C    | GLY | X | 519 | 39.974 | 23.371 | 54.025 | 0.00 | 0.00 |
| ATOM | 7921 | O    | GLY | X | 519 | 41.187 | 23.410 | 54.319 | 0.00 | 0.00 |
| ATOM | 7922 | N    | LEU | X | 520 | 39.447 | 24.150 | 53.096 | 0.00 | 0.00 |
| ATOM | 7923 | H    | LEU | X | 520 | 38.522 | 23.926 | 52.758 | 0.00 | 0.00 |
| ATOM | 7924 | CA   | LEU | X | 520 | 40.199 | 25.188 | 52.353 | 0.00 | 0.00 |
| ATOM | 7925 | HA   | LEU | X | 520 | 40.859 | 24.739 | 51.611 | 0.00 | 0.00 |
| ATOM | 7926 | CB   | LEU | X | 520 | 39.210 | 26.044 | 51.601 | 0.00 | 0.00 |
| ATOM | 7927 | HB2  | LEU | X | 520 | 38.466 | 25.485 | 51.034 | 0.00 | 0.00 |
| ATOM | 7928 | HB3  | LEU | X | 520 | 38.525 | 26.485 | 52.325 | 0.00 | 0.00 |
| ATOM | 7929 | CG   | LEU | X | 520 | 39.773 | 27.187 | 50.680 | 0.00 | 0.00 |
| ATOM | 7930 | HG   | LEU | X | 520 | 40.400 | 27.795 | 51.331 | 0.00 | 0.00 |
| ATOM | 7931 | CD1  | LEU | X | 520 | 40.637 | 26.843 | 49.456 | 0.00 | 0.00 |
| ATOM | 7932 | HD11 | LEU | X | 520 | 41.644 | 26.558 | 49.761 | 0.00 | 0.00 |
| ATOM | 7933 | HD12 | LEU | X | 520 | 40.867 | 27.697 | 48.818 | 0.00 | 0.00 |
| ATOM | 7934 | HD13 | LEU | X | 520 | 40.116 | 26.043 | 48.931 | 0.00 | 0.00 |
| ATOM | 7935 | CD2  | LEU | X | 520 | 38.590 | 27.933 | 50.075 | 0.00 | 0.00 |
| ATOM | 7936 | HD21 | LEU | X | 520 | 37.884 | 28.095 | 50.890 | 0.00 | 0.00 |
| ATOM | 7937 | HD22 | LEU | X | 520 | 38.869 | 28.853 | 49.561 | 0.00 | 0.00 |
| ATOM | 7938 | HD23 | LEU | X | 520 | 38.031 | 27.236 | 49.451 | 0.00 | 0.00 |
| ATOM | 7939 | C    | LEU | X | 520 | 41.082 | 25.970 | 53.332 | 0.00 | 0.00 |
| ATOM | 7940 | O    | LEU | X | 520 | 40.554 | 26.820 | 54.048 | 0.00 | 0.00 |
| ATOM | 7941 | N    | ARG | X | 521 | 42.403 | 25.682 | 53.291 | 0.00 | 0.00 |
| ATOM | 7942 | H    | ARG | X | 521 | 42.751 | 24.962 | 52.674 | 0.00 | 0.00 |
| ATOM | 7943 | CA   | ARG | X | 521 | 43.493 | 26.364 | 53.966 | 0.00 | 0.00 |
| ATOM | 7944 | HA   | ARG | X | 521 | 44.376 | 25.774 | 53.718 | 0.00 | 0.00 |
| ATOM | 7945 | CB   | ARG | X | 521 | 43.517 | 27.780 | 53.260 | 0.00 | 0.00 |
| ATOM | 7946 | HB2  | ARG | X | 521 | 43.422 | 27.657 | 52.181 | 0.00 | 0.00 |
| ATOM | 7947 | HB3  | ARG | X | 521 | 42.710 | 28.392 | 53.662 | 0.00 | 0.00 |
| ATOM | 7948 | CG   | ARG | X | 521 | 44.780 | 28.699 | 53.527 | 0.00 | 0.00 |
| ATOM | 7949 | HG2  | ARG | X | 521 | 44.624 | 29.654 | 53.025 | 0.00 | 0.00 |
| ATOM | 7950 | HG3  | ARG | X | 521 | 44.866 | 28.970 | 54.579 | 0.00 | 0.00 |
| ATOM | 7951 | CD   | ARG | X | 521 | 46.025 | 27.908 | 53.024 | 0.00 | 0.00 |
| ATOM | 7952 | HD2  | ARG | X | 521 | 46.104 | 26.984 | 53.596 | 0.00 | 0.00 |
| ATOM | 7953 | HD3  | ARG | X | 521 | 45.827 | 27.729 | 51.967 | 0.00 | 0.00 |
| ATOM | 7954 | NE   | ARG | X | 521 | 47.218 | 28.750 | 53.130 | 0.00 | 0.00 |
| ATOM | 7955 | HE   | ARG | X | 521 | 47.250 | 29.394 | 53.907 | 0.00 | 0.00 |
| ATOM | 7956 | CZ   | ARG | X | 521 | 48.265 | 28.615 | 52.287 | 0.00 | 0.00 |
| ATOM | 7957 | NH1  | ARG | X | 521 | 48.221 | 27.743 | 51.295 | 0.00 | 0.00 |
| ATOM | 7958 | HH11 | ARG | X | 521 | 47.402 | 27.264 | 50.947 | 0.00 | 0.00 |
| ATOM | 7959 | HH12 | ARG | X | 521 | 49.096 | 27.733 | 50.791 | 0.00 | 0.00 |
| ATOM | 7960 | NH2  | ARG | X | 521 | 49.338 | 29.321 | 52.564 | 0.00 | 0.00 |
| ATOM | 7961 | HH21 | ARG | X | 521 | 49.310 | 29.980 | 53.329 | 0.00 | 0.00 |
| ATOM | 7962 | HH22 | ARG | X | 521 | 50.218 | 29.205 | 52.082 | 0.00 | 0.00 |
| ATOM | 7963 | C    | ARG | X | 521 | 43.359 | 26.461 | 55.531 | 0.00 | 0.00 |
| ATOM | 7964 | O    | ARG | X | 521 | 44.267 | 27.003 | 56.183 | 0.00 | 0.00 |

|      |      |      |     |   |     |        |        |        |      |      |
|------|------|------|-----|---|-----|--------|--------|--------|------|------|
| ATOM | 7965 | N    | ALA | X | 522 | 42.349 | 25.759 | 56.052 | 0.00 | 0.00 |
| ATOM | 7966 | H    | ALA | X | 522 | 41.617 | 25.660 | 55.364 | 0.00 | 0.00 |
| ATOM | 7967 | CA   | ALA | X | 522 | 41.885 | 25.787 | 57.434 | 0.00 | 0.00 |
| ATOM | 7968 | HA   | ALA | X | 522 | 41.487 | 26.778 | 57.652 | 0.00 | 0.00 |
| ATOM | 7969 | CB   | ALA | X | 522 | 40.759 | 24.767 | 57.473 | 0.00 | 0.00 |
| ATOM | 7970 | HB1  | ALA | X | 522 | 41.290 | 23.816 | 57.508 | 0.00 | 0.00 |
| ATOM | 7971 | HB2  | ALA | X | 522 | 40.199 | 24.761 | 56.538 | 0.00 | 0.00 |
| ATOM | 7972 | HB3  | ALA | X | 522 | 40.140 | 24.909 | 58.359 | 0.00 | 0.00 |
| ATOM | 7973 | C    | ALA | X | 522 | 42.979 | 25.452 | 58.553 | 0.00 | 0.00 |
| ATOM | 7974 | O    | ALA | X | 522 | 43.045 | 26.218 | 59.537 | 0.00 | 0.00 |
| ATOM | 7975 | N    | GLN | X | 523 | 43.829 | 24.417 | 58.356 | 0.00 | 0.00 |
| ATOM | 7976 | H    | GLN | X | 523 | 43.888 | 23.979 | 57.448 | 0.00 | 0.00 |
| ATOM | 7977 | CA   | GLN | X | 523 | 44.903 | 24.055 | 59.307 | 0.00 | 0.00 |
| ATOM | 7978 | HA   | GLN | X | 523 | 44.375 | 23.981 | 60.258 | 0.00 | 0.00 |
| ATOM | 7979 | CB   | GLN | X | 523 | 45.560 | 22.672 | 58.984 | 0.00 | 0.00 |
| ATOM | 7980 | HB2  | GLN | X | 523 | 46.319 | 22.737 | 58.204 | 0.00 | 0.00 |
| ATOM | 7981 | HB3  | GLN | X | 523 | 46.084 | 22.414 | 59.904 | 0.00 | 0.00 |
| ATOM | 7982 | CG   | GLN | X | 523 | 44.618 | 21.400 | 58.704 | 0.00 | 0.00 |
| ATOM | 7983 | HG2  | GLN | X | 523 | 44.329 | 21.482 | 57.657 | 0.00 | 0.00 |
| ATOM | 7984 | HG3  | GLN | X | 523 | 45.189 | 20.497 | 58.919 | 0.00 | 0.00 |
| ATOM | 7985 | CD   | GLN | X | 523 | 43.453 | 21.393 | 59.660 | 0.00 | 0.00 |
| ATOM | 7986 | OE1  | GLN | X | 523 | 42.289 | 21.412 | 59.230 | 0.00 | 0.00 |
| ATOM | 7987 | NE2  | GLN | X | 523 | 43.677 | 21.329 | 60.918 | 0.00 | 0.00 |
| ATOM | 7988 | HE21 | GLN | X | 523 | 42.919 | 21.633 | 61.512 | 0.00 | 0.00 |
| ATOM | 7989 | HE22 | GLN | X | 523 | 44.567 | 21.335 | 61.396 | 0.00 | 0.00 |
| ATOM | 7990 | C    | GLN | X | 523 | 45.941 | 25.195 | 59.492 | 0.00 | 0.00 |
| ATOM | 7991 | O    | GLN | X | 523 | 46.239 | 25.517 | 60.640 | 0.00 | 0.00 |
| ATOM | 7992 | N    | ALA | X | 524 | 46.259 | 25.912 | 58.395 | 0.00 | 0.00 |
| ATOM | 7993 | H    | ALA | X | 524 | 45.828 | 25.728 | 57.500 | 0.00 | 0.00 |
| ATOM | 7994 | CA   | ALA | X | 524 | 47.146 | 27.055 | 58.392 | 0.00 | 0.00 |
| ATOM | 7995 | HA   | ALA | X | 524 | 48.044 | 26.818 | 58.963 | 0.00 | 0.00 |
| ATOM | 7996 | CB   | ALA | X | 524 | 47.535 | 27.369 | 56.904 | 0.00 | 0.00 |
| ATOM | 7997 | HB1  | ALA | X | 524 | 47.108 | 28.338 | 56.646 | 0.00 | 0.00 |
| ATOM | 7998 | HB2  | ALA | X | 524 | 46.976 | 26.695 | 56.254 | 0.00 | 0.00 |
| ATOM | 7999 | HB3  | ALA | X | 524 | 48.615 | 27.240 | 56.831 | 0.00 | 0.00 |
| ATOM | 8000 | C    | ALA | X | 524 | 46.512 | 28.311 | 59.109 | 0.00 | 0.00 |
| ATOM | 8001 | O    | ALA | X | 524 | 47.155 | 28.953 | 59.921 | 0.00 | 0.00 |
| ATOM | 8002 | N    | CYX | X | 525 | 45.308 | 28.687 | 58.744 | 0.00 | 0.00 |
| ATOM | 8003 | H    | CYX | X | 525 | 44.939 | 28.142 | 57.978 | 0.00 | 0.00 |
| ATOM | 8004 | CA   | CYX | X | 525 | 44.665 | 29.906 | 59.211 | 0.00 | 0.00 |
| ATOM | 8005 | HA   | CYX | X | 525 | 45.377 | 30.675 | 58.912 | 0.00 | 0.00 |
| ATOM | 8006 | CB   | CYX | X | 525 | 43.347 | 30.058 | 58.431 | 0.00 | 0.00 |
| ATOM | 8007 | HB2  | CYX | X | 525 | 42.688 | 29.259 | 58.771 | 0.00 | 0.00 |
| ATOM | 8008 | HB3  | CYX | X | 525 | 42.914 | 31.020 | 58.706 | 0.00 | 0.00 |
| ATOM | 8009 | SG   | CYX | X | 525 | 43.333 | 30.080 | 56.635 | 0.00 | 0.00 |
| ATOM | 8010 | C    | CYX | X | 525 | 44.430 | 29.903 | 60.740 | 0.00 | 0.00 |
| ATOM | 8011 | O    | CYX | X | 525 | 44.164 | 31.010 | 61.223 | 0.00 | 0.00 |
| ATOM | 8012 | N    | ALA | X | 526 | 44.362 | 28.828 | 61.489 | 0.00 | 0.00 |
| ATOM | 8013 | H    | ALA | X | 526 | 44.541 | 27.995 | 60.946 | 0.00 | 0.00 |
| ATOM | 8014 | CA   | ALA | X | 526 | 44.374 | 28.786 | 62.971 | 0.00 | 0.00 |
| ATOM | 8015 | HA   | ALA | X | 526 | 43.433 | 29.203 | 63.330 | 0.00 | 0.00 |
| ATOM | 8016 | CB   | ALA | X | 526 | 44.424 | 27.313 | 63.499 | 0.00 | 0.00 |
| ATOM | 8017 | HB1  | ALA | X | 526 | 45.275 | 26.829 | 63.019 | 0.00 | 0.00 |
| ATOM | 8018 | HB2  | ALA | X | 526 | 43.464 | 26.859 | 63.254 | 0.00 | 0.00 |
| ATOM | 8019 | HB3  | ALA | X | 526 | 44.542 | 27.425 | 64.577 | 0.00 | 0.00 |
| ATOM | 8020 | C    | ALA | X | 526 | 45.653 | 29.531 | 63.497 | 0.00 | 0.00 |
| ATOM | 8021 | O    | ALA | X | 526 | 45.561 | 30.082 | 64.627 | 0.00 | 0.00 |
| ATOM | 8022 | N    | PHE | X | 527 | 46.804 | 29.596 | 62.786 | 0.00 | 0.00 |
| ATOM | 8023 | H    | PHE | X | 527 | 46.908 | 28.909 | 62.053 | 0.00 | 0.00 |
| ATOM | 8024 | CA   | PHE | X | 527 | 48.008 | 30.269 | 63.292 | 0.00 | 0.00 |
| ATOM | 8025 | HA   | PHE | X | 527 | 48.040 | 30.015 | 64.351 | 0.00 | 0.00 |
| ATOM | 8026 | CB   | PHE | X | 527 | 49.291 | 29.797 | 62.511 | 0.00 | 0.00 |
| ATOM | 8027 | HB2  | PHE | X | 527 | 49.303 | 28.720 | 62.683 | 0.00 | 0.00 |
| ATOM | 8028 | HB3  | PHE | X | 527 | 49.081 | 30.112 | 61.489 | 0.00 | 0.00 |
| ATOM | 8029 | CG   | PHE | X | 527 | 50.624 | 30.430 | 62.959 | 0.00 | 0.00 |
| ATOM | 8030 | CD1  | PHE | X | 527 | 51.052 | 30.142 | 64.247 | 0.00 | 0.00 |
| ATOM | 8031 | HD1  | PHE | X | 527 | 50.476 | 29.480 | 64.877 | 0.00 | 0.00 |

|      |      |      |     |   |     |        |        |        |      |      |
|------|------|------|-----|---|-----|--------|--------|--------|------|------|
| ATOM | 8032 | CE1  | PHE | X | 527 | 52.358 | 30.563 | 64.639 | 0.00 | 0.00 |
| ATOM | 8033 | HE1  | PHE | X | 527 | 52.814 | 30.151 | 65.527 | 0.00 | 0.00 |
| ATOM | 8034 | CZ   | PHE | X | 527 | 53.070 | 31.447 | 63.856 | 0.00 | 0.00 |
| ATOM | 8035 | HZ   | PHE | X | 527 | 53.981 | 31.913 | 64.203 | 0.00 | 0.00 |
| ATOM | 8036 | CE2  | PHE | X | 527 | 52.583 | 31.821 | 62.614 | 0.00 | 0.00 |
| ATOM | 8037 | HE2  | PHE | X | 527 | 53.214 | 32.477 | 62.032 | 0.00 | 0.00 |
| ATOM | 8038 | CD2  | PHE | X | 527 | 51.385 | 31.238 | 62.178 | 0.00 | 0.00 |
| ATOM | 8039 | HD2  | PHE | X | 527 | 51.004 | 31.506 | 61.204 | 0.00 | 0.00 |
| ATOM | 8040 | C    | PHE | X | 527 | 47.770 | 31.796 | 63.266 | 0.00 | 0.00 |
| ATOM | 8041 | O    | PHE | X | 527 | 47.929 | 32.455 | 64.282 | 0.00 | 0.00 |
| ATOM | 8042 | N    | TRP | X | 528 | 47.321 | 32.292 | 62.096 | 0.00 | 0.00 |
| ATOM | 8043 | H    | TRP | X | 528 | 47.162 | 31.702 | 61.292 | 0.00 | 0.00 |
| ATOM | 8044 | CA   | TRP | X | 528 | 47.346 | 33.756 | 61.847 | 0.00 | 0.00 |
| ATOM | 8045 | HA   | TRP | X | 528 | 48.264 | 34.127 | 62.303 | 0.00 | 0.00 |
| ATOM | 8046 | CB   | TRP | X | 528 | 47.305 | 34.116 | 60.339 | 0.00 | 0.00 |
| ATOM | 8047 | HB2  | TRP | X | 528 | 46.460 | 33.586 | 59.900 | 0.00 | 0.00 |
| ATOM | 8048 | HB3  | TRP | X | 528 | 47.105 | 35.178 | 60.199 | 0.00 | 0.00 |
| ATOM | 8049 | CG   | TRP | X | 528 | 48.580 | 33.652 | 59.678 | 0.00 | 0.00 |
| ATOM | 8050 | CD1  | TRP | X | 528 | 48.734 | 32.624 | 58.828 | 0.00 | 0.00 |
| ATOM | 8051 | HD1  | TRP | X | 528 | 47.934 | 31.966 | 58.522 | 0.00 | 0.00 |
| ATOM | 8052 | NE1  | TRP | X | 528 | 50.012 | 32.378 | 58.496 | 0.00 | 0.00 |
| ATOM | 8053 | HE1  | TRP | X | 528 | 50.286 | 31.542 | 57.998 | 0.00 | 0.00 |
| ATOM | 8054 | CE2  | TRP | X | 528 | 50.834 | 33.292 | 59.105 | 0.00 | 0.00 |
| ATOM | 8055 | CZ2  | TRP | X | 528 | 52.223 | 33.497 | 59.223 | 0.00 | 0.00 |
| ATOM | 8056 | HZ2  | TRP | X | 528 | 52.988 | 32.791 | 58.934 | 0.00 | 0.00 |
| ATOM | 8057 | CH2  | TRP | X | 528 | 52.658 | 34.721 | 59.738 | 0.00 | 0.00 |
| ATOM | 8058 | HH2  | TRP | X | 528 | 53.723 | 34.888 | 59.799 | 0.00 | 0.00 |
| ATOM | 8059 | CZ3  | TRP | X | 528 | 51.781 | 35.663 | 60.244 | 0.00 | 0.00 |
| ATOM | 8060 | HZ3  | TRP | X | 528 | 52.189 | 36.592 | 60.614 | 0.00 | 0.00 |
| ATOM | 8061 | CE3  | TRP | X | 528 | 50.399 | 35.419 | 60.321 | 0.00 | 0.00 |
| ATOM | 8062 | HE3  | TRP | X | 528 | 49.740 | 36.112 | 60.822 | 0.00 | 0.00 |
| ATOM | 8063 | CD2  | TRP | X | 528 | 49.865 | 34.218 | 59.757 | 0.00 | 0.00 |
| ATOM | 8064 | C    | TRP | X | 528 | 46.239 | 34.423 | 62.714 | 0.00 | 0.00 |
| ATOM | 8065 | O    | TRP | X | 528 | 46.441 | 35.464 | 63.199 | 0.00 | 0.00 |
| ATOM | 8066 | N    | ASN | X | 529 | 45.071 | 33.762 | 62.859 | 0.00 | 0.00 |
| ATOM | 8067 | H    | ASN | X | 529 | 45.015 | 32.882 | 62.367 | 0.00 | 0.00 |
| ATOM | 8068 | CA   | ASN | X | 529 | 43.928 | 34.269 | 63.708 | 0.00 | 0.00 |
| ATOM | 8069 | HA   | ASN | X | 529 | 43.800 | 35.311 | 63.415 | 0.00 | 0.00 |
| ATOM | 8070 | CB   | ASN | X | 529 | 42.642 | 33.562 | 63.223 | 0.00 | 0.00 |
| ATOM | 8071 | HB2  | ASN | X | 529 | 42.552 | 33.809 | 62.165 | 0.00 | 0.00 |
| ATOM | 8072 | HB3  | ASN | X | 529 | 42.664 | 32.473 | 63.255 | 0.00 | 0.00 |
| ATOM | 8073 | CG   | ASN | X | 529 | 41.405 | 34.175 | 63.811 | 0.00 | 0.00 |
| ATOM | 8074 | OD1  | ASN | X | 529 | 40.688 | 33.792 | 64.729 | 0.00 | 0.00 |
| ATOM | 8075 | ND2  | ASN | X | 529 | 40.890 | 35.223 | 63.180 | 0.00 | 0.00 |
| ATOM | 8076 | HD21 | ASN | X | 529 | 40.206 | 35.780 | 63.671 | 0.00 | 0.00 |
| ATOM | 8077 | HD22 | ASN | X | 529 | 41.307 | 35.682 | 62.382 | 0.00 | 0.00 |
| ATOM | 8078 | C    | ASN | X | 529 | 44.100 | 34.097 | 65.229 | 0.00 | 0.00 |
| ATOM | 8079 | O    | ASN | X | 529 | 43.712 | 34.989 | 65.990 | 0.00 | 0.00 |
| ATOM | 8080 | N    | ARG | X | 530 | 44.604 | 32.926 | 65.648 | 0.00 | 0.00 |
| ATOM | 8081 | H    | ARG | X | 530 | 44.828 | 32.148 | 65.044 | 0.00 | 0.00 |
| ATOM | 8082 | CA   | ARG | X | 530 | 44.451 | 32.571 | 67.103 | 0.00 | 0.00 |
| ATOM | 8083 | HA   | ARG | X | 530 | 43.865 | 33.349 | 67.591 | 0.00 | 0.00 |
| ATOM | 8084 | CB   | ARG | X | 530 | 43.595 | 31.269 | 67.344 | 0.00 | 0.00 |
| ATOM | 8085 | HB2  | ARG | X | 530 | 43.989 | 30.386 | 66.841 | 0.00 | 0.00 |
| ATOM | 8086 | HB3  | ARG | X | 530 | 43.626 | 31.006 | 68.402 | 0.00 | 0.00 |
| ATOM | 8087 | CG   | ARG | X | 530 | 42.158 | 31.351 | 66.792 | 0.00 | 0.00 |
| ATOM | 8088 | HG2  | ARG | X | 530 | 42.192 | 31.636 | 65.741 | 0.00 | 0.00 |
| ATOM | 8089 | HG3  | ARG | X | 530 | 41.789 | 30.326 | 66.829 | 0.00 | 0.00 |
| ATOM | 8090 | CD   | ARG | X | 530 | 41.328 | 32.326 | 67.590 | 0.00 | 0.00 |
| ATOM | 8091 | HD2  | ARG | X | 530 | 41.647 | 33.353 | 67.416 | 0.00 | 0.00 |
| ATOM | 8092 | HD3  | ARG | X | 530 | 40.281 | 32.276 | 67.291 | 0.00 | 0.00 |
| ATOM | 8093 | NE   | ARG | X | 530 | 41.448 | 31.953 | 69.011 | 0.00 | 0.00 |
| ATOM | 8094 | HE   | ARG | X | 530 | 41.628 | 30.990 | 69.255 | 0.00 | 0.00 |
| ATOM | 8095 | CZ   | ARG | X | 530 | 41.517 | 32.625 | 70.099 | 0.00 | 0.00 |
| ATOM | 8096 | NH1  | ARG | X | 530 | 41.415 | 33.952 | 70.078 | 0.00 | 0.00 |
| ATOM | 8097 | HH11 | ARG | X | 530 | 41.361 | 34.514 | 69.240 | 0.00 | 0.00 |
| ATOM | 8098 | HH12 | ARG | X | 530 | 41.359 | 34.527 | 70.906 | 0.00 | 0.00 |

|      |      |      |     |   |     |        |        |        |      |      |
|------|------|------|-----|---|-----|--------|--------|--------|------|------|
| ATOM | 8099 | NH2  | ARG | X | 530 | 41.512 | 31.963 | 71.228 | 0.00 | 0.00 |
| ATOM | 8100 | HH21 | ARG | X | 530 | 41.495 | 30.953 | 71.230 | 0.00 | 0.00 |
| ATOM | 8101 | HH22 | ARG | X | 530 | 41.303 | 32.392 | 72.118 | 0.00 | 0.00 |
| ATOM | 8102 | C    | ARG | X | 530 | 45.794 | 32.594 | 67.853 | 0.00 | 0.00 |
| ATOM | 8103 | O    | ARG | X | 530 | 45.754 | 33.016 | 68.984 | 0.00 | 0.00 |
| ATOM | 8104 | N    | PHE | X | 531 | 46.915 | 32.106 | 67.282 | 0.00 | 0.00 |
| ATOM | 8105 | H    | PHE | X | 531 | 46.942 | 32.032 | 66.275 | 0.00 | 0.00 |
| ATOM | 8106 | CA   | PHE | X | 531 | 48.231 | 32.080 | 67.922 | 0.00 | 0.00 |
| ATOM | 8107 | HA   | PHE | X | 531 | 48.151 | 31.953 | 69.001 | 0.00 | 0.00 |
| ATOM | 8108 | CB   | PHE | X | 531 | 48.973 | 30.795 | 67.393 | 0.00 | 0.00 |
| ATOM | 8109 | HB2  | PHE | X | 531 | 48.295 | 29.974 | 67.626 | 0.00 | 0.00 |
| ATOM | 8110 | HB3  | PHE | X | 531 | 49.069 | 30.800 | 66.307 | 0.00 | 0.00 |
| ATOM | 8111 | CG   | PHE | X | 531 | 50.348 | 30.636 | 67.997 | 0.00 | 0.00 |
| ATOM | 8112 | CD1  | PHE | X | 531 | 51.352 | 31.367 | 67.433 | 0.00 | 0.00 |
| ATOM | 8113 | HD1  | PHE | X | 531 | 51.181 | 31.990 | 66.568 | 0.00 | 0.00 |
| ATOM | 8114 | CE1  | PHE | X | 531 | 52.641 | 31.416 | 67.985 | 0.00 | 0.00 |
| ATOM | 8115 | HE1  | PHE | X | 531 | 53.458 | 31.918 | 67.490 | 0.00 | 0.00 |
| ATOM | 8116 | CZ   | PHE | X | 531 | 52.970 | 30.602 | 69.084 | 0.00 | 0.00 |
| ATOM | 8117 | HZ   | PHE | X | 531 | 53.997 | 30.715 | 69.397 | 0.00 | 0.00 |
| ATOM | 8118 | CE2  | PHE | X | 531 | 51.920 | 29.915 | 69.747 | 0.00 | 0.00 |
| ATOM | 8119 | HE2  | PHE | X | 531 | 52.155 | 29.195 | 70.518 | 0.00 | 0.00 |
| ATOM | 8120 | CD2  | PHE | X | 531 | 50.594 | 29.845 | 69.159 | 0.00 | 0.00 |
| ATOM | 8121 | HD2  | PHE | X | 531 | 49.823 | 29.238 | 69.610 | 0.00 | 0.00 |
| ATOM | 8122 | C    | PHE | X | 531 | 48.958 | 33.392 | 67.641 | 0.00 | 0.00 |
| ATOM | 8123 | O    | PHE | X | 531 | 49.291 | 34.000 | 68.669 | 0.00 | 0.00 |
| ATOM | 8124 | N    | LEU | X | 532 | 49.211 | 33.797 | 66.377 | 0.00 | 0.00 |
| ATOM | 8125 | H    | LEU | X | 532 | 48.941 | 33.166 | 65.636 | 0.00 | 0.00 |
| ATOM | 8126 | CA   | LEU | X | 532 | 50.010 | 34.987 | 65.963 | 0.00 | 0.00 |
| ATOM | 8127 | HA   | LEU | X | 532 | 51.037 | 34.843 | 66.299 | 0.00 | 0.00 |
| ATOM | 8128 | CB   | LEU | X | 532 | 50.084 | 35.038 | 64.419 | 0.00 | 0.00 |
| ATOM | 8129 | HB2  | LEU | X | 532 | 50.158 | 34.018 | 64.041 | 0.00 | 0.00 |
| ATOM | 8130 | HB3  | LEU | X | 532 | 49.111 | 35.408 | 64.096 | 0.00 | 0.00 |
| ATOM | 8131 | CG   | LEU | X | 532 | 51.279 | 35.758 | 63.738 | 0.00 | 0.00 |
| ATOM | 8132 | HG   | LEU | X | 532 | 51.354 | 35.387 | 62.716 | 0.00 | 0.00 |
| ATOM | 8133 | CD1  | LEU | X | 532 | 50.975 | 37.276 | 63.541 | 0.00 | 0.00 |
| ATOM | 8134 | HD11 | LEU | X | 532 | 51.713 | 37.697 | 62.858 | 0.00 | 0.00 |
| ATOM | 8135 | HD12 | LEU | X | 532 | 50.987 | 37.785 | 64.505 | 0.00 | 0.00 |
| ATOM | 8136 | HD13 | LEU | X | 532 | 50.000 | 37.334 | 63.055 | 0.00 | 0.00 |
| ATOM | 8137 | CD2  | LEU | X | 532 | 52.695 | 35.719 | 64.385 | 0.00 | 0.00 |
| ATOM | 8138 | HD21 | LEU | X | 532 | 53.469 | 36.085 | 63.710 | 0.00 | 0.00 |
| ATOM | 8139 | HD22 | LEU | X | 532 | 52.644 | 36.219 | 65.352 | 0.00 | 0.00 |
| ATOM | 8140 | HD23 | LEU | X | 532 | 52.991 | 34.708 | 64.667 | 0.00 | 0.00 |
| ATOM | 8141 | C    | LEU | X | 532 | 49.550 | 36.331 | 66.649 | 0.00 | 0.00 |
| ATOM | 8142 | O    | LEU | X | 532 | 50.453 | 37.034 | 67.064 | 0.00 | 0.00 |
| ATOM | 8143 | N    | PRO | X | 533 | 48.239 | 36.605 | 66.811 | 0.00 | 0.00 |
| ATOM | 8144 | CD   | PRO | X | 533 | 47.125 | 36.047 | 66.245 | 0.00 | 0.00 |
| ATOM | 8145 | HD2  | PRO | X | 533 | 46.525 | 35.543 | 67.002 | 0.00 | 0.00 |
| ATOM | 8146 | HD3  | PRO | X | 533 | 47.176 | 35.525 | 65.290 | 0.00 | 0.00 |
| ATOM | 8147 | CG   | PRO | X | 533 | 46.303 | 37.269 | 65.961 | 0.00 | 0.00 |
| ATOM | 8148 | HG2  | PRO | X | 533 | 45.258 | 37.054 | 65.736 | 0.00 | 0.00 |
| ATOM | 8149 | HG3  | PRO | X | 533 | 46.717 | 37.780 | 65.092 | 0.00 | 0.00 |
| ATOM | 8150 | CB   | PRO | X | 533 | 46.314 | 38.080 | 67.220 | 0.00 | 0.00 |
| ATOM | 8151 | HB2  | PRO | X | 533 | 45.622 | 37.705 | 67.974 | 0.00 | 0.00 |
| ATOM | 8152 | HB3  | PRO | X | 533 | 46.091 | 39.091 | 66.879 | 0.00 | 0.00 |
| ATOM | 8153 | CA   | PRO | X | 533 | 47.816 | 37.859 | 67.518 | 0.00 | 0.00 |
| ATOM | 8154 | HA   | PRO | X | 533 | 48.377 | 38.650 | 67.021 | 0.00 | 0.00 |
| ATOM | 8155 | C    | PRO | X | 533 | 48.181 | 37.781 | 69.038 | 0.00 | 0.00 |
| ATOM | 8156 | O    | PRO | X | 533 | 48.606 | 38.838 | 69.552 | 0.00 | 0.00 |
| ATOM | 8157 | N    | LYS | X | 534 | 48.301 | 36.580 | 69.679 | 0.00 | 0.00 |
| ATOM | 8158 | H    | LYS | X | 534 | 48.006 | 35.784 | 69.132 | 0.00 | 0.00 |
| ATOM | 8159 | CA   | LYS | X | 534 | 48.752 | 36.364 | 70.960 | 0.00 | 0.00 |
| ATOM | 8160 | HA   | LYS | X | 534 | 48.472 | 37.205 | 71.595 | 0.00 | 0.00 |
| ATOM | 8161 | CB   | LYS | X | 534 | 47.987 | 35.167 | 71.494 | 0.00 | 0.00 |
| ATOM | 8162 | HB2  | LYS | X | 534 | 46.913 | 35.353 | 71.466 | 0.00 | 0.00 |
| ATOM | 8163 | HB3  | LYS | X | 534 | 48.165 | 34.351 | 70.794 | 0.00 | 0.00 |
| ATOM | 8164 | CG   | LYS | X | 534 | 48.301 | 34.743 | 72.913 | 0.00 | 0.00 |
| ATOM | 8165 | HG2  | LYS | X | 534 | 49.342 | 34.438 | 73.012 | 0.00 | 0.00 |

|      |      |      |     |   |     |        |        |        |      |      |
|------|------|------|-----|---|-----|--------|--------|--------|------|------|
| ATOM | 8166 | HG3  | LYS | X | 534 | 48.084 | 35.569 | 73.590 | 0.00 | 0.00 |
| ATOM | 8167 | CD   | LYS | X | 534 | 47.419 | 33.504 | 73.355 | 0.00 | 0.00 |
| ATOM | 8168 | HD2  | LYS | X | 534 | 47.693 | 32.650 | 72.735 | 0.00 | 0.00 |
| ATOM | 8169 | HD3  | LYS | X | 534 | 47.813 | 33.294 | 74.350 | 0.00 | 0.00 |
| ATOM | 8170 | CE   | LYS | X | 534 | 45.950 | 33.805 | 73.415 | 0.00 | 0.00 |
| ATOM | 8171 | HE2  | LYS | X | 534 | 45.852 | 34.600 | 74.153 | 0.00 | 0.00 |
| ATOM | 8172 | HE3  | LYS | X | 534 | 45.669 | 34.281 | 72.476 | 0.00 | 0.00 |
| ATOM | 8173 | NZ   | LYS | X | 534 | 45.052 | 32.695 | 73.848 | 0.00 | 0.00 |
| ATOM | 8174 | HZ1  | LYS | X | 534 | 45.282 | 32.252 | 74.726 | 0.00 | 0.00 |
| ATOM | 8175 | HZ2  | LYS | X | 534 | 44.140 | 33.087 | 74.039 | 0.00 | 0.00 |
| ATOM | 8176 | HZ3  | LYS | X | 534 | 44.922 | 31.963 | 73.165 | 0.00 | 0.00 |
| ATOM | 8177 | C    | LYS | X | 534 | 50.287 | 36.249 | 71.016 | 0.00 | 0.00 |
| ATOM | 8178 | O    | LYS | X | 534 | 50.879 | 36.648 | 72.018 | 0.00 | 0.00 |
| ATOM | 8179 | N    | LEU | X | 535 | 50.972 | 35.877 | 69.929 | 0.00 | 0.00 |
| ATOM | 8180 | H    | LEU | X | 535 | 50.469 | 35.532 | 69.125 | 0.00 | 0.00 |
| ATOM | 8181 | CA   | LEU | X | 535 | 52.460 | 35.955 | 69.905 | 0.00 | 0.00 |
| ATOM | 8182 | HA   | LEU | X | 535 | 53.061 | 35.446 | 70.659 | 0.00 | 0.00 |
| ATOM | 8183 | CB   | LEU | X | 535 | 52.889 | 35.182 | 68.667 | 0.00 | 0.00 |
| ATOM | 8184 | HB2  | LEU | X | 535 | 52.558 | 34.147 | 68.757 | 0.00 | 0.00 |
| ATOM | 8185 | HB3  | LEU | X | 535 | 52.323 | 35.635 | 67.853 | 0.00 | 0.00 |
| ATOM | 8186 | CG   | LEU | X | 535 | 54.446 | 35.127 | 68.342 | 0.00 | 0.00 |
| ATOM | 8187 | HG   | LEU | X | 535 | 54.759 | 36.171 | 68.321 | 0.00 | 0.00 |
| ATOM | 8188 | CD1  | LEU | X | 535 | 55.178 | 34.348 | 69.420 | 0.00 | 0.00 |
| ATOM | 8189 | HD11 | LEU | X | 535 | 55.194 | 34.892 | 70.364 | 0.00 | 0.00 |
| ATOM | 8190 | HD12 | LEU | X | 535 | 56.181 | 34.100 | 69.072 | 0.00 | 0.00 |
| ATOM | 8191 | HD13 | LEU | X | 535 | 54.587 | 33.466 | 69.667 | 0.00 | 0.00 |
| ATOM | 8192 | CD2  | LEU | X | 535 | 54.689 | 34.582 | 66.947 | 0.00 | 0.00 |
| ATOM | 8193 | HD21 | LEU | X | 535 | 55.699 | 34.198 | 66.799 | 0.00 | 0.00 |
| ATOM | 8194 | HD22 | LEU | X | 535 | 53.977 | 33.784 | 66.738 | 0.00 | 0.00 |
| ATOM | 8195 | HD23 | LEU | X | 535 | 54.515 | 35.391 | 66.238 | 0.00 | 0.00 |
| ATOM | 8196 | C    | LEU | X | 535 | 52.877 | 37.481 | 69.868 | 0.00 | 0.00 |
| ATOM | 8197 | O    | LEU | X | 535 | 53.792 | 37.865 | 70.656 | 0.00 | 0.00 |
| ATOM | 8198 | N    | LEU | X | 536 | 52.172 | 38.295 | 69.035 | 0.00 | 0.00 |
| ATOM | 8199 | H    | LEU | X | 536 | 51.473 | 37.853 | 68.456 | 0.00 | 0.00 |
| ATOM | 8200 | CA   | LEU | X | 536 | 52.396 | 39.793 | 68.995 | 0.00 | 0.00 |
| ATOM | 8201 | HA   | LEU | X | 536 | 53.448 | 40.081 | 69.000 | 0.00 | 0.00 |
| ATOM | 8202 | CB   | LEU | X | 536 | 51.544 | 40.362 | 67.769 | 0.00 | 0.00 |
| ATOM | 8203 | HB2  | LEU | X | 536 | 50.544 | 39.935 | 67.697 | 0.00 | 0.00 |
| ATOM | 8204 | HB3  | LEU | X | 536 | 51.336 | 41.420 | 67.930 | 0.00 | 0.00 |
| ATOM | 8205 | CG   | LEU | X | 536 | 52.188 | 40.168 | 66.441 | 0.00 | 0.00 |
| ATOM | 8206 | HG   | LEU | X | 536 | 52.533 | 39.134 | 66.455 | 0.00 | 0.00 |
| ATOM | 8207 | CD1  | LEU | X | 536 | 51.208 | 40.347 | 65.308 | 0.00 | 0.00 |
| ATOM | 8208 | HD11 | LEU | X | 536 | 51.683 | 40.089 | 64.361 | 0.00 | 0.00 |
| ATOM | 8209 | HD12 | LEU | X | 536 | 50.854 | 41.375 | 65.239 | 0.00 | 0.00 |
| ATOM | 8210 | HD13 | LEU | X | 536 | 50.329 | 39.727 | 65.481 | 0.00 | 0.00 |
| ATOM | 8211 | CD2  | LEU | X | 536 | 53.384 | 41.076 | 66.318 | 0.00 | 0.00 |
| ATOM | 8212 | HD21 | LEU | X | 536 | 53.825 | 40.968 | 65.327 | 0.00 | 0.00 |
| ATOM | 8213 | HD22 | LEU | X | 536 | 53.181 | 42.135 | 66.477 | 0.00 | 0.00 |
| ATOM | 8214 | HD23 | LEU | X | 536 | 54.067 | 40.704 | 67.082 | 0.00 | 0.00 |
| ATOM | 8215 | C    | LEU | X | 536 | 51.874 | 40.556 | 70.213 | 0.00 | 0.00 |
| ATOM | 8216 | O    | LEU | X | 536 | 52.384 | 41.638 | 70.492 | 0.00 | 0.00 |
| ATOM | 8217 | N    | SER | X | 537 | 50.889 | 40.032 | 70.958 | 0.00 | 0.00 |
| ATOM | 8218 | H    | SER | X | 537 | 50.302 | 39.342 | 70.512 | 0.00 | 0.00 |
| ATOM | 8219 | CA   | SER | X | 537 | 50.475 | 40.651 | 72.229 | 0.00 | 0.00 |
| ATOM | 8220 | HA   | SER | X | 537 | 50.710 | 41.715 | 72.264 | 0.00 | 0.00 |
| ATOM | 8221 | CB   | SER | X | 537 | 49.095 | 40.329 | 72.562 | 0.00 | 0.00 |
| ATOM | 8222 | HB2  | SER | X | 537 | 48.678 | 41.031 | 73.284 | 0.00 | 0.00 |
| ATOM | 8223 | HB3  | SER | X | 537 | 48.570 | 40.500 | 71.622 | 0.00 | 0.00 |
| ATOM | 8224 | OG   | SER | X | 537 | 48.813 | 38.996 | 73.017 | 0.00 | 0.00 |
| ATOM | 8225 | HG   | SER | X | 537 | 47.855 | 38.940 | 73.040 | 0.00 | 0.00 |
| ATOM | 8226 | C    | SER | X | 537 | 51.388 | 40.248 | 73.470 | 0.00 | 0.00 |
| ATOM | 8227 | O    | SER | X | 537 | 51.346 | 40.950 | 74.489 | 0.00 | 0.00 |
| ATOM | 8228 | N    | ALA | X | 538 | 52.290 | 39.294 | 73.316 | 0.00 | 0.00 |
| ATOM | 8229 | H    | ALA | X | 538 | 52.109 | 38.717 | 72.506 | 0.00 | 0.00 |
| ATOM | 8230 | CA   | ALA | X | 538 | 53.113 | 38.835 | 74.416 | 0.00 | 0.00 |
| ATOM | 8231 | HA   | ALA | X | 538 | 52.697 | 39.232 | 75.342 | 0.00 | 0.00 |
| ATOM | 8232 | CB   | ALA | X | 538 | 52.951 | 37.299 | 74.512 | 0.00 | 0.00 |

|      |      |      |     |   |     |        |        |        |      |      |
|------|------|------|-----|---|-----|--------|--------|--------|------|------|
| ATOM | 8233 | HB1  | ALA | X | 538 | 51.876 | 37.159 | 74.401 | 0.00 | 0.00 |
| ATOM | 8234 | HB2  | ALA | X | 538 | 53.320 | 36.939 | 75.472 | 0.00 | 0.00 |
| ATOM | 8235 | HB3  | ALA | X | 538 | 53.516 | 36.718 | 73.783 | 0.00 | 0.00 |
| ATOM | 8236 | C    | ALA | X | 538 | 54.585 | 39.321 | 74.362 | 0.00 | 0.00 |
| ATOM | 8237 | O    | ALA | X | 538 | 55.300 | 39.503 | 75.389 | 0.00 | 0.00 |
| ATOM | 8238 | N    | THR | X | 539 | 55.183 | 39.502 | 73.146 | 0.00 | 0.00 |
| ATOM | 8239 | H    | THR | X | 539 | 54.567 | 39.471 | 72.346 | 0.00 | 0.00 |
| ATOM | 8240 | CA   | THR | X | 539 | 56.648 | 39.451 | 72.990 | 0.00 | 0.00 |
| ATOM | 8241 | HA   | THR | X | 539 | 57.056 | 38.969 | 73.879 | 0.00 | 0.00 |
| ATOM | 8242 | CB   | THR | X | 539 | 57.084 | 38.851 | 71.707 | 0.00 | 0.00 |
| ATOM | 8243 | HB   | THR | X | 539 | 56.814 | 39.464 | 70.847 | 0.00 | 0.00 |
| ATOM | 8244 | CG2  | THR | X | 539 | 58.543 | 38.456 | 71.612 | 0.00 | 0.00 |
| ATOM | 8245 | HG21 | THR | X | 539 | 59.175 | 39.336 | 71.493 | 0.00 | 0.00 |
| ATOM | 8246 | HG22 | THR | X | 539 | 58.653 | 37.795 | 70.752 | 0.00 | 0.00 |
| ATOM | 8247 | HG23 | THR | X | 539 | 58.862 | 37.855 | 72.463 | 0.00 | 0.00 |
| ATOM | 8248 | OG1  | THR | X | 539 | 56.423 | 37.609 | 71.715 | 0.00 | 0.00 |
| ATOM | 8249 | HG1  | THR | X | 539 | 55.638 | 37.747 | 71.181 | 0.00 | 0.00 |
| ATOM | 8250 | C    | THR | X | 539 | 57.177 | 40.914 | 73.173 | 0.00 | 0.00 |
| ATOM | 8251 | O    | THR | X | 539 | 56.829 | 41.745 | 72.312 | 0.00 | 0.00 |
| ATOM | 8252 | OXT  | THR | X | 539 | 58.215 | 41.186 | 73.866 | 0.00 | 0.00 |

END

#-----  
# 1B41 Production MD Frame 1600  
#-----

| CRYST1 | 82.031 | 82.031 | 82.031 | 90.00 | 90.00 | 90.00  | P 1    |        | 1    |      |
|--------|--------|--------|--------|-------|-------|--------|--------|--------|------|------|
| ATOM   | 1      | N      | ASP    | X     | 1     | 30.464 | 47.102 | 5.737  | 0.00 | 0.00 |
| ATOM   | 2      | H1     | ASP    | X     | 1     | 29.536 | 47.350 | 5.426  | 0.00 | 0.00 |
| ATOM   | 3      | H2     | ASP    | X     | 1     | 30.428 | 46.270 | 6.309  | 0.00 | 0.00 |
| ATOM   | 4      | H3     | ASP    | X     | 1     | 30.896 | 46.932 | 4.840  | 0.00 | 0.00 |
| ATOM   | 5      | CA     | ASP    | X     | 1     | 31.049 | 48.257 | 6.480  | 0.00 | 0.00 |
| ATOM   | 6      | HA     | ASP    | X     | 1     | 32.132 | 48.151 | 6.429  | 0.00 | 0.00 |
| ATOM   | 7      | CB     | ASP    | X     | 1     | 30.701 | 49.681 | 5.901  | 0.00 | 0.00 |
| ATOM   | 8      | HB2    | ASP    | X     | 1     | 30.888 | 49.717 | 4.827  | 0.00 | 0.00 |
| ATOM   | 9      | HB3    | ASP    | X     | 1     | 29.639 | 49.921 | 5.920  | 0.00 | 0.00 |
| ATOM   | 10     | CG     | ASP    | X     | 1     | 31.612 | 50.836 | 6.398  | 0.00 | 0.00 |
| ATOM   | 11     | OD1    | ASP    | X     | 1     | 31.061 | 51.924 | 6.720  | 0.00 | 0.00 |
| ATOM   | 12     | OD2    | ASP    | X     | 1     | 32.815 | 50.685 | 6.487  | 0.00 | 0.00 |
| ATOM   | 13     | C      | ASP    | X     | 1     | 30.706 | 48.272 | 8.022  | 0.00 | 0.00 |
| ATOM   | 14     | O      | ASP    | X     | 1     | 31.580 | 48.307 | 8.871  | 0.00 | 0.00 |
| ATOM   | 15     | N      | ALA    | X     | 2     | 29.403 | 48.370 | 8.326  | 0.00 | 0.00 |
| ATOM   | 16     | H      | ALA    | X     | 2     | 28.713 | 48.318 | 7.590  | 0.00 | 0.00 |
| ATOM   | 17     | CA     | ALA    | X     | 2     | 28.906 | 48.667 | 9.750  | 0.00 | 0.00 |
| ATOM   | 18     | HA     | ALA    | X     | 2     | 29.635 | 49.385 | 10.125 | 0.00 | 0.00 |
| ATOM   | 19     | CB     | ALA    | X     | 2     | 27.540 | 49.241 | 9.566  | 0.00 | 0.00 |
| ATOM   | 20     | HB1    | ALA    | X     | 2     | 27.674 | 50.039 | 8.835  | 0.00 | 0.00 |
| ATOM   | 21     | HB2    | ALA    | X     | 2     | 27.213 | 49.673 | 10.512 | 0.00 | 0.00 |
| ATOM   | 22     | HB3    | ALA    | X     | 2     | 26.790 | 48.507 | 9.272  | 0.00 | 0.00 |
| ATOM   | 23     | C      | ALA    | X     | 2     | 28.881 | 47.400 | 10.691 | 0.00 | 0.00 |
| ATOM   | 24     | O      | ALA    | X     | 2     | 28.416 | 47.405 | 11.843 | 0.00 | 0.00 |
| ATOM   | 25     | N      | GLU    | X     | 3     | 29.543 | 46.319 | 10.310 | 0.00 | 0.00 |
| ATOM   | 26     | H      | GLU    | X     | 3     | 29.974 | 46.408 | 9.401  | 0.00 | 0.00 |
| ATOM   | 27     | CA     | GLU    | X     | 3     | 29.827 | 45.034 | 11.071 | 0.00 | 0.00 |
| ATOM   | 28     | HA     | GLU    | X     | 3     | 28.950 | 44.429 | 11.302 | 0.00 | 0.00 |
| ATOM   | 29     | CB     | GLU    | X     | 3     | 30.910 | 44.248 | 10.293 | 0.00 | 0.00 |
| ATOM   | 30     | HB2    | GLU    | X     | 3     | 31.810 | 44.850 | 10.168 | 0.00 | 0.00 |
| ATOM   | 31     | HB3    | GLU    | X     | 3     | 31.232 | 43.449 | 10.960 | 0.00 | 0.00 |
| ATOM   | 32     | CG     | GLU    | X     | 3     | 30.373 | 43.652 | 8.942  | 0.00 | 0.00 |
| ATOM   | 33     | HG2    | GLU    | X     | 3     | 31.003 | 42.821 | 8.625  | 0.00 | 0.00 |
| ATOM   | 34     | HG3    | GLU    | X     | 3     | 29.376 | 43.226 | 9.056  | 0.00 | 0.00 |
| ATOM   | 35     | CD     | GLU    | X     | 3     | 30.387 | 44.746 | 7.859  | 0.00 | 0.00 |
| ATOM   | 36     | OE1    | GLU    | X     | 3     | 29.334 | 45.320 | 7.480  | 0.00 | 0.00 |
| ATOM   | 37     | OE2    | GLU    | X     | 3     | 31.497 | 45.172 | 7.488  | 0.00 | 0.00 |
| ATOM   | 38     | C      | GLU    | X     | 3     | 30.449 | 45.397 | 12.423 | 0.00 | 0.00 |

|      |     |      |     |   |   |        |        |        |      |      |
|------|-----|------|-----|---|---|--------|--------|--------|------|------|
| ATOM | 39  | O    | GLU | X | 3 | 29.988 | 44.977 | 13.448 | 0.00 | 0.00 |
| ATOM | 40  | N    | LEU | X | 4 | 31.399 | 46.260 | 12.398 | 0.00 | 0.00 |
| ATOM | 41  | H    | LEU | X | 4 | 31.504 | 46.778 | 11.537 | 0.00 | 0.00 |
| ATOM | 42  | CA   | LEU | X | 4 | 32.194 | 46.689 | 13.530 | 0.00 | 0.00 |
| ATOM | 43  | HA   | LEU | X | 4 | 31.961 | 46.011 | 14.351 | 0.00 | 0.00 |
| ATOM | 44  | CB   | LEU | X | 4 | 33.714 | 46.657 | 13.143 | 0.00 | 0.00 |
| ATOM | 45  | HB2  | LEU | X | 4 | 33.845 | 47.146 | 12.177 | 0.00 | 0.00 |
| ATOM | 46  | HB3  | LEU | X | 4 | 34.336 | 47.180 | 13.869 | 0.00 | 0.00 |
| ATOM | 47  | CG   | LEU | X | 4 | 34.264 | 45.229 | 12.991 | 0.00 | 0.00 |
| ATOM | 48  | HG   | LEU | X | 4 | 33.595 | 44.649 | 12.354 | 0.00 | 0.00 |
| ATOM | 49  | CD1  | LEU | X | 4 | 35.616 | 45.366 | 12.244 | 0.00 | 0.00 |
| ATOM | 50  | HD11 | LEU | X | 4 | 36.301 | 45.904 | 12.899 | 0.00 | 0.00 |
| ATOM | 51  | HD12 | LEU | X | 4 | 35.570 | 45.831 | 11.259 | 0.00 | 0.00 |
| ATOM | 52  | HD13 | LEU | X | 4 | 35.921 | 44.332 | 12.089 | 0.00 | 0.00 |
| ATOM | 53  | CD2  | LEU | X | 4 | 34.514 | 44.456 | 14.283 | 0.00 | 0.00 |
| ATOM | 54  | HD21 | LEU | X | 4 | 35.060 | 43.541 | 14.055 | 0.00 | 0.00 |
| ATOM | 55  | HD22 | LEU | X | 4 | 35.083 | 45.063 | 14.987 | 0.00 | 0.00 |
| ATOM | 56  | HD23 | LEU | X | 4 | 33.568 | 44.182 | 14.752 | 0.00 | 0.00 |
| ATOM | 57  | C    | LEU | X | 4 | 31.756 | 48.007 | 14.197 | 0.00 | 0.00 |
| ATOM | 58  | O    | LEU | X | 4 | 32.376 | 48.498 | 15.108 | 0.00 | 0.00 |
| ATOM | 59  | N    | LEU | X | 5 | 30.725 | 48.652 | 13.567 | 0.00 | 0.00 |
| ATOM | 60  | H    | LEU | X | 5 | 30.190 | 48.088 | 12.923 | 0.00 | 0.00 |
| ATOM | 61  | CA   | LEU | X | 5 | 29.944 | 49.716 | 14.211 | 0.00 | 0.00 |
| ATOM | 62  | HA   | LEU | X | 5 | 30.503 | 50.537 | 14.660 | 0.00 | 0.00 |
| ATOM | 63  | CB   | LEU | X | 5 | 29.090 | 50.506 | 13.096 | 0.00 | 0.00 |
| ATOM | 64  | HB2  | LEU | X | 5 | 29.770 | 50.786 | 12.291 | 0.00 | 0.00 |
| ATOM | 65  | HB3  | LEU | X | 5 | 28.386 | 49.788 | 12.677 | 0.00 | 0.00 |
| ATOM | 66  | CG   | LEU | X | 5 | 28.340 | 51.828 | 13.404 | 0.00 | 0.00 |
| ATOM | 67  | HG   | LEU | X | 5 | 27.512 | 51.643 | 14.088 | 0.00 | 0.00 |
| ATOM | 68  | CD1  | LEU | X | 5 | 29.070 | 52.842 | 14.240 | 0.00 | 0.00 |
| ATOM | 69  | HD11 | LEU | X | 5 | 28.394 | 53.581 | 14.671 | 0.00 | 0.00 |
| ATOM | 70  | HD12 | LEU | X | 5 | 29.915 | 53.362 | 13.790 | 0.00 | 0.00 |
| ATOM | 71  | HD13 | LEU | X | 5 | 29.513 | 52.298 | 15.073 | 0.00 | 0.00 |
| ATOM | 72  | CD2  | LEU | X | 5 | 27.756 | 52.429 | 12.102 | 0.00 | 0.00 |
| ATOM | 73  | HD21 | LEU | X | 5 | 28.661 | 52.627 | 11.526 | 0.00 | 0.00 |
| ATOM | 74  | HD22 | LEU | X | 5 | 27.161 | 51.672 | 11.592 | 0.00 | 0.00 |
| ATOM | 75  | HD23 | LEU | X | 5 | 27.112 | 53.286 | 12.299 | 0.00 | 0.00 |
| ATOM | 76  | C    | LEU | X | 5 | 29.098 | 49.159 | 15.351 | 0.00 | 0.00 |
| ATOM | 77  | O    | LEU | X | 5 | 28.498 | 48.089 | 15.144 | 0.00 | 0.00 |
| ATOM | 78  | N    | VAL | X | 6 | 28.968 | 49.871 | 16.488 | 0.00 | 0.00 |
| ATOM | 79  | H    | VAL | X | 6 | 29.525 | 50.713 | 16.537 | 0.00 | 0.00 |
| ATOM | 80  | CA   | VAL | X | 6 | 27.992 | 49.630 | 17.629 | 0.00 | 0.00 |
| ATOM | 81  | HA   | VAL | X | 6 | 27.162 | 49.082 | 17.183 | 0.00 | 0.00 |
| ATOM | 82  | CB   | VAL | X | 6 | 28.588 | 48.767 | 18.765 | 0.00 | 0.00 |
| ATOM | 83  | HB   | VAL | X | 6 | 29.607 | 49.103 | 18.955 | 0.00 | 0.00 |
| ATOM | 84  | CG1  | VAL | X | 6 | 27.942 | 48.887 | 20.129 | 0.00 | 0.00 |
| ATOM | 85  | HG11 | VAL | X | 6 | 26.993 | 48.351 | 20.111 | 0.00 | 0.00 |
| ATOM | 86  | HG12 | VAL | X | 6 | 28.620 | 48.476 | 20.877 | 0.00 | 0.00 |
| ATOM | 87  | HG13 | VAL | X | 6 | 27.818 | 49.942 | 20.373 | 0.00 | 0.00 |
| ATOM | 88  | CG2  | VAL | X | 6 | 28.830 | 47.305 | 18.356 | 0.00 | 0.00 |
| ATOM | 89  | HG21 | VAL | X | 6 | 27.840 | 47.018 | 18.002 | 0.00 | 0.00 |
| ATOM | 90  | HG22 | VAL | X | 6 | 29.065 | 46.631 | 19.180 | 0.00 | 0.00 |
| ATOM | 91  | HG23 | VAL | X | 6 | 29.664 | 47.251 | 17.657 | 0.00 | 0.00 |
| ATOM | 92  | C    | VAL | X | 6 | 27.570 | 50.981 | 18.127 | 0.00 | 0.00 |
| ATOM | 93  | O    | VAL | X | 6 | 28.445 | 51.829 | 18.430 | 0.00 | 0.00 |
| ATOM | 94  | N    | THR | X | 7 | 26.286 | 51.140 | 18.387 | 0.00 | 0.00 |
| ATOM | 95  | H    | THR | X | 7 | 25.676 | 50.462 | 17.953 | 0.00 | 0.00 |
| ATOM | 96  | CA   | THR | X | 7 | 25.696 | 52.314 | 19.069 | 0.00 | 0.00 |
| ATOM | 97  | HA   | THR | X | 7 | 26.406 | 53.141 | 19.078 | 0.00 | 0.00 |
| ATOM | 98  | CB   | THR | X | 7 | 24.336 | 52.655 | 18.443 | 0.00 | 0.00 |
| ATOM | 99  | HB   | THR | X | 7 | 23.620 | 51.836 | 18.376 | 0.00 | 0.00 |
| ATOM | 100 | CG2  | THR | X | 7 | 23.550 | 53.814 | 19.069 | 0.00 | 0.00 |
| ATOM | 101 | HG21 | THR | X | 7 | 23.198 | 53.589 | 20.076 | 0.00 | 0.00 |
| ATOM | 102 | HG22 | THR | X | 7 | 22.626 | 54.123 | 18.581 | 0.00 | 0.00 |
| ATOM | 103 | HG23 | THR | X | 7 | 24.215 | 54.678 | 19.081 | 0.00 | 0.00 |
| ATOM | 104 | OG1  | THR | X | 7 | 24.439 | 53.017 | 17.119 | 0.00 | 0.00 |
| ATOM | 105 | HG1  | THR | X | 7 | 24.631 | 52.166 | 16.719 | 0.00 | 0.00 |

|      |     |      |     |   |    |        |        |        |      |      |
|------|-----|------|-----|---|----|--------|--------|--------|------|------|
| ATOM | 106 | C    | THR | X | 7  | 25.299 | 51.939 | 20.494 | 0.00 | 0.00 |
| ATOM | 107 | O    | THR | X | 7  | 24.617 | 50.907 | 20.607 | 0.00 | 0.00 |
| ATOM | 108 | N    | VAL | X | 8  | 25.504 | 52.788 | 21.529 | 0.00 | 0.00 |
| ATOM | 109 | H    | VAL | X | 8  | 25.883 | 53.688 | 21.272 | 0.00 | 0.00 |
| ATOM | 110 | CA   | VAL | X | 8  | 25.208 | 52.605 | 22.934 | 0.00 | 0.00 |
| ATOM | 111 | HA   | VAL | X | 8  | 24.649 | 51.690 | 23.131 | 0.00 | 0.00 |
| ATOM | 112 | CB   | VAL | X | 8  | 26.524 | 52.526 | 23.755 | 0.00 | 0.00 |
| ATOM | 113 | HB   | VAL | X | 8  | 26.282 | 52.419 | 24.812 | 0.00 | 0.00 |
| ATOM | 114 | CG1  | VAL | X | 8  | 27.422 | 51.398 | 23.241 | 0.00 | 0.00 |
| ATOM | 115 | HG11 | VAL | X | 8  | 28.396 | 51.464 | 23.727 | 0.00 | 0.00 |
| ATOM | 116 | HG12 | VAL | X | 8  | 26.969 | 50.426 | 23.436 | 0.00 | 0.00 |
| ATOM | 117 | HG13 | VAL | X | 8  | 27.657 | 51.315 | 22.179 | 0.00 | 0.00 |
| ATOM | 118 | CG2  | VAL | X | 8  | 27.381 | 53.823 | 23.728 | 0.00 | 0.00 |
| ATOM | 119 | HG21 | VAL | X | 8  | 28.068 | 53.732 | 22.887 | 0.00 | 0.00 |
| ATOM | 120 | HG22 | VAL | X | 8  | 28.069 | 53.792 | 24.573 | 0.00 | 0.00 |
| ATOM | 121 | HG23 | VAL | X | 8  | 26.815 | 54.751 | 23.654 | 0.00 | 0.00 |
| ATOM | 122 | C    | VAL | X | 8  | 24.217 | 53.642 | 23.442 | 0.00 | 0.00 |
| ATOM | 123 | O    | VAL | X | 8  | 23.520 | 54.353 | 22.716 | 0.00 | 0.00 |
| ATOM | 124 | N    | ARG | X | 9  | 24.104 | 53.778 | 24.768 | 0.00 | 0.00 |
| ATOM | 125 | H    | ARG | X | 9  | 24.451 | 53.069 | 25.398 | 0.00 | 0.00 |
| ATOM | 126 | CA   | ARG | X | 9  | 23.358 | 54.892 | 25.344 | 0.00 | 0.00 |
| ATOM | 127 | HA   | ARG | X | 9  | 22.343 | 54.742 | 24.976 | 0.00 | 0.00 |
| ATOM | 128 | CB   | ARG | X | 9  | 23.021 | 54.568 | 26.853 | 0.00 | 0.00 |
| ATOM | 129 | HB2  | ARG | X | 9  | 22.544 | 53.591 | 26.786 | 0.00 | 0.00 |
| ATOM | 130 | HB3  | ARG | X | 9  | 23.975 | 54.507 | 27.377 | 0.00 | 0.00 |
| ATOM | 131 | CG   | ARG | X | 9  | 22.092 | 55.605 | 27.371 | 0.00 | 0.00 |
| ATOM | 132 | HG2  | ARG | X | 9  | 22.569 | 56.584 | 27.328 | 0.00 | 0.00 |
| ATOM | 133 | HG3  | ARG | X | 9  | 21.231 | 55.661 | 26.705 | 0.00 | 0.00 |
| ATOM | 134 | CD   | ARG | X | 9  | 21.663 | 55.374 | 28.827 | 0.00 | 0.00 |
| ATOM | 135 | HD2  | ARG | X | 9  | 21.310 | 54.345 | 28.889 | 0.00 | 0.00 |
| ATOM | 136 | HD3  | ARG | X | 9  | 22.583 | 55.387 | 29.411 | 0.00 | 0.00 |
| ATOM | 137 | NE   | ARG | X | 9  | 20.653 | 56.309 | 29.301 | 0.00 | 0.00 |
| ATOM | 138 | HE   | ARG | X | 9  | 20.131 | 56.716 | 28.538 | 0.00 | 0.00 |
| ATOM | 139 | CZ   | ARG | X | 9  | 20.167 | 56.415 | 30.537 | 0.00 | 0.00 |
| ATOM | 140 | NH1  | ARG | X | 9  | 20.469 | 55.591 | 31.514 | 0.00 | 0.00 |
| ATOM | 141 | HH11 | ARG | X | 9  | 20.988 | 54.735 | 31.376 | 0.00 | 0.00 |
| ATOM | 142 | HH12 | ARG | X | 9  | 20.081 | 55.753 | 32.432 | 0.00 | 0.00 |
| ATOM | 143 | NH2  | ARG | X | 9  | 19.119 | 57.203 | 30.646 | 0.00 | 0.00 |
| ATOM | 144 | HH21 | ARG | X | 9  | 18.803 | 57.746 | 29.855 | 0.00 | 0.00 |
| ATOM | 145 | HH22 | ARG | X | 9  | 18.629 | 57.308 | 31.523 | 0.00 | 0.00 |
| ATOM | 146 | C    | ARG | X | 9  | 23.957 | 56.247 | 25.065 | 0.00 | 0.00 |
| ATOM | 147 | O    | ARG | X | 9  | 23.317 | 57.243 | 24.512 | 0.00 | 0.00 |
| ATOM | 148 | N    | GLY | X | 10 | 25.291 | 56.397 | 25.344 | 0.00 | 0.00 |
| ATOM | 149 | H    | GLY | X | 10 | 25.705 | 55.674 | 25.915 | 0.00 | 0.00 |
| ATOM | 150 | CA   | GLY | X | 10 | 26.061 | 57.635 | 25.237 | 0.00 | 0.00 |
| ATOM | 151 | HA2  | GLY | X | 10 | 25.422 | 58.382 | 25.708 | 0.00 | 0.00 |
| ATOM | 152 | HA3  | GLY | X | 10 | 27.050 | 57.546 | 25.686 | 0.00 | 0.00 |
| ATOM | 153 | C    | GLY | X | 10 | 26.302 | 58.198 | 23.865 | 0.00 | 0.00 |
| ATOM | 154 | O    | GLY | X | 10 | 26.603 | 59.378 | 23.717 | 0.00 | 0.00 |
| ATOM | 155 | N    | GLY | X | 11 | 26.256 | 57.352 | 22.838 | 0.00 | 0.00 |
| ATOM | 156 | H    | GLY | X | 11 | 26.164 | 56.351 | 22.935 | 0.00 | 0.00 |
| ATOM | 157 | CA   | GLY | X | 11 | 26.687 | 57.780 | 21.480 | 0.00 | 0.00 |
| ATOM | 158 | HA2  | GLY | X | 11 | 25.895 | 58.395 | 21.054 | 0.00 | 0.00 |
| ATOM | 159 | HA3  | GLY | X | 11 | 27.555 | 58.420 | 21.640 | 0.00 | 0.00 |
| ATOM | 160 | C    | GLY | X | 11 | 27.090 | 56.555 | 20.661 | 0.00 | 0.00 |
| ATOM | 161 | O    | GLY | X | 11 | 26.769 | 55.400 | 21.017 | 0.00 | 0.00 |
| ATOM | 162 | N    | ARG | X | 12 | 27.799 | 56.711 | 19.541 | 0.00 | 0.00 |
| ATOM | 163 | H    | ARG | X | 12 | 28.115 | 57.639 | 19.300 | 0.00 | 0.00 |
| ATOM | 164 | CA   | ARG | X | 12 | 28.387 | 55.630 | 18.656 | 0.00 | 0.00 |
| ATOM | 165 | HA   | ARG | X | 12 | 27.749 | 54.790 | 18.933 | 0.00 | 0.00 |
| ATOM | 166 | CB   | ARG | X | 12 | 27.999 | 55.999 | 17.216 | 0.00 | 0.00 |
| ATOM | 167 | HB2  | ARG | X | 12 | 28.404 | 56.988 | 17.002 | 0.00 | 0.00 |
| ATOM | 168 | HB3  | ARG | X | 12 | 28.420 | 55.277 | 16.516 | 0.00 | 0.00 |
| ATOM | 169 | CG   | ARG | X | 12 | 26.532 | 56.091 | 16.854 | 0.00 | 0.00 |
| ATOM | 170 | HG2  | ARG | X | 12 | 26.155 | 55.079 | 16.707 | 0.00 | 0.00 |
| ATOM | 171 | HG3  | ARG | X | 12 | 25.950 | 56.604 | 17.620 | 0.00 | 0.00 |
| ATOM | 172 | CD   | ARG | X | 12 | 26.438 | 56.953 | 15.621 | 0.00 | 0.00 |



|      |     |      |     |   |    |        |        |        |      |      |
|------|-----|------|-----|---|----|--------|--------|--------|------|------|
| ATOM | 173 | HD2  | ARG | X | 12 | 26.622 | 58.004 | 15.847 | 0.00 | 0.00 |
| ATOM | 174 | HD3  | ARG | X | 12 | 27.062 | 56.463 | 14.873 | 0.00 | 0.00 |
| ATOM | 175 | NE   | ARG | X | 12 | 25.037 | 56.984 | 15.069 | 0.00 | 0.00 |
| ATOM | 176 | HE   | ARG | X | 12 | 24.322 | 56.554 | 15.639 | 0.00 | 0.00 |
| ATOM | 177 | CZ   | ARG | X | 12 | 24.694 | 57.331 | 13.839 | 0.00 | 0.00 |
| ATOM | 178 | NH1  | ARG | X | 12 | 25.571 | 57.808 | 13.038 | 0.00 | 0.00 |
| ATOM | 179 | HH11 | ARG | X | 12 | 26.551 | 57.916 | 13.255 | 0.00 | 0.00 |
| ATOM | 180 | HH12 | ARG | X | 12 | 25.238 | 58.044 | 12.114 | 0.00 | 0.00 |
| ATOM | 181 | NH2  | ARG | X | 12 | 23.472 | 57.378 | 13.452 | 0.00 | 0.00 |
| ATOM | 182 | HH21 | ARG | X | 12 | 22.749 | 57.113 | 14.105 | 0.00 | 0.00 |
| ATOM | 183 | HH22 | ARG | X | 12 | 23.286 | 57.324 | 12.461 | 0.00 | 0.00 |
| ATOM | 184 | C    | ARG | X | 12 | 29.832 | 55.312 | 18.960 | 0.00 | 0.00 |
| ATOM | 185 | O    | ARG | X | 12 | 30.636 | 56.157 | 19.281 | 0.00 | 0.00 |
| ATOM | 186 | N    | LEU | X | 13 | 30.167 | 54.027 | 18.631 | 0.00 | 0.00 |
| ATOM | 187 | H    | LEU | X | 13 | 29.432 | 53.467 | 18.223 | 0.00 | 0.00 |
| ATOM | 188 | CA   | LEU | X | 13 | 31.499 | 53.320 | 18.788 | 0.00 | 0.00 |
| ATOM | 189 | HA   | LEU | X | 13 | 32.316 | 54.040 | 18.827 | 0.00 | 0.00 |
| ATOM | 190 | CB   | LEU | X | 13 | 31.632 | 52.357 | 19.939 | 0.00 | 0.00 |
| ATOM | 191 | HB2  | LEU | X | 13 | 30.894 | 51.571 | 19.778 | 0.00 | 0.00 |
| ATOM | 192 | HB3  | LEU | X | 13 | 32.647 | 51.966 | 19.874 | 0.00 | 0.00 |
| ATOM | 193 | CG   | LEU | X | 13 | 31.326 | 53.053 | 21.317 | 0.00 | 0.00 |
| ATOM | 194 | HG   | LEU | X | 13 | 30.316 | 53.444 | 21.193 | 0.00 | 0.00 |
| ATOM | 195 | CD1  | LEU | X | 13 | 31.253 | 51.992 | 22.444 | 0.00 | 0.00 |
| ATOM | 196 | HD11 | LEU | X | 13 | 31.010 | 52.483 | 23.386 | 0.00 | 0.00 |
| ATOM | 197 | HD12 | LEU | X | 13 | 32.177 | 51.416 | 22.511 | 0.00 | 0.00 |
| ATOM | 198 | HD13 | LEU | X | 13 | 30.416 | 51.326 | 22.232 | 0.00 | 0.00 |
| ATOM | 199 | CD2  | LEU | X | 13 | 32.310 | 54.195 | 21.684 | 0.00 | 0.00 |
| ATOM | 200 | HD21 | LEU | X | 13 | 32.182 | 55.069 | 21.045 | 0.00 | 0.00 |
| ATOM | 201 | HD22 | LEU | X | 13 | 32.215 | 54.574 | 22.702 | 0.00 | 0.00 |
| ATOM | 202 | HD23 | LEU | X | 13 | 33.330 | 53.856 | 21.501 | 0.00 | 0.00 |
| ATOM | 203 | C    | LEU | X | 13 | 31.778 | 52.432 | 17.571 | 0.00 | 0.00 |
| ATOM | 204 | O    | LEU | X | 13 | 30.957 | 51.742 | 17.020 | 0.00 | 0.00 |
| ATOM | 205 | N    | ARG | X | 14 | 33.079 | 52.331 | 17.321 | 0.00 | 0.00 |
| ATOM | 206 | H    | ARG | X | 14 | 33.631 | 53.084 | 17.707 | 0.00 | 0.00 |
| ATOM | 207 | CA   | ARG | X | 14 | 33.628 | 51.408 | 16.362 | 0.00 | 0.00 |
| ATOM | 208 | HA   | ARG | X | 14 | 32.894 | 50.605 | 16.294 | 0.00 | 0.00 |
| ATOM | 209 | CB   | ARG | X | 14 | 33.874 | 52.083 | 14.984 | 0.00 | 0.00 |
| ATOM | 210 | HB2  | ARG | X | 14 | 33.094 | 52.818 | 14.787 | 0.00 | 0.00 |
| ATOM | 211 | HB3  | ARG | X | 14 | 34.669 | 52.828 | 14.937 | 0.00 | 0.00 |
| ATOM | 212 | CG   | ARG | X | 14 | 34.051 | 51.015 | 13.862 | 0.00 | 0.00 |
| ATOM | 213 | HG2  | ARG | X | 14 | 34.549 | 50.141 | 14.281 | 0.00 | 0.00 |
| ATOM | 214 | HG3  | ARG | X | 14 | 33.051 | 50.754 | 13.515 | 0.00 | 0.00 |
| ATOM | 215 | CD   | ARG | X | 14 | 34.874 | 51.644 | 12.730 | 0.00 | 0.00 |
| ATOM | 216 | HD2  | ARG | X | 14 | 34.453 | 52.564 | 12.325 | 0.00 | 0.00 |
| ATOM | 217 | HD3  | ARG | X | 14 | 35.872 | 51.841 | 13.124 | 0.00 | 0.00 |
| ATOM | 218 | NE   | ARG | X | 14 | 35.038 | 50.607 | 11.654 | 0.00 | 0.00 |
| ATOM | 219 | HE   | ARG | X | 14 | 34.324 | 50.568 | 10.940 | 0.00 | 0.00 |
| ATOM | 220 | CZ   | ARG | X | 14 | 36.067 | 49.819 | 11.407 | 0.00 | 0.00 |
| ATOM | 221 | NH1  | ARG | X | 14 | 37.129 | 49.751 | 12.153 | 0.00 | 0.00 |
| ATOM | 222 | HH11 | ARG | X | 14 | 37.158 | 50.306 | 12.997 | 0.00 | 0.00 |
| ATOM | 223 | HH12 | ARG | X | 14 | 37.855 | 49.108 | 11.875 | 0.00 | 0.00 |
| ATOM | 224 | NH2  | ARG | X | 14 | 35.986 | 49.062 | 10.406 | 0.00 | 0.00 |
| ATOM | 225 | HH21 | ARG | X | 14 | 35.349 | 49.140 | 9.627  | 0.00 | 0.00 |
| ATOM | 226 | HH22 | ARG | X | 14 | 36.618 | 48.276 | 10.357 | 0.00 | 0.00 |
| ATOM | 227 | C    | ARG | X | 14 | 35.031 | 50.818 | 16.853 | 0.00 | 0.00 |
| ATOM | 228 | O    | ARG | X | 14 | 35.996 | 51.595 | 17.047 | 0.00 | 0.00 |
| ATOM | 229 | N    | GLY | X | 15 | 35.236 | 49.524 | 16.981 | 0.00 | 0.00 |
| ATOM | 230 | H    | GLY | X | 15 | 34.514 | 48.955 | 16.563 | 0.00 | 0.00 |
| ATOM | 231 | CA   | GLY | X | 15 | 36.465 | 48.771 | 17.252 | 0.00 | 0.00 |
| ATOM | 232 | HA2  | GLY | X | 15 | 37.270 | 49.484 | 17.429 | 0.00 | 0.00 |
| ATOM | 233 | HA3  | GLY | X | 15 | 36.352 | 48.189 | 18.167 | 0.00 | 0.00 |
| ATOM | 234 | C    | GLY | X | 15 | 36.816 | 47.791 | 16.098 | 0.00 | 0.00 |
| ATOM | 235 | O    | GLY | X | 15 | 36.769 | 48.195 | 14.919 | 0.00 | 0.00 |
| ATOM | 236 | N    | ILE | X | 16 | 37.418 | 46.653 | 16.501 | 0.00 | 0.00 |
| ATOM | 237 | H    | ILE | X | 16 | 37.504 | 46.562 | 17.503 | 0.00 | 0.00 |
| ATOM | 238 | CA   | ILE | X | 16 | 38.350 | 45.799 | 15.610 | 0.00 | 0.00 |
| ATOM | 239 | HA   | ILE | X | 16 | 38.184 | 46.189 | 14.606 | 0.00 | 0.00 |

|      |     |      |     |   |    |        |        |        |      |      |
|------|-----|------|-----|---|----|--------|--------|--------|------|------|
| ATOM | 240 | CB   | ILE | X | 16 | 39.900 | 45.824 | 15.978 | 0.00 | 0.00 |
| ATOM | 241 | HB   | ILE | X | 16 | 40.410 | 45.132 | 15.308 | 0.00 | 0.00 |
| ATOM | 242 | CG2  | ILE | X | 16 | 40.414 | 47.319 | 15.863 | 0.00 | 0.00 |
| ATOM | 243 | HG21 | ILE | X | 16 | 41.495 | 47.460 | 15.882 | 0.00 | 0.00 |
| ATOM | 244 | HG22 | ILE | X | 16 | 39.869 | 48.058 | 16.448 | 0.00 | 0.00 |
| ATOM | 245 | HG23 | ILE | X | 16 | 40.176 | 47.496 | 14.814 | 0.00 | 0.00 |
| ATOM | 246 | CG1  | ILE | X | 16 | 40.138 | 45.291 | 17.384 | 0.00 | 0.00 |
| ATOM | 247 | HG12 | ILE | X | 16 | 39.634 | 45.915 | 18.122 | 0.00 | 0.00 |
| ATOM | 248 | HG13 | ILE | X | 16 | 39.765 | 44.267 | 17.421 | 0.00 | 0.00 |
| ATOM | 249 | CD1  | ILE | X | 16 | 41.617 | 45.337 | 17.755 | 0.00 | 0.00 |
| ATOM | 250 | HD11 | ILE | X | 16 | 42.150 | 44.894 | 16.914 | 0.00 | 0.00 |
| ATOM | 251 | HD12 | ILE | X | 16 | 41.874 | 44.924 | 18.731 | 0.00 | 0.00 |
| ATOM | 252 | HD13 | ILE | X | 16 | 42.009 | 46.352 | 17.824 | 0.00 | 0.00 |
| ATOM | 253 | C    | ILE | X | 16 | 37.979 | 44.343 | 15.351 | 0.00 | 0.00 |
| ATOM | 254 | O    | ILE | X | 16 | 37.442 | 43.719 | 16.272 | 0.00 | 0.00 |
| ATOM | 255 | N    | ARG | X | 17 | 38.325 | 43.809 | 14.166 | 0.00 | 0.00 |
| ATOM | 256 | H    | ARG | X | 17 | 38.485 | 44.411 | 13.370 | 0.00 | 0.00 |
| ATOM | 257 | CA   | ARG | X | 17 | 38.468 | 42.337 | 13.948 | 0.00 | 0.00 |
| ATOM | 258 | HA   | ARG | X | 17 | 37.607 | 41.939 | 14.484 | 0.00 | 0.00 |
| ATOM | 259 | CB   | ARG | X | 17 | 38.202 | 42.059 | 12.505 | 0.00 | 0.00 |
| ATOM | 260 | HB2  | ARG | X | 17 | 37.504 | 42.816 | 12.148 | 0.00 | 0.00 |
| ATOM | 261 | HB3  | ARG | X | 17 | 39.067 | 42.244 | 11.867 | 0.00 | 0.00 |
| ATOM | 262 | CG   | ARG | X | 17 | 37.544 | 40.728 | 12.143 | 0.00 | 0.00 |
| ATOM | 263 | HG2  | ARG | X | 17 | 38.211 | 39.959 | 12.532 | 0.00 | 0.00 |
| ATOM | 264 | HG3  | ARG | X | 17 | 36.660 | 40.610 | 12.770 | 0.00 | 0.00 |
| ATOM | 265 | CD   | ARG | X | 17 | 37.094 | 40.427 | 10.703 | 0.00 | 0.00 |
| ATOM | 266 | HD2  | ARG | X | 17 | 36.257 | 41.094 | 10.499 | 0.00 | 0.00 |
| ATOM | 267 | HD3  | ARG | X | 17 | 37.831 | 40.615 | 9.921  | 0.00 | 0.00 |
| ATOM | 268 | NE   | ARG | X | 17 | 36.691 | 39.023 | 10.489 | 0.00 | 0.00 |
| ATOM | 269 | HE   | ARG | X | 17 | 35.715 | 38.917 | 10.253 | 0.00 | 0.00 |
| ATOM | 270 | CZ   | ARG | X | 17 | 37.486 | 37.983 | 10.211 | 0.00 | 0.00 |
| ATOM | 271 | NH1  | ARG | X | 17 | 38.784 | 38.061 | 10.448 | 0.00 | 0.00 |
| ATOM | 272 | HH11 | ARG | X | 17 | 39.276 | 38.871 | 10.797 | 0.00 | 0.00 |
| ATOM | 273 | HH12 | ARG | X | 17 | 39.237 | 37.178 | 10.635 | 0.00 | 0.00 |
| ATOM | 274 | NH2  | ARG | X | 17 | 37.036 | 36.819 | 9.730  | 0.00 | 0.00 |
| ATOM | 275 | HH21 | ARG | X | 17 | 36.038 | 36.698 | 9.627  | 0.00 | 0.00 |
| ATOM | 276 | HH22 | ARG | X | 17 | 37.632 | 36.004 | 9.768  | 0.00 | 0.00 |
| ATOM | 277 | C    | ARG | X | 17 | 39.795 | 41.784 | 14.517 | 0.00 | 0.00 |
| ATOM | 278 | O    | ARG | X | 17 | 40.685 | 42.575 | 14.652 | 0.00 | 0.00 |
| ATOM | 279 | N    | LEU | X | 18 | 39.848 | 40.534 | 14.739 | 0.00 | 0.00 |
| ATOM | 280 | H    | LEU | X | 18 | 38.908 | 40.166 | 14.722 | 0.00 | 0.00 |
| ATOM | 281 | CA   | LEU | X | 18 | 40.890 | 39.780 | 15.447 | 0.00 | 0.00 |
| ATOM | 282 | HA   | LEU | X | 18 | 41.861 | 40.228 | 15.236 | 0.00 | 0.00 |
| ATOM | 283 | CB   | LEU | X | 18 | 40.678 | 39.791 | 16.979 | 0.00 | 0.00 |
| ATOM | 284 | HB2  | LEU | X | 18 | 39.675 | 39.469 | 17.261 | 0.00 | 0.00 |
| ATOM | 285 | HB3  | LEU | X | 18 | 41.275 | 38.997 | 17.427 | 0.00 | 0.00 |
| ATOM | 286 | CG   | LEU | X | 18 | 41.094 | 41.166 | 17.668 | 0.00 | 0.00 |
| ATOM | 287 | HG   | LEU | X | 18 | 40.646 | 42.075 | 17.267 | 0.00 | 0.00 |
| ATOM | 288 | CD1  | LEU | X | 18 | 40.751 | 41.081 | 19.170 | 0.00 | 0.00 |
| ATOM | 289 | HD11 | LEU | X | 18 | 41.163 | 41.895 | 19.765 | 0.00 | 0.00 |
| ATOM | 290 | HD12 | LEU | X | 18 | 41.067 | 40.117 | 19.569 | 0.00 | 0.00 |
| ATOM | 291 | HD13 | LEU | X | 18 | 39.677 | 41.128 | 19.345 | 0.00 | 0.00 |
| ATOM | 292 | CD2  | LEU | X | 18 | 42.595 | 41.467 | 17.656 | 0.00 | 0.00 |
| ATOM | 293 | HD21 | LEU | X | 18 | 42.905 | 42.286 | 18.306 | 0.00 | 0.00 |
| ATOM | 294 | HD22 | LEU | X | 18 | 43.199 | 40.613 | 17.961 | 0.00 | 0.00 |
| ATOM | 295 | HD23 | LEU | X | 18 | 42.881 | 41.768 | 16.648 | 0.00 | 0.00 |
| ATOM | 296 | C    | LEU | X | 18 | 40.839 | 38.305 | 14.981 | 0.00 | 0.00 |
| ATOM | 297 | O    | LEU | X | 18 | 39.861 | 37.824 | 14.492 | 0.00 | 0.00 |
| ATOM | 298 | N    | LYS | X | 19 | 41.894 | 37.493 | 15.400 | 0.00 | 0.00 |
| ATOM | 299 | H    | LYS | X | 19 | 42.657 | 37.944 | 15.883 | 0.00 | 0.00 |
| ATOM | 300 | CA   | LYS | X | 19 | 41.954 | 36.048 | 15.086 | 0.00 | 0.00 |
| ATOM | 301 | HA   | LYS | X | 19 | 40.986 | 35.551 | 15.041 | 0.00 | 0.00 |
| ATOM | 302 | CB   | LYS | X | 19 | 42.466 | 35.889 | 13.615 | 0.00 | 0.00 |
| ATOM | 303 | HB2  | LYS | X | 19 | 41.776 | 36.455 | 12.989 | 0.00 | 0.00 |
| ATOM | 304 | HB3  | LYS | X | 19 | 43.379 | 36.481 | 13.542 | 0.00 | 0.00 |
| ATOM | 305 | CG   | LYS | X | 19 | 42.642 | 34.455 | 13.191 | 0.00 | 0.00 |
| ATOM | 306 | HG2  | LYS | X | 19 | 43.332 | 33.903 | 13.830 | 0.00 | 0.00 |

|      |     |      |     |   |    |        |        |        |      |      |
|------|-----|------|-----|---|----|--------|--------|--------|------|------|
| ATOM | 307 | HG3  | LYS | X | 19 | 41.611 | 34.103 | 13.229 | 0.00 | 0.00 |
| ATOM | 308 | CD   | LYS | X | 19 | 43.229 | 34.333 | 11.766 | 0.00 | 0.00 |
| ATOM | 309 | HD2  | LYS | X | 19 | 43.057 | 33.327 | 11.385 | 0.00 | 0.00 |
| ATOM | 310 | HD3  | LYS | X | 19 | 42.769 | 35.013 | 11.049 | 0.00 | 0.00 |
| ATOM | 311 | CE   | LYS | X | 19 | 44.734 | 34.618 | 11.872 | 0.00 | 0.00 |
| ATOM | 312 | HE2  | LYS | X | 19 | 45.044 | 35.625 | 12.153 | 0.00 | 0.00 |
| ATOM | 313 | HE3  | LYS | X | 19 | 45.132 | 33.976 | 12.657 | 0.00 | 0.00 |
| ATOM | 314 | NZ   | LYS | X | 19 | 45.289 | 34.423 | 10.503 | 0.00 | 0.00 |
| ATOM | 315 | HZ1  | LYS | X | 19 | 45.262 | 33.496 | 10.104 | 0.00 | 0.00 |
| ATOM | 316 | HZ2  | LYS | X | 19 | 44.813 | 34.963 | 9.794  | 0.00 | 0.00 |
| ATOM | 317 | HZ3  | LYS | X | 19 | 46.250 | 34.719 | 10.406 | 0.00 | 0.00 |
| ATOM | 318 | C    | LYS | X | 19 | 42.852 | 35.295 | 16.083 | 0.00 | 0.00 |
| ATOM | 319 | O    | LYS | X | 19 | 43.907 | 35.815 | 16.536 | 0.00 | 0.00 |
| ATOM | 320 | N    | THR | X | 20 | 42.565 | 34.048 | 16.234 | 0.00 | 0.00 |
| ATOM | 321 | H    | THR | X | 20 | 41.730 | 33.690 | 15.793 | 0.00 | 0.00 |
| ATOM | 322 | CA   | THR | X | 20 | 43.326 | 32.940 | 16.743 | 0.00 | 0.00 |
| ATOM | 323 | HA   | THR | X | 20 | 44.343 | 33.291 | 16.920 | 0.00 | 0.00 |
| ATOM | 324 | CB   | THR | X | 20 | 42.755 | 32.681 | 18.130 | 0.00 | 0.00 |
| ATOM | 325 | HB   | THR | X | 20 | 43.356 | 31.913 | 18.616 | 0.00 | 0.00 |
| ATOM | 326 | CG2  | THR | X | 20 | 42.871 | 33.864 | 19.139 | 0.00 | 0.00 |
| ATOM | 327 | HG21 | THR | X | 20 | 42.693 | 33.418 | 20.117 | 0.00 | 0.00 |
| ATOM | 328 | HG22 | THR | X | 20 | 42.231 | 34.715 | 18.906 | 0.00 | 0.00 |
| ATOM | 329 | HG23 | THR | X | 20 | 43.894 | 34.241 | 19.125 | 0.00 | 0.00 |
| ATOM | 330 | OG1  | THR | X | 20 | 41.434 | 32.263 | 18.035 | 0.00 | 0.00 |
| ATOM | 331 | HG1  | THR | X | 20 | 41.207 | 31.808 | 18.849 | 0.00 | 0.00 |
| ATOM | 332 | C    | THR | X | 20 | 43.322 | 31.697 | 15.788 | 0.00 | 0.00 |
| ATOM | 333 | O    | THR | X | 20 | 42.394 | 31.649 | 14.970 | 0.00 | 0.00 |
| ATOM | 334 | N    | PRO | X | 21 | 44.224 | 30.678 | 15.983 | 0.00 | 0.00 |
| ATOM | 335 | CD   | PRO | X | 21 | 45.394 | 30.766 | 16.821 | 0.00 | 0.00 |
| ATOM | 336 | HD2  | PRO | X | 21 | 45.094 | 30.575 | 17.851 | 0.00 | 0.00 |
| ATOM | 337 | HD3  | PRO | X | 21 | 45.937 | 31.711 | 16.787 | 0.00 | 0.00 |
| ATOM | 338 | CG   | PRO | X | 21 | 46.299 | 29.608 | 16.324 | 0.00 | 0.00 |
| ATOM | 339 | HG2  | PRO | X | 21 | 47.012 | 29.257 | 17.070 | 0.00 | 0.00 |
| ATOM | 340 | HG3  | PRO | X | 21 | 46.902 | 29.902 | 15.465 | 0.00 | 0.00 |
| ATOM | 341 | CB   | PRO | X | 21 | 45.212 | 28.589 | 15.896 | 0.00 | 0.00 |
| ATOM | 342 | HB2  | PRO | X | 21 | 44.917 | 27.955 | 16.732 | 0.00 | 0.00 |
| ATOM | 343 | HB3  | PRO | X | 21 | 45.726 | 27.945 | 15.182 | 0.00 | 0.00 |
| ATOM | 344 | CA   | PRO | X | 21 | 44.131 | 29.412 | 15.340 | 0.00 | 0.00 |
| ATOM | 345 | HA   | PRO | X | 21 | 44.372 | 29.597 | 14.293 | 0.00 | 0.00 |
| ATOM | 346 | C    | PRO | X | 21 | 42.839 | 28.765 | 15.495 | 0.00 | 0.00 |
| ATOM | 347 | O    | PRO | X | 21 | 42.525 | 27.964 | 14.615 | 0.00 | 0.00 |
| ATOM | 348 | N    | GLY | X | 22 | 42.071 | 29.052 | 16.491 | 0.00 | 0.00 |
| ATOM | 349 | H    | GLY | X | 22 | 42.418 | 29.751 | 17.132 | 0.00 | 0.00 |
| ATOM | 350 | CA   | GLY | X | 22 | 40.665 | 28.611 | 16.655 | 0.00 | 0.00 |
| ATOM | 351 | HA2  | GLY | X | 22 | 40.484 | 27.553 | 16.460 | 0.00 | 0.00 |
| ATOM | 352 | HA3  | GLY | X | 22 | 40.385 | 28.840 | 17.683 | 0.00 | 0.00 |
| ATOM | 353 | C    | GLY | X | 22 | 39.673 | 29.306 | 15.726 | 0.00 | 0.00 |
| ATOM | 354 | O    | GLY | X | 22 | 38.814 | 28.654 | 15.214 | 0.00 | 0.00 |
| ATOM | 355 | N    | GLY | X | 23 | 39.685 | 30.641 | 15.594 | 0.00 | 0.00 |
| ATOM | 356 | H    | GLY | X | 23 | 40.348 | 31.251 | 16.051 | 0.00 | 0.00 |
| ATOM | 357 | CA   | GLY | X | 23 | 38.593 | 31.413 | 14.955 | 0.00 | 0.00 |
| ATOM | 358 | HA2  | GLY | X | 23 | 38.522 | 30.961 | 13.966 | 0.00 | 0.00 |
| ATOM | 359 | HA3  | GLY | X | 23 | 37.616 | 31.195 | 15.385 | 0.00 | 0.00 |
| ATOM | 360 | C    | GLY | X | 23 | 38.821 | 32.919 | 14.880 | 0.00 | 0.00 |
| ATOM | 361 | O    | GLY | X | 23 | 39.729 | 33.375 | 15.522 | 0.00 | 0.00 |
| ATOM | 362 | N    | PRO | X | 24 | 38.033 | 33.647 | 14.183 | 0.00 | 0.00 |
| ATOM | 363 | CD   | PRO | X | 24 | 37.014 | 33.129 | 13.350 | 0.00 | 0.00 |
| ATOM | 364 | HD2  | PRO | X | 24 | 36.415 | 32.484 | 13.993 | 0.00 | 0.00 |
| ATOM | 365 | HD3  | PRO | X | 24 | 37.343 | 32.544 | 12.491 | 0.00 | 0.00 |
| ATOM | 366 | CG   | PRO | X | 24 | 36.193 | 34.272 | 12.830 | 0.00 | 0.00 |
| ATOM | 367 | HG2  | PRO | X | 24 | 35.335 | 34.444 | 13.479 | 0.00 | 0.00 |
| ATOM | 368 | HG3  | PRO | X | 24 | 36.020 | 34.124 | 11.764 | 0.00 | 0.00 |
| ATOM | 369 | CB   | PRO | X | 24 | 37.094 | 35.476 | 13.041 | 0.00 | 0.00 |
| ATOM | 370 | HB2  | PRO | X | 24 | 36.420 | 36.317 | 13.206 | 0.00 | 0.00 |
| ATOM | 371 | HB3  | PRO | X | 24 | 37.791 | 35.648 | 12.221 | 0.00 | 0.00 |
| ATOM | 372 | CA   | PRO | X | 24 | 37.869 | 35.091 | 14.225 | 0.00 | 0.00 |
| ATOM | 373 | HA   | PRO | X | 24 | 38.862 | 35.516 | 14.082 | 0.00 | 0.00 |

|      |     |      |     |   |    |        |        |        |      |      |
|------|-----|------|-----|---|----|--------|--------|--------|------|------|
| ATOM | 374 | C    | PRO | X | 24 | 37.246 | 35.527 | 15.554 | 0.00 | 0.00 |
| ATOM | 375 | O    | PRO | X | 24 | 36.504 | 34.773 | 16.197 | 0.00 | 0.00 |
| ATOM | 376 | N    | VAL | X | 25 | 37.552 | 36.803 | 15.844 | 0.00 | 0.00 |
| ATOM | 377 | H    | VAL | X | 25 | 38.250 | 37.328 | 15.337 | 0.00 | 0.00 |
| ATOM | 378 | CA   | VAL | X | 25 | 36.977 | 37.477 | 17.041 | 0.00 | 0.00 |
| ATOM | 379 | HA   | VAL | X | 25 | 35.994 | 37.069 | 17.275 | 0.00 | 0.00 |
| ATOM | 380 | CB   | VAL | X | 25 | 37.837 | 37.289 | 18.366 | 0.00 | 0.00 |
| ATOM | 381 | HB   | VAL | X | 25 | 38.298 | 38.187 | 18.778 | 0.00 | 0.00 |
| ATOM | 382 | CG1  | VAL | X | 25 | 36.809 | 36.925 | 19.507 | 0.00 | 0.00 |
| ATOM | 383 | HG11 | VAL | X | 25 | 37.214 | 37.084 | 20.506 | 0.00 | 0.00 |
| ATOM | 384 | HG12 | VAL | X | 25 | 35.992 | 37.645 | 19.555 | 0.00 | 0.00 |
| ATOM | 385 | HG13 | VAL | X | 25 | 36.308 | 35.982 | 19.290 | 0.00 | 0.00 |
| ATOM | 386 | CG2  | VAL | X | 25 | 38.951 | 36.209 | 18.360 | 0.00 | 0.00 |
| ATOM | 387 | HG21 | VAL | X | 25 | 39.260 | 36.018 | 19.387 | 0.00 | 0.00 |
| ATOM | 388 | HG22 | VAL | X | 25 | 39.868 | 36.588 | 17.908 | 0.00 | 0.00 |
| ATOM | 389 | HG23 | VAL | X | 25 | 38.633 | 35.320 | 17.815 | 0.00 | 0.00 |
| ATOM | 390 | C    | VAL | X | 25 | 36.823 | 38.987 | 16.873 | 0.00 | 0.00 |
| ATOM | 391 | O    | VAL | X | 25 | 37.225 | 39.523 | 15.804 | 0.00 | 0.00 |
| ATOM | 392 | N    | SER | X | 26 | 36.214 | 39.651 | 17.784 | 0.00 | 0.00 |
| ATOM | 393 | H    | SER | X | 26 | 35.850 | 39.184 | 18.602 | 0.00 | 0.00 |
| ATOM | 394 | CA   | SER | X | 26 | 36.180 | 41.138 | 17.814 | 0.00 | 0.00 |
| ATOM | 395 | HA   | SER | X | 26 | 36.916 | 41.592 | 17.152 | 0.00 | 0.00 |
| ATOM | 396 | CB   | SER | X | 26 | 34.837 | 41.733 | 17.291 | 0.00 | 0.00 |
| ATOM | 397 | HB2  | SER | X | 26 | 34.638 | 42.680 | 17.793 | 0.00 | 0.00 |
| ATOM | 398 | HB3  | SER | X | 26 | 35.008 | 41.960 | 16.238 | 0.00 | 0.00 |
| ATOM | 399 | OG   | SER | X | 26 | 33.666 | 40.887 | 17.363 | 0.00 | 0.00 |
| ATOM | 400 | HG   | SER | X | 26 | 33.674 | 40.208 | 18.041 | 0.00 | 0.00 |
| ATOM | 401 | C    | SER | X | 26 | 36.405 | 41.686 | 19.249 | 0.00 | 0.00 |
| ATOM | 402 | O    | SER | X | 26 | 35.942 | 41.104 | 20.207 | 0.00 | 0.00 |
| ATOM | 403 | N    | ALA | X | 27 | 36.985 | 42.905 | 19.227 | 0.00 | 0.00 |
| ATOM | 404 | H    | ALA | X | 27 | 37.135 | 43.286 | 18.304 | 0.00 | 0.00 |
| ATOM | 405 | CA   | ALA | X | 27 | 37.204 | 43.667 | 20.417 | 0.00 | 0.00 |
| ATOM | 406 | HA   | ALA | X | 27 | 36.479 | 43.370 | 21.175 | 0.00 | 0.00 |
| ATOM | 407 | CB   | ALA | X | 27 | 38.559 | 43.315 | 21.001 | 0.00 | 0.00 |
| ATOM | 408 | HB1  | ALA | X | 27 | 39.366 | 43.752 | 20.413 | 0.00 | 0.00 |
| ATOM | 409 | HB2  | ALA | X | 27 | 38.835 | 42.265 | 21.100 | 0.00 | 0.00 |
| ATOM | 410 | HB3  | ALA | X | 27 | 38.640 | 43.871 | 21.936 | 0.00 | 0.00 |
| ATOM | 411 | C    | ALA | X | 27 | 37.049 | 45.240 | 20.186 | 0.00 | 0.00 |
| ATOM | 412 | O    | ALA | X | 27 | 37.373 | 45.780 | 19.143 | 0.00 | 0.00 |
| ATOM | 413 | N    | PHE | X | 28 | 36.478 | 45.902 | 21.197 | 0.00 | 0.00 |
| ATOM | 414 | H    | PHE | X | 28 | 36.266 | 45.326 | 21.999 | 0.00 | 0.00 |
| ATOM | 415 | CA   | PHE | X | 28 | 36.299 | 47.358 | 21.331 | 0.00 | 0.00 |
| ATOM | 416 | HA   | PHE | X | 28 | 36.725 | 47.895 | 20.483 | 0.00 | 0.00 |
| ATOM | 417 | CB   | PHE | X | 28 | 34.787 | 47.682 | 21.427 | 0.00 | 0.00 |
| ATOM | 418 | HB2  | PHE | X | 28 | 34.284 | 47.105 | 22.202 | 0.00 | 0.00 |
| ATOM | 419 | HB3  | PHE | X | 28 | 34.633 | 48.751 | 21.578 | 0.00 | 0.00 |
| ATOM | 420 | CG   | PHE | X | 28 | 33.939 | 47.299 | 20.208 | 0.00 | 0.00 |
| ATOM | 421 | CD1  | PHE | X | 28 | 33.674 | 45.939 | 19.825 | 0.00 | 0.00 |
| ATOM | 422 | HD1  | PHE | X | 28 | 34.084 | 45.108 | 20.379 | 0.00 | 0.00 |
| ATOM | 423 | CE1  | PHE | X | 28 | 32.897 | 45.675 | 18.668 | 0.00 | 0.00 |
| ATOM | 424 | HE1  | PHE | X | 28 | 32.711 | 44.629 | 18.475 | 0.00 | 0.00 |
| ATOM | 425 | CZ   | PHE | X | 28 | 32.410 | 46.732 | 17.858 | 0.00 | 0.00 |
| ATOM | 426 | HZ   | PHE | X | 28 | 31.750 | 46.394 | 17.072 | 0.00 | 0.00 |
| ATOM | 427 | CE2  | PHE | X | 28 | 32.650 | 48.053 | 18.268 | 0.00 | 0.00 |
| ATOM | 428 | HE2  | PHE | X | 28 | 32.207 | 48.893 | 17.753 | 0.00 | 0.00 |
| ATOM | 429 | CD2  | PHE | X | 28 | 33.278 | 48.300 | 19.467 | 0.00 | 0.00 |
| ATOM | 430 | HD2  | PHE | X | 28 | 33.380 | 49.343 | 19.729 | 0.00 | 0.00 |
| ATOM | 431 | C    | PHE | X | 28 | 36.990 | 47.887 | 22.566 | 0.00 | 0.00 |
| ATOM | 432 | O    | PHE | X | 28 | 36.611 | 47.516 | 23.650 | 0.00 | 0.00 |
| ATOM | 433 | N    | LEU | X | 29 | 38.024 | 48.709 | 22.526 | 0.00 | 0.00 |
| ATOM | 434 | H    | LEU | X | 29 | 38.095 | 49.241 | 21.670 | 0.00 | 0.00 |
| ATOM | 435 | CA   | LEU | X | 29 | 39.069 | 48.910 | 23.540 | 0.00 | 0.00 |
| ATOM | 436 | HA   | LEU | X | 29 | 38.775 | 48.508 | 24.509 | 0.00 | 0.00 |
| ATOM | 437 | CB   | LEU | X | 29 | 40.462 | 48.366 | 23.118 | 0.00 | 0.00 |
| ATOM | 438 | HB2  | LEU | X | 29 | 40.832 | 48.936 | 22.265 | 0.00 | 0.00 |
| ATOM | 439 | HB3  | LEU | X | 29 | 41.213 | 48.386 | 23.907 | 0.00 | 0.00 |
| ATOM | 440 | CG   | LEU | X | 29 | 40.375 | 46.890 | 22.781 | 0.00 | 0.00 |

|      |     |      |     |   |    |        |        |        |      |      |
|------|-----|------|-----|---|----|--------|--------|--------|------|------|
| ATOM | 441 | HG   | LEU | X | 29 | 39.569 | 46.698 | 22.073 | 0.00 | 0.00 |
| ATOM | 442 | CD1  | LEU | X | 29 | 41.788 | 46.471 | 22.236 | 0.00 | 0.00 |
| ATOM | 443 | HD11 | LEU | X | 29 | 42.572 | 46.624 | 22.978 | 0.00 | 0.00 |
| ATOM | 444 | HD12 | LEU | X | 29 | 42.092 | 47.143 | 21.433 | 0.00 | 0.00 |
| ATOM | 445 | HD13 | LEU | X | 29 | 41.738 | 45.444 | 21.874 | 0.00 | 0.00 |
| ATOM | 446 | CD2  | LEU | X | 29 | 40.002 | 46.043 | 23.992 | 0.00 | 0.00 |
| ATOM | 447 | HD21 | LEU | X | 29 | 40.797 | 46.077 | 24.737 | 0.00 | 0.00 |
| ATOM | 448 | HD22 | LEU | X | 29 | 39.058 | 46.373 | 24.424 | 0.00 | 0.00 |
| ATOM | 449 | HD23 | LEU | X | 29 | 39.871 | 45.009 | 23.672 | 0.00 | 0.00 |
| ATOM | 450 | C    | LEU | X | 29 | 39.212 | 50.478 | 23.670 | 0.00 | 0.00 |
| ATOM | 451 | O    | LEU | X | 29 | 39.261 | 51.227 | 22.673 | 0.00 | 0.00 |
| ATOM | 452 | N    | GLY | X | 30 | 39.326 | 50.913 | 24.906 | 0.00 | 0.00 |
| ATOM | 453 | H    | GLY | X | 30 | 39.512 | 50.201 | 25.598 | 0.00 | 0.00 |
| ATOM | 454 | CA   | GLY | X | 30 | 39.539 | 52.353 | 25.216 | 0.00 | 0.00 |
| ATOM | 455 | HA2  | GLY | X | 30 | 39.920 | 52.426 | 26.235 | 0.00 | 0.00 |
| ATOM | 456 | HA3  | GLY | X | 30 | 40.280 | 52.682 | 24.487 | 0.00 | 0.00 |
| ATOM | 457 | C    | GLY | X | 30 | 38.200 | 53.167 | 25.282 | 0.00 | 0.00 |
| ATOM | 458 | O    | GLY | X | 30 | 38.161 | 54.277 | 24.924 | 0.00 | 0.00 |
| ATOM | 459 | N    | ILE | X | 31 | 37.107 | 52.537 | 25.699 | 0.00 | 0.00 |
| ATOM | 460 | H    | ILE | X | 31 | 37.247 | 51.550 | 25.860 | 0.00 | 0.00 |
| ATOM | 461 | CA   | ILE | X | 31 | 35.742 | 53.005 | 25.753 | 0.00 | 0.00 |
| ATOM | 462 | HA   | ILE | X | 31 | 35.533 | 53.610 | 24.871 | 0.00 | 0.00 |
| ATOM | 463 | CB   | ILE | X | 31 | 34.778 | 51.813 | 25.905 | 0.00 | 0.00 |
| ATOM | 464 | HB   | ILE | X | 31 | 35.110 | 51.233 | 26.766 | 0.00 | 0.00 |
| ATOM | 465 | CG2  | ILE | X | 31 | 33.254 | 52.096 | 26.086 | 0.00 | 0.00 |
| ATOM | 466 | HG21 | ILE | X | 31 | 32.702 | 51.233 | 26.458 | 0.00 | 0.00 |
| ATOM | 467 | HG22 | ILE | X | 31 | 32.862 | 52.534 | 25.168 | 0.00 | 0.00 |
| ATOM | 468 | HG23 | ILE | X | 31 | 33.071 | 52.907 | 26.791 | 0.00 | 0.00 |
| ATOM | 469 | CG1  | ILE | X | 31 | 34.890 | 50.938 | 24.621 | 0.00 | 0.00 |
| ATOM | 470 | HG12 | ILE | X | 31 | 34.864 | 51.563 | 23.728 | 0.00 | 0.00 |
| ATOM | 471 | HG13 | ILE | X | 31 | 35.868 | 50.485 | 24.780 | 0.00 | 0.00 |
| ATOM | 472 | CD1  | ILE | X | 31 | 33.956 | 49.811 | 24.352 | 0.00 | 0.00 |
| ATOM | 473 | HD11 | ILE | X | 31 | 32.932 | 50.179 | 24.282 | 0.00 | 0.00 |
| ATOM | 474 | HD12 | ILE | X | 31 | 33.948 | 49.244 | 25.283 | 0.00 | 0.00 |
| ATOM | 475 | HD13 | ILE | X | 31 | 34.203 | 49.192 | 23.489 | 0.00 | 0.00 |
| ATOM | 476 | C    | ILE | X | 31 | 35.429 | 53.881 | 27.001 | 0.00 | 0.00 |
| ATOM | 477 | O    | ILE | X | 31 | 35.753 | 53.540 | 28.151 | 0.00 | 0.00 |
| ATOM | 478 | N    | PRO | X | 32 | 34.744 | 55.047 | 26.786 | 0.00 | 0.00 |
| ATOM | 479 | CD   | PRO | X | 32 | 34.173 | 55.619 | 25.581 | 0.00 | 0.00 |
| ATOM | 480 | HD2  | PRO | X | 32 | 33.351 | 55.002 | 25.221 | 0.00 | 0.00 |
| ATOM | 481 | HD3  | PRO | X | 32 | 34.950 | 55.644 | 24.817 | 0.00 | 0.00 |
| ATOM | 482 | CG   | PRO | X | 32 | 33.578 | 57.039 | 25.965 | 0.00 | 0.00 |
| ATOM | 483 | HG2  | PRO | X | 32 | 32.497 | 56.928 | 26.051 | 0.00 | 0.00 |
| ATOM | 484 | HG3  | PRO | X | 32 | 33.773 | 57.806 | 25.215 | 0.00 | 0.00 |
| ATOM | 485 | CB   | PRO | X | 32 | 34.381 | 57.341 | 27.259 | 0.00 | 0.00 |
| ATOM | 486 | HB2  | PRO | X | 32 | 33.840 | 58.113 | 27.806 | 0.00 | 0.00 |
| ATOM | 487 | HB3  | PRO | X | 32 | 35.385 | 57.692 | 27.018 | 0.00 | 0.00 |
| ATOM | 488 | CA   | PRO | X | 32 | 34.492 | 55.922 | 27.939 | 0.00 | 0.00 |
| ATOM | 489 | HA   | PRO | X | 32 | 35.379 | 55.856 | 28.569 | 0.00 | 0.00 |
| ATOM | 490 | C    | PRO | X | 32 | 33.219 | 55.578 | 28.690 | 0.00 | 0.00 |
| ATOM | 491 | O    | PRO | X | 32 | 32.122 | 55.404 | 28.152 | 0.00 | 0.00 |
| ATOM | 492 | N    | PHE | X | 33 | 33.355 | 55.578 | 30.023 | 0.00 | 0.00 |
| ATOM | 493 | H    | PHE | X | 33 | 34.299 | 55.593 | 30.381 | 0.00 | 0.00 |
| ATOM | 494 | CA   | PHE | X | 33 | 32.360 | 55.404 | 31.042 | 0.00 | 0.00 |
| ATOM | 495 | HA   | PHE | X | 33 | 31.380 | 55.650 | 30.632 | 0.00 | 0.00 |
| ATOM | 496 | CB   | PHE | X | 33 | 32.384 | 53.878 | 31.458 | 0.00 | 0.00 |
| ATOM | 497 | HB2  | PHE | X | 33 | 31.450 | 53.758 | 32.008 | 0.00 | 0.00 |
| ATOM | 498 | HB3  | PHE | X | 33 | 32.321 | 53.288 | 30.544 | 0.00 | 0.00 |
| ATOM | 499 | CG   | PHE | X | 33 | 33.609 | 53.528 | 32.380 | 0.00 | 0.00 |
| ATOM | 500 | CD1  | PHE | X | 33 | 33.301 | 53.427 | 33.774 | 0.00 | 0.00 |
| ATOM | 501 | HD1  | PHE | X | 33 | 32.274 | 53.552 | 34.083 | 0.00 | 0.00 |
| ATOM | 502 | CE1  | PHE | X | 33 | 34.275 | 53.339 | 34.766 | 0.00 | 0.00 |
| ATOM | 503 | HE1  | PHE | X | 33 | 34.128 | 53.341 | 35.836 | 0.00 | 0.00 |
| ATOM | 504 | CZ   | PHE | X | 33 | 35.651 | 53.368 | 34.376 | 0.00 | 0.00 |
| ATOM | 505 | HZ   | PHE | X | 33 | 36.427 | 53.482 | 35.119 | 0.00 | 0.00 |
| ATOM | 506 | CE2  | PHE | X | 33 | 35.984 | 53.339 | 32.974 | 0.00 | 0.00 |
| ATOM | 507 | HE2  | PHE | X | 33 | 37.021 | 53.489 | 32.710 | 0.00 | 0.00 |

|      |     |     |     |   |    |        |        |        |      |      |
|------|-----|-----|-----|---|----|--------|--------|--------|------|------|
| ATOM | 508 | CD2 | PHE | X | 33 | 34.965 | 53.428 | 31.974 | 0.00 | 0.00 |
| ATOM | 509 | HD2 | PHE | X | 33 | 35.107 | 53.524 | 30.908 | 0.00 | 0.00 |
| ATOM | 510 | C   | PHE | X | 33 | 32.460 | 56.317 | 32.245 | 0.00 | 0.00 |
| ATOM | 511 | O   | PHE | X | 33 | 31.573 | 56.374 | 33.123 | 0.00 | 0.00 |
| ATOM | 512 | N   | ALA | X | 34 | 33.560 | 57.072 | 32.331 | 0.00 | 0.00 |
| ATOM | 513 | H   | ALA | X | 34 | 34.257 | 56.924 | 31.615 | 0.00 | 0.00 |
| ATOM | 514 | CA  | ALA | X | 34 | 33.828 | 58.108 | 33.354 | 0.00 | 0.00 |
| ATOM | 515 | HA  | ALA | X | 34 | 32.857 | 58.436 | 33.724 | 0.00 | 0.00 |
| ATOM | 516 | CB  | ALA | X | 34 | 34.749 | 57.464 | 34.435 | 0.00 | 0.00 |
| ATOM | 517 | HB1 | ALA | X | 34 | 34.947 | 58.155 | 35.255 | 0.00 | 0.00 |
| ATOM | 518 | HB2 | ALA | X | 34 | 35.675 | 57.060 | 34.026 | 0.00 | 0.00 |
| ATOM | 519 | HB3 | ALA | X | 34 | 34.225 | 56.596 | 34.833 | 0.00 | 0.00 |
| ATOM | 520 | C   | ALA | X | 34 | 34.511 | 59.288 | 32.708 | 0.00 | 0.00 |
| ATOM | 521 | O   | ALA | X | 34 | 35.465 | 59.204 | 31.946 | 0.00 | 0.00 |
| ATOM | 522 | N   | GLU | X | 35 | 34.235 | 60.439 | 33.284 | 0.00 | 0.00 |
| ATOM | 523 | H   | GLU | X | 35 | 33.700 | 60.400 | 34.139 | 0.00 | 0.00 |
| ATOM | 524 | CA  | GLU | X | 35 | 35.032 | 61.640 | 33.004 | 0.00 | 0.00 |
| ATOM | 525 | HA  | GLU | X | 35 | 35.237 | 61.757 | 31.939 | 0.00 | 0.00 |
| ATOM | 526 | CB  | GLU | X | 35 | 34.262 | 62.901 | 33.448 | 0.00 | 0.00 |
| ATOM | 527 | HB2 | GLU | X | 35 | 33.965 | 62.851 | 34.496 | 0.00 | 0.00 |
| ATOM | 528 | HB3 | GLU | X | 35 | 34.885 | 63.793 | 33.397 | 0.00 | 0.00 |
| ATOM | 529 | CG  | GLU | X | 35 | 32.891 | 63.022 | 32.721 | 0.00 | 0.00 |
| ATOM | 530 | HG2 | GLU | X | 35 | 32.277 | 62.125 | 32.788 | 0.00 | 0.00 |
| ATOM | 531 | HG3 | GLU | X | 35 | 32.410 | 63.917 | 33.115 | 0.00 | 0.00 |
| ATOM | 532 | CD  | GLU | X | 35 | 33.071 | 63.309 | 31.283 | 0.00 | 0.00 |
| ATOM | 533 | OE1 | GLU | X | 35 | 32.061 | 63.275 | 30.547 | 0.00 | 0.00 |
| ATOM | 534 | OE2 | GLU | X | 35 | 34.154 | 63.667 | 30.749 | 0.00 | 0.00 |
| ATOM | 535 | C   | GLU | X | 35 | 36.367 | 61.702 | 33.758 | 0.00 | 0.00 |
| ATOM | 536 | O   | GLU | X | 35 | 36.596 | 60.876 | 34.655 | 0.00 | 0.00 |
| ATOM | 537 | N   | PRO | X | 36 | 37.342 | 62.576 | 33.300 | 0.00 | 0.00 |
| ATOM | 538 | CD  | PRO | X | 36 | 37.367 | 63.415 | 32.171 | 0.00 | 0.00 |
| ATOM | 539 | HD2 | PRO | X | 36 | 36.981 | 64.409 | 32.399 | 0.00 | 0.00 |
| ATOM | 540 | HD3 | PRO | X | 36 | 36.862 | 63.101 | 31.258 | 0.00 | 0.00 |
| ATOM | 541 | CG  | PRO | X | 36 | 38.820 | 63.472 | 31.753 | 0.00 | 0.00 |
| ATOM | 542 | HG2 | PRO | X | 36 | 38.948 | 64.439 | 31.267 | 0.00 | 0.00 |
| ATOM | 543 | HG3 | PRO | X | 36 | 39.082 | 62.709 | 31.020 | 0.00 | 0.00 |
| ATOM | 544 | CB  | PRO | X | 36 | 39.633 | 63.327 | 33.058 | 0.00 | 0.00 |
| ATOM | 545 | HB2 | PRO | X | 36 | 39.663 | 64.274 | 33.597 | 0.00 | 0.00 |
| ATOM | 546 | HB3 | PRO | X | 36 | 40.661 | 62.971 | 32.990 | 0.00 | 0.00 |
| ATOM | 547 | CA  | PRO | X | 36 | 38.727 | 62.386 | 33.788 | 0.00 | 0.00 |
| ATOM | 548 | HA  | PRO | X | 36 | 38.988 | 61.348 | 33.583 | 0.00 | 0.00 |
| ATOM | 549 | C   | PRO | X | 36 | 38.801 | 62.560 | 35.331 | 0.00 | 0.00 |
| ATOM | 550 | O   | PRO | X | 36 | 38.315 | 63.628 | 35.789 | 0.00 | 0.00 |
| ATOM | 551 | N   | PRO | X | 37 | 39.434 | 61.668 | 36.106 | 0.00 | 0.00 |
| ATOM | 552 | CD  | PRO | X | 37 | 39.864 | 60.239 | 35.741 | 0.00 | 0.00 |
| ATOM | 553 | HD2 | PRO | X | 37 | 40.619 | 60.230 | 34.956 | 0.00 | 0.00 |
| ATOM | 554 | HD3 | PRO | X | 37 | 38.988 | 59.679 | 35.414 | 0.00 | 0.00 |
| ATOM | 555 | CG  | PRO | X | 37 | 40.458 | 59.674 | 37.029 | 0.00 | 0.00 |
| ATOM | 556 | HG2 | PRO | X | 37 | 41.487 | 59.990 | 37.198 | 0.00 | 0.00 |
| ATOM | 557 | HG3 | PRO | X | 37 | 40.410 | 58.591 | 37.149 | 0.00 | 0.00 |
| ATOM | 558 | CB  | PRO | X | 37 | 39.675 | 60.375 | 38.045 | 0.00 | 0.00 |
| ATOM | 559 | HB2 | PRO | X | 37 | 40.234 | 60.362 | 38.981 | 0.00 | 0.00 |
| ATOM | 560 | HB3 | PRO | X | 37 | 38.635 | 60.050 | 38.072 | 0.00 | 0.00 |
| ATOM | 561 | CA  | PRO | X | 37 | 39.539 | 61.796 | 37.534 | 0.00 | 0.00 |
| ATOM | 562 | HA  | PRO | X | 37 | 38.638 | 62.269 | 37.925 | 0.00 | 0.00 |
| ATOM | 563 | C   | PRO | X | 37 | 40.711 | 62.654 | 37.980 | 0.00 | 0.00 |
| ATOM | 564 | O   | PRO | X | 37 | 41.008 | 62.725 | 39.169 | 0.00 | 0.00 |
| ATOM | 565 | N   | MET | X | 38 | 41.366 | 63.373 | 37.079 | 0.00 | 0.00 |
| ATOM | 566 | H   | MET | X | 38 | 41.162 | 63.210 | 36.103 | 0.00 | 0.00 |
| ATOM | 567 | CA  | MET | X | 38 | 42.505 | 64.331 | 37.333 | 0.00 | 0.00 |
| ATOM | 568 | HA  | MET | X | 38 | 43.359 | 63.775 | 37.718 | 0.00 | 0.00 |
| ATOM | 569 | CB  | MET | X | 38 | 42.771 | 64.865 | 35.930 | 0.00 | 0.00 |
| ATOM | 570 | HB2 | MET | X | 38 | 43.668 | 65.485 | 35.906 | 0.00 | 0.00 |
| ATOM | 571 | HB3 | MET | X | 38 | 43.049 | 63.980 | 35.357 | 0.00 | 0.00 |
| ATOM | 572 | CG  | MET | X | 38 | 41.686 | 65.603 | 35.203 | 0.00 | 0.00 |
| ATOM | 573 | HG2 | MET | X | 38 | 40.786 | 65.006 | 35.357 | 0.00 | 0.00 |
| ATOM | 574 | HG3 | MET | X | 38 | 41.664 | 66.561 | 35.723 | 0.00 | 0.00 |

|      |     |      |     |   |    |        |        |        |      |      |
|------|-----|------|-----|---|----|--------|--------|--------|------|------|
| ATOM | 575 | SD   | MET | X | 38 | 42.003 | 65.854 | 33.438 | 0.00 | 0.00 |
| ATOM | 576 | CE   | MET | X | 38 | 43.790 | 66.299 | 33.398 | 0.00 | 0.00 |
| ATOM | 577 | HE1  | MET | X | 38 | 44.033 | 66.708 | 32.417 | 0.00 | 0.00 |
| ATOM | 578 | HE2  | MET | X | 38 | 44.066 | 67.030 | 34.158 | 0.00 | 0.00 |
| ATOM | 579 | HE3  | MET | X | 38 | 44.312 | 65.352 | 33.535 | 0.00 | 0.00 |
| ATOM | 580 | C    | MET | X | 38 | 42.199 | 65.492 | 38.311 | 0.00 | 0.00 |
| ATOM | 581 | O    | MET | X | 38 | 41.027 | 65.947 | 38.496 | 0.00 | 0.00 |
| ATOM | 582 | N    | GLY | X | 39 | 43.301 | 66.012 | 38.968 | 0.00 | 0.00 |
| ATOM | 583 | H    | GLY | X | 39 | 44.180 | 65.516 | 38.932 | 0.00 | 0.00 |
| ATOM | 584 | CA   | GLY | X | 39 | 43.327 | 67.281 | 39.656 | 0.00 | 0.00 |
| ATOM | 585 | HA2  | GLY | X | 39 | 44.335 | 67.370 | 40.062 | 0.00 | 0.00 |
| ATOM | 586 | HA3  | GLY | X | 39 | 43.218 | 68.128 | 38.978 | 0.00 | 0.00 |
| ATOM | 587 | C    | GLY | X | 39 | 42.392 | 67.383 | 40.895 | 0.00 | 0.00 |
| ATOM | 588 | O    | GLY | X | 39 | 42.765 | 66.732 | 41.885 | 0.00 | 0.00 |
| ATOM | 589 | N    | PRO | X | 40 | 41.305 | 68.126 | 40.733 | 0.00 | 0.00 |
| ATOM | 590 | CD   | PRO | X | 40 | 41.206 | 69.268 | 39.950 | 0.00 | 0.00 |
| ATOM | 591 | HD2  | PRO | X | 40 | 40.864 | 68.965 | 38.960 | 0.00 | 0.00 |
| ATOM | 592 | HD3  | PRO | X | 40 | 42.134 | 69.838 | 39.919 | 0.00 | 0.00 |
| ATOM | 593 | CG   | PRO | X | 40 | 40.100 | 70.132 | 40.516 | 0.00 | 0.00 |
| ATOM | 594 | HG2  | PRO | X | 40 | 39.644 | 70.745 | 39.739 | 0.00 | 0.00 |
| ATOM | 595 | HG3  | PRO | X | 40 | 40.569 | 70.802 | 41.236 | 0.00 | 0.00 |
| ATOM | 596 | CB   | PRO | X | 40 | 39.207 | 69.144 | 41.172 | 0.00 | 0.00 |
| ATOM | 597 | HB2  | PRO | X | 40 | 38.583 | 68.620 | 40.448 | 0.00 | 0.00 |
| ATOM | 598 | HB3  | PRO | X | 40 | 38.538 | 69.563 | 41.924 | 0.00 | 0.00 |
| ATOM | 599 | CA   | PRO | X | 40 | 40.247 | 68.160 | 41.711 | 0.00 | 0.00 |
| ATOM | 600 | HA   | PRO | X | 40 | 40.691 | 68.575 | 42.616 | 0.00 | 0.00 |
| ATOM | 601 | C    | PRO | X | 40 | 39.598 | 66.846 | 42.004 | 0.00 | 0.00 |
| ATOM | 602 | O    | PRO | X | 40 | 39.169 | 66.657 | 43.146 | 0.00 | 0.00 |
| ATOM | 603 | N    | ARG | X | 41 | 39.324 | 65.965 | 41.032 | 0.00 | 0.00 |
| ATOM | 604 | H    | ARG | X | 41 | 39.589 | 66.259 | 40.102 | 0.00 | 0.00 |
| ATOM | 605 | CA   | ARG | X | 41 | 38.781 | 64.667 | 41.150 | 0.00 | 0.00 |
| ATOM | 606 | HA   | ARG | X | 41 | 37.987 | 64.840 | 41.876 | 0.00 | 0.00 |
| ATOM | 607 | CB   | ARG | X | 41 | 38.155 | 64.228 | 39.772 | 0.00 | 0.00 |
| ATOM | 608 | HB2  | ARG | X | 41 | 38.892 | 64.058 | 38.987 | 0.00 | 0.00 |
| ATOM | 609 | HB3  | ARG | X | 41 | 37.578 | 63.317 | 39.933 | 0.00 | 0.00 |
| ATOM | 610 | CG   | ARG | X | 41 | 37.097 | 65.324 | 39.279 | 0.00 | 0.00 |
| ATOM | 611 | HG2  | ARG | X | 41 | 36.499 | 65.617 | 40.142 | 0.00 | 0.00 |
| ATOM | 612 | HG3  | ARG | X | 41 | 37.571 | 66.154 | 38.754 | 0.00 | 0.00 |
| ATOM | 613 | CD   | ARG | X | 41 | 36.177 | 64.552 | 38.245 | 0.00 | 0.00 |
| ATOM | 614 | HD2  | ARG | X | 41 | 36.800 | 64.086 | 37.482 | 0.00 | 0.00 |
| ATOM | 615 | HD3  | ARG | X | 41 | 35.463 | 63.875 | 38.713 | 0.00 | 0.00 |
| ATOM | 616 | NE   | ARG | X | 41 | 35.339 | 65.507 | 37.483 | 0.00 | 0.00 |
| ATOM | 617 | HE   | ARG | X | 41 | 34.407 | 65.749 | 37.788 | 0.00 | 0.00 |
| ATOM | 618 | CZ   | ARG | X | 41 | 35.697 | 66.219 | 36.493 | 0.00 | 0.00 |
| ATOM | 619 | NH1  | ARG | X | 41 | 36.839 | 65.983 | 35.873 | 0.00 | 0.00 |
| ATOM | 620 | HH11 | ARG | X | 41 | 37.460 | 65.224 | 36.118 | 0.00 | 0.00 |
| ATOM | 621 | HH12 | ARG | X | 41 | 37.190 | 66.468 | 35.060 | 0.00 | 0.00 |
| ATOM | 622 | NH2  | ARG | X | 41 | 34.931 | 67.197 | 36.075 | 0.00 | 0.00 |
| ATOM | 623 | HH21 | ARG | X | 41 | 34.018 | 67.358 | 36.477 | 0.00 | 0.00 |
| ATOM | 624 | HH22 | ARG | X | 41 | 35.248 | 67.930 | 35.457 | 0.00 | 0.00 |
| ATOM | 625 | C    | ARG | X | 41 | 39.668 | 63.655 | 41.696 | 0.00 | 0.00 |
| ATOM | 626 | O    | ARG | X | 41 | 39.271 | 62.584 | 42.097 | 0.00 | 0.00 |
| ATOM | 627 | N    | ARG | X | 42 | 40.986 | 63.923 | 41.930 | 0.00 | 0.00 |
| ATOM | 628 | H    | ARG | X | 42 | 41.236 | 64.863 | 41.655 | 0.00 | 0.00 |
| ATOM | 629 | CA   | ARG | X | 42 | 42.012 | 63.066 | 42.499 | 0.00 | 0.00 |
| ATOM | 630 | HA   | ARG | X | 42 | 42.146 | 62.096 | 42.020 | 0.00 | 0.00 |
| ATOM | 631 | CB   | ARG | X | 42 | 43.338 | 63.800 | 42.241 | 0.00 | 0.00 |
| ATOM | 632 | HB2  | ARG | X | 42 | 43.345 | 64.284 | 41.265 | 0.00 | 0.00 |
| ATOM | 633 | HB3  | ARG | X | 42 | 43.446 | 64.564 | 43.011 | 0.00 | 0.00 |
| ATOM | 634 | CG   | ARG | X | 42 | 44.587 | 62.922 | 42.375 | 0.00 | 0.00 |
| ATOM | 635 | HG2  | ARG | X | 42 | 44.287 | 62.234 | 43.166 | 0.00 | 0.00 |
| ATOM | 636 | HG3  | ARG | X | 42 | 44.677 | 62.181 | 41.581 | 0.00 | 0.00 |
| ATOM | 637 | CD   | ARG | X | 42 | 45.940 | 63.660 | 42.726 | 0.00 | 0.00 |
| ATOM | 638 | HD2  | ARG | X | 42 | 45.834 | 64.251 | 43.636 | 0.00 | 0.00 |
| ATOM | 639 | HD3  | ARG | X | 42 | 46.768 | 62.982 | 42.934 | 0.00 | 0.00 |
| ATOM | 640 | NE   | ARG | X | 42 | 46.220 | 64.384 | 41.486 | 0.00 | 0.00 |
| ATOM | 641 | HE   | ARG | X | 42 | 45.793 | 64.037 | 40.639 | 0.00 | 0.00 |

|      |     |      |     |   |    |        |        |        |      |      |
|------|-----|------|-----|---|----|--------|--------|--------|------|------|
| ATOM | 642 | CZ   | ARG | X | 42 | 47.353 | 65.069 | 41.317 | 0.00 | 0.00 |
| ATOM | 643 | NH1  | ARG | X | 42 | 48.029 | 65.532 | 42.404 | 0.00 | 0.00 |
| ATOM | 644 | HH11 | ARG | X | 42 | 47.610 | 65.292 | 43.291 | 0.00 | 0.00 |
| ATOM | 645 | HH12 | ARG | X | 42 | 48.836 | 66.131 | 42.309 | 0.00 | 0.00 |
| ATOM | 646 | NH2  | ARG | X | 42 | 47.787 | 65.429 | 40.078 | 0.00 | 0.00 |
| ATOM | 647 | HH21 | ARG | X | 42 | 47.237 | 65.249 | 39.250 | 0.00 | 0.00 |
| ATOM | 648 | HH22 | ARG | X | 42 | 48.573 | 66.051 | 39.962 | 0.00 | 0.00 |
| ATOM | 649 | C    | ARG | X | 42 | 41.602 | 62.747 | 43.947 | 0.00 | 0.00 |
| ATOM | 650 | O    | ARG | X | 42 | 41.483 | 63.720 | 44.686 | 0.00 | 0.00 |
| ATOM | 651 | N    | PHE | X | 43 | 41.466 | 61.439 | 44.355 | 0.00 | 0.00 |
| ATOM | 652 | H    | PHE | X | 43 | 41.588 | 60.800 | 43.583 | 0.00 | 0.00 |
| ATOM | 653 | CA   | PHE | X | 43 | 41.191 | 60.853 | 45.711 | 0.00 | 0.00 |
| ATOM | 654 | HA   | PHE | X | 43 | 41.452 | 59.802 | 45.587 | 0.00 | 0.00 |
| ATOM | 655 | CB   | PHE | X | 43 | 41.913 | 61.537 | 46.853 | 0.00 | 0.00 |
| ATOM | 656 | HB2  | PHE | X | 43 | 41.370 | 62.384 | 47.272 | 0.00 | 0.00 |
| ATOM | 657 | HB3  | PHE | X | 43 | 42.095 | 60.869 | 47.695 | 0.00 | 0.00 |
| ATOM | 658 | CG   | PHE | X | 43 | 43.341 | 61.984 | 46.512 | 0.00 | 0.00 |
| ATOM | 659 | CD1  | PHE | X | 43 | 44.226 | 61.066 | 45.872 | 0.00 | 0.00 |
| ATOM | 660 | HD1  | PHE | X | 43 | 43.768 | 60.142 | 45.552 | 0.00 | 0.00 |
| ATOM | 661 | CE1  | PHE | X | 43 | 45.604 | 61.353 | 45.640 | 0.00 | 0.00 |
| ATOM | 662 | HE1  | PHE | X | 43 | 46.176 | 60.545 | 45.207 | 0.00 | 0.00 |
| ATOM | 663 | CZ   | PHE | X | 43 | 46.084 | 62.603 | 46.069 | 0.00 | 0.00 |
| ATOM | 664 | HZ   | PHE | X | 43 | 47.056 | 62.989 | 45.799 | 0.00 | 0.00 |
| ATOM | 665 | CE2  | PHE | X | 43 | 45.239 | 63.546 | 46.650 | 0.00 | 0.00 |
| ATOM | 666 | HE2  | PHE | X | 43 | 45.692 | 64.475 | 46.963 | 0.00 | 0.00 |
| ATOM | 667 | CD2  | PHE | X | 43 | 43.872 | 63.222 | 46.928 | 0.00 | 0.00 |
| ATOM | 668 | HD2  | PHE | X | 43 | 43.214 | 63.900 | 47.450 | 0.00 | 0.00 |
| ATOM | 669 | C    | PHE | X | 43 | 39.652 | 60.823 | 45.945 | 0.00 | 0.00 |
| ATOM | 670 | O    | PHE | X | 43 | 39.255 | 60.561 | 47.116 | 0.00 | 0.00 |
| ATOM | 671 | N    | LEU | X | 44 | 38.700 | 61.064 | 45.007 | 0.00 | 0.00 |
| ATOM | 672 | H    | LEU | X | 44 | 39.045 | 61.366 | 44.106 | 0.00 | 0.00 |
| ATOM | 673 | CA   | LEU | X | 44 | 37.322 | 61.234 | 45.166 | 0.00 | 0.00 |
| ATOM | 674 | HA   | LEU | X | 44 | 37.127 | 61.042 | 46.222 | 0.00 | 0.00 |
| ATOM | 675 | CB   | LEU | X | 44 | 36.956 | 62.764 | 44.863 | 0.00 | 0.00 |
| ATOM | 676 | HB2  | LEU | X | 44 | 37.368 | 63.170 | 43.939 | 0.00 | 0.00 |
| ATOM | 677 | HB3  | LEU | X | 44 | 35.878 | 62.850 | 44.724 | 0.00 | 0.00 |
| ATOM | 678 | CG   | LEU | X | 44 | 37.344 | 63.712 | 46.040 | 0.00 | 0.00 |
| ATOM | 679 | HG   | LEU | X | 44 | 38.419 | 63.596 | 46.175 | 0.00 | 0.00 |
| ATOM | 680 | CD1  | LEU | X | 44 | 37.047 | 65.149 | 45.626 | 0.00 | 0.00 |
| ATOM | 681 | HD11 | LEU | X | 44 | 36.076 | 65.090 | 45.135 | 0.00 | 0.00 |
| ATOM | 682 | HD12 | LEU | X | 44 | 37.734 | 65.421 | 44.824 | 0.00 | 0.00 |
| ATOM | 683 | HD13 | LEU | X | 44 | 37.198 | 65.906 | 46.395 | 0.00 | 0.00 |
| ATOM | 684 | CD2  | LEU | X | 44 | 36.653 | 63.454 | 47.376 | 0.00 | 0.00 |
| ATOM | 685 | HD21 | LEU | X | 44 | 36.883 | 64.305 | 48.018 | 0.00 | 0.00 |
| ATOM | 686 | HD22 | LEU | X | 44 | 35.571 | 63.360 | 47.283 | 0.00 | 0.00 |
| ATOM | 687 | HD23 | LEU | X | 44 | 37.082 | 62.598 | 47.897 | 0.00 | 0.00 |
| ATOM | 688 | C    | LEU | X | 44 | 36.507 | 60.263 | 44.310 | 0.00 | 0.00 |
| ATOM | 689 | O    | LEU | X | 44 | 36.945 | 60.022 | 43.170 | 0.00 | 0.00 |
| ATOM | 690 | N    | PRO | X | 45 | 35.223 | 59.930 | 44.697 | 0.00 | 0.00 |
| ATOM | 691 | CD   | PRO | X | 45 | 34.527 | 60.433 | 45.866 | 0.00 | 0.00 |
| ATOM | 692 | HD2  | PRO | X | 45 | 34.248 | 61.480 | 45.750 | 0.00 | 0.00 |
| ATOM | 693 | HD3  | PRO | X | 45 | 35.135 | 60.270 | 46.755 | 0.00 | 0.00 |
| ATOM | 694 | CG   | PRO | X | 45 | 33.297 | 59.657 | 46.020 | 0.00 | 0.00 |
| ATOM | 695 | HG2  | PRO | X | 45 | 32.439 | 60.219 | 46.389 | 0.00 | 0.00 |
| ATOM | 696 | HG3  | PRO | X | 45 | 33.475 | 58.797 | 46.665 | 0.00 | 0.00 |
| ATOM | 697 | CB   | PRO | X | 45 | 32.989 | 59.063 | 44.620 | 0.00 | 0.00 |
| ATOM | 698 | HB2  | PRO | X | 45 | 32.216 | 59.706 | 44.199 | 0.00 | 0.00 |
| ATOM | 699 | HB3  | PRO | X | 45 | 32.587 | 58.053 | 44.695 | 0.00 | 0.00 |
| ATOM | 700 | CA   | PRO | X | 45 | 34.311 | 59.159 | 43.864 | 0.00 | 0.00 |
| ATOM | 701 | HA   | PRO | X | 45 | 34.739 | 58.159 | 43.787 | 0.00 | 0.00 |
| ATOM | 702 | C    | PRO | X | 45 | 34.207 | 59.721 | 42.390 | 0.00 | 0.00 |
| ATOM | 703 | O    | PRO | X | 45 | 34.118 | 60.969 | 42.278 | 0.00 | 0.00 |
| ATOM | 704 | N    | PRO | X | 46 | 34.308 | 58.894 | 41.337 | 0.00 | 0.00 |
| ATOM | 705 | CD   | PRO | X | 46 | 34.264 | 57.467 | 41.394 | 0.00 | 0.00 |
| ATOM | 706 | HD2  | PRO | X | 46 | 33.312 | 57.206 | 41.855 | 0.00 | 0.00 |
| ATOM | 707 | HD3  | PRO | X | 46 | 35.082 | 56.983 | 41.928 | 0.00 | 0.00 |
| ATOM | 708 | CG   | PRO | X | 46 | 34.292 | 56.943 | 39.956 | 0.00 | 0.00 |



|      |     |     |     |   |    |        |        |        |      |      |
|------|-----|-----|-----|---|----|--------|--------|--------|------|------|
| ATOM | 709 | HG2 | PRO | X | 46 | 33.284 | 56.728 | 39.601 | 0.00 | 0.00 |
| ATOM | 710 | HG3 | PRO | X | 46 | 34.901 | 56.039 | 39.980 | 0.00 | 0.00 |
| ATOM | 711 | CB  | PRO | X | 46 | 35.018 | 58.063 | 39.153 | 0.00 | 0.00 |
| ATOM | 712 | HB2 | PRO | X | 46 | 34.769 | 58.133 | 38.094 | 0.00 | 0.00 |
| ATOM | 713 | HB3 | PRO | X | 46 | 36.103 | 58.067 | 39.259 | 0.00 | 0.00 |
| ATOM | 714 | CA  | PRO | X | 46 | 34.457 | 59.303 | 39.924 | 0.00 | 0.00 |
| ATOM | 715 | HA  | PRO | X | 46 | 35.103 | 60.169 | 39.780 | 0.00 | 0.00 |
| ATOM | 716 | C   | PRO | X | 46 | 33.049 | 59.679 | 39.417 | 0.00 | 0.00 |
| ATOM | 717 | O   | PRO | X | 46 | 32.054 | 59.221 | 40.032 | 0.00 | 0.00 |
| ATOM | 718 | N   | GLU | X | 47 | 32.921 | 60.393 | 38.308 | 0.00 | 0.00 |
| ATOM | 719 | H   | GLU | X | 47 | 33.770 | 60.571 | 37.791 | 0.00 | 0.00 |
| ATOM | 720 | CA  | GLU | X | 47 | 31.690 | 60.919 | 37.814 | 0.00 | 0.00 |
| ATOM | 721 | HA  | GLU | X | 47 | 30.864 | 60.515 | 38.399 | 0.00 | 0.00 |
| ATOM | 722 | CB  | GLU | X | 47 | 31.506 | 62.439 | 37.692 | 0.00 | 0.00 |
| ATOM | 723 | HB2 | GLU | X | 47 | 32.332 | 62.876 | 37.130 | 0.00 | 0.00 |
| ATOM | 724 | HB3 | GLU | X | 47 | 30.595 | 62.649 | 37.131 | 0.00 | 0.00 |
| ATOM | 725 | CG  | GLU | X | 47 | 31.254 | 63.109 | 39.080 | 0.00 | 0.00 |
| ATOM | 726 | HG2 | GLU | X | 47 | 31.880 | 62.714 | 39.881 | 0.00 | 0.00 |
| ATOM | 727 | HG3 | GLU | X | 47 | 31.468 | 64.171 | 38.963 | 0.00 | 0.00 |
| ATOM | 728 | CD  | GLU | X | 47 | 29.692 | 63.204 | 39.387 | 0.00 | 0.00 |
| ATOM | 729 | OE1 | GLU | X | 47 | 28.948 | 63.890 | 38.619 | 0.00 | 0.00 |
| ATOM | 730 | OE2 | GLU | X | 47 | 29.207 | 62.571 | 40.338 | 0.00 | 0.00 |
| ATOM | 731 | C   | GLU | X | 47 | 31.467 | 60.310 | 36.391 | 0.00 | 0.00 |
| ATOM | 732 | O   | GLU | X | 47 | 32.422 | 60.137 | 35.626 | 0.00 | 0.00 |
| ATOM | 733 | N   | PRO | X | 48 | 30.214 | 59.855 | 36.098 | 0.00 | 0.00 |
| ATOM | 734 | CD  | PRO | X | 48 | 28.962 | 59.955 | 36.891 | 0.00 | 0.00 |
| ATOM | 735 | HD2 | PRO | X | 48 | 28.838 | 60.909 | 37.404 | 0.00 | 0.00 |
| ATOM | 736 | HD3 | PRO | X | 48 | 28.973 | 59.137 | 37.611 | 0.00 | 0.00 |
| ATOM | 737 | CG  | PRO | X | 48 | 27.792 | 59.845 | 35.947 | 0.00 | 0.00 |
| ATOM | 738 | HG2 | PRO | X | 48 | 27.532 | 60.819 | 35.534 | 0.00 | 0.00 |
| ATOM | 739 | HG3 | PRO | X | 48 | 26.906 | 59.389 | 36.389 | 0.00 | 0.00 |
| ATOM | 740 | CB  | PRO | X | 48 | 28.370 | 58.883 | 34.875 | 0.00 | 0.00 |
| ATOM | 741 | HB2 | PRO | X | 48 | 27.933 | 59.146 | 33.912 | 0.00 | 0.00 |
| ATOM | 742 | HB3 | PRO | X | 48 | 28.064 | 57.895 | 35.220 | 0.00 | 0.00 |
| ATOM | 743 | CA  | PRO | X | 48 | 29.904 | 59.222 | 34.805 | 0.00 | 0.00 |
| ATOM | 744 | HA  | PRO | X | 48 | 30.448 | 58.295 | 34.627 | 0.00 | 0.00 |
| ATOM | 745 | C   | PRO | X | 48 | 30.080 | 60.068 | 33.553 | 0.00 | 0.00 |
| ATOM | 746 | O   | PRO | X | 48 | 29.899 | 61.280 | 33.565 | 0.00 | 0.00 |
| ATOM | 747 | N   | LYS | X | 49 | 30.375 | 59.443 | 32.398 | 0.00 | 0.00 |
| ATOM | 748 | H   | LYS | X | 49 | 30.270 | 58.441 | 32.331 | 0.00 | 0.00 |
| ATOM | 749 | CA  | LYS | X | 49 | 30.679 | 60.045 | 31.078 | 0.00 | 0.00 |
| ATOM | 750 | HA  | LYS | X | 49 | 31.420 | 60.803 | 31.332 | 0.00 | 0.00 |
| ATOM | 751 | CB  | LYS | X | 49 | 31.435 | 59.065 | 30.201 | 0.00 | 0.00 |
| ATOM | 752 | HB2 | LYS | X | 49 | 32.462 | 59.152 | 30.556 | 0.00 | 0.00 |
| ATOM | 753 | HB3 | LYS | X | 49 | 30.952 | 58.093 | 30.296 | 0.00 | 0.00 |
| ATOM | 754 | CG  | LYS | X | 49 | 31.480 | 59.387 | 28.683 | 0.00 | 0.00 |
| ATOM | 755 | HG2 | LYS | X | 49 | 31.880 | 58.487 | 28.216 | 0.00 | 0.00 |
| ATOM | 756 | HG3 | LYS | X | 49 | 30.486 | 59.457 | 28.240 | 0.00 | 0.00 |
| ATOM | 757 | CD  | LYS | X | 49 | 32.075 | 60.738 | 28.287 | 0.00 | 0.00 |
| ATOM | 758 | HD2 | LYS | X | 49 | 32.050 | 60.886 | 27.208 | 0.00 | 0.00 |
| ATOM | 759 | HD3 | LYS | X | 49 | 31.570 | 61.587 | 28.748 | 0.00 | 0.00 |
| ATOM | 760 | CE  | LYS | X | 49 | 33.479 | 60.693 | 28.660 | 0.00 | 0.00 |
| ATOM | 761 | HE2 | LYS | X | 49 | 33.566 | 60.376 | 29.699 | 0.00 | 0.00 |
| ATOM | 762 | HE3 | LYS | X | 49 | 34.041 | 60.027 | 28.005 | 0.00 | 0.00 |
| ATOM | 763 | NZ  | LYS | X | 49 | 34.137 | 62.003 | 28.691 | 0.00 | 0.00 |
| ATOM | 764 | HZ1 | LYS | X | 49 | 33.675 | 62.626 | 29.338 | 0.00 | 0.00 |
| ATOM | 765 | HZ2 | LYS | X | 49 | 35.047 | 61.813 | 29.086 | 0.00 | 0.00 |
| ATOM | 766 | HZ3 | LYS | X | 49 | 34.241 | 62.423 | 27.778 | 0.00 | 0.00 |
| ATOM | 767 | C   | LYS | X | 49 | 29.368 | 60.664 | 30.509 | 0.00 | 0.00 |
| ATOM | 768 | O   | LYS | X | 49 | 28.437 | 59.961 | 30.218 | 0.00 | 0.00 |
| ATOM | 769 | N   | GLN | X | 50 | 29.471 | 61.982 | 30.253 | 0.00 | 0.00 |
| ATOM | 770 | H   | GLN | X | 50 | 30.355 | 62.423 | 30.464 | 0.00 | 0.00 |
| ATOM | 771 | CA  | GLN | X | 50 | 28.456 | 62.737 | 29.417 | 0.00 | 0.00 |
| ATOM | 772 | HA  | GLN | X | 50 | 27.461 | 62.550 | 29.820 | 0.00 | 0.00 |
| ATOM | 773 | CB  | GLN | X | 50 | 28.788 | 64.184 | 29.435 | 0.00 | 0.00 |
| ATOM | 774 | HB2 | GLN | X | 50 | 27.871 | 64.769 | 29.368 | 0.00 | 0.00 |
| ATOM | 775 | HB3 | GLN | X | 50 | 29.215 | 64.382 | 30.418 | 0.00 | 0.00 |

|      |     |      |     |   |    |        |        |        |      |      |
|------|-----|------|-----|---|----|--------|--------|--------|------|------|
| ATOM | 776 | CG   | GLN | X | 50 | 29.841 | 64.634 | 28.417 | 0.00 | 0.00 |
| ATOM | 777 | HG2  | GLN | X | 50 | 30.635 | 63.888 | 28.429 | 0.00 | 0.00 |
| ATOM | 778 | HG3  | GLN | X | 50 | 29.466 | 64.713 | 27.397 | 0.00 | 0.00 |
| ATOM | 779 | CD   | GLN | X | 50 | 30.504 | 66.004 | 28.891 | 0.00 | 0.00 |
| ATOM | 780 | OE1  | GLN | X | 50 | 30.063 | 67.154 | 28.663 | 0.00 | 0.00 |
| ATOM | 781 | NE2  | GLN | X | 50 | 31.586 | 65.905 | 29.604 | 0.00 | 0.00 |
| ATOM | 782 | HE21 | GLN | X | 50 | 32.020 | 66.702 | 30.047 | 0.00 | 0.00 |
| ATOM | 783 | HE22 | GLN | X | 50 | 31.828 | 64.973 | 29.907 | 0.00 | 0.00 |
| ATOM | 784 | C    | GLN | X | 50 | 28.425 | 62.190 | 27.913 | 0.00 | 0.00 |
| ATOM | 785 | O    | GLN | X | 50 | 29.436 | 61.848 | 27.388 | 0.00 | 0.00 |
| ATOM | 786 | N    | PRO | X | 51 | 27.289 | 62.138 | 27.236 | 0.00 | 0.00 |
| ATOM | 787 | CD   | PRO | X | 51 | 25.967 | 62.434 | 27.773 | 0.00 | 0.00 |
| ATOM | 788 | HD2  | PRO | X | 51 | 25.869 | 63.367 | 28.329 | 0.00 | 0.00 |
| ATOM | 789 | HD3  | PRO | X | 51 | 25.720 | 61.560 | 28.376 | 0.00 | 0.00 |
| ATOM | 790 | CG   | PRO | X | 51 | 25.095 | 62.597 | 26.523 | 0.00 | 0.00 |
| ATOM | 791 | HG2  | PRO | X | 51 | 25.181 | 63.614 | 26.140 | 0.00 | 0.00 |
| ATOM | 792 | HG3  | PRO | X | 51 | 24.045 | 62.345 | 26.670 | 0.00 | 0.00 |
| ATOM | 793 | CB   | PRO | X | 51 | 25.703 | 61.643 | 25.523 | 0.00 | 0.00 |
| ATOM | 794 | HB2  | PRO | X | 51 | 25.409 | 61.926 | 24.513 | 0.00 | 0.00 |
| ATOM | 795 | HB3  | PRO | X | 51 | 25.394 | 60.630 | 25.779 | 0.00 | 0.00 |
| ATOM | 796 | CA   | PRO | X | 51 | 27.162 | 61.708 | 25.810 | 0.00 | 0.00 |
| ATOM | 797 | HA   | PRO | X | 51 | 27.609 | 60.715 | 25.855 | 0.00 | 0.00 |
| ATOM | 798 | C    | PRO | X | 51 | 27.968 | 62.506 | 24.764 | 0.00 | 0.00 |
| ATOM | 799 | O    | PRO | X | 51 | 28.283 | 63.650 | 24.932 | 0.00 | 0.00 |
| ATOM | 800 | N    | TRP | X | 52 | 28.267 | 61.868 | 23.633 | 0.00 | 0.00 |
| ATOM | 801 | H    | TRP | X | 52 | 27.879 | 60.939 | 23.549 | 0.00 | 0.00 |
| ATOM | 802 | CA   | TRP | X | 52 | 28.970 | 62.418 | 22.483 | 0.00 | 0.00 |
| ATOM | 803 | HA   | TRP | X | 52 | 29.202 | 63.447 | 22.759 | 0.00 | 0.00 |
| ATOM | 804 | CB   | TRP | X | 52 | 30.305 | 61.765 | 22.354 | 0.00 | 0.00 |
| ATOM | 805 | HB2  | TRP | X | 52 | 30.925 | 62.360 | 21.683 | 0.00 | 0.00 |
| ATOM | 806 | HB3  | TRP | X | 52 | 30.854 | 61.743 | 23.295 | 0.00 | 0.00 |
| ATOM | 807 | CG   | TRP | X | 52 | 30.261 | 60.290 | 22.039 | 0.00 | 0.00 |
| ATOM | 808 | CD1  | TRP | X | 52 | 30.195 | 59.731 | 20.809 | 0.00 | 0.00 |
| ATOM | 809 | HD1  | TRP | X | 52 | 30.133 | 60.294 | 19.890 | 0.00 | 0.00 |
| ATOM | 810 | NE1  | TRP | X | 52 | 30.262 | 58.404 | 20.905 | 0.00 | 0.00 |
| ATOM | 811 | HE1  | TRP | X | 52 | 30.296 | 57.811 | 20.088 | 0.00 | 0.00 |
| ATOM | 812 | CE2  | TRP | X | 52 | 30.298 | 57.959 | 22.236 | 0.00 | 0.00 |
| ATOM | 813 | CZ2  | TRP | X | 52 | 30.142 | 56.756 | 22.865 | 0.00 | 0.00 |
| ATOM | 814 | HZ2  | TRP | X | 52 | 29.888 | 55.843 | 22.346 | 0.00 | 0.00 |
| ATOM | 815 | CH2  | TRP | X | 52 | 30.077 | 56.696 | 24.300 | 0.00 | 0.00 |
| ATOM | 816 | HH2  | TRP | X | 52 | 30.025 | 55.787 | 24.881 | 0.00 | 0.00 |
| ATOM | 817 | CZ3  | TRP | X | 52 | 30.251 | 57.877 | 25.029 | 0.00 | 0.00 |
| ATOM | 818 | HZ3  | TRP | X | 52 | 30.417 | 57.813 | 26.094 | 0.00 | 0.00 |
| ATOM | 819 | CE3  | TRP | X | 52 | 30.328 | 59.130 | 24.345 | 0.00 | 0.00 |
| ATOM | 820 | HE3  | TRP | X | 52 | 30.381 | 60.026 | 24.945 | 0.00 | 0.00 |
| ATOM | 821 | CD2  | TRP | X | 52 | 30.233 | 59.177 | 22.963 | 0.00 | 0.00 |
| ATOM | 822 | C    | TRP | X | 52 | 28.217 | 62.348 | 21.243 | 0.00 | 0.00 |
| ATOM | 823 | O    | TRP | X | 52 | 27.371 | 61.500 | 20.954 | 0.00 | 0.00 |
| ATOM | 824 | N    | SER | X | 53 | 28.535 | 63.291 | 20.342 | 0.00 | 0.00 |
| ATOM | 825 | H    | SER | X | 53 | 29.368 | 63.830 | 20.530 | 0.00 | 0.00 |
| ATOM | 826 | CA   | SER | X | 53 | 28.089 | 63.214 | 18.911 | 0.00 | 0.00 |
| ATOM | 827 | HA   | SER | X | 53 | 27.149 | 62.685 | 18.753 | 0.00 | 0.00 |
| ATOM | 828 | CB   | SER | X | 53 | 28.048 | 64.580 | 18.172 | 0.00 | 0.00 |
| ATOM | 829 | HB2  | SER | X | 53 | 28.948 | 65.134 | 18.440 | 0.00 | 0.00 |
| ATOM | 830 | HB3  | SER | X | 53 | 27.986 | 64.315 | 17.117 | 0.00 | 0.00 |
| ATOM | 831 | OG   | SER | X | 53 | 26.925 | 65.402 | 18.559 | 0.00 | 0.00 |
| ATOM | 832 | HG   | SER | X | 53 | 26.161 | 64.825 | 18.490 | 0.00 | 0.00 |
| ATOM | 833 | C    | SER | X | 53 | 29.087 | 62.393 | 18.173 | 0.00 | 0.00 |
| ATOM | 834 | O    | SER | X | 53 | 30.307 | 62.557 | 18.305 | 0.00 | 0.00 |
| ATOM | 835 | N    | GLY | X | 54 | 28.683 | 61.465 | 17.282 | 0.00 | 0.00 |
| ATOM | 836 | H    | GLY | X | 54 | 27.691 | 61.325 | 17.152 | 0.00 | 0.00 |
| ATOM | 837 | CA   | GLY | X | 54 | 29.482 | 60.742 | 16.308 | 0.00 | 0.00 |
| ATOM | 838 | HA2  | GLY | X | 54 | 28.878 | 60.524 | 15.428 | 0.00 | 0.00 |
| ATOM | 839 | HA3  | GLY | X | 54 | 30.271 | 61.443 | 16.036 | 0.00 | 0.00 |
| ATOM | 840 | C    | GLY | X | 54 | 30.126 | 59.431 | 16.787 | 0.00 | 0.00 |
| ATOM | 841 | O    | GLY | X | 54 | 29.763 | 58.924 | 17.827 | 0.00 | 0.00 |
| ATOM | 842 | N    | VAL | X | 55 | 31.028 | 58.896 | 16.008 | 0.00 | 0.00 |

|      |     |      |     |   |    |        |        |        |      |      |
|------|-----|------|-----|---|----|--------|--------|--------|------|------|
| ATOM | 843 | H    | VAL | X | 55 | 31.386 | 59.399 | 15.208 | 0.00 | 0.00 |
| ATOM | 844 | CA   | VAL | X | 55 | 31.884 | 57.682 | 16.337 | 0.00 | 0.00 |
| ATOM | 845 | HA   | VAL | X | 55 | 31.256 | 56.923 | 16.804 | 0.00 | 0.00 |
| ATOM | 846 | CB   | VAL | X | 55 | 32.341 | 56.890 | 15.115 | 0.00 | 0.00 |
| ATOM | 847 | HB   | VAL | X | 55 | 32.716 | 57.591 | 14.370 | 0.00 | 0.00 |
| ATOM | 848 | CG1  | VAL | X | 55 | 33.443 | 55.859 | 15.310 | 0.00 | 0.00 |
| ATOM | 849 | HG11 | VAL | X | 55 | 33.342 | 55.198 | 16.171 | 0.00 | 0.00 |
| ATOM | 850 | HG12 | VAL | X | 55 | 33.500 | 55.241 | 14.414 | 0.00 | 0.00 |
| ATOM | 851 | HG13 | VAL | X | 55 | 34.316 | 56.493 | 15.459 | 0.00 | 0.00 |
| ATOM | 852 | CG2  | VAL | X | 55 | 31.208 | 56.162 | 14.397 | 0.00 | 0.00 |
| ATOM | 853 | HG21 | VAL | X | 55 | 30.365 | 56.762 | 14.054 | 0.00 | 0.00 |
| ATOM | 854 | HG22 | VAL | X | 55 | 30.861 | 55.358 | 15.046 | 0.00 | 0.00 |
| ATOM | 855 | HG23 | VAL | X | 55 | 31.568 | 55.748 | 13.456 | 0.00 | 0.00 |
| ATOM | 856 | C    | VAL | X | 55 | 32.979 | 58.113 | 17.343 | 0.00 | 0.00 |
| ATOM | 857 | O    | VAL | X | 55 | 33.935 | 58.753 | 16.864 | 0.00 | 0.00 |
| ATOM | 858 | N    | VAL | X | 56 | 32.934 | 57.731 | 18.590 | 0.00 | 0.00 |
| ATOM | 859 | H    | VAL | X | 56 | 32.123 | 57.341 | 19.047 | 0.00 | 0.00 |
| ATOM | 860 | CA   | VAL | X | 56 | 34.152 | 57.702 | 19.319 | 0.00 | 0.00 |
| ATOM | 861 | HA   | VAL | X | 56 | 34.801 | 58.538 | 19.059 | 0.00 | 0.00 |
| ATOM | 862 | CB   | VAL | X | 56 | 34.047 | 57.882 | 20.835 | 0.00 | 0.00 |
| ATOM | 863 | HB   | VAL | X | 56 | 33.308 | 57.146 | 21.153 | 0.00 | 0.00 |
| ATOM | 864 | CG1  | VAL | X | 56 | 35.307 | 57.654 | 21.594 | 0.00 | 0.00 |
| ATOM | 865 | HG11 | VAL | X | 56 | 35.044 | 57.823 | 22.638 | 0.00 | 0.00 |
| ATOM | 866 | HG12 | VAL | X | 56 | 35.674 | 56.631 | 21.511 | 0.00 | 0.00 |
| ATOM | 867 | HG13 | VAL | X | 56 | 36.078 | 58.379 | 21.332 | 0.00 | 0.00 |
| ATOM | 868 | CG2  | VAL | X | 56 | 33.535 | 59.244 | 21.129 | 0.00 | 0.00 |
| ATOM | 869 | HG21 | VAL | X | 56 | 34.292 | 59.855 | 21.621 | 0.00 | 0.00 |
| ATOM | 870 | HG22 | VAL | X | 56 | 32.701 | 59.289 | 21.831 | 0.00 | 0.00 |
| ATOM | 871 | HG23 | VAL | X | 56 | 33.089 | 59.840 | 20.333 | 0.00 | 0.00 |
| ATOM | 872 | C    | VAL | X | 56 | 34.845 | 56.406 | 18.864 | 0.00 | 0.00 |
| ATOM | 873 | O    | VAL | X | 56 | 34.240 | 55.356 | 18.632 | 0.00 | 0.00 |
| ATOM | 874 | N    | ASP | X | 57 | 36.114 | 56.482 | 18.635 | 0.00 | 0.00 |
| ATOM | 875 | H    | ASP | X | 57 | 36.662 | 57.255 | 18.985 | 0.00 | 0.00 |
| ATOM | 876 | CA   | ASP | X | 57 | 36.928 | 55.365 | 18.233 | 0.00 | 0.00 |
| ATOM | 877 | HA   | ASP | X | 57 | 36.464 | 54.750 | 17.461 | 0.00 | 0.00 |
| ATOM | 878 | CB   | ASP | X | 57 | 38.270 | 55.866 | 17.610 | 0.00 | 0.00 |
| ATOM | 879 | HB2  | ASP | X | 57 | 38.038 | 56.508 | 16.761 | 0.00 | 0.00 |
| ATOM | 880 | HB3  | ASP | X | 57 | 38.832 | 56.450 | 18.340 | 0.00 | 0.00 |
| ATOM | 881 | CG   | ASP | X | 57 | 39.164 | 54.660 | 17.293 | 0.00 | 0.00 |
| ATOM | 882 | OD1  | ASP | X | 57 | 39.000 | 54.122 | 16.175 | 0.00 | 0.00 |
| ATOM | 883 | OD2  | ASP | X | 57 | 39.969 | 54.223 | 18.149 | 0.00 | 0.00 |
| ATOM | 884 | C    | ASP | X | 57 | 37.156 | 54.406 | 19.447 | 0.00 | 0.00 |
| ATOM | 885 | O    | ASP | X | 57 | 37.483 | 54.884 | 20.508 | 0.00 | 0.00 |
| ATOM | 886 | N    | ALA | X | 58 | 37.038 | 53.121 | 19.282 | 0.00 | 0.00 |
| ATOM | 887 | H    | ALA | X | 58 | 36.650 | 52.845 | 18.391 | 0.00 | 0.00 |
| ATOM | 888 | CA   | ALA | X | 58 | 37.260 | 52.100 | 20.287 | 0.00 | 0.00 |
| ATOM | 889 | HA   | ALA | X | 58 | 37.667 | 52.529 | 21.202 | 0.00 | 0.00 |
| ATOM | 890 | CB   | ALA | X | 58 | 35.891 | 51.376 | 20.671 | 0.00 | 0.00 |
| ATOM | 891 | HB1  | ALA | X | 58 | 36.159 | 50.637 | 21.426 | 0.00 | 0.00 |
| ATOM | 892 | HB2  | ALA | X | 58 | 35.508 | 50.836 | 19.806 | 0.00 | 0.00 |
| ATOM | 893 | HB3  | ALA | X | 58 | 35.139 | 52.051 | 21.080 | 0.00 | 0.00 |
| ATOM | 894 | C    | ALA | X | 58 | 38.325 | 51.068 | 19.800 | 0.00 | 0.00 |
| ATOM | 895 | O    | ALA | X | 58 | 38.071 | 49.856 | 19.757 | 0.00 | 0.00 |
| ATOM | 896 | N    | THR | X | 59 | 39.507 | 51.558 | 19.429 | 0.00 | 0.00 |
| ATOM | 897 | H    | THR | X | 59 | 39.756 | 52.534 | 19.498 | 0.00 | 0.00 |
| ATOM | 898 | CA   | THR | X | 59 | 40.472 | 50.628 | 18.764 | 0.00 | 0.00 |
| ATOM | 899 | HA   | THR | X | 59 | 39.939 | 49.765 | 18.365 | 0.00 | 0.00 |
| ATOM | 900 | CB   | THR | X | 59 | 41.168 | 51.189 | 17.510 | 0.00 | 0.00 |
| ATOM | 901 | HB   | THR | X | 59 | 41.951 | 50.549 | 17.102 | 0.00 | 0.00 |
| ATOM | 902 | CG2  | THR | X | 59 | 40.119 | 51.265 | 16.405 | 0.00 | 0.00 |
| ATOM | 903 | HG21 | THR | X | 59 | 39.206 | 51.630 | 16.874 | 0.00 | 0.00 |
| ATOM | 904 | HG22 | THR | X | 59 | 39.923 | 50.264 | 16.019 | 0.00 | 0.00 |
| ATOM | 905 | HG23 | THR | X | 59 | 40.579 | 51.937 | 15.680 | 0.00 | 0.00 |
| ATOM | 906 | OG1  | THR | X | 59 | 41.798 | 52.419 | 17.769 | 0.00 | 0.00 |
| ATOM | 907 | HG1  | THR | X | 59 | 41.184 | 53.090 | 18.078 | 0.00 | 0.00 |
| ATOM | 908 | C    | THR | X | 59 | 41.606 | 49.954 | 19.551 | 0.00 | 0.00 |
| ATOM | 909 | O    | THR | X | 59 | 41.977 | 48.846 | 19.173 | 0.00 | 0.00 |

|      |     |      |     |   |    |        |        |        |      |      |
|------|-----|------|-----|---|----|--------|--------|--------|------|------|
| ATOM | 910 | N    | THR | X | 60 | 42.044 | 50.642 | 20.615 | 0.00 | 0.00 |
| ATOM | 911 | H    | THR | X | 60 | 41.438 | 51.380 | 20.944 | 0.00 | 0.00 |
| ATOM | 912 | CA   | THR | X | 60 | 43.154 | 50.270 | 21.453 | 0.00 | 0.00 |
| ATOM | 913 | HA   | THR | X | 60 | 42.999 | 49.219 | 21.694 | 0.00 | 0.00 |
| ATOM | 914 | CB   | THR | X | 60 | 44.476 | 50.446 | 20.655 | 0.00 | 0.00 |
| ATOM | 915 | HB   | THR | X | 60 | 44.508 | 50.055 | 19.638 | 0.00 | 0.00 |
| ATOM | 916 | CG2  | THR | X | 60 | 44.986 | 51.876 | 20.472 | 0.00 | 0.00 |
| ATOM | 917 | HG21 | THR | X | 60 | 45.054 | 52.381 | 21.435 | 0.00 | 0.00 |
| ATOM | 918 | HG22 | THR | X | 60 | 44.273 | 52.517 | 19.955 | 0.00 | 0.00 |
| ATOM | 919 | HG23 | THR | X | 60 | 45.900 | 51.806 | 19.882 | 0.00 | 0.00 |
| ATOM | 920 | OG1  | THR | X | 60 | 45.473 | 49.722 | 21.324 | 0.00 | 0.00 |
| ATOM | 921 | HG1  | THR | X | 60 | 45.547 | 48.843 | 20.945 | 0.00 | 0.00 |
| ATOM | 922 | C    | THR | X | 60 | 43.094 | 50.938 | 22.833 | 0.00 | 0.00 |
| ATOM | 923 | O    | THR | X | 60 | 42.261 | 51.790 | 23.050 | 0.00 | 0.00 |
| ATOM | 924 | N    | PHE | X | 61 | 44.082 | 50.690 | 23.734 | 0.00 | 0.00 |
| ATOM | 925 | H    | PHE | X | 61 | 44.804 | 50.028 | 23.486 | 0.00 | 0.00 |
| ATOM | 926 | CA   | PHE | X | 61 | 44.203 | 51.402 | 25.021 | 0.00 | 0.00 |
| ATOM | 927 | HA   | PHE | X | 61 | 43.202 | 51.527 | 25.434 | 0.00 | 0.00 |
| ATOM | 928 | CB   | PHE | X | 61 | 45.051 | 50.609 | 25.982 | 0.00 | 0.00 |
| ATOM | 929 | HB2  | PHE | X | 61 | 46.104 | 50.638 | 25.705 | 0.00 | 0.00 |
| ATOM | 930 | HB3  | PHE | X | 61 | 45.024 | 51.133 | 26.938 | 0.00 | 0.00 |
| ATOM | 931 | CG   | PHE | X | 61 | 44.676 | 49.162 | 26.129 | 0.00 | 0.00 |
| ATOM | 932 | CD1  | PHE | X | 61 | 43.507 | 48.775 | 26.846 | 0.00 | 0.00 |
| ATOM | 933 | HD1  | PHE | X | 61 | 42.977 | 49.571 | 27.348 | 0.00 | 0.00 |
| ATOM | 934 | CE1  | PHE | X | 61 | 43.083 | 47.439 | 26.873 | 0.00 | 0.00 |
| ATOM | 935 | HE1  | PHE | X | 61 | 42.210 | 47.212 | 27.467 | 0.00 | 0.00 |
| ATOM | 936 | CZ   | PHE | X | 61 | 43.846 | 46.508 | 26.084 | 0.00 | 0.00 |
| ATOM | 937 | HZ   | PHE | X | 61 | 43.565 | 45.466 | 26.058 | 0.00 | 0.00 |
| ATOM | 938 | CE2  | PHE | X | 61 | 44.969 | 46.939 | 25.323 | 0.00 | 0.00 |
| ATOM | 939 | HE2  | PHE | X | 61 | 45.455 | 46.201 | 24.702 | 0.00 | 0.00 |
| ATOM | 940 | CD2  | PHE | X | 61 | 45.346 | 48.240 | 25.309 | 0.00 | 0.00 |
| ATOM | 941 | HD2  | PHE | X | 61 | 46.125 | 48.586 | 24.645 | 0.00 | 0.00 |
| ATOM | 942 | C    | PHE | X | 61 | 44.817 | 52.772 | 24.642 | 0.00 | 0.00 |
| ATOM | 943 | O    | PHE | X | 61 | 45.688 | 52.949 | 23.841 | 0.00 | 0.00 |
| ATOM | 944 | N    | GLN | X | 62 | 44.315 | 53.818 | 25.284 | 0.00 | 0.00 |
| ATOM | 945 | H    | GLN | X | 62 | 43.720 | 53.548 | 26.055 | 0.00 | 0.00 |
| ATOM | 946 | CA   | GLN | X | 62 | 44.686 | 55.272 | 25.153 | 0.00 | 0.00 |
| ATOM | 947 | HA   | GLN | X | 62 | 45.116 | 55.415 | 24.162 | 0.00 | 0.00 |
| ATOM | 948 | CB   | GLN | X | 62 | 43.412 | 56.107 | 25.344 | 0.00 | 0.00 |
| ATOM | 949 | HB2  | GLN | X | 62 | 42.993 | 56.101 | 26.350 | 0.00 | 0.00 |
| ATOM | 950 | HB3  | GLN | X | 62 | 43.796 | 57.109 | 25.151 | 0.00 | 0.00 |
| ATOM | 951 | CG   | GLN | X | 62 | 42.203 | 56.159 | 24.392 | 0.00 | 0.00 |
| ATOM | 952 | HG2  | GLN | X | 62 | 41.730 | 55.180 | 24.316 | 0.00 | 0.00 |
| ATOM | 953 | HG3  | GLN | X | 62 | 41.440 | 56.814 | 24.813 | 0.00 | 0.00 |
| ATOM | 954 | CD   | GLN | X | 62 | 42.521 | 56.622 | 22.991 | 0.00 | 0.00 |
| ATOM | 955 | OE1  | GLN | X | 62 | 42.597 | 55.901 | 22.051 | 0.00 | 0.00 |
| ATOM | 956 | NE2  | GLN | X | 62 | 42.624 | 57.953 | 22.775 | 0.00 | 0.00 |
| ATOM | 957 | HE21 | GLN | X | 62 | 42.593 | 58.259 | 21.813 | 0.00 | 0.00 |
| ATOM | 958 | HE22 | GLN | X | 62 | 42.462 | 58.590 | 23.542 | 0.00 | 0.00 |
| ATOM | 959 | C    | GLN | X | 62 | 45.671 | 55.693 | 26.242 | 0.00 | 0.00 |
| ATOM | 960 | O    | GLN | X | 62 | 46.730 | 56.324 | 25.975 | 0.00 | 0.00 |
| ATOM | 961 | N    | SER | X | 63 | 45.583 | 55.267 | 27.512 | 0.00 | 0.00 |
| ATOM | 962 | H    | SER | X | 63 | 44.874 | 54.604 | 27.791 | 0.00 | 0.00 |
| ATOM | 963 | CA   | SER | X | 63 | 46.463 | 55.498 | 28.661 | 0.00 | 0.00 |
| ATOM | 964 | HA   | SER | X | 63 | 47.419 | 55.287 | 28.183 | 0.00 | 0.00 |
| ATOM | 965 | CB   | SER | X | 63 | 46.389 | 56.928 | 29.147 | 0.00 | 0.00 |
| ATOM | 966 | HB2  | SER | X | 63 | 47.000 | 57.066 | 30.039 | 0.00 | 0.00 |
| ATOM | 967 | HB3  | SER | X | 63 | 46.871 | 57.585 | 28.423 | 0.00 | 0.00 |
| ATOM | 968 | OG   | SER | X | 63 | 45.057 | 57.206 | 29.430 | 0.00 | 0.00 |
| ATOM | 969 | HG   | SER | X | 63 | 44.689 | 57.669 | 28.674 | 0.00 | 0.00 |
| ATOM | 970 | C    | SER | X | 63 | 46.274 | 54.489 | 29.820 | 0.00 | 0.00 |
| ATOM | 971 | O    | SER | X | 63 | 45.356 | 53.675 | 29.695 | 0.00 | 0.00 |
| ATOM | 972 | N    | VAL | X | 64 | 46.990 | 54.554 | 30.964 | 0.00 | 0.00 |
| ATOM | 973 | H    | VAL | X | 64 | 47.837 | 55.103 | 30.919 | 0.00 | 0.00 |
| ATOM | 974 | CA   | VAL | X | 64 | 46.668 | 53.872 | 32.233 | 0.00 | 0.00 |
| ATOM | 975 | HA   | VAL | X | 64 | 45.595 | 53.775 | 32.399 | 0.00 | 0.00 |
| ATOM | 976 | CB   | VAL | X | 64 | 47.499 | 52.493 | 32.424 | 0.00 | 0.00 |

|      |      |      |     |   |    |        |        |        |      |      |
|------|------|------|-----|---|----|--------|--------|--------|------|------|
| ATOM | 977  | HB   | VAL | X | 64 | 47.216 | 52.039 | 33.373 | 0.00 | 0.00 |
| ATOM | 978  | CG1  | VAL | X | 64 | 47.180 | 51.560 | 31.231 | 0.00 | 0.00 |
| ATOM | 979  | HG11 | VAL | X | 64 | 47.725 | 51.978 | 30.386 | 0.00 | 0.00 |
| ATOM | 980  | HG12 | VAL | X | 64 | 47.608 | 50.592 | 31.492 | 0.00 | 0.00 |
| ATOM | 981  | HG13 | VAL | X | 64 | 46.094 | 51.535 | 31.131 | 0.00 | 0.00 |
| ATOM | 982  | CG2  | VAL | X | 64 | 48.991 | 52.725 | 32.498 | 0.00 | 0.00 |
| ATOM | 983  | HG21 | VAL | X | 64 | 49.346 | 53.289 | 31.637 | 0.00 | 0.00 |
| ATOM | 984  | HG22 | VAL | X | 64 | 49.536 | 51.784 | 32.578 | 0.00 | 0.00 |
| ATOM | 985  | HG23 | VAL | X | 64 | 49.134 | 53.393 | 33.348 | 0.00 | 0.00 |
| ATOM | 986  | C    | VAL | X | 64 | 47.053 | 54.829 | 33.433 | 0.00 | 0.00 |
| ATOM | 987  | O    | VAL | X | 64 | 47.582 | 55.963 | 33.230 | 0.00 | 0.00 |
| ATOM | 988  | N    | CYX | X | 65 | 46.535 | 54.530 | 34.635 | 0.00 | 0.00 |
| ATOM | 989  | H    | CYX | X | 65 | 46.074 | 53.646 | 34.794 | 0.00 | 0.00 |
| ATOM | 990  | CA   | CYX | X | 65 | 46.678 | 55.453 | 35.718 | 0.00 | 0.00 |
| ATOM | 991  | HA   | CYX | X | 65 | 46.605 | 56.449 | 35.282 | 0.00 | 0.00 |
| ATOM | 992  | CB   | CYX | X | 65 | 45.621 | 55.182 | 36.811 | 0.00 | 0.00 |
| ATOM | 993  | HB2  | CYX | X | 65 | 45.876 | 54.247 | 37.309 | 0.00 | 0.00 |
| ATOM | 994  | HB3  | CYX | X | 65 | 45.639 | 55.920 | 37.613 | 0.00 | 0.00 |
| ATOM | 995  | SG   | CYX | X | 65 | 43.907 | 55.164 | 36.337 | 0.00 | 0.00 |
| ATOM | 996  | C    | CYX | X | 65 | 48.094 | 55.477 | 36.289 | 0.00 | 0.00 |
| ATOM | 997  | O    | CYX | X | 65 | 48.747 | 54.400 | 36.410 | 0.00 | 0.00 |
| ATOM | 998  | N    | TYR | X | 66 | 48.634 | 56.629 | 36.677 | 0.00 | 0.00 |
| ATOM | 999  | H    | TYR | X | 66 | 48.159 | 57.479 | 36.411 | 0.00 | 0.00 |
| ATOM | 1000 | CA   | TYR | X | 66 | 49.931 | 56.847 | 37.323 | 0.00 | 0.00 |
| ATOM | 1001 | HA   | TYR | X | 66 | 50.784 | 56.726 | 36.656 | 0.00 | 0.00 |
| ATOM | 1002 | CB   | TYR | X | 66 | 50.085 | 58.282 | 37.900 | 0.00 | 0.00 |
| ATOM | 1003 | HB2  | TYR | X | 66 | 49.103 | 58.585 | 38.265 | 0.00 | 0.00 |
| ATOM | 1004 | HB3  | TYR | X | 66 | 50.830 | 58.310 | 38.695 | 0.00 | 0.00 |
| ATOM | 1005 | CG   | TYR | X | 66 | 50.508 | 59.198 | 36.777 | 0.00 | 0.00 |
| ATOM | 1006 | CD1  | TYR | X | 66 | 49.601 | 59.845 | 35.984 | 0.00 | 0.00 |
| ATOM | 1007 | HD1  | TYR | X | 66 | 48.555 | 59.897 | 36.248 | 0.00 | 0.00 |
| ATOM | 1008 | CE1  | TYR | X | 66 | 50.046 | 60.658 | 34.927 | 0.00 | 0.00 |
| ATOM | 1009 | HE1  | TYR | X | 66 | 49.284 | 61.290 | 34.495 | 0.00 | 0.00 |
| ATOM | 1010 | CZ   | TYR | X | 66 | 51.399 | 60.866 | 34.648 | 0.00 | 0.00 |
| ATOM | 1011 | OH   | TYR | X | 66 | 51.762 | 61.700 | 33.650 | 0.00 | 0.00 |
| ATOM | 1012 | HH   | TYR | X | 66 | 51.019 | 62.221 | 33.338 | 0.00 | 0.00 |
| ATOM | 1013 | CE2  | TYR | X | 66 | 52.307 | 60.120 | 35.477 | 0.00 | 0.00 |
| ATOM | 1014 | HE2  | TYR | X | 66 | 53.364 | 60.322 | 35.387 | 0.00 | 0.00 |
| ATOM | 1015 | CD2  | TYR | X | 66 | 51.873 | 59.427 | 36.533 | 0.00 | 0.00 |
| ATOM | 1016 | HD2  | TYR | X | 66 | 52.548 | 59.017 | 37.269 | 0.00 | 0.00 |
| ATOM | 1017 | C    | TYR | X | 66 | 50.076 | 55.863 | 38.530 | 0.00 | 0.00 |
| ATOM | 1018 | O    | TYR | X | 66 | 49.260 | 55.960 | 39.490 | 0.00 | 0.00 |
| ATOM | 1019 | N    | GLN | X | 67 | 51.136 | 55.086 | 38.441 | 0.00 | 0.00 |
| ATOM | 1020 | H    | GLN | X | 67 | 51.657 | 55.099 | 37.576 | 0.00 | 0.00 |
| ATOM | 1021 | CA   | GLN | X | 67 | 51.381 | 54.049 | 39.369 | 0.00 | 0.00 |
| ATOM | 1022 | HA   | GLN | X | 67 | 51.121 | 54.574 | 40.288 | 0.00 | 0.00 |
| ATOM | 1023 | CB   | GLN | X | 67 | 50.633 | 52.745 | 39.054 | 0.00 | 0.00 |
| ATOM | 1024 | HB2  | GLN | X | 67 | 50.873 | 52.000 | 39.813 | 0.00 | 0.00 |
| ATOM | 1025 | HB3  | GLN | X | 67 | 49.551 | 52.811 | 39.166 | 0.00 | 0.00 |
| ATOM | 1026 | CG   | GLN | X | 67 | 51.043 | 52.057 | 37.742 | 0.00 | 0.00 |
| ATOM | 1027 | HG2  | GLN | X | 67 | 50.950 | 52.783 | 36.935 | 0.00 | 0.00 |
| ATOM | 1028 | HG3  | GLN | X | 67 | 52.044 | 51.638 | 37.845 | 0.00 | 0.00 |
| ATOM | 1029 | CD   | GLN | X | 67 | 50.157 | 50.901 | 37.323 | 0.00 | 0.00 |
| ATOM | 1030 | OE1  | GLN | X | 67 | 50.311 | 49.730 | 37.575 | 0.00 | 0.00 |
| ATOM | 1031 | NE2  | GLN | X | 67 | 48.988 | 51.417 | 36.904 | 0.00 | 0.00 |
| ATOM | 1032 | HE21 | GLN | X | 67 | 48.223 | 50.760 | 36.852 | 0.00 | 0.00 |
| ATOM | 1033 | HE22 | GLN | X | 67 | 48.890 | 52.374 | 36.596 | 0.00 | 0.00 |
| ATOM | 1034 | C    | GLN | X | 67 | 52.916 | 53.832 | 39.325 | 0.00 | 0.00 |
| ATOM | 1035 | O    | GLN | X | 67 | 53.716 | 54.365 | 38.541 | 0.00 | 0.00 |
| ATOM | 1036 | N    | TYR | X | 68 | 53.386 | 53.057 | 40.295 | 0.00 | 0.00 |
| ATOM | 1037 | H    | TYR | X | 68 | 52.599 | 52.709 | 40.823 | 0.00 | 0.00 |
| ATOM | 1038 | CA   | TYR | X | 68 | 54.706 | 52.554 | 40.366 | 0.00 | 0.00 |
| ATOM | 1039 | HA   | TYR | X | 68 | 55.331 | 53.445 | 40.302 | 0.00 | 0.00 |
| ATOM | 1040 | CB   | TYR | X | 68 | 54.917 | 51.881 | 41.775 | 0.00 | 0.00 |
| ATOM | 1041 | HB2  | TYR | X | 68 | 54.689 | 52.564 | 42.593 | 0.00 | 0.00 |
| ATOM | 1042 | HB3  | TYR | X | 68 | 54.194 | 51.065 | 41.735 | 0.00 | 0.00 |
| ATOM | 1043 | CG   | TYR | X | 68 | 56.277 | 51.255 | 41.899 | 0.00 | 0.00 |

|      |      |      |     |   |    |        |        |        |      |      |
|------|------|------|-----|---|----|--------|--------|--------|------|------|
| ATOM | 1044 | CD1  | TYR | X | 68 | 57.271 | 52.101 | 42.291 | 0.00 | 0.00 |
| ATOM | 1045 | HD1  | TYR | X | 68 | 57.081 | 53.161 | 42.368 | 0.00 | 0.00 |
| ATOM | 1046 | CE1  | TYR | X | 68 | 58.630 | 51.596 | 42.371 | 0.00 | 0.00 |
| ATOM | 1047 | HE1  | TYR | X | 68 | 59.386 | 52.290 | 42.707 | 0.00 | 0.00 |
| ATOM | 1048 | CZ   | TYR | X | 68 | 58.780 | 50.167 | 42.403 | 0.00 | 0.00 |
| ATOM | 1049 | OH   | TYR | X | 68 | 59.936 | 49.528 | 42.721 | 0.00 | 0.00 |
| ATOM | 1050 | HH   | TYR | X | 68 | 60.726 | 50.073 | 42.735 | 0.00 | 0.00 |
| ATOM | 1051 | CE2  | TYR | X | 68 | 57.753 | 49.245 | 42.057 | 0.00 | 0.00 |
| ATOM | 1052 | HE2  | TYR | X | 68 | 57.833 | 48.171 | 42.139 | 0.00 | 0.00 |
| ATOM | 1053 | CD2  | TYR | X | 68 | 56.478 | 49.830 | 41.844 | 0.00 | 0.00 |
| ATOM | 1054 | HD2  | TYR | X | 68 | 55.728 | 49.071 | 41.678 | 0.00 | 0.00 |
| ATOM | 1055 | C    | TYR | X | 68 | 55.173 | 51.596 | 39.224 | 0.00 | 0.00 |
| ATOM | 1056 | O    | TYR | X | 68 | 54.352 | 50.866 | 38.712 | 0.00 | 0.00 |
| ATOM | 1057 | N    | VAL | X | 69 | 56.445 | 51.673 | 38.745 | 0.00 | 0.00 |
| ATOM | 1058 | H    | VAL | X | 69 | 57.077 | 52.330 | 39.179 | 0.00 | 0.00 |
| ATOM | 1059 | CA   | VAL | X | 69 | 57.069 | 50.613 | 37.871 | 0.00 | 0.00 |
| ATOM | 1060 | HA   | VAL | X | 69 | 56.440 | 49.723 | 37.864 | 0.00 | 0.00 |
| ATOM | 1061 | CB   | VAL | X | 69 | 57.425 | 51.044 | 36.429 | 0.00 | 0.00 |
| ATOM | 1062 | HB   | VAL | X | 69 | 57.912 | 50.182 | 35.973 | 0.00 | 0.00 |
| ATOM | 1063 | CG1  | VAL | X | 69 | 56.085 | 51.423 | 35.821 | 0.00 | 0.00 |
| ATOM | 1064 | HG11 | VAL | X | 69 | 55.543 | 50.490 | 35.669 | 0.00 | 0.00 |
| ATOM | 1065 | HG12 | VAL | X | 69 | 55.635 | 52.114 | 36.533 | 0.00 | 0.00 |
| ATOM | 1066 | HG13 | VAL | X | 69 | 56.161 | 51.894 | 34.841 | 0.00 | 0.00 |
| ATOM | 1067 | CG2  | VAL | X | 69 | 58.415 | 52.286 | 36.414 | 0.00 | 0.00 |
| ATOM | 1068 | HG21 | VAL | X | 69 | 59.451 | 52.121 | 36.710 | 0.00 | 0.00 |
| ATOM | 1069 | HG22 | VAL | X | 69 | 57.949 | 53.073 | 37.006 | 0.00 | 0.00 |
| ATOM | 1070 | HG23 | VAL | X | 69 | 58.354 | 52.669 | 35.395 | 0.00 | 0.00 |
| ATOM | 1071 | C    | VAL | X | 69 | 58.318 | 50.114 | 38.642 | 0.00 | 0.00 |
| ATOM | 1072 | O    | VAL | X | 69 | 59.033 | 50.801 | 39.310 | 0.00 | 0.00 |
| ATOM | 1073 | N    | ASP | X | 70 | 58.547 | 48.795 | 38.513 | 0.00 | 0.00 |
| ATOM | 1074 | H    | ASP | X | 70 | 57.830 | 48.235 | 38.075 | 0.00 | 0.00 |
| ATOM | 1075 | CA   | ASP | X | 70 | 59.608 | 48.148 | 39.237 | 0.00 | 0.00 |
| ATOM | 1076 | HA   | ASP | X | 70 | 59.319 | 48.204 | 40.287 | 0.00 | 0.00 |
| ATOM | 1077 | CB   | ASP | X | 70 | 59.579 | 46.637 | 38.873 | 0.00 | 0.00 |
| ATOM | 1078 | HB2  | ASP | X | 70 | 58.537 | 46.567 | 38.560 | 0.00 | 0.00 |
| ATOM | 1079 | HB3  | ASP | X | 70 | 60.208 | 46.454 | 38.001 | 0.00 | 0.00 |
| ATOM | 1080 | CG   | ASP | X | 70 | 59.843 | 45.589 | 39.991 | 0.00 | 0.00 |
| ATOM | 1081 | OD1  | ASP | X | 70 | 59.231 | 44.506 | 39.938 | 0.00 | 0.00 |
| ATOM | 1082 | OD2  | ASP | X | 70 | 60.709 | 45.953 | 40.814 | 0.00 | 0.00 |
| ATOM | 1083 | C    | ASP | X | 70 | 61.015 | 48.669 | 38.972 | 0.00 | 0.00 |
| ATOM | 1084 | O    | ASP | X | 70 | 61.460 | 48.798 | 37.823 | 0.00 | 0.00 |
| ATOM | 1085 | N    | THR | X | 71 | 61.690 | 48.871 | 40.119 | 0.00 | 0.00 |
| ATOM | 1086 | H    | THR | X | 71 | 61.214 | 48.607 | 40.969 | 0.00 | 0.00 |
| ATOM | 1087 | CA   | THR | X | 71 | 63.086 | 49.266 | 40.279 | 0.00 | 0.00 |
| ATOM | 1088 | HA   | THR | X | 71 | 63.478 | 49.480 | 39.285 | 0.00 | 0.00 |
| ATOM | 1089 | CB   | THR | X | 71 | 63.247 | 50.426 | 41.205 | 0.00 | 0.00 |
| ATOM | 1090 | HB   | THR | X | 71 | 64.323 | 50.458 | 41.377 | 0.00 | 0.00 |
| ATOM | 1091 | CG2  | THR | X | 71 | 62.796 | 51.765 | 40.539 | 0.00 | 0.00 |
| ATOM | 1092 | HG21 | THR | X | 71 | 62.816 | 52.667 | 41.151 | 0.00 | 0.00 |
| ATOM | 1093 | HG22 | THR | X | 71 | 61.774 | 51.712 | 40.164 | 0.00 | 0.00 |
| ATOM | 1094 | HG23 | THR | X | 71 | 63.481 | 51.862 | 39.697 | 0.00 | 0.00 |
| ATOM | 1095 | OG1  | THR | X | 71 | 62.629 | 50.148 | 42.478 | 0.00 | 0.00 |
| ATOM | 1096 | HG1  | THR | X | 71 | 62.498 | 51.005 | 42.890 | 0.00 | 0.00 |
| ATOM | 1097 | C    | THR | X | 71 | 63.922 | 48.086 | 40.667 | 0.00 | 0.00 |
| ATOM | 1098 | O    | THR | X | 71 | 65.078 | 48.008 | 40.204 | 0.00 | 0.00 |
| ATOM | 1099 | N    | LEU | X | 72 | 63.357 | 47.027 | 41.363 | 0.00 | 0.00 |
| ATOM | 1100 | H    | LEU | X | 72 | 62.355 | 46.951 | 41.270 | 0.00 | 0.00 |
| ATOM | 1101 | CA   | LEU | X | 72 | 64.090 | 45.923 | 41.982 | 0.00 | 0.00 |
| ATOM | 1102 | HA   | LEU | X | 72 | 65.030 | 46.411 | 42.239 | 0.00 | 0.00 |
| ATOM | 1103 | CB   | LEU | X | 72 | 63.387 | 45.466 | 43.268 | 0.00 | 0.00 |
| ATOM | 1104 | HB2  | LEU | X | 72 | 62.904 | 46.293 | 43.789 | 0.00 | 0.00 |
| ATOM | 1105 | HB3  | LEU | X | 72 | 62.564 | 44.878 | 42.862 | 0.00 | 0.00 |
| ATOM | 1106 | CG   | LEU | X | 72 | 64.244 | 44.592 | 44.237 | 0.00 | 0.00 |
| ATOM | 1107 | HG   | LEU | X | 72 | 64.659 | 43.759 | 43.669 | 0.00 | 0.00 |
| ATOM | 1108 | CD1  | LEU | X | 72 | 65.341 | 45.306 | 44.893 | 0.00 | 0.00 |
| ATOM | 1109 | HD11 | LEU | X | 72 | 64.921 | 46.070 | 45.548 | 0.00 | 0.00 |
| ATOM | 1110 | HD12 | LEU | X | 72 | 66.006 | 45.727 | 44.139 | 0.00 | 0.00 |

|      |      |      |     |   |    |        |        |        |      |      |
|------|------|------|-----|---|----|--------|--------|--------|------|------|
| ATOM | 1111 | HD13 | LEU | X | 72 | 65.878 | 44.493 | 45.382 | 0.00 | 0.00 |
| ATOM | 1112 | CD2  | LEU | X | 72 | 63.197 | 44.012 | 45.216 | 0.00 | 0.00 |
| ATOM | 1113 | HD21 | LEU | X | 72 | 63.701 | 43.629 | 46.103 | 0.00 | 0.00 |
| ATOM | 1114 | HD22 | LEU | X | 72 | 62.489 | 44.793 | 45.495 | 0.00 | 0.00 |
| ATOM | 1115 | HD23 | LEU | X | 72 | 62.635 | 43.181 | 44.789 | 0.00 | 0.00 |
| ATOM | 1116 | C    | LEU | X | 72 | 64.564 | 44.737 | 41.093 | 0.00 | 0.00 |
| ATOM | 1117 | O    | LEU | X | 72 | 65.723 | 44.363 | 41.294 | 0.00 | 0.00 |
| ATOM | 1118 | N    | TYR | X | 73 | 63.860 | 44.287 | 40.018 | 0.00 | 0.00 |
| ATOM | 1119 | H    | TYR | X | 73 | 62.987 | 44.776 | 39.877 | 0.00 | 0.00 |
| ATOM | 1120 | CA   | TYR | X | 73 | 64.402 | 43.394 | 38.939 | 0.00 | 0.00 |
| ATOM | 1121 | HA   | TYR | X | 73 | 65.474 | 43.517 | 38.783 | 0.00 | 0.00 |
| ATOM | 1122 | CB   | TYR | X | 73 | 64.080 | 41.941 | 39.326 | 0.00 | 0.00 |
| ATOM | 1123 | HB2  | TYR | X | 73 | 63.052 | 41.658 | 39.102 | 0.00 | 0.00 |
| ATOM | 1124 | HB3  | TYR | X | 73 | 64.623 | 41.319 | 38.614 | 0.00 | 0.00 |
| ATOM | 1125 | CG   | TYR | X | 73 | 64.439 | 41.651 | 40.837 | 0.00 | 0.00 |
| ATOM | 1126 | CD1  | TYR | X | 73 | 65.730 | 41.441 | 41.257 | 0.00 | 0.00 |
| ATOM | 1127 | HD1  | TYR | X | 73 | 66.577 | 41.444 | 40.587 | 0.00 | 0.00 |
| ATOM | 1128 | CE1  | TYR | X | 73 | 66.130 | 41.235 | 42.626 | 0.00 | 0.00 |
| ATOM | 1129 | HE1  | TYR | X | 73 | 67.160 | 41.055 | 42.896 | 0.00 | 0.00 |
| ATOM | 1130 | CZ   | TYR | X | 73 | 65.106 | 41.143 | 43.587 | 0.00 | 0.00 |
| ATOM | 1131 | OH   | TYR | X | 73 | 65.435 | 40.936 | 44.906 | 0.00 | 0.00 |
| ATOM | 1132 | HH   | TYR | X | 73 | 64.618 | 40.871 | 45.405 | 0.00 | 0.00 |
| ATOM | 1133 | CE2  | TYR | X | 73 | 63.760 | 41.246 | 43.141 | 0.00 | 0.00 |
| ATOM | 1134 | HE2  | TYR | X | 73 | 62.880 | 41.206 | 43.766 | 0.00 | 0.00 |
| ATOM | 1135 | CD2  | TYR | X | 73 | 63.444 | 41.543 | 41.795 | 0.00 | 0.00 |
| ATOM | 1136 | HD2  | TYR | X | 73 | 62.391 | 41.688 | 41.608 | 0.00 | 0.00 |
| ATOM | 1137 | C    | TYR | X | 73 | 63.665 | 43.793 | 37.617 | 0.00 | 0.00 |
| ATOM | 1138 | O    | TYR | X | 73 | 62.988 | 42.926 | 36.993 | 0.00 | 0.00 |
| ATOM | 1139 | N    | PRO | X | 74 | 63.674 | 45.020 | 37.090 | 0.00 | 0.00 |
| ATOM | 1140 | CD   | PRO | X | 74 | 64.462 | 46.028 | 37.658 | 0.00 | 0.00 |
| ATOM | 1141 | HD2  | PRO | X | 74 | 65.497 | 45.711 | 37.788 | 0.00 | 0.00 |
| ATOM | 1142 | HD3  | PRO | X | 74 | 63.959 | 46.386 | 38.557 | 0.00 | 0.00 |
| ATOM | 1143 | CG   | PRO | X | 74 | 64.522 | 47.262 | 36.677 | 0.00 | 0.00 |
| ATOM | 1144 | HG2  | PRO | X | 74 | 65.472 | 47.297 | 36.144 | 0.00 | 0.00 |
| ATOM | 1145 | HG3  | PRO | X | 74 | 64.387 | 48.178 | 37.253 | 0.00 | 0.00 |
| ATOM | 1146 | CB   | PRO | X | 74 | 63.300 | 46.977 | 35.753 | 0.00 | 0.00 |
| ATOM | 1147 | HB2  | PRO | X | 74 | 63.465 | 47.241 | 34.709 | 0.00 | 0.00 |
| ATOM | 1148 | HB3  | PRO | X | 74 | 62.412 | 47.374 | 36.245 | 0.00 | 0.00 |
| ATOM | 1149 | CA   | PRO | X | 74 | 63.168 | 45.444 | 35.749 | 0.00 | 0.00 |
| ATOM | 1150 | HA   | PRO | X | 74 | 62.165 | 45.044 | 35.601 | 0.00 | 0.00 |
| ATOM | 1151 | C    | PRO | X | 74 | 64.031 | 44.795 | 34.677 | 0.00 | 0.00 |
| ATOM | 1152 | O    | PRO | X | 74 | 65.274 | 44.622 | 34.801 | 0.00 | 0.00 |
| ATOM | 1153 | N    | GLY | X | 75 | 63.347 | 44.542 | 33.590 | 0.00 | 0.00 |
| ATOM | 1154 | H    | GLY | X | 75 | 62.342 | 44.641 | 33.600 | 0.00 | 0.00 |
| ATOM | 1155 | CA   | GLY | X | 75 | 63.910 | 43.988 | 32.401 | 0.00 | 0.00 |
| ATOM | 1156 | HA2  | GLY | X | 75 | 63.214 | 44.138 | 31.576 | 0.00 | 0.00 |
| ATOM | 1157 | HA3  | GLY | X | 75 | 64.883 | 44.418 | 32.162 | 0.00 | 0.00 |
| ATOM | 1158 | C    | GLY | X | 75 | 64.110 | 42.516 | 32.431 | 0.00 | 0.00 |
| ATOM | 1159 | O    | GLY | X | 75 | 64.440 | 41.978 | 31.394 | 0.00 | 0.00 |
| ATOM | 1160 | N    | PHE | X | 76 | 63.863 | 41.775 | 33.493 | 0.00 | 0.00 |
| ATOM | 1161 | H    | PHE | X | 76 | 63.699 | 42.299 | 34.341 | 0.00 | 0.00 |
| ATOM | 1162 | CA   | PHE | X | 76 | 63.726 | 40.330 | 33.626 | 0.00 | 0.00 |
| ATOM | 1163 | HA   | PHE | X | 76 | 64.440 | 39.812 | 32.986 | 0.00 | 0.00 |
| ATOM | 1164 | CB   | PHE | X | 76 | 63.787 | 39.977 | 35.110 | 0.00 | 0.00 |
| ATOM | 1165 | HB2  | PHE | X | 76 | 64.769 | 40.229 | 35.510 | 0.00 | 0.00 |
| ATOM | 1166 | HB3  | PHE | X | 76 | 63.160 | 40.709 | 35.619 | 0.00 | 0.00 |
| ATOM | 1167 | CG   | PHE | X | 76 | 63.499 | 38.563 | 35.529 | 0.00 | 0.00 |
| ATOM | 1168 | CD1  | PHE | X | 76 | 64.266 | 37.495 | 34.871 | 0.00 | 0.00 |
| ATOM | 1169 | HD1  | PHE | X | 76 | 65.048 | 37.718 | 34.161 | 0.00 | 0.00 |
| ATOM | 1170 | CE1  | PHE | X | 76 | 63.968 | 36.190 | 35.180 | 0.00 | 0.00 |
| ATOM | 1171 | HE1  | PHE | X | 76 | 64.575 | 35.350 | 34.877 | 0.00 | 0.00 |
| ATOM | 1172 | CZ   | PHE | X | 76 | 62.995 | 35.896 | 36.106 | 0.00 | 0.00 |
| ATOM | 1173 | HZ   | PHE | X | 76 | 62.846 | 34.851 | 36.334 | 0.00 | 0.00 |
| ATOM | 1174 | CE2  | PHE | X | 76 | 62.243 | 36.956 | 36.771 | 0.00 | 0.00 |
| ATOM | 1175 | HE2  | PHE | X | 76 | 61.478 | 36.713 | 37.494 | 0.00 | 0.00 |
| ATOM | 1176 | CD2  | PHE | X | 76 | 62.544 | 38.350 | 36.529 | 0.00 | 0.00 |
| ATOM | 1177 | HD2  | PHE | X | 76 | 61.932 | 39.148 | 36.923 | 0.00 | 0.00 |

|      |      |      |     |   |    |        |        |        |      |      |
|------|------|------|-----|---|----|--------|--------|--------|------|------|
| ATOM | 1178 | C    | PHE | X | 76 | 62.398 | 39.818 | 33.014 | 0.00 | 0.00 |
| ATOM | 1179 | O    | PHE | X | 76 | 61.326 | 40.328 | 33.280 | 0.00 | 0.00 |
| ATOM | 1180 | N    | GLU | X | 77 | 62.414 | 38.646 | 32.385 | 0.00 | 0.00 |
| ATOM | 1181 | H    | GLU | X | 77 | 63.264 | 38.223 | 32.040 | 0.00 | 0.00 |
| ATOM | 1182 | CA   | GLU | X | 77 | 61.237 | 37.839 | 32.012 | 0.00 | 0.00 |
| ATOM | 1183 | HA   | GLU | X | 77 | 60.934 | 38.256 | 31.051 | 0.00 | 0.00 |
| ATOM | 1184 | CB   | GLU | X | 77 | 61.752 | 36.418 | 31.687 | 0.00 | 0.00 |
| ATOM | 1185 | HB2  | GLU | X | 77 | 62.305 | 36.078 | 32.563 | 0.00 | 0.00 |
| ATOM | 1186 | HB3  | GLU | X | 77 | 60.867 | 35.811 | 31.497 | 0.00 | 0.00 |
| ATOM | 1187 | CG   | GLU | X | 77 | 62.540 | 36.165 | 30.382 | 0.00 | 0.00 |
| ATOM | 1188 | HG2  | GLU | X | 77 | 62.238 | 35.210 | 29.951 | 0.00 | 0.00 |
| ATOM | 1189 | HG3  | GLU | X | 77 | 62.356 | 36.938 | 29.636 | 0.00 | 0.00 |
| ATOM | 1190 | CD   | GLU | X | 77 | 64.025 | 36.051 | 30.660 | 0.00 | 0.00 |
| ATOM | 1191 | OE1  | GLU | X | 77 | 64.446 | 35.027 | 31.165 | 0.00 | 0.00 |
| ATOM | 1192 | OE2  | GLU | X | 77 | 64.622 | 37.143 | 30.444 | 0.00 | 0.00 |
| ATOM | 1193 | C    | GLU | X | 77 | 60.143 | 37.662 | 33.042 | 0.00 | 0.00 |
| ATOM | 1194 | O    | GLU | X | 77 | 58.970 | 37.917 | 32.677 | 0.00 | 0.00 |
| ATOM | 1195 | N    | GLY | X | 78 | 60.403 | 37.409 | 34.326 | 0.00 | 0.00 |
| ATOM | 1196 | H    | GLY | X | 78 | 61.325 | 37.242 | 34.702 | 0.00 | 0.00 |
| ATOM | 1197 | CA   | GLY | X | 78 | 59.322 | 37.255 | 35.289 | 0.00 | 0.00 |
| ATOM | 1198 | HA2  | GLY | X | 78 | 58.606 | 36.572 | 34.833 | 0.00 | 0.00 |
| ATOM | 1199 | HA3  | GLY | X | 78 | 59.733 | 36.840 | 36.210 | 0.00 | 0.00 |
| ATOM | 1200 | C    | GLY | X | 78 | 58.594 | 38.537 | 35.727 | 0.00 | 0.00 |
| ATOM | 1201 | O    | GLY | X | 78 | 57.644 | 38.422 | 36.499 | 0.00 | 0.00 |
| ATOM | 1202 | N    | THR | X | 79 | 59.076 | 39.739 | 35.339 | 0.00 | 0.00 |
| ATOM | 1203 | H    | THR | X | 79 | 59.907 | 39.803 | 34.768 | 0.00 | 0.00 |
| ATOM | 1204 | CA   | THR | X | 79 | 58.556 | 41.071 | 35.820 | 0.00 | 0.00 |
| ATOM | 1205 | HA   | THR | X | 79 | 57.811 | 40.879 | 36.591 | 0.00 | 0.00 |
| ATOM | 1206 | CB   | THR | X | 79 | 59.674 | 41.921 | 36.505 | 0.00 | 0.00 |
| ATOM | 1207 | HB   | THR | X | 79 | 59.296 | 42.940 | 36.592 | 0.00 | 0.00 |
| ATOM | 1208 | CG2  | THR | X | 79 | 60.022 | 41.444 | 37.902 | 0.00 | 0.00 |
| ATOM | 1209 | HG21 | THR | X | 79 | 60.405 | 42.362 | 38.348 | 0.00 | 0.00 |
| ATOM | 1210 | HG22 | THR | X | 79 | 60.781 | 40.662 | 37.919 | 0.00 | 0.00 |
| ATOM | 1211 | HG23 | THR | X | 79 | 59.097 | 41.211 | 38.427 | 0.00 | 0.00 |
| ATOM | 1212 | OG1  | THR | X | 79 | 60.906 | 41.962 | 35.783 | 0.00 | 0.00 |
| ATOM | 1213 | HG1  | THR | X | 79 | 61.627 | 42.281 | 36.331 | 0.00 | 0.00 |
| ATOM | 1214 | C    | THR | X | 79 | 57.985 | 41.792 | 34.645 | 0.00 | 0.00 |
| ATOM | 1215 | O    | THR | X | 79 | 56.855 | 42.383 | 34.842 | 0.00 | 0.00 |
| ATOM | 1216 | N    | GLU | X | 80 | 58.755 | 41.941 | 33.564 | 0.00 | 0.00 |
| ATOM | 1217 | H    | GLU | X | 80 | 59.724 | 41.681 | 33.685 | 0.00 | 0.00 |
| ATOM | 1218 | CA   | GLU | X | 80 | 58.274 | 42.723 | 32.440 | 0.00 | 0.00 |
| ATOM | 1219 | HA   | GLU | X | 80 | 58.104 | 43.736 | 32.804 | 0.00 | 0.00 |
| ATOM | 1220 | CB   | GLU | X | 80 | 59.548 | 42.828 | 31.421 | 0.00 | 0.00 |
| ATOM | 1221 | HB2  | GLU | X | 80 | 59.351 | 43.580 | 30.657 | 0.00 | 0.00 |
| ATOM | 1222 | HB3  | GLU | X | 80 | 60.374 | 43.208 | 32.021 | 0.00 | 0.00 |
| ATOM | 1223 | CG   | GLU | X | 80 | 59.926 | 41.605 | 30.658 | 0.00 | 0.00 |
| ATOM | 1224 | HG2  | GLU | X | 80 | 59.817 | 40.689 | 31.240 | 0.00 | 0.00 |
| ATOM | 1225 | HG3  | GLU | X | 80 | 59.286 | 41.443 | 29.790 | 0.00 | 0.00 |
| ATOM | 1226 | CD   | GLU | X | 80 | 61.269 | 41.753 | 29.945 | 0.00 | 0.00 |
| ATOM | 1227 | OE1  | GLU | X | 80 | 61.971 | 40.769 | 29.877 | 0.00 | 0.00 |
| ATOM | 1228 | OE2  | GLU | X | 80 | 61.664 | 42.750 | 29.378 | 0.00 | 0.00 |
| ATOM | 1229 | C    | GLU | X | 80 | 56.992 | 42.204 | 31.794 | 0.00 | 0.00 |
| ATOM | 1230 | O    | GLU | X | 80 | 56.403 | 42.948 | 31.060 | 0.00 | 0.00 |
| ATOM | 1231 | N    | MET | X | 81 | 56.432 | 41.075 | 32.162 | 0.00 | 0.00 |
| ATOM | 1232 | H    | MET | X | 81 | 56.989 | 40.478 | 32.756 | 0.00 | 0.00 |
| ATOM | 1233 | CA   | MET | X | 81 | 55.230 | 40.657 | 31.595 | 0.00 | 0.00 |
| ATOM | 1234 | HA   | MET | X | 81 | 55.208 | 40.831 | 30.520 | 0.00 | 0.00 |
| ATOM | 1235 | CB   | MET | X | 81 | 55.089 | 39.142 | 31.632 | 0.00 | 0.00 |
| ATOM | 1236 | HB2  | MET | X | 81 | 54.140 | 38.908 | 31.149 | 0.00 | 0.00 |
| ATOM | 1237 | HB3  | MET | X | 81 | 55.853 | 38.671 | 31.012 | 0.00 | 0.00 |
| ATOM | 1238 | CG   | MET | X | 81 | 55.031 | 38.532 | 33.087 | 0.00 | 0.00 |
| ATOM | 1239 | HG2  | MET | X | 81 | 55.949 | 38.644 | 33.663 | 0.00 | 0.00 |
| ATOM | 1240 | HG3  | MET | X | 81 | 54.356 | 39.158 | 33.672 | 0.00 | 0.00 |
| ATOM | 1241 | SD   | MET | X | 81 | 54.627 | 36.733 | 33.294 | 0.00 | 0.00 |
| ATOM | 1242 | CE   | MET | X | 81 | 53.019 | 36.575 | 32.548 | 0.00 | 0.00 |
| ATOM | 1243 | HE1  | MET | X | 81 | 52.834 | 35.510 | 32.411 | 0.00 | 0.00 |
| ATOM | 1244 | HE2  | MET | X | 81 | 52.198 | 36.930 | 33.171 | 0.00 | 0.00 |



|      |      |      |     |   |    |        |        |        |      |      |
|------|------|------|-----|---|----|--------|--------|--------|------|------|
| ATOM | 1245 | HE3  | MET | X | 81 | 52.892 | 36.969 | 31.539 | 0.00 | 0.00 |
| ATOM | 1246 | C    | MET | X | 81 | 54.073 | 41.477 | 32.247 | 0.00 | 0.00 |
| ATOM | 1247 | O    | MET | X | 81 | 53.041 | 41.618 | 31.646 | 0.00 | 0.00 |
| ATOM | 1248 | N    | TRP | X | 82 | 54.284 | 41.991 | 33.454 | 0.00 | 0.00 |
| ATOM | 1249 | H    | TRP | X | 82 | 55.143 | 41.820 | 33.957 | 0.00 | 0.00 |
| ATOM | 1250 | CA   | TRP | X | 82 | 53.291 | 42.842 | 34.180 | 0.00 | 0.00 |
| ATOM | 1251 | HA   | TRP | X | 82 | 52.286 | 42.512 | 33.918 | 0.00 | 0.00 |
| ATOM | 1252 | CB   | TRP | X | 82 | 53.496 | 42.502 | 35.623 | 0.00 | 0.00 |
| ATOM | 1253 | HB2  | TRP | X | 82 | 54.397 | 42.961 | 36.031 | 0.00 | 0.00 |
| ATOM | 1254 | HB3  | TRP | X | 82 | 52.757 | 42.978 | 36.268 | 0.00 | 0.00 |
| ATOM | 1255 | CG   | TRP | X | 82 | 53.670 | 41.076 | 36.028 | 0.00 | 0.00 |
| ATOM | 1256 | CD1  | TRP | X | 82 | 54.810 | 40.460 | 36.413 | 0.00 | 0.00 |
| ATOM | 1257 | HD1  | TRP | X | 82 | 55.798 | 40.887 | 36.492 | 0.00 | 0.00 |
| ATOM | 1258 | NE1  | TRP | X | 82 | 54.554 | 39.139 | 36.642 | 0.00 | 0.00 |
| ATOM | 1259 | HE1  | TRP | X | 82 | 55.349 | 38.530 | 36.772 | 0.00 | 0.00 |
| ATOM | 1260 | CE2  | TRP | X | 82 | 53.220 | 38.795 | 36.325 | 0.00 | 0.00 |
| ATOM | 1261 | CZ2  | TRP | X | 82 | 52.513 | 37.639 | 36.287 | 0.00 | 0.00 |
| ATOM | 1262 | HZ2  | TRP | X | 82 | 53.024 | 36.748 | 36.621 | 0.00 | 0.00 |
| ATOM | 1263 | CH2  | TRP | X | 82 | 51.209 | 37.575 | 35.959 | 0.00 | 0.00 |
| ATOM | 1264 | HH2  | TRP | X | 82 | 50.670 | 36.656 | 36.135 | 0.00 | 0.00 |
| ATOM | 1265 | CZ3  | TRP | X | 82 | 50.541 | 38.827 | 35.534 | 0.00 | 0.00 |
| ATOM | 1266 | HZ3  | TRP | X | 82 | 49.491 | 38.775 | 35.285 | 0.00 | 0.00 |
| ATOM | 1267 | CE3  | TRP | X | 82 | 51.273 | 40.026 | 35.537 | 0.00 | 0.00 |
| ATOM | 1268 | HE3  | TRP | X | 82 | 50.872 | 40.920 | 35.083 | 0.00 | 0.00 |
| ATOM | 1269 | CD2  | TRP | X | 82 | 52.634 | 40.034 | 35.995 | 0.00 | 0.00 |
| ATOM | 1270 | C    | TRP | X | 82 | 53.559 | 44.306 | 33.968 | 0.00 | 0.00 |
| ATOM | 1271 | O    | TRP | X | 82 | 52.728 | 45.122 | 34.401 | 0.00 | 0.00 |
| ATOM | 1272 | N    | ASN | X | 83 | 54.584 | 44.702 | 33.223 | 0.00 | 0.00 |
| ATOM | 1273 | H    | ASN | X | 83 | 55.187 | 43.988 | 32.842 | 0.00 | 0.00 |
| ATOM | 1274 | CA   | ASN | X | 83 | 54.853 | 46.123 | 33.027 | 0.00 | 0.00 |
| ATOM | 1275 | HA   | ASN | X | 83 | 54.910 | 46.627 | 33.991 | 0.00 | 0.00 |
| ATOM | 1276 | CB   | ASN | X | 83 | 56.279 | 46.160 | 32.548 | 0.00 | 0.00 |
| ATOM | 1277 | HB2  | ASN | X | 83 | 56.961 | 45.664 | 33.238 | 0.00 | 0.00 |
| ATOM | 1278 | HB3  | ASN | X | 83 | 56.302 | 45.666 | 31.576 | 0.00 | 0.00 |
| ATOM | 1279 | CG   | ASN | X | 83 | 56.763 | 47.565 | 32.514 | 0.00 | 0.00 |
| ATOM | 1280 | OD1  | ASN | X | 83 | 56.655 | 48.147 | 31.423 | 0.00 | 0.00 |
| ATOM | 1281 | ND2  | ASN | X | 83 | 57.165 | 48.088 | 33.659 | 0.00 | 0.00 |
| ATOM | 1282 | HD21 | ASN | X | 83 | 57.450 | 49.057 | 33.685 | 0.00 | 0.00 |
| ATOM | 1283 | HD22 | ASN | X | 83 | 57.125 | 47.540 | 34.506 | 0.00 | 0.00 |
| ATOM | 1284 | C    | ASN | X | 83 | 53.796 | 46.939 | 32.234 | 0.00 | 0.00 |
| ATOM | 1285 | O    | ASN | X | 83 | 53.387 | 46.500 | 31.179 | 0.00 | 0.00 |
| ATOM | 1286 | N    | PRO | X | 84 | 53.323 | 48.138 | 32.591 | 0.00 | 0.00 |
| ATOM | 1287 | CD   | PRO | X | 84 | 53.517 | 48.685 | 33.908 | 0.00 | 0.00 |
| ATOM | 1288 | HD2  | PRO | X | 84 | 54.583 | 48.820 | 34.091 | 0.00 | 0.00 |
| ATOM | 1289 | HD3  | PRO | X | 84 | 52.947 | 48.145 | 34.664 | 0.00 | 0.00 |
| ATOM | 1290 | CG   | PRO | X | 84 | 52.920 | 50.149 | 33.813 | 0.00 | 0.00 |
| ATOM | 1291 | HG2  | PRO | X | 84 | 53.727 | 50.808 | 33.493 | 0.00 | 0.00 |
| ATOM | 1292 | HG3  | PRO | X | 84 | 52.309 | 50.420 | 34.674 | 0.00 | 0.00 |
| ATOM | 1293 | CB   | PRO | X | 84 | 51.995 | 50.105 | 32.644 | 0.00 | 0.00 |
| ATOM | 1294 | HB2  | PRO | X | 84 | 52.201 | 50.972 | 32.016 | 0.00 | 0.00 |
| ATOM | 1295 | HB3  | PRO | X | 84 | 50.941 | 50.172 | 32.912 | 0.00 | 0.00 |
| ATOM | 1296 | CA   | PRO | X | 84 | 52.381 | 48.895 | 31.819 | 0.00 | 0.00 |
| ATOM | 1297 | HA   | PRO | X | 84 | 51.483 | 48.297 | 31.661 | 0.00 | 0.00 |
| ATOM | 1298 | C    | PRO | X | 84 | 53.087 | 49.295 | 30.500 | 0.00 | 0.00 |
| ATOM | 1299 | O    | PRO | X | 84 | 53.975 | 50.125 | 30.549 | 0.00 | 0.00 |
| ATOM | 1300 | N    | ASN | X | 85 | 52.680 | 48.728 | 29.341 | 0.00 | 0.00 |
| ATOM | 1301 | H    | ASN | X | 85 | 52.046 | 47.962 | 29.519 | 0.00 | 0.00 |
| ATOM | 1302 | CA   | ASN | X | 85 | 53.308 | 49.108 | 28.041 | 0.00 | 0.00 |
| ATOM | 1303 | HA   | ASN | X | 85 | 54.360 | 49.381 | 28.118 | 0.00 | 0.00 |
| ATOM | 1304 | CB   | ASN | X | 85 | 53.451 | 47.948 | 27.158 | 0.00 | 0.00 |
| ATOM | 1305 | HB2  | ASN | X | 85 | 54.305 | 48.048 | 26.488 | 0.00 | 0.00 |
| ATOM | 1306 | HB3  | ASN | X | 85 | 53.769 | 47.133 | 27.808 | 0.00 | 0.00 |
| ATOM | 1307 | CG   | ASN | X | 85 | 52.226 | 47.450 | 26.442 | 0.00 | 0.00 |
| ATOM | 1308 | OD1  | ASN | X | 85 | 51.095 | 47.804 | 26.682 | 0.00 | 0.00 |
| ATOM | 1309 | ND2  | ASN | X | 85 | 52.294 | 46.557 | 25.448 | 0.00 | 0.00 |
| ATOM | 1310 | HD21 | ASN | X | 85 | 51.427 | 46.390 | 24.958 | 0.00 | 0.00 |
| ATOM | 1311 | HD22 | ASN | X | 85 | 53.185 | 46.219 | 25.114 | 0.00 | 0.00 |

|      |      |      |     |   |    |        |        |        |      |      |
|------|------|------|-----|---|----|--------|--------|--------|------|------|
| ATOM | 1312 | C    | ASN | X | 85 | 52.563 | 50.315 | 27.385 | 0.00 | 0.00 |
| ATOM | 1313 | O    | ASN | X | 85 | 52.459 | 50.469 | 26.164 | 0.00 | 0.00 |
| ATOM | 1314 | N    | ARG | X | 86 | 52.001 | 51.149 | 28.229 | 0.00 | 0.00 |
| ATOM | 1315 | H    | ARG | X | 86 | 52.092 | 50.980 | 29.221 | 0.00 | 0.00 |
| ATOM | 1316 | CA   | ARG | X | 86 | 51.221 | 52.329 | 27.824 | 0.00 | 0.00 |
| ATOM | 1317 | HA   | ARG | X | 86 | 51.522 | 52.648 | 26.826 | 0.00 | 0.00 |
| ATOM | 1318 | CB   | ARG | X | 86 | 49.668 | 51.945 | 27.995 | 0.00 | 0.00 |
| ATOM | 1319 | HB2  | ARG | X | 86 | 49.457 | 51.727 | 29.041 | 0.00 | 0.00 |
| ATOM | 1320 | HB3  | ARG | X | 86 | 49.065 | 52.819 | 27.747 | 0.00 | 0.00 |
| ATOM | 1321 | CG   | ARG | X | 86 | 49.054 | 50.742 | 27.122 | 0.00 | 0.00 |
| ATOM | 1322 | HG2  | ARG | X | 86 | 49.716 | 49.900 | 27.323 | 0.00 | 0.00 |
| ATOM | 1323 | HG3  | ARG | X | 86 | 48.041 | 50.404 | 27.343 | 0.00 | 0.00 |
| ATOM | 1324 | CD   | ARG | X | 86 | 49.125 | 51.026 | 25.647 | 0.00 | 0.00 |
| ATOM | 1325 | HD2  | ARG | X | 86 | 48.367 | 51.778 | 25.425 | 0.00 | 0.00 |
| ATOM | 1326 | HD3  | ARG | X | 86 | 50.117 | 51.361 | 25.346 | 0.00 | 0.00 |
| ATOM | 1327 | NE   | ARG | X | 86 | 48.799 | 49.831 | 24.921 | 0.00 | 0.00 |
| ATOM | 1328 | HE   | ARG | X | 86 | 48.901 | 48.939 | 25.384 | 0.00 | 0.00 |
| ATOM | 1329 | CZ   | ARG | X | 86 | 48.547 | 49.802 | 23.615 | 0.00 | 0.00 |
| ATOM | 1330 | NH1  | ARG | X | 86 | 48.187 | 50.825 | 22.993 | 0.00 | 0.00 |
| ATOM | 1331 | HH11 | ARG | X | 86 | 47.898 | 51.688 | 23.430 | 0.00 | 0.00 |
| ATOM | 1332 | HH12 | ARG | X | 86 | 48.114 | 50.775 | 21.986 | 0.00 | 0.00 |
| ATOM | 1333 | NH2  | ARG | X | 86 | 48.574 | 48.647 | 22.998 | 0.00 | 0.00 |
| ATOM | 1334 | HH21 | ARG | X | 86 | 48.897 | 47.806 | 23.454 | 0.00 | 0.00 |
| ATOM | 1335 | HH22 | ARG | X | 86 | 48.562 | 48.521 | 21.996 | 0.00 | 0.00 |
| ATOM | 1336 | C    | ARG | X | 86 | 51.507 | 53.572 | 28.671 | 0.00 | 0.00 |
| ATOM | 1337 | O    | ARG | X | 86 | 52.109 | 53.631 | 29.741 | 0.00 | 0.00 |
| ATOM | 1338 | N    | GLU | X | 87 | 51.016 | 54.669 | 28.086 | 0.00 | 0.00 |
| ATOM | 1339 | H    | GLU | X | 87 | 50.640 | 54.530 | 27.159 | 0.00 | 0.00 |
| ATOM | 1340 | CA   | GLU | X | 87 | 51.135 | 56.062 | 28.609 | 0.00 | 0.00 |
| ATOM | 1341 | HA   | GLU | X | 87 | 52.184 | 56.316 | 28.755 | 0.00 | 0.00 |
| ATOM | 1342 | CB   | GLU | X | 87 | 50.386 | 56.978 | 27.679 | 0.00 | 0.00 |
| ATOM | 1343 | HB2  | GLU | X | 87 | 50.958 | 56.968 | 26.751 | 0.00 | 0.00 |
| ATOM | 1344 | HB3  | GLU | X | 87 | 49.402 | 56.540 | 27.512 | 0.00 | 0.00 |
| ATOM | 1345 | CG   | GLU | X | 87 | 50.297 | 58.465 | 28.116 | 0.00 | 0.00 |
| ATOM | 1346 | HG2  | GLU | X | 87 | 49.554 | 58.983 | 27.509 | 0.00 | 0.00 |
| ATOM | 1347 | HG3  | GLU | X | 87 | 49.838 | 58.474 | 29.105 | 0.00 | 0.00 |
| ATOM | 1348 | CD   | GLU | X | 87 | 51.707 | 59.135 | 28.196 | 0.00 | 0.00 |
| ATOM | 1349 | OE1  | GLU | X | 87 | 52.506 | 58.792 | 29.082 | 0.00 | 0.00 |
| ATOM | 1350 | OE2  | GLU | X | 87 | 52.122 | 59.889 | 27.284 | 0.00 | 0.00 |
| ATOM | 1351 | C    | GLU | X | 87 | 50.384 | 56.206 | 29.941 | 0.00 | 0.00 |
| ATOM | 1352 | O    | GLU | X | 87 | 49.268 | 55.716 | 30.214 | 0.00 | 0.00 |
| ATOM | 1353 | N    | LEU | X | 88 | 51.142 | 56.743 | 30.948 | 0.00 | 0.00 |
| ATOM | 1354 | H    | LEU | X | 88 | 52.056 | 57.038 | 30.637 | 0.00 | 0.00 |
| ATOM | 1355 | CA   | LEU | X | 88 | 50.644 | 57.235 | 32.304 | 0.00 | 0.00 |
| ATOM | 1356 | HA   | LEU | X | 88 | 50.006 | 56.518 | 32.821 | 0.00 | 0.00 |
| ATOM | 1357 | CB   | LEU | X | 88 | 51.799 | 57.311 | 33.286 | 0.00 | 0.00 |
| ATOM | 1358 | HB2  | LEU | X | 88 | 52.506 | 57.995 | 32.816 | 0.00 | 0.00 |
| ATOM | 1359 | HB3  | LEU | X | 88 | 51.440 | 57.736 | 34.223 | 0.00 | 0.00 |
| ATOM | 1360 | CG   | LEU | X | 88 | 52.458 | 55.996 | 33.616 | 0.00 | 0.00 |
| ATOM | 1361 | HG   | LEU | X | 88 | 52.755 | 55.458 | 32.716 | 0.00 | 0.00 |
| ATOM | 1362 | CD1  | LEU | X | 88 | 53.717 | 56.296 | 34.421 | 0.00 | 0.00 |
| ATOM | 1363 | HD11 | LEU | X | 88 | 53.610 | 56.954 | 35.284 | 0.00 | 0.00 |
| ATOM | 1364 | HD12 | LEU | X | 88 | 54.570 | 56.564 | 33.798 | 0.00 | 0.00 |
| ATOM | 1365 | HD13 | LEU | X | 88 | 54.075 | 55.401 | 34.929 | 0.00 | 0.00 |
| ATOM | 1366 | CD2  | LEU | X | 88 | 51.574 | 54.910 | 34.296 | 0.00 | 0.00 |
| ATOM | 1367 | HD21 | LEU | X | 88 | 51.317 | 55.118 | 35.335 | 0.00 | 0.00 |
| ATOM | 1368 | HD22 | LEU | X | 88 | 50.577 | 54.763 | 33.883 | 0.00 | 0.00 |
| ATOM | 1369 | HD23 | LEU | X | 88 | 52.059 | 53.936 | 34.356 | 0.00 | 0.00 |
| ATOM | 1370 | C    | LEU | X | 88 | 49.902 | 58.498 | 32.124 | 0.00 | 0.00 |
| ATOM | 1371 | O    | LEU | X | 88 | 50.368 | 59.567 | 31.616 | 0.00 | 0.00 |
| ATOM | 1372 | N    | SER | X | 89 | 48.620 | 58.513 | 32.614 | 0.00 | 0.00 |
| ATOM | 1373 | H    | SER | X | 89 | 48.313 | 57.741 | 33.189 | 0.00 | 0.00 |
| ATOM | 1374 | CA   | SER | X | 89 | 47.818 | 59.679 | 32.574 | 0.00 | 0.00 |
| ATOM | 1375 | HA   | SER | X | 89 | 48.362 | 60.624 | 32.565 | 0.00 | 0.00 |
| ATOM | 1376 | CB   | SER | X | 89 | 46.903 | 59.595 | 31.295 | 0.00 | 0.00 |
| ATOM | 1377 | HB2  | SER | X | 89 | 47.514 | 59.428 | 30.408 | 0.00 | 0.00 |
| ATOM | 1378 | HB3  | SER | X | 89 | 46.273 | 58.747 | 31.563 | 0.00 | 0.00 |

|      |      |      |     |   |    |        |        |        |      |      |
|------|------|------|-----|---|----|--------|--------|--------|------|------|
| ATOM | 1379 | OG   | SER | X | 89 | 46.107 | 60.739 | 31.133 | 0.00 | 0.00 |
| ATOM | 1380 | HG   | SER | X | 89 | 45.323 | 60.505 | 30.631 | 0.00 | 0.00 |
| ATOM | 1381 | C    | SER | X | 89 | 46.964 | 59.741 | 33.845 | 0.00 | 0.00 |
| ATOM | 1382 | O    | SER | X | 89 | 46.803 | 58.845 | 34.657 | 0.00 | 0.00 |
| ATOM | 1383 | N    | GLU | X | 90 | 46.379 | 60.890 | 34.057 | 0.00 | 0.00 |
| ATOM | 1384 | H    | GLU | X | 90 | 46.592 | 61.663 | 33.444 | 0.00 | 0.00 |
| ATOM | 1385 | CA   | GLU | X | 90 | 45.271 | 61.110 | 35.037 | 0.00 | 0.00 |
| ATOM | 1386 | HA   | GLU | X | 90 | 45.349 | 60.475 | 35.920 | 0.00 | 0.00 |
| ATOM | 1387 | CB   | GLU | X | 90 | 45.462 | 62.517 | 35.679 | 0.00 | 0.00 |
| ATOM | 1388 | HB2  | GLU | X | 90 | 45.467 | 63.334 | 34.957 | 0.00 | 0.00 |
| ATOM | 1389 | HB3  | GLU | X | 90 | 44.566 | 62.653 | 36.284 | 0.00 | 0.00 |
| ATOM | 1390 | CG   | GLU | X | 90 | 46.545 | 62.690 | 36.685 | 0.00 | 0.00 |
| ATOM | 1391 | HG2  | GLU | X | 90 | 46.477 | 61.888 | 37.421 | 0.00 | 0.00 |
| ATOM | 1392 | HG3  | GLU | X | 90 | 47.561 | 62.645 | 36.291 | 0.00 | 0.00 |
| ATOM | 1393 | CD   | GLU | X | 90 | 46.405 | 64.028 | 37.467 | 0.00 | 0.00 |
| ATOM | 1394 | OE1  | GLU | X | 90 | 45.707 | 64.059 | 38.529 | 0.00 | 0.00 |
| ATOM | 1395 | OE2  | GLU | X | 90 | 47.075 | 65.022 | 37.118 | 0.00 | 0.00 |
| ATOM | 1396 | C    | GLU | X | 90 | 43.882 | 61.072 | 34.433 | 0.00 | 0.00 |
| ATOM | 1397 | O    | GLU | X | 90 | 42.847 | 60.878 | 35.093 | 0.00 | 0.00 |
| ATOM | 1398 | N    | ASP | X | 91 | 43.720 | 61.206 | 33.132 | 0.00 | 0.00 |
| ATOM | 1399 | H    | ASP | X | 91 | 44.536 | 61.438 | 32.584 | 0.00 | 0.00 |
| ATOM | 1400 | CA   | ASP | X | 91 | 42.427 | 60.856 | 32.331 | 0.00 | 0.00 |
| ATOM | 1401 | HA   | ASP | X | 91 | 41.619 | 61.177 | 32.988 | 0.00 | 0.00 |
| ATOM | 1402 | CB   | ASP | X | 91 | 42.329 | 61.643 | 31.043 | 0.00 | 0.00 |
| ATOM | 1403 | HB2  | ASP | X | 91 | 41.247 | 61.715 | 30.935 | 0.00 | 0.00 |
| ATOM | 1404 | HB3  | ASP | X | 91 | 42.672 | 62.675 | 31.123 | 0.00 | 0.00 |
| ATOM | 1405 | CG   | ASP | X | 91 | 42.807 | 61.094 | 29.699 | 0.00 | 0.00 |
| ATOM | 1406 | OD1  | ASP | X | 91 | 42.210 | 61.476 | 28.721 | 0.00 | 0.00 |
| ATOM | 1407 | OD2  | ASP | X | 91 | 43.839 | 60.450 | 29.679 | 0.00 | 0.00 |
| ATOM | 1408 | C    | ASP | X | 91 | 42.248 | 59.352 | 32.112 | 0.00 | 0.00 |
| ATOM | 1409 | O    | ASP | X | 91 | 41.557 | 58.936 | 31.231 | 0.00 | 0.00 |
| ATOM | 1410 | N    | CYX | X | 92 | 42.909 | 58.521 | 32.877 | 0.00 | 0.00 |
| ATOM | 1411 | H    | CYX | X | 92 | 43.374 | 58.906 | 33.687 | 0.00 | 0.00 |
| ATOM | 1412 | CA   | CYX | X | 92 | 43.212 | 57.174 | 32.509 | 0.00 | 0.00 |
| ATOM | 1413 | HA   | CYX | X | 92 | 43.841 | 57.185 | 31.618 | 0.00 | 0.00 |
| ATOM | 1414 | CB   | CYX | X | 92 | 44.144 | 56.544 | 33.639 | 0.00 | 0.00 |
| ATOM | 1415 | HB2  | CYX | X | 92 | 44.166 | 55.464 | 33.490 | 0.00 | 0.00 |
| ATOM | 1416 | HB3  | CYX | X | 92 | 45.115 | 57.039 | 33.666 | 0.00 | 0.00 |
| ATOM | 1417 | SG   | CYX | X | 92 | 43.470 | 56.860 | 35.303 | 0.00 | 0.00 |
| ATOM | 1418 | C    | CYX | X | 92 | 42.086 | 56.195 | 32.345 | 0.00 | 0.00 |
| ATOM | 1419 | O    | CYX | X | 92 | 42.362 | 55.017 | 31.914 | 0.00 | 0.00 |
| ATOM | 1420 | N    | LEU | X | 93 | 40.849 | 56.528 | 32.761 | 0.00 | 0.00 |
| ATOM | 1421 | H    | LEU | X | 93 | 40.587 | 57.504 | 32.775 | 0.00 | 0.00 |
| ATOM | 1422 | CA   | LEU | X | 93 | 39.715 | 55.538 | 32.987 | 0.00 | 0.00 |
| ATOM | 1423 | HA   | LEU | X | 93 | 40.202 | 54.644 | 33.378 | 0.00 | 0.00 |
| ATOM | 1424 | CB   | LEU | X | 93 | 38.634 | 56.067 | 33.952 | 0.00 | 0.00 |
| ATOM | 1425 | HB2  | LEU | X | 93 | 38.124 | 56.985 | 33.659 | 0.00 | 0.00 |
| ATOM | 1426 | HB3  | LEU | X | 93 | 37.933 | 55.245 | 34.097 | 0.00 | 0.00 |
| ATOM | 1427 | CG   | LEU | X | 93 | 39.208 | 56.367 | 35.383 | 0.00 | 0.00 |
| ATOM | 1428 | HG   | LEU | X | 93 | 40.012 | 57.098 | 35.297 | 0.00 | 0.00 |
| ATOM | 1429 | CD1  | LEU | X | 93 | 38.061 | 56.891 | 36.318 | 0.00 | 0.00 |
| ATOM | 1430 | HD11 | LEU | X | 93 | 37.287 | 56.132 | 36.428 | 0.00 | 0.00 |
| ATOM | 1431 | HD12 | LEU | X | 93 | 37.569 | 57.782 | 35.929 | 0.00 | 0.00 |
| ATOM | 1432 | HD13 | LEU | X | 93 | 38.549 | 57.020 | 37.285 | 0.00 | 0.00 |
| ATOM | 1433 | CD2  | LEU | X | 93 | 39.908 | 55.138 | 36.023 | 0.00 | 0.00 |
| ATOM | 1434 | HD21 | LEU | X | 93 | 40.715 | 54.777 | 35.385 | 0.00 | 0.00 |
| ATOM | 1435 | HD22 | LEU | X | 93 | 40.192 | 55.311 | 37.061 | 0.00 | 0.00 |
| ATOM | 1436 | HD23 | LEU | X | 93 | 39.208 | 54.303 | 35.987 | 0.00 | 0.00 |
| ATOM | 1437 | C    | LEU | X | 93 | 39.004 | 55.192 | 31.648 | 0.00 | 0.00 |
| ATOM | 1438 | O    | LEU | X | 93 | 38.314 | 55.971 | 31.014 | 0.00 | 0.00 |
| ATOM | 1439 | N    | TYR | X | 94 | 39.195 | 53.970 | 31.176 | 0.00 | 0.00 |
| ATOM | 1440 | H    | TYR | X | 94 | 39.705 | 53.299 | 31.732 | 0.00 | 0.00 |
| ATOM | 1441 | CA   | TYR | X | 94 | 38.447 | 53.397 | 30.043 | 0.00 | 0.00 |
| ATOM | 1442 | HA   | TYR | X | 94 | 37.505 | 53.909 | 29.848 | 0.00 | 0.00 |
| ATOM | 1443 | CB   | TYR | X | 94 | 39.258 | 53.577 | 28.789 | 0.00 | 0.00 |
| ATOM | 1444 | HB2  | TYR | X | 94 | 40.133 | 52.930 | 28.851 | 0.00 | 0.00 |
| ATOM | 1445 | HB3  | TYR | X | 94 | 38.625 | 53.216 | 27.979 | 0.00 | 0.00 |

|      |      |      |     |   |    |        |        |        |      |      |
|------|------|------|-----|---|----|--------|--------|--------|------|------|
| ATOM | 1446 | CG   | TYR | X | 94 | 39.729 | 54.995 | 28.592 | 0.00 | 0.00 |
| ATOM | 1447 | CD1  | TYR | X | 94 | 38.979 | 55.952 | 27.835 | 0.00 | 0.00 |
| ATOM | 1448 | HD1  | TYR | X | 94 | 37.949 | 55.685 | 27.649 | 0.00 | 0.00 |
| ATOM | 1449 | CE1  | TYR | X | 94 | 39.591 | 57.149 | 27.439 | 0.00 | 0.00 |
| ATOM | 1450 | HE1  | TYR | X | 94 | 39.154 | 57.843 | 26.736 | 0.00 | 0.00 |
| ATOM | 1451 | CZ   | TYR | X | 94 | 40.817 | 57.544 | 28.028 | 0.00 | 0.00 |
| ATOM | 1452 | OH   | TYR | X | 94 | 41.367 | 58.729 | 27.643 | 0.00 | 0.00 |
| ATOM | 1453 | HH   | TYR | X | 94 | 42.138 | 58.893 | 28.191 | 0.00 | 0.00 |
| ATOM | 1454 | CE2  | TYR | X | 94 | 41.458 | 56.649 | 28.875 | 0.00 | 0.00 |
| ATOM | 1455 | HE2  | TYR | X | 94 | 42.370 | 57.004 | 29.333 | 0.00 | 0.00 |
| ATOM | 1456 | CD2  | TYR | X | 94 | 40.979 | 55.358 | 29.105 | 0.00 | 0.00 |
| ATOM | 1457 | HD2  | TYR | X | 94 | 41.585 | 54.700 | 29.709 | 0.00 | 0.00 |
| ATOM | 1458 | C    | TYR | X | 94 | 38.083 | 51.899 | 30.228 | 0.00 | 0.00 |
| ATOM | 1459 | O    | TYR | X | 94 | 38.869 | 51.155 | 30.758 | 0.00 | 0.00 |
| ATOM | 1460 | N    | LEU | X | 95 | 36.962 | 51.495 | 29.597 | 0.00 | 0.00 |
| ATOM | 1461 | H    | LEU | X | 95 | 36.484 | 52.208 | 29.066 | 0.00 | 0.00 |
| ATOM | 1462 | CA   | LEU | X | 95 | 36.326 | 50.132 | 29.508 | 0.00 | 0.00 |
| ATOM | 1463 | HA   | LEU | X | 95 | 36.789 | 49.640 | 30.363 | 0.00 | 0.00 |
| ATOM | 1464 | CB   | LEU | X | 95 | 34.823 | 50.372 | 29.758 | 0.00 | 0.00 |
| ATOM | 1465 | HB2  | LEU | X | 95 | 34.555 | 51.319 | 30.227 | 0.00 | 0.00 |
| ATOM | 1466 | HB3  | LEU | X | 95 | 34.353 | 50.524 | 28.786 | 0.00 | 0.00 |
| ATOM | 1467 | CG   | LEU | X | 95 | 33.984 | 49.320 | 30.479 | 0.00 | 0.00 |
| ATOM | 1468 | HG   | LEU | X | 95 | 34.613 | 48.730 | 31.146 | 0.00 | 0.00 |
| ATOM | 1469 | CD1  | LEU | X | 95 | 32.861 | 50.048 | 31.219 | 0.00 | 0.00 |
| ATOM | 1470 | HD11 | LEU | X | 95 | 32.215 | 50.659 | 30.588 | 0.00 | 0.00 |
| ATOM | 1471 | HD12 | LEU | X | 95 | 33.215 | 50.612 | 32.082 | 0.00 | 0.00 |
| ATOM | 1472 | HD13 | LEU | X | 95 | 32.377 | 49.187 | 31.680 | 0.00 | 0.00 |
| ATOM | 1473 | CD2  | LEU | X | 95 | 33.297 | 48.329 | 29.437 | 0.00 | 0.00 |
| ATOM | 1474 | HD21 | LEU | X | 95 | 32.974 | 47.494 | 30.059 | 0.00 | 0.00 |
| ATOM | 1475 | HD22 | LEU | X | 95 | 32.471 | 48.822 | 28.925 | 0.00 | 0.00 |
| ATOM | 1476 | HD23 | LEU | X | 95 | 33.950 | 47.900 | 28.677 | 0.00 | 0.00 |
| ATOM | 1477 | C    | LEU | X | 95 | 36.768 | 49.469 | 28.134 | 0.00 | 0.00 |
| ATOM | 1478 | O    | LEU | X | 95 | 37.209 | 50.174 | 27.233 | 0.00 | 0.00 |
| ATOM | 1479 | N    | ASN | X | 96 | 36.523 | 48.174 | 28.047 | 0.00 | 0.00 |
| ATOM | 1480 | H    | ASN | X | 96 | 36.152 | 47.709 | 28.864 | 0.00 | 0.00 |
| ATOM | 1481 | CA   | ASN | X | 96 | 37.196 | 47.295 | 27.085 | 0.00 | 0.00 |
| ATOM | 1482 | HA   | ASN | X | 96 | 37.178 | 47.853 | 26.149 | 0.00 | 0.00 |
| ATOM | 1483 | CB   | ASN | X | 96 | 38.551 | 46.923 | 27.464 | 0.00 | 0.00 |
| ATOM | 1484 | HB2  | ASN | X | 96 | 38.403 | 46.245 | 28.305 | 0.00 | 0.00 |
| ATOM | 1485 | HB3  | ASN | X | 96 | 39.026 | 46.331 | 26.682 | 0.00 | 0.00 |
| ATOM | 1486 | CG   | ASN | X | 96 | 39.480 | 48.081 | 27.770 | 0.00 | 0.00 |
| ATOM | 1487 | OD1  | ASN | X | 96 | 40.020 | 48.755 | 26.889 | 0.00 | 0.00 |
| ATOM | 1488 | ND2  | ASN | X | 96 | 39.707 | 48.372 | 29.023 | 0.00 | 0.00 |
| ATOM | 1489 | HD21 | ASN | X | 96 | 40.301 | 49.143 | 29.296 | 0.00 | 0.00 |
| ATOM | 1490 | HD22 | ASN | X | 96 | 39.230 | 47.856 | 29.748 | 0.00 | 0.00 |
| ATOM | 1491 | C    | ASN | X | 96 | 36.291 | 46.000 | 26.910 | 0.00 | 0.00 |
| ATOM | 1492 | O    | ASN | X | 96 | 36.030 | 45.384 | 27.913 | 0.00 | 0.00 |
| ATOM | 1493 | N    | VAL | X | 97 | 35.838 | 45.717 | 25.725 | 0.00 | 0.00 |
| ATOM | 1494 | H    | VAL | X | 97 | 36.043 | 46.312 | 24.935 | 0.00 | 0.00 |
| ATOM | 1495 | CA   | VAL | X | 97 | 34.939 | 44.586 | 25.429 | 0.00 | 0.00 |
| ATOM | 1496 | HA   | VAL | X | 97 | 34.686 | 44.026 | 26.329 | 0.00 | 0.00 |
| ATOM | 1497 | CB   | VAL | X | 97 | 33.593 | 44.999 | 24.864 | 0.00 | 0.00 |
| ATOM | 1498 | HB   | VAL | X | 97 | 33.841 | 45.645 | 24.022 | 0.00 | 0.00 |
| ATOM | 1499 | CG1  | VAL | X | 97 | 32.612 | 43.899 | 24.406 | 0.00 | 0.00 |
| ATOM | 1500 | HG11 | VAL | X | 97 | 33.037 | 43.309 | 23.594 | 0.00 | 0.00 |
| ATOM | 1501 | HG12 | VAL | X | 97 | 32.397 | 43.247 | 25.253 | 0.00 | 0.00 |
| ATOM | 1502 | HG13 | VAL | X | 97 | 31.706 | 44.382 | 24.039 | 0.00 | 0.00 |
| ATOM | 1503 | CG2  | VAL | X | 97 | 32.711 | 45.697 | 25.881 | 0.00 | 0.00 |
| ATOM | 1504 | HG21 | VAL | X | 97 | 31.813 | 46.078 | 25.394 | 0.00 | 0.00 |
| ATOM | 1505 | HG22 | VAL | X | 97 | 33.307 | 46.542 | 26.226 | 0.00 | 0.00 |
| ATOM | 1506 | HG23 | VAL | X | 97 | 32.415 | 45.123 | 26.759 | 0.00 | 0.00 |
| ATOM | 1507 | C    | VAL | X | 97 | 35.579 | 43.623 | 24.414 | 0.00 | 0.00 |
| ATOM | 1508 | O    | VAL | X | 97 | 36.215 | 44.131 | 23.477 | 0.00 | 0.00 |
| ATOM | 1509 | N    | TRP | X | 98 | 35.306 | 42.348 | 24.578 | 0.00 | 0.00 |
| ATOM | 1510 | H    | TRP | X | 98 | 34.741 | 42.141 | 25.389 | 0.00 | 0.00 |
| ATOM | 1511 | CA   | TRP | X | 98 | 35.663 | 41.191 | 23.733 | 0.00 | 0.00 |
| ATOM | 1512 | HA   | TRP | X | 98 | 36.017 | 41.508 | 22.752 | 0.00 | 0.00 |

|      |      |      |     |   |     |        |        |        |      |      |
|------|------|------|-----|---|-----|--------|--------|--------|------|------|
| ATOM | 1513 | CB   | TRP | X | 98  | 36.886 | 40.449 | 24.338 | 0.00 | 0.00 |
| ATOM | 1514 | HB2  | TRP | X | 98  | 36.467 | 40.092 | 25.278 | 0.00 | 0.00 |
| ATOM | 1515 | HB3  | TRP | X | 98  | 37.005 | 39.633 | 23.624 | 0.00 | 0.00 |
| ATOM | 1516 | CG   | TRP | X | 98  | 38.256 | 41.133 | 24.469 | 0.00 | 0.00 |
| ATOM | 1517 | CD1  | TRP | X | 98  | 39.274 | 40.947 | 23.604 | 0.00 | 0.00 |
| ATOM | 1518 | HD1  | TRP | X | 98  | 39.262 | 40.247 | 22.782 | 0.00 | 0.00 |
| ATOM | 1519 | NE1  | TRP | X | 98  | 40.413 | 41.628 | 24.018 | 0.00 | 0.00 |
| ATOM | 1520 | HE1  | TRP | X | 98  | 41.319 | 41.538 | 23.579 | 0.00 | 0.00 |
| ATOM | 1521 | CE2  | TRP | X | 98  | 40.129 | 42.359 | 25.145 | 0.00 | 0.00 |
| ATOM | 1522 | CZ2  | TRP | X | 98  | 40.854 | 43.226 | 25.924 | 0.00 | 0.00 |
| ATOM | 1523 | HZ2  | TRP | X | 98  | 41.882 | 43.325 | 25.607 | 0.00 | 0.00 |
| ATOM | 1524 | CH2  | TRP | X | 98  | 40.341 | 43.688 | 27.145 | 0.00 | 0.00 |
| ATOM | 1525 | HH2  | TRP | X | 98  | 40.963 | 44.243 | 27.831 | 0.00 | 0.00 |
| ATOM | 1526 | CZ3  | TRP | X | 98  | 38.997 | 43.405 | 27.465 | 0.00 | 0.00 |
| ATOM | 1527 | HZ3  | TRP | X | 98  | 38.508 | 43.860 | 28.314 | 0.00 | 0.00 |
| ATOM | 1528 | CE3  | TRP | X | 98  | 38.215 | 42.535 | 26.716 | 0.00 | 0.00 |
| ATOM | 1529 | HE3  | TRP | X | 98  | 37.151 | 42.415 | 26.852 | 0.00 | 0.00 |
| ATOM | 1530 | CD2  | TRP | X | 98  | 38.807 | 42.027 | 25.507 | 0.00 | 0.00 |
| ATOM | 1531 | C    | TRP | X | 98  | 34.410 | 40.381 | 23.396 | 0.00 | 0.00 |
| ATOM | 1532 | O    | TRP | X | 98  | 33.737 | 40.026 | 24.329 | 0.00 | 0.00 |
| ATOM | 1533 | N    | THR | X | 99  | 34.020 | 40.186 | 22.109 | 0.00 | 0.00 |
| ATOM | 1534 | H    | THR | X | 99  | 34.728 | 40.477 | 21.451 | 0.00 | 0.00 |
| ATOM | 1535 | CA   | THR | X | 99  | 32.782 | 39.488 | 21.590 | 0.00 | 0.00 |
| ATOM | 1536 | HA   | THR | X | 99  | 32.475 | 38.892 | 22.450 | 0.00 | 0.00 |
| ATOM | 1537 | CB   | THR | X | 99  | 31.673 | 40.521 | 21.372 | 0.00 | 0.00 |
| ATOM | 1538 | HB   | THR | X | 99  | 31.578 | 41.193 | 22.225 | 0.00 | 0.00 |
| ATOM | 1539 | CG2  | THR | X | 99  | 31.866 | 41.425 | 20.210 | 0.00 | 0.00 |
| ATOM | 1540 | HG21 | THR | X | 99  | 31.720 | 40.906 | 19.263 | 0.00 | 0.00 |
| ATOM | 1541 | HG22 | THR | X | 99  | 32.909 | 41.740 | 20.173 | 0.00 | 0.00 |
| ATOM | 1542 | HG23 | THR | X | 99  | 31.249 | 42.322 | 20.250 | 0.00 | 0.00 |
| ATOM | 1543 | OG1  | THR | X | 99  | 30.442 | 39.834 | 21.281 | 0.00 | 0.00 |
| ATOM | 1544 | HG1  | THR | X | 99  | 29.745 | 40.477 | 21.131 | 0.00 | 0.00 |
| ATOM | 1545 | C    | THR | X | 99  | 33.080 | 38.656 | 20.451 | 0.00 | 0.00 |
| ATOM | 1546 | O    | THR | X | 99  | 33.901 | 39.150 | 19.644 | 0.00 | 0.00 |
| ATOM | 1547 | N    | PRO | X | 100 | 32.479 | 37.457 | 20.327 | 0.00 | 0.00 |
| ATOM | 1548 | CD   | PRO | X | 100 | 31.628 | 36.835 | 21.346 | 0.00 | 0.00 |
| ATOM | 1549 | HD2  | PRO | X | 100 | 30.746 | 37.432 | 21.577 | 0.00 | 0.00 |
| ATOM | 1550 | HD3  | PRO | X | 100 | 32.078 | 36.583 | 22.307 | 0.00 | 0.00 |
| ATOM | 1551 | CG   | PRO | X | 100 | 31.098 | 35.597 | 20.695 | 0.00 | 0.00 |
| ATOM | 1552 | HG2  | PRO | X | 100 | 30.181 | 35.833 | 20.156 | 0.00 | 0.00 |
| ATOM | 1553 | HG3  | PRO | X | 100 | 30.852 | 34.786 | 21.380 | 0.00 | 0.00 |
| ATOM | 1554 | CB   | PRO | X | 100 | 32.237 | 35.202 | 19.710 | 0.00 | 0.00 |
| ATOM | 1555 | HB2  | PRO | X | 100 | 31.921 | 34.498 | 18.940 | 0.00 | 0.00 |
| ATOM | 1556 | HB3  | PRO | X | 100 | 33.076 | 34.756 | 20.244 | 0.00 | 0.00 |
| ATOM | 1557 | CA   | PRO | X | 100 | 32.856 | 36.527 | 19.229 | 0.00 | 0.00 |
| ATOM | 1558 | HA   | PRO | X | 100 | 33.944 | 36.496 | 19.296 | 0.00 | 0.00 |
| ATOM | 1559 | C    | PRO | X | 100 | 32.393 | 37.013 | 17.881 | 0.00 | 0.00 |
| ATOM | 1560 | O    | PRO | X | 100 | 31.238 | 37.375 | 17.722 | 0.00 | 0.00 |
| ATOM | 1561 | N    | TYR | X | 101 | 33.309 | 37.029 | 16.876 | 0.00 | 0.00 |
| ATOM | 1562 | H    | TYR | X | 101 | 34.290 | 36.896 | 17.080 | 0.00 | 0.00 |
| ATOM | 1563 | CA   | TYR | X | 101 | 32.856 | 37.517 | 15.536 | 0.00 | 0.00 |
| ATOM | 1564 | HA   | TYR | X | 101 | 32.013 | 38.186 | 15.707 | 0.00 | 0.00 |
| ATOM | 1565 | CB   | TYR | X | 101 | 34.025 | 38.195 | 14.933 | 0.00 | 0.00 |
| ATOM | 1566 | HB2  | TYR | X | 101 | 34.459 | 38.818 | 15.716 | 0.00 | 0.00 |
| ATOM | 1567 | HB3  | TYR | X | 101 | 34.716 | 37.426 | 14.589 | 0.00 | 0.00 |
| ATOM | 1568 | CG   | TYR | X | 101 | 33.699 | 39.016 | 13.716 | 0.00 | 0.00 |
| ATOM | 1569 | CD1  | TYR | X | 101 | 33.520 | 38.384 | 12.469 | 0.00 | 0.00 |
| ATOM | 1570 | HD1  | TYR | X | 101 | 33.645 | 37.312 | 12.419 | 0.00 | 0.00 |
| ATOM | 1571 | CE1  | TYR | X | 101 | 33.105 | 39.143 | 11.379 | 0.00 | 0.00 |
| ATOM | 1572 | HE1  | TYR | X | 101 | 32.870 | 38.627 | 10.459 | 0.00 | 0.00 |
| ATOM | 1573 | CZ   | TYR | X | 101 | 32.855 | 40.521 | 11.472 | 0.00 | 0.00 |
| ATOM | 1574 | OH   | TYR | X | 101 | 32.445 | 41.221 | 10.402 | 0.00 | 0.00 |
| ATOM | 1575 | HH   | TYR | X | 101 | 32.231 | 40.621 | 9.683  | 0.00 | 0.00 |
| ATOM | 1576 | CE2  | TYR | X | 101 | 33.225 | 41.210 | 12.678 | 0.00 | 0.00 |
| ATOM | 1577 | HE2  | TYR | X | 101 | 33.147 | 42.283 | 12.578 | 0.00 | 0.00 |
| ATOM | 1578 | CD2  | TYR | X | 101 | 33.619 | 40.454 | 13.784 | 0.00 | 0.00 |
| ATOM | 1579 | HD2  | TYR | X | 101 | 33.688 | 40.998 | 14.714 | 0.00 | 0.00 |

|      |      |      |     |   |     |        |        |        |      |      |
|------|------|------|-----|---|-----|--------|--------|--------|------|------|
| ATOM | 1580 | C    | TYR | X | 101 | 32.241 | 36.483 | 14.616 | 0.00 | 0.00 |
| ATOM | 1581 | O    | TYR | X | 101 | 32.713 | 35.361 | 14.544 | 0.00 | 0.00 |
| ATOM | 1582 | N    | PRO | X | 102 | 31.181 | 36.820 | 13.807 | 0.00 | 0.00 |
| ATOM | 1583 | CD   | PRO | X | 102 | 30.681 | 35.902 | 12.790 | 0.00 | 0.00 |
| ATOM | 1584 | HD2  | PRO | X | 102 | 30.577 | 34.929 | 13.270 | 0.00 | 0.00 |
| ATOM | 1585 | HD3  | PRO | X | 102 | 31.516 | 35.984 | 12.094 | 0.00 | 0.00 |
| ATOM | 1586 | CG   | PRO | X | 102 | 29.340 | 36.433 | 12.290 | 0.00 | 0.00 |
| ATOM | 1587 | HG2  | PRO | X | 102 | 28.530 | 36.062 | 12.918 | 0.00 | 0.00 |
| ATOM | 1588 | HG3  | PRO | X | 102 | 29.180 | 36.196 | 11.238 | 0.00 | 0.00 |
| ATOM | 1589 | CB   | PRO | X | 102 | 29.471 | 37.922 | 12.572 | 0.00 | 0.00 |
| ATOM | 1590 | HB2  | PRO | X | 102 | 28.457 | 38.302 | 12.694 | 0.00 | 0.00 |
| ATOM | 1591 | HB3  | PRO | X | 102 | 29.928 | 38.415 | 11.714 | 0.00 | 0.00 |
| ATOM | 1592 | CA   | PRO | X | 102 | 30.332 | 38.031 | 13.857 | 0.00 | 0.00 |
| ATOM | 1593 | HA   | PRO | X | 102 | 30.937 | 38.938 | 13.832 | 0.00 | 0.00 |
| ATOM | 1594 | C    | PRO | X | 102 | 29.523 | 38.047 | 15.086 | 0.00 | 0.00 |
| ATOM | 1595 | O    | PRO | X | 102 | 29.273 | 36.984 | 15.571 | 0.00 | 0.00 |
| ATOM | 1596 | N    | ARG | X | 103 | 29.171 | 39.263 | 15.510 | 0.00 | 0.00 |
| ATOM | 1597 | H    | ARG | X | 103 | 29.656 | 40.002 | 15.022 | 0.00 | 0.00 |
| ATOM | 1598 | CA   | ARG | X | 103 | 28.479 | 39.604 | 16.801 | 0.00 | 0.00 |
| ATOM | 1599 | HA   | ARG | X | 103 | 29.149 | 39.412 | 17.639 | 0.00 | 0.00 |
| ATOM | 1600 | CB   | ARG | X | 103 | 27.996 | 41.055 | 16.919 | 0.00 | 0.00 |
| ATOM | 1601 | HB2  | ARG | X | 103 | 28.903 | 41.632 | 17.099 | 0.00 | 0.00 |
| ATOM | 1602 | HB3  | ARG | X | 103 | 27.494 | 41.330 | 15.991 | 0.00 | 0.00 |
| ATOM | 1603 | CG   | ARG | X | 103 | 27.116 | 41.352 | 18.197 | 0.00 | 0.00 |
| ATOM | 1604 | HG2  | ARG | X | 103 | 26.184 | 40.802 | 18.069 | 0.00 | 0.00 |
| ATOM | 1605 | HG3  | ARG | X | 103 | 27.605 | 41.009 | 19.109 | 0.00 | 0.00 |
| ATOM | 1606 | CD   | ARG | X | 103 | 26.816 | 42.916 | 18.380 | 0.00 | 0.00 |
| ATOM | 1607 | HD2  | ARG | X | 103 | 26.108 | 43.165 | 19.171 | 0.00 | 0.00 |
| ATOM | 1608 | HD3  | ARG | X | 103 | 27.794 | 43.246 | 18.729 | 0.00 | 0.00 |
| ATOM | 1609 | NE   | ARG | X | 103 | 26.486 | 43.572 | 17.053 | 0.00 | 0.00 |
| ATOM | 1610 | HE   | ARG | X | 103 | 26.971 | 44.340 | 16.612 | 0.00 | 0.00 |
| ATOM | 1611 | CZ   | ARG | X | 103 | 25.448 | 43.376 | 16.267 | 0.00 | 0.00 |
| ATOM | 1612 | NH1  | ARG | X | 103 | 24.362 | 42.755 | 16.617 | 0.00 | 0.00 |
| ATOM | 1613 | HH11 | ARG | X | 103 | 24.342 | 42.231 | 17.480 | 0.00 | 0.00 |
| ATOM | 1614 | HH12 | ARG | X | 103 | 23.615 | 42.699 | 15.939 | 0.00 | 0.00 |
| ATOM | 1615 | NH2  | ARG | X | 103 | 25.408 | 43.836 | 15.092 | 0.00 | 0.00 |
| ATOM | 1616 | HH21 | ARG | X | 103 | 26.222 | 44.282 | 14.693 | 0.00 | 0.00 |
| ATOM | 1617 | HH22 | ARG | X | 103 | 24.530 | 43.882 | 14.595 | 0.00 | 0.00 |
| ATOM | 1618 | C    | ARG | X | 103 | 27.260 | 38.662 | 17.003 | 0.00 | 0.00 |
| ATOM | 1619 | O    | ARG | X | 103 | 26.446 | 38.485 | 16.041 | 0.00 | 0.00 |
| ATOM | 1620 | N    | PRO | X | 104 | 27.238 | 37.991 | 18.184 | 0.00 | 0.00 |
| ATOM | 1621 | CD   | PRO | X | 104 | 28.087 | 38.133 | 19.288 | 0.00 | 0.00 |
| ATOM | 1622 | HD2  | PRO | X | 104 | 28.363 | 39.118 | 19.666 | 0.00 | 0.00 |
| ATOM | 1623 | HD3  | PRO | X | 104 | 29.033 | 37.620 | 19.118 | 0.00 | 0.00 |
| ATOM | 1624 | CG   | PRO | X | 104 | 27.483 | 37.265 | 20.463 | 0.00 | 0.00 |
| ATOM | 1625 | HG2  | PRO | X | 104 | 26.971 | 37.918 | 21.170 | 0.00 | 0.00 |
| ATOM | 1626 | HG3  | PRO | X | 104 | 28.228 | 36.602 | 20.905 | 0.00 | 0.00 |
| ATOM | 1627 | CB   | PRO | X | 104 | 26.502 | 36.376 | 19.791 | 0.00 | 0.00 |
| ATOM | 1628 | HB2  | PRO | X | 104 | 25.673 | 36.230 | 20.483 | 0.00 | 0.00 |
| ATOM | 1629 | HB3  | PRO | X | 104 | 26.883 | 35.374 | 19.594 | 0.00 | 0.00 |
| ATOM | 1630 | CA   | PRO | X | 104 | 26.155 | 37.147 | 18.512 | 0.00 | 0.00 |
| ATOM | 1631 | HA   | PRO | X | 104 | 25.968 | 36.422 | 17.719 | 0.00 | 0.00 |
| ATOM | 1632 | C    | PRO | X | 104 | 24.913 | 37.964 | 18.794 | 0.00 | 0.00 |
| ATOM | 1633 | O    | PRO | X | 104 | 24.967 | 39.125 | 19.178 | 0.00 | 0.00 |
| ATOM | 1634 | N    | THR | X | 105 | 23.737 | 37.369 | 18.675 | 0.00 | 0.00 |
| ATOM | 1635 | H    | THR | X | 105 | 23.672 | 36.422 | 18.330 | 0.00 | 0.00 |
| ATOM | 1636 | CA   | THR | X | 105 | 22.357 | 38.083 | 18.821 | 0.00 | 0.00 |
| ATOM | 1637 | HA   | THR | X | 105 | 22.490 | 39.061 | 19.282 | 0.00 | 0.00 |
| ATOM | 1638 | CB   | THR | X | 105 | 21.718 | 38.394 | 17.479 | 0.00 | 0.00 |
| ATOM | 1639 | HB   | THR | X | 105 | 20.704 | 38.793 | 17.486 | 0.00 | 0.00 |
| ATOM | 1640 | CG2  | THR | X | 105 | 22.567 | 39.317 | 16.677 | 0.00 | 0.00 |
| ATOM | 1641 | HG21 | THR | X | 105 | 22.079 | 39.649 | 15.761 | 0.00 | 0.00 |
| ATOM | 1642 | HG22 | THR | X | 105 | 23.550 | 38.913 | 16.433 | 0.00 | 0.00 |
| ATOM | 1643 | HG23 | THR | X | 105 | 22.667 | 40.259 | 17.218 | 0.00 | 0.00 |
| ATOM | 1644 | OG1  | THR | X | 105 | 21.716 | 37.197 | 16.641 | 0.00 | 0.00 |
| ATOM | 1645 | HG1  | THR | X | 105 | 22.643 | 37.025 | 16.461 | 0.00 | 0.00 |
| ATOM | 1646 | C    | THR | X | 105 | 21.387 | 37.287 | 19.724 | 0.00 | 0.00 |

|      |      |      |     |   |     |        |        |        |      |      |
|------|------|------|-----|---|-----|--------|--------|--------|------|------|
| ATOM | 1647 | O    | THR | X | 105 | 20.337 | 37.815 | 19.967 | 0.00 | 0.00 |
| ATOM | 1648 | N    | SER | X | 106 | 21.795 | 36.154 | 20.309 | 0.00 | 0.00 |
| ATOM | 1649 | H    | SER | X | 106 | 22.741 | 35.857 | 20.114 | 0.00 | 0.00 |
| ATOM | 1650 | CA   | SER | X | 106 | 21.157 | 35.484 | 21.436 | 0.00 | 0.00 |
| ATOM | 1651 | HA   | SER | X | 106 | 20.152 | 35.881 | 21.582 | 0.00 | 0.00 |
| ATOM | 1652 | CB   | SER | X | 106 | 20.993 | 34.009 | 20.969 | 0.00 | 0.00 |
| ATOM | 1653 | HB2  | SER | X | 106 | 21.843 | 33.603 | 20.421 | 0.00 | 0.00 |
| ATOM | 1654 | HB3  | SER | X | 106 | 20.839 | 33.411 | 21.867 | 0.00 | 0.00 |
| ATOM | 1655 | OG   | SER | X | 106 | 19.826 | 33.926 | 20.180 | 0.00 | 0.00 |
| ATOM | 1656 | HG   | SER | X | 106 | 20.144 | 34.195 | 19.315 | 0.00 | 0.00 |
| ATOM | 1657 | C    | SER | X | 106 | 22.070 | 35.523 | 22.694 | 0.00 | 0.00 |
| ATOM | 1658 | O    | SER | X | 106 | 23.301 | 35.849 | 22.540 | 0.00 | 0.00 |
| ATOM | 1659 | N    | PRO | X | 107 | 21.599 | 35.302 | 23.893 | 0.00 | 0.00 |
| ATOM | 1660 | CD   | PRO | X | 107 | 20.214 | 34.898 | 24.192 | 0.00 | 0.00 |
| ATOM | 1661 | HD2  | PRO | X | 107 | 19.924 | 34.023 | 23.610 | 0.00 | 0.00 |
| ATOM | 1662 | HD3  | PRO | X | 107 | 19.549 | 35.758 | 24.110 | 0.00 | 0.00 |
| ATOM | 1663 | CG   | PRO | X | 107 | 20.222 | 34.447 | 25.655 | 0.00 | 0.00 |
| ATOM | 1664 | HG2  | PRO | X | 107 | 20.626 | 33.439 | 25.745 | 0.00 | 0.00 |
| ATOM | 1665 | HG3  | PRO | X | 107 | 19.221 | 34.461 | 26.086 | 0.00 | 0.00 |
| ATOM | 1666 | CB   | PRO | X | 107 | 21.172 | 35.448 | 26.241 | 0.00 | 0.00 |
| ATOM | 1667 | HB2  | PRO | X | 107 | 21.511 | 35.155 | 27.234 | 0.00 | 0.00 |
| ATOM | 1668 | HB3  | PRO | X | 107 | 20.759 | 36.443 | 26.403 | 0.00 | 0.00 |
| ATOM | 1669 | CA   | PRO | X | 107 | 22.273 | 35.534 | 25.152 | 0.00 | 0.00 |
| ATOM | 1670 | HA   | PRO | X | 107 | 22.692 | 36.536 | 25.235 | 0.00 | 0.00 |
| ATOM | 1671 | C    | PRO | X | 107 | 23.331 | 34.536 | 25.511 | 0.00 | 0.00 |
| ATOM | 1672 | O    | PRO | X | 107 | 23.189 | 33.298 | 25.458 | 0.00 | 0.00 |
| ATOM | 1673 | N    | THR | X | 108 | 24.549 | 35.078 | 25.768 | 0.00 | 0.00 |
| ATOM | 1674 | H    | THR | X | 108 | 24.604 | 36.086 | 25.796 | 0.00 | 0.00 |
| ATOM | 1675 | CA   | THR | X | 108 | 25.835 | 34.472 | 26.034 | 0.00 | 0.00 |
| ATOM | 1676 | HA   | THR | X | 108 | 25.614 | 33.427 | 26.248 | 0.00 | 0.00 |
| ATOM | 1677 | CB   | THR | X | 108 | 26.756 | 34.430 | 24.844 | 0.00 | 0.00 |
| ATOM | 1678 | HB   | THR | X | 108 | 26.288 | 33.778 | 24.106 | 0.00 | 0.00 |
| ATOM | 1679 | CG2  | THR | X | 108 | 27.167 | 35.842 | 24.275 | 0.00 | 0.00 |
| ATOM | 1680 | HG21 | THR | X | 108 | 27.843 | 35.798 | 23.421 | 0.00 | 0.00 |
| ATOM | 1681 | HG22 | THR | X | 108 | 27.612 | 36.328 | 25.144 | 0.00 | 0.00 |
| ATOM | 1682 | HG23 | THR | X | 108 | 26.219 | 36.314 | 24.019 | 0.00 | 0.00 |
| ATOM | 1683 | OG1  | THR | X | 108 | 27.923 | 33.768 | 25.174 | 0.00 | 0.00 |
| ATOM | 1684 | HG1  | THR | X | 108 | 28.322 | 33.375 | 24.395 | 0.00 | 0.00 |
| ATOM | 1685 | C    | THR | X | 108 | 26.459 | 35.223 | 27.262 | 0.00 | 0.00 |
| ATOM | 1686 | O    | THR | X | 108 | 26.494 | 36.439 | 27.248 | 0.00 | 0.00 |
| ATOM | 1687 | N    | PRO | X | 109 | 26.976 | 34.457 | 28.198 | 0.00 | 0.00 |
| ATOM | 1688 | CD   | PRO | X | 109 | 26.972 | 33.018 | 28.405 | 0.00 | 0.00 |
| ATOM | 1689 | HD2  | PRO | X | 109 | 27.839 | 32.562 | 27.927 | 0.00 | 0.00 |
| ATOM | 1690 | HD3  | PRO | X | 109 | 26.104 | 32.478 | 28.025 | 0.00 | 0.00 |
| ATOM | 1691 | CG   | PRO | X | 109 | 27.076 | 32.734 | 29.924 | 0.00 | 0.00 |
| ATOM | 1692 | HG2  | PRO | X | 109 | 27.679 | 31.868 | 30.196 | 0.00 | 0.00 |
| ATOM | 1693 | HG3  | PRO | X | 109 | 26.067 | 32.583 | 30.309 | 0.00 | 0.00 |
| ATOM | 1694 | CB   | PRO | X | 109 | 27.839 | 33.953 | 30.450 | 0.00 | 0.00 |
| ATOM | 1695 | HB2  | PRO | X | 109 | 28.903 | 33.765 | 30.305 | 0.00 | 0.00 |
| ATOM | 1696 | HB3  | PRO | X | 109 | 27.586 | 34.211 | 31.479 | 0.00 | 0.00 |
| ATOM | 1697 | CA   | PRO | X | 109 | 27.388 | 35.022 | 29.484 | 0.00 | 0.00 |
| ATOM | 1698 | HA   | PRO | X | 109 | 26.485 | 35.470 | 29.899 | 0.00 | 0.00 |
| ATOM | 1699 | C    | PRO | X | 109 | 28.524 | 36.020 | 29.432 | 0.00 | 0.00 |
| ATOM | 1700 | O    | PRO | X | 109 | 29.337 | 35.989 | 28.516 | 0.00 | 0.00 |
| ATOM | 1701 | N    | VAL | X | 110 | 28.613 | 36.891 | 30.467 | 0.00 | 0.00 |
| ATOM | 1702 | H    | VAL | X | 110 | 27.749 | 36.903 | 30.990 | 0.00 | 0.00 |
| ATOM | 1703 | CA   | VAL | X | 110 | 29.445 | 38.123 | 30.464 | 0.00 | 0.00 |
| ATOM | 1704 | HA   | VAL | X | 110 | 30.016 | 38.180 | 29.537 | 0.00 | 0.00 |
| ATOM | 1705 | CB   | VAL | X | 110 | 28.573 | 39.367 | 30.510 | 0.00 | 0.00 |
| ATOM | 1706 | HB   | VAL | X | 110 | 27.845 | 39.329 | 31.321 | 0.00 | 0.00 |
| ATOM | 1707 | CG1  | VAL | X | 110 | 29.396 | 40.670 | 30.465 | 0.00 | 0.00 |
| ATOM | 1708 | HG11 | VAL | X | 110 | 28.666 | 41.473 | 30.367 | 0.00 | 0.00 |
| ATOM | 1709 | HG12 | VAL | X | 110 | 29.924 | 40.810 | 31.409 | 0.00 | 0.00 |
| ATOM | 1710 | HG13 | VAL | X | 110 | 30.162 | 40.644 | 29.690 | 0.00 | 0.00 |
| ATOM | 1711 | CG2  | VAL | X | 110 | 27.613 | 39.259 | 29.330 | 0.00 | 0.00 |
| ATOM | 1712 | HG21 | VAL | X | 110 | 27.094 | 40.204 | 29.171 | 0.00 | 0.00 |
| ATOM | 1713 | HG22 | VAL | X | 110 | 26.975 | 38.408 | 29.568 | 0.00 | 0.00 |

|      |      |      |     |   |     |        |        |        |      |      |
|------|------|------|-----|---|-----|--------|--------|--------|------|------|
| ATOM | 1714 | HG23 | VAL | X | 110 | 28.132 | 38.930 | 28.429 | 0.00 | 0.00 |
| ATOM | 1715 | C    | VAL | X | 110 | 30.427 | 38.091 | 31.665 | 0.00 | 0.00 |
| ATOM | 1716 | O    | VAL | X | 110 | 30.057 | 38.222 | 32.846 | 0.00 | 0.00 |
| ATOM | 1717 | N    | LEU | X | 111 | 31.675 | 37.848 | 31.327 | 0.00 | 0.00 |
| ATOM | 1718 | H    | LEU | X | 111 | 31.824 | 37.814 | 30.329 | 0.00 | 0.00 |
| ATOM | 1719 | CA   | LEU | X | 111 | 32.850 | 37.913 | 32.281 | 0.00 | 0.00 |
| ATOM | 1720 | HA   | LEU | X | 111 | 32.501 | 37.715 | 33.294 | 0.00 | 0.00 |
| ATOM | 1721 | CB   | LEU | X | 111 | 33.877 | 36.832 | 31.797 | 0.00 | 0.00 |
| ATOM | 1722 | HB2  | LEU | X | 111 | 33.876 | 36.816 | 30.707 | 0.00 | 0.00 |
| ATOM | 1723 | HB3  | LEU | X | 111 | 34.844 | 37.091 | 32.230 | 0.00 | 0.00 |
| ATOM | 1724 | CG   | LEU | X | 111 | 33.398 | 35.408 | 32.271 | 0.00 | 0.00 |
| ATOM | 1725 | HG   | LEU | X | 111 | 32.314 | 35.320 | 32.201 | 0.00 | 0.00 |
| ATOM | 1726 | CD1  | LEU | X | 111 | 33.895 | 34.297 | 31.375 | 0.00 | 0.00 |
| ATOM | 1727 | HD11 | LEU | X | 111 | 34.981 | 34.210 | 31.389 | 0.00 | 0.00 |
| ATOM | 1728 | HD12 | LEU | X | 111 | 33.611 | 34.518 | 30.346 | 0.00 | 0.00 |
| ATOM | 1729 | HD13 | LEU | X | 111 | 33.464 | 33.332 | 31.641 | 0.00 | 0.00 |
| ATOM | 1730 | CD2  | LEU | X | 111 | 33.926 | 35.138 | 33.751 | 0.00 | 0.00 |
| ATOM | 1731 | HD21 | LEU | X | 111 | 35.007 | 34.999 | 33.787 | 0.00 | 0.00 |
| ATOM | 1732 | HD22 | LEU | X | 111 | 33.596 | 35.838 | 34.518 | 0.00 | 0.00 |
| ATOM | 1733 | HD23 | LEU | X | 111 | 33.478 | 34.196 | 34.068 | 0.00 | 0.00 |
| ATOM | 1734 | C    | LEU | X | 111 | 33.355 | 39.321 | 32.432 | 0.00 | 0.00 |
| ATOM | 1735 | O    | LEU | X | 111 | 33.952 | 39.817 | 31.418 | 0.00 | 0.00 |
| ATOM | 1736 | N    | VAL | X | 112 | 33.195 | 39.972 | 33.578 | 0.00 | 0.00 |
| ATOM | 1737 | H    | VAL | X | 112 | 32.590 | 39.568 | 34.279 | 0.00 | 0.00 |
| ATOM | 1738 | CA   | VAL | X | 112 | 33.754 | 41.293 | 33.837 | 0.00 | 0.00 |
| ATOM | 1739 | HA   | VAL | X | 112 | 34.015 | 41.736 | 32.876 | 0.00 | 0.00 |
| ATOM | 1740 | CB   | VAL | X | 112 | 32.818 | 42.326 | 34.458 | 0.00 | 0.00 |
| ATOM | 1741 | HB   | VAL | X | 112 | 32.538 | 41.961 | 35.446 | 0.00 | 0.00 |
| ATOM | 1742 | CG1  | VAL | X | 112 | 33.371 | 43.766 | 34.682 | 0.00 | 0.00 |
| ATOM | 1743 | HG11 | VAL | X | 112 | 32.484 | 44.388 | 34.798 | 0.00 | 0.00 |
| ATOM | 1744 | HG12 | VAL | X | 112 | 34.049 | 43.791 | 35.536 | 0.00 | 0.00 |
| ATOM | 1745 | HG13 | VAL | X | 112 | 33.934 | 43.969 | 33.771 | 0.00 | 0.00 |
| ATOM | 1746 | CG2  | VAL | X | 112 | 31.457 | 42.425 | 33.646 | 0.00 | 0.00 |
| ATOM | 1747 | HG21 | VAL | X | 112 | 30.705 | 43.018 | 34.166 | 0.00 | 0.00 |
| ATOM | 1748 | HG22 | VAL | X | 112 | 31.087 | 41.409 | 33.512 | 0.00 | 0.00 |
| ATOM | 1749 | HG23 | VAL | X | 112 | 31.625 | 42.866 | 32.664 | 0.00 | 0.00 |
| ATOM | 1750 | C    | VAL | X | 112 | 34.985 | 41.193 | 34.704 | 0.00 | 0.00 |
| ATOM | 1751 | O    | VAL | X | 112 | 34.970 | 40.780 | 35.872 | 0.00 | 0.00 |
| ATOM | 1752 | N    | TRP | X | 113 | 36.165 | 41.413 | 34.134 | 0.00 | 0.00 |
| ATOM | 1753 | H    | TRP | X | 113 | 36.064 | 41.803 | 33.208 | 0.00 | 0.00 |
| ATOM | 1754 | CA   | TRP | X | 113 | 37.461 | 41.201 | 34.768 | 0.00 | 0.00 |
| ATOM | 1755 | HA   | TRP | X | 113 | 37.330 | 40.308 | 35.379 | 0.00 | 0.00 |
| ATOM | 1756 | CB   | TRP | X | 113 | 38.500 | 40.907 | 33.682 | 0.00 | 0.00 |
| ATOM | 1757 | HB2  | TRP | X | 113 | 38.314 | 39.871 | 33.397 | 0.00 | 0.00 |
| ATOM | 1758 | HB3  | TRP | X | 113 | 38.447 | 41.669 | 32.905 | 0.00 | 0.00 |
| ATOM | 1759 | CG   | TRP | X | 113 | 39.876 | 40.919 | 34.256 | 0.00 | 0.00 |
| ATOM | 1760 | CD1  | TRP | X | 113 | 40.745 | 41.897 | 34.117 | 0.00 | 0.00 |
| ATOM | 1761 | HD1  | TRP | X | 113 | 40.755 | 42.788 | 33.506 | 0.00 | 0.00 |
| ATOM | 1762 | NE1  | TRP | X | 113 | 41.882 | 41.544 | 34.825 | 0.00 | 0.00 |
| ATOM | 1763 | HE1  | TRP | X | 113 | 42.706 | 42.092 | 34.624 | 0.00 | 0.00 |
| ATOM | 1764 | CE2  | TRP | X | 113 | 41.797 | 40.313 | 35.457 | 0.00 | 0.00 |
| ATOM | 1765 | CZ2  | TRP | X | 113 | 42.652 | 39.470 | 36.164 | 0.00 | 0.00 |
| ATOM | 1766 | HZ2  | TRP | X | 113 | 43.613 | 39.866 | 36.455 | 0.00 | 0.00 |
| ATOM | 1767 | CH2  | TRP | X | 113 | 42.388 | 38.094 | 36.433 | 0.00 | 0.00 |
| ATOM | 1768 | HH2  | TRP | X | 113 | 43.102 | 37.448 | 36.923 | 0.00 | 0.00 |
| ATOM | 1769 | CZ3  | TRP | X | 113 | 41.053 | 37.667 | 36.127 | 0.00 | 0.00 |
| ATOM | 1770 | HZ3  | TRP | X | 113 | 40.716 | 36.675 | 36.391 | 0.00 | 0.00 |
| ATOM | 1771 | CE3  | TRP | X | 113 | 40.121 | 38.564 | 35.515 | 0.00 | 0.00 |
| ATOM | 1772 | HE3  | TRP | X | 113 | 39.079 | 38.282 | 35.536 | 0.00 | 0.00 |
| ATOM | 1773 | CD2  | TRP | X | 113 | 40.485 | 39.887 | 35.082 | 0.00 | 0.00 |
| ATOM | 1774 | C    | TRP | X | 113 | 37.938 | 42.374 | 35.673 | 0.00 | 0.00 |
| ATOM | 1775 | O    | TRP | X | 113 | 37.740 | 43.569 | 35.377 | 0.00 | 0.00 |
| ATOM | 1776 | N    | ILE | X | 114 | 38.652 | 42.029 | 36.673 | 0.00 | 0.00 |
| ATOM | 1777 | H    | ILE | X | 114 | 38.957 | 41.074 | 36.796 | 0.00 | 0.00 |
| ATOM | 1778 | CA   | ILE | X | 114 | 39.094 | 42.906 | 37.777 | 0.00 | 0.00 |
| ATOM | 1779 | HA   | ILE | X | 114 | 39.175 | 43.944 | 37.455 | 0.00 | 0.00 |
| ATOM | 1780 | CB   | ILE | X | 114 | 38.096 | 42.913 | 38.962 | 0.00 | 0.00 |



|      |      |      |     |   |     |        |        |        |      |      |
|------|------|------|-----|---|-----|--------|--------|--------|------|------|
| ATOM | 1781 | HB   | ILE | X | 114 | 38.099 | 41.915 | 39.401 | 0.00 | 0.00 |
| ATOM | 1782 | CG2  | ILE | X | 114 | 38.511 | 43.924 | 40.094 | 0.00 | 0.00 |
| ATOM | 1783 | HG21 | ILE | X | 114 | 39.421 | 43.575 | 40.582 | 0.00 | 0.00 |
| ATOM | 1784 | HG22 | ILE | X | 114 | 37.805 | 43.836 | 40.920 | 0.00 | 0.00 |
| ATOM | 1785 | HG23 | ILE | X | 114 | 38.591 | 44.974 | 39.813 | 0.00 | 0.00 |
| ATOM | 1786 | CG1  | ILE | X | 114 | 36.720 | 43.310 | 38.385 | 0.00 | 0.00 |
| ATOM | 1787 | HG12 | ILE | X | 114 | 36.841 | 44.215 | 37.790 | 0.00 | 0.00 |
| ATOM | 1788 | HG13 | ILE | X | 114 | 36.382 | 42.479 | 37.766 | 0.00 | 0.00 |
| ATOM | 1789 | CD1  | ILE | X | 114 | 35.639 | 43.475 | 39.487 | 0.00 | 0.00 |
| ATOM | 1790 | HD11 | ILE | X | 114 | 34.664 | 43.603 | 39.017 | 0.00 | 0.00 |
| ATOM | 1791 | HD12 | ILE | X | 114 | 35.957 | 44.376 | 40.012 | 0.00 | 0.00 |
| ATOM | 1792 | HD13 | ILE | X | 114 | 35.747 | 42.560 | 40.068 | 0.00 | 0.00 |
| ATOM | 1793 | C    | ILE | X | 114 | 40.438 | 42.424 | 38.300 | 0.00 | 0.00 |
| ATOM | 1794 | O    | ILE | X | 114 | 40.546 | 41.359 | 38.945 | 0.00 | 0.00 |
| ATOM | 1795 | N    | TYR | X | 115 | 41.455 | 43.264 | 38.127 | 0.00 | 0.00 |
| ATOM | 1796 | H    | TYR | X | 115 | 41.301 | 44.255 | 38.010 | 0.00 | 0.00 |
| ATOM | 1797 | CA   | TYR | X | 115 | 42.823 | 42.897 | 38.286 | 0.00 | 0.00 |
| ATOM | 1798 | HA   | TYR | X | 115 | 42.952 | 41.874 | 37.930 | 0.00 | 0.00 |
| ATOM | 1799 | CB   | TYR | X | 115 | 43.737 | 43.638 | 37.292 | 0.00 | 0.00 |
| ATOM | 1800 | HB2  | TYR | X | 115 | 44.770 | 43.368 | 37.509 | 0.00 | 0.00 |
| ATOM | 1801 | HB3  | TYR | X | 115 | 43.526 | 43.228 | 36.304 | 0.00 | 0.00 |
| ATOM | 1802 | CG   | TYR | X | 115 | 43.607 | 45.132 | 37.196 | 0.00 | 0.00 |
| ATOM | 1803 | CD1  | TYR | X | 115 | 44.078 | 45.982 | 38.266 | 0.00 | 0.00 |
| ATOM | 1804 | HD1  | TYR | X | 115 | 44.387 | 45.530 | 39.197 | 0.00 | 0.00 |
| ATOM | 1805 | CE1  | TYR | X | 115 | 44.120 | 47.398 | 38.145 | 0.00 | 0.00 |
| ATOM | 1806 | HE1  | TYR | X | 115 | 44.260 | 48.024 | 39.015 | 0.00 | 0.00 |
| ATOM | 1807 | CZ   | TYR | X | 115 | 43.560 | 47.941 | 36.945 | 0.00 | 0.00 |
| ATOM | 1808 | OH   | TYR | X | 115 | 43.647 | 49.306 | 36.755 | 0.00 | 0.00 |
| ATOM | 1809 | HH   | TYR | X | 115 | 43.662 | 49.863 | 37.537 | 0.00 | 0.00 |
| ATOM | 1810 | CE2  | TYR | X | 115 | 43.154 | 47.177 | 35.862 | 0.00 | 0.00 |
| ATOM | 1811 | HE2  | TYR | X | 115 | 42.737 | 47.601 | 34.961 | 0.00 | 0.00 |
| ATOM | 1812 | CD2  | TYR | X | 115 | 43.128 | 45.761 | 36.013 | 0.00 | 0.00 |
| ATOM | 1813 | HD2  | TYR | X | 115 | 42.943 | 45.116 | 35.167 | 0.00 | 0.00 |
| ATOM | 1814 | C    | TYR | X | 115 | 43.349 | 42.900 | 39.734 | 0.00 | 0.00 |
| ATOM | 1815 | O    | TYR | X | 115 | 43.002 | 43.764 | 40.535 | 0.00 | 0.00 |
| ATOM | 1816 | N    | GLY | X | 116 | 44.373 | 42.047 | 40.098 | 0.00 | 0.00 |
| ATOM | 1817 | H    | GLY | X | 116 | 44.626 | 41.376 | 39.387 | 0.00 | 0.00 |
| ATOM | 1818 | CA   | GLY | X | 116 | 45.396 | 42.372 | 41.106 | 0.00 | 0.00 |
| ATOM | 1819 | HA2  | GLY | X | 116 | 44.941 | 42.841 | 41.978 | 0.00 | 0.00 |
| ATOM | 1820 | HA3  | GLY | X | 116 | 45.919 | 41.482 | 41.458 | 0.00 | 0.00 |
| ATOM | 1821 | C    | GLY | X | 116 | 46.425 | 43.491 | 40.687 | 0.00 | 0.00 |
| ATOM | 1822 | O    | GLY | X | 116 | 46.264 | 44.257 | 39.768 | 0.00 | 0.00 |
| ATOM | 1823 | N    | GLY | X | 117 | 47.397 | 43.572 | 41.527 | 0.00 | 0.00 |
| ATOM | 1824 | H    | GLY | X | 117 | 47.506 | 42.915 | 42.287 | 0.00 | 0.00 |
| ATOM | 1825 | CA   | GLY | X | 117 | 48.381 | 44.630 | 41.574 | 0.00 | 0.00 |
| ATOM | 1826 | HA2  | GLY | X | 117 | 49.373 | 44.195 | 41.461 | 0.00 | 0.00 |
| ATOM | 1827 | HA3  | GLY | X | 117 | 48.173 | 45.436 | 40.870 | 0.00 | 0.00 |
| ATOM | 1828 | C    | GLY | X | 117 | 48.557 | 45.343 | 42.928 | 0.00 | 0.00 |
| ATOM | 1829 | O    | GLY | X | 117 | 49.102 | 46.403 | 43.085 | 0.00 | 0.00 |
| ATOM | 1830 | N    | GLY | X | 118 | 48.128 | 44.692 | 44.044 | 0.00 | 0.00 |
| ATOM | 1831 | H    | GLY | X | 118 | 47.682 | 43.792 | 43.939 | 0.00 | 0.00 |
| ATOM | 1832 | CA   | GLY | X | 118 | 48.432 | 45.080 | 45.390 | 0.00 | 0.00 |
| ATOM | 1833 | HA2  | GLY | X | 118 | 48.111 | 44.202 | 45.950 | 0.00 | 0.00 |
| ATOM | 1834 | HA3  | GLY | X | 118 | 49.502 | 45.073 | 45.598 | 0.00 | 0.00 |
| ATOM | 1835 | C    | GLY | X | 118 | 47.663 | 46.267 | 45.950 | 0.00 | 0.00 |
| ATOM | 1836 | O    | GLY | X | 118 | 48.003 | 46.923 | 46.932 | 0.00 | 0.00 |
| ATOM | 1837 | N    | PHE | X | 119 | 46.693 | 46.764 | 45.094 | 0.00 | 0.00 |
| ATOM | 1838 | H    | PHE | X | 119 | 46.517 | 46.163 | 44.303 | 0.00 | 0.00 |
| ATOM | 1839 | CA   | PHE | X | 119 | 46.014 | 48.077 | 45.026 | 0.00 | 0.00 |
| ATOM | 1840 | HA   | PHE | X | 119 | 45.275 | 48.008 | 44.227 | 0.00 | 0.00 |
| ATOM | 1841 | CB   | PHE | X | 119 | 45.215 | 48.349 | 46.282 | 0.00 | 0.00 |
| ATOM | 1842 | HB2  | PHE | X | 119 | 45.889 | 48.573 | 47.109 | 0.00 | 0.00 |
| ATOM | 1843 | HB3  | PHE | X | 119 | 44.724 | 49.320 | 46.213 | 0.00 | 0.00 |
| ATOM | 1844 | CG   | PHE | X | 119 | 44.136 | 47.273 | 46.622 | 0.00 | 0.00 |
| ATOM | 1845 | CD1  | PHE | X | 119 | 42.893 | 47.321 | 45.946 | 0.00 | 0.00 |
| ATOM | 1846 | HD1  | PHE | X | 119 | 42.709 | 48.068 | 45.188 | 0.00 | 0.00 |
| ATOM | 1847 | CE1  | PHE | X | 119 | 41.850 | 46.336 | 46.218 | 0.00 | 0.00 |

|      |      |     |     |   |     |        |        |        |      |      |
|------|------|-----|-----|---|-----|--------|--------|--------|------|------|
| ATOM | 1848 | HE1 | PHE | X | 119 | 40.846 | 46.521 | 45.867 | 0.00 | 0.00 |
| ATOM | 1849 | CZ  | PHE | X | 119 | 42.115 | 45.391 | 47.269 | 0.00 | 0.00 |
| ATOM | 1850 | HZ  | PHE | X | 119 | 41.405 | 44.678 | 47.662 | 0.00 | 0.00 |
| ATOM | 1851 | CE2 | PHE | X | 119 | 43.374 | 45.353 | 47.880 | 0.00 | 0.00 |
| ATOM | 1852 | HE2 | PHE | X | 119 | 43.519 | 44.783 | 48.785 | 0.00 | 0.00 |
| ATOM | 1853 | CD2 | PHE | X | 119 | 44.409 | 46.215 | 47.475 | 0.00 | 0.00 |
| ATOM | 1854 | HD2 | PHE | X | 119 | 45.373 | 46.161 | 47.959 | 0.00 | 0.00 |
| ATOM | 1855 | C   | PHE | X | 119 | 46.897 | 49.266 | 44.714 | 0.00 | 0.00 |
| ATOM | 1856 | O   | PHE | X | 119 | 46.344 | 50.316 | 44.503 | 0.00 | 0.00 |
| ATOM | 1857 | N   | TYR | X | 120 | 48.182 | 49.071 | 44.585 | 0.00 | 0.00 |
| ATOM | 1858 | H   | TYR | X | 120 | 48.486 | 48.139 | 44.828 | 0.00 | 0.00 |
| ATOM | 1859 | CA  | TYR | X | 120 | 49.153 | 50.101 | 44.296 | 0.00 | 0.00 |
| ATOM | 1860 | HA  | TYR | X | 120 | 48.644 | 51.019 | 44.589 | 0.00 | 0.00 |
| ATOM | 1861 | CB  | TYR | X | 120 | 50.422 | 49.935 | 45.153 | 0.00 | 0.00 |
| ATOM | 1862 | HB2 | TYR | X | 120 | 50.991 | 50.863 | 45.083 | 0.00 | 0.00 |
| ATOM | 1863 | HB3 | TYR | X | 120 | 50.048 | 49.877 | 46.176 | 0.00 | 0.00 |
| ATOM | 1864 | CG  | TYR | X | 120 | 51.335 | 48.826 | 44.707 | 0.00 | 0.00 |
| ATOM | 1865 | CD1 | TYR | X | 120 | 52.544 | 49.150 | 44.136 | 0.00 | 0.00 |
| ATOM | 1866 | HD1 | TYR | X | 120 | 52.784 | 50.196 | 44.019 | 0.00 | 0.00 |
| ATOM | 1867 | CE1 | TYR | X | 120 | 53.464 | 48.109 | 43.829 | 0.00 | 0.00 |
| ATOM | 1868 | HE1 | TYR | X | 120 | 54.384 | 48.390 | 43.338 | 0.00 | 0.00 |
| ATOM | 1869 | CZ  | TYR | X | 120 | 53.148 | 46.754 | 43.937 | 0.00 | 0.00 |
| ATOM | 1870 | OH  | TYR | X | 120 | 54.045 | 45.790 | 43.674 | 0.00 | 0.00 |
| ATOM | 1871 | HH  | TYR | X | 120 | 53.767 | 44.952 | 44.050 | 0.00 | 0.00 |
| ATOM | 1872 | CE2 | TYR | X | 120 | 51.848 | 46.414 | 44.460 | 0.00 | 0.00 |
| ATOM | 1873 | HE2 | TYR | X | 120 | 51.726 | 45.381 | 44.747 | 0.00 | 0.00 |
| ATOM | 1874 | CD2 | TYR | X | 120 | 51.046 | 47.504 | 44.975 | 0.00 | 0.00 |
| ATOM | 1875 | HD2 | TYR | X | 120 | 50.125 | 47.242 | 45.475 | 0.00 | 0.00 |
| ATOM | 1876 | C   | TYR | X | 120 | 49.500 | 50.104 | 42.792 | 0.00 | 0.00 |
| ATOM | 1877 | O   | TYR | X | 120 | 50.298 | 50.912 | 42.391 | 0.00 | 0.00 |
| ATOM | 1878 | N   | SER | X | 121 | 49.010 | 49.165 | 41.953 | 0.00 | 0.00 |
| ATOM | 1879 | H   | SER | X | 121 | 48.264 | 48.589 | 42.317 | 0.00 | 0.00 |
| ATOM | 1880 | CA  | SER | X | 121 | 49.400 | 48.791 | 40.621 | 0.00 | 0.00 |
| ATOM | 1881 | HA  | SER | X | 121 | 49.453 | 49.745 | 40.096 | 0.00 | 0.00 |
| ATOM | 1882 | CB  | SER | X | 121 | 50.815 | 48.135 | 40.596 | 0.00 | 0.00 |
| ATOM | 1883 | HB2 | SER | X | 121 | 50.727 | 47.277 | 41.262 | 0.00 | 0.00 |
| ATOM | 1884 | HB3 | SER | X | 121 | 50.964 | 47.834 | 39.559 | 0.00 | 0.00 |
| ATOM | 1885 | OG  | SER | X | 121 | 51.844 | 49.040 | 40.915 | 0.00 | 0.00 |
| ATOM | 1886 | HG  | SER | X | 121 | 51.539 | 49.597 | 41.634 | 0.00 | 0.00 |
| ATOM | 1887 | C   | SER | X | 121 | 48.327 | 47.904 | 39.930 | 0.00 | 0.00 |
| ATOM | 1888 | O   | SER | X | 121 | 47.338 | 47.538 | 40.566 | 0.00 | 0.00 |
| ATOM | 1889 | N   | GLY | X | 122 | 48.490 | 47.638 | 38.615 | 0.00 | 0.00 |
| ATOM | 1890 | H   | GLY | X | 122 | 49.280 | 48.103 | 38.192 | 0.00 | 0.00 |
| ATOM | 1891 | CA  | GLY | X | 122 | 47.522 | 46.855 | 37.792 | 0.00 | 0.00 |
| ATOM | 1892 | HA2 | GLY | X | 122 | 48.070 | 46.031 | 37.335 | 0.00 | 0.00 |
| ATOM | 1893 | HA3 | GLY | X | 122 | 46.743 | 46.299 | 38.314 | 0.00 | 0.00 |
| ATOM | 1894 | C   | GLY | X | 122 | 46.973 | 47.686 | 36.697 | 0.00 | 0.00 |
| ATOM | 1895 | O   | GLY | X | 122 | 47.060 | 48.874 | 36.767 | 0.00 | 0.00 |
| ATOM | 1896 | N   | ALA | X | 123 | 46.478 | 47.026 | 35.598 | 0.00 | 0.00 |
| ATOM | 1897 | H   | ALA | X | 123 | 46.328 | 46.028 | 35.644 | 0.00 | 0.00 |
| ATOM | 1898 | CA  | ALA | X | 123 | 46.077 | 47.709 | 34.435 | 0.00 | 0.00 |
| ATOM | 1899 | HA  | ALA | X | 123 | 45.349 | 48.435 | 34.796 | 0.00 | 0.00 |
| ATOM | 1900 | CB  | ALA | X | 123 | 47.245 | 48.471 | 33.862 | 0.00 | 0.00 |
| ATOM | 1901 | HB1 | ALA | X | 123 | 47.478 | 49.422 | 34.342 | 0.00 | 0.00 |
| ATOM | 1902 | HB2 | ALA | X | 123 | 46.974 | 48.701 | 32.832 | 0.00 | 0.00 |
| ATOM | 1903 | HB3 | ALA | X | 123 | 48.121 | 47.843 | 33.702 | 0.00 | 0.00 |
| ATOM | 1904 | C   | ALA | X | 123 | 45.384 | 46.799 | 33.398 | 0.00 | 0.00 |
| ATOM | 1905 | O   | ALA | X | 123 | 45.883 | 45.740 | 33.172 | 0.00 | 0.00 |
| ATOM | 1906 | N   | SER | X | 124 | 44.370 | 47.204 | 32.602 | 0.00 | 0.00 |
| ATOM | 1907 | H   | SER | X | 124 | 44.025 | 48.138 | 32.769 | 0.00 | 0.00 |
| ATOM | 1908 | CA  | SER | X | 124 | 43.568 | 46.303 | 31.640 | 0.00 | 0.00 |
| ATOM | 1909 | HA  | SER | X | 124 | 43.347 | 45.395 | 32.200 | 0.00 | 0.00 |
| ATOM | 1910 | CB  | SER | X | 124 | 42.281 | 47.025 | 31.209 | 0.00 | 0.00 |
| ATOM | 1911 | HB2 | SER | X | 124 | 41.891 | 46.485 | 30.346 | 0.00 | 0.00 |
| ATOM | 1912 | HB3 | SER | X | 124 | 41.580 | 46.881 | 32.031 | 0.00 | 0.00 |
| ATOM | 1913 | OG  | SER | X | 124 | 42.380 | 48.434 | 30.924 | 0.00 | 0.00 |
| ATOM | 1914 | HG  | SER | X | 124 | 42.820 | 48.949 | 31.605 | 0.00 | 0.00 |

|      |      |      |     |   |     |        |        |        |      |      |
|------|------|------|-----|---|-----|--------|--------|--------|------|------|
| ATOM | 1915 | C    | SER | X | 124 | 44.394 | 45.902 | 30.366 | 0.00 | 0.00 |
| ATOM | 1916 | O    | SER | X | 124 | 44.103 | 44.922 | 29.656 | 0.00 | 0.00 |
| ATOM | 1917 | N    | SER | X | 125 | 45.483 | 46.747 | 30.109 | 0.00 | 0.00 |
| ATOM | 1918 | H    | SER | X | 125 | 45.772 | 47.391 | 30.831 | 0.00 | 0.00 |
| ATOM | 1919 | CA   | SER | X | 125 | 46.264 | 46.672 | 28.911 | 0.00 | 0.00 |
| ATOM | 1920 | HA   | SER | X | 125 | 45.573 | 46.295 | 28.157 | 0.00 | 0.00 |
| ATOM | 1921 | CB   | SER | X | 125 | 46.778 | 48.043 | 28.527 | 0.00 | 0.00 |
| ATOM | 1922 | HB2  | SER | X | 125 | 47.558 | 47.919 | 27.776 | 0.00 | 0.00 |
| ATOM | 1923 | HB3  | SER | X | 125 | 45.940 | 48.614 | 28.125 | 0.00 | 0.00 |
| ATOM | 1924 | OG   | SER | X | 125 | 47.353 | 48.702 | 29.700 | 0.00 | 0.00 |
| ATOM | 1925 | HG   | SER | X | 125 | 48.262 | 48.409 | 29.603 | 0.00 | 0.00 |
| ATOM | 1926 | C    | SER | X | 125 | 47.425 | 45.652 | 28.911 | 0.00 | 0.00 |
| ATOM | 1927 | O    | SER | X | 125 | 48.100 | 45.550 | 27.898 | 0.00 | 0.00 |
| ATOM | 1928 | N    | LEU | X | 126 | 47.640 | 44.929 | 30.035 | 0.00 | 0.00 |
| ATOM | 1929 | H    | LEU | X | 126 | 47.005 | 45.065 | 30.809 | 0.00 | 0.00 |
| ATOM | 1930 | CA   | LEU | X | 126 | 48.679 | 43.831 | 30.142 | 0.00 | 0.00 |
| ATOM | 1931 | HA   | LEU | X | 126 | 49.631 | 44.215 | 29.774 | 0.00 | 0.00 |
| ATOM | 1932 | CB   | LEU | X | 126 | 48.878 | 43.303 | 31.562 | 0.00 | 0.00 |
| ATOM | 1933 | HB2  | LEU | X | 126 | 47.986 | 42.811 | 31.951 | 0.00 | 0.00 |
| ATOM | 1934 | HB3  | LEU | X | 126 | 49.695 | 42.582 | 31.535 | 0.00 | 0.00 |
| ATOM | 1935 | CG   | LEU | X | 126 | 49.135 | 44.367 | 32.636 | 0.00 | 0.00 |
| ATOM | 1936 | HG   | LEU | X | 126 | 48.294 | 45.057 | 32.711 | 0.00 | 0.00 |
| ATOM | 1937 | CD1  | LEU | X | 126 | 49.370 | 43.682 | 34.054 | 0.00 | 0.00 |
| ATOM | 1938 | HD11 | LEU | X | 126 | 49.721 | 44.398 | 34.798 | 0.00 | 0.00 |
| ATOM | 1939 | HD12 | LEU | X | 126 | 50.141 | 42.920 | 33.945 | 0.00 | 0.00 |
| ATOM | 1940 | HD13 | LEU | X | 126 | 48.465 | 43.155 | 34.356 | 0.00 | 0.00 |
| ATOM | 1941 | CD2  | LEU | X | 126 | 50.317 | 45.136 | 32.216 | 0.00 | 0.00 |
| ATOM | 1942 | HD21 | LEU | X | 126 | 50.128 | 45.774 | 31.353 | 0.00 | 0.00 |
| ATOM | 1943 | HD22 | LEU | X | 126 | 50.741 | 45.736 | 33.021 | 0.00 | 0.00 |
| ATOM | 1944 | HD23 | LEU | X | 126 | 51.047 | 44.357 | 31.997 | 0.00 | 0.00 |
| ATOM | 1945 | C    | LEU | X | 126 | 48.261 | 42.670 | 29.233 | 0.00 | 0.00 |
| ATOM | 1946 | O    | LEU | X | 126 | 47.105 | 42.213 | 29.353 | 0.00 | 0.00 |
| ATOM | 1947 | N    | ASP | X | 127 | 49.090 | 42.121 | 28.328 | 0.00 | 0.00 |
| ATOM | 1948 | H    | ASP | X | 127 | 49.997 | 42.525 | 28.144 | 0.00 | 0.00 |
| ATOM | 1949 | CA   | ASP | X | 127 | 48.782 | 41.116 | 27.326 | 0.00 | 0.00 |
| ATOM | 1950 | HA   | ASP | X | 127 | 47.869 | 41.493 | 26.866 | 0.00 | 0.00 |
| ATOM | 1951 | CB   | ASP | X | 127 | 49.925 | 41.138 | 26.294 | 0.00 | 0.00 |
| ATOM | 1952 | HB2  | ASP | X | 127 | 49.534 | 40.601 | 25.430 | 0.00 | 0.00 |
| ATOM | 1953 | HB3  | ASP | X | 127 | 50.153 | 42.116 | 25.871 | 0.00 | 0.00 |
| ATOM | 1954 | CG   | ASP | X | 127 | 51.176 | 40.428 | 26.761 | 0.00 | 0.00 |
| ATOM | 1955 | OD1  | ASP | X | 127 | 51.612 | 40.724 | 27.893 | 0.00 | 0.00 |
| ATOM | 1956 | OD2  | ASP | X | 127 | 51.654 | 39.465 | 26.110 | 0.00 | 0.00 |
| ATOM | 1957 | C    | ASP | X | 127 | 48.388 | 39.735 | 27.749 | 0.00 | 0.00 |
| ATOM | 1958 | O    | ASP | X | 127 | 47.968 | 38.911 | 26.904 | 0.00 | 0.00 |
| ATOM | 1959 | N    | VAL | X | 128 | 48.462 | 39.395 | 29.062 | 0.00 | 0.00 |
| ATOM | 1960 | H    | VAL | X | 128 | 49.034 | 39.964 | 29.670 | 0.00 | 0.00 |
| ATOM | 1961 | CA   | VAL | X | 128 | 47.810 | 38.171 | 29.664 | 0.00 | 0.00 |
| ATOM | 1962 | HA   | VAL | X | 128 | 47.992 | 37.300 | 29.035 | 0.00 | 0.00 |
| ATOM | 1963 | CB   | VAL | X | 128 | 48.286 | 37.781 | 31.091 | 0.00 | 0.00 |
| ATOM | 1964 | HB   | VAL | X | 128 | 49.353 | 37.574 | 31.010 | 0.00 | 0.00 |
| ATOM | 1965 | CG1  | VAL | X | 128 | 48.233 | 38.833 | 32.208 | 0.00 | 0.00 |
| ATOM | 1966 | HG11 | VAL | X | 128 | 49.002 | 38.589 | 32.940 | 0.00 | 0.00 |
| ATOM | 1967 | HG12 | VAL | X | 128 | 48.385 | 39.820 | 31.771 | 0.00 | 0.00 |
| ATOM | 1968 | HG13 | VAL | X | 128 | 47.260 | 38.904 | 32.694 | 0.00 | 0.00 |
| ATOM | 1969 | CG2  | VAL | X | 128 | 47.568 | 36.547 | 31.558 | 0.00 | 0.00 |
| ATOM | 1970 | HG21 | VAL | X | 128 | 48.109 | 36.057 | 32.367 | 0.00 | 0.00 |
| ATOM | 1971 | HG22 | VAL | X | 128 | 47.548 | 35.861 | 30.711 | 0.00 | 0.00 |
| ATOM | 1972 | HG23 | VAL | X | 128 | 46.526 | 36.720 | 31.827 | 0.00 | 0.00 |
| ATOM | 1973 | C    | VAL | X | 128 | 46.273 | 38.402 | 29.617 | 0.00 | 0.00 |
| ATOM | 1974 | O    | VAL | X | 128 | 45.569 | 37.443 | 29.416 | 0.00 | 0.00 |
| ATOM | 1975 | N    | TYR | X | 129 | 45.734 | 39.626 | 29.860 | 0.00 | 0.00 |
| ATOM | 1976 | H    | TYR | X | 129 | 46.338 | 40.435 | 29.879 | 0.00 | 0.00 |
| ATOM | 1977 | CA   | TYR | X | 129 | 44.282 | 39.743 | 30.174 | 0.00 | 0.00 |
| ATOM | 1978 | HA   | TYR | X | 129 | 43.989 | 38.844 | 30.717 | 0.00 | 0.00 |
| ATOM | 1979 | CB   | TYR | X | 129 | 44.003 | 40.950 | 31.110 | 0.00 | 0.00 |
| ATOM | 1980 | HB2  | TYR | X | 129 | 44.034 | 41.911 | 30.598 | 0.00 | 0.00 |
| ATOM | 1981 | HB3  | TYR | X | 129 | 42.989 | 40.813 | 31.487 | 0.00 | 0.00 |

|      |      |      |     |   |     |        |        |        |      |      |
|------|------|------|-----|---|-----|--------|--------|--------|------|------|
| ATOM | 1982 | CG   | TYR | X | 129 | 44.776 | 41.074 | 32.418 | 0.00 | 0.00 |
| ATOM | 1983 | CD1  | TYR | X | 129 | 44.885 | 39.912 | 33.306 | 0.00 | 0.00 |
| ATOM | 1984 | HD1  | TYR | X | 129 | 44.590 | 38.933 | 32.957 | 0.00 | 0.00 |
| ATOM | 1985 | CE1  | TYR | X | 129 | 45.520 | 40.135 | 34.544 | 0.00 | 0.00 |
| ATOM | 1986 | HE1  | TYR | X | 129 | 45.672 | 39.376 | 35.297 | 0.00 | 0.00 |
| ATOM | 1987 | CZ   | TYR | X | 129 | 45.829 | 41.439 | 34.940 | 0.00 | 0.00 |
| ATOM | 1988 | OH   | TYR | X | 129 | 46.340 | 41.630 | 36.227 | 0.00 | 0.00 |
| ATOM | 1989 | HH   | TYR | X | 129 | 46.336 | 40.905 | 36.857 | 0.00 | 0.00 |
| ATOM | 1990 | CE2  | TYR | X | 129 | 45.786 | 42.537 | 34.061 | 0.00 | 0.00 |
| ATOM | 1991 | HE2  | TYR | X | 129 | 46.104 | 43.514 | 34.393 | 0.00 | 0.00 |
| ATOM | 1992 | CD2  | TYR | X | 129 | 45.210 | 42.341 | 32.791 | 0.00 | 0.00 |
| ATOM | 1993 | HD2  | TYR | X | 129 | 45.051 | 43.143 | 32.086 | 0.00 | 0.00 |
| ATOM | 1994 | C    | TYR | X | 129 | 43.343 | 39.870 | 28.955 | 0.00 | 0.00 |
| ATOM | 1995 | O    | TYR | X | 129 | 42.167 | 40.128 | 29.155 | 0.00 | 0.00 |
| ATOM | 1996 | N    | ASP | X | 130 | 43.837 | 39.562 | 27.739 | 0.00 | 0.00 |
| ATOM | 1997 | H    | ASP | X | 130 | 44.772 | 39.180 | 27.749 | 0.00 | 0.00 |
| ATOM | 1998 | CA   | ASP | X | 130 | 43.052 | 39.579 | 26.530 | 0.00 | 0.00 |
| ATOM | 1999 | HA   | ASP | X | 130 | 42.478 | 40.500 | 26.637 | 0.00 | 0.00 |
| ATOM | 2000 | CB   | ASP | X | 130 | 43.993 | 39.592 | 25.272 | 0.00 | 0.00 |
| ATOM | 2001 | HB2  | ASP | X | 130 | 44.832 | 40.275 | 25.409 | 0.00 | 0.00 |
| ATOM | 2002 | HB3  | ASP | X | 130 | 44.267 | 38.548 | 25.122 | 0.00 | 0.00 |
| ATOM | 2003 | CG   | ASP | X | 130 | 43.260 | 40.112 | 24.041 | 0.00 | 0.00 |
| ATOM | 2004 | OD1  | ASP | X | 130 | 42.420 | 39.376 | 23.527 | 0.00 | 0.00 |
| ATOM | 2005 | OD2  | ASP | X | 130 | 43.546 | 41.282 | 23.680 | 0.00 | 0.00 |
| ATOM | 2006 | C    | ASP | X | 130 | 42.021 | 38.437 | 26.506 | 0.00 | 0.00 |
| ATOM | 2007 | O    | ASP | X | 130 | 42.389 | 37.255 | 26.694 | 0.00 | 0.00 |
| ATOM | 2008 | N    | GLY | X | 131 | 40.766 | 38.720 | 26.169 | 0.00 | 0.00 |
| ATOM | 2009 | H    | GLY | X | 131 | 40.547 | 39.673 | 25.916 | 0.00 | 0.00 |
| ATOM | 2010 | CA   | GLY | X | 131 | 39.651 | 37.761 | 26.143 | 0.00 | 0.00 |
| ATOM | 2011 | HA2  | GLY | X | 131 | 39.791 | 37.212 | 27.074 | 0.00 | 0.00 |
| ATOM | 2012 | HA3  | GLY | X | 131 | 38.719 | 38.319 | 26.060 | 0.00 | 0.00 |
| ATOM | 2013 | C    | GLY | X | 131 | 39.701 | 36.795 | 24.928 | 0.00 | 0.00 |
| ATOM | 2014 | O    | GLY | X | 131 | 38.887 | 35.838 | 24.889 | 0.00 | 0.00 |
| ATOM | 2015 | N    | ARG | X | 132 | 40.549 | 37.008 | 23.939 | 0.00 | 0.00 |
| ATOM | 2016 | H    | ARG | X | 132 | 41.294 | 37.690 | 23.971 | 0.00 | 0.00 |
| ATOM | 2017 | CA   | ARG | X | 132 | 40.348 | 36.389 | 22.543 | 0.00 | 0.00 |
| ATOM | 2018 | HA   | ARG | X | 132 | 39.428 | 36.877 | 22.221 | 0.00 | 0.00 |
| ATOM | 2019 | CB   | ARG | X | 132 | 41.447 | 36.844 | 21.596 | 0.00 | 0.00 |
| ATOM | 2020 | HB2  | ARG | X | 132 | 41.335 | 36.502 | 20.567 | 0.00 | 0.00 |
| ATOM | 2021 | HB3  | ARG | X | 132 | 41.554 | 37.928 | 21.616 | 0.00 | 0.00 |
| ATOM | 2022 | CG   | ARG | X | 132 | 42.820 | 36.362 | 22.040 | 0.00 | 0.00 |
| ATOM | 2023 | HG2  | ARG | X | 132 | 43.023 | 36.509 | 23.101 | 0.00 | 0.00 |
| ATOM | 2024 | HG3  | ARG | X | 132 | 42.905 | 35.289 | 21.867 | 0.00 | 0.00 |
| ATOM | 2025 | CD   | ARG | X | 132 | 44.023 | 37.036 | 21.333 | 0.00 | 0.00 |
| ATOM | 2026 | HD2  | ARG | X | 132 | 44.938 | 36.909 | 21.912 | 0.00 | 0.00 |
| ATOM | 2027 | HD3  | ARG | X | 132 | 44.181 | 36.588 | 20.352 | 0.00 | 0.00 |
| ATOM | 2028 | NE   | ARG | X | 132 | 43.910 | 38.474 | 21.292 | 0.00 | 0.00 |
| ATOM | 2029 | HE   | ARG | X | 132 | 43.300 | 38.910 | 21.969 | 0.00 | 0.00 |
| ATOM | 2030 | CZ   | ARG | X | 132 | 44.682 | 39.390 | 20.717 | 0.00 | 0.00 |
| ATOM | 2031 | NH1  | ARG | X | 132 | 45.537 | 39.127 | 19.857 | 0.00 | 0.00 |
| ATOM | 2032 | HH11 | ARG | X | 132 | 45.700 | 38.182 | 19.541 | 0.00 | 0.00 |
| ATOM | 2033 | HH12 | ARG | X | 132 | 46.105 | 39.814 | 19.383 | 0.00 | 0.00 |
| ATOM | 2034 | NH2  | ARG | X | 132 | 44.562 | 40.640 | 21.081 | 0.00 | 0.00 |
| ATOM | 2035 | HH21 | ARG | X | 132 | 43.947 | 40.844 | 21.856 | 0.00 | 0.00 |
| ATOM | 2036 | HH22 | ARG | X | 132 | 45.241 | 41.339 | 20.816 | 0.00 | 0.00 |
| ATOM | 2037 | C    | ARG | X | 132 | 40.210 | 34.806 | 22.512 | 0.00 | 0.00 |
| ATOM | 2038 | O    | ARG | X | 132 | 39.319 | 34.313 | 21.779 | 0.00 | 0.00 |
| ATOM | 2039 | N    | PHE | X | 133 | 41.082 | 34.046 | 23.236 | 0.00 | 0.00 |
| ATOM | 2040 | H    | PHE | X | 133 | 41.559 | 34.534 | 23.980 | 0.00 | 0.00 |
| ATOM | 2041 | CA   | PHE | X | 133 | 41.110 | 32.596 | 23.143 | 0.00 | 0.00 |
| ATOM | 2042 | HA   | PHE | X | 133 | 40.968 | 32.378 | 22.084 | 0.00 | 0.00 |
| ATOM | 2043 | CB   | PHE | X | 133 | 42.403 | 32.042 | 23.730 | 0.00 | 0.00 |
| ATOM | 2044 | HB2  | PHE | X | 133 | 42.574 | 32.505 | 24.701 | 0.00 | 0.00 |
| ATOM | 2045 | HB3  | PHE | X | 133 | 42.300 | 30.961 | 23.822 | 0.00 | 0.00 |
| ATOM | 2046 | CG   | PHE | X | 133 | 43.619 | 32.310 | 22.877 | 0.00 | 0.00 |
| ATOM | 2047 | CD1  | PHE | X | 133 | 44.466 | 33.457 | 23.134 | 0.00 | 0.00 |
| ATOM | 2048 | HD1  | PHE | X | 133 | 44.208 | 34.085 | 23.975 | 0.00 | 0.00 |

|      |      |      |     |   |     |        |        |        |      |      |
|------|------|------|-----|---|-----|--------|--------|--------|------|------|
| ATOM | 2049 | CE1  | PHE | X | 133 | 45.474 | 33.807 | 22.231 | 0.00 | 0.00 |
| ATOM | 2050 | HE1  | PHE | X | 133 | 46.039 | 34.726 | 22.287 | 0.00 | 0.00 |
| ATOM | 2051 | CZ   | PHE | X | 133 | 45.758 | 32.855 | 21.252 | 0.00 | 0.00 |
| ATOM | 2052 | HZ   | PHE | X | 133 | 46.519 | 32.998 | 20.498 | 0.00 | 0.00 |
| ATOM | 2053 | CE2  | PHE | X | 133 | 44.965 | 31.723 | 21.013 | 0.00 | 0.00 |
| ATOM | 2054 | HE2  | PHE | X | 133 | 45.264 | 30.980 | 20.288 | 0.00 | 0.00 |
| ATOM | 2055 | CD2  | PHE | X | 133 | 43.909 | 31.418 | 21.817 | 0.00 | 0.00 |
| ATOM | 2056 | HD2  | PHE | X | 133 | 43.222 | 30.615 | 21.598 | 0.00 | 0.00 |
| ATOM | 2057 | C    | PHE | X | 133 | 39.867 | 31.966 | 23.885 | 0.00 | 0.00 |
| ATOM | 2058 | O    | PHE | X | 133 | 39.153 | 31.092 | 23.348 | 0.00 | 0.00 |
| ATOM | 2059 | N    | LEU | X | 134 | 39.587 | 32.488 | 25.099 | 0.00 | 0.00 |
| ATOM | 2060 | H    | LEU | X | 134 | 40.312 | 33.026 | 25.553 | 0.00 | 0.00 |
| ATOM | 2061 | CA   | LEU | X | 134 | 38.311 | 32.159 | 25.836 | 0.00 | 0.00 |
| ATOM | 2062 | HA   | LEU | X | 134 | 38.255 | 31.092 | 26.052 | 0.00 | 0.00 |
| ATOM | 2063 | CB   | LEU | X | 134 | 38.454 | 32.874 | 27.200 | 0.00 | 0.00 |
| ATOM | 2064 | HB2  | LEU | X | 134 | 39.417 | 32.611 | 27.637 | 0.00 | 0.00 |
| ATOM | 2065 | HB3  | LEU | X | 134 | 38.482 | 33.962 | 27.127 | 0.00 | 0.00 |
| ATOM | 2066 | CG   | LEU | X | 134 | 37.347 | 32.576 | 28.318 | 0.00 | 0.00 |
| ATOM | 2067 | HG   | LEU | X | 134 | 36.364 | 32.929 | 28.006 | 0.00 | 0.00 |
| ATOM | 2068 | CD1  | LEU | X | 134 | 37.044 | 31.107 | 28.448 | 0.00 | 0.00 |
| ATOM | 2069 | HD11 | LEU | X | 134 | 37.964 | 30.635 | 28.794 | 0.00 | 0.00 |
| ATOM | 2070 | HD12 | LEU | X | 134 | 36.699 | 30.702 | 27.496 | 0.00 | 0.00 |
| ATOM | 2071 | HD13 | LEU | X | 134 | 36.236 | 30.910 | 29.152 | 0.00 | 0.00 |
| ATOM | 2072 | CD2  | LEU | X | 134 | 37.749 | 33.139 | 29.653 | 0.00 | 0.00 |
| ATOM | 2073 | HD21 | LEU | X | 134 | 38.531 | 32.524 | 30.097 | 0.00 | 0.00 |
| ATOM | 2074 | HD22 | LEU | X | 134 | 38.076 | 34.165 | 29.482 | 0.00 | 0.00 |
| ATOM | 2075 | HD23 | LEU | X | 134 | 36.936 | 33.155 | 30.379 | 0.00 | 0.00 |
| ATOM | 2076 | C    | LEU | X | 134 | 37.107 | 32.604 | 25.044 | 0.00 | 0.00 |
| ATOM | 2077 | O    | LEU | X | 134 | 36.249 | 31.826 | 24.695 | 0.00 | 0.00 |
| ATOM | 2078 | N    | VAL | X | 135 | 36.953 | 33.841 | 24.653 | 0.00 | 0.00 |
| ATOM | 2079 | H    | VAL | X | 135 | 37.801 | 34.369 | 24.802 | 0.00 | 0.00 |
| ATOM | 2080 | CA   | VAL | X | 135 | 35.750 | 34.513 | 23.983 | 0.00 | 0.00 |
| ATOM | 2081 | HA   | VAL | X | 135 | 34.953 | 34.361 | 24.712 | 0.00 | 0.00 |
| ATOM | 2082 | CB   | VAL | X | 135 | 35.884 | 36.113 | 23.849 | 0.00 | 0.00 |
| ATOM | 2083 | HB   | VAL | X | 135 | 36.864 | 36.289 | 23.406 | 0.00 | 0.00 |
| ATOM | 2084 | CG1  | VAL | X | 135 | 34.944 | 36.844 | 22.935 | 0.00 | 0.00 |
| ATOM | 2085 | HG11 | VAL | X | 135 | 34.805 | 36.330 | 21.984 | 0.00 | 0.00 |
| ATOM | 2086 | HG12 | VAL | X | 135 | 33.955 | 37.012 | 23.362 | 0.00 | 0.00 |
| ATOM | 2087 | HG13 | VAL | X | 135 | 35.375 | 37.790 | 22.608 | 0.00 | 0.00 |
| ATOM | 2088 | CG2  | VAL | X | 135 | 35.775 | 36.818 | 25.265 | 0.00 | 0.00 |
| ATOM | 2089 | HG21 | VAL | X | 135 | 36.186 | 36.154 | 26.026 | 0.00 | 0.00 |
| ATOM | 2090 | HG22 | VAL | X | 135 | 34.745 | 36.949 | 25.595 | 0.00 | 0.00 |
| ATOM | 2091 | HG23 | VAL | X | 135 | 36.387 | 37.721 | 25.280 | 0.00 | 0.00 |
| ATOM | 2092 | C    | VAL | X | 135 | 35.390 | 33.846 | 22.670 | 0.00 | 0.00 |
| ATOM | 2093 | O    | VAL | X | 135 | 34.225 | 33.613 | 22.402 | 0.00 | 0.00 |
| ATOM | 2094 | N    | GLN | X | 136 | 36.380 | 33.465 | 21.848 | 0.00 | 0.00 |
| ATOM | 2095 | H    | GLN | X | 136 | 37.292 | 33.707 | 22.208 | 0.00 | 0.00 |
| ATOM | 2096 | CA   | GLN | X | 136 | 36.194 | 32.848 | 20.504 | 0.00 | 0.00 |
| ATOM | 2097 | HA   | GLN | X | 136 | 35.418 | 33.484 | 20.078 | 0.00 | 0.00 |
| ATOM | 2098 | CB   | GLN | X | 136 | 37.496 | 32.896 | 19.620 | 0.00 | 0.00 |
| ATOM | 2099 | HB2  | GLN | X | 136 | 37.784 | 33.945 | 19.551 | 0.00 | 0.00 |
| ATOM | 2100 | HB3  | GLN | X | 136 | 38.343 | 32.399 | 20.093 | 0.00 | 0.00 |
| ATOM | 2101 | CG   | GLN | X | 136 | 37.302 | 32.235 | 18.231 | 0.00 | 0.00 |
| ATOM | 2102 | HG2  | GLN | X | 136 | 36.368 | 32.453 | 17.713 | 0.00 | 0.00 |
| ATOM | 2103 | HG3  | GLN | X | 136 | 38.006 | 32.773 | 17.597 | 0.00 | 0.00 |
| ATOM | 2104 | CD   | GLN | X | 136 | 37.808 | 30.708 | 18.229 | 0.00 | 0.00 |
| ATOM | 2105 | OE1  | GLN | X | 136 | 38.792 | 30.369 | 18.824 | 0.00 | 0.00 |
| ATOM | 2106 | NE2  | GLN | X | 136 | 37.066 | 29.835 | 17.748 | 0.00 | 0.00 |
| ATOM | 2107 | HE21 | GLN | X | 136 | 37.497 | 28.926 | 17.653 | 0.00 | 0.00 |
| ATOM | 2108 | HE22 | GLN | X | 136 | 36.311 | 30.057 | 17.116 | 0.00 | 0.00 |
| ATOM | 2109 | C    | GLN | X | 136 | 35.724 | 31.362 | 20.595 | 0.00 | 0.00 |
| ATOM | 2110 | O    | GLN | X | 136 | 34.895 | 30.923 | 19.832 | 0.00 | 0.00 |
| ATOM | 2111 | N    | ALA | X | 137 | 36.236 | 30.556 | 21.552 | 0.00 | 0.00 |
| ATOM | 2112 | H    | ALA | X | 137 | 36.989 | 30.859 | 22.153 | 0.00 | 0.00 |
| ATOM | 2113 | CA   | ALA | X | 137 | 36.021 | 29.116 | 21.690 | 0.00 | 0.00 |
| ATOM | 2114 | HA   | ALA | X | 137 | 35.710 | 28.668 | 20.747 | 0.00 | 0.00 |
| ATOM | 2115 | CB   | ALA | X | 137 | 37.322 | 28.455 | 22.108 | 0.00 | 0.00 |

|      |      |      |     |   |     |        |        |        |      |      |
|------|------|------|-----|---|-----|--------|--------|--------|------|------|
| ATOM | 2116 | HB1  | ALA | X | 137 | 37.107 | 27.426 | 22.397 | 0.00 | 0.00 |
| ATOM | 2117 | HB2  | ALA | X | 137 | 37.669 | 28.926 | 23.027 | 0.00 | 0.00 |
| ATOM | 2118 | HB3  | ALA | X | 137 | 37.978 | 28.676 | 21.266 | 0.00 | 0.00 |
| ATOM | 2119 | C    | ALA | X | 137 | 34.911 | 28.797 | 22.693 | 0.00 | 0.00 |
| ATOM | 2120 | O    | ALA | X | 137 | 33.990 | 28.016 | 22.383 | 0.00 | 0.00 |
| ATOM | 2121 | N    | GLU | X | 138 | 34.838 | 29.469 | 23.841 | 0.00 | 0.00 |
| ATOM | 2122 | H    | GLU | X | 138 | 35.501 | 30.189 | 24.091 | 0.00 | 0.00 |
| ATOM | 2123 | CA   | GLU | X | 138 | 33.704 | 29.265 | 24.729 | 0.00 | 0.00 |
| ATOM | 2124 | HA   | GLU | X | 138 | 33.410 | 28.219 | 24.637 | 0.00 | 0.00 |
| ATOM | 2125 | CB   | GLU | X | 138 | 34.085 | 29.539 | 26.153 | 0.00 | 0.00 |
| ATOM | 2126 | HB2  | GLU | X | 138 | 34.437 | 30.566 | 26.256 | 0.00 | 0.00 |
| ATOM | 2127 | HB3  | GLU | X | 138 | 33.256 | 29.481 | 26.859 | 0.00 | 0.00 |
| ATOM | 2128 | CG   | GLU | X | 138 | 35.101 | 28.534 | 26.707 | 0.00 | 0.00 |
| ATOM | 2129 | HG2  | GLU | X | 138 | 36.063 | 28.602 | 26.197 | 0.00 | 0.00 |
| ATOM | 2130 | HG3  | GLU | X | 138 | 35.193 | 28.686 | 27.782 | 0.00 | 0.00 |
| ATOM | 2131 | CD   | GLU | X | 138 | 34.626 | 27.037 | 26.654 | 0.00 | 0.00 |
| ATOM | 2132 | OE1  | GLU | X | 138 | 33.495 | 26.711 | 27.008 | 0.00 | 0.00 |
| ATOM | 2133 | OE2  | GLU | X | 138 | 35.480 | 26.156 | 26.365 | 0.00 | 0.00 |
| ATOM | 2134 | C    | GLU | X | 138 | 32.462 | 30.115 | 24.337 | 0.00 | 0.00 |
| ATOM | 2135 | O    | GLU | X | 138 | 31.413 | 29.915 | 24.928 | 0.00 | 0.00 |
| ATOM | 2136 | N    | ARG | X | 139 | 32.559 | 31.025 | 23.368 | 0.00 | 0.00 |
| ATOM | 2137 | H    | ARG | X | 139 | 33.483 | 31.132 | 22.973 | 0.00 | 0.00 |
| ATOM | 2138 | CA   | ARG | X | 139 | 31.585 | 31.891 | 22.758 | 0.00 | 0.00 |
| ATOM | 2139 | HA   | ARG | X | 139 | 32.261 | 32.375 | 22.052 | 0.00 | 0.00 |
| ATOM | 2140 | CB   | ARG | X | 139 | 30.555 | 31.152 | 21.940 | 0.00 | 0.00 |
| ATOM | 2141 | HB2  | ARG | X | 139 | 30.101 | 30.396 | 22.580 | 0.00 | 0.00 |
| ATOM | 2142 | HB3  | ARG | X | 139 | 29.737 | 31.772 | 21.572 | 0.00 | 0.00 |
| ATOM | 2143 | CG   | ARG | X | 139 | 31.210 | 30.475 | 20.712 | 0.00 | 0.00 |
| ATOM | 2144 | HG2  | ARG | X | 139 | 31.646 | 31.333 | 20.200 | 0.00 | 0.00 |
| ATOM | 2145 | HG3  | ARG | X | 139 | 32.042 | 29.824 | 20.982 | 0.00 | 0.00 |
| ATOM | 2146 | CD   | ARG | X | 139 | 30.305 | 29.612 | 19.932 | 0.00 | 0.00 |
| ATOM | 2147 | HD2  | ARG | X | 139 | 30.777 | 29.240 | 19.022 | 0.00 | 0.00 |
| ATOM | 2148 | HD3  | ARG | X | 139 | 30.158 | 28.711 | 20.528 | 0.00 | 0.00 |
| ATOM | 2149 | NE   | ARG | X | 139 | 28.991 | 30.189 | 19.597 | 0.00 | 0.00 |
| ATOM | 2150 | HE   | ARG | X | 139 | 28.240 | 29.670 | 20.028 | 0.00 | 0.00 |
| ATOM | 2151 | CZ   | ARG | X | 139 | 28.623 | 31.318 | 19.065 | 0.00 | 0.00 |
| ATOM | 2152 | NH1  | ARG | X | 139 | 29.475 | 32.178 | 18.466 | 0.00 | 0.00 |
| ATOM | 2153 | HH11 | ARG | X | 139 | 30.450 | 31.936 | 18.359 | 0.00 | 0.00 |
| ATOM | 2154 | HH12 | ARG | X | 139 | 29.263 | 33.140 | 18.242 | 0.00 | 0.00 |
| ATOM | 2155 | NH2  | ARG | X | 139 | 27.342 | 31.662 | 19.096 | 0.00 | 0.00 |
| ATOM | 2156 | HH21 | ARG | X | 139 | 26.656 | 31.079 | 19.554 | 0.00 | 0.00 |
| ATOM | 2157 | HH22 | ARG | X | 139 | 27.049 | 32.492 | 18.601 | 0.00 | 0.00 |
| ATOM | 2158 | C    | ARG | X | 139 | 30.943 | 32.981 | 23.659 | 0.00 | 0.00 |
| ATOM | 2159 | O    | ARG | X | 139 | 29.906 | 33.520 | 23.290 | 0.00 | 0.00 |
| ATOM | 2160 | N    | THR | X | 140 | 31.445 | 33.218 | 24.875 | 0.00 | 0.00 |
| ATOM | 2161 | H    | THR | X | 140 | 32.236 | 32.642 | 25.123 | 0.00 | 0.00 |
| ATOM | 2162 | CA   | THR | X | 140 | 31.183 | 34.108 | 26.037 | 0.00 | 0.00 |
| ATOM | 2163 | HA   | THR | X | 140 | 30.137 | 34.333 | 26.245 | 0.00 | 0.00 |
| ATOM | 2164 | CB   | THR | X | 140 | 31.766 | 33.556 | 27.340 | 0.00 | 0.00 |
| ATOM | 2165 | HB   | THR | X | 140 | 32.012 | 34.336 | 28.061 | 0.00 | 0.00 |
| ATOM | 2166 | CG2  | THR | X | 140 | 30.834 | 32.523 | 27.954 | 0.00 | 0.00 |
| ATOM | 2167 | HG21 | THR | X | 140 | 30.705 | 31.671 | 27.287 | 0.00 | 0.00 |
| ATOM | 2168 | HG22 | THR | X | 140 | 29.964 | 33.088 | 28.289 | 0.00 | 0.00 |
| ATOM | 2169 | HG23 | THR | X | 140 | 31.299 | 32.177 | 28.877 | 0.00 | 0.00 |
| ATOM | 2170 | OG1  | THR | X | 140 | 32.995 | 32.874 | 26.937 | 0.00 | 0.00 |
| ATOM | 2171 | HG1  | THR | X | 140 | 33.544 | 33.523 | 26.491 | 0.00 | 0.00 |
| ATOM | 2172 | C    | THR | X | 140 | 31.701 | 35.479 | 25.695 | 0.00 | 0.00 |
| ATOM | 2173 | O    | THR | X | 140 | 32.684 | 35.566 | 25.017 | 0.00 | 0.00 |
| ATOM | 2174 | N    | VAL | X | 141 | 31.082 | 36.528 | 26.291 | 0.00 | 0.00 |
| ATOM | 2175 | H    | VAL | X | 141 | 30.448 | 36.354 | 27.057 | 0.00 | 0.00 |
| ATOM | 2176 | CA   | VAL | X | 141 | 31.549 | 37.946 | 26.209 | 0.00 | 0.00 |
| ATOM | 2177 | HA   | VAL | X | 141 | 32.173 | 37.950 | 25.316 | 0.00 | 0.00 |
| ATOM | 2178 | CB   | VAL | X | 141 | 30.412 | 38.982 | 26.028 | 0.00 | 0.00 |
| ATOM | 2179 | HB   | VAL | X | 141 | 29.553 | 38.710 | 26.642 | 0.00 | 0.00 |
| ATOM | 2180 | CG1  | VAL | X | 141 | 30.800 | 40.411 | 26.397 | 0.00 | 0.00 |
| ATOM | 2181 | HG11 | VAL | X | 141 | 30.020 | 41.137 | 26.164 | 0.00 | 0.00 |
| ATOM | 2182 | HG12 | VAL | X | 141 | 31.236 | 40.381 | 27.396 | 0.00 | 0.00 |

|      |      |      |     |   |     |        |        |        |      |      |
|------|------|------|-----|---|-----|--------|--------|--------|------|------|
| ATOM | 2183 | HG13 | VAL | X | 141 | 31.628 | 40.718 | 25.758 | 0.00 | 0.00 |
| ATOM | 2184 | CG2  | VAL | X | 141 | 30.014 | 39.017 | 24.516 | 0.00 | 0.00 |
| ATOM | 2185 | HG21 | VAL | X | 141 | 30.910 | 39.422 | 24.045 | 0.00 | 0.00 |
| ATOM | 2186 | HG22 | VAL | X | 141 | 29.155 | 39.686 | 24.454 | 0.00 | 0.00 |
| ATOM | 2187 | HG23 | VAL | X | 141 | 29.802 | 37.971 | 24.295 | 0.00 | 0.00 |
| ATOM | 2188 | C    | VAL | X | 141 | 32.451 | 38.191 | 27.441 | 0.00 | 0.00 |
| ATOM | 2189 | O    | VAL | X | 141 | 32.060 | 37.968 | 28.552 | 0.00 | 0.00 |
| ATOM | 2190 | N    | LEU | X | 142 | 33.607 | 38.655 | 27.151 | 0.00 | 0.00 |
| ATOM | 2191 | H    | LEU | X | 142 | 33.748 | 38.836 | 26.168 | 0.00 | 0.00 |
| ATOM | 2192 | CA   | LEU | X | 142 | 34.503 | 39.295 | 28.160 | 0.00 | 0.00 |
| ATOM | 2193 | HA   | LEU | X | 142 | 33.944 | 39.104 | 29.077 | 0.00 | 0.00 |
| ATOM | 2194 | CB   | LEU | X | 142 | 35.802 | 38.555 | 28.175 | 0.00 | 0.00 |
| ATOM | 2195 | HB2  | LEU | X | 142 | 35.508 | 37.531 | 28.404 | 0.00 | 0.00 |
| ATOM | 2196 | HB3  | LEU | X | 142 | 36.386 | 38.613 | 27.256 | 0.00 | 0.00 |
| ATOM | 2197 | CG   | LEU | X | 142 | 36.661 | 38.862 | 29.443 | 0.00 | 0.00 |
| ATOM | 2198 | HG   | LEU | X | 142 | 36.001 | 39.146 | 30.263 | 0.00 | 0.00 |
| ATOM | 2199 | CD1  | LEU | X | 142 | 37.356 | 37.596 | 29.912 | 0.00 | 0.00 |
| ATOM | 2200 | HD11 | LEU | X | 142 | 37.807 | 37.298 | 28.966 | 0.00 | 0.00 |
| ATOM | 2201 | HD12 | LEU | X | 142 | 36.589 | 36.873 | 30.189 | 0.00 | 0.00 |
| ATOM | 2202 | HD13 | LEU | X | 142 | 37.967 | 37.847 | 30.780 | 0.00 | 0.00 |
| ATOM | 2203 | CD2  | LEU | X | 142 | 37.719 | 40.013 | 29.139 | 0.00 | 0.00 |
| ATOM | 2204 | HD21 | LEU | X | 142 | 38.609 | 39.705 | 28.590 | 0.00 | 0.00 |
| ATOM | 2205 | HD22 | LEU | X | 142 | 37.255 | 40.878 | 28.667 | 0.00 | 0.00 |
| ATOM | 2206 | HD23 | LEU | X | 142 | 38.035 | 40.414 | 30.102 | 0.00 | 0.00 |
| ATOM | 2207 | C    | LEU | X | 142 | 34.593 | 40.796 | 28.061 | 0.00 | 0.00 |
| ATOM | 2208 | O    | LEU | X | 142 | 34.588 | 41.428 | 27.019 | 0.00 | 0.00 |
| ATOM | 2209 | N    | VAL | X | 143 | 34.656 | 41.462 | 29.268 | 0.00 | 0.00 |
| ATOM | 2210 | H    | VAL | X | 143 | 34.555 | 40.905 | 30.105 | 0.00 | 0.00 |
| ATOM | 2211 | CA   | VAL | X | 143 | 34.764 | 42.861 | 29.551 | 0.00 | 0.00 |
| ATOM | 2212 | HA   | VAL | X | 143 | 34.978 | 43.417 | 28.639 | 0.00 | 0.00 |
| ATOM | 2213 | CB   | VAL | X | 143 | 33.408 | 43.432 | 30.068 | 0.00 | 0.00 |
| ATOM | 2214 | HB   | VAL | X | 143 | 33.231 | 43.061 | 31.078 | 0.00 | 0.00 |
| ATOM | 2215 | CG1  | VAL | X | 143 | 33.420 | 44.942 | 30.072 | 0.00 | 0.00 |
| ATOM | 2216 | HG11 | VAL | X | 143 | 33.507 | 45.281 | 29.040 | 0.00 | 0.00 |
| ATOM | 2217 | HG12 | VAL | X | 143 | 32.501 | 45.309 | 30.529 | 0.00 | 0.00 |
| ATOM | 2218 | HG13 | VAL | X | 143 | 34.274 | 45.250 | 30.675 | 0.00 | 0.00 |
| ATOM | 2219 | CG2  | VAL | X | 143 | 32.145 | 43.018 | 29.282 | 0.00 | 0.00 |
| ATOM | 2220 | HG21 | VAL | X | 143 | 31.257 | 43.483 | 29.710 | 0.00 | 0.00 |
| ATOM | 2221 | HG22 | VAL | X | 143 | 31.986 | 41.942 | 29.348 | 0.00 | 0.00 |
| ATOM | 2222 | HG23 | VAL | X | 143 | 32.298 | 43.200 | 28.218 | 0.00 | 0.00 |
| ATOM | 2223 | C    | VAL | X | 143 | 35.902 | 43.251 | 30.596 | 0.00 | 0.00 |
| ATOM | 2224 | O    | VAL | X | 143 | 36.124 | 42.419 | 31.482 | 0.00 | 0.00 |
| ATOM | 2225 | N    | SER | X | 144 | 36.550 | 44.443 | 30.532 | 0.00 | 0.00 |
| ATOM | 2226 | H    | SER | X | 144 | 36.445 | 45.004 | 29.698 | 0.00 | 0.00 |
| ATOM | 2227 | CA   | SER | X | 144 | 37.512 | 44.999 | 31.582 | 0.00 | 0.00 |
| ATOM | 2228 | HA   | SER | X | 144 | 37.120 | 44.813 | 32.582 | 0.00 | 0.00 |
| ATOM | 2229 | CB   | SER | X | 144 | 38.823 | 44.224 | 31.501 | 0.00 | 0.00 |
| ATOM | 2230 | HB2  | SER | X | 144 | 39.370 | 44.252 | 32.443 | 0.00 | 0.00 |
| ATOM | 2231 | HB3  | SER | X | 144 | 38.736 | 43.186 | 31.182 | 0.00 | 0.00 |
| ATOM | 2232 | OG   | SER | X | 144 | 39.516 | 44.864 | 30.483 | 0.00 | 0.00 |
| ATOM | 2233 | HG   | SER | X | 144 | 40.299 | 44.310 | 30.443 | 0.00 | 0.00 |
| ATOM | 2234 | C    | SER | X | 144 | 37.589 | 46.489 | 31.555 | 0.00 | 0.00 |
| ATOM | 2235 | O    | SER | X | 144 | 36.799 | 47.156 | 30.856 | 0.00 | 0.00 |
| ATOM | 2236 | N    | MET | X | 145 | 38.506 | 47.082 | 32.336 | 0.00 | 0.00 |
| ATOM | 2237 | H    | MET | X | 145 | 39.185 | 46.521 | 32.831 | 0.00 | 0.00 |
| ATOM | 2238 | CA   | MET | X | 145 | 38.690 | 48.535 | 32.634 | 0.00 | 0.00 |
| ATOM | 2239 | HA   | MET | X | 145 | 38.787 | 49.026 | 31.666 | 0.00 | 0.00 |
| ATOM | 2240 | CB   | MET | X | 145 | 37.461 | 49.118 | 33.342 | 0.00 | 0.00 |
| ATOM | 2241 | HB2  | MET | X | 145 | 37.459 | 50.180 | 33.098 | 0.00 | 0.00 |
| ATOM | 2242 | HB3  | MET | X | 145 | 36.613 | 48.663 | 32.830 | 0.00 | 0.00 |
| ATOM | 2243 | CG   | MET | X | 145 | 37.434 | 49.002 | 34.906 | 0.00 | 0.00 |
| ATOM | 2244 | HG2  | MET | X | 145 | 38.246 | 49.495 | 35.441 | 0.00 | 0.00 |
| ATOM | 2245 | HG3  | MET | X | 145 | 36.546 | 49.575 | 35.173 | 0.00 | 0.00 |
| ATOM | 2246 | SD   | MET | X | 145 | 37.248 | 47.389 | 35.581 | 0.00 | 0.00 |
| ATOM | 2247 | CE   | MET | X | 145 | 35.678 | 46.958 | 34.938 | 0.00 | 0.00 |
| ATOM | 2248 | HE1  | MET | X | 145 | 34.867 | 47.592 | 35.296 | 0.00 | 0.00 |
| ATOM | 2249 | HE2  | MET | X | 145 | 35.753 | 46.896 | 33.852 | 0.00 | 0.00 |

|      |      |      |     |   |     |        |        |        |      |      |
|------|------|------|-----|---|-----|--------|--------|--------|------|------|
| ATOM | 2250 | HE3  | MET | X | 145 | 35.506 | 45.996 | 35.421 | 0.00 | 0.00 |
| ATOM | 2251 | C    | MET | X | 145 | 39.945 | 48.765 | 33.364 | 0.00 | 0.00 |
| ATOM | 2252 | O    | MET | X | 145 | 40.488 | 47.884 | 34.048 | 0.00 | 0.00 |
| ATOM | 2253 | N    | ASN | X | 146 | 40.247 | 50.053 | 33.487 | 0.00 | 0.00 |
| ATOM | 2254 | H    | ASN | X | 146 | 39.661 | 50.665 | 32.937 | 0.00 | 0.00 |
| ATOM | 2255 | CA   | ASN | X | 146 | 41.167 | 50.664 | 34.340 | 0.00 | 0.00 |
| ATOM | 2256 | HA   | ASN | X | 146 | 41.812 | 49.850 | 34.671 | 0.00 | 0.00 |
| ATOM | 2257 | CB   | ASN | X | 146 | 41.871 | 51.840 | 33.599 | 0.00 | 0.00 |
| ATOM | 2258 | HB2  | ASN | X | 146 | 41.129 | 52.417 | 33.047 | 0.00 | 0.00 |
| ATOM | 2259 | HB3  | ASN | X | 146 | 42.298 | 52.559 | 34.299 | 0.00 | 0.00 |
| ATOM | 2260 | CG   | ASN | X | 146 | 43.050 | 51.230 | 32.768 | 0.00 | 0.00 |
| ATOM | 2261 | OD1  | ASN | X | 146 | 43.389 | 50.078 | 32.853 | 0.00 | 0.00 |
| ATOM | 2262 | ND2  | ASN | X | 146 | 43.709 | 52.048 | 31.962 | 0.00 | 0.00 |
| ATOM | 2263 | HD21 | ASN | X | 146 | 44.464 | 51.726 | 31.375 | 0.00 | 0.00 |
| ATOM | 2264 | HD22 | ASN | X | 146 | 43.365 | 52.997 | 31.989 | 0.00 | 0.00 |
| ATOM | 2265 | C    | ASN | X | 146 | 40.496 | 51.391 | 35.555 | 0.00 | 0.00 |
| ATOM | 2266 | O    | ASN | X | 146 | 39.309 | 51.736 | 35.585 | 0.00 | 0.00 |
| ATOM | 2267 | N    | TYR | X | 147 | 41.340 | 51.572 | 36.531 | 0.00 | 0.00 |
| ATOM | 2268 | H    | TYR | X | 147 | 42.271 | 51.189 | 36.446 | 0.00 | 0.00 |
| ATOM | 2269 | CA   | TYR | X | 147 | 40.964 | 52.099 | 37.820 | 0.00 | 0.00 |
| ATOM | 2270 | HA   | TYR | X | 147 | 40.319 | 52.954 | 37.617 | 0.00 | 0.00 |
| ATOM | 2271 | CB   | TYR | X | 147 | 39.987 | 51.158 | 38.535 | 0.00 | 0.00 |
| ATOM | 2272 | HB2  | TYR | X | 147 | 39.757 | 51.674 | 39.467 | 0.00 | 0.00 |
| ATOM | 2273 | HB3  | TYR | X | 147 | 39.037 | 51.203 | 38.003 | 0.00 | 0.00 |
| ATOM | 2274 | CG   | TYR | X | 147 | 40.429 | 49.679 | 38.751 | 0.00 | 0.00 |
| ATOM | 2275 | CD1  | TYR | X | 147 | 39.817 | 48.623 | 37.981 | 0.00 | 0.00 |
| ATOM | 2276 | HD1  | TYR | X | 147 | 39.057 | 48.780 | 37.230 | 0.00 | 0.00 |
| ATOM | 2277 | CE1  | TYR | X | 147 | 40.143 | 47.290 | 38.281 | 0.00 | 0.00 |
| ATOM | 2278 | HE1  | TYR | X | 147 | 39.684 | 46.502 | 37.701 | 0.00 | 0.00 |
| ATOM | 2279 | CZ   | TYR | X | 147 | 41.018 | 46.952 | 39.372 | 0.00 | 0.00 |
| ATOM | 2280 | OH   | TYR | X | 147 | 41.205 | 45.689 | 39.767 | 0.00 | 0.00 |
| ATOM | 2281 | HH   | TYR | X | 147 | 41.926 | 45.474 | 40.363 | 0.00 | 0.00 |
| ATOM | 2282 | CE2  | TYR | X | 147 | 41.592 | 48.024 | 40.141 | 0.00 | 0.00 |
| ATOM | 2283 | HE2  | TYR | X | 147 | 42.207 | 47.758 | 40.988 | 0.00 | 0.00 |
| ATOM | 2284 | CD2  | TYR | X | 147 | 41.227 | 49.387 | 39.879 | 0.00 | 0.00 |
| ATOM | 2285 | HD2  | TYR | X | 147 | 41.629 | 50.117 | 40.565 | 0.00 | 0.00 |
| ATOM | 2286 | C    | TYR | X | 147 | 42.166 | 52.650 | 38.637 | 0.00 | 0.00 |
| ATOM | 2287 | O    | TYR | X | 147 | 43.292 | 52.227 | 38.416 | 0.00 | 0.00 |
| ATOM | 2288 | N    | ARG | X | 148 | 41.909 | 53.678 | 39.397 | 0.00 | 0.00 |
| ATOM | 2289 | H    | ARG | X | 148 | 40.936 | 53.908 | 39.535 | 0.00 | 0.00 |
| ATOM | 2290 | CA   | ARG | X | 148 | 42.983 | 54.391 | 40.091 | 0.00 | 0.00 |
| ATOM | 2291 | HA   | ARG | X | 148 | 43.755 | 54.623 | 39.357 | 0.00 | 0.00 |
| ATOM | 2292 | CB   | ARG | X | 148 | 42.450 | 55.670 | 40.668 | 0.00 | 0.00 |
| ATOM | 2293 | HB2  | ARG | X | 148 | 41.603 | 55.628 | 41.352 | 0.00 | 0.00 |
| ATOM | 2294 | HB3  | ARG | X | 148 | 43.346 | 55.995 | 41.198 | 0.00 | 0.00 |
| ATOM | 2295 | CG   | ARG | X | 148 | 42.143 | 56.843 | 39.643 | 0.00 | 0.00 |
| ATOM | 2296 | HG2  | ARG | X | 148 | 43.070 | 57.309 | 39.309 | 0.00 | 0.00 |
| ATOM | 2297 | HG3  | ARG | X | 148 | 41.663 | 56.499 | 38.727 | 0.00 | 0.00 |
| ATOM | 2298 | CD   | ARG | X | 148 | 41.253 | 58.015 | 40.117 | 0.00 | 0.00 |
| ATOM | 2299 | HD2  | ARG | X | 148 | 41.805 | 58.434 | 40.959 | 0.00 | 0.00 |
| ATOM | 2300 | HD3  | ARG | X | 148 | 41.350 | 58.814 | 39.381 | 0.00 | 0.00 |
| ATOM | 2301 | NE   | ARG | X | 148 | 39.845 | 57.656 | 40.411 | 0.00 | 0.00 |
| ATOM | 2302 | HE   | ARG | X | 148 | 39.578 | 56.737 | 40.087 | 0.00 | 0.00 |
| ATOM | 2303 | CZ   | ARG | X | 148 | 39.003 | 58.425 | 41.158 | 0.00 | 0.00 |
| ATOM | 2304 | NH1  | ARG | X | 148 | 39.193 | 59.659 | 41.632 | 0.00 | 0.00 |
| ATOM | 2305 | HH11 | ARG | X | 148 | 39.919 | 60.300 | 41.344 | 0.00 | 0.00 |
| ATOM | 2306 | HH12 | ARG | X | 148 | 38.503 | 60.144 | 42.187 | 0.00 | 0.00 |
| ATOM | 2307 | NH2  | ARG | X | 148 | 37.830 | 57.921 | 41.423 | 0.00 | 0.00 |
| ATOM | 2308 | HH21 | ARG | X | 148 | 37.514 | 57.020 | 41.094 | 0.00 | 0.00 |
| ATOM | 2309 | HH22 | ARG | X | 148 | 37.186 | 58.541 | 41.893 | 0.00 | 0.00 |
| ATOM | 2310 | C    | ARG | X | 148 | 43.584 | 53.531 | 41.220 | 0.00 | 0.00 |
| ATOM | 2311 | O    | ARG | X | 148 | 42.817 | 52.876 | 41.898 | 0.00 | 0.00 |
| ATOM | 2312 | N    | VAL | X | 149 | 44.896 | 53.489 | 41.436 | 0.00 | 0.00 |
| ATOM | 2313 | H    | VAL | X | 149 | 45.424 | 54.151 | 40.886 | 0.00 | 0.00 |
| ATOM | 2314 | CA   | VAL | X | 149 | 45.687 | 52.663 | 42.390 | 0.00 | 0.00 |
| ATOM | 2315 | HA   | VAL | X | 149 | 45.034 | 52.287 | 43.178 | 0.00 | 0.00 |
| ATOM | 2316 | CB   | VAL | X | 149 | 46.293 | 51.453 | 41.567 | 0.00 | 0.00 |



|      |      |      |     |   |     |        |        |        |      |      |
|------|------|------|-----|---|-----|--------|--------|--------|------|------|
| ATOM | 2317 | HB   | VAL | X | 149 | 46.842 | 50.851 | 42.292 | 0.00 | 0.00 |
| ATOM | 2318 | CG1  | VAL | X | 149 | 45.155 | 50.565 | 41.113 | 0.00 | 0.00 |
| ATOM | 2319 | HG11 | VAL | X | 149 | 44.568 | 51.066 | 40.343 | 0.00 | 0.00 |
| ATOM | 2320 | HG12 | VAL | X | 149 | 45.714 | 49.674 | 40.828 | 0.00 | 0.00 |
| ATOM | 2321 | HG13 | VAL | X | 149 | 44.556 | 50.177 | 41.937 | 0.00 | 0.00 |
| ATOM | 2322 | CG2  | VAL | X | 149 | 47.160 | 51.749 | 40.342 | 0.00 | 0.00 |
| ATOM | 2323 | HG21 | VAL | X | 149 | 47.953 | 52.453 | 40.595 | 0.00 | 0.00 |
| ATOM | 2324 | HG22 | VAL | X | 149 | 46.490 | 52.250 | 39.644 | 0.00 | 0.00 |
| ATOM | 2325 | HG23 | VAL | X | 149 | 47.545 | 50.845 | 39.869 | 0.00 | 0.00 |
| ATOM | 2326 | C    | VAL | X | 149 | 46.794 | 53.488 | 43.085 | 0.00 | 0.00 |
| ATOM | 2327 | O    | VAL | X | 149 | 47.185 | 54.540 | 42.627 | 0.00 | 0.00 |
| ATOM | 2328 | N    | GLY | X | 150 | 47.296 | 52.992 | 44.194 | 0.00 | 0.00 |
| ATOM | 2329 | H    | GLY | X | 150 | 46.839 | 52.124 | 44.437 | 0.00 | 0.00 |
| ATOM | 2330 | CA   | GLY | X | 150 | 48.099 | 53.702 | 45.133 | 0.00 | 0.00 |
| ATOM | 2331 | HA2  | GLY | X | 150 | 48.480 | 53.041 | 45.911 | 0.00 | 0.00 |
| ATOM | 2332 | HA3  | GLY | X | 150 | 48.988 | 54.078 | 44.625 | 0.00 | 0.00 |
| ATOM | 2333 | C    | GLY | X | 150 | 47.316 | 54.883 | 45.776 | 0.00 | 0.00 |
| ATOM | 2334 | O    | GLY | X | 150 | 46.100 | 54.944 | 45.803 | 0.00 | 0.00 |
| ATOM | 2335 | N    | ALA | X | 151 | 47.968 | 56.042 | 46.089 | 0.00 | 0.00 |
| ATOM | 2336 | H    | ALA | X | 151 | 48.875 | 56.289 | 45.719 | 0.00 | 0.00 |
| ATOM | 2337 | CA   | ALA | X | 151 | 47.343 | 57.223 | 46.625 | 0.00 | 0.00 |
| ATOM | 2338 | HA   | ALA | X | 151 | 46.905 | 56.872 | 47.559 | 0.00 | 0.00 |
| ATOM | 2339 | CB   | ALA | X | 151 | 48.329 | 58.397 | 46.923 | 0.00 | 0.00 |
| ATOM | 2340 | HB1  | ALA | X | 151 | 48.956 | 58.582 | 46.050 | 0.00 | 0.00 |
| ATOM | 2341 | HB2  | ALA | X | 151 | 48.959 | 58.008 | 47.723 | 0.00 | 0.00 |
| ATOM | 2342 | HB3  | ALA | X | 151 | 47.767 | 59.259 | 47.283 | 0.00 | 0.00 |
| ATOM | 2343 | C    | ALA | X | 151 | 46.140 | 57.817 | 45.754 | 0.00 | 0.00 |
| ATOM | 2344 | O    | ALA | X | 151 | 45.045 | 58.208 | 46.193 | 0.00 | 0.00 |
| ATOM | 2345 | N    | PHE | X | 152 | 46.319 | 57.780 | 44.471 | 0.00 | 0.00 |
| ATOM | 2346 | H    | PHE | X | 152 | 47.208 | 57.483 | 44.094 | 0.00 | 0.00 |
| ATOM | 2347 | CA   | PHE | X | 152 | 45.372 | 58.095 | 43.404 | 0.00 | 0.00 |
| ATOM | 2348 | HA   | PHE | X | 152 | 45.028 | 59.104 | 43.628 | 0.00 | 0.00 |
| ATOM | 2349 | CB   | PHE | X | 152 | 46.125 | 58.088 | 42.026 | 0.00 | 0.00 |
| ATOM | 2350 | HB2  | PHE | X | 152 | 47.018 | 58.692 | 42.185 | 0.00 | 0.00 |
| ATOM | 2351 | HB3  | PHE | X | 152 | 46.469 | 57.063 | 41.887 | 0.00 | 0.00 |
| ATOM | 2352 | CG   | PHE | X | 152 | 45.480 | 58.686 | 40.778 | 0.00 | 0.00 |
| ATOM | 2353 | CD1  | PHE | X | 152 | 45.996 | 58.290 | 39.587 | 0.00 | 0.00 |
| ATOM | 2354 | HD1  | PHE | X | 152 | 46.882 | 57.678 | 39.665 | 0.00 | 0.00 |
| ATOM | 2355 | CE1  | PHE | X | 152 | 45.491 | 58.731 | 38.351 | 0.00 | 0.00 |
| ATOM | 2356 | HE1  | PHE | X | 152 | 45.828 | 58.321 | 37.410 | 0.00 | 0.00 |
| ATOM | 2357 | CZ   | PHE | X | 152 | 44.344 | 59.601 | 38.356 | 0.00 | 0.00 |
| ATOM | 2358 | HZ   | PHE | X | 152 | 43.951 | 59.925 | 37.404 | 0.00 | 0.00 |
| ATOM | 2359 | CE2  | PHE | X | 152 | 43.762 | 60.007 | 39.598 | 0.00 | 0.00 |
| ATOM | 2360 | HE2  | PHE | X | 152 | 42.915 | 60.676 | 39.548 | 0.00 | 0.00 |
| ATOM | 2361 | CD2  | PHE | X | 152 | 44.375 | 59.570 | 40.793 | 0.00 | 0.00 |
| ATOM | 2362 | HD2  | PHE | X | 152 | 43.940 | 59.884 | 41.731 | 0.00 | 0.00 |
| ATOM | 2363 | C    | PHE | X | 152 | 44.089 | 57.291 | 43.455 | 0.00 | 0.00 |
| ATOM | 2364 | O    | PHE | X | 152 | 43.066 | 57.864 | 43.097 | 0.00 | 0.00 |
| ATOM | 2365 | N    | GLY | X | 153 | 44.022 | 56.061 | 44.036 | 0.00 | 0.00 |
| ATOM | 2366 | H    | GLY | X | 153 | 44.924 | 55.654 | 44.241 | 0.00 | 0.00 |
| ATOM | 2367 | CA   | GLY | X | 153 | 42.838 | 55.304 | 44.273 | 0.00 | 0.00 |
| ATOM | 2368 | HA2  | GLY | X | 153 | 41.985 | 55.733 | 43.747 | 0.00 | 0.00 |
| ATOM | 2369 | HA3  | GLY | X | 153 | 43.106 | 54.306 | 43.926 | 0.00 | 0.00 |
| ATOM | 2370 | C    | GLY | X | 153 | 42.462 | 55.059 | 45.728 | 0.00 | 0.00 |
| ATOM | 2371 | O    | GLY | X | 153 | 41.312 | 54.655 | 45.924 | 0.00 | 0.00 |
| ATOM | 2372 | N    | PHE | X | 154 | 43.390 | 55.227 | 46.652 | 0.00 | 0.00 |
| ATOM | 2373 | H    | PHE | X | 154 | 44.310 | 55.480 | 46.321 | 0.00 | 0.00 |
| ATOM | 2374 | CA   | PHE | X | 154 | 43.256 | 54.649 | 47.991 | 0.00 | 0.00 |
| ATOM | 2375 | HA   | PHE | X | 154 | 42.176 | 54.573 | 48.112 | 0.00 | 0.00 |
| ATOM | 2376 | CB   | PHE | X | 154 | 43.761 | 53.199 | 47.944 | 0.00 | 0.00 |
| ATOM | 2377 | HB2  | PHE | X | 154 | 44.815 | 53.226 | 47.667 | 0.00 | 0.00 |
| ATOM | 2378 | HB3  | PHE | X | 154 | 43.862 | 52.772 | 48.942 | 0.00 | 0.00 |
| ATOM | 2379 | CG   | PHE | X | 154 | 42.903 | 52.326 | 47.060 | 0.00 | 0.00 |
| ATOM | 2380 | CD1  | PHE | X | 154 | 43.444 | 51.810 | 45.924 | 0.00 | 0.00 |
| ATOM | 2381 | HD1  | PHE | X | 154 | 44.457 | 52.070 | 45.655 | 0.00 | 0.00 |
| ATOM | 2382 | CE1  | PHE | X | 154 | 42.689 | 51.111 | 45.006 | 0.00 | 0.00 |
| ATOM | 2383 | HE1  | PHE | X | 154 | 43.184 | 50.905 | 44.068 | 0.00 | 0.00 |

|      |      |      |     |   |     |        |        |        |      |      |
|------|------|------|-----|---|-----|--------|--------|--------|------|------|
| ATOM | 2384 | CZ   | PHE | X | 154 | 41.349 | 50.850 | 45.298 | 0.00 | 0.00 |
| ATOM | 2385 | HZ   | PHE | X | 154 | 40.741 | 50.354 | 44.556 | 0.00 | 0.00 |
| ATOM | 2386 | CE2  | PHE | X | 154 | 40.807 | 51.285 | 46.526 | 0.00 | 0.00 |
| ATOM | 2387 | HE2  | PHE | X | 154 | 39.748 | 51.188 | 46.716 | 0.00 | 0.00 |
| ATOM | 2388 | CD2  | PHE | X | 154 | 41.560 | 52.024 | 47.428 | 0.00 | 0.00 |
| ATOM | 2389 | HD2  | PHE | X | 154 | 41.160 | 52.391 | 48.362 | 0.00 | 0.00 |
| ATOM | 2390 | C    | PHE | X | 154 | 43.786 | 55.533 | 49.179 | 0.00 | 0.00 |
| ATOM | 2391 | O    | PHE | X | 154 | 43.983 | 54.997 | 50.300 | 0.00 | 0.00 |
| ATOM | 2392 | N    | LEU | X | 155 | 44.146 | 56.832 | 48.918 | 0.00 | 0.00 |
| ATOM | 2393 | H    | LEU | X | 155 | 43.996 | 57.205 | 47.991 | 0.00 | 0.00 |
| ATOM | 2394 | CA   | LEU | X | 155 | 44.431 | 57.847 | 49.975 | 0.00 | 0.00 |
| ATOM | 2395 | HA   | LEU | X | 155 | 45.079 | 57.433 | 50.747 | 0.00 | 0.00 |
| ATOM | 2396 | CB   | LEU | X | 155 | 45.497 | 58.853 | 49.444 | 0.00 | 0.00 |
| ATOM | 2397 | HB2  | LEU | X | 155 | 46.374 | 58.334 | 49.057 | 0.00 | 0.00 |
| ATOM | 2398 | HB3  | LEU | X | 155 | 45.102 | 59.320 | 48.542 | 0.00 | 0.00 |
| ATOM | 2399 | CG   | LEU | X | 155 | 46.040 | 59.902 | 50.480 | 0.00 | 0.00 |
| ATOM | 2400 | HG   | LEU | X | 155 | 46.245 | 59.456 | 51.453 | 0.00 | 0.00 |
| ATOM | 2401 | CD1  | LEU | X | 155 | 47.223 | 60.730 | 49.987 | 0.00 | 0.00 |
| ATOM | 2402 | HD11 | LEU | X | 155 | 47.706 | 61.184 | 50.852 | 0.00 | 0.00 |
| ATOM | 2403 | HD12 | LEU | X | 155 | 46.822 | 61.401 | 49.228 | 0.00 | 0.00 |
| ATOM | 2404 | HD13 | LEU | X | 155 | 47.954 | 60.049 | 49.551 | 0.00 | 0.00 |
| ATOM | 2405 | CD2  | LEU | X | 155 | 45.114 | 61.103 | 50.929 | 0.00 | 0.00 |
| ATOM | 2406 | HD21 | LEU | X | 155 | 44.429 | 60.796 | 51.719 | 0.00 | 0.00 |
| ATOM | 2407 | HD22 | LEU | X | 155 | 45.603 | 61.892 | 51.501 | 0.00 | 0.00 |
| ATOM | 2408 | HD23 | LEU | X | 155 | 44.623 | 61.654 | 50.127 | 0.00 | 0.00 |
| ATOM | 2409 | C    | LEU | X | 155 | 43.174 | 58.390 | 50.662 | 0.00 | 0.00 |
| ATOM | 2410 | O    | LEU | X | 155 | 42.264 | 58.953 | 50.092 | 0.00 | 0.00 |
| ATOM | 2411 | N    | ALA | X | 156 | 43.093 | 58.149 | 51.992 | 0.00 | 0.00 |
| ATOM | 2412 | H    | ALA | X | 156 | 43.910 | 57.790 | 52.464 | 0.00 | 0.00 |
| ATOM | 2413 | CA   | ALA | X | 156 | 42.039 | 58.577 | 52.881 | 0.00 | 0.00 |
| ATOM | 2414 | HA   | ALA | X | 156 | 41.182 | 59.000 | 52.356 | 0.00 | 0.00 |
| ATOM | 2415 | CB   | ALA | X | 156 | 41.426 | 57.356 | 53.585 | 0.00 | 0.00 |
| ATOM | 2416 | HB1  | ALA | X | 156 | 42.160 | 56.649 | 53.972 | 0.00 | 0.00 |
| ATOM | 2417 | HB2  | ALA | X | 156 | 40.931 | 56.827 | 52.772 | 0.00 | 0.00 |
| ATOM | 2418 | HB3  | ALA | X | 156 | 40.727 | 57.654 | 54.367 | 0.00 | 0.00 |
| ATOM | 2419 | C    | ALA | X | 156 | 42.570 | 59.577 | 53.971 | 0.00 | 0.00 |
| ATOM | 2420 | O    | ALA | X | 156 | 43.729 | 59.482 | 54.487 | 0.00 | 0.00 |
| ATOM | 2421 | N    | LEU | X | 157 | 41.737 | 60.613 | 54.364 | 0.00 | 0.00 |
| ATOM | 2422 | H    | LEU | X | 157 | 40.846 | 60.689 | 53.894 | 0.00 | 0.00 |
| ATOM | 2423 | CA   | LEU | X | 157 | 42.008 | 61.414 | 55.527 | 0.00 | 0.00 |
| ATOM | 2424 | HA   | LEU | X | 157 | 42.757 | 60.866 | 56.099 | 0.00 | 0.00 |
| ATOM | 2425 | CB   | LEU | X | 157 | 42.583 | 62.820 | 55.081 | 0.00 | 0.00 |
| ATOM | 2426 | HB2  | LEU | X | 157 | 41.837 | 63.288 | 54.439 | 0.00 | 0.00 |
| ATOM | 2427 | HB3  | LEU | X | 157 | 42.790 | 63.387 | 55.989 | 0.00 | 0.00 |
| ATOM | 2428 | CG   | LEU | X | 157 | 43.870 | 62.860 | 54.168 | 0.00 | 0.00 |
| ATOM | 2429 | HG   | LEU | X | 157 | 43.836 | 62.239 | 53.273 | 0.00 | 0.00 |
| ATOM | 2430 | CD1  | LEU | X | 157 | 43.936 | 64.312 | 53.698 | 0.00 | 0.00 |
| ATOM | 2431 | HD11 | LEU | X | 157 | 44.780 | 64.411 | 53.017 | 0.00 | 0.00 |
| ATOM | 2432 | HD12 | LEU | X | 157 | 44.188 | 64.980 | 54.522 | 0.00 | 0.00 |
| ATOM | 2433 | HD13 | LEU | X | 157 | 43.032 | 64.475 | 53.111 | 0.00 | 0.00 |
| ATOM | 2434 | CD2  | LEU | X | 157 | 45.130 | 62.430 | 54.987 | 0.00 | 0.00 |
| ATOM | 2435 | HD21 | LEU | X | 157 | 45.056 | 61.351 | 55.126 | 0.00 | 0.00 |
| ATOM | 2436 | HD22 | LEU | X | 157 | 46.066 | 62.688 | 54.491 | 0.00 | 0.00 |
| ATOM | 2437 | HD23 | LEU | X | 157 | 45.231 | 63.058 | 55.872 | 0.00 | 0.00 |
| ATOM | 2438 | C    | LEU | X | 157 | 40.795 | 61.553 | 56.439 | 0.00 | 0.00 |
| ATOM | 2439 | O    | LEU | X | 157 | 39.708 | 61.398 | 55.969 | 0.00 | 0.00 |
| ATOM | 2440 | N    | PRO | X | 158 | 40.915 | 61.862 | 57.776 | 0.00 | 0.00 |
| ATOM | 2441 | CD   | PRO | X | 158 | 42.149 | 61.751 | 58.586 | 0.00 | 0.00 |
| ATOM | 2442 | HD2  | PRO | X | 158 | 42.831 | 62.566 | 58.340 | 0.00 | 0.00 |
| ATOM | 2443 | HD3  | PRO | X | 158 | 42.719 | 60.827 | 58.480 | 0.00 | 0.00 |
| ATOM | 2444 | CG   | PRO | X | 158 | 41.790 | 62.025 | 60.083 | 0.00 | 0.00 |
| ATOM | 2445 | HG2  | PRO | X | 158 | 41.708 | 63.067 | 60.394 | 0.00 | 0.00 |
| ATOM | 2446 | HG3  | PRO | X | 158 | 42.240 | 61.441 | 60.886 | 0.00 | 0.00 |
| ATOM | 2447 | CB   | PRO | X | 158 | 40.336 | 61.517 | 60.011 | 0.00 | 0.00 |
| ATOM | 2448 | HB2  | PRO | X | 158 | 39.795 | 61.741 | 60.930 | 0.00 | 0.00 |
| ATOM | 2449 | HB3  | PRO | X | 158 | 40.448 | 60.446 | 59.843 | 0.00 | 0.00 |
| ATOM | 2450 | CA   | PRO | X | 158 | 39.744 | 62.049 | 58.675 | 0.00 | 0.00 |

|      |      |      |     |   |     |        |        |        |      |      |
|------|------|------|-----|---|-----|--------|--------|--------|------|------|
| ATOM | 2451 | HA   | PRO | X | 158 | 38.966 | 61.334 | 58.405 | 0.00 | 0.00 |
| ATOM | 2452 | C    | PRO | X | 158 | 39.269 | 63.483 | 58.985 | 0.00 | 0.00 |
| ATOM | 2453 | O    | PRO | X | 158 | 40.015 | 64.455 | 58.791 | 0.00 | 0.00 |
| ATOM | 2454 | N    | GLY | X | 159 | 38.033 | 63.538 | 59.399 | 0.00 | 0.00 |
| ATOM | 2455 | H    | GLY | X | 159 | 37.558 | 62.651 | 59.485 | 0.00 | 0.00 |
| ATOM | 2456 | CA   | GLY | X | 159 | 37.322 | 64.802 | 59.880 | 0.00 | 0.00 |
| ATOM | 2457 | HA2  | GLY | X | 159 | 36.586 | 64.405 | 60.579 | 0.00 | 0.00 |
| ATOM | 2458 | HA3  | GLY | X | 159 | 37.960 | 65.458 | 60.472 | 0.00 | 0.00 |
| ATOM | 2459 | C    | GLY | X | 159 | 36.586 | 65.643 | 58.881 | 0.00 | 0.00 |
| ATOM | 2460 | O    | GLY | X | 159 | 36.078 | 66.710 | 59.249 | 0.00 | 0.00 |
| ATOM | 2461 | N    | SER | X | 160 | 36.373 | 65.122 | 57.646 | 0.00 | 0.00 |
| ATOM | 2462 | H    | SER | X | 160 | 36.726 | 64.197 | 57.441 | 0.00 | 0.00 |
| ATOM | 2463 | CA   | SER | X | 160 | 35.813 | 65.845 | 56.466 | 0.00 | 0.00 |
| ATOM | 2464 | HA   | SER | X | 160 | 34.845 | 66.247 | 56.763 | 0.00 | 0.00 |
| ATOM | 2465 | CB   | SER | X | 160 | 36.545 | 67.149 | 56.108 | 0.00 | 0.00 |
| ATOM | 2466 | HB2  | SER | X | 160 | 36.185 | 67.729 | 55.259 | 0.00 | 0.00 |
| ATOM | 2467 | HB3  | SER | X | 160 | 36.447 | 67.780 | 56.991 | 0.00 | 0.00 |
| ATOM | 2468 | OG   | SER | X | 160 | 37.959 | 67.049 | 55.977 | 0.00 | 0.00 |
| ATOM | 2469 | HG   | SER | X | 160 | 38.324 | 67.892 | 56.257 | 0.00 | 0.00 |
| ATOM | 2470 | C    | SER | X | 160 | 35.878 | 64.939 | 55.294 | 0.00 | 0.00 |
| ATOM | 2471 | O    | SER | X | 160 | 36.634 | 63.961 | 55.236 | 0.00 | 0.00 |
| ATOM | 2472 | N    | ARG | X | 161 | 35.091 | 65.187 | 54.197 | 0.00 | 0.00 |
| ATOM | 2473 | H    | ARG | X | 161 | 34.559 | 66.045 | 54.188 | 0.00 | 0.00 |
| ATOM | 2474 | CA   | ARG | X | 161 | 34.924 | 64.379 | 53.021 | 0.00 | 0.00 |
| ATOM | 2475 | HA   | ARG | X | 161 | 35.100 | 63.330 | 53.261 | 0.00 | 0.00 |
| ATOM | 2476 | CB   | ARG | X | 161 | 33.448 | 64.483 | 52.621 | 0.00 | 0.00 |
| ATOM | 2477 | HB2  | ARG | X | 161 | 32.862 | 64.670 | 53.521 | 0.00 | 0.00 |
| ATOM | 2478 | HB3  | ARG | X | 161 | 33.252 | 65.271 | 51.893 | 0.00 | 0.00 |
| ATOM | 2479 | CG   | ARG | X | 161 | 32.971 | 63.130 | 52.007 | 0.00 | 0.00 |
| ATOM | 2480 | HG2  | ARG | X | 161 | 32.232 | 63.358 | 51.238 | 0.00 | 0.00 |
| ATOM | 2481 | HG3  | ARG | X | 161 | 33.724 | 62.680 | 51.360 | 0.00 | 0.00 |
| ATOM | 2482 | CD   | ARG | X | 161 | 32.546 | 62.077 | 53.116 | 0.00 | 0.00 |
| ATOM | 2483 | HD2  | ARG | X | 161 | 31.995 | 62.551 | 53.927 | 0.00 | 0.00 |
| ATOM | 2484 | HD3  | ARG | X | 161 | 31.943 | 61.350 | 52.571 | 0.00 | 0.00 |
| ATOM | 2485 | NE   | ARG | X | 161 | 33.646 | 61.286 | 53.702 | 0.00 | 0.00 |
| ATOM | 2486 | HE   | ARG | X | 161 | 34.324 | 61.887 | 54.148 | 0.00 | 0.00 |
| ATOM | 2487 | CZ   | ARG | X | 161 | 33.742 | 60.025 | 53.960 | 0.00 | 0.00 |
| ATOM | 2488 | NH1  | ARG | X | 161 | 32.869 | 59.153 | 53.629 | 0.00 | 0.00 |
| ATOM | 2489 | HH11 | ARG | X | 161 | 32.086 | 59.458 | 53.068 | 0.00 | 0.00 |
| ATOM | 2490 | HH12 | ARG | X | 161 | 33.064 | 58.162 | 53.612 | 0.00 | 0.00 |
| ATOM | 2491 | NH2  | ARG | X | 161 | 34.717 | 59.574 | 54.640 | 0.00 | 0.00 |
| ATOM | 2492 | HH21 | ARG | X | 161 | 35.523 | 60.143 | 54.857 | 0.00 | 0.00 |
| ATOM | 2493 | HH22 | ARG | X | 161 | 34.776 | 58.581 | 54.814 | 0.00 | 0.00 |
| ATOM | 2494 | C    | ARG | X | 161 | 35.880 | 64.599 | 51.890 | 0.00 | 0.00 |
| ATOM | 2495 | O    | ARG | X | 161 | 35.425 | 64.472 | 50.720 | 0.00 | 0.00 |
| ATOM | 2496 | N    | GLU | X | 162 | 37.130 | 64.983 | 52.157 | 0.00 | 0.00 |
| ATOM | 2497 | H    | GLU | X | 162 | 37.395 | 64.854 | 53.123 | 0.00 | 0.00 |
| ATOM | 2498 | CA   | GLU | X | 162 | 38.044 | 65.483 | 51.090 | 0.00 | 0.00 |
| ATOM | 2499 | HA   | GLU | X | 162 | 37.390 | 65.840 | 50.294 | 0.00 | 0.00 |
| ATOM | 2500 | CB   | GLU | X | 162 | 38.741 | 66.796 | 51.670 | 0.00 | 0.00 |
| ATOM | 2501 | HB2  | GLU | X | 162 | 39.322 | 66.534 | 52.554 | 0.00 | 0.00 |
| ATOM | 2502 | HB3  | GLU | X | 162 | 39.276 | 67.216 | 50.819 | 0.00 | 0.00 |
| ATOM | 2503 | CG   | GLU | X | 162 | 37.779 | 67.882 | 52.229 | 0.00 | 0.00 |
| ATOM | 2504 | HG2  | GLU | X | 162 | 37.141 | 67.411 | 52.975 | 0.00 | 0.00 |
| ATOM | 2505 | HG3  | GLU | X | 162 | 38.337 | 68.675 | 52.728 | 0.00 | 0.00 |
| ATOM | 2506 | CD   | GLU | X | 162 | 36.961 | 68.484 | 51.052 | 0.00 | 0.00 |
| ATOM | 2507 | OE1  | GLU | X | 162 | 37.461 | 69.339 | 50.289 | 0.00 | 0.00 |
| ATOM | 2508 | OE2  | GLU | X | 162 | 35.821 | 68.047 | 50.845 | 0.00 | 0.00 |
| ATOM | 2509 | C    | GLU | X | 162 | 38.952 | 64.416 | 50.469 | 0.00 | 0.00 |
| ATOM | 2510 | O    | GLU | X | 162 | 39.126 | 64.396 | 49.263 | 0.00 | 0.00 |
| ATOM | 2511 | N    | ALA | X | 163 | 39.204 | 63.395 | 51.197 | 0.00 | 0.00 |
| ATOM | 2512 | H    | ALA | X | 163 | 39.193 | 63.583 | 52.189 | 0.00 | 0.00 |
| ATOM | 2513 | CA   | ALA | X | 163 | 39.738 | 62.072 | 50.769 | 0.00 | 0.00 |
| ATOM | 2514 | HA   | ALA | X | 163 | 39.628 | 61.874 | 49.703 | 0.00 | 0.00 |
| ATOM | 2515 | CB   | ALA | X | 163 | 41.256 | 62.161 | 50.810 | 0.00 | 0.00 |
| ATOM | 2516 | HB1  | ALA | X | 163 | 41.513 | 62.412 | 51.839 | 0.00 | 0.00 |
| ATOM | 2517 | HB2  | ALA | X | 163 | 41.643 | 62.951 | 50.166 | 0.00 | 0.00 |

|      |      |      |     |   |     |        |        |        |      |      |
|------|------|------|-----|---|-----|--------|--------|--------|------|------|
| ATOM | 2518 | HB3  | ALA | X | 163 | 41.590 | 61.192 | 50.439 | 0.00 | 0.00 |
| ATOM | 2519 | C    | ALA | X | 163 | 39.093 | 60.834 | 51.550 | 0.00 | 0.00 |
| ATOM | 2520 | O    | ALA | X | 163 | 39.428 | 60.614 | 52.689 | 0.00 | 0.00 |
| ATOM | 2521 | N    | PRO | X | 164 | 38.007 | 60.238 | 50.999 | 0.00 | 0.00 |
| ATOM | 2522 | CD   | PRO | X | 164 | 37.280 | 60.615 | 49.804 | 0.00 | 0.00 |
| ATOM | 2523 | HD2  | PRO | X | 164 | 37.888 | 60.741 | 48.908 | 0.00 | 0.00 |
| ATOM | 2524 | HD3  | PRO | X | 164 | 36.797 | 61.545 | 50.103 | 0.00 | 0.00 |
| ATOM | 2525 | CG   | PRO | X | 164 | 36.143 | 59.658 | 49.639 | 0.00 | 0.00 |
| ATOM | 2526 | HG2  | PRO | X | 164 | 36.291 | 58.915 | 48.856 | 0.00 | 0.00 |
| ATOM | 2527 | HG3  | PRO | X | 164 | 35.238 | 60.100 | 49.221 | 0.00 | 0.00 |
| ATOM | 2528 | CB   | PRO | X | 164 | 35.965 | 59.200 | 51.028 | 0.00 | 0.00 |
| ATOM | 2529 | HB2  | PRO | X | 164 | 35.459 | 58.235 | 51.053 | 0.00 | 0.00 |
| ATOM | 2530 | HB3  | PRO | X | 164 | 35.284 | 59.948 | 51.434 | 0.00 | 0.00 |
| ATOM | 2531 | CA   | PRO | X | 164 | 37.342 | 59.259 | 51.750 | 0.00 | 0.00 |
| ATOM | 2532 | HA   | PRO | X | 164 | 37.181 | 59.696 | 52.735 | 0.00 | 0.00 |
| ATOM | 2533 | C    | PRO | X | 164 | 38.070 | 57.908 | 51.682 | 0.00 | 0.00 |
| ATOM | 2534 | O    | PRO | X | 164 | 37.833 | 57.057 | 52.551 | 0.00 | 0.00 |
| ATOM | 2535 | N    | GLY | X | 165 | 38.963 | 57.774 | 50.646 | 0.00 | 0.00 |
| ATOM | 2536 | H    | GLY | X | 165 | 39.336 | 58.604 | 50.209 | 0.00 | 0.00 |
| ATOM | 2537 | CA   | GLY | X | 165 | 39.803 | 56.519 | 50.446 | 0.00 | 0.00 |
| ATOM | 2538 | HA2  | GLY | X | 165 | 40.811 | 56.878 | 50.239 | 0.00 | 0.00 |
| ATOM | 2539 | HA3  | GLY | X | 165 | 39.720 | 55.927 | 51.358 | 0.00 | 0.00 |
| ATOM | 2540 | C    | GLY | X | 165 | 39.555 | 55.590 | 49.298 | 0.00 | 0.00 |
| ATOM | 2541 | O    | GLY | X | 165 | 40.314 | 55.521 | 48.295 | 0.00 | 0.00 |
| ATOM | 2542 | N    | ASN | X | 166 | 38.532 | 54.837 | 49.302 | 0.00 | 0.00 |
| ATOM | 2543 | H    | ASN | X | 166 | 38.009 | 54.977 | 50.154 | 0.00 | 0.00 |
| ATOM | 2544 | CA   | ASN | X | 166 | 38.173 | 53.654 | 48.533 | 0.00 | 0.00 |
| ATOM | 2545 | HA   | ASN | X | 166 | 38.944 | 52.887 | 48.601 | 0.00 | 0.00 |
| ATOM | 2546 | CB   | ASN | X | 166 | 36.974 | 53.030 | 49.275 | 0.00 | 0.00 |
| ATOM | 2547 | HB2  | ASN | X | 166 | 36.098 | 53.662 | 49.422 | 0.00 | 0.00 |
| ATOM | 2548 | HB3  | ASN | X | 166 | 36.835 | 52.082 | 48.754 | 0.00 | 0.00 |
| ATOM | 2549 | CG   | ASN | X | 166 | 37.402 | 52.584 | 50.691 | 0.00 | 0.00 |
| ATOM | 2550 | OD1  | ASN | X | 166 | 38.227 | 51.711 | 50.824 | 0.00 | 0.00 |
| ATOM | 2551 | ND2  | ASN | X | 166 | 37.023 | 53.284 | 51.719 | 0.00 | 0.00 |
| ATOM | 2552 | HD21 | ASN | X | 166 | 37.340 | 53.111 | 52.662 | 0.00 | 0.00 |
| ATOM | 2553 | HD22 | ASN | X | 166 | 36.411 | 54.065 | 51.529 | 0.00 | 0.00 |
| ATOM | 2554 | C    | ASN | X | 166 | 37.860 | 53.783 | 47.009 | 0.00 | 0.00 |
| ATOM | 2555 | O    | ASN | X | 166 | 37.237 | 52.931 | 46.420 | 0.00 | 0.00 |
| ATOM | 2556 | N    | VAL | X | 167 | 38.207 | 54.920 | 46.393 | 0.00 | 0.00 |
| ATOM | 2557 | H    | VAL | X | 167 | 38.800 | 55.578 | 46.879 | 0.00 | 0.00 |
| ATOM | 2558 | CA   | VAL | X | 167 | 37.699 | 55.401 | 45.124 | 0.00 | 0.00 |
| ATOM | 2559 | HA   | VAL | X | 167 | 36.618 | 55.355 | 45.259 | 0.00 | 0.00 |
| ATOM | 2560 | CB   | VAL | X | 167 | 37.959 | 56.907 | 44.909 | 0.00 | 0.00 |
| ATOM | 2561 | HB   | VAL | X | 167 | 37.309 | 57.340 | 44.149 | 0.00 | 0.00 |
| ATOM | 2562 | CG1  | VAL | X | 167 | 37.655 | 57.711 | 46.196 | 0.00 | 0.00 |
| ATOM | 2563 | HG11 | VAL | X | 167 | 38.241 | 57.486 | 47.087 | 0.00 | 0.00 |
| ATOM | 2564 | HG12 | VAL | X | 167 | 37.659 | 58.779 | 45.978 | 0.00 | 0.00 |
| ATOM | 2565 | HG13 | VAL | X | 167 | 36.602 | 57.538 | 46.417 | 0.00 | 0.00 |
| ATOM | 2566 | CG2  | VAL | X | 167 | 39.481 | 57.199 | 44.537 | 0.00 | 0.00 |
| ATOM | 2567 | HG21 | VAL | X | 167 | 40.100 | 56.868 | 45.371 | 0.00 | 0.00 |
| ATOM | 2568 | HG22 | VAL | X | 167 | 39.673 | 58.272 | 44.524 | 0.00 | 0.00 |
| ATOM | 2569 | HG23 | VAL | X | 167 | 39.731 | 56.824 | 43.545 | 0.00 | 0.00 |
| ATOM | 2570 | C    | VAL | X | 167 | 38.055 | 54.518 | 43.899 | 0.00 | 0.00 |
| ATOM | 2571 | O    | VAL | X | 167 | 37.392 | 54.687 | 42.838 | 0.00 | 0.00 |
| ATOM | 2572 | N    | GLY | X | 168 | 39.114 | 53.633 | 43.945 | 0.00 | 0.00 |
| ATOM | 2573 | H    | GLY | X | 168 | 39.828 | 53.620 | 44.658 | 0.00 | 0.00 |
| ATOM | 2574 | CA   | GLY | X | 168 | 39.277 | 52.672 | 42.782 | 0.00 | 0.00 |
| ATOM | 2575 | HA2  | GLY | X | 168 | 39.323 | 53.169 | 41.813 | 0.00 | 0.00 |
| ATOM | 2576 | HA3  | GLY | X | 168 | 40.259 | 52.204 | 42.849 | 0.00 | 0.00 |
| ATOM | 2577 | C    | GLY | X | 168 | 38.273 | 51.482 | 42.774 | 0.00 | 0.00 |
| ATOM | 2578 | O    | GLY | X | 168 | 38.079 | 50.880 | 41.733 | 0.00 | 0.00 |
| ATOM | 2579 | N    | LEU | X | 169 | 37.636 | 51.229 | 43.900 | 0.00 | 0.00 |
| ATOM | 2580 | H    | LEU | X | 169 | 37.791 | 51.873 | 44.663 | 0.00 | 0.00 |
| ATOM | 2581 | CA   | LEU | X | 169 | 36.544 | 50.249 | 44.044 | 0.00 | 0.00 |
| ATOM | 2582 | HA   | LEU | X | 169 | 36.724 | 49.355 | 43.447 | 0.00 | 0.00 |
| ATOM | 2583 | CB   | LEU | X | 169 | 36.329 | 49.874 | 45.497 | 0.00 | 0.00 |
| ATOM | 2584 | HB2  | LEU | X | 169 | 36.354 | 50.806 | 46.061 | 0.00 | 0.00 |

|      |      |      |     |   |     |        |        |        |      |      |
|------|------|------|-----|---|-----|--------|--------|--------|------|------|
| ATOM | 2585 | HB3  | LEU | X | 169 | 35.358 | 49.421 | 45.700 | 0.00 | 0.00 |
| ATOM | 2586 | CG   | LEU | X | 169 | 37.382 | 48.986 | 46.133 | 0.00 | 0.00 |
| ATOM | 2587 | HG   | LEU | X | 169 | 38.342 | 49.504 | 46.124 | 0.00 | 0.00 |
| ATOM | 2588 | CD1  | LEU | X | 169 | 37.062 | 48.778 | 47.612 | 0.00 | 0.00 |
| ATOM | 2589 | HD11 | LEU | X | 169 | 36.067 | 48.348 | 47.726 | 0.00 | 0.00 |
| ATOM | 2590 | HD12 | LEU | X | 169 | 37.036 | 49.743 | 48.118 | 0.00 | 0.00 |
| ATOM | 2591 | HD13 | LEU | X | 169 | 37.811 | 48.085 | 47.995 | 0.00 | 0.00 |
| ATOM | 2592 | CD2  | LEU | X | 169 | 37.526 | 47.697 | 45.379 | 0.00 | 0.00 |
| ATOM | 2593 | HD21 | LEU | X | 169 | 38.023 | 47.940 | 44.440 | 0.00 | 0.00 |
| ATOM | 2594 | HD22 | LEU | X | 169 | 38.174 | 47.004 | 45.916 | 0.00 | 0.00 |
| ATOM | 2595 | HD23 | LEU | X | 169 | 36.544 | 47.231 | 45.300 | 0.00 | 0.00 |
| ATOM | 2596 | C    | LEU | X | 169 | 35.316 | 50.919 | 43.484 | 0.00 | 0.00 |
| ATOM | 2597 | O    | LEU | X | 169 | 34.488 | 50.252 | 42.883 | 0.00 | 0.00 |
| ATOM | 2598 | N    | LEU | X | 170 | 35.130 | 52.236 | 43.535 | 0.00 | 0.00 |
| ATOM | 2599 | H    | LEU | X | 170 | 35.849 | 52.760 | 44.013 | 0.00 | 0.00 |
| ATOM | 2600 | CA   | LEU | X | 170 | 34.062 | 52.961 | 42.916 | 0.00 | 0.00 |
| ATOM | 2601 | HA   | LEU | X | 170 | 33.192 | 52.304 | 42.916 | 0.00 | 0.00 |
| ATOM | 2602 | CB   | LEU | X | 170 | 33.867 | 54.280 | 43.714 | 0.00 | 0.00 |
| ATOM | 2603 | HB2  | LEU | X | 170 | 34.749 | 54.898 | 43.548 | 0.00 | 0.00 |
| ATOM | 2604 | HB3  | LEU | X | 170 | 32.968 | 54.840 | 43.457 | 0.00 | 0.00 |
| ATOM | 2605 | CG   | LEU | X | 170 | 33.871 | 53.980 | 45.232 | 0.00 | 0.00 |
| ATOM | 2606 | HG   | LEU | X | 170 | 34.885 | 53.688 | 45.504 | 0.00 | 0.00 |
| ATOM | 2607 | CD1  | LEU | X | 170 | 33.570 | 55.252 | 46.048 | 0.00 | 0.00 |
| ATOM | 2608 | HD11 | LEU | X | 170 | 33.681 | 55.068 | 47.117 | 0.00 | 0.00 |
| ATOM | 2609 | HD12 | LEU | X | 170 | 32.564 | 55.611 | 45.831 | 0.00 | 0.00 |
| ATOM | 2610 | HD13 | LEU | X | 170 | 34.165 | 56.098 | 45.701 | 0.00 | 0.00 |
| ATOM | 2611 | CD2  | LEU | X | 170 | 32.953 | 52.842 | 45.663 | 0.00 | 0.00 |
| ATOM | 2612 | HD21 | LEU | X | 170 | 31.888 | 53.031 | 45.535 | 0.00 | 0.00 |
| ATOM | 2613 | HD22 | LEU | X | 170 | 33.306 | 51.862 | 45.342 | 0.00 | 0.00 |
| ATOM | 2614 | HD23 | LEU | X | 170 | 32.960 | 52.815 | 46.753 | 0.00 | 0.00 |
| ATOM | 2615 | C    | LEU | X | 170 | 34.360 | 53.216 | 41.485 | 0.00 | 0.00 |
| ATOM | 2616 | O    | LEU | X | 170 | 33.390 | 53.234 | 40.724 | 0.00 | 0.00 |
| ATOM | 2617 | N    | ASP | X | 171 | 35.596 | 53.367 | 40.991 | 0.00 | 0.00 |
| ATOM | 2618 | H    | ASP | X | 171 | 36.326 | 53.577 | 41.657 | 0.00 | 0.00 |
| ATOM | 2619 | CA   | ASP | X | 171 | 35.958 | 53.371 | 39.507 | 0.00 | 0.00 |
| ATOM | 2620 | HA   | ASP | X | 171 | 35.293 | 54.066 | 38.993 | 0.00 | 0.00 |
| ATOM | 2621 | CB   | ASP | X | 171 | 37.423 | 53.535 | 39.303 | 0.00 | 0.00 |
| ATOM | 2622 | HB2  | ASP | X | 171 | 37.889 | 52.784 | 39.941 | 0.00 | 0.00 |
| ATOM | 2623 | HB3  | ASP | X | 171 | 37.574 | 53.460 | 38.226 | 0.00 | 0.00 |
| ATOM | 2624 | CG   | ASP | X | 171 | 38.058 | 54.885 | 39.601 | 0.00 | 0.00 |
| ATOM | 2625 | OD1  | ASP | X | 171 | 37.405 | 55.956 | 39.571 | 0.00 | 0.00 |
| ATOM | 2626 | OD2  | ASP | X | 171 | 39.255 | 54.835 | 39.808 | 0.00 | 0.00 |
| ATOM | 2627 | C    | ASP | X | 171 | 35.513 | 52.009 | 38.901 | 0.00 | 0.00 |
| ATOM | 2628 | O    | ASP | X | 171 | 34.914 | 51.965 | 37.850 | 0.00 | 0.00 |
| ATOM | 2629 | N    | GLN | X | 172 | 35.666 | 50.901 | 39.660 | 0.00 | 0.00 |
| ATOM | 2630 | H    | GLN | X | 172 | 36.211 | 50.989 | 40.506 | 0.00 | 0.00 |
| ATOM | 2631 | CA   | GLN | X | 172 | 35.090 | 49.636 | 39.170 | 0.00 | 0.00 |
| ATOM | 2632 | HA   | GLN | X | 172 | 35.428 | 49.424 | 38.155 | 0.00 | 0.00 |
| ATOM | 2633 | CB   | GLN | X | 172 | 35.663 | 48.494 | 40.050 | 0.00 | 0.00 |
| ATOM | 2634 | HB2  | GLN | X | 172 | 35.380 | 48.642 | 41.092 | 0.00 | 0.00 |
| ATOM | 2635 | HB3  | GLN | X | 172 | 35.106 | 47.624 | 39.703 | 0.00 | 0.00 |
| ATOM | 2636 | CG   | GLN | X | 172 | 37.148 | 48.144 | 39.914 | 0.00 | 0.00 |
| ATOM | 2637 | HG2  | GLN | X | 172 | 37.385 | 47.689 | 38.952 | 0.00 | 0.00 |
| ATOM | 2638 | HG3  | GLN | X | 172 | 37.645 | 49.111 | 39.992 | 0.00 | 0.00 |
| ATOM | 2639 | CD   | GLN | X | 172 | 37.666 | 47.325 | 41.122 | 0.00 | 0.00 |
| ATOM | 2640 | OE1  | GLN | X | 172 | 36.903 | 46.571 | 41.760 | 0.00 | 0.00 |
| ATOM | 2641 | NE2  | GLN | X | 172 | 38.872 | 47.576 | 41.473 | 0.00 | 0.00 |
| ATOM | 2642 | HE21 | GLN | X | 172 | 39.350 | 46.941 | 42.096 | 0.00 | 0.00 |
| ATOM | 2643 | HE22 | GLN | X | 172 | 39.328 | 48.243 | 40.868 | 0.00 | 0.00 |
| ATOM | 2644 | C    | GLN | X | 172 | 33.540 | 49.764 | 39.158 | 0.00 | 0.00 |
| ATOM | 2645 | O    | GLN | X | 172 | 32.902 | 49.474 | 38.139 | 0.00 | 0.00 |
| ATOM | 2646 | N    | ARG | X | 173 | 32.970 | 50.075 | 40.334 | 0.00 | 0.00 |
| ATOM | 2647 | H    | ARG | X | 173 | 33.628 | 50.158 | 41.095 | 0.00 | 0.00 |
| ATOM | 2648 | CA   | ARG | X | 173 | 31.479 | 50.071 | 40.475 | 0.00 | 0.00 |
| ATOM | 2649 | HA   | ARG | X | 173 | 31.172 | 49.041 | 40.293 | 0.00 | 0.00 |
| ATOM | 2650 | CB   | ARG | X | 173 | 31.110 | 50.450 | 41.965 | 0.00 | 0.00 |
| ATOM | 2651 | HB2  | ARG | X | 173 | 31.677 | 49.960 | 42.756 | 0.00 | 0.00 |

|      |      |      |     |   |     |        |        |        |      |      |
|------|------|------|-----|---|-----|--------|--------|--------|------|------|
| ATOM | 2652 | HB3  | ARG | X | 173 | 31.365 | 51.506 | 42.062 | 0.00 | 0.00 |
| ATOM | 2653 | CG   | ARG | X | 173 | 29.609 | 50.317 | 42.222 | 0.00 | 0.00 |
| ATOM | 2654 | HG2  | ARG | X | 173 | 29.029 | 50.890 | 41.499 | 0.00 | 0.00 |
| ATOM | 2655 | HG3  | ARG | X | 173 | 29.346 | 49.268 | 42.086 | 0.00 | 0.00 |
| ATOM | 2656 | CD   | ARG | X | 173 | 29.222 | 50.882 | 43.596 | 0.00 | 0.00 |
| ATOM | 2657 | HD2  | ARG | X | 173 | 29.866 | 51.697 | 43.925 | 0.00 | 0.00 |
| ATOM | 2658 | HD3  | ARG | X | 173 | 28.203 | 51.269 | 43.578 | 0.00 | 0.00 |
| ATOM | 2659 | NE   | ARG | X | 173 | 29.344 | 49.799 | 44.603 | 0.00 | 0.00 |
| ATOM | 2660 | HE   | ARG | X | 173 | 29.305 | 48.854 | 44.250 | 0.00 | 0.00 |
| ATOM | 2661 | CZ   | ARG | X | 173 | 29.430 | 49.959 | 45.893 | 0.00 | 0.00 |
| ATOM | 2662 | NH1  | ARG | X | 173 | 29.484 | 51.112 | 46.510 | 0.00 | 0.00 |
| ATOM | 2663 | HH11 | ARG | X | 173 | 29.543 | 51.946 | 45.944 | 0.00 | 0.00 |
| ATOM | 2664 | HH12 | ARG | X | 173 | 29.451 | 51.256 | 47.510 | 0.00 | 0.00 |
| ATOM | 2665 | NH2  | ARG | X | 173 | 29.512 | 48.895 | 46.682 | 0.00 | 0.00 |
| ATOM | 2666 | HH21 | ARG | X | 173 | 29.633 | 47.996 | 46.237 | 0.00 | 0.00 |
| ATOM | 2667 | HH22 | ARG | X | 173 | 29.677 | 48.993 | 47.673 | 0.00 | 0.00 |
| ATOM | 2668 | C    | ARG | X | 173 | 30.807 | 50.971 | 39.389 | 0.00 | 0.00 |
| ATOM | 2669 | O    | ARG | X | 173 | 29.671 | 50.589 | 38.982 | 0.00 | 0.00 |
| ATOM | 2670 | N    | LEU | X | 174 | 31.469 | 51.937 | 38.818 | 0.00 | 0.00 |
| ATOM | 2671 | H    | LEU | X | 174 | 32.389 | 52.123 | 39.190 | 0.00 | 0.00 |
| ATOM | 2672 | CA   | LEU | X | 174 | 30.914 | 52.838 | 37.789 | 0.00 | 0.00 |
| ATOM | 2673 | HA   | LEU | X | 174 | 29.893 | 53.037 | 38.114 | 0.00 | 0.00 |
| ATOM | 2674 | CB   | LEU | X | 174 | 31.680 | 54.222 | 37.858 | 0.00 | 0.00 |
| ATOM | 2675 | HB2  | LEU | X | 174 | 31.568 | 54.651 | 38.854 | 0.00 | 0.00 |
| ATOM | 2676 | HB3  | LEU | X | 174 | 32.665 | 53.866 | 37.558 | 0.00 | 0.00 |
| ATOM | 2677 | CG   | LEU | X | 174 | 31.255 | 55.239 | 36.795 | 0.00 | 0.00 |
| ATOM | 2678 | HG   | LEU | X | 174 | 31.304 | 54.706 | 35.846 | 0.00 | 0.00 |
| ATOM | 2679 | CD1  | LEU | X | 174 | 29.862 | 55.723 | 36.797 | 0.00 | 0.00 |
| ATOM | 2680 | HD11 | LEU | X | 174 | 29.178 | 54.919 | 37.069 | 0.00 | 0.00 |
| ATOM | 2681 | HD12 | LEU | X | 174 | 29.613 | 56.047 | 35.787 | 0.00 | 0.00 |
| ATOM | 2682 | HD13 | LEU | X | 174 | 29.812 | 56.537 | 37.521 | 0.00 | 0.00 |
| ATOM | 2683 | CD2  | LEU | X | 174 | 32.277 | 56.374 | 36.593 | 0.00 | 0.00 |
| ATOM | 2684 | HD21 | LEU | X | 174 | 32.027 | 57.001 | 35.738 | 0.00 | 0.00 |
| ATOM | 2685 | HD22 | LEU | X | 174 | 32.275 | 56.899 | 37.548 | 0.00 | 0.00 |
| ATOM | 2686 | HD23 | LEU | X | 174 | 33.272 | 55.932 | 36.535 | 0.00 | 0.00 |
| ATOM | 2687 | C    | LEU | X | 174 | 30.821 | 52.158 | 36.461 | 0.00 | 0.00 |
| ATOM | 2688 | O    | LEU | X | 174 | 29.845 | 52.204 | 35.636 | 0.00 | 0.00 |
| ATOM | 2689 | N    | ALA | X | 175 | 31.837 | 51.338 | 36.156 | 0.00 | 0.00 |
| ATOM | 2690 | H    | ALA | X | 175 | 32.648 | 51.320 | 36.757 | 0.00 | 0.00 |
| ATOM | 2691 | CA   | ALA | X | 175 | 31.829 | 50.449 | 34.979 | 0.00 | 0.00 |
| ATOM | 2692 | HA   | ALA | X | 175 | 31.546 | 51.063 | 34.124 | 0.00 | 0.00 |
| ATOM | 2693 | CB   | ALA | X | 175 | 33.270 | 49.910 | 34.862 | 0.00 | 0.00 |
| ATOM | 2694 | HB1  | ALA | X | 175 | 33.953 | 50.716 | 34.594 | 0.00 | 0.00 |
| ATOM | 2695 | HB2  | ALA | X | 175 | 33.332 | 49.136 | 34.097 | 0.00 | 0.00 |
| ATOM | 2696 | HB3  | ALA | X | 175 | 33.541 | 49.528 | 35.846 | 0.00 | 0.00 |
| ATOM | 2697 | C    | ALA | X | 175 | 30.882 | 49.291 | 35.092 | 0.00 | 0.00 |
| ATOM | 2698 | O    | ALA | X | 175 | 30.177 | 49.013 | 34.091 | 0.00 | 0.00 |
| ATOM | 2699 | N    | LEU | X | 176 | 30.728 | 48.656 | 36.278 | 0.00 | 0.00 |
| ATOM | 2700 | H    | LEU | X | 176 | 31.391 | 48.846 | 37.016 | 0.00 | 0.00 |
| ATOM | 2701 | CA   | LEU | X | 176 | 29.669 | 47.574 | 36.448 | 0.00 | 0.00 |
| ATOM | 2702 | HA   | LEU | X | 176 | 29.828 | 46.772 | 35.727 | 0.00 | 0.00 |
| ATOM | 2703 | CB   | LEU | X | 176 | 29.812 | 46.983 | 37.878 | 0.00 | 0.00 |
| ATOM | 2704 | HB2  | LEU | X | 176 | 29.485 | 47.771 | 38.557 | 0.00 | 0.00 |
| ATOM | 2705 | HB3  | LEU | X | 176 | 29.177 | 46.098 | 37.860 | 0.00 | 0.00 |
| ATOM | 2706 | CG   | LEU | X | 176 | 31.240 | 46.469 | 38.362 | 0.00 | 0.00 |
| ATOM | 2707 | HG   | LEU | X | 176 | 31.916 | 47.248 | 38.715 | 0.00 | 0.00 |
| ATOM | 2708 | CD1  | LEU | X | 176 | 31.107 | 45.505 | 39.577 | 0.00 | 0.00 |
| ATOM | 2709 | HD11 | LEU | X | 176 | 30.668 | 45.980 | 40.454 | 0.00 | 0.00 |
| ATOM | 2710 | HD12 | LEU | X | 176 | 32.062 | 45.045 | 39.829 | 0.00 | 0.00 |
| ATOM | 2711 | HD13 | LEU | X | 176 | 30.461 | 44.674 | 39.294 | 0.00 | 0.00 |
| ATOM | 2712 | CD2  | LEU | X | 176 | 31.957 | 45.716 | 37.180 | 0.00 | 0.00 |
| ATOM | 2713 | HD21 | LEU | X | 176 | 32.936 | 45.347 | 37.486 | 0.00 | 0.00 |
| ATOM | 2714 | HD22 | LEU | X | 176 | 31.376 | 44.848 | 36.869 | 0.00 | 0.00 |
| ATOM | 2715 | HD23 | LEU | X | 176 | 32.107 | 46.353 | 36.309 | 0.00 | 0.00 |
| ATOM | 2716 | C    | LEU | X | 176 | 28.211 | 48.063 | 36.283 | 0.00 | 0.00 |
| ATOM | 2717 | O    | LEU | X | 176 | 27.301 | 47.326 | 35.890 | 0.00 | 0.00 |
| ATOM | 2718 | N    | GLN | X | 177 | 27.974 | 49.337 | 36.498 | 0.00 | 0.00 |

|      |      |      |     |   |     |        |        |        |      |      |
|------|------|------|-----|---|-----|--------|--------|--------|------|------|
| ATOM | 2719 | H    | GLN | X | 177 | 28.586 | 49.936 | 37.034 | 0.00 | 0.00 |
| ATOM | 2720 | CA   | GLN | X | 177 | 26.709 | 49.958 | 36.078 | 0.00 | 0.00 |
| ATOM | 2721 | HA   | GLN | X | 177 | 25.936 | 49.209 | 36.253 | 0.00 | 0.00 |
| ATOM | 2722 | CB   | GLN | X | 177 | 26.511 | 51.293 | 36.726 | 0.00 | 0.00 |
| ATOM | 2723 | HB2  | GLN | X | 177 | 27.348 | 51.886 | 36.356 | 0.00 | 0.00 |
| ATOM | 2724 | HB3  | GLN | X | 177 | 25.678 | 51.799 | 36.239 | 0.00 | 0.00 |
| ATOM | 2725 | CG   | GLN | X | 177 | 26.345 | 51.406 | 38.268 | 0.00 | 0.00 |
| ATOM | 2726 | HG2  | GLN | X | 177 | 25.419 | 50.925 | 38.586 | 0.00 | 0.00 |
| ATOM | 2727 | HG3  | GLN | X | 177 | 27.207 | 50.942 | 38.746 | 0.00 | 0.00 |
| ATOM | 2728 | CD   | GLN | X | 177 | 26.362 | 52.881 | 38.652 | 0.00 | 0.00 |
| ATOM | 2729 | OE1  | GLN | X | 177 | 27.284 | 53.660 | 38.424 | 0.00 | 0.00 |
| ATOM | 2730 | NE2  | GLN | X | 177 | 25.360 | 53.370 | 39.314 | 0.00 | 0.00 |
| ATOM | 2731 | HE21 | GLN | X | 177 | 25.484 | 54.252 | 39.791 | 0.00 | 0.00 |
| ATOM | 2732 | HE22 | GLN | X | 177 | 24.589 | 52.812 | 39.652 | 0.00 | 0.00 |
| ATOM | 2733 | C    | GLN | X | 177 | 26.579 | 49.973 | 34.486 | 0.00 | 0.00 |
| ATOM | 2734 | O    | GLN | X | 177 | 25.503 | 49.562 | 33.974 | 0.00 | 0.00 |
| ATOM | 2735 | N    | TRP | X | 178 | 27.590 | 50.477 | 33.763 | 0.00 | 0.00 |
| ATOM | 2736 | H    | TRP | X | 178 | 28.412 | 50.764 | 34.276 | 0.00 | 0.00 |
| ATOM | 2737 | CA   | TRP | X | 178 | 27.658 | 50.544 | 32.311 | 0.00 | 0.00 |
| ATOM | 2738 | HA   | TRP | X | 178 | 26.942 | 51.288 | 31.959 | 0.00 | 0.00 |
| ATOM | 2739 | CB   | TRP | X | 178 | 29.055 | 51.080 | 31.886 | 0.00 | 0.00 |
| ATOM | 2740 | HB2  | TRP | X | 178 | 29.134 | 52.036 | 32.403 | 0.00 | 0.00 |
| ATOM | 2741 | HB3  | TRP | X | 178 | 29.886 | 50.414 | 32.119 | 0.00 | 0.00 |
| ATOM | 2742 | CG   | TRP | X | 178 | 29.271 | 51.389 | 30.478 | 0.00 | 0.00 |
| ATOM | 2743 | CD1  | TRP | X | 178 | 29.405 | 52.641 | 30.070 | 0.00 | 0.00 |
| ATOM | 2744 | HD1  | TRP | X | 178 | 29.315 | 53.464 | 30.764 | 0.00 | 0.00 |
| ATOM | 2745 | NE1  | TRP | X | 178 | 29.591 | 52.642 | 28.685 | 0.00 | 0.00 |
| ATOM | 2746 | HE1  | TRP | X | 178 | 29.770 | 53.510 | 28.201 | 0.00 | 0.00 |
| ATOM | 2747 | CE2  | TRP | X | 178 | 29.792 | 51.322 | 28.205 | 0.00 | 0.00 |
| ATOM | 2748 | CZ2  | TRP | X | 178 | 30.224 | 50.787 | 26.972 | 0.00 | 0.00 |
| ATOM | 2749 | HZ2  | TRP | X | 178 | 30.338 | 51.310 | 26.034 | 0.00 | 0.00 |
| ATOM | 2750 | CH2  | TRP | X | 178 | 30.412 | 49.380 | 26.838 | 0.00 | 0.00 |
| ATOM | 2751 | HH2  | TRP | X | 178 | 30.586 | 48.956 | 25.860 | 0.00 | 0.00 |
| ATOM | 2752 | CZ3  | TRP | X | 178 | 30.145 | 48.508 | 27.842 | 0.00 | 0.00 |
| ATOM | 2753 | HZ3  | TRP | X | 178 | 30.369 | 47.458 | 27.724 | 0.00 | 0.00 |
| ATOM | 2754 | CE3  | TRP | X | 178 | 29.849 | 49.082 | 29.149 | 0.00 | 0.00 |
| ATOM | 2755 | HE3  | TRP | X | 178 | 29.813 | 48.445 | 30.021 | 0.00 | 0.00 |
| ATOM | 2756 | CD2  | TRP | X | 178 | 29.645 | 50.490 | 29.366 | 0.00 | 0.00 |
| ATOM | 2757 | C    | TRP | X | 178 | 27.455 | 49.136 | 31.706 | 0.00 | 0.00 |
| ATOM | 2758 | O    | TRP | X | 178 | 26.772 | 48.899 | 30.754 | 0.00 | 0.00 |
| ATOM | 2759 | N    | VAL | X | 179 | 28.088 | 48.098 | 32.273 | 0.00 | 0.00 |
| ATOM | 2760 | H    | VAL | X | 179 | 28.759 | 48.267 | 33.009 | 0.00 | 0.00 |
| ATOM | 2761 | CA   | VAL | X | 179 | 27.847 | 46.669 | 31.938 | 0.00 | 0.00 |
| ATOM | 2762 | HA   | VAL | X | 179 | 28.334 | 46.590 | 30.966 | 0.00 | 0.00 |
| ATOM | 2763 | CB   | VAL | X | 179 | 28.613 | 45.663 | 32.873 | 0.00 | 0.00 |
| ATOM | 2764 | HB   | VAL | X | 179 | 28.361 | 45.913 | 33.903 | 0.00 | 0.00 |
| ATOM | 2765 | CG1  | VAL | X | 179 | 28.212 | 44.195 | 32.800 | 0.00 | 0.00 |
| ATOM | 2766 | HG11 | VAL | X | 179 | 27.152 | 44.065 | 33.021 | 0.00 | 0.00 |
| ATOM | 2767 | HG12 | VAL | X | 179 | 28.494 | 43.746 | 31.848 | 0.00 | 0.00 |
| ATOM | 2768 | HG13 | VAL | X | 179 | 28.725 | 43.660 | 33.600 | 0.00 | 0.00 |
| ATOM | 2769 | CG2  | VAL | X | 179 | 30.073 | 45.797 | 32.709 | 0.00 | 0.00 |
| ATOM | 2770 | HG21 | VAL | X | 179 | 30.421 | 45.514 | 31.716 | 0.00 | 0.00 |
| ATOM | 2771 | HG22 | VAL | X | 179 | 30.565 | 45.138 | 33.424 | 0.00 | 0.00 |
| ATOM | 2772 | HG23 | VAL | X | 179 | 30.336 | 46.847 | 32.833 | 0.00 | 0.00 |
| ATOM | 2773 | C    | VAL | X | 179 | 26.349 | 46.333 | 31.734 | 0.00 | 0.00 |
| ATOM | 2774 | O    | VAL | X | 179 | 25.907 | 45.857 | 30.662 | 0.00 | 0.00 |
| ATOM | 2775 | N    | GLN | X | 180 | 25.576 | 46.578 | 32.814 | 0.00 | 0.00 |
| ATOM | 2776 | H    | GLN | X | 180 | 26.061 | 46.800 | 33.672 | 0.00 | 0.00 |
| ATOM | 2777 | CA   | GLN | X | 180 | 24.169 | 46.180 | 32.992 | 0.00 | 0.00 |
| ATOM | 2778 | HA   | GLN | X | 180 | 24.105 | 45.101 | 32.852 | 0.00 | 0.00 |
| ATOM | 2779 | CB   | GLN | X | 180 | 23.749 | 46.531 | 34.419 | 0.00 | 0.00 |
| ATOM | 2780 | HB2  | GLN | X | 180 | 24.372 | 45.799 | 34.933 | 0.00 | 0.00 |
| ATOM | 2781 | HB3  | GLN | X | 180 | 24.130 | 47.535 | 34.602 | 0.00 | 0.00 |
| ATOM | 2782 | CG   | GLN | X | 180 | 22.242 | 46.469 | 34.748 | 0.00 | 0.00 |
| ATOM | 2783 | HG2  | GLN | X | 180 | 21.711 | 47.388 | 34.497 | 0.00 | 0.00 |
| ATOM | 2784 | HG3  | GLN | X | 180 | 21.761 | 45.698 | 34.146 | 0.00 | 0.00 |
| ATOM | 2785 | CD   | GLN | X | 180 | 22.057 | 46.105 | 36.231 | 0.00 | 0.00 |

|      |      |      |     |   |     |        |        |        |      |      |
|------|------|------|-----|---|-----|--------|--------|--------|------|------|
| ATOM | 2786 | OE1  | GLN | X | 180 | 21.524 | 46.906 | 37.014 | 0.00 | 0.00 |
| ATOM | 2787 | NE2  | GLN | X | 180 | 22.381 | 44.934 | 36.674 | 0.00 | 0.00 |
| ATOM | 2788 | HE21 | GLN | X | 180 | 22.252 | 44.588 | 37.614 | 0.00 | 0.00 |
| ATOM | 2789 | HE22 | GLN | X | 180 | 22.919 | 44.427 | 35.986 | 0.00 | 0.00 |
| ATOM | 2790 | C    | GLN | X | 180 | 23.308 | 46.972 | 31.987 | 0.00 | 0.00 |
| ATOM | 2791 | O    | GLN | X | 180 | 22.476 | 46.460 | 31.327 | 0.00 | 0.00 |
| ATOM | 2792 | N    | GLU | X | 181 | 23.745 | 48.177 | 31.634 | 0.00 | 0.00 |
| ATOM | 2793 | H    | GLU | X | 181 | 24.543 | 48.458 | 32.186 | 0.00 | 0.00 |
| ATOM | 2794 | CA   | GLU | X | 181 | 23.067 | 49.222 | 30.800 | 0.00 | 0.00 |
| ATOM | 2795 | HA   | GLU | X | 181 | 21.988 | 49.147 | 30.938 | 0.00 | 0.00 |
| ATOM | 2796 | CB   | GLU | X | 181 | 23.527 | 50.651 | 31.288 | 0.00 | 0.00 |
| ATOM | 2797 | HB2  | GLU | X | 181 | 23.319 | 50.669 | 32.358 | 0.00 | 0.00 |
| ATOM | 2798 | HB3  | GLU | X | 181 | 24.576 | 50.787 | 31.028 | 0.00 | 0.00 |
| ATOM | 2799 | CG   | GLU | X | 181 | 22.661 | 51.689 | 30.635 | 0.00 | 0.00 |
| ATOM | 2800 | HG2  | GLU | X | 181 | 22.867 | 51.560 | 29.572 | 0.00 | 0.00 |
| ATOM | 2801 | HG3  | GLU | X | 181 | 21.611 | 51.482 | 30.841 | 0.00 | 0.00 |
| ATOM | 2802 | CD   | GLU | X | 181 | 23.163 | 53.079 | 31.047 | 0.00 | 0.00 |
| ATOM | 2803 | OE1  | GLU | X | 181 | 22.489 | 53.789 | 31.817 | 0.00 | 0.00 |
| ATOM | 2804 | OE2  | GLU | X | 181 | 24.193 | 53.632 | 30.590 | 0.00 | 0.00 |
| ATOM | 2805 | C    | GLU | X | 181 | 23.416 | 49.005 | 29.321 | 0.00 | 0.00 |
| ATOM | 2806 | O    | GLU | X | 181 | 22.568 | 49.204 | 28.446 | 0.00 | 0.00 |
| ATOM | 2807 | N    | ASN | X | 182 | 24.654 | 48.553 | 28.938 | 0.00 | 0.00 |
| ATOM | 2808 | H    | ASN | X | 182 | 25.318 | 48.261 | 29.641 | 0.00 | 0.00 |
| ATOM | 2809 | CA   | ASN | X | 182 | 25.221 | 48.713 | 27.540 | 0.00 | 0.00 |
| ATOM | 2810 | HA   | ASN | X | 182 | 24.464 | 49.032 | 26.822 | 0.00 | 0.00 |
| ATOM | 2811 | CB   | ASN | X | 182 | 26.338 | 49.721 | 27.516 | 0.00 | 0.00 |
| ATOM | 2812 | HB2  | ASN | X | 182 | 27.101 | 49.368 | 28.211 | 0.00 | 0.00 |
| ATOM | 2813 | HB3  | ASN | X | 182 | 26.674 | 49.751 | 26.479 | 0.00 | 0.00 |
| ATOM | 2814 | CG   | ASN | X | 182 | 25.889 | 51.115 | 27.933 | 0.00 | 0.00 |
| ATOM | 2815 | OD1  | ASN | X | 182 | 25.213 | 51.803 | 27.168 | 0.00 | 0.00 |
| ATOM | 2816 | ND2  | ASN | X | 182 | 26.154 | 51.677 | 29.117 | 0.00 | 0.00 |
| ATOM | 2817 | HD21 | ASN | X | 182 | 25.795 | 52.618 | 29.204 | 0.00 | 0.00 |
| ATOM | 2818 | HD22 | ASN | X | 182 | 26.646 | 51.231 | 29.877 | 0.00 | 0.00 |
| ATOM | 2819 | C    | ASN | X | 182 | 25.822 | 47.434 | 26.978 | 0.00 | 0.00 |
| ATOM | 2820 | O    | ASN | X | 182 | 25.955 | 47.384 | 25.731 | 0.00 | 0.00 |
| ATOM | 2821 | N    | VAL | X | 183 | 26.126 | 46.388 | 27.778 | 0.00 | 0.00 |
| ATOM | 2822 | H    | VAL | X | 183 | 25.852 | 46.314 | 28.748 | 0.00 | 0.00 |
| ATOM | 2823 | CA   | VAL | X | 183 | 26.712 | 45.149 | 27.162 | 0.00 | 0.00 |
| ATOM | 2824 | HA   | VAL | X | 183 | 27.565 | 45.533 | 26.602 | 0.00 | 0.00 |
| ATOM | 2825 | CB   | VAL | X | 183 | 27.214 | 44.091 | 28.133 | 0.00 | 0.00 |
| ATOM | 2826 | HB   | VAL | X | 183 | 27.623 | 44.668 | 28.962 | 0.00 | 0.00 |
| ATOM | 2827 | CG1  | VAL | X | 183 | 26.192 | 43.081 | 28.716 | 0.00 | 0.00 |
| ATOM | 2828 | HG11 | VAL | X | 183 | 25.319 | 43.613 | 29.093 | 0.00 | 0.00 |
| ATOM | 2829 | HG12 | VAL | X | 183 | 25.954 | 42.299 | 27.994 | 0.00 | 0.00 |
| ATOM | 2830 | HG13 | VAL | X | 183 | 26.747 | 42.631 | 29.539 | 0.00 | 0.00 |
| ATOM | 2831 | CG2  | VAL | X | 183 | 28.406 | 43.268 | 27.629 | 0.00 | 0.00 |
| ATOM | 2832 | HG21 | VAL | X | 183 | 28.378 | 43.028 | 26.566 | 0.00 | 0.00 |
| ATOM | 2833 | HG22 | VAL | X | 183 | 28.449 | 42.264 | 28.053 | 0.00 | 0.00 |
| ATOM | 2834 | HG23 | VAL | X | 183 | 29.298 | 43.866 | 27.814 | 0.00 | 0.00 |
| ATOM | 2835 | C    | VAL | X | 183 | 25.845 | 44.411 | 26.135 | 0.00 | 0.00 |
| ATOM | 2836 | O    | VAL | X | 183 | 26.456 | 43.895 | 25.198 | 0.00 | 0.00 |
| ATOM | 2837 | N    | ALA | X | 184 | 24.527 | 44.378 | 26.285 | 0.00 | 0.00 |
| ATOM | 2838 | H    | ALA | X | 184 | 24.238 | 44.922 | 27.085 | 0.00 | 0.00 |
| ATOM | 2839 | CA   | ALA | X | 184 | 23.660 | 43.871 | 25.246 | 0.00 | 0.00 |
| ATOM | 2840 | HA   | ALA | X | 184 | 23.950 | 42.849 | 25.003 | 0.00 | 0.00 |
| ATOM | 2841 | CB   | ALA | X | 184 | 22.221 | 43.770 | 25.810 | 0.00 | 0.00 |
| ATOM | 2842 | HB1  | ALA | X | 184 | 22.220 | 43.349 | 26.815 | 0.00 | 0.00 |
| ATOM | 2843 | HB2  | ALA | X | 184 | 21.693 | 43.042 | 25.194 | 0.00 | 0.00 |
| ATOM | 2844 | HB3  | ALA | X | 184 | 21.689 | 44.713 | 25.679 | 0.00 | 0.00 |
| ATOM | 2845 | C    | ALA | X | 184 | 23.767 | 44.562 | 23.804 | 0.00 | 0.00 |
| ATOM | 2846 | O    | ALA | X | 184 | 23.368 | 43.955 | 22.836 | 0.00 | 0.00 |
| ATOM | 2847 | N    | ALA | X | 185 | 24.502 | 45.660 | 23.736 | 0.00 | 0.00 |
| ATOM | 2848 | H    | ALA | X | 185 | 24.962 | 45.985 | 24.574 | 0.00 | 0.00 |
| ATOM | 2849 | CA   | ALA | X | 185 | 24.747 | 46.231 | 22.487 | 0.00 | 0.00 |
| ATOM | 2850 | HA   | ALA | X | 185 | 23.853 | 46.230 | 21.863 | 0.00 | 0.00 |
| ATOM | 2851 | CB   | ALA | X | 185 | 25.213 | 47.697 | 22.751 | 0.00 | 0.00 |
| ATOM | 2852 | HB1  | ALA | X | 185 | 25.247 | 48.284 | 21.834 | 0.00 | 0.00 |



|      |      |     |     |   |     |        |        |        |      |      |
|------|------|-----|-----|---|-----|--------|--------|--------|------|------|
| ATOM | 2853 | HB2 | ALA | X | 185 | 26.184 | 47.741 | 23.245 | 0.00 | 0.00 |
| ATOM | 2854 | HB3 | ALA | X | 185 | 24.496 | 48.242 | 23.365 | 0.00 | 0.00 |
| ATOM | 2855 | C   | ALA | X | 185 | 25.920 | 45.563 | 21.728 | 0.00 | 0.00 |
| ATOM | 2856 | O   | ALA | X | 185 | 25.884 | 45.428 | 20.488 | 0.00 | 0.00 |
| ATOM | 2857 | N   | PHE | X | 186 | 26.958 | 45.028 | 22.477 | 0.00 | 0.00 |
| ATOM | 2858 | H   | PHE | X | 186 | 26.998 | 45.096 | 23.484 | 0.00 | 0.00 |
| ATOM | 2859 | CA  | PHE | X | 186 | 28.081 | 44.336 | 21.911 | 0.00 | 0.00 |
| ATOM | 2860 | HA  | PHE | X | 186 | 28.158 | 44.623 | 20.863 | 0.00 | 0.00 |
| ATOM | 2861 | CB  | PHE | X | 186 | 29.437 | 44.677 | 22.562 | 0.00 | 0.00 |
| ATOM | 2862 | HB2 | PHE | X | 186 | 29.516 | 44.166 | 23.522 | 0.00 | 0.00 |
| ATOM | 2863 | HB3 | PHE | X | 186 | 30.188 | 44.329 | 21.852 | 0.00 | 0.00 |
| ATOM | 2864 | CG  | PHE | X | 186 | 29.770 | 46.147 | 22.957 | 0.00 | 0.00 |
| ATOM | 2865 | CD1 | PHE | X | 186 | 28.952 | 46.780 | 23.936 | 0.00 | 0.00 |
| ATOM | 2866 | HD1 | PHE | X | 186 | 28.207 | 46.175 | 24.430 | 0.00 | 0.00 |
| ATOM | 2867 | CE1 | PHE | X | 186 | 29.013 | 48.159 | 24.134 | 0.00 | 0.00 |
| ATOM | 2868 | HE1 | PHE | X | 186 | 28.405 | 48.665 | 24.869 | 0.00 | 0.00 |
| ATOM | 2869 | CZ  | PHE | X | 186 | 29.961 | 48.860 | 23.525 | 0.00 | 0.00 |
| ATOM | 2870 | HZ  | PHE | X | 186 | 30.047 | 49.933 | 23.612 | 0.00 | 0.00 |
| ATOM | 2871 | CE2 | PHE | X | 186 | 30.883 | 48.343 | 22.631 | 0.00 | 0.00 |
| ATOM | 2872 | HE2 | PHE | X | 186 | 31.653 | 48.986 | 22.231 | 0.00 | 0.00 |
| ATOM | 2873 | CD2 | PHE | X | 186 | 30.879 | 46.873 | 22.442 | 0.00 | 0.00 |
| ATOM | 2874 | HD2 | PHE | X | 186 | 31.542 | 46.386 | 21.743 | 0.00 | 0.00 |
| ATOM | 2875 | C   | PHE | X | 186 | 27.821 | 42.858 | 21.757 | 0.00 | 0.00 |
| ATOM | 2876 | O   | PHE | X | 186 | 28.553 | 42.191 | 21.033 | 0.00 | 0.00 |
| ATOM | 2877 | N   | GLY | X | 187 | 26.747 | 42.303 | 22.310 | 0.00 | 0.00 |
| ATOM | 2878 | H   | GLY | X | 187 | 26.186 | 42.969 | 22.822 | 0.00 | 0.00 |
| ATOM | 2879 | CA  | GLY | X | 187 | 26.305 | 40.947 | 22.079 | 0.00 | 0.00 |
| ATOM | 2880 | HA2 | GLY | X | 187 | 25.267 | 40.890 | 21.752 | 0.00 | 0.00 |
| ATOM | 2881 | HA3 | GLY | X | 187 | 26.732 | 40.467 | 21.199 | 0.00 | 0.00 |
| ATOM | 2882 | C   | GLY | X | 187 | 26.319 | 39.966 | 23.281 | 0.00 | 0.00 |
| ATOM | 2883 | O   | GLY | X | 187 | 25.852 | 38.812 | 23.267 | 0.00 | 0.00 |
| ATOM | 2884 | N   | GLY | X | 188 | 26.644 | 40.449 | 24.496 | 0.00 | 0.00 |
| ATOM | 2885 | H   | GLY | X | 188 | 26.675 | 41.457 | 24.556 | 0.00 | 0.00 |
| ATOM | 2886 | CA  | GLY | X | 188 | 26.585 | 39.662 | 25.773 | 0.00 | 0.00 |
| ATOM | 2887 | HA2 | GLY | X | 188 | 26.755 | 38.591 | 25.656 | 0.00 | 0.00 |
| ATOM | 2888 | HA3 | GLY | X | 188 | 27.244 | 40.153 | 26.490 | 0.00 | 0.00 |
| ATOM | 2889 | C   | GLY | X | 188 | 25.234 | 39.753 | 26.503 | 0.00 | 0.00 |
| ATOM | 2890 | O   | GLY | X | 188 | 24.451 | 40.675 | 26.213 | 0.00 | 0.00 |
| ATOM | 2891 | N   | ASP | X | 189 | 24.998 | 38.915 | 27.519 | 0.00 | 0.00 |
| ATOM | 2892 | H   | ASP | X | 189 | 25.562 | 38.076 | 27.534 | 0.00 | 0.00 |
| ATOM | 2893 | CA  | ASP | X | 189 | 23.794 | 38.881 | 28.383 | 0.00 | 0.00 |
| ATOM | 2894 | HA  | ASP | X | 189 | 23.067 | 39.354 | 27.722 | 0.00 | 0.00 |
| ATOM | 2895 | CB  | ASP | X | 189 | 23.363 | 37.385 | 28.548 | 0.00 | 0.00 |
| ATOM | 2896 | HB2 | ASP | X | 189 | 23.141 | 36.905 | 27.595 | 0.00 | 0.00 |
| ATOM | 2897 | HB3 | ASP | X | 189 | 24.180 | 36.834 | 29.013 | 0.00 | 0.00 |
| ATOM | 2898 | CG  | ASP | X | 189 | 22.123 | 37.239 | 29.354 | 0.00 | 0.00 |
| ATOM | 2899 | OD1 | ASP | X | 189 | 21.945 | 36.186 | 29.984 | 0.00 | 0.00 |
| ATOM | 2900 | OD2 | ASP | X | 189 | 21.325 | 38.216 | 29.368 | 0.00 | 0.00 |
| ATOM | 2901 | C   | ASP | X | 189 | 23.997 | 39.550 | 29.761 | 0.00 | 0.00 |
| ATOM | 2902 | O   | ASP | X | 189 | 24.594 | 38.920 | 30.671 | 0.00 | 0.00 |
| ATOM | 2903 | N   | PRO | X | 190 | 23.374 | 40.717 | 29.921 | 0.00 | 0.00 |
| ATOM | 2904 | CD  | PRO | X | 190 | 22.660 | 41.581 | 28.866 | 0.00 | 0.00 |
| ATOM | 2905 | HD2 | PRO | X | 190 | 22.072 | 41.040 | 28.125 | 0.00 | 0.00 |
| ATOM | 2906 | HD3 | PRO | X | 190 | 23.402 | 42.088 | 28.249 | 0.00 | 0.00 |
| ATOM | 2907 | CG  | PRO | X | 190 | 21.851 | 42.647 | 29.629 | 0.00 | 0.00 |
| ATOM | 2908 | HG2 | PRO | X | 190 | 20.902 | 42.217 | 29.950 | 0.00 | 0.00 |
| ATOM | 2909 | HG3 | PRO | X | 190 | 21.569 | 43.552 | 29.092 | 0.00 | 0.00 |
| ATOM | 2910 | CB  | PRO | X | 190 | 22.666 | 42.889 | 30.908 | 0.00 | 0.00 |
| ATOM | 2911 | HB2 | PRO | X | 190 | 21.994 | 43.288 | 31.667 | 0.00 | 0.00 |
| ATOM | 2912 | HB3 | PRO | X | 190 | 23.492 | 43.541 | 30.623 | 0.00 | 0.00 |
| ATOM | 2913 | CA  | PRO | X | 190 | 23.323 | 41.491 | 31.181 | 0.00 | 0.00 |
| ATOM | 2914 | HA  | PRO | X | 190 | 24.371 | 41.570 | 31.470 | 0.00 | 0.00 |
| ATOM | 2915 | C   | PRO | X | 190 | 22.534 | 40.738 | 32.270 | 0.00 | 0.00 |
| ATOM | 2916 | O   | PRO | X | 190 | 22.528 | 41.231 | 33.413 | 0.00 | 0.00 |
| ATOM | 2917 | N   | THR | X | 191 | 21.898 | 39.575 | 32.014 | 0.00 | 0.00 |
| ATOM | 2918 | H   | THR | X | 191 | 21.857 | 39.177 | 31.087 | 0.00 | 0.00 |
| ATOM | 2919 | CA  | THR | X | 191 | 21.267 | 38.769 | 33.118 | 0.00 | 0.00 |

|      |      |      |     |   |     |        |        |        |      |      |
|------|------|------|-----|---|-----|--------|--------|--------|------|------|
| ATOM | 2920 | HA   | THR | X | 191 | 21.236 | 39.348 | 34.041 | 0.00 | 0.00 |
| ATOM | 2921 | CB   | THR | X | 191 | 19.839 | 38.207 | 32.801 | 0.00 | 0.00 |
| ATOM | 2922 | HB   | THR | X | 191 | 19.580 | 37.645 | 33.698 | 0.00 | 0.00 |
| ATOM | 2923 | CG2  | THR | X | 191 | 18.674 | 39.183 | 32.552 | 0.00 | 0.00 |
| ATOM | 2924 | HG21 | THR | X | 191 | 17.772 | 38.588 | 32.408 | 0.00 | 0.00 |
| ATOM | 2925 | HG22 | THR | X | 191 | 18.973 | 39.757 | 31.675 | 0.00 | 0.00 |
| ATOM | 2926 | HG23 | THR | X | 191 | 18.540 | 39.873 | 33.384 | 0.00 | 0.00 |
| ATOM | 2927 | OG1  | THR | X | 191 | 19.816 | 37.331 | 31.738 | 0.00 | 0.00 |
| ATOM | 2928 | HG1  | THR | X | 191 | 20.481 | 37.666 | 31.133 | 0.00 | 0.00 |
| ATOM | 2929 | C    | THR | X | 191 | 22.269 | 37.709 | 33.602 | 0.00 | 0.00 |
| ATOM | 2930 | O    | THR | X | 191 | 21.963 | 37.092 | 34.629 | 0.00 | 0.00 |
| ATOM | 2931 | N    | SER | X | 192 | 23.393 | 37.531 | 32.900 | 0.00 | 0.00 |
| ATOM | 2932 | H    | SER | X | 192 | 23.621 | 38.126 | 32.116 | 0.00 | 0.00 |
| ATOM | 2933 | CA   | SER | X | 192 | 24.421 | 36.514 | 33.123 | 0.00 | 0.00 |
| ATOM | 2934 | HA   | SER | X | 192 | 24.068 | 35.942 | 33.981 | 0.00 | 0.00 |
| ATOM | 2935 | CB   | SER | X | 192 | 24.446 | 35.623 | 31.889 | 0.00 | 0.00 |
| ATOM | 2936 | HB2  | SER | X | 192 | 24.563 | 36.317 | 31.057 | 0.00 | 0.00 |
| ATOM | 2937 | HB3  | SER | X | 192 | 25.247 | 34.885 | 31.842 | 0.00 | 0.00 |
| ATOM | 2938 | OG   | SER | X | 192 | 23.172 | 35.001 | 31.831 | 0.00 | 0.00 |
| ATOM | 2939 | HG   | SER | X | 192 | 22.640 | 35.423 | 31.151 | 0.00 | 0.00 |
| ATOM | 2940 | C    | SER | X | 192 | 25.859 | 37.061 | 33.334 | 0.00 | 0.00 |
| ATOM | 2941 | O    | SER | X | 192 | 26.797 | 36.667 | 32.651 | 0.00 | 0.00 |
| ATOM | 2942 | N    | VAL | X | 193 | 26.044 | 37.993 | 34.296 | 0.00 | 0.00 |
| ATOM | 2943 | H    | VAL | X | 193 | 25.238 | 38.229 | 34.857 | 0.00 | 0.00 |
| ATOM | 2944 | CA   | VAL | X | 193 | 27.328 | 38.713 | 34.751 | 0.00 | 0.00 |
| ATOM | 2945 | HA   | VAL | X | 193 | 27.968 | 38.865 | 33.883 | 0.00 | 0.00 |
| ATOM | 2946 | CB   | VAL | X | 193 | 26.978 | 40.115 | 35.264 | 0.00 | 0.00 |
| ATOM | 2947 | HB   | VAL | X | 193 | 26.499 | 39.959 | 36.231 | 0.00 | 0.00 |
| ATOM | 2948 | CG1  | VAL | X | 193 | 28.192 | 40.976 | 35.252 | 0.00 | 0.00 |
| ATOM | 2949 | HG11 | VAL | X | 193 | 29.040 | 40.590 | 35.818 | 0.00 | 0.00 |
| ATOM | 2950 | HG12 | VAL | X | 193 | 28.480 | 40.997 | 34.201 | 0.00 | 0.00 |
| ATOM | 2951 | HG13 | VAL | X | 193 | 27.919 | 41.908 | 35.746 | 0.00 | 0.00 |
| ATOM | 2952 | CG2  | VAL | X | 193 | 25.944 | 40.830 | 34.293 | 0.00 | 0.00 |
| ATOM | 2953 | HG21 | VAL | X | 193 | 26.082 | 40.493 | 33.265 | 0.00 | 0.00 |
| ATOM | 2954 | HG22 | VAL | X | 193 | 26.075 | 41.909 | 34.375 | 0.00 | 0.00 |
| ATOM | 2955 | HG23 | VAL | X | 193 | 24.911 | 40.562 | 34.513 | 0.00 | 0.00 |
| ATOM | 2956 | C    | VAL | X | 193 | 28.010 | 37.977 | 35.866 | 0.00 | 0.00 |
| ATOM | 2957 | O    | VAL | X | 193 | 27.454 | 37.749 | 36.951 | 0.00 | 0.00 |
| ATOM | 2958 | N    | THR | X | 194 | 29.261 | 37.656 | 35.516 | 0.00 | 0.00 |
| ATOM | 2959 | H    | THR | X | 194 | 29.494 | 37.910 | 34.567 | 0.00 | 0.00 |
| ATOM | 2960 | CA   | THR | X | 194 | 30.317 | 37.196 | 36.480 | 0.00 | 0.00 |
| ATOM | 2961 | HA   | THR | X | 194 | 29.852 | 36.996 | 37.446 | 0.00 | 0.00 |
| ATOM | 2962 | CB   | THR | X | 194 | 31.025 | 35.952 | 35.939 | 0.00 | 0.00 |
| ATOM | 2963 | HB   | THR | X | 194 | 31.462 | 36.200 | 34.971 | 0.00 | 0.00 |
| ATOM | 2964 | CG2  | THR | X | 194 | 31.973 | 35.346 | 36.930 | 0.00 | 0.00 |
| ATOM | 2965 | HG21 | THR | X | 194 | 32.083 | 34.265 | 36.850 | 0.00 | 0.00 |
| ATOM | 2966 | HG22 | THR | X | 194 | 31.627 | 35.438 | 37.959 | 0.00 | 0.00 |
| ATOM | 2967 | HG23 | THR | X | 194 | 32.944 | 35.838 | 36.878 | 0.00 | 0.00 |
| ATOM | 2968 | OG1  | THR | X | 194 | 30.039 | 34.946 | 35.989 | 0.00 | 0.00 |
| ATOM | 2969 | HG1  | THR | X | 194 | 29.396 | 35.045 | 35.283 | 0.00 | 0.00 |
| ATOM | 2970 | C    | THR | X | 194 | 31.447 | 38.163 | 36.783 | 0.00 | 0.00 |
| ATOM | 2971 | O    | THR | X | 194 | 32.039 | 38.664 | 35.836 | 0.00 | 0.00 |
| ATOM | 2972 | N    | LEU | X | 195 | 31.814 | 38.467 | 38.037 | 0.00 | 0.00 |
| ATOM | 2973 | H    | LEU | X | 195 | 31.289 | 38.255 | 38.873 | 0.00 | 0.00 |
| ATOM | 2974 | CA   | LEU | X | 195 | 33.023 | 39.295 | 38.289 | 0.00 | 0.00 |
| ATOM | 2975 | HA   | LEU | X | 195 | 33.361 | 40.048 | 37.577 | 0.00 | 0.00 |
| ATOM | 2976 | CB   | LEU | X | 195 | 32.824 | 40.164 | 39.526 | 0.00 | 0.00 |
| ATOM | 2977 | HB2  | LEU | X | 195 | 32.627 | 39.475 | 40.347 | 0.00 | 0.00 |
| ATOM | 2978 | HB3  | LEU | X | 195 | 33.725 | 40.767 | 39.635 | 0.00 | 0.00 |
| ATOM | 2979 | CG   | LEU | X | 195 | 31.591 | 41.065 | 39.426 | 0.00 | 0.00 |
| ATOM | 2980 | HG   | LEU | X | 195 | 30.789 | 40.354 | 39.625 | 0.00 | 0.00 |
| ATOM | 2981 | CD1  | LEU | X | 195 | 31.496 | 41.895 | 40.689 | 0.00 | 0.00 |
| ATOM | 2982 | HD11 | LEU | X | 195 | 30.479 | 42.283 | 40.749 | 0.00 | 0.00 |
| ATOM | 2983 | HD12 | LEU | X | 195 | 32.309 | 42.621 | 40.685 | 0.00 | 0.00 |
| ATOM | 2984 | HD13 | LEU | X | 195 | 31.716 | 41.413 | 41.642 | 0.00 | 0.00 |
| ATOM | 2985 | CD2  | LEU | X | 195 | 31.539 | 41.785 | 38.119 | 0.00 | 0.00 |
| ATOM | 2986 | HD21 | LEU | X | 195 | 32.408 | 42.390 | 37.859 | 0.00 | 0.00 |

|      |      |      |     |   |     |        |        |        |      |      |
|------|------|------|-----|---|-----|--------|--------|--------|------|------|
| ATOM | 2987 | HD22 | LEU | X | 195 | 31.486 | 41.027 | 37.338 | 0.00 | 0.00 |
| ATOM | 2988 | HD23 | LEU | X | 195 | 30.638 | 42.388 | 38.005 | 0.00 | 0.00 |
| ATOM | 2989 | C    | LEU | X | 195 | 34.177 | 38.281 | 38.448 | 0.00 | 0.00 |
| ATOM | 2990 | O    | LEU | X | 195 | 34.105 | 37.312 | 39.195 | 0.00 | 0.00 |
| ATOM | 2991 | N    | PHE | X | 196 | 35.268 | 38.570 | 37.826 | 0.00 | 0.00 |
| ATOM | 2992 | H    | PHE | X | 196 | 35.207 | 39.468 | 37.368 | 0.00 | 0.00 |
| ATOM | 2993 | CA   | PHE | X | 196 | 36.356 | 37.664 | 37.550 | 0.00 | 0.00 |
| ATOM | 2994 | HA   | PHE | X | 196 | 36.334 | 36.788 | 38.199 | 0.00 | 0.00 |
| ATOM | 2995 | CB   | PHE | X | 196 | 36.227 | 37.225 | 36.068 | 0.00 | 0.00 |
| ATOM | 2996 | HB2  | PHE | X | 196 | 35.233 | 36.784 | 35.995 | 0.00 | 0.00 |
| ATOM | 2997 | HB3  | PHE | X | 196 | 36.105 | 38.112 | 35.445 | 0.00 | 0.00 |
| ATOM | 2998 | CG   | PHE | X | 196 | 37.269 | 36.355 | 35.387 | 0.00 | 0.00 |
| ATOM | 2999 | CD1  | PHE | X | 196 | 37.484 | 36.601 | 33.957 | 0.00 | 0.00 |
| ATOM | 3000 | HD1  | PHE | X | 196 | 36.892 | 37.364 | 33.474 | 0.00 | 0.00 |
| ATOM | 3001 | CE1  | PHE | X | 196 | 38.520 | 35.922 | 33.280 | 0.00 | 0.00 |
| ATOM | 3002 | HE1  | PHE | X | 196 | 38.587 | 36.046 | 32.209 | 0.00 | 0.00 |
| ATOM | 3003 | CZ   | PHE | X | 196 | 39.324 | 35.026 | 34.027 | 0.00 | 0.00 |
| ATOM | 3004 | HZ   | PHE | X | 196 | 40.124 | 34.509 | 33.518 | 0.00 | 0.00 |
| ATOM | 3005 | CE2  | PHE | X | 196 | 39.176 | 34.941 | 35.376 | 0.00 | 0.00 |
| ATOM | 3006 | HE2  | PHE | X | 196 | 39.765 | 34.274 | 35.988 | 0.00 | 0.00 |
| ATOM | 3007 | CD2  | PHE | X | 196 | 38.145 | 35.560 | 36.097 | 0.00 | 0.00 |
| ATOM | 3008 | HD2  | PHE | X | 196 | 38.037 | 35.476 | 37.168 | 0.00 | 0.00 |
| ATOM | 3009 | C    | PHE | X | 196 | 37.727 | 38.403 | 37.905 | 0.00 | 0.00 |
| ATOM | 3010 | O    | PHE | X | 196 | 37.884 | 39.524 | 37.475 | 0.00 | 0.00 |
| ATOM | 3011 | N    | GLY | X | 197 | 38.529 | 37.690 | 38.705 | 0.00 | 0.00 |
| ATOM | 3012 | H    | GLY | X | 197 | 38.220 | 36.815 | 39.103 | 0.00 | 0.00 |
| ATOM | 3013 | CA   | GLY | X | 197 | 39.778 | 38.280 | 39.240 | 0.00 | 0.00 |
| ATOM | 3014 | HA2  | GLY | X | 197 | 40.139 | 38.830 | 38.371 | 0.00 | 0.00 |
| ATOM | 3015 | HA3  | GLY | X | 197 | 39.594 | 38.908 | 40.111 | 0.00 | 0.00 |
| ATOM | 3016 | C    | GLY | X | 197 | 40.903 | 37.386 | 39.737 | 0.00 | 0.00 |
| ATOM | 3017 | O    | GLY | X | 197 | 40.785 | 36.179 | 39.818 | 0.00 | 0.00 |
| ATOM | 3018 | N    | GLU | X | 198 | 42.021 | 38.007 | 40.107 | 0.00 | 0.00 |
| ATOM | 3019 | H    | GLU | X | 198 | 42.029 | 39.005 | 39.946 | 0.00 | 0.00 |
| ATOM | 3020 | CA   | GLU | X | 198 | 43.199 | 37.396 | 40.716 | 0.00 | 0.00 |
| ATOM | 3021 | HA   | GLU | X | 198 | 42.968 | 36.422 | 41.148 | 0.00 | 0.00 |
| ATOM | 3022 | CB   | GLU | X | 198 | 44.319 | 37.177 | 39.717 | 0.00 | 0.00 |
| ATOM | 3023 | HB2  | GLU | X | 198 | 45.134 | 36.783 | 40.324 | 0.00 | 0.00 |
| ATOM | 3024 | HB3  | GLU | X | 198 | 43.993 | 36.504 | 38.925 | 0.00 | 0.00 |
| ATOM | 3025 | CG   | GLU | X | 198 | 44.692 | 38.390 | 38.845 | 0.00 | 0.00 |
| ATOM | 3026 | HG2  | GLU | X | 198 | 44.994 | 38.107 | 37.837 | 0.00 | 0.00 |
| ATOM | 3027 | HG3  | GLU | X | 198 | 43.874 | 39.090 | 38.678 | 0.00 | 0.00 |
| ATOM | 3028 | CD   | GLU | X | 198 | 45.831 | 39.211 | 39.383 | 0.00 | 0.00 |
| ATOM | 3029 | OE1  | GLU | X | 198 | 45.998 | 40.269 | 38.798 | 0.00 | 0.00 |
| ATOM | 3030 | OE2  | GLU | X | 198 | 46.504 | 38.897 | 40.380 | 0.00 | 0.00 |
| ATOM | 3031 | C    | GLU | X | 198 | 43.652 | 38.284 | 41.852 | 0.00 | 0.00 |
| ATOM | 3032 | O    | GLU | X | 198 | 43.466 | 39.488 | 41.783 | 0.00 | 0.00 |
| ATOM | 3033 | N    | XA1 | X | 199 | 44.203 | 37.838 | 42.988 | 0.00 | 0.00 |
| ATOM | 3034 | CA   | XA1 | X | 199 | 45.004 | 38.690 | 43.925 | 0.00 | 0.00 |
| ATOM | 3035 | C    | XA1 | X | 199 | 44.189 | 39.822 | 44.536 | 0.00 | 0.00 |
| ATOM | 3036 | O    | XA1 | X | 199 | 43.145 | 39.596 | 45.121 | 0.00 | 0.00 |
| ATOM | 3037 | CB   | XA1 | X | 199 | 46.423 | 39.089 | 43.404 | 0.00 | 0.00 |
| ATOM | 3038 | OG   | XA1 | X | 199 | 47.114 | 39.497 | 44.649 | 0.00 | 0.00 |
| ATOM | 3039 | P1   | XA1 | X | 199 | 48.065 | 40.793 | 44.591 | 0.00 | 0.00 |
| ATOM | 3040 | O1   | XA1 | X | 199 | 47.402 | 42.031 | 44.042 | 0.00 | 0.00 |
| ATOM | 3041 | O2   | XA1 | X | 199 | 49.336 | 40.302 | 43.938 | 0.00 | 0.00 |
| ATOM | 3042 | C1   | XA1 | X | 199 | 48.098 | 40.977 | 46.347 | 0.00 | 0.00 |
| ATOM | 3043 | H    | XA1 | X | 199 | 44.345 | 36.839 | 43.019 | 0.00 | 0.00 |
| ATOM | 3044 | HA   | XA1 | X | 199 | 45.236 | 38.039 | 44.767 | 0.00 | 0.00 |
| ATOM | 3045 | HB2  | XA1 | X | 199 | 46.968 | 38.332 | 42.835 | 0.00 | 0.00 |
| ATOM | 3046 | HB3  | XA1 | X | 199 | 46.252 | 39.837 | 42.626 | 0.00 | 0.00 |
| ATOM | 3047 | H11  | XA1 | X | 199 | 48.763 | 40.255 | 46.827 | 0.00 | 0.00 |
| ATOM | 3048 | H12  | XA1 | X | 199 | 48.365 | 42.026 | 46.494 | 0.00 | 0.00 |
| ATOM | 3049 | H13  | XA1 | X | 199 | 47.127 | 40.715 | 46.771 | 0.00 | 0.00 |
| ATOM | 3050 | N    | ALA | X | 200 | 44.584 | 41.052 | 44.533 | 0.00 | 0.00 |
| ATOM | 3051 | H    | ALA | X | 200 | 45.445 | 41.357 | 44.101 | 0.00 | 0.00 |
| ATOM | 3052 | CA   | ALA | X | 200 | 43.818 | 42.226 | 44.956 | 0.00 | 0.00 |
| ATOM | 3053 | HA   | ALA | X | 200 | 43.488 | 42.098 | 45.987 | 0.00 | 0.00 |

|      |      |      |     |   |     |        |        |        |      |      |
|------|------|------|-----|---|-----|--------|--------|--------|------|------|
| ATOM | 3054 | CB   | ALA | X | 200 | 44.595 | 43.556 | 44.847 | 0.00 | 0.00 |
| ATOM | 3055 | HB1  | ALA | X | 200 | 45.059 | 43.608 | 43.862 | 0.00 | 0.00 |
| ATOM | 3056 | HB2  | ALA | X | 200 | 45.329 | 43.613 | 45.651 | 0.00 | 0.00 |
| ATOM | 3057 | HB3  | ALA | X | 200 | 44.002 | 44.467 | 44.925 | 0.00 | 0.00 |
| ATOM | 3058 | C    | ALA | X | 200 | 42.541 | 42.357 | 44.145 | 0.00 | 0.00 |
| ATOM | 3059 | O    | ALA | X | 200 | 41.702 | 43.082 | 44.635 | 0.00 | 0.00 |
| ATOM | 3060 | N    | GLY | X | 201 | 42.436 | 41.813 | 42.944 | 0.00 | 0.00 |
| ATOM | 3061 | H    | GLY | X | 201 | 43.270 | 41.355 | 42.604 | 0.00 | 0.00 |
| ATOM | 3062 | CA   | GLY | X | 201 | 41.180 | 41.741 | 42.125 | 0.00 | 0.00 |
| ATOM | 3063 | HA2  | GLY | X | 201 | 40.692 | 42.715 | 42.111 | 0.00 | 0.00 |
| ATOM | 3064 | HA3  | GLY | X | 201 | 41.491 | 41.404 | 41.137 | 0.00 | 0.00 |
| ATOM | 3065 | C    | GLY | X | 201 | 40.213 | 40.642 | 42.669 | 0.00 | 0.00 |
| ATOM | 3066 | O    | GLY | X | 201 | 39.055 | 40.978 | 42.882 | 0.00 | 0.00 |
| ATOM | 3067 | N    | ALA | X | 202 | 40.681 | 39.393 | 42.986 | 0.00 | 0.00 |
| ATOM | 3068 | H    | ALA | X | 202 | 41.661 | 39.196 | 42.844 | 0.00 | 0.00 |
| ATOM | 3069 | CA   | ALA | X | 202 | 39.944 | 38.470 | 43.737 | 0.00 | 0.00 |
| ATOM | 3070 | HA   | ALA | X | 202 | 39.057 | 38.201 | 43.163 | 0.00 | 0.00 |
| ATOM | 3071 | CB   | ALA | X | 202 | 40.834 | 37.169 | 44.020 | 0.00 | 0.00 |
| ATOM | 3072 | HB1  | ALA | X | 202 | 41.021 | 36.781 | 43.019 | 0.00 | 0.00 |
| ATOM | 3073 | HB2  | ALA | X | 202 | 40.284 | 36.443 | 44.618 | 0.00 | 0.00 |
| ATOM | 3074 | HB3  | ALA | X | 202 | 41.798 | 37.483 | 44.419 | 0.00 | 0.00 |
| ATOM | 3075 | C    | ALA | X | 202 | 39.509 | 38.997 | 45.061 | 0.00 | 0.00 |
| ATOM | 3076 | O    | ALA | X | 202 | 38.383 | 38.867 | 45.537 | 0.00 | 0.00 |
| ATOM | 3077 | N    | ALA | X | 203 | 40.286 | 39.917 | 45.697 | 0.00 | 0.00 |
| ATOM | 3078 | H    | ALA | X | 203 | 41.187 | 40.091 | 45.276 | 0.00 | 0.00 |
| ATOM | 3079 | CA   | ALA | X | 203 | 39.858 | 40.761 | 46.873 | 0.00 | 0.00 |
| ATOM | 3080 | HA   | ALA | X | 203 | 39.325 | 40.182 | 47.627 | 0.00 | 0.00 |
| ATOM | 3081 | CB   | ALA | X | 203 | 41.123 | 41.332 | 47.582 | 0.00 | 0.00 |
| ATOM | 3082 | HB1  | ALA | X | 203 | 41.712 | 41.938 | 46.894 | 0.00 | 0.00 |
| ATOM | 3083 | HB2  | ALA | X | 203 | 41.707 | 40.639 | 48.188 | 0.00 | 0.00 |
| ATOM | 3084 | HB3  | ALA | X | 203 | 40.844 | 42.135 | 48.265 | 0.00 | 0.00 |
| ATOM | 3085 | C    | ALA | X | 203 | 38.811 | 41.899 | 46.436 | 0.00 | 0.00 |
| ATOM | 3086 | O    | ALA | X | 203 | 37.781 | 42.023 | 47.127 | 0.00 | 0.00 |
| ATOM | 3087 | N    | SER | X | 204 | 38.988 | 42.669 | 45.423 | 0.00 | 0.00 |
| ATOM | 3088 | H    | SER | X | 204 | 39.897 | 42.677 | 44.984 | 0.00 | 0.00 |
| ATOM | 3089 | CA   | SER | X | 204 | 37.969 | 43.598 | 44.915 | 0.00 | 0.00 |
| ATOM | 3090 | HA   | SER | X | 204 | 37.741 | 44.352 | 45.668 | 0.00 | 0.00 |
| ATOM | 3091 | CB   | SER | X | 204 | 38.487 | 44.288 | 43.681 | 0.00 | 0.00 |
| ATOM | 3092 | HB2  | SER | X | 204 | 38.897 | 43.561 | 42.981 | 0.00 | 0.00 |
| ATOM | 3093 | HB3  | SER | X | 204 | 37.688 | 44.826 | 43.171 | 0.00 | 0.00 |
| ATOM | 3094 | OG   | SER | X | 204 | 39.567 | 45.194 | 43.949 | 0.00 | 0.00 |
| ATOM | 3095 | HG   | SER | X | 204 | 40.366 | 44.708 | 44.165 | 0.00 | 0.00 |
| ATOM | 3096 | C    | SER | X | 204 | 36.569 | 42.903 | 44.601 | 0.00 | 0.00 |
| ATOM | 3097 | O    | SER | X | 204 | 35.555 | 43.398 | 45.097 | 0.00 | 0.00 |
| ATOM | 3098 | N    | VAL | X | 205 | 36.567 | 41.725 | 43.918 | 0.00 | 0.00 |
| ATOM | 3099 | H    | VAL | X | 205 | 37.463 | 41.486 | 43.519 | 0.00 | 0.00 |
| ATOM | 3100 | CA   | VAL | X | 205 | 35.432 | 40.769 | 43.648 | 0.00 | 0.00 |
| ATOM | 3101 | HA   | VAL | X | 205 | 34.653 | 41.358 | 43.164 | 0.00 | 0.00 |
| ATOM | 3102 | CB   | VAL | X | 205 | 35.778 | 39.573 | 42.701 | 0.00 | 0.00 |
| ATOM | 3103 | HB   | VAL | X | 205 | 36.637 | 38.988 | 43.028 | 0.00 | 0.00 |
| ATOM | 3104 | CG1  | VAL | X | 205 | 34.548 | 38.583 | 42.450 | 0.00 | 0.00 |
| ATOM | 3105 | HG11 | VAL | X | 205 | 33.679 | 39.180 | 42.174 | 0.00 | 0.00 |
| ATOM | 3106 | HG12 | VAL | X | 205 | 34.791 | 37.778 | 41.757 | 0.00 | 0.00 |
| ATOM | 3107 | HG13 | VAL | X | 205 | 34.307 | 38.080 | 43.386 | 0.00 | 0.00 |
| ATOM | 3108 | CG2  | VAL | X | 205 | 36.117 | 40.067 | 41.266 | 0.00 | 0.00 |
| ATOM | 3109 | HG21 | VAL | X | 205 | 36.781 | 40.930 | 41.308 | 0.00 | 0.00 |
| ATOM | 3110 | HG22 | VAL | X | 205 | 35.237 | 40.235 | 40.645 | 0.00 | 0.00 |
| ATOM | 3111 | HG23 | VAL | X | 205 | 36.722 | 39.304 | 40.777 | 0.00 | 0.00 |
| ATOM | 3112 | C    | VAL | X | 205 | 34.750 | 40.338 | 44.899 | 0.00 | 0.00 |
| ATOM | 3113 | O    | VAL | X | 205 | 33.543 | 40.125 | 44.921 | 0.00 | 0.00 |
| ATOM | 3114 | N    | GLY | X | 206 | 35.543 | 40.200 | 45.931 | 0.00 | 0.00 |
| ATOM | 3115 | H    | GLY | X | 206 | 36.531 | 40.304 | 45.752 | 0.00 | 0.00 |
| ATOM | 3116 | CA   | GLY | X | 206 | 35.224 | 39.773 | 47.251 | 0.00 | 0.00 |
| ATOM | 3117 | HA2  | GLY | X | 206 | 34.620 | 38.865 | 47.238 | 0.00 | 0.00 |
| ATOM | 3118 | HA3  | GLY | X | 206 | 36.108 | 39.546 | 47.846 | 0.00 | 0.00 |
| ATOM | 3119 | C    | GLY | X | 206 | 34.557 | 40.945 | 47.976 | 0.00 | 0.00 |
| ATOM | 3120 | O    | GLY | X | 206 | 33.538 | 40.735 | 48.661 | 0.00 | 0.00 |

|      |      |      |     |   |     |        |        |        |      |      |
|------|------|------|-----|---|-----|--------|--------|--------|------|------|
| ATOM | 3121 | N    | MET | X | 207 | 34.991 | 42.163 | 47.737 | 0.00 | 0.00 |
| ATOM | 3122 | H    | MET | X | 207 | 35.771 | 42.294 | 47.109 | 0.00 | 0.00 |
| ATOM | 3123 | CA   | MET | X | 207 | 34.440 | 43.353 | 48.404 | 0.00 | 0.00 |
| ATOM | 3124 | HA   | MET | X | 207 | 34.130 | 43.005 | 49.389 | 0.00 | 0.00 |
| ATOM | 3125 | CB   | MET | X | 207 | 35.482 | 44.531 | 48.454 | 0.00 | 0.00 |
| ATOM | 3126 | HB2  | MET | X | 207 | 35.922 | 44.626 | 47.461 | 0.00 | 0.00 |
| ATOM | 3127 | HB3  | MET | X | 207 | 34.945 | 45.470 | 48.592 | 0.00 | 0.00 |
| ATOM | 3128 | CG   | MET | X | 207 | 36.489 | 44.248 | 49.563 | 0.00 | 0.00 |
| ATOM | 3129 | HG2  | MET | X | 207 | 35.996 | 44.344 | 50.530 | 0.00 | 0.00 |
| ATOM | 3130 | HG3  | MET | X | 207 | 36.720 | 43.190 | 49.441 | 0.00 | 0.00 |
| ATOM | 3131 | SD   | MET | X | 207 | 37.970 | 45.260 | 49.369 | 0.00 | 0.00 |
| ATOM | 3132 | CE   | MET | X | 207 | 39.016 | 44.485 | 50.665 | 0.00 | 0.00 |
| ATOM | 3133 | HE1  | MET | X | 207 | 39.665 | 45.283 | 51.026 | 0.00 | 0.00 |
| ATOM | 3134 | HE2  | MET | X | 207 | 38.454 | 44.027 | 51.479 | 0.00 | 0.00 |
| ATOM | 3135 | HE3  | MET | X | 207 | 39.706 | 43.750 | 50.250 | 0.00 | 0.00 |
| ATOM | 3136 | C    | MET | X | 207 | 33.061 | 43.819 | 47.832 | 0.00 | 0.00 |
| ATOM | 3137 | O    | MET | X | 207 | 32.128 | 44.162 | 48.595 | 0.00 | 0.00 |
| ATOM | 3138 | N    | HIE | X | 208 | 32.940 | 43.663 | 46.485 | 0.00 | 0.00 |
| ATOM | 3139 | H    | HIE | X | 208 | 33.792 | 43.517 | 45.963 | 0.00 | 0.00 |
| ATOM | 3140 | CA   | HIE | X | 208 | 31.652 | 43.702 | 45.671 | 0.00 | 0.00 |
| ATOM | 3141 | HA   | HIE | X | 208 | 31.103 | 44.609 | 45.925 | 0.00 | 0.00 |
| ATOM | 3142 | CB   | HIE | X | 208 | 32.062 | 43.696 | 44.163 | 0.00 | 0.00 |
| ATOM | 3143 | HB2  | HIE | X | 208 | 32.742 | 42.851 | 44.062 | 0.00 | 0.00 |
| ATOM | 3144 | HB3  | HIE | X | 208 | 31.136 | 43.567 | 43.603 | 0.00 | 0.00 |
| ATOM | 3145 | CG   | HIE | X | 208 | 32.684 | 44.888 | 43.546 | 0.00 | 0.00 |
| ATOM | 3146 | ND1  | HIE | X | 208 | 32.263 | 46.185 | 43.597 | 0.00 | 0.00 |
| ATOM | 3147 | CE1  | HIE | X | 208 | 33.197 | 46.959 | 43.026 | 0.00 | 0.00 |
| ATOM | 3148 | HE1  | HIE | X | 208 | 33.177 | 48.037 | 42.960 | 0.00 | 0.00 |
| ATOM | 3149 | NE2  | HIE | X | 208 | 34.250 | 46.133 | 42.628 | 0.00 | 0.00 |
| ATOM | 3150 | HE2  | HIE | X | 208 | 35.087 | 46.376 | 42.118 | 0.00 | 0.00 |
| ATOM | 3151 | CD2  | HIE | X | 208 | 33.870 | 44.850 | 42.905 | 0.00 | 0.00 |
| ATOM | 3152 | HD2  | HIE | X | 208 | 34.396 | 43.925 | 42.719 | 0.00 | 0.00 |
| ATOM | 3153 | C    | HIE | X | 208 | 30.641 | 42.659 | 45.929 | 0.00 | 0.00 |
| ATOM | 3154 | O    | HIE | X | 208 | 29.493 | 42.904 | 45.836 | 0.00 | 0.00 |
| ATOM | 3155 | N    | LEU | X | 209 | 31.044 | 41.483 | 46.334 | 0.00 | 0.00 |
| ATOM | 3156 | H    | LEU | X | 209 | 32.031 | 41.314 | 46.206 | 0.00 | 0.00 |
| ATOM | 3157 | CA   | LEU | X | 209 | 30.157 | 40.471 | 47.031 | 0.00 | 0.00 |
| ATOM | 3158 | HA   | LEU | X | 209 | 29.219 | 40.453 | 46.476 | 0.00 | 0.00 |
| ATOM | 3159 | CB   | LEU | X | 209 | 30.840 | 39.082 | 46.945 | 0.00 | 0.00 |
| ATOM | 3160 | HB2  | LEU | X | 209 | 31.233 | 38.879 | 45.948 | 0.00 | 0.00 |
| ATOM | 3161 | HB3  | LEU | X | 209 | 31.709 | 39.009 | 47.598 | 0.00 | 0.00 |
| ATOM | 3162 | CG   | LEU | X | 209 | 30.019 | 37.895 | 47.345 | 0.00 | 0.00 |
| ATOM | 3163 | HG   | LEU | X | 209 | 29.861 | 37.990 | 48.420 | 0.00 | 0.00 |
| ATOM | 3164 | CD1  | LEU | X | 209 | 28.652 | 37.795 | 46.572 | 0.00 | 0.00 |
| ATOM | 3165 | HD11 | LEU | X | 209 | 28.824 | 37.753 | 45.497 | 0.00 | 0.00 |
| ATOM | 3166 | HD12 | LEU | X | 209 | 28.042 | 38.638 | 46.897 | 0.00 | 0.00 |
| ATOM | 3167 | HD13 | LEU | X | 209 | 28.269 | 36.811 | 46.842 | 0.00 | 0.00 |
| ATOM | 3168 | CD2  | LEU | X | 209 | 30.756 | 36.583 | 47.092 | 0.00 | 0.00 |
| ATOM | 3169 | HD21 | LEU | X | 209 | 31.822 | 36.674 | 47.299 | 0.00 | 0.00 |
| ATOM | 3170 | HD22 | LEU | X | 209 | 30.367 | 35.781 | 47.719 | 0.00 | 0.00 |
| ATOM | 3171 | HD23 | LEU | X | 209 | 30.788 | 36.371 | 46.024 | 0.00 | 0.00 |
| ATOM | 3172 | C    | LEU | X | 209 | 29.898 | 40.885 | 48.553 | 0.00 | 0.00 |
| ATOM | 3173 | O    | LEU | X | 209 | 28.799 | 40.539 | 49.022 | 0.00 | 0.00 |
| ATOM | 3174 | N    | LEU | X | 210 | 30.821 | 41.498 | 49.236 | 0.00 | 0.00 |
| ATOM | 3175 | H    | LEU | X | 210 | 31.773 | 41.618 | 48.919 | 0.00 | 0.00 |
| ATOM | 3176 | CA   | LEU | X | 210 | 30.644 | 41.878 | 50.679 | 0.00 | 0.00 |
| ATOM | 3177 | HA   | LEU | X | 210 | 30.208 | 41.010 | 51.174 | 0.00 | 0.00 |
| ATOM | 3178 | CB   | LEU | X | 210 | 32.044 | 42.091 | 51.350 | 0.00 | 0.00 |
| ATOM | 3179 | HB2  | LEU | X | 210 | 32.645 | 41.185 | 51.265 | 0.00 | 0.00 |
| ATOM | 3180 | HB3  | LEU | X | 210 | 32.557 | 42.900 | 50.831 | 0.00 | 0.00 |
| ATOM | 3181 | CG   | LEU | X | 210 | 32.004 | 42.497 | 52.844 | 0.00 | 0.00 |
| ATOM | 3182 | HG   | LEU | X | 210 | 31.456 | 43.430 | 52.978 | 0.00 | 0.00 |
| ATOM | 3183 | CD1  | LEU | X | 210 | 31.347 | 41.357 | 53.628 | 0.00 | 0.00 |
| ATOM | 3184 | HD11 | LEU | X | 210 | 30.287 | 41.360 | 53.377 | 0.00 | 0.00 |
| ATOM | 3185 | HD12 | LEU | X | 210 | 31.446 | 41.487 | 54.706 | 0.00 | 0.00 |
| ATOM | 3186 | HD13 | LEU | X | 210 | 31.831 | 40.451 | 53.263 | 0.00 | 0.00 |
| ATOM | 3187 | CD2  | LEU | X | 210 | 33.404 | 42.731 | 53.389 | 0.00 | 0.00 |

|      |      |      |     |   |     |        |        |        |      |      |
|------|------|------|-----|---|-----|--------|--------|--------|------|------|
| ATOM | 3188 | HD21 | LEU | X | 210 | 33.329 | 43.164 | 54.386 | 0.00 | 0.00 |
| ATOM | 3189 | HD22 | LEU | X | 210 | 34.029 | 41.838 | 53.374 | 0.00 | 0.00 |
| ATOM | 3190 | HD23 | LEU | X | 210 | 33.853 | 43.490 | 52.747 | 0.00 | 0.00 |
| ATOM | 3191 | C    | LEU | X | 210 | 29.714 | 43.065 | 50.866 | 0.00 | 0.00 |
| ATOM | 3192 | O    | LEU | X | 210 | 28.886 | 43.150 | 51.751 | 0.00 | 0.00 |
| ATOM | 3193 | N    | SER | X | 211 | 29.893 | 44.090 | 50.063 | 0.00 | 0.00 |
| ATOM | 3194 | H    | SER | X | 211 | 30.495 | 43.929 | 49.268 | 0.00 | 0.00 |
| ATOM | 3195 | CA   | SER | X | 211 | 29.126 | 45.359 | 50.177 | 0.00 | 0.00 |
| ATOM | 3196 | HA   | SER | X | 211 | 28.943 | 45.520 | 51.240 | 0.00 | 0.00 |
| ATOM | 3197 | CB   | SER | X | 211 | 29.996 | 46.586 | 49.709 | 0.00 | 0.00 |
| ATOM | 3198 | HB2  | SER | X | 211 | 29.426 | 47.465 | 50.009 | 0.00 | 0.00 |
| ATOM | 3199 | HB3  | SER | X | 211 | 30.854 | 46.606 | 50.382 | 0.00 | 0.00 |
| ATOM | 3200 | OG   | SER | X | 211 | 30.490 | 46.660 | 48.368 | 0.00 | 0.00 |
| ATOM | 3201 | HG   | SER | X | 211 | 31.245 | 46.082 | 48.232 | 0.00 | 0.00 |
| ATOM | 3202 | C    | SER | X | 211 | 27.791 | 45.242 | 49.409 | 0.00 | 0.00 |
| ATOM | 3203 | O    | SER | X | 211 | 27.916 | 45.259 | 48.184 | 0.00 | 0.00 |
| ATOM | 3204 | N    | PRO | X | 212 | 26.608 | 45.226 | 50.035 | 0.00 | 0.00 |
| ATOM | 3205 | CD   | PRO | X | 212 | 26.373 | 45.345 | 51.478 | 0.00 | 0.00 |
| ATOM | 3206 | HD2  | PRO | X | 212 | 26.449 | 46.388 | 51.788 | 0.00 | 0.00 |
| ATOM | 3207 | HD3  | PRO | X | 212 | 27.017 | 44.735 | 52.111 | 0.00 | 0.00 |
| ATOM | 3208 | CG   | PRO | X | 212 | 24.968 | 44.895 | 51.746 | 0.00 | 0.00 |
| ATOM | 3209 | HG2  | PRO | X | 212 | 24.477 | 45.542 | 52.473 | 0.00 | 0.00 |
| ATOM | 3210 | HG3  | PRO | X | 212 | 24.948 | 43.859 | 52.083 | 0.00 | 0.00 |
| ATOM | 3211 | CB   | PRO | X | 212 | 24.257 | 45.165 | 50.441 | 0.00 | 0.00 |
| ATOM | 3212 | HB2  | PRO | X | 212 | 23.803 | 46.155 | 50.405 | 0.00 | 0.00 |
| ATOM | 3213 | HB3  | PRO | X | 212 | 23.484 | 44.410 | 50.298 | 0.00 | 0.00 |
| ATOM | 3214 | CA   | PRO | X | 212 | 25.335 | 45.105 | 49.312 | 0.00 | 0.00 |
| ATOM | 3215 | HA   | PRO | X | 212 | 25.243 | 44.063 | 49.005 | 0.00 | 0.00 |
| ATOM | 3216 | C    | PRO | X | 212 | 25.158 | 46.013 | 48.160 | 0.00 | 0.00 |
| ATOM | 3217 | O    | PRO | X | 212 | 24.663 | 45.592 | 47.118 | 0.00 | 0.00 |
| ATOM | 3218 | N    | PRO | X | 213 | 25.583 | 47.327 | 48.219 | 0.00 | 0.00 |
| ATOM | 3219 | CD   | PRO | X | 213 | 25.781 | 48.110 | 49.442 | 0.00 | 0.00 |
| ATOM | 3220 | HD2  | PRO | X | 213 | 26.844 | 48.112 | 49.683 | 0.00 | 0.00 |
| ATOM | 3221 | HD3  | PRO | X | 213 | 25.018 | 47.929 | 50.200 | 0.00 | 0.00 |
| ATOM | 3222 | CG   | PRO | X | 213 | 25.458 | 49.530 | 49.032 | 0.00 | 0.00 |
| ATOM | 3223 | HG2  | PRO | X | 213 | 26.063 | 50.278 | 49.546 | 0.00 | 0.00 |
| ATOM | 3224 | HG3  | PRO | X | 213 | 24.403 | 49.743 | 49.203 | 0.00 | 0.00 |
| ATOM | 3225 | CB   | PRO | X | 213 | 25.693 | 49.583 | 47.566 | 0.00 | 0.00 |
| ATOM | 3226 | HB2  | PRO | X | 213 | 26.695 | 49.968 | 47.376 | 0.00 | 0.00 |
| ATOM | 3227 | HB3  | PRO | X | 213 | 24.990 | 50.286 | 47.118 | 0.00 | 0.00 |
| ATOM | 3228 | CA   | PRO | X | 213 | 25.478 | 48.189 | 47.088 | 0.00 | 0.00 |
| ATOM | 3229 | HA   | PRO | X | 213 | 24.405 | 48.048 | 46.960 | 0.00 | 0.00 |
| ATOM | 3230 | C    | PRO | X | 213 | 26.157 | 47.883 | 45.750 | 0.00 | 0.00 |
| ATOM | 3231 | O    | PRO | X | 213 | 26.036 | 48.681 | 44.870 | 0.00 | 0.00 |
| ATOM | 3232 | N    | SER | X | 214 | 27.006 | 46.848 | 45.634 | 0.00 | 0.00 |
| ATOM | 3233 | H    | SER | X | 214 | 27.205 | 46.321 | 46.472 | 0.00 | 0.00 |
| ATOM | 3234 | CA   | SER | X | 214 | 27.500 | 46.288 | 44.378 | 0.00 | 0.00 |
| ATOM | 3235 | HA   | SER | X | 214 | 27.612 | 47.099 | 43.658 | 0.00 | 0.00 |
| ATOM | 3236 | CB   | SER | X | 214 | 28.895 | 45.724 | 44.675 | 0.00 | 0.00 |
| ATOM | 3237 | HB2  | SER | X | 214 | 28.817 | 45.134 | 45.588 | 0.00 | 0.00 |
| ATOM | 3238 | HB3  | SER | X | 214 | 29.139 | 45.133 | 43.792 | 0.00 | 0.00 |
| ATOM | 3239 | OG   | SER | X | 214 | 29.770 | 46.781 | 44.813 | 0.00 | 0.00 |
| ATOM | 3240 | HG   | SER | X | 214 | 30.579 | 46.464 | 44.405 | 0.00 | 0.00 |
| ATOM | 3241 | C    | SER | X | 214 | 26.557 | 45.274 | 43.717 | 0.00 | 0.00 |
| ATOM | 3242 | O    | SER | X | 214 | 26.674 | 45.095 | 42.516 | 0.00 | 0.00 |
| ATOM | 3243 | N    | ARG | X | 215 | 25.660 | 44.640 | 44.464 | 0.00 | 0.00 |
| ATOM | 3244 | H    | ARG | X | 215 | 25.772 | 44.836 | 45.449 | 0.00 | 0.00 |
| ATOM | 3245 | CA   | ARG | X | 215 | 25.096 | 43.304 | 44.204 | 0.00 | 0.00 |
| ATOM | 3246 | HA   | ARG | X | 215 | 25.911 | 42.781 | 43.704 | 0.00 | 0.00 |
| ATOM | 3247 | CB   | ARG | X | 215 | 24.875 | 42.545 | 45.494 | 0.00 | 0.00 |
| ATOM | 3248 | HB2  | ARG | X | 215 | 24.187 | 43.074 | 46.153 | 0.00 | 0.00 |
| ATOM | 3249 | HB3  | ARG | X | 215 | 24.437 | 41.572 | 45.273 | 0.00 | 0.00 |
| ATOM | 3250 | CG   | ARG | X | 215 | 26.184 | 42.425 | 46.230 | 0.00 | 0.00 |
| ATOM | 3251 | HG2  | ARG | X | 215 | 26.941 | 42.154 | 45.494 | 0.00 | 0.00 |
| ATOM | 3252 | HG3  | ARG | X | 215 | 26.334 | 43.337 | 46.808 | 0.00 | 0.00 |
| ATOM | 3253 | CD   | ARG | X | 215 | 26.078 | 41.300 | 47.284 | 0.00 | 0.00 |
| ATOM | 3254 | HD2  | ARG | X | 215 | 26.008 | 40.317 | 46.818 | 0.00 | 0.00 |

|      |      |      |     |   |     |        |        |        |      |      |
|------|------|------|-----|---|-----|--------|--------|--------|------|------|
| ATOM | 3255 | HD3  | ARG | X | 215 | 27.038 | 41.257 | 47.800 | 0.00 | 0.00 |
| ATOM | 3256 | NE   | ARG | X | 215 | 24.936 | 41.450 | 48.235 | 0.00 | 0.00 |
| ATOM | 3257 | HE   | ARG | X | 215 | 24.163 | 41.985 | 47.866 | 0.00 | 0.00 |
| ATOM | 3258 | CZ   | ARG | X | 215 | 24.943 | 41.244 | 49.509 | 0.00 | 0.00 |
| ATOM | 3259 | NH1  | ARG | X | 215 | 26.016 | 40.908 | 50.200 | 0.00 | 0.00 |
| ATOM | 3260 | HH11 | ARG | X | 215 | 26.902 | 40.710 | 49.759 | 0.00 | 0.00 |
| ATOM | 3261 | HH12 | ARG | X | 215 | 25.877 | 40.641 | 51.164 | 0.00 | 0.00 |
| ATOM | 3262 | NH2  | ARG | X | 215 | 23.802 | 41.528 | 50.185 | 0.00 | 0.00 |
| ATOM | 3263 | HH21 | ARG | X | 215 | 22.997 | 41.856 | 49.672 | 0.00 | 0.00 |
| ATOM | 3264 | HH22 | ARG | X | 215 | 23.611 | 41.340 | 51.159 | 0.00 | 0.00 |
| ATOM | 3265 | C    | ARG | X | 215 | 23.789 | 43.229 | 43.356 | 0.00 | 0.00 |
| ATOM | 3266 | O    | ARG | X | 215 | 23.428 | 42.118 | 42.997 | 0.00 | 0.00 |
| ATOM | 3267 | N    | GLY | X | 216 | 23.292 | 44.422 | 42.900 | 0.00 | 0.00 |
| ATOM | 3268 | H    | GLY | X | 216 | 23.541 | 45.304 | 43.324 | 0.00 | 0.00 |
| ATOM | 3269 | CA   | GLY | X | 216 | 22.361 | 44.462 | 41.797 | 0.00 | 0.00 |
| ATOM | 3270 | HA2  | GLY | X | 216 | 21.570 | 43.741 | 42.004 | 0.00 | 0.00 |
| ATOM | 3271 | HA3  | GLY | X | 216 | 21.845 | 45.408 | 41.966 | 0.00 | 0.00 |
| ATOM | 3272 | C    | GLY | X | 216 | 23.014 | 44.347 | 40.401 | 0.00 | 0.00 |
| ATOM | 3273 | O    | GLY | X | 216 | 22.377 | 43.962 | 39.429 | 0.00 | 0.00 |
| ATOM | 3274 | N    | LEU | X | 217 | 24.218 | 44.857 | 40.263 | 0.00 | 0.00 |
| ATOM | 3275 | H    | LEU | X | 217 | 24.555 | 45.376 | 41.061 | 0.00 | 0.00 |
| ATOM | 3276 | CA   | LEU | X | 217 | 24.908 | 45.013 | 38.975 | 0.00 | 0.00 |
| ATOM | 3277 | HA   | LEU | X | 217 | 24.275 | 45.470 | 38.215 | 0.00 | 0.00 |
| ATOM | 3278 | CB   | LEU | X | 217 | 26.188 | 45.912 | 39.223 | 0.00 | 0.00 |
| ATOM | 3279 | HB2  | LEU | X | 217 | 26.921 | 45.364 | 39.815 | 0.00 | 0.00 |
| ATOM | 3280 | HB3  | LEU | X | 217 | 26.631 | 46.027 | 38.233 | 0.00 | 0.00 |
| ATOM | 3281 | CG   | LEU | X | 217 | 25.766 | 47.278 | 39.782 | 0.00 | 0.00 |
| ATOM | 3282 | HG   | LEU | X | 217 | 25.421 | 47.025 | 40.785 | 0.00 | 0.00 |
| ATOM | 3283 | CD1  | LEU | X | 217 | 26.968 | 48.200 | 39.961 | 0.00 | 0.00 |
| ATOM | 3284 | HD11 | LEU | X | 217 | 27.721 | 47.567 | 40.431 | 0.00 | 0.00 |
| ATOM | 3285 | HD12 | LEU | X | 217 | 26.683 | 49.055 | 40.574 | 0.00 | 0.00 |
| ATOM | 3286 | HD13 | LEU | X | 217 | 27.390 | 48.544 | 39.017 | 0.00 | 0.00 |
| ATOM | 3287 | CD2  | LEU | X | 217 | 24.616 | 47.936 | 39.055 | 0.00 | 0.00 |
| ATOM | 3288 | HD21 | LEU | X | 217 | 24.960 | 47.891 | 38.022 | 0.00 | 0.00 |
| ATOM | 3289 | HD22 | LEU | X | 217 | 23.675 | 47.392 | 39.126 | 0.00 | 0.00 |
| ATOM | 3290 | HD23 | LEU | X | 217 | 24.460 | 48.971 | 39.360 | 0.00 | 0.00 |
| ATOM | 3291 | C    | LEU | X | 217 | 25.399 | 43.635 | 38.405 | 0.00 | 0.00 |
| ATOM | 3292 | O    | LEU | X | 217 | 25.609 | 43.543 | 37.190 | 0.00 | 0.00 |
| ATOM | 3293 | N    | PHE | X | 218 | 25.584 | 42.653 | 39.285 | 0.00 | 0.00 |
| ATOM | 3294 | H    | PHE | X | 218 | 25.515 | 42.958 | 40.245 | 0.00 | 0.00 |
| ATOM | 3295 | CA   | PHE | X | 218 | 26.142 | 41.299 | 38.835 | 0.00 | 0.00 |
| ATOM | 3296 | HA   | PHE | X | 218 | 25.937 | 41.282 | 37.764 | 0.00 | 0.00 |
| ATOM | 3297 | CB   | PHE | X | 218 | 27.655 | 41.153 | 39.145 | 0.00 | 0.00 |
| ATOM | 3298 | HB2  | PHE | X | 218 | 28.182 | 40.318 | 38.685 | 0.00 | 0.00 |
| ATOM | 3299 | HB3  | PHE | X | 218 | 28.034 | 42.131 | 38.845 | 0.00 | 0.00 |
| ATOM | 3300 | CG   | PHE | X | 218 | 27.925 | 41.047 | 40.550 | 0.00 | 0.00 |
| ATOM | 3301 | CD1  | PHE | X | 218 | 27.683 | 42.104 | 41.472 | 0.00 | 0.00 |
| ATOM | 3302 | HD1  | PHE | X | 218 | 27.297 | 42.998 | 41.005 | 0.00 | 0.00 |
| ATOM | 3303 | CE1  | PHE | X | 218 | 28.112 | 41.995 | 42.741 | 0.00 | 0.00 |
| ATOM | 3304 | HE1  | PHE | X | 218 | 28.103 | 42.919 | 43.300 | 0.00 | 0.00 |
| ATOM | 3305 | CZ   | PHE | X | 218 | 28.762 | 40.840 | 43.217 | 0.00 | 0.00 |
| ATOM | 3306 | HZ   | PHE | X | 218 | 29.015 | 40.789 | 44.265 | 0.00 | 0.00 |
| ATOM | 3307 | CE2  | PHE | X | 218 | 28.907 | 39.716 | 42.443 | 0.00 | 0.00 |
| ATOM | 3308 | HE2  | PHE | X | 218 | 29.378 | 38.802 | 42.773 | 0.00 | 0.00 |
| ATOM | 3309 | CD2  | PHE | X | 218 | 28.600 | 39.875 | 41.033 | 0.00 | 0.00 |
| ATOM | 3310 | HD2  | PHE | X | 218 | 28.699 | 39.030 | 40.368 | 0.00 | 0.00 |
| ATOM | 3311 | C    | PHE | X | 218 | 25.399 | 40.157 | 39.467 | 0.00 | 0.00 |
| ATOM | 3312 | O    | PHE | X | 218 | 24.459 | 40.330 | 40.281 | 0.00 | 0.00 |
| ATOM | 3313 | N    | HIE | X | 219 | 25.693 | 38.955 | 38.987 | 0.00 | 0.00 |
| ATOM | 3314 | H    | HIE | X | 219 | 26.420 | 39.061 | 38.294 | 0.00 | 0.00 |
| ATOM | 3315 | CA   | HIE | X | 219 | 25.078 | 37.665 | 39.269 | 0.00 | 0.00 |
| ATOM | 3316 | HA   | HIE | X | 219 | 24.345 | 37.886 | 40.044 | 0.00 | 0.00 |
| ATOM | 3317 | CB   | HIE | X | 219 | 24.419 | 37.201 | 37.913 | 0.00 | 0.00 |
| ATOM | 3318 | HB2  | HIE | X | 219 | 25.165 | 36.967 | 37.154 | 0.00 | 0.00 |
| ATOM | 3319 | HB3  | HIE | X | 219 | 23.724 | 36.388 | 38.124 | 0.00 | 0.00 |
| ATOM | 3320 | CG   | HIE | X | 219 | 23.525 | 38.339 | 37.438 | 0.00 | 0.00 |
| ATOM | 3321 | ND1  | HIE | X | 219 | 23.796 | 39.126 | 36.343 | 0.00 | 0.00 |

|      |      |      |     |   |     |        |        |        |      |      |
|------|------|------|-----|---|-----|--------|--------|--------|------|------|
| ATOM | 3322 | CE1  | HIE | X | 219 | 22.936 | 40.114 | 36.416 | 0.00 | 0.00 |
| ATOM | 3323 | HE1  | HIE | X | 219 | 22.930 | 40.951 | 35.733 | 0.00 | 0.00 |
| ATOM | 3324 | NE2  | HIE | X | 219 | 22.237 | 40.029 | 37.514 | 0.00 | 0.00 |
| ATOM | 3325 | HE2  | HIE | X | 219 | 21.756 | 40.831 | 37.896 | 0.00 | 0.00 |
| ATOM | 3326 | CD2  | HIE | X | 219 | 22.561 | 38.903 | 38.171 | 0.00 | 0.00 |
| ATOM | 3327 | HD2  | HIE | X | 219 | 22.327 | 38.627 | 39.189 | 0.00 | 0.00 |
| ATOM | 3328 | C    | HIE | X | 219 | 25.990 | 36.487 | 39.838 | 0.00 | 0.00 |
| ATOM | 3329 | O    | HIE | X | 219 | 25.551 | 35.659 | 40.595 | 0.00 | 0.00 |
| ATOM | 3330 | N    | ARG | X | 220 | 27.305 | 36.507 | 39.511 | 0.00 | 0.00 |
| ATOM | 3331 | H    | ARG | X | 220 | 27.522 | 37.172 | 38.783 | 0.00 | 0.00 |
| ATOM | 3332 | CA   | ARG | X | 220 | 28.257 | 35.512 | 40.043 | 0.00 | 0.00 |
| ATOM | 3333 | HA   | ARG | X | 220 | 27.886 | 35.151 | 41.002 | 0.00 | 0.00 |
| ATOM | 3334 | CB   | ARG | X | 220 | 28.352 | 34.305 | 39.072 | 0.00 | 0.00 |
| ATOM | 3335 | HB2  | ARG | X | 220 | 28.844 | 34.702 | 38.185 | 0.00 | 0.00 |
| ATOM | 3336 | HB3  | ARG | X | 220 | 29.093 | 33.675 | 39.563 | 0.00 | 0.00 |
| ATOM | 3337 | CG   | ARG | X | 220 | 27.021 | 33.640 | 38.653 | 0.00 | 0.00 |
| ATOM | 3338 | HG2  | ARG | X | 220 | 26.545 | 33.341 | 39.587 | 0.00 | 0.00 |
| ATOM | 3339 | HG3  | ARG | X | 220 | 26.432 | 34.370 | 38.098 | 0.00 | 0.00 |
| ATOM | 3340 | CD   | ARG | X | 220 | 27.252 | 32.333 | 37.838 | 0.00 | 0.00 |
| ATOM | 3341 | HD2  | ARG | X | 220 | 27.464 | 32.650 | 36.817 | 0.00 | 0.00 |
| ATOM | 3342 | HD3  | ARG | X | 220 | 28.090 | 31.742 | 38.208 | 0.00 | 0.00 |
| ATOM | 3343 | NE   | ARG | X | 220 | 26.118 | 31.382 | 37.852 | 0.00 | 0.00 |
| ATOM | 3344 | HE   | ARG | X | 220 | 25.922 | 30.876 | 38.704 | 0.00 | 0.00 |
| ATOM | 3345 | CZ   | ARG | X | 220 | 25.123 | 31.302 | 37.004 | 0.00 | 0.00 |
| ATOM | 3346 | NH1  | ARG | X | 220 | 25.137 | 31.923 | 35.816 | 0.00 | 0.00 |
| ATOM | 3347 | HH11 | ARG | X | 220 | 25.945 | 32.484 | 35.585 | 0.00 | 0.00 |
| ATOM | 3348 | HH12 | ARG | X | 220 | 24.416 | 31.861 | 35.111 | 0.00 | 0.00 |
| ATOM | 3349 | NH2  | ARG | X | 220 | 24.139 | 30.527 | 37.388 | 0.00 | 0.00 |
| ATOM | 3350 | HH21 | ARG | X | 220 | 23.987 | 30.285 | 38.357 | 0.00 | 0.00 |
| ATOM | 3351 | HH22 | ARG | X | 220 | 23.446 | 30.247 | 36.709 | 0.00 | 0.00 |
| ATOM | 3352 | C    | ARG | X | 220 | 29.679 | 36.032 | 40.316 | 0.00 | 0.00 |
| ATOM | 3353 | O    | ARG | X | 220 | 29.983 | 37.190 | 39.973 | 0.00 | 0.00 |
| ATOM | 3354 | N    | ALA | X | 221 | 30.554 | 35.186 | 40.829 | 0.00 | 0.00 |
| ATOM | 3355 | H    | ALA | X | 221 | 30.180 | 34.310 | 41.166 | 0.00 | 0.00 |
| ATOM | 3356 | CA   | ALA | X | 221 | 31.879 | 35.630 | 41.271 | 0.00 | 0.00 |
| ATOM | 3357 | HA   | ALA | X | 221 | 32.156 | 36.511 | 40.691 | 0.00 | 0.00 |
| ATOM | 3358 | CB   | ALA | X | 221 | 31.785 | 36.003 | 42.785 | 0.00 | 0.00 |
| ATOM | 3359 | HB1  | ALA | X | 221 | 31.454 | 35.211 | 43.456 | 0.00 | 0.00 |
| ATOM | 3360 | HB2  | ALA | X | 221 | 31.053 | 36.773 | 43.027 | 0.00 | 0.00 |
| ATOM | 3361 | HB3  | ALA | X | 221 | 32.760 | 36.397 | 43.074 | 0.00 | 0.00 |
| ATOM | 3362 | C    | ALA | X | 221 | 33.020 | 34.566 | 41.062 | 0.00 | 0.00 |
| ATOM | 3363 | O    | ALA | X | 221 | 32.781 | 33.355 | 41.216 | 0.00 | 0.00 |
| ATOM | 3364 | N    | VAL | X | 222 | 34.270 | 34.905 | 40.655 | 0.00 | 0.00 |
| ATOM | 3365 | H    | VAL | X | 222 | 34.428 | 35.891 | 40.498 | 0.00 | 0.00 |
| ATOM | 3366 | CA   | VAL | X | 222 | 35.397 | 34.024 | 40.605 | 0.00 | 0.00 |
| ATOM | 3367 | HA   | VAL | X | 222 | 35.199 | 32.993 | 40.899 | 0.00 | 0.00 |
| ATOM | 3368 | CB   | VAL | X | 222 | 35.783 | 33.880 | 39.126 | 0.00 | 0.00 |
| ATOM | 3369 | HB   | VAL | X | 222 | 35.910 | 34.877 | 38.705 | 0.00 | 0.00 |
| ATOM | 3370 | CG1  | VAL | X | 222 | 37.148 | 33.176 | 39.062 | 0.00 | 0.00 |
| ATOM | 3371 | HG11 | VAL | X | 222 | 37.980 | 33.726 | 39.500 | 0.00 | 0.00 |
| ATOM | 3372 | HG12 | VAL | X | 222 | 37.146 | 32.134 | 39.383 | 0.00 | 0.00 |
| ATOM | 3373 | HG13 | VAL | X | 222 | 37.381 | 33.225 | 37.999 | 0.00 | 0.00 |
| ATOM | 3374 | CG2  | VAL | X | 222 | 34.769 | 33.028 | 38.354 | 0.00 | 0.00 |
| ATOM | 3375 | HG21 | VAL | X | 222 | 35.260 | 32.634 | 37.465 | 0.00 | 0.00 |
| ATOM | 3376 | HG22 | VAL | X | 222 | 33.893 | 33.578 | 38.011 | 0.00 | 0.00 |
| ATOM | 3377 | HG23 | VAL | X | 222 | 34.420 | 32.246 | 39.028 | 0.00 | 0.00 |
| ATOM | 3378 | C    | VAL | X | 222 | 36.595 | 34.586 | 41.315 | 0.00 | 0.00 |
| ATOM | 3379 | O    | VAL | X | 222 | 37.043 | 35.707 | 40.984 | 0.00 | 0.00 |
| ATOM | 3380 | N    | LEU | X | 223 | 37.114 | 33.949 | 42.361 | 0.00 | 0.00 |
| ATOM | 3381 | H    | LEU | X | 223 | 36.724 | 33.049 | 42.602 | 0.00 | 0.00 |
| ATOM | 3382 | CA   | LEU | X | 223 | 38.355 | 34.423 | 43.079 | 0.00 | 0.00 |
| ATOM | 3383 | HA   | LEU | X | 223 | 38.622 | 35.447 | 42.818 | 0.00 | 0.00 |
| ATOM | 3384 | CB   | LEU | X | 223 | 38.073 | 34.474 | 44.611 | 0.00 | 0.00 |
| ATOM | 3385 | HB2  | LEU | X | 223 | 37.639 | 33.502 | 44.841 | 0.00 | 0.00 |
| ATOM | 3386 | HB3  | LEU | X | 223 | 38.981 | 34.507 | 45.213 | 0.00 | 0.00 |
| ATOM | 3387 | CG   | LEU | X | 223 | 37.138 | 35.502 | 45.204 | 0.00 | 0.00 |
| ATOM | 3388 | HG   | LEU | X | 223 | 37.558 | 36.504 | 45.113 | 0.00 | 0.00 |



|      |      |      |     |   |     |        |        |        |      |      |
|------|------|------|-----|---|-----|--------|--------|--------|------|------|
| ATOM | 3389 | CD1  | LEU | X | 223 | 35.693 | 35.493 | 44.635 | 0.00 | 0.00 |
| ATOM | 3390 | HD11 | LEU | X | 223 | 35.312 | 34.482 | 44.782 | 0.00 | 0.00 |
| ATOM | 3391 | HD12 | LEU | X | 223 | 35.450 | 35.885 | 43.647 | 0.00 | 0.00 |
| ATOM | 3392 | HD13 | LEU | X | 223 | 35.159 | 36.218 | 45.249 | 0.00 | 0.00 |
| ATOM | 3393 | CD2  | LEU | X | 223 | 36.988 | 35.275 | 46.789 | 0.00 | 0.00 |
| ATOM | 3394 | HD21 | LEU | X | 223 | 37.994 | 35.095 | 47.167 | 0.00 | 0.00 |
| ATOM | 3395 | HD22 | LEU | X | 223 | 36.590 | 36.142 | 47.317 | 0.00 | 0.00 |
| ATOM | 3396 | HD23 | LEU | X | 223 | 36.266 | 34.508 | 47.069 | 0.00 | 0.00 |
| ATOM | 3397 | C    | LEU | X | 223 | 39.425 | 33.373 | 42.728 | 0.00 | 0.00 |
| ATOM | 3398 | O    | LEU | X | 223 | 39.191 | 32.171 | 43.040 | 0.00 | 0.00 |
| ATOM | 3399 | N    | GLN | X | 224 | 40.607 | 33.786 | 42.241 | 0.00 | 0.00 |
| ATOM | 3400 | H    | GLN | X | 224 | 40.636 | 34.763 | 41.988 | 0.00 | 0.00 |
| ATOM | 3401 | CA   | GLN | X | 224 | 41.780 | 32.988 | 42.148 | 0.00 | 0.00 |
| ATOM | 3402 | HA   | GLN | X | 224 | 41.675 | 31.992 | 42.578 | 0.00 | 0.00 |
| ATOM | 3403 | CB   | GLN | X | 224 | 42.167 | 32.980 | 40.745 | 0.00 | 0.00 |
| ATOM | 3404 | HB2  | GLN | X | 224 | 42.361 | 33.992 | 40.389 | 0.00 | 0.00 |
| ATOM | 3405 | HB3  | GLN | X | 224 | 42.991 | 32.276 | 40.631 | 0.00 | 0.00 |
| ATOM | 3406 | CG   | GLN | X | 224 | 41.095 | 32.364 | 39.867 | 0.00 | 0.00 |
| ATOM | 3407 | HG2  | GLN | X | 224 | 40.668 | 31.415 | 40.192 | 0.00 | 0.00 |
| ATOM | 3408 | HG3  | GLN | X | 224 | 40.310 | 33.110 | 39.991 | 0.00 | 0.00 |
| ATOM | 3409 | CD   | GLN | X | 224 | 41.544 | 32.347 | 38.438 | 0.00 | 0.00 |
| ATOM | 3410 | OE1  | GLN | X | 224 | 40.683 | 32.561 | 37.611 | 0.00 | 0.00 |
| ATOM | 3411 | NE2  | GLN | X | 224 | 42.775 | 32.228 | 38.055 | 0.00 | 0.00 |
| ATOM | 3412 | HE21 | GLN | X | 224 | 43.039 | 31.998 | 37.107 | 0.00 | 0.00 |
| ATOM | 3413 | HE22 | GLN | X | 224 | 43.561 | 32.040 | 38.662 | 0.00 | 0.00 |
| ATOM | 3414 | C    | GLN | X | 224 | 42.842 | 33.724 | 43.059 | 0.00 | 0.00 |
| ATOM | 3415 | O    | GLN | X | 224 | 42.932 | 34.951 | 42.982 | 0.00 | 0.00 |
| ATOM | 3416 | N    | SER | X | 225 | 43.662 | 33.020 | 43.861 | 0.00 | 0.00 |
| ATOM | 3417 | H    | SER | X | 225 | 43.505 | 32.054 | 44.109 | 0.00 | 0.00 |
| ATOM | 3418 | CA   | SER | X | 225 | 44.952 | 33.566 | 44.404 | 0.00 | 0.00 |
| ATOM | 3419 | HA   | SER | X | 225 | 45.372 | 32.796 | 45.051 | 0.00 | 0.00 |
| ATOM | 3420 | CB   | SER | X | 225 | 45.994 | 33.674 | 43.292 | 0.00 | 0.00 |
| ATOM | 3421 | HB2  | SER | X | 225 | 45.722 | 32.900 | 42.574 | 0.00 | 0.00 |
| ATOM | 3422 | HB3  | SER | X | 225 | 45.818 | 34.581 | 42.714 | 0.00 | 0.00 |
| ATOM | 3423 | OG   | SER | X | 225 | 47.370 | 33.517 | 43.740 | 0.00 | 0.00 |
| ATOM | 3424 | HG   | SER | X | 225 | 47.444 | 32.768 | 44.336 | 0.00 | 0.00 |
| ATOM | 3425 | C    | SER | X | 225 | 44.885 | 34.859 | 45.308 | 0.00 | 0.00 |
| ATOM | 3426 | O    | SER | X | 225 | 45.954 | 35.413 | 45.625 | 0.00 | 0.00 |
| ATOM | 3427 | N    | GLY | X | 226 | 43.677 | 35.306 | 45.711 | 0.00 | 0.00 |
| ATOM | 3428 | H    | GLY | X | 226 | 42.896 | 34.949 | 45.180 | 0.00 | 0.00 |
| ATOM | 3429 | CA   | GLY | X | 226 | 43.404 | 36.430 | 46.608 | 0.00 | 0.00 |
| ATOM | 3430 | HA2  | GLY | X | 226 | 44.227 | 36.546 | 47.313 | 0.00 | 0.00 |
| ATOM | 3431 | HA3  | GLY | X | 226 | 43.431 | 37.334 | 46.000 | 0.00 | 0.00 |
| ATOM | 3432 | C    | GLY | X | 226 | 42.021 | 36.404 | 47.292 | 0.00 | 0.00 |
| ATOM | 3433 | O    | GLY | X | 226 | 41.148 | 35.705 | 46.801 | 0.00 | 0.00 |
| ATOM | 3434 | N    | ALA | X | 227 | 41.888 | 37.181 | 48.412 | 0.00 | 0.00 |
| ATOM | 3435 | H    | ALA | X | 227 | 42.702 | 37.667 | 48.760 | 0.00 | 0.00 |
| ATOM | 3436 | CA   | ALA | X | 227 | 40.638 | 37.259 | 49.139 | 0.00 | 0.00 |
| ATOM | 3437 | HA   | ALA | X | 227 | 39.902 | 37.204 | 48.338 | 0.00 | 0.00 |
| ATOM | 3438 | CB   | ALA | X | 227 | 40.542 | 36.024 | 50.064 | 0.00 | 0.00 |
| ATOM | 3439 | HB1  | ALA | X | 227 | 41.311 | 36.104 | 50.832 | 0.00 | 0.00 |
| ATOM | 3440 | HB2  | ALA | X | 227 | 40.742 | 35.118 | 49.491 | 0.00 | 0.00 |
| ATOM | 3441 | HB3  | ALA | X | 227 | 39.605 | 36.019 | 50.620 | 0.00 | 0.00 |
| ATOM | 3442 | C    | ALA | X | 227 | 40.585 | 38.630 | 49.916 | 0.00 | 0.00 |
| ATOM | 3443 | O    | ALA | X | 227 | 41.622 | 39.206 | 50.267 | 0.00 | 0.00 |
| ATOM | 3444 | N    | PRO | X | 228 | 39.390 | 39.171 | 50.263 | 0.00 | 0.00 |
| ATOM | 3445 | CD   | PRO | X | 228 | 38.082 | 38.609 | 49.859 | 0.00 | 0.00 |
| ATOM | 3446 | HD2  | PRO | X | 228 | 38.062 | 37.599 | 50.268 | 0.00 | 0.00 |
| ATOM | 3447 | HD3  | PRO | X | 228 | 37.976 | 38.623 | 48.774 | 0.00 | 0.00 |
| ATOM | 3448 | CG   | PRO | X | 228 | 37.028 | 39.418 | 50.557 | 0.00 | 0.00 |
| ATOM | 3449 | HG2  | PRO | X | 228 | 36.848 | 39.197 | 51.610 | 0.00 | 0.00 |
| ATOM | 3450 | HG3  | PRO | X | 228 | 36.163 | 39.300 | 49.904 | 0.00 | 0.00 |
| ATOM | 3451 | CB   | PRO | X | 228 | 37.686 | 40.783 | 50.578 | 0.00 | 0.00 |
| ATOM | 3452 | HB2  | PRO | X | 228 | 37.245 | 41.438 | 51.330 | 0.00 | 0.00 |
| ATOM | 3453 | HB3  | PRO | X | 228 | 37.567 | 41.210 | 49.583 | 0.00 | 0.00 |
| ATOM | 3454 | CA   | PRO | X | 228 | 39.165 | 40.413 | 50.974 | 0.00 | 0.00 |
| ATOM | 3455 | HA   | PRO | X | 228 | 39.842 | 41.233 | 50.735 | 0.00 | 0.00 |

|      |      |      |     |   |     |        |        |        |      |      |
|------|------|------|-----|---|-----|--------|--------|--------|------|------|
| ATOM | 3456 | C    | PRO | X | 228 | 39.337 | 40.209 | 52.538 | 0.00 | 0.00 |
| ATOM | 3457 | O    | PRO | X | 228 | 39.646 | 41.241 | 53.139 | 0.00 | 0.00 |
| ATOM | 3458 | N    | ASN | X | 229 | 39.206 | 38.987 | 53.071 | 0.00 | 0.00 |
| ATOM | 3459 | H    | ASN | X | 229 | 39.079 | 38.135 | 52.544 | 0.00 | 0.00 |
| ATOM | 3460 | CA   | ASN | X | 229 | 39.493 | 38.823 | 54.506 | 0.00 | 0.00 |
| ATOM | 3461 | HA   | ASN | X | 229 | 39.026 | 39.616 | 55.089 | 0.00 | 0.00 |
| ATOM | 3462 | CB   | ASN | X | 229 | 38.746 | 37.605 | 55.074 | 0.00 | 0.00 |
| ATOM | 3463 | HB2  | ASN | X | 229 | 38.863 | 37.520 | 56.154 | 0.00 | 0.00 |
| ATOM | 3464 | HB3  | ASN | X | 229 | 37.704 | 37.680 | 54.763 | 0.00 | 0.00 |
| ATOM | 3465 | CG   | ASN | X | 229 | 39.173 | 36.174 | 54.636 | 0.00 | 0.00 |
| ATOM | 3466 | OD1  | ASN | X | 229 | 39.817 | 35.947 | 53.638 | 0.00 | 0.00 |
| ATOM | 3467 | ND2  | ASN | X | 229 | 38.951 | 35.203 | 55.510 | 0.00 | 0.00 |
| ATOM | 3468 | HD21 | ASN | X | 229 | 39.381 | 34.312 | 55.304 | 0.00 | 0.00 |
| ATOM | 3469 | HD22 | ASN | X | 229 | 38.877 | 35.368 | 56.504 | 0.00 | 0.00 |
| ATOM | 3470 | C    | ASN | X | 229 | 41.030 | 38.667 | 54.824 | 0.00 | 0.00 |
| ATOM | 3471 | O    | ASN | X | 229 | 41.359 | 38.357 | 55.997 | 0.00 | 0.00 |
| ATOM | 3472 | N    | GLY | X | 230 | 41.936 | 38.767 | 53.793 | 0.00 | 0.00 |
| ATOM | 3473 | H    | GLY | X | 230 | 41.598 | 39.134 | 52.915 | 0.00 | 0.00 |
| ATOM | 3474 | CA   | GLY | X | 230 | 43.339 | 38.686 | 54.084 | 0.00 | 0.00 |
| ATOM | 3475 | HA2  | GLY | X | 230 | 43.446 | 37.956 | 54.886 | 0.00 | 0.00 |
| ATOM | 3476 | HA3  | GLY | X | 230 | 43.821 | 38.434 | 53.139 | 0.00 | 0.00 |
| ATOM | 3477 | C    | GLY | X | 230 | 43.986 | 39.956 | 54.645 | 0.00 | 0.00 |
| ATOM | 3478 | O    | GLY | X | 230 | 43.575 | 41.031 | 54.250 | 0.00 | 0.00 |
| ATOM | 3479 | N    | PRO | X | 231 | 44.854 | 39.893 | 55.686 | 0.00 | 0.00 |
| ATOM | 3480 | CD   | PRO | X | 231 | 45.458 | 38.654 | 56.205 | 0.00 | 0.00 |
| ATOM | 3481 | HD2  | PRO | X | 231 | 45.907 | 38.096 | 55.383 | 0.00 | 0.00 |
| ATOM | 3482 | HD3  | PRO | X | 231 | 44.662 | 38.147 | 56.751 | 0.00 | 0.00 |
| ATOM | 3483 | CG   | PRO | X | 231 | 46.597 | 39.147 | 57.124 | 0.00 | 0.00 |
| ATOM | 3484 | HG2  | PRO | X | 231 | 47.463 | 39.416 | 56.519 | 0.00 | 0.00 |
| ATOM | 3485 | HG3  | PRO | X | 231 | 46.804 | 38.457 | 57.942 | 0.00 | 0.00 |
| ATOM | 3486 | CB   | PRO | X | 231 | 46.044 | 40.419 | 57.690 | 0.00 | 0.00 |
| ATOM | 3487 | HB2  | PRO | X | 231 | 46.909 | 41.060 | 57.858 | 0.00 | 0.00 |
| ATOM | 3488 | HB3  | PRO | X | 231 | 45.385 | 40.260 | 58.543 | 0.00 | 0.00 |
| ATOM | 3489 | CA   | PRO | X | 231 | 45.229 | 40.980 | 56.544 | 0.00 | 0.00 |
| ATOM | 3490 | HA   | PRO | X | 231 | 44.322 | 41.301 | 57.057 | 0.00 | 0.00 |
| ATOM | 3491 | C    | PRO | X | 231 | 45.874 | 42.164 | 55.768 | 0.00 | 0.00 |
| ATOM | 3492 | O    | PRO | X | 231 | 45.978 | 43.253 | 56.334 | 0.00 | 0.00 |
| ATOM | 3493 | N    | TRP | X | 232 | 46.328 | 41.958 | 54.525 | 0.00 | 0.00 |
| ATOM | 3494 | H    | TRP | X | 232 | 46.194 | 41.014 | 54.192 | 0.00 | 0.00 |
| ATOM | 3495 | CA   | TRP | X | 232 | 47.047 | 42.903 | 53.722 | 0.00 | 0.00 |
| ATOM | 3496 | HA   | TRP | X | 232 | 47.616 | 43.498 | 54.435 | 0.00 | 0.00 |
| ATOM | 3497 | CB   | TRP | X | 232 | 47.940 | 42.093 | 52.674 | 0.00 | 0.00 |
| ATOM | 3498 | HB2  | TRP | X | 232 | 48.225 | 42.790 | 51.886 | 0.00 | 0.00 |
| ATOM | 3499 | HB3  | TRP | X | 232 | 48.849 | 41.827 | 53.214 | 0.00 | 0.00 |
| ATOM | 3500 | CG   | TRP | X | 232 | 47.185 | 40.896 | 52.057 | 0.00 | 0.00 |
| ATOM | 3501 | CD1  | TRP | X | 232 | 47.079 | 39.630 | 52.545 | 0.00 | 0.00 |
| ATOM | 3502 | HD1  | TRP | X | 232 | 47.578 | 39.262 | 53.429 | 0.00 | 0.00 |
| ATOM | 3503 | NE1  | TRP | X | 232 | 46.222 | 38.880 | 51.774 | 0.00 | 0.00 |
| ATOM | 3504 | HE1  | TRP | X | 232 | 45.925 | 37.935 | 51.972 | 0.00 | 0.00 |
| ATOM | 3505 | CE2  | TRP | X | 232 | 45.817 | 39.578 | 50.634 | 0.00 | 0.00 |
| ATOM | 3506 | CZ2  | TRP | X | 232 | 44.876 | 39.261 | 49.631 | 0.00 | 0.00 |
| ATOM | 3507 | HZ2  | TRP | X | 232 | 44.326 | 38.336 | 49.536 | 0.00 | 0.00 |
| ATOM | 3508 | CH2  | TRP | X | 232 | 44.681 | 40.293 | 48.607 | 0.00 | 0.00 |
| ATOM | 3509 | HH2  | TRP | X | 232 | 44.054 | 40.049 | 47.763 | 0.00 | 0.00 |
| ATOM | 3510 | CZ3  | TRP | X | 232 | 45.319 | 41.540 | 48.758 | 0.00 | 0.00 |
| ATOM | 3511 | HZ3  | TRP | X | 232 | 45.169 | 42.250 | 47.958 | 0.00 | 0.00 |
| ATOM | 3512 | CE3  | TRP | X | 232 | 46.167 | 41.754 | 49.834 | 0.00 | 0.00 |
| ATOM | 3513 | HE3  | TRP | X | 232 | 46.646 | 42.711 | 49.978 | 0.00 | 0.00 |
| ATOM | 3514 | CD2  | TRP | X | 232 | 46.370 | 40.801 | 50.825 | 0.00 | 0.00 |
| ATOM | 3515 | C    | TRP | X | 232 | 46.073 | 43.837 | 52.903 | 0.00 | 0.00 |
| ATOM | 3516 | O    | TRP | X | 232 | 46.472 | 44.841 | 52.360 | 0.00 | 0.00 |
| ATOM | 3517 | N    | ALA | X | 233 | 44.781 | 43.410 | 52.752 | 0.00 | 0.00 |
| ATOM | 3518 | H    | ALA | X | 233 | 44.534 | 42.514 | 53.147 | 0.00 | 0.00 |
| ATOM | 3519 | CA   | ALA | X | 233 | 43.839 | 44.046 | 51.798 | 0.00 | 0.00 |
| ATOM | 3520 | HA   | ALA | X | 233 | 44.423 | 44.304 | 50.915 | 0.00 | 0.00 |
| ATOM | 3521 | CB   | ALA | X | 233 | 42.929 | 42.948 | 51.284 | 0.00 | 0.00 |
| ATOM | 3522 | HB1  | ALA | X | 233 | 42.028 | 43.296 | 50.780 | 0.00 | 0.00 |

|      |      |      |     |   |     |        |        |        |      |      |
|------|------|------|-----|---|-----|--------|--------|--------|------|------|
| ATOM | 3523 | HB2  | ALA | X | 233 | 42.620 | 42.308 | 52.110 | 0.00 | 0.00 |
| ATOM | 3524 | HB3  | ALA | X | 233 | 43.473 | 42.296 | 50.600 | 0.00 | 0.00 |
| ATOM | 3525 | C    | ALA | X | 233 | 43.099 | 45.276 | 52.346 | 0.00 | 0.00 |
| ATOM | 3526 | O    | ALA | X | 233 | 42.396 | 45.931 | 51.620 | 0.00 | 0.00 |
| ATOM | 3527 | N    | THR | X | 234 | 43.255 | 45.599 | 53.616 | 0.00 | 0.00 |
| ATOM | 3528 | H    | THR | X | 234 | 43.707 | 44.859 | 54.133 | 0.00 | 0.00 |
| ATOM | 3529 | CA   | THR | X | 234 | 43.026 | 46.940 | 54.201 | 0.00 | 0.00 |
| ATOM | 3530 | HA   | THR | X | 234 | 43.077 | 47.716 | 53.437 | 0.00 | 0.00 |
| ATOM | 3531 | CB   | THR | X | 234 | 41.610 | 47.008 | 54.914 | 0.00 | 0.00 |
| ATOM | 3532 | HB   | THR | X | 234 | 41.471 | 48.070 | 55.118 | 0.00 | 0.00 |
| ATOM | 3533 | CG2  | THR | X | 234 | 40.508 | 46.528 | 54.100 | 0.00 | 0.00 |
| ATOM | 3534 | HG21 | THR | X | 234 | 40.611 | 45.472 | 53.850 | 0.00 | 0.00 |
| ATOM | 3535 | HG22 | THR | X | 234 | 40.489 | 47.017 | 53.126 | 0.00 | 0.00 |
| ATOM | 3536 | HG23 | THR | X | 234 | 39.557 | 46.603 | 54.629 | 0.00 | 0.00 |
| ATOM | 3537 | OG1  | THR | X | 234 | 41.651 | 46.321 | 56.098 | 0.00 | 0.00 |
| ATOM | 3538 | HG1  | THR | X | 234 | 42.126 | 45.489 | 56.026 | 0.00 | 0.00 |
| ATOM | 3539 | C    | THR | X | 234 | 44.106 | 47.451 | 55.131 | 0.00 | 0.00 |
| ATOM | 3540 | O    | THR | X | 234 | 44.888 | 46.747 | 55.714 | 0.00 | 0.00 |
| ATOM | 3541 | N    | VAL | X | 235 | 44.017 | 48.778 | 55.426 | 0.00 | 0.00 |
| ATOM | 3542 | H    | VAL | X | 235 | 43.233 | 49.307 | 55.073 | 0.00 | 0.00 |
| ATOM | 3543 | CA   | VAL | X | 235 | 44.830 | 49.526 | 56.414 | 0.00 | 0.00 |
| ATOM | 3544 | HA   | VAL | X | 235 | 45.085 | 48.886 | 57.259 | 0.00 | 0.00 |
| ATOM | 3545 | CB   | VAL | X | 235 | 46.124 | 50.019 | 55.720 | 0.00 | 0.00 |
| ATOM | 3546 | HB   | VAL | X | 235 | 46.316 | 49.346 | 54.883 | 0.00 | 0.00 |
| ATOM | 3547 | CG1  | VAL | X | 235 | 46.094 | 51.395 | 55.101 | 0.00 | 0.00 |
| ATOM | 3548 | HG11 | VAL | X | 235 | 45.793 | 52.186 | 55.787 | 0.00 | 0.00 |
| ATOM | 3549 | HG12 | VAL | X | 235 | 47.156 | 51.505 | 54.880 | 0.00 | 0.00 |
| ATOM | 3550 | HG13 | VAL | X | 235 | 45.464 | 51.401 | 54.211 | 0.00 | 0.00 |
| ATOM | 3551 | CG2  | VAL | X | 235 | 47.221 | 49.995 | 56.859 | 0.00 | 0.00 |
| ATOM | 3552 | HG21 | VAL | X | 235 | 47.330 | 48.966 | 57.204 | 0.00 | 0.00 |
| ATOM | 3553 | HG22 | VAL | X | 235 | 46.986 | 50.654 | 57.695 | 0.00 | 0.00 |
| ATOM | 3554 | HG23 | VAL | X | 235 | 48.190 | 50.239 | 56.424 | 0.00 | 0.00 |
| ATOM | 3555 | C    | VAL | X | 235 | 43.981 | 50.650 | 56.940 | 0.00 | 0.00 |
| ATOM | 3556 | O    | VAL | X | 235 | 43.065 | 51.188 | 56.321 | 0.00 | 0.00 |
| ATOM | 3557 | N    | GLY | X | 236 | 44.281 | 50.951 | 58.241 | 0.00 | 0.00 |
| ATOM | 3558 | H    | GLY | X | 236 | 44.979 | 50.487 | 58.804 | 0.00 | 0.00 |
| ATOM | 3559 | CA   | GLY | X | 236 | 43.546 | 51.983 | 59.047 | 0.00 | 0.00 |
| ATOM | 3560 | HA2  | GLY | X | 236 | 42.541 | 51.577 | 59.167 | 0.00 | 0.00 |
| ATOM | 3561 | HA3  | GLY | X | 236 | 44.017 | 52.118 | 60.021 | 0.00 | 0.00 |
| ATOM | 3562 | C    | GLY | X | 236 | 43.544 | 53.365 | 58.447 | 0.00 | 0.00 |
| ATOM | 3563 | O    | GLY | X | 236 | 44.544 | 53.850 | 57.938 | 0.00 | 0.00 |
| ATOM | 3564 | N    | MET | X | 237 | 42.513 | 54.084 | 58.791 | 0.00 | 0.00 |
| ATOM | 3565 | H    | MET | X | 237 | 41.668 | 53.668 | 59.154 | 0.00 | 0.00 |
| ATOM | 3566 | CA   | MET | X | 237 | 42.412 | 55.544 | 58.533 | 0.00 | 0.00 |
| ATOM | 3567 | HA   | MET | X | 237 | 42.193 | 55.772 | 57.490 | 0.00 | 0.00 |
| ATOM | 3568 | CB   | MET | X | 237 | 41.106 | 56.039 | 59.146 | 0.00 | 0.00 |
| ATOM | 3569 | HB2  | MET | X | 237 | 40.258 | 55.455 | 58.788 | 0.00 | 0.00 |
| ATOM | 3570 | HB3  | MET | X | 237 | 41.179 | 55.887 | 60.223 | 0.00 | 0.00 |
| ATOM | 3571 | CG   | MET | X | 237 | 40.671 | 57.513 | 58.920 | 0.00 | 0.00 |
| ATOM | 3572 | HG2  | MET | X | 237 | 39.705 | 57.648 | 59.409 | 0.00 | 0.00 |
| ATOM | 3573 | HG3  | MET | X | 237 | 41.365 | 58.179 | 59.434 | 0.00 | 0.00 |
| ATOM | 3574 | SD   | MET | X | 237 | 40.623 | 58.028 | 57.242 | 0.00 | 0.00 |
| ATOM | 3575 | CE   | MET | X | 237 | 38.956 | 57.715 | 56.791 | 0.00 | 0.00 |
| ATOM | 3576 | HE1  | MET | X | 237 | 38.851 | 57.879 | 55.719 | 0.00 | 0.00 |
| ATOM | 3577 | HE2  | MET | X | 237 | 38.684 | 56.715 | 57.129 | 0.00 | 0.00 |
| ATOM | 3578 | HE3  | MET | X | 237 | 38.331 | 58.457 | 57.289 | 0.00 | 0.00 |
| ATOM | 3579 | C    | MET | X | 237 | 43.609 | 56.435 | 58.928 | 0.00 | 0.00 |
| ATOM | 3580 | O    | MET | X | 237 | 44.085 | 57.238 | 58.137 | 0.00 | 0.00 |
| ATOM | 3581 | N    | GLY | X | 238 | 44.176 | 56.236 | 60.130 | 0.00 | 0.00 |
| ATOM | 3582 | H    | GLY | X | 238 | 43.715 | 55.649 | 60.810 | 0.00 | 0.00 |
| ATOM | 3583 | CA   | GLY | X | 238 | 45.379 | 56.902 | 60.614 | 0.00 | 0.00 |
| ATOM | 3584 | HA2  | GLY | X | 238 | 45.209 | 57.935 | 60.311 | 0.00 | 0.00 |
| ATOM | 3585 | HA3  | GLY | X | 238 | 45.435 | 56.825 | 61.700 | 0.00 | 0.00 |
| ATOM | 3586 | C    | GLY | X | 238 | 46.725 | 56.447 | 59.918 | 0.00 | 0.00 |
| ATOM | 3587 | O    | GLY | X | 238 | 47.563 | 57.341 | 59.876 | 0.00 | 0.00 |
| ATOM | 3588 | N    | GLU | X | 239 | 46.812 | 55.299 | 59.407 | 0.00 | 0.00 |
| ATOM | 3589 | H    | GLU | X | 239 | 46.014 | 54.695 | 59.545 | 0.00 | 0.00 |

|      |      |      |     |   |     |        |        |        |      |      |
|------|------|------|-----|---|-----|--------|--------|--------|------|------|
| ATOM | 3590 | CA   | GLU | X | 239 | 47.977 | 54.794 | 58.689 | 0.00 | 0.00 |
| ATOM | 3591 | HA   | GLU | X | 239 | 48.948 | 54.921 | 59.167 | 0.00 | 0.00 |
| ATOM | 3592 | CB   | GLU | X | 239 | 47.918 | 53.238 | 58.526 | 0.00 | 0.00 |
| ATOM | 3593 | HB2  | GLU | X | 239 | 46.958 | 52.915 | 58.123 | 0.00 | 0.00 |
| ATOM | 3594 | HB3  | GLU | X | 239 | 48.726 | 52.863 | 57.897 | 0.00 | 0.00 |
| ATOM | 3595 | CG   | GLU | X | 239 | 48.179 | 52.513 | 59.820 | 0.00 | 0.00 |
| ATOM | 3596 | HG2  | GLU | X | 239 | 47.416 | 52.891 | 60.501 | 0.00 | 0.00 |
| ATOM | 3597 | HG3  | GLU | X | 239 | 47.931 | 51.458 | 59.699 | 0.00 | 0.00 |
| ATOM | 3598 | CD   | GLU | X | 239 | 49.604 | 52.589 | 60.317 | 0.00 | 0.00 |
| ATOM | 3599 | OE1  | GLU | X | 239 | 50.376 | 51.660 | 60.089 | 0.00 | 0.00 |
| ATOM | 3600 | OE2  | GLU | X | 239 | 49.935 | 53.634 | 60.923 | 0.00 | 0.00 |
| ATOM | 3601 | C    | GLU | X | 239 | 47.951 | 55.380 | 57.315 | 0.00 | 0.00 |
| ATOM | 3602 | O    | GLU | X | 239 | 49.016 | 55.785 | 56.783 | 0.00 | 0.00 |
| ATOM | 3603 | N    | ALA | X | 240 | 46.732 | 55.508 | 56.730 | 0.00 | 0.00 |
| ATOM | 3604 | H    | ALA | X | 240 | 45.954 | 55.158 | 57.270 | 0.00 | 0.00 |
| ATOM | 3605 | CA   | ALA | X | 240 | 46.475 | 56.331 | 55.545 | 0.00 | 0.00 |
| ATOM | 3606 | HA   | ALA | X | 240 | 47.185 | 56.090 | 54.753 | 0.00 | 0.00 |
| ATOM | 3607 | CB   | ALA | X | 240 | 44.994 | 56.289 | 55.101 | 0.00 | 0.00 |
| ATOM | 3608 | HB1  | ALA | X | 240 | 44.390 | 56.750 | 55.883 | 0.00 | 0.00 |
| ATOM | 3609 | HB2  | ALA | X | 240 | 44.668 | 55.249 | 55.098 | 0.00 | 0.00 |
| ATOM | 3610 | HB3  | ALA | X | 240 | 44.797 | 56.815 | 54.167 | 0.00 | 0.00 |
| ATOM | 3611 | C    | ALA | X | 240 | 46.937 | 57.806 | 55.827 | 0.00 | 0.00 |
| ATOM | 3612 | O    | ALA | X | 240 | 47.709 | 58.412 | 55.098 | 0.00 | 0.00 |
| ATOM | 3613 | N    | ARG | X | 241 | 46.422 | 58.438 | 56.888 | 0.00 | 0.00 |
| ATOM | 3614 | H    | ARG | X | 241 | 45.662 | 57.971 | 57.363 | 0.00 | 0.00 |
| ATOM | 3615 | CA   | ARG | X | 241 | 46.882 | 59.770 | 57.423 | 0.00 | 0.00 |
| ATOM | 3616 | HA   | ARG | X | 241 | 46.507 | 60.484 | 56.689 | 0.00 | 0.00 |
| ATOM | 3617 | CB   | ARG | X | 241 | 46.292 | 60.111 | 58.839 | 0.00 | 0.00 |
| ATOM | 3618 | HB2  | ARG | X | 241 | 45.276 | 59.723 | 58.773 | 0.00 | 0.00 |
| ATOM | 3619 | HB3  | ARG | X | 241 | 46.820 | 59.714 | 59.706 | 0.00 | 0.00 |
| ATOM | 3620 | CG   | ARG | X | 241 | 46.194 | 61.669 | 58.975 | 0.00 | 0.00 |
| ATOM | 3621 | HG2  | ARG | X | 241 | 47.128 | 62.229 | 58.922 | 0.00 | 0.00 |
| ATOM | 3622 | HG3  | ARG | X | 241 | 45.630 | 62.096 | 58.146 | 0.00 | 0.00 |
| ATOM | 3623 | CD   | ARG | X | 241 | 45.503 | 61.964 | 60.293 | 0.00 | 0.00 |
| ATOM | 3624 | HD2  | ARG | X | 241 | 44.753 | 61.273 | 60.678 | 0.00 | 0.00 |
| ATOM | 3625 | HD3  | ARG | X | 241 | 46.269 | 61.977 | 61.069 | 0.00 | 0.00 |
| ATOM | 3626 | NE   | ARG | X | 241 | 44.950 | 63.239 | 60.286 | 0.00 | 0.00 |
| ATOM | 3627 | HE   | ARG | X | 241 | 45.114 | 63.774 | 59.444 | 0.00 | 0.00 |
| ATOM | 3628 | CZ   | ARG | X | 241 | 44.164 | 63.772 | 61.229 | 0.00 | 0.00 |
| ATOM | 3629 | NH1  | ARG | X | 241 | 43.916 | 63.147 | 62.361 | 0.00 | 0.00 |
| ATOM | 3630 | HH11 | ARG | X | 241 | 44.328 | 62.257 | 62.602 | 0.00 | 0.00 |
| ATOM | 3631 | HH12 | ARG | X | 241 | 43.307 | 63.666 | 62.978 | 0.00 | 0.00 |
| ATOM | 3632 | NH2  | ARG | X | 241 | 43.640 | 65.012 | 61.125 | 0.00 | 0.00 |
| ATOM | 3633 | HH21 | ARG | X | 241 | 43.833 | 65.458 | 60.239 | 0.00 | 0.00 |
| ATOM | 3634 | HH22 | ARG | X | 241 | 43.002 | 65.382 | 61.816 | 0.00 | 0.00 |
| ATOM | 3635 | C    | ARG | X | 241 | 48.386 | 59.903 | 57.534 | 0.00 | 0.00 |
| ATOM | 3636 | O    | ARG | X | 241 | 49.039 | 60.813 | 57.024 | 0.00 | 0.00 |
| ATOM | 3637 | N    | ARG | X | 242 | 49.065 | 58.907 | 58.131 | 0.00 | 0.00 |
| ATOM | 3638 | H    | ARG | X | 242 | 48.529 | 58.224 | 58.648 | 0.00 | 0.00 |
| ATOM | 3639 | CA   | ARG | X | 242 | 50.486 | 58.781 | 58.229 | 0.00 | 0.00 |
| ATOM | 3640 | HA   | ARG | X | 242 | 50.869 | 59.712 | 58.647 | 0.00 | 0.00 |
| ATOM | 3641 | CB   | ARG | X | 242 | 50.844 | 57.528 | 59.002 | 0.00 | 0.00 |
| ATOM | 3642 | HB2  | ARG | X | 242 | 50.257 | 57.435 | 59.916 | 0.00 | 0.00 |
| ATOM | 3643 | HB3  | ARG | X | 242 | 50.655 | 56.616 | 58.436 | 0.00 | 0.00 |
| ATOM | 3644 | CG   | ARG | X | 242 | 52.289 | 57.618 | 59.298 | 0.00 | 0.00 |
| ATOM | 3645 | HG2  | ARG | X | 242 | 52.855 | 57.568 | 58.368 | 0.00 | 0.00 |
| ATOM | 3646 | HG3  | ARG | X | 242 | 52.522 | 58.490 | 59.910 | 0.00 | 0.00 |
| ATOM | 3647 | CD   | ARG | X | 242 | 52.905 | 56.419 | 60.113 | 0.00 | 0.00 |
| ATOM | 3648 | HD2  | ARG | X | 242 | 53.992 | 56.493 | 60.109 | 0.00 | 0.00 |
| ATOM | 3649 | HD3  | ARG | X | 242 | 52.654 | 56.597 | 61.158 | 0.00 | 0.00 |
| ATOM | 3650 | NE   | ARG | X | 242 | 52.318 | 55.037 | 59.707 | 0.00 | 0.00 |
| ATOM | 3651 | HE   | ARG | X | 242 | 51.662 | 54.553 | 60.302 | 0.00 | 0.00 |
| ATOM | 3652 | CZ   | ARG | X | 242 | 52.747 | 54.306 | 58.670 | 0.00 | 0.00 |
| ATOM | 3653 | NH1  | ARG | X | 242 | 53.450 | 54.871 | 57.701 | 0.00 | 0.00 |
| ATOM | 3654 | HH11 | ARG | X | 242 | 53.635 | 55.855 | 57.838 | 0.00 | 0.00 |
| ATOM | 3655 | HH12 | ARG | X | 242 | 53.731 | 54.369 | 56.871 | 0.00 | 0.00 |
| ATOM | 3656 | NH2  | ARG | X | 242 | 52.477 | 53.052 | 58.554 | 0.00 | 0.00 |

|      |      |      |     |   |     |        |        |        |      |      |
|------|------|------|-----|---|-----|--------|--------|--------|------|------|
| ATOM | 3657 | HH21 | ARG | X | 242 | 51.810 | 52.614 | 59.173 | 0.00 | 0.00 |
| ATOM | 3658 | HH22 | ARG | X | 242 | 53.103 | 52.430 | 58.063 | 0.00 | 0.00 |
| ATOM | 3659 | C    | ARG | X | 242 | 51.124 | 58.727 | 56.836 | 0.00 | 0.00 |
| ATOM | 3660 | O    | ARG | X | 242 | 51.994 | 59.603 | 56.609 | 0.00 | 0.00 |
| ATOM | 3661 | N    | ARG | X | 243 | 50.843 | 57.808 | 55.939 | 0.00 | 0.00 |
| ATOM | 3662 | H    | ARG | X | 243 | 50.215 | 57.075 | 56.235 | 0.00 | 0.00 |
| ATOM | 3663 | CA   | ARG | X | 243 | 51.537 | 57.788 | 54.619 | 0.00 | 0.00 |
| ATOM | 3664 | HA   | ARG | X | 243 | 52.603 | 57.794 | 54.849 | 0.00 | 0.00 |
| ATOM | 3665 | CB   | ARG | X | 243 | 51.133 | 56.545 | 53.829 | 0.00 | 0.00 |
| ATOM | 3666 | HB2  | ARG | X | 243 | 50.058 | 56.374 | 53.781 | 0.00 | 0.00 |
| ATOM | 3667 | HB3  | ARG | X | 243 | 51.431 | 56.713 | 52.794 | 0.00 | 0.00 |
| ATOM | 3668 | CG   | ARG | X | 243 | 51.797 | 55.303 | 54.479 | 0.00 | 0.00 |
| ATOM | 3669 | HG2  | ARG | X | 243 | 52.880 | 55.421 | 54.432 | 0.00 | 0.00 |
| ATOM | 3670 | HG3  | ARG | X | 243 | 51.285 | 55.182 | 55.434 | 0.00 | 0.00 |
| ATOM | 3671 | CD   | ARG | X | 243 | 51.425 | 54.145 | 53.589 | 0.00 | 0.00 |
| ATOM | 3672 | HD2  | ARG | X | 243 | 50.338 | 54.090 | 53.647 | 0.00 | 0.00 |
| ATOM | 3673 | HD3  | ARG | X | 243 | 51.757 | 54.203 | 52.553 | 0.00 | 0.00 |
| ATOM | 3674 | NE   | ARG | X | 243 | 52.077 | 52.976 | 54.216 | 0.00 | 0.00 |
| ATOM | 3675 | HE   | ARG | X | 243 | 52.930 | 53.214 | 54.702 | 0.00 | 0.00 |
| ATOM | 3676 | CZ   | ARG | X | 243 | 51.620 | 51.723 | 54.164 | 0.00 | 0.00 |
| ATOM | 3677 | NH1  | ARG | X | 243 | 50.517 | 51.447 | 53.502 | 0.00 | 0.00 |
| ATOM | 3678 | HH11 | ARG | X | 243 | 50.282 | 52.189 | 52.858 | 0.00 | 0.00 |
| ATOM | 3679 | HH12 | ARG | X | 243 | 50.286 | 50.469 | 53.398 | 0.00 | 0.00 |
| ATOM | 3680 | NH2  | ARG | X | 243 | 52.249 | 50.770 | 54.730 | 0.00 | 0.00 |
| ATOM | 3681 | HH21 | ARG | X | 243 | 53.089 | 50.987 | 55.247 | 0.00 | 0.00 |
| ATOM | 3682 | HH22 | ARG | X | 243 | 51.924 | 49.824 | 54.592 | 0.00 | 0.00 |
| ATOM | 3683 | C    | ARG | X | 243 | 51.191 | 59.011 | 53.793 | 0.00 | 0.00 |
| ATOM | 3684 | O    | ARG | X | 243 | 52.014 | 59.553 | 53.064 | 0.00 | 0.00 |
| ATOM | 3685 | N    | ALA | X | 244 | 50.022 | 59.591 | 53.914 | 0.00 | 0.00 |
| ATOM | 3686 | H    | ALA | X | 244 | 49.297 | 59.155 | 54.465 | 0.00 | 0.00 |
| ATOM | 3687 | CA   | ALA | X | 244 | 49.673 | 60.907 | 53.319 | 0.00 | 0.00 |
| ATOM | 3688 | HA   | ALA | X | 244 | 49.821 | 60.797 | 52.245 | 0.00 | 0.00 |
| ATOM | 3689 | CB   | ALA | X | 244 | 48.254 | 61.083 | 53.452 | 0.00 | 0.00 |
| ATOM | 3690 | HB1  | ALA | X | 244 | 47.632 | 60.193 | 53.358 | 0.00 | 0.00 |
| ATOM | 3691 | HB2  | ALA | X | 244 | 47.992 | 61.960 | 52.860 | 0.00 | 0.00 |
| ATOM | 3692 | HB3  | ALA | X | 244 | 48.057 | 61.264 | 54.509 | 0.00 | 0.00 |
| ATOM | 3693 | C    | ALA | X | 244 | 50.522 | 62.071 | 53.958 | 0.00 | 0.00 |
| ATOM | 3694 | O    | ALA | X | 244 | 50.888 | 62.995 | 53.232 | 0.00 | 0.00 |
| ATOM | 3695 | N    | THR | X | 245 | 50.903 | 62.037 | 55.241 | 0.00 | 0.00 |
| ATOM | 3696 | H    | THR | X | 245 | 50.561 | 61.297 | 55.836 | 0.00 | 0.00 |
| ATOM | 3697 | CA   | THR | X | 245 | 51.819 | 63.048 | 55.829 | 0.00 | 0.00 |
| ATOM | 3698 | HA   | THR | X | 245 | 51.540 | 64.038 | 55.469 | 0.00 | 0.00 |
| ATOM | 3699 | CB   | THR | X | 245 | 51.559 | 63.021 | 57.380 | 0.00 | 0.00 |
| ATOM | 3700 | HB   | THR | X | 245 | 51.849 | 62.037 | 57.749 | 0.00 | 0.00 |
| ATOM | 3701 | CG2  | THR | X | 245 | 52.295 | 64.047 | 58.186 | 0.00 | 0.00 |
| ATOM | 3702 | HG21 | THR | X | 245 | 52.018 | 65.059 | 57.891 | 0.00 | 0.00 |
| ATOM | 3703 | HG22 | THR | X | 245 | 53.360 | 64.097 | 57.957 | 0.00 | 0.00 |
| ATOM | 3704 | HG23 | THR | X | 245 | 52.171 | 63.815 | 59.244 | 0.00 | 0.00 |
| ATOM | 3705 | OG1  | THR | X | 245 | 50.192 | 63.104 | 57.701 | 0.00 | 0.00 |
| ATOM | 3706 | HG1  | THR | X | 245 | 49.837 | 62.418 | 57.131 | 0.00 | 0.00 |
| ATOM | 3707 | C    | THR | X | 245 | 53.299 | 62.818 | 55.599 | 0.00 | 0.00 |
| ATOM | 3708 | O    | THR | X | 245 | 53.982 | 63.808 | 55.261 | 0.00 | 0.00 |
| ATOM | 3709 | N    | GLN | X | 246 | 53.801 | 61.585 | 55.508 | 0.00 | 0.00 |
| ATOM | 3710 | H    | GLN | X | 246 | 53.128 | 60.867 | 55.735 | 0.00 | 0.00 |
| ATOM | 3711 | CA   | GLN | X | 246 | 55.073 | 61.221 | 54.939 | 0.00 | 0.00 |
| ATOM | 3712 | HA   | GLN | X | 246 | 55.877 | 61.715 | 55.483 | 0.00 | 0.00 |
| ATOM | 3713 | CB   | GLN | X | 246 | 55.197 | 59.680 | 55.084 | 0.00 | 0.00 |
| ATOM | 3714 | HB2  | GLN | X | 246 | 54.188 | 59.271 | 55.038 | 0.00 | 0.00 |
| ATOM | 3715 | HB3  | GLN | X | 246 | 55.868 | 59.311 | 54.308 | 0.00 | 0.00 |
| ATOM | 3716 | CG   | GLN | X | 246 | 55.554 | 59.291 | 56.503 | 0.00 | 0.00 |
| ATOM | 3717 | HG2  | GLN | X | 246 | 56.538 | 59.688 | 56.751 | 0.00 | 0.00 |
| ATOM | 3718 | HG3  | GLN | X | 246 | 54.868 | 59.581 | 57.299 | 0.00 | 0.00 |
| ATOM | 3719 | CD   | GLN | X | 246 | 55.646 | 57.831 | 56.735 | 0.00 | 0.00 |
| ATOM | 3720 | OE1  | GLN | X | 246 | 54.822 | 57.008 | 56.347 | 0.00 | 0.00 |
| ATOM | 3721 | NE2  | GLN | X | 246 | 56.712 | 57.312 | 57.309 | 0.00 | 0.00 |
| ATOM | 3722 | HE21 | GLN | X | 246 | 56.690 | 56.318 | 57.485 | 0.00 | 0.00 |
| ATOM | 3723 | HE22 | GLN | X | 246 | 57.574 | 57.831 | 57.404 | 0.00 | 0.00 |

|      |      |      |     |   |     |        |        |        |      |      |
|------|------|------|-----|---|-----|--------|--------|--------|------|------|
| ATOM | 3724 | C    | GLN | X | 246 | 55.224 | 61.547 | 53.452 | 0.00 | 0.00 |
| ATOM | 3725 | O    | GLN | X | 246 | 56.258 | 62.036 | 52.950 | 0.00 | 0.00 |
| ATOM | 3726 | N    | LEU | X | 247 | 54.163 | 61.335 | 52.698 | 0.00 | 0.00 |
| ATOM | 3727 | H    | LEU | X | 247 | 53.394 | 60.725 | 52.938 | 0.00 | 0.00 |
| ATOM | 3728 | CA   | LEU | X | 247 | 54.168 | 61.743 | 51.320 | 0.00 | 0.00 |
| ATOM | 3729 | HA   | LEU | X | 247 | 55.110 | 61.348 | 50.939 | 0.00 | 0.00 |
| ATOM | 3730 | CB   | LEU | X | 247 | 53.004 | 61.036 | 50.633 | 0.00 | 0.00 |
| ATOM | 3731 | HB2  | LEU | X | 247 | 53.125 | 59.953 | 50.629 | 0.00 | 0.00 |
| ATOM | 3732 | HB3  | LEU | X | 247 | 52.075 | 61.334 | 51.121 | 0.00 | 0.00 |
| ATOM | 3733 | CG   | LEU | X | 247 | 52.769 | 61.522 | 49.204 | 0.00 | 0.00 |
| ATOM | 3734 | HG   | LEU | X | 247 | 52.600 | 62.599 | 49.230 | 0.00 | 0.00 |
| ATOM | 3735 | CD1  | LEU | X | 247 | 53.908 | 61.265 | 48.201 | 0.00 | 0.00 |
| ATOM | 3736 | HD11 | LEU | X | 247 | 54.041 | 60.210 | 47.959 | 0.00 | 0.00 |
| ATOM | 3737 | HD12 | LEU | X | 247 | 54.904 | 61.510 | 48.568 | 0.00 | 0.00 |
| ATOM | 3738 | HD13 | LEU | X | 247 | 53.725 | 61.811 | 47.276 | 0.00 | 0.00 |
| ATOM | 3739 | CD2  | LEU | X | 247 | 51.509 | 60.795 | 48.637 | 0.00 | 0.00 |
| ATOM | 3740 | HD21 | LEU | X | 247 | 51.782 | 60.472 | 47.632 | 0.00 | 0.00 |
| ATOM | 3741 | HD22 | LEU | X | 247 | 51.098 | 60.021 | 49.285 | 0.00 | 0.00 |
| ATOM | 3742 | HD23 | LEU | X | 247 | 50.655 | 61.464 | 48.531 | 0.00 | 0.00 |
| ATOM | 3743 | C    | LEU | X | 247 | 54.208 | 63.205 | 51.137 | 0.00 | 0.00 |
| ATOM | 3744 | O    | LEU | X | 247 | 55.056 | 63.715 | 50.383 | 0.00 | 0.00 |
| ATOM | 3745 | N    | ALA | X | 248 | 53.437 | 63.999 | 51.886 | 0.00 | 0.00 |
| ATOM | 3746 | H    | ALA | X | 248 | 52.644 | 63.539 | 52.310 | 0.00 | 0.00 |
| ATOM | 3747 | CA   | ALA | X | 248 | 53.307 | 65.421 | 51.853 | 0.00 | 0.00 |
| ATOM | 3748 | HA   | ALA | X | 248 | 53.126 | 65.775 | 50.838 | 0.00 | 0.00 |
| ATOM | 3749 | CB   | ALA | X | 248 | 52.122 | 65.913 | 52.717 | 0.00 | 0.00 |
| ATOM | 3750 | HB1  | ALA | X | 248 | 51.205 | 65.463 | 52.335 | 0.00 | 0.00 |
| ATOM | 3751 | HB2  | ALA | X | 248 | 52.087 | 67.002 | 52.736 | 0.00 | 0.00 |
| ATOM | 3752 | HB3  | ALA | X | 248 | 52.254 | 65.606 | 53.755 | 0.00 | 0.00 |
| ATOM | 3753 | C    | ALA | X | 248 | 54.601 | 66.091 | 52.302 | 0.00 | 0.00 |
| ATOM | 3754 | O    | ALA | X | 248 | 55.084 | 67.004 | 51.603 | 0.00 | 0.00 |
| ATOM | 3755 | N    | HIE | X | 249 | 55.291 | 65.641 | 53.327 | 0.00 | 0.00 |
| ATOM | 3756 | H    | HIE | X | 249 | 54.855 | 65.033 | 54.005 | 0.00 | 0.00 |
| ATOM | 3757 | CA   | HIE | X | 249 | 56.699 | 66.086 | 53.619 | 0.00 | 0.00 |
| ATOM | 3758 | HA   | HIE | X | 249 | 56.721 | 67.157 | 53.816 | 0.00 | 0.00 |
| ATOM | 3759 | CB   | HIE | X | 249 | 57.173 | 65.436 | 54.920 | 0.00 | 0.00 |
| ATOM | 3760 | HB2  | HIE | X | 249 | 56.381 | 65.615 | 55.648 | 0.00 | 0.00 |
| ATOM | 3761 | HB3  | HIE | X | 249 | 57.425 | 64.386 | 54.771 | 0.00 | 0.00 |
| ATOM | 3762 | CG   | HIE | X | 249 | 58.504 | 66.027 | 55.316 | 0.00 | 0.00 |
| ATOM | 3763 | ND1  | HIE | X | 249 | 59.766 | 65.554 | 54.928 | 0.00 | 0.00 |
| ATOM | 3764 | CE1  | HIE | X | 249 | 60.599 | 66.177 | 55.726 | 0.00 | 0.00 |
| ATOM | 3765 | HE1  | HIE | X | 249 | 61.675 | 66.109 | 55.654 | 0.00 | 0.00 |
| ATOM | 3766 | NE2  | HIE | X | 249 | 59.949 | 67.054 | 56.546 | 0.00 | 0.00 |
| ATOM | 3767 | HE2  | HIE | X | 249 | 60.438 | 67.784 | 57.045 | 0.00 | 0.00 |
| ATOM | 3768 | CD2  | HIE | X | 249 | 58.629 | 66.947 | 56.256 | 0.00 | 0.00 |
| ATOM | 3769 | HD2  | HIE | X | 249 | 57.890 | 67.506 | 56.812 | 0.00 | 0.00 |
| ATOM | 3770 | C    | HIE | X | 249 | 57.753 | 66.003 | 52.456 | 0.00 | 0.00 |
| ATOM | 3771 | O    | HIE | X | 249 | 58.508 | 66.952 | 52.263 | 0.00 | 0.00 |
| ATOM | 3772 | N    | LEU | X | 250 | 57.665 | 64.924 | 51.703 | 0.00 | 0.00 |
| ATOM | 3773 | H    | LEU | X | 250 | 57.140 | 64.189 | 52.157 | 0.00 | 0.00 |
| ATOM | 3774 | CA   | LEU | X | 250 | 58.357 | 64.622 | 50.473 | 0.00 | 0.00 |
| ATOM | 3775 | HA   | LEU | X | 250 | 59.282 | 65.114 | 50.773 | 0.00 | 0.00 |
| ATOM | 3776 | CB   | LEU | X | 250 | 58.589 | 63.110 | 50.264 | 0.00 | 0.00 |
| ATOM | 3777 | HB2  | LEU | X | 250 | 58.836 | 62.775 | 51.271 | 0.00 | 0.00 |
| ATOM | 3778 | HB3  | LEU | X | 250 | 57.670 | 62.660 | 49.887 | 0.00 | 0.00 |
| ATOM | 3779 | CG   | LEU | X | 250 | 59.649 | 62.755 | 49.211 | 0.00 | 0.00 |
| ATOM | 3780 | HG   | LEU | X | 250 | 59.270 | 62.972 | 48.212 | 0.00 | 0.00 |
| ATOM | 3781 | CD1  | LEU | X | 250 | 60.989 | 63.451 | 49.385 | 0.00 | 0.00 |
| ATOM | 3782 | HD11 | LEU | X | 250 | 61.619 | 63.269 | 48.514 | 0.00 | 0.00 |
| ATOM | 3783 | HD12 | LEU | X | 250 | 61.536 | 63.236 | 50.303 | 0.00 | 0.00 |
| ATOM | 3784 | HD13 | LEU | X | 250 | 60.809 | 64.522 | 49.293 | 0.00 | 0.00 |
| ATOM | 3785 | CD2  | LEU | X | 250 | 60.033 | 61.242 | 49.276 | 0.00 | 0.00 |
| ATOM | 3786 | HD21 | LEU | X | 250 | 59.117 | 60.669 | 49.421 | 0.00 | 0.00 |
| ATOM | 3787 | HD22 | LEU | X | 250 | 60.649 | 60.991 | 48.412 | 0.00 | 0.00 |
| ATOM | 3788 | HD23 | LEU | X | 250 | 60.721 | 61.127 | 50.113 | 0.00 | 0.00 |
| ATOM | 3789 | C    | LEU | X | 250 | 57.875 | 65.338 | 49.202 | 0.00 | 0.00 |
| ATOM | 3790 | O    | LEU | X | 250 | 58.715 | 65.800 | 48.434 | 0.00 | 0.00 |

|      |      |      |     |   |     |        |        |        |      |      |
|------|------|------|-----|---|-----|--------|--------|--------|------|------|
| ATOM | 3791 | N    | VAL | X | 251 | 56.573 | 65.552 | 49.044 | 0.00 | 0.00 |
| ATOM | 3792 | H    | VAL | X | 251 | 55.986 | 64.960 | 49.614 | 0.00 | 0.00 |
| ATOM | 3793 | CA   | VAL | X | 251 | 55.979 | 66.261 | 47.879 | 0.00 | 0.00 |
| ATOM | 3794 | HA   | VAL | X | 251 | 56.427 | 65.828 | 46.985 | 0.00 | 0.00 |
| ATOM | 3795 | CB   | VAL | X | 251 | 54.478 | 65.968 | 47.822 | 0.00 | 0.00 |
| ATOM | 3796 | HB   | VAL | X | 251 | 54.088 | 65.925 | 48.839 | 0.00 | 0.00 |
| ATOM | 3797 | CG1  | VAL | X | 251 | 53.605 | 66.792 | 46.953 | 0.00 | 0.00 |
| ATOM | 3798 | HG11 | VAL | X | 251 | 53.533 | 67.791 | 47.385 | 0.00 | 0.00 |
| ATOM | 3799 | HG12 | VAL | X | 251 | 54.019 | 66.778 | 45.945 | 0.00 | 0.00 |
| ATOM | 3800 | HG13 | VAL | X | 251 | 52.591 | 66.403 | 47.045 | 0.00 | 0.00 |
| ATOM | 3801 | CG2  | VAL | X | 251 | 54.307 | 64.498 | 47.289 | 0.00 | 0.00 |
| ATOM | 3802 | HG21 | VAL | X | 251 | 54.970 | 63.771 | 47.757 | 0.00 | 0.00 |
| ATOM | 3803 | HG22 | VAL | X | 251 | 54.537 | 64.466 | 46.224 | 0.00 | 0.00 |
| ATOM | 3804 | HG23 | VAL | X | 251 | 53.257 | 64.219 | 47.378 | 0.00 | 0.00 |
| ATOM | 3805 | C    | VAL | X | 251 | 56.077 | 67.786 | 48.028 | 0.00 | 0.00 |
| ATOM | 3806 | O    | VAL | X | 251 | 56.116 | 68.450 | 47.013 | 0.00 | 0.00 |
| ATOM | 3807 | N    | GLY | X | 252 | 56.278 | 68.335 | 49.251 | 0.00 | 0.00 |
| ATOM | 3808 | H    | GLY | X | 252 | 56.022 | 67.768 | 50.048 | 0.00 | 0.00 |
| ATOM | 3809 | CA   | GLY | X | 252 | 56.445 | 69.834 | 49.551 | 0.00 | 0.00 |
| ATOM | 3810 | HA2  | GLY | X | 252 | 57.047 | 69.988 | 50.447 | 0.00 | 0.00 |
| ATOM | 3811 | HA3  | GLY | X | 252 | 56.905 | 70.417 | 48.753 | 0.00 | 0.00 |
| ATOM | 3812 | C    | GLY | X | 252 | 55.093 | 70.517 | 49.735 | 0.00 | 0.00 |
| ATOM | 3813 | O    | GLY | X | 252 | 54.892 | 71.570 | 49.209 | 0.00 | 0.00 |
| ATOM | 3814 | N    | CYX | X | 253 | 54.176 | 69.942 | 50.536 | 0.00 | 0.00 |
| ATOM | 3815 | H    | CYX | X | 253 | 54.445 | 69.066 | 50.962 | 0.00 | 0.00 |
| ATOM | 3816 | CA   | CYX | X | 253 | 52.867 | 70.482 | 50.824 | 0.00 | 0.00 |
| ATOM | 3817 | HA   | CYX | X | 253 | 52.823 | 71.534 | 50.540 | 0.00 | 0.00 |
| ATOM | 3818 | CB   | CYX | X | 253 | 51.786 | 69.648 | 50.082 | 0.00 | 0.00 |
| ATOM | 3819 | HB2  | CYX | X | 253 | 51.987 | 68.586 | 50.223 | 0.00 | 0.00 |
| ATOM | 3820 | HB3  | CYX | X | 253 | 50.798 | 69.722 | 50.536 | 0.00 | 0.00 |
| ATOM | 3821 | SG   | CYX | X | 253 | 51.666 | 69.979 | 48.369 | 0.00 | 0.00 |
| ATOM | 3822 | C    | CYX | X | 253 | 52.536 | 70.453 | 52.341 | 0.00 | 0.00 |
| ATOM | 3823 | O    | CYX | X | 253 | 52.962 | 69.535 | 53.031 | 0.00 | 0.00 |
| ATOM | 3824 | N    | PRO | X | 254 | 51.694 | 71.386 | 52.879 | 0.00 | 0.00 |
| ATOM | 3825 | CD   | PRO | X | 254 | 51.182 | 71.386 | 54.257 | 0.00 | 0.00 |
| ATOM | 3826 | HD2  | PRO | X | 254 | 51.931 | 71.232 | 55.033 | 0.00 | 0.00 |
| ATOM | 3827 | HD3  | PRO | X | 254 | 50.606 | 70.465 | 54.347 | 0.00 | 0.00 |
| ATOM | 3828 | CG   | PRO | X | 254 | 50.291 | 72.582 | 54.414 | 0.00 | 0.00 |
| ATOM | 3829 | HG2  | PRO | X | 254 | 50.949 | 73.362 | 54.795 | 0.00 | 0.00 |
| ATOM | 3830 | HG3  | PRO | X | 254 | 49.430 | 72.375 | 55.050 | 0.00 | 0.00 |
| ATOM | 3831 | CB   | PRO | X | 254 | 49.881 | 72.926 | 52.957 | 0.00 | 0.00 |
| ATOM | 3832 | HB2  | PRO | X | 254 | 49.578 | 73.950 | 52.739 | 0.00 | 0.00 |
| ATOM | 3833 | HB3  | PRO | X | 254 | 49.049 | 72.269 | 52.706 | 0.00 | 0.00 |
| ATOM | 3834 | CA   | PRO | X | 254 | 51.121 | 72.585 | 52.183 | 0.00 | 0.00 |
| ATOM | 3835 | HA   | PRO | X | 254 | 50.732 | 72.134 | 51.270 | 0.00 | 0.00 |
| ATOM | 3836 | C    | PRO | X | 254 | 52.179 | 73.659 | 51.958 | 0.00 | 0.00 |
| ATOM | 3837 | O    | PRO | X | 254 | 53.218 | 73.565 | 52.541 | 0.00 | 0.00 |
| ATOM | 3838 | N    | PRO | X | 255 | 51.944 | 74.770 | 51.175 | 0.00 | 0.00 |
| ATOM | 3839 | CD   | PRO | X | 255 | 50.852 | 75.073 | 50.227 | 0.00 | 0.00 |
| ATOM | 3840 | HD2  | PRO | X | 255 | 49.921 | 74.924 | 50.774 | 0.00 | 0.00 |
| ATOM | 3841 | HD3  | PRO | X | 255 | 51.116 | 74.469 | 49.359 | 0.00 | 0.00 |
| ATOM | 3842 | CG   | PRO | X | 255 | 50.844 | 76.514 | 49.861 | 0.00 | 0.00 |
| ATOM | 3843 | HG2  | PRO | X | 255 | 50.185 | 77.099 | 50.503 | 0.00 | 0.00 |
| ATOM | 3844 | HG3  | PRO | X | 255 | 50.709 | 76.600 | 48.783 | 0.00 | 0.00 |
| ATOM | 3845 | CB   | PRO | X | 255 | 52.320 | 76.856 | 50.180 | 0.00 | 0.00 |
| ATOM | 3846 | HB2  | PRO | X | 255 | 52.471 | 77.893 | 50.479 | 0.00 | 0.00 |
| ATOM | 3847 | HB3  | PRO | X | 255 | 52.926 | 76.748 | 49.280 | 0.00 | 0.00 |
| ATOM | 3848 | CA   | PRO | X | 255 | 52.866 | 75.880 | 51.224 | 0.00 | 0.00 |
| ATOM | 3849 | HA   | PRO | X | 255 | 53.889 | 75.595 | 50.976 | 0.00 | 0.00 |
| ATOM | 3850 | C    | PRO | X | 255 | 52.843 | 76.543 | 52.636 | 0.00 | 0.00 |
| ATOM | 3851 | O    | PRO | X | 255 | 51.801 | 76.642 | 53.224 | 0.00 | 0.00 |
| ATOM | 3852 | N    | GLY | X | 256 | 53.982 | 77.019 | 53.057 | 0.00 | 0.00 |
| ATOM | 3853 | H    | GLY | X | 256 | 54.746 | 76.866 | 52.414 | 0.00 | 0.00 |
| ATOM | 3854 | CA   | GLY | X | 256 | 54.233 | 77.471 | 54.383 | 0.00 | 0.00 |
| ATOM | 3855 | HA2  | GLY | X | 256 | 55.019 | 78.204 | 54.198 | 0.00 | 0.00 |
| ATOM | 3856 | HA3  | GLY | X | 256 | 53.315 | 77.812 | 54.861 | 0.00 | 0.00 |
| ATOM | 3857 | C    | GLY | X | 256 | 54.902 | 76.396 | 55.258 | 0.00 | 0.00 |

|      |      |      |     |   |     |        |        |        |      |      |
|------|------|------|-----|---|-----|--------|--------|--------|------|------|
| ATOM | 3858 | O    | GLY | X | 256 | 55.196 | 76.701 | 56.380 | 0.00 | 0.00 |
| ATOM | 3859 | N    | GLY | X | 257 | 55.237 | 75.180 | 54.794 | 0.00 | 0.00 |
| ATOM | 3860 | H    | GLY | X | 257 | 54.982 | 74.875 | 53.866 | 0.00 | 0.00 |
| ATOM | 3861 | CA   | GLY | X | 257 | 55.769 | 74.180 | 55.770 | 0.00 | 0.00 |
| ATOM | 3862 | HA2  | GLY | X | 257 | 56.848 | 74.146 | 55.919 | 0.00 | 0.00 |
| ATOM | 3863 | HA3  | GLY | X | 257 | 55.331 | 74.393 | 56.745 | 0.00 | 0.00 |
| ATOM | 3864 | C    | GLY | X | 257 | 55.292 | 72.821 | 55.373 | 0.00 | 0.00 |
| ATOM | 3865 | O    | GLY | X | 257 | 55.292 | 72.495 | 54.181 | 0.00 | 0.00 |
| ATOM | 3866 | N    | THR | X | 258 | 54.949 | 71.958 | 56.296 | 0.00 | 0.00 |
| ATOM | 3867 | H    | THR | X | 258 | 55.077 | 72.139 | 57.281 | 0.00 | 0.00 |
| ATOM | 3868 | CA   | THR | X | 258 | 54.498 | 70.589 | 56.071 | 0.00 | 0.00 |
| ATOM | 3869 | HA   | THR | X | 258 | 53.938 | 70.661 | 55.139 | 0.00 | 0.00 |
| ATOM | 3870 | CB   | THR | X | 258 | 55.700 | 69.627 | 55.978 | 0.00 | 0.00 |
| ATOM | 3871 | HB   | THR | X | 258 | 55.282 | 68.621 | 56.013 | 0.00 | 0.00 |
| ATOM | 3872 | CG2  | THR | X | 258 | 56.558 | 69.977 | 54.781 | 0.00 | 0.00 |
| ATOM | 3873 | HG21 | THR | X | 258 | 57.055 | 70.936 | 54.930 | 0.00 | 0.00 |
| ATOM | 3874 | HG22 | THR | X | 258 | 55.952 | 69.938 | 53.876 | 0.00 | 0.00 |
| ATOM | 3875 | HG23 | THR | X | 258 | 57.440 | 69.337 | 54.732 | 0.00 | 0.00 |
| ATOM | 3876 | OG1  | THR | X | 258 | 56.476 | 69.786 | 57.123 | 0.00 | 0.00 |
| ATOM | 3877 | HG1  | THR | X | 258 | 57.087 | 70.504 | 56.944 | 0.00 | 0.00 |
| ATOM | 3878 | C    | THR | X | 258 | 53.585 | 69.964 | 57.197 | 0.00 | 0.00 |
| ATOM | 3879 | O    | THR | X | 258 | 53.337 | 70.511 | 58.313 | 0.00 | 0.00 |
| ATOM | 3880 | N    | GLY | X | 259 | 52.906 | 68.860 | 56.893 | 0.00 | 0.00 |
| ATOM | 3881 | H    | GLY | X | 259 | 52.782 | 68.543 | 55.942 | 0.00 | 0.00 |
| ATOM | 3882 | CA   | GLY | X | 259 | 51.936 | 68.266 | 57.830 | 0.00 | 0.00 |
| ATOM | 3883 | HA2  | GLY | X | 259 | 51.675 | 67.257 | 57.513 | 0.00 | 0.00 |
| ATOM | 3884 | HA3  | GLY | X | 259 | 52.378 | 68.148 | 58.820 | 0.00 | 0.00 |
| ATOM | 3885 | C    | GLY | X | 259 | 50.710 | 69.131 | 58.031 | 0.00 | 0.00 |
| ATOM | 3886 | O    | GLY | X | 259 | 50.374 | 69.918 | 57.168 | 0.00 | 0.00 |
| ATOM | 3887 | N    | GLY | X | 260 | 50.133 | 69.146 | 59.224 | 0.00 | 0.00 |
| ATOM | 3888 | H    | GLY | X | 260 | 50.357 | 68.379 | 59.841 | 0.00 | 0.00 |
| ATOM | 3889 | CA   | GLY | X | 260 | 49.152 | 70.187 | 59.564 | 0.00 | 0.00 |
| ATOM | 3890 | HA2  | GLY | X | 260 | 48.985 | 70.306 | 60.635 | 0.00 | 0.00 |
| ATOM | 3891 | HA3  | GLY | X | 260 | 49.404 | 71.169 | 59.165 | 0.00 | 0.00 |
| ATOM | 3892 | C    | GLY | X | 260 | 47.734 | 69.902 | 59.098 | 0.00 | 0.00 |
| ATOM | 3893 | O    | GLY | X | 260 | 47.282 | 68.784 | 59.140 | 0.00 | 0.00 |
| ATOM | 3894 | N    | ASN | X | 261 | 46.963 | 70.953 | 58.756 | 0.00 | 0.00 |
| ATOM | 3895 | H    | ASN | X | 261 | 47.378 | 71.851 | 58.553 | 0.00 | 0.00 |
| ATOM | 3896 | CA   | ASN | X | 261 | 45.582 | 70.975 | 58.483 | 0.00 | 0.00 |
| ATOM | 3897 | HA   | ASN | X | 261 | 44.979 | 70.734 | 59.358 | 0.00 | 0.00 |
| ATOM | 3898 | CB   | ASN | X | 261 | 45.163 | 72.449 | 58.273 | 0.00 | 0.00 |
| ATOM | 3899 | HB2  | ASN | X | 261 | 45.555 | 73.032 | 59.106 | 0.00 | 0.00 |
| ATOM | 3900 | HB3  | ASN | X | 261 | 45.623 | 72.839 | 57.365 | 0.00 | 0.00 |
| ATOM | 3901 | CG   | ASN | X | 261 | 43.645 | 72.698 | 58.157 | 0.00 | 0.00 |
| ATOM | 3902 | OD1  | ASN | X | 261 | 43.150 | 72.797 | 57.122 | 0.00 | 0.00 |
| ATOM | 3903 | ND2  | ASN | X | 261 | 42.982 | 72.922 | 59.227 | 0.00 | 0.00 |
| ATOM | 3904 | HD21 | ASN | X | 261 | 41.973 | 72.965 | 59.195 | 0.00 | 0.00 |
| ATOM | 3905 | HD22 | ASN | X | 261 | 43.473 | 73.052 | 60.100 | 0.00 | 0.00 |
| ATOM | 3906 | C    | ASN | X | 261 | 45.185 | 70.216 | 57.234 | 0.00 | 0.00 |
| ATOM | 3907 | O    | ASN | X | 261 | 45.648 | 70.407 | 56.097 | 0.00 | 0.00 |
| ATOM | 3908 | N    | ASP | X | 262 | 44.322 | 69.207 | 57.339 | 0.00 | 0.00 |
| ATOM | 3909 | H    | ASP | X | 262 | 43.949 | 69.016 | 58.258 | 0.00 | 0.00 |
| ATOM | 3910 | CA   | ASP | X | 262 | 44.090 | 68.164 | 56.375 | 0.00 | 0.00 |
| ATOM | 3911 | HA   | ASP | X | 262 | 45.042 | 67.719 | 56.088 | 0.00 | 0.00 |
| ATOM | 3912 | CB   | ASP | X | 262 | 43.250 | 66.971 | 56.949 | 0.00 | 0.00 |
| ATOM | 3913 | HB2  | ASP | X | 262 | 42.253 | 67.320 | 57.220 | 0.00 | 0.00 |
| ATOM | 3914 | HB3  | ASP | X | 262 | 43.204 | 66.222 | 56.158 | 0.00 | 0.00 |
| ATOM | 3915 | CG   | ASP | X | 262 | 43.822 | 66.482 | 58.288 | 0.00 | 0.00 |
| ATOM | 3916 | OD1  | ASP | X | 262 | 44.760 | 65.632 | 58.381 | 0.00 | 0.00 |
| ATOM | 3917 | OD2  | ASP | X | 262 | 43.221 | 66.888 | 59.291 | 0.00 | 0.00 |
| ATOM | 3918 | C    | ASP | X | 262 | 43.464 | 68.600 | 55.040 | 0.00 | 0.00 |
| ATOM | 3919 | O    | ASP | X | 262 | 43.912 | 68.174 | 53.898 | 0.00 | 0.00 |
| ATOM | 3920 | N    | THR | X | 263 | 42.493 | 69.510 | 55.117 | 0.00 | 0.00 |
| ATOM | 3921 | H    | THR | X | 263 | 42.259 | 69.775 | 56.063 | 0.00 | 0.00 |
| ATOM | 3922 | CA   | THR | X | 263 | 41.977 | 70.366 | 53.941 | 0.00 | 0.00 |
| ATOM | 3923 | HA   | THR | X | 263 | 41.362 | 69.847 | 53.207 | 0.00 | 0.00 |
| ATOM | 3924 | CB   | THR | X | 263 | 40.950 | 71.330 | 54.494 | 0.00 | 0.00 |



|      |      |      |     |   |     |        |        |        |      |      |
|------|------|------|-----|---|-----|--------|--------|--------|------|------|
| ATOM | 3925 | HB   | THR | X | 263 | 41.402 | 72.012 | 55.214 | 0.00 | 0.00 |
| ATOM | 3926 | CG2  | THR | X | 263 | 40.111 | 72.057 | 53.461 | 0.00 | 0.00 |
| ATOM | 3927 | HG21 | THR | X | 263 | 40.766 | 72.481 | 52.700 | 0.00 | 0.00 |
| ATOM | 3928 | HG22 | THR | X | 263 | 39.590 | 72.869 | 53.967 | 0.00 | 0.00 |
| ATOM | 3929 | HG23 | THR | X | 263 | 39.293 | 71.461 | 53.057 | 0.00 | 0.00 |
| ATOM | 3930 | OG1  | THR | X | 263 | 39.943 | 70.621 | 55.206 | 0.00 | 0.00 |
| ATOM | 3931 | HG1  | THR | X | 263 | 39.747 | 71.037 | 56.049 | 0.00 | 0.00 |
| ATOM | 3932 | C    | THR | X | 263 | 43.039 | 71.090 | 53.173 | 0.00 | 0.00 |
| ATOM | 3933 | O    | THR | X | 263 | 43.070 | 70.977 | 51.973 | 0.00 | 0.00 |
| ATOM | 3934 | N    | GLU | X | 264 | 43.972 | 71.739 | 53.885 | 0.00 | 0.00 |
| ATOM | 3935 | H    | GLU | X | 264 | 43.980 | 71.602 | 54.886 | 0.00 | 0.00 |
| ATOM | 3936 | CA   | GLU | X | 264 | 45.105 | 72.552 | 53.331 | 0.00 | 0.00 |
| ATOM | 3937 | HA   | GLU | X | 264 | 44.648 | 73.126 | 52.524 | 0.00 | 0.00 |
| ATOM | 3938 | CB   | GLU | X | 264 | 45.732 | 73.455 | 54.357 | 0.00 | 0.00 |
| ATOM | 3939 | HB2  | GLU | X | 264 | 45.982 | 72.799 | 55.191 | 0.00 | 0.00 |
| ATOM | 3940 | HB3  | GLU | X | 264 | 46.726 | 73.824 | 54.106 | 0.00 | 0.00 |
| ATOM | 3941 | CG   | GLU | X | 264 | 44.986 | 74.726 | 54.806 | 0.00 | 0.00 |
| ATOM | 3942 | HG2  | GLU | X | 264 | 44.047 | 74.364 | 55.225 | 0.00 | 0.00 |
| ATOM | 3943 | HG3  | GLU | X | 264 | 45.567 | 75.293 | 55.533 | 0.00 | 0.00 |
| ATOM | 3944 | CD   | GLU | X | 264 | 44.660 | 75.565 | 53.548 | 0.00 | 0.00 |
| ATOM | 3945 | OE1  | GLU | X | 264 | 43.474 | 75.880 | 53.422 | 0.00 | 0.00 |
| ATOM | 3946 | OE2  | GLU | X | 264 | 45.492 | 75.979 | 52.730 | 0.00 | 0.00 |
| ATOM | 3947 | C    | GLU | X | 264 | 46.264 | 71.678 | 52.731 | 0.00 | 0.00 |
| ATOM | 3948 | O    | GLU | X | 264 | 46.786 | 72.066 | 51.693 | 0.00 | 0.00 |
| ATOM | 3949 | N    | LEU | X | 265 | 46.555 | 70.526 | 53.387 | 0.00 | 0.00 |
| ATOM | 3950 | H    | LEU | X | 265 | 46.248 | 70.431 | 54.344 | 0.00 | 0.00 |
| ATOM | 3951 | CA   | LEU | X | 265 | 47.393 | 69.375 | 52.952 | 0.00 | 0.00 |
| ATOM | 3952 | HA   | LEU | X | 265 | 48.374 | 69.830 | 52.819 | 0.00 | 0.00 |
| ATOM | 3953 | CB   | LEU | X | 265 | 47.471 | 68.378 | 54.087 | 0.00 | 0.00 |
| ATOM | 3954 | HB2  | LEU | X | 265 | 47.652 | 69.001 | 54.964 | 0.00 | 0.00 |
| ATOM | 3955 | HB3  | LEU | X | 265 | 46.480 | 68.029 | 54.376 | 0.00 | 0.00 |
| ATOM | 3956 | CG   | LEU | X | 265 | 48.548 | 67.295 | 53.939 | 0.00 | 0.00 |
| ATOM | 3957 | HG   | LEU | X | 265 | 49.441 | 67.632 | 53.413 | 0.00 | 0.00 |
| ATOM | 3958 | CD1  | LEU | X | 265 | 48.890 | 66.836 | 55.300 | 0.00 | 0.00 |
| ATOM | 3959 | HD11 | LEU | X | 265 | 48.022 | 66.512 | 55.874 | 0.00 | 0.00 |
| ATOM | 3960 | HD12 | LEU | X | 265 | 49.388 | 67.603 | 55.894 | 0.00 | 0.00 |
| ATOM | 3961 | HD13 | LEU | X | 265 | 49.519 | 65.948 | 55.239 | 0.00 | 0.00 |
| ATOM | 3962 | CD2  | LEU | X | 265 | 47.921 | 66.079 | 53.241 | 0.00 | 0.00 |
| ATOM | 3963 | HD21 | LEU | X | 265 | 46.885 | 65.971 | 53.562 | 0.00 | 0.00 |
| ATOM | 3964 | HD22 | LEU | X | 265 | 47.825 | 66.232 | 52.166 | 0.00 | 0.00 |
| ATOM | 3965 | HD23 | LEU | X | 265 | 48.478 | 65.166 | 53.451 | 0.00 | 0.00 |
| ATOM | 3966 | C    | LEU | X | 265 | 46.819 | 68.777 | 51.700 | 0.00 | 0.00 |
| ATOM | 3967 | O    | LEU | X | 265 | 47.458 | 68.850 | 50.680 | 0.00 | 0.00 |
| ATOM | 3968 | N    | VAL | X | 266 | 45.493 | 68.379 | 51.681 | 0.00 | 0.00 |
| ATOM | 3969 | H    | VAL | X | 266 | 44.883 | 68.535 | 52.471 | 0.00 | 0.00 |
| ATOM | 3970 | CA   | VAL | X | 266 | 44.913 | 67.574 | 50.545 | 0.00 | 0.00 |
| ATOM | 3971 | HA   | VAL | X | 266 | 45.755 | 66.933 | 50.284 | 0.00 | 0.00 |
| ATOM | 3972 | CB   | VAL | X | 266 | 43.647 | 66.688 | 50.969 | 0.00 | 0.00 |
| ATOM | 3973 | HB   | VAL | X | 266 | 43.870 | 66.258 | 51.946 | 0.00 | 0.00 |
| ATOM | 3974 | CG1  | VAL | X | 266 | 42.288 | 67.409 | 51.055 | 0.00 | 0.00 |
| ATOM | 3975 | HG11 | VAL | X | 266 | 41.495 | 66.736 | 51.383 | 0.00 | 0.00 |
| ATOM | 3976 | HG12 | VAL | X | 266 | 42.321 | 68.350 | 51.604 | 0.00 | 0.00 |
| ATOM | 3977 | HG13 | VAL | X | 266 | 41.972 | 67.722 | 50.060 | 0.00 | 0.00 |
| ATOM | 3978 | CG2  | VAL | X | 266 | 43.385 | 65.447 | 50.125 | 0.00 | 0.00 |
| ATOM | 3979 | HG21 | VAL | X | 266 | 44.176 | 64.704 | 50.228 | 0.00 | 0.00 |
| ATOM | 3980 | HG22 | VAL | X | 266 | 43.255 | 65.767 | 49.091 | 0.00 | 0.00 |
| ATOM | 3981 | HG23 | VAL | X | 266 | 42.451 | 64.933 | 50.350 | 0.00 | 0.00 |
| ATOM | 3982 | C    | VAL | X | 266 | 44.582 | 68.485 | 49.354 | 0.00 | 0.00 |
| ATOM | 3983 | O    | VAL | X | 266 | 44.662 | 67.973 | 48.255 | 0.00 | 0.00 |
| ATOM | 3984 | N    | ALA | X | 267 | 44.353 | 69.814 | 49.474 | 0.00 | 0.00 |
| ATOM | 3985 | H    | ALA | X | 267 | 44.160 | 70.180 | 50.395 | 0.00 | 0.00 |
| ATOM | 3986 | CA   | ALA | X | 267 | 44.260 | 70.713 | 48.272 | 0.00 | 0.00 |
| ATOM | 3987 | HA   | ALA | X | 267 | 43.554 | 70.281 | 47.562 | 0.00 | 0.00 |
| ATOM | 3988 | CB   | ALA | X | 267 | 43.749 | 72.097 | 48.676 | 0.00 | 0.00 |
| ATOM | 3989 | HB1  | ALA | X | 267 | 42.785 | 71.922 | 49.154 | 0.00 | 0.00 |
| ATOM | 3990 | HB2  | ALA | X | 267 | 43.584 | 72.797 | 47.857 | 0.00 | 0.00 |
| ATOM | 3991 | HB3  | ALA | X | 267 | 44.437 | 72.599 | 49.355 | 0.00 | 0.00 |

|      |      |      |     |   |     |        |        |        |      |      |
|------|------|------|-----|---|-----|--------|--------|--------|------|------|
| ATOM | 3992 | C    | ALA | X | 267 | 45.656 | 70.819 | 47.568 | 0.00 | 0.00 |
| ATOM | 3993 | O    | ALA | X | 267 | 45.669 | 70.794 | 46.336 | 0.00 | 0.00 |
| ATOM | 3994 | N    | CYX | X | 268 | 46.726 | 70.943 | 48.332 | 0.00 | 0.00 |
| ATOM | 3995 | H    | CYX | X | 268 | 46.611 | 71.143 | 49.316 | 0.00 | 0.00 |
| ATOM | 3996 | CA   | CYX | X | 268 | 48.067 | 71.013 | 47.771 | 0.00 | 0.00 |
| ATOM | 3997 | HA   | CYX | X | 268 | 48.155 | 71.744 | 46.967 | 0.00 | 0.00 |
| ATOM | 3998 | CB   | CYX | X | 268 | 49.057 | 71.486 | 48.913 | 0.00 | 0.00 |
| ATOM | 3999 | HB2  | CYX | X | 268 | 48.723 | 72.402 | 49.401 | 0.00 | 0.00 |
| ATOM | 4000 | HB3  | CYX | X | 268 | 49.160 | 70.691 | 49.651 | 0.00 | 0.00 |
| ATOM | 4001 | SG   | CYX | X | 268 | 50.775 | 71.837 | 48.381 | 0.00 | 0.00 |
| ATOM | 4002 | C    | CYX | X | 268 | 48.481 | 69.725 | 47.141 | 0.00 | 0.00 |
| ATOM | 4003 | O    | CYX | X | 268 | 49.012 | 69.672 | 45.971 | 0.00 | 0.00 |
| ATOM | 4004 | N    | LEU | X | 269 | 48.148 | 68.586 | 47.818 | 0.00 | 0.00 |
| ATOM | 4005 | H    | LEU | X | 269 | 47.603 | 68.684 | 48.663 | 0.00 | 0.00 |
| ATOM | 4006 | CA   | LEU | X | 269 | 48.232 | 67.189 | 47.289 | 0.00 | 0.00 |
| ATOM | 4007 | HA   | LEU | X | 269 | 49.269 | 66.965 | 47.036 | 0.00 | 0.00 |
| ATOM | 4008 | CB   | LEU | X | 269 | 47.913 | 66.200 | 48.368 | 0.00 | 0.00 |
| ATOM | 4009 | HB2  | LEU | X | 269 | 47.985 | 66.735 | 49.315 | 0.00 | 0.00 |
| ATOM | 4010 | HB3  | LEU | X | 269 | 46.876 | 65.878 | 48.279 | 0.00 | 0.00 |
| ATOM | 4011 | CG   | LEU | X | 269 | 48.900 | 64.994 | 48.481 | 0.00 | 0.00 |
| ATOM | 4012 | HG   | LEU | X | 269 | 49.032 | 64.559 | 47.490 | 0.00 | 0.00 |
| ATOM | 4013 | CD1  | LEU | X | 269 | 50.384 | 65.418 | 48.926 | 0.00 | 0.00 |
| ATOM | 4014 | HD11 | LEU | X | 269 | 51.017 | 64.533 | 48.996 | 0.00 | 0.00 |
| ATOM | 4015 | HD12 | LEU | X | 269 | 50.413 | 65.991 | 49.852 | 0.00 | 0.00 |
| ATOM | 4016 | HD13 | LEU | X | 269 | 50.765 | 66.161 | 48.225 | 0.00 | 0.00 |
| ATOM | 4017 | CD2  | LEU | X | 269 | 48.325 | 63.968 | 49.422 | 0.00 | 0.00 |
| ATOM | 4018 | HD21 | LEU | X | 269 | 47.473 | 63.534 | 48.899 | 0.00 | 0.00 |
| ATOM | 4019 | HD22 | LEU | X | 269 | 49.034 | 63.216 | 49.768 | 0.00 | 0.00 |
| ATOM | 4020 | HD23 | LEU | X | 269 | 47.893 | 64.428 | 50.311 | 0.00 | 0.00 |
| ATOM | 4021 | C    | LEU | X | 269 | 47.341 | 66.904 | 46.014 | 0.00 | 0.00 |
| ATOM | 4022 | O    | LEU | X | 269 | 47.658 | 65.989 | 45.284 | 0.00 | 0.00 |
| ATOM | 4023 | N    | ARG | X | 270 | 46.407 | 67.839 | 45.729 | 0.00 | 0.00 |
| ATOM | 4024 | H    | ARG | X | 270 | 46.169 | 68.527 | 46.428 | 0.00 | 0.00 |
| ATOM | 4025 | CA   | ARG | X | 270 | 45.623 | 67.812 | 44.491 | 0.00 | 0.00 |
| ATOM | 4026 | HA   | ARG | X | 270 | 45.577 | 66.809 | 44.068 | 0.00 | 0.00 |
| ATOM | 4027 | CB   | ARG | X | 270 | 44.143 | 68.237 | 44.613 | 0.00 | 0.00 |
| ATOM | 4028 | HB2  | ARG | X | 270 | 43.963 | 69.155 | 45.172 | 0.00 | 0.00 |
| ATOM | 4029 | HB3  | ARG | X | 270 | 43.772 | 68.424 | 43.606 | 0.00 | 0.00 |
| ATOM | 4030 | CG   | ARG | X | 270 | 43.329 | 67.116 | 45.230 | 0.00 | 0.00 |
| ATOM | 4031 | HG2  | ARG | X | 270 | 43.745 | 66.193 | 44.824 | 0.00 | 0.00 |
| ATOM | 4032 | HG3  | ARG | X | 270 | 43.570 | 67.136 | 46.292 | 0.00 | 0.00 |
| ATOM | 4033 | CD   | ARG | X | 270 | 41.782 | 67.152 | 45.059 | 0.00 | 0.00 |
| ATOM | 4034 | HD2  | ARG | X | 270 | 41.548 | 67.866 | 44.269 | 0.00 | 0.00 |
| ATOM | 4035 | HD3  | ARG | X | 270 | 41.376 | 66.239 | 44.623 | 0.00 | 0.00 |
| ATOM | 4036 | NE   | ARG | X | 270 | 41.120 | 67.431 | 46.438 | 0.00 | 0.00 |
| ATOM | 4037 | HE   | ARG | X | 270 | 41.274 | 68.343 | 46.843 | 0.00 | 0.00 |
| ATOM | 4038 | CZ   | ARG | X | 270 | 40.464 | 66.635 | 47.185 | 0.00 | 0.00 |
| ATOM | 4039 | NH1  | ARG | X | 270 | 40.586 | 65.275 | 47.042 | 0.00 | 0.00 |
| ATOM | 4040 | HH11 | ARG | X | 270 | 41.096 | 64.796 | 46.314 | 0.00 | 0.00 |
| ATOM | 4041 | HH12 | ARG | X | 270 | 39.993 | 64.699 | 47.622 | 0.00 | 0.00 |
| ATOM | 4042 | NH2  | ARG | X | 270 | 39.702 | 67.042 | 48.157 | 0.00 | 0.00 |
| ATOM | 4043 | HH21 | ARG | X | 270 | 39.427 | 68.010 | 48.074 | 0.00 | 0.00 |
| ATOM | 4044 | HH22 | ARG | X | 270 | 39.201 | 66.346 | 48.690 | 0.00 | 0.00 |
| ATOM | 4045 | C    | ARG | X | 270 | 46.270 | 68.755 | 43.449 | 0.00 | 0.00 |
| ATOM | 4046 | O    | ARG | X | 270 | 45.948 | 68.492 | 42.262 | 0.00 | 0.00 |
| ATOM | 4047 | N    | THR | X | 271 | 46.953 | 69.840 | 43.862 | 0.00 | 0.00 |
| ATOM | 4048 | H    | THR | X | 271 | 46.888 | 70.130 | 44.827 | 0.00 | 0.00 |
| ATOM | 4049 | CA   | THR | X | 271 | 47.516 | 70.727 | 42.845 | 0.00 | 0.00 |
| ATOM | 4050 | HA   | THR | X | 271 | 46.782 | 70.816 | 42.044 | 0.00 | 0.00 |
| ATOM | 4051 | CB   | THR | X | 271 | 47.745 | 72.142 | 43.446 | 0.00 | 0.00 |
| ATOM | 4052 | HB   | THR | X | 271 | 48.341 | 72.141 | 44.359 | 0.00 | 0.00 |
| ATOM | 4053 | CG2  | THR | X | 271 | 48.333 | 73.058 | 42.417 | 0.00 | 0.00 |
| ATOM | 4054 | HG21 | THR | X | 271 | 49.384 | 72.783 | 42.327 | 0.00 | 0.00 |
| ATOM | 4055 | HG22 | THR | X | 271 | 48.249 | 74.122 | 42.635 | 0.00 | 0.00 |
| ATOM | 4056 | HG23 | THR | X | 271 | 47.734 | 73.002 | 41.508 | 0.00 | 0.00 |
| ATOM | 4057 | OG1  | THR | X | 271 | 46.479 | 72.653 | 43.685 | 0.00 | 0.00 |
| ATOM | 4058 | HG1  | THR | X | 271 | 46.546 | 73.170 | 44.491 | 0.00 | 0.00 |

|      |      |      |     |   |     |        |        |        |      |      |
|------|------|------|-----|---|-----|--------|--------|--------|------|------|
| ATOM | 4059 | C    | THR | X | 271 | 48.749 | 70.160 | 42.116 | 0.00 | 0.00 |
| ATOM | 4060 | O    | THR | X | 271 | 48.777 | 70.250 | 40.852 | 0.00 | 0.00 |
| ATOM | 4061 | N    | ARG | X | 272 | 49.749 | 69.638 | 42.849 | 0.00 | 0.00 |
| ATOM | 4062 | H    | ARG | X | 272 | 49.628 | 69.592 | 43.851 | 0.00 | 0.00 |
| ATOM | 4063 | CA   | ARG | X | 272 | 51.087 | 69.332 | 42.276 | 0.00 | 0.00 |
| ATOM | 4064 | HA   | ARG | X | 272 | 51.301 | 70.186 | 41.634 | 0.00 | 0.00 |
| ATOM | 4065 | CB   | ARG | X | 272 | 52.175 | 69.267 | 43.303 | 0.00 | 0.00 |
| ATOM | 4066 | HB2  | ARG | X | 272 | 51.989 | 68.379 | 43.906 | 0.00 | 0.00 |
| ATOM | 4067 | HB3  | ARG | X | 272 | 53.102 | 69.389 | 42.742 | 0.00 | 0.00 |
| ATOM | 4068 | CG   | ARG | X | 272 | 52.149 | 70.279 | 44.509 | 0.00 | 0.00 |
| ATOM | 4069 | HG2  | ARG | X | 272 | 51.162 | 70.284 | 44.972 | 0.00 | 0.00 |
| ATOM | 4070 | HG3  | ARG | X | 272 | 52.908 | 69.931 | 45.211 | 0.00 | 0.00 |
| ATOM | 4071 | CD   | ARG | X | 272 | 52.416 | 71.699 | 44.061 | 0.00 | 0.00 |
| ATOM | 4072 | HD2  | ARG | X | 272 | 53.461 | 71.871 | 43.802 | 0.00 | 0.00 |
| ATOM | 4073 | HD3  | ARG | X | 272 | 51.804 | 71.771 | 43.162 | 0.00 | 0.00 |
| ATOM | 4074 | NE   | ARG | X | 272 | 52.041 | 72.647 | 45.105 | 0.00 | 0.00 |
| ATOM | 4075 | HE   | ARG | X | 272 | 51.177 | 73.159 | 45.002 | 0.00 | 0.00 |
| ATOM | 4076 | CZ   | ARG | X | 272 | 52.808 | 73.247 | 46.037 | 0.00 | 0.00 |
| ATOM | 4077 | NH1  | ARG | X | 272 | 54.001 | 72.842 | 46.458 | 0.00 | 0.00 |
| ATOM | 4078 | HH11 | ARG | X | 272 | 54.523 | 72.023 | 46.179 | 0.00 | 0.00 |
| ATOM | 4079 | HH12 | ARG | X | 272 | 54.320 | 73.365 | 47.261 | 0.00 | 0.00 |
| ATOM | 4080 | NH2  | ARG | X | 272 | 52.309 | 74.386 | 46.573 | 0.00 | 0.00 |
| ATOM | 4081 | HH21 | ARG | X | 272 | 51.452 | 74.754 | 46.187 | 0.00 | 0.00 |
| ATOM | 4082 | HH22 | ARG | X | 272 | 52.726 | 74.910 | 47.329 | 0.00 | 0.00 |
| ATOM | 4083 | C    | ARG | X | 272 | 51.078 | 68.124 | 41.252 | 0.00 | 0.00 |
| ATOM | 4084 | O    | ARG | X | 272 | 50.216 | 67.280 | 41.513 | 0.00 | 0.00 |
| ATOM | 4085 | N    | PRO | X | 273 | 51.944 | 67.984 | 40.218 | 0.00 | 0.00 |
| ATOM | 4086 | CD   | PRO | X | 273 | 53.129 | 68.764 | 40.001 | 0.00 | 0.00 |
| ATOM | 4087 | HD2  | PRO | X | 273 | 53.920 | 68.318 | 40.604 | 0.00 | 0.00 |
| ATOM | 4088 | HD3  | PRO | X | 273 | 52.970 | 69.803 | 40.290 | 0.00 | 0.00 |
| ATOM | 4089 | CG   | PRO | X | 273 | 53.559 | 68.604 | 38.472 | 0.00 | 0.00 |
| ATOM | 4090 | HG2  | PRO | X | 273 | 54.634 | 68.762 | 38.390 | 0.00 | 0.00 |
| ATOM | 4091 | HG3  | PRO | X | 273 | 52.878 | 69.216 | 37.881 | 0.00 | 0.00 |
| ATOM | 4092 | CB   | PRO | X | 273 | 53.114 | 67.212 | 38.187 | 0.00 | 0.00 |
| ATOM | 4093 | HB2  | PRO | X | 273 | 53.879 | 66.502 | 38.501 | 0.00 | 0.00 |
| ATOM | 4094 | HB3  | PRO | X | 273 | 52.935 | 67.045 | 37.124 | 0.00 | 0.00 |
| ATOM | 4095 | CA   | PRO | X | 273 | 51.818 | 67.118 | 39.009 | 0.00 | 0.00 |
| ATOM | 4096 | HA   | PRO | X | 273 | 50.934 | 67.363 | 38.421 | 0.00 | 0.00 |
| ATOM | 4097 | C    | PRO | X | 273 | 51.709 | 65.685 | 39.582 | 0.00 | 0.00 |
| ATOM | 4098 | O    | PRO | X | 273 | 52.444 | 65.271 | 40.495 | 0.00 | 0.00 |
| ATOM | 4099 | N    | ALA | X | 274 | 50.960 | 64.721 | 38.982 | 0.00 | 0.00 |
| ATOM | 4100 | H    | ALA | X | 274 | 50.331 | 65.040 | 38.259 | 0.00 | 0.00 |
| ATOM | 4101 | CA   | ALA | X | 274 | 51.042 | 63.253 | 39.203 | 0.00 | 0.00 |
| ATOM | 4102 | HA   | ALA | X | 274 | 50.588 | 63.144 | 40.189 | 0.00 | 0.00 |
| ATOM | 4103 | CB   | ALA | X | 274 | 50.051 | 62.508 | 38.276 | 0.00 | 0.00 |
| ATOM | 4104 | HB1  | ALA | X | 274 | 49.804 | 61.500 | 38.611 | 0.00 | 0.00 |
| ATOM | 4105 | HB2  | ALA | X | 274 | 50.501 | 62.500 | 37.283 | 0.00 | 0.00 |
| ATOM | 4106 | HB3  | ALA | X | 274 | 49.182 | 63.165 | 38.260 | 0.00 | 0.00 |
| ATOM | 4107 | C    | ALA | X | 274 | 52.502 | 62.701 | 39.100 | 0.00 | 0.00 |
| ATOM | 4108 | O    | ALA | X | 274 | 53.020 | 61.951 | 40.007 | 0.00 | 0.00 |
| ATOM | 4109 | N    | GLN | X | 275 | 53.210 | 63.180 | 38.088 | 0.00 | 0.00 |
| ATOM | 4110 | H    | GLN | X | 275 | 52.764 | 63.832 | 37.460 | 0.00 | 0.00 |
| ATOM | 4111 | CA   | GLN | X | 275 | 54.692 | 62.914 | 37.910 | 0.00 | 0.00 |
| ATOM | 4112 | HA   | GLN | X | 275 | 54.729 | 61.832 | 37.782 | 0.00 | 0.00 |
| ATOM | 4113 | CB   | GLN | X | 275 | 55.209 | 63.560 | 36.684 | 0.00 | 0.00 |
| ATOM | 4114 | HB2  | GLN | X | 275 | 54.805 | 64.560 | 36.845 | 0.00 | 0.00 |
| ATOM | 4115 | HB3  | GLN | X | 275 | 56.297 | 63.600 | 36.733 | 0.00 | 0.00 |
| ATOM | 4116 | CG   | GLN | X | 275 | 54.758 | 62.881 | 35.355 | 0.00 | 0.00 |
| ATOM | 4117 | HG2  | GLN | X | 275 | 55.373 | 61.989 | 35.241 | 0.00 | 0.00 |
| ATOM | 4118 | HG3  | GLN | X | 275 | 53.726 | 62.556 | 35.484 | 0.00 | 0.00 |
| ATOM | 4119 | CD   | GLN | X | 275 | 54.972 | 63.718 | 34.099 | 0.00 | 0.00 |
| ATOM | 4120 | OE1  | GLN | X | 275 | 54.059 | 64.250 | 33.467 | 0.00 | 0.00 |
| ATOM | 4121 | NE2  | GLN | X | 275 | 56.140 | 63.741 | 33.554 | 0.00 | 0.00 |
| ATOM | 4122 | HE21 | GLN | X | 275 | 56.249 | 64.128 | 32.627 | 0.00 | 0.00 |
| ATOM | 4123 | HE22 | GLN | X | 275 | 56.992 | 63.383 | 33.962 | 0.00 | 0.00 |
| ATOM | 4124 | C    | GLN | X | 275 | 55.557 | 63.166 | 39.129 | 0.00 | 0.00 |
| ATOM | 4125 | O    | GLN | X | 275 | 56.529 | 62.385 | 39.297 | 0.00 | 0.00 |

|      |      |      |     |   |     |        |        |        |      |      |
|------|------|------|-----|---|-----|--------|--------|--------|------|------|
| ATOM | 4126 | N    | VAL | X | 276 | 55.192 | 64.068 | 40.087 | 0.00 | 0.00 |
| ATOM | 4127 | H    | VAL | X | 276 | 54.309 | 64.535 | 39.937 | 0.00 | 0.00 |
| ATOM | 4128 | CA   | VAL | X | 276 | 55.795 | 64.194 | 41.404 | 0.00 | 0.00 |
| ATOM | 4129 | HA   | VAL | X | 276 | 56.857 | 64.012 | 41.238 | 0.00 | 0.00 |
| ATOM | 4130 | CB   | VAL | X | 276 | 55.547 | 65.656 | 41.883 | 0.00 | 0.00 |
| ATOM | 4131 | HB   | VAL | X | 276 | 54.466 | 65.724 | 42.006 | 0.00 | 0.00 |
| ATOM | 4132 | CG1  | VAL | X | 276 | 56.200 | 65.815 | 43.325 | 0.00 | 0.00 |
| ATOM | 4133 | HG11 | VAL | X | 276 | 55.743 | 65.152 | 44.059 | 0.00 | 0.00 |
| ATOM | 4134 | HG12 | VAL | X | 276 | 57.239 | 65.529 | 43.160 | 0.00 | 0.00 |
| ATOM | 4135 | HG13 | VAL | X | 276 | 56.072 | 66.817 | 43.734 | 0.00 | 0.00 |
| ATOM | 4136 | CG2  | VAL | X | 276 | 56.048 | 66.635 | 40.788 | 0.00 | 0.00 |
| ATOM | 4137 | HG21 | VAL | X | 276 | 56.245 | 67.581 | 41.292 | 0.00 | 0.00 |
| ATOM | 4138 | HG22 | VAL | X | 276 | 55.365 | 66.687 | 39.941 | 0.00 | 0.00 |
| ATOM | 4139 | HG23 | VAL | X | 276 | 56.985 | 66.350 | 40.308 | 0.00 | 0.00 |
| ATOM | 4140 | C    | VAL | X | 276 | 55.237 | 63.179 | 42.436 | 0.00 | 0.00 |
| ATOM | 4141 | O    | VAL | X | 276 | 55.953 | 62.404 | 43.059 | 0.00 | 0.00 |
| ATOM | 4142 | N    | LEU | X | 277 | 53.910 | 63.202 | 42.595 | 0.00 | 0.00 |
| ATOM | 4143 | H    | LEU | X | 277 | 53.410 | 63.741 | 41.902 | 0.00 | 0.00 |
| ATOM | 4144 | CA   | LEU | X | 277 | 53.135 | 62.372 | 43.443 | 0.00 | 0.00 |
| ATOM | 4145 | HA   | LEU | X | 277 | 53.347 | 62.721 | 44.453 | 0.00 | 0.00 |
| ATOM | 4146 | CB   | LEU | X | 277 | 51.603 | 62.458 | 43.216 | 0.00 | 0.00 |
| ATOM | 4147 | HB2  | LEU | X | 277 | 51.480 | 62.818 | 42.195 | 0.00 | 0.00 |
| ATOM | 4148 | HB3  | LEU | X | 277 | 51.221 | 61.442 | 43.323 | 0.00 | 0.00 |
| ATOM | 4149 | CG   | LEU | X | 277 | 50.822 | 63.354 | 44.182 | 0.00 | 0.00 |
| ATOM | 4150 | HG   | LEU | X | 277 | 49.814 | 63.447 | 43.779 | 0.00 | 0.00 |
| ATOM | 4151 | CD1  | LEU | X | 277 | 50.822 | 62.895 | 45.629 | 0.00 | 0.00 |
| ATOM | 4152 | HD11 | LEU | X | 277 | 50.217 | 63.612 | 46.186 | 0.00 | 0.00 |
| ATOM | 4153 | HD12 | LEU | X | 277 | 51.845 | 62.830 | 45.998 | 0.00 | 0.00 |
| ATOM | 4154 | HD13 | LEU | X | 277 | 50.321 | 61.931 | 45.540 | 0.00 | 0.00 |
| ATOM | 4155 | CD2  | LEU | X | 277 | 51.368 | 64.793 | 44.294 | 0.00 | 0.00 |
| ATOM | 4156 | HD21 | LEU | X | 277 | 52.262 | 64.758 | 44.917 | 0.00 | 0.00 |
| ATOM | 4157 | HD22 | LEU | X | 277 | 51.612 | 65.350 | 43.389 | 0.00 | 0.00 |
| ATOM | 4158 | HD23 | LEU | X | 277 | 50.618 | 65.367 | 44.838 | 0.00 | 0.00 |
| ATOM | 4159 | C    | LEU | X | 277 | 53.538 | 60.849 | 43.258 | 0.00 | 0.00 |
| ATOM | 4160 | O    | LEU | X | 277 | 53.814 | 60.208 | 44.249 | 0.00 | 0.00 |
| ATOM | 4161 | N    | VAL | X | 278 | 53.668 | 60.349 | 42.027 | 0.00 | 0.00 |
| ATOM | 4162 | H    | VAL | X | 278 | 53.152 | 60.922 | 41.375 | 0.00 | 0.00 |
| ATOM | 4163 | CA   | VAL | X | 278 | 53.944 | 58.930 | 41.736 | 0.00 | 0.00 |
| ATOM | 4164 | HA   | VAL | X | 278 | 53.319 | 58.385 | 42.444 | 0.00 | 0.00 |
| ATOM | 4165 | CB   | VAL | X | 278 | 53.657 | 58.409 | 40.303 | 0.00 | 0.00 |
| ATOM | 4166 | HB   | VAL | X | 278 | 52.726 | 58.900 | 40.022 | 0.00 | 0.00 |
| ATOM | 4167 | CG1  | VAL | X | 278 | 54.603 | 59.078 | 39.272 | 0.00 | 0.00 |
| ATOM | 4168 | HG11 | VAL | X | 278 | 54.649 | 60.159 | 39.400 | 0.00 | 0.00 |
| ATOM | 4169 | HG12 | VAL | X | 278 | 55.612 | 58.665 | 39.281 | 0.00 | 0.00 |
| ATOM | 4170 | HG13 | VAL | X | 278 | 54.238 | 58.740 | 38.302 | 0.00 | 0.00 |
| ATOM | 4171 | CG2  | VAL | X | 278 | 53.584 | 56.867 | 40.375 | 0.00 | 0.00 |
| ATOM | 4172 | HG21 | VAL | X | 278 | 54.585 | 56.488 | 40.583 | 0.00 | 0.00 |
| ATOM | 4173 | HG22 | VAL | X | 278 | 53.408 | 56.397 | 39.408 | 0.00 | 0.00 |
| ATOM | 4174 | HG23 | VAL | X | 278 | 52.785 | 56.516 | 41.028 | 0.00 | 0.00 |
| ATOM | 4175 | C    | VAL | X | 278 | 55.357 | 58.651 | 42.213 | 0.00 | 0.00 |
| ATOM | 4176 | O    | VAL | X | 278 | 55.586 | 57.656 | 42.973 | 0.00 | 0.00 |
| ATOM | 4177 | N    | ASN | X | 279 | 56.320 | 59.425 | 41.816 | 0.00 | 0.00 |
| ATOM | 4178 | H    | ASN | X | 279 | 56.073 | 60.276 | 41.332 | 0.00 | 0.00 |
| ATOM | 4179 | CA   | ASN | X | 279 | 57.718 | 59.232 | 42.071 | 0.00 | 0.00 |
| ATOM | 4180 | HA   | ASN | X | 279 | 57.823 | 58.242 | 41.628 | 0.00 | 0.00 |
| ATOM | 4181 | CB   | ASN | X | 279 | 58.485 | 60.029 | 41.033 | 0.00 | 0.00 |
| ATOM | 4182 | HB2  | ASN | X | 279 | 58.285 | 59.712 | 40.010 | 0.00 | 0.00 |
| ATOM | 4183 | HB3  | ASN | X | 279 | 58.251 | 61.086 | 41.162 | 0.00 | 0.00 |
| ATOM | 4184 | CG   | ASN | X | 279 | 59.953 | 59.783 | 41.177 | 0.00 | 0.00 |
| ATOM | 4185 | OD1  | ASN | X | 279 | 60.692 | 60.533 | 41.768 | 0.00 | 0.00 |
| ATOM | 4186 | ND2  | ASN | X | 279 | 60.453 | 58.760 | 40.453 | 0.00 | 0.00 |
| ATOM | 4187 | HD21 | ASN | X | 279 | 61.399 | 58.541 | 40.730 | 0.00 | 0.00 |
| ATOM | 4188 | HD22 | ASN | X | 279 | 59.863 | 58.079 | 39.998 | 0.00 | 0.00 |
| ATOM | 4189 | C    | ASN | X | 279 | 58.137 | 59.264 | 43.568 | 0.00 | 0.00 |
| ATOM | 4190 | O    | ASN | X | 279 | 58.924 | 58.366 | 43.963 | 0.00 | 0.00 |
| ATOM | 4191 | N    | HIE | X | 280 | 57.439 | 59.995 | 44.424 | 0.00 | 0.00 |
| ATOM | 4192 | H    | HIE | X | 280 | 56.801 | 60.636 | 43.975 | 0.00 | 0.00 |

|      |      |     |     |   |     |        |        |        |      |      |
|------|------|-----|-----|---|-----|--------|--------|--------|------|------|
| ATOM | 4193 | CA  | HIE | X | 280 | 57.523 | 59.970 | 45.870 | 0.00 | 0.00 |
| ATOM | 4194 | HA  | HIE | X | 280 | 58.545 | 59.836 | 46.223 | 0.00 | 0.00 |
| ATOM | 4195 | CB  | HIE | X | 280 | 57.143 | 61.332 | 46.433 | 0.00 | 0.00 |
| ATOM | 4196 | HB2 | HIE | X | 280 | 56.160 | 61.576 | 46.030 | 0.00 | 0.00 |
| ATOM | 4197 | HB3 | HIE | X | 280 | 57.180 | 61.197 | 47.514 | 0.00 | 0.00 |
| ATOM | 4198 | CG  | HIE | X | 280 | 58.092 | 62.429 | 45.974 | 0.00 | 0.00 |
| ATOM | 4199 | ND1 | HIE | X | 280 | 59.418 | 62.255 | 45.726 | 0.00 | 0.00 |
| ATOM | 4200 | CE1 | HIE | X | 280 | 59.756 | 63.407 | 45.239 | 0.00 | 0.00 |
| ATOM | 4201 | HE1 | HIE | X | 280 | 60.738 | 63.625 | 44.844 | 0.00 | 0.00 |
| ATOM | 4202 | NE2 | HIE | X | 280 | 58.750 | 64.250 | 45.083 | 0.00 | 0.00 |
| ATOM | 4203 | HE2 | HIE | X | 280 | 58.839 | 65.195 | 44.739 | 0.00 | 0.00 |
| ATOM | 4204 | CD2 | HIE | X | 280 | 57.645 | 63.653 | 45.620 | 0.00 | 0.00 |
| ATOM | 4205 | HD2 | HIE | X | 280 | 56.634 | 64.033 | 45.627 | 0.00 | 0.00 |
| ATOM | 4206 | C   | HIE | X | 280 | 56.772 | 58.769 | 46.570 | 0.00 | 0.00 |
| ATOM | 4207 | O   | HIE | X | 280 | 57.122 | 58.378 | 47.657 | 0.00 | 0.00 |
| ATOM | 4208 | N   | GLU | X | 281 | 55.772 | 58.170 | 45.933 | 0.00 | 0.00 |
| ATOM | 4209 | H   | GLU | X | 281 | 55.510 | 58.444 | 44.997 | 0.00 | 0.00 |
| ATOM | 4210 | CA  | GLU | X | 281 | 54.997 | 57.091 | 46.645 | 0.00 | 0.00 |
| ATOM | 4211 | HA  | GLU | X | 281 | 54.638 | 57.483 | 47.596 | 0.00 | 0.00 |
| ATOM | 4212 | CB  | GLU | X | 281 | 53.812 | 56.743 | 45.659 | 0.00 | 0.00 |
| ATOM | 4213 | HB2 | GLU | X | 281 | 53.455 | 57.645 | 45.162 | 0.00 | 0.00 |
| ATOM | 4214 | HB3 | GLU | X | 281 | 54.128 | 55.964 | 44.966 | 0.00 | 0.00 |
| ATOM | 4215 | CG  | GLU | X | 281 | 52.658 | 56.241 | 46.594 | 0.00 | 0.00 |
| ATOM | 4216 | HG2 | GLU | X | 281 | 52.975 | 55.508 | 47.336 | 0.00 | 0.00 |
| ATOM | 4217 | HG3 | GLU | X | 281 | 52.192 | 57.110 | 47.059 | 0.00 | 0.00 |
| ATOM | 4218 | CD  | GLU | X | 281 | 51.579 | 55.717 | 45.712 | 0.00 | 0.00 |
| ATOM | 4219 | OE1 | GLU | X | 281 | 50.802 | 56.488 | 45.132 | 0.00 | 0.00 |
| ATOM | 4220 | OE2 | GLU | X | 281 | 51.523 | 54.471 | 45.450 | 0.00 | 0.00 |
| ATOM | 4221 | C   | GLU | X | 281 | 55.854 | 55.828 | 46.972 | 0.00 | 0.00 |
| ATOM | 4222 | O   | GLU | X | 281 | 55.559 | 55.096 | 47.955 | 0.00 | 0.00 |
| ATOM | 4223 | N   | TRP | X | 282 | 56.895 | 55.485 | 46.196 | 0.00 | 0.00 |
| ATOM | 4224 | H   | TRP | X | 282 | 57.026 | 55.943 | 45.305 | 0.00 | 0.00 |
| ATOM | 4225 | CA  | TRP | X | 282 | 57.900 | 54.493 | 46.681 | 0.00 | 0.00 |
| ATOM | 4226 | HA  | TRP | X | 282 | 57.388 | 53.538 | 46.800 | 0.00 | 0.00 |
| ATOM | 4227 | CB  | TRP | X | 282 | 58.983 | 54.293 | 45.563 | 0.00 | 0.00 |
| ATOM | 4228 | HB2 | TRP | X | 282 | 58.578 | 54.142 | 44.563 | 0.00 | 0.00 |
| ATOM | 4229 | HB3 | TRP | X | 282 | 59.477 | 55.263 | 45.503 | 0.00 | 0.00 |
| ATOM | 4230 | CG  | TRP | X | 282 | 60.127 | 53.338 | 46.024 | 0.00 | 0.00 |
| ATOM | 4231 | CD1 | TRP | X | 282 | 60.151 | 52.005 | 45.790 | 0.00 | 0.00 |
| ATOM | 4232 | HD1 | TRP | X | 282 | 59.358 | 51.484 | 45.275 | 0.00 | 0.00 |
| ATOM | 4233 | NE1 | TRP | X | 282 | 61.088 | 51.409 | 46.491 | 0.00 | 0.00 |
| ATOM | 4234 | HE1 | TRP | X | 282 | 61.398 | 50.451 | 46.423 | 0.00 | 0.00 |
| ATOM | 4235 | CE2 | TRP | X | 282 | 61.801 | 52.253 | 47.255 | 0.00 | 0.00 |
| ATOM | 4236 | CZ2 | TRP | X | 282 | 62.853 | 52.110 | 48.208 | 0.00 | 0.00 |
| ATOM | 4237 | HZ2 | TRP | X | 282 | 63.230 | 51.118 | 48.410 | 0.00 | 0.00 |
| ATOM | 4238 | CH2 | TRP | X | 282 | 63.269 | 53.224 | 48.936 | 0.00 | 0.00 |
| ATOM | 4239 | HH2 | TRP | X | 282 | 63.833 | 53.053 | 49.841 | 0.00 | 0.00 |
| ATOM | 4240 | CZ3 | TRP | X | 282 | 62.727 | 54.474 | 48.652 | 0.00 | 0.00 |
| ATOM | 4241 | HZ3 | TRP | X | 282 | 62.975 | 55.325 | 49.269 | 0.00 | 0.00 |
| ATOM | 4242 | CE3 | TRP | X | 282 | 61.763 | 54.571 | 47.695 | 0.00 | 0.00 |
| ATOM | 4243 | HE3 | TRP | X | 282 | 61.450 | 55.598 | 47.576 | 0.00 | 0.00 |
| ATOM | 4244 | CD2 | TRP | X | 282 | 61.198 | 53.532 | 46.990 | 0.00 | 0.00 |
| ATOM | 4245 | C   | TRP | X | 282 | 58.513 | 54.739 | 48.056 | 0.00 | 0.00 |
| ATOM | 4246 | O   | TRP | X | 282 | 58.671 | 53.741 | 48.756 | 0.00 | 0.00 |
| ATOM | 4247 | N   | HIE | X | 283 | 58.614 | 55.974 | 48.507 | 0.00 | 0.00 |
| ATOM | 4248 | H   | HIE | X | 283 | 58.248 | 56.744 | 47.966 | 0.00 | 0.00 |
| ATOM | 4249 | CA  | HIE | X | 283 | 59.018 | 56.157 | 49.902 | 0.00 | 0.00 |
| ATOM | 4250 | HA  | HIE | X | 283 | 59.774 | 55.427 | 50.193 | 0.00 | 0.00 |
| ATOM | 4251 | CB  | HIE | X | 283 | 59.434 | 57.577 | 50.013 | 0.00 | 0.00 |
| ATOM | 4252 | HB2 | HIE | X | 283 | 58.637 | 58.238 | 49.673 | 0.00 | 0.00 |
| ATOM | 4253 | HB3 | HIE | X | 283 | 59.654 | 57.870 | 51.040 | 0.00 | 0.00 |
| ATOM | 4254 | CG  | HIE | X | 283 | 60.671 | 57.967 | 49.200 | 0.00 | 0.00 |
| ATOM | 4255 | ND1 | HIE | X | 283 | 61.956 | 57.843 | 49.680 | 0.00 | 0.00 |
| ATOM | 4256 | CE1 | HIE | X | 283 | 62.724 | 58.016 | 48.585 | 0.00 | 0.00 |
| ATOM | 4257 | HE1 | HIE | X | 283 | 63.802 | 58.072 | 48.611 | 0.00 | 0.00 |
| ATOM | 4258 | NE2 | HIE | X | 283 | 61.984 | 58.250 | 47.451 | 0.00 | 0.00 |
| ATOM | 4259 | HE2 | HIE | X | 283 | 62.407 | 58.477 | 46.562 | 0.00 | 0.00 |

|      |      |      |     |   |     |        |        |        |      |      |
|------|------|------|-----|---|-----|--------|--------|--------|------|------|
| ATOM | 4260 | CD2  | HIE | X | 283 | 60.691 | 58.269 | 47.834 | 0.00 | 0.00 |
| ATOM | 4261 | HD2  | HIE | X | 283 | 59.826 | 58.420 | 47.205 | 0.00 | 0.00 |
| ATOM | 4262 | C    | HIE | X | 283 | 57.943 | 55.761 | 50.926 | 0.00 | 0.00 |
| ATOM | 4263 | O    | HIE | X | 283 | 58.335 | 55.438 | 52.067 | 0.00 | 0.00 |
| ATOM | 4264 | N    | VAL | X | 284 | 56.678 | 55.591 | 50.546 | 0.00 | 0.00 |
| ATOM | 4265 | H    | VAL | X | 284 | 56.505 | 55.716 | 49.559 | 0.00 | 0.00 |
| ATOM | 4266 | CA   | VAL | X | 284 | 55.569 | 55.009 | 51.410 | 0.00 | 0.00 |
| ATOM | 4267 | HA   | VAL | X | 284 | 56.052 | 54.927 | 52.384 | 0.00 | 0.00 |
| ATOM | 4268 | CB   | VAL | X | 284 | 54.388 | 55.980 | 51.576 | 0.00 | 0.00 |
| ATOM | 4269 | HB   | VAL | X | 284 | 53.560 | 55.409 | 51.997 | 0.00 | 0.00 |
| ATOM | 4270 | CG1  | VAL | X | 284 | 54.749 | 57.150 | 52.532 | 0.00 | 0.00 |
| ATOM | 4271 | HG11 | VAL | X | 284 | 55.651 | 57.581 | 52.098 | 0.00 | 0.00 |
| ATOM | 4272 | HG12 | VAL | X | 284 | 53.879 | 57.805 | 52.583 | 0.00 | 0.00 |
| ATOM | 4273 | HG13 | VAL | X | 284 | 55.071 | 56.826 | 53.521 | 0.00 | 0.00 |
| ATOM | 4274 | CG2  | VAL | X | 284 | 53.874 | 56.532 | 50.222 | 0.00 | 0.00 |
| ATOM | 4275 | HG21 | VAL | X | 284 | 53.351 | 55.766 | 49.649 | 0.00 | 0.00 |
| ATOM | 4276 | HG22 | VAL | X | 284 | 54.716 | 56.958 | 49.677 | 0.00 | 0.00 |
| ATOM | 4277 | HG23 | VAL | X | 284 | 53.134 | 57.305 | 50.433 | 0.00 | 0.00 |
| ATOM | 4278 | C    | VAL | X | 284 | 55.093 | 53.566 | 51.088 | 0.00 | 0.00 |
| ATOM | 4279 | O    | VAL | X | 284 | 54.481 | 52.941 | 52.006 | 0.00 | 0.00 |
| ATOM | 4280 | N    | LEU | X | 285 | 55.434 | 53.029 | 49.935 | 0.00 | 0.00 |
| ATOM | 4281 | H    | LEU | X | 285 | 56.001 | 53.655 | 49.381 | 0.00 | 0.00 |
| ATOM | 4282 | CA   | LEU | X | 285 | 55.500 | 51.514 | 49.716 | 0.00 | 0.00 |
| ATOM | 4283 | HA   | LEU | X | 285 | 54.473 | 51.149 | 49.731 | 0.00 | 0.00 |
| ATOM | 4284 | CB   | LEU | X | 285 | 56.027 | 51.272 | 48.226 | 0.00 | 0.00 |
| ATOM | 4285 | HB2  | LEU | X | 285 | 55.282 | 51.721 | 47.568 | 0.00 | 0.00 |
| ATOM | 4286 | HB3  | LEU | X | 285 | 56.966 | 51.797 | 48.050 | 0.00 | 0.00 |
| ATOM | 4287 | CG   | LEU | X | 285 | 56.152 | 49.786 | 47.802 | 0.00 | 0.00 |
| ATOM | 4288 | HG   | LEU | X | 285 | 56.604 | 49.207 | 48.607 | 0.00 | 0.00 |
| ATOM | 4289 | CD1  | LEU | X | 285 | 54.676 | 49.230 | 47.601 | 0.00 | 0.00 |
| ATOM | 4290 | HD11 | LEU | X | 285 | 54.119 | 49.367 | 48.528 | 0.00 | 0.00 |
| ATOM | 4291 | HD12 | LEU | X | 285 | 54.778 | 48.193 | 47.283 | 0.00 | 0.00 |
| ATOM | 4292 | HD13 | LEU | X | 285 | 54.302 | 49.811 | 46.758 | 0.00 | 0.00 |
| ATOM | 4293 | CD2  | LEU | X | 285 | 56.978 | 49.545 | 46.545 | 0.00 | 0.00 |
| ATOM | 4294 | HD21 | LEU | X | 285 | 57.116 | 48.480 | 46.363 | 0.00 | 0.00 |
| ATOM | 4295 | HD22 | LEU | X | 285 | 56.445 | 49.978 | 45.699 | 0.00 | 0.00 |
| ATOM | 4296 | HD23 | LEU | X | 285 | 57.910 | 50.111 | 46.512 | 0.00 | 0.00 |
| ATOM | 4297 | C    | LEU | X | 285 | 56.414 | 50.895 | 50.794 | 0.00 | 0.00 |
| ATOM | 4298 | O    | LEU | X | 285 | 57.532 | 51.342 | 50.903 | 0.00 | 0.00 |
| ATOM | 4299 | N    | PRO | X | 286 | 55.960 | 49.904 | 51.564 | 0.00 | 0.00 |
| ATOM | 4300 | CD   | PRO | X | 286 | 54.635 | 49.373 | 51.583 | 0.00 | 0.00 |
| ATOM | 4301 | HD2  | PRO | X | 286 | 54.288 | 48.970 | 50.631 | 0.00 | 0.00 |
| ATOM | 4302 | HD3  | PRO | X | 286 | 53.968 | 50.228 | 51.690 | 0.00 | 0.00 |
| ATOM | 4303 | CG   | PRO | X | 286 | 54.584 | 48.453 | 52.773 | 0.00 | 0.00 |
| ATOM | 4304 | HG2  | PRO | X | 286 | 54.893 | 47.461 | 52.444 | 0.00 | 0.00 |
| ATOM | 4305 | HG3  | PRO | X | 286 | 53.672 | 48.423 | 53.369 | 0.00 | 0.00 |
| ATOM | 4306 | CB   | PRO | X | 286 | 55.627 | 49.058 | 53.648 | 0.00 | 0.00 |
| ATOM | 4307 | HB2  | PRO | X | 286 | 56.085 | 48.316 | 54.302 | 0.00 | 0.00 |
| ATOM | 4308 | HB3  | PRO | X | 286 | 55.276 | 49.876 | 54.278 | 0.00 | 0.00 |
| ATOM | 4309 | CA   | PRO | X | 286 | 56.705 | 49.513 | 52.713 | 0.00 | 0.00 |
| ATOM | 4310 | HA   | PRO | X | 286 | 57.128 | 50.390 | 53.203 | 0.00 | 0.00 |
| ATOM | 4311 | C    | PRO | X | 286 | 57.720 | 48.373 | 52.498 | 0.00 | 0.00 |
| ATOM | 4312 | O    | PRO | X | 286 | 57.502 | 47.545 | 51.612 | 0.00 | 0.00 |
| ATOM | 4313 | N    | GLN | X | 287 | 58.772 | 48.405 | 53.336 | 0.00 | 0.00 |
| ATOM | 4314 | H    | GLN | X | 287 | 58.833 | 49.296 | 53.808 | 0.00 | 0.00 |
| ATOM | 4315 | CA   | GLN | X | 287 | 59.883 | 47.435 | 53.347 | 0.00 | 0.00 |
| ATOM | 4316 | HA   | GLN | X | 287 | 59.942 | 46.844 | 52.434 | 0.00 | 0.00 |
| ATOM | 4317 | CB   | GLN | X | 287 | 61.248 | 48.225 | 53.410 | 0.00 | 0.00 |
| ATOM | 4318 | HB2  | GLN | X | 287 | 61.294 | 48.870 | 54.287 | 0.00 | 0.00 |
| ATOM | 4319 | HB3  | GLN | X | 287 | 62.069 | 47.512 | 53.485 | 0.00 | 0.00 |
| ATOM | 4320 | CG   | GLN | X | 287 | 61.470 | 49.212 | 52.175 | 0.00 | 0.00 |
| ATOM | 4321 | HG2  | GLN | X | 287 | 61.472 | 48.620 | 51.260 | 0.00 | 0.00 |
| ATOM | 4322 | HG3  | GLN | X | 287 | 60.666 | 49.947 | 52.156 | 0.00 | 0.00 |
| ATOM | 4323 | CD   | GLN | X | 287 | 62.802 | 49.890 | 52.270 | 0.00 | 0.00 |
| ATOM | 4324 | OE1  | GLN | X | 287 | 62.979 | 51.013 | 52.709 | 0.00 | 0.00 |
| ATOM | 4325 | NE2  | GLN | X | 287 | 63.911 | 49.212 | 51.952 | 0.00 | 0.00 |
| ATOM | 4326 | HE21 | GLN | X | 287 | 64.806 | 49.668 | 51.849 | 0.00 | 0.00 |

|      |      |      |     |   |     |        |        |        |      |      |
|------|------|------|-----|---|-----|--------|--------|--------|------|------|
| ATOM | 4327 | HE22 | GLN | X | 287 | 63.857 | 48.298 | 51.526 | 0.00 | 0.00 |
| ATOM | 4328 | C    | GLN | X | 287 | 59.703 | 46.637 | 54.664 | 0.00 | 0.00 |
| ATOM | 4329 | O    | GLN | X | 287 | 58.716 | 46.696 | 55.426 | 0.00 | 0.00 |
| ATOM | 4330 | N    | GLU | X | 288 | 60.643 | 45.728 | 54.926 | 0.00 | 0.00 |
| ATOM | 4331 | H    | GLU | X | 288 | 61.404 | 45.701 | 54.262 | 0.00 | 0.00 |
| ATOM | 4332 | CA   | GLU | X | 288 | 60.730 | 44.812 | 56.078 | 0.00 | 0.00 |
| ATOM | 4333 | HA   | GLU | X | 288 | 61.518 | 44.087 | 55.875 | 0.00 | 0.00 |
| ATOM | 4334 | CB   | GLU | X | 288 | 60.961 | 45.530 | 57.527 | 0.00 | 0.00 |
| ATOM | 4335 | HB2  | GLU | X | 288 | 60.087 | 46.097 | 57.848 | 0.00 | 0.00 |
| ATOM | 4336 | HB3  | GLU | X | 288 | 61.112 | 44.718 | 58.238 | 0.00 | 0.00 |
| ATOM | 4337 | CG   | GLU | X | 288 | 62.171 | 46.507 | 57.517 | 0.00 | 0.00 |
| ATOM | 4338 | HG2  | GLU | X | 288 | 61.920 | 47.374 | 56.905 | 0.00 | 0.00 |
| ATOM | 4339 | HG3  | GLU | X | 288 | 62.290 | 46.889 | 58.531 | 0.00 | 0.00 |
| ATOM | 4340 | CD   | GLU | X | 288 | 63.388 | 45.766 | 57.101 | 0.00 | 0.00 |
| ATOM | 4341 | OE1  | GLU | X | 288 | 63.946 | 44.865 | 57.756 | 0.00 | 0.00 |
| ATOM | 4342 | OE2  | GLU | X | 288 | 63.903 | 46.138 | 56.010 | 0.00 | 0.00 |
| ATOM | 4343 | C    | GLU | X | 288 | 59.478 | 43.947 | 56.130 | 0.00 | 0.00 |
| ATOM | 4344 | O    | GLU | X | 288 | 58.915 | 43.491 | 57.154 | 0.00 | 0.00 |
| ATOM | 4345 | N    | SER | X | 289 | 59.001 | 43.624 | 54.970 | 0.00 | 0.00 |
| ATOM | 4346 | H    | SER | X | 289 | 59.579 | 43.918 | 54.195 | 0.00 | 0.00 |
| ATOM | 4347 | CA   | SER | X | 289 | 57.662 | 43.057 | 54.700 | 0.00 | 0.00 |
| ATOM | 4348 | HA   | SER | X | 289 | 57.351 | 42.387 | 55.502 | 0.00 | 0.00 |
| ATOM | 4349 | CB   | SER | X | 289 | 56.693 | 44.215 | 54.597 | 0.00 | 0.00 |
| ATOM | 4350 | HB2  | SER | X | 289 | 57.039 | 44.852 | 53.783 | 0.00 | 0.00 |
| ATOM | 4351 | HB3  | SER | X | 289 | 55.731 | 43.741 | 54.400 | 0.00 | 0.00 |
| ATOM | 4352 | OG   | SER | X | 289 | 56.529 | 45.112 | 55.679 | 0.00 | 0.00 |
| ATOM | 4353 | HG   | SER | X | 289 | 57.281 | 45.700 | 55.577 | 0.00 | 0.00 |
| ATOM | 4354 | C    | SER | X | 289 | 57.562 | 42.244 | 53.347 | 0.00 | 0.00 |
| ATOM | 4355 | O    | SER | X | 289 | 58.410 | 42.523 | 52.467 | 0.00 | 0.00 |
| ATOM | 4356 | N    | VAL | X | 290 | 56.486 | 41.493 | 53.177 | 0.00 | 0.00 |
| ATOM | 4357 | H    | VAL | X | 290 | 55.856 | 41.345 | 53.952 | 0.00 | 0.00 |
| ATOM | 4358 | CA   | VAL | X | 290 | 56.148 | 40.840 | 51.910 | 0.00 | 0.00 |
| ATOM | 4359 | HA   | VAL | X | 290 | 56.491 | 41.531 | 51.140 | 0.00 | 0.00 |
| ATOM | 4360 | CB   | VAL | X | 290 | 56.784 | 39.443 | 51.684 | 0.00 | 0.00 |
| ATOM | 4361 | HB   | VAL | X | 290 | 56.327 | 38.897 | 50.858 | 0.00 | 0.00 |
| ATOM | 4362 | CG1  | VAL | X | 290 | 58.266 | 39.480 | 51.487 | 0.00 | 0.00 |
| ATOM | 4363 | HG11 | VAL | X | 290 | 58.791 | 39.871 | 52.358 | 0.00 | 0.00 |
| ATOM | 4364 | HG12 | VAL | X | 290 | 58.543 | 38.445 | 51.283 | 0.00 | 0.00 |
| ATOM | 4365 | HG13 | VAL | X | 290 | 58.532 | 40.037 | 50.588 | 0.00 | 0.00 |
| ATOM | 4366 | CG2  | VAL | X | 290 | 56.472 | 38.490 | 52.871 | 0.00 | 0.00 |
| ATOM | 4367 | HG21 | VAL | X | 290 | 56.861 | 38.804 | 53.840 | 0.00 | 0.00 |
| ATOM | 4368 | HG22 | VAL | X | 290 | 56.954 | 37.515 | 52.801 | 0.00 | 0.00 |
| ATOM | 4369 | HG23 | VAL | X | 290 | 55.397 | 38.320 | 52.934 | 0.00 | 0.00 |
| ATOM | 4370 | C    | VAL | X | 290 | 54.615 | 40.779 | 51.875 | 0.00 | 0.00 |
| ATOM | 4371 | O    | VAL | X | 290 | 53.945 | 40.574 | 52.946 | 0.00 | 0.00 |
| ATOM | 4372 | N    | PHE | X | 291 | 54.085 | 40.832 | 50.656 | 0.00 | 0.00 |
| ATOM | 4373 | H    | PHE | X | 291 | 54.684 | 40.984 | 49.858 | 0.00 | 0.00 |
| ATOM | 4374 | CA   | PHE | X | 291 | 52.576 | 40.763 | 50.525 | 0.00 | 0.00 |
| ATOM | 4375 | HA   | PHE | X | 291 | 52.295 | 40.605 | 49.484 | 0.00 | 0.00 |
| ATOM | 4376 | CB   | PHE | X | 291 | 52.079 | 39.436 | 51.035 | 0.00 | 0.00 |
| ATOM | 4377 | HB2  | PHE | X | 291 | 52.960 | 38.827 | 51.237 | 0.00 | 0.00 |
| ATOM | 4378 | HB3  | PHE | X | 291 | 51.533 | 39.641 | 51.956 | 0.00 | 0.00 |
| ATOM | 4379 | CG   | PHE | X | 291 | 51.169 | 38.618 | 50.193 | 0.00 | 0.00 |
| ATOM | 4380 | CD1  | PHE | X | 291 | 49.898 | 39.105 | 49.881 | 0.00 | 0.00 |
| ATOM | 4381 | HD1  | PHE | X | 291 | 49.681 | 40.107 | 50.222 | 0.00 | 0.00 |
| ATOM | 4382 | CE1  | PHE | X | 291 | 48.989 | 38.359 | 49.140 | 0.00 | 0.00 |
| ATOM | 4383 | HE1  | PHE | X | 291 | 48.065 | 38.806 | 48.804 | 0.00 | 0.00 |
| ATOM | 4384 | CZ   | PHE | X | 291 | 49.332 | 37.009 | 48.834 | 0.00 | 0.00 |
| ATOM | 4385 | HZ   | PHE | X | 291 | 48.665 | 36.453 | 48.191 | 0.00 | 0.00 |
| ATOM | 4386 | CE2  | PHE | X | 291 | 50.484 | 36.437 | 49.353 | 0.00 | 0.00 |
| ATOM | 4387 | HE2  | PHE | X | 291 | 50.616 | 35.390 | 49.125 | 0.00 | 0.00 |
| ATOM | 4388 | CD2  | PHE | X | 291 | 51.455 | 37.288 | 50.009 | 0.00 | 0.00 |
| ATOM | 4389 | HD2  | PHE | X | 291 | 52.234 | 36.842 | 50.609 | 0.00 | 0.00 |
| ATOM | 4390 | C    | PHE | X | 291 | 51.887 | 42.058 | 51.086 | 0.00 | 0.00 |
| ATOM | 4391 | O    | PHE | X | 291 | 50.787 | 41.966 | 51.656 | 0.00 | 0.00 |
| ATOM | 4392 | N    | ARG | X | 292 | 52.536 | 43.217 | 51.007 | 0.00 | 0.00 |
| ATOM | 4393 | H    | ARG | X | 292 | 53.387 | 43.146 | 50.469 | 0.00 | 0.00 |

|      |      |      |     |   |     |        |        |        |      |      |
|------|------|------|-----|---|-----|--------|--------|--------|------|------|
| ATOM | 4394 | CA   | ARG | X | 292 | 52.223 | 44.582 | 51.548 | 0.00 | 0.00 |
| ATOM | 4395 | HA   | ARG | X | 292 | 51.153 | 44.634 | 51.752 | 0.00 | 0.00 |
| ATOM | 4396 | CB   | ARG | X | 292 | 52.991 | 44.806 | 52.861 | 0.00 | 0.00 |
| ATOM | 4397 | HB2  | ARG | X | 292 | 54.055 | 44.609 | 52.731 | 0.00 | 0.00 |
| ATOM | 4398 | HB3  | ARG | X | 292 | 52.937 | 45.834 | 53.220 | 0.00 | 0.00 |
| ATOM | 4399 | CG   | ARG | X | 292 | 52.443 | 43.992 | 54.040 | 0.00 | 0.00 |
| ATOM | 4400 | HG2  | ARG | X | 292 | 52.483 | 42.956 | 53.704 | 0.00 | 0.00 |
| ATOM | 4401 | HG3  | ARG | X | 292 | 52.943 | 44.306 | 54.956 | 0.00 | 0.00 |
| ATOM | 4402 | CD   | ARG | X | 292 | 51.001 | 44.136 | 54.442 | 0.00 | 0.00 |
| ATOM | 4403 | HD2  | ARG | X | 292 | 50.769 | 45.093 | 54.909 | 0.00 | 0.00 |
| ATOM | 4404 | HD3  | ARG | X | 292 | 50.401 | 44.183 | 53.532 | 0.00 | 0.00 |
| ATOM | 4405 | NE   | ARG | X | 292 | 50.525 | 43.003 | 55.269 | 0.00 | 0.00 |
| ATOM | 4406 | HE   | ARG | X | 292 | 51.093 | 42.170 | 55.326 | 0.00 | 0.00 |
| ATOM | 4407 | CZ   | ARG | X | 292 | 49.542 | 43.069 | 56.158 | 0.00 | 0.00 |
| ATOM | 4408 | NH1  | ARG | X | 292 | 48.918 | 44.139 | 56.419 | 0.00 | 0.00 |
| ATOM | 4409 | HH11 | ARG | X | 292 | 49.061 | 44.974 | 55.869 | 0.00 | 0.00 |
| ATOM | 4410 | HH12 | ARG | X | 292 | 48.130 | 44.172 | 57.050 | 0.00 | 0.00 |
| ATOM | 4411 | NH2  | ARG | X | 292 | 49.315 | 41.999 | 56.841 | 0.00 | 0.00 |
| ATOM | 4412 | HH21 | ARG | X | 292 | 49.938 | 41.217 | 56.701 | 0.00 | 0.00 |
| ATOM | 4413 | HH22 | ARG | X | 292 | 48.716 | 42.046 | 57.653 | 0.00 | 0.00 |
| ATOM | 4414 | C    | ARG | X | 292 | 52.423 | 45.691 | 50.569 | 0.00 | 0.00 |
| ATOM | 4415 | O    | ARG | X | 292 | 53.222 | 45.542 | 49.640 | 0.00 | 0.00 |
| ATOM | 4416 | N    | PHE | X | 293 | 51.676 | 46.831 | 50.691 | 0.00 | 0.00 |
| ATOM | 4417 | H    | PHE | X | 293 | 51.027 | 47.077 | 51.424 | 0.00 | 0.00 |
| ATOM | 4418 | CA   | PHE | X | 293 | 51.616 | 47.796 | 49.583 | 0.00 | 0.00 |
| ATOM | 4419 | HA   | PHE | X | 293 | 52.545 | 47.740 | 49.016 | 0.00 | 0.00 |
| ATOM | 4420 | CB   | PHE | X | 293 | 50.479 | 47.432 | 48.642 | 0.00 | 0.00 |
| ATOM | 4421 | HB2  | PHE | X | 293 | 49.587 | 47.803 | 49.146 | 0.00 | 0.00 |
| ATOM | 4422 | HB3  | PHE | X | 293 | 50.632 | 47.854 | 47.649 | 0.00 | 0.00 |
| ATOM | 4423 | CG   | PHE | X | 293 | 50.288 | 45.935 | 48.402 | 0.00 | 0.00 |
| ATOM | 4424 | CD1  | PHE | X | 293 | 51.149 | 45.269 | 47.582 | 0.00 | 0.00 |
| ATOM | 4425 | HD1  | PHE | X | 293 | 51.860 | 45.912 | 47.084 | 0.00 | 0.00 |
| ATOM | 4426 | CE1  | PHE | X | 293 | 51.174 | 43.848 | 47.464 | 0.00 | 0.00 |
| ATOM | 4427 | HE1  | PHE | X | 293 | 52.010 | 43.448 | 46.908 | 0.00 | 0.00 |
| ATOM | 4428 | CZ   | PHE | X | 293 | 50.361 | 43.101 | 48.270 | 0.00 | 0.00 |
| ATOM | 4429 | HZ   | PHE | X | 293 | 50.433 | 42.025 | 48.330 | 0.00 | 0.00 |
| ATOM | 4430 | CE2  | PHE | X | 293 | 49.442 | 43.747 | 49.100 | 0.00 | 0.00 |
| ATOM | 4431 | HE2  | PHE | X | 293 | 48.849 | 43.164 | 49.789 | 0.00 | 0.00 |
| ATOM | 4432 | CD2  | PHE | X | 293 | 49.400 | 45.133 | 49.189 | 0.00 | 0.00 |
| ATOM | 4433 | HD2  | PHE | X | 293 | 48.689 | 45.611 | 49.846 | 0.00 | 0.00 |
| ATOM | 4434 | C    | PHE | X | 293 | 51.590 | 49.262 | 50.057 | 0.00 | 0.00 |
| ATOM | 4435 | O    | PHE | X | 293 | 51.618 | 49.553 | 51.270 | 0.00 | 0.00 |
| ATOM | 4436 | N    | SER | X | 294 | 51.581 | 50.223 | 49.142 | 0.00 | 0.00 |
| ATOM | 4437 | H    | SER | X | 294 | 51.514 | 49.959 | 48.170 | 0.00 | 0.00 |
| ATOM | 4438 | CA   | SER | X | 294 | 51.584 | 51.669 | 49.495 | 0.00 | 0.00 |
| ATOM | 4439 | HA   | SER | X | 294 | 52.234 | 51.772 | 50.363 | 0.00 | 0.00 |
| ATOM | 4440 | CB   | SER | X | 294 | 52.155 | 52.486 | 48.304 | 0.00 | 0.00 |
| ATOM | 4441 | HB2  | SER | X | 294 | 52.290 | 53.492 | 48.700 | 0.00 | 0.00 |
| ATOM | 4442 | HB3  | SER | X | 294 | 53.131 | 52.107 | 48.000 | 0.00 | 0.00 |
| ATOM | 4443 | OG   | SER | X | 294 | 51.304 | 52.416 | 47.193 | 0.00 | 0.00 |
| ATOM | 4444 | HG   | SER | X | 294 | 51.552 | 53.117 | 46.586 | 0.00 | 0.00 |
| ATOM | 4445 | C    | SER | X | 294 | 50.253 | 52.182 | 50.004 | 0.00 | 0.00 |
| ATOM | 4446 | O    | SER | X | 294 | 50.196 | 52.845 | 51.059 | 0.00 | 0.00 |
| ATOM | 4447 | N    | PHE | X | 295 | 49.177 | 51.891 | 49.224 | 0.00 | 0.00 |
| ATOM | 4448 | H    | PHE | X | 295 | 49.375 | 51.362 | 48.387 | 0.00 | 0.00 |
| ATOM | 4449 | CA   | PHE | X | 295 | 47.883 | 52.192 | 49.668 | 0.00 | 0.00 |
| ATOM | 4450 | HA   | PHE | X | 295 | 47.867 | 52.311 | 50.752 | 0.00 | 0.00 |
| ATOM | 4451 | CB   | PHE | X | 295 | 47.514 | 53.520 | 48.973 | 0.00 | 0.00 |
| ATOM | 4452 | HB2  | PHE | X | 295 | 47.765 | 53.354 | 47.925 | 0.00 | 0.00 |
| ATOM | 4453 | HB3  | PHE | X | 295 | 46.453 | 53.706 | 49.136 | 0.00 | 0.00 |
| ATOM | 4454 | CG   | PHE | X | 295 | 48.190 | 54.735 | 49.521 | 0.00 | 0.00 |
| ATOM | 4455 | CD1  | PHE | X | 295 | 47.540 | 55.574 | 50.462 | 0.00 | 0.00 |
| ATOM | 4456 | HD1  | PHE | X | 295 | 46.550 | 55.254 | 50.753 | 0.00 | 0.00 |
| ATOM | 4457 | CE1  | PHE | X | 295 | 48.163 | 56.720 | 50.959 | 0.00 | 0.00 |
| ATOM | 4458 | HE1  | PHE | X | 295 | 47.621 | 57.329 | 51.667 | 0.00 | 0.00 |
| ATOM | 4459 | CZ   | PHE | X | 295 | 49.509 | 57.006 | 50.547 | 0.00 | 0.00 |
| ATOM | 4460 | HZ   | PHE | X | 295 | 50.013 | 57.900 | 50.883 | 0.00 | 0.00 |



|      |      |      |     |   |     |        |        |        |      |      |
|------|------|------|-----|---|-----|--------|--------|--------|------|------|
| ATOM | 4461 | CE2  | PHE | X | 295 | 50.167 | 56.184 | 49.616 | 0.00 | 0.00 |
| ATOM | 4462 | HE2  | PHE | X | 295 | 51.163 | 56.273 | 49.209 | 0.00 | 0.00 |
| ATOM | 4463 | CD2  | PHE | X | 295 | 49.492 | 55.066 | 49.073 | 0.00 | 0.00 |
| ATOM | 4464 | HD2  | PHE | X | 295 | 50.055 | 54.427 | 48.408 | 0.00 | 0.00 |
| ATOM | 4465 | C    | PHE | X | 295 | 46.844 | 51.010 | 49.325 | 0.00 | 0.00 |
| ATOM | 4466 | O    | PHE | X | 295 | 46.924 | 50.510 | 48.244 | 0.00 | 0.00 |
| ATOM | 4467 | N    | VAL | X | 296 | 45.904 | 50.693 | 50.273 | 0.00 | 0.00 |
| ATOM | 4468 | H    | VAL | X | 296 | 45.811 | 51.219 | 51.130 | 0.00 | 0.00 |
| ATOM | 4469 | CA   | VAL | X | 296 | 44.852 | 49.617 | 50.071 | 0.00 | 0.00 |
| ATOM | 4470 | HA   | VAL | X | 296 | 44.715 | 49.300 | 49.037 | 0.00 | 0.00 |
| ATOM | 4471 | CB   | VAL | X | 296 | 45.370 | 48.303 | 50.767 | 0.00 | 0.00 |
| ATOM | 4472 | HB   | VAL | X | 296 | 44.604 | 47.557 | 50.555 | 0.00 | 0.00 |
| ATOM | 4473 | CG1  | VAL | X | 296 | 46.703 | 47.775 | 50.211 | 0.00 | 0.00 |
| ATOM | 4474 | HG11 | VAL | X | 296 | 46.760 | 47.749 | 49.123 | 0.00 | 0.00 |
| ATOM | 4475 | HG12 | VAL | X | 296 | 47.568 | 48.366 | 50.512 | 0.00 | 0.00 |
| ATOM | 4476 | HG13 | VAL | X | 296 | 46.983 | 46.761 | 50.498 | 0.00 | 0.00 |
| ATOM | 4477 | CG2  | VAL | X | 296 | 45.625 | 48.478 | 52.266 | 0.00 | 0.00 |
| ATOM | 4478 | HG21 | VAL | X | 296 | 46.452 | 49.149 | 52.498 | 0.00 | 0.00 |
| ATOM | 4479 | HG22 | VAL | X | 296 | 45.741 | 47.468 | 52.660 | 0.00 | 0.00 |
| ATOM | 4480 | HG23 | VAL | X | 296 | 44.686 | 48.895 | 52.629 | 0.00 | 0.00 |
| ATOM | 4481 | C    | VAL | X | 296 | 43.581 | 50.159 | 50.693 | 0.00 | 0.00 |
| ATOM | 4482 | O    | VAL | X | 296 | 43.607 | 51.195 | 51.369 | 0.00 | 0.00 |
| ATOM | 4483 | N    | PRO | X | 297 | 42.470 | 49.524 | 50.399 | 0.00 | 0.00 |
| ATOM | 4484 | CD   | PRO | X | 297 | 42.303 | 48.495 | 49.385 | 0.00 | 0.00 |
| ATOM | 4485 | HD2  | PRO | X | 297 | 42.827 | 47.566 | 49.612 | 0.00 | 0.00 |
| ATOM | 4486 | HD3  | PRO | X | 297 | 42.482 | 48.942 | 48.408 | 0.00 | 0.00 |
| ATOM | 4487 | CG   | PRO | X | 297 | 40.800 | 48.185 | 49.308 | 0.00 | 0.00 |
| ATOM | 4488 | HG2  | PRO | X | 297 | 40.518 | 47.137 | 49.410 | 0.00 | 0.00 |
| ATOM | 4489 | HB3  | PRO | X | 297 | 40.253 | 48.503 | 48.420 | 0.00 | 0.00 |
| ATOM | 4490 | CB   | PRO | X | 297 | 40.194 | 48.851 | 50.525 | 0.00 | 0.00 |
| ATOM | 4491 | HB2  | PRO | X | 297 | 40.102 | 48.123 | 51.331 | 0.00 | 0.00 |
| ATOM | 4492 | HB3  | PRO | X | 297 | 39.241 | 49.332 | 50.305 | 0.00 | 0.00 |
| ATOM | 4493 | CA   | PRO | X | 297 | 41.185 | 49.895 | 50.945 | 0.00 | 0.00 |
| ATOM | 4494 | HA   | PRO | X | 297 | 40.843 | 50.769 | 50.390 | 0.00 | 0.00 |
| ATOM | 4495 | C    | PRO | X | 297 | 41.131 | 50.135 | 52.478 | 0.00 | 0.00 |
| ATOM | 4496 | O    | PRO | X | 297 | 42.000 | 49.736 | 53.258 | 0.00 | 0.00 |
| ATOM | 4497 | N    | VAL | X | 298 | 40.055 | 50.831 | 52.868 | 0.00 | 0.00 |
| ATOM | 4498 | H    | VAL | X | 298 | 39.353 | 51.070 | 52.183 | 0.00 | 0.00 |
| ATOM | 4499 | CA   | VAL | X | 298 | 39.945 | 51.499 | 54.183 | 0.00 | 0.00 |
| ATOM | 4500 | HA   | VAL | X | 298 | 40.696 | 51.155 | 54.894 | 0.00 | 0.00 |
| ATOM | 4501 | CB   | VAL | X | 298 | 40.311 | 53.016 | 54.174 | 0.00 | 0.00 |
| ATOM | 4502 | HB   | VAL | X | 298 | 39.579 | 53.551 | 53.570 | 0.00 | 0.00 |
| ATOM | 4503 | CG1  | VAL | X | 298 | 40.326 | 53.709 | 55.596 | 0.00 | 0.00 |
| ATOM | 4504 | HG11 | VAL | X | 298 | 41.067 | 53.371 | 56.320 | 0.00 | 0.00 |
| ATOM | 4505 | HG12 | VAL | X | 298 | 40.480 | 54.772 | 55.408 | 0.00 | 0.00 |
| ATOM | 4506 | HG13 | VAL | X | 298 | 39.316 | 53.544 | 55.971 | 0.00 | 0.00 |
| ATOM | 4507 | CG2  | VAL | X | 298 | 41.620 | 53.257 | 53.501 | 0.00 | 0.00 |
| ATOM | 4508 | HG21 | VAL | X | 298 | 41.679 | 52.771 | 52.527 | 0.00 | 0.00 |
| ATOM | 4509 | HG22 | VAL | X | 298 | 42.482 | 52.907 | 54.069 | 0.00 | 0.00 |
| ATOM | 4510 | HG23 | VAL | X | 298 | 41.747 | 54.319 | 53.291 | 0.00 | 0.00 |
| ATOM | 4511 | C    | VAL | X | 298 | 38.497 | 51.409 | 54.659 | 0.00 | 0.00 |
| ATOM | 4512 | O    | VAL | X | 298 | 37.547 | 51.770 | 53.955 | 0.00 | 0.00 |
| ATOM | 4513 | N    | VAL | X | 299 | 38.380 | 50.943 | 55.884 | 0.00 | 0.00 |
| ATOM | 4514 | H    | VAL | X | 299 | 39.199 | 50.713 | 56.428 | 0.00 | 0.00 |
| ATOM | 4515 | CA   | VAL | X | 299 | 37.071 | 50.953 | 56.632 | 0.00 | 0.00 |
| ATOM | 4516 | HA   | VAL | X | 299 | 36.224 | 50.793 | 55.965 | 0.00 | 0.00 |
| ATOM | 4517 | CB   | VAL | X | 299 | 37.008 | 49.828 | 57.735 | 0.00 | 0.00 |
| ATOM | 4518 | HB   | VAL | X | 299 | 37.664 | 50.135 | 58.550 | 0.00 | 0.00 |
| ATOM | 4519 | CG1  | VAL | X | 299 | 35.630 | 49.841 | 58.406 | 0.00 | 0.00 |
| ATOM | 4520 | HG11 | VAL | X | 299 | 35.642 | 49.311 | 59.358 | 0.00 | 0.00 |
| ATOM | 4521 | HG12 | VAL | X | 299 | 35.277 | 50.861 | 58.556 | 0.00 | 0.00 |
| ATOM | 4522 | HG13 | VAL | X | 299 | 34.846 | 49.467 | 57.747 | 0.00 | 0.00 |
| ATOM | 4523 | CG2  | VAL | X | 299 | 37.323 | 48.385 | 57.118 | 0.00 | 0.00 |
| ATOM | 4524 | HG21 | VAL | X | 299 | 36.460 | 47.971 | 56.596 | 0.00 | 0.00 |
| ATOM | 4525 | HG22 | VAL | X | 299 | 37.468 | 47.683 | 57.939 | 0.00 | 0.00 |
| ATOM | 4526 | HG23 | VAL | X | 299 | 38.223 | 48.391 | 56.503 | 0.00 | 0.00 |
| ATOM | 4527 | C    | VAL | X | 299 | 36.995 | 52.423 | 57.183 | 0.00 | 0.00 |

|      |      |      |     |   |     |        |        |        |      |      |
|------|------|------|-----|---|-----|--------|--------|--------|------|------|
| ATOM | 4528 | O    | VAL | X | 299 | 37.569 | 52.714 | 58.250 | 0.00 | 0.00 |
| ATOM | 4529 | N    | ASP | X | 300 | 36.464 | 53.410 | 56.399 | 0.00 | 0.00 |
| ATOM | 4530 | H    | ASP | X | 300 | 35.999 | 53.113 | 55.553 | 0.00 | 0.00 |
| ATOM | 4531 | CA   | ASP | X | 300 | 36.064 | 54.677 | 56.949 | 0.00 | 0.00 |
| ATOM | 4532 | HA   | ASP | X | 300 | 36.892 | 55.024 | 57.568 | 0.00 | 0.00 |
| ATOM | 4533 | CB   | ASP | X | 300 | 35.935 | 55.689 | 55.828 | 0.00 | 0.00 |
| ATOM | 4534 | HB2  | ASP | X | 300 | 35.785 | 56.624 | 56.368 | 0.00 | 0.00 |
| ATOM | 4535 | HB3  | ASP | X | 300 | 36.759 | 55.837 | 55.131 | 0.00 | 0.00 |
| ATOM | 4536 | CG   | ASP | X | 300 | 34.722 | 55.500 | 54.948 | 0.00 | 0.00 |
| ATOM | 4537 | OD1  | ASP | X | 300 | 34.033 | 56.470 | 54.517 | 0.00 | 0.00 |
| ATOM | 4538 | OD2  | ASP | X | 300 | 34.387 | 54.322 | 54.683 | 0.00 | 0.00 |
| ATOM | 4539 | C    | ASP | X | 300 | 34.793 | 54.680 | 57.785 | 0.00 | 0.00 |
| ATOM | 4540 | O    | ASP | X | 300 | 34.467 | 55.724 | 58.398 | 0.00 | 0.00 |
| ATOM | 4541 | N    | GLY | X | 301 | 34.087 | 53.586 | 57.874 | 0.00 | 0.00 |
| ATOM | 4542 | H    | GLY | X | 301 | 34.360 | 52.772 | 57.343 | 0.00 | 0.00 |
| ATOM | 4543 | CA   | GLY | X | 301 | 32.780 | 53.562 | 58.580 | 0.00 | 0.00 |
| ATOM | 4544 | HA2  | GLY | X | 301 | 32.651 | 52.543 | 58.944 | 0.00 | 0.00 |
| ATOM | 4545 | HA3  | GLY | X | 301 | 32.798 | 54.317 | 59.366 | 0.00 | 0.00 |
| ATOM | 4546 | C    | GLY | X | 301 | 31.577 | 53.815 | 57.665 | 0.00 | 0.00 |
| ATOM | 4547 | O    | GLY | X | 301 | 30.457 | 53.730 | 58.107 | 0.00 | 0.00 |
| ATOM | 4548 | N    | ASP | X | 302 | 31.799 | 54.089 | 56.346 | 0.00 | 0.00 |
| ATOM | 4549 | H    | ASP | X | 302 | 32.768 | 54.193 | 56.078 | 0.00 | 0.00 |
| ATOM | 4550 | CA   | ASP | X | 302 | 30.696 | 54.301 | 55.358 | 0.00 | 0.00 |
| ATOM | 4551 | HA   | ASP | X | 302 | 29.729 | 54.040 | 55.788 | 0.00 | 0.00 |
| ATOM | 4552 | CB   | ASP | X | 302 | 30.766 | 55.781 | 55.076 | 0.00 | 0.00 |
| ATOM | 4553 | HB2  | ASP | X | 302 | 30.876 | 56.443 | 55.934 | 0.00 | 0.00 |
| ATOM | 4554 | HB3  | ASP | X | 302 | 31.681 | 55.902 | 54.497 | 0.00 | 0.00 |
| ATOM | 4555 | CG   | ASP | X | 302 | 29.584 | 56.239 | 54.205 | 0.00 | 0.00 |
| ATOM | 4556 | OD1  | ASP | X | 302 | 29.939 | 56.408 | 52.998 | 0.00 | 0.00 |
| ATOM | 4557 | OD2  | ASP | X | 302 | 28.464 | 56.502 | 54.586 | 0.00 | 0.00 |
| ATOM | 4558 | C    | ASP | X | 302 | 30.854 | 53.482 | 54.081 | 0.00 | 0.00 |
| ATOM | 4559 | O    | ASP | X | 302 | 29.850 | 53.010 | 53.533 | 0.00 | 0.00 |
| ATOM | 4560 | N    | PHE | X | 303 | 32.027 | 53.204 | 53.589 | 0.00 | 0.00 |
| ATOM | 4561 | H    | PHE | X | 303 | 32.836 | 53.455 | 54.140 | 0.00 | 0.00 |
| ATOM | 4562 | CA   | PHE | X | 303 | 32.212 | 52.141 | 52.514 | 0.00 | 0.00 |
| ATOM | 4563 | HA   | PHE | X | 303 | 31.401 | 52.176 | 51.787 | 0.00 | 0.00 |
| ATOM | 4564 | CB   | PHE | X | 303 | 33.530 | 52.311 | 51.769 | 0.00 | 0.00 |
| ATOM | 4565 | HB2  | PHE | X | 303 | 33.616 | 53.294 | 51.306 | 0.00 | 0.00 |
| ATOM | 4566 | HB3  | PHE | X | 303 | 34.224 | 52.187 | 52.601 | 0.00 | 0.00 |
| ATOM | 4567 | CG   | PHE | X | 303 | 33.771 | 51.246 | 50.710 | 0.00 | 0.00 |
| ATOM | 4568 | CD1  | PHE | X | 303 | 34.494 | 50.042 | 51.043 | 0.00 | 0.00 |
| ATOM | 4569 | HD1  | PHE | X | 303 | 35.031 | 49.856 | 51.962 | 0.00 | 0.00 |
| ATOM | 4570 | CE1  | PHE | X | 303 | 34.431 | 48.953 | 50.193 | 0.00 | 0.00 |
| ATOM | 4571 | HE1  | PHE | X | 303 | 35.056 | 48.104 | 50.427 | 0.00 | 0.00 |
| ATOM | 4572 | CZ   | PHE | X | 303 | 33.654 | 48.973 | 48.984 | 0.00 | 0.00 |
| ATOM | 4573 | HZ   | PHE | X | 303 | 33.588 | 48.102 | 48.349 | 0.00 | 0.00 |
| ATOM | 4574 | CE2  | PHE | X | 303 | 33.075 | 50.265 | 48.598 | 0.00 | 0.00 |
| ATOM | 4575 | HE2  | PHE | X | 303 | 32.691 | 50.387 | 47.596 | 0.00 | 0.00 |
| ATOM | 4576 | CD2  | PHE | X | 303 | 33.161 | 51.354 | 49.469 | 0.00 | 0.00 |
| ATOM | 4577 | HD2  | PHE | X | 303 | 32.655 | 52.239 | 49.114 | 0.00 | 0.00 |
| ATOM | 4578 | C    | PHE | X | 303 | 32.133 | 50.755 | 53.154 | 0.00 | 0.00 |
| ATOM | 4579 | O    | PHE | X | 303 | 31.520 | 49.891 | 52.579 | 0.00 | 0.00 |
| ATOM | 4580 | N    | LEU | X | 304 | 32.636 | 50.603 | 54.389 | 0.00 | 0.00 |
| ATOM | 4581 | H    | LEU | X | 304 | 33.002 | 51.426 | 54.844 | 0.00 | 0.00 |
| ATOM | 4582 | CA   | LEU | X | 304 | 32.395 | 49.424 | 55.204 | 0.00 | 0.00 |
| ATOM | 4583 | HA   | LEU | X | 304 | 31.470 | 49.010 | 54.803 | 0.00 | 0.00 |
| ATOM | 4584 | CB   | LEU | X | 304 | 33.594 | 48.399 | 54.989 | 0.00 | 0.00 |
| ATOM | 4585 | HB2  | LEU | X | 304 | 34.525 | 48.965 | 55.023 | 0.00 | 0.00 |
| ATOM | 4586 | HB3  | LEU | X | 304 | 33.569 | 47.638 | 55.770 | 0.00 | 0.00 |
| ATOM | 4587 | CG   | LEU | X | 304 | 33.672 | 47.632 | 53.649 | 0.00 | 0.00 |
| ATOM | 4588 | HG   | LEU | X | 304 | 33.919 | 48.351 | 52.868 | 0.00 | 0.00 |
| ATOM | 4589 | CD1  | LEU | X | 304 | 34.871 | 46.790 | 53.619 | 0.00 | 0.00 |
| ATOM | 4590 | HD11 | LEU | X | 304 | 34.919 | 46.178 | 52.718 | 0.00 | 0.00 |
| ATOM | 4591 | HD12 | LEU | X | 304 | 34.737 | 46.199 | 54.525 | 0.00 | 0.00 |
| ATOM | 4592 | HD13 | LEU | X | 304 | 35.763 | 47.408 | 53.713 | 0.00 | 0.00 |
| ATOM | 4593 | CD2  | LEU | X | 304 | 32.427 | 46.794 | 53.329 | 0.00 | 0.00 |
| ATOM | 4594 | HD21 | LEU | X | 304 | 32.386 | 45.877 | 53.917 | 0.00 | 0.00 |

|      |      |      |     |   |     |        |        |        |      |      |
|------|------|------|-----|---|-----|--------|--------|--------|------|------|
| ATOM | 4595 | HD22 | LEU | X | 304 | 31.512 | 47.371 | 53.461 | 0.00 | 0.00 |
| ATOM | 4596 | HD23 | LEU | X | 304 | 32.540 | 46.435 | 52.306 | 0.00 | 0.00 |
| ATOM | 4597 | C    | LEU | X | 304 | 32.246 | 49.911 | 56.725 | 0.00 | 0.00 |
| ATOM | 4598 | O    | LEU | X | 304 | 32.872 | 50.918 | 57.123 | 0.00 | 0.00 |
| ATOM | 4599 | N    | SER | X | 305 | 31.425 | 49.183 | 57.498 | 0.00 | 0.00 |
| ATOM | 4600 | H    | SER | X | 305 | 31.004 | 48.297 | 57.258 | 0.00 | 0.00 |
| ATOM | 4601 | CA   | SER | X | 305 | 31.101 | 49.472 | 58.894 | 0.00 | 0.00 |
| ATOM | 4602 | HA   | SER | X | 305 | 31.243 | 50.552 | 58.930 | 0.00 | 0.00 |
| ATOM | 4603 | CB   | SER | X | 305 | 29.668 | 49.015 | 59.266 | 0.00 | 0.00 |
| ATOM | 4604 | HB2  | SER | X | 305 | 29.556 | 47.934 | 59.181 | 0.00 | 0.00 |
| ATOM | 4605 | HB3  | SER | X | 305 | 29.542 | 49.315 | 60.306 | 0.00 | 0.00 |
| ATOM | 4606 | OG   | SER | X | 305 | 28.607 | 49.680 | 58.538 | 0.00 | 0.00 |
| ATOM | 4607 | HG   | SER | X | 305 | 27.783 | 49.492 | 58.992 | 0.00 | 0.00 |
| ATOM | 4608 | C    | SER | X | 305 | 32.033 | 48.913 | 59.985 | 0.00 | 0.00 |
| ATOM | 4609 | O    | SER | X | 305 | 32.137 | 49.497 | 61.045 | 0.00 | 0.00 |
| ATOM | 4610 | N    | ASP | X | 306 | 32.922 | 48.029 | 59.637 | 0.00 | 0.00 |
| ATOM | 4611 | H    | ASP | X | 306 | 33.015 | 47.784 | 58.662 | 0.00 | 0.00 |
| ATOM | 4612 | CA   | ASP | X | 306 | 33.842 | 47.231 | 60.485 | 0.00 | 0.00 |
| ATOM | 4613 | HA   | ASP | X | 306 | 34.404 | 47.870 | 61.166 | 0.00 | 0.00 |
| ATOM | 4614 | CB   | ASP | X | 306 | 33.021 | 46.200 | 61.295 | 0.00 | 0.00 |
| ATOM | 4615 | HB2  | ASP | X | 306 | 32.044 | 46.638 | 61.497 | 0.00 | 0.00 |
| ATOM | 4616 | HB3  | ASP | X | 306 | 32.912 | 45.294 | 60.697 | 0.00 | 0.00 |
| ATOM | 4617 | CG   | ASP | X | 306 | 33.599 | 45.863 | 62.666 | 0.00 | 0.00 |
| ATOM | 4618 | OD1  | ASP | X | 306 | 34.641 | 45.130 | 62.703 | 0.00 | 0.00 |
| ATOM | 4619 | OD2  | ASP | X | 306 | 33.088 | 46.370 | 63.706 | 0.00 | 0.00 |
| ATOM | 4620 | C    | ASP | X | 306 | 34.855 | 46.493 | 59.557 | 0.00 | 0.00 |
| ATOM | 4621 | O    | ASP | X | 306 | 34.836 | 46.547 | 58.328 | 0.00 | 0.00 |
| ATOM | 4622 | N    | THR | X | 307 | 35.847 | 45.839 | 60.200 | 0.00 | 0.00 |
| ATOM | 4623 | H    | THR | X | 307 | 35.726 | 45.660 | 61.187 | 0.00 | 0.00 |
| ATOM | 4624 | CA   | THR | X | 307 | 36.918 | 45.175 | 59.483 | 0.00 | 0.00 |
| ATOM | 4625 | HA   | THR | X | 307 | 37.475 | 45.897 | 58.886 | 0.00 | 0.00 |
| ATOM | 4626 | CB   | THR | X | 307 | 37.905 | 44.657 | 60.513 | 0.00 | 0.00 |
| ATOM | 4627 | HB   | THR | X | 307 | 37.531 | 43.880 | 61.180 | 0.00 | 0.00 |
| ATOM | 4628 | CG2  | THR | X | 307 | 39.125 | 44.062 | 59.818 | 0.00 | 0.00 |
| ATOM | 4629 | HG21 | THR | X | 307 | 38.909 | 43.166 | 59.237 | 0.00 | 0.00 |
| ATOM | 4630 | HG22 | THR | X | 307 | 39.835 | 43.782 | 60.596 | 0.00 | 0.00 |
| ATOM | 4631 | HG23 | THR | X | 307 | 39.677 | 44.701 | 59.128 | 0.00 | 0.00 |
| ATOM | 4632 | OG1  | THR | X | 307 | 38.279 | 45.790 | 61.276 | 0.00 | 0.00 |
| ATOM | 4633 | HG1  | THR | X | 307 | 38.824 | 45.340 | 61.925 | 0.00 | 0.00 |
| ATOM | 4634 | C    | THR | X | 307 | 36.325 | 44.082 | 58.544 | 0.00 | 0.00 |
| ATOM | 4635 | O    | THR | X | 307 | 35.433 | 43.314 | 58.975 | 0.00 | 0.00 |
| ATOM | 4636 | N    | PRO | X | 308 | 36.788 | 43.880 | 57.283 | 0.00 | 0.00 |
| ATOM | 4637 | CD   | PRO | X | 308 | 37.916 | 44.577 | 56.733 | 0.00 | 0.00 |
| ATOM | 4638 | HD2  | PRO | X | 308 | 38.915 | 44.372 | 57.117 | 0.00 | 0.00 |
| ATOM | 4639 | HD3  | PRO | X | 308 | 37.744 | 45.653 | 56.768 | 0.00 | 0.00 |
| ATOM | 4640 | CG   | PRO | X | 308 | 37.772 | 44.311 | 55.221 | 0.00 | 0.00 |
| ATOM | 4641 | HG2  | PRO | X | 308 | 38.710 | 44.439 | 54.681 | 0.00 | 0.00 |
| ATOM | 4642 | HG3  | PRO | X | 308 | 37.177 | 45.082 | 54.730 | 0.00 | 0.00 |
| ATOM | 4643 | CB   | PRO | X | 308 | 37.062 | 42.983 | 55.065 | 0.00 | 0.00 |
| ATOM | 4644 | HB2  | PRO | X | 308 | 37.811 | 42.197 | 54.972 | 0.00 | 0.00 |
| ATOM | 4645 | HB3  | PRO | X | 308 | 36.438 | 43.008 | 54.171 | 0.00 | 0.00 |
| ATOM | 4646 | CA   | PRO | X | 308 | 36.250 | 42.873 | 56.355 | 0.00 | 0.00 |
| ATOM | 4647 | HA   | PRO | X | 308 | 35.223 | 43.222 | 56.244 | 0.00 | 0.00 |
| ATOM | 4648 | C    | PRO | X | 308 | 36.054 | 41.355 | 56.829 | 0.00 | 0.00 |
| ATOM | 4649 | O    | PRO | X | 308 | 34.985 | 40.816 | 56.697 | 0.00 | 0.00 |
| ATOM | 4650 | N    | GLU | X | 309 | 37.092 | 40.795 | 57.508 | 0.00 | 0.00 |
| ATOM | 4651 | H    | GLU | X | 309 | 37.979 | 41.274 | 57.563 | 0.00 | 0.00 |
| ATOM | 4652 | CA   | GLU | X | 309 | 37.102 | 39.395 | 58.075 | 0.00 | 0.00 |
| ATOM | 4653 | HA   | GLU | X | 309 | 37.040 | 38.788 | 57.172 | 0.00 | 0.00 |
| ATOM | 4654 | CB   | GLU | X | 309 | 38.418 | 39.072 | 58.772 | 0.00 | 0.00 |
| ATOM | 4655 | HB2  | GLU | X | 309 | 38.433 | 38.027 | 59.085 | 0.00 | 0.00 |
| ATOM | 4656 | HB3  | GLU | X | 309 | 39.159 | 39.109 | 57.973 | 0.00 | 0.00 |
| ATOM | 4657 | CG   | GLU | X | 309 | 38.936 | 40.066 | 59.839 | 0.00 | 0.00 |
| ATOM | 4658 | HG2  | GLU | X | 309 | 38.874 | 41.057 | 59.389 | 0.00 | 0.00 |
| ATOM | 4659 | HG3  | GLU | X | 309 | 38.183 | 40.098 | 60.627 | 0.00 | 0.00 |
| ATOM | 4660 | CD   | GLU | X | 309 | 40.396 | 39.945 | 60.382 | 0.00 | 0.00 |
| ATOM | 4661 | OE1  | GLU | X | 309 | 40.516 | 39.700 | 61.607 | 0.00 | 0.00 |

|      |      |      |     |   |     |        |        |        |      |      |
|------|------|------|-----|---|-----|--------|--------|--------|------|------|
| ATOM | 4662 | OE2  | GLU | X | 309 | 41.427 | 40.037 | 59.661 | 0.00 | 0.00 |
| ATOM | 4663 | C    | GLU | X | 309 | 35.892 | 39.103 | 59.027 | 0.00 | 0.00 |
| ATOM | 4664 | O    | GLU | X | 309 | 35.353 | 38.006 | 59.056 | 0.00 | 0.00 |
| ATOM | 4665 | N    | ALA | X | 310 | 35.602 | 40.151 | 59.786 | 0.00 | 0.00 |
| ATOM | 4666 | H    | ALA | X | 310 | 36.135 | 40.992 | 59.610 | 0.00 | 0.00 |
| ATOM | 4667 | CA   | ALA | X | 310 | 34.597 | 40.264 | 60.873 | 0.00 | 0.00 |
| ATOM | 4668 | HA   | ALA | X | 310 | 34.510 | 39.337 | 61.441 | 0.00 | 0.00 |
| ATOM | 4669 | CB   | ALA | X | 310 | 35.015 | 41.368 | 61.802 | 0.00 | 0.00 |
| ATOM | 4670 | HB1  | ALA | X | 310 | 36.059 | 41.285 | 62.105 | 0.00 | 0.00 |
| ATOM | 4671 | HB2  | ALA | X | 310 | 34.460 | 41.404 | 62.739 | 0.00 | 0.00 |
| ATOM | 4672 | HB3  | ALA | X | 310 | 34.955 | 42.373 | 61.384 | 0.00 | 0.00 |
| ATOM | 4673 | C    | ALA | X | 310 | 33.193 | 40.575 | 60.217 | 0.00 | 0.00 |
| ATOM | 4674 | O    | ALA | X | 310 | 32.194 | 40.170 | 60.700 | 0.00 | 0.00 |
| ATOM | 4675 | N    | LEU | X | 311 | 33.143 | 41.363 | 59.140 | 0.00 | 0.00 |
| ATOM | 4676 | H    | LEU | X | 311 | 33.987 | 41.770 | 58.764 | 0.00 | 0.00 |
| ATOM | 4677 | CA   | LEU | X | 311 | 31.941 | 41.622 | 58.227 | 0.00 | 0.00 |
| ATOM | 4678 | HA   | LEU | X | 311 | 31.073 | 41.820 | 58.857 | 0.00 | 0.00 |
| ATOM | 4679 | CB   | LEU | X | 311 | 32.274 | 42.898 | 57.357 | 0.00 | 0.00 |
| ATOM | 4680 | HB2  | LEU | X | 311 | 33.254 | 42.688 | 56.929 | 0.00 | 0.00 |
| ATOM | 4681 | HB3  | LEU | X | 311 | 31.616 | 42.888 | 56.488 | 0.00 | 0.00 |
| ATOM | 4682 | CG   | LEU | X | 311 | 32.283 | 44.174 | 58.152 | 0.00 | 0.00 |
| ATOM | 4683 | HG   | LEU | X | 311 | 33.177 | 44.228 | 58.773 | 0.00 | 0.00 |
| ATOM | 4684 | CD1  | LEU | X | 311 | 32.344 | 45.347 | 57.077 | 0.00 | 0.00 |
| ATOM | 4685 | HD11 | LEU | X | 311 | 33.258 | 45.342 | 56.483 | 0.00 | 0.00 |
| ATOM | 4686 | HD12 | LEU | X | 311 | 32.326 | 46.303 | 57.600 | 0.00 | 0.00 |
| ATOM | 4687 | HD13 | LEU | X | 311 | 31.554 | 45.266 | 56.330 | 0.00 | 0.00 |
| ATOM | 4688 | CD2  | LEU | X | 311 | 31.122 | 44.369 | 59.069 | 0.00 | 0.00 |
| ATOM | 4689 | HD21 | LEU | X | 311 | 31.246 | 43.886 | 60.039 | 0.00 | 0.00 |
| ATOM | 4690 | HD22 | LEU | X | 311 | 30.881 | 45.413 | 59.273 | 0.00 | 0.00 |
| ATOM | 4691 | HD23 | LEU | X | 311 | 30.294 | 43.969 | 58.485 | 0.00 | 0.00 |
| ATOM | 4692 | C    | LEU | X | 311 | 31.551 | 40.312 | 57.519 | 0.00 | 0.00 |
| ATOM | 4693 | O    | LEU | X | 311 | 30.391 | 40.035 | 57.275 | 0.00 | 0.00 |
| ATOM | 4694 | N    | ILE | X | 312 | 32.514 | 39.528 | 57.069 | 0.00 | 0.00 |
| ATOM | 4695 | H    | ILE | X | 312 | 33.477 | 39.820 | 57.160 | 0.00 | 0.00 |
| ATOM | 4696 | CA   | ILE | X | 312 | 32.382 | 38.232 | 56.436 | 0.00 | 0.00 |
| ATOM | 4697 | HA   | ILE | X | 312 | 31.615 | 38.368 | 55.673 | 0.00 | 0.00 |
| ATOM | 4698 | CB   | ILE | X | 312 | 33.601 | 37.693 | 55.722 | 0.00 | 0.00 |
| ATOM | 4699 | HB   | ILE | X | 312 | 34.474 | 37.766 | 56.371 | 0.00 | 0.00 |
| ATOM | 4700 | CG2  | ILE | X | 312 | 33.545 | 36.229 | 55.312 | 0.00 | 0.00 |
| ATOM | 4701 | HG21 | ILE | X | 312 | 34.384 | 35.815 | 54.753 | 0.00 | 0.00 |
| ATOM | 4702 | HG22 | ILE | X | 312 | 32.613 | 35.943 | 54.823 | 0.00 | 0.00 |
| ATOM | 4703 | HG23 | ILE | X | 312 | 33.569 | 35.636 | 56.226 | 0.00 | 0.00 |
| ATOM | 4704 | CG1  | ILE | X | 312 | 33.832 | 38.617 | 54.422 | 0.00 | 0.00 |
| ATOM | 4705 | HG12 | ILE | X | 312 | 33.107 | 38.368 | 53.647 | 0.00 | 0.00 |
| ATOM | 4706 | HG13 | ILE | X | 312 | 33.714 | 39.672 | 54.670 | 0.00 | 0.00 |
| ATOM | 4707 | CD1  | ILE | X | 312 | 35.263 | 38.496 | 53.930 | 0.00 | 0.00 |
| ATOM | 4708 | HD11 | ILE | X | 312 | 35.324 | 37.502 | 53.487 | 0.00 | 0.00 |
| ATOM | 4709 | HD12 | ILE | X | 312 | 35.895 | 38.657 | 54.803 | 0.00 | 0.00 |
| ATOM | 4710 | HD13 | ILE | X | 312 | 35.486 | 39.313 | 53.243 | 0.00 | 0.00 |
| ATOM | 4711 | C    | ILE | X | 312 | 31.705 | 37.332 | 57.523 | 0.00 | 0.00 |
| ATOM | 4712 | O    | ILE | X | 312 | 30.902 | 36.529 | 57.132 | 0.00 | 0.00 |
| ATOM | 4713 | N    | ASN | X | 313 | 31.972 | 37.566 | 58.763 | 0.00 | 0.00 |
| ATOM | 4714 | H    | ASN | X | 313 | 32.726 | 38.229 | 58.875 | 0.00 | 0.00 |
| ATOM | 4715 | CA   | ASN | X | 313 | 31.441 | 36.744 | 59.850 | 0.00 | 0.00 |
| ATOM | 4716 | HA   | ASN | X | 313 | 31.204 | 35.717 | 59.573 | 0.00 | 0.00 |
| ATOM | 4717 | CB   | ASN | X | 313 | 32.422 | 36.742 | 61.099 | 0.00 | 0.00 |
| ATOM | 4718 | HB2  | ASN | X | 313 | 33.421 | 36.682 | 60.667 | 0.00 | 0.00 |
| ATOM | 4719 | HB3  | ASN | X | 313 | 32.352 | 37.616 | 61.747 | 0.00 | 0.00 |
| ATOM | 4720 | CG   | ASN | X | 313 | 32.240 | 35.548 | 62.020 | 0.00 | 0.00 |
| ATOM | 4721 | OD1  | ASN | X | 313 | 31.532 | 35.534 | 63.035 | 0.00 | 0.00 |
| ATOM | 4722 | ND2  | ASN | X | 313 | 32.890 | 34.400 | 61.685 | 0.00 | 0.00 |
| ATOM | 4723 | HD21 | ASN | X | 313 | 32.851 | 33.527 | 62.191 | 0.00 | 0.00 |
| ATOM | 4724 | HD22 | ASN | X | 313 | 33.439 | 34.423 | 60.838 | 0.00 | 0.00 |
| ATOM | 4725 | C    | ASN | X | 313 | 29.990 | 37.251 | 60.191 | 0.00 | 0.00 |
| ATOM | 4726 | O    | ASN | X | 313 | 29.073 | 36.454 | 60.425 | 0.00 | 0.00 |
| ATOM | 4727 | N    | ALA | X | 314 | 29.708 | 38.550 | 59.970 | 0.00 | 0.00 |
| ATOM | 4728 | H    | ALA | X | 314 | 30.550 | 39.100 | 60.065 | 0.00 | 0.00 |

|      |      |     |     |   |     |        |        |        |      |      |
|------|------|-----|-----|---|-----|--------|--------|--------|------|------|
| ATOM | 4729 | CA  | ALA | X | 314 | 28.483 | 39.214 | 60.383 | 0.00 | 0.00 |
| ATOM | 4730 | HA  | ALA | X | 314 | 27.973 | 38.665 | 61.176 | 0.00 | 0.00 |
| ATOM | 4731 | CB  | ALA | X | 314 | 28.917 | 40.516 | 61.080 | 0.00 | 0.00 |
| ATOM | 4732 | HB1 | ALA | X | 314 | 29.663 | 40.307 | 61.847 | 0.00 | 0.00 |
| ATOM | 4733 | HB2 | ALA | X | 314 | 28.000 | 40.958 | 61.468 | 0.00 | 0.00 |
| ATOM | 4734 | HB3 | ALA | X | 314 | 29.345 | 41.248 | 60.395 | 0.00 | 0.00 |
| ATOM | 4735 | C   | ALA | X | 314 | 27.418 | 39.313 | 59.261 | 0.00 | 0.00 |
| ATOM | 4736 | O   | ALA | X | 314 | 26.374 | 39.906 | 59.466 | 0.00 | 0.00 |
| ATOM | 4737 | N   | GLY | X | 315 | 27.725 | 38.752 | 58.054 | 0.00 | 0.00 |
| ATOM | 4738 | H   | GLY | X | 315 | 28.641 | 38.329 | 58.006 | 0.00 | 0.00 |
| ATOM | 4739 | CA  | GLY | X | 315 | 26.933 | 38.780 | 56.787 | 0.00 | 0.00 |
| ATOM | 4740 | HA2 | GLY | X | 315 | 26.090 | 39.462 | 56.900 | 0.00 | 0.00 |
| ATOM | 4741 | HA3 | GLY | X | 315 | 27.629 | 39.179 | 56.049 | 0.00 | 0.00 |
| ATOM | 4742 | C   | GLY | X | 315 | 26.508 | 37.409 | 56.408 | 0.00 | 0.00 |
| ATOM | 4743 | O   | GLY | X | 315 | 27.298 | 36.421 | 56.502 | 0.00 | 0.00 |
| ATOM | 4744 | N   | ASP | X | 316 | 25.264 | 37.296 | 55.884 | 0.00 | 0.00 |
| ATOM | 4745 | H   | ASP | X | 316 | 24.681 | 38.113 | 55.995 | 0.00 | 0.00 |
| ATOM | 4746 | CA  | ASP | X | 316 | 24.652 | 36.129 | 55.216 | 0.00 | 0.00 |
| ATOM | 4747 | HA  | ASP | X | 316 | 25.048 | 35.270 | 55.757 | 0.00 | 0.00 |
| ATOM | 4748 | CB  | ASP | X | 316 | 23.151 | 36.194 | 55.371 | 0.00 | 0.00 |
| ATOM | 4749 | HB2 | ASP | X | 316 | 22.812 | 36.310 | 56.400 | 0.00 | 0.00 |
| ATOM | 4750 | HB3 | ASP | X | 316 | 22.811 | 36.945 | 54.658 | 0.00 | 0.00 |
| ATOM | 4751 | CG  | ASP | X | 316 | 22.557 | 34.918 | 54.919 | 0.00 | 0.00 |
| ATOM | 4752 | OD1 | ASP | X | 316 | 21.371 | 35.057 | 54.527 | 0.00 | 0.00 |
| ATOM | 4753 | OD2 | ASP | X | 316 | 23.118 | 33.840 | 55.012 | 0.00 | 0.00 |
| ATOM | 4754 | C   | ASP | X | 316 | 25.260 | 36.071 | 53.799 | 0.00 | 0.00 |
| ATOM | 4755 | O   | ASP | X | 316 | 25.728 | 37.060 | 53.306 | 0.00 | 0.00 |
| ATOM | 4756 | N   | PHE | X | 317 | 25.314 | 34.878 | 53.158 | 0.00 | 0.00 |
| ATOM | 4757 | H   | PHE | X | 317 | 24.883 | 34.080 | 53.602 | 0.00 | 0.00 |
| ATOM | 4758 | CA  | PHE | X | 317 | 25.764 | 34.660 | 51.764 | 0.00 | 0.00 |
| ATOM | 4759 | HA  | PHE | X | 317 | 25.595 | 35.579 | 51.203 | 0.00 | 0.00 |
| ATOM | 4760 | CB  | PHE | X | 317 | 27.237 | 34.362 | 51.713 | 0.00 | 0.00 |
| ATOM | 4761 | HB2 | PHE | X | 317 | 27.501 | 33.437 | 52.225 | 0.00 | 0.00 |
| ATOM | 4762 | HB3 | PHE | X | 317 | 27.419 | 34.174 | 50.654 | 0.00 | 0.00 |
| ATOM | 4763 | CG  | PHE | X | 317 | 28.172 | 35.452 | 52.108 | 0.00 | 0.00 |
| ATOM | 4764 | CD1 | PHE | X | 317 | 28.533 | 36.496 | 51.203 | 0.00 | 0.00 |
| ATOM | 4765 | HD1 | PHE | X | 317 | 28.126 | 36.488 | 50.203 | 0.00 | 0.00 |
| ATOM | 4766 | CE1 | PHE | X | 317 | 29.407 | 37.535 | 51.595 | 0.00 | 0.00 |
| ATOM | 4767 | HE1 | PHE | X | 317 | 29.522 | 38.401 | 50.961 | 0.00 | 0.00 |
| ATOM | 4768 | CZ  | PHE | X | 317 | 29.910 | 37.583 | 52.891 | 0.00 | 0.00 |
| ATOM | 4769 | HZ  | PHE | X | 317 | 30.451 | 38.391 | 53.361 | 0.00 | 0.00 |
| ATOM | 4770 | CE2 | PHE | X | 317 | 29.612 | 36.455 | 53.721 | 0.00 | 0.00 |
| ATOM | 4771 | HE2 | PHE | X | 317 | 29.851 | 36.466 | 54.774 | 0.00 | 0.00 |
| ATOM | 4772 | CD2 | PHE | X | 317 | 28.768 | 35.404 | 53.373 | 0.00 | 0.00 |
| ATOM | 4773 | HD2 | PHE | X | 317 | 28.402 | 34.697 | 54.102 | 0.00 | 0.00 |
| ATOM | 4774 | C   | PHE | X | 317 | 24.911 | 33.549 | 51.072 | 0.00 | 0.00 |
| ATOM | 4775 | O   | PHE | X | 317 | 25.349 | 33.060 | 50.023 | 0.00 | 0.00 |
| ATOM | 4776 | N   | HIE | X | 318 | 23.823 | 33.091 | 51.741 | 0.00 | 0.00 |
| ATOM | 4777 | H   | HIE | X | 318 | 23.380 | 33.826 | 52.274 | 0.00 | 0.00 |
| ATOM | 4778 | CA  | HIE | X | 318 | 22.980 | 31.947 | 51.287 | 0.00 | 0.00 |
| ATOM | 4779 | HA  | HIE | X | 318 | 23.638 | 31.078 | 51.307 | 0.00 | 0.00 |
| ATOM | 4780 | CB  | HIE | X | 318 | 21.891 | 31.655 | 52.371 | 0.00 | 0.00 |
| ATOM | 4781 | HB2 | HIE | X | 318 | 22.317 | 31.937 | 53.334 | 0.00 | 0.00 |
| ATOM | 4782 | HB3 | HIE | X | 318 | 21.040 | 32.287 | 52.118 | 0.00 | 0.00 |
| ATOM | 4783 | CG  | HIE | X | 318 | 21.432 | 30.209 | 52.372 | 0.00 | 0.00 |
| ATOM | 4784 | ND1 | HIE | X | 318 | 21.469 | 29.345 | 51.275 | 0.00 | 0.00 |
| ATOM | 4785 | CE1 | HIE | X | 318 | 20.814 | 28.205 | 51.670 | 0.00 | 0.00 |
| ATOM | 4786 | HE1 | HIE | X | 318 | 20.689 | 27.357 | 51.013 | 0.00 | 0.00 |
| ATOM | 4787 | NE2 | HIE | X | 318 | 20.407 | 28.274 | 52.950 | 0.00 | 0.00 |
| ATOM | 4788 | HE2 | HIE | X | 318 | 19.746 | 27.655 | 53.398 | 0.00 | 0.00 |
| ATOM | 4789 | CD2 | HIE | X | 318 | 20.721 | 29.578 | 53.345 | 0.00 | 0.00 |
| ATOM | 4790 | HD2 | HIE | X | 318 | 20.524 | 29.948 | 54.340 | 0.00 | 0.00 |
| ATOM | 4791 | C   | HIE | X | 318 | 22.416 | 31.990 | 49.767 | 0.00 | 0.00 |
| ATOM | 4792 | O   | HIE | X | 318 | 21.787 | 33.018 | 49.429 | 0.00 | 0.00 |
| ATOM | 4793 | N   | GLY | X | 319 | 22.745 | 31.004 | 48.959 | 0.00 | 0.00 |
| ATOM | 4794 | H   | GLY | X | 319 | 23.253 | 30.238 | 49.379 | 0.00 | 0.00 |
| ATOM | 4795 | CA  | GLY | X | 319 | 22.239 | 30.885 | 47.597 | 0.00 | 0.00 |

|      |      |      |     |   |     |        |        |        |      |      |
|------|------|------|-----|---|-----|--------|--------|--------|------|------|
| ATOM | 4796 | HA2  | GLY | X | 319 | 22.243 | 29.826 | 47.336 | 0.00 | 0.00 |
| ATOM | 4797 | HA3  | GLY | X | 319 | 21.225 | 31.260 | 47.453 | 0.00 | 0.00 |
| ATOM | 4798 | C    | GLY | X | 319 | 23.051 | 31.584 | 46.508 | 0.00 | 0.00 |
| ATOM | 4799 | O    | GLY | X | 319 | 22.780 | 31.294 | 45.365 | 0.00 | 0.00 |
| ATOM | 4800 | N    | LEU | X | 320 | 24.010 | 32.480 | 46.858 | 0.00 | 0.00 |
| ATOM | 4801 | H    | LEU | X | 320 | 23.914 | 32.854 | 47.791 | 0.00 | 0.00 |
| ATOM | 4802 | CA   | LEU | X | 320 | 24.958 | 33.178 | 45.960 | 0.00 | 0.00 |
| ATOM | 4803 | HA   | LEU | X | 320 | 24.435 | 33.490 | 45.056 | 0.00 | 0.00 |
| ATOM | 4804 | CB   | LEU | X | 320 | 25.661 | 34.292 | 46.742 | 0.00 | 0.00 |
| ATOM | 4805 | HB2  | LEU | X | 320 | 26.206 | 33.891 | 47.597 | 0.00 | 0.00 |
| ATOM | 4806 | HB3  | LEU | X | 320 | 26.513 | 34.715 | 46.210 | 0.00 | 0.00 |
| ATOM | 4807 | CG   | LEU | X | 320 | 24.629 | 35.424 | 47.288 | 0.00 | 0.00 |
| ATOM | 4808 | HG   | LEU | X | 320 | 23.948 | 34.936 | 47.984 | 0.00 | 0.00 |
| ATOM | 4809 | CD1  | LEU | X | 320 | 25.500 | 36.528 | 47.978 | 0.00 | 0.00 |
| ATOM | 4810 | HD11 | LEU | X | 320 | 24.852 | 37.242 | 48.487 | 0.00 | 0.00 |
| ATOM | 4811 | HD12 | LEU | X | 320 | 26.026 | 36.977 | 47.136 | 0.00 | 0.00 |
| ATOM | 4812 | HD13 | LEU | X | 320 | 26.169 | 35.998 | 48.656 | 0.00 | 0.00 |
| ATOM | 4813 | CD2  | LEU | X | 320 | 23.713 | 35.955 | 46.180 | 0.00 | 0.00 |
| ATOM | 4814 | HD21 | LEU | X | 320 | 24.415 | 36.444 | 45.505 | 0.00 | 0.00 |
| ATOM | 4815 | HD22 | LEU | X | 320 | 23.303 | 35.112 | 45.623 | 0.00 | 0.00 |
| ATOM | 4816 | HD23 | LEU | X | 320 | 23.040 | 36.662 | 46.665 | 0.00 | 0.00 |
| ATOM | 4817 | C    | LEU | X | 320 | 26.008 | 32.120 | 45.514 | 0.00 | 0.00 |
| ATOM | 4818 | O    | LEU | X | 320 | 26.391 | 31.217 | 46.348 | 0.00 | 0.00 |
| ATOM | 4819 | N    | GLN | X | 321 | 26.476 | 32.229 | 44.219 | 0.00 | 0.00 |
| ATOM | 4820 | H    | GLN | X | 321 | 26.109 | 32.968 | 43.638 | 0.00 | 0.00 |
| ATOM | 4821 | CA   | GLN | X | 321 | 27.331 | 31.279 | 43.584 | 0.00 | 0.00 |
| ATOM | 4822 | HA   | GLN | X | 321 | 27.398 | 30.407 | 44.234 | 0.00 | 0.00 |
| ATOM | 4823 | CB   | GLN | X | 321 | 26.805 | 30.847 | 42.205 | 0.00 | 0.00 |
| ATOM | 4824 | HB2  | GLN | X | 321 | 26.715 | 31.775 | 41.640 | 0.00 | 0.00 |
| ATOM | 4825 | HB3  | GLN | X | 321 | 27.526 | 30.239 | 41.658 | 0.00 | 0.00 |
| ATOM | 4826 | CG   | GLN | X | 321 | 25.534 | 29.974 | 42.290 | 0.00 | 0.00 |
| ATOM | 4827 | HG2  | GLN | X | 321 | 25.830 | 28.925 | 42.271 | 0.00 | 0.00 |
| ATOM | 4828 | HG3  | GLN | X | 321 | 24.995 | 30.151 | 43.221 | 0.00 | 0.00 |
| ATOM | 4829 | CD   | GLN | X | 321 | 24.512 | 30.214 | 41.197 | 0.00 | 0.00 |
| ATOM | 4830 | OE1  | GLN | X | 321 | 24.685 | 31.035 | 40.297 | 0.00 | 0.00 |
| ATOM | 4831 | NE2  | GLN | X | 321 | 23.339 | 29.540 | 41.195 | 0.00 | 0.00 |
| ATOM | 4832 | HE21 | GLN | X | 321 | 22.545 | 29.738 | 40.602 | 0.00 | 0.00 |
| ATOM | 4833 | HE22 | GLN | X | 321 | 23.151 | 28.920 | 41.970 | 0.00 | 0.00 |
| ATOM | 4834 | C    | GLN | X | 321 | 28.721 | 31.952 | 43.380 | 0.00 | 0.00 |
| ATOM | 4835 | O    | GLN | X | 321 | 28.958 | 32.992 | 42.681 | 0.00 | 0.00 |
| ATOM | 4836 | N    | VAL | X | 322 | 29.746 | 31.301 | 43.953 | 0.00 | 0.00 |
| ATOM | 4837 | H    | VAL | X | 322 | 29.527 | 30.384 | 44.315 | 0.00 | 0.00 |
| ATOM | 4838 | CA   | VAL | X | 322 | 31.128 | 31.866 | 44.126 | 0.00 | 0.00 |
| ATOM | 4839 | HA   | VAL | X | 322 | 31.327 | 32.736 | 43.500 | 0.00 | 0.00 |
| ATOM | 4840 | CB   | VAL | X | 322 | 31.415 | 32.233 | 45.663 | 0.00 | 0.00 |
| ATOM | 4841 | HB   | VAL | X | 322 | 31.407 | 31.304 | 46.233 | 0.00 | 0.00 |
| ATOM | 4842 | CG1  | VAL | X | 322 | 32.757 | 33.044 | 45.760 | 0.00 | 0.00 |
| ATOM | 4843 | HG11 | VAL | X | 322 | 32.711 | 33.919 | 45.112 | 0.00 | 0.00 |
| ATOM | 4844 | HG12 | VAL | X | 322 | 32.877 | 33.346 | 46.801 | 0.00 | 0.00 |
| ATOM | 4845 | HG13 | VAL | X | 322 | 33.573 | 32.501 | 45.283 | 0.00 | 0.00 |
| ATOM | 4846 | CG2  | VAL | X | 322 | 30.349 | 33.122 | 46.283 | 0.00 | 0.00 |
| ATOM | 4847 | HG21 | VAL | X | 322 | 29.334 | 32.735 | 46.195 | 0.00 | 0.00 |
| ATOM | 4848 | HG22 | VAL | X | 322 | 30.412 | 34.018 | 45.665 | 0.00 | 0.00 |
| ATOM | 4849 | HG23 | VAL | X | 322 | 30.622 | 33.310 | 47.321 | 0.00 | 0.00 |
| ATOM | 4850 | C    | VAL | X | 322 | 32.117 | 30.788 | 43.722 | 0.00 | 0.00 |
| ATOM | 4851 | O    | VAL | X | 322 | 31.896 | 29.655 | 44.106 | 0.00 | 0.00 |
| ATOM | 4852 | N    | LEU | X | 323 | 33.164 | 31.088 | 43.025 | 0.00 | 0.00 |
| ATOM | 4853 | H    | LEU | X | 323 | 33.144 | 31.934 | 42.474 | 0.00 | 0.00 |
| ATOM | 4854 | CA   | LEU | X | 323 | 34.325 | 30.217 | 42.822 | 0.00 | 0.00 |
| ATOM | 4855 | HA   | LEU | X | 323 | 34.060 | 29.238 | 43.222 | 0.00 | 0.00 |
| ATOM | 4856 | CB   | LEU | X | 323 | 34.538 | 30.017 | 41.308 | 0.00 | 0.00 |
| ATOM | 4857 | HB2  | LEU | X | 323 | 33.538 | 29.870 | 40.901 | 0.00 | 0.00 |
| ATOM | 4858 | HB3  | LEU | X | 323 | 34.897 | 30.926 | 40.825 | 0.00 | 0.00 |
| ATOM | 4859 | CG   | LEU | X | 323 | 35.441 | 28.905 | 40.795 | 0.00 | 0.00 |
| ATOM | 4860 | HG   | LEU | X | 323 | 35.134 | 28.019 | 41.352 | 0.00 | 0.00 |
| ATOM | 4861 | CD1  | LEU | X | 323 | 35.262 | 28.530 | 39.297 | 0.00 | 0.00 |
| ATOM | 4862 | HD11 | LEU | X | 323 | 35.709 | 29.325 | 38.699 | 0.00 | 0.00 |

|      |      |      |     |   |     |        |        |        |      |      |
|------|------|------|-----|---|-----|--------|--------|--------|------|------|
| ATOM | 4863 | HD12 | LEU | X | 323 | 34.193 | 28.496 | 39.090 | 0.00 | 0.00 |
| ATOM | 4864 | HD13 | LEU | X | 323 | 35.603 | 27.510 | 39.123 | 0.00 | 0.00 |
| ATOM | 4865 | CD2  | LEU | X | 323 | 36.941 | 29.227 | 40.928 | 0.00 | 0.00 |
| ATOM | 4866 | HD21 | LEU | X | 323 | 37.062 | 30.282 | 40.682 | 0.00 | 0.00 |
| ATOM | 4867 | HD22 | LEU | X | 323 | 37.279 | 28.964 | 41.930 | 0.00 | 0.00 |
| ATOM | 4868 | HD23 | LEU | X | 323 | 37.609 | 28.570 | 40.371 | 0.00 | 0.00 |
| ATOM | 4869 | C    | LEU | X | 323 | 35.471 | 30.794 | 43.664 | 0.00 | 0.00 |
| ATOM | 4870 | O    | LEU | X | 323 | 35.661 | 32.006 | 43.686 | 0.00 | 0.00 |
| ATOM | 4871 | N    | VAL | X | 324 | 36.219 | 29.890 | 44.346 | 0.00 | 0.00 |
| ATOM | 4872 | H    | VAL | X | 324 | 36.150 | 28.894 | 44.190 | 0.00 | 0.00 |
| ATOM | 4873 | CA   | VAL | X | 324 | 37.366 | 30.238 | 45.172 | 0.00 | 0.00 |
| ATOM | 4874 | HA   | VAL | X | 324 | 37.633 | 31.266 | 44.926 | 0.00 | 0.00 |
| ATOM | 4875 | CB   | VAL | X | 324 | 37.031 | 30.212 | 46.672 | 0.00 | 0.00 |
| ATOM | 4876 | HB   | VAL | X | 324 | 37.941 | 30.309 | 47.264 | 0.00 | 0.00 |
| ATOM | 4877 | CG1  | VAL | X | 324 | 36.013 | 31.352 | 46.982 | 0.00 | 0.00 |
| ATOM | 4878 | HG11 | VAL | X | 324 | 36.387 | 32.322 | 46.653 | 0.00 | 0.00 |
| ATOM | 4879 | HG12 | VAL | X | 324 | 35.059 | 31.054 | 46.547 | 0.00 | 0.00 |
| ATOM | 4880 | HG13 | VAL | X | 324 | 35.851 | 31.369 | 48.059 | 0.00 | 0.00 |
| ATOM | 4881 | CG2  | VAL | X | 324 | 36.304 | 28.886 | 47.010 | 0.00 | 0.00 |
| ATOM | 4882 | HG21 | VAL | X | 324 | 36.772 | 28.013 | 46.553 | 0.00 | 0.00 |
| ATOM | 4883 | HG22 | VAL | X | 324 | 35.258 | 28.842 | 46.707 | 0.00 | 0.00 |
| ATOM | 4884 | HG23 | VAL | X | 324 | 36.294 | 28.717 | 48.087 | 0.00 | 0.00 |
| ATOM | 4885 | C    | VAL | X | 324 | 38.596 | 29.379 | 44.855 | 0.00 | 0.00 |
| ATOM | 4886 | O    | VAL | X | 324 | 38.356 | 28.237 | 44.446 | 0.00 | 0.00 |
| ATOM | 4887 | N    | GLY | X | 325 | 39.818 | 29.762 | 45.138 | 0.00 | 0.00 |
| ATOM | 4888 | H    | GLY | X | 325 | 39.958 | 30.726 | 45.403 | 0.00 | 0.00 |
| ATOM | 4889 | CA   | GLY | X | 325 | 41.037 | 28.975 | 45.030 | 0.00 | 0.00 |
| ATOM | 4890 | HA2  | GLY | X | 325 | 40.937 | 28.059 | 45.612 | 0.00 | 0.00 |
| ATOM | 4891 | HA3  | GLY | X | 325 | 41.101 | 28.540 | 44.033 | 0.00 | 0.00 |
| ATOM | 4892 | C    | GLY | X | 325 | 42.335 | 29.685 | 45.212 | 0.00 | 0.00 |
| ATOM | 4893 | O    | GLY | X | 325 | 42.260 | 30.917 | 45.465 | 0.00 | 0.00 |
| ATOM | 4894 | N    | VAL | X | 326 | 43.489 | 28.981 | 45.067 | 0.00 | 0.00 |
| ATOM | 4895 | H    | VAL | X | 326 | 43.350 | 28.065 | 44.666 | 0.00 | 0.00 |
| ATOM | 4896 | CA   | VAL | X | 326 | 44.949 | 29.420 | 45.101 | 0.00 | 0.00 |
| ATOM | 4897 | HA   | VAL | X | 326 | 45.026 | 30.476 | 44.839 | 0.00 | 0.00 |
| ATOM | 4898 | CB   | VAL | X | 326 | 45.607 | 29.248 | 46.519 | 0.00 | 0.00 |
| ATOM | 4899 | HB   | VAL | X | 326 | 46.690 | 29.149 | 46.594 | 0.00 | 0.00 |
| ATOM | 4900 | CG1  | VAL | X | 326 | 45.180 | 30.504 | 47.234 | 0.00 | 0.00 |
| ATOM | 4901 | HG11 | VAL | X | 326 | 45.841 | 31.314 | 46.925 | 0.00 | 0.00 |
| ATOM | 4902 | HG12 | VAL | X | 326 | 44.143 | 30.814 | 47.102 | 0.00 | 0.00 |
| ATOM | 4903 | HG13 | VAL | X | 326 | 45.383 | 30.468 | 48.304 | 0.00 | 0.00 |
| ATOM | 4904 | CG2  | VAL | X | 326 | 45.174 | 27.945 | 47.256 | 0.00 | 0.00 |
| ATOM | 4905 | HG21 | VAL | X | 326 | 45.345 | 27.068 | 46.630 | 0.00 | 0.00 |
| ATOM | 4906 | HG22 | VAL | X | 326 | 44.105 | 27.874 | 47.457 | 0.00 | 0.00 |
| ATOM | 4907 | HG23 | VAL | X | 326 | 45.773 | 27.855 | 48.163 | 0.00 | 0.00 |
| ATOM | 4908 | C    | VAL | X | 326 | 45.802 | 28.649 | 44.075 | 0.00 | 0.00 |
| ATOM | 4909 | O    | VAL | X | 326 | 45.348 | 27.627 | 43.613 | 0.00 | 0.00 |
| ATOM | 4910 | N    | VAL | X | 327 | 47.059 | 29.067 | 43.878 | 0.00 | 0.00 |
| ATOM | 4911 | H    | VAL | X | 327 | 47.352 | 29.904 | 44.361 | 0.00 | 0.00 |
| ATOM | 4912 | CA   | VAL | X | 327 | 48.080 | 28.280 | 43.224 | 0.00 | 0.00 |
| ATOM | 4913 | HA   | VAL | X | 327 | 47.624 | 27.608 | 42.497 | 0.00 | 0.00 |
| ATOM | 4914 | CB   | VAL | X | 327 | 49.092 | 29.212 | 42.430 | 0.00 | 0.00 |
| ATOM | 4915 | HB   | VAL | X | 327 | 49.785 | 28.524 | 41.946 | 0.00 | 0.00 |
| ATOM | 4916 | CG1  | VAL | X | 327 | 48.388 | 30.101 | 41.421 | 0.00 | 0.00 |
| ATOM | 4917 | HG11 | VAL | X | 327 | 49.080 | 30.487 | 40.672 | 0.00 | 0.00 |
| ATOM | 4918 | HG12 | VAL | X | 327 | 47.643 | 29.490 | 40.913 | 0.00 | 0.00 |
| ATOM | 4919 | HG13 | VAL | X | 327 | 47.852 | 30.965 | 41.814 | 0.00 | 0.00 |
| ATOM | 4920 | CG2  | VAL | X | 327 | 49.924 | 30.211 | 43.275 | 0.00 | 0.00 |
| ATOM | 4921 | HG21 | VAL | X | 327 | 50.228 | 29.745 | 44.212 | 0.00 | 0.00 |
| ATOM | 4922 | HG22 | VAL | X | 327 | 49.314 | 31.080 | 43.518 | 0.00 | 0.00 |
| ATOM | 4923 | HG23 | VAL | X | 327 | 50.800 | 30.583 | 42.742 | 0.00 | 0.00 |
| ATOM | 4924 | C    | VAL | X | 327 | 48.845 | 27.425 | 44.303 | 0.00 | 0.00 |
| ATOM | 4925 | O    | VAL | X | 327 | 48.701 | 27.738 | 45.460 | 0.00 | 0.00 |
| ATOM | 4926 | N    | LYS | X | 328 | 49.663 | 26.436 | 43.887 | 0.00 | 0.00 |
| ATOM | 4927 | H    | LYS | X | 328 | 49.765 | 26.092 | 42.943 | 0.00 | 0.00 |
| ATOM | 4928 | CA   | LYS | X | 328 | 50.354 | 25.606 | 44.932 | 0.00 | 0.00 |
| ATOM | 4929 | HA   | LYS | X | 328 | 49.632 | 25.310 | 45.693 | 0.00 | 0.00 |

|      |      |     |     |   |     |        |        |        |      |      |
|------|------|-----|-----|---|-----|--------|--------|--------|------|------|
| ATOM | 4930 | CB  | LYS | X | 328 | 50.889 | 24.335 | 44.216 | 0.00 | 0.00 |
| ATOM | 4931 | HB2 | LYS | X | 328 | 49.955 | 23.810 | 44.015 | 0.00 | 0.00 |
| ATOM | 4932 | HB3 | LYS | X | 328 | 51.468 | 24.708 | 43.371 | 0.00 | 0.00 |
| ATOM | 4933 | CG  | LYS | X | 328 | 51.895 | 23.591 | 45.163 | 0.00 | 0.00 |
| ATOM | 4934 | HG2 | LYS | X | 328 | 52.772 | 24.230 | 45.261 | 0.00 | 0.00 |
| ATOM | 4935 | HG3 | LYS | X | 328 | 51.377 | 23.329 | 46.086 | 0.00 | 0.00 |
| ATOM | 4936 | CD  | LYS | X | 328 | 52.451 | 22.246 | 44.548 | 0.00 | 0.00 |
| ATOM | 4937 | HD2 | LYS | X | 328 | 53.208 | 21.922 | 45.262 | 0.00 | 0.00 |
| ATOM | 4938 | HD3 | LYS | X | 328 | 51.627 | 21.540 | 44.437 | 0.00 | 0.00 |
| ATOM | 4939 | CE  | LYS | X | 328 | 53.116 | 22.499 | 43.166 | 0.00 | 0.00 |
| ATOM | 4940 | HE2 | LYS | X | 328 | 52.964 | 21.569 | 42.618 | 0.00 | 0.00 |
| ATOM | 4941 | HE3 | LYS | X | 328 | 52.632 | 23.254 | 42.547 | 0.00 | 0.00 |
| ATOM | 4942 | NZ  | LYS | X | 328 | 54.558 | 22.829 | 43.271 | 0.00 | 0.00 |
| ATOM | 4943 | HZ1 | LYS | X | 328 | 55.105 | 22.067 | 43.646 | 0.00 | 0.00 |
| ATOM | 4944 | HZ2 | LYS | X | 328 | 54.940 | 23.063 | 42.366 | 0.00 | 0.00 |
| ATOM | 4945 | HZ3 | LYS | X | 328 | 54.690 | 23.668 | 43.817 | 0.00 | 0.00 |
| ATOM | 4946 | C   | LYS | X | 328 | 51.374 | 26.254 | 45.827 | 0.00 | 0.00 |
| ATOM | 4947 | O   | LYS | X | 328 | 51.445 | 25.956 | 46.987 | 0.00 | 0.00 |
| ATOM | 4948 | N   | ASP | X | 329 | 52.124 | 27.201 | 45.266 | 0.00 | 0.00 |
| ATOM | 4949 | H   | ASP | X | 329 | 52.165 | 27.398 | 44.277 | 0.00 | 0.00 |
| ATOM | 4950 | CA  | ASP | X | 329 | 53.341 | 27.616 | 46.005 | 0.00 | 0.00 |
| ATOM | 4951 | HA  | ASP | X | 329 | 53.478 | 26.933 | 46.843 | 0.00 | 0.00 |
| ATOM | 4952 | CB  | ASP | X | 329 | 54.634 | 27.562 | 45.198 | 0.00 | 0.00 |
| ATOM | 4953 | HB2 | ASP | X | 329 | 54.674 | 28.211 | 44.323 | 0.00 | 0.00 |
| ATOM | 4954 | HB3 | ASP | X | 329 | 55.453 | 27.936 | 45.812 | 0.00 | 0.00 |
| ATOM | 4955 | CG  | ASP | X | 329 | 54.963 | 26.105 | 44.849 | 0.00 | 0.00 |
| ATOM | 4956 | OD1 | ASP | X | 329 | 55.753 | 25.526 | 45.620 | 0.00 | 0.00 |
| ATOM | 4957 | OD2 | ASP | X | 329 | 54.398 | 25.630 | 43.836 | 0.00 | 0.00 |
| ATOM | 4958 | C   | ASP | X | 329 | 53.181 | 29.101 | 46.504 | 0.00 | 0.00 |
| ATOM | 4959 | O   | ASP | X | 329 | 53.920 | 29.479 | 47.402 | 0.00 | 0.00 |
| ATOM | 4960 | N   | GLU | X | 330 | 52.225 | 29.904 | 46.013 | 0.00 | 0.00 |
| ATOM | 4961 | H   | GLU | X | 330 | 51.730 | 29.568 | 45.198 | 0.00 | 0.00 |
| ATOM | 4962 | CA  | GLU | X | 330 | 51.772 | 31.238 | 46.397 | 0.00 | 0.00 |
| ATOM | 4963 | HA  | GLU | X | 330 | 51.241 | 31.678 | 45.554 | 0.00 | 0.00 |
| ATOM | 4964 | CB  | GLU | X | 330 | 50.700 | 31.306 | 47.515 | 0.00 | 0.00 |
| ATOM | 4965 | HB2 | GLU | X | 330 | 50.971 | 30.632 | 48.327 | 0.00 | 0.00 |
| ATOM | 4966 | HB3 | GLU | X | 330 | 50.520 | 32.300 | 47.924 | 0.00 | 0.00 |
| ATOM | 4967 | CG  | GLU | X | 330 | 49.255 | 30.788 | 47.179 | 0.00 | 0.00 |
| ATOM | 4968 | HG2 | GLU | X | 330 | 49.365 | 29.743 | 46.891 | 0.00 | 0.00 |
| ATOM | 4969 | HG3 | GLU | X | 330 | 48.600 | 30.844 | 48.049 | 0.00 | 0.00 |
| ATOM | 4970 | CD  | GLU | X | 330 | 48.649 | 31.744 | 46.087 | 0.00 | 0.00 |
| ATOM | 4971 | OE1 | GLU | X | 330 | 49.121 | 32.903 | 46.127 | 0.00 | 0.00 |
| ATOM | 4972 | OE2 | GLU | X | 330 | 47.799 | 31.369 | 45.259 | 0.00 | 0.00 |
| ATOM | 4973 | C   | GLU | X | 330 | 52.970 | 32.134 | 46.574 | 0.00 | 0.00 |
| ATOM | 4974 | O   | GLU | X | 330 | 53.586 | 32.577 | 45.663 | 0.00 | 0.00 |
| ATOM | 4975 | N   | GLY | X | 331 | 53.205 | 32.484 | 47.860 | 0.00 | 0.00 |
| ATOM | 4976 | H   | GLY | X | 331 | 52.862 | 31.977 | 48.664 | 0.00 | 0.00 |
| ATOM | 4977 | CA  | GLY | X | 331 | 54.103 | 33.482 | 48.311 | 0.00 | 0.00 |
| ATOM | 4978 | HA2 | GLY | X | 331 | 53.941 | 34.382 | 47.718 | 0.00 | 0.00 |
| ATOM | 4979 | HA3 | GLY | X | 331 | 53.948 | 33.707 | 49.366 | 0.00 | 0.00 |
| ATOM | 4980 | C   | GLY | X | 331 | 55.592 | 33.109 | 48.078 | 0.00 | 0.00 |
| ATOM | 4981 | O   | GLY | X | 331 | 56.432 | 33.990 | 48.392 | 0.00 | 0.00 |
| ATOM | 4982 | N   | SER | X | 332 | 55.836 | 31.968 | 47.487 | 0.00 | 0.00 |
| ATOM | 4983 | H   | SER | X | 332 | 55.046 | 31.375 | 47.278 | 0.00 | 0.00 |
| ATOM | 4984 | CA  | SER | X | 332 | 57.155 | 31.774 | 46.786 | 0.00 | 0.00 |
| ATOM | 4985 | HA  | SER | X | 332 | 57.958 | 31.708 | 47.520 | 0.00 | 0.00 |
| ATOM | 4986 | CB  | SER | X | 332 | 57.168 | 30.445 | 46.032 | 0.00 | 0.00 |
| ATOM | 4987 | HB2 | SER | X | 332 | 58.120 | 30.114 | 45.616 | 0.00 | 0.00 |
| ATOM | 4988 | HB3 | SER | X | 332 | 56.874 | 29.624 | 46.686 | 0.00 | 0.00 |
| ATOM | 4989 | OG  | SER | X | 332 | 56.286 | 30.391 | 44.863 | 0.00 | 0.00 |
| ATOM | 4990 | HG  | SER | X | 332 | 56.439 | 29.569 | 44.393 | 0.00 | 0.00 |
| ATOM | 4991 | C   | SER | X | 332 | 57.504 | 32.940 | 45.842 | 0.00 | 0.00 |
| ATOM | 4992 | O   | SER | X | 332 | 58.641 | 33.377 | 45.706 | 0.00 | 0.00 |
| ATOM | 4993 | N   | TYR | X | 333 | 56.478 | 33.498 | 45.112 | 0.00 | 0.00 |
| ATOM | 4994 | H   | TYR | X | 333 | 55.617 | 32.971 | 45.070 | 0.00 | 0.00 |
| ATOM | 4995 | CA  | TYR | X | 333 | 56.606 | 34.738 | 44.378 | 0.00 | 0.00 |
| ATOM | 4996 | HA  | TYR | X | 333 | 57.315 | 34.579 | 43.566 | 0.00 | 0.00 |



|      |      |      |     |   |     |        |        |        |      |      |
|------|------|------|-----|---|-----|--------|--------|--------|------|------|
| ATOM | 4997 | CB   | TYR | X | 333 | 55.155 | 35.081 | 43.909 | 0.00 | 0.00 |
| ATOM | 4998 | HB2  | TYR | X | 333 | 54.651 | 34.168 | 43.592 | 0.00 | 0.00 |
| ATOM | 4999 | HB3  | TYR | X | 333 | 54.678 | 35.382 | 44.842 | 0.00 | 0.00 |
| ATOM | 5000 | CG   | TYR | X | 333 | 55.007 | 36.263 | 42.962 | 0.00 | 0.00 |
| ATOM | 5001 | CD1  | TYR | X | 333 | 55.835 | 36.306 | 41.842 | 0.00 | 0.00 |
| ATOM | 5002 | HD1  | TYR | X | 333 | 56.655 | 35.638 | 41.624 | 0.00 | 0.00 |
| ATOM | 5003 | CE1  | TYR | X | 333 | 55.753 | 37.394 | 40.982 | 0.00 | 0.00 |
| ATOM | 5004 | HE1  | TYR | X | 333 | 56.455 | 37.422 | 40.161 | 0.00 | 0.00 |
| ATOM | 5005 | CZ   | TYR | X | 333 | 54.724 | 38.383 | 41.194 | 0.00 | 0.00 |
| ATOM | 5006 | OH   | TYR | X | 333 | 54.589 | 39.403 | 40.298 | 0.00 | 0.00 |
| ATOM | 5007 | HH   | TYR | X | 333 | 55.137 | 39.323 | 39.514 | 0.00 | 0.00 |
| ATOM | 5008 | CE2  | TYR | X | 333 | 53.947 | 38.346 | 42.381 | 0.00 | 0.00 |
| ATOM | 5009 | HE2  | TYR | X | 333 | 53.255 | 39.169 | 42.491 | 0.00 | 0.00 |
| ATOM | 5010 | CD2  | TYR | X | 333 | 54.157 | 37.341 | 43.259 | 0.00 | 0.00 |
| ATOM | 5011 | HD2  | TYR | X | 333 | 53.564 | 37.299 | 44.160 | 0.00 | 0.00 |
| ATOM | 5012 | C    | TYR | X | 333 | 57.147 | 35.991 | 45.175 | 0.00 | 0.00 |
| ATOM | 5013 | O    | TYR | X | 333 | 57.910 | 36.732 | 44.581 | 0.00 | 0.00 |
| ATOM | 5014 | N    | PHE | X | 334 | 56.725 | 36.245 | 46.408 | 0.00 | 0.00 |
| ATOM | 5015 | H    | PHE | X | 334 | 55.899 | 35.753 | 46.716 | 0.00 | 0.00 |
| ATOM | 5016 | CA   | PHE | X | 334 | 57.105 | 37.558 | 47.012 | 0.00 | 0.00 |
| ATOM | 5017 | HA   | PHE | X | 334 | 56.958 | 38.383 | 46.315 | 0.00 | 0.00 |
| ATOM | 5018 | CB   | PHE | X | 334 | 56.041 | 37.876 | 48.105 | 0.00 | 0.00 |
| ATOM | 5019 | HB2  | PHE | X | 334 | 55.993 | 36.997 | 48.749 | 0.00 | 0.00 |
| ATOM | 5020 | HB3  | PHE | X | 334 | 56.346 | 38.703 | 48.746 | 0.00 | 0.00 |
| ATOM | 5021 | CG   | PHE | X | 334 | 54.727 | 38.330 | 47.515 | 0.00 | 0.00 |
| ATOM | 5022 | CD1  | PHE | X | 334 | 53.696 | 37.420 | 47.436 | 0.00 | 0.00 |
| ATOM | 5023 | HD1  | PHE | X | 334 | 53.723 | 36.344 | 47.527 | 0.00 | 0.00 |
| ATOM | 5024 | CE1  | PHE | X | 334 | 52.491 | 37.884 | 46.814 | 0.00 | 0.00 |
| ATOM | 5025 | HE1  | PHE | X | 334 | 51.645 | 37.229 | 46.669 | 0.00 | 0.00 |
| ATOM | 5026 | CZ   | PHE | X | 334 | 52.324 | 39.263 | 46.518 | 0.00 | 0.00 |
| ATOM | 5027 | HZ   | PHE | X | 334 | 51.376 | 39.607 | 46.131 | 0.00 | 0.00 |
| ATOM | 5028 | CE2  | PHE | X | 334 | 53.323 | 40.170 | 46.740 | 0.00 | 0.00 |
| ATOM | 5029 | HE2  | PHE | X | 334 | 53.196 | 41.224 | 46.541 | 0.00 | 0.00 |
| ATOM | 5030 | CD2  | PHE | X | 334 | 54.567 | 39.720 | 47.177 | 0.00 | 0.00 |
| ATOM | 5031 | HD2  | PHE | X | 334 | 55.379 | 40.430 | 47.232 | 0.00 | 0.00 |
| ATOM | 5032 | C    | PHE | X | 334 | 58.434 | 37.561 | 47.690 | 0.00 | 0.00 |
| ATOM | 5033 | O    | PHE | X | 334 | 58.882 | 38.634 | 48.032 | 0.00 | 0.00 |
| ATOM | 5034 | N    | LEU | X | 335 | 59.025 | 36.380 | 47.817 | 0.00 | 0.00 |
| ATOM | 5035 | H    | LEU | X | 335 | 58.537 | 35.546 | 47.522 | 0.00 | 0.00 |
| ATOM | 5036 | CA   | LEU | X | 335 | 60.195 | 36.313 | 48.726 | 0.00 | 0.00 |
| ATOM | 5037 | HA   | LEU | X | 335 | 59.883 | 36.595 | 49.731 | 0.00 | 0.00 |
| ATOM | 5038 | CB   | LEU | X | 335 | 60.728 | 34.930 | 48.686 | 0.00 | 0.00 |
| ATOM | 5039 | HB2  | LEU | X | 335 | 61.101 | 34.690 | 47.690 | 0.00 | 0.00 |
| ATOM | 5040 | HB3  | LEU | X | 335 | 61.549 | 34.854 | 49.399 | 0.00 | 0.00 |
| ATOM | 5041 | CG   | LEU | X | 335 | 59.782 | 33.753 | 49.148 | 0.00 | 0.00 |
| ATOM | 5042 | HG   | LEU | X | 335 | 59.094 | 33.814 | 48.306 | 0.00 | 0.00 |
| ATOM | 5043 | CD1  | LEU | X | 335 | 60.586 | 32.498 | 48.965 | 0.00 | 0.00 |
| ATOM | 5044 | HD11 | LEU | X | 335 | 60.866 | 32.310 | 47.928 | 0.00 | 0.00 |
| ATOM | 5045 | HD12 | LEU | X | 335 | 60.012 | 31.612 | 49.234 | 0.00 | 0.00 |
| ATOM | 5046 | HD13 | LEU | X | 335 | 61.540 | 32.662 | 49.465 | 0.00 | 0.00 |
| ATOM | 5047 | CD2  | LEU | X | 335 | 58.971 | 33.859 | 50.416 | 0.00 | 0.00 |
| ATOM | 5048 | HD21 | LEU | X | 335 | 59.583 | 34.079 | 51.291 | 0.00 | 0.00 |
| ATOM | 5049 | HD22 | LEU | X | 335 | 58.166 | 34.593 | 50.375 | 0.00 | 0.00 |
| ATOM | 5050 | HD23 | LEU | X | 335 | 58.623 | 32.861 | 50.682 | 0.00 | 0.00 |
| ATOM | 5051 | C    | LEU | X | 335 | 61.323 | 37.282 | 48.301 | 0.00 | 0.00 |
| ATOM | 5052 | O    | LEU | X | 335 | 61.993 | 37.798 | 49.180 | 0.00 | 0.00 |
| ATOM | 5053 | N    | VAL | X | 336 | 61.441 | 37.506 | 46.954 | 0.00 | 0.00 |
| ATOM | 5054 | H    | VAL | X | 336 | 60.972 | 36.894 | 46.302 | 0.00 | 0.00 |
| ATOM | 5055 | CA   | VAL | X | 336 | 62.549 | 38.317 | 46.444 | 0.00 | 0.00 |
| ATOM | 5056 | HA   | VAL | X | 336 | 63.399 | 37.911 | 46.993 | 0.00 | 0.00 |
| ATOM | 5057 | CB   | VAL | X | 336 | 62.773 | 38.237 | 44.931 | 0.00 | 0.00 |
| ATOM | 5058 | HB   | VAL | X | 336 | 63.548 | 38.985 | 44.762 | 0.00 | 0.00 |
| ATOM | 5059 | CG1  | VAL | X | 336 | 63.417 | 36.910 | 44.699 | 0.00 | 0.00 |
| ATOM | 5060 | HG11 | VAL | X | 336 | 62.758 | 36.089 | 44.981 | 0.00 | 0.00 |
| ATOM | 5061 | HG12 | VAL | X | 336 | 63.694 | 36.847 | 43.647 | 0.00 | 0.00 |
| ATOM | 5062 | HG13 | VAL | X | 336 | 64.374 | 36.836 | 45.216 | 0.00 | 0.00 |
| ATOM | 5063 | CG2  | VAL | X | 336 | 61.493 | 38.501 | 44.048 | 0.00 | 0.00 |

|      |      |      |     |   |     |        |        |        |      |      |
|------|------|------|-----|---|-----|--------|--------|--------|------|------|
| ATOM | 5064 | HG21 | VAL | X | 336 | 60.762 | 37.695 | 43.990 | 0.00 | 0.00 |
| ATOM | 5065 | HG22 | VAL | X | 336 | 61.824 | 38.711 | 43.031 | 0.00 | 0.00 |
| ATOM | 5066 | HG23 | VAL | X | 336 | 60.939 | 39.357 | 44.435 | 0.00 | 0.00 |
| ATOM | 5067 | C    | VAL | X | 336 | 62.306 | 39.800 | 46.774 | 0.00 | 0.00 |
| ATOM | 5068 | O    | VAL | X | 336 | 63.305 | 40.566 | 46.691 | 0.00 | 0.00 |
| ATOM | 5069 | N    | TYR | X | 337 | 61.129 | 40.195 | 47.278 | 0.00 | 0.00 |
| ATOM | 5070 | H    | TYR | X | 337 | 60.425 | 39.490 | 47.443 | 0.00 | 0.00 |
| ATOM | 5071 | CA   | TYR | X | 337 | 60.805 | 41.622 | 47.586 | 0.00 | 0.00 |
| ATOM | 5072 | HA   | TYR | X | 337 | 61.503 | 42.320 | 47.121 | 0.00 | 0.00 |
| ATOM | 5073 | CB   | TYR | X | 337 | 59.418 | 41.933 | 46.977 | 0.00 | 0.00 |
| ATOM | 5074 | HB2  | TYR | X | 337 | 58.624 | 41.391 | 47.490 | 0.00 | 0.00 |
| ATOM | 5075 | HB3  | TYR | X | 337 | 59.190 | 42.988 | 47.130 | 0.00 | 0.00 |
| ATOM | 5076 | CG   | TYR | X | 337 | 59.190 | 41.704 | 45.472 | 0.00 | 0.00 |
| ATOM | 5077 | CD1  | TYR | X | 337 | 59.948 | 42.578 | 44.664 | 0.00 | 0.00 |
| ATOM | 5078 | HD1  | TYR | X | 337 | 60.452 | 43.378 | 45.186 | 0.00 | 0.00 |
| ATOM | 5079 | CE1  | TYR | X | 337 | 59.892 | 42.454 | 43.306 | 0.00 | 0.00 |
| ATOM | 5080 | HE1  | TYR | X | 337 | 60.360 | 43.117 | 42.592 | 0.00 | 0.00 |
| ATOM | 5081 | CZ   | TYR | X | 337 | 58.997 | 41.504 | 42.825 | 0.00 | 0.00 |
| ATOM | 5082 | OH   | TYR | X | 337 | 58.813 | 41.375 | 41.451 | 0.00 | 0.00 |
| ATOM | 5083 | HH   | TYR | X | 337 | 59.359 | 42.062 | 41.062 | 0.00 | 0.00 |
| ATOM | 5084 | CE2  | TYR | X | 337 | 58.283 | 40.543 | 43.626 | 0.00 | 0.00 |
| ATOM | 5085 | HE2  | TYR | X | 337 | 57.540 | 39.836 | 43.288 | 0.00 | 0.00 |
| ATOM | 5086 | CD2  | TYR | X | 337 | 58.416 | 40.653 | 45.024 | 0.00 | 0.00 |
| ATOM | 5087 | HD2  | TYR | X | 337 | 57.811 | 40.110 | 45.734 | 0.00 | 0.00 |
| ATOM | 5088 | C    | TYR | X | 337 | 60.953 | 41.915 | 49.093 | 0.00 | 0.00 |
| ATOM | 5089 | O    | TYR | X | 337 | 60.967 | 43.099 | 49.527 | 0.00 | 0.00 |
| ATOM | 5090 | N    | GLY | X | 338 | 61.222 | 40.874 | 49.934 | 0.00 | 0.00 |
| ATOM | 5091 | H    | GLY | X | 338 | 60.963 | 39.981 | 49.539 | 0.00 | 0.00 |
| ATOM | 5092 | CA   | GLY | X | 338 | 61.441 | 40.992 | 51.317 | 0.00 | 0.00 |
| ATOM | 5093 | HA2  | GLY | X | 338 | 61.655 | 42.014 | 51.629 | 0.00 | 0.00 |
| ATOM | 5094 | HA3  | GLY | X | 338 | 60.555 | 40.562 | 51.784 | 0.00 | 0.00 |
| ATOM | 5095 | C    | GLY | X | 338 | 62.566 | 40.174 | 51.946 | 0.00 | 0.00 |
| ATOM | 5096 | O    | GLY | X | 338 | 63.084 | 40.648 | 52.977 | 0.00 | 0.00 |
| ATOM | 5097 | N    | ALA | X | 339 | 62.840 | 38.992 | 51.403 | 0.00 | 0.00 |
| ATOM | 5098 | H    | ALA | X | 339 | 62.294 | 38.774 | 50.581 | 0.00 | 0.00 |
| ATOM | 5099 | CA   | ALA | X | 339 | 63.681 | 38.041 | 52.116 | 0.00 | 0.00 |
| ATOM | 5100 | HA   | ALA | X | 339 | 63.478 | 38.174 | 53.179 | 0.00 | 0.00 |
| ATOM | 5101 | CB   | ALA | X | 339 | 63.221 | 36.630 | 51.778 | 0.00 | 0.00 |
| ATOM | 5102 | HB1  | ALA | X | 339 | 62.131 | 36.611 | 51.753 | 0.00 | 0.00 |
| ATOM | 5103 | HB2  | ALA | X | 339 | 63.627 | 35.997 | 52.567 | 0.00 | 0.00 |
| ATOM | 5104 | HB3  | ALA | X | 339 | 63.511 | 36.198 | 50.821 | 0.00 | 0.00 |
| ATOM | 5105 | C    | ALA | X | 339 | 65.179 | 38.316 | 51.951 | 0.00 | 0.00 |
| ATOM | 5106 | O    | ALA | X | 339 | 65.634 | 38.911 | 50.970 | 0.00 | 0.00 |
| ATOM | 5107 | N    | PRO | X | 340 | 65.970 | 38.115 | 53.026 | 0.00 | 0.00 |
| ATOM | 5108 | CD   | PRO | X | 340 | 65.694 | 37.806 | 54.388 | 0.00 | 0.00 |
| ATOM | 5109 | HD2  | PRO | X | 340 | 64.985 | 36.979 | 54.393 | 0.00 | 0.00 |
| ATOM | 5110 | HD3  | PRO | X | 340 | 65.239 | 38.623 | 54.948 | 0.00 | 0.00 |
| ATOM | 5111 | CG   | PRO | X | 340 | 67.003 | 37.376 | 55.032 | 0.00 | 0.00 |
| ATOM | 5112 | HG2  | PRO | X | 340 | 67.134 | 36.303 | 54.888 | 0.00 | 0.00 |
| ATOM | 5113 | HG3  | PRO | X | 340 | 67.052 | 37.591 | 56.099 | 0.00 | 0.00 |
| ATOM | 5114 | CB   | PRO | X | 340 | 68.093 | 38.156 | 54.215 | 0.00 | 0.00 |
| ATOM | 5115 | HB2  | PRO | X | 340 | 69.025 | 37.600 | 54.118 | 0.00 | 0.00 |
| ATOM | 5116 | HB3  | PRO | X | 340 | 68.066 | 39.154 | 54.654 | 0.00 | 0.00 |
| ATOM | 5117 | CA   | PRO | X | 340 | 67.411 | 38.360 | 52.866 | 0.00 | 0.00 |
| ATOM | 5118 | HA   | PRO | X | 340 | 67.553 | 39.372 | 52.487 | 0.00 | 0.00 |
| ATOM | 5119 | C    | PRO | X | 340 | 68.102 | 37.491 | 51.822 | 0.00 | 0.00 |
| ATOM | 5120 | O    | PRO | X | 340 | 68.158 | 36.266 | 51.932 | 0.00 | 0.00 |
| ATOM | 5121 | N    | GLY | X | 341 | 68.595 | 38.136 | 50.733 | 0.00 | 0.00 |
| ATOM | 5122 | H    | GLY | X | 341 | 68.418 | 39.128 | 50.662 | 0.00 | 0.00 |
| ATOM | 5123 | CA   | GLY | X | 341 | 69.588 | 37.637 | 49.791 | 0.00 | 0.00 |
| ATOM | 5124 | HA2  | GLY | X | 341 | 69.969 | 38.542 | 49.318 | 0.00 | 0.00 |
| ATOM | 5125 | HA3  | GLY | X | 341 | 70.369 | 37.180 | 50.398 | 0.00 | 0.00 |
| ATOM | 5126 | C    | GLY | X | 341 | 68.928 | 36.639 | 48.728 | 0.00 | 0.00 |
| ATOM | 5127 | O    | GLY | X | 341 | 69.625 | 35.912 | 48.080 | 0.00 | 0.00 |
| ATOM | 5128 | N    | PHE | X | 342 | 67.594 | 36.669 | 48.724 | 0.00 | 0.00 |
| ATOM | 5129 | H    | PHE | X | 342 | 67.203 | 37.251 | 49.452 | 0.00 | 0.00 |
| ATOM | 5130 | CA   | PHE | X | 342 | 66.771 | 36.161 | 47.672 | 0.00 | 0.00 |

|      |      |     |     |   |     |        |        |        |      |      |
|------|------|-----|-----|---|-----|--------|--------|--------|------|------|
| ATOM | 5131 | HA  | PHE | X | 342 | 67.260 | 35.241 | 47.353 | 0.00 | 0.00 |
| ATOM | 5132 | CB  | PHE | X | 342 | 65.319 | 35.970 | 48.125 | 0.00 | 0.00 |
| ATOM | 5133 | HB2 | PHE | X | 342 | 65.131 | 36.752 | 48.860 | 0.00 | 0.00 |
| ATOM | 5134 | HB3 | PHE | X | 342 | 64.562 | 35.943 | 47.342 | 0.00 | 0.00 |
| ATOM | 5135 | CG  | PHE | X | 342 | 65.051 | 34.660 | 48.805 | 0.00 | 0.00 |
| ATOM | 5136 | CD1 | PHE | X | 342 | 64.386 | 33.678 | 48.151 | 0.00 | 0.00 |
| ATOM | 5137 | HD1 | PHE | X | 342 | 64.043 | 33.879 | 47.147 | 0.00 | 0.00 |
| ATOM | 5138 | CE1 | PHE | X | 342 | 64.073 | 32.500 | 48.818 | 0.00 | 0.00 |
| ATOM | 5139 | HE1 | PHE | X | 342 | 63.489 | 31.754 | 48.300 | 0.00 | 0.00 |
| ATOM | 5140 | CZ  | PHE | X | 342 | 64.398 | 32.379 | 50.146 | 0.00 | 0.00 |
| ATOM | 5141 | HZ  | PHE | X | 342 | 64.062 | 31.549 | 50.750 | 0.00 | 0.00 |
| ATOM | 5142 | CE2 | PHE | X | 342 | 65.075 | 33.396 | 50.793 | 0.00 | 0.00 |
| ATOM | 5143 | HE2 | PHE | X | 342 | 65.295 | 33.323 | 51.848 | 0.00 | 0.00 |
| ATOM | 5144 | CD2 | PHE | X | 342 | 65.484 | 34.515 | 50.124 | 0.00 | 0.00 |
| ATOM | 5145 | HD2 | PHE | X | 342 | 66.067 | 35.273 | 50.625 | 0.00 | 0.00 |
| ATOM | 5146 | C   | PHE | X | 342 | 66.889 | 37.021 | 46.332 | 0.00 | 0.00 |
| ATOM | 5147 | O   | PHE | X | 342 | 66.995 | 38.208 | 46.490 | 0.00 | 0.00 |
| ATOM | 5148 | N   | SER | X | 343 | 66.871 | 36.426 | 45.151 | 0.00 | 0.00 |
| ATOM | 5149 | H   | SER | X | 343 | 66.926 | 35.418 | 45.120 | 0.00 | 0.00 |
| ATOM | 5150 | CA  | SER | X | 343 | 66.853 | 37.189 | 43.874 | 0.00 | 0.00 |
| ATOM | 5151 | HA  | SER | X | 343 | 66.069 | 37.946 | 43.850 | 0.00 | 0.00 |
| ATOM | 5152 | CB  | SER | X | 343 | 68.233 | 37.674 | 43.565 | 0.00 | 0.00 |
| ATOM | 5153 | HB2 | SER | X | 343 | 68.207 | 38.678 | 43.141 | 0.00 | 0.00 |
| ATOM | 5154 | HB3 | SER | X | 343 | 68.736 | 37.890 | 44.508 | 0.00 | 0.00 |
| ATOM | 5155 | OG  | SER | X | 343 | 68.987 | 36.848 | 42.730 | 0.00 | 0.00 |
| ATOM | 5156 | HG  | SER | X | 343 | 69.601 | 37.415 | 42.258 | 0.00 | 0.00 |
| ATOM | 5157 | C   | SER | X | 343 | 66.263 | 36.362 | 42.735 | 0.00 | 0.00 |
| ATOM | 5158 | O   | SER | X | 343 | 66.056 | 35.136 | 42.943 | 0.00 | 0.00 |
| ATOM | 5159 | N   | LYS | X | 344 | 66.020 | 36.946 | 41.583 | 0.00 | 0.00 |
| ATOM | 5160 | H   | LYS | X | 344 | 66.302 | 37.914 | 41.519 | 0.00 | 0.00 |
| ATOM | 5161 | CA  | LYS | X | 344 | 65.260 | 36.363 | 40.569 | 0.00 | 0.00 |
| ATOM | 5162 | HA  | LYS | X | 344 | 64.364 | 35.867 | 40.941 | 0.00 | 0.00 |
| ATOM | 5163 | CB  | LYS | X | 344 | 64.498 | 37.531 | 39.789 | 0.00 | 0.00 |
| ATOM | 5164 | HB2 | LYS | X | 344 | 63.743 | 37.028 | 39.184 | 0.00 | 0.00 |
| ATOM | 5165 | HB3 | LYS | X | 344 | 63.941 | 38.112 | 40.524 | 0.00 | 0.00 |
| ATOM | 5166 | CG  | LYS | X | 344 | 65.377 | 38.558 | 38.961 | 0.00 | 0.00 |
| ATOM | 5167 | HG2 | LYS | X | 344 | 64.689 | 39.293 | 38.544 | 0.00 | 0.00 |
| ATOM | 5168 | HG3 | LYS | X | 344 | 65.958 | 39.107 | 39.702 | 0.00 | 0.00 |
| ATOM | 5169 | CD  | LYS | X | 344 | 66.200 | 37.987 | 37.769 | 0.00 | 0.00 |
| ATOM | 5170 | HD2 | LYS | X | 344 | 66.949 | 37.360 | 38.252 | 0.00 | 0.00 |
| ATOM | 5171 | HD3 | LYS | X | 344 | 65.682 | 37.428 | 36.990 | 0.00 | 0.00 |
| ATOM | 5172 | CE  | LYS | X | 344 | 67.105 | 39.129 | 37.278 | 0.00 | 0.00 |
| ATOM | 5173 | HE2 | LYS | X | 344 | 66.438 | 39.770 | 36.701 | 0.00 | 0.00 |
| ATOM | 5174 | HE3 | LYS | X | 344 | 67.459 | 39.768 | 38.087 | 0.00 | 0.00 |
| ATOM | 5175 | NZ  | LYS | X | 344 | 68.246 | 38.654 | 36.491 | 0.00 | 0.00 |
| ATOM | 5176 | HZ1 | LYS | X | 344 | 69.029 | 39.263 | 36.678 | 0.00 | 0.00 |
| ATOM | 5177 | HZ2 | LYS | X | 344 | 68.501 | 37.711 | 36.745 | 0.00 | 0.00 |
| ATOM | 5178 | HZ3 | LYS | X | 344 | 68.109 | 38.685 | 35.490 | 0.00 | 0.00 |
| ATOM | 5179 | C   | LYS | X | 344 | 65.994 | 35.299 | 39.738 | 0.00 | 0.00 |
| ATOM | 5180 | O   | LYS | X | 344 | 65.442 | 34.769 | 38.806 | 0.00 | 0.00 |
| ATOM | 5181 | N   | ASP | X | 345 | 67.195 | 34.851 | 40.203 | 0.00 | 0.00 |
| ATOM | 5182 | H   | ASP | X | 345 | 67.563 | 35.318 | 41.019 | 0.00 | 0.00 |
| ATOM | 5183 | CA  | ASP | X | 345 | 68.124 | 33.913 | 39.557 | 0.00 | 0.00 |
| ATOM | 5184 | HA  | ASP | X | 345 | 67.509 | 33.130 | 39.113 | 0.00 | 0.00 |
| ATOM | 5185 | CB  | ASP | X | 345 | 68.816 | 34.525 | 38.287 | 0.00 | 0.00 |
| ATOM | 5186 | HB2 | ASP | X | 345 | 69.355 | 33.753 | 37.738 | 0.00 | 0.00 |
| ATOM | 5187 | HB3 | ASP | X | 345 | 68.055 | 34.914 | 37.610 | 0.00 | 0.00 |
| ATOM | 5188 | CG  | ASP | X | 345 | 69.794 | 35.677 | 38.558 | 0.00 | 0.00 |
| ATOM | 5189 | OD1 | ASP | X | 345 | 70.958 | 35.623 | 38.150 | 0.00 | 0.00 |
| ATOM | 5190 | OD2 | ASP | X | 345 | 69.352 | 36.717 | 39.064 | 0.00 | 0.00 |
| ATOM | 5191 | C   | ASP | X | 345 | 69.144 | 33.245 | 40.506 | 0.00 | 0.00 |
| ATOM | 5192 | O   | ASP | X | 345 | 69.593 | 32.119 | 40.141 | 0.00 | 0.00 |
| ATOM | 5193 | N   | ASN | X | 346 | 69.399 | 33.787 | 41.714 | 0.00 | 0.00 |
| ATOM | 5194 | H   | ASN | X | 346 | 68.918 | 34.662 | 41.866 | 0.00 | 0.00 |
| ATOM | 5195 | CA  | ASN | X | 346 | 70.274 | 33.255 | 42.737 | 0.00 | 0.00 |
| ATOM | 5196 | HA  | ASN | X | 346 | 71.139 | 32.842 | 42.219 | 0.00 | 0.00 |
| ATOM | 5197 | CB  | ASN | X | 346 | 70.714 | 34.460 | 43.582 | 0.00 | 0.00 |

|      |      |      |     |   |     |        |        |        |      |      |
|------|------|------|-----|---|-----|--------|--------|--------|------|------|
| ATOM | 5198 | HB2  | ASN | X | 346 | 70.980 | 35.273 | 42.905 | 0.00 | 0.00 |
| ATOM | 5199 | HB3  | ASN | X | 346 | 69.877 | 34.826 | 44.175 | 0.00 | 0.00 |
| ATOM | 5200 | CG   | ASN | X | 346 | 71.864 | 34.140 | 44.488 | 0.00 | 0.00 |
| ATOM | 5201 | OD1  | ASN | X | 346 | 71.656 | 33.526 | 45.512 | 0.00 | 0.00 |
| ATOM | 5202 | ND2  | ASN | X | 346 | 73.077 | 34.674 | 44.244 | 0.00 | 0.00 |
| ATOM | 5203 | HD21 | ASN | X | 346 | 73.821 | 34.303 | 44.817 | 0.00 | 0.00 |
| ATOM | 5204 | HD22 | ASN | X | 346 | 73.284 | 35.096 | 43.350 | 0.00 | 0.00 |
| ATOM | 5205 | C    | ASN | X | 346 | 69.539 | 32.074 | 43.535 | 0.00 | 0.00 |
| ATOM | 5206 | O    | ASN | X | 346 | 68.332 | 32.109 | 43.762 | 0.00 | 0.00 |
| ATOM | 5207 | N    | GLU | X | 347 | 70.335 | 31.099 | 43.998 | 0.00 | 0.00 |
| ATOM | 5208 | H    | GLU | X | 347 | 71.284 | 31.032 | 43.658 | 0.00 | 0.00 |
| ATOM | 5209 | CA   | GLU | X | 347 | 69.811 | 29.947 | 44.818 | 0.00 | 0.00 |
| ATOM | 5210 | HA   | GLU | X | 347 | 68.940 | 29.528 | 44.314 | 0.00 | 0.00 |
| ATOM | 5211 | CB   | GLU | X | 347 | 70.932 | 28.848 | 44.857 | 0.00 | 0.00 |
| ATOM | 5212 | HB2  | GLU | X | 347 | 71.857 | 29.417 | 44.950 | 0.00 | 0.00 |
| ATOM | 5213 | HB3  | GLU | X | 347 | 70.787 | 28.133 | 45.667 | 0.00 | 0.00 |
| ATOM | 5214 | CG   | GLU | X | 347 | 70.958 | 28.114 | 43.545 | 0.00 | 0.00 |
| ATOM | 5215 | HG2  | GLU | X | 347 | 69.975 | 27.645 | 43.500 | 0.00 | 0.00 |
| ATOM | 5216 | HG3  | GLU | X | 347 | 71.058 | 28.744 | 42.661 | 0.00 | 0.00 |
| ATOM | 5217 | CD   | GLU | X | 347 | 71.991 | 26.987 | 43.690 | 0.00 | 0.00 |
| ATOM | 5218 | OE1  | GLU | X | 347 | 73.175 | 27.240 | 43.474 | 0.00 | 0.00 |
| ATOM | 5219 | OE2  | GLU | X | 347 | 71.664 | 25.769 | 43.928 | 0.00 | 0.00 |
| ATOM | 5220 | C    | GLU | X | 347 | 69.369 | 30.254 | 46.253 | 0.00 | 0.00 |
| ATOM | 5221 | O    | GLU | X | 347 | 68.650 | 29.458 | 46.854 | 0.00 | 0.00 |
| ATOM | 5222 | N    | SER | X | 348 | 69.713 | 31.381 | 46.792 | 0.00 | 0.00 |
| ATOM | 5223 | H    | SER | X | 348 | 70.339 | 32.004 | 46.303 | 0.00 | 0.00 |
| ATOM | 5224 | CA   | SER | X | 348 | 69.090 | 31.901 | 48.084 | 0.00 | 0.00 |
| ATOM | 5225 | HA   | SER | X | 348 | 69.619 | 32.804 | 48.389 | 0.00 | 0.00 |
| ATOM | 5226 | CB   | SER | X | 348 | 67.617 | 32.221 | 47.814 | 0.00 | 0.00 |
| ATOM | 5227 | HB2  | SER | X | 348 | 67.031 | 31.302 | 47.814 | 0.00 | 0.00 |
| ATOM | 5228 | HB3  | SER | X | 348 | 67.246 | 32.795 | 48.663 | 0.00 | 0.00 |
| ATOM | 5229 | OG   | SER | X | 348 | 67.357 | 32.893 | 46.566 | 0.00 | 0.00 |
| ATOM | 5230 | HG   | SER | X | 348 | 67.693 | 32.329 | 45.866 | 0.00 | 0.00 |
| ATOM | 5231 | C    | SER | X | 348 | 69.350 | 30.937 | 49.284 | 0.00 | 0.00 |
| ATOM | 5232 | O    | SER | X | 348 | 68.365 | 30.545 | 49.937 | 0.00 | 0.00 |
| ATOM | 5233 | N    | LEU | X | 349 | 70.653 | 30.626 | 49.589 | 0.00 | 0.00 |
| ATOM | 5234 | H    | LEU | X | 349 | 71.197 | 31.087 | 48.873 | 0.00 | 0.00 |
| ATOM | 5235 | CA   | LEU | X | 349 | 71.283 | 29.663 | 50.486 | 0.00 | 0.00 |
| ATOM | 5236 | HA   | LEU | X | 349 | 70.614 | 28.803 | 50.477 | 0.00 | 0.00 |
| ATOM | 5237 | CB   | LEU | X | 349 | 72.673 | 29.288 | 49.895 | 0.00 | 0.00 |
| ATOM | 5238 | HB2  | LEU | X | 349 | 73.290 | 30.158 | 49.668 | 0.00 | 0.00 |
| ATOM | 5239 | HB3  | LEU | X | 349 | 73.147 | 28.730 | 50.702 | 0.00 | 0.00 |
| ATOM | 5240 | CG   | LEU | X | 349 | 72.693 | 28.542 | 48.486 | 0.00 | 0.00 |
| ATOM | 5241 | HG   | LEU | X | 349 | 72.250 | 29.257 | 47.793 | 0.00 | 0.00 |
| ATOM | 5242 | CD1  | LEU | X | 349 | 74.159 | 28.365 | 48.060 | 0.00 | 0.00 |
| ATOM | 5243 | HD11 | LEU | X | 349 | 74.805 | 27.785 | 48.719 | 0.00 | 0.00 |
| ATOM | 5244 | HD12 | LEU | X | 349 | 74.712 | 29.280 | 47.844 | 0.00 | 0.00 |
| ATOM | 5245 | HD13 | LEU | X | 349 | 74.151 | 27.760 | 47.154 | 0.00 | 0.00 |
| ATOM | 5246 | CD2  | LEU | X | 349 | 71.942 | 27.218 | 48.390 | 0.00 | 0.00 |
| ATOM | 5247 | HD21 | LEU | X | 349 | 70.956 | 27.415 | 48.812 | 0.00 | 0.00 |
| ATOM | 5248 | HD22 | LEU | X | 349 | 71.859 | 26.900 | 47.351 | 0.00 | 0.00 |
| ATOM | 5249 | HD23 | LEU | X | 349 | 72.428 | 26.573 | 49.122 | 0.00 | 0.00 |
| ATOM | 5250 | C    | LEU | X | 349 | 71.240 | 30.065 | 51.992 | 0.00 | 0.00 |
| ATOM | 5251 | O    | LEU | X | 349 | 72.222 | 30.173 | 52.700 | 0.00 | 0.00 |
| ATOM | 5252 | N    | ILE | X | 350 | 70.050 | 30.241 | 52.552 | 0.00 | 0.00 |
| ATOM | 5253 | H    | ILE | X | 350 | 69.335 | 30.277 | 51.839 | 0.00 | 0.00 |
| ATOM | 5254 | CA   | ILE | X | 350 | 69.807 | 30.772 | 53.857 | 0.00 | 0.00 |
| ATOM | 5255 | HA   | ILE | X | 350 | 70.351 | 31.688 | 54.087 | 0.00 | 0.00 |
| ATOM | 5256 | CB   | ILE | X | 350 | 68.324 | 31.206 | 53.964 | 0.00 | 0.00 |
| ATOM | 5257 | HB   | ILE | X | 350 | 68.121 | 31.637 | 54.944 | 0.00 | 0.00 |
| ATOM | 5258 | CG2  | ILE | X | 350 | 67.956 | 32.225 | 52.878 | 0.00 | 0.00 |
| ATOM | 5259 | HG21 | ILE | X | 350 | 67.841 | 31.780 | 51.889 | 0.00 | 0.00 |
| ATOM | 5260 | HG22 | ILE | X | 350 | 68.691 | 33.021 | 52.767 | 0.00 | 0.00 |
| ATOM | 5261 | HG23 | ILE | X | 350 | 67.022 | 32.756 | 53.064 | 0.00 | 0.00 |
| ATOM | 5262 | CG1  | ILE | X | 350 | 67.410 | 29.921 | 53.880 | 0.00 | 0.00 |
| ATOM | 5263 | HG12 | ILE | X | 350 | 67.697 | 29.334 | 53.007 | 0.00 | 0.00 |
| ATOM | 5264 | HG13 | ILE | X | 350 | 67.505 | 29.277 | 54.754 | 0.00 | 0.00 |

|      |      |      |     |   |     |        |        |        |      |      |
|------|------|------|-----|---|-----|--------|--------|--------|------|------|
| ATOM | 5265 | CD1  | ILE | X | 350 | 65.925 | 30.176 | 53.827 | 0.00 | 0.00 |
| ATOM | 5266 | HD11 | ILE | X | 350 | 65.313 | 29.282 | 53.952 | 0.00 | 0.00 |
| ATOM | 5267 | HD12 | ILE | X | 350 | 65.584 | 30.536 | 52.856 | 0.00 | 0.00 |
| ATOM | 5268 | HD13 | ILE | X | 350 | 65.608 | 30.916 | 54.561 | 0.00 | 0.00 |
| ATOM | 5269 | C    | ILE | X | 350 | 70.202 | 29.774 | 54.978 | 0.00 | 0.00 |
| ATOM | 5270 | O    | ILE | X | 350 | 69.936 | 28.570 | 54.921 | 0.00 | 0.00 |
| ATOM | 5271 | N    | SER | X | 351 | 70.785 | 30.262 | 56.054 | 0.00 | 0.00 |
| ATOM | 5272 | H    | SER | X | 351 | 71.026 | 31.241 | 56.117 | 0.00 | 0.00 |
| ATOM | 5273 | CA   | SER | X | 351 | 71.024 | 29.514 | 57.305 | 0.00 | 0.00 |
| ATOM | 5274 | HA   | SER | X | 351 | 71.222 | 28.450 | 57.183 | 0.00 | 0.00 |
| ATOM | 5275 | CB   | SER | X | 351 | 72.154 | 30.233 | 58.037 | 0.00 | 0.00 |
| ATOM | 5276 | HB2  | SER | X | 351 | 72.210 | 29.777 | 59.025 | 0.00 | 0.00 |
| ATOM | 5277 | HB3  | SER | X | 351 | 73.080 | 30.171 | 57.466 | 0.00 | 0.00 |
| ATOM | 5278 | OG   | SER | X | 351 | 71.878 | 31.610 | 58.332 | 0.00 | 0.00 |
| ATOM | 5279 | HG   | SER | X | 351 | 72.458 | 32.258 | 57.927 | 0.00 | 0.00 |
| ATOM | 5280 | C    | SER | X | 351 | 69.753 | 29.601 | 58.126 | 0.00 | 0.00 |
| ATOM | 5281 | O    | SER | X | 351 | 68.852 | 30.411 | 57.847 | 0.00 | 0.00 |
| ATOM | 5282 | N    | ARG | X | 352 | 69.607 | 28.921 | 59.235 | 0.00 | 0.00 |
| ATOM | 5283 | H    | ARG | X | 352 | 70.397 | 28.396 | 59.581 | 0.00 | 0.00 |
| ATOM | 5284 | CA   | ARG | X | 352 | 68.465 | 29.062 | 60.126 | 0.00 | 0.00 |
| ATOM | 5285 | HA   | ARG | X | 352 | 67.627 | 28.713 | 59.523 | 0.00 | 0.00 |
| ATOM | 5286 | CB   | ARG | X | 352 | 68.581 | 28.199 | 61.418 | 0.00 | 0.00 |
| ATOM | 5287 | HB2  | ARG | X | 352 | 69.517 | 28.408 | 61.936 | 0.00 | 0.00 |
| ATOM | 5288 | HB3  | ARG | X | 352 | 67.789 | 28.435 | 62.130 | 0.00 | 0.00 |
| ATOM | 5289 | CG   | ARG | X | 352 | 68.549 | 26.743 | 61.055 | 0.00 | 0.00 |
| ATOM | 5290 | HG2  | ARG | X | 352 | 67.650 | 26.555 | 60.468 | 0.00 | 0.00 |
| ATOM | 5291 | HG3  | ARG | X | 352 | 69.342 | 26.552 | 60.332 | 0.00 | 0.00 |
| ATOM | 5292 | CD   | ARG | X | 352 | 68.687 | 25.722 | 62.240 | 0.00 | 0.00 |
| ATOM | 5293 | HD2  | ARG | X | 352 | 68.612 | 24.683 | 61.922 | 0.00 | 0.00 |
| ATOM | 5294 | HD3  | ARG | X | 352 | 69.671 | 25.873 | 62.684 | 0.00 | 0.00 |
| ATOM | 5295 | NE   | ARG | X | 352 | 67.713 | 25.999 | 63.319 | 0.00 | 0.00 |
| ATOM | 5296 | HE   | ARG | X | 352 | 67.967 | 26.367 | 64.224 | 0.00 | 0.00 |
| ATOM | 5297 | CZ   | ARG | X | 352 | 66.461 | 25.654 | 63.255 | 0.00 | 0.00 |
| ATOM | 5298 | NH1  | ARG | X | 352 | 65.908 | 24.970 | 62.248 | 0.00 | 0.00 |
| ATOM | 5299 | HH11 | ARG | X | 352 | 66.471 | 24.696 | 61.456 | 0.00 | 0.00 |
| ATOM | 5300 | HH12 | ARG | X | 352 | 64.907 | 24.851 | 62.314 | 0.00 | 0.00 |
| ATOM | 5301 | NH2  | ARG | X | 352 | 65.671 | 25.916 | 64.285 | 0.00 | 0.00 |
| ATOM | 5302 | HH21 | ARG | X | 352 | 66.045 | 26.338 | 65.123 | 0.00 | 0.00 |
| ATOM | 5303 | HH22 | ARG | X | 352 | 64.671 | 25.819 | 64.185 | 0.00 | 0.00 |
| ATOM | 5304 | C    | ARG | X | 352 | 68.324 | 30.526 | 60.560 | 0.00 | 0.00 |
| ATOM | 5305 | O    | ARG | X | 352 | 67.182 | 31.037 | 60.699 | 0.00 | 0.00 |
| ATOM | 5306 | N    | ALA | X | 353 | 69.444 | 31.215 | 60.750 | 0.00 | 0.00 |
| ATOM | 5307 | H    | ALA | X | 353 | 70.344 | 30.793 | 60.575 | 0.00 | 0.00 |
| ATOM | 5308 | CA   | ALA | X | 353 | 69.408 | 32.639 | 61.172 | 0.00 | 0.00 |
| ATOM | 5309 | HA   | ALA | X | 353 | 68.672 | 32.761 | 61.966 | 0.00 | 0.00 |
| ATOM | 5310 | CB   | ALA | X | 353 | 70.728 | 33.248 | 61.601 | 0.00 | 0.00 |
| ATOM | 5311 | HB1  | ALA | X | 353 | 71.233 | 32.656 | 62.365 | 0.00 | 0.00 |
| ATOM | 5312 | HB2  | ALA | X | 353 | 70.655 | 34.297 | 61.886 | 0.00 | 0.00 |
| ATOM | 5313 | HB3  | ALA | X | 353 | 71.341 | 33.255 | 60.700 | 0.00 | 0.00 |
| ATOM | 5314 | C    | ALA | X | 353 | 68.886 | 33.629 | 60.079 | 0.00 | 0.00 |
| ATOM | 5315 | O    | ALA | X | 353 | 68.235 | 34.564 | 60.484 | 0.00 | 0.00 |
| ATOM | 5316 | N    | GLU | X | 354 | 68.999 | 33.338 | 58.831 | 0.00 | 0.00 |
| ATOM | 5317 | H    | GLU | X | 354 | 69.521 | 32.522 | 58.547 | 0.00 | 0.00 |
| ATOM | 5318 | CA   | GLU | X | 354 | 68.310 | 34.048 | 57.776 | 0.00 | 0.00 |
| ATOM | 5319 | HA   | GLU | X | 354 | 68.279 | 35.102 | 58.052 | 0.00 | 0.00 |
| ATOM | 5320 | CB   | GLU | X | 354 | 69.077 | 34.077 | 56.375 | 0.00 | 0.00 |
| ATOM | 5321 | HB2  | GLU | X | 354 | 69.060 | 33.030 | 56.072 | 0.00 | 0.00 |
| ATOM | 5322 | HB3  | GLU | X | 354 | 68.610 | 34.786 | 55.692 | 0.00 | 0.00 |
| ATOM | 5323 | CG   | GLU | X | 354 | 70.566 | 34.622 | 56.498 | 0.00 | 0.00 |
| ATOM | 5324 | HG2  | GLU | X | 354 | 70.610 | 35.711 | 56.508 | 0.00 | 0.00 |
| ATOM | 5325 | HG3  | GLU | X | 354 | 71.020 | 34.357 | 57.453 | 0.00 | 0.00 |
| ATOM | 5326 | CD   | GLU | X | 354 | 71.460 | 34.047 | 55.435 | 0.00 | 0.00 |
| ATOM | 5327 | OE1  | GLU | X | 354 | 71.723 | 32.815 | 55.498 | 0.00 | 0.00 |
| ATOM | 5328 | OE2  | GLU | X | 354 | 71.972 | 34.918 | 54.668 | 0.00 | 0.00 |
| ATOM | 5329 | C    | GLU | X | 354 | 66.939 | 33.590 | 57.512 | 0.00 | 0.00 |
| ATOM | 5330 | O    | GLU | X | 354 | 66.214 | 34.480 | 57.142 | 0.00 | 0.00 |
| ATOM | 5331 | N    | PHE | X | 355 | 66.498 | 32.374 | 57.671 | 0.00 | 0.00 |

|      |      |      |     |   |     |        |        |        |      |      |
|------|------|------|-----|---|-----|--------|--------|--------|------|------|
| ATOM | 5332 | H    | PHE | X | 355 | 67.194 | 31.726 | 58.014 | 0.00 | 0.00 |
| ATOM | 5333 | CA   | PHE | X | 355 | 65.147 | 31.901 | 57.684 | 0.00 | 0.00 |
| ATOM | 5334 | HA   | PHE | X | 355 | 64.626 | 32.396 | 56.863 | 0.00 | 0.00 |
| ATOM | 5335 | CB   | PHE | X | 355 | 65.167 | 30.401 | 57.691 | 0.00 | 0.00 |
| ATOM | 5336 | HB2  | PHE | X | 355 | 65.557 | 30.034 | 56.742 | 0.00 | 0.00 |
| ATOM | 5337 | HB3  | PHE | X | 355 | 65.866 | 29.978 | 58.413 | 0.00 | 0.00 |
| ATOM | 5338 | CG   | PHE | X | 355 | 63.810 | 29.744 | 57.888 | 0.00 | 0.00 |
| ATOM | 5339 | CD1  | PHE | X | 355 | 62.904 | 29.593 | 56.834 | 0.00 | 0.00 |
| ATOM | 5340 | HD1  | PHE | X | 355 | 63.100 | 29.914 | 55.822 | 0.00 | 0.00 |
| ATOM | 5341 | CE1  | PHE | X | 355 | 61.571 | 29.217 | 57.055 | 0.00 | 0.00 |
| ATOM | 5342 | HE1  | PHE | X | 355 | 60.871 | 29.245 | 56.233 | 0.00 | 0.00 |
| ATOM | 5343 | CZ   | PHE | X | 355 | 61.177 | 29.014 | 58.366 | 0.00 | 0.00 |
| ATOM | 5344 | HZ   | PHE | X | 355 | 60.158 | 28.773 | 58.630 | 0.00 | 0.00 |
| ATOM | 5345 | CE2  | PHE | X | 355 | 62.117 | 29.031 | 59.394 | 0.00 | 0.00 |
| ATOM | 5346 | HE2  | PHE | X | 355 | 61.788 | 28.790 | 60.394 | 0.00 | 0.00 |
| ATOM | 5347 | CD2  | PHE | X | 355 | 63.451 | 29.377 | 59.171 | 0.00 | 0.00 |
| ATOM | 5348 | HD2  | PHE | X | 355 | 64.132 | 29.420 | 60.008 | 0.00 | 0.00 |
| ATOM | 5349 | C    | PHE | X | 355 | 64.332 | 32.529 | 58.851 | 0.00 | 0.00 |
| ATOM | 5350 | O    | PHE | X | 355 | 63.220 | 32.981 | 58.675 | 0.00 | 0.00 |
| ATOM | 5351 | N    | LEU | X | 356 | 64.954 | 32.729 | 60.015 | 0.00 | 0.00 |
| ATOM | 5352 | H    | LEU | X | 356 | 65.882 | 32.329 | 60.017 | 0.00 | 0.00 |
| ATOM | 5353 | CA   | LEU | X | 356 | 64.470 | 33.583 | 61.086 | 0.00 | 0.00 |
| ATOM | 5354 | HA   | LEU | X | 356 | 63.486 | 33.209 | 61.368 | 0.00 | 0.00 |
| ATOM | 5355 | CB   | LEU | X | 356 | 65.273 | 33.451 | 62.380 | 0.00 | 0.00 |
| ATOM | 5356 | HB2  | LEU | X | 356 | 65.344 | 32.426 | 62.744 | 0.00 | 0.00 |
| ATOM | 5357 | HB3  | LEU | X | 356 | 66.296 | 33.825 | 62.346 | 0.00 | 0.00 |
| ATOM | 5358 | CG   | LEU | X | 356 | 64.669 | 34.202 | 63.588 | 0.00 | 0.00 |
| ATOM | 5359 | HG   | LEU | X | 356 | 63.595 | 34.317 | 63.439 | 0.00 | 0.00 |
| ATOM | 5360 | CD1  | LEU | X | 356 | 64.833 | 33.390 | 64.821 | 0.00 | 0.00 |
| ATOM | 5361 | HD11 | LEU | X | 356 | 64.090 | 32.593 | 64.840 | 0.00 | 0.00 |
| ATOM | 5362 | HD12 | LEU | X | 356 | 64.676 | 33.888 | 65.778 | 0.00 | 0.00 |
| ATOM | 5363 | HD13 | LEU | X | 356 | 65.821 | 32.937 | 64.902 | 0.00 | 0.00 |
| ATOM | 5364 | CD2  | LEU | X | 356 | 65.066 | 35.707 | 63.754 | 0.00 | 0.00 |
| ATOM | 5365 | HD21 | LEU | X | 356 | 65.262 | 36.188 | 62.795 | 0.00 | 0.00 |
| ATOM | 5366 | HD22 | LEU | X | 356 | 64.286 | 36.307 | 64.223 | 0.00 | 0.00 |
| ATOM | 5367 | HD23 | LEU | X | 356 | 65.896 | 35.798 | 64.454 | 0.00 | 0.00 |
| ATOM | 5368 | C    | LEU | X | 356 | 64.292 | 35.064 | 60.672 | 0.00 | 0.00 |
| ATOM | 5369 | O    | LEU | X | 356 | 63.211 | 35.575 | 61.000 | 0.00 | 0.00 |
| ATOM | 5370 | N    | ALA | X | 357 | 65.187 | 35.649 | 59.920 | 0.00 | 0.00 |
| ATOM | 5371 | H    | ALA | X | 357 | 66.079 | 35.187 | 59.811 | 0.00 | 0.00 |
| ATOM | 5372 | CA   | ALA | X | 357 | 64.968 | 36.915 | 59.340 | 0.00 | 0.00 |
| ATOM | 5373 | HA   | ALA | X | 357 | 64.673 | 37.630 | 60.108 | 0.00 | 0.00 |
| ATOM | 5374 | CB   | ALA | X | 357 | 66.293 | 37.468 | 58.758 | 0.00 | 0.00 |
| ATOM | 5375 | HB1  | ALA | X | 357 | 66.852 | 36.747 | 58.162 | 0.00 | 0.00 |
| ATOM | 5376 | HB2  | ALA | X | 357 | 67.033 | 37.710 | 59.521 | 0.00 | 0.00 |
| ATOM | 5377 | HB3  | ALA | X | 357 | 66.183 | 38.430 | 58.256 | 0.00 | 0.00 |
| ATOM | 5378 | C    | ALA | X | 357 | 63.857 | 36.919 | 58.299 | 0.00 | 0.00 |
| ATOM | 5379 | O    | ALA | X | 357 | 63.022 | 37.804 | 58.281 | 0.00 | 0.00 |
| ATOM | 5380 | N    | GLY | X | 358 | 63.788 | 35.917 | 57.482 | 0.00 | 0.00 |
| ATOM | 5381 | H    | GLY | X | 358 | 64.593 | 35.320 | 57.354 | 0.00 | 0.00 |
| ATOM | 5382 | CA   | GLY | X | 358 | 62.768 | 35.565 | 56.534 | 0.00 | 0.00 |
| ATOM | 5383 | HA2  | GLY | X | 358 | 62.681 | 36.352 | 55.784 | 0.00 | 0.00 |
| ATOM | 5384 | HA3  | GLY | X | 358 | 62.926 | 34.628 | 56.000 | 0.00 | 0.00 |
| ATOM | 5385 | C    | GLY | X | 358 | 61.387 | 35.509 | 57.193 | 0.00 | 0.00 |
| ATOM | 5386 | O    | GLY | X | 358 | 60.509 | 36.262 | 56.787 | 0.00 | 0.00 |
| ATOM | 5387 | N    | VAL | X | 359 | 61.221 | 34.752 | 58.287 | 0.00 | 0.00 |
| ATOM | 5388 | H    | VAL | X | 359 | 62.035 | 34.242 | 58.600 | 0.00 | 0.00 |
| ATOM | 5389 | CA   | VAL | X | 359 | 59.969 | 34.625 | 59.097 | 0.00 | 0.00 |
| ATOM | 5390 | HA   | VAL | X | 359 | 59.144 | 34.392 | 58.422 | 0.00 | 0.00 |
| ATOM | 5391 | CB   | VAL | X | 359 | 60.155 | 33.484 | 60.165 | 0.00 | 0.00 |
| ATOM | 5392 | HB   | VAL | X | 359 | 61.117 | 33.645 | 60.651 | 0.00 | 0.00 |
| ATOM | 5393 | CG1  | VAL | X | 359 | 59.233 | 33.527 | 61.312 | 0.00 | 0.00 |
| ATOM | 5394 | HG11 | VAL | X | 359 | 59.184 | 32.641 | 61.946 | 0.00 | 0.00 |
| ATOM | 5395 | HG12 | VAL | X | 359 | 59.188 | 34.468 | 61.859 | 0.00 | 0.00 |
| ATOM | 5396 | HG13 | VAL | X | 359 | 58.250 | 33.574 | 60.844 | 0.00 | 0.00 |
| ATOM | 5397 | CG2  | VAL | X | 359 | 60.167 | 32.051 | 59.517 | 0.00 | 0.00 |
| ATOM | 5398 | HG21 | VAL | X | 359 | 59.520 | 32.069 | 58.640 | 0.00 | 0.00 |

|      |      |      |     |   |     |        |        |        |      |      |
|------|------|------|-----|---|-----|--------|--------|--------|------|------|
| ATOM | 5399 | HG22 | VAL | X | 359 | 59.993 | 31.284 | 60.272 | 0.00 | 0.00 |
| ATOM | 5400 | HG23 | VAL | X | 359 | 61.145 | 31.799 | 59.109 | 0.00 | 0.00 |
| ATOM | 5401 | C    | VAL | X | 359 | 59.662 | 35.974 | 59.698 | 0.00 | 0.00 |
| ATOM | 5402 | O    | VAL | X | 359 | 58.489 | 36.344 | 59.769 | 0.00 | 0.00 |
| ATOM | 5403 | N    | ARG | X | 360 | 60.696 | 36.752 | 60.185 | 0.00 | 0.00 |
| ATOM | 5404 | H    | ARG | X | 360 | 61.612 | 36.331 | 60.118 | 0.00 | 0.00 |
| ATOM | 5405 | CA   | ARG | X | 360 | 60.503 | 38.098 | 60.708 | 0.00 | 0.00 |
| ATOM | 5406 | HA   | ARG | X | 360 | 59.688 | 37.997 | 61.424 | 0.00 | 0.00 |
| ATOM | 5407 | CB   | ARG | X | 360 | 61.824 | 38.579 | 61.334 | 0.00 | 0.00 |
| ATOM | 5408 | HB2  | ARG | X | 360 | 62.317 | 37.753 | 61.846 | 0.00 | 0.00 |
| ATOM | 5409 | HB3  | ARG | X | 360 | 62.478 | 38.928 | 60.535 | 0.00 | 0.00 |
| ATOM | 5410 | CG   | ARG | X | 360 | 61.618 | 39.724 | 62.419 | 0.00 | 0.00 |
| ATOM | 5411 | HG2  | ARG | X | 360 | 61.142 | 40.607 | 61.994 | 0.00 | 0.00 |
| ATOM | 5412 | HG3  | ARG | X | 360 | 61.089 | 39.461 | 63.335 | 0.00 | 0.00 |
| ATOM | 5413 | CD   | ARG | X | 360 | 63.065 | 40.314 | 62.760 | 0.00 | 0.00 |
| ATOM | 5414 | HD2  | ARG | X | 360 | 63.073 | 41.156 | 63.453 | 0.00 | 0.00 |
| ATOM | 5415 | HD3  | ARG | X | 360 | 63.574 | 39.443 | 63.174 | 0.00 | 0.00 |
| ATOM | 5416 | NE   | ARG | X | 360 | 63.846 | 40.851 | 61.571 | 0.00 | 0.00 |
| ATOM | 5417 | HE   | ARG | X | 360 | 63.280 | 41.435 | 60.972 | 0.00 | 0.00 |
| ATOM | 5418 | CZ   | ARG | X | 360 | 65.147 | 40.923 | 61.458 | 0.00 | 0.00 |
| ATOM | 5419 | NH1  | ARG | X | 360 | 66.050 | 40.247 | 62.178 | 0.00 | 0.00 |
| ATOM | 5420 | HH11 | ARG | X | 360 | 65.756 | 39.678 | 62.960 | 0.00 | 0.00 |
| ATOM | 5421 | HH12 | ARG | X | 360 | 66.976 | 40.120 | 61.796 | 0.00 | 0.00 |
| ATOM | 5422 | NH2  | ARG | X | 360 | 65.624 | 41.658 | 60.404 | 0.00 | 0.00 |
| ATOM | 5423 | HH21 | ARG | X | 360 | 64.909 | 42.228 | 59.975 | 0.00 | 0.00 |
| ATOM | 5424 | HH22 | ARG | X | 360 | 66.601 | 41.699 | 60.153 | 0.00 | 0.00 |
| ATOM | 5425 | C    | ARG | X | 360 | 60.035 | 39.231 | 59.742 | 0.00 | 0.00 |
| ATOM | 5426 | O    | ARG | X | 360 | 59.031 | 39.885 | 60.007 | 0.00 | 0.00 |
| ATOM | 5427 | N    | VAL | X | 361 | 60.624 | 39.345 | 58.485 | 0.00 | 0.00 |
| ATOM | 5428 | H    | VAL | X | 361 | 61.411 | 38.730 | 58.336 | 0.00 | 0.00 |
| ATOM | 5429 | CA   | VAL | X | 361 | 59.939 | 40.067 | 57.380 | 0.00 | 0.00 |
| ATOM | 5430 | HA   | VAL | X | 361 | 59.565 | 40.999 | 57.802 | 0.00 | 0.00 |
| ATOM | 5431 | CB   | VAL | X | 361 | 60.922 | 40.590 | 56.320 | 0.00 | 0.00 |
| ATOM | 5432 | HB   | VAL | X | 361 | 60.506 | 41.447 | 55.790 | 0.00 | 0.00 |
| ATOM | 5433 | CG1  | VAL | X | 361 | 62.128 | 41.241 | 56.906 | 0.00 | 0.00 |
| ATOM | 5434 | HG11 | VAL | X | 361 | 62.840 | 41.444 | 56.107 | 0.00 | 0.00 |
| ATOM | 5435 | HG12 | VAL | X | 361 | 61.961 | 42.188 | 57.419 | 0.00 | 0.00 |
| ATOM | 5436 | HG13 | VAL | X | 361 | 62.669 | 40.558 | 57.562 | 0.00 | 0.00 |
| ATOM | 5437 | CG2  | VAL | X | 361 | 61.415 | 39.492 | 55.376 | 0.00 | 0.00 |
| ATOM | 5438 | HG21 | VAL | X | 361 | 60.970 | 38.547 | 55.686 | 0.00 | 0.00 |
| ATOM | 5439 | HG22 | VAL | X | 361 | 62.500 | 39.476 | 55.276 | 0.00 | 0.00 |
| ATOM | 5440 | HG23 | VAL | X | 361 | 60.994 | 39.644 | 54.382 | 0.00 | 0.00 |
| ATOM | 5441 | C    | VAL | X | 361 | 58.792 | 39.266 | 56.652 | 0.00 | 0.00 |
| ATOM | 5442 | O    | VAL | X | 361 | 58.146 | 39.860 | 55.811 | 0.00 | 0.00 |
| ATOM | 5443 | N    | GLY | X | 362 | 58.524 | 38.040 | 57.092 | 0.00 | 0.00 |
| ATOM | 5444 | H    | GLY | X | 362 | 59.064 | 37.558 | 57.796 | 0.00 | 0.00 |
| ATOM | 5445 | CA   | GLY | X | 362 | 57.521 | 37.135 | 56.395 | 0.00 | 0.00 |
| ATOM | 5446 | HA2  | GLY | X | 362 | 57.370 | 37.232 | 55.320 | 0.00 | 0.00 |
| ATOM | 5447 | HA3  | GLY | X | 362 | 58.018 | 36.166 | 56.369 | 0.00 | 0.00 |
| ATOM | 5448 | C    | GLY | X | 362 | 56.127 | 36.884 | 57.093 | 0.00 | 0.00 |
| ATOM | 5449 | O    | GLY | X | 362 | 55.136 | 36.561 | 56.368 | 0.00 | 0.00 |
| ATOM | 5450 | N    | VAL | X | 363 | 56.181 | 37.061 | 58.393 | 0.00 | 0.00 |
| ATOM | 5451 | H    | VAL | X | 363 | 57.023 | 37.183 | 58.937 | 0.00 | 0.00 |
| ATOM | 5452 | CA   | VAL | X | 363 | 54.972 | 37.307 | 59.191 | 0.00 | 0.00 |
| ATOM | 5453 | HA   | VAL | X | 363 | 54.218 | 37.281 | 58.404 | 0.00 | 0.00 |
| ATOM | 5454 | CB   | VAL | X | 363 | 54.731 | 36.234 | 60.305 | 0.00 | 0.00 |
| ATOM | 5455 | HB   | VAL | X | 363 | 55.457 | 36.383 | 61.104 | 0.00 | 0.00 |
| ATOM | 5456 | CG1  | VAL | X | 363 | 53.321 | 36.349 | 60.854 | 0.00 | 0.00 |
| ATOM | 5457 | HG11 | VAL | X | 363 | 53.210 | 35.476 | 61.498 | 0.00 | 0.00 |
| ATOM | 5458 | HG12 | VAL | X | 363 | 53.160 | 37.292 | 61.376 | 0.00 | 0.00 |
| ATOM | 5459 | HG13 | VAL | X | 363 | 52.534 | 36.261 | 60.106 | 0.00 | 0.00 |
| ATOM | 5460 | CG2  | VAL | X | 363 | 54.958 | 34.839 | 59.838 | 0.00 | 0.00 |
| ATOM | 5461 | HG21 | VAL | X | 363 | 54.215 | 34.551 | 59.095 | 0.00 | 0.00 |
| ATOM | 5462 | HG22 | VAL | X | 363 | 55.045 | 34.125 | 60.657 | 0.00 | 0.00 |
| ATOM | 5463 | HG23 | VAL | X | 363 | 55.893 | 34.842 | 59.277 | 0.00 | 0.00 |
| ATOM | 5464 | C    | VAL | X | 363 | 54.983 | 38.652 | 59.858 | 0.00 | 0.00 |
| ATOM | 5465 | O    | VAL | X | 363 | 55.896 | 38.915 | 60.614 | 0.00 | 0.00 |

|      |      |      |     |   |     |        |        |        |      |      |
|------|------|------|-----|---|-----|--------|--------|--------|------|------|
| ATOM | 5466 | N    | PRO | X | 364 | 53.941 | 39.543 | 59.745 | 0.00 | 0.00 |
| ATOM | 5467 | CD   | PRO | X | 364 | 52.813 | 39.436 | 58.883 | 0.00 | 0.00 |
| ATOM | 5468 | HD2  | PRO | X | 364 | 52.413 | 38.425 | 58.959 | 0.00 | 0.00 |
| ATOM | 5469 | HD3  | PRO | X | 364 | 53.090 | 39.688 | 57.860 | 0.00 | 0.00 |
| ATOM | 5470 | CG   | PRO | X | 364 | 51.801 | 40.460 | 59.418 | 0.00 | 0.00 |
| ATOM | 5471 | HG2  | PRO | X | 364 | 51.251 | 40.055 | 60.268 | 0.00 | 0.00 |
| ATOM | 5472 | HG3  | PRO | X | 364 | 51.003 | 40.744 | 58.732 | 0.00 | 0.00 |
| ATOM | 5473 | CB   | PRO | X | 364 | 52.641 | 41.650 | 59.904 | 0.00 | 0.00 |
| ATOM | 5474 | HB2  | PRO | X | 364 | 52.076 | 42.278 | 60.592 | 0.00 | 0.00 |
| ATOM | 5475 | HB3  | PRO | X | 364 | 52.897 | 42.219 | 59.010 | 0.00 | 0.00 |
| ATOM | 5476 | CA   | PRO | X | 364 | 53.898 | 40.851 | 60.421 | 0.00 | 0.00 |
| ATOM | 5477 | HA   | PRO | X | 364 | 54.805 | 41.426 | 60.233 | 0.00 | 0.00 |
| ATOM | 5478 | C    | PRO | X | 364 | 53.802 | 40.687 | 61.999 | 0.00 | 0.00 |
| ATOM | 5479 | O    | PRO | X | 364 | 53.362 | 39.648 | 62.398 | 0.00 | 0.00 |
| ATOM | 5480 | N    | GLN | X | 365 | 54.174 | 41.674 | 62.739 | 0.00 | 0.00 |
| ATOM | 5481 | H    | GLN | X | 365 | 54.559 | 42.479 | 62.267 | 0.00 | 0.00 |
| ATOM | 5482 | CA   | GLN | X | 365 | 54.159 | 41.846 | 64.183 | 0.00 | 0.00 |
| ATOM | 5483 | HA   | GLN | X | 365 | 54.662 | 42.794 | 64.373 | 0.00 | 0.00 |
| ATOM | 5484 | CB   | GLN | X | 365 | 52.717 | 41.960 | 64.590 | 0.00 | 0.00 |
| ATOM | 5485 | HB2  | GLN | X | 365 | 52.184 | 42.446 | 63.772 | 0.00 | 0.00 |
| ATOM | 5486 | HB3  | GLN | X | 365 | 52.294 | 40.965 | 64.721 | 0.00 | 0.00 |
| ATOM | 5487 | CG   | GLN | X | 365 | 52.414 | 42.737 | 65.888 | 0.00 | 0.00 |
| ATOM | 5488 | HG2  | GLN | X | 365 | 53.061 | 42.332 | 66.666 | 0.00 | 0.00 |
| ATOM | 5489 | HG3  | GLN | X | 365 | 52.876 | 43.704 | 65.691 | 0.00 | 0.00 |
| ATOM | 5490 | CD   | GLN | X | 365 | 50.919 | 42.635 | 66.319 | 0.00 | 0.00 |
| ATOM | 5491 | OE1  | GLN | X | 365 | 50.636 | 42.029 | 67.349 | 0.00 | 0.00 |
| ATOM | 5492 | NE2  | GLN | X | 365 | 49.952 | 43.110 | 65.535 | 0.00 | 0.00 |
| ATOM | 5493 | HE21 | GLN | X | 365 | 49.060 | 43.051 | 66.005 | 0.00 | 0.00 |
| ATOM | 5494 | HE22 | GLN | X | 365 | 50.099 | 43.712 | 64.738 | 0.00 | 0.00 |
| ATOM | 5495 | C    | GLN | X | 365 | 55.159 | 40.936 | 64.963 | 0.00 | 0.00 |
| ATOM | 5496 | O    | GLN | X | 365 | 55.457 | 41.381 | 66.076 | 0.00 | 0.00 |
| ATOM | 5497 | N    | VAL | X | 366 | 55.629 | 39.787 | 64.400 | 0.00 | 0.00 |
| ATOM | 5498 | H    | VAL | X | 366 | 55.161 | 39.541 | 63.539 | 0.00 | 0.00 |
| ATOM | 5499 | CA   | VAL | X | 366 | 56.612 | 38.846 | 64.898 | 0.00 | 0.00 |
| ATOM | 5500 | HA   | VAL | X | 366 | 56.393 | 38.733 | 65.960 | 0.00 | 0.00 |
| ATOM | 5501 | CB   | VAL | X | 366 | 56.483 | 37.485 | 64.094 | 0.00 | 0.00 |
| ATOM | 5502 | HB   | VAL | X | 366 | 56.556 | 37.607 | 63.013 | 0.00 | 0.00 |
| ATOM | 5503 | CG1  | VAL | X | 366 | 57.639 | 36.657 | 64.654 | 0.00 | 0.00 |
| ATOM | 5504 | HG11 | VAL | X | 366 | 57.519 | 35.619 | 64.342 | 0.00 | 0.00 |
| ATOM | 5505 | HG12 | VAL | X | 366 | 58.617 | 36.977 | 64.294 | 0.00 | 0.00 |
| ATOM | 5506 | HG13 | VAL | X | 366 | 57.680 | 36.790 | 65.735 | 0.00 | 0.00 |
| ATOM | 5507 | CG2  | VAL | X | 366 | 55.233 | 36.671 | 64.498 | 0.00 | 0.00 |
| ATOM | 5508 | HG21 | VAL | X | 366 | 55.055 | 35.759 | 63.928 | 0.00 | 0.00 |
| ATOM | 5509 | HG22 | VAL | X | 366 | 54.353 | 37.274 | 64.276 | 0.00 | 0.00 |
| ATOM | 5510 | HG23 | VAL | X | 366 | 55.290 | 36.413 | 65.556 | 0.00 | 0.00 |
| ATOM | 5511 | C    | VAL | X | 366 | 57.969 | 39.560 | 64.804 | 0.00 | 0.00 |
| ATOM | 5512 | O    | VAL | X | 366 | 58.434 | 40.008 | 63.738 | 0.00 | 0.00 |
| ATOM | 5513 | N    | SER | X | 367 | 58.569 | 39.761 | 66.008 | 0.00 | 0.00 |
| ATOM | 5514 | H    | SER | X | 367 | 58.034 | 39.358 | 66.764 | 0.00 | 0.00 |
| ATOM | 5515 | CA   | SER | X | 367 | 59.817 | 40.492 | 66.233 | 0.00 | 0.00 |
| ATOM | 5516 | HA   | SER | X | 367 | 59.983 | 41.104 | 65.347 | 0.00 | 0.00 |
| ATOM | 5517 | CB   | SER | X | 367 | 59.887 | 41.362 | 67.521 | 0.00 | 0.00 |
| ATOM | 5518 | HB2  | SER | X | 367 | 60.907 | 41.478 | 67.888 | 0.00 | 0.00 |
| ATOM | 5519 | HB3  | SER | X | 367 | 59.356 | 42.307 | 67.405 | 0.00 | 0.00 |
| ATOM | 5520 | OG   | SER | X | 367 | 59.227 | 40.677 | 68.610 | 0.00 | 0.00 |
| ATOM | 5521 | HG   | SER | X | 367 | 58.338 | 41.005 | 68.456 | 0.00 | 0.00 |
| ATOM | 5522 | C    | SER | X | 367 | 61.001 | 39.412 | 66.221 | 0.00 | 0.00 |
| ATOM | 5523 | O    | SER | X | 367 | 60.697 | 38.243 | 66.532 | 0.00 | 0.00 |
| ATOM | 5524 | N    | ASP | X | 368 | 62.265 | 39.831 | 66.214 | 0.00 | 0.00 |
| ATOM | 5525 | H    | ASP | X | 368 | 62.356 | 40.837 | 66.237 | 0.00 | 0.00 |
| ATOM | 5526 | CA   | ASP | X | 368 | 63.353 | 38.976 | 66.422 | 0.00 | 0.00 |
| ATOM | 5527 | HA   | ASP | X | 368 | 63.322 | 38.138 | 65.725 | 0.00 | 0.00 |
| ATOM | 5528 | CB   | ASP | X | 368 | 64.632 | 39.855 | 66.186 | 0.00 | 0.00 |
| ATOM | 5529 | HB2  | ASP | X | 368 | 64.555 | 40.537 | 65.338 | 0.00 | 0.00 |
| ATOM | 5530 | HB3  | ASP | X | 368 | 64.771 | 40.438 | 67.096 | 0.00 | 0.00 |
| ATOM | 5531 | CG   | ASP | X | 368 | 65.958 | 39.096 | 65.897 | 0.00 | 0.00 |
| ATOM | 5532 | OD1  | ASP | X | 368 | 66.560 | 38.616 | 66.867 | 0.00 | 0.00 |



|      |      |      |     |   |     |        |        |        |      |      |
|------|------|------|-----|---|-----|--------|--------|--------|------|------|
| ATOM | 5533 | OD2  | ASP | X | 368 | 66.356 | 39.079 | 64.728 | 0.00 | 0.00 |
| ATOM | 5534 | C    | ASP | X | 368 | 63.315 | 38.381 | 67.863 | 0.00 | 0.00 |
| ATOM | 5535 | O    | ASP | X | 368 | 63.936 | 37.285 | 68.100 | 0.00 | 0.00 |
| ATOM | 5536 | N    | LEU | X | 369 | 62.607 | 38.983 | 68.808 | 0.00 | 0.00 |
| ATOM | 5537 | H    | LEU | X | 369 | 62.182 | 39.879 | 68.616 | 0.00 | 0.00 |
| ATOM | 5538 | CA   | LEU | X | 369 | 62.468 | 38.413 | 70.102 | 0.00 | 0.00 |
| ATOM | 5539 | HA   | LEU | X | 369 | 63.486 | 38.068 | 70.283 | 0.00 | 0.00 |
| ATOM | 5540 | CB   | LEU | X | 369 | 62.156 | 39.424 | 71.220 | 0.00 | 0.00 |
| ATOM | 5541 | HB2  | LEU | X | 369 | 62.792 | 40.299 | 71.089 | 0.00 | 0.00 |
| ATOM | 5542 | HB3  | LEU | X | 369 | 61.118 | 39.709 | 71.046 | 0.00 | 0.00 |
| ATOM | 5543 | CG   | LEU | X | 369 | 62.200 | 39.022 | 72.662 | 0.00 | 0.00 |
| ATOM | 5544 | HG   | LEU | X | 369 | 61.509 | 38.210 | 72.889 | 0.00 | 0.00 |
| ATOM | 5545 | CD1  | LEU | X | 369 | 63.641 | 38.490 | 73.025 | 0.00 | 0.00 |
| ATOM | 5546 | HD11 | LEU | X | 369 | 63.692 | 38.024 | 74.009 | 0.00 | 0.00 |
| ATOM | 5547 | HD12 | LEU | X | 369 | 64.312 | 39.348 | 72.994 | 0.00 | 0.00 |
| ATOM | 5548 | HD13 | LEU | X | 369 | 63.929 | 37.779 | 72.251 | 0.00 | 0.00 |
| ATOM | 5549 | CD2  | LEU | X | 369 | 61.815 | 40.304 | 73.515 | 0.00 | 0.00 |
| ATOM | 5550 | HD21 | LEU | X | 369 | 61.864 | 40.163 | 74.595 | 0.00 | 0.00 |
| ATOM | 5551 | HD22 | LEU | X | 369 | 62.521 | 41.100 | 73.275 | 0.00 | 0.00 |
| ATOM | 5552 | HD23 | LEU | X | 369 | 60.812 | 40.713 | 73.398 | 0.00 | 0.00 |
| ATOM | 5553 | C    | LEU | X | 369 | 61.532 | 37.184 | 70.062 | 0.00 | 0.00 |
| ATOM | 5554 | O    | LEU | X | 369 | 61.781 | 36.176 | 70.708 | 0.00 | 0.00 |
| ATOM | 5555 | N    | ALA | X | 370 | 60.458 | 37.205 | 69.311 | 0.00 | 0.00 |
| ATOM | 5556 | H    | ALA | X | 370 | 60.349 | 38.036 | 68.748 | 0.00 | 0.00 |
| ATOM | 5557 | CA   | ALA | X | 370 | 59.456 | 36.179 | 69.206 | 0.00 | 0.00 |
| ATOM | 5558 | HA   | ALA | X | 370 | 59.513 | 35.521 | 70.073 | 0.00 | 0.00 |
| ATOM | 5559 | CB   | ALA | X | 370 | 58.091 | 36.847 | 69.264 | 0.00 | 0.00 |
| ATOM | 5560 | HB1  | ALA | X | 370 | 57.370 | 36.035 | 69.160 | 0.00 | 0.00 |
| ATOM | 5561 | HB2  | ALA | X | 370 | 57.991 | 37.654 | 68.539 | 0.00 | 0.00 |
| ATOM | 5562 | HB3  | ALA | X | 370 | 58.109 | 37.318 | 70.246 | 0.00 | 0.00 |
| ATOM | 5563 | C    | ALA | X | 370 | 59.581 | 35.098 | 68.101 | 0.00 | 0.00 |
| ATOM | 5564 | O    | ALA | X | 370 | 59.221 | 33.971 | 68.353 | 0.00 | 0.00 |
| ATOM | 5565 | N    | ALA | X | 371 | 60.221 | 35.456 | 66.970 | 0.00 | 0.00 |
| ATOM | 5566 | H    | ALA | X | 371 | 60.531 | 36.417 | 66.940 | 0.00 | 0.00 |
| ATOM | 5567 | CA   | ALA | X | 371 | 60.424 | 34.633 | 65.800 | 0.00 | 0.00 |
| ATOM | 5568 | HA   | ALA | X | 371 | 59.491 | 34.588 | 65.237 | 0.00 | 0.00 |
| ATOM | 5569 | CB   | ALA | X | 371 | 61.421 | 35.302 | 64.902 | 0.00 | 0.00 |
| ATOM | 5570 | HB1  | ALA | X | 371 | 62.330 | 35.532 | 65.459 | 0.00 | 0.00 |
| ATOM | 5571 | HB2  | ALA | X | 371 | 61.116 | 36.240 | 64.439 | 0.00 | 0.00 |
| ATOM | 5572 | HB3  | ALA | X | 371 | 61.660 | 34.583 | 64.119 | 0.00 | 0.00 |
| ATOM | 5573 | C    | ALA | X | 371 | 60.763 | 33.193 | 66.061 | 0.00 | 0.00 |
| ATOM | 5574 | O    | ALA | X | 371 | 60.274 | 32.314 | 65.316 | 0.00 | 0.00 |
| ATOM | 5575 | N    | GLU | X | 372 | 61.618 | 33.001 | 66.980 | 0.00 | 0.00 |
| ATOM | 5576 | H    | GLU | X | 372 | 61.830 | 33.814 | 67.541 | 0.00 | 0.00 |
| ATOM | 5577 | CA   | GLU | X | 372 | 62.105 | 31.700 | 67.407 | 0.00 | 0.00 |
| ATOM | 5578 | HA   | GLU | X | 372 | 62.770 | 31.294 | 66.645 | 0.00 | 0.00 |
| ATOM | 5579 | CB   | GLU | X | 372 | 63.016 | 31.690 | 68.691 | 0.00 | 0.00 |
| ATOM | 5580 | HB2  | GLU | X | 372 | 62.999 | 30.657 | 69.038 | 0.00 | 0.00 |
| ATOM | 5581 | HB3  | GLU | X | 372 | 64.048 | 31.917 | 68.424 | 0.00 | 0.00 |
| ATOM | 5582 | CG   | GLU | X | 372 | 62.497 | 32.466 | 69.835 | 0.00 | 0.00 |
| ATOM | 5583 | HG2  | GLU | X | 372 | 62.668 | 33.519 | 69.610 | 0.00 | 0.00 |
| ATOM | 5584 | HG3  | GLU | X | 372 | 61.424 | 32.350 | 69.986 | 0.00 | 0.00 |
| ATOM | 5585 | CD   | GLU | X | 372 | 63.072 | 32.042 | 71.191 | 0.00 | 0.00 |
| ATOM | 5586 | OE1  | GLU | X | 372 | 62.354 | 32.017 | 72.171 | 0.00 | 0.00 |
| ATOM | 5587 | OE2  | GLU | X | 372 | 64.295 | 31.765 | 71.303 | 0.00 | 0.00 |
| ATOM | 5588 | C    | GLU | X | 372 | 60.932 | 30.662 | 67.608 | 0.00 | 0.00 |
| ATOM | 5589 | O    | GLU | X | 372 | 60.982 | 29.586 | 67.117 | 0.00 | 0.00 |
| ATOM | 5590 | N    | ALA | X | 373 | 59.852 | 31.126 | 68.280 | 0.00 | 0.00 |
| ATOM | 5591 | H    | ALA | X | 373 | 59.992 | 32.061 | 68.636 | 0.00 | 0.00 |
| ATOM | 5592 | CA   | ALA | X | 373 | 58.677 | 30.361 | 68.610 | 0.00 | 0.00 |
| ATOM | 5593 | HA   | ALA | X | 373 | 59.064 | 29.380 | 68.884 | 0.00 | 0.00 |
| ATOM | 5594 | CB   | ALA | X | 373 | 57.989 | 31.053 | 69.838 | 0.00 | 0.00 |
| ATOM | 5595 | HB1  | ALA | X | 373 | 57.081 | 30.549 | 70.167 | 0.00 | 0.00 |
| ATOM | 5596 | HB2  | ALA | X | 373 | 57.930 | 32.125 | 69.650 | 0.00 | 0.00 |
| ATOM | 5597 | HB3  | ALA | X | 373 | 58.669 | 31.034 | 70.690 | 0.00 | 0.00 |
| ATOM | 5598 | C    | ALA | X | 373 | 57.750 | 30.152 | 67.379 | 0.00 | 0.00 |
| ATOM | 5599 | O    | ALA | X | 373 | 57.033 | 29.155 | 67.331 | 0.00 | 0.00 |

|      |      |      |     |   |     |        |        |        |      |      |
|------|------|------|-----|---|-----|--------|--------|--------|------|------|
| ATOM | 5600 | N    | VAL | X | 374 | 57.993 | 30.871 | 66.289 | 0.00 | 0.00 |
| ATOM | 5601 | H    | VAL | X | 374 | 58.589 | 31.676 | 66.417 | 0.00 | 0.00 |
| ATOM | 5602 | CA   | VAL | X | 374 | 57.465 | 30.791 | 64.913 | 0.00 | 0.00 |
| ATOM | 5603 | HA   | VAL | X | 374 | 56.504 | 30.294 | 65.048 | 0.00 | 0.00 |
| ATOM | 5604 | CB   | VAL | X | 374 | 57.119 | 32.098 | 64.322 | 0.00 | 0.00 |
| ATOM | 5605 | HB   | VAL | X | 374 | 58.004 | 32.712 | 64.156 | 0.00 | 0.00 |
| ATOM | 5606 | CG1  | VAL | X | 374 | 56.376 | 31.872 | 62.946 | 0.00 | 0.00 |
| ATOM | 5607 | HG11 | VAL | X | 374 | 56.061 | 32.853 | 62.591 | 0.00 | 0.00 |
| ATOM | 5608 | HG12 | VAL | X | 374 | 57.073 | 31.374 | 62.272 | 0.00 | 0.00 |
| ATOM | 5609 | HG13 | VAL | X | 374 | 55.541 | 31.188 | 63.098 | 0.00 | 0.00 |
| ATOM | 5610 | CG2  | VAL | X | 374 | 56.122 | 32.902 | 65.197 | 0.00 | 0.00 |
| ATOM | 5611 | HG21 | VAL | X | 374 | 56.605 | 33.362 | 66.058 | 0.00 | 0.00 |
| ATOM | 5612 | HG22 | VAL | X | 374 | 55.220 | 32.318 | 65.378 | 0.00 | 0.00 |
| ATOM | 5613 | HG23 | VAL | X | 374 | 55.802 | 33.845 | 64.753 | 0.00 | 0.00 |
| ATOM | 5614 | C    | VAL | X | 374 | 58.392 | 29.873 | 64.065 | 0.00 | 0.00 |
| ATOM | 5615 | O    | VAL | X | 374 | 57.901 | 29.114 | 63.203 | 0.00 | 0.00 |
| ATOM | 5616 | N    | VAL | X | 375 | 59.714 | 29.801 | 64.280 | 0.00 | 0.00 |
| ATOM | 5617 | H    | VAL | X | 375 | 60.053 | 30.454 | 64.972 | 0.00 | 0.00 |
| ATOM | 5618 | CA   | VAL | X | 375 | 60.734 | 29.044 | 63.545 | 0.00 | 0.00 |
| ATOM | 5619 | HA   | VAL | X | 375 | 60.357 | 28.964 | 62.525 | 0.00 | 0.00 |
| ATOM | 5620 | CB   | VAL | X | 375 | 62.144 | 29.614 | 63.575 | 0.00 | 0.00 |
| ATOM | 5621 | HB   | VAL | X | 375 | 62.390 | 29.941 | 64.585 | 0.00 | 0.00 |
| ATOM | 5622 | CG1  | VAL | X | 375 | 63.245 | 28.654 | 63.168 | 0.00 | 0.00 |
| ATOM | 5623 | HG11 | VAL | X | 375 | 63.389 | 27.844 | 63.884 | 0.00 | 0.00 |
| ATOM | 5624 | HG12 | VAL | X | 375 | 62.958 | 28.324 | 62.170 | 0.00 | 0.00 |
| ATOM | 5625 | HG13 | VAL | X | 375 | 64.182 | 29.211 | 63.135 | 0.00 | 0.00 |
| ATOM | 5626 | CG2  | VAL | X | 375 | 62.031 | 30.888 | 62.719 | 0.00 | 0.00 |
| ATOM | 5627 | HG21 | VAL | X | 375 | 62.923 | 31.480 | 62.925 | 0.00 | 0.00 |
| ATOM | 5628 | HG22 | VAL | X | 375 | 61.147 | 31.513 | 62.845 | 0.00 | 0.00 |
| ATOM | 5629 | HG23 | VAL | X | 375 | 61.982 | 30.504 | 61.701 | 0.00 | 0.00 |
| ATOM | 5630 | C    | VAL | X | 375 | 60.799 | 27.593 | 64.076 | 0.00 | 0.00 |
| ATOM | 5631 | O    | VAL | X | 375 | 61.080 | 26.681 | 63.322 | 0.00 | 0.00 |
| ATOM | 5632 | N    | LEU | X | 376 | 60.591 | 27.302 | 65.340 | 0.00 | 0.00 |
| ATOM | 5633 | H    | LEU | X | 376 | 60.505 | 28.093 | 65.963 | 0.00 | 0.00 |
| ATOM | 5634 | CA   | LEU | X | 376 | 60.276 | 25.961 | 65.904 | 0.00 | 0.00 |
| ATOM | 5635 | HA   | LEU | X | 376 | 61.133 | 25.292 | 65.827 | 0.00 | 0.00 |
| ATOM | 5636 | CB   | LEU | X | 376 | 60.152 | 26.186 | 67.419 | 0.00 | 0.00 |
| ATOM | 5637 | HB2  | LEU | X | 376 | 61.022 | 26.760 | 67.738 | 0.00 | 0.00 |
| ATOM | 5638 | HB3  | LEU | X | 376 | 59.273 | 26.784 | 67.661 | 0.00 | 0.00 |
| ATOM | 5639 | CG   | LEU | X | 376 | 60.107 | 24.925 | 68.266 | 0.00 | 0.00 |
| ATOM | 5640 | HG   | LEU | X | 376 | 60.198 | 25.238 | 69.306 | 0.00 | 0.00 |
| ATOM | 5641 | CD1  | LEU | X | 376 | 58.809 | 24.054 | 68.154 | 0.00 | 0.00 |
| ATOM | 5642 | HD11 | LEU | X | 376 | 58.882 | 23.379 | 69.007 | 0.00 | 0.00 |
| ATOM | 5643 | HD12 | LEU | X | 376 | 58.731 | 23.474 | 67.234 | 0.00 | 0.00 |
| ATOM | 5644 | HD13 | LEU | X | 376 | 57.924 | 24.690 | 68.145 | 0.00 | 0.00 |
| ATOM | 5645 | CD2  | LEU | X | 376 | 61.276 | 24.011 | 68.144 | 0.00 | 0.00 |
| ATOM | 5646 | HD21 | LEU | X | 376 | 61.246 | 23.733 | 67.090 | 0.00 | 0.00 |
| ATOM | 5647 | HD22 | LEU | X | 376 | 62.221 | 24.522 | 68.330 | 0.00 | 0.00 |
| ATOM | 5648 | HD23 | LEU | X | 376 | 61.179 | 23.121 | 68.765 | 0.00 | 0.00 |
| ATOM | 5649 | C    | LEU | X | 376 | 58.995 | 25.319 | 65.305 | 0.00 | 0.00 |
| ATOM | 5650 | O    | LEU | X | 376 | 59.142 | 24.171 | 64.896 | 0.00 | 0.00 |
| ATOM | 5651 | N    | HIE | X | 377 | 57.875 | 26.082 | 65.082 | 0.00 | 0.00 |
| ATOM | 5652 | H    | HIE | X | 377 | 57.920 | 27.031 | 65.424 | 0.00 | 0.00 |
| ATOM | 5653 | CA   | HIE | X | 377 | 56.683 | 25.657 | 64.400 | 0.00 | 0.00 |
| ATOM | 5654 | HA   | HIE | X | 377 | 56.190 | 24.900 | 65.010 | 0.00 | 0.00 |
| ATOM | 5655 | CB   | HIE | X | 377 | 55.771 | 26.819 | 64.530 | 0.00 | 0.00 |
| ATOM | 5656 | HB2  | HIE | X | 377 | 55.423 | 26.906 | 65.559 | 0.00 | 0.00 |
| ATOM | 5657 | HB3  | HIE | X | 377 | 56.356 | 27.700 | 64.264 | 0.00 | 0.00 |
| ATOM | 5658 | CG   | HIE | X | 377 | 54.580 | 26.748 | 63.576 | 0.00 | 0.00 |
| ATOM | 5659 | ND1  | HIE | X | 377 | 53.270 | 26.484 | 63.848 | 0.00 | 0.00 |
| ATOM | 5660 | CE1  | HIE | X | 377 | 52.452 | 26.880 | 62.903 | 0.00 | 0.00 |
| ATOM | 5661 | HE1  | HIE | X | 377 | 51.384 | 26.718 | 62.894 | 0.00 | 0.00 |
| ATOM | 5662 | NE2  | HIE | X | 377 | 53.219 | 27.503 | 61.979 | 0.00 | 0.00 |
| ATOM | 5663 | HE2  | HIE | X | 377 | 52.889 | 28.034 | 61.186 | 0.00 | 0.00 |
| ATOM | 5664 | CD2  | HIE | X | 377 | 54.534 | 27.428 | 62.393 | 0.00 | 0.00 |
| ATOM | 5665 | HD2  | HIE | X | 377 | 55.223 | 28.028 | 61.819 | 0.00 | 0.00 |
| ATOM | 5666 | C    | HIE | X | 377 | 56.905 | 25.129 | 62.921 | 0.00 | 0.00 |

|      |      |      |     |   |     |        |        |        |      |      |
|------|------|------|-----|---|-----|--------|--------|--------|------|------|
| ATOM | 5667 | O    | HIE | X | 377 | 56.235 | 24.113 | 62.588 | 0.00 | 0.00 |
| ATOM | 5668 | N    | TYR | X | 378 | 57.861 | 25.683 | 62.130 | 0.00 | 0.00 |
| ATOM | 5669 | H    | TYR | X | 378 | 58.176 | 26.580 | 62.471 | 0.00 | 0.00 |
| ATOM | 5670 | CA   | TYR | X | 378 | 58.302 | 25.162 | 60.792 | 0.00 | 0.00 |
| ATOM | 5671 | HA   | TYR | X | 378 | 57.531 | 24.534 | 60.346 | 0.00 | 0.00 |
| ATOM | 5672 | CB   | TYR | X | 378 | 58.501 | 26.368 | 59.845 | 0.00 | 0.00 |
| ATOM | 5673 | HB2  | TYR | X | 378 | 58.802 | 27.205 | 60.474 | 0.00 | 0.00 |
| ATOM | 5674 | HB3  | TYR | X | 378 | 59.290 | 26.092 | 59.144 | 0.00 | 0.00 |
| ATOM | 5675 | CG   | TYR | X | 378 | 57.250 | 26.762 | 59.129 | 0.00 | 0.00 |
| ATOM | 5676 | CD1  | TYR | X | 378 | 56.831 | 25.994 | 58.067 | 0.00 | 0.00 |
| ATOM | 5677 | HD1  | TYR | X | 378 | 57.424 | 25.131 | 57.800 | 0.00 | 0.00 |
| ATOM | 5678 | CE1  | TYR | X | 378 | 55.700 | 26.319 | 57.316 | 0.00 | 0.00 |
| ATOM | 5679 | HE1  | TYR | X | 378 | 55.333 | 25.786 | 56.451 | 0.00 | 0.00 |
| ATOM | 5680 | CZ   | TYR | X | 378 | 54.893 | 27.327 | 57.799 | 0.00 | 0.00 |
| ATOM | 5681 | OH   | TYR | X | 378 | 53.657 | 27.642 | 57.276 | 0.00 | 0.00 |
| ATOM | 5682 | HH   | TYR | X | 378 | 53.390 | 27.053 | 56.566 | 0.00 | 0.00 |
| ATOM | 5683 | CE2  | TYR | X | 378 | 55.298 | 28.107 | 58.915 | 0.00 | 0.00 |
| ATOM | 5684 | HE2  | TYR | X | 378 | 54.678 | 28.913 | 59.279 | 0.00 | 0.00 |
| ATOM | 5685 | CD2  | TYR | X | 378 | 56.521 | 27.842 | 59.549 | 0.00 | 0.00 |
| ATOM | 5686 | HD2  | TYR | X | 378 | 56.879 | 28.519 | 60.310 | 0.00 | 0.00 |
| ATOM | 5687 | C    | TYR | X | 378 | 59.539 | 24.250 | 60.807 | 0.00 | 0.00 |
| ATOM | 5688 | O    | TYR | X | 378 | 59.866 | 23.661 | 59.770 | 0.00 | 0.00 |
| ATOM | 5689 | N    | THR | X | 379 | 60.265 | 24.127 | 61.932 | 0.00 | 0.00 |
| ATOM | 5690 | H    | THR | X | 379 | 59.984 | 24.561 | 62.800 | 0.00 | 0.00 |
| ATOM | 5691 | CA   | THR | X | 379 | 61.530 | 23.323 | 61.965 | 0.00 | 0.00 |
| ATOM | 5692 | HA   | THR | X | 379 | 62.290 | 23.689 | 61.275 | 0.00 | 0.00 |
| ATOM | 5693 | CB   | THR | X | 379 | 62.051 | 23.558 | 63.347 | 0.00 | 0.00 |
| ATOM | 5694 | HB   | THR | X | 379 | 61.411 | 23.397 | 64.214 | 0.00 | 0.00 |
| ATOM | 5695 | CG2  | THR | X | 379 | 63.234 | 22.508 | 63.632 | 0.00 | 0.00 |
| ATOM | 5696 | HG21 | THR | X | 379 | 63.811 | 22.414 | 62.712 | 0.00 | 0.00 |
| ATOM | 5697 | HG22 | THR | X | 379 | 62.782 | 21.544 | 63.867 | 0.00 | 0.00 |
| ATOM | 5698 | HG23 | THR | X | 379 | 63.854 | 22.852 | 64.460 | 0.00 | 0.00 |
| ATOM | 5699 | OG1  | THR | X | 379 | 62.715 | 24.814 | 63.350 | 0.00 | 0.00 |
| ATOM | 5700 | HG1  | THR | X | 379 | 62.072 | 25.527 | 63.315 | 0.00 | 0.00 |
| ATOM | 5701 | C    | THR | X | 379 | 61.185 | 21.879 | 61.601 | 0.00 | 0.00 |
| ATOM | 5702 | O    | THR | X | 379 | 60.284 | 21.355 | 62.273 | 0.00 | 0.00 |
| ATOM | 5703 | N    | ASP | X | 380 | 61.785 | 21.288 | 60.539 | 0.00 | 0.00 |
| ATOM | 5704 | H    | ASP | X | 380 | 62.481 | 21.777 | 59.995 | 0.00 | 0.00 |
| ATOM | 5705 | CA   | ASP | X | 380 | 61.572 | 19.868 | 60.254 | 0.00 | 0.00 |
| ATOM | 5706 | HA   | ASP | X | 380 | 60.675 | 19.382 | 60.636 | 0.00 | 0.00 |
| ATOM | 5707 | CB   | ASP | X | 380 | 61.556 | 19.665 | 58.750 | 0.00 | 0.00 |
| ATOM | 5708 | HB2  | ASP | X | 380 | 60.866 | 20.372 | 58.292 | 0.00 | 0.00 |
| ATOM | 5709 | HB3  | ASP | X | 380 | 62.503 | 19.830 | 58.235 | 0.00 | 0.00 |
| ATOM | 5710 | CG   | ASP | X | 380 | 60.970 | 18.314 | 58.359 | 0.00 | 0.00 |
| ATOM | 5711 | OD1  | ASP | X | 380 | 60.905 | 17.980 | 57.162 | 0.00 | 0.00 |
| ATOM | 5712 | OD2  | ASP | X | 380 | 60.962 | 17.429 | 59.257 | 0.00 | 0.00 |
| ATOM | 5713 | C    | ASP | X | 380 | 62.718 | 19.049 | 60.865 | 0.00 | 0.00 |
| ATOM | 5714 | O    | ASP | X | 380 | 63.874 | 19.175 | 60.468 | 0.00 | 0.00 |
| ATOM | 5715 | N    | TRP | X | 381 | 62.322 | 18.260 | 61.806 | 0.00 | 0.00 |
| ATOM | 5716 | H    | TRP | X | 381 | 61.404 | 18.340 | 62.220 | 0.00 | 0.00 |
| ATOM | 5717 | CA   | TRP | X | 381 | 63.142 | 17.330 | 62.607 | 0.00 | 0.00 |
| ATOM | 5718 | HA   | TRP | X | 381 | 64.045 | 17.846 | 62.934 | 0.00 | 0.00 |
| ATOM | 5719 | CB   | TRP | X | 381 | 62.373 | 16.717 | 63.768 | 0.00 | 0.00 |
| ATOM | 5720 | HB2  | TRP | X | 381 | 61.684 | 16.027 | 63.281 | 0.00 | 0.00 |
| ATOM | 5721 | HB3  | TRP | X | 381 | 63.105 | 16.093 | 64.279 | 0.00 | 0.00 |
| ATOM | 5722 | CG   | TRP | X | 381 | 61.792 | 17.662 | 64.854 | 0.00 | 0.00 |
| ATOM | 5723 | CD1  | TRP | X | 381 | 60.536 | 17.708 | 65.139 | 0.00 | 0.00 |
| ATOM | 5724 | HD1  | TRP | X | 381 | 59.691 | 17.211 | 64.686 | 0.00 | 0.00 |
| ATOM | 5725 | NE1  | TRP | X | 381 | 60.254 | 18.788 | 65.921 | 0.00 | 0.00 |
| ATOM | 5726 | HE1  | TRP | X | 381 | 59.266 | 18.853 | 66.120 | 0.00 | 0.00 |
| ATOM | 5727 | CE2  | TRP | X | 381 | 61.362 | 19.525 | 66.200 | 0.00 | 0.00 |
| ATOM | 5728 | CZ2  | TRP | X | 381 | 61.632 | 20.594 | 66.999 | 0.00 | 0.00 |
| ATOM | 5729 | HZ2  | TRP | X | 381 | 60.885 | 21.095 | 67.597 | 0.00 | 0.00 |
| ATOM | 5730 | CH2  | TRP | X | 381 | 62.944 | 20.958 | 67.276 | 0.00 | 0.00 |
| ATOM | 5731 | HH2  | TRP | X | 381 | 63.127 | 21.767 | 67.967 | 0.00 | 0.00 |
| ATOM | 5732 | CZ3  | TRP | X | 381 | 64.003 | 20.270 | 66.616 | 0.00 | 0.00 |
| ATOM | 5733 | HZ3  | TRP | X | 381 | 64.994 | 20.654 | 66.812 | 0.00 | 0.00 |

|      |      |      |     |   |     |        |        |        |      |      |
|------|------|------|-----|---|-----|--------|--------|--------|------|------|
| ATOM | 5734 | CE3  | TRP | X | 381 | 63.730 | 19.165 | 65.781 | 0.00 | 0.00 |
| ATOM | 5735 | HE3  | TRP | X | 381 | 64.505 | 18.662 | 65.221 | 0.00 | 0.00 |
| ATOM | 5736 | CD2  | TRP | X | 381 | 62.422 | 18.802 | 65.585 | 0.00 | 0.00 |
| ATOM | 5737 | C    | TRP | X | 381 | 63.817 | 16.218 | 61.775 | 0.00 | 0.00 |
| ATOM | 5738 | O    | TRP | X | 381 | 64.688 | 15.576 | 62.331 | 0.00 | 0.00 |
| ATOM | 5739 | N    | LEU | X | 382 | 63.504 | 16.032 | 60.458 | 0.00 | 0.00 |
| ATOM | 5740 | H    | LEU | X | 382 | 62.737 | 16.576 | 60.088 | 0.00 | 0.00 |
| ATOM | 5741 | CA   | LEU | X | 382 | 64.312 | 15.278 | 59.481 | 0.00 | 0.00 |
| ATOM | 5742 | HA   | LEU | X | 382 | 64.332 | 14.222 | 59.750 | 0.00 | 0.00 |
| ATOM | 5743 | CB   | LEU | X | 382 | 63.445 | 15.316 | 58.128 | 0.00 | 0.00 |
| ATOM | 5744 | HB2  | LEU | X | 382 | 62.450 | 15.739 | 58.268 | 0.00 | 0.00 |
| ATOM | 5745 | HB3  | LEU | X | 382 | 63.844 | 16.116 | 57.505 | 0.00 | 0.00 |
| ATOM | 5746 | CG   | LEU | X | 382 | 63.359 | 13.995 | 57.350 | 0.00 | 0.00 |
| ATOM | 5747 | HG   | LEU | X | 382 | 62.838 | 14.137 | 56.403 | 0.00 | 0.00 |
| ATOM | 5748 | CD1  | LEU | X | 382 | 64.743 | 13.606 | 57.051 | 0.00 | 0.00 |
| ATOM | 5749 | HD11 | LEU | X | 382 | 64.752 | 12.662 | 56.506 | 0.00 | 0.00 |
| ATOM | 5750 | HD12 | LEU | X | 382 | 65.230 | 13.387 | 58.001 | 0.00 | 0.00 |
| ATOM | 5751 | HD13 | LEU | X | 382 | 65.198 | 14.343 | 56.390 | 0.00 | 0.00 |
| ATOM | 5752 | CD2  | LEU | X | 382 | 62.582 | 12.903 | 58.191 | 0.00 | 0.00 |
| ATOM | 5753 | HD21 | LEU | X | 382 | 61.778 | 13.453 | 58.680 | 0.00 | 0.00 |
| ATOM | 5754 | HD22 | LEU | X | 382 | 62.164 | 12.081 | 57.611 | 0.00 | 0.00 |
| ATOM | 5755 | HD23 | LEU | X | 382 | 63.171 | 12.521 | 59.025 | 0.00 | 0.00 |
| ATOM | 5756 | C    | LEU | X | 382 | 65.717 | 15.853 | 59.438 | 0.00 | 0.00 |
| ATOM | 5757 | O    | LEU | X | 382 | 66.642 | 15.093 | 59.537 | 0.00 | 0.00 |
| ATOM | 5758 | N    | HIE | X | 383 | 65.865 | 17.181 | 59.315 | 0.00 | 0.00 |
| ATOM | 5759 | H    | HIE | X | 383 | 65.094 | 17.822 | 59.193 | 0.00 | 0.00 |
| ATOM | 5760 | CA   | HIE | X | 383 | 67.166 | 17.866 | 59.177 | 0.00 | 0.00 |
| ATOM | 5761 | HA   | HIE | X | 383 | 67.874 | 17.469 | 59.904 | 0.00 | 0.00 |
| ATOM | 5762 | CB   | HIE | X | 383 | 67.742 | 17.539 | 57.786 | 0.00 | 0.00 |
| ATOM | 5763 | HB2  | HIE | X | 383 | 67.742 | 16.485 | 57.505 | 0.00 | 0.00 |
| ATOM | 5764 | HB3  | HIE | X | 383 | 67.050 | 17.992 | 57.077 | 0.00 | 0.00 |
| ATOM | 5765 | CG   | HIE | X | 383 | 69.093 | 18.200 | 57.451 | 0.00 | 0.00 |
| ATOM | 5766 | ND1  | HIE | X | 383 | 69.660 | 19.272 | 58.205 | 0.00 | 0.00 |
| ATOM | 5767 | CE1  | HIE | X | 383 | 70.835 | 19.521 | 57.747 | 0.00 | 0.00 |
| ATOM | 5768 | HE1  | HIE | X | 383 | 71.411 | 20.402 | 57.990 | 0.00 | 0.00 |
| ATOM | 5769 | NE2  | HIE | X | 383 | 71.119 | 18.698 | 56.712 | 0.00 | 0.00 |
| ATOM | 5770 | HE2  | HIE | X | 383 | 71.899 | 18.722 | 56.071 | 0.00 | 0.00 |
| ATOM | 5771 | CD2  | HIE | X | 383 | 70.017 | 17.851 | 56.510 | 0.00 | 0.00 |
| ATOM | 5772 | HD2  | HIE | X | 383 | 69.846 | 17.183 | 55.678 | 0.00 | 0.00 |
| ATOM | 5773 | C    | HIE | X | 383 | 66.861 | 19.341 | 59.467 | 0.00 | 0.00 |
| ATOM | 5774 | O    | HIE | X | 383 | 66.165 | 19.937 | 58.611 | 0.00 | 0.00 |
| ATOM | 5775 | N    | PRO | X | 384 | 67.108 | 19.817 | 60.704 | 0.00 | 0.00 |
| ATOM | 5776 | CD   | PRO | X | 384 | 67.291 | 18.949 | 61.819 | 0.00 | 0.00 |
| ATOM | 5777 | HD2  | PRO | X | 384 | 68.197 | 18.346 | 61.765 | 0.00 | 0.00 |
| ATOM | 5778 | HD3  | PRO | X | 384 | 66.467 | 18.236 | 61.864 | 0.00 | 0.00 |
| ATOM | 5779 | CG   | PRO | X | 384 | 67.382 | 19.881 | 63.056 | 0.00 | 0.00 |
| ATOM | 5780 | HG2  | PRO | X | 384 | 68.383 | 19.666 | 63.431 | 0.00 | 0.00 |
| ATOM | 5781 | HG3  | PRO | X | 384 | 66.571 | 19.604 | 63.729 | 0.00 | 0.00 |
| ATOM | 5782 | CB   | PRO | X | 384 | 67.188 | 21.292 | 62.582 | 0.00 | 0.00 |
| ATOM | 5783 | HB2  | PRO | X | 384 | 68.177 | 21.746 | 62.647 | 0.00 | 0.00 |
| ATOM | 5784 | HB3  | PRO | X | 384 | 66.494 | 21.774 | 63.270 | 0.00 | 0.00 |
| ATOM | 5785 | CA   | PRO | X | 384 | 66.687 | 21.142 | 61.097 | 0.00 | 0.00 |
| ATOM | 5786 | HA   | PRO | X | 384 | 65.598 | 21.126 | 61.060 | 0.00 | 0.00 |
| ATOM | 5787 | C    | PRO | X | 384 | 67.203 | 22.265 | 60.189 | 0.00 | 0.00 |
| ATOM | 5788 | O    | PRO | X | 384 | 66.407 | 23.136 | 59.903 | 0.00 | 0.00 |
| ATOM | 5789 | N    | GLU | X | 385 | 68.423 | 22.170 | 59.697 | 0.00 | 0.00 |
| ATOM | 5790 | H    | GLU | X | 385 | 69.053 | 21.388 | 59.807 | 0.00 | 0.00 |
| ATOM | 5791 | CA   | GLU | X | 385 | 69.063 | 23.317 | 58.959 | 0.00 | 0.00 |
| ATOM | 5792 | HA   | GLU | X | 385 | 68.505 | 24.222 | 59.197 | 0.00 | 0.00 |
| ATOM | 5793 | CB   | GLU | X | 385 | 70.597 | 23.447 | 59.348 | 0.00 | 0.00 |
| ATOM | 5794 | HB2  | GLU | X | 385 | 71.056 | 22.508 | 59.041 | 0.00 | 0.00 |
| ATOM | 5795 | HB3  | GLU | X | 385 | 71.094 | 24.330 | 58.948 | 0.00 | 0.00 |
| ATOM | 5796 | CG   | GLU | X | 385 | 70.889 | 23.620 | 60.860 | 0.00 | 0.00 |
| ATOM | 5797 | HG2  | GLU | X | 385 | 70.825 | 24.696 | 61.022 | 0.00 | 0.00 |
| ATOM | 5798 | HG3  | GLU | X | 385 | 70.240 | 23.011 | 61.489 | 0.00 | 0.00 |
| ATOM | 5799 | CD   | GLU | X | 385 | 72.321 | 23.169 | 61.135 | 0.00 | 0.00 |
| ATOM | 5800 | OE1  | GLU | X | 385 | 72.465 | 21.941 | 61.359 | 0.00 | 0.00 |

|      |      |      |     |   |     |        |        |        |      |      |
|------|------|------|-----|---|-----|--------|--------|--------|------|------|
| ATOM | 5801 | OE2  | GLU | X | 385 | 73.390 | 23.875 | 61.072 | 0.00 | 0.00 |
| ATOM | 5802 | C    | GLU | X | 385 | 69.017 | 23.200 | 57.444 | 0.00 | 0.00 |
| ATOM | 5803 | O    | GLU | X | 385 | 69.711 | 24.020 | 56.805 | 0.00 | 0.00 |
| ATOM | 5804 | N    | ASP | X | 386 | 68.365 | 22.157 | 56.874 | 0.00 | 0.00 |
| ATOM | 5805 | H    | ASP | X | 386 | 67.808 | 21.556 | 57.465 | 0.00 | 0.00 |
| ATOM | 5806 | CA   | ASP | X | 386 | 68.294 | 21.962 | 55.433 | 0.00 | 0.00 |
| ATOM | 5807 | HA   | ASP | X | 386 | 69.338 | 21.974 | 55.122 | 0.00 | 0.00 |
| ATOM | 5808 | CB   | ASP | X | 386 | 67.582 | 20.719 | 55.113 | 0.00 | 0.00 |
| ATOM | 5809 | HB2  | ASP | X | 386 | 67.912 | 19.884 | 55.731 | 0.00 | 0.00 |
| ATOM | 5810 | HB3  | ASP | X | 386 | 66.533 | 20.761 | 55.405 | 0.00 | 0.00 |
| ATOM | 5811 | CG   | ASP | X | 386 | 67.691 | 20.436 | 53.631 | 0.00 | 0.00 |
| ATOM | 5812 | OD1  | ASP | X | 386 | 67.220 | 21.246 | 52.817 | 0.00 | 0.00 |
| ATOM | 5813 | OD2  | ASP | X | 386 | 68.272 | 19.387 | 53.255 | 0.00 | 0.00 |
| ATOM | 5814 | C    | ASP | X | 386 | 67.648 | 23.282 | 54.704 | 0.00 | 0.00 |
| ATOM | 5815 | O    | ASP | X | 386 | 66.578 | 23.724 | 55.077 | 0.00 | 0.00 |
| ATOM | 5816 | N    | PRO | X | 387 | 68.322 | 23.821 | 53.672 | 0.00 | 0.00 |
| ATOM | 5817 | CD   | PRO | X | 387 | 69.623 | 23.425 | 53.228 | 0.00 | 0.00 |
| ATOM | 5818 | HD2  | PRO | X | 387 | 69.591 | 22.408 | 52.837 | 0.00 | 0.00 |
| ATOM | 5819 | HD3  | PRO | X | 387 | 70.429 | 23.559 | 53.949 | 0.00 | 0.00 |
| ATOM | 5820 | CG   | PRO | X | 387 | 69.917 | 24.311 | 52.031 | 0.00 | 0.00 |
| ATOM | 5821 | HG2  | PRO | X | 387 | 69.595 | 23.828 | 51.109 | 0.00 | 0.00 |
| ATOM | 5822 | HG3  | PRO | X | 387 | 70.992 | 24.490 | 52.057 | 0.00 | 0.00 |
| ATOM | 5823 | CB   | PRO | X | 387 | 69.078 | 25.592 | 52.360 | 0.00 | 0.00 |
| ATOM | 5824 | HB2  | PRO | X | 387 | 68.763 | 26.075 | 51.435 | 0.00 | 0.00 |
| ATOM | 5825 | HB3  | PRO | X | 387 | 69.704 | 26.178 | 53.033 | 0.00 | 0.00 |
| ATOM | 5826 | CA   | PRO | X | 387 | 67.859 | 25.067 | 53.072 | 0.00 | 0.00 |
| ATOM | 5827 | HA   | PRO | X | 387 | 67.519 | 25.769 | 53.833 | 0.00 | 0.00 |
| ATOM | 5828 | C    | PRO | X | 387 | 66.667 | 24.929 | 52.156 | 0.00 | 0.00 |
| ATOM | 5829 | O    | PRO | X | 387 | 65.976 | 25.920 | 51.893 | 0.00 | 0.00 |
| ATOM | 5830 | N    | ALA | X | 388 | 66.400 | 23.736 | 51.589 | 0.00 | 0.00 |
| ATOM | 5831 | H    | ALA | X | 388 | 66.968 | 22.916 | 51.747 | 0.00 | 0.00 |
| ATOM | 5832 | CA   | ALA | X | 388 | 65.192 | 23.464 | 50.729 | 0.00 | 0.00 |
| ATOM | 5833 | HA   | ALA | X | 388 | 65.007 | 24.236 | 49.981 | 0.00 | 0.00 |
| ATOM | 5834 | CB   | ALA | X | 388 | 65.340 | 22.172 | 49.955 | 0.00 | 0.00 |
| ATOM | 5835 | HB1  | ALA | X | 388 | 65.609 | 21.383 | 50.658 | 0.00 | 0.00 |
| ATOM | 5836 | HB2  | ALA | X | 388 | 66.201 | 22.202 | 49.288 | 0.00 | 0.00 |
| ATOM | 5837 | HB3  | ALA | X | 388 | 64.376 | 21.884 | 49.534 | 0.00 | 0.00 |
| ATOM | 5838 | C    | ALA | X | 388 | 63.972 | 23.396 | 51.627 | 0.00 | 0.00 |
| ATOM | 5839 | O    | ALA | X | 388 | 62.887 | 23.912 | 51.353 | 0.00 | 0.00 |
| ATOM | 5840 | N    | ARG | X | 389 | 64.113 | 22.700 | 52.772 | 0.00 | 0.00 |
| ATOM | 5841 | H    | ARG | X | 389 | 65.042 | 22.307 | 52.827 | 0.00 | 0.00 |
| ATOM | 5842 | CA   | ARG | X | 389 | 63.175 | 22.518 | 53.821 | 0.00 | 0.00 |
| ATOM | 5843 | HA   | ARG | X | 389 | 62.204 | 22.265 | 53.395 | 0.00 | 0.00 |
| ATOM | 5844 | CB   | ARG | X | 389 | 63.612 | 21.587 | 55.013 | 0.00 | 0.00 |
| ATOM | 5845 | HB2  | ARG | X | 389 | 64.621 | 21.915 | 55.265 | 0.00 | 0.00 |
| ATOM | 5846 | HB3  | ARG | X | 389 | 62.855 | 21.700 | 55.789 | 0.00 | 0.00 |
| ATOM | 5847 | CG   | ARG | X | 389 | 63.639 | 20.121 | 54.606 | 0.00 | 0.00 |
| ATOM | 5848 | HG2  | ARG | X | 389 | 62.688 | 19.727 | 54.250 | 0.00 | 0.00 |
| ATOM | 5849 | HG3  | ARG | X | 389 | 64.348 | 19.934 | 53.799 | 0.00 | 0.00 |
| ATOM | 5850 | CD   | ARG | X | 389 | 64.007 | 19.227 | 55.784 | 0.00 | 0.00 |
| ATOM | 5851 | HD2  | ARG | X | 389 | 64.761 | 19.718 | 56.399 | 0.00 | 0.00 |
| ATOM | 5852 | HD3  | ARG | X | 389 | 63.132 | 19.094 | 56.421 | 0.00 | 0.00 |
| ATOM | 5853 | NE   | ARG | X | 389 | 64.514 | 17.936 | 55.233 | 0.00 | 0.00 |
| ATOM | 5854 | HE   | ARG | X | 389 | 65.514 | 17.941 | 55.094 | 0.00 | 0.00 |
| ATOM | 5855 | CZ   | ARG | X | 389 | 63.773 | 16.926 | 54.668 | 0.00 | 0.00 |
| ATOM | 5856 | NH1  | ARG | X | 389 | 62.480 | 16.830 | 54.953 | 0.00 | 0.00 |
| ATOM | 5857 | HH11 | ARG | X | 389 | 62.008 | 17.462 | 55.584 | 0.00 | 0.00 |
| ATOM | 5858 | HH12 | ARG | X | 389 | 61.977 | 16.084 | 54.495 | 0.00 | 0.00 |
| ATOM | 5859 | NH2  | ARG | X | 389 | 64.271 | 16.144 | 53.797 | 0.00 | 0.00 |
| ATOM | 5860 | HH21 | ARG | X | 389 | 65.246 | 16.196 | 53.538 | 0.00 | 0.00 |
| ATOM | 5861 | HH22 | ARG | X | 389 | 63.750 | 15.331 | 53.502 | 0.00 | 0.00 |
| ATOM | 5862 | C    | ARG | X | 389 | 62.840 | 23.869 | 54.344 | 0.00 | 0.00 |
| ATOM | 5863 | O    | ARG | X | 389 | 61.644 | 24.260 | 54.343 | 0.00 | 0.00 |
| ATOM | 5864 | N    | LEU | X | 390 | 63.850 | 24.715 | 54.638 | 0.00 | 0.00 |
| ATOM | 5865 | H    | LEU | X | 390 | 64.808 | 24.399 | 54.689 | 0.00 | 0.00 |
| ATOM | 5866 | CA   | LEU | X | 390 | 63.505 | 26.113 | 55.107 | 0.00 | 0.00 |
| ATOM | 5867 | HA   | LEU | X | 390 | 62.751 | 26.049 | 55.891 | 0.00 | 0.00 |

|      |      |      |     |   |     |        |        |        |      |      |
|------|------|------|-----|---|-----|--------|--------|--------|------|------|
| ATOM | 5868 | CB   | LEU | X | 390 | 64.749 | 26.694 | 55.763 | 0.00 | 0.00 |
| ATOM | 5869 | HB2  | LEU | X | 390 | 65.540 | 26.481 | 55.044 | 0.00 | 0.00 |
| ATOM | 5870 | HB3  | LEU | X | 390 | 64.664 | 27.779 | 55.808 | 0.00 | 0.00 |
| ATOM | 5871 | CG   | LEU | X | 390 | 64.978 | 26.074 | 57.096 | 0.00 | 0.00 |
| ATOM | 5872 | HG   | LEU | X | 390 | 65.170 | 25.006 | 56.994 | 0.00 | 0.00 |
| ATOM | 5873 | CD1  | LEU | X | 390 | 66.206 | 26.746 | 57.698 | 0.00 | 0.00 |
| ATOM | 5874 | HD11 | LEU | X | 390 | 67.049 | 26.635 | 57.016 | 0.00 | 0.00 |
| ATOM | 5875 | HD12 | LEU | X | 390 | 66.523 | 26.372 | 58.672 | 0.00 | 0.00 |
| ATOM | 5876 | HD13 | LEU | X | 390 | 66.040 | 27.823 | 57.703 | 0.00 | 0.00 |
| ATOM | 5877 | CD2  | LEU | X | 390 | 63.751 | 26.117 | 58.059 | 0.00 | 0.00 |
| ATOM | 5878 | HD21 | LEU | X | 390 | 63.248 | 25.168 | 58.246 | 0.00 | 0.00 |
| ATOM | 5879 | HD22 | LEU | X | 390 | 63.966 | 26.528 | 59.046 | 0.00 | 0.00 |
| ATOM | 5880 | HD23 | LEU | X | 390 | 62.995 | 26.767 | 57.618 | 0.00 | 0.00 |
| ATOM | 5881 | C    | LEU | X | 390 | 62.968 | 27.074 | 54.019 | 0.00 | 0.00 |
| ATOM | 5882 | O    | LEU | X | 390 | 62.132 | 27.921 | 54.352 | 0.00 | 0.00 |
| ATOM | 5883 | N    | ARG | X | 391 | 63.330 | 26.860 | 52.768 | 0.00 | 0.00 |
| ATOM | 5884 | H    | ARG | X | 391 | 64.064 | 26.182 | 52.621 | 0.00 | 0.00 |
| ATOM | 5885 | CA   | ARG | X | 391 | 62.913 | 27.723 | 51.631 | 0.00 | 0.00 |
| ATOM | 5886 | HA   | ARG | X | 391 | 62.832 | 28.746 | 51.998 | 0.00 | 0.00 |
| ATOM | 5887 | CB   | ARG | X | 391 | 63.826 | 27.516 | 50.394 | 0.00 | 0.00 |
| ATOM | 5888 | HB2  | ARG | X | 391 | 64.867 | 27.565 | 50.713 | 0.00 | 0.00 |
| ATOM | 5889 | HB3  | ARG | X | 391 | 63.743 | 26.546 | 49.905 | 0.00 | 0.00 |
| ATOM | 5890 | CG   | ARG | X | 391 | 63.496 | 28.579 | 49.342 | 0.00 | 0.00 |
| ATOM | 5891 | HG2  | ARG | X | 391 | 62.430 | 28.560 | 49.116 | 0.00 | 0.00 |
| ATOM | 5892 | HG3  | ARG | X | 391 | 63.649 | 29.580 | 49.746 | 0.00 | 0.00 |
| ATOM | 5893 | CD   | ARG | X | 391 | 64.466 | 28.483 | 48.117 | 0.00 | 0.00 |
| ATOM | 5894 | HD2  | ARG | X | 391 | 64.276 | 27.502 | 47.683 | 0.00 | 0.00 |
| ATOM | 5895 | HD3  | ARG | X | 391 | 64.181 | 29.286 | 47.437 | 0.00 | 0.00 |
| ATOM | 5896 | NE   | ARG | X | 391 | 65.898 | 28.652 | 48.492 | 0.00 | 0.00 |
| ATOM | 5897 | HE   | ARG | X | 391 | 66.266 | 29.589 | 48.584 | 0.00 | 0.00 |
| ATOM | 5898 | CZ   | ARG | X | 391 | 66.685 | 27.582 | 48.742 | 0.00 | 0.00 |
| ATOM | 5899 | NH1  | ARG | X | 391 | 66.465 | 26.377 | 48.332 | 0.00 | 0.00 |
| ATOM | 5900 | HH11 | ARG | X | 391 | 65.647 | 26.138 | 47.789 | 0.00 | 0.00 |
| ATOM | 5901 | HH12 | ARG | X | 391 | 67.161 | 25.702 | 48.616 | 0.00 | 0.00 |
| ATOM | 5902 | NH2  | ARG | X | 391 | 67.805 | 27.754 | 49.311 | 0.00 | 0.00 |
| ATOM | 5903 | HH21 | ARG | X | 391 | 67.909 | 28.695 | 49.663 | 0.00 | 0.00 |
| ATOM | 5904 | HH22 | ARG | X | 391 | 68.598 | 27.134 | 49.233 | 0.00 | 0.00 |
| ATOM | 5905 | C    | ARG | X | 391 | 61.474 | 27.288 | 51.206 | 0.00 | 0.00 |
| ATOM | 5906 | O    | ARG | X | 391 | 60.631 | 28.208 | 51.034 | 0.00 | 0.00 |
| ATOM | 5907 | N    | GLU | X | 392 | 61.090 | 26.009 | 50.995 | 0.00 | 0.00 |
| ATOM | 5908 | H    | GLU | X | 392 | 61.766 | 25.274 | 51.146 | 0.00 | 0.00 |
| ATOM | 5909 | CA   | GLU | X | 392 | 59.714 | 25.567 | 50.865 | 0.00 | 0.00 |
| ATOM | 5910 | HA   | GLU | X | 392 | 59.324 | 26.059 | 49.974 | 0.00 | 0.00 |
| ATOM | 5911 | CB   | GLU | X | 392 | 59.660 | 24.069 | 50.417 | 0.00 | 0.00 |
| ATOM | 5912 | HB2  | GLU | X | 392 | 60.391 | 23.887 | 49.629 | 0.00 | 0.00 |
| ATOM | 5913 | HB3  | GLU | X | 392 | 59.898 | 23.363 | 51.212 | 0.00 | 0.00 |
| ATOM | 5914 | CG   | GLU | X | 392 | 58.270 | 23.676 | 49.925 | 0.00 | 0.00 |
| ATOM | 5915 | HG2  | GLU | X | 392 | 57.573 | 23.486 | 50.741 | 0.00 | 0.00 |
| ATOM | 5916 | HG3  | GLU | X | 392 | 57.849 | 24.529 | 49.393 | 0.00 | 0.00 |
| ATOM | 5917 | CD   | GLU | X | 392 | 58.343 | 22.396 | 49.050 | 0.00 | 0.00 |
| ATOM | 5918 | OE1  | GLU | X | 392 | 58.229 | 22.457 | 47.818 | 0.00 | 0.00 |
| ATOM | 5919 | OE2  | GLU | X | 392 | 58.337 | 21.329 | 49.669 | 0.00 | 0.00 |
| ATOM | 5920 | C    | GLU | X | 392 | 58.839 | 26.009 | 52.035 | 0.00 | 0.00 |
| ATOM | 5921 | O    | GLU | X | 392 | 57.701 | 26.462 | 51.799 | 0.00 | 0.00 |
| ATOM | 5922 | N    | ALA | X | 393 | 59.376 | 26.123 | 53.276 | 0.00 | 0.00 |
| ATOM | 5923 | H    | ALA | X | 393 | 60.285 | 25.695 | 53.384 | 0.00 | 0.00 |
| ATOM | 5924 | CA   | ALA | X | 393 | 58.636 | 26.585 | 54.498 | 0.00 | 0.00 |
| ATOM | 5925 | HA   | ALA | X | 393 | 57.669 | 26.107 | 54.345 | 0.00 | 0.00 |
| ATOM | 5926 | CB   | ALA | X | 393 | 59.366 | 26.034 | 55.708 | 0.00 | 0.00 |
| ATOM | 5927 | HB1  | ALA | X | 393 | 58.861 | 26.244 | 56.651 | 0.00 | 0.00 |
| ATOM | 5928 | HB2  | ALA | X | 393 | 60.366 | 26.418 | 55.909 | 0.00 | 0.00 |
| ATOM | 5929 | HB3  | ALA | X | 393 | 59.312 | 24.950 | 55.612 | 0.00 | 0.00 |
| ATOM | 5930 | C    | ALA | X | 393 | 58.358 | 28.130 | 54.613 | 0.00 | 0.00 |
| ATOM | 5931 | O    | ALA | X | 393 | 57.338 | 28.529 | 55.233 | 0.00 | 0.00 |
| ATOM | 5932 | N    | LEU | X | 394 | 59.309 | 28.940 | 54.201 | 0.00 | 0.00 |
| ATOM | 5933 | H    | LEU | X | 394 | 60.129 | 28.531 | 53.775 | 0.00 | 0.00 |
| ATOM | 5934 | CA   | LEU | X | 394 | 59.166 | 30.322 | 54.014 | 0.00 | 0.00 |

|      |      |      |     |   |     |        |        |        |      |      |
|------|------|------|-----|---|-----|--------|--------|--------|------|------|
| ATOM | 5935 | HA   | LEU | X | 394 | 58.813 | 30.792 | 54.932 | 0.00 | 0.00 |
| ATOM | 5936 | CB   | LEU | X | 394 | 60.566 | 30.823 | 53.737 | 0.00 | 0.00 |
| ATOM | 5937 | HB2  | LEU | X | 394 | 61.193 | 30.477 | 54.559 | 0.00 | 0.00 |
| ATOM | 5938 | HB3  | LEU | X | 394 | 60.849 | 30.239 | 52.862 | 0.00 | 0.00 |
| ATOM | 5939 | CG   | LEU | X | 394 | 60.818 | 32.333 | 53.466 | 0.00 | 0.00 |
| ATOM | 5940 | HG   | LEU | X | 394 | 60.143 | 32.492 | 52.625 | 0.00 | 0.00 |
| ATOM | 5941 | CD1  | LEU | X | 394 | 60.467 | 33.070 | 54.741 | 0.00 | 0.00 |
| ATOM | 5942 | HD11 | LEU | X | 394 | 61.140 | 32.940 | 55.589 | 0.00 | 0.00 |
| ATOM | 5943 | HD12 | LEU | X | 394 | 59.476 | 32.794 | 55.101 | 0.00 | 0.00 |
| ATOM | 5944 | HD13 | LEU | X | 394 | 60.270 | 34.135 | 54.618 | 0.00 | 0.00 |
| ATOM | 5945 | CD2  | LEU | X | 394 | 62.272 | 32.718 | 53.039 | 0.00 | 0.00 |
| ATOM | 5946 | HD21 | LEU | X | 394 | 62.948 | 32.404 | 53.834 | 0.00 | 0.00 |
| ATOM | 5947 | HD22 | LEU | X | 394 | 62.567 | 32.200 | 52.126 | 0.00 | 0.00 |
| ATOM | 5948 | HD23 | LEU | X | 394 | 62.264 | 33.787 | 52.826 | 0.00 | 0.00 |
| ATOM | 5949 | C    | LEU | X | 394 | 58.212 | 30.657 | 52.877 | 0.00 | 0.00 |
| ATOM | 5950 | O    | LEU | X | 394 | 57.463 | 31.597 | 53.065 | 0.00 | 0.00 |
| ATOM | 5951 | N    | SER | X | 395 | 58.345 | 30.008 | 51.695 | 0.00 | 0.00 |
| ATOM | 5952 | H    | SER | X | 395 | 58.944 | 29.195 | 51.700 | 0.00 | 0.00 |
| ATOM | 5953 | CA   | SER | X | 395 | 57.344 | 30.048 | 50.654 | 0.00 | 0.00 |
| ATOM | 5954 | HA   | SER | X | 395 | 57.305 | 31.033 | 50.190 | 0.00 | 0.00 |
| ATOM | 5955 | CB   | SER | X | 395 | 57.772 | 29.029 | 49.575 | 0.00 | 0.00 |
| ATOM | 5956 | HB2  | SER | X | 395 | 58.262 | 28.130 | 49.950 | 0.00 | 0.00 |
| ATOM | 5957 | HB3  | SER | X | 395 | 56.930 | 28.750 | 48.941 | 0.00 | 0.00 |
| ATOM | 5958 | OG   | SER | X | 395 | 58.711 | 29.720 | 48.825 | 0.00 | 0.00 |
| ATOM | 5959 | HG   | SER | X | 395 | 59.275 | 29.127 | 48.323 | 0.00 | 0.00 |
| ATOM | 5960 | C    | SER | X | 395 | 55.922 | 29.677 | 51.238 | 0.00 | 0.00 |
| ATOM | 5961 | O    | SER | X | 395 | 54.907 | 30.305 | 50.908 | 0.00 | 0.00 |
| ATOM | 5962 | N    | ASP | X | 396 | 55.864 | 28.696 | 52.215 | 0.00 | 0.00 |
| ATOM | 5963 | H    | ASP | X | 396 | 56.710 | 28.188 | 52.431 | 0.00 | 0.00 |
| ATOM | 5964 | CA   | ASP | X | 396 | 54.631 | 28.240 | 52.920 | 0.00 | 0.00 |
| ATOM | 5965 | HA   | ASP | X | 396 | 53.961 | 27.982 | 52.099 | 0.00 | 0.00 |
| ATOM | 5966 | CB   | ASP | X | 396 | 54.682 | 26.964 | 53.746 | 0.00 | 0.00 |
| ATOM | 5967 | HB2  | ASP | X | 396 | 55.293 | 26.323 | 53.110 | 0.00 | 0.00 |
| ATOM | 5968 | HB3  | ASP | X | 396 | 55.192 | 27.081 | 54.702 | 0.00 | 0.00 |
| ATOM | 5969 | CG   | ASP | X | 396 | 53.341 | 26.260 | 53.977 | 0.00 | 0.00 |
| ATOM | 5970 | OD1  | ASP | X | 396 | 52.977 | 26.112 | 55.182 | 0.00 | 0.00 |
| ATOM | 5971 | OD2  | ASP | X | 396 | 52.672 | 25.898 | 53.052 | 0.00 | 0.00 |
| ATOM | 5972 | C    | ASP | X | 396 | 53.988 | 29.313 | 53.755 | 0.00 | 0.00 |
| ATOM | 5973 | O    | ASP | X | 396 | 52.962 | 29.924 | 53.441 | 0.00 | 0.00 |
| ATOM | 5974 | N    | VAL | X | 397 | 54.775 | 29.784 | 54.760 | 0.00 | 0.00 |
| ATOM | 5975 | H    | VAL | X | 397 | 55.564 | 29.233 | 55.066 | 0.00 | 0.00 |
| ATOM | 5976 | CA   | VAL | X | 397 | 54.308 | 30.838 | 55.670 | 0.00 | 0.00 |
| ATOM | 5977 | HA   | VAL | X | 397 | 53.380 | 30.451 | 56.090 | 0.00 | 0.00 |
| ATOM | 5978 | CB   | VAL | X | 397 | 55.366 | 30.949 | 56.815 | 0.00 | 0.00 |
| ATOM | 5979 | HB   | VAL | X | 397 | 55.819 | 29.981 | 57.029 | 0.00 | 0.00 |
| ATOM | 5980 | CG1  | VAL | X | 397 | 56.451 | 31.928 | 56.450 | 0.00 | 0.00 |
| ATOM | 5981 | HG11 | VAL | X | 397 | 57.304 | 31.997 | 57.126 | 0.00 | 0.00 |
| ATOM | 5982 | HG12 | VAL | X | 397 | 56.880 | 31.667 | 55.483 | 0.00 | 0.00 |
| ATOM | 5983 | HG13 | VAL | X | 397 | 56.018 | 32.920 | 56.324 | 0.00 | 0.00 |
| ATOM | 5984 | CG2  | VAL | X | 397 | 54.698 | 31.507 | 58.060 | 0.00 | 0.00 |
| ATOM | 5985 | HG21 | VAL | X | 397 | 53.898 | 30.832 | 58.364 | 0.00 | 0.00 |
| ATOM | 5986 | HG22 | VAL | X | 397 | 54.401 | 32.541 | 57.881 | 0.00 | 0.00 |
| ATOM | 5987 | HG23 | VAL | X | 397 | 55.448 | 31.481 | 58.850 | 0.00 | 0.00 |
| ATOM | 5988 | C    | VAL | X | 397 | 53.916 | 32.162 | 55.028 | 0.00 | 0.00 |
| ATOM | 5989 | O    | VAL | X | 397 | 52.980 | 32.828 | 55.417 | 0.00 | 0.00 |
| ATOM | 5990 | N    | VAL | X | 398 | 54.638 | 32.541 | 53.925 | 0.00 | 0.00 |
| ATOM | 5991 | H    | VAL | X | 398 | 55.367 | 31.912 | 53.619 | 0.00 | 0.00 |
| ATOM | 5992 | CA   | VAL | X | 398 | 54.408 | 33.850 | 53.210 | 0.00 | 0.00 |
| ATOM | 5993 | HA   | VAL | X | 398 | 54.283 | 34.562 | 54.026 | 0.00 | 0.00 |
| ATOM | 5994 | CB   | VAL | X | 398 | 55.596 | 34.345 | 52.381 | 0.00 | 0.00 |
| ATOM | 5995 | HB   | VAL | X | 398 | 56.021 | 33.588 | 51.721 | 0.00 | 0.00 |
| ATOM | 5996 | CG1  | VAL | X | 398 | 55.239 | 35.524 | 51.487 | 0.00 | 0.00 |
| ATOM | 5997 | HG11 | VAL | X | 398 | 54.484 | 35.324 | 50.727 | 0.00 | 0.00 |
| ATOM | 5998 | HG12 | VAL | X | 398 | 54.766 | 36.258 | 52.139 | 0.00 | 0.00 |
| ATOM | 5999 | HG13 | VAL | X | 398 | 56.149 | 35.892 | 51.013 | 0.00 | 0.00 |
| ATOM | 6000 | CG2  | VAL | X | 398 | 56.639 | 34.873 | 53.350 | 0.00 | 0.00 |
| ATOM | 6001 | HG21 | VAL | X | 398 | 57.196 | 34.138 | 53.931 | 0.00 | 0.00 |

|      |      |      |     |   |     |        |        |        |      |      |
|------|------|------|-----|---|-----|--------|--------|--------|------|------|
| ATOM | 6002 | HG22 | VAL | X | 398 | 56.211 | 35.636 | 54.000 | 0.00 | 0.00 |
| ATOM | 6003 | HG23 | VAL | X | 398 | 57.343 | 35.487 | 52.788 | 0.00 | 0.00 |
| ATOM | 6004 | C    | VAL | X | 398 | 53.150 | 33.744 | 52.305 | 0.00 | 0.00 |
| ATOM | 6005 | O    | VAL | X | 398 | 52.545 | 34.752 | 51.961 | 0.00 | 0.00 |
| ATOM | 6006 | N    | GLY | X | 399 | 52.599 | 32.542 | 52.153 | 0.00 | 0.00 |
| ATOM | 6007 | H    | GLY | X | 399 | 53.114 | 31.722 | 52.438 | 0.00 | 0.00 |
| ATOM | 6008 | CA   | GLY | X | 399 | 51.247 | 32.353 | 51.582 | 0.00 | 0.00 |
| ATOM | 6009 | HA2  | GLY | X | 399 | 51.028 | 33.256 | 51.012 | 0.00 | 0.00 |
| ATOM | 6010 | HA3  | GLY | X | 399 | 51.246 | 31.560 | 50.835 | 0.00 | 0.00 |
| ATOM | 6011 | C    | GLY | X | 399 | 50.149 | 32.143 | 52.634 | 0.00 | 0.00 |
| ATOM | 6012 | O    | GLY | X | 399 | 48.997 | 32.533 | 52.407 | 0.00 | 0.00 |
| ATOM | 6013 | N    | ASP | X | 400 | 50.421 | 31.420 | 53.691 | 0.00 | 0.00 |
| ATOM | 6014 | H    | ASP | X | 400 | 51.422 | 31.294 | 53.741 | 0.00 | 0.00 |
| ATOM | 6015 | CA   | ASP | X | 400 | 49.468 | 30.777 | 54.626 | 0.00 | 0.00 |
| ATOM | 6016 | HA   | ASP | X | 400 | 48.814 | 30.079 | 54.103 | 0.00 | 0.00 |
| ATOM | 6017 | CB   | ASP | X | 400 | 50.266 | 29.929 | 55.630 | 0.00 | 0.00 |
| ATOM | 6018 | HB2  | ASP | X | 400 | 50.980 | 29.315 | 55.081 | 0.00 | 0.00 |
| ATOM | 6019 | HB3  | ASP | X | 400 | 50.746 | 30.656 | 56.287 | 0.00 | 0.00 |
| ATOM | 6020 | CG   | ASP | X | 400 | 49.499 | 29.012 | 56.543 | 0.00 | 0.00 |
| ATOM | 6021 | OD1  | ASP | X | 400 | 49.040 | 29.422 | 57.670 | 0.00 | 0.00 |
| ATOM | 6022 | OD2  | ASP | X | 400 | 49.209 | 27.900 | 56.129 | 0.00 | 0.00 |
| ATOM | 6023 | C    | ASP | X | 400 | 48.595 | 31.863 | 55.266 | 0.00 | 0.00 |
| ATOM | 6024 | O    | ASP | X | 400 | 47.405 | 31.969 | 54.916 | 0.00 | 0.00 |
| ATOM | 6025 | N    | HIE | X | 401 | 49.128 | 32.740 | 56.124 | 0.00 | 0.00 |
| ATOM | 6026 | H    | HIE | X | 401 | 50.136 | 32.703 | 56.187 | 0.00 | 0.00 |
| ATOM | 6027 | CA   | HIE | X | 401 | 48.300 | 33.720 | 56.821 | 0.00 | 0.00 |
| ATOM | 6028 | HA   | HIE | X | 401 | 47.437 | 33.335 | 57.365 | 0.00 | 0.00 |
| ATOM | 6029 | CB   | HIE | X | 401 | 49.101 | 34.332 | 57.973 | 0.00 | 0.00 |
| ATOM | 6030 | HB2  | HIE | X | 401 | 48.360 | 34.784 | 58.632 | 0.00 | 0.00 |
| ATOM | 6031 | HB3  | HIE | X | 401 | 49.583 | 33.509 | 58.502 | 0.00 | 0.00 |
| ATOM | 6032 | CG   | HIE | X | 401 | 50.169 | 35.308 | 57.552 | 0.00 | 0.00 |
| ATOM | 6033 | ND1  | HIE | X | 401 | 50.102 | 36.672 | 57.550 | 0.00 | 0.00 |
| ATOM | 6034 | CE1  | HIE | X | 401 | 51.334 | 37.053 | 57.171 | 0.00 | 0.00 |
| ATOM | 6035 | HE1  | HIE | X | 401 | 51.514 | 38.085 | 56.909 | 0.00 | 0.00 |
| ATOM | 6036 | NE2  | HIE | X | 401 | 52.153 | 36.053 | 56.998 | 0.00 | 0.00 |
| ATOM | 6037 | HE2  | HIE | X | 401 | 53.090 | 36.115 | 56.626 | 0.00 | 0.00 |
| ATOM | 6038 | CD2  | HIE | X | 401 | 51.429 | 34.909 | 57.237 | 0.00 | 0.00 |
| ATOM | 6039 | HD2  | HIE | X | 401 | 51.795 | 33.894 | 57.265 | 0.00 | 0.00 |
| ATOM | 6040 | C    | HIE | X | 401 | 47.665 | 34.758 | 55.893 | 0.00 | 0.00 |
| ATOM | 6041 | O    | HIE | X | 401 | 46.565 | 35.278 | 56.194 | 0.00 | 0.00 |
| ATOM | 6042 | N    | ASN | X | 402 | 48.400 | 35.149 | 54.823 | 0.00 | 0.00 |
| ATOM | 6043 | H    | ASN | X | 402 | 49.236 | 34.615 | 54.633 | 0.00 | 0.00 |
| ATOM | 6044 | CA   | ASN | X | 402 | 47.966 | 36.170 | 53.880 | 0.00 | 0.00 |
| ATOM | 6045 | HA   | ASN | X | 402 | 47.593 | 37.016 | 54.458 | 0.00 | 0.00 |
| ATOM | 6046 | CB   | ASN | X | 402 | 49.101 | 36.717 | 52.966 | 0.00 | 0.00 |
| ATOM | 6047 | HB2  | ASN | X | 402 | 49.505 | 35.841 | 52.460 | 0.00 | 0.00 |
| ATOM | 6048 | HB3  | ASN | X | 402 | 48.669 | 37.364 | 52.202 | 0.00 | 0.00 |
| ATOM | 6049 | CG   | ASN | X | 402 | 50.058 | 37.585 | 53.721 | 0.00 | 0.00 |
| ATOM | 6050 | OD1  | ASN | X | 402 | 49.633 | 38.409 | 54.510 | 0.00 | 0.00 |
| ATOM | 6051 | ND2  | ASN | X | 402 | 51.338 | 37.429 | 53.631 | 0.00 | 0.00 |
| ATOM | 6052 | HD21 | ASN | X | 402 | 51.870 | 38.065 | 54.207 | 0.00 | 0.00 |
| ATOM | 6053 | HD22 | ASN | X | 402 | 51.776 | 36.749 | 53.026 | 0.00 | 0.00 |
| ATOM | 6054 | C    | ASN | X | 402 | 46.752 | 35.697 | 52.991 | 0.00 | 0.00 |
| ATOM | 6055 | O    | ASN | X | 402 | 45.754 | 36.409 | 52.838 | 0.00 | 0.00 |
| ATOM | 6056 | N    | VAL | X | 403 | 46.693 | 34.448 | 52.508 | 0.00 | 0.00 |
| ATOM | 6057 | H    | VAL | X | 403 | 47.522 | 33.874 | 52.569 | 0.00 | 0.00 |
| ATOM | 6058 | CA   | VAL | X | 403 | 45.615 | 33.890 | 51.643 | 0.00 | 0.00 |
| ATOM | 6059 | HA   | VAL | X | 403 | 44.690 | 34.426 | 51.856 | 0.00 | 0.00 |
| ATOM | 6060 | CB   | VAL | X | 403 | 45.876 | 34.238 | 50.210 | 0.00 | 0.00 |
| ATOM | 6061 | HB   | VAL | X | 403 | 45.847 | 35.316 | 50.049 | 0.00 | 0.00 |
| ATOM | 6062 | CG1  | VAL | X | 403 | 47.298 | 33.699 | 49.744 | 0.00 | 0.00 |
| ATOM | 6063 | HG11 | VAL | X | 403 | 47.523 | 34.148 | 48.776 | 0.00 | 0.00 |
| ATOM | 6064 | HG12 | VAL | X | 403 | 48.120 | 34.077 | 50.351 | 0.00 | 0.00 |
| ATOM | 6065 | HG13 | VAL | X | 403 | 47.402 | 32.615 | 49.702 | 0.00 | 0.00 |
| ATOM | 6066 | CG2  | VAL | X | 403 | 44.946 | 33.627 | 49.183 | 0.00 | 0.00 |
| ATOM | 6067 | HG21 | VAL | X | 403 | 45.263 | 33.936 | 48.187 | 0.00 | 0.00 |
| ATOM | 6068 | HG22 | VAL | X | 403 | 43.932 | 33.961 | 49.402 | 0.00 | 0.00 |



|      |      |      |     |   |     |        |        |        |      |      |
|------|------|------|-----|---|-----|--------|--------|--------|------|------|
| ATOM | 6069 | HG23 | VAL | X | 403 | 44.911 | 32.538 | 49.159 | 0.00 | 0.00 |
| ATOM | 6070 | C    | VAL | X | 403 | 45.196 | 32.382 | 51.932 | 0.00 | 0.00 |
| ATOM | 6071 | O    | VAL | X | 403 | 44.011 | 32.124 | 52.166 | 0.00 | 0.00 |
| ATOM | 6072 | N    | VAL | X | 404 | 46.153 | 31.423 | 51.953 | 0.00 | 0.00 |
| ATOM | 6073 | H    | VAL | X | 404 | 47.117 | 31.725 | 51.948 | 0.00 | 0.00 |
| ATOM | 6074 | CA   | VAL | X | 404 | 45.898 | 29.950 | 51.956 | 0.00 | 0.00 |
| ATOM | 6075 | HA   | VAL | X | 404 | 45.236 | 29.922 | 51.091 | 0.00 | 0.00 |
| ATOM | 6076 | CB   | VAL | X | 404 | 47.111 | 28.955 | 51.736 | 0.00 | 0.00 |
| ATOM | 6077 | HB   | VAL | X | 404 | 47.835 | 28.933 | 52.551 | 0.00 | 0.00 |
| ATOM | 6078 | CG1  | VAL | X | 404 | 46.612 | 27.514 | 51.501 | 0.00 | 0.00 |
| ATOM | 6079 | HG11 | VAL | X | 404 | 47.462 | 26.881 | 51.247 | 0.00 | 0.00 |
| ATOM | 6080 | HG12 | VAL | X | 404 | 46.101 | 27.162 | 52.398 | 0.00 | 0.00 |
| ATOM | 6081 | HG13 | VAL | X | 404 | 45.912 | 27.542 | 50.665 | 0.00 | 0.00 |
| ATOM | 6082 | CG2  | VAL | X | 404 | 47.834 | 29.390 | 50.469 | 0.00 | 0.00 |
| ATOM | 6083 | HG21 | VAL | X | 404 | 47.058 | 29.530 | 49.717 | 0.00 | 0.00 |
| ATOM | 6084 | HG22 | VAL | X | 404 | 48.637 | 28.689 | 50.239 | 0.00 | 0.00 |
| ATOM | 6085 | HG23 | VAL | X | 404 | 48.342 | 30.351 | 50.548 | 0.00 | 0.00 |
| ATOM | 6086 | C    | VAL | X | 404 | 45.013 | 29.499 | 53.165 | 0.00 | 0.00 |
| ATOM | 6087 | O    | VAL | X | 404 | 44.097 | 28.675 | 52.978 | 0.00 | 0.00 |
| ATOM | 6088 | N    | CYX | X | 405 | 45.200 | 30.079 | 54.367 | 0.00 | 0.00 |
| ATOM | 6089 | H    | CYX | X | 405 | 45.933 | 30.774 | 54.402 | 0.00 | 0.00 |
| ATOM | 6090 | CA   | CYX | X | 405 | 44.229 | 30.019 | 55.455 | 0.00 | 0.00 |
| ATOM | 6091 | HA   | CYX | X | 405 | 43.985 | 28.958 | 55.518 | 0.00 | 0.00 |
| ATOM | 6092 | CB   | CYX | X | 405 | 45.066 | 30.248 | 56.727 | 0.00 | 0.00 |
| ATOM | 6093 | HB2  | CYX | X | 405 | 45.977 | 30.822 | 56.560 | 0.00 | 0.00 |
| ATOM | 6094 | HB3  | CYX | X | 405 | 44.491 | 30.784 | 57.482 | 0.00 | 0.00 |
| ATOM | 6095 | SG   | CYX | X | 405 | 45.707 | 28.689 | 57.385 | 0.00 | 0.00 |
| ATOM | 6096 | C    | CYX | X | 405 | 42.950 | 30.945 | 55.187 | 0.00 | 0.00 |
| ATOM | 6097 | O    | CYX | X | 405 | 41.941 | 30.301 | 54.953 | 0.00 | 0.00 |
| ATOM | 6098 | N    | PRO | X | 406 | 42.976 | 32.354 | 55.198 | 0.00 | 0.00 |
| ATOM | 6099 | CD   | PRO | X | 406 | 44.160 | 33.165 | 55.463 | 0.00 | 0.00 |
| ATOM | 6100 | HD2  | PRO | X | 406 | 44.844 | 32.960 | 54.640 | 0.00 | 0.00 |
| ATOM | 6101 | HD3  | PRO | X | 406 | 44.704 | 32.886 | 56.365 | 0.00 | 0.00 |
| ATOM | 6102 | CG   | PRO | X | 406 | 43.683 | 34.613 | 55.314 | 0.00 | 0.00 |
| ATOM | 6103 | HG2  | PRO | X | 406 | 44.470 | 35.225 | 54.873 | 0.00 | 0.00 |
| ATOM | 6104 | HG3  | PRO | X | 406 | 43.344 | 35.153 | 56.199 | 0.00 | 0.00 |
| ATOM | 6105 | CB   | PRO | X | 406 | 42.430 | 34.531 | 54.463 | 0.00 | 0.00 |
| ATOM | 6106 | HB2  | PRO | X | 406 | 42.594 | 34.768 | 53.412 | 0.00 | 0.00 |
| ATOM | 6107 | HB3  | PRO | X | 406 | 41.893 | 35.401 | 54.842 | 0.00 | 0.00 |
| ATOM | 6108 | CA   | PRO | X | 406 | 41.902 | 33.181 | 54.815 | 0.00 | 0.00 |
| ATOM | 6109 | HA   | PRO | X | 406 | 41.326 | 33.220 | 55.740 | 0.00 | 0.00 |
| ATOM | 6110 | C    | PRO | X | 406 | 40.923 | 32.597 | 53.846 | 0.00 | 0.00 |
| ATOM | 6111 | O    | PRO | X | 406 | 39.706 | 32.458 | 54.159 | 0.00 | 0.00 |
| ATOM | 6112 | N    | VAL | X | 407 | 41.270 | 32.197 | 52.587 | 0.00 | 0.00 |
| ATOM | 6113 | H    | VAL | X | 407 | 42.275 | 32.214 | 52.490 | 0.00 | 0.00 |
| ATOM | 6114 | CA   | VAL | X | 407 | 40.416 | 31.686 | 51.489 | 0.00 | 0.00 |
| ATOM | 6115 | HA   | VAL | X | 407 | 39.526 | 32.315 | 51.463 | 0.00 | 0.00 |
| ATOM | 6116 | CB   | VAL | X | 407 | 41.157 | 31.626 | 50.141 | 0.00 | 0.00 |
| ATOM | 6117 | HB   | VAL | X | 407 | 41.911 | 32.401 | 50.005 | 0.00 | 0.00 |
| ATOM | 6118 | CG1  | VAL | X | 407 | 41.981 | 30.290 | 49.842 | 0.00 | 0.00 |
| ATOM | 6119 | HG11 | VAL | X | 407 | 42.721 | 30.076 | 50.614 | 0.00 | 0.00 |
| ATOM | 6120 | HG12 | VAL | X | 407 | 41.326 | 29.419 | 49.835 | 0.00 | 0.00 |
| ATOM | 6121 | HG13 | VAL | X | 407 | 42.567 | 30.508 | 48.950 | 0.00 | 0.00 |
| ATOM | 6122 | CG2  | VAL | X | 407 | 40.141 | 31.930 | 48.943 | 0.00 | 0.00 |
| ATOM | 6123 | HG21 | VAL | X | 407 | 39.181 | 31.474 | 49.186 | 0.00 | 0.00 |
| ATOM | 6124 | HG22 | VAL | X | 407 | 40.397 | 31.602 | 47.936 | 0.00 | 0.00 |
| ATOM | 6125 | HG23 | VAL | X | 407 | 40.016 | 33.010 | 48.866 | 0.00 | 0.00 |
| ATOM | 6126 | C    | VAL | X | 407 | 39.768 | 30.300 | 51.866 | 0.00 | 0.00 |
| ATOM | 6127 | O    | VAL | X | 407 | 38.741 | 30.005 | 51.271 | 0.00 | 0.00 |
| ATOM | 6128 | N    | ALA | X | 408 | 40.334 | 29.514 | 52.783 | 0.00 | 0.00 |
| ATOM | 6129 | H    | ALA | X | 408 | 41.178 | 29.864 | 53.212 | 0.00 | 0.00 |
| ATOM | 6130 | CA   | ALA | X | 408 | 39.745 | 28.288 | 53.341 | 0.00 | 0.00 |
| ATOM | 6131 | HA   | ALA | X | 408 | 39.276 | 27.706 | 52.548 | 0.00 | 0.00 |
| ATOM | 6132 | CB   | ALA | X | 408 | 40.919 | 27.479 | 53.993 | 0.00 | 0.00 |
| ATOM | 6133 | HB1  | ALA | X | 408 | 40.592 | 26.451 | 54.148 | 0.00 | 0.00 |
| ATOM | 6134 | HB2  | ALA | X | 408 | 41.203 | 27.834 | 54.984 | 0.00 | 0.00 |
| ATOM | 6135 | HB3  | ALA | X | 408 | 41.836 | 27.455 | 53.403 | 0.00 | 0.00 |

|      |      |      |     |   |     |        |        |        |      |      |
|------|------|------|-----|---|-----|--------|--------|--------|------|------|
| ATOM | 6136 | C    | ALA | X | 408 | 38.676 | 28.518 | 54.419 | 0.00 | 0.00 |
| ATOM | 6137 | O    | ALA | X | 408 | 37.636 | 27.894 | 54.535 | 0.00 | 0.00 |
| ATOM | 6138 | N    | GLN | X | 409 | 39.024 | 29.595 | 55.172 | 0.00 | 0.00 |
| ATOM | 6139 | H    | GLN | X | 409 | 39.861 | 30.082 | 54.886 | 0.00 | 0.00 |
| ATOM | 6140 | CA   | GLN | X | 409 | 38.102 | 30.248 | 56.183 | 0.00 | 0.00 |
| ATOM | 6141 | HA   | GLN | X | 409 | 37.517 | 29.474 | 56.679 | 0.00 | 0.00 |
| ATOM | 6142 | CB   | GLN | X | 409 | 38.865 | 31.087 | 57.188 | 0.00 | 0.00 |
| ATOM | 6143 | HB2  | GLN | X | 409 | 39.396 | 31.830 | 56.593 | 0.00 | 0.00 |
| ATOM | 6144 | HB3  | GLN | X | 409 | 38.109 | 31.588 | 57.793 | 0.00 | 0.00 |
| ATOM | 6145 | CG   | GLN | X | 409 | 39.834 | 30.163 | 57.983 | 0.00 | 0.00 |
| ATOM | 6146 | HG2  | GLN | X | 409 | 39.284 | 29.434 | 58.579 | 0.00 | 0.00 |
| ATOM | 6147 | HG3  | GLN | X | 409 | 40.517 | 29.672 | 57.290 | 0.00 | 0.00 |
| ATOM | 6148 | CD   | GLN | X | 409 | 40.711 | 31.003 | 58.956 | 0.00 | 0.00 |
| ATOM | 6149 | OE1  | GLN | X | 409 | 41.450 | 31.861 | 58.525 | 0.00 | 0.00 |
| ATOM | 6150 | NE2  | GLN | X | 409 | 40.635 | 30.802 | 60.225 | 0.00 | 0.00 |
| ATOM | 6151 | HE21 | GLN | X | 409 | 41.375 | 31.170 | 60.806 | 0.00 | 0.00 |
| ATOM | 6152 | HE22 | GLN | X | 409 | 39.878 | 30.266 | 60.626 | 0.00 | 0.00 |
| ATOM | 6153 | C    | GLN | X | 409 | 36.979 | 31.021 | 55.580 | 0.00 | 0.00 |
| ATOM | 6154 | O    | GLN | X | 409 | 35.845 | 31.049 | 56.060 | 0.00 | 0.00 |
| ATOM | 6155 | N    | LEU | X | 410 | 37.242 | 31.537 | 54.301 | 0.00 | 0.00 |
| ATOM | 6156 | H    | LEU | X | 410 | 38.196 | 31.607 | 53.979 | 0.00 | 0.00 |
| ATOM | 6157 | CA   | LEU | X | 410 | 36.245 | 32.211 | 53.518 | 0.00 | 0.00 |
| ATOM | 6158 | HA   | LEU | X | 410 | 35.576 | 32.825 | 54.122 | 0.00 | 0.00 |
| ATOM | 6159 | CB   | LEU | X | 410 | 36.875 | 33.087 | 52.435 | 0.00 | 0.00 |
| ATOM | 6160 | HB2  | LEU | X | 410 | 37.446 | 33.805 | 53.024 | 0.00 | 0.00 |
| ATOM | 6161 | HB3  | LEU | X | 410 | 37.568 | 32.532 | 51.803 | 0.00 | 0.00 |
| ATOM | 6162 | CG   | LEU | X | 410 | 35.950 | 33.764 | 51.403 | 0.00 | 0.00 |
| ATOM | 6163 | HG   | LEU | X | 410 | 35.566 | 33.072 | 50.653 | 0.00 | 0.00 |
| ATOM | 6164 | CD1  | LEU | X | 410 | 34.756 | 34.474 | 51.975 | 0.00 | 0.00 |
| ATOM | 6165 | HD11 | LEU | X | 410 | 34.130 | 34.820 | 51.153 | 0.00 | 0.00 |
| ATOM | 6166 | HD12 | LEU | X | 410 | 35.111 | 35.226 | 52.679 | 0.00 | 0.00 |
| ATOM | 6167 | HD13 | LEU | X | 410 | 34.282 | 33.759 | 52.647 | 0.00 | 0.00 |
| ATOM | 6168 | CD2  | LEU | X | 410 | 36.807 | 34.835 | 50.689 | 0.00 | 0.00 |
| ATOM | 6169 | HD21 | LEU | X | 410 | 37.342 | 35.455 | 51.408 | 0.00 | 0.00 |
| ATOM | 6170 | HD22 | LEU | X | 410 | 37.447 | 34.360 | 49.945 | 0.00 | 0.00 |
| ATOM | 6171 | HD23 | LEU | X | 410 | 36.105 | 35.554 | 50.266 | 0.00 | 0.00 |
| ATOM | 6172 | C    | LEU | X | 410 | 35.361 | 31.134 | 52.959 | 0.00 | 0.00 |
| ATOM | 6173 | O    | LEU | X | 410 | 34.151 | 31.232 | 53.000 | 0.00 | 0.00 |
| ATOM | 6174 | N    | ALA | X | 411 | 35.941 | 30.173 | 52.311 | 0.00 | 0.00 |
| ATOM | 6175 | H    | ALA | X | 411 | 36.940 | 30.264 | 52.191 | 0.00 | 0.00 |
| ATOM | 6176 | CA   | ALA | X | 411 | 35.146 | 28.992 | 51.768 | 0.00 | 0.00 |
| ATOM | 6177 | HA   | ALA | X | 411 | 34.419 | 29.377 | 51.053 | 0.00 | 0.00 |
| ATOM | 6178 | CB   | ALA | X | 411 | 36.107 | 28.023 | 51.022 | 0.00 | 0.00 |
| ATOM | 6179 | HB1  | ALA | X | 411 | 36.733 | 27.424 | 51.683 | 0.00 | 0.00 |
| ATOM | 6180 | HB2  | ALA | X | 411 | 36.684 | 28.649 | 50.342 | 0.00 | 0.00 |
| ATOM | 6181 | HB3  | ALA | X | 411 | 35.514 | 27.356 | 50.396 | 0.00 | 0.00 |
| ATOM | 6182 | C    | ALA | X | 411 | 34.260 | 28.317 | 52.825 | 0.00 | 0.00 |
| ATOM | 6183 | O    | ALA | X | 411 | 33.048 | 28.139 | 52.639 | 0.00 | 0.00 |
| ATOM | 6184 | N    | GLY | X | 412 | 34.877 | 28.072 | 54.027 | 0.00 | 0.00 |
| ATOM | 6185 | H    | GLY | X | 412 | 35.859 | 28.276 | 54.145 | 0.00 | 0.00 |
| ATOM | 6186 | CA   | GLY | X | 412 | 34.258 | 27.593 | 55.169 | 0.00 | 0.00 |
| ATOM | 6187 | HA2  | GLY | X | 412 | 33.743 | 26.671 | 54.900 | 0.00 | 0.00 |
| ATOM | 6188 | HA3  | GLY | X | 412 | 34.928 | 27.433 | 56.014 | 0.00 | 0.00 |
| ATOM | 6189 | C    | GLY | X | 412 | 33.030 | 28.410 | 55.659 | 0.00 | 0.00 |
| ATOM | 6190 | O    | GLY | X | 412 | 31.926 | 27.933 | 55.839 | 0.00 | 0.00 |
| ATOM | 6191 | N    | ARG | X | 413 | 33.235 | 29.689 | 55.966 | 0.00 | 0.00 |
| ATOM | 6192 | H    | ARG | X | 413 | 34.188 | 30.002 | 55.848 | 0.00 | 0.00 |
| ATOM | 6193 | CA   | ARG | X | 413 | 32.144 | 30.652 | 56.205 | 0.00 | 0.00 |
| ATOM | 6194 | HA   | ARG | X | 413 | 31.756 | 30.300 | 57.161 | 0.00 | 0.00 |
| ATOM | 6195 | CB   | ARG | X | 413 | 32.741 | 32.008 | 56.460 | 0.00 | 0.00 |
| ATOM | 6196 | HB2  | ARG | X | 413 | 33.367 | 32.027 | 57.352 | 0.00 | 0.00 |
| ATOM | 6197 | HB3  | ARG | X | 413 | 33.408 | 32.128 | 55.607 | 0.00 | 0.00 |
| ATOM | 6198 | CG   | ARG | X | 413 | 31.706 | 33.175 | 56.595 | 0.00 | 0.00 |
| ATOM | 6199 | HG2  | ARG | X | 413 | 32.347 | 34.024 | 56.831 | 0.00 | 0.00 |
| ATOM | 6200 | HG3  | ARG | X | 413 | 31.067 | 33.367 | 55.733 | 0.00 | 0.00 |
| ATOM | 6201 | CD   | ARG | X | 413 | 30.786 | 32.947 | 57.800 | 0.00 | 0.00 |
| ATOM | 6202 | HD2  | ARG | X | 413 | 30.288 | 31.981 | 57.723 | 0.00 | 0.00 |

|      |      |      |     |   |     |        |        |        |      |      |
|------|------|------|-----|---|-----|--------|--------|--------|------|------|
| ATOM | 6203 | HD3  | ARG | X | 413 | 31.299 | 32.853 | 58.758 | 0.00 | 0.00 |
| ATOM | 6204 | NE   | ARG | X | 413 | 29.839 | 34.031 | 57.944 | 0.00 | 0.00 |
| ATOM | 6205 | HE   | ARG | X | 413 | 30.009 | 34.845 | 57.371 | 0.00 | 0.00 |
| ATOM | 6206 | CZ   | ARG | X | 413 | 28.794 | 33.997 | 58.789 | 0.00 | 0.00 |
| ATOM | 6207 | NH1  | ARG | X | 413 | 28.849 | 33.152 | 59.743 | 0.00 | 0.00 |
| ATOM | 6208 | HH11 | ARG | X | 413 | 29.602 | 32.481 | 59.803 | 0.00 | 0.00 |
| ATOM | 6209 | HH12 | ARG | X | 413 | 28.105 | 33.209 | 60.424 | 0.00 | 0.00 |
| ATOM | 6210 | NH2  | ARG | X | 413 | 27.765 | 34.798 | 58.621 | 0.00 | 0.00 |
| ATOM | 6211 | HH21 | ARG | X | 413 | 27.818 | 35.559 | 57.959 | 0.00 | 0.00 |
| ATOM | 6212 | HH22 | ARG | X | 413 | 27.040 | 34.706 | 59.318 | 0.00 | 0.00 |
| ATOM | 6213 | C    | ARG | X | 413 | 31.062 | 30.656 | 55.134 | 0.00 | 0.00 |
| ATOM | 6214 | O    | ARG | X | 413 | 29.851 | 30.546 | 55.500 | 0.00 | 0.00 |
| ATOM | 6215 | N    | LEU | X | 414 | 31.360 | 30.614 | 53.837 | 0.00 | 0.00 |
| ATOM | 6216 | H    | LEU | X | 414 | 32.340 | 30.657 | 53.596 | 0.00 | 0.00 |
| ATOM | 6217 | CA   | LEU | X | 414 | 30.333 | 30.807 | 52.787 | 0.00 | 0.00 |
| ATOM | 6218 | HA   | LEU | X | 414 | 29.732 | 31.680 | 53.041 | 0.00 | 0.00 |
| ATOM | 6219 | CB   | LEU | X | 414 | 31.042 | 31.096 | 51.429 | 0.00 | 0.00 |
| ATOM | 6220 | HB2  | LEU | X | 414 | 31.815 | 30.338 | 51.302 | 0.00 | 0.00 |
| ATOM | 6221 | HB3  | LEU | X | 414 | 30.404 | 30.955 | 50.557 | 0.00 | 0.00 |
| ATOM | 6222 | CG   | LEU | X | 414 | 31.780 | 32.419 | 51.157 | 0.00 | 0.00 |
| ATOM | 6223 | HG   | LEU | X | 414 | 32.424 | 32.642 | 52.008 | 0.00 | 0.00 |
| ATOM | 6224 | CD1  | LEU | X | 414 | 32.582 | 32.317 | 49.821 | 0.00 | 0.00 |
| ATOM | 6225 | HD11 | LEU | X | 414 | 33.301 | 31.501 | 49.896 | 0.00 | 0.00 |
| ATOM | 6226 | HD12 | LEU | X | 414 | 33.154 | 33.210 | 49.568 | 0.00 | 0.00 |
| ATOM | 6227 | HD13 | LEU | X | 414 | 31.850 | 32.180 | 49.025 | 0.00 | 0.00 |
| ATOM | 6228 | CD2  | LEU | X | 414 | 30.780 | 33.510 | 50.802 | 0.00 | 0.00 |
| ATOM | 6229 | HD21 | LEU | X | 414 | 29.966 | 33.162 | 50.165 | 0.00 | 0.00 |
| ATOM | 6230 | HD22 | LEU | X | 414 | 30.380 | 33.819 | 51.768 | 0.00 | 0.00 |
| ATOM | 6231 | HD23 | LEU | X | 414 | 31.300 | 34.331 | 50.309 | 0.00 | 0.00 |
| ATOM | 6232 | C    | LEU | X | 414 | 29.488 | 29.508 | 52.702 | 0.00 | 0.00 |
| ATOM | 6233 | O    | LEU | X | 414 | 28.275 | 29.651 | 52.743 | 0.00 | 0.00 |
| ATOM | 6234 | N    | ALA | X | 415 | 30.118 | 28.326 | 52.772 | 0.00 | 0.00 |
| ATOM | 6235 | H    | ALA | X | 415 | 31.125 | 28.312 | 52.694 | 0.00 | 0.00 |
| ATOM | 6236 | CA   | ALA | X | 415 | 29.412 | 27.051 | 52.620 | 0.00 | 0.00 |
| ATOM | 6237 | HA   | ALA | X | 415 | 28.614 | 27.146 | 51.883 | 0.00 | 0.00 |
| ATOM | 6238 | CB   | ALA | X | 415 | 30.374 | 25.921 | 52.329 | 0.00 | 0.00 |
| ATOM | 6239 | HB1  | ALA | X | 415 | 30.858 | 26.117 | 51.372 | 0.00 | 0.00 |
| ATOM | 6240 | HB2  | ALA | X | 415 | 29.927 | 24.927 | 52.316 | 0.00 | 0.00 |
| ATOM | 6241 | HB3  | ALA | X | 415 | 31.151 | 25.975 | 53.091 | 0.00 | 0.00 |
| ATOM | 6242 | C    | ALA | X | 415 | 28.546 | 26.857 | 53.900 | 0.00 | 0.00 |
| ATOM | 6243 | O    | ALA | X | 415 | 27.494 | 26.201 | 53.814 | 0.00 | 0.00 |
| ATOM | 6244 | N    | ALA | X | 416 | 28.995 | 27.349 | 55.094 | 0.00 | 0.00 |
| ATOM | 6245 | H    | ALA | X | 416 | 29.879 | 27.837 | 55.073 | 0.00 | 0.00 |
| ATOM | 6246 | CA   | ALA | X | 416 | 28.305 | 27.218 | 56.376 | 0.00 | 0.00 |
| ATOM | 6247 | HA   | ALA | X | 416 | 27.983 | 26.185 | 56.507 | 0.00 | 0.00 |
| ATOM | 6248 | CB   | ALA | X | 416 | 29.177 | 27.748 | 57.571 | 0.00 | 0.00 |
| ATOM | 6249 | HB1  | ALA | X | 416 | 30.026 | 27.093 | 57.767 | 0.00 | 0.00 |
| ATOM | 6250 | HB2  | ALA | X | 416 | 28.653 | 27.613 | 58.518 | 0.00 | 0.00 |
| ATOM | 6251 | HB3  | ALA | X | 416 | 29.515 | 28.777 | 57.452 | 0.00 | 0.00 |
| ATOM | 6252 | C    | ALA | X | 416 | 27.016 | 28.106 | 56.362 | 0.00 | 0.00 |
| ATOM | 6253 | O    | ALA | X | 416 | 26.000 | 27.643 | 56.883 | 0.00 | 0.00 |
| ATOM | 6254 | N    | GLN | X | 417 | 27.057 | 29.222 | 55.728 | 0.00 | 0.00 |
| ATOM | 6255 | H    | GLN | X | 417 | 27.903 | 29.432 | 55.218 | 0.00 | 0.00 |
| ATOM | 6256 | CA   | GLN | X | 417 | 25.959 | 30.110 | 55.309 | 0.00 | 0.00 |
| ATOM | 6257 | HA   | GLN | X | 417 | 25.376 | 30.193 | 56.226 | 0.00 | 0.00 |
| ATOM | 6258 | CB   | GLN | X | 417 | 26.455 | 31.581 | 55.086 | 0.00 | 0.00 |
| ATOM | 6259 | HB2  | GLN | X | 417 | 27.248 | 31.589 | 54.338 | 0.00 | 0.00 |
| ATOM | 6260 | HB3  | GLN | X | 417 | 25.630 | 32.126 | 54.626 | 0.00 | 0.00 |
| ATOM | 6261 | CG   | GLN | X | 417 | 26.896 | 32.261 | 56.361 | 0.00 | 0.00 |
| ATOM | 6262 | HG2  | GLN | X | 417 | 27.772 | 31.847 | 56.860 | 0.00 | 0.00 |
| ATOM | 6263 | HG3  | GLN | X | 417 | 27.080 | 33.279 | 56.019 | 0.00 | 0.00 |
| ATOM | 6264 | CD   | GLN | X | 417 | 25.743 | 32.144 | 57.438 | 0.00 | 0.00 |
| ATOM | 6265 | OE1  | GLN | X | 417 | 25.869 | 31.632 | 58.491 | 0.00 | 0.00 |
| ATOM | 6266 | NE2  | GLN | X | 417 | 24.551 | 32.643 | 57.153 | 0.00 | 0.00 |
| ATOM | 6267 | HE21 | GLN | X | 417 | 23.829 | 32.611 | 57.859 | 0.00 | 0.00 |
| ATOM | 6268 | HE22 | GLN | X | 417 | 24.277 | 33.099 | 56.294 | 0.00 | 0.00 |
| ATOM | 6269 | C    | GLN | X | 417 | 25.085 | 29.576 | 54.214 | 0.00 | 0.00 |

|      |      |      |     |   |     |        |        |        |      |      |
|------|------|------|-----|---|-----|--------|--------|--------|------|------|
| ATOM | 6270 | O    | GLN | X | 417 | 23.900 | 29.872 | 54.221 | 0.00 | 0.00 |
| ATOM | 6271 | N    | GLY | X | 418 | 25.519 | 28.648 | 53.353 | 0.00 | 0.00 |
| ATOM | 6272 | H    | GLY | X | 418 | 26.496 | 28.407 | 53.435 | 0.00 | 0.00 |
| ATOM | 6273 | CA   | GLY | X | 418 | 24.743 | 28.116 | 52.228 | 0.00 | 0.00 |
| ATOM | 6274 | HA2  | GLY | X | 418 | 25.028 | 27.066 | 52.165 | 0.00 | 0.00 |
| ATOM | 6275 | HA3  | GLY | X | 418 | 23.688 | 28.138 | 52.503 | 0.00 | 0.00 |
| ATOM | 6276 | C    | GLY | X | 418 | 25.004 | 28.632 | 50.818 | 0.00 | 0.00 |
| ATOM | 6277 | O    | GLY | X | 418 | 24.140 | 28.487 | 49.947 | 0.00 | 0.00 |
| ATOM | 6278 | N    | ALA | X | 419 | 26.027 | 29.454 | 50.633 | 0.00 | 0.00 |
| ATOM | 6279 | H    | ALA | X | 419 | 26.691 | 29.559 | 51.386 | 0.00 | 0.00 |
| ATOM | 6280 | CA   | ALA | X | 419 | 26.514 | 29.827 | 49.311 | 0.00 | 0.00 |
| ATOM | 6281 | HA   | ALA | X | 419 | 25.740 | 30.322 | 48.724 | 0.00 | 0.00 |
| ATOM | 6282 | CB   | ALA | X | 419 | 27.652 | 30.795 | 49.487 | 0.00 | 0.00 |
| ATOM | 6283 | HB1  | ALA | X | 419 | 28.536 | 30.350 | 49.944 | 0.00 | 0.00 |
| ATOM | 6284 | HB2  | ALA | X | 419 | 27.325 | 31.609 | 50.133 | 0.00 | 0.00 |
| ATOM | 6285 | HB3  | ALA | X | 419 | 27.958 | 31.234 | 48.538 | 0.00 | 0.00 |
| ATOM | 6286 | C    | ALA | X | 419 | 27.026 | 28.600 | 48.552 | 0.00 | 0.00 |
| ATOM | 6287 | O    | ALA | X | 419 | 27.513 | 27.680 | 49.182 | 0.00 | 0.00 |
| ATOM | 6288 | N    | ARG | X | 420 | 26.839 | 28.557 | 47.254 | 0.00 | 0.00 |
| ATOM | 6289 | H    | ARG | X | 420 | 26.333 | 29.329 | 46.843 | 0.00 | 0.00 |
| ATOM | 6290 | CA   | ARG | X | 420 | 27.368 | 27.538 | 46.364 | 0.00 | 0.00 |
| ATOM | 6291 | HA   | ARG | X | 420 | 27.307 | 26.546 | 46.812 | 0.00 | 0.00 |
| ATOM | 6292 | CB   | ARG | X | 420 | 26.480 | 27.621 | 45.102 | 0.00 | 0.00 |
| ATOM | 6293 | HB2  | ARG | X | 420 | 25.460 | 27.356 | 45.383 | 0.00 | 0.00 |
| ATOM | 6294 | HB3  | ARG | X | 420 | 26.430 | 28.610 | 44.647 | 0.00 | 0.00 |
| ATOM | 6295 | CG   | ARG | X | 420 | 26.844 | 26.465 | 44.105 | 0.00 | 0.00 |
| ATOM | 6296 | HG2  | ARG | X | 420 | 26.150 | 26.550 | 43.269 | 0.00 | 0.00 |
| ATOM | 6297 | HG3  | ARG | X | 420 | 27.905 | 26.572 | 43.880 | 0.00 | 0.00 |
| ATOM | 6298 | CD   | ARG | X | 420 | 26.632 | 25.064 | 44.711 | 0.00 | 0.00 |
| ATOM | 6299 | HD2  | ARG | X | 420 | 27.606 | 24.699 | 45.036 | 0.00 | 0.00 |
| ATOM | 6300 | HD3  | ARG | X | 420 | 25.933 | 24.983 | 45.545 | 0.00 | 0.00 |
| ATOM | 6301 | NE   | ARG | X | 420 | 26.130 | 24.114 | 43.652 | 0.00 | 0.00 |
| ATOM | 6302 | HE   | ARG | X | 420 | 26.075 | 24.501 | 42.721 | 0.00 | 0.00 |
| ATOM | 6303 | CZ   | ARG | X | 420 | 25.811 | 22.840 | 43.881 | 0.00 | 0.00 |
| ATOM | 6304 | NH1  | ARG | X | 420 | 25.748 | 22.263 | 45.057 | 0.00 | 0.00 |
| ATOM | 6305 | HH11 | ARG | X | 420 | 25.591 | 22.827 | 45.880 | 0.00 | 0.00 |
| ATOM | 6306 | HH12 | ARG | X | 420 | 25.520 | 21.281 | 45.121 | 0.00 | 0.00 |
| ATOM | 6307 | NH2  | ARG | X | 420 | 25.474 | 22.165 | 42.771 | 0.00 | 0.00 |
| ATOM | 6308 | HH21 | ARG | X | 420 | 25.367 | 22.624 | 41.878 | 0.00 | 0.00 |
| ATOM | 6309 | HH22 | ARG | X | 420 | 25.391 | 21.173 | 42.945 | 0.00 | 0.00 |
| ATOM | 6310 | C    | ARG | X | 420 | 28.813 | 27.757 | 45.972 | 0.00 | 0.00 |
| ATOM | 6311 | O    | ARG | X | 420 | 29.035 | 28.624 | 45.146 | 0.00 | 0.00 |
| ATOM | 6312 | N    | VAL | X | 421 | 29.710 | 27.111 | 46.724 | 0.00 | 0.00 |
| ATOM | 6313 | H    | VAL | X | 421 | 29.298 | 26.463 | 47.380 | 0.00 | 0.00 |
| ATOM | 6314 | CA   | VAL | X | 421 | 31.112 | 27.335 | 46.740 | 0.00 | 0.00 |
| ATOM | 6315 | HA   | VAL | X | 421 | 31.402 | 28.296 | 46.316 | 0.00 | 0.00 |
| ATOM | 6316 | CB   | VAL | X | 421 | 31.589 | 27.373 | 48.131 | 0.00 | 0.00 |
| ATOM | 6317 | HB   | VAL | X | 421 | 31.471 | 26.393 | 48.595 | 0.00 | 0.00 |
| ATOM | 6318 | CG1  | VAL | X | 421 | 33.136 | 27.763 | 48.239 | 0.00 | 0.00 |
| ATOM | 6319 | HG11 | VAL | X | 421 | 33.429 | 27.942 | 49.273 | 0.00 | 0.00 |
| ATOM | 6320 | HG12 | VAL | X | 421 | 33.670 | 26.915 | 47.811 | 0.00 | 0.00 |
| ATOM | 6321 | HG13 | VAL | X | 421 | 33.267 | 28.662 | 47.636 | 0.00 | 0.00 |
| ATOM | 6322 | CG2  | VAL | X | 421 | 30.820 | 28.347 | 48.973 | 0.00 | 0.00 |
| ATOM | 6323 | HG21 | VAL | X | 421 | 29.741 | 28.208 | 49.047 | 0.00 | 0.00 |
| ATOM | 6324 | HG22 | VAL | X | 421 | 30.975 | 29.317 | 48.501 | 0.00 | 0.00 |
| ATOM | 6325 | HG23 | VAL | X | 421 | 31.306 | 28.250 | 49.944 | 0.00 | 0.00 |
| ATOM | 6326 | C    | VAL | X | 421 | 31.836 | 26.166 | 45.967 | 0.00 | 0.00 |
| ATOM | 6327 | O    | VAL | X | 421 | 31.549 | 25.037 | 46.215 | 0.00 | 0.00 |
| ATOM | 6328 | N    | TYR | X | 422 | 32.831 | 26.519 | 45.096 | 0.00 | 0.00 |
| ATOM | 6329 | H    | TYR | X | 422 | 33.003 | 27.509 | 44.988 | 0.00 | 0.00 |
| ATOM | 6330 | CA   | TYR | X | 422 | 33.722 | 25.560 | 44.335 | 0.00 | 0.00 |
| ATOM | 6331 | HA   | TYR | X | 422 | 33.555 | 24.545 | 44.697 | 0.00 | 0.00 |
| ATOM | 6332 | CB   | TYR | X | 422 | 33.348 | 25.576 | 42.808 | 0.00 | 0.00 |
| ATOM | 6333 | HB2  | TYR | X | 422 | 33.460 | 26.601 | 42.456 | 0.00 | 0.00 |
| ATOM | 6334 | HB3  | TYR | X | 422 | 34.173 | 25.061 | 42.316 | 0.00 | 0.00 |
| ATOM | 6335 | CG   | TYR | X | 422 | 32.061 | 24.930 | 42.416 | 0.00 | 0.00 |
| ATOM | 6336 | CD1  | TYR | X | 422 | 32.006 | 23.560 | 42.257 | 0.00 | 0.00 |

|      |      |      |     |   |     |        |        |        |      |      |
|------|------|------|-----|---|-----|--------|--------|--------|------|------|
| ATOM | 6337 | HD1  | TYR | X | 422 | 32.872 | 22.919 | 42.331 | 0.00 | 0.00 |
| ATOM | 6338 | CE1  | TYR | X | 422 | 30.814 | 22.869 | 42.040 | 0.00 | 0.00 |
| ATOM | 6339 | HE1  | TYR | X | 422 | 30.894 | 21.798 | 41.921 | 0.00 | 0.00 |
| ATOM | 6340 | CZ   | TYR | X | 422 | 29.646 | 23.639 | 41.897 | 0.00 | 0.00 |
| ATOM | 6341 | OH   | TYR | X | 422 | 28.432 | 23.032 | 41.741 | 0.00 | 0.00 |
| ATOM | 6342 | HH   | TYR | X | 422 | 28.510 | 22.147 | 41.376 | 0.00 | 0.00 |
| ATOM | 6343 | CE2  | TYR | X | 422 | 29.675 | 25.037 | 42.104 | 0.00 | 0.00 |
| ATOM | 6344 | HE2  | TYR | X | 422 | 28.717 | 25.533 | 42.161 | 0.00 | 0.00 |
| ATOM | 6345 | CD2  | TYR | X | 422 | 30.882 | 25.709 | 42.313 | 0.00 | 0.00 |
| ATOM | 6346 | HD2  | TYR | X | 422 | 30.950 | 26.787 | 42.320 | 0.00 | 0.00 |
| ATOM | 6347 | C    | TYR | X | 422 | 35.199 | 25.957 | 44.550 | 0.00 | 0.00 |
| ATOM | 6348 | O    | TYR | X | 422 | 35.597 | 27.005 | 44.068 | 0.00 | 0.00 |
| ATOM | 6349 | N    | ALA | X | 423 | 35.908 | 25.022 | 45.173 | 0.00 | 0.00 |
| ATOM | 6350 | H    | ALA | X | 423 | 35.414 | 24.181 | 45.434 | 0.00 | 0.00 |
| ATOM | 6351 | CA   | ALA | X | 423 | 37.320 | 25.197 | 45.523 | 0.00 | 0.00 |
| ATOM | 6352 | HA   | ALA | X | 423 | 37.589 | 26.243 | 45.374 | 0.00 | 0.00 |
| ATOM | 6353 | CB   | ALA | X | 423 | 37.487 | 25.002 | 47.086 | 0.00 | 0.00 |
| ATOM | 6354 | HB1  | ALA | X | 423 | 37.246 | 24.003 | 47.450 | 0.00 | 0.00 |
| ATOM | 6355 | HB2  | ALA | X | 423 | 36.818 | 25.679 | 47.617 | 0.00 | 0.00 |
| ATOM | 6356 | HB3  | ALA | X | 423 | 38.494 | 25.299 | 47.377 | 0.00 | 0.00 |
| ATOM | 6357 | C    | ALA | X | 423 | 38.454 | 24.392 | 44.835 | 0.00 | 0.00 |
| ATOM | 6358 | O    | ALA | X | 423 | 38.294 | 23.215 | 44.512 | 0.00 | 0.00 |
| ATOM | 6359 | N    | TYR | X | 424 | 39.545 | 25.059 | 44.529 | 0.00 | 0.00 |
| ATOM | 6360 | H    | TYR | X | 424 | 39.532 | 26.067 | 44.592 | 0.00 | 0.00 |
| ATOM | 6361 | CA   | TYR | X | 424 | 40.671 | 24.435 | 43.807 | 0.00 | 0.00 |
| ATOM | 6362 | HA   | TYR | X | 424 | 40.538 | 23.353 | 43.811 | 0.00 | 0.00 |
| ATOM | 6363 | CB   | TYR | X | 424 | 40.555 | 24.737 | 42.233 | 0.00 | 0.00 |
| ATOM | 6364 | HB2  | TYR | X | 424 | 41.059 | 23.941 | 41.684 | 0.00 | 0.00 |
| ATOM | 6365 | HB3  | TYR | X | 424 | 39.541 | 24.538 | 41.885 | 0.00 | 0.00 |
| ATOM | 6366 | CG   | TYR | X | 424 | 41.074 | 26.098 | 41.733 | 0.00 | 0.00 |
| ATOM | 6367 | CD1  | TYR | X | 424 | 42.435 | 26.305 | 41.445 | 0.00 | 0.00 |
| ATOM | 6368 | HD1  | TYR | X | 424 | 43.132 | 25.480 | 41.423 | 0.00 | 0.00 |
| ATOM | 6369 | CE1  | TYR | X | 424 | 43.026 | 27.612 | 41.361 | 0.00 | 0.00 |
| ATOM | 6370 | HE1  | TYR | X | 424 | 44.074 | 27.862 | 41.289 | 0.00 | 0.00 |
| ATOM | 6371 | CZ   | TYR | X | 424 | 42.150 | 28.685 | 41.360 | 0.00 | 0.00 |
| ATOM | 6372 | OH   | TYR | X | 424 | 42.571 | 29.929 | 41.346 | 0.00 | 0.00 |
| ATOM | 6373 | HH   | TYR | X | 424 | 43.530 | 29.903 | 41.327 | 0.00 | 0.00 |
| ATOM | 6374 | CE2  | TYR | X | 424 | 40.688 | 28.515 | 41.475 | 0.00 | 0.00 |
| ATOM | 6375 | HE2  | TYR | X | 424 | 39.946 | 29.297 | 41.406 | 0.00 | 0.00 |
| ATOM | 6376 | CD2  | TYR | X | 424 | 40.217 | 27.238 | 41.713 | 0.00 | 0.00 |
| ATOM | 6377 | HD2  | TYR | X | 424 | 39.205 | 27.196 | 42.088 | 0.00 | 0.00 |
| ATOM | 6378 | C    | TYR | X | 424 | 42.050 | 24.852 | 44.292 | 0.00 | 0.00 |
| ATOM | 6379 | O    | TYR | X | 424 | 42.287 | 25.788 | 45.001 | 0.00 | 0.00 |
| ATOM | 6380 | N    | VAL | X | 425 | 43.031 | 24.023 | 43.945 | 0.00 | 0.00 |
| ATOM | 6381 | H    | VAL | X | 425 | 42.714 | 23.156 | 43.535 | 0.00 | 0.00 |
| ATOM | 6382 | CA   | VAL | X | 425 | 44.468 | 24.317 | 44.000 | 0.00 | 0.00 |
| ATOM | 6383 | HA   | VAL | X | 425 | 44.543 | 25.392 | 44.164 | 0.00 | 0.00 |
| ATOM | 6384 | CB   | VAL | X | 425 | 45.275 | 23.636 | 45.151 | 0.00 | 0.00 |
| ATOM | 6385 | HB   | VAL | X | 425 | 44.848 | 24.101 | 46.040 | 0.00 | 0.00 |
| ATOM | 6386 | CG1  | VAL | X | 425 | 44.892 | 22.140 | 45.254 | 0.00 | 0.00 |
| ATOM | 6387 | HG11 | VAL | X | 425 | 43.923 | 22.109 | 45.753 | 0.00 | 0.00 |
| ATOM | 6388 | HG12 | VAL | X | 425 | 44.836 | 21.716 | 44.252 | 0.00 | 0.00 |
| ATOM | 6389 | HG13 | VAL | X | 425 | 45.593 | 21.726 | 45.980 | 0.00 | 0.00 |
| ATOM | 6390 | CG2  | VAL | X | 425 | 46.778 | 23.830 | 44.947 | 0.00 | 0.00 |
| ATOM | 6391 | HG21 | VAL | X | 425 | 46.910 | 24.875 | 44.668 | 0.00 | 0.00 |
| ATOM | 6392 | HG22 | VAL | X | 425 | 47.118 | 23.261 | 44.081 | 0.00 | 0.00 |
| ATOM | 6393 | HG23 | VAL | X | 425 | 47.260 | 23.603 | 45.897 | 0.00 | 0.00 |
| ATOM | 6394 | C    | VAL | X | 425 | 44.992 | 23.966 | 42.553 | 0.00 | 0.00 |
| ATOM | 6395 | O    | VAL | X | 425 | 44.653 | 22.939 | 41.951 | 0.00 | 0.00 |
| ATOM | 6396 | N    | PHE | X | 426 | 45.795 | 24.876 | 41.991 | 0.00 | 0.00 |
| ATOM | 6397 | H    | PHE | X | 426 | 46.091 | 25.625 | 42.601 | 0.00 | 0.00 |
| ATOM | 6398 | CA   | PHE | X | 426 | 46.512 | 24.700 | 40.727 | 0.00 | 0.00 |
| ATOM | 6399 | HA   | PHE | X | 426 | 46.096 | 23.849 | 40.187 | 0.00 | 0.00 |
| ATOM | 6400 | CB   | PHE | X | 426 | 46.313 | 25.985 | 39.837 | 0.00 | 0.00 |
| ATOM | 6401 | HB2  | PHE | X | 426 | 45.237 | 25.994 | 39.664 | 0.00 | 0.00 |
| ATOM | 6402 | HB3  | PHE | X | 426 | 46.610 | 26.945 | 40.260 | 0.00 | 0.00 |
| ATOM | 6403 | CG   | PHE | X | 426 | 47.059 | 25.978 | 38.516 | 0.00 | 0.00 |

|      |      |      |     |   |     |        |        |        |      |      |
|------|------|------|-----|---|-----|--------|--------|--------|------|------|
| ATOM | 6404 | CD1  | PHE | X | 426 | 46.492 | 25.598 | 37.289 | 0.00 | 0.00 |
| ATOM | 6405 | HD1  | PHE | X | 426 | 45.463 | 25.280 | 37.211 | 0.00 | 0.00 |
| ATOM | 6406 | CE1  | PHE | X | 426 | 47.310 | 25.591 | 36.077 | 0.00 | 0.00 |
| ATOM | 6407 | HE1  | PHE | X | 426 | 46.824 | 25.398 | 35.132 | 0.00 | 0.00 |
| ATOM | 6408 | CZ   | PHE | X | 426 | 48.675 | 25.902 | 36.192 | 0.00 | 0.00 |
| ATOM | 6409 | HZ   | PHE | X | 426 | 49.348 | 25.968 | 35.350 | 0.00 | 0.00 |
| ATOM | 6410 | CE2  | PHE | X | 426 | 49.279 | 26.276 | 37.402 | 0.00 | 0.00 |
| ATOM | 6411 | HE2  | PHE | X | 426 | 50.327 | 26.526 | 37.483 | 0.00 | 0.00 |
| ATOM | 6412 | CD2  | PHE | X | 426 | 48.461 | 26.344 | 38.523 | 0.00 | 0.00 |
| ATOM | 6413 | HD2  | PHE | X | 426 | 48.890 | 26.588 | 39.484 | 0.00 | 0.00 |
| ATOM | 6414 | C    | PHE | X | 426 | 47.997 | 24.277 | 40.920 | 0.00 | 0.00 |
| ATOM | 6415 | O    | PHE | X | 426 | 48.697 | 25.032 | 41.570 | 0.00 | 0.00 |
| ATOM | 6416 | N    | GLU | X | 427 | 48.474 | 23.150 | 40.311 | 0.00 | 0.00 |
| ATOM | 6417 | H    | GLU | X | 427 | 47.773 | 22.480 | 40.030 | 0.00 | 0.00 |
| ATOM | 6418 | CA   | GLU | X | 427 | 49.755 | 22.525 | 40.734 | 0.00 | 0.00 |
| ATOM | 6419 | HA   | GLU | X | 427 | 50.189 | 23.171 | 41.496 | 0.00 | 0.00 |
| ATOM | 6420 | CB   | GLU | X | 427 | 49.578 | 21.118 | 41.357 | 0.00 | 0.00 |
| ATOM | 6421 | HB2  | GLU | X | 427 | 49.001 | 20.500 | 40.671 | 0.00 | 0.00 |
| ATOM | 6422 | HB3  | GLU | X | 427 | 50.501 | 20.561 | 41.522 | 0.00 | 0.00 |
| ATOM | 6423 | CG   | GLU | X | 427 | 48.853 | 21.212 | 42.738 | 0.00 | 0.00 |
| ATOM | 6424 | HG2  | GLU | X | 427 | 49.530 | 21.701 | 43.439 | 0.00 | 0.00 |
| ATOM | 6425 | HG3  | GLU | X | 427 | 47.890 | 21.722 | 42.689 | 0.00 | 0.00 |
| ATOM | 6426 | CD   | GLU | X | 427 | 48.636 | 19.796 | 43.238 | 0.00 | 0.00 |
| ATOM | 6427 | OE1  | GLU | X | 427 | 49.370 | 19.357 | 44.148 | 0.00 | 0.00 |
| ATOM | 6428 | OE2  | GLU | X | 427 | 47.801 | 19.066 | 42.755 | 0.00 | 0.00 |
| ATOM | 6429 | C    | GLU | X | 427 | 50.852 | 22.384 | 39.714 | 0.00 | 0.00 |
| ATOM | 6430 | O    | GLU | X | 427 | 51.958 | 21.983 | 40.091 | 0.00 | 0.00 |
| ATOM | 6431 | N    | HIE | X | 428 | 50.531 | 22.546 | 38.459 | 0.00 | 0.00 |
| ATOM | 6432 | H    | HIE | X | 428 | 49.593 | 22.898 | 38.332 | 0.00 | 0.00 |
| ATOM | 6433 | CA   | HIE | X | 428 | 51.372 | 22.288 | 37.322 | 0.00 | 0.00 |
| ATOM | 6434 | HA   | HIE | X | 428 | 52.066 | 21.493 | 37.599 | 0.00 | 0.00 |
| ATOM | 6435 | CB   | HIE | X | 428 | 50.518 | 21.910 | 36.125 | 0.00 | 0.00 |
| ATOM | 6436 | HB2  | HIE | X | 428 | 50.125 | 20.917 | 36.344 | 0.00 | 0.00 |
| ATOM | 6437 | HB3  | HIE | X | 428 | 49.760 | 22.678 | 35.977 | 0.00 | 0.00 |
| ATOM | 6438 | CG   | HIE | X | 428 | 51.334 | 21.842 | 34.819 | 0.00 | 0.00 |
| ATOM | 6439 | ND1  | HIE | X | 428 | 52.395 | 21.066 | 34.605 | 0.00 | 0.00 |
| ATOM | 6440 | CE1  | HIE | X | 428 | 52.824 | 21.179 | 33.385 | 0.00 | 0.00 |
| ATOM | 6441 | HE1  | HIE | X | 428 | 53.695 | 20.719 | 32.941 | 0.00 | 0.00 |
| ATOM | 6442 | NE2  | HIE | X | 428 | 52.201 | 22.222 | 32.787 | 0.00 | 0.00 |
| ATOM | 6443 | HE2  | HIE | X | 428 | 52.390 | 22.666 | 31.900 | 0.00 | 0.00 |
| ATOM | 6444 | CD2  | HIE | X | 428 | 51.226 | 22.633 | 33.708 | 0.00 | 0.00 |
| ATOM | 6445 | HD2  | HIE | X | 428 | 50.454 | 23.388 | 33.709 | 0.00 | 0.00 |
| ATOM | 6446 | C    | HIE | X | 428 | 52.281 | 23.451 | 37.029 | 0.00 | 0.00 |
| ATOM | 6447 | O    | HIE | X | 428 | 51.813 | 24.466 | 36.460 | 0.00 | 0.00 |
| ATOM | 6448 | N    | ARG | X | 429 | 53.593 | 23.323 | 37.290 | 0.00 | 0.00 |
| ATOM | 6449 | H    | ARG | X | 429 | 53.953 | 22.461 | 37.673 | 0.00 | 0.00 |
| ATOM | 6450 | CA   | ARG | X | 429 | 54.506 | 24.363 | 36.754 | 0.00 | 0.00 |
| ATOM | 6451 | HA   | ARG | X | 429 | 54.223 | 25.355 | 37.105 | 0.00 | 0.00 |
| ATOM | 6452 | CB   | ARG | X | 429 | 55.894 | 24.097 | 37.390 | 0.00 | 0.00 |
| ATOM | 6453 | HB2  | ARG | X | 429 | 55.689 | 23.921 | 38.446 | 0.00 | 0.00 |
| ATOM | 6454 | HB3  | ARG | X | 429 | 56.398 | 23.241 | 36.943 | 0.00 | 0.00 |
| ATOM | 6455 | CG   | ARG | X | 429 | 56.763 | 25.386 | 37.366 | 0.00 | 0.00 |
| ATOM | 6456 | HG2  | ARG | X | 429 | 56.920 | 25.741 | 36.347 | 0.00 | 0.00 |
| ATOM | 6457 | HG3  | ARG | X | 429 | 56.221 | 26.218 | 37.815 | 0.00 | 0.00 |
| ATOM | 6458 | CD   | ARG | X | 429 | 58.157 | 24.978 | 37.910 | 0.00 | 0.00 |
| ATOM | 6459 | HD2  | ARG | X | 429 | 57.941 | 24.429 | 38.827 | 0.00 | 0.00 |
| ATOM | 6460 | HD3  | ARG | X | 429 | 58.759 | 24.383 | 37.224 | 0.00 | 0.00 |
| ATOM | 6461 | NE   | ARG | X | 429 | 58.850 | 26.088 | 38.426 | 0.00 | 0.00 |
| ATOM | 6462 | HE   | ARG | X | 429 | 58.673 | 26.439 | 39.356 | 0.00 | 0.00 |
| ATOM | 6463 | CZ   | ARG | X | 429 | 59.465 | 26.977 | 37.613 | 0.00 | 0.00 |
| ATOM | 6464 | NH1  | ARG | X | 429 | 59.830 | 26.642 | 36.397 | 0.00 | 0.00 |
| ATOM | 6465 | HH11 | ARG | X | 429 | 59.559 | 25.727 | 36.066 | 0.00 | 0.00 |
| ATOM | 6466 | HH12 | ARG | X | 429 | 60.272 | 27.241 | 35.715 | 0.00 | 0.00 |
| ATOM | 6467 | NH2  | ARG | X | 429 | 59.756 | 28.111 | 38.160 | 0.00 | 0.00 |
| ATOM | 6468 | HH21 | ARG | X | 429 | 59.550 | 28.430 | 39.096 | 0.00 | 0.00 |
| ATOM | 6469 | HH22 | ARG | X | 429 | 60.415 | 28.768 | 37.767 | 0.00 | 0.00 |
| ATOM | 6470 | C    | ARG | X | 429 | 54.654 | 24.312 | 35.259 | 0.00 | 0.00 |

|      |      |      |     |   |     |        |        |        |      |      |
|------|------|------|-----|---|-----|--------|--------|--------|------|------|
| ATOM | 6471 | O    | ARG | X | 429 | 54.931 | 23.223 | 34.683 | 0.00 | 0.00 |
| ATOM | 6472 | N    | ALA | X | 430 | 54.468 | 25.464 | 34.563 | 0.00 | 0.00 |
| ATOM | 6473 | H    | ALA | X | 430 | 54.139 | 26.224 | 35.141 | 0.00 | 0.00 |
| ATOM | 6474 | CA   | ALA | X | 430 | 54.385 | 25.647 | 33.159 | 0.00 | 0.00 |
| ATOM | 6475 | HA   | ALA | X | 430 | 53.662 | 24.950 | 32.734 | 0.00 | 0.00 |
| ATOM | 6476 | CB   | ALA | X | 430 | 53.700 | 26.996 | 32.850 | 0.00 | 0.00 |
| ATOM | 6477 | HB1  | ALA | X | 430 | 53.635 | 27.015 | 31.762 | 0.00 | 0.00 |
| ATOM | 6478 | HB2  | ALA | X | 430 | 54.402 | 27.814 | 33.008 | 0.00 | 0.00 |
| ATOM | 6479 | HB3  | ALA | X | 430 | 52.703 | 27.217 | 33.231 | 0.00 | 0.00 |
| ATOM | 6480 | C    | ALA | X | 430 | 55.751 | 25.526 | 32.526 | 0.00 | 0.00 |
| ATOM | 6481 | O    | ALA | X | 430 | 56.748 | 26.094 | 32.900 | 0.00 | 0.00 |
| ATOM | 6482 | N    | SER | X | 431 | 55.765 | 24.923 | 31.363 | 0.00 | 0.00 |
| ATOM | 6483 | H    | SER | X | 431 | 54.908 | 24.746 | 30.858 | 0.00 | 0.00 |
| ATOM | 6484 | CA   | SER | X | 431 | 57.018 | 24.722 | 30.528 | 0.00 | 0.00 |
| ATOM | 6485 | HA   | SER | X | 431 | 57.723 | 24.153 | 31.135 | 0.00 | 0.00 |
| ATOM | 6486 | CB   | SER | X | 431 | 56.643 | 23.829 | 29.310 | 0.00 | 0.00 |
| ATOM | 6487 | HB2  | SER | X | 431 | 57.476 | 23.569 | 28.658 | 0.00 | 0.00 |
| ATOM | 6488 | HB3  | SER | X | 431 | 56.295 | 22.847 | 29.630 | 0.00 | 0.00 |
| ATOM | 6489 | OG   | SER | X | 431 | 55.682 | 24.397 | 28.496 | 0.00 | 0.00 |
| ATOM | 6490 | HG   | SER | X | 431 | 54.910 | 23.837 | 28.604 | 0.00 | 0.00 |
| ATOM | 6491 | C    | SER | X | 431 | 57.732 | 26.041 | 30.072 | 0.00 | 0.00 |
| ATOM | 6492 | O    | SER | X | 431 | 58.844 | 25.990 | 29.536 | 0.00 | 0.00 |
| ATOM | 6493 | N    | THR | X | 432 | 56.984 | 27.170 | 30.156 | 0.00 | 0.00 |
| ATOM | 6494 | H    | THR | X | 432 | 56.110 | 27.007 | 30.635 | 0.00 | 0.00 |
| ATOM | 6495 | CA   | THR | X | 432 | 57.398 | 28.489 | 29.759 | 0.00 | 0.00 |
| ATOM | 6496 | HA   | THR | X | 432 | 58.269 | 28.481 | 29.104 | 0.00 | 0.00 |
| ATOM | 6497 | CB   | THR | X | 432 | 56.274 | 29.216 | 29.090 | 0.00 | 0.00 |
| ATOM | 6498 | HB   | THR | X | 432 | 56.554 | 30.264 | 28.983 | 0.00 | 0.00 |
| ATOM | 6499 | CG2  | THR | X | 432 | 55.917 | 28.546 | 27.732 | 0.00 | 0.00 |
| ATOM | 6500 | HG21 | THR | X | 432 | 56.801 | 28.131 | 27.248 | 0.00 | 0.00 |
| ATOM | 6501 | HG22 | THR | X | 432 | 55.443 | 29.244 | 27.042 | 0.00 | 0.00 |
| ATOM | 6502 | HG23 | THR | X | 432 | 55.233 | 27.737 | 27.991 | 0.00 | 0.00 |
| ATOM | 6503 | OG1  | THR | X | 432 | 55.169 | 29.140 | 29.954 | 0.00 | 0.00 |
| ATOM | 6504 | HG1  | THR | X | 432 | 54.460 | 29.015 | 29.319 | 0.00 | 0.00 |
| ATOM | 6505 | C    | THR | X | 432 | 57.909 | 29.317 | 30.955 | 0.00 | 0.00 |
| ATOM | 6506 | O    | THR | X | 432 | 58.428 | 30.433 | 30.803 | 0.00 | 0.00 |
| ATOM | 6507 | N    | LEU | X | 433 | 57.685 | 28.822 | 32.199 | 0.00 | 0.00 |
| ATOM | 6508 | H    | LEU | X | 433 | 57.205 | 27.937 | 32.281 | 0.00 | 0.00 |
| ATOM | 6509 | CA   | LEU | X | 433 | 57.732 | 29.640 | 33.420 | 0.00 | 0.00 |
| ATOM | 6510 | HA   | LEU | X | 433 | 57.122 | 30.529 | 33.257 | 0.00 | 0.00 |
| ATOM | 6511 | CB   | LEU | X | 433 | 57.115 | 28.946 | 34.604 | 0.00 | 0.00 |
| ATOM | 6512 | HB2  | LEU | X | 433 | 56.068 | 28.818 | 34.330 | 0.00 | 0.00 |
| ATOM | 6513 | HB3  | LEU | X | 433 | 57.501 | 27.930 | 34.687 | 0.00 | 0.00 |
| ATOM | 6514 | CG   | LEU | X | 433 | 57.210 | 29.803 | 35.954 | 0.00 | 0.00 |
| ATOM | 6515 | HG   | LEU | X | 433 | 58.245 | 29.741 | 36.291 | 0.00 | 0.00 |
| ATOM | 6516 | CD1  | LEU | X | 433 | 56.481 | 31.149 | 35.851 | 0.00 | 0.00 |
| ATOM | 6517 | HD11 | LEU | X | 433 | 56.599 | 31.756 | 36.748 | 0.00 | 0.00 |
| ATOM | 6518 | HD12 | LEU | X | 433 | 55.412 | 31.027 | 35.675 | 0.00 | 0.00 |
| ATOM | 6519 | HD13 | LEU | X | 433 | 56.925 | 31.691 | 35.016 | 0.00 | 0.00 |
| ATOM | 6520 | CD2  | LEU | X | 433 | 56.508 | 28.918 | 36.914 | 0.00 | 0.00 |
| ATOM | 6521 | HD21 | LEU | X | 433 | 56.308 | 29.487 | 37.822 | 0.00 | 0.00 |
| ATOM | 6522 | HD22 | LEU | X | 433 | 55.518 | 28.730 | 36.498 | 0.00 | 0.00 |
| ATOM | 6523 | HD23 | LEU | X | 433 | 57.112 | 28.030 | 37.098 | 0.00 | 0.00 |
| ATOM | 6524 | C    | LEU | X | 433 | 59.193 | 30.169 | 33.586 | 0.00 | 0.00 |
| ATOM | 6525 | O    | LEU | X | 433 | 60.103 | 29.441 | 33.272 | 0.00 | 0.00 |
| ATOM | 6526 | N    | SER | X | 434 | 59.349 | 31.444 | 33.972 | 0.00 | 0.00 |
| ATOM | 6527 | H    | SER | X | 434 | 58.539 | 32.029 | 34.118 | 0.00 | 0.00 |
| ATOM | 6528 | CA   | SER | X | 434 | 60.629 | 32.127 | 34.010 | 0.00 | 0.00 |
| ATOM | 6529 | HA   | SER | X | 434 | 61.381 | 31.709 | 33.341 | 0.00 | 0.00 |
| ATOM | 6530 | CB   | SER | X | 434 | 60.427 | 33.543 | 33.448 | 0.00 | 0.00 |
| ATOM | 6531 | HB2  | SER | X | 434 | 61.406 | 34.011 | 33.543 | 0.00 | 0.00 |
| ATOM | 6532 | HB3  | SER | X | 434 | 60.167 | 33.335 | 32.410 | 0.00 | 0.00 |
| ATOM | 6533 | OG   | SER | X | 434 | 59.399 | 34.351 | 34.035 | 0.00 | 0.00 |
| ATOM | 6534 | HG   | SER | X | 434 | 58.631 | 34.411 | 33.462 | 0.00 | 0.00 |
| ATOM | 6535 | C    | SER | X | 434 | 61.329 | 32.274 | 35.404 | 0.00 | 0.00 |
| ATOM | 6536 | O    | SER | X | 434 | 62.533 | 32.090 | 35.404 | 0.00 | 0.00 |
| ATOM | 6537 | N    | TRP | X | 435 | 60.604 | 32.412 | 36.525 | 0.00 | 0.00 |

|      |      |      |     |   |     |        |        |        |      |      |
|------|------|------|-----|---|-----|--------|--------|--------|------|------|
| ATOM | 6538 | H    | TRP | X | 435 | 59.618 | 32.626 | 36.480 | 0.00 | 0.00 |
| ATOM | 6539 | CA   | TRP | X | 435 | 61.256 | 32.526 | 37.878 | 0.00 | 0.00 |
| ATOM | 6540 | HA   | TRP | X | 435 | 61.964 | 33.346 | 37.760 | 0.00 | 0.00 |
| ATOM | 6541 | CB   | TRP | X | 435 | 60.117 | 32.792 | 38.894 | 0.00 | 0.00 |
| ATOM | 6542 | HB2  | TRP | X | 435 | 59.357 | 32.029 | 38.724 | 0.00 | 0.00 |
| ATOM | 6543 | HB3  | TRP | X | 435 | 60.548 | 32.669 | 39.888 | 0.00 | 0.00 |
| ATOM | 6544 | CG   | TRP | X | 435 | 59.368 | 34.055 | 38.823 | 0.00 | 0.00 |
| ATOM | 6545 | CD1  | TRP | X | 435 | 58.242 | 34.397 | 38.167 | 0.00 | 0.00 |
| ATOM | 6546 | HD1  | TRP | X | 435 | 57.763 | 33.787 | 37.414 | 0.00 | 0.00 |
| ATOM | 6547 | NE1  | TRP | X | 435 | 57.878 | 35.696 | 38.357 | 0.00 | 0.00 |
| ATOM | 6548 | HE1  | TRP | X | 435 | 57.147 | 36.229 | 37.909 | 0.00 | 0.00 |
| ATOM | 6549 | CE2  | TRP | X | 435 | 58.818 | 36.287 | 39.180 | 0.00 | 0.00 |
| ATOM | 6550 | CZ2  | TRP | X | 435 | 59.017 | 37.656 | 39.529 | 0.00 | 0.00 |
| ATOM | 6551 | HZ2  | TRP | X | 435 | 58.336 | 38.433 | 39.213 | 0.00 | 0.00 |
| ATOM | 6552 | CH2  | TRP | X | 435 | 60.153 | 37.980 | 40.359 | 0.00 | 0.00 |
| ATOM | 6553 | HH2  | TRP | X | 435 | 60.427 | 38.966 | 40.706 | 0.00 | 0.00 |
| ATOM | 6554 | CZ3  | TRP | X | 435 | 61.061 | 36.898 | 40.705 | 0.00 | 0.00 |
| ATOM | 6555 | HZ3  | TRP | X | 435 | 61.967 | 37.174 | 41.223 | 0.00 | 0.00 |
| ATOM | 6556 | CE3  | TRP | X | 435 | 60.828 | 35.628 | 40.316 | 0.00 | 0.00 |
| ATOM | 6557 | HE3  | TRP | X | 435 | 61.429 | 34.840 | 40.746 | 0.00 | 0.00 |
| ATOM | 6558 | CD2  | TRP | X | 435 | 59.781 | 35.283 | 39.500 | 0.00 | 0.00 |
| ATOM | 6559 | C    | TRP | X | 435 | 61.932 | 31.228 | 38.266 | 0.00 | 0.00 |
| ATOM | 6560 | O    | TRP | X | 435 | 61.647 | 30.235 | 37.608 | 0.00 | 0.00 |
| ATOM | 6561 | N    | PRO | X | 436 | 62.808 | 31.232 | 39.275 | 0.00 | 0.00 |
| ATOM | 6562 | CD   | PRO | X | 436 | 63.433 | 32.414 | 39.855 | 0.00 | 0.00 |
| ATOM | 6563 | HD2  | PRO | X | 436 | 62.707 | 32.850 | 40.542 | 0.00 | 0.00 |
| ATOM | 6564 | HD3  | PRO | X | 436 | 63.692 | 33.201 | 39.147 | 0.00 | 0.00 |
| ATOM | 6565 | CG   | PRO | X | 436 | 64.609 | 32.013 | 40.706 | 0.00 | 0.00 |
| ATOM | 6566 | HG2  | PRO | X | 436 | 64.737 | 32.630 | 41.596 | 0.00 | 0.00 |
| ATOM | 6567 | HG3  | PRO | X | 436 | 65.499 | 32.146 | 40.091 | 0.00 | 0.00 |
| ATOM | 6568 | CB   | PRO | X | 436 | 64.369 | 30.509 | 41.012 | 0.00 | 0.00 |
| ATOM | 6569 | HB2  | PRO | X | 436 | 63.850 | 30.359 | 41.958 | 0.00 | 0.00 |
| ATOM | 6570 | HB3  | PRO | X | 436 | 65.375 | 30.093 | 41.061 | 0.00 | 0.00 |
| ATOM | 6571 | CA   | PRO | X | 436 | 63.579 | 30.097 | 39.774 | 0.00 | 0.00 |
| ATOM | 6572 | HA   | PRO | X | 436 | 64.272 | 29.983 | 38.940 | 0.00 | 0.00 |
| ATOM | 6573 | C    | PRO | X | 436 | 62.790 | 28.850 | 39.828 | 0.00 | 0.00 |
| ATOM | 6574 | O    | PRO | X | 436 | 61.774 | 28.930 | 40.504 | 0.00 | 0.00 |
| ATOM | 6575 | N    | LEU | X | 437 | 63.277 | 27.752 | 39.235 | 0.00 | 0.00 |
| ATOM | 6576 | H    | LEU | X | 437 | 64.133 | 27.921 | 38.726 | 0.00 | 0.00 |
| ATOM | 6577 | CA   | LEU | X | 437 | 62.752 | 26.437 | 39.183 | 0.00 | 0.00 |
| ATOM | 6578 | HA   | LEU | X | 437 | 61.906 | 26.469 | 38.496 | 0.00 | 0.00 |
| ATOM | 6579 | CB   | LEU | X | 437 | 63.845 | 25.483 | 38.587 | 0.00 | 0.00 |
| ATOM | 6580 | HB2  | LEU | X | 437 | 64.008 | 25.823 | 37.564 | 0.00 | 0.00 |
| ATOM | 6581 | HB3  | LEU | X | 437 | 64.751 | 25.697 | 39.153 | 0.00 | 0.00 |
| ATOM | 6582 | CG   | LEU | X | 437 | 63.406 | 24.087 | 38.660 | 0.00 | 0.00 |
| ATOM | 6583 | HG   | LEU | X | 437 | 63.273 | 23.771 | 39.694 | 0.00 | 0.00 |
| ATOM | 6584 | CD1  | LEU | X | 437 | 62.016 | 23.782 | 38.100 | 0.00 | 0.00 |
| ATOM | 6585 | HD11 | LEU | X | 437 | 61.825 | 22.713 | 38.196 | 0.00 | 0.00 |
| ATOM | 6586 | HD12 | LEU | X | 437 | 61.866 | 24.045 | 37.053 | 0.00 | 0.00 |
| ATOM | 6587 | HD13 | LEU | X | 437 | 61.169 | 24.197 | 38.646 | 0.00 | 0.00 |
| ATOM | 6588 | CD2  | LEU | X | 437 | 64.330 | 23.183 | 37.893 | 0.00 | 0.00 |
| ATOM | 6589 | HD21 | LEU | X | 437 | 64.159 | 23.313 | 36.825 | 0.00 | 0.00 |
| ATOM | 6590 | HD22 | LEU | X | 437 | 65.385 | 23.322 | 38.129 | 0.00 | 0.00 |
| ATOM | 6591 | HD23 | LEU | X | 437 | 64.240 | 22.154 | 38.242 | 0.00 | 0.00 |
| ATOM | 6592 | C    | LEU | X | 437 | 62.227 | 26.000 | 40.577 | 0.00 | 0.00 |
| ATOM | 6593 | O    | LEU | X | 437 | 61.054 | 25.611 | 40.712 | 0.00 | 0.00 |
| ATOM | 6594 | N    | TRP | X | 438 | 62.949 | 26.305 | 41.640 | 0.00 | 0.00 |
| ATOM | 6595 | H    | TRP | X | 438 | 63.795 | 26.850 | 41.554 | 0.00 | 0.00 |
| ATOM | 6596 | CA   | TRP | X | 438 | 62.542 | 25.801 | 42.949 | 0.00 | 0.00 |
| ATOM | 6597 | HA   | TRP | X | 438 | 62.256 | 24.753 | 42.858 | 0.00 | 0.00 |
| ATOM | 6598 | CB   | TRP | X | 438 | 63.740 | 25.821 | 43.995 | 0.00 | 0.00 |
| ATOM | 6599 | HB2  | TRP | X | 438 | 63.431 | 25.629 | 45.023 | 0.00 | 0.00 |
| ATOM | 6600 | HB3  | TRP | X | 438 | 64.501 | 25.084 | 43.738 | 0.00 | 0.00 |
| ATOM | 6601 | CG   | TRP | X | 438 | 64.508 | 27.145 | 43.918 | 0.00 | 0.00 |
| ATOM | 6602 | CD1  | TRP | X | 438 | 65.651 | 27.393 | 43.266 | 0.00 | 0.00 |
| ATOM | 6603 | HD1  | TRP | X | 438 | 66.233 | 26.696 | 42.681 | 0.00 | 0.00 |
| ATOM | 6604 | NE1  | TRP | X | 438 | 65.968 | 28.680 | 43.412 | 0.00 | 0.00 |



|      |      |      |     |   |     |        |        |        |      |      |
|------|------|------|-----|---|-----|--------|--------|--------|------|------|
| ATOM | 6605 | HE1  | TRP | X | 438 | 66.689 | 29.132 | 42.867 | 0.00 | 0.00 |
| ATOM | 6606 | CE2  | TRP | X | 438 | 65.144 | 29.401 | 44.264 | 0.00 | 0.00 |
| ATOM | 6607 | CZ2  | TRP | X | 438 | 65.112 | 30.711 | 44.744 | 0.00 | 0.00 |
| ATOM | 6608 | HZ2  | TRP | X | 438 | 65.907 | 31.412 | 44.537 | 0.00 | 0.00 |
| ATOM | 6609 | CH2  | TRP | X | 438 | 64.010 | 31.172 | 45.407 | 0.00 | 0.00 |
| ATOM | 6610 | HH2  | TRP | X | 438 | 63.913 | 32.225 | 45.627 | 0.00 | 0.00 |
| ATOM | 6611 | CZ3  | TRP | X | 438 | 62.960 | 30.326 | 45.737 | 0.00 | 0.00 |
| ATOM | 6612 | HZ3  | TRP | X | 438 | 62.124 | 30.670 | 46.328 | 0.00 | 0.00 |
| ATOM | 6613 | CE3  | TRP | X | 438 | 63.037 | 28.961 | 45.303 | 0.00 | 0.00 |
| ATOM | 6614 | HE3  | TRP | X | 438 | 62.352 | 28.198 | 45.641 | 0.00 | 0.00 |
| ATOM | 6615 | CD2  | TRP | X | 438 | 64.107 | 28.428 | 44.531 | 0.00 | 0.00 |
| ATOM | 6616 | C    | TRP | X | 438 | 61.222 | 26.459 | 43.539 | 0.00 | 0.00 |
| ATOM | 6617 | O    | TRP | X | 438 | 60.557 | 25.905 | 44.454 | 0.00 | 0.00 |
| ATOM | 6618 | N    | MET | X | 439 | 60.866 | 27.661 | 43.050 | 0.00 | 0.00 |
| ATOM | 6619 | H    | MET | X | 439 | 61.395 | 28.040 | 42.278 | 0.00 | 0.00 |
| ATOM | 6620 | CA   | MET | X | 439 | 59.603 | 28.354 | 43.400 | 0.00 | 0.00 |
| ATOM | 6621 | HA   | MET | X | 439 | 59.434 | 28.504 | 44.466 | 0.00 | 0.00 |
| ATOM | 6622 | CB   | MET | X | 439 | 59.545 | 29.791 | 42.837 | 0.00 | 0.00 |
| ATOM | 6623 | HB2  | MET | X | 439 | 59.844 | 29.739 | 41.790 | 0.00 | 0.00 |
| ATOM | 6624 | HB3  | MET | X | 439 | 58.520 | 30.162 | 42.844 | 0.00 | 0.00 |
| ATOM | 6625 | CG   | MET | X | 439 | 60.569 | 30.706 | 43.522 | 0.00 | 0.00 |
| ATOM | 6626 | HG2  | MET | X | 439 | 60.401 | 30.781 | 44.596 | 0.00 | 0.00 |
| ATOM | 6627 | HG3  | MET | X | 439 | 61.563 | 30.273 | 43.407 | 0.00 | 0.00 |
| ATOM | 6628 | SD   | MET | X | 439 | 60.512 | 32.417 | 42.860 | 0.00 | 0.00 |
| ATOM | 6629 | CE   | MET | X | 439 | 61.887 | 33.142 | 43.816 | 0.00 | 0.00 |
| ATOM | 6630 | HE1  | MET | X | 439 | 61.793 | 34.206 | 43.601 | 0.00 | 0.00 |
| ATOM | 6631 | HE2  | MET | X | 439 | 61.702 | 33.067 | 44.887 | 0.00 | 0.00 |
| ATOM | 6632 | HE3  | MET | X | 439 | 62.767 | 32.577 | 43.510 | 0.00 | 0.00 |
| ATOM | 6633 | C    | MET | X | 439 | 58.298 | 27.626 | 43.002 | 0.00 | 0.00 |
| ATOM | 6634 | O    | MET | X | 439 | 57.255 | 27.906 | 43.589 | 0.00 | 0.00 |
| ATOM | 6635 | N    | GLY | X | 440 | 58.343 | 26.691 | 42.064 | 0.00 | 0.00 |
| ATOM | 6636 | H    | GLY | X | 440 | 59.240 | 26.551 | 41.621 | 0.00 | 0.00 |
| ATOM | 6637 | CA   | GLY | X | 440 | 57.220 | 25.859 | 41.696 | 0.00 | 0.00 |
| ATOM | 6638 | HA2  | GLY | X | 440 | 57.485 | 25.101 | 40.959 | 0.00 | 0.00 |
| ATOM | 6639 | HA3  | GLY | X | 440 | 56.831 | 25.253 | 42.514 | 0.00 | 0.00 |
| ATOM | 6640 | C    | GLY | X | 440 | 56.201 | 26.740 | 40.927 | 0.00 | 0.00 |
| ATOM | 6641 | O    | GLY | X | 440 | 56.614 | 27.274 | 39.917 | 0.00 | 0.00 |
| ATOM | 6642 | N    | VAL | X | 441 | 55.040 | 27.032 | 41.527 | 0.00 | 0.00 |
| ATOM | 6643 | H    | VAL | X | 441 | 54.878 | 26.441 | 42.330 | 0.00 | 0.00 |
| ATOM | 6644 | CA   | VAL | X | 441 | 53.927 | 27.755 | 40.982 | 0.00 | 0.00 |
| ATOM | 6645 | HA   | VAL | X | 441 | 54.181 | 28.131 | 39.991 | 0.00 | 0.00 |
| ATOM | 6646 | CB   | VAL | X | 441 | 52.578 | 26.982 | 40.769 | 0.00 | 0.00 |
| ATOM | 6647 | HB   | VAL | X | 441 | 52.064 | 26.758 | 41.703 | 0.00 | 0.00 |
| ATOM | 6648 | CG1  | VAL | X | 441 | 51.560 | 27.739 | 39.906 | 0.00 | 0.00 |
| ATOM | 6649 | HG11 | VAL | X | 441 | 51.896 | 27.876 | 38.879 | 0.00 | 0.00 |
| ATOM | 6650 | HG12 | VAL | X | 441 | 50.652 | 27.199 | 40.176 | 0.00 | 0.00 |
| ATOM | 6651 | HG13 | VAL | X | 441 | 51.409 | 28.763 | 40.249 | 0.00 | 0.00 |
| ATOM | 6652 | CG2  | VAL | X | 441 | 52.652 | 25.622 | 40.019 | 0.00 | 0.00 |
| ATOM | 6653 | HG21 | VAL | X | 441 | 51.739 | 25.335 | 39.496 | 0.00 | 0.00 |
| ATOM | 6654 | HG22 | VAL | X | 441 | 53.040 | 24.814 | 40.639 | 0.00 | 0.00 |
| ATOM | 6655 | HG23 | VAL | X | 441 | 53.418 | 25.586 | 39.244 | 0.00 | 0.00 |
| ATOM | 6656 | C    | VAL | X | 441 | 53.672 | 29.024 | 41.775 | 0.00 | 0.00 |
| ATOM | 6657 | O    | VAL | X | 441 | 52.956 | 28.967 | 42.784 | 0.00 | 0.00 |
| ATOM | 6658 | N    | PRO | X | 442 | 54.258 | 30.197 | 41.394 | 0.00 | 0.00 |
| ATOM | 6659 | CD   | PRO | X | 442 | 55.074 | 30.446 | 40.235 | 0.00 | 0.00 |
| ATOM | 6660 | HD2  | PRO | X | 442 | 54.417 | 30.744 | 39.418 | 0.00 | 0.00 |
| ATOM | 6661 | HD3  | PRO | X | 442 | 55.664 | 29.565 | 39.985 | 0.00 | 0.00 |
| ATOM | 6662 | CG   | PRO | X | 442 | 55.978 | 31.609 | 40.631 | 0.00 | 0.00 |
| ATOM | 6663 | HG2  | PRO | X | 442 | 56.176 | 32.194 | 39.732 | 0.00 | 0.00 |
| ATOM | 6664 | HG3  | PRO | X | 442 | 56.887 | 31.234 | 41.102 | 0.00 | 0.00 |
| ATOM | 6665 | CB   | PRO | X | 442 | 55.166 | 32.380 | 41.641 | 0.00 | 0.00 |
| ATOM | 6666 | HB2  | PRO | X | 442 | 54.609 | 33.192 | 41.174 | 0.00 | 0.00 |
| ATOM | 6667 | HB3  | PRO | X | 442 | 55.838 | 32.717 | 42.430 | 0.00 | 0.00 |
| ATOM | 6668 | CA   | PRO | X | 442 | 54.095 | 31.448 | 42.155 | 0.00 | 0.00 |
| ATOM | 6669 | HA   | PRO | X | 442 | 54.234 | 31.127 | 43.187 | 0.00 | 0.00 |
| ATOM | 6670 | C    | PRO | X | 442 | 52.703 | 32.037 | 42.090 | 0.00 | 0.00 |
| ATOM | 6671 | O    | PRO | X | 442 | 52.015 | 31.879 | 41.079 | 0.00 | 0.00 |

|      |      |     |     |   |     |        |        |        |      |      |
|------|------|-----|-----|---|-----|--------|--------|--------|------|------|
| ATOM | 6672 | N   | HIP | X | 443 | 52.343 | 32.775 | 43.123 | 0.00 | 0.00 |
| ATOM | 6673 | H   | HIP | X | 443 | 53.057 | 32.876 | 43.830 | 0.00 | 0.00 |
| ATOM | 6674 | CA  | HIP | X | 443 | 51.060 | 33.577 | 43.270 | 0.00 | 0.00 |
| ATOM | 6675 | HA  | HIP | X | 443 | 50.212 | 33.022 | 43.672 | 0.00 | 0.00 |
| ATOM | 6676 | CB  | HIP | X | 443 | 51.438 | 34.601 | 44.342 | 0.00 | 0.00 |
| ATOM | 6677 | HB2 | HIP | X | 443 | 51.446 | 33.975 | 45.234 | 0.00 | 0.00 |
| ATOM | 6678 | HB3 | HIP | X | 443 | 52.411 | 35.008 | 44.067 | 0.00 | 0.00 |
| ATOM | 6679 | CG  | HIP | X | 443 | 50.438 | 35.609 | 44.490 | 0.00 | 0.00 |
| ATOM | 6680 | ND1 | HIP | X | 443 | 49.216 | 35.554 | 45.216 | 0.00 | 0.00 |
| ATOM | 6681 | HD1 | HIP | X | 443 | 48.880 | 34.730 | 45.695 | 0.00 | 0.00 |
| ATOM | 6682 | CE1 | HIP | X | 443 | 48.579 | 36.755 | 45.039 | 0.00 | 0.00 |
| ATOM | 6683 | HE1 | HIP | X | 443 | 47.642 | 36.998 | 45.520 | 0.00 | 0.00 |
| ATOM | 6684 | NE2 | HIP | X | 443 | 49.443 | 37.583 | 44.387 | 0.00 | 0.00 |
| ATOM | 6685 | HE2 | HIP | X | 443 | 49.252 | 38.566 | 44.253 | 0.00 | 0.00 |
| ATOM | 6686 | CD2 | HIP | X | 443 | 50.563 | 36.871 | 43.997 | 0.00 | 0.00 |
| ATOM | 6687 | HD2 | HIP | X | 443 | 51.311 | 37.182 | 43.282 | 0.00 | 0.00 |
| ATOM | 6688 | C   | HIP | X | 443 | 50.643 | 34.200 | 41.956 | 0.00 | 0.00 |
| ATOM | 6689 | O   | HIP | X | 443 | 51.379 | 35.049 | 41.458 | 0.00 | 0.00 |
| ATOM | 6690 | N   | GLY | X | 444 | 49.415 | 33.874 | 41.513 | 0.00 | 0.00 |
| ATOM | 6691 | H   | GLY | X | 444 | 48.918 | 33.257 | 42.140 | 0.00 | 0.00 |
| ATOM | 6692 | CA  | GLY | X | 444 | 48.732 | 34.498 | 40.345 | 0.00 | 0.00 |
| ATOM | 6693 | HA2 | GLY | X | 444 | 47.738 | 34.097 | 40.543 | 0.00 | 0.00 |
| ATOM | 6694 | HA3 | GLY | X | 444 | 49.036 | 35.543 | 40.276 | 0.00 | 0.00 |
| ATOM | 6695 | C   | GLY | X | 444 | 48.969 | 33.940 | 38.912 | 0.00 | 0.00 |
| ATOM | 6696 | O   | GLY | X | 444 | 48.473 | 34.477 | 37.936 | 0.00 | 0.00 |
| ATOM | 6697 | N   | TYR | X | 445 | 49.598 | 32.788 | 38.810 | 0.00 | 0.00 |
| ATOM | 6698 | H   | TYR | X | 445 | 49.931 | 32.504 | 39.720 | 0.00 | 0.00 |
| ATOM | 6699 | CA  | TYR | X | 445 | 50.088 | 32.265 | 37.522 | 0.00 | 0.00 |
| ATOM | 6700 | HA  | TYR | X | 445 | 50.091 | 33.066 | 36.783 | 0.00 | 0.00 |
| ATOM | 6701 | CB  | TYR | X | 445 | 51.486 | 31.600 | 37.560 | 0.00 | 0.00 |
| ATOM | 6702 | HB2 | TYR | X | 445 | 51.738 | 31.166 | 38.527 | 0.00 | 0.00 |
| ATOM | 6703 | HB3 | TYR | X | 445 | 51.454 | 30.755 | 36.873 | 0.00 | 0.00 |
| ATOM | 6704 | CG  | TYR | X | 445 | 52.566 | 32.543 | 37.197 | 0.00 | 0.00 |
| ATOM | 6705 | CD1 | TYR | X | 445 | 52.877 | 32.689 | 35.854 | 0.00 | 0.00 |
| ATOM | 6706 | HD1 | TYR | X | 445 | 52.384 | 32.044 | 35.142 | 0.00 | 0.00 |
| ATOM | 6707 | CE1 | TYR | X | 445 | 53.763 | 33.742 | 35.438 | 0.00 | 0.00 |
| ATOM | 6708 | HE1 | TYR | X | 445 | 53.721 | 34.037 | 34.400 | 0.00 | 0.00 |
| ATOM | 6709 | CZ  | TYR | X | 445 | 54.504 | 34.475 | 36.402 | 0.00 | 0.00 |
| ATOM | 6710 | OH  | TYR | X | 445 | 55.572 | 35.226 | 36.047 | 0.00 | 0.00 |
| ATOM | 6711 | HH  | TYR | X | 445 | 55.599 | 35.330 | 35.093 | 0.00 | 0.00 |
| ATOM | 6712 | CE2 | TYR | X | 445 | 54.181 | 34.366 | 37.712 | 0.00 | 0.00 |
| ATOM | 6713 | HE2 | TYR | X | 445 | 54.619 | 35.086 | 38.388 | 0.00 | 0.00 |
| ATOM | 6714 | CD2 | TYR | X | 445 | 53.214 | 33.412 | 38.155 | 0.00 | 0.00 |
| ATOM | 6715 | HD2 | TYR | X | 445 | 53.053 | 33.282 | 39.214 | 0.00 | 0.00 |
| ATOM | 6716 | C   | TYR | X | 445 | 49.076 | 31.309 | 36.889 | 0.00 | 0.00 |
| ATOM | 6717 | O   | TYR | X | 445 | 49.338 | 30.722 | 35.814 | 0.00 | 0.00 |
| ATOM | 6718 | N   | GLU | X | 446 | 47.970 | 30.944 | 37.512 | 0.00 | 0.00 |
| ATOM | 6719 | H   | GLU | X | 446 | 47.744 | 31.248 | 38.449 | 0.00 | 0.00 |
| ATOM | 6720 | CA  | GLU | X | 446 | 46.895 | 30.103 | 36.908 | 0.00 | 0.00 |
| ATOM | 6721 | HA  | GLU | X | 446 | 47.441 | 29.476 | 36.203 | 0.00 | 0.00 |
| ATOM | 6722 | CB  | GLU | X | 446 | 46.200 | 29.107 | 37.872 | 0.00 | 0.00 |
| ATOM | 6723 | HB2 | GLU | X | 446 | 45.828 | 28.248 | 37.314 | 0.00 | 0.00 |
| ATOM | 6724 | HB3 | GLU | X | 446 | 46.911 | 28.940 | 38.681 | 0.00 | 0.00 |
| ATOM | 6725 | CG  | GLU | X | 446 | 44.979 | 29.550 | 38.662 | 0.00 | 0.00 |
| ATOM | 6726 | HG2 | GLU | X | 446 | 44.168 | 29.849 | 37.997 | 0.00 | 0.00 |
| ATOM | 6727 | HG3 | GLU | X | 446 | 44.665 | 28.675 | 39.232 | 0.00 | 0.00 |
| ATOM | 6728 | CD  | GLU | X | 446 | 45.250 | 30.739 | 39.601 | 0.00 | 0.00 |
| ATOM | 6729 | OE1 | GLU | X | 446 | 45.515 | 31.795 | 39.084 | 0.00 | 0.00 |
| ATOM | 6730 | OE2 | GLU | X | 446 | 45.107 | 30.558 | 40.820 | 0.00 | 0.00 |
| ATOM | 6731 | C   | GLU | X | 446 | 45.826 | 30.857 | 36.121 | 0.00 | 0.00 |
| ATOM | 6732 | O   | GLU | X | 446 | 45.133 | 30.248 | 35.345 | 0.00 | 0.00 |
| ATOM | 6733 | N   | ILE | X | 447 | 45.700 | 32.229 | 36.277 | 0.00 | 0.00 |
| ATOM | 6734 | H   | ILE | X | 447 | 46.196 | 32.692 | 37.026 | 0.00 | 0.00 |
| ATOM | 6735 | CA  | ILE | X | 447 | 45.215 | 33.162 | 35.222 | 0.00 | 0.00 |
| ATOM | 6736 | HA  | ILE | X | 447 | 44.129 | 33.076 | 35.268 | 0.00 | 0.00 |
| ATOM | 6737 | CB  | ILE | X | 447 | 45.535 | 34.660 | 35.413 | 0.00 | 0.00 |
| ATOM | 6738 | HB  | ILE | X | 447 | 44.854 | 35.127 | 34.702 | 0.00 | 0.00 |

|      |      |      |     |   |     |        |        |        |      |      |
|------|------|------|-----|---|-----|--------|--------|--------|------|------|
| ATOM | 6739 | CG2  | ILE | X | 447 | 44.982 | 35.035 | 36.795 | 0.00 | 0.00 |
| ATOM | 6740 | HG21 | ILE | X | 447 | 43.959 | 34.663 | 36.841 | 0.00 | 0.00 |
| ATOM | 6741 | HG22 | ILE | X | 447 | 44.990 | 36.125 | 36.774 | 0.00 | 0.00 |
| ATOM | 6742 | HG23 | ILE | X | 447 | 45.656 | 34.647 | 37.559 | 0.00 | 0.00 |
| ATOM | 6743 | CG1  | ILE | X | 447 | 46.974 | 35.033 | 34.960 | 0.00 | 0.00 |
| ATOM | 6744 | HG12 | ILE | X | 447 | 47.630 | 34.405 | 35.561 | 0.00 | 0.00 |
| ATOM | 6745 | HG13 | ILE | X | 447 | 47.203 | 34.762 | 33.929 | 0.00 | 0.00 |
| ATOM | 6746 | CD1  | ILE | X | 447 | 47.376 | 36.484 | 35.155 | 0.00 | 0.00 |
| ATOM | 6747 | HD11 | ILE | X | 447 | 46.692 | 36.932 | 34.435 | 0.00 | 0.00 |
| ATOM | 6748 | HD12 | ILE | X | 447 | 48.433 | 36.590 | 34.911 | 0.00 | 0.00 |
| ATOM | 6749 | HD13 | ILE | X | 447 | 47.287 | 36.914 | 36.152 | 0.00 | 0.00 |
| ATOM | 6750 | C    | ILE | X | 447 | 45.588 | 32.691 | 33.742 | 0.00 | 0.00 |
| ATOM | 6751 | O    | ILE | X | 447 | 44.757 | 32.872 | 32.843 | 0.00 | 0.00 |
| ATOM | 6752 | N    | GLU | X | 448 | 46.782 | 32.138 | 33.598 | 0.00 | 0.00 |
| ATOM | 6753 | H    | GLU | X | 448 | 47.284 | 31.873 | 34.434 | 0.00 | 0.00 |
| ATOM | 6754 | CA   | GLU | X | 448 | 47.362 | 31.792 | 32.301 | 0.00 | 0.00 |
| ATOM | 6755 | HA   | GLU | X | 448 | 47.304 | 32.749 | 31.781 | 0.00 | 0.00 |
| ATOM | 6756 | CB   | GLU | X | 448 | 48.908 | 31.385 | 32.385 | 0.00 | 0.00 |
| ATOM | 6757 | HB2  | GLU | X | 448 | 49.095 | 30.592 | 33.108 | 0.00 | 0.00 |
| ATOM | 6758 | HB3  | GLU | X | 448 | 49.289 | 31.048 | 31.421 | 0.00 | 0.00 |
| ATOM | 6759 | CG   | GLU | X | 448 | 49.754 | 32.622 | 32.799 | 0.00 | 0.00 |
| ATOM | 6760 | HG2  | GLU | X | 448 | 49.315 | 33.509 | 32.341 | 0.00 | 0.00 |
| ATOM | 6761 | HG3  | GLU | X | 448 | 49.651 | 32.840 | 33.862 | 0.00 | 0.00 |
| ATOM | 6762 | CD   | GLU | X | 448 | 51.252 | 32.399 | 32.351 | 0.00 | 0.00 |
| ATOM | 6763 | OE1  | GLU | X | 448 | 51.796 | 33.226 | 31.572 | 0.00 | 0.00 |
| ATOM | 6764 | OE2  | GLU | X | 448 | 51.896 | 31.457 | 32.808 | 0.00 | 0.00 |
| ATOM | 6765 | C    | GLU | X | 448 | 46.554 | 30.736 | 31.538 | 0.00 | 0.00 |
| ATOM | 6766 | O    | GLU | X | 448 | 46.489 | 30.789 | 30.291 | 0.00 | 0.00 |
| ATOM | 6767 | N    | PHE | X | 449 | 45.855 | 29.872 | 32.237 | 0.00 | 0.00 |
| ATOM | 6768 | H    | PHE | X | 449 | 45.839 | 30.034 | 33.234 | 0.00 | 0.00 |
| ATOM | 6769 | CA   | PHE | X | 449 | 45.109 | 28.768 | 31.702 | 0.00 | 0.00 |
| ATOM | 6770 | HA   | PHE | X | 449 | 45.369 | 28.456 | 30.691 | 0.00 | 0.00 |
| ATOM | 6771 | CB   | PHE | X | 449 | 45.430 | 27.582 | 32.630 | 0.00 | 0.00 |
| ATOM | 6772 | HB2  | PHE | X | 449 | 45.364 | 27.949 | 33.654 | 0.00 | 0.00 |
| ATOM | 6773 | HB3  | PHE | X | 449 | 44.628 | 26.845 | 32.593 | 0.00 | 0.00 |
| ATOM | 6774 | CG   | PHE | X | 449 | 46.813 | 26.953 | 32.302 | 0.00 | 0.00 |
| ATOM | 6775 | CD1  | PHE | X | 449 | 47.987 | 27.351 | 32.991 | 0.00 | 0.00 |
| ATOM | 6776 | HD1  | PHE | X | 449 | 47.950 | 28.124 | 33.745 | 0.00 | 0.00 |
| ATOM | 6777 | CE1  | PHE | X | 449 | 49.213 | 26.855 | 32.622 | 0.00 | 0.00 |
| ATOM | 6778 | HE1  | PHE | X | 449 | 50.083 | 27.254 | 33.123 | 0.00 | 0.00 |
| ATOM | 6779 | CZ   | PHE | X | 449 | 49.391 | 25.882 | 31.624 | 0.00 | 0.00 |
| ATOM | 6780 | HZ   | PHE | X | 449 | 50.382 | 25.532 | 31.375 | 0.00 | 0.00 |
| ATOM | 6781 | CE2  | PHE | X | 449 | 48.184 | 25.424 | 30.953 | 0.00 | 0.00 |
| ATOM | 6782 | HE2  | PHE | X | 449 | 48.170 | 24.549 | 30.319 | 0.00 | 0.00 |
| ATOM | 6783 | CD2  | PHE | X | 449 | 46.924 | 25.867 | 31.386 | 0.00 | 0.00 |
| ATOM | 6784 | HD2  | PHE | X | 449 | 46.003 | 25.387 | 31.090 | 0.00 | 0.00 |
| ATOM | 6785 | C    | PHE | X | 449 | 43.646 | 29.157 | 31.598 | 0.00 | 0.00 |
| ATOM | 6786 | O    | PHE | X | 449 | 42.951 | 28.454 | 30.871 | 0.00 | 0.00 |
| ATOM | 6787 | N    | ILE | X | 450 | 43.161 | 30.153 | 32.289 | 0.00 | 0.00 |
| ATOM | 6788 | H    | ILE | X | 450 | 43.791 | 30.736 | 32.822 | 0.00 | 0.00 |
| ATOM | 6789 | CA   | ILE | X | 450 | 41.814 | 30.759 | 32.159 | 0.00 | 0.00 |
| ATOM | 6790 | HA   | ILE | X | 450 | 41.125 | 29.921 | 32.056 | 0.00 | 0.00 |
| ATOM | 6791 | CB   | ILE | X | 450 | 41.340 | 31.590 | 33.343 | 0.00 | 0.00 |
| ATOM | 6792 | HB   | ILE | X | 450 | 41.595 | 32.645 | 33.243 | 0.00 | 0.00 |
| ATOM | 6793 | CG2  | ILE | X | 450 | 39.824 | 31.445 | 33.407 | 0.00 | 0.00 |
| ATOM | 6794 | HG21 | ILE | X | 450 | 39.472 | 32.079 | 34.221 | 0.00 | 0.00 |
| ATOM | 6795 | HG22 | ILE | X | 450 | 39.483 | 30.421 | 33.559 | 0.00 | 0.00 |
| ATOM | 6796 | HG23 | ILE | X | 450 | 39.372 | 31.846 | 32.500 | 0.00 | 0.00 |
| ATOM | 6797 | CG1  | ILE | X | 450 | 41.964 | 31.102 | 34.670 | 0.00 | 0.00 |
| ATOM | 6798 | HG12 | ILE | X | 450 | 43.041 | 31.256 | 34.601 | 0.00 | 0.00 |
| ATOM | 6799 | HG13 | ILE | X | 450 | 41.568 | 31.695 | 35.494 | 0.00 | 0.00 |
| ATOM | 6800 | CD1  | ILE | X | 450 | 41.633 | 29.595 | 34.966 | 0.00 | 0.00 |
| ATOM | 6801 | HD11 | ILE | X | 450 | 42.219 | 29.250 | 35.818 | 0.00 | 0.00 |
| ATOM | 6802 | HD12 | ILE | X | 450 | 41.781 | 28.960 | 34.093 | 0.00 | 0.00 |
| ATOM | 6803 | HD13 | ILE | X | 450 | 40.574 | 29.516 | 35.211 | 0.00 | 0.00 |
| ATOM | 6804 | C    | ILE | X | 450 | 41.731 | 31.566 | 30.839 | 0.00 | 0.00 |
| ATOM | 6805 | O    | ILE | X | 450 | 40.834 | 31.386 | 29.992 | 0.00 | 0.00 |

|      |      |      |     |   |     |        |        |        |      |      |
|------|------|------|-----|---|-----|--------|--------|--------|------|------|
| ATOM | 6806 | N    | PHE | X | 451 | 42.620 | 32.529 | 30.711 | 0.00 | 0.00 |
| ATOM | 6807 | H    | PHE | X | 451 | 43.076 | 32.840 | 31.556 | 0.00 | 0.00 |
| ATOM | 6808 | CA   | PHE | X | 451 | 42.873 | 33.292 | 29.480 | 0.00 | 0.00 |
| ATOM | 6809 | HA   | PHE | X | 451 | 41.893 | 33.661 | 29.178 | 0.00 | 0.00 |
| ATOM | 6810 | CB   | PHE | X | 451 | 43.797 | 34.497 | 29.771 | 0.00 | 0.00 |
| ATOM | 6811 | HB2  | PHE | X | 451 | 44.657 | 34.121 | 30.325 | 0.00 | 0.00 |
| ATOM | 6812 | HB3  | PHE | X | 451 | 44.220 | 35.024 | 28.916 | 0.00 | 0.00 |
| ATOM | 6813 | CG   | PHE | X | 451 | 43.096 | 35.582 | 30.570 | 0.00 | 0.00 |
| ATOM | 6814 | CD1  | PHE | X | 451 | 43.316 | 35.656 | 31.951 | 0.00 | 0.00 |
| ATOM | 6815 | HD1  | PHE | X | 451 | 43.835 | 34.912 | 32.537 | 0.00 | 0.00 |
| ATOM | 6816 | CE1  | PHE | X | 451 | 42.691 | 36.715 | 32.706 | 0.00 | 0.00 |
| ATOM | 6817 | HE1  | PHE | X | 451 | 42.794 | 36.750 | 33.780 | 0.00 | 0.00 |
| ATOM | 6818 | CZ   | PHE | X | 451 | 41.768 | 37.589 | 32.095 | 0.00 | 0.00 |
| ATOM | 6819 | HZ   | PHE | X | 451 | 41.254 | 38.274 | 32.753 | 0.00 | 0.00 |
| ATOM | 6820 | CE2  | PHE | X | 451 | 41.549 | 37.430 | 30.678 | 0.00 | 0.00 |
| ATOM | 6821 | HE2  | PHE | X | 451 | 40.792 | 38.054 | 30.224 | 0.00 | 0.00 |
| ATOM | 6822 | CD2  | PHE | X | 451 | 42.191 | 36.443 | 29.963 | 0.00 | 0.00 |
| ATOM | 6823 | HD2  | PHE | X | 451 | 42.041 | 36.352 | 28.897 | 0.00 | 0.00 |
| ATOM | 6824 | C    | PHE | X | 451 | 43.329 | 32.439 | 28.270 | 0.00 | 0.00 |
| ATOM | 6825 | O    | PHE | X | 451 | 43.762 | 33.042 | 27.257 | 0.00 | 0.00 |
| ATOM | 6826 | N    | GLY | X | 452 | 43.383 | 31.072 | 28.357 | 0.00 | 0.00 |
| ATOM | 6827 | H    | GLY | X | 452 | 42.958 | 30.585 | 29.133 | 0.00 | 0.00 |
| ATOM | 6828 | CA   | GLY | X | 452 | 43.910 | 30.273 | 27.255 | 0.00 | 0.00 |
| ATOM | 6829 | HA2  | GLY | X | 452 | 43.810 | 29.221 | 27.524 | 0.00 | 0.00 |
| ATOM | 6830 | HA3  | GLY | X | 452 | 43.371 | 30.440 | 26.322 | 0.00 | 0.00 |
| ATOM | 6831 | C    | GLY | X | 452 | 45.344 | 30.501 | 26.782 | 0.00 | 0.00 |
| ATOM | 6832 | O    | GLY | X | 452 | 45.628 | 30.177 | 25.656 | 0.00 | 0.00 |
| ATOM | 6833 | N    | ILE | X | 453 | 46.235 | 31.101 | 27.565 | 0.00 | 0.00 |
| ATOM | 6834 | H    | ILE | X | 453 | 46.021 | 31.394 | 28.507 | 0.00 | 0.00 |
| ATOM | 6835 | CA   | ILE | X | 453 | 47.572 | 31.508 | 26.993 | 0.00 | 0.00 |
| ATOM | 6836 | HA   | ILE | X | 453 | 47.318 | 32.206 | 26.196 | 0.00 | 0.00 |
| ATOM | 6837 | CB   | ILE | X | 453 | 48.427 | 32.216 | 28.105 | 0.00 | 0.00 |
| ATOM | 6838 | HB   | ILE | X | 453 | 48.660 | 31.412 | 28.803 | 0.00 | 0.00 |
| ATOM | 6839 | CG2  | ILE | X | 453 | 49.807 | 32.568 | 27.570 | 0.00 | 0.00 |
| ATOM | 6840 | HG21 | ILE | X | 453 | 49.674 | 33.306 | 26.778 | 0.00 | 0.00 |
| ATOM | 6841 | HG22 | ILE | X | 453 | 50.329 | 31.675 | 27.225 | 0.00 | 0.00 |
| ATOM | 6842 | HG23 | ILE | X | 453 | 50.325 | 33.048 | 28.400 | 0.00 | 0.00 |
| ATOM | 6843 | CG1  | ILE | X | 453 | 47.754 | 33.387 | 28.856 | 0.00 | 0.00 |
| ATOM | 6844 | HG12 | ILE | X | 453 | 46.740 | 33.168 | 29.191 | 0.00 | 0.00 |
| ATOM | 6845 | HG13 | ILE | X | 453 | 48.461 | 33.656 | 29.641 | 0.00 | 0.00 |
| ATOM | 6846 | CD1  | ILE | X | 453 | 47.633 | 34.655 | 28.071 | 0.00 | 0.00 |
| ATOM | 6847 | HD11 | ILE | X | 453 | 48.601 | 35.156 | 28.059 | 0.00 | 0.00 |
| ATOM | 6848 | HD12 | ILE | X | 453 | 46.938 | 35.323 | 28.581 | 0.00 | 0.00 |
| ATOM | 6849 | HD13 | ILE | X | 453 | 47.325 | 34.336 | 27.075 | 0.00 | 0.00 |
| ATOM | 6850 | C    | ILE | X | 453 | 48.296 | 30.434 | 26.233 | 0.00 | 0.00 |
| ATOM | 6851 | O    | ILE | X | 453 | 48.932 | 30.799 | 25.252 | 0.00 | 0.00 |
| ATOM | 6852 | N    | PRO | X | 454 | 48.343 | 29.163 | 26.640 | 0.00 | 0.00 |
| ATOM | 6853 | CD   | PRO | X | 454 | 47.910 | 28.684 | 27.980 | 0.00 | 0.00 |
| ATOM | 6854 | HD2  | PRO | X | 454 | 46.836 | 28.796 | 28.131 | 0.00 | 0.00 |
| ATOM | 6855 | HD3  | PRO | X | 454 | 48.363 | 29.274 | 28.777 | 0.00 | 0.00 |
| ATOM | 6856 | CG   | PRO | X | 454 | 48.327 | 27.231 | 28.067 | 0.00 | 0.00 |
| ATOM | 6857 | HG2  | PRO | X | 454 | 47.537 | 26.781 | 28.669 | 0.00 | 0.00 |
| ATOM | 6858 | HG3  | PRO | X | 454 | 49.225 | 27.044 | 28.655 | 0.00 | 0.00 |
| ATOM | 6859 | CB   | PRO | X | 454 | 48.442 | 26.794 | 26.644 | 0.00 | 0.00 |
| ATOM | 6860 | HB2  | PRO | X | 454 | 47.490 | 26.434 | 26.253 | 0.00 | 0.00 |
| ATOM | 6861 | HB3  | PRO | X | 454 | 49.164 | 26.007 | 26.429 | 0.00 | 0.00 |
| ATOM | 6862 | CA   | PRO | X | 454 | 48.971 | 28.059 | 25.971 | 0.00 | 0.00 |
| ATOM | 6863 | HA   | PRO | X | 454 | 50.045 | 28.223 | 26.057 | 0.00 | 0.00 |
| ATOM | 6864 | C    | PRO | X | 454 | 48.744 | 27.991 | 24.447 | 0.00 | 0.00 |
| ATOM | 6865 | O    | PRO | X | 454 | 49.560 | 27.511 | 23.672 | 0.00 | 0.00 |
| ATOM | 6866 | N    | LEU | X | 455 | 47.595 | 28.590 | 23.937 | 0.00 | 0.00 |
| ATOM | 6867 | H    | LEU | X | 455 | 46.960 | 29.095 | 24.538 | 0.00 | 0.00 |
| ATOM | 6868 | CA   | LEU | X | 455 | 47.199 | 28.505 | 22.572 | 0.00 | 0.00 |
| ATOM | 6869 | HA   | LEU | X | 455 | 47.474 | 27.520 | 22.195 | 0.00 | 0.00 |
| ATOM | 6870 | CB   | LEU | X | 455 | 45.688 | 28.718 | 22.467 | 0.00 | 0.00 |
| ATOM | 6871 | HB2  | LEU | X | 455 | 45.474 | 29.642 | 23.004 | 0.00 | 0.00 |
| ATOM | 6872 | HB3  | LEU | X | 455 | 45.453 | 28.901 | 21.418 | 0.00 | 0.00 |

|      |      |      |     |   |     |        |        |        |      |      |
|------|------|------|-----|---|-----|--------|--------|--------|------|------|
| ATOM | 6873 | CG   | LEU | X | 455 | 44.930 | 27.519 | 22.953 | 0.00 | 0.00 |
| ATOM | 6874 | HG   | LEU | X | 455 | 45.243 | 27.219 | 23.953 | 0.00 | 0.00 |
| ATOM | 6875 | CD1  | LEU | X | 455 | 43.458 | 27.916 | 23.096 | 0.00 | 0.00 |
| ATOM | 6876 | HD11 | LEU | X | 455 | 43.002 | 28.272 | 22.172 | 0.00 | 0.00 |
| ATOM | 6877 | HD12 | LEU | X | 455 | 43.416 | 28.745 | 23.803 | 0.00 | 0.00 |
| ATOM | 6878 | HD13 | LEU | X | 455 | 42.897 | 27.170 | 23.660 | 0.00 | 0.00 |
| ATOM | 6879 | CD2  | LEU | X | 455 | 44.899 | 26.350 | 22.019 | 0.00 | 0.00 |
| ATOM | 6880 | HD21 | LEU | X | 455 | 44.698 | 25.402 | 22.519 | 0.00 | 0.00 |
| ATOM | 6881 | HD22 | LEU | X | 455 | 44.063 | 26.375 | 21.320 | 0.00 | 0.00 |
| ATOM | 6882 | HD23 | LEU | X | 455 | 45.889 | 26.144 | 21.613 | 0.00 | 0.00 |
| ATOM | 6883 | C    | LEU | X | 455 | 47.855 | 29.621 | 21.728 | 0.00 | 0.00 |
| ATOM | 6884 | O    | LEU | X | 455 | 47.857 | 29.563 | 20.513 | 0.00 | 0.00 |
| ATOM | 6885 | N    | ASP | X | 456 | 48.501 | 30.620 | 22.359 | 0.00 | 0.00 |
| ATOM | 6886 | H    | ASP | X | 456 | 48.554 | 30.592 | 23.368 | 0.00 | 0.00 |
| ATOM | 6887 | CA   | ASP | X | 456 | 49.272 | 31.628 | 21.623 | 0.00 | 0.00 |
| ATOM | 6888 | HA   | ASP | X | 456 | 48.611 | 31.919 | 20.807 | 0.00 | 0.00 |
| ATOM | 6889 | CB   | ASP | X | 456 | 49.374 | 32.945 | 22.367 | 0.00 | 0.00 |
| ATOM | 6890 | HB2  | ASP | X | 456 | 48.369 | 33.309 | 22.582 | 0.00 | 0.00 |
| ATOM | 6891 | HB3  | ASP | X | 456 | 49.902 | 32.780 | 23.307 | 0.00 | 0.00 |
| ATOM | 6892 | CG   | ASP | X | 456 | 50.128 | 33.980 | 21.448 | 0.00 | 0.00 |
| ATOM | 6893 | OD1  | ASP | X | 456 | 51.385 | 33.935 | 21.409 | 0.00 | 0.00 |
| ATOM | 6894 | OD2  | ASP | X | 456 | 49.424 | 34.559 | 20.652 | 0.00 | 0.00 |
| ATOM | 6895 | C    | ASP | X | 456 | 50.563 | 31.026 | 21.084 | 0.00 | 0.00 |
| ATOM | 6896 | O    | ASP | X | 456 | 51.321 | 30.298 | 21.742 | 0.00 | 0.00 |
| ATOM | 6897 | N    | PRO | X | 457 | 50.839 | 31.189 | 19.735 | 0.00 | 0.00 |
| ATOM | 6898 | CD   | PRO | X | 457 | 49.911 | 31.769 | 18.712 | 0.00 | 0.00 |
| ATOM | 6899 | HD2  | PRO | X | 457 | 49.647 | 32.813 | 18.881 | 0.00 | 0.00 |
| ATOM | 6900 | HD3  | PRO | X | 457 | 49.015 | 31.149 | 18.672 | 0.00 | 0.00 |
| ATOM | 6901 | CG   | PRO | X | 457 | 50.597 | 31.679 | 17.355 | 0.00 | 0.00 |
| ATOM | 6902 | HG2  | PRO | X | 457 | 51.073 | 32.626 | 17.101 | 0.00 | 0.00 |
| ATOM | 6903 | HG3  | PRO | X | 457 | 49.847 | 31.393 | 16.618 | 0.00 | 0.00 |
| ATOM | 6904 | CB   | PRO | X | 457 | 51.622 | 30.617 | 17.667 | 0.00 | 0.00 |
| ATOM | 6905 | HB2  | PRO | X | 457 | 52.501 | 30.812 | 17.052 | 0.00 | 0.00 |
| ATOM | 6906 | HB3  | PRO | X | 457 | 51.162 | 29.654 | 17.445 | 0.00 | 0.00 |
| ATOM | 6907 | CA   | PRO | X | 457 | 51.957 | 30.516 | 19.111 | 0.00 | 0.00 |
| ATOM | 6908 | HA   | PRO | X | 457 | 51.963 | 29.434 | 19.247 | 0.00 | 0.00 |
| ATOM | 6909 | C    | PRO | X | 457 | 53.386 | 31.106 | 19.410 | 0.00 | 0.00 |
| ATOM | 6910 | O    | PRO | X | 457 | 54.410 | 30.518 | 19.097 | 0.00 | 0.00 |
| ATOM | 6911 | N    | SER | X | 458 | 53.434 | 32.401 | 19.859 | 0.00 | 0.00 |
| ATOM | 6912 | H    | SER | X | 458 | 52.581 | 32.914 | 20.028 | 0.00 | 0.00 |
| ATOM | 6913 | CA   | SER | X | 458 | 54.655 | 33.265 | 19.977 | 0.00 | 0.00 |
| ATOM | 6914 | HA   | SER | X | 458 | 55.137 | 33.244 | 19.000 | 0.00 | 0.00 |
| ATOM | 6915 | CB   | SER | X | 458 | 54.262 | 34.649 | 20.474 | 0.00 | 0.00 |
| ATOM | 6916 | HB2  | SER | X | 458 | 55.174 | 35.247 | 20.461 | 0.00 | 0.00 |
| ATOM | 6917 | HB3  | SER | X | 458 | 53.464 | 35.028 | 19.836 | 0.00 | 0.00 |
| ATOM | 6918 | OG   | SER | X | 458 | 53.814 | 34.622 | 21.818 | 0.00 | 0.00 |
| ATOM | 6919 | HG   | SER | X | 458 | 52.860 | 34.544 | 21.744 | 0.00 | 0.00 |
| ATOM | 6920 | C    | SER | X | 458 | 55.819 | 32.677 | 20.845 | 0.00 | 0.00 |
| ATOM | 6921 | O    | SER | X | 458 | 57.051 | 32.992 | 20.610 | 0.00 | 0.00 |
| ATOM | 6922 | N    | ARG | X | 459 | 55.514 | 31.611 | 21.663 | 0.00 | 0.00 |
| ATOM | 6923 | H    | ARG | X | 459 | 54.591 | 31.262 | 21.448 | 0.00 | 0.00 |
| ATOM | 6924 | CA   | ARG | X | 459 | 56.393 | 30.951 | 22.656 | 0.00 | 0.00 |
| ATOM | 6925 | HA   | ARG | X | 459 | 57.390 | 30.888 | 22.220 | 0.00 | 0.00 |
| ATOM | 6926 | CB   | ARG | X | 459 | 56.429 | 31.790 | 24.019 | 0.00 | 0.00 |
| ATOM | 6927 | HB2  | ARG | X | 459 | 57.149 | 31.258 | 24.641 | 0.00 | 0.00 |
| ATOM | 6928 | HB3  | ARG | X | 459 | 56.907 | 32.744 | 23.800 | 0.00 | 0.00 |
| ATOM | 6929 | CG   | ARG | X | 459 | 55.087 | 32.006 | 24.842 | 0.00 | 0.00 |
| ATOM | 6930 | HG2  | ARG | X | 459 | 54.426 | 32.718 | 24.348 | 0.00 | 0.00 |
| ATOM | 6931 | HG3  | ARG | X | 459 | 54.563 | 31.060 | 24.981 | 0.00 | 0.00 |
| ATOM | 6932 | CD   | ARG | X | 459 | 55.318 | 32.562 | 26.225 | 0.00 | 0.00 |
| ATOM | 6933 | HD2  | ARG | X | 459 | 56.073 | 31.995 | 26.769 | 0.00 | 0.00 |
| ATOM | 6934 | HD3  | ARG | X | 459 | 55.685 | 33.574 | 26.053 | 0.00 | 0.00 |
| ATOM | 6935 | NE   | ARG | X | 459 | 54.092 | 32.761 | 27.051 | 0.00 | 0.00 |
| ATOM | 6936 | HE   | ARG | X | 459 | 53.271 | 32.903 | 26.480 | 0.00 | 0.00 |
| ATOM | 6937 | CZ   | ARG | X | 459 | 54.021 | 32.816 | 28.376 | 0.00 | 0.00 |
| ATOM | 6938 | NH1  | ARG | X | 459 | 54.998 | 32.419 | 29.161 | 0.00 | 0.00 |
| ATOM | 6939 | HH11 | ARG | X | 459 | 55.939 | 32.527 | 28.810 | 0.00 | 0.00 |

|      |      |      |     |   |     |        |        |        |      |      |
|------|------|------|-----|---|-----|--------|--------|--------|------|------|
| ATOM | 6940 | HH12 | ARG | X | 459 | 54.763 | 32.408 | 30.143 | 0.00 | 0.00 |
| ATOM | 6941 | NH2  | ARG | X | 459 | 52.856 | 33.128 | 28.944 | 0.00 | 0.00 |
| ATOM | 6942 | HH21 | ARG | X | 459 | 52.092 | 33.623 | 28.505 | 0.00 | 0.00 |
| ATOM | 6943 | HH22 | ARG | X | 459 | 52.729 | 32.934 | 29.927 | 0.00 | 0.00 |
| ATOM | 6944 | C    | ARG | X | 459 | 55.783 | 29.555 | 22.824 | 0.00 | 0.00 |
| ATOM | 6945 | O    | ARG | X | 459 | 54.579 | 29.326 | 22.610 | 0.00 | 0.00 |
| ATOM | 6946 | N    | ASN | X | 460 | 56.644 | 28.506 | 23.129 | 0.00 | 0.00 |
| ATOM | 6947 | H    | ASN | X | 460 | 57.509 | 28.779 | 23.573 | 0.00 | 0.00 |
| ATOM | 6948 | CA   | ASN | X | 460 | 56.224 | 27.114 | 23.068 | 0.00 | 0.00 |
| ATOM | 6949 | HA   | ASN | X | 460 | 55.334 | 27.058 | 22.442 | 0.00 | 0.00 |
| ATOM | 6950 | CB   | ASN | X | 460 | 57.283 | 26.271 | 22.369 | 0.00 | 0.00 |
| ATOM | 6951 | HB2  | ASN | X | 460 | 57.588 | 26.869 | 21.511 | 0.00 | 0.00 |
| ATOM | 6952 | HB3  | ASN | X | 460 | 58.105 | 26.201 | 23.081 | 0.00 | 0.00 |
| ATOM | 6953 | CG   | ASN | X | 460 | 56.767 | 24.901 | 21.946 | 0.00 | 0.00 |
| ATOM | 6954 | OD1  | ASN | X | 460 | 56.452 | 24.082 | 22.812 | 0.00 | 0.00 |
| ATOM | 6955 | ND2  | ASN | X | 460 | 56.419 | 24.755 | 20.692 | 0.00 | 0.00 |
| ATOM | 6956 | HD21 | ASN | X | 460 | 55.834 | 23.960 | 20.479 | 0.00 | 0.00 |
| ATOM | 6957 | HD22 | ASN | X | 460 | 56.791 | 25.366 | 19.979 | 0.00 | 0.00 |
| ATOM | 6958 | C    | ASN | X | 460 | 55.850 | 26.646 | 24.495 | 0.00 | 0.00 |
| ATOM | 6959 | O    | ASN | X | 460 | 56.679 | 26.211 | 25.232 | 0.00 | 0.00 |
| ATOM | 6960 | N    | TYR | X | 461 | 54.591 | 26.754 | 24.944 | 0.00 | 0.00 |
| ATOM | 6961 | H    | TYR | X | 461 | 53.892 | 27.156 | 24.335 | 0.00 | 0.00 |
| ATOM | 6962 | CA   | TYR | X | 461 | 53.967 | 25.723 | 25.808 | 0.00 | 0.00 |
| ATOM | 6963 | HA   | TYR | X | 461 | 54.670 | 25.578 | 26.629 | 0.00 | 0.00 |
| ATOM | 6964 | CB   | TYR | X | 461 | 52.623 | 26.185 | 26.286 | 0.00 | 0.00 |
| ATOM | 6965 | HB2  | TYR | X | 461 | 51.963 | 26.290 | 25.424 | 0.00 | 0.00 |
| ATOM | 6966 | HB3  | TYR | X | 461 | 52.115 | 25.412 | 26.862 | 0.00 | 0.00 |
| ATOM | 6967 | CG   | TYR | X | 461 | 52.544 | 27.321 | 27.277 | 0.00 | 0.00 |
| ATOM | 6968 | CD1  | TYR | X | 461 | 52.728 | 28.608 | 26.851 | 0.00 | 0.00 |
| ATOM | 6969 | HD1  | TYR | X | 461 | 52.811 | 28.781 | 25.788 | 0.00 | 0.00 |
| ATOM | 6970 | CE1  | TYR | X | 461 | 52.523 | 29.692 | 27.771 | 0.00 | 0.00 |
| ATOM | 6971 | HE1  | TYR | X | 461 | 52.554 | 30.715 | 27.424 | 0.00 | 0.00 |
| ATOM | 6972 | CZ   | TYR | X | 461 | 52.175 | 29.437 | 29.099 | 0.00 | 0.00 |
| ATOM | 6973 | OH   | TYR | X | 461 | 51.880 | 30.522 | 29.848 | 0.00 | 0.00 |
| ATOM | 6974 | HH   | TYR | X | 461 | 51.649 | 30.341 | 30.762 | 0.00 | 0.00 |
| ATOM | 6975 | CE2  | TYR | X | 461 | 52.066 | 28.100 | 29.553 | 0.00 | 0.00 |
| ATOM | 6976 | HE2  | TYR | X | 461 | 51.803 | 27.888 | 30.579 | 0.00 | 0.00 |
| ATOM | 6977 | CD2  | TYR | X | 461 | 52.282 | 27.093 | 28.643 | 0.00 | 0.00 |
| ATOM | 6978 | HD2  | TYR | X | 461 | 52.271 | 26.049 | 28.919 | 0.00 | 0.00 |
| ATOM | 6979 | C    | TYR | X | 461 | 53.863 | 24.446 | 24.996 | 0.00 | 0.00 |
| ATOM | 6980 | O    | TYR | X | 461 | 53.742 | 24.419 | 23.749 | 0.00 | 0.00 |
| ATOM | 6981 | N    | THR | X | 462 | 53.832 | 23.288 | 25.669 | 0.00 | 0.00 |
| ATOM | 6982 | H    | THR | X | 462 | 53.695 | 23.403 | 26.663 | 0.00 | 0.00 |
| ATOM | 6983 | CA   | THR | X | 462 | 53.672 | 22.003 | 25.028 | 0.00 | 0.00 |
| ATOM | 6984 | HA   | THR | X | 462 | 54.311 | 21.881 | 24.154 | 0.00 | 0.00 |
| ATOM | 6985 | CB   | THR | X | 462 | 53.934 | 20.835 | 25.975 | 0.00 | 0.00 |
| ATOM | 6986 | HB   | THR | X | 462 | 53.679 | 19.912 | 25.455 | 0.00 | 0.00 |
| ATOM | 6987 | CG2  | THR | X | 462 | 55.412 | 20.726 | 26.332 | 0.00 | 0.00 |
| ATOM | 6988 | HG21 | THR | X | 462 | 55.780 | 21.344 | 27.150 | 0.00 | 0.00 |
| ATOM | 6989 | HG22 | THR | X | 462 | 56.009 | 21.031 | 25.473 | 0.00 | 0.00 |
| ATOM | 6990 | HG23 | THR | X | 462 | 55.640 | 19.662 | 26.394 | 0.00 | 0.00 |
| ATOM | 6991 | OG1  | THR | X | 462 | 53.214 | 20.955 | 27.200 | 0.00 | 0.00 |
| ATOM | 6992 | HG1  | THR | X | 462 | 53.478 | 21.801 | 27.570 | 0.00 | 0.00 |
| ATOM | 6993 | C    | THR | X | 462 | 52.196 | 21.840 | 24.519 | 0.00 | 0.00 |
| ATOM | 6994 | O    | THR | X | 462 | 51.319 | 22.701 | 24.731 | 0.00 | 0.00 |
| ATOM | 6995 | N    | ALA | X | 463 | 51.897 | 20.779 | 23.835 | 0.00 | 0.00 |
| ATOM | 6996 | H    | ALA | X | 463 | 52.681 | 20.232 | 23.511 | 0.00 | 0.00 |
| ATOM | 6997 | CA   | ALA | X | 463 | 50.537 | 20.345 | 23.534 | 0.00 | 0.00 |
| ATOM | 6998 | HA   | ALA | X | 463 | 50.050 | 21.169 | 23.012 | 0.00 | 0.00 |
| ATOM | 6999 | CB   | ALA | X | 463 | 50.716 | 19.170 | 22.569 | 0.00 | 0.00 |
| ATOM | 7000 | HB1  | ALA | X | 463 | 51.389 | 19.360 | 21.734 | 0.00 | 0.00 |
| ATOM | 7001 | HB2  | ALA | X | 463 | 49.771 | 19.034 | 22.043 | 0.00 | 0.00 |
| ATOM | 7002 | HB3  | ALA | X | 463 | 51.049 | 18.242 | 23.034 | 0.00 | 0.00 |
| ATOM | 7003 | C    | ALA | X | 463 | 49.699 | 19.907 | 24.664 | 0.00 | 0.00 |
| ATOM | 7004 | O    | ALA | X | 463 | 48.456 | 19.984 | 24.699 | 0.00 | 0.00 |
| ATOM | 7005 | N    | GLU | X | 464 | 50.380 | 19.335 | 25.707 | 0.00 | 0.00 |
| ATOM | 7006 | H    | GLU | X | 464 | 51.380 | 19.224 | 25.620 | 0.00 | 0.00 |

|      |      |      |     |   |     |        |        |        |      |      |
|------|------|------|-----|---|-----|--------|--------|--------|------|------|
| ATOM | 7007 | CA   | GLU | X | 464 | 49.775 | 18.838 | 26.926 | 0.00 | 0.00 |
| ATOM | 7008 | HA   | GLU | X | 464 | 48.939 | 18.188 | 26.667 | 0.00 | 0.00 |
| ATOM | 7009 | CB   | GLU | X | 464 | 50.888 | 18.054 | 27.696 | 0.00 | 0.00 |
| ATOM | 7010 | HB2  | GLU | X | 464 | 51.411 | 17.365 | 27.033 | 0.00 | 0.00 |
| ATOM | 7011 | HB3  | GLU | X | 464 | 51.579 | 18.744 | 28.181 | 0.00 | 0.00 |
| ATOM | 7012 | CG   | GLU | X | 464 | 50.359 | 17.097 | 28.676 | 0.00 | 0.00 |
| ATOM | 7013 | HG2  | GLU | X | 464 | 51.181 | 16.458 | 28.997 | 0.00 | 0.00 |
| ATOM | 7014 | HG3  | GLU | X | 464 | 49.891 | 17.661 | 29.483 | 0.00 | 0.00 |
| ATOM | 7015 | CD   | GLU | X | 464 | 49.321 | 16.156 | 28.088 | 0.00 | 0.00 |
| ATOM | 7016 | OE1  | GLU | X | 464 | 48.164 | 16.118 | 28.581 | 0.00 | 0.00 |
| ATOM | 7017 | OE2  | GLU | X | 464 | 49.704 | 15.428 | 27.163 | 0.00 | 0.00 |
| ATOM | 7018 | C    | GLU | X | 464 | 49.128 | 20.068 | 27.682 | 0.00 | 0.00 |
| ATOM | 7019 | O    | GLU | X | 464 | 47.966 | 19.916 | 28.156 | 0.00 | 0.00 |
| ATOM | 7020 | N    | GLU | X | 465 | 49.727 | 21.200 | 27.630 | 0.00 | 0.00 |
| ATOM | 7021 | H    | GLU | X | 465 | 50.565 | 21.261 | 27.069 | 0.00 | 0.00 |
| ATOM | 7022 | CA   | GLU | X | 465 | 49.264 | 22.489 | 28.180 | 0.00 | 0.00 |
| ATOM | 7023 | HA   | GLU | X | 465 | 48.893 | 22.103 | 29.129 | 0.00 | 0.00 |
| ATOM | 7024 | CB   | GLU | X | 465 | 50.493 | 23.364 | 28.387 | 0.00 | 0.00 |
| ATOM | 7025 | HB2  | GLU | X | 465 | 50.967 | 23.443 | 27.409 | 0.00 | 0.00 |
| ATOM | 7026 | HB3  | GLU | X | 465 | 50.264 | 24.369 | 28.743 | 0.00 | 0.00 |
| ATOM | 7027 | CG   | GLU | X | 465 | 51.349 | 22.731 | 29.569 | 0.00 | 0.00 |
| ATOM | 7028 | HG2  | GLU | X | 465 | 50.872 | 22.850 | 30.541 | 0.00 | 0.00 |
| ATOM | 7029 | HG3  | GLU | X | 465 | 51.629 | 21.690 | 29.403 | 0.00 | 0.00 |
| ATOM | 7030 | CD   | GLU | X | 465 | 52.809 | 23.285 | 29.534 | 0.00 | 0.00 |
| ATOM | 7031 | OE1  | GLU | X | 465 | 53.388 | 23.243 | 28.438 | 0.00 | 0.00 |
| ATOM | 7032 | OE2  | GLU | X | 465 | 53.399 | 23.714 | 30.571 | 0.00 | 0.00 |
| ATOM | 7033 | C    | GLU | X | 465 | 48.214 | 23.186 | 27.317 | 0.00 | 0.00 |
| ATOM | 7034 | O    | GLU | X | 465 | 47.175 | 23.671 | 27.794 | 0.00 | 0.00 |
| ATOM | 7035 | N    | LYS | X | 466 | 48.293 | 23.097 | 25.959 | 0.00 | 0.00 |
| ATOM | 7036 | H    | LYS | X | 466 | 49.117 | 22.641 | 25.595 | 0.00 | 0.00 |
| ATOM | 7037 | CA   | LYS | X | 466 | 47.096 | 23.542 | 25.196 | 0.00 | 0.00 |
| ATOM | 7038 | HA   | LYS | X | 466 | 46.802 | 24.575 | 25.382 | 0.00 | 0.00 |
| ATOM | 7039 | CB   | LYS | X | 466 | 47.427 | 23.499 | 23.720 | 0.00 | 0.00 |
| ATOM | 7040 | HB2  | LYS | X | 466 | 47.986 | 22.595 | 23.481 | 0.00 | 0.00 |
| ATOM | 7041 | HB3  | LYS | X | 466 | 46.527 | 23.570 | 23.109 | 0.00 | 0.00 |
| ATOM | 7042 | CG   | LYS | X | 466 | 48.287 | 24.656 | 23.281 | 0.00 | 0.00 |
| ATOM | 7043 | HG2  | LYS | X | 466 | 47.786 | 25.585 | 23.555 | 0.00 | 0.00 |
| ATOM | 7044 | HG3  | LYS | X | 466 | 49.126 | 24.800 | 23.962 | 0.00 | 0.00 |
| ATOM | 7045 | CD   | LYS | X | 466 | 48.661 | 24.530 | 21.784 | 0.00 | 0.00 |
| ATOM | 7046 | HD2  | LYS | X | 466 | 48.935 | 23.523 | 21.471 | 0.00 | 0.00 |
| ATOM | 7047 | HD3  | LYS | X | 466 | 47.829 | 24.739 | 21.113 | 0.00 | 0.00 |
| ATOM | 7048 | CE   | LYS | X | 466 | 49.743 | 25.565 | 21.430 | 0.00 | 0.00 |
| ATOM | 7049 | HE2  | LYS | X | 466 | 49.954 | 25.645 | 20.364 | 0.00 | 0.00 |
| ATOM | 7050 | HE3  | LYS | X | 466 | 49.290 | 26.506 | 21.741 | 0.00 | 0.00 |
| ATOM | 7051 | NZ   | LYS | X | 466 | 51.011 | 25.299 | 22.079 | 0.00 | 0.00 |
| ATOM | 7052 | HZ1  | LYS | X | 466 | 50.912 | 25.394 | 23.080 | 0.00 | 0.00 |
| ATOM | 7053 | HZ2  | LYS | X | 466 | 51.283 | 24.398 | 21.712 | 0.00 | 0.00 |
| ATOM | 7054 | HZ3  | LYS | X | 466 | 51.676 | 26.003 | 21.792 | 0.00 | 0.00 |
| ATOM | 7055 | C    | LYS | X | 466 | 45.833 | 22.801 | 25.530 | 0.00 | 0.00 |
| ATOM | 7056 | O    | LYS | X | 466 | 44.871 | 23.496 | 25.830 | 0.00 | 0.00 |
| ATOM | 7057 | N    | ILE | X | 467 | 45.768 | 21.466 | 25.618 | 0.00 | 0.00 |
| ATOM | 7058 | H    | ILE | X | 467 | 46.636 | 20.950 | 25.591 | 0.00 | 0.00 |
| ATOM | 7059 | CA   | ILE | X | 467 | 44.433 | 20.729 | 25.929 | 0.00 | 0.00 |
| ATOM | 7060 | HA   | ILE | X | 467 | 43.707 | 21.209 | 25.273 | 0.00 | 0.00 |
| ATOM | 7061 | CB   | ILE | X | 467 | 44.455 | 19.209 | 25.527 | 0.00 | 0.00 |
| ATOM | 7062 | HB   | ILE | X | 467 | 44.861 | 19.064 | 24.526 | 0.00 | 0.00 |
| ATOM | 7063 | CG2  | ILE | X | 467 | 45.467 | 18.383 | 26.360 | 0.00 | 0.00 |
| ATOM | 7064 | HG21 | ILE | X | 467 | 46.352 | 18.997 | 26.531 | 0.00 | 0.00 |
| ATOM | 7065 | HG22 | ILE | X | 467 | 45.777 | 17.459 | 25.873 | 0.00 | 0.00 |
| ATOM | 7066 | HG23 | ILE | X | 467 | 44.966 | 18.097 | 27.285 | 0.00 | 0.00 |
| ATOM | 7067 | CG1  | ILE | X | 467 | 43.008 | 18.596 | 25.520 | 0.00 | 0.00 |
| ATOM | 7068 | HG12 | ILE | X | 467 | 43.039 | 17.514 | 25.393 | 0.00 | 0.00 |
| ATOM | 7069 | HG13 | ILE | X | 467 | 42.622 | 18.705 | 26.534 | 0.00 | 0.00 |
| ATOM | 7070 | CD1  | ILE | X | 467 | 41.980 | 19.227 | 24.532 | 0.00 | 0.00 |
| ATOM | 7071 | HD11 | ILE | X | 467 | 41.637 | 20.154 | 24.993 | 0.00 | 0.00 |
| ATOM | 7072 | HD12 | ILE | X | 467 | 41.141 | 18.571 | 24.304 | 0.00 | 0.00 |
| ATOM | 7073 | HD13 | ILE | X | 467 | 42.590 | 19.410 | 23.647 | 0.00 | 0.00 |

|      |      |      |     |   |     |        |        |        |      |      |
|------|------|------|-----|---|-----|--------|--------|--------|------|------|
| ATOM | 7074 | C    | ILE | X | 467 | 44.000 | 20.978 | 27.374 | 0.00 | 0.00 |
| ATOM | 7075 | O    | ILE | X | 467 | 42.801 | 21.100 | 27.569 | 0.00 | 0.00 |
| ATOM | 7076 | N    | PHE | X | 468 | 44.929 | 21.161 | 28.327 | 0.00 | 0.00 |
| ATOM | 7077 | H    | PHE | X | 468 | 45.863 | 20.858 | 28.092 | 0.00 | 0.00 |
| ATOM | 7078 | CA   | PHE | X | 468 | 44.682 | 21.633 | 29.689 | 0.00 | 0.00 |
| ATOM | 7079 | HA   | PHE | X | 468 | 43.941 | 20.972 | 30.140 | 0.00 | 0.00 |
| ATOM | 7080 | CB   | PHE | X | 468 | 45.997 | 21.549 | 30.570 | 0.00 | 0.00 |
| ATOM | 7081 | HB2  | PHE | X | 468 | 46.339 | 20.516 | 30.629 | 0.00 | 0.00 |
| ATOM | 7082 | HB3  | PHE | X | 468 | 46.804 | 22.013 | 30.004 | 0.00 | 0.00 |
| ATOM | 7083 | CG   | PHE | X | 468 | 46.004 | 22.038 | 31.966 | 0.00 | 0.00 |
| ATOM | 7084 | CD1  | PHE | X | 468 | 44.921 | 21.673 | 32.892 | 0.00 | 0.00 |
| ATOM | 7085 | HD1  | PHE | X | 468 | 44.064 | 21.228 | 32.407 | 0.00 | 0.00 |
| ATOM | 7086 | CE1  | PHE | X | 468 | 44.980 | 22.053 | 34.222 | 0.00 | 0.00 |
| ATOM | 7087 | HE1  | PHE | X | 468 | 44.274 | 21.805 | 35.001 | 0.00 | 0.00 |
| ATOM | 7088 | CZ   | PHE | X | 468 | 46.089 | 22.695 | 34.682 | 0.00 | 0.00 |
| ATOM | 7089 | HZ   | PHE | X | 468 | 46.056 | 22.936 | 35.734 | 0.00 | 0.00 |
| ATOM | 7090 | CE2  | PHE | X | 468 | 47.236 | 23.005 | 33.870 | 0.00 | 0.00 |
| ATOM | 7091 | HE2  | PHE | X | 468 | 48.191 | 23.327 | 34.259 | 0.00 | 0.00 |
| ATOM | 7092 | CD2  | PHE | X | 468 | 47.184 | 22.717 | 32.472 | 0.00 | 0.00 |
| ATOM | 7093 | HD2  | PHE | X | 468 | 48.047 | 22.913 | 31.853 | 0.00 | 0.00 |
| ATOM | 7094 | C    | PHE | X | 468 | 44.086 | 23.076 | 29.583 | 0.00 | 0.00 |
| ATOM | 7095 | O    | PHE | X | 468 | 43.101 | 23.355 | 30.299 | 0.00 | 0.00 |
| ATOM | 7096 | N    | ALA | X | 469 | 44.574 | 24.027 | 28.774 | 0.00 | 0.00 |
| ATOM | 7097 | H    | ALA | X | 469 | 45.455 | 23.892 | 28.299 | 0.00 | 0.00 |
| ATOM | 7098 | CA   | ALA | X | 469 | 43.889 | 25.344 | 28.634 | 0.00 | 0.00 |
| ATOM | 7099 | HA   | ALA | X | 469 | 43.790 | 25.915 | 29.557 | 0.00 | 0.00 |
| ATOM | 7100 | CB   | ALA | X | 469 | 44.641 | 26.252 | 27.621 | 0.00 | 0.00 |
| ATOM | 7101 | HB1  | ALA | X | 469 | 44.140 | 27.220 | 27.631 | 0.00 | 0.00 |
| ATOM | 7102 | HB2  | ALA | X | 469 | 44.675 | 25.795 | 26.632 | 0.00 | 0.00 |
| ATOM | 7103 | HB3  | ALA | X | 469 | 45.693 | 26.274 | 27.905 | 0.00 | 0.00 |
| ATOM | 7104 | C    | ALA | X | 469 | 42.480 | 25.151 | 28.133 | 0.00 | 0.00 |
| ATOM | 7105 | O    | ALA | X | 469 | 41.578 | 25.840 | 28.700 | 0.00 | 0.00 |
| ATOM | 7106 | N    | GLN | X | 470 | 42.126 | 24.138 | 27.315 | 0.00 | 0.00 |
| ATOM | 7107 | H    | GLN | X | 470 | 42.850 | 23.604 | 26.857 | 0.00 | 0.00 |
| ATOM | 7108 | CA   | GLN | X | 470 | 40.744 | 23.907 | 26.946 | 0.00 | 0.00 |
| ATOM | 7109 | HA   | GLN | X | 470 | 40.329 | 24.909 | 26.836 | 0.00 | 0.00 |
| ATOM | 7110 | CB   | GLN | X | 470 | 40.606 | 23.090 | 25.700 | 0.00 | 0.00 |
| ATOM | 7111 | HB2  | GLN | X | 470 | 41.001 | 22.089 | 25.877 | 0.00 | 0.00 |
| ATOM | 7112 | HB3  | GLN | X | 470 | 39.550 | 22.834 | 25.614 | 0.00 | 0.00 |
| ATOM | 7113 | CG   | GLN | X | 470 | 41.252 | 23.690 | 24.503 | 0.00 | 0.00 |
| ATOM | 7114 | HG2  | GLN | X | 470 | 40.912 | 24.705 | 24.295 | 0.00 | 0.00 |
| ATOM | 7115 | HG3  | GLN | X | 470 | 42.325 | 23.578 | 24.657 | 0.00 | 0.00 |
| ATOM | 7116 | CD   | GLN | X | 470 | 40.731 | 22.880 | 23.256 | 0.00 | 0.00 |
| ATOM | 7117 | OE1  | GLN | X | 470 | 41.371 | 22.033 | 22.687 | 0.00 | 0.00 |
| ATOM | 7118 | NE2  | GLN | X | 470 | 39.575 | 23.326 | 22.773 | 0.00 | 0.00 |
| ATOM | 7119 | HE21 | GLN | X | 470 | 39.236 | 22.885 | 21.930 | 0.00 | 0.00 |
| ATOM | 7120 | HE22 | GLN | X | 470 | 39.168 | 24.159 | 23.174 | 0.00 | 0.00 |
| ATOM | 7121 | C    | GLN | X | 470 | 39.896 | 23.378 | 28.073 | 0.00 | 0.00 |
| ATOM | 7122 | O    | GLN | X | 470 | 38.724 | 23.784 | 28.067 | 0.00 | 0.00 |
| ATOM | 7123 | N    | ARG | X | 471 | 40.412 | 22.695 | 29.036 | 0.00 | 0.00 |
| ATOM | 7124 | H    | ARG | X | 471 | 41.371 | 22.420 | 28.878 | 0.00 | 0.00 |
| ATOM | 7125 | CA   | ARG | X | 471 | 39.710 | 22.328 | 30.242 | 0.00 | 0.00 |
| ATOM | 7126 | HA   | ARG | X | 471 | 38.722 | 21.922 | 30.025 | 0.00 | 0.00 |
| ATOM | 7127 | CB   | ARG | X | 471 | 40.481 | 21.245 | 31.035 | 0.00 | 0.00 |
| ATOM | 7128 | HB2  | ARG | X | 471 | 41.502 | 21.559 | 31.252 | 0.00 | 0.00 |
| ATOM | 7129 | HB3  | ARG | X | 471 | 39.899 | 20.962 | 31.912 | 0.00 | 0.00 |
| ATOM | 7130 | CG   | ARG | X | 471 | 40.761 | 20.007 | 30.214 | 0.00 | 0.00 |
| ATOM | 7131 | HG2  | ARG | X | 471 | 39.786 | 19.532 | 30.100 | 0.00 | 0.00 |
| ATOM | 7132 | HG3  | ARG | X | 471 | 41.170 | 20.295 | 29.246 | 0.00 | 0.00 |
| ATOM | 7133 | CD   | ARG | X | 471 | 41.677 | 18.989 | 30.922 | 0.00 | 0.00 |
| ATOM | 7134 | HD2  | ARG | X | 471 | 41.720 | 18.060 | 30.354 | 0.00 | 0.00 |
| ATOM | 7135 | HD3  | ARG | X | 471 | 42.686 | 19.394 | 31.008 | 0.00 | 0.00 |
| ATOM | 7136 | NE   | ARG | X | 471 | 41.120 | 18.694 | 32.294 | 0.00 | 0.00 |
| ATOM | 7137 | HE   | ARG | X | 471 | 40.120 | 18.764 | 32.416 | 0.00 | 0.00 |
| ATOM | 7138 | CZ   | ARG | X | 471 | 41.814 | 18.451 | 33.435 | 0.00 | 0.00 |
| ATOM | 7139 | NH1  | ARG | X | 471 | 43.119 | 18.268 | 33.471 | 0.00 | 0.00 |
| ATOM | 7140 | HH11 | ARG | X | 471 | 43.683 | 18.346 | 32.638 | 0.00 | 0.00 |



|      |      |      |     |   |     |        |        |        |      |      |
|------|------|------|-----|---|-----|--------|--------|--------|------|------|
| ATOM | 7141 | HH12 | ARG | X | 471 | 43.542 | 17.792 | 34.255 | 0.00 | 0.00 |
| ATOM | 7142 | NH2  | ARG | X | 471 | 41.236 | 18.172 | 34.559 | 0.00 | 0.00 |
| ATOM | 7143 | HH21 | ARG | X | 471 | 40.230 | 18.128 | 34.638 | 0.00 | 0.00 |
| ATOM | 7144 | HH22 | ARG | X | 471 | 41.822 | 17.985 | 35.360 | 0.00 | 0.00 |
| ATOM | 7145 | C    | ARG | X | 471 | 39.433 | 23.459 | 31.177 | 0.00 | 0.00 |
| ATOM | 7146 | O    | ARG | X | 471 | 38.239 | 23.586 | 31.501 | 0.00 | 0.00 |
| ATOM | 7147 | N    | LEU | X | 472 | 40.387 | 24.354 | 31.401 | 0.00 | 0.00 |
| ATOM | 7148 | H    | LEU | X | 472 | 41.292 | 24.248 | 30.964 | 0.00 | 0.00 |
| ATOM | 7149 | CA   | LEU | X | 472 | 40.257 | 25.419 | 32.430 | 0.00 | 0.00 |
| ATOM | 7150 | HA   | LEU | X | 472 | 39.656 | 24.933 | 33.199 | 0.00 | 0.00 |
| ATOM | 7151 | CB   | LEU | X | 472 | 41.567 | 25.959 | 32.992 | 0.00 | 0.00 |
| ATOM | 7152 | HB2  | LEU | X | 472 | 42.369 | 25.710 | 32.297 | 0.00 | 0.00 |
| ATOM | 7153 | HB3  | LEU | X | 472 | 41.545 | 27.041 | 33.123 | 0.00 | 0.00 |
| ATOM | 7154 | CG   | LEU | X | 472 | 41.883 | 25.308 | 34.383 | 0.00 | 0.00 |
| ATOM | 7155 | HG   | LEU | X | 472 | 41.137 | 25.577 | 35.132 | 0.00 | 0.00 |
| ATOM | 7156 | CD1  | LEU | X | 472 | 41.979 | 23.791 | 34.225 | 0.00 | 0.00 |
| ATOM | 7157 | HD11 | LEU | X | 472 | 42.660 | 23.610 | 33.394 | 0.00 | 0.00 |
| ATOM | 7158 | HD12 | LEU | X | 472 | 41.046 | 23.248 | 34.078 | 0.00 | 0.00 |
| ATOM | 7159 | HD13 | LEU | X | 472 | 42.402 | 23.361 | 35.133 | 0.00 | 0.00 |
| ATOM | 7160 | CD2  | LEU | X | 472 | 43.300 | 25.734 | 34.927 | 0.00 | 0.00 |
| ATOM | 7161 | HD21 | LEU | X | 472 | 44.075 | 25.604 | 34.172 | 0.00 | 0.00 |
| ATOM | 7162 | HD22 | LEU | X | 472 | 43.405 | 26.815 | 35.009 | 0.00 | 0.00 |
| ATOM | 7163 | HD23 | LEU | X | 472 | 43.622 | 25.187 | 35.812 | 0.00 | 0.00 |
| ATOM | 7164 | C    | LEU | X | 472 | 39.385 | 26.500 | 31.865 | 0.00 | 0.00 |
| ATOM | 7165 | O    | LEU | X | 472 | 38.535 | 27.012 | 32.654 | 0.00 | 0.00 |
| ATOM | 7166 | N    | MET | X | 473 | 39.554 | 26.895 | 30.590 | 0.00 | 0.00 |
| ATOM | 7167 | H    | MET | X | 473 | 40.209 | 26.471 | 29.949 | 0.00 | 0.00 |
| ATOM | 7168 | CA   | MET | X | 473 | 38.520 | 27.752 | 29.953 | 0.00 | 0.00 |
| ATOM | 7169 | HA   | MET | X | 473 | 38.503 | 28.726 | 30.442 | 0.00 | 0.00 |
| ATOM | 7170 | CB   | MET | X | 473 | 38.872 | 27.901 | 28.429 | 0.00 | 0.00 |
| ATOM | 7171 | HB2  | MET | X | 473 | 38.892 | 26.962 | 27.876 | 0.00 | 0.00 |
| ATOM | 7172 | HB3  | MET | X | 473 | 38.019 | 28.458 | 28.041 | 0.00 | 0.00 |
| ATOM | 7173 | CG   | MET | X | 473 | 40.229 | 28.721 | 28.289 | 0.00 | 0.00 |
| ATOM | 7174 | HG2  | MET | X | 473 | 40.357 | 29.296 | 29.206 | 0.00 | 0.00 |
| ATOM | 7175 | HG3  | MET | X | 473 | 41.066 | 28.034 | 28.415 | 0.00 | 0.00 |
| ATOM | 7176 | SD   | MET | X | 473 | 40.601 | 29.721 | 26.888 | 0.00 | 0.00 |
| ATOM | 7177 | CE   | MET | X | 473 | 40.150 | 28.699 | 25.412 | 0.00 | 0.00 |
| ATOM | 7178 | HE1  | MET | X | 473 | 40.056 | 27.654 | 25.709 | 0.00 | 0.00 |
| ATOM | 7179 | HE2  | MET | X | 473 | 39.131 | 28.919 | 25.094 | 0.00 | 0.00 |
| ATOM | 7180 | HE3  | MET | X | 473 | 40.880 | 28.786 | 24.607 | 0.00 | 0.00 |
| ATOM | 7181 | C    | MET | X | 473 | 37.080 | 27.215 | 30.119 | 0.00 | 0.00 |
| ATOM | 7182 | O    | MET | X | 473 | 36.134 | 27.925 | 30.325 | 0.00 | 0.00 |
| ATOM | 7183 | N    | ARG | X | 474 | 36.938 | 25.897 | 29.841 | 0.00 | 0.00 |
| ATOM | 7184 | H    | ARG | X | 474 | 37.739 | 25.347 | 29.562 | 0.00 | 0.00 |
| ATOM | 7185 | CA   | ARG | X | 474 | 35.649 | 25.239 | 29.841 | 0.00 | 0.00 |
| ATOM | 7186 | HA   | ARG | X | 474 | 35.022 | 25.823 | 29.167 | 0.00 | 0.00 |
| ATOM | 7187 | CB   | ARG | X | 474 | 35.855 | 23.930 | 29.177 | 0.00 | 0.00 |
| ATOM | 7188 | HB2  | ARG | X | 474 | 36.142 | 24.164 | 28.152 | 0.00 | 0.00 |
| ATOM | 7189 | HB3  | ARG | X | 474 | 36.654 | 23.377 | 29.671 | 0.00 | 0.00 |
| ATOM | 7190 | CG   | ARG | X | 474 | 34.604 | 23.059 | 29.061 | 0.00 | 0.00 |
| ATOM | 7191 | HG2  | ARG | X | 474 | 34.936 | 22.125 | 28.609 | 0.00 | 0.00 |
| ATOM | 7192 | HG3  | ARG | X | 474 | 34.171 | 22.853 | 30.040 | 0.00 | 0.00 |
| ATOM | 7193 | CD   | ARG | X | 474 | 33.577 | 23.654 | 28.125 | 0.00 | 0.00 |
| ATOM | 7194 | HD2  | ARG | X | 474 | 33.101 | 24.516 | 28.593 | 0.00 | 0.00 |
| ATOM | 7195 | HD3  | ARG | X | 474 | 34.097 | 23.895 | 27.197 | 0.00 | 0.00 |
| ATOM | 7196 | NE   | ARG | X | 474 | 32.495 | 22.791 | 27.861 | 0.00 | 0.00 |
| ATOM | 7197 | HE   | ARG | X | 474 | 32.394 | 21.911 | 28.347 | 0.00 | 0.00 |
| ATOM | 7198 | CZ   | ARG | X | 474 | 31.424 | 23.100 | 27.192 | 0.00 | 0.00 |
| ATOM | 7199 | NH1  | ARG | X | 474 | 31.381 | 24.212 | 26.395 | 0.00 | 0.00 |
| ATOM | 7200 | HH11 | ARG | X | 474 | 32.255 | 24.703 | 26.274 | 0.00 | 0.00 |
| ATOM | 7201 | HH12 | ARG | X | 474 | 30.541 | 24.506 | 25.917 | 0.00 | 0.00 |
| ATOM | 7202 | NH2  | ARG | X | 474 | 30.388 | 22.280 | 27.316 | 0.00 | 0.00 |
| ATOM | 7203 | HH21 | ARG | X | 474 | 30.532 | 21.450 | 27.874 | 0.00 | 0.00 |
| ATOM | 7204 | HH22 | ARG | X | 474 | 29.537 | 22.390 | 26.784 | 0.00 | 0.00 |
| ATOM | 7205 | C    | ARG | X | 474 | 35.098 | 25.293 | 31.244 | 0.00 | 0.00 |
| ATOM | 7206 | O    | ARG | X | 474 | 33.945 | 25.608 | 31.367 | 0.00 | 0.00 |
| ATOM | 7207 | N    | TYR | X | 475 | 35.836 | 24.800 | 32.264 | 0.00 | 0.00 |

|      |      |      |     |   |     |        |        |        |      |      |
|------|------|------|-----|---|-----|--------|--------|--------|------|------|
| ATOM | 7208 | H    | TYR | X | 475 | 36.809 | 24.567 | 32.125 | 0.00 | 0.00 |
| ATOM | 7209 | CA   | TYR | X | 475 | 35.468 | 24.866 | 33.654 | 0.00 | 0.00 |
| ATOM | 7210 | HA   | TYR | X | 475 | 34.627 | 24.180 | 33.750 | 0.00 | 0.00 |
| ATOM | 7211 | CB   | TYR | X | 475 | 36.690 | 24.283 | 34.343 | 0.00 | 0.00 |
| ATOM | 7212 | HB2  | TYR | X | 475 | 37.574 | 24.868 | 34.090 | 0.00 | 0.00 |
| ATOM | 7213 | HB3  | TYR | X | 475 | 36.513 | 24.302 | 35.419 | 0.00 | 0.00 |
| ATOM | 7214 | CG   | TYR | X | 475 | 37.122 | 22.831 | 34.036 | 0.00 | 0.00 |
| ATOM | 7215 | CD1  | TYR | X | 475 | 36.329 | 21.815 | 33.373 | 0.00 | 0.00 |
| ATOM | 7216 | HD1  | TYR | X | 475 | 35.430 | 22.090 | 32.841 | 0.00 | 0.00 |
| ATOM | 7217 | CE1  | TYR | X | 475 | 36.696 | 20.492 | 33.244 | 0.00 | 0.00 |
| ATOM | 7218 | HE1  | TYR | X | 475 | 35.988 | 19.881 | 32.703 | 0.00 | 0.00 |
| ATOM | 7219 | CZ   | TYR | X | 475 | 37.873 | 20.055 | 33.960 | 0.00 | 0.00 |
| ATOM | 7220 | OH   | TYR | X | 475 | 38.192 | 18.696 | 34.083 | 0.00 | 0.00 |
| ATOM | 7221 | HH   | TYR | X | 475 | 37.534 | 18.123 | 33.684 | 0.00 | 0.00 |
| ATOM | 7222 | CE2  | TYR | X | 475 | 38.640 | 20.976 | 34.622 | 0.00 | 0.00 |
| ATOM | 7223 | HE2  | TYR | X | 475 | 39.461 | 20.606 | 35.218 | 0.00 | 0.00 |
| ATOM | 7224 | CD2  | TYR | X | 475 | 38.331 | 22.364 | 34.605 | 0.00 | 0.00 |
| ATOM | 7225 | HD2  | TYR | X | 475 | 38.978 | 23.091 | 35.074 | 0.00 | 0.00 |
| ATOM | 7226 | C    | TYR | X | 475 | 35.037 | 26.307 | 34.127 | 0.00 | 0.00 |
| ATOM | 7227 | O    | TYR | X | 475 | 33.947 | 26.568 | 34.668 | 0.00 | 0.00 |
| ATOM | 7228 | N    | TRP | X | 476 | 35.824 | 27.316 | 33.747 | 0.00 | 0.00 |
| ATOM | 7229 | H    | TRP | X | 476 | 36.647 | 27.157 | 33.184 | 0.00 | 0.00 |
| ATOM | 7230 | CA   | TRP | X | 476 | 35.453 | 28.709 | 34.081 | 0.00 | 0.00 |
| ATOM | 7231 | HA   | TRP | X | 476 | 35.207 | 28.725 | 35.143 | 0.00 | 0.00 |
| ATOM | 7232 | CB   | TRP | X | 476 | 36.603 | 29.650 | 33.968 | 0.00 | 0.00 |
| ATOM | 7233 | HB2  | TRP | X | 476 | 37.310 | 29.368 | 33.188 | 0.00 | 0.00 |
| ATOM | 7234 | HB3  | TRP | X | 476 | 36.330 | 30.605 | 33.519 | 0.00 | 0.00 |
| ATOM | 7235 | CG   | TRP | X | 476 | 37.344 | 29.884 | 35.225 | 0.00 | 0.00 |
| ATOM | 7236 | CD1  | TRP | X | 476 | 37.383 | 31.056 | 35.865 | 0.00 | 0.00 |
| ATOM | 7237 | HD1  | TRP | X | 476 | 36.961 | 31.931 | 35.394 | 0.00 | 0.00 |
| ATOM | 7238 | NE1  | TRP | X | 476 | 38.315 | 31.009 | 36.963 | 0.00 | 0.00 |
| ATOM | 7239 | HE1  | TRP | X | 476 | 38.696 | 31.763 | 37.517 | 0.00 | 0.00 |
| ATOM | 7240 | CE2  | TRP | X | 476 | 38.789 | 29.741 | 37.086 | 0.00 | 0.00 |
| ATOM | 7241 | CZ2  | TRP | X | 476 | 39.667 | 29.190 | 38.056 | 0.00 | 0.00 |
| ATOM | 7242 | HZ2  | TRP | X | 476 | 40.048 | 29.770 | 38.883 | 0.00 | 0.00 |
| ATOM | 7243 | CH2  | TRP | X | 476 | 39.971 | 27.857 | 37.971 | 0.00 | 0.00 |
| ATOM | 7244 | HH2  | TRP | X | 476 | 40.612 | 27.425 | 38.725 | 0.00 | 0.00 |
| ATOM | 7245 | CZ3  | TRP | X | 476 | 39.434 | 27.052 | 36.929 | 0.00 | 0.00 |
| ATOM | 7246 | HZ3  | TRP | X | 476 | 39.598 | 25.985 | 36.949 | 0.00 | 0.00 |
| ATOM | 7247 | CE3  | TRP | X | 476 | 38.482 | 27.615 | 36.065 | 0.00 | 0.00 |
| ATOM | 7248 | HE3  | TRP | X | 476 | 38.027 | 27.023 | 35.284 | 0.00 | 0.00 |
| ATOM | 7249 | CD2  | TRP | X | 476 | 38.190 | 28.967 | 36.033 | 0.00 | 0.00 |
| ATOM | 7250 | C    | TRP | X | 476 | 34.276 | 29.319 | 33.347 | 0.00 | 0.00 |
| ATOM | 7251 | O    | TRP | X | 476 | 33.447 | 29.941 | 33.951 | 0.00 | 0.00 |
| ATOM | 7252 | N    | ALA | X | 477 | 34.210 | 28.997 | 32.028 | 0.00 | 0.00 |
| ATOM | 7253 | H    | ALA | X | 477 | 34.964 | 28.581 | 31.502 | 0.00 | 0.00 |
| ATOM | 7254 | CA   | ALA | X | 477 | 32.975 | 29.330 | 31.322 | 0.00 | 0.00 |
| ATOM | 7255 | HA   | ALA | X | 477 | 32.705 | 30.355 | 31.578 | 0.00 | 0.00 |
| ATOM | 7256 | CB   | ALA | X | 477 | 33.174 | 29.021 | 29.800 | 0.00 | 0.00 |
| ATOM | 7257 | HB1  | ALA | X | 477 | 32.267 | 28.937 | 29.201 | 0.00 | 0.00 |
| ATOM | 7258 | HB2  | ALA | X | 477 | 33.595 | 28.016 | 29.770 | 0.00 | 0.00 |
| ATOM | 7259 | HB3  | ALA | X | 477 | 33.893 | 29.679 | 29.311 | 0.00 | 0.00 |
| ATOM | 7260 | C    | ALA | X | 477 | 31.794 | 28.500 | 31.783 | 0.00 | 0.00 |
| ATOM | 7261 | O    | ALA | X | 477 | 30.756 | 29.058 | 32.111 | 0.00 | 0.00 |
| ATOM | 7262 | N    | ASN | X | 478 | 31.820 | 27.183 | 32.080 | 0.00 | 0.00 |
| ATOM | 7263 | H    | ASN | X | 478 | 32.665 | 26.655 | 31.919 | 0.00 | 0.00 |
| ATOM | 7264 | CA   | ASN | X | 478 | 30.710 | 26.364 | 32.636 | 0.00 | 0.00 |
| ATOM | 7265 | HA   | ASN | X | 478 | 29.910 | 26.344 | 31.896 | 0.00 | 0.00 |
| ATOM | 7266 | CB   | ASN | X | 478 | 31.233 | 24.960 | 32.757 | 0.00 | 0.00 |
| ATOM | 7267 | HB2  | ASN | X | 478 | 32.275 | 25.041 | 33.067 | 0.00 | 0.00 |
| ATOM | 7268 | HB3  | ASN | X | 478 | 30.630 | 24.393 | 33.467 | 0.00 | 0.00 |
| ATOM | 7269 | CG   | ASN | X | 478 | 31.216 | 24.115 | 31.526 | 0.00 | 0.00 |
| ATOM | 7270 | OD1  | ASN | X | 478 | 30.785 | 24.476 | 30.475 | 0.00 | 0.00 |
| ATOM | 7271 | ND2  | ASN | X | 478 | 31.625 | 22.882 | 31.641 | 0.00 | 0.00 |
| ATOM | 7272 | HD21 | ASN | X | 478 | 31.659 | 22.153 | 30.944 | 0.00 | 0.00 |
| ATOM | 7273 | HD22 | ASN | X | 478 | 32.011 | 22.589 | 32.527 | 0.00 | 0.00 |
| ATOM | 7274 | C    | ASN | X | 478 | 30.177 | 26.970 | 33.975 | 0.00 | 0.00 |

|      |      |      |     |   |     |        |        |        |      |      |
|------|------|------|-----|---|-----|--------|--------|--------|------|------|
| ATOM | 7275 | O    | ASN | X | 478 | 28.988 | 26.942 | 34.141 | 0.00 | 0.00 |
| ATOM | 7276 | N    | PHE | X | 479 | 31.078 | 27.378 | 34.861 | 0.00 | 0.00 |
| ATOM | 7277 | H    | PHE | X | 479 | 32.033 | 27.338 | 34.534 | 0.00 | 0.00 |
| ATOM | 7278 | CA   | PHE | X | 479 | 30.686 | 28.126 | 36.101 | 0.00 | 0.00 |
| ATOM | 7279 | HA   | PHE | X | 479 | 29.979 | 27.429 | 36.551 | 0.00 | 0.00 |
| ATOM | 7280 | CB   | PHE | X | 479 | 31.954 | 28.234 | 37.051 | 0.00 | 0.00 |
| ATOM | 7281 | HB2  | PHE | X | 479 | 31.968 | 27.235 | 37.485 | 0.00 | 0.00 |
| ATOM | 7282 | HB3  | PHE | X | 479 | 32.838 | 28.584 | 36.517 | 0.00 | 0.00 |
| ATOM | 7283 | CG   | PHE | X | 479 | 31.685 | 29.201 | 38.199 | 0.00 | 0.00 |
| ATOM | 7284 | CD1  | PHE | X | 479 | 31.203 | 28.624 | 39.392 | 0.00 | 0.00 |
| ATOM | 7285 | HD1  | PHE | X | 479 | 30.930 | 27.579 | 39.389 | 0.00 | 0.00 |
| ATOM | 7286 | CE1  | PHE | X | 479 | 30.966 | 29.571 | 40.398 | 0.00 | 0.00 |
| ATOM | 7287 | HE1  | PHE | X | 479 | 30.516 | 29.048 | 41.228 | 0.00 | 0.00 |
| ATOM | 7288 | CZ   | PHE | X | 479 | 31.140 | 30.950 | 40.335 | 0.00 | 0.00 |
| ATOM | 7289 | HZ   | PHE | X | 479 | 30.933 | 31.566 | 41.197 | 0.00 | 0.00 |
| ATOM | 7290 | CE2  | PHE | X | 479 | 31.423 | 31.463 | 39.070 | 0.00 | 0.00 |
| ATOM | 7291 | HE2  | PHE | X | 479 | 31.473 | 32.529 | 38.902 | 0.00 | 0.00 |
| ATOM | 7292 | CD2  | PHE | X | 479 | 31.715 | 30.590 | 38.029 | 0.00 | 0.00 |
| ATOM | 7293 | HD2  | PHE | X | 479 | 32.068 | 30.904 | 37.058 | 0.00 | 0.00 |
| ATOM | 7294 | C    | PHE | X | 479 | 29.994 | 29.396 | 35.777 | 0.00 | 0.00 |
| ATOM | 7295 | O    | PHE | X | 479 | 29.003 | 29.769 | 36.430 | 0.00 | 0.00 |
| ATOM | 7296 | N    | ALA | X | 480 | 30.457 | 30.174 | 34.730 | 0.00 | 0.00 |
| ATOM | 7297 | H    | ALA | X | 480 | 31.154 | 29.741 | 34.142 | 0.00 | 0.00 |
| ATOM | 7298 | CA   | ALA | X | 480 | 29.774 | 31.388 | 34.354 | 0.00 | 0.00 |
| ATOM | 7299 | HA   | ALA | X | 480 | 29.704 | 31.986 | 35.263 | 0.00 | 0.00 |
| ATOM | 7300 | CB   | ALA | X | 480 | 30.622 | 32.134 | 33.335 | 0.00 | 0.00 |
| ATOM | 7301 | HB1  | ALA | X | 480 | 31.683 | 32.114 | 33.583 | 0.00 | 0.00 |
| ATOM | 7302 | HB2  | ALA | X | 480 | 30.305 | 33.177 | 33.329 | 0.00 | 0.00 |
| ATOM | 7303 | HB3  | ALA | X | 480 | 30.558 | 31.698 | 32.337 | 0.00 | 0.00 |
| ATOM | 7304 | C    | ALA | X | 480 | 28.386 | 31.093 | 33.777 | 0.00 | 0.00 |
| ATOM | 7305 | O    | ALA | X | 480 | 27.365 | 31.744 | 34.127 | 0.00 | 0.00 |
| ATOM | 7306 | N    | ARG | X | 481 | 28.256 | 30.067 | 32.975 | 0.00 | 0.00 |
| ATOM | 7307 | H    | ARG | X | 481 | 29.080 | 29.618 | 32.603 | 0.00 | 0.00 |
| ATOM | 7308 | CA   | ARG | X | 481 | 27.015 | 29.590 | 32.396 | 0.00 | 0.00 |
| ATOM | 7309 | HA   | ARG | X | 481 | 26.467 | 30.314 | 31.793 | 0.00 | 0.00 |
| ATOM | 7310 | CB   | ARG | X | 481 | 27.302 | 28.364 | 31.410 | 0.00 | 0.00 |
| ATOM | 7311 | HB2  | ARG | X | 481 | 27.804 | 27.576 | 31.971 | 0.00 | 0.00 |
| ATOM | 7312 | HB3  | ARG | X | 481 | 26.305 | 28.004 | 31.155 | 0.00 | 0.00 |
| ATOM | 7313 | CG   | ARG | X | 481 | 28.029 | 28.789 | 30.091 | 0.00 | 0.00 |
| ATOM | 7314 | HG2  | ARG | X | 481 | 27.356 | 29.379 | 29.470 | 0.00 | 0.00 |
| ATOM | 7315 | HG3  | ARG | X | 481 | 28.963 | 29.342 | 30.184 | 0.00 | 0.00 |
| ATOM | 7316 | CD   | ARG | X | 481 | 28.361 | 27.509 | 29.329 | 0.00 | 0.00 |
| ATOM | 7317 | HD2  | ARG | X | 481 | 28.817 | 26.724 | 29.933 | 0.00 | 0.00 |
| ATOM | 7318 | HD3  | ARG | X | 481 | 27.394 | 27.137 | 28.992 | 0.00 | 0.00 |
| ATOM | 7319 | NE   | ARG | X | 481 | 29.071 | 27.711 | 28.087 | 0.00 | 0.00 |
| ATOM | 7320 | HE   | ARG | X | 481 | 28.530 | 28.183 | 27.377 | 0.00 | 0.00 |
| ATOM | 7321 | CZ   | ARG | X | 481 | 30.368 | 27.386 | 27.850 | 0.00 | 0.00 |
| ATOM | 7322 | NH1  | ARG | X | 481 | 31.044 | 26.589 | 28.640 | 0.00 | 0.00 |
| ATOM | 7323 | HH11 | ARG | X | 481 | 30.602 | 25.917 | 29.252 | 0.00 | 0.00 |
| ATOM | 7324 | HH12 | ARG | X | 481 | 32.030 | 26.405 | 28.523 | 0.00 | 0.00 |
| ATOM | 7325 | NH2  | ARG | X | 481 | 30.954 | 27.779 | 26.727 | 0.00 | 0.00 |
| ATOM | 7326 | HH21 | ARG | X | 481 | 30.586 | 28.556 | 26.197 | 0.00 | 0.00 |
| ATOM | 7327 | HH22 | ARG | X | 481 | 31.923 | 27.511 | 26.635 | 0.00 | 0.00 |
| ATOM | 7328 | C    | ARG | X | 481 | 25.981 | 29.041 | 33.428 | 0.00 | 0.00 |
| ATOM | 7329 | O    | ARG | X | 481 | 24.791 | 29.332 | 33.270 | 0.00 | 0.00 |
| ATOM | 7330 | N    | THR | X | 482 | 26.376 | 28.284 | 34.436 | 0.00 | 0.00 |
| ATOM | 7331 | H    | THR | X | 482 | 27.367 | 28.296 | 34.627 | 0.00 | 0.00 |
| ATOM | 7332 | CA   | THR | X | 482 | 25.463 | 27.455 | 35.319 | 0.00 | 0.00 |
| ATOM | 7333 | HA   | THR | X | 482 | 24.438 | 27.752 | 35.095 | 0.00 | 0.00 |
| ATOM | 7334 | CB   | THR | X | 482 | 25.703 | 26.042 | 35.042 | 0.00 | 0.00 |
| ATOM | 7335 | HB   | THR | X | 482 | 26.617 | 25.801 | 35.586 | 0.00 | 0.00 |
| ATOM | 7336 | CG2  | THR | X | 482 | 24.570 | 25.099 | 35.489 | 0.00 | 0.00 |
| ATOM | 7337 | HG21 | THR | X | 482 | 24.892 | 24.077 | 35.287 | 0.00 | 0.00 |
| ATOM | 7338 | HG22 | THR | X | 482 | 23.643 | 25.349 | 34.973 | 0.00 | 0.00 |
| ATOM | 7339 | HG23 | THR | X | 482 | 24.274 | 25.176 | 36.535 | 0.00 | 0.00 |
| ATOM | 7340 | OG1  | THR | X | 482 | 25.877 | 25.838 | 33.643 | 0.00 | 0.00 |
| ATOM | 7341 | HG1  | THR | X | 482 | 26.494 | 25.106 | 33.561 | 0.00 | 0.00 |

|      |      |      |     |   |     |        |        |        |      |      |
|------|------|------|-----|---|-----|--------|--------|--------|------|------|
| ATOM | 7342 | C    | THR | X | 482 | 25.694 | 27.690 | 36.795 | 0.00 | 0.00 |
| ATOM | 7343 | O    | THR | X | 482 | 24.891 | 27.270 | 37.596 | 0.00 | 0.00 |
| ATOM | 7344 | N    | GLY | X | 483 | 26.829 | 28.331 | 37.182 | 0.00 | 0.00 |
| ATOM | 7345 | H    | GLY | X | 483 | 27.493 | 28.715 | 36.524 | 0.00 | 0.00 |
| ATOM | 7346 | CA   | GLY | X | 483 | 27.225 | 28.378 | 38.558 | 0.00 | 0.00 |
| ATOM | 7347 | HA2  | GLY | X | 483 | 27.887 | 29.243 | 38.519 | 0.00 | 0.00 |
| ATOM | 7348 | HA3  | GLY | X | 483 | 26.369 | 28.566 | 39.206 | 0.00 | 0.00 |
| ATOM | 7349 | C    | GLY | X | 483 | 27.834 | 27.050 | 39.110 | 0.00 | 0.00 |
| ATOM | 7350 | O    | GLY | X | 483 | 27.813 | 26.811 | 40.271 | 0.00 | 0.00 |
| ATOM | 7351 | N    | ASP | X | 484 | 28.428 | 26.276 | 38.200 | 0.00 | 0.00 |
| ATOM | 7352 | H    | ASP | X | 484 | 28.201 | 26.559 | 37.258 | 0.00 | 0.00 |
| ATOM | 7353 | CA   | ASP | X | 484 | 28.916 | 24.931 | 38.383 | 0.00 | 0.00 |
| ATOM | 7354 | HA   | ASP | X | 484 | 29.505 | 25.055 | 39.292 | 0.00 | 0.00 |
| ATOM | 7355 | CB   | ASP | X | 484 | 27.731 | 23.978 | 38.513 | 0.00 | 0.00 |
| ATOM | 7356 | HB2  | ASP | X | 484 | 27.308 | 24.356 | 39.444 | 0.00 | 0.00 |
| ATOM | 7357 | HB3  | ASP | X | 484 | 26.972 | 24.175 | 37.756 | 0.00 | 0.00 |
| ATOM | 7358 | CG   | ASP | X | 484 | 28.084 | 22.476 | 38.483 | 0.00 | 0.00 |
| ATOM | 7359 | OD1  | ASP | X | 484 | 27.147 | 21.631 | 38.280 | 0.00 | 0.00 |
| ATOM | 7360 | OD2  | ASP | X | 484 | 29.281 | 22.123 | 38.637 | 0.00 | 0.00 |
| ATOM | 7361 | C    | ASP | X | 484 | 29.884 | 24.561 | 37.188 | 0.00 | 0.00 |
| ATOM | 7362 | O    | ASP | X | 484 | 29.351 | 24.532 | 36.092 | 0.00 | 0.00 |
| ATOM | 7363 | N    | PRO | X | 485 | 31.198 | 24.319 | 37.403 | 0.00 | 0.00 |
| ATOM | 7364 | CD   | PRO | X | 485 | 31.865 | 24.192 | 38.670 | 0.00 | 0.00 |
| ATOM | 7365 | HD2  | PRO | X | 485 | 31.661 | 23.170 | 38.989 | 0.00 | 0.00 |
| ATOM | 7366 | HD3  | PRO | X | 485 | 31.580 | 24.951 | 39.398 | 0.00 | 0.00 |
| ATOM | 7367 | CG   | PRO | X | 485 | 33.302 | 24.351 | 38.386 | 0.00 | 0.00 |
| ATOM | 7368 | HG2  | PRO | X | 485 | 33.919 | 23.901 | 39.164 | 0.00 | 0.00 |
| ATOM | 7369 | HG3  | PRO | X | 485 | 33.483 | 25.423 | 38.300 | 0.00 | 0.00 |
| ATOM | 7370 | CB   | PRO | X | 485 | 33.519 | 23.818 | 36.966 | 0.00 | 0.00 |
| ATOM | 7371 | HB2  | PRO | X | 485 | 33.786 | 22.778 | 37.156 | 0.00 | 0.00 |
| ATOM | 7372 | HB3  | PRO | X | 485 | 34.297 | 24.344 | 36.413 | 0.00 | 0.00 |
| ATOM | 7373 | CA   | PRO | X | 485 | 32.136 | 23.923 | 36.342 | 0.00 | 0.00 |
| ATOM | 7374 | HA   | PRO | X | 485 | 32.204 | 24.753 | 35.639 | 0.00 | 0.00 |
| ATOM | 7375 | C    | PRO | X | 485 | 31.830 | 22.687 | 35.479 | 0.00 | 0.00 |
| ATOM | 7376 | O    | PRO | X | 485 | 32.500 | 22.400 | 34.508 | 0.00 | 0.00 |
| ATOM | 7377 | N    | ASN | X | 486 | 30.762 | 21.931 | 35.849 | 0.00 | 0.00 |
| ATOM | 7378 | H    | ASN | X | 486 | 30.271 | 22.296 | 36.653 | 0.00 | 0.00 |
| ATOM | 7379 | CA   | ASN | X | 486 | 30.428 | 20.616 | 35.379 | 0.00 | 0.00 |
| ATOM | 7380 | HA   | ASN | X | 486 | 31.195 | 19.896 | 35.664 | 0.00 | 0.00 |
| ATOM | 7381 | CB   | ASN | X | 486 | 29.233 | 20.084 | 36.242 | 0.00 | 0.00 |
| ATOM | 7382 | HB2  | ASN | X | 486 | 29.499 | 20.092 | 37.299 | 0.00 | 0.00 |
| ATOM | 7383 | HB3  | ASN | X | 486 | 28.387 | 20.702 | 35.944 | 0.00 | 0.00 |
| ATOM | 7384 | CG   | ASN | X | 486 | 28.847 | 18.743 | 35.886 | 0.00 | 0.00 |
| ATOM | 7385 | OD1  | ASN | X | 486 | 29.528 | 17.738 | 36.219 | 0.00 | 0.00 |
| ATOM | 7386 | ND2  | ASN | X | 486 | 27.720 | 18.562 | 35.178 | 0.00 | 0.00 |
| ATOM | 7387 | HD21 | ASN | X | 486 | 27.367 | 17.616 | 35.155 | 0.00 | 0.00 |
| ATOM | 7388 | HD22 | ASN | X | 486 | 27.152 | 19.376 | 34.988 | 0.00 | 0.00 |
| ATOM | 7389 | C    | ASN | X | 486 | 30.046 | 20.551 | 33.902 | 0.00 | 0.00 |
| ATOM | 7390 | O    | ASN | X | 486 | 29.331 | 21.418 | 33.402 | 0.00 | 0.00 |
| ATOM | 7391 | N    | GLU | X | 487 | 30.393 | 19.428 | 33.283 | 0.00 | 0.00 |
| ATOM | 7392 | H    | GLU | X | 487 | 30.905 | 18.746 | 33.825 | 0.00 | 0.00 |
| ATOM | 7393 | CA   | GLU | X | 487 | 29.875 | 19.003 | 31.987 | 0.00 | 0.00 |
| ATOM | 7394 | HA   | GLU | X | 487 | 29.752 | 19.896 | 31.375 | 0.00 | 0.00 |
| ATOM | 7395 | CB   | GLU | X | 487 | 30.970 | 18.112 | 31.264 | 0.00 | 0.00 |
| ATOM | 7396 | HB2  | GLU | X | 487 | 31.188 | 17.260 | 31.908 | 0.00 | 0.00 |
| ATOM | 7397 | HB3  | GLU | X | 487 | 30.558 | 17.853 | 30.289 | 0.00 | 0.00 |
| ATOM | 7398 | CG   | GLU | X | 487 | 32.283 | 18.921 | 31.043 | 0.00 | 0.00 |
| ATOM | 7399 | HG2  | GLU | X | 487 | 32.605 | 19.500 | 31.909 | 0.00 | 0.00 |
| ATOM | 7400 | HG3  | GLU | X | 487 | 33.132 | 18.294 | 30.772 | 0.00 | 0.00 |
| ATOM | 7401 | CD   | GLU | X | 487 | 32.210 | 19.896 | 29.843 | 0.00 | 0.00 |
| ATOM | 7402 | OE1  | GLU | X | 487 | 33.189 | 19.975 | 29.054 | 0.00 | 0.00 |
| ATOM | 7403 | OE2  | GLU | X | 487 | 31.142 | 20.607 | 29.690 | 0.00 | 0.00 |
| ATOM | 7404 | C    | GLU | X | 487 | 28.539 | 18.280 | 31.997 | 0.00 | 0.00 |
| ATOM | 7405 | O    | GLU | X | 487 | 28.366 | 17.087 | 32.270 | 0.00 | 0.00 |
| ATOM | 7406 | N    | PRO | X | 488 | 27.389 | 18.895 | 31.602 | 0.00 | 0.00 |
| ATOM | 7407 | CD   | PRO | X | 488 | 27.289 | 20.223 | 31.030 | 0.00 | 0.00 |
| ATOM | 7408 | HD2  | PRO | X | 488 | 27.993 | 20.481 | 30.239 | 0.00 | 0.00 |

|      |      |      |     |   |     |        |        |        |      |      |
|------|------|------|-----|---|-----|--------|--------|--------|------|------|
| ATOM | 7409 | HD3  | PRO | X | 488 | 27.357 | 20.928 | 31.859 | 0.00 | 0.00 |
| ATOM | 7410 | CG   | PRO | X | 488 | 25.947 | 20.284 | 30.322 | 0.00 | 0.00 |
| ATOM | 7411 | HG2  | PRO | X | 488 | 25.846 | 19.681 | 29.419 | 0.00 | 0.00 |
| ATOM | 7412 | HG3  | PRO | X | 488 | 25.539 | 21.284 | 30.176 | 0.00 | 0.00 |
| ATOM | 7413 | CB   | PRO | X | 488 | 25.117 | 19.528 | 31.383 | 0.00 | 0.00 |
| ATOM | 7414 | HB2  | PRO | X | 488 | 24.093 | 19.259 | 31.122 | 0.00 | 0.00 |
| ATOM | 7415 | HB3  | PRO | X | 488 | 25.050 | 20.241 | 32.204 | 0.00 | 0.00 |
| ATOM | 7416 | CA   | PRO | X | 488 | 26.022 | 18.354 | 31.806 | 0.00 | 0.00 |
| ATOM | 7417 | HA   | PRO | X | 488 | 25.888 | 18.149 | 32.868 | 0.00 | 0.00 |
| ATOM | 7418 | C    | PRO | X | 488 | 25.708 | 17.025 | 30.949 | 0.00 | 0.00 |
| ATOM | 7419 | O    | PRO | X | 488 | 24.872 | 16.222 | 31.333 | 0.00 | 0.00 |
| ATOM | 7420 | N    | ARG | X | 489 | 26.488 | 16.761 | 29.892 | 0.00 | 0.00 |
| ATOM | 7421 | H    | ARG | X | 489 | 27.182 | 17.474 | 29.718 | 0.00 | 0.00 |
| ATOM | 7422 | CA   | ARG | X | 489 | 26.385 | 15.590 | 29.044 | 0.00 | 0.00 |
| ATOM | 7423 | HA   | ARG | X | 489 | 25.333 | 15.315 | 28.964 | 0.00 | 0.00 |
| ATOM | 7424 | CB   | ARG | X | 489 | 26.862 | 15.956 | 27.611 | 0.00 | 0.00 |
| ATOM | 7425 | HB2  | ARG | X | 489 | 26.602 | 15.090 | 27.001 | 0.00 | 0.00 |
| ATOM | 7426 | HB3  | ARG | X | 489 | 26.400 | 16.887 | 27.282 | 0.00 | 0.00 |
| ATOM | 7427 | CG   | ARG | X | 489 | 28.372 | 16.115 | 27.525 | 0.00 | 0.00 |
| ATOM | 7428 | HG2  | ARG | X | 489 | 28.612 | 17.080 | 27.971 | 0.00 | 0.00 |
| ATOM | 7429 | HG3  | ARG | X | 489 | 28.891 | 15.262 | 27.963 | 0.00 | 0.00 |
| ATOM | 7430 | CD   | ARG | X | 489 | 29.008 | 16.202 | 26.101 | 0.00 | 0.00 |
| ATOM | 7431 | HD2  | ARG | X | 489 | 28.674 | 15.286 | 25.612 | 0.00 | 0.00 |
| ATOM | 7432 | HD3  | ARG | X | 489 | 28.512 | 16.904 | 25.430 | 0.00 | 0.00 |
| ATOM | 7433 | NE   | ARG | X | 489 | 30.445 | 16.297 | 26.028 | 0.00 | 0.00 |
| ATOM | 7434 | HE   | ARG | X | 489 | 30.846 | 17.222 | 25.967 | 0.00 | 0.00 |
| ATOM | 7435 | CZ   | ARG | X | 489 | 31.262 | 15.274 | 25.917 | 0.00 | 0.00 |
| ATOM | 7436 | NH1  | ARG | X | 489 | 32.565 | 15.415 | 25.790 | 0.00 | 0.00 |
| ATOM | 7437 | HH11 | ARG | X | 489 | 32.853 | 16.369 | 25.953 | 0.00 | 0.00 |
| ATOM | 7438 | HH12 | ARG | X | 489 | 33.134 | 14.635 | 25.492 | 0.00 | 0.00 |
| ATOM | 7439 | NH2  | ARG | X | 489 | 30.798 | 14.033 | 25.895 | 0.00 | 0.00 |
| ATOM | 7440 | HH21 | ARG | X | 489 | 29.884 | 13.718 | 26.187 | 0.00 | 0.00 |
| ATOM | 7441 | HH22 | ARG | X | 489 | 31.474 | 13.286 | 25.971 | 0.00 | 0.00 |
| ATOM | 7442 | C    | ARG | X | 489 | 26.967 | 14.318 | 29.678 | 0.00 | 0.00 |
| ATOM | 7443 | O    | ARG | X | 489 | 26.912 | 13.254 | 29.043 | 0.00 | 0.00 |
| ATOM | 7444 | N    | ASP | X | 490 | 27.622 | 14.410 | 30.868 | 0.00 | 0.00 |
| ATOM | 7445 | H    | ASP | X | 490 | 27.590 | 15.330 | 31.286 | 0.00 | 0.00 |
| ATOM | 7446 | CA   | ASP | X | 490 | 28.323 | 13.304 | 31.590 | 0.00 | 0.00 |
| ATOM | 7447 | HA   | ASP | X | 490 | 28.867 | 13.813 | 32.386 | 0.00 | 0.00 |
| ATOM | 7448 | CB   | ASP | X | 490 | 27.275 | 12.324 | 32.286 | 0.00 | 0.00 |
| ATOM | 7449 | HB2  | ASP | X | 490 | 26.666 | 12.928 | 32.959 | 0.00 | 0.00 |
| ATOM | 7450 | HB3  | ASP | X | 490 | 26.677 | 11.844 | 31.511 | 0.00 | 0.00 |
| ATOM | 7451 | CG   | ASP | X | 490 | 27.875 | 11.208 | 33.239 | 0.00 | 0.00 |
| ATOM | 7452 | OD1  | ASP | X | 490 | 28.103 | 11.451 | 34.468 | 0.00 | 0.00 |
| ATOM | 7453 | OD2  | ASP | X | 490 | 28.127 | 10.113 | 32.680 | 0.00 | 0.00 |
| ATOM | 7454 | C    | ASP | X | 490 | 29.375 | 12.640 | 30.678 | 0.00 | 0.00 |
| ATOM | 7455 | O    | ASP | X | 490 | 29.019 | 11.575 | 30.166 | 0.00 | 0.00 |
| ATOM | 7456 | N    | PRO | X | 491 | 30.616 | 13.144 | 30.482 | 0.00 | 0.00 |
| ATOM | 7457 | CD   | PRO | X | 491 | 30.997 | 14.489 | 30.936 | 0.00 | 0.00 |
| ATOM | 7458 | HD2  | PRO | X | 491 | 30.839 | 14.662 | 32.001 | 0.00 | 0.00 |
| ATOM | 7459 | HD3  | PRO | X | 491 | 30.281 | 15.174 | 30.483 | 0.00 | 0.00 |
| ATOM | 7460 | CG   | PRO | X | 491 | 32.416 | 14.715 | 30.383 | 0.00 | 0.00 |
| ATOM | 7461 | HG2  | PRO | X | 491 | 33.020 | 14.520 | 31.269 | 0.00 | 0.00 |
| ATOM | 7462 | HG3  | PRO | X | 491 | 32.513 | 15.765 | 30.107 | 0.00 | 0.00 |
| ATOM | 7463 | CB   | PRO | X | 491 | 32.535 | 13.619 | 29.289 | 0.00 | 0.00 |
| ATOM | 7464 | HB2  | PRO | X | 491 | 33.607 | 13.463 | 29.173 | 0.00 | 0.00 |
| ATOM | 7465 | HB3  | PRO | X | 491 | 32.082 | 13.930 | 28.347 | 0.00 | 0.00 |
| ATOM | 7466 | CA   | PRO | X | 491 | 31.693 | 12.428 | 29.760 | 0.00 | 0.00 |
| ATOM | 7467 | HA   | PRO | X | 491 | 31.247 | 11.906 | 28.913 | 0.00 | 0.00 |
| ATOM | 7468 | C    | PRO | X | 491 | 32.545 | 11.566 | 30.704 | 0.00 | 0.00 |
| ATOM | 7469 | O    | PRO | X | 491 | 32.598 | 11.762 | 31.934 | 0.00 | 0.00 |
| ATOM | 7470 | N    | LYS | X | 492 | 33.492 | 10.857 | 30.065 | 0.00 | 0.00 |
| ATOM | 7471 | H    | LYS | X | 492 | 33.604 | 10.831 | 29.062 | 0.00 | 0.00 |
| ATOM | 7472 | CA   | LYS | X | 492 | 34.426 | 9.876  | 30.730 | 0.00 | 0.00 |
| ATOM | 7473 | HA   | LYS | X | 492 | 33.914 | 9.190  | 31.404 | 0.00 | 0.00 |
| ATOM | 7474 | CB   | LYS | X | 492 | 35.113 | 9.088  | 29.651 | 0.00 | 0.00 |
| ATOM | 7475 | HB2  | LYS | X | 492 | 35.785 | 9.728  | 29.080 | 0.00 | 0.00 |

|      |      |      |     |   |     |        |        |        |      |      |
|------|------|------|-----|---|-----|--------|--------|--------|------|------|
| ATOM | 7476 | HB3  | LYS | X | 492 | 35.751 | 8.352  | 30.140 | 0.00 | 0.00 |
| ATOM | 7477 | CG   | LYS | X | 492 | 34.139 | 8.385  | 28.675 | 0.00 | 0.00 |
| ATOM | 7478 | HG2  | LYS | X | 492 | 33.503 | 9.123  | 28.186 | 0.00 | 0.00 |
| ATOM | 7479 | HG3  | LYS | X | 492 | 34.725 | 7.786  | 27.977 | 0.00 | 0.00 |
| ATOM | 7480 | CD   | LYS | X | 492 | 33.173 | 7.424  | 29.361 | 0.00 | 0.00 |
| ATOM | 7481 | HD2  | LYS | X | 492 | 33.744 | 6.657  | 29.884 | 0.00 | 0.00 |
| ATOM | 7482 | HD3  | LYS | X | 492 | 32.606 | 7.926  | 30.145 | 0.00 | 0.00 |
| ATOM | 7483 | CE   | LYS | X | 492 | 32.298 | 6.722  | 28.354 | 0.00 | 0.00 |
| ATOM | 7484 | HE2  | LYS | X | 492 | 31.577 | 7.402  | 27.900 | 0.00 | 0.00 |
| ATOM | 7485 | HE3  | LYS | X | 492 | 32.805 | 6.269  | 27.502 | 0.00 | 0.00 |
| ATOM | 7486 | NZ   | LYS | X | 492 | 31.502 | 5.717  | 29.051 | 0.00 | 0.00 |
| ATOM | 7487 | HZ1  | LYS | X | 492 | 30.969 | 6.076  | 29.831 | 0.00 | 0.00 |
| ATOM | 7488 | HZ2  | LYS | X | 492 | 30.906 | 5.284  | 28.361 | 0.00 | 0.00 |
| ATOM | 7489 | HZ3  | LYS | X | 492 | 32.083 | 4.970  | 29.405 | 0.00 | 0.00 |
| ATOM | 7490 | C    | LYS | X | 492 | 35.590 | 10.534 | 31.506 | 0.00 | 0.00 |
| ATOM | 7491 | O    | LYS | X | 492 | 36.419 | 9.879  | 32.169 | 0.00 | 0.00 |
| ATOM | 7492 | N    | ALA | X | 493 | 35.638 | 11.888 | 31.356 | 0.00 | 0.00 |
| ATOM | 7493 | H    | ALA | X | 493 | 34.823 | 12.156 | 30.822 | 0.00 | 0.00 |
| ATOM | 7494 | CA   | ALA | X | 493 | 36.486 | 12.763 | 32.192 | 0.00 | 0.00 |
| ATOM | 7495 | HA   | ALA | X | 493 | 37.420 | 12.237 | 32.387 | 0.00 | 0.00 |
| ATOM | 7496 | CB   | ALA | X | 493 | 36.848 | 14.089 | 31.335 | 0.00 | 0.00 |
| ATOM | 7497 | HB1  | ALA | X | 493 | 37.748 | 13.825 | 30.781 | 0.00 | 0.00 |
| ATOM | 7498 | HB2  | ALA | X | 493 | 37.246 | 14.745 | 32.109 | 0.00 | 0.00 |
| ATOM | 7499 | HB3  | ALA | X | 493 | 35.959 | 14.445 | 30.813 | 0.00 | 0.00 |
| ATOM | 7500 | C    | ALA | X | 493 | 35.898 | 13.190 | 33.519 | 0.00 | 0.00 |
| ATOM | 7501 | O    | ALA | X | 493 | 34.818 | 13.696 | 33.688 | 0.00 | 0.00 |
| ATOM | 7502 | N    | PRO | X | 494 | 36.712 | 12.998 | 34.583 | 0.00 | 0.00 |
| ATOM | 7503 | CD   | PRO | X | 494 | 38.014 | 12.315 | 34.691 | 0.00 | 0.00 |
| ATOM | 7504 | HD2  | PRO | X | 494 | 38.748 | 12.611 | 33.942 | 0.00 | 0.00 |
| ATOM | 7505 | HD3  | PRO | X | 494 | 37.896 | 11.231 | 34.686 | 0.00 | 0.00 |
| ATOM | 7506 | CG   | PRO | X | 494 | 38.646 | 12.636 | 36.101 | 0.00 | 0.00 |
| ATOM | 7507 | HG2  | PRO | X | 494 | 39.171 | 13.591 | 36.127 | 0.00 | 0.00 |
| ATOM | 7508 | HG3  | PRO | X | 494 | 39.345 | 11.839 | 36.355 | 0.00 | 0.00 |
| ATOM | 7509 | CB   | PRO | X | 494 | 37.366 | 12.746 | 36.939 | 0.00 | 0.00 |
| ATOM | 7510 | HB2  | PRO | X | 494 | 37.472 | 13.490 | 37.728 | 0.00 | 0.00 |
| ATOM | 7511 | HB3  | PRO | X | 494 | 37.081 | 11.774 | 37.343 | 0.00 | 0.00 |
| ATOM | 7512 | CA   | PRO | X | 494 | 36.304 | 13.242 | 35.906 | 0.00 | 0.00 |
| ATOM | 7513 | HA   | PRO | X | 494 | 35.455 | 12.587 | 36.101 | 0.00 | 0.00 |
| ATOM | 7514 | C    | PRO | X | 494 | 35.883 | 14.742 | 36.052 | 0.00 | 0.00 |
| ATOM | 7515 | O    | PRO | X | 494 | 36.451 | 15.589 | 35.308 | 0.00 | 0.00 |
| ATOM | 7516 | N    | GLN | X | 495 | 34.987 | 15.082 | 37.014 | 0.00 | 0.00 |
| ATOM | 7517 | H    | GLN | X | 495 | 34.489 | 14.327 | 37.463 | 0.00 | 0.00 |
| ATOM | 7518 | CA   | GLN | X | 495 | 34.378 | 16.325 | 37.207 | 0.00 | 0.00 |
| ATOM | 7519 | HA   | GLN | X | 495 | 34.889 | 17.001 | 36.522 | 0.00 | 0.00 |
| ATOM | 7520 | CB   | GLN | X | 495 | 32.840 | 16.231 | 36.927 | 0.00 | 0.00 |
| ATOM | 7521 | HB2  | GLN | X | 495 | 32.471 | 15.440 | 37.579 | 0.00 | 0.00 |
| ATOM | 7522 | HB3  | GLN | X | 495 | 32.318 | 17.165 | 37.140 | 0.00 | 0.00 |
| ATOM | 7523 | CG   | GLN | X | 495 | 32.460 | 15.812 | 35.510 | 0.00 | 0.00 |
| ATOM | 7524 | HG2  | GLN | X | 495 | 32.837 | 14.799 | 35.366 | 0.00 | 0.00 |
| ATOM | 7525 | HG3  | GLN | X | 495 | 31.375 | 15.841 | 35.412 | 0.00 | 0.00 |
| ATOM | 7526 | CD   | GLN | X | 495 | 32.957 | 16.720 | 34.384 | 0.00 | 0.00 |
| ATOM | 7527 | OE1  | GLN | X | 495 | 32.513 | 17.852 | 34.220 | 0.00 | 0.00 |
| ATOM | 7528 | NE2  | GLN | X | 495 | 33.829 | 16.372 | 33.471 | 0.00 | 0.00 |
| ATOM | 7529 | HE21 | GLN | X | 495 | 34.119 | 17.059 | 32.789 | 0.00 | 0.00 |
| ATOM | 7530 | HE22 | GLN | X | 495 | 34.238 | 15.450 | 33.425 | 0.00 | 0.00 |
| ATOM | 7531 | C    | GLN | X | 495 | 34.625 | 16.902 | 38.630 | 0.00 | 0.00 |
| ATOM | 7532 | O    | GLN | X | 495 | 34.687 | 16.109 | 39.580 | 0.00 | 0.00 |
| ATOM | 7533 | N    | TRP | X | 496 | 34.600 | 18.240 | 38.746 | 0.00 | 0.00 |
| ATOM | 7534 | H    | TRP | X | 496 | 34.587 | 18.804 | 37.909 | 0.00 | 0.00 |
| ATOM | 7535 | CA   | TRP | X | 496 | 34.772 | 19.096 | 40.021 | 0.00 | 0.00 |
| ATOM | 7536 | HA   | TRP | X | 496 | 35.649 | 18.685 | 40.520 | 0.00 | 0.00 |
| ATOM | 7537 | CB   | TRP | X | 496 | 35.150 | 20.466 | 39.520 | 0.00 | 0.00 |
| ATOM | 7538 | HB2  | TRP | X | 496 | 35.931 | 20.359 | 38.767 | 0.00 | 0.00 |
| ATOM | 7539 | HB3  | TRP | X | 496 | 34.241 | 20.776 | 39.005 | 0.00 | 0.00 |
| ATOM | 7540 | CG   | TRP | X | 496 | 35.624 | 21.568 | 40.430 | 0.00 | 0.00 |
| ATOM | 7541 | CD1  | TRP | X | 496 | 35.499 | 21.596 | 41.752 | 0.00 | 0.00 |
| ATOM | 7542 | HD1  | TRP | X | 496 | 35.034 | 20.836 | 42.362 | 0.00 | 0.00 |

|      |      |     |     |   |     |        |        |        |      |      |
|------|------|-----|-----|---|-----|--------|--------|--------|------|------|
| ATOM | 7543 | NE1 | TRP | X | 496 | 36.100 | 22.771 | 42.205 | 0.00 | 0.00 |
| ATOM | 7544 | HE1 | TRP | X | 496 | 36.069 | 23.083 | 43.165 | 0.00 | 0.00 |
| ATOM | 7545 | CE2 | TRP | X | 496 | 36.414 | 23.626 | 41.141 | 0.00 | 0.00 |
| ATOM | 7546 | CZ2 | TRP | X | 496 | 36.837 | 24.977 | 41.151 | 0.00 | 0.00 |
| ATOM | 7547 | HZ2 | TRP | X | 496 | 36.921 | 25.577 | 42.045 | 0.00 | 0.00 |
| ATOM | 7548 | CH2 | TRP | X | 496 | 37.298 | 25.448 | 39.951 | 0.00 | 0.00 |
| ATOM | 7549 | HH2 | TRP | X | 496 | 37.737 | 26.435 | 39.963 | 0.00 | 0.00 |
| ATOM | 7550 | CZ3 | TRP | X | 496 | 37.280 | 24.615 | 38.868 | 0.00 | 0.00 |
| ATOM | 7551 | HZ3 | TRP | X | 496 | 37.886 | 24.891 | 38.018 | 0.00 | 0.00 |
| ATOM | 7552 | CE3 | TRP | X | 496 | 36.569 | 23.419 | 38.840 | 0.00 | 0.00 |
| ATOM | 7553 | HE3 | TRP | X | 496 | 36.505 | 22.799 | 37.958 | 0.00 | 0.00 |
| ATOM | 7554 | CD2 | TRP | X | 496 | 36.197 | 22.814 | 40.040 | 0.00 | 0.00 |
| ATOM | 7555 | C   | TRP | X | 496 | 33.444 | 19.077 | 40.842 | 0.00 | 0.00 |
| ATOM | 7556 | O   | TRP | X | 496 | 32.526 | 19.773 | 40.442 | 0.00 | 0.00 |
| ATOM | 7557 | N   | PRO | X | 497 | 33.437 | 18.351 | 41.966 | 0.00 | 0.00 |
| ATOM | 7558 | CD  | PRO | X | 497 | 34.494 | 17.600 | 42.584 | 0.00 | 0.00 |
| ATOM | 7559 | HD2 | PRO | X | 497 | 35.464 | 18.097 | 42.608 | 0.00 | 0.00 |
| ATOM | 7560 | HD3 | PRO | X | 497 | 34.607 | 16.620 | 42.121 | 0.00 | 0.00 |
| ATOM | 7561 | CG  | PRO | X | 497 | 34.030 | 17.129 | 43.925 | 0.00 | 0.00 |
| ATOM | 7562 | HG2 | PRO | X | 497 | 34.268 | 17.798 | 44.752 | 0.00 | 0.00 |
| ATOM | 7563 | HG3 | PRO | X | 497 | 34.350 | 16.121 | 44.192 | 0.00 | 0.00 |
| ATOM | 7564 | CB  | PRO | X | 497 | 32.506 | 17.264 | 43.857 | 0.00 | 0.00 |
| ATOM | 7565 | HB2 | PRO | X | 497 | 32.030 | 17.560 | 44.791 | 0.00 | 0.00 |
| ATOM | 7566 | HB3 | PRO | X | 497 | 31.988 | 16.452 | 43.345 | 0.00 | 0.00 |
| ATOM | 7567 | CA  | PRO | X | 497 | 32.352 | 18.446 | 42.905 | 0.00 | 0.00 |
| ATOM | 7568 | HA  | PRO | X | 497 | 31.377 | 18.352 | 42.427 | 0.00 | 0.00 |
| ATOM | 7569 | C   | PRO | X | 497 | 32.386 | 19.754 | 43.644 | 0.00 | 0.00 |
| ATOM | 7570 | O   | PRO | X | 497 | 33.481 | 20.346 | 43.693 | 0.00 | 0.00 |
| ATOM | 7571 | N   | PRO | X | 498 | 31.251 | 20.210 | 44.218 | 0.00 | 0.00 |
| ATOM | 7572 | CD  | PRO | X | 498 | 29.982 | 19.544 | 43.996 | 0.00 | 0.00 |
| ATOM | 7573 | HD2 | PRO | X | 498 | 29.987 | 18.482 | 44.244 | 0.00 | 0.00 |
| ATOM | 7574 | HD3 | PRO | X | 498 | 29.682 | 19.654 | 42.954 | 0.00 | 0.00 |
| ATOM | 7575 | CG  | PRO | X | 498 | 29.071 | 20.301 | 44.970 | 0.00 | 0.00 |
| ATOM | 7576 | HG2 | PRO | X | 498 | 29.137 | 19.739 | 45.902 | 0.00 | 0.00 |
| ATOM | 7577 | HG3 | PRO | X | 498 | 28.034 | 20.328 | 44.636 | 0.00 | 0.00 |
| ATOM | 7578 | CB  | PRO | X | 498 | 29.633 | 21.685 | 45.124 | 0.00 | 0.00 |
| ATOM | 7579 | HB2 | PRO | X | 498 | 29.310 | 22.105 | 46.077 | 0.00 | 0.00 |
| ATOM | 7580 | HB3 | PRO | X | 498 | 29.329 | 22.161 | 44.192 | 0.00 | 0.00 |
| ATOM | 7581 | CA  | PRO | X | 498 | 31.134 | 21.373 | 45.113 | 0.00 | 0.00 |
| ATOM | 7582 | HA  | PRO | X | 498 | 31.642 | 22.273 | 44.769 | 0.00 | 0.00 |
| ATOM | 7583 | C   | PRO | X | 498 | 31.753 | 21.251 | 46.528 | 0.00 | 0.00 |
| ATOM | 7584 | O   | PRO | X | 498 | 31.701 | 20.149 | 47.081 | 0.00 | 0.00 |
| ATOM | 7585 | N   | TYR | X | 499 | 32.098 | 22.456 | 47.053 | 0.00 | 0.00 |
| ATOM | 7586 | H   | TYR | X | 499 | 31.813 | 23.275 | 46.535 | 0.00 | 0.00 |
| ATOM | 7587 | CA  | TYR | X | 499 | 32.609 | 22.624 | 48.386 | 0.00 | 0.00 |
| ATOM | 7588 | HA  | TYR | X | 499 | 33.142 | 21.707 | 48.635 | 0.00 | 0.00 |
| ATOM | 7589 | CB  | TYR | X | 499 | 33.578 | 23.850 | 48.534 | 0.00 | 0.00 |
| ATOM | 7590 | HB2 | TYR | X | 499 | 34.394 | 23.844 | 47.812 | 0.00 | 0.00 |
| ATOM | 7591 | HB3 | TYR | X | 499 | 33.037 | 24.779 | 48.356 | 0.00 | 0.00 |
| ATOM | 7592 | CG  | TYR | X | 499 | 34.309 | 23.795 | 49.903 | 0.00 | 0.00 |
| ATOM | 7593 | CD1 | TYR | X | 499 | 33.715 | 24.407 | 51.039 | 0.00 | 0.00 |
| ATOM | 7594 | HD1 | TYR | X | 499 | 32.708 | 24.797 | 51.020 | 0.00 | 0.00 |
| ATOM | 7595 | CE1 | TYR | X | 499 | 34.370 | 24.438 | 52.293 | 0.00 | 0.00 |
| ATOM | 7596 | HE1 | TYR | X | 499 | 33.839 | 24.692 | 53.199 | 0.00 | 0.00 |
| ATOM | 7597 | CZ  | TYR | X | 499 | 35.712 | 24.016 | 52.392 | 0.00 | 0.00 |
| ATOM | 7598 | OH  | TYR | X | 499 | 36.392 | 24.132 | 53.584 | 0.00 | 0.00 |
| ATOM | 7599 | HH  | TYR | X | 499 | 35.974 | 24.527 | 54.352 | 0.00 | 0.00 |
| ATOM | 7600 | CE2 | TYR | X | 499 | 36.220 | 23.401 | 51.263 | 0.00 | 0.00 |
| ATOM | 7601 | HE2 | TYR | X | 499 | 37.198 | 22.946 | 51.302 | 0.00 | 0.00 |
| ATOM | 7602 | CD2 | TYR | X | 499 | 35.567 | 23.298 | 50.052 | 0.00 | 0.00 |
| ATOM | 7603 | HD2 | TYR | X | 499 | 35.994 | 22.721 | 49.246 | 0.00 | 0.00 |
| ATOM | 7604 | C   | TYR | X | 499 | 31.382 | 22.700 | 49.359 | 0.00 | 0.00 |
| ATOM | 7605 | O   | TYR | X | 499 | 30.686 | 23.707 | 49.384 | 0.00 | 0.00 |
| ATOM | 7606 | N   | THR | X | 500 | 31.138 | 21.720 | 50.148 | 0.00 | 0.00 |
| ATOM | 7607 | H   | THR | X | 500 | 31.845 | 21.010 | 50.280 | 0.00 | 0.00 |
| ATOM | 7608 | CA  | THR | X | 500 | 30.010 | 21.627 | 51.160 | 0.00 | 0.00 |
| ATOM | 7609 | HA  | THR | X | 500 | 29.399 | 22.520 | 51.035 | 0.00 | 0.00 |

|      |      |      |     |   |     |        |        |        |      |      |
|------|------|------|-----|---|-----|--------|--------|--------|------|------|
| ATOM | 7610 | CB   | THR | X | 500 | 29.023 | 20.486 | 50.901 | 0.00 | 0.00 |
| ATOM | 7611 | HB   | THR | X | 500 | 28.418 | 20.288 | 51.786 | 0.00 | 0.00 |
| ATOM | 7612 | CG2  | THR | X | 500 | 28.068 | 20.793 | 49.674 | 0.00 | 0.00 |
| ATOM | 7613 | HG21 | THR | X | 500 | 28.455 | 21.469 | 48.911 | 0.00 | 0.00 |
| ATOM | 7614 | HG22 | THR | X | 500 | 27.132 | 21.129 | 50.119 | 0.00 | 0.00 |
| ATOM | 7615 | HG23 | THR | X | 500 | 27.954 | 19.915 | 49.038 | 0.00 | 0.00 |
| ATOM | 7616 | OG1  | THR | X | 500 | 29.800 | 19.397 | 50.562 | 0.00 | 0.00 |
| ATOM | 7617 | HG1  | THR | X | 500 | 29.293 | 18.583 | 50.615 | 0.00 | 0.00 |
| ATOM | 7618 | C    | THR | X | 500 | 30.589 | 21.528 | 52.551 | 0.00 | 0.00 |
| ATOM | 7619 | O    | THR | X | 500 | 31.559 | 20.804 | 52.766 | 0.00 | 0.00 |
| ATOM | 7620 | N    | ALA | X | 501 | 30.012 | 22.333 | 53.441 | 0.00 | 0.00 |
| ATOM | 7621 | H    | ALA | X | 501 | 29.268 | 22.930 | 53.111 | 0.00 | 0.00 |
| ATOM | 7622 | CA   | ALA | X | 501 | 30.463 | 22.599 | 54.774 | 0.00 | 0.00 |
| ATOM | 7623 | HA   | ALA | X | 501 | 31.279 | 23.321 | 54.780 | 0.00 | 0.00 |
| ATOM | 7624 | CB   | ALA | X | 501 | 29.273 | 23.161 | 55.573 | 0.00 | 0.00 |
| ATOM | 7625 | HB1  | ALA | X | 501 | 29.424 | 23.261 | 56.647 | 0.00 | 0.00 |
| ATOM | 7626 | HB2  | ALA | X | 501 | 28.366 | 22.570 | 55.446 | 0.00 | 0.00 |
| ATOM | 7627 | HB3  | ALA | X | 501 | 29.140 | 24.189 | 55.235 | 0.00 | 0.00 |
| ATOM | 7628 | C    | ALA | X | 501 | 31.066 | 21.451 | 55.532 | 0.00 | 0.00 |
| ATOM | 7629 | O    | ALA | X | 501 | 32.128 | 21.580 | 56.139 | 0.00 | 0.00 |
| ATOM | 7630 | N    | GLY | X | 502 | 30.520 | 20.190 | 55.401 | 0.00 | 0.00 |
| ATOM | 7631 | H    | GLY | X | 502 | 29.702 | 20.078 | 54.819 | 0.00 | 0.00 |
| ATOM | 7632 | CA   | GLY | X | 502 | 30.972 | 19.083 | 56.224 | 0.00 | 0.00 |
| ATOM | 7633 | HA2  | GLY | X | 502 | 31.390 | 19.475 | 57.152 | 0.00 | 0.00 |
| ATOM | 7634 | HA3  | GLY | X | 502 | 30.118 | 18.425 | 56.380 | 0.00 | 0.00 |
| ATOM | 7635 | C    | GLY | X | 502 | 31.914 | 18.216 | 55.397 | 0.00 | 0.00 |
| ATOM | 7636 | O    | GLY | X | 502 | 32.525 | 17.342 | 56.050 | 0.00 | 0.00 |
| ATOM | 7637 | N    | ALA | X | 503 | 32.086 | 18.381 | 54.092 | 0.00 | 0.00 |
| ATOM | 7638 | H    | ALA | X | 503 | 31.652 | 19.158 | 53.614 | 0.00 | 0.00 |
| ATOM | 7639 | CA   | ALA | X | 503 | 32.856 | 17.486 | 53.215 | 0.00 | 0.00 |
| ATOM | 7640 | HA   | ALA | X | 503 | 33.265 | 16.602 | 53.704 | 0.00 | 0.00 |
| ATOM | 7641 | CB   | ALA | X | 503 | 32.031 | 17.182 | 51.967 | 0.00 | 0.00 |
| ATOM | 7642 | HB1  | ALA | X | 503 | 31.663 | 18.089 | 51.486 | 0.00 | 0.00 |
| ATOM | 7643 | HB2  | ALA | X | 503 | 31.340 | 16.378 | 52.219 | 0.00 | 0.00 |
| ATOM | 7644 | HB3  | ALA | X | 503 | 32.682 | 16.678 | 51.253 | 0.00 | 0.00 |
| ATOM | 7645 | C    | ALA | X | 503 | 34.144 | 18.160 | 52.822 | 0.00 | 0.00 |
| ATOM | 7646 | O    | ALA | X | 503 | 35.170 | 17.458 | 52.694 | 0.00 | 0.00 |
| ATOM | 7647 | N    | GLN | X | 504 | 34.100 | 19.521 | 52.494 | 0.00 | 0.00 |
| ATOM | 7648 | H    | GLN | X | 504 | 33.205 | 19.974 | 52.376 | 0.00 | 0.00 |
| ATOM | 7649 | CA   | GLN | X | 504 | 35.269 | 20.312 | 52.345 | 0.00 | 0.00 |
| ATOM | 7650 | HA   | GLN | X | 504 | 34.836 | 21.281 | 52.095 | 0.00 | 0.00 |
| ATOM | 7651 | CB   | GLN | X | 504 | 36.013 | 20.461 | 53.702 | 0.00 | 0.00 |
| ATOM | 7652 | HB2  | GLN | X | 504 | 36.438 | 19.482 | 53.923 | 0.00 | 0.00 |
| ATOM | 7653 | HB3  | GLN | X | 504 | 36.820 | 21.175 | 53.534 | 0.00 | 0.00 |
| ATOM | 7654 | CG   | GLN | X | 504 | 35.128 | 20.955 | 54.925 | 0.00 | 0.00 |
| ATOM | 7655 | HG2  | GLN | X | 504 | 34.787 | 21.977 | 54.759 | 0.00 | 0.00 |
| ATOM | 7656 | HG3  | GLN | X | 504 | 34.236 | 20.337 | 55.024 | 0.00 | 0.00 |
| ATOM | 7657 | CD   | GLN | X | 504 | 35.860 | 20.934 | 56.256 | 0.00 | 0.00 |
| ATOM | 7658 | OE1  | GLN | X | 504 | 36.145 | 21.900 | 56.980 | 0.00 | 0.00 |
| ATOM | 7659 | NE2  | GLN | X | 504 | 36.425 | 19.788 | 56.664 | 0.00 | 0.00 |
| ATOM | 7660 | HE21 | GLN | X | 504 | 37.031 | 19.831 | 57.470 | 0.00 | 0.00 |
| ATOM | 7661 | HE22 | GLN | X | 504 | 36.114 | 18.864 | 56.399 | 0.00 | 0.00 |
| ATOM | 7662 | C    | GLN | X | 504 | 36.179 | 20.064 | 51.159 | 0.00 | 0.00 |
| ATOM | 7663 | O    | GLN | X | 504 | 37.393 | 20.332 | 51.203 | 0.00 | 0.00 |
| ATOM | 7664 | N    | GLN | X | 505 | 35.601 | 19.490 | 50.088 | 0.00 | 0.00 |
| ATOM | 7665 | H    | GLN | X | 505 | 34.609 | 19.553 | 49.905 | 0.00 | 0.00 |
| ATOM | 7666 | CA   | GLN | X | 505 | 36.353 | 19.036 | 48.925 | 0.00 | 0.00 |
| ATOM | 7667 | HA   | GLN | X | 505 | 37.156 | 18.379 | 49.259 | 0.00 | 0.00 |
| ATOM | 7668 | CB   | GLN | X | 505 | 35.483 | 18.265 | 47.879 | 0.00 | 0.00 |
| ATOM | 7669 | HB2  | GLN | X | 505 | 34.555 | 18.760 | 47.593 | 0.00 | 0.00 |
| ATOM | 7670 | HB3  | GLN | X | 505 | 36.028 | 18.047 | 46.960 | 0.00 | 0.00 |
| ATOM | 7671 | CG   | GLN | X | 505 | 35.095 | 16.943 | 48.596 | 0.00 | 0.00 |
| ATOM | 7672 | HG2  | GLN | X | 505 | 35.992 | 16.357 | 48.797 | 0.00 | 0.00 |
| ATOM | 7673 | HG3  | GLN | X | 505 | 34.620 | 17.171 | 49.550 | 0.00 | 0.00 |
| ATOM | 7674 | CD   | GLN | X | 505 | 34.080 | 16.103 | 47.808 | 0.00 | 0.00 |
| ATOM | 7675 | OE1  | GLN | X | 505 | 32.960 | 16.525 | 47.538 | 0.00 | 0.00 |
| ATOM | 7676 | NE2  | GLN | X | 505 | 34.398 | 14.890 | 47.355 | 0.00 | 0.00 |



|      |      |      |     |   |     |        |        |        |      |      |
|------|------|------|-----|---|-----|--------|--------|--------|------|------|
| ATOM | 7677 | HE21 | GLN | X | 505 | 33.840 | 14.553 | 46.583 | 0.00 | 0.00 |
| ATOM | 7678 | HE22 | GLN | X | 505 | 35.336 | 14.602 | 47.597 | 0.00 | 0.00 |
| ATOM | 7679 | C    | GLN | X | 505 | 36.891 | 20.201 | 48.093 | 0.00 | 0.00 |
| ATOM | 7680 | O    | GLN | X | 505 | 36.099 | 20.876 | 47.421 | 0.00 | 0.00 |
| ATOM | 7681 | N    | TYR | X | 506 | 38.221 | 20.366 | 48.093 | 0.00 | 0.00 |
| ATOM | 7682 | H    | TYR | X | 506 | 38.786 | 19.792 | 48.702 | 0.00 | 0.00 |
| ATOM | 7683 | CA   | TYR | X | 506 | 38.931 | 21.181 | 47.153 | 0.00 | 0.00 |
| ATOM | 7684 | HA   | TYR | X | 506 | 38.194 | 21.744 | 46.580 | 0.00 | 0.00 |
| ATOM | 7685 | CB   | TYR | X | 506 | 39.824 | 22.261 | 47.973 | 0.00 | 0.00 |
| ATOM | 7686 | HB2  | TYR | X | 506 | 40.216 | 23.041 | 47.320 | 0.00 | 0.00 |
| ATOM | 7687 | HB3  | TYR | X | 506 | 39.352 | 22.675 | 48.864 | 0.00 | 0.00 |
| ATOM | 7688 | CG   | TYR | X | 506 | 41.049 | 21.607 | 48.584 | 0.00 | 0.00 |
| ATOM | 7689 | CD1  | TYR | X | 506 | 41.020 | 20.701 | 49.688 | 0.00 | 0.00 |
| ATOM | 7690 | HD1  | TYR | X | 506 | 40.027 | 20.444 | 50.026 | 0.00 | 0.00 |
| ATOM | 7691 | CE1  | TYR | X | 506 | 42.140 | 20.072 | 50.249 | 0.00 | 0.00 |
| ATOM | 7692 | HE1  | TYR | X | 506 | 42.042 | 19.378 | 51.071 | 0.00 | 0.00 |
| ATOM | 7693 | CZ   | TYR | X | 506 | 43.378 | 20.479 | 49.697 | 0.00 | 0.00 |
| ATOM | 7694 | OH   | TYR | X | 506 | 44.555 | 19.882 | 50.068 | 0.00 | 0.00 |
| ATOM | 7695 | HH   | TYR | X | 506 | 44.424 | 19.160 | 50.687 | 0.00 | 0.00 |
| ATOM | 7696 | CE2  | TYR | X | 506 | 43.450 | 21.421 | 48.640 | 0.00 | 0.00 |
| ATOM | 7697 | HE2  | TYR | X | 506 | 44.395 | 21.674 | 48.182 | 0.00 | 0.00 |
| ATOM | 7698 | CD2  | TYR | X | 506 | 42.284 | 21.935 | 48.035 | 0.00 | 0.00 |
| ATOM | 7699 | HD2  | TYR | X | 506 | 42.353 | 22.501 | 47.118 | 0.00 | 0.00 |
| ATOM | 7700 | C    | TYR | X | 506 | 39.698 | 20.355 | 46.068 | 0.00 | 0.00 |
| ATOM | 7701 | O    | TYR | X | 506 | 40.336 | 19.415 | 46.385 | 0.00 | 0.00 |
| ATOM | 7702 | N    | VAL | X | 507 | 39.595 | 20.778 | 44.797 | 0.00 | 0.00 |
| ATOM | 7703 | H    | VAL | X | 507 | 38.963 | 21.564 | 44.741 | 0.00 | 0.00 |
| ATOM | 7704 | CA   | VAL | X | 507 | 40.098 | 19.933 | 43.651 | 0.00 | 0.00 |
| ATOM | 7705 | HA   | VAL | X | 507 | 40.207 | 18.928 | 44.058 | 0.00 | 0.00 |
| ATOM | 7706 | CB   | VAL | X | 507 | 39.237 | 20.097 | 42.456 | 0.00 | 0.00 |
| ATOM | 7707 | HB   | VAL | X | 507 | 39.482 | 19.434 | 41.627 | 0.00 | 0.00 |
| ATOM | 7708 | CG1  | VAL | X | 507 | 37.820 | 19.687 | 42.892 | 0.00 | 0.00 |
| ATOM | 7709 | HG11 | VAL | X | 507 | 37.120 | 19.543 | 42.069 | 0.00 | 0.00 |
| ATOM | 7710 | HG12 | VAL | X | 507 | 37.961 | 18.800 | 43.510 | 0.00 | 0.00 |
| ATOM | 7711 | HG13 | VAL | X | 507 | 37.440 | 20.475 | 43.541 | 0.00 | 0.00 |
| ATOM | 7712 | CG2  | VAL | X | 507 | 39.287 | 21.474 | 41.715 | 0.00 | 0.00 |
| ATOM | 7713 | HG21 | VAL | X | 507 | 38.696 | 21.389 | 40.803 | 0.00 | 0.00 |
| ATOM | 7714 | HG22 | VAL | X | 507 | 40.341 | 21.611 | 41.475 | 0.00 | 0.00 |
| ATOM | 7715 | HG23 | VAL | X | 507 | 38.819 | 22.261 | 42.306 | 0.00 | 0.00 |
| ATOM | 7716 | C    | VAL | X | 507 | 41.620 | 20.302 | 43.400 | 0.00 | 0.00 |
| ATOM | 7717 | O    | VAL | X | 507 | 42.059 | 21.341 | 43.749 | 0.00 | 0.00 |
| ATOM | 7718 | N    | SER | X | 508 | 42.345 | 19.376 | 42.795 | 0.00 | 0.00 |
| ATOM | 7719 | H    | SER | X | 508 | 41.925 | 18.473 | 42.624 | 0.00 | 0.00 |
| ATOM | 7720 | CA   | SER | X | 508 | 43.661 | 19.615 | 42.170 | 0.00 | 0.00 |
| ATOM | 7721 | HA   | SER | X | 508 | 44.254 | 20.418 | 42.609 | 0.00 | 0.00 |
| ATOM | 7722 | CB   | SER | X | 508 | 44.466 | 18.277 | 42.389 | 0.00 | 0.00 |
| ATOM | 7723 | HB2  | SER | X | 508 | 44.754 | 18.126 | 43.430 | 0.00 | 0.00 |
| ATOM | 7724 | HB3  | SER | X | 508 | 43.964 | 17.358 | 42.086 | 0.00 | 0.00 |
| ATOM | 7725 | OG   | SER | X | 508 | 45.704 | 18.315 | 41.703 | 0.00 | 0.00 |
| ATOM | 7726 | HG   | SER | X | 508 | 46.458 | 18.620 | 42.213 | 0.00 | 0.00 |
| ATOM | 7727 | C    | SER | X | 508 | 43.378 | 19.880 | 40.632 | 0.00 | 0.00 |
| ATOM | 7728 | O    | SER | X | 508 | 42.443 | 19.197 | 40.077 | 0.00 | 0.00 |
| ATOM | 7729 | N    | LEU | X | 509 | 44.110 | 20.858 | 40.041 | 0.00 | 0.00 |
| ATOM | 7730 | H    | LEU | X | 509 | 44.745 | 21.391 | 40.618 | 0.00 | 0.00 |
| ATOM | 7731 | CA   | LEU | X | 509 | 44.007 | 21.130 | 38.627 | 0.00 | 0.00 |
| ATOM | 7732 | HA   | LEU | X | 509 | 43.441 | 20.344 | 38.127 | 0.00 | 0.00 |
| ATOM | 7733 | CB   | LEU | X | 509 | 43.490 | 22.535 | 38.305 | 0.00 | 0.00 |
| ATOM | 7734 | HB2  | LEU | X | 509 | 43.893 | 23.290 | 38.981 | 0.00 | 0.00 |
| ATOM | 7735 | HB3  | LEU | X | 509 | 43.751 | 22.840 | 37.292 | 0.00 | 0.00 |
| ATOM | 7736 | CG   | LEU | X | 509 | 41.972 | 22.581 | 38.501 | 0.00 | 0.00 |
| ATOM | 7737 | HG   | LEU | X | 509 | 41.702 | 22.098 | 39.440 | 0.00 | 0.00 |
| ATOM | 7738 | CD1  | LEU | X | 509 | 41.375 | 24.006 | 38.594 | 0.00 | 0.00 |
| ATOM | 7739 | HD11 | LEU | X | 509 | 41.751 | 24.422 | 39.529 | 0.00 | 0.00 |
| ATOM | 7740 | HD12 | LEU | X | 509 | 40.318 | 24.005 | 38.860 | 0.00 | 0.00 |
| ATOM | 7741 | HD13 | LEU | X | 509 | 41.454 | 24.627 | 37.702 | 0.00 | 0.00 |
| ATOM | 7742 | CD2  | LEU | X | 509 | 41.195 | 21.816 | 37.396 | 0.00 | 0.00 |
| ATOM | 7743 | HD21 | LEU | X | 509 | 41.059 | 20.745 | 37.544 | 0.00 | 0.00 |

|      |      |      |     |   |     |        |        |        |      |      |
|------|------|------|-----|---|-----|--------|--------|--------|------|------|
| ATOM | 7744 | HD22 | LEU | X | 509 | 40.213 | 22.283 | 37.329 | 0.00 | 0.00 |
| ATOM | 7745 | HD23 | LEU | X | 509 | 41.719 | 21.825 | 36.440 | 0.00 | 0.00 |
| ATOM | 7746 | C    | LEU | X | 509 | 45.469 | 20.997 | 38.093 | 0.00 | 0.00 |
| ATOM | 7747 | O    | LEU | X | 509 | 46.392 | 21.629 | 38.646 | 0.00 | 0.00 |
| ATOM | 7748 | N    | ASP | X | 510 | 45.638 | 20.148 | 37.106 | 0.00 | 0.00 |
| ATOM | 7749 | H    | ASP | X | 510 | 44.837 | 19.700 | 36.684 | 0.00 | 0.00 |
| ATOM | 7750 | CA   | ASP | X | 510 | 46.910 | 19.664 | 36.605 | 0.00 | 0.00 |
| ATOM | 7751 | HA   | ASP | X | 510 | 47.657 | 20.457 | 36.632 | 0.00 | 0.00 |
| ATOM | 7752 | CB   | ASP | X | 510 | 47.298 | 18.539 | 37.595 | 0.00 | 0.00 |
| ATOM | 7753 | HB2  | ASP | X | 510 | 47.388 | 19.004 | 38.576 | 0.00 | 0.00 |
| ATOM | 7754 | HB3  | ASP | X | 510 | 46.553 | 17.746 | 37.653 | 0.00 | 0.00 |
| ATOM | 7755 | CG   | ASP | X | 510 | 48.669 | 17.850 | 37.334 | 0.00 | 0.00 |
| ATOM | 7756 | OD1  | ASP | X | 510 | 49.590 | 18.466 | 36.809 | 0.00 | 0.00 |
| ATOM | 7757 | OD2  | ASP | X | 510 | 48.821 | 16.677 | 37.698 | 0.00 | 0.00 |
| ATOM | 7758 | C    | ASP | X | 510 | 46.816 | 19.163 | 35.141 | 0.00 | 0.00 |
| ATOM | 7759 | O    | ASP | X | 510 | 45.705 | 19.203 | 34.621 | 0.00 | 0.00 |
| ATOM | 7760 | N    | LEU | X | 511 | 47.976 | 18.589 | 34.567 | 0.00 | 0.00 |
| ATOM | 7761 | H    | LEU | X | 511 | 48.852 | 18.556 | 35.068 | 0.00 | 0.00 |
| ATOM | 7762 | CA   | LEU | X | 511 | 47.955 | 17.840 | 33.283 | 0.00 | 0.00 |
| ATOM | 7763 | HA   | LEU | X | 511 | 47.335 | 18.338 | 32.537 | 0.00 | 0.00 |
| ATOM | 7764 | CB   | LEU | X | 511 | 49.414 | 17.605 | 32.920 | 0.00 | 0.00 |
| ATOM | 7765 | HB2  | LEU | X | 511 | 50.007 | 17.042 | 33.640 | 0.00 | 0.00 |
| ATOM | 7766 | HB3  | LEU | X | 511 | 49.352 | 16.950 | 32.051 | 0.00 | 0.00 |
| ATOM | 7767 | CG   | LEU | X | 511 | 50.100 | 18.883 | 32.544 | 0.00 | 0.00 |
| ATOM | 7768 | HG   | LEU | X | 511 | 50.202 | 19.415 | 33.490 | 0.00 | 0.00 |
| ATOM | 7769 | CD1  | LEU | X | 511 | 51.508 | 18.500 | 32.131 | 0.00 | 0.00 |
| ATOM | 7770 | HD11 | LEU | X | 511 | 52.033 | 19.323 | 31.646 | 0.00 | 0.00 |
| ATOM | 7771 | HD12 | LEU | X | 511 | 51.614 | 17.592 | 31.535 | 0.00 | 0.00 |
| ATOM | 7772 | HD13 | LEU | X | 511 | 51.979 | 18.283 | 33.090 | 0.00 | 0.00 |
| ATOM | 7773 | CD2  | LEU | X | 511 | 49.421 | 19.803 | 31.481 | 0.00 | 0.00 |
| ATOM | 7774 | HD21 | LEU | X | 511 | 49.156 | 19.359 | 30.522 | 0.00 | 0.00 |
| ATOM | 7775 | HD22 | LEU | X | 511 | 48.498 | 20.219 | 31.885 | 0.00 | 0.00 |
| ATOM | 7776 | HD23 | LEU | X | 511 | 50.024 | 20.696 | 31.321 | 0.00 | 0.00 |
| ATOM | 7777 | C    | LEU | X | 511 | 47.046 | 16.566 | 33.337 | 0.00 | 0.00 |
| ATOM | 7778 | O    | LEU | X | 511 | 46.195 | 16.398 | 32.472 | 0.00 | 0.00 |
| ATOM | 7779 | N    | ARG | X | 512 | 47.157 | 15.851 | 34.513 | 0.00 | 0.00 |
| ATOM | 7780 | H    | ARG | X | 512 | 47.825 | 16.097 | 35.230 | 0.00 | 0.00 |
| ATOM | 7781 | CA   | ARG | X | 512 | 46.259 | 14.820 | 34.945 | 0.00 | 0.00 |
| ATOM | 7782 | HA   | ARG | X | 512 | 46.460 | 13.978 | 34.283 | 0.00 | 0.00 |
| ATOM | 7783 | CB   | ARG | X | 512 | 46.634 | 14.335 | 36.363 | 0.00 | 0.00 |
| ATOM | 7784 | HB2  | ARG | X | 512 | 46.867 | 15.289 | 36.838 | 0.00 | 0.00 |
| ATOM | 7785 | HB3  | ARG | X | 512 | 45.828 | 13.714 | 36.752 | 0.00 | 0.00 |
| ATOM | 7786 | CG   | ARG | X | 512 | 47.891 | 13.495 | 36.188 | 0.00 | 0.00 |
| ATOM | 7787 | HG2  | ARG | X | 512 | 47.645 | 12.658 | 35.535 | 0.00 | 0.00 |
| ATOM | 7788 | HG3  | ARG | X | 512 | 48.610 | 14.089 | 35.624 | 0.00 | 0.00 |
| ATOM | 7789 | CD   | ARG | X | 512 | 48.444 | 12.938 | 37.574 | 0.00 | 0.00 |
| ATOM | 7790 | HD2  | ARG | X | 512 | 47.662 | 12.376 | 38.084 | 0.00 | 0.00 |
| ATOM | 7791 | HD3  | ARG | X | 512 | 49.278 | 12.291 | 37.303 | 0.00 | 0.00 |
| ATOM | 7792 | NE   | ARG | X | 512 | 49.016 | 14.080 | 38.371 | 0.00 | 0.00 |
| ATOM | 7793 | HE   | ARG | X | 512 | 48.937 | 15.015 | 37.997 | 0.00 | 0.00 |
| ATOM | 7794 | CZ   | ARG | X | 512 | 49.688 | 14.031 | 39.529 | 0.00 | 0.00 |
| ATOM | 7795 | NH1  | ARG | X | 512 | 50.023 | 12.946 | 40.174 | 0.00 | 0.00 |
| ATOM | 7796 | HH11 | ARG | X | 512 | 49.614 | 12.032 | 40.039 | 0.00 | 0.00 |
| ATOM | 7797 | HH12 | ARG | X | 512 | 50.547 | 13.180 | 41.004 | 0.00 | 0.00 |
| ATOM | 7798 | NH2  | ARG | X | 512 | 50.088 | 15.165 | 40.031 | 0.00 | 0.00 |
| ATOM | 7799 | HH21 | ARG | X | 512 | 49.738 | 16.022 | 39.628 | 0.00 | 0.00 |
| ATOM | 7800 | HH22 | ARG | X | 512 | 50.501 | 15.229 | 40.950 | 0.00 | 0.00 |
| ATOM | 7801 | C    | ARG | X | 512 | 44.786 | 15.219 | 34.963 | 0.00 | 0.00 |
| ATOM | 7802 | O    | ARG | X | 512 | 44.385 | 16.396 | 35.219 | 0.00 | 0.00 |
| ATOM | 7803 | N    | PRO | X | 513 | 44.008 | 14.206 | 34.777 | 0.00 | 0.00 |
| ATOM | 7804 | CD   | PRO | X | 513 | 44.212 | 12.886 | 34.120 | 0.00 | 0.00 |
| ATOM | 7805 | HD2  | PRO | X | 513 | 44.728 | 12.200 | 34.791 | 0.00 | 0.00 |
| ATOM | 7806 | HD3  | PRO | X | 513 | 44.826 | 13.093 | 33.244 | 0.00 | 0.00 |
| ATOM | 7807 | CG   | PRO | X | 513 | 42.811 | 12.379 | 33.671 | 0.00 | 0.00 |
| ATOM | 7808 | HG2  | PRO | X | 513 | 42.769 | 11.319 | 33.416 | 0.00 | 0.00 |
| ATOM | 7809 | HG3  | PRO | X | 513 | 42.546 | 12.944 | 32.777 | 0.00 | 0.00 |
| ATOM | 7810 | CB   | PRO | X | 513 | 41.926 | 12.901 | 34.810 | 0.00 | 0.00 |

|      |      |      |     |   |     |        |        |        |      |      |
|------|------|------|-----|---|-----|--------|--------|--------|------|------|
| ATOM | 7811 | HB2  | PRO | X | 513 | 41.955 | 12.198 | 35.642 | 0.00 | 0.00 |
| ATOM | 7812 | HB3  | PRO | X | 513 | 40.903 | 13.123 | 34.507 | 0.00 | 0.00 |
| ATOM | 7813 | CA   | PRO | X | 513 | 42.570 | 14.197 | 35.224 | 0.00 | 0.00 |
| ATOM | 7814 | HA   | PRO | X | 513 | 42.037 | 14.963 | 34.661 | 0.00 | 0.00 |
| ATOM | 7815 | C    | PRO | X | 513 | 42.347 | 14.492 | 36.705 | 0.00 | 0.00 |
| ATOM | 7816 | O    | PRO | X | 513 | 43.201 | 14.222 | 37.495 | 0.00 | 0.00 |
| ATOM | 7817 | N    | LEU | X | 514 | 41.201 | 15.083 | 36.937 | 0.00 | 0.00 |
| ATOM | 7818 | H    | LEU | X | 514 | 40.555 | 15.225 | 36.174 | 0.00 | 0.00 |
| ATOM | 7819 | CA   | LEU | X | 514 | 40.832 | 15.773 | 38.201 | 0.00 | 0.00 |
| ATOM | 7820 | HA   | LEU | X | 514 | 41.750 | 16.348 | 38.330 | 0.00 | 0.00 |
| ATOM | 7821 | CB   | LEU | X | 514 | 39.626 | 16.737 | 37.972 | 0.00 | 0.00 |
| ATOM | 7822 | HB2  | LEU | X | 514 | 39.816 | 17.297 | 37.057 | 0.00 | 0.00 |
| ATOM | 7823 | HB3  | LEU | X | 514 | 38.722 | 16.137 | 37.868 | 0.00 | 0.00 |
| ATOM | 7824 | CG   | LEU | X | 514 | 39.322 | 17.727 | 39.192 | 0.00 | 0.00 |
| ATOM | 7825 | HG   | LEU | X | 514 | 40.278 | 18.095 | 39.566 | 0.00 | 0.00 |
| ATOM | 7826 | CD1  | LEU | X | 514 | 38.435 | 18.849 | 38.549 | 0.00 | 0.00 |
| ATOM | 7827 | HD11 | LEU | X | 514 | 37.601 | 18.350 | 38.056 | 0.00 | 0.00 |
| ATOM | 7828 | HD12 | LEU | X | 514 | 38.879 | 19.459 | 37.762 | 0.00 | 0.00 |
| ATOM | 7829 | HD13 | LEU | X | 514 | 38.042 | 19.468 | 39.356 | 0.00 | 0.00 |
| ATOM | 7830 | CD2  | LEU | X | 514 | 38.491 | 17.043 | 40.322 | 0.00 | 0.00 |
| ATOM | 7831 | HD21 | LEU | X | 514 | 39.123 | 16.323 | 40.842 | 0.00 | 0.00 |
| ATOM | 7832 | HD22 | LEU | X | 514 | 38.115 | 17.779 | 41.031 | 0.00 | 0.00 |
| ATOM | 7833 | HD23 | LEU | X | 514 | 37.633 | 16.526 | 39.892 | 0.00 | 0.00 |
| ATOM | 7834 | C    | LEU | X | 514 | 40.955 | 14.836 | 39.421 | 0.00 | 0.00 |
| ATOM | 7835 | O    | LEU | X | 514 | 40.186 | 13.881 | 39.579 | 0.00 | 0.00 |
| ATOM | 7836 | N    | GLU | X | 515 | 41.905 | 15.127 | 40.324 | 0.00 | 0.00 |
| ATOM | 7837 | H    | GLU | X | 515 | 42.688 | 15.697 | 40.038 | 0.00 | 0.00 |
| ATOM | 7838 | CA   | GLU | X | 515 | 41.928 | 14.581 | 41.684 | 0.00 | 0.00 |
| ATOM | 7839 | HA   | GLU | X | 515 | 41.454 | 13.600 | 41.709 | 0.00 | 0.00 |
| ATOM | 7840 | CB   | GLU | X | 515 | 43.341 | 14.321 | 42.096 | 0.00 | 0.00 |
| ATOM | 7841 | HB2  | GLU | X | 515 | 43.771 | 13.532 | 41.478 | 0.00 | 0.00 |
| ATOM | 7842 | HB3  | GLU | X | 515 | 43.900 | 15.239 | 41.915 | 0.00 | 0.00 |
| ATOM | 7843 | CG   | GLU | X | 515 | 43.454 | 13.906 | 43.604 | 0.00 | 0.00 |
| ATOM | 7844 | HG2  | GLU | X | 515 | 43.013 | 14.683 | 44.229 | 0.00 | 0.00 |
| ATOM | 7845 | HG3  | GLU | X | 515 | 42.888 | 12.995 | 43.797 | 0.00 | 0.00 |
| ATOM | 7846 | CD   | GLU | X | 515 | 44.952 | 13.693 | 44.043 | 0.00 | 0.00 |
| ATOM | 7847 | OE1  | GLU | X | 515 | 45.634 | 12.682 | 43.796 | 0.00 | 0.00 |
| ATOM | 7848 | OE2  | GLU | X | 515 | 45.421 | 14.594 | 44.715 | 0.00 | 0.00 |
| ATOM | 7849 | C    | GLU | X | 515 | 41.135 | 15.512 | 42.674 | 0.00 | 0.00 |
| ATOM | 7850 | O    | GLU | X | 515 | 41.378 | 16.693 | 42.803 | 0.00 | 0.00 |
| ATOM | 7851 | N    | VAL | X | 516 | 40.262 | 14.918 | 43.549 | 0.00 | 0.00 |
| ATOM | 7852 | H    | VAL | X | 516 | 40.096 | 13.933 | 43.395 | 0.00 | 0.00 |
| ATOM | 7853 | CA   | VAL | X | 516 | 39.634 | 15.532 | 44.682 | 0.00 | 0.00 |
| ATOM | 7854 | HA   | VAL | X | 516 | 39.631 | 16.616 | 44.571 | 0.00 | 0.00 |
| ATOM | 7855 | CB   | VAL | X | 516 | 38.184 | 15.076 | 44.790 | 0.00 | 0.00 |
| ATOM | 7856 | HB   | VAL | X | 516 | 38.067 | 14.044 | 45.120 | 0.00 | 0.00 |
| ATOM | 7857 | CG1  | VAL | X | 516 | 37.477 | 16.070 | 45.807 | 0.00 | 0.00 |
| ATOM | 7858 | HG11 | VAL | X | 516 | 36.451 | 15.757 | 45.996 | 0.00 | 0.00 |
| ATOM | 7859 | HG12 | VAL | X | 516 | 37.937 | 16.102 | 46.795 | 0.00 | 0.00 |
| ATOM | 7860 | HG13 | VAL | X | 516 | 37.419 | 17.076 | 45.390 | 0.00 | 0.00 |
| ATOM | 7861 | CG2  | VAL | X | 516 | 37.424 | 15.221 | 43.436 | 0.00 | 0.00 |
| ATOM | 7862 | HG21 | VAL | X | 516 | 36.374 | 15.058 | 43.679 | 0.00 | 0.00 |
| ATOM | 7863 | HG22 | VAL | X | 516 | 37.797 | 14.469 | 42.741 | 0.00 | 0.00 |
| ATOM | 7864 | HG23 | VAL | X | 516 | 37.533 | 16.263 | 43.134 | 0.00 | 0.00 |
| ATOM | 7865 | C    | VAL | X | 516 | 40.428 | 15.294 | 45.992 | 0.00 | 0.00 |
| ATOM | 7866 | O    | VAL | X | 516 | 40.638 | 14.178 | 46.405 | 0.00 | 0.00 |
| ATOM | 7867 | N    | ARG | X | 517 | 40.694 | 16.394 | 46.728 | 0.00 | 0.00 |
| ATOM | 7868 | H    | ARG | X | 517 | 40.553 | 17.275 | 46.253 | 0.00 | 0.00 |
| ATOM | 7869 | CA   | ARG | X | 517 | 41.289 | 16.423 | 48.102 | 0.00 | 0.00 |
| ATOM | 7870 | HA   | ARG | X | 517 | 41.531 | 15.421 | 48.456 | 0.00 | 0.00 |
| ATOM | 7871 | CB   | ARG | X | 517 | 42.545 | 17.280 | 48.116 | 0.00 | 0.00 |
| ATOM | 7872 | HB2  | ARG | X | 517 | 42.345 | 18.307 | 47.811 | 0.00 | 0.00 |
| ATOM | 7873 | HB3  | ARG | X | 517 | 43.025 | 17.397 | 49.087 | 0.00 | 0.00 |
| ATOM | 7874 | CG   | ARG | X | 517 | 43.607 | 16.676 | 47.240 | 0.00 | 0.00 |
| ATOM | 7875 | HG2  | ARG | X | 517 | 43.743 | 15.617 | 47.463 | 0.00 | 0.00 |
| ATOM | 7876 | HG3  | ARG | X | 517 | 43.367 | 16.594 | 46.180 | 0.00 | 0.00 |
| ATOM | 7877 | CD   | ARG | X | 517 | 44.961 | 17.413 | 47.338 | 0.00 | 0.00 |

|      |      |      |     |   |     |        |        |        |      |      |
|------|------|------|-----|---|-----|--------|--------|--------|------|------|
| ATOM | 7878 | HD2  | ARG | X | 517 | 44.900 | 18.487 | 47.162 | 0.00 | 0.00 |
| ATOM | 7879 | HD3  | ARG | X | 517 | 45.334 | 17.337 | 48.359 | 0.00 | 0.00 |
| ATOM | 7880 | NE   | ARG | X | 517 | 45.916 | 16.738 | 46.395 | 0.00 | 0.00 |
| ATOM | 7881 | HE   | ARG | X | 517 | 45.606 | 15.867 | 45.988 | 0.00 | 0.00 |
| ATOM | 7882 | CZ   | ARG | X | 517 | 46.836 | 17.377 | 45.675 | 0.00 | 0.00 |
| ATOM | 7883 | NH1  | ARG | X | 517 | 47.241 | 18.616 | 46.043 | 0.00 | 0.00 |
| ATOM | 7884 | HH11 | ARG | X | 517 | 46.916 | 19.111 | 46.860 | 0.00 | 0.00 |
| ATOM | 7885 | HH12 | ARG | X | 517 | 47.864 | 19.134 | 45.440 | 0.00 | 0.00 |
| ATOM | 7886 | NH2  | ARG | X | 517 | 47.168 | 16.904 | 44.530 | 0.00 | 0.00 |
| ATOM | 7887 | HH21 | ARG | X | 517 | 46.603 | 16.150 | 44.166 | 0.00 | 0.00 |
| ATOM | 7888 | HH22 | ARG | X | 517 | 47.765 | 17.507 | 43.983 | 0.00 | 0.00 |
| ATOM | 7889 | C    | ARG | X | 517 | 40.302 | 17.032 | 49.086 | 0.00 | 0.00 |
| ATOM | 7890 | O    | ARG | X | 517 | 39.450 | 17.892 | 48.775 | 0.00 | 0.00 |
| ATOM | 7891 | N    | ARG | X | 518 | 40.420 | 16.656 | 50.370 | 0.00 | 0.00 |
| ATOM | 7892 | H    | ARG | X | 518 | 41.320 | 16.282 | 50.637 | 0.00 | 0.00 |
| ATOM | 7893 | CA   | ARG | X | 518 | 39.483 | 16.901 | 51.487 | 0.00 | 0.00 |
| ATOM | 7894 | HA   | ARG | X | 518 | 38.701 | 17.477 | 50.992 | 0.00 | 0.00 |
| ATOM | 7895 | CB   | ARG | X | 518 | 38.823 | 15.607 | 51.968 | 0.00 | 0.00 |
| ATOM | 7896 | HB2  | ARG | X | 518 | 38.230 | 15.818 | 52.857 | 0.00 | 0.00 |
| ATOM | 7897 | HB3  | ARG | X | 518 | 38.173 | 15.434 | 51.110 | 0.00 | 0.00 |
| ATOM | 7898 | CG   | ARG | X | 518 | 39.776 | 14.477 | 52.255 | 0.00 | 0.00 |
| ATOM | 7899 | HG2  | ARG | X | 518 | 40.359 | 14.233 | 51.367 | 0.00 | 0.00 |
| ATOM | 7900 | HG3  | ARG | X | 518 | 40.478 | 14.828 | 53.012 | 0.00 | 0.00 |
| ATOM | 7901 | CD   | ARG | X | 518 | 38.942 | 13.212 | 52.642 | 0.00 | 0.00 |
| ATOM | 7902 | HD2  | ARG | X | 518 | 38.293 | 13.497 | 53.470 | 0.00 | 0.00 |
| ATOM | 7903 | HD3  | ARG | X | 518 | 38.455 | 12.856 | 51.735 | 0.00 | 0.00 |
| ATOM | 7904 | NE   | ARG | X | 518 | 39.793 | 12.140 | 53.127 | 0.00 | 0.00 |
| ATOM | 7905 | HE   | ARG | X | 518 | 40.791 | 12.280 | 53.057 | 0.00 | 0.00 |
| ATOM | 7906 | CZ   | ARG | X | 518 | 39.502 | 10.909 | 53.456 | 0.00 | 0.00 |
| ATOM | 7907 | NH1  | ARG | X | 518 | 38.253 | 10.510 | 53.465 | 0.00 | 0.00 |
| ATOM | 7908 | HH11 | ARG | X | 518 | 37.582 | 11.189 | 53.135 | 0.00 | 0.00 |
| ATOM | 7909 | HH12 | ARG | X | 518 | 38.003 | 9.598  | 53.818 | 0.00 | 0.00 |
| ATOM | 7910 | NH2  | ARG | X | 518 | 40.452 | 10.150 | 53.887 | 0.00 | 0.00 |
| ATOM | 7911 | HH21 | ARG | X | 518 | 41.442 | 10.347 | 53.900 | 0.00 | 0.00 |
| ATOM | 7912 | HH22 | ARG | X | 518 | 40.115 | 9.198  | 53.861 | 0.00 | 0.00 |
| ATOM | 7913 | C    | ARG | X | 518 | 40.080 | 17.774 | 52.586 | 0.00 | 0.00 |
| ATOM | 7914 | O    | ARG | X | 518 | 41.311 | 17.842 | 52.850 | 0.00 | 0.00 |
| ATOM | 7915 | N    | GLY | X | 519 | 39.229 | 18.455 | 53.318 | 0.00 | 0.00 |
| ATOM | 7916 | H    | GLY | X | 519 | 38.258 | 18.266 | 53.115 | 0.00 | 0.00 |
| ATOM | 7917 | CA   | GLY | X | 519 | 39.549 | 19.136 | 54.523 | 0.00 | 0.00 |
| ATOM | 7918 | HA2  | GLY | X | 519 | 38.702 | 19.577 | 55.048 | 0.00 | 0.00 |
| ATOM | 7919 | HA3  | GLY | X | 519 | 40.058 | 18.356 | 55.090 | 0.00 | 0.00 |
| ATOM | 7920 | C    | GLY | X | 519 | 40.488 | 20.324 | 54.296 | 0.00 | 0.00 |
| ATOM | 7921 | O    | GLY | X | 519 | 41.547 | 20.477 | 54.960 | 0.00 | 0.00 |
| ATOM | 7922 | N    | LEU | X | 520 | 40.327 | 21.122 | 53.283 | 0.00 | 0.00 |
| ATOM | 7923 | H    | LEU | X | 520 | 39.443 | 21.054 | 52.798 | 0.00 | 0.00 |
| ATOM | 7924 | CA   | LEU | X | 520 | 41.151 | 22.257 | 52.873 | 0.00 | 0.00 |
| ATOM | 7925 | HA   | LEU | X | 520 | 42.002 | 21.954 | 52.262 | 0.00 | 0.00 |
| ATOM | 7926 | CB   | LEU | X | 520 | 40.208 | 23.185 | 51.983 | 0.00 | 0.00 |
| ATOM | 7927 | HB2  | LEU | X | 520 | 39.918 | 22.736 | 51.033 | 0.00 | 0.00 |
| ATOM | 7928 | HB3  | LEU | X | 520 | 39.286 | 23.405 | 52.521 | 0.00 | 0.00 |
| ATOM | 7929 | CG   | LEU | X | 520 | 40.751 | 24.569 | 51.538 | 0.00 | 0.00 |
| ATOM | 7930 | HG   | LEU | X | 520 | 41.217 | 25.068 | 52.388 | 0.00 | 0.00 |
| ATOM | 7931 | CD1  | LEU | X | 520 | 41.826 | 24.539 | 50.389 | 0.00 | 0.00 |
| ATOM | 7932 | HD11 | LEU | X | 520 | 42.617 | 23.874 | 50.734 | 0.00 | 0.00 |
| ATOM | 7933 | HD12 | LEU | X | 520 | 42.209 | 25.529 | 50.142 | 0.00 | 0.00 |
| ATOM | 7934 | HD13 | LEU | X | 520 | 41.430 | 24.194 | 49.433 | 0.00 | 0.00 |
| ATOM | 7935 | CD2  | LEU | X | 520 | 39.590 | 25.453 | 50.902 | 0.00 | 0.00 |
| ATOM | 7936 | HD21 | LEU | X | 520 | 38.710 | 25.349 | 51.537 | 0.00 | 0.00 |
| ATOM | 7937 | HD22 | LEU | X | 520 | 39.894 | 26.497 | 50.821 | 0.00 | 0.00 |
| ATOM | 7938 | HD23 | LEU | X | 520 | 39.358 | 24.975 | 49.951 | 0.00 | 0.00 |
| ATOM | 7939 | C    | LEU | X | 520 | 41.699 | 23.076 | 54.052 | 0.00 | 0.00 |
| ATOM | 7940 | O    | LEU | X | 520 | 40.949 | 23.793 | 54.766 | 0.00 | 0.00 |
| ATOM | 7941 | N    | ARG | X | 521 | 43.034 | 22.914 | 54.243 | 0.00 | 0.00 |
| ATOM | 7942 | H    | ARG | X | 521 | 43.462 | 22.149 | 53.742 | 0.00 | 0.00 |
| ATOM | 7943 | CA   | ARG | X | 521 | 43.911 | 23.569 | 55.201 | 0.00 | 0.00 |
| ATOM | 7944 | HA   | ARG | X | 521 | 44.889 | 23.108 | 55.064 | 0.00 | 0.00 |

|      |      |      |     |   |     |        |        |        |      |      |
|------|------|------|-----|---|-----|--------|--------|--------|------|------|
| ATOM | 7945 | CB   | ARG | X | 521 | 44.094 | 25.033 | 54.783 | 0.00 | 0.00 |
| ATOM | 7946 | HB2  | ARG | X | 521 | 44.145 | 25.000 | 53.695 | 0.00 | 0.00 |
| ATOM | 7947 | HB3  | ARG | X | 521 | 43.269 | 25.683 | 55.075 | 0.00 | 0.00 |
| ATOM | 7948 | CG   | ARG | X | 521 | 45.483 | 25.625 | 55.197 | 0.00 | 0.00 |
| ATOM | 7949 | HG2  | ARG | X | 521 | 45.470 | 26.689 | 54.958 | 0.00 | 0.00 |
| ATOM | 7950 | HG3  | ARG | X | 521 | 45.570 | 25.480 | 56.274 | 0.00 | 0.00 |
| ATOM | 7951 | CD   | ARG | X | 521 | 46.640 | 25.073 | 54.355 | 0.00 | 0.00 |
| ATOM | 7952 | HD2  | ARG | X | 521 | 46.816 | 24.037 | 54.647 | 0.00 | 0.00 |
| ATOM | 7953 | HD3  | ARG | X | 521 | 46.413 | 25.135 | 53.291 | 0.00 | 0.00 |
| ATOM | 7954 | NE   | ARG | X | 521 | 47.871 | 25.862 | 54.441 | 0.00 | 0.00 |
| ATOM | 7955 | HE   | ARG | X | 521 | 48.010 | 26.561 | 55.155 | 0.00 | 0.00 |
| ATOM | 7956 | CZ   | ARG | X | 521 | 48.910 | 25.734 | 53.597 | 0.00 | 0.00 |
| ATOM | 7957 | NH1  | ARG | X | 521 | 48.753 | 24.873 | 52.624 | 0.00 | 0.00 |
| ATOM | 7958 | HH11 | ARG | X | 521 | 47.955 | 24.253 | 52.639 | 0.00 | 0.00 |
| ATOM | 7959 | HH12 | ARG | X | 521 | 49.319 | 24.842 | 51.788 | 0.00 | 0.00 |
| ATOM | 7960 | NH2  | ARG | X | 521 | 49.936 | 26.502 | 53.723 | 0.00 | 0.00 |
| ATOM | 7961 | HH21 | ARG | X | 521 | 50.009 | 27.164 | 54.482 | 0.00 | 0.00 |
| ATOM | 7962 | HH22 | ARG | X | 521 | 50.793 | 26.284 | 53.235 | 0.00 | 0.00 |
| ATOM | 7963 | C    | ARG | X | 521 | 43.426 | 23.376 | 56.638 | 0.00 | 0.00 |
| ATOM | 7964 | O    | ARG | X | 521 | 43.335 | 24.363 | 57.324 | 0.00 | 0.00 |
| ATOM | 7965 | N    | ALA | X | 522 | 42.846 | 22.204 | 56.926 | 0.00 | 0.00 |
| ATOM | 7966 | H    | ALA | X | 522 | 42.988 | 21.435 | 56.288 | 0.00 | 0.00 |
| ATOM | 7967 | CA   | ALA | X | 522 | 41.959 | 22.065 | 58.093 | 0.00 | 0.00 |
| ATOM | 7968 | HA   | ALA | X | 522 | 41.120 | 22.749 | 57.966 | 0.00 | 0.00 |
| ATOM | 7969 | CB   | ALA | X | 522 | 41.549 | 20.580 | 58.358 | 0.00 | 0.00 |
| ATOM | 7970 | HB1  | ALA | X | 522 | 40.834 | 20.558 | 59.181 | 0.00 | 0.00 |
| ATOM | 7971 | HB2  | ALA | X | 522 | 42.407 | 19.912 | 58.419 | 0.00 | 0.00 |
| ATOM | 7972 | HB3  | ALA | X | 522 | 40.996 | 20.296 | 57.462 | 0.00 | 0.00 |
| ATOM | 7973 | C    | ALA | X | 522 | 42.625 | 22.554 | 59.421 | 0.00 | 0.00 |
| ATOM | 7974 | O    | ALA | X | 522 | 41.949 | 23.058 | 60.311 | 0.00 | 0.00 |
| ATOM | 7975 | N    | GLN | X | 523 | 43.963 | 22.275 | 59.541 | 0.00 | 0.00 |
| ATOM | 7976 | H    | GLN | X | 523 | 44.417 | 22.013 | 58.677 | 0.00 | 0.00 |
| ATOM | 7977 | CA   | GLN | X | 523 | 44.516 | 22.274 | 60.884 | 0.00 | 0.00 |
| ATOM | 7978 | HA   | GLN | X | 523 | 43.743 | 22.196 | 61.649 | 0.00 | 0.00 |
| ATOM | 7979 | CB   | GLN | X | 523 | 45.419 | 21.026 | 61.132 | 0.00 | 0.00 |
| ATOM | 7980 | HB2  | GLN | X | 523 | 46.060 | 20.898 | 60.260 | 0.00 | 0.00 |
| ATOM | 7981 | HB3  | GLN | X | 523 | 45.959 | 21.227 | 62.058 | 0.00 | 0.00 |
| ATOM | 7982 | CG   | GLN | X | 523 | 44.698 | 19.725 | 61.347 | 0.00 | 0.00 |
| ATOM | 7983 | HG2  | GLN | X | 523 | 44.294 | 19.733 | 62.359 | 0.00 | 0.00 |
| ATOM | 7984 | HG3  | GLN | X | 523 | 43.788 | 19.657 | 60.750 | 0.00 | 0.00 |
| ATOM | 7985 | CD   | GLN | X | 523 | 45.483 | 18.404 | 61.194 | 0.00 | 0.00 |
| ATOM | 7986 | OE1  | GLN | X | 523 | 45.163 | 17.484 | 60.414 | 0.00 | 0.00 |
| ATOM | 7987 | NE2  | GLN | X | 523 | 46.567 | 18.226 | 61.912 | 0.00 | 0.00 |
| ATOM | 7988 | HE21 | GLN | X | 523 | 47.061 | 17.358 | 61.760 | 0.00 | 0.00 |
| ATOM | 7989 | HE22 | GLN | X | 523 | 46.723 | 18.962 | 62.585 | 0.00 | 0.00 |
| ATOM | 7990 | C    | GLN | X | 523 | 45.391 | 23.533 | 61.152 | 0.00 | 0.00 |
| ATOM | 7991 | O    | GLN | X | 523 | 45.337 | 24.026 | 62.315 | 0.00 | 0.00 |
| ATOM | 7992 | N    | ALA | X | 524 | 46.081 | 24.028 | 60.123 | 0.00 | 0.00 |
| ATOM | 7993 | H    | ALA | X | 524 | 46.006 | 23.597 | 59.212 | 0.00 | 0.00 |
| ATOM | 7994 | CA   | ALA | X | 524 | 47.108 | 25.087 | 60.256 | 0.00 | 0.00 |
| ATOM | 7995 | HA   | ALA | X | 524 | 47.996 | 24.719 | 60.769 | 0.00 | 0.00 |
| ATOM | 7996 | CB   | ALA | X | 524 | 47.521 | 25.394 | 58.807 | 0.00 | 0.00 |
| ATOM | 7997 | HB1  | ALA | X | 524 | 47.917 | 24.562 | 58.225 | 0.00 | 0.00 |
| ATOM | 7998 | HB2  | ALA | X | 524 | 48.253 | 26.201 | 58.806 | 0.00 | 0.00 |
| ATOM | 7999 | HB3  | ALA | X | 524 | 46.759 | 25.955 | 58.266 | 0.00 | 0.00 |
| ATOM | 8000 | C    | ALA | X | 524 | 46.565 | 26.327 | 61.005 | 0.00 | 0.00 |
| ATOM | 8001 | O    | ALA | X | 524 | 47.350 | 26.996 | 61.769 | 0.00 | 0.00 |
| ATOM | 8002 | N    | CYX | X | 525 | 45.356 | 26.683 | 60.609 | 0.00 | 0.00 |
| ATOM | 8003 | H    | CYX | X | 525 | 44.925 | 25.997 | 60.006 | 0.00 | 0.00 |
| ATOM | 8004 | CA   | CYX | X | 525 | 44.842 | 27.976 | 60.840 | 0.00 | 0.00 |
| ATOM | 8005 | HA   | CYX | X | 525 | 45.702 | 28.595 | 60.586 | 0.00 | 0.00 |
| ATOM | 8006 | CB   | CYX | X | 525 | 43.732 | 28.319 | 59.809 | 0.00 | 0.00 |
| ATOM | 8007 | HB2  | CYX | X | 525 | 42.803 | 27.813 | 60.071 | 0.00 | 0.00 |
| ATOM | 8008 | HB3  | CYX | X | 525 | 43.668 | 29.407 | 59.852 | 0.00 | 0.00 |
| ATOM | 8009 | SG   | CYX | X | 525 | 44.083 | 27.683 | 58.111 | 0.00 | 0.00 |
| ATOM | 8010 | C    | CYX | X | 525 | 44.431 | 28.295 | 62.267 | 0.00 | 0.00 |
| ATOM | 8011 | O    | CYX | X | 525 | 44.308 | 29.446 | 62.630 | 0.00 | 0.00 |

|      |      |      |     |   |     |        |        |        |      |      |
|------|------|------|-----|---|-----|--------|--------|--------|------|------|
| ATOM | 8012 | N    | ALA | X | 526 | 44.276 | 27.281 | 63.128 | 0.00 | 0.00 |
| ATOM | 8013 | H    | ALA | X | 526 | 44.358 | 26.323 | 62.817 | 0.00 | 0.00 |
| ATOM | 8014 | CA   | ALA | X | 526 | 44.064 | 27.502 | 64.578 | 0.00 | 0.00 |
| ATOM | 8015 | HA   | ALA | X | 526 | 43.205 | 28.139 | 64.786 | 0.00 | 0.00 |
| ATOM | 8016 | CB   | ALA | X | 526 | 43.766 | 26.185 | 65.283 | 0.00 | 0.00 |
| ATOM | 8017 | HB1  | ALA | X | 526 | 43.506 | 26.398 | 66.320 | 0.00 | 0.00 |
| ATOM | 8018 | HB2  | ALA | X | 526 | 44.659 | 25.565 | 65.356 | 0.00 | 0.00 |
| ATOM | 8019 | HB3  | ALA | X | 526 | 43.000 | 25.533 | 64.863 | 0.00 | 0.00 |
| ATOM | 8020 | C    | ALA | X | 526 | 45.185 | 28.302 | 65.172 | 0.00 | 0.00 |
| ATOM | 8021 | O    | ALA | X | 526 | 44.966 | 29.106 | 66.032 | 0.00 | 0.00 |
| ATOM | 8022 | N    | PHE | X | 527 | 46.386 | 28.178 | 64.669 | 0.00 | 0.00 |
| ATOM | 8023 | H    | PHE | X | 527 | 46.444 | 27.598 | 63.844 | 0.00 | 0.00 |
| ATOM | 8024 | CA   | PHE | X | 527 | 47.645 | 28.728 | 65.234 | 0.00 | 0.00 |
| ATOM | 8025 | HA   | PHE | X | 527 | 47.827 | 28.338 | 66.235 | 0.00 | 0.00 |
| ATOM | 8026 | CB   | PHE | X | 527 | 48.791 | 28.290 | 64.305 | 0.00 | 0.00 |
| ATOM | 8027 | HB2  | PHE | X | 527 | 48.830 | 27.224 | 64.084 | 0.00 | 0.00 |
| ATOM | 8028 | HB3  | PHE | X | 527 | 48.620 | 28.723 | 63.319 | 0.00 | 0.00 |
| ATOM | 8029 | CG   | PHE | X | 527 | 50.222 | 28.788 | 64.697 | 0.00 | 0.00 |
| ATOM | 8030 | CD1  | PHE | X | 527 | 50.909 | 28.178 | 65.748 | 0.00 | 0.00 |
| ATOM | 8031 | HD1  | PHE | X | 527 | 50.502 | 27.331 | 66.281 | 0.00 | 0.00 |
| ATOM | 8032 | CE1  | PHE | X | 527 | 52.228 | 28.616 | 66.041 | 0.00 | 0.00 |
| ATOM | 8033 | HE1  | PHE | X | 527 | 52.817 | 28.137 | 66.809 | 0.00 | 0.00 |
| ATOM | 8034 | CZ   | PHE | X | 527 | 52.779 | 29.724 | 65.395 | 0.00 | 0.00 |
| ATOM | 8035 | HZ   | PHE | X | 527 | 53.714 | 30.106 | 65.778 | 0.00 | 0.00 |
| ATOM | 8036 | CE2  | PHE | X | 527 | 52.067 | 30.388 | 64.377 | 0.00 | 0.00 |
| ATOM | 8037 | HE2  | PHE | X | 527 | 52.572 | 31.217 | 63.902 | 0.00 | 0.00 |
| ATOM | 8038 | CD2  | PHE | X | 527 | 50.885 | 29.820 | 63.912 | 0.00 | 0.00 |
| ATOM | 8039 | HD2  | PHE | X | 527 | 50.468 | 30.208 | 62.994 | 0.00 | 0.00 |
| ATOM | 8040 | C    | PHE | X | 527 | 47.499 | 30.278 | 65.379 | 0.00 | 0.00 |
| ATOM | 8041 | O    | PHE | X | 527 | 47.702 | 30.791 | 66.467 | 0.00 | 0.00 |
| ATOM | 8042 | N    | TRP | X | 528 | 47.159 | 30.880 | 64.171 | 0.00 | 0.00 |
| ATOM | 8043 | H    | TRP | X | 528 | 46.855 | 30.368 | 63.355 | 0.00 | 0.00 |
| ATOM | 8044 | CA   | TRP | X | 528 | 47.011 | 32.337 | 64.045 | 0.00 | 0.00 |
| ATOM | 8045 | HA   | TRP | X | 528 | 47.992 | 32.750 | 64.277 | 0.00 | 0.00 |
| ATOM | 8046 | CB   | TRP | X | 528 | 46.598 | 32.619 | 62.612 | 0.00 | 0.00 |
| ATOM | 8047 | HB2  | TRP | X | 528 | 45.540 | 32.385 | 62.490 | 0.00 | 0.00 |
| ATOM | 8048 | HB3  | TRP | X | 528 | 46.732 | 33.698 | 62.545 | 0.00 | 0.00 |
| ATOM | 8049 | CG   | TRP | X | 528 | 47.382 | 31.969 | 61.522 | 0.00 | 0.00 |
| ATOM | 8050 | CD1  | TRP | X | 528 | 46.944 | 31.118 | 60.576 | 0.00 | 0.00 |
| ATOM | 8051 | HD1  | TRP | X | 528 | 45.923 | 30.765 | 60.565 | 0.00 | 0.00 |
| ATOM | 8052 | NE1  | TRP | X | 528 | 48.100 | 30.695 | 59.900 | 0.00 | 0.00 |
| ATOM | 8053 | HE1  | TRP | X | 528 | 48.064 | 30.113 | 59.076 | 0.00 | 0.00 |
| ATOM | 8054 | CE2  | TRP | X | 528 | 49.240 | 31.357 | 60.224 | 0.00 | 0.00 |
| ATOM | 8055 | CZ2  | TRP | X | 528 | 50.563 | 31.382 | 59.770 | 0.00 | 0.00 |
| ATOM | 8056 | HZ2  | TRP | X | 528 | 50.875 | 30.767 | 58.939 | 0.00 | 0.00 |
| ATOM | 8057 | CH2  | TRP | X | 528 | 51.452 | 32.276 | 60.376 | 0.00 | 0.00 |
| ATOM | 8058 | HH2  | TRP | X | 528 | 52.463 | 32.342 | 60.002 | 0.00 | 0.00 |
| ATOM | 8059 | CZ3  | TRP | X | 528 | 51.090 | 33.066 | 61.507 | 0.00 | 0.00 |
| ATOM | 8060 | HZ3  | TRP | X | 528 | 51.705 | 33.867 | 61.890 | 0.00 | 0.00 |
| ATOM | 8061 | CE3  | TRP | X | 528 | 49.745 | 33.100 | 61.861 | 0.00 | 0.00 |
| ATOM | 8062 | HE3  | TRP | X | 528 | 49.439 | 33.738 | 62.677 | 0.00 | 0.00 |
| ATOM | 8063 | CD2  | TRP | X | 528 | 48.791 | 32.177 | 61.325 | 0.00 | 0.00 |
| ATOM | 8064 | C    | TRP | X | 528 | 45.892 | 32.864 | 64.972 | 0.00 | 0.00 |
| ATOM | 8065 | O    | TRP | X | 528 | 45.946 | 34.025 | 65.403 | 0.00 | 0.00 |
| ATOM | 8066 | N    | ASN | X | 529 | 44.866 | 32.071 | 65.280 | 0.00 | 0.00 |
| ATOM | 8067 | H    | ASN | X | 529 | 44.863 | 31.148 | 64.869 | 0.00 | 0.00 |
| ATOM | 8068 | CA   | ASN | X | 529 | 43.791 | 32.475 | 66.157 | 0.00 | 0.00 |
| ATOM | 8069 | HA   | ASN | X | 529 | 43.648 | 33.536 | 65.952 | 0.00 | 0.00 |
| ATOM | 8070 | CB   | ASN | X | 529 | 42.539 | 31.707 | 65.725 | 0.00 | 0.00 |
| ATOM | 8071 | HB2  | ASN | X | 529 | 42.212 | 32.105 | 64.764 | 0.00 | 0.00 |
| ATOM | 8072 | HB3  | ASN | X | 529 | 42.706 | 30.630 | 65.720 | 0.00 | 0.00 |
| ATOM | 8073 | CG   | ASN | X | 529 | 41.412 | 31.919 | 66.742 | 0.00 | 0.00 |
| ATOM | 8074 | OD1  | ASN | X | 529 | 41.474 | 31.285 | 67.773 | 0.00 | 0.00 |
| ATOM | 8075 | ND2  | ASN | X | 529 | 40.484 | 32.862 | 66.512 | 0.00 | 0.00 |
| ATOM | 8076 | HD21 | ASN | X | 529 | 39.807 | 33.036 | 67.241 | 0.00 | 0.00 |
| ATOM | 8077 | HD22 | ASN | X | 529 | 40.700 | 33.506 | 65.765 | 0.00 | 0.00 |
| ATOM | 8078 | C    | ASN | X | 529 | 44.095 | 32.206 | 67.634 | 0.00 | 0.00 |

|      |      |      |     |   |     |        |        |        |      |      |
|------|------|------|-----|---|-----|--------|--------|--------|------|------|
| ATOM | 8079 | O    | ASN | X | 529 | 43.946 | 33.032 | 68.482 | 0.00 | 0.00 |
| ATOM | 8080 | N    | ARG | X | 530 | 44.520 | 30.997 | 67.976 | 0.00 | 0.00 |
| ATOM | 8081 | H    | ARG | X | 530 | 44.722 | 30.297 | 67.276 | 0.00 | 0.00 |
| ATOM | 8082 | CA   | ARG | X | 530 | 44.630 | 30.478 | 69.347 | 0.00 | 0.00 |
| ATOM | 8083 | HA   | ARG | X | 530 | 43.761 | 30.689 | 69.969 | 0.00 | 0.00 |
| ATOM | 8084 | CB   | ARG | X | 530 | 44.713 | 28.940 | 69.457 | 0.00 | 0.00 |
| ATOM | 8085 | HB2  | ARG | X | 530 | 45.486 | 28.572 | 68.782 | 0.00 | 0.00 |
| ATOM | 8086 | HB3  | ARG | X | 530 | 44.825 | 28.705 | 70.515 | 0.00 | 0.00 |
| ATOM | 8087 | CG   | ARG | X | 530 | 43.494 | 28.280 | 68.831 | 0.00 | 0.00 |
| ATOM | 8088 | HG2  | ARG | X | 530 | 43.401 | 28.558 | 67.781 | 0.00 | 0.00 |
| ATOM | 8089 | HG3  | ARG | X | 530 | 43.760 | 27.232 | 68.698 | 0.00 | 0.00 |
| ATOM | 8090 | CD   | ARG | X | 530 | 42.122 | 28.308 | 69.437 | 0.00 | 0.00 |
| ATOM | 8091 | HD2  | ARG | X | 530 | 42.127 | 27.796 | 70.399 | 0.00 | 0.00 |
| ATOM | 8092 | HD3  | ARG | X | 530 | 41.817 | 29.354 | 69.485 | 0.00 | 0.00 |
| ATOM | 8093 | NE   | ARG | X | 530 | 41.112 | 27.727 | 68.440 | 0.00 | 0.00 |
| ATOM | 8094 | HE   | ARG | X | 530 | 40.426 | 28.370 | 68.071 | 0.00 | 0.00 |
| ATOM | 8095 | CZ   | ARG | X | 530 | 40.877 | 26.464 | 68.043 | 0.00 | 0.00 |
| ATOM | 8096 | NH1  | ARG | X | 530 | 41.620 | 25.441 | 68.336 | 0.00 | 0.00 |
| ATOM | 8097 | HH11 | ARG | X | 530 | 42.232 | 25.423 | 69.139 | 0.00 | 0.00 |
| ATOM | 8098 | HH12 | ARG | X | 530 | 41.594 | 24.596 | 67.783 | 0.00 | 0.00 |
| ATOM | 8099 | NH2  | ARG | X | 530 | 39.869 | 26.239 | 67.257 | 0.00 | 0.00 |
| ATOM | 8100 | HH21 | ARG | X | 530 | 39.274 | 27.009 | 66.989 | 0.00 | 0.00 |
| ATOM | 8101 | HH22 | ARG | X | 530 | 39.690 | 25.273 | 67.022 | 0.00 | 0.00 |
| ATOM | 8102 | C    | ARG | X | 530 | 45.906 | 30.984 | 69.995 | 0.00 | 0.00 |
| ATOM | 8103 | O    | ARG | X | 530 | 45.860 | 31.501 | 71.117 | 0.00 | 0.00 |
| ATOM | 8104 | N    | PHE | X | 531 | 47.029 | 30.834 | 69.238 | 0.00 | 0.00 |
| ATOM | 8105 | H    | PHE | X | 531 | 46.874 | 30.407 | 68.336 | 0.00 | 0.00 |
| ATOM | 8106 | CA   | PHE | X | 531 | 48.352 | 30.867 | 69.818 | 0.00 | 0.00 |
| ATOM | 8107 | HA   | PHE | X | 531 | 48.332 | 30.625 | 70.881 | 0.00 | 0.00 |
| ATOM | 8108 | CB   | PHE | X | 531 | 49.233 | 29.789 | 69.167 | 0.00 | 0.00 |
| ATOM | 8109 | HB2  | PHE | X | 531 | 48.770 | 28.812 | 69.305 | 0.00 | 0.00 |
| ATOM | 8110 | HB3  | PHE | X | 531 | 49.281 | 29.887 | 68.082 | 0.00 | 0.00 |
| ATOM | 8111 | CG   | PHE | X | 531 | 50.685 | 29.789 | 69.532 | 0.00 | 0.00 |
| ATOM | 8112 | CD1  | PHE | X | 531 | 51.611 | 30.450 | 68.693 | 0.00 | 0.00 |
| ATOM | 8113 | HD1  | PHE | X | 531 | 51.255 | 31.044 | 67.865 | 0.00 | 0.00 |
| ATOM | 8114 | CE1  | PHE | X | 531 | 52.997 | 30.289 | 68.943 | 0.00 | 0.00 |
| ATOM | 8115 | HE1  | PHE | X | 531 | 53.709 | 30.831 | 68.338 | 0.00 | 0.00 |
| ATOM | 8116 | CZ   | PHE | X | 531 | 53.482 | 29.556 | 70.045 | 0.00 | 0.00 |
| ATOM | 8117 | HZ   | PHE | X | 531 | 54.545 | 29.662 | 70.203 | 0.00 | 0.00 |
| ATOM | 8118 | CE2  | PHE | X | 531 | 52.544 | 28.951 | 70.883 | 0.00 | 0.00 |
| ATOM | 8119 | HE2  | PHE | X | 531 | 52.787 | 28.327 | 71.730 | 0.00 | 0.00 |
| ATOM | 8120 | CD2  | PHE | X | 531 | 51.212 | 28.975 | 70.549 | 0.00 | 0.00 |
| ATOM | 8121 | HD2  | PHE | X | 531 | 50.546 | 28.354 | 71.130 | 0.00 | 0.00 |
| ATOM | 8122 | C    | PHE | X | 531 | 48.981 | 32.249 | 69.636 | 0.00 | 0.00 |
| ATOM | 8123 | O    | PHE | X | 531 | 49.248 | 32.920 | 70.619 | 0.00 | 0.00 |
| ATOM | 8124 | N    | LEU | X | 532 | 49.157 | 32.592 | 68.336 | 0.00 | 0.00 |
| ATOM | 8125 | H    | LEU | X | 532 | 48.787 | 31.939 | 67.661 | 0.00 | 0.00 |
| ATOM | 8126 | CA   | LEU | X | 532 | 49.935 | 33.788 | 67.819 | 0.00 | 0.00 |
| ATOM | 8127 | HA   | LEU | X | 532 | 50.980 | 33.675 | 68.107 | 0.00 | 0.00 |
| ATOM | 8128 | CB   | LEU | X | 532 | 49.795 | 33.893 | 66.286 | 0.00 | 0.00 |
| ATOM | 8129 | HB2  | LEU | X | 532 | 49.934 | 32.851 | 65.998 | 0.00 | 0.00 |
| ATOM | 8130 | HB3  | LEU | X | 532 | 48.763 | 34.088 | 65.995 | 0.00 | 0.00 |
| ATOM | 8131 | CG   | LEU | X | 532 | 50.921 | 34.679 | 65.570 | 0.00 | 0.00 |
| ATOM | 8132 | HG   | LEU | X | 532 | 50.978 | 34.306 | 64.547 | 0.00 | 0.00 |
| ATOM | 8133 | CD1  | LEU | X | 532 | 50.629 | 36.245 | 65.626 | 0.00 | 0.00 |
| ATOM | 8134 | HD11 | LEU | X | 532 | 51.205 | 36.827 | 64.907 | 0.00 | 0.00 |
| ATOM | 8135 | HD12 | LEU | X | 532 | 50.776 | 36.576 | 66.654 | 0.00 | 0.00 |
| ATOM | 8136 | HD13 | LEU | X | 532 | 49.587 | 36.405 | 65.349 | 0.00 | 0.00 |
| ATOM | 8137 | CD2  | LEU | X | 532 | 52.349 | 34.532 | 66.073 | 0.00 | 0.00 |
| ATOM | 8138 | HD21 | LEU | X | 532 | 52.990 | 35.108 | 65.405 | 0.00 | 0.00 |
| ATOM | 8139 | HD22 | LEU | X | 532 | 52.396 | 34.957 | 67.076 | 0.00 | 0.00 |
| ATOM | 8140 | HD23 | LEU | X | 532 | 52.673 | 33.492 | 66.086 | 0.00 | 0.00 |
| ATOM | 8141 | C    | LEU | X | 532 | 49.651 | 35.137 | 68.621 | 0.00 | 0.00 |
| ATOM | 8142 | O    | LEU | X | 532 | 50.625 | 35.714 | 69.108 | 0.00 | 0.00 |
| ATOM | 8143 | N    | PRO | X | 533 | 48.399 | 35.508 | 68.871 | 0.00 | 0.00 |
| ATOM | 8144 | CD   | PRO | X | 533 | 47.209 | 35.156 | 68.147 | 0.00 | 0.00 |
| ATOM | 8145 | HD2  | PRO | X | 533 | 47.162 | 34.137 | 67.763 | 0.00 | 0.00 |

|      |      |      |     |   |     |        |        |        |      |      |
|------|------|------|-----|---|-----|--------|--------|--------|------|------|
| ATOM | 8146 | HD3  | PRO | X | 533 | 47.015 | 35.804 | 67.293 | 0.00 | 0.00 |
| ATOM | 8147 | CG   | PRO | X | 533 | 46.054 | 35.273 | 69.237 | 0.00 | 0.00 |
| ATOM | 8148 | HG2  | PRO | X | 533 | 46.070 | 34.378 | 69.859 | 0.00 | 0.00 |
| ATOM | 8149 | HG3  | PRO | X | 533 | 45.085 | 35.427 | 68.763 | 0.00 | 0.00 |
| ATOM | 8150 | CB   | PRO | X | 533 | 46.612 | 36.494 | 69.973 | 0.00 | 0.00 |
| ATOM | 8151 | HB2  | PRO | X | 533 | 46.285 | 36.452 | 71.012 | 0.00 | 0.00 |
| ATOM | 8152 | HB3  | PRO | X | 533 | 46.149 | 37.398 | 69.577 | 0.00 | 0.00 |
| ATOM | 8153 | CA   | PRO | X | 533 | 48.099 | 36.554 | 69.820 | 0.00 | 0.00 |
| ATOM | 8154 | HA   | PRO | X | 533 | 48.413 | 37.513 | 69.407 | 0.00 | 0.00 |
| ATOM | 8155 | C    | PRO | X | 533 | 48.672 | 36.338 | 71.218 | 0.00 | 0.00 |
| ATOM | 8156 | O    | PRO | X | 533 | 49.327 | 37.251 | 71.629 | 0.00 | 0.00 |
| ATOM | 8157 | N    | LYS | X | 534 | 48.488 | 35.192 | 71.946 | 0.00 | 0.00 |
| ATOM | 8158 | H    | LYS | X | 534 | 48.001 | 34.435 | 71.487 | 0.00 | 0.00 |
| ATOM | 8159 | CA   | LYS | X | 534 | 49.099 | 34.987 | 73.262 | 0.00 | 0.00 |
| ATOM | 8160 | HA   | LYS | X | 534 | 48.602 | 35.719 | 73.899 | 0.00 | 0.00 |
| ATOM | 8161 | CB   | LYS | X | 534 | 48.886 | 33.541 | 73.779 | 0.00 | 0.00 |
| ATOM | 8162 | HB2  | LYS | X | 534 | 49.340 | 32.813 | 73.106 | 0.00 | 0.00 |
| ATOM | 8163 | HB3  | LYS | X | 534 | 49.208 | 33.309 | 74.795 | 0.00 | 0.00 |
| ATOM | 8164 | CG   | LYS | X | 534 | 47.418 | 32.995 | 73.867 | 0.00 | 0.00 |
| ATOM | 8165 | HG2  | LYS | X | 534 | 46.911 | 33.424 | 74.731 | 0.00 | 0.00 |
| ATOM | 8166 | HG3  | LYS | X | 534 | 46.867 | 33.485 | 73.064 | 0.00 | 0.00 |
| ATOM | 8167 | CD   | LYS | X | 534 | 47.281 | 31.520 | 73.844 | 0.00 | 0.00 |
| ATOM | 8168 | HD2  | LYS | X | 534 | 47.602 | 31.051 | 72.914 | 0.00 | 0.00 |
| ATOM | 8169 | HD3  | LYS | X | 534 | 47.949 | 31.150 | 74.622 | 0.00 | 0.00 |
| ATOM | 8170 | CE   | LYS | X | 534 | 45.967 | 30.837 | 74.151 | 0.00 | 0.00 |
| ATOM | 8171 | HE2  | LYS | X | 534 | 45.621 | 31.140 | 75.139 | 0.00 | 0.00 |
| ATOM | 8172 | HE3  | LYS | X | 534 | 45.305 | 31.249 | 73.389 | 0.00 | 0.00 |
| ATOM | 8173 | NZ   | LYS | X | 534 | 46.170 | 29.363 | 74.241 | 0.00 | 0.00 |
| ATOM | 8174 | HZ1  | LYS | X | 534 | 45.233 | 28.992 | 74.310 | 0.00 | 0.00 |
| ATOM | 8175 | HZ2  | LYS | X | 534 | 46.666 | 28.953 | 73.462 | 0.00 | 0.00 |
| ATOM | 8176 | HZ3  | LYS | X | 534 | 46.771 | 29.040 | 74.985 | 0.00 | 0.00 |
| ATOM | 8177 | C    | LYS | X | 534 | 50.612 | 35.270 | 73.223 | 0.00 | 0.00 |
| ATOM | 8178 | O    | LYS | X | 534 | 51.156 | 35.949 | 74.164 | 0.00 | 0.00 |
| ATOM | 8179 | N    | LEU | X | 535 | 51.238 | 34.971 | 72.118 | 0.00 | 0.00 |
| ATOM | 8180 | H    | LEU | X | 535 | 50.651 | 34.737 | 71.330 | 0.00 | 0.00 |
| ATOM | 8181 | CA   | LEU | X | 535 | 52.696 | 35.035 | 71.942 | 0.00 | 0.00 |
| ATOM | 8182 | HA   | LEU | X | 535 | 53.134 | 34.525 | 72.800 | 0.00 | 0.00 |
| ATOM | 8183 | CB   | LEU | X | 535 | 53.188 | 34.328 | 70.655 | 0.00 | 0.00 |
| ATOM | 8184 | HB2  | LEU | X | 535 | 52.984 | 33.258 | 70.683 | 0.00 | 0.00 |
| ATOM | 8185 | HB3  | LEU | X | 535 | 52.571 | 34.762 | 69.868 | 0.00 | 0.00 |
| ATOM | 8186 | CG   | LEU | X | 535 | 54.615 | 34.557 | 70.122 | 0.00 | 0.00 |
| ATOM | 8187 | HG   | LEU | X | 535 | 54.755 | 35.583 | 69.781 | 0.00 | 0.00 |
| ATOM | 8188 | CD1  | LEU | X | 535 | 55.622 | 34.308 | 71.294 | 0.00 | 0.00 |
| ATOM | 8189 | HD11 | LEU | X | 535 | 56.625 | 34.273 | 70.870 | 0.00 | 0.00 |
| ATOM | 8190 | HD12 | LEU | X | 535 | 55.403 | 33.296 | 71.633 | 0.00 | 0.00 |
| ATOM | 8191 | HD13 | LEU | X | 535 | 55.523 | 35.116 | 72.019 | 0.00 | 0.00 |
| ATOM | 8192 | CD2  | LEU | X | 535 | 54.934 | 33.694 | 68.908 | 0.00 | 0.00 |
| ATOM | 8193 | HD21 | LEU | X | 535 | 54.080 | 33.709 | 68.230 | 0.00 | 0.00 |
| ATOM | 8194 | HD22 | LEU | X | 535 | 55.777 | 34.114 | 68.359 | 0.00 | 0.00 |
| ATOM | 8195 | HD23 | LEU | X | 535 | 55.199 | 32.655 | 69.101 | 0.00 | 0.00 |
| ATOM | 8196 | C    | LEU | X | 535 | 53.123 | 36.472 | 71.906 | 0.00 | 0.00 |
| ATOM | 8197 | O    | LEU | X | 535 | 53.961 | 36.938 | 72.755 | 0.00 | 0.00 |
| ATOM | 8198 | N    | LEU | X | 536 | 52.446 | 37.238 | 71.032 | 0.00 | 0.00 |
| ATOM | 8199 | H    | LEU | X | 536 | 51.668 | 36.930 | 70.466 | 0.00 | 0.00 |
| ATOM | 8200 | CA   | LEU | X | 536 | 52.842 | 38.684 | 70.846 | 0.00 | 0.00 |
| ATOM | 8201 | HA   | LEU | X | 536 | 53.930 | 38.746 | 70.856 | 0.00 | 0.00 |
| ATOM | 8202 | CB   | LEU | X | 536 | 52.323 | 39.217 | 69.474 | 0.00 | 0.00 |
| ATOM | 8203 | HB2  | LEU | X | 536 | 51.238 | 39.230 | 69.377 | 0.00 | 0.00 |
| ATOM | 8204 | HB3  | LEU | X | 536 | 52.766 | 40.182 | 69.225 | 0.00 | 0.00 |
| ATOM | 8205 | CG   | LEU | X | 536 | 52.838 | 38.327 | 68.373 | 0.00 | 0.00 |
| ATOM | 8206 | HG   | LEU | X | 536 | 52.196 | 37.448 | 68.434 | 0.00 | 0.00 |
| ATOM | 8207 | CD1  | LEU | X | 536 | 52.471 | 39.102 | 67.050 | 0.00 | 0.00 |
| ATOM | 8208 | HD11 | LEU | X | 536 | 52.837 | 38.568 | 66.172 | 0.00 | 0.00 |
| ATOM | 8209 | HD12 | LEU | X | 536 | 52.978 | 40.057 | 67.186 | 0.00 | 0.00 |
| ATOM | 8210 | HD13 | LEU | X | 536 | 51.387 | 39.213 | 67.017 | 0.00 | 0.00 |
| ATOM | 8211 | CD2  | LEU | X | 536 | 54.360 | 37.993 | 68.404 | 0.00 | 0.00 |
| ATOM | 8212 | HD21 | LEU | X | 536 | 54.695 | 37.741 | 69.410 | 0.00 | 0.00 |



|      |      |      |     |   |     |        |        |        |      |      |
|------|------|------|-----|---|-----|--------|--------|--------|------|------|
| ATOM | 8213 | HD22 | LEU | X | 536 | 54.534 | 37.191 | 67.686 | 0.00 | 0.00 |
| ATOM | 8214 | HD23 | LEU | X | 536 | 54.914 | 38.893 | 68.139 | 0.00 | 0.00 |
| ATOM | 8215 | C    | LEU | X | 536 | 52.279 | 39.471 | 72.094 | 0.00 | 0.00 |
| ATOM | 8216 | O    | LEU | X | 536 | 52.953 | 40.403 | 72.558 | 0.00 | 0.00 |
| ATOM | 8217 | N    | SER | X | 537 | 51.137 | 39.022 | 72.768 | 0.00 | 0.00 |
| ATOM | 8218 | H    | SER | X | 537 | 50.597 | 38.395 | 72.189 | 0.00 | 0.00 |
| ATOM | 8219 | CA   | SER | X | 537 | 50.498 | 39.663 | 73.939 | 0.00 | 0.00 |
| ATOM | 8220 | HA   | SER | X | 537 | 50.363 | 40.738 | 73.821 | 0.00 | 0.00 |
| ATOM | 8221 | CB   | SER | X | 537 | 49.118 | 39.125 | 74.211 | 0.00 | 0.00 |
| ATOM | 8222 | HB2  | SER | X | 537 | 49.242 | 38.050 | 74.346 | 0.00 | 0.00 |
| ATOM | 8223 | HB3  | SER | X | 537 | 48.674 | 39.533 | 75.119 | 0.00 | 0.00 |
| ATOM | 8224 | OG   | SER | X | 537 | 48.158 | 39.427 | 73.198 | 0.00 | 0.00 |
| ATOM | 8225 | HG   | SER | X | 537 | 47.343 | 38.939 | 73.337 | 0.00 | 0.00 |
| ATOM | 8226 | C    | SER | X | 537 | 51.392 | 39.479 | 75.192 | 0.00 | 0.00 |
| ATOM | 8227 | O    | SER | X | 537 | 51.303 | 40.141 | 76.215 | 0.00 | 0.00 |
| ATOM | 8228 | N    | ALA | X | 538 | 52.384 | 38.635 | 75.191 | 0.00 | 0.00 |
| ATOM | 8229 | H    | ALA | X | 538 | 52.458 | 38.160 | 74.302 | 0.00 | 0.00 |
| ATOM | 8230 | CA   | ALA | X | 538 | 53.370 | 38.281 | 76.235 | 0.00 | 0.00 |
| ATOM | 8231 | HA   | ALA | X | 538 | 53.074 | 38.764 | 77.166 | 0.00 | 0.00 |
| ATOM | 8232 | CB   | ALA | X | 538 | 53.254 | 36.781 | 76.444 | 0.00 | 0.00 |
| ATOM | 8233 | HB1  | ALA | X | 538 | 53.337 | 36.146 | 75.562 | 0.00 | 0.00 |
| ATOM | 8234 | HB2  | ALA | X | 538 | 52.251 | 36.719 | 76.865 | 0.00 | 0.00 |
| ATOM | 8235 | HB3  | ALA | X | 538 | 54.028 | 36.403 | 77.113 | 0.00 | 0.00 |
| ATOM | 8236 | C    | ALA | X | 538 | 54.778 | 38.750 | 75.880 | 0.00 | 0.00 |
| ATOM | 8237 | O    | ALA | X | 538 | 55.686 | 38.492 | 76.740 | 0.00 | 0.00 |
| ATOM | 8238 | N    | THR | X | 539 | 54.958 | 39.374 | 74.764 | 0.00 | 0.00 |
| ATOM | 8239 | H    | THR | X | 539 | 54.228 | 39.425 | 74.067 | 0.00 | 0.00 |
| ATOM | 8240 | CA   | THR | X | 539 | 56.267 | 39.708 | 74.224 | 0.00 | 0.00 |
| ATOM | 8241 | HA   | THR | X | 539 | 56.942 | 39.252 | 74.949 | 0.00 | 0.00 |
| ATOM | 8242 | CB   | THR | X | 539 | 56.447 | 39.128 | 72.810 | 0.00 | 0.00 |
| ATOM | 8243 | HB   | THR | X | 539 | 55.590 | 39.414 | 72.200 | 0.00 | 0.00 |
| ATOM | 8244 | CG2  | THR | X | 539 | 57.699 | 39.575 | 72.083 | 0.00 | 0.00 |
| ATOM | 8245 | HG21 | THR | X | 539 | 57.672 | 40.664 | 72.041 | 0.00 | 0.00 |
| ATOM | 8246 | HG22 | THR | X | 539 | 57.750 | 39.128 | 71.091 | 0.00 | 0.00 |
| ATOM | 8247 | HG23 | THR | X | 539 | 58.627 | 39.378 | 72.620 | 0.00 | 0.00 |
| ATOM | 8248 | OG1  | THR | X | 539 | 56.552 | 37.706 | 72.914 | 0.00 | 0.00 |
| ATOM | 8249 | HG1  | THR | X | 539 | 55.679 | 37.306 | 72.940 | 0.00 | 0.00 |
| ATOM | 8250 | C    | THR | X | 539 | 56.504 | 41.237 | 74.395 | 0.00 | 0.00 |
| ATOM | 8251 | O    | THR | X | 539 | 56.101 | 42.087 | 73.519 | 0.00 | 0.00 |
| ATOM | 8252 | OXT  | THR | X | 539 | 56.977 | 41.694 | 75.431 | 0.00 | 0.00 |

END

#-----  
# 1B41 Production MD Frame 1800  
#-----

|        |        |        |        |       |       |        |        |        |      |      |
|--------|--------|--------|--------|-------|-------|--------|--------|--------|------|------|
| CRYST1 | 82.067 | 82.067 | 82.067 | 90.00 | 90.00 | 90.00  | P 1    |        |      | 1    |
| ATOM   | 1      | N      | ASP    | X     | 1     | 30.173 | 46.999 | 6.712  | 0.00 | 0.00 |
| ATOM   | 2      | H1     | ASP    | X     | 1     | 30.750 | 46.316 | 6.241  | 0.00 | 0.00 |
| ATOM   | 3      | H2     | ASP    | X     | 1     | 29.648 | 47.608 | 6.101  | 0.00 | 0.00 |
| ATOM   | 4      | H3     | ASP    | X     | 1     | 29.457 | 46.420 | 7.126  | 0.00 | 0.00 |
| ATOM   | 5      | CA     | ASP    | X     | 1     | 31.046 | 47.768 | 7.680  | 0.00 | 0.00 |
| ATOM   | 6      | HA     | ASP    | X     | 1     | 31.923 | 47.223 | 8.029  | 0.00 | 0.00 |
| ATOM   | 7      | CB     | ASP    | X     | 1     | 31.550 | 49.026 | 6.962  | 0.00 | 0.00 |
| ATOM   | 8      | HB2    | ASP    | X     | 1     | 32.113 | 48.697 | 6.089  | 0.00 | 0.00 |
| ATOM   | 9      | HB3    | ASP    | X     | 1     | 30.658 | 49.566 | 6.646  | 0.00 | 0.00 |
| ATOM   | 10     | CG     | ASP    | X     | 1     | 32.486 | 49.779 | 7.879  | 0.00 | 0.00 |
| ATOM   | 11     | OD1    | ASP    | X     | 1     | 33.561 | 49.192 | 8.150  | 0.00 | 0.00 |
| ATOM   | 12     | OD2    | ASP    | X     | 1     | 32.119 | 50.899 | 8.359  | 0.00 | 0.00 |
| ATOM   | 13     | C      | ASP    | X     | 1     | 30.215 | 48.189 | 8.864  | 0.00 | 0.00 |
| ATOM   | 14     | O      | ASP    | X     | 1     | 30.613 | 47.978 | 10.045 | 0.00 | 0.00 |
| ATOM   | 15     | N      | ALA    | X     | 2     | 28.992 | 48.752 | 8.683  | 0.00 | 0.00 |
| ATOM   | 16     | H      | ALA    | X     | 2     | 28.686 | 48.829 | 7.724  | 0.00 | 0.00 |
| ATOM   | 17     | CA     | ALA    | X     | 2     | 28.133 | 49.227 | 9.761  | 0.00 | 0.00 |
| ATOM   | 18     | HA     | ALA    | X     | 2     | 28.668 | 49.991 | 10.326 | 0.00 | 0.00 |

|      |    |      |     |   |   |        |        |        |      |      |
|------|----|------|-----|---|---|--------|--------|--------|------|------|
| ATOM | 19 | CB   | ALA | X | 2 | 26.919 | 49.788 | 8.971  | 0.00 | 0.00 |
| ATOM | 20 | HB1  | ALA | X | 2 | 26.136 | 50.165 | 9.630  | 0.00 | 0.00 |
| ATOM | 21 | HB2  | ALA | X | 2 | 26.453 | 49.093 | 8.272  | 0.00 | 0.00 |
| ATOM | 22 | HB3  | ALA | X | 2 | 27.218 | 50.691 | 8.439  | 0.00 | 0.00 |
| ATOM | 23 | C    | ALA | X | 2 | 27.704 | 48.130 | 10.757 | 0.00 | 0.00 |
| ATOM | 24 | O    | ALA | X | 2 | 27.217 | 48.538 | 11.797 | 0.00 | 0.00 |
| ATOM | 25 | N    | GLU | X | 3 | 27.856 | 46.876 | 10.518 | 0.00 | 0.00 |
| ATOM | 26 | H    | GLU | X | 3 | 28.201 | 46.719 | 9.582  | 0.00 | 0.00 |
| ATOM | 27 | CA   | GLU | X | 3 | 27.696 | 45.811 | 11.495 | 0.00 | 0.00 |
| ATOM | 28 | HA   | GLU | X | 3 | 26.670 | 45.703 | 11.846 | 0.00 | 0.00 |
| ATOM | 29 | CB   | GLU | X | 3 | 28.090 | 44.460 | 10.778 | 0.00 | 0.00 |
| ATOM | 30 | HB2  | GLU | X | 3 | 29.078 | 44.610 | 10.343 | 0.00 | 0.00 |
| ATOM | 31 | HB3  | GLU | X | 3 | 28.058 | 43.610 | 11.460 | 0.00 | 0.00 |
| ATOM | 32 | CG   | GLU | X | 3 | 27.119 | 44.007 | 9.621  | 0.00 | 0.00 |
| ATOM | 33 | HG2  | GLU | X | 3 | 27.366 | 42.987 | 9.325  | 0.00 | 0.00 |
| ATOM | 34 | HG3  | GLU | X | 3 | 26.111 | 43.996 | 10.037 | 0.00 | 0.00 |
| ATOM | 35 | CD   | GLU | X | 3 | 27.225 | 44.866 | 8.350  | 0.00 | 0.00 |
| ATOM | 36 | OE1  | GLU | X | 3 | 28.317 | 45.398 | 8.083  | 0.00 | 0.00 |
| ATOM | 37 | OE2  | GLU | X | 3 | 26.200 | 45.202 | 7.756  | 0.00 | 0.00 |
| ATOM | 38 | C    | GLU | X | 3 | 28.534 | 45.786 | 12.750 | 0.00 | 0.00 |
| ATOM | 39 | O    | GLU | X | 3 | 28.183 | 45.158 | 13.767 | 0.00 | 0.00 |
| ATOM | 40 | N    | LEU | X | 4 | 29.655 | 46.504 | 12.797 | 0.00 | 0.00 |
| ATOM | 41 | H    | LEU | X | 4 | 29.874 | 46.982 | 11.934 | 0.00 | 0.00 |
| ATOM | 42 | CA   | LEU | X | 4 | 30.478 | 46.914 | 13.940 | 0.00 | 0.00 |
| ATOM | 43 | HA   | LEU | X | 4 | 30.301 | 46.286 | 14.813 | 0.00 | 0.00 |
| ATOM | 44 | CB   | LEU | X | 4 | 31.963 | 46.706 | 13.645 | 0.00 | 0.00 |
| ATOM | 45 | HB2  | LEU | X | 4 | 32.166 | 47.204 | 12.698 | 0.00 | 0.00 |
| ATOM | 46 | HB3  | LEU | X | 4 | 32.601 | 47.249 | 14.342 | 0.00 | 0.00 |
| ATOM | 47 | CG   | LEU | X | 4 | 32.423 | 45.218 | 13.521 | 0.00 | 0.00 |
| ATOM | 48 | HG   | LEU | X | 4 | 31.846 | 44.642 | 12.798 | 0.00 | 0.00 |
| ATOM | 49 | CD1  | LEU | X | 4 | 33.800 | 45.179 | 12.886 | 0.00 | 0.00 |
| ATOM | 50 | HD11 | LEU | X | 4 | 34.093 | 44.149 | 12.683 | 0.00 | 0.00 |
| ATOM | 51 | HD12 | LEU | X | 4 | 34.471 | 45.814 | 13.464 | 0.00 | 0.00 |
| ATOM | 52 | HD13 | LEU | X | 4 | 33.685 | 45.755 | 11.968 | 0.00 | 0.00 |
| ATOM | 53 | CD2  | LEU | X | 4 | 32.397 | 44.561 | 14.897 | 0.00 | 0.00 |
| ATOM | 54 | HD21 | LEU | X | 4 | 31.361 | 44.567 | 15.237 | 0.00 | 0.00 |
| ATOM | 55 | HD22 | LEU | X | 4 | 32.735 | 43.525 | 14.903 | 0.00 | 0.00 |
| ATOM | 56 | HD23 | LEU | X | 4 | 32.966 | 45.074 | 15.672 | 0.00 | 0.00 |
| ATOM | 57 | C    | LEU | X | 4 | 30.143 | 48.233 | 14.535 | 0.00 | 0.00 |
| ATOM | 58 | O    | LEU | X | 4 | 30.907 | 48.739 | 15.390 | 0.00 | 0.00 |
| ATOM | 59 | N    | LEU | X | 5 | 29.080 | 48.899 | 14.122 | 0.00 | 0.00 |
| ATOM | 60 | H    | LEU | X | 5 | 28.572 | 48.515 | 13.338 | 0.00 | 0.00 |
| ATOM | 61 | CA   | LEU | X | 5 | 28.525 | 50.026 | 14.854 | 0.00 | 0.00 |
| ATOM | 62 | HA   | LEU | X | 5 | 29.238 | 50.653 | 15.389 | 0.00 | 0.00 |
| ATOM | 63 | CB   | LEU | X | 5 | 27.740 | 50.909 | 13.773 | 0.00 | 0.00 |
| ATOM | 64 | HB2  | LEU | X | 5 | 28.469 | 51.141 | 12.996 | 0.00 | 0.00 |
| ATOM | 65 | HB3  | LEU | X | 5 | 26.952 | 50.267 | 13.378 | 0.00 | 0.00 |
| ATOM | 66 | CG   | LEU | X | 5 | 27.122 | 52.262 | 14.294 | 0.00 | 0.00 |
| ATOM | 67 | HG   | LEU | X | 5 | 26.367 | 52.069 | 15.056 | 0.00 | 0.00 |
| ATOM | 68 | CD1  | LEU | X | 5 | 28.267 | 53.252 | 14.729 | 0.00 | 0.00 |
| ATOM | 69 | HD11 | LEU | X | 5 | 27.895 | 54.182 | 15.160 | 0.00 | 0.00 |
| ATOM | 70 | HD12 | LEU | X | 5 | 28.751 | 53.535 | 13.794 | 0.00 | 0.00 |
| ATOM | 71 | HD13 | LEU | X | 5 | 28.995 | 52.781 | 15.389 | 0.00 | 0.00 |
| ATOM | 72 | CD2  | LEU | X | 5 | 26.328 | 52.844 | 13.107 | 0.00 | 0.00 |
| ATOM | 73 | HD21 | LEU | X | 5 | 25.560 | 53.478 | 13.550 | 0.00 | 0.00 |
| ATOM | 74 | HD22 | LEU | X | 5 | 27.008 | 53.207 | 12.336 | 0.00 | 0.00 |
| ATOM | 75 | HD23 | LEU | X | 5 | 25.739 | 52.005 | 12.737 | 0.00 | 0.00 |
| ATOM | 76 | C    | LEU | X | 5 | 27.600 | 49.483 | 15.964 | 0.00 | 0.00 |
| ATOM | 77 | O    | LEU | X | 5 | 26.562 | 48.822 | 15.674 | 0.00 | 0.00 |
| ATOM | 78 | N    | VAL | X | 6 | 27.795 | 49.864 | 17.222 | 0.00 | 0.00 |
| ATOM | 79 | H    | VAL | X | 6 | 28.659 | 50.362 | 17.381 | 0.00 | 0.00 |
| ATOM | 80 | CA   | VAL | X | 6 | 27.104 | 49.384 | 18.389 | 0.00 | 0.00 |
| ATOM | 81 | HA   | VAL | X | 6 | 26.230 | 48.793 | 18.115 | 0.00 | 0.00 |
| ATOM | 82 | CB   | VAL | X | 6 | 28.075 | 48.567 | 19.211 | 0.00 | 0.00 |
| ATOM | 83 | HB   | VAL | X | 6 | 28.969 | 49.186 | 19.283 | 0.00 | 0.00 |
| ATOM | 84 | CG1  | VAL | X | 6 | 27.477 | 48.127 | 20.593 | 0.00 | 0.00 |
| ATOM | 85 | HG11 | VAL | X | 6 | 27.627 | 48.890 | 21.357 | 0.00 | 0.00 |

|      |     |      |     |   |    |        |        |        |      |      |
|------|-----|------|-----|---|----|--------|--------|--------|------|------|
| ATOM | 86  | HG12 | VAL | X | 6  | 26.438 | 47.857 | 20.406 | 0.00 | 0.00 |
| ATOM | 87  | HG13 | VAL | X | 6  | 27.903 | 47.150 | 20.821 | 0.00 | 0.00 |
| ATOM | 88  | CG2  | VAL | X | 6  | 28.483 | 47.299 | 18.383 | 0.00 | 0.00 |
| ATOM | 89  | HG21 | VAL | X | 6  | 29.041 | 46.679 | 19.085 | 0.00 | 0.00 |
| ATOM | 90  | HG22 | VAL | X | 6  | 28.926 | 47.368 | 17.390 | 0.00 | 0.00 |
| ATOM | 91  | HG23 | VAL | X | 6  | 27.588 | 46.677 | 18.411 | 0.00 | 0.00 |
| ATOM | 92  | C    | VAL | X | 6  | 26.646 | 50.568 | 19.222 | 0.00 | 0.00 |
| ATOM | 93  | O    | VAL | X | 6  | 27.482 | 51.314 | 19.766 | 0.00 | 0.00 |
| ATOM | 94  | N    | THR | X | 7  | 25.301 | 50.539 | 19.387 | 0.00 | 0.00 |
| ATOM | 95  | H    | THR | X | 7  | 24.787 | 49.730 | 19.069 | 0.00 | 0.00 |
| ATOM | 96  | CA   | THR | X | 7  | 24.595 | 51.651 | 20.099 | 0.00 | 0.00 |
| ATOM | 97  | HA   | THR | X | 7  | 25.255 | 52.518 | 20.078 | 0.00 | 0.00 |
| ATOM | 98  | CB   | THR | X | 7  | 23.259 | 52.229 | 19.445 | 0.00 | 0.00 |
| ATOM | 99  | HB   | THR | X | 7  | 22.446 | 51.503 | 19.432 | 0.00 | 0.00 |
| ATOM | 100 | CG2  | THR | X | 7  | 22.832 | 53.493 | 20.077 | 0.00 | 0.00 |
| ATOM | 101 | HG21 | THR | X | 7  | 22.407 | 53.198 | 21.037 | 0.00 | 0.00 |
| ATOM | 102 | HG22 | THR | X | 7  | 22.076 | 53.988 | 19.467 | 0.00 | 0.00 |
| ATOM | 103 | HG23 | THR | X | 7  | 23.651 | 54.180 | 20.292 | 0.00 | 0.00 |
| ATOM | 104 | OG1  | THR | X | 7  | 23.548 | 52.420 | 18.123 | 0.00 | 0.00 |
| ATOM | 105 | HG1  | THR | X | 7  | 23.605 | 51.549 | 17.723 | 0.00 | 0.00 |
| ATOM | 106 | C    | THR | X | 7  | 24.344 | 51.296 | 21.580 | 0.00 | 0.00 |
| ATOM | 107 | O    | THR | X | 7  | 23.836 | 50.185 | 21.902 | 0.00 | 0.00 |
| ATOM | 108 | N    | VAL | X | 8  | 24.819 | 52.252 | 22.452 | 0.00 | 0.00 |
| ATOM | 109 | H    | VAL | X | 8  | 25.300 | 53.077 | 22.123 | 0.00 | 0.00 |
| ATOM | 110 | CA   | VAL | X | 8  | 24.544 | 52.229 | 23.870 | 0.00 | 0.00 |
| ATOM | 111 | HA   | VAL | X | 8  | 23.971 | 51.319 | 24.050 | 0.00 | 0.00 |
| ATOM | 112 | CB   | VAL | X | 8  | 25.945 | 52.034 | 24.511 | 0.00 | 0.00 |
| ATOM | 113 | HB   | VAL | X | 8  | 25.817 | 52.250 | 25.572 | 0.00 | 0.00 |
| ATOM | 114 | CG1  | VAL | X | 8  | 26.469 | 50.558 | 24.306 | 0.00 | 0.00 |
| ATOM | 115 | HG11 | VAL | X | 8  | 27.484 | 50.537 | 24.703 | 0.00 | 0.00 |
| ATOM | 116 | HG12 | VAL | X | 8  | 25.914 | 49.749 | 24.782 | 0.00 | 0.00 |
| ATOM | 117 | HG13 | VAL | X | 8  | 26.515 | 50.286 | 23.252 | 0.00 | 0.00 |
| ATOM | 118 | CG2  | VAL | X | 8  | 26.999 | 53.137 | 24.146 | 0.00 | 0.00 |
| ATOM | 119 | HG21 | VAL | X | 8  | 27.362 | 53.097 | 23.118 | 0.00 | 0.00 |
| ATOM | 120 | HG22 | VAL | X | 8  | 27.850 | 53.059 | 24.823 | 0.00 | 0.00 |
| ATOM | 121 | HG23 | VAL | X | 8  | 26.433 | 54.022 | 24.436 | 0.00 | 0.00 |
| ATOM | 122 | C    | VAL | X | 8  | 23.794 | 53.419 | 24.388 | 0.00 | 0.00 |
| ATOM | 123 | O    | VAL | X | 8  | 23.464 | 54.269 | 23.603 | 0.00 | 0.00 |
| ATOM | 124 | N    | ARG | X | 9  | 23.590 | 53.601 | 25.681 | 0.00 | 0.00 |
| ATOM | 125 | H    | ARG | X | 9  | 23.884 | 52.839 | 26.274 | 0.00 | 0.00 |
| ATOM | 126 | CA   | ARG | X | 9  | 22.711 | 54.615 | 26.271 | 0.00 | 0.00 |
| ATOM | 127 | HA   | ARG | X | 9  | 21.672 | 54.643 | 25.940 | 0.00 | 0.00 |
| ATOM | 128 | CB   | ARG | X | 9  | 22.609 | 54.302 | 27.767 | 0.00 | 0.00 |
| ATOM | 129 | HB2  | ARG | X | 9  | 22.363 | 53.255 | 27.942 | 0.00 | 0.00 |
| ATOM | 130 | HB3  | ARG | X | 9  | 23.603 | 54.462 | 28.185 | 0.00 | 0.00 |
| ATOM | 131 | CG   | ARG | X | 9  | 21.662 | 55.263 | 28.500 | 0.00 | 0.00 |
| ATOM | 132 | HG2  | ARG | X | 9  | 22.106 | 56.256 | 28.574 | 0.00 | 0.00 |
| ATOM | 133 | HG3  | ARG | X | 9  | 20.748 | 55.450 | 27.937 | 0.00 | 0.00 |
| ATOM | 134 | CD   | ARG | X | 9  | 21.489 | 54.723 | 29.873 | 0.00 | 0.00 |
| ATOM | 135 | HD2  | ARG | X | 9  | 21.364 | 53.640 | 29.879 | 0.00 | 0.00 |
| ATOM | 136 | HD3  | ARG | X | 9  | 22.280 | 55.025 | 30.559 | 0.00 | 0.00 |
| ATOM | 137 | NE   | ARG | X | 9  | 20.253 | 55.359 | 30.408 | 0.00 | 0.00 |
| ATOM | 138 | HE   | ARG | X | 9  | 19.755 | 55.965 | 29.771 | 0.00 | 0.00 |
| ATOM | 139 | CZ   | ARG | X | 9  | 19.671 | 55.421 | 31.571 | 0.00 | 0.00 |
| ATOM | 140 | NH1  | ARG | X | 9  | 20.206 | 54.840 | 32.619 | 0.00 | 0.00 |
| ATOM | 141 | HH11 | ARG | X | 9  | 21.019 | 54.250 | 32.516 | 0.00 | 0.00 |
| ATOM | 142 | HH12 | ARG | X | 9  | 19.872 | 55.025 | 33.554 | 0.00 | 0.00 |
| ATOM | 143 | NH2  | ARG | X | 9  | 18.579 | 56.073 | 31.680 | 0.00 | 0.00 |
| ATOM | 144 | HH21 | ARG | X | 9  | 18.069 | 56.539 | 30.943 | 0.00 | 0.00 |
| ATOM | 145 | HH22 | ARG | X | 9  | 18.004 | 56.039 | 32.510 | 0.00 | 0.00 |
| ATOM | 146 | C    | ARG | X | 9  | 23.315 | 56.005 | 26.020 | 0.00 | 0.00 |
| ATOM | 147 | O    | ARG | X | 9  | 22.580 | 56.950 | 25.686 | 0.00 | 0.00 |
| ATOM | 148 | N    | GLY | X | 10 | 24.597 | 56.124 | 26.180 | 0.00 | 0.00 |
| ATOM | 149 | H    | GLY | X | 10 | 25.062 | 55.318 | 26.573 | 0.00 | 0.00 |
| ATOM | 150 | CA   | GLY | X | 10 | 25.356 | 57.377 | 26.082 | 0.00 | 0.00 |
| ATOM | 151 | HA2  | GLY | X | 10 | 24.964 | 58.223 | 26.646 | 0.00 | 0.00 |
| ATOM | 152 | HA3  | GLY | X | 10 | 26.331 | 57.126 | 26.498 | 0.00 | 0.00 |

|      |     |      |     |   |    |        |        |        |      |      |
|------|-----|------|-----|---|----|--------|--------|--------|------|------|
| ATOM | 153 | C    | GLY | X | 10 | 25.564 | 57.786 | 24.571 | 0.00 | 0.00 |
| ATOM | 154 | O    | GLY | X | 10 | 25.792 | 58.983 | 24.330 | 0.00 | 0.00 |
| ATOM | 155 | N    | GLY | X | 11 | 25.475 | 56.864 | 23.595 | 0.00 | 0.00 |
| ATOM | 156 | H    | GLY | X | 11 | 25.178 | 55.911 | 23.754 | 0.00 | 0.00 |
| ATOM | 157 | CA   | GLY | X | 11 | 25.702 | 57.160 | 22.218 | 0.00 | 0.00 |
| ATOM | 158 | HA2  | GLY | X | 11 | 24.785 | 57.645 | 21.880 | 0.00 | 0.00 |
| ATOM | 159 | HA3  | GLY | X | 11 | 26.422 | 57.974 | 22.131 | 0.00 | 0.00 |
| ATOM | 160 | C    | GLY | X | 11 | 26.108 | 55.906 | 21.384 | 0.00 | 0.00 |
| ATOM | 161 | O    | GLY | X | 11 | 25.940 | 54.793 | 21.849 | 0.00 | 0.00 |
| ATOM | 162 | N    | ARG | X | 12 | 26.691 | 56.183 | 20.243 | 0.00 | 0.00 |
| ATOM | 163 | H    | ARG | X | 12 | 26.940 | 57.106 | 19.917 | 0.00 | 0.00 |
| ATOM | 164 | CA   | ARG | X | 12 | 27.133 | 55.103 | 19.337 | 0.00 | 0.00 |
| ATOM | 165 | HA   | ARG | X | 12 | 26.612 | 54.180 | 19.591 | 0.00 | 0.00 |
| ATOM | 166 | CB   | ARG | X | 12 | 26.745 | 55.461 | 17.930 | 0.00 | 0.00 |
| ATOM | 167 | HB2  | ARG | X | 12 | 27.136 | 56.451 | 17.696 | 0.00 | 0.00 |
| ATOM | 168 | HB3  | ARG | X | 12 | 27.167 | 54.743 | 17.227 | 0.00 | 0.00 |
| ATOM | 169 | CG   | ARG | X | 12 | 25.210 | 55.428 | 17.715 | 0.00 | 0.00 |
| ATOM | 170 | HG2  | ARG | X | 12 | 24.993 | 54.404 | 18.019 | 0.00 | 0.00 |
| ATOM | 171 | HG3  | ARG | X | 12 | 24.646 | 56.129 | 18.330 | 0.00 | 0.00 |
| ATOM | 172 | CD   | ARG | X | 12 | 24.902 | 55.668 | 16.190 | 0.00 | 0.00 |
| ATOM | 173 | HD2  | ARG | X | 12 | 24.834 | 56.750 | 16.082 | 0.00 | 0.00 |
| ATOM | 174 | HD3  | ARG | X | 12 | 25.733 | 55.253 | 15.619 | 0.00 | 0.00 |
| ATOM | 175 | NE   | ARG | X | 12 | 23.686 | 54.869 | 15.849 | 0.00 | 0.00 |
| ATOM | 176 | HE   | ARG | X | 12 | 23.363 | 54.202 | 16.535 | 0.00 | 0.00 |
| ATOM | 177 | CZ   | ARG | X | 12 | 23.043 | 54.760 | 14.671 | 0.00 | 0.00 |
| ATOM | 178 | NH1  | ARG | X | 12 | 23.321 | 55.586 | 13.686 | 0.00 | 0.00 |
| ATOM | 179 | HH11 | ARG | X | 12 | 24.001 | 56.331 | 13.726 | 0.00 | 0.00 |
| ATOM | 180 | HH12 | ARG | X | 12 | 22.779 | 55.595 | 12.834 | 0.00 | 0.00 |
| ATOM | 181 | NH2  | ARG | X | 12 | 22.032 | 53.881 | 14.547 | 0.00 | 0.00 |
| ATOM | 182 | HH21 | ARG | X | 12 | 21.863 | 53.242 | 15.310 | 0.00 | 0.00 |
| ATOM | 183 | HH22 | ARG | X | 12 | 21.596 | 53.845 | 13.636 | 0.00 | 0.00 |
| ATOM | 184 | C    | ARG | X | 12 | 28.615 | 54.794 | 19.502 | 0.00 | 0.00 |
| ATOM | 185 | O    | ARG | X | 12 | 29.403 | 55.707 | 19.862 | 0.00 | 0.00 |
| ATOM | 186 | N    | LEU | X | 13 | 29.075 | 53.537 | 19.245 | 0.00 | 0.00 |
| ATOM | 187 | H    | LEU | X | 13 | 28.332 | 52.884 | 19.043 | 0.00 | 0.00 |
| ATOM | 188 | CA   | LEU | X | 13 | 30.470 | 53.015 | 19.309 | 0.00 | 0.00 |
| ATOM | 189 | HA   | LEU | X | 13 | 31.158 | 53.858 | 19.369 | 0.00 | 0.00 |
| ATOM | 190 | CB   | LEU | X | 13 | 30.618 | 52.188 | 20.628 | 0.00 | 0.00 |
| ATOM | 191 | HB2  | LEU | X | 13 | 29.876 | 51.389 | 20.628 | 0.00 | 0.00 |
| ATOM | 192 | HB3  | LEU | X | 13 | 31.523 | 51.594 | 20.504 | 0.00 | 0.00 |
| ATOM | 193 | CG   | LEU | X | 13 | 30.544 | 52.969 | 21.958 | 0.00 | 0.00 |
| ATOM | 194 | HG   | LEU | X | 13 | 29.787 | 53.753 | 21.930 | 0.00 | 0.00 |
| ATOM | 195 | CD1  | LEU | X | 13 | 30.254 | 51.983 | 23.085 | 0.00 | 0.00 |
| ATOM | 196 | HD11 | LEU | X | 13 | 31.189 | 51.427 | 23.158 | 0.00 | 0.00 |
| ATOM | 197 | HD12 | LEU | X | 13 | 29.396 | 51.322 | 22.966 | 0.00 | 0.00 |
| ATOM | 198 | HD13 | LEU | X | 13 | 30.190 | 52.622 | 23.965 | 0.00 | 0.00 |
| ATOM | 199 | CD2  | LEU | X | 13 | 31.809 | 53.814 | 22.230 | 0.00 | 0.00 |
| ATOM | 200 | HD21 | LEU | X | 13 | 31.685 | 54.305 | 23.196 | 0.00 | 0.00 |
| ATOM | 201 | HD22 | LEU | X | 13 | 32.628 | 53.099 | 22.312 | 0.00 | 0.00 |
| ATOM | 202 | HD23 | LEU | X | 13 | 31.974 | 54.508 | 21.406 | 0.00 | 0.00 |
| ATOM | 203 | C    | LEU | X | 13 | 30.876 | 52.145 | 18.148 | 0.00 | 0.00 |
| ATOM | 204 | O    | LEU | X | 13 | 29.992 | 51.375 | 17.727 | 0.00 | 0.00 |
| ATOM | 205 | N    | ARG | X | 14 | 32.114 | 52.204 | 17.655 | 0.00 | 0.00 |
| ATOM | 206 | H    | ARG | X | 14 | 32.777 | 52.873 | 18.020 | 0.00 | 0.00 |
| ATOM | 207 | CA   | ARG | X | 14 | 32.550 | 51.311 | 16.518 | 0.00 | 0.00 |
| ATOM | 208 | HA   | ARG | X | 14 | 31.702 | 50.797 | 16.064 | 0.00 | 0.00 |
| ATOM | 209 | CB   | ARG | X | 14 | 33.131 | 52.306 | 15.479 | 0.00 | 0.00 |
| ATOM | 210 | HB2  | ARG | X | 14 | 32.386 | 53.100 | 15.452 | 0.00 | 0.00 |
| ATOM | 211 | HB3  | ARG | X | 14 | 34.109 | 52.665 | 15.799 | 0.00 | 0.00 |
| ATOM | 212 | CG   | ARG | X | 14 | 33.277 | 51.689 | 14.065 | 0.00 | 0.00 |
| ATOM | 213 | HG2  | ARG | X | 14 | 33.707 | 50.690 | 14.129 | 0.00 | 0.00 |
| ATOM | 214 | HG3  | ARG | X | 14 | 32.255 | 51.532 | 13.720 | 0.00 | 0.00 |
| ATOM | 215 | CD   | ARG | X | 14 | 34.165 | 52.563 | 13.084 | 0.00 | 0.00 |
| ATOM | 216 | HD2  | ARG | X | 14 | 33.915 | 53.612 | 13.242 | 0.00 | 0.00 |
| ATOM | 217 | HD3  | ARG | X | 14 | 35.132 | 52.441 | 13.571 | 0.00 | 0.00 |
| ATOM | 218 | NE   | ARG | X | 14 | 34.029 | 52.072 | 11.683 | 0.00 | 0.00 |
| ATOM | 219 | HE   | ARG | X | 14 | 33.418 | 51.306 | 11.437 | 0.00 | 0.00 |

|      |     |      |     |   |    |        |        |        |      |      |
|------|-----|------|-----|---|----|--------|--------|--------|------|------|
| ATOM | 220 | CZ   | ARG | X | 14 | 34.538 | 52.680 | 10.646 | 0.00 | 0.00 |
| ATOM | 221 | NH1  | ARG | X | 14 | 35.243 | 53.793 | 10.726 | 0.00 | 0.00 |
| ATOM | 222 | HH11 | ARG | X | 14 | 35.558 | 54.245 | 11.572 | 0.00 | 0.00 |
| ATOM | 223 | HH12 | ARG | X | 14 | 35.493 | 54.211 | 9.841  | 0.00 | 0.00 |
| ATOM | 224 | NH2  | ARG | X | 14 | 34.489 | 52.102 | 9.467  | 0.00 | 0.00 |
| ATOM | 225 | HH21 | ARG | X | 14 | 33.823 | 51.363 | 9.296  | 0.00 | 0.00 |
| ATOM | 226 | HH22 | ARG | X | 14 | 34.736 | 52.688 | 8.683  | 0.00 | 0.00 |
| ATOM | 227 | C    | ARG | X | 14 | 33.645 | 50.398 | 17.116 | 0.00 | 0.00 |
| ATOM | 228 | O    | ARG | X | 14 | 34.533 | 50.904 | 17.807 | 0.00 | 0.00 |
| ATOM | 229 | N    | GLY | X | 15 | 33.536 | 49.102 | 16.815 | 0.00 | 0.00 |
| ATOM | 230 | H    | GLY | X | 15 | 32.715 | 48.784 | 16.319 | 0.00 | 0.00 |
| ATOM | 231 | CA   | GLY | X | 15 | 34.465 | 47.958 | 17.155 | 0.00 | 0.00 |
| ATOM | 232 | HA2  | GLY | X | 15 | 34.942 | 48.114 | 18.123 | 0.00 | 0.00 |
| ATOM | 233 | HA3  | GLY | X | 15 | 33.947 | 47.016 | 17.339 | 0.00 | 0.00 |
| ATOM | 234 | C    | GLY | X | 15 | 35.515 | 47.646 | 16.103 | 0.00 | 0.00 |
| ATOM | 235 | O    | GLY | X | 15 | 35.657 | 48.225 | 14.991 | 0.00 | 0.00 |
| ATOM | 236 | N    | ILE | X | 16 | 36.116 | 46.460 | 16.309 | 0.00 | 0.00 |
| ATOM | 237 | H    | ILE | X | 16 | 36.081 | 45.965 | 17.189 | 0.00 | 0.00 |
| ATOM | 238 | CA   | ILE | X | 16 | 37.121 | 45.781 | 15.338 | 0.00 | 0.00 |
| ATOM | 239 | HA   | ILE | X | 16 | 36.979 | 46.282 | 14.380 | 0.00 | 0.00 |
| ATOM | 240 | CB   | ILE | X | 16 | 38.588 | 46.014 | 15.795 | 0.00 | 0.00 |
| ATOM | 241 | HB   | ILE | X | 16 | 39.090 | 45.414 | 15.036 | 0.00 | 0.00 |
| ATOM | 242 | CG2  | ILE | X | 16 | 38.931 | 47.487 | 15.537 | 0.00 | 0.00 |
| ATOM | 243 | HG21 | ILE | X | 16 | 40.011 | 47.634 | 15.574 | 0.00 | 0.00 |
| ATOM | 244 | HG22 | ILE | X | 16 | 38.541 | 48.187 | 16.276 | 0.00 | 0.00 |
| ATOM | 245 | HG23 | ILE | X | 16 | 38.574 | 47.862 | 14.578 | 0.00 | 0.00 |
| ATOM | 246 | CG1  | ILE | X | 16 | 39.024 | 45.503 | 17.130 | 0.00 | 0.00 |
| ATOM | 247 | HG12 | ILE | X | 16 | 38.350 | 45.910 | 17.884 | 0.00 | 0.00 |
| ATOM | 248 | HG13 | ILE | X | 16 | 38.814 | 44.433 | 17.135 | 0.00 | 0.00 |
| ATOM | 249 | CD1  | ILE | X | 16 | 40.454 | 45.851 | 17.445 | 0.00 | 0.00 |
| ATOM | 250 | HD11 | ILE | X | 16 | 40.526 | 46.914 | 17.673 | 0.00 | 0.00 |
| ATOM | 251 | HD12 | ILE | X | 16 | 41.115 | 45.582 | 16.621 | 0.00 | 0.00 |
| ATOM | 252 | HD13 | ILE | X | 16 | 40.860 | 45.321 | 18.307 | 0.00 | 0.00 |
| ATOM | 253 | C    | ILE | X | 16 | 36.828 | 44.311 | 15.262 | 0.00 | 0.00 |
| ATOM | 254 | O    | ILE | X | 16 | 36.346 | 43.670 | 16.211 | 0.00 | 0.00 |
| ATOM | 255 | N    | ARG | X | 17 | 37.170 | 43.676 | 14.162 | 0.00 | 0.00 |
| ATOM | 256 | H    | ARG | X | 17 | 37.593 | 44.222 | 13.425 | 0.00 | 0.00 |
| ATOM | 257 | CA   | ARG | X | 17 | 37.138 | 42.221 | 13.949 | 0.00 | 0.00 |
| ATOM | 258 | HA   | ARG | X | 17 | 36.352 | 41.813 | 14.584 | 0.00 | 0.00 |
| ATOM | 259 | CB   | ARG | X | 17 | 36.914 | 41.906 | 12.434 | 0.00 | 0.00 |
| ATOM | 260 | HB2  | ARG | X | 17 | 36.180 | 42.546 | 11.943 | 0.00 | 0.00 |
| ATOM | 261 | HB3  | ARG | X | 17 | 37.860 | 42.029 | 11.907 | 0.00 | 0.00 |
| ATOM | 262 | CG   | ARG | X | 17 | 36.523 | 40.456 | 12.168 | 0.00 | 0.00 |
| ATOM | 263 | HG2  | ARG | X | 17 | 37.158 | 39.697 | 12.625 | 0.00 | 0.00 |
| ATOM | 264 | HG3  | ARG | X | 17 | 35.536 | 40.296 | 12.601 | 0.00 | 0.00 |
| ATOM | 265 | CD   | ARG | X | 17 | 36.350 | 40.151 | 10.677 | 0.00 | 0.00 |
| ATOM | 266 | HD2  | ARG | X | 17 | 35.578 | 40.826 | 10.307 | 0.00 | 0.00 |
| ATOM | 267 | HD3  | ARG | X | 17 | 37.186 | 40.298 | 9.992  | 0.00 | 0.00 |
| ATOM | 268 | NE   | ARG | X | 17 | 35.908 | 38.796 | 10.418 | 0.00 | 0.00 |
| ATOM | 269 | HE   | ARG | X | 17 | 34.969 | 38.602 | 10.102 | 0.00 | 0.00 |
| ATOM | 270 | CZ   | ARG | X | 17 | 36.733 | 37.807 | 10.129 | 0.00 | 0.00 |
| ATOM | 271 | NH1  | ARG | X | 17 | 38.071 | 37.802 | 10.341 | 0.00 | 0.00 |
| ATOM | 272 | HH11 | ARG | X | 17 | 38.447 | 38.636 | 10.769 | 0.00 | 0.00 |
| ATOM | 273 | HH12 | ARG | X | 17 | 38.666 | 37.070 | 9.980  | 0.00 | 0.00 |
| ATOM | 274 | NH2  | ARG | X | 17 | 36.225 | 36.716 | 9.594  | 0.00 | 0.00 |
| ATOM | 275 | HH21 | ARG | X | 17 | 35.226 | 36.600 | 9.501  | 0.00 | 0.00 |
| ATOM | 276 | HH22 | ARG | X | 17 | 36.876 | 35.954 | 9.469  | 0.00 | 0.00 |
| ATOM | 277 | C    | ARG | X | 17 | 38.512 | 41.602 | 14.439 | 0.00 | 0.00 |
| ATOM | 278 | O    | ARG | X | 17 | 39.575 | 42.164 | 14.192 | 0.00 | 0.00 |
| ATOM | 279 | N    | LEU | X | 18 | 38.517 | 40.424 | 15.106 | 0.00 | 0.00 |
| ATOM | 280 | H    | LEU | X | 18 | 37.649 | 39.943 | 15.292 | 0.00 | 0.00 |
| ATOM | 281 | CA   | LEU | X | 18 | 39.687 | 39.681 | 15.600 | 0.00 | 0.00 |
| ATOM | 282 | HA   | LEU | X | 18 | 40.568 | 40.182 | 15.199 | 0.00 | 0.00 |
| ATOM | 283 | CB   | LEU | X | 18 | 39.788 | 39.627 | 17.123 | 0.00 | 0.00 |
| ATOM | 284 | HB2  | LEU | X | 18 | 38.892 | 39.068 | 17.390 | 0.00 | 0.00 |
| ATOM | 285 | HB3  | LEU | X | 18 | 40.625 | 38.942 | 17.261 | 0.00 | 0.00 |
| ATOM | 286 | CG   | LEU | X | 18 | 39.857 | 40.904 | 17.955 | 0.00 | 0.00 |

|      |     |      |     |   |    |        |        |        |      |      |
|------|-----|------|-----|---|----|--------|--------|--------|------|------|
| ATOM | 287 | HG   | LEU | X | 18 | 38.946 | 41.473 | 17.768 | 0.00 | 0.00 |
| ATOM | 288 | CD1  | LEU | X | 18 | 40.023 | 40.696 | 19.443 | 0.00 | 0.00 |
| ATOM | 289 | HD11 | LEU | X | 18 | 40.156 | 41.592 | 20.049 | 0.00 | 0.00 |
| ATOM | 290 | HD12 | LEU | X | 18 | 40.876 | 40.044 | 19.633 | 0.00 | 0.00 |
| ATOM | 291 | HD13 | LEU | X | 18 | 39.162 | 40.151 | 19.830 | 0.00 | 0.00 |
| ATOM | 292 | CD2  | LEU | X | 18 | 41.082 | 41.805 | 17.444 | 0.00 | 0.00 |
| ATOM | 293 | HD21 | LEU | X | 18 | 41.205 | 42.699 | 18.056 | 0.00 | 0.00 |
| ATOM | 294 | HD22 | LEU | X | 18 | 42.058 | 41.319 | 17.453 | 0.00 | 0.00 |
| ATOM | 295 | HD23 | LEU | X | 18 | 40.814 | 42.048 | 16.416 | 0.00 | 0.00 |
| ATOM | 296 | C    | LEU | X | 18 | 39.590 | 38.286 | 14.978 | 0.00 | 0.00 |
| ATOM | 297 | O    | LEU | X | 18 | 38.518 | 37.644 | 14.931 | 0.00 | 0.00 |
| ATOM | 298 | N    | LYS | X | 19 | 40.761 | 37.769 | 14.604 | 0.00 | 0.00 |
| ATOM | 299 | H    | LYS | X | 19 | 41.565 | 38.326 | 14.856 | 0.00 | 0.00 |
| ATOM | 300 | CA   | LYS | X | 19 | 41.060 | 36.435 | 14.131 | 0.00 | 0.00 |
| ATOM | 301 | HA   | LYS | X | 19 | 40.172 | 36.108 | 13.590 | 0.00 | 0.00 |
| ATOM | 302 | CB   | LYS | X | 19 | 42.187 | 36.565 | 13.102 | 0.00 | 0.00 |
| ATOM | 303 | HB2  | LYS | X | 19 | 43.080 | 36.894 | 13.632 | 0.00 | 0.00 |
| ATOM | 304 | HB3  | LYS | X | 19 | 42.468 | 35.561 | 12.784 | 0.00 | 0.00 |
| ATOM | 305 | CG   | LYS | X | 19 | 41.752 | 37.312 | 11.828 | 0.00 | 0.00 |
| ATOM | 306 | HG2  | LYS | X | 19 | 40.797 | 36.943 | 11.452 | 0.00 | 0.00 |
| ATOM | 307 | HG3  | LYS | X | 19 | 41.602 | 38.373 | 12.029 | 0.00 | 0.00 |
| ATOM | 308 | CD   | LYS | X | 19 | 42.884 | 37.190 | 10.742 | 0.00 | 0.00 |
| ATOM | 309 | HD2  | LYS | X | 19 | 43.820 | 37.362 | 11.273 | 0.00 | 0.00 |
| ATOM | 310 | HD3  | LYS | X | 19 | 42.779 | 36.148 | 10.439 | 0.00 | 0.00 |
| ATOM | 311 | CE   | LYS | X | 19 | 42.789 | 38.181 | 9.571  | 0.00 | 0.00 |
| ATOM | 312 | HE2  | LYS | X | 19 | 43.540 | 37.921 | 8.824  | 0.00 | 0.00 |
| ATOM | 313 | HE3  | LYS | X | 19 | 41.876 | 38.090 | 8.982  | 0.00 | 0.00 |
| ATOM | 314 | NZ   | LYS | X | 19 | 43.008 | 39.555 | 10.022 | 0.00 | 0.00 |
| ATOM | 315 | HZ1  | LYS | X | 19 | 42.581 | 39.826 | 10.896 | 0.00 | 0.00 |
| ATOM | 316 | HZ2  | LYS | X | 19 | 44.004 | 39.720 | 10.010 | 0.00 | 0.00 |
| ATOM | 317 | HZ3  | LYS | X | 19 | 42.591 | 40.195 | 9.361  | 0.00 | 0.00 |
| ATOM | 318 | C    | LYS | X | 19 | 41.453 | 35.565 | 15.364 | 0.00 | 0.00 |
| ATOM | 319 | O    | LYS | X | 19 | 41.788 | 36.127 | 16.454 | 0.00 | 0.00 |
| ATOM | 320 | N    | THR | X | 20 | 41.613 | 34.203 | 15.099 | 0.00 | 0.00 |
| ATOM | 321 | H    | THR | X | 20 | 41.287 | 33.862 | 14.206 | 0.00 | 0.00 |
| ATOM | 322 | CA   | THR | X | 20 | 41.823 | 33.250 | 16.097 | 0.00 | 0.00 |
| ATOM | 323 | HA   | THR | X | 20 | 42.824 | 33.290 | 16.527 | 0.00 | 0.00 |
| ATOM | 324 | CB   | THR | X | 20 | 40.856 | 33.274 | 17.287 | 0.00 | 0.00 |
| ATOM | 325 | HB   | THR | X | 20 | 40.591 | 32.225 | 17.425 | 0.00 | 0.00 |
| ATOM | 326 | CG2  | THR | X | 20 | 41.562 | 33.663 | 18.554 | 0.00 | 0.00 |
| ATOM | 327 | HG21 | THR | X | 20 | 42.352 | 32.941 | 18.759 | 0.00 | 0.00 |
| ATOM | 328 | HG22 | THR | X | 20 | 40.848 | 33.537 | 19.368 | 0.00 | 0.00 |
| ATOM | 329 | HG23 | THR | X | 20 | 41.893 | 34.702 | 18.532 | 0.00 | 0.00 |
| ATOM | 330 | OG1  | THR | X | 20 | 39.749 | 34.008 | 17.063 | 0.00 | 0.00 |
| ATOM | 331 | HG1  | THR | X | 20 | 39.197 | 33.437 | 16.524 | 0.00 | 0.00 |
| ATOM | 332 | C    | THR | X | 20 | 41.860 | 31.841 | 15.458 | 0.00 | 0.00 |
| ATOM | 333 | O    | THR | X | 20 | 41.392 | 31.750 | 14.368 | 0.00 | 0.00 |
| ATOM | 334 | N    | PRO | X | 21 | 42.415 | 30.734 | 16.003 | 0.00 | 0.00 |
| ATOM | 335 | CD   | PRO | X | 21 | 43.171 | 30.716 | 17.245 | 0.00 | 0.00 |
| ATOM | 336 | HD2  | PRO | X | 21 | 42.477 | 30.461 | 18.045 | 0.00 | 0.00 |
| ATOM | 337 | HD3  | PRO | X | 21 | 43.746 | 31.628 | 17.405 | 0.00 | 0.00 |
| ATOM | 338 | CG   | PRO | X | 21 | 44.109 | 29.526 | 17.203 | 0.00 | 0.00 |
| ATOM | 339 | HG2  | PRO | X | 21 | 44.264 | 28.989 | 18.139 | 0.00 | 0.00 |
| ATOM | 340 | HG3  | PRO | X | 21 | 44.991 | 29.717 | 16.592 | 0.00 | 0.00 |
| ATOM | 341 | CB   | PRO | X | 21 | 43.231 | 28.584 | 16.293 | 0.00 | 0.00 |
| ATOM | 342 | HB2  | PRO | X | 21 | 42.552 | 28.046 | 16.956 | 0.00 | 0.00 |
| ATOM | 343 | HB3  | PRO | X | 21 | 43.911 | 27.862 | 15.841 | 0.00 | 0.00 |
| ATOM | 344 | CA   | PRO | X | 21 | 42.511 | 29.486 | 15.358 | 0.00 | 0.00 |
| ATOM | 345 | HA   | PRO | X | 21 | 43.160 | 29.578 | 14.487 | 0.00 | 0.00 |
| ATOM | 346 | C    | PRO | X | 21 | 41.213 | 28.872 | 14.942 | 0.00 | 0.00 |
| ATOM | 347 | O    | PRO | X | 21 | 41.112 | 28.461 | 13.765 | 0.00 | 0.00 |
| ATOM | 348 | N    | GLY | X | 22 | 40.282 | 28.832 | 15.810 | 0.00 | 0.00 |
| ATOM | 349 | H    | GLY | X | 22 | 40.447 | 29.316 | 16.681 | 0.00 | 0.00 |
| ATOM | 350 | CA   | GLY | X | 22 | 38.956 | 28.124 | 15.680 | 0.00 | 0.00 |
| ATOM | 351 | HA2  | GLY | X | 22 | 39.156 | 27.281 | 15.018 | 0.00 | 0.00 |
| ATOM | 352 | HA3  | GLY | X | 22 | 38.594 | 27.915 | 16.687 | 0.00 | 0.00 |
| ATOM | 353 | C    | GLY | X | 22 | 37.869 | 28.979 | 14.940 | 0.00 | 0.00 |

|      |     |      |     |   |    |        |        |        |      |      |
|------|-----|------|-----|---|----|--------|--------|--------|------|------|
| ATOM | 354 | O    | GLY | X | 22 | 36.690 | 28.679 | 14.878 | 0.00 | 0.00 |
| ATOM | 355 | N    | GLY | X | 23 | 38.327 | 30.095 | 14.371 | 0.00 | 0.00 |
| ATOM | 356 | H    | GLY | X | 23 | 39.298 | 30.307 | 14.554 | 0.00 | 0.00 |
| ATOM | 357 | CA   | GLY | X | 23 | 37.486 | 31.098 | 13.667 | 0.00 | 0.00 |
| ATOM | 358 | HA2  | GLY | X | 23 | 37.968 | 31.334 | 12.718 | 0.00 | 0.00 |
| ATOM | 359 | HA3  | GLY | X | 23 | 36.471 | 30.755 | 13.467 | 0.00 | 0.00 |
| ATOM | 360 | C    | GLY | X | 23 | 37.475 | 32.472 | 14.410 | 0.00 | 0.00 |
| ATOM | 361 | O    | GLY | X | 23 | 38.188 | 32.647 | 15.459 | 0.00 | 0.00 |
| ATOM | 362 | N    | PRO | X | 24 | 36.657 | 33.467 | 13.936 | 0.00 | 0.00 |
| ATOM | 363 | CD   | PRO | X | 24 | 35.795 | 33.389 | 12.777 | 0.00 | 0.00 |
| ATOM | 364 | HD2  | PRO | X | 24 | 34.959 | 32.696 | 12.871 | 0.00 | 0.00 |
| ATOM | 365 | HD3  | PRO | X | 24 | 36.387 | 32.964 | 11.967 | 0.00 | 0.00 |
| ATOM | 366 | CG   | PRO | X | 24 | 35.325 | 34.747 | 12.413 | 0.00 | 0.00 |
| ATOM | 367 | HG2  | PRO | X | 24 | 34.314 | 34.922 | 12.781 | 0.00 | 0.00 |
| ATOM | 368 | HG3  | PRO | X | 24 | 35.261 | 34.833 | 11.328 | 0.00 | 0.00 |
| ATOM | 369 | CB   | PRO | X | 24 | 36.433 | 35.622 | 13.066 | 0.00 | 0.00 |
| ATOM | 370 | HB2  | PRO | X | 24 | 36.074 | 36.637 | 13.241 | 0.00 | 0.00 |
| ATOM | 371 | HB3  | PRO | X | 24 | 37.313 | 35.681 | 12.427 | 0.00 | 0.00 |
| ATOM | 372 | CA   | PRO | X | 24 | 36.781 | 34.893 | 14.342 | 0.00 | 0.00 |
| ATOM | 373 | HA   | PRO | X | 24 | 37.788 | 35.067 | 14.722 | 0.00 | 0.00 |
| ATOM | 374 | C    | PRO | X | 24 | 35.880 | 35.308 | 15.521 | 0.00 | 0.00 |
| ATOM | 375 | O    | PRO | X | 24 | 34.916 | 34.610 | 15.856 | 0.00 | 0.00 |
| ATOM | 376 | N    | VAL | X | 25 | 36.231 | 36.452 | 16.149 | 0.00 | 0.00 |
| ATOM | 377 | H    | VAL | X | 25 | 37.028 | 36.951 | 15.783 | 0.00 | 0.00 |
| ATOM | 378 | CA   | VAL | X | 25 | 35.462 | 37.124 | 17.215 | 0.00 | 0.00 |
| ATOM | 379 | HA   | VAL | X | 25 | 34.399 | 36.891 | 17.150 | 0.00 | 0.00 |
| ATOM | 380 | CB   | VAL | X | 25 | 36.017 | 36.739 | 18.558 | 0.00 | 0.00 |
| ATOM | 381 | HB   | VAL | X | 25 | 35.442 | 37.322 | 19.278 | 0.00 | 0.00 |
| ATOM | 382 | CG1  | VAL | X | 25 | 35.654 | 35.275 | 18.843 | 0.00 | 0.00 |
| ATOM | 383 | HG11 | VAL | X | 25 | 35.684 | 35.093 | 19.917 | 0.00 | 0.00 |
| ATOM | 384 | HG12 | VAL | X | 25 | 34.631 | 34.997 | 18.588 | 0.00 | 0.00 |
| ATOM | 385 | HG13 | VAL | X | 25 | 36.362 | 34.592 | 18.374 | 0.00 | 0.00 |
| ATOM | 386 | CG2  | VAL | X | 25 | 37.574 | 36.843 | 18.695 | 0.00 | 0.00 |
| ATOM | 387 | HG21 | VAL | X | 25 | 37.861 | 37.892 | 18.769 | 0.00 | 0.00 |
| ATOM | 388 | HG22 | VAL | X | 25 | 37.980 | 36.359 | 17.806 | 0.00 | 0.00 |
| ATOM | 389 | HG23 | VAL | X | 25 | 37.974 | 36.360 | 19.587 | 0.00 | 0.00 |
| ATOM | 390 | C    | VAL | X | 25 | 35.609 | 38.668 | 16.963 | 0.00 | 0.00 |
| ATOM | 391 | O    | VAL | X | 25 | 36.205 | 39.085 | 16.006 | 0.00 | 0.00 |
| ATOM | 392 | N    | SER | X | 26 | 35.141 | 39.480 | 17.867 | 0.00 | 0.00 |
| ATOM | 393 | H    | SER | X | 26 | 34.810 | 39.044 | 18.716 | 0.00 | 0.00 |
| ATOM | 394 | CA   | SER | X | 26 | 35.055 | 40.968 | 17.642 | 0.00 | 0.00 |
| ATOM | 395 | HA   | SER | X | 26 | 35.926 | 41.312 | 17.084 | 0.00 | 0.00 |
| ATOM | 396 | CB   | SER | X | 26 | 33.762 | 41.418 | 16.997 | 0.00 | 0.00 |
| ATOM | 397 | HB2  | SER | X | 26 | 33.841 | 42.488 | 16.806 | 0.00 | 0.00 |
| ATOM | 398 | HB3  | SER | X | 26 | 33.757 | 40.861 | 16.060 | 0.00 | 0.00 |
| ATOM | 399 | OG   | SER | X | 26 | 32.643 | 41.169 | 17.826 | 0.00 | 0.00 |
| ATOM | 400 | HG   | SER | X | 26 | 32.742 | 40.416 | 18.414 | 0.00 | 0.00 |
| ATOM | 401 | C    | SER | X | 26 | 35.211 | 41.610 | 19.064 | 0.00 | 0.00 |
| ATOM | 402 | O    | SER | X | 26 | 34.974 | 41.006 | 20.092 | 0.00 | 0.00 |
| ATOM | 403 | N    | ALA | X | 27 | 35.677 | 42.881 | 19.071 | 0.00 | 0.00 |
| ATOM | 404 | H    | ALA | X | 27 | 35.930 | 43.280 | 18.178 | 0.00 | 0.00 |
| ATOM | 405 | CA   | ALA | X | 27 | 36.358 | 43.575 | 20.239 | 0.00 | 0.00 |
| ATOM | 406 | HA   | ALA | X | 27 | 35.830 | 43.264 | 21.141 | 0.00 | 0.00 |
| ATOM | 407 | CB   | ALA | X | 27 | 37.774 | 43.046 | 20.271 | 0.00 | 0.00 |
| ATOM | 408 | HB1  | ALA | X | 27 | 38.324 | 43.478 | 21.107 | 0.00 | 0.00 |
| ATOM | 409 | HB2  | ALA | X | 27 | 38.331 | 43.083 | 19.334 | 0.00 | 0.00 |
| ATOM | 410 | HB3  | ALA | X | 27 | 37.743 | 41.993 | 20.548 | 0.00 | 0.00 |
| ATOM | 411 | C    | ALA | X | 27 | 36.208 | 45.094 | 20.168 | 0.00 | 0.00 |
| ATOM | 412 | O    | ALA | X | 27 | 36.251 | 45.833 | 19.218 | 0.00 | 0.00 |
| ATOM | 413 | N    | PHE | X | 28 | 35.850 | 45.496 | 21.390 | 0.00 | 0.00 |
| ATOM | 414 | H    | PHE | X | 28 | 35.742 | 44.871 | 22.176 | 0.00 | 0.00 |
| ATOM | 415 | CA   | PHE | X | 28 | 35.545 | 46.933 | 21.672 | 0.00 | 0.00 |
| ATOM | 416 | HA   | PHE | X | 28 | 35.808 | 47.541 | 20.807 | 0.00 | 0.00 |
| ATOM | 417 | CB   | PHE | X | 28 | 34.045 | 47.242 | 21.853 | 0.00 | 0.00 |
| ATOM | 418 | HB2  | PHE | X | 28 | 33.812 | 46.767 | 22.807 | 0.00 | 0.00 |
| ATOM | 419 | HB3  | PHE | X | 28 | 33.981 | 48.315 | 22.033 | 0.00 | 0.00 |
| ATOM | 420 | CG   | PHE | X | 28 | 33.222 | 46.868 | 20.728 | 0.00 | 0.00 |

|      |     |      |     |   |    |        |        |        |      |      |
|------|-----|------|-----|---|----|--------|--------|--------|------|------|
| ATOM | 421 | CD1  | PHE | X | 28 | 33.036 | 45.519 | 20.468 | 0.00 | 0.00 |
| ATOM | 422 | HD1  | PHE | X | 28 | 33.311 | 44.760 | 21.185 | 0.00 | 0.00 |
| ATOM | 423 | CE1  | PHE | X | 28 | 32.303 | 45.038 | 19.334 | 0.00 | 0.00 |
| ATOM | 424 | HE1  | PHE | X | 28 | 32.218 | 43.969 | 19.206 | 0.00 | 0.00 |
| ATOM | 425 | CZ   | PHE | X | 28 | 31.732 | 45.982 | 18.469 | 0.00 | 0.00 |
| ATOM | 426 | HZ   | PHE | X | 28 | 31.166 | 45.587 | 17.639 | 0.00 | 0.00 |
| ATOM | 427 | CE2  | PHE | X | 28 | 31.748 | 47.374 | 18.802 | 0.00 | 0.00 |
| ATOM | 428 | HE2  | PHE | X | 28 | 31.234 | 48.072 | 18.157 | 0.00 | 0.00 |
| ATOM | 429 | CD2  | PHE | X | 28 | 32.576 | 47.833 | 19.877 | 0.00 | 0.00 |
| ATOM | 430 | HD2  | PHE | X | 28 | 32.680 | 48.891 | 20.073 | 0.00 | 0.00 |
| ATOM | 431 | C    | PHE | X | 28 | 36.358 | 47.473 | 22.863 | 0.00 | 0.00 |
| ATOM | 432 | O    | PHE | X | 28 | 36.318 | 46.862 | 23.923 | 0.00 | 0.00 |
| ATOM | 433 | N    | LEU | X | 29 | 37.113 | 48.582 | 22.714 | 0.00 | 0.00 |
| ATOM | 434 | H    | LEU | X | 29 | 37.020 | 49.218 | 21.935 | 0.00 | 0.00 |
| ATOM | 435 | CA   | LEU | X | 29 | 38.096 | 49.033 | 23.696 | 0.00 | 0.00 |
| ATOM | 436 | HA   | LEU | X | 29 | 37.761 | 48.515 | 24.594 | 0.00 | 0.00 |
| ATOM | 437 | CB   | LEU | X | 29 | 39.541 | 48.605 | 23.171 | 0.00 | 0.00 |
| ATOM | 438 | HB2  | LEU | X | 29 | 39.813 | 49.200 | 22.300 | 0.00 | 0.00 |
| ATOM | 439 | HB3  | LEU | X | 29 | 40.305 | 48.910 | 23.887 | 0.00 | 0.00 |
| ATOM | 440 | CG   | LEU | X | 29 | 39.712 | 47.165 | 22.658 | 0.00 | 0.00 |
| ATOM | 441 | HG   | LEU | X | 29 | 38.911 | 46.845 | 21.992 | 0.00 | 0.00 |
| ATOM | 442 | CD1  | LEU | X | 29 | 41.019 | 47.058 | 21.851 | 0.00 | 0.00 |
| ATOM | 443 | HD11 | LEU | X | 29 | 40.806 | 47.331 | 20.817 | 0.00 | 0.00 |
| ATOM | 444 | HD12 | LEU | X | 29 | 41.371 | 46.027 | 21.867 | 0.00 | 0.00 |
| ATOM | 445 | HD13 | LEU | X | 29 | 41.748 | 47.599 | 22.454 | 0.00 | 0.00 |
| ATOM | 446 | CD2  | LEU | X | 29 | 39.698 | 46.093 | 23.877 | 0.00 | 0.00 |
| ATOM | 447 | HD21 | LEU | X | 29 | 39.461 | 45.094 | 23.514 | 0.00 | 0.00 |
| ATOM | 448 | HD22 | LEU | X | 29 | 40.739 | 46.071 | 24.202 | 0.00 | 0.00 |
| ATOM | 449 | HD23 | LEU | X | 29 | 38.916 | 46.492 | 24.523 | 0.00 | 0.00 |
| ATOM | 450 | C    | LEU | X | 29 | 37.997 | 50.520 | 23.917 | 0.00 | 0.00 |
| ATOM | 451 | O    | LEU | X | 29 | 37.772 | 51.284 | 22.999 | 0.00 | 0.00 |
| ATOM | 452 | N    | GLY | X | 30 | 38.209 | 51.045 | 25.121 | 0.00 | 0.00 |
| ATOM | 453 | H    | GLY | X | 30 | 38.388 | 50.401 | 25.878 | 0.00 | 0.00 |
| ATOM | 454 | CA   | GLY | X | 30 | 38.310 | 52.457 | 25.412 | 0.00 | 0.00 |
| ATOM | 455 | HA2  | GLY | X | 30 | 38.841 | 52.651 | 26.344 | 0.00 | 0.00 |
| ATOM | 456 | HA3  | GLY | X | 30 | 38.998 | 52.948 | 24.724 | 0.00 | 0.00 |
| ATOM | 457 | C    | GLY | X | 30 | 36.966 | 53.110 | 25.470 | 0.00 | 0.00 |
| ATOM | 458 | O    | GLY | X | 30 | 36.830 | 54.290 | 25.225 | 0.00 | 0.00 |
| ATOM | 459 | N    | ILE | X | 31 | 35.938 | 52.338 | 25.924 | 0.00 | 0.00 |
| ATOM | 460 | H    | ILE | X | 31 | 36.155 | 51.441 | 26.336 | 0.00 | 0.00 |
| ATOM | 461 | CA   | ILE | X | 31 | 34.537 | 52.786 | 26.022 | 0.00 | 0.00 |
| ATOM | 462 | HA   | ILE | X | 31 | 34.190 | 53.339 | 25.150 | 0.00 | 0.00 |
| ATOM | 463 | CB   | ILE | X | 31 | 33.571 | 51.576 | 26.121 | 0.00 | 0.00 |
| ATOM | 464 | HB   | ILE | X | 31 | 33.928 | 51.130 | 27.049 | 0.00 | 0.00 |
| ATOM | 465 | CG2  | ILE | X | 31 | 32.154 | 52.181 | 26.279 | 0.00 | 0.00 |
| ATOM | 466 | HG21 | ILE | X | 31 | 32.032 | 52.747 | 27.203 | 0.00 | 0.00 |
| ATOM | 467 | HG22 | ILE | X | 31 | 31.449 | 51.350 | 26.288 | 0.00 | 0.00 |
| ATOM | 468 | HG23 | ILE | X | 31 | 31.950 | 52.852 | 25.445 | 0.00 | 0.00 |
| ATOM | 469 | CG1  | ILE | X | 31 | 33.517 | 50.716 | 24.849 | 0.00 | 0.00 |
| ATOM | 470 | HG12 | ILE | X | 31 | 32.978 | 51.223 | 24.049 | 0.00 | 0.00 |
| ATOM | 471 | HG13 | ILE | X | 31 | 34.528 | 50.484 | 24.512 | 0.00 | 0.00 |
| ATOM | 472 | CD1  | ILE | X | 31 | 33.002 | 49.293 | 25.082 | 0.00 | 0.00 |
| ATOM | 473 | HD11 | ILE | X | 31 | 32.842 | 48.729 | 24.163 | 0.00 | 0.00 |
| ATOM | 474 | HD12 | ILE | X | 31 | 32.057 | 49.219 | 25.619 | 0.00 | 0.00 |
| ATOM | 475 | HD13 | ILE | X | 31 | 33.811 | 48.796 | 25.618 | 0.00 | 0.00 |
| ATOM | 476 | C    | ILE | X | 31 | 34.575 | 53.713 | 27.215 | 0.00 | 0.00 |
| ATOM | 477 | O    | ILE | X | 31 | 34.772 | 53.308 | 28.349 | 0.00 | 0.00 |
| ATOM | 478 | N    | PRO | X | 32 | 34.246 | 55.010 | 27.062 | 0.00 | 0.00 |
| ATOM | 479 | CD   | PRO | X | 32 | 33.765 | 55.630 | 25.877 | 0.00 | 0.00 |
| ATOM | 480 | HD2  | PRO | X | 32 | 32.971 | 55.068 | 25.385 | 0.00 | 0.00 |
| ATOM | 481 | HD3  | PRO | X | 32 | 34.636 | 55.748 | 25.232 | 0.00 | 0.00 |
| ATOM | 482 | CG   | PRO | X | 32 | 33.290 | 56.987 | 26.260 | 0.00 | 0.00 |
| ATOM | 483 | HG2  | PRO | X | 32 | 32.217 | 56.862 | 26.406 | 0.00 | 0.00 |
| ATOM | 484 | HG3  | PRO | X | 32 | 33.386 | 57.671 | 25.417 | 0.00 | 0.00 |
| ATOM | 485 | CB   | PRO | X | 32 | 33.996 | 57.301 | 27.561 | 0.00 | 0.00 |
| ATOM | 486 | HB2  | PRO | X | 32 | 33.574 | 58.090 | 28.182 | 0.00 | 0.00 |
| ATOM | 487 | HB3  | PRO | X | 32 | 35.066 | 57.476 | 27.453 | 0.00 | 0.00 |



|      |     |     |     |   |    |        |        |        |      |      |
|------|-----|-----|-----|---|----|--------|--------|--------|------|------|
| ATOM | 488 | CA  | PRO | X | 32 | 33.991 | 55.912 | 28.219 | 0.00 | 0.00 |
| ATOM | 489 | HA  | PRO | X | 32 | 34.922 | 56.030 | 28.773 | 0.00 | 0.00 |
| ATOM | 490 | C   | PRO | X | 32 | 32.739 | 55.597 | 29.036 | 0.00 | 0.00 |
| ATOM | 491 | O   | PRO | X | 32 | 31.663 | 55.414 | 28.529 | 0.00 | 0.00 |
| ATOM | 492 | N   | PHE | X | 33 | 32.784 | 55.538 | 30.408 | 0.00 | 0.00 |
| ATOM | 493 | H   | PHE | X | 33 | 33.669 | 55.594 | 30.892 | 0.00 | 0.00 |
| ATOM | 494 | CA  | PHE | X | 33 | 31.678 | 55.254 | 31.335 | 0.00 | 0.00 |
| ATOM | 495 | HA  | PHE | X | 33 | 30.762 | 55.232 | 30.745 | 0.00 | 0.00 |
| ATOM | 496 | CB  | PHE | X | 33 | 31.845 | 53.854 | 32.018 | 0.00 | 0.00 |
| ATOM | 497 | HB2 | PHE | X | 33 | 30.910 | 53.766 | 32.571 | 0.00 | 0.00 |
| ATOM | 498 | HB3 | PHE | X | 33 | 31.826 | 52.989 | 31.354 | 0.00 | 0.00 |
| ATOM | 499 | CG  | PHE | X | 33 | 33.072 | 53.577 | 32.975 | 0.00 | 0.00 |
| ATOM | 500 | CD1 | PHE | X | 33 | 32.868 | 53.513 | 34.353 | 0.00 | 0.00 |
| ATOM | 501 | HD1 | PHE | X | 33 | 31.841 | 53.598 | 34.676 | 0.00 | 0.00 |
| ATOM | 502 | CE1 | PHE | X | 33 | 34.006 | 53.367 | 35.157 | 0.00 | 0.00 |
| ATOM | 503 | HE1 | PHE | X | 33 | 33.890 | 53.379 | 36.231 | 0.00 | 0.00 |
| ATOM | 504 | CZ  | PHE | X | 33 | 35.227 | 53.061 | 34.534 | 0.00 | 0.00 |
| ATOM | 505 | HZ  | PHE | X | 33 | 36.118 | 52.775 | 35.072 | 0.00 | 0.00 |
| ATOM | 506 | CE2 | PHE | X | 33 | 35.445 | 52.955 | 33.188 | 0.00 | 0.00 |
| ATOM | 507 | HE2 | PHE | X | 33 | 36.361 | 52.588 | 32.749 | 0.00 | 0.00 |
| ATOM | 508 | CD2 | PHE | X | 33 | 34.336 | 53.254 | 32.410 | 0.00 | 0.00 |
| ATOM | 509 | HD2 | PHE | X | 33 | 34.427 | 53.298 | 31.334 | 0.00 | 0.00 |
| ATOM | 510 | C   | PHE | X | 33 | 31.594 | 56.261 | 32.438 | 0.00 | 0.00 |
| ATOM | 511 | O   | PHE | X | 33 | 30.508 | 56.406 | 32.949 | 0.00 | 0.00 |
| ATOM | 512 | N   | ALA | X | 34 | 32.691 | 56.911 | 32.785 | 0.00 | 0.00 |
| ATOM | 513 | H   | ALA | X | 34 | 33.461 | 56.911 | 32.132 | 0.00 | 0.00 |
| ATOM | 514 | CA  | ALA | X | 34 | 32.705 | 57.956 | 33.867 | 0.00 | 0.00 |
| ATOM | 515 | HA  | ALA | X | 34 | 31.732 | 58.126 | 34.327 | 0.00 | 0.00 |
| ATOM | 516 | CB  | ALA | X | 34 | 33.564 | 57.280 | 34.996 | 0.00 | 0.00 |
| ATOM | 517 | HB1 | ALA | X | 34 | 32.997 | 56.504 | 35.511 | 0.00 | 0.00 |
| ATOM | 518 | HB2 | ALA | X | 34 | 33.826 | 58.081 | 35.686 | 0.00 | 0.00 |
| ATOM | 519 | HB3 | ALA | X | 34 | 34.513 | 56.924 | 34.595 | 0.00 | 0.00 |
| ATOM | 520 | C   | ALA | X | 34 | 33.309 | 59.319 | 33.431 | 0.00 | 0.00 |
| ATOM | 521 | O   | ALA | X | 34 | 34.158 | 59.264 | 32.542 | 0.00 | 0.00 |
| ATOM | 522 | N   | GLU | X | 35 | 32.961 | 60.355 | 34.170 | 0.00 | 0.00 |
| ATOM | 523 | H   | GLU | X | 35 | 32.222 | 60.081 | 34.803 | 0.00 | 0.00 |
| ATOM | 524 | CA  | GLU | X | 35 | 33.485 | 61.729 | 34.172 | 0.00 | 0.00 |
| ATOM | 525 | HA  | GLU | X | 35 | 33.475 | 62.043 | 33.129 | 0.00 | 0.00 |
| ATOM | 526 | CB  | GLU | X | 35 | 32.528 | 62.607 | 35.035 | 0.00 | 0.00 |
| ATOM | 527 | HB2 | GLU | X | 35 | 32.378 | 62.217 | 36.042 | 0.00 | 0.00 |
| ATOM | 528 | HB3 | GLU | X | 35 | 32.969 | 63.598 | 35.141 | 0.00 | 0.00 |
| ATOM | 529 | CG  | GLU | X | 35 | 31.185 | 62.788 | 34.414 | 0.00 | 0.00 |
| ATOM | 530 | HG2 | GLU | X | 35 | 30.743 | 61.811 | 34.224 | 0.00 | 0.00 |
| ATOM | 531 | HG3 | GLU | X | 35 | 30.554 | 63.279 | 35.154 | 0.00 | 0.00 |
| ATOM | 532 | CD  | GLU | X | 35 | 31.209 | 63.640 | 33.161 | 0.00 | 0.00 |
| ATOM | 533 | OE1 | GLU | X | 35 | 30.952 | 63.169 | 32.039 | 0.00 | 0.00 |
| ATOM | 534 | OE2 | GLU | X | 35 | 31.309 | 64.902 | 33.250 | 0.00 | 0.00 |
| ATOM | 535 | C   | GLU | X | 35 | 34.961 | 61.910 | 34.566 | 0.00 | 0.00 |
| ATOM | 536 | O   | GLU | X | 35 | 35.586 | 61.042 | 35.239 | 0.00 | 0.00 |
| ATOM | 537 | N   | PRO | X | 36 | 35.616 | 63.031 | 34.182 | 0.00 | 0.00 |
| ATOM | 538 | CD  | PRO | X | 36 | 35.066 | 64.206 | 33.419 | 0.00 | 0.00 |
| ATOM | 539 | HD2 | PRO | X | 36 | 34.506 | 64.854 | 34.093 | 0.00 | 0.00 |
| ATOM | 540 | HD3 | PRO | X | 36 | 34.412 | 63.806 | 32.644 | 0.00 | 0.00 |
| ATOM | 541 | CG  | PRO | X | 36 | 36.305 | 64.935 | 32.903 | 0.00 | 0.00 |
| ATOM | 542 | HG2 | PRO | X | 36 | 36.194 | 66.019 | 32.881 | 0.00 | 0.00 |
| ATOM | 543 | HG3 | PRO | X | 36 | 36.659 | 64.542 | 31.949 | 0.00 | 0.00 |
| ATOM | 544 | CB  | PRO | X | 36 | 37.317 | 64.683 | 33.957 | 0.00 | 0.00 |
| ATOM | 545 | HB2 | PRO | X | 36 | 37.165 | 65.465 | 34.701 | 0.00 | 0.00 |
| ATOM | 546 | HB3 | PRO | X | 36 | 38.336 | 64.846 | 33.607 | 0.00 | 0.00 |
| ATOM | 547 | CA  | PRO | X | 36 | 36.981 | 63.275 | 34.495 | 0.00 | 0.00 |
| ATOM | 548 | HA  | PRO | X | 36 | 37.477 | 62.595 | 33.803 | 0.00 | 0.00 |
| ATOM | 549 | C   | PRO | X | 36 | 37.401 | 63.006 | 35.905 | 0.00 | 0.00 |
| ATOM | 550 | O   | PRO | X | 36 | 36.934 | 63.679 | 36.832 | 0.00 | 0.00 |
| ATOM | 551 | N   | PRO | X | 37 | 38.356 | 62.042 | 36.122 | 0.00 | 0.00 |
| ATOM | 552 | CD  | PRO | X | 37 | 38.916 | 61.142 | 35.172 | 0.00 | 0.00 |
| ATOM | 553 | HD2 | PRO | X | 37 | 39.333 | 61.754 | 34.372 | 0.00 | 0.00 |
| ATOM | 554 | HD3 | PRO | X | 37 | 38.188 | 60.500 | 34.676 | 0.00 | 0.00 |

|      |     |      |     |   |    |        |        |        |      |      |
|------|-----|------|-----|---|----|--------|--------|--------|------|------|
| ATOM | 555 | CG   | PRO | X | 37 | 39.897 | 60.213 | 35.898 | 0.00 | 0.00 |
| ATOM | 556 | HG2  | PRO | X | 37 | 40.897 | 60.643 | 35.849 | 0.00 | 0.00 |
| ATOM | 557 | HG3  | PRO | X | 37 | 39.903 | 59.208 | 35.476 | 0.00 | 0.00 |
| ATOM | 558 | CB   | PRO | X | 37 | 39.442 | 60.240 | 37.353 | 0.00 | 0.00 |
| ATOM | 559 | HB2  | PRO | X | 37 | 40.319 | 60.211 | 37.999 | 0.00 | 0.00 |
| ATOM | 560 | HB3  | PRO | X | 37 | 38.683 | 59.467 | 37.472 | 0.00 | 0.00 |
| ATOM | 561 | CA   | PRO | X | 37 | 38.823 | 61.664 | 37.440 | 0.00 | 0.00 |
| ATOM | 562 | HA   | PRO | X | 37 | 38.023 | 61.653 | 38.180 | 0.00 | 0.00 |
| ATOM | 563 | C    | PRO | X | 37 | 39.952 | 62.521 | 37.890 | 0.00 | 0.00 |
| ATOM | 564 | O    | PRO | X | 37 | 40.175 | 62.604 | 39.101 | 0.00 | 0.00 |
| ATOM | 565 | N    | MET | X | 38 | 40.643 | 63.187 | 36.938 | 0.00 | 0.00 |
| ATOM | 566 | H    | MET | X | 38 | 40.353 | 63.021 | 35.985 | 0.00 | 0.00 |
| ATOM | 567 | CA   | MET | X | 38 | 41.630 | 64.292 | 37.151 | 0.00 | 0.00 |
| ATOM | 568 | HA   | MET | X | 38 | 42.528 | 63.822 | 37.553 | 0.00 | 0.00 |
| ATOM | 569 | CB   | MET | X | 38 | 41.948 | 64.922 | 35.735 | 0.00 | 0.00 |
| ATOM | 570 | HB2  | MET | X | 38 | 42.902 | 65.448 | 35.725 | 0.00 | 0.00 |
| ATOM | 571 | HB3  | MET | X | 38 | 42.132 | 64.104 | 35.038 | 0.00 | 0.00 |
| ATOM | 572 | CG   | MET | X | 38 | 40.771 | 65.892 | 35.289 | 0.00 | 0.00 |
| ATOM | 573 | HG2  | MET | X | 38 | 40.756 | 65.851 | 34.200 | 0.00 | 0.00 |
| ATOM | 574 | HG3  | MET | X | 38 | 39.883 | 65.415 | 35.706 | 0.00 | 0.00 |
| ATOM | 575 | SD   | MET | X | 38 | 40.785 | 67.660 | 35.643 | 0.00 | 0.00 |
| ATOM | 576 | CE   | MET | X | 38 | 39.089 | 68.092 | 35.161 | 0.00 | 0.00 |
| ATOM | 577 | HE1  | MET | X | 38 | 38.358 | 67.849 | 35.932 | 0.00 | 0.00 |
| ATOM | 578 | HE2  | MET | X | 38 | 39.012 | 69.126 | 34.824 | 0.00 | 0.00 |
| ATOM | 579 | HE3  | MET | X | 38 | 38.830 | 67.525 | 34.267 | 0.00 | 0.00 |
| ATOM | 580 | C    | MET | X | 38 | 41.236 | 65.361 | 38.161 | 0.00 | 0.00 |
| ATOM | 581 | O    | MET | X | 38 | 40.082 | 65.580 | 38.539 | 0.00 | 0.00 |
| ATOM | 582 | N    | GLY | X | 39 | 42.326 | 66.077 | 38.498 | 0.00 | 0.00 |
| ATOM | 583 | H    | GLY | X | 39 | 43.235 | 65.730 | 38.226 | 0.00 | 0.00 |
| ATOM | 584 | CA   | GLY | X | 39 | 42.443 | 67.398 | 39.089 | 0.00 | 0.00 |
| ATOM | 585 | HA2  | GLY | X | 39 | 43.449 | 67.743 | 39.327 | 0.00 | 0.00 |
| ATOM | 586 | HA3  | GLY | X | 39 | 42.133 | 68.088 | 38.305 | 0.00 | 0.00 |
| ATOM | 587 | C    | GLY | X | 39 | 41.437 | 67.519 | 40.264 | 0.00 | 0.00 |
| ATOM | 588 | O    | GLY | X | 39 | 41.637 | 66.889 | 41.304 | 0.00 | 0.00 |
| ATOM | 589 | N    | PRO | X | 40 | 40.375 | 68.294 | 40.098 | 0.00 | 0.00 |
| ATOM | 590 | CD   | PRO | X | 40 | 39.882 | 68.955 | 38.965 | 0.00 | 0.00 |
| ATOM | 591 | HD2  | PRO | X | 40 | 39.344 | 68.222 | 38.363 | 0.00 | 0.00 |
| ATOM | 592 | HD3  | PRO | X | 40 | 40.639 | 69.440 | 38.349 | 0.00 | 0.00 |
| ATOM | 593 | CG   | PRO | X | 40 | 38.824 | 69.939 | 39.491 | 0.00 | 0.00 |
| ATOM | 594 | HG2  | PRO | X | 40 | 38.071 | 70.068 | 38.713 | 0.00 | 0.00 |
| ATOM | 595 | HG3  | PRO | X | 40 | 39.327 | 70.888 | 39.676 | 0.00 | 0.00 |
| ATOM | 596 | CB   | PRO | X | 40 | 38.305 | 69.324 | 40.805 | 0.00 | 0.00 |
| ATOM | 597 | HB2  | PRO | X | 40 | 37.381 | 68.790 | 40.583 | 0.00 | 0.00 |
| ATOM | 598 | HB3  | PRO | X | 40 | 38.156 | 70.216 | 41.413 | 0.00 | 0.00 |
| ATOM | 599 | CA   | PRO | X | 40 | 39.451 | 68.488 | 41.287 | 0.00 | 0.00 |
| ATOM | 600 | HA   | PRO | X | 40 | 40.006 | 69.053 | 42.036 | 0.00 | 0.00 |
| ATOM | 601 | C    | PRO | X | 40 | 38.788 | 67.213 | 41.867 | 0.00 | 0.00 |
| ATOM | 602 | O    | PRO | X | 40 | 38.600 | 67.140 | 43.098 | 0.00 | 0.00 |
| ATOM | 603 | N    | ARG | X | 41 | 38.572 | 66.153 | 41.021 | 0.00 | 0.00 |
| ATOM | 604 | H    | ARG | X | 41 | 39.111 | 66.190 | 40.167 | 0.00 | 0.00 |
| ATOM | 605 | CA   | ARG | X | 41 | 38.074 | 64.849 | 41.381 | 0.00 | 0.00 |
| ATOM | 606 | HA   | ARG | X | 41 | 37.431 | 64.933 | 42.257 | 0.00 | 0.00 |
| ATOM | 607 | CB   | ARG | X | 41 | 37.116 | 64.347 | 40.316 | 0.00 | 0.00 |
| ATOM | 608 | HB2  | ARG | X | 41 | 36.422 | 65.145 | 40.053 | 0.00 | 0.00 |
| ATOM | 609 | HB3  | ARG | X | 41 | 37.619 | 63.975 | 39.424 | 0.00 | 0.00 |
| ATOM | 610 | CG   | ARG | X | 41 | 36.125 | 63.260 | 40.801 | 0.00 | 0.00 |
| ATOM | 611 | HG2  | ARG | X | 41 | 36.695 | 62.415 | 41.187 | 0.00 | 0.00 |
| ATOM | 612 | HG3  | ARG | X | 41 | 35.601 | 63.663 | 41.667 | 0.00 | 0.00 |
| ATOM | 613 | CD   | ARG | X | 41 | 35.317 | 62.715 | 39.632 | 0.00 | 0.00 |
| ATOM | 614 | HD2  | ARG | X | 41 | 36.008 | 62.495 | 38.818 | 0.00 | 0.00 |
| ATOM | 615 | HD3  | ARG | X | 41 | 34.888 | 61.780 | 39.990 | 0.00 | 0.00 |
| ATOM | 616 | NE   | ARG | X | 41 | 34.244 | 63.607 | 39.238 | 0.00 | 0.00 |
| ATOM | 617 | HE   | ARG | X | 41 | 34.243 | 63.918 | 38.277 | 0.00 | 0.00 |
| ATOM | 618 | CZ   | ARG | X | 41 | 33.220 | 64.044 | 39.974 | 0.00 | 0.00 |
| ATOM | 619 | NH1  | ARG | X | 41 | 32.851 | 63.526 | 41.090 | 0.00 | 0.00 |
| ATOM | 620 | HH11 | ARG | X | 41 | 33.568 | 63.063 | 41.631 | 0.00 | 0.00 |
| ATOM | 621 | HH12 | ARG | X | 41 | 32.077 | 64.035 | 41.493 | 0.00 | 0.00 |

|      |     |      |     |   |    |        |        |        |      |      |
|------|-----|------|-----|---|----|--------|--------|--------|------|------|
| ATOM | 622 | NH2  | ARG | X | 41 | 32.563 | 65.040 | 39.502 | 0.00 | 0.00 |
| ATOM | 623 | HH21 | ARG | X | 41 | 33.020 | 65.541 | 38.753 | 0.00 | 0.00 |
| ATOM | 624 | HH22 | ARG | X | 41 | 31.719 | 65.444 | 39.883 | 0.00 | 0.00 |
| ATOM | 625 | C    | ARG | X | 41 | 39.106 | 63.839 | 41.816 | 0.00 | 0.00 |
| ATOM | 626 | O    | ARG | X | 41 | 38.795 | 62.739 | 42.213 | 0.00 | 0.00 |
| ATOM | 627 | N    | ARG | X | 42 | 40.376 | 64.142 | 41.799 | 0.00 | 0.00 |
| ATOM | 628 | H    | ARG | X | 42 | 40.557 | 65.099 | 41.534 | 0.00 | 0.00 |
| ATOM | 629 | CA   | ARG | X | 42 | 41.519 | 63.311 | 42.197 | 0.00 | 0.00 |
| ATOM | 630 | HA   | ARG | X | 42 | 41.516 | 62.435 | 41.549 | 0.00 | 0.00 |
| ATOM | 631 | CB   | ARG | X | 42 | 42.841 | 64.070 | 41.998 | 0.00 | 0.00 |
| ATOM | 632 | HB2  | ARG | X | 42 | 42.900 | 64.432 | 40.972 | 0.00 | 0.00 |
| ATOM | 633 | HB3  | ARG | X | 42 | 42.960 | 64.919 | 42.671 | 0.00 | 0.00 |
| ATOM | 634 | CG   | ARG | X | 42 | 44.078 | 63.166 | 42.258 | 0.00 | 0.00 |
| ATOM | 635 | HG2  | ARG | X | 42 | 43.990 | 62.572 | 43.168 | 0.00 | 0.00 |
| ATOM | 636 | HG3  | ARG | X | 42 | 44.056 | 62.462 | 41.426 | 0.00 | 0.00 |
| ATOM | 637 | CD   | ARG | X | 42 | 45.428 | 63.920 | 42.294 | 0.00 | 0.00 |
| ATOM | 638 | HD2  | ARG | X | 42 | 45.473 | 64.649 | 43.104 | 0.00 | 0.00 |
| ATOM | 639 | HD3  | ARG | X | 42 | 46.227 | 63.185 | 42.393 | 0.00 | 0.00 |
| ATOM | 640 | NE   | ARG | X | 42 | 45.640 | 64.591 | 40.996 | 0.00 | 0.00 |
| ATOM | 641 | HE   | ARG | X | 42 | 44.932 | 64.503 | 40.281 | 0.00 | 0.00 |
| ATOM | 642 | CZ   | ARG | X | 42 | 46.664 | 65.424 | 40.781 | 0.00 | 0.00 |
| ATOM | 643 | NH1  | ARG | X | 42 | 47.599 | 65.600 | 41.648 | 0.00 | 0.00 |
| ATOM | 644 | HH11 | ARG | X | 42 | 47.411 | 65.384 | 42.617 | 0.00 | 0.00 |
| ATOM | 645 | HH12 | ARG | X | 42 | 48.467 | 66.060 | 41.414 | 0.00 | 0.00 |
| ATOM | 646 | NH2  | ARG | X | 42 | 46.701 | 66.020 | 39.637 | 0.00 | 0.00 |
| ATOM | 647 | HH21 | ARG | X | 42 | 46.049 | 65.654 | 38.958 | 0.00 | 0.00 |
| ATOM | 648 | HH22 | ARG | X | 42 | 47.535 | 66.515 | 39.356 | 0.00 | 0.00 |
| ATOM | 649 | C    | ARG | X | 42 | 41.336 | 62.969 | 43.728 | 0.00 | 0.00 |
| ATOM | 650 | O    | ARG | X | 42 | 41.215 | 63.935 | 44.515 | 0.00 | 0.00 |
| ATOM | 651 | N    | PHE | X | 43 | 41.267 | 61.720 | 44.070 | 0.00 | 0.00 |
| ATOM | 652 | H    | PHE | X | 43 | 41.435 | 61.045 | 43.337 | 0.00 | 0.00 |
| ATOM | 653 | CA   | PHE | X | 43 | 40.946 | 61.222 | 45.466 | 0.00 | 0.00 |
| ATOM | 654 | HA   | PHE | X | 43 | 41.276 | 60.185 | 45.419 | 0.00 | 0.00 |
| ATOM | 655 | CB   | PHE | X | 43 | 41.819 | 61.942 | 46.537 | 0.00 | 0.00 |
| ATOM | 656 | HB2  | PHE | X | 43 | 41.272 | 62.849 | 46.799 | 0.00 | 0.00 |
| ATOM | 657 | HB3  | PHE | X | 43 | 41.890 | 61.324 | 47.432 | 0.00 | 0.00 |
| ATOM | 658 | CG   | PHE | X | 43 | 43.316 | 62.397 | 46.269 | 0.00 | 0.00 |
| ATOM | 659 | CD1  | PHE | X | 43 | 44.302 | 61.485 | 45.870 | 0.00 | 0.00 |
| ATOM | 660 | HD1  | PHE | X | 43 | 43.945 | 60.495 | 45.626 | 0.00 | 0.00 |
| ATOM | 661 | CE1  | PHE | X | 43 | 45.618 | 61.905 | 45.589 | 0.00 | 0.00 |
| ATOM | 662 | HE1  | PHE | X | 43 | 46.418 | 61.258 | 45.262 | 0.00 | 0.00 |
| ATOM | 663 | CZ   | PHE | X | 43 | 45.932 | 63.273 | 45.798 | 0.00 | 0.00 |
| ATOM | 664 | HZ   | PHE | X | 43 | 46.935 | 63.580 | 45.542 | 0.00 | 0.00 |
| ATOM | 665 | CE2  | PHE | X | 43 | 44.961 | 64.188 | 46.195 | 0.00 | 0.00 |
| ATOM | 666 | HE2  | PHE | X | 43 | 45.174 | 65.215 | 46.453 | 0.00 | 0.00 |
| ATOM | 667 | CD2  | PHE | X | 43 | 43.670 | 63.772 | 46.378 | 0.00 | 0.00 |
| ATOM | 668 | HD2  | PHE | X | 43 | 42.965 | 64.476 | 46.796 | 0.00 | 0.00 |
| ATOM | 669 | C    | PHE | X | 43 | 39.499 | 61.051 | 45.865 | 0.00 | 0.00 |
| ATOM | 670 | O    | PHE | X | 43 | 39.135 | 60.688 | 46.969 | 0.00 | 0.00 |
| ATOM | 671 | N    | LEU | X | 44 | 38.576 | 61.419 | 44.963 | 0.00 | 0.00 |
| ATOM | 672 | H    | LEU | X | 44 | 38.957 | 61.720 | 44.077 | 0.00 | 0.00 |
| ATOM | 673 | CA   | LEU | X | 44 | 37.105 | 61.692 | 45.091 | 0.00 | 0.00 |
| ATOM | 674 | HA   | LEU | X | 44 | 36.819 | 61.387 | 46.098 | 0.00 | 0.00 |
| ATOM | 675 | CB   | LEU | X | 44 | 36.873 | 63.174 | 44.912 | 0.00 | 0.00 |
| ATOM | 676 | HB2  | LEU | X | 44 | 37.715 | 63.504 | 44.303 | 0.00 | 0.00 |
| ATOM | 677 | HB3  | LEU | X | 44 | 35.919 | 63.336 | 44.412 | 0.00 | 0.00 |
| ATOM | 678 | CG   | LEU | X | 44 | 36.906 | 64.038 | 46.173 | 0.00 | 0.00 |
| ATOM | 679 | HG   | LEU | X | 44 | 37.838 | 63.783 | 46.678 | 0.00 | 0.00 |
| ATOM | 680 | CD1  | LEU | X | 44 | 36.921 | 65.481 | 45.795 | 0.00 | 0.00 |
| ATOM | 681 | HD11 | LEU | X | 44 | 37.164 | 66.080 | 46.673 | 0.00 | 0.00 |
| ATOM | 682 | HD12 | LEU | X | 44 | 35.914 | 65.630 | 45.405 | 0.00 | 0.00 |
| ATOM | 683 | HD13 | LEU | X | 44 | 37.656 | 65.591 | 44.997 | 0.00 | 0.00 |
| ATOM | 684 | CD2  | LEU | X | 44 | 35.718 | 63.803 | 47.133 | 0.00 | 0.00 |
| ATOM | 685 | HD21 | LEU | X | 44 | 35.852 | 64.345 | 48.069 | 0.00 | 0.00 |
| ATOM | 686 | HD22 | LEU | X | 44 | 34.770 | 64.007 | 46.636 | 0.00 | 0.00 |
| ATOM | 687 | HD23 | LEU | X | 44 | 35.733 | 62.734 | 47.347 | 0.00 | 0.00 |
| ATOM | 688 | C    | LEU | X | 44 | 36.334 | 60.890 | 44.106 | 0.00 | 0.00 |

|      |     |     |     |   |    |        |        |        |      |      |
|------|-----|-----|-----|---|----|--------|--------|--------|------|------|
| ATOM | 689 | O   | LEU | X | 44 | 36.827 | 60.445 | 43.088 | 0.00 | 0.00 |
| ATOM | 690 | N   | PRO | X | 45 | 35.125 | 60.478 | 44.446 | 0.00 | 0.00 |
| ATOM | 691 | CD  | PRO | X | 45 | 34.280 | 60.796 | 45.593 | 0.00 | 0.00 |
| ATOM | 692 | HD2 | PRO | X | 45 | 34.451 | 61.852 | 45.800 | 0.00 | 0.00 |
| ATOM | 693 | HD3 | PRO | X | 45 | 34.580 | 60.183 | 46.443 | 0.00 | 0.00 |
| ATOM | 694 | CG  | PRO | X | 45 | 32.891 | 60.427 | 45.243 | 0.00 | 0.00 |
| ATOM | 695 | HG2 | PRO | X | 45 | 32.536 | 61.215 | 44.579 | 0.00 | 0.00 |
| ATOM | 696 | HG3 | PRO | X | 45 | 32.233 | 60.279 | 46.099 | 0.00 | 0.00 |
| ATOM | 697 | CB  | PRO | X | 45 | 33.062 | 59.187 | 44.474 | 0.00 | 0.00 |
| ATOM | 698 | HB2 | PRO | X | 45 | 32.173 | 59.001 | 43.872 | 0.00 | 0.00 |
| ATOM | 699 | HB3 | PRO | X | 45 | 33.291 | 58.377 | 45.167 | 0.00 | 0.00 |
| ATOM | 700 | CA  | PRO | X | 45 | 34.354 | 59.448 | 43.658 | 0.00 | 0.00 |
| ATOM | 701 | HA  | PRO | X | 45 | 34.938 | 58.530 | 43.733 | 0.00 | 0.00 |
| ATOM | 702 | C   | PRO | X | 45 | 33.952 | 59.751 | 42.209 | 0.00 | 0.00 |
| ATOM | 703 | O   | PRO | X | 45 | 33.985 | 60.955 | 41.997 | 0.00 | 0.00 |
| ATOM | 704 | N   | PRO | X | 46 | 33.583 | 58.751 | 41.356 | 0.00 | 0.00 |
| ATOM | 705 | CD  | PRO | X | 46 | 33.662 | 57.372 | 41.580 | 0.00 | 0.00 |
| ATOM | 706 | HD2 | PRO | X | 46 | 33.131 | 56.995 | 42.455 | 0.00 | 0.00 |
| ATOM | 707 | HD3 | PRO | X | 46 | 34.705 | 57.077 | 41.691 | 0.00 | 0.00 |
| ATOM | 708 | CG  | PRO | X | 46 | 33.086 | 56.698 | 40.333 | 0.00 | 0.00 |
| ATOM | 709 | HG2 | PRO | X | 46 | 32.004 | 56.757 | 40.216 | 0.00 | 0.00 |
| ATOM | 710 | HG3 | PRO | X | 46 | 33.479 | 55.685 | 40.252 | 0.00 | 0.00 |
| ATOM | 711 | CB  | PRO | X | 46 | 33.556 | 57.645 | 39.239 | 0.00 | 0.00 |
| ATOM | 712 | HB2 | PRO | X | 46 | 32.987 | 57.634 | 38.309 | 0.00 | 0.00 |
| ATOM | 713 | HB3 | PRO | X | 46 | 34.624 | 57.533 | 39.051 | 0.00 | 0.00 |
| ATOM | 714 | CA  | PRO | X | 46 | 33.323 | 59.010 | 39.950 | 0.00 | 0.00 |
| ATOM | 715 | HA  | PRO | X | 46 | 34.065 | 59.681 | 39.517 | 0.00 | 0.00 |
| ATOM | 716 | C   | PRO | X | 46 | 31.941 | 59.534 | 39.820 | 0.00 | 0.00 |
| ATOM | 717 | O   | PRO | X | 46 | 31.064 | 59.169 | 40.676 | 0.00 | 0.00 |
| ATOM | 718 | N   | GLU | X | 47 | 31.667 | 60.266 | 38.741 | 0.00 | 0.00 |
| ATOM | 719 | H   | GLU | X | 47 | 32.444 | 60.501 | 38.140 | 0.00 | 0.00 |
| ATOM | 720 | CA  | GLU | X | 47 | 30.346 | 60.647 | 38.244 | 0.00 | 0.00 |
| ATOM | 721 | HA  | GLU | X | 47 | 29.576 | 60.146 | 38.832 | 0.00 | 0.00 |
| ATOM | 722 | CB  | GLU | X | 47 | 30.192 | 62.218 | 38.309 | 0.00 | 0.00 |
| ATOM | 723 | HB2 | GLU | X | 47 | 31.196 | 62.643 | 38.317 | 0.00 | 0.00 |
| ATOM | 724 | HB3 | GLU | X | 47 | 29.755 | 62.515 | 37.356 | 0.00 | 0.00 |
| ATOM | 725 | CG  | GLU | X | 47 | 29.396 | 62.635 | 39.623 | 0.00 | 0.00 |
| ATOM | 726 | HG2 | GLU | X | 47 | 28.340 | 62.365 | 39.592 | 0.00 | 0.00 |
| ATOM | 727 | HG3 | GLU | X | 47 | 29.827 | 62.093 | 40.465 | 0.00 | 0.00 |
| ATOM | 728 | CD  | GLU | X | 47 | 29.369 | 64.163 | 39.825 | 0.00 | 0.00 |
| ATOM | 729 | OE1 | GLU | X | 47 | 29.919 | 64.640 | 40.880 | 0.00 | 0.00 |
| ATOM | 730 | OE2 | GLU | X | 47 | 28.754 | 64.896 | 39.020 | 0.00 | 0.00 |
| ATOM | 731 | C   | GLU | X | 47 | 30.029 | 60.040 | 36.879 | 0.00 | 0.00 |
| ATOM | 732 | O   | GLU | X | 47 | 30.969 | 59.631 | 36.162 | 0.00 | 0.00 |
| ATOM | 733 | N   | PRO | X | 48 | 28.774 | 59.781 | 36.487 | 0.00 | 0.00 |
| ATOM | 734 | CD  | PRO | X | 48 | 27.562 | 60.075 | 37.283 | 0.00 | 0.00 |
| ATOM | 735 | HD2 | PRO | X | 48 | 27.641 | 61.117 | 37.590 | 0.00 | 0.00 |
| ATOM | 736 | HD3 | PRO | X | 48 | 27.439 | 59.382 | 38.115 | 0.00 | 0.00 |
| ATOM | 737 | CG  | PRO | X | 48 | 26.444 | 59.875 | 36.307 | 0.00 | 0.00 |
| ATOM | 738 | HG2 | PRO | X | 48 | 26.249 | 60.738 | 35.669 | 0.00 | 0.00 |
| ATOM | 739 | HG3 | PRO | X | 48 | 25.454 | 59.618 | 36.685 | 0.00 | 0.00 |
| ATOM | 740 | CB  | PRO | X | 48 | 26.853 | 58.733 | 35.390 | 0.00 | 0.00 |
| ATOM | 741 | HB2 | PRO | X | 48 | 26.204 | 58.708 | 34.515 | 0.00 | 0.00 |
| ATOM | 742 | HB3 | PRO | X | 48 | 26.773 | 57.838 | 36.007 | 0.00 | 0.00 |
| ATOM | 743 | CA  | PRO | X | 48 | 28.324 | 59.162 | 35.237 | 0.00 | 0.00 |
| ATOM | 744 | HA  | PRO | X | 48 | 28.798 | 58.182 | 35.187 | 0.00 | 0.00 |
| ATOM | 745 | C   | PRO | X | 48 | 28.671 | 59.886 | 33.984 | 0.00 | 0.00 |
| ATOM | 746 | O   | PRO | X | 48 | 28.366 | 61.129 | 33.897 | 0.00 | 0.00 |
| ATOM | 747 | N   | LYS | X | 49 | 29.316 | 59.219 | 32.974 | 0.00 | 0.00 |
| ATOM | 748 | H   | LYS | X | 49 | 29.638 | 58.277 | 33.143 | 0.00 | 0.00 |
| ATOM | 749 | CA  | LYS | X | 49 | 29.815 | 59.959 | 31.757 | 0.00 | 0.00 |
| ATOM | 750 | HA  | LYS | X | 49 | 30.594 | 60.664 | 32.046 | 0.00 | 0.00 |
| ATOM | 751 | CB  | LYS | X | 49 | 30.521 | 59.005 | 30.742 | 0.00 | 0.00 |
| ATOM | 752 | HB2 | LYS | X | 49 | 31.310 | 58.475 | 31.276 | 0.00 | 0.00 |
| ATOM | 753 | HB3 | LYS | X | 49 | 29.837 | 58.203 | 30.464 | 0.00 | 0.00 |
| ATOM | 754 | CG  | LYS | X | 49 | 31.084 | 59.548 | 29.472 | 0.00 | 0.00 |
| ATOM | 755 | HG2 | LYS | X | 49 | 31.339 | 58.679 | 28.865 | 0.00 | 0.00 |

|      |     |      |     |   |    |        |        |        |      |      |
|------|-----|------|-----|---|----|--------|--------|--------|------|------|
| ATOM | 756 | HG3  | LYS | X | 49 | 30.313 | 60.010 | 28.856 | 0.00 | 0.00 |
| ATOM | 757 | CD   | LYS | X | 49 | 32.278 | 60.476 | 29.583 | 0.00 | 0.00 |
| ATOM | 758 | HD2  | LYS | X | 49 | 31.837 | 61.324 | 30.107 | 0.00 | 0.00 |
| ATOM | 759 | HD3  | LYS | X | 49 | 33.155 | 60.211 | 30.174 | 0.00 | 0.00 |
| ATOM | 760 | CE   | LYS | X | 49 | 32.566 | 60.891 | 28.096 | 0.00 | 0.00 |
| ATOM | 761 | HE2  | LYS | X | 49 | 32.969 | 60.072 | 27.500 | 0.00 | 0.00 |
| ATOM | 762 | HE3  | LYS | X | 49 | 31.688 | 61.254 | 27.561 | 0.00 | 0.00 |
| ATOM | 763 | NZ   | LYS | X | 49 | 33.494 | 62.051 | 28.164 | 0.00 | 0.00 |
| ATOM | 764 | HZ1  | LYS | X | 49 | 34.485 | 61.852 | 28.173 | 0.00 | 0.00 |
| ATOM | 765 | HZ2  | LYS | X | 49 | 33.374 | 62.553 | 27.296 | 0.00 | 0.00 |
| ATOM | 766 | HZ3  | LYS | X | 49 | 33.344 | 62.700 | 28.923 | 0.00 | 0.00 |
| ATOM | 767 | C    | LYS | X | 49 | 28.671 | 60.587 | 31.010 | 0.00 | 0.00 |
| ATOM | 768 | O    | LYS | X | 49 | 27.692 | 59.896 | 30.819 | 0.00 | 0.00 |
| ATOM | 769 | N    | GLN | X | 50 | 28.823 | 61.821 | 30.619 | 0.00 | 0.00 |
| ATOM | 770 | H    | GLN | X | 50 | 29.467 | 62.480 | 31.033 | 0.00 | 0.00 |
| ATOM | 771 | CA   | GLN | X | 50 | 27.936 | 62.650 | 29.769 | 0.00 | 0.00 |
| ATOM | 772 | HA   | GLN | X | 50 | 26.932 | 62.414 | 30.122 | 0.00 | 0.00 |
| ATOM | 773 | CB   | GLN | X | 50 | 28.197 | 64.193 | 29.981 | 0.00 | 0.00 |
| ATOM | 774 | HB2  | GLN | X | 50 | 27.217 | 64.657 | 29.865 | 0.00 | 0.00 |
| ATOM | 775 | HB3  | GLN | X | 50 | 28.577 | 64.242 | 31.001 | 0.00 | 0.00 |
| ATOM | 776 | CG   | GLN | X | 50 | 29.203 | 64.854 | 29.016 | 0.00 | 0.00 |
| ATOM | 777 | HG2  | GLN | X | 50 | 30.137 | 64.333 | 29.225 | 0.00 | 0.00 |
| ATOM | 778 | HG3  | GLN | X | 50 | 28.843 | 64.682 | 28.002 | 0.00 | 0.00 |
| ATOM | 779 | CD   | GLN | X | 50 | 29.350 | 66.415 | 29.265 | 0.00 | 0.00 |
| ATOM | 780 | OE1  | GLN | X | 50 | 28.812 | 66.967 | 30.221 | 0.00 | 0.00 |
| ATOM | 781 | NE2  | GLN | X | 50 | 30.094 | 67.163 | 28.565 | 0.00 | 0.00 |
| ATOM | 782 | HE21 | GLN | X | 50 | 30.296 | 68.130 | 28.776 | 0.00 | 0.00 |
| ATOM | 783 | HE22 | GLN | X | 50 | 30.652 | 66.736 | 27.839 | 0.00 | 0.00 |
| ATOM | 784 | C    | GLN | X | 50 | 27.733 | 62.125 | 28.299 | 0.00 | 0.00 |
| ATOM | 785 | O    | GLN | X | 50 | 28.652 | 61.520 | 27.851 | 0.00 | 0.00 |
| ATOM | 786 | N    | PRO | X | 51 | 26.563 | 62.228 | 27.619 | 0.00 | 0.00 |
| ATOM | 787 | CD   | PRO | X | 51 | 25.478 | 63.144 | 27.923 | 0.00 | 0.00 |
| ATOM | 788 | HD2  | PRO | X | 51 | 25.809 | 64.125 | 27.582 | 0.00 | 0.00 |
| ATOM | 789 | HD3  | PRO | X | 51 | 25.197 | 63.227 | 28.973 | 0.00 | 0.00 |
| ATOM | 790 | CG   | PRO | X | 51 | 24.325 | 62.794 | 26.969 | 0.00 | 0.00 |
| ATOM | 791 | HG2  | PRO | X | 51 | 23.948 | 63.614 | 26.358 | 0.00 | 0.00 |
| ATOM | 792 | HG3  | PRO | X | 51 | 23.412 | 62.523 | 27.499 | 0.00 | 0.00 |
| ATOM | 793 | CB   | PRO | X | 51 | 24.844 | 61.605 | 26.137 | 0.00 | 0.00 |
| ATOM | 794 | HB2  | PRO | X | 51 | 24.615 | 61.738 | 25.079 | 0.00 | 0.00 |
| ATOM | 795 | HB3  | PRO | X | 51 | 24.469 | 60.654 | 26.515 | 0.00 | 0.00 |
| ATOM | 796 | CA   | PRO | X | 51 | 26.375 | 61.545 | 26.399 | 0.00 | 0.00 |
| ATOM | 797 | HA   | PRO | X | 51 | 26.670 | 60.508 | 26.564 | 0.00 | 0.00 |
| ATOM | 798 | C    | PRO | X | 51 | 27.277 | 62.108 | 25.343 | 0.00 | 0.00 |
| ATOM | 799 | O    | PRO | X | 51 | 27.659 | 63.312 | 25.428 | 0.00 | 0.00 |
| ATOM | 800 | N    | TRP | X | 52 | 27.511 | 61.419 | 24.195 | 0.00 | 0.00 |
| ATOM | 801 | H    | TRP | X | 52 | 27.084 | 60.508 | 24.111 | 0.00 | 0.00 |
| ATOM | 802 | CA   | TRP | X | 52 | 28.321 | 61.827 | 23.063 | 0.00 | 0.00 |
| ATOM | 803 | HA   | TRP | X | 52 | 28.557 | 62.887 | 23.160 | 0.00 | 0.00 |
| ATOM | 804 | CB   | TRP | X | 52 | 29.623 | 61.050 | 22.971 | 0.00 | 0.00 |
| ATOM | 805 | HB2  | TRP | X | 52 | 30.209 | 61.322 | 22.093 | 0.00 | 0.00 |
| ATOM | 806 | HB3  | TRP | X | 52 | 30.261 | 61.328 | 23.810 | 0.00 | 0.00 |
| ATOM | 807 | CG   | TRP | X | 52 | 29.485 | 59.565 | 22.896 | 0.00 | 0.00 |
| ATOM | 808 | CD1  | TRP | X | 52 | 29.444 | 58.742 | 21.820 | 0.00 | 0.00 |
| ATOM | 809 | HD1  | TRP | X | 52 | 29.512 | 59.087 | 20.799 | 0.00 | 0.00 |
| ATOM | 810 | NE1  | TRP | X | 52 | 29.362 | 57.376 | 22.120 | 0.00 | 0.00 |
| ATOM | 811 | HE1  | TRP | X | 52 | 29.444 | 56.623 | 21.451 | 0.00 | 0.00 |
| ATOM | 812 | CE2  | TRP | X | 52 | 29.221 | 57.314 | 23.440 | 0.00 | 0.00 |
| ATOM | 813 | CZ2  | TRP | X | 52 | 29.041 | 56.177 | 24.263 | 0.00 | 0.00 |
| ATOM | 814 | HZ2  | TRP | X | 52 | 29.055 | 55.194 | 23.814 | 0.00 | 0.00 |
| ATOM | 815 | CH2  | TRP | X | 52 | 29.030 | 56.312 | 25.619 | 0.00 | 0.00 |
| ATOM | 816 | HH2  | TRP | X | 52 | 28.910 | 55.426 | 26.225 | 0.00 | 0.00 |
| ATOM | 817 | CZ3  | TRP | X | 52 | 28.933 | 57.618 | 26.152 | 0.00 | 0.00 |
| ATOM | 818 | HZ3  | TRP | X | 52 | 28.746 | 57.754 | 27.207 | 0.00 | 0.00 |
| ATOM | 819 | CE3  | TRP | X | 52 | 29.091 | 58.717 | 25.348 | 0.00 | 0.00 |
| ATOM | 820 | HE3  | TRP | X | 52 | 29.156 | 59.722 | 25.740 | 0.00 | 0.00 |
| ATOM | 821 | CD2  | TRP | X | 52 | 29.257 | 58.620 | 23.960 | 0.00 | 0.00 |
| ATOM | 822 | C    | TRP | X | 52 | 27.448 | 61.782 | 21.792 | 0.00 | 0.00 |

|      |     |      |     |   |    |        |        |        |      |      |
|------|-----|------|-----|---|----|--------|--------|--------|------|------|
| ATOM | 823 | O    | TRP | X | 52 | 26.885 | 60.764 | 21.427 | 0.00 | 0.00 |
| ATOM | 824 | N    | SER | X | 53 | 27.428 | 62.811 | 20.919 | 0.00 | 0.00 |
| ATOM | 825 | H    | SER | X | 53 | 28.108 | 63.537 | 21.096 | 0.00 | 0.00 |
| ATOM | 826 | CA   | SER | X | 53 | 26.695 | 63.098 | 19.679 | 0.00 | 0.00 |
| ATOM | 827 | HA   | SER | X | 53 | 25.614 | 63.022 | 19.797 | 0.00 | 0.00 |
| ATOM | 828 | CB   | SER | X | 53 | 26.980 | 64.584 | 19.391 | 0.00 | 0.00 |
| ATOM | 829 | HB2  | SER | X | 53 | 27.984 | 64.897 | 19.105 | 0.00 | 0.00 |
| ATOM | 830 | HB3  | SER | X | 53 | 26.269 | 64.953 | 18.651 | 0.00 | 0.00 |
| ATOM | 831 | OG   | SER | X | 53 | 26.740 | 65.346 | 20.575 | 0.00 | 0.00 |
| ATOM | 832 | HG   | SER | X | 53 | 26.288 | 64.801 | 21.223 | 0.00 | 0.00 |
| ATOM | 833 | C    | SER | X | 53 | 27.089 | 62.163 | 18.555 | 0.00 | 0.00 |
| ATOM | 834 | O    | SER | X | 53 | 28.271 | 62.116 | 18.077 | 0.00 | 0.00 |
| ATOM | 835 | N    | GLY | X | 54 | 26.116 | 61.372 | 18.040 | 0.00 | 0.00 |
| ATOM | 836 | H    | GLY | X | 54 | 25.142 | 61.541 | 18.243 | 0.00 | 0.00 |
| ATOM | 837 | CA   | GLY | X | 54 | 26.518 | 60.314 | 17.110 | 0.00 | 0.00 |
| ATOM | 838 | HA2  | GLY | X | 54 | 25.688 | 59.679 | 16.803 | 0.00 | 0.00 |
| ATOM | 839 | HA3  | GLY | X | 54 | 26.955 | 60.753 | 16.214 | 0.00 | 0.00 |
| ATOM | 840 | C    | GLY | X | 54 | 27.434 | 59.306 | 17.692 | 0.00 | 0.00 |
| ATOM | 841 | O    | GLY | X | 54 | 27.153 | 58.694 | 18.717 | 0.00 | 0.00 |
| ATOM | 842 | N    | VAL | X | 55 | 28.542 | 59.058 | 17.051 | 0.00 | 0.00 |
| ATOM | 843 | H    | VAL | X | 55 | 28.847 | 59.711 | 16.344 | 0.00 | 0.00 |
| ATOM | 844 | CA   | VAL | X | 55 | 29.525 | 57.969 | 17.360 | 0.00 | 0.00 |
| ATOM | 845 | HA   | VAL | X | 55 | 28.926 | 57.336 | 18.014 | 0.00 | 0.00 |
| ATOM | 846 | CB   | VAL | X | 55 | 29.877 | 57.278 | 16.034 | 0.00 | 0.00 |
| ATOM | 847 | HB   | VAL | X | 55 | 30.654 | 57.893 | 15.580 | 0.00 | 0.00 |
| ATOM | 848 | CG1  | VAL | X | 55 | 30.440 | 55.880 | 16.299 | 0.00 | 0.00 |
| ATOM | 849 | HG11 | VAL | X | 55 | 31.369 | 55.996 | 16.856 | 0.00 | 0.00 |
| ATOM | 850 | HG12 | VAL | X | 55 | 29.814 | 55.269 | 16.950 | 0.00 | 0.00 |
| ATOM | 851 | HG13 | VAL | X | 55 | 30.591 | 55.315 | 15.379 | 0.00 | 0.00 |
| ATOM | 852 | CG2  | VAL | X | 55 | 28.732 | 57.148 | 15.011 | 0.00 | 0.00 |
| ATOM | 853 | HG21 | VAL | X | 55 | 28.285 | 58.136 | 14.900 | 0.00 | 0.00 |
| ATOM | 854 | HG22 | VAL | X | 55 | 27.916 | 56.470 | 15.262 | 0.00 | 0.00 |
| ATOM | 855 | HG23 | VAL | X | 55 | 29.085 | 56.751 | 14.059 | 0.00 | 0.00 |
| ATOM | 856 | C    | VAL | X | 55 | 30.856 | 58.479 | 17.964 | 0.00 | 0.00 |
| ATOM | 857 | O    | VAL | X | 55 | 31.365 | 59.490 | 17.477 | 0.00 | 0.00 |
| ATOM | 858 | N    | VAL | X | 56 | 31.489 | 57.654 | 18.780 | 0.00 | 0.00 |
| ATOM | 859 | H    | VAL | X | 56 | 30.944 | 56.828 | 18.982 | 0.00 | 0.00 |
| ATOM | 860 | CA   | VAL | X | 56 | 32.884 | 57.712 | 19.145 | 0.00 | 0.00 |
| ATOM | 861 | HA   | VAL | X | 56 | 33.444 | 58.371 | 18.482 | 0.00 | 0.00 |
| ATOM | 862 | CB   | VAL | X | 56 | 33.015 | 58.102 | 20.632 | 0.00 | 0.00 |
| ATOM | 863 | HB   | VAL | X | 56 | 32.256 | 57.574 | 21.210 | 0.00 | 0.00 |
| ATOM | 864 | CG1  | VAL | X | 56 | 34.361 | 57.707 | 21.277 | 0.00 | 0.00 |
| ATOM | 865 | HG11 | VAL | X | 56 | 34.481 | 56.624 | 21.291 | 0.00 | 0.00 |
| ATOM | 866 | HG12 | VAL | X | 56 | 35.198 | 58.238 | 20.823 | 0.00 | 0.00 |
| ATOM | 867 | HG13 | VAL | X | 56 | 34.378 | 57.991 | 22.329 | 0.00 | 0.00 |
| ATOM | 868 | CG2  | VAL | X | 56 | 32.782 | 59.613 | 20.895 | 0.00 | 0.00 |
| ATOM | 869 | HG21 | VAL | X | 56 | 33.512 | 60.276 | 20.430 | 0.00 | 0.00 |
| ATOM | 870 | HG22 | VAL | X | 56 | 32.884 | 59.785 | 21.966 | 0.00 | 0.00 |
| ATOM | 871 | HG23 | VAL | X | 56 | 31.786 | 59.992 | 20.671 | 0.00 | 0.00 |
| ATOM | 872 | C    | VAL | X | 56 | 33.485 | 56.327 | 18.788 | 0.00 | 0.00 |
| ATOM | 873 | O    | VAL | X | 56 | 32.806 | 55.291 | 18.878 | 0.00 | 0.00 |
| ATOM | 874 | N    | ASP | X | 57 | 34.793 | 56.322 | 18.347 | 0.00 | 0.00 |
| ATOM | 875 | H    | ASP | X | 57 | 35.162 | 57.260 | 18.293 | 0.00 | 0.00 |
| ATOM | 876 | CA   | ASP | X | 57 | 35.543 | 55.070 | 18.028 | 0.00 | 0.00 |
| ATOM | 877 | HA   | ASP | X | 57 | 34.862 | 54.400 | 17.504 | 0.00 | 0.00 |
| ATOM | 878 | CB   | ASP | X | 57 | 36.651 | 55.492 | 17.038 | 0.00 | 0.00 |
| ATOM | 879 | HB2  | ASP | X | 57 | 36.093 | 55.912 | 16.201 | 0.00 | 0.00 |
| ATOM | 880 | HB3  | ASP | X | 57 | 37.244 | 56.310 | 17.448 | 0.00 | 0.00 |
| ATOM | 881 | CG   | ASP | X | 57 | 37.650 | 54.408 | 16.608 | 0.00 | 0.00 |
| ATOM | 882 | OD1  | ASP | X | 57 | 37.603 | 54.094 | 15.393 | 0.00 | 0.00 |
| ATOM | 883 | OD2  | ASP | X | 57 | 38.396 | 53.822 | 17.428 | 0.00 | 0.00 |
| ATOM | 884 | C    | ASP | X | 57 | 36.034 | 54.306 | 19.288 | 0.00 | 0.00 |
| ATOM | 885 | O    | ASP | X | 57 | 36.551 | 54.879 | 20.239 | 0.00 | 0.00 |
| ATOM | 886 | N    | ALA | X | 58 | 35.785 | 53.065 | 19.334 | 0.00 | 0.00 |
| ATOM | 887 | H    | ALA | X | 58 | 35.290 | 52.675 | 18.545 | 0.00 | 0.00 |
| ATOM | 888 | CA   | ALA | X | 58 | 36.216 | 52.176 | 20.447 | 0.00 | 0.00 |
| ATOM | 889 | HA   | ALA | X | 58 | 36.778 | 52.715 | 21.210 | 0.00 | 0.00 |

|      |     |      |     |   |    |        |        |        |      |      |
|------|-----|------|-----|---|----|--------|--------|--------|------|------|
| ATOM | 890 | CB   | ALA | X | 58 | 34.908 | 51.610 | 21.167 | 0.00 | 0.00 |
| ATOM | 891 | HB1  | ALA | X | 58 | 34.402 | 50.813 | 20.622 | 0.00 | 0.00 |
| ATOM | 892 | HB2  | ALA | X | 58 | 34.155 | 52.395 | 21.227 | 0.00 | 0.00 |
| ATOM | 893 | HB3  | ALA | X | 58 | 35.050 | 51.192 | 22.163 | 0.00 | 0.00 |
| ATOM | 894 | C    | ALA | X | 58 | 37.079 | 50.990 | 19.993 | 0.00 | 0.00 |
| ATOM | 895 | O    | ALA | X | 58 | 36.827 | 49.780 | 20.230 | 0.00 | 0.00 |
| ATOM | 896 | N    | THR | X | 59 | 38.220 | 51.242 | 19.278 | 0.00 | 0.00 |
| ATOM | 897 | H    | THR | X | 59 | 38.431 | 52.219 | 19.132 | 0.00 | 0.00 |
| ATOM | 898 | CA   | THR | X | 59 | 38.956 | 50.226 | 18.467 | 0.00 | 0.00 |
| ATOM | 899 | HA   | THR | X | 59 | 38.452 | 49.260 | 18.487 | 0.00 | 0.00 |
| ATOM | 900 | CB   | THR | X | 59 | 39.140 | 50.665 | 17.033 | 0.00 | 0.00 |
| ATOM | 901 | HB   | THR | X | 59 | 39.714 | 49.932 | 16.465 | 0.00 | 0.00 |
| ATOM | 902 | CG2  | THR | X | 59 | 37.749 | 50.815 | 16.364 | 0.00 | 0.00 |
| ATOM | 903 | HG21 | THR | X | 59 | 37.094 | 51.600 | 16.740 | 0.00 | 0.00 |
| ATOM | 904 | HG22 | THR | X | 59 | 37.101 | 49.939 | 16.348 | 0.00 | 0.00 |
| ATOM | 905 | HG23 | THR | X | 59 | 37.961 | 51.080 | 15.328 | 0.00 | 0.00 |
| ATOM | 906 | OG1  | THR | X | 59 | 39.971 | 51.843 | 17.101 | 0.00 | 0.00 |
| ATOM | 907 | HG1  | THR | X | 59 | 39.381 | 52.597 | 17.171 | 0.00 | 0.00 |
| ATOM | 908 | C    | THR | X | 59 | 40.341 | 49.929 | 19.066 | 0.00 | 0.00 |
| ATOM | 909 | O    | THR | X | 59 | 41.053 | 49.026 | 18.617 | 0.00 | 0.00 |
| ATOM | 910 | N    | THR | X | 60 | 40.840 | 50.635 | 20.093 | 0.00 | 0.00 |
| ATOM | 911 | H    | THR | X | 60 | 40.303 | 51.375 | 20.523 | 0.00 | 0.00 |
| ATOM | 912 | CA   | THR | X | 60 | 42.223 | 50.565 | 20.667 | 0.00 | 0.00 |
| ATOM | 913 | HA   | THR | X | 60 | 42.253 | 49.498 | 20.889 | 0.00 | 0.00 |
| ATOM | 914 | CB   | THR | X | 60 | 43.312 | 50.986 | 19.653 | 0.00 | 0.00 |
| ATOM | 915 | HB   | THR | X | 60 | 43.047 | 50.524 | 18.702 | 0.00 | 0.00 |
| ATOM | 916 | CG2  | THR | X | 60 | 43.286 | 52.493 | 19.433 | 0.00 | 0.00 |
| ATOM | 917 | HG21 | THR | X | 60 | 42.249 | 52.821 | 19.358 | 0.00 | 0.00 |
| ATOM | 918 | HG22 | THR | X | 60 | 43.843 | 52.817 | 18.553 | 0.00 | 0.00 |
| ATOM | 919 | HG23 | THR | X | 60 | 43.786 | 52.902 | 20.310 | 0.00 | 0.00 |
| ATOM | 920 | OG1  | THR | X | 60 | 44.543 | 50.535 | 20.130 | 0.00 | 0.00 |
| ATOM | 921 | HG1  | THR | X | 60 | 45.228 | 50.818 | 19.519 | 0.00 | 0.00 |
| ATOM | 922 | C    | THR | X | 60 | 42.266 | 51.407 | 22.029 | 0.00 | 0.00 |
| ATOM | 923 | O    | THR | X | 60 | 41.505 | 52.370 | 22.121 | 0.00 | 0.00 |
| ATOM | 924 | N    | PHE | X | 61 | 43.082 | 50.965 | 22.987 | 0.00 | 0.00 |
| ATOM | 925 | H    | PHE | X | 61 | 43.594 | 50.126 | 22.754 | 0.00 | 0.00 |
| ATOM | 926 | CA   | PHE | X | 61 | 43.375 | 51.733 | 24.170 | 0.00 | 0.00 |
| ATOM | 927 | HA   | PHE | X | 61 | 42.412 | 51.872 | 24.661 | 0.00 | 0.00 |
| ATOM | 928 | CB   | PHE | X | 61 | 44.185 | 50.757 | 25.069 | 0.00 | 0.00 |
| ATOM | 929 | HB2  | PHE | X | 61 | 45.200 | 50.891 | 24.696 | 0.00 | 0.00 |
| ATOM | 930 | HB3  | PHE | X | 61 | 44.156 | 51.205 | 26.062 | 0.00 | 0.00 |
| ATOM | 931 | CG   | PHE | X | 61 | 43.664 | 49.394 | 25.202 | 0.00 | 0.00 |
| ATOM | 932 | CD1  | PHE | X | 61 | 42.716 | 49.185 | 26.258 | 0.00 | 0.00 |
| ATOM | 933 | HD1  | PHE | X | 61 | 42.291 | 50.004 | 26.819 | 0.00 | 0.00 |
| ATOM | 934 | CE1  | PHE | X | 61 | 42.170 | 47.890 | 26.406 | 0.00 | 0.00 |
| ATOM | 935 | HE1  | PHE | X | 61 | 41.452 | 47.753 | 27.202 | 0.00 | 0.00 |
| ATOM | 936 | CZ   | PHE | X | 61 | 42.727 | 46.823 | 25.661 | 0.00 | 0.00 |
| ATOM | 937 | HZ   | PHE | X | 61 | 42.519 | 45.785 | 25.877 | 0.00 | 0.00 |
| ATOM | 938 | CE2  | PHE | X | 61 | 43.701 | 47.047 | 24.606 | 0.00 | 0.00 |
| ATOM | 939 | HE2  | PHE | X | 61 | 44.094 | 46.128 | 24.196 | 0.00 | 0.00 |
| ATOM | 940 | CD2  | PHE | X | 61 | 44.197 | 48.298 | 24.468 | 0.00 | 0.00 |
| ATOM | 941 | HD2  | PHE | X | 61 | 45.072 | 48.406 | 23.843 | 0.00 | 0.00 |
| ATOM | 942 | C    | PHE | X | 61 | 44.084 | 53.055 | 23.931 | 0.00 | 0.00 |
| ATOM | 943 | O    | PHE | X | 61 | 44.989 | 53.147 | 23.121 | 0.00 | 0.00 |
| ATOM | 944 | N    | GLN | X | 62 | 43.746 | 54.124 | 24.659 | 0.00 | 0.00 |
| ATOM | 945 | H    | GLN | X | 62 | 42.945 | 53.916 | 25.238 | 0.00 | 0.00 |
| ATOM | 946 | CA   | GLN | X | 62 | 44.213 | 55.538 | 24.467 | 0.00 | 0.00 |
| ATOM | 947 | HA   | GLN | X | 62 | 44.730 | 55.682 | 23.518 | 0.00 | 0.00 |
| ATOM | 948 | CB   | GLN | X | 62 | 43.003 | 56.485 | 24.387 | 0.00 | 0.00 |
| ATOM | 949 | HB2  | GLN | X | 62 | 42.426 | 56.376 | 25.305 | 0.00 | 0.00 |
| ATOM | 950 | HB3  | GLN | X | 62 | 43.350 | 57.519 | 24.383 | 0.00 | 0.00 |
| ATOM | 951 | CG   | GLN | X | 62 | 42.217 | 56.230 | 23.103 | 0.00 | 0.00 |
| ATOM | 952 | HG2  | GLN | X | 62 | 42.791 | 56.550 | 22.234 | 0.00 | 0.00 |
| ATOM | 953 | HG3  | GLN | X | 62 | 41.970 | 55.176 | 22.977 | 0.00 | 0.00 |
| ATOM | 954 | CD   | GLN | X | 62 | 40.898 | 56.932 | 23.108 | 0.00 | 0.00 |
| ATOM | 955 | OE1  | GLN | X | 62 | 40.855 | 58.153 | 23.026 | 0.00 | 0.00 |
| ATOM | 956 | NE2  | GLN | X | 62 | 39.764 | 56.210 | 23.286 | 0.00 | 0.00 |

|      |      |      |     |   |    |        |        |        |      |      |
|------|------|------|-----|---|----|--------|--------|--------|------|------|
| ATOM | 957  | HE21 | GLN | X | 62 | 38.820 | 56.569 | 23.302 | 0.00 | 0.00 |
| ATOM | 958  | HE22 | GLN | X | 62 | 39.834 | 55.229 | 23.056 | 0.00 | 0.00 |
| ATOM | 959  | C    | GLN | X | 62 | 45.281 | 55.890 | 25.582 | 0.00 | 0.00 |
| ATOM | 960  | O    | GLN | X | 62 | 46.268 | 56.614 | 25.432 | 0.00 | 0.00 |
| ATOM | 961  | N    | SER | X | 63 | 45.024 | 55.361 | 26.796 | 0.00 | 0.00 |
| ATOM | 962  | H    | SER | X | 63 | 44.429 | 54.547 | 26.851 | 0.00 | 0.00 |
| ATOM | 963  | CA   | SER | X | 63 | 45.731 | 55.697 | 28.046 | 0.00 | 0.00 |
| ATOM | 964  | HA   | SER | X | 63 | 46.789 | 55.748 | 27.788 | 0.00 | 0.00 |
| ATOM | 965  | CB   | SER | X | 63 | 45.382 | 57.094 | 28.505 | 0.00 | 0.00 |
| ATOM | 966  | HB2  | SER | X | 63 | 46.004 | 57.337 | 29.366 | 0.00 | 0.00 |
| ATOM | 967  | HB3  | SER | X | 63 | 45.599 | 57.779 | 27.685 | 0.00 | 0.00 |
| ATOM | 968  | OG   | SER | X | 63 | 44.077 | 57.434 | 28.960 | 0.00 | 0.00 |
| ATOM | 969  | HG   | SER | X | 63 | 43.904 | 58.375 | 29.040 | 0.00 | 0.00 |
| ATOM | 970  | C    | SER | X | 63 | 45.593 | 54.732 | 29.266 | 0.00 | 0.00 |
| ATOM | 971  | O    | SER | X | 63 | 44.640 | 53.868 | 29.171 | 0.00 | 0.00 |
| ATOM | 972  | N    | VAL | X | 64 | 46.510 | 54.721 | 30.215 | 0.00 | 0.00 |
| ATOM | 973  | H    | VAL | X | 64 | 47.223 | 55.433 | 30.151 | 0.00 | 0.00 |
| ATOM | 974  | CA   | VAL | X | 64 | 46.606 | 53.857 | 31.475 | 0.00 | 0.00 |
| ATOM | 975  | HA   | VAL | X | 64 | 45.618 | 53.420 | 31.622 | 0.00 | 0.00 |
| ATOM | 976  | CB   | VAL | X | 64 | 47.590 | 52.612 | 31.406 | 0.00 | 0.00 |
| ATOM | 977  | HB   | VAL | X | 64 | 48.578 | 53.001 | 31.158 | 0.00 | 0.00 |
| ATOM | 978  | CG1  | VAL | X | 64 | 47.723 | 51.845 | 32.736 | 0.00 | 0.00 |
| ATOM | 979  | HG11 | VAL | X | 64 | 48.388 | 51.012 | 32.508 | 0.00 | 0.00 |
| ATOM | 980  | HG12 | VAL | X | 64 | 48.187 | 52.437 | 33.525 | 0.00 | 0.00 |
| ATOM | 981  | HG13 | VAL | X | 64 | 46.736 | 51.450 | 32.976 | 0.00 | 0.00 |
| ATOM | 982  | CG2  | VAL | X | 64 | 47.104 | 51.504 | 30.375 | 0.00 | 0.00 |
| ATOM | 983  | HG21 | VAL | X | 64 | 46.163 | 51.107 | 30.756 | 0.00 | 0.00 |
| ATOM | 984  | HG22 | VAL | X | 64 | 47.695 | 50.608 | 30.185 | 0.00 | 0.00 |
| ATOM | 985  | HG23 | VAL | X | 64 | 46.795 | 51.997 | 29.453 | 0.00 | 0.00 |
| ATOM | 986  | C    | VAL | X | 64 | 46.645 | 54.720 | 32.753 | 0.00 | 0.00 |
| ATOM | 987  | O    | VAL | X | 64 | 47.074 | 55.881 | 32.656 | 0.00 | 0.00 |
| ATOM | 988  | N    | CYX | X | 65 | 46.062 | 54.253 | 33.828 | 0.00 | 0.00 |
| ATOM | 989  | H    | CYX | X | 65 | 45.765 | 53.291 | 33.900 | 0.00 | 0.00 |
| ATOM | 990  | CA   | CYX | X | 65 | 45.912 | 54.969 | 35.077 | 0.00 | 0.00 |
| ATOM | 991  | HA   | CYX | X | 65 | 45.558 | 55.972 | 34.842 | 0.00 | 0.00 |
| ATOM | 992  | CB   | CYX | X | 65 | 44.993 | 54.208 | 35.988 | 0.00 | 0.00 |
| ATOM | 993  | HB2  | CYX | X | 65 | 45.411 | 53.202 | 36.032 | 0.00 | 0.00 |
| ATOM | 994  | HB3  | CYX | X | 65 | 44.968 | 54.715 | 36.952 | 0.00 | 0.00 |
| ATOM | 995  | SG   | CYX | X | 65 | 43.249 | 54.259 | 35.264 | 0.00 | 0.00 |
| ATOM | 996  | C    | CYX | X | 65 | 47.228 | 55.093 | 35.807 | 0.00 | 0.00 |
| ATOM | 997  | O    | CYX | X | 65 | 47.968 | 54.104 | 35.984 | 0.00 | 0.00 |
| ATOM | 998  | N    | TYR | X | 66 | 47.550 | 56.307 | 36.238 | 0.00 | 0.00 |
| ATOM | 999  | H    | TYR | X | 66 | 46.876 | 57.031 | 36.037 | 0.00 | 0.00 |
| ATOM | 1000 | CA   | TYR | X | 66 | 48.811 | 56.619 | 36.891 | 0.00 | 0.00 |
| ATOM | 1001 | HA   | TYR | X | 66 | 49.608 | 56.755 | 36.161 | 0.00 | 0.00 |
| ATOM | 1002 | CB   | TYR | X | 66 | 48.750 | 58.023 | 37.512 | 0.00 | 0.00 |
| ATOM | 1003 | HB2  | TYR | X | 66 | 47.742 | 58.408 | 37.666 | 0.00 | 0.00 |
| ATOM | 1004 | HB3  | TYR | X | 66 | 49.395 | 57.883 | 38.380 | 0.00 | 0.00 |
| ATOM | 1005 | CG   | TYR | X | 66 | 49.446 | 59.090 | 36.773 | 0.00 | 0.00 |
| ATOM | 1006 | CD1  | TYR | X | 66 | 48.814 | 60.197 | 36.143 | 0.00 | 0.00 |
| ATOM | 1007 | HD1  | TYR | X | 66 | 47.756 | 60.380 | 36.265 | 0.00 | 0.00 |
| ATOM | 1008 | CE1  | TYR | X | 66 | 49.520 | 60.955 | 35.202 | 0.00 | 0.00 |
| ATOM | 1009 | HE1  | TYR | X | 66 | 48.990 | 61.707 | 34.636 | 0.00 | 0.00 |
| ATOM | 1010 | CZ   | TYR | X | 66 | 50.877 | 60.757 | 34.999 | 0.00 | 0.00 |
| ATOM | 1011 | OH   | TYR | X | 66 | 51.486 | 61.470 | 34.098 | 0.00 | 0.00 |
| ATOM | 1012 | HH   | TYR | X | 66 | 51.012 | 62.281 | 33.898 | 0.00 | 0.00 |
| ATOM | 1013 | CE2  | TYR | X | 66 | 51.546 | 59.619 | 35.594 | 0.00 | 0.00 |
| ATOM | 1014 | HE2  | TYR | X | 66 | 52.574 | 59.397 | 35.349 | 0.00 | 0.00 |
| ATOM | 1015 | CD2  | TYR | X | 66 | 50.815 | 58.797 | 36.439 | 0.00 | 0.00 |
| ATOM | 1016 | HD2  | TYR | X | 66 | 51.326 | 57.910 | 36.781 | 0.00 | 0.00 |
| ATOM | 1017 | C    | TYR | X | 66 | 49.273 | 55.605 | 37.977 | 0.00 | 0.00 |
| ATOM | 1018 | O    | TYR | X | 66 | 48.434 | 55.268 | 38.813 | 0.00 | 0.00 |
| ATOM | 1019 | N    | GLN | X | 67 | 50.478 | 55.195 | 37.928 | 0.00 | 0.00 |
| ATOM | 1020 | H    | GLN | X | 67 | 51.159 | 55.598 | 37.301 | 0.00 | 0.00 |
| ATOM | 1021 | CA   | GLN | X | 67 | 50.977 | 54.052 | 38.812 | 0.00 | 0.00 |
| ATOM | 1022 | HA   | GLN | X | 67 | 50.535 | 54.226 | 39.793 | 0.00 | 0.00 |
| ATOM | 1023 | CB   | GLN | X | 67 | 50.329 | 52.704 | 38.312 | 0.00 | 0.00 |



|      |      |      |     |   |    |        |        |        |      |      |
|------|------|------|-----|---|----|--------|--------|--------|------|------|
| ATOM | 1024 | HB2  | GLN | X | 67 | 50.540 | 51.865 | 38.976 | 0.00 | 0.00 |
| ATOM | 1025 | HB3  | GLN | X | 67 | 49.240 | 52.716 | 38.270 | 0.00 | 0.00 |
| ATOM | 1026 | CG   | GLN | X | 67 | 50.708 | 52.359 | 36.853 | 0.00 | 0.00 |
| ATOM | 1027 | HG2  | GLN | X | 67 | 50.468 | 53.203 | 36.207 | 0.00 | 0.00 |
| ATOM | 1028 | HG3  | GLN | X | 67 | 51.768 | 52.173 | 36.680 | 0.00 | 0.00 |
| ATOM | 1029 | CD   | GLN | X | 67 | 49.922 | 51.149 | 36.456 | 0.00 | 0.00 |
| ATOM | 1030 | OE1  | GLN | X | 67 | 50.309 | 49.963 | 36.616 | 0.00 | 0.00 |
| ATOM | 1031 | NE2  | GLN | X | 67 | 48.797 | 51.371 | 35.868 | 0.00 | 0.00 |
| ATOM | 1032 | HE21 | GLN | X | 67 | 48.217 | 50.582 | 35.622 | 0.00 | 0.00 |
| ATOM | 1033 | HE22 | GLN | X | 67 | 48.484 | 52.301 | 35.627 | 0.00 | 0.00 |
| ATOM | 1034 | C    | GLN | X | 67 | 52.436 | 53.950 | 38.924 | 0.00 | 0.00 |
| ATOM | 1035 | O    | GLN | X | 67 | 53.184 | 54.775 | 38.307 | 0.00 | 0.00 |
| ATOM | 1036 | N    | TYR | X | 68 | 52.916 | 52.894 | 39.639 | 0.00 | 0.00 |
| ATOM | 1037 | H    | TYR | X | 68 | 52.279 | 52.339 | 40.192 | 0.00 | 0.00 |
| ATOM | 1038 | CA   | TYR | X | 68 | 54.333 | 52.517 | 39.586 | 0.00 | 0.00 |
| ATOM | 1039 | HA   | TYR | X | 68 | 54.942 | 53.415 | 39.475 | 0.00 | 0.00 |
| ATOM | 1040 | CB   | TYR | X | 68 | 54.725 | 51.815 | 40.909 | 0.00 | 0.00 |
| ATOM | 1041 | HB2  | TYR | X | 68 | 54.804 | 52.491 | 41.760 | 0.00 | 0.00 |
| ATOM | 1042 | HB3  | TYR | X | 68 | 54.027 | 51.050 | 41.249 | 0.00 | 0.00 |
| ATOM | 1043 | CG   | TYR | X | 68 | 56.093 | 51.042 | 40.851 | 0.00 | 0.00 |
| ATOM | 1044 | CD1  | TYR | X | 68 | 57.262 | 51.739 | 41.184 | 0.00 | 0.00 |
| ATOM | 1045 | HD1  | TYR | X | 68 | 57.165 | 52.749 | 41.554 | 0.00 | 0.00 |
| ATOM | 1046 | CE1  | TYR | X | 68 | 58.488 | 51.072 | 41.069 | 0.00 | 0.00 |
| ATOM | 1047 | HE1  | TYR | X | 68 | 59.432 | 51.597 | 41.092 | 0.00 | 0.00 |
| ATOM | 1048 | CZ   | TYR | X | 68 | 58.536 | 49.727 | 40.694 | 0.00 | 0.00 |
| ATOM | 1049 | OH   | TYR | X | 68 | 59.732 | 49.076 | 40.567 | 0.00 | 0.00 |
| ATOM | 1050 | HH   | TYR | X | 68 | 60.437 | 49.726 | 40.527 | 0.00 | 0.00 |
| ATOM | 1051 | CE2  | TYR | X | 68 | 57.384 | 49.013 | 40.393 | 0.00 | 0.00 |
| ATOM | 1052 | HE2  | TYR | X | 68 | 57.344 | 47.949 | 40.213 | 0.00 | 0.00 |
| ATOM | 1053 | CD2  | TYR | X | 68 | 56.102 | 49.683 | 40.516 | 0.00 | 0.00 |
| ATOM | 1054 | HD2  | TYR | X | 68 | 55.174 | 49.274 | 40.145 | 0.00 | 0.00 |
| ATOM | 1055 | C    | TYR | X | 68 | 54.586 | 51.637 | 38.333 | 0.00 | 0.00 |
| ATOM | 1056 | O    | TYR | X | 68 | 54.084 | 50.509 | 38.249 | 0.00 | 0.00 |
| ATOM | 1057 | N    | VAL | X | 69 | 55.411 | 52.129 | 37.401 | 0.00 | 0.00 |
| ATOM | 1058 | H    | VAL | X | 69 | 55.854 | 53.021 | 37.569 | 0.00 | 0.00 |
| ATOM | 1059 | CA   | VAL | X | 69 | 56.010 | 51.310 | 36.305 | 0.00 | 0.00 |
| ATOM | 1060 | HA   | VAL | X | 69 | 55.394 | 50.510 | 35.894 | 0.00 | 0.00 |
| ATOM | 1061 | CB   | VAL | X | 69 | 56.351 | 52.150 | 35.034 | 0.00 | 0.00 |
| ATOM | 1062 | HB   | VAL | X | 69 | 56.883 | 51.559 | 34.289 | 0.00 | 0.00 |
| ATOM | 1063 | CG1  | VAL | X | 69 | 55.030 | 52.464 | 34.329 | 0.00 | 0.00 |
| ATOM | 1064 | HG11 | VAL | X | 69 | 54.635 | 51.536 | 33.916 | 0.00 | 0.00 |
| ATOM | 1065 | HG12 | VAL | X | 69 | 54.345 | 53.062 | 34.930 | 0.00 | 0.00 |
| ATOM | 1066 | HG13 | VAL | X | 69 | 55.279 | 53.102 | 33.481 | 0.00 | 0.00 |
| ATOM | 1067 | CG2  | VAL | X | 69 | 57.247 | 53.400 | 35.228 | 0.00 | 0.00 |
| ATOM | 1068 | HG21 | VAL | X | 69 | 56.813 | 54.291 | 35.683 | 0.00 | 0.00 |
| ATOM | 1069 | HG22 | VAL | X | 69 | 57.486 | 53.638 | 34.192 | 0.00 | 0.00 |
| ATOM | 1070 | HG23 | VAL | X | 69 | 58.179 | 53.067 | 35.686 | 0.00 | 0.00 |
| ATOM | 1071 | C    | VAL | X | 69 | 57.197 | 50.527 | 36.877 | 0.00 | 0.00 |
| ATOM | 1072 | O    | VAL | X | 69 | 57.732 | 51.010 | 37.820 | 0.00 | 0.00 |
| ATOM | 1073 | N    | ASP | X | 70 | 57.527 | 49.433 | 36.239 | 0.00 | 0.00 |
| ATOM | 1074 | H    | ASP | X | 70 | 57.029 | 49.146 | 35.408 | 0.00 | 0.00 |
| ATOM | 1075 | CA   | ASP | X | 70 | 58.475 | 48.543 | 36.831 | 0.00 | 0.00 |
| ATOM | 1076 | HA   | ASP | X | 70 | 58.323 | 48.371 | 37.897 | 0.00 | 0.00 |
| ATOM | 1077 | CB   | ASP | X | 70 | 58.249 | 47.237 | 36.059 | 0.00 | 0.00 |
| ATOM | 1078 | HB2  | ASP | X | 70 | 57.206 | 46.935 | 36.158 | 0.00 | 0.00 |
| ATOM | 1079 | HB3  | ASP | X | 70 | 58.479 | 47.478 | 35.021 | 0.00 | 0.00 |
| ATOM | 1080 | CG   | ASP | X | 70 | 59.093 | 46.133 | 36.553 | 0.00 | 0.00 |
| ATOM | 1081 | OD1  | ASP | X | 70 | 60.034 | 46.361 | 37.355 | 0.00 | 0.00 |
| ATOM | 1082 | OD2  | ASP | X | 70 | 58.756 | 44.950 | 36.313 | 0.00 | 0.00 |
| ATOM | 1083 | C    | ASP | X | 70 | 59.953 | 49.082 | 36.600 | 0.00 | 0.00 |
| ATOM | 1084 | O    | ASP | X | 70 | 60.489 | 49.198 | 35.508 | 0.00 | 0.00 |
| ATOM | 1085 | N    | THR | X | 71 | 60.549 | 49.466 | 37.726 | 0.00 | 0.00 |
| ATOM | 1086 | H    | THR | X | 71 | 60.032 | 49.232 | 38.562 | 0.00 | 0.00 |
| ATOM | 1087 | CA   | THR | X | 71 | 62.017 | 49.869 | 37.825 | 0.00 | 0.00 |
| ATOM | 1088 | HA   | THR | X | 71 | 62.382 | 49.995 | 36.806 | 0.00 | 0.00 |
| ATOM | 1089 | CB   | THR | X | 71 | 61.978 | 51.218 | 38.522 | 0.00 | 0.00 |
| ATOM | 1090 | HB   | THR | X | 71 | 62.983 | 51.622 | 38.641 | 0.00 | 0.00 |

|      |      |      |     |   |    |        |        |        |      |      |
|------|------|------|-----|---|----|--------|--------|--------|------|------|
| ATOM | 1091 | CG2  | THR | X | 71 | 61.046 | 52.180 | 37.844 | 0.00 | 0.00 |
| ATOM | 1092 | HG21 | THR | X | 71 | 61.404 | 53.206 | 37.933 | 0.00 | 0.00 |
| ATOM | 1093 | HG22 | THR | X | 71 | 60.049 | 52.263 | 38.277 | 0.00 | 0.00 |
| ATOM | 1094 | HG23 | THR | X | 71 | 60.890 | 51.991 | 36.782 | 0.00 | 0.00 |
| ATOM | 1095 | OG1  | THR | X | 71 | 61.413 | 51.120 | 39.858 | 0.00 | 0.00 |
| ATOM | 1096 | HG1  | THR | X | 71 | 61.711 | 51.912 | 40.311 | 0.00 | 0.00 |
| ATOM | 1097 | C    | THR | X | 71 | 62.834 | 48.788 | 38.573 | 0.00 | 0.00 |
| ATOM | 1098 | O    | THR | X | 71 | 64.009 | 48.967 | 38.850 | 0.00 | 0.00 |
| ATOM | 1099 | N    | LEU | X | 72 | 62.110 | 47.746 | 39.052 | 0.00 | 0.00 |
| ATOM | 1100 | H    | LEU | X | 72 | 61.216 | 47.540 | 38.631 | 0.00 | 0.00 |
| ATOM | 1101 | CA   | LEU | X | 72 | 62.861 | 46.743 | 39.887 | 0.00 | 0.00 |
| ATOM | 1102 | HA   | LEU | X | 72 | 63.688 | 47.248 | 40.386 | 0.00 | 0.00 |
| ATOM | 1103 | CB   | LEU | X | 72 | 61.875 | 46.138 | 40.938 | 0.00 | 0.00 |
| ATOM | 1104 | HB2  | LEU | X | 72 | 61.253 | 46.974 | 41.259 | 0.00 | 0.00 |
| ATOM | 1105 | HB3  | LEU | X | 72 | 61.267 | 45.310 | 40.572 | 0.00 | 0.00 |
| ATOM | 1106 | CG   | LEU | X | 72 | 62.565 | 45.732 | 42.299 | 0.00 | 0.00 |
| ATOM | 1107 | HG   | LEU | X | 72 | 63.431 | 45.116 | 42.057 | 0.00 | 0.00 |
| ATOM | 1108 | CD1  | LEU | X | 72 | 63.126 | 46.966 | 43.135 | 0.00 | 0.00 |
| ATOM | 1109 | HD11 | LEU | X | 72 | 62.420 | 47.743 | 43.430 | 0.00 | 0.00 |
| ATOM | 1110 | HD12 | LEU | X | 72 | 64.085 | 47.323 | 42.761 | 0.00 | 0.00 |
| ATOM | 1111 | HD13 | LEU | X | 72 | 63.436 | 46.502 | 44.071 | 0.00 | 0.00 |
| ATOM | 1112 | CD2  | LEU | X | 72 | 61.643 | 44.867 | 43.170 | 0.00 | 0.00 |
| ATOM | 1113 | HD21 | LEU | X | 72 | 61.334 | 44.174 | 42.387 | 0.00 | 0.00 |
| ATOM | 1114 | HD22 | LEU | X | 72 | 62.306 | 44.497 | 43.952 | 0.00 | 0.00 |
| ATOM | 1115 | HD23 | LEU | X | 72 | 60.847 | 45.486 | 43.584 | 0.00 | 0.00 |
| ATOM | 1116 | C    | LEU | X | 72 | 63.477 | 45.627 | 39.069 | 0.00 | 0.00 |
| ATOM | 1117 | O    | LEU | X | 72 | 64.661 | 45.282 | 39.206 | 0.00 | 0.00 |
| ATOM | 1118 | N    | TYR | X | 73 | 62.582 | 44.997 | 38.197 | 0.00 | 0.00 |
| ATOM | 1119 | H    | TYR | X | 73 | 61.615 | 45.285 | 38.147 | 0.00 | 0.00 |
| ATOM | 1120 | CA   | TYR | X | 73 | 63.037 | 44.075 | 37.162 | 0.00 | 0.00 |
| ATOM | 1121 | HA   | TYR | X | 73 | 64.124 | 44.019 | 37.224 | 0.00 | 0.00 |
| ATOM | 1122 | CB   | TYR | X | 73 | 62.647 | 42.615 | 37.561 | 0.00 | 0.00 |
| ATOM | 1123 | HB2  | TYR | X | 73 | 61.575 | 42.536 | 37.742 | 0.00 | 0.00 |
| ATOM | 1124 | HB3  | TYR | X | 73 | 62.854 | 41.885 | 36.778 | 0.00 | 0.00 |
| ATOM | 1125 | CG   | TYR | X | 73 | 63.233 | 42.151 | 38.891 | 0.00 | 0.00 |
| ATOM | 1126 | CD1  | TYR | X | 73 | 64.646 | 42.102 | 38.983 | 0.00 | 0.00 |
| ATOM | 1127 | HD1  | TYR | X | 73 | 65.175 | 42.520 | 38.139 | 0.00 | 0.00 |
| ATOM | 1128 | CE1  | TYR | X | 73 | 65.287 | 41.867 | 40.198 | 0.00 | 0.00 |
| ATOM | 1129 | HE1  | TYR | X | 73 | 66.357 | 41.931 | 40.326 | 0.00 | 0.00 |
| ATOM | 1130 | CZ   | TYR | X | 73 | 64.414 | 41.751 | 41.363 | 0.00 | 0.00 |
| ATOM | 1131 | OH   | TYR | X | 73 | 65.002 | 41.839 | 42.631 | 0.00 | 0.00 |
| ATOM | 1132 | HH   | TYR | X | 73 | 64.292 | 41.715 | 43.265 | 0.00 | 0.00 |
| ATOM | 1133 | CE2  | TYR | X | 73 | 63.008 | 41.643 | 41.244 | 0.00 | 0.00 |
| ATOM | 1134 | HE2  | TYR | X | 73 | 62.414 | 41.508 | 42.137 | 0.00 | 0.00 |
| ATOM | 1135 | CD2  | TYR | X | 73 | 62.451 | 41.813 | 40.020 | 0.00 | 0.00 |
| ATOM | 1136 | HD2  | TYR | X | 73 | 61.376 | 41.724 | 39.972 | 0.00 | 0.00 |
| ATOM | 1137 | C    | TYR | X | 73 | 62.568 | 44.566 | 35.743 | 0.00 | 0.00 |
| ATOM | 1138 | O    | TYR | X | 73 | 61.778 | 43.797 | 35.155 | 0.00 | 0.00 |
| ATOM | 1139 | N    | PRO | X | 74 | 62.977 | 45.788 | 35.248 | 0.00 | 0.00 |
| ATOM | 1140 | CD   | PRO | X | 74 | 64.057 | 46.611 | 35.914 | 0.00 | 0.00 |
| ATOM | 1141 | HD2  | PRO | X | 74 | 64.919 | 46.093 | 36.334 | 0.00 | 0.00 |
| ATOM | 1142 | HD3  | PRO | X | 74 | 63.734 | 47.200 | 36.772 | 0.00 | 0.00 |
| ATOM | 1143 | CG   | PRO | X | 74 | 64.603 | 47.579 | 34.872 | 0.00 | 0.00 |
| ATOM | 1144 | HG2  | PRO | X | 74 | 65.449 | 47.177 | 34.314 | 0.00 | 0.00 |
| ATOM | 1145 | HG3  | PRO | X | 74 | 64.764 | 48.591 | 35.244 | 0.00 | 0.00 |
| ATOM | 1146 | CB   | PRO | X | 74 | 63.413 | 47.707 | 33.902 | 0.00 | 0.00 |
| ATOM | 1147 | HB2  | PRO | X | 74 | 63.759 | 47.827 | 32.875 | 0.00 | 0.00 |
| ATOM | 1148 | HB3  | PRO | X | 74 | 62.762 | 48.532 | 34.191 | 0.00 | 0.00 |
| ATOM | 1149 | CA   | PRO | X | 74 | 62.654 | 46.383 | 34.027 | 0.00 | 0.00 |
| ATOM | 1150 | HA   | PRO | X | 74 | 61.573 | 46.482 | 34.125 | 0.00 | 0.00 |
| ATOM | 1151 | C    | PRO | X | 74 | 62.920 | 45.390 | 32.858 | 0.00 | 0.00 |
| ATOM | 1152 | O    | PRO | X | 74 | 63.985 | 44.901 | 32.864 | 0.00 | 0.00 |
| ATOM | 1153 | N    | GLY | X | 75 | 62.032 | 45.192 | 31.916 | 0.00 | 0.00 |
| ATOM | 1154 | H    | GLY | X | 75 | 61.114 | 45.604 | 32.005 | 0.00 | 0.00 |
| ATOM | 1155 | CA   | GLY | X | 75 | 62.087 | 44.407 | 30.657 | 0.00 | 0.00 |
| ATOM | 1156 | HA2  | GLY | X | 75 | 61.228 | 44.687 | 30.047 | 0.00 | 0.00 |
| ATOM | 1157 | HA3  | GLY | X | 75 | 62.972 | 44.777 | 30.140 | 0.00 | 0.00 |

|      |      |      |     |   |    |        |        |        |      |      |
|------|------|------|-----|---|----|--------|--------|--------|------|------|
| ATOM | 1158 | C    | GLY | X | 75 | 62.225 | 42.926 | 30.745 | 0.00 | 0.00 |
| ATOM | 1159 | O    | GLY | X | 75 | 62.418 | 42.251 | 29.750 | 0.00 | 0.00 |
| ATOM | 1160 | N    | PHE | X | 76 | 62.385 | 42.349 | 31.959 | 0.00 | 0.00 |
| ATOM | 1161 | H    | PHE | X | 76 | 62.453 | 42.935 | 32.779 | 0.00 | 0.00 |
| ATOM | 1162 | CA   | PHE | X | 76 | 62.774 | 40.924 | 32.102 | 0.00 | 0.00 |
| ATOM | 1163 | HA   | PHE | X | 76 | 63.687 | 40.704 | 31.548 | 0.00 | 0.00 |
| ATOM | 1164 | CB   | PHE | X | 76 | 63.167 | 40.681 | 33.568 | 0.00 | 0.00 |
| ATOM | 1165 | HB2  | PHE | X | 76 | 64.116 | 41.179 | 33.765 | 0.00 | 0.00 |
| ATOM | 1166 | HB3  | PHE | X | 76 | 62.481 | 41.242 | 34.204 | 0.00 | 0.00 |
| ATOM | 1167 | CG   | PHE | X | 76 | 63.128 | 39.250 | 34.075 | 0.00 | 0.00 |
| ATOM | 1168 | CD1  | PHE | X | 76 | 64.232 | 38.396 | 33.773 | 0.00 | 0.00 |
| ATOM | 1169 | HD1  | PHE | X | 76 | 65.009 | 38.822 | 33.155 | 0.00 | 0.00 |
| ATOM | 1170 | CE1  | PHE | X | 76 | 64.289 | 37.154 | 34.381 | 0.00 | 0.00 |
| ATOM | 1171 | HE1  | PHE | X | 76 | 65.159 | 36.520 | 34.297 | 0.00 | 0.00 |
| ATOM | 1172 | CZ   | PHE | X | 76 | 63.407 | 36.800 | 35.381 | 0.00 | 0.00 |
| ATOM | 1173 | HZ   | PHE | X | 76 | 63.620 | 35.893 | 35.927 | 0.00 | 0.00 |
| ATOM | 1174 | CE2  | PHE | X | 76 | 62.273 | 37.599 | 35.619 | 0.00 | 0.00 |
| ATOM | 1175 | HE2  | PHE | X | 76 | 61.529 | 37.331 | 36.354 | 0.00 | 0.00 |
| ATOM | 1176 | CD2  | PHE | X | 76 | 62.157 | 38.877 | 34.980 | 0.00 | 0.00 |
| ATOM | 1177 | HD2  | PHE | X | 76 | 61.218 | 39.400 | 35.088 | 0.00 | 0.00 |
| ATOM | 1178 | C    | PHE | X | 76 | 61.684 | 40.001 | 31.627 | 0.00 | 0.00 |
| ATOM | 1179 | O    | PHE | X | 76 | 60.475 | 40.337 | 31.807 | 0.00 | 0.00 |
| ATOM | 1180 | N    | GLU | X | 77 | 62.087 | 38.874 | 31.019 | 0.00 | 0.00 |
| ATOM | 1181 | H    | GLU | X | 77 | 63.068 | 38.655 | 30.922 | 0.00 | 0.00 |
| ATOM | 1182 | CA   | GLU | X | 77 | 61.128 | 38.023 | 30.332 | 0.00 | 0.00 |
| ATOM | 1183 | HA   | GLU | X | 77 | 60.583 | 38.606 | 29.589 | 0.00 | 0.00 |
| ATOM | 1184 | CB   | GLU | X | 77 | 61.812 | 36.932 | 29.511 | 0.00 | 0.00 |
| ATOM | 1185 | HB2  | GLU | X | 77 | 62.746 | 36.631 | 29.987 | 0.00 | 0.00 |
| ATOM | 1186 | HB3  | GLU | X | 77 | 61.140 | 36.080 | 29.416 | 0.00 | 0.00 |
| ATOM | 1187 | CG   | GLU | X | 77 | 62.170 | 37.302 | 28.052 | 0.00 | 0.00 |
| ATOM | 1188 | HG2  | GLU | X | 77 | 62.304 | 36.326 | 27.586 | 0.00 | 0.00 |
| ATOM | 1189 | HG3  | GLU | X | 77 | 61.323 | 37.775 | 27.556 | 0.00 | 0.00 |
| ATOM | 1190 | CD   | GLU | X | 77 | 63.351 | 38.170 | 27.928 | 0.00 | 0.00 |
| ATOM | 1191 | OE1  | GLU | X | 77 | 64.477 | 37.615 | 27.786 | 0.00 | 0.00 |
| ATOM | 1192 | OE2  | GLU | X | 77 | 63.139 | 39.352 | 27.785 | 0.00 | 0.00 |
| ATOM | 1193 | C    | GLU | X | 77 | 60.131 | 37.471 | 31.353 | 0.00 | 0.00 |
| ATOM | 1194 | O    | GLU | X | 77 | 59.082 | 37.044 | 30.953 | 0.00 | 0.00 |
| ATOM | 1195 | N    | GLY | X | 78 | 60.463 | 37.376 | 32.647 | 0.00 | 0.00 |
| ATOM | 1196 | H    | GLY | X | 78 | 61.424 | 37.535 | 32.914 | 0.00 | 0.00 |
| ATOM | 1197 | CA   | GLY | X | 78 | 59.461 | 37.065 | 33.713 | 0.00 | 0.00 |
| ATOM | 1198 | HA2  | GLY | X | 78 | 58.794 | 36.281 | 33.354 | 0.00 | 0.00 |
| ATOM | 1199 | HA3  | GLY | X | 78 | 60.068 | 36.756 | 34.564 | 0.00 | 0.00 |
| ATOM | 1200 | C    | GLY | X | 78 | 58.490 | 38.137 | 34.202 | 0.00 | 0.00 |
| ATOM | 1201 | O    | GLY | X | 78 | 57.699 | 37.828 | 35.036 | 0.00 | 0.00 |
| ATOM | 1202 | N    | THR | X | 79 | 58.584 | 39.366 | 33.775 | 0.00 | 0.00 |
| ATOM | 1203 | H    | THR | X | 79 | 59.331 | 39.543 | 33.118 | 0.00 | 0.00 |
| ATOM | 1204 | CA   | THR | X | 79 | 57.851 | 40.469 | 34.418 | 0.00 | 0.00 |
| ATOM | 1205 | HA   | THR | X | 79 | 57.004 | 40.118 | 35.007 | 0.00 | 0.00 |
| ATOM | 1206 | CB   | THR | X | 79 | 58.684 | 41.362 | 35.361 | 0.00 | 0.00 |
| ATOM | 1207 | HB   | THR | X | 79 | 58.130 | 42.215 | 35.753 | 0.00 | 0.00 |
| ATOM | 1208 | CG2  | THR | X | 79 | 59.125 | 40.548 | 36.563 | 0.00 | 0.00 |
| ATOM | 1209 | HG21 | THR | X | 79 | 58.331 | 40.271 | 37.257 | 0.00 | 0.00 |
| ATOM | 1210 | HG22 | THR | X | 79 | 59.909 | 41.059 | 37.122 | 0.00 | 0.00 |
| ATOM | 1211 | HG23 | THR | X | 79 | 59.584 | 39.596 | 36.294 | 0.00 | 0.00 |
| ATOM | 1212 | OG1  | THR | X | 79 | 59.781 | 41.737 | 34.573 | 0.00 | 0.00 |
| ATOM | 1213 | HG1  | THR | X | 79 | 60.314 | 42.323 | 35.115 | 0.00 | 0.00 |
| ATOM | 1214 | C    | THR | X | 79 | 57.223 | 41.428 | 33.470 | 0.00 | 0.00 |
| ATOM | 1215 | O    | THR | X | 79 | 56.419 | 42.266 | 33.920 | 0.00 | 0.00 |
| ATOM | 1216 | N    | GLU | X | 80 | 57.581 | 41.418 | 32.177 | 0.00 | 0.00 |
| ATOM | 1217 | H    | GLU | X | 80 | 58.285 | 40.788 | 31.818 | 0.00 | 0.00 |
| ATOM | 1218 | CA   | GLU | X | 80 | 57.160 | 42.467 | 31.245 | 0.00 | 0.00 |
| ATOM | 1219 | HA   | GLU | X | 80 | 57.397 | 43.463 | 31.618 | 0.00 | 0.00 |
| ATOM | 1220 | CB   | GLU | X | 80 | 58.021 | 42.429 | 29.979 | 0.00 | 0.00 |
| ATOM | 1221 | HB2  | GLU | X | 80 | 57.800 | 43.267 | 29.317 | 0.00 | 0.00 |
| ATOM | 1222 | HB3  | GLU | X | 80 | 59.013 | 42.650 | 30.373 | 0.00 | 0.00 |
| ATOM | 1223 | CG   | GLU | X | 80 | 58.079 | 41.068 | 29.227 | 0.00 | 0.00 |
| ATOM | 1224 | HG2  | GLU | X | 80 | 58.441 | 40.389 | 29.999 | 0.00 | 0.00 |

|      |      |      |     |   |    |        |        |        |      |      |
|------|------|------|-----|---|----|--------|--------|--------|------|------|
| ATOM | 1225 | HG3  | GLU | X | 80 | 57.112 | 40.768 | 28.824 | 0.00 | 0.00 |
| ATOM | 1226 | CD   | GLU | X | 80 | 59.161 | 41.133 | 28.128 | 0.00 | 0.00 |
| ATOM | 1227 | OE1  | GLU | X | 80 | 59.814 | 40.119 | 27.908 | 0.00 | 0.00 |
| ATOM | 1228 | OE2  | GLU | X | 80 | 59.477 | 42.194 | 27.568 | 0.00 | 0.00 |
| ATOM | 1229 | C    | GLU | X | 80 | 55.664 | 42.437 | 30.821 | 0.00 | 0.00 |
| ATOM | 1230 | O    | GLU | X | 80 | 55.203 | 43.309 | 30.069 | 0.00 | 0.00 |
| ATOM | 1231 | N    | MET | X | 81 | 54.753 | 41.452 | 31.095 | 0.00 | 0.00 |
| ATOM | 1232 | H    | MET | X | 81 | 55.071 | 40.670 | 31.650 | 0.00 | 0.00 |
| ATOM | 1233 | CA   | MET | X | 81 | 53.289 | 41.415 | 30.871 | 0.00 | 0.00 |
| ATOM | 1234 | HA   | MET | X | 81 | 53.115 | 41.829 | 29.878 | 0.00 | 0.00 |
| ATOM | 1235 | CB   | MET | X | 81 | 52.891 | 39.919 | 31.079 | 0.00 | 0.00 |
| ATOM | 1236 | HB2  | MET | X | 81 | 51.811 | 39.789 | 31.012 | 0.00 | 0.00 |
| ATOM | 1237 | HB3  | MET | X | 81 | 53.414 | 39.318 | 30.335 | 0.00 | 0.00 |
| ATOM | 1238 | CG   | MET | X | 81 | 53.215 | 39.400 | 32.455 | 0.00 | 0.00 |
| ATOM | 1239 | HG2  | MET | X | 81 | 52.688 | 40.057 | 33.146 | 0.00 | 0.00 |
| ATOM | 1240 | HG3  | MET | X | 81 | 52.643 | 38.472 | 32.492 | 0.00 | 0.00 |
| ATOM | 1241 | SD   | MET | X | 81 | 54.954 | 39.078 | 33.015 | 0.00 | 0.00 |
| ATOM | 1242 | CE   | MET | X | 81 | 55.585 | 37.999 | 31.619 | 0.00 | 0.00 |
| ATOM | 1243 | HE1  | MET | X | 81 | 56.570 | 37.577 | 31.816 | 0.00 | 0.00 |
| ATOM | 1244 | HE2  | MET | X | 81 | 54.756 | 37.341 | 31.359 | 0.00 | 0.00 |
| ATOM | 1245 | HE3  | MET | X | 81 | 55.741 | 38.701 | 30.800 | 0.00 | 0.00 |
| ATOM | 1246 | C    | MET | X | 81 | 52.491 | 42.160 | 31.880 | 0.00 | 0.00 |
| ATOM | 1247 | O    | MET | X | 81 | 51.346 | 42.502 | 31.636 | 0.00 | 0.00 |
| ATOM | 1248 | N    | TRP | X | 82 | 53.000 | 42.427 | 33.058 | 0.00 | 0.00 |
| ATOM | 1249 | H    | TRP | X | 82 | 53.980 | 42.216 | 33.179 | 0.00 | 0.00 |
| ATOM | 1250 | CA   | TRP | X | 82 | 52.345 | 43.363 | 34.030 | 0.00 | 0.00 |
| ATOM | 1251 | HA   | TRP | X | 82 | 51.303 | 43.133 | 34.253 | 0.00 | 0.00 |
| ATOM | 1252 | CB   | TRP | X | 82 | 52.914 | 43.083 | 35.411 | 0.00 | 0.00 |
| ATOM | 1253 | HB2  | TRP | X | 82 | 53.958 | 43.396 | 35.393 | 0.00 | 0.00 |
| ATOM | 1254 | HB3  | TRP | X | 82 | 52.547 | 43.780 | 36.163 | 0.00 | 0.00 |
| ATOM | 1255 | CG   | TRP | X | 82 | 52.829 | 41.671 | 35.828 | 0.00 | 0.00 |
| ATOM | 1256 | CD1  | TRP | X | 82 | 53.857 | 40.933 | 36.328 | 0.00 | 0.00 |
| ATOM | 1257 | HD1  | TRP | X | 82 | 54.850 | 41.276 | 36.576 | 0.00 | 0.00 |
| ATOM | 1258 | NE1  | TRP | X | 82 | 53.499 | 39.614 | 36.511 | 0.00 | 0.00 |
| ATOM | 1259 | HE1  | TRP | X | 82 | 54.087 | 38.974 | 37.026 | 0.00 | 0.00 |
| ATOM | 1260 | CE2  | TRP | X | 82 | 52.282 | 39.321 | 36.018 | 0.00 | 0.00 |
| ATOM | 1261 | CZ2  | TRP | X | 82 | 51.486 | 38.115 | 35.952 | 0.00 | 0.00 |
| ATOM | 1262 | HZ2  | TRP | X | 82 | 51.823 | 37.169 | 36.350 | 0.00 | 0.00 |
| ATOM | 1263 | CH2  | TRP | X | 82 | 50.195 | 38.224 | 35.456 | 0.00 | 0.00 |
| ATOM | 1264 | HH2  | TRP | X | 82 | 49.572 | 37.373 | 35.226 | 0.00 | 0.00 |
| ATOM | 1265 | CZ3  | TRP | X | 82 | 49.666 | 39.490 | 35.074 | 0.00 | 0.00 |
| ATOM | 1266 | HZ3  | TRP | X | 82 | 48.627 | 39.481 | 34.779 | 0.00 | 0.00 |
| ATOM | 1267 | CE3  | TRP | X | 82 | 50.483 | 40.662 | 35.216 | 0.00 | 0.00 |
| ATOM | 1268 | HE3  | TRP | X | 82 | 49.965 | 41.588 | 35.018 | 0.00 | 0.00 |
| ATOM | 1269 | CD2  | TRP | X | 82 | 51.783 | 40.654 | 35.669 | 0.00 | 0.00 |
| ATOM | 1270 | C    | TRP | X | 82 | 52.468 | 44.855 | 33.596 | 0.00 | 0.00 |
| ATOM | 1271 | O    | TRP | X | 82 | 51.661 | 45.727 | 33.945 | 0.00 | 0.00 |
| ATOM | 1272 | N    | ASN | X | 83 | 53.452 | 45.070 | 32.757 | 0.00 | 0.00 |
| ATOM | 1273 | H    | ASN | X | 83 | 53.904 | 44.232 | 32.421 | 0.00 | 0.00 |
| ATOM | 1274 | CA   | ASN | X | 83 | 53.771 | 46.409 | 32.297 | 0.00 | 0.00 |
| ATOM | 1275 | HA   | ASN | X | 83 | 53.689 | 47.011 | 33.202 | 0.00 | 0.00 |
| ATOM | 1276 | CB   | ASN | X | 83 | 55.248 | 46.506 | 31.835 | 0.00 | 0.00 |
| ATOM | 1277 | HB2  | ASN | X | 83 | 55.861 | 46.292 | 32.710 | 0.00 | 0.00 |
| ATOM | 1278 | HB3  | ASN | X | 83 | 55.498 | 45.790 | 31.053 | 0.00 | 0.00 |
| ATOM | 1279 | CG   | ASN | X | 83 | 55.498 | 47.994 | 31.422 | 0.00 | 0.00 |
| ATOM | 1280 | OD1  | ASN | X | 83 | 55.726 | 48.198 | 30.242 | 0.00 | 0.00 |
| ATOM | 1281 | ND2  | ASN | X | 83 | 55.456 | 48.878 | 32.401 | 0.00 | 0.00 |
| ATOM | 1282 | HD21 | ASN | X | 83 | 55.551 | 49.847 | 32.133 | 0.00 | 0.00 |
| ATOM | 1283 | HD22 | ASN | X | 83 | 55.038 | 48.538 | 33.255 | 0.00 | 0.00 |
| ATOM | 1284 | C    | ASN | X | 83 | 52.772 | 46.912 | 31.222 | 0.00 | 0.00 |
| ATOM | 1285 | O    | ASN | X | 83 | 52.668 | 46.311 | 30.143 | 0.00 | 0.00 |
| ATOM | 1286 | N    | PRO | X | 84 | 52.053 | 48.080 | 31.487 | 0.00 | 0.00 |
| ATOM | 1287 | CD   | PRO | X | 84 | 51.765 | 48.667 | 32.783 | 0.00 | 0.00 |
| ATOM | 1288 | HD2  | PRO | X | 84 | 52.695 | 48.604 | 33.348 | 0.00 | 0.00 |
| ATOM | 1289 | HD3  | PRO | X | 84 | 50.884 | 48.203 | 33.226 | 0.00 | 0.00 |
| ATOM | 1290 | CG   | PRO | X | 84 | 51.311 | 50.106 | 32.571 | 0.00 | 0.00 |
| ATOM | 1291 | HG2  | PRO | X | 84 | 52.162 | 50.778 | 32.462 | 0.00 | 0.00 |

|      |      |      |     |   |    |        |        |        |      |      |
|------|------|------|-----|---|----|--------|--------|--------|------|------|
| ATOM | 1292 | HG3  | PRO | X | 84 | 50.694 | 50.491 | 33.383 | 0.00 | 0.00 |
| ATOM | 1293 | CB   | PRO | X | 84 | 50.406 | 49.805 | 31.309 | 0.00 | 0.00 |
| ATOM | 1294 | HB2  | PRO | X | 84 | 50.267 | 50.703 | 30.707 | 0.00 | 0.00 |
| ATOM | 1295 | HB3  | PRO | X | 84 | 49.433 | 49.441 | 31.638 | 0.00 | 0.00 |
| ATOM | 1296 | CA   | PRO | X | 84 | 51.194 | 48.762 | 30.532 | 0.00 | 0.00 |
| ATOM | 1297 | HA   | PRO | X | 84 | 50.446 | 48.172 | 30.003 | 0.00 | 0.00 |
| ATOM | 1298 | C    | PRO | X | 84 | 52.129 | 49.435 | 29.453 | 0.00 | 0.00 |
| ATOM | 1299 | O    | PRO | X | 84 | 53.010 | 50.176 | 29.814 | 0.00 | 0.00 |
| ATOM | 1300 | N    | ASN | X | 85 | 51.923 | 49.118 | 28.175 | 0.00 | 0.00 |
| ATOM | 1301 | H    | ASN | X | 85 | 51.179 | 48.507 | 27.871 | 0.00 | 0.00 |
| ATOM | 1302 | CA   | ASN | X | 85 | 52.676 | 49.743 | 27.050 | 0.00 | 0.00 |
| ATOM | 1303 | HA   | ASN | X | 85 | 53.739 | 49.829 | 27.274 | 0.00 | 0.00 |
| ATOM | 1304 | CB   | ASN | X | 85 | 52.748 | 48.740 | 25.875 | 0.00 | 0.00 |
| ATOM | 1305 | HB2  | ASN | X | 85 | 53.393 | 49.178 | 25.114 | 0.00 | 0.00 |
| ATOM | 1306 | HB3  | ASN | X | 85 | 53.235 | 47.864 | 26.304 | 0.00 | 0.00 |
| ATOM | 1307 | CG   | ASN | X | 85 | 51.398 | 48.344 | 25.231 | 0.00 | 0.00 |
| ATOM | 1308 | OD1  | ASN | X | 85 | 50.376 | 49.015 | 25.461 | 0.00 | 0.00 |
| ATOM | 1309 | ND2  | ASN | X | 85 | 51.471 | 47.488 | 24.209 | 0.00 | 0.00 |
| ATOM | 1310 | HD21 | ASN | X | 85 | 50.663 | 47.317 | 23.628 | 0.00 | 0.00 |
| ATOM | 1311 | HD22 | ASN | X | 85 | 52.380 | 47.083 | 24.040 | 0.00 | 0.00 |
| ATOM | 1312 | C    | ASN | X | 85 | 52.219 | 51.148 | 26.665 | 0.00 | 0.00 |
| ATOM | 1313 | O    | ASN | X | 85 | 52.907 | 51.896 | 26.005 | 0.00 | 0.00 |
| ATOM | 1314 | N    | ARG | X | 86 | 51.013 | 51.520 | 27.054 | 0.00 | 0.00 |
| ATOM | 1315 | H    | ARG | X | 86 | 50.482 | 50.779 | 27.490 | 0.00 | 0.00 |
| ATOM | 1316 | CA   | ARG | X | 86 | 50.390 | 52.765 | 26.785 | 0.00 | 0.00 |
| ATOM | 1317 | HA   | ARG | X | 86 | 50.651 | 53.046 | 25.765 | 0.00 | 0.00 |
| ATOM | 1318 | CB   | ARG | X | 86 | 48.829 | 52.579 | 26.882 | 0.00 | 0.00 |
| ATOM | 1319 | HB2  | ARG | X | 86 | 48.532 | 52.532 | 27.930 | 0.00 | 0.00 |
| ATOM | 1320 | HB3  | ARG | X | 86 | 48.320 | 53.492 | 26.572 | 0.00 | 0.00 |
| ATOM | 1321 | CG   | ARG | X | 86 | 48.162 | 51.365 | 26.112 | 0.00 | 0.00 |
| ATOM | 1322 | HG2  | ARG | X | 86 | 48.601 | 50.405 | 26.385 | 0.00 | 0.00 |
| ATOM | 1323 | HG3  | ARG | X | 86 | 47.085 | 51.303 | 26.273 | 0.00 | 0.00 |
| ATOM | 1324 | CD   | ARG | X | 86 | 48.314 | 51.543 | 24.613 | 0.00 | 0.00 |
| ATOM | 1325 | HD2  | ARG | X | 86 | 47.813 | 52.435 | 24.238 | 0.00 | 0.00 |
| ATOM | 1326 | HD3  | ARG | X | 86 | 49.380 | 51.634 | 24.405 | 0.00 | 0.00 |
| ATOM | 1327 | NE   | ARG | X | 86 | 47.839 | 50.323 | 23.909 | 0.00 | 0.00 |
| ATOM | 1328 | HE   | ARG | X | 86 | 47.736 | 49.490 | 24.471 | 0.00 | 0.00 |
| ATOM | 1329 | CZ   | ARG | X | 86 | 47.906 | 50.075 | 22.643 | 0.00 | 0.00 |
| ATOM | 1330 | NH1  | ARG | X | 86 | 48.337 | 51.005 | 21.862 | 0.00 | 0.00 |
| ATOM | 1331 | HH11 | ARG | X | 86 | 48.741 | 51.895 | 22.116 | 0.00 | 0.00 |
| ATOM | 1332 | HH12 | ARG | X | 86 | 48.122 | 50.845 | 20.888 | 0.00 | 0.00 |
| ATOM | 1333 | NH2  | ARG | X | 86 | 47.422 | 48.957 | 22.209 | 0.00 | 0.00 |
| ATOM | 1334 | HH21 | ARG | X | 86 | 47.178 | 48.211 | 22.846 | 0.00 | 0.00 |
| ATOM | 1335 | HH22 | ARG | X | 86 | 47.553 | 48.678 | 21.247 | 0.00 | 0.00 |
| ATOM | 1336 | C    | ARG | X | 86 | 50.846 | 53.934 | 27.677 | 0.00 | 0.00 |
| ATOM | 1337 | O    | ARG | X | 86 | 51.448 | 53.757 | 28.775 | 0.00 | 0.00 |
| ATOM | 1338 | N    | GLU | X | 87 | 50.398 | 55.155 | 27.414 | 0.00 | 0.00 |
| ATOM | 1339 | H    | GLU | X | 87 | 49.777 | 55.250 | 26.623 | 0.00 | 0.00 |
| ATOM | 1340 | CA   | GLU | X | 87 | 50.765 | 56.408 | 28.112 | 0.00 | 0.00 |
| ATOM | 1341 | HA   | GLU | X | 87 | 51.838 | 56.414 | 28.305 | 0.00 | 0.00 |
| ATOM | 1342 | CB   | GLU | X | 87 | 50.489 | 57.559 | 27.040 | 0.00 | 0.00 |
| ATOM | 1343 | HB2  | GLU | X | 87 | 50.945 | 57.261 | 26.096 | 0.00 | 0.00 |
| ATOM | 1344 | HB3  | GLU | X | 87 | 49.409 | 57.683 | 26.964 | 0.00 | 0.00 |
| ATOM | 1345 | CG   | GLU | X | 87 | 51.109 | 58.858 | 27.572 | 0.00 | 0.00 |
| ATOM | 1346 | HG2  | GLU | X | 87 | 50.486 | 59.244 | 28.378 | 0.00 | 0.00 |
| ATOM | 1347 | HG3  | GLU | X | 87 | 52.152 | 58.684 | 27.837 | 0.00 | 0.00 |
| ATOM | 1348 | CD   | GLU | X | 87 | 51.076 | 59.962 | 26.508 | 0.00 | 0.00 |
| ATOM | 1349 | OE1  | GLU | X | 87 | 50.052 | 60.248 | 25.923 | 0.00 | 0.00 |
| ATOM | 1350 | OE2  | GLU | X | 87 | 52.123 | 60.506 | 26.189 | 0.00 | 0.00 |
| ATOM | 1351 | C    | GLU | X | 87 | 50.001 | 56.493 | 29.470 | 0.00 | 0.00 |
| ATOM | 1352 | O    | GLU | X | 87 | 48.787 | 56.170 | 29.611 | 0.00 | 0.00 |
| ATOM | 1353 | N    | LEU | X | 88 | 50.741 | 56.898 | 30.538 | 0.00 | 0.00 |
| ATOM | 1354 | H    | LEU | X | 88 | 51.740 | 57.030 | 30.591 | 0.00 | 0.00 |
| ATOM | 1355 | CA   | LEU | X | 88 | 50.111 | 57.182 | 31.864 | 0.00 | 0.00 |
| ATOM | 1356 | HA   | LEU | X | 88 | 49.355 | 56.423 | 32.065 | 0.00 | 0.00 |
| ATOM | 1357 | CB   | LEU | X | 88 | 51.256 | 57.085 | 32.914 | 0.00 | 0.00 |
| ATOM | 1358 | HB2  | LEU | X | 88 | 52.042 | 57.839 | 32.875 | 0.00 | 0.00 |

|      |      |      |     |   |    |        |        |        |      |      |
|------|------|------|-----|---|----|--------|--------|--------|------|------|
| ATOM | 1359 | HB3  | LEU | X | 88 | 50.853 | 57.379 | 33.884 | 0.00 | 0.00 |
| ATOM | 1360 | CG   | LEU | X | 88 | 52.023 | 55.703 | 33.054 | 0.00 | 0.00 |
| ATOM | 1361 | HG   | LEU | X | 88 | 52.453 | 55.423 | 32.092 | 0.00 | 0.00 |
| ATOM | 1362 | CD1  | LEU | X | 88 | 53.115 | 55.934 | 34.095 | 0.00 | 0.00 |
| ATOM | 1363 | HD11 | LEU | X | 88 | 52.671 | 56.185 | 35.058 | 0.00 | 0.00 |
| ATOM | 1364 | HD12 | LEU | X | 88 | 53.744 | 56.773 | 33.796 | 0.00 | 0.00 |
| ATOM | 1365 | HD13 | LEU | X | 88 | 53.808 | 55.095 | 34.040 | 0.00 | 0.00 |
| ATOM | 1366 | CD2  | LEU | X | 88 | 51.016 | 54.688 | 33.558 | 0.00 | 0.00 |
| ATOM | 1367 | HD21 | LEU | X | 88 | 50.077 | 54.585 | 33.014 | 0.00 | 0.00 |
| ATOM | 1368 | HD22 | LEU | X | 88 | 51.401 | 53.669 | 33.577 | 0.00 | 0.00 |
| ATOM | 1369 | HD23 | LEU | X | 88 | 50.791 | 54.973 | 34.586 | 0.00 | 0.00 |
| ATOM | 1370 | C    | LEU | X | 88 | 49.345 | 58.477 | 31.844 | 0.00 | 0.00 |
| ATOM | 1371 | O    | LEU | X | 88 | 49.740 | 59.456 | 31.221 | 0.00 | 0.00 |
| ATOM | 1372 | N    | SER | X | 89 | 48.297 | 58.599 | 32.616 | 0.00 | 0.00 |
| ATOM | 1373 | H    | SER | X | 89 | 48.033 | 57.708 | 33.011 | 0.00 | 0.00 |
| ATOM | 1374 | CA   | SER | X | 89 | 47.272 | 59.629 | 32.620 | 0.00 | 0.00 |
| ATOM | 1375 | HA   | SER | X | 89 | 47.809 | 60.577 | 32.584 | 0.00 | 0.00 |
| ATOM | 1376 | CB   | SER | X | 89 | 46.305 | 59.496 | 31.427 | 0.00 | 0.00 |
| ATOM | 1377 | HB2  | SER | X | 89 | 47.003 | 59.416 | 30.594 | 0.00 | 0.00 |
| ATOM | 1378 | HB3  | SER | X | 89 | 45.812 | 58.527 | 31.498 | 0.00 | 0.00 |
| ATOM | 1379 | OG   | SER | X | 89 | 45.534 | 60.641 | 31.363 | 0.00 | 0.00 |
| ATOM | 1380 | HG   | SER | X | 89 | 45.064 | 60.638 | 30.526 | 0.00 | 0.00 |
| ATOM | 1381 | C    | SER | X | 89 | 46.428 | 59.612 | 33.899 | 0.00 | 0.00 |
| ATOM | 1382 | O    | SER | X | 89 | 46.299 | 58.571 | 34.550 | 0.00 | 0.00 |
| ATOM | 1383 | N    | GLU | X | 90 | 45.850 | 60.779 | 34.248 | 0.00 | 0.00 |
| ATOM | 1384 | H    | GLU | X | 90 | 46.013 | 61.592 | 33.671 | 0.00 | 0.00 |
| ATOM | 1385 | CA   | GLU | X | 90 | 44.779 | 60.897 | 35.213 | 0.00 | 0.00 |
| ATOM | 1386 | HA   | GLU | X | 90 | 45.113 | 60.291 | 36.055 | 0.00 | 0.00 |
| ATOM | 1387 | CB   | GLU | X | 90 | 44.508 | 62.304 | 35.784 | 0.00 | 0.00 |
| ATOM | 1388 | HB2  | GLU | X | 90 | 44.534 | 62.927 | 34.890 | 0.00 | 0.00 |
| ATOM | 1389 | HB3  | GLU | X | 90 | 43.560 | 62.242 | 36.319 | 0.00 | 0.00 |
| ATOM | 1390 | CG   | GLU | X | 90 | 45.662 | 62.985 | 36.532 | 0.00 | 0.00 |
| ATOM | 1391 | HG2  | GLU | X | 90 | 45.859 | 62.317 | 37.371 | 0.00 | 0.00 |
| ATOM | 1392 | HG3  | GLU | X | 90 | 46.587 | 62.916 | 35.960 | 0.00 | 0.00 |
| ATOM | 1393 | CD   | GLU | X | 90 | 45.283 | 64.405 | 37.020 | 0.00 | 0.00 |
| ATOM | 1394 | OE1  | GLU | X | 90 | 44.741 | 64.487 | 38.139 | 0.00 | 0.00 |
| ATOM | 1395 | OE2  | GLU | X | 90 | 45.654 | 65.391 | 36.345 | 0.00 | 0.00 |
| ATOM | 1396 | C    | GLU | X | 90 | 43.419 | 60.458 | 34.616 | 0.00 | 0.00 |
| ATOM | 1397 | O    | GLU | X | 90 | 42.809 | 59.502 | 35.116 | 0.00 | 0.00 |
| ATOM | 1398 | N    | ASP | X | 91 | 42.959 | 61.143 | 33.591 | 0.00 | 0.00 |
| ATOM | 1399 | H    | ASP | X | 91 | 43.554 | 61.900 | 33.285 | 0.00 | 0.00 |
| ATOM | 1400 | CA   | ASP | X | 91 | 41.825 | 60.803 | 32.589 | 0.00 | 0.00 |
| ATOM | 1401 | HA   | ASP | X | 91 | 40.925 | 60.694 | 33.195 | 0.00 | 0.00 |
| ATOM | 1402 | CB   | ASP | X | 91 | 41.453 | 62.014 | 31.775 | 0.00 | 0.00 |
| ATOM | 1403 | HB2  | ASP | X | 91 | 40.773 | 61.679 | 30.992 | 0.00 | 0.00 |
| ATOM | 1404 | HB3  | ASP | X | 91 | 40.997 | 62.840 | 32.321 | 0.00 | 0.00 |
| ATOM | 1405 | CG   | ASP | X | 91 | 42.660 | 62.621 | 31.070 | 0.00 | 0.00 |
| ATOM | 1406 | OD1  | ASP | X | 91 | 43.492 | 63.227 | 31.779 | 0.00 | 0.00 |
| ATOM | 1407 | OD2  | ASP | X | 91 | 42.688 | 62.546 | 29.813 | 0.00 | 0.00 |
| ATOM | 1408 | C    | ASP | X | 91 | 41.906 | 59.436 | 31.867 | 0.00 | 0.00 |
| ATOM | 1409 | O    | ASP | X | 91 | 41.982 | 59.349 | 30.676 | 0.00 | 0.00 |
| ATOM | 1410 | N    | CYX | X | 92 | 41.954 | 58.462 | 32.714 | 0.00 | 0.00 |
| ATOM | 1411 | H    | CYX | X | 92 | 42.171 | 58.774 | 33.650 | 0.00 | 0.00 |
| ATOM | 1412 | CA   | CYX | X | 92 | 42.385 | 57.138 | 32.270 | 0.00 | 0.00 |
| ATOM | 1413 | HA   | CYX | X | 92 | 42.840 | 57.144 | 31.280 | 0.00 | 0.00 |
| ATOM | 1414 | CB   | CYX | X | 92 | 43.426 | 56.614 | 33.242 | 0.00 | 0.00 |
| ATOM | 1415 | HB2  | CYX | X | 92 | 43.884 | 55.679 | 32.921 | 0.00 | 0.00 |
| ATOM | 1416 | HB3  | CYX | X | 92 | 44.199 | 57.377 | 33.333 | 0.00 | 0.00 |
| ATOM | 1417 | SG   | CYX | X | 92 | 42.857 | 56.225 | 34.960 | 0.00 | 0.00 |
| ATOM | 1418 | C    | CYX | X | 92 | 41.251 | 56.088 | 32.177 | 0.00 | 0.00 |
| ATOM | 1419 | O    | CYX | X | 92 | 41.453 | 54.958 | 31.692 | 0.00 | 0.00 |
| ATOM | 1420 | N    | LEU | X | 93 | 40.055 | 56.350 | 32.705 | 0.00 | 0.00 |
| ATOM | 1421 | H    | LEU | X | 93 | 39.791 | 57.244 | 33.094 | 0.00 | 0.00 |
| ATOM | 1422 | CA   | LEU | X | 93 | 39.044 | 55.276 | 32.916 | 0.00 | 0.00 |
| ATOM | 1423 | HA   | LEU | X | 93 | 39.603 | 54.436 | 33.329 | 0.00 | 0.00 |
| ATOM | 1424 | CB   | LEU | X | 93 | 37.976 | 55.719 | 34.015 | 0.00 | 0.00 |
| ATOM | 1425 | HB2  | LEU | X | 93 | 37.547 | 56.662 | 33.673 | 0.00 | 0.00 |

|      |      |      |     |   |    |        |        |        |      |      |
|------|------|------|-----|---|----|--------|--------|--------|------|------|
| ATOM | 1426 | HB3  | LEU | X | 93 | 37.173 | 54.988 | 34.114 | 0.00 | 0.00 |
| ATOM | 1427 | CG   | LEU | X | 93 | 38.476 | 56.149 | 35.401 | 0.00 | 0.00 |
| ATOM | 1428 | HG   | LEU | X | 93 | 39.276 | 56.889 | 35.375 | 0.00 | 0.00 |
| ATOM | 1429 | CD1  | LEU | X | 93 | 37.248 | 56.718 | 36.128 | 0.00 | 0.00 |
| ATOM | 1430 | HD11 | LEU | X | 93 | 36.505 | 55.922 | 36.077 | 0.00 | 0.00 |
| ATOM | 1431 | HD12 | LEU | X | 93 | 36.906 | 57.573 | 35.544 | 0.00 | 0.00 |
| ATOM | 1432 | HD13 | LEU | X | 93 | 37.456 | 57.042 | 37.147 | 0.00 | 0.00 |
| ATOM | 1433 | CD2  | LEU | X | 93 | 38.941 | 54.907 | 36.194 | 0.00 | 0.00 |
| ATOM | 1434 | HD21 | LEU | X | 93 | 39.762 | 54.422 | 35.667 | 0.00 | 0.00 |
| ATOM | 1435 | HD22 | LEU | X | 93 | 39.352 | 55.325 | 37.113 | 0.00 | 0.00 |
| ATOM | 1436 | HD23 | LEU | X | 93 | 38.057 | 54.272 | 36.254 | 0.00 | 0.00 |
| ATOM | 1437 | C    | LEU | X | 93 | 38.340 | 54.958 | 31.640 | 0.00 | 0.00 |
| ATOM | 1438 | O    | LEU | X | 93 | 37.735 | 55.866 | 31.036 | 0.00 | 0.00 |
| ATOM | 1439 | N    | TYR | X | 94 | 38.311 | 53.682 | 31.262 | 0.00 | 0.00 |
| ATOM | 1440 | H    | TYR | X | 94 | 38.940 | 53.053 | 31.741 | 0.00 | 0.00 |
| ATOM | 1441 | CA   | TYR | X | 94 | 37.526 | 53.139 | 30.136 | 0.00 | 0.00 |
| ATOM | 1442 | HA   | TYR | X | 94 | 36.572 | 53.667 | 30.143 | 0.00 | 0.00 |
| ATOM | 1443 | CB   | TYR | X | 94 | 38.335 | 53.199 | 28.789 | 0.00 | 0.00 |
| ATOM | 1444 | HB2  | TYR | X | 94 | 38.972 | 52.318 | 28.870 | 0.00 | 0.00 |
| ATOM | 1445 | HB3  | TYR | X | 94 | 37.623 | 53.121 | 27.968 | 0.00 | 0.00 |
| ATOM | 1446 | CG   | TYR | X | 94 | 39.263 | 54.380 | 28.560 | 0.00 | 0.00 |
| ATOM | 1447 | CD1  | TYR | X | 94 | 38.738 | 55.486 | 27.819 | 0.00 | 0.00 |
| ATOM | 1448 | HD1  | TYR | X | 94 | 37.691 | 55.395 | 27.572 | 0.00 | 0.00 |
| ATOM | 1449 | CE1  | TYR | X | 94 | 39.533 | 56.549 | 27.266 | 0.00 | 0.00 |
| ATOM | 1450 | HE1  | TYR | X | 94 | 39.159 | 57.323 | 26.613 | 0.00 | 0.00 |
| ATOM | 1451 | CZ   | TYR | X | 94 | 40.869 | 56.584 | 27.768 | 0.00 | 0.00 |
| ATOM | 1452 | OH   | TYR | X | 94 | 41.674 | 57.555 | 27.396 | 0.00 | 0.00 |
| ATOM | 1453 | HH   | TYR | X | 94 | 42.599 | 57.338 | 27.532 | 0.00 | 0.00 |
| ATOM | 1454 | CE2  | TYR | X | 94 | 41.365 | 55.545 | 28.644 | 0.00 | 0.00 |
| ATOM | 1455 | HE2  | TYR | X | 94 | 42.314 | 55.731 | 29.126 | 0.00 | 0.00 |
| ATOM | 1456 | CD2  | TYR | X | 94 | 40.599 | 54.415 | 29.003 | 0.00 | 0.00 |
| ATOM | 1457 | HD2  | TYR | X | 94 | 40.903 | 53.690 | 29.743 | 0.00 | 0.00 |
| ATOM | 1458 | C    | TYR | X | 94 | 37.083 | 51.657 | 30.375 | 0.00 | 0.00 |
| ATOM | 1459 | O    | TYR | X | 94 | 37.733 | 50.968 | 31.204 | 0.00 | 0.00 |
| ATOM | 1460 | N    | LEU | X | 95 | 35.987 | 51.284 | 29.751 | 0.00 | 0.00 |
| ATOM | 1461 | H    | LEU | X | 95 | 35.646 | 52.054 | 29.193 | 0.00 | 0.00 |
| ATOM | 1462 | CA   | LEU | X | 95 | 35.378 | 50.017 | 29.672 | 0.00 | 0.00 |
| ATOM | 1463 | HA   | LEU | X | 95 | 35.667 | 49.313 | 30.452 | 0.00 | 0.00 |
| ATOM | 1464 | CB   | LEU | X | 95 | 33.801 | 50.132 | 29.891 | 0.00 | 0.00 |
| ATOM | 1465 | HB2  | LEU | X | 95 | 33.641 | 50.985 | 30.552 | 0.00 | 0.00 |
| ATOM | 1466 | HB3  | LEU | X | 95 | 33.348 | 50.384 | 28.932 | 0.00 | 0.00 |
| ATOM | 1467 | CG   | LEU | X | 95 | 33.053 | 48.939 | 30.590 | 0.00 | 0.00 |
| ATOM | 1468 | HG   | LEU | X | 95 | 33.809 | 48.355 | 31.116 | 0.00 | 0.00 |
| ATOM | 1469 | CD1  | LEU | X | 95 | 31.828 | 49.450 | 31.494 | 0.00 | 0.00 |
| ATOM | 1470 | HD11 | LEU | X | 95 | 32.306 | 50.132 | 32.197 | 0.00 | 0.00 |
| ATOM | 1471 | HD12 | LEU | X | 95 | 31.364 | 48.673 | 32.102 | 0.00 | 0.00 |
| ATOM | 1472 | HD13 | LEU | X | 95 | 31.141 | 50.095 | 30.945 | 0.00 | 0.00 |
| ATOM | 1473 | CD2  | LEU | X | 95 | 32.447 | 48.070 | 29.565 | 0.00 | 0.00 |
| ATOM | 1474 | HD21 | LEU | X | 95 | 32.040 | 48.780 | 28.844 | 0.00 | 0.00 |
| ATOM | 1475 | HD22 | LEU | X | 95 | 33.200 | 47.544 | 28.978 | 0.00 | 0.00 |
| ATOM | 1476 | HD23 | LEU | X | 95 | 31.749 | 47.351 | 29.993 | 0.00 | 0.00 |
| ATOM | 1477 | C    | LEU | X | 95 | 35.684 | 49.279 | 28.281 | 0.00 | 0.00 |
| ATOM | 1478 | O    | LEU | X | 95 | 36.115 | 49.987 | 27.327 | 0.00 | 0.00 |
| ATOM | 1479 | N    | ASN | X | 96 | 35.626 | 47.964 | 28.254 | 0.00 | 0.00 |
| ATOM | 1480 | H    | ASN | X | 96 | 35.398 | 47.387 | 29.050 | 0.00 | 0.00 |
| ATOM | 1481 | CA   | ASN | X | 96 | 36.018 | 47.076 | 27.099 | 0.00 | 0.00 |
| ATOM | 1482 | HA   | ASN | X | 96 | 35.929 | 47.644 | 26.173 | 0.00 | 0.00 |
| ATOM | 1483 | CB   | ASN | X | 96 | 37.541 | 46.694 | 27.301 | 0.00 | 0.00 |
| ATOM | 1484 | HB2  | ASN | X | 96 | 37.602 | 46.049 | 28.177 | 0.00 | 0.00 |
| ATOM | 1485 | HB3  | ASN | X | 96 | 38.008 | 46.150 | 26.479 | 0.00 | 0.00 |
| ATOM | 1486 | CG   | ASN | X | 96 | 38.447 | 47.883 | 27.656 | 0.00 | 0.00 |
| ATOM | 1487 | OD1  | ASN | X | 96 | 38.900 | 48.727 | 26.832 | 0.00 | 0.00 |
| ATOM | 1488 | ND2  | ASN | X | 96 | 38.785 | 47.937 | 28.928 | 0.00 | 0.00 |
| ATOM | 1489 | HD21 | ASN | X | 96 | 39.256 | 48.748 | 29.302 | 0.00 | 0.00 |
| ATOM | 1490 | HD22 | ASN | X | 96 | 38.428 | 47.316 | 29.641 | 0.00 | 0.00 |
| ATOM | 1491 | C    | ASN | X | 96 | 35.221 | 45.789 | 27.068 | 0.00 | 0.00 |
| ATOM | 1492 | O    | ASN | X | 96 | 34.740 | 45.324 | 28.145 | 0.00 | 0.00 |

|      |      |      |     |   |     |        |        |        |      |      |
|------|------|------|-----|---|-----|--------|--------|--------|------|------|
| ATOM | 1493 | N    | VAL | X | 97  | 34.918 | 45.230 | 25.874 | 0.00 | 0.00 |
| ATOM | 1494 | H    | VAL | X | 97  | 35.389 | 45.626 | 25.073 | 0.00 | 0.00 |
| ATOM | 1495 | CA   | VAL | X | 97  | 33.980 | 44.111 | 25.578 | 0.00 | 0.00 |
| ATOM | 1496 | HA   | VAL | X | 97  | 33.913 | 43.477 | 26.462 | 0.00 | 0.00 |
| ATOM | 1497 | CB   | VAL | X | 97  | 32.596 | 44.624 | 25.189 | 0.00 | 0.00 |
| ATOM | 1498 | HB   | VAL | X | 97  | 32.681 | 45.055 | 24.192 | 0.00 | 0.00 |
| ATOM | 1499 | CG1  | VAL | X | 97  | 31.581 | 43.474 | 25.202 | 0.00 | 0.00 |
| ATOM | 1500 | HG11 | VAL | X | 97  | 31.382 | 43.041 | 26.183 | 0.00 | 0.00 |
| ATOM | 1501 | HG12 | VAL | X | 97  | 30.613 | 43.936 | 25.008 | 0.00 | 0.00 |
| ATOM | 1502 | HG13 | VAL | X | 97  | 31.874 | 42.673 | 24.523 | 0.00 | 0.00 |
| ATOM | 1503 | CG2  | VAL | X | 97  | 31.989 | 45.813 | 25.945 | 0.00 | 0.00 |
| ATOM | 1504 | HG21 | VAL | X | 97  | 32.087 | 45.668 | 27.021 | 0.00 | 0.00 |
| ATOM | 1505 | HG22 | VAL | X | 97  | 30.906 | 45.923 | 25.883 | 0.00 | 0.00 |
| ATOM | 1506 | HG23 | VAL | X | 97  | 32.473 | 46.755 | 25.690 | 0.00 | 0.00 |
| ATOM | 1507 | C    | VAL | X | 97  | 34.672 | 43.336 | 24.485 | 0.00 | 0.00 |
| ATOM | 1508 | O    | VAL | X | 97  | 35.109 | 43.884 | 23.448 | 0.00 | 0.00 |
| ATOM | 1509 | N    | TRP | X | 98  | 34.612 | 41.989 | 24.649 | 0.00 | 0.00 |
| ATOM | 1510 | H    | TRP | X | 98  | 34.433 | 41.713 | 25.604 | 0.00 | 0.00 |
| ATOM | 1511 | CA   | TRP | X | 98  | 35.005 | 40.922 | 23.657 | 0.00 | 0.00 |
| ATOM | 1512 | HA   | TRP | X | 98  | 35.329 | 41.303 | 22.689 | 0.00 | 0.00 |
| ATOM | 1513 | CB   | TRP | X | 98  | 36.268 | 40.202 | 24.218 | 0.00 | 0.00 |
| ATOM | 1514 | HB2  | TRP | X | 98  | 36.036 | 39.923 | 25.245 | 0.00 | 0.00 |
| ATOM | 1515 | HB3  | TRP | X | 98  | 36.356 | 39.310 | 23.598 | 0.00 | 0.00 |
| ATOM | 1516 | CG   | TRP | X | 98  | 37.577 | 40.890 | 24.266 | 0.00 | 0.00 |
| ATOM | 1517 | CD1  | TRP | X | 98  | 38.634 | 40.736 | 23.383 | 0.00 | 0.00 |
| ATOM | 1518 | HD1  | TRP | X | 98  | 38.568 | 40.084 | 22.524 | 0.00 | 0.00 |
| ATOM | 1519 | NE1  | TRP | X | 98  | 39.688 | 41.532 | 23.809 | 0.00 | 0.00 |
| ATOM | 1520 | HE1  | TRP | X | 98  | 40.610 | 41.508 | 23.397 | 0.00 | 0.00 |
| ATOM | 1521 | CE2  | TRP | X | 98  | 39.391 | 42.117 | 24.982 | 0.00 | 0.00 |
| ATOM | 1522 | CZ2  | TRP | X | 98  | 40.138 | 42.987 | 25.763 | 0.00 | 0.00 |
| ATOM | 1523 | HZ2  | TRP | X | 98  | 41.109 | 43.351 | 25.462 | 0.00 | 0.00 |
| ATOM | 1524 | CH2  | TRP | X | 98  | 39.627 | 43.485 | 26.960 | 0.00 | 0.00 |
| ATOM | 1525 | HH2  | TRP | X | 98  | 40.202 | 44.197 | 27.533 | 0.00 | 0.00 |
| ATOM | 1526 | CZ3  | TRP | X | 98  | 38.360 | 43.093 | 27.419 | 0.00 | 0.00 |
| ATOM | 1527 | HZ3  | TRP | X | 98  | 38.006 | 43.538 | 28.337 | 0.00 | 0.00 |
| ATOM | 1528 | CE3  | TRP | X | 98  | 37.559 | 42.277 | 26.585 | 0.00 | 0.00 |
| ATOM | 1529 | HE3  | TRP | X | 98  | 36.555 | 41.947 | 26.809 | 0.00 | 0.00 |
| ATOM | 1530 | CD2  | TRP | X | 98  | 38.039 | 41.772 | 25.342 | 0.00 | 0.00 |
| ATOM | 1531 | C    | TRP | X | 98  | 33.805 | 39.944 | 23.423 | 0.00 | 0.00 |
| ATOM | 1532 | O    | TRP | X | 98  | 33.228 | 39.461 | 24.412 | 0.00 | 0.00 |
| ATOM | 1533 | N    | THR | X | 99  | 33.389 | 39.720 | 22.201 | 0.00 | 0.00 |
| ATOM | 1534 | H    | THR | X | 99  | 33.923 | 40.022 | 21.399 | 0.00 | 0.00 |
| ATOM | 1535 | CA   | THR | X | 99  | 32.146 | 39.075 | 21.836 | 0.00 | 0.00 |
| ATOM | 1536 | HA   | THR | X | 99  | 31.915 | 38.397 | 22.658 | 0.00 | 0.00 |
| ATOM | 1537 | CB   | THR | X | 99  | 31.025 | 40.078 | 21.892 | 0.00 | 0.00 |
| ATOM | 1538 | HB   | THR | X | 99  | 30.802 | 40.442 | 22.895 | 0.00 | 0.00 |
| ATOM | 1539 | CG2  | THR | X | 99  | 31.390 | 41.382 | 21.227 | 0.00 | 0.00 |
| ATOM | 1540 | HG21 | THR | X | 99  | 32.049 | 41.968 | 21.867 | 0.00 | 0.00 |
| ATOM | 1541 | HG22 | THR | X | 99  | 30.448 | 41.895 | 21.035 | 0.00 | 0.00 |
| ATOM | 1542 | HG23 | THR | X | 99  | 31.751 | 41.122 | 20.232 | 0.00 | 0.00 |
| ATOM | 1543 | OG1  | THR | X | 99  | 29.800 | 39.546 | 21.427 | 0.00 | 0.00 |
| ATOM | 1544 | HG1  | THR | X | 99  | 29.055 | 40.044 | 21.771 | 0.00 | 0.00 |
| ATOM | 1545 | C    | THR | X | 99  | 32.248 | 38.325 | 20.397 | 0.00 | 0.00 |
| ATOM | 1546 | O    | THR | X | 99  | 32.929 | 38.786 | 19.486 | 0.00 | 0.00 |
| ATOM | 1547 | N    | PRO | X | 100 | 31.572 | 37.124 | 20.262 | 0.00 | 0.00 |
| ATOM | 1548 | CD   | PRO | X | 100 | 30.752 | 36.497 | 21.374 | 0.00 | 0.00 |
| ATOM | 1549 | HD2  | PRO | X | 100 | 29.881 | 37.063 | 21.705 | 0.00 | 0.00 |
| ATOM | 1550 | HD3  | PRO | X | 100 | 31.389 | 36.191 | 22.204 | 0.00 | 0.00 |
| ATOM | 1551 | CG   | PRO | X | 100 | 30.069 | 35.337 | 20.785 | 0.00 | 0.00 |
| ATOM | 1552 | HG2  | PRO | X | 100 | 29.122 | 35.502 | 20.271 | 0.00 | 0.00 |
| ATOM | 1553 | HB3  | PRO | X | 100 | 30.013 | 34.692 | 21.662 | 0.00 | 0.00 |
| ATOM | 1554 | CB   | PRO | X | 100 | 31.064 | 34.815 | 19.727 | 0.00 | 0.00 |
| ATOM | 1555 | HB2  | PRO | X | 100 | 30.482 | 34.343 | 18.935 | 0.00 | 0.00 |
| ATOM | 1556 | HB3  | PRO | X | 100 | 31.848 | 34.249 | 20.229 | 0.00 | 0.00 |
| ATOM | 1557 | CA   | PRO | X | 100 | 31.680 | 36.149 | 19.209 | 0.00 | 0.00 |
| ATOM | 1558 | HA   | PRO | X | 100 | 32.726 | 35.925 | 19.000 | 0.00 | 0.00 |
| ATOM | 1559 | C    | PRO | X | 100 | 31.056 | 36.702 | 17.933 | 0.00 | 0.00 |



|      |      |      |     |   |     |        |        |        |      |      |
|------|------|------|-----|---|-----|--------|--------|--------|------|------|
| ATOM | 1560 | O    | PRO | X | 100 | 29.959 | 37.271 | 17.986 | 0.00 | 0.00 |
| ATOM | 1561 | N    | TYR | X | 101 | 31.720 | 36.537 | 16.780 | 0.00 | 0.00 |
| ATOM | 1562 | H    | TYR | X | 101 | 32.665 | 36.188 | 16.848 | 0.00 | 0.00 |
| ATOM | 1563 | CA   | TYR | X | 101 | 31.368 | 37.185 | 15.445 | 0.00 | 0.00 |
| ATOM | 1564 | HA   | TYR | X | 101 | 30.527 | 37.860 | 15.603 | 0.00 | 0.00 |
| ATOM | 1565 | CB   | TYR | X | 101 | 32.503 | 38.026 | 14.964 | 0.00 | 0.00 |
| ATOM | 1566 | HB2  | TYR | X | 101 | 33.029 | 38.480 | 15.804 | 0.00 | 0.00 |
| ATOM | 1567 | HB3  | TYR | X | 101 | 33.231 | 37.367 | 14.490 | 0.00 | 0.00 |
| ATOM | 1568 | CG   | TYR | X | 101 | 32.165 | 39.216 | 14.144 | 0.00 | 0.00 |
| ATOM | 1569 | CD1  | TYR | X | 101 | 32.679 | 39.287 | 12.846 | 0.00 | 0.00 |
| ATOM | 1570 | HD1  | TYR | X | 101 | 33.393 | 38.539 | 12.534 | 0.00 | 0.00 |
| ATOM | 1571 | CE1  | TYR | X | 101 | 32.259 | 40.260 | 11.876 | 0.00 | 0.00 |
| ATOM | 1572 | HE1  | TYR | X | 101 | 32.675 | 40.341 | 10.883 | 0.00 | 0.00 |
| ATOM | 1573 | CZ   | TYR | X | 101 | 31.360 | 41.271 | 12.391 | 0.00 | 0.00 |
| ATOM | 1574 | OH   | TYR | X | 101 | 31.164 | 42.471 | 11.820 | 0.00 | 0.00 |
| ATOM | 1575 | HH   | TYR | X | 101 | 31.405 | 42.477 | 10.891 | 0.00 | 0.00 |
| ATOM | 1576 | CE2  | TYR | X | 101 | 30.895 | 41.243 | 13.742 | 0.00 | 0.00 |
| ATOM | 1577 | HE2  | TYR | X | 101 | 30.270 | 42.007 | 14.180 | 0.00 | 0.00 |
| ATOM | 1578 | CD2  | TYR | X | 101 | 31.282 | 40.177 | 14.561 | 0.00 | 0.00 |
| ATOM | 1579 | HD2  | TYR | X | 101 | 30.851 | 40.181 | 15.552 | 0.00 | 0.00 |
| ATOM | 1580 | C    | TYR | X | 101 | 30.981 | 36.233 | 14.269 | 0.00 | 0.00 |
| ATOM | 1581 | O    | TYR | X | 101 | 31.605 | 35.121 | 14.280 | 0.00 | 0.00 |
| ATOM | 1582 | N    | PRO | X | 102 | 30.027 | 36.560 | 13.310 | 0.00 | 0.00 |
| ATOM | 1583 | CD   | PRO | X | 102 | 29.809 | 35.797 | 12.059 | 0.00 | 0.00 |
| ATOM | 1584 | HD2  | PRO | X | 102 | 29.325 | 34.842 | 12.263 | 0.00 | 0.00 |
| ATOM | 1585 | HD3  | PRO | X | 102 | 30.734 | 35.696 | 11.491 | 0.00 | 0.00 |
| ATOM | 1586 | CG   | PRO | X | 102 | 28.929 | 36.747 | 11.267 | 0.00 | 0.00 |
| ATOM | 1587 | HG2  | PRO | X | 102 | 28.402 | 36.299 | 10.425 | 0.00 | 0.00 |
| ATOM | 1588 | HG3  | PRO | X | 102 | 29.497 | 37.525 | 10.757 | 0.00 | 0.00 |
| ATOM | 1589 | CB   | PRO | X | 102 | 27.999 | 37.420 | 12.283 | 0.00 | 0.00 |
| ATOM | 1590 | HB2  | PRO | X | 102 | 27.158 | 36.758 | 12.494 | 0.00 | 0.00 |
| ATOM | 1591 | HB3  | PRO | X | 102 | 27.507 | 38.342 | 11.976 | 0.00 | 0.00 |
| ATOM | 1592 | CA   | PRO | X | 102 | 28.921 | 37.580 | 13.506 | 0.00 | 0.00 |
| ATOM | 1593 | HA   | PRO | X | 102 | 29.424 | 38.545 | 13.442 | 0.00 | 0.00 |
| ATOM | 1594 | C    | PRO | X | 102 | 28.153 | 37.242 | 14.795 | 0.00 | 0.00 |
| ATOM | 1595 | O    | PRO | X | 102 | 28.497 | 36.339 | 15.582 | 0.00 | 0.00 |
| ATOM | 1596 | N    | ARG | X | 103 | 27.201 | 38.126 | 15.256 | 0.00 | 0.00 |
| ATOM | 1597 | H    | ARG | X | 103 | 26.889 | 38.774 | 14.546 | 0.00 | 0.00 |
| ATOM | 1598 | CA   | ARG | X | 103 | 26.516 | 38.138 | 16.593 | 0.00 | 0.00 |
| ATOM | 1599 | HA   | ARG | X | 103 | 27.371 | 38.373 | 17.227 | 0.00 | 0.00 |
| ATOM | 1600 | CB   | ARG | X | 103 | 25.452 | 39.285 | 16.667 | 0.00 | 0.00 |
| ATOM | 1601 | HB2  | ARG | X | 103 | 24.664 | 39.047 | 15.953 | 0.00 | 0.00 |
| ATOM | 1602 | HB3  | ARG | X | 103 | 24.920 | 39.354 | 17.616 | 0.00 | 0.00 |
| ATOM | 1603 | CG   | ARG | X | 103 | 26.061 | 40.712 | 16.473 | 0.00 | 0.00 |
| ATOM | 1604 | HG2  | ARG | X | 103 | 26.485 | 40.889 | 17.462 | 0.00 | 0.00 |
| ATOM | 1605 | HG3  | ARG | X | 103 | 26.942 | 40.727 | 15.831 | 0.00 | 0.00 |
| ATOM | 1606 | CD   | ARG | X | 103 | 25.034 | 41.774 | 16.149 | 0.00 | 0.00 |
| ATOM | 1607 | HD2  | ARG | X | 103 | 25.592 | 42.708 | 16.073 | 0.00 | 0.00 |
| ATOM | 1608 | HD3  | ARG | X | 103 | 24.621 | 41.462 | 15.190 | 0.00 | 0.00 |
| ATOM | 1609 | NE   | ARG | X | 103 | 24.047 | 41.993 | 17.144 | 0.00 | 0.00 |
| ATOM | 1610 | HE   | ARG | X | 103 | 23.308 | 41.320 | 16.999 | 0.00 | 0.00 |
| ATOM | 1611 | CZ   | ARG | X | 103 | 24.129 | 42.792 | 18.158 | 0.00 | 0.00 |
| ATOM | 1612 | NH1  | ARG | X | 103 | 25.153 | 43.572 | 18.412 | 0.00 | 0.00 |
| ATOM | 1613 | HH11 | ARG | X | 103 | 25.915 | 43.524 | 17.752 | 0.00 | 0.00 |
| ATOM | 1614 | HH12 | ARG | X | 103 | 25.097 | 44.173 | 19.222 | 0.00 | 0.00 |
| ATOM | 1615 | NH2  | ARG | X | 103 | 23.041 | 42.963 | 18.879 | 0.00 | 0.00 |
| ATOM | 1616 | HH21 | ARG | X | 103 | 22.190 | 42.462 | 18.668 | 0.00 | 0.00 |
| ATOM | 1617 | HH22 | ARG | X | 103 | 23.079 | 43.493 | 19.737 | 0.00 | 0.00 |
| ATOM | 1618 | C    | ARG | X | 103 | 25.891 | 36.724 | 17.034 | 0.00 | 0.00 |
| ATOM | 1619 | O    | ARG | X | 103 | 25.306 | 36.036 | 16.136 | 0.00 | 0.00 |
| ATOM | 1620 | N    | PRO | X | 104 | 26.020 | 36.323 | 18.283 | 0.00 | 0.00 |
| ATOM | 1621 | CD   | PRO | X | 104 | 26.539 | 37.176 | 19.330 | 0.00 | 0.00 |
| ATOM | 1622 | HD2  | PRO | X | 104 | 25.993 | 38.117 | 19.266 | 0.00 | 0.00 |
| ATOM | 1623 | HD3  | PRO | X | 104 | 27.620 | 37.311 | 19.349 | 0.00 | 0.00 |
| ATOM | 1624 | CG   | PRO | X | 104 | 26.182 | 36.559 | 20.685 | 0.00 | 0.00 |
| ATOM | 1625 | HG2  | PRO | X | 104 | 25.275 | 36.868 | 21.203 | 0.00 | 0.00 |
| ATOM | 1626 | HG3  | PRO | X | 104 | 26.989 | 36.597 | 21.417 | 0.00 | 0.00 |

|      |      |      |     |   |     |        |        |        |      |      |
|------|------|------|-----|---|-----|--------|--------|--------|------|------|
| ATOM | 1627 | CB   | PRO | X | 104 | 26.000 | 35.054 | 20.368 | 0.00 | 0.00 |
| ATOM | 1628 | HB2  | PRO | X | 104 | 25.246 | 34.570 | 20.988 | 0.00 | 0.00 |
| ATOM | 1629 | HB3  | PRO | X | 104 | 26.970 | 34.556 | 20.391 | 0.00 | 0.00 |
| ATOM | 1630 | CA   | PRO | X | 104 | 25.434 | 35.089 | 18.904 | 0.00 | 0.00 |
| ATOM | 1631 | HA   | PRO | X | 104 | 25.785 | 34.168 | 18.438 | 0.00 | 0.00 |
| ATOM | 1632 | C    | PRO | X | 104 | 23.916 | 35.109 | 18.737 | 0.00 | 0.00 |
| ATOM | 1633 | O    | PRO | X | 104 | 23.293 | 36.198 | 18.905 | 0.00 | 0.00 |
| ATOM | 1634 | N    | THR | X | 105 | 23.355 | 33.931 | 18.399 | 0.00 | 0.00 |
| ATOM | 1635 | H    | THR | X | 105 | 23.932 | 33.138 | 18.159 | 0.00 | 0.00 |
| ATOM | 1636 | CA   | THR | X | 105 | 22.000 | 33.801 | 17.950 | 0.00 | 0.00 |
| ATOM | 1637 | HA   | THR | X | 105 | 21.690 | 34.574 | 17.247 | 0.00 | 0.00 |
| ATOM | 1638 | CB   | THR | X | 105 | 21.848 | 32.577 | 16.996 | 0.00 | 0.00 |
| ATOM | 1639 | HB   | THR | X | 105 | 20.810 | 32.428 | 16.701 | 0.00 | 0.00 |
| ATOM | 1640 | CG2  | THR | X | 105 | 22.579 | 32.925 | 15.710 | 0.00 | 0.00 |
| ATOM | 1641 | HG21 | THR | X | 105 | 22.529 | 31.993 | 15.147 | 0.00 | 0.00 |
| ATOM | 1642 | HG22 | THR | X | 105 | 23.611 | 33.193 | 15.936 | 0.00 | 0.00 |
| ATOM | 1643 | HG23 | THR | X | 105 | 22.002 | 33.652 | 15.139 | 0.00 | 0.00 |
| ATOM | 1644 | OG1  | THR | X | 105 | 22.373 | 31.500 | 17.712 | 0.00 | 0.00 |
| ATOM | 1645 | HG1  | THR | X | 105 | 22.383 | 30.766 | 17.093 | 0.00 | 0.00 |
| ATOM | 1646 | C    | THR | X | 105 | 20.886 | 33.718 | 19.054 | 0.00 | 0.00 |
| ATOM | 1647 | O    | THR | X | 105 | 19.723 | 33.723 | 18.675 | 0.00 | 0.00 |
| ATOM | 1648 | N    | SER | X | 106 | 21.351 | 33.589 | 20.313 | 0.00 | 0.00 |
| ATOM | 1649 | H    | SER | X | 106 | 22.340 | 33.711 | 20.480 | 0.00 | 0.00 |
| ATOM | 1650 | CA   | SER | X | 106 | 20.598 | 33.686 | 21.537 | 0.00 | 0.00 |
| ATOM | 1651 | HA   | SER | X | 106 | 19.643 | 34.142 | 21.276 | 0.00 | 0.00 |
| ATOM | 1652 | CB   | SER | X | 106 | 20.144 | 32.340 | 22.026 | 0.00 | 0.00 |
| ATOM | 1653 | HB2  | SER | X | 106 | 20.965 | 31.627 | 21.952 | 0.00 | 0.00 |
| ATOM | 1654 | HB3  | SER | X | 106 | 19.837 | 32.277 | 23.070 | 0.00 | 0.00 |
| ATOM | 1655 | OG   | SER | X | 106 | 18.998 | 31.872 | 21.270 | 0.00 | 0.00 |
| ATOM | 1656 | HG   | SER | X | 106 | 19.217 | 31.662 | 20.359 | 0.00 | 0.00 |
| ATOM | 1657 | C    | SER | X | 106 | 21.439 | 34.439 | 22.657 | 0.00 | 0.00 |
| ATOM | 1658 | O    | SER | X | 106 | 22.650 | 34.354 | 22.540 | 0.00 | 0.00 |
| ATOM | 1659 | N    | PRO | X | 107 | 20.796 | 35.004 | 23.632 | 0.00 | 0.00 |
| ATOM | 1660 | CD   | PRO | X | 107 | 19.350 | 34.985 | 23.854 | 0.00 | 0.00 |
| ATOM | 1661 | HD2  | PRO | X | 107 | 19.072 | 33.961 | 24.104 | 0.00 | 0.00 |
| ATOM | 1662 | HD3  | PRO | X | 107 | 18.855 | 35.296 | 22.934 | 0.00 | 0.00 |
| ATOM | 1663 | CG   | PRO | X | 107 | 19.183 | 36.005 | 24.989 | 0.00 | 0.00 |
| ATOM | 1664 | HG2  | PRO | X | 107 | 18.280 | 35.813 | 25.570 | 0.00 | 0.00 |
| ATOM | 1665 | HG3  | PRO | X | 107 | 18.970 | 36.952 | 24.492 | 0.00 | 0.00 |
| ATOM | 1666 | CB   | PRO | X | 107 | 20.486 | 36.107 | 25.875 | 0.00 | 0.00 |
| ATOM | 1667 | HB2  | PRO | X | 107 | 20.416 | 35.350 | 26.656 | 0.00 | 0.00 |
| ATOM | 1668 | HB3  | PRO | X | 107 | 20.716 | 37.100 | 26.262 | 0.00 | 0.00 |
| ATOM | 1669 | CA   | PRO | X | 107 | 21.546 | 35.641 | 24.790 | 0.00 | 0.00 |
| ATOM | 1670 | HA   | PRO | X | 107 | 22.046 | 36.495 | 24.333 | 0.00 | 0.00 |
| ATOM | 1671 | C    | PRO | X | 107 | 22.524 | 34.653 | 25.425 | 0.00 | 0.00 |
| ATOM | 1672 | O    | PRO | X | 107 | 22.186 | 33.517 | 25.804 | 0.00 | 0.00 |
| ATOM | 1673 | N    | THR | X | 108 | 23.752 | 35.151 | 25.616 | 0.00 | 0.00 |
| ATOM | 1674 | H    | THR | X | 108 | 23.905 | 36.110 | 25.337 | 0.00 | 0.00 |
| ATOM | 1675 | CA   | THR | X | 108 | 24.936 | 34.369 | 26.020 | 0.00 | 0.00 |
| ATOM | 1676 | HA   | THR | X | 108 | 24.670 | 33.352 | 26.307 | 0.00 | 0.00 |
| ATOM | 1677 | CB   | THR | X | 108 | 25.856 | 34.233 | 24.809 | 0.00 | 0.00 |
| ATOM | 1678 | HB   | THR | X | 108 | 25.273 | 33.782 | 24.005 | 0.00 | 0.00 |
| ATOM | 1679 | CG2  | THR | X | 108 | 26.383 | 35.501 | 24.209 | 0.00 | 0.00 |
| ATOM | 1680 | HG21 | THR | X | 108 | 26.965 | 35.260 | 23.320 | 0.00 | 0.00 |
| ATOM | 1681 | HG22 | THR | X | 108 | 27.134 | 35.913 | 24.884 | 0.00 | 0.00 |
| ATOM | 1682 | HG23 | THR | X | 108 | 25.595 | 36.218 | 23.981 | 0.00 | 0.00 |
| ATOM | 1683 | OG1  | THR | X | 108 | 26.920 | 33.300 | 25.113 | 0.00 | 0.00 |
| ATOM | 1684 | HG1  | THR | X | 108 | 27.642 | 33.496 | 24.511 | 0.00 | 0.00 |
| ATOM | 1685 | C    | THR | X | 108 | 25.631 | 35.116 | 27.216 | 0.00 | 0.00 |
| ATOM | 1686 | O    | THR | X | 108 | 25.671 | 36.383 | 27.172 | 0.00 | 0.00 |
| ATOM | 1687 | N    | PRO | X | 109 | 26.205 | 34.335 | 28.138 | 0.00 | 0.00 |
| ATOM | 1688 | CD   | PRO | X | 109 | 26.253 | 32.902 | 28.235 | 0.00 | 0.00 |
| ATOM | 1689 | HD2  | PRO | X | 109 | 27.198 | 32.643 | 27.758 | 0.00 | 0.00 |
| ATOM | 1690 | HD3  | PRO | X | 109 | 25.370 | 32.398 | 27.840 | 0.00 | 0.00 |
| ATOM | 1691 | CG   | PRO | X | 109 | 26.324 | 32.577 | 29.663 | 0.00 | 0.00 |
| ATOM | 1692 | HG2  | PRO | X | 109 | 26.826 | 31.633 | 29.877 | 0.00 | 0.00 |
| ATOM | 1693 | HG3  | PRO | X | 109 | 25.300 | 32.674 | 30.024 | 0.00 | 0.00 |

|      |      |      |     |   |     |        |        |        |      |      |
|------|------|------|-----|---|-----|--------|--------|--------|------|------|
| ATOM | 1694 | CB   | PRO | X | 109 | 27.118 | 33.666 | 30.301 | 0.00 | 0.00 |
| ATOM | 1695 | HB2  | PRO | X | 109 | 28.198 | 33.535 | 30.235 | 0.00 | 0.00 |
| ATOM | 1696 | HB3  | PRO | X | 109 | 27.011 | 33.724 | 31.384 | 0.00 | 0.00 |
| ATOM | 1697 | CA   | PRO | X | 109 | 26.702 | 34.881 | 29.483 | 0.00 | 0.00 |
| ATOM | 1698 | HA   | PRO | X | 109 | 25.940 | 35.432 | 30.034 | 0.00 | 0.00 |
| ATOM | 1699 | C    | PRO | X | 109 | 27.821 | 35.888 | 29.318 | 0.00 | 0.00 |
| ATOM | 1700 | O    | PRO | X | 109 | 28.577 | 35.668 | 28.396 | 0.00 | 0.00 |
| ATOM | 1701 | N    | VAL | X | 110 | 28.084 | 36.773 | 30.268 | 0.00 | 0.00 |
| ATOM | 1702 | H    | VAL | X | 110 | 27.399 | 36.688 | 31.005 | 0.00 | 0.00 |
| ATOM | 1703 | CA   | VAL | X | 110 | 29.076 | 37.850 | 30.384 | 0.00 | 0.00 |
| ATOM | 1704 | HA   | VAL | X | 110 | 29.560 | 37.943 | 29.412 | 0.00 | 0.00 |
| ATOM | 1705 | CB   | VAL | X | 110 | 28.294 | 39.174 | 30.538 | 0.00 | 0.00 |
| ATOM | 1706 | HB   | VAL | X | 110 | 27.690 | 39.201 | 31.445 | 0.00 | 0.00 |
| ATOM | 1707 | CG1  | VAL | X | 110 | 29.254 | 40.372 | 30.637 | 0.00 | 0.00 |
| ATOM | 1708 | HG11 | VAL | X | 110 | 28.828 | 41.199 | 31.206 | 0.00 | 0.00 |
| ATOM | 1709 | HG12 | VAL | X | 110 | 30.202 | 40.174 | 31.137 | 0.00 | 0.00 |
| ATOM | 1710 | HG13 | VAL | X | 110 | 29.325 | 40.735 | 29.612 | 0.00 | 0.00 |
| ATOM | 1711 | CG2  | VAL | X | 110 | 27.370 | 39.388 | 29.360 | 0.00 | 0.00 |
| ATOM | 1712 | HG21 | VAL | X | 110 | 27.124 | 40.445 | 29.255 | 0.00 | 0.00 |
| ATOM | 1713 | HG22 | VAL | X | 110 | 26.489 | 38.754 | 29.460 | 0.00 | 0.00 |
| ATOM | 1714 | HG23 | VAL | X | 110 | 27.841 | 38.995 | 28.459 | 0.00 | 0.00 |
| ATOM | 1715 | C    | VAL | X | 110 | 30.066 | 37.595 | 31.516 | 0.00 | 0.00 |
| ATOM | 1716 | O    | VAL | X | 110 | 29.739 | 37.475 | 32.690 | 0.00 | 0.00 |
| ATOM | 1717 | N    | LEU | X | 111 | 31.411 | 37.542 | 31.303 | 0.00 | 0.00 |
| ATOM | 1718 | H    | LEU | X | 111 | 31.691 | 37.785 | 30.364 | 0.00 | 0.00 |
| ATOM | 1719 | CA   | LEU | X | 111 | 32.512 | 37.596 | 32.298 | 0.00 | 0.00 |
| ATOM | 1720 | HA   | LEU | X | 111 | 32.258 | 37.251 | 33.300 | 0.00 | 0.00 |
| ATOM | 1721 | CB   | LEU | X | 111 | 33.722 | 36.819 | 31.872 | 0.00 | 0.00 |
| ATOM | 1722 | HB2  | LEU | X | 111 | 33.967 | 37.261 | 30.906 | 0.00 | 0.00 |
| ATOM | 1723 | HB3  | LEU | X | 111 | 34.585 | 36.904 | 32.533 | 0.00 | 0.00 |
| ATOM | 1724 | CG   | LEU | X | 111 | 33.515 | 35.367 | 31.628 | 0.00 | 0.00 |
| ATOM | 1725 | HG   | LEU | X | 111 | 32.593 | 35.193 | 31.074 | 0.00 | 0.00 |
| ATOM | 1726 | CD1  | LEU | X | 111 | 34.699 | 34.887 | 30.835 | 0.00 | 0.00 |
| ATOM | 1727 | HD11 | LEU | X | 111 | 34.894 | 35.505 | 29.958 | 0.00 | 0.00 |
| ATOM | 1728 | HD12 | LEU | X | 111 | 34.656 | 33.864 | 30.460 | 0.00 | 0.00 |
| ATOM | 1729 | HD13 | LEU | X | 111 | 35.583 | 34.794 | 31.466 | 0.00 | 0.00 |
| ATOM | 1730 | CD2  | LEU | X | 111 | 33.389 | 34.596 | 32.942 | 0.00 | 0.00 |
| ATOM | 1731 | HD21 | LEU | X | 111 | 33.261 | 33.520 | 32.830 | 0.00 | 0.00 |
| ATOM | 1732 | HD22 | LEU | X | 111 | 34.239 | 34.774 | 33.601 | 0.00 | 0.00 |
| ATOM | 1733 | HD23 | LEU | X | 111 | 32.512 | 34.962 | 33.477 | 0.00 | 0.00 |
| ATOM | 1734 | C    | LEU | X | 111 | 32.922 | 39.051 | 32.515 | 0.00 | 0.00 |
| ATOM | 1735 | O    | LEU | X | 111 | 33.118 | 39.765 | 31.533 | 0.00 | 0.00 |
| ATOM | 1736 | N    | VAL | X | 112 | 33.145 | 39.470 | 33.752 | 0.00 | 0.00 |
| ATOM | 1737 | H    | VAL | X | 112 | 32.976 | 38.774 | 34.465 | 0.00 | 0.00 |
| ATOM | 1738 | CA   | VAL | X | 112 | 33.721 | 40.823 | 34.054 | 0.00 | 0.00 |
| ATOM | 1739 | HA   | VAL | X | 112 | 33.869 | 41.328 | 33.099 | 0.00 | 0.00 |
| ATOM | 1740 | CB   | VAL | X | 112 | 32.759 | 41.711 | 34.864 | 0.00 | 0.00 |
| ATOM | 1741 | HB   | VAL | X | 112 | 32.603 | 41.213 | 35.821 | 0.00 | 0.00 |
| ATOM | 1742 | CG1  | VAL | X | 112 | 33.330 | 43.173 | 35.013 | 0.00 | 0.00 |
| ATOM | 1743 | HG11 | VAL | X | 112 | 34.378 | 43.130 | 35.310 | 0.00 | 0.00 |
| ATOM | 1744 | HG12 | VAL | X | 112 | 33.295 | 43.611 | 34.015 | 0.00 | 0.00 |
| ATOM | 1745 | HG13 | VAL | X | 112 | 32.710 | 43.784 | 35.669 | 0.00 | 0.00 |
| ATOM | 1746 | CG2  | VAL | X | 112 | 31.365 | 41.852 | 34.313 | 0.00 | 0.00 |
| ATOM | 1747 | HG21 | VAL | X | 112 | 30.826 | 40.907 | 34.371 | 0.00 | 0.00 |
| ATOM | 1748 | HG22 | VAL | X | 112 | 31.284 | 42.149 | 33.268 | 0.00 | 0.00 |
| ATOM | 1749 | HG23 | VAL | X | 112 | 30.848 | 42.662 | 34.828 | 0.00 | 0.00 |
| ATOM | 1750 | C    | VAL | X | 112 | 35.103 | 40.672 | 34.760 | 0.00 | 0.00 |
| ATOM | 1751 | O    | VAL | X | 112 | 35.079 | 40.239 | 35.889 | 0.00 | 0.00 |
| ATOM | 1752 | N    | TRP | X | 113 | 36.213 | 41.019 | 34.094 | 0.00 | 0.00 |
| ATOM | 1753 | H    | TRP | X | 113 | 36.175 | 41.345 | 33.138 | 0.00 | 0.00 |
| ATOM | 1754 | CA   | TRP | X | 113 | 37.588 | 41.001 | 34.617 | 0.00 | 0.00 |
| ATOM | 1755 | HA   | TRP | X | 113 | 37.748 | 40.095 | 35.200 | 0.00 | 0.00 |
| ATOM | 1756 | CB   | TRP | X | 113 | 38.507 | 40.848 | 33.439 | 0.00 | 0.00 |
| ATOM | 1757 | HB2  | TRP | X | 113 | 38.180 | 40.039 | 32.786 | 0.00 | 0.00 |
| ATOM | 1758 | HB3  | TRP | X | 113 | 38.392 | 41.741 | 32.826 | 0.00 | 0.00 |
| ATOM | 1759 | CG   | TRP | X | 113 | 39.948 | 40.678 | 33.868 | 0.00 | 0.00 |
| ATOM | 1760 | CD1  | TRP | X | 113 | 40.742 | 41.758 | 33.938 | 0.00 | 0.00 |

|      |      |      |     |   |     |        |        |        |      |      |
|------|------|------|-----|---|-----|--------|--------|--------|------|------|
| ATOM | 1761 | HD1  | TRP | X | 113 | 40.530 | 42.735 | 33.529 | 0.00 | 0.00 |
| ATOM | 1762 | NE1  | TRP | X | 113 | 41.918 | 41.418 | 34.589 | 0.00 | 0.00 |
| ATOM | 1763 | HE1  | TRP | X | 113 | 42.723 | 42.010 | 34.732 | 0.00 | 0.00 |
| ATOM | 1764 | CE2  | TRP | X | 113 | 41.906 | 40.142 | 35.061 | 0.00 | 0.00 |
| ATOM | 1765 | CZ2  | TRP | X | 113 | 42.762 | 39.270 | 35.753 | 0.00 | 0.00 |
| ATOM | 1766 | HZ2  | TRP | X | 113 | 43.797 | 39.532 | 35.914 | 0.00 | 0.00 |
| ATOM | 1767 | CH2  | TRP | X | 113 | 42.413 | 37.898 | 36.008 | 0.00 | 0.00 |
| ATOM | 1768 | HH2  | TRP | X | 113 | 43.037 | 37.173 | 36.508 | 0.00 | 0.00 |
| ATOM | 1769 | CZ3  | TRP | X | 113 | 41.117 | 37.478 | 35.679 | 0.00 | 0.00 |
| ATOM | 1770 | HZ3  | TRP | X | 113 | 40.937 | 36.439 | 35.909 | 0.00 | 0.00 |
| ATOM | 1771 | CE3  | TRP | X | 113 | 40.227 | 38.357 | 35.068 | 0.00 | 0.00 |
| ATOM | 1772 | HE3  | TRP | X | 113 | 39.237 | 37.995 | 34.833 | 0.00 | 0.00 |
| ATOM | 1773 | CD2  | TRP | X | 113 | 40.624 | 39.621 | 34.688 | 0.00 | 0.00 |
| ATOM | 1774 | C    | TRP | X | 113 | 38.017 | 42.202 | 35.433 | 0.00 | 0.00 |
| ATOM | 1775 | O    | TRP | X | 113 | 37.855 | 43.394 | 35.122 | 0.00 | 0.00 |
| ATOM | 1776 | N    | ILE | X | 114 | 38.554 | 41.875 | 36.652 | 0.00 | 0.00 |
| ATOM | 1777 | H    | ILE | X | 114 | 38.727 | 40.896 | 36.831 | 0.00 | 0.00 |
| ATOM | 1778 | CA   | ILE | X | 114 | 39.119 | 42.768 | 37.652 | 0.00 | 0.00 |
| ATOM | 1779 | HA   | ILE | X | 114 | 39.142 | 43.738 | 37.157 | 0.00 | 0.00 |
| ATOM | 1780 | CB   | ILE | X | 114 | 38.086 | 42.803 | 38.779 | 0.00 | 0.00 |
| ATOM | 1781 | HB   | ILE | X | 114 | 38.042 | 41.844 | 39.295 | 0.00 | 0.00 |
| ATOM | 1782 | CG2  | ILE | X | 114 | 38.592 | 43.932 | 39.755 | 0.00 | 0.00 |
| ATOM | 1783 | HG21 | ILE | X | 114 | 37.946 | 43.797 | 40.623 | 0.00 | 0.00 |
| ATOM | 1784 | HG22 | ILE | X | 114 | 38.442 | 44.895 | 39.266 | 0.00 | 0.00 |
| ATOM | 1785 | HG23 | ILE | X | 114 | 39.657 | 43.822 | 39.955 | 0.00 | 0.00 |
| ATOM | 1786 | CG1  | ILE | X | 114 | 36.684 | 43.283 | 38.214 | 0.00 | 0.00 |
| ATOM | 1787 | HG12 | ILE | X | 114 | 36.840 | 44.283 | 37.809 | 0.00 | 0.00 |
| ATOM | 1788 | HG13 | ILE | X | 114 | 36.430 | 42.543 | 37.456 | 0.00 | 0.00 |
| ATOM | 1789 | CD1  | ILE | X | 114 | 35.493 | 43.385 | 39.202 | 0.00 | 0.00 |
| ATOM | 1790 | HD11 | ILE | X | 114 | 35.632 | 44.199 | 39.914 | 0.00 | 0.00 |
| ATOM | 1791 | HD12 | ILE | X | 114 | 35.379 | 42.470 | 39.785 | 0.00 | 0.00 |
| ATOM | 1792 | HD13 | ILE | X | 114 | 34.607 | 43.555 | 38.590 | 0.00 | 0.00 |
| ATOM | 1793 | C    | ILE | X | 114 | 40.558 | 42.455 | 38.041 | 0.00 | 0.00 |
| ATOM | 1794 | O    | ILE | X | 114 | 40.818 | 41.333 | 38.529 | 0.00 | 0.00 |
| ATOM | 1795 | N    | TYR | X | 115 | 41.542 | 43.394 | 37.843 | 0.00 | 0.00 |
| ATOM | 1796 | H    | TYR | X | 115 | 41.164 | 44.286 | 37.559 | 0.00 | 0.00 |
| ATOM | 1797 | CA   | TYR | X | 115 | 43.008 | 43.084 | 37.814 | 0.00 | 0.00 |
| ATOM | 1798 | HA   | TYR | X | 115 | 43.096 | 42.024 | 37.575 | 0.00 | 0.00 |
| ATOM | 1799 | CB   | TYR | X | 115 | 43.685 | 43.868 | 36.663 | 0.00 | 0.00 |
| ATOM | 1800 | HB2  | TYR | X | 115 | 44.731 | 43.590 | 36.793 | 0.00 | 0.00 |
| ATOM | 1801 | HB3  | TYR | X | 115 | 43.389 | 43.575 | 35.656 | 0.00 | 0.00 |
| ATOM | 1802 | CG   | TYR | X | 115 | 43.460 | 45.359 | 36.639 | 0.00 | 0.00 |
| ATOM | 1803 | CD1  | TYR | X | 115 | 44.132 | 46.173 | 37.538 | 0.00 | 0.00 |
| ATOM | 1804 | HD1  | TYR | X | 115 | 44.738 | 45.698 | 38.296 | 0.00 | 0.00 |
| ATOM | 1805 | CE1  | TYR | X | 115 | 43.861 | 47.577 | 37.497 | 0.00 | 0.00 |
| ATOM | 1806 | HE1  | TYR | X | 115 | 44.275 | 48.089 | 38.354 | 0.00 | 0.00 |
| ATOM | 1807 | CZ   | TYR | X | 115 | 43.075 | 48.122 | 36.556 | 0.00 | 0.00 |
| ATOM | 1808 | OH   | TYR | X | 115 | 42.985 | 49.497 | 36.466 | 0.00 | 0.00 |
| ATOM | 1809 | HH   | TYR | X | 115 | 43.430 | 49.933 | 37.196 | 0.00 | 0.00 |
| ATOM | 1810 | CE2  | TYR | X | 115 | 42.465 | 47.354 | 35.601 | 0.00 | 0.00 |
| ATOM | 1811 | HE2  | TYR | X | 115 | 41.830 | 47.936 | 34.950 | 0.00 | 0.00 |
| ATOM | 1812 | CD2  | TYR | X | 115 | 42.621 | 45.933 | 35.618 | 0.00 | 0.00 |
| ATOM | 1813 | HD2  | TYR | X | 115 | 42.064 | 45.287 | 34.955 | 0.00 | 0.00 |
| ATOM | 1814 | C    | TYR | X | 115 | 43.852 | 43.182 | 39.167 | 0.00 | 0.00 |
| ATOM | 1815 | O    | TYR | X | 115 | 43.511 | 43.895 | 40.100 | 0.00 | 0.00 |
| ATOM | 1816 | N    | GLY | X | 116 | 44.987 | 42.523 | 39.145 | 0.00 | 0.00 |
| ATOM | 1817 | H    | GLY | X | 116 | 45.282 | 41.969 | 38.354 | 0.00 | 0.00 |
| ATOM | 1818 | CA   | GLY | X | 116 | 45.937 | 42.527 | 40.270 | 0.00 | 0.00 |
| ATOM | 1819 | HA2  | GLY | X | 116 | 45.512 | 42.618 | 41.270 | 0.00 | 0.00 |
| ATOM | 1820 | HA3  | GLY | X | 116 | 46.581 | 41.648 | 40.276 | 0.00 | 0.00 |
| ATOM | 1821 | C    | GLY | X | 116 | 46.880 | 43.702 | 40.125 | 0.00 | 0.00 |
| ATOM | 1822 | O    | GLY | X | 116 | 46.749 | 44.538 | 39.239 | 0.00 | 0.00 |
| ATOM | 1823 | N    | GLY | X | 117 | 47.779 | 43.712 | 41.035 | 0.00 | 0.00 |
| ATOM | 1824 | H    | GLY | X | 117 | 47.594 | 43.102 | 41.818 | 0.00 | 0.00 |
| ATOM | 1825 | CA   | GLY | X | 117 | 48.883 | 44.675 | 41.148 | 0.00 | 0.00 |
| ATOM | 1826 | HA2  | GLY | X | 117 | 49.784 | 44.185 | 40.781 | 0.00 | 0.00 |
| ATOM | 1827 | HA3  | GLY | X | 117 | 48.778 | 45.502 | 40.446 | 0.00 | 0.00 |

|      |      |     |     |   |     |        |        |        |      |      |
|------|------|-----|-----|---|-----|--------|--------|--------|------|------|
| ATOM | 1828 | C   | GLY | X | 117 | 48.985 | 45.273 | 42.536 | 0.00 | 0.00 |
| ATOM | 1829 | O   | GLY | X | 117 | 49.560 | 46.417 | 42.580 | 0.00 | 0.00 |
| ATOM | 1830 | N   | GLY | X | 118 | 48.428 | 44.695 | 43.605 | 0.00 | 0.00 |
| ATOM | 1831 | H   | GLY | X | 118 | 48.111 | 43.757 | 43.406 | 0.00 | 0.00 |
| ATOM | 1832 | CA  | GLY | X | 118 | 48.698 | 45.225 | 44.925 | 0.00 | 0.00 |
| ATOM | 1833 | HA2 | GLY | X | 118 | 48.469 | 44.458 | 45.665 | 0.00 | 0.00 |
| ATOM | 1834 | HA3 | GLY | X | 118 | 49.758 | 45.478 | 44.926 | 0.00 | 0.00 |
| ATOM | 1835 | C   | GLY | X | 118 | 47.950 | 46.482 | 45.255 | 0.00 | 0.00 |
| ATOM | 1836 | O   | GLY | X | 118 | 48.390 | 47.303 | 46.096 | 0.00 | 0.00 |
| ATOM | 1837 | N   | PHE | X | 119 | 46.918 | 46.781 | 44.465 | 0.00 | 0.00 |
| ATOM | 1838 | H   | PHE | X | 119 | 46.745 | 46.101 | 43.739 | 0.00 | 0.00 |
| ATOM | 1839 | CA  | PHE | X | 119 | 46.169 | 48.019 | 44.362 | 0.00 | 0.00 |
| ATOM | 1840 | HA  | PHE | X | 119 | 45.418 | 48.069 | 43.574 | 0.00 | 0.00 |
| ATOM | 1841 | CB  | PHE | X | 119 | 45.470 | 48.226 | 45.718 | 0.00 | 0.00 |
| ATOM | 1842 | HB2 | PHE | X | 119 | 46.204 | 48.278 | 46.522 | 0.00 | 0.00 |
| ATOM | 1843 | HB3 | PHE | X | 119 | 45.030 | 49.222 | 45.773 | 0.00 | 0.00 |
| ATOM | 1844 | CG  | PHE | X | 119 | 44.382 | 47.260 | 45.978 | 0.00 | 0.00 |
| ATOM | 1845 | CD1 | PHE | X | 119 | 43.118 | 47.370 | 45.389 | 0.00 | 0.00 |
| ATOM | 1846 | HD1 | PHE | X | 119 | 42.882 | 48.204 | 44.745 | 0.00 | 0.00 |
| ATOM | 1847 | CE1 | PHE | X | 119 | 42.077 | 46.469 | 45.765 | 0.00 | 0.00 |
| ATOM | 1848 | HE1 | PHE | X | 119 | 41.110 | 46.642 | 45.316 | 0.00 | 0.00 |
| ATOM | 1849 | CZ  | PHE | X | 119 | 42.348 | 45.406 | 46.655 | 0.00 | 0.00 |
| ATOM | 1850 | HZ  | PHE | X | 119 | 41.557 | 44.708 | 46.887 | 0.00 | 0.00 |
| ATOM | 1851 | CE2 | PHE | X | 119 | 43.626 | 45.222 | 47.136 | 0.00 | 0.00 |
| ATOM | 1852 | HE2 | PHE | X | 119 | 43.886 | 44.414 | 47.805 | 0.00 | 0.00 |
| ATOM | 1853 | CD2 | PHE | X | 119 | 44.609 | 46.183 | 46.858 | 0.00 | 0.00 |
| ATOM | 1854 | HD2 | PHE | X | 119 | 45.628 | 46.066 | 47.195 | 0.00 | 0.00 |
| ATOM | 1855 | C   | PHE | X | 119 | 47.049 | 49.274 | 44.103 | 0.00 | 0.00 |
| ATOM | 1856 | O   | PHE | X | 119 | 46.549 | 50.385 | 43.898 | 0.00 | 0.00 |
| ATOM | 1857 | N   | TYR | X | 120 | 48.323 | 49.179 | 43.819 | 0.00 | 0.00 |
| ATOM | 1858 | H   | TYR | X | 120 | 48.802 | 48.290 | 43.810 | 0.00 | 0.00 |
| ATOM | 1859 | CA  | TYR | X | 120 | 49.143 | 50.402 | 43.476 | 0.00 | 0.00 |
| ATOM | 1860 | HA  | TYR | X | 120 | 48.553 | 51.315 | 43.559 | 0.00 | 0.00 |
| ATOM | 1861 | CB  | TYR | X | 120 | 50.308 | 50.538 | 44.338 | 0.00 | 0.00 |
| ATOM | 1862 | HB2 | TYR | X | 120 | 50.776 | 51.508 | 44.169 | 0.00 | 0.00 |
| ATOM | 1863 | HB3 | TYR | X | 120 | 50.083 | 50.378 | 45.393 | 0.00 | 0.00 |
| ATOM | 1864 | CG  | TYR | X | 120 | 51.461 | 49.556 | 44.085 | 0.00 | 0.00 |
| ATOM | 1865 | CD1 | TYR | X | 120 | 52.711 | 50.093 | 43.571 | 0.00 | 0.00 |
| ATOM | 1866 | HD1 | TYR | X | 120 | 52.836 | 51.165 | 43.530 | 0.00 | 0.00 |
| ATOM | 1867 | CE1 | TYR | X | 120 | 53.822 | 49.257 | 43.446 | 0.00 | 0.00 |
| ATOM | 1868 | HE1 | TYR | X | 120 | 54.756 | 49.678 | 43.103 | 0.00 | 0.00 |
| ATOM | 1869 | CZ  | TYR | X | 120 | 53.723 | 47.867 | 43.584 | 0.00 | 0.00 |
| ATOM | 1870 | OH  | TYR | X | 120 | 54.766 | 46.985 | 43.295 | 0.00 | 0.00 |
| ATOM | 1871 | HH  | TYR | X | 120 | 54.498 | 46.063 | 43.310 | 0.00 | 0.00 |
| ATOM | 1872 | CE2 | TYR | X | 120 | 52.538 | 47.346 | 44.044 | 0.00 | 0.00 |
| ATOM | 1873 | HE2 | TYR | X | 120 | 52.526 | 46.287 | 44.254 | 0.00 | 0.00 |
| ATOM | 1874 | CD2 | TYR | X | 120 | 51.418 | 48.171 | 44.352 | 0.00 | 0.00 |
| ATOM | 1875 | HD2 | TYR | X | 120 | 50.526 | 47.711 | 44.752 | 0.00 | 0.00 |
| ATOM | 1876 | C   | TYR | X | 120 | 49.543 | 50.392 | 41.959 | 0.00 | 0.00 |
| ATOM | 1877 | O   | TYR | X | 120 | 50.321 | 51.334 | 41.576 | 0.00 | 0.00 |
| ATOM | 1878 | N   | SER | X | 121 | 49.126 | 49.411 | 41.189 | 0.00 | 0.00 |
| ATOM | 1879 | H   | SER | X | 121 | 48.467 | 48.716 | 41.509 | 0.00 | 0.00 |
| ATOM | 1880 | CA  | SER | X | 121 | 49.500 | 49.243 | 39.759 | 0.00 | 0.00 |
| ATOM | 1881 | HA  | SER | X | 121 | 49.490 | 50.172 | 39.190 | 0.00 | 0.00 |
| ATOM | 1882 | CB  | SER | X | 121 | 51.001 | 48.718 | 39.839 | 0.00 | 0.00 |
| ATOM | 1883 | HB2 | SER | X | 121 | 51.374 | 48.582 | 38.824 | 0.00 | 0.00 |
| ATOM | 1884 | HB3 | SER | X | 121 | 51.567 | 49.457 | 40.406 | 0.00 | 0.00 |
| ATOM | 1885 | OG  | SER | X | 121 | 51.051 | 47.513 | 40.506 | 0.00 | 0.00 |
| ATOM | 1886 | HG  | SER | X | 121 | 50.384 | 47.472 | 41.196 | 0.00 | 0.00 |
| ATOM | 1887 | C   | SER | X | 121 | 48.381 | 48.427 | 39.070 | 0.00 | 0.00 |
| ATOM | 1888 | O   | SER | X | 121 | 47.451 | 48.168 | 39.765 | 0.00 | 0.00 |
| ATOM | 1889 | N   | GLY | X | 122 | 48.576 | 48.072 | 37.761 | 0.00 | 0.00 |
| ATOM | 1890 | H   | GLY | X | 122 | 49.209 | 48.628 | 37.204 | 0.00 | 0.00 |
| ATOM | 1891 | CA  | GLY | X | 122 | 47.563 | 47.297 | 37.019 | 0.00 | 0.00 |
| ATOM | 1892 | HA2 | GLY | X | 122 | 48.029 | 46.462 | 36.494 | 0.00 | 0.00 |
| ATOM | 1893 | HA3 | GLY | X | 122 | 46.844 | 46.950 | 37.761 | 0.00 | 0.00 |
| ATOM | 1894 | C   | GLY | X | 122 | 46.735 | 48.046 | 35.916 | 0.00 | 0.00 |

|      |      |      |     |   |     |        |        |        |      |      |
|------|------|------|-----|---|-----|--------|--------|--------|------|------|
| ATOM | 1895 | O    | GLY | X | 122 | 46.729 | 49.245 | 35.839 | 0.00 | 0.00 |
| ATOM | 1896 | N    | ALA | X | 123 | 46.180 | 47.321 | 34.918 | 0.00 | 0.00 |
| ATOM | 1897 | H    | ALA | X | 123 | 46.283 | 46.317 | 34.886 | 0.00 | 0.00 |
| ATOM | 1898 | CA   | ALA | X | 123 | 45.544 | 47.937 | 33.757 | 0.00 | 0.00 |
| ATOM | 1899 | HA   | ALA | X | 123 | 44.862 | 48.732 | 34.059 | 0.00 | 0.00 |
| ATOM | 1900 | CB   | ALA | X | 123 | 46.621 | 48.537 | 32.820 | 0.00 | 0.00 |
| ATOM | 1901 | HB1  | ALA | X | 123 | 46.242 | 48.989 | 31.903 | 0.00 | 0.00 |
| ATOM | 1902 | HB2  | ALA | X | 123 | 47.169 | 47.656 | 32.486 | 0.00 | 0.00 |
| ATOM | 1903 | HB3  | ALA | X | 123 | 47.341 | 49.069 | 33.442 | 0.00 | 0.00 |
| ATOM | 1904 | C    | ALA | X | 123 | 44.749 | 46.970 | 32.944 | 0.00 | 0.00 |
| ATOM | 1905 | O    | ALA | X | 123 | 45.257 | 45.856 | 32.665 | 0.00 | 0.00 |
| ATOM | 1906 | N    | SER | X | 124 | 43.516 | 47.270 | 32.630 | 0.00 | 0.00 |
| ATOM | 1907 | H    | SER | X | 124 | 43.242 | 48.213 | 32.867 | 0.00 | 0.00 |
| ATOM | 1908 | CA   | SER | X | 124 | 42.699 | 46.418 | 31.732 | 0.00 | 0.00 |
| ATOM | 1909 | HA   | SER | X | 124 | 42.524 | 45.488 | 32.273 | 0.00 | 0.00 |
| ATOM | 1910 | CB   | SER | X | 124 | 41.354 | 46.999 | 31.587 | 0.00 | 0.00 |
| ATOM | 1911 | HB2  | SER | X | 124 | 40.866 | 46.418 | 30.804 | 0.00 | 0.00 |
| ATOM | 1912 | HB3  | SER | X | 124 | 40.710 | 46.975 | 32.467 | 0.00 | 0.00 |
| ATOM | 1913 | OG   | SER | X | 124 | 41.307 | 48.349 | 31.232 | 0.00 | 0.00 |
| ATOM | 1914 | HG   | SER | X | 124 | 41.894 | 48.876 | 31.780 | 0.00 | 0.00 |
| ATOM | 1915 | C    | SER | X | 124 | 43.238 | 46.117 | 30.325 | 0.00 | 0.00 |
| ATOM | 1916 | O    | SER | X | 124 | 42.935 | 45.051 | 29.830 | 0.00 | 0.00 |
| ATOM | 1917 | N    | SER | X | 125 | 44.189 | 46.906 | 29.849 | 0.00 | 0.00 |
| ATOM | 1918 | H    | SER | X | 125 | 44.516 | 47.671 | 30.421 | 0.00 | 0.00 |
| ATOM | 1919 | CA   | SER | X | 125 | 44.736 | 46.842 | 28.459 | 0.00 | 0.00 |
| ATOM | 1920 | HA   | SER | X | 125 | 43.932 | 46.761 | 27.727 | 0.00 | 0.00 |
| ATOM | 1921 | CB   | SER | X | 125 | 45.454 | 48.202 | 28.232 | 0.00 | 0.00 |
| ATOM | 1922 | HB2  | SER | X | 125 | 45.926 | 48.173 | 27.250 | 0.00 | 0.00 |
| ATOM | 1923 | HB3  | SER | X | 125 | 44.735 | 49.022 | 28.228 | 0.00 | 0.00 |
| ATOM | 1924 | OG   | SER | X | 125 | 46.395 | 48.362 | 29.322 | 0.00 | 0.00 |
| ATOM | 1925 | HG   | SER | X | 125 | 47.275 | 48.088 | 29.053 | 0.00 | 0.00 |
| ATOM | 1926 | C    | SER | X | 125 | 45.844 | 45.801 | 28.194 | 0.00 | 0.00 |
| ATOM | 1927 | O    | SER | X | 125 | 46.399 | 45.779 | 27.131 | 0.00 | 0.00 |
| ATOM | 1928 | N    | LEU | X | 126 | 46.233 | 45.058 | 29.210 | 0.00 | 0.00 |
| ATOM | 1929 | H    | LEU | X | 126 | 45.534 | 44.925 | 29.926 | 0.00 | 0.00 |
| ATOM | 1930 | CA   | LEU | X | 126 | 47.377 | 44.181 | 29.239 | 0.00 | 0.00 |
| ATOM | 1931 | HA   | LEU | X | 126 | 48.184 | 44.695 | 28.717 | 0.00 | 0.00 |
| ATOM | 1932 | CB   | LEU | X | 126 | 47.835 | 43.892 | 30.711 | 0.00 | 0.00 |
| ATOM | 1933 | HB2  | LEU | X | 126 | 46.965 | 43.448 | 31.196 | 0.00 | 0.00 |
| ATOM | 1934 | HB3  | LEU | X | 126 | 48.645 | 43.165 | 30.665 | 0.00 | 0.00 |
| ATOM | 1935 | CG   | LEU | X | 126 | 48.389 | 45.029 | 31.581 | 0.00 | 0.00 |
| ATOM | 1936 | HG   | LEU | X | 126 | 47.659 | 45.838 | 31.607 | 0.00 | 0.00 |
| ATOM | 1937 | CD1  | LEU | X | 126 | 48.634 | 44.442 | 32.960 | 0.00 | 0.00 |
| ATOM | 1938 | HD11 | LEU | X | 126 | 49.018 | 45.253 | 33.579 | 0.00 | 0.00 |
| ATOM | 1939 | HD12 | LEU | X | 126 | 49.282 | 43.566 | 32.943 | 0.00 | 0.00 |
| ATOM | 1940 | HD13 | LEU | X | 126 | 47.650 | 44.165 | 33.338 | 0.00 | 0.00 |
| ATOM | 1941 | CD2  | LEU | X | 126 | 49.712 | 45.495 | 31.116 | 0.00 | 0.00 |
| ATOM | 1942 | HD21 | LEU | X | 126 | 49.992 | 46.380 | 31.687 | 0.00 | 0.00 |
| ATOM | 1943 | HD22 | LEU | X | 126 | 50.487 | 44.745 | 31.270 | 0.00 | 0.00 |
| ATOM | 1944 | HD23 | LEU | X | 126 | 49.872 | 45.800 | 30.082 | 0.00 | 0.00 |
| ATOM | 1945 | C    | LEU | X | 126 | 46.983 | 42.936 | 28.375 | 0.00 | 0.00 |
| ATOM | 1946 | O    | LEU | X | 126 | 45.845 | 42.424 | 28.514 | 0.00 | 0.00 |
| ATOM | 1947 | N    | ASP | X | 127 | 47.909 | 42.436 | 27.543 | 0.00 | 0.00 |
| ATOM | 1948 | H    | ASP | X | 127 | 48.794 | 42.918 | 27.608 | 0.00 | 0.00 |
| ATOM | 1949 | CA   | ASP | X | 127 | 47.734 | 41.281 | 26.653 | 0.00 | 0.00 |
| ATOM | 1950 | HA   | ASP | X | 127 | 46.855 | 41.629 | 26.112 | 0.00 | 0.00 |
| ATOM | 1951 | CB   | ASP | X | 127 | 48.947 | 41.237 | 25.746 | 0.00 | 0.00 |
| ATOM | 1952 | HB2  | ASP | X | 127 | 48.699 | 40.485 | 24.997 | 0.00 | 0.00 |
| ATOM | 1953 | HB3  | ASP | X | 127 | 48.984 | 42.152 | 25.154 | 0.00 | 0.00 |
| ATOM | 1954 | CG   | ASP | X | 127 | 50.279 | 40.943 | 26.324 | 0.00 | 0.00 |
| ATOM | 1955 | OD1  | ASP | X | 127 | 50.941 | 41.859 | 26.914 | 0.00 | 0.00 |
| ATOM | 1956 | OD2  | ASP | X | 127 | 50.630 | 39.744 | 26.420 | 0.00 | 0.00 |
| ATOM | 1957 | C    | ASP | X | 127 | 47.402 | 39.917 | 27.355 | 0.00 | 0.00 |
| ATOM | 1958 | O    | ASP | X | 127 | 46.708 | 39.042 | 26.714 | 0.00 | 0.00 |
| ATOM | 1959 | N    | VAL | X | 128 | 47.789 | 39.701 | 28.582 | 0.00 | 0.00 |
| ATOM | 1960 | H    | VAL | X | 128 | 48.331 | 40.388 | 29.087 | 0.00 | 0.00 |
| ATOM | 1961 | CA   | VAL | X | 128 | 47.299 | 38.572 | 29.428 | 0.00 | 0.00 |

|      |      |      |     |   |     |        |        |        |      |      |
|------|------|------|-----|---|-----|--------|--------|--------|------|------|
| ATOM | 1962 | HA   | VAL | X | 128 | 47.402 | 37.738 | 28.734 | 0.00 | 0.00 |
| ATOM | 1963 | CB   | VAL | X | 128 | 48.155 | 38.361 | 30.667 | 0.00 | 0.00 |
| ATOM | 1964 | HB   | VAL | X | 128 | 49.170 | 38.464 | 30.283 | 0.00 | 0.00 |
| ATOM | 1965 | CG1  | VAL | X | 128 | 47.866 | 39.463 | 31.773 | 0.00 | 0.00 |
| ATOM | 1966 | HG11 | VAL | X | 128 | 48.757 | 39.517 | 32.399 | 0.00 | 0.00 |
| ATOM | 1967 | HG12 | VAL | X | 128 | 47.494 | 40.433 | 31.446 | 0.00 | 0.00 |
| ATOM | 1968 | HG13 | VAL | X | 128 | 47.086 | 39.048 | 32.412 | 0.00 | 0.00 |
| ATOM | 1969 | CG2  | VAL | X | 128 | 48.065 | 37.001 | 31.333 | 0.00 | 0.00 |
| ATOM | 1970 | HG21 | VAL | X | 128 | 47.068 | 36.625 | 31.562 | 0.00 | 0.00 |
| ATOM | 1971 | HG22 | VAL | X | 128 | 48.757 | 36.792 | 32.149 | 0.00 | 0.00 |
| ATOM | 1972 | HG23 | VAL | X | 128 | 48.467 | 36.283 | 30.618 | 0.00 | 0.00 |
| ATOM | 1973 | C    | VAL | X | 128 | 45.837 | 38.635 | 29.740 | 0.00 | 0.00 |
| ATOM | 1974 | O    | VAL | X | 128 | 45.291 | 37.550 | 29.881 | 0.00 | 0.00 |
| ATOM | 1975 | N    | TYR | X | 129 | 45.193 | 39.849 | 29.766 | 0.00 | 0.00 |
| ATOM | 1976 | H    | TYR | X | 129 | 45.744 | 40.637 | 29.457 | 0.00 | 0.00 |
| ATOM | 1977 | CA   | TYR | X | 129 | 43.851 | 40.024 | 30.166 | 0.00 | 0.00 |
| ATOM | 1978 | HA   | TYR | X | 129 | 43.382 | 39.146 | 30.609 | 0.00 | 0.00 |
| ATOM | 1979 | CB   | TYR | X | 129 | 43.652 | 41.250 | 31.092 | 0.00 | 0.00 |
| ATOM | 1980 | HB2  | TYR | X | 129 | 43.653 | 42.140 | 30.464 | 0.00 | 0.00 |
| ATOM | 1981 | HB3  | TYR | X | 129 | 42.623 | 41.150 | 31.436 | 0.00 | 0.00 |
| ATOM | 1982 | CG   | TYR | X | 129 | 44.477 | 41.379 | 32.436 | 0.00 | 0.00 |
| ATOM | 1983 | CD1  | TYR | X | 129 | 44.857 | 40.228 | 33.106 | 0.00 | 0.00 |
| ATOM | 1984 | HD1  | TYR | X | 129 | 44.631 | 39.286 | 32.628 | 0.00 | 0.00 |
| ATOM | 1985 | CE1  | TYR | X | 129 | 45.459 | 40.321 | 34.356 | 0.00 | 0.00 |
| ATOM | 1986 | HE1  | TYR | X | 129 | 45.710 | 39.489 | 34.997 | 0.00 | 0.00 |
| ATOM | 1987 | CZ   | TYR | X | 129 | 45.824 | 41.636 | 34.849 | 0.00 | 0.00 |
| ATOM | 1988 | OH   | TYR | X | 129 | 46.280 | 41.805 | 36.128 | 0.00 | 0.00 |
| ATOM | 1989 | HH   | TYR | X | 129 | 46.265 | 40.938 | 36.541 | 0.00 | 0.00 |
| ATOM | 1990 | CE2  | TYR | X | 129 | 45.457 | 42.780 | 34.080 | 0.00 | 0.00 |
| ATOM | 1991 | HE2  | TYR | X | 129 | 45.672 | 43.757 | 34.486 | 0.00 | 0.00 |
| ATOM | 1992 | CD2  | TYR | X | 129 | 44.756 | 42.690 | 32.888 | 0.00 | 0.00 |
| ATOM | 1993 | HD2  | TYR | X | 129 | 44.544 | 43.550 | 32.270 | 0.00 | 0.00 |
| ATOM | 1994 | C    | TYR | X | 129 | 42.974 | 40.290 | 28.880 | 0.00 | 0.00 |
| ATOM | 1995 | O    | TYR | X | 129 | 41.788 | 40.526 | 28.974 | 0.00 | 0.00 |
| ATOM | 1996 | N    | ASP | X | 130 | 43.525 | 40.224 | 27.662 | 0.00 | 0.00 |
| ATOM | 1997 | H    | ASP | X | 130 | 44.502 | 39.968 | 27.634 | 0.00 | 0.00 |
| ATOM | 1998 | CA   | ASP | X | 130 | 42.705 | 40.185 | 26.418 | 0.00 | 0.00 |
| ATOM | 1999 | HA   | ASP | X | 130 | 42.016 | 41.029 | 26.439 | 0.00 | 0.00 |
| ATOM | 2000 | CB   | ASP | X | 130 | 43.631 | 40.463 | 25.208 | 0.00 | 0.00 |
| ATOM | 2001 | HB2  | ASP | X | 130 | 44.176 | 41.395 | 25.359 | 0.00 | 0.00 |
| ATOM | 2002 | HB3  | ASP | X | 130 | 44.414 | 39.722 | 25.048 | 0.00 | 0.00 |
| ATOM | 2003 | CG   | ASP | X | 130 | 42.714 | 40.570 | 24.014 | 0.00 | 0.00 |
| ATOM | 2004 | OD1  | ASP | X | 130 | 42.170 | 39.508 | 23.570 | 0.00 | 0.00 |
| ATOM | 2005 | OD2  | ASP | X | 130 | 42.629 | 41.703 | 23.449 | 0.00 | 0.00 |
| ATOM | 2006 | C    | ASP | X | 130 | 41.856 | 38.895 | 26.332 | 0.00 | 0.00 |
| ATOM | 2007 | O    | ASP | X | 130 | 42.360 | 37.776 | 26.458 | 0.00 | 0.00 |
| ATOM | 2008 | N    | GLY | X | 131 | 40.486 | 38.992 | 26.231 | 0.00 | 0.00 |
| ATOM | 2009 | H    | GLY | X | 131 | 40.156 | 39.932 | 26.063 | 0.00 | 0.00 |
| ATOM | 2010 | CA   | GLY | X | 131 | 39.614 | 37.800 | 26.320 | 0.00 | 0.00 |
| ATOM | 2011 | HA2  | GLY | X | 131 | 39.937 | 37.064 | 27.057 | 0.00 | 0.00 |
| ATOM | 2012 | HA3  | GLY | X | 131 | 38.657 | 38.192 | 26.664 | 0.00 | 0.00 |
| ATOM | 2013 | C    | GLY | X | 131 | 39.335 | 37.002 | 25.032 | 0.00 | 0.00 |
| ATOM | 2014 | O    | GLY | X | 131 | 38.641 | 35.949 | 25.096 | 0.00 | 0.00 |
| ATOM | 2015 | N    | ARG | X | 132 | 39.856 | 37.415 | 23.879 | 0.00 | 0.00 |
| ATOM | 2016 | H    | ARG | X | 132 | 40.392 | 38.270 | 23.915 | 0.00 | 0.00 |
| ATOM | 2017 | CA   | ARG | X | 132 | 39.677 | 36.763 | 22.555 | 0.00 | 0.00 |
| ATOM | 2018 | HA   | ARG | X | 132 | 38.655 | 37.032 | 22.289 | 0.00 | 0.00 |
| ATOM | 2019 | CB   | ARG | X | 132 | 40.600 | 37.317 | 21.432 | 0.00 | 0.00 |
| ATOM | 2020 | HB2  | ARG | X | 132 | 40.405 | 36.813 | 20.486 | 0.00 | 0.00 |
| ATOM | 2021 | HB3  | ARG | X | 132 | 40.426 | 38.373 | 21.227 | 0.00 | 0.00 |
| ATOM | 2022 | CG   | ARG | X | 132 | 42.116 | 37.072 | 21.656 | 0.00 | 0.00 |
| ATOM | 2023 | HG2  | ARG | X | 132 | 42.522 | 37.296 | 22.643 | 0.00 | 0.00 |
| ATOM | 2024 | HG3  | ARG | X | 132 | 42.310 | 36.006 | 21.542 | 0.00 | 0.00 |
| ATOM | 2025 | CD   | ARG | X | 132 | 42.924 | 37.809 | 20.597 | 0.00 | 0.00 |
| ATOM | 2026 | HD2  | ARG | X | 132 | 43.848 | 37.248 | 20.458 | 0.00 | 0.00 |
| ATOM | 2027 | HD3  | ARG | X | 132 | 42.346 | 37.835 | 19.673 | 0.00 | 0.00 |
| ATOM | 2028 | NE   | ARG | X | 132 | 43.147 | 39.161 | 21.036 | 0.00 | 0.00 |

|      |      |      |     |   |     |        |        |        |      |      |
|------|------|------|-----|---|-----|--------|--------|--------|------|------|
| ATOM | 2029 | HE   | ARG | X | 132 | 43.142 | 39.362 | 22.026 | 0.00 | 0.00 |
| ATOM | 2030 | CZ   | ARG | X | 132 | 43.552 | 40.129 | 20.301 | 0.00 | 0.00 |
| ATOM | 2031 | NH1  | ARG | X | 132 | 44.077 | 40.003 | 19.141 | 0.00 | 0.00 |
| ATOM | 2032 | HH11 | ARG | X | 132 | 43.935 | 39.143 | 18.631 | 0.00 | 0.00 |
| ATOM | 2033 | HH12 | ARG | X | 132 | 44.331 | 40.872 | 18.692 | 0.00 | 0.00 |
| ATOM | 2034 | NH2  | ARG | X | 132 | 43.455 | 41.316 | 20.784 | 0.00 | 0.00 |
| ATOM | 2035 | HH21 | ARG | X | 132 | 43.176 | 41.480 | 21.741 | 0.00 | 0.00 |
| ATOM | 2036 | HH22 | ARG | X | 132 | 43.812 | 42.093 | 20.247 | 0.00 | 0.00 |
| ATOM | 2037 | C    | ARG | X | 132 | 39.711 | 35.251 | 22.473 | 0.00 | 0.00 |
| ATOM | 2038 | O    | ARG | X | 132 | 38.858 | 34.715 | 21.838 | 0.00 | 0.00 |
| ATOM | 2039 | N    | PHE | X | 133 | 40.697 | 34.556 | 23.058 | 0.00 | 0.00 |
| ATOM | 2040 | H    | PHE | X | 133 | 41.461 | 35.113 | 23.413 | 0.00 | 0.00 |
| ATOM | 2041 | CA   | PHE | X | 133 | 40.731 | 33.151 | 23.055 | 0.00 | 0.00 |
| ATOM | 2042 | HA   | PHE | X | 133 | 40.699 | 32.745 | 22.044 | 0.00 | 0.00 |
| ATOM | 2043 | CB   | PHE | X | 133 | 42.096 | 32.612 | 23.443 | 0.00 | 0.00 |
| ATOM | 2044 | HB2  | PHE | X | 133 | 42.193 | 32.841 | 24.504 | 0.00 | 0.00 |
| ATOM | 2045 | HB3  | PHE | X | 133 | 42.095 | 31.538 | 23.259 | 0.00 | 0.00 |
| ATOM | 2046 | CG   | PHE | X | 133 | 43.312 | 33.177 | 22.713 | 0.00 | 0.00 |
| ATOM | 2047 | CD1  | PHE | X | 133 | 44.137 | 34.195 | 23.231 | 0.00 | 0.00 |
| ATOM | 2048 | HD1  | PHE | X | 133 | 43.881 | 34.688 | 24.158 | 0.00 | 0.00 |
| ATOM | 2049 | CE1  | PHE | X | 133 | 45.298 | 34.578 | 22.539 | 0.00 | 0.00 |
| ATOM | 2050 | HE1  | PHE | X | 133 | 46.022 | 35.173 | 23.076 | 0.00 | 0.00 |
| ATOM | 2051 | CZ   | PHE | X | 133 | 45.519 | 34.064 | 21.245 | 0.00 | 0.00 |
| ATOM | 2052 | HZ   | PHE | X | 133 | 46.269 | 34.577 | 20.662 | 0.00 | 0.00 |
| ATOM | 2053 | CE2  | PHE | X | 133 | 44.632 | 33.108 | 20.673 | 0.00 | 0.00 |
| ATOM | 2054 | HE2  | PHE | X | 133 | 44.841 | 32.578 | 19.755 | 0.00 | 0.00 |
| ATOM | 2055 | CD2  | PHE | X | 133 | 43.576 | 32.675 | 21.452 | 0.00 | 0.00 |
| ATOM | 2056 | HD2  | PHE | X | 133 | 42.925 | 31.873 | 21.138 | 0.00 | 0.00 |
| ATOM | 2057 | C    | PHE | X | 133 | 39.654 | 32.444 | 23.879 | 0.00 | 0.00 |
| ATOM | 2058 | O    | PHE | X | 133 | 38.953 | 31.551 | 23.386 | 0.00 | 0.00 |
| ATOM | 2059 | N    | LEU | X | 134 | 39.520 | 32.953 | 25.104 | 0.00 | 0.00 |
| ATOM | 2060 | H    | LEU | X | 134 | 40.081 | 33.767 | 25.310 | 0.00 | 0.00 |
| ATOM | 2061 | CA   | LEU | X | 134 | 38.421 | 32.604 | 26.037 | 0.00 | 0.00 |
| ATOM | 2062 | HA   | LEU | X | 134 | 38.322 | 31.542 | 26.262 | 0.00 | 0.00 |
| ATOM | 2063 | CB   | LEU | X | 134 | 38.682 | 33.348 | 27.435 | 0.00 | 0.00 |
| ATOM | 2064 | HB2  | LEU | X | 134 | 39.706 | 33.063 | 27.673 | 0.00 | 0.00 |
| ATOM | 2065 | HB3  | LEU | X | 134 | 38.723 | 34.398 | 27.146 | 0.00 | 0.00 |
| ATOM | 2066 | CG   | LEU | X | 134 | 37.688 | 33.024 | 28.504 | 0.00 | 0.00 |
| ATOM | 2067 | HG   | LEU | X | 134 | 36.742 | 33.431 | 28.148 | 0.00 | 0.00 |
| ATOM | 2068 | CD1  | LEU | X | 134 | 37.423 | 31.498 | 28.777 | 0.00 | 0.00 |
| ATOM | 2069 | HD11 | LEU | X | 134 | 36.795 | 31.378 | 29.659 | 0.00 | 0.00 |
| ATOM | 2070 | HD12 | LEU | X | 134 | 38.407 | 31.057 | 28.936 | 0.00 | 0.00 |
| ATOM | 2071 | HD13 | LEU | X | 134 | 37.042 | 30.956 | 27.911 | 0.00 | 0.00 |
| ATOM | 2072 | CD2  | LEU | X | 134 | 38.009 | 33.724 | 29.895 | 0.00 | 0.00 |
| ATOM | 2073 | HD21 | LEU | X | 134 | 39.029 | 34.049 | 30.101 | 0.00 | 0.00 |
| ATOM | 2074 | HD22 | LEU | X | 134 | 37.315 | 34.556 | 30.020 | 0.00 | 0.00 |
| ATOM | 2075 | HD23 | LEU | X | 134 | 37.700 | 33.103 | 30.736 | 0.00 | 0.00 |
| ATOM | 2076 | C    | LEU | X | 134 | 37.035 | 32.866 | 25.420 | 0.00 | 0.00 |
| ATOM | 2077 | O    | LEU | X | 134 | 36.087 | 32.026 | 25.577 | 0.00 | 0.00 |
| ATOM | 2078 | N    | VAL | X | 135 | 36.906 | 33.986 | 24.709 | 0.00 | 0.00 |
| ATOM | 2079 | H    | VAL | X | 135 | 37.594 | 34.722 | 24.781 | 0.00 | 0.00 |
| ATOM | 2080 | CA   | VAL | X | 135 | 35.587 | 34.346 | 24.085 | 0.00 | 0.00 |
| ATOM | 2081 | HA   | VAL | X | 135 | 34.786 | 34.172 | 24.804 | 0.00 | 0.00 |
| ATOM | 2082 | CB   | VAL | X | 135 | 35.547 | 35.864 | 23.772 | 0.00 | 0.00 |
| ATOM | 2083 | HB   | VAL | X | 135 | 36.471 | 36.225 | 23.320 | 0.00 | 0.00 |
| ATOM | 2084 | CG1  | VAL | X | 135 | 34.368 | 36.321 | 22.842 | 0.00 | 0.00 |
| ATOM | 2085 | HG11 | VAL | X | 135 | 33.378 | 36.177 | 23.276 | 0.00 | 0.00 |
| ATOM | 2086 | HG12 | VAL | X | 135 | 34.412 | 37.407 | 22.769 | 0.00 | 0.00 |
| ATOM | 2087 | HG13 | VAL | X | 135 | 34.454 | 35.951 | 21.821 | 0.00 | 0.00 |
| ATOM | 2088 | CG2  | VAL | X | 135 | 35.430 | 36.643 | 25.111 | 0.00 | 0.00 |
| ATOM | 2089 | HG21 | VAL | X | 135 | 35.837 | 36.153 | 25.995 | 0.00 | 0.00 |
| ATOM | 2090 | HG22 | VAL | X | 135 | 34.409 | 36.996 | 25.255 | 0.00 | 0.00 |
| ATOM | 2091 | HG23 | VAL | X | 135 | 35.974 | 37.570 | 24.929 | 0.00 | 0.00 |
| ATOM | 2092 | C    | VAL | X | 135 | 35.280 | 33.470 | 22.859 | 0.00 | 0.00 |
| ATOM | 2093 | O    | VAL | X | 135 | 34.137 | 32.889 | 22.711 | 0.00 | 0.00 |
| ATOM | 2094 | N    | GLN | X | 136 | 36.221 | 33.335 | 21.938 | 0.00 | 0.00 |
| ATOM | 2095 | H    | GLN | X | 136 | 37.127 | 33.765 | 22.058 | 0.00 | 0.00 |



|      |      |      |     |   |     |        |        |        |      |      |
|------|------|------|-----|---|-----|--------|--------|--------|------|------|
| ATOM | 2096 | CA   | GLN | X | 136 | 36.116 | 32.474 | 20.739 | 0.00 | 0.00 |
| ATOM | 2097 | HA   | GLN | X | 136 | 35.338 | 32.841 | 20.070 | 0.00 | 0.00 |
| ATOM | 2098 | CB   | GLN | X | 136 | 37.481 | 32.406 | 19.961 | 0.00 | 0.00 |
| ATOM | 2099 | HB2  | GLN | X | 136 | 37.813 | 33.390 | 19.628 | 0.00 | 0.00 |
| ATOM | 2100 | HB3  | GLN | X | 136 | 38.320 | 32.087 | 20.579 | 0.00 | 0.00 |
| ATOM | 2101 | CG   | GLN | X | 136 | 37.467 | 31.507 | 18.700 | 0.00 | 0.00 |
| ATOM | 2102 | HG2  | GLN | X | 136 | 36.433 | 31.395 | 18.374 | 0.00 | 0.00 |
| ATOM | 2103 | HG3  | GLN | X | 136 | 37.957 | 32.032 | 17.880 | 0.00 | 0.00 |
| ATOM | 2104 | CD   | GLN | X | 136 | 38.119 | 30.148 | 18.803 | 0.00 | 0.00 |
| ATOM | 2105 | OE1  | GLN | X | 136 | 39.301 | 29.879 | 18.560 | 0.00 | 0.00 |
| ATOM | 2106 | NE2  | GLN | X | 136 | 37.406 | 29.150 | 19.179 | 0.00 | 0.00 |
| ATOM | 2107 | HE21 | GLN | X | 136 | 37.841 | 28.242 | 19.259 | 0.00 | 0.00 |
| ATOM | 2108 | HE22 | GLN | X | 136 | 36.422 | 29.296 | 19.355 | 0.00 | 0.00 |
| ATOM | 2109 | C    | GLN | X | 136 | 35.792 | 31.018 | 21.082 | 0.00 | 0.00 |
| ATOM | 2110 | O    | GLN | X | 136 | 34.938 | 30.372 | 20.464 | 0.00 | 0.00 |
| ATOM | 2111 | N    | ALA | X | 137 | 36.395 | 30.505 | 22.170 | 0.00 | 0.00 |
| ATOM | 2112 | H    | ALA | X | 137 | 37.241 | 30.953 | 22.493 | 0.00 | 0.00 |
| ATOM | 2113 | CA   | ALA | X | 137 | 36.133 | 29.105 | 22.597 | 0.00 | 0.00 |
| ATOM | 2114 | HA   | ALA | X | 137 | 36.014 | 28.431 | 21.748 | 0.00 | 0.00 |
| ATOM | 2115 | CB   | ALA | X | 137 | 37.243 | 28.589 | 23.444 | 0.00 | 0.00 |
| ATOM | 2116 | HB1  | ALA | X | 137 | 37.555 | 29.384 | 24.122 | 0.00 | 0.00 |
| ATOM | 2117 | HB2  | ALA | X | 137 | 38.081 | 28.343 | 22.793 | 0.00 | 0.00 |
| ATOM | 2118 | HB3  | ALA | X | 137 | 37.146 | 27.596 | 23.884 | 0.00 | 0.00 |
| ATOM | 2119 | C    | ALA | X | 137 | 34.832 | 28.821 | 23.380 | 0.00 | 0.00 |
| ATOM | 2120 | O    | ALA | X | 137 | 34.202 | 27.795 | 23.247 | 0.00 | 0.00 |
| ATOM | 2121 | N    | GLU | X | 138 | 34.368 | 29.801 | 24.164 | 0.00 | 0.00 |
| ATOM | 2122 | H    | GLU | X | 138 | 34.964 | 30.589 | 24.373 | 0.00 | 0.00 |
| ATOM | 2123 | CA   | GLU | X | 138 | 33.253 | 29.518 | 25.042 | 0.00 | 0.00 |
| ATOM | 2124 | HA   | GLU | X | 138 | 32.882 | 28.498 | 24.941 | 0.00 | 0.00 |
| ATOM | 2125 | CB   | GLU | X | 138 | 33.791 | 29.650 | 26.483 | 0.00 | 0.00 |
| ATOM | 2126 | HB2  | GLU | X | 138 | 34.030 | 30.705 | 26.621 | 0.00 | 0.00 |
| ATOM | 2127 | HB3  | GLU | X | 138 | 32.957 | 29.508 | 27.171 | 0.00 | 0.00 |
| ATOM | 2128 | CG   | GLU | X | 138 | 34.945 | 28.685 | 26.781 | 0.00 | 0.00 |
| ATOM | 2129 | HG2  | GLU | X | 138 | 35.828 | 29.040 | 26.249 | 0.00 | 0.00 |
| ATOM | 2130 | HG3  | GLU | X | 138 | 35.092 | 28.994 | 27.816 | 0.00 | 0.00 |
| ATOM | 2131 | CD   | GLU | X | 138 | 34.577 | 27.165 | 26.731 | 0.00 | 0.00 |
| ATOM | 2132 | OE1  | GLU | X | 138 | 33.420 | 26.750 | 26.656 | 0.00 | 0.00 |
| ATOM | 2133 | OE2  | GLU | X | 138 | 35.474 | 26.354 | 26.607 | 0.00 | 0.00 |
| ATOM | 2134 | C    | GLU | X | 138 | 32.048 | 30.387 | 24.787 | 0.00 | 0.00 |
| ATOM | 2135 | O    | GLU | X | 138 | 31.085 | 30.338 | 25.549 | 0.00 | 0.00 |
| ATOM | 2136 | N    | ARG | X | 139 | 32.074 | 31.274 | 23.722 | 0.00 | 0.00 |
| ATOM | 2137 | H    | ARG | X | 139 | 32.983 | 31.279 | 23.282 | 0.00 | 0.00 |
| ATOM | 2138 | CA   | ARG | X | 139 | 30.945 | 32.071 | 23.246 | 0.00 | 0.00 |
| ATOM | 2139 | HA   | ARG | X | 139 | 31.370 | 32.703 | 22.466 | 0.00 | 0.00 |
| ATOM | 2140 | CB   | ARG | X | 139 | 29.921 | 31.140 | 22.650 | 0.00 | 0.00 |
| ATOM | 2141 | HB2  | ARG | X | 139 | 29.563 | 30.351 | 23.310 | 0.00 | 0.00 |
| ATOM | 2142 | HB3  | ARG | X | 139 | 29.056 | 31.726 | 22.338 | 0.00 | 0.00 |
| ATOM | 2143 | CG   | ARG | X | 139 | 30.450 | 30.467 | 21.455 | 0.00 | 0.00 |
| ATOM | 2144 | HG2  | ARG | X | 139 | 31.053 | 31.193 | 20.909 | 0.00 | 0.00 |
| ATOM | 2145 | HG3  | ARG | X | 139 | 31.153 | 29.669 | 21.693 | 0.00 | 0.00 |
| ATOM | 2146 | CD   | ARG | X | 139 | 29.275 | 29.793 | 20.596 | 0.00 | 0.00 |
| ATOM | 2147 | HD2  | ARG | X | 139 | 29.583 | 29.011 | 19.902 | 0.00 | 0.00 |
| ATOM | 2148 | HD3  | ARG | X | 139 | 28.666 | 29.391 | 21.406 | 0.00 | 0.00 |
| ATOM | 2149 | NE   | ARG | X | 139 | 28.518 | 30.794 | 19.911 | 0.00 | 0.00 |
| ATOM | 2150 | HE   | ARG | X | 139 | 27.540 | 30.818 | 20.161 | 0.00 | 0.00 |
| ATOM | 2151 | CZ   | ARG | X | 139 | 28.875 | 31.478 | 18.854 | 0.00 | 0.00 |
| ATOM | 2152 | NH1  | ARG | X | 139 | 30.090 | 31.529 | 18.317 | 0.00 | 0.00 |
| ATOM | 2153 | HH11 | ARG | X | 139 | 30.850 | 31.063 | 18.792 | 0.00 | 0.00 |
| ATOM | 2154 | HH12 | ARG | X | 139 | 30.489 | 32.169 | 17.645 | 0.00 | 0.00 |
| ATOM | 2155 | NH2  | ARG | X | 139 | 28.000 | 32.182 | 18.288 | 0.00 | 0.00 |
| ATOM | 2156 | HH21 | ARG | X | 139 | 27.027 | 32.206 | 18.558 | 0.00 | 0.00 |
| ATOM | 2157 | HH22 | ARG | X | 139 | 28.213 | 32.612 | 17.399 | 0.00 | 0.00 |
| ATOM | 2158 | C    | ARG | X | 139 | 30.317 | 33.001 | 24.292 | 0.00 | 0.00 |
| ATOM | 2159 | O    | ARG | X | 139 | 29.429 | 33.803 | 23.917 | 0.00 | 0.00 |
| ATOM | 2160 | N    | THR | X | 140 | 30.729 | 32.997 | 25.562 | 0.00 | 0.00 |
| ATOM | 2161 | H    | THR | X | 140 | 31.427 | 32.292 | 25.753 | 0.00 | 0.00 |
| ATOM | 2162 | CA   | THR | X | 140 | 30.490 | 33.987 | 26.601 | 0.00 | 0.00 |

|      |      |      |     |   |     |        |        |        |      |      |
|------|------|------|-----|---|-----|--------|--------|--------|------|------|
| ATOM | 2163 | HA   | THR | X | 140 | 29.415 | 34.123 | 26.477 | 0.00 | 0.00 |
| ATOM | 2164 | CB   | THR | X | 140 | 30.913 | 33.643 | 28.009 | 0.00 | 0.00 |
| ATOM | 2165 | HB   | THR | X | 140 | 30.488 | 34.430 | 28.630 | 0.00 | 0.00 |
| ATOM | 2166 | CG2  | THR | X | 140 | 30.302 | 32.270 | 28.385 | 0.00 | 0.00 |
| ATOM | 2167 | HG21 | THR | X | 140 | 30.688 | 31.406 | 27.843 | 0.00 | 0.00 |
| ATOM | 2168 | HG22 | THR | X | 140 | 29.233 | 32.346 | 28.187 | 0.00 | 0.00 |
| ATOM | 2169 | HG23 | THR | X | 140 | 30.453 | 32.243 | 29.464 | 0.00 | 0.00 |
| ATOM | 2170 | OG1  | THR | X | 140 | 32.304 | 33.507 | 28.146 | 0.00 | 0.00 |
| ATOM | 2171 | HG1  | THR | X | 140 | 32.605 | 34.393 | 27.934 | 0.00 | 0.00 |
| ATOM | 2172 | C    | THR | X | 140 | 31.219 | 35.235 | 26.210 | 0.00 | 0.00 |
| ATOM | 2173 | O    | THR | X | 140 | 32.373 | 35.115 | 25.753 | 0.00 | 0.00 |
| ATOM | 2174 | N    | VAL | X | 141 | 30.538 | 36.352 | 26.470 | 0.00 | 0.00 |
| ATOM | 2175 | H    | VAL | X | 141 | 29.631 | 36.235 | 26.898 | 0.00 | 0.00 |
| ATOM | 2176 | CA   | VAL | X | 141 | 31.048 | 37.721 | 26.320 | 0.00 | 0.00 |
| ATOM | 2177 | HA   | VAL | X | 141 | 31.561 | 37.734 | 25.359 | 0.00 | 0.00 |
| ATOM | 2178 | CB   | VAL | X | 141 | 29.928 | 38.768 | 26.274 | 0.00 | 0.00 |
| ATOM | 2179 | HB   | VAL | X | 141 | 29.353 | 38.692 | 27.197 | 0.00 | 0.00 |
| ATOM | 2180 | CG1  | VAL | X | 141 | 30.409 | 40.167 | 26.137 | 0.00 | 0.00 |
| ATOM | 2181 | HG11 | VAL | X | 141 | 31.074 | 40.310 | 25.285 | 0.00 | 0.00 |
| ATOM | 2182 | HG12 | VAL | X | 141 | 29.606 | 40.866 | 25.905 | 0.00 | 0.00 |
| ATOM | 2183 | HG13 | VAL | X | 141 | 30.994 | 40.400 | 27.027 | 0.00 | 0.00 |
| ATOM | 2184 | CG2  | VAL | X | 141 | 28.958 | 38.455 | 25.059 | 0.00 | 0.00 |
| ATOM | 2185 | HG21 | VAL | X | 141 | 29.452 | 38.274 | 24.105 | 0.00 | 0.00 |
| ATOM | 2186 | HG22 | VAL | X | 141 | 28.330 | 39.317 | 24.833 | 0.00 | 0.00 |
| ATOM | 2187 | HG23 | VAL | X | 141 | 28.297 | 37.664 | 25.413 | 0.00 | 0.00 |
| ATOM | 2188 | C    | VAL | X | 141 | 32.067 | 37.981 | 27.470 | 0.00 | 0.00 |
| ATOM | 2189 | O    | VAL | X | 141 | 31.777 | 37.512 | 28.588 | 0.00 | 0.00 |
| ATOM | 2190 | N    | LEU | X | 142 | 33.168 | 38.714 | 27.295 | 0.00 | 0.00 |
| ATOM | 2191 | H    | LEU | X | 142 | 33.382 | 38.987 | 26.346 | 0.00 | 0.00 |
| ATOM | 2192 | CA   | LEU | X | 142 | 34.058 | 39.074 | 28.341 | 0.00 | 0.00 |
| ATOM | 2193 | HA   | LEU | X | 142 | 33.629 | 38.757 | 29.292 | 0.00 | 0.00 |
| ATOM | 2194 | CB   | LEU | X | 142 | 35.356 | 38.320 | 28.302 | 0.00 | 0.00 |
| ATOM | 2195 | HB2  | LEU | X | 142 | 35.066 | 37.271 | 28.368 | 0.00 | 0.00 |
| ATOM | 2196 | HB3  | LEU | X | 142 | 35.741 | 38.332 | 27.282 | 0.00 | 0.00 |
| ATOM | 2197 | CG   | LEU | X | 142 | 36.416 | 38.725 | 29.444 | 0.00 | 0.00 |
| ATOM | 2198 | HG   | LEU | X | 142 | 35.937 | 39.021 | 30.377 | 0.00 | 0.00 |
| ATOM | 2199 | CD1  | LEU | X | 142 | 37.196 | 37.416 | 29.707 | 0.00 | 0.00 |
| ATOM | 2200 | HD11 | LEU | X | 142 | 38.144 | 37.702 | 30.163 | 0.00 | 0.00 |
| ATOM | 2201 | HD12 | LEU | X | 142 | 37.583 | 36.938 | 28.807 | 0.00 | 0.00 |
| ATOM | 2202 | HD13 | LEU | X | 142 | 36.661 | 36.790 | 30.420 | 0.00 | 0.00 |
| ATOM | 2203 | CD2  | LEU | X | 142 | 37.388 | 39.859 | 29.006 | 0.00 | 0.00 |
| ATOM | 2204 | HD21 | LEU | X | 142 | 36.922 | 40.837 | 29.123 | 0.00 | 0.00 |
| ATOM | 2205 | HD22 | LEU | X | 142 | 38.209 | 39.922 | 29.721 | 0.00 | 0.00 |
| ATOM | 2206 | HD23 | LEU | X | 142 | 37.593 | 39.901 | 27.936 | 0.00 | 0.00 |
| ATOM | 2207 | C    | LEU | X | 142 | 34.244 | 40.583 | 28.372 | 0.00 | 0.00 |
| ATOM | 2208 | O    | LEU | X | 142 | 34.363 | 41.133 | 27.288 | 0.00 | 0.00 |
| ATOM | 2209 | N    | VAL | X | 143 | 34.152 | 41.261 | 29.476 | 0.00 | 0.00 |
| ATOM | 2210 | H    | VAL | X | 143 | 34.038 | 40.771 | 30.352 | 0.00 | 0.00 |
| ATOM | 2211 | CA   | VAL | X | 143 | 34.203 | 42.683 | 29.709 | 0.00 | 0.00 |
| ATOM | 2212 | HA   | VAL | X | 143 | 34.525 | 43.122 | 28.765 | 0.00 | 0.00 |
| ATOM | 2213 | CB   | VAL | X | 143 | 32.828 | 43.160 | 30.136 | 0.00 | 0.00 |
| ATOM | 2214 | HB   | VAL | X | 143 | 32.714 | 42.524 | 31.013 | 0.00 | 0.00 |
| ATOM | 2215 | CG1  | VAL | X | 143 | 32.768 | 44.592 | 30.651 | 0.00 | 0.00 |
| ATOM | 2216 | HG11 | VAL | X | 143 | 31.786 | 44.854 | 31.044 | 0.00 | 0.00 |
| ATOM | 2217 | HG12 | VAL | X | 143 | 33.545 | 44.757 | 31.397 | 0.00 | 0.00 |
| ATOM | 2218 | HG13 | VAL | X | 143 | 32.876 | 45.293 | 29.823 | 0.00 | 0.00 |
| ATOM | 2219 | CG2  | VAL | X | 143 | 31.687 | 42.904 | 29.154 | 0.00 | 0.00 |
| ATOM | 2220 | HG21 | VAL | X | 143 | 30.809 | 43.310 | 29.657 | 0.00 | 0.00 |
| ATOM | 2221 | HG22 | VAL | X | 143 | 31.649 | 41.826 | 28.998 | 0.00 | 0.00 |
| ATOM | 2222 | HG23 | VAL | X | 143 | 32.027 | 43.371 | 28.229 | 0.00 | 0.00 |
| ATOM | 2223 | C    | VAL | X | 143 | 35.332 | 42.858 | 30.731 | 0.00 | 0.00 |
| ATOM | 2224 | O    | VAL | X | 143 | 35.657 | 41.962 | 31.442 | 0.00 | 0.00 |
| ATOM | 2225 | N    | SER | X | 144 | 35.914 | 44.055 | 30.673 | 0.00 | 0.00 |
| ATOM | 2226 | H    | SER | X | 144 | 35.640 | 44.767 | 30.011 | 0.00 | 0.00 |
| ATOM | 2227 | CA   | SER | X | 144 | 36.784 | 44.656 | 31.777 | 0.00 | 0.00 |
| ATOM | 2228 | HA   | SER | X | 144 | 36.409 | 44.393 | 32.766 | 0.00 | 0.00 |
| ATOM | 2229 | CB   | SER | X | 144 | 38.192 | 44.128 | 31.639 | 0.00 | 0.00 |

|      |      |      |     |   |     |        |        |        |      |      |
|------|------|------|-----|---|-----|--------|--------|--------|------|------|
| ATOM | 2230 | HB2  | SER | X | 144 | 38.592 | 44.219 | 32.649 | 0.00 | 0.00 |
| ATOM | 2231 | HB3  | SER | X | 144 | 38.050 | 43.080 | 31.376 | 0.00 | 0.00 |
| ATOM | 2232 | OG   | SER | X | 144 | 38.952 | 44.756 | 30.652 | 0.00 | 0.00 |
| ATOM | 2233 | HG   | SER | X | 144 | 39.544 | 44.097 | 30.282 | 0.00 | 0.00 |
| ATOM | 2234 | C    | SER | X | 144 | 36.757 | 46.200 | 31.678 | 0.00 | 0.00 |
| ATOM | 2235 | O    | SER | X | 144 | 36.049 | 46.830 | 30.835 | 0.00 | 0.00 |
| ATOM | 2236 | N    | MET | X | 145 | 37.533 | 46.869 | 32.593 | 0.00 | 0.00 |
| ATOM | 2237 | H    | MET | X | 145 | 38.100 | 46.290 | 33.196 | 0.00 | 0.00 |
| ATOM | 2238 | CA   | MET | X | 145 | 37.731 | 48.303 | 32.708 | 0.00 | 0.00 |
| ATOM | 2239 | HA   | MET | X | 145 | 37.811 | 48.679 | 31.688 | 0.00 | 0.00 |
| ATOM | 2240 | CB   | MET | X | 145 | 36.411 | 48.893 | 33.372 | 0.00 | 0.00 |
| ATOM | 2241 | HB2  | MET | X | 145 | 36.415 | 49.959 | 33.600 | 0.00 | 0.00 |
| ATOM | 2242 | HB3  | MET | X | 145 | 35.598 | 48.895 | 32.646 | 0.00 | 0.00 |
| ATOM | 2243 | CG   | MET | X | 145 | 35.992 | 48.233 | 34.652 | 0.00 | 0.00 |
| ATOM | 2244 | HG2  | MET | X | 145 | 36.891 | 47.894 | 35.167 | 0.00 | 0.00 |
| ATOM | 2245 | HG3  | MET | X | 145 | 35.745 | 49.069 | 35.307 | 0.00 | 0.00 |
| ATOM | 2246 | SD   | MET | X | 145 | 34.783 | 46.855 | 34.734 | 0.00 | 0.00 |
| ATOM | 2247 | CE   | MET | X | 145 | 34.615 | 46.592 | 36.467 | 0.00 | 0.00 |
| ATOM | 2248 | HE1  | MET | X | 145 | 35.600 | 46.665 | 36.927 | 0.00 | 0.00 |
| ATOM | 2249 | HE2  | MET | X | 145 | 33.888 | 47.328 | 36.809 | 0.00 | 0.00 |
| ATOM | 2250 | HE3  | MET | X | 145 | 34.189 | 45.597 | 36.593 | 0.00 | 0.00 |
| ATOM | 2251 | C    | MET | X | 145 | 38.943 | 48.762 | 33.646 | 0.00 | 0.00 |
| ATOM | 2252 | O    | MET | X | 145 | 39.405 | 47.932 | 34.504 | 0.00 | 0.00 |
| ATOM | 2253 | N    | ASN | X | 146 | 39.376 | 50.056 | 33.488 | 0.00 | 0.00 |
| ATOM | 2254 | H    | ASN | X | 146 | 38.972 | 50.684 | 32.809 | 0.00 | 0.00 |
| ATOM | 2255 | CA   | ASN | X | 146 | 40.409 | 50.693 | 34.313 | 0.00 | 0.00 |
| ATOM | 2256 | HA   | ASN | X | 146 | 40.967 | 49.834 | 34.685 | 0.00 | 0.00 |
| ATOM | 2257 | CB   | ASN | X | 146 | 41.218 | 51.585 | 33.464 | 0.00 | 0.00 |
| ATOM | 2258 | HB2  | ASN | X | 146 | 40.535 | 52.170 | 32.847 | 0.00 | 0.00 |
| ATOM | 2259 | HB3  | ASN | X | 146 | 41.791 | 52.306 | 34.047 | 0.00 | 0.00 |
| ATOM | 2260 | CG   | ASN | X | 146 | 42.230 | 50.980 | 32.442 | 0.00 | 0.00 |
| ATOM | 2261 | OD1  | ASN | X | 146 | 42.814 | 49.929 | 32.590 | 0.00 | 0.00 |
| ATOM | 2262 | ND2  | ASN | X | 146 | 42.561 | 51.643 | 31.382 | 0.00 | 0.00 |
| ATOM | 2263 | HD21 | ASN | X | 146 | 43.419 | 51.337 | 30.944 | 0.00 | 0.00 |
| ATOM | 2264 | HD22 | ASN | X | 146 | 42.323 | 52.622 | 31.308 | 0.00 | 0.00 |
| ATOM | 2265 | C    | ASN | X | 146 | 39.746 | 51.366 | 35.477 | 0.00 | 0.00 |
| ATOM | 2266 | O    | ASN | X | 146 | 38.674 | 51.926 | 35.374 | 0.00 | 0.00 |
| ATOM | 2267 | N    | TYR | X | 147 | 40.561 | 51.554 | 36.534 | 0.00 | 0.00 |
| ATOM | 2268 | H    | TYR | X | 147 | 41.410 | 51.007 | 36.546 | 0.00 | 0.00 |
| ATOM | 2269 | CA   | TYR | X | 147 | 40.113 | 52.133 | 37.793 | 0.00 | 0.00 |
| ATOM | 2270 | HA   | TYR | X | 147 | 39.471 | 52.986 | 37.574 | 0.00 | 0.00 |
| ATOM | 2271 | CB   | TYR | X | 147 | 39.268 | 51.132 | 38.596 | 0.00 | 0.00 |
| ATOM | 2272 | HB2  | TYR | X | 147 | 39.076 | 51.560 | 39.579 | 0.00 | 0.00 |
| ATOM | 2273 | HB3  | TYR | X | 147 | 38.300 | 51.101 | 38.096 | 0.00 | 0.00 |
| ATOM | 2274 | CG   | TYR | X | 147 | 39.867 | 49.700 | 38.854 | 0.00 | 0.00 |
| ATOM | 2275 | CD1  | TYR | X | 147 | 39.502 | 48.670 | 37.972 | 0.00 | 0.00 |
| ATOM | 2276 | HD1  | TYR | X | 147 | 38.920 | 48.844 | 37.080 | 0.00 | 0.00 |
| ATOM | 2277 | CE1  | TYR | X | 147 | 40.049 | 47.425 | 38.193 | 0.00 | 0.00 |
| ATOM | 2278 | HE1  | TYR | X | 147 | 39.752 | 46.698 | 37.452 | 0.00 | 0.00 |
| ATOM | 2279 | CZ   | TYR | X | 147 | 41.001 | 47.191 | 39.142 | 0.00 | 0.00 |
| ATOM | 2280 | OH   | TYR | X | 147 | 41.506 | 45.934 | 39.214 | 0.00 | 0.00 |
| ATOM | 2281 | HH   | TYR | X | 147 | 42.178 | 45.849 | 39.894 | 0.00 | 0.00 |
| ATOM | 2282 | CE2  | TYR | X | 147 | 41.407 | 48.272 | 39.983 | 0.00 | 0.00 |
| ATOM | 2283 | HE2  | TYR | X | 147 | 42.175 | 48.044 | 40.707 | 0.00 | 0.00 |
| ATOM | 2284 | CD2  | TYR | X | 147 | 40.827 | 49.549 | 39.853 | 0.00 | 0.00 |
| ATOM | 2285 | HD2  | TYR | X | 147 | 41.055 | 50.367 | 40.520 | 0.00 | 0.00 |
| ATOM | 2286 | C    | TYR | X | 147 | 41.366 | 52.577 | 38.512 | 0.00 | 0.00 |
| ATOM | 2287 | O    | TYR | X | 147 | 42.450 | 52.051 | 38.270 | 0.00 | 0.00 |
| ATOM | 2288 | N    | ARG | X | 148 | 41.248 | 53.582 | 39.390 | 0.00 | 0.00 |
| ATOM | 2289 | H    | ARG | X | 148 | 40.366 | 54.073 | 39.429 | 0.00 | 0.00 |
| ATOM | 2290 | CA   | ARG | X | 148 | 42.482 | 54.169 | 40.019 | 0.00 | 0.00 |
| ATOM | 2291 | HA   | ARG | X | 148 | 43.253 | 54.342 | 39.267 | 0.00 | 0.00 |
| ATOM | 2292 | CB   | ARG | X | 148 | 42.142 | 55.541 | 40.648 | 0.00 | 0.00 |
| ATOM | 2293 | HB2  | ARG | X | 148 | 41.355 | 55.433 | 41.395 | 0.00 | 0.00 |
| ATOM | 2294 | HB3  | ARG | X | 148 | 43.019 | 56.023 | 41.079 | 0.00 | 0.00 |
| ATOM | 2295 | CG   | ARG | X | 148 | 41.591 | 56.407 | 39.516 | 0.00 | 0.00 |
| ATOM | 2296 | HG2  | ARG | X | 148 | 42.443 | 56.667 | 38.887 | 0.00 | 0.00 |

|      |      |      |     |   |     |        |        |        |      |      |
|------|------|------|-----|---|-----|--------|--------|--------|------|------|
| ATOM | 2297 | HG3  | ARG | X | 148 | 40.858 | 55.943 | 38.857 | 0.00 | 0.00 |
| ATOM | 2298 | CD   | ARG | X | 148 | 40.962 | 57.736 | 40.051 | 0.00 | 0.00 |
| ATOM | 2299 | HD2  | ARG | X | 148 | 41.544 | 58.184 | 40.856 | 0.00 | 0.00 |
| ATOM | 2300 | HD3  | ARG | X | 148 | 41.091 | 58.384 | 39.184 | 0.00 | 0.00 |
| ATOM | 2301 | NE   | ARG | X | 148 | 39.652 | 57.539 | 40.489 | 0.00 | 0.00 |
| ATOM | 2302 | HE   | ARG | X | 148 | 39.222 | 56.668 | 40.214 | 0.00 | 0.00 |
| ATOM | 2303 | CZ   | ARG | X | 148 | 38.815 | 58.513 | 40.826 | 0.00 | 0.00 |
| ATOM | 2304 | NH1  | ARG | X | 148 | 39.276 | 59.717 | 41.045 | 0.00 | 0.00 |
| ATOM | 2305 | HH11 | ARG | X | 148 | 40.244 | 59.848 | 40.786 | 0.00 | 0.00 |
| ATOM | 2306 | HH12 | ARG | X | 148 | 38.634 | 60.386 | 41.444 | 0.00 | 0.00 |
| ATOM | 2307 | NH2  | ARG | X | 148 | 37.578 | 58.233 | 41.116 | 0.00 | 0.00 |
| ATOM | 2308 | HH21 | ARG | X | 148 | 37.224 | 57.330 | 40.833 | 0.00 | 0.00 |
| ATOM | 2309 | HH22 | ARG | X | 148 | 37.020 | 58.944 | 41.567 | 0.00 | 0.00 |
| ATOM | 2310 | C    | ARG | X | 148 | 43.123 | 53.317 | 41.144 | 0.00 | 0.00 |
| ATOM | 2311 | O    | ARG | X | 148 | 42.430 | 52.714 | 41.946 | 0.00 | 0.00 |
| ATOM | 2312 | N    | VAL | X | 149 | 44.424 | 53.275 | 40.961 | 0.00 | 0.00 |
| ATOM | 2313 | H    | VAL | X | 149 | 44.799 | 53.758 | 40.157 | 0.00 | 0.00 |
| ATOM | 2314 | CA   | VAL | X | 149 | 45.393 | 52.515 | 41.713 | 0.00 | 0.00 |
| ATOM | 2315 | HA   | VAL | X | 149 | 44.815 | 52.059 | 42.517 | 0.00 | 0.00 |
| ATOM | 2316 | CB   | VAL | X | 149 | 45.951 | 51.335 | 40.860 | 0.00 | 0.00 |
| ATOM | 2317 | HB   | VAL | X | 149 | 46.754 | 50.869 | 41.432 | 0.00 | 0.00 |
| ATOM | 2318 | CG1  | VAL | X | 149 | 44.867 | 50.232 | 40.742 | 0.00 | 0.00 |
| ATOM | 2319 | HG11 | VAL | X | 149 | 45.335 | 49.311 | 40.396 | 0.00 | 0.00 |
| ATOM | 2320 | HG12 | VAL | X | 149 | 44.530 | 49.782 | 41.675 | 0.00 | 0.00 |
| ATOM | 2321 | HG13 | VAL | X | 149 | 44.114 | 50.670 | 40.086 | 0.00 | 0.00 |
| ATOM | 2322 | CG2  | VAL | X | 149 | 46.342 | 51.766 | 39.419 | 0.00 | 0.00 |
| ATOM | 2323 | HG21 | VAL | X | 149 | 46.937 | 52.679 | 39.444 | 0.00 | 0.00 |
| ATOM | 2324 | HG22 | VAL | X | 149 | 45.378 | 51.998 | 38.966 | 0.00 | 0.00 |
| ATOM | 2325 | HG23 | VAL | X | 149 | 46.996 | 50.994 | 39.012 | 0.00 | 0.00 |
| ATOM | 2326 | C    | VAL | X | 149 | 46.548 | 53.389 | 42.286 | 0.00 | 0.00 |
| ATOM | 2327 | O    | VAL | X | 149 | 47.134 | 54.227 | 41.601 | 0.00 | 0.00 |
| ATOM | 2328 | N    | GLY | X | 150 | 46.875 | 53.229 | 43.552 | 0.00 | 0.00 |
| ATOM | 2329 | H    | GLY | X | 150 | 46.433 | 52.537 | 44.140 | 0.00 | 0.00 |
| ATOM | 2330 | CA   | GLY | X | 150 | 47.854 | 54.043 | 44.255 | 0.00 | 0.00 |
| ATOM | 2331 | HA2  | GLY | X | 150 | 48.593 | 53.500 | 44.843 | 0.00 | 0.00 |
| ATOM | 2332 | HA3  | GLY | X | 150 | 48.366 | 54.733 | 43.584 | 0.00 | 0.00 |
| ATOM | 2333 | C    | GLY | X | 150 | 47.176 | 55.003 | 45.230 | 0.00 | 0.00 |
| ATOM | 2334 | O    | GLY | X | 150 | 45.987 | 54.876 | 45.520 | 0.00 | 0.00 |
| ATOM | 2335 | N    | ALA | X | 151 | 47.835 | 56.144 | 45.604 | 0.00 | 0.00 |
| ATOM | 2336 | H    | ALA | X | 151 | 48.806 | 56.275 | 45.357 | 0.00 | 0.00 |
| ATOM | 2337 | CA   | ALA | X | 151 | 47.204 | 57.297 | 46.254 | 0.00 | 0.00 |
| ATOM | 2338 | HA   | ALA | X | 151 | 46.985 | 57.032 | 47.289 | 0.00 | 0.00 |
| ATOM | 2339 | CB   | ALA | X | 151 | 48.201 | 58.450 | 46.412 | 0.00 | 0.00 |
| ATOM | 2340 | HB1  | ALA | X | 151 | 47.686 | 59.210 | 46.999 | 0.00 | 0.00 |
| ATOM | 2341 | HB2  | ALA | X | 151 | 48.391 | 58.973 | 45.476 | 0.00 | 0.00 |
| ATOM | 2342 | HB3  | ALA | X | 151 | 49.128 | 58.081 | 46.851 | 0.00 | 0.00 |
| ATOM | 2343 | C    | ALA | X | 151 | 45.891 | 57.817 | 45.538 | 0.00 | 0.00 |
| ATOM | 2344 | O    | ALA | X | 151 | 44.860 | 57.943 | 46.198 | 0.00 | 0.00 |
| ATOM | 2345 | N    | PHE | X | 152 | 45.992 | 58.033 | 44.243 | 0.00 | 0.00 |
| ATOM | 2346 | H    | PHE | X | 152 | 46.895 | 58.016 | 43.791 | 0.00 | 0.00 |
| ATOM | 2347 | CA   | PHE | X | 152 | 44.900 | 58.528 | 43.381 | 0.00 | 0.00 |
| ATOM | 2348 | HA   | PHE | X | 152 | 44.710 | 59.568 | 43.645 | 0.00 | 0.00 |
| ATOM | 2349 | CB   | PHE | X | 152 | 45.560 | 58.499 | 41.977 | 0.00 | 0.00 |
| ATOM | 2350 | HB2  | PHE | X | 152 | 46.429 | 59.150 | 42.072 | 0.00 | 0.00 |
| ATOM | 2351 | HB3  | PHE | X | 152 | 45.942 | 57.506 | 41.742 | 0.00 | 0.00 |
| ATOM | 2352 | CG   | PHE | X | 152 | 44.708 | 58.875 | 40.819 | 0.00 | 0.00 |
| ATOM | 2353 | CD1  | PHE | X | 152 | 45.143 | 58.475 | 39.525 | 0.00 | 0.00 |
| ATOM | 2354 | HD1  | PHE | X | 152 | 45.999 | 57.830 | 39.388 | 0.00 | 0.00 |
| ATOM | 2355 | CE1  | PHE | X | 152 | 44.382 | 58.827 | 38.388 | 0.00 | 0.00 |
| ATOM | 2356 | HE1  | PHE | X | 152 | 44.652 | 58.333 | 37.466 | 0.00 | 0.00 |
| ATOM | 2357 | CZ   | PHE | X | 152 | 43.389 | 59.751 | 38.492 | 0.00 | 0.00 |
| ATOM | 2358 | HZ   | PHE | X | 152 | 42.801 | 60.065 | 37.642 | 0.00 | 0.00 |
| ATOM | 2359 | CE2  | PHE | X | 152 | 43.019 | 60.260 | 39.740 | 0.00 | 0.00 |
| ATOM | 2360 | HE2  | PHE | X | 152 | 42.168 | 60.915 | 39.855 | 0.00 | 0.00 |
| ATOM | 2361 | CD2  | PHE | X | 152 | 43.721 | 59.834 | 40.876 | 0.00 | 0.00 |
| ATOM | 2362 | HD2  | PHE | X | 152 | 43.536 | 60.187 | 41.879 | 0.00 | 0.00 |
| ATOM | 2363 | C    | PHE | X | 152 | 43.546 | 57.783 | 43.583 | 0.00 | 0.00 |

|      |      |      |     |   |     |        |        |        |      |      |
|------|------|------|-----|---|-----|--------|--------|--------|------|------|
| ATOM | 2364 | O    | PHE | X | 152 | 42.520 | 58.401 | 43.478 | 0.00 | 0.00 |
| ATOM | 2365 | N    | GLY | X | 153 | 43.622 | 56.516 | 43.895 | 0.00 | 0.00 |
| ATOM | 2366 | H    | GLY | X | 153 | 44.552 | 56.151 | 44.042 | 0.00 | 0.00 |
| ATOM | 2367 | CA   | GLY | X | 153 | 42.500 | 55.634 | 44.080 | 0.00 | 0.00 |
| ATOM | 2368 | HA2  | GLY | X | 153 | 41.631 | 56.107 | 43.623 | 0.00 | 0.00 |
| ATOM | 2369 | HA3  | GLY | X | 153 | 42.817 | 54.670 | 43.682 | 0.00 | 0.00 |
| ATOM | 2370 | C    | GLY | X | 153 | 42.225 | 55.294 | 45.542 | 0.00 | 0.00 |
| ATOM | 2371 | O    | GLY | X | 153 | 41.166 | 54.671 | 45.620 | 0.00 | 0.00 |
| ATOM | 2372 | N    | PHE | X | 154 | 43.079 | 55.628 | 46.530 | 0.00 | 0.00 |
| ATOM | 2373 | H    | PHE | X | 154 | 43.857 | 56.254 | 46.377 | 0.00 | 0.00 |
| ATOM | 2374 | CA   | PHE | X | 154 | 43.040 | 55.055 | 47.840 | 0.00 | 0.00 |
| ATOM | 2375 | HA   | PHE | X | 154 | 41.985 | 54.835 | 48.004 | 0.00 | 0.00 |
| ATOM | 2376 | CB   | PHE | X | 154 | 43.782 | 53.705 | 47.957 | 0.00 | 0.00 |
| ATOM | 2377 | HB2  | PHE | X | 154 | 44.802 | 53.876 | 47.613 | 0.00 | 0.00 |
| ATOM | 2378 | HB3  | PHE | X | 154 | 43.887 | 53.377 | 48.991 | 0.00 | 0.00 |
| ATOM | 2379 | CG   | PHE | X | 154 | 43.075 | 52.662 | 47.078 | 0.00 | 0.00 |
| ATOM | 2380 | CD1  | PHE | X | 154 | 43.697 | 52.287 | 45.915 | 0.00 | 0.00 |
| ATOM | 2381 | HD1  | PHE | X | 154 | 44.667 | 52.671 | 45.635 | 0.00 | 0.00 |
| ATOM | 2382 | CE1  | PHE | X | 154 | 43.022 | 51.346 | 45.084 | 0.00 | 0.00 |
| ATOM | 2383 | HE1  | PHE | X | 154 | 43.408 | 51.188 | 44.088 | 0.00 | 0.00 |
| ATOM | 2384 | CZ   | PHE | X | 154 | 41.805 | 50.733 | 45.518 | 0.00 | 0.00 |
| ATOM | 2385 | HZ   | PHE | X | 154 | 41.319 | 50.137 | 44.759 | 0.00 | 0.00 |
| ATOM | 2386 | CE2  | PHE | X | 154 | 41.300 | 51.084 | 46.743 | 0.00 | 0.00 |
| ATOM | 2387 | HE2  | PHE | X | 154 | 40.334 | 50.746 | 47.089 | 0.00 | 0.00 |
| ATOM | 2388 | CD2  | PHE | X | 154 | 41.850 | 52.077 | 47.537 | 0.00 | 0.00 |
| ATOM | 2389 | HD2  | PHE | X | 154 | 41.334 | 52.462 | 48.405 | 0.00 | 0.00 |
| ATOM | 2390 | C    | PHE | X | 154 | 43.488 | 55.963 | 48.986 | 0.00 | 0.00 |
| ATOM | 2391 | O    | PHE | X | 154 | 43.458 | 55.529 | 50.160 | 0.00 | 0.00 |
| ATOM | 2392 | N    | LEU | X | 155 | 44.018 | 57.187 | 48.816 | 0.00 | 0.00 |
| ATOM | 2393 | H    | LEU | X | 155 | 44.034 | 57.530 | 47.866 | 0.00 | 0.00 |
| ATOM | 2394 | CA   | LEU | X | 155 | 44.633 | 57.991 | 49.886 | 0.00 | 0.00 |
| ATOM | 2395 | HA   | LEU | X | 155 | 45.216 | 57.423 | 50.612 | 0.00 | 0.00 |
| ATOM | 2396 | CB   | LEU | X | 155 | 45.625 | 59.043 | 49.263 | 0.00 | 0.00 |
| ATOM | 2397 | HB2  | LEU | X | 155 | 46.502 | 58.508 | 48.898 | 0.00 | 0.00 |
| ATOM | 2398 | HB3  | LEU | X | 155 | 45.194 | 59.466 | 48.356 | 0.00 | 0.00 |
| ATOM | 2399 | CG   | LEU | X | 155 | 45.987 | 60.300 | 50.090 | 0.00 | 0.00 |
| ATOM | 2400 | HG   | LEU | X | 155 | 46.033 | 59.887 | 51.098 | 0.00 | 0.00 |
| ATOM | 2401 | CD1  | LEU | X | 155 | 47.163 | 60.915 | 49.432 | 0.00 | 0.00 |
| ATOM | 2402 | HD11 | LEU | X | 155 | 47.925 | 60.198 | 49.126 | 0.00 | 0.00 |
| ATOM | 2403 | HD12 | LEU | X | 155 | 47.641 | 61.591 | 50.141 | 0.00 | 0.00 |
| ATOM | 2404 | HD13 | LEU | X | 155 | 47.010 | 61.330 | 48.436 | 0.00 | 0.00 |
| ATOM | 2405 | CD2  | LEU | X | 155 | 44.957 | 61.473 | 50.028 | 0.00 | 0.00 |
| ATOM | 2406 | HD21 | LEU | X | 155 | 44.116 | 61.391 | 50.717 | 0.00 | 0.00 |
| ATOM | 2407 | HD22 | LEU | X | 155 | 45.450 | 62.396 | 50.335 | 0.00 | 0.00 |
| ATOM | 2408 | HD23 | LEU | X | 155 | 44.611 | 61.537 | 48.996 | 0.00 | 0.00 |
| ATOM | 2409 | C    | LEU | X | 155 | 43.458 | 58.723 | 50.649 | 0.00 | 0.00 |
| ATOM | 2410 | O    | LEU | X | 155 | 42.577 | 59.275 | 49.988 | 0.00 | 0.00 |
| ATOM | 2411 | N    | ALA | X | 156 | 43.349 | 58.614 | 51.965 | 0.00 | 0.00 |
| ATOM | 2412 | H    | ALA | X | 156 | 44.038 | 58.135 | 52.528 | 0.00 | 0.00 |
| ATOM | 2413 | CA   | ALA | X | 156 | 42.243 | 59.073 | 52.841 | 0.00 | 0.00 |
| ATOM | 2414 | HA   | ALA | X | 156 | 41.572 | 59.706 | 52.260 | 0.00 | 0.00 |
| ATOM | 2415 | CB   | ALA | X | 156 | 41.323 | 57.935 | 53.363 | 0.00 | 0.00 |
| ATOM | 2416 | HB1  | ALA | X | 156 | 40.390 | 58.278 | 53.811 | 0.00 | 0.00 |
| ATOM | 2417 | HB2  | ALA | X | 156 | 41.930 | 57.267 | 53.974 | 0.00 | 0.00 |
| ATOM | 2418 | HB3  | ALA | X | 156 | 41.050 | 57.281 | 52.534 | 0.00 | 0.00 |
| ATOM | 2419 | C    | ALA | X | 156 | 42.862 | 59.949 | 53.934 | 0.00 | 0.00 |
| ATOM | 2420 | O    | ALA | X | 156 | 43.965 | 59.824 | 54.432 | 0.00 | 0.00 |
| ATOM | 2421 | N    | LEU | X | 157 | 41.997 | 60.903 | 54.353 | 0.00 | 0.00 |
| ATOM | 2422 | H    | LEU | X | 157 | 41.138 | 61.050 | 53.842 | 0.00 | 0.00 |
| ATOM | 2423 | CA   | LEU | X | 157 | 42.189 | 61.864 | 55.456 | 0.00 | 0.00 |
| ATOM | 2424 | HA   | LEU | X | 157 | 43.009 | 61.471 | 56.057 | 0.00 | 0.00 |
| ATOM | 2425 | CB   | LEU | X | 157 | 42.567 | 63.260 | 54.950 | 0.00 | 0.00 |
| ATOM | 2426 | HB2  | LEU | X | 157 | 41.666 | 63.732 | 54.557 | 0.00 | 0.00 |
| ATOM | 2427 | HB3  | LEU | X | 157 | 42.920 | 63.846 | 55.799 | 0.00 | 0.00 |
| ATOM | 2428 | CG   | LEU | X | 157 | 43.671 | 63.276 | 53.882 | 0.00 | 0.00 |
| ATOM | 2429 | HG   | LEU | X | 157 | 43.482 | 62.429 | 53.222 | 0.00 | 0.00 |
| ATOM | 2430 | CD1  | LEU | X | 157 | 43.489 | 64.499 | 53.023 | 0.00 | 0.00 |

|      |      |      |     |   |     |        |        |        |      |      |
|------|------|------|-----|---|-----|--------|--------|--------|------|------|
| ATOM | 2431 | HD11 | LEU | X | 157 | 43.602 | 65.394 | 53.633 | 0.00 | 0.00 |
| ATOM | 2432 | HD12 | LEU | X | 157 | 42.456 | 64.477 | 52.676 | 0.00 | 0.00 |
| ATOM | 2433 | HD13 | LEU | X | 157 | 44.207 | 64.436 | 52.205 | 0.00 | 0.00 |
| ATOM | 2434 | CD2  | LEU | X | 157 | 45.128 | 63.175 | 54.424 | 0.00 | 0.00 |
| ATOM | 2435 | HD21 | LEU | X | 157 | 45.442 | 64.008 | 55.054 | 0.00 | 0.00 |
| ATOM | 2436 | HD22 | LEU | X | 157 | 45.199 | 62.219 | 54.944 | 0.00 | 0.00 |
| ATOM | 2437 | HD23 | LEU | X | 157 | 45.753 | 63.152 | 53.531 | 0.00 | 0.00 |
| ATOM | 2438 | C    | LEU | X | 157 | 40.865 | 61.957 | 56.327 | 0.00 | 0.00 |
| ATOM | 2439 | O    | LEU | X | 157 | 39.789 | 62.236 | 55.724 | 0.00 | 0.00 |
| ATOM | 2440 | N    | PRO | X | 158 | 40.986 | 61.685 | 57.612 | 0.00 | 0.00 |
| ATOM | 2441 | CD   | PRO | X | 158 | 42.224 | 61.511 | 58.388 | 0.00 | 0.00 |
| ATOM | 2442 | HD2  | PRO | X | 158 | 42.983 | 62.269 | 58.197 | 0.00 | 0.00 |
| ATOM | 2443 | HD3  | PRO | X | 158 | 42.674 | 60.567 | 58.080 | 0.00 | 0.00 |
| ATOM | 2444 | CG   | PRO | X | 158 | 41.787 | 61.512 | 59.801 | 0.00 | 0.00 |
| ATOM | 2445 | HG2  | PRO | X | 158 | 42.039 | 62.489 | 60.214 | 0.00 | 0.00 |
| ATOM | 2446 | HG3  | PRO | X | 158 | 42.235 | 60.676 | 60.339 | 0.00 | 0.00 |
| ATOM | 2447 | CB   | PRO | X | 158 | 40.277 | 61.431 | 59.871 | 0.00 | 0.00 |
| ATOM | 2448 | HB2  | PRO | X | 158 | 39.849 | 61.880 | 60.767 | 0.00 | 0.00 |
| ATOM | 2449 | HB3  | PRO | X | 158 | 39.910 | 60.412 | 59.994 | 0.00 | 0.00 |
| ATOM | 2450 | CA   | PRO | X | 158 | 39.877 | 62.000 | 58.536 | 0.00 | 0.00 |
| ATOM | 2451 | HA   | PRO | X | 158 | 38.949 | 61.492 | 58.272 | 0.00 | 0.00 |
| ATOM | 2452 | C    | PRO | X | 158 | 39.611 | 63.496 | 58.638 | 0.00 | 0.00 |
| ATOM | 2453 | O    | PRO | X | 158 | 40.474 | 64.281 | 58.229 | 0.00 | 0.00 |
| ATOM | 2454 | N    | GLY | X | 159 | 38.509 | 63.831 | 59.351 | 0.00 | 0.00 |
| ATOM | 2455 | H    | GLY | X | 159 | 37.898 | 63.099 | 59.684 | 0.00 | 0.00 |
| ATOM | 2456 | CA   | GLY | X | 159 | 38.165 | 65.221 | 59.666 | 0.00 | 0.00 |
| ATOM | 2457 | HA2  | GLY | X | 159 | 37.681 | 65.261 | 60.641 | 0.00 | 0.00 |
| ATOM | 2458 | HA3  | GLY | X | 159 | 39.093 | 65.793 | 59.681 | 0.00 | 0.00 |
| ATOM | 2459 | C    | GLY | X | 159 | 37.298 | 65.891 | 58.647 | 0.00 | 0.00 |
| ATOM | 2460 | O    | GLY | X | 159 | 36.935 | 67.057 | 58.970 | 0.00 | 0.00 |
| ATOM | 2461 | N    | SER | X | 160 | 36.991 | 65.265 | 57.527 | 0.00 | 0.00 |
| ATOM | 2462 | H    | SER | X | 160 | 37.278 | 64.298 | 57.467 | 0.00 | 0.00 |
| ATOM | 2463 | CA   | SER | X | 160 | 36.308 | 65.696 | 56.292 | 0.00 | 0.00 |
| ATOM | 2464 | HA   | SER | X | 160 | 35.299 | 65.990 | 56.579 | 0.00 | 0.00 |
| ATOM | 2465 | CB   | SER | X | 160 | 36.955 | 66.882 | 55.677 | 0.00 | 0.00 |
| ATOM | 2466 | HB2  | SER | X | 160 | 36.343 | 67.145 | 54.814 | 0.00 | 0.00 |
| ATOM | 2467 | HB3  | SER | X | 160 | 37.055 | 67.743 | 56.338 | 0.00 | 0.00 |
| ATOM | 2468 | OG   | SER | X | 160 | 38.299 | 66.586 | 55.229 | 0.00 | 0.00 |
| ATOM | 2469 | HG   | SER | X | 160 | 38.813 | 66.771 | 56.019 | 0.00 | 0.00 |
| ATOM | 2470 | C    | SER | X | 160 | 36.178 | 64.518 | 55.263 | 0.00 | 0.00 |
| ATOM | 2471 | O    | SER | X | 160 | 36.778 | 63.467 | 55.484 | 0.00 | 0.00 |
| ATOM | 2472 | N    | ARG | X | 161 | 35.515 | 64.799 | 54.139 | 0.00 | 0.00 |
| ATOM | 2473 | H    | ARG | X | 161 | 35.153 | 65.742 | 54.115 | 0.00 | 0.00 |
| ATOM | 2474 | CA   | ARG | X | 161 | 35.295 | 63.915 | 53.024 | 0.00 | 0.00 |
| ATOM | 2475 | HA   | ARG | X | 161 | 35.798 | 62.989 | 53.300 | 0.00 | 0.00 |
| ATOM | 2476 | CB   | ARG | X | 161 | 33.785 | 63.740 | 52.810 | 0.00 | 0.00 |
| ATOM | 2477 | HB2  | ARG | X | 161 | 33.278 | 64.151 | 53.683 | 0.00 | 0.00 |
| ATOM | 2478 | HB3  | ARG | X | 161 | 33.439 | 64.347 | 51.973 | 0.00 | 0.00 |
| ATOM | 2479 | CG   | ARG | X | 161 | 33.333 | 62.266 | 52.686 | 0.00 | 0.00 |
| ATOM | 2480 | HG2  | ARG | X | 161 | 32.280 | 62.336 | 52.414 | 0.00 | 0.00 |
| ATOM | 2481 | HG3  | ARG | X | 161 | 33.981 | 61.769 | 51.965 | 0.00 | 0.00 |
| ATOM | 2482 | CD   | ARG | X | 161 | 33.416 | 61.368 | 53.997 | 0.00 | 0.00 |
| ATOM | 2483 | HD2  | ARG | X | 161 | 33.290 | 62.018 | 54.863 | 0.00 | 0.00 |
| ATOM | 2484 | HD3  | ARG | X | 161 | 32.590 | 60.658 | 53.955 | 0.00 | 0.00 |
| ATOM | 2485 | NE   | ARG | X | 161 | 34.655 | 60.603 | 54.098 | 0.00 | 0.00 |
| ATOM | 2486 | HE   | ARG | X | 161 | 35.590 | 60.982 | 54.145 | 0.00 | 0.00 |
| ATOM | 2487 | CZ   | ARG | X | 161 | 34.711 | 59.256 | 54.204 | 0.00 | 0.00 |
| ATOM | 2488 | NH1  | ARG | X | 161 | 33.694 | 58.472 | 54.309 | 0.00 | 0.00 |
| ATOM | 2489 | HH11 | ARG | X | 161 | 32.857 | 58.980 | 54.555 | 0.00 | 0.00 |
| ATOM | 2490 | HH12 | ARG | X | 161 | 33.922 | 57.491 | 54.392 | 0.00 | 0.00 |
| ATOM | 2491 | NH2  | ARG | X | 161 | 35.875 | 58.620 | 54.221 | 0.00 | 0.00 |
| ATOM | 2492 | HH21 | ARG | X | 161 | 36.729 | 59.158 | 54.247 | 0.00 | 0.00 |
| ATOM | 2493 | HH22 | ARG | X | 161 | 35.829 | 57.611 | 54.208 | 0.00 | 0.00 |
| ATOM | 2494 | C    | ARG | X | 161 | 36.016 | 64.541 | 51.783 | 0.00 | 0.00 |
| ATOM | 2495 | O    | ARG | X | 161 | 35.591 | 64.358 | 50.629 | 0.00 | 0.00 |
| ATOM | 2496 | N    | GLU | X | 162 | 37.015 | 65.364 | 51.999 | 0.00 | 0.00 |
| ATOM | 2497 | H    | GLU | X | 162 | 37.467 | 65.317 | 52.901 | 0.00 | 0.00 |

|      |      |      |     |   |     |        |        |        |      |      |
|------|------|------|-----|---|-----|--------|--------|--------|------|------|
| ATOM | 2498 | CA   | GLU | X | 162 | 37.886 | 65.976 | 50.980 | 0.00 | 0.00 |
| ATOM | 2499 | HA   | GLU | X | 162 | 37.233 | 66.372 | 50.202 | 0.00 | 0.00 |
| ATOM | 2500 | CB   | GLU | X | 162 | 38.791 | 66.946 | 51.758 | 0.00 | 0.00 |
| ATOM | 2501 | HB2  | GLU | X | 162 | 39.214 | 66.521 | 52.669 | 0.00 | 0.00 |
| ATOM | 2502 | HB3  | GLU | X | 162 | 39.571 | 67.164 | 51.029 | 0.00 | 0.00 |
| ATOM | 2503 | CG   | GLU | X | 162 | 38.089 | 68.237 | 52.097 | 0.00 | 0.00 |
| ATOM | 2504 | HG2  | GLU | X | 162 | 37.320 | 68.148 | 52.864 | 0.00 | 0.00 |
| ATOM | 2505 | HG3  | GLU | X | 162 | 38.880 | 68.916 | 52.416 | 0.00 | 0.00 |
| ATOM | 2506 | CD   | GLU | X | 162 | 37.461 | 68.674 | 50.800 | 0.00 | 0.00 |
| ATOM | 2507 | OE1  | GLU | X | 162 | 38.141 | 69.284 | 49.941 | 0.00 | 0.00 |
| ATOM | 2508 | OE2  | GLU | X | 162 | 36.282 | 68.498 | 50.609 | 0.00 | 0.00 |
| ATOM | 2509 | C    | GLU | X | 162 | 38.699 | 64.953 | 50.261 | 0.00 | 0.00 |
| ATOM | 2510 | O    | GLU | X | 162 | 39.107 | 65.083 | 49.137 | 0.00 | 0.00 |
| ATOM | 2511 | N    | ALA | X | 163 | 38.987 | 63.880 | 50.992 | 0.00 | 0.00 |
| ATOM | 2512 | H    | ALA | X | 163 | 39.070 | 64.028 | 51.988 | 0.00 | 0.00 |
| ATOM | 2513 | CA   | ALA | X | 163 | 39.624 | 62.636 | 50.536 | 0.00 | 0.00 |
| ATOM | 2514 | HA   | ALA | X | 163 | 39.486 | 62.453 | 49.471 | 0.00 | 0.00 |
| ATOM | 2515 | CB   | ALA | X | 163 | 41.112 | 62.714 | 50.674 | 0.00 | 0.00 |
| ATOM | 2516 | HB1  | ALA | X | 163 | 41.272 | 62.792 | 51.749 | 0.00 | 0.00 |
| ATOM | 2517 | HB2  | ALA | X | 163 | 41.411 | 63.627 | 50.158 | 0.00 | 0.00 |
| ATOM | 2518 | HB3  | ALA | X | 163 | 41.556 | 61.788 | 50.307 | 0.00 | 0.00 |
| ATOM | 2519 | C    | ALA | X | 163 | 39.027 | 61.360 | 51.277 | 0.00 | 0.00 |
| ATOM | 2520 | O    | ALA | X | 163 | 39.510 | 60.958 | 52.324 | 0.00 | 0.00 |
| ATOM | 2521 | N    | PRO | X | 164 | 38.043 | 60.718 | 50.643 | 0.00 | 0.00 |
| ATOM | 2522 | CD   | PRO | X | 164 | 37.123 | 61.421 | 49.644 | 0.00 | 0.00 |
| ATOM | 2523 | HD2  | PRO | X | 164 | 37.689 | 61.624 | 48.735 | 0.00 | 0.00 |
| ATOM | 2524 | HD3  | PRO | X | 164 | 36.617 | 62.268 | 50.107 | 0.00 | 0.00 |
| ATOM | 2525 | CG   | PRO | X | 164 | 36.067 | 60.400 | 49.340 | 0.00 | 0.00 |
| ATOM | 2526 | HG2  | PRO | X | 164 | 36.358 | 59.824 | 48.462 | 0.00 | 0.00 |
| ATOM | 2527 | HG3  | PRO | X | 164 | 35.071 | 60.813 | 49.181 | 0.00 | 0.00 |
| ATOM | 2528 | CB   | PRO | X | 164 | 35.999 | 59.408 | 50.515 | 0.00 | 0.00 |
| ATOM | 2529 | HB2  | PRO | X | 164 | 35.844 | 58.389 | 50.160 | 0.00 | 0.00 |
| ATOM | 2530 | HB3  | PRO | X | 164 | 35.239 | 59.800 | 51.190 | 0.00 | 0.00 |
| ATOM | 2531 | CA   | PRO | X | 164 | 37.383 | 59.527 | 51.150 | 0.00 | 0.00 |
| ATOM | 2532 | HA   | PRO | X | 164 | 37.394 | 59.600 | 52.238 | 0.00 | 0.00 |
| ATOM | 2533 | C    | PRO | X | 164 | 38.157 | 58.243 | 50.924 | 0.00 | 0.00 |
| ATOM | 2534 | O    | PRO | X | 164 | 37.747 | 57.229 | 51.437 | 0.00 | 0.00 |
| ATOM | 2535 | N    | GLY | X | 165 | 39.084 | 58.165 | 49.998 | 0.00 | 0.00 |
| ATOM | 2536 | H    | GLY | X | 165 | 39.386 | 59.009 | 49.532 | 0.00 | 0.00 |
| ATOM | 2537 | CA   | GLY | X | 165 | 39.967 | 57.002 | 49.882 | 0.00 | 0.00 |
| ATOM | 2538 | HA2  | GLY | X | 165 | 40.899 | 57.396 | 49.477 | 0.00 | 0.00 |
| ATOM | 2539 | HA3  | GLY | X | 165 | 40.120 | 56.429 | 50.797 | 0.00 | 0.00 |
| ATOM | 2540 | C    | GLY | X | 165 | 39.434 | 56.014 | 48.797 | 0.00 | 0.00 |
| ATOM | 2541 | O    | GLY | X | 165 | 39.793 | 56.189 | 47.655 | 0.00 | 0.00 |
| ATOM | 2542 | N    | ASN | X | 166 | 38.622 | 55.032 | 49.147 | 0.00 | 0.00 |
| ATOM | 2543 | H    | ASN | X | 166 | 38.304 | 55.007 | 50.105 | 0.00 | 0.00 |
| ATOM | 2544 | CA   | ASN | X | 166 | 38.125 | 53.833 | 48.300 | 0.00 | 0.00 |
| ATOM | 2545 | HA   | ASN | X | 166 | 38.959 | 53.152 | 48.128 | 0.00 | 0.00 |
| ATOM | 2546 | CB   | ASN | X | 166 | 37.048 | 53.127 | 49.165 | 0.00 | 0.00 |
| ATOM | 2547 | HB2  | ASN | X | 166 | 36.311 | 53.871 | 49.469 | 0.00 | 0.00 |
| ATOM | 2548 | HB3  | ASN | X | 166 | 36.462 | 52.346 | 48.681 | 0.00 | 0.00 |
| ATOM | 2549 | CG   | ASN | X | 166 | 37.694 | 52.645 | 50.440 | 0.00 | 0.00 |
| ATOM | 2550 | OD1  | ASN | X | 166 | 38.396 | 51.629 | 50.425 | 0.00 | 0.00 |
| ATOM | 2551 | ND2  | ASN | X | 166 | 37.349 | 53.193 | 51.610 | 0.00 | 0.00 |
| ATOM | 2552 | HD21 | ASN | X | 166 | 37.629 | 52.568 | 52.353 | 0.00 | 0.00 |
| ATOM | 2553 | HD22 | ASN | X | 166 | 36.629 | 53.896 | 51.692 | 0.00 | 0.00 |
| ATOM | 2554 | C    | ASN | X | 166 | 37.679 | 54.117 | 46.877 | 0.00 | 0.00 |
| ATOM | 2555 | O    | ASN | X | 166 | 37.205 | 53.155 | 46.239 | 0.00 | 0.00 |
| ATOM | 2556 | N    | VAL | X | 167 | 37.792 | 55.364 | 46.360 | 0.00 | 0.00 |
| ATOM | 2557 | H    | VAL | X | 167 | 38.132 | 56.111 | 46.949 | 0.00 | 0.00 |
| ATOM | 2558 | CA   | VAL | X | 167 | 37.403 | 55.690 | 45.019 | 0.00 | 0.00 |
| ATOM | 2559 | HA   | VAL | X | 167 | 36.316 | 55.615 | 45.062 | 0.00 | 0.00 |
| ATOM | 2560 | CB   | VAL | X | 167 | 37.671 | 57.172 | 44.607 | 0.00 | 0.00 |
| ATOM | 2561 | HB   | VAL | X | 167 | 37.039 | 57.502 | 43.782 | 0.00 | 0.00 |
| ATOM | 2562 | CG1  | VAL | X | 167 | 37.382 | 58.097 | 45.795 | 0.00 | 0.00 |
| ATOM | 2563 | HG11 | VAL | X | 167 | 38.118 | 57.851 | 46.560 | 0.00 | 0.00 |
| ATOM | 2564 | HG12 | VAL | X | 167 | 37.317 | 59.146 | 45.508 | 0.00 | 0.00 |

|      |      |      |     |   |     |        |        |        |      |      |
|------|------|------|-----|---|-----|--------|--------|--------|------|------|
| ATOM | 2565 | HG13 | VAL | X | 167 | 36.359 | 58.012 | 46.162 | 0.00 | 0.00 |
| ATOM | 2566 | CG2  | VAL | X | 167 | 39.142 | 57.410 | 44.362 | 0.00 | 0.00 |
| ATOM | 2567 | HG21 | VAL | X | 167 | 39.643 | 57.288 | 45.322 | 0.00 | 0.00 |
| ATOM | 2568 | HG22 | VAL | X | 167 | 39.418 | 58.416 | 44.044 | 0.00 | 0.00 |
| ATOM | 2569 | HG23 | VAL | X | 167 | 39.490 | 56.725 | 43.589 | 0.00 | 0.00 |
| ATOM | 2570 | C    | VAL | X | 167 | 37.786 | 54.679 | 43.876 | 0.00 | 0.00 |
| ATOM | 2571 | O    | VAL | X | 167 | 37.102 | 54.610 | 42.867 | 0.00 | 0.00 |
| ATOM | 2572 | N    | GLY | X | 168 | 38.848 | 53.872 | 44.119 | 0.00 | 0.00 |
| ATOM | 2573 | H    | GLY | X | 168 | 39.346 | 53.914 | 44.997 | 0.00 | 0.00 |
| ATOM | 2574 | CA   | GLY | X | 168 | 39.350 | 52.794 | 43.190 | 0.00 | 0.00 |
| ATOM | 2575 | HA2  | GLY | X | 168 | 39.409 | 53.157 | 42.164 | 0.00 | 0.00 |
| ATOM | 2576 | HA3  | GLY | X | 168 | 40.363 | 52.460 | 43.413 | 0.00 | 0.00 |
| ATOM | 2577 | C    | GLY | X | 168 | 38.527 | 51.528 | 43.117 | 0.00 | 0.00 |
| ATOM | 2578 | O    | GLY | X | 168 | 38.504 | 50.892 | 42.067 | 0.00 | 0.00 |
| ATOM | 2579 | N    | LEU | X | 169 | 37.625 | 51.296 | 44.088 | 0.00 | 0.00 |
| ATOM | 2580 | H    | LEU | X | 169 | 37.587 | 51.898 | 44.898 | 0.00 | 0.00 |
| ATOM | 2581 | CA   | LEU | X | 169 | 36.463 | 50.333 | 44.079 | 0.00 | 0.00 |
| ATOM | 2582 | HA   | LEU | X | 169 | 36.644 | 49.540 | 43.354 | 0.00 | 0.00 |
| ATOM | 2583 | CB   | LEU | X | 169 | 36.279 | 49.683 | 45.486 | 0.00 | 0.00 |
| ATOM | 2584 | HB2  | LEU | X | 169 | 36.445 | 50.442 | 46.250 | 0.00 | 0.00 |
| ATOM | 2585 | HB3  | LEU | X | 169 | 35.252 | 49.346 | 45.627 | 0.00 | 0.00 |
| ATOM | 2586 | CG   | LEU | X | 169 | 37.276 | 48.523 | 45.612 | 0.00 | 0.00 |
| ATOM | 2587 | HG   | LEU | X | 169 | 38.148 | 48.768 | 45.006 | 0.00 | 0.00 |
| ATOM | 2588 | CD1  | LEU | X | 169 | 37.676 | 48.306 | 47.086 | 0.00 | 0.00 |
| ATOM | 2589 | HD11 | LEU | X | 169 | 38.426 | 47.516 | 47.122 | 0.00 | 0.00 |
| ATOM | 2590 | HD12 | LEU | X | 169 | 36.783 | 47.971 | 47.613 | 0.00 | 0.00 |
| ATOM | 2591 | HD13 | LEU | X | 169 | 38.066 | 49.172 | 47.621 | 0.00 | 0.00 |
| ATOM | 2592 | CD2  | LEU | X | 169 | 36.634 | 47.252 | 44.995 | 0.00 | 0.00 |
| ATOM | 2593 | HD21 | LEU | X | 169 | 36.376 | 47.383 | 43.944 | 0.00 | 0.00 |
| ATOM | 2594 | HD22 | LEU | X | 169 | 37.331 | 46.414 | 44.989 | 0.00 | 0.00 |
| ATOM | 2595 | HD23 | LEU | X | 169 | 35.700 | 46.963 | 45.476 | 0.00 | 0.00 |
| ATOM | 2596 | C    | LEU | X | 169 | 35.083 | 50.980 | 43.728 | 0.00 | 0.00 |
| ATOM | 2597 | O    | LEU | X | 169 | 34.126 | 50.250 | 43.430 | 0.00 | 0.00 |
| ATOM | 2598 | N    | LEU | X | 170 | 34.938 | 52.299 | 43.797 | 0.00 | 0.00 |
| ATOM | 2599 | H    | LEU | X | 170 | 35.729 | 52.825 | 44.142 | 0.00 | 0.00 |
| ATOM | 2600 | CA   | LEU | X | 170 | 33.708 | 52.980 | 43.418 | 0.00 | 0.00 |
| ATOM | 2601 | HA   | LEU | X | 170 | 32.825 | 52.349 | 43.528 | 0.00 | 0.00 |
| ATOM | 2602 | CB   | LEU | X | 170 | 33.534 | 54.261 | 44.324 | 0.00 | 0.00 |
| ATOM | 2603 | HB2  | LEU | X | 170 | 34.182 | 55.075 | 44.000 | 0.00 | 0.00 |
| ATOM | 2604 | HB3  | LEU | X | 170 | 32.507 | 54.601 | 44.188 | 0.00 | 0.00 |
| ATOM | 2605 | CG   | LEU | X | 170 | 33.710 | 54.050 | 45.860 | 0.00 | 0.00 |
| ATOM | 2606 | HG   | LEU | X | 170 | 34.718 | 53.795 | 46.184 | 0.00 | 0.00 |
| ATOM | 2607 | CD1  | LEU | X | 170 | 33.515 | 55.524 | 46.322 | 0.00 | 0.00 |
| ATOM | 2608 | HD11 | LEU | X | 170 | 34.294 | 56.220 | 46.010 | 0.00 | 0.00 |
| ATOM | 2609 | HD12 | LEU | X | 170 | 33.475 | 55.597 | 47.409 | 0.00 | 0.00 |
| ATOM | 2610 | HD13 | LEU | X | 170 | 32.475 | 55.790 | 46.137 | 0.00 | 0.00 |
| ATOM | 2611 | CD2  | LEU | X | 170 | 32.759 | 53.033 | 46.580 | 0.00 | 0.00 |
| ATOM | 2612 | HD21 | LEU | X | 170 | 31.882 | 52.953 | 45.937 | 0.00 | 0.00 |
| ATOM | 2613 | HD22 | LEU | X | 170 | 33.251 | 52.087 | 46.809 | 0.00 | 0.00 |
| ATOM | 2614 | HD23 | LEU | X | 170 | 32.485 | 53.506 | 47.523 | 0.00 | 0.00 |
| ATOM | 2615 | C    | LEU | X | 170 | 33.811 | 53.336 | 41.930 | 0.00 | 0.00 |
| ATOM | 2616 | O    | LEU | X | 170 | 32.761 | 53.384 | 41.268 | 0.00 | 0.00 |
| ATOM | 2617 | N    | ASP | X | 171 | 35.005 | 53.488 | 41.386 | 0.00 | 0.00 |
| ATOM | 2618 | H    | ASP | X | 171 | 35.804 | 53.852 | 41.886 | 0.00 | 0.00 |
| ATOM | 2619 | CA   | ASP | X | 171 | 35.338 | 53.346 | 39.976 | 0.00 | 0.00 |
| ATOM | 2620 | HA   | ASP | X | 171 | 34.817 | 54.159 | 39.470 | 0.00 | 0.00 |
| ATOM | 2621 | CB   | ASP | X | 171 | 36.824 | 53.354 | 39.645 | 0.00 | 0.00 |
| ATOM | 2622 | HB2  | ASP | X | 171 | 37.274 | 52.679 | 40.374 | 0.00 | 0.00 |
| ATOM | 2623 | HB3  | ASP | X | 171 | 37.027 | 52.980 | 38.642 | 0.00 | 0.00 |
| ATOM | 2624 | CG   | ASP | X | 171 | 37.466 | 54.713 | 39.805 | 0.00 | 0.00 |
| ATOM | 2625 | OD1  | ASP | X | 171 | 36.800 | 55.795 | 39.973 | 0.00 | 0.00 |
| ATOM | 2626 | OD2  | ASP | X | 171 | 38.699 | 54.842 | 39.482 | 0.00 | 0.00 |
| ATOM | 2627 | C    | ASP | X | 171 | 34.774 | 52.051 | 39.356 | 0.00 | 0.00 |
| ATOM | 2628 | O    | ASP | X | 171 | 34.052 | 51.975 | 38.402 | 0.00 | 0.00 |
| ATOM | 2629 | N    | GLN | X | 172 | 35.144 | 50.934 | 39.986 | 0.00 | 0.00 |
| ATOM | 2630 | H    | GLN | X | 172 | 35.580 | 51.073 | 40.887 | 0.00 | 0.00 |
| ATOM | 2631 | CA   | GLN | X | 172 | 34.675 | 49.632 | 39.515 | 0.00 | 0.00 |



|      |      |      |     |   |     |        |        |        |      |      |
|------|------|------|-----|---|-----|--------|--------|--------|------|------|
| ATOM | 2632 | HA   | GLN | X | 172 | 35.009 | 49.461 | 38.491 | 0.00 | 0.00 |
| ATOM | 2633 | CB   | GLN | X | 172 | 35.392 | 48.480 | 40.312 | 0.00 | 0.00 |
| ATOM | 2634 | HB2  | GLN | X | 172 | 35.320 | 48.526 | 41.398 | 0.00 | 0.00 |
| ATOM | 2635 | HB3  | GLN | X | 172 | 34.919 | 47.546 | 40.009 | 0.00 | 0.00 |
| ATOM | 2636 | CG   | GLN | X | 172 | 36.869 | 48.291 | 40.052 | 0.00 | 0.00 |
| ATOM | 2637 | HG2  | GLN | X | 172 | 37.081 | 47.913 | 39.052 | 0.00 | 0.00 |
| ATOM | 2638 | HG3  | GLN | X | 172 | 37.452 | 49.203 | 40.183 | 0.00 | 0.00 |
| ATOM | 2639 | CD   | GLN | X | 172 | 37.590 | 47.275 | 40.989 | 0.00 | 0.00 |
| ATOM | 2640 | OE1  | GLN | X | 172 | 36.988 | 46.261 | 41.407 | 0.00 | 0.00 |
| ATOM | 2641 | NE2  | GLN | X | 172 | 38.866 | 47.343 | 41.355 | 0.00 | 0.00 |
| ATOM | 2642 | HE21 | GLN | X | 172 | 39.305 | 46.644 | 41.937 | 0.00 | 0.00 |
| ATOM | 2643 | HE22 | GLN | X | 172 | 39.558 | 47.846 | 40.820 | 0.00 | 0.00 |
| ATOM | 2644 | C    | GLN | X | 172 | 33.177 | 49.382 | 39.663 | 0.00 | 0.00 |
| ATOM | 2645 | O    | GLN | X | 172 | 32.631 | 48.962 | 38.704 | 0.00 | 0.00 |
| ATOM | 2646 | N    | ARG | X | 173 | 32.540 | 49.861 | 40.763 | 0.00 | 0.00 |
| ATOM | 2647 | H    | ARG | X | 173 | 33.002 | 50.377 | 41.497 | 0.00 | 0.00 |
| ATOM | 2648 | CA   | ARG | X | 173 | 31.079 | 49.742 | 40.942 | 0.00 | 0.00 |
| ATOM | 2649 | HA   | ARG | X | 173 | 30.774 | 48.696 | 40.900 | 0.00 | 0.00 |
| ATOM | 2650 | CB   | ARG | X | 173 | 30.727 | 50.182 | 42.333 | 0.00 | 0.00 |
| ATOM | 2651 | HB2  | ARG | X | 173 | 31.282 | 49.633 | 43.093 | 0.00 | 0.00 |
| ATOM | 2652 | HB3  | ARG | X | 173 | 30.779 | 51.238 | 42.596 | 0.00 | 0.00 |
| ATOM | 2653 | CG   | ARG | X | 173 | 29.288 | 49.751 | 42.611 | 0.00 | 0.00 |
| ATOM | 2654 | HG2  | ARG | X | 173 | 28.676 | 49.995 | 41.742 | 0.00 | 0.00 |
| ATOM | 2655 | HG3  | ARG | X | 173 | 29.160 | 48.669 | 42.608 | 0.00 | 0.00 |
| ATOM | 2656 | CD   | ARG | X | 173 | 28.540 | 50.292 | 43.918 | 0.00 | 0.00 |
| ATOM | 2657 | HD2  | ARG | X | 173 | 28.745 | 51.351 | 44.069 | 0.00 | 0.00 |
| ATOM | 2658 | HD3  | ARG | X | 173 | 27.474 | 50.244 | 43.694 | 0.00 | 0.00 |
| ATOM | 2659 | NE   | ARG | X | 173 | 28.850 | 49.461 | 45.083 | 0.00 | 0.00 |
| ATOM | 2660 | HE   | ARG | X | 173 | 28.884 | 48.455 | 44.998 | 0.00 | 0.00 |
| ATOM | 2661 | CZ   | ARG | X | 173 | 29.261 | 49.951 | 46.273 | 0.00 | 0.00 |
| ATOM | 2662 | NH1  | ARG | X | 173 | 29.187 | 51.229 | 46.668 | 0.00 | 0.00 |
| ATOM | 2663 | HH11 | ARG | X | 173 | 28.734 | 51.950 | 46.125 | 0.00 | 0.00 |
| ATOM | 2664 | HH12 | ARG | X | 173 | 29.560 | 51.486 | 47.571 | 0.00 | 0.00 |
| ATOM | 2665 | NH2  | ARG | X | 173 | 29.623 | 49.178 | 47.259 | 0.00 | 0.00 |
| ATOM | 2666 | HH21 | ARG | X | 173 | 29.630 | 48.192 | 47.043 | 0.00 | 0.00 |
| ATOM | 2667 | HH22 | ARG | X | 173 | 29.718 | 49.538 | 48.198 | 0.00 | 0.00 |
| ATOM | 2668 | C    | ARG | X | 173 | 30.312 | 50.525 | 39.779 | 0.00 | 0.00 |
| ATOM | 2669 | O    | ARG | X | 173 | 29.256 | 49.960 | 39.419 | 0.00 | 0.00 |
| ATOM | 2670 | N    | LEU | X | 174 | 30.726 | 51.737 | 39.326 | 0.00 | 0.00 |
| ATOM | 2671 | H    | LEU | X | 174 | 31.629 | 52.112 | 39.579 | 0.00 | 0.00 |
| ATOM | 2672 | CA   | LEU | X | 174 | 29.994 | 52.364 | 38.287 | 0.00 | 0.00 |
| ATOM | 2673 | HA   | LEU | X | 174 | 28.959 | 52.280 | 38.618 | 0.00 | 0.00 |
| ATOM | 2674 | CB   | LEU | X | 174 | 30.513 | 53.829 | 38.253 | 0.00 | 0.00 |
| ATOM | 2675 | HB2  | LEU | X | 174 | 30.723 | 54.210 | 39.253 | 0.00 | 0.00 |
| ATOM | 2676 | HB3  | LEU | X | 174 | 31.467 | 53.812 | 37.725 | 0.00 | 0.00 |
| ATOM | 2677 | CG   | LEU | X | 174 | 29.624 | 54.786 | 37.505 | 0.00 | 0.00 |
| ATOM | 2678 | HG   | LEU | X | 174 | 29.389 | 54.321 | 36.548 | 0.00 | 0.00 |
| ATOM | 2679 | CD1  | LEU | X | 174 | 28.352 | 54.996 | 38.252 | 0.00 | 0.00 |
| ATOM | 2680 | HD11 | LEU | X | 174 | 27.745 | 55.833 | 37.906 | 0.00 | 0.00 |
| ATOM | 2681 | HD12 | LEU | X | 174 | 28.533 | 55.139 | 39.317 | 0.00 | 0.00 |
| ATOM | 2682 | HD13 | LEU | X | 174 | 27.661 | 54.153 | 38.234 | 0.00 | 0.00 |
| ATOM | 2683 | CD2  | LEU | X | 174 | 30.262 | 56.144 | 37.177 | 0.00 | 0.00 |
| ATOM | 2684 | HD21 | LEU | X | 174 | 30.870 | 55.925 | 36.300 | 0.00 | 0.00 |
| ATOM | 2685 | HD22 | LEU | X | 174 | 29.526 | 56.941 | 37.069 | 0.00 | 0.00 |
| ATOM | 2686 | HD23 | LEU | X | 174 | 30.804 | 56.382 | 38.092 | 0.00 | 0.00 |
| ATOM | 2687 | C    | LEU | X | 174 | 30.101 | 51.648 | 36.939 | 0.00 | 0.00 |
| ATOM | 2688 | O    | LEU | X | 174 | 29.122 | 51.765 | 36.241 | 0.00 | 0.00 |
| ATOM | 2689 | N    | ALA | X | 175 | 31.172 | 50.918 | 36.613 | 0.00 | 0.00 |
| ATOM | 2690 | H    | ALA | X | 175 | 31.960 | 50.983 | 37.241 | 0.00 | 0.00 |
| ATOM | 2691 | CA   | ALA | X | 175 | 31.250 | 50.026 | 35.440 | 0.00 | 0.00 |
| ATOM | 2692 | HA   | ALA | X | 175 | 30.963 | 50.580 | 34.546 | 0.00 | 0.00 |
| ATOM | 2693 | CB   | ALA | X | 175 | 32.677 | 49.598 | 35.301 | 0.00 | 0.00 |
| ATOM | 2694 | HB1  | ALA | X | 175 | 32.985 | 49.061 | 36.197 | 0.00 | 0.00 |
| ATOM | 2695 | HB2  | ALA | X | 175 | 33.386 | 50.381 | 35.029 | 0.00 | 0.00 |
| ATOM | 2696 | HB3  | ALA | X | 175 | 32.643 | 48.903 | 34.462 | 0.00 | 0.00 |
| ATOM | 2697 | C    | ALA | X | 175 | 30.238 | 48.866 | 35.518 | 0.00 | 0.00 |
| ATOM | 2698 | O    | ALA | X | 175 | 29.571 | 48.606 | 34.516 | 0.00 | 0.00 |

|      |      |      |     |   |     |        |        |        |      |      |
|------|------|------|-----|---|-----|--------|--------|--------|------|------|
| ATOM | 2699 | N    | LEU | X | 176 | 30.159 | 48.158 | 36.623 | 0.00 | 0.00 |
| ATOM | 2700 | H    | LEU | X | 176 | 30.723 | 48.443 | 37.411 | 0.00 | 0.00 |
| ATOM | 2701 | CA   | LEU | X | 176 | 29.327 | 46.965 | 36.763 | 0.00 | 0.00 |
| ATOM | 2702 | HA   | LEU | X | 176 | 29.636 | 46.105 | 36.170 | 0.00 | 0.00 |
| ATOM | 2703 | CB   | LEU | X | 176 | 29.235 | 46.375 | 38.206 | 0.00 | 0.00 |
| ATOM | 2704 | HB2  | LEU | X | 176 | 28.714 | 47.048 | 38.887 | 0.00 | 0.00 |
| ATOM | 2705 | HB3  | LEU | X | 176 | 28.605 | 45.485 | 38.185 | 0.00 | 0.00 |
| ATOM | 2706 | CG   | LEU | X | 176 | 30.536 | 45.882 | 38.848 | 0.00 | 0.00 |
| ATOM | 2707 | HG   | LEU | X | 176 | 31.191 | 46.667 | 39.224 | 0.00 | 0.00 |
| ATOM | 2708 | CD1  | LEU | X | 176 | 30.116 | 45.065 | 40.059 | 0.00 | 0.00 |
| ATOM | 2709 | HD11 | LEU | X | 176 | 29.677 | 45.748 | 40.787 | 0.00 | 0.00 |
| ATOM | 2710 | HD12 | LEU | X | 176 | 30.950 | 44.586 | 40.572 | 0.00 | 0.00 |
| ATOM | 2711 | HD13 | LEU | X | 176 | 29.387 | 44.308 | 39.774 | 0.00 | 0.00 |
| ATOM | 2712 | CD2  | LEU | X | 176 | 31.402 | 45.116 | 37.883 | 0.00 | 0.00 |
| ATOM | 2713 | HD21 | LEU | X | 176 | 32.203 | 44.742 | 38.520 | 0.00 | 0.00 |
| ATOM | 2714 | HD22 | LEU | X | 176 | 30.774 | 44.343 | 37.441 | 0.00 | 0.00 |
| ATOM | 2715 | HD23 | LEU | X | 176 | 31.783 | 45.843 | 37.166 | 0.00 | 0.00 |
| ATOM | 2716 | C    | LEU | X | 176 | 27.864 | 47.357 | 36.381 | 0.00 | 0.00 |
| ATOM | 2717 | O    | LEU | X | 176 | 27.114 | 46.631 | 35.773 | 0.00 | 0.00 |
| ATOM | 2718 | N    | GLN | X | 177 | 27.421 | 48.525 | 36.891 | 0.00 | 0.00 |
| ATOM | 2719 | H    | GLN | X | 177 | 28.018 | 49.066 | 37.500 | 0.00 | 0.00 |
| ATOM | 2720 | CA   | GLN | X | 177 | 26.175 | 49.183 | 36.708 | 0.00 | 0.00 |
| ATOM | 2721 | HA   | GLN | X | 177 | 25.348 | 48.535 | 36.998 | 0.00 | 0.00 |
| ATOM | 2722 | CB   | GLN | X | 177 | 26.145 | 50.422 | 37.507 | 0.00 | 0.00 |
| ATOM | 2723 | HB2  | GLN | X | 177 | 27.049 | 50.958 | 37.217 | 0.00 | 0.00 |
| ATOM | 2724 | HB3  | GLN | X | 177 | 25.308 | 51.021 | 37.148 | 0.00 | 0.00 |
| ATOM | 2725 | CG   | GLN | X | 177 | 25.977 | 50.258 | 39.073 | 0.00 | 0.00 |
| ATOM | 2726 | HG2  | GLN | X | 177 | 25.094 | 49.732 | 39.437 | 0.00 | 0.00 |
| ATOM | 2727 | HG3  | GLN | X | 177 | 26.809 | 49.648 | 39.425 | 0.00 | 0.00 |
| ATOM | 2728 | CD   | GLN | X | 177 | 25.939 | 51.656 | 39.785 | 0.00 | 0.00 |
| ATOM | 2729 | OE1  | GLN | X | 177 | 26.860 | 52.475 | 39.808 | 0.00 | 0.00 |
| ATOM | 2730 | NE2  | GLN | X | 177 | 24.866 | 52.060 | 40.383 | 0.00 | 0.00 |
| ATOM | 2731 | HE21 | GLN | X | 177 | 24.986 | 52.785 | 41.076 | 0.00 | 0.00 |
| ATOM | 2732 | HE22 | GLN | X | 177 | 24.099 | 51.405 | 40.444 | 0.00 | 0.00 |
| ATOM | 2733 | C    | GLN | X | 177 | 26.009 | 49.556 | 35.216 | 0.00 | 0.00 |
| ATOM | 2734 | O    | GLN | X | 177 | 25.029 | 49.170 | 34.661 | 0.00 | 0.00 |
| ATOM | 2735 | N    | TRP | X | 178 | 27.057 | 50.063 | 34.522 | 0.00 | 0.00 |
| ATOM | 2736 | H    | TRP | X | 178 | 27.889 | 50.230 | 35.069 | 0.00 | 0.00 |
| ATOM | 2737 | CA   | TRP | X | 178 | 27.050 | 50.373 | 33.144 | 0.00 | 0.00 |
| ATOM | 2738 | HA   | TRP | X | 178 | 26.224 | 51.055 | 32.943 | 0.00 | 0.00 |
| ATOM | 2739 | CB   | TRP | X | 178 | 28.346 | 51.040 | 32.704 | 0.00 | 0.00 |
| ATOM | 2740 | HB2  | TRP | X | 178 | 28.659 | 51.834 | 33.382 | 0.00 | 0.00 |
| ATOM | 2741 | HB3  | TRP | X | 178 | 29.123 | 50.277 | 32.761 | 0.00 | 0.00 |
| ATOM | 2742 | CG   | TRP | X | 178 | 28.460 | 51.650 | 31.375 | 0.00 | 0.00 |
| ATOM | 2743 | CD1  | TRP | X | 178 | 28.463 | 52.959 | 31.078 | 0.00 | 0.00 |
| ATOM | 2744 | HD1  | TRP | X | 178 | 28.389 | 53.719 | 31.841 | 0.00 | 0.00 |
| ATOM | 2745 | NE1  | TRP | X | 178 | 28.625 | 53.276 | 29.771 | 0.00 | 0.00 |
| ATOM | 2746 | HE1  | TRP | X | 178 | 28.725 | 54.221 | 29.429 | 0.00 | 0.00 |
| ATOM | 2747 | CE2  | TRP | X | 178 | 28.796 | 52.163 | 29.011 | 0.00 | 0.00 |
| ATOM | 2748 | CZ2  | TRP | X | 178 | 29.038 | 51.851 | 27.660 | 0.00 | 0.00 |
| ATOM | 2749 | HZ2  | TRP | X | 178 | 29.174 | 52.629 | 26.924 | 0.00 | 0.00 |
| ATOM | 2750 | CH2  | TRP | X | 178 | 28.946 | 50.568 | 27.165 | 0.00 | 0.00 |
| ATOM | 2751 | HH2  | TRP | X | 178 | 29.104 | 50.410 | 26.109 | 0.00 | 0.00 |
| ATOM | 2752 | CZ3  | TRP | X | 178 | 28.860 | 49.571 | 28.102 | 0.00 | 0.00 |
| ATOM | 2753 | HZ3  | TRP | X | 178 | 28.913 | 48.553 | 27.746 | 0.00 | 0.00 |
| ATOM | 2754 | CE3  | TRP | X | 178 | 28.756 | 49.834 | 29.484 | 0.00 | 0.00 |
| ATOM | 2755 | HE3  | TRP | X | 178 | 28.715 | 48.986 | 30.152 | 0.00 | 0.00 |
| ATOM | 2756 | CD2  | TRP | X | 178 | 28.677 | 51.120 | 30.008 | 0.00 | 0.00 |
| ATOM | 2757 | C    | TRP | X | 178 | 26.823 | 49.014 | 32.435 | 0.00 | 0.00 |
| ATOM | 2758 | O    | TRP | X | 178 | 26.143 | 49.040 | 31.359 | 0.00 | 0.00 |
| ATOM | 2759 | N    | VAL | X | 179 | 27.371 | 47.836 | 32.863 | 0.00 | 0.00 |
| ATOM | 2760 | H    | VAL | X | 179 | 27.877 | 47.956 | 33.728 | 0.00 | 0.00 |
| ATOM | 2761 | CA   | VAL | X | 179 | 27.212 | 46.499 | 32.199 | 0.00 | 0.00 |
| ATOM | 2762 | HA   | VAL | X | 179 | 27.376 | 46.591 | 31.125 | 0.00 | 0.00 |
| ATOM | 2763 | CB   | VAL | X | 179 | 28.111 | 45.450 | 32.795 | 0.00 | 0.00 |
| ATOM | 2764 | HB   | VAL | X | 179 | 28.052 | 45.612 | 33.871 | 0.00 | 0.00 |
| ATOM | 2765 | CG1  | VAL | X | 179 | 27.612 | 44.009 | 32.490 | 0.00 | 0.00 |

|      |      |      |     |   |     |        |        |        |      |      |
|------|------|------|-----|---|-----|--------|--------|--------|------|------|
| ATOM | 2766 | HG11 | VAL | X | 179 | 28.043 | 43.309 | 33.206 | 0.00 | 0.00 |
| ATOM | 2767 | HG12 | VAL | X | 179 | 26.549 | 43.860 | 32.682 | 0.00 | 0.00 |
| ATOM | 2768 | HG13 | VAL | X | 179 | 27.825 | 43.691 | 31.469 | 0.00 | 0.00 |
| ATOM | 2769 | CG2  | VAL | X | 179 | 29.559 | 45.572 | 32.322 | 0.00 | 0.00 |
| ATOM | 2770 | HG21 | VAL | X | 179 | 29.819 | 46.618 | 32.483 | 0.00 | 0.00 |
| ATOM | 2771 | HG22 | VAL | X | 179 | 29.506 | 45.500 | 31.236 | 0.00 | 0.00 |
| ATOM | 2772 | HG23 | VAL | X | 179 | 30.235 | 44.925 | 32.881 | 0.00 | 0.00 |
| ATOM | 2773 | C    | VAL | X | 179 | 25.732 | 46.153 | 32.249 | 0.00 | 0.00 |
| ATOM | 2774 | O    | VAL | X | 179 | 25.137 | 45.742 | 31.247 | 0.00 | 0.00 |
| ATOM | 2775 | N    | GLN | X | 180 | 25.158 | 46.302 | 33.432 | 0.00 | 0.00 |
| ATOM | 2776 | H    | GLN | X | 180 | 25.634 | 46.823 | 34.154 | 0.00 | 0.00 |
| ATOM | 2777 | CA   | GLN | X | 180 | 23.772 | 46.027 | 33.673 | 0.00 | 0.00 |
| ATOM | 2778 | HA   | GLN | X | 180 | 23.756 | 44.938 | 33.702 | 0.00 | 0.00 |
| ATOM | 2779 | CB   | GLN | X | 180 | 23.426 | 46.378 | 35.133 | 0.00 | 0.00 |
| ATOM | 2780 | HB2  | GLN | X | 180 | 24.163 | 45.806 | 35.697 | 0.00 | 0.00 |
| ATOM | 2781 | HB3  | GLN | X | 180 | 23.682 | 47.398 | 35.419 | 0.00 | 0.00 |
| ATOM | 2782 | CG   | GLN | X | 180 | 21.999 | 45.973 | 35.635 | 0.00 | 0.00 |
| ATOM | 2783 | HG2  | GLN | X | 180 | 21.231 | 46.528 | 35.096 | 0.00 | 0.00 |
| ATOM | 2784 | HG3  | GLN | X | 180 | 21.720 | 44.936 | 35.447 | 0.00 | 0.00 |
| ATOM | 2785 | CD   | GLN | X | 180 | 21.823 | 46.266 | 37.099 | 0.00 | 0.00 |
| ATOM | 2786 | OE1  | GLN | X | 180 | 21.986 | 47.402 | 37.558 | 0.00 | 0.00 |
| ATOM | 2787 | NE2  | GLN | X | 180 | 21.464 | 45.273 | 37.923 | 0.00 | 0.00 |
| ATOM | 2788 | HE21 | GLN | X | 180 | 21.429 | 45.367 | 38.928 | 0.00 | 0.00 |
| ATOM | 2789 | HE22 | GLN | X | 180 | 20.986 | 44.441 | 37.607 | 0.00 | 0.00 |
| ATOM | 2790 | C    | GLN | X | 180 | 22.845 | 46.837 | 32.691 | 0.00 | 0.00 |
| ATOM | 2791 | O    | GLN | X | 180 | 21.997 | 46.144 | 32.104 | 0.00 | 0.00 |
| ATOM | 2792 | N    | GLU | X | 181 | 23.076 | 48.127 | 32.503 | 0.00 | 0.00 |
| ATOM | 2793 | H    | GLU | X | 181 | 23.936 | 48.553 | 32.820 | 0.00 | 0.00 |
| ATOM | 2794 | CA   | GLU | X | 181 | 22.255 | 48.898 | 31.520 | 0.00 | 0.00 |
| ATOM | 2795 | HA   | GLU | X | 181 | 21.196 | 48.741 | 31.726 | 0.00 | 0.00 |
| ATOM | 2796 | CB   | GLU | X | 181 | 22.396 | 50.439 | 31.731 | 0.00 | 0.00 |
| ATOM | 2797 | HB2  | GLU | X | 181 | 23.298 | 50.843 | 31.272 | 0.00 | 0.00 |
| ATOM | 2798 | HB3  | GLU | X | 181 | 21.550 | 50.997 | 31.330 | 0.00 | 0.00 |
| ATOM | 2799 | CG   | GLU | X | 181 | 22.358 | 50.952 | 33.180 | 0.00 | 0.00 |
| ATOM | 2800 | HG2  | GLU | X | 181 | 21.598 | 50.395 | 33.727 | 0.00 | 0.00 |
| ATOM | 2801 | HG3  | GLU | X | 181 | 23.294 | 50.706 | 33.681 | 0.00 | 0.00 |
| ATOM | 2802 | CD   | GLU | X | 181 | 22.136 | 52.433 | 33.410 | 0.00 | 0.00 |
| ATOM | 2803 | OE1  | GLU | X | 181 | 21.454 | 52.771 | 34.410 | 0.00 | 0.00 |
| ATOM | 2804 | OE2  | GLU | X | 181 | 22.572 | 53.235 | 32.576 | 0.00 | 0.00 |
| ATOM | 2805 | C    | GLU | X | 181 | 22.614 | 48.515 | 30.064 | 0.00 | 0.00 |
| ATOM | 2806 | O    | GLU | X | 181 | 21.692 | 48.344 | 29.290 | 0.00 | 0.00 |
| ATOM | 2807 | N    | ASN | X | 182 | 23.910 | 48.417 | 29.676 | 0.00 | 0.00 |
| ATOM | 2808 | H    | ASN | X | 182 | 24.563 | 48.522 | 30.439 | 0.00 | 0.00 |
| ATOM | 2809 | CA   | ASN | X | 182 | 24.277 | 48.467 | 28.277 | 0.00 | 0.00 |
| ATOM | 2810 | HA   | ASN | X | 182 | 23.371 | 48.790 | 27.764 | 0.00 | 0.00 |
| ATOM | 2811 | CB   | ASN | X | 182 | 25.491 | 49.529 | 28.125 | 0.00 | 0.00 |
| ATOM | 2812 | HB2  | ASN | X | 182 | 26.397 | 49.344 | 28.702 | 0.00 | 0.00 |
| ATOM | 2813 | HB3  | ASN | X | 182 | 25.820 | 49.587 | 27.087 | 0.00 | 0.00 |
| ATOM | 2814 | CG   | ASN | X | 182 | 25.024 | 50.943 | 28.466 | 0.00 | 0.00 |
| ATOM | 2815 | OD1  | ASN | X | 182 | 24.229 | 51.553 | 27.678 | 0.00 | 0.00 |
| ATOM | 2816 | ND2  | ASN | X | 182 | 25.419 | 51.579 | 29.526 | 0.00 | 0.00 |
| ATOM | 2817 | HD21 | ASN | X | 182 | 25.008 | 52.480 | 29.725 | 0.00 | 0.00 |
| ATOM | 2818 | HD22 | ASN | X | 182 | 26.117 | 51.149 | 30.116 | 0.00 | 0.00 |
| ATOM | 2819 | C    | ASN | X | 182 | 24.606 | 47.124 | 27.515 | 0.00 | 0.00 |
| ATOM | 2820 | O    | ASN | X | 182 | 24.380 | 47.059 | 26.289 | 0.00 | 0.00 |
| ATOM | 2821 | N    | VAL | X | 183 | 25.085 | 46.116 | 28.223 | 0.00 | 0.00 |
| ATOM | 2822 | H    | VAL | X | 183 | 25.177 | 46.244 | 29.221 | 0.00 | 0.00 |
| ATOM | 2823 | CA   | VAL | X | 183 | 25.866 | 45.015 | 27.608 | 0.00 | 0.00 |
| ATOM | 2824 | HA   | VAL | X | 183 | 26.737 | 45.573 | 27.264 | 0.00 | 0.00 |
| ATOM | 2825 | CB   | VAL | X | 183 | 26.333 | 43.922 | 28.617 | 0.00 | 0.00 |
| ATOM | 2826 | HB   | VAL | X | 183 | 26.681 | 44.386 | 29.540 | 0.00 | 0.00 |
| ATOM | 2827 | CG1  | VAL | X | 183 | 25.183 | 42.914 | 29.100 | 0.00 | 0.00 |
| ATOM | 2828 | HG11 | VAL | X | 183 | 25.120 | 42.151 | 28.323 | 0.00 | 0.00 |
| ATOM | 2829 | HG12 | VAL | X | 183 | 25.400 | 42.390 | 30.030 | 0.00 | 0.00 |
| ATOM | 2830 | HG13 | VAL | X | 183 | 24.275 | 43.517 | 29.117 | 0.00 | 0.00 |
| ATOM | 2831 | CG2  | VAL | X | 183 | 27.509 | 43.089 | 28.191 | 0.00 | 0.00 |
| ATOM | 2832 | HG21 | VAL | X | 183 | 27.903 | 42.571 | 29.066 | 0.00 | 0.00 |

|      |      |      |     |   |     |        |        |        |      |      |
|------|------|------|-----|---|-----|--------|--------|--------|------|------|
| ATOM | 2833 | HG22 | VAL | X | 183 | 28.361 | 43.704 | 27.900 | 0.00 | 0.00 |
| ATOM | 2834 | HG23 | VAL | X | 183 | 27.200 | 42.408 | 27.399 | 0.00 | 0.00 |
| ATOM | 2835 | C    | VAL | X | 183 | 25.206 | 44.329 | 26.357 | 0.00 | 0.00 |
| ATOM | 2836 | O    | VAL | X | 183 | 25.865 | 43.843 | 25.443 | 0.00 | 0.00 |
| ATOM | 2837 | N    | ALA | X | 184 | 23.854 | 44.118 | 26.390 | 0.00 | 0.00 |
| ATOM | 2838 | H    | ALA | X | 184 | 23.322 | 44.379 | 27.208 | 0.00 | 0.00 |
| ATOM | 2839 | CA   | ALA | X | 184 | 23.129 | 43.543 | 25.274 | 0.00 | 0.00 |
| ATOM | 2840 | HA   | ALA | X | 184 | 23.470 | 42.511 | 25.193 | 0.00 | 0.00 |
| ATOM | 2841 | CB   | ALA | X | 184 | 21.670 | 43.459 | 25.662 | 0.00 | 0.00 |
| ATOM | 2842 | HB1  | ALA | X | 184 | 21.560 | 43.003 | 26.647 | 0.00 | 0.00 |
| ATOM | 2843 | HB2  | ALA | X | 184 | 21.078 | 42.795 | 25.032 | 0.00 | 0.00 |
| ATOM | 2844 | HB3  | ALA | X | 184 | 21.223 | 44.447 | 25.775 | 0.00 | 0.00 |
| ATOM | 2845 | C    | ALA | X | 184 | 23.351 | 44.185 | 23.897 | 0.00 | 0.00 |
| ATOM | 2846 | O    | ALA | X | 184 | 23.260 | 43.440 | 22.930 | 0.00 | 0.00 |
| ATOM | 2847 | N    | ALA | X | 185 | 23.705 | 45.444 | 23.746 | 0.00 | 0.00 |
| ATOM | 2848 | H    | ALA | X | 185 | 23.778 | 45.950 | 24.617 | 0.00 | 0.00 |
| ATOM | 2849 | CA   | ALA | X | 185 | 24.154 | 46.068 | 22.523 | 0.00 | 0.00 |
| ATOM | 2850 | HA   | ALA | X | 185 | 23.272 | 46.148 | 21.888 | 0.00 | 0.00 |
| ATOM | 2851 | CB   | ALA | X | 185 | 24.587 | 47.498 | 22.935 | 0.00 | 0.00 |
| ATOM | 2852 | HB1  | ALA | X | 185 | 24.793 | 48.002 | 21.991 | 0.00 | 0.00 |
| ATOM | 2853 | HB2  | ALA | X | 185 | 25.518 | 47.568 | 23.498 | 0.00 | 0.00 |
| ATOM | 2854 | HB3  | ALA | X | 185 | 23.777 | 48.096 | 23.351 | 0.00 | 0.00 |
| ATOM | 2855 | C    | ALA | X | 185 | 25.251 | 45.335 | 21.727 | 0.00 | 0.00 |
| ATOM | 2856 | O    | ALA | X | 185 | 25.086 | 45.316 | 20.505 | 0.00 | 0.00 |
| ATOM | 2857 | N    | PHE | X | 186 | 26.220 | 44.690 | 22.395 | 0.00 | 0.00 |
| ATOM | 2858 | H    | PHE | X | 186 | 26.236 | 44.843 | 23.394 | 0.00 | 0.00 |
| ATOM | 2859 | CA   | PHE | X | 186 | 27.263 | 43.906 | 21.889 | 0.00 | 0.00 |
| ATOM | 2860 | HA   | PHE | X | 186 | 27.569 | 44.209 | 20.888 | 0.00 | 0.00 |
| ATOM | 2861 | CB   | PHE | X | 186 | 28.533 | 44.169 | 22.810 | 0.00 | 0.00 |
| ATOM | 2862 | HB2  | PHE | X | 186 | 28.417 | 43.575 | 23.717 | 0.00 | 0.00 |
| ATOM | 2863 | HB3  | PHE | X | 186 | 29.473 | 43.714 | 22.500 | 0.00 | 0.00 |
| ATOM | 2864 | CG   | PHE | X | 186 | 28.900 | 45.612 | 23.218 | 0.00 | 0.00 |
| ATOM | 2865 | CD1  | PHE | X | 186 | 28.339 | 46.222 | 24.347 | 0.00 | 0.00 |
| ATOM | 2866 | HD1  | PHE | X | 186 | 27.579 | 45.691 | 24.901 | 0.00 | 0.00 |
| ATOM | 2867 | CE1  | PHE | X | 186 | 28.648 | 47.490 | 24.777 | 0.00 | 0.00 |
| ATOM | 2868 | HE1  | PHE | X | 186 | 28.110 | 48.004 | 25.560 | 0.00 | 0.00 |
| ATOM | 2869 | CZ   | PHE | X | 186 | 29.647 | 48.214 | 24.071 | 0.00 | 0.00 |
| ATOM | 2870 | HZ   | PHE | X | 186 | 30.011 | 49.168 | 24.424 | 0.00 | 0.00 |
| ATOM | 2871 | CE2  | PHE | X | 186 | 30.388 | 47.617 | 23.007 | 0.00 | 0.00 |
| ATOM | 2872 | HE2  | PHE | X | 186 | 31.112 | 48.212 | 22.470 | 0.00 | 0.00 |
| ATOM | 2873 | CD2  | PHE | X | 186 | 29.935 | 46.302 | 22.528 | 0.00 | 0.00 |
| ATOM | 2874 | HD2  | PHE | X | 186 | 30.527 | 45.772 | 21.797 | 0.00 | 0.00 |
| ATOM | 2875 | C    | PHE | X | 186 | 26.949 | 42.423 | 21.850 | 0.00 | 0.00 |
| ATOM | 2876 | O    | PHE | X | 186 | 27.703 | 41.553 | 21.371 | 0.00 | 0.00 |
| ATOM | 2877 | N    | GLY | X | 187 | 25.750 | 41.997 | 22.276 | 0.00 | 0.00 |
| ATOM | 2878 | H    | GLY | X | 187 | 25.070 | 42.684 | 22.571 | 0.00 | 0.00 |
| ATOM | 2879 | CA   | GLY | X | 187 | 25.157 | 40.666 | 22.135 | 0.00 | 0.00 |
| ATOM | 2880 | HA2  | GLY | X | 187 | 24.169 | 40.829 | 21.703 | 0.00 | 0.00 |
| ATOM | 2881 | HA3  | GLY | X | 187 | 25.879 | 40.162 | 21.492 | 0.00 | 0.00 |
| ATOM | 2882 | C    | GLY | X | 187 | 24.983 | 39.838 | 23.441 | 0.00 | 0.00 |
| ATOM | 2883 | O    | GLY | X | 187 | 24.737 | 38.655 | 23.391 | 0.00 | 0.00 |
| ATOM | 2884 | N    | GLY | X | 188 | 25.121 | 40.440 | 24.639 | 0.00 | 0.00 |
| ATOM | 2885 | H    | GLY | X | 188 | 25.361 | 41.417 | 24.555 | 0.00 | 0.00 |
| ATOM | 2886 | CA   | GLY | X | 188 | 25.343 | 39.840 | 25.939 | 0.00 | 0.00 |
| ATOM | 2887 | HA2  | GLY | X | 188 | 25.787 | 38.846 | 25.882 | 0.00 | 0.00 |
| ATOM | 2888 | HA3  | GLY | X | 188 | 26.088 | 40.340 | 26.557 | 0.00 | 0.00 |
| ATOM | 2889 | C    | GLY | X | 188 | 24.083 | 39.643 | 26.775 | 0.00 | 0.00 |
| ATOM | 2890 | O    | GLY | X | 188 | 23.125 | 40.358 | 26.527 | 0.00 | 0.00 |
| ATOM | 2891 | N    | ASP | X | 189 | 24.136 | 38.774 | 27.780 | 0.00 | 0.00 |
| ATOM | 2892 | H    | ASP | X | 189 | 24.951 | 38.177 | 27.802 | 0.00 | 0.00 |
| ATOM | 2893 | CA   | ASP | X | 189 | 23.055 | 38.330 | 28.625 | 0.00 | 0.00 |
| ATOM | 2894 | HA   | ASP | X | 189 | 22.149 | 38.746 | 28.185 | 0.00 | 0.00 |
| ATOM | 2895 | CB   | ASP | X | 189 | 22.898 | 36.828 | 28.707 | 0.00 | 0.00 |
| ATOM | 2896 | HB2  | ASP | X | 189 | 22.920 | 36.535 | 27.657 | 0.00 | 0.00 |
| ATOM | 2897 | HB3  | ASP | X | 189 | 23.750 | 36.315 | 29.153 | 0.00 | 0.00 |
| ATOM | 2898 | CG   | ASP | X | 189 | 21.600 | 36.324 | 29.371 | 0.00 | 0.00 |
| ATOM | 2899 | OD1  | ASP | X | 189 | 21.591 | 35.131 | 29.703 | 0.00 | 0.00 |

|      |      |      |     |   |     |        |        |        |      |      |
|------|------|------|-----|---|-----|--------|--------|--------|------|------|
| ATOM | 2900 | OD2  | ASP | X | 189 | 20.650 | 37.145 | 29.402 | 0.00 | 0.00 |
| ATOM | 2901 | C    | ASP | X | 189 | 23.240 | 38.967 | 30.076 | 0.00 | 0.00 |
| ATOM | 2902 | O    | ASP | X | 189 | 24.035 | 38.374 | 30.900 | 0.00 | 0.00 |
| ATOM | 2903 | N    | PRO | X | 190 | 22.546 | 40.065 | 30.380 | 0.00 | 0.00 |
| ATOM | 2904 | CD   | PRO | X | 190 | 21.577 | 40.760 | 29.576 | 0.00 | 0.00 |
| ATOM | 2905 | HD2  | PRO | X | 190 | 20.880 | 40.048 | 29.135 | 0.00 | 0.00 |
| ATOM | 2906 | HD3  | PRO | X | 190 | 22.162 | 41.352 | 28.871 | 0.00 | 0.00 |
| ATOM | 2907 | CG   | PRO | X | 190 | 20.773 | 41.676 | 30.505 | 0.00 | 0.00 |
| ATOM | 2908 | HG2  | PRO | X | 190 | 19.864 | 41.169 | 30.829 | 0.00 | 0.00 |
| ATOM | 2909 | HG3  | PRO | X | 190 | 20.418 | 42.549 | 29.956 | 0.00 | 0.00 |
| ATOM | 2910 | CB   | PRO | X | 190 | 21.694 | 41.975 | 31.651 | 0.00 | 0.00 |
| ATOM | 2911 | HB2  | PRO | X | 190 | 21.209 | 42.311 | 32.568 | 0.00 | 0.00 |
| ATOM | 2912 | HB3  | PRO | X | 190 | 22.360 | 42.817 | 31.460 | 0.00 | 0.00 |
| ATOM | 2913 | CA   | PRO | X | 190 | 22.509 | 40.675 | 31.740 | 0.00 | 0.00 |
| ATOM | 2914 | HA   | PRO | X | 190 | 23.523 | 40.948 | 32.036 | 0.00 | 0.00 |
| ATOM | 2915 | C    | PRO | X | 190 | 21.942 | 39.776 | 32.837 | 0.00 | 0.00 |
| ATOM | 2916 | O    | PRO | X | 190 | 22.365 | 40.010 | 34.004 | 0.00 | 0.00 |
| ATOM | 2917 | N    | THR | X | 191 | 21.207 | 38.757 | 32.436 | 0.00 | 0.00 |
| ATOM | 2918 | H    | THR | X | 191 | 20.872 | 38.720 | 31.484 | 0.00 | 0.00 |
| ATOM | 2919 | CA   | THR | X | 191 | 20.672 | 37.590 | 33.136 | 0.00 | 0.00 |
| ATOM | 2920 | HA   | THR | X | 191 | 20.304 | 38.050 | 34.054 | 0.00 | 0.00 |
| ATOM | 2921 | CB   | THR | X | 191 | 19.511 | 36.912 | 32.337 | 0.00 | 0.00 |
| ATOM | 2922 | HB   | THR | X | 191 | 19.964 | 36.248 | 31.601 | 0.00 | 0.00 |
| ATOM | 2923 | CG2  | THR | X | 191 | 18.494 | 36.287 | 33.270 | 0.00 | 0.00 |
| ATOM | 2924 | HG21 | THR | X | 191 | 18.990 | 36.020 | 34.203 | 0.00 | 0.00 |
| ATOM | 2925 | HG22 | THR | X | 191 | 18.016 | 35.371 | 32.923 | 0.00 | 0.00 |
| ATOM | 2926 | HG23 | THR | X | 191 | 17.801 | 37.111 | 33.442 | 0.00 | 0.00 |
| ATOM | 2927 | OG1  | THR | X | 191 | 18.873 | 37.897 | 31.563 | 0.00 | 0.00 |
| ATOM | 2928 | HG1  | THR | X | 191 | 18.776 | 37.525 | 30.683 | 0.00 | 0.00 |
| ATOM | 2929 | C    | THR | X | 191 | 21.738 | 36.508 | 33.614 | 0.00 | 0.00 |
| ATOM | 2930 | O    | THR | X | 191 | 21.371 | 35.591 | 34.344 | 0.00 | 0.00 |
| ATOM | 2931 | N    | SER | X | 192 | 22.988 | 36.687 | 33.212 | 0.00 | 0.00 |
| ATOM | 2932 | H    | SER | X | 192 | 23.220 | 37.550 | 32.742 | 0.00 | 0.00 |
| ATOM | 2933 | CA   | SER | X | 192 | 24.065 | 35.641 | 33.225 | 0.00 | 0.00 |
| ATOM | 2934 | HA   | SER | X | 192 | 23.885 | 34.919 | 34.021 | 0.00 | 0.00 |
| ATOM | 2935 | CB   | SER | X | 192 | 24.035 | 34.816 | 31.862 | 0.00 | 0.00 |
| ATOM | 2936 | HB2  | SER | X | 192 | 24.171 | 35.610 | 31.128 | 0.00 | 0.00 |
| ATOM | 2937 | HB3  | SER | X | 192 | 24.911 | 34.168 | 31.864 | 0.00 | 0.00 |
| ATOM | 2938 | OG   | SER | X | 192 | 22.768 | 34.092 | 31.770 | 0.00 | 0.00 |
| ATOM | 2939 | HG   | SER | X | 192 | 22.360 | 34.537 | 31.024 | 0.00 | 0.00 |
| ATOM | 2940 | C    | SER | X | 192 | 25.441 | 36.360 | 33.401 | 0.00 | 0.00 |
| ATOM | 2941 | O    | SER | X | 192 | 26.343 | 36.331 | 32.512 | 0.00 | 0.00 |
| ATOM | 2942 | N    | VAL | X | 193 | 25.708 | 37.119 | 34.467 | 0.00 | 0.00 |
| ATOM | 2943 | H    | VAL | X | 193 | 25.029 | 37.016 | 35.207 | 0.00 | 0.00 |
| ATOM | 2944 | CA   | VAL | X | 193 | 26.935 | 37.980 | 34.660 | 0.00 | 0.00 |
| ATOM | 2945 | HA   | VAL | X | 193 | 27.442 | 38.099 | 33.703 | 0.00 | 0.00 |
| ATOM | 2946 | CB   | VAL | X | 193 | 26.452 | 39.431 | 35.027 | 0.00 | 0.00 |
| ATOM | 2947 | HB   | VAL | X | 193 | 25.741 | 39.352 | 35.849 | 0.00 | 0.00 |
| ATOM | 2948 | CG1  | VAL | X | 193 | 27.637 | 40.264 | 35.575 | 0.00 | 0.00 |
| ATOM | 2949 | HG11 | VAL | X | 193 | 27.913 | 39.947 | 36.581 | 0.00 | 0.00 |
| ATOM | 2950 | HG12 | VAL | X | 193 | 28.445 | 40.052 | 34.876 | 0.00 | 0.00 |
| ATOM | 2951 | HG13 | VAL | X | 193 | 27.269 | 41.286 | 35.663 | 0.00 | 0.00 |
| ATOM | 2952 | CG2  | VAL | X | 193 | 25.773 | 40.139 | 33.846 | 0.00 | 0.00 |
| ATOM | 2953 | HG21 | VAL | X | 193 | 26.560 | 40.297 | 33.108 | 0.00 | 0.00 |
| ATOM | 2954 | HG22 | VAL | X | 193 | 25.303 | 41.090 | 34.094 | 0.00 | 0.00 |
| ATOM | 2955 | HG23 | VAL | X | 193 | 24.991 | 39.489 | 33.454 | 0.00 | 0.00 |
| ATOM | 2956 | C    | VAL | X | 193 | 27.840 | 37.309 | 35.718 | 0.00 | 0.00 |
| ATOM | 2957 | O    | VAL | X | 193 | 27.288 | 37.042 | 36.835 | 0.00 | 0.00 |
| ATOM | 2958 | N    | THR | X | 194 | 29.163 | 37.099 | 35.489 | 0.00 | 0.00 |
| ATOM | 2959 | H    | THR | X | 194 | 29.600 | 37.459 | 34.652 | 0.00 | 0.00 |
| ATOM | 2960 | CA   | THR | X | 194 | 30.154 | 36.581 | 36.475 | 0.00 | 0.00 |
| ATOM | 2961 | HA   | THR | X | 194 | 29.598 | 36.493 | 37.409 | 0.00 | 0.00 |
| ATOM | 2962 | CB   | THR | X | 194 | 30.624 | 35.158 | 36.065 | 0.00 | 0.00 |
| ATOM | 2963 | HB   | THR | X | 194 | 31.078 | 35.120 | 35.075 | 0.00 | 0.00 |
| ATOM | 2964 | CG2  | THR | X | 194 | 31.676 | 34.591 | 37.016 | 0.00 | 0.00 |
| ATOM | 2965 | HG21 | THR | X | 194 | 32.588 | 35.185 | 36.960 | 0.00 | 0.00 |
| ATOM | 2966 | HG22 | THR | X | 194 | 32.044 | 33.608 | 36.721 | 0.00 | 0.00 |

|      |      |      |     |   |     |        |        |        |      |      |
|------|------|------|-----|---|-----|--------|--------|--------|------|------|
| ATOM | 2967 | HG23 | THR | X | 194 | 31.322 | 34.401 | 38.029 | 0.00 | 0.00 |
| ATOM | 2968 | OG1  | THR | X | 194 | 29.553 | 34.234 | 35.974 | 0.00 | 0.00 |
| ATOM | 2969 | HG1  | THR | X | 194 | 29.185 | 34.322 | 35.092 | 0.00 | 0.00 |
| ATOM | 2970 | C    | THR | X | 194 | 31.387 | 37.523 | 36.684 | 0.00 | 0.00 |
| ATOM | 2971 | O    | THR | X | 194 | 32.101 | 37.825 | 35.747 | 0.00 | 0.00 |
| ATOM | 2972 | N    | LEU | X | 195 | 31.677 | 37.901 | 37.944 | 0.00 | 0.00 |
| ATOM | 2973 | H    | LEU | X | 195 | 31.092 | 37.473 | 38.647 | 0.00 | 0.00 |
| ATOM | 2974 | CA   | LEU | X | 195 | 32.950 | 38.623 | 38.359 | 0.00 | 0.00 |
| ATOM | 2975 | HA   | LEU | X | 195 | 33.160 | 39.347 | 37.572 | 0.00 | 0.00 |
| ATOM | 2976 | CB   | LEU | X | 195 | 32.785 | 39.283 | 39.697 | 0.00 | 0.00 |
| ATOM | 2977 | HB2  | LEU | X | 195 | 32.337 | 38.599 | 40.417 | 0.00 | 0.00 |
| ATOM | 2978 | HB3  | LEU | X | 195 | 33.803 | 39.622 | 39.891 | 0.00 | 0.00 |
| ATOM | 2979 | CG   | LEU | X | 195 | 31.840 | 40.501 | 39.796 | 0.00 | 0.00 |
| ATOM | 2980 | HG   | LEU | X | 195 | 30.835 | 40.084 | 39.860 | 0.00 | 0.00 |
| ATOM | 2981 | CD1  | LEU | X | 195 | 32.258 | 41.418 | 41.040 | 0.00 | 0.00 |
| ATOM | 2982 | HD11 | LEU | X | 195 | 32.247 | 40.714 | 41.872 | 0.00 | 0.00 |
| ATOM | 2983 | HD12 | LEU | X | 195 | 31.539 | 42.228 | 41.165 | 0.00 | 0.00 |
| ATOM | 2984 | HD13 | LEU | X | 195 | 33.268 | 41.788 | 40.866 | 0.00 | 0.00 |
| ATOM | 2985 | CD2  | LEU | X | 195 | 31.605 | 41.285 | 38.487 | 0.00 | 0.00 |
| ATOM | 2986 | HD21 | LEU | X | 195 | 31.027 | 40.700 | 37.772 | 0.00 | 0.00 |
| ATOM | 2987 | HD22 | LEU | X | 195 | 30.947 | 42.139 | 38.648 | 0.00 | 0.00 |
| ATOM | 2988 | HD23 | LEU | X | 195 | 32.524 | 41.620 | 38.006 | 0.00 | 0.00 |
| ATOM | 2989 | C    | LEU | X | 195 | 34.087 | 37.597 | 38.374 | 0.00 | 0.00 |
| ATOM | 2990 | O    | LEU | X | 195 | 33.947 | 36.426 | 38.874 | 0.00 | 0.00 |
| ATOM | 2991 | N    | PHE | X | 196 | 35.258 | 38.078 | 37.919 | 0.00 | 0.00 |
| ATOM | 2992 | H    | PHE | X | 196 | 35.337 | 39.032 | 37.599 | 0.00 | 0.00 |
| ATOM | 2993 | CA   | PHE | X | 196 | 36.475 | 37.261 | 37.670 | 0.00 | 0.00 |
| ATOM | 2994 | HA   | PHE | X | 196 | 36.598 | 36.397 | 38.324 | 0.00 | 0.00 |
| ATOM | 2995 | CB   | PHE | X | 196 | 36.512 | 37.013 | 36.140 | 0.00 | 0.00 |
| ATOM | 2996 | HB2  | PHE | X | 196 | 35.548 | 36.614 | 35.824 | 0.00 | 0.00 |
| ATOM | 2997 | HB3  | PHE | X | 196 | 36.571 | 38.018 | 35.722 | 0.00 | 0.00 |
| ATOM | 2998 | CG   | PHE | X | 196 | 37.569 | 36.094 | 35.508 | 0.00 | 0.00 |
| ATOM | 2999 | CD1  | PHE | X | 196 | 37.792 | 36.115 | 34.101 | 0.00 | 0.00 |
| ATOM | 3000 | HD1  | PHE | X | 196 | 37.238 | 36.923 | 33.647 | 0.00 | 0.00 |
| ATOM | 3001 | CE1  | PHE | X | 196 | 38.839 | 35.402 | 33.605 | 0.00 | 0.00 |
| ATOM | 3002 | HE1  | PHE | X | 196 | 39.190 | 35.577 | 32.599 | 0.00 | 0.00 |
| ATOM | 3003 | CZ   | PHE | X | 196 | 39.502 | 34.408 | 34.332 | 0.00 | 0.00 |
| ATOM | 3004 | HZ   | PHE | X | 196 | 40.244 | 33.733 | 33.931 | 0.00 | 0.00 |
| ATOM | 3005 | CE2  | PHE | X | 196 | 39.205 | 34.259 | 35.703 | 0.00 | 0.00 |
| ATOM | 3006 | HE2  | PHE | X | 196 | 39.591 | 33.463 | 36.321 | 0.00 | 0.00 |
| ATOM | 3007 | CD2  | PHE | X | 196 | 38.206 | 35.144 | 36.304 | 0.00 | 0.00 |
| ATOM | 3008 | HD2  | PHE | X | 196 | 37.972 | 35.078 | 37.356 | 0.00 | 0.00 |
| ATOM | 3009 | C    | PHE | X | 196 | 37.761 | 38.123 | 37.995 | 0.00 | 0.00 |
| ATOM | 3010 | O    | PHE | X | 196 | 37.908 | 39.252 | 37.605 | 0.00 | 0.00 |
| ATOM | 3011 | N    | GLY | X | 197 | 38.708 | 37.582 | 38.734 | 0.00 | 0.00 |
| ATOM | 3012 | H    | GLY | X | 197 | 38.507 | 36.720 | 39.221 | 0.00 | 0.00 |
| ATOM | 3013 | CA   | GLY | X | 197 | 39.932 | 38.289 | 38.960 | 0.00 | 0.00 |
| ATOM | 3014 | HA2  | GLY | X | 197 | 40.356 | 38.521 | 37.983 | 0.00 | 0.00 |
| ATOM | 3015 | HA3  | GLY | X | 197 | 39.780 | 39.251 | 39.449 | 0.00 | 0.00 |
| ATOM | 3016 | C    | GLY | X | 197 | 41.036 | 37.584 | 39.731 | 0.00 | 0.00 |
| ATOM | 3017 | O    | GLY | X | 197 | 40.833 | 36.521 | 40.370 | 0.00 | 0.00 |
| ATOM | 3018 | N    | GLU | X | 198 | 42.237 | 38.161 | 39.638 | 0.00 | 0.00 |
| ATOM | 3019 | H    | GLU | X | 198 | 42.291 | 39.023 | 39.113 | 0.00 | 0.00 |
| ATOM | 3020 | CA   | GLU | X | 198 | 43.466 | 37.705 | 40.344 | 0.00 | 0.00 |
| ATOM | 3021 | HA   | GLU | X | 198 | 43.214 | 36.832 | 40.946 | 0.00 | 0.00 |
| ATOM | 3022 | CB   | GLU | X | 198 | 44.560 | 37.300 | 39.334 | 0.00 | 0.00 |
| ATOM | 3023 | HB2  | GLU | X | 198 | 45.414 | 36.785 | 39.772 | 0.00 | 0.00 |
| ATOM | 3024 | HB3  | GLU | X | 198 | 44.114 | 36.575 | 38.653 | 0.00 | 0.00 |
| ATOM | 3025 | CG   | GLU | X | 198 | 45.046 | 38.435 | 38.430 | 0.00 | 0.00 |
| ATOM | 3026 | HG2  | GLU | X | 198 | 45.291 | 37.995 | 37.463 | 0.00 | 0.00 |
| ATOM | 3027 | HG3  | GLU | X | 198 | 44.248 | 39.178 | 38.426 | 0.00 | 0.00 |
| ATOM | 3028 | CD   | GLU | X | 198 | 46.335 | 39.120 | 38.933 | 0.00 | 0.00 |
| ATOM | 3029 | OE1  | GLU | X | 198 | 46.716 | 40.196 | 38.426 | 0.00 | 0.00 |
| ATOM | 3030 | OE2  | GLU | X | 198 | 46.970 | 38.634 | 39.924 | 0.00 | 0.00 |
| ATOM | 3031 | C    | GLU | X | 198 | 43.937 | 38.679 | 41.431 | 0.00 | 0.00 |
| ATOM | 3032 | O    | GLU | X | 198 | 43.973 | 39.886 | 41.269 | 0.00 | 0.00 |
| ATOM | 3033 | N    | XA1 | X | 199 | 44.618 | 38.222 | 42.478 | 0.00 | 0.00 |

|      |      |     |     |   |     |        |        |        |      |      |
|------|------|-----|-----|---|-----|--------|--------|--------|------|------|
| ATOM | 3034 | CA  | XA1 | X | 199 | 45.315 | 38.941 | 43.534 | 0.00 | 0.00 |
| ATOM | 3035 | C   | XA1 | X | 199 | 44.489 | 40.165 | 44.014 | 0.00 | 0.00 |
| ATOM | 3036 | O   | XA1 | X | 199 | 43.413 | 40.014 | 44.527 | 0.00 | 0.00 |
| ATOM | 3037 | CB  | XA1 | X | 199 | 46.750 | 39.327 | 43.117 | 0.00 | 0.00 |
| ATOM | 3038 | OG  | XA1 | X | 199 | 47.419 | 39.881 | 44.306 | 0.00 | 0.00 |
| ATOM | 3039 | P1  | XA1 | X | 199 | 48.352 | 41.052 | 44.064 | 0.00 | 0.00 |
| ATOM | 3040 | O1  | XA1 | X | 199 | 47.678 | 42.162 | 43.298 | 0.00 | 0.00 |
| ATOM | 3041 | O2  | XA1 | X | 199 | 49.744 | 40.694 | 43.616 | 0.00 | 0.00 |
| ATOM | 3042 | C1  | XA1 | X | 199 | 48.504 | 41.714 | 45.713 | 0.00 | 0.00 |
| ATOM | 3043 | H   | XA1 | X | 199 | 44.700 | 37.216 | 42.507 | 0.00 | 0.00 |
| ATOM | 3044 | HA  | XA1 | X | 199 | 45.513 | 38.325 | 44.411 | 0.00 | 0.00 |
| ATOM | 3045 | HB2 | XA1 | X | 199 | 47.296 | 38.430 | 42.816 | 0.00 | 0.00 |
| ATOM | 3046 | HB3 | XA1 | X | 199 | 46.785 | 40.024 | 42.276 | 0.00 | 0.00 |
| ATOM | 3047 | H11 | XA1 | X | 199 | 48.631 | 40.882 | 46.409 | 0.00 | 0.00 |
| ATOM | 3048 | H12 | XA1 | X | 199 | 49.338 | 42.414 | 45.793 | 0.00 | 0.00 |
| ATOM | 3049 | H13 | XA1 | X | 199 | 47.564 | 42.263 | 45.785 | 0.00 | 0.00 |
| ATOM | 3050 | N   | ALA | X | 200 | 44.927 | 41.437 | 43.877 | 0.00 | 0.00 |
| ATOM | 3051 | H   | ALA | X | 200 | 45.884 | 41.539 | 43.571 | 0.00 | 0.00 |
| ATOM | 3052 | CA  | ALA | X | 200 | 44.138 | 42.635 | 44.242 | 0.00 | 0.00 |
| ATOM | 3053 | HA  | ALA | X | 200 | 43.805 | 42.582 | 45.278 | 0.00 | 0.00 |
| ATOM | 3054 | CB  | ALA | X | 200 | 44.992 | 43.958 | 43.916 | 0.00 | 0.00 |
| ATOM | 3055 | HB1 | ALA | X | 200 | 44.369 | 44.850 | 43.997 | 0.00 | 0.00 |
| ATOM | 3056 | HB2 | ALA | X | 200 | 45.412 | 43.962 | 42.911 | 0.00 | 0.00 |
| ATOM | 3057 | HB3 | ALA | X | 200 | 45.848 | 43.944 | 44.591 | 0.00 | 0.00 |
| ATOM | 3058 | C   | ALA | X | 200 | 42.799 | 42.747 | 43.420 | 0.00 | 0.00 |
| ATOM | 3059 | O   | ALA | X | 200 | 41.831 | 43.349 | 43.885 | 0.00 | 0.00 |
| ATOM | 3060 | N   | GLY | X | 201 | 42.762 | 42.026 | 42.352 | 0.00 | 0.00 |
| ATOM | 3061 | H   | GLY | X | 201 | 43.614 | 41.600 | 42.017 | 0.00 | 0.00 |
| ATOM | 3062 | CA  | GLY | X | 201 | 41.606 | 41.712 | 41.589 | 0.00 | 0.00 |
| ATOM | 3063 | HA2 | GLY | X | 201 | 41.070 | 42.594 | 41.236 | 0.00 | 0.00 |
| ATOM | 3064 | HA3 | GLY | X | 201 | 41.861 | 41.095 | 40.727 | 0.00 | 0.00 |
| ATOM | 3065 | C   | GLY | X | 201 | 40.608 | 40.733 | 42.245 | 0.00 | 0.00 |
| ATOM | 3066 | O   | GLY | X | 201 | 39.403 | 40.945 | 42.367 | 0.00 | 0.00 |
| ATOM | 3067 | N   | ALA | X | 202 | 41.228 | 39.598 | 42.650 | 0.00 | 0.00 |
| ATOM | 3068 | H   | ALA | X | 202 | 42.235 | 39.553 | 42.586 | 0.00 | 0.00 |
| ATOM | 3069 | CA  | ALA | X | 202 | 40.459 | 38.564 | 43.404 | 0.00 | 0.00 |
| ATOM | 3070 | HA  | ALA | X | 202 | 39.605 | 38.144 | 42.873 | 0.00 | 0.00 |
| ATOM | 3071 | CB  | ALA | X | 202 | 41.403 | 37.443 | 43.648 | 0.00 | 0.00 |
| ATOM | 3072 | HB1 | ALA | X | 202 | 41.814 | 37.055 | 42.716 | 0.00 | 0.00 |
| ATOM | 3073 | HB2 | ALA | X | 202 | 40.878 | 36.656 | 44.190 | 0.00 | 0.00 |
| ATOM | 3074 | HB3 | ALA | X | 202 | 42.196 | 37.894 | 44.244 | 0.00 | 0.00 |
| ATOM | 3075 | C   | ALA | X | 202 | 39.939 | 39.179 | 44.696 | 0.00 | 0.00 |
| ATOM | 3076 | O   | ALA | X | 202 | 38.745 | 38.978 | 45.013 | 0.00 | 0.00 |
| ATOM | 3077 | N   | ALA | X | 203 | 40.695 | 40.022 | 45.391 | 0.00 | 0.00 |
| ATOM | 3078 | H   | ALA | X | 203 | 41.634 | 40.200 | 45.063 | 0.00 | 0.00 |
| ATOM | 3079 | CA  | ALA | X | 203 | 40.270 | 40.639 | 46.593 | 0.00 | 0.00 |
| ATOM | 3080 | HA  | ALA | X | 203 | 39.667 | 39.908 | 47.131 | 0.00 | 0.00 |
| ATOM | 3081 | CB  | ALA | X | 203 | 41.459 | 41.022 | 47.318 | 0.00 | 0.00 |
| ATOM | 3082 | HB1 | ALA | X | 203 | 42.031 | 41.782 | 46.786 | 0.00 | 0.00 |
| ATOM | 3083 | HB2 | ALA | X | 203 | 42.037 | 40.100 | 47.386 | 0.00 | 0.00 |
| ATOM | 3084 | HB3 | ALA | X | 203 | 41.233 | 41.397 | 48.316 | 0.00 | 0.00 |
| ATOM | 3085 | C   | ALA | X | 203 | 39.402 | 41.840 | 46.412 | 0.00 | 0.00 |
| ATOM | 3086 | O   | ALA | X | 203 | 38.664 | 42.147 | 47.312 | 0.00 | 0.00 |
| ATOM | 3087 | N   | SER | X | 204 | 39.397 | 42.392 | 45.216 | 0.00 | 0.00 |
| ATOM | 3088 | H   | SER | X | 204 | 40.075 | 42.070 | 44.540 | 0.00 | 0.00 |
| ATOM | 3089 | CA  | SER | X | 204 | 38.348 | 43.368 | 44.807 | 0.00 | 0.00 |
| ATOM | 3090 | HA  | SER | X | 204 | 38.058 | 44.202 | 45.445 | 0.00 | 0.00 |
| ATOM | 3091 | CB  | SER | X | 204 | 38.742 | 44.061 | 43.450 | 0.00 | 0.00 |
| ATOM | 3092 | HB2 | SER | X | 204 | 39.233 | 43.394 | 42.740 | 0.00 | 0.00 |
| ATOM | 3093 | HB3 | SER | X | 204 | 37.832 | 44.354 | 42.927 | 0.00 | 0.00 |
| ATOM | 3094 | OG  | SER | X | 204 | 39.683 | 45.090 | 43.584 | 0.00 | 0.00 |
| ATOM | 3095 | HG  | SER | X | 204 | 40.532 | 44.649 | 43.664 | 0.00 | 0.00 |
| ATOM | 3096 | C   | SER | X | 204 | 37.011 | 42.665 | 44.510 | 0.00 | 0.00 |
| ATOM | 3097 | O   | SER | X | 204 | 36.009 | 43.048 | 45.079 | 0.00 | 0.00 |
| ATOM | 3098 | N   | VAL | X | 205 | 37.069 | 41.584 | 43.694 | 0.00 | 0.00 |
| ATOM | 3099 | H   | VAL | X | 205 | 37.902 | 41.441 | 43.140 | 0.00 | 0.00 |
| ATOM | 3100 | CA  | VAL | X | 205 | 35.985 | 40.661 | 43.529 | 0.00 | 0.00 |

|      |      |      |     |   |     |        |        |        |      |      |
|------|------|------|-----|---|-----|--------|--------|--------|------|------|
| ATOM | 3101 | HA   | VAL | X | 205 | 35.205 | 41.168 | 42.959 | 0.00 | 0.00 |
| ATOM | 3102 | CB   | VAL | X | 205 | 36.316 | 39.458 | 42.621 | 0.00 | 0.00 |
| ATOM | 3103 | HB   | VAL | X | 205 | 37.101 | 38.907 | 43.138 | 0.00 | 0.00 |
| ATOM | 3104 | CG1  | VAL | X | 205 | 35.126 | 38.544 | 42.415 | 0.00 | 0.00 |
| ATOM | 3105 | HG11 | VAL | X | 205 | 34.297 | 39.191 | 42.128 | 0.00 | 0.00 |
| ATOM | 3106 | HG12 | VAL | X | 205 | 35.374 | 37.848 | 41.614 | 0.00 | 0.00 |
| ATOM | 3107 | HG13 | VAL | X | 205 | 34.816 | 37.994 | 43.304 | 0.00 | 0.00 |
| ATOM | 3108 | CG2  | VAL | X | 205 | 36.762 | 39.918 | 41.201 | 0.00 | 0.00 |
| ATOM | 3109 | HG21 | VAL | X | 205 | 37.313 | 39.032 | 40.887 | 0.00 | 0.00 |
| ATOM | 3110 | HG22 | VAL | X | 205 | 37.459 | 40.751 | 41.112 | 0.00 | 0.00 |
| ATOM | 3111 | HG23 | VAL | X | 205 | 35.946 | 40.093 | 40.500 | 0.00 | 0.00 |
| ATOM | 3112 | C    | VAL | X | 205 | 35.312 | 40.189 | 44.881 | 0.00 | 0.00 |
| ATOM | 3113 | O    | VAL | X | 205 | 34.103 | 40.208 | 44.971 | 0.00 | 0.00 |
| ATOM | 3114 | N    | GLY | X | 206 | 36.095 | 39.972 | 45.955 | 0.00 | 0.00 |
| ATOM | 3115 | H    | GLY | X | 206 | 37.090 | 39.895 | 45.800 | 0.00 | 0.00 |
| ATOM | 3116 | CA   | GLY | X | 206 | 35.678 | 39.697 | 47.287 | 0.00 | 0.00 |
| ATOM | 3117 | HA2  | GLY | X | 206 | 34.826 | 39.020 | 47.351 | 0.00 | 0.00 |
| ATOM | 3118 | HA3  | GLY | X | 206 | 36.491 | 39.354 | 47.926 | 0.00 | 0.00 |
| ATOM | 3119 | C    | GLY | X | 206 | 35.011 | 40.867 | 48.029 | 0.00 | 0.00 |
| ATOM | 3120 | O    | GLY | X | 206 | 34.128 | 40.707 | 48.880 | 0.00 | 0.00 |
| ATOM | 3121 | N    | MET | X | 207 | 35.519 | 42.117 | 47.803 | 0.00 | 0.00 |
| ATOM | 3122 | H    | MET | X | 207 | 36.205 | 42.209 | 47.068 | 0.00 | 0.00 |
| ATOM | 3123 | CA   | MET | X | 207 | 34.891 | 43.351 | 48.421 | 0.00 | 0.00 |
| ATOM | 3124 | HA   | MET | X | 207 | 34.689 | 43.359 | 49.492 | 0.00 | 0.00 |
| ATOM | 3125 | CB   | MET | X | 207 | 35.942 | 44.546 | 48.252 | 0.00 | 0.00 |
| ATOM | 3126 | HB2  | MET | X | 207 | 36.959 | 44.156 | 48.266 | 0.00 | 0.00 |
| ATOM | 3127 | HB3  | MET | X | 207 | 35.784 | 45.132 | 47.347 | 0.00 | 0.00 |
| ATOM | 3128 | CG   | MET | X | 207 | 35.995 | 45.531 | 49.388 | 0.00 | 0.00 |
| ATOM | 3129 | HG2  | MET | X | 207 | 36.738 | 46.288 | 49.135 | 0.00 | 0.00 |
| ATOM | 3130 | HG3  | MET | X | 207 | 35.057 | 46.042 | 49.605 | 0.00 | 0.00 |
| ATOM | 3131 | SD   | MET | X | 207 | 36.565 | 44.831 | 50.913 | 0.00 | 0.00 |
| ATOM | 3132 | CE   | MET | X | 207 | 38.371 | 44.873 | 50.630 | 0.00 | 0.00 |
| ATOM | 3133 | HE1  | MET | X | 207 | 38.883 | 44.616 | 51.557 | 0.00 | 0.00 |
| ATOM | 3134 | HE2  | MET | X | 207 | 38.716 | 44.184 | 49.860 | 0.00 | 0.00 |
| ATOM | 3135 | HE3  | MET | X | 207 | 38.681 | 45.853 | 50.266 | 0.00 | 0.00 |
| ATOM | 3136 | C    | MET | X | 207 | 33.505 | 43.616 | 47.751 | 0.00 | 0.00 |
| ATOM | 3137 | O    | MET | X | 207 | 32.653 | 44.053 | 48.501 | 0.00 | 0.00 |
| ATOM | 3138 | N    | HIE | X | 208 | 33.314 | 43.318 | 46.475 | 0.00 | 0.00 |
| ATOM | 3139 | H    | HIE | X | 208 | 34.072 | 42.954 | 45.915 | 0.00 | 0.00 |
| ATOM | 3140 | CA   | HIE | X | 208 | 32.048 | 43.550 | 45.866 | 0.00 | 0.00 |
| ATOM | 3141 | HA   | HIE | X | 208 | 31.715 | 44.540 | 46.178 | 0.00 | 0.00 |
| ATOM | 3142 | CB   | HIE | X | 208 | 32.239 | 43.507 | 44.402 | 0.00 | 0.00 |
| ATOM | 3143 | HB2  | HIE | X | 208 | 32.541 | 42.482 | 44.185 | 0.00 | 0.00 |
| ATOM | 3144 | HB3  | HIE | X | 208 | 31.285 | 43.521 | 43.875 | 0.00 | 0.00 |
| ATOM | 3145 | CG   | HIE | X | 208 | 32.982 | 44.657 | 43.818 | 0.00 | 0.00 |
| ATOM | 3146 | ND1  | HIE | X | 208 | 32.703 | 46.044 | 43.951 | 0.00 | 0.00 |
| ATOM | 3147 | CE1  | HIE | X | 208 | 33.655 | 46.676 | 43.273 | 0.00 | 0.00 |
| ATOM | 3148 | HE1  | HIE | X | 208 | 33.771 | 47.740 | 43.418 | 0.00 | 0.00 |
| ATOM | 3149 | NE2  | HIE | X | 208 | 34.491 | 45.797 | 42.787 | 0.00 | 0.00 |
| ATOM | 3150 | HE2  | HIE | X | 208 | 35.361 | 46.063 | 42.347 | 0.00 | 0.00 |
| ATOM | 3151 | CD2  | HIE | X | 208 | 34.111 | 44.537 | 43.072 | 0.00 | 0.00 |
| ATOM | 3152 | HD2  | HIE | X | 208 | 34.644 | 43.631 | 42.822 | 0.00 | 0.00 |
| ATOM | 3153 | C    | HIE | X | 208 | 31.035 | 42.403 | 46.307 | 0.00 | 0.00 |
| ATOM | 3154 | O    | HIE | X | 208 | 29.873 | 42.637 | 46.142 | 0.00 | 0.00 |
| ATOM | 3155 | N    | LEU | X | 209 | 31.457 | 41.271 | 46.863 | 0.00 | 0.00 |
| ATOM | 3156 | H    | LEU | X | 209 | 32.387 | 40.983 | 46.597 | 0.00 | 0.00 |
| ATOM | 3157 | CA   | LEU | X | 209 | 30.663 | 40.240 | 47.503 | 0.00 | 0.00 |
| ATOM | 3158 | HA   | LEU | X | 209 | 29.726 | 40.322 | 46.952 | 0.00 | 0.00 |
| ATOM | 3159 | CB   | LEU | X | 209 | 31.504 | 38.945 | 47.369 | 0.00 | 0.00 |
| ATOM | 3160 | HB2  | LEU | X | 209 | 31.991 | 38.945 | 46.394 | 0.00 | 0.00 |
| ATOM | 3161 | HB3  | LEU | X | 209 | 32.325 | 38.786 | 48.068 | 0.00 | 0.00 |
| ATOM | 3162 | CG   | LEU | X | 209 | 30.548 | 37.705 | 47.539 | 0.00 | 0.00 |
| ATOM | 3163 | HG   | LEU | X | 209 | 29.990 | 37.878 | 48.459 | 0.00 | 0.00 |
| ATOM | 3164 | CD1  | LEU | X | 209 | 29.595 | 37.480 | 46.424 | 0.00 | 0.00 |
| ATOM | 3165 | HD11 | LEU | X | 209 | 29.227 | 36.465 | 46.571 | 0.00 | 0.00 |
| ATOM | 3166 | HD12 | LEU | X | 209 | 30.143 | 37.554 | 45.484 | 0.00 | 0.00 |
| ATOM | 3167 | HD13 | LEU | X | 209 | 28.885 | 38.306 | 46.393 | 0.00 | 0.00 |



|      |      |      |     |   |     |        |        |        |      |      |
|------|------|------|-----|---|-----|--------|--------|--------|------|------|
| ATOM | 3168 | CD2  | LEU | X | 209 | 31.390 | 36.449 | 47.711 | 0.00 | 0.00 |
| ATOM | 3169 | HD21 | LEU | X | 209 | 30.837 | 35.522 | 47.861 | 0.00 | 0.00 |
| ATOM | 3170 | HD22 | LEU | X | 209 | 31.977 | 36.221 | 46.821 | 0.00 | 0.00 |
| ATOM | 3171 | HD23 | LEU | X | 209 | 32.095 | 36.566 | 48.534 | 0.00 | 0.00 |
| ATOM | 3172 | C    | LEU | X | 209 | 30.322 | 40.524 | 48.971 | 0.00 | 0.00 |
| ATOM | 3173 | O    | LEU | X | 209 | 29.278 | 40.111 | 49.443 | 0.00 | 0.00 |
| ATOM | 3174 | N    | LEU | X | 210 | 31.232 | 41.327 | 49.631 | 0.00 | 0.00 |
| ATOM | 3175 | H    | LEU | X | 210 | 32.071 | 41.613 | 49.146 | 0.00 | 0.00 |
| ATOM | 3176 | CA   | LEU | X | 210 | 31.109 | 41.674 | 51.074 | 0.00 | 0.00 |
| ATOM | 3177 | HA   | LEU | X | 210 | 30.656 | 40.878 | 51.665 | 0.00 | 0.00 |
| ATOM | 3178 | CB   | LEU | X | 210 | 32.467 | 41.945 | 51.622 | 0.00 | 0.00 |
| ATOM | 3179 | HB2  | LEU | X | 210 | 33.106 | 41.073 | 51.480 | 0.00 | 0.00 |
| ATOM | 3180 | HB3  | LEU | X | 210 | 32.923 | 42.731 | 51.020 | 0.00 | 0.00 |
| ATOM | 3181 | CG   | LEU | X | 210 | 32.707 | 42.226 | 53.091 | 0.00 | 0.00 |
| ATOM | 3182 | HG   | LEU | X | 210 | 32.300 | 43.183 | 53.420 | 0.00 | 0.00 |
| ATOM | 3183 | CD1  | LEU | X | 210 | 31.870 | 41.257 | 54.003 | 0.00 | 0.00 |
| ATOM | 3184 | HD11 | LEU | X | 210 | 32.175 | 41.380 | 55.043 | 0.00 | 0.00 |
| ATOM | 3185 | HD12 | LEU | X | 210 | 32.113 | 40.219 | 53.775 | 0.00 | 0.00 |
| ATOM | 3186 | HD13 | LEU | X | 210 | 30.803 | 41.444 | 53.885 | 0.00 | 0.00 |
| ATOM | 3187 | CD2  | LEU | X | 210 | 34.184 | 42.048 | 53.422 | 0.00 | 0.00 |
| ATOM | 3188 | HD21 | LEU | X | 210 | 34.346 | 41.956 | 54.496 | 0.00 | 0.00 |
| ATOM | 3189 | HD22 | LEU | X | 210 | 34.562 | 41.054 | 53.184 | 0.00 | 0.00 |
| ATOM | 3190 | HD23 | LEU | X | 210 | 34.940 | 42.659 | 52.929 | 0.00 | 0.00 |
| ATOM | 3191 | C    | LEU | X | 210 | 30.205 | 42.914 | 51.216 | 0.00 | 0.00 |
| ATOM | 3192 | O    | LEU | X | 210 | 29.640 | 43.139 | 52.247 | 0.00 | 0.00 |
| ATOM | 3193 | N    | SER | X | 211 | 30.127 | 43.819 | 50.230 | 0.00 | 0.00 |
| ATOM | 3194 | H    | SER | X | 211 | 30.565 | 43.527 | 49.369 | 0.00 | 0.00 |
| ATOM | 3195 | CA   | SER | X | 211 | 29.342 | 45.097 | 50.168 | 0.00 | 0.00 |
| ATOM | 3196 | HA   | SER | X | 211 | 29.198 | 45.442 | 51.192 | 0.00 | 0.00 |
| ATOM | 3197 | CB   | SER | X | 211 | 30.248 | 46.124 | 49.553 | 0.00 | 0.00 |
| ATOM | 3198 | HB2  | SER | X | 211 | 29.762 | 47.097 | 49.488 | 0.00 | 0.00 |
| ATOM | 3199 | HB3  | SER | X | 211 | 31.041 | 46.356 | 50.263 | 0.00 | 0.00 |
| ATOM | 3200 | OG   | SER | X | 211 | 30.772 | 45.849 | 48.303 | 0.00 | 0.00 |
| ATOM | 3201 | HG   | SER | X | 211 | 31.485 | 45.249 | 48.536 | 0.00 | 0.00 |
| ATOM | 3202 | C    | SER | X | 211 | 27.944 | 45.062 | 49.473 | 0.00 | 0.00 |
| ATOM | 3203 | O    | SER | X | 211 | 27.864 | 45.083 | 48.212 | 0.00 | 0.00 |
| ATOM | 3204 | N    | PRO | X | 212 | 26.763 | 45.086 | 50.199 | 0.00 | 0.00 |
| ATOM | 3205 | CD   | PRO | X | 212 | 26.726 | 45.238 | 51.690 | 0.00 | 0.00 |
| ATOM | 3206 | HD2  | PRO | X | 212 | 27.009 | 46.247 | 51.988 | 0.00 | 0.00 |
| ATOM | 3207 | HD3  | PRO | X | 212 | 27.462 | 44.557 | 52.117 | 0.00 | 0.00 |
| ATOM | 3208 | CG   | PRO | X | 212 | 25.311 | 44.825 | 52.057 | 0.00 | 0.00 |
| ATOM | 3209 | HG2  | PRO | X | 212 | 24.974 | 45.333 | 52.961 | 0.00 | 0.00 |
| ATOM | 3210 | HG3  | PRO | X | 212 | 25.192 | 43.757 | 52.241 | 0.00 | 0.00 |
| ATOM | 3211 | CB   | PRO | X | 212 | 24.434 | 45.162 | 50.806 | 0.00 | 0.00 |
| ATOM | 3212 | HB2  | PRO | X | 212 | 24.125 | 46.206 | 50.753 | 0.00 | 0.00 |
| ATOM | 3213 | HB3  | PRO | X | 212 | 23.556 | 44.550 | 50.599 | 0.00 | 0.00 |
| ATOM | 3214 | CA   | PRO | X | 212 | 25.427 | 44.854 | 49.691 | 0.00 | 0.00 |
| ATOM | 3215 | HA   | PRO | X | 212 | 25.364 | 43.796 | 49.436 | 0.00 | 0.00 |
| ATOM | 3216 | C    | PRO | X | 212 | 25.068 | 45.711 | 48.432 | 0.00 | 0.00 |
| ATOM | 3217 | O    | PRO | X | 212 | 24.403 | 45.175 | 47.522 | 0.00 | 0.00 |
| ATOM | 3218 | N    | PRO | X | 213 | 25.547 | 46.976 | 48.329 | 0.00 | 0.00 |
| ATOM | 3219 | CD   | PRO | X | 213 | 26.263 | 47.848 | 49.288 | 0.00 | 0.00 |
| ATOM | 3220 | HD2  | PRO | X | 213 | 27.338 | 47.769 | 49.123 | 0.00 | 0.00 |
| ATOM | 3221 | HD3  | PRO | X | 213 | 26.009 | 47.527 | 50.298 | 0.00 | 0.00 |
| ATOM | 3222 | CG   | PRO | X | 213 | 25.828 | 49.316 | 49.081 | 0.00 | 0.00 |
| ATOM | 3223 | HG2  | PRO | X | 213 | 26.586 | 49.962 | 49.523 | 0.00 | 0.00 |
| ATOM | 3224 | HG3  | PRO | X | 213 | 24.889 | 49.269 | 49.632 | 0.00 | 0.00 |
| ATOM | 3225 | CB   | PRO | X | 213 | 25.717 | 49.317 | 47.529 | 0.00 | 0.00 |
| ATOM | 3226 | HB2  | PRO | X | 213 | 26.678 | 49.553 | 47.074 | 0.00 | 0.00 |
| ATOM | 3227 | HB3  | PRO | X | 213 | 24.920 | 49.933 | 47.113 | 0.00 | 0.00 |
| ATOM | 3228 | CA   | PRO | X | 213 | 25.365 | 47.846 | 47.118 | 0.00 | 0.00 |
| ATOM | 3229 | HA   | PRO | X | 213 | 24.297 | 47.844 | 46.899 | 0.00 | 0.00 |
| ATOM | 3230 | C    | PRO | X | 213 | 26.167 | 47.482 | 45.875 | 0.00 | 0.00 |
| ATOM | 3231 | O    | PRO | X | 213 | 25.844 | 47.993 | 44.804 | 0.00 | 0.00 |
| ATOM | 3232 | N    | SER | X | 214 | 27.082 | 46.478 | 46.002 | 0.00 | 0.00 |
| ATOM | 3233 | H    | SER | X | 214 | 27.300 | 46.000 | 46.865 | 0.00 | 0.00 |
| ATOM | 3234 | CA   | SER | X | 214 | 27.814 | 45.776 | 44.949 | 0.00 | 0.00 |

|      |      |      |     |   |     |        |        |        |      |      |
|------|------|------|-----|---|-----|--------|--------|--------|------|------|
| ATOM | 3235 | HA   | SER | X | 214 | 27.575 | 46.259 | 44.001 | 0.00 | 0.00 |
| ATOM | 3236 | CB   | SER | X | 214 | 29.335 | 45.656 | 45.253 | 0.00 | 0.00 |
| ATOM | 3237 | HB2  | SER | X | 214 | 29.466 | 45.267 | 46.263 | 0.00 | 0.00 |
| ATOM | 3238 | HB3  | SER | X | 214 | 29.829 | 45.008 | 44.529 | 0.00 | 0.00 |
| ATOM | 3239 | OG   | SER | X | 214 | 30.033 | 46.892 | 45.108 | 0.00 | 0.00 |
| ATOM | 3240 | HG   | SER | X | 214 | 30.985 | 46.796 | 45.034 | 0.00 | 0.00 |
| ATOM | 3241 | C    | SER | X | 214 | 27.259 | 44.411 | 44.740 | 0.00 | 0.00 |
| ATOM | 3242 | O    | SER | X | 214 | 27.265 | 43.928 | 43.559 | 0.00 | 0.00 |
| ATOM | 3243 | N    | ARG | X | 215 | 26.860 | 43.658 | 45.767 | 0.00 | 0.00 |
| ATOM | 3244 | H    | ARG | X | 215 | 26.830 | 44.075 | 46.686 | 0.00 | 0.00 |
| ATOM | 3245 | CA   | ARG | X | 215 | 26.430 | 42.231 | 45.638 | 0.00 | 0.00 |
| ATOM | 3246 | HA   | ARG | X | 215 | 27.342 | 41.722 | 45.330 | 0.00 | 0.00 |
| ATOM | 3247 | CB   | ARG | X | 215 | 25.940 | 41.780 | 46.990 | 0.00 | 0.00 |
| ATOM | 3248 | HB2  | ARG | X | 215 | 26.561 | 42.123 | 47.818 | 0.00 | 0.00 |
| ATOM | 3249 | HB3  | ARG | X | 215 | 24.960 | 42.236 | 47.130 | 0.00 | 0.00 |
| ATOM | 3250 | CG   | ARG | X | 215 | 25.739 | 40.249 | 47.138 | 0.00 | 0.00 |
| ATOM | 3251 | HG2  | ARG | X | 215 | 24.945 | 39.960 | 46.450 | 0.00 | 0.00 |
| ATOM | 3252 | HG3  | ARG | X | 215 | 26.685 | 39.758 | 46.907 | 0.00 | 0.00 |
| ATOM | 3253 | CD   | ARG | X | 215 | 25.264 | 39.871 | 48.572 | 0.00 | 0.00 |
| ATOM | 3254 | HD2  | ARG | X | 215 | 25.148 | 38.789 | 48.636 | 0.00 | 0.00 |
| ATOM | 3255 | HD3  | ARG | X | 215 | 26.028 | 40.093 | 49.317 | 0.00 | 0.00 |
| ATOM | 3256 | NE   | ARG | X | 215 | 23.880 | 40.357 | 48.940 | 0.00 | 0.00 |
| ATOM | 3257 | HE   | ARG | X | 215 | 23.121 | 40.343 | 48.275 | 0.00 | 0.00 |
| ATOM | 3258 | CZ   | ARG | X | 215 | 23.602 | 40.587 | 50.225 | 0.00 | 0.00 |
| ATOM | 3259 | NH1  | ARG | X | 215 | 24.437 | 40.649 | 51.216 | 0.00 | 0.00 |
| ATOM | 3260 | HH11 | ARG | X | 215 | 25.413 | 40.699 | 50.961 | 0.00 | 0.00 |
| ATOM | 3261 | HH12 | ARG | X | 215 | 24.118 | 40.760 | 52.168 | 0.00 | 0.00 |
| ATOM | 3262 | NH2  | ARG | X | 215 | 22.337 | 40.822 | 50.526 | 0.00 | 0.00 |
| ATOM | 3263 | HH21 | ARG | X | 215 | 21.579 | 40.723 | 49.865 | 0.00 | 0.00 |
| ATOM | 3264 | HH22 | ARG | X | 215 | 22.117 | 41.168 | 51.449 | 0.00 | 0.00 |
| ATOM | 3265 | C    | ARG | X | 215 | 25.371 | 41.991 | 44.571 | 0.00 | 0.00 |
| ATOM | 3266 | O    | ARG | X | 215 | 25.433 | 40.937 | 43.964 | 0.00 | 0.00 |
| ATOM | 3267 | N    | GLY | X | 216 | 24.465 | 42.923 | 44.290 | 0.00 | 0.00 |
| ATOM | 3268 | H    | GLY | X | 216 | 24.525 | 43.763 | 44.847 | 0.00 | 0.00 |
| ATOM | 3269 | CA   | GLY | X | 216 | 23.347 | 42.611 | 43.435 | 0.00 | 0.00 |
| ATOM | 3270 | HA2  | GLY | X | 216 | 23.071 | 41.564 | 43.557 | 0.00 | 0.00 |
| ATOM | 3271 | HA3  | GLY | X | 216 | 22.533 | 43.284 | 43.707 | 0.00 | 0.00 |
| ATOM | 3272 | C    | GLY | X | 216 | 23.596 | 42.862 | 41.945 | 0.00 | 0.00 |
| ATOM | 3273 | O    | GLY | X | 216 | 22.744 | 42.706 | 41.078 | 0.00 | 0.00 |
| ATOM | 3274 | N    | LEU | X | 217 | 24.867 | 43.201 | 41.626 | 0.00 | 0.00 |
| ATOM | 3275 | H    | LEU | X | 217 | 25.506 | 43.360 | 42.392 | 0.00 | 0.00 |
| ATOM | 3276 | CA   | LEU | X | 217 | 25.249 | 43.590 | 40.255 | 0.00 | 0.00 |
| ATOM | 3277 | HA   | LEU | X | 217 | 24.405 | 44.001 | 39.701 | 0.00 | 0.00 |
| ATOM | 3278 | CB   | LEU | X | 217 | 26.213 | 44.791 | 40.276 | 0.00 | 0.00 |
| ATOM | 3279 | HB2  | LEU | X | 217 | 27.033 | 44.485 | 40.925 | 0.00 | 0.00 |
| ATOM | 3280 | HB3  | LEU | X | 217 | 26.635 | 45.023 | 39.299 | 0.00 | 0.00 |
| ATOM | 3281 | CG   | LEU | X | 217 | 25.569 | 46.102 | 40.890 | 0.00 | 0.00 |
| ATOM | 3282 | HG   | LEU | X | 217 | 25.063 | 45.865 | 41.826 | 0.00 | 0.00 |
| ATOM | 3283 | CD1  | LEU | X | 217 | 26.644 | 47.103 | 41.171 | 0.00 | 0.00 |
| ATOM | 3284 | HD11 | LEU | X | 217 | 27.375 | 46.658 | 41.847 | 0.00 | 0.00 |
| ATOM | 3285 | HD12 | LEU | X | 217 | 26.333 | 48.040 | 41.633 | 0.00 | 0.00 |
| ATOM | 3286 | HD13 | LEU | X | 217 | 27.167 | 47.365 | 40.251 | 0.00 | 0.00 |
| ATOM | 3287 | CD2  | LEU | X | 217 | 24.569 | 46.645 | 39.844 | 0.00 | 0.00 |
| ATOM | 3288 | HD21 | LEU | X | 217 | 24.066 | 47.540 | 40.210 | 0.00 | 0.00 |
| ATOM | 3289 | HD22 | LEU | X | 217 | 25.174 | 46.929 | 38.983 | 0.00 | 0.00 |
| ATOM | 3290 | HD23 | LEU | X | 217 | 23.903 | 45.852 | 39.503 | 0.00 | 0.00 |
| ATOM | 3291 | C    | LEU | X | 217 | 25.764 | 42.433 | 39.401 | 0.00 | 0.00 |
| ATOM | 3292 | O    | LEU | X | 217 | 26.088 | 42.528 | 38.194 | 0.00 | 0.00 |
| ATOM | 3293 | N    | PHE | X | 218 | 25.737 | 41.237 | 39.952 | 0.00 | 0.00 |
| ATOM | 3294 | H    | PHE | X | 218 | 25.353 | 41.163 | 40.884 | 0.00 | 0.00 |
| ATOM | 3295 | CA   | PHE | X | 218 | 26.301 | 40.044 | 39.246 | 0.00 | 0.00 |
| ATOM | 3296 | HA   | PHE | X | 218 | 25.830 | 39.966 | 38.266 | 0.00 | 0.00 |
| ATOM | 3297 | CB   | PHE | X | 218 | 27.833 | 40.163 | 39.515 | 0.00 | 0.00 |
| ATOM | 3298 | HB2  | PHE | X | 218 | 28.312 | 39.328 | 39.003 | 0.00 | 0.00 |
| ATOM | 3299 | HB3  | PHE | X | 218 | 28.273 | 41.051 | 39.060 | 0.00 | 0.00 |
| ATOM | 3300 | CG   | PHE | X | 218 | 28.336 | 40.159 | 40.880 | 0.00 | 0.00 |
| ATOM | 3301 | CD1  | PHE | X | 218 | 28.386 | 41.265 | 41.715 | 0.00 | 0.00 |

|      |      |      |     |   |     |        |        |        |      |      |
|------|------|------|-----|---|-----|--------|--------|--------|------|------|
| ATOM | 3302 | HD1  | PHE | X | 218 | 27.759 | 42.115 | 41.488 | 0.00 | 0.00 |
| ATOM | 3303 | CE1  | PHE | X | 218 | 28.987 | 41.164 | 42.983 | 0.00 | 0.00 |
| ATOM | 3304 | HE1  | PHE | X | 218 | 28.941 | 41.974 | 43.697 | 0.00 | 0.00 |
| ATOM | 3305 | CZ   | PHE | X | 218 | 29.610 | 39.993 | 43.384 | 0.00 | 0.00 |
| ATOM | 3306 | HZ   | PHE | X | 218 | 30.088 | 39.995 | 44.353 | 0.00 | 0.00 |
| ATOM | 3307 | CE2  | PHE | X | 218 | 29.581 | 38.826 | 42.546 | 0.00 | 0.00 |
| ATOM | 3308 | HE2  | PHE | X | 218 | 29.958 | 37.885 | 42.917 | 0.00 | 0.00 |
| ATOM | 3309 | CD2  | PHE | X | 218 | 28.924 | 38.908 | 41.325 | 0.00 | 0.00 |
| ATOM | 3310 | HD2  | PHE | X | 218 | 28.843 | 38.034 | 40.695 | 0.00 | 0.00 |
| ATOM | 3311 | C    | PHE | X | 218 | 25.809 | 38.785 | 39.883 | 0.00 | 0.00 |
| ATOM | 3312 | O    | PHE | X | 218 | 25.339 | 38.863 | 40.981 | 0.00 | 0.00 |
| ATOM | 3313 | N    | HIE | X | 219 | 26.042 | 37.616 | 39.235 | 0.00 | 0.00 |
| ATOM | 3314 | H    | HIE | X | 219 | 26.259 | 37.707 | 38.253 | 0.00 | 0.00 |
| ATOM | 3315 | CA   | HIE | X | 219 | 25.466 | 36.377 | 39.736 | 0.00 | 0.00 |
| ATOM | 3316 | HA   | HIE | X | 219 | 24.649 | 36.611 | 40.418 | 0.00 | 0.00 |
| ATOM | 3317 | CB   | HIE | X | 219 | 24.922 | 35.684 | 38.504 | 0.00 | 0.00 |
| ATOM | 3318 | HB2  | HIE | X | 219 | 25.668 | 35.507 | 37.729 | 0.00 | 0.00 |
| ATOM | 3319 | HB3  | HIE | X | 219 | 24.579 | 34.669 | 38.708 | 0.00 | 0.00 |
| ATOM | 3320 | CG   | HIE | X | 219 | 23.816 | 36.410 | 37.809 | 0.00 | 0.00 |
| ATOM | 3321 | ND1  | HIE | X | 219 | 23.886 | 37.269 | 36.711 | 0.00 | 0.00 |
| ATOM | 3322 | CE1  | HIE | X | 219 | 22.619 | 37.755 | 36.552 | 0.00 | 0.00 |
| ATOM | 3323 | HE1  | HIE | X | 219 | 22.265 | 38.384 | 35.749 | 0.00 | 0.00 |
| ATOM | 3324 | NE2  | HIE | X | 219 | 21.811 | 37.185 | 37.401 | 0.00 | 0.00 |
| ATOM | 3325 | HE2  | HIE | X | 219 | 20.812 | 37.325 | 37.339 | 0.00 | 0.00 |
| ATOM | 3326 | CD2  | HIE | X | 219 | 22.471 | 36.259 | 38.192 | 0.00 | 0.00 |
| ATOM | 3327 | HD2  | HIE | X | 219 | 22.124 | 35.831 | 39.121 | 0.00 | 0.00 |
| ATOM | 3328 | C    | HIE | X | 219 | 26.471 | 35.552 | 40.544 | 0.00 | 0.00 |
| ATOM | 3329 | O    | HIE | X | 219 | 26.056 | 34.936 | 41.562 | 0.00 | 0.00 |
| ATOM | 3330 | N    | ARG | X | 220 | 27.738 | 35.519 | 40.115 | 0.00 | 0.00 |
| ATOM | 3331 | H    | ARG | X | 220 | 27.962 | 36.071 | 39.299 | 0.00 | 0.00 |
| ATOM | 3332 | CA   | ARG | X | 220 | 28.807 | 34.588 | 40.594 | 0.00 | 0.00 |
| ATOM | 3333 | HA   | ARG | X | 220 | 28.587 | 34.161 | 41.573 | 0.00 | 0.00 |
| ATOM | 3334 | CB   | ARG | X | 220 | 28.929 | 33.531 | 39.476 | 0.00 | 0.00 |
| ATOM | 3335 | HB2  | ARG | X | 220 | 28.897 | 33.954 | 38.472 | 0.00 | 0.00 |
| ATOM | 3336 | HB3  | ARG | X | 220 | 29.888 | 33.021 | 39.392 | 0.00 | 0.00 |
| ATOM | 3337 | CG   | ARG | X | 220 | 27.819 | 32.479 | 39.570 | 0.00 | 0.00 |
| ATOM | 3338 | HG2  | ARG | X | 220 | 27.990 | 31.783 | 40.391 | 0.00 | 0.00 |
| ATOM | 3339 | HG3  | ARG | X | 220 | 26.908 | 33.001 | 39.865 | 0.00 | 0.00 |
| ATOM | 3340 | CD   | ARG | X | 220 | 27.499 | 31.729 | 38.295 | 0.00 | 0.00 |
| ATOM | 3341 | HD2  | ARG | X | 220 | 27.469 | 32.522 | 37.547 | 0.00 | 0.00 |
| ATOM | 3342 | HD3  | ARG | X | 220 | 28.307 | 31.033 | 38.070 | 0.00 | 0.00 |
| ATOM | 3343 | NE   | ARG | X | 220 | 26.290 | 30.912 | 38.415 | 0.00 | 0.00 |
| ATOM | 3344 | HE   | ARG | X | 220 | 26.246 | 30.161 | 39.090 | 0.00 | 0.00 |
| ATOM | 3345 | CZ   | ARG | X | 220 | 25.215 | 30.922 | 37.631 | 0.00 | 0.00 |
| ATOM | 3346 | NH1  | ARG | X | 220 | 25.157 | 31.607 | 36.521 | 0.00 | 0.00 |
| ATOM | 3347 | HH11 | ARG | X | 220 | 26.008 | 32.064 | 36.224 | 0.00 | 0.00 |
| ATOM | 3348 | HH12 | ARG | X | 220 | 24.311 | 31.666 | 35.972 | 0.00 | 0.00 |
| ATOM | 3349 | NH2  | ARG | X | 220 | 24.152 | 30.281 | 38.022 | 0.00 | 0.00 |
| ATOM | 3350 | HH21 | ARG | X | 220 | 24.051 | 29.927 | 38.962 | 0.00 | 0.00 |
| ATOM | 3351 | HH22 | ARG | X | 220 | 23.289 | 30.279 | 37.496 | 0.00 | 0.00 |
| ATOM | 3352 | C    | ARG | X | 220 | 30.214 | 35.292 | 40.720 | 0.00 | 0.00 |
| ATOM | 3353 | O    | ARG | X | 220 | 30.440 | 36.217 | 39.949 | 0.00 | 0.00 |
| ATOM | 3354 | N    | ALA | X | 221 | 31.101 | 34.720 | 41.525 | 0.00 | 0.00 |
| ATOM | 3355 | H    | ALA | X | 221 | 30.810 | 33.930 | 42.083 | 0.00 | 0.00 |
| ATOM | 3356 | CA   | ALA | X | 221 | 32.419 | 35.235 | 41.734 | 0.00 | 0.00 |
| ATOM | 3357 | HA   | ALA | X | 221 | 32.567 | 36.060 | 41.037 | 0.00 | 0.00 |
| ATOM | 3358 | CB   | ALA | X | 221 | 32.480 | 35.735 | 43.242 | 0.00 | 0.00 |
| ATOM | 3359 | HB1  | ALA | X | 221 | 32.535 | 34.896 | 43.936 | 0.00 | 0.00 |
| ATOM | 3360 | HB2  | ALA | X | 221 | 31.586 | 36.272 | 43.561 | 0.00 | 0.00 |
| ATOM | 3361 | HB3  | ALA | X | 221 | 33.301 | 36.445 | 43.350 | 0.00 | 0.00 |
| ATOM | 3362 | C    | ALA | X | 221 | 33.495 | 34.203 | 41.486 | 0.00 | 0.00 |
| ATOM | 3363 | O    | ALA | X | 221 | 33.402 | 33.082 | 41.888 | 0.00 | 0.00 |
| ATOM | 3364 | N    | VAL | X | 222 | 34.559 | 34.630 | 40.845 | 0.00 | 0.00 |
| ATOM | 3365 | H    | VAL | X | 222 | 34.646 | 35.495 | 40.331 | 0.00 | 0.00 |
| ATOM | 3366 | CA   | VAL | X | 222 | 35.811 | 33.814 | 40.644 | 0.00 | 0.00 |
| ATOM | 3367 | HA   | VAL | X | 222 | 35.758 | 32.906 | 41.246 | 0.00 | 0.00 |
| ATOM | 3368 | CB   | VAL | X | 222 | 36.076 | 33.483 | 39.172 | 0.00 | 0.00 |

|      |      |      |     |   |     |        |        |        |      |      |
|------|------|------|-----|---|-----|--------|--------|--------|------|------|
| ATOM | 3369 | HB   | VAL | X | 222 | 36.031 | 34.472 | 38.716 | 0.00 | 0.00 |
| ATOM | 3370 | CG1  | VAL | X | 222 | 37.456 | 32.910 | 38.937 | 0.00 | 0.00 |
| ATOM | 3371 | HG11 | VAL | X | 222 | 38.226 | 33.680 | 38.896 | 0.00 | 0.00 |
| ATOM | 3372 | HG12 | VAL | X | 222 | 37.617 | 32.181 | 39.731 | 0.00 | 0.00 |
| ATOM | 3373 | HG13 | VAL | X | 222 | 37.633 | 32.402 | 37.989 | 0.00 | 0.00 |
| ATOM | 3374 | CG2  | VAL | X | 222 | 34.923 | 32.620 | 38.554 | 0.00 | 0.00 |
| ATOM | 3375 | HG21 | VAL | X | 222 | 34.009 | 33.132 | 38.855 | 0.00 | 0.00 |
| ATOM | 3376 | HG22 | VAL | X | 222 | 34.977 | 31.670 | 39.085 | 0.00 | 0.00 |
| ATOM | 3377 | HG23 | VAL | X | 222 | 34.945 | 32.457 | 37.477 | 0.00 | 0.00 |
| ATOM | 3378 | C    | VAL | X | 222 | 37.030 | 34.721 | 41.190 | 0.00 | 0.00 |
| ATOM | 3379 | O    | VAL | X | 222 | 37.263 | 35.774 | 40.680 | 0.00 | 0.00 |
| ATOM | 3380 | N    | LEU | X | 223 | 37.716 | 34.218 | 42.213 | 0.00 | 0.00 |
| ATOM | 3381 | H    | LEU | X | 223 | 37.528 | 33.312 | 42.617 | 0.00 | 0.00 |
| ATOM | 3382 | CA   | LEU | X | 223 | 38.786 | 34.732 | 42.970 | 0.00 | 0.00 |
| ATOM | 3383 | HA   | LEU | X | 223 | 39.057 | 35.707 | 42.565 | 0.00 | 0.00 |
| ATOM | 3384 | CB   | LEU | X | 223 | 38.536 | 34.846 | 44.436 | 0.00 | 0.00 |
| ATOM | 3385 | HB2  | LEU | X | 223 | 38.125 | 33.873 | 44.705 | 0.00 | 0.00 |
| ATOM | 3386 | HB3  | LEU | X | 223 | 39.443 | 34.836 | 45.041 | 0.00 | 0.00 |
| ATOM | 3387 | CG   | LEU | X | 223 | 37.489 | 35.871 | 45.012 | 0.00 | 0.00 |
| ATOM | 3388 | HG   | LEU | X | 223 | 37.747 | 36.829 | 44.560 | 0.00 | 0.00 |
| ATOM | 3389 | CD1  | LEU | X | 223 | 36.061 | 35.614 | 44.711 | 0.00 | 0.00 |
| ATOM | 3390 | HD11 | LEU | X | 223 | 35.970 | 35.727 | 43.631 | 0.00 | 0.00 |
| ATOM | 3391 | HD12 | LEU | X | 223 | 35.408 | 36.398 | 45.095 | 0.00 | 0.00 |
| ATOM | 3392 | HD13 | LEU | X | 223 | 35.761 | 34.649 | 45.120 | 0.00 | 0.00 |
| ATOM | 3393 | CD2  | LEU | X | 223 | 37.718 | 36.123 | 46.545 | 0.00 | 0.00 |
| ATOM | 3394 | HD21 | LEU | X | 223 | 36.892 | 36.710 | 46.946 | 0.00 | 0.00 |
| ATOM | 3395 | HD22 | LEU | X | 223 | 37.606 | 35.190 | 47.096 | 0.00 | 0.00 |
| ATOM | 3396 | HD23 | LEU | X | 223 | 38.647 | 36.612 | 46.838 | 0.00 | 0.00 |
| ATOM | 3397 | C    | LEU | X | 223 | 40.090 | 33.850 | 42.864 | 0.00 | 0.00 |
| ATOM | 3398 | O    | LEU | X | 223 | 39.954 | 32.613 | 42.977 | 0.00 | 0.00 |
| ATOM | 3399 | N    | GLN | X | 224 | 41.300 | 34.392 | 42.618 | 0.00 | 0.00 |
| ATOM | 3400 | H    | GLN | X | 224 | 41.342 | 35.372 | 42.379 | 0.00 | 0.00 |
| ATOM | 3401 | CA   | GLN | X | 224 | 42.456 | 33.533 | 42.354 | 0.00 | 0.00 |
| ATOM | 3402 | HA   | GLN | X | 224 | 42.418 | 32.600 | 42.915 | 0.00 | 0.00 |
| ATOM | 3403 | CB   | GLN | X | 224 | 42.593 | 33.278 | 40.848 | 0.00 | 0.00 |
| ATOM | 3404 | HB2  | GLN | X | 224 | 42.550 | 34.243 | 40.343 | 0.00 | 0.00 |
| ATOM | 3405 | HB3  | GLN | X | 224 | 43.604 | 32.931 | 40.635 | 0.00 | 0.00 |
| ATOM | 3406 | CG   | GLN | X | 224 | 41.483 | 32.464 | 40.280 | 0.00 | 0.00 |
| ATOM | 3407 | HG2  | GLN | X | 224 | 41.467 | 31.497 | 40.782 | 0.00 | 0.00 |
| ATOM | 3408 | HG3  | GLN | X | 224 | 40.500 | 32.931 | 40.337 | 0.00 | 0.00 |
| ATOM | 3409 | CD   | GLN | X | 224 | 41.748 | 32.170 | 38.791 | 0.00 | 0.00 |
| ATOM | 3410 | OE1  | GLN | X | 224 | 40.872 | 32.235 | 37.918 | 0.00 | 0.00 |
| ATOM | 3411 | NE2  | GLN | X | 224 | 42.882 | 31.670 | 38.457 | 0.00 | 0.00 |
| ATOM | 3412 | HE21 | GLN | X | 224 | 42.912 | 31.371 | 37.492 | 0.00 | 0.00 |
| ATOM | 3413 | HE22 | GLN | X | 224 | 43.629 | 31.533 | 39.123 | 0.00 | 0.00 |
| ATOM | 3414 | C    | GLN | X | 224 | 43.669 | 34.286 | 42.921 | 0.00 | 0.00 |
| ATOM | 3415 | O    | GLN | X | 224 | 43.991 | 35.404 | 42.434 | 0.00 | 0.00 |
| ATOM | 3416 | N    | SER | X | 225 | 44.320 | 33.677 | 43.915 | 0.00 | 0.00 |
| ATOM | 3417 | H    | SER | X | 225 | 44.138 | 32.698 | 44.087 | 0.00 | 0.00 |
| ATOM | 3418 | CA   | SER | X | 225 | 45.577 | 34.251 | 44.492 | 0.00 | 0.00 |
| ATOM | 3419 | HA   | SER | X | 225 | 45.915 | 33.539 | 45.245 | 0.00 | 0.00 |
| ATOM | 3420 | CB   | SER | X | 225 | 46.662 | 34.431 | 43.400 | 0.00 | 0.00 |
| ATOM | 3421 | HB2  | SER | X | 225 | 46.374 | 33.795 | 42.563 | 0.00 | 0.00 |
| ATOM | 3422 | HB3  | SER | X | 225 | 46.628 | 35.420 | 42.942 | 0.00 | 0.00 |
| ATOM | 3423 | OG   | SER | X | 225 | 47.934 | 34.133 | 43.779 | 0.00 | 0.00 |
| ATOM | 3424 | HG   | SER | X | 225 | 48.010 | 33.305 | 44.258 | 0.00 | 0.00 |
| ATOM | 3425 | C    | SER | X | 225 | 45.282 | 35.507 | 45.307 | 0.00 | 0.00 |
| ATOM | 3426 | O    | SER | X | 225 | 46.154 | 36.256 | 45.712 | 0.00 | 0.00 |
| ATOM | 3427 | N    | GLY | X | 226 | 44.004 | 35.862 | 45.476 | 0.00 | 0.00 |
| ATOM | 3428 | H    | GLY | X | 226 | 43.245 | 35.387 | 45.008 | 0.00 | 0.00 |
| ATOM | 3429 | CA   | GLY | X | 226 | 43.730 | 36.777 | 46.551 | 0.00 | 0.00 |
| ATOM | 3430 | HA2  | GLY | X | 226 | 44.430 | 36.600 | 47.368 | 0.00 | 0.00 |
| ATOM | 3431 | HA3  | GLY | X | 226 | 43.897 | 37.776 | 46.149 | 0.00 | 0.00 |
| ATOM | 3432 | C    | GLY | X | 226 | 42.329 | 36.822 | 47.231 | 0.00 | 0.00 |
| ATOM | 3433 | O    | GLY | X | 226 | 41.413 | 36.247 | 46.686 | 0.00 | 0.00 |
| ATOM | 3434 | N    | ALA | X | 227 | 42.123 | 37.547 | 48.290 | 0.00 | 0.00 |
| ATOM | 3435 | H    | ALA | X | 227 | 42.879 | 38.176 | 48.519 | 0.00 | 0.00 |

|      |      |      |     |   |     |        |        |        |      |      |
|------|------|------|-----|---|-----|--------|--------|--------|------|------|
| ATOM | 3436 | CA   | ALA | X | 227 | 40.936 | 37.492 | 49.138 | 0.00 | 0.00 |
| ATOM | 3437 | HA   | ALA | X | 227 | 40.011 | 37.535 | 48.564 | 0.00 | 0.00 |
| ATOM | 3438 | CB   | ALA | X | 227 | 41.006 | 36.140 | 49.855 | 0.00 | 0.00 |
| ATOM | 3439 | HB1  | ALA | X | 227 | 41.943 | 36.145 | 50.411 | 0.00 | 0.00 |
| ATOM | 3440 | HB2  | ALA | X | 227 | 40.925 | 35.278 | 49.192 | 0.00 | 0.00 |
| ATOM | 3441 | HB3  | ALA | X | 227 | 40.241 | 36.022 | 50.623 | 0.00 | 0.00 |
| ATOM | 3442 | C    | ALA | X | 227 | 40.826 | 38.657 | 50.104 | 0.00 | 0.00 |
| ATOM | 3443 | O    | ALA | X | 227 | 41.911 | 39.091 | 50.515 | 0.00 | 0.00 |
| ATOM | 3444 | N    | PRO | X | 228 | 39.599 | 39.176 | 50.380 | 0.00 | 0.00 |
| ATOM | 3445 | CD   | PRO | X | 228 | 38.308 | 38.412 | 50.315 | 0.00 | 0.00 |
| ATOM | 3446 | HD2  | PRO | X | 228 | 38.419 | 37.546 | 50.967 | 0.00 | 0.00 |
| ATOM | 3447 | HD3  | PRO | X | 228 | 38.065 | 38.149 | 49.286 | 0.00 | 0.00 |
| ATOM | 3448 | CG   | PRO | X | 228 | 37.178 | 39.305 | 50.849 | 0.00 | 0.00 |
| ATOM | 3449 | HG2  | PRO | X | 228 | 36.691 | 38.957 | 51.760 | 0.00 | 0.00 |
| ATOM | 3450 | HG3  | PRO | X | 228 | 36.421 | 39.482 | 50.085 | 0.00 | 0.00 |
| ATOM | 3451 | CB   | PRO | X | 228 | 37.896 | 40.664 | 51.022 | 0.00 | 0.00 |
| ATOM | 3452 | HB2  | PRO | X | 228 | 37.469 | 41.196 | 51.872 | 0.00 | 0.00 |
| ATOM | 3453 | HB3  | PRO | X | 228 | 37.687 | 41.325 | 50.181 | 0.00 | 0.00 |
| ATOM | 3454 | CA   | PRO | X | 228 | 39.413 | 40.404 | 51.208 | 0.00 | 0.00 |
| ATOM | 3455 | HA   | PRO | X | 228 | 40.023 | 41.151 | 50.700 | 0.00 | 0.00 |
| ATOM | 3456 | C    | PRO | X | 228 | 39.951 | 40.263 | 52.612 | 0.00 | 0.00 |
| ATOM | 3457 | O    | PRO | X | 228 | 40.420 | 41.198 | 53.263 | 0.00 | 0.00 |
| ATOM | 3458 | N    | ASN | X | 229 | 39.814 | 39.086 | 53.226 | 0.00 | 0.00 |
| ATOM | 3459 | H    | ASN | X | 229 | 39.608 | 38.396 | 52.519 | 0.00 | 0.00 |
| ATOM | 3460 | CA   | ASN | X | 229 | 40.111 | 38.707 | 54.588 | 0.00 | 0.00 |
| ATOM | 3461 | HA   | ASN | X | 229 | 39.765 | 39.485 | 55.269 | 0.00 | 0.00 |
| ATOM | 3462 | CB   | ASN | X | 229 | 39.222 | 37.518 | 54.900 | 0.00 | 0.00 |
| ATOM | 3463 | HB2  | ASN | X | 229 | 39.381 | 37.198 | 55.930 | 0.00 | 0.00 |
| ATOM | 3464 | HB3  | ASN | X | 229 | 38.165 | 37.754 | 54.774 | 0.00 | 0.00 |
| ATOM | 3465 | CG   | ASN | X | 229 | 39.617 | 36.285 | 54.027 | 0.00 | 0.00 |
| ATOM | 3466 | OD1  | ASN | X | 229 | 39.572 | 36.348 | 52.811 | 0.00 | 0.00 |
| ATOM | 3467 | ND2  | ASN | X | 229 | 39.972 | 35.129 | 54.694 | 0.00 | 0.00 |
| ATOM | 3468 | HD21 | ASN | X | 229 | 39.926 | 34.276 | 54.155 | 0.00 | 0.00 |
| ATOM | 3469 | HD22 | ASN | X | 229 | 40.137 | 35.075 | 55.689 | 0.00 | 0.00 |
| ATOM | 3470 | C    | ASN | X | 229 | 41.611 | 38.428 | 54.851 | 0.00 | 0.00 |
| ATOM | 3471 | O    | ASN | X | 229 | 41.971 | 38.079 | 56.005 | 0.00 | 0.00 |
| ATOM | 3472 | N    | GLY | X | 230 | 42.452 | 38.638 | 53.798 | 0.00 | 0.00 |
| ATOM | 3473 | H    | GLY | X | 230 | 42.030 | 38.955 | 52.937 | 0.00 | 0.00 |
| ATOM | 3474 | CA   | GLY | X | 230 | 43.904 | 38.487 | 53.952 | 0.00 | 0.00 |
| ATOM | 3475 | HA2  | GLY | X | 230 | 44.188 | 37.729 | 54.682 | 0.00 | 0.00 |
| ATOM | 3476 | HA3  | GLY | X | 230 | 44.393 | 38.121 | 53.049 | 0.00 | 0.00 |
| ATOM | 3477 | C    | GLY | X | 230 | 44.581 | 39.846 | 54.337 | 0.00 | 0.00 |
| ATOM | 3478 | O    | GLY | X | 230 | 44.032 | 40.869 | 54.017 | 0.00 | 0.00 |
| ATOM | 3479 | N    | PRO | X | 231 | 45.699 | 39.726 | 55.053 | 0.00 | 0.00 |
| ATOM | 3480 | CD   | PRO | X | 231 | 46.653 | 38.561 | 55.055 | 0.00 | 0.00 |
| ATOM | 3481 | HD2  | PRO | X | 231 | 46.793 | 38.274 | 54.013 | 0.00 | 0.00 |
| ATOM | 3482 | HD3  | PRO | X | 231 | 46.324 | 37.736 | 55.688 | 0.00 | 0.00 |
| ATOM | 3483 | CG   | PRO | X | 231 | 47.926 | 39.094 | 55.726 | 0.00 | 0.00 |
| ATOM | 3484 | HG2  | PRO | X | 231 | 48.530 | 39.614 | 54.982 | 0.00 | 0.00 |
| ATOM | 3485 | HG3  | PRO | X | 231 | 48.504 | 38.316 | 56.224 | 0.00 | 0.00 |
| ATOM | 3486 | CB   | PRO | X | 231 | 47.390 | 40.173 | 56.723 | 0.00 | 0.00 |
| ATOM | 3487 | HB2  | PRO | X | 231 | 48.119 | 40.940 | 56.983 | 0.00 | 0.00 |
| ATOM | 3488 | HB3  | PRO | X | 231 | 46.894 | 39.684 | 57.561 | 0.00 | 0.00 |
| ATOM | 3489 | CA   | PRO | X | 231 | 46.265 | 40.869 | 55.858 | 0.00 | 0.00 |
| ATOM | 3490 | HA   | PRO | X | 231 | 45.556 | 41.352 | 56.530 | 0.00 | 0.00 |
| ATOM | 3491 | C    | PRO | X | 231 | 46.857 | 41.985 | 54.971 | 0.00 | 0.00 |
| ATOM | 3492 | O    | PRO | X | 231 | 47.208 | 42.995 | 55.483 | 0.00 | 0.00 |
| ATOM | 3493 | N    | TRP | X | 232 | 46.828 | 41.925 | 53.685 | 0.00 | 0.00 |
| ATOM | 3494 | H    | TRP | X | 232 | 46.370 | 41.178 | 53.184 | 0.00 | 0.00 |
| ATOM | 3495 | CA   | TRP | X | 232 | 47.287 | 43.065 | 52.749 | 0.00 | 0.00 |
| ATOM | 3496 | HA   | TRP | X | 232 | 47.994 | 43.755 | 53.209 | 0.00 | 0.00 |
| ATOM | 3497 | CB   | TRP | X | 232 | 48.081 | 42.387 | 51.584 | 0.00 | 0.00 |
| ATOM | 3498 | HB2  | TRP | X | 232 | 48.280 | 43.077 | 50.764 | 0.00 | 0.00 |
| ATOM | 3499 | HB3  | TRP | X | 232 | 49.027 | 42.099 | 52.043 | 0.00 | 0.00 |
| ATOM | 3500 | CG   | TRP | X | 232 | 47.599 | 41.142 | 50.893 | 0.00 | 0.00 |
| ATOM | 3501 | CD1  | TRP | X | 232 | 47.773 | 39.884 | 51.361 | 0.00 | 0.00 |
| ATOM | 3502 | HD1  | TRP | X | 232 | 48.223 | 39.583 | 52.295 | 0.00 | 0.00 |

|      |      |      |     |   |     |        |        |        |      |      |
|------|------|------|-----|---|-----|--------|--------|--------|------|------|
| ATOM | 3503 | NE1  | TRP | X | 232 | 47.060 | 39.022 | 50.554 | 0.00 | 0.00 |
| ATOM | 3504 | HE1  | TRP | X | 232 | 47.024 | 38.017 | 50.645 | 0.00 | 0.00 |
| ATOM | 3505 | CE2  | TRP | X | 232 | 46.365 | 39.702 | 49.577 | 0.00 | 0.00 |
| ATOM | 3506 | CZ2  | TRP | X | 232 | 45.452 | 39.257 | 48.580 | 0.00 | 0.00 |
| ATOM | 3507 | HZ2  | TRP | X | 232 | 45.239 | 38.204 | 48.474 | 0.00 | 0.00 |
| ATOM | 3508 | CH2  | TRP | X | 232 | 45.047 | 40.172 | 47.680 | 0.00 | 0.00 |
| ATOM | 3509 | HH2  | TRP | X | 232 | 44.470 | 39.868 | 46.819 | 0.00 | 0.00 |
| ATOM | 3510 | CZ3  | TRP | X | 232 | 45.324 | 41.535 | 47.852 | 0.00 | 0.00 |
| ATOM | 3511 | HZ3  | TRP | X | 232 | 44.900 | 42.216 | 47.129 | 0.00 | 0.00 |
| ATOM | 3512 | CE3  | TRP | X | 232 | 46.190 | 42.030 | 48.823 | 0.00 | 0.00 |
| ATOM | 3513 | HE3  | TRP | X | 232 | 46.625 | 43.018 | 48.840 | 0.00 | 0.00 |
| ATOM | 3514 | CD2  | TRP | X | 232 | 46.749 | 41.054 | 49.690 | 0.00 | 0.00 |
| ATOM | 3515 | C    | TRP | X | 232 | 46.032 | 43.779 | 52.165 | 0.00 | 0.00 |
| ATOM | 3516 | O    | TRP | X | 232 | 46.064 | 44.985 | 51.744 | 0.00 | 0.00 |
| ATOM | 3517 | N    | ALA | X | 233 | 44.843 | 43.226 | 52.214 | 0.00 | 0.00 |
| ATOM | 3518 | H    | ALA | X | 233 | 44.790 | 42.320 | 52.658 | 0.00 | 0.00 |
| ATOM | 3519 | CA   | ALA | X | 233 | 43.685 | 43.714 | 51.456 | 0.00 | 0.00 |
| ATOM | 3520 | HA   | ALA | X | 233 | 44.061 | 43.933 | 50.457 | 0.00 | 0.00 |
| ATOM | 3521 | CB   | ALA | X | 233 | 42.742 | 42.492 | 51.245 | 0.00 | 0.00 |
| ATOM | 3522 | HB1  | ALA | X | 233 | 42.417 | 42.218 | 52.248 | 0.00 | 0.00 |
| ATOM | 3523 | HB2  | ALA | X | 233 | 43.316 | 41.733 | 50.713 | 0.00 | 0.00 |
| ATOM | 3524 | HB3  | ALA | X | 233 | 41.887 | 42.717 | 50.608 | 0.00 | 0.00 |
| ATOM | 3525 | C    | ALA | X | 233 | 43.016 | 44.935 | 52.106 | 0.00 | 0.00 |
| ATOM | 3526 | O    | ALA | X | 233 | 42.270 | 45.566 | 51.426 | 0.00 | 0.00 |
| ATOM | 3527 | N    | THR | X | 234 | 43.396 | 45.475 | 53.339 | 0.00 | 0.00 |
| ATOM | 3528 | H    | THR | X | 234 | 44.260 | 45.180 | 53.772 | 0.00 | 0.00 |
| ATOM | 3529 | CA   | THR | X | 234 | 42.842 | 46.641 | 53.964 | 0.00 | 0.00 |
| ATOM | 3530 | HA   | THR | X | 234 | 42.589 | 47.297 | 53.131 | 0.00 | 0.00 |
| ATOM | 3531 | CB   | THR | X | 234 | 41.530 | 46.438 | 54.853 | 0.00 | 0.00 |
| ATOM | 3532 | HB   | THR | X | 234 | 41.320 | 47.431 | 55.252 | 0.00 | 0.00 |
| ATOM | 3533 | CG2  | THR | X | 234 | 40.379 | 46.002 | 53.957 | 0.00 | 0.00 |
| ATOM | 3534 | HG21 | THR | X | 234 | 39.429 | 46.145 | 54.472 | 0.00 | 0.00 |
| ATOM | 3535 | HG22 | THR | X | 234 | 40.472 | 45.006 | 53.525 | 0.00 | 0.00 |
| ATOM | 3536 | HG23 | THR | X | 234 | 40.408 | 46.697 | 53.118 | 0.00 | 0.00 |
| ATOM | 3537 | OG1  | THR | X | 234 | 41.719 | 45.528 | 55.884 | 0.00 | 0.00 |
| ATOM | 3538 | HG1  | THR | X | 234 | 41.716 | 44.654 | 55.486 | 0.00 | 0.00 |
| ATOM | 3539 | C    | THR | X | 234 | 43.847 | 47.352 | 54.779 | 0.00 | 0.00 |
| ATOM | 3540 | O    | THR | X | 234 | 44.902 | 46.766 | 55.144 | 0.00 | 0.00 |
| ATOM | 3541 | N    | VAL | X | 235 | 43.638 | 48.637 | 55.027 | 0.00 | 0.00 |
| ATOM | 3542 | H    | VAL | X | 235 | 42.836 | 49.049 | 54.572 | 0.00 | 0.00 |
| ATOM | 3543 | CA   | VAL | X | 235 | 44.426 | 49.348 | 55.968 | 0.00 | 0.00 |
| ATOM | 3544 | HA   | VAL | X | 235 | 44.858 | 48.687 | 56.719 | 0.00 | 0.00 |
| ATOM | 3545 | CB   | VAL | X | 235 | 45.685 | 49.974 | 55.311 | 0.00 | 0.00 |
| ATOM | 3546 | HB   | VAL | X | 235 | 46.065 | 49.168 | 54.683 | 0.00 | 0.00 |
| ATOM | 3547 | CG1  | VAL | X | 235 | 45.239 | 51.147 | 54.388 | 0.00 | 0.00 |
| ATOM | 3548 | HG11 | VAL | X | 235 | 46.070 | 51.493 | 53.774 | 0.00 | 0.00 |
| ATOM | 3549 | HG12 | VAL | X | 235 | 44.283 | 50.994 | 53.887 | 0.00 | 0.00 |
| ATOM | 3550 | HG13 | VAL | X | 235 | 45.043 | 52.034 | 54.991 | 0.00 | 0.00 |
| ATOM | 3551 | CG2  | VAL | X | 235 | 46.783 | 50.513 | 56.217 | 0.00 | 0.00 |
| ATOM | 3552 | HG21 | VAL | X | 235 | 47.713 | 50.491 | 55.650 | 0.00 | 0.00 |
| ATOM | 3553 | HG22 | VAL | X | 235 | 46.955 | 49.863 | 57.074 | 0.00 | 0.00 |
| ATOM | 3554 | HG23 | VAL | X | 235 | 46.637 | 51.538 | 56.557 | 0.00 | 0.00 |
| ATOM | 3555 | C    | VAL | X | 235 | 43.520 | 50.398 | 56.669 | 0.00 | 0.00 |
| ATOM | 3556 | O    | VAL | X | 235 | 42.416 | 50.748 | 56.227 | 0.00 | 0.00 |
| ATOM | 3557 | N    | GLY | X | 236 | 44.086 | 50.904 | 57.766 | 0.00 | 0.00 |
| ATOM | 3558 | H    | GLY | X | 236 | 44.963 | 50.542 | 58.110 | 0.00 | 0.00 |
| ATOM | 3559 | CA   | GLY | X | 236 | 43.446 | 51.931 | 58.689 | 0.00 | 0.00 |
| ATOM | 3560 | HA2  | GLY | X | 236 | 42.386 | 51.694 | 58.790 | 0.00 | 0.00 |
| ATOM | 3561 | HA3  | GLY | X | 236 | 43.880 | 51.828 | 59.683 | 0.00 | 0.00 |
| ATOM | 3562 | C    | GLY | X | 236 | 43.581 | 53.373 | 58.259 | 0.00 | 0.00 |
| ATOM | 3563 | O    | GLY | X | 236 | 44.559 | 53.810 | 57.720 | 0.00 | 0.00 |
| ATOM | 3564 | N    | MET | X | 237 | 42.632 | 54.241 | 58.640 | 0.00 | 0.00 |
| ATOM | 3565 | H    | MET | X | 237 | 42.056 | 53.869 | 59.382 | 0.00 | 0.00 |
| ATOM | 3566 | CA   | MET | X | 237 | 42.521 | 55.646 | 58.360 | 0.00 | 0.00 |
| ATOM | 3567 | HA   | MET | X | 237 | 42.453 | 55.841 | 57.290 | 0.00 | 0.00 |
| ATOM | 3568 | CB   | MET | X | 237 | 41.192 | 56.143 | 58.938 | 0.00 | 0.00 |
| ATOM | 3569 | HB2  | MET | X | 237 | 40.378 | 55.591 | 58.470 | 0.00 | 0.00 |

|      |      |      |     |   |     |        |        |        |      |      |
|------|------|------|-----|---|-----|--------|--------|--------|------|------|
| ATOM | 3570 | HB3  | MET | X | 237 | 41.168 | 55.931 | 60.007 | 0.00 | 0.00 |
| ATOM | 3571 | CG   | MET | X | 237 | 40.847 | 57.628 | 58.884 | 0.00 | 0.00 |
| ATOM | 3572 | HG2  | MET | X | 237 | 39.958 | 57.848 | 59.474 | 0.00 | 0.00 |
| ATOM | 3573 | HG3  | MET | X | 237 | 41.698 | 58.108 | 59.368 | 0.00 | 0.00 |
| ATOM | 3574 | SD   | MET | X | 237 | 40.608 | 58.090 | 57.122 | 0.00 | 0.00 |
| ATOM | 3575 | CE   | MET | X | 237 | 38.866 | 57.686 | 56.855 | 0.00 | 0.00 |
| ATOM | 3576 | HE1  | MET | X | 237 | 38.813 | 57.262 | 55.852 | 0.00 | 0.00 |
| ATOM | 3577 | HE2  | MET | X | 237 | 38.625 | 56.920 | 57.591 | 0.00 | 0.00 |
| ATOM | 3578 | HE3  | MET | X | 237 | 38.181 | 58.530 | 56.933 | 0.00 | 0.00 |
| ATOM | 3579 | C    | MET | X | 237 | 43.714 | 56.450 | 58.804 | 0.00 | 0.00 |
| ATOM | 3580 | O    | MET | X | 237 | 44.221 | 57.276 | 58.005 | 0.00 | 0.00 |
| ATOM | 3581 | N    | GLY | X | 238 | 44.174 | 56.277 | 60.071 | 0.00 | 0.00 |
| ATOM | 3582 | H    | GLY | X | 238 | 43.811 | 55.572 | 60.696 | 0.00 | 0.00 |
| ATOM | 3583 | CA   | GLY | X | 238 | 45.314 | 57.030 | 60.576 | 0.00 | 0.00 |
| ATOM | 3584 | HA2  | GLY | X | 238 | 45.124 | 58.100 | 60.495 | 0.00 | 0.00 |
| ATOM | 3585 | HA3  | GLY | X | 238 | 45.348 | 56.709 | 61.617 | 0.00 | 0.00 |
| ATOM | 3586 | C    | GLY | X | 238 | 46.624 | 56.713 | 59.856 | 0.00 | 0.00 |
| ATOM | 3587 | O    | GLY | X | 238 | 47.428 | 57.630 | 59.598 | 0.00 | 0.00 |
| ATOM | 3588 | N    | GLU | X | 239 | 46.770 | 55.492 | 59.359 | 0.00 | 0.00 |
| ATOM | 3589 | H    | GLU | X | 239 | 46.067 | 54.767 | 59.367 | 0.00 | 0.00 |
| ATOM | 3590 | CA   | GLU | X | 239 | 47.899 | 55.157 | 58.548 | 0.00 | 0.00 |
| ATOM | 3591 | HA   | GLU | X | 239 | 48.808 | 55.458 | 59.069 | 0.00 | 0.00 |
| ATOM | 3592 | CB   | GLU | X | 239 | 47.991 | 53.620 | 58.461 | 0.00 | 0.00 |
| ATOM | 3593 | HB2  | GLU | X | 239 | 47.053 | 53.222 | 58.073 | 0.00 | 0.00 |
| ATOM | 3594 | HB3  | GLU | X | 239 | 48.625 | 53.348 | 57.617 | 0.00 | 0.00 |
| ATOM | 3595 | CG   | GLU | X | 239 | 48.436 | 52.808 | 59.724 | 0.00 | 0.00 |
| ATOM | 3596 | HG2  | GLU | X | 239 | 47.687 | 52.966 | 60.500 | 0.00 | 0.00 |
| ATOM | 3597 | HG3  | GLU | X | 239 | 48.387 | 51.742 | 59.503 | 0.00 | 0.00 |
| ATOM | 3598 | CD   | GLU | X | 239 | 49.872 | 53.239 | 60.153 | 0.00 | 0.00 |
| ATOM | 3599 | OE1  | GLU | X | 239 | 50.028 | 54.098 | 61.019 | 0.00 | 0.00 |
| ATOM | 3600 | OE2  | GLU | X | 239 | 50.848 | 52.724 | 59.594 | 0.00 | 0.00 |
| ATOM | 3601 | C    | GLU | X | 239 | 47.769 | 55.727 | 57.150 | 0.00 | 0.00 |
| ATOM | 3602 | O    | GLU | X | 239 | 48.751 | 56.094 | 56.607 | 0.00 | 0.00 |
| ATOM | 3603 | N    | ALA | X | 240 | 46.589 | 55.631 | 56.485 | 0.00 | 0.00 |
| ATOM | 3604 | H    | ALA | X | 240 | 45.748 | 55.315 | 56.947 | 0.00 | 0.00 |
| ATOM | 3605 | CA   | ALA | X | 240 | 46.375 | 56.337 | 55.206 | 0.00 | 0.00 |
| ATOM | 3606 | HA   | ALA | X | 240 | 47.047 | 55.892 | 54.471 | 0.00 | 0.00 |
| ATOM | 3607 | CB   | ALA | X | 240 | 44.982 | 56.134 | 54.751 | 0.00 | 0.00 |
| ATOM | 3608 | HB1  | ALA | X | 240 | 44.855 | 56.657 | 53.803 | 0.00 | 0.00 |
| ATOM | 3609 | HB2  | ALA | X | 240 | 44.181 | 56.445 | 55.421 | 0.00 | 0.00 |
| ATOM | 3610 | HB3  | ALA | X | 240 | 44.871 | 55.067 | 54.558 | 0.00 | 0.00 |
| ATOM | 3611 | C    | ALA | X | 240 | 46.768 | 57.837 | 55.402 | 0.00 | 0.00 |
| ATOM | 3612 | O    | ALA | X | 240 | 47.644 | 58.271 | 54.593 | 0.00 | 0.00 |
| ATOM | 3613 | N    | ARG | X | 241 | 46.138 | 58.591 | 56.292 | 0.00 | 0.00 |
| ATOM | 3614 | H    | ARG | X | 241 | 45.209 | 58.315 | 56.576 | 0.00 | 0.00 |
| ATOM | 3615 | CA   | ARG | X | 241 | 46.536 | 59.932 | 56.667 | 0.00 | 0.00 |
| ATOM | 3616 | HA   | ARG | X | 241 | 46.202 | 60.554 | 55.837 | 0.00 | 0.00 |
| ATOM | 3617 | CB   | ARG | X | 241 | 45.887 | 60.438 | 57.980 | 0.00 | 0.00 |
| ATOM | 3618 | HB2  | ARG | X | 241 | 44.922 | 59.988 | 58.210 | 0.00 | 0.00 |
| ATOM | 3619 | HB3  | ARG | X | 241 | 46.581 | 60.189 | 58.783 | 0.00 | 0.00 |
| ATOM | 3620 | CG   | ARG | X | 241 | 45.911 | 61.958 | 57.967 | 0.00 | 0.00 |
| ATOM | 3621 | HG2  | ARG | X | 241 | 46.836 | 62.436 | 57.645 | 0.00 | 0.00 |
| ATOM | 3622 | HG3  | ARG | X | 241 | 45.082 | 62.305 | 57.350 | 0.00 | 0.00 |
| ATOM | 3623 | CD   | ARG | X | 241 | 45.493 | 62.315 | 59.500 | 0.00 | 0.00 |
| ATOM | 3624 | HD2  | ARG | X | 241 | 44.724 | 61.675 | 59.932 | 0.00 | 0.00 |
| ATOM | 3625 | HD3  | ARG | X | 241 | 46.338 | 62.122 | 60.161 | 0.00 | 0.00 |
| ATOM | 3626 | NE   | ARG | X | 241 | 44.923 | 63.668 | 59.572 | 0.00 | 0.00 |
| ATOM | 3627 | HE   | ARG | X | 241 | 44.703 | 64.261 | 58.785 | 0.00 | 0.00 |
| ATOM | 3628 | CZ   | ARG | X | 241 | 44.623 | 64.165 | 60.756 | 0.00 | 0.00 |
| ATOM | 3629 | NH1  | ARG | X | 241 | 44.732 | 63.454 | 61.876 | 0.00 | 0.00 |
| ATOM | 3630 | HH11 | ARG | X | 241 | 45.117 | 62.521 | 61.919 | 0.00 | 0.00 |
| ATOM | 3631 | HH12 | ARG | X | 241 | 44.400 | 63.914 | 62.711 | 0.00 | 0.00 |
| ATOM | 3632 | NH2  | ARG | X | 241 | 44.206 | 65.361 | 60.916 | 0.00 | 0.00 |
| ATOM | 3633 | HH21 | ARG | X | 241 | 44.068 | 65.967 | 60.120 | 0.00 | 0.00 |
| ATOM | 3634 | HH22 | ARG | X | 241 | 43.854 | 65.615 | 61.827 | 0.00 | 0.00 |
| ATOM | 3635 | C    | ARG | X | 241 | 48.114 | 59.992 | 56.812 | 0.00 | 0.00 |
| ATOM | 3636 | O    | ARG | X | 241 | 48.636 | 60.923 | 56.260 | 0.00 | 0.00 |

|      |      |      |     |   |     |        |        |        |      |      |
|------|------|------|-----|---|-----|--------|--------|--------|------|------|
| ATOM | 3637 | N    | ARG | X | 242 | 48.816 | 58.972 | 57.485 | 0.00 | 0.00 |
| ATOM | 3638 | H    | ARG | X | 242 | 48.239 | 58.348 | 58.030 | 0.00 | 0.00 |
| ATOM | 3639 | CA   | ARG | X | 242 | 50.292 | 59.067 | 57.687 | 0.00 | 0.00 |
| ATOM | 3640 | HA   | ARG | X | 242 | 50.511 | 60.113 | 57.903 | 0.00 | 0.00 |
| ATOM | 3641 | CB   | ARG | X | 242 | 50.610 | 58.121 | 58.861 | 0.00 | 0.00 |
| ATOM | 3642 | HB2  | ARG | X | 242 | 50.121 | 58.625 | 59.695 | 0.00 | 0.00 |
| ATOM | 3643 | HB3  | ARG | X | 242 | 50.308 | 57.085 | 58.709 | 0.00 | 0.00 |
| ATOM | 3644 | CG   | ARG | X | 242 | 52.037 | 58.060 | 59.246 | 0.00 | 0.00 |
| ATOM | 3645 | HG2  | ARG | X | 242 | 52.514 | 57.479 | 58.456 | 0.00 | 0.00 |
| ATOM | 3646 | HG3  | ARG | X | 242 | 52.408 | 59.082 | 59.170 | 0.00 | 0.00 |
| ATOM | 3647 | CD   | ARG | X | 242 | 52.227 | 57.512 | 60.670 | 0.00 | 0.00 |
| ATOM | 3648 | HD2  | ARG | X | 242 | 53.167 | 57.889 | 61.074 | 0.00 | 0.00 |
| ATOM | 3649 | HD3  | ARG | X | 242 | 51.395 | 57.935 | 61.233 | 0.00 | 0.00 |
| ATOM | 3650 | NE   | ARG | X | 242 | 52.224 | 56.068 | 60.800 | 0.00 | 0.00 |
| ATOM | 3651 | HE   | ARG | X | 242 | 51.343 | 55.612 | 60.993 | 0.00 | 0.00 |
| ATOM | 3652 | CZ   | ARG | X | 242 | 53.301 | 55.256 | 60.590 | 0.00 | 0.00 |
| ATOM | 3653 | NH1  | ARG | X | 242 | 54.528 | 55.674 | 60.279 | 0.00 | 0.00 |
| ATOM | 3654 | HH11 | ARG | X | 242 | 54.779 | 56.643 | 60.144 | 0.00 | 0.00 |
| ATOM | 3655 | HH12 | ARG | X | 242 | 55.256 | 55.010 | 60.060 | 0.00 | 0.00 |
| ATOM | 3656 | NH2  | ARG | X | 242 | 53.220 | 53.976 | 60.670 | 0.00 | 0.00 |
| ATOM | 3657 | HH21 | ARG | X | 242 | 52.283 | 53.602 | 60.615 | 0.00 | 0.00 |
| ATOM | 3658 | HH22 | ARG | X | 242 | 53.985 | 53.396 | 60.358 | 0.00 | 0.00 |
| ATOM | 3659 | C    | ARG | X | 242 | 51.033 | 58.727 | 56.485 | 0.00 | 0.00 |
| ATOM | 3660 | O    | ARG | X | 242 | 52.061 | 59.399 | 56.211 | 0.00 | 0.00 |
| ATOM | 3661 | N    | ARG | X | 243 | 50.623 | 57.912 | 55.514 | 0.00 | 0.00 |
| ATOM | 3662 | H    | ARG | X | 243 | 49.919 | 57.268 | 55.845 | 0.00 | 0.00 |
| ATOM | 3663 | CA   | ARG | X | 243 | 51.335 | 57.737 | 54.239 | 0.00 | 0.00 |
| ATOM | 3664 | HA   | ARG | X | 243 | 52.387 | 57.768 | 54.522 | 0.00 | 0.00 |
| ATOM | 3665 | CB   | ARG | X | 243 | 51.008 | 56.442 | 53.606 | 0.00 | 0.00 |
| ATOM | 3666 | HB2  | ARG | X | 243 | 49.924 | 56.426 | 53.497 | 0.00 | 0.00 |
| ATOM | 3667 | HB3  | ARG | X | 243 | 51.569 | 56.464 | 52.672 | 0.00 | 0.00 |
| ATOM | 3668 | CG   | ARG | X | 243 | 51.555 | 55.283 | 54.462 | 0.00 | 0.00 |
| ATOM | 3669 | HG2  | ARG | X | 243 | 52.600 | 55.551 | 54.618 | 0.00 | 0.00 |
| ATOM | 3670 | HG3  | ARG | X | 243 | 51.048 | 55.216 | 55.425 | 0.00 | 0.00 |
| ATOM | 3671 | CD   | ARG | X | 243 | 51.521 | 53.957 | 53.680 | 0.00 | 0.00 |
| ATOM | 3672 | HD2  | ARG | X | 243 | 50.774 | 53.985 | 52.887 | 0.00 | 0.00 |
| ATOM | 3673 | HD3  | ARG | X | 243 | 52.415 | 53.705 | 53.110 | 0.00 | 0.00 |
| ATOM | 3674 | NE   | ARG | X | 243 | 51.365 | 52.884 | 54.637 | 0.00 | 0.00 |
| ATOM | 3675 | HE   | ARG | X | 243 | 51.310 | 53.055 | 55.631 | 0.00 | 0.00 |
| ATOM | 3676 | CZ   | ARG | X | 243 | 50.926 | 51.642 | 54.295 | 0.00 | 0.00 |
| ATOM | 3677 | NH1  | ARG | X | 243 | 50.766 | 51.294 | 53.067 | 0.00 | 0.00 |
| ATOM | 3678 | HH11 | ARG | X | 243 | 50.893 | 51.909 | 52.276 | 0.00 | 0.00 |
| ATOM | 3679 | HH12 | ARG | X | 243 | 50.577 | 50.335 | 52.816 | 0.00 | 0.00 |
| ATOM | 3680 | NH2  | ARG | X | 243 | 50.808 | 50.734 | 55.282 | 0.00 | 0.00 |
| ATOM | 3681 | HH21 | ARG | X | 243 | 51.222 | 51.000 | 56.165 | 0.00 | 0.00 |
| ATOM | 3682 | HH22 | ARG | X | 243 | 50.614 | 49.758 | 55.108 | 0.00 | 0.00 |
| ATOM | 3683 | C    | ARG | X | 243 | 50.974 | 58.833 | 53.299 | 0.00 | 0.00 |
| ATOM | 3684 | O    | ARG | X | 243 | 51.839 | 59.237 | 52.532 | 0.00 | 0.00 |
| ATOM | 3685 | N    | ALA | X | 244 | 49.803 | 59.468 | 53.434 | 0.00 | 0.00 |
| ATOM | 3686 | H    | ALA | X | 244 | 49.040 | 59.147 | 54.013 | 0.00 | 0.00 |
| ATOM | 3687 | CA   | ALA | X | 244 | 49.671 | 60.800 | 52.776 | 0.00 | 0.00 |
| ATOM | 3688 | HA   | ALA | X | 244 | 49.721 | 60.665 | 51.695 | 0.00 | 0.00 |
| ATOM | 3689 | CB   | ALA | X | 244 | 48.233 | 61.389 | 53.003 | 0.00 | 0.00 |
| ATOM | 3690 | HB1  | ALA | X | 244 | 47.371 | 60.840 | 52.624 | 0.00 | 0.00 |
| ATOM | 3691 | HB2  | ALA | X | 244 | 48.234 | 62.415 | 52.635 | 0.00 | 0.00 |
| ATOM | 3692 | HB3  | ALA | X | 244 | 48.041 | 61.538 | 54.065 | 0.00 | 0.00 |
| ATOM | 3693 | C    | ALA | X | 244 | 50.726 | 61.821 | 53.257 | 0.00 | 0.00 |
| ATOM | 3694 | O    | ALA | X | 244 | 51.427 | 62.440 | 52.436 | 0.00 | 0.00 |
| ATOM | 3695 | N    | THR | X | 245 | 50.943 | 61.879 | 54.554 | 0.00 | 0.00 |
| ATOM | 3696 | H    | THR | X | 245 | 50.397 | 61.330 | 55.203 | 0.00 | 0.00 |
| ATOM | 3697 | CA   | THR | X | 245 | 52.053 | 62.708 | 55.056 | 0.00 | 0.00 |
| ATOM | 3698 | HA   | THR | X | 245 | 51.863 | 63.699 | 54.644 | 0.00 | 0.00 |
| ATOM | 3699 | CB   | THR | X | 245 | 52.004 | 62.725 | 56.616 | 0.00 | 0.00 |
| ATOM | 3700 | HB   | THR | X | 245 | 52.165 | 61.748 | 57.072 | 0.00 | 0.00 |
| ATOM | 3701 | CG2  | THR | X | 245 | 53.111 | 63.654 | 57.092 | 0.00 | 0.00 |
| ATOM | 3702 | HG21 | THR | X | 245 | 54.145 | 63.460 | 56.805 | 0.00 | 0.00 |
| ATOM | 3703 | HG22 | THR | X | 245 | 53.038 | 63.673 | 58.179 | 0.00 | 0.00 |



|      |      |      |     |   |     |        |        |        |      |      |
|------|------|------|-----|---|-----|--------|--------|--------|------|------|
| ATOM | 3704 | HG23 | THR | X | 245 | 52.903 | 64.669 | 56.753 | 0.00 | 0.00 |
| ATOM | 3705 | OG1  | THR | X | 245 | 50.839 | 63.336 | 57.090 | 0.00 | 0.00 |
| ATOM | 3706 | HG1  | THR | X | 245 | 50.269 | 62.652 | 57.449 | 0.00 | 0.00 |
| ATOM | 3707 | C    | THR | X | 245 | 53.411 | 62.319 | 54.528 | 0.00 | 0.00 |
| ATOM | 3708 | O    | THR | X | 245 | 54.031 | 63.199 | 53.993 | 0.00 | 0.00 |
| ATOM | 3709 | N    | GLN | X | 246 | 53.743 | 61.051 | 54.546 | 0.00 | 0.00 |
| ATOM | 3710 | H    | GLN | X | 246 | 53.154 | 60.414 | 55.063 | 0.00 | 0.00 |
| ATOM | 3711 | CA   | GLN | X | 246 | 54.992 | 60.574 | 54.018 | 0.00 | 0.00 |
| ATOM | 3712 | HA   | GLN | X | 246 | 55.803 | 60.864 | 54.686 | 0.00 | 0.00 |
| ATOM | 3713 | CB   | GLN | X | 246 | 55.005 | 59.050 | 54.098 | 0.00 | 0.00 |
| ATOM | 3714 | HB2  | GLN | X | 246 | 54.092 | 58.615 | 53.688 | 0.00 | 0.00 |
| ATOM | 3715 | HB3  | GLN | X | 246 | 55.816 | 58.677 | 53.473 | 0.00 | 0.00 |
| ATOM | 3716 | CG   | GLN | X | 246 | 55.293 | 58.655 | 55.564 | 0.00 | 0.00 |
| ATOM | 3717 | HG2  | GLN | X | 246 | 56.362 | 58.823 | 55.694 | 0.00 | 0.00 |
| ATOM | 3718 | HG3  | GLN | X | 246 | 54.735 | 59.199 | 56.326 | 0.00 | 0.00 |
| ATOM | 3719 | CD   | GLN | X | 246 | 55.014 | 57.151 | 55.738 | 0.00 | 0.00 |
| ATOM | 3720 | OE1  | GLN | X | 246 | 55.012 | 56.409 | 54.770 | 0.00 | 0.00 |
| ATOM | 3721 | NE2  | GLN | X | 246 | 54.749 | 56.584 | 56.908 | 0.00 | 0.00 |
| ATOM | 3722 | HE21 | GLN | X | 246 | 54.843 | 55.587 | 57.045 | 0.00 | 0.00 |
| ATOM | 3723 | HE22 | GLN | X | 246 | 54.680 | 57.225 | 57.686 | 0.00 | 0.00 |
| ATOM | 3724 | C    | GLN | X | 246 | 55.333 | 61.062 | 52.588 | 0.00 | 0.00 |
| ATOM | 3725 | O    | GLN | X | 246 | 56.398 | 61.594 | 52.366 | 0.00 | 0.00 |
| ATOM | 3726 | N    | LEU | X | 247 | 54.291 | 61.151 | 51.734 | 0.00 | 0.00 |
| ATOM | 3727 | H    | LEU | X | 247 | 53.412 | 60.840 | 52.123 | 0.00 | 0.00 |
| ATOM | 3728 | CA   | LEU | X | 247 | 54.281 | 61.664 | 50.367 | 0.00 | 0.00 |
| ATOM | 3729 | HA   | LEU | X | 247 | 55.139 | 61.185 | 49.896 | 0.00 | 0.00 |
| ATOM | 3730 | CB   | LEU | X | 247 | 52.977 | 61.200 | 49.603 | 0.00 | 0.00 |
| ATOM | 3731 | HB2  | LEU | X | 247 | 52.524 | 60.340 | 50.097 | 0.00 | 0.00 |
| ATOM | 3732 | HB3  | LEU | X | 247 | 52.249 | 62.008 | 49.674 | 0.00 | 0.00 |
| ATOM | 3733 | CG   | LEU | X | 247 | 53.114 | 60.639 | 48.197 | 0.00 | 0.00 |
| ATOM | 3734 | HG   | LEU | X | 247 | 53.837 | 59.828 | 48.288 | 0.00 | 0.00 |
| ATOM | 3735 | CD1  | LEU | X | 247 | 51.836 | 60.042 | 47.613 | 0.00 | 0.00 |
| ATOM | 3736 | HD11 | LEU | X | 247 | 51.028 | 60.768 | 47.532 | 0.00 | 0.00 |
| ATOM | 3737 | HD12 | LEU | X | 247 | 51.502 | 59.176 | 48.184 | 0.00 | 0.00 |
| ATOM | 3738 | HD13 | LEU | X | 247 | 52.123 | 59.711 | 46.615 | 0.00 | 0.00 |
| ATOM | 3739 | CD2  | LEU | X | 247 | 53.577 | 61.710 | 47.193 | 0.00 | 0.00 |
| ATOM | 3740 | HD21 | LEU | X | 247 | 54.564 | 62.047 | 47.511 | 0.00 | 0.00 |
| ATOM | 3741 | HD22 | LEU | X | 247 | 53.540 | 61.325 | 46.174 | 0.00 | 0.00 |
| ATOM | 3742 | HD23 | LEU | X | 247 | 52.862 | 62.532 | 47.201 | 0.00 | 0.00 |
| ATOM | 3743 | C    | LEU | X | 247 | 54.469 | 63.215 | 50.405 | 0.00 | 0.00 |
| ATOM | 3744 | O    | LEU | X | 247 | 55.348 | 63.783 | 49.816 | 0.00 | 0.00 |
| ATOM | 3745 | N    | ALA | X | 248 | 53.698 | 63.857 | 51.259 | 0.00 | 0.00 |
| ATOM | 3746 | H    | ALA | X | 248 | 53.111 | 63.380 | 51.928 | 0.00 | 0.00 |
| ATOM | 3747 | CA   | ALA | X | 248 | 53.637 | 65.365 | 51.363 | 0.00 | 0.00 |
| ATOM | 3748 | HA   | ALA | X | 248 | 53.527 | 65.901 | 50.420 | 0.00 | 0.00 |
| ATOM | 3749 | CB   | ALA | X | 248 | 52.333 | 65.776 | 52.004 | 0.00 | 0.00 |
| ATOM | 3750 | HB1  | ALA | X | 248 | 52.138 | 65.152 | 52.876 | 0.00 | 0.00 |
| ATOM | 3751 | HB2  | ALA | X | 248 | 51.546 | 65.554 | 51.283 | 0.00 | 0.00 |
| ATOM | 3752 | HB3  | ALA | X | 248 | 52.235 | 66.836 | 52.238 | 0.00 | 0.00 |
| ATOM | 3753 | C    | ALA | X | 248 | 54.876 | 66.033 | 51.999 | 0.00 | 0.00 |
| ATOM | 3754 | O    | ALA | X | 248 | 55.246 | 67.109 | 51.553 | 0.00 | 0.00 |
| ATOM | 3755 | N    | HIE | X | 249 | 55.480 | 65.447 | 53.020 | 0.00 | 0.00 |
| ATOM | 3756 | H    | HIE | X | 249 | 55.115 | 64.580 | 53.386 | 0.00 | 0.00 |
| ATOM | 3757 | CA   | HIE | X | 249 | 56.891 | 65.806 | 53.509 | 0.00 | 0.00 |
| ATOM | 3758 | HA   | HIE | X | 249 | 56.819 | 66.802 | 53.945 | 0.00 | 0.00 |
| ATOM | 3759 | CB   | HIE | X | 249 | 57.305 | 64.788 | 54.541 | 0.00 | 0.00 |
| ATOM | 3760 | HB2  | HIE | X | 249 | 56.554 | 64.713 | 55.327 | 0.00 | 0.00 |
| ATOM | 3761 | HB3  | HIE | X | 249 | 57.226 | 63.819 | 54.049 | 0.00 | 0.00 |
| ATOM | 3762 | CG   | HIE | X | 249 | 58.667 | 64.911 | 55.192 | 0.00 | 0.00 |
| ATOM | 3763 | ND1  | HIE | X | 249 | 59.907 | 65.030 | 54.511 | 0.00 | 0.00 |
| ATOM | 3764 | CE1  | HIE | X | 249 | 60.835 | 65.038 | 55.513 | 0.00 | 0.00 |
| ATOM | 3765 | HE1  | HIE | X | 249 | 61.889 | 65.010 | 55.280 | 0.00 | 0.00 |
| ATOM | 3766 | NE2  | HIE | X | 249 | 60.232 | 65.166 | 56.730 | 0.00 | 0.00 |
| ATOM | 3767 | HE2  | HIE | X | 249 | 60.742 | 65.490 | 57.539 | 0.00 | 0.00 |
| ATOM | 3768 | CD2  | HIE | X | 249 | 58.832 | 65.018 | 56.554 | 0.00 | 0.00 |
| ATOM | 3769 | HD2  | HIE | X | 249 | 57.993 | 64.930 | 57.228 | 0.00 | 0.00 |
| ATOM | 3770 | C    | HIE | X | 249 | 57.871 | 66.027 | 52.352 | 0.00 | 0.00 |

|      |      |      |     |   |     |        |        |        |      |      |
|------|------|------|-----|---|-----|--------|--------|--------|------|------|
| ATOM | 3771 | O    | HIE | X | 249 | 58.539 | 67.072 | 52.253 | 0.00 | 0.00 |
| ATOM | 3772 | N    | LEU | X | 250 | 57.960 | 65.010 | 51.431 | 0.00 | 0.00 |
| ATOM | 3773 | H    | LEU | X | 250 | 57.339 | 64.247 | 51.662 | 0.00 | 0.00 |
| ATOM | 3774 | CA   | LEU | X | 250 | 59.121 | 64.955 | 50.483 | 0.00 | 0.00 |
| ATOM | 3775 | HA   | LEU | X | 250 | 59.995 | 65.359 | 50.996 | 0.00 | 0.00 |
| ATOM | 3776 | CB   | LEU | X | 250 | 59.295 | 63.454 | 50.205 | 0.00 | 0.00 |
| ATOM | 3777 | HB2  | LEU | X | 250 | 59.358 | 62.986 | 51.187 | 0.00 | 0.00 |
| ATOM | 3778 | HB3  | LEU | X | 250 | 58.370 | 63.073 | 49.771 | 0.00 | 0.00 |
| ATOM | 3779 | CG   | LEU | X | 250 | 60.482 | 63.018 | 49.347 | 0.00 | 0.00 |
| ATOM | 3780 | HG   | LEU | X | 250 | 60.624 | 63.709 | 48.515 | 0.00 | 0.00 |
| ATOM | 3781 | CD1  | LEU | X | 250 | 61.726 | 63.171 | 50.256 | 0.00 | 0.00 |
| ATOM | 3782 | HD11 | LEU | X | 250 | 62.064 | 64.207 | 50.206 | 0.00 | 0.00 |
| ATOM | 3783 | HD12 | LEU | X | 250 | 62.552 | 62.565 | 49.884 | 0.00 | 0.00 |
| ATOM | 3784 | HD13 | LEU | X | 250 | 61.424 | 63.091 | 51.300 | 0.00 | 0.00 |
| ATOM | 3785 | CD2  | LEU | X | 250 | 60.415 | 61.552 | 48.847 | 0.00 | 0.00 |
| ATOM | 3786 | HD21 | LEU | X | 250 | 61.405 | 61.202 | 48.552 | 0.00 | 0.00 |
| ATOM | 3787 | HD22 | LEU | X | 250 | 60.220 | 60.850 | 49.657 | 0.00 | 0.00 |
| ATOM | 3788 | HD23 | LEU | X | 250 | 59.566 | 61.509 | 48.164 | 0.00 | 0.00 |
| ATOM | 3789 | C    | LEU | X | 250 | 58.811 | 65.779 | 49.232 | 0.00 | 0.00 |
| ATOM | 3790 | O    | LEU | X | 250 | 59.752 | 66.381 | 48.759 | 0.00 | 0.00 |
| ATOM | 3791 | N    | VAL | X | 251 | 57.564 | 65.899 | 48.785 | 0.00 | 0.00 |
| ATOM | 3792 | H    | VAL | X | 251 | 56.834 | 65.352 | 49.217 | 0.00 | 0.00 |
| ATOM | 3793 | CA   | VAL | X | 251 | 57.039 | 66.830 | 47.851 | 0.00 | 0.00 |
| ATOM | 3794 | HA   | VAL | X | 251 | 57.559 | 66.803 | 46.893 | 0.00 | 0.00 |
| ATOM | 3795 | CB   | VAL | X | 251 | 55.518 | 66.596 | 47.757 | 0.00 | 0.00 |
| ATOM | 3796 | HB   | VAL | X | 251 | 55.117 | 66.646 | 48.769 | 0.00 | 0.00 |
| ATOM | 3797 | CG1  | VAL | X | 251 | 54.778 | 67.730 | 47.007 | 0.00 | 0.00 |
| ATOM | 3798 | HG11 | VAL | X | 251 | 55.308 | 67.854 | 46.062 | 0.00 | 0.00 |
| ATOM | 3799 | HG12 | VAL | X | 251 | 53.719 | 67.520 | 46.859 | 0.00 | 0.00 |
| ATOM | 3800 | HG13 | VAL | X | 251 | 54.842 | 68.674 | 47.548 | 0.00 | 0.00 |
| ATOM | 3801 | CG2  | VAL | X | 251 | 55.199 | 65.311 | 46.971 | 0.00 | 0.00 |
| ATOM | 3802 | HG21 | VAL | X | 251 | 54.138 | 65.063 | 47.011 | 0.00 | 0.00 |
| ATOM | 3803 | HG22 | VAL | X | 251 | 55.711 | 64.469 | 47.438 | 0.00 | 0.00 |
| ATOM | 3804 | HG23 | VAL | X | 251 | 55.531 | 65.397 | 45.937 | 0.00 | 0.00 |
| ATOM | 3805 | C    | VAL | X | 251 | 57.217 | 68.271 | 48.397 | 0.00 | 0.00 |
| ATOM | 3806 | O    | VAL | X | 251 | 57.622 | 69.143 | 47.658 | 0.00 | 0.00 |
| ATOM | 3807 | N    | GLY | X | 252 | 56.852 | 68.476 | 49.671 | 0.00 | 0.00 |
| ATOM | 3808 | H    | GLY | X | 252 | 56.619 | 67.756 | 50.340 | 0.00 | 0.00 |
| ATOM | 3809 | CA   | GLY | X | 252 | 56.839 | 69.824 | 50.263 | 0.00 | 0.00 |
| ATOM | 3810 | HA2  | GLY | X | 252 | 57.100 | 69.772 | 51.320 | 0.00 | 0.00 |
| ATOM | 3811 | HA3  | GLY | X | 252 | 57.539 | 70.502 | 49.775 | 0.00 | 0.00 |
| ATOM | 3812 | C    | GLY | X | 252 | 55.465 | 70.447 | 50.274 | 0.00 | 0.00 |
| ATOM | 3813 | O    | GLY | X | 252 | 55.230 | 71.382 | 49.535 | 0.00 | 0.00 |
| ATOM | 3814 | N    | CYX | X | 253 | 54.494 | 69.954 | 51.103 | 0.00 | 0.00 |
| ATOM | 3815 | H    | CYX | X | 253 | 54.819 | 69.250 | 51.750 | 0.00 | 0.00 |
| ATOM | 3816 | CA   | CYX | X | 253 | 53.030 | 70.308 | 51.190 | 0.00 | 0.00 |
| ATOM | 3817 | HA   | CYX | X | 253 | 52.822 | 71.324 | 50.857 | 0.00 | 0.00 |
| ATOM | 3818 | CB   | CYX | X | 253 | 52.327 | 69.267 | 50.312 | 0.00 | 0.00 |
| ATOM | 3819 | HB2  | CYX | X | 253 | 52.911 | 68.349 | 50.379 | 0.00 | 0.00 |
| ATOM | 3820 | HB3  | CYX | X | 253 | 51.322 | 69.124 | 50.710 | 0.00 | 0.00 |
| ATOM | 3821 | SG   | CYX | X | 253 | 52.041 | 69.585 | 48.615 | 0.00 | 0.00 |
| ATOM | 3822 | C    | CYX | X | 253 | 52.619 | 70.207 | 52.626 | 0.00 | 0.00 |
| ATOM | 3823 | O    | CYX | X | 253 | 52.934 | 69.196 | 53.254 | 0.00 | 0.00 |
| ATOM | 3824 | N    | PRO | X | 254 | 51.678 | 71.053 | 53.011 | 0.00 | 0.00 |
| ATOM | 3825 | CD   | PRO | X | 254 | 51.079 | 70.912 | 54.345 | 0.00 | 0.00 |
| ATOM | 3826 | HD2  | PRO | X | 254 | 51.839 | 71.248 | 55.050 | 0.00 | 0.00 |
| ATOM | 3827 | HD3  | PRO | X | 254 | 50.689 | 69.911 | 54.528 | 0.00 | 0.00 |
| ATOM | 3828 | CG   | PRO | X | 254 | 49.910 | 71.913 | 54.367 | 0.00 | 0.00 |
| ATOM | 3829 | HG2  | PRO | X | 254 | 49.670 | 72.305 | 55.355 | 0.00 | 0.00 |
| ATOM | 3830 | HG3  | PRO | X | 254 | 49.034 | 71.515 | 53.854 | 0.00 | 0.00 |
| ATOM | 3831 | CB   | PRO | X | 254 | 50.568 | 73.071 | 53.521 | 0.00 | 0.00 |
| ATOM | 3832 | HB2  | PRO | X | 254 | 51.242 | 73.582 | 54.208 | 0.00 | 0.00 |
| ATOM | 3833 | HB3  | PRO | X | 254 | 49.815 | 73.778 | 53.172 | 0.00 | 0.00 |
| ATOM | 3834 | CA   | PRO | X | 254 | 51.345 | 72.440 | 52.462 | 0.00 | 0.00 |
| ATOM | 3835 | HA   | PRO | X | 254 | 50.721 | 72.286 | 51.582 | 0.00 | 0.00 |
| ATOM | 3836 | C    | PRO | X | 254 | 52.548 | 73.314 | 52.196 | 0.00 | 0.00 |
| ATOM | 3837 | O    | PRO | X | 254 | 53.583 | 73.006 | 52.850 | 0.00 | 0.00 |

|      |      |      |     |   |     |        |        |        |      |      |
|------|------|------|-----|---|-----|--------|--------|--------|------|------|
| ATOM | 3838 | N    | PRO | X | 255 | 52.567 | 74.264 | 51.257 | 0.00 | 0.00 |
| ATOM | 3839 | CD   | PRO | X | 255 | 51.409 | 74.612 | 50.412 | 0.00 | 0.00 |
| ATOM | 3840 | HD2  | PRO | X | 255 | 50.534 | 74.755 | 51.047 | 0.00 | 0.00 |
| ATOM | 3841 | HD3  | PRO | X | 255 | 51.187 | 73.791 | 49.731 | 0.00 | 0.00 |
| ATOM | 3842 | CG   | PRO | X | 255 | 51.720 | 75.917 | 49.726 | 0.00 | 0.00 |
| ATOM | 3843 | HG2  | PRO | X | 255 | 51.545 | 76.728 | 50.433 | 0.00 | 0.00 |
| ATOM | 3844 | HG3  | PRO | X | 255 | 51.160 | 76.056 | 48.801 | 0.00 | 0.00 |
| ATOM | 3845 | CB   | PRO | X | 255 | 53.339 | 75.881 | 49.619 | 0.00 | 0.00 |
| ATOM | 3846 | HB2  | PRO | X | 255 | 53.781 | 76.876 | 49.673 | 0.00 | 0.00 |
| ATOM | 3847 | HB3  | PRO | X | 255 | 53.655 | 75.345 | 48.724 | 0.00 | 0.00 |
| ATOM | 3848 | CA   | PRO | X | 255 | 53.789 | 74.949 | 50.768 | 0.00 | 0.00 |
| ATOM | 3849 | HA   | PRO | X | 255 | 54.483 | 74.213 | 50.360 | 0.00 | 0.00 |
| ATOM | 3850 | C    | PRO | X | 255 | 54.408 | 75.660 | 52.009 | 0.00 | 0.00 |
| ATOM | 3851 | O    | PRO | X | 255 | 53.732 | 76.136 | 52.951 | 0.00 | 0.00 |
| ATOM | 3852 | N    | GLY | X | 256 | 55.756 | 75.785 | 51.909 | 0.00 | 0.00 |
| ATOM | 3853 | H    | GLY | X | 256 | 56.120 | 75.277 | 51.115 | 0.00 | 0.00 |
| ATOM | 3854 | CA   | GLY | X | 256 | 56.664 | 76.335 | 52.907 | 0.00 | 0.00 |
| ATOM | 3855 | HA2  | GLY | X | 256 | 57.619 | 76.590 | 52.447 | 0.00 | 0.00 |
| ATOM | 3856 | HA3  | GLY | X | 256 | 56.178 | 77.181 | 53.393 | 0.00 | 0.00 |
| ATOM | 3857 | C    | GLY | X | 256 | 57.003 | 75.341 | 54.030 | 0.00 | 0.00 |
| ATOM | 3858 | O    | GLY | X | 256 | 57.603 | 75.739 | 55.034 | 0.00 | 0.00 |
| ATOM | 3859 | N    | GLY | X | 257 | 56.488 | 74.081 | 53.921 | 0.00 | 0.00 |
| ATOM | 3860 | H    | GLY | X | 257 | 55.974 | 73.874 | 53.077 | 0.00 | 0.00 |
| ATOM | 3861 | CA   | GLY | X | 257 | 56.317 | 73.145 | 55.058 | 0.00 | 0.00 |
| ATOM | 3862 | HA2  | GLY | X | 257 | 57.062 | 73.303 | 55.838 | 0.00 | 0.00 |
| ATOM | 3863 | HA3  | GLY | X | 257 | 55.376 | 73.502 | 55.478 | 0.00 | 0.00 |
| ATOM | 3864 | C    | GLY | X | 257 | 56.098 | 71.690 | 54.702 | 0.00 | 0.00 |
| ATOM | 3865 | O    | GLY | X | 257 | 56.207 | 71.308 | 53.514 | 0.00 | 0.00 |
| ATOM | 3866 | N    | THR | X | 258 | 55.840 | 70.924 | 55.689 | 0.00 | 0.00 |
| ATOM | 3867 | H    | THR | X | 258 | 55.741 | 71.324 | 56.611 | 0.00 | 0.00 |
| ATOM | 3868 | CA   | THR | X | 258 | 55.981 | 69.426 | 55.643 | 0.00 | 0.00 |
| ATOM | 3869 | HA   | THR | X | 258 | 55.778 | 69.174 | 54.602 | 0.00 | 0.00 |
| ATOM | 3870 | CB   | THR | X | 258 | 57.410 | 68.945 | 56.025 | 0.00 | 0.00 |
| ATOM | 3871 | HB   | THR | X | 258 | 57.349 | 67.871 | 56.196 | 0.00 | 0.00 |
| ATOM | 3872 | CG2  | THR | X | 258 | 58.504 | 69.053 | 54.939 | 0.00 | 0.00 |
| ATOM | 3873 | HG21 | THR | X | 258 | 58.654 | 70.084 | 54.618 | 0.00 | 0.00 |
| ATOM | 3874 | HG22 | THR | X | 258 | 58.104 | 68.583 | 54.040 | 0.00 | 0.00 |
| ATOM | 3875 | HG23 | THR | X | 258 | 59.436 | 68.635 | 55.322 | 0.00 | 0.00 |
| ATOM | 3876 | OG1  | THR | X | 258 | 57.996 | 69.567 | 57.170 | 0.00 | 0.00 |
| ATOM | 3877 | HG1  | THR | X | 258 | 58.218 | 68.946 | 57.868 | 0.00 | 0.00 |
| ATOM | 3878 | C    | THR | X | 258 | 54.948 | 68.804 | 56.550 | 0.00 | 0.00 |
| ATOM | 3879 | O    | THR | X | 258 | 55.196 | 68.497 | 57.714 | 0.00 | 0.00 |
| ATOM | 3880 | N    | GLY | X | 259 | 53.774 | 68.595 | 55.957 | 0.00 | 0.00 |
| ATOM | 3881 | H    | GLY | X | 259 | 53.675 | 68.921 | 55.007 | 0.00 | 0.00 |
| ATOM | 3882 | CA   | GLY | X | 259 | 52.619 | 68.105 | 56.679 | 0.00 | 0.00 |
| ATOM | 3883 | HA2  | GLY | X | 259 | 51.946 | 67.629 | 55.966 | 0.00 | 0.00 |
| ATOM | 3884 | HA3  | GLY | X | 259 | 52.868 | 67.354 | 57.429 | 0.00 | 0.00 |
| ATOM | 3885 | C    | GLY | X | 259 | 51.876 | 69.252 | 57.305 | 0.00 | 0.00 |
| ATOM | 3886 | O    | GLY | X | 259 | 52.456 | 70.323 | 57.450 | 0.00 | 0.00 |
| ATOM | 3887 | N    | GLY | X | 260 | 50.569 | 69.014 | 57.566 | 0.00 | 0.00 |
| ATOM | 3888 | H    | GLY | X | 260 | 50.184 | 68.096 | 57.398 | 0.00 | 0.00 |
| ATOM | 3889 | CA   | GLY | X | 260 | 49.652 | 70.019 | 58.210 | 0.00 | 0.00 |
| ATOM | 3890 | HA2  | GLY | X | 260 | 49.798 | 70.065 | 59.289 | 0.00 | 0.00 |
| ATOM | 3891 | HA3  | GLY | X | 260 | 49.959 | 71.022 | 57.914 | 0.00 | 0.00 |
| ATOM | 3892 | C    | GLY | X | 260 | 48.138 | 69.805 | 58.001 | 0.00 | 0.00 |
| ATOM | 3893 | O    | GLY | X | 260 | 47.695 | 68.664 | 58.050 | 0.00 | 0.00 |
| ATOM | 3894 | N    | ASN | X | 261 | 47.422 | 70.935 | 57.830 | 0.00 | 0.00 |
| ATOM | 3895 | H    | ASN | X | 261 | 48.005 | 71.759 | 57.807 | 0.00 | 0.00 |
| ATOM | 3896 | CA   | ASN | X | 261 | 45.990 | 70.995 | 57.724 | 0.00 | 0.00 |
| ATOM | 3897 | HA   | ASN | X | 261 | 45.570 | 70.561 | 58.632 | 0.00 | 0.00 |
| ATOM | 3898 | CB   | ASN | X | 261 | 45.498 | 72.501 | 57.758 | 0.00 | 0.00 |
| ATOM | 3899 | HB2  | ASN | X | 261 | 45.901 | 73.010 | 58.634 | 0.00 | 0.00 |
| ATOM | 3900 | HB3  | ASN | X | 261 | 45.715 | 72.926 | 56.778 | 0.00 | 0.00 |
| ATOM | 3901 | CG   | ASN | X | 261 | 43.936 | 72.561 | 57.837 | 0.00 | 0.00 |
| ATOM | 3902 | OD1  | ASN | X | 261 | 43.265 | 72.531 | 56.789 | 0.00 | 0.00 |
| ATOM | 3903 | ND2  | ASN | X | 261 | 43.386 | 72.507 | 59.066 | 0.00 | 0.00 |
| ATOM | 3904 | HD21 | ASN | X | 261 | 42.383 | 72.569 | 58.966 | 0.00 | 0.00 |

|      |      |      |     |   |     |        |        |        |      |      |
|------|------|------|-----|---|-----|--------|--------|--------|------|------|
| ATOM | 3905 | HD22 | ASN | X | 261 | 43.878 | 72.462 | 59.947 | 0.00 | 0.00 |
| ATOM | 3906 | C    | ASN | X | 261 | 45.489 | 70.222 | 56.448 | 0.00 | 0.00 |
| ATOM | 3907 | O    | ASN | X | 261 | 45.936 | 70.523 | 55.362 | 0.00 | 0.00 |
| ATOM | 3908 | N    | ASP | X | 262 | 44.682 | 69.177 | 56.677 | 0.00 | 0.00 |
| ATOM | 3909 | H    | ASP | X | 262 | 44.496 | 68.987 | 57.651 | 0.00 | 0.00 |
| ATOM | 3910 | CA   | ASP | X | 262 | 44.325 | 68.121 | 55.691 | 0.00 | 0.00 |
| ATOM | 3911 | HA   | ASP | X | 262 | 45.276 | 67.626 | 55.493 | 0.00 | 0.00 |
| ATOM | 3912 | CB   | ASP | X | 262 | 43.410 | 67.018 | 56.325 | 0.00 | 0.00 |
| ATOM | 3913 | HB2  | ASP | X | 262 | 42.396 | 67.341 | 56.563 | 0.00 | 0.00 |
| ATOM | 3914 | HB3  | ASP | X | 262 | 43.312 | 66.136 | 55.692 | 0.00 | 0.00 |
| ATOM | 3915 | CG   | ASP | X | 262 | 44.065 | 66.449 | 57.543 | 0.00 | 0.00 |
| ATOM | 3916 | OD1  | ASP | X | 262 | 44.661 | 65.331 | 57.550 | 0.00 | 0.00 |
| ATOM | 3917 | OD2  | ASP | X | 262 | 44.019 | 67.077 | 58.619 | 0.00 | 0.00 |
| ATOM | 3918 | C    | ASP | X | 262 | 43.729 | 68.659 | 54.391 | 0.00 | 0.00 |
| ATOM | 3919 | O    | ASP | X | 262 | 44.083 | 68.139 | 53.312 | 0.00 | 0.00 |
| ATOM | 3920 | N    | THR | X | 263 | 42.874 | 69.642 | 54.460 | 0.00 | 0.00 |
| ATOM | 3921 | H    | THR | X | 263 | 42.610 | 70.001 | 55.367 | 0.00 | 0.00 |
| ATOM | 3922 | CA   | THR | X | 263 | 42.230 | 70.391 | 53.418 | 0.00 | 0.00 |
| ATOM | 3923 | HA   | THR | X | 263 | 41.859 | 69.658 | 52.702 | 0.00 | 0.00 |
| ATOM | 3924 | CB   | THR | X | 263 | 41.017 | 71.265 | 53.912 | 0.00 | 0.00 |
| ATOM | 3925 | HB   | THR | X | 263 | 40.460 | 71.472 | 52.998 | 0.00 | 0.00 |
| ATOM | 3926 | CG2  | THR | X | 263 | 40.132 | 70.481 | 54.796 | 0.00 | 0.00 |
| ATOM | 3927 | HG21 | THR | X | 263 | 40.595 | 70.537 | 55.781 | 0.00 | 0.00 |
| ATOM | 3928 | HG22 | THR | X | 263 | 40.156 | 69.405 | 54.621 | 0.00 | 0.00 |
| ATOM | 3929 | HG23 | THR | X | 263 | 39.150 | 70.941 | 54.685 | 0.00 | 0.00 |
| ATOM | 3930 | OG1  | THR | X | 263 | 41.368 | 72.464 | 54.570 | 0.00 | 0.00 |
| ATOM | 3931 | HG1  | THR | X | 263 | 41.636 | 73.181 | 53.991 | 0.00 | 0.00 |
| ATOM | 3932 | C    | THR | X | 263 | 43.087 | 71.264 | 52.622 | 0.00 | 0.00 |
| ATOM | 3933 | O    | THR | X | 263 | 42.727 | 71.559 | 51.506 | 0.00 | 0.00 |
| ATOM | 3934 | N    | GLU | X | 264 | 44.312 | 71.609 | 53.037 | 0.00 | 0.00 |
| ATOM | 3935 | H    | GLU | X | 264 | 44.542 | 71.294 | 53.969 | 0.00 | 0.00 |
| ATOM | 3936 | CA   | GLU | X | 264 | 45.459 | 72.293 | 52.466 | 0.00 | 0.00 |
| ATOM | 3937 | HA   | GLU | X | 264 | 45.088 | 72.960 | 51.687 | 0.00 | 0.00 |
| ATOM | 3938 | CB   | GLU | X | 264 | 46.278 | 73.125 | 53.464 | 0.00 | 0.00 |
| ATOM | 3939 | HB2  | GLU | X | 264 | 46.587 | 72.529 | 54.323 | 0.00 | 0.00 |
| ATOM | 3940 | HB3  | GLU | X | 264 | 47.225 | 73.429 | 53.019 | 0.00 | 0.00 |
| ATOM | 3941 | CG   | GLU | X | 264 | 45.565 | 74.412 | 53.897 | 0.00 | 0.00 |
| ATOM | 3942 | HG2  | GLU | X | 264 | 44.613 | 74.089 | 54.319 | 0.00 | 0.00 |
| ATOM | 3943 | HG3  | GLU | X | 264 | 46.097 | 75.014 | 54.633 | 0.00 | 0.00 |
| ATOM | 3944 | CD   | GLU | X | 264 | 45.264 | 75.463 | 52.845 | 0.00 | 0.00 |
| ATOM | 3945 | OE1  | GLU | X | 264 | 44.073 | 75.915 | 52.673 | 0.00 | 0.00 |
| ATOM | 3946 | OE2  | GLU | X | 264 | 46.099 | 75.767 | 52.035 | 0.00 | 0.00 |
| ATOM | 3947 | C    | GLU | X | 264 | 46.385 | 71.316 | 51.837 | 0.00 | 0.00 |
| ATOM | 3948 | O    | GLU | X | 264 | 46.828 | 71.475 | 50.696 | 0.00 | 0.00 |
| ATOM | 3949 | N    | LEU | X | 265 | 46.716 | 70.300 | 52.613 | 0.00 | 0.00 |
| ATOM | 3950 | H    | LEU | X | 265 | 46.236 | 70.239 | 53.500 | 0.00 | 0.00 |
| ATOM | 3951 | CA   | LEU | X | 265 | 47.587 | 69.167 | 52.185 | 0.00 | 0.00 |
| ATOM | 3952 | HA   | LEU | X | 265 | 48.569 | 69.551 | 51.908 | 0.00 | 0.00 |
| ATOM | 3953 | CB   | LEU | X | 265 | 47.824 | 68.183 | 53.338 | 0.00 | 0.00 |
| ATOM | 3954 | HB2  | LEU | X | 265 | 48.033 | 68.698 | 54.275 | 0.00 | 0.00 |
| ATOM | 3955 | HB3  | LEU | X | 265 | 46.883 | 67.659 | 53.506 | 0.00 | 0.00 |
| ATOM | 3956 | CG   | LEU | X | 265 | 48.945 | 67.099 | 53.131 | 0.00 | 0.00 |
| ATOM | 3957 | HG   | LEU | X | 265 | 49.651 | 67.510 | 52.409 | 0.00 | 0.00 |
| ATOM | 3958 | CD1  | LEU | X | 265 | 49.600 | 66.933 | 54.562 | 0.00 | 0.00 |
| ATOM | 3959 | HD11 | LEU | X | 265 | 48.871 | 66.642 | 55.318 | 0.00 | 0.00 |
| ATOM | 3960 | HD12 | LEU | X | 265 | 50.029 | 67.907 | 54.795 | 0.00 | 0.00 |
| ATOM | 3961 | HD13 | LEU | X | 265 | 50.426 | 66.226 | 54.489 | 0.00 | 0.00 |
| ATOM | 3962 | CD2  | LEU | X | 265 | 48.399 | 65.743 | 52.627 | 0.00 | 0.00 |
| ATOM | 3963 | HD21 | LEU | X | 265 | 48.098 | 65.834 | 51.584 | 0.00 | 0.00 |
| ATOM | 3964 | HD22 | LEU | X | 265 | 48.970 | 64.837 | 52.827 | 0.00 | 0.00 |
| ATOM | 3965 | HD23 | LEU | X | 265 | 47.467 | 65.647 | 53.184 | 0.00 | 0.00 |
| ATOM | 3966 | C    | LEU | X | 265 | 46.984 | 68.422 | 50.973 | 0.00 | 0.00 |
| ATOM | 3967 | O    | LEU | X | 265 | 47.711 | 68.124 | 50.047 | 0.00 | 0.00 |
| ATOM | 3968 | N    | VAL | X | 266 | 45.717 | 68.126 | 50.922 | 0.00 | 0.00 |
| ATOM | 3969 | H    | VAL | X | 266 | 45.116 | 68.325 | 51.709 | 0.00 | 0.00 |
| ATOM | 3970 | CA   | VAL | X | 266 | 45.065 | 67.721 | 49.718 | 0.00 | 0.00 |
| ATOM | 3971 | HA   | VAL | X | 266 | 45.751 | 66.974 | 49.319 | 0.00 | 0.00 |

|      |      |      |     |   |     |        |        |        |      |      |
|------|------|------|-----|---|-----|--------|--------|--------|------|------|
| ATOM | 3972 | CB   | VAL | X | 266 | 43.724 | 67.066 | 50.116 | 0.00 | 0.00 |
| ATOM | 3973 | HB   | VAL | X | 266 | 43.793 | 66.631 | 51.113 | 0.00 | 0.00 |
| ATOM | 3974 | CG1  | VAL | X | 266 | 42.579 | 68.096 | 50.297 | 0.00 | 0.00 |
| ATOM | 3975 | HG11 | VAL | X | 266 | 42.287 | 68.554 | 49.352 | 0.00 | 0.00 |
| ATOM | 3976 | HG12 | VAL | X | 266 | 41.653 | 67.597 | 50.582 | 0.00 | 0.00 |
| ATOM | 3977 | HG13 | VAL | X | 266 | 42.923 | 68.785 | 51.068 | 0.00 | 0.00 |
| ATOM | 3978 | CG2  | VAL | X | 266 | 43.309 | 65.943 | 49.162 | 0.00 | 0.00 |
| ATOM | 3979 | HG21 | VAL | X | 266 | 43.314 | 66.269 | 48.122 | 0.00 | 0.00 |
| ATOM | 3980 | HG22 | VAL | X | 266 | 42.292 | 65.579 | 49.307 | 0.00 | 0.00 |
| ATOM | 3981 | HG23 | VAL | X | 266 | 43.856 | 65.019 | 49.352 | 0.00 | 0.00 |
| ATOM | 3982 | C    | VAL | X | 266 | 44.788 | 68.803 | 48.620 | 0.00 | 0.00 |
| ATOM | 3983 | O    | VAL | X | 266 | 44.722 | 68.436 | 47.458 | 0.00 | 0.00 |
| ATOM | 3984 | N    | ALA | X | 267 | 44.703 | 70.105 | 48.938 | 0.00 | 0.00 |
| ATOM | 3985 | H    | ALA | X | 267 | 44.700 | 70.480 | 49.876 | 0.00 | 0.00 |
| ATOM | 3986 | CA   | ALA | X | 267 | 44.805 | 71.132 | 47.916 | 0.00 | 0.00 |
| ATOM | 3987 | HA   | ALA | X | 267 | 44.059 | 71.025 | 47.129 | 0.00 | 0.00 |
| ATOM | 3988 | CB   | ALA | X | 267 | 44.307 | 72.408 | 48.492 | 0.00 | 0.00 |
| ATOM | 3989 | HB1  | ALA | X | 267 | 44.451 | 73.187 | 47.743 | 0.00 | 0.00 |
| ATOM | 3990 | HB2  | ALA | X | 267 | 44.917 | 72.616 | 49.371 | 0.00 | 0.00 |
| ATOM | 3991 | HB3  | ALA | X | 267 | 43.240 | 72.365 | 48.708 | 0.00 | 0.00 |
| ATOM | 3992 | C    | ALA | X | 267 | 46.191 | 71.147 | 47.192 | 0.00 | 0.00 |
| ATOM | 3993 | O    | ALA | X | 267 | 46.330 | 71.162 | 45.980 | 0.00 | 0.00 |
| ATOM | 3994 | N    | CYX | X | 268 | 47.240 | 70.875 | 47.993 | 0.00 | 0.00 |
| ATOM | 3995 | H    | CYX | X | 268 | 47.081 | 70.787 | 48.987 | 0.00 | 0.00 |
| ATOM | 3996 | CA   | CYX | X | 268 | 48.651 | 70.821 | 47.506 | 0.00 | 0.00 |
| ATOM | 3997 | HA   | CYX | X | 268 | 48.791 | 71.717 | 46.901 | 0.00 | 0.00 |
| ATOM | 3998 | CB   | CYX | X | 268 | 49.500 | 71.013 | 48.736 | 0.00 | 0.00 |
| ATOM | 3999 | HB2  | CYX | X | 268 | 48.966 | 71.742 | 49.346 | 0.00 | 0.00 |
| ATOM | 4000 | HB3  | CYX | X | 268 | 49.427 | 70.109 | 49.340 | 0.00 | 0.00 |
| ATOM | 4001 | SG   | CYX | X | 268 | 51.194 | 71.494 | 48.504 | 0.00 | 0.00 |
| ATOM | 4002 | C    | CYX | X | 268 | 48.795 | 69.531 | 46.682 | 0.00 | 0.00 |
| ATOM | 4003 | O    | CYX | X | 268 | 49.075 | 69.530 | 45.483 | 0.00 | 0.00 |
| ATOM | 4004 | N    | LEU | X | 269 | 48.432 | 68.379 | 47.274 | 0.00 | 0.00 |
| ATOM | 4005 | H    | LEU | X | 269 | 48.347 | 68.385 | 48.280 | 0.00 | 0.00 |
| ATOM | 4006 | CA   | LEU | X | 269 | 48.451 | 67.059 | 46.567 | 0.00 | 0.00 |
| ATOM | 4007 | HA   | LEU | X | 269 | 49.435 | 66.928 | 46.117 | 0.00 | 0.00 |
| ATOM | 4008 | CB   | LEU | X | 269 | 48.102 | 65.902 | 47.576 | 0.00 | 0.00 |
| ATOM | 4009 | HB2  | LEU | X | 269 | 47.925 | 66.268 | 48.587 | 0.00 | 0.00 |
| ATOM | 4010 | HB3  | LEU | X | 269 | 47.204 | 65.427 | 47.183 | 0.00 | 0.00 |
| ATOM | 4011 | CG   | LEU | X | 269 | 49.288 | 64.845 | 47.667 | 0.00 | 0.00 |
| ATOM | 4012 | HG   | LEU | X | 269 | 49.402 | 64.303 | 46.728 | 0.00 | 0.00 |
| ATOM | 4013 | CD1  | LEU | X | 269 | 50.593 | 65.468 | 48.133 | 0.00 | 0.00 |
| ATOM | 4014 | HD11 | LEU | X | 269 | 50.574 | 65.494 | 49.222 | 0.00 | 0.00 |
| ATOM | 4015 | HD12 | LEU | X | 269 | 50.838 | 66.374 | 47.579 | 0.00 | 0.00 |
| ATOM | 4016 | HD13 | LEU | X | 269 | 51.362 | 64.737 | 47.884 | 0.00 | 0.00 |
| ATOM | 4017 | CD2  | LEU | X | 269 | 48.790 | 63.744 | 48.650 | 0.00 | 0.00 |
| ATOM | 4018 | HD21 | LEU | X | 269 | 49.468 | 62.892 | 48.694 | 0.00 | 0.00 |
| ATOM | 4019 | HD22 | LEU | X | 269 | 48.667 | 64.178 | 49.642 | 0.00 | 0.00 |
| ATOM | 4020 | HD23 | LEU | X | 269 | 47.868 | 63.273 | 48.306 | 0.00 | 0.00 |
| ATOM | 4021 | C    | LEU | X | 269 | 47.551 | 67.002 | 45.304 | 0.00 | 0.00 |
| ATOM | 4022 | O    | LEU | X | 269 | 47.664 | 66.113 | 44.477 | 0.00 | 0.00 |
| ATOM | 4023 | N    | ARG | X | 270 | 46.532 | 67.903 | 45.040 | 0.00 | 0.00 |
| ATOM | 4024 | H    | ARG | X | 270 | 46.244 | 68.599 | 45.713 | 0.00 | 0.00 |
| ATOM | 4025 | CA   | ARG | X | 270 | 45.659 | 68.042 | 43.869 | 0.00 | 0.00 |
| ATOM | 4026 | HA   | ARG | X | 270 | 45.605 | 67.119 | 43.292 | 0.00 | 0.00 |
| ATOM | 4027 | CB   | ARG | X | 270 | 44.191 | 68.465 | 44.273 | 0.00 | 0.00 |
| ATOM | 4028 | HB2  | ARG | X | 270 | 44.132 | 69.210 | 45.067 | 0.00 | 0.00 |
| ATOM | 4029 | HB3  | ARG | X | 270 | 43.715 | 68.867 | 43.379 | 0.00 | 0.00 |
| ATOM | 4030 | CG   | ARG | X | 270 | 43.373 | 67.206 | 44.696 | 0.00 | 0.00 |
| ATOM | 4031 | HG2  | ARG | X | 270 | 43.512 | 66.428 | 43.945 | 0.00 | 0.00 |
| ATOM | 4032 | HG3  | ARG | X | 270 | 43.761 | 66.783 | 45.622 | 0.00 | 0.00 |
| ATOM | 4033 | CD   | ARG | X | 270 | 41.836 | 67.427 | 44.739 | 0.00 | 0.00 |
| ATOM | 4034 | HD2  | ARG | X | 270 | 41.585 | 68.219 | 44.033 | 0.00 | 0.00 |
| ATOM | 4035 | HD3  | ARG | X | 270 | 41.282 | 66.552 | 44.400 | 0.00 | 0.00 |
| ATOM | 4036 | NE   | ARG | X | 270 | 41.273 | 67.839 | 46.019 | 0.00 | 0.00 |
| ATOM | 4037 | HE   | ARG | X | 270 | 41.527 | 68.750 | 46.372 | 0.00 | 0.00 |
| ATOM | 4038 | CZ   | ARG | X | 270 | 40.487 | 67.132 | 46.833 | 0.00 | 0.00 |

|      |      |      |     |   |     |        |        |        |      |      |
|------|------|------|-----|---|-----|--------|--------|--------|------|------|
| ATOM | 4039 | NH1  | ARG | X | 270 | 40.309 | 65.811 | 46.754 | 0.00 | 0.00 |
| ATOM | 4040 | HH11 | ARG | X | 270 | 40.576 | 65.215 | 45.983 | 0.00 | 0.00 |
| ATOM | 4041 | HH12 | ARG | X | 270 | 39.808 | 65.446 | 47.552 | 0.00 | 0.00 |
| ATOM | 4042 | NH2  | ARG | X | 270 | 39.839 | 67.733 | 47.818 | 0.00 | 0.00 |
| ATOM | 4043 | HH21 | ARG | X | 270 | 39.998 | 68.713 | 48.006 | 0.00 | 0.00 |
| ATOM | 4044 | HH22 | ARG | X | 270 | 39.344 | 67.193 | 48.513 | 0.00 | 0.00 |
| ATOM | 4045 | C    | ARG | X | 270 | 46.271 | 69.013 | 42.827 | 0.00 | 0.00 |
| ATOM | 4046 | O    | ARG | X | 270 | 46.227 | 68.773 | 41.643 | 0.00 | 0.00 |
| ATOM | 4047 | N    | THR | X | 271 | 46.852 | 70.146 | 43.223 | 0.00 | 0.00 |
| ATOM | 4048 | H    | THR | X | 271 | 46.791 | 70.381 | 44.203 | 0.00 | 0.00 |
| ATOM | 4049 | CA   | THR | X | 271 | 47.618 | 71.135 | 42.489 | 0.00 | 0.00 |
| ATOM | 4050 | HA   | THR | X | 271 | 47.074 | 71.696 | 41.729 | 0.00 | 0.00 |
| ATOM | 4051 | CB   | THR | X | 271 | 48.171 | 72.168 | 43.471 | 0.00 | 0.00 |
| ATOM | 4052 | HB   | THR | X | 271 | 48.793 | 71.752 | 44.264 | 0.00 | 0.00 |
| ATOM | 4053 | CG2  | THR | X | 271 | 48.884 | 73.371 | 42.715 | 0.00 | 0.00 |
| ATOM | 4054 | HG21 | THR | X | 271 | 48.122 | 73.926 | 42.167 | 0.00 | 0.00 |
| ATOM | 4055 | HG22 | THR | X | 271 | 49.588 | 73.036 | 41.954 | 0.00 | 0.00 |
| ATOM | 4056 | HG23 | THR | X | 271 | 49.336 | 73.971 | 43.505 | 0.00 | 0.00 |
| ATOM | 4057 | OG1  | THR | X | 271 | 47.015 | 72.753 | 44.049 | 0.00 | 0.00 |
| ATOM | 4058 | HG1  | THR | X | 271 | 46.611 | 72.159 | 44.687 | 0.00 | 0.00 |
| ATOM | 4059 | C    | THR | X | 271 | 48.829 | 70.453 | 41.823 | 0.00 | 0.00 |
| ATOM | 4060 | O    | THR | X | 271 | 48.829 | 70.479 | 40.611 | 0.00 | 0.00 |
| ATOM | 4061 | N    | ARG | X | 272 | 49.739 | 69.822 | 42.587 | 0.00 | 0.00 |
| ATOM | 4062 | H    | ARG | X | 272 | 49.600 | 69.825 | 43.588 | 0.00 | 0.00 |
| ATOM | 4063 | CA   | ARG | X | 272 | 50.992 | 69.293 | 42.115 | 0.00 | 0.00 |
| ATOM | 4064 | HA   | ARG | X | 272 | 51.632 | 70.104 | 41.768 | 0.00 | 0.00 |
| ATOM | 4065 | CB   | ARG | X | 272 | 51.816 | 68.672 | 43.360 | 0.00 | 0.00 |
| ATOM | 4066 | HB2  | ARG | X | 272 | 51.130 | 68.152 | 44.028 | 0.00 | 0.00 |
| ATOM | 4067 | HB3  | ARG | X | 272 | 52.487 | 67.922 | 42.942 | 0.00 | 0.00 |
| ATOM | 4068 | CG   | ARG | X | 272 | 52.397 | 69.698 | 44.275 | 0.00 | 0.00 |
| ATOM | 4069 | HG2  | ARG | X | 272 | 51.488 | 70.138 | 44.686 | 0.00 | 0.00 |
| ATOM | 4070 | HG3  | ARG | X | 272 | 52.923 | 69.254 | 45.120 | 0.00 | 0.00 |
| ATOM | 4071 | CD   | ARG | X | 272 | 53.380 | 70.709 | 43.681 | 0.00 | 0.00 |
| ATOM | 4072 | HD2  | ARG | X | 272 | 54.286 | 70.191 | 43.366 | 0.00 | 0.00 |
| ATOM | 4073 | HD3  | ARG | X | 272 | 52.949 | 71.260 | 42.845 | 0.00 | 0.00 |
| ATOM | 4074 | NE   | ARG | X | 272 | 53.655 | 71.700 | 44.737 | 0.00 | 0.00 |
| ATOM | 4075 | HE   | ARG | X | 272 | 52.905 | 72.331 | 44.982 | 0.00 | 0.00 |
| ATOM | 4076 | CZ   | ARG | X | 272 | 54.733 | 71.686 | 45.435 | 0.00 | 0.00 |
| ATOM | 4077 | NH1  | ARG | X | 272 | 55.708 | 70.909 | 45.162 | 0.00 | 0.00 |
| ATOM | 4078 | HH11 | ARG | X | 272 | 55.543 | 70.103 | 44.577 | 0.00 | 0.00 |
| ATOM | 4079 | HH12 | ARG | X | 272 | 56.508 | 70.797 | 45.769 | 0.00 | 0.00 |
| ATOM | 4080 | NH2  | ARG | X | 272 | 54.920 | 72.516 | 46.429 | 0.00 | 0.00 |
| ATOM | 4081 | HH21 | ARG | X | 272 | 54.213 | 73.233 | 46.506 | 0.00 | 0.00 |
| ATOM | 4082 | HH22 | ARG | X | 272 | 55.665 | 72.315 | 47.080 | 0.00 | 0.00 |
| ATOM | 4083 | C    | ARG | X | 272 | 50.642 | 68.175 | 40.989 | 0.00 | 0.00 |
| ATOM | 4084 | O    | ARG | X | 272 | 49.691 | 67.440 | 41.230 | 0.00 | 0.00 |
| ATOM | 4085 | N    | PRO | X | 273 | 51.400 | 68.112 | 39.873 | 0.00 | 0.00 |
| ATOM | 4086 | CD   | PRO | X | 273 | 52.316 | 69.196 | 39.468 | 0.00 | 0.00 |
| ATOM | 4087 | HD2  | PRO | X | 273 | 53.321 | 69.016 | 39.850 | 0.00 | 0.00 |
| ATOM | 4088 | HD3  | PRO | X | 273 | 51.892 | 70.172 | 39.704 | 0.00 | 0.00 |
| ATOM | 4089 | CG   | PRO | X | 273 | 52.440 | 69.112 | 37.988 | 0.00 | 0.00 |
| ATOM | 4090 | HG2  | PRO | X | 273 | 53.460 | 69.179 | 37.610 | 0.00 | 0.00 |
| ATOM | 4091 | HG3  | PRO | X | 273 | 51.769 | 69.861 | 37.568 | 0.00 | 0.00 |
| ATOM | 4092 | CB   | PRO | X | 273 | 51.870 | 67.791 | 37.549 | 0.00 | 0.00 |
| ATOM | 4093 | HB2  | PRO | X | 273 | 52.660 | 67.106 | 37.241 | 0.00 | 0.00 |
| ATOM | 4094 | HB3  | PRO | X | 273 | 51.175 | 67.821 | 36.709 | 0.00 | 0.00 |
| ATOM | 4095 | CA   | PRO | X | 273 | 50.968 | 67.323 | 38.761 | 0.00 | 0.00 |
| ATOM | 4096 | HA   | PRO | X | 273 | 49.929 | 67.599 | 38.582 | 0.00 | 0.00 |
| ATOM | 4097 | C    | PRO | X | 273 | 51.197 | 65.846 | 39.083 | 0.00 | 0.00 |
| ATOM | 4098 | O    | PRO | X | 273 | 52.235 | 65.537 | 39.570 | 0.00 | 0.00 |
| ATOM | 4099 | N    | ALA | X | 274 | 50.247 | 64.959 | 38.702 | 0.00 | 0.00 |
| ATOM | 4100 | H    | ALA | X | 274 | 49.487 | 65.290 | 38.124 | 0.00 | 0.00 |
| ATOM | 4101 | CA   | ALA | X | 274 | 50.221 | 63.538 | 39.120 | 0.00 | 0.00 |
| ATOM | 4102 | HA   | ALA | X | 274 | 50.093 | 63.475 | 40.201 | 0.00 | 0.00 |
| ATOM | 4103 | CB   | ALA | X | 274 | 49.020 | 62.944 | 38.445 | 0.00 | 0.00 |
| ATOM | 4104 | HB1  | ALA | X | 274 | 49.067 | 61.855 | 38.447 | 0.00 | 0.00 |
| ATOM | 4105 | HB2  | ALA | X | 274 | 48.916 | 63.257 | 37.407 | 0.00 | 0.00 |

|      |      |      |     |   |     |        |        |        |      |      |
|------|------|------|-----|---|-----|--------|--------|--------|------|------|
| ATOM | 4106 | HB3  | ALA | X | 274 | 48.096 | 63.204 | 38.962 | 0.00 | 0.00 |
| ATOM | 4107 | C    | ALA | X | 274 | 51.510 | 62.810 | 38.722 | 0.00 | 0.00 |
| ATOM | 4108 | O    | ALA | X | 274 | 52.068 | 62.008 | 39.420 | 0.00 | 0.00 |
| ATOM | 4109 | N    | GLN | X | 275 | 51.964 | 63.164 | 37.504 | 0.00 | 0.00 |
| ATOM | 4110 | H    | GLN | X | 275 | 51.343 | 63.756 | 36.972 | 0.00 | 0.00 |
| ATOM | 4111 | CA   | GLN | X | 275 | 53.294 | 62.799 | 36.888 | 0.00 | 0.00 |
| ATOM | 4112 | HA   | GLN | X | 275 | 53.228 | 61.777 | 36.517 | 0.00 | 0.00 |
| ATOM | 4113 | CB   | GLN | X | 275 | 53.503 | 63.751 | 35.654 | 0.00 | 0.00 |
| ATOM | 4114 | HB2  | GLN | X | 275 | 52.539 | 63.816 | 35.149 | 0.00 | 0.00 |
| ATOM | 4115 | HB3  | GLN | X | 275 | 53.677 | 64.769 | 36.001 | 0.00 | 0.00 |
| ATOM | 4116 | CG   | GLN | X | 275 | 54.544 | 63.288 | 34.600 | 0.00 | 0.00 |
| ATOM | 4117 | HG2  | GLN | X | 275 | 55.543 | 63.165 | 35.017 | 0.00 | 0.00 |
| ATOM | 4118 | HG3  | GLN | X | 275 | 54.231 | 62.305 | 34.247 | 0.00 | 0.00 |
| ATOM | 4119 | CD   | GLN | X | 275 | 54.723 | 64.174 | 33.347 | 0.00 | 0.00 |
| ATOM | 4120 | OE1  | GLN | X | 275 | 54.649 | 65.362 | 33.413 | 0.00 | 0.00 |
| ATOM | 4121 | NE2  | GLN | X | 275 | 54.969 | 63.536 | 32.209 | 0.00 | 0.00 |
| ATOM | 4122 | HE21 | GLN | X | 275 | 55.041 | 64.097 | 31.372 | 0.00 | 0.00 |
| ATOM | 4123 | HE22 | GLN | X | 275 | 54.920 | 62.546 | 32.014 | 0.00 | 0.00 |
| ATOM | 4124 | C    | GLN | X | 275 | 54.490 | 62.916 | 37.833 | 0.00 | 0.00 |
| ATOM | 4125 | O    | GLN | X | 275 | 55.475 | 62.237 | 37.677 | 0.00 | 0.00 |
| ATOM | 4126 | N    | VAL | X | 276 | 54.407 | 63.888 | 38.746 | 0.00 | 0.00 |
| ATOM | 4127 | H    | VAL | X | 276 | 53.510 | 64.351 | 38.778 | 0.00 | 0.00 |
| ATOM | 4128 | CA   | VAL | X | 276 | 55.454 | 64.159 | 39.758 | 0.00 | 0.00 |
| ATOM | 4129 | HA   | VAL | X | 276 | 56.465 | 63.873 | 39.470 | 0.00 | 0.00 |
| ATOM | 4130 | CB   | VAL | X | 276 | 55.521 | 65.761 | 40.014 | 0.00 | 0.00 |
| ATOM | 4131 | HB   | VAL | X | 276 | 54.593 | 66.084 | 40.485 | 0.00 | 0.00 |
| ATOM | 4132 | CG1  | VAL | X | 276 | 56.682 | 66.038 | 41.020 | 0.00 | 0.00 |
| ATOM | 4133 | HG11 | VAL | X | 276 | 56.845 | 67.114 | 41.083 | 0.00 | 0.00 |
| ATOM | 4134 | HG12 | VAL | X | 276 | 56.430 | 65.771 | 42.046 | 0.00 | 0.00 |
| ATOM | 4135 | HG13 | VAL | X | 276 | 57.580 | 65.523 | 40.681 | 0.00 | 0.00 |
| ATOM | 4136 | CG2  | VAL | X | 276 | 55.625 | 66.618 | 38.700 | 0.00 | 0.00 |
| ATOM | 4137 | HG21 | VAL | X | 276 | 54.852 | 66.369 | 37.973 | 0.00 | 0.00 |
| ATOM | 4138 | HG22 | VAL | X | 276 | 56.559 | 66.273 | 38.255 | 0.00 | 0.00 |
| ATOM | 4139 | HG23 | VAL | X | 276 | 55.621 | 67.700 | 38.829 | 0.00 | 0.00 |
| ATOM | 4140 | C    | VAL | X | 276 | 55.050 | 63.389 | 41.054 | 0.00 | 0.00 |
| ATOM | 4141 | O    | VAL | X | 276 | 55.948 | 62.738 | 41.553 | 0.00 | 0.00 |
| ATOM | 4142 | N    | LEU | X | 277 | 53.744 | 63.402 | 41.410 | 0.00 | 0.00 |
| ATOM | 4143 | H    | LEU | X | 277 | 53.058 | 63.973 | 40.937 | 0.00 | 0.00 |
| ATOM | 4144 | CA   | LEU | X | 277 | 53.317 | 62.721 | 42.560 | 0.00 | 0.00 |
| ATOM | 4145 | HA   | LEU | X | 277 | 53.852 | 63.161 | 43.401 | 0.00 | 0.00 |
| ATOM | 4146 | CB   | LEU | X | 277 | 51.811 | 62.903 | 42.775 | 0.00 | 0.00 |
| ATOM | 4147 | HB2  | LEU | X | 277 | 51.298 | 62.434 | 41.935 | 0.00 | 0.00 |
| ATOM | 4148 | HB3  | LEU | X | 277 | 51.577 | 62.425 | 43.726 | 0.00 | 0.00 |
| ATOM | 4149 | CG   | LEU | X | 277 | 51.501 | 64.402 | 43.060 | 0.00 | 0.00 |
| ATOM | 4150 | HG   | LEU | X | 277 | 51.825 | 65.141 | 42.328 | 0.00 | 0.00 |
| ATOM | 4151 | CD1  | LEU | X | 277 | 50.063 | 64.566 | 43.044 | 0.00 | 0.00 |
| ATOM | 4152 | HD11 | LEU | X | 277 | 49.639 | 64.137 | 42.136 | 0.00 | 0.00 |
| ATOM | 4153 | HD12 | LEU | X | 277 | 49.769 | 65.614 | 43.103 | 0.00 | 0.00 |
| ATOM | 4154 | HD13 | LEU | X | 277 | 49.652 | 63.948 | 43.842 | 0.00 | 0.00 |
| ATOM | 4155 | CD2  | LEU | X | 277 | 52.022 | 64.824 | 44.428 | 0.00 | 0.00 |
| ATOM | 4156 | HD21 | LEU | X | 277 | 53.109 | 64.819 | 44.347 | 0.00 | 0.00 |
| ATOM | 4157 | HD22 | LEU | X | 277 | 51.805 | 65.786 | 44.893 | 0.00 | 0.00 |
| ATOM | 4158 | HD23 | LEU | X | 277 | 51.880 | 64.053 | 45.186 | 0.00 | 0.00 |
| ATOM | 4159 | C    | LEU | X | 277 | 53.694 | 61.239 | 42.517 | 0.00 | 0.00 |
| ATOM | 4160 | O    | LEU | X | 277 | 54.108 | 60.743 | 43.563 | 0.00 | 0.00 |
| ATOM | 4161 | N    | VAL | X | 278 | 53.524 | 60.543 | 41.370 | 0.00 | 0.00 |
| ATOM | 4162 | H    | VAL | X | 278 | 52.965 | 60.941 | 40.629 | 0.00 | 0.00 |
| ATOM | 4163 | CA   | VAL | X | 278 | 53.712 | 59.106 | 41.395 | 0.00 | 0.00 |
| ATOM | 4164 | HA   | VAL | X | 278 | 53.155 | 58.796 | 42.279 | 0.00 | 0.00 |
| ATOM | 4165 | CB   | VAL | X | 278 | 53.011 | 58.360 | 40.147 | 0.00 | 0.00 |
| ATOM | 4166 | HB   | VAL | X | 278 | 53.196 | 57.286 | 40.129 | 0.00 | 0.00 |
| ATOM | 4167 | CG1  | VAL | X | 278 | 51.529 | 58.542 | 40.289 | 0.00 | 0.00 |
| ATOM | 4168 | HG11 | VAL | X | 278 | 51.050 | 57.857 | 39.590 | 0.00 | 0.00 |
| ATOM | 4169 | HG12 | VAL | X | 278 | 51.157 | 58.257 | 41.274 | 0.00 | 0.00 |
| ATOM | 4170 | HG13 | VAL | X | 278 | 51.326 | 59.560 | 39.957 | 0.00 | 0.00 |
| ATOM | 4171 | CG2  | VAL | X | 278 | 53.600 | 59.011 | 38.851 | 0.00 | 0.00 |
| ATOM | 4172 | HG21 | VAL | X | 278 | 54.688 | 58.938 | 38.868 | 0.00 | 0.00 |

|      |      |      |     |   |     |        |        |        |      |      |
|------|------|------|-----|---|-----|--------|--------|--------|------|------|
| ATOM | 4173 | HG22 | VAL | X | 278 | 53.445 | 60.089 | 38.808 | 0.00 | 0.00 |
| ATOM | 4174 | HG23 | VAL | X | 278 | 53.289 | 58.514 | 37.932 | 0.00 | 0.00 |
| ATOM | 4175 | C    | VAL | X | 278 | 55.203 | 58.598 | 41.604 | 0.00 | 0.00 |
| ATOM | 4176 | O    | VAL | X | 278 | 55.378 | 57.458 | 41.976 | 0.00 | 0.00 |
| ATOM | 4177 | N    | ASN | X | 279 | 56.179 | 59.474 | 41.299 | 0.00 | 0.00 |
| ATOM | 4178 | H    | ASN | X | 279 | 55.865 | 60.251 | 40.735 | 0.00 | 0.00 |
| ATOM | 4179 | CA   | ASN | X | 279 | 57.649 | 59.330 | 41.688 | 0.00 | 0.00 |
| ATOM | 4180 | HA   | ASN | X | 279 | 58.027 | 58.366 | 41.345 | 0.00 | 0.00 |
| ATOM | 4181 | CB   | ASN | X | 279 | 58.437 | 60.363 | 40.875 | 0.00 | 0.00 |
| ATOM | 4182 | HB2  | ASN | X | 279 | 58.205 | 60.162 | 39.829 | 0.00 | 0.00 |
| ATOM | 4183 | HB3  | ASN | X | 279 | 58.054 | 61.348 | 41.142 | 0.00 | 0.00 |
| ATOM | 4184 | CG   | ASN | X | 279 | 59.936 | 60.272 | 41.046 | 0.00 | 0.00 |
| ATOM | 4185 | OD1  | ASN | X | 279 | 60.601 | 61.155 | 41.531 | 0.00 | 0.00 |
| ATOM | 4186 | ND2  | ASN | X | 279 | 60.481 | 59.114 | 40.776 | 0.00 | 0.00 |
| ATOM | 4187 | HD21 | ASN | X | 279 | 61.442 | 59.023 | 41.072 | 0.00 | 0.00 |
| ATOM | 4188 | HD22 | ASN | X | 279 | 60.092 | 58.379 | 40.203 | 0.00 | 0.00 |
| ATOM | 4189 | C    | ASN | X | 279 | 57.954 | 59.416 | 43.137 | 0.00 | 0.00 |
| ATOM | 4190 | O    | ASN | X | 279 | 58.817 | 58.739 | 43.676 | 0.00 | 0.00 |
| ATOM | 4191 | N    | HIE | X | 280 | 57.259 | 60.292 | 43.872 | 0.00 | 0.00 |
| ATOM | 4192 | H    | HIE | X | 280 | 56.446 | 60.717 | 43.449 | 0.00 | 0.00 |
| ATOM | 4193 | CA   | HIE | X | 280 | 57.358 | 60.540 | 45.307 | 0.00 | 0.00 |
| ATOM | 4194 | HA   | HIE | X | 280 | 58.361 | 60.331 | 45.679 | 0.00 | 0.00 |
| ATOM | 4195 | CB   | HIE | X | 280 | 56.996 | 61.989 | 45.616 | 0.00 | 0.00 |
| ATOM | 4196 | HB2  | HIE | X | 280 | 56.198 | 62.293 | 44.939 | 0.00 | 0.00 |
| ATOM | 4197 | HB3  | HIE | X | 280 | 56.571 | 62.242 | 46.588 | 0.00 | 0.00 |
| ATOM | 4198 | CG   | HIE | X | 280 | 58.141 | 63.031 | 45.442 | 0.00 | 0.00 |
| ATOM | 4199 | ND1  | HIE | X | 280 | 58.770 | 63.614 | 46.501 | 0.00 | 0.00 |
| ATOM | 4200 | CE1  | HIE | X | 280 | 59.556 | 64.574 | 45.935 | 0.00 | 0.00 |
| ATOM | 4201 | HE1  | HIE | X | 280 | 60.132 | 65.278 | 46.516 | 0.00 | 0.00 |
| ATOM | 4202 | NE2  | HIE | X | 280 | 59.429 | 64.577 | 44.610 | 0.00 | 0.00 |
| ATOM | 4203 | HE2  | HIE | X | 280 | 59.962 | 65.217 | 44.039 | 0.00 | 0.00 |
| ATOM | 4204 | CD2  | HIE | X | 280 | 58.553 | 63.594 | 44.283 | 0.00 | 0.00 |
| ATOM | 4205 | HD2  | HIE | X | 280 | 58.223 | 63.385 | 43.276 | 0.00 | 0.00 |
| ATOM | 4206 | C    | HIE | X | 280 | 56.433 | 59.576 | 46.065 | 0.00 | 0.00 |
| ATOM | 4207 | O    | HIE | X | 280 | 56.704 | 59.353 | 47.283 | 0.00 | 0.00 |
| ATOM | 4208 | N    | GLU | X | 281 | 55.400 | 58.896 | 45.421 | 0.00 | 0.00 |
| ATOM | 4209 | H    | GLU | X | 281 | 55.158 | 59.132 | 44.470 | 0.00 | 0.00 |
| ATOM | 4210 | CA   | GLU | X | 281 | 54.546 | 57.894 | 46.090 | 0.00 | 0.00 |
| ATOM | 4211 | HA   | GLU | X | 281 | 54.327 | 58.261 | 47.093 | 0.00 | 0.00 |
| ATOM | 4212 | CB   | GLU | X | 281 | 53.306 | 57.613 | 45.210 | 0.00 | 0.00 |
| ATOM | 4213 | HB2  | GLU | X | 281 | 52.836 | 58.576 | 45.008 | 0.00 | 0.00 |
| ATOM | 4214 | HB3  | GLU | X | 281 | 53.501 | 57.239 | 44.205 | 0.00 | 0.00 |
| ATOM | 4215 | CG   | GLU | X | 281 | 52.306 | 56.689 | 45.839 | 0.00 | 0.00 |
| ATOM | 4216 | HG2  | GLU | X | 281 | 52.882 | 55.841 | 46.211 | 0.00 | 0.00 |
| ATOM | 4217 | HG3  | GLU | X | 281 | 51.832 | 57.196 | 46.679 | 0.00 | 0.00 |
| ATOM | 4218 | CD   | GLU | X | 281 | 51.227 | 56.198 | 44.891 | 0.00 | 0.00 |
| ATOM | 4219 | OE1  | GLU | X | 281 | 50.559 | 57.119 | 44.403 | 0.00 | 0.00 |
| ATOM | 4220 | OE2  | GLU | X | 281 | 51.037 | 54.982 | 44.706 | 0.00 | 0.00 |
| ATOM | 4221 | C    | GLU | X | 281 | 55.224 | 56.502 | 46.273 | 0.00 | 0.00 |
| ATOM | 4222 | O    | GLU | X | 281 | 54.944 | 55.944 | 47.310 | 0.00 | 0.00 |
| ATOM | 4223 | N    | TRP | X | 282 | 56.059 | 56.028 | 45.440 | 0.00 | 0.00 |
| ATOM | 4224 | H    | TRP | X | 282 | 56.065 | 56.429 | 44.513 | 0.00 | 0.00 |
| ATOM | 4225 | CA   | TRP | X | 282 | 56.634 | 54.694 | 45.541 | 0.00 | 0.00 |
| ATOM | 4226 | HA   | TRP | X | 282 | 55.905 | 53.884 | 45.543 | 0.00 | 0.00 |
| ATOM | 4227 | CB   | TRP | X | 282 | 57.658 | 54.490 | 44.411 | 0.00 | 0.00 |
| ATOM | 4228 | HB2  | TRP | X | 282 | 57.140 | 54.636 | 43.463 | 0.00 | 0.00 |
| ATOM | 4229 | HB3  | TRP | X | 282 | 58.545 | 55.117 | 44.497 | 0.00 | 0.00 |
| ATOM | 4230 | CG   | TRP | X | 282 | 58.160 | 53.062 | 44.446 | 0.00 | 0.00 |
| ATOM | 4231 | CD1  | TRP | X | 282 | 57.370 | 51.937 | 44.390 | 0.00 | 0.00 |
| ATOM | 4232 | HD1  | TRP | X | 282 | 56.290 | 51.906 | 44.360 | 0.00 | 0.00 |
| ATOM | 4233 | NE1  | TRP | X | 282 | 58.229 | 50.893 | 44.195 | 0.00 | 0.00 |
| ATOM | 4234 | HE1  | TRP | X | 282 | 57.930 | 49.930 | 44.152 | 0.00 | 0.00 |
| ATOM | 4235 | CE2  | TRP | X | 282 | 59.519 | 51.250 | 44.292 | 0.00 | 0.00 |
| ATOM | 4236 | CZ2  | TRP | X | 282 | 60.675 | 50.537 | 44.287 | 0.00 | 0.00 |
| ATOM | 4237 | HZ2  | TRP | X | 282 | 60.669 | 49.458 | 44.251 | 0.00 | 0.00 |
| ATOM | 4238 | CH2  | TRP | X | 282 | 61.936 | 51.131 | 44.297 | 0.00 | 0.00 |
| ATOM | 4239 | HH2  | TRP | X | 282 | 62.845 | 50.576 | 44.115 | 0.00 | 0.00 |



|      |      |      |     |   |     |        |        |        |      |      |
|------|------|------|-----|---|-----|--------|--------|--------|------|------|
| ATOM | 4240 | CZ3  | TRP | X | 282 | 62.033 | 52.553 | 44.410 | 0.00 | 0.00 |
| ATOM | 4241 | HZ3  | TRP | X | 282 | 62.984 | 53.047 | 44.543 | 0.00 | 0.00 |
| ATOM | 4242 | CE3  | TRP | X | 282 | 60.828 | 53.318 | 44.389 | 0.00 | 0.00 |
| ATOM | 4243 | HE3  | TRP | X | 282 | 60.914 | 54.380 | 44.564 | 0.00 | 0.00 |
| ATOM | 4244 | CD2  | TRP | X | 282 | 59.544 | 52.718 | 44.397 | 0.00 | 0.00 |
| ATOM | 4245 | C    | TRP | X | 282 | 57.381 | 54.570 | 46.900 | 0.00 | 0.00 |
| ATOM | 4246 | O    | TRP | X | 282 | 57.553 | 53.490 | 47.535 | 0.00 | 0.00 |
| ATOM | 4247 | N    | HIE | X | 283 | 57.963 | 55.698 | 47.338 | 0.00 | 0.00 |
| ATOM | 4248 | H    | HIE | X | 283 | 58.130 | 56.406 | 46.637 | 0.00 | 0.00 |
| ATOM | 4249 | CA   | HIE | X | 283 | 58.623 | 55.773 | 48.635 | 0.00 | 0.00 |
| ATOM | 4250 | HA   | HIE | X | 283 | 59.461 | 55.076 | 48.648 | 0.00 | 0.00 |
| ATOM | 4251 | CB   | HIE | X | 283 | 59.159 | 57.199 | 48.801 | 0.00 | 0.00 |
| ATOM | 4252 | HB2  | HIE | X | 283 | 58.324 | 57.895 | 48.884 | 0.00 | 0.00 |
| ATOM | 4253 | HB3  | HIE | X | 283 | 59.683 | 57.234 | 49.756 | 0.00 | 0.00 |
| ATOM | 4254 | CG   | HIE | X | 283 | 60.198 | 57.590 | 47.760 | 0.00 | 0.00 |
| ATOM | 4255 | ND1  | HIE | X | 283 | 59.890 | 58.323 | 46.640 | 0.00 | 0.00 |
| ATOM | 4256 | CE1  | HIE | X | 283 | 61.142 | 58.552 | 46.177 | 0.00 | 0.00 |
| ATOM | 4257 | HE1  | HIE | X | 283 | 61.272 | 59.076 | 45.241 | 0.00 | 0.00 |
| ATOM | 4258 | NE2  | HIE | X | 283 | 62.089 | 57.997 | 46.869 | 0.00 | 0.00 |
| ATOM | 4259 | HE2  | HIE | X | 283 | 63.070 | 58.152 | 46.682 | 0.00 | 0.00 |
| ATOM | 4260 | CD2  | HIE | X | 283 | 61.503 | 57.424 | 47.903 | 0.00 | 0.00 |
| ATOM | 4261 | HD2  | HIE | X | 283 | 62.017 | 57.026 | 48.765 | 0.00 | 0.00 |
| ATOM | 4262 | C    | HIE | X | 283 | 57.679 | 55.347 | 49.789 | 0.00 | 0.00 |
| ATOM | 4263 | O    | HIE | X | 283 | 58.189 | 54.865 | 50.809 | 0.00 | 0.00 |
| ATOM | 4264 | N    | VAL | X | 284 | 56.337 | 55.567 | 49.616 | 0.00 | 0.00 |
| ATOM | 4265 | H    | VAL | X | 284 | 55.978 | 55.865 | 48.720 | 0.00 | 0.00 |
| ATOM | 4266 | CA   | VAL | X | 284 | 55.322 | 55.330 | 50.686 | 0.00 | 0.00 |
| ATOM | 4267 | HA   | VAL | X | 284 | 55.872 | 55.528 | 51.606 | 0.00 | 0.00 |
| ATOM | 4268 | CB   | VAL | X | 284 | 54.133 | 56.290 | 50.664 | 0.00 | 0.00 |
| ATOM | 4269 | HB   | VAL | X | 284 | 53.793 | 56.258 | 51.699 | 0.00 | 0.00 |
| ATOM | 4270 | CG1  | VAL | X | 284 | 54.495 | 57.751 | 50.455 | 0.00 | 0.00 |
| ATOM | 4271 | HG11 | VAL | X | 284 | 54.639 | 57.907 | 49.386 | 0.00 | 0.00 |
| ATOM | 4272 | HG12 | VAL | X | 284 | 53.784 | 58.465 | 50.869 | 0.00 | 0.00 |
| ATOM | 4273 | HG13 | VAL | X | 284 | 55.378 | 57.999 | 51.044 | 0.00 | 0.00 |
| ATOM | 4274 | CG2  | VAL | X | 284 | 52.891 | 55.873 | 49.762 | 0.00 | 0.00 |
| ATOM | 4275 | HG21 | VAL | X | 284 | 52.182 | 56.695 | 49.860 | 0.00 | 0.00 |
| ATOM | 4276 | HG22 | VAL | X | 284 | 52.534 | 54.939 | 50.197 | 0.00 | 0.00 |
| ATOM | 4277 | HG23 | VAL | X | 284 | 53.140 | 55.698 | 48.715 | 0.00 | 0.00 |
| ATOM | 4278 | C    | VAL | X | 284 | 54.894 | 53.808 | 50.815 | 0.00 | 0.00 |
| ATOM | 4279 | O    | VAL | X | 284 | 54.313 | 53.396 | 51.824 | 0.00 | 0.00 |
| ATOM | 4280 | N    | LEU | X | 285 | 55.278 | 52.998 | 49.880 | 0.00 | 0.00 |
| ATOM | 4281 | H    | LEU | X | 285 | 55.697 | 53.316 | 49.018 | 0.00 | 0.00 |
| ATOM | 4282 | CA   | LEU | X | 285 | 55.319 | 51.525 | 50.155 | 0.00 | 0.00 |
| ATOM | 4283 | HA   | LEU | X | 285 | 54.304 | 51.127 | 50.162 | 0.00 | 0.00 |
| ATOM | 4284 | CB   | LEU | X | 285 | 55.996 | 50.793 | 49.019 | 0.00 | 0.00 |
| ATOM | 4285 | HB2  | LEU | X | 285 | 55.559 | 51.134 | 48.081 | 0.00 | 0.00 |
| ATOM | 4286 | HB3  | LEU | X | 285 | 57.032 | 51.105 | 48.889 | 0.00 | 0.00 |
| ATOM | 4287 | CG   | LEU | X | 285 | 55.839 | 49.286 | 49.021 | 0.00 | 0.00 |
| ATOM | 4288 | HG   | LEU | X | 285 | 54.955 | 48.991 | 49.586 | 0.00 | 0.00 |
| ATOM | 4289 | CD1  | LEU | X | 285 | 55.778 | 48.669 | 47.680 | 0.00 | 0.00 |
| ATOM | 4290 | HD11 | LEU | X | 285 | 55.046 | 49.125 | 47.014 | 0.00 | 0.00 |
| ATOM | 4291 | HD12 | LEU | X | 285 | 55.385 | 47.656 | 47.771 | 0.00 | 0.00 |
| ATOM | 4292 | HD13 | LEU | X | 285 | 56.712 | 48.690 | 47.118 | 0.00 | 0.00 |
| ATOM | 4293 | CD2  | LEU | X | 285 | 56.964 | 48.586 | 49.744 | 0.00 | 0.00 |
| ATOM | 4294 | HD21 | LEU | X | 285 | 57.955 | 48.977 | 49.512 | 0.00 | 0.00 |
| ATOM | 4295 | HD22 | LEU | X | 285 | 56.832 | 48.685 | 50.821 | 0.00 | 0.00 |
| ATOM | 4296 | HD23 | LEU | X | 285 | 57.084 | 47.561 | 49.393 | 0.00 | 0.00 |
| ATOM | 4297 | C    | LEU | X | 285 | 56.060 | 51.273 | 51.436 | 0.00 | 0.00 |
| ATOM | 4298 | O    | LEU | X | 285 | 57.171 | 51.745 | 51.612 | 0.00 | 0.00 |
| ATOM | 4299 | N    | PRO | X | 286 | 55.466 | 50.560 | 52.437 | 0.00 | 0.00 |
| ATOM | 4300 | CD   | PRO | X | 286 | 54.129 | 49.970 | 52.248 | 0.00 | 0.00 |
| ATOM | 4301 | HD2  | PRO | X | 286 | 54.063 | 49.289 | 51.400 | 0.00 | 0.00 |
| ATOM | 4302 | HD3  | PRO | X | 286 | 53.329 | 50.710 | 52.258 | 0.00 | 0.00 |
| ATOM | 4303 | CG   | PRO | X | 286 | 53.949 | 49.236 | 53.539 | 0.00 | 0.00 |
| ATOM | 4304 | HG2  | PRO | X | 286 | 54.275 | 48.206 | 53.396 | 0.00 | 0.00 |
| ATOM | 4305 | HG3  | PRO | X | 286 | 52.894 | 49.375 | 53.777 | 0.00 | 0.00 |
| ATOM | 4306 | CB   | PRO | X | 286 | 54.843 | 49.945 | 54.681 | 0.00 | 0.00 |

|      |      |      |     |   |     |        |        |        |      |      |
|------|------|------|-----|---|-----|--------|--------|--------|------|------|
| ATOM | 4307 | HB2  | PRO | X | 286 | 55.170 | 49.236 | 55.441 | 0.00 | 0.00 |
| ATOM | 4308 | HB3  | PRO | X | 286 | 54.238 | 50.771 | 55.056 | 0.00 | 0.00 |
| ATOM | 4309 | CA   | PRO | X | 286 | 55.917 | 50.512 | 53.790 | 0.00 | 0.00 |
| ATOM | 4310 | HA   | PRO | X | 286 | 56.196 | 51.432 | 54.303 | 0.00 | 0.00 |
| ATOM | 4311 | C    | PRO | X | 286 | 57.162 | 49.565 | 53.883 | 0.00 | 0.00 |
| ATOM | 4312 | O    | PRO | X | 286 | 57.128 | 48.488 | 53.248 | 0.00 | 0.00 |
| ATOM | 4313 | N    | GLN | X | 287 | 58.240 | 49.991 | 54.529 | 0.00 | 0.00 |
| ATOM | 4314 | H    | GLN | X | 287 | 58.282 | 50.889 | 54.989 | 0.00 | 0.00 |
| ATOM | 4315 | CA   | GLN | X | 287 | 59.519 | 49.280 | 54.566 | 0.00 | 0.00 |
| ATOM | 4316 | HA   | GLN | X | 287 | 59.912 | 49.035 | 53.579 | 0.00 | 0.00 |
| ATOM | 4317 | CB   | GLN | X | 287 | 60.722 | 50.131 | 55.168 | 0.00 | 0.00 |
| ATOM | 4318 | HB2  | GLN | X | 287 | 60.552 | 50.523 | 56.171 | 0.00 | 0.00 |
| ATOM | 4319 | HB3  | GLN | X | 287 | 61.621 | 49.516 | 55.175 | 0.00 | 0.00 |
| ATOM | 4320 | CG   | GLN | X | 287 | 61.119 | 51.430 | 54.403 | 0.00 | 0.00 |
| ATOM | 4321 | HG2  | GLN | X | 287 | 61.576 | 51.145 | 53.455 | 0.00 | 0.00 |
| ATOM | 4322 | HG3  | GLN | X | 287 | 60.238 | 52.018 | 54.145 | 0.00 | 0.00 |
| ATOM | 4323 | CD   | GLN | X | 287 | 62.053 | 52.278 | 55.239 | 0.00 | 0.00 |
| ATOM | 4324 | OE1  | GLN | X | 287 | 63.251 | 52.184 | 55.289 | 0.00 | 0.00 |
| ATOM | 4325 | NE2  | GLN | X | 287 | 61.527 | 53.195 | 56.022 | 0.00 | 0.00 |
| ATOM | 4326 | HE21 | GLN | X | 287 | 62.260 | 53.653 | 56.544 | 0.00 | 0.00 |
| ATOM | 4327 | HE22 | GLN | X | 287 | 60.527 | 53.233 | 56.156 | 0.00 | 0.00 |
| ATOM | 4328 | C    | GLN | X | 287 | 59.372 | 47.958 | 55.439 | 0.00 | 0.00 |
| ATOM | 4329 | O    | GLN | X | 287 | 58.327 | 47.822 | 56.123 | 0.00 | 0.00 |
| ATOM | 4330 | N    | GLU | X | 288 | 60.354 | 47.032 | 55.381 | 0.00 | 0.00 |
| ATOM | 4331 | H    | GLU | X | 288 | 61.175 | 47.286 | 54.851 | 0.00 | 0.00 |
| ATOM | 4332 | CA   | GLU | X | 288 | 60.483 | 45.854 | 56.228 | 0.00 | 0.00 |
| ATOM | 4333 | HA   | GLU | X | 288 | 61.413 | 45.403 | 55.882 | 0.00 | 0.00 |
| ATOM | 4334 | CB   | GLU | X | 288 | 60.538 | 46.365 | 57.711 | 0.00 | 0.00 |
| ATOM | 4335 | HB2  | GLU | X | 288 | 59.585 | 46.848 | 57.926 | 0.00 | 0.00 |
| ATOM | 4336 | HB3  | GLU | X | 288 | 60.523 | 45.499 | 58.373 | 0.00 | 0.00 |
| ATOM | 4337 | CG   | GLU | X | 288 | 61.739 | 47.308 | 57.960 | 0.00 | 0.00 |
| ATOM | 4338 | HG2  | GLU | X | 288 | 61.840 | 47.950 | 57.085 | 0.00 | 0.00 |
| ATOM | 4339 | HG3  | GLU | X | 288 | 61.656 | 47.981 | 58.813 | 0.00 | 0.00 |
| ATOM | 4340 | CD   | GLU | X | 288 | 63.026 | 46.533 | 58.174 | 0.00 | 0.00 |
| ATOM | 4341 | OE1  | GLU | X | 288 | 63.351 | 46.215 | 59.348 | 0.00 | 0.00 |
| ATOM | 4342 | OE2  | GLU | X | 288 | 63.711 | 46.145 | 57.185 | 0.00 | 0.00 |
| ATOM | 4343 | C    | GLU | X | 288 | 59.228 | 44.929 | 55.956 | 0.00 | 0.00 |
| ATOM | 4344 | O    | GLU | X | 288 | 58.470 | 44.660 | 56.894 | 0.00 | 0.00 |
| ATOM | 4345 | N    | SER | X | 289 | 58.920 | 44.598 | 54.690 | 0.00 | 0.00 |
| ATOM | 4346 | H    | SER | X | 289 | 59.628 | 44.772 | 53.991 | 0.00 | 0.00 |
| ATOM | 4347 | CA   | SER | X | 289 | 57.563 | 44.093 | 54.251 | 0.00 | 0.00 |
| ATOM | 4348 | HA   | SER | X | 289 | 57.340 | 43.328 | 54.995 | 0.00 | 0.00 |
| ATOM | 4349 | CB   | SER | X | 289 | 56.512 | 45.194 | 54.143 | 0.00 | 0.00 |
| ATOM | 4350 | HB2  | SER | X | 289 | 56.784 | 45.895 | 53.354 | 0.00 | 0.00 |
| ATOM | 4351 | HB3  | SER | X | 289 | 55.557 | 44.725 | 53.908 | 0.00 | 0.00 |
| ATOM | 4352 | OG   | SER | X | 289 | 56.260 | 45.944 | 55.311 | 0.00 | 0.00 |
| ATOM | 4353 | HG   | SER | X | 289 | 57.020 | 46.512 | 55.456 | 0.00 | 0.00 |
| ATOM | 4354 | C    | SER | X | 289 | 57.679 | 43.377 | 52.905 | 0.00 | 0.00 |
| ATOM | 4355 | O    | SER | X | 289 | 58.464 | 43.831 | 52.070 | 0.00 | 0.00 |
| ATOM | 4356 | N    | VAL | X | 290 | 56.881 | 42.296 | 52.644 | 0.00 | 0.00 |
| ATOM | 4357 | H    | VAL | X | 290 | 56.182 | 42.028 | 53.322 | 0.00 | 0.00 |
| ATOM | 4358 | CA   | VAL | X | 290 | 56.539 | 41.817 | 51.294 | 0.00 | 0.00 |
| ATOM | 4359 | HA   | VAL | X | 290 | 56.783 | 42.610 | 50.587 | 0.00 | 0.00 |
| ATOM | 4360 | CB   | VAL | X | 290 | 57.326 | 40.519 | 50.937 | 0.00 | 0.00 |
| ATOM | 4361 | HB   | VAL | X | 290 | 56.840 | 40.083 | 50.065 | 0.00 | 0.00 |
| ATOM | 4362 | CG1  | VAL | X | 290 | 58.801 | 40.809 | 50.561 | 0.00 | 0.00 |
| ATOM | 4363 | HG11 | VAL | X | 290 | 59.292 | 40.915 | 51.528 | 0.00 | 0.00 |
| ATOM | 4364 | HG12 | VAL | X | 290 | 59.217 | 39.934 | 50.061 | 0.00 | 0.00 |
| ATOM | 4365 | HG13 | VAL | X | 290 | 58.916 | 41.680 | 49.916 | 0.00 | 0.00 |
| ATOM | 4366 | CG2  | VAL | X | 290 | 57.242 | 39.432 | 52.081 | 0.00 | 0.00 |
| ATOM | 4367 | HG21 | VAL | X | 290 | 57.628 | 38.456 | 51.787 | 0.00 | 0.00 |
| ATOM | 4368 | HG22 | VAL | X | 290 | 56.240 | 39.328 | 52.495 | 0.00 | 0.00 |
| ATOM | 4369 | HG23 | VAL | X | 290 | 57.911 | 39.589 | 52.927 | 0.00 | 0.00 |
| ATOM | 4370 | C    | VAL | X | 290 | 55.071 | 41.581 | 51.251 | 0.00 | 0.00 |
| ATOM | 4371 | O    | VAL | X | 290 | 54.523 | 41.168 | 52.250 | 0.00 | 0.00 |
| ATOM | 4372 | N    | PHE | X | 291 | 54.347 | 41.673 | 50.062 | 0.00 | 0.00 |
| ATOM | 4373 | H    | PHE | X | 291 | 54.817 | 41.886 | 49.194 | 0.00 | 0.00 |

|      |      |      |     |   |     |        |        |        |      |      |
|------|------|------|-----|---|-----|--------|--------|--------|------|------|
| ATOM | 4374 | CA   | PHE | X | 291 | 52.908 | 41.418 | 49.835 | 0.00 | 0.00 |
| ATOM | 4375 | HA   | PHE | X | 291 | 52.677 | 41.477 | 48.771 | 0.00 | 0.00 |
| ATOM | 4376 | CB   | PHE | X | 291 | 52.637 | 39.902 | 50.172 | 0.00 | 0.00 |
| ATOM | 4377 | HB2  | PHE | X | 291 | 53.549 | 39.407 | 49.840 | 0.00 | 0.00 |
| ATOM | 4378 | HB3  | PHE | X | 291 | 52.602 | 39.810 | 51.257 | 0.00 | 0.00 |
| ATOM | 4379 | CG   | PHE | X | 291 | 51.516 | 39.064 | 49.584 | 0.00 | 0.00 |
| ATOM | 4380 | CD1  | PHE | X | 291 | 50.372 | 39.701 | 48.995 | 0.00 | 0.00 |
| ATOM | 4381 | HD1  | PHE | X | 291 | 50.379 | 40.781 | 49.010 | 0.00 | 0.00 |
| ATOM | 4382 | CE1  | PHE | X | 291 | 49.387 | 38.945 | 48.352 | 0.00 | 0.00 |
| ATOM | 4383 | HE1  | PHE | X | 291 | 48.530 | 39.483 | 47.975 | 0.00 | 0.00 |
| ATOM | 4384 | CZ   | PHE | X | 291 | 49.579 | 37.525 | 48.258 | 0.00 | 0.00 |
| ATOM | 4385 | HZ   | PHE | X | 291 | 48.831 | 36.885 | 47.814 | 0.00 | 0.00 |
| ATOM | 4386 | CE2  | PHE | X | 291 | 50.635 | 36.847 | 48.903 | 0.00 | 0.00 |
| ATOM | 4387 | HE2  | PHE | X | 291 | 50.764 | 35.775 | 48.920 | 0.00 | 0.00 |
| ATOM | 4388 | CD2  | PHE | X | 291 | 51.632 | 37.648 | 49.528 | 0.00 | 0.00 |
| ATOM | 4389 | HD2  | PHE | X | 291 | 52.508 | 37.129 | 49.888 | 0.00 | 0.00 |
| ATOM | 4390 | C    | PHE | X | 291 | 52.126 | 42.508 | 50.558 | 0.00 | 0.00 |
| ATOM | 4391 | O    | PHE | X | 291 | 51.010 | 42.302 | 50.955 | 0.00 | 0.00 |
| ATOM | 4392 | N    | ARG | X | 292 | 52.713 | 43.687 | 50.655 | 0.00 | 0.00 |
| ATOM | 4393 | H    | ARG | X | 292 | 53.650 | 43.635 | 50.282 | 0.00 | 0.00 |
| ATOM | 4394 | CA   | ARG | X | 292 | 52.194 | 44.956 | 51.158 | 0.00 | 0.00 |
| ATOM | 4395 | HA   | ARG | X | 292 | 51.148 | 45.156 | 50.928 | 0.00 | 0.00 |
| ATOM | 4396 | CB   | ARG | X | 292 | 52.576 | 45.124 | 52.675 | 0.00 | 0.00 |
| ATOM | 4397 | HB2  | ARG | X | 292 | 53.623 | 44.927 | 52.903 | 0.00 | 0.00 |
| ATOM | 4398 | HB3  | ARG | X | 292 | 52.551 | 46.179 | 52.948 | 0.00 | 0.00 |
| ATOM | 4399 | CG   | ARG | X | 292 | 51.593 | 44.321 | 53.552 | 0.00 | 0.00 |
| ATOM | 4400 | HG2  | ARG | X | 292 | 50.674 | 44.813 | 53.232 | 0.00 | 0.00 |
| ATOM | 4401 | HG3  | ARG | X | 292 | 51.489 | 43.254 | 53.356 | 0.00 | 0.00 |
| ATOM | 4402 | CD   | ARG | X | 292 | 51.736 | 44.527 | 55.079 | 0.00 | 0.00 |
| ATOM | 4403 | HD2  | ARG | X | 292 | 52.516 | 43.915 | 55.530 | 0.00 | 0.00 |
| ATOM | 4404 | HD3  | ARG | X | 292 | 51.995 | 45.578 | 55.205 | 0.00 | 0.00 |
| ATOM | 4405 | NE   | ARG | X | 292 | 50.498 | 44.213 | 55.737 | 0.00 | 0.00 |
| ATOM | 4406 | HE   | ARG | X | 292 | 49.798 | 43.802 | 55.136 | 0.00 | 0.00 |
| ATOM | 4407 | CZ   | ARG | X | 292 | 50.124 | 44.729 | 56.923 | 0.00 | 0.00 |
| ATOM | 4408 | NH1  | ARG | X | 292 | 50.996 | 45.403 | 57.661 | 0.00 | 0.00 |
| ATOM | 4409 | HH11 | ARG | X | 292 | 51.977 | 45.450 | 57.425 | 0.00 | 0.00 |
| ATOM | 4410 | HH12 | ARG | X | 292 | 50.753 | 45.823 | 58.547 | 0.00 | 0.00 |
| ATOM | 4411 | NH2  | ARG | X | 292 | 48.923 | 44.646 | 57.365 | 0.00 | 0.00 |
| ATOM | 4412 | HH21 | ARG | X | 292 | 48.193 | 44.179 | 56.846 | 0.00 | 0.00 |
| ATOM | 4413 | HH22 | ARG | X | 292 | 48.653 | 44.911 | 58.302 | 0.00 | 0.00 |
| ATOM | 4414 | C    | ARG | X | 292 | 52.777 | 46.140 | 50.286 | 0.00 | 0.00 |
| ATOM | 4415 | O    | ARG | X | 292 | 53.897 | 46.101 | 49.717 | 0.00 | 0.00 |
| ATOM | 4416 | N    | PHE | X | 293 | 51.954 | 47.166 | 50.125 | 0.00 | 0.00 |
| ATOM | 4417 | H    | PHE | X | 293 | 51.152 | 47.194 | 50.738 | 0.00 | 0.00 |
| ATOM | 4418 | CA   | PHE | X | 293 | 52.001 | 48.186 | 49.102 | 0.00 | 0.00 |
| ATOM | 4419 | HA   | PHE | X | 293 | 52.974 | 48.146 | 48.612 | 0.00 | 0.00 |
| ATOM | 4420 | CB   | PHE | X | 293 | 50.940 | 47.629 | 48.048 | 0.00 | 0.00 |
| ATOM | 4421 | HB2  | PHE | X | 293 | 49.968 | 47.926 | 48.442 | 0.00 | 0.00 |
| ATOM | 4422 | HB3  | PHE | X | 293 | 51.068 | 48.202 | 47.130 | 0.00 | 0.00 |
| ATOM | 4423 | CG   | PHE | X | 293 | 50.967 | 46.135 | 47.757 | 0.00 | 0.00 |
| ATOM | 4424 | CD1  | PHE | X | 293 | 52.147 | 45.577 | 47.203 | 0.00 | 0.00 |
| ATOM | 4425 | HD1  | PHE | X | 293 | 52.844 | 46.244 | 46.716 | 0.00 | 0.00 |
| ATOM | 4426 | CE1  | PHE | X | 293 | 52.213 | 44.190 | 46.886 | 0.00 | 0.00 |
| ATOM | 4427 | HE1  | PHE | X | 293 | 53.106 | 43.783 | 46.436 | 0.00 | 0.00 |
| ATOM | 4428 | CZ   | PHE | X | 293 | 51.106 | 43.369 | 47.289 | 0.00 | 0.00 |
| ATOM | 4429 | HZ   | PHE | X | 293 | 51.319 | 42.312 | 47.239 | 0.00 | 0.00 |
| ATOM | 4430 | CE2  | PHE | X | 293 | 50.081 | 43.905 | 48.005 | 0.00 | 0.00 |
| ATOM | 4431 | HE2  | PHE | X | 293 | 49.296 | 43.247 | 48.348 | 0.00 | 0.00 |
| ATOM | 4432 | CD2  | PHE | X | 293 | 49.963 | 45.288 | 48.256 | 0.00 | 0.00 |
| ATOM | 4433 | HD2  | PHE | X | 293 | 49.128 | 45.590 | 48.871 | 0.00 | 0.00 |
| ATOM | 4434 | C    | PHE | X | 293 | 51.705 | 49.591 | 49.589 | 0.00 | 0.00 |
| ATOM | 4435 | O    | PHE | X | 293 | 51.464 | 49.760 | 50.755 | 0.00 | 0.00 |
| ATOM | 4436 | N    | SER | X | 294 | 51.753 | 50.563 | 48.726 | 0.00 | 0.00 |
| ATOM | 4437 | H    | SER | X | 294 | 52.012 | 50.345 | 47.774 | 0.00 | 0.00 |
| ATOM | 4438 | CA   | SER | X | 294 | 51.748 | 52.011 | 48.940 | 0.00 | 0.00 |
| ATOM | 4439 | HA   | SER | X | 294 | 52.524 | 52.361 | 49.620 | 0.00 | 0.00 |
| ATOM | 4440 | CB   | SER | X | 294 | 52.029 | 52.671 | 47.597 | 0.00 | 0.00 |

|      |      |      |     |   |     |        |        |        |      |      |
|------|------|------|-----|---|-----|--------|--------|--------|------|------|
| ATOM | 4441 | HB2  | SER | X | 294 | 51.174 | 52.607 | 46.925 | 0.00 | 0.00 |
| ATOM | 4442 | HB3  | SER | X | 294 | 52.070 | 53.747 | 47.770 | 0.00 | 0.00 |
| ATOM | 4443 | OG   | SER | X | 294 | 53.299 | 52.338 | 47.092 | 0.00 | 0.00 |
| ATOM | 4444 | HG   | SER | X | 294 | 53.350 | 52.661 | 46.189 | 0.00 | 0.00 |
| ATOM | 4445 | C    | SER | X | 294 | 50.468 | 52.477 | 49.641 | 0.00 | 0.00 |
| ATOM | 4446 | O    | SER | X | 294 | 50.458 | 52.974 | 50.788 | 0.00 | 0.00 |
| ATOM | 4447 | N    | PHE | X | 295 | 49.328 | 52.341 | 48.916 | 0.00 | 0.00 |
| ATOM | 4448 | H    | PHE | X | 295 | 49.309 | 51.768 | 48.085 | 0.00 | 0.00 |
| ATOM | 4449 | CA   | PHE | X | 295 | 47.946 | 52.560 | 49.402 | 0.00 | 0.00 |
| ATOM | 4450 | HA   | PHE | X | 295 | 47.957 | 52.473 | 50.488 | 0.00 | 0.00 |
| ATOM | 4451 | CB   | PHE | X | 295 | 47.320 | 53.867 | 49.021 | 0.00 | 0.00 |
| ATOM | 4452 | HB2  | PHE | X | 295 | 47.294 | 53.799 | 47.934 | 0.00 | 0.00 |
| ATOM | 4453 | HB3  | PHE | X | 295 | 46.263 | 53.993 | 49.255 | 0.00 | 0.00 |
| ATOM | 4454 | CG   | PHE | X | 295 | 48.050 | 55.169 | 49.448 | 0.00 | 0.00 |
| ATOM | 4455 | CD1  | PHE | X | 295 | 47.644 | 55.857 | 50.612 | 0.00 | 0.00 |
| ATOM | 4456 | HD1  | PHE | X | 295 | 46.854 | 55.491 | 51.251 | 0.00 | 0.00 |
| ATOM | 4457 | CE1  | PHE | X | 295 | 48.241 | 57.092 | 50.987 | 0.00 | 0.00 |
| ATOM | 4458 | HE1  | PHE | X | 295 | 47.867 | 57.693 | 51.802 | 0.00 | 0.00 |
| ATOM | 4459 | CZ   | PHE | X | 295 | 49.329 | 57.615 | 50.242 | 0.00 | 0.00 |
| ATOM | 4460 | HZ   | PHE | X | 295 | 49.814 | 58.574 | 50.348 | 0.00 | 0.00 |
| ATOM | 4461 | CE2  | PHE | X | 295 | 49.705 | 56.841 | 49.076 | 0.00 | 0.00 |
| ATOM | 4462 | HE2  | PHE | X | 295 | 50.510 | 57.160 | 48.430 | 0.00 | 0.00 |
| ATOM | 4463 | CD2  | PHE | X | 295 | 49.072 | 55.705 | 48.617 | 0.00 | 0.00 |
| ATOM | 4464 | HD2  | PHE | X | 295 | 49.485 | 55.258 | 47.725 | 0.00 | 0.00 |
| ATOM | 4465 | C    | PHE | X | 295 | 47.020 | 51.486 | 48.841 | 0.00 | 0.00 |
| ATOM | 4466 | O    | PHE | X | 295 | 47.431 | 50.925 | 47.786 | 0.00 | 0.00 |
| ATOM | 4467 | N    | VAL | X | 296 | 45.913 | 51.193 | 49.482 | 0.00 | 0.00 |
| ATOM | 4468 | H    | VAL | X | 296 | 45.640 | 51.767 | 50.267 | 0.00 | 0.00 |
| ATOM | 4469 | CA   | VAL | X | 296 | 45.101 | 49.982 | 49.339 | 0.00 | 0.00 |
| ATOM | 4470 | HA   | VAL | X | 296 | 45.004 | 49.817 | 48.265 | 0.00 | 0.00 |
| ATOM | 4471 | CB   | VAL | X | 296 | 45.738 | 48.737 | 49.997 | 0.00 | 0.00 |
| ATOM | 4472 | HB   | VAL | X | 296 | 45.146 | 47.839 | 49.820 | 0.00 | 0.00 |
| ATOM | 4473 | CG1  | VAL | X | 296 | 47.250 | 48.462 | 49.514 | 0.00 | 0.00 |
| ATOM | 4474 | HG11 | VAL | X | 296 | 47.315 | 48.497 | 48.427 | 0.00 | 0.00 |
| ATOM | 4475 | HG12 | VAL | X | 296 | 47.966 | 49.187 | 49.900 | 0.00 | 0.00 |
| ATOM | 4476 | HG13 | VAL | X | 296 | 47.523 | 47.419 | 49.679 | 0.00 | 0.00 |
| ATOM | 4477 | CG2  | VAL | X | 296 | 45.813 | 48.997 | 51.488 | 0.00 | 0.00 |
| ATOM | 4478 | HG21 | VAL | X | 296 | 46.382 | 49.868 | 51.814 | 0.00 | 0.00 |
| ATOM | 4479 | HG22 | VAL | X | 296 | 46.259 | 48.159 | 52.024 | 0.00 | 0.00 |
| ATOM | 4480 | HG23 | VAL | X | 296 | 44.794 | 49.169 | 51.834 | 0.00 | 0.00 |
| ATOM | 4481 | C    | VAL | X | 296 | 43.638 | 50.324 | 49.915 | 0.00 | 0.00 |
| ATOM | 4482 | O    | VAL | X | 296 | 43.414 | 51.398 | 50.397 | 0.00 | 0.00 |
| ATOM | 4483 | N    | PRO | X | 297 | 42.657 | 49.374 | 49.861 | 0.00 | 0.00 |
| ATOM | 4484 | CD   | PRO | X | 297 | 42.709 | 48.169 | 49.022 | 0.00 | 0.00 |
| ATOM | 4485 | HD2  | PRO | X | 297 | 43.257 | 47.413 | 49.586 | 0.00 | 0.00 |
| ATOM | 4486 | HD3  | PRO | X | 297 | 43.170 | 48.334 | 48.048 | 0.00 | 0.00 |
| ATOM | 4487 | CG   | PRO | X | 297 | 41.285 | 47.767 | 48.885 | 0.00 | 0.00 |
| ATOM | 4488 | HG2  | PRO | X | 297 | 41.277 | 46.677 | 48.907 | 0.00 | 0.00 |
| ATOM | 4489 | HG3  | PRO | X | 297 | 40.859 | 48.223 | 47.991 | 0.00 | 0.00 |
| ATOM | 4490 | CB   | PRO | X | 297 | 40.541 | 48.379 | 50.083 | 0.00 | 0.00 |
| ATOM | 4491 | HB2  | PRO | X | 297 | 40.471 | 47.750 | 50.970 | 0.00 | 0.00 |
| ATOM | 4492 | HB3  | PRO | X | 297 | 39.539 | 48.724 | 49.828 | 0.00 | 0.00 |
| ATOM | 4493 | CA   | PRO | X | 297 | 41.348 | 49.555 | 50.449 | 0.00 | 0.00 |
| ATOM | 4494 | HA   | PRO | X | 297 | 40.804 | 50.389 | 50.005 | 0.00 | 0.00 |
| ATOM | 4495 | C    | PRO | X | 297 | 41.300 | 50.021 | 51.924 | 0.00 | 0.00 |
| ATOM | 4496 | O    | PRO | X | 297 | 41.910 | 49.423 | 52.825 | 0.00 | 0.00 |
| ATOM | 4497 | N    | VAL | X | 298 | 40.585 | 51.143 | 52.161 | 0.00 | 0.00 |
| ATOM | 4498 | H    | VAL | X | 298 | 40.119 | 51.476 | 51.329 | 0.00 | 0.00 |
| ATOM | 4499 | CA   | VAL | X | 298 | 40.771 | 51.892 | 53.431 | 0.00 | 0.00 |
| ATOM | 4500 | HA   | VAL | X | 298 | 41.689 | 51.558 | 53.915 | 0.00 | 0.00 |
| ATOM | 4501 | CB   | VAL | X | 298 | 40.914 | 53.404 | 53.190 | 0.00 | 0.00 |
| ATOM | 4502 | HB   | VAL | X | 298 | 39.953 | 53.618 | 52.722 | 0.00 | 0.00 |
| ATOM | 4503 | CG1  | VAL | X | 298 | 41.136 | 54.100 | 54.502 | 0.00 | 0.00 |
| ATOM | 4504 | HG11 | VAL | X | 298 | 41.750 | 53.497 | 55.172 | 0.00 | 0.00 |
| ATOM | 4505 | HG12 | VAL | X | 298 | 41.524 | 55.105 | 54.340 | 0.00 | 0.00 |
| ATOM | 4506 | HG13 | VAL | X | 298 | 40.157 | 54.130 | 54.980 | 0.00 | 0.00 |
| ATOM | 4507 | CG2  | VAL | X | 298 | 42.043 | 53.670 | 52.236 | 0.00 | 0.00 |

|      |      |      |     |   |     |        |        |        |      |      |
|------|------|------|-----|---|-----|--------|--------|--------|------|------|
| ATOM | 4508 | HG21 | VAL | X | 298 | 41.968 | 54.720 | 51.954 | 0.00 | 0.00 |
| ATOM | 4509 | HG22 | VAL | X | 298 | 42.070 | 53.095 | 51.310 | 0.00 | 0.00 |
| ATOM | 4510 | HG23 | VAL | X | 298 | 43.041 | 53.610 | 52.670 | 0.00 | 0.00 |
| ATOM | 4511 | C    | VAL | X | 298 | 39.577 | 51.539 | 54.308 | 0.00 | 0.00 |
| ATOM | 4512 | O    | VAL | X | 298 | 38.445 | 51.730 | 53.866 | 0.00 | 0.00 |
| ATOM | 4513 | N    | VAL | X | 299 | 39.761 | 50.965 | 55.513 | 0.00 | 0.00 |
| ATOM | 4514 | H    | VAL | X | 299 | 40.708 | 50.763 | 55.801 | 0.00 | 0.00 |
| ATOM | 4515 | CA   | VAL | X | 299 | 38.702 | 50.996 | 56.550 | 0.00 | 0.00 |
| ATOM | 4516 | HA   | VAL | X | 299 | 37.854 | 50.459 | 56.125 | 0.00 | 0.00 |
| ATOM | 4517 | CB   | VAL | X | 299 | 39.127 | 50.142 | 57.810 | 0.00 | 0.00 |
| ATOM | 4518 | HB   | VAL | X | 299 | 40.056 | 50.424 | 58.306 | 0.00 | 0.00 |
| ATOM | 4519 | CG1  | VAL | X | 299 | 37.985 | 50.110 | 58.768 | 0.00 | 0.00 |
| ATOM | 4520 | HG11 | VAL | X | 299 | 37.127 | 49.601 | 58.329 | 0.00 | 0.00 |
| ATOM | 4521 | HG12 | VAL | X | 299 | 38.135 | 49.363 | 59.547 | 0.00 | 0.00 |
| ATOM | 4522 | HG13 | VAL | X | 299 | 37.806 | 51.144 | 59.062 | 0.00 | 0.00 |
| ATOM | 4523 | CG2  | VAL | X | 299 | 39.269 | 48.661 | 57.308 | 0.00 | 0.00 |
| ATOM | 4524 | HG21 | VAL | X | 299 | 38.407 | 48.300 | 56.747 | 0.00 | 0.00 |
| ATOM | 4525 | HG22 | VAL | X | 299 | 39.348 | 48.070 | 58.221 | 0.00 | 0.00 |
| ATOM | 4526 | HG23 | VAL | X | 299 | 40.228 | 48.603 | 56.792 | 0.00 | 0.00 |
| ATOM | 4527 | C    | VAL | X | 299 | 38.396 | 52.445 | 56.958 | 0.00 | 0.00 |
| ATOM | 4528 | O    | VAL | X | 299 | 39.076 | 52.982 | 57.858 | 0.00 | 0.00 |
| ATOM | 4529 | N    | ASP | X | 300 | 37.488 | 53.093 | 56.279 | 0.00 | 0.00 |
| ATOM | 4530 | H    | ASP | X | 300 | 36.917 | 52.612 | 55.599 | 0.00 | 0.00 |
| ATOM | 4531 | CA   | ASP | X | 300 | 37.210 | 54.495 | 56.323 | 0.00 | 0.00 |
| ATOM | 4532 | HA   | ASP | X | 300 | 38.032 | 55.002 | 56.828 | 0.00 | 0.00 |
| ATOM | 4533 | CB   | ASP | X | 300 | 37.218 | 54.997 | 54.856 | 0.00 | 0.00 |
| ATOM | 4534 | HB2  | ASP | X | 300 | 37.472 | 56.055 | 54.801 | 0.00 | 0.00 |
| ATOM | 4535 | HB3  | ASP | X | 300 | 37.925 | 54.421 | 54.259 | 0.00 | 0.00 |
| ATOM | 4536 | CG   | ASP | X | 300 | 35.825 | 54.785 | 54.219 | 0.00 | 0.00 |
| ATOM | 4537 | OD1  | ASP | X | 300 | 35.224 | 55.812 | 53.783 | 0.00 | 0.00 |
| ATOM | 4538 | OD2  | ASP | X | 300 | 35.300 | 53.656 | 54.142 | 0.00 | 0.00 |
| ATOM | 4539 | C    | ASP | X | 300 | 36.004 | 54.985 | 57.082 | 0.00 | 0.00 |
| ATOM | 4540 | O    | ASP | X | 300 | 35.904 | 56.213 | 57.362 | 0.00 | 0.00 |
| ATOM | 4541 | N    | GLY | X | 301 | 34.990 | 54.146 | 57.439 | 0.00 | 0.00 |
| ATOM | 4542 | H    | GLY | X | 301 | 35.093 | 53.175 | 57.180 | 0.00 | 0.00 |
| ATOM | 4543 | CA   | GLY | X | 301 | 33.733 | 54.503 | 58.039 | 0.00 | 0.00 |
| ATOM | 4544 | HA2  | GLY | X | 301 | 33.496 | 53.639 | 58.660 | 0.00 | 0.00 |
| ATOM | 4545 | HA3  | GLY | X | 301 | 33.914 | 55.360 | 58.688 | 0.00 | 0.00 |
| ATOM | 4546 | C    | GLY | X | 301 | 32.528 | 54.728 | 57.155 | 0.00 | 0.00 |
| ATOM | 4547 | O    | GLY | X | 301 | 31.487 | 55.204 | 57.648 | 0.00 | 0.00 |
| ATOM | 4548 | N    | ASP | X | 302 | 32.566 | 54.311 | 55.919 | 0.00 | 0.00 |
| ATOM | 4549 | H    | ASP | X | 302 | 33.402 | 53.859 | 55.578 | 0.00 | 0.00 |
| ATOM | 4550 | CA   | ASP | X | 302 | 31.456 | 54.403 | 54.921 | 0.00 | 0.00 |
| ATOM | 4551 | HA   | ASP | X | 302 | 30.472 | 54.371 | 55.390 | 0.00 | 0.00 |
| ATOM | 4552 | CB   | ASP | X | 302 | 31.562 | 55.779 | 54.226 | 0.00 | 0.00 |
| ATOM | 4553 | HB2  | ASP | X | 302 | 31.489 | 56.569 | 54.973 | 0.00 | 0.00 |
| ATOM | 4554 | HB3  | ASP | X | 302 | 32.503 | 55.948 | 53.703 | 0.00 | 0.00 |
| ATOM | 4555 | CG   | ASP | X | 302 | 30.432 | 56.133 | 53.248 | 0.00 | 0.00 |
| ATOM | 4556 | OD1  | ASP | X | 302 | 30.658 | 56.635 | 52.133 | 0.00 | 0.00 |
| ATOM | 4557 | OD2  | ASP | X | 302 | 29.245 | 55.917 | 53.696 | 0.00 | 0.00 |
| ATOM | 4558 | C    | ASP | X | 302 | 31.516 | 53.304 | 53.869 | 0.00 | 0.00 |
| ATOM | 4559 | O    | ASP | X | 302 | 30.473 | 52.714 | 53.532 | 0.00 | 0.00 |
| ATOM | 4560 | N    | PHE | X | 303 | 32.677 | 53.012 | 53.252 | 0.00 | 0.00 |
| ATOM | 4561 | H    | PHE | X | 303 | 33.530 | 53.515 | 53.450 | 0.00 | 0.00 |
| ATOM | 4562 | CA   | PHE | X | 303 | 32.804 | 51.946 | 52.276 | 0.00 | 0.00 |
| ATOM | 4563 | HA   | PHE | X | 303 | 31.884 | 51.759 | 51.722 | 0.00 | 0.00 |
| ATOM | 4564 | CB   | PHE | X | 303 | 33.731 | 52.473 | 51.166 | 0.00 | 0.00 |
| ATOM | 4565 | HB2  | PHE | X | 303 | 33.299 | 53.290 | 50.589 | 0.00 | 0.00 |
| ATOM | 4566 | HB3  | PHE | X | 303 | 34.654 | 52.772 | 51.662 | 0.00 | 0.00 |
| ATOM | 4567 | CG   | PHE | X | 303 | 34.089 | 51.248 | 50.315 | 0.00 | 0.00 |
| ATOM | 4568 | CD1  | PHE | X | 303 | 35.259 | 50.496 | 50.631 | 0.00 | 0.00 |
| ATOM | 4569 | HD1  | PHE | X | 303 | 35.953 | 50.866 | 51.371 | 0.00 | 0.00 |
| ATOM | 4570 | CE1  | PHE | X | 303 | 35.504 | 49.314 | 49.836 | 0.00 | 0.00 |
| ATOM | 4571 | HE1  | PHE | X | 303 | 36.463 | 48.825 | 49.925 | 0.00 | 0.00 |
| ATOM | 4572 | CZ   | PHE | X | 303 | 34.581 | 48.833 | 48.960 | 0.00 | 0.00 |
| ATOM | 4573 | HZ   | PHE | X | 303 | 34.734 | 47.930 | 48.388 | 0.00 | 0.00 |
| ATOM | 4574 | CE2  | PHE | X | 303 | 33.499 | 49.575 | 48.641 | 0.00 | 0.00 |

|      |      |      |     |   |     |        |        |        |      |      |
|------|------|------|-----|---|-----|--------|--------|--------|------|------|
| ATOM | 4575 | HE2  | PHE | X | 303 | 32.780 | 49.157 | 47.952 | 0.00 | 0.00 |
| ATOM | 4576 | CD2  | PHE | X | 303 | 33.217 | 50.843 | 49.299 | 0.00 | 0.00 |
| ATOM | 4577 | HD2  | PHE | X | 303 | 32.313 | 51.367 | 49.026 | 0.00 | 0.00 |
| ATOM | 4578 | C    | PHE | X | 303 | 33.343 | 50.625 | 52.897 | 0.00 | 0.00 |
| ATOM | 4579 | O    | PHE | X | 303 | 33.085 | 49.493 | 52.431 | 0.00 | 0.00 |
| ATOM | 4580 | N    | LEU | X | 304 | 34.066 | 50.775 | 54.015 | 0.00 | 0.00 |
| ATOM | 4581 | H    | LEU | X | 304 | 34.276 | 51.718 | 54.311 | 0.00 | 0.00 |
| ATOM | 4582 | CA   | LEU | X | 304 | 34.433 | 49.732 | 55.031 | 0.00 | 0.00 |
| ATOM | 4583 | HA   | LEU | X | 304 | 33.762 | 48.896 | 54.835 | 0.00 | 0.00 |
| ATOM | 4584 | CB   | LEU | X | 304 | 35.939 | 49.415 | 54.819 | 0.00 | 0.00 |
| ATOM | 4585 | HB2  | LEU | X | 304 | 36.436 | 50.363 | 54.615 | 0.00 | 0.00 |
| ATOM | 4586 | HB3  | LEU | X | 304 | 36.363 | 49.099 | 55.773 | 0.00 | 0.00 |
| ATOM | 4587 | CG   | LEU | X | 304 | 36.338 | 48.351 | 53.818 | 0.00 | 0.00 |
| ATOM | 4588 | HG   | LEU | X | 304 | 35.735 | 48.504 | 52.923 | 0.00 | 0.00 |
| ATOM | 4589 | CD1  | LEU | X | 304 | 37.818 | 48.416 | 53.496 | 0.00 | 0.00 |
| ATOM | 4590 | HD11 | LEU | X | 304 | 38.539 | 48.322 | 54.308 | 0.00 | 0.00 |
| ATOM | 4591 | HD12 | LEU | X | 304 | 38.033 | 49.341 | 52.960 | 0.00 | 0.00 |
| ATOM | 4592 | HD13 | LEU | X | 304 | 37.986 | 47.586 | 52.810 | 0.00 | 0.00 |
| ATOM | 4593 | CD2  | LEU | X | 304 | 35.916 | 46.905 | 54.286 | 0.00 | 0.00 |
| ATOM | 4594 | HD21 | LEU | X | 304 | 36.001 | 46.184 | 53.474 | 0.00 | 0.00 |
| ATOM | 4595 | HD22 | LEU | X | 304 | 36.640 | 46.853 | 55.099 | 0.00 | 0.00 |
| ATOM | 4596 | HD23 | LEU | X | 304 | 34.926 | 46.976 | 54.737 | 0.00 | 0.00 |
| ATOM | 4597 | C    | LEU | X | 304 | 34.116 | 50.232 | 56.479 | 0.00 | 0.00 |
| ATOM | 4598 | O    | LEU | X | 304 | 34.423 | 51.317 | 56.861 | 0.00 | 0.00 |
| ATOM | 4599 | N    | SER | X | 305 | 33.543 | 49.303 | 57.184 | 0.00 | 0.00 |
| ATOM | 4600 | H    | SER | X | 305 | 33.145 | 48.521 | 56.684 | 0.00 | 0.00 |
| ATOM | 4601 | CA   | SER | X | 305 | 33.112 | 49.465 | 58.585 | 0.00 | 0.00 |
| ATOM | 4602 | HA   | SER | X | 305 | 33.142 | 50.524 | 58.841 | 0.00 | 0.00 |
| ATOM | 4603 | CB   | SER | X | 305 | 31.614 | 49.071 | 58.791 | 0.00 | 0.00 |
| ATOM | 4604 | HB2  | SER | X | 305 | 31.563 | 48.027 | 59.100 | 0.00 | 0.00 |
| ATOM | 4605 | HB3  | SER | X | 305 | 31.259 | 49.643 | 59.649 | 0.00 | 0.00 |
| ATOM | 4606 | OG   | SER | X | 305 | 30.773 | 49.322 | 57.689 | 0.00 | 0.00 |
| ATOM | 4607 | HG   | SER | X | 305 | 31.057 | 48.755 | 56.968 | 0.00 | 0.00 |
| ATOM | 4608 | C    | SER | X | 305 | 33.943 | 48.625 | 59.583 | 0.00 | 0.00 |
| ATOM | 4609 | O    | SER | X | 305 | 33.808 | 48.899 | 60.774 | 0.00 | 0.00 |
| ATOM | 4610 | N    | ASP | X | 306 | 34.837 | 47.701 | 59.221 | 0.00 | 0.00 |
| ATOM | 4611 | H    | ASP | X | 306 | 34.954 | 47.674 | 58.218 | 0.00 | 0.00 |
| ATOM | 4612 | CA   | ASP | X | 306 | 35.798 | 46.971 | 60.027 | 0.00 | 0.00 |
| ATOM | 4613 | HA   | ASP | X | 306 | 36.311 | 47.601 | 60.753 | 0.00 | 0.00 |
| ATOM | 4614 | CB   | ASP | X | 306 | 35.083 | 45.892 | 60.920 | 0.00 | 0.00 |
| ATOM | 4615 | HB2  | ASP | X | 306 | 34.013 | 46.090 | 60.974 | 0.00 | 0.00 |
| ATOM | 4616 | HB3  | ASP | X | 306 | 35.157 | 44.893 | 60.489 | 0.00 | 0.00 |
| ATOM | 4617 | CG   | ASP | X | 306 | 35.674 | 45.788 | 62.279 | 0.00 | 0.00 |
| ATOM | 4618 | OD1  | ASP | X | 306 | 34.980 | 45.299 | 63.232 | 0.00 | 0.00 |
| ATOM | 4619 | OD2  | ASP | X | 306 | 36.925 | 45.871 | 62.422 | 0.00 | 0.00 |
| ATOM | 4620 | C    | ASP | X | 306 | 36.872 | 46.376 | 59.079 | 0.00 | 0.00 |
| ATOM | 4621 | O    | ASP | X | 306 | 36.815 | 46.536 | 57.837 | 0.00 | 0.00 |
| ATOM | 4622 | N    | THR | X | 307 | 37.909 | 45.652 | 59.536 | 0.00 | 0.00 |
| ATOM | 4623 | H    | THR | X | 307 | 38.069 | 45.382 | 60.496 | 0.00 | 0.00 |
| ATOM | 4624 | CA   | THR | X | 307 | 38.650 | 44.777 | 58.613 | 0.00 | 0.00 |
| ATOM | 4625 | HA   | THR | X | 307 | 38.945 | 45.349 | 57.734 | 0.00 | 0.00 |
| ATOM | 4626 | CB   | THR | X | 307 | 39.860 | 44.222 | 59.342 | 0.00 | 0.00 |
| ATOM | 4627 | HB   | THR | X | 307 | 40.263 | 43.492 | 58.640 | 0.00 | 0.00 |
| ATOM | 4628 | CG2  | THR | X | 307 | 40.908 | 45.239 | 59.869 | 0.00 | 0.00 |
| ATOM | 4629 | HG21 | THR | X | 307 | 41.228 | 45.858 | 59.031 | 0.00 | 0.00 |
| ATOM | 4630 | HG22 | THR | X | 307 | 41.854 | 44.790 | 60.171 | 0.00 | 0.00 |
| ATOM | 4631 | HG23 | THR | X | 307 | 40.401 | 45.774 | 60.672 | 0.00 | 0.00 |
| ATOM | 4632 | OG1  | THR | X | 307 | 39.463 | 43.689 | 60.573 | 0.00 | 0.00 |
| ATOM | 4633 | HG1  | THR | X | 307 | 40.119 | 43.017 | 60.771 | 0.00 | 0.00 |
| ATOM | 4634 | C    | THR | X | 307 | 37.726 | 43.648 | 58.119 | 0.00 | 0.00 |
| ATOM | 4635 | O    | THR | X | 307 | 37.008 | 43.057 | 58.914 | 0.00 | 0.00 |
| ATOM | 4636 | N    | PRO | X | 308 | 37.775 | 43.233 | 56.826 | 0.00 | 0.00 |
| ATOM | 4637 | CD   | PRO | X | 308 | 38.219 | 44.091 | 55.650 | 0.00 | 0.00 |
| ATOM | 4638 | HD2  | PRO | X | 308 | 39.284 | 44.265 | 55.804 | 0.00 | 0.00 |
| ATOM | 4639 | HD3  | PRO | X | 308 | 37.559 | 44.955 | 55.725 | 0.00 | 0.00 |
| ATOM | 4640 | CG   | PRO | X | 308 | 37.795 | 43.222 | 54.401 | 0.00 | 0.00 |
| ATOM | 4641 | HG2  | PRO | X | 308 | 38.590 | 43.133 | 53.661 | 0.00 | 0.00 |

|      |      |      |     |   |     |        |        |        |      |      |
|------|------|------|-----|---|-----|--------|--------|--------|------|------|
| ATOM | 4642 | HG3  | PRO | X | 308 | 36.914 | 43.589 | 53.875 | 0.00 | 0.00 |
| ATOM | 4643 | CB   | PRO | X | 308 | 37.614 | 41.826 | 54.891 | 0.00 | 0.00 |
| ATOM | 4644 | HB2  | PRO | X | 308 | 38.604 | 41.379 | 54.982 | 0.00 | 0.00 |
| ATOM | 4645 | HB3  | PRO | X | 308 | 36.967 | 41.269 | 54.214 | 0.00 | 0.00 |
| ATOM | 4646 | CA   | PRO | X | 308 | 37.036 | 42.122 | 56.301 | 0.00 | 0.00 |
| ATOM | 4647 | HA   | PRO | X | 308 | 35.998 | 42.447 | 56.228 | 0.00 | 0.00 |
| ATOM | 4648 | C    | PRO | X | 308 | 37.105 | 40.864 | 57.165 | 0.00 | 0.00 |
| ATOM | 4649 | O    | PRO | X | 308 | 36.080 | 40.109 | 57.281 | 0.00 | 0.00 |
| ATOM | 4650 | N    | GLU | X | 309 | 38.290 | 40.616 | 57.810 | 0.00 | 0.00 |
| ATOM | 4651 | H    | GLU | X | 309 | 39.086 | 41.230 | 57.722 | 0.00 | 0.00 |
| ATOM | 4652 | CA   | GLU | X | 309 | 38.384 | 39.327 | 58.615 | 0.00 | 0.00 |
| ATOM | 4653 | HA   | GLU | X | 309 | 37.915 | 38.537 | 58.027 | 0.00 | 0.00 |
| ATOM | 4654 | CB   | GLU | X | 309 | 39.898 | 39.054 | 58.826 | 0.00 | 0.00 |
| ATOM | 4655 | HB2  | GLU | X | 309 | 40.038 | 38.028 | 59.167 | 0.00 | 0.00 |
| ATOM | 4656 | HB3  | GLU | X | 309 | 40.342 | 39.172 | 57.838 | 0.00 | 0.00 |
| ATOM | 4657 | CG   | GLU | X | 309 | 40.619 | 39.963 | 59.781 | 0.00 | 0.00 |
| ATOM | 4658 | HG2  | GLU | X | 309 | 40.547 | 40.954 | 59.334 | 0.00 | 0.00 |
| ATOM | 4659 | HG3  | GLU | X | 309 | 40.083 | 39.977 | 60.730 | 0.00 | 0.00 |
| ATOM | 4660 | CD   | GLU | X | 309 | 42.058 | 39.483 | 59.916 | 0.00 | 0.00 |
| ATOM | 4661 | OE1  | GLU | X | 309 | 42.913 | 39.985 | 59.186 | 0.00 | 0.00 |
| ATOM | 4662 | OE2  | GLU | X | 309 | 42.346 | 38.500 | 60.644 | 0.00 | 0.00 |
| ATOM | 4663 | C    | GLU | X | 309 | 37.478 | 39.366 | 59.851 | 0.00 | 0.00 |
| ATOM | 4664 | O    | GLU | X | 309 | 37.313 | 38.303 | 60.477 | 0.00 | 0.00 |
| ATOM | 4665 | N    | ALA | X | 310 | 36.979 | 40.517 | 60.245 | 0.00 | 0.00 |
| ATOM | 4666 | H    | ALA | X | 310 | 37.405 | 41.386 | 59.956 | 0.00 | 0.00 |
| ATOM | 4667 | CA   | ALA | X | 310 | 35.812 | 40.621 | 61.205 | 0.00 | 0.00 |
| ATOM | 4668 | HA   | ALA | X | 310 | 35.773 | 39.634 | 61.666 | 0.00 | 0.00 |
| ATOM | 4669 | CB   | ALA | X | 310 | 36.334 | 41.633 | 62.192 | 0.00 | 0.00 |
| ATOM | 4670 | HB1  | ALA | X | 310 | 36.504 | 42.568 | 61.658 | 0.00 | 0.00 |
| ATOM | 4671 | HB2  | ALA | X | 310 | 37.293 | 41.387 | 62.647 | 0.00 | 0.00 |
| ATOM | 4672 | HB3  | ALA | X | 310 | 35.532 | 41.754 | 62.920 | 0.00 | 0.00 |
| ATOM | 4673 | C    | ALA | X | 310 | 34.449 | 40.820 | 60.565 | 0.00 | 0.00 |
| ATOM | 4674 | O    | ALA | X | 310 | 33.470 | 40.319 | 61.085 | 0.00 | 0.00 |
| ATOM | 4675 | N    | LEU | X | 311 | 34.324 | 41.550 | 59.456 | 0.00 | 0.00 |
| ATOM | 4676 | H    | LEU | X | 311 | 35.108 | 42.127 | 59.188 | 0.00 | 0.00 |
| ATOM | 4677 | CA   | LEU | X | 311 | 33.027 | 41.786 | 58.775 | 0.00 | 0.00 |
| ATOM | 4678 | HA   | LEU | X | 311 | 32.402 | 42.320 | 59.491 | 0.00 | 0.00 |
| ATOM | 4679 | CB   | LEU | X | 311 | 33.147 | 42.782 | 57.606 | 0.00 | 0.00 |
| ATOM | 4680 | HB2  | LEU | X | 311 | 33.839 | 42.304 | 56.912 | 0.00 | 0.00 |
| ATOM | 4681 | HB3  | LEU | X | 311 | 32.143 | 42.838 | 57.184 | 0.00 | 0.00 |
| ATOM | 4682 | CG   | LEU | X | 311 | 33.430 | 44.293 | 57.875 | 0.00 | 0.00 |
| ATOM | 4683 | HG   | LEU | X | 311 | 34.178 | 44.380 | 58.664 | 0.00 | 0.00 |
| ATOM | 4684 | CD1  | LEU | X | 311 | 33.969 | 44.951 | 56.679 | 0.00 | 0.00 |
| ATOM | 4685 | HD11 | LEU | X | 311 | 34.906 | 44.532 | 56.313 | 0.00 | 0.00 |
| ATOM | 4686 | HD12 | LEU | X | 311 | 34.073 | 46.028 | 56.810 | 0.00 | 0.00 |
| ATOM | 4687 | HD13 | LEU | X | 311 | 33.318 | 44.932 | 55.805 | 0.00 | 0.00 |
| ATOM | 4688 | CD2  | LEU | X | 311 | 32.190 | 44.979 | 58.420 | 0.00 | 0.00 |
| ATOM | 4689 | HD21 | LEU | X | 311 | 31.736 | 44.526 | 59.301 | 0.00 | 0.00 |
| ATOM | 4690 | HD22 | LEU | X | 311 | 32.583 | 45.956 | 58.701 | 0.00 | 0.00 |
| ATOM | 4691 | HD23 | LEU | X | 311 | 31.421 | 45.158 | 57.668 | 0.00 | 0.00 |
| ATOM | 4692 | C    | LEU | X | 311 | 32.371 | 40.523 | 58.324 | 0.00 | 0.00 |
| ATOM | 4693 | O    | LEU | X | 311 | 31.180 | 40.417 | 58.390 | 0.00 | 0.00 |
| ATOM | 4694 | N    | ILE | X | 312 | 33.194 | 39.565 | 57.916 | 0.00 | 0.00 |
| ATOM | 4695 | H    | ILE | X | 312 | 34.187 | 39.744 | 57.873 | 0.00 | 0.00 |
| ATOM | 4696 | CA   | ILE | X | 312 | 32.716 | 38.291 | 57.353 | 0.00 | 0.00 |
| ATOM | 4697 | HA   | ILE | X | 312 | 31.954 | 38.399 | 56.581 | 0.00 | 0.00 |
| ATOM | 4698 | CB   | ILE | X | 312 | 33.893 | 37.647 | 56.664 | 0.00 | 0.00 |
| ATOM | 4699 | HB   | ILE | X | 312 | 34.480 | 38.443 | 56.205 | 0.00 | 0.00 |
| ATOM | 4700 | CG2  | ILE | X | 312 | 34.967 | 37.041 | 57.603 | 0.00 | 0.00 |
| ATOM | 4701 | HG21 | ILE | X | 312 | 34.564 | 36.202 | 58.170 | 0.00 | 0.00 |
| ATOM | 4702 | HG22 | ILE | X | 312 | 35.311 | 37.742 | 58.363 | 0.00 | 0.00 |
| ATOM | 4703 | HG23 | ILE | X | 312 | 35.785 | 36.829 | 56.914 | 0.00 | 0.00 |
| ATOM | 4704 | CG1  | ILE | X | 312 | 33.563 | 36.572 | 55.552 | 0.00 | 0.00 |
| ATOM | 4705 | HG12 | ILE | X | 312 | 34.316 | 35.789 | 55.464 | 0.00 | 0.00 |
| ATOM | 4706 | HG13 | ILE | X | 312 | 32.574 | 36.127 | 55.659 | 0.00 | 0.00 |
| ATOM | 4707 | CD1  | ILE | X | 312 | 33.484 | 37.339 | 54.232 | 0.00 | 0.00 |
| ATOM | 4708 | HD11 | ILE | X | 312 | 33.228 | 36.473 | 53.622 | 0.00 | 0.00 |

|      |      |      |     |   |     |        |        |        |      |      |
|------|------|------|-----|---|-----|--------|--------|--------|------|------|
| ATOM | 4709 | HD12 | ILE | X | 312 | 34.471 | 37.664 | 53.903 | 0.00 | 0.00 |
| ATOM | 4710 | HD13 | ILE | X | 312 | 32.671 | 38.061 | 54.154 | 0.00 | 0.00 |
| ATOM | 4711 | C    | ILE | X | 312 | 32.128 | 37.290 | 58.395 | 0.00 | 0.00 |
| ATOM | 4712 | O    | ILE | X | 312 | 31.293 | 36.445 | 58.074 | 0.00 | 0.00 |
| ATOM | 4713 | N    | ASN | X | 313 | 32.419 | 37.524 | 59.701 | 0.00 | 0.00 |
| ATOM | 4714 | H    | ASN | X | 313 | 32.960 | 38.321 | 60.004 | 0.00 | 0.00 |
| ATOM | 4715 | CA   | ASN | X | 313 | 31.828 | 36.805 | 60.819 | 0.00 | 0.00 |
| ATOM | 4716 | HA   | ASN | X | 313 | 31.473 | 35.817 | 60.528 | 0.00 | 0.00 |
| ATOM | 4717 | CB   | ASN | X | 313 | 32.907 | 36.534 | 61.874 | 0.00 | 0.00 |
| ATOM | 4718 | HB2  | ASN | X | 313 | 33.722 | 36.006 | 61.379 | 0.00 | 0.00 |
| ATOM | 4719 | HB3  | ASN | X | 313 | 33.217 | 37.422 | 62.426 | 0.00 | 0.00 |
| ATOM | 4720 | CG   | ASN | X | 313 | 32.484 | 35.549 | 62.932 | 0.00 | 0.00 |
| ATOM | 4721 | OD1  | ASN | X | 313 | 32.236 | 34.389 | 62.724 | 0.00 | 0.00 |
| ATOM | 4722 | ND2  | ASN | X | 313 | 32.339 | 35.985 | 64.198 | 0.00 | 0.00 |
| ATOM | 4723 | HD21 | ASN | X | 313 | 32.180 | 35.428 | 65.026 | 0.00 | 0.00 |
| ATOM | 4724 | HD22 | ASN | X | 313 | 32.780 | 36.879 | 64.358 | 0.00 | 0.00 |
| ATOM | 4725 | C    | ASN | X | 313 | 30.484 | 37.419 | 61.220 | 0.00 | 0.00 |
| ATOM | 4726 | O    | ASN | X | 313 | 29.637 | 36.761 | 61.865 | 0.00 | 0.00 |
| ATOM | 4727 | N    | ALA | X | 314 | 30.278 | 38.653 | 60.739 | 0.00 | 0.00 |
| ATOM | 4728 | H    | ALA | X | 314 | 30.927 | 39.100 | 60.108 | 0.00 | 0.00 |
| ATOM | 4729 | CA   | ALA | X | 314 | 29.060 | 39.298 | 61.152 | 0.00 | 0.00 |
| ATOM | 4730 | HA   | ALA | X | 314 | 29.000 | 39.219 | 62.237 | 0.00 | 0.00 |
| ATOM | 4731 | CB   | ALA | X | 314 | 29.257 | 40.802 | 60.976 | 0.00 | 0.00 |
| ATOM | 4732 | HB1  | ALA | X | 314 | 28.366 | 41.365 | 61.253 | 0.00 | 0.00 |
| ATOM | 4733 | HB2  | ALA | X | 314 | 29.618 | 41.081 | 59.986 | 0.00 | 0.00 |
| ATOM | 4734 | HB3  | ALA | X | 314 | 30.069 | 41.107 | 61.635 | 0.00 | 0.00 |
| ATOM | 4735 | C    | ALA | X | 314 | 27.748 | 38.924 | 60.385 | 0.00 | 0.00 |
| ATOM | 4736 | O    | ALA | X | 314 | 26.739 | 38.779 | 61.055 | 0.00 | 0.00 |
| ATOM | 4737 | N    | GLY | X | 315 | 27.904 | 38.793 | 59.063 | 0.00 | 0.00 |
| ATOM | 4738 | H    | GLY | X | 315 | 28.841 | 38.800 | 58.687 | 0.00 | 0.00 |
| ATOM | 4739 | CA   | GLY | X | 315 | 26.771 | 38.602 | 58.163 | 0.00 | 0.00 |
| ATOM | 4740 | HA2  | GLY | X | 315 | 25.852 | 38.954 | 58.633 | 0.00 | 0.00 |
| ATOM | 4741 | HA3  | GLY | X | 315 | 26.974 | 39.290 | 57.342 | 0.00 | 0.00 |
| ATOM | 4742 | C    | GLY | X | 315 | 26.618 | 37.167 | 57.648 | 0.00 | 0.00 |
| ATOM | 4743 | O    | GLY | X | 315 | 27.315 | 36.186 | 57.980 | 0.00 | 0.00 |
| ATOM | 4744 | N    | ASP | X | 316 | 25.658 | 36.990 | 56.777 | 0.00 | 0.00 |
| ATOM | 4745 | H    | ASP | X | 316 | 25.079 | 37.786 | 56.551 | 0.00 | 0.00 |
| ATOM | 4746 | CA   | ASP | X | 316 | 25.444 | 35.793 | 56.018 | 0.00 | 0.00 |
| ATOM | 4747 | HA   | ASP | X | 316 | 25.933 | 34.953 | 56.510 | 0.00 | 0.00 |
| ATOM | 4748 | CB   | ASP | X | 316 | 23.886 | 35.544 | 56.052 | 0.00 | 0.00 |
| ATOM | 4749 | HB2  | ASP | X | 316 | 23.532 | 35.381 | 57.070 | 0.00 | 0.00 |
| ATOM | 4750 | HB3  | ASP | X | 316 | 23.286 | 36.388 | 55.712 | 0.00 | 0.00 |
| ATOM | 4751 | CG   | ASP | X | 316 | 23.525 | 34.259 | 55.379 | 0.00 | 0.00 |
| ATOM | 4752 | OD1  | ASP | X | 316 | 24.304 | 33.289 | 55.520 | 0.00 | 0.00 |
| ATOM | 4753 | OD2  | ASP | X | 316 | 22.519 | 34.234 | 54.601 | 0.00 | 0.00 |
| ATOM | 4754 | C    | ASP | X | 316 | 26.038 | 35.903 | 54.529 | 0.00 | 0.00 |
| ATOM | 4755 | O    | ASP | X | 316 | 26.286 | 36.975 | 54.002 | 0.00 | 0.00 |
| ATOM | 4756 | N    | PHE | X | 317 | 26.226 | 34.697 | 53.935 | 0.00 | 0.00 |
| ATOM | 4757 | H    | PHE | X | 317 | 25.986 | 33.862 | 54.450 | 0.00 | 0.00 |
| ATOM | 4758 | CA   | PHE | X | 317 | 26.669 | 34.480 | 52.573 | 0.00 | 0.00 |
| ATOM | 4759 | HA   | PHE | X | 317 | 26.232 | 35.225 | 51.908 | 0.00 | 0.00 |
| ATOM | 4760 | CB   | PHE | X | 317 | 28.213 | 34.435 | 52.428 | 0.00 | 0.00 |
| ATOM | 4761 | HB2  | PHE | X | 317 | 28.636 | 33.539 | 52.882 | 0.00 | 0.00 |
| ATOM | 4762 | HB3  | PHE | X | 317 | 28.423 | 34.341 | 51.363 | 0.00 | 0.00 |
| ATOM | 4763 | CG   | PHE | X | 317 | 28.916 | 35.698 | 52.896 | 0.00 | 0.00 |
| ATOM | 4764 | CD1  | PHE | X | 317 | 28.903 | 36.927 | 52.155 | 0.00 | 0.00 |
| ATOM | 4765 | HD1  | PHE | X | 317 | 28.408 | 36.965 | 51.196 | 0.00 | 0.00 |
| ATOM | 4766 | CE1  | PHE | X | 317 | 29.513 | 38.081 | 52.730 | 0.00 | 0.00 |
| ATOM | 4767 | HE1  | PHE | X | 317 | 29.741 | 38.993 | 52.199 | 0.00 | 0.00 |
| ATOM | 4768 | CZ   | PHE | X | 317 | 29.942 | 38.027 | 54.061 | 0.00 | 0.00 |
| ATOM | 4769 | HZ   | PHE | X | 317 | 30.379 | 38.930 | 54.460 | 0.00 | 0.00 |
| ATOM | 4770 | CE2  | PHE | X | 317 | 29.867 | 36.842 | 54.879 | 0.00 | 0.00 |
| ATOM | 4771 | HE2  | PHE | X | 317 | 30.074 | 36.910 | 55.937 | 0.00 | 0.00 |
| ATOM | 4772 | CD2  | PHE | X | 317 | 29.358 | 35.708 | 54.223 | 0.00 | 0.00 |
| ATOM | 4773 | HD2  | PHE | X | 317 | 29.207 | 34.812 | 54.807 | 0.00 | 0.00 |
| ATOM | 4774 | C    | PHE | X | 317 | 25.960 | 33.172 | 52.097 | 0.00 | 0.00 |
| ATOM | 4775 | O    | PHE | X | 317 | 26.387 | 32.651 | 51.092 | 0.00 | 0.00 |



|      |      |      |     |   |     |        |        |        |      |      |
|------|------|------|-----|---|-----|--------|--------|--------|------|------|
| ATOM | 4776 | N    | HIE | X | 318 | 24.938 | 32.614 | 52.780 | 0.00 | 0.00 |
| ATOM | 4777 | H    | HIE | X | 318 | 24.696 | 32.921 | 53.711 | 0.00 | 0.00 |
| ATOM | 4778 | CA   | HIE | X | 318 | 24.103 | 31.473 | 52.252 | 0.00 | 0.00 |
| ATOM | 4779 | HA   | HIE | X | 318 | 24.717 | 30.572 | 52.267 | 0.00 | 0.00 |
| ATOM | 4780 | CB   | HIE | X | 318 | 22.871 | 31.264 | 53.148 | 0.00 | 0.00 |
| ATOM | 4781 | HB2  | HIE | X | 318 | 23.107 | 31.158 | 54.206 | 0.00 | 0.00 |
| ATOM | 4782 | HB3  | HIE | X | 318 | 22.258 | 32.162 | 53.077 | 0.00 | 0.00 |
| ATOM | 4783 | CG   | HIE | X | 318 | 22.195 | 30.017 | 52.732 | 0.00 | 0.00 |
| ATOM | 4784 | ND1  | HIE | X | 318 | 22.822 | 28.910 | 52.277 | 0.00 | 0.00 |
| ATOM | 4785 | CE1  | HIE | X | 318 | 21.820 | 28.141 | 51.892 | 0.00 | 0.00 |
| ATOM | 4786 | HE1  | HIE | X | 318 | 21.962 | 27.187 | 51.406 | 0.00 | 0.00 |
| ATOM | 4787 | NE2  | HIE | X | 318 | 20.564 | 28.709 | 52.059 | 0.00 | 0.00 |
| ATOM | 4788 | HE2  | HIE | X | 318 | 19.677 | 28.277 | 51.841 | 0.00 | 0.00 |
| ATOM | 4789 | CD2  | HIE | X | 318 | 20.846 | 29.852 | 52.730 | 0.00 | 0.00 |
| ATOM | 4790 | HD2  | HIE | X | 318 | 20.109 | 30.586 | 53.020 | 0.00 | 0.00 |
| ATOM | 4791 | C    | HIE | X | 318 | 23.672 | 31.700 | 50.810 | 0.00 | 0.00 |
| ATOM | 4792 | O    | HIE | X | 318 | 23.357 | 32.823 | 50.354 | 0.00 | 0.00 |
| ATOM | 4793 | N    | GLY | X | 319 | 23.617 | 30.607 | 50.044 | 0.00 | 0.00 |
| ATOM | 4794 | H    | GLY | X | 319 | 23.726 | 29.788 | 50.624 | 0.00 | 0.00 |
| ATOM | 4795 | CA   | GLY | X | 319 | 23.189 | 30.453 | 48.679 | 0.00 | 0.00 |
| ATOM | 4796 | HA2  | GLY | X | 319 | 23.356 | 29.394 | 48.482 | 0.00 | 0.00 |
| ATOM | 4797 | HA3  | GLY | X | 319 | 22.111 | 30.606 | 48.621 | 0.00 | 0.00 |
| ATOM | 4798 | C    | GLY | X | 319 | 23.841 | 31.308 | 47.634 | 0.00 | 0.00 |
| ATOM | 4799 | O    | GLY | X | 319 | 23.300 | 31.493 | 46.542 | 0.00 | 0.00 |
| ATOM | 4800 | N    | LEU | X | 320 | 25.069 | 31.824 | 47.854 | 0.00 | 0.00 |
| ATOM | 4801 | H    | LEU | X | 320 | 25.487 | 31.628 | 48.753 | 0.00 | 0.00 |
| ATOM | 4802 | CA   | LEU | X | 320 | 25.952 | 32.410 | 46.826 | 0.00 | 0.00 |
| ATOM | 4803 | HA   | LEU | X | 320 | 25.297 | 32.876 | 46.089 | 0.00 | 0.00 |
| ATOM | 4804 | CB   | LEU | X | 320 | 26.787 | 33.544 | 47.438 | 0.00 | 0.00 |
| ATOM | 4805 | HB2  | LEU | X | 320 | 27.246 | 33.143 | 48.342 | 0.00 | 0.00 |
| ATOM | 4806 | HB3  | LEU | X | 320 | 27.524 | 33.974 | 46.760 | 0.00 | 0.00 |
| ATOM | 4807 | CG   | LEU | X | 320 | 25.923 | 34.735 | 47.869 | 0.00 | 0.00 |
| ATOM | 4808 | HG   | LEU | X | 320 | 25.159 | 34.392 | 48.567 | 0.00 | 0.00 |
| ATOM | 4809 | CD1  | LEU | X | 320 | 26.660 | 35.825 | 48.639 | 0.00 | 0.00 |
| ATOM | 4810 | HD11 | LEU | X | 320 | 27.349 | 36.388 | 48.009 | 0.00 | 0.00 |
| ATOM | 4811 | HD12 | LEU | X | 320 | 27.197 | 35.553 | 49.548 | 0.00 | 0.00 |
| ATOM | 4812 | HD13 | LEU | X | 320 | 25.880 | 36.524 | 48.941 | 0.00 | 0.00 |
| ATOM | 4813 | CD2  | LEU | X | 320 | 25.027 | 35.190 | 46.692 | 0.00 | 0.00 |
| ATOM | 4814 | HD21 | LEU | X | 320 | 25.394 | 34.898 | 45.708 | 0.00 | 0.00 |
| ATOM | 4815 | HD22 | LEU | X | 320 | 24.115 | 34.632 | 46.907 | 0.00 | 0.00 |
| ATOM | 4816 | HD23 | LEU | X | 320 | 24.822 | 36.260 | 46.714 | 0.00 | 0.00 |
| ATOM | 4817 | C    | LEU | X | 320 | 26.770 | 31.345 | 46.085 | 0.00 | 0.00 |
| ATOM | 4818 | O    | LEU | X | 320 | 26.945 | 30.188 | 46.606 | 0.00 | 0.00 |
| ATOM | 4819 | N    | GLN | X | 321 | 27.266 | 31.666 | 44.880 | 0.00 | 0.00 |
| ATOM | 4820 | H    | GLN | X | 321 | 27.180 | 32.608 | 44.526 | 0.00 | 0.00 |
| ATOM | 4821 | CA   | GLN | X | 321 | 28.053 | 30.784 | 44.050 | 0.00 | 0.00 |
| ATOM | 4822 | HA   | GLN | X | 321 | 28.225 | 29.826 | 44.541 | 0.00 | 0.00 |
| ATOM | 4823 | CB   | GLN | X | 321 | 27.276 | 30.766 | 42.854 | 0.00 | 0.00 |
| ATOM | 4824 | HB2  | GLN | X | 321 | 26.973 | 31.788 | 42.627 | 0.00 | 0.00 |
| ATOM | 4825 | HB3  | GLN | X | 321 | 27.892 | 30.452 | 42.012 | 0.00 | 0.00 |
| ATOM | 4826 | CG   | GLN | X | 321 | 26.011 | 29.850 | 42.896 | 0.00 | 0.00 |
| ATOM | 4827 | HG2  | GLN | X | 321 | 26.238 | 28.784 | 42.881 | 0.00 | 0.00 |
| ATOM | 4828 | HG3  | GLN | X | 321 | 25.358 | 29.900 | 43.767 | 0.00 | 0.00 |
| ATOM | 4829 | CD   | GLN | X | 321 | 24.998 | 30.137 | 41.732 | 0.00 | 0.00 |
| ATOM | 4830 | OE1  | GLN | X | 321 | 24.743 | 29.344 | 40.841 | 0.00 | 0.00 |
| ATOM | 4831 | NE2  | GLN | X | 321 | 24.199 | 31.149 | 41.787 | 0.00 | 0.00 |
| ATOM | 4832 | HE21 | GLN | X | 321 | 23.482 | 31.227 | 41.080 | 0.00 | 0.00 |
| ATOM | 4833 | HE22 | GLN | X | 321 | 24.343 | 31.921 | 42.422 | 0.00 | 0.00 |
| ATOM | 4834 | C    | GLN | X | 321 | 29.510 | 31.339 | 43.825 | 0.00 | 0.00 |
| ATOM | 4835 | O    | GLN | X | 321 | 29.666 | 32.443 | 43.204 | 0.00 | 0.00 |
| ATOM | 4836 | N    | VAL | X | 322 | 30.535 | 30.613 | 44.308 | 0.00 | 0.00 |
| ATOM | 4837 | H    | VAL | X | 322 | 30.348 | 29.718 | 44.738 | 0.00 | 0.00 |
| ATOM | 4838 | CA   | VAL | X | 322 | 31.892 | 31.241 | 44.358 | 0.00 | 0.00 |
| ATOM | 4839 | HA   | VAL | X | 322 | 31.998 | 32.153 | 43.771 | 0.00 | 0.00 |
| ATOM | 4840 | CB   | VAL | X | 322 | 32.238 | 31.750 | 45.790 | 0.00 | 0.00 |
| ATOM | 4841 | HB   | VAL | X | 322 | 32.513 | 30.956 | 46.484 | 0.00 | 0.00 |
| ATOM | 4842 | CG1  | VAL | X | 322 | 33.519 | 32.531 | 45.881 | 0.00 | 0.00 |

|      |      |      |     |   |     |        |        |        |      |      |
|------|------|------|-----|---|-----|--------|--------|--------|------|------|
| ATOM | 4843 | HG11 | VAL | X | 322 | 33.906 | 32.598 | 46.898 | 0.00 | 0.00 |
| ATOM | 4844 | HG12 | VAL | X | 322 | 34.237 | 32.295 | 45.096 | 0.00 | 0.00 |
| ATOM | 4845 | HG13 | VAL | X | 322 | 33.355 | 33.607 | 45.820 | 0.00 | 0.00 |
| ATOM | 4846 | CG2  | VAL | X | 322 | 31.141 | 32.605 | 46.394 | 0.00 | 0.00 |
| ATOM | 4847 | HG21 | VAL | X | 322 | 30.290 | 31.952 | 46.589 | 0.00 | 0.00 |
| ATOM | 4848 | HG22 | VAL | X | 322 | 30.840 | 33.392 | 45.703 | 0.00 | 0.00 |
| ATOM | 4849 | HG23 | VAL | X | 322 | 31.406 | 32.981 | 47.382 | 0.00 | 0.00 |
| ATOM | 4850 | C    | VAL | X | 322 | 32.982 | 30.208 | 43.979 | 0.00 | 0.00 |
| ATOM | 4851 | O    | VAL | X | 322 | 32.897 | 29.065 | 44.488 | 0.00 | 0.00 |
| ATOM | 4852 | N    | LEU | X | 323 | 33.856 | 30.478 | 43.087 | 0.00 | 0.00 |
| ATOM | 4853 | H    | LEU | X | 323 | 33.823 | 31.410 | 42.698 | 0.00 | 0.00 |
| ATOM | 4854 | CA   | LEU | X | 323 | 35.071 | 29.727 | 42.912 | 0.00 | 0.00 |
| ATOM | 4855 | HA   | LEU | X | 323 | 34.865 | 28.729 | 43.298 | 0.00 | 0.00 |
| ATOM | 4856 | CB   | LEU | X | 323 | 35.285 | 29.638 | 41.429 | 0.00 | 0.00 |
| ATOM | 4857 | HB2  | LEU | X | 323 | 34.363 | 29.324 | 40.940 | 0.00 | 0.00 |
| ATOM | 4858 | HB3  | LEU | X | 323 | 35.556 | 30.623 | 41.050 | 0.00 | 0.00 |
| ATOM | 4859 | CG   | LEU | X | 323 | 36.446 | 28.665 | 41.095 | 0.00 | 0.00 |
| ATOM | 4860 | HG   | LEU | X | 323 | 36.522 | 27.921 | 41.888 | 0.00 | 0.00 |
| ATOM | 4861 | CD1  | LEU | X | 323 | 36.032 | 27.948 | 39.850 | 0.00 | 0.00 |
| ATOM | 4862 | HD11 | LEU | X | 323 | 35.117 | 27.382 | 40.022 | 0.00 | 0.00 |
| ATOM | 4863 | HD12 | LEU | X | 323 | 36.783 | 27.273 | 39.441 | 0.00 | 0.00 |
| ATOM | 4864 | HD13 | LEU | X | 323 | 35.593 | 28.582 | 39.080 | 0.00 | 0.00 |
| ATOM | 4865 | CD2  | LEU | X | 323 | 37.913 | 29.196 | 40.904 | 0.00 | 0.00 |
| ATOM | 4866 | HD21 | LEU | X | 323 | 38.638 | 28.451 | 41.233 | 0.00 | 0.00 |
| ATOM | 4867 | HD22 | LEU | X | 323 | 38.042 | 29.474 | 39.858 | 0.00 | 0.00 |
| ATOM | 4868 | HD23 | LEU | X | 323 | 38.049 | 30.070 | 41.541 | 0.00 | 0.00 |
| ATOM | 4869 | C    | LEU | X | 323 | 36.258 | 30.407 | 43.618 | 0.00 | 0.00 |
| ATOM | 4870 | O    | LEU | X | 323 | 36.341 | 31.626 | 43.537 | 0.00 | 0.00 |
| ATOM | 4871 | N    | VAL | X | 324 | 37.151 | 29.652 | 44.338 | 0.00 | 0.00 |
| ATOM | 4872 | H    | VAL | X | 324 | 37.008 | 28.653 | 44.319 | 0.00 | 0.00 |
| ATOM | 4873 | CA   | VAL | X | 324 | 38.292 | 30.157 | 45.097 | 0.00 | 0.00 |
| ATOM | 4874 | HA   | VAL | X | 324 | 38.561 | 31.144 | 44.720 | 0.00 | 0.00 |
| ATOM | 4875 | CB   | VAL | X | 324 | 38.015 | 30.134 | 46.637 | 0.00 | 0.00 |
| ATOM | 4876 | HB   | VAL | X | 324 | 38.875 | 30.536 | 47.172 | 0.00 | 0.00 |
| ATOM | 4877 | CG1  | VAL | X | 324 | 36.836 | 31.094 | 47.032 | 0.00 | 0.00 |
| ATOM | 4878 | HG11 | VAL | X | 324 | 35.894 | 30.830 | 46.550 | 0.00 | 0.00 |
| ATOM | 4879 | HG12 | VAL | X | 324 | 36.756 | 31.047 | 48.118 | 0.00 | 0.00 |
| ATOM | 4880 | HG13 | VAL | X | 324 | 37.092 | 32.106 | 46.719 | 0.00 | 0.00 |
| ATOM | 4881 | CG2  | VAL | X | 324 | 37.676 | 28.734 | 47.202 | 0.00 | 0.00 |
| ATOM | 4882 | HG21 | VAL | X | 324 | 36.866 | 28.313 | 46.607 | 0.00 | 0.00 |
| ATOM | 4883 | HG22 | VAL | X | 324 | 37.434 | 28.798 | 48.263 | 0.00 | 0.00 |
| ATOM | 4884 | HG23 | VAL | X | 324 | 38.628 | 28.217 | 47.082 | 0.00 | 0.00 |
| ATOM | 4885 | C    | VAL | X | 324 | 39.561 | 29.356 | 44.791 | 0.00 | 0.00 |
| ATOM | 4886 | O    | VAL | X | 324 | 39.370 | 28.199 | 44.423 | 0.00 | 0.00 |
| ATOM | 4887 | N    | GLY | X | 325 | 40.789 | 29.823 | 45.122 | 0.00 | 0.00 |
| ATOM | 4888 | H    | GLY | X | 325 | 40.892 | 30.750 | 45.509 | 0.00 | 0.00 |
| ATOM | 4889 | CA   | GLY | X | 325 | 42.038 | 29.046 | 44.932 | 0.00 | 0.00 |
| ATOM | 4890 | HA2  | GLY | X | 325 | 42.094 | 28.352 | 45.771 | 0.00 | 0.00 |
| ATOM | 4891 | HA3  | GLY | X | 325 | 42.036 | 28.486 | 43.997 | 0.00 | 0.00 |
| ATOM | 4892 | C    | GLY | X | 325 | 43.273 | 29.909 | 44.864 | 0.00 | 0.00 |
| ATOM | 4893 | O    | GLY | X | 325 | 43.277 | 31.151 | 45.016 | 0.00 | 0.00 |
| ATOM | 4894 | N    | VAL | X | 326 | 44.371 | 29.237 | 44.615 | 0.00 | 0.00 |
| ATOM | 4895 | H    | VAL | X | 326 | 44.300 | 28.236 | 44.495 | 0.00 | 0.00 |
| ATOM | 4896 | CA   | VAL | X | 326 | 45.733 | 29.718 | 44.736 | 0.00 | 0.00 |
| ATOM | 4897 | HA   | VAL | X | 326 | 45.793 | 30.738 | 44.356 | 0.00 | 0.00 |
| ATOM | 4898 | CB   | VAL | X | 326 | 46.235 | 29.680 | 46.192 | 0.00 | 0.00 |
| ATOM | 4899 | HB   | VAL | X | 326 | 47.299 | 29.443 | 46.184 | 0.00 | 0.00 |
| ATOM | 4900 | CG1  | VAL | X | 326 | 46.028 | 30.994 | 46.982 | 0.00 | 0.00 |
| ATOM | 4901 | HG11 | VAL | X | 326 | 46.567 | 31.821 | 46.520 | 0.00 | 0.00 |
| ATOM | 4902 | HG12 | VAL | X | 326 | 44.962 | 31.223 | 46.969 | 0.00 | 0.00 |
| ATOM | 4903 | HG13 | VAL | X | 326 | 46.348 | 30.857 | 48.015 | 0.00 | 0.00 |
| ATOM | 4904 | CG2  | VAL | X | 326 | 45.616 | 28.586 | 47.001 | 0.00 | 0.00 |
| ATOM | 4905 | HG21 | VAL | X | 326 | 46.018 | 28.512 | 48.011 | 0.00 | 0.00 |
| ATOM | 4906 | HG22 | VAL | X | 326 | 45.865 | 27.679 | 46.450 | 0.00 | 0.00 |
| ATOM | 4907 | HG23 | VAL | X | 326 | 44.553 | 28.788 | 47.131 | 0.00 | 0.00 |
| ATOM | 4908 | C    | VAL | X | 326 | 46.672 | 28.827 | 43.898 | 0.00 | 0.00 |
| ATOM | 4909 | O    | VAL | X | 326 | 46.213 | 27.745 | 43.490 | 0.00 | 0.00 |

|      |      |      |     |   |     |        |        |        |      |      |
|------|------|------|-----|---|-----|--------|--------|--------|------|------|
| ATOM | 4910 | N    | VAL | X | 327 | 47.883 | 29.248 | 43.652 | 0.00 | 0.00 |
| ATOM | 4911 | H    | VAL | X | 327 | 48.177 | 30.173 | 43.929 | 0.00 | 0.00 |
| ATOM | 4912 | CA   | VAL | X | 327 | 48.894 | 28.321 | 43.068 | 0.00 | 0.00 |
| ATOM | 4913 | HA   | VAL | X | 327 | 48.321 | 27.741 | 42.344 | 0.00 | 0.00 |
| ATOM | 4914 | CB   | VAL | X | 327 | 49.935 | 29.049 | 42.212 | 0.00 | 0.00 |
| ATOM | 4915 | HB   | VAL | X | 327 | 50.761 | 28.355 | 42.059 | 0.00 | 0.00 |
| ATOM | 4916 | CG1  | VAL | X | 327 | 49.413 | 29.505 | 40.820 | 0.00 | 0.00 |
| ATOM | 4917 | HG11 | VAL | X | 327 | 48.946 | 28.637 | 40.355 | 0.00 | 0.00 |
| ATOM | 4918 | HG12 | VAL | X | 327 | 48.741 | 30.360 | 40.889 | 0.00 | 0.00 |
| ATOM | 4919 | HG13 | VAL | X | 327 | 50.226 | 29.698 | 40.120 | 0.00 | 0.00 |
| ATOM | 4920 | CG2  | VAL | X | 327 | 50.550 | 30.300 | 42.848 | 0.00 | 0.00 |
| ATOM | 4921 | HG21 | VAL | X | 327 | 49.847 | 31.128 | 42.758 | 0.00 | 0.00 |
| ATOM | 4922 | HG22 | VAL | X | 327 | 51.409 | 30.616 | 42.257 | 0.00 | 0.00 |
| ATOM | 4923 | HG23 | VAL | X | 327 | 50.797 | 30.115 | 43.894 | 0.00 | 0.00 |
| ATOM | 4924 | C    | VAL | X | 327 | 49.622 | 27.565 | 44.144 | 0.00 | 0.00 |
| ATOM | 4925 | O    | VAL | X | 327 | 49.622 | 27.997 | 45.267 | 0.00 | 0.00 |
| ATOM | 4926 | N    | LYS | X | 328 | 50.335 | 26.462 | 43.798 | 0.00 | 0.00 |
| ATOM | 4927 | H    | LYS | X | 328 | 50.242 | 26.157 | 42.839 | 0.00 | 0.00 |
| ATOM | 4928 | CA   | LYS | X | 328 | 51.103 | 25.628 | 44.716 | 0.00 | 0.00 |
| ATOM | 4929 | HA   | LYS | X | 328 | 50.350 | 25.222 | 45.391 | 0.00 | 0.00 |
| ATOM | 4930 | CB   | LYS | X | 328 | 51.833 | 24.539 | 43.892 | 0.00 | 0.00 |
| ATOM | 4931 | HB2  | LYS | X | 328 | 51.083 | 23.981 | 43.331 | 0.00 | 0.00 |
| ATOM | 4932 | HB3  | LYS | X | 328 | 52.426 | 25.058 | 43.139 | 0.00 | 0.00 |
| ATOM | 4933 | CG   | LYS | X | 328 | 52.557 | 23.516 | 44.695 | 0.00 | 0.00 |
| ATOM | 4934 | HG2  | LYS | X | 328 | 53.386 | 23.967 | 45.239 | 0.00 | 0.00 |
| ATOM | 4935 | HG3  | LYS | X | 328 | 51.768 | 23.231 | 45.390 | 0.00 | 0.00 |
| ATOM | 4936 | CD   | LYS | X | 328 | 53.118 | 22.329 | 43.889 | 0.00 | 0.00 |
| ATOM | 4937 | HD2  | LYS | X | 328 | 53.359 | 21.528 | 44.588 | 0.00 | 0.00 |
| ATOM | 4938 | HD3  | LYS | X | 328 | 52.452 | 21.741 | 43.257 | 0.00 | 0.00 |
| ATOM | 4939 | CE   | LYS | X | 328 | 54.421 | 22.610 | 43.142 | 0.00 | 0.00 |
| ATOM | 4940 | HE2  | LYS | X | 328 | 54.801 | 21.653 | 42.783 | 0.00 | 0.00 |
| ATOM | 4941 | HE3  | LYS | X | 328 | 53.993 | 23.090 | 42.262 | 0.00 | 0.00 |
| ATOM | 4942 | NZ   | LYS | X | 328 | 55.468 | 23.393 | 43.757 | 0.00 | 0.00 |
| ATOM | 4943 | HZ1  | LYS | X | 328 | 55.940 | 22.988 | 44.553 | 0.00 | 0.00 |
| ATOM | 4944 | HZ2  | LYS | X | 328 | 56.232 | 23.539 | 43.113 | 0.00 | 0.00 |
| ATOM | 4945 | HZ3  | LYS | X | 328 | 55.117 | 24.297 | 44.040 | 0.00 | 0.00 |
| ATOM | 4946 | C    | LYS | X | 328 | 52.038 | 26.457 | 45.677 | 0.00 | 0.00 |
| ATOM | 4947 | O    | LYS | X | 328 | 51.807 | 26.287 | 46.862 | 0.00 | 0.00 |
| ATOM | 4948 | N    | ASP | X | 329 | 53.015 | 27.262 | 45.218 | 0.00 | 0.00 |
| ATOM | 4949 | H    | ASP | X | 329 | 53.088 | 27.407 | 44.221 | 0.00 | 0.00 |
| ATOM | 4950 | CA   | ASP | X | 329 | 54.050 | 27.900 | 45.999 | 0.00 | 0.00 |
| ATOM | 4951 | HA   | ASP | X | 329 | 54.132 | 27.214 | 46.842 | 0.00 | 0.00 |
| ATOM | 4952 | CB   | ASP | X | 329 | 55.356 | 28.000 | 45.226 | 0.00 | 0.00 |
| ATOM | 4953 | HB2  | ASP | X | 329 | 55.320 | 28.747 | 44.434 | 0.00 | 0.00 |
| ATOM | 4954 | HB3  | ASP | X | 329 | 56.226 | 28.263 | 45.827 | 0.00 | 0.00 |
| ATOM | 4955 | CG   | ASP | X | 329 | 55.781 | 26.510 | 44.716 | 0.00 | 0.00 |
| ATOM | 4956 | OD1  | ASP | X | 329 | 56.214 | 25.767 | 45.630 | 0.00 | 0.00 |
| ATOM | 4957 | OD2  | ASP | X | 329 | 55.528 | 26.197 | 43.519 | 0.00 | 0.00 |
| ATOM | 4958 | C    | ASP | X | 329 | 53.681 | 29.321 | 46.519 | 0.00 | 0.00 |
| ATOM | 4959 | O    | ASP | X | 329 | 54.089 | 29.685 | 47.618 | 0.00 | 0.00 |
| ATOM | 4960 | N    | GLU | X | 330 | 52.829 | 30.035 | 45.838 | 0.00 | 0.00 |
| ATOM | 4961 | H    | GLU | X | 330 | 52.560 | 29.576 | 44.979 | 0.00 | 0.00 |
| ATOM | 4962 | CA   | GLU | X | 330 | 52.357 | 31.364 | 46.093 | 0.00 | 0.00 |
| ATOM | 4963 | HA   | GLU | X | 330 | 51.998 | 31.647 | 45.103 | 0.00 | 0.00 |
| ATOM | 4964 | CB   | GLU | X | 330 | 51.248 | 31.388 | 47.188 | 0.00 | 0.00 |
| ATOM | 4965 | HB2  | GLU | X | 330 | 51.467 | 30.661 | 47.970 | 0.00 | 0.00 |
| ATOM | 4966 | HB3  | GLU | X | 330 | 51.343 | 32.409 | 47.558 | 0.00 | 0.00 |
| ATOM | 4967 | CG   | GLU | X | 330 | 49.814 | 31.074 | 46.711 | 0.00 | 0.00 |
| ATOM | 4968 | HG2  | GLU | X | 330 | 49.753 | 30.091 | 46.245 | 0.00 | 0.00 |
| ATOM | 4969 | HG3  | GLU | X | 330 | 49.092 | 31.043 | 47.527 | 0.00 | 0.00 |
| ATOM | 4970 | CD   | GLU | X | 330 | 49.189 | 32.053 | 45.684 | 0.00 | 0.00 |
| ATOM | 4971 | OE1  | GLU | X | 330 | 49.321 | 33.260 | 45.803 | 0.00 | 0.00 |
| ATOM | 4972 | OE2  | GLU | X | 330 | 48.423 | 31.659 | 44.745 | 0.00 | 0.00 |
| ATOM | 4973 | C    | GLU | X | 330 | 53.503 | 32.308 | 46.420 | 0.00 | 0.00 |
| ATOM | 4974 | O    | GLU | X | 330 | 54.076 | 32.906 | 45.498 | 0.00 | 0.00 |
| ATOM | 4975 | N    | GLY | X | 331 | 53.869 | 32.554 | 47.699 | 0.00 | 0.00 |
| ATOM | 4976 | H    | GLY | X | 331 | 53.502 | 31.833 | 48.304 | 0.00 | 0.00 |

|      |      |     |     |   |     |        |        |        |      |      |
|------|------|-----|-----|---|-----|--------|--------|--------|------|------|
| ATOM | 4977 | CA  | GLY | X | 331 | 54.708 | 33.619 | 48.264 | 0.00 | 0.00 |
| ATOM | 4978 | HA2 | GLY | X | 331 | 54.468 | 34.599 | 47.851 | 0.00 | 0.00 |
| ATOM | 4979 | HA3 | GLY | X | 331 | 54.666 | 33.536 | 49.350 | 0.00 | 0.00 |
| ATOM | 4980 | C   | GLY | X | 331 | 56.211 | 33.399 | 47.957 | 0.00 | 0.00 |
| ATOM | 4981 | O   | GLY | X | 331 | 57.004 | 34.281 | 48.262 | 0.00 | 0.00 |
| ATOM | 4982 | N   | SER | X | 332 | 56.540 | 32.347 | 47.197 | 0.00 | 0.00 |
| ATOM | 4983 | H   | SER | X | 332 | 55.767 | 31.796 | 46.852 | 0.00 | 0.00 |
| ATOM | 4984 | CA  | SER | X | 332 | 57.853 | 32.112 | 46.614 | 0.00 | 0.00 |
| ATOM | 4985 | HA  | SER | X | 332 | 58.665 | 32.028 | 47.336 | 0.00 | 0.00 |
| ATOM | 4986 | CB  | SER | X | 332 | 57.811 | 30.824 | 45.843 | 0.00 | 0.00 |
| ATOM | 4987 | HB2 | SER | X | 332 | 58.820 | 30.457 | 45.660 | 0.00 | 0.00 |
| ATOM | 4988 | HB3 | SER | X | 332 | 57.268 | 30.092 | 46.441 | 0.00 | 0.00 |
| ATOM | 4989 | OG  | SER | X | 332 | 57.060 | 30.986 | 44.645 | 0.00 | 0.00 |
| ATOM | 4990 | HG  | SER | X | 332 | 57.128 | 30.236 | 44.050 | 0.00 | 0.00 |
| ATOM | 4991 | C   | SER | X | 332 | 58.173 | 33.292 | 45.751 | 0.00 | 0.00 |
| ATOM | 4992 | O   | SER | X | 332 | 59.260 | 33.699 | 45.762 | 0.00 | 0.00 |
| ATOM | 4993 | N   | TYR | X | 333 | 57.158 | 33.931 | 45.107 | 0.00 | 0.00 |
| ATOM | 4994 | H   | TYR | X | 333 | 56.260 | 33.469 | 45.098 | 0.00 | 0.00 |
| ATOM | 4995 | CA  | TYR | X | 333 | 57.276 | 35.078 | 44.175 | 0.00 | 0.00 |
| ATOM | 4996 | HA  | TYR | X | 333 | 57.968 | 34.925 | 43.347 | 0.00 | 0.00 |
| ATOM | 4997 | CB  | TYR | X | 333 | 55.840 | 35.282 | 43.651 | 0.00 | 0.00 |
| ATOM | 4998 | HB2 | TYR | X | 333 | 55.600 | 34.297 | 43.251 | 0.00 | 0.00 |
| ATOM | 4999 | HB3 | TYR | X | 333 | 55.120 | 35.522 | 44.434 | 0.00 | 0.00 |
| ATOM | 5000 | CG  | TYR | X | 333 | 55.687 | 36.378 | 42.621 | 0.00 | 0.00 |
| ATOM | 5001 | CD1 | TYR | X | 333 | 56.419 | 36.353 | 41.473 | 0.00 | 0.00 |
| ATOM | 5002 | HD1 | TYR | X | 333 | 57.033 | 35.533 | 41.132 | 0.00 | 0.00 |
| ATOM | 5003 | CE1 | TYR | X | 333 | 56.400 | 37.406 | 40.515 | 0.00 | 0.00 |
| ATOM | 5004 | HE1 | TYR | X | 333 | 56.910 | 37.327 | 39.567 | 0.00 | 0.00 |
| ATOM | 5005 | CZ  | TYR | X | 333 | 55.541 | 38.504 | 40.737 | 0.00 | 0.00 |
| ATOM | 5006 | OH  | TYR | X | 333 | 55.390 | 39.536 | 39.842 | 0.00 | 0.00 |
| ATOM | 5007 | HH  | TYR | X | 333 | 55.953 | 39.574 | 39.066 | 0.00 | 0.00 |
| ATOM | 5008 | CE2 | TYR | X | 333 | 54.716 | 38.511 | 41.882 | 0.00 | 0.00 |
| ATOM | 5009 | HE2 | TYR | X | 333 | 54.028 | 39.308 | 42.125 | 0.00 | 0.00 |
| ATOM | 5010 | CD2 | TYR | X | 333 | 54.794 | 37.442 | 42.820 | 0.00 | 0.00 |
| ATOM | 5011 | HD2 | TYR | X | 333 | 54.295 | 37.589 | 43.766 | 0.00 | 0.00 |
| ATOM | 5012 | C   | TYR | X | 333 | 57.680 | 36.363 | 44.810 | 0.00 | 0.00 |
| ATOM | 5013 | O   | TYR | X | 333 | 58.474 | 37.118 | 44.215 | 0.00 | 0.00 |
| ATOM | 5014 | N   | PHE | X | 334 | 57.240 | 36.656 | 46.040 | 0.00 | 0.00 |
| ATOM | 5015 | H   | PHE | X | 334 | 56.667 | 35.964 | 46.502 | 0.00 | 0.00 |
| ATOM | 5016 | CA  | PHE | X | 334 | 57.407 | 37.968 | 46.725 | 0.00 | 0.00 |
| ATOM | 5017 | HA  | PHE | X | 334 | 57.294 | 38.666 | 45.896 | 0.00 | 0.00 |
| ATOM | 5018 | CB  | PHE | X | 334 | 56.217 | 38.007 | 47.732 | 0.00 | 0.00 |
| ATOM | 5019 | HB2 | PHE | X | 334 | 55.990 | 37.016 | 48.124 | 0.00 | 0.00 |
| ATOM | 5020 | HB3 | PHE | X | 334 | 56.514 | 38.680 | 48.536 | 0.00 | 0.00 |
| ATOM | 5021 | CG  | PHE | X | 334 | 54.983 | 38.581 | 47.101 | 0.00 | 0.00 |
| ATOM | 5022 | CD1 | PHE | X | 334 | 53.788 | 37.826 | 46.892 | 0.00 | 0.00 |
| ATOM | 5023 | HD1 | PHE | X | 334 | 53.766 | 36.810 | 47.258 | 0.00 | 0.00 |
| ATOM | 5024 | CE1 | PHE | X | 334 | 52.578 | 38.424 | 46.408 | 0.00 | 0.00 |
| ATOM | 5025 | HE1 | PHE | X | 334 | 51.654 | 37.879 | 46.283 | 0.00 | 0.00 |
| ATOM | 5026 | CZ  | PHE | X | 334 | 52.542 | 39.801 | 46.081 | 0.00 | 0.00 |
| ATOM | 5027 | HZ  | PHE | X | 334 | 51.664 | 40.259 | 45.652 | 0.00 | 0.00 |
| ATOM | 5028 | CE2 | PHE | X | 334 | 53.739 | 40.509 | 46.177 | 0.00 | 0.00 |
| ATOM | 5029 | HE2 | PHE | X | 334 | 53.705 | 41.548 | 45.884 | 0.00 | 0.00 |
| ATOM | 5030 | CD2 | PHE | X | 334 | 54.924 | 39.945 | 46.785 | 0.00 | 0.00 |
| ATOM | 5031 | HD2 | PHE | X | 334 | 55.697 | 40.661 | 47.023 | 0.00 | 0.00 |
| ATOM | 5032 | C   | PHE | X | 334 | 58.794 | 38.217 | 47.342 | 0.00 | 0.00 |
| ATOM | 5033 | O   | PHE | X | 334 | 59.195 | 39.378 | 47.555 | 0.00 | 0.00 |
| ATOM | 5034 | N   | LEU | X | 335 | 59.648 | 37.179 | 47.576 | 0.00 | 0.00 |
| ATOM | 5035 | H   | LEU | X | 335 | 59.190 | 36.287 | 47.454 | 0.00 | 0.00 |
| ATOM | 5036 | CA  | LEU | X | 335 | 60.876 | 37.329 | 48.312 | 0.00 | 0.00 |
| ATOM | 5037 | HA  | LEU | X | 335 | 60.758 | 37.666 | 49.342 | 0.00 | 0.00 |
| ATOM | 5038 | CB  | LEU | X | 335 | 61.548 | 35.926 | 48.374 | 0.00 | 0.00 |
| ATOM | 5039 | HB2 | LEU | X | 335 | 61.794 | 35.720 | 47.332 | 0.00 | 0.00 |
| ATOM | 5040 | HB3 | LEU | X | 335 | 62.526 | 36.004 | 48.849 | 0.00 | 0.00 |
| ATOM | 5041 | CG  | LEU | X | 335 | 60.615 | 34.800 | 48.907 | 0.00 | 0.00 |
| ATOM | 5042 | HG  | LEU | X | 335 | 59.911 | 34.564 | 48.109 | 0.00 | 0.00 |
| ATOM | 5043 | CD1 | LEU | X | 335 | 61.282 | 33.453 | 49.105 | 0.00 | 0.00 |

|      |      |      |     |   |     |        |        |        |      |      |
|------|------|------|-----|---|-----|--------|--------|--------|------|------|
| ATOM | 5044 | HD11 | LEU | X | 335 | 62.003 | 33.572 | 49.914 | 0.00 | 0.00 |
| ATOM | 5045 | HD12 | LEU | X | 335 | 61.707 | 33.067 | 48.179 | 0.00 | 0.00 |
| ATOM | 5046 | HD13 | LEU | X | 335 | 60.532 | 32.710 | 49.376 | 0.00 | 0.00 |
| ATOM | 5047 | CD2  | LEU | X | 335 | 59.836 | 35.298 | 50.135 | 0.00 | 0.00 |
| ATOM | 5048 | HD21 | LEU | X | 335 | 60.534 | 35.901 | 50.716 | 0.00 | 0.00 |
| ATOM | 5049 | HD22 | LEU | X | 335 | 59.099 | 36.077 | 49.943 | 0.00 | 0.00 |
| ATOM | 5050 | HD23 | LEU | X | 335 | 59.356 | 34.437 | 50.601 | 0.00 | 0.00 |
| ATOM | 5051 | C    | LEU | X | 335 | 61.834 | 38.344 | 47.624 | 0.00 | 0.00 |
| ATOM | 5052 | O    | LEU | X | 335 | 62.412 | 39.184 | 48.295 | 0.00 | 0.00 |
| ATOM | 5053 | N    | VAL | X | 336 | 62.114 | 38.159 | 46.302 | 0.00 | 0.00 |
| ATOM | 5054 | H    | VAL | X | 336 | 61.726 | 37.311 | 45.916 | 0.00 | 0.00 |
| ATOM | 5055 | CA   | VAL | X | 336 | 62.845 | 39.098 | 45.472 | 0.00 | 0.00 |
| ATOM | 5056 | HA   | VAL | X | 336 | 63.830 | 39.092 | 45.937 | 0.00 | 0.00 |
| ATOM | 5057 | CB   | VAL | X | 336 | 63.046 | 38.559 | 44.059 | 0.00 | 0.00 |
| ATOM | 5058 | HB   | VAL | X | 336 | 63.808 | 39.141 | 43.539 | 0.00 | 0.00 |
| ATOM | 5059 | CG1  | VAL | X | 336 | 63.719 | 37.255 | 43.875 | 0.00 | 0.00 |
| ATOM | 5060 | HG11 | VAL | X | 336 | 64.753 | 37.328 | 44.213 | 0.00 | 0.00 |
| ATOM | 5061 | HG12 | VAL | X | 336 | 63.207 | 36.510 | 44.484 | 0.00 | 0.00 |
| ATOM | 5062 | HG13 | VAL | X | 336 | 63.708 | 36.934 | 42.834 | 0.00 | 0.00 |
| ATOM | 5063 | CG2  | VAL | X | 336 | 61.713 | 38.661 | 43.235 | 0.00 | 0.00 |
| ATOM | 5064 | HG21 | VAL | X | 336 | 60.881 | 38.113 | 43.678 | 0.00 | 0.00 |
| ATOM | 5065 | HG22 | VAL | X | 336 | 61.842 | 38.271 | 42.226 | 0.00 | 0.00 |
| ATOM | 5066 | HG23 | VAL | X | 336 | 61.326 | 39.678 | 43.179 | 0.00 | 0.00 |
| ATOM | 5067 | C    | VAL | X | 336 | 62.350 | 40.566 | 45.557 | 0.00 | 0.00 |
| ATOM | 5068 | O    | VAL | X | 336 | 63.082 | 41.409 | 44.949 | 0.00 | 0.00 |
| ATOM | 5069 | N    | TYR | X | 337 | 61.212 | 40.906 | 46.184 | 0.00 | 0.00 |
| ATOM | 5070 | H    | TYR | X | 337 | 60.650 | 40.139 | 46.523 | 0.00 | 0.00 |
| ATOM | 5071 | CA   | TYR | X | 337 | 60.638 | 42.332 | 46.296 | 0.00 | 0.00 |
| ATOM | 5072 | HA   | TYR | X | 337 | 61.073 | 43.068 | 45.620 | 0.00 | 0.00 |
| ATOM | 5073 | CB   | TYR | X | 337 | 59.090 | 42.313 | 45.942 | 0.00 | 0.00 |
| ATOM | 5074 | HB2  | TYR | X | 337 | 58.499 | 41.546 | 46.442 | 0.00 | 0.00 |
| ATOM | 5075 | HB3  | TYR | X | 337 | 58.618 | 43.260 | 46.202 | 0.00 | 0.00 |
| ATOM | 5076 | CG   | TYR | X | 337 | 58.714 | 41.971 | 44.506 | 0.00 | 0.00 |
| ATOM | 5077 | CD1  | TYR | X | 337 | 58.625 | 43.045 | 43.581 | 0.00 | 0.00 |
| ATOM | 5078 | HD1  | TYR | X | 337 | 58.592 | 44.074 | 43.906 | 0.00 | 0.00 |
| ATOM | 5079 | CE1  | TYR | X | 337 | 58.558 | 42.741 | 42.191 | 0.00 | 0.00 |
| ATOM | 5080 | HE1  | TYR | X | 337 | 58.534 | 43.592 | 41.528 | 0.00 | 0.00 |
| ATOM | 5081 | CZ   | TYR | X | 337 | 58.513 | 41.394 | 41.739 | 0.00 | 0.00 |
| ATOM | 5082 | OH   | TYR | X | 337 | 58.697 | 41.083 | 40.395 | 0.00 | 0.00 |
| ATOM | 5083 | HH   | TYR | X | 337 | 58.779 | 41.927 | 39.946 | 0.00 | 0.00 |
| ATOM | 5084 | CE2  | TYR | X | 337 | 58.615 | 40.360 | 42.714 | 0.00 | 0.00 |
| ATOM | 5085 | HE2  | TYR | X | 337 | 58.814 | 39.403 | 42.255 | 0.00 | 0.00 |
| ATOM | 5086 | CD2  | TYR | X | 337 | 58.751 | 40.624 | 44.055 | 0.00 | 0.00 |
| ATOM | 5087 | HD2  | TYR | X | 337 | 59.149 | 39.924 | 44.775 | 0.00 | 0.00 |
| ATOM | 5088 | C    | TYR | X | 337 | 60.894 | 42.886 | 47.770 | 0.00 | 0.00 |
| ATOM | 5089 | O    | TYR | X | 337 | 60.377 | 43.887 | 48.172 | 0.00 | 0.00 |
| ATOM | 5090 | N    | GLY | X | 338 | 61.668 | 42.183 | 48.606 | 0.00 | 0.00 |
| ATOM | 5091 | H    | GLY | X | 338 | 62.130 | 41.397 | 48.172 | 0.00 | 0.00 |
| ATOM | 5092 | CA   | GLY | X | 338 | 62.174 | 42.616 | 49.946 | 0.00 | 0.00 |
| ATOM | 5093 | HA2  | GLY | X | 338 | 62.749 | 43.524 | 49.763 | 0.00 | 0.00 |
| ATOM | 5094 | HA3  | GLY | X | 338 | 61.326 | 43.016 | 50.503 | 0.00 | 0.00 |
| ATOM | 5095 | C    | GLY | X | 338 | 62.973 | 41.682 | 50.853 | 0.00 | 0.00 |
| ATOM | 5096 | O    | GLY | X | 338 | 63.462 | 42.197 | 51.896 | 0.00 | 0.00 |
| ATOM | 5097 | N    | ALA | X | 339 | 63.212 | 40.443 | 50.567 | 0.00 | 0.00 |
| ATOM | 5098 | H    | ALA | X | 339 | 63.029 | 40.202 | 49.603 | 0.00 | 0.00 |
| ATOM | 5099 | CA   | ALA | X | 339 | 64.071 | 39.551 | 51.337 | 0.00 | 0.00 |
| ATOM | 5100 | HA   | ALA | X | 339 | 63.818 | 39.817 | 52.364 | 0.00 | 0.00 |
| ATOM | 5101 | CB   | ALA | X | 339 | 63.600 | 38.126 | 51.109 | 0.00 | 0.00 |
| ATOM | 5102 | HB1  | ALA | X | 339 | 64.058 | 37.904 | 50.146 | 0.00 | 0.00 |
| ATOM | 5103 | HB2  | ALA | X | 339 | 62.526 | 37.937 | 51.104 | 0.00 | 0.00 |
| ATOM | 5104 | HB3  | ALA | X | 339 | 64.024 | 37.444 | 51.846 | 0.00 | 0.00 |
| ATOM | 5105 | C    | ALA | X | 339 | 65.620 | 39.709 | 51.172 | 0.00 | 0.00 |
| ATOM | 5106 | O    | ALA | X | 339 | 66.022 | 40.052 | 50.036 | 0.00 | 0.00 |
| ATOM | 5107 | N    | PRO | X | 340 | 66.491 | 39.544 | 52.210 | 0.00 | 0.00 |
| ATOM | 5108 | CD   | PRO | X | 340 | 66.171 | 39.131 | 53.579 | 0.00 | 0.00 |
| ATOM | 5109 | HD2  | PRO | X | 340 | 65.617 | 38.201 | 53.699 | 0.00 | 0.00 |
| ATOM | 5110 | HD3  | PRO | X | 340 | 65.686 | 40.009 | 54.006 | 0.00 | 0.00 |

|      |      |     |     |   |     |        |        |        |      |      |
|------|------|-----|-----|---|-----|--------|--------|--------|------|------|
| ATOM | 5111 | CG  | PRO | X | 340 | 67.545 | 38.914 | 54.248 | 0.00 | 0.00 |
| ATOM | 5112 | HG2 | PRO | X | 340 | 67.865 | 37.872 | 54.267 | 0.00 | 0.00 |
| ATOM | 5113 | HG3 | PRO | X | 340 | 67.508 | 39.274 | 55.276 | 0.00 | 0.00 |
| ATOM | 5114 | CB  | PRO | X | 340 | 68.540 | 39.737 | 53.514 | 0.00 | 0.00 |
| ATOM | 5115 | HB2 | PRO | X | 340 | 69.498 | 39.241 | 53.672 | 0.00 | 0.00 |
| ATOM | 5116 | HB3 | PRO | X | 340 | 68.683 | 40.757 | 53.871 | 0.00 | 0.00 |
| ATOM | 5117 | CA  | PRO | X | 340 | 67.947 | 39.705 | 52.093 | 0.00 | 0.00 |
| ATOM | 5118 | HA  | PRO | X | 340 | 68.221 | 40.582 | 51.507 | 0.00 | 0.00 |
| ATOM | 5119 | C   | PRO | X | 340 | 68.592 | 38.475 | 51.396 | 0.00 | 0.00 |
| ATOM | 5120 | O   | PRO | X | 340 | 68.180 | 37.375 | 51.703 | 0.00 | 0.00 |
| ATOM | 5121 | N   | GLY | X | 341 | 69.469 | 38.725 | 50.385 | 0.00 | 0.00 |
| ATOM | 5122 | H   | GLY | X | 341 | 69.736 | 39.681 | 50.202 | 0.00 | 0.00 |
| ATOM | 5123 | CA  | GLY | X | 341 | 70.158 | 37.678 | 49.622 | 0.00 | 0.00 |
| ATOM | 5124 | HA2 | GLY | X | 341 | 71.036 | 38.123 | 49.154 | 0.00 | 0.00 |
| ATOM | 5125 | HA3 | GLY | X | 341 | 70.534 | 36.940 | 50.330 | 0.00 | 0.00 |
| ATOM | 5126 | C   | GLY | X | 341 | 69.273 | 37.064 | 48.516 | 0.00 | 0.00 |
| ATOM | 5127 | O   | GLY | X | 341 | 69.446 | 35.908 | 48.121 | 0.00 | 0.00 |
| ATOM | 5128 | N   | PHE | X | 342 | 68.250 | 37.822 | 48.023 | 0.00 | 0.00 |
| ATOM | 5129 | H   | PHE | X | 342 | 68.180 | 38.761 | 48.390 | 0.00 | 0.00 |
| ATOM | 5130 | CA  | PHE | X | 342 | 67.247 | 37.341 | 46.994 | 0.00 | 0.00 |
| ATOM | 5131 | HA  | PHE | X | 342 | 67.602 | 36.395 | 46.585 | 0.00 | 0.00 |
| ATOM | 5132 | CB  | PHE | X | 342 | 65.866 | 37.137 | 47.581 | 0.00 | 0.00 |
| ATOM | 5133 | HB2 | PHE | X | 342 | 65.591 | 38.036 | 48.132 | 0.00 | 0.00 |
| ATOM | 5134 | HB3 | PHE | X | 342 | 65.121 | 37.093 | 46.787 | 0.00 | 0.00 |
| ATOM | 5135 | CG  | PHE | X | 342 | 65.535 | 35.951 | 48.406 | 0.00 | 0.00 |
| ATOM | 5136 | CD1 | PHE | X | 342 | 64.898 | 34.826 | 47.889 | 0.00 | 0.00 |
| ATOM | 5137 | HD1 | PHE | X | 342 | 64.588 | 34.664 | 46.867 | 0.00 | 0.00 |
| ATOM | 5138 | CE1 | PHE | X | 342 | 64.511 | 33.772 | 48.702 | 0.00 | 0.00 |
| ATOM | 5139 | HE1 | PHE | X | 342 | 63.983 | 32.887 | 48.379 | 0.00 | 0.00 |
| ATOM | 5140 | CZ  | PHE | X | 342 | 64.729 | 33.913 | 50.080 | 0.00 | 0.00 |
| ATOM | 5141 | HZ  | PHE | X | 342 | 64.391 | 33.108 | 50.716 | 0.00 | 0.00 |
| ATOM | 5142 | CE2 | PHE | X | 342 | 65.507 | 34.973 | 50.639 | 0.00 | 0.00 |
| ATOM | 5143 | HE2 | PHE | X | 342 | 65.628 | 35.041 | 51.711 | 0.00 | 0.00 |
| ATOM | 5144 | CD2 | PHE | X | 342 | 65.930 | 35.998 | 49.760 | 0.00 | 0.00 |
| ATOM | 5145 | HD2 | PHE | X | 342 | 66.434 | 36.858 | 50.173 | 0.00 | 0.00 |
| ATOM | 5146 | C   | PHE | X | 342 | 67.263 | 38.244 | 45.788 | 0.00 | 0.00 |
| ATOM | 5147 | O   | PHE | X | 342 | 67.228 | 39.475 | 46.006 | 0.00 | 0.00 |
| ATOM | 5148 | N   | SER | X | 343 | 67.140 | 37.683 | 44.586 | 0.00 | 0.00 |
| ATOM | 5149 | H   | SER | X | 343 | 67.046 | 36.679 | 44.529 | 0.00 | 0.00 |
| ATOM | 5150 | CA  | SER | X | 343 | 67.235 | 38.454 | 43.333 | 0.00 | 0.00 |
| ATOM | 5151 | HA  | SER | X | 343 | 66.541 | 39.287 | 43.444 | 0.00 | 0.00 |
| ATOM | 5152 | CB  | SER | X | 343 | 68.659 | 39.034 | 43.234 | 0.00 | 0.00 |
| ATOM | 5153 | HB2 | SER | X | 343 | 68.894 | 39.586 | 44.145 | 0.00 | 0.00 |
| ATOM | 5154 | HB3 | SER | X | 343 | 69.425 | 38.284 | 43.038 | 0.00 | 0.00 |
| ATOM | 5155 | OG  | SER | X | 343 | 68.664 | 39.944 | 42.151 | 0.00 | 0.00 |
| ATOM | 5156 | HG  | SER | X | 343 | 69.323 | 39.584 | 41.552 | 0.00 | 0.00 |
| ATOM | 5157 | C   | SER | X | 343 | 66.884 | 37.539 | 42.172 | 0.00 | 0.00 |
| ATOM | 5158 | O   | SER | X | 343 | 67.083 | 36.330 | 42.309 | 0.00 | 0.00 |
| ATOM | 5159 | N   | LYS | X | 344 | 66.430 | 38.044 | 41.058 | 0.00 | 0.00 |
| ATOM | 5160 | H   | LYS | X | 344 | 66.444 | 39.040 | 40.893 | 0.00 | 0.00 |
| ATOM | 5161 | CA  | LYS | X | 344 | 65.720 | 37.161 | 40.071 | 0.00 | 0.00 |
| ATOM | 5162 | HA  | LYS | X | 344 | 64.875 | 36.627 | 40.505 | 0.00 | 0.00 |
| ATOM | 5163 | CB  | LYS | X | 344 | 65.125 | 38.071 | 38.979 | 0.00 | 0.00 |
| ATOM | 5164 | HB2 | LYS | X | 344 | 64.687 | 37.425 | 38.219 | 0.00 | 0.00 |
| ATOM | 5165 | HB3 | LYS | X | 344 | 64.277 | 38.556 | 39.463 | 0.00 | 0.00 |
| ATOM | 5166 | CG  | LYS | X | 344 | 66.129 | 39.021 | 38.236 | 0.00 | 0.00 |
| ATOM | 5167 | HG2 | LYS | X | 344 | 66.245 | 39.937 | 38.815 | 0.00 | 0.00 |
| ATOM | 5168 | HG3 | LYS | X | 344 | 67.086 | 38.542 | 38.032 | 0.00 | 0.00 |
| ATOM | 5169 | CD  | LYS | X | 344 | 65.510 | 39.316 | 36.816 | 0.00 | 0.00 |
| ATOM | 5170 | HD2 | LYS | X | 344 | 65.271 | 38.387 | 36.299 | 0.00 | 0.00 |
| ATOM | 5171 | HD3 | LYS | X | 344 | 64.589 | 39.881 | 36.954 | 0.00 | 0.00 |
| ATOM | 5172 | CE  | LYS | X | 344 | 66.508 | 40.085 | 35.912 | 0.00 | 0.00 |
| ATOM | 5173 | HE2 | LYS | X | 344 | 66.050 | 40.420 | 34.981 | 0.00 | 0.00 |
| ATOM | 5174 | HE3 | LYS | X | 344 | 66.832 | 41.029 | 36.350 | 0.00 | 0.00 |
| ATOM | 5175 | NZ  | LYS | X | 344 | 67.838 | 39.381 | 35.662 | 0.00 | 0.00 |
| ATOM | 5176 | HZ1 | LYS | X | 344 | 68.348 | 39.892 | 34.956 | 0.00 | 0.00 |
| ATOM | 5177 | HZ2 | LYS | X | 344 | 68.447 | 39.468 | 36.463 | 0.00 | 0.00 |

|      |      |      |     |   |     |        |        |        |      |      |
|------|------|------|-----|---|-----|--------|--------|--------|------|------|
| ATOM | 5178 | HZ3  | LYS | X | 344 | 67.797 | 38.384 | 35.505 | 0.00 | 0.00 |
| ATOM | 5179 | C    | LYS | X | 344 | 66.663 | 36.067 | 39.449 | 0.00 | 0.00 |
| ATOM | 5180 | O    | LYS | X | 344 | 66.134 | 35.063 | 38.973 | 0.00 | 0.00 |
| ATOM | 5181 | N    | ASP | X | 345 | 67.982 | 36.304 | 39.433 | 0.00 | 0.00 |
| ATOM | 5182 | H    | ASP | X | 345 | 68.313 | 37.162 | 39.849 | 0.00 | 0.00 |
| ATOM | 5183 | CA   | ASP | X | 345 | 69.122 | 35.640 | 38.962 | 0.00 | 0.00 |
| ATOM | 5184 | HA   | ASP | X | 345 | 68.917 | 34.966 | 38.131 | 0.00 | 0.00 |
| ATOM | 5185 | CB   | ASP | X | 345 | 70.160 | 36.638 | 38.445 | 0.00 | 0.00 |
| ATOM | 5186 | HB2  | ASP | X | 345 | 70.995 | 36.104 | 37.991 | 0.00 | 0.00 |
| ATOM | 5187 | HB3  | ASP | X | 345 | 69.709 | 37.404 | 37.813 | 0.00 | 0.00 |
| ATOM | 5188 | CG   | ASP | X | 345 | 70.682 | 37.431 | 39.575 | 0.00 | 0.00 |
| ATOM | 5189 | OD1  | ASP | X | 345 | 71.880 | 37.300 | 39.811 | 0.00 | 0.00 |
| ATOM | 5190 | OD2  | ASP | X | 345 | 69.911 | 38.232 | 40.160 | 0.00 | 0.00 |
| ATOM | 5191 | C    | ASP | X | 345 | 69.763 | 34.644 | 39.998 | 0.00 | 0.00 |
| ATOM | 5192 | O    | ASP | X | 345 | 70.561 | 33.783 | 39.622 | 0.00 | 0.00 |
| ATOM | 5193 | N    | ASN | X | 346 | 69.384 | 34.901 | 41.280 | 0.00 | 0.00 |
| ATOM | 5194 | H    | ASN | X | 346 | 68.631 | 35.543 | 41.483 | 0.00 | 0.00 |
| ATOM | 5195 | CA   | ASN | X | 346 | 70.028 | 34.257 | 42.441 | 0.00 | 0.00 |
| ATOM | 5196 | HA   | ASN | X | 346 | 71.093 | 34.176 | 42.226 | 0.00 | 0.00 |
| ATOM | 5197 | CB   | ASN | X | 346 | 70.011 | 35.290 | 43.637 | 0.00 | 0.00 |
| ATOM | 5198 | HB2  | ASN | X | 346 | 70.341 | 36.289 | 43.352 | 0.00 | 0.00 |
| ATOM | 5199 | HB3  | ASN | X | 346 | 69.042 | 35.303 | 44.136 | 0.00 | 0.00 |
| ATOM | 5200 | CG   | ASN | X | 346 | 71.028 | 34.916 | 44.641 | 0.00 | 0.00 |
| ATOM | 5201 | OD1  | ASN | X | 346 | 71.614 | 33.907 | 44.618 | 0.00 | 0.00 |
| ATOM | 5202 | ND2  | ASN | X | 346 | 71.248 | 35.778 | 45.632 | 0.00 | 0.00 |
| ATOM | 5203 | HD21 | ASN | X | 346 | 71.846 | 35.365 | 46.334 | 0.00 | 0.00 |
| ATOM | 5204 | HD22 | ASN | X | 346 | 70.866 | 36.710 | 45.563 | 0.00 | 0.00 |
| ATOM | 5205 | C    | ASN | X | 346 | 69.415 | 32.870 | 42.771 | 0.00 | 0.00 |
| ATOM | 5206 | O    | ASN | X | 346 | 68.193 | 32.831 | 43.032 | 0.00 | 0.00 |
| ATOM | 5207 | N    | GLU | X | 347 | 70.204 | 31.818 | 42.954 | 0.00 | 0.00 |
| ATOM | 5208 | H    | GLU | X | 347 | 71.143 | 31.751 | 42.587 | 0.00 | 0.00 |
| ATOM | 5209 | CA   | GLU | X | 347 | 69.679 | 30.559 | 43.581 | 0.00 | 0.00 |
| ATOM | 5210 | HA   | GLU | X | 347 | 68.915 | 30.141 | 42.926 | 0.00 | 0.00 |
| ATOM | 5211 | CB   | GLU | X | 347 | 70.781 | 29.504 | 43.513 | 0.00 | 0.00 |
| ATOM | 5212 | HB2  | GLU | X | 347 | 71.428 | 29.786 | 42.683 | 0.00 | 0.00 |
| ATOM | 5213 | HB3  | GLU | X | 347 | 71.385 | 29.580 | 44.417 | 0.00 | 0.00 |
| ATOM | 5214 | CG   | GLU | X | 347 | 70.288 | 28.098 | 43.402 | 0.00 | 0.00 |
| ATOM | 5215 | HG2  | GLU | X | 347 | 69.842 | 27.801 | 44.351 | 0.00 | 0.00 |
| ATOM | 5216 | HG3  | GLU | X | 347 | 69.551 | 28.089 | 42.599 | 0.00 | 0.00 |
| ATOM | 5217 | CD   | GLU | X | 347 | 71.381 | 27.105 | 43.048 | 0.00 | 0.00 |
| ATOM | 5218 | OE1  | GLU | X | 347 | 71.665 | 26.286 | 43.968 | 0.00 | 0.00 |
| ATOM | 5219 | OE2  | GLU | X | 347 | 72.096 | 27.190 | 42.014 | 0.00 | 0.00 |
| ATOM | 5220 | C    | GLU | X | 347 | 69.069 | 30.811 | 45.002 | 0.00 | 0.00 |
| ATOM | 5221 | O    | GLU | X | 347 | 68.371 | 29.981 | 45.550 | 0.00 | 0.00 |
| ATOM | 5222 | N    | SER | X | 348 | 69.390 | 31.956 | 45.628 | 0.00 | 0.00 |
| ATOM | 5223 | H    | SER | X | 348 | 70.202 | 32.412 | 45.236 | 0.00 | 0.00 |
| ATOM | 5224 | CA   | SER | X | 348 | 68.706 | 32.580 | 46.733 | 0.00 | 0.00 |
| ATOM | 5225 | HA   | SER | X | 348 | 69.173 | 33.534 | 46.978 | 0.00 | 0.00 |
| ATOM | 5226 | CB   | SER | X | 348 | 67.246 | 32.784 | 46.340 | 0.00 | 0.00 |
| ATOM | 5227 | HB2  | SER | X | 348 | 66.743 | 31.938 | 45.872 | 0.00 | 0.00 |
| ATOM | 5228 | HB3  | SER | X | 348 | 66.660 | 33.075 | 47.213 | 0.00 | 0.00 |
| ATOM | 5229 | OG   | SER | X | 348 | 67.076 | 33.915 | 45.477 | 0.00 | 0.00 |
| ATOM | 5230 | HG   | SER | X | 348 | 67.437 | 33.762 | 44.600 | 0.00 | 0.00 |
| ATOM | 5231 | C    | SER | X | 348 | 68.897 | 31.724 | 48.012 | 0.00 | 0.00 |
| ATOM | 5232 | O    | SER | X | 348 | 67.958 | 31.220 | 48.618 | 0.00 | 0.00 |
| ATOM | 5233 | N    | LEU | X | 349 | 70.185 | 31.348 | 48.309 | 0.00 | 0.00 |
| ATOM | 5234 | H    | LEU | X | 349 | 70.842 | 31.790 | 47.682 | 0.00 | 0.00 |
| ATOM | 5235 | CA   | LEU | X | 349 | 70.613 | 30.368 | 49.392 | 0.00 | 0.00 |
| ATOM | 5236 | HA   | LEU | X | 349 | 69.780 | 29.729 | 49.684 | 0.00 | 0.00 |
| ATOM | 5237 | CB   | LEU | X | 349 | 71.803 | 29.513 | 48.815 | 0.00 | 0.00 |
| ATOM | 5238 | HB2  | LEU | X | 349 | 72.574 | 30.163 | 48.402 | 0.00 | 0.00 |
| ATOM | 5239 | HB3  | LEU | X | 349 | 72.286 | 29.025 | 49.662 | 0.00 | 0.00 |
| ATOM | 5240 | CG   | LEU | X | 349 | 71.420 | 28.469 | 47.740 | 0.00 | 0.00 |
| ATOM | 5241 | HG   | LEU | X | 349 | 70.934 | 28.952 | 46.893 | 0.00 | 0.00 |
| ATOM | 5242 | CD1  | LEU | X | 349 | 72.608 | 27.841 | 47.149 | 0.00 | 0.00 |
| ATOM | 5243 | HD11 | LEU | X | 349 | 73.202 | 27.259 | 47.854 | 0.00 | 0.00 |
| ATOM | 5244 | HD12 | LEU | X | 349 | 73.217 | 28.616 | 46.684 | 0.00 | 0.00 |

|      |      |      |     |   |     |        |        |        |      |      |
|------|------|------|-----|---|-----|--------|--------|--------|------|------|
| ATOM | 5245 | HD13 | LEU | X | 349 | 72.244 | 27.196 | 46.349 | 0.00 | 0.00 |
| ATOM | 5246 | CD2  | LEU | X | 349 | 70.411 | 27.437 | 48.339 | 0.00 | 0.00 |
| ATOM | 5247 | HD21 | LEU | X | 349 | 70.885 | 26.836 | 49.115 | 0.00 | 0.00 |
| ATOM | 5248 | HD22 | LEU | X | 349 | 69.523 | 27.891 | 48.779 | 0.00 | 0.00 |
| ATOM | 5249 | HD23 | LEU | X | 349 | 70.007 | 26.791 | 47.559 | 0.00 | 0.00 |
| ATOM | 5250 | C    | LEU | X | 349 | 71.203 | 31.210 | 50.539 | 0.00 | 0.00 |
| ATOM | 5251 | O    | LEU | X | 349 | 72.040 | 32.070 | 50.354 | 0.00 | 0.00 |
| ATOM | 5252 | N    | ILE | X | 350 | 70.731 | 30.891 | 51.769 | 0.00 | 0.00 |
| ATOM | 5253 | H    | ILE | X | 350 | 70.149 | 30.066 | 51.815 | 0.00 | 0.00 |
| ATOM | 5254 | CA   | ILE | X | 350 | 70.672 | 31.873 | 52.873 | 0.00 | 0.00 |
| ATOM | 5255 | HA   | ILE | X | 350 | 71.409 | 32.660 | 52.715 | 0.00 | 0.00 |
| ATOM | 5256 | CB   | ILE | X | 350 | 69.312 | 32.693 | 52.810 | 0.00 | 0.00 |
| ATOM | 5257 | HB   | ILE | X | 350 | 69.228 | 33.214 | 53.763 | 0.00 | 0.00 |
| ATOM | 5258 | CG2  | ILE | X | 350 | 69.300 | 33.690 | 51.630 | 0.00 | 0.00 |
| ATOM | 5259 | HG21 | ILE | X | 350 | 69.367 | 33.182 | 50.667 | 0.00 | 0.00 |
| ATOM | 5260 | HG22 | ILE | X | 350 | 70.235 | 34.236 | 51.760 | 0.00 | 0.00 |
| ATOM | 5261 | HG23 | ILE | X | 350 | 68.412 | 34.322 | 51.619 | 0.00 | 0.00 |
| ATOM | 5262 | CG1  | ILE | X | 350 | 67.933 | 32.064 | 52.540 | 0.00 | 0.00 |
| ATOM | 5263 | HG12 | ILE | X | 350 | 67.180 | 32.850 | 52.610 | 0.00 | 0.00 |
| ATOM | 5264 | HG13 | ILE | X | 350 | 67.787 | 31.644 | 51.545 | 0.00 | 0.00 |
| ATOM | 5265 | CD1  | ILE | X | 350 | 67.597 | 30.832 | 53.440 | 0.00 | 0.00 |
| ATOM | 5266 | HD11 | ILE | X | 350 | 67.902 | 30.971 | 54.477 | 0.00 | 0.00 |
| ATOM | 5267 | HD12 | ILE | X | 350 | 68.193 | 29.997 | 53.071 | 0.00 | 0.00 |
| ATOM | 5268 | HD13 | ILE | X | 350 | 66.573 | 30.464 | 53.386 | 0.00 | 0.00 |
| ATOM | 5269 | C    | ILE | X | 350 | 70.934 | 31.315 | 54.239 | 0.00 | 0.00 |
| ATOM | 5270 | O    | ILE | X | 350 | 70.810 | 30.120 | 54.549 | 0.00 | 0.00 |
| ATOM | 5271 | N    | SER | X | 351 | 71.482 | 32.235 | 55.080 | 0.00 | 0.00 |
| ATOM | 5272 | H    | SER | X | 351 | 71.737 | 33.178 | 54.821 | 0.00 | 0.00 |
| ATOM | 5273 | CA   | SER | X | 351 | 71.850 | 31.830 | 56.508 | 0.00 | 0.00 |
| ATOM | 5274 | HA   | SER | X | 351 | 72.078 | 30.767 | 56.430 | 0.00 | 0.00 |
| ATOM | 5275 | CB   | SER | X | 351 | 73.015 | 32.711 | 56.923 | 0.00 | 0.00 |
| ATOM | 5276 | HB2  | SER | X | 351 | 73.312 | 32.271 | 57.875 | 0.00 | 0.00 |
| ATOM | 5277 | HB3  | SER | X | 351 | 73.769 | 32.680 | 56.136 | 0.00 | 0.00 |
| ATOM | 5278 | OG   | SER | X | 351 | 72.575 | 34.102 | 57.191 | 0.00 | 0.00 |
| ATOM | 5279 | HG   | SER | X | 351 | 73.393 | 34.562 | 57.389 | 0.00 | 0.00 |
| ATOM | 5280 | C    | SER | X | 351 | 70.631 | 31.805 | 57.422 | 0.00 | 0.00 |
| ATOM | 5281 | O    | SER | X | 351 | 69.588 | 32.258 | 56.899 | 0.00 | 0.00 |
| ATOM | 5282 | N    | ARG | X | 352 | 70.848 | 31.502 | 58.696 | 0.00 | 0.00 |
| ATOM | 5283 | H    | ARG | X | 352 | 71.780 | 31.370 | 59.063 | 0.00 | 0.00 |
| ATOM | 5284 | CA   | ARG | X | 352 | 69.769 | 31.568 | 59.672 | 0.00 | 0.00 |
| ATOM | 5285 | HA   | ARG | X | 352 | 68.930 | 31.140 | 59.123 | 0.00 | 0.00 |
| ATOM | 5286 | CB   | ARG | X | 352 | 70.029 | 30.759 | 60.974 | 0.00 | 0.00 |
| ATOM | 5287 | HB2  | ARG | X | 352 | 71.010 | 30.779 | 61.449 | 0.00 | 0.00 |
| ATOM | 5288 | HB3  | ARG | X | 352 | 69.373 | 31.112 | 61.770 | 0.00 | 0.00 |
| ATOM | 5289 | CG   | ARG | X | 352 | 69.962 | 29.265 | 60.655 | 0.00 | 0.00 |
| ATOM | 5290 | HG2  | ARG | X | 352 | 68.962 | 29.096 | 60.256 | 0.00 | 0.00 |
| ATOM | 5291 | HG3  | ARG | X | 352 | 70.702 | 29.086 | 59.874 | 0.00 | 0.00 |
| ATOM | 5292 | CD   | ARG | X | 352 | 70.145 | 28.339 | 61.847 | 0.00 | 0.00 |
| ATOM | 5293 | HD2  | ARG | X | 352 | 70.205 | 27.309 | 61.495 | 0.00 | 0.00 |
| ATOM | 5294 | HD3  | ARG | X | 352 | 71.131 | 28.526 | 62.273 | 0.00 | 0.00 |
| ATOM | 5295 | NE   | ARG | X | 352 | 69.136 | 28.571 | 62.903 | 0.00 | 0.00 |
| ATOM | 5296 | HE   | ARG | X | 352 | 69.484 | 29.216 | 63.599 | 0.00 | 0.00 |
| ATOM | 5297 | CZ   | ARG | X | 352 | 67.907 | 28.077 | 63.000 | 0.00 | 0.00 |
| ATOM | 5298 | NH1  | ARG | X | 352 | 67.299 | 27.380 | 62.071 | 0.00 | 0.00 |
| ATOM | 5299 | HH11 | ARG | X | 352 | 67.864 | 26.804 | 61.464 | 0.00 | 0.00 |
| ATOM | 5300 | HH12 | ARG | X | 352 | 66.291 | 27.330 | 62.029 | 0.00 | 0.00 |
| ATOM | 5301 | NH2  | ARG | X | 352 | 67.147 | 28.573 | 63.896 | 0.00 | 0.00 |
| ATOM | 5302 | HH21 | ARG | X | 352 | 67.671 | 29.128 | 64.559 | 0.00 | 0.00 |
| ATOM | 5303 | HH22 | ARG | X | 352 | 66.266 | 28.105 | 64.050 | 0.00 | 0.00 |
| ATOM | 5304 | C    | ARG | X | 352 | 69.533 | 33.050 | 59.923 | 0.00 | 0.00 |
| ATOM | 5305 | O    | ARG | X | 352 | 68.351 | 33.374 | 60.076 | 0.00 | 0.00 |
| ATOM | 5306 | N    | ALA | X | 353 | 70.502 | 33.928 | 59.950 | 0.00 | 0.00 |
| ATOM | 5307 | H    | ALA | X | 353 | 71.451 | 33.607 | 60.082 | 0.00 | 0.00 |
| ATOM | 5308 | CA   | ALA | X | 353 | 70.313 | 35.346 | 60.093 | 0.00 | 0.00 |
| ATOM | 5309 | HA   | ALA | X | 353 | 69.727 | 35.456 | 61.006 | 0.00 | 0.00 |
| ATOM | 5310 | CB   | ALA | X | 353 | 71.618 | 36.034 | 60.298 | 0.00 | 0.00 |
| ATOM | 5311 | HB1  | ALA | X | 353 | 72.170 | 35.724 | 61.185 | 0.00 | 0.00 |



|      |      |      |     |   |     |        |        |        |      |      |
|------|------|------|-----|---|-----|--------|--------|--------|------|------|
| ATOM | 5312 | HB2  | ALA | X | 353 | 71.323 | 37.067 | 60.486 | 0.00 | 0.00 |
| ATOM | 5313 | HB3  | ALA | X | 353 | 72.265 | 35.890 | 59.433 | 0.00 | 0.00 |
| ATOM | 5314 | C    | ALA | X | 353 | 69.508 | 36.026 | 58.952 | 0.00 | 0.00 |
| ATOM | 5315 | O    | ALA | X | 353 | 68.600 | 36.816 | 59.163 | 0.00 | 0.00 |
| ATOM | 5316 | N    | GLU | X | 354 | 69.864 | 35.648 | 57.715 | 0.00 | 0.00 |
| ATOM | 5317 | H    | GLU | X | 354 | 70.608 | 34.974 | 57.606 | 0.00 | 0.00 |
| ATOM | 5318 | CA   | GLU | X | 354 | 69.060 | 36.029 | 56.578 | 0.00 | 0.00 |
| ATOM | 5319 | HA   | GLU | X | 354 | 68.956 | 37.104 | 56.432 | 0.00 | 0.00 |
| ATOM | 5320 | CB   | GLU | X | 354 | 69.874 | 35.549 | 55.370 | 0.00 | 0.00 |
| ATOM | 5321 | HB2  | GLU | X | 354 | 70.079 | 34.484 | 55.484 | 0.00 | 0.00 |
| ATOM | 5322 | HB3  | GLU | X | 354 | 69.201 | 35.535 | 54.513 | 0.00 | 0.00 |
| ATOM | 5323 | CG   | GLU | X | 354 | 71.229 | 36.354 | 55.282 | 0.00 | 0.00 |
| ATOM | 5324 | HG2  | GLU | X | 354 | 70.935 | 37.395 | 55.150 | 0.00 | 0.00 |
| ATOM | 5325 | HG3  | GLU | X | 354 | 71.803 | 36.339 | 56.208 | 0.00 | 0.00 |
| ATOM | 5326 | CD   | GLU | X | 354 | 72.028 | 35.920 | 54.073 | 0.00 | 0.00 |
| ATOM | 5327 | OE1  | GLU | X | 354 | 72.163 | 34.723 | 53.825 | 0.00 | 0.00 |
| ATOM | 5328 | OE2  | GLU | X | 354 | 72.670 | 36.715 | 53.478 | 0.00 | 0.00 |
| ATOM | 5329 | C    | GLU | X | 354 | 67.642 | 35.456 | 56.573 | 0.00 | 0.00 |
| ATOM | 5330 | O    | GLU | X | 354 | 66.697 | 36.165 | 56.309 | 0.00 | 0.00 |
| ATOM | 5331 | N    | PHE | X | 355 | 67.469 | 34.158 | 56.857 | 0.00 | 0.00 |
| ATOM | 5332 | H    | PHE | X | 355 | 68.233 | 33.507 | 56.969 | 0.00 | 0.00 |
| ATOM | 5333 | CA   | PHE | X | 355 | 66.036 | 33.683 | 56.974 | 0.00 | 0.00 |
| ATOM | 5334 | HA   | PHE | X | 355 | 65.562 | 34.000 | 56.044 | 0.00 | 0.00 |
| ATOM | 5335 | CB   | PHE | X | 355 | 65.866 | 32.156 | 57.115 | 0.00 | 0.00 |
| ATOM | 5336 | HB2  | PHE | X | 355 | 66.179 | 31.615 | 56.222 | 0.00 | 0.00 |
| ATOM | 5337 | HB3  | PHE | X | 355 | 66.597 | 31.728 | 57.801 | 0.00 | 0.00 |
| ATOM | 5338 | CG   | PHE | X | 355 | 64.454 | 31.644 | 57.504 | 0.00 | 0.00 |
| ATOM | 5339 | CD1  | PHE | X | 355 | 63.371 | 31.782 | 56.588 | 0.00 | 0.00 |
| ATOM | 5340 | HD1  | PHE | X | 355 | 63.579 | 32.256 | 55.640 | 0.00 | 0.00 |
| ATOM | 5341 | CE1  | PHE | X | 355 | 62.130 | 31.185 | 56.887 | 0.00 | 0.00 |
| ATOM | 5342 | HE1  | PHE | X | 355 | 61.393 | 31.159 | 56.098 | 0.00 | 0.00 |
| ATOM | 5343 | CZ   | PHE | X | 355 | 61.919 | 30.468 | 58.098 | 0.00 | 0.00 |
| ATOM | 5344 | HZ   | PHE | X | 355 | 60.961 | 30.029 | 58.334 | 0.00 | 0.00 |
| ATOM | 5345 | CE2  | PHE | X | 355 | 62.936 | 30.385 | 59.034 | 0.00 | 0.00 |
| ATOM | 5346 | HE2  | PHE | X | 355 | 62.838 | 29.838 | 59.960 | 0.00 | 0.00 |
| ATOM | 5347 | CD2  | PHE | X | 355 | 64.149 | 30.984 | 58.732 | 0.00 | 0.00 |
| ATOM | 5348 | HD2  | PHE | X | 355 | 64.941 | 30.986 | 59.466 | 0.00 | 0.00 |
| ATOM | 5349 | C    | PHE | X | 355 | 65.241 | 34.344 | 58.085 | 0.00 | 0.00 |
| ATOM | 5350 | O    | PHE | X | 355 | 64.091 | 34.694 | 57.873 | 0.00 | 0.00 |
| ATOM | 5351 | N    | LEU | X | 356 | 65.901 | 34.671 | 59.254 | 0.00 | 0.00 |
| ATOM | 5352 | H    | LEU | X | 356 | 66.869 | 34.419 | 59.392 | 0.00 | 0.00 |
| ATOM | 5353 | CA   | LEU | X | 356 | 65.256 | 35.464 | 60.277 | 0.00 | 0.00 |
| ATOM | 5354 | HA   | LEU | X | 356 | 64.356 | 35.004 | 60.687 | 0.00 | 0.00 |
| ATOM | 5355 | CB   | LEU | X | 356 | 66.231 | 35.408 | 61.478 | 0.00 | 0.00 |
| ATOM | 5356 | HB2  | LEU | X | 356 | 66.282 | 34.354 | 61.752 | 0.00 | 0.00 |
| ATOM | 5357 | HB3  | LEU | X | 356 | 67.176 | 35.840 | 61.148 | 0.00 | 0.00 |
| ATOM | 5358 | CG   | LEU | X | 356 | 65.668 | 36.208 | 62.657 | 0.00 | 0.00 |
| ATOM | 5359 | HG   | LEU | X | 356 | 65.468 | 37.247 | 62.397 | 0.00 | 0.00 |
| ATOM | 5360 | CD1  | LEU | X | 356 | 64.447 | 35.565 | 63.238 | 0.00 | 0.00 |
| ATOM | 5361 | HD11 | LEU | X | 356 | 64.712 | 34.605 | 63.681 | 0.00 | 0.00 |
| ATOM | 5362 | HD12 | LEU | X | 356 | 63.645 | 35.403 | 62.518 | 0.00 | 0.00 |
| ATOM | 5363 | HD13 | LEU | X | 356 | 64.137 | 36.168 | 64.092 | 0.00 | 0.00 |
| ATOM | 5364 | CD2  | LEU | X | 356 | 66.641 | 36.350 | 63.868 | 0.00 | 0.00 |
| ATOM | 5365 | HD21 | LEU | X | 356 | 67.536 | 36.946 | 63.689 | 0.00 | 0.00 |
| ATOM | 5366 | HD22 | LEU | X | 356 | 66.263 | 36.785 | 64.794 | 0.00 | 0.00 |
| ATOM | 5367 | HD23 | LEU | X | 356 | 67.005 | 35.333 | 64.013 | 0.00 | 0.00 |
| ATOM | 5368 | C    | LEU | X | 356 | 64.863 | 36.902 | 59.912 | 0.00 | 0.00 |
| ATOM | 5369 | O    | LEU | X | 356 | 63.780 | 37.407 | 60.225 | 0.00 | 0.00 |
| ATOM | 5370 | N    | ALA | X | 357 | 65.763 | 37.641 | 59.190 | 0.00 | 0.00 |
| ATOM | 5371 | H    | ALA | X | 357 | 66.727 | 37.378 | 59.039 | 0.00 | 0.00 |
| ATOM | 5372 | CA   | ALA | X | 357 | 65.472 | 38.878 | 58.613 | 0.00 | 0.00 |
| ATOM | 5373 | HA   | ALA | X | 357 | 65.036 | 39.521 | 59.377 | 0.00 | 0.00 |
| ATOM | 5374 | CB   | ALA | X | 357 | 66.770 | 39.398 | 58.091 | 0.00 | 0.00 |
| ATOM | 5375 | HB1  | ALA | X | 357 | 66.646 | 40.162 | 57.324 | 0.00 | 0.00 |
| ATOM | 5376 | HB2  | ALA | X | 357 | 67.386 | 38.645 | 57.599 | 0.00 | 0.00 |
| ATOM | 5377 | HB3  | ALA | X | 357 | 67.430 | 39.708 | 58.901 | 0.00 | 0.00 |
| ATOM | 5378 | C    | ALA | X | 357 | 64.343 | 38.738 | 57.587 | 0.00 | 0.00 |

|      |      |      |     |   |     |        |        |        |      |      |
|------|------|------|-----|---|-----|--------|--------|--------|------|------|
| ATOM | 5379 | O    | ALA | X | 357 | 63.402 | 39.571 | 57.615 | 0.00 | 0.00 |
| ATOM | 5380 | N    | GLY | X | 358 | 64.386 | 37.686 | 56.724 | 0.00 | 0.00 |
| ATOM | 5381 | H    | GLY | X | 358 | 65.176 | 37.070 | 56.855 | 0.00 | 0.00 |
| ATOM | 5382 | CA   | GLY | X | 358 | 63.365 | 37.457 | 55.763 | 0.00 | 0.00 |
| ATOM | 5383 | HA2  | GLY | X | 358 | 63.326 | 38.323 | 55.102 | 0.00 | 0.00 |
| ATOM | 5384 | HA3  | GLY | X | 358 | 63.691 | 36.608 | 55.162 | 0.00 | 0.00 |
| ATOM | 5385 | C    | GLY | X | 358 | 62.049 | 37.140 | 56.427 | 0.00 | 0.00 |
| ATOM | 5386 | O    | GLY | X | 358 | 61.125 | 37.914 | 56.068 | 0.00 | 0.00 |
| ATOM | 5387 | N    | VAL | X | 359 | 62.038 | 36.343 | 57.502 | 0.00 | 0.00 |
| ATOM | 5388 | H    | VAL | X | 359 | 62.723 | 35.603 | 57.566 | 0.00 | 0.00 |
| ATOM | 5389 | CA   | VAL | X | 359 | 60.776 | 36.118 | 58.244 | 0.00 | 0.00 |
| ATOM | 5390 | HA   | VAL | X | 359 | 60.050 | 35.826 | 57.485 | 0.00 | 0.00 |
| ATOM | 5391 | CB   | VAL | X | 359 | 61.032 | 35.038 | 59.386 | 0.00 | 0.00 |
| ATOM | 5392 | HB   | VAL | X | 359 | 61.949 | 35.269 | 59.929 | 0.00 | 0.00 |
| ATOM | 5393 | CG1  | VAL | X | 359 | 59.889 | 34.926 | 60.502 | 0.00 | 0.00 |
| ATOM | 5394 | HG11 | VAL | X | 359 | 59.933 | 35.817 | 61.129 | 0.00 | 0.00 |
| ATOM | 5395 | HG12 | VAL | X | 359 | 58.874 | 34.840 | 60.114 | 0.00 | 0.00 |
| ATOM | 5396 | HG13 | VAL | X | 359 | 60.044 | 34.107 | 61.203 | 0.00 | 0.00 |
| ATOM | 5397 | CG2  | VAL | X | 359 | 61.104 | 33.637 | 58.762 | 0.00 | 0.00 |
| ATOM | 5398 | HG21 | VAL | X | 359 | 61.837 | 33.571 | 57.957 | 0.00 | 0.00 |
| ATOM | 5399 | HG22 | VAL | X | 359 | 60.152 | 33.450 | 58.266 | 0.00 | 0.00 |
| ATOM | 5400 | HG23 | VAL | X | 359 | 61.351 | 32.862 | 59.488 | 0.00 | 0.00 |
| ATOM | 5401 | C    | VAL | X | 359 | 60.221 | 37.468 | 58.930 | 0.00 | 0.00 |
| ATOM | 5402 | O    | VAL | X | 359 | 58.998 | 37.628 | 58.902 | 0.00 | 0.00 |
| ATOM | 5403 | N    | ARG | X | 360 | 61.065 | 38.474 | 59.335 | 0.00 | 0.00 |
| ATOM | 5404 | H    | ARG | X | 360 | 62.058 | 38.324 | 59.230 | 0.00 | 0.00 |
| ATOM | 5405 | CA   | ARG | X | 360 | 60.575 | 39.738 | 59.831 | 0.00 | 0.00 |
| ATOM | 5406 | HA   | ARG | X | 360 | 59.882 | 39.610 | 60.663 | 0.00 | 0.00 |
| ATOM | 5407 | CB   | ARG | X | 360 | 61.805 | 40.590 | 60.232 | 0.00 | 0.00 |
| ATOM | 5408 | HB2  | ARG | X | 360 | 62.606 | 39.955 | 60.610 | 0.00 | 0.00 |
| ATOM | 5409 | HB3  | ARG | X | 360 | 62.122 | 41.063 | 59.303 | 0.00 | 0.00 |
| ATOM | 5410 | CG   | ARG | X | 360 | 61.444 | 41.743 | 61.255 | 0.00 | 0.00 |
| ATOM | 5411 | HG2  | ARG | X | 360 | 60.508 | 42.157 | 60.882 | 0.00 | 0.00 |
| ATOM | 5412 | HG3  | ARG | X | 360 | 61.247 | 41.242 | 62.203 | 0.00 | 0.00 |
| ATOM | 5413 | CD   | ARG | X | 360 | 62.402 | 42.848 | 61.586 | 0.00 | 0.00 |
| ATOM | 5414 | HD2  | ARG | X | 360 | 61.956 | 43.711 | 62.081 | 0.00 | 0.00 |
| ATOM | 5415 | HD3  | ARG | X | 360 | 63.150 | 42.542 | 62.317 | 0.00 | 0.00 |
| ATOM | 5416 | NE   | ARG | X | 360 | 63.087 | 43.341 | 60.389 | 0.00 | 0.00 |
| ATOM | 5417 | HE   | ARG | X | 360 | 62.548 | 44.018 | 59.868 | 0.00 | 0.00 |
| ATOM | 5418 | CZ   | ARG | X | 360 | 64.217 | 42.923 | 59.801 | 0.00 | 0.00 |
| ATOM | 5419 | NH1  | ARG | X | 360 | 64.963 | 41.986 | 60.403 | 0.00 | 0.00 |
| ATOM | 5420 | HH11 | ARG | X | 360 | 64.587 | 41.438 | 61.163 | 0.00 | 0.00 |
| ATOM | 5421 | HH12 | ARG | X | 360 | 65.950 | 41.855 | 60.236 | 0.00 | 0.00 |
| ATOM | 5422 | NH2  | ARG | X | 360 | 64.593 | 43.545 | 58.709 | 0.00 | 0.00 |
| ATOM | 5423 | HH21 | ARG | X | 360 | 64.188 | 44.402 | 58.360 | 0.00 | 0.00 |
| ATOM | 5424 | HH22 | ARG | X | 360 | 65.454 | 43.320 | 58.232 | 0.00 | 0.00 |
| ATOM | 5425 | C    | ARG | X | 360 | 59.746 | 40.402 | 58.827 | 0.00 | 0.00 |
| ATOM | 5426 | O    | ARG | X | 360 | 58.553 | 40.700 | 59.059 | 0.00 | 0.00 |
| ATOM | 5427 | N    | VAL | X | 361 | 60.323 | 40.475 | 57.599 | 0.00 | 0.00 |
| ATOM | 5428 | H    | VAL | X | 361 | 61.295 | 40.201 | 57.577 | 0.00 | 0.00 |
| ATOM | 5429 | CA   | VAL | X | 361 | 59.648 | 41.161 | 56.494 | 0.00 | 0.00 |
| ATOM | 5430 | HA   | VAL | X | 361 | 59.297 | 42.137 | 56.829 | 0.00 | 0.00 |
| ATOM | 5431 | CB   | VAL | X | 361 | 60.704 | 41.618 | 55.412 | 0.00 | 0.00 |
| ATOM | 5432 | HB   | VAL | X | 361 | 60.281 | 42.310 | 54.683 | 0.00 | 0.00 |
| ATOM | 5433 | CG1  | VAL | X | 361 | 61.774 | 42.533 | 56.145 | 0.00 | 0.00 |
| ATOM | 5434 | HG11 | VAL | X | 361 | 61.249 | 43.310 | 56.703 | 0.00 | 0.00 |
| ATOM | 5435 | HG12 | VAL | X | 361 | 62.304 | 41.974 | 56.916 | 0.00 | 0.00 |
| ATOM | 5436 | HG13 | VAL | X | 361 | 62.415 | 43.051 | 55.432 | 0.00 | 0.00 |
| ATOM | 5437 | CG2  | VAL | X | 361 | 61.383 | 40.555 | 54.601 | 0.00 | 0.00 |
| ATOM | 5438 | HG21 | VAL | X | 361 | 60.699 | 39.751 | 54.330 | 0.00 | 0.00 |
| ATOM | 5439 | HG22 | VAL | X | 361 | 62.171 | 40.172 | 55.250 | 0.00 | 0.00 |
| ATOM | 5440 | HG23 | VAL | X | 361 | 61.800 | 41.103 | 53.756 | 0.00 | 0.00 |
| ATOM | 5441 | C    | VAL | X | 361 | 58.529 | 40.446 | 55.838 | 0.00 | 0.00 |
| ATOM | 5442 | O    | VAL | X | 361 | 57.659 | 40.981 | 55.122 | 0.00 | 0.00 |
| ATOM | 5443 | N    | GLY | X | 362 | 58.424 | 39.159 | 56.064 | 0.00 | 0.00 |
| ATOM | 5444 | H    | GLY | X | 362 | 59.217 | 38.741 | 56.530 | 0.00 | 0.00 |
| ATOM | 5445 | CA   | GLY | X | 362 | 57.441 | 38.164 | 55.636 | 0.00 | 0.00 |

|      |      |      |     |   |     |        |        |        |      |      |
|------|------|------|-----|---|-----|--------|--------|--------|------|------|
| ATOM | 5446 | HA2  | GLY | X | 362 | 57.142 | 38.314 | 54.598 | 0.00 | 0.00 |
| ATOM | 5447 | HA3  | GLY | X | 362 | 57.899 | 37.178 | 55.715 | 0.00 | 0.00 |
| ATOM | 5448 | C    | GLY | X | 362 | 56.160 | 38.062 | 56.485 | 0.00 | 0.00 |
| ATOM | 5449 | O    | GLY | X | 362 | 55.125 | 37.414 | 55.991 | 0.00 | 0.00 |
| ATOM | 5450 | N    | VAL | X | 363 | 56.207 | 38.641 | 57.715 | 0.00 | 0.00 |
| ATOM | 5451 | H    | VAL | X | 363 | 57.104 | 38.959 | 58.052 | 0.00 | 0.00 |
| ATOM | 5452 | CA   | VAL | X | 363 | 55.011 | 38.817 | 58.524 | 0.00 | 0.00 |
| ATOM | 5453 | HA   | VAL | X | 363 | 54.172 | 38.484 | 57.914 | 0.00 | 0.00 |
| ATOM | 5454 | CB   | VAL | X | 363 | 55.151 | 37.848 | 59.719 | 0.00 | 0.00 |
| ATOM | 5455 | HB   | VAL | X | 363 | 55.900 | 38.222 | 60.417 | 0.00 | 0.00 |
| ATOM | 5456 | CG1  | VAL | X | 363 | 53.749 | 37.760 | 60.502 | 0.00 | 0.00 |
| ATOM | 5457 | HG11 | VAL | X | 363 | 53.745 | 37.167 | 61.416 | 0.00 | 0.00 |
| ATOM | 5458 | HG12 | VAL | X | 363 | 53.431 | 38.787 | 60.687 | 0.00 | 0.00 |
| ATOM | 5459 | HG13 | VAL | X | 363 | 53.068 | 37.365 | 59.748 | 0.00 | 0.00 |
| ATOM | 5460 | CG2  | VAL | X | 363 | 55.594 | 36.416 | 59.318 | 0.00 | 0.00 |
| ATOM | 5461 | HG21 | VAL | X | 363 | 54.985 | 36.038 | 58.497 | 0.00 | 0.00 |
| ATOM | 5462 | HG22 | VAL | X | 363 | 55.489 | 35.746 | 60.172 | 0.00 | 0.00 |
| ATOM | 5463 | HG23 | VAL | X | 363 | 56.552 | 36.321 | 58.806 | 0.00 | 0.00 |
| ATOM | 5464 | C    | VAL | X | 363 | 54.754 | 40.264 | 58.949 | 0.00 | 0.00 |
| ATOM | 5465 | O    | VAL | X | 363 | 55.674 | 40.990 | 59.322 | 0.00 | 0.00 |
| ATOM | 5466 | N    | PRO | X | 364 | 53.506 | 40.800 | 58.822 | 0.00 | 0.00 |
| ATOM | 5467 | CD   | PRO | X | 364 | 52.331 | 40.065 | 58.308 | 0.00 | 0.00 |
| ATOM | 5468 | HD2  | PRO | X | 364 | 52.147 | 39.182 | 58.920 | 0.00 | 0.00 |
| ATOM | 5469 | HD3  | PRO | X | 364 | 52.416 | 39.745 | 57.270 | 0.00 | 0.00 |
| ATOM | 5470 | CG   | PRO | X | 364 | 51.148 | 41.025 | 58.447 | 0.00 | 0.00 |
| ATOM | 5471 | HG2  | PRO | X | 364 | 50.503 | 40.848 | 59.308 | 0.00 | 0.00 |
| ATOM | 5472 | HG3  | PRO | X | 364 | 50.556 | 40.882 | 57.544 | 0.00 | 0.00 |
| ATOM | 5473 | CB   | PRO | X | 364 | 51.821 | 42.399 | 58.610 | 0.00 | 0.00 |
| ATOM | 5474 | HB2  | PRO | X | 364 | 51.175 | 43.024 | 59.227 | 0.00 | 0.00 |
| ATOM | 5475 | HB3  | PRO | X | 364 | 52.044 | 42.854 | 57.645 | 0.00 | 0.00 |
| ATOM | 5476 | CA   | PRO | X | 364 | 53.118 | 42.076 | 59.375 | 0.00 | 0.00 |
| ATOM | 5477 | HA   | PRO | X | 364 | 53.886 | 42.816 | 59.148 | 0.00 | 0.00 |
| ATOM | 5478 | C    | PRO | X | 364 | 52.951 | 41.972 | 60.921 | 0.00 | 0.00 |
| ATOM | 5479 | O    | PRO | X | 364 | 52.501 | 40.911 | 61.427 | 0.00 | 0.00 |
| ATOM | 5480 | N    | GLN | X | 365 | 53.347 | 43.010 | 61.607 | 0.00 | 0.00 |
| ATOM | 5481 | H    | GLN | X | 365 | 53.793 | 43.787 | 61.140 | 0.00 | 0.00 |
| ATOM | 5482 | CA   | GLN | X | 365 | 53.314 | 43.253 | 63.081 | 0.00 | 0.00 |
| ATOM | 5483 | HA   | GLN | X | 365 | 53.404 | 44.333 | 63.201 | 0.00 | 0.00 |
| ATOM | 5484 | CB   | GLN | X | 365 | 51.882 | 43.006 | 63.601 | 0.00 | 0.00 |
| ATOM | 5485 | HB2  | GLN | X | 365 | 51.614 | 41.951 | 63.552 | 0.00 | 0.00 |
| ATOM | 5486 | HB3  | GLN | X | 365 | 51.946 | 43.157 | 64.678 | 0.00 | 0.00 |
| ATOM | 5487 | CG   | GLN | X | 365 | 50.702 | 43.779 | 62.911 | 0.00 | 0.00 |
| ATOM | 5488 | HG2  | GLN | X | 365 | 51.093 | 44.782 | 62.740 | 0.00 | 0.00 |
| ATOM | 5489 | HG3  | GLN | X | 365 | 50.474 | 43.312 | 61.952 | 0.00 | 0.00 |
| ATOM | 5490 | CD   | GLN | X | 365 | 49.528 | 43.880 | 63.885 | 0.00 | 0.00 |
| ATOM | 5491 | OE1  | GLN | X | 365 | 48.861 | 42.938 | 64.206 | 0.00 | 0.00 |
| ATOM | 5492 | NE2  | GLN | X | 365 | 49.264 | 45.074 | 64.379 | 0.00 | 0.00 |
| ATOM | 5493 | HE21 | GLN | X | 365 | 48.366 | 45.298 | 64.782 | 0.00 | 0.00 |
| ATOM | 5494 | HE22 | GLN | X | 365 | 49.911 | 45.832 | 64.213 | 0.00 | 0.00 |
| ATOM | 5495 | C    | GLN | X | 365 | 54.456 | 42.576 | 63.847 | 0.00 | 0.00 |
| ATOM | 5496 | O    | GLN | X | 365 | 54.790 | 43.002 | 64.887 | 0.00 | 0.00 |
| ATOM | 5497 | N    | VAL | X | 366 | 55.159 | 41.584 | 63.226 | 0.00 | 0.00 |
| ATOM | 5498 | H    | VAL | X | 366 | 54.779 | 41.239 | 62.356 | 0.00 | 0.00 |
| ATOM | 5499 | CA   | VAL | X | 366 | 56.197 | 40.801 | 63.871 | 0.00 | 0.00 |
| ATOM | 5500 | HA   | VAL | X | 366 | 55.948 | 40.652 | 64.922 | 0.00 | 0.00 |
| ATOM | 5501 | CB   | VAL | X | 366 | 56.246 | 39.390 | 63.234 | 0.00 | 0.00 |
| ATOM | 5502 | HB   | VAL | X | 366 | 56.123 | 39.571 | 62.166 | 0.00 | 0.00 |
| ATOM | 5503 | CG1  | VAL | X | 366 | 57.590 | 38.719 | 63.370 | 0.00 | 0.00 |
| ATOM | 5504 | HG11 | VAL | X | 366 | 57.551 | 37.674 | 63.062 | 0.00 | 0.00 |
| ATOM | 5505 | HG12 | VAL | X | 366 | 58.273 | 39.265 | 62.719 | 0.00 | 0.00 |
| ATOM | 5506 | HG13 | VAL | X | 366 | 57.907 | 38.699 | 64.413 | 0.00 | 0.00 |
| ATOM | 5507 | CG2  | VAL | X | 366 | 55.118 | 38.490 | 63.661 | 0.00 | 0.00 |
| ATOM | 5508 | HG21 | VAL | X | 366 | 55.210 | 38.293 | 64.729 | 0.00 | 0.00 |
| ATOM | 5509 | HG22 | VAL | X | 366 | 55.231 | 37.535 | 63.148 | 0.00 | 0.00 |
| ATOM | 5510 | HG23 | VAL | X | 366 | 54.177 | 38.972 | 63.397 | 0.00 | 0.00 |
| ATOM | 5511 | C    | VAL | X | 366 | 57.556 | 41.567 | 63.809 | 0.00 | 0.00 |
| ATOM | 5512 | O    | VAL | X | 366 | 58.101 | 41.971 | 62.844 | 0.00 | 0.00 |

|      |      |      |     |   |     |        |        |        |      |      |
|------|------|------|-----|---|-----|--------|--------|--------|------|------|
| ATOM | 5513 | N    | SER | X | 367 | 57.990 | 41.849 | 65.010 | 0.00 | 0.00 |
| ATOM | 5514 | H    | SER | X | 367 | 57.385 | 41.524 | 65.751 | 0.00 | 0.00 |
| ATOM | 5515 | CA   | SER | X | 367 | 59.315 | 42.288 | 65.301 | 0.00 | 0.00 |
| ATOM | 5516 | HA   | SER | X | 367 | 59.692 | 42.779 | 64.404 | 0.00 | 0.00 |
| ATOM | 5517 | CB   | SER | X | 367 | 59.212 | 43.340 | 66.419 | 0.00 | 0.00 |
| ATOM | 5518 | HB2  | SER | X | 367 | 60.107 | 43.950 | 66.540 | 0.00 | 0.00 |
| ATOM | 5519 | HB3  | SER | X | 367 | 58.568 | 44.143 | 66.059 | 0.00 | 0.00 |
| ATOM | 5520 | OG   | SER | X | 367 | 58.770 | 42.883 | 67.685 | 0.00 | 0.00 |
| ATOM | 5521 | HG   | SER | X | 367 | 57.847 | 42.628 | 67.750 | 0.00 | 0.00 |
| ATOM | 5522 | C    | SER | X | 367 | 60.251 | 41.154 | 65.667 | 0.00 | 0.00 |
| ATOM | 5523 | O    | SER | X | 367 | 59.834 | 40.015 | 65.883 | 0.00 | 0.00 |
| ATOM | 5524 | N    | ASP | X | 368 | 61.535 | 41.417 | 65.860 | 0.00 | 0.00 |
| ATOM | 5525 | H    | ASP | X | 368 | 61.821 | 42.380 | 65.751 | 0.00 | 0.00 |
| ATOM | 5526 | CA   | ASP | X | 368 | 62.652 | 40.410 | 65.816 | 0.00 | 0.00 |
| ATOM | 5527 | HA   | ASP | X | 368 | 62.677 | 39.977 | 64.816 | 0.00 | 0.00 |
| ATOM | 5528 | CB   | ASP | X | 368 | 63.935 | 41.201 | 66.091 | 0.00 | 0.00 |
| ATOM | 5529 | HB2  | ASP | X | 368 | 64.200 | 41.971 | 65.366 | 0.00 | 0.00 |
| ATOM | 5530 | HB3  | ASP | X | 368 | 63.765 | 41.716 | 67.036 | 0.00 | 0.00 |
| ATOM | 5531 | CG   | ASP | X | 368 | 65.237 | 40.346 | 66.091 | 0.00 | 0.00 |
| ATOM | 5532 | OD1  | ASP | X | 368 | 65.640 | 39.779 | 67.134 | 0.00 | 0.00 |
| ATOM | 5533 | OD2  | ASP | X | 368 | 65.901 | 40.294 | 65.072 | 0.00 | 0.00 |
| ATOM | 5534 | C    | ASP | X | 368 | 62.535 | 39.223 | 66.846 | 0.00 | 0.00 |
| ATOM | 5535 | O    | ASP | X | 368 | 62.663 | 38.032 | 66.579 | 0.00 | 0.00 |
| ATOM | 5536 | N    | LEU | X | 369 | 62.220 | 39.652 | 68.065 | 0.00 | 0.00 |
| ATOM | 5537 | H    | LEU | X | 369 | 61.974 | 40.613 | 68.255 | 0.00 | 0.00 |
| ATOM | 5538 | CA   | LEU | X | 369 | 62.017 | 38.762 | 69.189 | 0.00 | 0.00 |
| ATOM | 5539 | HA   | LEU | X | 369 | 62.866 | 38.128 | 69.446 | 0.00 | 0.00 |
| ATOM | 5540 | CB   | LEU | X | 369 | 61.788 | 39.508 | 70.508 | 0.00 | 0.00 |
| ATOM | 5541 | HB2  | LEU | X | 369 | 62.605 | 40.203 | 70.698 | 0.00 | 0.00 |
| ATOM | 5542 | HB3  | LEU | X | 369 | 61.030 | 40.245 | 70.242 | 0.00 | 0.00 |
| ATOM | 5543 | CG   | LEU | X | 369 | 61.540 | 38.745 | 71.862 | 0.00 | 0.00 |
| ATOM | 5544 | HG   | LEU | X | 369 | 60.629 | 38.157 | 71.750 | 0.00 | 0.00 |
| ATOM | 5545 | CD1  | LEU | X | 369 | 62.625 | 37.732 | 72.245 | 0.00 | 0.00 |
| ATOM | 5546 | HD11 | LEU | X | 369 | 63.586 | 38.137 | 72.564 | 0.00 | 0.00 |
| ATOM | 5547 | HD12 | LEU | X | 369 | 62.788 | 37.021 | 71.436 | 0.00 | 0.00 |
| ATOM | 5548 | HD13 | LEU | X | 369 | 62.280 | 37.159 | 73.106 | 0.00 | 0.00 |
| ATOM | 5549 | CD2  | LEU | X | 369 | 61.401 | 39.741 | 73.000 | 0.00 | 0.00 |
| ATOM | 5550 | HD21 | LEU | X | 369 | 60.854 | 40.571 | 72.553 | 0.00 | 0.00 |
| ATOM | 5551 | HD22 | LEU | X | 369 | 60.876 | 39.294 | 73.844 | 0.00 | 0.00 |
| ATOM | 5552 | HD23 | LEU | X | 369 | 62.409 | 40.111 | 73.186 | 0.00 | 0.00 |
| ATOM | 5553 | C    | LEU | X | 369 | 60.767 | 37.847 | 69.002 | 0.00 | 0.00 |
| ATOM | 5554 | O    | LEU | X | 369 | 60.719 | 36.789 | 69.600 | 0.00 | 0.00 |
| ATOM | 5555 | N    | ALA | X | 370 | 59.854 | 38.187 | 68.083 | 0.00 | 0.00 |
| ATOM | 5556 | H    | ALA | X | 370 | 59.915 | 39.131 | 67.729 | 0.00 | 0.00 |
| ATOM | 5557 | CA   | ALA | X | 370 | 58.769 | 37.296 | 67.646 | 0.00 | 0.00 |
| ATOM | 5558 | HA   | ALA | X | 370 | 58.575 | 36.497 | 68.362 | 0.00 | 0.00 |
| ATOM | 5559 | CB   | ALA | X | 370 | 57.494 | 38.088 | 67.495 | 0.00 | 0.00 |
| ATOM | 5560 | HB1  | ALA | X | 370 | 56.706 | 37.479 | 67.052 | 0.00 | 0.00 |
| ATOM | 5561 | HB2  | ALA | X | 370 | 57.598 | 38.941 | 66.824 | 0.00 | 0.00 |
| ATOM | 5562 | HB3  | ALA | X | 370 | 57.198 | 38.466 | 68.474 | 0.00 | 0.00 |
| ATOM | 5563 | C    | ALA | X | 370 | 59.140 | 36.607 | 66.386 | 0.00 | 0.00 |
| ATOM | 5564 | O    | ALA | X | 370 | 58.862 | 35.402 | 66.208 | 0.00 | 0.00 |
| ATOM | 5565 | N    | ALA | X | 371 | 59.927 | 37.214 | 65.493 | 0.00 | 0.00 |
| ATOM | 5566 | H    | ALA | X | 371 | 59.926 | 38.222 | 65.560 | 0.00 | 0.00 |
| ATOM | 5567 | CA   | ALA | X | 371 | 60.437 | 36.591 | 64.237 | 0.00 | 0.00 |
| ATOM | 5568 | HA   | ALA | X | 371 | 59.600 | 36.165 | 63.684 | 0.00 | 0.00 |
| ATOM | 5569 | CB   | ALA | X | 371 | 61.206 | 37.763 | 63.530 | 0.00 | 0.00 |
| ATOM | 5570 | HB1  | ALA | X | 371 | 60.503 | 38.596 | 63.525 | 0.00 | 0.00 |
| ATOM | 5571 | HB2  | ALA | X | 371 | 61.439 | 37.497 | 62.499 | 0.00 | 0.00 |
| ATOM | 5572 | HB3  | ALA | X | 371 | 62.200 | 37.928 | 63.945 | 0.00 | 0.00 |
| ATOM | 5573 | C    | ALA | X | 371 | 61.280 | 35.346 | 64.625 | 0.00 | 0.00 |
| ATOM | 5574 | O    | ALA | X | 371 | 61.169 | 34.305 | 63.914 | 0.00 | 0.00 |
| ATOM | 5575 | N    | GLU | X | 372 | 62.208 | 35.349 | 65.585 | 0.00 | 0.00 |
| ATOM | 5576 | H    | GLU | X | 372 | 62.423 | 36.266 | 65.948 | 0.00 | 0.00 |
| ATOM | 5577 | CA   | GLU | X | 372 | 62.990 | 34.207 | 66.004 | 0.00 | 0.00 |
| ATOM | 5578 | HA   | GLU | X | 372 | 63.405 | 33.775 | 65.093 | 0.00 | 0.00 |
| ATOM | 5579 | CB   | GLU | X | 372 | 64.133 | 34.547 | 66.933 | 0.00 | 0.00 |

|      |      |      |     |   |     |        |        |        |      |      |
|------|------|------|-----|---|-----|--------|--------|--------|------|------|
| ATOM | 5580 | HB2  | GLU | X | 372 | 64.759 | 33.715 | 67.256 | 0.00 | 0.00 |
| ATOM | 5581 | HB3  | GLU | X | 372 | 64.792 | 35.253 | 66.426 | 0.00 | 0.00 |
| ATOM | 5582 | CG   | GLU | X | 372 | 63.802 | 35.194 | 68.264 | 0.00 | 0.00 |
| ATOM | 5583 | HG2  | GLU | X | 372 | 63.542 | 36.225 | 68.021 | 0.00 | 0.00 |
| ATOM | 5584 | HG3  | GLU | X | 372 | 63.046 | 34.694 | 68.870 | 0.00 | 0.00 |
| ATOM | 5585 | CD   | GLU | X | 372 | 65.063 | 35.227 | 69.215 | 0.00 | 0.00 |
| ATOM | 5586 | OE1  | GLU | X | 372 | 65.489 | 34.176 | 69.736 | 0.00 | 0.00 |
| ATOM | 5587 | OE2  | GLU | X | 372 | 65.790 | 36.264 | 69.216 | 0.00 | 0.00 |
| ATOM | 5588 | C    | GLU | X | 372 | 62.077 | 33.132 | 66.598 | 0.00 | 0.00 |
| ATOM | 5589 | O    | GLU | X | 372 | 62.428 | 31.929 | 66.479 | 0.00 | 0.00 |
| ATOM | 5590 | N    | ALA | X | 373 | 60.870 | 33.458 | 67.098 | 0.00 | 0.00 |
| ATOM | 5591 | H    | ALA | X | 373 | 60.552 | 34.417 | 67.112 | 0.00 | 0.00 |
| ATOM | 5592 | CA   | ALA | X | 373 | 59.917 | 32.422 | 67.534 | 0.00 | 0.00 |
| ATOM | 5593 | HA   | ALA | X | 373 | 60.538 | 31.631 | 67.954 | 0.00 | 0.00 |
| ATOM | 5594 | CB   | ALA | X | 373 | 59.200 | 33.023 | 68.741 | 0.00 | 0.00 |
| ATOM | 5595 | HB1  | ALA | X | 373 | 58.345 | 32.408 | 69.023 | 0.00 | 0.00 |
| ATOM | 5596 | HB2  | ALA | X | 373 | 58.796 | 34.021 | 68.567 | 0.00 | 0.00 |
| ATOM | 5597 | HB3  | ALA | X | 373 | 59.870 | 32.981 | 69.600 | 0.00 | 0.00 |
| ATOM | 5598 | C    | ALA | X | 373 | 59.189 | 31.798 | 66.311 | 0.00 | 0.00 |
| ATOM | 5599 | O    | ALA | X | 373 | 58.935 | 30.612 | 66.273 | 0.00 | 0.00 |
| ATOM | 5600 | N    | VAL | X | 374 | 58.880 | 32.596 | 65.256 | 0.00 | 0.00 |
| ATOM | 5601 | H    | VAL | X | 374 | 58.999 | 33.593 | 65.368 | 0.00 | 0.00 |
| ATOM | 5602 | CA   | VAL | X | 374 | 58.344 | 32.128 | 63.934 | 0.00 | 0.00 |
| ATOM | 5603 | HA   | VAL | X | 374 | 57.524 | 31.450 | 64.171 | 0.00 | 0.00 |
| ATOM | 5604 | CB   | VAL | X | 374 | 57.808 | 33.279 | 63.078 | 0.00 | 0.00 |
| ATOM | 5605 | HB   | VAL | X | 374 | 58.635 | 33.978 | 62.949 | 0.00 | 0.00 |
| ATOM | 5606 | CG1  | VAL | X | 374 | 57.508 | 32.821 | 61.619 | 0.00 | 0.00 |
| ATOM | 5607 | HG11 | VAL | X | 374 | 56.950 | 33.632 | 61.151 | 0.00 | 0.00 |
| ATOM | 5608 | HG12 | VAL | X | 374 | 58.421 | 32.507 | 61.113 | 0.00 | 0.00 |
| ATOM | 5609 | HG13 | VAL | X | 374 | 56.760 | 32.047 | 61.789 | 0.00 | 0.00 |
| ATOM | 5610 | CG2  | VAL | X | 374 | 56.621 | 34.013 | 63.705 | 0.00 | 0.00 |
| ATOM | 5611 | HG21 | VAL | X | 374 | 56.786 | 34.460 | 64.685 | 0.00 | 0.00 |
| ATOM | 5612 | HG22 | VAL | X | 374 | 55.724 | 33.414 | 63.857 | 0.00 | 0.00 |
| ATOM | 5613 | HG23 | VAL | X | 374 | 56.288 | 34.830 | 63.065 | 0.00 | 0.00 |
| ATOM | 5614 | C    | VAL | X | 374 | 59.429 | 31.315 | 63.227 | 0.00 | 0.00 |
| ATOM | 5615 | O    | VAL | X | 374 | 59.087 | 30.338 | 62.595 | 0.00 | 0.00 |
| ATOM | 5616 | N    | VAL | X | 375 | 60.697 | 31.689 | 63.258 | 0.00 | 0.00 |
| ATOM | 5617 | H    | VAL | X | 375 | 60.927 | 32.597 | 63.635 | 0.00 | 0.00 |
| ATOM | 5618 | CA   | VAL | X | 375 | 61.804 | 30.782 | 62.801 | 0.00 | 0.00 |
| ATOM | 5619 | HA   | VAL | X | 375 | 61.537 | 30.499 | 61.782 | 0.00 | 0.00 |
| ATOM | 5620 | CB   | VAL | X | 375 | 63.075 | 31.519 | 62.822 | 0.00 | 0.00 |
| ATOM | 5621 | HB   | VAL | X | 375 | 63.163 | 31.978 | 63.807 | 0.00 | 0.00 |
| ATOM | 5622 | CG1  | VAL | X | 375 | 64.436 | 30.692 | 62.728 | 0.00 | 0.00 |
| ATOM | 5623 | HG11 | VAL | X | 375 | 64.454 | 30.192 | 61.760 | 0.00 | 0.00 |
| ATOM | 5624 | HG12 | VAL | X | 375 | 65.267 | 31.395 | 62.799 | 0.00 | 0.00 |
| ATOM | 5625 | HG13 | VAL | X | 375 | 64.443 | 29.995 | 63.566 | 0.00 | 0.00 |
| ATOM | 5626 | CG2  | VAL | X | 375 | 63.119 | 32.670 | 61.818 | 0.00 | 0.00 |
| ATOM | 5627 | HG21 | VAL | X | 375 | 62.943 | 32.239 | 60.833 | 0.00 | 0.00 |
| ATOM | 5628 | HG22 | VAL | X | 375 | 64.100 | 33.144 | 61.784 | 0.00 | 0.00 |
| ATOM | 5629 | HG23 | VAL | X | 375 | 62.329 | 33.420 | 61.823 | 0.00 | 0.00 |
| ATOM | 5630 | C    | VAL | X | 375 | 61.966 | 29.466 | 63.557 | 0.00 | 0.00 |
| ATOM | 5631 | O    | VAL | X | 375 | 62.147 | 28.453 | 62.923 | 0.00 | 0.00 |
| ATOM | 5632 | N    | LEU | X | 376 | 61.831 | 29.530 | 64.915 | 0.00 | 0.00 |
| ATOM | 5633 | H    | LEU | X | 376 | 61.853 | 30.430 | 65.373 | 0.00 | 0.00 |
| ATOM | 5634 | CA   | LEU | X | 376 | 61.794 | 28.315 | 65.661 | 0.00 | 0.00 |
| ATOM | 5635 | HA   | LEU | X | 376 | 62.708 | 27.775 | 65.413 | 0.00 | 0.00 |
| ATOM | 5636 | CB   | LEU | X | 376 | 61.675 | 28.597 | 67.203 | 0.00 | 0.00 |
| ATOM | 5637 | HB2  | LEU | X | 376 | 62.172 | 29.563 | 67.293 | 0.00 | 0.00 |
| ATOM | 5638 | HB3  | LEU | X | 376 | 60.615 | 28.660 | 67.448 | 0.00 | 0.00 |
| ATOM | 5639 | CG   | LEU | X | 376 | 62.253 | 27.558 | 68.205 | 0.00 | 0.00 |
| ATOM | 5640 | HG   | LEU | X | 376 | 62.307 | 27.965 | 69.214 | 0.00 | 0.00 |
| ATOM | 5641 | CD1  | LEU | X | 376 | 61.401 | 26.294 | 68.291 | 0.00 | 0.00 |
| ATOM | 5642 | HD11 | LEU | X | 376 | 60.407 | 26.558 | 68.651 | 0.00 | 0.00 |
| ATOM | 5643 | HD12 | LEU | X | 376 | 61.735 | 25.680 | 69.127 | 0.00 | 0.00 |
| ATOM | 5644 | HD13 | LEU | X | 376 | 61.352 | 25.746 | 67.350 | 0.00 | 0.00 |
| ATOM | 5645 | CD2  | LEU | X | 376 | 63.727 | 27.057 | 68.045 | 0.00 | 0.00 |
| ATOM | 5646 | HD21 | LEU | X | 376 | 63.968 | 26.579 | 68.994 | 0.00 | 0.00 |

|      |      |      |     |   |     |        |        |        |      |      |
|------|------|------|-----|---|-----|--------|--------|--------|------|------|
| ATOM | 5647 | HD22 | LEU | X | 376 | 63.816 | 26.188 | 67.394 | 0.00 | 0.00 |
| ATOM | 5648 | HD23 | LEU | X | 376 | 64.521 | 27.769 | 67.819 | 0.00 | 0.00 |
| ATOM | 5649 | C    | LEU | X | 376 | 60.648 | 27.340 | 65.184 | 0.00 | 0.00 |
| ATOM | 5650 | O    | LEU | X | 376 | 60.874 | 26.168 | 64.871 | 0.00 | 0.00 |
| ATOM | 5651 | N    | HIE | X | 377 | 59.400 | 27.807 | 65.083 | 0.00 | 0.00 |
| ATOM | 5652 | H    | HIE | X | 377 | 59.279 | 28.783 | 65.313 | 0.00 | 0.00 |
| ATOM | 5653 | CA   | HIE | X | 377 | 58.280 | 27.058 | 64.409 | 0.00 | 0.00 |
| ATOM | 5654 | HA   | HIE | X | 377 | 57.934 | 26.353 | 65.165 | 0.00 | 0.00 |
| ATOM | 5655 | CB   | HIE | X | 377 | 57.127 | 28.031 | 64.239 | 0.00 | 0.00 |
| ATOM | 5656 | HB2  | HIE | X | 377 | 56.826 | 28.439 | 65.204 | 0.00 | 0.00 |
| ATOM | 5657 | HB3  | HIE | X | 377 | 57.417 | 28.869 | 63.605 | 0.00 | 0.00 |
| ATOM | 5658 | CG   | HIE | X | 377 | 55.944 | 27.409 | 63.674 | 0.00 | 0.00 |
| ATOM | 5659 | ND1  | HIE | X | 377 | 55.222 | 26.340 | 64.291 | 0.00 | 0.00 |
| ATOM | 5660 | CE1  | HIE | X | 377 | 54.288 | 25.992 | 63.451 | 0.00 | 0.00 |
| ATOM | 5661 | HE1  | HIE | X | 377 | 53.644 | 25.176 | 63.744 | 0.00 | 0.00 |
| ATOM | 5662 | NE2  | HIE | X | 377 | 54.443 | 26.584 | 62.200 | 0.00 | 0.00 |
| ATOM | 5663 | HE2  | HIE | X | 377 | 53.913 | 26.342 | 61.375 | 0.00 | 0.00 |
| ATOM | 5664 | CD2  | HIE | X | 377 | 55.437 | 27.558 | 62.383 | 0.00 | 0.00 |
| ATOM | 5665 | HD2  | HIE | X | 377 | 55.828 | 28.245 | 61.647 | 0.00 | 0.00 |
| ATOM | 5666 | C    | HIE | X | 377 | 58.624 | 26.432 | 62.977 | 0.00 | 0.00 |
| ATOM | 5667 | O    | HIE | X | 377 | 58.141 | 25.388 | 62.583 | 0.00 | 0.00 |
| ATOM | 5668 | N    | TYR | X | 378 | 59.453 | 27.081 | 62.240 | 0.00 | 0.00 |
| ATOM | 5669 | H    | TYR | X | 378 | 59.926 | 27.881 | 62.636 | 0.00 | 0.00 |
| ATOM | 5670 | CA   | TYR | X | 378 | 59.953 | 26.553 | 60.995 | 0.00 | 0.00 |
| ATOM | 5671 | HA   | TYR | X | 378 | 59.334 | 25.794 | 60.517 | 0.00 | 0.00 |
| ATOM | 5672 | CB   | TYR | X | 378 | 59.889 | 27.652 | 59.973 | 0.00 | 0.00 |
| ATOM | 5673 | HB2  | TYR | X | 378 | 60.307 | 28.619 | 60.255 | 0.00 | 0.00 |
| ATOM | 5674 | HB3  | TYR | X | 378 | 60.468 | 27.349 | 59.100 | 0.00 | 0.00 |
| ATOM | 5675 | CG   | TYR | X | 378 | 58.505 | 27.905 | 59.351 | 0.00 | 0.00 |
| ATOM | 5676 | CD1  | TYR | X | 378 | 58.094 | 26.888 | 58.478 | 0.00 | 0.00 |
| ATOM | 5677 | HD1  | TYR | X | 378 | 58.825 | 26.177 | 58.122 | 0.00 | 0.00 |
| ATOM | 5678 | CE1  | TYR | X | 378 | 56.832 | 27.066 | 57.810 | 0.00 | 0.00 |
| ATOM | 5679 | HE1  | TYR | X | 378 | 56.440 | 26.379 | 57.074 | 0.00 | 0.00 |
| ATOM | 5680 | CZ   | TYR | X | 378 | 56.013 | 28.121 | 58.172 | 0.00 | 0.00 |
| ATOM | 5681 | OH   | TYR | X | 378 | 54.797 | 28.273 | 57.575 | 0.00 | 0.00 |
| ATOM | 5682 | HH   | TYR | X | 378 | 54.531 | 27.550 | 57.002 | 0.00 | 0.00 |
| ATOM | 5683 | CE2  | TYR | X | 378 | 56.463 | 29.141 | 59.089 | 0.00 | 0.00 |
| ATOM | 5684 | HE2  | TYR | X | 378 | 55.820 | 30.005 | 59.164 | 0.00 | 0.00 |
| ATOM | 5685 | CD2  | TYR | X | 378 | 57.703 | 29.021 | 59.699 | 0.00 | 0.00 |
| ATOM | 5686 | HD2  | TYR | X | 378 | 58.120 | 29.756 | 60.373 | 0.00 | 0.00 |
| ATOM | 5687 | C    | TYR | X | 378 | 61.360 | 25.899 | 61.024 | 0.00 | 0.00 |
| ATOM | 5688 | O    | TYR | X | 378 | 61.974 | 25.692 | 60.006 | 0.00 | 0.00 |
| ATOM | 5689 | N    | THR | X | 379 | 61.906 | 25.598 | 62.252 | 0.00 | 0.00 |
| ATOM | 5690 | H    | THR | X | 379 | 61.444 | 25.917 | 63.092 | 0.00 | 0.00 |
| ATOM | 5691 | CA   | THR | X | 379 | 63.312 | 25.115 | 62.316 | 0.00 | 0.00 |
| ATOM | 5692 | HA   | THR | X | 379 | 63.865 | 25.323 | 61.400 | 0.00 | 0.00 |
| ATOM | 5693 | CB   | THR | X | 379 | 64.168 | 25.643 | 63.472 | 0.00 | 0.00 |
| ATOM | 5694 | HB   | THR | X | 379 | 63.640 | 25.491 | 64.413 | 0.00 | 0.00 |
| ATOM | 5695 | CG2  | THR | X | 379 | 65.578 | 25.019 | 63.607 | 0.00 | 0.00 |
| ATOM | 5696 | HG21 | THR | X | 379 | 66.216 | 25.531 | 64.327 | 0.00 | 0.00 |
| ATOM | 5697 | HG22 | THR | X | 379 | 65.967 | 25.068 | 62.590 | 0.00 | 0.00 |
| ATOM | 5698 | HG23 | THR | X | 379 | 65.485 | 23.984 | 63.936 | 0.00 | 0.00 |
| ATOM | 5699 | OG1  | THR | X | 379 | 64.325 | 26.961 | 63.063 | 0.00 | 0.00 |
| ATOM | 5700 | HG1  | THR | X | 379 | 63.510 | 27.442 | 63.222 | 0.00 | 0.00 |
| ATOM | 5701 | C    | THR | X | 379 | 63.345 | 23.636 | 62.366 | 0.00 | 0.00 |
| ATOM | 5702 | O    | THR | X | 379 | 62.855 | 23.075 | 63.284 | 0.00 | 0.00 |
| ATOM | 5703 | N    | ASP | X | 380 | 63.877 | 23.014 | 61.282 | 0.00 | 0.00 |
| ATOM | 5704 | H    | ASP | X | 380 | 64.247 | 23.652 | 60.593 | 0.00 | 0.00 |
| ATOM | 5705 | CA   | ASP | X | 380 | 63.978 | 21.582 | 61.129 | 0.00 | 0.00 |
| ATOM | 5706 | HA   | ASP | X | 380 | 63.235 | 21.076 | 61.746 | 0.00 | 0.00 |
| ATOM | 5707 | CB   | ASP | X | 380 | 63.697 | 21.142 | 59.664 | 0.00 | 0.00 |
| ATOM | 5708 | HB2  | ASP | X | 380 | 62.788 | 21.638 | 59.322 | 0.00 | 0.00 |
| ATOM | 5709 | HB3  | ASP | X | 380 | 64.555 | 21.444 | 59.064 | 0.00 | 0.00 |
| ATOM | 5710 | CG   | ASP | X | 380 | 63.690 | 19.599 | 59.499 | 0.00 | 0.00 |
| ATOM | 5711 | OD1  | ASP | X | 380 | 63.555 | 19.091 | 58.377 | 0.00 | 0.00 |
| ATOM | 5712 | OD2  | ASP | X | 380 | 63.757 | 18.875 | 60.464 | 0.00 | 0.00 |
| ATOM | 5713 | C    | ASP | X | 380 | 65.327 | 21.097 | 61.767 | 0.00 | 0.00 |

|      |      |      |     |   |     |        |        |        |      |      |
|------|------|------|-----|---|-----|--------|--------|--------|------|------|
| ATOM | 5714 | O    | ASP | X | 380 | 66.384 | 21.293 | 61.161 | 0.00 | 0.00 |
| ATOM | 5715 | N    | TRP | X | 381 | 65.159 | 20.288 | 62.802 | 0.00 | 0.00 |
| ATOM | 5716 | H    | TRP | X | 381 | 64.238 | 20.232 | 63.213 | 0.00 | 0.00 |
| ATOM | 5717 | CA   | TRP | X | 381 | 66.153 | 19.612 | 63.466 | 0.00 | 0.00 |
| ATOM | 5718 | HA   | TRP | X | 381 | 66.898 | 20.323 | 63.824 | 0.00 | 0.00 |
| ATOM | 5719 | CB   | TRP | X | 381 | 65.648 | 19.105 | 64.839 | 0.00 | 0.00 |
| ATOM | 5720 | HB2  | TRP | X | 381 | 65.033 | 18.205 | 64.821 | 0.00 | 0.00 |
| ATOM | 5721 | HB3  | TRP | X | 381 | 66.538 | 18.835 | 65.408 | 0.00 | 0.00 |
| ATOM | 5722 | CG   | TRP | X | 381 | 64.983 | 20.154 | 65.707 | 0.00 | 0.00 |
| ATOM | 5723 | CD1  | TRP | X | 381 | 63.617 | 20.042 | 66.012 | 0.00 | 0.00 |
| ATOM | 5724 | HD1  | TRP | X | 381 | 62.923 | 19.294 | 65.661 | 0.00 | 0.00 |
| ATOM | 5725 | NE1  | TRP | X | 381 | 63.205 | 21.173 | 66.671 | 0.00 | 0.00 |
| ATOM | 5726 | HE1  | TRP | X | 381 | 62.246 | 21.449 | 66.821 | 0.00 | 0.00 |
| ATOM | 5727 | CE2  | TRP | X | 381 | 64.318 | 21.980 | 66.992 | 0.00 | 0.00 |
| ATOM | 5728 | CZ2  | TRP | X | 381 | 64.404 | 23.165 | 67.775 | 0.00 | 0.00 |
| ATOM | 5729 | HZ2  | TRP | X | 381 | 63.471 | 23.499 | 68.204 | 0.00 | 0.00 |
| ATOM | 5730 | CH2  | TRP | X | 381 | 65.679 | 23.749 | 67.998 | 0.00 | 0.00 |
| ATOM | 5731 | HH2  | TRP | X | 381 | 65.754 | 24.634 | 68.613 | 0.00 | 0.00 |
| ATOM | 5732 | CZ3  | TRP | X | 381 | 66.798 | 23.110 | 67.460 | 0.00 | 0.00 |
| ATOM | 5733 | HZ3  | TRP | X | 381 | 67.797 | 23.435 | 67.709 | 0.00 | 0.00 |
| ATOM | 5734 | CE3  | TRP | X | 381 | 66.717 | 21.945 | 66.666 | 0.00 | 0.00 |
| ATOM | 5735 | HE3  | TRP | X | 381 | 67.555 | 21.550 | 66.111 | 0.00 | 0.00 |
| ATOM | 5736 | CD2  | TRP | X | 381 | 65.487 | 21.327 | 66.432 | 0.00 | 0.00 |
| ATOM | 5737 | C    | TRP | X | 381 | 66.847 | 18.499 | 62.628 | 0.00 | 0.00 |
| ATOM | 5738 | O    | TRP | X | 381 | 67.824 | 17.946 | 63.085 | 0.00 | 0.00 |
| ATOM | 5739 | N    | LEU | X | 382 | 66.385 | 18.194 | 61.372 | 0.00 | 0.00 |
| ATOM | 5740 | H    | LEU | X | 382 | 65.550 | 18.716 | 61.147 | 0.00 | 0.00 |
| ATOM | 5741 | CA   | LEU | X | 382 | 67.082 | 17.448 | 60.338 | 0.00 | 0.00 |
| ATOM | 5742 | HA   | LEU | X | 382 | 67.388 | 16.526 | 60.832 | 0.00 | 0.00 |
| ATOM | 5743 | CB   | LEU | X | 382 | 66.204 | 17.357 | 58.999 | 0.00 | 0.00 |
| ATOM | 5744 | HB2  | LEU | X | 382 | 65.318 | 16.834 | 59.361 | 0.00 | 0.00 |
| ATOM | 5745 | HB3  | LEU | X | 382 | 65.863 | 18.305 | 58.585 | 0.00 | 0.00 |
| ATOM | 5746 | CG   | LEU | X | 382 | 66.641 | 16.571 | 57.756 | 0.00 | 0.00 |
| ATOM | 5747 | HG   | LEU | X | 382 | 65.822 | 16.473 | 57.043 | 0.00 | 0.00 |
| ATOM | 5748 | CD1  | LEU | X | 382 | 67.806 | 17.237 | 56.990 | 0.00 | 0.00 |
| ATOM | 5749 | HD11 | LEU | X | 382 | 68.686 | 17.370 | 57.619 | 0.00 | 0.00 |
| ATOM | 5750 | HD12 | LEU | X | 382 | 67.558 | 18.229 | 56.612 | 0.00 | 0.00 |
| ATOM | 5751 | HD13 | LEU | X | 382 | 68.111 | 16.745 | 56.066 | 0.00 | 0.00 |
| ATOM | 5752 | CD2  | LEU | X | 382 | 67.013 | 15.102 | 58.086 | 0.00 | 0.00 |
| ATOM | 5753 | HD21 | LEU | X | 382 | 67.883 | 15.122 | 58.743 | 0.00 | 0.00 |
| ATOM | 5754 | HD22 | LEU | X | 382 | 66.272 | 14.550 | 58.665 | 0.00 | 0.00 |
| ATOM | 5755 | HD23 | LEU | X | 382 | 67.493 | 14.554 | 57.275 | 0.00 | 0.00 |
| ATOM | 5756 | C    | LEU | X | 382 | 68.478 | 18.062 | 60.136 | 0.00 | 0.00 |
| ATOM | 5757 | O    | LEU | X | 382 | 69.535 | 17.458 | 60.383 | 0.00 | 0.00 |
| ATOM | 5758 | N    | HIE | X | 383 | 68.490 | 19.365 | 59.850 | 0.00 | 0.00 |
| ATOM | 5759 | H    | HIE | X | 383 | 67.561 | 19.747 | 59.747 | 0.00 | 0.00 |
| ATOM | 5760 | CA   | HIE | X | 383 | 69.620 | 20.192 | 59.570 | 0.00 | 0.00 |
| ATOM | 5761 | HA   | HIE | X | 383 | 70.373 | 19.883 | 60.295 | 0.00 | 0.00 |
| ATOM | 5762 | CB   | HIE | X | 383 | 70.204 | 19.816 | 58.172 | 0.00 | 0.00 |
| ATOM | 5763 | HB2  | HIE | X | 383 | 70.430 | 18.753 | 58.091 | 0.00 | 0.00 |
| ATOM | 5764 | HB3  | HIE | X | 383 | 69.522 | 20.132 | 57.382 | 0.00 | 0.00 |
| ATOM | 5765 | CG   | HIE | X | 383 | 71.552 | 20.542 | 57.824 | 0.00 | 0.00 |
| ATOM | 5766 | ND1  | HIE | X | 383 | 72.265 | 21.464 | 58.612 | 0.00 | 0.00 |
| ATOM | 5767 | CE1  | HIE | X | 383 | 73.455 | 21.514 | 58.016 | 0.00 | 0.00 |
| ATOM | 5768 | HE1  | HIE | X | 383 | 74.317 | 22.125 | 58.240 | 0.00 | 0.00 |
| ATOM | 5769 | NE2  | HIE | X | 383 | 73.610 | 20.673 | 57.019 | 0.00 | 0.00 |
| ATOM | 5770 | HE2  | HIE | X | 383 | 74.432 | 20.673 | 56.432 | 0.00 | 0.00 |
| ATOM | 5771 | CD2  | HIE | X | 383 | 72.358 | 20.146 | 56.808 | 0.00 | 0.00 |
| ATOM | 5772 | HD2  | HIE | X | 383 | 72.166 | 19.522 | 55.948 | 0.00 | 0.00 |
| ATOM | 5773 | C    | HIE | X | 383 | 69.266 | 21.715 | 59.713 | 0.00 | 0.00 |
| ATOM | 5774 | O    | HIE | X | 383 | 68.645 | 22.265 | 58.781 | 0.00 | 0.00 |
| ATOM | 5775 | N    | PRO | X | 384 | 69.561 | 22.356 | 60.871 | 0.00 | 0.00 |
| ATOM | 5776 | CD   | PRO | X | 384 | 70.327 | 21.864 | 62.020 | 0.00 | 0.00 |
| ATOM | 5777 | HD2  | PRO | X | 384 | 71.348 | 22.142 | 61.761 | 0.00 | 0.00 |
| ATOM | 5778 | HD3  | PRO | X | 384 | 70.314 | 20.812 | 62.306 | 0.00 | 0.00 |
| ATOM | 5779 | CG   | PRO | X | 384 | 69.851 | 22.690 | 63.176 | 0.00 | 0.00 |
| ATOM | 5780 | HG2  | PRO | X | 384 | 70.727 | 23.045 | 63.720 | 0.00 | 0.00 |

|      |      |     |     |   |     |        |        |        |      |      |
|------|------|-----|-----|---|-----|--------|--------|--------|------|------|
| ATOM | 5781 | HG3 | PRO | X | 384 | 69.187 | 22.065 | 63.773 | 0.00 | 0.00 |
| ATOM | 5782 | CB  | PRO | X | 384 | 69.151 | 23.937 | 62.596 | 0.00 | 0.00 |
| ATOM | 5783 | HB2 | PRO | X | 384 | 69.824 | 24.793 | 62.653 | 0.00 | 0.00 |
| ATOM | 5784 | HB3 | PRO | X | 384 | 68.214 | 24.216 | 63.080 | 0.00 | 0.00 |
| ATOM | 5785 | CA  | PRO | X | 384 | 68.858 | 23.518 | 61.174 | 0.00 | 0.00 |
| ATOM | 5786 | HA  | PRO | X | 384 | 67.793 | 23.325 | 61.049 | 0.00 | 0.00 |
| ATOM | 5787 | C   | PRO | X | 384 | 69.209 | 24.678 | 60.245 | 0.00 | 0.00 |
| ATOM | 5788 | O   | PRO | X | 384 | 68.488 | 25.649 | 60.214 | 0.00 | 0.00 |
| ATOM | 5789 | N   | GLU | X | 385 | 70.301 | 24.499 | 59.441 | 0.00 | 0.00 |
| ATOM | 5790 | H   | GLU | X | 385 | 70.802 | 23.626 | 59.532 | 0.00 | 0.00 |
| ATOM | 5791 | CA  | GLU | X | 385 | 70.921 | 25.547 | 58.655 | 0.00 | 0.00 |
| ATOM | 5792 | HA  | GLU | X | 385 | 70.286 | 26.423 | 58.790 | 0.00 | 0.00 |
| ATOM | 5793 | CB  | GLU | X | 385 | 72.293 | 25.992 | 59.105 | 0.00 | 0.00 |
| ATOM | 5794 | HB2 | GLU | X | 385 | 72.684 | 26.776 | 58.456 | 0.00 | 0.00 |
| ATOM | 5795 | HB3 | GLU | X | 385 | 72.251 | 26.470 | 60.083 | 0.00 | 0.00 |
| ATOM | 5796 | CG  | GLU | X | 385 | 73.394 | 24.909 | 59.262 | 0.00 | 0.00 |
| ATOM | 5797 | HG2 | GLU | X | 385 | 73.273 | 24.294 | 60.154 | 0.00 | 0.00 |
| ATOM | 5798 | HG3 | GLU | X | 385 | 73.344 | 24.249 | 58.396 | 0.00 | 0.00 |
| ATOM | 5799 | CD  | GLU | X | 385 | 74.782 | 25.506 | 59.211 | 0.00 | 0.00 |
| ATOM | 5800 | OE1 | GLU | X | 385 | 75.193 | 25.793 | 58.110 | 0.00 | 0.00 |
| ATOM | 5801 | OE2 | GLU | X | 385 | 75.518 | 25.514 | 60.242 | 0.00 | 0.00 |
| ATOM | 5802 | C   | GLU | X | 385 | 70.886 | 25.299 | 57.133 | 0.00 | 0.00 |
| ATOM | 5803 | O   | GLU | X | 385 | 71.610 | 25.920 | 56.340 | 0.00 | 0.00 |
| ATOM | 5804 | N   | ASP | X | 386 | 70.135 | 24.305 | 56.693 | 0.00 | 0.00 |
| ATOM | 5805 | H   | ASP | X | 386 | 69.561 | 23.747 | 57.309 | 0.00 | 0.00 |
| ATOM | 5806 | CA  | ASP | X | 386 | 70.137 | 23.873 | 55.317 | 0.00 | 0.00 |
| ATOM | 5807 | HA  | ASP | X | 386 | 71.164 | 23.627 | 55.047 | 0.00 | 0.00 |
| ATOM | 5808 | CB  | ASP | X | 386 | 69.405 | 22.539 | 55.251 | 0.00 | 0.00 |
| ATOM | 5809 | HB2 | ASP | X | 386 | 69.890 | 21.815 | 55.905 | 0.00 | 0.00 |
| ATOM | 5810 | HB3 | ASP | X | 386 | 68.358 | 22.598 | 55.548 | 0.00 | 0.00 |
| ATOM | 5811 | CG  | ASP | X | 386 | 69.514 | 22.106 | 53.833 | 0.00 | 0.00 |
| ATOM | 5812 | OD1 | ASP | X | 386 | 68.449 | 22.272 | 53.104 | 0.00 | 0.00 |
| ATOM | 5813 | OD2 | ASP | X | 386 | 70.677 | 21.745 | 53.376 | 0.00 | 0.00 |
| ATOM | 5814 | C   | ASP | X | 386 | 69.617 | 24.961 | 54.309 | 0.00 | 0.00 |
| ATOM | 5815 | O   | ASP | X | 386 | 68.393 | 25.184 | 54.386 | 0.00 | 0.00 |
| ATOM | 5816 | N   | PRO | X | 387 | 70.406 | 25.575 | 53.413 | 0.00 | 0.00 |
| ATOM | 5817 | CD  | PRO | X | 387 | 71.810 | 25.243 | 53.169 | 0.00 | 0.00 |
| ATOM | 5818 | HD2 | PRO | X | 387 | 72.058 | 24.223 | 52.877 | 0.00 | 0.00 |
| ATOM | 5819 | HD3 | PRO | X | 387 | 72.421 | 25.543 | 54.020 | 0.00 | 0.00 |
| ATOM | 5820 | CG  | PRO | X | 387 | 72.151 | 26.207 | 51.991 | 0.00 | 0.00 |
| ATOM | 5821 | HG2 | PRO | X | 387 | 71.784 | 25.687 | 51.106 | 0.00 | 0.00 |
| ATOM | 5822 | HG3 | PRO | X | 387 | 73.227 | 26.362 | 51.918 | 0.00 | 0.00 |
| ATOM | 5823 | CB  | PRO | X | 387 | 71.268 | 27.441 | 52.186 | 0.00 | 0.00 |
| ATOM | 5824 | HB2 | PRO | X | 387 | 71.189 | 27.852 | 51.179 | 0.00 | 0.00 |
| ATOM | 5825 | HB3 | PRO | X | 387 | 71.743 | 28.066 | 52.942 | 0.00 | 0.00 |
| ATOM | 5826 | CA  | PRO | X | 387 | 69.942 | 26.854 | 52.788 | 0.00 | 0.00 |
| ATOM | 5827 | HA  | PRO | X | 387 | 69.589 | 27.438 | 53.638 | 0.00 | 0.00 |
| ATOM | 5828 | C   | PRO | X | 387 | 68.846 | 26.858 | 51.776 | 0.00 | 0.00 |
| ATOM | 5829 | O   | PRO | X | 387 | 68.074 | 27.850 | 51.742 | 0.00 | 0.00 |
| ATOM | 5830 | N   | ALA | X | 388 | 68.620 | 25.726 | 51.079 | 0.00 | 0.00 |
| ATOM | 5831 | H   | ALA | X | 388 | 69.269 | 24.959 | 51.180 | 0.00 | 0.00 |
| ATOM | 5832 | CA  | ALA | X | 388 | 67.493 | 25.524 | 50.288 | 0.00 | 0.00 |
| ATOM | 5833 | HA  | ALA | X | 388 | 67.246 | 26.414 | 49.710 | 0.00 | 0.00 |
| ATOM | 5834 | CB  | ALA | X | 388 | 67.654 | 24.283 | 49.340 | 0.00 | 0.00 |
| ATOM | 5835 | HB1 | ALA | X | 388 | 68.230 | 24.525 | 48.446 | 0.00 | 0.00 |
| ATOM | 5836 | HB2 | ALA | X | 388 | 66.687 | 23.794 | 49.217 | 0.00 | 0.00 |
| ATOM | 5837 | HB3 | ALA | X | 388 | 68.184 | 23.463 | 49.825 | 0.00 | 0.00 |
| ATOM | 5838 | C   | ALA | X | 388 | 66.304 | 25.233 | 51.122 | 0.00 | 0.00 |
| ATOM | 5839 | O   | ALA | X | 388 | 65.223 | 25.736 | 50.753 | 0.00 | 0.00 |
| ATOM | 5840 | N   | ARG | X | 389 | 66.335 | 24.574 | 52.300 | 0.00 | 0.00 |
| ATOM | 5841 | H   | ARG | X | 389 | 67.197 | 24.076 | 52.467 | 0.00 | 0.00 |
| ATOM | 5842 | CA  | ARG | X | 389 | 65.211 | 24.251 | 53.204 | 0.00 | 0.00 |
| ATOM | 5843 | HA  | ARG | X | 389 | 64.323 | 23.914 | 52.670 | 0.00 | 0.00 |
| ATOM | 5844 | CB  | ARG | X | 389 | 65.661 | 23.122 | 54.146 | 0.00 | 0.00 |
| ATOM | 5845 | HB2 | ARG | X | 389 | 65.968 | 22.334 | 53.458 | 0.00 | 0.00 |
| ATOM | 5846 | HB3 | ARG | X | 389 | 66.546 | 23.440 | 54.696 | 0.00 | 0.00 |
| ATOM | 5847 | CG  | ARG | X | 389 | 64.602 | 22.560 | 55.085 | 0.00 | 0.00 |



|      |      |      |     |   |     |        |        |        |      |      |
|------|------|------|-----|---|-----|--------|--------|--------|------|------|
| ATOM | 5848 | HG2  | ARG | X | 389 | 64.435 | 23.341 | 55.827 | 0.00 | 0.00 |
| ATOM | 5849 | HG3  | ARG | X | 389 | 63.703 | 22.316 | 54.519 | 0.00 | 0.00 |
| ATOM | 5850 | CD   | ARG | X | 389 | 64.838 | 21.238 | 55.884 | 0.00 | 0.00 |
| ATOM | 5851 | HD2  | ARG | X | 389 | 65.599 | 21.356 | 56.656 | 0.00 | 0.00 |
| ATOM | 5852 | HD3  | ARG | X | 389 | 63.964 | 21.026 | 56.501 | 0.00 | 0.00 |
| ATOM | 5853 | NE   | ARG | X | 389 | 65.244 | 20.069 | 55.037 | 0.00 | 0.00 |
| ATOM | 5854 | HE   | ARG | X | 389 | 65.997 | 20.142 | 54.368 | 0.00 | 0.00 |
| ATOM | 5855 | CZ   | ARG | X | 389 | 64.611 | 18.905 | 54.888 | 0.00 | 0.00 |
| ATOM | 5856 | NH1  | ARG | X | 389 | 63.896 | 18.349 | 55.811 | 0.00 | 0.00 |
| ATOM | 5857 | HH11 | ARG | X | 389 | 63.682 | 18.793 | 56.693 | 0.00 | 0.00 |
| ATOM | 5858 | HH12 | ARG | X | 389 | 63.264 | 17.631 | 55.487 | 0.00 | 0.00 |
| ATOM | 5859 | NH2  | ARG | X | 389 | 64.602 | 18.405 | 53.687 | 0.00 | 0.00 |
| ATOM | 5860 | HH21 | ARG | X | 389 | 65.137 | 18.945 | 53.021 | 0.00 | 0.00 |
| ATOM | 5861 | HH22 | ARG | X | 389 | 64.108 | 17.558 | 53.447 | 0.00 | 0.00 |
| ATOM | 5862 | C    | ARG | X | 389 | 64.783 | 25.472 | 53.981 | 0.00 | 0.00 |
| ATOM | 5863 | O    | ARG | X | 389 | 63.628 | 25.628 | 54.351 | 0.00 | 0.00 |
| ATOM | 5864 | N    | LEU | X | 390 | 65.707 | 26.353 | 54.235 | 0.00 | 0.00 |
| ATOM | 5865 | H    | LEU | X | 390 | 66.635 | 26.138 | 53.899 | 0.00 | 0.00 |
| ATOM | 5866 | CA   | LEU | X | 390 | 65.483 | 27.640 | 54.798 | 0.00 | 0.00 |
| ATOM | 5867 | HA   | LEU | X | 390 | 64.846 | 27.602 | 55.682 | 0.00 | 0.00 |
| ATOM | 5868 | CB   | LEU | X | 390 | 66.795 | 28.283 | 55.244 | 0.00 | 0.00 |
| ATOM | 5869 | HB2  | LEU | X | 390 | 67.562 | 28.178 | 54.477 | 0.00 | 0.00 |
| ATOM | 5870 | HB3  | LEU | X | 390 | 66.599 | 29.340 | 55.426 | 0.00 | 0.00 |
| ATOM | 5871 | CG   | LEU | X | 390 | 67.423 | 27.745 | 56.484 | 0.00 | 0.00 |
| ATOM | 5872 | HG   | LEU | X | 390 | 67.452 | 26.659 | 56.393 | 0.00 | 0.00 |
| ATOM | 5873 | CD1  | LEU | X | 390 | 68.815 | 28.236 | 56.520 | 0.00 | 0.00 |
| ATOM | 5874 | HD11 | LEU | X | 390 | 69.430 | 27.908 | 57.358 | 0.00 | 0.00 |
| ATOM | 5875 | HD12 | LEU | X | 390 | 68.786 | 29.325 | 56.552 | 0.00 | 0.00 |
| ATOM | 5876 | HD13 | LEU | X | 390 | 69.343 | 27.951 | 55.609 | 0.00 | 0.00 |
| ATOM | 5877 | CD2  | LEU | X | 390 | 66.570 | 28.003 | 57.754 | 0.00 | 0.00 |
| ATOM | 5878 | HD21 | LEU | X | 390 | 67.142 | 28.135 | 58.672 | 0.00 | 0.00 |
| ATOM | 5879 | HD22 | LEU | X | 390 | 65.877 | 28.833 | 57.614 | 0.00 | 0.00 |
| ATOM | 5880 | HD23 | LEU | X | 390 | 65.996 | 27.096 | 57.944 | 0.00 | 0.00 |
| ATOM | 5881 | C    | LEU | X | 390 | 64.746 | 28.555 | 53.835 | 0.00 | 0.00 |
| ATOM | 5882 | O    | LEU | X | 390 | 63.629 | 29.068 | 54.113 | 0.00 | 0.00 |
| ATOM | 5883 | N    | ARG | X | 391 | 65.130 | 28.650 | 52.559 | 0.00 | 0.00 |
| ATOM | 5884 | H    | ARG | X | 391 | 66.021 | 28.269 | 52.274 | 0.00 | 0.00 |
| ATOM | 5885 | CA   | ARG | X | 391 | 64.471 | 29.382 | 51.494 | 0.00 | 0.00 |
| ATOM | 5886 | HA   | ARG | X | 391 | 64.431 | 30.424 | 51.812 | 0.00 | 0.00 |
| ATOM | 5887 | CB   | ARG | X | 391 | 65.240 | 29.283 | 50.161 | 0.00 | 0.00 |
| ATOM | 5888 | HB2  | ARG | X | 391 | 66.315 | 29.361 | 50.320 | 0.00 | 0.00 |
| ATOM | 5889 | HB3  | ARG | X | 391 | 65.040 | 28.278 | 49.789 | 0.00 | 0.00 |
| ATOM | 5890 | CG   | ARG | X | 391 | 64.882 | 30.287 | 49.068 | 0.00 | 0.00 |
| ATOM | 5891 | HG2  | ARG | X | 391 | 63.826 | 30.558 | 49.052 | 0.00 | 0.00 |
| ATOM | 5892 | HG3  | ARG | X | 391 | 65.521 | 31.170 | 49.089 | 0.00 | 0.00 |
| ATOM | 5893 | CD   | ARG | X | 391 | 65.078 | 29.753 | 47.661 | 0.00 | 0.00 |
| ATOM | 5894 | HD2  | ARG | X | 391 | 64.206 | 29.191 | 47.326 | 0.00 | 0.00 |
| ATOM | 5895 | HD3  | ARG | X | 391 | 64.895 | 30.625 | 47.032 | 0.00 | 0.00 |
| ATOM | 5896 | NE   | ARG | X | 391 | 66.320 | 29.117 | 47.291 | 0.00 | 0.00 |
| ATOM | 5897 | HE   | ARG | X | 391 | 67.097 | 29.741 | 47.129 | 0.00 | 0.00 |
| ATOM | 5898 | CZ   | ARG | X | 391 | 66.433 | 27.854 | 46.957 | 0.00 | 0.00 |
| ATOM | 5899 | NH1  | ARG | X | 391 | 65.558 | 26.939 | 47.356 | 0.00 | 0.00 |
| ATOM | 5900 | HH11 | ARG | X | 391 | 64.836 | 27.131 | 48.035 | 0.00 | 0.00 |
| ATOM | 5901 | HH12 | ARG | X | 391 | 65.441 | 26.028 | 46.936 | 0.00 | 0.00 |
| ATOM | 5902 | NH2  | ARG | X | 391 | 67.443 | 27.478 | 46.209 | 0.00 | 0.00 |
| ATOM | 5903 | HH21 | ARG | X | 391 | 67.984 | 28.230 | 45.806 | 0.00 | 0.00 |
| ATOM | 5904 | HH22 | ARG | X | 391 | 67.662 | 26.522 | 45.967 | 0.00 | 0.00 |
| ATOM | 5905 | C    | ARG | X | 391 | 62.986 | 28.871 | 51.251 | 0.00 | 0.00 |
| ATOM | 5906 | O    | ARG | X | 391 | 62.052 | 29.666 | 51.123 | 0.00 | 0.00 |
| ATOM | 5907 | N    | GLU | X | 392 | 62.845 | 27.516 | 51.202 | 0.00 | 0.00 |
| ATOM | 5908 | H    | GLU | X | 392 | 63.666 | 26.928 | 51.234 | 0.00 | 0.00 |
| ATOM | 5909 | CA   | GLU | X | 392 | 61.518 | 26.894 | 50.967 | 0.00 | 0.00 |
| ATOM | 5910 | HA   | GLU | X | 392 | 61.021 | 27.171 | 50.037 | 0.00 | 0.00 |
| ATOM | 5911 | CB   | GLU | X | 392 | 61.773 | 25.393 | 50.993 | 0.00 | 0.00 |
| ATOM | 5912 | HB2  | GLU | X | 392 | 62.442 | 25.203 | 50.154 | 0.00 | 0.00 |
| ATOM | 5913 | HB3  | GLU | X | 392 | 62.212 | 25.072 | 51.938 | 0.00 | 0.00 |
| ATOM | 5914 | CG   | GLU | X | 392 | 60.425 | 24.737 | 50.728 | 0.00 | 0.00 |

|      |      |      |     |   |     |        |        |        |      |      |
|------|------|------|-----|---|-----|--------|--------|--------|------|------|
| ATOM | 5915 | HG2  | GLU | X | 392 | 59.657 | 25.158 | 51.376 | 0.00 | 0.00 |
| ATOM | 5916 | HG3  | GLU | X | 392 | 60.007 | 25.077 | 49.781 | 0.00 | 0.00 |
| ATOM | 5917 | CD   | GLU | X | 392 | 60.377 | 23.232 | 50.789 | 0.00 | 0.00 |
| ATOM | 5918 | OE1  | GLU | X | 392 | 60.986 | 22.548 | 49.906 | 0.00 | 0.00 |
| ATOM | 5919 | OE2  | GLU | X | 392 | 59.901 | 22.628 | 51.831 | 0.00 | 0.00 |
| ATOM | 5920 | C    | GLU | X | 392 | 60.560 | 27.422 | 52.096 | 0.00 | 0.00 |
| ATOM | 5921 | O    | GLU | X | 392 | 59.428 | 27.817 | 51.806 | 0.00 | 0.00 |
| ATOM | 5922 | N    | ALA | X | 393 | 61.021 | 27.398 | 53.346 | 0.00 | 0.00 |
| ATOM | 5923 | H    | ALA | X | 393 | 61.934 | 26.990 | 53.487 | 0.00 | 0.00 |
| ATOM | 5924 | CA   | ALA | X | 393 | 60.263 | 27.859 | 54.544 | 0.00 | 0.00 |
| ATOM | 5925 | HA   | ALA | X | 393 | 59.390 | 27.210 | 54.614 | 0.00 | 0.00 |
| ATOM | 5926 | CB   | ALA | X | 393 | 61.055 | 27.522 | 55.823 | 0.00 | 0.00 |
| ATOM | 5927 | HB1  | ALA | X | 393 | 61.975 | 28.071 | 56.023 | 0.00 | 0.00 |
| ATOM | 5928 | HB2  | ALA | X | 393 | 61.313 | 26.467 | 55.740 | 0.00 | 0.00 |
| ATOM | 5929 | HB3  | ALA | X | 393 | 60.388 | 27.548 | 56.684 | 0.00 | 0.00 |
| ATOM | 5930 | C    | ALA | X | 393 | 59.848 | 29.341 | 54.447 | 0.00 | 0.00 |
| ATOM | 5931 | O    | ALA | X | 393 | 58.811 | 29.765 | 54.997 | 0.00 | 0.00 |
| ATOM | 5932 | N    | LEU | X | 394 | 60.556 | 30.177 | 53.659 | 0.00 | 0.00 |
| ATOM | 5933 | H    | LEU | X | 394 | 61.524 | 29.965 | 53.462 | 0.00 | 0.00 |
| ATOM | 5934 | CA   | LEU | X | 394 | 60.127 | 31.544 | 53.539 | 0.00 | 0.00 |
| ATOM | 5935 | HA   | LEU | X | 394 | 59.645 | 31.799 | 54.483 | 0.00 | 0.00 |
| ATOM | 5936 | CB   | LEU | X | 394 | 61.299 | 32.525 | 53.330 | 0.00 | 0.00 |
| ATOM | 5937 | HB2  | LEU | X | 394 | 62.111 | 32.161 | 53.958 | 0.00 | 0.00 |
| ATOM | 5938 | HB3  | LEU | X | 394 | 61.690 | 32.495 | 52.313 | 0.00 | 0.00 |
| ATOM | 5939 | CG   | LEU | X | 394 | 60.885 | 34.024 | 53.506 | 0.00 | 0.00 |
| ATOM | 5940 | HG   | LEU | X | 394 | 60.100 | 34.183 | 52.767 | 0.00 | 0.00 |
| ATOM | 5941 | CD1  | LEU | X | 394 | 60.513 | 34.350 | 54.982 | 0.00 | 0.00 |
| ATOM | 5942 | HD11 | LEU | X | 394 | 59.556 | 33.865 | 55.178 | 0.00 | 0.00 |
| ATOM | 5943 | HD12 | LEU | X | 394 | 60.317 | 35.410 | 55.146 | 0.00 | 0.00 |
| ATOM | 5944 | HD13 | LEU | X | 394 | 61.343 | 33.973 | 55.580 | 0.00 | 0.00 |
| ATOM | 5945 | CD2  | LEU | X | 394 | 62.080 | 34.973 | 53.327 | 0.00 | 0.00 |
| ATOM | 5946 | HD21 | LEU | X | 394 | 62.676 | 34.908 | 52.416 | 0.00 | 0.00 |
| ATOM | 5947 | HD22 | LEU | X | 394 | 61.797 | 36.018 | 53.448 | 0.00 | 0.00 |
| ATOM | 5948 | HD23 | LEU | X | 394 | 62.766 | 34.852 | 54.165 | 0.00 | 0.00 |
| ATOM | 5949 | C    | LEU | X | 394 | 59.034 | 31.744 | 52.480 | 0.00 | 0.00 |
| ATOM | 5950 | O    | LEU | X | 394 | 58.049 | 32.502 | 52.721 | 0.00 | 0.00 |
| ATOM | 5951 | N    | SER | X | 395 | 59.076 | 30.994 | 51.337 | 0.00 | 0.00 |
| ATOM | 5952 | H    | SER | X | 395 | 59.926 | 30.469 | 51.187 | 0.00 | 0.00 |
| ATOM | 5953 | CA   | SER | X | 395 | 57.958 | 30.860 | 50.390 | 0.00 | 0.00 |
| ATOM | 5954 | HA   | SER | X | 395 | 57.705 | 31.866 | 50.053 | 0.00 | 0.00 |
| ATOM | 5955 | CB   | SER | X | 395 | 58.263 | 29.848 | 49.264 | 0.00 | 0.00 |
| ATOM | 5956 | HB2  | SER | X | 395 | 58.179 | 28.837 | 49.662 | 0.00 | 0.00 |
| ATOM | 5957 | HB3  | SER | X | 395 | 57.521 | 29.952 | 48.473 | 0.00 | 0.00 |
| ATOM | 5958 | OG   | SER | X | 395 | 59.539 | 30.080 | 48.712 | 0.00 | 0.00 |
| ATOM | 5959 | HG   | SER | X | 395 | 59.705 | 29.353 | 48.106 | 0.00 | 0.00 |
| ATOM | 5960 | C    | SER | X | 395 | 56.715 | 30.333 | 51.205 | 0.00 | 0.00 |
| ATOM | 5961 | O    | SER | X | 395 | 55.623 | 30.677 | 50.885 | 0.00 | 0.00 |
| ATOM | 5962 | N    | ASP | X | 396 | 56.938 | 29.310 | 52.058 | 0.00 | 0.00 |
| ATOM | 5963 | H    | ASP | X | 396 | 57.858 | 28.905 | 51.961 | 0.00 | 0.00 |
| ATOM | 5964 | CA   | ASP | X | 396 | 55.902 | 28.691 | 52.963 | 0.00 | 0.00 |
| ATOM | 5965 | HA   | ASP | X | 396 | 55.101 | 28.245 | 52.374 | 0.00 | 0.00 |
| ATOM | 5966 | CB   | ASP | X | 396 | 56.504 | 27.542 | 53.848 | 0.00 | 0.00 |
| ATOM | 5967 | HB2  | ASP | X | 396 | 57.396 | 27.147 | 53.363 | 0.00 | 0.00 |
| ATOM | 5968 | HB3  | ASP | X | 396 | 56.708 | 27.934 | 54.844 | 0.00 | 0.00 |
| ATOM | 5969 | CG   | ASP | X | 396 | 55.473 | 26.416 | 54.083 | 0.00 | 0.00 |
| ATOM | 5970 | OD1  | ASP | X | 396 | 54.818 | 26.332 | 55.173 | 0.00 | 0.00 |
| ATOM | 5971 | OD2  | ASP | X | 396 | 55.285 | 25.609 | 53.129 | 0.00 | 0.00 |
| ATOM | 5972 | C    | ASP | X | 396 | 55.319 | 29.771 | 53.864 | 0.00 | 0.00 |
| ATOM | 5973 | O    | ASP | X | 396 | 54.101 | 29.981 | 53.733 | 0.00 | 0.00 |
| ATOM | 5974 | N    | VAL | X | 397 | 56.176 | 30.547 | 54.584 | 0.00 | 0.00 |
| ATOM | 5975 | H    | VAL | X | 397 | 57.119 | 30.187 | 54.628 | 0.00 | 0.00 |
| ATOM | 5976 | CA   | VAL | X | 397 | 55.666 | 31.718 | 55.325 | 0.00 | 0.00 |
| ATOM | 5977 | HA   | VAL | X | 397 | 55.114 | 31.358 | 56.192 | 0.00 | 0.00 |
| ATOM | 5978 | CB   | VAL | X | 397 | 56.884 | 32.533 | 55.977 | 0.00 | 0.00 |
| ATOM | 5979 | HB   | VAL | X | 397 | 57.748 | 32.730 | 55.342 | 0.00 | 0.00 |
| ATOM | 5980 | CG1  | VAL | X | 397 | 56.445 | 33.903 | 56.485 | 0.00 | 0.00 |
| ATOM | 5981 | HG11 | VAL | X | 397 | 56.279 | 34.538 | 55.614 | 0.00 | 0.00 |

|      |      |      |     |   |     |        |        |        |      |      |
|------|------|------|-----|---|-----|--------|--------|--------|------|------|
| ATOM | 5982 | HG12 | VAL | X | 397 | 55.492 | 33.925 | 57.013 | 0.00 | 0.00 |
| ATOM | 5983 | HG13 | VAL | X | 397 | 57.263 | 34.425 | 56.980 | 0.00 | 0.00 |
| ATOM | 5984 | CG2  | VAL | X | 397 | 57.352 | 31.864 | 57.303 | 0.00 | 0.00 |
| ATOM | 5985 | HG21 | VAL | X | 397 | 58.215 | 32.399 | 57.698 | 0.00 | 0.00 |
| ATOM | 5986 | HG22 | VAL | X | 397 | 57.586 | 30.800 | 57.269 | 0.00 | 0.00 |
| ATOM | 5987 | HG23 | VAL | X | 397 | 56.662 | 31.938 | 58.143 | 0.00 | 0.00 |
| ATOM | 5988 | C    | VAL | X | 397 | 54.729 | 32.600 | 54.376 | 0.00 | 0.00 |
| ATOM | 5989 | O    | VAL | X | 397 | 53.583 | 32.825 | 54.710 | 0.00 | 0.00 |
| ATOM | 5990 | N    | VAL | X | 398 | 55.257 | 33.056 | 53.237 | 0.00 | 0.00 |
| ATOM | 5991 | H    | VAL | X | 398 | 56.238 | 32.848 | 53.116 | 0.00 | 0.00 |
| ATOM | 5992 | CA   | VAL | X | 398 | 54.669 | 34.165 | 52.506 | 0.00 | 0.00 |
| ATOM | 5993 | HA   | VAL | X | 398 | 54.370 | 34.906 | 53.249 | 0.00 | 0.00 |
| ATOM | 5994 | CB   | VAL | X | 398 | 55.754 | 34.885 | 51.602 | 0.00 | 0.00 |
| ATOM | 5995 | HB   | VAL | X | 398 | 56.124 | 34.115 | 50.925 | 0.00 | 0.00 |
| ATOM | 5996 | CG1  | VAL | X | 398 | 55.167 | 35.973 | 50.742 | 0.00 | 0.00 |
| ATOM | 5997 | HG11 | VAL | X | 398 | 54.591 | 36.624 | 51.400 | 0.00 | 0.00 |
| ATOM | 5998 | HG12 | VAL | X | 398 | 56.013 | 36.456 | 50.254 | 0.00 | 0.00 |
| ATOM | 5999 | HG13 | VAL | X | 398 | 54.622 | 35.566 | 49.890 | 0.00 | 0.00 |
| ATOM | 6000 | CG2  | VAL | X | 398 | 56.879 | 35.519 | 52.417 | 0.00 | 0.00 |
| ATOM | 6001 | HG21 | VAL | X | 398 | 56.608 | 36.432 | 52.947 | 0.00 | 0.00 |
| ATOM | 6002 | HG22 | VAL | X | 398 | 57.680 | 35.916 | 51.793 | 0.00 | 0.00 |
| ATOM | 6003 | HG23 | VAL | X | 398 | 57.295 | 34.820 | 53.142 | 0.00 | 0.00 |
| ATOM | 6004 | C    | VAL | X | 398 | 53.446 | 33.708 | 51.678 | 0.00 | 0.00 |
| ATOM | 6005 | O    | VAL | X | 398 | 52.636 | 34.516 | 51.190 | 0.00 | 0.00 |
| ATOM | 6006 | N    | GLY | X | 399 | 53.272 | 32.366 | 51.552 | 0.00 | 0.00 |
| ATOM | 6007 | H    | GLY | X | 399 | 53.874 | 31.676 | 51.978 | 0.00 | 0.00 |
| ATOM | 6008 | CA   | GLY | X | 399 | 51.967 | 31.748 | 51.106 | 0.00 | 0.00 |
| ATOM | 6009 | HA2  | GLY | X | 399 | 51.546 | 32.268 | 50.246 | 0.00 | 0.00 |
| ATOM | 6010 | HA3  | GLY | X | 399 | 52.123 | 30.681 | 50.946 | 0.00 | 0.00 |
| ATOM | 6011 | C    | GLY | X | 399 | 50.823 | 31.799 | 52.054 | 0.00 | 0.00 |
| ATOM | 6012 | O    | GLY | X | 399 | 49.801 | 32.498 | 51.828 | 0.00 | 0.00 |
| ATOM | 6013 | N    | ASP | X | 400 | 50.988 | 31.098 | 53.165 | 0.00 | 0.00 |
| ATOM | 6014 | H    | ASP | X | 400 | 51.781 | 30.474 | 53.190 | 0.00 | 0.00 |
| ATOM | 6015 | CA   | ASP | X | 400 | 50.045 | 30.711 | 54.193 | 0.00 | 0.00 |
| ATOM | 6016 | HA   | ASP | X | 400 | 49.305 | 30.003 | 53.820 | 0.00 | 0.00 |
| ATOM | 6017 | CB   | ASP | X | 400 | 50.792 | 29.969 | 55.303 | 0.00 | 0.00 |
| ATOM | 6018 | HB2  | ASP | X | 400 | 51.655 | 30.514 | 55.685 | 0.00 | 0.00 |
| ATOM | 6019 | HB3  | ASP | X | 400 | 50.168 | 29.846 | 56.189 | 0.00 | 0.00 |
| ATOM | 6020 | CG   | ASP | X | 400 | 51.022 | 28.563 | 54.917 | 0.00 | 0.00 |
| ATOM | 6021 | OD1  | ASP | X | 400 | 51.258 | 27.740 | 55.849 | 0.00 | 0.00 |
| ATOM | 6022 | OD2  | ASP | X | 400 | 50.913 | 28.220 | 53.743 | 0.00 | 0.00 |
| ATOM | 6023 | C    | ASP | X | 400 | 49.182 | 31.845 | 54.749 | 0.00 | 0.00 |
| ATOM | 6024 | O    | ASP | X | 400 | 48.237 | 32.233 | 54.031 | 0.00 | 0.00 |
| ATOM | 6025 | N    | HIE | X | 401 | 49.522 | 32.420 | 55.856 | 0.00 | 0.00 |
| ATOM | 6026 | H    | HIE | X | 401 | 50.240 | 31.957 | 56.395 | 0.00 | 0.00 |
| ATOM | 6027 | CA   | HIE | X | 401 | 48.823 | 33.560 | 56.448 | 0.00 | 0.00 |
| ATOM | 6028 | HA   | HIE | X | 401 | 47.821 | 33.294 | 56.783 | 0.00 | 0.00 |
| ATOM | 6029 | CB   | HIE | X | 401 | 49.560 | 33.961 | 57.729 | 0.00 | 0.00 |
| ATOM | 6030 | HB2  | HIE | X | 401 | 49.015 | 34.588 | 58.436 | 0.00 | 0.00 |
| ATOM | 6031 | HB3  | HIE | X | 401 | 49.925 | 33.121 | 58.318 | 0.00 | 0.00 |
| ATOM | 6032 | CG   | HIE | X | 401 | 50.725 | 34.872 | 57.425 | 0.00 | 0.00 |
| ATOM | 6033 | ND1  | HIE | X | 401 | 50.707 | 36.253 | 57.502 | 0.00 | 0.00 |
| ATOM | 6034 | CE1  | HIE | X | 401 | 51.857 | 36.576 | 56.932 | 0.00 | 0.00 |
| ATOM | 6035 | HE1  | HIE | X | 401 | 52.072 | 37.621 | 56.766 | 0.00 | 0.00 |
| ATOM | 6036 | NE2  | HIE | X | 401 | 52.633 | 35.550 | 56.764 | 0.00 | 0.00 |
| ATOM | 6037 | HE2  | HIE | X | 401 | 53.569 | 35.555 | 56.384 | 0.00 | 0.00 |
| ATOM | 6038 | CD2  | HIE | X | 401 | 51.875 | 34.440 | 56.968 | 0.00 | 0.00 |
| ATOM | 6039 | HD2  | HIE | X | 401 | 52.169 | 33.420 | 56.770 | 0.00 | 0.00 |
| ATOM | 6040 | C    | HIE | X | 401 | 48.715 | 34.826 | 55.617 | 0.00 | 0.00 |
| ATOM | 6041 | O    | HIE | X | 401 | 47.768 | 35.615 | 55.884 | 0.00 | 0.00 |
| ATOM | 6042 | N    | ASN | X | 402 | 49.482 | 35.017 | 54.549 | 0.00 | 0.00 |
| ATOM | 6043 | H    | ASN | X | 402 | 50.162 | 34.285 | 54.402 | 0.00 | 0.00 |
| ATOM | 6044 | CA   | ASN | X | 402 | 49.417 | 36.060 | 53.567 | 0.00 | 0.00 |
| ATOM | 6045 | HA   | ASN | X | 402 | 49.293 | 37.016 | 54.076 | 0.00 | 0.00 |
| ATOM | 6046 | CB   | ASN | X | 402 | 50.752 | 36.274 | 52.907 | 0.00 | 0.00 |
| ATOM | 6047 | HB2  | ASN | X | 402 | 51.390 | 35.408 | 53.083 | 0.00 | 0.00 |
| ATOM | 6048 | HB3  | ASN | X | 402 | 50.625 | 36.456 | 51.840 | 0.00 | 0.00 |

|      |      |      |     |   |     |        |        |        |      |      |
|------|------|------|-----|---|-----|--------|--------|--------|------|------|
| ATOM | 6049 | CG   | ASN | X | 402 | 51.490 | 37.566 | 53.242 | 0.00 | 0.00 |
| ATOM | 6050 | OD1  | ASN | X | 402 | 50.947 | 38.623 | 53.171 | 0.00 | 0.00 |
| ATOM | 6051 | ND2  | ASN | X | 402 | 52.722 | 37.551 | 53.724 | 0.00 | 0.00 |
| ATOM | 6052 | HD21 | ASN | X | 402 | 53.220 | 38.387 | 53.995 | 0.00 | 0.00 |
| ATOM | 6053 | HD22 | ASN | X | 402 | 53.220 | 36.673 | 53.691 | 0.00 | 0.00 |
| ATOM | 6054 | C    | ASN | X | 402 | 48.238 | 35.820 | 52.573 | 0.00 | 0.00 |
| ATOM | 6055 | O    | ASN | X | 402 | 47.585 | 36.758 | 52.165 | 0.00 | 0.00 |
| ATOM | 6056 | N    | VAL | X | 403 | 47.937 | 34.563 | 52.020 | 0.00 | 0.00 |
| ATOM | 6057 | H    | VAL | X | 403 | 48.562 | 33.796 | 52.226 | 0.00 | 0.00 |
| ATOM | 6058 | CA   | VAL | X | 403 | 46.824 | 34.312 | 51.090 | 0.00 | 0.00 |
| ATOM | 6059 | HA   | VAL | X | 403 | 46.070 | 35.033 | 51.405 | 0.00 | 0.00 |
| ATOM | 6060 | CB   | VAL | X | 403 | 47.284 | 34.692 | 49.658 | 0.00 | 0.00 |
| ATOM | 6061 | HB   | VAL | X | 403 | 47.540 | 35.750 | 49.705 | 0.00 | 0.00 |
| ATOM | 6062 | CG1  | VAL | X | 403 | 48.405 | 33.861 | 49.127 | 0.00 | 0.00 |
| ATOM | 6063 | HG11 | VAL | X | 403 | 49.350 | 33.945 | 49.663 | 0.00 | 0.00 |
| ATOM | 6064 | HG12 | VAL | X | 403 | 48.201 | 32.791 | 49.098 | 0.00 | 0.00 |
| ATOM | 6065 | HG13 | VAL | X | 403 | 48.667 | 34.151 | 48.110 | 0.00 | 0.00 |
| ATOM | 6066 | CG2  | VAL | X | 403 | 46.007 | 34.492 | 48.719 | 0.00 | 0.00 |
| ATOM | 6067 | HG21 | VAL | X | 403 | 46.248 | 34.756 | 47.689 | 0.00 | 0.00 |
| ATOM | 6068 | HG22 | VAL | X | 403 | 45.288 | 35.255 | 49.015 | 0.00 | 0.00 |
| ATOM | 6069 | HG23 | VAL | X | 403 | 45.572 | 33.505 | 48.872 | 0.00 | 0.00 |
| ATOM | 6070 | C    | VAL | X | 403 | 46.183 | 32.977 | 51.177 | 0.00 | 0.00 |
| ATOM | 6071 | O    | VAL | X | 403 | 44.920 | 32.871 | 51.275 | 0.00 | 0.00 |
| ATOM | 6072 | N    | VAL | X | 404 | 46.987 | 31.921 | 51.231 | 0.00 | 0.00 |
| ATOM | 6073 | H    | VAL | X | 404 | 47.968 | 32.159 | 51.214 | 0.00 | 0.00 |
| ATOM | 6074 | CA   | VAL | X | 404 | 46.633 | 30.485 | 51.375 | 0.00 | 0.00 |
| ATOM | 6075 | HA   | VAL | X | 404 | 46.050 | 30.169 | 50.509 | 0.00 | 0.00 |
| ATOM | 6076 | CB   | VAL | X | 404 | 47.857 | 29.569 | 51.395 | 0.00 | 0.00 |
| ATOM | 6077 | HB   | VAL | X | 404 | 48.695 | 29.928 | 51.992 | 0.00 | 0.00 |
| ATOM | 6078 | CG1  | VAL | X | 404 | 47.552 | 28.092 | 51.820 | 0.00 | 0.00 |
| ATOM | 6079 | HG11 | VAL | X | 404 | 46.927 | 27.599 | 51.075 | 0.00 | 0.00 |
| ATOM | 6080 | HG12 | VAL | X | 404 | 48.440 | 27.461 | 51.826 | 0.00 | 0.00 |
| ATOM | 6081 | HG13 | VAL | X | 404 | 47.034 | 28.056 | 52.779 | 0.00 | 0.00 |
| ATOM | 6082 | CG2  | VAL | X | 404 | 48.452 | 29.571 | 49.935 | 0.00 | 0.00 |
| ATOM | 6083 | HG21 | VAL | X | 404 | 49.425 | 29.079 | 49.948 | 0.00 | 0.00 |
| ATOM | 6084 | HG22 | VAL | X | 404 | 48.842 | 30.553 | 49.666 | 0.00 | 0.00 |
| ATOM | 6085 | HG23 | VAL | X | 404 | 47.695 | 29.293 | 49.202 | 0.00 | 0.00 |
| ATOM | 6086 | C    | VAL | X | 404 | 45.733 | 30.210 | 52.518 | 0.00 | 0.00 |
| ATOM | 6087 | O    | VAL | X | 404 | 44.574 | 29.755 | 52.321 | 0.00 | 0.00 |
| ATOM | 6088 | N    | CYX | X | 405 | 46.185 | 30.488 | 53.790 | 0.00 | 0.00 |
| ATOM | 6089 | H    | CYX | X | 405 | 47.147 | 30.742 | 53.963 | 0.00 | 0.00 |
| ATOM | 6090 | CA   | CYX | X | 405 | 45.296 | 30.293 | 54.919 | 0.00 | 0.00 |
| ATOM | 6091 | HA   | CYX | X | 405 | 45.133 | 29.216 | 54.891 | 0.00 | 0.00 |
| ATOM | 6092 | CB   | CYX | X | 405 | 46.000 | 30.504 | 56.311 | 0.00 | 0.00 |
| ATOM | 6093 | HB2  | CYX | X | 405 | 46.268 | 31.559 | 56.371 | 0.00 | 0.00 |
| ATOM | 6094 | HB3  | CYX | X | 405 | 45.296 | 30.257 | 57.106 | 0.00 | 0.00 |
| ATOM | 6095 | SG   | CYX | X | 405 | 47.369 | 29.432 | 56.602 | 0.00 | 0.00 |
| ATOM | 6096 | C    | CYX | X | 405 | 44.048 | 31.147 | 54.853 | 0.00 | 0.00 |
| ATOM | 6097 | O    | CYX | X | 405 | 43.033 | 30.536 | 54.901 | 0.00 | 0.00 |
| ATOM | 6098 | N    | PRO | X | 406 | 44.160 | 32.485 | 54.611 | 0.00 | 0.00 |
| ATOM | 6099 | CD   | PRO | X | 406 | 45.307 | 33.411 | 54.506 | 0.00 | 0.00 |
| ATOM | 6100 | HD2  | PRO | X | 406 | 45.823 | 33.253 | 53.559 | 0.00 | 0.00 |
| ATOM | 6101 | HD3  | PRO | X | 406 | 46.048 | 33.128 | 55.254 | 0.00 | 0.00 |
| ATOM | 6102 | CG   | PRO | X | 406 | 44.867 | 34.873 | 54.516 | 0.00 | 0.00 |
| ATOM | 6103 | HG2  | PRO | X | 406 | 45.529 | 35.507 | 53.927 | 0.00 | 0.00 |
| ATOM | 6104 | HG3  | PRO | X | 406 | 44.704 | 35.153 | 55.557 | 0.00 | 0.00 |
| ATOM | 6105 | CB   | PRO | X | 406 | 43.514 | 34.642 | 53.768 | 0.00 | 0.00 |
| ATOM | 6106 | HB2  | PRO | X | 406 | 43.791 | 34.680 | 52.714 | 0.00 | 0.00 |
| ATOM | 6107 | HB3  | PRO | X | 406 | 42.738 | 35.379 | 53.977 | 0.00 | 0.00 |
| ATOM | 6108 | CA   | PRO | X | 406 | 42.998 | 33.268 | 54.250 | 0.00 | 0.00 |
| ATOM | 6109 | HA   | PRO | X | 406 | 42.547 | 33.331 | 55.241 | 0.00 | 0.00 |
| ATOM | 6110 | C    | PRO | X | 406 | 42.022 | 32.670 | 53.256 | 0.00 | 0.00 |
| ATOM | 6111 | O    | PRO | X | 406 | 40.827 | 32.622 | 53.530 | 0.00 | 0.00 |
| ATOM | 6112 | N    | VAL | X | 407 | 42.546 | 32.223 | 52.121 | 0.00 | 0.00 |
| ATOM | 6113 | H    | VAL | X | 407 | 43.542 | 32.359 | 52.019 | 0.00 | 0.00 |
| ATOM | 6114 | CA   | VAL | X | 407 | 41.612 | 31.689 | 51.067 | 0.00 | 0.00 |
| ATOM | 6115 | HA   | VAL | X | 407 | 40.838 | 32.433 | 50.880 | 0.00 | 0.00 |

|      |      |      |     |   |     |        |        |        |      |      |
|------|------|------|-----|---|-----|--------|--------|--------|------|------|
| ATOM | 6116 | CB   | VAL | X | 407 | 42.398 | 31.511 | 49.712 | 0.00 | 0.00 |
| ATOM | 6117 | HB   | VAL | X | 407 | 43.300 | 30.937 | 49.921 | 0.00 | 0.00 |
| ATOM | 6118 | CG1  | VAL | X | 407 | 41.505 | 30.622 | 48.776 | 0.00 | 0.00 |
| ATOM | 6119 | HG11 | VAL | X | 407 | 40.604 | 31.131 | 48.435 | 0.00 | 0.00 |
| ATOM | 6120 | HG12 | VAL | X | 407 | 42.078 | 30.273 | 47.918 | 0.00 | 0.00 |
| ATOM | 6121 | HG13 | VAL | X | 407 | 41.213 | 29.700 | 49.280 | 0.00 | 0.00 |
| ATOM | 6122 | CG2  | VAL | X | 407 | 42.882 | 32.798 | 49.053 | 0.00 | 0.00 |
| ATOM | 6123 | HG21 | VAL | X | 407 | 42.090 | 33.248 | 48.454 | 0.00 | 0.00 |
| ATOM | 6124 | HG22 | VAL | X | 407 | 43.643 | 32.427 | 48.367 | 0.00 | 0.00 |
| ATOM | 6125 | HG23 | VAL | X | 407 | 43.334 | 33.490 | 49.764 | 0.00 | 0.00 |
| ATOM | 6126 | C    | VAL | X | 407 | 40.932 | 30.356 | 51.617 | 0.00 | 0.00 |
| ATOM | 6127 | O    | VAL | X | 407 | 39.820 | 30.053 | 51.216 | 0.00 | 0.00 |
| ATOM | 6128 | N    | ALA | X | 408 | 41.579 | 29.560 | 52.477 | 0.00 | 0.00 |
| ATOM | 6129 | H    | ALA | X | 408 | 42.551 | 29.750 | 52.674 | 0.00 | 0.00 |
| ATOM | 6130 | CA   | ALA | X | 408 | 40.906 | 28.333 | 53.021 | 0.00 | 0.00 |
| ATOM | 6131 | HA   | ALA | X | 408 | 40.397 | 27.772 | 52.237 | 0.00 | 0.00 |
| ATOM | 6132 | CB   | ALA | X | 408 | 42.092 | 27.460 | 53.449 | 0.00 | 0.00 |
| ATOM | 6133 | HB1  | ALA | X | 408 | 42.586 | 27.416 | 52.478 | 0.00 | 0.00 |
| ATOM | 6134 | HB2  | ALA | X | 408 | 41.834 | 26.506 | 53.907 | 0.00 | 0.00 |
| ATOM | 6135 | HB3  | ALA | X | 408 | 42.763 | 27.898 | 54.188 | 0.00 | 0.00 |
| ATOM | 6136 | C    | ALA | X | 408 | 39.885 | 28.671 | 54.136 | 0.00 | 0.00 |
| ATOM | 6137 | O    | ALA | X | 408 | 38.852 | 27.991 | 54.249 | 0.00 | 0.00 |
| ATOM | 6138 | N    | GLN | X | 409 | 40.201 | 29.676 | 54.952 | 0.00 | 0.00 |
| ATOM | 6139 | H    | GLN | X | 409 | 41.094 | 30.122 | 54.804 | 0.00 | 0.00 |
| ATOM | 6140 | CA   | GLN | X | 409 | 39.382 | 30.147 | 56.062 | 0.00 | 0.00 |
| ATOM | 6141 | HA   | GLN | X | 409 | 39.105 | 29.254 | 56.622 | 0.00 | 0.00 |
| ATOM | 6142 | CB   | GLN | X | 409 | 40.194 | 31.144 | 57.002 | 0.00 | 0.00 |
| ATOM | 6143 | HB2  | GLN | X | 409 | 40.878 | 31.810 | 56.475 | 0.00 | 0.00 |
| ATOM | 6144 | HB3  | GLN | X | 409 | 39.520 | 31.816 | 57.532 | 0.00 | 0.00 |
| ATOM | 6145 | CG   | GLN | X | 409 | 41.093 | 30.490 | 58.052 | 0.00 | 0.00 |
| ATOM | 6146 | HG2  | GLN | X | 409 | 40.470 | 29.878 | 58.704 | 0.00 | 0.00 |
| ATOM | 6147 | HG3  | GLN | X | 409 | 41.789 | 29.816 | 57.553 | 0.00 | 0.00 |
| ATOM | 6148 | CD   | GLN | X | 409 | 41.949 | 31.488 | 58.805 | 0.00 | 0.00 |
| ATOM | 6149 | OE1  | GLN | X | 409 | 43.102 | 31.774 | 58.459 | 0.00 | 0.00 |
| ATOM | 6150 | NE2  | GLN | X | 409 | 41.488 | 32.073 | 59.870 | 0.00 | 0.00 |
| ATOM | 6151 | HE21 | GLN | X | 409 | 42.028 | 32.807 | 60.305 | 0.00 | 0.00 |
| ATOM | 6152 | HE22 | GLN | X | 409 | 40.589 | 31.761 | 60.208 | 0.00 | 0.00 |
| ATOM | 6153 | C    | GLN | X | 409 | 38.112 | 30.798 | 55.598 | 0.00 | 0.00 |
| ATOM | 6154 | O    | GLN | X | 409 | 37.023 | 30.503 | 56.134 | 0.00 | 0.00 |
| ATOM | 6155 | N    | LEU | X | 410 | 38.157 | 31.534 | 54.509 | 0.00 | 0.00 |
| ATOM | 6156 | H    | LEU | X | 410 | 39.042 | 31.583 | 54.024 | 0.00 | 0.00 |
| ATOM | 6157 | CA   | LEU | X | 410 | 37.080 | 32.120 | 53.781 | 0.00 | 0.00 |
| ATOM | 6158 | HA   | LEU | X | 410 | 36.440 | 32.704 | 54.443 | 0.00 | 0.00 |
| ATOM | 6159 | CB   | LEU | X | 410 | 37.721 | 33.049 | 52.735 | 0.00 | 0.00 |
| ATOM | 6160 | HB2  | LEU | X | 410 | 38.310 | 33.824 | 53.226 | 0.00 | 0.00 |
| ATOM | 6161 | HB3  | LEU | X | 410 | 38.438 | 32.500 | 52.125 | 0.00 | 0.00 |
| ATOM | 6162 | CG   | LEU | X | 410 | 36.751 | 33.728 | 51.710 | 0.00 | 0.00 |
| ATOM | 6163 | HG   | LEU | X | 410 | 36.086 | 33.013 | 51.224 | 0.00 | 0.00 |
| ATOM | 6164 | CD1  | LEU | X | 410 | 35.763 | 34.652 | 52.400 | 0.00 | 0.00 |
| ATOM | 6165 | HD11 | LEU | X | 410 | 35.005 | 35.115 | 51.768 | 0.00 | 0.00 |
| ATOM | 6166 | HD12 | LEU | X | 410 | 36.424 | 35.418 | 52.805 | 0.00 | 0.00 |
| ATOM | 6167 | HD13 | LEU | X | 410 | 35.175 | 34.130 | 53.155 | 0.00 | 0.00 |
| ATOM | 6168 | CD2  | LEU | X | 410 | 37.469 | 34.475 | 50.585 | 0.00 | 0.00 |
| ATOM | 6169 | HD21 | LEU | X | 410 | 38.063 | 33.753 | 50.025 | 0.00 | 0.00 |
| ATOM | 6170 | HD22 | LEU | X | 410 | 36.700 | 34.865 | 49.918 | 0.00 | 0.00 |
| ATOM | 6171 | HD23 | LEU | X | 410 | 37.967 | 35.363 | 50.974 | 0.00 | 0.00 |
| ATOM | 6172 | C    | LEU | X | 410 | 36.238 | 31.053 | 53.171 | 0.00 | 0.00 |
| ATOM | 6173 | O    | LEU | X | 410 | 35.054 | 31.057 | 53.412 | 0.00 | 0.00 |
| ATOM | 6174 | N    | ALA | X | 411 | 36.802 | 30.028 | 52.518 | 0.00 | 0.00 |
| ATOM | 6175 | H    | ALA | X | 411 | 37.734 | 30.187 | 52.163 | 0.00 | 0.00 |
| ATOM | 6176 | CA   | ALA | X | 411 | 36.119 | 28.924 | 51.809 | 0.00 | 0.00 |
| ATOM | 6177 | HA   | ALA | X | 411 | 35.426 | 29.308 | 51.061 | 0.00 | 0.00 |
| ATOM | 6178 | CB   | ALA | X | 411 | 37.198 | 27.962 | 51.331 | 0.00 | 0.00 |
| ATOM | 6179 | HB1  | ALA | X | 411 | 36.625 | 27.159 | 50.868 | 0.00 | 0.00 |
| ATOM | 6180 | HB2  | ALA | X | 411 | 37.956 | 27.644 | 52.047 | 0.00 | 0.00 |
| ATOM | 6181 | HB3  | ALA | X | 411 | 37.726 | 28.410 | 50.490 | 0.00 | 0.00 |
| ATOM | 6182 | C    | ALA | X | 411 | 35.189 | 28.223 | 52.873 | 0.00 | 0.00 |

|      |      |      |     |   |     |        |        |        |      |      |
|------|------|------|-----|---|-----|--------|--------|--------|------|------|
| ATOM | 6183 | O    | ALA | X | 411 | 33.987 | 27.965 | 52.660 | 0.00 | 0.00 |
| ATOM | 6184 | N    | GLY | X | 412 | 35.747 | 27.926 | 54.006 | 0.00 | 0.00 |
| ATOM | 6185 | H    | GLY | X | 412 | 36.747 | 27.999 | 54.125 | 0.00 | 0.00 |
| ATOM | 6186 | CA   | GLY | X | 412 | 35.046 | 27.352 | 55.175 | 0.00 | 0.00 |
| ATOM | 6187 | HA2  | GLY | X | 412 | 34.496 | 26.503 | 54.770 | 0.00 | 0.00 |
| ATOM | 6188 | HA3  | GLY | X | 412 | 35.742 | 27.110 | 55.978 | 0.00 | 0.00 |
| ATOM | 6189 | C    | GLY | X | 412 | 34.060 | 28.241 | 55.896 | 0.00 | 0.00 |
| ATOM | 6190 | O    | GLY | X | 412 | 33.015 | 27.710 | 56.231 | 0.00 | 0.00 |
| ATOM | 6191 | N    | ARG | X | 413 | 34.252 | 29.614 | 55.896 | 0.00 | 0.00 |
| ATOM | 6192 | H    | ARG | X | 413 | 35.123 | 29.994 | 55.553 | 0.00 | 0.00 |
| ATOM | 6193 | CA   | ARG | X | 413 | 33.220 | 30.524 | 56.415 | 0.00 | 0.00 |
| ATOM | 6194 | HA   | ARG | X | 413 | 32.729 | 30.204 | 57.334 | 0.00 | 0.00 |
| ATOM | 6195 | CB   | ARG | X | 413 | 33.878 | 31.932 | 56.616 | 0.00 | 0.00 |
| ATOM | 6196 | HB2  | ARG | X | 413 | 34.651 | 31.856 | 57.381 | 0.00 | 0.00 |
| ATOM | 6197 | HB3  | ARG | X | 413 | 34.356 | 32.180 | 55.668 | 0.00 | 0.00 |
| ATOM | 6198 | CG   | ARG | X | 413 | 32.958 | 33.067 | 57.021 | 0.00 | 0.00 |
| ATOM | 6199 | HG2  | ARG | X | 413 | 33.544 | 33.962 | 57.228 | 0.00 | 0.00 |
| ATOM | 6200 | HG3  | ARG | X | 413 | 32.309 | 33.348 | 56.192 | 0.00 | 0.00 |
| ATOM | 6201 | CD   | ARG | X | 413 | 32.157 | 32.741 | 58.256 | 0.00 | 0.00 |
| ATOM | 6202 | HD2  | ARG | X | 413 | 31.560 | 31.855 | 58.044 | 0.00 | 0.00 |
| ATOM | 6203 | HD3  | ARG | X | 413 | 32.818 | 32.613 | 59.113 | 0.00 | 0.00 |
| ATOM | 6204 | NE   | ARG | X | 413 | 31.110 | 33.717 | 58.651 | 0.00 | 0.00 |
| ATOM | 6205 | HE   | ARG | X | 413 | 30.993 | 34.556 | 58.100 | 0.00 | 0.00 |
| ATOM | 6206 | CZ   | ARG | X | 413 | 30.294 | 33.587 | 59.659 | 0.00 | 0.00 |
| ATOM | 6207 | NH1  | ARG | X | 413 | 30.469 | 32.648 | 60.600 | 0.00 | 0.00 |
| ATOM | 6208 | HH11 | ARG | X | 413 | 31.061 | 31.863 | 60.371 | 0.00 | 0.00 |
| ATOM | 6209 | HH12 | ARG | X | 413 | 30.082 | 32.620 | 61.532 | 0.00 | 0.00 |
| ATOM | 6210 | NH2  | ARG | X | 413 | 29.355 | 34.474 | 59.744 | 0.00 | 0.00 |
| ATOM | 6211 | HH21 | ARG | X | 413 | 29.334 | 35.152 | 58.996 | 0.00 | 0.00 |
| ATOM | 6212 | HH22 | ARG | X | 413 | 28.497 | 34.375 | 60.266 | 0.00 | 0.00 |
| ATOM | 6213 | C    | ARG | X | 413 | 32.006 | 30.557 | 55.429 | 0.00 | 0.00 |
| ATOM | 6214 | O    | ARG | X | 413 | 30.846 | 30.557 | 55.843 | 0.00 | 0.00 |
| ATOM | 6215 | N    | LEU | X | 414 | 32.302 | 30.519 | 54.121 | 0.00 | 0.00 |
| ATOM | 6216 | H    | LEU | X | 414 | 33.268 | 30.488 | 53.828 | 0.00 | 0.00 |
| ATOM | 6217 | CA   | LEU | X | 414 | 31.305 | 30.411 | 53.039 | 0.00 | 0.00 |
| ATOM | 6218 | HA   | LEU | X | 414 | 30.574 | 31.204 | 53.199 | 0.00 | 0.00 |
| ATOM | 6219 | CB   | LEU | X | 414 | 31.964 | 30.646 | 51.652 | 0.00 | 0.00 |
| ATOM | 6220 | HB2  | LEU | X | 414 | 32.739 | 29.900 | 51.476 | 0.00 | 0.00 |
| ATOM | 6221 | HB3  | LEU | X | 414 | 31.239 | 30.429 | 50.868 | 0.00 | 0.00 |
| ATOM | 6222 | CG   | LEU | X | 414 | 32.538 | 32.046 | 51.330 | 0.00 | 0.00 |
| ATOM | 6223 | HG   | LEU | X | 414 | 33.275 | 32.327 | 52.082 | 0.00 | 0.00 |
| ATOM | 6224 | CD1  | LEU | X | 414 | 33.359 | 31.982 | 50.049 | 0.00 | 0.00 |
| ATOM | 6225 | HD11 | LEU | X | 414 | 33.618 | 32.980 | 49.697 | 0.00 | 0.00 |
| ATOM | 6226 | HD12 | LEU | X | 414 | 32.694 | 31.540 | 49.307 | 0.00 | 0.00 |
| ATOM | 6227 | HD13 | LEU | X | 414 | 34.247 | 31.365 | 50.190 | 0.00 | 0.00 |
| ATOM | 6228 | CD2  | LEU | X | 414 | 31.585 | 33.231 | 51.271 | 0.00 | 0.00 |
| ATOM | 6229 | HD21 | LEU | X | 414 | 32.122 | 34.095 | 50.879 | 0.00 | 0.00 |
| ATOM | 6230 | HD22 | LEU | X | 414 | 30.886 | 32.992 | 50.469 | 0.00 | 0.00 |
| ATOM | 6231 | HD23 | LEU | X | 414 | 31.151 | 33.432 | 52.251 | 0.00 | 0.00 |
| ATOM | 6232 | C    | LEU | X | 414 | 30.485 | 29.088 | 53.057 | 0.00 | 0.00 |
| ATOM | 6233 | O    | LEU | X | 414 | 29.242 | 29.118 | 53.186 | 0.00 | 0.00 |
| ATOM | 6234 | N    | ALA | X | 415 | 31.199 | 27.936 | 53.124 | 0.00 | 0.00 |
| ATOM | 6235 | H    | ALA | X | 415 | 32.191 | 27.920 | 52.938 | 0.00 | 0.00 |
| ATOM | 6236 | CA   | ALA | X | 415 | 30.532 | 26.578 | 53.177 | 0.00 | 0.00 |
| ATOM | 6237 | HA   | ALA | X | 415 | 29.834 | 26.480 | 52.345 | 0.00 | 0.00 |
| ATOM | 6238 | CB   | ALA | X | 415 | 31.592 | 25.525 | 52.938 | 0.00 | 0.00 |
| ATOM | 6239 | HB1  | ALA | X | 415 | 32.232 | 25.364 | 53.805 | 0.00 | 0.00 |
| ATOM | 6240 | HB2  | ALA | X | 415 | 32.212 | 25.928 | 52.137 | 0.00 | 0.00 |
| ATOM | 6241 | HB3  | ALA | X | 415 | 31.195 | 24.521 | 52.787 | 0.00 | 0.00 |
| ATOM | 6242 | C    | ALA | X | 415 | 29.720 | 26.356 | 54.415 | 0.00 | 0.00 |
| ATOM | 6243 | O    | ALA | X | 415 | 28.747 | 25.583 | 54.410 | 0.00 | 0.00 |
| ATOM | 6244 | N    | ALA | X | 416 | 30.116 | 27.060 | 55.568 | 0.00 | 0.00 |
| ATOM | 6245 | H    | ALA | X | 416 | 31.037 | 27.473 | 55.597 | 0.00 | 0.00 |
| ATOM | 6246 | CA   | ALA | X | 416 | 29.400 | 27.117 | 56.885 | 0.00 | 0.00 |
| ATOM | 6247 | HA   | ALA | X | 416 | 29.000 | 26.136 | 57.141 | 0.00 | 0.00 |
| ATOM | 6248 | CB   | ALA | X | 416 | 30.379 | 27.615 | 57.995 | 0.00 | 0.00 |
| ATOM | 6249 | HB1  | ALA | X | 416 | 29.918 | 27.646 | 58.983 | 0.00 | 0.00 |

|      |      |      |     |   |     |        |        |        |      |      |
|------|------|------|-----|---|-----|--------|--------|--------|------|------|
| ATOM | 6250 | HB2  | ALA | X | 416 | 30.632 | 28.646 | 57.752 | 0.00 | 0.00 |
| ATOM | 6251 | HB3  | ALA | X | 416 | 31.214 | 26.933 | 58.155 | 0.00 | 0.00 |
| ATOM | 6252 | C    | ALA | X | 416 | 28.119 | 27.916 | 56.711 | 0.00 | 0.00 |
| ATOM | 6253 | O    | ALA | X | 416 | 27.118 | 27.428 | 57.208 | 0.00 | 0.00 |
| ATOM | 6254 | N    | GLN | X | 417 | 28.170 | 29.095 | 56.061 | 0.00 | 0.00 |
| ATOM | 6255 | H    | GLN | X | 417 | 29.039 | 29.562 | 55.847 | 0.00 | 0.00 |
| ATOM | 6256 | CA   | GLN | X | 417 | 26.967 | 29.815 | 55.717 | 0.00 | 0.00 |
| ATOM | 6257 | HA   | GLN | X | 417 | 26.319 | 29.835 | 56.593 | 0.00 | 0.00 |
| ATOM | 6258 | CB   | GLN | X | 417 | 27.196 | 31.255 | 55.310 | 0.00 | 0.00 |
| ATOM | 6259 | HB2  | GLN | X | 417 | 27.760 | 31.368 | 54.385 | 0.00 | 0.00 |
| ATOM | 6260 | HB3  | GLN | X | 417 | 26.235 | 31.688 | 55.033 | 0.00 | 0.00 |
| ATOM | 6261 | CG   | GLN | X | 417 | 27.862 | 32.102 | 56.401 | 0.00 | 0.00 |
| ATOM | 6262 | HG2  | GLN | X | 417 | 28.881 | 31.752 | 56.566 | 0.00 | 0.00 |
| ATOM | 6263 | HG3  | GLN | X | 417 | 27.785 | 33.155 | 56.131 | 0.00 | 0.00 |
| ATOM | 6264 | CD   | GLN | X | 417 | 27.075 | 32.141 | 57.730 | 0.00 | 0.00 |
| ATOM | 6265 | OE1  | GLN | X | 417 | 27.558 | 31.775 | 58.819 | 0.00 | 0.00 |
| ATOM | 6266 | NE2  | GLN | X | 417 | 25.808 | 32.444 | 57.726 | 0.00 | 0.00 |
| ATOM | 6267 | HE21 | GLN | X | 417 | 25.203 | 32.348 | 58.528 | 0.00 | 0.00 |
| ATOM | 6268 | HE22 | GLN | X | 417 | 25.356 | 32.706 | 56.861 | 0.00 | 0.00 |
| ATOM | 6269 | C    | GLN | X | 417 | 26.154 | 29.026 | 54.683 | 0.00 | 0.00 |
| ATOM | 6270 | O    | GLN | X | 417 | 24.937 | 29.161 | 54.666 | 0.00 | 0.00 |
| ATOM | 6271 | N    | GLY | X | 418 | 26.730 | 28.056 | 53.913 | 0.00 | 0.00 |
| ATOM | 6272 | H    | GLY | X | 418 | 27.728 | 27.926 | 53.829 | 0.00 | 0.00 |
| ATOM | 6273 | CA   | GLY | X | 418 | 26.007 | 27.277 | 52.921 | 0.00 | 0.00 |
| ATOM | 6274 | HA2  | GLY | X | 418 | 26.346 | 26.242 | 52.887 | 0.00 | 0.00 |
| ATOM | 6275 | HA3  | GLY | X | 418 | 24.924 | 27.280 | 53.040 | 0.00 | 0.00 |
| ATOM | 6276 | C    | GLY | X | 418 | 26.180 | 27.735 | 51.508 | 0.00 | 0.00 |
| ATOM | 6277 | O    | GLY | X | 418 | 25.410 | 27.291 | 50.628 | 0.00 | 0.00 |
| ATOM | 6278 | N    | ALA | X | 419 | 27.098 | 28.679 | 51.209 | 0.00 | 0.00 |
| ATOM | 6279 | H    | ALA | X | 419 | 27.654 | 28.957 | 52.005 | 0.00 | 0.00 |
| ATOM | 6280 | CA   | ALA | X | 419 | 27.404 | 29.044 | 49.894 | 0.00 | 0.00 |
| ATOM | 6281 | HA   | ALA | X | 419 | 26.506 | 29.317 | 49.340 | 0.00 | 0.00 |
| ATOM | 6282 | CB   | ALA | X | 419 | 28.209 | 30.350 | 49.890 | 0.00 | 0.00 |
| ATOM | 6283 | HB1  | ALA | X | 419 | 28.534 | 30.508 | 50.918 | 0.00 | 0.00 |
| ATOM | 6284 | HB2  | ALA | X | 419 | 27.551 | 31.171 | 49.608 | 0.00 | 0.00 |
| ATOM | 6285 | HB3  | ALA | X | 419 | 29.099 | 30.189 | 49.280 | 0.00 | 0.00 |
| ATOM | 6286 | C    | ALA | X | 419 | 28.097 | 27.877 | 49.077 | 0.00 | 0.00 |
| ATOM | 6287 | O    | ALA | X | 419 | 28.824 | 27.077 | 49.708 | 0.00 | 0.00 |
| ATOM | 6288 | N    | ARG | X | 420 | 27.697 | 27.785 | 47.756 | 0.00 | 0.00 |
| ATOM | 6289 | H    | ARG | X | 420 | 27.151 | 28.559 | 47.403 | 0.00 | 0.00 |
| ATOM | 6290 | CA   | ARG | X | 420 | 28.065 | 26.690 | 46.953 | 0.00 | 0.00 |
| ATOM | 6291 | HA   | ARG | X | 420 | 28.150 | 25.820 | 47.604 | 0.00 | 0.00 |
| ATOM | 6292 | CB   | ARG | X | 420 | 26.931 | 26.384 | 45.988 | 0.00 | 0.00 |
| ATOM | 6293 | HB2  | ARG | X | 420 | 25.997 | 26.252 | 46.533 | 0.00 | 0.00 |
| ATOM | 6294 | HB3  | ARG | X | 420 | 26.856 | 27.270 | 45.358 | 0.00 | 0.00 |
| ATOM | 6295 | CG   | ARG | X | 420 | 27.210 | 25.152 | 45.176 | 0.00 | 0.00 |
| ATOM | 6296 | HG2  | ARG | X | 420 | 27.734 | 25.541 | 44.303 | 0.00 | 0.00 |
| ATOM | 6297 | HG3  | ARG | X | 420 | 27.890 | 24.477 | 45.695 | 0.00 | 0.00 |
| ATOM | 6298 | CD   | ARG | X | 420 | 25.968 | 24.426 | 44.725 | 0.00 | 0.00 |
| ATOM | 6299 | HD2  | ARG | X | 420 | 25.351 | 24.289 | 45.613 | 0.00 | 0.00 |
| ATOM | 6300 | HD3  | ARG | X | 420 | 25.386 | 24.961 | 43.974 | 0.00 | 0.00 |
| ATOM | 6301 | NE   | ARG | X | 420 | 26.313 | 23.074 | 44.309 | 0.00 | 0.00 |
| ATOM | 6302 | HE   | ARG | X | 420 | 26.623 | 23.023 | 43.350 | 0.00 | 0.00 |
| ATOM | 6303 | CZ   | ARG | X | 420 | 26.252 | 21.943 | 45.058 | 0.00 | 0.00 |
| ATOM | 6304 | NH1  | ARG | X | 420 | 26.281 | 21.905 | 46.340 | 0.00 | 0.00 |
| ATOM | 6305 | HH11 | ARG | X | 420 | 26.352 | 22.805 | 46.792 | 0.00 | 0.00 |
| ATOM | 6306 | HH12 | ARG | X | 420 | 26.285 | 21.054 | 46.885 | 0.00 | 0.00 |
| ATOM | 6307 | NH2  | ARG | X | 420 | 26.231 | 20.816 | 44.400 | 0.00 | 0.00 |
| ATOM | 6308 | HH21 | ARG | X | 420 | 26.533 | 20.889 | 43.439 | 0.00 | 0.00 |
| ATOM | 6309 | HH22 | ARG | X | 420 | 26.181 | 19.916 | 44.855 | 0.00 | 0.00 |
| ATOM | 6310 | C    | ARG | X | 420 | 29.396 | 27.038 | 46.256 | 0.00 | 0.00 |
| ATOM | 6311 | O    | ARG | X | 420 | 29.387 | 28.044 | 45.580 | 0.00 | 0.00 |
| ATOM | 6312 | N    | VAL | X | 421 | 30.465 | 26.276 | 46.407 | 0.00 | 0.00 |
| ATOM | 6313 | H    | VAL | X | 421 | 30.422 | 25.358 | 46.826 | 0.00 | 0.00 |
| ATOM | 6314 | CA   | VAL | X | 421 | 31.866 | 26.737 | 46.312 | 0.00 | 0.00 |
| ATOM | 6315 | HA   | VAL | X | 421 | 31.813 | 27.710 | 45.822 | 0.00 | 0.00 |
| ATOM | 6316 | CB   | VAL | X | 421 | 32.387 | 27.193 | 47.734 | 0.00 | 0.00 |

|      |      |      |     |   |     |        |        |        |      |      |
|------|------|------|-----|---|-----|--------|--------|--------|------|------|
| ATOM | 6317 | HB   | VAL | X | 421 | 32.259 | 26.319 | 48.372 | 0.00 | 0.00 |
| ATOM | 6318 | CG1  | VAL | X | 421 | 33.910 | 27.696 | 47.843 | 0.00 | 0.00 |
| ATOM | 6319 | HG11 | VAL | X | 421 | 34.185 | 28.442 | 47.097 | 0.00 | 0.00 |
| ATOM | 6320 | HG12 | VAL | X | 421 | 34.273 | 28.165 | 48.758 | 0.00 | 0.00 |
| ATOM | 6321 | HG13 | VAL | X | 421 | 34.515 | 26.795 | 47.743 | 0.00 | 0.00 |
| ATOM | 6322 | CG2  | VAL | X | 421 | 31.560 | 28.376 | 48.277 | 0.00 | 0.00 |
| ATOM | 6323 | HG21 | VAL | X | 421 | 31.798 | 29.254 | 47.675 | 0.00 | 0.00 |
| ATOM | 6324 | HG22 | VAL | X | 421 | 31.897 | 28.541 | 49.300 | 0.00 | 0.00 |
| ATOM | 6325 | HG23 | VAL | X | 421 | 30.489 | 28.188 | 48.207 | 0.00 | 0.00 |
| ATOM | 6326 | C    | VAL | X | 421 | 32.807 | 25.713 | 45.700 | 0.00 | 0.00 |
| ATOM | 6327 | O    | VAL | X | 421 | 32.419 | 24.517 | 45.765 | 0.00 | 0.00 |
| ATOM | 6328 | N    | TYR | X | 422 | 33.959 | 26.111 | 45.098 | 0.00 | 0.00 |
| ATOM | 6329 | H    | TYR | X | 422 | 34.097 | 27.099 | 45.256 | 0.00 | 0.00 |
| ATOM | 6330 | CA   | TYR | X | 422 | 34.957 | 25.265 | 44.369 | 0.00 | 0.00 |
| ATOM | 6331 | HA   | TYR | X | 422 | 34.729 | 24.232 | 44.633 | 0.00 | 0.00 |
| ATOM | 6332 | CB   | TYR | X | 422 | 34.509 | 25.349 | 42.938 | 0.00 | 0.00 |
| ATOM | 6333 | HB2  | TYR | X | 422 | 34.667 | 26.345 | 42.524 | 0.00 | 0.00 |
| ATOM | 6334 | HB3  | TYR | X | 422 | 35.027 | 24.625 | 42.309 | 0.00 | 0.00 |
| ATOM | 6335 | CG   | TYR | X | 422 | 33.024 | 24.938 | 42.727 | 0.00 | 0.00 |
| ATOM | 6336 | CD1  | TYR | X | 422 | 32.710 | 23.580 | 42.804 | 0.00 | 0.00 |
| ATOM | 6337 | HD1  | TYR | X | 422 | 33.451 | 22.830 | 43.039 | 0.00 | 0.00 |
| ATOM | 6338 | CE1  | TYR | X | 422 | 31.377 | 23.170 | 42.868 | 0.00 | 0.00 |
| ATOM | 6339 | HE1  | TYR | X | 422 | 31.175 | 22.110 | 42.914 | 0.00 | 0.00 |
| ATOM | 6340 | CZ   | TYR | X | 422 | 30.332 | 24.186 | 42.694 | 0.00 | 0.00 |
| ATOM | 6341 | OH   | TYR | X | 422 | 28.994 | 23.844 | 42.701 | 0.00 | 0.00 |
| ATOM | 6342 | HH   | TYR | X | 422 | 28.931 | 22.891 | 42.805 | 0.00 | 0.00 |
| ATOM | 6343 | CE2  | TYR | X | 422 | 30.662 | 25.543 | 42.536 | 0.00 | 0.00 |
| ATOM | 6344 | HE2  | TYR | X | 422 | 29.896 | 26.303 | 42.500 | 0.00 | 0.00 |
| ATOM | 6345 | CD2  | TYR | X | 422 | 31.997 | 25.877 | 42.547 | 0.00 | 0.00 |
| ATOM | 6346 | HD2  | TYR | X | 422 | 32.239 | 26.929 | 42.528 | 0.00 | 0.00 |
| ATOM | 6347 | C    | TYR | X | 422 | 36.363 | 25.742 | 44.632 | 0.00 | 0.00 |
| ATOM | 6348 | O    | TYR | X | 422 | 36.734 | 26.826 | 44.246 | 0.00 | 0.00 |
| ATOM | 6349 | N    | ALA | X | 423 | 37.157 | 24.883 | 45.307 | 0.00 | 0.00 |
| ATOM | 6350 | H    | ALA | X | 423 | 36.742 | 23.985 | 45.512 | 0.00 | 0.00 |
| ATOM | 6351 | CA   | ALA | X | 423 | 38.548 | 25.226 | 45.638 | 0.00 | 0.00 |
| ATOM | 6352 | HA   | ALA | X | 423 | 38.763 | 26.260 | 45.370 | 0.00 | 0.00 |
| ATOM | 6353 | CB   | ALA | X | 423 | 38.732 | 24.973 | 47.169 | 0.00 | 0.00 |
| ATOM | 6354 | HB1  | ALA | X | 423 | 37.961 | 25.480 | 47.748 | 0.00 | 0.00 |
| ATOM | 6355 | HB2  | ALA | X | 423 | 39.735 | 25.260 | 47.485 | 0.00 | 0.00 |
| ATOM | 6356 | HB3  | ALA | X | 423 | 38.573 | 23.906 | 47.324 | 0.00 | 0.00 |
| ATOM | 6357 | C    | ALA | X | 423 | 39.563 | 24.513 | 44.775 | 0.00 | 0.00 |
| ATOM | 6358 | O    | ALA | X | 423 | 39.606 | 23.289 | 44.613 | 0.00 | 0.00 |
| ATOM | 6359 | N    | TYR | X | 424 | 40.559 | 25.265 | 44.239 | 0.00 | 0.00 |
| ATOM | 6360 | H    | TYR | X | 424 | 40.647 | 26.193 | 44.629 | 0.00 | 0.00 |
| ATOM | 6361 | CA   | TYR | X | 424 | 41.750 | 24.638 | 43.615 | 0.00 | 0.00 |
| ATOM | 6362 | HA   | TYR | X | 424 | 41.711 | 23.552 | 43.700 | 0.00 | 0.00 |
| ATOM | 6363 | CB   | TYR | X | 424 | 41.751 | 24.891 | 42.103 | 0.00 | 0.00 |
| ATOM | 6364 | HB2  | TYR | X | 424 | 42.273 | 24.064 | 41.622 | 0.00 | 0.00 |
| ATOM | 6365 | HB3  | TYR | X | 424 | 40.727 | 24.736 | 41.763 | 0.00 | 0.00 |
| ATOM | 6366 | CG   | TYR | X | 424 | 42.190 | 26.264 | 41.676 | 0.00 | 0.00 |
| ATOM | 6367 | CD1  | TYR | X | 424 | 43.540 | 26.523 | 41.348 | 0.00 | 0.00 |
| ATOM | 6368 | HD1  | TYR | X | 424 | 44.256 | 25.715 | 41.328 | 0.00 | 0.00 |
| ATOM | 6369 | CE1  | TYR | X | 424 | 43.913 | 27.899 | 41.111 | 0.00 | 0.00 |
| ATOM | 6370 | HE1  | TYR | X | 424 | 44.916 | 28.176 | 40.820 | 0.00 | 0.00 |
| ATOM | 6371 | CZ   | TYR | X | 424 | 42.931 | 28.964 | 41.257 | 0.00 | 0.00 |
| ATOM | 6372 | OH   | TYR | X | 424 | 43.397 | 30.237 | 41.403 | 0.00 | 0.00 |
| ATOM | 6373 | HH   | TYR | X | 424 | 44.306 | 30.350 | 41.115 | 0.00 | 0.00 |
| ATOM | 6374 | CE2  | TYR | X | 424 | 41.594 | 28.615 | 41.549 | 0.00 | 0.00 |
| ATOM | 6375 | HE2  | TYR | X | 424 | 40.892 | 29.434 | 41.594 | 0.00 | 0.00 |
| ATOM | 6376 | CD2  | TYR | X | 424 | 41.297 | 27.314 | 41.851 | 0.00 | 0.00 |
| ATOM | 6377 | HD2  | TYR | X | 424 | 40.340 | 27.053 | 42.277 | 0.00 | 0.00 |
| ATOM | 6378 | C    | TYR | X | 424 | 43.151 | 25.036 | 44.288 | 0.00 | 0.00 |
| ATOM | 6379 | O    | TYR | X | 424 | 43.382 | 26.121 | 44.920 | 0.00 | 0.00 |
| ATOM | 6380 | N    | VAL | X | 425 | 44.069 | 24.115 | 44.182 | 0.00 | 0.00 |
| ATOM | 6381 | H    | VAL | X | 425 | 43.803 | 23.188 | 43.881 | 0.00 | 0.00 |
| ATOM | 6382 | CA   | VAL | X | 425 | 45.591 | 24.304 | 43.954 | 0.00 | 0.00 |
| ATOM | 6383 | HA   | VAL | X | 425 | 45.901 | 25.347 | 44.010 | 0.00 | 0.00 |



|      |      |      |     |   |     |        |        |        |      |      |
|------|------|------|-----|---|-----|--------|--------|--------|------|------|
| ATOM | 6384 | CB   | VAL | X | 425 | 46.401 | 23.655 | 45.111 | 0.00 | 0.00 |
| ATOM | 6385 | HB   | VAL | X | 425 | 45.840 | 23.666 | 46.046 | 0.00 | 0.00 |
| ATOM | 6386 | CG1  | VAL | X | 425 | 46.789 | 22.201 | 44.744 | 0.00 | 0.00 |
| ATOM | 6387 | HG11 | VAL | X | 425 | 45.850 | 21.661 | 44.624 | 0.00 | 0.00 |
| ATOM | 6388 | HG12 | VAL | X | 425 | 47.390 | 21.997 | 43.858 | 0.00 | 0.00 |
| ATOM | 6389 | HG13 | VAL | X | 425 | 47.144 | 21.743 | 45.667 | 0.00 | 0.00 |
| ATOM | 6390 | CG2  | VAL | X | 425 | 47.699 | 24.385 | 45.467 | 0.00 | 0.00 |
| ATOM | 6391 | HG21 | VAL | X | 425 | 48.203 | 24.692 | 44.551 | 0.00 | 0.00 |
| ATOM | 6392 | HG22 | VAL | X | 425 | 48.366 | 23.808 | 46.108 | 0.00 | 0.00 |
| ATOM | 6393 | HG23 | VAL | X | 425 | 47.420 | 25.373 | 45.835 | 0.00 | 0.00 |
| ATOM | 6394 | C    | VAL | X | 425 | 46.115 | 23.968 | 42.577 | 0.00 | 0.00 |
| ATOM | 6395 | O    | VAL | X | 425 | 45.479 | 23.063 | 42.029 | 0.00 | 0.00 |
| ATOM | 6396 | N    | PHE | X | 426 | 47.124 | 24.722 | 42.124 | 0.00 | 0.00 |
| ATOM | 6397 | H    | PHE | X | 426 | 47.551 | 25.437 | 42.695 | 0.00 | 0.00 |
| ATOM | 6398 | CA   | PHE | X | 426 | 47.559 | 24.679 | 40.719 | 0.00 | 0.00 |
| ATOM | 6399 | HA   | PHE | X | 426 | 46.868 | 23.979 | 40.249 | 0.00 | 0.00 |
| ATOM | 6400 | CB   | PHE | X | 426 | 47.329 | 26.118 | 40.105 | 0.00 | 0.00 |
| ATOM | 6401 | HB2  | PHE | X | 426 | 46.333 | 26.435 | 40.413 | 0.00 | 0.00 |
| ATOM | 6402 | HB3  | PHE | X | 426 | 48.065 | 26.837 | 40.466 | 0.00 | 0.00 |
| ATOM | 6403 | CG   | PHE | X | 426 | 47.223 | 26.142 | 38.603 | 0.00 | 0.00 |
| ATOM | 6404 | CD1  | PHE | X | 426 | 46.006 | 26.255 | 37.955 | 0.00 | 0.00 |
| ATOM | 6405 | HD1  | PHE | X | 426 | 45.152 | 26.381 | 38.604 | 0.00 | 0.00 |
| ATOM | 6406 | CE1  | PHE | X | 426 | 45.889 | 26.215 | 36.559 | 0.00 | 0.00 |
| ATOM | 6407 | HE1  | PHE | X | 426 | 44.917 | 26.274 | 36.093 | 0.00 | 0.00 |
| ATOM | 6408 | CZ   | PHE | X | 426 | 47.080 | 26.184 | 35.809 | 0.00 | 0.00 |
| ATOM | 6409 | HZ   | PHE | X | 426 | 46.983 | 26.315 | 34.742 | 0.00 | 0.00 |
| ATOM | 6410 | CE2  | PHE | X | 426 | 48.358 | 26.137 | 36.448 | 0.00 | 0.00 |
| ATOM | 6411 | HE2  | PHE | X | 426 | 49.314 | 26.133 | 35.947 | 0.00 | 0.00 |
| ATOM | 6412 | CD2  | PHE | X | 426 | 48.415 | 26.125 | 37.845 | 0.00 | 0.00 |
| ATOM | 6413 | HD2  | PHE | X | 426 | 49.385 | 26.116 | 38.320 | 0.00 | 0.00 |
| ATOM | 6414 | C    | PHE | X | 426 | 49.011 | 24.176 | 40.592 | 0.00 | 0.00 |
| ATOM | 6415 | O    | PHE | X | 426 | 49.960 | 24.900 | 40.924 | 0.00 | 0.00 |
| ATOM | 6416 | N    | GLU | X | 427 | 49.229 | 22.927 | 40.239 | 0.00 | 0.00 |
| ATOM | 6417 | H    | GLU | X | 427 | 48.463 | 22.335 | 39.949 | 0.00 | 0.00 |
| ATOM | 6418 | CA   | GLU | X | 427 | 50.593 | 22.343 | 40.141 | 0.00 | 0.00 |
| ATOM | 6419 | HA   | GLU | X | 427 | 51.196 | 22.823 | 40.911 | 0.00 | 0.00 |
| ATOM | 6420 | CB   | GLU | X | 427 | 50.465 | 20.956 | 40.763 | 0.00 | 0.00 |
| ATOM | 6421 | HB2  | GLU | X | 427 | 49.929 | 20.277 | 40.100 | 0.00 | 0.00 |
| ATOM | 6422 | HB3  | GLU | X | 427 | 51.403 | 20.403 | 40.810 | 0.00 | 0.00 |
| ATOM | 6423 | CG   | GLU | X | 427 | 49.767 | 20.946 | 42.177 | 0.00 | 0.00 |
| ATOM | 6424 | HG2  | GLU | X | 427 | 50.032 | 21.845 | 42.734 | 0.00 | 0.00 |
| ATOM | 6425 | HG3  | GLU | X | 427 | 48.688 | 21.062 | 42.079 | 0.00 | 0.00 |
| ATOM | 6426 | CD   | GLU | X | 427 | 50.184 | 19.797 | 42.995 | 0.00 | 0.00 |
| ATOM | 6427 | OE1  | GLU | X | 427 | 50.627 | 19.979 | 44.131 | 0.00 | 0.00 |
| ATOM | 6428 | OE2  | GLU | X | 427 | 50.213 | 18.667 | 42.469 | 0.00 | 0.00 |
| ATOM | 6429 | C    | GLU | X | 427 | 51.374 | 22.390 | 38.779 | 0.00 | 0.00 |
| ATOM | 6430 | O    | GLU | X | 427 | 52.487 | 21.902 | 38.736 | 0.00 | 0.00 |
| ATOM | 6431 | N    | HIE | X | 428 | 50.824 | 22.874 | 37.647 | 0.00 | 0.00 |
| ATOM | 6432 | H    | HIE | X | 428 | 49.956 | 23.348 | 37.850 | 0.00 | 0.00 |
| ATOM | 6433 | CA   | HIE | X | 428 | 51.588 | 23.013 | 36.412 | 0.00 | 0.00 |
| ATOM | 6434 | HA   | HIE | X | 428 | 52.324 | 22.209 | 36.418 | 0.00 | 0.00 |
| ATOM | 6435 | CB   | HIE | X | 428 | 50.724 | 22.739 | 35.146 | 0.00 | 0.00 |
| ATOM | 6436 | HB2  | HIE | X | 428 | 50.279 | 21.749 | 35.243 | 0.00 | 0.00 |
| ATOM | 6437 | HB3  | HIE | X | 428 | 49.837 | 23.369 | 35.076 | 0.00 | 0.00 |
| ATOM | 6438 | CG   | HIE | X | 428 | 51.534 | 22.827 | 33.960 | 0.00 | 0.00 |
| ATOM | 6439 | ND1  | HIE | X | 428 | 52.509 | 21.950 | 33.618 | 0.00 | 0.00 |
| ATOM | 6440 | CE1  | HIE | X | 428 | 53.163 | 22.391 | 32.573 | 0.00 | 0.00 |
| ATOM | 6441 | HE1  | HIE | X | 428 | 53.953 | 21.880 | 32.044 | 0.00 | 0.00 |
| ATOM | 6442 | NE2  | HIE | X | 428 | 52.570 | 23.565 | 32.158 | 0.00 | 0.00 |
| ATOM | 6443 | HE2  | HIE | X | 428 | 52.913 | 24.022 | 31.326 | 0.00 | 0.00 |
| ATOM | 6444 | CD2  | HIE | X | 428 | 51.583 | 23.855 | 33.038 | 0.00 | 0.00 |
| ATOM | 6445 | HD2  | HIE | X | 428 | 51.007 | 24.768 | 32.996 | 0.00 | 0.00 |
| ATOM | 6446 | C    | HIE | X | 428 | 52.419 | 24.295 | 36.297 | 0.00 | 0.00 |
| ATOM | 6447 | O    | HIE | X | 428 | 52.018 | 25.426 | 36.738 | 0.00 | 0.00 |
| ATOM | 6448 | N    | ARG | X | 429 | 53.640 | 24.127 | 35.670 | 0.00 | 0.00 |
| ATOM | 6449 | H    | ARG | X | 429 | 53.891 | 23.210 | 35.330 | 0.00 | 0.00 |
| ATOM | 6450 | CA   | ARG | X | 429 | 54.695 | 25.075 | 35.583 | 0.00 | 0.00 |

|      |      |      |     |   |     |        |        |        |      |      |
|------|------|------|-----|---|-----|--------|--------|--------|------|------|
| ATOM | 6451 | HA   | ARG | X | 429 | 54.346 | 26.016 | 36.009 | 0.00 | 0.00 |
| ATOM | 6452 | CB   | ARG | X | 429 | 55.990 | 24.530 | 36.321 | 0.00 | 0.00 |
| ATOM | 6453 | HB2  | ARG | X | 429 | 55.641 | 24.186 | 37.294 | 0.00 | 0.00 |
| ATOM | 6454 | HB3  | ARG | X | 429 | 56.433 | 23.739 | 35.717 | 0.00 | 0.00 |
| ATOM | 6455 | CG   | ARG | X | 429 | 56.927 | 25.756 | 36.573 | 0.00 | 0.00 |
| ATOM | 6456 | HG2  | ARG | X | 429 | 57.277 | 26.191 | 35.637 | 0.00 | 0.00 |
| ATOM | 6457 | HG3  | ARG | X | 429 | 56.437 | 26.508 | 37.193 | 0.00 | 0.00 |
| ATOM | 6458 | CD   | ARG | X | 429 | 58.234 | 25.354 | 37.347 | 0.00 | 0.00 |
| ATOM | 6459 | HD2  | ARG | X | 429 | 57.858 | 24.875 | 38.251 | 0.00 | 0.00 |
| ATOM | 6460 | HD3  | ARG | X | 429 | 58.872 | 24.658 | 36.802 | 0.00 | 0.00 |
| ATOM | 6461 | NE   | ARG | X | 429 | 59.017 | 26.596 | 37.718 | 0.00 | 0.00 |
| ATOM | 6462 | HE   | ARG | X | 429 | 58.521 | 27.222 | 38.336 | 0.00 | 0.00 |
| ATOM | 6463 | CZ   | ARG | X | 429 | 60.206 | 26.912 | 37.370 | 0.00 | 0.00 |
| ATOM | 6464 | NH1  | ARG | X | 429 | 60.951 | 26.083 | 36.661 | 0.00 | 0.00 |
| ATOM | 6465 | HH11 | ARG | X | 429 | 60.658 | 25.132 | 36.488 | 0.00 | 0.00 |
| ATOM | 6466 | HH12 | ARG | X | 429 | 61.936 | 26.225 | 36.486 | 0.00 | 0.00 |
| ATOM | 6467 | NH2  | ARG | X | 429 | 60.690 | 28.055 | 37.765 | 0.00 | 0.00 |
| ATOM | 6468 | HH21 | ARG | X | 429 | 60.046 | 28.703 | 38.195 | 0.00 | 0.00 |
| ATOM | 6469 | HH22 | ARG | X | 429 | 61.408 | 28.449 | 37.173 | 0.00 | 0.00 |
| ATOM | 6470 | C    | ARG | X | 429 | 55.045 | 25.363 | 34.074 | 0.00 | 0.00 |
| ATOM | 6471 | O    | ARG | X | 429 | 55.543 | 24.481 | 33.389 | 0.00 | 0.00 |
| ATOM | 6472 | N    | ALA | X | 430 | 54.518 | 26.509 | 33.643 | 0.00 | 0.00 |
| ATOM | 6473 | H    | ALA | X | 430 | 54.182 | 27.208 | 34.290 | 0.00 | 0.00 |
| ATOM | 6474 | CA   | ALA | X | 430 | 54.555 | 26.843 | 32.209 | 0.00 | 0.00 |
| ATOM | 6475 | HA   | ALA | X | 430 | 53.981 | 26.065 | 31.706 | 0.00 | 0.00 |
| ATOM | 6476 | CB   | ALA | X | 430 | 54.104 | 28.311 | 31.909 | 0.00 | 0.00 |
| ATOM | 6477 | HB1  | ALA | X | 430 | 54.249 | 28.548 | 30.855 | 0.00 | 0.00 |
| ATOM | 6478 | HB2  | ALA | X | 430 | 54.735 | 29.000 | 32.471 | 0.00 | 0.00 |
| ATOM | 6479 | HB3  | ALA | X | 430 | 53.094 | 28.469 | 32.288 | 0.00 | 0.00 |
| ATOM | 6480 | C    | ALA | X | 430 | 55.995 | 26.672 | 31.664 | 0.00 | 0.00 |
| ATOM | 6481 | O    | ALA | X | 430 | 56.978 | 26.969 | 32.306 | 0.00 | 0.00 |
| ATOM | 6482 | N    | SER | X | 431 | 56.034 | 26.202 | 30.388 | 0.00 | 0.00 |
| ATOM | 6483 | H    | SER | X | 431 | 55.186 | 26.097 | 29.848 | 0.00 | 0.00 |
| ATOM | 6484 | CA   | SER | X | 431 | 57.291 | 25.908 | 29.686 | 0.00 | 0.00 |
| ATOM | 6485 | HA   | SER | X | 431 | 57.907 | 25.347 | 30.389 | 0.00 | 0.00 |
| ATOM | 6486 | CB   | SER | X | 431 | 57.026 | 25.023 | 28.466 | 0.00 | 0.00 |
| ATOM | 6487 | HB2  | SER | X | 431 | 57.977 | 24.886 | 27.951 | 0.00 | 0.00 |
| ATOM | 6488 | HB3  | SER | X | 431 | 56.564 | 24.077 | 28.747 | 0.00 | 0.00 |
| ATOM | 6489 | OG   | SER | X | 431 | 56.182 | 25.666 | 27.552 | 0.00 | 0.00 |
| ATOM | 6490 | HG   | SER | X | 431 | 55.293 | 25.340 | 27.710 | 0.00 | 0.00 |
| ATOM | 6491 | C    | SER | X | 431 | 58.236 | 27.089 | 29.341 | 0.00 | 0.00 |
| ATOM | 6492 | O    | SER | X | 431 | 59.501 | 27.043 | 29.276 | 0.00 | 0.00 |
| ATOM | 6493 | N    | THR | X | 432 | 57.622 | 28.254 | 29.098 | 0.00 | 0.00 |
| ATOM | 6494 | H    | THR | X | 432 | 56.625 | 28.123 | 29.198 | 0.00 | 0.00 |
| ATOM | 6495 | CA   | THR | X | 432 | 58.143 | 29.639 | 28.819 | 0.00 | 0.00 |
| ATOM | 6496 | HA   | THR | X | 432 | 59.024 | 29.573 | 28.181 | 0.00 | 0.00 |
| ATOM | 6497 | CB   | THR | X | 432 | 57.083 | 30.593 | 28.280 | 0.00 | 0.00 |
| ATOM | 6498 | HB   | THR | X | 432 | 57.578 | 31.562 | 28.215 | 0.00 | 0.00 |
| ATOM | 6499 | CG2  | THR | X | 432 | 56.484 | 30.016 | 26.985 | 0.00 | 0.00 |
| ATOM | 6500 | HG21 | THR | X | 432 | 57.308 | 29.778 | 26.313 | 0.00 | 0.00 |
| ATOM | 6501 | HG22 | THR | X | 432 | 55.918 | 30.789 | 26.465 | 0.00 | 0.00 |
| ATOM | 6502 | HG23 | THR | X | 432 | 55.809 | 29.174 | 27.140 | 0.00 | 0.00 |
| ATOM | 6503 | OG1  | THR | X | 432 | 56.019 | 30.660 | 29.165 | 0.00 | 0.00 |
| ATOM | 6504 | HG1  | THR | X | 432 | 55.320 | 31.211 | 28.806 | 0.00 | 0.00 |
| ATOM | 6505 | C    | THR | X | 432 | 58.664 | 30.376 | 30.025 | 0.00 | 0.00 |
| ATOM | 6506 | O    | THR | X | 432 | 59.509 | 31.262 | 29.873 | 0.00 | 0.00 |
| ATOM | 6507 | N    | LEU | X | 433 | 58.197 | 30.047 | 31.239 | 0.00 | 0.00 |
| ATOM | 6508 | H    | LEU | X | 433 | 57.582 | 29.248 | 31.294 | 0.00 | 0.00 |
| ATOM | 6509 | CA   | LEU | X | 433 | 58.433 | 30.679 | 32.514 | 0.00 | 0.00 |
| ATOM | 6510 | HA   | LEU | X | 433 | 57.902 | 31.631 | 32.503 | 0.00 | 0.00 |
| ATOM | 6511 | CB   | LEU | X | 433 | 57.794 | 29.889 | 33.677 | 0.00 | 0.00 |
| ATOM | 6512 | HB2  | LEU | X | 433 | 56.734 | 29.661 | 33.566 | 0.00 | 0.00 |
| ATOM | 6513 | HB3  | LEU | X | 433 | 58.431 | 29.004 | 33.676 | 0.00 | 0.00 |
| ATOM | 6514 | CG   | LEU | X | 433 | 57.915 | 30.536 | 35.075 | 0.00 | 0.00 |
| ATOM | 6515 | HG   | LEU | X | 433 | 58.871 | 31.037 | 35.220 | 0.00 | 0.00 |
| ATOM | 6516 | CD1  | LEU | X | 433 | 56.764 | 31.647 | 35.133 | 0.00 | 0.00 |
| ATOM | 6517 | HD11 | LEU | X | 433 | 56.843 | 32.403 | 34.352 | 0.00 | 0.00 |

|      |      |      |     |   |     |        |        |        |      |      |
|------|------|------|-----|---|-----|--------|--------|--------|------|------|
| ATOM | 6518 | HD12 | LEU | X | 433 | 56.805 | 32.056 | 36.142 | 0.00 | 0.00 |
| ATOM | 6519 | HD13 | LEU | X | 433 | 55.776 | 31.205 | 35.004 | 0.00 | 0.00 |
| ATOM | 6520 | CD2  | LEU | X | 433 | 57.788 | 29.531 | 36.232 | 0.00 | 0.00 |
| ATOM | 6521 | HD21 | LEU | X | 433 | 58.261 | 30.045 | 37.069 | 0.00 | 0.00 |
| ATOM | 6522 | HD22 | LEU | X | 433 | 56.756 | 29.303 | 36.498 | 0.00 | 0.00 |
| ATOM | 6523 | HD23 | LEU | X | 433 | 58.324 | 28.596 | 36.071 | 0.00 | 0.00 |
| ATOM | 6524 | C    | LEU | X | 433 | 59.947 | 30.926 | 32.718 | 0.00 | 0.00 |
| ATOM | 6525 | O    | LEU | X | 433 | 60.779 | 30.006 | 32.754 | 0.00 | 0.00 |
| ATOM | 6526 | N    | SER | X | 434 | 60.308 | 32.171 | 33.081 | 0.00 | 0.00 |
| ATOM | 6527 | H    | SER | X | 434 | 59.617 | 32.886 | 32.901 | 0.00 | 0.00 |
| ATOM | 6528 | CA   | SER | X | 434 | 61.714 | 32.657 | 33.193 | 0.00 | 0.00 |
| ATOM | 6529 | HA   | SER | X | 434 | 62.310 | 32.010 | 32.550 | 0.00 | 0.00 |
| ATOM | 6530 | CB   | SER | X | 434 | 61.782 | 34.213 | 32.772 | 0.00 | 0.00 |
| ATOM | 6531 | HB2  | SER | X | 434 | 61.128 | 34.760 | 33.450 | 0.00 | 0.00 |
| ATOM | 6532 | HB3  | SER | X | 434 | 62.785 | 34.634 | 32.840 | 0.00 | 0.00 |
| ATOM | 6533 | OG   | SER | X | 434 | 61.355 | 34.432 | 31.456 | 0.00 | 0.00 |
| ATOM | 6534 | HG   | SER | X | 434 | 61.615 | 33.640 | 30.979 | 0.00 | 0.00 |
| ATOM | 6535 | C    | SER | X | 434 | 62.329 | 32.579 | 34.656 | 0.00 | 0.00 |
| ATOM | 6536 | O    | SER | X | 434 | 63.523 | 32.648 | 34.724 | 0.00 | 0.00 |
| ATOM | 6537 | N    | TRP | X | 435 | 61.508 | 32.487 | 35.726 | 0.00 | 0.00 |
| ATOM | 6538 | H    | TRP | X | 435 | 60.526 | 32.491 | 35.488 | 0.00 | 0.00 |
| ATOM | 6539 | CA   | TRP | X | 435 | 61.770 | 32.436 | 37.135 | 0.00 | 0.00 |
| ATOM | 6540 | HA   | TRP | X | 435 | 62.436 | 33.244 | 37.437 | 0.00 | 0.00 |
| ATOM | 6541 | CB   | TRP | X | 435 | 60.476 | 32.722 | 37.874 | 0.00 | 0.00 |
| ATOM | 6542 | HB2  | TRP | X | 435 | 59.678 | 32.080 | 37.501 | 0.00 | 0.00 |
| ATOM | 6543 | HB3  | TRP | X | 435 | 60.635 | 32.463 | 38.920 | 0.00 | 0.00 |
| ATOM | 6544 | CG   | TRP | X | 435 | 59.978 | 34.126 | 37.775 | 0.00 | 0.00 |
| ATOM | 6545 | CD1  | TRP | X | 435 | 59.009 | 34.654 | 36.976 | 0.00 | 0.00 |
| ATOM | 6546 | HD1  | TRP | X | 435 | 58.374 | 34.046 | 36.349 | 0.00 | 0.00 |
| ATOM | 6547 | NE1  | TRP | X | 435 | 58.802 | 36.006 | 37.265 | 0.00 | 0.00 |
| ATOM | 6548 | HE1  | TRP | X | 435 | 58.209 | 36.599 | 36.702 | 0.00 | 0.00 |
| ATOM | 6549 | CE2  | TRP | X | 435 | 59.626 | 36.461 | 38.250 | 0.00 | 0.00 |
| ATOM | 6550 | CZ2  | TRP | X | 435 | 59.954 | 37.752 | 38.737 | 0.00 | 0.00 |
| ATOM | 6551 | HZ2  | TRP | X | 435 | 59.350 | 38.586 | 38.413 | 0.00 | 0.00 |
| ATOM | 6552 | CH2  | TRP | X | 435 | 61.141 | 37.884 | 39.537 | 0.00 | 0.00 |
| ATOM | 6553 | HH2  | TRP | X | 435 | 61.531 | 38.874 | 39.719 | 0.00 | 0.00 |
| ATOM | 6554 | CZ3  | TRP | X | 435 | 61.908 | 36.746 | 39.895 | 0.00 | 0.00 |
| ATOM | 6555 | HZ3  | TRP | X | 435 | 62.752 | 36.910 | 40.549 | 0.00 | 0.00 |
| ATOM | 6556 | CE3  | TRP | X | 435 | 61.586 | 35.513 | 39.327 | 0.00 | 0.00 |
| ATOM | 6557 | HE3  | TRP | X | 435 | 62.264 | 34.690 | 39.497 | 0.00 | 0.00 |
| ATOM | 6558 | CD2  | TRP | X | 435 | 60.506 | 35.330 | 38.446 | 0.00 | 0.00 |
| ATOM | 6559 | C    | TRP | X | 435 | 62.597 | 31.159 | 37.534 | 0.00 | 0.00 |
| ATOM | 6560 | O    | TRP | X | 435 | 62.630 | 30.194 | 36.814 | 0.00 | 0.00 |
| ATOM | 6561 | N    | PRO | X | 436 | 63.489 | 31.283 | 38.558 | 0.00 | 0.00 |
| ATOM | 6562 | CD   | PRO | X | 436 | 63.696 | 32.308 | 39.555 | 0.00 | 0.00 |
| ATOM | 6563 | HD2  | PRO | X | 436 | 62.762 | 32.801 | 39.820 | 0.00 | 0.00 |
| ATOM | 6564 | HD3  | PRO | X | 436 | 64.459 | 33.010 | 39.220 | 0.00 | 0.00 |
| ATOM | 6565 | CG   | PRO | X | 436 | 64.341 | 31.696 | 40.853 | 0.00 | 0.00 |
| ATOM | 6566 | HG2  | PRO | X | 436 | 63.579 | 31.087 | 41.340 | 0.00 | 0.00 |
| ATOM | 6567 | HG3  | PRO | X | 436 | 64.870 | 32.393 | 41.503 | 0.00 | 0.00 |
| ATOM | 6568 | CB   | PRO | X | 436 | 65.215 | 30.683 | 40.140 | 0.00 | 0.00 |
| ATOM | 6569 | HB2  | PRO | X | 436 | 65.435 | 29.878 | 40.842 | 0.00 | 0.00 |
| ATOM | 6570 | HB3  | PRO | X | 436 | 66.137 | 31.082 | 39.717 | 0.00 | 0.00 |
| ATOM | 6571 | CA   | PRO | X | 436 | 64.308 | 30.146 | 38.973 | 0.00 | 0.00 |
| ATOM | 6572 | HA   | PRO | X | 436 | 65.025 | 29.857 | 38.204 | 0.00 | 0.00 |
| ATOM | 6573 | C    | PRO | X | 436 | 63.431 | 28.983 | 39.366 | 0.00 | 0.00 |
| ATOM | 6574 | O    | PRO | X | 436 | 62.300 | 29.159 | 39.874 | 0.00 | 0.00 |
| ATOM | 6575 | N    | LEU | X | 437 | 64.058 | 27.820 | 39.305 | 0.00 | 0.00 |
| ATOM | 6576 | H    | LEU | X | 437 | 64.931 | 27.741 | 38.802 | 0.00 | 0.00 |
| ATOM | 6577 | CA   | LEU | X | 437 | 63.378 | 26.530 | 39.541 | 0.00 | 0.00 |
| ATOM | 6578 | HA   | LEU | X | 437 | 62.581 | 26.335 | 38.822 | 0.00 | 0.00 |
| ATOM | 6579 | CB   | LEU | X | 437 | 64.326 | 25.364 | 39.282 | 0.00 | 0.00 |
| ATOM | 6580 | HB2  | LEU | X | 437 | 64.706 | 25.463 | 38.265 | 0.00 | 0.00 |
| ATOM | 6581 | HB3  | LEU | X | 437 | 65.227 | 25.572 | 39.860 | 0.00 | 0.00 |
| ATOM | 6582 | CG   | LEU | X | 437 | 63.804 | 23.901 | 39.375 | 0.00 | 0.00 |
| ATOM | 6583 | HG   | LEU | X | 437 | 63.235 | 23.744 | 40.292 | 0.00 | 0.00 |
| ATOM | 6584 | CD1  | LEU | X | 437 | 62.844 | 23.489 | 38.234 | 0.00 | 0.00 |

|      |      |      |     |   |     |        |        |        |      |      |
|------|------|------|-----|---|-----|--------|--------|--------|------|------|
| ATOM | 6585 | HD11 | LEU | X | 437 | 63.348 | 23.463 | 37.269 | 0.00 | 0.00 |
| ATOM | 6586 | HD12 | LEU | X | 437 | 62.063 | 24.241 | 38.114 | 0.00 | 0.00 |
| ATOM | 6587 | HD13 | LEU | X | 437 | 62.482 | 22.467 | 38.340 | 0.00 | 0.00 |
| ATOM | 6588 | CD2  | LEU | X | 437 | 64.967 | 22.898 | 39.562 | 0.00 | 0.00 |
| ATOM | 6589 | HD21 | LEU | X | 437 | 64.614 | 21.923 | 39.900 | 0.00 | 0.00 |
| ATOM | 6590 | HD22 | LEU | X | 437 | 65.520 | 22.833 | 38.625 | 0.00 | 0.00 |
| ATOM | 6591 | HD23 | LEU | X | 437 | 65.601 | 23.328 | 40.337 | 0.00 | 0.00 |
| ATOM | 6592 | C    | LEU | X | 437 | 62.730 | 26.497 | 40.925 | 0.00 | 0.00 |
| ATOM | 6593 | O    | LEU | X | 437 | 61.598 | 26.073 | 41.080 | 0.00 | 0.00 |
| ATOM | 6594 | N    | TRP | X | 438 | 63.473 | 26.941 | 41.972 | 0.00 | 0.00 |
| ATOM | 6595 | H    | TRP | X | 438 | 64.381 | 27.339 | 41.780 | 0.00 | 0.00 |
| ATOM | 6596 | CA   | TRP | X | 438 | 62.935 | 26.949 | 43.329 | 0.00 | 0.00 |
| ATOM | 6597 | HA   | TRP | X | 438 | 62.645 | 25.942 | 43.631 | 0.00 | 0.00 |
| ATOM | 6598 | CB   | TRP | X | 438 | 63.945 | 27.489 | 44.320 | 0.00 | 0.00 |
| ATOM | 6599 | HB2  | TRP | X | 438 | 63.527 | 27.382 | 45.322 | 0.00 | 0.00 |
| ATOM | 6600 | HB3  | TRP | X | 438 | 64.825 | 26.858 | 44.197 | 0.00 | 0.00 |
| ATOM | 6601 | CG   | TRP | X | 438 | 64.290 | 28.962 | 44.185 | 0.00 | 0.00 |
| ATOM | 6602 | CD1  | TRP | X | 438 | 65.473 | 29.422 | 43.727 | 0.00 | 0.00 |
| ATOM | 6603 | HD1  | TRP | X | 438 | 66.326 | 28.855 | 43.384 | 0.00 | 0.00 |
| ATOM | 6604 | NE1  | TRP | X | 438 | 65.631 | 30.783 | 43.791 | 0.00 | 0.00 |
| ATOM | 6605 | HE1  | TRP | X | 438 | 66.525 | 31.248 | 43.731 | 0.00 | 0.00 |
| ATOM | 6606 | CE2  | TRP | X | 438 | 64.438 | 31.352 | 44.289 | 0.00 | 0.00 |
| ATOM | 6607 | CZ2  | TRP | X | 438 | 63.924 | 32.615 | 44.531 | 0.00 | 0.00 |
| ATOM | 6608 | HZ2  | TRP | X | 438 | 64.613 | 33.409 | 44.282 | 0.00 | 0.00 |
| ATOM | 6609 | CH2  | TRP | X | 438 | 62.651 | 32.876 | 45.031 | 0.00 | 0.00 |
| ATOM | 6610 | HH2  | TRP | X | 438 | 62.250 | 33.874 | 45.124 | 0.00 | 0.00 |
| ATOM | 6611 | CZ3  | TRP | X | 438 | 61.870 | 31.719 | 45.372 | 0.00 | 0.00 |
| ATOM | 6612 | HZ3  | TRP | X | 438 | 60.965 | 31.858 | 45.944 | 0.00 | 0.00 |
| ATOM | 6613 | CE3  | TRP | X | 438 | 62.387 | 30.365 | 45.265 | 0.00 | 0.00 |
| ATOM | 6614 | HE3  | TRP | X | 438 | 61.856 | 29.515 | 45.668 | 0.00 | 0.00 |
| ATOM | 6615 | CD2  | TRP | X | 438 | 63.618 | 30.170 | 44.586 | 0.00 | 0.00 |
| ATOM | 6616 | C    | TRP | X | 438 | 61.549 | 27.657 | 43.571 | 0.00 | 0.00 |
| ATOM | 6617 | O    | TRP | X | 438 | 60.746 | 27.204 | 44.405 | 0.00 | 0.00 |
| ATOM | 6618 | N    | MET | X | 439 | 61.231 | 28.715 | 42.788 | 0.00 | 0.00 |
| ATOM | 6619 | H    | MET | X | 439 | 61.918 | 28.937 | 42.082 | 0.00 | 0.00 |
| ATOM | 6620 | CA   | MET | X | 439 | 59.977 | 29.477 | 42.905 | 0.00 | 0.00 |
| ATOM | 6621 | HA   | MET | X | 439 | 59.972 | 29.682 | 43.976 | 0.00 | 0.00 |
| ATOM | 6622 | CB   | MET | X | 439 | 60.138 | 30.698 | 42.021 | 0.00 | 0.00 |
| ATOM | 6623 | HB2  | MET | X | 439 | 61.172 | 31.013 | 42.167 | 0.00 | 0.00 |
| ATOM | 6624 | HB3  | MET | X | 439 | 60.131 | 30.418 | 40.968 | 0.00 | 0.00 |
| ATOM | 6625 | CG   | MET | X | 439 | 59.092 | 31.830 | 42.205 | 0.00 | 0.00 |
| ATOM | 6626 | HG2  | MET | X | 439 | 58.122 | 31.390 | 41.971 | 0.00 | 0.00 |
| ATOM | 6627 | HG3  | MET | X | 439 | 59.154 | 32.081 | 43.264 | 0.00 | 0.00 |
| ATOM | 6628 | SD   | MET | X | 439 | 59.355 | 33.387 | 41.284 | 0.00 | 0.00 |
| ATOM | 6629 | CE   | MET | X | 439 | 60.816 | 34.080 | 42.049 | 0.00 | 0.00 |
| ATOM | 6630 | HE1  | MET | X | 439 | 61.766 | 33.869 | 41.558 | 0.00 | 0.00 |
| ATOM | 6631 | HE2  | MET | X | 439 | 60.641 | 35.155 | 42.004 | 0.00 | 0.00 |
| ATOM | 6632 | HE3  | MET | X | 439 | 60.927 | 33.760 | 43.085 | 0.00 | 0.00 |
| ATOM | 6633 | C    | MET | X | 439 | 58.696 | 28.665 | 42.534 | 0.00 | 0.00 |
| ATOM | 6634 | O    | MET | X | 439 | 57.525 | 29.038 | 42.826 | 0.00 | 0.00 |
| ATOM | 6635 | N    | GLY | X | 440 | 58.942 | 27.553 | 41.913 | 0.00 | 0.00 |
| ATOM | 6636 | H    | GLY | X | 440 | 59.906 | 27.434 | 41.636 | 0.00 | 0.00 |
| ATOM | 6637 | CA   | GLY | X | 440 | 57.941 | 26.562 | 41.436 | 0.00 | 0.00 |
| ATOM | 6638 | HA2  | GLY | X | 440 | 58.535 | 25.831 | 40.888 | 0.00 | 0.00 |
| ATOM | 6639 | HA3  | GLY | X | 440 | 57.482 | 26.156 | 42.337 | 0.00 | 0.00 |
| ATOM | 6640 | C    | GLY | X | 440 | 56.846 | 27.196 | 40.495 | 0.00 | 0.00 |
| ATOM | 6641 | O    | GLY | X | 440 | 57.111 | 27.512 | 39.345 | 0.00 | 0.00 |
| ATOM | 6642 | N    | VAL | X | 441 | 55.663 | 27.321 | 41.053 | 0.00 | 0.00 |
| ATOM | 6643 | H    | VAL | X | 441 | 55.568 | 26.948 | 41.987 | 0.00 | 0.00 |
| ATOM | 6644 | CA   | VAL | X | 441 | 54.441 | 27.950 | 40.541 | 0.00 | 0.00 |
| ATOM | 6645 | HA   | VAL | X | 441 | 54.530 | 28.043 | 39.458 | 0.00 | 0.00 |
| ATOM | 6646 | CB   | VAL | X | 441 | 53.246 | 26.948 | 40.713 | 0.00 | 0.00 |
| ATOM | 6647 | HB   | VAL | X | 441 | 52.858 | 26.951 | 41.732 | 0.00 | 0.00 |
| ATOM | 6648 | CG1  | VAL | X | 441 | 52.044 | 27.395 | 39.759 | 0.00 | 0.00 |
| ATOM | 6649 | HG11 | VAL | X | 441 | 51.194 | 26.777 | 40.048 | 0.00 | 0.00 |
| ATOM | 6650 | HG12 | VAL | X | 441 | 51.882 | 28.416 | 40.103 | 0.00 | 0.00 |
| ATOM | 6651 | HG13 | VAL | X | 441 | 52.353 | 27.332 | 38.715 | 0.00 | 0.00 |

|      |      |      |     |   |     |        |        |        |      |      |
|------|------|------|-----|---|-----|--------|--------|--------|------|------|
| ATOM | 6652 | CG2  | VAL | X | 441 | 53.572 | 25.433 | 40.487 | 0.00 | 0.00 |
| ATOM | 6653 | HG21 | VAL | X | 441 | 52.628 | 24.916 | 40.657 | 0.00 | 0.00 |
| ATOM | 6654 | HG22 | VAL | X | 441 | 54.303 | 25.062 | 41.206 | 0.00 | 0.00 |
| ATOM | 6655 | HG23 | VAL | X | 441 | 53.994 | 25.281 | 39.494 | 0.00 | 0.00 |
| ATOM | 6656 | C    | VAL | X | 441 | 54.184 | 29.242 | 41.319 | 0.00 | 0.00 |
| ATOM | 6657 | O    | VAL | X | 441 | 53.751 | 29.128 | 42.442 | 0.00 | 0.00 |
| ATOM | 6658 | N    | PRO | X | 442 | 54.312 | 30.367 | 40.595 | 0.00 | 0.00 |
| ATOM | 6659 | CD   | PRO | X | 442 | 54.927 | 30.420 | 39.289 | 0.00 | 0.00 |
| ATOM | 6660 | HD2  | PRO | X | 442 | 54.304 | 30.019 | 38.490 | 0.00 | 0.00 |
| ATOM | 6661 | HD3  | PRO | X | 442 | 55.901 | 29.932 | 39.309 | 0.00 | 0.00 |
| ATOM | 6662 | CG   | PRO | X | 442 | 55.224 | 31.861 | 39.048 | 0.00 | 0.00 |
| ATOM | 6663 | HG2  | PRO | X | 442 | 54.394 | 32.361 | 38.548 | 0.00 | 0.00 |
| ATOM | 6664 | HG3  | PRO | X | 442 | 56.217 | 31.972 | 38.613 | 0.00 | 0.00 |
| ATOM | 6665 | CB   | PRO | X | 442 | 55.275 | 32.463 | 40.470 | 0.00 | 0.00 |
| ATOM | 6666 | HB2  | PRO | X | 442 | 55.119 | 33.539 | 40.559 | 0.00 | 0.00 |
| ATOM | 6667 | HB3  | PRO | X | 442 | 56.270 | 32.160 | 40.795 | 0.00 | 0.00 |
| ATOM | 6668 | CA   | PRO | X | 442 | 54.263 | 31.650 | 41.261 | 0.00 | 0.00 |
| ATOM | 6669 | HA   | PRO | X | 442 | 54.652 | 31.504 | 42.269 | 0.00 | 0.00 |
| ATOM | 6670 | C    | PRO | X | 442 | 52.925 | 32.298 | 41.211 | 0.00 | 0.00 |
| ATOM | 6671 | O    | PRO | X | 442 | 52.119 | 32.146 | 40.290 | 0.00 | 0.00 |
| ATOM | 6672 | N    | HIP | X | 443 | 52.674 | 33.168 | 42.218 | 0.00 | 0.00 |
| ATOM | 6673 | H    | HIP | X | 443 | 53.366 | 33.198 | 42.953 | 0.00 | 0.00 |
| ATOM | 6674 | CA   | HIP | X | 443 | 51.474 | 33.932 | 42.495 | 0.00 | 0.00 |
| ATOM | 6675 | HA   | HIP | X | 443 | 50.769 | 33.113 | 42.639 | 0.00 | 0.00 |
| ATOM | 6676 | CB   | HIP | X | 443 | 51.793 | 34.773 | 43.768 | 0.00 | 0.00 |
| ATOM | 6677 | HB2  | HIP | X | 443 | 52.064 | 34.221 | 44.668 | 0.00 | 0.00 |
| ATOM | 6678 | HB3  | HIP | X | 443 | 52.663 | 35.296 | 43.369 | 0.00 | 0.00 |
| ATOM | 6679 | CG   | HIP | X | 443 | 50.903 | 35.915 | 44.132 | 0.00 | 0.00 |
| ATOM | 6680 | ND1  | HIP | X | 443 | 49.804 | 35.924 | 45.005 | 0.00 | 0.00 |
| ATOM | 6681 | HD1  | HIP | X | 443 | 49.365 | 35.064 | 45.303 | 0.00 | 0.00 |
| ATOM | 6682 | CE1  | HIP | X | 443 | 49.238 | 37.140 | 44.952 | 0.00 | 0.00 |
| ATOM | 6683 | HE1  | HIP | X | 443 | 48.201 | 37.262 | 45.225 | 0.00 | 0.00 |
| ATOM | 6684 | NE2  | HIP | X | 443 | 50.030 | 37.986 | 44.276 | 0.00 | 0.00 |
| ATOM | 6685 | HE2  | HIP | X | 443 | 49.797 | 38.923 | 43.982 | 0.00 | 0.00 |
| ATOM | 6686 | CD2  | HIP | X | 443 | 51.095 | 37.227 | 43.749 | 0.00 | 0.00 |
| ATOM | 6687 | HD2  | HIP | X | 443 | 51.969 | 37.565 | 43.213 | 0.00 | 0.00 |
| ATOM | 6688 | C    | HIP | X | 443 | 51.023 | 34.806 | 41.270 | 0.00 | 0.00 |
| ATOM | 6689 | O    | HIP | X | 443 | 51.744 | 35.700 | 40.761 | 0.00 | 0.00 |
| ATOM | 6690 | N    | GLY | X | 444 | 49.795 | 34.358 | 40.894 | 0.00 | 0.00 |
| ATOM | 6691 | H    | GLY | X | 444 | 49.467 | 33.494 | 41.303 | 0.00 | 0.00 |
| ATOM | 6692 | CA   | GLY | X | 444 | 49.016 | 34.948 | 39.796 | 0.00 | 0.00 |
| ATOM | 6693 | HA2  | GLY | X | 444 | 48.008 | 34.534 | 39.794 | 0.00 | 0.00 |
| ATOM | 6694 | HA3  | GLY | X | 444 | 48.778 | 36.009 | 39.866 | 0.00 | 0.00 |
| ATOM | 6695 | C    | GLY | X | 444 | 49.465 | 34.693 | 38.335 | 0.00 | 0.00 |
| ATOM | 6696 | O    | GLY | X | 444 | 49.005 | 35.400 | 37.411 | 0.00 | 0.00 |
| ATOM | 6697 | N    | TYR | X | 445 | 50.381 | 33.794 | 38.107 | 0.00 | 0.00 |
| ATOM | 6698 | H    | TYR | X | 445 | 50.791 | 33.330 | 38.905 | 0.00 | 0.00 |
| ATOM | 6699 | CA   | TYR | X | 445 | 50.765 | 33.375 | 36.729 | 0.00 | 0.00 |
| ATOM | 6700 | HA   | TYR | X | 445 | 50.584 | 34.153 | 35.987 | 0.00 | 0.00 |
| ATOM | 6701 | CB   | TYR | X | 445 | 52.325 | 33.248 | 36.593 | 0.00 | 0.00 |
| ATOM | 6702 | HB2  | TYR | X | 445 | 52.588 | 32.501 | 37.343 | 0.00 | 0.00 |
| ATOM | 6703 | HB3  | TYR | X | 445 | 52.433 | 32.967 | 35.545 | 0.00 | 0.00 |
| ATOM | 6704 | CG   | TYR | X | 445 | 53.180 | 34.516 | 36.632 | 0.00 | 0.00 |
| ATOM | 6705 | CD1  | TYR | X | 445 | 53.850 | 34.982 | 35.460 | 0.00 | 0.00 |
| ATOM | 6706 | HD1  | TYR | X | 445 | 53.862 | 34.467 | 34.511 | 0.00 | 0.00 |
| ATOM | 6707 | CE1  | TYR | X | 445 | 54.612 | 36.150 | 35.602 | 0.00 | 0.00 |
| ATOM | 6708 | HE1  | TYR | X | 445 | 55.116 | 36.483 | 34.706 | 0.00 | 0.00 |
| ATOM | 6709 | CZ   | TYR | X | 445 | 54.945 | 36.702 | 36.853 | 0.00 | 0.00 |
| ATOM | 6710 | OH   | TYR | X | 445 | 55.863 | 37.704 | 36.997 | 0.00 | 0.00 |
| ATOM | 6711 | HH   | TYR | X | 445 | 56.348 | 37.839 | 36.179 | 0.00 | 0.00 |
| ATOM | 6712 | CE2  | TYR | X | 445 | 54.290 | 36.218 | 38.004 | 0.00 | 0.00 |
| ATOM | 6713 | HE2  | TYR | X | 445 | 54.514 | 36.585 | 38.995 | 0.00 | 0.00 |
| ATOM | 6714 | CD2  | TYR | X | 445 | 53.375 | 35.179 | 37.874 | 0.00 | 0.00 |
| ATOM | 6715 | HD2  | TYR | X | 445 | 52.804 | 34.824 | 38.719 | 0.00 | 0.00 |
| ATOM | 6716 | C    | TYR | X | 445 | 50.099 | 32.080 | 36.224 | 0.00 | 0.00 |
| ATOM | 6717 | O    | TYR | X | 445 | 50.540 | 31.530 | 35.187 | 0.00 | 0.00 |
| ATOM | 6718 | N    | GLU | X | 446 | 49.085 | 31.483 | 36.902 | 0.00 | 0.00 |

|      |      |      |     |   |     |        |        |        |      |      |
|------|------|------|-----|---|-----|--------|--------|--------|------|------|
| ATOM | 6719 | H    | GLU | X | 446 | 48.785 | 31.891 | 37.776 | 0.00 | 0.00 |
| ATOM | 6720 | CA   | GLU | X | 446 | 48.215 | 30.462 | 36.315 | 0.00 | 0.00 |
| ATOM | 6721 | HA   | GLU | X | 446 | 48.889 | 29.802 | 35.769 | 0.00 | 0.00 |
| ATOM | 6722 | CB   | GLU | X | 446 | 47.531 | 29.564 | 37.378 | 0.00 | 0.00 |
| ATOM | 6723 | HB2  | GLU | X | 446 | 47.272 | 28.684 | 36.790 | 0.00 | 0.00 |
| ATOM | 6724 | HB3  | GLU | X | 446 | 48.235 | 29.172 | 38.112 | 0.00 | 0.00 |
| ATOM | 6725 | CG   | GLU | X | 446 | 46.223 | 29.978 | 37.973 | 0.00 | 0.00 |
| ATOM | 6726 | HG2  | GLU | X | 446 | 45.476 | 30.168 | 37.202 | 0.00 | 0.00 |
| ATOM | 6727 | HG3  | GLU | X | 446 | 45.899 | 29.123 | 38.567 | 0.00 | 0.00 |
| ATOM | 6728 | CD   | GLU | X | 446 | 46.261 | 31.187 | 38.840 | 0.00 | 0.00 |
| ATOM | 6729 | OE1  | GLU | X | 446 | 47.277 | 31.896 | 38.835 | 0.00 | 0.00 |
| ATOM | 6730 | OE2  | GLU | X | 446 | 45.348 | 31.366 | 39.605 | 0.00 | 0.00 |
| ATOM | 6731 | C    | GLU | X | 446 | 47.097 | 30.970 | 35.416 | 0.00 | 0.00 |
| ATOM | 6732 | O    | GLU | X | 446 | 46.555 | 30.240 | 34.536 | 0.00 | 0.00 |
| ATOM | 6733 | N    | ILE | X | 447 | 46.853 | 32.294 | 35.468 | 0.00 | 0.00 |
| ATOM | 6734 | H    | ILE | X | 447 | 47.346 | 32.903 | 36.105 | 0.00 | 0.00 |
| ATOM | 6735 | CA   | ILE | X | 447 | 45.760 | 32.845 | 34.641 | 0.00 | 0.00 |
| ATOM | 6736 | HA   | ILE | X | 447 | 44.814 | 32.315 | 34.751 | 0.00 | 0.00 |
| ATOM | 6737 | CB   | ILE | X | 447 | 45.415 | 34.345 | 35.123 | 0.00 | 0.00 |
| ATOM | 6738 | HB   | ILE | X | 447 | 44.580 | 34.678 | 34.507 | 0.00 | 0.00 |
| ATOM | 6739 | CG2  | ILE | X | 447 | 45.013 | 34.393 | 36.640 | 0.00 | 0.00 |
| ATOM | 6740 | HG21 | ILE | X | 447 | 45.893 | 34.355 | 37.283 | 0.00 | 0.00 |
| ATOM | 6741 | HG22 | ILE | X | 447 | 44.226 | 33.690 | 36.912 | 0.00 | 0.00 |
| ATOM | 6742 | HG23 | ILE | X | 447 | 44.512 | 35.351 | 36.777 | 0.00 | 0.00 |
| ATOM | 6743 | CG1  | ILE | X | 447 | 46.585 | 35.267 | 34.854 | 0.00 | 0.00 |
| ATOM | 6744 | HG12 | ILE | X | 447 | 47.458 | 34.786 | 35.297 | 0.00 | 0.00 |
| ATOM | 6745 | HG13 | ILE | X | 447 | 46.787 | 35.285 | 33.783 | 0.00 | 0.00 |
| ATOM | 6746 | CD1  | ILE | X | 447 | 46.439 | 36.717 | 35.334 | 0.00 | 0.00 |
| ATOM | 6747 | HD11 | ILE | X | 447 | 45.492 | 37.252 | 35.266 | 0.00 | 0.00 |
| ATOM | 6748 | HD12 | ILE | X | 447 | 47.116 | 37.410 | 34.834 | 0.00 | 0.00 |
| ATOM | 6749 | HD13 | ILE | X | 447 | 46.789 | 36.770 | 36.365 | 0.00 | 0.00 |
| ATOM | 6750 | C    | ILE | X | 447 | 46.065 | 32.796 | 33.180 | 0.00 | 0.00 |
| ATOM | 6751 | O    | ILE | X | 447 | 45.075 | 32.899 | 32.437 | 0.00 | 0.00 |
| ATOM | 6752 | N    | GLU | X | 448 | 47.366 | 32.507 | 32.776 | 0.00 | 0.00 |
| ATOM | 6753 | H    | GLU | X | 448 | 48.108 | 32.570 | 33.459 | 0.00 | 0.00 |
| ATOM | 6754 | CA   | GLU | X | 448 | 47.772 | 32.158 | 31.455 | 0.00 | 0.00 |
| ATOM | 6755 | HA   | GLU | X | 448 | 47.553 | 32.959 | 30.749 | 0.00 | 0.00 |
| ATOM | 6756 | CB   | GLU | X | 448 | 49.228 | 31.636 | 31.446 | 0.00 | 0.00 |
| ATOM | 6757 | HB2  | GLU | X | 448 | 49.376 | 30.771 | 32.092 | 0.00 | 0.00 |
| ATOM | 6758 | HB3  | GLU | X | 448 | 49.449 | 31.387 | 30.408 | 0.00 | 0.00 |
| ATOM | 6759 | CG   | GLU | X | 448 | 50.287 | 32.723 | 31.977 | 0.00 | 0.00 |
| ATOM | 6760 | HG2  | GLU | X | 448 | 50.071 | 33.743 | 31.660 | 0.00 | 0.00 |
| ATOM | 6761 | HG3  | GLU | X | 448 | 50.065 | 32.847 | 33.038 | 0.00 | 0.00 |
| ATOM | 6762 | CD   | GLU | X | 448 | 51.754 | 32.269 | 31.858 | 0.00 | 0.00 |
| ATOM | 6763 | OE1  | GLU | X | 448 | 52.567 | 33.237 | 31.833 | 0.00 | 0.00 |
| ATOM | 6764 | OE2  | GLU | X | 448 | 52.117 | 31.112 | 31.809 | 0.00 | 0.00 |
| ATOM | 6765 | C    | GLU | X | 448 | 46.803 | 31.074 | 30.945 | 0.00 | 0.00 |
| ATOM | 6766 | O    | GLU | X | 448 | 46.281 | 31.123 | 29.827 | 0.00 | 0.00 |
| ATOM | 6767 | N    | PHE | X | 449 | 46.605 | 30.034 | 31.736 | 0.00 | 0.00 |
| ATOM | 6768 | H    | PHE | X | 449 | 46.903 | 30.128 | 32.696 | 0.00 | 0.00 |
| ATOM | 6769 | CA   | PHE | X | 449 | 45.950 | 28.801 | 31.317 | 0.00 | 0.00 |
| ATOM | 6770 | HA   | PHE | X | 449 | 46.287 | 28.538 | 30.314 | 0.00 | 0.00 |
| ATOM | 6771 | CB   | PHE | X | 449 | 46.418 | 27.646 | 32.109 | 0.00 | 0.00 |
| ATOM | 6772 | HB2  | PHE | X | 449 | 46.173 | 27.774 | 33.163 | 0.00 | 0.00 |
| ATOM | 6773 | HB3  | PHE | X | 449 | 45.989 | 26.708 | 31.757 | 0.00 | 0.00 |
| ATOM | 6774 | CG   | PHE | X | 449 | 47.894 | 27.371 | 31.861 | 0.00 | 0.00 |
| ATOM | 6775 | CD1  | PHE | X | 449 | 48.803 | 27.842 | 32.779 | 0.00 | 0.00 |
| ATOM | 6776 | HD1  | PHE | X | 449 | 48.383 | 28.333 | 33.644 | 0.00 | 0.00 |
| ATOM | 6777 | CE1  | PHE | X | 449 | 50.158 | 27.613 | 32.644 | 0.00 | 0.00 |
| ATOM | 6778 | HE1  | PHE | X | 449 | 50.810 | 28.008 | 33.409 | 0.00 | 0.00 |
| ATOM | 6779 | CZ   | PHE | X | 449 | 50.584 | 26.819 | 31.550 | 0.00 | 0.00 |
| ATOM | 6780 | HZ   | PHE | X | 449 | 51.634 | 26.657 | 31.357 | 0.00 | 0.00 |
| ATOM | 6781 | CE2  | PHE | X | 449 | 49.702 | 26.369 | 30.613 | 0.00 | 0.00 |
| ATOM | 6782 | HE2  | PHE | X | 449 | 49.992 | 25.892 | 29.688 | 0.00 | 0.00 |
| ATOM | 6783 | CD2  | PHE | X | 449 | 48.321 | 26.509 | 30.821 | 0.00 | 0.00 |
| ATOM | 6784 | HD2  | PHE | X | 449 | 47.646 | 26.047 | 30.116 | 0.00 | 0.00 |
| ATOM | 6785 | C    | PHE | X | 449 | 44.387 | 28.898 | 31.394 | 0.00 | 0.00 |

|      |      |      |     |   |     |        |        |        |      |      |
|------|------|------|-----|---|-----|--------|--------|--------|------|------|
| ATOM | 6786 | O    | PHE | X | 449 | 43.767 | 28.071 | 30.776 | 0.00 | 0.00 |
| ATOM | 6787 | N    | ILE | X | 450 | 43.872 | 29.953 | 32.082 | 0.00 | 0.00 |
| ATOM | 6788 | H    | ILE | X | 450 | 44.564 | 30.546 | 32.518 | 0.00 | 0.00 |
| ATOM | 6789 | CA   | ILE | X | 450 | 42.421 | 30.272 | 32.289 | 0.00 | 0.00 |
| ATOM | 6790 | HA   | ILE | X | 450 | 41.824 | 29.360 | 32.298 | 0.00 | 0.00 |
| ATOM | 6791 | CB   | ILE | X | 450 | 42.160 | 30.846 | 33.736 | 0.00 | 0.00 |
| ATOM | 6792 | HB   | ILE | X | 450 | 42.533 | 31.870 | 33.710 | 0.00 | 0.00 |
| ATOM | 6793 | CG2  | ILE | X | 450 | 40.653 | 30.923 | 34.105 | 0.00 | 0.00 |
| ATOM | 6794 | HG21 | ILE | X | 450 | 40.571 | 31.306 | 35.122 | 0.00 | 0.00 |
| ATOM | 6795 | HG22 | ILE | X | 450 | 40.151 | 29.959 | 34.016 | 0.00 | 0.00 |
| ATOM | 6796 | HG23 | ILE | X | 450 | 40.236 | 31.795 | 33.602 | 0.00 | 0.00 |
| ATOM | 6797 | CG1  | ILE | X | 450 | 42.918 | 30.017 | 34.833 | 0.00 | 0.00 |
| ATOM | 6798 | HG12 | ILE | X | 450 | 43.998 | 30.040 | 34.683 | 0.00 | 0.00 |
| ATOM | 6799 | HG13 | ILE | X | 450 | 42.759 | 30.583 | 35.751 | 0.00 | 0.00 |
| ATOM | 6800 | CD1  | ILE | X | 450 | 42.432 | 28.500 | 35.041 | 0.00 | 0.00 |
| ATOM | 6801 | HD11 | ILE | X | 450 | 42.920 | 27.980 | 34.216 | 0.00 | 0.00 |
| ATOM | 6802 | HD12 | ILE | X | 450 | 41.348 | 28.403 | 34.984 | 0.00 | 0.00 |
| ATOM | 6803 | HD13 | ILE | X | 450 | 42.880 | 28.051 | 35.928 | 0.00 | 0.00 |
| ATOM | 6804 | C    | ILE | X | 450 | 41.781 | 31.358 | 31.334 | 0.00 | 0.00 |
| ATOM | 6805 | O    | ILE | X | 450 | 40.622 | 31.207 | 30.939 | 0.00 | 0.00 |
| ATOM | 6806 | N    | PHE | X | 451 | 42.534 | 32.326 | 30.790 | 0.00 | 0.00 |
| ATOM | 6807 | H    | PHE | X | 451 | 43.402 | 32.526 | 31.266 | 0.00 | 0.00 |
| ATOM | 6808 | CA   | PHE | X | 451 | 42.279 | 33.175 | 29.594 | 0.00 | 0.00 |
| ATOM | 6809 | HA   | PHE | X | 451 | 41.225 | 33.435 | 29.493 | 0.00 | 0.00 |
| ATOM | 6810 | CB   | PHE | X | 451 | 43.089 | 34.482 | 29.835 | 0.00 | 0.00 |
| ATOM | 6811 | HB2  | PHE | X | 451 | 43.880 | 34.252 | 30.550 | 0.00 | 0.00 |
| ATOM | 6812 | HB3  | PHE | X | 451 | 43.577 | 34.901 | 28.955 | 0.00 | 0.00 |
| ATOM | 6813 | CG   | PHE | X | 451 | 42.374 | 35.636 | 30.397 | 0.00 | 0.00 |
| ATOM | 6814 | CD1  | PHE | X | 451 | 42.713 | 36.054 | 31.722 | 0.00 | 0.00 |
| ATOM | 6815 | HD1  | PHE | X | 451 | 43.501 | 35.565 | 32.275 | 0.00 | 0.00 |
| ATOM | 6816 | CE1  | PHE | X | 451 | 42.109 | 37.230 | 32.251 | 0.00 | 0.00 |
| ATOM | 6817 | HE1  | PHE | X | 451 | 42.258 | 37.468 | 33.294 | 0.00 | 0.00 |
| ATOM | 6818 | CZ   | PHE | X | 451 | 41.268 | 37.972 | 31.381 | 0.00 | 0.00 |
| ATOM | 6819 | HZ   | PHE | X | 451 | 40.814 | 38.916 | 31.642 | 0.00 | 0.00 |
| ATOM | 6820 | CE2  | PHE | X | 451 | 40.948 | 37.553 | 30.082 | 0.00 | 0.00 |
| ATOM | 6821 | HE2  | PHE | X | 451 | 40.401 | 38.236 | 29.450 | 0.00 | 0.00 |
| ATOM | 6822 | CD2  | PHE | X | 451 | 41.518 | 36.430 | 29.579 | 0.00 | 0.00 |
| ATOM | 6823 | HD2  | PHE | X | 451 | 41.399 | 36.125 | 28.550 | 0.00 | 0.00 |
| ATOM | 6824 | C    | PHE | X | 451 | 42.692 | 32.476 | 28.233 | 0.00 | 0.00 |
| ATOM | 6825 | O    | PHE | X | 451 | 42.453 | 32.966 | 27.125 | 0.00 | 0.00 |
| ATOM | 6826 | N    | GLY | X | 452 | 43.424 | 31.384 | 28.276 | 0.00 | 0.00 |
| ATOM | 6827 | H    | GLY | X | 452 | 43.649 | 31.085 | 29.214 | 0.00 | 0.00 |
| ATOM | 6828 | CA   | GLY | X | 452 | 43.922 | 30.616 | 27.099 | 0.00 | 0.00 |
| ATOM | 6829 | HA2  | GLY | X | 452 | 44.153 | 29.592 | 27.390 | 0.00 | 0.00 |
| ATOM | 6830 | HA3  | GLY | X | 452 | 43.154 | 30.545 | 26.329 | 0.00 | 0.00 |
| ATOM | 6831 | C    | GLY | X | 452 | 45.238 | 31.236 | 26.460 | 0.00 | 0.00 |
| ATOM | 6832 | O    | GLY | X | 452 | 45.355 | 31.111 | 25.263 | 0.00 | 0.00 |
| ATOM | 6833 | N    | ILE | X | 453 | 46.142 | 31.868 | 27.217 | 0.00 | 0.00 |
| ATOM | 6834 | H    | ILE | X | 453 | 46.113 | 31.692 | 28.211 | 0.00 | 0.00 |
| ATOM | 6835 | CA   | ILE | X | 453 | 47.349 | 32.539 | 26.705 | 0.00 | 0.00 |
| ATOM | 6836 | HA   | ILE | X | 453 | 46.968 | 33.134 | 25.875 | 0.00 | 0.00 |
| ATOM | 6837 | CB   | ILE | X | 453 | 47.876 | 33.548 | 27.753 | 0.00 | 0.00 |
| ATOM | 6838 | HB   | ILE | X | 453 | 48.107 | 32.919 | 28.612 | 0.00 | 0.00 |
| ATOM | 6839 | CG2  | ILE | X | 453 | 49.247 | 34.200 | 27.392 | 0.00 | 0.00 |
| ATOM | 6840 | HG21 | ILE | X | 453 | 49.661 | 34.749 | 28.238 | 0.00 | 0.00 |
| ATOM | 6841 | HG22 | ILE | X | 453 | 49.130 | 34.841 | 26.518 | 0.00 | 0.00 |
| ATOM | 6842 | HG23 | ILE | X | 453 | 50.036 | 33.490 | 27.143 | 0.00 | 0.00 |
| ATOM | 6843 | CG1  | ILE | X | 453 | 46.775 | 34.489 | 28.226 | 0.00 | 0.00 |
| ATOM | 6844 | HG12 | ILE | X | 453 | 46.075 | 33.931 | 28.848 | 0.00 | 0.00 |
| ATOM | 6845 | HG13 | ILE | X | 453 | 47.217 | 35.207 | 28.916 | 0.00 | 0.00 |
| ATOM | 6846 | CD1  | ILE | X | 453 | 46.017 | 35.358 | 27.175 | 0.00 | 0.00 |
| ATOM | 6847 | HD11 | ILE | X | 453 | 45.516 | 34.680 | 26.483 | 0.00 | 0.00 |
| ATOM | 6848 | HD12 | ILE | X | 453 | 46.677 | 36.092 | 26.714 | 0.00 | 0.00 |
| ATOM | 6849 | HD13 | ILE | X | 453 | 45.265 | 36.068 | 27.518 | 0.00 | 0.00 |
| ATOM | 6850 | C    | ILE | X | 453 | 48.444 | 31.688 | 26.024 | 0.00 | 0.00 |
| ATOM | 6851 | O    | ILE | X | 453 | 49.118 | 32.165 | 25.080 | 0.00 | 0.00 |
| ATOM | 6852 | N    | PRO | X | 454 | 48.577 | 30.426 | 26.389 | 0.00 | 0.00 |

|      |      |      |     |   |     |        |        |        |      |      |
|------|------|------|-----|---|-----|--------|--------|--------|------|------|
| ATOM | 6853 | CD   | PRO | X | 454 | 48.170 | 29.829 | 27.663 | 0.00 | 0.00 |
| ATOM | 6854 | HD2  | PRO | X | 454 | 47.102 | 29.709 | 27.480 | 0.00 | 0.00 |
| ATOM | 6855 | HD3  | PRO | X | 454 | 48.310 | 30.582 | 28.438 | 0.00 | 0.00 |
| ATOM | 6856 | CG   | PRO | X | 454 | 48.973 | 28.495 | 27.751 | 0.00 | 0.00 |
| ATOM | 6857 | HG2  | PRO | X | 454 | 48.392 | 27.718 | 28.248 | 0.00 | 0.00 |
| ATOM | 6858 | HG3  | PRO | X | 454 | 49.846 | 28.637 | 28.389 | 0.00 | 0.00 |
| ATOM | 6859 | CB   | PRO | X | 454 | 49.290 | 28.093 | 26.294 | 0.00 | 0.00 |
| ATOM | 6860 | HB2  | PRO | X | 454 | 48.395 | 27.656 | 25.850 | 0.00 | 0.00 |
| ATOM | 6861 | HB3  | PRO | X | 454 | 50.205 | 27.502 | 26.253 | 0.00 | 0.00 |
| ATOM | 6862 | CA   | PRO | X | 454 | 49.415 | 29.482 | 25.601 | 0.00 | 0.00 |
| ATOM | 6863 | HA   | PRO | X | 454 | 50.427 | 29.851 | 25.766 | 0.00 | 0.00 |
| ATOM | 6864 | C    | PRO | X | 454 | 49.131 | 29.436 | 24.124 | 0.00 | 0.00 |
| ATOM | 6865 | O    | PRO | X | 454 | 50.116 | 29.300 | 23.465 | 0.00 | 0.00 |
| ATOM | 6866 | N    | LEU | X | 455 | 47.956 | 29.829 | 23.577 | 0.00 | 0.00 |
| ATOM | 6867 | H    | LEU | X | 455 | 47.187 | 30.014 | 24.206 | 0.00 | 0.00 |
| ATOM | 6868 | CA   | LEU | X | 455 | 47.607 | 29.869 | 22.176 | 0.00 | 0.00 |
| ATOM | 6869 | HA   | LEU | X | 455 | 48.067 | 28.962 | 21.784 | 0.00 | 0.00 |
| ATOM | 6870 | CB   | LEU | X | 455 | 46.118 | 29.870 | 21.910 | 0.00 | 0.00 |
| ATOM | 6871 | HB2  | LEU | X | 455 | 45.667 | 30.639 | 22.537 | 0.00 | 0.00 |
| ATOM | 6872 | HB3  | LEU | X | 455 | 45.875 | 30.230 | 20.911 | 0.00 | 0.00 |
| ATOM | 6873 | CG   | LEU | X | 455 | 45.459 | 28.482 | 22.058 | 0.00 | 0.00 |
| ATOM | 6874 | HG   | LEU | X | 455 | 45.936 | 27.824 | 21.332 | 0.00 | 0.00 |
| ATOM | 6875 | CD1  | LEU | X | 455 | 45.437 | 27.857 | 23.503 | 0.00 | 0.00 |
| ATOM | 6876 | HD11 | LEU | X | 455 | 44.897 | 28.535 | 24.165 | 0.00 | 0.00 |
| ATOM | 6877 | HD12 | LEU | X | 455 | 46.422 | 27.649 | 23.920 | 0.00 | 0.00 |
| ATOM | 6878 | HD13 | LEU | X | 455 | 44.814 | 26.963 | 23.516 | 0.00 | 0.00 |
| ATOM | 6879 | CD2  | LEU | X | 455 | 44.031 | 28.665 | 21.605 | 0.00 | 0.00 |
| ATOM | 6880 | HD21 | LEU | X | 455 | 44.050 | 29.022 | 20.576 | 0.00 | 0.00 |
| ATOM | 6881 | HD22 | LEU | X | 455 | 43.461 | 27.737 | 21.562 | 0.00 | 0.00 |
| ATOM | 6882 | HD23 | LEU | X | 455 | 43.584 | 29.429 | 22.241 | 0.00 | 0.00 |
| ATOM | 6883 | C    | LEU | X | 455 | 48.347 | 30.853 | 21.355 | 0.00 | 0.00 |
| ATOM | 6884 | O    | LEU | X | 455 | 48.346 | 30.838 | 20.133 | 0.00 | 0.00 |
| ATOM | 6885 | N    | ASP | X | 456 | 48.855 | 31.910 | 22.016 | 0.00 | 0.00 |
| ATOM | 6886 | H    | ASP | X | 456 | 48.832 | 31.829 | 23.022 | 0.00 | 0.00 |
| ATOM | 6887 | CA   | ASP | X | 456 | 49.330 | 33.159 | 21.447 | 0.00 | 0.00 |
| ATOM | 6888 | HA   | ASP | X | 456 | 48.728 | 33.503 | 20.606 | 0.00 | 0.00 |
| ATOM | 6889 | CB   | ASP | X | 456 | 49.166 | 34.295 | 22.474 | 0.00 | 0.00 |
| ATOM | 6890 | HB2  | ASP | X | 456 | 48.207 | 34.344 | 22.989 | 0.00 | 0.00 |
| ATOM | 6891 | HB3  | ASP | X | 456 | 49.818 | 34.187 | 23.341 | 0.00 | 0.00 |
| ATOM | 6892 | CG   | ASP | X | 456 | 49.324 | 35.626 | 21.834 | 0.00 | 0.00 |
| ATOM | 6893 | OD1  | ASP | X | 456 | 48.343 | 36.205 | 21.327 | 0.00 | 0.00 |
| ATOM | 6894 | OD2  | ASP | X | 456 | 50.454 | 36.119 | 21.716 | 0.00 | 0.00 |
| ATOM | 6895 | C    | ASP | X | 456 | 50.777 | 33.103 | 21.007 | 0.00 | 0.00 |
| ATOM | 6896 | O    | ASP | X | 456 | 51.642 | 32.842 | 21.827 | 0.00 | 0.00 |
| ATOM | 6897 | N    | PRO | X | 457 | 51.131 | 33.447 | 19.746 | 0.00 | 0.00 |
| ATOM | 6898 | CD   | PRO | X | 457 | 50.185 | 33.596 | 18.639 | 0.00 | 0.00 |
| ATOM | 6899 | HD2  | PRO | X | 457 | 49.660 | 34.549 | 18.706 | 0.00 | 0.00 |
| ATOM | 6900 | HD3  | PRO | X | 457 | 49.502 | 32.754 | 18.750 | 0.00 | 0.00 |
| ATOM | 6901 | CG   | PRO | X | 457 | 50.918 | 33.444 | 17.289 | 0.00 | 0.00 |
| ATOM | 6902 | HG2  | PRO | X | 457 | 50.602 | 34.135 | 16.508 | 0.00 | 0.00 |
| ATOM | 6903 | HG3  | PRO | X | 457 | 50.809 | 32.381 | 17.072 | 0.00 | 0.00 |
| ATOM | 6904 | CB   | PRO | X | 457 | 52.322 | 33.579 | 17.641 | 0.00 | 0.00 |
| ATOM | 6905 | HB2  | PRO | X | 457 | 52.770 | 34.539 | 17.383 | 0.00 | 0.00 |
| ATOM | 6906 | HB3  | PRO | X | 457 | 52.975 | 32.886 | 17.112 | 0.00 | 0.00 |
| ATOM | 6907 | CA   | PRO | X | 457 | 52.545 | 33.382 | 19.183 | 0.00 | 0.00 |
| ATOM | 6908 | HA   | PRO | X | 457 | 52.977 | 32.410 | 19.423 | 0.00 | 0.00 |
| ATOM | 6909 | C    | PRO | X | 457 | 53.611 | 34.440 | 19.641 | 0.00 | 0.00 |
| ATOM | 6910 | O    | PRO | X | 457 | 54.718 | 34.507 | 19.100 | 0.00 | 0.00 |
| ATOM | 6911 | N    | SER | X | 458 | 53.352 | 35.275 | 20.726 | 0.00 | 0.00 |
| ATOM | 6912 | H    | SER | X | 458 | 52.391 | 35.216 | 21.030 | 0.00 | 0.00 |
| ATOM | 6913 | CA   | SER | X | 458 | 54.379 | 36.076 | 21.530 | 0.00 | 0.00 |
| ATOM | 6914 | HA   | SER | X | 458 | 54.986 | 36.673 | 20.848 | 0.00 | 0.00 |
| ATOM | 6915 | CB   | SER | X | 458 | 53.726 | 37.181 | 22.299 | 0.00 | 0.00 |
| ATOM | 6916 | HB2  | SER | X | 458 | 54.553 | 37.755 | 22.718 | 0.00 | 0.00 |
| ATOM | 6917 | HB3  | SER | X | 458 | 53.149 | 37.835 | 21.646 | 0.00 | 0.00 |
| ATOM | 6918 | OG   | SER | X | 458 | 52.867 | 36.804 | 23.306 | 0.00 | 0.00 |
| ATOM | 6919 | HG   | SER | X | 458 | 52.076 | 36.436 | 22.906 | 0.00 | 0.00 |



|      |      |      |     |   |     |        |        |        |      |      |
|------|------|------|-----|---|-----|--------|--------|--------|------|------|
| ATOM | 6920 | C    | SER | X | 458 | 55.345 | 35.271 | 22.369 | 0.00 | 0.00 |
| ATOM | 6921 | O    | SER | X | 458 | 56.562 | 35.615 | 22.607 | 0.00 | 0.00 |
| ATOM | 6922 | N    | ARG | X | 459 | 54.940 | 34.065 | 22.780 | 0.00 | 0.00 |
| ATOM | 6923 | H    | ARG | X | 459 | 54.058 | 33.682 | 22.474 | 0.00 | 0.00 |
| ATOM | 6924 | CA   | ARG | X | 459 | 55.792 | 33.079 | 23.396 | 0.00 | 0.00 |
| ATOM | 6925 | HA   | ARG | X | 459 | 56.827 | 33.354 | 23.190 | 0.00 | 0.00 |
| ATOM | 6926 | CB   | ARG | X | 459 | 55.596 | 33.209 | 24.869 | 0.00 | 0.00 |
| ATOM | 6927 | HB2  | ARG | X | 459 | 54.602 | 32.889 | 25.184 | 0.00 | 0.00 |
| ATOM | 6928 | HB3  | ARG | X | 459 | 56.178 | 32.426 | 25.355 | 0.00 | 0.00 |
| ATOM | 6929 | CG   | ARG | X | 459 | 55.925 | 34.593 | 25.513 | 0.00 | 0.00 |
| ATOM | 6930 | HG2  | ARG | X | 459 | 56.848 | 34.910 | 25.027 | 0.00 | 0.00 |
| ATOM | 6931 | HG3  | ARG | X | 459 | 55.241 | 35.374 | 25.182 | 0.00 | 0.00 |
| ATOM | 6932 | CD   | ARG | X | 459 | 56.168 | 34.641 | 26.960 | 0.00 | 0.00 |
| ATOM | 6933 | HD2  | ARG | X | 459 | 56.857 | 33.847 | 27.247 | 0.00 | 0.00 |
| ATOM | 6934 | HD3  | ARG | X | 459 | 56.737 | 35.513 | 27.279 | 0.00 | 0.00 |
| ATOM | 6935 | NE   | ARG | X | 459 | 54.864 | 34.666 | 27.697 | 0.00 | 0.00 |
| ATOM | 6936 | HE   | ARG | X | 459 | 54.004 | 34.978 | 27.269 | 0.00 | 0.00 |
| ATOM | 6937 | CZ   | ARG | X | 459 | 54.527 | 34.129 | 28.891 | 0.00 | 0.00 |
| ATOM | 6938 | NH1  | ARG | X | 459 | 55.506 | 33.833 | 29.734 | 0.00 | 0.00 |
| ATOM | 6939 | HH11 | ARG | X | 459 | 56.445 | 34.139 | 29.521 | 0.00 | 0.00 |
| ATOM | 6940 | HH12 | ARG | X | 459 | 55.391 | 33.377 | 30.628 | 0.00 | 0.00 |
| ATOM | 6941 | NH2  | ARG | X | 459 | 53.280 | 33.986 | 29.218 | 0.00 | 0.00 |
| ATOM | 6942 | HH21 | ARG | X | 459 | 52.630 | 34.489 | 28.630 | 0.00 | 0.00 |
| ATOM | 6943 | HH22 | ARG | X | 459 | 53.056 | 33.710 | 30.164 | 0.00 | 0.00 |
| ATOM | 6944 | C    | ARG | X | 459 | 55.392 | 31.645 | 23.037 | 0.00 | 0.00 |
| ATOM | 6945 | O    | ARG | X | 459 | 54.235 | 31.382 | 22.594 | 0.00 | 0.00 |
| ATOM | 6946 | N    | ASN | X | 460 | 56.406 | 30.787 | 23.118 | 0.00 | 0.00 |
| ATOM | 6947 | H    | ASN | X | 460 | 57.269 | 31.029 | 23.584 | 0.00 | 0.00 |
| ATOM | 6948 | CA   | ASN | X | 460 | 56.333 | 29.412 | 22.696 | 0.00 | 0.00 |
| ATOM | 6949 | HA   | ASN | X | 460 | 55.715 | 29.462 | 21.800 | 0.00 | 0.00 |
| ATOM | 6950 | CB   | ASN | X | 460 | 57.740 | 29.009 | 22.128 | 0.00 | 0.00 |
| ATOM | 6951 | HB2  | ASN | X | 460 | 58.093 | 29.638 | 21.311 | 0.00 | 0.00 |
| ATOM | 6952 | HB3  | ASN | X | 460 | 58.489 | 29.130 | 22.911 | 0.00 | 0.00 |
| ATOM | 6953 | CG   | ASN | X | 460 | 57.732 | 27.567 | 21.516 | 0.00 | 0.00 |
| ATOM | 6954 | OD1  | ASN | X | 460 | 56.811 | 27.118 | 20.920 | 0.00 | 0.00 |
| ATOM | 6955 | ND2  | ASN | X | 460 | 58.812 | 26.909 | 21.555 | 0.00 | 0.00 |
| ATOM | 6956 | HD21 | ASN | X | 460 | 58.947 | 26.048 | 21.045 | 0.00 | 0.00 |
| ATOM | 6957 | HD22 | ASN | X | 460 | 59.636 | 27.340 | 21.949 | 0.00 | 0.00 |
| ATOM | 6958 | C    | ASN | X | 460 | 55.803 | 28.371 | 23.733 | 0.00 | 0.00 |
| ATOM | 6959 | O    | ASN | X | 460 | 56.570 | 27.965 | 24.603 | 0.00 | 0.00 |
| ATOM | 6960 | N    | TYR | X | 461 | 54.523 | 27.964 | 23.647 | 0.00 | 0.00 |
| ATOM | 6961 | H    | TYR | X | 461 | 53.954 | 28.269 | 22.870 | 0.00 | 0.00 |
| ATOM | 6962 | CA   | TYR | X | 461 | 53.948 | 26.862 | 24.473 | 0.00 | 0.00 |
| ATOM | 6963 | HA   | TYR | X | 461 | 54.537 | 26.660 | 25.367 | 0.00 | 0.00 |
| ATOM | 6964 | CB   | TYR | X | 461 | 52.577 | 27.360 | 24.981 | 0.00 | 0.00 |
| ATOM | 6965 | HB2  | TYR | X | 461 | 52.123 | 27.941 | 24.178 | 0.00 | 0.00 |
| ATOM | 6966 | HB3  | TYR | X | 461 | 51.960 | 26.527 | 25.316 | 0.00 | 0.00 |
| ATOM | 6967 | CG   | TYR | X | 461 | 52.760 | 28.251 | 26.188 | 0.00 | 0.00 |
| ATOM | 6968 | CD1  | TYR | X | 461 | 52.985 | 29.639 | 25.954 | 0.00 | 0.00 |
| ATOM | 6969 | HD1  | TYR | X | 461 | 53.072 | 30.027 | 24.950 | 0.00 | 0.00 |
| ATOM | 6970 | CE1  | TYR | X | 461 | 53.029 | 30.571 | 27.026 | 0.00 | 0.00 |
| ATOM | 6971 | HE1  | TYR | X | 461 | 53.316 | 31.601 | 26.872 | 0.00 | 0.00 |
| ATOM | 6972 | CZ   | TYR | X | 461 | 52.915 | 30.100 | 28.350 | 0.00 | 0.00 |
| ATOM | 6973 | OH   | TYR | X | 461 | 52.931 | 31.092 | 29.231 | 0.00 | 0.00 |
| ATOM | 6974 | HH   | TYR | X | 461 | 52.746 | 30.920 | 30.157 | 0.00 | 0.00 |
| ATOM | 6975 | CE2  | TYR | X | 461 | 52.709 | 28.734 | 28.623 | 0.00 | 0.00 |
| ATOM | 6976 | HE2  | TYR | X | 461 | 52.461 | 28.436 | 29.631 | 0.00 | 0.00 |
| ATOM | 6977 | CD2  | TYR | X | 461 | 52.615 | 27.805 | 27.513 | 0.00 | 0.00 |
| ATOM | 6978 | HD2  | TYR | X | 461 | 52.527 | 26.753 | 27.745 | 0.00 | 0.00 |
| ATOM | 6979 | C    | TYR | X | 461 | 53.804 | 25.534 | 23.800 | 0.00 | 0.00 |
| ATOM | 6980 | O    | TYR | X | 461 | 53.604 | 25.502 | 22.603 | 0.00 | 0.00 |
| ATOM | 6981 | N    | THR | X | 462 | 53.890 | 24.445 | 24.577 | 0.00 | 0.00 |
| ATOM | 6982 | H    | THR | X | 462 | 53.823 | 24.583 | 25.575 | 0.00 | 0.00 |
| ATOM | 6983 | CA   | THR | X | 462 | 53.759 | 23.093 | 24.045 | 0.00 | 0.00 |
| ATOM | 6984 | HA   | THR | X | 462 | 54.356 | 22.945 | 23.145 | 0.00 | 0.00 |
| ATOM | 6985 | CB   | THR | X | 462 | 54.338 | 22.049 | 25.053 | 0.00 | 0.00 |
| ATOM | 6986 | HB   | THR | X | 462 | 54.309 | 21.049 | 24.620 | 0.00 | 0.00 |

|      |      |      |     |   |     |        |        |        |      |      |
|------|------|------|-----|---|-----|--------|--------|--------|------|------|
| ATOM | 6987 | CG2  | THR | X | 462 | 55.770 | 22.240 | 25.467 | 0.00 | 0.00 |
| ATOM | 6988 | HG21 | THR | X | 462 | 56.383 | 22.415 | 24.583 | 0.00 | 0.00 |
| ATOM | 6989 | HG22 | THR | X | 462 | 56.033 | 21.334 | 26.012 | 0.00 | 0.00 |
| ATOM | 6990 | HG23 | THR | X | 462 | 55.974 | 23.098 | 26.106 | 0.00 | 0.00 |
| ATOM | 6991 | OG1  | THR | X | 462 | 53.522 | 22.069 | 26.229 | 0.00 | 0.00 |
| ATOM | 6992 | HG1  | THR | X | 462 | 53.468 | 22.992 | 26.490 | 0.00 | 0.00 |
| ATOM | 6993 | C    | THR | X | 462 | 52.285 | 22.752 | 23.730 | 0.00 | 0.00 |
| ATOM | 6994 | O    | THR | X | 462 | 51.366 | 23.433 | 24.304 | 0.00 | 0.00 |
| ATOM | 6995 | N    | ALA | X | 463 | 52.001 | 21.820 | 22.839 | 0.00 | 0.00 |
| ATOM | 6996 | H    | ALA | X | 463 | 52.813 | 21.452 | 22.365 | 0.00 | 0.00 |
| ATOM | 6997 | CA   | ALA | X | 463 | 50.676 | 21.519 | 22.392 | 0.00 | 0.00 |
| ATOM | 6998 | HA   | ALA | X | 463 | 50.062 | 22.392 | 22.170 | 0.00 | 0.00 |
| ATOM | 6999 | CB   | ALA | X | 463 | 50.705 | 20.779 | 21.050 | 0.00 | 0.00 |
| ATOM | 7000 | HB1  | ALA | X | 463 | 51.169 | 19.823 | 21.291 | 0.00 | 0.00 |
| ATOM | 7001 | HB2  | ALA | X | 463 | 51.112 | 21.441 | 20.286 | 0.00 | 0.00 |
| ATOM | 7002 | HB3  | ALA | X | 463 | 49.665 | 20.595 | 20.781 | 0.00 | 0.00 |
| ATOM | 7003 | C    | ALA | X | 463 | 49.908 | 20.887 | 23.544 | 0.00 | 0.00 |
| ATOM | 7004 | O    | ALA | X | 463 | 48.634 | 20.911 | 23.616 | 0.00 | 0.00 |
| ATOM | 7005 | N    | GLU | X | 464 | 50.629 | 20.300 | 24.498 | 0.00 | 0.00 |
| ATOM | 7006 | H    | GLU | X | 464 | 51.634 | 20.276 | 24.403 | 0.00 | 0.00 |
| ATOM | 7007 | CA   | GLU | X | 464 | 50.156 | 19.656 | 25.682 | 0.00 | 0.00 |
| ATOM | 7008 | HA   | GLU | X | 464 | 49.447 | 18.929 | 25.287 | 0.00 | 0.00 |
| ATOM | 7009 | CB   | GLU | X | 464 | 51.197 | 18.839 | 26.435 | 0.00 | 0.00 |
| ATOM | 7010 | HB2  | GLU | X | 464 | 51.437 | 18.018 | 25.759 | 0.00 | 0.00 |
| ATOM | 7011 | HB3  | GLU | X | 464 | 52.086 | 19.448 | 26.600 | 0.00 | 0.00 |
| ATOM | 7012 | CG   | GLU | X | 464 | 50.792 | 18.177 | 27.764 | 0.00 | 0.00 |
| ATOM | 7013 | HG2  | GLU | X | 464 | 51.729 | 17.909 | 28.253 | 0.00 | 0.00 |
| ATOM | 7014 | HG3  | GLU | X | 464 | 50.255 | 18.874 | 28.407 | 0.00 | 0.00 |
| ATOM | 7015 | CD   | GLU | X | 464 | 49.967 | 16.951 | 27.490 | 0.00 | 0.00 |
| ATOM | 7016 | OE1  | GLU | X | 464 | 48.739 | 16.834 | 27.653 | 0.00 | 0.00 |
| ATOM | 7017 | OE2  | GLU | X | 464 | 50.537 | 15.995 | 26.969 | 0.00 | 0.00 |
| ATOM | 7018 | C    | GLU | X | 464 | 49.432 | 20.735 | 26.583 | 0.00 | 0.00 |
| ATOM | 7019 | O    | GLU | X | 464 | 48.263 | 20.626 | 26.992 | 0.00 | 0.00 |
| ATOM | 7020 | N    | GLU | X | 465 | 50.130 | 21.838 | 26.862 | 0.00 | 0.00 |
| ATOM | 7021 | H    | GLU | X | 465 | 51.014 | 21.880 | 26.375 | 0.00 | 0.00 |
| ATOM | 7022 | CA   | GLU | X | 465 | 49.635 | 23.083 | 27.553 | 0.00 | 0.00 |
| ATOM | 7023 | HA   | GLU | X | 465 | 49.291 | 22.897 | 28.570 | 0.00 | 0.00 |
| ATOM | 7024 | CB   | GLU | X | 465 | 50.872 | 24.029 | 27.628 | 0.00 | 0.00 |
| ATOM | 7025 | HB2  | GLU | X | 465 | 51.502 | 24.129 | 26.744 | 0.00 | 0.00 |
| ATOM | 7026 | HB3  | GLU | X | 465 | 50.530 | 25.060 | 27.721 | 0.00 | 0.00 |
| ATOM | 7027 | CG   | GLU | X | 465 | 51.788 | 23.579 | 28.775 | 0.00 | 0.00 |
| ATOM | 7028 | HG2  | GLU | X | 465 | 51.428 | 23.728 | 29.793 | 0.00 | 0.00 |
| ATOM | 7029 | HG3  | GLU | X | 465 | 52.002 | 22.536 | 28.545 | 0.00 | 0.00 |
| ATOM | 7030 | CD   | GLU | X | 465 | 53.185 | 24.334 | 28.753 | 0.00 | 0.00 |
| ATOM | 7031 | OE1  | GLU | X | 465 | 53.891 | 24.335 | 27.723 | 0.00 | 0.00 |
| ATOM | 7032 | OE2  | GLU | X | 465 | 53.647 | 24.900 | 29.750 | 0.00 | 0.00 |
| ATOM | 7033 | C    | GLU | X | 465 | 48.500 | 23.760 | 26.750 | 0.00 | 0.00 |
| ATOM | 7034 | O    | GLU | X | 465 | 47.586 | 24.337 | 27.392 | 0.00 | 0.00 |
| ATOM | 7035 | N    | LYS | X | 466 | 48.456 | 23.677 | 25.413 | 0.00 | 0.00 |
| ATOM | 7036 | H    | LYS | X | 466 | 49.172 | 23.328 | 24.791 | 0.00 | 0.00 |
| ATOM | 7037 | CA   | LYS | X | 466 | 47.262 | 24.302 | 24.746 | 0.00 | 0.00 |
| ATOM | 7038 | HA   | LYS | X | 466 | 47.113 | 25.250 | 25.263 | 0.00 | 0.00 |
| ATOM | 7039 | CB   | LYS | X | 466 | 47.643 | 24.547 | 23.265 | 0.00 | 0.00 |
| ATOM | 7040 | HB2  | LYS | X | 466 | 47.790 | 23.614 | 22.722 | 0.00 | 0.00 |
| ATOM | 7041 | HB3  | LYS | X | 466 | 46.803 | 24.986 | 22.728 | 0.00 | 0.00 |
| ATOM | 7042 | CG   | LYS | X | 466 | 48.841 | 25.503 | 23.175 | 0.00 | 0.00 |
| ATOM | 7043 | HG2  | LYS | X | 466 | 48.601 | 26.519 | 23.490 | 0.00 | 0.00 |
| ATOM | 7044 | HG3  | LYS | X | 466 | 49.701 | 25.079 | 23.692 | 0.00 | 0.00 |
| ATOM | 7045 | CD   | LYS | X | 466 | 49.418 | 25.583 | 21.792 | 0.00 | 0.00 |
| ATOM | 7046 | HD2  | LYS | X | 466 | 49.484 | 24.621 | 21.282 | 0.00 | 0.00 |
| ATOM | 7047 | HD3  | LYS | X | 466 | 48.699 | 26.204 | 21.257 | 0.00 | 0.00 |
| ATOM | 7048 | CE   | LYS | X | 466 | 50.757 | 26.182 | 21.830 | 0.00 | 0.00 |
| ATOM | 7049 | HE2  | LYS | X | 466 | 50.752 | 27.167 | 22.297 | 0.00 | 0.00 |
| ATOM | 7050 | HE3  | LYS | X | 466 | 51.490 | 25.566 | 22.350 | 0.00 | 0.00 |
| ATOM | 7051 | NZ   | LYS | X | 466 | 51.312 | 26.372 | 20.474 | 0.00 | 0.00 |
| ATOM | 7052 | HZ1  | LYS | X | 466 | 51.122 | 25.660 | 19.784 | 0.00 | 0.00 |
| ATOM | 7053 | HZ2  | LYS | X | 466 | 51.043 | 27.269 | 20.097 | 0.00 | 0.00 |

|      |      |      |     |   |     |        |        |        |      |      |
|------|------|------|-----|---|-----|--------|--------|--------|------|------|
| ATOM | 7054 | HZ3  | LYS | X | 466 | 52.320 | 26.415 | 20.521 | 0.00 | 0.00 |
| ATOM | 7055 | C    | LYS | X | 466 | 45.979 | 23.489 | 24.984 | 0.00 | 0.00 |
| ATOM | 7056 | O    | LYS | X | 466 | 44.930 | 24.145 | 25.023 | 0.00 | 0.00 |
| ATOM | 7057 | N    | ILE | X | 467 | 46.079 | 22.173 | 25.210 | 0.00 | 0.00 |
| ATOM | 7058 | H    | ILE | X | 467 | 47.026 | 21.828 | 25.150 | 0.00 | 0.00 |
| ATOM | 7059 | CA   | ILE | X | 467 | 45.007 | 21.263 | 25.486 | 0.00 | 0.00 |
| ATOM | 7060 | HA   | ILE | X | 467 | 44.071 | 21.366 | 24.937 | 0.00 | 0.00 |
| ATOM | 7061 | CB   | ILE | X | 467 | 45.539 | 19.824 | 25.348 | 0.00 | 0.00 |
| ATOM | 7062 | HB   | ILE | X | 467 | 46.466 | 19.762 | 25.918 | 0.00 | 0.00 |
| ATOM | 7063 | CG2  | ILE | X | 467 | 44.629 | 18.733 | 25.951 | 0.00 | 0.00 |
| ATOM | 7064 | HG21 | ILE | X | 467 | 44.605 | 18.686 | 27.040 | 0.00 | 0.00 |
| ATOM | 7065 | HG22 | ILE | X | 467 | 45.124 | 17.780 | 25.766 | 0.00 | 0.00 |
| ATOM | 7066 | HG23 | ILE | X | 467 | 43.593 | 18.842 | 25.628 | 0.00 | 0.00 |
| ATOM | 7067 | CG1  | ILE | X | 467 | 45.775 | 19.479 | 23.803 | 0.00 | 0.00 |
| ATOM | 7068 | HG12 | ILE | X | 467 | 44.847 | 19.071 | 23.401 | 0.00 | 0.00 |
| ATOM | 7069 | HG13 | ILE | X | 467 | 45.938 | 20.429 | 23.294 | 0.00 | 0.00 |
| ATOM | 7070 | CD1  | ILE | X | 467 | 46.698 | 18.272 | 23.553 | 0.00 | 0.00 |
| ATOM | 7071 | HD11 | ILE | X | 467 | 47.033 | 18.273 | 22.515 | 0.00 | 0.00 |
| ATOM | 7072 | HD12 | ILE | X | 467 | 46.204 | 17.315 | 23.721 | 0.00 | 0.00 |
| ATOM | 7073 | HD13 | ILE | X | 467 | 47.662 | 18.257 | 24.062 | 0.00 | 0.00 |
| ATOM | 7074 | C    | ILE | X | 467 | 44.584 | 21.429 | 26.999 | 0.00 | 0.00 |
| ATOM | 7075 | O    | ILE | X | 467 | 43.379 | 21.571 | 27.331 | 0.00 | 0.00 |
| ATOM | 7076 | N    | PHE | X | 468 | 45.576 | 21.517 | 27.910 | 0.00 | 0.00 |
| ATOM | 7077 | H    | PHE | X | 468 | 46.513 | 21.506 | 27.533 | 0.00 | 0.00 |
| ATOM | 7078 | CA   | PHE | X | 468 | 45.360 | 21.829 | 29.270 | 0.00 | 0.00 |
| ATOM | 7079 | HA   | PHE | X | 468 | 44.763 | 21.070 | 29.774 | 0.00 | 0.00 |
| ATOM | 7080 | CB   | PHE | X | 468 | 46.711 | 21.939 | 29.967 | 0.00 | 0.00 |
| ATOM | 7081 | HB2  | PHE | X | 468 | 47.159 | 20.953 | 29.848 | 0.00 | 0.00 |
| ATOM | 7082 | HB3  | PHE | X | 468 | 47.197 | 22.771 | 29.458 | 0.00 | 0.00 |
| ATOM | 7083 | CG   | PHE | X | 468 | 46.656 | 22.386 | 31.401 | 0.00 | 0.00 |
| ATOM | 7084 | CD1  | PHE | X | 468 | 45.844 | 21.757 | 32.374 | 0.00 | 0.00 |
| ATOM | 7085 | HD1  | PHE | X | 468 | 45.170 | 21.023 | 31.957 | 0.00 | 0.00 |
| ATOM | 7086 | CE1  | PHE | X | 468 | 46.053 | 22.061 | 33.744 | 0.00 | 0.00 |
| ATOM | 7087 | HE1  | PHE | X | 468 | 45.521 | 21.499 | 34.497 | 0.00 | 0.00 |
| ATOM | 7088 | CZ   | PHE | X | 468 | 46.907 | 23.123 | 34.125 | 0.00 | 0.00 |
| ATOM | 7089 | HZ   | PHE | X | 468 | 47.057 | 23.292 | 35.181 | 0.00 | 0.00 |
| ATOM | 7090 | CE2  | PHE | X | 468 | 47.710 | 23.735 | 33.197 | 0.00 | 0.00 |
| ATOM | 7091 | HE2  | PHE | X | 468 | 48.390 | 24.553 | 33.384 | 0.00 | 0.00 |
| ATOM | 7092 | CD2  | PHE | X | 468 | 47.713 | 23.286 | 31.872 | 0.00 | 0.00 |
| ATOM | 7093 | HD2  | PHE | X | 468 | 48.434 | 23.779 | 31.237 | 0.00 | 0.00 |
| ATOM | 7094 | C    | PHE | X | 468 | 44.529 | 23.113 | 29.447 | 0.00 | 0.00 |
| ATOM | 7095 | O    | PHE | X | 468 | 43.508 | 23.165 | 30.167 | 0.00 | 0.00 |
| ATOM | 7096 | N    | ALA | X | 469 | 44.989 | 24.156 | 28.724 | 0.00 | 0.00 |
| ATOM | 7097 | H    | ALA | X | 469 | 45.847 | 24.117 | 28.193 | 0.00 | 0.00 |
| ATOM | 7098 | CA   | ALA | X | 469 | 44.335 | 25.420 | 28.701 | 0.00 | 0.00 |
| ATOM | 7099 | HA   | ALA | X | 469 | 44.316 | 25.820 | 29.715 | 0.00 | 0.00 |
| ATOM | 7100 | CB   | ALA | X | 469 | 45.182 | 26.388 | 27.830 | 0.00 | 0.00 |
| ATOM | 7101 | HB1  | ALA | X | 469 | 44.596 | 27.207 | 27.413 | 0.00 | 0.00 |
| ATOM | 7102 | HB2  | ALA | X | 469 | 45.573 | 25.909 | 26.932 | 0.00 | 0.00 |
| ATOM | 7103 | HB3  | ALA | X | 469 | 46.008 | 26.765 | 28.433 | 0.00 | 0.00 |
| ATOM | 7104 | C    | ALA | X | 469 | 42.849 | 25.382 | 28.347 | 0.00 | 0.00 |
| ATOM | 7105 | O    | ALA | X | 469 | 41.993 | 25.892 | 29.099 | 0.00 | 0.00 |
| ATOM | 7106 | N    | GLN | X | 470 | 42.505 | 24.737 | 27.215 | 0.00 | 0.00 |
| ATOM | 7107 | H    | GLN | X | 470 | 43.285 | 24.443 | 26.644 | 0.00 | 0.00 |
| ATOM | 7108 | CA   | GLN | X | 470 | 41.165 | 24.518 | 26.727 | 0.00 | 0.00 |
| ATOM | 7109 | HA   | GLN | X | 470 | 40.749 | 25.522 | 26.631 | 0.00 | 0.00 |
| ATOM | 7110 | CB   | GLN | X | 470 | 41.378 | 23.851 | 25.329 | 0.00 | 0.00 |
| ATOM | 7111 | HB2  | GLN | X | 470 | 42.097 | 23.032 | 25.342 | 0.00 | 0.00 |
| ATOM | 7112 | HB3  | GLN | X | 470 | 40.414 | 23.447 | 25.018 | 0.00 | 0.00 |
| ATOM | 7113 | CG   | GLN | X | 470 | 41.870 | 24.812 | 24.210 | 0.00 | 0.00 |
| ATOM | 7114 | HG2  | GLN | X | 470 | 41.216 | 25.678 | 24.111 | 0.00 | 0.00 |
| ATOM | 7115 | HG3  | GLN | X | 470 | 42.798 | 25.315 | 24.482 | 0.00 | 0.00 |
| ATOM | 7116 | CD   | GLN | X | 470 | 42.061 | 24.138 | 22.891 | 0.00 | 0.00 |
| ATOM | 7117 | OE1  | GLN | X | 470 | 41.142 | 24.165 | 22.061 | 0.00 | 0.00 |
| ATOM | 7118 | NE2  | GLN | X | 470 | 43.238 | 23.710 | 22.512 | 0.00 | 0.00 |
| ATOM | 7119 | HE21 | GLN | X | 470 | 43.346 | 23.341 | 21.578 | 0.00 | 0.00 |
| ATOM | 7120 | HE22 | GLN | X | 470 | 44.008 | 23.920 | 23.131 | 0.00 | 0.00 |

|      |      |      |     |   |     |        |        |        |      |      |
|------|------|------|-----|---|-----|--------|--------|--------|------|------|
| ATOM | 7121 | C    | GLN | X | 470 | 40.314 | 23.712 | 27.707 | 0.00 | 0.00 |
| ATOM | 7122 | O    | GLN | X | 470 | 39.086 | 23.853 | 27.635 | 0.00 | 0.00 |
| ATOM | 7123 | N    | ARG | X | 471 | 40.882 | 22.900 | 28.559 | 0.00 | 0.00 |
| ATOM | 7124 | H    | ARG | X | 471 | 41.889 | 22.871 | 28.485 | 0.00 | 0.00 |
| ATOM | 7125 | CA   | ARG | X | 471 | 40.186 | 22.055 | 29.568 | 0.00 | 0.00 |
| ATOM | 7126 | HA   | ARG | X | 471 | 39.358 | 21.541 | 29.079 | 0.00 | 0.00 |
| ATOM | 7127 | CB   | ARG | X | 471 | 41.121 | 20.887 | 30.010 | 0.00 | 0.00 |
| ATOM | 7128 | HB2  | ARG | X | 471 | 41.165 | 20.298 | 29.094 | 0.00 | 0.00 |
| ATOM | 7129 | HB3  | ARG | X | 471 | 42.096 | 21.359 | 30.126 | 0.00 | 0.00 |
| ATOM | 7130 | CG   | ARG | X | 471 | 40.810 | 19.977 | 31.253 | 0.00 | 0.00 |
| ATOM | 7131 | HG2  | ARG | X | 471 | 40.813 | 20.569 | 32.168 | 0.00 | 0.00 |
| ATOM | 7132 | HG3  | ARG | X | 471 | 39.843 | 19.508 | 31.071 | 0.00 | 0.00 |
| ATOM | 7133 | CD   | ARG | X | 471 | 41.949 | 18.910 | 31.314 | 0.00 | 0.00 |
| ATOM | 7134 | HD2  | ARG | X | 471 | 41.853 | 18.158 | 30.530 | 0.00 | 0.00 |
| ATOM | 7135 | HD3  | ARG | X | 471 | 42.864 | 19.492 | 31.205 | 0.00 | 0.00 |
| ATOM | 7136 | NE   | ARG | X | 471 | 41.897 | 18.183 | 32.542 | 0.00 | 0.00 |
| ATOM | 7137 | HE   | ARG | X | 471 | 41.036 | 17.735 | 32.821 | 0.00 | 0.00 |
| ATOM | 7138 | CZ   | ARG | X | 471 | 42.839 | 18.162 | 33.532 | 0.00 | 0.00 |
| ATOM | 7139 | NH1  | ARG | X | 471 | 44.094 | 18.328 | 33.228 | 0.00 | 0.00 |
| ATOM | 7140 | HH11 | ARG | X | 471 | 44.380 | 18.255 | 32.262 | 0.00 | 0.00 |
| ATOM | 7141 | HH12 | ARG | X | 471 | 44.855 | 18.191 | 33.877 | 0.00 | 0.00 |
| ATOM | 7142 | NH2  | ARG | X | 471 | 42.611 | 17.915 | 34.801 | 0.00 | 0.00 |
| ATOM | 7143 | HH21 | ARG | X | 471 | 41.663 | 17.728 | 35.095 | 0.00 | 0.00 |
| ATOM | 7144 | HH22 | ARG | X | 471 | 43.407 | 17.790 | 35.410 | 0.00 | 0.00 |
| ATOM | 7145 | C    | ARG | X | 471 | 39.725 | 22.968 | 30.718 | 0.00 | 0.00 |
| ATOM | 7146 | O    | ARG | X | 471 | 38.643 | 22.842 | 31.324 | 0.00 | 0.00 |
| ATOM | 7147 | N    | LEU | X | 472 | 40.675 | 23.879 | 31.028 | 0.00 | 0.00 |
| ATOM | 7148 | H    | LEU | X | 472 | 41.590 | 23.699 | 30.641 | 0.00 | 0.00 |
| ATOM | 7149 | CA   | LEU | X | 472 | 40.583 | 24.828 | 32.171 | 0.00 | 0.00 |
| ATOM | 7150 | HA   | LEU | X | 472 | 40.249 | 24.354 | 33.094 | 0.00 | 0.00 |
| ATOM | 7151 | CB   | LEU | X | 472 | 41.980 | 25.378 | 32.528 | 0.00 | 0.00 |
| ATOM | 7152 | HB2  | LEU | X | 472 | 42.594 | 25.308 | 31.630 | 0.00 | 0.00 |
| ATOM | 7153 | HB3  | LEU | X | 472 | 41.986 | 26.429 | 32.817 | 0.00 | 0.00 |
| ATOM | 7154 | CG   | LEU | X | 472 | 42.682 | 24.707 | 33.729 | 0.00 | 0.00 |
| ATOM | 7155 | HG   | LEU | X | 472 | 42.230 | 25.114 | 34.634 | 0.00 | 0.00 |
| ATOM | 7156 | CD1  | LEU | X | 472 | 42.572 | 23.185 | 33.727 | 0.00 | 0.00 |
| ATOM | 7157 | HD11 | LEU | X | 472 | 42.966 | 22.846 | 34.685 | 0.00 | 0.00 |
| ATOM | 7158 | HD12 | LEU | X | 472 | 43.118 | 22.720 | 32.906 | 0.00 | 0.00 |
| ATOM | 7159 | HD13 | LEU | X | 472 | 41.518 | 22.908 | 33.710 | 0.00 | 0.00 |
| ATOM | 7160 | CD2  | LEU | X | 472 | 44.124 | 25.228 | 33.658 | 0.00 | 0.00 |
| ATOM | 7161 | HD21 | LEU | X | 472 | 44.477 | 24.780 | 32.729 | 0.00 | 0.00 |
| ATOM | 7162 | HD22 | LEU | X | 472 | 44.165 | 26.310 | 33.536 | 0.00 | 0.00 |
| ATOM | 7163 | HD23 | LEU | X | 472 | 44.638 | 24.892 | 34.558 | 0.00 | 0.00 |
| ATOM | 7164 | C    | LEU | X | 472 | 39.652 | 26.005 | 31.881 | 0.00 | 0.00 |
| ATOM | 7165 | O    | LEU | X | 472 | 38.823 | 26.264 | 32.726 | 0.00 | 0.00 |
| ATOM | 7166 | N    | MET | X | 473 | 39.819 | 26.668 | 30.688 | 0.00 | 0.00 |
| ATOM | 7167 | H    | MET | X | 473 | 40.622 | 26.457 | 30.114 | 0.00 | 0.00 |
| ATOM | 7168 | CA   | MET | X | 473 | 38.908 | 27.704 | 30.183 | 0.00 | 0.00 |
| ATOM | 7169 | HA   | MET | X | 473 | 38.938 | 28.571 | 30.844 | 0.00 | 0.00 |
| ATOM | 7170 | CB   | MET | X | 473 | 39.263 | 28.182 | 28.741 | 0.00 | 0.00 |
| ATOM | 7171 | HB2  | MET | X | 473 | 39.131 | 27.304 | 28.110 | 0.00 | 0.00 |
| ATOM | 7172 | HB3  | MET | X | 473 | 38.567 | 28.900 | 28.306 | 0.00 | 0.00 |
| ATOM | 7173 | CG   | MET | X | 473 | 40.698 | 28.770 | 28.709 | 0.00 | 0.00 |
| ATOM | 7174 | HG2  | MET | X | 473 | 40.499 | 29.834 | 28.839 | 0.00 | 0.00 |
| ATOM | 7175 | HG3  | MET | X | 473 | 41.331 | 28.255 | 29.431 | 0.00 | 0.00 |
| ATOM | 7176 | SD   | MET | X | 473 | 41.445 | 28.504 | 27.111 | 0.00 | 0.00 |
| ATOM | 7177 | CE   | MET | X | 473 | 40.401 | 29.684 | 26.182 | 0.00 | 0.00 |
| ATOM | 7178 | HE1  | MET | X | 473 | 40.721 | 30.702 | 26.402 | 0.00 | 0.00 |
| ATOM | 7179 | HE2  | MET | X | 473 | 40.534 | 29.525 | 25.112 | 0.00 | 0.00 |
| ATOM | 7180 | HE3  | MET | X | 473 | 39.350 | 29.602 | 26.460 | 0.00 | 0.00 |
| ATOM | 7181 | C    | MET | X | 473 | 37.545 | 27.127 | 30.237 | 0.00 | 0.00 |
| ATOM | 7182 | O    | MET | X | 473 | 36.537 | 27.781 | 30.454 | 0.00 | 0.00 |
| ATOM | 7183 | N    | ARG | X | 474 | 37.405 | 25.819 | 29.938 | 0.00 | 0.00 |
| ATOM | 7184 | H    | ARG | X | 474 | 38.163 | 25.265 | 29.567 | 0.00 | 0.00 |
| ATOM | 7185 | CA   | ARG | X | 474 | 36.056 | 25.117 | 29.842 | 0.00 | 0.00 |
| ATOM | 7186 | HA   | ARG | X | 474 | 35.464 | 25.855 | 29.301 | 0.00 | 0.00 |
| ATOM | 7187 | CB   | ARG | X | 474 | 36.103 | 23.859 | 28.919 | 0.00 | 0.00 |

|      |      |      |     |   |     |        |        |        |      |      |
|------|------|------|-----|---|-----|--------|--------|--------|------|------|
| ATOM | 7188 | HB2  | ARG | X | 474 | 36.499 | 24.268 | 27.989 | 0.00 | 0.00 |
| ATOM | 7189 | HB3  | ARG | X | 474 | 36.830 | 23.153 | 29.320 | 0.00 | 0.00 |
| ATOM | 7190 | CG   | ARG | X | 474 | 34.798 | 23.031 | 28.680 | 0.00 | 0.00 |
| ATOM | 7191 | HG2  | ARG | X | 474 | 35.062 | 22.225 | 27.996 | 0.00 | 0.00 |
| ATOM | 7192 | HG3  | ARG | X | 474 | 34.411 | 22.653 | 29.626 | 0.00 | 0.00 |
| ATOM | 7193 | CD   | ARG | X | 474 | 33.666 | 23.810 | 28.100 | 0.00 | 0.00 |
| ATOM | 7194 | HD2  | ARG | X | 474 | 33.497 | 24.801 | 28.522 | 0.00 | 0.00 |
| ATOM | 7195 | HD3  | ARG | X | 474 | 33.823 | 23.823 | 27.021 | 0.00 | 0.00 |
| ATOM | 7196 | NE   | ARG | X | 474 | 32.508 | 23.003 | 28.433 | 0.00 | 0.00 |
| ATOM | 7197 | HE   | ARG | X | 474 | 32.672 | 22.191 | 29.012 | 0.00 | 0.00 |
| ATOM | 7198 | CZ   | ARG | X | 474 | 31.373 | 23.044 | 27.845 | 0.00 | 0.00 |
| ATOM | 7199 | NH1  | ARG | X | 474 | 31.077 | 23.979 | 27.036 | 0.00 | 0.00 |
| ATOM | 7200 | HH11 | ARG | X | 474 | 31.766 | 24.577 | 26.603 | 0.00 | 0.00 |
| ATOM | 7201 | HH12 | ARG | X | 474 | 30.091 | 24.064 | 26.836 | 0.00 | 0.00 |
| ATOM | 7202 | NH2  | ARG | X | 474 | 30.483 | 22.174 | 28.054 | 0.00 | 0.00 |
| ATOM | 7203 | HH21 | ARG | X | 474 | 30.630 | 21.461 | 28.755 | 0.00 | 0.00 |
| ATOM | 7204 | HH22 | ARG | X | 474 | 29.625 | 22.299 | 27.535 | 0.00 | 0.00 |
| ATOM | 7205 | C    | ARG | X | 474 | 35.474 | 24.820 | 31.225 | 0.00 | 0.00 |
| ATOM | 7206 | O    | ARG | X | 474 | 34.249 | 24.693 | 31.250 | 0.00 | 0.00 |
| ATOM | 7207 | N    | TYR | X | 475 | 36.196 | 24.713 | 32.356 | 0.00 | 0.00 |
| ATOM | 7208 | H    | TYR | X | 475 | 37.189 | 24.589 | 32.223 | 0.00 | 0.00 |
| ATOM | 7209 | CA   | TYR | X | 475 | 35.581 | 24.570 | 33.685 | 0.00 | 0.00 |
| ATOM | 7210 | HA   | TYR | X | 475 | 34.653 | 23.999 | 33.658 | 0.00 | 0.00 |
| ATOM | 7211 | CB   | TYR | X | 475 | 36.562 | 23.966 | 34.727 | 0.00 | 0.00 |
| ATOM | 7212 | HB2  | TYR | X | 475 | 37.441 | 24.605 | 34.808 | 0.00 | 0.00 |
| ATOM | 7213 | HB3  | TYR | X | 475 | 36.031 | 23.736 | 35.651 | 0.00 | 0.00 |
| ATOM | 7214 | CG   | TYR | X | 475 | 37.185 | 22.636 | 34.423 | 0.00 | 0.00 |
| ATOM | 7215 | CD1  | TYR | X | 475 | 36.422 | 21.589 | 33.884 | 0.00 | 0.00 |
| ATOM | 7216 | HD1  | TYR | X | 475 | 35.374 | 21.670 | 33.636 | 0.00 | 0.00 |
| ATOM | 7217 | CE1  | TYR | X | 475 | 36.969 | 20.351 | 33.583 | 0.00 | 0.00 |
| ATOM | 7218 | HE1  | TYR | X | 475 | 36.238 | 19.651 | 33.206 | 0.00 | 0.00 |
| ATOM | 7219 | CZ   | TYR | X | 475 | 38.326 | 20.124 | 33.743 | 0.00 | 0.00 |
| ATOM | 7220 | OH   | TYR | X | 475 | 38.878 | 18.997 | 33.253 | 0.00 | 0.00 |
| ATOM | 7221 | HH   | TYR | X | 475 | 38.227 | 18.404 | 32.870 | 0.00 | 0.00 |
| ATOM | 7222 | CE2  | TYR | X | 475 | 39.132 | 21.187 | 34.201 | 0.00 | 0.00 |
| ATOM | 7223 | HE2  | TYR | X | 475 | 40.205 | 21.071 | 34.223 | 0.00 | 0.00 |
| ATOM | 7224 | CD2  | TYR | X | 475 | 38.539 | 22.461 | 34.542 | 0.00 | 0.00 |
| ATOM | 7225 | HD2  | TYR | X | 475 | 39.206 | 23.263 | 34.823 | 0.00 | 0.00 |
| ATOM | 7226 | C    | TYR | X | 475 | 35.193 | 25.959 | 34.097 | 0.00 | 0.00 |
| ATOM | 7227 | O    | TYR | X | 475 | 34.068 | 26.127 | 34.615 | 0.00 | 0.00 |
| ATOM | 7228 | N    | TRP | X | 476 | 36.081 | 26.996 | 33.965 | 0.00 | 0.00 |
| ATOM | 7229 | H    | TRP | X | 476 | 37.070 | 26.885 | 33.790 | 0.00 | 0.00 |
| ATOM | 7230 | CA   | TRP | X | 476 | 35.732 | 28.358 | 34.446 | 0.00 | 0.00 |
| ATOM | 7231 | HA   | TRP | X | 476 | 35.497 | 28.363 | 35.511 | 0.00 | 0.00 |
| ATOM | 7232 | CB   | TRP | X | 476 | 36.976 | 29.311 | 34.219 | 0.00 | 0.00 |
| ATOM | 7233 | HB2  | TRP | X | 476 | 37.569 | 29.195 | 33.312 | 0.00 | 0.00 |
| ATOM | 7234 | HB3  | TRP | X | 476 | 36.574 | 30.297 | 33.985 | 0.00 | 0.00 |
| ATOM | 7235 | CG   | TRP | X | 476 | 37.860 | 29.497 | 35.391 | 0.00 | 0.00 |
| ATOM | 7236 | CD1  | TRP | X | 476 | 38.035 | 30.554 | 36.131 | 0.00 | 0.00 |
| ATOM | 7237 | HD1  | TRP | X | 476 | 37.502 | 31.491 | 36.066 | 0.00 | 0.00 |
| ATOM | 7238 | NE1  | TRP | X | 476 | 39.019 | 30.377 | 37.116 | 0.00 | 0.00 |
| ATOM | 7239 | HE1  | TRP | X | 476 | 39.414 | 31.146 | 37.638 | 0.00 | 0.00 |
| ATOM | 7240 | CE2  | TRP | X | 476 | 39.398 | 29.095 | 37.105 | 0.00 | 0.00 |
| ATOM | 7241 | CZ2  | TRP | X | 476 | 40.329 | 28.470 | 37.978 | 0.00 | 0.00 |
| ATOM | 7242 | HZ2  | TRP | X | 476 | 40.760 | 29.043 | 38.785 | 0.00 | 0.00 |
| ATOM | 7243 | CH2  | TRP | X | 476 | 40.677 | 27.150 | 37.822 | 0.00 | 0.00 |
| ATOM | 7244 | HH2  | TRP | X | 476 | 41.342 | 26.660 | 38.518 | 0.00 | 0.00 |
| ATOM | 7245 | CZ3  | TRP | X | 476 | 39.959 | 26.483 | 36.783 | 0.00 | 0.00 |
| ATOM | 7246 | HZ3  | TRP | X | 476 | 40.139 | 25.439 | 36.572 | 0.00 | 0.00 |
| ATOM | 7247 | CE3  | TRP | X | 476 | 39.085 | 27.147 | 35.892 | 0.00 | 0.00 |
| ATOM | 7248 | HE3  | TRP | X | 476 | 38.811 | 26.586 | 35.011 | 0.00 | 0.00 |
| ATOM | 7249 | CD2  | TRP | X | 476 | 38.739 | 28.507 | 36.005 | 0.00 | 0.00 |
| ATOM | 7250 | C    | TRP | X | 476 | 34.592 | 29.002 | 33.696 | 0.00 | 0.00 |
| ATOM | 7251 | O    | TRP | X | 476 | 33.823 | 29.636 | 34.374 | 0.00 | 0.00 |
| ATOM | 7252 | N    | ALA | X | 477 | 34.408 | 28.701 | 32.421 | 0.00 | 0.00 |
| ATOM | 7253 | H    | ALA | X | 477 | 35.029 | 28.175 | 31.824 | 0.00 | 0.00 |
| ATOM | 7254 | CA   | ALA | X | 477 | 33.203 | 29.150 | 31.778 | 0.00 | 0.00 |

|      |      |      |     |   |     |        |        |        |      |      |
|------|------|------|-----|---|-----|--------|--------|--------|------|------|
| ATOM | 7255 | HA   | ALA | X | 477 | 33.128 | 30.199 | 32.066 | 0.00 | 0.00 |
| ATOM | 7256 | CB   | ALA | X | 477 | 33.334 | 29.219 | 30.271 | 0.00 | 0.00 |
| ATOM | 7257 | HB1  | ALA | X | 477 | 32.586 | 29.945 | 29.953 | 0.00 | 0.00 |
| ATOM | 7258 | HB2  | ALA | X | 477 | 33.309 | 28.222 | 29.830 | 0.00 | 0.00 |
| ATOM | 7259 | HB3  | ALA | X | 477 | 34.308 | 29.634 | 30.009 | 0.00 | 0.00 |
| ATOM | 7260 | C    | ALA | X | 477 | 32.009 | 28.229 | 32.164 | 0.00 | 0.00 |
| ATOM | 7261 | O    | ALA | X | 477 | 30.906 | 28.724 | 32.334 | 0.00 | 0.00 |
| ATOM | 7262 | N    | ASN | X | 478 | 32.205 | 26.990 | 32.497 | 0.00 | 0.00 |
| ATOM | 7263 | H    | ASN | X | 478 | 33.115 | 26.588 | 32.320 | 0.00 | 0.00 |
| ATOM | 7264 | CA   | ASN | X | 478 | 31.128 | 26.129 | 33.094 | 0.00 | 0.00 |
| ATOM | 7265 | HA   | ASN | X | 478 | 30.296 | 26.171 | 32.391 | 0.00 | 0.00 |
| ATOM | 7266 | CB   | ASN | X | 478 | 31.542 | 24.662 | 33.297 | 0.00 | 0.00 |
| ATOM | 7267 | HB2  | ASN | X | 478 | 32.579 | 24.694 | 33.633 | 0.00 | 0.00 |
| ATOM | 7268 | HB3  | ASN | X | 478 | 30.852 | 24.231 | 34.022 | 0.00 | 0.00 |
| ATOM | 7269 | CG   | ASN | X | 478 | 31.396 | 23.826 | 31.997 | 0.00 | 0.00 |
| ATOM | 7270 | OD1  | ASN | X | 478 | 30.771 | 24.146 | 30.994 | 0.00 | 0.00 |
| ATOM | 7271 | ND2  | ASN | X | 478 | 32.076 | 22.697 | 31.985 | 0.00 | 0.00 |
| ATOM | 7272 | HD21 | ASN | X | 478 | 32.039 | 22.117 | 31.159 | 0.00 | 0.00 |
| ATOM | 7273 | HD22 | ASN | X | 478 | 32.470 | 22.380 | 32.860 | 0.00 | 0.00 |
| ATOM | 7274 | C    | ASN | X | 478 | 30.578 | 26.649 | 34.452 | 0.00 | 0.00 |
| ATOM | 7275 | O    | ASN | X | 478 | 29.355 | 26.676 | 34.623 | 0.00 | 0.00 |
| ATOM | 7276 | N    | PHE | X | 479 | 31.443 | 27.117 | 35.301 | 0.00 | 0.00 |
| ATOM | 7277 | H    | PHE | X | 479 | 32.428 | 27.042 | 35.093 | 0.00 | 0.00 |
| ATOM | 7278 | CA   | PHE | X | 479 | 31.055 | 27.829 | 36.495 | 0.00 | 0.00 |
| ATOM | 7279 | HA   | PHE | X | 479 | 30.423 | 27.151 | 37.069 | 0.00 | 0.00 |
| ATOM | 7280 | CB   | PHE | X | 479 | 32.397 | 28.158 | 37.282 | 0.00 | 0.00 |
| ATOM | 7281 | HB2  | PHE | X | 479 | 32.623 | 27.188 | 37.724 | 0.00 | 0.00 |
| ATOM | 7282 | HB3  | PHE | X | 479 | 33.176 | 28.595 | 36.657 | 0.00 | 0.00 |
| ATOM | 7283 | CG   | PHE | X | 479 | 32.078 | 29.030 | 38.469 | 0.00 | 0.00 |
| ATOM | 7284 | CD1  | PHE | X | 479 | 31.380 | 28.459 | 39.594 | 0.00 | 0.00 |
| ATOM | 7285 | HD1  | PHE | X | 479 | 31.189 | 27.404 | 39.715 | 0.00 | 0.00 |
| ATOM | 7286 | CE1  | PHE | X | 479 | 30.906 | 29.292 | 40.625 | 0.00 | 0.00 |
| ATOM | 7287 | HE1  | PHE | X | 479 | 30.318 | 28.788 | 41.378 | 0.00 | 0.00 |
| ATOM | 7288 | CZ   | PHE | X | 479 | 31.152 | 30.652 | 40.515 | 0.00 | 0.00 |
| ATOM | 7289 | HZ   | PHE | X | 479 | 30.885 | 31.277 | 41.355 | 0.00 | 0.00 |
| ATOM | 7290 | CE2  | PHE | X | 479 | 31.880 | 31.208 | 39.523 | 0.00 | 0.00 |
| ATOM | 7291 | HE2  | PHE | X | 479 | 32.066 | 32.272 | 39.508 | 0.00 | 0.00 |
| ATOM | 7292 | CD2  | PHE | X | 479 | 32.196 | 30.388 | 38.426 | 0.00 | 0.00 |
| ATOM | 7293 | HD2  | PHE | X | 479 | 32.702 | 30.841 | 37.586 | 0.00 | 0.00 |
| ATOM | 7294 | C    | PHE | X | 479 | 30.204 | 29.066 | 36.101 | 0.00 | 0.00 |
| ATOM | 7295 | O    | PHE | X | 479 | 29.074 | 29.110 | 36.523 | 0.00 | 0.00 |
| ATOM | 7296 | N    | ALA | X | 480 | 30.702 | 29.964 | 35.303 | 0.00 | 0.00 |
| ATOM | 7297 | H    | ALA | X | 480 | 31.634 | 29.847 | 34.932 | 0.00 | 0.00 |
| ATOM | 7298 | CA   | ALA | X | 480 | 30.051 | 31.168 | 34.760 | 0.00 | 0.00 |
| ATOM | 7299 | HA   | ALA | X | 480 | 29.912 | 31.861 | 35.589 | 0.00 | 0.00 |
| ATOM | 7300 | CB   | ALA | X | 480 | 30.986 | 31.802 | 33.762 | 0.00 | 0.00 |
| ATOM | 7301 | HB1  | ALA | X | 480 | 30.546 | 32.781 | 33.571 | 0.00 | 0.00 |
| ATOM | 7302 | HB2  | ALA | X | 480 | 30.967 | 31.264 | 32.814 | 0.00 | 0.00 |
| ATOM | 7303 | HB3  | ALA | X | 480 | 31.964 | 31.846 | 34.240 | 0.00 | 0.00 |
| ATOM | 7304 | C    | ALA | X | 480 | 28.611 | 30.991 | 34.207 | 0.00 | 0.00 |
| ATOM | 7305 | O    | ALA | X | 480 | 27.658 | 31.839 | 34.370 | 0.00 | 0.00 |
| ATOM | 7306 | N    | ARG | X | 481 | 28.384 | 29.864 | 33.611 | 0.00 | 0.00 |
| ATOM | 7307 | H    | ARG | X | 481 | 29.121 | 29.175 | 33.571 | 0.00 | 0.00 |
| ATOM | 7308 | CA   | ARG | X | 481 | 27.134 | 29.470 | 32.952 | 0.00 | 0.00 |
| ATOM | 7309 | HA   | ARG | X | 481 | 26.773 | 30.354 | 32.426 | 0.00 | 0.00 |
| ATOM | 7310 | CB   | ARG | X | 481 | 27.287 | 28.287 | 31.938 | 0.00 | 0.00 |
| ATOM | 7311 | HB2  | ARG | X | 481 | 27.900 | 27.507 | 32.390 | 0.00 | 0.00 |
| ATOM | 7312 | HB3  | ARG | X | 481 | 26.306 | 27.893 | 31.671 | 0.00 | 0.00 |
| ATOM | 7313 | CG   | ARG | X | 481 | 28.014 | 28.620 | 30.654 | 0.00 | 0.00 |
| ATOM | 7314 | HG2  | ARG | X | 481 | 27.387 | 29.259 | 30.031 | 0.00 | 0.00 |
| ATOM | 7315 | HG3  | ARG | X | 481 | 28.887 | 29.207 | 30.937 | 0.00 | 0.00 |
| ATOM | 7316 | CD   | ARG | X | 481 | 28.507 | 27.362 | 29.837 | 0.00 | 0.00 |
| ATOM | 7317 | HD2  | ARG | X | 481 | 29.233 | 26.770 | 30.394 | 0.00 | 0.00 |
| ATOM | 7318 | HD3  | ARG | X | 481 | 27.627 | 26.805 | 29.514 | 0.00 | 0.00 |
| ATOM | 7319 | NE   | ARG | X | 481 | 29.227 | 27.700 | 28.551 | 0.00 | 0.00 |
| ATOM | 7320 | HE   | ARG | X | 481 | 28.750 | 28.351 | 27.943 | 0.00 | 0.00 |
| ATOM | 7321 | CZ   | ARG | X | 481 | 30.384 | 27.255 | 28.093 | 0.00 | 0.00 |

|      |      |      |     |   |     |        |        |        |      |      |
|------|------|------|-----|---|-----|--------|--------|--------|------|------|
| ATOM | 7322 | NH1  | ARG | X | 481 | 31.119 | 26.486 | 28.823 | 0.00 | 0.00 |
| ATOM | 7323 | HH11 | ARG | X | 481 | 30.941 | 26.292 | 29.798 | 0.00 | 0.00 |
| ATOM | 7324 | HH12 | ARG | X | 481 | 31.940 | 26.055 | 28.423 | 0.00 | 0.00 |
| ATOM | 7325 | NH2  | ARG | X | 481 | 30.933 | 27.718 | 26.986 | 0.00 | 0.00 |
| ATOM | 7326 | HH21 | ARG | X | 481 | 30.610 | 28.483 | 26.411 | 0.00 | 0.00 |
| ATOM | 7327 | HH22 | ARG | X | 481 | 31.796 | 27.277 | 26.704 | 0.00 | 0.00 |
| ATOM | 7328 | C    | ARG | X | 481 | 26.019 | 29.125 | 34.009 | 0.00 | 0.00 |
| ATOM | 7329 | O    | ARG | X | 481 | 24.947 | 29.739 | 33.998 | 0.00 | 0.00 |
| ATOM | 7330 | N    | THR | X | 482 | 26.228 | 28.089 | 34.833 | 0.00 | 0.00 |
| ATOM | 7331 | H    | THR | X | 482 | 27.055 | 27.622 | 34.489 | 0.00 | 0.00 |
| ATOM | 7332 | CA   | THR | X | 482 | 25.199 | 27.323 | 35.636 | 0.00 | 0.00 |
| ATOM | 7333 | HA   | THR | X | 482 | 24.263 | 27.866 | 35.499 | 0.00 | 0.00 |
| ATOM | 7334 | CB   | THR | X | 482 | 24.988 | 25.891 | 35.081 | 0.00 | 0.00 |
| ATOM | 7335 | HB   | THR | X | 482 | 25.816 | 25.225 | 35.324 | 0.00 | 0.00 |
| ATOM | 7336 | CG2  | THR | X | 482 | 23.636 | 25.165 | 35.517 | 0.00 | 0.00 |
| ATOM | 7337 | HG21 | THR | X | 482 | 23.553 | 25.053 | 36.598 | 0.00 | 0.00 |
| ATOM | 7338 | HG22 | THR | X | 482 | 23.786 | 24.115 | 35.266 | 0.00 | 0.00 |
| ATOM | 7339 | HG23 | THR | X | 482 | 22.740 | 25.687 | 35.179 | 0.00 | 0.00 |
| ATOM | 7340 | OG1  | THR | X | 482 | 24.958 | 26.003 | 33.666 | 0.00 | 0.00 |
| ATOM | 7341 | HG1  | THR | X | 482 | 25.450 | 25.223 | 33.398 | 0.00 | 0.00 |
| ATOM | 7342 | C    | THR | X | 482 | 25.578 | 27.334 | 37.111 | 0.00 | 0.00 |
| ATOM | 7343 | O    | THR | X | 482 | 24.794 | 26.849 | 37.963 | 0.00 | 0.00 |
| ATOM | 7344 | N    | GLY | X | 483 | 26.719 | 27.938 | 37.522 | 0.00 | 0.00 |
| ATOM | 7345 | H    | GLY | X | 483 | 27.340 | 28.456 | 36.916 | 0.00 | 0.00 |
| ATOM | 7346 | CA   | GLY | X | 483 | 27.156 | 27.757 | 38.893 | 0.00 | 0.00 |
| ATOM | 7347 | HA2  | GLY | X | 483 | 27.750 | 28.662 | 39.020 | 0.00 | 0.00 |
| ATOM | 7348 | HA3  | GLY | X | 483 | 26.253 | 27.803 | 39.501 | 0.00 | 0.00 |
| ATOM | 7349 | C    | GLY | X | 483 | 28.039 | 26.636 | 39.250 | 0.00 | 0.00 |
| ATOM | 7350 | O    | GLY | X | 483 | 28.132 | 26.335 | 40.435 | 0.00 | 0.00 |
| ATOM | 7351 | N    | ASP | X | 484 | 28.677 | 25.820 | 38.347 | 0.00 | 0.00 |
| ATOM | 7352 | H    | ASP | X | 484 | 28.495 | 26.055 | 37.382 | 0.00 | 0.00 |
| ATOM | 7353 | CA   | ASP | X | 484 | 29.250 | 24.508 | 38.515 | 0.00 | 0.00 |
| ATOM | 7354 | HA   | ASP | X | 484 | 29.737 | 24.469 | 39.489 | 0.00 | 0.00 |
| ATOM | 7355 | CB   | ASP | X | 484 | 28.113 | 23.479 | 38.480 | 0.00 | 0.00 |
| ATOM | 7356 | HB2  | ASP | X | 484 | 27.362 | 23.687 | 39.242 | 0.00 | 0.00 |
| ATOM | 7357 | HB3  | ASP | X | 484 | 27.655 | 23.553 | 37.494 | 0.00 | 0.00 |
| ATOM | 7358 | CG   | ASP | X | 484 | 28.554 | 22.007 | 38.685 | 0.00 | 0.00 |
| ATOM | 7359 | OD1  | ASP | X | 484 | 27.637 | 21.164 | 38.831 | 0.00 | 0.00 |
| ATOM | 7360 | OD2  | ASP | X | 484 | 29.776 | 21.710 | 38.891 | 0.00 | 0.00 |
| ATOM | 7361 | C    | ASP | X | 484 | 30.324 | 24.295 | 37.405 | 0.00 | 0.00 |
| ATOM | 7362 | O    | ASP | X | 484 | 29.936 | 24.333 | 36.267 | 0.00 | 0.00 |
| ATOM | 7363 | N    | PRO | X | 485 | 31.557 | 24.117 | 37.830 | 0.00 | 0.00 |
| ATOM | 7364 | CD   | PRO | X | 485 | 32.107 | 24.212 | 39.250 | 0.00 | 0.00 |
| ATOM | 7365 | HD2  | PRO | X | 485 | 31.584 | 23.682 | 40.046 | 0.00 | 0.00 |
| ATOM | 7366 | HD3  | PRO | X | 485 | 32.196 | 25.263 | 39.524 | 0.00 | 0.00 |
| ATOM | 7367 | CG   | PRO | X | 485 | 33.515 | 23.687 | 39.155 | 0.00 | 0.00 |
| ATOM | 7368 | HG2  | PRO | X | 485 | 33.498 | 22.605 | 39.292 | 0.00 | 0.00 |
| ATOM | 7369 | HG3  | PRO | X | 485 | 34.180 | 24.025 | 39.950 | 0.00 | 0.00 |
| ATOM | 7370 | CB   | PRO | X | 485 | 33.967 | 23.969 | 37.756 | 0.00 | 0.00 |
| ATOM | 7371 | HB2  | PRO | X | 485 | 34.681 | 23.220 | 37.415 | 0.00 | 0.00 |
| ATOM | 7372 | HB3  | PRO | X | 485 | 34.279 | 25.007 | 37.640 | 0.00 | 0.00 |
| ATOM | 7373 | CA   | PRO | X | 485 | 32.660 | 23.860 | 36.914 | 0.00 | 0.00 |
| ATOM | 7374 | HA   | PRO | X | 485 | 32.671 | 24.636 | 36.148 | 0.00 | 0.00 |
| ATOM | 7375 | C    | PRO | X | 485 | 32.476 | 22.428 | 36.285 | 0.00 | 0.00 |
| ATOM | 7376 | O    | PRO | X | 485 | 33.020 | 22.249 | 35.177 | 0.00 | 0.00 |
| ATOM | 7377 | N    | ASN | X | 486 | 31.789 | 21.481 | 36.918 | 0.00 | 0.00 |
| ATOM | 7378 | H    | ASN | X | 486 | 31.327 | 21.749 | 37.775 | 0.00 | 0.00 |
| ATOM | 7379 | CA   | ASN | X | 486 | 31.635 | 20.130 | 36.418 | 0.00 | 0.00 |
| ATOM | 7380 | HA   | ASN | X | 486 | 32.617 | 19.656 | 36.423 | 0.00 | 0.00 |
| ATOM | 7381 | CB   | ASN | X | 486 | 30.794 | 19.243 | 37.383 | 0.00 | 0.00 |
| ATOM | 7382 | HB2  | ASN | X | 486 | 30.910 | 19.607 | 38.404 | 0.00 | 0.00 |
| ATOM | 7383 | HB3  | ASN | X | 486 | 29.753 | 19.442 | 37.130 | 0.00 | 0.00 |
| ATOM | 7384 | CG   | ASN | X | 486 | 30.941 | 17.750 | 37.334 | 0.00 | 0.00 |
| ATOM | 7385 | OD1  | ASN | X | 486 | 31.371 | 17.089 | 38.217 | 0.00 | 0.00 |
| ATOM | 7386 | ND2  | ASN | X | 486 | 30.656 | 17.201 | 36.197 | 0.00 | 0.00 |
| ATOM | 7387 | HD21 | ASN | X | 486 | 30.802 | 16.202 | 36.185 | 0.00 | 0.00 |
| ATOM | 7388 | HD22 | ASN | X | 486 | 30.157 | 17.637 | 35.434 | 0.00 | 0.00 |

|      |      |      |     |   |     |        |        |        |      |      |
|------|------|------|-----|---|-----|--------|--------|--------|------|------|
| ATOM | 7389 | C    | ASN | X | 486 | 31.143 | 20.194 | 34.979 | 0.00 | 0.00 |
| ATOM | 7390 | O    | ASN | X | 486 | 30.287 | 21.005 | 34.682 | 0.00 | 0.00 |
| ATOM | 7391 | N    | GLU | X | 487 | 31.625 | 19.281 | 34.097 | 0.00 | 0.00 |
| ATOM | 7392 | H    | GLU | X | 487 | 32.181 | 18.507 | 34.432 | 0.00 | 0.00 |
| ATOM | 7393 | CA   | GLU | X | 487 | 31.310 | 19.231 | 32.651 | 0.00 | 0.00 |
| ATOM | 7394 | HA   | GLU | X | 487 | 31.310 | 20.233 | 32.221 | 0.00 | 0.00 |
| ATOM | 7395 | CB   | GLU | X | 487 | 32.378 | 18.450 | 31.880 | 0.00 | 0.00 |
| ATOM | 7396 | HB2  | GLU | X | 487 | 32.751 | 17.592 | 32.439 | 0.00 | 0.00 |
| ATOM | 7397 | HB3  | GLU | X | 487 | 31.901 | 17.940 | 31.043 | 0.00 | 0.00 |
| ATOM | 7398 | CG   | GLU | X | 487 | 33.464 | 19.377 | 31.420 | 0.00 | 0.00 |
| ATOM | 7399 | HG2  | GLU | X | 487 | 33.618 | 20.160 | 32.162 | 0.00 | 0.00 |
| ATOM | 7400 | HG3  | GLU | X | 487 | 34.344 | 18.757 | 31.246 | 0.00 | 0.00 |
| ATOM | 7401 | CD   | GLU | X | 487 | 33.160 | 20.074 | 30.137 | 0.00 | 0.00 |
| ATOM | 7402 | OE1  | GLU | X | 487 | 34.079 | 20.164 | 29.278 | 0.00 | 0.00 |
| ATOM | 7403 | OE2  | GLU | X | 487 | 32.051 | 20.599 | 30.000 | 0.00 | 0.00 |
| ATOM | 7404 | C    | GLU | X | 487 | 29.955 | 18.620 | 32.429 | 0.00 | 0.00 |
| ATOM | 7405 | O    | GLU | X | 487 | 29.768 | 17.381 | 32.572 | 0.00 | 0.00 |
| ATOM | 7406 | N    | PRO | X | 488 | 28.891 | 19.375 | 32.100 | 0.00 | 0.00 |
| ATOM | 7407 | CD   | PRO | X | 488 | 28.877 | 20.738 | 31.415 | 0.00 | 0.00 |
| ATOM | 7408 | HD2  | PRO | X | 488 | 29.651 | 20.777 | 30.649 | 0.00 | 0.00 |
| ATOM | 7409 | HD3  | PRO | X | 488 | 29.159 | 21.550 | 32.085 | 0.00 | 0.00 |
| ATOM | 7410 | CG   | PRO | X | 488 | 27.486 | 20.932 | 30.899 | 0.00 | 0.00 |
| ATOM | 7411 | HG2  | PRO | X | 488 | 27.422 | 20.510 | 29.896 | 0.00 | 0.00 |
| ATOM | 7412 | HG3  | PRO | X | 488 | 27.165 | 21.972 | 30.837 | 0.00 | 0.00 |
| ATOM | 7413 | CB   | PRO | X | 488 | 26.554 | 20.098 | 31.899 | 0.00 | 0.00 |
| ATOM | 7414 | HB2  | PRO | X | 488 | 25.612 | 19.762 | 31.464 | 0.00 | 0.00 |
| ATOM | 7415 | HB3  | PRO | X | 488 | 26.442 | 20.510 | 32.901 | 0.00 | 0.00 |
| ATOM | 7416 | CA   | PRO | X | 488 | 27.512 | 18.892 | 32.104 | 0.00 | 0.00 |
| ATOM | 7417 | HA   | PRO | X | 488 | 27.325 | 18.319 | 33.012 | 0.00 | 0.00 |
| ATOM | 7418 | C    | PRO | X | 488 | 27.238 | 17.888 | 31.011 | 0.00 | 0.00 |
| ATOM | 7419 | O    | PRO | X | 488 | 26.291 | 17.109 | 31.105 | 0.00 | 0.00 |
| ATOM | 7420 | N    | ARG | X | 489 | 28.080 | 17.818 | 29.974 | 0.00 | 0.00 |
| ATOM | 7421 | H    | ARG | X | 489 | 28.847 | 18.470 | 30.055 | 0.00 | 0.00 |
| ATOM | 7422 | CA   | ARG | X | 489 | 27.940 | 16.857 | 28.863 | 0.00 | 0.00 |
| ATOM | 7423 | HA   | ARG | X | 489 | 26.920 | 16.887 | 28.480 | 0.00 | 0.00 |
| ATOM | 7424 | CB   | ARG | X | 489 | 28.963 | 17.234 | 27.675 | 0.00 | 0.00 |
| ATOM | 7425 | HB2  | ARG | X | 489 | 28.951 | 16.498 | 26.871 | 0.00 | 0.00 |
| ATOM | 7426 | HB3  | ARG | X | 489 | 28.543 | 18.173 | 27.315 | 0.00 | 0.00 |
| ATOM | 7427 | CG   | ARG | X | 489 | 30.420 | 17.519 | 28.097 | 0.00 | 0.00 |
| ATOM | 7428 | HG2  | ARG | X | 489 | 30.379 | 18.020 | 29.064 | 0.00 | 0.00 |
| ATOM | 7429 | HG3  | ARG | X | 489 | 30.889 | 16.541 | 28.211 | 0.00 | 0.00 |
| ATOM | 7430 | CD   | ARG | X | 489 | 31.173 | 18.305 | 27.019 | 0.00 | 0.00 |
| ATOM | 7431 | HD2  | ARG | X | 489 | 31.001 | 17.807 | 26.065 | 0.00 | 0.00 |
| ATOM | 7432 | HD3  | ARG | X | 489 | 30.709 | 19.271 | 26.820 | 0.00 | 0.00 |
| ATOM | 7433 | NE   | ARG | X | 489 | 32.605 | 18.543 | 27.397 | 0.00 | 0.00 |
| ATOM | 7434 | HE   | ARG | X | 489 | 32.711 | 19.390 | 27.937 | 0.00 | 0.00 |
| ATOM | 7435 | CZ   | ARG | X | 489 | 33.666 | 17.855 | 27.058 | 0.00 | 0.00 |
| ATOM | 7436 | NH1  | ARG | X | 489 | 34.815 | 18.354 | 27.356 | 0.00 | 0.00 |
| ATOM | 7437 | HH11 | ARG | X | 489 | 34.901 | 19.201 | 27.900 | 0.00 | 0.00 |
| ATOM | 7438 | HH12 | ARG | X | 489 | 35.636 | 17.834 | 27.081 | 0.00 | 0.00 |
| ATOM | 7439 | NH2  | ARG | X | 489 | 33.566 | 16.656 | 26.545 | 0.00 | 0.00 |
| ATOM | 7440 | HH21 | ARG | X | 489 | 32.631 | 16.419 | 26.246 | 0.00 | 0.00 |
| ATOM | 7441 | HH22 | ARG | X | 489 | 34.412 | 16.105 | 26.528 | 0.00 | 0.00 |
| ATOM | 7442 | C    | ARG | X | 489 | 28.342 | 15.465 | 29.311 | 0.00 | 0.00 |
| ATOM | 7443 | O    | ARG | X | 489 | 28.277 | 14.537 | 28.485 | 0.00 | 0.00 |
| ATOM | 7444 | N    | ASP | X | 490 | 28.841 | 15.347 | 30.587 | 0.00 | 0.00 |
| ATOM | 7445 | H    | ASP | X | 490 | 28.821 | 16.200 | 31.127 | 0.00 | 0.00 |
| ATOM | 7446 | CA   | ASP | X | 490 | 29.187 | 14.169 | 31.295 | 0.00 | 0.00 |
| ATOM | 7447 | HA   | ASP | X | 490 | 29.594 | 14.481 | 32.257 | 0.00 | 0.00 |
| ATOM | 7448 | CB   | ASP | X | 490 | 27.811 | 13.534 | 31.549 | 0.00 | 0.00 |
| ATOM | 7449 | HB2  | ASP | X | 490 | 27.090 | 14.186 | 32.044 | 0.00 | 0.00 |
| ATOM | 7450 | HB3  | ASP | X | 490 | 27.377 | 13.190 | 30.611 | 0.00 | 0.00 |
| ATOM | 7451 | CG   | ASP | X | 490 | 27.869 | 12.226 | 32.358 | 0.00 | 0.00 |
| ATOM | 7452 | OD1  | ASP | X | 490 | 27.187 | 11.229 | 31.992 | 0.00 | 0.00 |
| ATOM | 7453 | OD2  | ASP | X | 490 | 28.514 | 12.280 | 33.452 | 0.00 | 0.00 |
| ATOM | 7454 | C    | ASP | X | 490 | 30.266 | 13.271 | 30.649 | 0.00 | 0.00 |
| ATOM | 7455 | O    | ASP | X | 490 | 29.980 | 12.139 | 30.314 | 0.00 | 0.00 |



|      |      |     |     |   |     |        |        |        |      |      |
|------|------|-----|-----|---|-----|--------|--------|--------|------|------|
| ATOM | 7456 | N   | PRO | X | 491 | 31.475 | 13.742 | 30.413 | 0.00 | 0.00 |
| ATOM | 7457 | CD  | PRO | X | 491 | 32.090 | 15.012 | 30.802 | 0.00 | 0.00 |
| ATOM | 7458 | HD2 | PRO | X | 491 | 32.036 | 15.256 | 31.864 | 0.00 | 0.00 |
| ATOM | 7459 | HD3 | PRO | X | 491 | 31.578 | 15.800 | 30.249 | 0.00 | 0.00 |
| ATOM | 7460 | CG  | PRO | X | 491 | 33.542 | 14.922 | 30.347 | 0.00 | 0.00 |
| ATOM | 7461 | HG2 | PRO | X | 491 | 34.175 | 14.610 | 31.177 | 0.00 | 0.00 |
| ATOM | 7462 | HG3 | PRO | X | 491 | 33.945 | 15.851 | 29.944 | 0.00 | 0.00 |
| ATOM | 7463 | CB  | PRO | X | 491 | 33.555 | 13.857 | 29.228 | 0.00 | 0.00 |
| ATOM | 7464 | HB2 | PRO | X | 491 | 34.533 | 13.384 | 29.132 | 0.00 | 0.00 |
| ATOM | 7465 | HB3 | PRO | X | 491 | 33.214 | 14.183 | 28.246 | 0.00 | 0.00 |
| ATOM | 7466 | CA  | PRO | X | 491 | 32.523 | 12.914 | 29.852 | 0.00 | 0.00 |
| ATOM | 7467 | HA  | PRO | X | 491 | 32.053 | 12.409 | 29.008 | 0.00 | 0.00 |
| ATOM | 7468 | C   | PRO | X | 491 | 33.104 | 11.910 | 30.836 | 0.00 | 0.00 |
| ATOM | 7469 | O   | PRO | X | 491 | 33.018 | 12.116 | 32.015 | 0.00 | 0.00 |
| ATOM | 7470 | N   | LYS | X | 492 | 33.803 | 10.897 | 30.404 | 0.00 | 0.00 |
| ATOM | 7471 | H   | LYS | X | 492 | 33.844 | 10.697 | 29.415 | 0.00 | 0.00 |
| ATOM | 7472 | CA  | LYS | X | 492 | 34.418 | 9.940  | 31.352 | 0.00 | 0.00 |
| ATOM | 7473 | HA  | LYS | X | 492 | 33.693 | 9.859  | 32.162 | 0.00 | 0.00 |
| ATOM | 7474 | CB  | LYS | X | 492 | 34.606 | 8.509  | 30.718 | 0.00 | 0.00 |
| ATOM | 7475 | HB2 | LYS | X | 492 | 35.149 | 8.518  | 29.773 | 0.00 | 0.00 |
| ATOM | 7476 | HB3 | LYS | X | 492 | 35.157 | 7.975  | 31.492 | 0.00 | 0.00 |
| ATOM | 7477 | CG  | LYS | X | 492 | 33.282 | 7.759  | 30.484 | 0.00 | 0.00 |
| ATOM | 7478 | HG2 | LYS | X | 492 | 32.974 | 7.228  | 31.385 | 0.00 | 0.00 |
| ATOM | 7479 | HG3 | LYS | X | 492 | 32.507 | 8.418  | 30.094 | 0.00 | 0.00 |
| ATOM | 7480 | CD  | LYS | X | 492 | 33.539 | 6.575  | 29.442 | 0.00 | 0.00 |
| ATOM | 7481 | HD2 | LYS | X | 492 | 33.785 | 7.007  | 28.472 | 0.00 | 0.00 |
| ATOM | 7482 | HD3 | LYS | X | 492 | 34.411 | 6.033  | 29.809 | 0.00 | 0.00 |
| ATOM | 7483 | CE  | LYS | X | 492 | 32.239 | 5.708  | 29.349 | 0.00 | 0.00 |
| ATOM | 7484 | HE2 | LYS | X | 492 | 32.093 | 5.342  | 30.365 | 0.00 | 0.00 |
| ATOM | 7485 | HE3 | LYS | X | 492 | 31.340 | 6.278  | 29.113 | 0.00 | 0.00 |
| ATOM | 7486 | NZ  | LYS | X | 492 | 32.480 | 4.521  | 28.407 | 0.00 | 0.00 |
| ATOM | 7487 | HZ1 | LYS | X | 492 | 31.699 | 3.880  | 28.402 | 0.00 | 0.00 |
| ATOM | 7488 | HZ2 | LYS | X | 492 | 32.501 | 4.689  | 27.412 | 0.00 | 0.00 |
| ATOM | 7489 | HZ3 | LYS | X | 492 | 33.283 | 3.977  | 28.690 | 0.00 | 0.00 |
| ATOM | 7490 | C   | LYS | X | 492 | 35.593 | 10.418 | 32.163 | 0.00 | 0.00 |
| ATOM | 7491 | O   | LYS | X | 492 | 35.936 | 9.886  | 33.234 | 0.00 | 0.00 |
| ATOM | 7492 | N   | ALA | X | 493 | 36.239 | 11.527 | 31.746 | 0.00 | 0.00 |
| ATOM | 7493 | H   | ALA | X | 493 | 35.864 | 12.064 | 30.977 | 0.00 | 0.00 |
| ATOM | 7494 | CA  | ALA | X | 493 | 37.325 | 12.114 | 32.506 | 0.00 | 0.00 |
| ATOM | 7495 | HA  | ALA | X | 493 | 37.917 | 11.215 | 32.676 | 0.00 | 0.00 |
| ATOM | 7496 | CB  | ALA | X | 493 | 37.925 | 13.196 | 31.558 | 0.00 | 0.00 |
| ATOM | 7497 | HB1 | ALA | X | 493 | 38.085 | 12.729 | 30.586 | 0.00 | 0.00 |
| ATOM | 7498 | HB2 | ALA | X | 493 | 38.913 | 13.442 | 31.945 | 0.00 | 0.00 |
| ATOM | 7499 | HB3 | ALA | X | 493 | 37.334 | 14.094 | 31.380 | 0.00 | 0.00 |
| ATOM | 7500 | C   | ALA | X | 493 | 36.851 | 12.665 | 33.855 | 0.00 | 0.00 |
| ATOM | 7501 | O   | ALA | X | 493 | 35.727 | 13.103 | 33.935 | 0.00 | 0.00 |
| ATOM | 7502 | N   | PRO | X | 494 | 37.701 | 12.808 | 34.902 | 0.00 | 0.00 |
| ATOM | 7503 | CD  | PRO | X | 494 | 39.073 | 12.475 | 34.862 | 0.00 | 0.00 |
| ATOM | 7504 | HD2 | PRO | X | 494 | 39.509 | 12.999 | 34.011 | 0.00 | 0.00 |
| ATOM | 7505 | HD3 | PRO | X | 494 | 39.006 | 11.389 | 34.796 | 0.00 | 0.00 |
| ATOM | 7506 | CG  | PRO | X | 494 | 39.611 | 12.848 | 36.231 | 0.00 | 0.00 |
| ATOM | 7507 | HG2 | PRO | X | 494 | 39.897 | 13.889 | 36.073 | 0.00 | 0.00 |
| ATOM | 7508 | HG3 | PRO | X | 494 | 40.396 | 12.176 | 36.577 | 0.00 | 0.00 |
| ATOM | 7509 | CB  | PRO | X | 494 | 38.438 | 12.943 | 37.212 | 0.00 | 0.00 |
| ATOM | 7510 | HB2 | PRO | X | 494 | 38.671 | 13.721 | 37.939 | 0.00 | 0.00 |
| ATOM | 7511 | HB3 | PRO | X | 494 | 38.358 | 11.971 | 37.698 | 0.00 | 0.00 |
| ATOM | 7512 | CA  | PRO | X | 494 | 37.299 | 13.322 | 36.230 | 0.00 | 0.00 |
| ATOM | 7513 | HA  | PRO | X | 494 | 36.352 | 12.905 | 36.571 | 0.00 | 0.00 |
| ATOM | 7514 | C   | PRO | X | 494 | 37.156 | 14.809 | 36.346 | 0.00 | 0.00 |
| ATOM | 7515 | O   | PRO | X | 494 | 37.860 | 15.588 | 35.690 | 0.00 | 0.00 |
| ATOM | 7516 | N   | GLN | X | 495 | 36.173 | 15.136 | 37.203 | 0.00 | 0.00 |
| ATOM | 7517 | H   | GLN | X | 495 | 35.701 | 14.430 | 37.750 | 0.00 | 0.00 |
| ATOM | 7518 | CA  | GLN | X | 495 | 35.677 | 16.504 | 37.405 | 0.00 | 0.00 |
| ATOM | 7519 | HA  | GLN | X | 495 | 36.292 | 17.165 | 36.795 | 0.00 | 0.00 |
| ATOM | 7520 | CB  | GLN | X | 495 | 34.215 | 16.621 | 36.887 | 0.00 | 0.00 |
| ATOM | 7521 | HB2 | GLN | X | 495 | 33.571 | 16.212 | 37.666 | 0.00 | 0.00 |
| ATOM | 7522 | HB3 | GLN | X | 495 | 33.993 | 17.687 | 36.827 | 0.00 | 0.00 |

|      |      |      |     |   |     |        |        |        |      |      |
|------|------|------|-----|---|-----|--------|--------|--------|------|------|
| ATOM | 7523 | CG   | GLN | X | 495 | 33.863 | 15.957 | 35.508 | 0.00 | 0.00 |
| ATOM | 7524 | HG2  | GLN | X | 495 | 34.169 | 14.913 | 35.590 | 0.00 | 0.00 |
| ATOM | 7525 | HG3  | GLN | X | 495 | 32.804 | 16.163 | 35.353 | 0.00 | 0.00 |
| ATOM | 7526 | CD   | GLN | X | 495 | 34.535 | 16.618 | 34.355 | 0.00 | 0.00 |
| ATOM | 7527 | OE1  | GLN | X | 495 | 34.587 | 17.847 | 34.310 | 0.00 | 0.00 |
| ATOM | 7528 | NE2  | GLN | X | 495 | 35.186 | 15.944 | 33.398 | 0.00 | 0.00 |
| ATOM | 7529 | HE21 | GLN | X | 495 | 35.614 | 16.495 | 32.668 | 0.00 | 0.00 |
| ATOM | 7530 | HE22 | GLN | X | 495 | 35.164 | 14.934 | 33.402 | 0.00 | 0.00 |
| ATOM | 7531 | C    | GLN | X | 495 | 35.733 | 17.040 | 38.892 | 0.00 | 0.00 |
| ATOM | 7532 | O    | GLN | X | 495 | 35.975 | 16.265 | 39.827 | 0.00 | 0.00 |
| ATOM | 7533 | N    | TRP | X | 496 | 35.471 | 18.346 | 39.112 | 0.00 | 0.00 |
| ATOM | 7534 | H    | TRP | X | 496 | 35.524 | 18.936 | 38.294 | 0.00 | 0.00 |
| ATOM | 7535 | CA   | TRP | X | 496 | 35.616 | 19.065 | 40.405 | 0.00 | 0.00 |
| ATOM | 7536 | HA   | TRP | X | 496 | 36.504 | 18.683 | 40.910 | 0.00 | 0.00 |
| ATOM | 7537 | CB   | TRP | X | 496 | 35.881 | 20.480 | 40.015 | 0.00 | 0.00 |
| ATOM | 7538 | HB2  | TRP | X | 496 | 36.691 | 20.443 | 39.287 | 0.00 | 0.00 |
| ATOM | 7539 | HB3  | TRP | X | 496 | 35.030 | 20.884 | 39.466 | 0.00 | 0.00 |
| ATOM | 7540 | CG   | TRP | X | 496 | 36.309 | 21.578 | 40.956 | 0.00 | 0.00 |
| ATOM | 7541 | CD1  | TRP | X | 496 | 36.318 | 21.540 | 42.309 | 0.00 | 0.00 |
| ATOM | 7542 | HD1  | TRP | X | 496 | 36.163 | 20.690 | 42.957 | 0.00 | 0.00 |
| ATOM | 7543 | NE1  | TRP | X | 496 | 36.955 | 22.663 | 42.781 | 0.00 | 0.00 |
| ATOM | 7544 | HE1  | TRP | X | 496 | 37.138 | 22.826 | 43.761 | 0.00 | 0.00 |
| ATOM | 7545 | CE2  | TRP | X | 496 | 37.316 | 23.484 | 41.729 | 0.00 | 0.00 |
| ATOM | 7546 | CZ2  | TRP | X | 496 | 37.918 | 24.779 | 41.591 | 0.00 | 0.00 |
| ATOM | 7547 | HZ2  | TRP | X | 496 | 38.211 | 25.276 | 42.505 | 0.00 | 0.00 |
| ATOM | 7548 | CH2  | TRP | X | 496 | 38.307 | 25.194 | 40.315 | 0.00 | 0.00 |
| ATOM | 7549 | HH2  | TRP | X | 496 | 39.003 | 26.019 | 40.295 | 0.00 | 0.00 |
| ATOM | 7550 | CZ3  | TRP | X | 496 | 37.877 | 24.544 | 39.121 | 0.00 | 0.00 |
| ATOM | 7551 | HZ3  | TRP | X | 496 | 38.184 | 24.875 | 38.140 | 0.00 | 0.00 |
| ATOM | 7552 | CE3  | TRP | X | 496 | 37.129 | 23.406 | 39.266 | 0.00 | 0.00 |
| ATOM | 7553 | HE3  | TRP | X | 496 | 36.753 | 22.854 | 38.417 | 0.00 | 0.00 |
| ATOM | 7554 | CD2  | TRP | X | 496 | 36.896 | 22.839 | 40.530 | 0.00 | 0.00 |
| ATOM | 7555 | C    | TRP | X | 496 | 34.390 | 19.022 | 41.344 | 0.00 | 0.00 |
| ATOM | 7556 | O    | TRP | X | 496 | 33.295 | 19.492 | 40.941 | 0.00 | 0.00 |
| ATOM | 7557 | N    | PRO | X | 497 | 34.489 | 18.495 | 42.625 | 0.00 | 0.00 |
| ATOM | 7558 | CD   | PRO | X | 497 | 35.668 | 17.851 | 43.222 | 0.00 | 0.00 |
| ATOM | 7559 | HD2  | PRO | X | 497 | 36.545 | 18.484 | 43.358 | 0.00 | 0.00 |
| ATOM | 7560 | HD3  | PRO | X | 497 | 36.038 | 17.003 | 42.647 | 0.00 | 0.00 |
| ATOM | 7561 | CG   | PRO | X | 497 | 35.183 | 17.328 | 44.604 | 0.00 | 0.00 |
| ATOM | 7562 | HG2  | PRO | X | 497 | 35.546 | 18.047 | 45.339 | 0.00 | 0.00 |
| ATOM | 7563 | HG3  | PRO | X | 497 | 35.536 | 16.303 | 44.726 | 0.00 | 0.00 |
| ATOM | 7564 | CB   | PRO | X | 497 | 33.680 | 17.376 | 44.521 | 0.00 | 0.00 |
| ATOM | 7565 | HB2  | PRO | X | 497 | 33.165 | 17.537 | 45.468 | 0.00 | 0.00 |
| ATOM | 7566 | HB3  | PRO | X | 497 | 33.255 | 16.440 | 44.159 | 0.00 | 0.00 |
| ATOM | 7567 | CA   | PRO | X | 497 | 33.413 | 18.563 | 43.614 | 0.00 | 0.00 |
| ATOM | 7568 | HA   | PRO | X | 497 | 32.443 | 18.433 | 43.134 | 0.00 | 0.00 |
| ATOM | 7569 | C    | PRO | X | 497 | 33.345 | 19.856 | 44.412 | 0.00 | 0.00 |
| ATOM | 7570 | O    | PRO | X | 497 | 34.323 | 20.581 | 44.580 | 0.00 | 0.00 |
| ATOM | 7571 | N    | PRO | X | 498 | 32.124 | 20.166 | 44.962 | 0.00 | 0.00 |
| ATOM | 7572 | CD   | PRO | X | 498 | 30.824 | 19.518 | 44.768 | 0.00 | 0.00 |
| ATOM | 7573 | HD2  | PRO | X | 498 | 30.959 | 18.449 | 44.933 | 0.00 | 0.00 |
| ATOM | 7574 | HD3  | PRO | X | 498 | 30.668 | 19.656 | 43.698 | 0.00 | 0.00 |
| ATOM | 7575 | CG   | PRO | X | 498 | 29.858 | 20.192 | 45.694 | 0.00 | 0.00 |
| ATOM | 7576 | HG2  | PRO | X | 498 | 29.914 | 19.623 | 46.622 | 0.00 | 0.00 |
| ATOM | 7577 | HG3  | PRO | X | 498 | 28.829 | 20.083 | 45.351 | 0.00 | 0.00 |
| ATOM | 7578 | CB   | PRO | X | 498 | 30.389 | 21.592 | 46.011 | 0.00 | 0.00 |
| ATOM | 7579 | HB2  | PRO | X | 498 | 30.277 | 21.926 | 47.043 | 0.00 | 0.00 |
| ATOM | 7580 | HB3  | PRO | X | 498 | 30.086 | 22.234 | 45.183 | 0.00 | 0.00 |
| ATOM | 7581 | CA   | PRO | X | 498 | 31.915 | 21.349 | 45.818 | 0.00 | 0.00 |
| ATOM | 7582 | HA   | PRO | X | 498 | 32.418 | 22.198 | 45.356 | 0.00 | 0.00 |
| ATOM | 7583 | C    | PRO | X | 498 | 32.745 | 21.178 | 47.076 | 0.00 | 0.00 |
| ATOM | 7584 | O    | PRO | X | 498 | 32.665 | 20.128 | 47.714 | 0.00 | 0.00 |
| ATOM | 7585 | N    | TYR | X | 499 | 33.517 | 22.204 | 47.479 | 0.00 | 0.00 |
| ATOM | 7586 | H    | TYR | X | 499 | 33.471 | 23.055 | 46.939 | 0.00 | 0.00 |
| ATOM | 7587 | CA   | TYR | X | 499 | 34.088 | 22.358 | 48.807 | 0.00 | 0.00 |
| ATOM | 7588 | HA   | TYR | X | 499 | 34.699 | 21.468 | 48.956 | 0.00 | 0.00 |
| ATOM | 7589 | CB   | TYR | X | 499 | 34.905 | 23.705 | 48.851 | 0.00 | 0.00 |

|      |      |      |     |   |     |        |        |        |      |      |
|------|------|------|-----|---|-----|--------|--------|--------|------|------|
| ATOM | 7590 | HB2  | TYR | X | 499 | 35.559 | 23.800 | 47.984 | 0.00 | 0.00 |
| ATOM | 7591 | HB3  | TYR | X | 499 | 34.243 | 24.551 | 48.664 | 0.00 | 0.00 |
| ATOM | 7592 | CG   | TYR | X | 499 | 35.625 | 23.920 | 50.127 | 0.00 | 0.00 |
| ATOM | 7593 | CD1  | TYR | X | 499 | 35.090 | 24.417 | 51.271 | 0.00 | 0.00 |
| ATOM | 7594 | HD1  | TYR | X | 499 | 34.011 | 24.455 | 51.241 | 0.00 | 0.00 |
| ATOM | 7595 | CE1  | TYR | X | 499 | 35.872 | 24.506 | 52.445 | 0.00 | 0.00 |
| ATOM | 7596 | HE1  | TYR | X | 499 | 35.443 | 24.902 | 53.354 | 0.00 | 0.00 |
| ATOM | 7597 | CZ   | TYR | X | 499 | 37.259 | 24.310 | 52.409 | 0.00 | 0.00 |
| ATOM | 7598 | OH   | TYR | X | 499 | 38.089 | 24.469 | 53.454 | 0.00 | 0.00 |
| ATOM | 7599 | HH   | TYR | X | 499 | 37.669 | 24.818 | 54.243 | 0.00 | 0.00 |
| ATOM | 7600 | CE2  | TYR | X | 499 | 37.784 | 23.789 | 51.189 | 0.00 | 0.00 |
| ATOM | 7601 | HE2  | TYR | X | 499 | 38.822 | 23.497 | 51.122 | 0.00 | 0.00 |
| ATOM | 7602 | CD2  | TYR | X | 499 | 36.986 | 23.627 | 50.081 | 0.00 | 0.00 |
| ATOM | 7603 | HD2  | TYR | X | 499 | 37.414 | 23.263 | 49.158 | 0.00 | 0.00 |
| ATOM | 7604 | C    | TYR | X | 499 | 32.983 | 22.290 | 49.859 | 0.00 | 0.00 |
| ATOM | 7605 | O    | TYR | X | 499 | 32.015 | 23.031 | 49.781 | 0.00 | 0.00 |
| ATOM | 7606 | N    | THR | X | 500 | 33.152 | 21.449 | 50.885 | 0.00 | 0.00 |
| ATOM | 7607 | H    | THR | X | 500 | 33.922 | 20.811 | 50.738 | 0.00 | 0.00 |
| ATOM | 7608 | CA   | THR | X | 500 | 32.393 | 21.463 | 52.173 | 0.00 | 0.00 |
| ATOM | 7609 | HA   | THR | X | 500 | 31.766 | 22.351 | 52.087 | 0.00 | 0.00 |
| ATOM | 7610 | CB   | THR | X | 500 | 31.536 | 20.157 | 52.194 | 0.00 | 0.00 |
| ATOM | 7611 | HB   | THR | X | 500 | 31.038 | 20.175 | 53.163 | 0.00 | 0.00 |
| ATOM | 7612 | CG2  | THR | X | 500 | 30.484 | 20.362 | 51.151 | 0.00 | 0.00 |
| ATOM | 7613 | HG21 | THR | X | 500 | 29.870 | 21.243 | 51.343 | 0.00 | 0.00 |
| ATOM | 7614 | HG22 | THR | X | 500 | 29.719 | 19.586 | 51.176 | 0.00 | 0.00 |
| ATOM | 7615 | HG23 | THR | X | 500 | 30.938 | 20.310 | 50.162 | 0.00 | 0.00 |
| ATOM | 7616 | OG1  | THR | X | 500 | 32.268 | 18.976 | 52.074 | 0.00 | 0.00 |
| ATOM | 7617 | HG1  | THR | X | 500 | 31.730 | 18.183 | 52.005 | 0.00 | 0.00 |
| ATOM | 7618 | C    | THR | X | 500 | 33.193 | 21.570 | 53.411 | 0.00 | 0.00 |
| ATOM | 7619 | O    | THR | X | 500 | 34.250 | 20.964 | 53.432 | 0.00 | 0.00 |
| ATOM | 7620 | N    | ALA | X | 501 | 32.652 | 22.182 | 54.451 | 0.00 | 0.00 |
| ATOM | 7621 | H    | ALA | X | 501 | 31.716 | 22.526 | 54.289 | 0.00 | 0.00 |
| ATOM | 7622 | CA   | ALA | X | 501 | 33.361 | 22.561 | 55.734 | 0.00 | 0.00 |
| ATOM | 7623 | HA   | ALA | X | 501 | 34.250 | 23.157 | 55.526 | 0.00 | 0.00 |
| ATOM | 7624 | CB   | ALA | X | 501 | 32.389 | 23.567 | 56.488 | 0.00 | 0.00 |
| ATOM | 7625 | HB1  | ALA | X | 501 | 31.547 | 23.028 | 56.922 | 0.00 | 0.00 |
| ATOM | 7626 | HB2  | ALA | X | 501 | 31.880 | 24.215 | 55.775 | 0.00 | 0.00 |
| ATOM | 7627 | HB3  | ALA | X | 501 | 33.021 | 24.196 | 57.114 | 0.00 | 0.00 |
| ATOM | 7628 | C    | ALA | X | 501 | 33.903 | 21.346 | 56.534 | 0.00 | 0.00 |
| ATOM | 7629 | O    | ALA | X | 501 | 34.904 | 21.491 | 57.227 | 0.00 | 0.00 |
| ATOM | 7630 | N    | GLY | X | 502 | 33.255 | 20.141 | 56.446 | 0.00 | 0.00 |
| ATOM | 7631 | H    | GLY | X | 502 | 32.539 | 20.121 | 55.734 | 0.00 | 0.00 |
| ATOM | 7632 | CA   | GLY | X | 502 | 33.664 | 18.854 | 57.024 | 0.00 | 0.00 |
| ATOM | 7633 | HA2  | GLY | X | 502 | 33.930 | 19.108 | 58.050 | 0.00 | 0.00 |
| ATOM | 7634 | HA3  | GLY | X | 502 | 32.859 | 18.120 | 56.980 | 0.00 | 0.00 |
| ATOM | 7635 | C    | GLY | X | 502 | 34.927 | 18.366 | 56.261 | 0.00 | 0.00 |
| ATOM | 7636 | O    | GLY | X | 502 | 36.023 | 18.508 | 56.804 | 0.00 | 0.00 |
| ATOM | 7637 | N    | ALA | X | 503 | 34.821 | 17.858 | 55.008 | 0.00 | 0.00 |
| ATOM | 7638 | H    | ALA | X | 503 | 33.902 | 17.869 | 54.588 | 0.00 | 0.00 |
| ATOM | 7639 | CA   | ALA | X | 503 | 35.911 | 17.225 | 54.286 | 0.00 | 0.00 |
| ATOM | 7640 | HA   | ALA | X | 503 | 36.366 | 16.560 | 55.020 | 0.00 | 0.00 |
| ATOM | 7641 | CB   | ALA | X | 503 | 35.279 | 16.303 | 53.243 | 0.00 | 0.00 |
| ATOM | 7642 | HB1  | ALA | X | 503 | 35.043 | 16.867 | 52.341 | 0.00 | 0.00 |
| ATOM | 7643 | HB2  | ALA | X | 503 | 34.323 | 15.941 | 53.621 | 0.00 | 0.00 |
| ATOM | 7644 | HB3  | ALA | X | 503 | 35.961 | 15.483 | 53.020 | 0.00 | 0.00 |
| ATOM | 7645 | C    | ALA | X | 503 | 36.927 | 18.177 | 53.697 | 0.00 | 0.00 |
| ATOM | 7646 | O    | ALA | X | 503 | 38.058 | 17.770 | 53.584 | 0.00 | 0.00 |
| ATOM | 7647 | N    | GLN | X | 504 | 36.475 | 19.410 | 53.336 | 0.00 | 0.00 |
| ATOM | 7648 | H    | GLN | X | 504 | 35.474 | 19.540 | 53.366 | 0.00 | 0.00 |
| ATOM | 7649 | CA   | GLN | X | 504 | 37.295 | 20.512 | 52.790 | 0.00 | 0.00 |
| ATOM | 7650 | HA   | GLN | X | 504 | 36.654 | 21.347 | 52.506 | 0.00 | 0.00 |
| ATOM | 7651 | CB   | GLN | X | 504 | 38.176 | 21.020 | 53.936 | 0.00 | 0.00 |
| ATOM | 7652 | HB2  | GLN | X | 504 | 38.937 | 20.249 | 54.054 | 0.00 | 0.00 |
| ATOM | 7653 | HB3  | GLN | X | 504 | 38.671 | 21.896 | 53.516 | 0.00 | 0.00 |
| ATOM | 7654 | CG   | GLN | X | 504 | 37.375 | 21.362 | 55.266 | 0.00 | 0.00 |
| ATOM | 7655 | HG2  | GLN | X | 504 | 36.572 | 22.058 | 55.021 | 0.00 | 0.00 |
| ATOM | 7656 | HG3  | GLN | X | 504 | 36.844 | 20.465 | 55.586 | 0.00 | 0.00 |

|      |      |      |     |   |     |        |        |        |      |      |
|------|------|------|-----|---|-----|--------|--------|--------|------|------|
| ATOM | 7657 | CD   | GLN | X | 504 | 38.344 | 21.858 | 56.383 | 0.00 | 0.00 |
| ATOM | 7658 | OE1  | GLN | X | 504 | 39.388 | 22.412 | 56.082 | 0.00 | 0.00 |
| ATOM | 7659 | NE2  | GLN | X | 504 | 37.893 | 22.040 | 57.599 | 0.00 | 0.00 |
| ATOM | 7660 | HE21 | GLN | X | 504 | 38.618 | 22.283 | 58.259 | 0.00 | 0.00 |
| ATOM | 7661 | HE22 | GLN | X | 504 | 36.943 | 21.793 | 57.835 | 0.00 | 0.00 |
| ATOM | 7662 | C    | GLN | X | 504 | 38.094 | 20.088 | 51.548 | 0.00 | 0.00 |
| ATOM | 7663 | O    | GLN | X | 504 | 39.311 | 20.160 | 51.493 | 0.00 | 0.00 |
| ATOM | 7664 | N    | GLN | X | 505 | 37.404 | 19.602 | 50.537 | 0.00 | 0.00 |
| ATOM | 7665 | H    | GLN | X | 505 | 36.417 | 19.499 | 50.724 | 0.00 | 0.00 |
| ATOM | 7666 | CA   | GLN | X | 505 | 37.921 | 19.138 | 49.260 | 0.00 | 0.00 |
| ATOM | 7667 | HA   | GLN | X | 505 | 38.892 | 18.704 | 49.499 | 0.00 | 0.00 |
| ATOM | 7668 | CB   | GLN | X | 505 | 37.061 | 18.133 | 48.550 | 0.00 | 0.00 |
| ATOM | 7669 | HB2  | GLN | X | 505 | 36.007 | 18.409 | 48.536 | 0.00 | 0.00 |
| ATOM | 7670 | HB3  | GLN | X | 505 | 37.325 | 18.113 | 47.492 | 0.00 | 0.00 |
| ATOM | 7671 | CG   | GLN | X | 505 | 37.189 | 16.770 | 49.228 | 0.00 | 0.00 |
| ATOM | 7672 | HG2  | GLN | X | 505 | 38.237 | 16.473 | 49.176 | 0.00 | 0.00 |
| ATOM | 7673 | HG3  | GLN | X | 505 | 36.807 | 16.776 | 50.248 | 0.00 | 0.00 |
| ATOM | 7674 | CD   | GLN | X | 505 | 36.480 | 15.604 | 48.579 | 0.00 | 0.00 |
| ATOM | 7675 | OE1  | GLN | X | 505 | 36.986 | 14.512 | 48.430 | 0.00 | 0.00 |
| ATOM | 7676 | NE2  | GLN | X | 505 | 35.241 | 15.725 | 48.308 | 0.00 | 0.00 |
| ATOM | 7677 | HE21 | GLN | X | 505 | 34.636 | 14.922 | 48.213 | 0.00 | 0.00 |
| ATOM | 7678 | HE22 | GLN | X | 505 | 34.777 | 16.606 | 48.480 | 0.00 | 0.00 |
| ATOM | 7679 | C    | GLN | X | 505 | 38.295 | 20.317 | 48.343 | 0.00 | 0.00 |
| ATOM | 7680 | O    | GLN | X | 505 | 37.491 | 21.121 | 47.945 | 0.00 | 0.00 |
| ATOM | 7681 | N    | TYR | X | 506 | 39.536 | 20.209 | 47.839 | 0.00 | 0.00 |
| ATOM | 7682 | H    | TYR | X | 506 | 39.958 | 19.321 | 48.070 | 0.00 | 0.00 |
| ATOM | 7683 | CA   | TYR | X | 506 | 40.278 | 21.083 | 46.945 | 0.00 | 0.00 |
| ATOM | 7684 | HA   | TYR | X | 506 | 39.536 | 21.646 | 46.378 | 0.00 | 0.00 |
| ATOM | 7685 | CB   | TYR | X | 506 | 41.158 | 21.950 | 47.821 | 0.00 | 0.00 |
| ATOM | 7686 | HB2  | TYR | X | 506 | 41.409 | 22.785 | 47.168 | 0.00 | 0.00 |
| ATOM | 7687 | HB3  | TYR | X | 506 | 40.551 | 22.328 | 48.644 | 0.00 | 0.00 |
| ATOM | 7688 | CG   | TYR | X | 506 | 42.421 | 21.340 | 48.363 | 0.00 | 0.00 |
| ATOM | 7689 | CD1  | TYR | X | 506 | 42.335 | 20.509 | 49.472 | 0.00 | 0.00 |
| ATOM | 7690 | HD1  | TYR | X | 506 | 41.422 | 20.334 | 50.022 | 0.00 | 0.00 |
| ATOM | 7691 | CE1  | TYR | X | 506 | 43.457 | 19.905 | 49.963 | 0.00 | 0.00 |
| ATOM | 7692 | HE1  | TYR | X | 506 | 43.455 | 19.243 | 50.817 | 0.00 | 0.00 |
| ATOM | 7693 | CZ   | TYR | X | 506 | 44.720 | 20.030 | 49.271 | 0.00 | 0.00 |
| ATOM | 7694 | OH   | TYR | X | 506 | 45.833 | 19.443 | 49.819 | 0.00 | 0.00 |
| ATOM | 7695 | HH   | TYR | X | 506 | 45.663 | 18.901 | 50.593 | 0.00 | 0.00 |
| ATOM | 7696 | CE2  | TYR | X | 506 | 44.828 | 21.012 | 48.254 | 0.00 | 0.00 |
| ATOM | 7697 | HE2  | TYR | X | 506 | 45.796 | 21.128 | 47.788 | 0.00 | 0.00 |
| ATOM | 7698 | CD2  | TYR | X | 506 | 43.669 | 21.639 | 47.755 | 0.00 | 0.00 |
| ATOM | 7699 | HD2  | TYR | X | 506 | 43.703 | 22.359 | 46.951 | 0.00 | 0.00 |
| ATOM | 7700 | C    | TYR | X | 506 | 41.074 | 20.338 | 45.817 | 0.00 | 0.00 |
| ATOM | 7701 | O    | TYR | X | 506 | 41.889 | 19.413 | 46.004 | 0.00 | 0.00 |
| ATOM | 7702 | N    | VAL | X | 507 | 40.749 | 20.721 | 44.599 | 0.00 | 0.00 |
| ATOM | 7703 | H    | VAL | X | 507 | 40.231 | 21.579 | 44.470 | 0.00 | 0.00 |
| ATOM | 7704 | CA   | VAL | X | 507 | 41.314 | 19.953 | 43.468 | 0.00 | 0.00 |
| ATOM | 7705 | HA   | VAL | X | 507 | 41.314 | 18.922 | 43.822 | 0.00 | 0.00 |
| ATOM | 7706 | CB   | VAL | X | 507 | 40.481 | 20.038 | 42.174 | 0.00 | 0.00 |
| ATOM | 7707 | HB   | VAL | X | 507 | 40.929 | 19.338 | 41.468 | 0.00 | 0.00 |
| ATOM | 7708 | CG1  | VAL | X | 507 | 39.229 | 19.312 | 42.416 | 0.00 | 0.00 |
| ATOM | 7709 | HG11 | VAL | X | 507 | 39.573 | 18.365 | 42.833 | 0.00 | 0.00 |
| ATOM | 7710 | HG12 | VAL | X | 507 | 38.666 | 19.687 | 43.271 | 0.00 | 0.00 |
| ATOM | 7711 | HG13 | VAL | X | 507 | 38.587 | 19.296 | 41.536 | 0.00 | 0.00 |
| ATOM | 7712 | CG2  | VAL | X | 507 | 40.210 | 21.371 | 41.384 | 0.00 | 0.00 |
| ATOM | 7713 | HG21 | VAL | X | 507 | 39.190 | 21.451 | 41.008 | 0.00 | 0.00 |
| ATOM | 7714 | HG22 | VAL | X | 507 | 40.957 | 21.317 | 40.592 | 0.00 | 0.00 |
| ATOM | 7715 | HG23 | VAL | X | 507 | 40.398 | 22.209 | 42.054 | 0.00 | 0.00 |
| ATOM | 7716 | C    | VAL | X | 507 | 42.813 | 20.344 | 43.220 | 0.00 | 0.00 |
| ATOM | 7717 | O    | VAL | X | 507 | 43.214 | 21.513 | 43.405 | 0.00 | 0.00 |
| ATOM | 7718 | N    | SER | X | 508 | 43.649 | 19.369 | 42.764 | 0.00 | 0.00 |
| ATOM | 7719 | H    | SER | X | 508 | 43.260 | 18.437 | 42.728 | 0.00 | 0.00 |
| ATOM | 7720 | CA   | SER | X | 508 | 44.946 | 19.705 | 42.088 | 0.00 | 0.00 |
| ATOM | 7721 | HA   | SER | X | 508 | 45.363 | 20.565 | 42.610 | 0.00 | 0.00 |
| ATOM | 7722 | CB   | SER | X | 508 | 45.959 | 18.605 | 42.424 | 0.00 | 0.00 |
| ATOM | 7723 | HB2  | SER | X | 508 | 46.380 | 18.873 | 43.393 | 0.00 | 0.00 |

|      |      |      |     |   |     |        |        |        |      |      |
|------|------|------|-----|---|-----|--------|--------|--------|------|------|
| ATOM | 7724 | HB3  | SER | X | 508 | 45.433 | 17.651 | 42.379 | 0.00 | 0.00 |
| ATOM | 7725 | OG   | SER | X | 508 | 47.023 | 18.568 | 41.497 | 0.00 | 0.00 |
| ATOM | 7726 | HG   | SER | X | 508 | 46.720 | 18.043 | 40.753 | 0.00 | 0.00 |
| ATOM | 7727 | C    | SER | X | 508 | 44.654 | 19.956 | 40.558 | 0.00 | 0.00 |
| ATOM | 7728 | O    | SER | X | 508 | 43.849 | 19.192 | 39.998 | 0.00 | 0.00 |
| ATOM | 7729 | N    | LEU | X | 509 | 45.190 | 21.031 | 39.917 | 0.00 | 0.00 |
| ATOM | 7730 | H    | LEU | X | 509 | 45.634 | 21.744 | 40.478 | 0.00 | 0.00 |
| ATOM | 7731 | CA   | LEU | X | 509 | 45.164 | 21.269 | 38.484 | 0.00 | 0.00 |
| ATOM | 7732 | HA   | LEU | X | 509 | 44.494 | 20.520 | 38.061 | 0.00 | 0.00 |
| ATOM | 7733 | CB   | LEU | X | 509 | 44.493 | 22.558 | 38.165 | 0.00 | 0.00 |
| ATOM | 7734 | HB2  | LEU | X | 509 | 44.999 | 23.173 | 38.909 | 0.00 | 0.00 |
| ATOM | 7735 | HB3  | LEU | X | 509 | 44.682 | 22.932 | 37.159 | 0.00 | 0.00 |
| ATOM | 7736 | CG   | LEU | X | 509 | 42.952 | 22.585 | 38.495 | 0.00 | 0.00 |
| ATOM | 7737 | HG   | LEU | X | 509 | 42.792 | 22.235 | 39.515 | 0.00 | 0.00 |
| ATOM | 7738 | CD1  | LEU | X | 509 | 42.490 | 24.128 | 38.398 | 0.00 | 0.00 |
| ATOM | 7739 | HD11 | LEU | X | 509 | 43.089 | 24.788 | 39.026 | 0.00 | 0.00 |
| ATOM | 7740 | HD12 | LEU | X | 509 | 41.454 | 24.246 | 38.713 | 0.00 | 0.00 |
| ATOM | 7741 | HD13 | LEU | X | 509 | 42.632 | 24.436 | 37.362 | 0.00 | 0.00 |
| ATOM | 7742 | CD2  | LEU | X | 509 | 42.010 | 21.772 | 37.563 | 0.00 | 0.00 |
| ATOM | 7743 | HD21 | LEU | X | 509 | 42.054 | 20.693 | 37.715 | 0.00 | 0.00 |
| ATOM | 7744 | HD22 | LEU | X | 509 | 40.979 | 22.033 | 37.800 | 0.00 | 0.00 |
| ATOM | 7745 | HD23 | LEU | X | 509 | 42.208 | 22.104 | 36.544 | 0.00 | 0.00 |
| ATOM | 7746 | C    | LEU | X | 509 | 46.544 | 21.075 | 37.923 | 0.00 | 0.00 |
| ATOM | 7747 | O    | LEU | X | 509 | 47.463 | 21.574 | 38.521 | 0.00 | 0.00 |
| ATOM | 7748 | N    | ASP | X | 510 | 46.682 | 20.566 | 36.734 | 0.00 | 0.00 |
| ATOM | 7749 | H    | ASP | X | 510 | 45.917 | 20.243 | 36.158 | 0.00 | 0.00 |
| ATOM | 7750 | CA   | ASP | X | 510 | 47.960 | 20.048 | 36.182 | 0.00 | 0.00 |
| ATOM | 7751 | HA   | ASP | X | 510 | 48.509 | 20.963 | 35.960 | 0.00 | 0.00 |
| ATOM | 7752 | CB   | ASP | X | 510 | 48.877 | 19.230 | 37.185 | 0.00 | 0.00 |
| ATOM | 7753 | HB2  | ASP | X | 510 | 49.353 | 19.910 | 37.893 | 0.00 | 0.00 |
| ATOM | 7754 | HB3  | ASP | X | 510 | 48.292 | 18.512 | 37.759 | 0.00 | 0.00 |
| ATOM | 7755 | CG   | ASP | X | 510 | 50.082 | 18.618 | 36.558 | 0.00 | 0.00 |
| ATOM | 7756 | OD1  | ASP | X | 510 | 50.088 | 17.374 | 36.437 | 0.00 | 0.00 |
| ATOM | 7757 | OD2  | ASP | X | 510 | 50.854 | 19.417 | 35.940 | 0.00 | 0.00 |
| ATOM | 7758 | C    | ASP | X | 510 | 47.690 | 19.303 | 34.793 | 0.00 | 0.00 |
| ATOM | 7759 | O    | ASP | X | 510 | 46.497 | 18.896 | 34.579 | 0.00 | 0.00 |
| ATOM | 7760 | N    | LEU | X | 511 | 48.769 | 19.104 | 33.968 | 0.00 | 0.00 |
| ATOM | 7761 | H    | LEU | X | 511 | 49.655 | 19.120 | 34.454 | 0.00 | 0.00 |
| ATOM | 7762 | CA   | LEU | X | 511 | 48.681 | 18.394 | 32.740 | 0.00 | 0.00 |
| ATOM | 7763 | HA   | LEU | X | 511 | 48.179 | 18.957 | 31.954 | 0.00 | 0.00 |
| ATOM | 7764 | CB   | LEU | X | 511 | 50.022 | 18.275 | 32.089 | 0.00 | 0.00 |
| ATOM | 7765 | HB2  | LEU | X | 511 | 50.599 | 17.545 | 32.657 | 0.00 | 0.00 |
| ATOM | 7766 | HB3  | LEU | X | 511 | 49.912 | 17.881 | 31.079 | 0.00 | 0.00 |
| ATOM | 7767 | CG   | LEU | X | 511 | 50.821 | 19.547 | 31.932 | 0.00 | 0.00 |
| ATOM | 7768 | HG   | LEU | X | 511 | 51.072 | 19.927 | 32.922 | 0.00 | 0.00 |
| ATOM | 7769 | CD1  | LEU | X | 511 | 52.180 | 19.310 | 31.271 | 0.00 | 0.00 |
| ATOM | 7770 | HD11 | LEU | X | 511 | 52.179 | 18.622 | 30.426 | 0.00 | 0.00 |
| ATOM | 7771 | HD12 | LEU | X | 511 | 52.862 | 18.813 | 31.961 | 0.00 | 0.00 |
| ATOM | 7772 | HD13 | LEU | X | 511 | 52.648 | 20.205 | 30.863 | 0.00 | 0.00 |
| ATOM | 7773 | CD2  | LEU | X | 511 | 50.222 | 20.641 | 31.079 | 0.00 | 0.00 |
| ATOM | 7774 | HD21 | LEU | X | 511 | 49.934 | 20.259 | 30.099 | 0.00 | 0.00 |
| ATOM | 7775 | HD22 | LEU | X | 511 | 49.281 | 20.955 | 31.531 | 0.00 | 0.00 |
| ATOM | 7776 | HD23 | LEU | X | 511 | 50.907 | 21.489 | 31.094 | 0.00 | 0.00 |
| ATOM | 7777 | C    | LEU | X | 511 | 47.930 | 17.105 | 32.904 | 0.00 | 0.00 |
| ATOM | 7778 | O    | LEU | X | 511 | 47.152 | 16.793 | 31.992 | 0.00 | 0.00 |
| ATOM | 7779 | N    | ARG | X | 512 | 48.124 | 16.332 | 33.957 | 0.00 | 0.00 |
| ATOM | 7780 | H    | ARG | X | 512 | 48.898 | 16.471 | 34.590 | 0.00 | 0.00 |
| ATOM | 7781 | CA   | ARG | X | 512 | 47.419 | 15.087 | 34.207 | 0.00 | 0.00 |
| ATOM | 7782 | HA   | ARG | X | 512 | 47.610 | 14.382 | 33.397 | 0.00 | 0.00 |
| ATOM | 7783 | CB   | ARG | X | 512 | 48.085 | 14.417 | 35.376 | 0.00 | 0.00 |
| ATOM | 7784 | HB2  | ARG | X | 512 | 47.792 | 13.377 | 35.516 | 0.00 | 0.00 |
| ATOM | 7785 | HB3  | ARG | X | 512 | 49.139 | 14.498 | 35.109 | 0.00 | 0.00 |
| ATOM | 7786 | CG   | ARG | X | 512 | 47.817 | 15.218 | 36.639 | 0.00 | 0.00 |
| ATOM | 7787 | HG2  | ARG | X | 512 | 47.818 | 16.294 | 36.465 | 0.00 | 0.00 |
| ATOM | 7788 | HG3  | ARG | X | 512 | 46.863 | 14.982 | 37.111 | 0.00 | 0.00 |
| ATOM | 7789 | CD   | ARG | X | 512 | 48.868 | 14.820 | 37.703 | 0.00 | 0.00 |
| ATOM | 7790 | HD2  | ARG | X | 512 | 48.977 | 13.762 | 37.942 | 0.00 | 0.00 |

|      |      |      |     |   |     |        |        |        |      |      |
|------|------|------|-----|---|-----|--------|--------|--------|------|------|
| ATOM | 7791 | HD3  | ARG | X | 512 | 49.799 | 15.162 | 37.252 | 0.00 | 0.00 |
| ATOM | 7792 | NE   | ARG | X | 512 | 48.615 | 15.561 | 39.017 | 0.00 | 0.00 |
| ATOM | 7793 | HE   | ARG | X | 512 | 47.715 | 15.371 | 39.434 | 0.00 | 0.00 |
| ATOM | 7794 | CZ   | ARG | X | 512 | 49.430 | 16.389 | 39.684 | 0.00 | 0.00 |
| ATOM | 7795 | NH1  | ARG | X | 512 | 50.495 | 16.892 | 39.207 | 0.00 | 0.00 |
| ATOM | 7796 | HH11 | ARG | X | 512 | 50.584 | 17.003 | 38.207 | 0.00 | 0.00 |
| ATOM | 7797 | HH12 | ARG | X | 512 | 51.052 | 17.435 | 39.851 | 0.00 | 0.00 |
| ATOM | 7798 | NH2  | ARG | X | 512 | 49.047 | 16.682 | 40.869 | 0.00 | 0.00 |
| ATOM | 7799 | HH21 | ARG | X | 512 | 48.212 | 16.244 | 41.229 | 0.00 | 0.00 |
| ATOM | 7800 | HH22 | ARG | X | 512 | 49.557 | 17.351 | 41.429 | 0.00 | 0.00 |
| ATOM | 7801 | C    | ARG | X | 512 | 45.917 | 15.224 | 34.498 | 0.00 | 0.00 |
| ATOM | 7802 | O    | ARG | X | 512 | 45.496 | 16.293 | 34.973 | 0.00 | 0.00 |
| ATOM | 7803 | N    | PRO | X | 513 | 45.007 | 14.247 | 34.282 | 0.00 | 0.00 |
| ATOM | 7804 | CD   | PRO | X | 513 | 45.310 | 12.921 | 33.816 | 0.00 | 0.00 |
| ATOM | 7805 | HD2  | PRO | X | 513 | 45.700 | 12.355 | 34.662 | 0.00 | 0.00 |
| ATOM | 7806 | HD3  | PRO | X | 513 | 45.997 | 12.813 | 32.977 | 0.00 | 0.00 |
| ATOM | 7807 | CG   | PRO | X | 513 | 43.891 | 12.383 | 33.463 | 0.00 | 0.00 |
| ATOM | 7808 | HG2  | PRO | X | 513 | 43.795 | 11.300 | 33.532 | 0.00 | 0.00 |
| ATOM | 7809 | HG3  | PRO | X | 513 | 43.581 | 12.687 | 32.464 | 0.00 | 0.00 |
| ATOM | 7810 | CB   | PRO | X | 513 | 42.944 | 13.001 | 34.476 | 0.00 | 0.00 |
| ATOM | 7811 | HB2  | PRO | X | 513 | 43.008 | 12.461 | 35.421 | 0.00 | 0.00 |
| ATOM | 7812 | HB3  | PRO | X | 513 | 41.962 | 13.146 | 34.025 | 0.00 | 0.00 |
| ATOM | 7813 | CA   | PRO | X | 513 | 43.572 | 14.366 | 34.699 | 0.00 | 0.00 |
| ATOM | 7814 | HA   | PRO | X | 513 | 43.081 | 14.973 | 33.938 | 0.00 | 0.00 |
| ATOM | 7815 | C    | PRO | X | 513 | 43.353 | 14.858 | 36.197 | 0.00 | 0.00 |
| ATOM | 7816 | O    | PRO | X | 513 | 44.204 | 14.801 | 37.021 | 0.00 | 0.00 |
| ATOM | 7817 | N    | LEU | X | 514 | 42.077 | 15.194 | 36.501 | 0.00 | 0.00 |
| ATOM | 7818 | H    | LEU | X | 514 | 41.384 | 15.248 | 35.769 | 0.00 | 0.00 |
| ATOM | 7819 | CA   | LEU | X | 514 | 41.913 | 15.992 | 37.747 | 0.00 | 0.00 |
| ATOM | 7820 | HA   | LEU | X | 514 | 42.693 | 16.752 | 37.684 | 0.00 | 0.00 |
| ATOM | 7821 | CB   | LEU | X | 514 | 40.474 | 16.654 | 37.734 | 0.00 | 0.00 |
| ATOM | 7822 | HB2  | LEU | X | 514 | 40.330 | 17.322 | 36.885 | 0.00 | 0.00 |
| ATOM | 7823 | HB3  | LEU | X | 514 | 39.721 | 15.871 | 37.652 | 0.00 | 0.00 |
| ATOM | 7824 | CG   | LEU | X | 514 | 40.256 | 17.463 | 38.948 | 0.00 | 0.00 |
| ATOM | 7825 | HG   | LEU | X | 514 | 41.204 | 17.804 | 39.364 | 0.00 | 0.00 |
| ATOM | 7826 | CD1  | LEU | X | 514 | 39.498 | 18.796 | 38.628 | 0.00 | 0.00 |
| ATOM | 7827 | HD11 | LEU | X | 514 | 39.634 | 19.545 | 39.409 | 0.00 | 0.00 |
| ATOM | 7828 | HD12 | LEU | X | 514 | 38.422 | 18.629 | 38.578 | 0.00 | 0.00 |
| ATOM | 7829 | HD13 | LEU | X | 514 | 39.734 | 19.287 | 37.683 | 0.00 | 0.00 |
| ATOM | 7830 | CD2  | LEU | X | 514 | 39.542 | 16.632 | 40.021 | 0.00 | 0.00 |
| ATOM | 7831 | HD21 | LEU | X | 514 | 39.704 | 17.068 | 41.007 | 0.00 | 0.00 |
| ATOM | 7832 | HD22 | LEU | X | 514 | 38.496 | 16.545 | 39.726 | 0.00 | 0.00 |
| ATOM | 7833 | HD23 | LEU | X | 514 | 39.875 | 15.594 | 40.036 | 0.00 | 0.00 |
| ATOM | 7834 | C    | LEU | X | 514 | 42.142 | 15.027 | 38.978 | 0.00 | 0.00 |
| ATOM | 7835 | O    | LEU | X | 514 | 41.860 | 13.810 | 38.882 | 0.00 | 0.00 |
| ATOM | 7836 | N    | GLU | X | 515 | 42.723 | 15.583 | 40.055 | 0.00 | 0.00 |
| ATOM | 7837 | H    | GLU | X | 515 | 43.018 | 16.549 | 40.050 | 0.00 | 0.00 |
| ATOM | 7838 | CA   | GLU | X | 515 | 42.848 | 14.815 | 41.318 | 0.00 | 0.00 |
| ATOM | 7839 | HA   | GLU | X | 515 | 42.384 | 13.829 | 41.299 | 0.00 | 0.00 |
| ATOM | 7840 | CB   | GLU | X | 515 | 44.362 | 14.586 | 41.606 | 0.00 | 0.00 |
| ATOM | 7841 | HB2  | GLU | X | 515 | 44.898 | 15.527 | 41.727 | 0.00 | 0.00 |
| ATOM | 7842 | HB3  | GLU | X | 515 | 44.370 | 14.030 | 42.543 | 0.00 | 0.00 |
| ATOM | 7843 | CG   | GLU | X | 515 | 45.146 | 13.734 | 40.601 | 0.00 | 0.00 |
| ATOM | 7844 | HG2  | GLU | X | 515 | 44.583 | 12.822 | 40.403 | 0.00 | 0.00 |
| ATOM | 7845 | HG3  | GLU | X | 515 | 45.286 | 14.277 | 39.666 | 0.00 | 0.00 |
| ATOM | 7846 | CD   | GLU | X | 515 | 46.419 | 13.215 | 41.304 | 0.00 | 0.00 |
| ATOM | 7847 | OE1  | GLU | X | 515 | 47.451 | 13.925 | 41.310 | 0.00 | 0.00 |
| ATOM | 7848 | OE2  | GLU | X | 515 | 46.350 | 12.025 | 41.652 | 0.00 | 0.00 |
| ATOM | 7849 | C    | GLU | X | 515 | 42.217 | 15.667 | 42.404 | 0.00 | 0.00 |
| ATOM | 7850 | O    | GLU | X | 515 | 42.354 | 16.899 | 42.389 | 0.00 | 0.00 |
| ATOM | 7851 | N    | VAL | X | 516 | 41.472 | 15.038 | 43.246 | 0.00 | 0.00 |
| ATOM | 7852 | H    | VAL | X | 516 | 41.283 | 14.068 | 43.036 | 0.00 | 0.00 |
| ATOM | 7853 | CA   | VAL | X | 516 | 40.897 | 15.632 | 44.544 | 0.00 | 0.00 |
| ATOM | 7854 | HA   | VAL | X | 516 | 40.745 | 16.692 | 44.338 | 0.00 | 0.00 |
| ATOM | 7855 | CB   | VAL | X | 516 | 39.448 | 15.152 | 44.926 | 0.00 | 0.00 |
| ATOM | 7856 | HB   | VAL | X | 516 | 39.566 | 14.259 | 45.540 | 0.00 | 0.00 |
| ATOM | 7857 | CG1  | VAL | X | 516 | 38.661 | 16.123 | 45.853 | 0.00 | 0.00 |

|      |      |      |     |   |     |        |        |        |      |      |
|------|------|------|-----|---|-----|--------|--------|--------|------|------|
| ATOM | 7858 | HG11 | VAL | X | 516 | 37.790 | 15.569 | 46.203 | 0.00 | 0.00 |
| ATOM | 7859 | HG12 | VAL | X | 516 | 39.188 | 16.437 | 46.754 | 0.00 | 0.00 |
| ATOM | 7860 | HG13 | VAL | X | 516 | 38.584 | 17.106 | 45.389 | 0.00 | 0.00 |
| ATOM | 7861 | CG2  | VAL | X | 516 | 38.581 | 14.907 | 43.639 | 0.00 | 0.00 |
| ATOM | 7862 | HG21 | VAL | X | 516 | 38.578 | 15.788 | 42.997 | 0.00 | 0.00 |
| ATOM | 7863 | HG22 | VAL | X | 516 | 37.522 | 14.716 | 43.813 | 0.00 | 0.00 |
| ATOM | 7864 | HG23 | VAL | X | 516 | 38.974 | 14.119 | 42.996 | 0.00 | 0.00 |
| ATOM | 7865 | C    | VAL | X | 516 | 41.867 | 15.441 | 45.744 | 0.00 | 0.00 |
| ATOM | 7866 | O    | VAL | X | 516 | 42.247 | 14.308 | 46.046 | 0.00 | 0.00 |
| ATOM | 7867 | N    | ARG | X | 517 | 42.061 | 16.467 | 46.554 | 0.00 | 0.00 |
| ATOM | 7868 | H    | ARG | X | 517 | 41.674 | 17.328 | 46.197 | 0.00 | 0.00 |
| ATOM | 7869 | CA   | ARG | X | 517 | 42.729 | 16.522 | 47.878 | 0.00 | 0.00 |
| ATOM | 7870 | HA   | ARG | X | 517 | 43.042 | 15.568 | 48.303 | 0.00 | 0.00 |
| ATOM | 7871 | CB   | ARG | X | 517 | 44.050 | 17.385 | 47.765 | 0.00 | 0.00 |
| ATOM | 7872 | HB2  | ARG | X | 517 | 43.819 | 18.392 | 47.417 | 0.00 | 0.00 |
| ATOM | 7873 | HB3  | ARG | X | 517 | 44.495 | 17.482 | 48.755 | 0.00 | 0.00 |
| ATOM | 7874 | CG   | ARG | X | 517 | 45.123 | 16.738 | 46.826 | 0.00 | 0.00 |
| ATOM | 7875 | HG2  | ARG | X | 517 | 45.286 | 15.714 | 47.161 | 0.00 | 0.00 |
| ATOM | 7876 | HG3  | ARG | X | 517 | 44.625 | 16.697 | 45.858 | 0.00 | 0.00 |
| ATOM | 7877 | CD   | ARG | X | 517 | 46.437 | 17.579 | 46.847 | 0.00 | 0.00 |
| ATOM | 7878 | HD2  | ARG | X | 517 | 46.032 | 18.575 | 46.667 | 0.00 | 0.00 |
| ATOM | 7879 | HD3  | ARG | X | 517 | 46.890 | 17.516 | 47.836 | 0.00 | 0.00 |
| ATOM | 7880 | NE   | ARG | X | 517 | 47.293 | 17.013 | 45.762 | 0.00 | 0.00 |
| ATOM | 7881 | HE   | ARG | X | 517 | 47.141 | 16.034 | 45.565 | 0.00 | 0.00 |
| ATOM | 7882 | CZ   | ARG | X | 517 | 48.367 | 17.649 | 45.305 | 0.00 | 0.00 |
| ATOM | 7883 | NH1  | ARG | X | 517 | 48.603 | 18.976 | 45.575 | 0.00 | 0.00 |
| ATOM | 7884 | HH11 | ARG | X | 517 | 48.098 | 19.522 | 46.258 | 0.00 | 0.00 |
| ATOM | 7885 | HH12 | ARG | X | 517 | 49.442 | 19.379 | 45.183 | 0.00 | 0.00 |
| ATOM | 7886 | NH2  | ARG | X | 517 | 49.185 | 17.041 | 44.517 | 0.00 | 0.00 |
| ATOM | 7887 | HH21 | ARG | X | 517 | 49.066 | 16.098 | 44.173 | 0.00 | 0.00 |
| ATOM | 7888 | HH22 | ARG | X | 517 | 49.713 | 17.657 | 43.915 | 0.00 | 0.00 |
| ATOM | 7889 | C    | ARG | X | 517 | 41.746 | 17.018 | 48.908 | 0.00 | 0.00 |
| ATOM | 7890 | O    | ARG | X | 517 | 40.683 | 17.545 | 48.511 | 0.00 | 0.00 |
| ATOM | 7891 | N    | ARG | X | 518 | 42.019 | 16.872 | 50.195 | 0.00 | 0.00 |
| ATOM | 7892 | H    | ARG | X | 518 | 42.947 | 16.545 | 50.421 | 0.00 | 0.00 |
| ATOM | 7893 | CA   | ARG | X | 518 | 41.106 | 17.233 | 51.279 | 0.00 | 0.00 |
| ATOM | 7894 | HA   | ARG | X | 518 | 40.418 | 17.989 | 50.901 | 0.00 | 0.00 |
| ATOM | 7895 | CB   | ARG | X | 518 | 40.220 | 15.986 | 51.603 | 0.00 | 0.00 |
| ATOM | 7896 | HB2  | ARG | X | 518 | 39.515 | 16.223 | 52.401 | 0.00 | 0.00 |
| ATOM | 7897 | HB3  | ARG | X | 518 | 39.787 | 15.853 | 50.612 | 0.00 | 0.00 |
| ATOM | 7898 | CG   | ARG | X | 518 | 40.971 | 14.725 | 52.033 | 0.00 | 0.00 |
| ATOM | 7899 | HG2  | ARG | X | 518 | 41.607 | 14.594 | 51.158 | 0.00 | 0.00 |
| ATOM | 7900 | HG3  | ARG | X | 518 | 41.543 | 14.898 | 52.945 | 0.00 | 0.00 |
| ATOM | 7901 | CD   | ARG | X | 518 | 40.182 | 13.493 | 52.263 | 0.00 | 0.00 |
| ATOM | 7902 | HD2  | ARG | X | 518 | 39.562 | 13.460 | 53.158 | 0.00 | 0.00 |
| ATOM | 7903 | HD3  | ARG | X | 518 | 39.480 | 13.241 | 51.467 | 0.00 | 0.00 |
| ATOM | 7904 | NE   | ARG | X | 518 | 41.082 | 12.363 | 52.486 | 0.00 | 0.00 |
| ATOM | 7905 | HE   | ARG | X | 518 | 41.503 | 12.284 | 53.401 | 0.00 | 0.00 |
| ATOM | 7906 | CZ   | ARG | X | 518 | 41.565 | 11.564 | 51.567 | 0.00 | 0.00 |
| ATOM | 7907 | NH1  | ARG | X | 518 | 41.388 | 11.670 | 50.269 | 0.00 | 0.00 |
| ATOM | 7908 | HH11 | ARG | X | 518 | 40.647 | 12.264 | 49.925 | 0.00 | 0.00 |
| ATOM | 7909 | HH12 | ARG | X | 518 | 41.649 | 11.014 | 49.547 | 0.00 | 0.00 |
| ATOM | 7910 | NH2  | ARG | X | 518 | 42.348 | 10.555 | 51.897 | 0.00 | 0.00 |
| ATOM | 7911 | HH21 | ARG | X | 518 | 42.554 | 10.328 | 52.860 | 0.00 | 0.00 |
| ATOM | 7912 | HH22 | ARG | X | 518 | 42.807 | 10.083 | 51.131 | 0.00 | 0.00 |
| ATOM | 7913 | C    | ARG | X | 518 | 41.814 | 17.778 | 52.522 | 0.00 | 0.00 |
| ATOM | 7914 | O    | ARG | X | 518 | 42.962 | 17.457 | 52.699 | 0.00 | 0.00 |
| ATOM | 7915 | N    | GLY | X | 519 | 41.156 | 18.765 | 53.207 | 0.00 | 0.00 |
| ATOM | 7916 | H    | GLY | X | 519 | 40.201 | 19.009 | 52.990 | 0.00 | 0.00 |
| ATOM | 7917 | CA   | GLY | X | 519 | 41.771 | 19.407 | 54.435 | 0.00 | 0.00 |
| ATOM | 7918 | HA2  | GLY | X | 519 | 40.957 | 19.741 | 55.079 | 0.00 | 0.00 |
| ATOM | 7919 | HA3  | GLY | X | 519 | 42.523 | 18.750 | 54.872 | 0.00 | 0.00 |
| ATOM | 7920 | C    | GLY | X | 519 | 42.698 | 20.621 | 54.069 | 0.00 | 0.00 |
| ATOM | 7921 | O    | GLY | X | 519 | 43.759 | 20.759 | 54.679 | 0.00 | 0.00 |
| ATOM | 7922 | N    | LEU | X | 520 | 42.233 | 21.423 | 53.124 | 0.00 | 0.00 |
| ATOM | 7923 | H    | LEU | X | 520 | 41.262 | 21.369 | 52.850 | 0.00 | 0.00 |
| ATOM | 7924 | CA   | LEU | X | 520 | 42.891 | 22.621 | 52.665 | 0.00 | 0.00 |

|      |      |      |     |   |     |        |        |        |      |      |
|------|------|------|-----|---|-----|--------|--------|--------|------|------|
| ATOM | 7925 | HA   | LEU | X | 520 | 43.611 | 22.262 | 51.929 | 0.00 | 0.00 |
| ATOM | 7926 | CB   | LEU | X | 520 | 41.920 | 23.404 | 51.735 | 0.00 | 0.00 |
| ATOM | 7927 | HB2  | LEU | X | 520 | 41.571 | 22.747 | 50.939 | 0.00 | 0.00 |
| ATOM | 7928 | HB3  | LEU | X | 520 | 41.011 | 23.394 | 52.337 | 0.00 | 0.00 |
| ATOM | 7929 | CG   | LEU | X | 520 | 42.386 | 24.728 | 51.132 | 0.00 | 0.00 |
| ATOM | 7930 | HG   | LEU | X | 520 | 42.778 | 25.381 | 51.912 | 0.00 | 0.00 |
| ATOM | 7931 | CD1  | LEU | X | 520 | 43.480 | 24.633 | 50.073 | 0.00 | 0.00 |
| ATOM | 7932 | HD11 | LEU | X | 520 | 44.442 | 24.312 | 50.473 | 0.00 | 0.00 |
| ATOM | 7933 | HD12 | LEU | X | 520 | 43.655 | 25.643 | 49.704 | 0.00 | 0.00 |
| ATOM | 7934 | HD13 | LEU | X | 520 | 43.131 | 23.977 | 49.275 | 0.00 | 0.00 |
| ATOM | 7935 | CD2  | LEU | X | 520 | 41.187 | 25.431 | 50.537 | 0.00 | 0.00 |
| ATOM | 7936 | HD21 | LEU | X | 520 | 40.453 | 25.488 | 51.342 | 0.00 | 0.00 |
| ATOM | 7937 | HD22 | LEU | X | 520 | 41.547 | 26.441 | 50.343 | 0.00 | 0.00 |
| ATOM | 7938 | HD23 | LEU | X | 520 | 40.923 | 24.880 | 49.635 | 0.00 | 0.00 |
| ATOM | 7939 | C    | LEU | X | 520 | 43.620 | 23.438 | 53.732 | 0.00 | 0.00 |
| ATOM | 7940 | O    | LEU | X | 520 | 43.040 | 24.227 | 54.437 | 0.00 | 0.00 |
| ATOM | 7941 | N    | ARG | X | 521 | 44.945 | 23.233 | 53.733 | 0.00 | 0.00 |
| ATOM | 7942 | H    | ARG | X | 521 | 45.328 | 22.775 | 52.918 | 0.00 | 0.00 |
| ATOM | 7943 | CA   | ARG | X | 521 | 45.987 | 23.790 | 54.571 | 0.00 | 0.00 |
| ATOM | 7944 | HA   | ARG | X | 521 | 46.923 | 23.242 | 54.462 | 0.00 | 0.00 |
| ATOM | 7945 | CB   | ARG | X | 521 | 46.395 | 25.190 | 54.042 | 0.00 | 0.00 |
| ATOM | 7946 | HB2  | ARG | X | 521 | 46.395 | 25.131 | 52.954 | 0.00 | 0.00 |
| ATOM | 7947 | HB3  | ARG | X | 521 | 45.710 | 25.961 | 54.396 | 0.00 | 0.00 |
| ATOM | 7948 | CG   | ARG | X | 521 | 47.853 | 25.609 | 54.296 | 0.00 | 0.00 |
| ATOM | 7949 | HG2  | ARG | X | 521 | 47.909 | 26.687 | 54.145 | 0.00 | 0.00 |
| ATOM | 7950 | HG3  | ARG | X | 521 | 48.111 | 25.536 | 55.353 | 0.00 | 0.00 |
| ATOM | 7951 | CD   | ARG | X | 521 | 48.857 | 24.816 | 53.525 | 0.00 | 0.00 |
| ATOM | 7952 | HD2  | ARG | X | 521 | 48.966 | 23.831 | 53.979 | 0.00 | 0.00 |
| ATOM | 7953 | HD3  | ARG | X | 521 | 48.555 | 24.687 | 52.485 | 0.00 | 0.00 |
| ATOM | 7954 | NE   | ARG | X | 521 | 50.180 | 25.370 | 53.659 | 0.00 | 0.00 |
| ATOM | 7955 | HE   | ARG | X | 521 | 50.330 | 26.207 | 54.202 | 0.00 | 0.00 |
| ATOM | 7956 | CZ   | ARG | X | 521 | 51.302 | 24.728 | 53.550 | 0.00 | 0.00 |
| ATOM | 7957 | NH1  | ARG | X | 521 | 51.367 | 23.619 | 52.874 | 0.00 | 0.00 |
| ATOM | 7958 | HH11 | ARG | X | 521 | 50.536 | 23.231 | 52.451 | 0.00 | 0.00 |
| ATOM | 7959 | HH12 | ARG | X | 521 | 52.208 | 23.088 | 52.700 | 0.00 | 0.00 |
| ATOM | 7960 | NH2  | ARG | X | 521 | 52.365 | 25.299 | 54.112 | 0.00 | 0.00 |
| ATOM | 7961 | HH21 | ARG | X | 521 | 52.405 | 26.237 | 54.485 | 0.00 | 0.00 |
| ATOM | 7962 | HH22 | ARG | X | 521 | 53.232 | 24.796 | 54.232 | 0.00 | 0.00 |
| ATOM | 7963 | C    | ARG | X | 521 | 45.704 | 23.738 | 56.085 | 0.00 | 0.00 |
| ATOM | 7964 | O    | ARG | X | 521 | 46.291 | 24.383 | 56.909 | 0.00 | 0.00 |
| ATOM | 7965 | N    | ALA | X | 522 | 44.749 | 22.887 | 56.457 | 0.00 | 0.00 |
| ATOM | 7966 | H    | ALA | X | 522 | 44.566 | 22.243 | 55.701 | 0.00 | 0.00 |
| ATOM | 7967 | CA   | ALA | X | 522 | 44.043 | 22.878 | 57.753 | 0.00 | 0.00 |
| ATOM | 7968 | HA   | ALA | X | 522 | 43.645 | 23.848 | 58.051 | 0.00 | 0.00 |
| ATOM | 7969 | CB   | ALA | X | 522 | 42.811 | 21.944 | 57.457 | 0.00 | 0.00 |
| ATOM | 7970 | HB1  | ALA | X | 522 | 42.226 | 22.160 | 56.563 | 0.00 | 0.00 |
| ATOM | 7971 | HB2  | ALA | X | 522 | 42.120 | 21.867 | 58.297 | 0.00 | 0.00 |
| ATOM | 7972 | HB3  | ALA | X | 522 | 43.285 | 20.974 | 57.312 | 0.00 | 0.00 |
| ATOM | 7973 | C    | ALA | X | 522 | 44.979 | 22.512 | 58.951 | 0.00 | 0.00 |
| ATOM | 7974 | O    | ALA | X | 522 | 44.735 | 23.157 | 59.975 | 0.00 | 0.00 |
| ATOM | 7975 | N    | GLN | X | 523 | 45.951 | 21.619 | 58.853 | 0.00 | 0.00 |
| ATOM | 7976 | H    | GLN | X | 523 | 46.020 | 21.105 | 57.987 | 0.00 | 0.00 |
| ATOM | 7977 | CA   | GLN | X | 523 | 46.930 | 21.406 | 59.881 | 0.00 | 0.00 |
| ATOM | 7978 | HA   | GLN | X | 523 | 46.453 | 21.509 | 60.856 | 0.00 | 0.00 |
| ATOM | 7979 | CB   | GLN | X | 523 | 47.755 | 20.160 | 59.565 | 0.00 | 0.00 |
| ATOM | 7980 | HB2  | GLN | X | 523 | 48.122 | 20.210 | 58.540 | 0.00 | 0.00 |
| ATOM | 7981 | HB3  | GLN | X | 523 | 48.620 | 20.268 | 60.220 | 0.00 | 0.00 |
| ATOM | 7982 | CG   | GLN | X | 523 | 47.044 | 18.808 | 59.687 | 0.00 | 0.00 |
| ATOM | 7983 | HG2  | GLN | X | 523 | 46.367 | 18.937 | 60.532 | 0.00 | 0.00 |
| ATOM | 7984 | HG3  | GLN | X | 523 | 46.374 | 18.532 | 58.872 | 0.00 | 0.00 |
| ATOM | 7985 | CD   | GLN | X | 523 | 48.040 | 17.688 | 59.960 | 0.00 | 0.00 |
| ATOM | 7986 | OE1  | GLN | X | 523 | 49.253 | 17.746 | 59.576 | 0.00 | 0.00 |
| ATOM | 7987 | NE2  | GLN | X | 523 | 47.678 | 16.696 | 60.729 | 0.00 | 0.00 |
| ATOM | 7988 | HE21 | GLN | X | 523 | 48.239 | 15.874 | 60.904 | 0.00 | 0.00 |
| ATOM | 7989 | HE22 | GLN | X | 523 | 46.714 | 16.632 | 61.024 | 0.00 | 0.00 |
| ATOM | 7990 | C    | GLN | X | 523 | 47.873 | 22.596 | 59.967 | 0.00 | 0.00 |
| ATOM | 7991 | O    | GLN | X | 523 | 48.000 | 23.061 | 61.100 | 0.00 | 0.00 |



|      |      |     |     |   |     |        |        |        |      |      |
|------|------|-----|-----|---|-----|--------|--------|--------|------|------|
| ATOM | 7992 | N   | ALA | X | 524 | 48.482 | 23.133 | 58.898 | 0.00 | 0.00 |
| ATOM | 7993 | H   | ALA | X | 524 | 48.223 | 22.806 | 57.978 | 0.00 | 0.00 |
| ATOM | 7994 | CA  | ALA | X | 524 | 49.614 | 24.056 | 58.915 | 0.00 | 0.00 |
| ATOM | 7995 | HA  | ALA | X | 524 | 50.177 | 23.859 | 59.826 | 0.00 | 0.00 |
| ATOM | 7996 | CB  | ALA | X | 524 | 50.386 | 24.125 | 57.549 | 0.00 | 0.00 |
| ATOM | 7997 | HB1 | ALA | X | 524 | 49.561 | 24.556 | 56.982 | 0.00 | 0.00 |
| ATOM | 7998 | HB2 | ALA | X | 524 | 50.697 | 23.142 | 57.195 | 0.00 | 0.00 |
| ATOM | 7999 | HB3 | ALA | X | 524 | 51.295 | 24.718 | 57.653 | 0.00 | 0.00 |
| ATOM | 8000 | C   | ALA | X | 524 | 48.934 | 25.475 | 59.238 | 0.00 | 0.00 |
| ATOM | 8001 | O   | ALA | X | 524 | 49.562 | 26.296 | 59.944 | 0.00 | 0.00 |
| ATOM | 8002 | N   | CYX | X | 525 | 47.749 | 25.857 | 58.749 | 0.00 | 0.00 |
| ATOM | 8003 | H   | CYX | X | 525 | 47.369 | 25.246 | 58.041 | 0.00 | 0.00 |
| ATOM | 8004 | CA  | CYX | X | 525 | 47.085 | 27.120 | 59.081 | 0.00 | 0.00 |
| ATOM | 8005 | HA  | CYX | X | 525 | 47.769 | 27.958 | 58.948 | 0.00 | 0.00 |
| ATOM | 8006 | CB  | CYX | X | 525 | 45.922 | 27.358 | 58.113 | 0.00 | 0.00 |
| ATOM | 8007 | HB2 | CYX | X | 525 | 45.211 | 26.533 | 58.080 | 0.00 | 0.00 |
| ATOM | 8008 | HB3 | CYX | X | 525 | 45.572 | 28.317 | 58.495 | 0.00 | 0.00 |
| ATOM | 8009 | SG  | CYX | X | 525 | 46.437 | 27.575 | 56.491 | 0.00 | 0.00 |
| ATOM | 8010 | C   | CYX | X | 525 | 46.644 | 27.187 | 60.511 | 0.00 | 0.00 |
| ATOM | 8011 | O   | CYX | X | 525 | 46.472 | 28.328 | 60.967 | 0.00 | 0.00 |
| ATOM | 8012 | N   | ALA | X | 526 | 46.538 | 26.054 | 61.318 | 0.00 | 0.00 |
| ATOM | 8013 | H   | ALA | X | 526 | 46.814 | 25.128 | 61.024 | 0.00 | 0.00 |
| ATOM | 8014 | CA  | ALA | X | 526 | 46.252 | 26.161 | 62.748 | 0.00 | 0.00 |
| ATOM | 8015 | HA  | ALA | X | 526 | 45.405 | 26.844 | 62.811 | 0.00 | 0.00 |
| ATOM | 8016 | CB  | ALA | X | 526 | 45.905 | 24.780 | 63.325 | 0.00 | 0.00 |
| ATOM | 8017 | HB1 | ALA | X | 526 | 45.069 | 24.292 | 62.824 | 0.00 | 0.00 |
| ATOM | 8018 | HB2 | ALA | X | 526 | 45.598 | 24.887 | 64.366 | 0.00 | 0.00 |
| ATOM | 8019 | HB3 | ALA | X | 526 | 46.759 | 24.111 | 63.218 | 0.00 | 0.00 |
| ATOM | 8020 | C   | ALA | X | 526 | 47.388 | 26.694 | 63.714 | 0.00 | 0.00 |
| ATOM | 8021 | O   | ALA | X | 526 | 47.229 | 26.993 | 64.927 | 0.00 | 0.00 |
| ATOM | 8022 | N   | PHE | X | 527 | 48.557 | 27.002 | 63.107 | 0.00 | 0.00 |
| ATOM | 8023 | H   | PHE | X | 527 | 48.669 | 26.795 | 62.125 | 0.00 | 0.00 |
| ATOM | 8024 | CA  | PHE | X | 527 | 49.606 | 27.760 | 63.780 | 0.00 | 0.00 |
| ATOM | 8025 | HA  | PHE | X | 527 | 49.745 | 27.460 | 64.819 | 0.00 | 0.00 |
| ATOM | 8026 | CB  | PHE | X | 527 | 50.908 | 27.670 | 62.996 | 0.00 | 0.00 |
| ATOM | 8027 | HB2 | PHE | X | 527 | 51.312 | 26.664 | 62.886 | 0.00 | 0.00 |
| ATOM | 8028 | HB3 | PHE | X | 527 | 50.729 | 27.937 | 61.955 | 0.00 | 0.00 |
| ATOM | 8029 | CG  | PHE | X | 527 | 52.005 | 28.483 | 63.590 | 0.00 | 0.00 |
| ATOM | 8030 | CD1 | PHE | X | 527 | 52.394 | 28.295 | 64.933 | 0.00 | 0.00 |
| ATOM | 8031 | HD1 | PHE | X | 527 | 52.003 | 27.545 | 65.606 | 0.00 | 0.00 |
| ATOM | 8032 | CE1 | PHE | X | 527 | 53.379 | 29.108 | 65.454 | 0.00 | 0.00 |
| ATOM | 8033 | HE1 | PHE | X | 527 | 53.638 | 28.983 | 66.496 | 0.00 | 0.00 |
| ATOM | 8034 | CZ  | PHE | X | 527 | 54.053 | 30.096 | 64.672 | 0.00 | 0.00 |
| ATOM | 8035 | HZ  | PHE | X | 527 | 54.813 | 30.704 | 65.140 | 0.00 | 0.00 |
| ATOM | 8036 | CE2 | PHE | X | 527 | 53.659 | 30.189 | 63.305 | 0.00 | 0.00 |
| ATOM | 8037 | HE2 | PHE | X | 527 | 54.235 | 30.805 | 62.631 | 0.00 | 0.00 |
| ATOM | 8038 | CD2 | PHE | X | 527 | 52.670 | 29.390 | 62.777 | 0.00 | 0.00 |
| ATOM | 8039 | HD2 | PHE | X | 527 | 52.339 | 29.412 | 61.750 | 0.00 | 0.00 |
| ATOM | 8040 | C   | PHE | X | 527 | 49.170 | 29.219 | 63.854 | 0.00 | 0.00 |
| ATOM | 8041 | O   | PHE | X | 527 | 49.058 | 29.762 | 64.928 | 0.00 | 0.00 |
| ATOM | 8042 | N   | TRP | X | 528 | 48.916 | 29.810 | 62.669 | 0.00 | 0.00 |
| ATOM | 8043 | H   | TRP | X | 528 | 48.940 | 29.378 | 61.757 | 0.00 | 0.00 |
| ATOM | 8044 | CA  | TRP | X | 528 | 48.906 | 31.256 | 62.542 | 0.00 | 0.00 |
| ATOM | 8045 | HA  | TRP | X | 528 | 49.876 | 31.574 | 62.925 | 0.00 | 0.00 |
| ATOM | 8046 | CB  | TRP | X | 528 | 48.945 | 31.556 | 61.050 | 0.00 | 0.00 |
| ATOM | 8047 | HB2 | TRP | X | 528 | 48.034 | 31.212 | 60.559 | 0.00 | 0.00 |
| ATOM | 8048 | HB3 | TRP | X | 528 | 49.013 | 32.615 | 60.804 | 0.00 | 0.00 |
| ATOM | 8049 | CG  | TRP | X | 528 | 50.170 | 31.146 | 60.246 | 0.00 | 0.00 |
| ATOM | 8050 | CD1 | TRP | X | 528 | 50.304 | 30.119 | 59.391 | 0.00 | 0.00 |
| ATOM | 8051 | HD1 | TRP | X | 528 | 49.536 | 29.365 | 59.312 | 0.00 | 0.00 |
| ATOM | 8052 | NE1 | TRP | X | 528 | 51.506 | 30.100 | 58.809 | 0.00 | 0.00 |
| ATOM | 8053 | HE1 | TRP | X | 528 | 51.701 | 29.403 | 58.105 | 0.00 | 0.00 |
| ATOM | 8054 | CE2 | TRP | X | 528 | 52.307 | 31.147 | 59.200 | 0.00 | 0.00 |
| ATOM | 8055 | CZ2 | TRP | X | 528 | 53.630 | 31.538 | 58.979 | 0.00 | 0.00 |
| ATOM | 8056 | HZ2 | TRP | X | 528 | 54.315 | 31.015 | 58.328 | 0.00 | 0.00 |
| ATOM | 8057 | CH2 | TRP | X | 528 | 54.208 | 32.655 | 59.713 | 0.00 | 0.00 |
| ATOM | 8058 | HH2 | TRP | X | 528 | 55.170 | 33.066 | 59.445 | 0.00 | 0.00 |

|      |      |      |     |   |     |        |        |        |      |      |
|------|------|------|-----|---|-----|--------|--------|--------|------|------|
| ATOM | 8059 | CZ3  | TRP | X | 528 | 53.413 | 33.368 | 60.636 | 0.00 | 0.00 |
| ATOM | 8060 | HZ3  | TRP | X | 528 | 53.694 | 34.206 | 61.256 | 0.00 | 0.00 |
| ATOM | 8061 | CE3  | TRP | X | 528 | 52.113 | 32.882 | 60.882 | 0.00 | 0.00 |
| ATOM | 8062 | HE3  | TRP | X | 528 | 51.550 | 33.317 | 61.695 | 0.00 | 0.00 |
| ATOM | 8063 | CD2  | TRP | X | 528 | 51.487 | 31.813 | 60.182 | 0.00 | 0.00 |
| ATOM | 8064 | C    | TRP | X | 528 | 47.751 | 31.874 | 63.357 | 0.00 | 0.00 |
| ATOM | 8065 | O    | TRP | X | 528 | 47.966 | 32.747 | 64.207 | 0.00 | 0.00 |
| ATOM | 8066 | N    | ASN | X | 529 | 46.502 | 31.446 | 63.180 | 0.00 | 0.00 |
| ATOM | 8067 | H    | ASN | X | 529 | 46.360 | 30.690 | 62.526 | 0.00 | 0.00 |
| ATOM | 8068 | CA   | ASN | X | 529 | 45.385 | 32.099 | 63.838 | 0.00 | 0.00 |
| ATOM | 8069 | HA   | ASN | X | 529 | 45.512 | 33.181 | 63.785 | 0.00 | 0.00 |
| ATOM | 8070 | CB   | ASN | X | 529 | 44.146 | 31.915 | 63.063 | 0.00 | 0.00 |
| ATOM | 8071 | HB2  | ASN | X | 529 | 43.367 | 32.557 | 63.473 | 0.00 | 0.00 |
| ATOM | 8072 | HB3  | ASN | X | 529 | 44.319 | 32.270 | 62.047 | 0.00 | 0.00 |
| ATOM | 8073 | CG   | ASN | X | 529 | 43.628 | 30.509 | 63.137 | 0.00 | 0.00 |
| ATOM | 8074 | OD1  | ASN | X | 529 | 44.282 | 29.583 | 62.701 | 0.00 | 0.00 |
| ATOM | 8075 | ND2  | ASN | X | 529 | 42.458 | 30.183 | 63.672 | 0.00 | 0.00 |
| ATOM | 8076 | HD21 | ASN | X | 529 | 42.334 | 29.214 | 63.929 | 0.00 | 0.00 |
| ATOM | 8077 | HD22 | ASN | X | 529 | 41.904 | 30.968 | 63.984 | 0.00 | 0.00 |
| ATOM | 8078 | C    | ASN | X | 529 | 45.263 | 31.597 | 65.313 | 0.00 | 0.00 |
| ATOM | 8079 | O    | ASN | X | 529 | 44.270 | 31.907 | 65.949 | 0.00 | 0.00 |
| ATOM | 8080 | N    | ARG | X | 530 | 46.286 | 30.991 | 65.868 | 0.00 | 0.00 |
| ATOM | 8081 | H    | ARG | X | 530 | 47.033 | 30.739 | 65.236 | 0.00 | 0.00 |
| ATOM | 8082 | CA   | ARG | X | 530 | 46.335 | 30.530 | 67.214 | 0.00 | 0.00 |
| ATOM | 8083 | HA   | ARG | X | 530 | 45.496 | 30.953 | 67.767 | 0.00 | 0.00 |
| ATOM | 8084 | CB   | ARG | X | 530 | 46.231 | 28.992 | 67.179 | 0.00 | 0.00 |
| ATOM | 8085 | HB2  | ARG | X | 530 | 47.145 | 28.518 | 66.819 | 0.00 | 0.00 |
| ATOM | 8086 | HB3  | ARG | X | 530 | 46.198 | 28.686 | 68.224 | 0.00 | 0.00 |
| ATOM | 8087 | CG   | ARG | X | 530 | 44.875 | 28.561 | 66.515 | 0.00 | 0.00 |
| ATOM | 8088 | HG2  | ARG | X | 530 | 44.056 | 29.119 | 66.969 | 0.00 | 0.00 |
| ATOM | 8089 | HG3  | ARG | X | 530 | 44.826 | 28.608 | 65.428 | 0.00 | 0.00 |
| ATOM | 8090 | CD   | ARG | X | 530 | 44.547 | 27.018 | 66.765 | 0.00 | 0.00 |
| ATOM | 8091 | HD2  | ARG | X | 530 | 45.074 | 26.459 | 65.992 | 0.00 | 0.00 |
| ATOM | 8092 | HD3  | ARG | X | 530 | 44.810 | 26.712 | 67.778 | 0.00 | 0.00 |
| ATOM | 8093 | NE   | ARG | X | 530 | 43.093 | 26.782 | 66.606 | 0.00 | 0.00 |
| ATOM | 8094 | HE   | ARG | X | 530 | 42.491 | 27.573 | 66.785 | 0.00 | 0.00 |
| ATOM | 8095 | CZ   | ARG | X | 530 | 42.537 | 25.570 | 66.558 | 0.00 | 0.00 |
| ATOM | 8096 | NH1  | ARG | X | 530 | 43.229 | 24.485 | 66.599 | 0.00 | 0.00 |
| ATOM | 8097 | HH11 | ARG | X | 530 | 44.231 | 24.552 | 66.701 | 0.00 | 0.00 |
| ATOM | 8098 | HH12 | ARG | X | 530 | 42.752 | 23.595 | 66.573 | 0.00 | 0.00 |
| ATOM | 8099 | NH2  | ARG | X | 530 | 41.264 | 25.315 | 66.460 | 0.00 | 0.00 |
| ATOM | 8100 | HH21 | ARG | X | 530 | 40.535 | 25.956 | 66.739 | 0.00 | 0.00 |
| ATOM | 8101 | HH22 | ARG | X | 530 | 40.995 | 24.343 | 66.408 | 0.00 | 0.00 |
| ATOM | 8102 | C    | ARG | X | 530 | 47.554 | 31.049 | 67.877 | 0.00 | 0.00 |
| ATOM | 8103 | O    | ARG | X | 530 | 47.458 | 31.818 | 68.818 | 0.00 | 0.00 |
| ATOM | 8104 | N    | PHE | X | 531 | 48.739 | 30.601 | 67.489 | 0.00 | 0.00 |
| ATOM | 8105 | H    | PHE | X | 531 | 48.763 | 29.958 | 66.710 | 0.00 | 0.00 |
| ATOM | 8106 | CA   | PHE | X | 531 | 50.017 | 30.990 | 68.128 | 0.00 | 0.00 |
| ATOM | 8107 | HA   | PHE | X | 531 | 49.901 | 30.904 | 69.209 | 0.00 | 0.00 |
| ATOM | 8108 | CB   | PHE | X | 531 | 51.138 | 30.106 | 67.661 | 0.00 | 0.00 |
| ATOM | 8109 | HB2  | PHE | X | 531 | 50.746 | 29.090 | 67.609 | 0.00 | 0.00 |
| ATOM | 8110 | HB3  | PHE | X | 531 | 51.340 | 30.377 | 66.625 | 0.00 | 0.00 |
| ATOM | 8111 | CG   | PHE | X | 531 | 52.389 | 30.114 | 68.523 | 0.00 | 0.00 |
| ATOM | 8112 | CD1  | PHE | X | 531 | 53.304 | 31.193 | 68.394 | 0.00 | 0.00 |
| ATOM | 8113 | HD1  | PHE | X | 531 | 53.203 | 31.982 | 67.665 | 0.00 | 0.00 |
| ATOM | 8114 | CE1  | PHE | X | 531 | 54.495 | 31.218 | 69.200 | 0.00 | 0.00 |
| ATOM | 8115 | HE1  | PHE | X | 531 | 55.200 | 32.032 | 69.128 | 0.00 | 0.00 |
| ATOM | 8116 | CZ   | PHE | X | 531 | 54.759 | 30.196 | 70.074 | 0.00 | 0.00 |
| ATOM | 8117 | HZ   | PHE | X | 531 | 55.610 | 30.207 | 70.738 | 0.00 | 0.00 |
| ATOM | 8118 | CE2  | PHE | X | 531 | 53.846 | 29.164 | 70.149 | 0.00 | 0.00 |
| ATOM | 8119 | HE2  | PHE | X | 531 | 54.101 | 28.340 | 70.800 | 0.00 | 0.00 |
| ATOM | 8120 | CD2  | PHE | X | 531 | 52.675 | 29.083 | 69.401 | 0.00 | 0.00 |
| ATOM | 8121 | HD2  | PHE | X | 531 | 52.034 | 28.217 | 69.477 | 0.00 | 0.00 |
| ATOM | 8122 | C    | PHE | X | 531 | 50.436 | 32.444 | 67.785 | 0.00 | 0.00 |
| ATOM | 8123 | O    | PHE | X | 531 | 51.002 | 33.128 | 68.629 | 0.00 | 0.00 |
| ATOM | 8124 | N    | LEU | X | 532 | 50.144 | 32.926 | 66.522 | 0.00 | 0.00 |
| ATOM | 8125 | H    | LEU | X | 532 | 49.460 | 32.405 | 65.992 | 0.00 | 0.00 |

|      |      |      |     |   |     |        |        |        |      |      |
|------|------|------|-----|---|-----|--------|--------|--------|------|------|
| ATOM | 8126 | CA   | LEU | X | 532 | 50.481 | 34.202 | 66.051 | 0.00 | 0.00 |
| ATOM | 8127 | HA   | LEU | X | 532 | 51.533 | 34.299 | 66.321 | 0.00 | 0.00 |
| ATOM | 8128 | CB   | LEU | X | 532 | 50.581 | 34.230 | 64.514 | 0.00 | 0.00 |
| ATOM | 8129 | HB2  | LEU | X | 532 | 50.855 | 33.226 | 64.191 | 0.00 | 0.00 |
| ATOM | 8130 | HB3  | LEU | X | 532 | 49.617 | 34.476 | 64.070 | 0.00 | 0.00 |
| ATOM | 8131 | CG   | LEU | X | 532 | 51.585 | 35.293 | 64.049 | 0.00 | 0.00 |
| ATOM | 8132 | HG   | LEU | X | 532 | 51.854 | 34.997 | 63.035 | 0.00 | 0.00 |
| ATOM | 8133 | CD1  | LEU | X | 532 | 50.856 | 36.645 | 63.949 | 0.00 | 0.00 |
| ATOM | 8134 | HD11 | LEU | X | 532 | 50.496 | 36.802 | 64.966 | 0.00 | 0.00 |
| ATOM | 8135 | HD12 | LEU | X | 532 | 50.059 | 36.667 | 63.206 | 0.00 | 0.00 |
| ATOM | 8136 | HD13 | LEU | X | 532 | 51.533 | 37.417 | 63.583 | 0.00 | 0.00 |
| ATOM | 8137 | CD2  | LEU | X | 532 | 52.917 | 35.421 | 64.748 | 0.00 | 0.00 |
| ATOM | 8138 | HD21 | LEU | X | 532 | 52.774 | 35.893 | 65.720 | 0.00 | 0.00 |
| ATOM | 8139 | HD22 | LEU | X | 532 | 53.451 | 34.471 | 64.748 | 0.00 | 0.00 |
| ATOM | 8140 | HD23 | LEU | X | 532 | 53.450 | 36.176 | 64.171 | 0.00 | 0.00 |
| ATOM | 8141 | C    | LEU | X | 532 | 49.860 | 35.390 | 66.781 | 0.00 | 0.00 |
| ATOM | 8142 | O    | LEU | X | 532 | 50.625 | 36.245 | 67.214 | 0.00 | 0.00 |
| ATOM | 8143 | N    | PRO | X | 533 | 48.484 | 35.494 | 66.865 | 0.00 | 0.00 |
| ATOM | 8144 | CD   | PRO | X | 533 | 47.437 | 34.519 | 66.531 | 0.00 | 0.00 |
| ATOM | 8145 | HD2  | PRO | X | 533 | 47.635 | 33.470 | 66.752 | 0.00 | 0.00 |
| ATOM | 8146 | HD3  | PRO | X | 533 | 47.169 | 34.552 | 65.475 | 0.00 | 0.00 |
| ATOM | 8147 | CG   | PRO | X | 533 | 46.266 | 34.926 | 67.347 | 0.00 | 0.00 |
| ATOM | 8148 | HG2  | PRO | X | 533 | 46.331 | 34.526 | 68.359 | 0.00 | 0.00 |
| ATOM | 8149 | HG3  | PRO | X | 533 | 45.338 | 34.580 | 66.891 | 0.00 | 0.00 |
| ATOM | 8150 | CB   | PRO | X | 533 | 46.382 | 36.466 | 67.413 | 0.00 | 0.00 |
| ATOM | 8151 | HB2  | PRO | X | 533 | 45.758 | 36.942 | 68.169 | 0.00 | 0.00 |
| ATOM | 8152 | HB3  | PRO | X | 533 | 46.138 | 36.883 | 66.436 | 0.00 | 0.00 |
| ATOM | 8153 | CA   | PRO | X | 533 | 47.874 | 36.653 | 67.575 | 0.00 | 0.00 |
| ATOM | 8154 | HA   | PRO | X | 533 | 48.101 | 37.635 | 67.160 | 0.00 | 0.00 |
| ATOM | 8155 | C    | PRO | X | 533 | 48.320 | 36.595 | 69.078 | 0.00 | 0.00 |
| ATOM | 8156 | O    | PRO | X | 533 | 48.516 | 37.656 | 69.680 | 0.00 | 0.00 |
| ATOM | 8157 | N    | LYS | X | 534 | 48.524 | 35.439 | 69.716 | 0.00 | 0.00 |
| ATOM | 8158 | H    | LYS | X | 534 | 48.441 | 34.562 | 69.222 | 0.00 | 0.00 |
| ATOM | 8159 | CA   | LYS | X | 534 | 48.993 | 35.329 | 71.082 | 0.00 | 0.00 |
| ATOM | 8160 | HA   | LYS | X | 534 | 48.410 | 35.990 | 71.723 | 0.00 | 0.00 |
| ATOM | 8161 | CB   | LYS | X | 534 | 48.746 | 33.909 | 71.595 | 0.00 | 0.00 |
| ATOM | 8162 | HB2  | LYS | X | 534 | 47.684 | 33.734 | 71.424 | 0.00 | 0.00 |
| ATOM | 8163 | HB3  | LYS | X | 534 | 49.356 | 33.257 | 70.971 | 0.00 | 0.00 |
| ATOM | 8164 | CG   | LYS | X | 534 | 49.085 | 33.884 | 73.073 | 0.00 | 0.00 |
| ATOM | 8165 | HG2  | LYS | X | 534 | 50.149 | 33.864 | 73.309 | 0.00 | 0.00 |
| ATOM | 8166 | HG3  | LYS | X | 534 | 48.740 | 34.826 | 73.500 | 0.00 | 0.00 |
| ATOM | 8167 | CD   | LYS | X | 534 | 48.361 | 32.720 | 73.703 | 0.00 | 0.00 |
| ATOM | 8168 | HD2  | LYS | X | 534 | 47.338 | 32.599 | 73.347 | 0.00 | 0.00 |
| ATOM | 8169 | HD3  | LYS | X | 534 | 48.942 | 31.826 | 73.475 | 0.00 | 0.00 |
| ATOM | 8170 | CE   | LYS | X | 534 | 48.432 | 32.953 | 75.248 | 0.00 | 0.00 |
| ATOM | 8171 | HE2  | LYS | X | 534 | 49.464 | 33.153 | 75.538 | 0.00 | 0.00 |
| ATOM | 8172 | HE3  | LYS | X | 534 | 47.853 | 33.850 | 75.469 | 0.00 | 0.00 |
| ATOM | 8173 | NZ   | LYS | X | 534 | 47.949 | 31.689 | 75.886 | 0.00 | 0.00 |
| ATOM | 8174 | HZ1  | LYS | X | 534 | 47.173 | 31.254 | 75.408 | 0.00 | 0.00 |
| ATOM | 8175 | HZ2  | LYS | X | 534 | 48.736 | 31.056 | 75.904 | 0.00 | 0.00 |
| ATOM | 8176 | HZ3  | LYS | X | 534 | 47.616 | 31.876 | 76.821 | 0.00 | 0.00 |
| ATOM | 8177 | C    | LYS | X | 534 | 50.476 | 35.736 | 71.223 | 0.00 | 0.00 |
| ATOM | 8178 | O    | LYS | X | 534 | 50.841 | 36.308 | 72.263 | 0.00 | 0.00 |
| ATOM | 8179 | N    | LEU | X | 535 | 51.282 | 35.490 | 70.237 | 0.00 | 0.00 |
| ATOM | 8180 | H    | LEU | X | 535 | 50.941 | 34.838 | 69.545 | 0.00 | 0.00 |
| ATOM | 8181 | CA   | LEU | X | 535 | 52.713 | 35.952 | 70.238 | 0.00 | 0.00 |
| ATOM | 8182 | HA   | LEU | X | 535 | 53.145 | 35.759 | 71.220 | 0.00 | 0.00 |
| ATOM | 8183 | CB   | LEU | X | 535 | 53.482 | 35.175 | 69.200 | 0.00 | 0.00 |
| ATOM | 8184 | HB2  | LEU | X | 535 | 53.529 | 34.130 | 69.503 | 0.00 | 0.00 |
| ATOM | 8185 | HB3  | LEU | X | 535 | 53.043 | 35.306 | 68.210 | 0.00 | 0.00 |
| ATOM | 8186 | CG   | LEU | X | 535 | 54.960 | 35.512 | 68.961 | 0.00 | 0.00 |
| ATOM | 8187 | HG   | LEU | X | 535 | 55.173 | 36.563 | 68.767 | 0.00 | 0.00 |
| ATOM | 8188 | CD1  | LEU | X | 535 | 55.845 | 35.077 | 70.196 | 0.00 | 0.00 |
| ATOM | 8189 | HD11 | LEU | X | 535 | 55.703 | 34.013 | 70.383 | 0.00 | 0.00 |
| ATOM | 8190 | HD12 | LEU | X | 535 | 55.352 | 35.513 | 71.066 | 0.00 | 0.00 |
| ATOM | 8191 | HD13 | LEU | X | 535 | 56.850 | 35.498 | 70.230 | 0.00 | 0.00 |
| ATOM | 8192 | CD2  | LEU | X | 535 | 55.657 | 34.892 | 67.749 | 0.00 | 0.00 |

|      |      |      |     |   |     |        |        |        |      |      |
|------|------|------|-----|---|-----|--------|--------|--------|------|------|
| ATOM | 8193 | HD21 | LEU | X | 535 | 56.675 | 35.266 | 67.647 | 0.00 | 0.00 |
| ATOM | 8194 | HD22 | LEU | X | 535 | 55.687 | 33.815 | 67.917 | 0.00 | 0.00 |
| ATOM | 8195 | HD23 | LEU | X | 535 | 55.144 | 35.226 | 66.848 | 0.00 | 0.00 |
| ATOM | 8196 | C    | LEU | X | 535 | 52.831 | 37.474 | 70.070 | 0.00 | 0.00 |
| ATOM | 8197 | O    | LEU | X | 535 | 53.681 | 38.041 | 70.775 | 0.00 | 0.00 |
| ATOM | 8198 | N    | LEU | X | 536 | 52.023 | 38.049 | 69.150 | 0.00 | 0.00 |
| ATOM | 8199 | H    | LEU | X | 536 | 51.403 | 37.475 | 68.597 | 0.00 | 0.00 |
| ATOM | 8200 | CA   | LEU | X | 536 | 52.102 | 39.494 | 68.835 | 0.00 | 0.00 |
| ATOM | 8201 | HA   | LEU | X | 536 | 53.123 | 39.851 | 68.697 | 0.00 | 0.00 |
| ATOM | 8202 | CB   | LEU | X | 536 | 51.154 | 39.805 | 67.726 | 0.00 | 0.00 |
| ATOM | 8203 | HB2  | LEU | X | 536 | 50.289 | 39.147 | 67.809 | 0.00 | 0.00 |
| ATOM | 8204 | HB3  | LEU | X | 536 | 50.810 | 40.837 | 67.803 | 0.00 | 0.00 |
| ATOM | 8205 | CG   | LEU | X | 536 | 51.826 | 39.600 | 66.315 | 0.00 | 0.00 |
| ATOM | 8206 | HG   | LEU | X | 536 | 52.161 | 38.563 | 66.352 | 0.00 | 0.00 |
| ATOM | 8207 | CD1  | LEU | X | 536 | 50.763 | 39.967 | 65.318 | 0.00 | 0.00 |
| ATOM | 8208 | HD11 | LEU | X | 536 | 50.172 | 40.844 | 65.581 | 0.00 | 0.00 |
| ATOM | 8209 | HD12 | LEU | X | 536 | 50.025 | 39.191 | 65.522 | 0.00 | 0.00 |
| ATOM | 8210 | HD13 | LEU | X | 536 | 51.030 | 39.920 | 64.263 | 0.00 | 0.00 |
| ATOM | 8211 | CD2  | LEU | X | 536 | 53.077 | 40.469 | 66.118 | 0.00 | 0.00 |
| ATOM | 8212 | HD21 | LEU | X | 536 | 52.742 | 41.502 | 66.212 | 0.00 | 0.00 |
| ATOM | 8213 | HD22 | LEU | X | 536 | 53.839 | 40.126 | 66.817 | 0.00 | 0.00 |
| ATOM | 8214 | HD23 | LEU | X | 536 | 53.461 | 40.177 | 65.140 | 0.00 | 0.00 |
| ATOM | 8215 | C    | LEU | X | 536 | 51.646 | 40.274 | 70.088 | 0.00 | 0.00 |
| ATOM | 8216 | O    | LEU | X | 536 | 52.257 | 41.283 | 70.389 | 0.00 | 0.00 |
| ATOM | 8217 | N    | SER | X | 537 | 50.721 | 39.845 | 70.923 | 0.00 | 0.00 |
| ATOM | 8218 | H    | SER | X | 537 | 50.160 | 39.059 | 70.625 | 0.00 | 0.00 |
| ATOM | 8219 | CA   | SER | X | 537 | 50.325 | 40.479 | 72.205 | 0.00 | 0.00 |
| ATOM | 8220 | HA   | SER | X | 537 | 50.338 | 41.547 | 71.988 | 0.00 | 0.00 |
| ATOM | 8221 | CB   | SER | X | 537 | 48.912 | 40.022 | 72.601 | 0.00 | 0.00 |
| ATOM | 8222 | HB2  | SER | X | 537 | 48.539 | 40.555 | 73.476 | 0.00 | 0.00 |
| ATOM | 8223 | HB3  | SER | X | 537 | 48.201 | 40.261 | 71.810 | 0.00 | 0.00 |
| ATOM | 8224 | OG   | SER | X | 537 | 49.018 | 38.686 | 72.815 | 0.00 | 0.00 |
| ATOM | 8225 | HG   | SER | X | 537 | 48.197 | 38.388 | 73.213 | 0.00 | 0.00 |
| ATOM | 8226 | C    | SER | X | 537 | 51.320 | 40.178 | 73.355 | 0.00 | 0.00 |
| ATOM | 8227 | O    | SER | X | 537 | 51.542 | 41.148 | 74.142 | 0.00 | 0.00 |
| ATOM | 8228 | N    | ALA | X | 538 | 52.058 | 39.059 | 73.331 | 0.00 | 0.00 |
| ATOM | 8229 | H    | ALA | X | 538 | 51.697 | 38.365 | 72.693 | 0.00 | 0.00 |
| ATOM | 8230 | CA   | ALA | X | 538 | 53.064 | 38.651 | 74.292 | 0.00 | 0.00 |
| ATOM | 8231 | HA   | ALA | X | 538 | 52.561 | 38.832 | 75.242 | 0.00 | 0.00 |
| ATOM | 8232 | CB   | ALA | X | 538 | 53.336 | 37.136 | 74.178 | 0.00 | 0.00 |
| ATOM | 8233 | HB1  | ALA | X | 538 | 54.069 | 36.740 | 74.882 | 0.00 | 0.00 |
| ATOM | 8234 | HB2  | ALA | X | 538 | 53.846 | 36.843 | 73.261 | 0.00 | 0.00 |
| ATOM | 8235 | HB3  | ALA | X | 538 | 52.444 | 36.535 | 74.350 | 0.00 | 0.00 |
| ATOM | 8236 | C    | ALA | X | 538 | 54.384 | 39.410 | 74.052 | 0.00 | 0.00 |
| ATOM | 8237 | O    | ALA | X | 538 | 55.050 | 39.588 | 75.096 | 0.00 | 0.00 |
| ATOM | 8238 | N    | THR | X | 539 | 54.740 | 39.832 | 72.825 | 0.00 | 0.00 |
| ATOM | 8239 | H    | THR | X | 539 | 54.066 | 39.680 | 72.089 | 0.00 | 0.00 |
| ATOM | 8240 | CA   | THR | X | 539 | 56.098 | 40.361 | 72.526 | 0.00 | 0.00 |
| ATOM | 8241 | HA   | THR | X | 539 | 56.810 | 39.912 | 73.218 | 0.00 | 0.00 |
| ATOM | 8242 | CB   | THR | X | 539 | 56.484 | 39.995 | 71.126 | 0.00 | 0.00 |
| ATOM | 8243 | HB   | THR | X | 539 | 55.809 | 40.431 | 70.390 | 0.00 | 0.00 |
| ATOM | 8244 | CG2  | THR | X | 539 | 57.924 | 40.495 | 70.741 | 0.00 | 0.00 |
| ATOM | 8245 | HG21 | THR | X | 539 | 58.045 | 40.368 | 69.665 | 0.00 | 0.00 |
| ATOM | 8246 | HG22 | THR | X | 539 | 58.702 | 39.938 | 71.263 | 0.00 | 0.00 |
| ATOM | 8247 | HG23 | THR | X | 539 | 58.139 | 41.524 | 71.031 | 0.00 | 0.00 |
| ATOM | 8248 | OG1  | THR | X | 539 | 56.499 | 38.615 | 70.866 | 0.00 | 0.00 |
| ATOM | 8249 | HG1  | THR | X | 539 | 55.561 | 38.415 | 70.811 | 0.00 | 0.00 |
| ATOM | 8250 | C    | THR | X | 539 | 56.153 | 41.893 | 72.601 | 0.00 | 0.00 |
| ATOM | 8251 | O    | THR | X | 539 | 55.119 | 42.520 | 72.270 | 0.00 | 0.00 |
| ATOM | 8252 | OXT  | THR | X | 539 | 57.181 | 42.393 | 73.174 | 0.00 | 0.00 |

END

#-----  
# 1B41 Production MD Frame 2000  
#-----

| CRYST1 | 82.120 | 82.120 | 82.120 | 90.00 | 90.00 | 90.00  | P 1    |        | 1    |      |
|--------|--------|--------|--------|-------|-------|--------|--------|--------|------|------|
| ATOM   | 1      | N      | ASP    | X     | 1     | 29.248 | 47.269 | 5.409  | 0.00 | 0.00 |
| ATOM   | 2      | H1     | ASP    | X     | 1     | 28.245 | 47.243 | 5.291  | 0.00 | 0.00 |
| ATOM   | 3      | H2     | ASP    | X     | 1     | 29.322 | 46.464 | 6.014  | 0.00 | 0.00 |
| ATOM   | 4      | H3     | ASP    | X     | 1     | 29.760 | 47.141 | 4.548  | 0.00 | 0.00 |
| ATOM   | 5      | CA     | ASP    | X     | 1     | 29.695 | 48.493 | 6.194  | 0.00 | 0.00 |
| ATOM   | 6      | HA     | ASP    | X     | 1     | 30.756 | 48.473 | 6.445  | 0.00 | 0.00 |
| ATOM   | 7      | CB     | ASP    | X     | 1     | 29.502 | 49.843 | 5.431  | 0.00 | 0.00 |
| ATOM   | 8      | HB2    | ASP    | X     | 1     | 30.090 | 49.865 | 4.514  | 0.00 | 0.00 |
| ATOM   | 9      | HB3    | ASP    | X     | 1     | 28.424 | 49.950 | 5.311  | 0.00 | 0.00 |
| ATOM   | 10     | CG     | ASP    | X     | 1     | 29.903 | 51.119 | 6.227  | 0.00 | 0.00 |
| ATOM   | 11     | OD1    | ASP    | X     | 1     | 29.026 | 51.886 | 6.681  | 0.00 | 0.00 |
| ATOM   | 12     | OD2    | ASP    | X     | 1     | 31.127 | 51.154 | 6.505  | 0.00 | 0.00 |
| ATOM   | 13     | C      | ASP    | X     | 1     | 29.010 | 48.571 | 7.597  | 0.00 | 0.00 |
| ATOM   | 14     | O      | ASP    | X     | 1     | 29.770 | 48.711 | 8.567  | 0.00 | 0.00 |
| ATOM   | 15     | N      | ALA    | X     | 2     | 27.693 | 48.404 | 7.606  | 0.00 | 0.00 |
| ATOM   | 16     | H      | ALA    | X     | 2     | 27.187 | 48.318 | 6.737  | 0.00 | 0.00 |
| ATOM   | 17     | CA     | ALA    | X     | 2     | 27.030 | 48.456 | 8.906  | 0.00 | 0.00 |
| ATOM   | 18     | HA     | ALA    | X     | 2     | 27.285 | 49.329 | 9.507  | 0.00 | 0.00 |
| ATOM   | 19     | CB     | ALA    | X     | 2     | 25.509 | 48.436 | 8.663  | 0.00 | 0.00 |
| ATOM   | 20     | HB1    | ALA    | X     | 2     | 25.282 | 47.578 | 8.031  | 0.00 | 0.00 |
| ATOM   | 21     | HB2    | ALA    | X     | 2     | 25.104 | 49.275 | 8.097  | 0.00 | 0.00 |
| ATOM   | 22     | HB3    | ALA    | X     | 2     | 24.892 | 48.454 | 9.562  | 0.00 | 0.00 |
| ATOM   | 23     | C      | ALA    | X     | 2     | 27.290 | 47.336 | 9.856  | 0.00 | 0.00 |
| ATOM   | 24     | O      | ALA    | X     | 2     | 27.021 | 47.430 | 11.049 | 0.00 | 0.00 |
| ATOM   | 25     | N      | GLU    | X     | 3     | 27.870 | 46.179 | 9.479  | 0.00 | 0.00 |
| ATOM   | 26     | H      | GLU    | X     | 3     | 27.881 | 46.060 | 8.476  | 0.00 | 0.00 |
| ATOM   | 27     | CA     | GLU    | X     | 3     | 28.172 | 45.054 | 10.362 | 0.00 | 0.00 |
| ATOM   | 28     | HA     | GLU    | X     | 3     | 27.214 | 44.635 | 10.669 | 0.00 | 0.00 |
| ATOM   | 29     | CB     | GLU    | X     | 3     | 28.901 | 44.009 | 9.581  | 0.00 | 0.00 |
| ATOM   | 30     | HB2    | GLU    | X     | 3     | 29.816 | 44.366 | 9.107  | 0.00 | 0.00 |
| ATOM   | 31     | HB3    | GLU    | X     | 3     | 29.210 | 43.215 | 10.260 | 0.00 | 0.00 |
| ATOM   | 32     | CG     | GLU    | X     | 3     | 28.140 | 43.314 | 8.461  | 0.00 | 0.00 |
| ATOM   | 33     | HG2    | GLU    | X     | 3     | 28.664 | 42.455 | 8.042  | 0.00 | 0.00 |
| ATOM   | 34     | HG3    | GLU    | X     | 3     | 27.210 | 42.963 | 8.909  | 0.00 | 0.00 |
| ATOM   | 35     | CD     | GLU    | X     | 3     | 27.790 | 44.158 | 7.286  | 0.00 | 0.00 |
| ATOM   | 36     | OE1    | GLU    | X     | 3     | 26.786 | 44.001 | 6.614  | 0.00 | 0.00 |
| ATOM   | 37     | OE2    | GLU    | X     | 3     | 28.571 | 45.104 | 7.027  | 0.00 | 0.00 |
| ATOM   | 38     | C      | GLU    | X     | 3     | 29.095 | 45.458 | 11.556 | 0.00 | 0.00 |
| ATOM   | 39     | O      | GLU    | X     | 3     | 29.132 | 44.725 | 12.544 | 0.00 | 0.00 |
| ATOM   | 40     | N      | LEU    | X     | 4     | 29.806 | 46.622 | 11.379 | 0.00 | 0.00 |
| ATOM   | 41     | H      | LEU    | X     | 4     | 29.663 | 47.159 | 10.535 | 0.00 | 0.00 |
| ATOM   | 42     | CA     | LEU    | X     | 4     | 30.796 | 47.224 | 12.220 | 0.00 | 0.00 |
| ATOM   | 43     | HA     | LEU    | X     | 4     | 31.179 | 46.441 | 12.875 | 0.00 | 0.00 |
| ATOM   | 44     | CB     | LEU    | X     | 4     | 31.918 | 47.731 | 11.320 | 0.00 | 0.00 |
| ATOM   | 45     | HB2    | LEU    | X     | 4     | 31.453 | 48.465 | 10.663 | 0.00 | 0.00 |
| ATOM   | 46     | HB3    | LEU    | X     | 4     | 32.577 | 48.299 | 11.976 | 0.00 | 0.00 |
| ATOM   | 47     | CG     | LEU    | X     | 4     | 32.788 | 46.636 | 10.757 | 0.00 | 0.00 |
| ATOM   | 48     | HG     | LEU    | X     | 4     | 32.193 | 46.073 | 10.038 | 0.00 | 0.00 |
| ATOM   | 49     | CD1    | LEU    | X     | 4     | 33.891 | 47.414 | 9.962  | 0.00 | 0.00 |
| ATOM   | 50     | HD11   | LEU    | X     | 4     | 33.425 | 48.041 | 9.202  | 0.00 | 0.00 |
| ATOM   | 51     | HD12   | LEU    | X     | 4     | 34.455 | 46.729 | 9.329  | 0.00 | 0.00 |
| ATOM   | 52     | HD13   | LEU    | X     | 4     | 34.521 | 47.962 | 10.662 | 0.00 | 0.00 |
| ATOM   | 53     | CD2    | LEU    | X     | 4     | 33.507 | 45.740 | 11.678 | 0.00 | 0.00 |
| ATOM   | 54     | HD21   | LEU    | X     | 4     | 32.820 | 45.115 | 12.249 | 0.00 | 0.00 |
| ATOM   | 55     | HD22   | LEU    | X     | 4     | 34.255 | 45.167 | 11.130 | 0.00 | 0.00 |
| ATOM   | 56     | HD23   | LEU    | X     | 4     | 33.923 | 46.297 | 12.518 | 0.00 | 0.00 |
| ATOM   | 57     | C      | LEU    | X     | 4     | 30.237 | 48.311 | 13.187 | 0.00 | 0.00 |
| ATOM   | 58     | O      | LEU    | X     | 4     | 30.785 | 48.607 | 14.262 | 0.00 | 0.00 |
| ATOM   | 59     | N      | LEU    | X     | 5     | 29.087 | 48.870 | 12.779 | 0.00 | 0.00 |
| ATOM   | 60     | H      | LEU    | X     | 5     | 28.615 | 48.389 | 12.026 | 0.00 | 0.00 |
| ATOM   | 61     | CA     | LEU    | X     | 5     | 28.244 | 49.769 | 13.631 | 0.00 | 0.00 |
| ATOM   | 62     | HA     | LEU    | X     | 5     | 28.854 | 50.483 | 14.185 | 0.00 | 0.00 |
| ATOM   | 63     | CB     | LEU    | X     | 5     | 27.237 | 50.511 | 12.700 | 0.00 | 0.00 |
| ATOM   | 64     | HB2    | LEU    | X     | 5     | 27.848 | 51.048 | 11.974 | 0.00 | 0.00 |
| ATOM   | 65     | HB3    | LEU    | X     | 5     | 26.630 | 49.745 | 12.219 | 0.00 | 0.00 |

|      |     |      |     |   |   |        |        |        |      |      |
|------|-----|------|-----|---|---|--------|--------|--------|------|------|
| ATOM | 66  | CG   | LEU | X | 5 | 26.223 | 51.442 | 13.538 | 0.00 | 0.00 |
| ATOM | 67  | HG   | LEU | X | 5 | 26.027 | 51.118 | 14.560 | 0.00 | 0.00 |
| ATOM | 68  | CD1  | LEU | X | 5 | 26.806 | 52.850 | 13.544 | 0.00 | 0.00 |
| ATOM | 69  | HD11 | LEU | X | 5 | 27.628 | 52.786 | 14.257 | 0.00 | 0.00 |
| ATOM | 70  | HD12 | LEU | X | 5 | 26.107 | 53.558 | 13.989 | 0.00 | 0.00 |
| ATOM | 71  | HD13 | LEU | X | 5 | 27.030 | 53.293 | 12.574 | 0.00 | 0.00 |
| ATOM | 72  | CD2  | LEU | X | 5 | 24.842 | 51.342 | 12.805 | 0.00 | 0.00 |
| ATOM | 73  | HD21 | LEU | X | 5 | 24.546 | 52.142 | 12.127 | 0.00 | 0.00 |
| ATOM | 74  | HD22 | LEU | X | 5 | 24.624 | 50.383 | 12.336 | 0.00 | 0.00 |
| ATOM | 75  | HD23 | LEU | X | 5 | 24.062 | 51.302 | 13.565 | 0.00 | 0.00 |
| ATOM | 76  | C    | LEU | X | 5 | 27.510 | 48.942 | 14.659 | 0.00 | 0.00 |
| ATOM | 77  | O    | LEU | X | 5 | 27.041 | 47.833 | 14.299 | 0.00 | 0.00 |
| ATOM | 78  | N    | VAL | X | 6 | 27.429 | 49.339 | 15.949 | 0.00 | 0.00 |
| ATOM | 79  | H    | VAL | X | 6 | 27.981 | 50.174 | 16.083 | 0.00 | 0.00 |
| ATOM | 80  | CA   | VAL | X | 6 | 26.686 | 48.684 | 17.076 | 0.00 | 0.00 |
| ATOM | 81  | HA   | VAL | X | 6 | 25.915 | 48.033 | 16.664 | 0.00 | 0.00 |
| ATOM | 82  | CB   | VAL | X | 6 | 27.610 | 47.829 | 17.934 | 0.00 | 0.00 |
| ATOM | 83  | HB   | VAL | X | 6 | 28.103 | 47.079 | 17.315 | 0.00 | 0.00 |
| ATOM | 84  | CG1  | VAL | X | 6 | 28.612 | 48.608 | 18.801 | 0.00 | 0.00 |
| ATOM | 85  | HG11 | VAL | X | 6 | 28.135 | 49.206 | 19.577 | 0.00 | 0.00 |
| ATOM | 86  | HG12 | VAL | X | 6 | 29.306 | 47.917 | 19.282 | 0.00 | 0.00 |
| ATOM | 87  | HG13 | VAL | X | 6 | 29.262 | 49.160 | 18.123 | 0.00 | 0.00 |
| ATOM | 88  | CG2  | VAL | X | 6 | 26.685 | 46.994 | 18.951 | 0.00 | 0.00 |
| ATOM | 89  | HG21 | VAL | X | 6 | 25.897 | 46.433 | 18.449 | 0.00 | 0.00 |
| ATOM | 90  | HG22 | VAL | X | 6 | 26.228 | 47.745 | 19.596 | 0.00 | 0.00 |
| ATOM | 91  | HG23 | VAL | X | 6 | 27.273 | 46.256 | 19.497 | 0.00 | 0.00 |
| ATOM | 92  | C    | VAL | X | 6 | 26.045 | 49.855 | 17.836 | 0.00 | 0.00 |
| ATOM | 93  | O    | VAL | X | 6 | 26.649 | 50.930 | 17.976 | 0.00 | 0.00 |
| ATOM | 94  | N    | THR | X | 7 | 24.853 | 49.653 | 18.421 | 0.00 | 0.00 |
| ATOM | 95  | H    | THR | X | 7 | 24.440 | 48.742 | 18.284 | 0.00 | 0.00 |
| ATOM | 96  | CA   | THR | X | 7 | 24.066 | 50.674 | 19.173 | 0.00 | 0.00 |
| ATOM | 97  | HA   | THR | X | 7 | 24.618 | 51.608 | 19.064 | 0.00 | 0.00 |
| ATOM | 98  | CB   | THR | X | 7 | 22.581 | 50.944 | 18.710 | 0.00 | 0.00 |
| ATOM | 99  | HB   | THR | X | 7 | 22.031 | 50.004 | 18.738 | 0.00 | 0.00 |
| ATOM | 100 | CG2  | THR | X | 7 | 21.812 | 51.956 | 19.500 | 0.00 | 0.00 |
| ATOM | 101 | HG21 | THR | X | 7 | 21.679 | 51.459 | 20.461 | 0.00 | 0.00 |
| ATOM | 102 | HG22 | THR | X | 7 | 20.785 | 52.089 | 19.158 | 0.00 | 0.00 |
| ATOM | 103 | HG23 | THR | X | 7 | 22.327 | 52.917 | 19.505 | 0.00 | 0.00 |
| ATOM | 104 | OG1  | THR | X | 7 | 22.772 | 51.503 | 17.440 | 0.00 | 0.00 |
| ATOM | 105 | HG1  | THR | X | 7 | 21.913 | 51.624 | 17.029 | 0.00 | 0.00 |
| ATOM | 106 | C    | THR | X | 7 | 24.130 | 50.303 | 20.679 | 0.00 | 0.00 |
| ATOM | 107 | O    | THR | X | 7 | 24.080 | 49.126 | 20.944 | 0.00 | 0.00 |
| ATOM | 108 | N    | VAL | X | 8 | 24.227 | 51.299 | 21.605 | 0.00 | 0.00 |
| ATOM | 109 | H    | VAL | X | 8 | 24.115 | 52.241 | 21.257 | 0.00 | 0.00 |
| ATOM | 110 | CA   | VAL | X | 8 | 24.182 | 51.136 | 23.046 | 0.00 | 0.00 |
| ATOM | 111 | HA   | VAL | X | 8 | 23.805 | 50.141 | 23.282 | 0.00 | 0.00 |
| ATOM | 112 | CB   | VAL | X | 8 | 25.627 | 51.249 | 23.645 | 0.00 | 0.00 |
| ATOM | 113 | HB   | VAL | X | 8 | 25.567 | 51.280 | 24.733 | 0.00 | 0.00 |
| ATOM | 114 | CG1  | VAL | X | 8 | 26.446 | 50.006 | 23.205 | 0.00 | 0.00 |
| ATOM | 115 | HG11 | VAL | X | 8 | 27.492 | 49.969 | 23.510 | 0.00 | 0.00 |
| ATOM | 116 | HG12 | VAL | X | 8 | 26.003 | 49.066 | 23.531 | 0.00 | 0.00 |
| ATOM | 117 | HG13 | VAL | X | 8 | 26.399 | 49.927 | 22.119 | 0.00 | 0.00 |
| ATOM | 118 | CG2  | VAL | X | 8 | 26.527 | 52.399 | 23.276 | 0.00 | 0.00 |
| ATOM | 119 | HG21 | VAL | X | 8 | 26.400 | 52.689 | 22.233 | 0.00 | 0.00 |
| ATOM | 120 | HG22 | VAL | X | 8 | 27.554 | 52.198 | 23.582 | 0.00 | 0.00 |
| ATOM | 121 | HG23 | VAL | X | 8 | 26.218 | 53.265 | 23.862 | 0.00 | 0.00 |
| ATOM | 122 | C    | VAL | X | 8 | 23.234 | 52.128 | 23.670 | 0.00 | 0.00 |
| ATOM | 123 | O    | VAL | X | 8 | 22.839 | 53.083 | 23.030 | 0.00 | 0.00 |
| ATOM | 124 | N    | ARG | X | 9 | 22.992 | 52.022 | 24.932 | 0.00 | 0.00 |
| ATOM | 125 | H    | ARG | X | 9 | 23.516 | 51.391 | 25.521 | 0.00 | 0.00 |
| ATOM | 126 | CA   | ARG | X | 9 | 21.945 | 52.857 | 25.607 | 0.00 | 0.00 |
| ATOM | 127 | HA   | ARG | X | 9 | 21.041 | 52.828 | 25.000 | 0.00 | 0.00 |
| ATOM | 128 | CB   | ARG | X | 9 | 21.606 | 52.393 | 27.045 | 0.00 | 0.00 |
| ATOM | 129 | HB2  | ARG | X | 9 | 21.626 | 51.303 | 27.024 | 0.00 | 0.00 |
| ATOM | 130 | HB3  | ARG | X | 9 | 22.247 | 52.781 | 27.836 | 0.00 | 0.00 |
| ATOM | 131 | CG   | ARG | X | 9 | 20.226 | 52.756 | 27.497 | 0.00 | 0.00 |
| ATOM | 132 | HG2  | ARG | X | 9 | 20.041 | 53.756 | 27.889 | 0.00 | 0.00 |

|      |     |      |     |   |    |        |        |        |      |      |
|------|-----|------|-----|---|----|--------|--------|--------|------|------|
| ATOM | 133 | HG3  | ARG | X | 9  | 19.594 | 52.633 | 26.618 | 0.00 | 0.00 |
| ATOM | 134 | CD   | ARG | X | 9  | 19.823 | 51.883 | 28.674 | 0.00 | 0.00 |
| ATOM | 135 | HD2  | ARG | X | 9  | 20.216 | 50.868 | 28.624 | 0.00 | 0.00 |
| ATOM | 136 | HD3  | ARG | X | 9  | 20.233 | 52.303 | 29.593 | 0.00 | 0.00 |
| ATOM | 137 | NE   | ARG | X | 9  | 18.316 | 51.887 | 28.825 | 0.00 | 0.00 |
| ATOM | 138 | HE   | ARG | X | 9  | 17.715 | 52.190 | 28.072 | 0.00 | 0.00 |
| ATOM | 139 | CZ   | ARG | X | 9  | 17.688 | 51.812 | 30.032 | 0.00 | 0.00 |
| ATOM | 140 | NH1  | ARG | X | 9  | 18.337 | 51.397 | 31.139 | 0.00 | 0.00 |
| ATOM | 141 | HH11 | ARG | X | 9  | 19.310 | 51.135 | 31.205 | 0.00 | 0.00 |
| ATOM | 142 | HH12 | ARG | X | 9  | 17.921 | 51.398 | 32.059 | 0.00 | 0.00 |
| ATOM | 143 | NH2  | ARG | X | 9  | 16.459 | 52.240 | 30.127 | 0.00 | 0.00 |
| ATOM | 144 | HH21 | ARG | X | 9  | 15.890 | 52.545 | 29.350 | 0.00 | 0.00 |
| ATOM | 145 | HH22 | ARG | X | 9  | 15.931 | 52.174 | 30.986 | 0.00 | 0.00 |
| ATOM | 146 | C    | ARG | X | 9  | 22.261 | 54.393 | 25.619 | 0.00 | 0.00 |
| ATOM | 147 | O    | ARG | X | 9  | 21.260 | 55.139 | 25.564 | 0.00 | 0.00 |
| ATOM | 148 | N    | GLY | X | 10 | 23.493 | 54.817 | 25.447 | 0.00 | 0.00 |
| ATOM | 149 | H    | GLY | X | 10 | 24.249 | 54.165 | 25.599 | 0.00 | 0.00 |
| ATOM | 150 | CA   | GLY | X | 10 | 23.853 | 56.274 | 25.260 | 0.00 | 0.00 |
| ATOM | 151 | HA2  | GLY | X | 10 | 23.122 | 56.937 | 25.723 | 0.00 | 0.00 |
| ATOM | 152 | HA3  | GLY | X | 10 | 24.823 | 56.425 | 25.733 | 0.00 | 0.00 |
| ATOM | 153 | C    | GLY | X | 10 | 24.039 | 56.786 | 23.841 | 0.00 | 0.00 |
| ATOM | 154 | O    | GLY | X | 10 | 24.361 | 57.910 | 23.635 | 0.00 | 0.00 |
| ATOM | 155 | N    | GLY | X | 11 | 23.928 | 55.916 | 22.794 | 0.00 | 0.00 |
| ATOM | 156 | H    | GLY | X | 11 | 23.622 | 55.016 | 23.135 | 0.00 | 0.00 |
| ATOM | 157 | CA   | GLY | X | 11 | 24.149 | 56.218 | 21.330 | 0.00 | 0.00 |
| ATOM | 158 | HA2  | GLY | X | 11 | 23.194 | 56.420 | 20.845 | 0.00 | 0.00 |
| ATOM | 159 | HA3  | GLY | X | 11 | 24.735 | 57.136 | 21.293 | 0.00 | 0.00 |
| ATOM | 160 | C    | GLY | X | 11 | 24.902 | 55.094 | 20.476 | 0.00 | 0.00 |
| ATOM | 161 | O    | GLY | X | 11 | 24.784 | 53.858 | 20.723 | 0.00 | 0.00 |
| ATOM | 162 | N    | ARG | X | 12 | 25.625 | 55.540 | 19.392 | 0.00 | 0.00 |
| ATOM | 163 | H    | ARG | X | 12 | 25.651 | 56.514 | 19.125 | 0.00 | 0.00 |
| ATOM | 164 | CA   | ARG | X | 12 | 26.231 | 54.662 | 18.420 | 0.00 | 0.00 |
| ATOM | 165 | HA   | ARG | X | 12 | 25.894 | 53.629 | 18.505 | 0.00 | 0.00 |
| ATOM | 166 | CB   | ARG | X | 12 | 25.839 | 55.183 | 17.060 | 0.00 | 0.00 |
| ATOM | 167 | HB2  | ARG | X | 12 | 25.737 | 56.268 | 17.092 | 0.00 | 0.00 |
| ATOM | 168 | HB3  | ARG | X | 12 | 26.527 | 54.898 | 16.264 | 0.00 | 0.00 |
| ATOM | 169 | CG   | ARG | X | 12 | 24.488 | 54.541 | 16.626 | 0.00 | 0.00 |
| ATOM | 170 | HG2  | ARG | X | 12 | 24.462 | 53.454 | 16.561 | 0.00 | 0.00 |
| ATOM | 171 | HG3  | ARG | X | 12 | 23.798 | 54.740 | 17.446 | 0.00 | 0.00 |
| ATOM | 172 | CD   | ARG | X | 12 | 24.005 | 55.150 | 15.286 | 0.00 | 0.00 |
| ATOM | 173 | HD2  | ARG | X | 12 | 24.076 | 56.234 | 15.376 | 0.00 | 0.00 |
| ATOM | 174 | HD3  | ARG | X | 12 | 24.615 | 54.796 | 14.454 | 0.00 | 0.00 |
| ATOM | 175 | NE   | ARG | X | 12 | 22.539 | 54.853 | 15.066 | 0.00 | 0.00 |
| ATOM | 176 | HE   | ARG | X | 12 | 22.307 | 53.872 | 15.133 | 0.00 | 0.00 |
| ATOM | 177 | CZ   | ARG | X | 12 | 21.530 | 55.738 | 15.007 | 0.00 | 0.00 |
| ATOM | 178 | NH1  | ARG | X | 12 | 21.893 | 57.025 | 14.987 | 0.00 | 0.00 |
| ATOM | 179 | HH11 | ARG | X | 12 | 22.848 | 57.352 | 14.972 | 0.00 | 0.00 |
| ATOM | 180 | HH12 | ARG | X | 12 | 21.146 | 57.672 | 14.775 | 0.00 | 0.00 |
| ATOM | 181 | NH2  | ARG | X | 12 | 20.285 | 55.454 | 15.073 | 0.00 | 0.00 |
| ATOM | 182 | HH21 | ARG | X | 12 | 20.163 | 54.458 | 15.188 | 0.00 | 0.00 |
| ATOM | 183 | HH22 | ARG | X | 12 | 19.510 | 56.077 | 15.250 | 0.00 | 0.00 |
| ATOM | 184 | C    | ARG | X | 12 | 27.770 | 54.572 | 18.550 | 0.00 | 0.00 |
| ATOM | 185 | O    | ARG | X | 12 | 28.498 | 55.573 | 18.632 | 0.00 | 0.00 |
| ATOM | 186 | N    | LEU | X | 13 | 28.306 | 53.350 | 18.457 | 0.00 | 0.00 |
| ATOM | 187 | H    | LEU | X | 13 | 27.619 | 52.610 | 18.427 | 0.00 | 0.00 |
| ATOM | 188 | CA   | LEU | X | 13 | 29.742 | 53.111 | 18.310 | 0.00 | 0.00 |
| ATOM | 189 | HA   | LEU | X | 13 | 30.395 | 53.982 | 18.349 | 0.00 | 0.00 |
| ATOM | 190 | CB   | LEU | X | 13 | 30.203 | 52.262 | 19.510 | 0.00 | 0.00 |
| ATOM | 191 | HB2  | LEU | X | 13 | 29.986 | 51.255 | 19.152 | 0.00 | 0.00 |
| ATOM | 192 | HB3  | LEU | X | 13 | 31.292 | 52.225 | 19.537 | 0.00 | 0.00 |
| ATOM | 193 | CG   | LEU | X | 13 | 29.768 | 52.451 | 21.019 | 0.00 | 0.00 |
| ATOM | 194 | HG   | LEU | X | 13 | 28.678 | 52.497 | 21.015 | 0.00 | 0.00 |
| ATOM | 195 | CD1  | LEU | X | 13 | 30.200 | 51.255 | 21.848 | 0.00 | 0.00 |
| ATOM | 196 | HD11 | LEU | X | 13 | 31.289 | 51.202 | 21.858 | 0.00 | 0.00 |
| ATOM | 197 | HD12 | LEU | X | 13 | 29.790 | 50.414 | 21.289 | 0.00 | 0.00 |
| ATOM | 198 | HD13 | LEU | X | 13 | 29.838 | 51.240 | 22.876 | 0.00 | 0.00 |
| ATOM | 199 | CD2  | LEU | X | 13 | 30.294 | 53.788 | 21.636 | 0.00 | 0.00 |

|      |     |      |     |   |    |        |        |        |      |      |
|------|-----|------|-----|---|----|--------|--------|--------|------|------|
| ATOM | 200 | HD21 | LEU | X | 13 | 30.023 | 54.663 | 21.046 | 0.00 | 0.00 |
| ATOM | 201 | HD22 | LEU | X | 13 | 30.056 | 53.894 | 22.694 | 0.00 | 0.00 |
| ATOM | 202 | HD23 | LEU | X | 13 | 31.383 | 53.767 | 21.695 | 0.00 | 0.00 |
| ATOM | 203 | C    | LEU | X | 13 | 30.016 | 52.334 | 17.032 | 0.00 | 0.00 |
| ATOM | 204 | O    | LEU | X | 13 | 29.101 | 51.711 | 16.452 | 0.00 | 0.00 |
| ATOM | 205 | N    | ARG | X | 14 | 31.290 | 52.329 | 16.565 | 0.00 | 0.00 |
| ATOM | 206 | H    | ARG | X | 14 | 31.942 | 52.830 | 17.151 | 0.00 | 0.00 |
| ATOM | 207 | CA   | ARG | X | 14 | 31.794 | 51.532 | 15.488 | 0.00 | 0.00 |
| ATOM | 208 | HA   | ARG | X | 14 | 31.048 | 50.763 | 15.288 | 0.00 | 0.00 |
| ATOM | 209 | CB   | ARG | X | 14 | 32.108 | 52.350 | 14.197 | 0.00 | 0.00 |
| ATOM | 210 | HB2  | ARG | X | 14 | 31.306 | 53.038 | 13.928 | 0.00 | 0.00 |
| ATOM | 211 | HB3  | ARG | X | 14 | 32.976 | 52.975 | 14.406 | 0.00 | 0.00 |
| ATOM | 212 | CG   | ARG | X | 14 | 32.580 | 51.510 | 13.001 | 0.00 | 0.00 |
| ATOM | 213 | HG2  | ARG | X | 14 | 33.454 | 50.981 | 13.379 | 0.00 | 0.00 |
| ATOM | 214 | HG3  | ARG | X | 14 | 31.741 | 50.877 | 12.712 | 0.00 | 0.00 |
| ATOM | 215 | CD   | ARG | X | 14 | 33.028 | 52.354 | 11.759 | 0.00 | 0.00 |
| ATOM | 216 | HD2  | ARG | X | 14 | 33.958 | 52.901 | 11.914 | 0.00 | 0.00 |
| ATOM | 217 | HD3  | ARG | X | 14 | 33.331 | 51.598 | 11.034 | 0.00 | 0.00 |
| ATOM | 218 | NE   | ARG | X | 14 | 31.963 | 53.221 | 11.182 | 0.00 | 0.00 |
| ATOM | 219 | HE   | ARG | X | 14 | 31.516 | 52.833 | 10.364 | 0.00 | 0.00 |
| ATOM | 220 | CZ   | ARG | X | 14 | 31.812 | 54.516 | 11.417 | 0.00 | 0.00 |
| ATOM | 221 | NH1  | ARG | X | 14 | 32.443 | 55.081 | 12.357 | 0.00 | 0.00 |
| ATOM | 222 | HH11 | ARG | X | 14 | 33.303 | 54.702 | 12.727 | 0.00 | 0.00 |
| ATOM | 223 | HH12 | ARG | X | 14 | 32.370 | 56.079 | 12.493 | 0.00 | 0.00 |
| ATOM | 224 | NH2  | ARG | X | 14 | 30.841 | 55.218 | 10.762 | 0.00 | 0.00 |
| ATOM | 225 | HH21 | ARG | X | 14 | 30.415 | 54.773 | 9.961  | 0.00 | 0.00 |
| ATOM | 226 | HH22 | ARG | X | 14 | 30.635 | 56.173 | 11.018 | 0.00 | 0.00 |
| ATOM | 227 | C    | ARG | X | 14 | 33.108 | 50.833 | 15.955 | 0.00 | 0.00 |
| ATOM | 228 | O    | ARG | X | 14 | 34.023 | 51.468 | 16.423 | 0.00 | 0.00 |
| ATOM | 229 | N    | GLY | X | 15 | 33.103 | 49.504 | 15.730 | 0.00 | 0.00 |
| ATOM | 230 | H    | GLY | X | 15 | 32.217 | 49.208 | 15.346 | 0.00 | 0.00 |
| ATOM | 231 | CA   | GLY | X | 15 | 34.135 | 48.418 | 15.961 | 0.00 | 0.00 |
| ATOM | 232 | HA2  | GLY | X | 15 | 34.836 | 48.674 | 16.755 | 0.00 | 0.00 |
| ATOM | 233 | HA3  | GLY | X | 15 | 33.552 | 47.558 | 16.288 | 0.00 | 0.00 |
| ATOM | 234 | C    | GLY | X | 15 | 34.941 | 48.037 | 14.806 | 0.00 | 0.00 |
| ATOM | 235 | O    | GLY | X | 15 | 34.973 | 48.706 | 13.787 | 0.00 | 0.00 |
| ATOM | 236 | N    | ILE | X | 16 | 35.662 | 46.907 | 14.893 | 0.00 | 0.00 |
| ATOM | 237 | H    | ILE | X | 16 | 35.749 | 46.550 | 15.834 | 0.00 | 0.00 |
| ATOM | 238 | CA   | ILE | X | 16 | 36.484 | 46.303 | 13.843 | 0.00 | 0.00 |
| ATOM | 239 | HA   | ILE | X | 16 | 36.173 | 46.659 | 12.861 | 0.00 | 0.00 |
| ATOM | 240 | CB   | ILE | X | 16 | 37.925 | 46.684 | 14.013 | 0.00 | 0.00 |
| ATOM | 241 | HB   | ILE | X | 16 | 38.480 | 45.924 | 13.463 | 0.00 | 0.00 |
| ATOM | 242 | CG2  | ILE | X | 16 | 38.256 | 47.968 | 13.207 | 0.00 | 0.00 |
| ATOM | 243 | HG21 | ILE | X | 16 | 39.320 | 48.198 | 13.144 | 0.00 | 0.00 |
| ATOM | 244 | HG22 | ILE | X | 16 | 37.678 | 48.806 | 13.597 | 0.00 | 0.00 |
| ATOM | 245 | HG23 | ILE | X | 16 | 37.974 | 47.781 | 12.171 | 0.00 | 0.00 |
| ATOM | 246 | CG1  | ILE | X | 16 | 38.419 | 46.688 | 15.447 | 0.00 | 0.00 |
| ATOM | 247 | HG12 | ILE | X | 16 | 37.932 | 47.546 | 15.912 | 0.00 | 0.00 |
| ATOM | 248 | HG13 | ILE | X | 16 | 38.071 | 45.738 | 15.852 | 0.00 | 0.00 |
| ATOM | 249 | CD1  | ILE | X | 16 | 40.016 | 46.936 | 15.642 | 0.00 | 0.00 |
| ATOM | 250 | HD11 | ILE | X | 16 | 40.549 | 46.241 | 14.993 | 0.00 | 0.00 |
| ATOM | 251 | HD12 | ILE | X | 16 | 40.288 | 46.733 | 16.678 | 0.00 | 0.00 |
| ATOM | 252 | HD13 | ILE | X | 16 | 40.271 | 47.967 | 15.400 | 0.00 | 0.00 |
| ATOM | 253 | C    | ILE | X | 16 | 36.146 | 44.791 | 13.791 | 0.00 | 0.00 |
| ATOM | 254 | O    | ILE | X | 16 | 35.860 | 44.129 | 14.802 | 0.00 | 0.00 |
| ATOM | 255 | N    | ARG | X | 17 | 36.250 | 44.207 | 12.633 | 0.00 | 0.00 |
| ATOM | 256 | H    | ARG | X | 17 | 36.584 | 44.828 | 11.910 | 0.00 | 0.00 |
| ATOM | 257 | CA   | ARG | X | 17 | 36.409 | 42.703 | 12.478 | 0.00 | 0.00 |
| ATOM | 258 | HA   | ARG | X | 17 | 35.715 | 42.148 | 13.109 | 0.00 | 0.00 |
| ATOM | 259 | CB   | ARG | X | 17 | 36.050 | 42.472 | 10.978 | 0.00 | 0.00 |
| ATOM | 260 | HB2  | ARG | X | 17 | 35.039 | 42.836 | 10.797 | 0.00 | 0.00 |
| ATOM | 261 | HB3  | ARG | X | 17 | 36.739 | 43.046 | 10.358 | 0.00 | 0.00 |
| ATOM | 262 | CG   | ARG | X | 17 | 36.245 | 40.985 | 10.499 | 0.00 | 0.00 |
| ATOM | 263 | HG2  | ARG | X | 17 | 37.292 | 40.758 | 10.695 | 0.00 | 0.00 |
| ATOM | 264 | HG3  | ARG | X | 17 | 35.515 | 40.300 | 10.932 | 0.00 | 0.00 |
| ATOM | 265 | CD   | ARG | X | 17 | 35.947 | 40.917 | 8.959  | 0.00 | 0.00 |
| ATOM | 266 | HD2  | ARG | X | 17 | 35.126 | 41.548 | 8.617  | 0.00 | 0.00 |



|      |     |      |     |   |    |        |        |        |      |      |
|------|-----|------|-----|---|----|--------|--------|--------|------|------|
| ATOM | 267 | HD3  | ARG | X | 17 | 36.858 | 41.232 | 8.451  | 0.00 | 0.00 |
| ATOM | 268 | NE   | ARG | X | 17 | 35.779 | 39.510 | 8.533  | 0.00 | 0.00 |
| ATOM | 269 | HE   | ARG | X | 17 | 34.847 | 39.305 | 8.203  | 0.00 | 0.00 |
| ATOM | 270 | CZ   | ARG | X | 17 | 36.751 | 38.605 | 8.409  | 0.00 | 0.00 |
| ATOM | 271 | NH1  | ARG | X | 17 | 37.981 | 38.859 | 8.834  | 0.00 | 0.00 |
| ATOM | 272 | HH11 | ARG | X | 17 | 38.230 | 39.745 | 9.248  | 0.00 | 0.00 |
| ATOM | 273 | HH12 | ARG | X | 17 | 38.733 | 38.218 | 8.622  | 0.00 | 0.00 |
| ATOM | 274 | NH2  | ARG | X | 17 | 36.586 | 37.456 | 7.863  | 0.00 | 0.00 |
| ATOM | 275 | HH21 | ARG | X | 17 | 35.671 | 37.177 | 7.540  | 0.00 | 0.00 |
| ATOM | 276 | HH22 | ARG | X | 17 | 37.293 | 36.735 | 7.894  | 0.00 | 0.00 |
| ATOM | 277 | C    | ARG | X | 17 | 37.926 | 42.429 | 12.734 | 0.00 | 0.00 |
| ATOM | 278 | O    | ARG | X | 17 | 38.794 | 43.193 | 12.358 | 0.00 | 0.00 |
| ATOM | 279 | N    | LEU | X | 18 | 38.243 | 41.303 | 13.415 | 0.00 | 0.00 |
| ATOM | 280 | H    | LEU | X | 18 | 37.504 | 40.741 | 13.811 | 0.00 | 0.00 |
| ATOM | 281 | CA   | LEU | X | 18 | 39.536 | 40.701 | 13.490 | 0.00 | 0.00 |
| ATOM | 282 | HA   | LEU | X | 18 | 40.306 | 41.365 | 13.095 | 0.00 | 0.00 |
| ATOM | 283 | CB   | LEU | X | 18 | 39.900 | 40.527 | 15.038 | 0.00 | 0.00 |
| ATOM | 284 | HB2  | LEU | X | 18 | 39.270 | 39.735 | 15.441 | 0.00 | 0.00 |
| ATOM | 285 | HB3  | LEU | X | 18 | 40.878 | 40.069 | 15.186 | 0.00 | 0.00 |
| ATOM | 286 | CG   | LEU | X | 18 | 39.925 | 41.863 | 15.849 | 0.00 | 0.00 |
| ATOM | 287 | HG   | LEU | X | 18 | 38.997 | 42.415 | 15.697 | 0.00 | 0.00 |
| ATOM | 288 | CD1  | LEU | X | 18 | 40.186 | 41.597 | 17.363 | 0.00 | 0.00 |
| ATOM | 289 | HD11 | LEU | X | 18 | 40.141 | 42.579 | 17.833 | 0.00 | 0.00 |
| ATOM | 290 | HD12 | LEU | X | 18 | 41.096 | 41.054 | 17.617 | 0.00 | 0.00 |
| ATOM | 291 | HD13 | LEU | X | 18 | 39.280 | 41.124 | 17.743 | 0.00 | 0.00 |
| ATOM | 292 | CD2  | LEU | X | 18 | 41.035 | 42.734 | 15.310 | 0.00 | 0.00 |
| ATOM | 293 | HD21 | LEU | X | 18 | 41.061 | 43.730 | 15.750 | 0.00 | 0.00 |
| ATOM | 294 | HD22 | LEU | X | 18 | 41.996 | 42.271 | 15.534 | 0.00 | 0.00 |
| ATOM | 295 | HD23 | LEU | X | 18 | 41.025 | 42.977 | 14.247 | 0.00 | 0.00 |
| ATOM | 296 | C    | LEU | X | 18 | 39.650 | 39.359 | 12.822 | 0.00 | 0.00 |
| ATOM | 297 | O    | LEU | X | 18 | 38.652 | 38.651 | 12.664 | 0.00 | 0.00 |
| ATOM | 298 | N    | LYS | X | 19 | 40.851 | 38.953 | 12.399 | 0.00 | 0.00 |
| ATOM | 299 | H    | LYS | X | 19 | 41.636 | 39.571 | 12.545 | 0.00 | 0.00 |
| ATOM | 300 | CA   | LYS | X | 19 | 41.195 | 37.638 | 11.926 | 0.00 | 0.00 |
| ATOM | 301 | HA   | LYS | X | 19 | 40.324 | 37.135 | 11.505 | 0.00 | 0.00 |
| ATOM | 302 | CB   | LYS | X | 19 | 42.349 | 37.633 | 10.857 | 0.00 | 0.00 |
| ATOM | 303 | HB2  | LYS | X | 19 | 43.266 | 37.844 | 11.408 | 0.00 | 0.00 |
| ATOM | 304 | HB3  | LYS | X | 19 | 42.374 | 36.716 | 10.270 | 0.00 | 0.00 |
| ATOM | 305 | CG   | LYS | X | 19 | 42.208 | 38.787 | 9.878  | 0.00 | 0.00 |
| ATOM | 306 | HG2  | LYS | X | 19 | 41.290 | 38.819 | 9.291  | 0.00 | 0.00 |
| ATOM | 307 | HG3  | LYS | X | 19 | 42.459 | 39.664 | 10.474 | 0.00 | 0.00 |
| ATOM | 308 | CD   | LYS | X | 19 | 43.251 | 38.777 | 8.776  | 0.00 | 0.00 |
| ATOM | 309 | HD2  | LYS | X | 19 | 44.237 | 38.582 | 9.199  | 0.00 | 0.00 |
| ATOM | 310 | HD3  | LYS | X | 19 | 42.975 | 37.949 | 8.123  | 0.00 | 0.00 |
| ATOM | 311 | CE   | LYS | X | 19 | 43.438 | 40.091 | 8.028  | 0.00 | 0.00 |
| ATOM | 312 | HE2  | LYS | X | 19 | 42.549 | 40.391 | 7.473  | 0.00 | 0.00 |
| ATOM | 313 | HE3  | LYS | X | 19 | 43.662 | 40.825 | 8.803  | 0.00 | 0.00 |
| ATOM | 314 | NZ   | LYS | X | 19 | 44.578 | 39.989 | 7.060  | 0.00 | 0.00 |
| ATOM | 315 | HZ1  | LYS | X | 19 | 45.431 | 39.607 | 7.445  | 0.00 | 0.00 |
| ATOM | 316 | HZ2  | LYS | X | 19 | 44.211 | 39.368 | 6.353  | 0.00 | 0.00 |
| ATOM | 317 | HZ3  | LYS | X | 19 | 44.859 | 40.882 | 6.681  | 0.00 | 0.00 |
| ATOM | 318 | C    | LYS | X | 19 | 41.707 | 36.779 | 13.086 | 0.00 | 0.00 |
| ATOM | 319 | O    | LYS | X | 19 | 42.401 | 37.205 | 14.004 | 0.00 | 0.00 |
| ATOM | 320 | N    | THR | X | 20 | 41.642 | 35.448 | 12.920 | 0.00 | 0.00 |
| ATOM | 321 | H    | THR | X | 20 | 40.960 | 35.138 | 12.243 | 0.00 | 0.00 |
| ATOM | 322 | CA   | THR | X | 20 | 42.015 | 34.414 | 13.884 | 0.00 | 0.00 |
| ATOM | 323 | HA   | THR | X | 20 | 42.958 | 34.648 | 14.378 | 0.00 | 0.00 |
| ATOM | 324 | CB   | THR | X | 20 | 41.013 | 34.291 | 15.079 | 0.00 | 0.00 |
| ATOM | 325 | HB   | THR | X | 20 | 40.733 | 33.240 | 15.155 | 0.00 | 0.00 |
| ATOM | 326 | CG2  | THR | X | 20 | 41.558 | 34.715 | 16.416 | 0.00 | 0.00 |
| ATOM | 327 | HG21 | THR | X | 20 | 42.583 | 34.345 | 16.454 | 0.00 | 0.00 |
| ATOM | 328 | HG22 | THR | X | 20 | 40.949 | 34.295 | 17.216 | 0.00 | 0.00 |
| ATOM | 329 | HG23 | THR | X | 20 | 41.598 | 35.795 | 16.556 | 0.00 | 0.00 |
| ATOM | 330 | OG1  | THR | X | 20 | 39.811 | 34.955 | 14.771 | 0.00 | 0.00 |
| ATOM | 331 | HG1  | THR | X | 20 | 39.280 | 34.408 | 14.188 | 0.00 | 0.00 |
| ATOM | 332 | C    | THR | X | 20 | 42.246 | 33.061 | 13.179 | 0.00 | 0.00 |
| ATOM | 333 | O    | THR | X | 20 | 41.623 | 32.823 | 12.088 | 0.00 | 0.00 |

|      |     |      |     |   |    |        |        |        |      |      |
|------|-----|------|-----|---|----|--------|--------|--------|------|------|
| ATOM | 334 | N    | PRO | X | 21 | 43.114 | 32.175 | 13.669 | 0.00 | 0.00 |
| ATOM | 335 | CD   | PRO | X | 21 | 43.929 | 32.304 | 14.906 | 0.00 | 0.00 |
| ATOM | 336 | HD2  | PRO | X | 21 | 43.294 | 32.487 | 15.772 | 0.00 | 0.00 |
| ATOM | 337 | HD3  | PRO | X | 21 | 44.642 | 33.120 | 14.783 | 0.00 | 0.00 |
| ATOM | 338 | CG   | PRO | X | 21 | 44.637 | 30.916 | 15.076 | 0.00 | 0.00 |
| ATOM | 339 | HG2  | PRO | X | 21 | 43.926 | 30.308 | 15.635 | 0.00 | 0.00 |
| ATOM | 340 | HG3  | PRO | X | 21 | 45.608 | 31.025 | 15.559 | 0.00 | 0.00 |
| ATOM | 341 | CB   | PRO | X | 21 | 44.754 | 30.354 | 13.640 | 0.00 | 0.00 |
| ATOM | 342 | HB2  | PRO | X | 21 | 44.787 | 29.268 | 13.552 | 0.00 | 0.00 |
| ATOM | 343 | HB3  | PRO | X | 21 | 45.618 | 30.782 | 13.130 | 0.00 | 0.00 |
| ATOM | 344 | CA   | PRO | X | 21 | 43.553 | 30.954 | 12.921 | 0.00 | 0.00 |
| ATOM | 345 | HA   | PRO | X | 21 | 43.793 | 31.126 | 11.872 | 0.00 | 0.00 |
| ATOM | 346 | C    | PRO | X | 21 | 42.401 | 29.876 | 12.870 | 0.00 | 0.00 |
| ATOM | 347 | O    | PRO | X | 21 | 42.415 | 29.037 | 11.966 | 0.00 | 0.00 |
| ATOM | 348 | N    | GLY | X | 22 | 41.336 | 29.931 | 13.698 | 0.00 | 0.00 |
| ATOM | 349 | H    | GLY | X | 22 | 41.348 | 30.610 | 14.445 | 0.00 | 0.00 |
| ATOM | 350 | CA   | GLY | X | 22 | 40.060 | 29.157 | 13.603 | 0.00 | 0.00 |
| ATOM | 351 | HA2  | GLY | X | 22 | 40.286 | 28.172 | 13.195 | 0.00 | 0.00 |
| ATOM | 352 | HA3  | GLY | X | 22 | 39.674 | 29.049 | 14.617 | 0.00 | 0.00 |
| ATOM | 353 | C    | GLY | X | 22 | 38.969 | 29.846 | 12.800 | 0.00 | 0.00 |
| ATOM | 354 | O    | GLY | X | 22 | 37.838 | 29.320 | 12.851 | 0.00 | 0.00 |
| ATOM | 355 | N    | GLY | X | 23 | 39.189 | 30.967 | 12.131 | 0.00 | 0.00 |
| ATOM | 356 | H    | GLY | X | 23 | 40.171 | 31.191 | 12.057 | 0.00 | 0.00 |
| ATOM | 357 | CA   | GLY | X | 23 | 38.123 | 31.831 | 11.503 | 0.00 | 0.00 |
| ATOM | 358 | HA2  | GLY | X | 23 | 38.448 | 32.221 | 10.539 | 0.00 | 0.00 |
| ATOM | 359 | HA3  | GLY | X | 23 | 37.240 | 31.241 | 11.257 | 0.00 | 0.00 |
| ATOM | 360 | C    | GLY | X | 23 | 37.798 | 33.117 | 12.329 | 0.00 | 0.00 |
| ATOM | 361 | O    | GLY | X | 23 | 38.413 | 33.197 | 13.424 | 0.00 | 0.00 |
| ATOM | 362 | N    | PRO | X | 24 | 36.938 | 34.061 | 11.884 | 0.00 | 0.00 |
| ATOM | 363 | CD   | PRO | X | 24 | 36.187 | 33.987 | 10.673 | 0.00 | 0.00 |
| ATOM | 364 | HD2  | PRO | X | 24 | 35.399 | 33.335 | 11.049 | 0.00 | 0.00 |
| ATOM | 365 | HD3  | PRO | X | 24 | 36.786 | 33.533 | 9.884  | 0.00 | 0.00 |
| ATOM | 366 | CG   | PRO | X | 24 | 35.662 | 35.363 | 10.362 | 0.00 | 0.00 |
| ATOM | 367 | HG2  | PRO | X | 24 | 34.634 | 35.504 | 10.696 | 0.00 | 0.00 |
| ATOM | 368 | HG3  | PRO | X | 24 | 35.602 | 35.483 | 9.280  | 0.00 | 0.00 |
| ATOM | 369 | CB   | PRO | X | 24 | 36.714 | 36.249 | 11.116 | 0.00 | 0.00 |
| ATOM | 370 | HB2  | PRO | X | 24 | 36.232 | 37.181 | 11.411 | 0.00 | 0.00 |
| ATOM | 371 | HB3  | PRO | X | 24 | 37.575 | 36.480 | 10.489 | 0.00 | 0.00 |
| ATOM | 372 | CA   | PRO | X | 24 | 37.203 | 35.419 | 12.303 | 0.00 | 0.00 |
| ATOM | 373 | HA   | PRO | X | 24 | 38.263 | 35.461 | 12.555 | 0.00 | 0.00 |
| ATOM | 374 | C    | PRO | X | 24 | 36.375 | 35.801 | 13.524 | 0.00 | 0.00 |
| ATOM | 375 | O    | PRO | X | 24 | 35.474 | 35.009 | 13.853 | 0.00 | 0.00 |
| ATOM | 376 | N    | VAL | X | 25 | 36.726 | 36.900 | 14.223 | 0.00 | 0.00 |
| ATOM | 377 | H    | VAL | X | 25 | 37.291 | 37.452 | 13.595 | 0.00 | 0.00 |
| ATOM | 378 | CA   | VAL | X | 25 | 35.987 | 37.512 | 15.335 | 0.00 | 0.00 |
| ATOM | 379 | HA   | VAL | X | 25 | 34.942 | 37.204 | 15.298 | 0.00 | 0.00 |
| ATOM | 380 | CB   | VAL | X | 25 | 36.495 | 37.052 | 16.772 | 0.00 | 0.00 |
| ATOM | 381 | HB   | VAL | X | 25 | 35.875 | 37.430 | 17.585 | 0.00 | 0.00 |
| ATOM | 382 | CG1  | VAL | X | 25 | 36.424 | 35.538 | 16.909 | 0.00 | 0.00 |
| ATOM | 383 | HG11 | VAL | X | 25 | 36.709 | 35.297 | 17.933 | 0.00 | 0.00 |
| ATOM | 384 | HG12 | VAL | X | 25 | 35.395 | 35.283 | 16.654 | 0.00 | 0.00 |
| ATOM | 385 | HG13 | VAL | X | 25 | 37.175 | 35.123 | 16.236 | 0.00 | 0.00 |
| ATOM | 386 | CG2  | VAL | X | 25 | 37.962 | 37.537 | 16.906 | 0.00 | 0.00 |
| ATOM | 387 | HG21 | VAL | X | 25 | 38.039 | 38.622 | 16.962 | 0.00 | 0.00 |
| ATOM | 388 | HG22 | VAL | X | 25 | 38.568 | 37.264 | 16.041 | 0.00 | 0.00 |
| ATOM | 389 | HG23 | VAL | X | 25 | 38.364 | 37.278 | 17.886 | 0.00 | 0.00 |
| ATOM | 390 | C    | VAL | X | 25 | 35.928 | 39.056 | 15.103 | 0.00 | 0.00 |
| ATOM | 391 | O    | VAL | X | 25 | 36.182 | 39.501 | 13.987 | 0.00 | 0.00 |
| ATOM | 392 | N    | SER | X | 26 | 35.733 | 39.849 | 16.176 | 0.00 | 0.00 |
| ATOM | 393 | H    | SER | X | 26 | 35.552 | 39.468 | 17.094 | 0.00 | 0.00 |
| ATOM | 394 | CA   | SER | X | 26 | 35.533 | 41.359 | 16.124 | 0.00 | 0.00 |
| ATOM | 395 | HA   | SER | X | 26 | 36.222 | 41.716 | 15.358 | 0.00 | 0.00 |
| ATOM | 396 | CB   | SER | X | 26 | 34.126 | 41.544 | 15.674 | 0.00 | 0.00 |
| ATOM | 397 | HB2  | SER | X | 26 | 34.065 | 42.632 | 15.672 | 0.00 | 0.00 |
| ATOM | 398 | HB3  | SER | X | 26 | 34.016 | 41.172 | 14.655 | 0.00 | 0.00 |
| ATOM | 399 | OG   | SER | X | 26 | 33.088 | 41.174 | 16.583 | 0.00 | 0.00 |
| ATOM | 400 | HG   | SER | X | 26 | 33.513 | 40.629 | 17.250 | 0.00 | 0.00 |

|      |     |      |     |   |    |        |        |        |      |      |
|------|-----|------|-----|---|----|--------|--------|--------|------|------|
| ATOM | 401 | C    | SER | X | 26 | 35.824 | 41.997 | 17.514 | 0.00 | 0.00 |
| ATOM | 402 | O    | SER | X | 26 | 36.128 | 41.288 | 18.464 | 0.00 | 0.00 |
| ATOM | 403 | N    | ALA | X | 27 | 35.726 | 43.281 | 17.613 | 0.00 | 0.00 |
| ATOM | 404 | H    | ALA | X | 27 | 35.517 | 43.817 | 16.783 | 0.00 | 0.00 |
| ATOM | 405 | CA   | ALA | X | 27 | 36.154 | 44.059 | 18.711 | 0.00 | 0.00 |
| ATOM | 406 | HA   | ALA | X | 27 | 35.814 | 43.535 | 19.604 | 0.00 | 0.00 |
| ATOM | 407 | CB   | ALA | X | 27 | 37.637 | 44.041 | 18.822 | 0.00 | 0.00 |
| ATOM | 408 | HB1  | ALA | X | 27 | 38.148 | 44.347 | 17.910 | 0.00 | 0.00 |
| ATOM | 409 | HB2  | ALA | X | 27 | 37.965 | 43.035 | 19.083 | 0.00 | 0.00 |
| ATOM | 410 | HB3  | ALA | X | 27 | 37.988 | 44.738 | 19.582 | 0.00 | 0.00 |
| ATOM | 411 | C    | ALA | X | 27 | 35.635 | 45.519 | 18.737 | 0.00 | 0.00 |
| ATOM | 412 | O    | ALA | X | 27 | 35.706 | 46.228 | 17.719 | 0.00 | 0.00 |
| ATOM | 413 | N    | PHE | X | 28 | 35.173 | 45.905 | 19.974 | 0.00 | 0.00 |
| ATOM | 414 | H    | PHE | X | 28 | 35.089 | 45.135 | 20.623 | 0.00 | 0.00 |
| ATOM | 415 | CA   | PHE | X | 28 | 34.745 | 47.231 | 20.316 | 0.00 | 0.00 |
| ATOM | 416 | HA   | PHE | X | 28 | 34.890 | 47.910 | 19.475 | 0.00 | 0.00 |
| ATOM | 417 | CB   | PHE | X | 28 | 33.291 | 47.206 | 20.676 | 0.00 | 0.00 |
| ATOM | 418 | HB2  | PHE | X | 28 | 33.300 | 46.572 | 21.562 | 0.00 | 0.00 |
| ATOM | 419 | HB3  | PHE | X | 28 | 33.015 | 48.156 | 21.133 | 0.00 | 0.00 |
| ATOM | 420 | CG   | PHE | X | 28 | 32.397 | 46.819 | 19.539 | 0.00 | 0.00 |
| ATOM | 421 | CD1  | PHE | X | 28 | 31.994 | 45.513 | 19.302 | 0.00 | 0.00 |
| ATOM | 422 | HD1  | PHE | X | 28 | 32.245 | 44.792 | 20.067 | 0.00 | 0.00 |
| ATOM | 423 | CE1  | PHE | X | 28 | 31.260 | 45.108 | 18.206 | 0.00 | 0.00 |
| ATOM | 424 | HE1  | PHE | X | 28 | 31.036 | 44.073 | 17.990 | 0.00 | 0.00 |
| ATOM | 425 | CZ   | PHE | X | 28 | 30.915 | 46.054 | 17.267 | 0.00 | 0.00 |
| ATOM | 426 | HZ   | PHE | X | 28 | 30.319 | 45.791 | 16.405 | 0.00 | 0.00 |
| ATOM | 427 | CE2  | PHE | X | 28 | 31.254 | 47.362 | 17.504 | 0.00 | 0.00 |
| ATOM | 428 | HE2  | PHE | X | 28 | 30.777 | 48.101 | 16.878 | 0.00 | 0.00 |
| ATOM | 429 | CD2  | PHE | X | 28 | 32.058 | 47.740 | 18.580 | 0.00 | 0.00 |
| ATOM | 430 | HD2  | PHE | X | 28 | 32.346 | 48.775 | 18.688 | 0.00 | 0.00 |
| ATOM | 431 | C    | PHE | X | 28 | 35.617 | 47.627 | 21.527 | 0.00 | 0.00 |
| ATOM | 432 | O    | PHE | X | 28 | 35.688 | 46.889 | 22.482 | 0.00 | 0.00 |
| ATOM | 433 | N    | LEU | X | 29 | 36.407 | 48.675 | 21.360 | 0.00 | 0.00 |
| ATOM | 434 | H    | LEU | X | 29 | 36.245 | 49.344 | 20.621 | 0.00 | 0.00 |
| ATOM | 435 | CA   | LEU | X | 29 | 37.592 | 48.942 | 22.210 | 0.00 | 0.00 |
| ATOM | 436 | HA   | LEU | X | 29 | 37.478 | 48.389 | 23.142 | 0.00 | 0.00 |
| ATOM | 437 | CB   | LEU | X | 29 | 38.869 | 48.503 | 21.408 | 0.00 | 0.00 |
| ATOM | 438 | HB2  | LEU | X | 29 | 38.852 | 49.170 | 20.547 | 0.00 | 0.00 |
| ATOM | 439 | HB3  | LEU | X | 29 | 39.835 | 48.699 | 21.874 | 0.00 | 0.00 |
| ATOM | 440 | CG   | LEU | X | 29 | 38.876 | 47.081 | 20.944 | 0.00 | 0.00 |
| ATOM | 441 | HG   | LEU | X | 29 | 37.935 | 46.836 | 20.450 | 0.00 | 0.00 |
| ATOM | 442 | CD1  | LEU | X | 29 | 40.018 | 46.983 | 19.925 | 0.00 | 0.00 |
| ATOM | 443 | HD11 | LEU | X | 29 | 40.273 | 45.971 | 19.611 | 0.00 | 0.00 |
| ATOM | 444 | HD12 | LEU | X | 29 | 40.946 | 47.303 | 20.397 | 0.00 | 0.00 |
| ATOM | 445 | HD13 | LEU | X | 29 | 39.805 | 47.642 | 19.083 | 0.00 | 0.00 |
| ATOM | 446 | CD2  | LEU | X | 29 | 39.014 | 46.017 | 22.054 | 0.00 | 0.00 |
| ATOM | 447 | HD21 | LEU | X | 29 | 39.006 | 45.011 | 21.635 | 0.00 | 0.00 |
| ATOM | 448 | HD22 | LEU | X | 29 | 39.986 | 46.178 | 22.522 | 0.00 | 0.00 |
| ATOM | 449 | HD23 | LEU | X | 29 | 38.210 | 46.150 | 22.778 | 0.00 | 0.00 |
| ATOM | 450 | C    | LEU | X | 29 | 37.693 | 50.391 | 22.697 | 0.00 | 0.00 |
| ATOM | 451 | O    | LEU | X | 29 | 37.406 | 51.348 | 21.970 | 0.00 | 0.00 |
| ATOM | 452 | N    | GLY | X | 30 | 38.151 | 50.530 | 23.951 | 0.00 | 0.00 |
| ATOM | 453 | H    | GLY | X | 30 | 38.302 | 49.630 | 24.384 | 0.00 | 0.00 |
| ATOM | 454 | CA   | GLY | X | 30 | 38.460 | 51.742 | 24.726 | 0.00 | 0.00 |
| ATOM | 455 | HA2  | GLY | X | 30 | 38.667 | 51.350 | 25.722 | 0.00 | 0.00 |
| ATOM | 456 | HA3  | GLY | X | 30 | 39.263 | 52.244 | 24.187 | 0.00 | 0.00 |
| ATOM | 457 | C    | GLY | X | 30 | 37.280 | 52.691 | 24.853 | 0.00 | 0.00 |
| ATOM | 458 | O    | GLY | X | 30 | 37.344 | 53.898 | 24.745 | 0.00 | 0.00 |
| ATOM | 459 | N    | ILE | X | 31 | 36.116 | 52.075 | 25.246 | 0.00 | 0.00 |
| ATOM | 460 | H    | ILE | X | 31 | 36.259 | 51.117 | 25.533 | 0.00 | 0.00 |
| ATOM | 461 | CA   | ILE | X | 31 | 34.796 | 52.599 | 25.355 | 0.00 | 0.00 |
| ATOM | 462 | HA   | ILE | X | 31 | 34.722 | 53.303 | 24.526 | 0.00 | 0.00 |
| ATOM | 463 | CB   | ILE | X | 31 | 33.743 | 51.457 | 25.119 | 0.00 | 0.00 |
| ATOM | 464 | HB   | ILE | X | 31 | 33.793 | 50.769 | 25.963 | 0.00 | 0.00 |
| ATOM | 465 | CG2  | ILE | X | 31 | 32.349 | 52.196 | 25.150 | 0.00 | 0.00 |
| ATOM | 466 | HG21 | ILE | X | 31 | 32.111 | 52.853 | 25.987 | 0.00 | 0.00 |
| ATOM | 467 | HG22 | ILE | X | 31 | 31.674 | 51.342 | 25.105 | 0.00 | 0.00 |

|      |     |      |     |   |    |        |        |        |      |      |
|------|-----|------|-----|---|----|--------|--------|--------|------|------|
| ATOM | 468 | HG23 | ILE | X | 31 | 32.179 | 52.731 | 24.216 | 0.00 | 0.00 |
| ATOM | 469 | CG1  | ILE | X | 31 | 33.935 | 50.578 | 23.841 | 0.00 | 0.00 |
| ATOM | 470 | HG12 | ILE | X | 31 | 33.821 | 51.234 | 22.978 | 0.00 | 0.00 |
| ATOM | 471 | HG13 | ILE | X | 31 | 34.967 | 50.250 | 23.712 | 0.00 | 0.00 |
| ATOM | 472 | CD1  | ILE | X | 31 | 33.038 | 49.353 | 23.969 | 0.00 | 0.00 |
| ATOM | 473 | HD11 | ILE | X | 31 | 31.975 | 49.591 | 23.927 | 0.00 | 0.00 |
| ATOM | 474 | HD12 | ILE | X | 31 | 33.232 | 48.867 | 24.926 | 0.00 | 0.00 |
| ATOM | 475 | HD13 | ILE | X | 31 | 33.241 | 48.676 | 23.140 | 0.00 | 0.00 |
| ATOM | 476 | C    | ILE | X | 31 | 34.597 | 53.292 | 26.733 | 0.00 | 0.00 |
| ATOM | 477 | O    | ILE | X | 31 | 34.769 | 52.567 | 27.777 | 0.00 | 0.00 |
| ATOM | 478 | N    | PRO | X | 32 | 34.270 | 54.558 | 26.802 | 0.00 | 0.00 |
| ATOM | 479 | CD   | PRO | X | 32 | 34.292 | 55.414 | 25.609 | 0.00 | 0.00 |
| ATOM | 480 | HD2  | PRO | X | 32 | 33.618 | 54.969 | 24.877 | 0.00 | 0.00 |
| ATOM | 481 | HD3  | PRO | X | 32 | 35.307 | 55.440 | 25.212 | 0.00 | 0.00 |
| ATOM | 482 | CG   | PRO | X | 32 | 33.782 | 56.769 | 26.158 | 0.00 | 0.00 |
| ATOM | 483 | HG2  | PRO | X | 32 | 32.694 | 56.748 | 26.220 | 0.00 | 0.00 |
| ATOM | 484 | HG3  | PRO | X | 32 | 34.208 | 57.635 | 25.651 | 0.00 | 0.00 |
| ATOM | 485 | CB   | PRO | X | 32 | 34.325 | 56.747 | 27.567 | 0.00 | 0.00 |
| ATOM | 486 | HB2  | PRO | X | 32 | 33.855 | 57.519 | 28.176 | 0.00 | 0.00 |
| ATOM | 487 | HB3  | PRO | X | 32 | 35.384 | 57.002 | 27.607 | 0.00 | 0.00 |
| ATOM | 488 | CA   | PRO | X | 32 | 34.253 | 55.289 | 28.029 | 0.00 | 0.00 |
| ATOM | 489 | HA   | PRO | X | 32 | 35.152 | 55.074 | 28.607 | 0.00 | 0.00 |
| ATOM | 490 | C    | PRO | X | 32 | 32.986 | 54.892 | 28.791 | 0.00 | 0.00 |
| ATOM | 491 | O    | PRO | X | 32 | 31.892 | 55.104 | 28.380 | 0.00 | 0.00 |
| ATOM | 492 | N    | PHE | X | 33 | 33.066 | 54.154 | 29.964 | 0.00 | 0.00 |
| ATOM | 493 | H    | PHE | X | 33 | 33.996 | 53.885 | 30.251 | 0.00 | 0.00 |
| ATOM | 494 | CA   | PHE | X | 33 | 31.976 | 53.809 | 30.879 | 0.00 | 0.00 |
| ATOM | 495 | HA   | PHE | X | 33 | 31.121 | 53.556 | 30.253 | 0.00 | 0.00 |
| ATOM | 496 | CB   | PHE | X | 33 | 32.252 | 52.494 | 31.641 | 0.00 | 0.00 |
| ATOM | 497 | HB2  | PHE | X | 33 | 31.366 | 52.125 | 32.159 | 0.00 | 0.00 |
| ATOM | 498 | HB3  | PHE | X | 33 | 32.472 | 51.702 | 30.924 | 0.00 | 0.00 |
| ATOM | 499 | CG   | PHE | X | 33 | 33.463 | 52.446 | 32.611 | 0.00 | 0.00 |
| ATOM | 500 | CD1  | PHE | X | 33 | 33.305 | 53.078 | 33.873 | 0.00 | 0.00 |
| ATOM | 501 | HD1  | PHE | X | 33 | 32.393 | 53.631 | 34.042 | 0.00 | 0.00 |
| ATOM | 502 | CE1  | PHE | X | 33 | 34.376 | 53.052 | 34.786 | 0.00 | 0.00 |
| ATOM | 503 | HE1  | PHE | X | 33 | 34.224 | 53.514 | 35.751 | 0.00 | 0.00 |
| ATOM | 504 | CZ   | PHE | X | 33 | 35.491 | 52.201 | 34.554 | 0.00 | 0.00 |
| ATOM | 505 | HZ   | PHE | X | 33 | 36.309 | 52.144 | 35.257 | 0.00 | 0.00 |
| ATOM | 506 | CE2  | PHE | X | 33 | 35.640 | 51.605 | 33.311 | 0.00 | 0.00 |
| ATOM | 507 | HE2  | PHE | X | 33 | 36.460 | 50.937 | 33.094 | 0.00 | 0.00 |
| ATOM | 508 | CD2  | PHE | X | 33 | 34.586 | 51.605 | 32.335 | 0.00 | 0.00 |
| ATOM | 509 | HD2  | PHE | X | 33 | 34.666 | 51.125 | 31.371 | 0.00 | 0.00 |
| ATOM | 510 | C    | PHE | X | 33 | 31.555 | 54.966 | 31.843 | 0.00 | 0.00 |
| ATOM | 511 | O    | PHE | X | 33 | 30.615 | 54.861 | 32.580 | 0.00 | 0.00 |
| ATOM | 512 | N    | ALA | X | 34 | 32.348 | 56.062 | 31.811 | 0.00 | 0.00 |
| ATOM | 513 | H    | ALA | X | 34 | 33.004 | 56.023 | 31.044 | 0.00 | 0.00 |
| ATOM | 514 | CA   | ALA | X | 34 | 32.391 | 57.242 | 32.692 | 0.00 | 0.00 |
| ATOM | 515 | HA   | ALA | X | 34 | 31.382 | 57.321 | 33.098 | 0.00 | 0.00 |
| ATOM | 516 | CB   | ALA | X | 34 | 33.353 | 57.061 | 33.935 | 0.00 | 0.00 |
| ATOM | 517 | HB1  | ALA | X | 34 | 33.449 | 57.989 | 34.497 | 0.00 | 0.00 |
| ATOM | 518 | HB2  | ALA | X | 34 | 34.310 | 56.588 | 33.712 | 0.00 | 0.00 |
| ATOM | 519 | HB3  | ALA | X | 34 | 32.888 | 56.235 | 34.473 | 0.00 | 0.00 |
| ATOM | 520 | C    | ALA | X | 34 | 32.683 | 58.489 | 31.924 | 0.00 | 0.00 |
| ATOM | 521 | O    | ALA | X | 34 | 33.238 | 58.386 | 30.789 | 0.00 | 0.00 |
| ATOM | 522 | N    | GLU | X | 35 | 32.339 | 59.621 | 32.491 | 0.00 | 0.00 |
| ATOM | 523 | H    | GLU | X | 35 | 31.862 | 59.504 | 33.374 | 0.00 | 0.00 |
| ATOM | 524 | CA   | GLU | X | 35 | 33.041 | 60.860 | 32.353 | 0.00 | 0.00 |
| ATOM | 525 | HA   | GLU | X | 35 | 33.036 | 61.155 | 31.303 | 0.00 | 0.00 |
| ATOM | 526 | CB   | GLU | X | 35 | 32.333 | 61.932 | 33.183 | 0.00 | 0.00 |
| ATOM | 527 | HB2  | GLU | X | 35 | 32.244 | 61.707 | 34.246 | 0.00 | 0.00 |
| ATOM | 528 | HB3  | GLU | X | 35 | 32.904 | 62.859 | 33.237 | 0.00 | 0.00 |
| ATOM | 529 | CG   | GLU | X | 35 | 30.880 | 62.227 | 32.638 | 0.00 | 0.00 |
| ATOM | 530 | HG2  | GLU | X | 35 | 30.418 | 61.241 | 32.598 | 0.00 | 0.00 |
| ATOM | 531 | HG3  | GLU | X | 35 | 30.302 | 62.808 | 33.357 | 0.00 | 0.00 |
| ATOM | 532 | CD   | GLU | X | 35 | 30.837 | 62.785 | 31.203 | 0.00 | 0.00 |
| ATOM | 533 | OE1  | GLU | X | 35 | 30.413 | 62.045 | 30.307 | 0.00 | 0.00 |
| ATOM | 534 | OE2  | GLU | X | 35 | 31.306 | 63.940 | 31.129 | 0.00 | 0.00 |

|      |     |     |     |   |    |        |        |        |      |      |
|------|-----|-----|-----|---|----|--------|--------|--------|------|------|
| ATOM | 535 | C   | GLU | X | 35 | 34.535 | 60.815 | 32.808 | 0.00 | 0.00 |
| ATOM | 536 | O   | GLU | X | 35 | 34.915 | 59.922 | 33.620 | 0.00 | 0.00 |
| ATOM | 537 | N   | PRO | X | 36 | 35.468 | 61.626 | 32.300 | 0.00 | 0.00 |
| ATOM | 538 | CD  | PRO | X | 36 | 35.270 | 62.645 | 31.267 | 0.00 | 0.00 |
| ATOM | 539 | HD2 | PRO | X | 36 | 34.426 | 63.255 | 31.590 | 0.00 | 0.00 |
| ATOM | 540 | HD3 | PRO | X | 36 | 35.028 | 62.122 | 30.342 | 0.00 | 0.00 |
| ATOM | 541 | CG  | PRO | X | 36 | 36.551 | 63.472 | 31.270 | 0.00 | 0.00 |
| ATOM | 542 | HG2 | PRO | X | 36 | 36.597 | 64.134 | 32.135 | 0.00 | 0.00 |
| ATOM | 543 | HG3 | PRO | X | 36 | 36.755 | 63.936 | 30.305 | 0.00 | 0.00 |
| ATOM | 544 | CB  | PRO | X | 36 | 37.615 | 62.386 | 31.527 | 0.00 | 0.00 |
| ATOM | 545 | HB2 | PRO | X | 36 | 38.564 | 62.890 | 31.712 | 0.00 | 0.00 |
| ATOM | 546 | HB3 | PRO | X | 36 | 37.665 | 61.796 | 30.612 | 0.00 | 0.00 |
| ATOM | 547 | CA  | PRO | X | 36 | 36.883 | 61.556 | 32.607 | 0.00 | 0.00 |
| ATOM | 548 | HA  | PRO | X | 36 | 37.245 | 60.535 | 32.480 | 0.00 | 0.00 |
| ATOM | 549 | C   | PRO | X | 36 | 37.168 | 62.102 | 34.029 | 0.00 | 0.00 |
| ATOM | 550 | O   | PRO | X | 36 | 36.833 | 63.212 | 34.344 | 0.00 | 0.00 |
| ATOM | 551 | N   | PRO | X | 37 | 37.775 | 61.290 | 34.932 | 0.00 | 0.00 |
| ATOM | 552 | CD  | PRO | X | 37 | 38.127 | 59.890 | 34.718 | 0.00 | 0.00 |
| ATOM | 553 | HD2 | PRO | X | 37 | 38.905 | 59.815 | 33.959 | 0.00 | 0.00 |
| ATOM | 554 | HD3 | PRO | X | 37 | 37.237 | 59.339 | 34.411 | 0.00 | 0.00 |
| ATOM | 555 | CG  | PRO | X | 37 | 38.559 | 59.448 | 36.122 | 0.00 | 0.00 |
| ATOM | 556 | HG2 | PRO | X | 37 | 39.625 | 59.610 | 36.279 | 0.00 | 0.00 |
| ATOM | 557 | HG3 | PRO | X | 37 | 38.443 | 58.388 | 36.349 | 0.00 | 0.00 |
| ATOM | 558 | CB  | PRO | X | 37 | 37.704 | 60.294 | 37.054 | 0.00 | 0.00 |
| ATOM | 559 | HB2 | PRO | X | 37 | 38.254 | 60.398 | 37.989 | 0.00 | 0.00 |
| ATOM | 560 | HB3 | PRO | X | 37 | 36.673 | 59.969 | 37.192 | 0.00 | 0.00 |
| ATOM | 561 | CA  | PRO | X | 37 | 37.780 | 61.674 | 36.354 | 0.00 | 0.00 |
| ATOM | 562 | HA  | PRO | X | 37 | 36.909 | 62.260 | 36.646 | 0.00 | 0.00 |
| ATOM | 563 | C   | PRO | X | 37 | 39.033 | 62.540 | 36.758 | 0.00 | 0.00 |
| ATOM | 564 | O   | PRO | X | 37 | 39.725 | 62.381 | 37.741 | 0.00 | 0.00 |
| ATOM | 565 | N   | MET | X | 38 | 39.351 | 63.457 | 35.830 | 0.00 | 0.00 |
| ATOM | 566 | H   | MET | X | 38 | 38.882 | 63.471 | 34.936 | 0.00 | 0.00 |
| ATOM | 567 | CA  | MET | X | 38 | 40.438 | 64.471 | 35.991 | 0.00 | 0.00 |
| ATOM | 568 | HA  | MET | X | 38 | 41.286 | 63.917 | 36.393 | 0.00 | 0.00 |
| ATOM | 569 | CB  | MET | X | 38 | 40.814 | 65.065 | 34.625 | 0.00 | 0.00 |
| ATOM | 570 | HB2 | MET | X | 38 | 41.705 | 65.671 | 34.789 | 0.00 | 0.00 |
| ATOM | 571 | HB3 | MET | X | 38 | 41.012 | 64.196 | 33.997 | 0.00 | 0.00 |
| ATOM | 572 | CG  | MET | X | 38 | 39.736 | 65.847 | 34.009 | 0.00 | 0.00 |
| ATOM | 573 | HG2 | MET | X | 38 | 38.794 | 65.303 | 34.080 | 0.00 | 0.00 |
| ATOM | 574 | HG3 | MET | X | 38 | 39.601 | 66.752 | 34.601 | 0.00 | 0.00 |
| ATOM | 575 | SD  | MET | X | 38 | 40.076 | 66.352 | 32.289 | 0.00 | 0.00 |
| ATOM | 576 | CE  | MET | X | 38 | 38.518 | 67.218 | 31.954 | 0.00 | 0.00 |
| ATOM | 577 | HE1 | MET | X | 38 | 37.646 | 66.632 | 32.245 | 0.00 | 0.00 |
| ATOM | 578 | HE2 | MET | X | 38 | 38.571 | 68.195 | 32.433 | 0.00 | 0.00 |
| ATOM | 579 | HE3 | MET | X | 38 | 38.436 | 67.528 | 30.912 | 0.00 | 0.00 |
| ATOM | 580 | C   | MET | X | 38 | 40.148 | 65.674 | 36.980 | 0.00 | 0.00 |
| ATOM | 581 | O   | MET | X | 38 | 39.023 | 66.088 | 37.146 | 0.00 | 0.00 |
| ATOM | 582 | N   | GLY | X | 39 | 41.208 | 66.085 | 37.690 | 0.00 | 0.00 |
| ATOM | 583 | H   | GLY | X | 39 | 42.093 | 65.642 | 37.491 | 0.00 | 0.00 |
| ATOM | 584 | CA  | GLY | X | 39 | 41.208 | 67.281 | 38.509 | 0.00 | 0.00 |
| ATOM | 585 | HA2 | GLY | X | 39 | 42.265 | 67.374 | 38.759 | 0.00 | 0.00 |
| ATOM | 586 | HA3 | GLY | X | 39 | 40.945 | 68.026 | 37.758 | 0.00 | 0.00 |
| ATOM | 587 | C   | GLY | X | 39 | 40.279 | 67.164 | 39.700 | 0.00 | 0.00 |
| ATOM | 588 | O   | GLY | X | 39 | 40.556 | 66.354 | 40.573 | 0.00 | 0.00 |
| ATOM | 589 | N   | PRO | X | 40 | 39.130 | 67.874 | 39.823 | 0.00 | 0.00 |
| ATOM | 590 | CD  | PRO | X | 40 | 38.814 | 69.017 | 39.038 | 0.00 | 0.00 |
| ATOM | 591 | HD2 | PRO | X | 40 | 38.440 | 68.672 | 38.074 | 0.00 | 0.00 |
| ATOM | 592 | HD3 | PRO | X | 40 | 39.653 | 69.708 | 38.953 | 0.00 | 0.00 |
| ATOM | 593 | CG  | PRO | X | 40 | 37.753 | 69.859 | 39.849 | 0.00 | 0.00 |
| ATOM | 594 | HG2 | PRO | X | 40 | 36.903 | 70.258 | 39.297 | 0.00 | 0.00 |
| ATOM | 595 | HG3 | PRO | X | 40 | 38.261 | 70.459 | 40.605 | 0.00 | 0.00 |
| ATOM | 596 | CB  | PRO | X | 40 | 37.136 | 68.755 | 40.747 | 0.00 | 0.00 |
| ATOM | 597 | HB2 | PRO | X | 40 | 36.362 | 68.273 | 40.149 | 0.00 | 0.00 |
| ATOM | 598 | HB3 | PRO | X | 40 | 36.695 | 69.352 | 41.545 | 0.00 | 0.00 |
| ATOM | 599 | CA  | PRO | X | 40 | 38.308 | 67.819 | 41.065 | 0.00 | 0.00 |
| ATOM | 600 | HA  | PRO | X | 40 | 38.870 | 68.239 | 41.899 | 0.00 | 0.00 |
| ATOM | 601 | C   | PRO | X | 40 | 37.751 | 66.453 | 41.371 | 0.00 | 0.00 |

|      |     |      |     |   |    |        |        |        |      |      |
|------|-----|------|-----|---|----|--------|--------|--------|------|------|
| ATOM | 602 | O    | PRO | X | 40 | 37.567 | 66.115 | 42.511 | 0.00 | 0.00 |
| ATOM | 603 | N    | ARG | X | 41 | 37.487 | 65.607 | 40.359 | 0.00 | 0.00 |
| ATOM | 604 | H    | ARG | X | 41 | 37.887 | 65.956 | 39.500 | 0.00 | 0.00 |
| ATOM | 605 | CA   | ARG | X | 41 | 37.123 | 64.164 | 40.446 | 0.00 | 0.00 |
| ATOM | 606 | HA   | ARG | X | 41 | 36.303 | 64.114 | 41.163 | 0.00 | 0.00 |
| ATOM | 607 | CB   | ARG | X | 41 | 36.624 | 63.647 | 39.106 | 0.00 | 0.00 |
| ATOM | 608 | HB2  | ARG | X | 41 | 37.164 | 64.088 | 38.269 | 0.00 | 0.00 |
| ATOM | 609 | HB3  | ARG | X | 41 | 36.700 | 62.560 | 39.078 | 0.00 | 0.00 |
| ATOM | 610 | CG   | ARG | X | 41 | 35.080 | 63.917 | 38.803 | 0.00 | 0.00 |
| ATOM | 611 | HG2  | ARG | X | 41 | 35.014 | 65.003 | 38.751 | 0.00 | 0.00 |
| ATOM | 612 | HG3  | ARG | X | 41 | 34.810 | 63.554 | 37.811 | 0.00 | 0.00 |
| ATOM | 613 | CD   | ARG | X | 41 | 34.183 | 63.216 | 39.795 | 0.00 | 0.00 |
| ATOM | 614 | HD2  | ARG | X | 41 | 33.397 | 62.777 | 39.181 | 0.00 | 0.00 |
| ATOM | 615 | HD3  | ARG | X | 41 | 34.671 | 62.349 | 40.240 | 0.00 | 0.00 |
| ATOM | 616 | NE   | ARG | X | 41 | 33.414 | 64.127 | 40.677 | 0.00 | 0.00 |
| ATOM | 617 | HE   | ARG | X | 41 | 33.534 | 65.118 | 40.522 | 0.00 | 0.00 |
| ATOM | 618 | CZ   | ARG | X | 41 | 32.852 | 63.735 | 41.839 | 0.00 | 0.00 |
| ATOM | 619 | NH1  | ARG | X | 41 | 32.767 | 62.504 | 42.228 | 0.00 | 0.00 |
| ATOM | 620 | HH11 | ARG | X | 41 | 33.100 | 61.700 | 41.715 | 0.00 | 0.00 |
| ATOM | 621 | HH12 | ARG | X | 41 | 32.131 | 62.385 | 43.004 | 0.00 | 0.00 |
| ATOM | 622 | NH2  | ARG | X | 41 | 32.328 | 64.609 | 42.664 | 0.00 | 0.00 |
| ATOM | 623 | HH21 | ARG | X | 41 | 32.411 | 65.601 | 42.492 | 0.00 | 0.00 |
| ATOM | 624 | HH22 | ARG | X | 41 | 32.170 | 64.375 | 43.634 | 0.00 | 0.00 |
| ATOM | 625 | C    | ARG | X | 41 | 38.202 | 63.102 | 40.871 | 0.00 | 0.00 |
| ATOM | 626 | O    | ARG | X | 41 | 37.873 | 62.014 | 41.171 | 0.00 | 0.00 |
| ATOM | 627 | N    | ARG | X | 42 | 39.499 | 63.587 | 40.925 | 0.00 | 0.00 |
| ATOM | 628 | H    | ARG | X | 42 | 39.553 | 64.564 | 40.671 | 0.00 | 0.00 |
| ATOM | 629 | CA   | ARG | X | 42 | 40.640 | 62.854 | 41.489 | 0.00 | 0.00 |
| ATOM | 630 | HA   | ARG | X | 42 | 40.860 | 61.984 | 40.870 | 0.00 | 0.00 |
| ATOM | 631 | CB   | ARG | X | 42 | 41.828 | 63.782 | 41.237 | 0.00 | 0.00 |
| ATOM | 632 | HB2  | ARG | X | 42 | 41.991 | 63.970 | 40.176 | 0.00 | 0.00 |
| ATOM | 633 | HB3  | ARG | X | 42 | 41.570 | 64.690 | 41.783 | 0.00 | 0.00 |
| ATOM | 634 | CG   | ARG | X | 42 | 43.232 | 63.206 | 41.721 | 0.00 | 0.00 |
| ATOM | 635 | HG2  | ARG | X | 42 | 43.168 | 62.907 | 42.768 | 0.00 | 0.00 |
| ATOM | 636 | HG3  | ARG | X | 42 | 43.451 | 62.287 | 41.178 | 0.00 | 0.00 |
| ATOM | 637 | CD   | ARG | X | 42 | 44.383 | 64.269 | 41.586 | 0.00 | 0.00 |
| ATOM | 638 | HD2  | ARG | X | 42 | 44.190 | 65.034 | 42.339 | 0.00 | 0.00 |
| ATOM | 639 | HD3  | ARG | X | 42 | 45.310 | 63.755 | 41.839 | 0.00 | 0.00 |
| ATOM | 640 | NE   | ARG | X | 42 | 44.502 | 64.810 | 40.252 | 0.00 | 0.00 |
| ATOM | 641 | HE   | ARG | X | 42 | 43.917 | 64.495 | 39.492 | 0.00 | 0.00 |
| ATOM | 642 | CZ   | ARG | X | 42 | 45.247 | 65.863 | 39.956 | 0.00 | 0.00 |
| ATOM | 643 | NH1  | ARG | X | 42 | 45.955 | 66.438 | 40.902 | 0.00 | 0.00 |
| ATOM | 644 | HH11 | ARG | X | 42 | 45.978 | 66.170 | 41.875 | 0.00 | 0.00 |
| ATOM | 645 | HH12 | ARG | X | 42 | 46.592 | 67.203 | 40.730 | 0.00 | 0.00 |
| ATOM | 646 | NH2  | ARG | X | 42 | 45.221 | 66.324 | 38.773 | 0.00 | 0.00 |
| ATOM | 647 | HH21 | ARG | X | 42 | 44.644 | 65.833 | 38.104 | 0.00 | 0.00 |
| ATOM | 648 | HH22 | ARG | X | 42 | 45.653 | 67.191 | 38.487 | 0.00 | 0.00 |
| ATOM | 649 | C    | ARG | X | 42 | 40.438 | 62.563 | 42.975 | 0.00 | 0.00 |
| ATOM | 650 | O    | ARG | X | 42 | 40.106 | 63.406 | 43.767 | 0.00 | 0.00 |
| ATOM | 651 | N    | PHE | X | 43 | 40.532 | 61.275 | 43.300 | 0.00 | 0.00 |
| ATOM | 652 | H    | PHE | X | 43 | 40.908 | 60.624 | 42.625 | 0.00 | 0.00 |
| ATOM | 653 | CA   | PHE | X | 43 | 40.364 | 60.774 | 44.646 | 0.00 | 0.00 |
| ATOM | 654 | HA   | PHE | X | 43 | 40.596 | 59.709 | 44.651 | 0.00 | 0.00 |
| ATOM | 655 | CB   | PHE | X | 43 | 41.247 | 61.440 | 45.764 | 0.00 | 0.00 |
| ATOM | 656 | HB2  | PHE | X | 43 | 40.858 | 62.316 | 46.284 | 0.00 | 0.00 |
| ATOM | 657 | HB3  | PHE | X | 43 | 41.421 | 60.766 | 46.603 | 0.00 | 0.00 |
| ATOM | 658 | CG   | PHE | X | 43 | 42.655 | 61.858 | 45.405 | 0.00 | 0.00 |
| ATOM | 659 | CD1  | PHE | X | 43 | 43.589 | 60.853 | 45.016 | 0.00 | 0.00 |
| ATOM | 660 | HD1  | PHE | X | 43 | 43.213 | 59.844 | 44.932 | 0.00 | 0.00 |
| ATOM | 661 | CE1  | PHE | X | 43 | 44.953 | 61.161 | 44.750 | 0.00 | 0.00 |
| ATOM | 662 | HE1  | PHE | X | 43 | 45.637 | 60.352 | 44.536 | 0.00 | 0.00 |
| ATOM | 663 | CZ   | PHE | X | 43 | 45.329 | 62.544 | 44.916 | 0.00 | 0.00 |
| ATOM | 664 | HZ   | PHE | X | 43 | 46.354 | 62.817 | 44.712 | 0.00 | 0.00 |
| ATOM | 665 | CE2  | PHE | X | 43 | 44.387 | 63.538 | 45.316 | 0.00 | 0.00 |
| ATOM | 666 | HE2  | PHE | X | 43 | 44.730 | 64.547 | 45.489 | 0.00 | 0.00 |
| ATOM | 667 | CD2  | PHE | X | 43 | 43.022 | 63.242 | 45.585 | 0.00 | 0.00 |
| ATOM | 668 | HD2  | PHE | X | 43 | 42.297 | 63.963 | 45.933 | 0.00 | 0.00 |

|      |     |      |     |   |    |        |        |        |      |      |
|------|-----|------|-----|---|----|--------|--------|--------|------|------|
| ATOM | 669 | C    | PHE | X | 43 | 38.872 | 60.691 | 45.008 | 0.00 | 0.00 |
| ATOM | 670 | O    | PHE | X | 43 | 38.594 | 60.242 | 46.108 | 0.00 | 0.00 |
| ATOM | 671 | N    | LEU | X | 44 | 37.894 | 61.127 | 44.254 | 0.00 | 0.00 |
| ATOM | 672 | H    | LEU | X | 44 | 38.068 | 61.425 | 43.305 | 0.00 | 0.00 |
| ATOM | 673 | CA   | LEU | X | 44 | 36.471 | 60.906 | 44.484 | 0.00 | 0.00 |
| ATOM | 674 | HA   | LEU | X | 44 | 36.331 | 60.523 | 45.495 | 0.00 | 0.00 |
| ATOM | 675 | CB   | LEU | X | 44 | 35.707 | 62.254 | 44.322 | 0.00 | 0.00 |
| ATOM | 676 | HB2  | LEU | X | 44 | 36.102 | 62.715 | 43.417 | 0.00 | 0.00 |
| ATOM | 677 | HB3  | LEU | X | 44 | 34.639 | 62.072 | 44.204 | 0.00 | 0.00 |
| ATOM | 678 | CG   | LEU | X | 44 | 35.834 | 63.216 | 45.519 | 0.00 | 0.00 |
| ATOM | 679 | HG   | LEU | X | 44 | 36.800 | 63.243 | 46.024 | 0.00 | 0.00 |
| ATOM | 680 | CD1  | LEU | X | 44 | 35.423 | 64.569 | 44.898 | 0.00 | 0.00 |
| ATOM | 681 | HD11 | LEU | X | 44 | 35.362 | 65.383 | 45.621 | 0.00 | 0.00 |
| ATOM | 682 | HD12 | LEU | X | 44 | 34.479 | 64.461 | 44.365 | 0.00 | 0.00 |
| ATOM | 683 | HD13 | LEU | X | 44 | 36.195 | 64.863 | 44.187 | 0.00 | 0.00 |
| ATOM | 684 | CD2  | LEU | X | 44 | 34.940 | 62.885 | 46.768 | 0.00 | 0.00 |
| ATOM | 685 | HD21 | LEU | X | 44 | 33.878 | 63.006 | 46.557 | 0.00 | 0.00 |
| ATOM | 686 | HD22 | LEU | X | 44 | 35.058 | 61.851 | 47.093 | 0.00 | 0.00 |
| ATOM | 687 | HD23 | LEU | X | 44 | 35.251 | 63.406 | 47.673 | 0.00 | 0.00 |
| ATOM | 688 | C    | LEU | X | 44 | 35.985 | 59.840 | 43.505 | 0.00 | 0.00 |
| ATOM | 689 | O    | LEU | X | 44 | 36.756 | 59.440 | 42.614 | 0.00 | 0.00 |
| ATOM | 690 | N    | PRO | X | 45 | 34.752 | 59.290 | 43.685 | 0.00 | 0.00 |
| ATOM | 691 | CD   | PRO | X | 45 | 33.909 | 59.622 | 44.749 | 0.00 | 0.00 |
| ATOM | 692 | HD2  | PRO | X | 45 | 33.340 | 60.527 | 44.538 | 0.00 | 0.00 |
| ATOM | 693 | HD3  | PRO | X | 45 | 34.325 | 59.777 | 45.744 | 0.00 | 0.00 |
| ATOM | 694 | CG   | PRO | X | 45 | 32.987 | 58.407 | 44.892 | 0.00 | 0.00 |
| ATOM | 695 | HG2  | PRO | X | 45 | 32.049 | 58.693 | 45.368 | 0.00 | 0.00 |
| ATOM | 696 | HG3  | PRO | X | 45 | 33.431 | 57.584 | 45.452 | 0.00 | 0.00 |
| ATOM | 697 | CB   | PRO | X | 45 | 32.727 | 57.980 | 43.482 | 0.00 | 0.00 |
| ATOM | 698 | HB2  | PRO | X | 45 | 31.876 | 58.499 | 43.041 | 0.00 | 0.00 |
| ATOM | 699 | HB3  | PRO | X | 45 | 32.426 | 56.938 | 43.372 | 0.00 | 0.00 |
| ATOM | 700 | CA   | PRO | X | 45 | 34.097 | 58.365 | 42.787 | 0.00 | 0.00 |
| ATOM | 701 | HA   | PRO | X | 45 | 34.659 | 57.431 | 42.771 | 0.00 | 0.00 |
| ATOM | 702 | C    | PRO | X | 45 | 33.852 | 58.935 | 41.356 | 0.00 | 0.00 |
| ATOM | 703 | O    | PRO | X | 45 | 33.904 | 60.168 | 41.177 | 0.00 | 0.00 |
| ATOM | 704 | N    | PRO | X | 46 | 33.673 | 58.132 | 40.251 | 0.00 | 0.00 |
| ATOM | 705 | CD   | PRO | X | 46 | 33.793 | 56.676 | 40.324 | 0.00 | 0.00 |
| ATOM | 706 | HD2  | PRO | X | 46 | 33.044 | 56.273 | 41.006 | 0.00 | 0.00 |
| ATOM | 707 | HD3  | PRO | X | 46 | 34.810 | 56.518 | 40.683 | 0.00 | 0.00 |
| ATOM | 708 | CG   | PRO | X | 46 | 33.538 | 56.152 | 38.993 | 0.00 | 0.00 |
| ATOM | 709 | HG2  | PRO | X | 46 | 32.474 | 55.921 | 38.959 | 0.00 | 0.00 |
| ATOM | 710 | HG3  | PRO | X | 46 | 34.078 | 55.236 | 38.752 | 0.00 | 0.00 |
| ATOM | 711 | CB   | PRO | X | 46 | 33.910 | 57.344 | 38.038 | 0.00 | 0.00 |
| ATOM | 712 | HB2  | PRO | X | 46 | 33.553 | 57.259 | 37.012 | 0.00 | 0.00 |
| ATOM | 713 | HB3  | PRO | X | 46 | 34.996 | 57.253 | 38.035 | 0.00 | 0.00 |
| ATOM | 714 | CA   | PRO | X | 46 | 33.465 | 58.509 | 38.848 | 0.00 | 0.00 |
| ATOM | 715 | HA   | PRO | X | 46 | 34.170 | 59.299 | 38.587 | 0.00 | 0.00 |
| ATOM | 716 | C    | PRO | X | 46 | 32.044 | 58.934 | 38.622 | 0.00 | 0.00 |
| ATOM | 717 | O    | PRO | X | 46 | 31.193 | 58.797 | 39.533 | 0.00 | 0.00 |
| ATOM | 718 | N    | GLU | X | 47 | 31.712 | 59.395 | 37.426 | 0.00 | 0.00 |
| ATOM | 719 | H    | GLU | X | 47 | 32.502 | 59.711 | 36.881 | 0.00 | 0.00 |
| ATOM | 720 | CA   | GLU | X | 47 | 30.383 | 59.758 | 37.040 | 0.00 | 0.00 |
| ATOM | 721 | HA   | GLU | X | 47 | 29.654 | 59.453 | 37.791 | 0.00 | 0.00 |
| ATOM | 722 | CB   | GLU | X | 47 | 30.315 | 61.254 | 36.742 | 0.00 | 0.00 |
| ATOM | 723 | HB2  | GLU | X | 47 | 30.980 | 61.410 | 35.893 | 0.00 | 0.00 |
| ATOM | 724 | HB3  | GLU | X | 47 | 29.320 | 61.315 | 36.300 | 0.00 | 0.00 |
| ATOM | 725 | CG   | GLU | X | 47 | 30.504 | 62.103 | 37.965 | 0.00 | 0.00 |
| ATOM | 726 | HG2  | GLU | X | 47 | 30.091 | 61.490 | 38.766 | 0.00 | 0.00 |
| ATOM | 727 | HG3  | GLU | X | 47 | 31.530 | 62.407 | 38.173 | 0.00 | 0.00 |
| ATOM | 728 | CD   | GLU | X | 47 | 29.740 | 63.335 | 37.958 | 0.00 | 0.00 |
| ATOM | 729 | OE1  | GLU | X | 47 | 29.809 | 64.037 | 36.880 | 0.00 | 0.00 |
| ATOM | 730 | OE2  | GLU | X | 47 | 29.087 | 63.722 | 38.951 | 0.00 | 0.00 |
| ATOM | 731 | C    | GLU | X | 47 | 30.087 | 59.015 | 35.758 | 0.00 | 0.00 |
| ATOM | 732 | O    | GLU | X | 47 | 30.990 | 58.855 | 34.889 | 0.00 | 0.00 |
| ATOM | 733 | N    | PRO | X | 48 | 28.793 | 58.567 | 35.569 | 0.00 | 0.00 |
| ATOM | 734 | CD   | PRO | X | 48 | 27.670 | 58.660 | 36.411 | 0.00 | 0.00 |
| ATOM | 735 | HD2  | PRO | X | 48 | 27.553 | 59.664 | 36.818 | 0.00 | 0.00 |

|      |     |      |     |   |    |        |        |        |      |      |
|------|-----|------|-----|---|----|--------|--------|--------|------|------|
| ATOM | 736 | HD3  | PRO | X | 48 | 27.574 | 57.868 | 37.153 | 0.00 | 0.00 |
| ATOM | 737 | CG   | PRO | X | 48 | 26.427 | 58.457 | 35.529 | 0.00 | 0.00 |
| ATOM | 738 | HG2  | PRO | X | 48 | 26.122 | 59.373 | 35.023 | 0.00 | 0.00 |
| ATOM | 739 | HG3  | PRO | X | 48 | 25.561 | 58.120 | 36.098 | 0.00 | 0.00 |
| ATOM | 740 | CB   | PRO | X | 48 | 26.940 | 57.397 | 34.516 | 0.00 | 0.00 |
| ATOM | 741 | HB2  | PRO | X | 48 | 26.303 | 57.395 | 33.632 | 0.00 | 0.00 |
| ATOM | 742 | HB3  | PRO | X | 48 | 26.939 | 56.466 | 35.083 | 0.00 | 0.00 |
| ATOM | 743 | CA   | PRO | X | 48 | 28.383 | 57.785 | 34.373 | 0.00 | 0.00 |
| ATOM | 744 | HA   | PRO | X | 48 | 29.103 | 56.967 | 34.370 | 0.00 | 0.00 |
| ATOM | 745 | C    | PRO | X | 48 | 28.622 | 58.680 | 33.125 | 0.00 | 0.00 |
| ATOM | 746 | O    | PRO | X | 48 | 28.159 | 59.803 | 33.029 | 0.00 | 0.00 |
| ATOM | 747 | N    | LYS | X | 49 | 29.163 | 58.059 | 32.034 | 0.00 | 0.00 |
| ATOM | 748 | H    | LYS | X | 49 | 29.437 | 57.089 | 31.970 | 0.00 | 0.00 |
| ATOM | 749 | CA   | LYS | X | 49 | 29.277 | 58.820 | 30.711 | 0.00 | 0.00 |
| ATOM | 750 | HA   | LYS | X | 49 | 29.982 | 59.649 | 30.768 | 0.00 | 0.00 |
| ATOM | 751 | CB   | LYS | X | 49 | 29.878 | 57.715 | 29.773 | 0.00 | 0.00 |
| ATOM | 752 | HB2  | LYS | X | 49 | 30.899 | 57.535 | 30.109 | 0.00 | 0.00 |
| ATOM | 753 | HB3  | LYS | X | 49 | 29.233 | 56.841 | 29.860 | 0.00 | 0.00 |
| ATOM | 754 | CG   | LYS | X | 49 | 29.851 | 58.074 | 28.303 | 0.00 | 0.00 |
| ATOM | 755 | HG2  | LYS | X | 49 | 30.193 | 57.240 | 27.690 | 0.00 | 0.00 |
| ATOM | 756 | HG3  | LYS | X | 49 | 28.809 | 58.239 | 28.026 | 0.00 | 0.00 |
| ATOM | 757 | CD   | LYS | X | 49 | 30.696 | 59.167 | 27.804 | 0.00 | 0.00 |
| ATOM | 758 | HD2  | LYS | X | 49 | 30.473 | 60.080 | 28.355 | 0.00 | 0.00 |
| ATOM | 759 | HD3  | LYS | X | 49 | 31.750 | 59.034 | 28.052 | 0.00 | 0.00 |
| ATOM | 760 | CE   | LYS | X | 49 | 30.431 | 59.420 | 26.278 | 0.00 | 0.00 |
| ATOM | 761 | HE2  | LYS | X | 49 | 30.754 | 58.529 | 25.739 | 0.00 | 0.00 |
| ATOM | 762 | HE3  | LYS | X | 49 | 29.382 | 59.526 | 26.000 | 0.00 | 0.00 |
| ATOM | 763 | NZ   | LYS | X | 49 | 31.263 | 60.495 | 25.780 | 0.00 | 0.00 |
| ATOM | 764 | HZ1  | LYS | X | 49 | 31.087 | 61.404 | 26.183 | 0.00 | 0.00 |
| ATOM | 765 | HZ2  | LYS | X | 49 | 32.252 | 60.354 | 25.925 | 0.00 | 0.00 |
| ATOM | 766 | HZ3  | LYS | X | 49 | 31.175 | 60.622 | 24.782 | 0.00 | 0.00 |
| ATOM | 767 | C    | LYS | X | 49 | 27.869 | 59.353 | 30.164 | 0.00 | 0.00 |
| ATOM | 768 | O    | LYS | X | 49 | 26.864 | 58.639 | 30.082 | 0.00 | 0.00 |
| ATOM | 769 | N    | GLN | X | 50 | 27.899 | 60.591 | 29.722 | 0.00 | 0.00 |
| ATOM | 770 | H    | GLN | X | 50 | 28.742 | 61.136 | 29.827 | 0.00 | 0.00 |
| ATOM | 771 | CA   | GLN | X | 50 | 26.749 | 61.287 | 29.070 | 0.00 | 0.00 |
| ATOM | 772 | HA   | GLN | X | 50 | 25.880 | 60.863 | 29.574 | 0.00 | 0.00 |
| ATOM | 773 | CB   | GLN | X | 50 | 26.865 | 62.802 | 29.225 | 0.00 | 0.00 |
| ATOM | 774 | HB2  | GLN | X | 50 | 25.934 | 63.312 | 28.975 | 0.00 | 0.00 |
| ATOM | 775 | HB3  | GLN | X | 50 | 27.000 | 62.990 | 30.290 | 0.00 | 0.00 |
| ATOM | 776 | CG   | GLN | X | 50 | 27.998 | 63.497 | 28.392 | 0.00 | 0.00 |
| ATOM | 777 | HG2  | GLN | X | 50 | 28.938 | 62.945 | 28.376 | 0.00 | 0.00 |
| ATOM | 778 | HG3  | GLN | X | 50 | 27.806 | 63.616 | 27.325 | 0.00 | 0.00 |
| ATOM | 779 | CD   | GLN | X | 50 | 28.149 | 64.891 | 28.957 | 0.00 | 0.00 |
| ATOM | 780 | OE1  | GLN | X | 50 | 27.273 | 65.690 | 29.003 | 0.00 | 0.00 |
| ATOM | 781 | NE2  | GLN | X | 50 | 29.312 | 65.154 | 29.520 | 0.00 | 0.00 |
| ATOM | 782 | HE21 | GLN | X | 50 | 29.381 | 65.944 | 30.145 | 0.00 | 0.00 |
| ATOM | 783 | HE22 | GLN | X | 50 | 30.059 | 64.476 | 29.546 | 0.00 | 0.00 |
| ATOM | 784 | C    | GLN | X | 50 | 26.586 | 60.938 | 27.563 | 0.00 | 0.00 |
| ATOM | 785 | O    | GLN | X | 50 | 27.626 | 60.856 | 26.859 | 0.00 | 0.00 |
| ATOM | 786 | N    | PRO | X | 51 | 25.329 | 60.888 | 27.041 | 0.00 | 0.00 |
| ATOM | 787 | CD   | PRO | X | 51 | 24.134 | 61.193 | 27.813 | 0.00 | 0.00 |
| ATOM | 788 | HD2  | PRO | X | 51 | 24.122 | 62.276 | 27.933 | 0.00 | 0.00 |
| ATOM | 789 | HD3  | PRO | X | 51 | 24.054 | 60.678 | 28.771 | 0.00 | 0.00 |
| ATOM | 790 | CG   | PRO | X | 51 | 22.945 | 60.710 | 26.923 | 0.00 | 0.00 |
| ATOM | 791 | HG2  | PRO | X | 51 | 22.020 | 61.287 | 26.904 | 0.00 | 0.00 |
| ATOM | 792 | HG3  | PRO | X | 51 | 22.665 | 59.756 | 27.369 | 0.00 | 0.00 |
| ATOM | 793 | CB   | PRO | X | 51 | 23.479 | 60.502 | 25.516 | 0.00 | 0.00 |
| ATOM | 794 | HB2  | PRO | X | 51 | 23.103 | 61.245 | 24.813 | 0.00 | 0.00 |
| ATOM | 795 | HB3  | PRO | X | 51 | 23.074 | 59.532 | 25.227 | 0.00 | 0.00 |
| ATOM | 796 | CA   | PRO | X | 51 | 25.026 | 60.492 | 25.647 | 0.00 | 0.00 |
| ATOM | 797 | HA   | PRO | X | 51 | 25.340 | 59.470 | 25.437 | 0.00 | 0.00 |
| ATOM | 798 | C    | PRO | X | 51 | 25.534 | 61.511 | 24.584 | 0.00 | 0.00 |
| ATOM | 799 | O    | PRO | X | 51 | 26.038 | 62.578 | 25.032 | 0.00 | 0.00 |
| ATOM | 800 | N    | TRP | X | 52 | 25.503 | 61.153 | 23.252 | 0.00 | 0.00 |
| ATOM | 801 | H    | TRP | X | 52 | 25.149 | 60.254 | 22.956 | 0.00 | 0.00 |
| ATOM | 802 | CA   | TRP | X | 52 | 26.255 | 61.792 | 22.164 | 0.00 | 0.00 |



|      |     |      |     |   |    |        |        |        |      |      |
|------|-----|------|-----|---|----|--------|--------|--------|------|------|
| ATOM | 803 | HA   | TRP | X | 52 | 26.376 | 62.864 | 22.318 | 0.00 | 0.00 |
| ATOM | 804 | CB   | TRP | X | 52 | 27.612 | 61.142 | 21.938 | 0.00 | 0.00 |
| ATOM | 805 | HB2  | TRP | X | 52 | 28.258 | 61.688 | 21.250 | 0.00 | 0.00 |
| ATOM | 806 | HB3  | TRP | X | 52 | 28.154 | 61.172 | 22.884 | 0.00 | 0.00 |
| ATOM | 807 | CG   | TRP | X | 52 | 27.523 | 59.727 | 21.531 | 0.00 | 0.00 |
| ATOM | 808 | CD1  | TRP | X | 52 | 27.624 | 59.256 | 20.254 | 0.00 | 0.00 |
| ATOM | 809 | HD1  | TRP | X | 52 | 27.775 | 59.879 | 19.384 | 0.00 | 0.00 |
| ATOM | 810 | NE1  | TRP | X | 52 | 27.679 | 57.888 | 20.231 | 0.00 | 0.00 |
| ATOM | 811 | HE1  | TRP | X | 52 | 27.904 | 57.320 | 19.427 | 0.00 | 0.00 |
| ATOM | 812 | CE2  | TRP | X | 52 | 27.631 | 57.398 | 21.536 | 0.00 | 0.00 |
| ATOM | 813 | CZ2  | TRP | X | 52 | 27.519 | 56.088 | 22.122 | 0.00 | 0.00 |
| ATOM | 814 | HZ2  | TRP | X | 52 | 27.581 | 55.253 | 21.440 | 0.00 | 0.00 |
| ATOM | 815 | CH2  | TRP | X | 52 | 27.422 | 55.927 | 23.469 | 0.00 | 0.00 |
| ATOM | 816 | HH2  | TRP | X | 52 | 27.398 | 54.931 | 23.886 | 0.00 | 0.00 |
| ATOM | 817 | CZ3  | TRP | X | 52 | 27.363 | 57.041 | 24.321 | 0.00 | 0.00 |
| ATOM | 818 | HZ3  | TRP | X | 52 | 27.251 | 56.938 | 25.390 | 0.00 | 0.00 |
| ATOM | 819 | CE3  | TRP | X | 52 | 27.348 | 58.306 | 23.769 | 0.00 | 0.00 |
| ATOM | 820 | HE3  | TRP | X | 52 | 27.331 | 59.124 | 24.475 | 0.00 | 0.00 |
| ATOM | 821 | CD2  | TRP | X | 52 | 27.516 | 58.506 | 22.380 | 0.00 | 0.00 |
| ATOM | 822 | C    | TRP | X | 52 | 25.512 | 61.772 | 20.772 | 0.00 | 0.00 |
| ATOM | 823 | O    | TRP | X | 52 | 24.880 | 60.809 | 20.398 | 0.00 | 0.00 |
| ATOM | 824 | N    | SER | X | 53 | 25.768 | 62.794 | 19.971 | 0.00 | 0.00 |
| ATOM | 825 | H    | SER | X | 53 | 26.528 | 63.395 | 20.255 | 0.00 | 0.00 |
| ATOM | 826 | CA   | SER | X | 53 | 25.343 | 62.877 | 18.583 | 0.00 | 0.00 |
| ATOM | 827 | HA   | SER | X | 53 | 24.338 | 62.458 | 18.525 | 0.00 | 0.00 |
| ATOM | 828 | CB   | SER | X | 53 | 25.125 | 64.350 | 18.170 | 0.00 | 0.00 |
| ATOM | 829 | HB2  | SER | X | 53 | 25.931 | 65.045 | 18.405 | 0.00 | 0.00 |
| ATOM | 830 | HB3  | SER | X | 53 | 24.927 | 64.194 | 17.110 | 0.00 | 0.00 |
| ATOM | 831 | OG   | SER | X | 53 | 23.970 | 64.972 | 18.648 | 0.00 | 0.00 |
| ATOM | 832 | HG   | SER | X | 53 | 23.816 | 65.777 | 18.148 | 0.00 | 0.00 |
| ATOM | 833 | C    | SER | X | 53 | 26.436 | 62.304 | 17.644 | 0.00 | 0.00 |
| ATOM | 834 | O    | SER | X | 53 | 27.612 | 62.515 | 17.847 | 0.00 | 0.00 |
| ATOM | 835 | N    | GLY | X | 54 | 26.031 | 61.570 | 16.600 | 0.00 | 0.00 |
| ATOM | 836 | H    | GLY | X | 54 | 25.046 | 61.355 | 16.532 | 0.00 | 0.00 |
| ATOM | 837 | CA   | GLY | X | 54 | 27.031 | 60.924 | 15.604 | 0.00 | 0.00 |
| ATOM | 838 | HA2  | GLY | X | 54 | 26.553 | 60.803 | 14.632 | 0.00 | 0.00 |
| ATOM | 839 | HA3  | GLY | X | 54 | 27.928 | 61.529 | 15.471 | 0.00 | 0.00 |
| ATOM | 840 | C    | GLY | X | 54 | 27.435 | 59.516 | 16.068 | 0.00 | 0.00 |
| ATOM | 841 | O    | GLY | X | 54 | 27.004 | 59.114 | 17.175 | 0.00 | 0.00 |
| ATOM | 842 | N    | VAL | X | 55 | 28.269 | 58.846 | 15.260 | 0.00 | 0.00 |
| ATOM | 843 | H    | VAL | X | 55 | 28.311 | 59.323 | 14.370 | 0.00 | 0.00 |
| ATOM | 844 | CA   | VAL | X | 55 | 28.950 | 57.595 | 15.489 | 0.00 | 0.00 |
| ATOM | 845 | HA   | VAL | X | 55 | 28.440 | 57.057 | 16.287 | 0.00 | 0.00 |
| ATOM | 846 | CB   | VAL | X | 55 | 28.878 | 56.724 | 14.203 | 0.00 | 0.00 |
| ATOM | 847 | HB   | VAL | X | 55 | 29.503 | 57.232 | 13.469 | 0.00 | 0.00 |
| ATOM | 848 | CG1  | VAL | X | 55 | 29.368 | 55.318 | 14.511 | 0.00 | 0.00 |
| ATOM | 849 | HG11 | VAL | X | 55 | 30.458 | 55.296 | 14.523 | 0.00 | 0.00 |
| ATOM | 850 | HG12 | VAL | X | 55 | 28.794 | 54.832 | 15.300 | 0.00 | 0.00 |
| ATOM | 851 | HG13 | VAL | X | 55 | 29.164 | 54.654 | 13.671 | 0.00 | 0.00 |
| ATOM | 852 | CG2  | VAL | X | 55 | 27.356 | 56.640 | 13.804 | 0.00 | 0.00 |
| ATOM | 853 | HG21 | VAL | X | 55 | 27.059 | 57.619 | 13.427 | 0.00 | 0.00 |
| ATOM | 854 | HG22 | VAL | X | 55 | 26.705 | 56.354 | 14.631 | 0.00 | 0.00 |
| ATOM | 855 | HG23 | VAL | X | 55 | 27.215 | 56.008 | 12.928 | 0.00 | 0.00 |
| ATOM | 856 | C    | VAL | X | 55 | 30.367 | 57.693 | 15.972 | 0.00 | 0.00 |
| ATOM | 857 | O    | VAL | X | 55 | 31.194 | 58.210 | 15.249 | 0.00 | 0.00 |
| ATOM | 858 | N    | VAL | X | 56 | 30.676 | 57.172 | 17.215 | 0.00 | 0.00 |
| ATOM | 859 | H    | VAL | X | 56 | 29.891 | 56.772 | 17.709 | 0.00 | 0.00 |
| ATOM | 860 | CA   | VAL | X | 56 | 32.054 | 57.081 | 17.836 | 0.00 | 0.00 |
| ATOM | 861 | HA   | VAL | X | 56 | 32.522 | 58.028 | 17.566 | 0.00 | 0.00 |
| ATOM | 862 | CB   | VAL | X | 56 | 31.835 | 57.007 | 19.349 | 0.00 | 0.00 |
| ATOM | 863 | HB   | VAL | X | 56 | 31.079 | 56.240 | 19.522 | 0.00 | 0.00 |
| ATOM | 864 | CG1  | VAL | X | 56 | 33.132 | 56.637 | 20.193 | 0.00 | 0.00 |
| ATOM | 865 | HG11 | VAL | X | 56 | 33.917 | 57.385 | 20.086 | 0.00 | 0.00 |
| ATOM | 866 | HG12 | VAL | X | 56 | 32.967 | 56.463 | 21.257 | 0.00 | 0.00 |
| ATOM | 867 | HG13 | VAL | X | 56 | 33.525 | 55.701 | 19.796 | 0.00 | 0.00 |
| ATOM | 868 | CG2  | VAL | X | 56 | 31.196 | 58.342 | 19.938 | 0.00 | 0.00 |
| ATOM | 869 | HG21 | VAL | X | 56 | 30.906 | 58.240 | 20.983 | 0.00 | 0.00 |

|      |     |      |     |   |    |        |        |        |      |      |
|------|-----|------|-----|---|----|--------|--------|--------|------|------|
| ATOM | 870 | HG22 | VAL | X | 56 | 30.270 | 58.636 | 19.444 | 0.00 | 0.00 |
| ATOM | 871 | HG23 | VAL | X | 56 | 31.887 | 59.166 | 19.761 | 0.00 | 0.00 |
| ATOM | 872 | C    | VAL | X | 56 | 32.948 | 55.988 | 17.381 | 0.00 | 0.00 |
| ATOM | 873 | O    | VAL | X | 56 | 32.656 | 54.819 | 17.611 | 0.00 | 0.00 |
| ATOM | 874 | N    | ASP | X | 57 | 34.207 | 56.305 | 16.955 | 0.00 | 0.00 |
| ATOM | 875 | H    | ASP | X | 57 | 34.391 | 57.270 | 16.719 | 0.00 | 0.00 |
| ATOM | 876 | CA   | ASP | X | 57 | 35.352 | 55.381 | 16.797 | 0.00 | 0.00 |
| ATOM | 877 | HA   | ASP | X | 57 | 34.924 | 54.655 | 16.105 | 0.00 | 0.00 |
| ATOM | 878 | CB   | ASP | X | 57 | 36.569 | 56.060 | 16.202 | 0.00 | 0.00 |
| ATOM | 879 | HB2  | ASP | X | 57 | 36.249 | 56.691 | 15.372 | 0.00 | 0.00 |
| ATOM | 880 | HB3  | ASP | X | 57 | 36.961 | 56.693 | 16.998 | 0.00 | 0.00 |
| ATOM | 881 | CG   | ASP | X | 57 | 37.720 | 55.090 | 15.789 | 0.00 | 0.00 |
| ATOM | 882 | OD1  | ASP | X | 57 | 37.804 | 54.844 | 14.620 | 0.00 | 0.00 |
| ATOM | 883 | OD2  | ASP | X | 57 | 38.491 | 54.605 | 16.653 | 0.00 | 0.00 |
| ATOM | 884 | C    | ASP | X | 57 | 35.752 | 54.686 | 18.066 | 0.00 | 0.00 |
| ATOM | 885 | O    | ASP | X | 57 | 36.185 | 55.311 | 18.993 | 0.00 | 0.00 |
| ATOM | 886 | N    | ALA | X | 58 | 35.487 | 53.401 | 18.171 | 0.00 | 0.00 |
| ATOM | 887 | H    | ALA | X | 58 | 35.034 | 52.982 | 17.372 | 0.00 | 0.00 |
| ATOM | 888 | CA   | ALA | X | 58 | 35.753 | 52.498 | 19.319 | 0.00 | 0.00 |
| ATOM | 889 | HA   | ALA | X | 58 | 36.414 | 53.030 | 20.003 | 0.00 | 0.00 |
| ATOM | 890 | CB   | ALA | X | 58 | 34.464 | 52.101 | 20.066 | 0.00 | 0.00 |
| ATOM | 891 | HB1  | ALA | X | 58 | 33.824 | 51.541 | 19.384 | 0.00 | 0.00 |
| ATOM | 892 | HB2  | ALA | X | 58 | 33.962 | 52.933 | 20.559 | 0.00 | 0.00 |
| ATOM | 893 | HB3  | ALA | X | 58 | 34.696 | 51.388 | 20.857 | 0.00 | 0.00 |
| ATOM | 894 | C    | ALA | X | 58 | 36.629 | 51.317 | 18.854 | 0.00 | 0.00 |
| ATOM | 895 | O    | ALA | X | 58 | 36.169 | 50.184 | 19.024 | 0.00 | 0.00 |
| ATOM | 896 | N    | THR | X | 59 | 37.822 | 51.671 | 18.302 | 0.00 | 0.00 |
| ATOM | 897 | H    | THR | X | 59 | 38.120 | 52.636 | 18.311 | 0.00 | 0.00 |
| ATOM | 898 | CA   | THR | X | 59 | 38.678 | 50.631 | 17.590 | 0.00 | 0.00 |
| ATOM | 899 | HA   | THR | X | 59 | 38.221 | 49.642 | 17.617 | 0.00 | 0.00 |
| ATOM | 900 | CB   | THR | X | 59 | 38.900 | 51.011 | 16.147 | 0.00 | 0.00 |
| ATOM | 901 | HB   | THR | X | 59 | 39.411 | 50.216 | 15.604 | 0.00 | 0.00 |
| ATOM | 902 | CG2  | THR | X | 59 | 37.618 | 51.392 | 15.329 | 0.00 | 0.00 |
| ATOM | 903 | HG21 | THR | X | 59 | 38.005 | 51.839 | 14.413 | 0.00 | 0.00 |
| ATOM | 904 | HG22 | THR | X | 59 | 36.973 | 52.125 | 15.813 | 0.00 | 0.00 |
| ATOM | 905 | HG23 | THR | X | 59 | 37.014 | 50.520 | 15.080 | 0.00 | 0.00 |
| ATOM | 906 | OG1  | THR | X | 59 | 39.824 | 52.064 | 16.076 | 0.00 | 0.00 |
| ATOM | 907 | HG1  | THR | X | 59 | 39.346 | 52.832 | 16.398 | 0.00 | 0.00 |
| ATOM | 908 | C    | THR | X | 59 | 40.061 | 50.369 | 18.185 | 0.00 | 0.00 |
| ATOM | 909 | O    | THR | X | 59 | 40.750 | 49.452 | 17.687 | 0.00 | 0.00 |
| ATOM | 910 | N    | THR | X | 60 | 40.471 | 51.083 | 19.206 | 0.00 | 0.00 |
| ATOM | 911 | H    | THR | X | 60 | 39.806 | 51.575 | 19.785 | 0.00 | 0.00 |
| ATOM | 912 | CA   | THR | X | 60 | 41.786 | 50.975 | 19.770 | 0.00 | 0.00 |
| ATOM | 913 | HA   | THR | X | 60 | 42.056 | 49.920 | 19.757 | 0.00 | 0.00 |
| ATOM | 914 | CB   | THR | X | 60 | 42.729 | 51.785 | 18.856 | 0.00 | 0.00 |
| ATOM | 915 | HB   | THR | X | 60 | 42.497 | 51.446 | 17.847 | 0.00 | 0.00 |
| ATOM | 916 | CG2  | THR | X | 60 | 42.697 | 53.358 | 18.978 | 0.00 | 0.00 |
| ATOM | 917 | HG21 | THR | X | 60 | 41.669 | 53.705 | 18.876 | 0.00 | 0.00 |
| ATOM | 918 | HG22 | THR | X | 60 | 43.248 | 53.690 | 18.099 | 0.00 | 0.00 |
| ATOM | 919 | HG23 | THR | X | 60 | 43.098 | 53.719 | 19.926 | 0.00 | 0.00 |
| ATOM | 920 | OG1  | THR | X | 60 | 44.007 | 51.223 | 19.174 | 0.00 | 0.00 |
| ATOM | 921 | HG1  | THR | X | 60 | 44.689 | 51.417 | 18.526 | 0.00 | 0.00 |
| ATOM | 922 | C    | THR | X | 60 | 41.797 | 51.444 | 21.247 | 0.00 | 0.00 |
| ATOM | 923 | O    | THR | X | 60 | 40.864 | 52.125 | 21.700 | 0.00 | 0.00 |
| ATOM | 924 | N    | PHE | X | 61 | 42.715 | 50.911 | 22.108 | 0.00 | 0.00 |
| ATOM | 925 | H    | PHE | X | 61 | 43.345 | 50.224 | 21.719 | 0.00 | 0.00 |
| ATOM | 926 | CA   | PHE | X | 61 | 43.002 | 51.495 | 23.415 | 0.00 | 0.00 |
| ATOM | 927 | HA   | PHE | X | 61 | 42.224 | 51.337 | 24.162 | 0.00 | 0.00 |
| ATOM | 928 | CB   | PHE | X | 61 | 44.321 | 50.949 | 23.920 | 0.00 | 0.00 |
| ATOM | 929 | HB2  | PHE | X | 61 | 45.071 | 51.196 | 23.168 | 0.00 | 0.00 |
| ATOM | 930 | HB3  | PHE | X | 61 | 44.590 | 51.488 | 24.828 | 0.00 | 0.00 |
| ATOM | 931 | CG   | PHE | X | 61 | 44.337 | 49.463 | 24.352 | 0.00 | 0.00 |
| ATOM | 932 | CD1  | PHE | X | 61 | 43.721 | 48.985 | 25.535 | 0.00 | 0.00 |
| ATOM | 933 | HD1  | PHE | X | 61 | 43.156 | 49.587 | 26.231 | 0.00 | 0.00 |
| ATOM | 934 | CE1  | PHE | X | 61 | 43.837 | 47.653 | 25.924 | 0.00 | 0.00 |
| ATOM | 935 | HE1  | PHE | X | 61 | 43.391 | 47.363 | 26.864 | 0.00 | 0.00 |
| ATOM | 936 | CZ   | PHE | X | 61 | 44.421 | 46.686 | 25.067 | 0.00 | 0.00 |

|      |      |      |     |   |    |        |        |        |      |      |
|------|------|------|-----|---|----|--------|--------|--------|------|------|
| ATOM | 937  | HZ   | PHE | X | 61 | 44.534 | 45.641 | 25.312 | 0.00 | 0.00 |
| ATOM | 938  | CE2  | PHE | X | 61 | 45.094 | 47.199 | 23.967 | 0.00 | 0.00 |
| ATOM | 939  | HE2  | PHE | X | 61 | 45.716 | 46.536 | 23.383 | 0.00 | 0.00 |
| ATOM | 940  | CD2  | PHE | X | 61 | 45.017 | 48.536 | 23.579 | 0.00 | 0.00 |
| ATOM | 941  | HD2  | PHE | X | 61 | 45.463 | 48.796 | 22.630 | 0.00 | 0.00 |
| ATOM | 942  | C    | PHE | X | 61 | 43.135 | 53.034 | 23.257 | 0.00 | 0.00 |
| ATOM | 943  | O    | PHE | X | 61 | 43.878 | 53.541 | 22.359 | 0.00 | 0.00 |
| ATOM | 944  | N    | GLN | X | 62 | 42.520 | 53.815 | 24.156 | 0.00 | 0.00 |
| ATOM | 945  | H    | GLN | X | 62 | 42.016 | 53.375 | 24.912 | 0.00 | 0.00 |
| ATOM | 946  | CA   | GLN | X | 62 | 42.671 | 55.269 | 24.125 | 0.00 | 0.00 |
| ATOM | 947  | HA   | GLN | X | 62 | 42.882 | 55.602 | 23.109 | 0.00 | 0.00 |
| ATOM | 948  | CB   | GLN | X | 62 | 41.427 | 56.023 | 24.580 | 0.00 | 0.00 |
| ATOM | 949  | HB2  | GLN | X | 62 | 41.270 | 55.809 | 25.638 | 0.00 | 0.00 |
| ATOM | 950  | HB3  | GLN | X | 62 | 41.446 | 57.109 | 24.497 | 0.00 | 0.00 |
| ATOM | 951  | CG   | GLN | X | 62 | 40.199 | 55.465 | 23.869 | 0.00 | 0.00 |
| ATOM | 952  | HG2  | GLN | X | 62 | 40.499 | 54.909 | 22.981 | 0.00 | 0.00 |
| ATOM | 953  | HG3  | GLN | X | 62 | 39.557 | 54.886 | 24.533 | 0.00 | 0.00 |
| ATOM | 954  | CD   | GLN | X | 62 | 39.220 | 56.515 | 23.438 | 0.00 | 0.00 |
| ATOM | 955  | OE1  | GLN | X | 62 | 39.608 | 57.540 | 22.960 | 0.00 | 0.00 |
| ATOM | 956  | NE2  | GLN | X | 62 | 37.986 | 56.243 | 23.585 | 0.00 | 0.00 |
| ATOM | 957  | HE21 | GLN | X | 62 | 37.314 | 56.935 | 23.286 | 0.00 | 0.00 |
| ATOM | 958  | HE22 | GLN | X | 62 | 37.675 | 55.387 | 24.022 | 0.00 | 0.00 |
| ATOM | 959  | C    | GLN | X | 62 | 43.842 | 55.779 | 24.998 | 0.00 | 0.00 |
| ATOM | 960  | O    | GLN | X | 62 | 44.680 | 56.547 | 24.556 | 0.00 | 0.00 |
| ATOM | 961  | N    | SER | X | 63 | 43.935 | 55.280 | 26.282 | 0.00 | 0.00 |
| ATOM | 962  | H    | SER | X | 63 | 43.274 | 54.574 | 26.573 | 0.00 | 0.00 |
| ATOM | 963  | CA   | SER | X | 63 | 44.657 | 56.008 | 27.393 | 0.00 | 0.00 |
| ATOM | 964  | HA   | SER | X | 63 | 45.706 | 56.099 | 27.114 | 0.00 | 0.00 |
| ATOM | 965  | CB   | SER | X | 63 | 44.132 | 57.466 | 27.698 | 0.00 | 0.00 |
| ATOM | 966  | HB2  | SER | X | 63 | 44.901 | 58.202 | 27.461 | 0.00 | 0.00 |
| ATOM | 967  | HB3  | SER | X | 63 | 43.284 | 57.512 | 27.015 | 0.00 | 0.00 |
| ATOM | 968  | OG   | SER | X | 63 | 43.625 | 57.704 | 28.991 | 0.00 | 0.00 |
| ATOM | 969  | HG   | SER | X | 63 | 43.092 | 58.501 | 28.937 | 0.00 | 0.00 |
| ATOM | 970  | C    | SER | X | 63 | 44.705 | 55.151 | 28.630 | 0.00 | 0.00 |
| ATOM | 971  | O    | SER | X | 63 | 43.883 | 54.258 | 28.789 | 0.00 | 0.00 |
| ATOM | 972  | N    | VAL | X | 64 | 45.704 | 55.315 | 29.544 | 0.00 | 0.00 |
| ATOM | 973  | H    | VAL | X | 64 | 46.388 | 56.029 | 29.336 | 0.00 | 0.00 |
| ATOM | 974  | CA   | VAL | X | 64 | 45.958 | 54.506 | 30.760 | 0.00 | 0.00 |
| ATOM | 975  | HA   | VAL | X | 64 | 45.157 | 53.782 | 30.913 | 0.00 | 0.00 |
| ATOM | 976  | CB   | VAL | X | 64 | 47.264 | 53.747 | 30.632 | 0.00 | 0.00 |
| ATOM | 977  | HB   | VAL | X | 64 | 47.991 | 54.416 | 30.171 | 0.00 | 0.00 |
| ATOM | 978  | CG1  | VAL | X | 64 | 47.781 | 53.057 | 31.921 | 0.00 | 0.00 |
| ATOM | 979  | HG11 | VAL | X | 64 | 48.544 | 52.328 | 31.649 | 0.00 | 0.00 |
| ATOM | 980  | HG12 | VAL | X | 64 | 48.208 | 53.797 | 32.599 | 0.00 | 0.00 |
| ATOM | 981  | HG13 | VAL | X | 64 | 46.927 | 52.548 | 32.369 | 0.00 | 0.00 |
| ATOM | 982  | CG2  | VAL | X | 64 | 46.991 | 52.675 | 29.622 | 0.00 | 0.00 |
| ATOM | 983  | HG21 | VAL | X | 64 | 46.739 | 52.975 | 28.605 | 0.00 | 0.00 |
| ATOM | 984  | HG22 | VAL | X | 64 | 46.197 | 51.963 | 29.851 | 0.00 | 0.00 |
| ATOM | 985  | HG23 | VAL | X | 64 | 47.871 | 52.039 | 29.529 | 0.00 | 0.00 |
| ATOM | 986  | C    | VAL | X | 64 | 46.031 | 55.448 | 31.971 | 0.00 | 0.00 |
| ATOM | 987  | O    | VAL | X | 64 | 46.515 | 56.557 | 31.767 | 0.00 | 0.00 |
| ATOM | 988  | N    | CYX | X | 65 | 45.688 | 55.030 | 33.178 | 0.00 | 0.00 |
| ATOM | 989  | H    | CYX | X | 65 | 45.189 | 54.154 | 33.215 | 0.00 | 0.00 |
| ATOM | 990  | CA   | CYX | X | 65 | 45.766 | 55.994 | 34.348 | 0.00 | 0.00 |
| ATOM | 991  | HA   | CYX | X | 65 | 45.149 | 56.855 | 34.090 | 0.00 | 0.00 |
| ATOM | 992  | CB   | CYX | X | 65 | 44.970 | 55.297 | 35.475 | 0.00 | 0.00 |
| ATOM | 993  | HB2  | CYX | X | 65 | 45.572 | 54.543 | 35.981 | 0.00 | 0.00 |
| ATOM | 994  | HB3  | CYX | X | 65 | 44.785 | 56.128 | 36.156 | 0.00 | 0.00 |
| ATOM | 995  | SG   | CYX | X | 65 | 43.306 | 54.683 | 35.097 | 0.00 | 0.00 |
| ATOM | 996  | C    | CYX | X | 65 | 47.193 | 56.385 | 34.713 | 0.00 | 0.00 |
| ATOM | 997  | O    | CYX | X | 65 | 48.042 | 55.418 | 34.742 | 0.00 | 0.00 |
| ATOM | 998  | N    | TYR | X | 66 | 47.501 | 57.676 | 34.954 | 0.00 | 0.00 |
| ATOM | 999  | H    | TYR | X | 66 | 46.830 | 58.352 | 34.617 | 0.00 | 0.00 |
| ATOM | 1000 | CA   | TYR | X | 66 | 48.744 | 58.103 | 35.538 | 0.00 | 0.00 |
| ATOM | 1001 | HA   | TYR | X | 66 | 49.548 | 57.956 | 34.817 | 0.00 | 0.00 |
| ATOM | 1002 | CB   | TYR | X | 66 | 48.777 | 59.516 | 36.014 | 0.00 | 0.00 |
| ATOM | 1003 | HB2  | TYR | X | 66 | 47.896 | 59.661 | 36.638 | 0.00 | 0.00 |

|      |      |      |     |   |    |        |        |        |      |      |
|------|------|------|-----|---|----|--------|--------|--------|------|------|
| ATOM | 1004 | HB3  | TYR | X | 66 | 49.675 | 59.609 | 36.626 | 0.00 | 0.00 |
| ATOM | 1005 | CG   | TYR | X | 66 | 48.886 | 60.566 | 34.968 | 0.00 | 0.00 |
| ATOM | 1006 | CD1  | TYR | X | 66 | 47.820 | 61.560 | 34.818 | 0.00 | 0.00 |
| ATOM | 1007 | HD1  | TYR | X | 66 | 46.864 | 61.433 | 35.303 | 0.00 | 0.00 |
| ATOM | 1008 | CE1  | TYR | X | 66 | 47.995 | 62.673 | 33.994 | 0.00 | 0.00 |
| ATOM | 1009 | HE1  | TYR | X | 66 | 47.236 | 63.440 | 33.953 | 0.00 | 0.00 |
| ATOM | 1010 | CZ   | TYR | X | 66 | 49.166 | 62.900 | 33.340 | 0.00 | 0.00 |
| ATOM | 1011 | OH   | TYR | X | 66 | 49.274 | 64.075 | 32.581 | 0.00 | 0.00 |
| ATOM | 1012 | HH   | TYR | X | 66 | 48.482 | 64.611 | 32.670 | 0.00 | 0.00 |
| ATOM | 1013 | CE2  | TYR | X | 66 | 50.203 | 61.909 | 33.363 | 0.00 | 0.00 |
| ATOM | 1014 | HE2  | TYR | X | 66 | 50.997 | 62.071 | 32.649 | 0.00 | 0.00 |
| ATOM | 1015 | CD2  | TYR | X | 66 | 50.082 | 60.781 | 34.216 | 0.00 | 0.00 |
| ATOM | 1016 | HD2  | TYR | X | 66 | 50.914 | 60.093 | 34.257 | 0.00 | 0.00 |
| ATOM | 1017 | C    | TYR | X | 66 | 49.095 | 57.189 | 36.733 | 0.00 | 0.00 |
| ATOM | 1018 | O    | TYR | X | 66 | 48.212 | 56.832 | 37.492 | 0.00 | 0.00 |
| ATOM | 1019 | N    | GLN | X | 67 | 50.322 | 56.651 | 36.690 | 0.00 | 0.00 |
| ATOM | 1020 | H    | GLN | X | 67 | 50.997 | 56.900 | 35.981 | 0.00 | 0.00 |
| ATOM | 1021 | CA   | GLN | X | 67 | 50.786 | 55.595 | 37.576 | 0.00 | 0.00 |
| ATOM | 1022 | HA   | GLN | X | 67 | 50.423 | 55.738 | 38.594 | 0.00 | 0.00 |
| ATOM | 1023 | CB   | GLN | X | 67 | 50.277 | 54.213 | 37.112 | 0.00 | 0.00 |
| ATOM | 1024 | HB2  | GLN | X | 67 | 50.615 | 53.457 | 37.821 | 0.00 | 0.00 |
| ATOM | 1025 | HB3  | GLN | X | 67 | 49.187 | 54.184 | 37.115 | 0.00 | 0.00 |
| ATOM | 1026 | CG   | GLN | X | 67 | 50.718 | 53.718 | 35.746 | 0.00 | 0.00 |
| ATOM | 1027 | HG2  | GLN | X | 67 | 50.508 | 54.445 | 34.962 | 0.00 | 0.00 |
| ATOM | 1028 | HG3  | GLN | X | 67 | 51.796 | 53.556 | 35.747 | 0.00 | 0.00 |
| ATOM | 1029 | CD   | GLN | X | 67 | 50.015 | 52.418 | 35.351 | 0.00 | 0.00 |
| ATOM | 1030 | OE1  | GLN | X | 67 | 50.457 | 51.295 | 35.554 | 0.00 | 0.00 |
| ATOM | 1031 | NE2  | GLN | X | 67 | 48.750 | 52.507 | 35.001 | 0.00 | 0.00 |
| ATOM | 1032 | HE21 | GLN | X | 67 | 48.225 | 51.649 | 34.912 | 0.00 | 0.00 |
| ATOM | 1033 | HE22 | GLN | X | 67 | 48.302 | 53.388 | 34.794 | 0.00 | 0.00 |
| ATOM | 1034 | C    | GLN | X | 67 | 52.310 | 55.600 | 37.617 | 0.00 | 0.00 |
| ATOM | 1035 | O    | GLN | X | 67 | 52.966 | 56.192 | 36.770 | 0.00 | 0.00 |
| ATOM | 1036 | N    | TYR | X | 68 | 52.837 | 54.945 | 38.648 | 0.00 | 0.00 |
| ATOM | 1037 | H    | TYR | X | 68 | 52.245 | 54.618 | 39.397 | 0.00 | 0.00 |
| ATOM | 1038 | CA   | TYR | X | 68 | 54.284 | 54.725 | 38.767 | 0.00 | 0.00 |
| ATOM | 1039 | HA   | TYR | X | 68 | 54.818 | 55.675 | 38.781 | 0.00 | 0.00 |
| ATOM | 1040 | CB   | TYR | X | 68 | 54.662 | 54.121 | 40.097 | 0.00 | 0.00 |
| ATOM | 1041 | HB2  | TYR | X | 68 | 54.449 | 54.888 | 40.842 | 0.00 | 0.00 |
| ATOM | 1042 | HB3  | TYR | X | 68 | 53.977 | 53.312 | 40.349 | 0.00 | 0.00 |
| ATOM | 1043 | CG   | TYR | X | 68 | 56.106 | 53.661 | 40.102 | 0.00 | 0.00 |
| ATOM | 1044 | CD1  | TYR | X | 68 | 57.150 | 54.618 | 40.215 | 0.00 | 0.00 |
| ATOM | 1045 | HD1  | TYR | X | 68 | 56.917 | 55.642 | 40.469 | 0.00 | 0.00 |
| ATOM | 1046 | CE1  | TYR | X | 68 | 58.478 | 54.220 | 39.974 | 0.00 | 0.00 |
| ATOM | 1047 | HE1  | TYR | X | 68 | 59.273 | 54.931 | 40.145 | 0.00 | 0.00 |
| ATOM | 1048 | CZ   | TYR | X | 68 | 58.824 | 52.831 | 39.739 | 0.00 | 0.00 |
| ATOM | 1049 | OH   | TYR | X | 68 | 60.061 | 52.324 | 39.603 | 0.00 | 0.00 |
| ATOM | 1050 | HH   | TYR | X | 68 | 60.767 | 52.975 | 39.591 | 0.00 | 0.00 |
| ATOM | 1051 | CE2  | TYR | X | 68 | 57.751 | 51.877 | 39.871 | 0.00 | 0.00 |
| ATOM | 1052 | HE2  | TYR | X | 68 | 58.009 | 50.841 | 39.708 | 0.00 | 0.00 |
| ATOM | 1053 | CD2  | TYR | X | 68 | 56.452 | 52.270 | 39.979 | 0.00 | 0.00 |
| ATOM | 1054 | HD2  | TYR | X | 68 | 55.737 | 51.461 | 39.955 | 0.00 | 0.00 |
| ATOM | 1055 | C    | TYR | X | 68 | 54.703 | 53.869 | 37.536 | 0.00 | 0.00 |
| ATOM | 1056 | O    | TYR | X | 68 | 53.984 | 52.933 | 37.215 | 0.00 | 0.00 |
| ATOM | 1057 | N    | VAL | X | 69 | 55.788 | 54.176 | 36.926 | 0.00 | 0.00 |
| ATOM | 1058 | H    | VAL | X | 69 | 56.287 | 54.978 | 37.284 | 0.00 | 0.00 |
| ATOM | 1059 | CA   | VAL | X | 69 | 56.328 | 53.346 | 35.880 | 0.00 | 0.00 |
| ATOM | 1060 | HA   | VAL | X | 69 | 55.797 | 52.406 | 35.732 | 0.00 | 0.00 |
| ATOM | 1061 | CB   | VAL | X | 69 | 56.281 | 54.043 | 34.475 | 0.00 | 0.00 |
| ATOM | 1062 | HB   | VAL | X | 69 | 56.828 | 53.409 | 33.776 | 0.00 | 0.00 |
| ATOM | 1063 | CG1  | VAL | X | 69 | 54.788 | 54.231 | 34.075 | 0.00 | 0.00 |
| ATOM | 1064 | HG11 | VAL | X | 69 | 54.326 | 53.245 | 34.135 | 0.00 | 0.00 |
| ATOM | 1065 | HG12 | VAL | X | 69 | 54.240 | 54.959 | 34.672 | 0.00 | 0.00 |
| ATOM | 1066 | HG13 | VAL | X | 69 | 54.665 | 54.637 | 33.071 | 0.00 | 0.00 |
| ATOM | 1067 | CG2  | VAL | X | 69 | 56.983 | 55.358 | 34.400 | 0.00 | 0.00 |
| ATOM | 1068 | HG21 | VAL | X | 69 | 58.008 | 55.266 | 34.759 | 0.00 | 0.00 |
| ATOM | 1069 | HG22 | VAL | X | 69 | 56.413 | 56.090 | 34.972 | 0.00 | 0.00 |
| ATOM | 1070 | HG23 | VAL | X | 69 | 57.021 | 55.805 | 33.406 | 0.00 | 0.00 |

|      |      |      |     |   |    |        |        |        |      |      |
|------|------|------|-----|---|----|--------|--------|--------|------|------|
| ATOM | 1071 | C    | VAL | X | 69 | 57.768 | 53.013 | 36.254 | 0.00 | 0.00 |
| ATOM | 1072 | O    | VAL | X | 69 | 58.566 | 53.896 | 36.635 | 0.00 | 0.00 |
| ATOM | 1073 | N    | ASP | X | 70 | 58.187 | 51.785 | 35.988 | 0.00 | 0.00 |
| ATOM | 1074 | H    | ASP | X | 70 | 57.596 | 51.224 | 35.391 | 0.00 | 0.00 |
| ATOM | 1075 | CA   | ASP | X | 70 | 59.361 | 51.112 | 36.592 | 0.00 | 0.00 |
| ATOM | 1076 | HA   | ASP | X | 70 | 59.245 | 51.262 | 37.665 | 0.00 | 0.00 |
| ATOM | 1077 | CB   | ASP | X | 70 | 59.195 | 49.603 | 36.389 | 0.00 | 0.00 |
| ATOM | 1078 | HB2  | ASP | X | 70 | 58.499 | 49.254 | 37.152 | 0.00 | 0.00 |
| ATOM | 1079 | HB3  | ASP | X | 70 | 58.786 | 49.471 | 35.387 | 0.00 | 0.00 |
| ATOM | 1080 | CG   | ASP | X | 70 | 60.487 | 48.814 | 36.439 | 0.00 | 0.00 |
| ATOM | 1081 | OD1  | ASP | X | 70 | 61.002 | 48.650 | 37.521 | 0.00 | 0.00 |
| ATOM | 1082 | OD2  | ASP | X | 70 | 61.137 | 48.550 | 35.393 | 0.00 | 0.00 |
| ATOM | 1083 | C    | ASP | X | 70 | 60.766 | 51.719 | 36.189 | 0.00 | 0.00 |
| ATOM | 1084 | O    | ASP | X | 70 | 61.087 | 52.153 | 35.104 | 0.00 | 0.00 |
| ATOM | 1085 | N    | THR | X | 71 | 61.610 | 51.784 | 37.195 | 0.00 | 0.00 |
| ATOM | 1086 | H    | THR | X | 71 | 61.322 | 51.472 | 38.112 | 0.00 | 0.00 |
| ATOM | 1087 | CA   | THR | X | 71 | 63.067 | 52.172 | 37.133 | 0.00 | 0.00 |
| ATOM | 1088 | HA   | THR | X | 71 | 63.281 | 52.284 | 36.070 | 0.00 | 0.00 |
| ATOM | 1089 | CB   | THR | X | 71 | 63.334 | 53.526 | 37.873 | 0.00 | 0.00 |
| ATOM | 1090 | HB   | THR | X | 71 | 64.378 | 53.831 | 37.943 | 0.00 | 0.00 |
| ATOM | 1091 | CG2  | THR | X | 71 | 62.584 | 54.540 | 37.046 | 0.00 | 0.00 |
| ATOM | 1092 | HG21 | THR | X | 71 | 63.043 | 54.524 | 36.057 | 0.00 | 0.00 |
| ATOM | 1093 | HG22 | THR | X | 71 | 62.745 | 55.528 | 37.477 | 0.00 | 0.00 |
| ATOM | 1094 | HG23 | THR | X | 71 | 61.508 | 54.369 | 37.090 | 0.00 | 0.00 |
| ATOM | 1095 | OG1  | THR | X | 71 | 62.705 | 53.436 | 39.145 | 0.00 | 0.00 |
| ATOM | 1096 | HG1  | THR | X | 71 | 63.107 | 54.084 | 39.728 | 0.00 | 0.00 |
| ATOM | 1097 | C    | THR | X | 71 | 64.070 | 51.235 | 37.714 | 0.00 | 0.00 |
| ATOM | 1098 | O    | THR | X | 71 | 65.275 | 51.401 | 37.523 | 0.00 | 0.00 |
| ATOM | 1099 | N    | LEU | X | 72 | 63.551 | 50.163 | 38.192 | 0.00 | 0.00 |
| ATOM | 1100 | H    | LEU | X | 72 | 62.563 | 49.985 | 38.302 | 0.00 | 0.00 |
| ATOM | 1101 | CA   | LEU | X | 72 | 64.330 | 49.097 | 38.899 | 0.00 | 0.00 |
| ATOM | 1102 | HA   | LEU | X | 72 | 65.166 | 49.584 | 39.401 | 0.00 | 0.00 |
| ATOM | 1103 | CB   | LEU | X | 72 | 63.423 | 48.438 | 40.065 | 0.00 | 0.00 |
| ATOM | 1104 | HB2  | LEU | X | 72 | 63.020 | 49.138 | 40.797 | 0.00 | 0.00 |
| ATOM | 1105 | HB3  | LEU | X | 72 | 62.555 | 47.923 | 39.656 | 0.00 | 0.00 |
| ATOM | 1106 | CG   | LEU | X | 72 | 64.225 | 47.437 | 40.975 | 0.00 | 0.00 |
| ATOM | 1107 | HG   | LEU | X | 72 | 64.685 | 46.678 | 40.343 | 0.00 | 0.00 |
| ATOM | 1108 | CD1  | LEU | X | 72 | 65.293 | 47.959 | 41.823 | 0.00 | 0.00 |
| ATOM | 1109 | HD11 | LEU | X | 72 | 64.818 | 48.525 | 42.624 | 0.00 | 0.00 |
| ATOM | 1110 | HD12 | LEU | X | 72 | 65.948 | 48.600 | 41.233 | 0.00 | 0.00 |
| ATOM | 1111 | HD13 | LEU | X | 72 | 65.809 | 47.117 | 42.284 | 0.00 | 0.00 |
| ATOM | 1112 | CD2  | LEU | X | 72 | 63.147 | 46.765 | 41.895 | 0.00 | 0.00 |
| ATOM | 1113 | HD21 | LEU | X | 72 | 62.346 | 46.346 | 41.287 | 0.00 | 0.00 |
| ATOM | 1114 | HD22 | LEU | X | 72 | 63.684 | 45.945 | 42.372 | 0.00 | 0.00 |
| ATOM | 1115 | HD23 | LEU | X | 72 | 62.711 | 47.390 | 42.674 | 0.00 | 0.00 |
| ATOM | 1116 | C    | LEU | X | 72 | 64.811 | 47.927 | 38.044 | 0.00 | 0.00 |
| ATOM | 1117 | O    | LEU | X | 72 | 65.922 | 47.441 | 38.149 | 0.00 | 0.00 |
| ATOM | 1118 | N    | TYR | X | 73 | 64.025 | 47.651 | 37.011 | 0.00 | 0.00 |
| ATOM | 1119 | H    | TYR | X | 73 | 63.103 | 48.046 | 36.892 | 0.00 | 0.00 |
| ATOM | 1120 | CA   | TYR | X | 73 | 64.369 | 46.740 | 35.868 | 0.00 | 0.00 |
| ATOM | 1121 | HA   | TYR | X | 73 | 65.456 | 46.674 | 35.816 | 0.00 | 0.00 |
| ATOM | 1122 | CB   | TYR | X | 73 | 63.974 | 45.290 | 36.320 | 0.00 | 0.00 |
| ATOM | 1123 | HB2  | TYR | X | 73 | 62.907 | 45.118 | 36.179 | 0.00 | 0.00 |
| ATOM | 1124 | HB3  | TYR | X | 73 | 64.444 | 44.577 | 35.643 | 0.00 | 0.00 |
| ATOM | 1125 | CG   | TYR | X | 73 | 64.487 | 44.775 | 37.602 | 0.00 | 0.00 |
| ATOM | 1126 | CD1  | TYR | X | 73 | 65.906 | 44.572 | 37.735 | 0.00 | 0.00 |
| ATOM | 1127 | HD1  | TYR | X | 73 | 66.508 | 44.943 | 36.918 | 0.00 | 0.00 |
| ATOM | 1128 | CE1  | TYR | X | 73 | 66.514 | 44.136 | 38.912 | 0.00 | 0.00 |
| ATOM | 1129 | HE1  | TYR | X | 73 | 67.578 | 44.181 | 39.090 | 0.00 | 0.00 |
| ATOM | 1130 | CZ   | TYR | X | 73 | 65.628 | 43.954 | 40.053 | 0.00 | 0.00 |
| ATOM | 1131 | OH   | TYR | X | 73 | 66.208 | 43.524 | 41.229 | 0.00 | 0.00 |
| ATOM | 1132 | HH   | TYR | X | 73 | 65.500 | 43.334 | 41.849 | 0.00 | 0.00 |
| ATOM | 1133 | CE2  | TYR | X | 73 | 64.237 | 44.030 | 39.894 | 0.00 | 0.00 |
| ATOM | 1134 | HE2  | TYR | X | 73 | 63.658 | 43.827 | 40.783 | 0.00 | 0.00 |
| ATOM | 1135 | CD2  | TYR | X | 73 | 63.628 | 44.411 | 38.707 | 0.00 | 0.00 |
| ATOM | 1136 | HD2  | TYR | X | 73 | 62.561 | 44.512 | 38.576 | 0.00 | 0.00 |
| ATOM | 1137 | C    | TYR | X | 73 | 63.762 | 47.133 | 34.495 | 0.00 | 0.00 |

|      |      |     |     |   |    |        |        |        |      |      |
|------|------|-----|-----|---|----|--------|--------|--------|------|------|
| ATOM | 1138 | O   | TYR | X | 73 | 63.005 | 46.355 | 33.862 | 0.00 | 0.00 |
| ATOM | 1139 | N   | PRO | X | 74 | 64.041 | 48.360 | 33.956 | 0.00 | 0.00 |
| ATOM | 1140 | CD  | PRO | X | 74 | 64.813 | 49.388 | 34.597 | 0.00 | 0.00 |
| ATOM | 1141 | HD2 | PRO | X | 74 | 65.877 | 49.275 | 34.392 | 0.00 | 0.00 |
| ATOM | 1142 | HD3 | PRO | X | 74 | 64.654 | 49.437 | 35.675 | 0.00 | 0.00 |
| ATOM | 1143 | CG  | PRO | X | 74 | 64.361 | 50.683 | 33.862 | 0.00 | 0.00 |
| ATOM | 1144 | HG2 | PRO | X | 74 | 65.130 | 51.452 | 33.942 | 0.00 | 0.00 |
| ATOM | 1145 | HG3 | PRO | X | 74 | 63.435 | 51.049 | 34.305 | 0.00 | 0.00 |
| ATOM | 1146 | CB  | PRO | X | 74 | 64.177 | 50.269 | 32.452 | 0.00 | 0.00 |
| ATOM | 1147 | HB2 | PRO | X | 74 | 65.170 | 50.241 | 32.005 | 0.00 | 0.00 |
| ATOM | 1148 | HB3 | PRO | X | 74 | 63.407 | 50.749 | 31.847 | 0.00 | 0.00 |
| ATOM | 1149 | CA  | PRO | X | 74 | 63.678 | 48.829 | 32.630 | 0.00 | 0.00 |
| ATOM | 1150 | HA  | PRO | X | 74 | 62.594 | 48.762 | 32.539 | 0.00 | 0.00 |
| ATOM | 1151 | C   | PRO | X | 74 | 64.302 | 47.918 | 31.621 | 0.00 | 0.00 |
| ATOM | 1152 | O   | PRO | X | 74 | 65.458 | 47.508 | 31.726 | 0.00 | 0.00 |
| ATOM | 1153 | N   | GLY | X | 75 | 63.501 | 47.639 | 30.600 | 0.00 | 0.00 |
| ATOM | 1154 | H   | GLY | X | 75 | 62.648 | 48.161 | 30.458 | 0.00 | 0.00 |
| ATOM | 1155 | CA  | GLY | X | 75 | 63.840 | 46.689 | 29.485 | 0.00 | 0.00 |
| ATOM | 1156 | HA2 | GLY | X | 75 | 63.199 | 46.810 | 28.611 | 0.00 | 0.00 |
| ATOM | 1157 | HA3 | GLY | X | 75 | 64.847 | 46.835 | 29.095 | 0.00 | 0.00 |
| ATOM | 1158 | C   | GLY | X | 75 | 63.875 | 45.180 | 29.834 | 0.00 | 0.00 |
| ATOM | 1159 | O   | GLY | X | 75 | 64.048 | 44.393 | 28.909 | 0.00 | 0.00 |
| ATOM | 1160 | N   | PHE | X | 76 | 63.732 | 44.737 | 31.151 | 0.00 | 0.00 |
| ATOM | 1161 | H   | PHE | X | 76 | 63.367 | 45.369 | 31.850 | 0.00 | 0.00 |
| ATOM | 1162 | CA  | PHE | X | 76 | 63.953 | 43.345 | 31.508 | 0.00 | 0.00 |
| ATOM | 1163 | HA  | PHE | X | 76 | 64.998 | 43.168 | 31.255 | 0.00 | 0.00 |
| ATOM | 1164 | CB  | PHE | X | 76 | 63.921 | 43.166 | 33.096 | 0.00 | 0.00 |
| ATOM | 1165 | HB2 | PHE | X | 76 | 64.589 | 43.891 | 33.562 | 0.00 | 0.00 |
| ATOM | 1166 | HB3 | PHE | X | 76 | 62.965 | 43.617 | 33.360 | 0.00 | 0.00 |
| ATOM | 1167 | CG  | PHE | X | 76 | 64.095 | 41.807 | 33.768 | 0.00 | 0.00 |
| ATOM | 1168 | CD1 | PHE | X | 76 | 64.885 | 40.830 | 33.113 | 0.00 | 0.00 |
| ATOM | 1169 | HD1 | PHE | X | 76 | 65.379 | 41.098 | 32.191 | 0.00 | 0.00 |
| ATOM | 1170 | CE1 | PHE | X | 76 | 64.920 | 39.485 | 33.627 | 0.00 | 0.00 |
| ATOM | 1171 | HE1 | PHE | X | 76 | 65.391 | 38.706 | 33.046 | 0.00 | 0.00 |
| ATOM | 1172 | CZ  | PHE | X | 76 | 64.227 | 39.216 | 34.824 | 0.00 | 0.00 |
| ATOM | 1173 | HZ  | PHE | X | 76 | 64.249 | 38.199 | 35.189 | 0.00 | 0.00 |
| ATOM | 1174 | CE2 | PHE | X | 76 | 63.539 | 40.219 | 35.500 | 0.00 | 0.00 |
| ATOM | 1175 | HE2 | PHE | X | 76 | 62.896 | 39.922 | 36.315 | 0.00 | 0.00 |
| ATOM | 1176 | CD2 | PHE | X | 76 | 63.500 | 41.507 | 35.017 | 0.00 | 0.00 |
| ATOM | 1177 | HD2 | PHE | X | 76 | 62.866 | 42.214 | 35.530 | 0.00 | 0.00 |
| ATOM | 1178 | C   | PHE | X | 76 | 62.901 | 42.416 | 30.892 | 0.00 | 0.00 |
| ATOM | 1179 | O   | PHE | X | 76 | 61.716 | 42.599 | 31.074 | 0.00 | 0.00 |
| ATOM | 1180 | N   | GLU | X | 77 | 63.408 | 41.382 | 30.261 | 0.00 | 0.00 |
| ATOM | 1181 | H   | GLU | X | 77 | 64.402 | 41.352 | 30.080 | 0.00 | 0.00 |
| ATOM | 1182 | CA  | GLU | X | 77 | 62.674 | 40.429 | 29.487 | 0.00 | 0.00 |
| ATOM | 1183 | HA  | GLU | X | 77 | 62.271 | 40.959 | 28.624 | 0.00 | 0.00 |
| ATOM | 1184 | CB  | GLU | X | 77 | 63.538 | 39.283 | 28.913 | 0.00 | 0.00 |
| ATOM | 1185 | HB2 | GLU | X | 77 | 64.180 | 38.950 | 29.729 | 0.00 | 0.00 |
| ATOM | 1186 | HB3 | GLU | X | 77 | 62.910 | 38.442 | 28.619 | 0.00 | 0.00 |
| ATOM | 1187 | CG  | GLU | X | 77 | 64.468 | 39.846 | 27.765 | 0.00 | 0.00 |
| ATOM | 1188 | HG2 | GLU | X | 77 | 65.151 | 39.053 | 27.459 | 0.00 | 0.00 |
| ATOM | 1189 | HG3 | GLU | X | 77 | 63.859 | 39.956 | 26.868 | 0.00 | 0.00 |
| ATOM | 1190 | CD  | GLU | X | 77 | 65.281 | 41.066 | 28.103 | 0.00 | 0.00 |
| ATOM | 1191 | OE1 | GLU | X | 77 | 65.037 | 42.095 | 27.400 | 0.00 | 0.00 |
| ATOM | 1192 | OE2 | GLU | X | 77 | 65.997 | 41.097 | 29.140 | 0.00 | 0.00 |
| ATOM | 1193 | C   | GLU | X | 77 | 61.479 | 39.736 | 30.218 | 0.00 | 0.00 |
| ATOM | 1194 | O   | GLU | X | 77 | 60.447 | 39.543 | 29.616 | 0.00 | 0.00 |
| ATOM | 1195 | N   | GLY | X | 78 | 61.692 | 39.610 | 31.548 | 0.00 | 0.00 |
| ATOM | 1196 | H   | GLY | X | 78 | 62.545 | 39.999 | 31.925 | 0.00 | 0.00 |
| ATOM | 1197 | CA  | GLY | X | 78 | 60.666 | 39.022 | 32.487 | 0.00 | 0.00 |
| ATOM | 1198 | HA2 | GLY | X | 78 | 60.264 | 38.161 | 31.952 | 0.00 | 0.00 |
| ATOM | 1199 | HA3 | GLY | X | 78 | 61.241 | 38.756 | 33.373 | 0.00 | 0.00 |
| ATOM | 1200 | C   | GLY | X | 78 | 59.539 | 39.933 | 32.918 | 0.00 | 0.00 |
| ATOM | 1201 | O   | GLY | X | 78 | 58.511 | 39.412 | 33.331 | 0.00 | 0.00 |
| ATOM | 1202 | N   | THR | X | 79 | 59.752 | 41.258 | 32.738 | 0.00 | 0.00 |
| ATOM | 1203 | H   | THR | X | 79 | 60.612 | 41.603 | 32.336 | 0.00 | 0.00 |
| ATOM | 1204 | CA  | THR | X | 79 | 58.756 | 42.356 | 33.175 | 0.00 | 0.00 |

|      |      |      |     |   |    |        |        |        |      |      |
|------|------|------|-----|---|----|--------|--------|--------|------|------|
| ATOM | 1205 | HA   | THR | X | 79 | 57.773 | 41.942 | 33.400 | 0.00 | 0.00 |
| ATOM | 1206 | CB   | THR | X | 79 | 59.207 | 43.120 | 34.401 | 0.00 | 0.00 |
| ATOM | 1207 | HB   | THR | X | 79 | 58.352 | 43.748 | 34.652 | 0.00 | 0.00 |
| ATOM | 1208 | CG2  | THR | X | 79 | 59.537 | 42.206 | 35.605 | 0.00 | 0.00 |
| ATOM | 1209 | HG21 | THR | X | 79 | 60.518 | 41.740 | 35.508 | 0.00 | 0.00 |
| ATOM | 1210 | HG22 | THR | X | 79 | 58.731 | 41.487 | 35.753 | 0.00 | 0.00 |
| ATOM | 1211 | HG23 | THR | X | 79 | 59.718 | 42.897 | 36.429 | 0.00 | 0.00 |
| ATOM | 1212 | OG1  | THR | X | 79 | 60.345 | 43.816 | 33.946 | 0.00 | 0.00 |
| ATOM | 1213 | HG1  | THR | X | 79 | 60.292 | 44.632 | 34.448 | 0.00 | 0.00 |
| ATOM | 1214 | C    | THR | X | 79 | 58.246 | 43.357 | 32.084 | 0.00 | 0.00 |
| ATOM | 1215 | O    | THR | X | 79 | 57.234 | 44.030 | 32.336 | 0.00 | 0.00 |
| ATOM | 1216 | N    | GLU | X | 80 | 58.923 | 43.375 | 30.916 | 0.00 | 0.00 |
| ATOM | 1217 | H    | GLU | X | 80 | 59.806 | 42.888 | 30.962 | 0.00 | 0.00 |
| ATOM | 1218 | CA   | GLU | X | 80 | 58.623 | 44.290 | 29.807 | 0.00 | 0.00 |
| ATOM | 1219 | HA   | GLU | X | 80 | 58.917 | 45.307 | 30.065 | 0.00 | 0.00 |
| ATOM | 1220 | CB   | GLU | X | 80 | 59.558 | 43.928 | 28.615 | 0.00 | 0.00 |
| ATOM | 1221 | HB2  | GLU | X | 80 | 59.058 | 44.398 | 27.768 | 0.00 | 0.00 |
| ATOM | 1222 | HB3  | GLU | X | 80 | 60.457 | 44.527 | 28.757 | 0.00 | 0.00 |
| ATOM | 1223 | CG   | GLU | X | 80 | 59.792 | 42.449 | 28.342 | 0.00 | 0.00 |
| ATOM | 1224 | HG2  | GLU | X | 80 | 60.636 | 42.169 | 28.972 | 0.00 | 0.00 |
| ATOM | 1225 | HG3  | GLU | X | 80 | 58.871 | 41.899 | 28.538 | 0.00 | 0.00 |
| ATOM | 1226 | CD   | GLU | X | 80 | 60.261 | 42.301 | 26.828 | 0.00 | 0.00 |
| ATOM | 1227 | OE1  | GLU | X | 80 | 61.485 | 42.212 | 26.635 | 0.00 | 0.00 |
| ATOM | 1228 | OE2  | GLU | X | 80 | 59.412 | 42.125 | 25.960 | 0.00 | 0.00 |
| ATOM | 1229 | C    | GLU | X | 80 | 57.217 | 44.294 | 29.279 | 0.00 | 0.00 |
| ATOM | 1230 | O    | GLU | X | 80 | 56.850 | 45.161 | 28.535 | 0.00 | 0.00 |
| ATOM | 1231 | N    | MET | X | 81 | 56.382 | 43.316 | 29.654 | 0.00 | 0.00 |
| ATOM | 1232 | H    | MET | X | 81 | 56.702 | 42.547 | 30.225 | 0.00 | 0.00 |
| ATOM | 1233 | CA   | MET | X | 81 | 54.923 | 43.204 | 29.330 | 0.00 | 0.00 |
| ATOM | 1234 | HA   | MET | X | 81 | 54.855 | 43.520 | 28.289 | 0.00 | 0.00 |
| ATOM | 1235 | CB   | MET | X | 81 | 54.496 | 41.779 | 29.287 | 0.00 | 0.00 |
| ATOM | 1236 | HB2  | MET | X | 81 | 53.480 | 41.721 | 28.894 | 0.00 | 0.00 |
| ATOM | 1237 | HB3  | MET | X | 81 | 55.107 | 41.269 | 28.542 | 0.00 | 0.00 |
| ATOM | 1238 | CG   | MET | X | 81 | 54.533 | 41.010 | 30.618 | 0.00 | 0.00 |
| ATOM | 1239 | HG2  | MET | X | 81 | 53.786 | 41.434 | 31.289 | 0.00 | 0.00 |
| ATOM | 1240 | HG3  | MET | X | 81 | 54.140 | 40.019 | 30.390 | 0.00 | 0.00 |
| ATOM | 1241 | SD   | MET | X | 81 | 56.025 | 40.783 | 31.464 | 0.00 | 0.00 |
| ATOM | 1242 | CE   | MET | X | 81 | 56.858 | 39.689 | 30.372 | 0.00 | 0.00 |
| ATOM | 1243 | HE1  | MET | X | 81 | 56.195 | 38.902 | 30.014 | 0.00 | 0.00 |
| ATOM | 1244 | HE2  | MET | X | 81 | 57.204 | 40.249 | 29.504 | 0.00 | 0.00 |
| ATOM | 1245 | HE3  | MET | X | 81 | 57.660 | 39.131 | 30.856 | 0.00 | 0.00 |
| ATOM | 1246 | C    | MET | X | 81 | 53.982 | 44.086 | 30.203 | 0.00 | 0.00 |
| ATOM | 1247 | O    | MET | X | 81 | 52.973 | 44.668 | 29.712 | 0.00 | 0.00 |
| ATOM | 1248 | N    | TRP | X | 82 | 54.353 | 44.194 | 31.459 | 0.00 | 0.00 |
| ATOM | 1249 | H    | TRP | X | 82 | 55.289 | 43.901 | 31.701 | 0.00 | 0.00 |
| ATOM | 1250 | CA   | TRP | X | 82 | 53.765 | 45.031 | 32.475 | 0.00 | 0.00 |
| ATOM | 1251 | HA   | TRP | X | 82 | 52.698 | 44.907 | 32.659 | 0.00 | 0.00 |
| ATOM | 1252 | CB   | TRP | X | 82 | 54.303 | 44.637 | 33.865 | 0.00 | 0.00 |
| ATOM | 1253 | HB2  | TRP | X | 82 | 55.336 | 44.981 | 33.927 | 0.00 | 0.00 |
| ATOM | 1254 | HB3  | TRP | X | 82 | 53.713 | 45.171 | 34.610 | 0.00 | 0.00 |
| ATOM | 1255 | CG   | TRP | X | 82 | 54.144 | 43.145 | 34.172 | 0.00 | 0.00 |
| ATOM | 1256 | CD1  | TRP | X | 82 | 54.996 | 42.420 | 34.917 | 0.00 | 0.00 |
| ATOM | 1257 | HD1  | TRP | X | 82 | 55.803 | 42.821 | 35.512 | 0.00 | 0.00 |
| ATOM | 1258 | NE1  | TRP | X | 82 | 54.583 | 41.070 | 35.013 | 0.00 | 0.00 |
| ATOM | 1259 | HE1  | TRP | X | 82 | 55.088 | 40.384 | 35.554 | 0.00 | 0.00 |
| ATOM | 1260 | CE2  | TRP | X | 82 | 53.494 | 40.878 | 34.190 | 0.00 | 0.00 |
| ATOM | 1261 | CZ2  | TRP | X | 82 | 52.781 | 39.745 | 33.751 | 0.00 | 0.00 |
| ATOM | 1262 | HZ2  | TRP | X | 82 | 53.003 | 38.813 | 34.248 | 0.00 | 0.00 |
| ATOM | 1263 | CH2  | TRP | X | 82 | 51.660 | 39.927 | 32.960 | 0.00 | 0.00 |
| ATOM | 1264 | HH2  | TRP | X | 82 | 51.000 | 39.107 | 32.718 | 0.00 | 0.00 |
| ATOM | 1265 | CZ3  | TRP | X | 82 | 51.294 | 41.227 | 32.472 | 0.00 | 0.00 |
| ATOM | 1266 | HZ3  | TRP | X | 82 | 50.359 | 41.384 | 31.955 | 0.00 | 0.00 |
| ATOM | 1267 | CE3  | TRP | X | 82 | 51.945 | 42.346 | 32.967 | 0.00 | 0.00 |
| ATOM | 1268 | HE3  | TRP | X | 82 | 51.587 | 43.340 | 32.742 | 0.00 | 0.00 |
| ATOM | 1269 | CD2  | TRP | X | 82 | 53.126 | 42.179 | 33.763 | 0.00 | 0.00 |
| ATOM | 1270 | C    | TRP | X | 82 | 54.095 | 46.536 | 32.325 | 0.00 | 0.00 |
| ATOM | 1271 | O    | TRP | X | 82 | 53.765 | 47.384 | 33.190 | 0.00 | 0.00 |

|      |      |      |     |   |    |        |        |        |      |      |
|------|------|------|-----|---|----|--------|--------|--------|------|------|
| ATOM | 1272 | N    | ASN | X | 83 | 54.769 | 46.996 | 31.269 | 0.00 | 0.00 |
| ATOM | 1273 | H    | ASN | X | 83 | 55.045 | 46.375 | 30.522 | 0.00 | 0.00 |
| ATOM | 1274 | CA   | ASN | X | 83 | 54.950 | 48.417 | 30.882 | 0.00 | 0.00 |
| ATOM | 1275 | HA   | ASN | X | 83 | 55.140 | 48.889 | 31.846 | 0.00 | 0.00 |
| ATOM | 1276 | CB   | ASN | X | 83 | 56.168 | 48.535 | 30.071 | 0.00 | 0.00 |
| ATOM | 1277 | HB2  | ASN | X | 83 | 57.108 | 48.432 | 30.612 | 0.00 | 0.00 |
| ATOM | 1278 | HB3  | ASN | X | 83 | 56.227 | 47.711 | 29.361 | 0.00 | 0.00 |
| ATOM | 1279 | CG   | ASN | X | 83 | 56.241 | 49.864 | 29.336 | 0.00 | 0.00 |
| ATOM | 1280 | OD1  | ASN | X | 83 | 55.750 | 50.868 | 29.858 | 0.00 | 0.00 |
| ATOM | 1281 | ND2  | ASN | X | 83 | 56.855 | 49.906 | 28.143 | 0.00 | 0.00 |
| ATOM | 1282 | HD21 | ASN | X | 83 | 56.969 | 50.756 | 27.610 | 0.00 | 0.00 |
| ATOM | 1283 | HD22 | ASN | X | 83 | 57.506 | 49.159 | 27.948 | 0.00 | 0.00 |
| ATOM | 1284 | C    | ASN | X | 83 | 53.683 | 49.074 | 30.208 | 0.00 | 0.00 |
| ATOM | 1285 | O    | ASN | X | 83 | 53.320 | 48.687 | 29.091 | 0.00 | 0.00 |
| ATOM | 1286 | N    | PRO | X | 84 | 53.062 | 50.091 | 30.719 | 0.00 | 0.00 |
| ATOM | 1287 | CD   | PRO | X | 84 | 53.373 | 50.601 | 32.067 | 0.00 | 0.00 |
| ATOM | 1288 | HD2  | PRO | X | 84 | 54.438 | 50.781 | 32.213 | 0.00 | 0.00 |
| ATOM | 1289 | HD3  | PRO | X | 84 | 53.165 | 49.857 | 32.837 | 0.00 | 0.00 |
| ATOM | 1290 | CG   | PRO | X | 84 | 52.480 | 51.842 | 32.326 | 0.00 | 0.00 |
| ATOM | 1291 | HG2  | PRO | X | 84 | 53.018 | 52.784 | 32.223 | 0.00 | 0.00 |
| ATOM | 1292 | HG3  | PRO | X | 84 | 51.946 | 51.758 | 33.273 | 0.00 | 0.00 |
| ATOM | 1293 | CB   | PRO | X | 84 | 51.460 | 51.718 | 31.149 | 0.00 | 0.00 |
| ATOM | 1294 | HB2  | PRO | X | 84 | 51.306 | 52.714 | 30.734 | 0.00 | 0.00 |
| ATOM | 1295 | HB3  | PRO | X | 84 | 50.490 | 51.315 | 31.442 | 0.00 | 0.00 |
| ATOM | 1296 | CA   | PRO | X | 84 | 51.997 | 50.878 | 30.088 | 0.00 | 0.00 |
| ATOM | 1297 | HA   | PRO | X | 84 | 51.143 | 50.253 | 29.829 | 0.00 | 0.00 |
| ATOM | 1298 | C    | PRO | X | 84 | 52.621 | 51.632 | 28.894 | 0.00 | 0.00 |
| ATOM | 1299 | O    | PRO | X | 84 | 53.324 | 52.672 | 29.040 | 0.00 | 0.00 |
| ATOM | 1300 | N    | ASN | X | 85 | 52.435 | 51.154 | 27.688 | 0.00 | 0.00 |
| ATOM | 1301 | H    | ASN | X | 85 | 51.956 | 50.305 | 27.422 | 0.00 | 0.00 |
| ATOM | 1302 | CA   | ASN | X | 85 | 52.940 | 51.807 | 26.498 | 0.00 | 0.00 |
| ATOM | 1303 | HA   | ASN | X | 85 | 53.736 | 52.498 | 26.779 | 0.00 | 0.00 |
| ATOM | 1304 | CB   | ASN | X | 85 | 53.716 | 50.714 | 25.685 | 0.00 | 0.00 |
| ATOM | 1305 | HB2  | ASN | X | 85 | 54.168 | 51.162 | 24.800 | 0.00 | 0.00 |
| ATOM | 1306 | HB3  | ASN | X | 85 | 54.521 | 50.255 | 26.259 | 0.00 | 0.00 |
| ATOM | 1307 | CG   | ASN | X | 85 | 52.821 | 49.565 | 25.256 | 0.00 | 0.00 |
| ATOM | 1308 | OD1  | ASN | X | 85 | 51.640 | 49.769 | 24.979 | 0.00 | 0.00 |
| ATOM | 1309 | ND2  | ASN | X | 85 | 53.346 | 48.358 | 25.111 | 0.00 | 0.00 |
| ATOM | 1310 | HD21 | ASN | X | 85 | 52.686 | 47.598 | 25.030 | 0.00 | 0.00 |
| ATOM | 1311 | HD22 | ASN | X | 85 | 54.326 | 48.169 | 25.267 | 0.00 | 0.00 |
| ATOM | 1312 | C    | ASN | X | 85 | 51.867 | 52.628 | 25.719 | 0.00 | 0.00 |
| ATOM | 1313 | O    | ASN | X | 85 | 52.172 | 53.220 | 24.668 | 0.00 | 0.00 |
| ATOM | 1314 | N    | ARG | X | 86 | 50.621 | 52.664 | 26.181 | 0.00 | 0.00 |
| ATOM | 1315 | H    | ARG | X | 86 | 50.581 | 52.464 | 27.171 | 0.00 | 0.00 |
| ATOM | 1316 | CA   | ARG | X | 86 | 49.578 | 53.690 | 25.693 | 0.00 | 0.00 |
| ATOM | 1317 | HA   | ARG | X | 86 | 49.834 | 54.018 | 24.685 | 0.00 | 0.00 |
| ATOM | 1318 | CB   | ARG | X | 86 | 48.178 | 53.056 | 25.695 | 0.00 | 0.00 |
| ATOM | 1319 | HB2  | ARG | X | 86 | 48.007 | 52.588 | 26.665 | 0.00 | 0.00 |
| ATOM | 1320 | HB3  | ARG | X | 86 | 47.423 | 53.821 | 25.512 | 0.00 | 0.00 |
| ATOM | 1321 | CG   | ARG | X | 86 | 47.879 | 51.837 | 24.790 | 0.00 | 0.00 |
| ATOM | 1322 | HG2  | ARG | X | 86 | 48.403 | 50.922 | 25.066 | 0.00 | 0.00 |
| ATOM | 1323 | HG3  | ARG | X | 86 | 46.836 | 51.535 | 24.879 | 0.00 | 0.00 |
| ATOM | 1324 | CD   | ARG | X | 86 | 48.232 | 52.108 | 23.341 | 0.00 | 0.00 |
| ATOM | 1325 | HD2  | ARG | X | 86 | 47.483 | 52.810 | 22.975 | 0.00 | 0.00 |
| ATOM | 1326 | HD3  | ARG | X | 86 | 49.243 | 52.506 | 23.424 | 0.00 | 0.00 |
| ATOM | 1327 | NE   | ARG | X | 86 | 48.222 | 50.948 | 22.451 | 0.00 | 0.00 |
| ATOM | 1328 | HE   | ARG | X | 86 | 48.848 | 50.190 | 22.681 | 0.00 | 0.00 |
| ATOM | 1329 | CZ   | ARG | X | 86 | 47.455 | 50.777 | 21.364 | 0.00 | 0.00 |
| ATOM | 1330 | NH1  | ARG | X | 86 | 46.573 | 51.594 | 20.833 | 0.00 | 0.00 |
| ATOM | 1331 | HH11 | ARG | X | 86 | 46.641 | 52.540 | 21.179 | 0.00 | 0.00 |
| ATOM | 1332 | HH12 | ARG | X | 86 | 46.041 | 51.345 | 20.011 | 0.00 | 0.00 |
| ATOM | 1333 | NH2  | ARG | X | 86 | 47.653 | 49.652 | 20.705 | 0.00 | 0.00 |
| ATOM | 1334 | HH21 | ARG | X | 86 | 48.164 | 48.851 | 21.050 | 0.00 | 0.00 |
| ATOM | 1335 | HH22 | ARG | X | 86 | 47.009 | 49.431 | 19.960 | 0.00 | 0.00 |
| ATOM | 1336 | C    | ARG | X | 86 | 49.628 | 54.970 | 26.613 | 0.00 | 0.00 |
| ATOM | 1337 | O    | ARG | X | 86 | 50.159 | 54.897 | 27.701 | 0.00 | 0.00 |
| ATOM | 1338 | N    | GLU | X | 87 | 49.125 | 56.037 | 26.064 | 0.00 | 0.00 |



|      |      |      |     |   |    |        |        |        |      |      |
|------|------|------|-----|---|----|--------|--------|--------|------|------|
| ATOM | 1339 | H    | GLU | X | 87 | 48.662 | 55.960 | 25.170 | 0.00 | 0.00 |
| ATOM | 1340 | CA   | GLU | X | 87 | 49.113 | 57.387 | 26.613 | 0.00 | 0.00 |
| ATOM | 1341 | HA   | GLU | X | 87 | 50.184 | 57.565 | 26.714 | 0.00 | 0.00 |
| ATOM | 1342 | CB   | GLU | X | 87 | 48.496 | 58.447 | 25.696 | 0.00 | 0.00 |
| ATOM | 1343 | HB2  | GLU | X | 87 | 48.962 | 58.368 | 24.714 | 0.00 | 0.00 |
| ATOM | 1344 | HB3  | GLU | X | 87 | 47.434 | 58.284 | 25.514 | 0.00 | 0.00 |
| ATOM | 1345 | CG   | GLU | X | 87 | 48.642 | 59.867 | 26.157 | 0.00 | 0.00 |
| ATOM | 1346 | HG2  | GLU | X | 87 | 48.013 | 60.461 | 25.494 | 0.00 | 0.00 |
| ATOM | 1347 | HG3  | GLU | X | 87 | 48.295 | 60.013 | 27.180 | 0.00 | 0.00 |
| ATOM | 1348 | CD   | GLU | X | 87 | 50.073 | 60.362 | 25.948 | 0.00 | 0.00 |
| ATOM | 1349 | OE1  | GLU | X | 87 | 50.254 | 61.353 | 25.194 | 0.00 | 0.00 |
| ATOM | 1350 | OE2  | GLU | X | 87 | 51.014 | 59.853 | 26.652 | 0.00 | 0.00 |
| ATOM | 1351 | C    | GLU | X | 87 | 48.634 | 57.318 | 28.093 | 0.00 | 0.00 |
| ATOM | 1352 | O    | GLU | X | 87 | 47.452 | 57.049 | 28.301 | 0.00 | 0.00 |
| ATOM | 1353 | N    | LEU | X | 88 | 49.450 | 57.697 | 29.039 | 0.00 | 0.00 |
| ATOM | 1354 | H    | LEU | X | 88 | 50.393 | 57.888 | 28.731 | 0.00 | 0.00 |
| ATOM | 1355 | CA   | LEU | X | 88 | 49.075 | 57.924 | 30.458 | 0.00 | 0.00 |
| ATOM | 1356 | HA   | LEU | X | 88 | 48.567 | 57.071 | 30.909 | 0.00 | 0.00 |
| ATOM | 1357 | CB   | LEU | X | 88 | 50.366 | 58.094 | 31.221 | 0.00 | 0.00 |
| ATOM | 1358 | HB2  | LEU | X | 88 | 50.851 | 58.862 | 30.620 | 0.00 | 0.00 |
| ATOM | 1359 | HB3  | LEU | X | 88 | 50.162 | 58.440 | 32.235 | 0.00 | 0.00 |
| ATOM | 1360 | CG   | LEU | X | 88 | 51.141 | 56.771 | 31.213 | 0.00 | 0.00 |
| ATOM | 1361 | HG   | LEU | X | 88 | 51.083 | 56.198 | 30.288 | 0.00 | 0.00 |
| ATOM | 1362 | CD1  | LEU | X | 88 | 52.613 | 57.139 | 31.356 | 0.00 | 0.00 |
| ATOM | 1363 | HD11 | LEU | X | 88 | 53.101 | 57.337 | 30.401 | 0.00 | 0.00 |
| ATOM | 1364 | HD12 | LEU | X | 88 | 52.969 | 56.310 | 31.966 | 0.00 | 0.00 |
| ATOM | 1365 | HD13 | LEU | X | 88 | 52.700 | 58.071 | 31.914 | 0.00 | 0.00 |
| ATOM | 1366 | CD2  | LEU | X | 88 | 50.723 | 55.757 | 32.231 | 0.00 | 0.00 |
| ATOM | 1367 | HD21 | LEU | X | 88 | 51.353 | 54.876 | 32.110 | 0.00 | 0.00 |
| ATOM | 1368 | HD22 | LEU | X | 88 | 50.840 | 56.191 | 33.224 | 0.00 | 0.00 |
| ATOM | 1369 | HD23 | LEU | X | 88 | 49.695 | 55.468 | 32.013 | 0.00 | 0.00 |
| ATOM | 1370 | C    | LEU | X | 88 | 48.292 | 59.298 | 30.525 | 0.00 | 0.00 |
| ATOM | 1371 | O    | LEU | X | 88 | 48.459 | 60.216 | 29.759 | 0.00 | 0.00 |
| ATOM | 1372 | N    | SER | X | 89 | 47.426 | 59.434 | 31.509 | 0.00 | 0.00 |
| ATOM | 1373 | H    | SER | X | 89 | 47.119 | 58.616 | 32.016 | 0.00 | 0.00 |
| ATOM | 1374 | CA   | SER | X | 89 | 46.383 | 60.422 | 31.590 | 0.00 | 0.00 |
| ATOM | 1375 | HA   | SER | X | 89 | 46.860 | 61.397 | 31.689 | 0.00 | 0.00 |
| ATOM | 1376 | CB   | SER | X | 89 | 45.498 | 60.401 | 30.326 | 0.00 | 0.00 |
| ATOM | 1377 | HB2  | SER | X | 89 | 46.044 | 60.193 | 29.405 | 0.00 | 0.00 |
| ATOM | 1378 | HB3  | SER | X | 89 | 44.776 | 59.586 | 30.389 | 0.00 | 0.00 |
| ATOM | 1379 | OG   | SER | X | 89 | 44.759 | 61.546 | 30.261 | 0.00 | 0.00 |
| ATOM | 1380 | HG   | SER | X | 89 | 44.283 | 61.600 | 29.429 | 0.00 | 0.00 |
| ATOM | 1381 | C    | SER | X | 89 | 45.419 | 60.280 | 32.736 | 0.00 | 0.00 |
| ATOM | 1382 | O    | SER | X | 89 | 45.185 | 59.166 | 33.248 | 0.00 | 0.00 |
| ATOM | 1383 | N    | GLU | X | 90 | 44.636 | 61.328 | 33.090 | 0.00 | 0.00 |
| ATOM | 1384 | H    | GLU | X | 90 | 44.733 | 62.251 | 32.692 | 0.00 | 0.00 |
| ATOM | 1385 | CA   | GLU | X | 90 | 43.583 | 61.294 | 34.059 | 0.00 | 0.00 |
| ATOM | 1386 | HA   | GLU | X | 90 | 43.984 | 60.681 | 34.866 | 0.00 | 0.00 |
| ATOM | 1387 | CB   | GLU | X | 90 | 43.242 | 62.654 | 34.705 | 0.00 | 0.00 |
| ATOM | 1388 | HB2  | GLU | X | 90 | 43.117 | 63.494 | 34.022 | 0.00 | 0.00 |
| ATOM | 1389 | HB3  | GLU | X | 90 | 42.352 | 62.402 | 35.282 | 0.00 | 0.00 |
| ATOM | 1390 | CG   | GLU | X | 90 | 44.339 | 62.937 | 35.766 | 0.00 | 0.00 |
| ATOM | 1391 | HG2  | GLU | X | 90 | 44.352 | 62.186 | 36.556 | 0.00 | 0.00 |
| ATOM | 1392 | HG3  | GLU | X | 90 | 45.311 | 62.918 | 35.274 | 0.00 | 0.00 |
| ATOM | 1393 | CD   | GLU | X | 90 | 44.108 | 64.372 | 36.453 | 0.00 | 0.00 |
| ATOM | 1394 | OE1  | GLU | X | 90 | 43.485 | 64.498 | 37.521 | 0.00 | 0.00 |
| ATOM | 1395 | OE2  | GLU | X | 90 | 44.449 | 65.369 | 35.796 | 0.00 | 0.00 |
| ATOM | 1396 | C    | GLU | X | 90 | 42.234 | 60.698 | 33.548 | 0.00 | 0.00 |
| ATOM | 1397 | O    | GLU | X | 90 | 41.496 | 60.111 | 34.257 | 0.00 | 0.00 |
| ATOM | 1398 | N    | ASP | X | 91 | 41.976 | 60.811 | 32.238 | 0.00 | 0.00 |
| ATOM | 1399 | H    | ASP | X | 91 | 42.750 | 61.151 | 31.685 | 0.00 | 0.00 |
| ATOM | 1400 | CA   | ASP | X | 91 | 40.762 | 60.386 | 31.511 | 0.00 | 0.00 |
| ATOM | 1401 | HA   | ASP | X | 91 | 39.920 | 60.861 | 32.014 | 0.00 | 0.00 |
| ATOM | 1402 | CB   | ASP | X | 91 | 40.590 | 61.077 | 30.139 | 0.00 | 0.00 |
| ATOM | 1403 | HB2  | ASP | X | 91 | 39.636 | 60.831 | 29.673 | 0.00 | 0.00 |
| ATOM | 1404 | HB3  | ASP | X | 91 | 40.644 | 62.153 | 30.305 | 0.00 | 0.00 |
| ATOM | 1405 | CG   | ASP | X | 91 | 41.711 | 60.871 | 29.119 | 0.00 | 0.00 |

|      |      |      |     |   |    |        |        |        |      |      |
|------|------|------|-----|---|----|--------|--------|--------|------|------|
| ATOM | 1406 | OD1  | ASP | X | 91 | 41.941 | 59.762 | 28.589 | 0.00 | 0.00 |
| ATOM | 1407 | OD2  | ASP | X | 91 | 42.429 | 61.910 | 28.916 | 0.00 | 0.00 |
| ATOM | 1408 | C    | ASP | X | 91 | 40.516 | 58.832 | 31.421 | 0.00 | 0.00 |
| ATOM | 1409 | O    | ASP | X | 91 | 39.765 | 58.360 | 30.645 | 0.00 | 0.00 |
| ATOM | 1410 | N    | CYX | X | 92 | 41.363 | 58.046 | 32.133 | 0.00 | 0.00 |
| ATOM | 1411 | H    | CYX | X | 92 | 41.818 | 58.437 | 32.944 | 0.00 | 0.00 |
| ATOM | 1412 | CA   | CYX | X | 92 | 41.643 | 56.621 | 31.791 | 0.00 | 0.00 |
| ATOM | 1413 | HA   | CYX | X | 92 | 41.915 | 56.491 | 30.744 | 0.00 | 0.00 |
| ATOM | 1414 | CB   | CYX | X | 92 | 42.807 | 56.232 | 32.573 | 0.00 | 0.00 |
| ATOM | 1415 | HB2  | CYX | X | 92 | 43.182 | 55.256 | 32.264 | 0.00 | 0.00 |
| ATOM | 1416 | HB3  | CYX | X | 92 | 43.672 | 56.873 | 32.403 | 0.00 | 0.00 |
| ATOM | 1417 | SG   | CYX | X | 92 | 42.393 | 56.361 | 34.391 | 0.00 | 0.00 |
| ATOM | 1418 | C    | CYX | X | 92 | 40.624 | 55.486 | 32.008 | 0.00 | 0.00 |
| ATOM | 1419 | O    | CYX | X | 92 | 40.960 | 54.305 | 31.837 | 0.00 | 0.00 |
| ATOM | 1420 | N    | LEU | X | 93 | 39.392 | 55.839 | 32.322 | 0.00 | 0.00 |
| ATOM | 1421 | H    | LEU | X | 93 | 39.153 | 56.800 | 32.519 | 0.00 | 0.00 |
| ATOM | 1422 | CA   | LEU | X | 93 | 38.300 | 54.865 | 32.436 | 0.00 | 0.00 |
| ATOM | 1423 | HA   | LEU | X | 93 | 38.695 | 53.923 | 32.815 | 0.00 | 0.00 |
| ATOM | 1424 | CB   | LEU | X | 93 | 37.231 | 55.439 | 33.440 | 0.00 | 0.00 |
| ATOM | 1425 | HB2  | LEU | X | 93 | 36.716 | 56.274 | 32.965 | 0.00 | 0.00 |
| ATOM | 1426 | HB3  | LEU | X | 93 | 36.459 | 54.674 | 33.519 | 0.00 | 0.00 |
| ATOM | 1427 | CG   | LEU | X | 93 | 37.776 | 55.913 | 34.794 | 0.00 | 0.00 |
| ATOM | 1428 | HG   | LEU | X | 93 | 38.311 | 56.851 | 34.643 | 0.00 | 0.00 |
| ATOM | 1429 | CD1  | LEU | X | 93 | 36.598 | 56.217 | 35.764 | 0.00 | 0.00 |
| ATOM | 1430 | HD11 | LEU | X | 93 | 35.947 | 55.343 | 35.775 | 0.00 | 0.00 |
| ATOM | 1431 | HD12 | LEU | X | 93 | 36.138 | 57.177 | 35.533 | 0.00 | 0.00 |
| ATOM | 1432 | HD13 | LEU | X | 93 | 36.878 | 56.233 | 36.818 | 0.00 | 0.00 |
| ATOM | 1433 | CD2  | LEU | X | 93 | 38.683 | 54.834 | 35.365 | 0.00 | 0.00 |
| ATOM | 1434 | HD21 | LEU | X | 93 | 38.970 | 55.144 | 36.370 | 0.00 | 0.00 |
| ATOM | 1435 | HD22 | LEU | X | 93 | 38.119 | 53.901 | 35.384 | 0.00 | 0.00 |
| ATOM | 1436 | HD23 | LEU | X | 93 | 39.615 | 54.754 | 34.805 | 0.00 | 0.00 |
| ATOM | 1437 | C    | LEU | X | 93 | 37.681 | 54.494 | 31.031 | 0.00 | 0.00 |
| ATOM | 1438 | O    | LEU | X | 93 | 36.893 | 55.250 | 30.486 | 0.00 | 0.00 |
| ATOM | 1439 | N    | TYR | X | 94 | 38.027 | 53.318 | 30.563 | 0.00 | 0.00 |
| ATOM | 1440 | H    | TYR | X | 94 | 38.574 | 52.648 | 31.085 | 0.00 | 0.00 |
| ATOM | 1441 | CA   | TYR | X | 94 | 37.599 | 52.745 | 29.284 | 0.00 | 0.00 |
| ATOM | 1442 | HA   | TYR | X | 94 | 36.642 | 53.144 | 28.946 | 0.00 | 0.00 |
| ATOM | 1443 | CB   | TYR | X | 94 | 38.684 | 53.068 | 28.299 | 0.00 | 0.00 |
| ATOM | 1444 | HB2  | TYR | X | 94 | 39.535 | 52.492 | 28.661 | 0.00 | 0.00 |
| ATOM | 1445 | HB3  | TYR | X | 94 | 38.415 | 52.548 | 27.379 | 0.00 | 0.00 |
| ATOM | 1446 | CG   | TYR | X | 94 | 39.010 | 54.529 | 28.149 | 0.00 | 0.00 |
| ATOM | 1447 | CD1  | TYR | X | 94 | 38.001 | 55.308 | 27.502 | 0.00 | 0.00 |
| ATOM | 1448 | HD1  | TYR | X | 94 | 37.054 | 54.861 | 27.243 | 0.00 | 0.00 |
| ATOM | 1449 | CE1  | TYR | X | 94 | 38.220 | 56.679 | 27.318 | 0.00 | 0.00 |
| ATOM | 1450 | HE1  | TYR | X | 94 | 37.448 | 57.263 | 26.840 | 0.00 | 0.00 |
| ATOM | 1451 | CZ   | TYR | X | 94 | 39.506 | 57.217 | 27.732 | 0.00 | 0.00 |
| ATOM | 1452 | OH   | TYR | X | 94 | 39.786 | 58.492 | 27.418 | 0.00 | 0.00 |
| ATOM | 1453 | HH   | TYR | X | 94 | 40.654 | 58.751 | 27.737 | 0.00 | 0.00 |
| ATOM | 1454 | CE2  | TYR | X | 94 | 40.485 | 56.417 | 28.222 | 0.00 | 0.00 |
| ATOM | 1455 | HE2  | TYR | X | 94 | 41.313 | 56.903 | 28.717 | 0.00 | 0.00 |
| ATOM | 1456 | CD2  | TYR | X | 94 | 40.235 | 55.101 | 28.530 | 0.00 | 0.00 |
| ATOM | 1457 | HD2  | TYR | X | 94 | 40.972 | 54.518 | 29.062 | 0.00 | 0.00 |
| ATOM | 1458 | C    | TYR | X | 94 | 37.384 | 51.234 | 29.351 | 0.00 | 0.00 |
| ATOM | 1459 | O    | TYR | X | 94 | 37.921 | 50.481 | 30.183 | 0.00 | 0.00 |
| ATOM | 1460 | N    | LEU | X | 95 | 36.585 | 50.746 | 28.416 | 0.00 | 0.00 |
| ATOM | 1461 | H    | LEU | X | 95 | 36.134 | 51.381 | 27.773 | 0.00 | 0.00 |
| ATOM | 1462 | CA   | LEU | X | 95 | 36.152 | 49.310 | 28.448 | 0.00 | 0.00 |
| ATOM | 1463 | HA   | LEU | X | 95 | 36.650 | 48.764 | 29.250 | 0.00 | 0.00 |
| ATOM | 1464 | CB   | LEU | X | 95 | 34.580 | 49.387 | 28.697 | 0.00 | 0.00 |
| ATOM | 1465 | HB2  | LEU | X | 95 | 34.358 | 50.090 | 29.500 | 0.00 | 0.00 |
| ATOM | 1466 | HB3  | LEU | X | 95 | 34.119 | 49.774 | 27.788 | 0.00 | 0.00 |
| ATOM | 1467 | CG   | LEU | X | 95 | 34.102 | 47.961 | 28.977 | 0.00 | 0.00 |
| ATOM | 1468 | HG   | LEU | X | 95 | 34.645 | 47.246 | 28.359 | 0.00 | 0.00 |
| ATOM | 1469 | CD1  | LEU | X | 95 | 34.191 | 47.562 | 30.486 | 0.00 | 0.00 |
| ATOM | 1470 | HD11 | LEU | X | 95 | 33.848 | 48.358 | 31.147 | 0.00 | 0.00 |
| ATOM | 1471 | HD12 | LEU | X | 95 | 35.228 | 47.419 | 30.790 | 0.00 | 0.00 |
| ATOM | 1472 | HD13 | LEU | X | 95 | 33.600 | 46.680 | 30.731 | 0.00 | 0.00 |

|      |      |      |     |   |    |        |        |        |      |      |
|------|------|------|-----|---|----|--------|--------|--------|------|------|
| ATOM | 1473 | CD2  | LEU | X | 95 | 32.659 | 47.830 | 28.554 | 0.00 | 0.00 |
| ATOM | 1474 | HD21 | LEU | X | 95 | 32.069 | 48.439 | 29.239 | 0.00 | 0.00 |
| ATOM | 1475 | HD22 | LEU | X | 95 | 32.576 | 48.292 | 27.570 | 0.00 | 0.00 |
| ATOM | 1476 | HD23 | LEU | X | 95 | 32.342 | 46.789 | 28.496 | 0.00 | 0.00 |
| ATOM | 1477 | C    | LEU | X | 95 | 36.524 | 48.691 | 27.090 | 0.00 | 0.00 |
| ATOM | 1478 | O    | LEU | X | 95 | 36.371 | 49.339 | 26.046 | 0.00 | 0.00 |
| ATOM | 1479 | N    | ASN | X | 96 | 36.929 | 47.484 | 27.003 | 0.00 | 0.00 |
| ATOM | 1480 | H    | ASN | X | 96 | 36.829 | 46.930 | 27.841 | 0.00 | 0.00 |
| ATOM | 1481 | CA   | ASN | X | 96 | 37.300 | 46.699 | 25.782 | 0.00 | 0.00 |
| ATOM | 1482 | HA   | ASN | X | 96 | 37.090 | 47.347 | 24.931 | 0.00 | 0.00 |
| ATOM | 1483 | CB   | ASN | X | 96 | 38.822 | 46.374 | 25.694 | 0.00 | 0.00 |
| ATOM | 1484 | HB2  | ASN | X | 96 | 38.905 | 45.537 | 26.387 | 0.00 | 0.00 |
| ATOM | 1485 | HB3  | ASN | X | 96 | 39.109 | 45.915 | 24.748 | 0.00 | 0.00 |
| ATOM | 1486 | CG   | ASN | X | 96 | 39.837 | 47.519 | 25.963 | 0.00 | 0.00 |
| ATOM | 1487 | OD1  | ASN | X | 96 | 39.942 | 48.387 | 25.103 | 0.00 | 0.00 |
| ATOM | 1488 | ND2  | ASN | X | 96 | 40.502 | 47.461 | 27.158 | 0.00 | 0.00 |
| ATOM | 1489 | HD21 | ASN | X | 96 | 41.124 | 48.236 | 27.334 | 0.00 | 0.00 |
| ATOM | 1490 | HD22 | ASN | X | 96 | 40.265 | 46.766 | 27.852 | 0.00 | 0.00 |
| ATOM | 1491 | C    | ASN | X | 96 | 36.411 | 45.436 | 25.764 | 0.00 | 0.00 |
| ATOM | 1492 | O    | ASN | X | 96 | 36.212 | 44.866 | 26.821 | 0.00 | 0.00 |
| ATOM | 1493 | N    | VAL | X | 97 | 35.720 | 45.143 | 24.605 | 0.00 | 0.00 |
| ATOM | 1494 | H    | VAL | X | 97 | 35.875 | 45.801 | 23.856 | 0.00 | 0.00 |
| ATOM | 1495 | CA   | VAL | X | 97 | 34.844 | 44.035 | 24.271 | 0.00 | 0.00 |
| ATOM | 1496 | HA   | VAL | X | 97 | 34.700 | 43.368 | 25.121 | 0.00 | 0.00 |
| ATOM | 1497 | CB   | VAL | X | 97 | 33.377 | 44.522 | 24.016 | 0.00 | 0.00 |
| ATOM | 1498 | HB   | VAL | X | 97 | 33.486 | 45.184 | 23.157 | 0.00 | 0.00 |
| ATOM | 1499 | CG1  | VAL | X | 97 | 32.335 | 43.377 | 23.795 | 0.00 | 0.00 |
| ATOM | 1500 | HG11 | VAL | X | 97 | 32.608 | 42.916 | 22.846 | 0.00 | 0.00 |
| ATOM | 1501 | HG12 | VAL | X | 97 | 32.280 | 42.586 | 24.543 | 0.00 | 0.00 |
| ATOM | 1502 | HG13 | VAL | X | 97 | 31.367 | 43.872 | 23.714 | 0.00 | 0.00 |
| ATOM | 1503 | CG2  | VAL | X | 97 | 32.862 | 45.556 | 25.028 | 0.00 | 0.00 |
| ATOM | 1504 | HG21 | VAL | X | 97 | 33.504 | 46.425 | 25.172 | 0.00 | 0.00 |
| ATOM | 1505 | HG22 | VAL | X | 97 | 32.811 | 44.955 | 25.936 | 0.00 | 0.00 |
| ATOM | 1506 | HG23 | VAL | X | 97 | 31.832 | 45.834 | 24.802 | 0.00 | 0.00 |
| ATOM | 1507 | C    | VAL | X | 97 | 35.295 | 43.213 | 23.100 | 0.00 | 0.00 |
| ATOM | 1508 | O    | VAL | X | 97 | 35.626 | 43.813 | 22.073 | 0.00 | 0.00 |
| ATOM | 1509 | N    | TRP | X | 98 | 35.443 | 41.903 | 23.316 | 0.00 | 0.00 |
| ATOM | 1510 | H    | TRP | X | 98 | 35.431 | 41.654 | 24.295 | 0.00 | 0.00 |
| ATOM | 1511 | CA   | TRP | X | 98 | 35.778 | 40.962 | 22.248 | 0.00 | 0.00 |
| ATOM | 1512 | HA   | TRP | X | 98 | 36.012 | 41.569 | 21.374 | 0.00 | 0.00 |
| ATOM | 1513 | CB   | TRP | X | 98 | 37.045 | 40.239 | 22.654 | 0.00 | 0.00 |
| ATOM | 1514 | HB2  | TRP | X | 98 | 36.785 | 39.743 | 23.589 | 0.00 | 0.00 |
| ATOM | 1515 | HB3  | TRP | X | 98 | 37.205 | 39.450 | 21.919 | 0.00 | 0.00 |
| ATOM | 1516 | CG   | TRP | X | 98 | 38.322 | 41.035 | 22.711 | 0.00 | 0.00 |
| ATOM | 1517 | CD1  | TRP | X | 98 | 39.148 | 41.371 | 21.699 | 0.00 | 0.00 |
| ATOM | 1518 | HD1  | TRP | X | 98 | 38.994 | 40.923 | 20.728 | 0.00 | 0.00 |
| ATOM | 1519 | NE1  | TRP | X | 98 | 40.123 | 42.211 | 22.170 | 0.00 | 0.00 |
| ATOM | 1520 | HE1  | TRP | X | 98 | 40.772 | 42.788 | 21.653 | 0.00 | 0.00 |
| ATOM | 1521 | CE2  | TRP | X | 98 | 40.042 | 42.375 | 23.483 | 0.00 | 0.00 |
| ATOM | 1522 | CZ2  | TRP | X | 98 | 40.862 | 43.075 | 24.320 | 0.00 | 0.00 |
| ATOM | 1523 | HZ2  | TRP | X | 98 | 41.774 | 43.522 | 23.952 | 0.00 | 0.00 |
| ATOM | 1524 | CH2  | TRP | X | 98 | 40.382 | 43.208 | 25.614 | 0.00 | 0.00 |
| ATOM | 1525 | HH2  | TRP | X | 98 | 40.896 | 43.887 | 26.277 | 0.00 | 0.00 |
| ATOM | 1526 | CZ3  | TRP | X | 98 | 39.160 | 42.705 | 26.046 | 0.00 | 0.00 |
| ATOM | 1527 | HZ3  | TRP | X | 98 | 38.934 | 42.822 | 27.096 | 0.00 | 0.00 |
| ATOM | 1528 | CE3  | TRP | X | 98 | 38.315 | 41.970 | 25.166 | 0.00 | 0.00 |
| ATOM | 1529 | HE3  | TRP | X | 98 | 37.416 | 41.482 | 25.515 | 0.00 | 0.00 |
| ATOM | 1530 | CD2  | TRP | X | 98 | 38.807 | 41.703 | 23.869 | 0.00 | 0.00 |
| ATOM | 1531 | C    | TRP | X | 98 | 34.560 | 40.085 | 22.033 | 0.00 | 0.00 |
| ATOM | 1532 | O    | TRP | X | 98 | 33.900 | 39.572 | 22.938 | 0.00 | 0.00 |
| ATOM | 1533 | N    | THR | X | 99 | 34.223 | 39.830 | 20.744 | 0.00 | 0.00 |
| ATOM | 1534 | H    | THR | X | 99 | 34.755 | 40.347 | 20.058 | 0.00 | 0.00 |
| ATOM | 1535 | CA   | THR | X | 99 | 32.916 | 39.184 | 20.358 | 0.00 | 0.00 |
| ATOM | 1536 | HA   | THR | X | 99 | 32.678 | 38.313 | 20.968 | 0.00 | 0.00 |
| ATOM | 1537 | CB   | THR | X | 99 | 31.702 | 40.126 | 20.573 | 0.00 | 0.00 |
| ATOM | 1538 | HB   | THR | X | 99 | 31.756 | 40.519 | 21.589 | 0.00 | 0.00 |
| ATOM | 1539 | CG2  | THR | X | 99 | 31.494 | 41.325 | 19.643 | 0.00 | 0.00 |

|      |      |      |     |   |     |        |        |        |      |      |
|------|------|------|-----|---|-----|--------|--------|--------|------|------|
| ATOM | 1540 | HG21 | THR | X | 99  | 30.973 | 42.064 | 20.251 | 0.00 | 0.00 |
| ATOM | 1541 | HG22 | THR | X | 99  | 30.980 | 41.051 | 18.722 | 0.00 | 0.00 |
| ATOM | 1542 | HG23 | THR | X | 99  | 32.406 | 41.846 | 19.350 | 0.00 | 0.00 |
| ATOM | 1543 | OG1  | THR | X | 99  | 30.599 | 39.307 | 20.448 | 0.00 | 0.00 |
| ATOM | 1544 | HG1  | THR | X | 99  | 29.844 | 39.698 | 20.894 | 0.00 | 0.00 |
| ATOM | 1545 | C    | THR | X | 99  | 33.080 | 38.599 | 18.939 | 0.00 | 0.00 |
| ATOM | 1546 | O    | THR | X | 99  | 33.767 | 39.232 | 18.182 | 0.00 | 0.00 |
| ATOM | 1547 | N    | PRO | X | 100 | 32.574 | 37.453 | 18.514 | 0.00 | 0.00 |
| ATOM | 1548 | CD   | PRO | X | 100 | 31.823 | 36.541 | 19.314 | 0.00 | 0.00 |
| ATOM | 1549 | HD2  | PRO | X | 100 | 30.780 | 36.828 | 19.177 | 0.00 | 0.00 |
| ATOM | 1550 | HD3  | PRO | X | 100 | 31.986 | 36.614 | 20.389 | 0.00 | 0.00 |
| ATOM | 1551 | CG   | PRO | X | 100 | 31.939 | 35.122 | 18.764 | 0.00 | 0.00 |
| ATOM | 1552 | HG2  | PRO | X | 100 | 31.087 | 34.455 | 18.898 | 0.00 | 0.00 |
| ATOM | 1553 | HG3  | PRO | X | 100 | 32.755 | 34.557 | 19.215 | 0.00 | 0.00 |
| ATOM | 1554 | CB   | PRO | X | 100 | 32.298 | 35.406 | 17.331 | 0.00 | 0.00 |
| ATOM | 1555 | HB2  | PRO | X | 100 | 31.343 | 35.222 | 16.840 | 0.00 | 0.00 |
| ATOM | 1556 | HB3  | PRO | X | 100 | 33.027 | 34.684 | 16.963 | 0.00 | 0.00 |
| ATOM | 1557 | CA   | PRO | X | 100 | 32.724 | 36.848 | 17.195 | 0.00 | 0.00 |
| ATOM | 1558 | HA   | PRO | X | 100 | 33.777 | 36.820 | 16.913 | 0.00 | 0.00 |
| ATOM | 1559 | C    | PRO | X | 100 | 32.047 | 37.588 | 16.062 | 0.00 | 0.00 |
| ATOM | 1560 | O    | PRO | X | 100 | 31.221 | 38.442 | 16.265 | 0.00 | 0.00 |
| ATOM | 1561 | N    | TYR | X | 101 | 32.375 | 37.194 | 14.849 | 0.00 | 0.00 |
| ATOM | 1562 | H    | TYR | X | 101 | 32.899 | 36.359 | 14.633 | 0.00 | 0.00 |
| ATOM | 1563 | CA   | TYR | X | 101 | 31.842 | 37.874 | 13.675 | 0.00 | 0.00 |
| ATOM | 1564 | HA   | TYR | X | 101 | 31.131 | 38.630 | 14.007 | 0.00 | 0.00 |
| ATOM | 1565 | CB   | TYR | X | 101 | 33.005 | 38.568 | 12.944 | 0.00 | 0.00 |
| ATOM | 1566 | HB2  | TYR | X | 101 | 33.482 | 39.301 | 13.594 | 0.00 | 0.00 |
| ATOM | 1567 | HB3  | TYR | X | 101 | 33.786 | 37.857 | 12.675 | 0.00 | 0.00 |
| ATOM | 1568 | CG   | TYR | X | 101 | 32.589 | 39.355 | 11.635 | 0.00 | 0.00 |
| ATOM | 1569 | CD1  | TYR | X | 101 | 32.570 | 38.677 | 10.408 | 0.00 | 0.00 |
| ATOM | 1570 | HD1  | TYR | X | 101 | 32.657 | 37.601 | 10.405 | 0.00 | 0.00 |
| ATOM | 1571 | CE1  | TYR | X | 101 | 32.437 | 39.410 | 9.238  | 0.00 | 0.00 |
| ATOM | 1572 | HE1  | TYR | X | 101 | 32.296 | 38.965 | 8.264  | 0.00 | 0.00 |
| ATOM | 1573 | CZ   | TYR | X | 101 | 32.171 | 40.807 | 9.373  | 0.00 | 0.00 |
| ATOM | 1574 | OH   | TYR | X | 101 | 32.075 | 41.584 | 8.271  | 0.00 | 0.00 |
| ATOM | 1575 | HH   | TYR | X | 101 | 31.947 | 41.065 | 7.474  | 0.00 | 0.00 |
| ATOM | 1576 | CE2  | TYR | X | 101 | 32.011 | 41.412 | 10.652 | 0.00 | 0.00 |
| ATOM | 1577 | HE2  | TYR | X | 101 | 31.763 | 42.457 | 10.762 | 0.00 | 0.00 |
| ATOM | 1578 | CD2  | TYR | X | 101 | 32.291 | 40.692 | 11.797 | 0.00 | 0.00 |
| ATOM | 1579 | HD2  | TYR | X | 101 | 32.209 | 41.154 | 12.770 | 0.00 | 0.00 |
| ATOM | 1580 | C    | TYR | X | 101 | 31.169 | 36.815 | 12.794 | 0.00 | 0.00 |
| ATOM | 1581 | O    | TYR | X | 101 | 31.898 | 35.854 | 12.530 | 0.00 | 0.00 |
| ATOM | 1582 | N    | PRO | X | 102 | 29.926 | 36.967 | 12.322 | 0.00 | 0.00 |
| ATOM | 1583 | CD   | PRO | X | 102 | 29.441 | 36.007 | 11.310 | 0.00 | 0.00 |
| ATOM | 1584 | HD2  | PRO | X | 102 | 29.625 | 34.960 | 11.554 | 0.00 | 0.00 |
| ATOM | 1585 | HD3  | PRO | X | 102 | 29.906 | 36.242 | 10.353 | 0.00 | 0.00 |
| ATOM | 1586 | CG   | PRO | X | 102 | 27.935 | 36.350 | 11.161 | 0.00 | 0.00 |
| ATOM | 1587 | HG2  | PRO | X | 102 | 27.409 | 35.695 | 11.855 | 0.00 | 0.00 |
| ATOM | 1588 | HG3  | PRO | X | 102 | 27.609 | 36.210 | 10.130 | 0.00 | 0.00 |
| ATOM | 1589 | CB   | PRO | X | 102 | 27.867 | 37.837 | 11.643 | 0.00 | 0.00 |
| ATOM | 1590 | HB2  | PRO | X | 102 | 26.928 | 38.103 | 12.129 | 0.00 | 0.00 |
| ATOM | 1591 | HB3  | PRO | X | 102 | 27.878 | 38.550 | 10.820 | 0.00 | 0.00 |
| ATOM | 1592 | CA   | PRO | X | 102 | 28.982 | 38.050 | 12.573 | 0.00 | 0.00 |
| ATOM | 1593 | HA   | PRO | X | 102 | 29.469 | 39.004 | 12.368 | 0.00 | 0.00 |
| ATOM | 1594 | C    | PRO | X | 102 | 28.641 | 38.159 | 14.017 | 0.00 | 0.00 |
| ATOM | 1595 | O    | PRO | X | 102 | 28.815 | 37.174 | 14.784 | 0.00 | 0.00 |
| ATOM | 1596 | N    | ARG | X | 103 | 28.159 | 39.367 | 14.424 | 0.00 | 0.00 |
| ATOM | 1597 | H    | ARG | X | 103 | 28.257 | 40.115 | 13.752 | 0.00 | 0.00 |
| ATOM | 1598 | CA   | ARG | X | 103 | 27.801 | 39.598 | 15.818 | 0.00 | 0.00 |
| ATOM | 1599 | HA   | ARG | X | 103 | 28.721 | 39.558 | 16.401 | 0.00 | 0.00 |
| ATOM | 1600 | CB   | ARG | X | 103 | 27.380 | 41.106 | 15.993 | 0.00 | 0.00 |
| ATOM | 1601 | HB2  | ARG | X | 103 | 28.088 | 41.732 | 15.450 | 0.00 | 0.00 |
| ATOM | 1602 | HB3  | ARG | X | 103 | 26.429 | 41.215 | 15.472 | 0.00 | 0.00 |
| ATOM | 1603 | CG   | ARG | X | 103 | 27.289 | 41.590 | 17.446 | 0.00 | 0.00 |
| ATOM | 1604 | HG2  | ARG | X | 103 | 26.490 | 41.004 | 17.900 | 0.00 | 0.00 |
| ATOM | 1605 | HG3  | ARG | X | 103 | 28.165 | 41.275 | 18.012 | 0.00 | 0.00 |
| ATOM | 1606 | CD   | ARG | X | 103 | 27.177 | 43.051 | 17.646 | 0.00 | 0.00 |

|      |      |      |     |   |     |        |        |        |      |      |
|------|------|------|-----|---|-----|--------|--------|--------|------|------|
| ATOM | 1607 | HD2  | ARG | X | 103 | 26.959 | 43.293 | 18.686 | 0.00 | 0.00 |
| ATOM | 1608 | HD3  | ARG | X | 103 | 28.157 | 43.507 | 17.505 | 0.00 | 0.00 |
| ATOM | 1609 | NE   | ARG | X | 103 | 26.162 | 43.688 | 16.811 | 0.00 | 0.00 |
| ATOM | 1610 | HE   | ARG | X | 103 | 25.213 | 43.634 | 17.153 | 0.00 | 0.00 |
| ATOM | 1611 | CZ   | ARG | X | 103 | 26.346 | 44.552 | 15.819 | 0.00 | 0.00 |
| ATOM | 1612 | NH1  | ARG | X | 103 | 27.505 | 44.940 | 15.370 | 0.00 | 0.00 |
| ATOM | 1613 | HH11 | ARG | X | 103 | 28.411 | 44.522 | 15.526 | 0.00 | 0.00 |
| ATOM | 1614 | HH12 | ARG | X | 103 | 27.546 | 45.840 | 14.914 | 0.00 | 0.00 |
| ATOM | 1615 | NH2  | ARG | X | 103 | 25.342 | 45.025 | 15.179 | 0.00 | 0.00 |
| ATOM | 1616 | HH21 | ARG | X | 103 | 24.436 | 44.645 | 15.412 | 0.00 | 0.00 |
| ATOM | 1617 | HH22 | ARG | X | 103 | 25.407 | 45.732 | 14.460 | 0.00 | 0.00 |
| ATOM | 1618 | C    | ARG | X | 103 | 26.767 | 38.595 | 16.422 | 0.00 | 0.00 |
| ATOM | 1619 | O    | ARG | X | 103 | 25.816 | 38.243 | 15.735 | 0.00 | 0.00 |
| ATOM | 1620 | N    | PRO | X | 104 | 26.875 | 38.080 | 17.673 | 0.00 | 0.00 |
| ATOM | 1621 | CD   | PRO | X | 104 | 28.121 | 38.132 | 18.439 | 0.00 | 0.00 |
| ATOM | 1622 | HD2  | PRO | X | 104 | 28.392 | 39.142 | 18.748 | 0.00 | 0.00 |
| ATOM | 1623 | HD3  | PRO | X | 104 | 28.891 | 37.766 | 17.759 | 0.00 | 0.00 |
| ATOM | 1624 | CG   | PRO | X | 104 | 27.981 | 37.327 | 19.680 | 0.00 | 0.00 |
| ATOM | 1625 | HG2  | PRO | X | 104 | 27.520 | 38.055 | 20.347 | 0.00 | 0.00 |
| ATOM | 1626 | HG3  | PRO | X | 104 | 28.919 | 36.842 | 19.949 | 0.00 | 0.00 |
| ATOM | 1627 | CB   | PRO | X | 104 | 26.889 | 36.335 | 19.269 | 0.00 | 0.00 |
| ATOM | 1628 | HB2  | PRO | X | 104 | 26.233 | 36.191 | 20.128 | 0.00 | 0.00 |
| ATOM | 1629 | HB3  | PRO | X | 104 | 27.325 | 35.374 | 18.994 | 0.00 | 0.00 |
| ATOM | 1630 | CA   | PRO | X | 104 | 26.139 | 36.918 | 18.045 | 0.00 | 0.00 |
| ATOM | 1631 | HA   | PRO | X | 104 | 26.237 | 36.234 | 17.203 | 0.00 | 0.00 |
| ATOM | 1632 | C    | PRO | X | 104 | 24.612 | 37.124 | 18.270 | 0.00 | 0.00 |
| ATOM | 1633 | O    | PRO | X | 104 | 24.205 | 38.108 | 18.965 | 0.00 | 0.00 |
| ATOM | 1634 | N    | THR | X | 105 | 23.738 | 36.288 | 17.665 | 0.00 | 0.00 |
| ATOM | 1635 | H    | THR | X | 105 | 24.185 | 35.691 | 16.985 | 0.00 | 0.00 |
| ATOM | 1636 | CA   | THR | X | 105 | 22.274 | 36.318 | 17.518 | 0.00 | 0.00 |
| ATOM | 1637 | HA   | THR | X | 105 | 21.936 | 37.354 | 17.471 | 0.00 | 0.00 |
| ATOM | 1638 | CB   | THR | X | 105 | 22.056 | 35.736 | 16.102 | 0.00 | 0.00 |
| ATOM | 1639 | HB   | THR | X | 105 | 21.004 | 35.715 | 15.816 | 0.00 | 0.00 |
| ATOM | 1640 | CG2  | THR | X | 105 | 22.721 | 36.515 | 15.022 | 0.00 | 0.00 |
| ATOM | 1641 | HG21 | THR | X | 105 | 22.569 | 36.119 | 14.018 | 0.00 | 0.00 |
| ATOM | 1642 | HG22 | THR | X | 105 | 23.793 | 36.570 | 15.214 | 0.00 | 0.00 |
| ATOM | 1643 | HG23 | THR | X | 105 | 22.341 | 37.536 | 15.029 | 0.00 | 0.00 |
| ATOM | 1644 | OG1  | THR | X | 105 | 22.569 | 34.422 | 16.064 | 0.00 | 0.00 |
| ATOM | 1645 | HG1  | THR | X | 105 | 21.810 | 33.833 | 16.061 | 0.00 | 0.00 |
| ATOM | 1646 | C    | THR | X | 105 | 21.501 | 35.635 | 18.727 | 0.00 | 0.00 |
| ATOM | 1647 | O    | THR | X | 105 | 20.236 | 35.485 | 18.536 | 0.00 | 0.00 |
| ATOM | 1648 | N    | SER | X | 106 | 22.124 | 35.223 | 19.799 | 0.00 | 0.00 |
| ATOM | 1649 | H    | SER | X | 106 | 23.088 | 35.522 | 19.804 | 0.00 | 0.00 |
| ATOM | 1650 | CA   | SER | X | 106 | 21.622 | 34.250 | 20.780 | 0.00 | 0.00 |
| ATOM | 1651 | HA   | SER | X | 106 | 20.709 | 34.702 | 21.168 | 0.00 | 0.00 |
| ATOM | 1652 | CB   | SER | X | 106 | 21.256 | 32.894 | 20.132 | 0.00 | 0.00 |
| ATOM | 1653 | HB2  | SER | X | 106 | 21.167 | 32.183 | 20.953 | 0.00 | 0.00 |
| ATOM | 1654 | HB3  | SER | X | 106 | 20.361 | 32.983 | 19.515 | 0.00 | 0.00 |
| ATOM | 1655 | OG   | SER | X | 106 | 22.320 | 32.447 | 19.190 | 0.00 | 0.00 |
| ATOM | 1656 | HG   | SER | X | 106 | 22.093 | 31.533 | 19.004 | 0.00 | 0.00 |
| ATOM | 1657 | C    | SER | X | 106 | 22.568 | 34.086 | 21.903 | 0.00 | 0.00 |
| ATOM | 1658 | O    | SER | X | 106 | 23.783 | 34.172 | 21.710 | 0.00 | 0.00 |
| ATOM | 1659 | N    | PRO | X | 107 | 22.041 | 33.835 | 23.135 | 0.00 | 0.00 |
| ATOM | 1660 | CD   | PRO | X | 107 | 20.628 | 33.681 | 23.500 | 0.00 | 0.00 |
| ATOM | 1661 | HD2  | PRO | X | 107 | 20.115 | 33.008 | 22.813 | 0.00 | 0.00 |
| ATOM | 1662 | HD3  | PRO | X | 107 | 20.204 | 34.654 | 23.253 | 0.00 | 0.00 |
| ATOM | 1663 | CG   | PRO | X | 107 | 20.563 | 33.386 | 24.982 | 0.00 | 0.00 |
| ATOM | 1664 | HG2  | PRO | X | 107 | 19.911 | 32.531 | 25.164 | 0.00 | 0.00 |
| ATOM | 1665 | HG3  | PRO | X | 107 | 20.258 | 34.329 | 25.435 | 0.00 | 0.00 |
| ATOM | 1666 | CB   | PRO | X | 107 | 21.972 | 33.024 | 25.373 | 0.00 | 0.00 |
| ATOM | 1667 | HB2  | PRO | X | 107 | 22.060 | 31.979 | 25.078 | 0.00 | 0.00 |
| ATOM | 1668 | HB3  | PRO | X | 107 | 22.246 | 33.344 | 26.379 | 0.00 | 0.00 |
| ATOM | 1669 | CA   | PRO | X | 107 | 22.833 | 33.796 | 24.386 | 0.00 | 0.00 |
| ATOM | 1670 | HA   | PRO | X | 107 | 22.957 | 34.820 | 24.737 | 0.00 | 0.00 |
| ATOM | 1671 | C    | PRO | X | 107 | 24.224 | 33.261 | 24.380 | 0.00 | 0.00 |
| ATOM | 1672 | O    | PRO | X | 107 | 24.518 | 32.202 | 23.820 | 0.00 | 0.00 |
| ATOM | 1673 | N    | THR | X | 108 | 25.045 | 33.937 | 25.177 | 0.00 | 0.00 |

|      |      |      |     |   |     |        |        |        |      |      |
|------|------|------|-----|---|-----|--------|--------|--------|------|------|
| ATOM | 1674 | H    | THR | X | 108 | 24.714 | 34.805 | 25.575 | 0.00 | 0.00 |
| ATOM | 1675 | CA   | THR | X | 108 | 26.434 | 33.483 | 25.363 | 0.00 | 0.00 |
| ATOM | 1676 | HA   | THR | X | 108 | 26.318 | 32.450 | 25.689 | 0.00 | 0.00 |
| ATOM | 1677 | CB   | THR | X | 108 | 27.170 | 33.510 | 24.018 | 0.00 | 0.00 |
| ATOM | 1678 | HB   | THR | X | 108 | 26.620 | 33.221 | 23.123 | 0.00 | 0.00 |
| ATOM | 1679 | CG2  | THR | X | 108 | 27.793 | 34.821 | 23.718 | 0.00 | 0.00 |
| ATOM | 1680 | HG21 | THR | X | 108 | 28.380 | 35.196 | 24.556 | 0.00 | 0.00 |
| ATOM | 1681 | HG22 | THR | X | 108 | 27.026 | 35.564 | 23.496 | 0.00 | 0.00 |
| ATOM | 1682 | HG23 | THR | X | 108 | 28.376 | 34.749 | 22.800 | 0.00 | 0.00 |
| ATOM | 1683 | OG1  | THR | X | 108 | 28.188 | 32.609 | 24.164 | 0.00 | 0.00 |
| ATOM | 1684 | HG1  | THR | X | 108 | 28.722 | 32.720 | 23.374 | 0.00 | 0.00 |
| ATOM | 1685 | C    | THR | X | 108 | 27.088 | 34.195 | 26.549 | 0.00 | 0.00 |
| ATOM | 1686 | O    | THR | X | 108 | 26.807 | 35.389 | 26.714 | 0.00 | 0.00 |
| ATOM | 1687 | N    | PRO | X | 109 | 27.820 | 33.503 | 27.479 | 0.00 | 0.00 |
| ATOM | 1688 | CD   | PRO | X | 109 | 28.142 | 32.080 | 27.457 | 0.00 | 0.00 |
| ATOM | 1689 | HD2  | PRO | X | 109 | 28.579 | 31.794 | 26.501 | 0.00 | 0.00 |
| ATOM | 1690 | HD3  | PRO | X | 109 | 27.250 | 31.500 | 27.690 | 0.00 | 0.00 |
| ATOM | 1691 | CG   | PRO | X | 109 | 29.133 | 31.959 | 28.581 | 0.00 | 0.00 |
| ATOM | 1692 | HG2  | PRO | X | 109 | 30.171 | 31.958 | 28.247 | 0.00 | 0.00 |
| ATOM | 1693 | HG3  | PRO | X | 109 | 29.024 | 30.924 | 28.905 | 0.00 | 0.00 |
| ATOM | 1694 | CB   | PRO | X | 109 | 28.700 | 32.995 | 29.663 | 0.00 | 0.00 |
| ATOM | 1695 | HB2  | PRO | X | 109 | 29.532 | 33.194 | 30.339 | 0.00 | 0.00 |
| ATOM | 1696 | HB3  | PRO | X | 109 | 27.874 | 32.513 | 30.187 | 0.00 | 0.00 |
| ATOM | 1697 | CA   | PRO | X | 109 | 28.124 | 34.153 | 28.761 | 0.00 | 0.00 |
| ATOM | 1698 | HA   | PRO | X | 109 | 27.170 | 34.599 | 29.043 | 0.00 | 0.00 |
| ATOM | 1699 | C    | PRO | X | 109 | 29.277 | 35.118 | 28.504 | 0.00 | 0.00 |
| ATOM | 1700 | O    | PRO | X | 109 | 29.989 | 35.013 | 27.498 | 0.00 | 0.00 |
| ATOM | 1701 | N    | VAL | X | 110 | 29.318 | 36.068 | 29.418 | 0.00 | 0.00 |
| ATOM | 1702 | H    | VAL | X | 110 | 28.774 | 35.865 | 30.245 | 0.00 | 0.00 |
| ATOM | 1703 | CA   | VAL | X | 110 | 30.264 | 37.164 | 29.520 | 0.00 | 0.00 |
| ATOM | 1704 | HA   | VAL | X | 110 | 30.691 | 37.200 | 28.517 | 0.00 | 0.00 |
| ATOM | 1705 | CB   | VAL | X | 110 | 29.586 | 38.513 | 29.775 | 0.00 | 0.00 |
| ATOM | 1706 | HB   | VAL | X | 110 | 29.204 | 38.478 | 30.795 | 0.00 | 0.00 |
| ATOM | 1707 | CG1  | VAL | X | 110 | 30.619 | 39.664 | 29.667 | 0.00 | 0.00 |
| ATOM | 1708 | HG11 | VAL | X | 110 | 31.279 | 39.697 | 30.534 | 0.00 | 0.00 |
| ATOM | 1709 | HG12 | VAL | X | 110 | 31.286 | 39.525 | 28.816 | 0.00 | 0.00 |
| ATOM | 1710 | HG13 | VAL | X | 110 | 30.130 | 40.636 | 29.614 | 0.00 | 0.00 |
| ATOM | 1711 | CG2  | VAL | X | 110 | 28.355 | 38.762 | 28.891 | 0.00 | 0.00 |
| ATOM | 1712 | HG21 | VAL | X | 110 | 27.572 | 38.007 | 28.967 | 0.00 | 0.00 |
| ATOM | 1713 | HG22 | VAL | X | 110 | 28.747 | 38.943 | 27.890 | 0.00 | 0.00 |
| ATOM | 1714 | HG23 | VAL | X | 110 | 27.870 | 39.688 | 29.198 | 0.00 | 0.00 |
| ATOM | 1715 | C    | VAL | X | 110 | 31.343 | 36.852 | 30.551 | 0.00 | 0.00 |
| ATOM | 1716 | O    | VAL | X | 110 | 31.061 | 36.569 | 31.728 | 0.00 | 0.00 |
| ATOM | 1717 | N    | LEU | X | 111 | 32.623 | 36.924 | 30.107 | 0.00 | 0.00 |
| ATOM | 1718 | H    | LEU | X | 111 | 32.688 | 37.015 | 29.103 | 0.00 | 0.00 |
| ATOM | 1719 | CA   | LEU | X | 111 | 33.831 | 36.811 | 30.856 | 0.00 | 0.00 |
| ATOM | 1720 | HA   | LEU | X | 111 | 33.606 | 36.484 | 31.871 | 0.00 | 0.00 |
| ATOM | 1721 | CB   | LEU | X | 111 | 34.873 | 35.771 | 30.218 | 0.00 | 0.00 |
| ATOM | 1722 | HB2  | LEU | X | 111 | 35.257 | 36.146 | 29.269 | 0.00 | 0.00 |
| ATOM | 1723 | HB3  | LEU | X | 111 | 35.819 | 35.798 | 30.758 | 0.00 | 0.00 |
| ATOM | 1724 | CG   | LEU | X | 111 | 34.511 | 34.284 | 29.920 | 0.00 | 0.00 |
| ATOM | 1725 | HG   | LEU | X | 111 | 33.483 | 34.288 | 29.559 | 0.00 | 0.00 |
| ATOM | 1726 | CD1  | LEU | X | 111 | 35.390 | 33.795 | 28.802 | 0.00 | 0.00 |
| ATOM | 1727 | HD11 | LEU | X | 111 | 35.016 | 32.797 | 28.574 | 0.00 | 0.00 |
| ATOM | 1728 | HD12 | LEU | X | 111 | 36.431 | 33.767 | 29.124 | 0.00 | 0.00 |
| ATOM | 1729 | HD13 | LEU | X | 111 | 35.277 | 34.349 | 27.870 | 0.00 | 0.00 |
| ATOM | 1730 | CD2  | LEU | X | 111 | 34.646 | 33.369 | 31.163 | 0.00 | 0.00 |
| ATOM | 1731 | HD21 | LEU | X | 111 | 35.617 | 33.525 | 31.633 | 0.00 | 0.00 |
| ATOM | 1732 | HD22 | LEU | X | 111 | 33.787 | 33.595 | 31.795 | 0.00 | 0.00 |
| ATOM | 1733 | HD23 | LEU | X | 111 | 34.620 | 32.331 | 30.832 | 0.00 | 0.00 |
| ATOM | 1734 | C    | LEU | X | 111 | 34.400 | 38.250 | 31.088 | 0.00 | 0.00 |
| ATOM | 1735 | O    | LEU | X | 111 | 34.792 | 38.875 | 30.120 | 0.00 | 0.00 |
| ATOM | 1736 | N    | VAL | X | 112 | 34.371 | 38.793 | 32.379 | 0.00 | 0.00 |
| ATOM | 1737 | H    | VAL | X | 112 | 33.850 | 38.288 | 33.082 | 0.00 | 0.00 |
| ATOM | 1738 | CA   | VAL | X | 112 | 34.837 | 40.166 | 32.583 | 0.00 | 0.00 |
| ATOM | 1739 | HA   | VAL | X | 112 | 34.981 | 40.641 | 31.612 | 0.00 | 0.00 |
| ATOM | 1740 | CB   | VAL | X | 112 | 33.909 | 41.077 | 33.359 | 0.00 | 0.00 |

|      |      |      |     |   |     |        |        |        |      |      |
|------|------|------|-----|---|-----|--------|--------|--------|------|------|
| ATOM | 1741 | HB   | VAL | X | 112 | 33.723 | 40.624 | 34.333 | 0.00 | 0.00 |
| ATOM | 1742 | CG1  | VAL | X | 112 | 34.514 | 42.492 | 33.532 | 0.00 | 0.00 |
| ATOM | 1743 | HG11 | VAL | X | 112 | 33.857 | 43.027 | 34.218 | 0.00 | 0.00 |
| ATOM | 1744 | HG12 | VAL | X | 112 | 35.475 | 42.542 | 34.045 | 0.00 | 0.00 |
| ATOM | 1745 | HG13 | VAL | X | 112 | 34.478 | 43.045 | 32.594 | 0.00 | 0.00 |
| ATOM | 1746 | CG2  | VAL | X | 112 | 32.481 | 41.265 | 32.796 | 0.00 | 0.00 |
| ATOM | 1747 | HG21 | VAL | X | 112 | 31.914 | 41.939 | 33.439 | 0.00 | 0.00 |
| ATOM | 1748 | HG22 | VAL | X | 112 | 31.957 | 40.310 | 32.854 | 0.00 | 0.00 |
| ATOM | 1749 | HG23 | VAL | X | 112 | 32.450 | 41.580 | 31.753 | 0.00 | 0.00 |
| ATOM | 1750 | C    | VAL | X | 112 | 36.182 | 40.166 | 33.342 | 0.00 | 0.00 |
| ATOM | 1751 | O    | VAL | X | 112 | 36.178 | 39.822 | 34.522 | 0.00 | 0.00 |
| ATOM | 1752 | N    | TRP | X | 113 | 37.290 | 40.539 | 32.624 | 0.00 | 0.00 |
| ATOM | 1753 | H    | TRP | X | 113 | 37.274 | 40.858 | 31.666 | 0.00 | 0.00 |
| ATOM | 1754 | CA   | TRP | X | 113 | 38.568 | 40.662 | 33.216 | 0.00 | 0.00 |
| ATOM | 1755 | HA   | TRP | X | 113 | 38.621 | 39.790 | 33.869 | 0.00 | 0.00 |
| ATOM | 1756 | CB   | TRP | X | 113 | 39.635 | 40.476 | 32.175 | 0.00 | 0.00 |
| ATOM | 1757 | HB2  | TRP | X | 113 | 39.369 | 39.550 | 31.667 | 0.00 | 0.00 |
| ATOM | 1758 | HB3  | TRP | X | 113 | 39.699 | 41.298 | 31.462 | 0.00 | 0.00 |
| ATOM | 1759 | CG   | TRP | X | 113 | 40.994 | 40.338 | 32.715 | 0.00 | 0.00 |
| ATOM | 1760 | CD1  | TRP | X | 113 | 42.037 | 41.193 | 32.560 | 0.00 | 0.00 |
| ATOM | 1761 | HD1  | TRP | X | 113 | 41.966 | 41.970 | 31.813 | 0.00 | 0.00 |
| ATOM | 1762 | NE1  | TRP | X | 113 | 43.182 | 40.835 | 33.239 | 0.00 | 0.00 |
| ATOM | 1763 | HE1  | TRP | X | 113 | 44.093 | 41.271 | 33.229 | 0.00 | 0.00 |
| ATOM | 1764 | CE2  | TRP | X | 113 | 42.998 | 39.502 | 33.715 | 0.00 | 0.00 |
| ATOM | 1765 | CZ2  | TRP | X | 113 | 43.791 | 38.626 | 34.345 | 0.00 | 0.00 |
| ATOM | 1766 | HZ2  | TRP | X | 113 | 44.828 | 38.842 | 34.556 | 0.00 | 0.00 |
| ATOM | 1767 | CH2  | TRP | X | 113 | 43.243 | 37.339 | 34.728 | 0.00 | 0.00 |
| ATOM | 1768 | HH2  | TRP | X | 113 | 43.936 | 36.635 | 35.165 | 0.00 | 0.00 |
| ATOM | 1769 | CZ3  | TRP | X | 113 | 41.814 | 37.081 | 34.640 | 0.00 | 0.00 |
| ATOM | 1770 | HZ3  | TRP | X | 113 | 41.502 | 36.090 | 34.937 | 0.00 | 0.00 |
| ATOM | 1771 | CE3  | TRP | X | 113 | 41.028 | 38.086 | 34.031 | 0.00 | 0.00 |
| ATOM | 1772 | HE3  | TRP | X | 113 | 39.965 | 37.927 | 33.931 | 0.00 | 0.00 |
| ATOM | 1773 | CD2  | TRP | X | 113 | 41.528 | 39.274 | 33.542 | 0.00 | 0.00 |
| ATOM | 1774 | C    | TRP | X | 113 | 38.771 | 41.962 | 34.062 | 0.00 | 0.00 |
| ATOM | 1775 | O    | TRP | X | 113 | 38.596 | 43.077 | 33.613 | 0.00 | 0.00 |
| ATOM | 1776 | N    | ILE | X | 114 | 39.302 | 41.704 | 35.308 | 0.00 | 0.00 |
| ATOM | 1777 | H    | ILE | X | 114 | 39.394 | 40.750 | 35.624 | 0.00 | 0.00 |
| ATOM | 1778 | CA   | ILE | X | 114 | 39.862 | 42.766 | 36.183 | 0.00 | 0.00 |
| ATOM | 1779 | HA   | ILE | X | 114 | 39.915 | 43.671 | 35.576 | 0.00 | 0.00 |
| ATOM | 1780 | CB   | ILE | X | 114 | 38.929 | 42.888 | 37.464 | 0.00 | 0.00 |
| ATOM | 1781 | HB   | ILE | X | 114 | 38.936 | 41.883 | 37.887 | 0.00 | 0.00 |
| ATOM | 1782 | CG2  | ILE | X | 114 | 39.516 | 43.956 | 38.383 | 0.00 | 0.00 |
| ATOM | 1783 | HG21 | ILE | X | 114 | 38.754 | 44.242 | 39.108 | 0.00 | 0.00 |
| ATOM | 1784 | HG22 | ILE | X | 114 | 39.888 | 44.797 | 37.799 | 0.00 | 0.00 |
| ATOM | 1785 | HG23 | ILE | X | 114 | 40.401 | 43.572 | 38.891 | 0.00 | 0.00 |
| ATOM | 1786 | CG1  | ILE | X | 114 | 37.537 | 43.355 | 37.005 | 0.00 | 0.00 |
| ATOM | 1787 | HG12 | ILE | X | 114 | 37.528 | 44.394 | 36.674 | 0.00 | 0.00 |
| ATOM | 1788 | HG13 | ILE | X | 114 | 37.184 | 42.759 | 36.164 | 0.00 | 0.00 |
| ATOM | 1789 | CD1  | ILE | X | 114 | 36.459 | 43.171 | 38.109 | 0.00 | 0.00 |
| ATOM | 1790 | HD11 | ILE | X | 114 | 36.639 | 42.186 | 38.542 | 0.00 | 0.00 |
| ATOM | 1791 | HD12 | ILE | X | 114 | 35.458 | 43.279 | 37.693 | 0.00 | 0.00 |
| ATOM | 1792 | HD13 | ILE | X | 114 | 36.607 | 43.898 | 38.907 | 0.00 | 0.00 |
| ATOM | 1793 | C    | ILE | X | 114 | 41.278 | 42.405 | 36.635 | 0.00 | 0.00 |
| ATOM | 1794 | O    | ILE | X | 114 | 41.520 | 41.249 | 36.935 | 0.00 | 0.00 |
| ATOM | 1795 | N    | TYR | X | 115 | 42.272 | 43.276 | 36.533 | 0.00 | 0.00 |
| ATOM | 1796 | H    | TYR | X | 115 | 42.026 | 44.248 | 36.413 | 0.00 | 0.00 |
| ATOM | 1797 | CA   | TYR | X | 115 | 43.665 | 42.925 | 36.495 | 0.00 | 0.00 |
| ATOM | 1798 | HA   | TYR | X | 115 | 43.730 | 41.841 | 36.400 | 0.00 | 0.00 |
| ATOM | 1799 | CB   | TYR | X | 115 | 44.220 | 43.712 | 35.306 | 0.00 | 0.00 |
| ATOM | 1800 | HB2  | TYR | X | 115 | 45.295 | 43.540 | 35.246 | 0.00 | 0.00 |
| ATOM | 1801 | HB3  | TYR | X | 115 | 43.893 | 43.370 | 34.324 | 0.00 | 0.00 |
| ATOM | 1802 | CG   | TYR | X | 115 | 44.065 | 45.242 | 35.292 | 0.00 | 0.00 |
| ATOM | 1803 | CD1  | TYR | X | 115 | 44.717 | 46.146 | 36.182 | 0.00 | 0.00 |
| ATOM | 1804 | HD1  | TYR | X | 115 | 45.253 | 45.634 | 36.967 | 0.00 | 0.00 |
| ATOM | 1805 | CE1  | TYR | X | 115 | 44.379 | 47.485 | 36.255 | 0.00 | 0.00 |
| ATOM | 1806 | HE1  | TYR | X | 115 | 44.702 | 48.114 | 37.071 | 0.00 | 0.00 |
| ATOM | 1807 | CZ   | TYR | X | 115 | 43.689 | 48.034 | 35.157 | 0.00 | 0.00 |

|      |      |     |     |   |     |        |        |        |      |      |
|------|------|-----|-----|---|-----|--------|--------|--------|------|------|
| ATOM | 1808 | OH  | TYR | X | 115 | 43.436 | 49.375 | 35.123 | 0.00 | 0.00 |
| ATOM | 1809 | HH  | TYR | X | 115 | 43.837 | 49.989 | 35.742 | 0.00 | 0.00 |
| ATOM | 1810 | CE2 | TYR | X | 115 | 43.314 | 47.189 | 34.072 | 0.00 | 0.00 |
| ATOM | 1811 | HE2 | TYR | X | 115 | 42.842 | 47.726 | 33.263 | 0.00 | 0.00 |
| ATOM | 1812 | CD2 | TYR | X | 115 | 43.411 | 45.784 | 34.162 | 0.00 | 0.00 |
| ATOM | 1813 | HD2 | TYR | X | 115 | 42.988 | 45.139 | 33.406 | 0.00 | 0.00 |
| ATOM | 1814 | C   | TYR | X | 115 | 44.595 | 43.155 | 37.764 | 0.00 | 0.00 |
| ATOM | 1815 | O   | TYR | X | 115 | 44.157 | 43.788 | 38.735 | 0.00 | 0.00 |
| ATOM | 1816 | N   | GLY | X | 116 | 45.872 | 42.642 | 37.659 | 0.00 | 0.00 |
| ATOM | 1817 | H   | GLY | X | 116 | 46.046 | 41.881 | 37.018 | 0.00 | 0.00 |
| ATOM | 1818 | CA  | GLY | X | 116 | 46.719 | 42.626 | 38.849 | 0.00 | 0.00 |
| ATOM | 1819 | HA2 | GLY | X | 116 | 46.068 | 42.603 | 39.723 | 0.00 | 0.00 |
| ATOM | 1820 | HA3 | GLY | X | 116 | 47.345 | 41.735 | 38.903 | 0.00 | 0.00 |
| ATOM | 1821 | C   | GLY | X | 116 | 47.629 | 43.881 | 39.018 | 0.00 | 0.00 |
| ATOM | 1822 | O   | GLY | X | 116 | 47.385 | 44.876 | 38.311 | 0.00 | 0.00 |
| ATOM | 1823 | N   | GLY | X | 117 | 48.739 | 43.748 | 39.734 | 0.00 | 0.00 |
| ATOM | 1824 | H   | GLY | X | 117 | 48.946 | 42.847 | 40.140 | 0.00 | 0.00 |
| ATOM | 1825 | CA  | GLY | X | 117 | 49.803 | 44.772 | 39.769 | 0.00 | 0.00 |
| ATOM | 1826 | HA2 | GLY | X | 117 | 50.796 | 44.341 | 39.643 | 0.00 | 0.00 |
| ATOM | 1827 | HA3 | GLY | X | 117 | 49.726 | 45.546 | 39.005 | 0.00 | 0.00 |
| ATOM | 1828 | C   | GLY | X | 117 | 49.846 | 45.542 | 41.087 | 0.00 | 0.00 |
| ATOM | 1829 | O   | GLY | X | 117 | 50.222 | 46.714 | 41.179 | 0.00 | 0.00 |
| ATOM | 1830 | N   | GLY | X | 118 | 49.446 | 44.866 | 42.177 | 0.00 | 0.00 |
| ATOM | 1831 | H   | GLY | X | 118 | 49.090 | 43.935 | 42.012 | 0.00 | 0.00 |
| ATOM | 1832 | CA  | GLY | X | 118 | 49.727 | 45.253 | 43.586 | 0.00 | 0.00 |
| ATOM | 1833 | HA2 | GLY | X | 118 | 49.653 | 44.380 | 44.235 | 0.00 | 0.00 |
| ATOM | 1834 | HA3 | GLY | X | 118 | 50.718 | 45.701 | 43.663 | 0.00 | 0.00 |
| ATOM | 1835 | C   | GLY | X | 118 | 48.817 | 46.386 | 44.100 | 0.00 | 0.00 |
| ATOM | 1836 | O   | GLY | X | 118 | 48.946 | 46.920 | 45.252 | 0.00 | 0.00 |
| ATOM | 1837 | N   | PHE | X | 119 | 47.920 | 46.896 | 43.226 | 0.00 | 0.00 |
| ATOM | 1838 | H   | PHE | X | 119 | 47.915 | 46.475 | 42.308 | 0.00 | 0.00 |
| ATOM | 1839 | CA  | PHE | X | 119 | 47.062 | 48.036 | 43.341 | 0.00 | 0.00 |
| ATOM | 1840 | HA  | PHE | X | 119 | 46.241 | 47.946 | 42.629 | 0.00 | 0.00 |
| ATOM | 1841 | CB  | PHE | X | 119 | 46.325 | 48.111 | 44.642 | 0.00 | 0.00 |
| ATOM | 1842 | HB2 | PHE | X | 119 | 47.057 | 47.996 | 45.441 | 0.00 | 0.00 |
| ATOM | 1843 | HB3 | PHE | X | 119 | 45.800 | 49.061 | 44.747 | 0.00 | 0.00 |
| ATOM | 1844 | CG  | PHE | X | 119 | 45.318 | 46.932 | 44.825 | 0.00 | 0.00 |
| ATOM | 1845 | CD1 | PHE | X | 119 | 44.023 | 47.047 | 44.285 | 0.00 | 0.00 |
| ATOM | 1846 | HD1 | PHE | X | 119 | 43.706 | 47.954 | 43.790 | 0.00 | 0.00 |
| ATOM | 1847 | CE1 | PHE | X | 119 | 43.023 | 46.076 | 44.470 | 0.00 | 0.00 |
| ATOM | 1848 | HE1 | PHE | X | 119 | 42.055 | 46.276 | 44.036 | 0.00 | 0.00 |
| ATOM | 1849 | CZ  | PHE | X | 119 | 43.394 | 44.908 | 45.175 | 0.00 | 0.00 |
| ATOM | 1850 | HZ  | PHE | X | 119 | 42.547 | 44.247 | 45.287 | 0.00 | 0.00 |
| ATOM | 1851 | CE2 | PHE | X | 119 | 44.676 | 44.751 | 45.761 | 0.00 | 0.00 |
| ATOM | 1852 | HE2 | PHE | X | 119 | 44.913 | 43.942 | 46.435 | 0.00 | 0.00 |
| ATOM | 1853 | CD2 | PHE | X | 119 | 45.576 | 45.793 | 45.597 | 0.00 | 0.00 |
| ATOM | 1854 | HD2 | PHE | X | 119 | 46.512 | 45.688 | 46.125 | 0.00 | 0.00 |
| ATOM | 1855 | C   | PHE | X | 119 | 47.734 | 49.377 | 43.026 | 0.00 | 0.00 |
| ATOM | 1856 | O   | PHE | X | 119 | 47.033 | 50.382 | 42.761 | 0.00 | 0.00 |
| ATOM | 1857 | N   | TYR | X | 120 | 49.054 | 49.382 | 42.837 | 0.00 | 0.00 |
| ATOM | 1858 | H   | TYR | X | 120 | 49.555 | 48.636 | 43.299 | 0.00 | 0.00 |
| ATOM | 1859 | CA  | TYR | X | 120 | 49.855 | 50.615 | 42.590 | 0.00 | 0.00 |
| ATOM | 1860 | HA  | TYR | X | 120 | 49.198 | 51.458 | 42.801 | 0.00 | 0.00 |
| ATOM | 1861 | CB  | TYR | X | 120 | 51.055 | 50.577 | 43.530 | 0.00 | 0.00 |
| ATOM | 1862 | HB2 | TYR | X | 120 | 51.322 | 51.633 | 43.506 | 0.00 | 0.00 |
| ATOM | 1863 | HB3 | TYR | X | 120 | 50.769 | 50.310 | 44.548 | 0.00 | 0.00 |
| ATOM | 1864 | CG  | TYR | X | 120 | 52.233 | 49.683 | 43.123 | 0.00 | 0.00 |
| ATOM | 1865 | CD1 | TYR | X | 120 | 53.401 | 50.201 | 42.521 | 0.00 | 0.00 |
| ATOM | 1866 | HD1 | TYR | X | 120 | 53.489 | 51.275 | 42.446 | 0.00 | 0.00 |
| ATOM | 1867 | CE1 | TYR | X | 120 | 54.383 | 49.357 | 42.045 | 0.00 | 0.00 |
| ATOM | 1868 | HE1 | TYR | X | 120 | 55.255 | 49.680 | 41.495 | 0.00 | 0.00 |
| ATOM | 1869 | CZ  | TYR | X | 120 | 54.234 | 47.981 | 42.091 | 0.00 | 0.00 |
| ATOM | 1870 | OH  | TYR | X | 120 | 55.154 | 47.179 | 41.602 | 0.00 | 0.00 |
| ATOM | 1871 | HH  | TYR | X | 120 | 54.844 | 46.270 | 41.631 | 0.00 | 0.00 |
| ATOM | 1872 | CE2 | TYR | X | 120 | 53.046 | 47.432 | 42.640 | 0.00 | 0.00 |
| ATOM | 1873 | HE2 | TYR | X | 120 | 52.749 | 46.401 | 42.517 | 0.00 | 0.00 |
| ATOM | 1874 | CD2 | TYR | X | 120 | 52.032 | 48.287 | 43.155 | 0.00 | 0.00 |



|      |      |      |     |   |     |        |        |        |      |      |
|------|------|------|-----|---|-----|--------|--------|--------|------|------|
| ATOM | 1875 | HD2  | TYR | X | 120 | 51.080 | 47.849 | 43.420 | 0.00 | 0.00 |
| ATOM | 1876 | C    | TYR | X | 120 | 50.196 | 50.858 | 41.072 | 0.00 | 0.00 |
| ATOM | 1877 | O    | TYR | X | 120 | 50.546 | 51.968 | 40.648 | 0.00 | 0.00 |
| ATOM | 1878 | N    | SER | X | 121 | 50.009 | 49.840 | 40.197 | 0.00 | 0.00 |
| ATOM | 1879 | H    | SER | X | 121 | 49.551 | 49.001 | 40.524 | 0.00 | 0.00 |
| ATOM | 1880 | CA   | SER | X | 121 | 50.698 | 49.716 | 38.835 | 0.00 | 0.00 |
| ATOM | 1881 | HA   | SER | X | 121 | 50.679 | 50.682 | 38.331 | 0.00 | 0.00 |
| ATOM | 1882 | CB   | SER | X | 121 | 52.191 | 49.442 | 38.950 | 0.00 | 0.00 |
| ATOM | 1883 | HB2  | SER | X | 121 | 52.250 | 48.595 | 39.634 | 0.00 | 0.00 |
| ATOM | 1884 | HB3  | SER | X | 121 | 52.549 | 49.077 | 37.987 | 0.00 | 0.00 |
| ATOM | 1885 | OG   | SER | X | 121 | 53.055 | 50.488 | 39.376 | 0.00 | 0.00 |
| ATOM | 1886 | HG   | SER | X | 121 | 52.626 | 50.916 | 40.121 | 0.00 | 0.00 |
| ATOM | 1887 | C    | SER | X | 121 | 49.925 | 48.590 | 37.992 | 0.00 | 0.00 |
| ATOM | 1888 | O    | SER | X | 121 | 50.275 | 47.374 | 38.027 | 0.00 | 0.00 |
| ATOM | 1889 | N    | GLY | X | 122 | 48.842 | 48.925 | 37.233 | 0.00 | 0.00 |
| ATOM | 1890 | H    | GLY | X | 122 | 48.618 | 49.908 | 37.289 | 0.00 | 0.00 |
| ATOM | 1891 | CA   | GLY | X | 122 | 47.965 | 47.993 | 36.507 | 0.00 | 0.00 |
| ATOM | 1892 | HA2  | GLY | X | 122 | 48.616 | 47.264 | 36.025 | 0.00 | 0.00 |
| ATOM | 1893 | HA3  | GLY | X | 122 | 47.331 | 47.408 | 37.174 | 0.00 | 0.00 |
| ATOM | 1894 | C    | GLY | X | 122 | 47.110 | 48.731 | 35.443 | 0.00 | 0.00 |
| ATOM | 1895 | O    | GLY | X | 122 | 46.740 | 49.881 | 35.676 | 0.00 | 0.00 |
| ATOM | 1896 | N    | ALA | X | 123 | 46.922 | 48.128 | 34.291 | 0.00 | 0.00 |
| ATOM | 1897 | H    | ALA | X | 123 | 47.163 | 47.148 | 34.249 | 0.00 | 0.00 |
| ATOM | 1898 | CA   | ALA | X | 123 | 46.221 | 48.651 | 33.133 | 0.00 | 0.00 |
| ATOM | 1899 | HA   | ALA | X | 123 | 45.314 | 49.173 | 33.438 | 0.00 | 0.00 |
| ATOM | 1900 | CB   | ALA | X | 123 | 47.112 | 49.663 | 32.445 | 0.00 | 0.00 |
| ATOM | 1901 | HB1  | ALA | X | 123 | 46.587 | 50.185 | 31.644 | 0.00 | 0.00 |
| ATOM | 1902 | HB2  | ALA | X | 123 | 47.841 | 49.019 | 31.954 | 0.00 | 0.00 |
| ATOM | 1903 | HB3  | ALA | X | 123 | 47.460 | 50.390 | 33.179 | 0.00 | 0.00 |
| ATOM | 1904 | C    | ALA | X | 123 | 45.743 | 47.625 | 32.102 | 0.00 | 0.00 |
| ATOM | 1905 | O    | ALA | X | 123 | 46.213 | 46.472 | 32.170 | 0.00 | 0.00 |
| ATOM | 1906 | N    | SER | X | 124 | 44.856 | 47.983 | 31.181 | 0.00 | 0.00 |
| ATOM | 1907 | H    | SER | X | 124 | 44.540 | 48.940 | 31.249 | 0.00 | 0.00 |
| ATOM | 1908 | CA   | SER | X | 124 | 44.154 | 47.099 | 30.168 | 0.00 | 0.00 |
| ATOM | 1909 | HA   | SER | X | 124 | 43.989 | 46.191 | 30.748 | 0.00 | 0.00 |
| ATOM | 1910 | CB   | SER | X | 124 | 42.779 | 47.703 | 29.774 | 0.00 | 0.00 |
| ATOM | 1911 | HB2  | SER | X | 124 | 42.315 | 46.914 | 29.182 | 0.00 | 0.00 |
| ATOM | 1912 | HB3  | SER | X | 124 | 42.071 | 47.910 | 30.577 | 0.00 | 0.00 |
| ATOM | 1913 | OG   | SER | X | 124 | 43.008 | 48.902 | 29.156 | 0.00 | 0.00 |
| ATOM | 1914 | HG   | SER | X | 124 | 43.407 | 49.496 | 29.795 | 0.00 | 0.00 |
| ATOM | 1915 | C    | SER | X | 124 | 45.023 | 46.688 | 28.933 | 0.00 | 0.00 |
| ATOM | 1916 | O    | SER | X | 124 | 44.880 | 45.646 | 28.368 | 0.00 | 0.00 |
| ATOM | 1917 | N    | SER | X | 125 | 45.967 | 47.639 | 28.525 | 0.00 | 0.00 |
| ATOM | 1918 | H    | SER | X | 125 | 46.075 | 48.473 | 29.083 | 0.00 | 0.00 |
| ATOM | 1919 | CA   | SER | X | 125 | 46.834 | 47.551 | 27.385 | 0.00 | 0.00 |
| ATOM | 1920 | HA   | SER | X | 125 | 46.368 | 46.948 | 26.605 | 0.00 | 0.00 |
| ATOM | 1921 | CB   | SER | X | 125 | 47.098 | 48.992 | 26.841 | 0.00 | 0.00 |
| ATOM | 1922 | HB2  | SER | X | 125 | 47.646 | 48.992 | 25.899 | 0.00 | 0.00 |
| ATOM | 1923 | HB3  | SER | X | 125 | 46.175 | 49.571 | 26.789 | 0.00 | 0.00 |
| ATOM | 1924 | OG   | SER | X | 125 | 47.801 | 49.783 | 27.801 | 0.00 | 0.00 |
| ATOM | 1925 | HG   | SER | X | 125 | 48.749 | 49.644 | 27.739 | 0.00 | 0.00 |
| ATOM | 1926 | C    | SER | X | 125 | 48.105 | 46.759 | 27.612 | 0.00 | 0.00 |
| ATOM | 1927 | O    | SER | X | 125 | 48.854 | 46.641 | 26.655 | 0.00 | 0.00 |
| ATOM | 1928 | N    | LEU | X | 126 | 48.221 | 46.059 | 28.723 | 0.00 | 0.00 |
| ATOM | 1929 | H    | LEU | X | 126 | 47.398 | 45.921 | 29.291 | 0.00 | 0.00 |
| ATOM | 1930 | CA   | LEU | X | 126 | 49.403 | 45.193 | 29.133 | 0.00 | 0.00 |
| ATOM | 1931 | HA   | LEU | X | 126 | 50.310 | 45.794 | 29.067 | 0.00 | 0.00 |
| ATOM | 1932 | CB   | LEU | X | 126 | 49.400 | 44.878 | 30.677 | 0.00 | 0.00 |
| ATOM | 1933 | HB2  | LEU | X | 126 | 48.514 | 44.306 | 30.953 | 0.00 | 0.00 |
| ATOM | 1934 | HB3  | LEU | X | 126 | 50.271 | 44.244 | 30.843 | 0.00 | 0.00 |
| ATOM | 1935 | CG   | LEU | X | 126 | 49.478 | 46.242 | 31.447 | 0.00 | 0.00 |
| ATOM | 1936 | HG   | LEU | X | 126 | 48.516 | 46.716 | 31.253 | 0.00 | 0.00 |
| ATOM | 1937 | CD1  | LEU | X | 126 | 49.304 | 46.040 | 32.975 | 0.00 | 0.00 |
| ATOM | 1938 | HD11 | LEU | X | 126 | 49.323 | 47.042 | 33.402 | 0.00 | 0.00 |
| ATOM | 1939 | HD12 | LEU | X | 126 | 50.176 | 45.482 | 33.316 | 0.00 | 0.00 |
| ATOM | 1940 | HD13 | LEU | X | 126 | 48.363 | 45.565 | 33.252 | 0.00 | 0.00 |
| ATOM | 1941 | CD2  | LEU | X | 126 | 50.781 | 47.082 | 31.174 | 0.00 | 0.00 |

|      |      |      |     |   |     |        |        |        |      |      |
|------|------|------|-----|---|-----|--------|--------|--------|------|------|
| ATOM | 1942 | HD21 | LEU | X | 126 | 50.521 | 47.754 | 30.356 | 0.00 | 0.00 |
| ATOM | 1943 | HD22 | LEU | X | 126 | 50.951 | 47.776 | 31.997 | 0.00 | 0.00 |
| ATOM | 1944 | HD23 | LEU | X | 126 | 51.584 | 46.375 | 30.969 | 0.00 | 0.00 |
| ATOM | 1945 | C    | LEU | X | 126 | 49.538 | 43.982 | 28.198 | 0.00 | 0.00 |
| ATOM | 1946 | O    | LEU | X | 126 | 48.550 | 43.242 | 27.906 | 0.00 | 0.00 |
| ATOM | 1947 | N    | ASP | X | 127 | 50.741 | 43.598 | 27.782 | 0.00 | 0.00 |
| ATOM | 1948 | H    | ASP | X | 127 | 51.548 | 44.130 | 28.076 | 0.00 | 0.00 |
| ATOM | 1949 | CA   | ASP | X | 127 | 50.933 | 42.710 | 26.545 | 0.00 | 0.00 |
| ATOM | 1950 | HA   | ASP | X | 127 | 50.238 | 43.053 | 25.780 | 0.00 | 0.00 |
| ATOM | 1951 | CB   | ASP | X | 127 | 52.413 | 42.949 | 26.032 | 0.00 | 0.00 |
| ATOM | 1952 | HB2  | ASP | X | 127 | 52.655 | 44.011 | 25.983 | 0.00 | 0.00 |
| ATOM | 1953 | HB3  | ASP | X | 127 | 53.137 | 42.454 | 26.680 | 0.00 | 0.00 |
| ATOM | 1954 | CG   | ASP | X | 127 | 52.625 | 42.213 | 24.632 | 0.00 | 0.00 |
| ATOM | 1955 | OD1  | ASP | X | 127 | 51.813 | 42.331 | 23.697 | 0.00 | 0.00 |
| ATOM | 1956 | OD2  | ASP | X | 127 | 53.725 | 41.575 | 24.471 | 0.00 | 0.00 |
| ATOM | 1957 | C    | ASP | X | 127 | 50.659 | 41.174 | 26.824 | 0.00 | 0.00 |
| ATOM | 1958 | O    | ASP | X | 127 | 51.494 | 40.331 | 26.593 | 0.00 | 0.00 |
| ATOM | 1959 | N    | VAL | X | 128 | 49.446 | 40.841 | 27.167 | 0.00 | 0.00 |
| ATOM | 1960 | H    | VAL | X | 128 | 48.828 | 41.632 | 27.279 | 0.00 | 0.00 |
| ATOM | 1961 | CA   | VAL | X | 128 | 48.795 | 39.553 | 27.433 | 0.00 | 0.00 |
| ATOM | 1962 | HA   | VAL | X | 128 | 49.067 | 38.907 | 26.598 | 0.00 | 0.00 |
| ATOM | 1963 | CB   | VAL | X | 128 | 49.307 | 38.883 | 28.734 | 0.00 | 0.00 |
| ATOM | 1964 | HB   | VAL | X | 128 | 50.379 | 38.704 | 28.648 | 0.00 | 0.00 |
| ATOM | 1965 | CG1  | VAL | X | 128 | 49.066 | 39.732 | 29.979 | 0.00 | 0.00 |
| ATOM | 1966 | HG11 | VAL | X | 128 | 48.012 | 39.580 | 30.210 | 0.00 | 0.00 |
| ATOM | 1967 | HG12 | VAL | X | 128 | 49.659 | 39.261 | 30.763 | 0.00 | 0.00 |
| ATOM | 1968 | HG13 | VAL | X | 128 | 49.278 | 40.784 | 29.787 | 0.00 | 0.00 |
| ATOM | 1969 | CG2  | VAL | X | 128 | 48.765 | 37.479 | 28.951 | 0.00 | 0.00 |
| ATOM | 1970 | HG21 | VAL | X | 128 | 47.677 | 37.475 | 29.008 | 0.00 | 0.00 |
| ATOM | 1971 | HG22 | VAL | X | 128 | 49.118 | 36.969 | 29.847 | 0.00 | 0.00 |
| ATOM | 1972 | HG23 | VAL | X | 128 | 49.210 | 36.914 | 28.132 | 0.00 | 0.00 |
| ATOM | 1973 | C    | VAL | X | 128 | 47.277 | 39.698 | 27.492 | 0.00 | 0.00 |
| ATOM | 1974 | O    | VAL | X | 128 | 46.663 | 38.767 | 26.978 | 0.00 | 0.00 |
| ATOM | 1975 | N    | TYR | X | 129 | 46.680 | 40.790 | 28.066 | 0.00 | 0.00 |
| ATOM | 1976 | H    | TYR | X | 129 | 47.237 | 41.390 | 28.658 | 0.00 | 0.00 |
| ATOM | 1977 | CA   | TYR | X | 129 | 45.205 | 40.961 | 28.264 | 0.00 | 0.00 |
| ATOM | 1978 | HA   | TYR | X | 129 | 44.774 | 40.047 | 28.673 | 0.00 | 0.00 |
| ATOM | 1979 | CB   | TYR | X | 129 | 45.008 | 42.001 | 29.345 | 0.00 | 0.00 |
| ATOM | 1980 | HB2  | TYR | X | 129 | 45.278 | 42.944 | 28.869 | 0.00 | 0.00 |
| ATOM | 1981 | HB3  | TYR | X | 129 | 43.951 | 42.048 | 29.608 | 0.00 | 0.00 |
| ATOM | 1982 | CG   | TYR | X | 129 | 45.674 | 41.884 | 30.678 | 0.00 | 0.00 |
| ATOM | 1983 | CD1  | TYR | X | 129 | 45.727 | 40.673 | 31.369 | 0.00 | 0.00 |
| ATOM | 1984 | HD1  | TYR | X | 129 | 45.334 | 39.759 | 30.949 | 0.00 | 0.00 |
| ATOM | 1985 | CE1  | TYR | X | 129 | 46.395 | 40.645 | 32.600 | 0.00 | 0.00 |
| ATOM | 1986 | HE1  | TYR | X | 129 | 46.448 | 39.732 | 33.176 | 0.00 | 0.00 |
| ATOM | 1987 | CZ   | TYR | X | 129 | 47.005 | 41.809 | 33.174 | 0.00 | 0.00 |
| ATOM | 1988 | OH   | TYR | X | 129 | 47.566 | 41.793 | 34.411 | 0.00 | 0.00 |
| ATOM | 1989 | HH   | TYR | X | 129 | 47.253 | 41.046 | 34.927 | 0.00 | 0.00 |
| ATOM | 1990 | CE2  | TYR | X | 129 | 46.846 | 42.987 | 32.494 | 0.00 | 0.00 |
| ATOM | 1991 | HE2  | TYR | X | 129 | 47.190 | 43.943 | 32.860 | 0.00 | 0.00 |
| ATOM | 1992 | CD2  | TYR | X | 129 | 46.224 | 42.996 | 31.243 | 0.00 | 0.00 |
| ATOM | 1993 | HD2  | TYR | X | 129 | 46.068 | 43.889 | 30.657 | 0.00 | 0.00 |
| ATOM | 1994 | C    | TYR | X | 129 | 44.345 | 41.190 | 27.015 | 0.00 | 0.00 |
| ATOM | 1995 | O    | TYR | X | 129 | 43.800 | 42.282 | 26.884 | 0.00 | 0.00 |
| ATOM | 1996 | N    | ASP | X | 130 | 44.260 | 40.192 | 26.153 | 0.00 | 0.00 |
| ATOM | 1997 | H    | ASP | X | 130 | 44.593 | 39.297 | 26.482 | 0.00 | 0.00 |
| ATOM | 1998 | CA   | ASP | X | 130 | 43.451 | 40.288 | 24.889 | 0.00 | 0.00 |
| ATOM | 1999 | HA   | ASP | X | 130 | 42.734 | 41.091 | 25.062 | 0.00 | 0.00 |
| ATOM | 2000 | CB   | ASP | X | 130 | 44.402 | 40.649 | 23.716 | 0.00 | 0.00 |
| ATOM | 2001 | HB2  | ASP | X | 130 | 45.009 | 41.529 | 23.926 | 0.00 | 0.00 |
| ATOM | 2002 | HB3  | ASP | X | 130 | 45.105 | 39.826 | 23.587 | 0.00 | 0.00 |
| ATOM | 2003 | CG   | ASP | X | 130 | 43.719 | 40.917 | 22.389 | 0.00 | 0.00 |
| ATOM | 2004 | OD1  | ASP | X | 130 | 43.218 | 39.994 | 21.751 | 0.00 | 0.00 |
| ATOM | 2005 | OD2  | ASP | X | 130 | 43.604 | 42.123 | 22.092 | 0.00 | 0.00 |
| ATOM | 2006 | C    | ASP | X | 130 | 42.636 | 39.026 | 24.637 | 0.00 | 0.00 |
| ATOM | 2007 | O    | ASP | X | 130 | 43.157 | 37.926 | 24.622 | 0.00 | 0.00 |
| ATOM | 2008 | N    | GLY | X | 131 | 41.316 | 39.279 | 24.361 | 0.00 | 0.00 |

|      |      |      |     |   |     |        |        |        |      |      |
|------|------|------|-----|---|-----|--------|--------|--------|------|------|
| ATOM | 2009 | H    | GLY | X | 131 | 41.109 | 40.260 | 24.237 | 0.00 | 0.00 |
| ATOM | 2010 | CA   | GLY | X | 131 | 40.351 | 38.221 | 24.327 | 0.00 | 0.00 |
| ATOM | 2011 | HA2  | GLY | X | 131 | 40.620 | 37.489 | 25.088 | 0.00 | 0.00 |
| ATOM | 2012 | HA3  | GLY | X | 131 | 39.319 | 38.554 | 24.432 | 0.00 | 0.00 |
| ATOM | 2013 | C    | GLY | X | 131 | 40.254 | 37.446 | 23.042 | 0.00 | 0.00 |
| ATOM | 2014 | O    | GLY | X | 131 | 39.571 | 36.433 | 23.017 | 0.00 | 0.00 |
| ATOM | 2015 | N    | ARG | X | 132 | 40.812 | 37.928 | 21.890 | 0.00 | 0.00 |
| ATOM | 2016 | H    | ARG | X | 132 | 41.293 | 38.811 | 21.984 | 0.00 | 0.00 |
| ATOM | 2017 | CA   | ARG | X | 132 | 40.557 | 37.481 | 20.549 | 0.00 | 0.00 |
| ATOM | 2018 | HA   | ARG | X | 132 | 39.519 | 37.808 | 20.489 | 0.00 | 0.00 |
| ATOM | 2019 | CB   | ARG | X | 132 | 41.244 | 38.382 | 19.456 | 0.00 | 0.00 |
| ATOM | 2020 | HB2  | ARG | X | 132 | 40.737 | 38.197 | 18.509 | 0.00 | 0.00 |
| ATOM | 2021 | HB3  | ARG | X | 132 | 41.156 | 39.433 | 19.731 | 0.00 | 0.00 |
| ATOM | 2022 | CG   | ARG | X | 132 | 42.656 | 37.911 | 19.190 | 0.00 | 0.00 |
| ATOM | 2023 | HG2  | ARG | X | 132 | 43.192 | 37.822 | 20.135 | 0.00 | 0.00 |
| ATOM | 2024 | HG3  | ARG | X | 132 | 42.775 | 36.928 | 18.733 | 0.00 | 0.00 |
| ATOM | 2025 | CD   | ARG | X | 132 | 43.392 | 38.805 | 18.222 | 0.00 | 0.00 |
| ATOM | 2026 | HD2  | ARG | X | 132 | 44.339 | 38.280 | 18.104 | 0.00 | 0.00 |
| ATOM | 2027 | HD3  | ARG | X | 132 | 42.850 | 38.795 | 17.276 | 0.00 | 0.00 |
| ATOM | 2028 | NE   | ARG | X | 132 | 43.675 | 40.075 | 18.847 | 0.00 | 0.00 |
| ATOM | 2029 | HE   | ARG | X | 132 | 43.568 | 40.197 | 19.844 | 0.00 | 0.00 |
| ATOM | 2030 | CZ   | ARG | X | 132 | 44.405 | 40.987 | 18.389 | 0.00 | 0.00 |
| ATOM | 2031 | NH1  | ARG | X | 132 | 44.945 | 40.971 | 17.198 | 0.00 | 0.00 |
| ATOM | 2032 | HH11 | ARG | X | 132 | 44.935 | 40.072 | 16.739 | 0.00 | 0.00 |
| ATOM | 2033 | HH12 | ARG | X | 132 | 45.734 | 41.559 | 16.971 | 0.00 | 0.00 |
| ATOM | 2034 | NH2  | ARG | X | 132 | 44.639 | 42.111 | 19.074 | 0.00 | 0.00 |
| ATOM | 2035 | HH21 | ARG | X | 132 | 44.264 | 42.222 | 20.005 | 0.00 | 0.00 |
| ATOM | 2036 | HH22 | ARG | X | 132 | 45.180 | 42.894 | 18.736 | 0.00 | 0.00 |
| ATOM | 2037 | C    | ARG | X | 132 | 40.548 | 36.027 | 20.283 | 0.00 | 0.00 |
| ATOM | 2038 | O    | ARG | X | 132 | 39.569 | 35.496 | 19.821 | 0.00 | 0.00 |
| ATOM | 2039 | N    | PHE | X | 133 | 41.601 | 35.332 | 20.607 | 0.00 | 0.00 |
| ATOM | 2040 | H    | PHE | X | 133 | 42.385 | 35.826 | 21.009 | 0.00 | 0.00 |
| ATOM | 2041 | CA   | PHE | X | 133 | 41.813 | 33.898 | 20.371 | 0.00 | 0.00 |
| ATOM | 2042 | HA   | PHE | X | 133 | 41.502 | 33.751 | 19.337 | 0.00 | 0.00 |
| ATOM | 2043 | CB   | PHE | X | 133 | 43.200 | 33.350 | 20.566 | 0.00 | 0.00 |
| ATOM | 2044 | HB2  | PHE | X | 133 | 43.509 | 33.294 | 21.610 | 0.00 | 0.00 |
| ATOM | 2045 | HB3  | PHE | X | 133 | 43.267 | 32.319 | 20.220 | 0.00 | 0.00 |
| ATOM | 2046 | CG   | PHE | X | 133 | 44.284 | 34.082 | 19.798 | 0.00 | 0.00 |
| ATOM | 2047 | CD1  | PHE | X | 133 | 44.919 | 35.236 | 20.310 | 0.00 | 0.00 |
| ATOM | 2048 | HD1  | PHE | X | 133 | 44.559 | 35.545 | 21.281 | 0.00 | 0.00 |
| ATOM | 2049 | CE1  | PHE | X | 133 | 45.868 | 35.971 | 19.567 | 0.00 | 0.00 |
| ATOM | 2050 | HE1  | PHE | X | 133 | 46.209 | 36.916 | 19.963 | 0.00 | 0.00 |
| ATOM | 2051 | CZ   | PHE | X | 133 | 46.400 | 35.388 | 18.398 | 0.00 | 0.00 |
| ATOM | 2052 | HZ   | PHE | X | 133 | 47.110 | 35.963 | 17.822 | 0.00 | 0.00 |
| ATOM | 2053 | CE2  | PHE | X | 133 | 45.899 | 34.176 | 17.964 | 0.00 | 0.00 |
| ATOM | 2054 | HE2  | PHE | X | 133 | 46.314 | 33.794 | 17.043 | 0.00 | 0.00 |
| ATOM | 2055 | CD2  | PHE | X | 133 | 44.865 | 33.483 | 18.655 | 0.00 | 0.00 |
| ATOM | 2056 | HD2  | PHE | X | 133 | 44.438 | 32.637 | 18.137 | 0.00 | 0.00 |
| ATOM | 2057 | C    | PHE | X | 133 | 40.803 | 33.110 | 21.254 | 0.00 | 0.00 |
| ATOM | 2058 | O    | PHE | X | 133 | 40.175 | 32.238 | 20.710 | 0.00 | 0.00 |
| ATOM | 2059 | N    | LEU | X | 134 | 40.571 | 33.473 | 22.517 | 0.00 | 0.00 |
| ATOM | 2060 | H    | LEU | X | 134 | 41.051 | 34.273 | 22.903 | 0.00 | 0.00 |
| ATOM | 2061 | CA   | LEU | X | 134 | 39.615 | 32.806 | 23.419 | 0.00 | 0.00 |
| ATOM | 2062 | HA   | LEU | X | 134 | 39.860 | 31.744 | 23.394 | 0.00 | 0.00 |
| ATOM | 2063 | CB   | LEU | X | 134 | 39.685 | 33.287 | 24.807 | 0.00 | 0.00 |
| ATOM | 2064 | HB2  | LEU | X | 134 | 40.697 | 33.056 | 25.138 | 0.00 | 0.00 |
| ATOM | 2065 | HB3  | LEU | X | 134 | 39.584 | 34.371 | 24.859 | 0.00 | 0.00 |
| ATOM | 2066 | CG   | LEU | X | 134 | 38.654 | 32.671 | 25.799 | 0.00 | 0.00 |
| ATOM | 2067 | HG   | LEU | X | 134 | 37.646 | 32.900 | 25.454 | 0.00 | 0.00 |
| ATOM | 2068 | CD1  | LEU | X | 134 | 38.574 | 31.151 | 25.893 | 0.00 | 0.00 |
| ATOM | 2069 | HD11 | LEU | X | 134 | 39.377 | 30.729 | 26.498 | 0.00 | 0.00 |
| ATOM | 2070 | HD12 | LEU | X | 134 | 38.646 | 30.615 | 24.947 | 0.00 | 0.00 |
| ATOM | 2071 | HD13 | LEU | X | 134 | 37.586 | 30.926 | 26.294 | 0.00 | 0.00 |
| ATOM | 2072 | CD2  | LEU | X | 134 | 38.797 | 33.250 | 27.189 | 0.00 | 0.00 |
| ATOM | 2073 | HD21 | LEU | X | 134 | 37.844 | 33.179 | 27.714 | 0.00 | 0.00 |
| ATOM | 2074 | HD22 | LEU | X | 134 | 39.374 | 32.538 | 27.779 | 0.00 | 0.00 |
| ATOM | 2075 | HD23 | LEU | X | 134 | 39.281 | 34.226 | 27.240 | 0.00 | 0.00 |

|      |      |      |     |   |     |        |        |        |      |      |
|------|------|------|-----|---|-----|--------|--------|--------|------|------|
| ATOM | 2076 | C    | LEU | X | 134 | 38.157 | 32.963 | 22.939 | 0.00 | 0.00 |
| ATOM | 2077 | O    | LEU | X | 134 | 37.411 | 31.938 | 22.827 | 0.00 | 0.00 |
| ATOM | 2078 | N    | VAL | X | 135 | 37.868 | 34.193 | 22.507 | 0.00 | 0.00 |
| ATOM | 2079 | H    | VAL | X | 135 | 38.468 | 34.952 | 22.796 | 0.00 | 0.00 |
| ATOM | 2080 | CA   | VAL | X | 135 | 36.576 | 34.541 | 21.883 | 0.00 | 0.00 |
| ATOM | 2081 | HA   | VAL | X | 135 | 35.849 | 34.195 | 22.617 | 0.00 | 0.00 |
| ATOM | 2082 | CB   | VAL | X | 135 | 36.426 | 36.074 | 21.758 | 0.00 | 0.00 |
| ATOM | 2083 | HB   | VAL | X | 135 | 37.400 | 36.512 | 21.541 | 0.00 | 0.00 |
| ATOM | 2084 | CG1  | VAL | X | 135 | 35.397 | 36.582 | 20.718 | 0.00 | 0.00 |
| ATOM | 2085 | HG11 | VAL | X | 135 | 34.474 | 36.004 | 20.672 | 0.00 | 0.00 |
| ATOM | 2086 | HG12 | VAL | X | 135 | 35.284 | 37.638 | 20.960 | 0.00 | 0.00 |
| ATOM | 2087 | HG13 | VAL | X | 135 | 35.860 | 36.526 | 19.732 | 0.00 | 0.00 |
| ATOM | 2088 | CG2  | VAL | X | 135 | 36.067 | 36.557 | 23.154 | 0.00 | 0.00 |
| ATOM | 2089 | HG21 | VAL | X | 135 | 35.005 | 36.309 | 23.165 | 0.00 | 0.00 |
| ATOM | 2090 | HG22 | VAL | X | 135 | 36.049 | 37.644 | 23.232 | 0.00 | 0.00 |
| ATOM | 2091 | HG23 | VAL | X | 135 | 36.608 | 36.089 | 23.976 | 0.00 | 0.00 |
| ATOM | 2092 | C    | VAL | X | 135 | 36.322 | 33.742 | 20.640 | 0.00 | 0.00 |
| ATOM | 2093 | O    | VAL | X | 135 | 35.145 | 33.489 | 20.288 | 0.00 | 0.00 |
| ATOM | 2094 | N    | GLN | X | 136 | 37.385 | 33.227 | 19.951 | 0.00 | 0.00 |
| ATOM | 2095 | H    | GLN | X | 136 | 38.321 | 33.559 | 20.135 | 0.00 | 0.00 |
| ATOM | 2096 | CA   | GLN | X | 136 | 37.226 | 32.327 | 18.814 | 0.00 | 0.00 |
| ATOM | 2097 | HA   | GLN | X | 136 | 36.253 | 32.481 | 18.347 | 0.00 | 0.00 |
| ATOM | 2098 | CB   | GLN | X | 136 | 38.386 | 32.641 | 17.905 | 0.00 | 0.00 |
| ATOM | 2099 | HB2  | GLN | X | 136 | 38.670 | 33.688 | 17.798 | 0.00 | 0.00 |
| ATOM | 2100 | HB3  | GLN | X | 136 | 39.193 | 32.074 | 18.370 | 0.00 | 0.00 |
| ATOM | 2101 | CG   | GLN | X | 136 | 38.036 | 32.289 | 16.418 | 0.00 | 0.00 |
| ATOM | 2102 | HG2  | GLN | X | 136 | 37.159 | 32.822 | 16.052 | 0.00 | 0.00 |
| ATOM | 2103 | HG3  | GLN | X | 136 | 38.841 | 32.623 | 15.765 | 0.00 | 0.00 |
| ATOM | 2104 | CD   | GLN | X | 136 | 37.932 | 30.779 | 16.184 | 0.00 | 0.00 |
| ATOM | 2105 | OE1  | GLN | X | 136 | 38.721 | 29.968 | 16.550 | 0.00 | 0.00 |
| ATOM | 2106 | NE2  | GLN | X | 136 | 36.859 | 30.347 | 15.514 | 0.00 | 0.00 |
| ATOM | 2107 | HE21 | GLN | X | 136 | 36.820 | 29.381 | 15.222 | 0.00 | 0.00 |
| ATOM | 2108 | HE22 | GLN | X | 136 | 36.178 | 31.007 | 15.166 | 0.00 | 0.00 |
| ATOM | 2109 | C    | GLN | X | 136 | 37.166 | 30.808 | 19.280 | 0.00 | 0.00 |
| ATOM | 2110 | O    | GLN | X | 136 | 36.501 | 30.057 | 18.637 | 0.00 | 0.00 |
| ATOM | 2111 | N    | ALA | X | 137 | 37.930 | 30.439 | 20.274 | 0.00 | 0.00 |
| ATOM | 2112 | H    | ALA | X | 137 | 38.429 | 31.173 | 20.755 | 0.00 | 0.00 |
| ATOM | 2113 | CA   | ALA | X | 137 | 38.027 | 29.044 | 20.674 | 0.00 | 0.00 |
| ATOM | 2114 | HA   | ALA | X | 137 | 38.107 | 28.394 | 19.802 | 0.00 | 0.00 |
| ATOM | 2115 | CB   | ALA | X | 137 | 39.273 | 28.868 | 21.534 | 0.00 | 0.00 |
| ATOM | 2116 | HB1  | ALA | X | 137 | 40.150 | 28.906 | 20.887 | 0.00 | 0.00 |
| ATOM | 2117 | HB2  | ALA | X | 137 | 39.354 | 27.885 | 21.997 | 0.00 | 0.00 |
| ATOM | 2118 | HB3  | ALA | X | 137 | 39.170 | 29.676 | 22.259 | 0.00 | 0.00 |
| ATOM | 2119 | C    | ALA | X | 137 | 36.835 | 28.517 | 21.452 | 0.00 | 0.00 |
| ATOM | 2120 | O    | ALA | X | 137 | 36.258 | 27.443 | 21.148 | 0.00 | 0.00 |
| ATOM | 2121 | N    | GLU | X | 138 | 36.219 | 29.350 | 22.304 | 0.00 | 0.00 |
| ATOM | 2122 | H    | GLU | X | 138 | 36.694 | 30.231 | 22.443 | 0.00 | 0.00 |
| ATOM | 2123 | CA   | GLU | X | 138 | 35.134 | 28.980 | 23.151 | 0.00 | 0.00 |
| ATOM | 2124 | HA   | GLU | X | 138 | 34.872 | 27.926 | 23.053 | 0.00 | 0.00 |
| ATOM | 2125 | CB   | GLU | X | 138 | 35.557 | 29.180 | 24.640 | 0.00 | 0.00 |
| ATOM | 2126 | HB2  | GLU | X | 138 | 35.966 | 30.188 | 24.691 | 0.00 | 0.00 |
| ATOM | 2127 | HB3  | GLU | X | 138 | 34.711 | 29.187 | 25.327 | 0.00 | 0.00 |
| ATOM | 2128 | CG   | GLU | X | 138 | 36.586 | 28.097 | 25.017 | 0.00 | 0.00 |
| ATOM | 2129 | HG2  | GLU | X | 138 | 37.532 | 28.079 | 24.475 | 0.00 | 0.00 |
| ATOM | 2130 | HG3  | GLU | X | 138 | 36.994 | 28.275 | 26.012 | 0.00 | 0.00 |
| ATOM | 2131 | CD   | GLU | X | 138 | 35.960 | 26.768 | 25.061 | 0.00 | 0.00 |
| ATOM | 2132 | OE1  | GLU | X | 138 | 34.844 | 26.501 | 25.567 | 0.00 | 0.00 |
| ATOM | 2133 | OE2  | GLU | X | 138 | 36.547 | 25.807 | 24.496 | 0.00 | 0.00 |
| ATOM | 2134 | C    | GLU | X | 138 | 33.799 | 29.797 | 22.885 | 0.00 | 0.00 |
| ATOM | 2135 | O    | GLU | X | 138 | 32.826 | 29.434 | 23.518 | 0.00 | 0.00 |
| ATOM | 2136 | N    | ARG | X | 139 | 33.821 | 30.830 | 22.070 | 0.00 | 0.00 |
| ATOM | 2137 | H    | ARG | X | 139 | 34.715 | 31.184 | 21.762 | 0.00 | 0.00 |
| ATOM | 2138 | CA   | ARG | X | 139 | 32.640 | 31.382 | 21.486 | 0.00 | 0.00 |
| ATOM | 2139 | HA   | ARG | X | 139 | 33.053 | 32.169 | 20.855 | 0.00 | 0.00 |
| ATOM | 2140 | CB   | ARG | X | 139 | 31.878 | 30.329 | 20.676 | 0.00 | 0.00 |
| ATOM | 2141 | HB2  | ARG | X | 139 | 31.430 | 29.551 | 21.293 | 0.00 | 0.00 |
| ATOM | 2142 | HB3  | ARG | X | 139 | 31.055 | 30.835 | 20.171 | 0.00 | 0.00 |

|      |      |      |     |   |     |        |        |        |      |      |
|------|------|------|-----|---|-----|--------|--------|--------|------|------|
| ATOM | 2143 | CG   | ARG | X | 139 | 32.744 | 29.600 | 19.671 | 0.00 | 0.00 |
| ATOM | 2144 | HG2  | ARG | X | 139 | 33.599 | 30.209 | 19.376 | 0.00 | 0.00 |
| ATOM | 2145 | HG3  | ARG | X | 139 | 33.088 | 28.756 | 20.268 | 0.00 | 0.00 |
| ATOM | 2146 | CD   | ARG | X | 139 | 31.860 | 29.175 | 18.424 | 0.00 | 0.00 |
| ATOM | 2147 | HD2  | ARG | X | 139 | 32.356 | 28.526 | 17.702 | 0.00 | 0.00 |
| ATOM | 2148 | HD3  | ARG | X | 139 | 31.010 | 28.591 | 18.778 | 0.00 | 0.00 |
| ATOM | 2149 | NE   | ARG | X | 139 | 31.445 | 30.410 | 17.726 | 0.00 | 0.00 |
| ATOM | 2150 | HE   | ARG | X | 139 | 30.464 | 30.603 | 17.867 | 0.00 | 0.00 |
| ATOM | 2151 | CZ   | ARG | X | 139 | 32.164 | 31.147 | 16.859 | 0.00 | 0.00 |
| ATOM | 2152 | NH1  | ARG | X | 139 | 33.421 | 30.807 | 16.466 | 0.00 | 0.00 |
| ATOM | 2153 | HH11 | ARG | X | 139 | 33.991 | 30.021 | 16.746 | 0.00 | 0.00 |
| ATOM | 2154 | HH12 | ARG | X | 139 | 33.725 | 31.339 | 15.663 | 0.00 | 0.00 |
| ATOM | 2155 | NH2  | ARG | X | 139 | 31.553 | 32.120 | 16.270 | 0.00 | 0.00 |
| ATOM | 2156 | HH21 | ARG | X | 139 | 30.702 | 32.426 | 16.721 | 0.00 | 0.00 |
| ATOM | 2157 | HH22 | ARG | X | 139 | 31.863 | 32.591 | 15.432 | 0.00 | 0.00 |
| ATOM | 2158 | C    | ARG | X | 139 | 31.705 | 32.104 | 22.463 | 0.00 | 0.00 |
| ATOM | 2159 | O    | ARG | X | 139 | 30.553 | 32.331 | 22.207 | 0.00 | 0.00 |
| ATOM | 2160 | N    | THR | X | 140 | 32.278 | 32.577 | 23.512 | 0.00 | 0.00 |
| ATOM | 2161 | H    | THR | X | 140 | 33.287 | 32.524 | 23.506 | 0.00 | 0.00 |
| ATOM | 2162 | CA   | THR | X | 140 | 31.717 | 33.410 | 24.556 | 0.00 | 0.00 |
| ATOM | 2163 | HA   | THR | X | 140 | 30.691 | 33.087 | 24.730 | 0.00 | 0.00 |
| ATOM | 2164 | CB   | THR | X | 140 | 32.540 | 33.306 | 25.847 | 0.00 | 0.00 |
| ATOM | 2165 | HB   | THR | X | 140 | 32.118 | 34.017 | 26.557 | 0.00 | 0.00 |
| ATOM | 2166 | CG2  | THR | X | 140 | 32.425 | 31.902 | 26.313 | 0.00 | 0.00 |
| ATOM | 2167 | HG21 | THR | X | 140 | 31.458 | 31.469 | 26.059 | 0.00 | 0.00 |
| ATOM | 2168 | HG22 | THR | X | 140 | 32.585 | 31.981 | 27.389 | 0.00 | 0.00 |
| ATOM | 2169 | HG23 | THR | X | 140 | 33.291 | 31.346 | 25.953 | 0.00 | 0.00 |
| ATOM | 2170 | OG1  | THR | X | 140 | 33.860 | 33.744 | 25.711 | 0.00 | 0.00 |
| ATOM | 2171 | HG1  | THR | X | 140 | 33.735 | 34.689 | 25.605 | 0.00 | 0.00 |
| ATOM | 2172 | C    | THR | X | 140 | 31.595 | 34.871 | 24.099 | 0.00 | 0.00 |
| ATOM | 2173 | O    | THR | X | 140 | 32.053 | 35.213 | 23.009 | 0.00 | 0.00 |
| ATOM | 2174 | N    | VAL | X | 141 | 31.273 | 35.779 | 24.965 | 0.00 | 0.00 |
| ATOM | 2175 | H    | VAL | X | 141 | 30.812 | 35.419 | 25.788 | 0.00 | 0.00 |
| ATOM | 2176 | CA   | VAL | X | 141 | 31.597 | 37.195 | 24.870 | 0.00 | 0.00 |
| ATOM | 2177 | HA   | VAL | X | 141 | 31.950 | 37.447 | 23.870 | 0.00 | 0.00 |
| ATOM | 2178 | CB   | VAL | X | 141 | 30.317 | 38.137 | 25.076 | 0.00 | 0.00 |
| ATOM | 2179 | HB   | VAL | X | 141 | 29.712 | 37.844 | 25.935 | 0.00 | 0.00 |
| ATOM | 2180 | CG1  | VAL | X | 141 | 30.692 | 39.546 | 25.375 | 0.00 | 0.00 |
| ATOM | 2181 | HG11 | VAL | X | 141 | 31.290 | 39.966 | 24.566 | 0.00 | 0.00 |
| ATOM | 2182 | HG12 | VAL | X | 141 | 29.799 | 40.169 | 25.428 | 0.00 | 0.00 |
| ATOM | 2183 | HG13 | VAL | X | 141 | 31.323 | 39.578 | 26.264 | 0.00 | 0.00 |
| ATOM | 2184 | CG2  | VAL | X | 141 | 29.480 | 38.134 | 23.765 | 0.00 | 0.00 |
| ATOM | 2185 | HG21 | VAL | X | 141 | 28.621 | 38.802 | 23.812 | 0.00 | 0.00 |
| ATOM | 2186 | HG22 | VAL | X | 141 | 29.286 | 37.093 | 23.504 | 0.00 | 0.00 |
| ATOM | 2187 | HG23 | VAL | X | 141 | 30.100 | 38.546 | 22.969 | 0.00 | 0.00 |
| ATOM | 2188 | C    | VAL | X | 141 | 32.706 | 37.454 | 25.922 | 0.00 | 0.00 |
| ATOM | 2189 | O    | VAL | X | 141 | 32.877 | 36.661 | 26.829 | 0.00 | 0.00 |
| ATOM | 2190 | N    | LEU | X | 142 | 33.632 | 38.375 | 25.681 | 0.00 | 0.00 |
| ATOM | 2191 | H    | LEU | X | 142 | 33.564 | 38.894 | 24.817 | 0.00 | 0.00 |
| ATOM | 2192 | CA   | LEU | X | 142 | 34.719 | 38.622 | 26.660 | 0.00 | 0.00 |
| ATOM | 2193 | HA   | LEU | X | 142 | 34.392 | 38.220 | 27.619 | 0.00 | 0.00 |
| ATOM | 2194 | CB   | LEU | X | 142 | 36.035 | 37.878 | 26.350 | 0.00 | 0.00 |
| ATOM | 2195 | HB2  | LEU | X | 142 | 35.772 | 36.820 | 26.364 | 0.00 | 0.00 |
| ATOM | 2196 | HB3  | LEU | X | 142 | 36.531 | 38.072 | 25.399 | 0.00 | 0.00 |
| ATOM | 2197 | CG   | LEU | X | 142 | 37.167 | 37.902 | 27.358 | 0.00 | 0.00 |
| ATOM | 2198 | HG   | LEU | X | 142 | 36.709 | 37.777 | 28.339 | 0.00 | 0.00 |
| ATOM | 2199 | CD1  | LEU | X | 142 | 38.187 | 36.741 | 27.181 | 0.00 | 0.00 |
| ATOM | 2200 | HD11 | LEU | X | 142 | 38.907 | 36.757 | 27.998 | 0.00 | 0.00 |
| ATOM | 2201 | HD12 | LEU | X | 142 | 38.759 | 36.893 | 26.265 | 0.00 | 0.00 |
| ATOM | 2202 | HD13 | LEU | X | 142 | 37.756 | 35.741 | 27.143 | 0.00 | 0.00 |
| ATOM | 2203 | CD2  | LEU | X | 142 | 37.968 | 39.201 | 27.408 | 0.00 | 0.00 |
| ATOM | 2204 | HD21 | LEU | X | 142 | 37.429 | 39.971 | 27.961 | 0.00 | 0.00 |
| ATOM | 2205 | HD22 | LEU | X | 142 | 38.860 | 39.095 | 28.024 | 0.00 | 0.00 |
| ATOM | 2206 | HD23 | LEU | X | 142 | 38.200 | 39.481 | 26.380 | 0.00 | 0.00 |
| ATOM | 2207 | C    | LEU | X | 142 | 34.970 | 40.080 | 26.809 | 0.00 | 0.00 |
| ATOM | 2208 | O    | LEU | X | 142 | 35.109 | 40.760 | 25.831 | 0.00 | 0.00 |
| ATOM | 2209 | N    | VAL | X | 143 | 34.877 | 40.640 | 27.996 | 0.00 | 0.00 |

|      |      |      |     |   |     |        |        |        |      |      |
|------|------|------|-----|---|-----|--------|--------|--------|------|------|
| ATOM | 2210 | H    | VAL | X | 143 | 34.855 | 39.994 | 28.773 | 0.00 | 0.00 |
| ATOM | 2211 | CA   | VAL | X | 143 | 35.171 | 42.082 | 28.271 | 0.00 | 0.00 |
| ATOM | 2212 | HA   | VAL | X | 143 | 35.278 | 42.509 | 27.273 | 0.00 | 0.00 |
| ATOM | 2213 | CB   | VAL | X | 143 | 33.772 | 42.530 | 28.773 | 0.00 | 0.00 |
| ATOM | 2214 | HB   | VAL | X | 143 | 33.525 | 42.015 | 29.702 | 0.00 | 0.00 |
| ATOM | 2215 | CG1  | VAL | X | 143 | 33.693 | 44.029 | 29.076 | 0.00 | 0.00 |
| ATOM | 2216 | HG11 | VAL | X | 143 | 34.459 | 44.159 | 29.841 | 0.00 | 0.00 |
| ATOM | 2217 | HG12 | VAL | X | 143 | 33.982 | 44.491 | 28.132 | 0.00 | 0.00 |
| ATOM | 2218 | HG13 | VAL | X | 143 | 32.684 | 44.172 | 29.463 | 0.00 | 0.00 |
| ATOM | 2219 | CG2  | VAL | X | 143 | 32.523 | 42.142 | 27.927 | 0.00 | 0.00 |
| ATOM | 2220 | HG21 | VAL | X | 143 | 31.659 | 42.632 | 28.377 | 0.00 | 0.00 |
| ATOM | 2221 | HG22 | VAL | X | 143 | 32.359 | 41.065 | 27.939 | 0.00 | 0.00 |
| ATOM | 2222 | HG23 | VAL | X | 143 | 32.686 | 42.512 | 26.915 | 0.00 | 0.00 |
| ATOM | 2223 | C    | VAL | X | 143 | 36.342 | 42.292 | 29.231 | 0.00 | 0.00 |
| ATOM | 2224 | O    | VAL | X | 143 | 36.695 | 41.328 | 29.908 | 0.00 | 0.00 |
| ATOM | 2225 | N    | SER | X | 144 | 36.793 | 43.563 | 29.292 | 0.00 | 0.00 |
| ATOM | 2226 | H    | SER | X | 144 | 36.482 | 44.199 | 28.572 | 0.00 | 0.00 |
| ATOM | 2227 | CA   | SER | X | 144 | 37.784 | 44.055 | 30.211 | 0.00 | 0.00 |
| ATOM | 2228 | HA   | SER | X | 144 | 37.581 | 43.643 | 31.200 | 0.00 | 0.00 |
| ATOM | 2229 | CB   | SER | X | 144 | 39.253 | 43.697 | 29.844 | 0.00 | 0.00 |
| ATOM | 2230 | HB2  | SER | X | 144 | 39.867 | 43.613 | 30.740 | 0.00 | 0.00 |
| ATOM | 2231 | HB3  | SER | X | 144 | 39.260 | 42.661 | 29.506 | 0.00 | 0.00 |
| ATOM | 2232 | OG   | SER | X | 144 | 39.838 | 44.559 | 28.935 | 0.00 | 0.00 |
| ATOM | 2233 | HG   | SER | X | 144 | 40.686 | 44.235 | 28.621 | 0.00 | 0.00 |
| ATOM | 2234 | C    | SER | X | 144 | 37.737 | 45.579 | 30.455 | 0.00 | 0.00 |
| ATOM | 2235 | O    | SER | X | 144 | 37.408 | 46.388 | 29.595 | 0.00 | 0.00 |
| ATOM | 2236 | N    | MET | X | 145 | 38.114 | 46.006 | 31.661 | 0.00 | 0.00 |
| ATOM | 2237 | H    | MET | X | 145 | 38.483 | 45.378 | 32.362 | 0.00 | 0.00 |
| ATOM | 2238 | CA   | MET | X | 145 | 37.905 | 47.369 | 32.172 | 0.00 | 0.00 |
| ATOM | 2239 | HA   | MET | X | 145 | 37.545 | 48.012 | 31.369 | 0.00 | 0.00 |
| ATOM | 2240 | CB   | MET | X | 145 | 36.806 | 47.317 | 33.215 | 0.00 | 0.00 |
| ATOM | 2241 | HB2  | MET | X | 145 | 36.508 | 48.272 | 33.647 | 0.00 | 0.00 |
| ATOM | 2242 | HB3  | MET | X | 145 | 35.916 | 46.854 | 32.789 | 0.00 | 0.00 |
| ATOM | 2243 | CG   | MET | X | 145 | 37.232 | 46.539 | 34.406 | 0.00 | 0.00 |
| ATOM | 2244 | HG2  | MET | X | 145 | 37.409 | 45.503 | 34.115 | 0.00 | 0.00 |
| ATOM | 2245 | HG3  | MET | X | 145 | 38.135 | 47.006 | 34.799 | 0.00 | 0.00 |
| ATOM | 2246 | SD   | MET | X | 145 | 35.992 | 46.627 | 35.733 | 0.00 | 0.00 |
| ATOM | 2247 | CE   | MET | X | 145 | 34.546 | 45.962 | 34.942 | 0.00 | 0.00 |
| ATOM | 2248 | HE1  | MET | X | 145 | 34.198 | 46.557 | 34.097 | 0.00 | 0.00 |
| ATOM | 2249 | HE2  | MET | X | 145 | 34.634 | 44.881 | 34.831 | 0.00 | 0.00 |
| ATOM | 2250 | HE3  | MET | X | 145 | 33.687 | 46.104 | 35.598 | 0.00 | 0.00 |
| ATOM | 2251 | C    | MET | X | 145 | 39.230 | 47.918 | 32.584 | 0.00 | 0.00 |
| ATOM | 2252 | O    | MET | X | 145 | 40.122 | 47.264 | 33.183 | 0.00 | 0.00 |
| ATOM | 2253 | N    | ASN | X | 146 | 39.368 | 49.211 | 32.361 | 0.00 | 0.00 |
| ATOM | 2254 | H    | ASN | X | 146 | 38.682 | 49.779 | 31.885 | 0.00 | 0.00 |
| ATOM | 2255 | CA   | ASN | X | 146 | 40.475 | 50.054 | 32.828 | 0.00 | 0.00 |
| ATOM | 2256 | HA   | ASN | X | 146 | 41.320 | 49.437 | 33.134 | 0.00 | 0.00 |
| ATOM | 2257 | CB   | ASN | X | 146 | 41.024 | 50.898 | 31.633 | 0.00 | 0.00 |
| ATOM | 2258 | HB2  | ASN | X | 146 | 40.986 | 50.320 | 30.710 | 0.00 | 0.00 |
| ATOM | 2259 | HB3  | ASN | X | 146 | 40.281 | 51.664 | 31.413 | 0.00 | 0.00 |
| ATOM | 2260 | CG   | ASN | X | 146 | 42.529 | 51.320 | 31.771 | 0.00 | 0.00 |
| ATOM | 2261 | OD1  | ASN | X | 146 | 43.497 | 50.583 | 31.452 | 0.00 | 0.00 |
| ATOM | 2262 | ND2  | ASN | X | 146 | 42.818 | 52.448 | 32.436 | 0.00 | 0.00 |
| ATOM | 2263 | HD21 | ASN | X | 146 | 43.790 | 52.688 | 32.571 | 0.00 | 0.00 |
| ATOM | 2264 | HD22 | ASN | X | 146 | 42.072 | 53.118 | 32.552 | 0.00 | 0.00 |
| ATOM | 2265 | C    | ASN | X | 146 | 39.943 | 50.921 | 33.968 | 0.00 | 0.00 |
| ATOM | 2266 | O    | ASN | X | 146 | 38.835 | 51.462 | 33.816 | 0.00 | 0.00 |
| ATOM | 2267 | N    | TYR | X | 147 | 40.804 | 51.026 | 35.003 | 0.00 | 0.00 |
| ATOM | 2268 | H    | TYR | X | 147 | 41.703 | 50.578 | 34.897 | 0.00 | 0.00 |
| ATOM | 2269 | CA   | TYR | X | 147 | 40.499 | 51.741 | 36.223 | 0.00 | 0.00 |
| ATOM | 2270 | HA   | TYR | X | 147 | 39.827 | 52.558 | 35.958 | 0.00 | 0.00 |
| ATOM | 2271 | CB   | TYR | X | 147 | 39.683 | 50.787 | 37.102 | 0.00 | 0.00 |
| ATOM | 2272 | HB2  | TYR | X | 147 | 39.504 | 51.230 | 38.082 | 0.00 | 0.00 |
| ATOM | 2273 | HB3  | TYR | X | 147 | 38.786 | 50.408 | 36.613 | 0.00 | 0.00 |
| ATOM | 2274 | CG   | TYR | X | 147 | 40.373 | 49.419 | 37.399 | 0.00 | 0.00 |
| ATOM | 2275 | CD1  | TYR | X | 147 | 40.063 | 48.321 | 36.640 | 0.00 | 0.00 |
| ATOM | 2276 | HD1  | TYR | X | 147 | 39.454 | 48.373 | 35.749 | 0.00 | 0.00 |

|      |      |      |     |   |     |        |        |        |      |      |
|------|------|------|-----|---|-----|--------|--------|--------|------|------|
| ATOM | 2277 | CE1  | TYR | X | 147 | 40.806 | 47.146 | 36.785 | 0.00 | 0.00 |
| ATOM | 2278 | HE1  | TYR | X | 147 | 40.815 | 46.407 | 35.998 | 0.00 | 0.00 |
| ATOM | 2279 | CZ   | TYR | X | 147 | 41.734 | 46.936 | 37.820 | 0.00 | 0.00 |
| ATOM | 2280 | OH   | TYR | X | 147 | 42.332 | 45.695 | 37.852 | 0.00 | 0.00 |
| ATOM | 2281 | HH   | TYR | X | 147 | 43.051 | 45.652 | 38.487 | 0.00 | 0.00 |
| ATOM | 2282 | CE2  | TYR | X | 147 | 41.954 | 48.087 | 38.631 | 0.00 | 0.00 |
| ATOM | 2283 | HE2  | TYR | X | 147 | 42.668 | 48.004 | 39.438 | 0.00 | 0.00 |
| ATOM | 2284 | CD2  | TYR | X | 147 | 41.387 | 49.325 | 38.398 | 0.00 | 0.00 |
| ATOM | 2285 | HD2  | TYR | X | 147 | 41.605 | 50.107 | 39.110 | 0.00 | 0.00 |
| ATOM | 2286 | C    | TYR | X | 147 | 41.755 | 52.221 | 37.017 | 0.00 | 0.00 |
| ATOM | 2287 | O    | TYR | X | 147 | 42.892 | 51.999 | 36.636 | 0.00 | 0.00 |
| ATOM | 2288 | N    | ARG | X | 148 | 41.451 | 53.048 | 38.094 | 0.00 | 0.00 |
| ATOM | 2289 | H    | ARG | X | 148 | 40.482 | 53.300 | 38.224 | 0.00 | 0.00 |
| ATOM | 2290 | CA   | ARG | X | 148 | 42.558 | 53.822 | 38.705 | 0.00 | 0.00 |
| ATOM | 2291 | HA   | ARG | X | 148 | 43.124 | 54.216 | 37.860 | 0.00 | 0.00 |
| ATOM | 2292 | CB   | ARG | X | 148 | 41.941 | 55.076 | 39.402 | 0.00 | 0.00 |
| ATOM | 2293 | HB2  | ARG | X | 148 | 41.076 | 54.727 | 39.967 | 0.00 | 0.00 |
| ATOM | 2294 | HB3  | ARG | X | 148 | 42.738 | 55.577 | 39.953 | 0.00 | 0.00 |
| ATOM | 2295 | CG   | ARG | X | 148 | 41.374 | 56.041 | 38.302 | 0.00 | 0.00 |
| ATOM | 2296 | HG2  | ARG | X | 148 | 42.186 | 56.337 | 37.638 | 0.00 | 0.00 |
| ATOM | 2297 | HG3  | ARG | X | 148 | 40.631 | 55.557 | 37.668 | 0.00 | 0.00 |
| ATOM | 2298 | CD   | ARG | X | 148 | 40.698 | 57.295 | 38.844 | 0.00 | 0.00 |
| ATOM | 2299 | HD2  | ARG | X | 148 | 41.403 | 57.682 | 39.581 | 0.00 | 0.00 |
| ATOM | 2300 | HD3  | ARG | X | 148 | 40.616 | 58.030 | 38.044 | 0.00 | 0.00 |
| ATOM | 2301 | NE   | ARG | X | 148 | 39.353 | 57.023 | 39.305 | 0.00 | 0.00 |
| ATOM | 2302 | HE   | ARG | X | 148 | 39.039 | 56.105 | 39.024 | 0.00 | 0.00 |
| ATOM | 2303 | CZ   | ARG | X | 148 | 38.506 | 57.769 | 39.950 | 0.00 | 0.00 |
| ATOM | 2304 | NH1  | ARG | X | 148 | 38.933 | 58.991 | 40.382 | 0.00 | 0.00 |
| ATOM | 2305 | HH11 | ARG | X | 148 | 39.907 | 59.255 | 40.353 | 0.00 | 0.00 |
| ATOM | 2306 | HH12 | ARG | X | 148 | 38.238 | 59.491 | 40.920 | 0.00 | 0.00 |
| ATOM | 2307 | NH2  | ARG | X | 148 | 37.304 | 57.418 | 40.308 | 0.00 | 0.00 |
| ATOM | 2308 | HH21 | ARG | X | 148 | 36.994 | 56.534 | 39.932 | 0.00 | 0.00 |
| ATOM | 2309 | HH22 | ARG | X | 148 | 36.638 | 58.026 | 40.762 | 0.00 | 0.00 |
| ATOM | 2310 | C    | ARG | X | 148 | 43.383 | 52.945 | 39.621 | 0.00 | 0.00 |
| ATOM | 2311 | O    | ARG | X | 148 | 42.931 | 52.035 | 40.347 | 0.00 | 0.00 |
| ATOM | 2312 | N    | VAL | X | 149 | 44.662 | 53.263 | 39.620 | 0.00 | 0.00 |
| ATOM | 2313 | H    | VAL | X | 149 | 44.959 | 54.010 | 39.009 | 0.00 | 0.00 |
| ATOM | 2314 | CA   | VAL | X | 149 | 45.641 | 52.640 | 40.493 | 0.00 | 0.00 |
| ATOM | 2315 | HA   | VAL | X | 149 | 45.134 | 52.112 | 41.301 | 0.00 | 0.00 |
| ATOM | 2316 | CB   | VAL | X | 149 | 46.487 | 51.538 | 39.735 | 0.00 | 0.00 |
| ATOM | 2317 | HB   | VAL | X | 149 | 47.277 | 51.279 | 40.441 | 0.00 | 0.00 |
| ATOM | 2318 | CG1  | VAL | X | 149 | 45.584 | 50.354 | 39.362 | 0.00 | 0.00 |
| ATOM | 2319 | HG11 | VAL | X | 149 | 44.783 | 50.802 | 38.774 | 0.00 | 0.00 |
| ATOM | 2320 | HG12 | VAL | X | 149 | 46.181 | 49.572 | 38.891 | 0.00 | 0.00 |
| ATOM | 2321 | HG13 | VAL | X | 149 | 45.214 | 49.996 | 40.323 | 0.00 | 0.00 |
| ATOM | 2322 | CG2  | VAL | X | 149 | 47.274 | 52.158 | 38.583 | 0.00 | 0.00 |
| ATOM | 2323 | HG21 | VAL | X | 149 | 48.012 | 52.784 | 39.084 | 0.00 | 0.00 |
| ATOM | 2324 | HG22 | VAL | X | 149 | 46.572 | 52.587 | 37.869 | 0.00 | 0.00 |
| ATOM | 2325 | HG23 | VAL | X | 149 | 47.831 | 51.367 | 38.082 | 0.00 | 0.00 |
| ATOM | 2326 | C    | VAL | X | 149 | 46.617 | 53.587 | 41.171 | 0.00 | 0.00 |
| ATOM | 2327 | O    | VAL | X | 149 | 46.992 | 54.652 | 40.628 | 0.00 | 0.00 |
| ATOM | 2328 | N    | GLY | X | 150 | 47.107 | 53.162 | 42.319 | 0.00 | 0.00 |
| ATOM | 2329 | H    | GLY | X | 150 | 46.814 | 52.221 | 42.542 | 0.00 | 0.00 |
| ATOM | 2330 | CA   | GLY | X | 150 | 47.994 | 53.859 | 43.215 | 0.00 | 0.00 |
| ATOM | 2331 | HA2  | GLY | X | 150 | 48.654 | 53.289 | 43.870 | 0.00 | 0.00 |
| ATOM | 2332 | HA3  | GLY | X | 150 | 48.667 | 54.483 | 42.627 | 0.00 | 0.00 |
| ATOM | 2333 | C    | GLY | X | 150 | 47.123 | 54.877 | 44.063 | 0.00 | 0.00 |
| ATOM | 2334 | O    | GLY | X | 150 | 45.973 | 54.535 | 44.430 | 0.00 | 0.00 |
| ATOM | 2335 | N    | ALA | X | 151 | 47.662 | 56.057 | 44.411 | 0.00 | 0.00 |
| ATOM | 2336 | H    | ALA | X | 151 | 48.485 | 56.383 | 43.927 | 0.00 | 0.00 |
| ATOM | 2337 | CA   | ALA | X | 151 | 46.888 | 57.070 | 45.144 | 0.00 | 0.00 |
| ATOM | 2338 | HA   | ALA | X | 151 | 46.455 | 56.600 | 46.027 | 0.00 | 0.00 |
| ATOM | 2339 | CB   | ALA | X | 151 | 47.707 | 58.255 | 45.639 | 0.00 | 0.00 |
| ATOM | 2340 | HB1  | ALA | X | 151 | 46.949 | 59.038 | 45.675 | 0.00 | 0.00 |
| ATOM | 2341 | HB2  | ALA | X | 151 | 48.552 | 58.434 | 44.973 | 0.00 | 0.00 |
| ATOM | 2342 | HB3  | ALA | X | 151 | 47.973 | 58.041 | 46.674 | 0.00 | 0.00 |
| ATOM | 2343 | C    | ALA | X | 151 | 45.676 | 57.582 | 44.308 | 0.00 | 0.00 |

|      |      |      |     |   |     |        |        |        |      |      |
|------|------|------|-----|---|-----|--------|--------|--------|------|------|
| ATOM | 2344 | O    | ALA | X | 151 | 44.620 | 57.825 | 44.876 | 0.00 | 0.00 |
| ATOM | 2345 | N    | PHE | X | 152 | 45.738 | 57.742 | 42.991 | 0.00 | 0.00 |
| ATOM | 2346 | H    | PHE | X | 152 | 46.616 | 57.446 | 42.588 | 0.00 | 0.00 |
| ATOM | 2347 | CA   | PHE | X | 152 | 44.547 | 58.068 | 42.129 | 0.00 | 0.00 |
| ATOM | 2348 | HA   | PHE | X | 152 | 44.267 | 59.058 | 42.490 | 0.00 | 0.00 |
| ATOM | 2349 | CB   | PHE | X | 152 | 45.010 | 58.205 | 40.618 | 0.00 | 0.00 |
| ATOM | 2350 | HB2  | PHE | X | 152 | 45.982 | 58.697 | 40.578 | 0.00 | 0.00 |
| ATOM | 2351 | HB3  | PHE | X | 152 | 45.169 | 57.209 | 40.205 | 0.00 | 0.00 |
| ATOM | 2352 | CG   | PHE | X | 152 | 44.131 | 58.843 | 39.607 | 0.00 | 0.00 |
| ATOM | 2353 | CD1  | PHE | X | 152 | 44.253 | 58.387 | 38.264 | 0.00 | 0.00 |
| ATOM | 2354 | HD1  | PHE | X | 152 | 45.149 | 57.847 | 37.998 | 0.00 | 0.00 |
| ATOM | 2355 | CE1  | PHE | X | 152 | 43.441 | 58.965 | 37.288 | 0.00 | 0.00 |
| ATOM | 2356 | HE1  | PHE | X | 152 | 43.571 | 58.758 | 36.236 | 0.00 | 0.00 |
| ATOM | 2357 | CZ   | PHE | X | 152 | 42.423 | 59.921 | 37.603 | 0.00 | 0.00 |
| ATOM | 2358 | HZ   | PHE | X | 152 | 41.807 | 60.444 | 36.886 | 0.00 | 0.00 |
| ATOM | 2359 | CE2  | PHE | X | 152 | 42.312 | 60.355 | 38.961 | 0.00 | 0.00 |
| ATOM | 2360 | HE2  | PHE | X | 152 | 41.639 | 61.174 | 39.168 | 0.00 | 0.00 |
| ATOM | 2361 | CD2  | PHE | X | 152 | 43.123 | 59.760 | 39.943 | 0.00 | 0.00 |
| ATOM | 2362 | HD2  | PHE | X | 152 | 43.011 | 60.034 | 40.982 | 0.00 | 0.00 |
| ATOM | 2363 | C    | PHE | X | 152 | 43.340 | 57.095 | 42.389 | 0.00 | 0.00 |
| ATOM | 2364 | O    | PHE | X | 152 | 42.148 | 57.532 | 42.479 | 0.00 | 0.00 |
| ATOM | 2365 | N    | GLY | X | 153 | 43.579 | 55.747 | 42.512 | 0.00 | 0.00 |
| ATOM | 2366 | H    | GLY | X | 153 | 44.518 | 55.382 | 42.443 | 0.00 | 0.00 |
| ATOM | 2367 | CA   | GLY | X | 153 | 42.539 | 54.747 | 42.784 | 0.00 | 0.00 |
| ATOM | 2368 | HA2  | GLY | X | 153 | 41.570 | 54.893 | 42.307 | 0.00 | 0.00 |
| ATOM | 2369 | HA3  | GLY | X | 153 | 42.885 | 53.764 | 42.464 | 0.00 | 0.00 |
| ATOM | 2370 | C    | GLY | X | 153 | 42.232 | 54.639 | 44.243 | 0.00 | 0.00 |
| ATOM | 2371 | O    | GLY | X | 153 | 41.090 | 54.262 | 44.543 | 0.00 | 0.00 |
| ATOM | 2372 | N    | PHE | X | 154 | 43.150 | 54.764 | 45.181 | 0.00 | 0.00 |
| ATOM | 2373 | H    | PHE | X | 154 | 44.086 | 54.964 | 44.856 | 0.00 | 0.00 |
| ATOM | 2374 | CA   | PHE | X | 154 | 43.125 | 54.117 | 46.561 | 0.00 | 0.00 |
| ATOM | 2375 | HA   | PHE | X | 154 | 42.092 | 53.953 | 46.867 | 0.00 | 0.00 |
| ATOM | 2376 | CB   | PHE | X | 154 | 43.830 | 52.715 | 46.551 | 0.00 | 0.00 |
| ATOM | 2377 | HB2  | PHE | X | 154 | 44.913 | 52.822 | 46.504 | 0.00 | 0.00 |
| ATOM | 2378 | HB3  | PHE | X | 154 | 43.642 | 52.164 | 47.473 | 0.00 | 0.00 |
| ATOM | 2379 | CG   | PHE | X | 154 | 43.354 | 51.757 | 45.499 | 0.00 | 0.00 |
| ATOM | 2380 | CD1  | PHE | X | 154 | 44.166 | 51.466 | 44.391 | 0.00 | 0.00 |
| ATOM | 2381 | HD1  | PHE | X | 154 | 45.182 | 51.817 | 44.286 | 0.00 | 0.00 |
| ATOM | 2382 | CE1  | PHE | X | 154 | 43.534 | 50.735 | 43.360 | 0.00 | 0.00 |
| ATOM | 2383 | HE1  | PHE | X | 154 | 44.081 | 50.514 | 42.455 | 0.00 | 0.00 |
| ATOM | 2384 | CZ   | PHE | X | 154 | 42.165 | 50.411 | 43.323 | 0.00 | 0.00 |
| ATOM | 2385 | HZ   | PHE | X | 154 | 41.747 | 49.857 | 42.495 | 0.00 | 0.00 |
| ATOM | 2386 | CE2  | PHE | X | 154 | 41.410 | 50.713 | 44.436 | 0.00 | 0.00 |
| ATOM | 2387 | HE2  | PHE | X | 154 | 40.349 | 50.561 | 44.565 | 0.00 | 0.00 |
| ATOM | 2388 | CD2  | PHE | X | 154 | 42.009 | 51.410 | 45.543 | 0.00 | 0.00 |
| ATOM | 2389 | HD2  | PHE | X | 154 | 41.373 | 51.861 | 46.291 | 0.00 | 0.00 |
| ATOM | 2390 | C    | PHE | X | 154 | 43.572 | 55.066 | 47.695 | 0.00 | 0.00 |
| ATOM | 2391 | O    | PHE | X | 154 | 43.943 | 54.520 | 48.751 | 0.00 | 0.00 |
| ATOM | 2392 | N    | LEU | X | 155 | 43.566 | 56.413 | 47.473 | 0.00 | 0.00 |
| ATOM | 2393 | H    | LEU | X | 155 | 43.259 | 56.788 | 46.587 | 0.00 | 0.00 |
| ATOM | 2394 | CA   | LEU | X | 155 | 43.783 | 57.329 | 48.543 | 0.00 | 0.00 |
| ATOM | 2395 | HA   | LEU | X | 155 | 44.643 | 57.130 | 49.183 | 0.00 | 0.00 |
| ATOM | 2396 | CB   | LEU | X | 155 | 44.112 | 58.636 | 47.975 | 0.00 | 0.00 |
| ATOM | 2397 | HB2  | LEU | X | 155 | 45.069 | 58.437 | 47.493 | 0.00 | 0.00 |
| ATOM | 2398 | HB3  | LEU | X | 155 | 43.319 | 58.881 | 47.269 | 0.00 | 0.00 |
| ATOM | 2399 | CG   | LEU | X | 155 | 44.419 | 59.844 | 48.878 | 0.00 | 0.00 |
| ATOM | 2400 | HG   | LEU | X | 155 | 43.488 | 60.248 | 49.276 | 0.00 | 0.00 |
| ATOM | 2401 | CD1  | LEU | X | 155 | 45.395 | 59.562 | 49.970 | 0.00 | 0.00 |
| ATOM | 2402 | HD11 | LEU | X | 155 | 46.373 | 59.273 | 49.585 | 0.00 | 0.00 |
| ATOM | 2403 | HD12 | LEU | X | 155 | 45.080 | 58.867 | 50.748 | 0.00 | 0.00 |
| ATOM | 2404 | HD13 | LEU | X | 155 | 45.493 | 60.462 | 50.577 | 0.00 | 0.00 |
| ATOM | 2405 | CD2  | LEU | X | 155 | 44.952 | 61.063 | 48.201 | 0.00 | 0.00 |
| ATOM | 2406 | HD21 | LEU | X | 155 | 44.192 | 61.603 | 47.636 | 0.00 | 0.00 |
| ATOM | 2407 | HD22 | LEU | X | 155 | 45.387 | 61.714 | 48.959 | 0.00 | 0.00 |
| ATOM | 2408 | HD23 | LEU | X | 155 | 45.776 | 60.777 | 47.546 | 0.00 | 0.00 |
| ATOM | 2409 | C    | LEU | X | 155 | 42.614 | 57.449 | 49.501 | 0.00 | 0.00 |
| ATOM | 2410 | O    | LEU | X | 155 | 41.568 | 57.810 | 49.054 | 0.00 | 0.00 |



|      |      |      |     |   |     |        |        |        |      |      |
|------|------|------|-----|---|-----|--------|--------|--------|------|------|
| ATOM | 2411 | N    | ALA | X | 156 | 42.725 | 57.124 | 50.769 | 0.00 | 0.00 |
| ATOM | 2412 | H    | ALA | X | 156 | 43.637 | 56.945 | 51.164 | 0.00 | 0.00 |
| ATOM | 2413 | CA   | ALA | X | 156 | 41.771 | 57.283 | 51.843 | 0.00 | 0.00 |
| ATOM | 2414 | HA   | ALA | X | 156 | 40.798 | 57.678 | 51.553 | 0.00 | 0.00 |
| ATOM | 2415 | CB   | ALA | X | 156 | 41.696 | 55.838 | 52.417 | 0.00 | 0.00 |
| ATOM | 2416 | HB1  | ALA | X | 156 | 42.635 | 55.551 | 52.889 | 0.00 | 0.00 |
| ATOM | 2417 | HB2  | ALA | X | 156 | 41.448 | 55.058 | 51.697 | 0.00 | 0.00 |
| ATOM | 2418 | HB3  | ALA | X | 156 | 40.824 | 55.795 | 53.070 | 0.00 | 0.00 |
| ATOM | 2419 | C    | ALA | X | 156 | 42.214 | 58.172 | 53.036 | 0.00 | 0.00 |
| ATOM | 2420 | O    | ALA | X | 156 | 43.359 | 58.092 | 53.455 | 0.00 | 0.00 |
| ATOM | 2421 | N    | LEU | X | 157 | 41.395 | 59.146 | 53.537 | 0.00 | 0.00 |
| ATOM | 2422 | H    | LEU | X | 157 | 40.450 | 59.244 | 53.193 | 0.00 | 0.00 |
| ATOM | 2423 | CA   | LEU | X | 157 | 41.805 | 60.117 | 54.528 | 0.00 | 0.00 |
| ATOM | 2424 | HA   | LEU | X | 157 | 42.714 | 59.789 | 55.033 | 0.00 | 0.00 |
| ATOM | 2425 | CB   | LEU | X | 157 | 42.100 | 61.449 | 53.869 | 0.00 | 0.00 |
| ATOM | 2426 | HB2  | LEU | X | 157 | 41.252 | 61.584 | 53.197 | 0.00 | 0.00 |
| ATOM | 2427 | HB3  | LEU | X | 157 | 42.156 | 62.259 | 54.596 | 0.00 | 0.00 |
| ATOM | 2428 | CG   | LEU | X | 157 | 43.372 | 61.599 | 53.019 | 0.00 | 0.00 |
| ATOM | 2429 | HG   | LEU | X | 157 | 43.288 | 60.881 | 52.203 | 0.00 | 0.00 |
| ATOM | 2430 | CD1  | LEU | X | 157 | 43.201 | 62.911 | 52.297 | 0.00 | 0.00 |
| ATOM | 2431 | HD11 | LEU | X | 157 | 43.834 | 63.018 | 51.416 | 0.00 | 0.00 |
| ATOM | 2432 | HD12 | LEU | X | 157 | 43.558 | 63.686 | 52.975 | 0.00 | 0.00 |
| ATOM | 2433 | HD13 | LEU | X | 157 | 42.192 | 63.168 | 51.971 | 0.00 | 0.00 |
| ATOM | 2434 | CD2  | LEU | X | 157 | 44.671 | 61.397 | 53.759 | 0.00 | 0.00 |
| ATOM | 2435 | HD21 | LEU | X | 157 | 44.850 | 60.372 | 54.084 | 0.00 | 0.00 |
| ATOM | 2436 | HD22 | LEU | X | 157 | 45.540 | 61.630 | 53.143 | 0.00 | 0.00 |
| ATOM | 2437 | HD23 | LEU | X | 157 | 44.756 | 62.098 | 54.589 | 0.00 | 0.00 |
| ATOM | 2438 | C    | LEU | X | 157 | 40.622 | 60.227 | 55.501 | 0.00 | 0.00 |
| ATOM | 2439 | O    | LEU | X | 157 | 39.492 | 60.190 | 55.047 | 0.00 | 0.00 |
| ATOM | 2440 | N    | PRO | X | 158 | 40.933 | 60.475 | 56.786 | 0.00 | 0.00 |
| ATOM | 2441 | CD   | PRO | X | 158 | 42.214 | 60.412 | 57.477 | 0.00 | 0.00 |
| ATOM | 2442 | HD2  | PRO | X | 158 | 42.989 | 61.073 | 57.089 | 0.00 | 0.00 |
| ATOM | 2443 | HD3  | PRO | X | 158 | 42.589 | 59.409 | 57.273 | 0.00 | 0.00 |
| ATOM | 2444 | CG   | PRO | X | 158 | 41.982 | 60.779 | 58.969 | 0.00 | 0.00 |
| ATOM | 2445 | HG2  | PRO | X | 158 | 42.090 | 61.862 | 58.927 | 0.00 | 0.00 |
| ATOM | 2446 | HG3  | PRO | X | 158 | 42.565 | 60.211 | 59.694 | 0.00 | 0.00 |
| ATOM | 2447 | CB   | PRO | X | 158 | 40.516 | 60.397 | 59.147 | 0.00 | 0.00 |
| ATOM | 2448 | HB2  | PRO | X | 158 | 40.053 | 61.085 | 59.855 | 0.00 | 0.00 |
| ATOM | 2449 | HB3  | PRO | X | 158 | 40.542 | 59.358 | 59.476 | 0.00 | 0.00 |
| ATOM | 2450 | CA   | PRO | X | 158 | 39.886 | 60.569 | 57.794 | 0.00 | 0.00 |
| ATOM | 2451 | HA   | PRO | X | 158 | 39.111 | 59.813 | 57.668 | 0.00 | 0.00 |
| ATOM | 2452 | C    | PRO | X | 158 | 39.166 | 61.905 | 57.607 | 0.00 | 0.00 |
| ATOM | 2453 | O    | PRO | X | 158 | 39.603 | 62.756 | 56.914 | 0.00 | 0.00 |
| ATOM | 2454 | N    | GLY | X | 159 | 38.142 | 62.224 | 58.501 | 0.00 | 0.00 |
| ATOM | 2455 | H    | GLY | X | 159 | 37.859 | 61.550 | 59.199 | 0.00 | 0.00 |
| ATOM | 2456 | CA   | GLY | X | 159 | 37.671 | 63.576 | 58.727 | 0.00 | 0.00 |
| ATOM | 2457 | HA2  | GLY | X | 159 | 37.094 | 63.552 | 59.651 | 0.00 | 0.00 |
| ATOM | 2458 | HA3  | GLY | X | 159 | 38.575 | 64.183 | 58.783 | 0.00 | 0.00 |
| ATOM | 2459 | C    | GLY | X | 159 | 36.704 | 64.176 | 57.651 | 0.00 | 0.00 |
| ATOM | 2460 | O    | GLY | X | 159 | 36.296 | 65.300 | 57.861 | 0.00 | 0.00 |
| ATOM | 2461 | N    | SER | X | 160 | 36.195 | 63.364 | 56.744 | 0.00 | 0.00 |
| ATOM | 2462 | H    | SER | X | 160 | 36.474 | 62.394 | 56.782 | 0.00 | 0.00 |
| ATOM | 2463 | CA   | SER | X | 160 | 35.324 | 63.801 | 55.656 | 0.00 | 0.00 |
| ATOM | 2464 | HA   | SER | X | 160 | 34.434 | 64.251 | 56.095 | 0.00 | 0.00 |
| ATOM | 2465 | CB   | SER | X | 160 | 35.999 | 64.940 | 54.860 | 0.00 | 0.00 |
| ATOM | 2466 | HB2  | SER | X | 160 | 35.259 | 65.276 | 54.134 | 0.00 | 0.00 |
| ATOM | 2467 | HB3  | SER | X | 160 | 36.181 | 65.837 | 55.453 | 0.00 | 0.00 |
| ATOM | 2468 | OG   | SER | X | 160 | 37.271 | 64.449 | 54.212 | 0.00 | 0.00 |
| ATOM | 2469 | HG   | SER | X | 160 | 37.982 | 64.988 | 54.566 | 0.00 | 0.00 |
| ATOM | 2470 | C    | SER | X | 160 | 34.897 | 62.570 | 54.789 | 0.00 | 0.00 |
| ATOM | 2471 | O    | SER | X | 160 | 35.216 | 61.417 | 55.169 | 0.00 | 0.00 |
| ATOM | 2472 | N    | ARG | X | 161 | 34.406 | 62.725 | 53.549 | 0.00 | 0.00 |
| ATOM | 2473 | H    | ARG | X | 161 | 34.156 | 63.661 | 53.265 | 0.00 | 0.00 |
| ATOM | 2474 | CA   | ARG | X | 161 | 34.513 | 61.742 | 52.387 | 0.00 | 0.00 |
| ATOM | 2475 | HA   | ARG | X | 161 | 35.104 | 60.891 | 52.723 | 0.00 | 0.00 |
| ATOM | 2476 | CB   | ARG | X | 161 | 33.150 | 61.107 | 52.039 | 0.00 | 0.00 |
| ATOM | 2477 | HB2  | ARG | X | 161 | 32.581 | 61.865 | 51.501 | 0.00 | 0.00 |

|      |      |      |     |   |     |        |        |        |      |      |
|------|------|------|-----|---|-----|--------|--------|--------|------|------|
| ATOM | 2478 | HB3  | ARG | X | 161 | 33.347 | 60.287 | 51.349 | 0.00 | 0.00 |
| ATOM | 2479 | CG   | ARG | X | 161 | 32.287 | 60.619 | 53.274 | 0.00 | 0.00 |
| ATOM | 2480 | HG2  | ARG | X | 161 | 32.630 | 61.037 | 54.221 | 0.00 | 0.00 |
| ATOM | 2481 | HG3  | ARG | X | 161 | 31.262 | 60.965 | 53.145 | 0.00 | 0.00 |
| ATOM | 2482 | CD   | ARG | X | 161 | 32.292 | 59.107 | 53.435 | 0.00 | 0.00 |
| ATOM | 2483 | HD2  | ARG | X | 161 | 31.675 | 58.754 | 54.262 | 0.00 | 0.00 |
| ATOM | 2484 | HD3  | ARG | X | 161 | 31.765 | 58.680 | 52.582 | 0.00 | 0.00 |
| ATOM | 2485 | NE   | ARG | X | 161 | 33.613 | 58.615 | 53.713 | 0.00 | 0.00 |
| ATOM | 2486 | HE   | ARG | X | 161 | 34.301 | 59.247 | 54.096 | 0.00 | 0.00 |
| ATOM | 2487 | CZ   | ARG | X | 161 | 33.880 | 57.342 | 53.992 | 0.00 | 0.00 |
| ATOM | 2488 | NH1  | ARG | X | 161 | 33.113 | 56.347 | 53.742 | 0.00 | 0.00 |
| ATOM | 2489 | HH11 | ARG | X | 161 | 32.176 | 56.483 | 53.390 | 0.00 | 0.00 |
| ATOM | 2490 | HH12 | ARG | X | 161 | 33.583 | 55.486 | 53.499 | 0.00 | 0.00 |
| ATOM | 2491 | NH2  | ARG | X | 161 | 35.029 | 57.039 | 54.573 | 0.00 | 0.00 |
| ATOM | 2492 | HH21 | ARG | X | 161 | 35.686 | 57.773 | 54.798 | 0.00 | 0.00 |
| ATOM | 2493 | HH22 | ARG | X | 161 | 35.150 | 56.097 | 54.915 | 0.00 | 0.00 |
| ATOM | 2494 | C    | ARG | X | 161 | 35.231 | 62.433 | 51.192 | 0.00 | 0.00 |
| ATOM | 2495 | O    | ARG | X | 161 | 34.922 | 62.075 | 50.052 | 0.00 | 0.00 |
| ATOM | 2496 | N    | GLU | X | 162 | 36.140 | 63.354 | 51.427 | 0.00 | 0.00 |
| ATOM | 2497 | H    | GLU | X | 162 | 36.402 | 63.448 | 52.398 | 0.00 | 0.00 |
| ATOM | 2498 | CA   | GLU | X | 162 | 36.819 | 64.169 | 50.427 | 0.00 | 0.00 |
| ATOM | 2499 | HA   | GLU | X | 162 | 36.040 | 64.600 | 49.798 | 0.00 | 0.00 |
| ATOM | 2500 | CB   | GLU | X | 162 | 37.560 | 65.424 | 50.949 | 0.00 | 0.00 |
| ATOM | 2501 | HB2  | GLU | X | 162 | 37.943 | 65.081 | 51.910 | 0.00 | 0.00 |
| ATOM | 2502 | HB3  | GLU | X | 162 | 38.342 | 65.766 | 50.271 | 0.00 | 0.00 |
| ATOM | 2503 | CG   | GLU | X | 162 | 36.640 | 66.647 | 51.141 | 0.00 | 0.00 |
| ATOM | 2504 | HG2  | GLU | X | 162 | 35.715 | 66.363 | 51.642 | 0.00 | 0.00 |
| ATOM | 2505 | HG3  | GLU | X | 162 | 37.037 | 67.370 | 51.854 | 0.00 | 0.00 |
| ATOM | 2506 | CD   | GLU | X | 162 | 36.293 | 67.364 | 49.827 | 0.00 | 0.00 |
| ATOM | 2507 | OE1  | GLU | X | 162 | 35.476 | 66.789 | 49.120 | 0.00 | 0.00 |
| ATOM | 2508 | OE2  | GLU | X | 162 | 36.906 | 68.392 | 49.557 | 0.00 | 0.00 |
| ATOM | 2509 | C    | GLU | X | 162 | 37.788 | 63.357 | 49.555 | 0.00 | 0.00 |
| ATOM | 2510 | O    | GLU | X | 162 | 37.860 | 63.696 | 48.395 | 0.00 | 0.00 |
| ATOM | 2511 | N    | ALA | X | 163 | 38.435 | 62.292 | 50.042 | 0.00 | 0.00 |
| ATOM | 2512 | H    | ALA | X | 163 | 38.357 | 62.281 | 51.049 | 0.00 | 0.00 |
| ATOM | 2513 | CA   | ALA | X | 163 | 39.061 | 61.133 | 49.383 | 0.00 | 0.00 |
| ATOM | 2514 | HA   | ALA | X | 163 | 38.797 | 61.146 | 48.326 | 0.00 | 0.00 |
| ATOM | 2515 | CB   | ALA | X | 163 | 40.541 | 61.322 | 49.533 | 0.00 | 0.00 |
| ATOM | 2516 | HB1  | ALA | X | 163 | 40.788 | 62.231 | 48.985 | 0.00 | 0.00 |
| ATOM | 2517 | HB2  | ALA | X | 163 | 41.101 | 60.476 | 49.133 | 0.00 | 0.00 |
| ATOM | 2518 | HB3  | ALA | X | 163 | 40.709 | 61.422 | 50.605 | 0.00 | 0.00 |
| ATOM | 2519 | C    | ALA | X | 163 | 38.579 | 59.827 | 50.070 | 0.00 | 0.00 |
| ATOM | 2520 | O    | ALA | X | 163 | 38.966 | 59.572 | 51.239 | 0.00 | 0.00 |
| ATOM | 2521 | N    | PRO | X | 164 | 37.530 | 59.148 | 49.535 | 0.00 | 0.00 |
| ATOM | 2522 | CD   | PRO | X | 164 | 36.613 | 59.544 | 48.417 | 0.00 | 0.00 |
| ATOM | 2523 | HD2  | PRO | X | 164 | 36.981 | 59.165 | 47.464 | 0.00 | 0.00 |
| ATOM | 2524 | HD3  | PRO | X | 164 | 36.554 | 60.621 | 48.259 | 0.00 | 0.00 |
| ATOM | 2525 | CG   | PRO | X | 164 | 35.216 | 58.905 | 48.790 | 0.00 | 0.00 |
| ATOM | 2526 | HG2  | PRO | X | 164 | 34.466 | 58.698 | 48.027 | 0.00 | 0.00 |
| ATOM | 2527 | HG3  | PRO | X | 164 | 34.626 | 59.499 | 49.489 | 0.00 | 0.00 |
| ATOM | 2528 | CB   | PRO | X | 164 | 35.608 | 57.608 | 49.485 | 0.00 | 0.00 |
| ATOM | 2529 | HB2  | PRO | X | 164 | 35.814 | 56.896 | 48.686 | 0.00 | 0.00 |
| ATOM | 2530 | HB3  | PRO | X | 164 | 34.822 | 57.155 | 50.089 | 0.00 | 0.00 |
| ATOM | 2531 | CA   | PRO | X | 164 | 36.913 | 58.001 | 50.214 | 0.00 | 0.00 |
| ATOM | 2532 | HA   | PRO | X | 164 | 36.665 | 58.201 | 51.256 | 0.00 | 0.00 |
| ATOM | 2533 | C    | PRO | X | 164 | 37.797 | 56.808 | 50.396 | 0.00 | 0.00 |
| ATOM | 2534 | O    | PRO | X | 164 | 37.499 | 56.008 | 51.295 | 0.00 | 0.00 |
| ATOM | 2535 | N    | GLY | X | 165 | 38.840 | 56.592 | 49.609 | 0.00 | 0.00 |
| ATOM | 2536 | H    | GLY | X | 165 | 39.199 | 57.298 | 48.982 | 0.00 | 0.00 |
| ATOM | 2537 | CA   | GLY | X | 165 | 39.589 | 55.292 | 49.593 | 0.00 | 0.00 |
| ATOM | 2538 | HA2  | GLY | X | 165 | 40.628 | 55.600 | 49.485 | 0.00 | 0.00 |
| ATOM | 2539 | HA3  | GLY | X | 165 | 39.382 | 54.642 | 50.444 | 0.00 | 0.00 |
| ATOM | 2540 | C    | GLY | X | 165 | 39.325 | 54.474 | 48.431 | 0.00 | 0.00 |
| ATOM | 2541 | O    | GLY | X | 165 | 39.975 | 54.492 | 47.393 | 0.00 | 0.00 |
| ATOM | 2542 | N    | ASN | X | 166 | 38.251 | 53.740 | 48.451 | 0.00 | 0.00 |
| ATOM | 2543 | H    | ASN | X | 166 | 37.711 | 53.739 | 49.304 | 0.00 | 0.00 |
| ATOM | 2544 | CA   | ASN | X | 166 | 37.907 | 52.647 | 47.616 | 0.00 | 0.00 |

|      |      |      |     |   |     |        |        |        |      |      |
|------|------|------|-----|---|-----|--------|--------|--------|------|------|
| ATOM | 2545 | HA   | ASN | X | 166 | 38.825 | 52.112 | 47.373 | 0.00 | 0.00 |
| ATOM | 2546 | CB   | ASN | X | 166 | 37.008 | 51.625 | 48.363 | 0.00 | 0.00 |
| ATOM | 2547 | HB2  | ASN | X | 166 | 36.049 | 52.043 | 48.667 | 0.00 | 0.00 |
| ATOM | 2548 | HB3  | ASN | X | 166 | 36.778 | 50.731 | 47.783 | 0.00 | 0.00 |
| ATOM | 2549 | CG   | ASN | X | 166 | 37.656 | 51.272 | 49.722 | 0.00 | 0.00 |
| ATOM | 2550 | OD1  | ASN | X | 166 | 38.844 | 51.109 | 49.813 | 0.00 | 0.00 |
| ATOM | 2551 | ND2  | ASN | X | 166 | 36.975 | 51.171 | 50.888 | 0.00 | 0.00 |
| ATOM | 2552 | HD21 | ASN | X | 166 | 37.553 | 51.049 | 51.707 | 0.00 | 0.00 |
| ATOM | 2553 | HD22 | ASN | X | 166 | 35.975 | 51.266 | 50.989 | 0.00 | 0.00 |
| ATOM | 2554 | C    | ASN | X | 166 | 37.379 | 52.979 | 46.112 | 0.00 | 0.00 |
| ATOM | 2555 | O    | ASN | X | 166 | 36.586 | 52.323 | 45.416 | 0.00 | 0.00 |
| ATOM | 2556 | N    | VAL | X | 167 | 37.849 | 54.096 | 45.560 | 0.00 | 0.00 |
| ATOM | 2557 | H    | VAL | X | 167 | 38.555 | 54.584 | 46.092 | 0.00 | 0.00 |
| ATOM | 2558 | CA   | VAL | X | 167 | 37.338 | 54.724 | 44.287 | 0.00 | 0.00 |
| ATOM | 2559 | HA   | VAL | X | 167 | 36.251 | 54.635 | 44.288 | 0.00 | 0.00 |
| ATOM | 2560 | CB   | VAL | X | 167 | 37.608 | 56.200 | 44.173 | 0.00 | 0.00 |
| ATOM | 2561 | HB   | VAL | X | 167 | 36.984 | 56.569 | 43.359 | 0.00 | 0.00 |
| ATOM | 2562 | CG1  | VAL | X | 167 | 37.133 | 56.996 | 45.351 | 0.00 | 0.00 |
| ATOM | 2563 | HG11 | VAL | X | 167 | 36.138 | 56.696 | 45.679 | 0.00 | 0.00 |
| ATOM | 2564 | HG12 | VAL | X | 167 | 37.785 | 56.963 | 46.224 | 0.00 | 0.00 |
| ATOM | 2565 | HG13 | VAL | X | 167 | 36.988 | 58.001 | 44.955 | 0.00 | 0.00 |
| ATOM | 2566 | CG2  | VAL | X | 167 | 39.008 | 56.633 | 43.794 | 0.00 | 0.00 |
| ATOM | 2567 | HG21 | VAL | X | 167 | 39.658 | 56.551 | 44.666 | 0.00 | 0.00 |
| ATOM | 2568 | HG22 | VAL | X | 167 | 39.011 | 57.688 | 43.522 | 0.00 | 0.00 |
| ATOM | 2569 | HG23 | VAL | X | 167 | 39.418 | 55.974 | 43.029 | 0.00 | 0.00 |
| ATOM | 2570 | C    | VAL | X | 167 | 37.730 | 53.924 | 43.000 | 0.00 | 0.00 |
| ATOM | 2571 | O    | VAL | X | 167 | 36.992 | 53.913 | 42.035 | 0.00 | 0.00 |
| ATOM | 2572 | N    | GLY | X | 168 | 38.887 | 53.181 | 43.040 | 0.00 | 0.00 |
| ATOM | 2573 | H    | GLY | X | 168 | 39.430 | 53.233 | 43.891 | 0.00 | 0.00 |
| ATOM | 2574 | CA   | GLY | X | 168 | 39.360 | 52.314 | 41.950 | 0.00 | 0.00 |
| ATOM | 2575 | HA2  | GLY | X | 168 | 39.173 | 52.808 | 40.997 | 0.00 | 0.00 |
| ATOM | 2576 | HA3  | GLY | X | 168 | 40.414 | 52.087 | 42.108 | 0.00 | 0.00 |
| ATOM | 2577 | C    | GLY | X | 168 | 38.610 | 50.946 | 41.952 | 0.00 | 0.00 |
| ATOM | 2578 | O    | GLY | X | 168 | 38.521 | 50.292 | 40.924 | 0.00 | 0.00 |
| ATOM | 2579 | N    | LEU | X | 169 | 37.975 | 50.557 | 43.063 | 0.00 | 0.00 |
| ATOM | 2580 | H    | LEU | X | 169 | 37.934 | 51.180 | 43.856 | 0.00 | 0.00 |
| ATOM | 2581 | CA   | LEU | X | 169 | 36.909 | 49.578 | 43.002 | 0.00 | 0.00 |
| ATOM | 2582 | HA   | LEU | X | 169 | 37.129 | 48.821 | 42.250 | 0.00 | 0.00 |
| ATOM | 2583 | CB   | LEU | X | 169 | 36.669 | 48.841 | 44.387 | 0.00 | 0.00 |
| ATOM | 2584 | HB2  | LEU | X | 169 | 35.991 | 49.531 | 44.889 | 0.00 | 0.00 |
| ATOM | 2585 | HB3  | LEU | X | 169 | 36.093 | 47.919 | 44.312 | 0.00 | 0.00 |
| ATOM | 2586 | CG   | LEU | X | 169 | 37.960 | 48.523 | 45.158 | 0.00 | 0.00 |
| ATOM | 2587 | HG   | LEU | X | 169 | 38.625 | 49.370 | 45.328 | 0.00 | 0.00 |
| ATOM | 2588 | CD1  | LEU | X | 169 | 37.670 | 47.939 | 46.580 | 0.00 | 0.00 |
| ATOM | 2589 | HD11 | LEU | X | 169 | 38.526 | 47.585 | 47.154 | 0.00 | 0.00 |
| ATOM | 2590 | HD12 | LEU | X | 169 | 36.980 | 47.098 | 46.500 | 0.00 | 0.00 |
| ATOM | 2591 | HD13 | LEU | X | 169 | 37.206 | 48.795 | 47.070 | 0.00 | 0.00 |
| ATOM | 2592 | CD2  | LEU | X | 169 | 38.876 | 47.541 | 44.473 | 0.00 | 0.00 |
| ATOM | 2593 | HD21 | LEU | X | 169 | 39.075 | 47.873 | 43.454 | 0.00 | 0.00 |
| ATOM | 2594 | HD22 | LEU | X | 169 | 39.794 | 47.464 | 45.056 | 0.00 | 0.00 |
| ATOM | 2595 | HD23 | LEU | X | 169 | 38.396 | 46.564 | 44.423 | 0.00 | 0.00 |
| ATOM | 2596 | C    | LEU | X | 169 | 35.528 | 50.164 | 42.484 | 0.00 | 0.00 |
| ATOM | 2597 | O    | LEU | X | 169 | 34.845 | 49.478 | 41.782 | 0.00 | 0.00 |
| ATOM | 2598 | N    | LEU | X | 170 | 35.189 | 51.411 | 42.854 | 0.00 | 0.00 |
| ATOM | 2599 | H    | LEU | X | 170 | 35.818 | 51.937 | 43.443 | 0.00 | 0.00 |
| ATOM | 2600 | CA   | LEU | X | 170 | 34.016 | 52.116 | 42.273 | 0.00 | 0.00 |
| ATOM | 2601 | HA   | LEU | X | 170 | 33.167 | 51.440 | 42.376 | 0.00 | 0.00 |
| ATOM | 2602 | CB   | LEU | X | 170 | 33.704 | 53.407 | 43.038 | 0.00 | 0.00 |
| ATOM | 2603 | HB2  | LEU | X | 170 | 34.600 | 54.025 | 43.093 | 0.00 | 0.00 |
| ATOM | 2604 | HB3  | LEU | X | 170 | 32.883 | 53.947 | 42.569 | 0.00 | 0.00 |
| ATOM | 2605 | CG   | LEU | X | 170 | 33.241 | 53.225 | 44.515 | 0.00 | 0.00 |
| ATOM | 2606 | HG   | LEU | X | 170 | 33.903 | 52.593 | 45.107 | 0.00 | 0.00 |
| ATOM | 2607 | CD1  | LEU | X | 170 | 33.270 | 54.612 | 45.103 | 0.00 | 0.00 |
| ATOM | 2608 | HD11 | LEU | X | 170 | 34.284 | 55.001 | 45.197 | 0.00 | 0.00 |
| ATOM | 2609 | HD12 | LEU | X | 170 | 32.942 | 54.669 | 46.141 | 0.00 | 0.00 |
| ATOM | 2610 | HD13 | LEU | X | 170 | 32.537 | 55.198 | 44.548 | 0.00 | 0.00 |
| ATOM | 2611 | CD2  | LEU | X | 170 | 31.792 | 52.762 | 44.533 | 0.00 | 0.00 |

|      |      |      |     |   |     |        |        |        |      |      |
|------|------|------|-----|---|-----|--------|--------|--------|------|------|
| ATOM | 2612 | HD21 | LEU | X | 170 | 31.196 | 53.356 | 43.841 | 0.00 | 0.00 |
| ATOM | 2613 | HD22 | LEU | X | 170 | 31.791 | 51.708 | 44.252 | 0.00 | 0.00 |
| ATOM | 2614 | HD23 | LEU | X | 170 | 31.448 | 52.829 | 45.565 | 0.00 | 0.00 |
| ATOM | 2615 | C    | LEU | X | 170 | 34.069 | 52.369 | 40.754 | 0.00 | 0.00 |
| ATOM | 2616 | O    | LEU | X | 170 | 33.011 | 52.427 | 40.128 | 0.00 | 0.00 |
| ATOM | 2617 | N    | ASP | X | 171 | 35.219 | 52.667 | 40.177 | 0.00 | 0.00 |
| ATOM | 2618 | H    | ASP | X | 171 | 36.077 | 52.762 | 40.700 | 0.00 | 0.00 |
| ATOM | 2619 | CA   | ASP | X | 171 | 35.449 | 52.586 | 38.721 | 0.00 | 0.00 |
| ATOM | 2620 | HA   | ASP | X | 171 | 34.969 | 53.415 | 38.201 | 0.00 | 0.00 |
| ATOM | 2621 | CB   | ASP | X | 171 | 36.911 | 52.693 | 38.372 | 0.00 | 0.00 |
| ATOM | 2622 | HB2  | ASP | X | 171 | 37.475 | 51.882 | 38.832 | 0.00 | 0.00 |
| ATOM | 2623 | HB3  | ASP | X | 171 | 37.039 | 52.421 | 37.325 | 0.00 | 0.00 |
| ATOM | 2624 | CG   | ASP | X | 171 | 37.564 | 54.044 | 38.786 | 0.00 | 0.00 |
| ATOM | 2625 | OD1  | ASP | X | 171 | 36.898 | 55.048 | 39.154 | 0.00 | 0.00 |
| ATOM | 2626 | OD2  | ASP | X | 171 | 38.791 | 54.165 | 38.495 | 0.00 | 0.00 |
| ATOM | 2627 | C    | ASP | X | 171 | 34.856 | 51.264 | 38.194 | 0.00 | 0.00 |
| ATOM | 2628 | O    | ASP | X | 171 | 33.859 | 51.268 | 37.431 | 0.00 | 0.00 |
| ATOM | 2629 | N    | GLN | X | 172 | 35.357 | 50.079 | 38.648 | 0.00 | 0.00 |
| ATOM | 2630 | H    | GLN | X | 172 | 36.083 | 50.152 | 39.346 | 0.00 | 0.00 |
| ATOM | 2631 | CA   | GLN | X | 172 | 35.005 | 48.711 | 38.190 | 0.00 | 0.00 |
| ATOM | 2632 | HA   | GLN | X | 172 | 35.052 | 48.645 | 37.103 | 0.00 | 0.00 |
| ATOM | 2633 | CB   | GLN | X | 172 | 35.832 | 47.556 | 38.948 | 0.00 | 0.00 |
| ATOM | 2634 | HB2  | GLN | X | 172 | 35.624 | 47.600 | 40.017 | 0.00 | 0.00 |
| ATOM | 2635 | HB3  | GLN | X | 172 | 35.561 | 46.531 | 38.694 | 0.00 | 0.00 |
| ATOM | 2636 | CG   | GLN | X | 172 | 37.320 | 47.746 | 38.853 | 0.00 | 0.00 |
| ATOM | 2637 | HG2  | GLN | X | 172 | 37.716 | 47.301 | 37.940 | 0.00 | 0.00 |
| ATOM | 2638 | HG3  | GLN | X | 172 | 37.555 | 48.808 | 38.910 | 0.00 | 0.00 |
| ATOM | 2639 | CD   | GLN | X | 172 | 38.139 | 47.137 | 40.037 | 0.00 | 0.00 |
| ATOM | 2640 | OE1  | GLN | X | 172 | 37.591 | 46.608 | 40.992 | 0.00 | 0.00 |
| ATOM | 2641 | NE2  | GLN | X | 172 | 39.460 | 47.055 | 40.070 | 0.00 | 0.00 |
| ATOM | 2642 | HE21 | GLN | X | 172 | 39.759 | 46.706 | 40.969 | 0.00 | 0.00 |
| ATOM | 2643 | HE22 | GLN | X | 172 | 40.071 | 47.283 | 39.298 | 0.00 | 0.00 |
| ATOM | 2644 | C    | GLN | X | 172 | 33.529 | 48.430 | 38.486 | 0.00 | 0.00 |
| ATOM | 2645 | O    | GLN | X | 172 | 32.845 | 47.907 | 37.609 | 0.00 | 0.00 |
| ATOM | 2646 | N    | ARG | X | 173 | 32.946 | 48.918 | 39.570 | 0.00 | 0.00 |
| ATOM | 2647 | H    | ARG | X | 173 | 33.573 | 49.328 | 40.247 | 0.00 | 0.00 |
| ATOM | 2648 | CA   | ARG | X | 173 | 31.502 | 48.813 | 39.851 | 0.00 | 0.00 |
| ATOM | 2649 | HA   | ARG | X | 173 | 31.171 | 47.774 | 39.831 | 0.00 | 0.00 |
| ATOM | 2650 | CB   | ARG | X | 173 | 31.181 | 49.485 | 41.265 | 0.00 | 0.00 |
| ATOM | 2651 | HB2  | ARG | X | 173 | 31.927 | 49.201 | 42.007 | 0.00 | 0.00 |
| ATOM | 2652 | HB3  | ARG | X | 173 | 31.313 | 50.563 | 41.178 | 0.00 | 0.00 |
| ATOM | 2653 | CG   | ARG | X | 173 | 29.806 | 49.042 | 41.662 | 0.00 | 0.00 |
| ATOM | 2654 | HG2  | ARG | X | 173 | 29.125 | 49.256 | 40.839 | 0.00 | 0.00 |
| ATOM | 2655 | HG3  | ARG | X | 173 | 29.690 | 47.963 | 41.769 | 0.00 | 0.00 |
| ATOM | 2656 | CD   | ARG | X | 173 | 29.174 | 49.772 | 42.886 | 0.00 | 0.00 |
| ATOM | 2657 | HD2  | ARG | X | 173 | 29.668 | 50.742 | 42.949 | 0.00 | 0.00 |
| ATOM | 2658 | HD3  | ARG | X | 173 | 28.088 | 49.824 | 42.813 | 0.00 | 0.00 |
| ATOM | 2659 | NE   | ARG | X | 173 | 29.492 | 48.886 | 44.024 | 0.00 | 0.00 |
| ATOM | 2660 | HE   | ARG | X | 173 | 29.517 | 47.906 | 43.782 | 0.00 | 0.00 |
| ATOM | 2661 | CZ   | ARG | X | 173 | 29.742 | 49.207 | 45.274 | 0.00 | 0.00 |
| ATOM | 2662 | NH1  | ARG | X | 173 | 29.803 | 50.483 | 45.628 | 0.00 | 0.00 |
| ATOM | 2663 | HH11 | ARG | X | 173 | 29.317 | 51.248 | 45.184 | 0.00 | 0.00 |
| ATOM | 2664 | HH12 | ARG | X | 173 | 30.101 | 50.590 | 46.588 | 0.00 | 0.00 |
| ATOM | 2665 | NH2  | ARG | X | 173 | 30.088 | 48.261 | 46.137 | 0.00 | 0.00 |
| ATOM | 2666 | HH21 | ARG | X | 173 | 30.348 | 47.352 | 45.780 | 0.00 | 0.00 |
| ATOM | 2667 | HH22 | ARG | X | 173 | 30.141 | 48.353 | 47.141 | 0.00 | 0.00 |
| ATOM | 2668 | C    | ARG | X | 173 | 30.673 | 49.499 | 38.743 | 0.00 | 0.00 |
| ATOM | 2669 | O    | ARG | X | 173 | 29.598 | 49.050 | 38.295 | 0.00 | 0.00 |
| ATOM | 2670 | N    | LEU | X | 174 | 31.125 | 50.641 | 38.256 | 0.00 | 0.00 |
| ATOM | 2671 | H    | LEU | X | 174 | 32.020 | 50.937 | 38.619 | 0.00 | 0.00 |
| ATOM | 2672 | CA   | LEU | X | 174 | 30.399 | 51.567 | 37.394 | 0.00 | 0.00 |
| ATOM | 2673 | HA   | LEU | X | 174 | 29.390 | 51.538 | 37.805 | 0.00 | 0.00 |
| ATOM | 2674 | CB   | LEU | X | 174 | 30.851 | 53.071 | 37.491 | 0.00 | 0.00 |
| ATOM | 2675 | HB2  | LEU | X | 174 | 30.815 | 53.397 | 38.531 | 0.00 | 0.00 |
| ATOM | 2676 | HB3  | LEU | X | 174 | 31.891 | 53.054 | 37.165 | 0.00 | 0.00 |
| ATOM | 2677 | CG   | LEU | X | 174 | 30.102 | 54.089 | 36.619 | 0.00 | 0.00 |
| ATOM | 2678 | HG   | LEU | X | 174 | 29.897 | 53.774 | 35.596 | 0.00 | 0.00 |

|      |      |      |     |   |     |        |        |        |      |      |
|------|------|------|-----|---|-----|--------|--------|--------|------|------|
| ATOM | 2679 | CD1  | LEU | X | 174 | 28.685 | 54.119 | 37.188 | 0.00 | 0.00 |
| ATOM | 2680 | HD11 | LEU | X | 174 | 28.710 | 54.148 | 38.277 | 0.00 | 0.00 |
| ATOM | 2681 | HD12 | LEU | X | 174 | 28.004 | 53.333 | 36.861 | 0.00 | 0.00 |
| ATOM | 2682 | HD13 | LEU | X | 174 | 28.237 | 55.085 | 36.957 | 0.00 | 0.00 |
| ATOM | 2683 | CD2  | LEU | X | 174 | 30.837 | 55.390 | 36.542 | 0.00 | 0.00 |
| ATOM | 2684 | HD21 | LEU | X | 174 | 30.756 | 55.852 | 37.526 | 0.00 | 0.00 |
| ATOM | 2685 | HD22 | LEU | X | 174 | 31.879 | 55.302 | 36.233 | 0.00 | 0.00 |
| ATOM | 2686 | HD23 | LEU | X | 174 | 30.397 | 56.026 | 35.773 | 0.00 | 0.00 |
| ATOM | 2687 | C    | LEU | X | 174 | 30.418 | 50.919 | 35.963 | 0.00 | 0.00 |
| ATOM | 2688 | O    | LEU | X | 174 | 29.354 | 50.869 | 35.363 | 0.00 | 0.00 |
| ATOM | 2689 | N    | ALA | X | 175 | 31.539 | 50.305 | 35.601 | 0.00 | 0.00 |
| ATOM | 2690 | H    | ALA | X | 175 | 32.352 | 50.388 | 36.195 | 0.00 | 0.00 |
| ATOM | 2691 | CA   | ALA | X | 175 | 31.702 | 49.515 | 34.379 | 0.00 | 0.00 |
| ATOM | 2692 | HA   | ALA | X | 175 | 31.421 | 50.096 | 33.501 | 0.00 | 0.00 |
| ATOM | 2693 | CB   | ALA | X | 175 | 33.214 | 49.252 | 34.163 | 0.00 | 0.00 |
| ATOM | 2694 | HB1  | ALA | X | 175 | 33.777 | 50.167 | 34.345 | 0.00 | 0.00 |
| ATOM | 2695 | HB2  | ALA | X | 175 | 33.326 | 48.860 | 33.153 | 0.00 | 0.00 |
| ATOM | 2696 | HB3  | ALA | X | 175 | 33.574 | 48.457 | 34.816 | 0.00 | 0.00 |
| ATOM | 2697 | C    | ALA | X | 175 | 30.814 | 48.198 | 34.396 | 0.00 | 0.00 |
| ATOM | 2698 | O    | ALA | X | 175 | 30.189 | 47.877 | 33.391 | 0.00 | 0.00 |
| ATOM | 2699 | N    | LEU | X | 176 | 30.841 | 47.533 | 35.556 | 0.00 | 0.00 |
| ATOM | 2700 | H    | LEU | X | 176 | 31.396 | 47.810 | 36.353 | 0.00 | 0.00 |
| ATOM | 2701 | CA   | LEU | X | 176 | 29.872 | 46.385 | 35.758 | 0.00 | 0.00 |
| ATOM | 2702 | HA   | LEU | X | 176 | 30.071 | 45.632 | 34.996 | 0.00 | 0.00 |
| ATOM | 2703 | CB   | LEU | X | 176 | 30.008 | 45.704 | 37.151 | 0.00 | 0.00 |
| ATOM | 2704 | HB2  | LEU | X | 176 | 29.757 | 46.450 | 37.905 | 0.00 | 0.00 |
| ATOM | 2705 | HB3  | LEU | X | 176 | 29.180 | 44.998 | 37.201 | 0.00 | 0.00 |
| ATOM | 2706 | CG   | LEU | X | 176 | 31.292 | 44.937 | 37.422 | 0.00 | 0.00 |
| ATOM | 2707 | HG   | LEU | X | 176 | 32.170 | 45.571 | 37.298 | 0.00 | 0.00 |
| ATOM | 2708 | CD1  | LEU | X | 176 | 31.275 | 44.465 | 38.886 | 0.00 | 0.00 |
| ATOM | 2709 | HD11 | LEU | X | 176 | 31.988 | 43.672 | 39.113 | 0.00 | 0.00 |
| ATOM | 2710 | HD12 | LEU | X | 176 | 30.286 | 44.178 | 39.243 | 0.00 | 0.00 |
| ATOM | 2711 | HD13 | LEU | X | 176 | 31.486 | 45.355 | 39.478 | 0.00 | 0.00 |
| ATOM | 2712 | CD2  | LEU | X | 176 | 31.497 | 43.881 | 36.392 | 0.00 | 0.00 |
| ATOM | 2713 | HD21 | LEU | X | 176 | 30.596 | 43.279 | 36.276 | 0.00 | 0.00 |
| ATOM | 2714 | HD22 | LEU | X | 176 | 31.735 | 44.349 | 35.436 | 0.00 | 0.00 |
| ATOM | 2715 | HD23 | LEU | X | 176 | 32.297 | 43.195 | 36.670 | 0.00 | 0.00 |
| ATOM | 2716 | C    | LEU | X | 176 | 28.470 | 46.864 | 35.524 | 0.00 | 0.00 |
| ATOM | 2717 | O    | LEU | X | 176 | 27.746 | 46.258 | 34.782 | 0.00 | 0.00 |
| ATOM | 2718 | N    | GLN | X | 177 | 28.023 | 47.983 | 36.017 | 0.00 | 0.00 |
| ATOM | 2719 | H    | GLN | X | 177 | 28.643 | 48.491 | 36.632 | 0.00 | 0.00 |
| ATOM | 2720 | CA   | GLN | X | 177 | 26.668 | 48.463 | 35.751 | 0.00 | 0.00 |
| ATOM | 2721 | HA   | GLN | X | 177 | 26.016 | 47.595 | 35.848 | 0.00 | 0.00 |
| ATOM | 2722 | CB   | GLN | X | 177 | 26.243 | 49.552 | 36.717 | 0.00 | 0.00 |
| ATOM | 2723 | HB2  | GLN | X | 177 | 26.579 | 49.116 | 37.658 | 0.00 | 0.00 |
| ATOM | 2724 | HB3  | GLN | X | 177 | 26.771 | 50.496 | 36.585 | 0.00 | 0.00 |
| ATOM | 2725 | CG   | GLN | X | 177 | 24.773 | 49.633 | 36.739 | 0.00 | 0.00 |
| ATOM | 2726 | HG2  | GLN | X | 177 | 24.400 | 49.818 | 35.731 | 0.00 | 0.00 |
| ATOM | 2727 | HG3  | GLN | X | 177 | 24.296 | 48.726 | 37.111 | 0.00 | 0.00 |
| ATOM | 2728 | CD   | GLN | X | 177 | 24.419 | 50.803 | 37.618 | 0.00 | 0.00 |
| ATOM | 2729 | OE1  | GLN | X | 177 | 24.893 | 51.928 | 37.598 | 0.00 | 0.00 |
| ATOM | 2730 | NE2  | GLN | X | 177 | 23.409 | 50.667 | 38.457 | 0.00 | 0.00 |
| ATOM | 2731 | HE21 | GLN | X | 177 | 23.165 | 51.435 | 39.065 | 0.00 | 0.00 |
| ATOM | 2732 | HE22 | GLN | X | 177 | 22.910 | 49.810 | 38.648 | 0.00 | 0.00 |
| ATOM | 2733 | C    | GLN | X | 177 | 26.453 | 48.794 | 34.293 | 0.00 | 0.00 |
| ATOM | 2734 | O    | GLN | X | 177 | 25.394 | 48.547 | 33.752 | 0.00 | 0.00 |
| ATOM | 2735 | N    | TRP | X | 178 | 27.456 | 49.401 | 33.655 | 0.00 | 0.00 |
| ATOM | 2736 | H    | TRP | X | 178 | 28.231 | 49.724 | 34.216 | 0.00 | 0.00 |
| ATOM | 2737 | CA   | TRP | X | 178 | 27.534 | 49.585 | 32.202 | 0.00 | 0.00 |
| ATOM | 2738 | HA   | TRP | X | 178 | 26.746 | 50.274 | 31.900 | 0.00 | 0.00 |
| ATOM | 2739 | CB   | TRP | X | 178 | 28.806 | 50.351 | 31.773 | 0.00 | 0.00 |
| ATOM | 2740 | HB2  | TRP | X | 178 | 29.020 | 51.106 | 32.530 | 0.00 | 0.00 |
| ATOM | 2741 | HB3  | TRP | X | 178 | 29.599 | 49.611 | 31.664 | 0.00 | 0.00 |
| ATOM | 2742 | CG   | TRP | X | 178 | 28.771 | 50.983 | 30.431 | 0.00 | 0.00 |
| ATOM | 2743 | CD1  | TRP | X | 178 | 28.519 | 52.294 | 30.166 | 0.00 | 0.00 |
| ATOM | 2744 | HD1  | TRP | X | 178 | 28.567 | 53.058 | 30.928 | 0.00 | 0.00 |
| ATOM | 2745 | NE1  | TRP | X | 178 | 28.686 | 52.619 | 28.807 | 0.00 | 0.00 |

|      |      |      |     |   |     |        |        |        |      |      |
|------|------|------|-----|---|-----|--------|--------|--------|------|------|
| ATOM | 2746 | HE1  | TRP | X | 178 | 28.427 | 53.538 | 28.479 | 0.00 | 0.00 |
| ATOM | 2747 | CE2  | TRP | X | 178 | 28.794 | 51.474 | 28.087 | 0.00 | 0.00 |
| ATOM | 2748 | CZ2  | TRP | X | 178 | 28.841 | 51.269 | 26.700 | 0.00 | 0.00 |
| ATOM | 2749 | HZ2  | TRP | X | 178 | 28.724 | 52.016 | 25.928 | 0.00 | 0.00 |
| ATOM | 2750 | CH2  | TRP | X | 178 | 29.086 | 49.978 | 26.288 | 0.00 | 0.00 |
| ATOM | 2751 | HH2  | TRP | X | 178 | 29.203 | 49.896 | 25.217 | 0.00 | 0.00 |
| ATOM | 2752 | CZ3  | TRP | X | 178 | 29.214 | 48.910 | 27.193 | 0.00 | 0.00 |
| ATOM | 2753 | HZ3  | TRP | X | 178 | 29.432 | 47.913 | 26.839 | 0.00 | 0.00 |
| ATOM | 2754 | CE3  | TRP | X | 178 | 29.127 | 49.117 | 28.544 | 0.00 | 0.00 |
| ATOM | 2755 | HE3  | TRP | X | 178 | 29.308 | 48.290 | 29.215 | 0.00 | 0.00 |
| ATOM | 2756 | CD2  | TRP | X | 178 | 28.953 | 50.408 | 29.083 | 0.00 | 0.00 |
| ATOM | 2757 | C    | TRP | X | 178 | 27.337 | 48.247 | 31.442 | 0.00 | 0.00 |
| ATOM | 2758 | O    | TRP | X | 178 | 26.623 | 48.272 | 30.478 | 0.00 | 0.00 |
| ATOM | 2759 | N    | VAL | X | 179 | 28.043 | 47.207 | 31.790 | 0.00 | 0.00 |
| ATOM | 2760 | H    | VAL | X | 179 | 28.628 | 47.355 | 32.599 | 0.00 | 0.00 |
| ATOM | 2761 | CA   | VAL | X | 179 | 27.962 | 45.903 | 31.183 | 0.00 | 0.00 |
| ATOM | 2762 | HA   | VAL | X | 179 | 28.208 | 45.904 | 30.121 | 0.00 | 0.00 |
| ATOM | 2763 | CB   | VAL | X | 179 | 29.106 | 44.938 | 31.720 | 0.00 | 0.00 |
| ATOM | 2764 | HB   | VAL | X | 179 | 29.142 | 45.204 | 32.777 | 0.00 | 0.00 |
| ATOM | 2765 | CG1  | VAL | X | 179 | 28.910 | 43.433 | 31.580 | 0.00 | 0.00 |
| ATOM | 2766 | HG11 | VAL | X | 179 | 27.915 | 43.197 | 31.958 | 0.00 | 0.00 |
| ATOM | 2767 | HG12 | VAL | X | 179 | 28.939 | 43.138 | 30.532 | 0.00 | 0.00 |
| ATOM | 2768 | HG13 | VAL | X | 179 | 29.684 | 42.895 | 32.127 | 0.00 | 0.00 |
| ATOM | 2769 | CG2  | VAL | X | 179 | 30.409 | 45.499 | 31.221 | 0.00 | 0.00 |
| ATOM | 2770 | HG21 | VAL | X | 179 | 31.217 | 45.283 | 31.920 | 0.00 | 0.00 |
| ATOM | 2771 | HG22 | VAL | X | 179 | 30.263 | 46.578 | 31.174 | 0.00 | 0.00 |
| ATOM | 2772 | HG23 | VAL | X | 179 | 30.580 | 45.245 | 30.175 | 0.00 | 0.00 |
| ATOM | 2773 | C    | VAL | X | 179 | 26.516 | 45.380 | 31.295 | 0.00 | 0.00 |
| ATOM | 2774 | O    | VAL | X | 179 | 25.936 | 44.961 | 30.292 | 0.00 | 0.00 |
| ATOM | 2775 | N    | GLN | X | 180 | 25.958 | 45.479 | 32.573 | 0.00 | 0.00 |
| ATOM | 2776 | H    | GLN | X | 180 | 26.506 | 45.855 | 33.334 | 0.00 | 0.00 |
| ATOM | 2777 | CA   | GLN | X | 180 | 24.537 | 45.153 | 32.773 | 0.00 | 0.00 |
| ATOM | 2778 | HA   | GLN | X | 180 | 24.338 | 44.103 | 32.559 | 0.00 | 0.00 |
| ATOM | 2779 | CB   | GLN | X | 180 | 24.080 | 45.178 | 34.201 | 0.00 | 0.00 |
| ATOM | 2780 | HB2  | GLN | X | 180 | 24.442 | 46.125 | 34.600 | 0.00 | 0.00 |
| ATOM | 2781 | HB3  | GLN | X | 180 | 22.994 | 45.248 | 34.260 | 0.00 | 0.00 |
| ATOM | 2782 | CG   | GLN | X | 180 | 24.597 | 44.046 | 35.083 | 0.00 | 0.00 |
| ATOM | 2783 | HG2  | GLN | X | 180 | 25.668 | 44.247 | 35.051 | 0.00 | 0.00 |
| ATOM | 2784 | HG3  | GLN | X | 180 | 24.285 | 44.172 | 36.120 | 0.00 | 0.00 |
| ATOM | 2785 | CD   | GLN | X | 180 | 24.299 | 42.612 | 34.639 | 0.00 | 0.00 |
| ATOM | 2786 | OE1  | GLN | X | 180 | 23.210 | 42.300 | 34.180 | 0.00 | 0.00 |
| ATOM | 2787 | NE2  | GLN | X | 180 | 25.237 | 41.748 | 34.828 | 0.00 | 0.00 |
| ATOM | 2788 | HE21 | GLN | X | 180 | 25.009 | 40.836 | 34.461 | 0.00 | 0.00 |
| ATOM | 2789 | HE22 | GLN | X | 180 | 25.986 | 41.927 | 35.482 | 0.00 | 0.00 |
| ATOM | 2790 | C    | GLN | X | 180 | 23.574 | 46.102 | 31.934 | 0.00 | 0.00 |
| ATOM | 2791 | O    | GLN | X | 180 | 22.424 | 45.773 | 31.705 | 0.00 | 0.00 |
| ATOM | 2792 | N    | GLU | X | 181 | 24.036 | 47.319 | 31.493 | 0.00 | 0.00 |
| ATOM | 2793 | H    | GLU | X | 181 | 24.943 | 47.642 | 31.798 | 0.00 | 0.00 |
| ATOM | 2794 | CA   | GLU | X | 181 | 23.170 | 48.108 | 30.587 | 0.00 | 0.00 |
| ATOM | 2795 | HA   | GLU | X | 181 | 22.104 | 47.978 | 30.774 | 0.00 | 0.00 |
| ATOM | 2796 | CB   | GLU | X | 181 | 23.415 | 49.545 | 31.003 | 0.00 | 0.00 |
| ATOM | 2797 | HB2  | GLU | X | 181 | 24.466 | 49.831 | 30.965 | 0.00 | 0.00 |
| ATOM | 2798 | HB3  | GLU | X | 181 | 23.023 | 50.240 | 30.261 | 0.00 | 0.00 |
| ATOM | 2799 | CG   | GLU | X | 181 | 22.808 | 49.918 | 32.342 | 0.00 | 0.00 |
| ATOM | 2800 | HG2  | GLU | X | 181 | 22.894 | 49.022 | 32.957 | 0.00 | 0.00 |
| ATOM | 2801 | HG3  | GLU | X | 181 | 23.254 | 50.809 | 32.784 | 0.00 | 0.00 |
| ATOM | 2802 | CD   | GLU | X | 181 | 21.379 | 50.114 | 32.053 | 0.00 | 0.00 |
| ATOM | 2803 | OE1  | GLU | X | 181 | 20.454 | 49.294 | 32.362 | 0.00 | 0.00 |
| ATOM | 2804 | OE2  | GLU | X | 181 | 21.040 | 51.232 | 31.608 | 0.00 | 0.00 |
| ATOM | 2805 | C    | GLU | X | 181 | 23.325 | 47.998 | 29.045 | 0.00 | 0.00 |
| ATOM | 2806 | O    | GLU | X | 181 | 22.465 | 48.308 | 28.232 | 0.00 | 0.00 |
| ATOM | 2807 | N    | ASN | X | 182 | 24.519 | 47.500 | 28.616 | 0.00 | 0.00 |
| ATOM | 2808 | H    | ASN | X | 182 | 25.258 | 47.366 | 29.291 | 0.00 | 0.00 |
| ATOM | 2809 | CA   | ASN | X | 182 | 24.860 | 47.395 | 27.187 | 0.00 | 0.00 |
| ATOM | 2810 | HA   | ASN | X | 182 | 23.991 | 47.668 | 26.588 | 0.00 | 0.00 |
| ATOM | 2811 | CB   | ASN | X | 182 | 25.936 | 48.460 | 26.998 | 0.00 | 0.00 |
| ATOM | 2812 | HB2  | ASN | X | 182 | 26.799 | 48.288 | 27.642 | 0.00 | 0.00 |

|      |      |      |     |   |     |        |        |        |      |      |
|------|------|------|-----|---|-----|--------|--------|--------|------|------|
| ATOM | 2813 | HB3  | ASN | X | 182 | 26.280 | 48.527 | 25.966 | 0.00 | 0.00 |
| ATOM | 2814 | CG   | ASN | X | 182 | 25.444 | 49.883 | 27.449 | 0.00 | 0.00 |
| ATOM | 2815 | OD1  | ASN | X | 182 | 24.794 | 50.577 | 26.747 | 0.00 | 0.00 |
| ATOM | 2816 | ND2  | ASN | X | 182 | 25.831 | 50.338 | 28.620 | 0.00 | 0.00 |
| ATOM | 2817 | HD21 | ASN | X | 182 | 25.335 | 51.134 | 28.994 | 0.00 | 0.00 |
| ATOM | 2818 | HD22 | ASN | X | 182 | 26.448 | 49.765 | 29.178 | 0.00 | 0.00 |
| ATOM | 2819 | C    | ASN | X | 182 | 25.380 | 46.058 | 26.662 | 0.00 | 0.00 |
| ATOM | 2820 | O    | ASN | X | 182 | 25.626 | 45.959 | 25.437 | 0.00 | 0.00 |
| ATOM | 2821 | N    | VAL | X | 183 | 25.648 | 45.031 | 27.492 | 0.00 | 0.00 |
| ATOM | 2822 | H    | VAL | X | 183 | 25.310 | 45.076 | 28.442 | 0.00 | 0.00 |
| ATOM | 2823 | CA   | VAL | X | 183 | 26.186 | 43.746 | 27.011 | 0.00 | 0.00 |
| ATOM | 2824 | HA   | VAL | X | 183 | 27.058 | 44.069 | 26.442 | 0.00 | 0.00 |
| ATOM | 2825 | CB   | VAL | X | 183 | 26.781 | 42.899 | 28.141 | 0.00 | 0.00 |
| ATOM | 2826 | HB   | VAL | X | 183 | 27.284 | 43.588 | 28.820 | 0.00 | 0.00 |
| ATOM | 2827 | CG1  | VAL | X | 183 | 25.765 | 41.964 | 28.914 | 0.00 | 0.00 |
| ATOM | 2828 | HG11 | VAL | X | 183 | 26.154 | 41.855 | 29.926 | 0.00 | 0.00 |
| ATOM | 2829 | HG12 | VAL | X | 183 | 24.798 | 42.467 | 28.916 | 0.00 | 0.00 |
| ATOM | 2830 | HG13 | VAL | X | 183 | 25.568 | 40.988 | 28.470 | 0.00 | 0.00 |
| ATOM | 2831 | CG2  | VAL | X | 183 | 27.838 | 41.939 | 27.680 | 0.00 | 0.00 |
| ATOM | 2832 | HG21 | VAL | X | 183 | 27.484 | 41.060 | 27.142 | 0.00 | 0.00 |
| ATOM | 2833 | HG22 | VAL | X | 183 | 28.431 | 41.657 | 28.549 | 0.00 | 0.00 |
| ATOM | 2834 | HG23 | VAL | X | 183 | 28.508 | 42.514 | 27.040 | 0.00 | 0.00 |
| ATOM | 2835 | C    | VAL | X | 183 | 25.400 | 42.909 | 26.044 | 0.00 | 0.00 |
| ATOM | 2836 | O    | VAL | X | 183 | 25.958 | 42.101 | 25.354 | 0.00 | 0.00 |
| ATOM | 2837 | N    | ALA | X | 184 | 24.031 | 43.060 | 26.060 | 0.00 | 0.00 |
| ATOM | 2838 | H    | ALA | X | 184 | 23.567 | 43.712 | 26.676 | 0.00 | 0.00 |
| ATOM | 2839 | CA   | ALA | X | 184 | 23.209 | 42.235 | 25.144 | 0.00 | 0.00 |
| ATOM | 2840 | HA   | ALA | X | 184 | 23.625 | 41.229 | 25.090 | 0.00 | 0.00 |
| ATOM | 2841 | CB   | ALA | X | 184 | 21.749 | 42.053 | 25.558 | 0.00 | 0.00 |
| ATOM | 2842 | HB1  | ALA | X | 184 | 21.609 | 41.266 | 26.299 | 0.00 | 0.00 |
| ATOM | 2843 | HB2  | ALA | X | 184 | 21.225 | 41.821 | 24.631 | 0.00 | 0.00 |
| ATOM | 2844 | HB3  | ALA | X | 184 | 21.338 | 42.895 | 26.116 | 0.00 | 0.00 |
| ATOM | 2845 | C    | ALA | X | 184 | 23.392 | 42.821 | 23.619 | 0.00 | 0.00 |
| ATOM | 2846 | O    | ALA | X | 184 | 23.254 | 42.133 | 22.627 | 0.00 | 0.00 |
| ATOM | 2847 | N    | ALA | X | 185 | 23.749 | 44.115 | 23.479 | 0.00 | 0.00 |
| ATOM | 2848 | H    | ALA | X | 185 | 23.838 | 44.723 | 24.280 | 0.00 | 0.00 |
| ATOM | 2849 | CA   | ALA | X | 185 | 24.030 | 44.690 | 22.185 | 0.00 | 0.00 |
| ATOM | 2850 | HA   | ALA | X | 185 | 23.177 | 44.391 | 21.575 | 0.00 | 0.00 |
| ATOM | 2851 | CB   | ALA | X | 185 | 24.287 | 46.217 | 22.326 | 0.00 | 0.00 |
| ATOM | 2852 | HB1  | ALA | X | 185 | 23.328 | 46.656 | 22.600 | 0.00 | 0.00 |
| ATOM | 2853 | HB2  | ALA | X | 185 | 24.666 | 46.691 | 21.420 | 0.00 | 0.00 |
| ATOM | 2854 | HB3  | ALA | X | 185 | 25.005 | 46.508 | 23.092 | 0.00 | 0.00 |
| ATOM | 2855 | C    | ALA | X | 185 | 25.338 | 44.077 | 21.552 | 0.00 | 0.00 |
| ATOM | 2856 | O    | ALA | X | 185 | 25.395 | 44.004 | 20.307 | 0.00 | 0.00 |
| ATOM | 2857 | N    | PHE | X | 186 | 26.367 | 43.815 | 22.360 | 0.00 | 0.00 |
| ATOM | 2858 | H    | PHE | X | 186 | 26.116 | 43.853 | 23.338 | 0.00 | 0.00 |
| ATOM | 2859 | CA   | PHE | X | 186 | 27.537 | 43.022 | 22.004 | 0.00 | 0.00 |
| ATOM | 2860 | HA   | PHE | X | 186 | 27.947 | 43.402 | 21.068 | 0.00 | 0.00 |
| ATOM | 2861 | CB   | PHE | X | 186 | 28.691 | 43.339 | 22.978 | 0.00 | 0.00 |
| ATOM | 2862 | HB2  | PHE | X | 186 | 28.386 | 42.947 | 23.948 | 0.00 | 0.00 |
| ATOM | 2863 | HB3  | PHE | X | 186 | 29.532 | 42.705 | 22.699 | 0.00 | 0.00 |
| ATOM | 2864 | CG   | PHE | X | 186 | 29.036 | 44.764 | 23.013 | 0.00 | 0.00 |
| ATOM | 2865 | CD1  | PHE | X | 186 | 28.496 | 45.553 | 23.994 | 0.00 | 0.00 |
| ATOM | 2866 | HD1  | PHE | X | 186 | 27.979 | 45.084 | 24.818 | 0.00 | 0.00 |
| ATOM | 2867 | CE1  | PHE | X | 186 | 28.660 | 46.966 | 24.011 | 0.00 | 0.00 |
| ATOM | 2868 | HE1  | PHE | X | 186 | 28.204 | 47.719 | 24.637 | 0.00 | 0.00 |
| ATOM | 2869 | CZ   | PHE | X | 186 | 29.398 | 47.528 | 22.955 | 0.00 | 0.00 |
| ATOM | 2870 | HZ   | PHE | X | 186 | 29.479 | 48.604 | 22.898 | 0.00 | 0.00 |
| ATOM | 2871 | CE2  | PHE | X | 186 | 30.039 | 46.746 | 21.973 | 0.00 | 0.00 |
| ATOM | 2872 | HE2  | PHE | X | 186 | 30.573 | 47.115 | 21.110 | 0.00 | 0.00 |
| ATOM | 2873 | CD2  | PHE | X | 186 | 29.867 | 45.318 | 22.002 | 0.00 | 0.00 |
| ATOM | 2874 | HD2  | PHE | X | 186 | 30.240 | 44.737 | 21.171 | 0.00 | 0.00 |
| ATOM | 2875 | C    | PHE | X | 186 | 27.243 | 41.540 | 21.702 | 0.00 | 0.00 |
| ATOM | 2876 | O    | PHE | X | 186 | 28.259 | 40.921 | 21.304 | 0.00 | 0.00 |
| ATOM | 2877 | N    | GLY | X | 187 | 26.021 | 41.086 | 22.013 | 0.00 | 0.00 |
| ATOM | 2878 | H    | GLY | X | 187 | 25.406 | 41.806 | 22.365 | 0.00 | 0.00 |
| ATOM | 2879 | CA   | GLY | X | 187 | 25.487 | 39.760 | 21.729 | 0.00 | 0.00 |

|      |      |      |     |   |     |        |        |        |      |      |
|------|------|------|-----|---|-----|--------|--------|--------|------|------|
| ATOM | 2880 | HA2  | GLY | X | 187 | 24.449 | 39.868 | 21.415 | 0.00 | 0.00 |
| ATOM | 2881 | HA3  | GLY | X | 187 | 25.922 | 39.340 | 20.822 | 0.00 | 0.00 |
| ATOM | 2882 | C    | GLY | X | 187 | 25.579 | 38.770 | 22.860 | 0.00 | 0.00 |
| ATOM | 2883 | O    | GLY | X | 187 | 25.065 | 37.640 | 22.664 | 0.00 | 0.00 |
| ATOM | 2884 | N    | GLY | X | 188 | 26.097 | 39.084 | 24.108 | 0.00 | 0.00 |
| ATOM | 2885 | H    | GLY | X | 188 | 26.375 | 40.037 | 24.298 | 0.00 | 0.00 |
| ATOM | 2886 | CA   | GLY | X | 188 | 26.002 | 38.279 | 25.365 | 0.00 | 0.00 |
| ATOM | 2887 | HA2  | GLY | X | 188 | 26.314 | 37.262 | 25.127 | 0.00 | 0.00 |
| ATOM | 2888 | HA3  | GLY | X | 188 | 26.736 | 38.654 | 26.079 | 0.00 | 0.00 |
| ATOM | 2889 | C    | GLY | X | 188 | 24.576 | 38.309 | 26.033 | 0.00 | 0.00 |
| ATOM | 2890 | O    | GLY | X | 188 | 23.535 | 38.516 | 25.429 | 0.00 | 0.00 |
| ATOM | 2891 | N    | ASP | X | 189 | 24.639 | 37.739 | 27.262 | 0.00 | 0.00 |
| ATOM | 2892 | H    | ASP | X | 189 | 25.574 | 37.462 | 27.524 | 0.00 | 0.00 |
| ATOM | 2893 | CA   | ASP | X | 189 | 23.542 | 37.419 | 28.178 | 0.00 | 0.00 |
| ATOM | 2894 | HA   | ASP | X | 189 | 22.631 | 37.868 | 27.783 | 0.00 | 0.00 |
| ATOM | 2895 | CB   | ASP | X | 189 | 23.406 | 35.919 | 28.248 | 0.00 | 0.00 |
| ATOM | 2896 | HB2  | ASP | X | 189 | 23.003 | 35.518 | 27.318 | 0.00 | 0.00 |
| ATOM | 2897 | HB3  | ASP | X | 189 | 24.375 | 35.472 | 28.469 | 0.00 | 0.00 |
| ATOM | 2898 | CG   | ASP | X | 189 | 22.414 | 35.458 | 29.318 | 0.00 | 0.00 |
| ATOM | 2899 | OD1  | ASP | X | 189 | 22.428 | 34.255 | 29.602 | 0.00 | 0.00 |
| ATOM | 2900 | OD2  | ASP | X | 189 | 21.588 | 36.272 | 29.731 | 0.00 | 0.00 |
| ATOM | 2901 | C    | ASP | X | 189 | 23.854 | 38.121 | 29.451 | 0.00 | 0.00 |
| ATOM | 2902 | O    | ASP | X | 189 | 24.750 | 37.639 | 30.109 | 0.00 | 0.00 |
| ATOM | 2903 | N    | PRO | X | 190 | 23.136 | 39.238 | 29.800 | 0.00 | 0.00 |
| ATOM | 2904 | CD   | PRO | X | 190 | 21.842 | 39.730 | 29.312 | 0.00 | 0.00 |
| ATOM | 2905 | HD2  | PRO | X | 190 | 20.959 | 39.338 | 29.817 | 0.00 | 0.00 |
| ATOM | 2906 | HD3  | PRO | X | 190 | 21.723 | 39.635 | 28.233 | 0.00 | 0.00 |
| ATOM | 2907 | CG   | PRO | X | 190 | 21.891 | 41.227 | 29.628 | 0.00 | 0.00 |
| ATOM | 2908 | HG2  | PRO | X | 190 | 20.884 | 41.614 | 29.784 | 0.00 | 0.00 |
| ATOM | 2909 | HG3  | PRO | X | 190 | 22.358 | 41.853 | 28.867 | 0.00 | 0.00 |
| ATOM | 2910 | CB   | PRO | X | 190 | 22.530 | 41.173 | 31.028 | 0.00 | 0.00 |
| ATOM | 2911 | HB2  | PRO | X | 190 | 21.659 | 41.133 | 31.681 | 0.00 | 0.00 |
| ATOM | 2912 | HB3  | PRO | X | 190 | 23.040 | 42.127 | 31.161 | 0.00 | 0.00 |
| ATOM | 2913 | CA   | PRO | X | 190 | 23.406 | 39.925 | 31.042 | 0.00 | 0.00 |
| ATOM | 2914 | HA   | PRO | X | 190 | 24.456 | 40.197 | 31.146 | 0.00 | 0.00 |
| ATOM | 2915 | C    | PRO | X | 190 | 23.077 | 39.035 | 32.299 | 0.00 | 0.00 |
| ATOM | 2916 | O    | PRO | X | 190 | 23.589 | 39.369 | 33.410 | 0.00 | 0.00 |
| ATOM | 2917 | N    | THR | X | 191 | 22.367 | 37.897 | 32.068 | 0.00 | 0.00 |
| ATOM | 2918 | H    | THR | X | 191 | 21.994 | 37.653 | 31.161 | 0.00 | 0.00 |
| ATOM | 2919 | CA   | THR | X | 191 | 22.167 | 36.939 | 33.132 | 0.00 | 0.00 |
| ATOM | 2920 | HA   | THR | X | 191 | 22.216 | 37.476 | 34.080 | 0.00 | 0.00 |
| ATOM | 2921 | CB   | THR | X | 191 | 20.845 | 36.242 | 33.037 | 0.00 | 0.00 |
| ATOM | 2922 | HB   | THR | X | 191 | 20.703 | 35.820 | 34.033 | 0.00 | 0.00 |
| ATOM | 2923 | CG2  | THR | X | 191 | 19.648 | 37.224 | 32.850 | 0.00 | 0.00 |
| ATOM | 2924 | HG21 | THR | X | 191 | 18.694 | 36.704 | 32.941 | 0.00 | 0.00 |
| ATOM | 2925 | HG22 | THR | X | 191 | 19.736 | 37.820 | 31.942 | 0.00 | 0.00 |
| ATOM | 2926 | HG23 | THR | X | 191 | 19.582 | 37.909 | 33.695 | 0.00 | 0.00 |
| ATOM | 2927 | OG1  | THR | X | 191 | 20.732 | 35.273 | 32.063 | 0.00 | 0.00 |
| ATOM | 2928 | HG1  | THR | X | 191 | 21.049 | 35.606 | 31.220 | 0.00 | 0.00 |
| ATOM | 2929 | C    | THR | X | 191 | 23.268 | 35.936 | 33.310 | 0.00 | 0.00 |
| ATOM | 2930 | O    | THR | X | 191 | 23.151 | 35.040 | 34.132 | 0.00 | 0.00 |
| ATOM | 2931 | N    | SER | X | 192 | 24.409 | 36.149 | 32.621 | 0.00 | 0.00 |
| ATOM | 2932 | H    | SER | X | 192 | 24.418 | 36.983 | 32.051 | 0.00 | 0.00 |
| ATOM | 2933 | CA   | SER | X | 192 | 25.394 | 35.117 | 32.491 | 0.00 | 0.00 |
| ATOM | 2934 | HA   | SER | X | 192 | 25.329 | 34.441 | 33.343 | 0.00 | 0.00 |
| ATOM | 2935 | CB   | SER | X | 192 | 25.286 | 34.346 | 31.168 | 0.00 | 0.00 |
| ATOM | 2936 | HB2  | SER | X | 192 | 25.097 | 35.004 | 30.319 | 0.00 | 0.00 |
| ATOM | 2937 | HB3  | SER | X | 192 | 26.172 | 33.725 | 31.040 | 0.00 | 0.00 |
| ATOM | 2938 | OG   | SER | X | 192 | 24.224 | 33.431 | 31.304 | 0.00 | 0.00 |
| ATOM | 2939 | HG   | SER | X | 192 | 23.505 | 33.584 | 30.688 | 0.00 | 0.00 |
| ATOM | 2940 | C    | SER | X | 192 | 26.790 | 35.753 | 32.669 | 0.00 | 0.00 |
| ATOM | 2941 | O    | SER | X | 192 | 27.746 | 35.285 | 32.045 | 0.00 | 0.00 |
| ATOM | 2942 | N    | VAL | X | 193 | 26.994 | 36.747 | 33.513 | 0.00 | 0.00 |
| ATOM | 2943 | H    | VAL | X | 193 | 26.209 | 37.078 | 34.055 | 0.00 | 0.00 |
| ATOM | 2944 | CA   | VAL | X | 193 | 28.203 | 37.511 | 33.777 | 0.00 | 0.00 |
| ATOM | 2945 | HA   | VAL | X | 193 | 28.816 | 37.363 | 32.888 | 0.00 | 0.00 |
| ATOM | 2946 | CB   | VAL | X | 193 | 27.981 | 39.018 | 34.107 | 0.00 | 0.00 |



|      |      |      |     |   |     |        |        |        |      |      |
|------|------|------|-----|---|-----|--------|--------|--------|------|------|
| ATOM | 2947 | HB   | VAL | X | 193 | 27.297 | 39.159 | 34.944 | 0.00 | 0.00 |
| ATOM | 2948 | CG1  | VAL | X | 193 | 29.287 | 39.811 | 34.415 | 0.00 | 0.00 |
| ATOM | 2949 | HG11 | VAL | X | 193 | 29.124 | 40.872 | 34.604 | 0.00 | 0.00 |
| ATOM | 2950 | HG12 | VAL | X | 193 | 29.785 | 39.411 | 35.298 | 0.00 | 0.00 |
| ATOM | 2951 | HG13 | VAL | X | 193 | 30.043 | 39.663 | 33.644 | 0.00 | 0.00 |
| ATOM | 2952 | CG2  | VAL | X | 193 | 27.260 | 39.622 | 32.943 | 0.00 | 0.00 |
| ATOM | 2953 | HG21 | VAL | X | 193 | 26.261 | 39.198 | 32.843 | 0.00 | 0.00 |
| ATOM | 2954 | HG22 | VAL | X | 193 | 27.821 | 39.414 | 32.032 | 0.00 | 0.00 |
| ATOM | 2955 | HG23 | VAL | X | 193 | 27.376 | 40.698 | 33.076 | 0.00 | 0.00 |
| ATOM | 2956 | C    | VAL | X | 193 | 29.047 | 36.934 | 34.914 | 0.00 | 0.00 |
| ATOM | 2957 | O    | VAL | X | 193 | 28.668 | 36.980 | 36.089 | 0.00 | 0.00 |
| ATOM | 2958 | N    | THR | X | 194 | 30.261 | 36.439 | 34.599 | 0.00 | 0.00 |
| ATOM | 2959 | H    | THR | X | 194 | 30.484 | 36.516 | 33.617 | 0.00 | 0.00 |
| ATOM | 2960 | CA   | THR | X | 194 | 31.370 | 35.995 | 35.460 | 0.00 | 0.00 |
| ATOM | 2961 | HA   | THR | X | 194 | 31.114 | 35.733 | 36.487 | 0.00 | 0.00 |
| ATOM | 2962 | CB   | THR | X | 194 | 31.801 | 34.680 | 34.837 | 0.00 | 0.00 |
| ATOM | 2963 | HB   | THR | X | 194 | 32.268 | 34.846 | 33.867 | 0.00 | 0.00 |
| ATOM | 2964 | CG2  | THR | X | 194 | 32.780 | 34.017 | 35.875 | 0.00 | 0.00 |
| ATOM | 2965 | HG21 | THR | X | 194 | 32.292 | 34.051 | 36.849 | 0.00 | 0.00 |
| ATOM | 2966 | HG22 | THR | X | 194 | 33.698 | 34.605 | 35.915 | 0.00 | 0.00 |
| ATOM | 2967 | HG23 | THR | X | 194 | 32.982 | 32.998 | 35.546 | 0.00 | 0.00 |
| ATOM | 2968 | OG1  | THR | X | 194 | 30.737 | 33.812 | 34.555 | 0.00 | 0.00 |
| ATOM | 2969 | HG1  | THR | X | 194 | 29.886 | 34.210 | 34.358 | 0.00 | 0.00 |
| ATOM | 2970 | C    | THR | X | 194 | 32.450 | 36.988 | 35.329 | 0.00 | 0.00 |
| ATOM | 2971 | O    | THR | X | 194 | 32.703 | 37.495 | 34.217 | 0.00 | 0.00 |
| ATOM | 2972 | N    | LEU | X | 195 | 33.025 | 37.295 | 36.509 | 0.00 | 0.00 |
| ATOM | 2973 | H    | LEU | X | 195 | 32.748 | 36.968 | 37.423 | 0.00 | 0.00 |
| ATOM | 2974 | CA   | LEU | X | 195 | 34.267 | 38.058 | 36.603 | 0.00 | 0.00 |
| ATOM | 2975 | HA   | LEU | X | 195 | 34.412 | 38.740 | 35.765 | 0.00 | 0.00 |
| ATOM | 2976 | CB   | LEU | X | 195 | 34.359 | 38.894 | 37.870 | 0.00 | 0.00 |
| ATOM | 2977 | HB2  | LEU | X | 195 | 34.575 | 38.343 | 38.785 | 0.00 | 0.00 |
| ATOM | 2978 | HB3  | LEU | X | 195 | 35.136 | 39.629 | 37.658 | 0.00 | 0.00 |
| ATOM | 2979 | CG   | LEU | X | 195 | 33.079 | 39.659 | 38.293 | 0.00 | 0.00 |
| ATOM | 2980 | HG   | LEU | X | 195 | 32.349 | 38.955 | 38.694 | 0.00 | 0.00 |
| ATOM | 2981 | CD1  | LEU | X | 195 | 33.300 | 40.580 | 39.501 | 0.00 | 0.00 |
| ATOM | 2982 | HD11 | LEU | X | 195 | 33.991 | 40.145 | 40.223 | 0.00 | 0.00 |
| ATOM | 2983 | HD12 | LEU | X | 195 | 32.355 | 40.734 | 40.021 | 0.00 | 0.00 |
| ATOM | 2984 | HD13 | LEU | X | 195 | 33.772 | 41.515 | 39.197 | 0.00 | 0.00 |
| ATOM | 2985 | CD2  | LEU | X | 195 | 32.350 | 40.374 | 37.119 | 0.00 | 0.00 |
| ATOM | 2986 | HD21 | LEU | X | 195 | 31.477 | 40.881 | 37.530 | 0.00 | 0.00 |
| ATOM | 2987 | HD22 | LEU | X | 195 | 32.945 | 41.129 | 36.606 | 0.00 | 0.00 |
| ATOM | 2988 | HD23 | LEU | X | 195 | 31.918 | 39.669 | 36.408 | 0.00 | 0.00 |
| ATOM | 2989 | C    | LEU | X | 195 | 35.447 | 37.040 | 36.640 | 0.00 | 0.00 |
| ATOM | 2990 | O    | LEU | X | 195 | 35.339 | 36.057 | 37.346 | 0.00 | 0.00 |
| ATOM | 2991 | N    | PHE | X | 196 | 36.612 | 37.489 | 36.111 | 0.00 | 0.00 |
| ATOM | 2992 | H    | PHE | X | 196 | 36.684 | 38.319 | 35.541 | 0.00 | 0.00 |
| ATOM | 2993 | CA   | PHE | X | 196 | 37.849 | 36.726 | 36.424 | 0.00 | 0.00 |
| ATOM | 2994 | HA   | PHE | X | 196 | 37.622 | 36.353 | 37.422 | 0.00 | 0.00 |
| ATOM | 2995 | CB   | PHE | X | 196 | 38.108 | 35.606 | 35.364 | 0.00 | 0.00 |
| ATOM | 2996 | HB2  | PHE | X | 196 | 38.956 | 35.038 | 35.748 | 0.00 | 0.00 |
| ATOM | 2997 | HB3  | PHE | X | 196 | 37.224 | 34.970 | 35.317 | 0.00 | 0.00 |
| ATOM | 2998 | CG   | PHE | X | 196 | 38.352 | 35.973 | 33.868 | 0.00 | 0.00 |
| ATOM | 2999 | CD1  | PHE | X | 196 | 37.564 | 36.877 | 33.152 | 0.00 | 0.00 |
| ATOM | 3000 | HD1  | PHE | X | 196 | 36.728 | 37.283 | 33.702 | 0.00 | 0.00 |
| ATOM | 3001 | CE1  | PHE | X | 196 | 37.937 | 37.192 | 31.846 | 0.00 | 0.00 |
| ATOM | 3002 | HE1  | PHE | X | 196 | 37.368 | 37.945 | 31.322 | 0.00 | 0.00 |
| ATOM | 3003 | CZ   | PHE | X | 196 | 39.069 | 36.559 | 31.220 | 0.00 | 0.00 |
| ATOM | 3004 | HZ   | PHE | X | 196 | 39.307 | 36.799 | 30.194 | 0.00 | 0.00 |
| ATOM | 3005 | CE2  | PHE | X | 196 | 39.864 | 35.643 | 31.916 | 0.00 | 0.00 |
| ATOM | 3006 | HE2  | PHE | X | 196 | 40.715 | 35.145 | 31.477 | 0.00 | 0.00 |
| ATOM | 3007 | CD2  | PHE | X | 196 | 39.422 | 35.319 | 33.216 | 0.00 | 0.00 |
| ATOM | 3008 | HD2  | PHE | X | 196 | 40.032 | 34.640 | 33.793 | 0.00 | 0.00 |
| ATOM | 3009 | C    | PHE | X | 196 | 38.977 | 37.763 | 36.634 | 0.00 | 0.00 |
| ATOM | 3010 | O    | PHE | X | 196 | 38.908 | 38.939 | 36.173 | 0.00 | 0.00 |
| ATOM | 3011 | N    | GLY | X | 197 | 40.070 | 37.378 | 37.342 | 0.00 | 0.00 |
| ATOM | 3012 | H    | GLY | X | 197 | 39.974 | 36.480 | 37.794 | 0.00 | 0.00 |
| ATOM | 3013 | CA   | GLY | X | 197 | 41.352 | 38.116 | 37.440 | 0.00 | 0.00 |

|      |      |     |     |   |     |        |        |        |      |      |
|------|------|-----|-----|---|-----|--------|--------|--------|------|------|
| ATOM | 3014 | HA2 | GLY | X | 197 | 41.747 | 38.578 | 36.535 | 0.00 | 0.00 |
| ATOM | 3015 | HA3 | GLY | X | 197 | 41.134 | 38.964 | 38.088 | 0.00 | 0.00 |
| ATOM | 3016 | C   | GLY | X | 197 | 42.403 | 37.453 | 38.114 | 0.00 | 0.00 |
| ATOM | 3017 | O   | GLY | X | 197 | 42.128 | 36.359 | 38.610 | 0.00 | 0.00 |
| ATOM | 3018 | N   | GLU | X | 198 | 43.574 | 38.048 | 38.170 | 0.00 | 0.00 |
| ATOM | 3019 | H   | GLU | X | 198 | 43.681 | 38.978 | 37.791 | 0.00 | 0.00 |
| ATOM | 3020 | CA  | GLU | X | 198 | 44.678 | 37.521 | 38.910 | 0.00 | 0.00 |
| ATOM | 3021 | HA  | GLU | X | 198 | 44.375 | 36.623 | 39.448 | 0.00 | 0.00 |
| ATOM | 3022 | CB  | GLU | X | 198 | 45.770 | 36.981 | 38.002 | 0.00 | 0.00 |
| ATOM | 3023 | HB2 | GLU | X | 198 | 46.629 | 36.877 | 38.666 | 0.00 | 0.00 |
| ATOM | 3024 | HB3 | GLU | X | 198 | 45.557 | 36.018 | 37.538 | 0.00 | 0.00 |
| ATOM | 3025 | CG  | GLU | X | 198 | 46.350 | 37.894 | 36.911 | 0.00 | 0.00 |
| ATOM | 3026 | HG2 | GLU | X | 198 | 47.241 | 37.368 | 36.569 | 0.00 | 0.00 |
| ATOM | 3027 | HG3 | GLU | X | 198 | 45.580 | 37.933 | 36.140 | 0.00 | 0.00 |
| ATOM | 3028 | CD  | GLU | X | 198 | 46.855 | 39.331 | 37.114 | 0.00 | 0.00 |
| ATOM | 3029 | OE1 | GLU | X | 198 | 46.452 | 40.206 | 36.269 | 0.00 | 0.00 |
| ATOM | 3030 | OE2 | GLU | X | 198 | 47.699 | 39.529 | 38.061 | 0.00 | 0.00 |
| ATOM | 3031 | C   | GLU | X | 198 | 45.230 | 38.551 | 39.878 | 0.00 | 0.00 |
| ATOM | 3032 | O   | GLU | X | 198 | 45.003 | 39.797 | 39.776 | 0.00 | 0.00 |
| ATOM | 3033 | N   | XA1 | X | 199 | 45.846 | 38.109 | 40.949 | 0.00 | 0.00 |
| ATOM | 3034 | CA  | XA1 | X | 199 | 46.452 | 38.980 | 41.909 | 0.00 | 0.00 |
| ATOM | 3035 | C   | XA1 | X | 199 | 45.510 | 40.059 | 42.576 | 0.00 | 0.00 |
| ATOM | 3036 | O   | XA1 | X | 199 | 44.525 | 39.662 | 43.222 | 0.00 | 0.00 |
| ATOM | 3037 | CB  | XA1 | X | 199 | 47.814 | 39.593 | 41.362 | 0.00 | 0.00 |
| ATOM | 3038 | OG  | XA1 | X | 199 | 48.690 | 39.830 | 42.449 | 0.00 | 0.00 |
| ATOM | 3039 | P1  | XA1 | X | 199 | 49.447 | 41.106 | 42.348 | 0.00 | 0.00 |
| ATOM | 3040 | O1  | XA1 | X | 199 | 48.591 | 42.224 | 41.957 | 0.00 | 0.00 |
| ATOM | 3041 | O2  | XA1 | X | 199 | 50.640 | 40.810 | 41.528 | 0.00 | 0.00 |
| ATOM | 3042 | C1  | XA1 | X | 199 | 49.943 | 41.283 | 44.040 | 0.00 | 0.00 |
| ATOM | 3043 | H   | XA1 | X | 199 | 45.929 | 37.123 | 41.149 | 0.00 | 0.00 |
| ATOM | 3044 | HA  | XA1 | X | 199 | 46.645 | 38.279 | 42.722 | 0.00 | 0.00 |
| ATOM | 3045 | HB2 | XA1 | X | 199 | 48.320 | 38.982 | 40.610 | 0.00 | 0.00 |
| ATOM | 3046 | HB3 | XA1 | X | 199 | 47.536 | 40.488 | 40.801 | 0.00 | 0.00 |
| ATOM | 3047 | H11 | XA1 | X | 199 | 49.412 | 40.496 | 44.580 | 0.00 | 0.00 |
| ATOM | 3048 | H12 | XA1 | X | 199 | 51.011 | 41.101 | 44.184 | 0.00 | 0.00 |
| ATOM | 3049 | H13 | XA1 | X | 199 | 49.553 | 42.194 | 44.500 | 0.00 | 0.00 |
| ATOM | 3050 | N   | ALA | X | 200 | 45.833 | 41.344 | 42.423 | 0.00 | 0.00 |
| ATOM | 3051 | H   | ALA | X | 200 | 46.599 | 41.685 | 41.860 | 0.00 | 0.00 |
| ATOM | 3052 | CA  | ALA | X | 200 | 45.008 | 42.537 | 42.869 | 0.00 | 0.00 |
| ATOM | 3053 | HA  | ALA | X | 200 | 44.701 | 42.370 | 43.901 | 0.00 | 0.00 |
| ATOM | 3054 | CB  | ALA | X | 200 | 45.876 | 43.808 | 42.535 | 0.00 | 0.00 |
| ATOM | 3055 | HB1 | ALA | X | 200 | 45.987 | 44.033 | 41.474 | 0.00 | 0.00 |
| ATOM | 3056 | HB2 | ALA | X | 200 | 46.793 | 43.559 | 43.069 | 0.00 | 0.00 |
| ATOM | 3057 | HB3 | ALA | X | 200 | 45.473 | 44.674 | 43.059 | 0.00 | 0.00 |
| ATOM | 3058 | C   | ALA | X | 200 | 43.665 | 42.575 | 42.116 | 0.00 | 0.00 |
| ATOM | 3059 | O   | ALA | X | 200 | 42.670 | 42.934 | 42.750 | 0.00 | 0.00 |
| ATOM | 3060 | N   | GLY | X | 201 | 43.545 | 41.948 | 40.958 | 0.00 | 0.00 |
| ATOM | 3061 | H   | GLY | X | 201 | 44.411 | 41.611 | 40.563 | 0.00 | 0.00 |
| ATOM | 3062 | CA  | GLY | X | 201 | 42.361 | 41.642 | 40.255 | 0.00 | 0.00 |
| ATOM | 3063 | HA2 | GLY | X | 201 | 41.773 | 42.532 | 40.031 | 0.00 | 0.00 |
| ATOM | 3064 | HA3 | GLY | X | 201 | 42.747 | 41.193 | 39.341 | 0.00 | 0.00 |
| ATOM | 3065 | C   | GLY | X | 201 | 41.459 | 40.619 | 41.030 | 0.00 | 0.00 |
| ATOM | 3066 | O   | GLY | X | 201 | 40.264 | 40.831 | 41.382 | 0.00 | 0.00 |
| ATOM | 3067 | N   | ALA | X | 202 | 42.107 | 39.502 | 41.326 | 0.00 | 0.00 |
| ATOM | 3068 | H   | ALA | X | 202 | 43.008 | 39.305 | 40.916 | 0.00 | 0.00 |
| ATOM | 3069 | CA  | ALA | X | 202 | 41.488 | 38.428 | 42.053 | 0.00 | 0.00 |
| ATOM | 3070 | HA  | ALA | X | 202 | 40.618 | 38.089 | 41.491 | 0.00 | 0.00 |
| ATOM | 3071 | CB  | ALA | X | 202 | 42.519 | 37.314 | 42.197 | 0.00 | 0.00 |
| ATOM | 3072 | HB1 | ALA | X | 202 | 42.768 | 36.913 | 41.215 | 0.00 | 0.00 |
| ATOM | 3073 | HB2 | ALA | X | 202 | 42.103 | 36.436 | 42.691 | 0.00 | 0.00 |
| ATOM | 3074 | HB3 | ALA | X | 202 | 43.437 | 37.625 | 42.695 | 0.00 | 0.00 |
| ATOM | 3075 | C   | ALA | X | 202 | 41.087 | 38.892 | 43.489 | 0.00 | 0.00 |
| ATOM | 3076 | O   | ALA | X | 202 | 40.009 | 38.568 | 43.932 | 0.00 | 0.00 |
| ATOM | 3077 | N   | ALA | X | 203 | 41.944 | 39.789 | 44.109 | 0.00 | 0.00 |
| ATOM | 3078 | H   | ALA | X | 203 | 42.749 | 40.153 | 43.619 | 0.00 | 0.00 |
| ATOM | 3079 | CA  | ALA | X | 203 | 41.522 | 40.466 | 45.353 | 0.00 | 0.00 |
| ATOM | 3080 | HA  | ALA | X | 203 | 41.219 | 39.733 | 46.101 | 0.00 | 0.00 |

|      |      |      |     |   |     |        |        |        |      |      |
|------|------|------|-----|---|-----|--------|--------|--------|------|------|
| ATOM | 3081 | CB   | ALA | X | 203 | 42.739 | 41.098 | 46.123 | 0.00 | 0.00 |
| ATOM | 3082 | HB1  | ALA | X | 203 | 42.958 | 42.116 | 45.798 | 0.00 | 0.00 |
| ATOM | 3083 | HB2  | ALA | X | 203 | 43.530 | 40.369 | 45.947 | 0.00 | 0.00 |
| ATOM | 3084 | HB3  | ALA | X | 203 | 42.531 | 41.092 | 47.193 | 0.00 | 0.00 |
| ATOM | 3085 | C    | ALA | X | 203 | 40.382 | 41.538 | 45.134 | 0.00 | 0.00 |
| ATOM | 3086 | O    | ALA | X | 203 | 39.496 | 41.625 | 45.961 | 0.00 | 0.00 |
| ATOM | 3087 | N    | SER | X | 204 | 40.294 | 42.182 | 43.936 | 0.00 | 0.00 |
| ATOM | 3088 | H    | SER | X | 204 | 41.131 | 42.140 | 43.372 | 0.00 | 0.00 |
| ATOM | 3089 | CA   | SER | X | 204 | 39.140 | 43.085 | 43.581 | 0.00 | 0.00 |
| ATOM | 3090 | HA   | SER | X | 204 | 38.956 | 43.776 | 44.404 | 0.00 | 0.00 |
| ATOM | 3091 | CB   | SER | X | 204 | 39.397 | 43.902 | 42.365 | 0.00 | 0.00 |
| ATOM | 3092 | HB2  | SER | X | 204 | 39.360 | 43.262 | 41.483 | 0.00 | 0.00 |
| ATOM | 3093 | HB3  | SER | X | 204 | 38.534 | 44.562 | 42.277 | 0.00 | 0.00 |
| ATOM | 3094 | OG   | SER | X | 204 | 40.676 | 44.651 | 42.475 | 0.00 | 0.00 |
| ATOM | 3095 | HG   | SER | X | 204 | 41.408 | 44.032 | 42.432 | 0.00 | 0.00 |
| ATOM | 3096 | C    | SER | X | 204 | 37.851 | 42.264 | 43.427 | 0.00 | 0.00 |
| ATOM | 3097 | O    | SER | X | 204 | 36.829 | 42.579 | 43.990 | 0.00 | 0.00 |
| ATOM | 3098 | N    | VAL | X | 205 | 37.893 | 41.092 | 42.790 | 0.00 | 0.00 |
| ATOM | 3099 | H    | VAL | X | 205 | 38.820 | 40.891 | 42.443 | 0.00 | 0.00 |
| ATOM | 3100 | CA   | VAL | X | 205 | 36.732 | 40.214 | 42.648 | 0.00 | 0.00 |
| ATOM | 3101 | HA   | VAL | X | 205 | 35.954 | 40.861 | 42.241 | 0.00 | 0.00 |
| ATOM | 3102 | CB   | VAL | X | 205 | 37.076 | 39.063 | 41.670 | 0.00 | 0.00 |
| ATOM | 3103 | HB   | VAL | X | 205 | 38.026 | 38.585 | 41.909 | 0.00 | 0.00 |
| ATOM | 3104 | CG1  | VAL | X | 205 | 36.010 | 37.916 | 41.659 | 0.00 | 0.00 |
| ATOM | 3105 | HG11 | VAL | X | 205 | 35.031 | 38.337 | 41.431 | 0.00 | 0.00 |
| ATOM | 3106 | HG12 | VAL | X | 205 | 36.305 | 37.215 | 40.878 | 0.00 | 0.00 |
| ATOM | 3107 | HG13 | VAL | X | 205 | 35.991 | 37.434 | 42.636 | 0.00 | 0.00 |
| ATOM | 3108 | CG2  | VAL | X | 205 | 37.226 | 39.564 | 40.241 | 0.00 | 0.00 |
| ATOM | 3109 | HG21 | VAL | X | 205 | 37.261 | 38.752 | 39.514 | 0.00 | 0.00 |
| ATOM | 3110 | HG22 | VAL | X | 205 | 38.155 | 40.114 | 40.093 | 0.00 | 0.00 |
| ATOM | 3111 | HG23 | VAL | X | 205 | 36.364 | 40.202 | 40.044 | 0.00 | 0.00 |
| ATOM | 3112 | C    | VAL | X | 205 | 36.241 | 39.634 | 43.943 | 0.00 | 0.00 |
| ATOM | 3113 | O    | VAL | X | 205 | 35.063 | 39.401 | 44.152 | 0.00 | 0.00 |
| ATOM | 3114 | N    | GLY | X | 206 | 37.200 | 39.301 | 44.747 | 0.00 | 0.00 |
| ATOM | 3115 | H    | GLY | X | 206 | 38.177 | 39.411 | 44.519 | 0.00 | 0.00 |
| ATOM | 3116 | CA   | GLY | X | 206 | 37.006 | 38.956 | 46.135 | 0.00 | 0.00 |
| ATOM | 3117 | HA2  | GLY | X | 206 | 36.329 | 38.103 | 46.186 | 0.00 | 0.00 |
| ATOM | 3118 | HA3  | GLY | X | 206 | 37.970 | 38.670 | 46.558 | 0.00 | 0.00 |
| ATOM | 3119 | C    | GLY | X | 206 | 36.504 | 40.036 | 47.035 | 0.00 | 0.00 |
| ATOM | 3120 | O    | GLY | X | 206 | 36.093 | 39.816 | 48.152 | 0.00 | 0.00 |
| ATOM | 3121 | N    | MET | X | 207 | 36.580 | 41.333 | 46.678 | 0.00 | 0.00 |
| ATOM | 3122 | H    | MET | X | 207 | 36.992 | 41.587 | 45.791 | 0.00 | 0.00 |
| ATOM | 3123 | CA   | MET | X | 207 | 35.928 | 42.450 | 47.409 | 0.00 | 0.00 |
| ATOM | 3124 | HA   | MET | X | 207 | 35.655 | 42.308 | 48.455 | 0.00 | 0.00 |
| ATOM | 3125 | CB   | MET | X | 207 | 36.776 | 43.752 | 47.315 | 0.00 | 0.00 |
| ATOM | 3126 | HB2  | MET | X | 207 | 37.164 | 43.903 | 46.307 | 0.00 | 0.00 |
| ATOM | 3127 | HB3  | MET | X | 207 | 36.223 | 44.603 | 47.713 | 0.00 | 0.00 |
| ATOM | 3128 | CG   | MET | X | 207 | 37.951 | 43.523 | 48.249 | 0.00 | 0.00 |
| ATOM | 3129 | HG2  | MET | X | 207 | 37.555 | 43.056 | 49.151 | 0.00 | 0.00 |
| ATOM | 3130 | HG3  | MET | X | 207 | 38.581 | 42.745 | 47.818 | 0.00 | 0.00 |
| ATOM | 3131 | SD   | MET | X | 207 | 39.058 | 44.799 | 48.910 | 0.00 | 0.00 |
| ATOM | 3132 | CE   | MET | X | 207 | 40.521 | 44.490 | 47.891 | 0.00 | 0.00 |
| ATOM | 3133 | HE1  | MET | X | 207 | 40.903 | 43.508 | 48.171 | 0.00 | 0.00 |
| ATOM | 3134 | HE2  | MET | X | 207 | 40.319 | 44.413 | 46.823 | 0.00 | 0.00 |
| ATOM | 3135 | HE3  | MET | X | 207 | 41.304 | 45.196 | 48.167 | 0.00 | 0.00 |
| ATOM | 3136 | C    | MET | X | 207 | 34.545 | 42.648 | 46.815 | 0.00 | 0.00 |
| ATOM | 3137 | O    | MET | X | 207 | 33.616 | 42.855 | 47.565 | 0.00 | 0.00 |
| ATOM | 3138 | N    | HIE | X | 208 | 34.294 | 42.498 | 45.468 | 0.00 | 0.00 |
| ATOM | 3139 | H    | HIE | X | 208 | 35.030 | 42.650 | 44.793 | 0.00 | 0.00 |
| ATOM | 3140 | CA   | HIE | X | 208 | 32.903 | 42.546 | 44.853 | 0.00 | 0.00 |
| ATOM | 3141 | HA   | HIE | X | 208 | 32.306 | 43.433 | 45.064 | 0.00 | 0.00 |
| ATOM | 3142 | CB   | HIE | X | 208 | 33.059 | 42.605 | 43.342 | 0.00 | 0.00 |
| ATOM | 3143 | HB2  | HIE | X | 208 | 33.820 | 41.896 | 43.015 | 0.00 | 0.00 |
| ATOM | 3144 | HB3  | HIE | X | 208 | 32.152 | 42.229 | 42.870 | 0.00 | 0.00 |
| ATOM | 3145 | CG   | HIE | X | 208 | 33.583 | 43.917 | 42.727 | 0.00 | 0.00 |
| ATOM | 3146 | ND1  | HIE | X | 208 | 32.922 | 45.121 | 42.696 | 0.00 | 0.00 |
| ATOM | 3147 | CE1  | HIE | X | 208 | 33.844 | 45.954 | 42.165 | 0.00 | 0.00 |

|      |      |      |     |   |     |        |        |        |      |      |
|------|------|------|-----|---|-----|--------|--------|--------|------|------|
| ATOM | 3148 | HE1  | HIE | X | 208 | 33.741 | 46.983 | 41.854 | 0.00 | 0.00 |
| ATOM | 3149 | NE2  | HIE | X | 208 | 34.983 | 45.368 | 41.867 | 0.00 | 0.00 |
| ATOM | 3150 | HE2  | HIE | X | 208 | 35.836 | 45.778 | 41.517 | 0.00 | 0.00 |
| ATOM | 3151 | CD2  | HIE | X | 208 | 34.809 | 44.052 | 42.151 | 0.00 | 0.00 |
| ATOM | 3152 | HD2  | HIE | X | 208 | 35.483 | 43.213 | 42.065 | 0.00 | 0.00 |
| ATOM | 3153 | C    | HIE | X | 208 | 31.987 | 41.396 | 45.294 | 0.00 | 0.00 |
| ATOM | 3154 | O    | HIE | X | 208 | 30.811 | 41.621 | 45.398 | 0.00 | 0.00 |
| ATOM | 3155 | N    | LEU | X | 209 | 32.581 | 40.277 | 45.710 | 0.00 | 0.00 |
| ATOM | 3156 | H    | LEU | X | 209 | 33.511 | 39.974 | 45.456 | 0.00 | 0.00 |
| ATOM | 3157 | CA   | LEU | X | 209 | 31.867 | 39.238 | 46.502 | 0.00 | 0.00 |
| ATOM | 3158 | HA   | LEU | X | 209 | 31.004 | 38.891 | 45.934 | 0.00 | 0.00 |
| ATOM | 3159 | CB   | LEU | X | 209 | 32.916 | 38.096 | 46.546 | 0.00 | 0.00 |
| ATOM | 3160 | HB2  | LEU | X | 209 | 33.485 | 38.014 | 45.619 | 0.00 | 0.00 |
| ATOM | 3161 | HB3  | LEU | X | 209 | 33.748 | 38.375 | 47.193 | 0.00 | 0.00 |
| ATOM | 3162 | CG   | LEU | X | 209 | 32.280 | 36.766 | 47.036 | 0.00 | 0.00 |
| ATOM | 3163 | HG   | LEU | X | 209 | 31.673 | 36.941 | 47.924 | 0.00 | 0.00 |
| ATOM | 3164 | CD1  | LEU | X | 209 | 31.385 | 36.123 | 45.963 | 0.00 | 0.00 |
| ATOM | 3165 | HD11 | LEU | X | 209 | 30.410 | 36.583 | 45.803 | 0.00 | 0.00 |
| ATOM | 3166 | HD12 | LEU | X | 209 | 31.174 | 35.117 | 46.325 | 0.00 | 0.00 |
| ATOM | 3167 | HD13 | LEU | X | 209 | 31.871 | 36.038 | 44.991 | 0.00 | 0.00 |
| ATOM | 3168 | CD2  | LEU | X | 209 | 33.352 | 35.801 | 47.505 | 0.00 | 0.00 |
| ATOM | 3169 | HD21 | LEU | X | 209 | 33.750 | 36.324 | 48.375 | 0.00 | 0.00 |
| ATOM | 3170 | HD22 | LEU | X | 209 | 32.910 | 34.817 | 47.661 | 0.00 | 0.00 |
| ATOM | 3171 | HD23 | LEU | X | 209 | 34.112 | 35.691 | 46.731 | 0.00 | 0.00 |
| ATOM | 3172 | C    | LEU | X | 209 | 31.438 | 39.573 | 47.867 | 0.00 | 0.00 |
| ATOM | 3173 | O    | LEU | X | 209 | 30.550 | 38.875 | 48.393 | 0.00 | 0.00 |
| ATOM | 3174 | N    | LEU | X | 210 | 32.130 | 40.558 | 48.456 | 0.00 | 0.00 |
| ATOM | 3175 | H    | LEU | X | 210 | 32.817 | 41.075 | 47.926 | 0.00 | 0.00 |
| ATOM | 3176 | CA   | LEU | X | 210 | 31.836 | 41.048 | 49.803 | 0.00 | 0.00 |
| ATOM | 3177 | HA   | LEU | X | 210 | 31.180 | 40.301 | 50.250 | 0.00 | 0.00 |
| ATOM | 3178 | CB   | LEU | X | 210 | 33.142 | 41.270 | 50.641 | 0.00 | 0.00 |
| ATOM | 3179 | HB2  | LEU | X | 210 | 33.745 | 42.018 | 50.126 | 0.00 | 0.00 |
| ATOM | 3180 | HB3  | LEU | X | 210 | 32.825 | 41.767 | 51.558 | 0.00 | 0.00 |
| ATOM | 3181 | CG   | LEU | X | 210 | 33.996 | 40.053 | 50.921 | 0.00 | 0.00 |
| ATOM | 3182 | HG   | LEU | X | 210 | 34.182 | 39.529 | 49.983 | 0.00 | 0.00 |
| ATOM | 3183 | CD1  | LEU | X | 210 | 35.387 | 40.506 | 51.511 | 0.00 | 0.00 |
| ATOM | 3184 | HD11 | LEU | X | 210 | 35.377 | 41.100 | 52.425 | 0.00 | 0.00 |
| ATOM | 3185 | HD12 | LEU | X | 210 | 35.943 | 41.150 | 50.829 | 0.00 | 0.00 |
| ATOM | 3186 | HD13 | LEU | X | 210 | 36.021 | 39.629 | 51.643 | 0.00 | 0.00 |
| ATOM | 3187 | CD2  | LEU | X | 210 | 33.395 | 39.075 | 51.923 | 0.00 | 0.00 |
| ATOM | 3188 | HD21 | LEU | X | 210 | 32.463 | 38.651 | 51.550 | 0.00 | 0.00 |
| ATOM | 3189 | HD22 | LEU | X | 210 | 34.110 | 38.291 | 52.172 | 0.00 | 0.00 |
| ATOM | 3190 | HD23 | LEU | X | 210 | 33.128 | 39.558 | 52.863 | 0.00 | 0.00 |
| ATOM | 3191 | C    | LEU | X | 210 | 30.964 | 42.273 | 49.842 | 0.00 | 0.00 |
| ATOM | 3192 | O    | LEU | X | 210 | 30.061 | 42.321 | 50.648 | 0.00 | 0.00 |
| ATOM | 3193 | N    | SER | X | 211 | 31.079 | 43.254 | 48.941 | 0.00 | 0.00 |
| ATOM | 3194 | H    | SER | X | 211 | 31.920 | 43.365 | 48.392 | 0.00 | 0.00 |
| ATOM | 3195 | CA   | SER | X | 211 | 30.277 | 44.470 | 49.050 | 0.00 | 0.00 |
| ATOM | 3196 | HA   | SER | X | 211 | 30.177 | 44.665 | 50.118 | 0.00 | 0.00 |
| ATOM | 3197 | CB   | SER | X | 211 | 31.075 | 45.647 | 48.363 | 0.00 | 0.00 |
| ATOM | 3198 | HB2  | SER | X | 211 | 30.462 | 46.548 | 48.371 | 0.00 | 0.00 |
| ATOM | 3199 | HB3  | SER | X | 211 | 31.933 | 45.767 | 49.024 | 0.00 | 0.00 |
| ATOM | 3200 | OG   | SER | X | 211 | 31.360 | 45.325 | 47.027 | 0.00 | 0.00 |
| ATOM | 3201 | HG   | SER | X | 211 | 30.513 | 45.046 | 46.672 | 0.00 | 0.00 |
| ATOM | 3202 | C    | SER | X | 211 | 28.890 | 44.347 | 48.421 | 0.00 | 0.00 |
| ATOM | 3203 | O    | SER | X | 211 | 28.816 | 44.231 | 47.191 | 0.00 | 0.00 |
| ATOM | 3204 | N    | PRO | X | 212 | 27.785 | 44.331 | 49.176 | 0.00 | 0.00 |
| ATOM | 3205 | CD   | PRO | X | 212 | 27.718 | 44.572 | 50.589 | 0.00 | 0.00 |
| ATOM | 3206 | HD2  | PRO | X | 212 | 27.808 | 45.651 | 50.711 | 0.00 | 0.00 |
| ATOM | 3207 | HD3  | PRO | X | 212 | 28.448 | 43.999 | 51.161 | 0.00 | 0.00 |
| ATOM | 3208 | CG   | PRO | X | 212 | 26.389 | 44.072 | 51.116 | 0.00 | 0.00 |
| ATOM | 3209 | HG2  | PRO | X | 212 | 25.986 | 44.704 | 51.908 | 0.00 | 0.00 |
| ATOM | 3210 | HG3  | PRO | X | 212 | 26.591 | 43.088 | 51.539 | 0.00 | 0.00 |
| ATOM | 3211 | CB   | PRO | X | 212 | 25.418 | 44.027 | 49.896 | 0.00 | 0.00 |
| ATOM | 3212 | HB2  | PRO | X | 212 | 24.824 | 44.939 | 49.831 | 0.00 | 0.00 |
| ATOM | 3213 | HB3  | PRO | X | 212 | 24.830 | 43.110 | 49.843 | 0.00 | 0.00 |
| ATOM | 3214 | CA   | PRO | X | 212 | 26.449 | 43.970 | 48.703 | 0.00 | 0.00 |

|      |      |      |     |   |     |        |        |        |      |      |
|------|------|------|-----|---|-----|--------|--------|--------|------|------|
| ATOM | 3215 | HA   | PRO | X | 212 | 26.339 | 42.900 | 48.525 | 0.00 | 0.00 |
| ATOM | 3216 | C    | PRO | X | 212 | 25.942 | 44.766 | 47.476 | 0.00 | 0.00 |
| ATOM | 3217 | O    | PRO | X | 212 | 25.228 | 44.141 | 46.588 | 0.00 | 0.00 |
| ATOM | 3218 | N    | PRO | X | 213 | 26.171 | 46.089 | 47.320 | 0.00 | 0.00 |
| ATOM | 3219 | CD   | PRO | X | 213 | 26.658 | 47.027 | 48.378 | 0.00 | 0.00 |
| ATOM | 3220 | HD2  | PRO | X | 213 | 27.742 | 47.040 | 48.497 | 0.00 | 0.00 |
| ATOM | 3221 | HD3  | PRO | X | 213 | 26.304 | 46.626 | 49.328 | 0.00 | 0.00 |
| ATOM | 3222 | CG   | PRO | X | 213 | 26.024 | 48.339 | 47.985 | 0.00 | 0.00 |
| ATOM | 3223 | HG2  | PRO | X | 213 | 26.502 | 49.306 | 48.140 | 0.00 | 0.00 |
| ATOM | 3224 | HG3  | PRO | X | 213 | 25.017 | 48.352 | 48.403 | 0.00 | 0.00 |
| ATOM | 3225 | CB   | PRO | X | 213 | 25.870 | 48.259 | 46.513 | 0.00 | 0.00 |
| ATOM | 3226 | HB2  | PRO | X | 213 | 26.658 | 48.707 | 45.908 | 0.00 | 0.00 |
| ATOM | 3227 | HB3  | PRO | X | 213 | 24.944 | 48.776 | 46.260 | 0.00 | 0.00 |
| ATOM | 3228 | CA   | PRO | X | 213 | 25.790 | 46.784 | 46.151 | 0.00 | 0.00 |
| ATOM | 3229 | HA   | PRO | X | 213 | 24.724 | 46.580 | 46.049 | 0.00 | 0.00 |
| ATOM | 3230 | C    | PRO | X | 213 | 26.625 | 46.342 | 44.876 | 0.00 | 0.00 |
| ATOM | 3231 | O    | PRO | X | 213 | 26.374 | 46.927 | 43.805 | 0.00 | 0.00 |
| ATOM | 3232 | N    | SER | X | 214 | 27.617 | 45.473 | 44.939 | 0.00 | 0.00 |
| ATOM | 3233 | H    | SER | X | 214 | 27.838 | 44.966 | 45.784 | 0.00 | 0.00 |
| ATOM | 3234 | CA   | SER | X | 214 | 28.208 | 44.888 | 43.688 | 0.00 | 0.00 |
| ATOM | 3235 | HA   | SER | X | 214 | 28.053 | 45.487 | 42.791 | 0.00 | 0.00 |
| ATOM | 3236 | CB   | SER | X | 214 | 29.760 | 44.703 | 43.855 | 0.00 | 0.00 |
| ATOM | 3237 | HB2  | SER | X | 214 | 29.915 | 44.139 | 44.775 | 0.00 | 0.00 |
| ATOM | 3238 | HB3  | SER | X | 214 | 30.173 | 44.199 | 42.981 | 0.00 | 0.00 |
| ATOM | 3239 | OG   | SER | X | 214 | 30.457 | 45.907 | 44.069 | 0.00 | 0.00 |
| ATOM | 3240 | HG   | SER | X | 214 | 31.306 | 45.736 | 43.655 | 0.00 | 0.00 |
| ATOM | 3241 | C    | SER | X | 214 | 27.558 | 43.515 | 43.370 | 0.00 | 0.00 |
| ATOM | 3242 | O    | SER | X | 214 | 27.566 | 43.192 | 42.182 | 0.00 | 0.00 |
| ATOM | 3243 | N    | ARG | X | 215 | 27.126 | 42.698 | 44.376 | 0.00 | 0.00 |
| ATOM | 3244 | H    | ARG | X | 215 | 27.116 | 43.009 | 45.336 | 0.00 | 0.00 |
| ATOM | 3245 | CA   | ARG | X | 215 | 26.629 | 41.374 | 44.147 | 0.00 | 0.00 |
| ATOM | 3246 | HA   | ARG | X | 215 | 27.483 | 40.895 | 43.668 | 0.00 | 0.00 |
| ATOM | 3247 | CB   | ARG | X | 215 | 26.309 | 40.710 | 45.551 | 0.00 | 0.00 |
| ATOM | 3248 | HB2  | ARG | X | 215 | 25.753 | 41.389 | 46.197 | 0.00 | 0.00 |
| ATOM | 3249 | HB3  | ARG | X | 215 | 25.649 | 39.847 | 45.469 | 0.00 | 0.00 |
| ATOM | 3250 | CG   | ARG | X | 215 | 27.587 | 40.315 | 46.341 | 0.00 | 0.00 |
| ATOM | 3251 | HG2  | ARG | X | 215 | 28.263 | 39.820 | 45.644 | 0.00 | 0.00 |
| ATOM | 3252 | HG3  | ARG | X | 215 | 28.032 | 41.241 | 46.705 | 0.00 | 0.00 |
| ATOM | 3253 | CD   | ARG | X | 215 | 27.225 | 39.273 | 47.461 | 0.00 | 0.00 |
| ATOM | 3254 | HD2  | ARG | X | 215 | 26.535 | 38.493 | 47.137 | 0.00 | 0.00 |
| ATOM | 3255 | HD3  | ARG | X | 215 | 28.133 | 38.734 | 47.732 | 0.00 | 0.00 |
| ATOM | 3256 | NE   | ARG | X | 215 | 26.650 | 39.975 | 48.639 | 0.00 | 0.00 |
| ATOM | 3257 | HE   | ARG | X | 215 | 25.670 | 40.215 | 48.589 | 0.00 | 0.00 |
| ATOM | 3258 | CZ   | ARG | X | 215 | 27.294 | 40.073 | 49.826 | 0.00 | 0.00 |
| ATOM | 3259 | NH1  | ARG | X | 215 | 28.559 | 39.851 | 49.986 | 0.00 | 0.00 |
| ATOM | 3260 | HH11 | ARG | X | 215 | 29.106 | 39.514 | 49.207 | 0.00 | 0.00 |
| ATOM | 3261 | HH12 | ARG | X | 215 | 28.849 | 39.691 | 50.941 | 0.00 | 0.00 |
| ATOM | 3262 | NH2  | ARG | X | 215 | 26.616 | 40.433 | 50.874 | 0.00 | 0.00 |
| ATOM | 3263 | HH21 | ARG | X | 215 | 25.614 | 40.353 | 50.778 | 0.00 | 0.00 |
| ATOM | 3264 | HH22 | ARG | X | 215 | 27.043 | 40.472 | 51.789 | 0.00 | 0.00 |
| ATOM | 3265 | C    | ARG | X | 215 | 25.431 | 41.289 | 43.163 | 0.00 | 0.00 |
| ATOM | 3266 | O    | ARG | X | 215 | 25.280 | 40.332 | 42.426 | 0.00 | 0.00 |
| ATOM | 3267 | N    | GLY | X | 216 | 24.622 | 42.297 | 43.100 | 0.00 | 0.00 |
| ATOM | 3268 | H    | GLY | X | 216 | 24.730 | 43.093 | 43.712 | 0.00 | 0.00 |
| ATOM | 3269 | CA   | GLY | X | 216 | 23.467 | 42.340 | 42.150 | 0.00 | 0.00 |
| ATOM | 3270 | HA2  | GLY | X | 216 | 22.856 | 41.439 | 42.198 | 0.00 | 0.00 |
| ATOM | 3271 | HA3  | GLY | X | 216 | 22.872 | 43.203 | 42.449 | 0.00 | 0.00 |
| ATOM | 3272 | C    | GLY | X | 216 | 23.926 | 42.540 | 40.680 | 0.00 | 0.00 |
| ATOM | 3273 | O    | GLY | X | 216 | 23.109 | 42.358 | 39.724 | 0.00 | 0.00 |
| ATOM | 3274 | N    | LEU | X | 217 | 25.172 | 42.910 | 40.468 | 0.00 | 0.00 |
| ATOM | 3275 | H    | LEU | X | 217 | 25.750 | 43.321 | 41.187 | 0.00 | 0.00 |
| ATOM | 3276 | CA   | LEU | X | 217 | 25.648 | 43.225 | 39.075 | 0.00 | 0.00 |
| ATOM | 3277 | HA   | LEU | X | 217 | 24.904 | 43.436 | 38.307 | 0.00 | 0.00 |
| ATOM | 3278 | CB   | LEU | X | 217 | 26.706 | 44.423 | 39.140 | 0.00 | 0.00 |
| ATOM | 3279 | HB2  | LEU | X | 217 | 27.645 | 44.170 | 39.632 | 0.00 | 0.00 |
| ATOM | 3280 | HB3  | LEU | X | 217 | 26.991 | 44.738 | 38.137 | 0.00 | 0.00 |
| ATOM | 3281 | CG   | LEU | X | 217 | 26.136 | 45.691 | 39.831 | 0.00 | 0.00 |

|      |      |      |     |   |     |        |        |        |      |      |
|------|------|------|-----|---|-----|--------|--------|--------|------|------|
| ATOM | 3282 | HG   | LEU | X | 217 | 25.872 | 45.520 | 40.875 | 0.00 | 0.00 |
| ATOM | 3283 | CD1  | LEU | X | 217 | 27.065 | 46.882 | 39.652 | 0.00 | 0.00 |
| ATOM | 3284 | HD11 | LEU | X | 217 | 26.610 | 47.667 | 40.255 | 0.00 | 0.00 |
| ATOM | 3285 | HD12 | LEU | X | 217 | 27.072 | 47.250 | 38.626 | 0.00 | 0.00 |
| ATOM | 3286 | HD13 | LEU | X | 217 | 28.084 | 46.645 | 39.961 | 0.00 | 0.00 |
| ATOM | 3287 | CD2  | LEU | X | 217 | 24.898 | 46.255 | 39.175 | 0.00 | 0.00 |
| ATOM | 3288 | HD21 | LEU | X | 217 | 24.014 | 45.620 | 39.225 | 0.00 | 0.00 |
| ATOM | 3289 | HD22 | LEU | X | 217 | 24.584 | 47.140 | 39.729 | 0.00 | 0.00 |
| ATOM | 3290 | HD23 | LEU | X | 217 | 25.066 | 46.464 | 38.118 | 0.00 | 0.00 |
| ATOM | 3291 | C    | LEU | X | 217 | 26.335 | 42.047 | 38.404 | 0.00 | 0.00 |
| ATOM | 3292 | O    | LEU | X | 217 | 26.713 | 42.218 | 37.219 | 0.00 | 0.00 |
| ATOM | 3293 | N    | PHE | X | 218 | 26.593 | 40.996 | 39.148 | 0.00 | 0.00 |
| ATOM | 3294 | H    | PHE | X | 218 | 26.303 | 40.893 | 40.110 | 0.00 | 0.00 |
| ATOM | 3295 | CA   | PHE | X | 218 | 27.328 | 39.786 | 38.581 | 0.00 | 0.00 |
| ATOM | 3296 | HA   | PHE | X | 218 | 27.009 | 39.676 | 37.544 | 0.00 | 0.00 |
| ATOM | 3297 | CB   | PHE | X | 218 | 28.817 | 40.098 | 38.510 | 0.00 | 0.00 |
| ATOM | 3298 | HB2  | PHE | X | 218 | 29.259 | 39.382 | 37.816 | 0.00 | 0.00 |
| ATOM | 3299 | HB3  | PHE | X | 218 | 29.034 | 41.139 | 38.270 | 0.00 | 0.00 |
| ATOM | 3300 | CG   | PHE | X | 218 | 29.506 | 39.944 | 39.859 | 0.00 | 0.00 |
| ATOM | 3301 | CD1  | PHE | X | 218 | 29.375 | 40.971 | 40.833 | 0.00 | 0.00 |
| ATOM | 3302 | HD1  | PHE | X | 218 | 28.913 | 41.919 | 40.600 | 0.00 | 0.00 |
| ATOM | 3303 | CE1  | PHE | X | 218 | 29.856 | 40.798 | 42.158 | 0.00 | 0.00 |
| ATOM | 3304 | HE1  | PHE | X | 218 | 29.779 | 41.585 | 42.894 | 0.00 | 0.00 |
| ATOM | 3305 | CZ   | PHE | X | 218 | 30.593 | 39.660 | 42.502 | 0.00 | 0.00 |
| ATOM | 3306 | HZ   | PHE | X | 218 | 30.993 | 39.647 | 43.504 | 0.00 | 0.00 |
| ATOM | 3307 | CE2  | PHE | X | 218 | 30.726 | 38.662 | 41.564 | 0.00 | 0.00 |
| ATOM | 3308 | HE2  | PHE | X | 218 | 31.344 | 37.802 | 41.778 | 0.00 | 0.00 |
| ATOM | 3309 | CD2  | PHE | X | 218 | 30.287 | 38.809 | 40.234 | 0.00 | 0.00 |
| ATOM | 3310 | HD2  | PHE | X | 218 | 30.441 | 38.023 | 39.509 | 0.00 | 0.00 |
| ATOM | 3311 | C    | PHE | X | 218 | 27.071 | 38.418 | 39.267 | 0.00 | 0.00 |
| ATOM | 3312 | O    | PHE | X | 218 | 27.050 | 38.268 | 40.503 | 0.00 | 0.00 |
| ATOM | 3313 | N    | HIE | X | 219 | 27.209 | 37.338 | 38.504 | 0.00 | 0.00 |
| ATOM | 3314 | H    | HIE | X | 219 | 27.549 | 37.542 | 37.575 | 0.00 | 0.00 |
| ATOM | 3315 | CA   | HIE | X | 219 | 26.556 | 36.051 | 38.765 | 0.00 | 0.00 |
| ATOM | 3316 | HA   | HIE | X | 219 | 25.773 | 36.178 | 39.513 | 0.00 | 0.00 |
| ATOM | 3317 | CB   | HIE | X | 219 | 25.985 | 35.515 | 37.474 | 0.00 | 0.00 |
| ATOM | 3318 | HB2  | HIE | X | 219 | 26.771 | 35.467 | 36.721 | 0.00 | 0.00 |
| ATOM | 3319 | HB3  | HIE | X | 219 | 25.479 | 34.551 | 37.521 | 0.00 | 0.00 |
| ATOM | 3320 | CG   | HIE | X | 219 | 24.956 | 36.434 | 36.881 | 0.00 | 0.00 |
| ATOM | 3321 | ND1  | HIE | X | 219 | 25.344 | 37.450 | 36.055 | 0.00 | 0.00 |
| ATOM | 3322 | CE1  | HIE | X | 219 | 24.275 | 38.294 | 36.107 | 0.00 | 0.00 |
| ATOM | 3323 | HE1  | HIE | X | 219 | 24.247 | 39.331 | 35.806 | 0.00 | 0.00 |
| ATOM | 3324 | NE2  | HIE | X | 219 | 23.192 | 37.755 | 36.696 | 0.00 | 0.00 |
| ATOM | 3325 | HE2  | HIE | X | 219 | 22.329 | 38.212 | 36.952 | 0.00 | 0.00 |
| ATOM | 3326 | CD2  | HIE | X | 219 | 23.632 | 36.545 | 37.262 | 0.00 | 0.00 |
| ATOM | 3327 | HD2  | HIE | X | 219 | 23.157 | 35.875 | 37.964 | 0.00 | 0.00 |
| ATOM | 3328 | C    | HIE | X | 219 | 27.640 | 35.025 | 39.295 | 0.00 | 0.00 |
| ATOM | 3329 | O    | HIE | X | 219 | 27.294 | 34.090 | 39.921 | 0.00 | 0.00 |
| ATOM | 3330 | N    | ARG | X | 220 | 28.964 | 35.194 | 39.041 | 0.00 | 0.00 |
| ATOM | 3331 | H    | ARG | X | 220 | 29.227 | 36.091 | 38.659 | 0.00 | 0.00 |
| ATOM | 3332 | CA   | ARG | X | 220 | 30.032 | 34.151 | 39.133 | 0.00 | 0.00 |
| ATOM | 3333 | HA   | ARG | X | 220 | 29.936 | 33.591 | 40.064 | 0.00 | 0.00 |
| ATOM | 3334 | CB   | ARG | X | 220 | 30.000 | 33.098 | 37.986 | 0.00 | 0.00 |
| ATOM | 3335 | HB2  | ARG | X | 220 | 29.924 | 33.709 | 37.086 | 0.00 | 0.00 |
| ATOM | 3336 | HB3  | ARG | X | 220 | 30.925 | 32.522 | 37.964 | 0.00 | 0.00 |
| ATOM | 3337 | CG   | ARG | X | 220 | 28.789 | 32.068 | 37.972 | 0.00 | 0.00 |
| ATOM | 3338 | HG2  | ARG | X | 220 | 28.672 | 31.650 | 38.972 | 0.00 | 0.00 |
| ATOM | 3339 | HG3  | ARG | X | 220 | 27.968 | 32.699 | 37.632 | 0.00 | 0.00 |
| ATOM | 3340 | CD   | ARG | X | 220 | 28.943 | 30.884 | 37.103 | 0.00 | 0.00 |
| ATOM | 3341 | HD2  | ARG | X | 220 | 29.217 | 31.147 | 36.081 | 0.00 | 0.00 |
| ATOM | 3342 | HD3  | ARG | X | 220 | 29.808 | 30.321 | 37.452 | 0.00 | 0.00 |
| ATOM | 3343 | NE   | ARG | X | 220 | 27.720 | 30.059 | 37.138 | 0.00 | 0.00 |
| ATOM | 3344 | HE   | ARG | X | 220 | 27.510 | 29.677 | 38.050 | 0.00 | 0.00 |
| ATOM | 3345 | CZ   | ARG | X | 220 | 26.804 | 29.812 | 36.166 | 0.00 | 0.00 |
| ATOM | 3346 | NH1  | ARG | X | 220 | 26.982 | 30.186 | 34.903 | 0.00 | 0.00 |
| ATOM | 3347 | HH11 | ARG | X | 220 | 27.838 | 30.611 | 34.576 | 0.00 | 0.00 |
| ATOM | 3348 | HH12 | ARG | X | 220 | 26.182 | 30.026 | 34.309 | 0.00 | 0.00 |

|      |      |      |     |   |     |        |        |        |      |      |
|------|------|------|-----|---|-----|--------|--------|--------|------|------|
| ATOM | 3349 | NH2  | ARG | X | 220 | 25.662 | 29.258 | 36.476 | 0.00 | 0.00 |
| ATOM | 3350 | HH21 | ARG | X | 220 | 25.389 | 29.186 | 37.445 | 0.00 | 0.00 |
| ATOM | 3351 | HH22 | ARG | X | 220 | 25.078 | 29.067 | 35.675 | 0.00 | 0.00 |
| ATOM | 3352 | C    | ARG | X | 220 | 31.399 | 34.838 | 39.238 | 0.00 | 0.00 |
| ATOM | 3353 | O    | ARG | X | 220 | 31.679 | 35.943 | 38.705 | 0.00 | 0.00 |
| ATOM | 3354 | N    | ALA | X | 221 | 32.326 | 34.158 | 39.932 | 0.00 | 0.00 |
| ATOM | 3355 | H    | ALA | X | 221 | 32.077 | 33.240 | 40.272 | 0.00 | 0.00 |
| ATOM | 3356 | CA   | ALA | X | 221 | 33.558 | 34.881 | 40.234 | 0.00 | 0.00 |
| ATOM | 3357 | HA   | ALA | X | 221 | 33.853 | 35.694 | 39.571 | 0.00 | 0.00 |
| ATOM | 3358 | CB   | ALA | X | 221 | 33.557 | 35.470 | 41.629 | 0.00 | 0.00 |
| ATOM | 3359 | HB1  | ALA | X | 221 | 33.214 | 36.505 | 41.624 | 0.00 | 0.00 |
| ATOM | 3360 | HB2  | ALA | X | 221 | 34.591 | 35.534 | 41.967 | 0.00 | 0.00 |
| ATOM | 3361 | HB3  | ALA | X | 221 | 32.932 | 34.884 | 42.303 | 0.00 | 0.00 |
| ATOM | 3362 | C    | ALA | X | 221 | 34.753 | 33.856 | 40.217 | 0.00 | 0.00 |
| ATOM | 3363 | O    | ALA | X | 221 | 34.739 | 32.910 | 40.945 | 0.00 | 0.00 |
| ATOM | 3364 | N    | VAL | X | 222 | 35.770 | 34.165 | 39.441 | 0.00 | 0.00 |
| ATOM | 3365 | H    | VAL | X | 222 | 35.790 | 35.072 | 38.997 | 0.00 | 0.00 |
| ATOM | 3366 | CA   | VAL | X | 222 | 37.060 | 33.434 | 39.295 | 0.00 | 0.00 |
| ATOM | 3367 | HA   | VAL | X | 222 | 36.895 | 32.491 | 39.818 | 0.00 | 0.00 |
| ATOM | 3368 | CB   | VAL | X | 222 | 37.329 | 33.120 | 37.832 | 0.00 | 0.00 |
| ATOM | 3369 | HB   | VAL | X | 222 | 37.376 | 34.040 | 37.249 | 0.00 | 0.00 |
| ATOM | 3370 | CG1  | VAL | X | 222 | 38.692 | 32.318 | 37.609 | 0.00 | 0.00 |
| ATOM | 3371 | HG11 | VAL | X | 222 | 38.692 | 31.380 | 38.163 | 0.00 | 0.00 |
| ATOM | 3372 | HG12 | VAL | X | 222 | 38.782 | 32.131 | 36.539 | 0.00 | 0.00 |
| ATOM | 3373 | HG13 | VAL | X | 222 | 39.485 | 32.977 | 37.964 | 0.00 | 0.00 |
| ATOM | 3374 | CG2  | VAL | X | 222 | 36.263 | 32.212 | 37.241 | 0.00 | 0.00 |
| ATOM | 3375 | HG21 | VAL | X | 222 | 36.567 | 31.795 | 36.281 | 0.00 | 0.00 |
| ATOM | 3376 | HG22 | VAL | X | 222 | 35.424 | 32.878 | 37.041 | 0.00 | 0.00 |
| ATOM | 3377 | HG23 | VAL | X | 222 | 36.061 | 31.342 | 37.865 | 0.00 | 0.00 |
| ATOM | 3378 | C    | VAL | X | 222 | 38.226 | 34.165 | 39.863 | 0.00 | 0.00 |
| ATOM | 3379 | O    | VAL | X | 222 | 38.369 | 35.373 | 39.548 | 0.00 | 0.00 |
| ATOM | 3380 | N    | LEU | X | 223 | 39.049 | 33.620 | 40.740 | 0.00 | 0.00 |
| ATOM | 3381 | H    | LEU | X | 223 | 38.875 | 32.647 | 40.946 | 0.00 | 0.00 |
| ATOM | 3382 | CA   | LEU | X | 223 | 40.160 | 34.275 | 41.500 | 0.00 | 0.00 |
| ATOM | 3383 | HA   | LEU | X | 223 | 40.380 | 35.284 | 41.152 | 0.00 | 0.00 |
| ATOM | 3384 | CB   | LEU | X | 223 | 39.813 | 34.297 | 42.993 | 0.00 | 0.00 |
| ATOM | 3385 | HB2  | LEU | X | 223 | 39.410 | 33.323 | 43.270 | 0.00 | 0.00 |
| ATOM | 3386 | HB3  | LEU | X | 223 | 40.725 | 34.366 | 43.585 | 0.00 | 0.00 |
| ATOM | 3387 | CG   | LEU | X | 223 | 38.828 | 35.379 | 43.510 | 0.00 | 0.00 |
| ATOM | 3388 | HG   | LEU | X | 223 | 38.977 | 36.288 | 42.928 | 0.00 | 0.00 |
| ATOM | 3389 | CD1  | LEU | X | 223 | 37.365 | 34.923 | 43.277 | 0.00 | 0.00 |
| ATOM | 3390 | HD11 | LEU | X | 223 | 37.341 | 34.853 | 42.190 | 0.00 | 0.00 |
| ATOM | 3391 | HD12 | LEU | X | 223 | 36.792 | 35.815 | 43.529 | 0.00 | 0.00 |
| ATOM | 3392 | HD13 | LEU | X | 223 | 37.060 | 34.064 | 43.876 | 0.00 | 0.00 |
| ATOM | 3393 | CD2  | LEU | X | 223 | 39.101 | 35.555 | 44.986 | 0.00 | 0.00 |
| ATOM | 3394 | HD21 | LEU | X | 223 | 38.818 | 34.618 | 45.465 | 0.00 | 0.00 |
| ATOM | 3395 | HD22 | LEU | X | 223 | 40.160 | 35.735 | 45.173 | 0.00 | 0.00 |
| ATOM | 3396 | HD23 | LEU | X | 223 | 38.487 | 36.406 | 45.279 | 0.00 | 0.00 |
| ATOM | 3397 | C    | LEU | X | 223 | 41.520 | 33.552 | 41.328 | 0.00 | 0.00 |
| ATOM | 3398 | O    | LEU | X | 223 | 41.675 | 32.410 | 41.754 | 0.00 | 0.00 |
| ATOM | 3399 | N    | GLN | X | 224 | 42.502 | 34.131 | 40.656 | 0.00 | 0.00 |
| ATOM | 3400 | H    | GLN | X | 224 | 42.209 | 35.001 | 40.235 | 0.00 | 0.00 |
| ATOM | 3401 | CA   | GLN | X | 224 | 43.788 | 33.537 | 40.267 | 0.00 | 0.00 |
| ATOM | 3402 | HA   | GLN | X | 224 | 43.766 | 32.472 | 40.500 | 0.00 | 0.00 |
| ATOM | 3403 | CB   | GLN | X | 224 | 43.969 | 33.493 | 38.771 | 0.00 | 0.00 |
| ATOM | 3404 | HB2  | GLN | X | 224 | 44.249 | 34.493 | 38.441 | 0.00 | 0.00 |
| ATOM | 3405 | HB3  | GLN | X | 224 | 44.801 | 32.790 | 38.719 | 0.00 | 0.00 |
| ATOM | 3406 | CG   | GLN | X | 224 | 42.809 | 32.927 | 37.929 | 0.00 | 0.00 |
| ATOM | 3407 | HG2  | GLN | X | 224 | 42.683 | 31.908 | 38.294 | 0.00 | 0.00 |
| ATOM | 3408 | HG3  | GLN | X | 224 | 41.835 | 33.392 | 38.086 | 0.00 | 0.00 |
| ATOM | 3409 | CD   | GLN | X | 224 | 42.997 | 32.845 | 36.467 | 0.00 | 0.00 |
| ATOM | 3410 | OE1  | GLN | X | 224 | 42.089 | 33.056 | 35.652 | 0.00 | 0.00 |
| ATOM | 3411 | NE2  | GLN | X | 224 | 44.162 | 32.712 | 35.880 | 0.00 | 0.00 |
| ATOM | 3412 | HE21 | GLN | X | 224 | 44.133 | 32.611 | 34.876 | 0.00 | 0.00 |
| ATOM | 3413 | HE22 | GLN | X | 224 | 44.974 | 32.467 | 36.429 | 0.00 | 0.00 |
| ATOM | 3414 | C    | GLN | X | 224 | 44.953 | 34.098 | 41.034 | 0.00 | 0.00 |
| ATOM | 3415 | O    | GLN | X | 224 | 45.304 | 35.273 | 40.907 | 0.00 | 0.00 |

|      |      |      |     |   |     |        |        |        |      |      |
|------|------|------|-----|---|-----|--------|--------|--------|------|------|
| ATOM | 3416 | N    | SER | X | 225 | 45.638 | 33.256 | 41.823 | 0.00 | 0.00 |
| ATOM | 3417 | H    | SER | X | 225 | 45.275 | 32.332 | 42.009 | 0.00 | 0.00 |
| ATOM | 3418 | CA   | SER | X | 225 | 46.923 | 33.607 | 42.315 | 0.00 | 0.00 |
| ATOM | 3419 | HA   | SER | X | 225 | 47.337 | 32.856 | 42.987 | 0.00 | 0.00 |
| ATOM | 3420 | CB   | SER | X | 225 | 47.938 | 33.717 | 41.121 | 0.00 | 0.00 |
| ATOM | 3421 | HB2  | SER | X | 225 | 47.759 | 32.852 | 40.483 | 0.00 | 0.00 |
| ATOM | 3422 | HB3  | SER | X | 225 | 47.645 | 34.618 | 40.584 | 0.00 | 0.00 |
| ATOM | 3423 | OG   | SER | X | 225 | 49.319 | 33.862 | 41.427 | 0.00 | 0.00 |
| ATOM | 3424 | HG   | SER | X | 225 | 49.444 | 33.178 | 42.089 | 0.00 | 0.00 |
| ATOM | 3425 | C    | SER | X | 225 | 46.916 | 34.821 | 43.318 | 0.00 | 0.00 |
| ATOM | 3426 | O    | SER | X | 225 | 47.982 | 35.347 | 43.810 | 0.00 | 0.00 |
| ATOM | 3427 | N    | GLY | X | 226 | 45.767 | 35.282 | 43.757 | 0.00 | 0.00 |
| ATOM | 3428 | H    | GLY | X | 226 | 44.948 | 34.775 | 43.456 | 0.00 | 0.00 |
| ATOM | 3429 | CA   | GLY | X | 226 | 45.495 | 36.291 | 44.849 | 0.00 | 0.00 |
| ATOM | 3430 | HA2  | GLY | X | 226 | 46.294 | 36.431 | 45.577 | 0.00 | 0.00 |
| ATOM | 3431 | HA3  | GLY | X | 226 | 45.572 | 37.297 | 44.436 | 0.00 | 0.00 |
| ATOM | 3432 | C    | GLY | X | 226 | 44.183 | 36.078 | 45.586 | 0.00 | 0.00 |
| ATOM | 3433 | O    | GLY | X | 226 | 43.292 | 35.388 | 45.151 | 0.00 | 0.00 |
| ATOM | 3434 | N    | ALA | X | 227 | 44.051 | 36.725 | 46.730 | 0.00 | 0.00 |
| ATOM | 3435 | H    | ALA | X | 227 | 44.881 | 37.123 | 47.145 | 0.00 | 0.00 |
| ATOM | 3436 | CA   | ALA | X | 227 | 42.938 | 36.582 | 47.683 | 0.00 | 0.00 |
| ATOM | 3437 | HA   | ALA | X | 227 | 42.081 | 36.332 | 47.058 | 0.00 | 0.00 |
| ATOM | 3438 | CB   | ALA | X | 227 | 43.146 | 35.372 | 48.690 | 0.00 | 0.00 |
| ATOM | 3439 | HB1  | ALA | X | 227 | 43.761 | 35.681 | 49.535 | 0.00 | 0.00 |
| ATOM | 3440 | HB2  | ALA | X | 227 | 43.634 | 34.509 | 48.239 | 0.00 | 0.00 |
| ATOM | 3441 | HB3  | ALA | X | 227 | 42.172 | 35.063 | 49.070 | 0.00 | 0.00 |
| ATOM | 3442 | C    | ALA | X | 227 | 42.500 | 37.907 | 48.326 | 0.00 | 0.00 |
| ATOM | 3443 | O    | ALA | X | 227 | 43.312 | 38.775 | 48.588 | 0.00 | 0.00 |
| ATOM | 3444 | N    | PRO | X | 228 | 41.198 | 38.079 | 48.740 | 0.00 | 0.00 |
| ATOM | 3445 | CD   | PRO | X | 228 | 40.109 | 37.269 | 48.334 | 0.00 | 0.00 |
| ATOM | 3446 | HD2  | PRO | X | 228 | 40.250 | 36.192 | 48.250 | 0.00 | 0.00 |
| ATOM | 3447 | HD3  | PRO | X | 228 | 39.930 | 37.618 | 47.317 | 0.00 | 0.00 |
| ATOM | 3448 | CG   | PRO | X | 228 | 38.882 | 37.646 | 49.160 | 0.00 | 0.00 |
| ATOM | 3449 | HG2  | PRO | X | 228 | 38.787 | 37.044 | 50.064 | 0.00 | 0.00 |
| ATOM | 3450 | HG3  | PRO | X | 228 | 37.987 | 37.595 | 48.541 | 0.00 | 0.00 |
| ATOM | 3451 | CB   | PRO | X | 228 | 39.191 | 39.143 | 49.462 | 0.00 | 0.00 |
| ATOM | 3452 | HB2  | PRO | X | 228 | 38.908 | 39.412 | 50.479 | 0.00 | 0.00 |
| ATOM | 3453 | HB3  | PRO | X | 228 | 38.671 | 39.768 | 48.736 | 0.00 | 0.00 |
| ATOM | 3454 | CA   | PRO | X | 228 | 40.741 | 39.290 | 49.364 | 0.00 | 0.00 |
| ATOM | 3455 | HA   | PRO | X | 228 | 41.100 | 40.204 | 48.893 | 0.00 | 0.00 |
| ATOM | 3456 | C    | PRO | X | 228 | 41.237 | 39.485 | 50.815 | 0.00 | 0.00 |
| ATOM | 3457 | O    | PRO | X | 228 | 41.776 | 40.563 | 51.104 | 0.00 | 0.00 |
| ATOM | 3458 | N    | ASN | X | 229 | 41.105 | 38.439 | 51.599 | 0.00 | 0.00 |
| ATOM | 3459 | H    | ASN | X | 229 | 40.658 | 37.623 | 51.206 | 0.00 | 0.00 |
| ATOM | 3460 | CA   | ASN | X | 229 | 41.556 | 38.185 | 52.949 | 0.00 | 0.00 |
| ATOM | 3461 | HA   | ASN | X | 229 | 41.140 | 39.029 | 53.499 | 0.00 | 0.00 |
| ATOM | 3462 | CB   | ASN | X | 229 | 40.998 | 36.855 | 53.401 | 0.00 | 0.00 |
| ATOM | 3463 | HB2  | ASN | X | 229 | 41.304 | 36.709 | 54.437 | 0.00 | 0.00 |
| ATOM | 3464 | HB3  | ASN | X | 229 | 39.913 | 36.959 | 53.388 | 0.00 | 0.00 |
| ATOM | 3465 | CG   | ASN | X | 229 | 41.191 | 35.592 | 52.575 | 0.00 | 0.00 |
| ATOM | 3466 | OD1  | ASN | X | 229 | 41.148 | 35.563 | 51.345 | 0.00 | 0.00 |
| ATOM | 3467 | ND2  | ASN | X | 229 | 41.229 | 34.455 | 53.261 | 0.00 | 0.00 |
| ATOM | 3468 | HD21 | ASN | X | 229 | 41.461 | 33.623 | 52.737 | 0.00 | 0.00 |
| ATOM | 3469 | HD22 | ASN | X | 229 | 41.450 | 34.550 | 54.242 | 0.00 | 0.00 |
| ATOM | 3470 | C    | ASN | X | 229 | 43.084 | 38.155 | 53.110 | 0.00 | 0.00 |
| ATOM | 3471 | O    | ASN | X | 229 | 43.602 | 37.762 | 54.171 | 0.00 | 0.00 |
| ATOM | 3472 | N    | GLY | X | 230 | 43.809 | 38.554 | 52.038 | 0.00 | 0.00 |
| ATOM | 3473 | H    | GLY | X | 230 | 43.296 | 39.035 | 51.313 | 0.00 | 0.00 |
| ATOM | 3474 | CA   | GLY | X | 230 | 45.308 | 38.618 | 51.973 | 0.00 | 0.00 |
| ATOM | 3475 | HA2  | GLY | X | 230 | 45.631 | 37.659 | 52.378 | 0.00 | 0.00 |
| ATOM | 3476 | HA3  | GLY | X | 230 | 45.580 | 38.673 | 50.919 | 0.00 | 0.00 |
| ATOM | 3477 | C    | GLY | X | 230 | 45.906 | 39.859 | 52.641 | 0.00 | 0.00 |
| ATOM | 3478 | O    | GLY | X | 230 | 45.424 | 40.980 | 52.410 | 0.00 | 0.00 |
| ATOM | 3479 | N    | PRO | X | 231 | 46.944 | 39.657 | 53.537 | 0.00 | 0.00 |
| ATOM | 3480 | CD   | PRO | X | 231 | 47.676 | 38.376 | 53.693 | 0.00 | 0.00 |
| ATOM | 3481 | HD2  | PRO | X | 231 | 48.237 | 38.180 | 52.779 | 0.00 | 0.00 |
| ATOM | 3482 | HD3  | PRO | X | 231 | 46.997 | 37.563 | 53.950 | 0.00 | 0.00 |



|      |      |      |     |   |     |        |        |        |      |      |
|------|------|------|-----|---|-----|--------|--------|--------|------|------|
| ATOM | 3483 | CG   | PRO | X | 231 | 48.619 | 38.698 | 54.911 | 0.00 | 0.00 |
| ATOM | 3484 | HG2  | PRO | X | 231 | 49.460 | 38.011 | 54.999 | 0.00 | 0.00 |
| ATOM | 3485 | HG3  | PRO | X | 231 | 48.130 | 38.677 | 55.885 | 0.00 | 0.00 |
| ATOM | 3486 | CB   | PRO | X | 231 | 49.019 | 40.124 | 54.645 | 0.00 | 0.00 |
| ATOM | 3487 | HB2  | PRO | X | 231 | 49.698 | 40.309 | 53.812 | 0.00 | 0.00 |
| ATOM | 3488 | HB3  | PRO | X | 231 | 49.587 | 40.450 | 55.517 | 0.00 | 0.00 |
| ATOM | 3489 | CA   | PRO | X | 231 | 47.704 | 40.735 | 54.247 | 0.00 | 0.00 |
| ATOM | 3490 | HA   | PRO | X | 231 | 47.120 | 41.013 | 55.124 | 0.00 | 0.00 |
| ATOM | 3491 | C    | PRO | X | 231 | 48.098 | 42.027 | 53.480 | 0.00 | 0.00 |
| ATOM | 3492 | O    | PRO | X | 231 | 48.035 | 43.091 | 54.011 | 0.00 | 0.00 |
| ATOM | 3493 | N    | TRP | X | 232 | 48.403 | 41.923 | 52.184 | 0.00 | 0.00 |
| ATOM | 3494 | H    | TRP | X | 232 | 48.444 | 40.992 | 51.796 | 0.00 | 0.00 |
| ATOM | 3495 | CA   | TRP | X | 232 | 48.774 | 42.961 | 51.262 | 0.00 | 0.00 |
| ATOM | 3496 | HA   | TRP | X | 232 | 49.312 | 43.680 | 51.881 | 0.00 | 0.00 |
| ATOM | 3497 | CB   | TRP | X | 232 | 49.721 | 42.367 | 50.155 | 0.00 | 0.00 |
| ATOM | 3498 | HB2  | TRP | X | 232 | 49.783 | 43.107 | 49.357 | 0.00 | 0.00 |
| ATOM | 3499 | HB3  | TRP | X | 232 | 50.669 | 42.183 | 50.661 | 0.00 | 0.00 |
| ATOM | 3500 | CG   | TRP | X | 232 | 49.175 | 41.122 | 49.507 | 0.00 | 0.00 |
| ATOM | 3501 | CD1  | TRP | X | 232 | 49.370 | 39.876 | 49.964 | 0.00 | 0.00 |
| ATOM | 3502 | HD1  | TRP | X | 232 | 49.807 | 39.569 | 50.903 | 0.00 | 0.00 |
| ATOM | 3503 | NE1  | TRP | X | 232 | 48.665 | 39.058 | 49.144 | 0.00 | 0.00 |
| ATOM | 3504 | HE1  | TRP | X | 232 | 48.538 | 38.088 | 49.396 | 0.00 | 0.00 |
| ATOM | 3505 | CE2  | TRP | X | 232 | 48.071 | 39.673 | 48.100 | 0.00 | 0.00 |
| ATOM | 3506 | CZ2  | TRP | X | 232 | 47.285 | 39.230 | 46.981 | 0.00 | 0.00 |
| ATOM | 3507 | HZ2  | TRP | X | 232 | 46.982 | 38.195 | 46.914 | 0.00 | 0.00 |
| ATOM | 3508 | CH2  | TRP | X | 232 | 46.771 | 40.134 | 46.102 | 0.00 | 0.00 |
| ATOM | 3509 | HH2  | TRP | X | 232 | 45.981 | 39.877 | 45.411 | 0.00 | 0.00 |
| ATOM | 3510 | CZ3  | TRP | X | 232 | 47.204 | 41.477 | 46.216 | 0.00 | 0.00 |
| ATOM | 3511 | HZ3  | TRP | X | 232 | 46.842 | 42.199 | 45.499 | 0.00 | 0.00 |
| ATOM | 3512 | CE3  | TRP | X | 232 | 48.078 | 41.865 | 47.307 | 0.00 | 0.00 |
| ATOM | 3513 | HE3  | TRP | X | 232 | 48.200 | 42.936 | 47.381 | 0.00 | 0.00 |
| ATOM | 3514 | CD2  | TRP | X | 232 | 48.499 | 40.962 | 48.250 | 0.00 | 0.00 |
| ATOM | 3515 | C    | TRP | X | 232 | 47.683 | 43.703 | 50.592 | 0.00 | 0.00 |
| ATOM | 3516 | O    | TRP | X | 232 | 47.810 | 44.878 | 50.167 | 0.00 | 0.00 |
| ATOM | 3517 | N    | ALA | X | 233 | 46.486 | 43.035 | 50.492 | 0.00 | 0.00 |
| ATOM | 3518 | H    | ALA | X | 233 | 46.273 | 42.093 | 50.788 | 0.00 | 0.00 |
| ATOM | 3519 | CA   | ALA | X | 233 | 45.522 | 43.558 | 49.423 | 0.00 | 0.00 |
| ATOM | 3520 | HA   | ALA | X | 233 | 45.921 | 43.908 | 48.471 | 0.00 | 0.00 |
| ATOM | 3521 | CB   | ALA | X | 233 | 44.602 | 42.430 | 48.992 | 0.00 | 0.00 |
| ATOM | 3522 | HB1  | ALA | X | 233 | 45.250 | 41.693 | 48.517 | 0.00 | 0.00 |
| ATOM | 3523 | HB2  | ALA | X | 233 | 43.780 | 42.722 | 48.339 | 0.00 | 0.00 |
| ATOM | 3524 | HB3  | ALA | X | 233 | 44.124 | 42.012 | 49.878 | 0.00 | 0.00 |
| ATOM | 3525 | C    | ALA | X | 233 | 44.690 | 44.791 | 49.993 | 0.00 | 0.00 |
| ATOM | 3526 | O    | ALA | X | 233 | 43.890 | 45.249 | 49.194 | 0.00 | 0.00 |
| ATOM | 3527 | N    | THR | X | 234 | 44.805 | 45.177 | 51.311 | 0.00 | 0.00 |
| ATOM | 3528 | H    | THR | X | 234 | 45.479 | 44.677 | 51.872 | 0.00 | 0.00 |
| ATOM | 3529 | CA   | THR | X | 234 | 44.122 | 46.323 | 51.973 | 0.00 | 0.00 |
| ATOM | 3530 | HA   | THR | X | 234 | 43.903 | 47.045 | 51.186 | 0.00 | 0.00 |
| ATOM | 3531 | CB   | THR | X | 234 | 42.804 | 45.934 | 52.592 | 0.00 | 0.00 |
| ATOM | 3532 | HB   | THR | X | 234 | 42.408 | 46.764 | 53.178 | 0.00 | 0.00 |
| ATOM | 3533 | CG2  | THR | X | 234 | 41.758 | 45.490 | 51.613 | 0.00 | 0.00 |
| ATOM | 3534 | HG21 | THR | X | 234 | 41.604 | 46.223 | 50.821 | 0.00 | 0.00 |
| ATOM | 3535 | HG22 | THR | X | 234 | 40.793 | 45.262 | 52.066 | 0.00 | 0.00 |
| ATOM | 3536 | HG23 | THR | X | 234 | 42.172 | 44.697 | 50.990 | 0.00 | 0.00 |
| ATOM | 3537 | OG1  | THR | X | 234 | 42.917 | 44.938 | 53.588 | 0.00 | 0.00 |
| ATOM | 3538 | HG1  | THR | X | 234 | 42.919 | 44.079 | 53.158 | 0.00 | 0.00 |
| ATOM | 3539 | C    | THR | X | 234 | 44.953 | 47.038 | 52.998 | 0.00 | 0.00 |
| ATOM | 3540 | O    | THR | X | 234 | 46.001 | 46.474 | 53.382 | 0.00 | 0.00 |
| ATOM | 3541 | N    | VAL | X | 235 | 44.520 | 48.182 | 53.516 | 0.00 | 0.00 |
| ATOM | 3542 | H    | VAL | X | 235 | 43.649 | 48.536 | 53.149 | 0.00 | 0.00 |
| ATOM | 3543 | CA   | VAL | X | 235 | 45.141 | 48.802 | 54.733 | 0.00 | 0.00 |
| ATOM | 3544 | HA   | VAL | X | 235 | 45.497 | 47.996 | 55.375 | 0.00 | 0.00 |
| ATOM | 3545 | CB   | VAL | X | 235 | 46.466 | 49.591 | 54.287 | 0.00 | 0.00 |
| ATOM | 3546 | HB   | VAL | X | 235 | 46.918 | 49.223 | 53.366 | 0.00 | 0.00 |
| ATOM | 3547 | CG1  | VAL | X | 235 | 46.319 | 51.102 | 54.030 | 0.00 | 0.00 |
| ATOM | 3548 | HG11 | VAL | X | 235 | 45.975 | 51.601 | 54.937 | 0.00 | 0.00 |
| ATOM | 3549 | HG12 | VAL | X | 235 | 47.162 | 51.580 | 53.530 | 0.00 | 0.00 |

|      |      |      |     |   |     |        |        |        |      |      |
|------|------|------|-----|---|-----|--------|--------|--------|------|------|
| ATOM | 3550 | HG13 | VAL | X | 235 | 45.550 | 51.159 | 53.260 | 0.00 | 0.00 |
| ATOM | 3551 | CG2  | VAL | X | 235 | 47.572 | 49.415 | 55.371 | 0.00 | 0.00 |
| ATOM | 3552 | HG21 | VAL | X | 235 | 48.370 | 50.142 | 55.220 | 0.00 | 0.00 |
| ATOM | 3553 | HG22 | VAL | X | 235 | 47.913 | 48.383 | 55.297 | 0.00 | 0.00 |
| ATOM | 3554 | HG23 | VAL | X | 235 | 47.153 | 49.573 | 56.365 | 0.00 | 0.00 |
| ATOM | 3555 | C    | VAL | X | 235 | 44.115 | 49.467 | 55.559 | 0.00 | 0.00 |
| ATOM | 3556 | O    | VAL | X | 235 | 42.913 | 49.441 | 55.263 | 0.00 | 0.00 |
| ATOM | 3557 | N    | GLY | X | 236 | 44.427 | 50.173 | 56.679 | 0.00 | 0.00 |
| ATOM | 3558 | H    | GLY | X | 236 | 45.391 | 50.070 | 56.961 | 0.00 | 0.00 |
| ATOM | 3559 | CA   | GLY | X | 236 | 43.653 | 50.889 | 57.713 | 0.00 | 0.00 |
| ATOM | 3560 | HA2  | GLY | X | 236 | 42.625 | 50.527 | 57.736 | 0.00 | 0.00 |
| ATOM | 3561 | HA3  | GLY | X | 236 | 43.997 | 50.598 | 58.705 | 0.00 | 0.00 |
| ATOM | 3562 | C    | GLY | X | 236 | 43.776 | 52.412 | 57.470 | 0.00 | 0.00 |
| ATOM | 3563 | O    | GLY | X | 236 | 44.845 | 52.840 | 57.068 | 0.00 | 0.00 |
| ATOM | 3564 | N    | MET | X | 237 | 42.717 | 53.186 | 57.667 | 0.00 | 0.00 |
| ATOM | 3565 | H    | MET | X | 237 | 42.020 | 52.808 | 58.292 | 0.00 | 0.00 |
| ATOM | 3566 | CA   | MET | X | 237 | 42.701 | 54.626 | 57.472 | 0.00 | 0.00 |
| ATOM | 3567 | HA   | MET | X | 237 | 42.714 | 54.742 | 56.388 | 0.00 | 0.00 |
| ATOM | 3568 | CB   | MET | X | 237 | 41.423 | 55.211 | 58.156 | 0.00 | 0.00 |
| ATOM | 3569 | HB2  | MET | X | 237 | 40.610 | 54.646 | 57.701 | 0.00 | 0.00 |
| ATOM | 3570 | HB3  | MET | X | 237 | 41.550 | 54.981 | 59.214 | 0.00 | 0.00 |
| ATOM | 3571 | CG   | MET | X | 237 | 41.225 | 56.717 | 57.932 | 0.00 | 0.00 |
| ATOM | 3572 | HG2  | MET | X | 237 | 40.377 | 56.990 | 58.560 | 0.00 | 0.00 |
| ATOM | 3573 | HG3  | MET | X | 237 | 42.126 | 57.210 | 58.296 | 0.00 | 0.00 |
| ATOM | 3574 | SD   | MET | X | 237 | 40.839 | 57.210 | 56.205 | 0.00 | 0.00 |
| ATOM | 3575 | CE   | MET | X | 237 | 39.035 | 56.918 | 56.030 | 0.00 | 0.00 |
| ATOM | 3576 | HE1  | MET | X | 237 | 38.529 | 57.664 | 56.643 | 0.00 | 0.00 |
| ATOM | 3577 | HE2  | MET | X | 237 | 38.816 | 57.102 | 54.978 | 0.00 | 0.00 |
| ATOM | 3578 | HE3  | MET | X | 237 | 38.737 | 55.956 | 56.446 | 0.00 | 0.00 |
| ATOM | 3579 | C    | MET | X | 237 | 44.023 | 55.413 | 58.046 | 0.00 | 0.00 |
| ATOM | 3580 | O    | MET | X | 237 | 44.354 | 56.372 | 57.367 | 0.00 | 0.00 |
| ATOM | 3581 | N    | GLY | X | 238 | 44.630 | 55.144 | 59.200 | 0.00 | 0.00 |
| ATOM | 3582 | H    | GLY | X | 238 | 44.289 | 54.440 | 59.840 | 0.00 | 0.00 |
| ATOM | 3583 | CA   | GLY | X | 238 | 45.834 | 55.892 | 59.637 | 0.00 | 0.00 |
| ATOM | 3584 | HA2  | GLY | X | 238 | 45.606 | 56.931 | 59.400 | 0.00 | 0.00 |
| ATOM | 3585 | HA3  | GLY | X | 238 | 46.037 | 55.767 | 60.701 | 0.00 | 0.00 |
| ATOM | 3586 | C    | GLY | X | 238 | 47.117 | 55.484 | 58.950 | 0.00 | 0.00 |
| ATOM | 3587 | O    | GLY | X | 238 | 47.931 | 56.375 | 58.833 | 0.00 | 0.00 |
| ATOM | 3588 | N    | GLU | X | 239 | 47.215 | 54.309 | 58.369 | 0.00 | 0.00 |
| ATOM | 3589 | H    | GLU | X | 239 | 46.442 | 53.663 | 58.296 | 0.00 | 0.00 |
| ATOM | 3590 | CA   | GLU | X | 239 | 48.448 | 54.006 | 57.545 | 0.00 | 0.00 |
| ATOM | 3591 | HA   | GLU | X | 239 | 49.321 | 54.311 | 58.123 | 0.00 | 0.00 |
| ATOM | 3592 | CB   | GLU | X | 239 | 48.608 | 52.490 | 57.364 | 0.00 | 0.00 |
| ATOM | 3593 | HB2  | GLU | X | 239 | 47.583 | 52.120 | 57.372 | 0.00 | 0.00 |
| ATOM | 3594 | HB3  | GLU | X | 239 | 49.116 | 52.364 | 56.407 | 0.00 | 0.00 |
| ATOM | 3595 | CG   | GLU | X | 239 | 49.311 | 51.780 | 58.533 | 0.00 | 0.00 |
| ATOM | 3596 | HG2  | GLU | X | 239 | 48.753 | 51.902 | 59.461 | 0.00 | 0.00 |
| ATOM | 3597 | HG3  | GLU | X | 239 | 49.125 | 50.724 | 58.339 | 0.00 | 0.00 |
| ATOM | 3598 | CD   | GLU | X | 239 | 50.849 | 52.015 | 58.607 | 0.00 | 0.00 |
| ATOM | 3599 | OE1  | GLU | X | 239 | 51.274 | 52.982 | 59.335 | 0.00 | 0.00 |
| ATOM | 3600 | OE2  | GLU | X | 239 | 51.614 | 51.403 | 57.848 | 0.00 | 0.00 |
| ATOM | 3601 | C    | GLU | X | 239 | 48.415 | 54.691 | 56.246 | 0.00 | 0.00 |
| ATOM | 3602 | O    | GLU | X | 239 | 49.336 | 55.373 | 55.813 | 0.00 | 0.00 |
| ATOM | 3603 | N    | ALA | X | 240 | 47.244 | 54.564 | 55.556 | 0.00 | 0.00 |
| ATOM | 3604 | H    | ALA | X | 240 | 46.437 | 54.130 | 55.980 | 0.00 | 0.00 |
| ATOM | 3605 | CA   | ALA | X | 240 | 46.847 | 55.245 | 54.265 | 0.00 | 0.00 |
| ATOM | 3606 | HA   | ALA | X | 240 | 47.375 | 54.830 | 53.406 | 0.00 | 0.00 |
| ATOM | 3607 | CB   | ALA | X | 240 | 45.380 | 54.873 | 54.121 | 0.00 | 0.00 |
| ATOM | 3608 | HB1  | ALA | X | 240 | 44.743 | 55.232 | 54.929 | 0.00 | 0.00 |
| ATOM | 3609 | HB2  | ALA | X | 240 | 45.279 | 53.792 | 54.022 | 0.00 | 0.00 |
| ATOM | 3610 | HB3  | ALA | X | 240 | 45.066 | 55.270 | 53.155 | 0.00 | 0.00 |
| ATOM | 3611 | C    | ALA | X | 240 | 47.031 | 56.796 | 54.271 | 0.00 | 0.00 |
| ATOM | 3612 | O    | ALA | X | 240 | 47.773 | 57.380 | 53.490 | 0.00 | 0.00 |
| ATOM | 3613 | N    | ARG | X | 241 | 46.569 | 57.393 | 55.378 | 0.00 | 0.00 |
| ATOM | 3614 | H    | ARG | X | 241 | 45.978 | 56.832 | 55.975 | 0.00 | 0.00 |
| ATOM | 3615 | CA   | ARG | X | 241 | 46.804 | 58.765 | 55.785 | 0.00 | 0.00 |
| ATOM | 3616 | HA   | ARG | X | 241 | 46.545 | 59.452 | 54.980 | 0.00 | 0.00 |

|      |      |      |     |   |     |        |        |        |      |      |
|------|------|------|-----|---|-----|--------|--------|--------|------|------|
| ATOM | 3617 | CB   | ARG | X | 241 | 46.149 | 59.117 | 57.161 | 0.00 | 0.00 |
| ATOM | 3618 | HB2  | ARG | X | 241 | 45.065 | 59.064 | 57.064 | 0.00 | 0.00 |
| ATOM | 3619 | HB3  | ARG | X | 241 | 46.490 | 58.392 | 57.899 | 0.00 | 0.00 |
| ATOM | 3620 | CG   | ARG | X | 241 | 46.386 | 60.512 | 57.712 | 0.00 | 0.00 |
| ATOM | 3621 | HG2  | ARG | X | 241 | 47.445 | 60.761 | 57.636 | 0.00 | 0.00 |
| ATOM | 3622 | HG3  | ARG | X | 241 | 45.952 | 61.246 | 57.032 | 0.00 | 0.00 |
| ATOM | 3623 | CD   | ARG | X | 241 | 45.875 | 60.824 | 59.129 | 0.00 | 0.00 |
| ATOM | 3624 | HD2  | ARG | X | 241 | 44.904 | 60.337 | 59.210 | 0.00 | 0.00 |
| ATOM | 3625 | HD3  | ARG | X | 241 | 46.581 | 60.417 | 59.853 | 0.00 | 0.00 |
| ATOM | 3626 | NE   | ARG | X | 241 | 45.655 | 62.296 | 59.400 | 0.00 | 0.00 |
| ATOM | 3627 | HE   | ARG | X | 241 | 45.413 | 62.848 | 58.589 | 0.00 | 0.00 |
| ATOM | 3628 | CZ   | ARG | X | 241 | 45.498 | 62.776 | 60.618 | 0.00 | 0.00 |
| ATOM | 3629 | NH1  | ARG | X | 241 | 45.709 | 62.173 | 61.735 | 0.00 | 0.00 |
| ATOM | 3630 | HH11 | ARG | X | 241 | 46.479 | 61.522 | 61.686 | 0.00 | 0.00 |
| ATOM | 3631 | HH12 | ARG | X | 241 | 45.630 | 62.690 | 62.599 | 0.00 | 0.00 |
| ATOM | 3632 | NH2  | ARG | X | 241 | 44.926 | 63.963 | 60.675 | 0.00 | 0.00 |
| ATOM | 3633 | HH21 | ARG | X | 241 | 44.822 | 64.498 | 59.825 | 0.00 | 0.00 |
| ATOM | 3634 | HH22 | ARG | X | 241 | 44.475 | 64.210 | 61.544 | 0.00 | 0.00 |
| ATOM | 3635 | C    | ARG | X | 241 | 48.317 | 58.999 | 55.896 | 0.00 | 0.00 |
| ATOM | 3636 | O    | ARG | X | 241 | 48.854 | 59.881 | 55.196 | 0.00 | 0.00 |
| ATOM | 3637 | N    | ARG | X | 242 | 48.986 | 58.192 | 56.703 | 0.00 | 0.00 |
| ATOM | 3638 | H    | ARG | X | 242 | 48.479 | 57.417 | 57.108 | 0.00 | 0.00 |
| ATOM | 3639 | CA   | ARG | X | 242 | 50.400 | 58.367 | 57.057 | 0.00 | 0.00 |
| ATOM | 3640 | HA   | ARG | X | 242 | 50.600 | 59.280 | 57.617 | 0.00 | 0.00 |
| ATOM | 3641 | CB   | ARG | X | 242 | 50.958 | 57.243 | 58.005 | 0.00 | 0.00 |
| ATOM | 3642 | HB2  | ARG | X | 242 | 50.341 | 57.229 | 58.903 | 0.00 | 0.00 |
| ATOM | 3643 | HB3  | ARG | X | 242 | 50.822 | 56.289 | 57.496 | 0.00 | 0.00 |
| ATOM | 3644 | CG   | ARG | X | 242 | 52.453 | 57.419 | 58.408 | 0.00 | 0.00 |
| ATOM | 3645 | HG2  | ARG | X | 242 | 53.011 | 57.564 | 57.482 | 0.00 | 0.00 |
| ATOM | 3646 | HG3  | ARG | X | 242 | 52.583 | 58.306 | 59.027 | 0.00 | 0.00 |
| ATOM | 3647 | CD   | ARG | X | 242 | 53.047 | 56.246 | 59.246 | 0.00 | 0.00 |
| ATOM | 3648 | HD2  | ARG | X | 242 | 54.071 | 56.496 | 59.523 | 0.00 | 0.00 |
| ATOM | 3649 | HD3  | ARG | X | 242 | 52.411 | 56.198 | 60.129 | 0.00 | 0.00 |
| ATOM | 3650 | NE   | ARG | X | 242 | 53.066 | 54.921 | 58.596 | 0.00 | 0.00 |
| ATOM | 3651 | HE   | ARG | X | 242 | 52.400 | 54.227 | 58.902 | 0.00 | 0.00 |
| ATOM | 3652 | CZ   | ARG | X | 242 | 53.691 | 54.555 | 57.439 | 0.00 | 0.00 |
| ATOM | 3653 | NH1  | ARG | X | 242 | 54.469 | 55.364 | 56.746 | 0.00 | 0.00 |
| ATOM | 3654 | HH11 | ARG | X | 242 | 54.923 | 56.129 | 57.226 | 0.00 | 0.00 |
| ATOM | 3655 | HH12 | ARG | X | 242 | 54.860 | 55.163 | 55.837 | 0.00 | 0.00 |
| ATOM | 3656 | NH2  | ARG | X | 242 | 53.376 | 53.505 | 56.837 | 0.00 | 0.00 |
| ATOM | 3657 | HH21 | ARG | X | 242 | 52.752 | 52.864 | 57.305 | 0.00 | 0.00 |
| ATOM | 3658 | HH22 | ARG | X | 242 | 53.942 | 53.171 | 56.070 | 0.00 | 0.00 |
| ATOM | 3659 | C    | ARG | X | 242 | 51.205 | 58.422 | 55.796 | 0.00 | 0.00 |
| ATOM | 3660 | O    | ARG | X | 242 | 52.068 | 59.303 | 55.663 | 0.00 | 0.00 |
| ATOM | 3661 | N    | ARG | X | 243 | 51.058 | 57.521 | 54.757 | 0.00 | 0.00 |
| ATOM | 3662 | H    | ARG | X | 243 | 50.369 | 56.789 | 54.848 | 0.00 | 0.00 |
| ATOM | 3663 | CA   | ARG | X | 243 | 51.707 | 57.547 | 53.454 | 0.00 | 0.00 |
| ATOM | 3664 | HA   | ARG | X | 243 | 52.779 | 57.639 | 53.631 | 0.00 | 0.00 |
| ATOM | 3665 | CB   | ARG | X | 243 | 51.314 | 56.235 | 52.826 | 0.00 | 0.00 |
| ATOM | 3666 | HB2  | ARG | X | 243 | 50.238 | 56.107 | 52.947 | 0.00 | 0.00 |
| ATOM | 3667 | HB3  | ARG | X | 243 | 51.468 | 56.399 | 51.759 | 0.00 | 0.00 |
| ATOM | 3668 | CG   | ARG | X | 243 | 52.073 | 54.955 | 53.332 | 0.00 | 0.00 |
| ATOM | 3669 | HG2  | ARG | X | 243 | 53.064 | 54.979 | 52.878 | 0.00 | 0.00 |
| ATOM | 3670 | HG3  | ARG | X | 243 | 52.047 | 55.049 | 54.417 | 0.00 | 0.00 |
| ATOM | 3671 | CD   | ARG | X | 243 | 51.389 | 53.636 | 52.853 | 0.00 | 0.00 |
| ATOM | 3672 | HD2  | ARG | X | 243 | 50.641 | 53.457 | 53.626 | 0.00 | 0.00 |
| ATOM | 3673 | HD3  | ARG | X | 243 | 50.947 | 53.751 | 51.863 | 0.00 | 0.00 |
| ATOM | 3674 | NE   | ARG | X | 243 | 52.356 | 52.526 | 52.962 | 0.00 | 0.00 |
| ATOM | 3675 | HE   | ARG | X | 243 | 53.287 | 52.750 | 53.281 | 0.00 | 0.00 |
| ATOM | 3676 | CZ   | ARG | X | 243 | 52.132 | 51.227 | 52.837 | 0.00 | 0.00 |
| ATOM | 3677 | NH1  | ARG | X | 243 | 50.950 | 50.739 | 52.488 | 0.00 | 0.00 |
| ATOM | 3678 | HH11 | ARG | X | 243 | 50.252 | 51.386 | 52.149 | 0.00 | 0.00 |
| ATOM | 3679 | HH12 | ARG | X | 243 | 50.710 | 49.758 | 52.499 | 0.00 | 0.00 |
| ATOM | 3680 | NH2  | ARG | X | 243 | 53.141 | 50.506 | 53.204 | 0.00 | 0.00 |
| ATOM | 3681 | HH21 | ARG | X | 243 | 54.026 | 50.911 | 53.472 | 0.00 | 0.00 |
| ATOM | 3682 | HH22 | ARG | X | 243 | 53.040 | 49.522 | 53.409 | 0.00 | 0.00 |
| ATOM | 3683 | C    | ARG | X | 243 | 51.211 | 58.717 | 52.557 | 0.00 | 0.00 |

|      |      |      |     |   |     |        |        |        |      |      |
|------|------|------|-----|---|-----|--------|--------|--------|------|------|
| ATOM | 3684 | O    | ARG | X | 243 | 51.919 | 59.282 | 51.766 | 0.00 | 0.00 |
| ATOM | 3685 | N    | ALA | X | 244 | 49.917 | 59.129 | 52.659 | 0.00 | 0.00 |
| ATOM | 3686 | H    | ALA | X | 244 | 49.289 | 58.707 | 53.327 | 0.00 | 0.00 |
| ATOM | 3687 | CA   | ALA | X | 244 | 49.458 | 60.352 | 51.964 | 0.00 | 0.00 |
| ATOM | 3688 | HA   | ALA | X | 244 | 49.567 | 60.265 | 50.883 | 0.00 | 0.00 |
| ATOM | 3689 | CB   | ALA | X | 244 | 47.937 | 60.483 | 52.071 | 0.00 | 0.00 |
| ATOM | 3690 | HB1  | ALA | X | 244 | 47.727 | 61.004 | 53.005 | 0.00 | 0.00 |
| ATOM | 3691 | HB2  | ALA | X | 244 | 47.359 | 59.561 | 52.012 | 0.00 | 0.00 |
| ATOM | 3692 | HB3  | ALA | X | 244 | 47.602 | 61.121 | 51.253 | 0.00 | 0.00 |
| ATOM | 3693 | C    | ALA | X | 244 | 50.154 | 61.750 | 52.411 | 0.00 | 0.00 |
| ATOM | 3694 | O    | ALA | X | 244 | 50.420 | 62.600 | 51.638 | 0.00 | 0.00 |
| ATOM | 3695 | N    | THR | X | 245 | 50.317 | 61.898 | 53.779 | 0.00 | 0.00 |
| ATOM | 3696 | H    | THR | X | 245 | 49.928 | 61.177 | 54.369 | 0.00 | 0.00 |
| ATOM | 3697 | CA   | THR | X | 245 | 50.884 | 63.077 | 54.458 | 0.00 | 0.00 |
| ATOM | 3698 | HA   | THR | X | 245 | 50.456 | 63.998 | 54.062 | 0.00 | 0.00 |
| ATOM | 3699 | CB   | THR | X | 245 | 50.603 | 63.073 | 55.946 | 0.00 | 0.00 |
| ATOM | 3700 | HB   | THR | X | 245 | 51.171 | 62.341 | 56.520 | 0.00 | 0.00 |
| ATOM | 3701 | CG2  | THR | X | 245 | 50.834 | 64.471 | 56.520 | 0.00 | 0.00 |
| ATOM | 3702 | HG21 | THR | X | 245 | 51.891 | 64.728 | 56.590 | 0.00 | 0.00 |
| ATOM | 3703 | HG22 | THR | X | 245 | 50.612 | 64.519 | 57.586 | 0.00 | 0.00 |
| ATOM | 3704 | HG23 | THR | X | 245 | 50.303 | 65.259 | 55.985 | 0.00 | 0.00 |
| ATOM | 3705 | OG1  | THR | X | 245 | 49.253 | 62.739 | 56.132 | 0.00 | 0.00 |
| ATOM | 3706 | HG1  | THR | X | 245 | 48.751 | 63.318 | 56.711 | 0.00 | 0.00 |
| ATOM | 3707 | C    | THR | X | 245 | 52.422 | 63.170 | 54.235 | 0.00 | 0.00 |
| ATOM | 3708 | O    | THR | X | 245 | 52.988 | 64.309 | 54.168 | 0.00 | 0.00 |
| ATOM | 3709 | N    | GLN | X | 246 | 53.080 | 62.031 | 54.087 | 0.00 | 0.00 |
| ATOM | 3710 | H    | GLN | X | 246 | 52.588 | 61.153 | 54.175 | 0.00 | 0.00 |
| ATOM | 3711 | CA   | GLN | X | 246 | 54.512 | 61.898 | 53.721 | 0.00 | 0.00 |
| ATOM | 3712 | HA   | GLN | X | 246 | 55.148 | 62.634 | 54.214 | 0.00 | 0.00 |
| ATOM | 3713 | CB   | GLN | X | 246 | 55.056 | 60.501 | 54.073 | 0.00 | 0.00 |
| ATOM | 3714 | HB2  | GLN | X | 246 | 54.286 | 59.759 | 53.862 | 0.00 | 0.00 |
| ATOM | 3715 | HB3  | GLN | X | 246 | 55.990 | 60.253 | 53.570 | 0.00 | 0.00 |
| ATOM | 3716 | CG   | GLN | X | 246 | 55.332 | 60.455 | 55.622 | 0.00 | 0.00 |
| ATOM | 3717 | HG2  | GLN | X | 246 | 56.244 | 61.028 | 55.788 | 0.00 | 0.00 |
| ATOM | 3718 | HG3  | GLN | X | 246 | 54.521 | 60.988 | 56.120 | 0.00 | 0.00 |
| ATOM | 3719 | CD   | GLN | X | 246 | 55.613 | 59.089 | 56.222 | 0.00 | 0.00 |
| ATOM | 3720 | OE1  | GLN | X | 246 | 55.979 | 58.129 | 55.497 | 0.00 | 0.00 |
| ATOM | 3721 | NE2  | GLN | X | 246 | 55.453 | 58.900 | 57.493 | 0.00 | 0.00 |
| ATOM | 3722 | HE21 | GLN | X | 246 | 55.941 | 58.073 | 57.808 | 0.00 | 0.00 |
| ATOM | 3723 | HE22 | GLN | X | 246 | 55.104 | 59.648 | 58.073 | 0.00 | 0.00 |
| ATOM | 3724 | C    | GLN | X | 246 | 54.739 | 62.076 | 52.189 | 0.00 | 0.00 |
| ATOM | 3725 | O    | GLN | X | 246 | 55.789 | 62.581 | 51.907 | 0.00 | 0.00 |
| ATOM | 3726 | N    | LEU | X | 247 | 53.868 | 61.720 | 51.254 | 0.00 | 0.00 |
| ATOM | 3727 | H    | LEU | X | 247 | 53.034 | 61.200 | 51.486 | 0.00 | 0.00 |
| ATOM | 3728 | CA   | LEU | X | 247 | 53.935 | 62.172 | 49.828 | 0.00 | 0.00 |
| ATOM | 3729 | HA   | LEU | X | 247 | 54.855 | 61.810 | 49.367 | 0.00 | 0.00 |
| ATOM | 3730 | CB   | LEU | X | 247 | 52.662 | 61.506 | 49.132 | 0.00 | 0.00 |
| ATOM | 3731 | HB2  | LEU | X | 247 | 52.642 | 60.416 | 49.137 | 0.00 | 0.00 |
| ATOM | 3732 | HB3  | LEU | X | 247 | 51.813 | 61.816 | 49.741 | 0.00 | 0.00 |
| ATOM | 3733 | CG   | LEU | X | 247 | 52.377 | 61.959 | 47.721 | 0.00 | 0.00 |
| ATOM | 3734 | HG   | LEU | X | 247 | 52.377 | 63.048 | 47.685 | 0.00 | 0.00 |
| ATOM | 3735 | CD1  | LEU | X | 247 | 53.485 | 61.574 | 46.725 | 0.00 | 0.00 |
| ATOM | 3736 | HD11 | LEU | X | 247 | 53.220 | 61.906 | 45.721 | 0.00 | 0.00 |
| ATOM | 3737 | HD12 | LEU | X | 247 | 53.560 | 60.492 | 46.620 | 0.00 | 0.00 |
| ATOM | 3738 | HD13 | LEU | X | 247 | 54.450 | 62.005 | 46.992 | 0.00 | 0.00 |
| ATOM | 3739 | CD2  | LEU | X | 247 | 50.979 | 61.393 | 47.216 | 0.00 | 0.00 |
| ATOM | 3740 | HD21 | LEU | X | 247 | 50.790 | 61.628 | 46.168 | 0.00 | 0.00 |
| ATOM | 3741 | HD22 | LEU | X | 247 | 50.977 | 60.335 | 47.478 | 0.00 | 0.00 |
| ATOM | 3742 | HD23 | LEU | X | 247 | 50.203 | 61.919 | 47.771 | 0.00 | 0.00 |
| ATOM | 3743 | C    | LEU | X | 247 | 53.817 | 63.692 | 49.797 | 0.00 | 0.00 |
| ATOM | 3744 | O    | LEU | X | 247 | 54.584 | 64.396 | 49.214 | 0.00 | 0.00 |
| ATOM | 3745 | N    | ALA | X | 248 | 52.813 | 64.254 | 50.529 | 0.00 | 0.00 |
| ATOM | 3746 | H    | ALA | X | 248 | 52.168 | 63.696 | 51.069 | 0.00 | 0.00 |
| ATOM | 3747 | CA   | ALA | X | 248 | 52.567 | 65.675 | 50.601 | 0.00 | 0.00 |
| ATOM | 3748 | HA   | ALA | X | 248 | 52.288 | 66.052 | 49.617 | 0.00 | 0.00 |
| ATOM | 3749 | CB   | ALA | X | 248 | 51.330 | 65.891 | 51.482 | 0.00 | 0.00 |
| ATOM | 3750 | HB1  | ALA | X | 248 | 51.481 | 65.477 | 52.479 | 0.00 | 0.00 |

|      |      |      |     |   |     |        |        |        |      |      |
|------|------|------|-----|---|-----|--------|--------|--------|------|------|
| ATOM | 3751 | HB2  | ALA | X | 248 | 50.522 | 65.298 | 51.054 | 0.00 | 0.00 |
| ATOM | 3752 | HB3  | ALA | X | 248 | 51.194 | 66.972 | 51.500 | 0.00 | 0.00 |
| ATOM | 3753 | C    | ALA | X | 248 | 53.762 | 66.533 | 51.191 | 0.00 | 0.00 |
| ATOM | 3754 | O    | ALA | X | 248 | 54.027 | 67.593 | 50.661 | 0.00 | 0.00 |
| ATOM | 3755 | N    | HIE | X | 249 | 54.445 | 66.125 | 52.299 | 0.00 | 0.00 |
| ATOM | 3756 | H    | HIE | X | 249 | 54.124 | 65.240 | 52.665 | 0.00 | 0.00 |
| ATOM | 3757 | CA   | HIE | X | 249 | 55.749 | 66.713 | 52.788 | 0.00 | 0.00 |
| ATOM | 3758 | HA   | HIE | X | 249 | 55.450 | 67.702 | 53.133 | 0.00 | 0.00 |
| ATOM | 3759 | CB   | HIE | X | 249 | 56.239 | 65.852 | 53.953 | 0.00 | 0.00 |
| ATOM | 3760 | HB2  | HIE | X | 249 | 55.461 | 65.923 | 54.713 | 0.00 | 0.00 |
| ATOM | 3761 | HB3  | HIE | X | 249 | 56.384 | 64.786 | 53.778 | 0.00 | 0.00 |
| ATOM | 3762 | CG   | HIE | X | 249 | 57.561 | 66.323 | 54.548 | 0.00 | 0.00 |
| ATOM | 3763 | ND1  | HIE | X | 249 | 58.823 | 66.008 | 54.010 | 0.00 | 0.00 |
| ATOM | 3764 | CE1  | HIE | X | 249 | 59.711 | 66.637 | 54.830 | 0.00 | 0.00 |
| ATOM | 3765 | HE1  | HIE | X | 249 | 60.765 | 66.406 | 54.800 | 0.00 | 0.00 |
| ATOM | 3766 | NE2  | HIE | X | 249 | 59.109 | 67.325 | 55.778 | 0.00 | 0.00 |
| ATOM | 3767 | HE2  | HIE | X | 249 | 59.583 | 67.649 | 56.609 | 0.00 | 0.00 |
| ATOM | 3768 | CD2  | HIE | X | 249 | 57.745 | 67.172 | 55.621 | 0.00 | 0.00 |
| ATOM | 3769 | HD2  | HIE | X | 249 | 56.950 | 67.641 | 56.181 | 0.00 | 0.00 |
| ATOM | 3770 | C    | HIE | X | 249 | 56.851 | 66.852 | 51.746 | 0.00 | 0.00 |
| ATOM | 3771 | O    | HIE | X | 249 | 57.468 | 67.890 | 51.699 | 0.00 | 0.00 |
| ATOM | 3772 | N    | LEU | X | 250 | 57.074 | 65.818 | 50.930 | 0.00 | 0.00 |
| ATOM | 3773 | H    | LEU | X | 250 | 56.572 | 64.982 | 51.196 | 0.00 | 0.00 |
| ATOM | 3774 | CA   | LEU | X | 250 | 57.944 | 65.977 | 49.731 | 0.00 | 0.00 |
| ATOM | 3775 | HA   | LEU | X | 250 | 58.885 | 66.466 | 49.982 | 0.00 | 0.00 |
| ATOM | 3776 | CB   | LEU | X | 250 | 58.116 | 64.528 | 49.116 | 0.00 | 0.00 |
| ATOM | 3777 | HB2  | LEU | X | 250 | 58.605 | 63.887 | 49.849 | 0.00 | 0.00 |
| ATOM | 3778 | HB3  | LEU | X | 250 | 57.087 | 64.200 | 48.969 | 0.00 | 0.00 |
| ATOM | 3779 | CG   | LEU | X | 250 | 58.987 | 64.331 | 47.829 | 0.00 | 0.00 |
| ATOM | 3780 | HG   | LEU | X | 250 | 58.520 | 64.882 | 47.012 | 0.00 | 0.00 |
| ATOM | 3781 | CD1  | LEU | X | 250 | 60.432 | 64.765 | 48.048 | 0.00 | 0.00 |
| ATOM | 3782 | HD11 | LEU | X | 250 | 60.352 | 65.733 | 48.543 | 0.00 | 0.00 |
| ATOM | 3783 | HD12 | LEU | X | 250 | 60.820 | 64.851 | 47.033 | 0.00 | 0.00 |
| ATOM | 3784 | HD13 | LEU | X | 250 | 60.989 | 64.058 | 48.663 | 0.00 | 0.00 |
| ATOM | 3785 | CD2  | LEU | X | 250 | 58.806 | 62.938 | 47.199 | 0.00 | 0.00 |
| ATOM | 3786 | HD21 | LEU | X | 250 | 57.787 | 62.555 | 47.246 | 0.00 | 0.00 |
| ATOM | 3787 | HD22 | LEU | X | 250 | 59.121 | 62.888 | 46.156 | 0.00 | 0.00 |
| ATOM | 3788 | HD23 | LEU | X | 250 | 59.444 | 62.318 | 47.829 | 0.00 | 0.00 |
| ATOM | 3789 | C    | LEU | X | 250 | 57.351 | 66.854 | 48.582 | 0.00 | 0.00 |
| ATOM | 3790 | O    | LEU | X | 250 | 58.041 | 67.735 | 48.112 | 0.00 | 0.00 |
| ATOM | 3791 | N    | VAL | X | 251 | 56.112 | 66.633 | 48.226 | 0.00 | 0.00 |
| ATOM | 3792 | H    | VAL | X | 251 | 55.637 | 65.881 | 48.704 | 0.00 | 0.00 |
| ATOM | 3793 | CA   | VAL | X | 251 | 55.390 | 67.512 | 47.193 | 0.00 | 0.00 |
| ATOM | 3794 | HA   | VAL | X | 251 | 55.937 | 67.449 | 46.253 | 0.00 | 0.00 |
| ATOM | 3795 | CB   | VAL | X | 251 | 53.935 | 66.961 | 46.960 | 0.00 | 0.00 |
| ATOM | 3796 | HB   | VAL | X | 251 | 53.495 | 66.704 | 47.923 | 0.00 | 0.00 |
| ATOM | 3797 | CG1  | VAL | X | 251 | 53.125 | 67.767 | 45.969 | 0.00 | 0.00 |
| ATOM | 3798 | HG11 | VAL | X | 251 | 53.663 | 67.819 | 45.022 | 0.00 | 0.00 |
| ATOM | 3799 | HG12 | VAL | X | 251 | 52.171 | 67.250 | 45.866 | 0.00 | 0.00 |
| ATOM | 3800 | HG13 | VAL | X | 251 | 52.939 | 68.789 | 46.299 | 0.00 | 0.00 |
| ATOM | 3801 | CG2  | VAL | X | 251 | 54.032 | 65.645 | 46.262 | 0.00 | 0.00 |
| ATOM | 3802 | HG21 | VAL | X | 251 | 54.616 | 65.722 | 45.345 | 0.00 | 0.00 |
| ATOM | 3803 | HG22 | VAL | X | 251 | 53.025 | 65.252 | 46.121 | 0.00 | 0.00 |
| ATOM | 3804 | HG23 | VAL | X | 251 | 54.544 | 64.878 | 46.843 | 0.00 | 0.00 |
| ATOM | 3805 | C    | VAL | X | 251 | 55.200 | 68.943 | 47.613 | 0.00 | 0.00 |
| ATOM | 3806 | O    | VAL | X | 251 | 55.379 | 69.801 | 46.690 | 0.00 | 0.00 |
| ATOM | 3807 | N    | GLY | X | 252 | 55.121 | 69.320 | 48.892 | 0.00 | 0.00 |
| ATOM | 3808 | H    | GLY | X | 252 | 55.137 | 68.643 | 49.641 | 0.00 | 0.00 |
| ATOM | 3809 | CA   | GLY | X | 252 | 54.905 | 70.687 | 49.406 | 0.00 | 0.00 |
| ATOM | 3810 | HA2  | GLY | X | 252 | 55.422 | 70.866 | 50.349 | 0.00 | 0.00 |
| ATOM | 3811 | HA3  | GLY | X | 252 | 55.426 | 71.322 | 48.690 | 0.00 | 0.00 |
| ATOM | 3812 | C    | GLY | X | 252 | 53.444 | 71.097 | 49.488 | 0.00 | 0.00 |
| ATOM | 3813 | O    | GLY | X | 252 | 53.107 | 72.274 | 49.229 | 0.00 | 0.00 |
| ATOM | 3814 | N    | CYX | X | 253 | 52.599 | 70.165 | 49.933 | 0.00 | 0.00 |
| ATOM | 3815 | H    | CYX | X | 253 | 52.944 | 69.241 | 50.151 | 0.00 | 0.00 |
| ATOM | 3816 | CA   | CYX | X | 253 | 51.193 | 70.497 | 50.031 | 0.00 | 0.00 |
| ATOM | 3817 | HA   | CYX | X | 253 | 50.956 | 71.468 | 49.597 | 0.00 | 0.00 |

|      |      |      |     |   |     |        |        |        |      |      |
|------|------|------|-----|---|-----|--------|--------|--------|------|------|
| ATOM | 3818 | CB   | CYX | X | 253 | 50.463 | 69.387 | 49.201 | 0.00 | 0.00 |
| ATOM | 3819 | HB2  | CYX | X | 253 | 50.908 | 68.406 | 49.363 | 0.00 | 0.00 |
| ATOM | 3820 | HB3  | CYX | X | 253 | 49.473 | 69.285 | 49.646 | 0.00 | 0.00 |
| ATOM | 3821 | SG   | CYX | X | 253 | 50.316 | 69.774 | 47.388 | 0.00 | 0.00 |
| ATOM | 3822 | C    | CYX | X | 253 | 50.761 | 70.447 | 51.458 | 0.00 | 0.00 |
| ATOM | 3823 | O    | CYX | X | 253 | 51.068 | 69.437 | 52.075 | 0.00 | 0.00 |
| ATOM | 3824 | N    | PRO | X | 254 | 50.090 | 71.517 | 51.980 | 0.00 | 0.00 |
| ATOM | 3825 | CD   | PRO | X | 254 | 49.825 | 71.639 | 53.410 | 0.00 | 0.00 |
| ATOM | 3826 | HD2  | PRO | X | 254 | 50.750 | 71.562 | 53.982 | 0.00 | 0.00 |
| ATOM | 3827 | HD3  | PRO | X | 254 | 49.086 | 70.872 | 53.640 | 0.00 | 0.00 |
| ATOM | 3828 | CG   | PRO | X | 254 | 49.240 | 73.027 | 53.668 | 0.00 | 0.00 |
| ATOM | 3829 | HG2  | PRO | X | 254 | 49.985 | 73.808 | 53.821 | 0.00 | 0.00 |
| ATOM | 3830 | HG3  | PRO | X | 254 | 48.397 | 72.949 | 54.353 | 0.00 | 0.00 |
| ATOM | 3831 | CB   | PRO | X | 254 | 48.642 | 73.307 | 52.313 | 0.00 | 0.00 |
| ATOM | 3832 | HB2  | PRO | X | 254 | 48.633 | 74.395 | 52.246 | 0.00 | 0.00 |
| ATOM | 3833 | HB3  | PRO | X | 254 | 47.631 | 72.906 | 52.250 | 0.00 | 0.00 |
| ATOM | 3834 | CA   | PRO | X | 254 | 49.533 | 72.658 | 51.237 | 0.00 | 0.00 |
| ATOM | 3835 | HA   | PRO | X | 254 | 49.054 | 72.352 | 50.307 | 0.00 | 0.00 |
| ATOM | 3836 | C    | PRO | X | 254 | 50.599 | 73.702 | 50.844 | 0.00 | 0.00 |
| ATOM | 3837 | O    | PRO | X | 254 | 51.731 | 73.581 | 51.360 | 0.00 | 0.00 |
| ATOM | 3838 | N    | PRO | X | 255 | 50.281 | 74.744 | 50.071 | 0.00 | 0.00 |
| ATOM | 3839 | CD   | PRO | X | 255 | 49.018 | 75.074 | 49.495 | 0.00 | 0.00 |
| ATOM | 3840 | HD2  | PRO | X | 255 | 48.437 | 75.539 | 50.292 | 0.00 | 0.00 |
| ATOM | 3841 | HD3  | PRO | X | 255 | 48.431 | 74.209 | 49.189 | 0.00 | 0.00 |
| ATOM | 3842 | CG   | PRO | X | 255 | 49.269 | 76.057 | 48.363 | 0.00 | 0.00 |
| ATOM | 3843 | HG2  | PRO | X | 255 | 48.370 | 76.633 | 48.139 | 0.00 | 0.00 |
| ATOM | 3844 | HG3  | PRO | X | 255 | 49.568 | 75.591 | 47.424 | 0.00 | 0.00 |
| ATOM | 3845 | CB   | PRO | X | 255 | 50.492 | 76.810 | 48.831 | 0.00 | 0.00 |
| ATOM | 3846 | HB2  | PRO | X | 255 | 50.148 | 77.695 | 49.367 | 0.00 | 0.00 |
| ATOM | 3847 | HB3  | PRO | X | 255 | 51.154 | 77.149 | 48.034 | 0.00 | 0.00 |
| ATOM | 3848 | CA   | PRO | X | 255 | 51.213 | 75.783 | 49.731 | 0.00 | 0.00 |
| ATOM | 3849 | HA   | PRO | X | 255 | 52.014 | 75.418 | 49.088 | 0.00 | 0.00 |
| ATOM | 3850 | C    | PRO | X | 255 | 51.666 | 76.560 | 50.999 | 0.00 | 0.00 |
| ATOM | 3851 | O    | PRO | X | 255 | 50.866 | 76.945 | 51.816 | 0.00 | 0.00 |
| ATOM | 3852 | N    | GLY | X | 256 | 53.017 | 76.844 | 51.118 | 0.00 | 0.00 |
| ATOM | 3853 | H    | GLY | X | 256 | 53.602 | 76.310 | 50.491 | 0.00 | 0.00 |
| ATOM | 3854 | CA   | GLY | X | 256 | 53.742 | 77.228 | 52.361 | 0.00 | 0.00 |
| ATOM | 3855 | HA2  | GLY | X | 256 | 54.763 | 77.523 | 52.120 | 0.00 | 0.00 |
| ATOM | 3856 | HA3  | GLY | X | 256 | 53.143 | 78.073 | 52.700 | 0.00 | 0.00 |
| ATOM | 3857 | C    | GLY | X | 256 | 53.675 | 76.178 | 53.450 | 0.00 | 0.00 |
| ATOM | 3858 | O    | GLY | X | 256 | 54.150 | 76.533 | 54.565 | 0.00 | 0.00 |
| ATOM | 3859 | N    | GLY | X | 257 | 53.161 | 74.980 | 53.234 | 0.00 | 0.00 |
| ATOM | 3860 | H    | GLY | X | 257 | 53.030 | 74.800 | 52.249 | 0.00 | 0.00 |
| ATOM | 3861 | CA   | GLY | X | 257 | 53.341 | 73.903 | 54.211 | 0.00 | 0.00 |
| ATOM | 3862 | HA2  | GLY | X | 257 | 53.992 | 74.051 | 55.072 | 0.00 | 0.00 |
| ATOM | 3863 | HA3  | GLY | X | 257 | 52.362 | 73.600 | 54.584 | 0.00 | 0.00 |
| ATOM | 3864 | C    | GLY | X | 257 | 53.853 | 72.630 | 53.624 | 0.00 | 0.00 |
| ATOM | 3865 | O    | GLY | X | 257 | 54.213 | 72.639 | 52.417 | 0.00 | 0.00 |
| ATOM | 3866 | N    | THR | X | 258 | 53.724 | 71.539 | 54.425 | 0.00 | 0.00 |
| ATOM | 3867 | H    | THR | X | 258 | 53.419 | 71.761 | 55.362 | 0.00 | 0.00 |
| ATOM | 3868 | CA   | THR | X | 258 | 54.362 | 70.200 | 54.212 | 0.00 | 0.00 |
| ATOM | 3869 | HA   | THR | X | 258 | 54.282 | 69.920 | 53.161 | 0.00 | 0.00 |
| ATOM | 3870 | CB   | THR | X | 258 | 55.863 | 70.322 | 54.575 | 0.00 | 0.00 |
| ATOM | 3871 | HB   | THR | X | 258 | 56.152 | 69.327 | 54.914 | 0.00 | 0.00 |
| ATOM | 3872 | CG2  | THR | X | 258 | 56.757 | 70.875 | 53.452 | 0.00 | 0.00 |
| ATOM | 3873 | HG21 | THR | X | 258 | 57.809 | 70.687 | 53.665 | 0.00 | 0.00 |
| ATOM | 3874 | HG22 | THR | X | 258 | 56.572 | 71.944 | 53.347 | 0.00 | 0.00 |
| ATOM | 3875 | HG23 | THR | X | 258 | 56.468 | 70.396 | 52.516 | 0.00 | 0.00 |
| ATOM | 3876 | OG1  | THR | X | 258 | 56.034 | 71.164 | 55.678 | 0.00 | 0.00 |
| ATOM | 3877 | HG1  | THR | X | 258 | 56.783 | 70.703 | 56.063 | 0.00 | 0.00 |
| ATOM | 3878 | C    | THR | X | 258 | 53.601 | 69.142 | 55.011 | 0.00 | 0.00 |
| ATOM | 3879 | O    | THR | X | 258 | 54.058 | 68.753 | 56.018 | 0.00 | 0.00 |
| ATOM | 3880 | N    | GLY | X | 259 | 52.428 | 68.753 | 54.523 | 0.00 | 0.00 |
| ATOM | 3881 | H    | GLY | X | 259 | 52.108 | 69.156 | 53.654 | 0.00 | 0.00 |
| ATOM | 3882 | CA   | GLY | X | 259 | 51.637 | 67.904 | 55.340 | 0.00 | 0.00 |
| ATOM | 3883 | HA2  | GLY | X | 259 | 50.923 | 67.426 | 54.669 | 0.00 | 0.00 |
| ATOM | 3884 | HA3  | GLY | X | 259 | 52.238 | 67.140 | 55.833 | 0.00 | 0.00 |

|      |      |      |     |   |     |        |        |        |      |      |
|------|------|------|-----|---|-----|--------|--------|--------|------|------|
| ATOM | 3885 | C    | GLY | X | 259 | 50.760 | 68.743 | 56.355 | 0.00 | 0.00 |
| ATOM | 3886 | O    | GLY | X | 259 | 50.925 | 69.962 | 56.400 | 0.00 | 0.00 |
| ATOM | 3887 | N    | GLY | X | 260 | 49.830 | 68.120 | 57.105 | 0.00 | 0.00 |
| ATOM | 3888 | H    | GLY | X | 260 | 49.711 | 67.118 | 57.072 | 0.00 | 0.00 |
| ATOM | 3889 | CA   | GLY | X | 260 | 49.148 | 68.766 | 58.244 | 0.00 | 0.00 |
| ATOM | 3890 | HA2  | GLY | X | 260 | 49.418 | 68.093 | 59.058 | 0.00 | 0.00 |
| ATOM | 3891 | HA3  | GLY | X | 260 | 49.353 | 69.828 | 58.379 | 0.00 | 0.00 |
| ATOM | 3892 | C    | GLY | X | 260 | 47.660 | 68.469 | 58.026 | 0.00 | 0.00 |
| ATOM | 3893 | O    | GLY | X | 260 | 47.275 | 67.296 | 57.943 | 0.00 | 0.00 |
| ATOM | 3894 | N    | ASN | X | 261 | 46.778 | 69.536 | 58.084 | 0.00 | 0.00 |
| ATOM | 3895 | H    | ASN | X | 261 | 47.277 | 70.414 | 58.067 | 0.00 | 0.00 |
| ATOM | 3896 | CA   | ASN | X | 261 | 45.342 | 69.487 | 57.726 | 0.00 | 0.00 |
| ATOM | 3897 | HA   | ASN | X | 261 | 45.040 | 68.928 | 58.612 | 0.00 | 0.00 |
| ATOM | 3898 | CB   | ASN | X | 261 | 44.746 | 70.920 | 57.760 | 0.00 | 0.00 |
| ATOM | 3899 | HB2  | ASN | X | 261 | 44.918 | 71.340 | 58.751 | 0.00 | 0.00 |
| ATOM | 3900 | HB3  | ASN | X | 261 | 45.071 | 71.575 | 56.952 | 0.00 | 0.00 |
| ATOM | 3901 | CG   | ASN | X | 261 | 43.233 | 70.954 | 57.675 | 0.00 | 0.00 |
| ATOM | 3902 | OD1  | ASN | X | 261 | 42.692 | 69.870 | 57.507 | 0.00 | 0.00 |
| ATOM | 3903 | ND2  | ASN | X | 261 | 42.641 | 72.111 | 57.838 | 0.00 | 0.00 |
| ATOM | 3904 | HD21 | ASN | X | 261 | 41.651 | 72.282 | 57.733 | 0.00 | 0.00 |
| ATOM | 3905 | HD22 | ASN | X | 261 | 43.209 | 72.931 | 57.998 | 0.00 | 0.00 |
| ATOM | 3906 | C    | ASN | X | 261 | 44.993 | 68.694 | 56.476 | 0.00 | 0.00 |
| ATOM | 3907 | O    | ASN | X | 261 | 45.330 | 69.059 | 55.366 | 0.00 | 0.00 |
| ATOM | 3908 | N    | ASP | X | 262 | 44.367 | 67.512 | 56.644 | 0.00 | 0.00 |
| ATOM | 3909 | H    | ASP | X | 262 | 44.116 | 67.292 | 57.597 | 0.00 | 0.00 |
| ATOM | 3910 | CA   | ASP | X | 262 | 44.031 | 66.601 | 55.541 | 0.00 | 0.00 |
| ATOM | 3911 | HA   | ASP | X | 262 | 44.955 | 66.278 | 55.061 | 0.00 | 0.00 |
| ATOM | 3912 | CB   | ASP | X | 262 | 43.231 | 65.333 | 56.100 | 0.00 | 0.00 |
| ATOM | 3913 | HB2  | ASP | X | 262 | 42.272 | 65.736 | 56.427 | 0.00 | 0.00 |
| ATOM | 3914 | HB3  | ASP | X | 262 | 43.047 | 64.717 | 55.221 | 0.00 | 0.00 |
| ATOM | 3915 | CG   | ASP | X | 262 | 43.978 | 64.702 | 57.289 | 0.00 | 0.00 |
| ATOM | 3916 | OD1  | ASP | X | 262 | 43.817 | 65.146 | 58.435 | 0.00 | 0.00 |
| ATOM | 3917 | OD2  | ASP | X | 262 | 44.838 | 63.800 | 57.065 | 0.00 | 0.00 |
| ATOM | 3918 | C    | ASP | X | 262 | 43.258 | 67.318 | 54.345 | 0.00 | 0.00 |
| ATOM | 3919 | O    | ASP | X | 262 | 43.523 | 66.980 | 53.193 | 0.00 | 0.00 |
| ATOM | 3920 | N    | THR | X | 263 | 42.308 | 68.191 | 54.706 | 0.00 | 0.00 |
| ATOM | 3921 | H    | THR | X | 263 | 42.155 | 68.415 | 55.679 | 0.00 | 0.00 |
| ATOM | 3922 | CA   | THR | X | 263 | 41.434 | 69.059 | 53.772 | 0.00 | 0.00 |
| ATOM | 3923 | HA   | THR | X | 263 | 40.892 | 68.353 | 53.143 | 0.00 | 0.00 |
| ATOM | 3924 | CB   | THR | X | 263 | 40.385 | 69.909 | 54.539 | 0.00 | 0.00 |
| ATOM | 3925 | HB   | THR | X | 263 | 39.885 | 70.469 | 53.749 | 0.00 | 0.00 |
| ATOM | 3926 | CG2  | THR | X | 263 | 39.315 | 69.071 | 55.296 | 0.00 | 0.00 |
| ATOM | 3927 | HG21 | THR | X | 263 | 39.729 | 68.343 | 55.993 | 0.00 | 0.00 |
| ATOM | 3928 | HG22 | THR | X | 263 | 38.852 | 68.492 | 54.497 | 0.00 | 0.00 |
| ATOM | 3929 | HG23 | THR | X | 263 | 38.684 | 69.796 | 55.810 | 0.00 | 0.00 |
| ATOM | 3930 | OG1  | THR | X | 263 | 40.946 | 70.727 | 55.502 | 0.00 | 0.00 |
| ATOM | 3931 | HG1  | THR | X | 263 | 41.537 | 70.259 | 56.097 | 0.00 | 0.00 |
| ATOM | 3932 | C    | THR | X | 263 | 42.234 | 69.938 | 52.820 | 0.00 | 0.00 |
| ATOM | 3933 | O    | THR | X | 263 | 42.104 | 69.874 | 51.629 | 0.00 | 0.00 |
| ATOM | 3934 | N    | GLU | X | 264 | 43.178 | 70.760 | 53.372 | 0.00 | 0.00 |
| ATOM | 3935 | H    | GLU | X | 264 | 43.391 | 70.494 | 54.323 | 0.00 | 0.00 |
| ATOM | 3936 | CA   | GLU | X | 264 | 44.093 | 71.694 | 52.746 | 0.00 | 0.00 |
| ATOM | 3937 | HA   | GLU | X | 264 | 43.540 | 72.382 | 52.107 | 0.00 | 0.00 |
| ATOM | 3938 | CB   | GLU | X | 264 | 44.718 | 72.523 | 53.864 | 0.00 | 0.00 |
| ATOM | 3939 | HB2  | GLU | X | 264 | 45.191 | 71.859 | 54.587 | 0.00 | 0.00 |
| ATOM | 3940 | HB3  | GLU | X | 264 | 45.521 | 73.118 | 53.431 | 0.00 | 0.00 |
| ATOM | 3941 | CG   | GLU | X | 264 | 43.730 | 73.489 | 54.451 | 0.00 | 0.00 |
| ATOM | 3942 | HG2  | GLU | X | 264 | 42.781 | 72.976 | 54.607 | 0.00 | 0.00 |
| ATOM | 3943 | HG3  | GLU | X | 264 | 44.129 | 73.856 | 55.397 | 0.00 | 0.00 |
| ATOM | 3944 | CD   | GLU | X | 264 | 43.477 | 74.686 | 53.541 | 0.00 | 0.00 |
| ATOM | 3945 | OE1  | GLU | X | 264 | 42.746 | 74.659 | 52.523 | 0.00 | 0.00 |
| ATOM | 3946 | OE2  | GLU | X | 264 | 44.072 | 75.711 | 53.824 | 0.00 | 0.00 |
| ATOM | 3947 | C    | GLU | X | 264 | 45.173 | 70.941 | 51.960 | 0.00 | 0.00 |
| ATOM | 3948 | O    | GLU | X | 264 | 45.434 | 71.233 | 50.746 | 0.00 | 0.00 |
| ATOM | 3949 | N    | LEU | X | 265 | 45.680 | 69.851 | 52.520 | 0.00 | 0.00 |
| ATOM | 3950 | H    | LEU | X | 265 | 45.213 | 69.547 | 53.363 | 0.00 | 0.00 |
| ATOM | 3951 | CA   | LEU | X | 265 | 46.425 | 68.790 | 51.695 | 0.00 | 0.00 |

|      |      |      |     |   |     |        |        |        |      |      |
|------|------|------|-----|---|-----|--------|--------|--------|------|------|
| ATOM | 3952 | HA   | LEU | X | 265 | 47.389 | 69.280 | 51.560 | 0.00 | 0.00 |
| ATOM | 3953 | CB   | LEU | X | 265 | 46.684 | 67.596 | 52.627 | 0.00 | 0.00 |
| ATOM | 3954 | HB2  | LEU | X | 265 | 47.191 | 68.094 | 53.453 | 0.00 | 0.00 |
| ATOM | 3955 | HB3  | LEU | X | 265 | 45.738 | 67.102 | 52.851 | 0.00 | 0.00 |
| ATOM | 3956 | CG   | LEU | X | 265 | 47.768 | 66.587 | 52.156 | 0.00 | 0.00 |
| ATOM | 3957 | HG   | LEU | X | 265 | 48.640 | 67.186 | 51.893 | 0.00 | 0.00 |
| ATOM | 3958 | CD1  | LEU | X | 265 | 48.106 | 65.663 | 53.358 | 0.00 | 0.00 |
| ATOM | 3959 | HD11 | LEU | X | 265 | 48.676 | 66.218 | 54.103 | 0.00 | 0.00 |
| ATOM | 3960 | HD12 | LEU | X | 265 | 48.892 | 65.008 | 52.983 | 0.00 | 0.00 |
| ATOM | 3961 | HD13 | LEU | X | 265 | 47.255 | 65.124 | 53.775 | 0.00 | 0.00 |
| ATOM | 3962 | CD2  | LEU | X | 265 | 47.275 | 65.644 | 51.023 | 0.00 | 0.00 |
| ATOM | 3963 | HD21 | LEU | X | 265 | 47.218 | 66.076 | 50.024 | 0.00 | 0.00 |
| ATOM | 3964 | HD22 | LEU | X | 265 | 48.023 | 64.854 | 50.945 | 0.00 | 0.00 |
| ATOM | 3965 | HD23 | LEU | X | 265 | 46.352 | 65.158 | 51.337 | 0.00 | 0.00 |
| ATOM | 3966 | C    | LEU | X | 265 | 45.725 | 68.373 | 50.404 | 0.00 | 0.00 |
| ATOM | 3967 | O    | LEU | X | 265 | 46.150 | 68.693 | 49.350 | 0.00 | 0.00 |
| ATOM | 3968 | N    | VAL | X | 266 | 44.642 | 67.610 | 50.539 | 0.00 | 0.00 |
| ATOM | 3969 | H    | VAL | X | 266 | 44.203 | 67.412 | 51.427 | 0.00 | 0.00 |
| ATOM | 3970 | CA   | VAL | X | 266 | 43.982 | 66.931 | 49.418 | 0.00 | 0.00 |
| ATOM | 3971 | HA   | VAL | X | 266 | 44.731 | 66.229 | 49.052 | 0.00 | 0.00 |
| ATOM | 3972 | CB   | VAL | X | 266 | 42.888 | 65.885 | 49.768 | 0.00 | 0.00 |
| ATOM | 3973 | HB   | VAL | X | 266 | 43.235 | 65.399 | 50.680 | 0.00 | 0.00 |
| ATOM | 3974 | CG1  | VAL | X | 266 | 41.496 | 66.560 | 50.072 | 0.00 | 0.00 |
| ATOM | 3975 | HG11 | VAL | X | 266 | 40.851 | 65.731 | 50.362 | 0.00 | 0.00 |
| ATOM | 3976 | HG12 | VAL | X | 266 | 41.575 | 67.287 | 50.881 | 0.00 | 0.00 |
| ATOM | 3977 | HG13 | VAL | X | 266 | 41.084 | 67.132 | 49.241 | 0.00 | 0.00 |
| ATOM | 3978 | CG2  | VAL | X | 266 | 42.667 | 64.858 | 48.698 | 0.00 | 0.00 |
| ATOM | 3979 | HG21 | VAL | X | 266 | 43.537 | 64.231 | 48.505 | 0.00 | 0.00 |
| ATOM | 3980 | HG22 | VAL | X | 266 | 42.339 | 65.251 | 47.736 | 0.00 | 0.00 |
| ATOM | 3981 | HG23 | VAL | X | 266 | 41.908 | 64.137 | 49.000 | 0.00 | 0.00 |
| ATOM | 3982 | C    | VAL | X | 266 | 43.477 | 67.948 | 48.374 | 0.00 | 0.00 |
| ATOM | 3983 | O    | VAL | X | 266 | 43.496 | 67.690 | 47.169 | 0.00 | 0.00 |
| ATOM | 3984 | N    | ALA | X | 267 | 43.121 | 69.151 | 48.767 | 0.00 | 0.00 |
| ATOM | 3985 | H    | ALA | X | 267 | 43.135 | 69.224 | 49.774 | 0.00 | 0.00 |
| ATOM | 3986 | CA   | ALA | X | 267 | 42.794 | 70.264 | 47.861 | 0.00 | 0.00 |
| ATOM | 3987 | HA   | ALA | X | 267 | 42.134 | 69.921 | 47.064 | 0.00 | 0.00 |
| ATOM | 3988 | CB   | ALA | X | 267 | 42.013 | 71.245 | 48.750 | 0.00 | 0.00 |
| ATOM | 3989 | HB1  | ALA | X | 267 | 41.091 | 70.723 | 49.008 | 0.00 | 0.00 |
| ATOM | 3990 | HB2  | ALA | X | 267 | 41.889 | 72.185 | 48.213 | 0.00 | 0.00 |
| ATOM | 3991 | HB3  | ALA | X | 267 | 42.535 | 71.556 | 49.655 | 0.00 | 0.00 |
| ATOM | 3992 | C    | ALA | X | 267 | 44.122 | 70.720 | 47.093 | 0.00 | 0.00 |
| ATOM | 3993 | O    | ALA | X | 267 | 44.116 | 70.641 | 45.880 | 0.00 | 0.00 |
| ATOM | 3994 | N    | CYX | X | 268 | 45.245 | 70.838 | 47.754 | 0.00 | 0.00 |
| ATOM | 3995 | H    | CYX | X | 268 | 45.284 | 70.809 | 48.763 | 0.00 | 0.00 |
| ATOM | 3996 | CA   | CYX | X | 268 | 46.562 | 70.928 | 47.089 | 0.00 | 0.00 |
| ATOM | 3997 | HA   | CYX | X | 268 | 46.472 | 71.736 | 46.363 | 0.00 | 0.00 |
| ATOM | 3998 | CB   | CYX | X | 268 | 47.663 | 71.213 | 48.090 | 0.00 | 0.00 |
| ATOM | 3999 | HB2  | CYX | X | 268 | 47.501 | 72.219 | 48.479 | 0.00 | 0.00 |
| ATOM | 4000 | HB3  | CYX | X | 268 | 47.827 | 70.551 | 48.940 | 0.00 | 0.00 |
| ATOM | 4001 | SG   | CYX | X | 268 | 49.216 | 71.530 | 47.263 | 0.00 | 0.00 |
| ATOM | 4002 | C    | CYX | X | 268 | 46.941 | 69.777 | 46.238 | 0.00 | 0.00 |
| ATOM | 4003 | O    | CYX | X | 268 | 47.432 | 70.060 | 45.137 | 0.00 | 0.00 |
| ATOM | 4004 | N    | LEU | X | 269 | 46.750 | 68.550 | 46.630 | 0.00 | 0.00 |
| ATOM | 4005 | H    | LEU | X | 269 | 46.247 | 68.526 | 47.505 | 0.00 | 0.00 |
| ATOM | 4006 | CA   | LEU | X | 269 | 46.810 | 67.332 | 45.810 | 0.00 | 0.00 |
| ATOM | 4007 | HA   | LEU | X | 269 | 47.742 | 67.434 | 45.254 | 0.00 | 0.00 |
| ATOM | 4008 | CB   | LEU | X | 269 | 46.843 | 66.144 | 46.742 | 0.00 | 0.00 |
| ATOM | 4009 | HB2  | LEU | X | 269 | 47.090 | 66.491 | 47.745 | 0.00 | 0.00 |
| ATOM | 4010 | HB3  | LEU | X | 269 | 45.832 | 65.744 | 46.820 | 0.00 | 0.00 |
| ATOM | 4011 | CG   | LEU | X | 269 | 47.965 | 65.186 | 46.494 | 0.00 | 0.00 |
| ATOM | 4012 | HG   | LEU | X | 269 | 48.008 | 64.919 | 45.438 | 0.00 | 0.00 |
| ATOM | 4013 | CD1  | LEU | X | 269 | 49.343 | 65.753 | 46.966 | 0.00 | 0.00 |
| ATOM | 4014 | HD11 | LEU | X | 269 | 49.305 | 65.895 | 48.046 | 0.00 | 0.00 |
| ATOM | 4015 | HD12 | LEU | X | 269 | 49.651 | 66.735 | 46.606 | 0.00 | 0.00 |
| ATOM | 4016 | HD13 | LEU | X | 269 | 50.184 | 65.131 | 46.660 | 0.00 | 0.00 |
| ATOM | 4017 | CD2  | LEU | X | 269 | 47.769 | 63.803 | 47.162 | 0.00 | 0.00 |
| ATOM | 4018 | HD21 | LEU | X | 269 | 46.728 | 63.498 | 47.057 | 0.00 | 0.00 |



|      |      |      |     |   |     |        |        |        |      |      |
|------|------|------|-----|---|-----|--------|--------|--------|------|------|
| ATOM | 4019 | HD22 | LEU | X | 269 | 48.419 | 63.023 | 46.765 | 0.00 | 0.00 |
| ATOM | 4020 | HD23 | LEU | X | 269 | 47.981 | 63.922 | 48.224 | 0.00 | 0.00 |
| ATOM | 4021 | C    | LEU | X | 269 | 45.835 | 67.168 | 44.705 | 0.00 | 0.00 |
| ATOM | 4022 | O    | LEU | X | 269 | 46.063 | 66.354 | 43.856 | 0.00 | 0.00 |
| ATOM | 4023 | N    | ARG | X | 270 | 44.775 | 68.029 | 44.665 | 0.00 | 0.00 |
| ATOM | 4024 | H    | ARG | X | 270 | 44.564 | 68.548 | 45.505 | 0.00 | 0.00 |
| ATOM | 4025 | CA   | ARG | X | 270 | 44.027 | 68.136 | 43.463 | 0.00 | 0.00 |
| ATOM | 4026 | HA   | ARG | X | 270 | 44.206 | 67.275 | 42.818 | 0.00 | 0.00 |
| ATOM | 4027 | CB   | ARG | X | 270 | 42.525 | 68.282 | 43.771 | 0.00 | 0.00 |
| ATOM | 4028 | HB2  | ARG | X | 270 | 42.443 | 68.908 | 44.660 | 0.00 | 0.00 |
| ATOM | 4029 | HB3  | ARG | X | 270 | 42.035 | 68.519 | 42.826 | 0.00 | 0.00 |
| ATOM | 4030 | CG   | ARG | X | 270 | 41.996 | 66.820 | 44.124 | 0.00 | 0.00 |
| ATOM | 4031 | HG2  | ARG | X | 270 | 42.469 | 66.211 | 43.354 | 0.00 | 0.00 |
| ATOM | 4032 | HG3  | ARG | X | 270 | 42.329 | 66.465 | 45.099 | 0.00 | 0.00 |
| ATOM | 4033 | CD   | ARG | X | 270 | 40.495 | 66.782 | 44.091 | 0.00 | 0.00 |
| ATOM | 4034 | HD2  | ARG | X | 270 | 40.110 | 67.648 | 43.552 | 0.00 | 0.00 |
| ATOM | 4035 | HD3  | ARG | X | 270 | 40.098 | 65.836 | 43.723 | 0.00 | 0.00 |
| ATOM | 4036 | NE   | ARG | X | 270 | 40.063 | 67.014 | 45.551 | 0.00 | 0.00 |
| ATOM | 4037 | HE   | ARG | X | 270 | 40.218 | 67.874 | 46.057 | 0.00 | 0.00 |
| ATOM | 4038 | CZ   | ARG | X | 270 | 39.420 | 66.050 | 46.260 | 0.00 | 0.00 |
| ATOM | 4039 | NH1  | ARG | X | 270 | 39.139 | 64.784 | 45.896 | 0.00 | 0.00 |
| ATOM | 4040 | HH11 | ARG | X | 270 | 39.368 | 64.400 | 44.991 | 0.00 | 0.00 |
| ATOM | 4041 | HH12 | ARG | X | 270 | 38.629 | 64.278 | 46.606 | 0.00 | 0.00 |
| ATOM | 4042 | NH2  | ARG | X | 270 | 39.212 | 66.367 | 47.524 | 0.00 | 0.00 |
| ATOM | 4043 | HH21 | ARG | X | 270 | 39.522 | 67.268 | 47.858 | 0.00 | 0.00 |
| ATOM | 4044 | HH22 | ARG | X | 270 | 38.760 | 65.742 | 48.177 | 0.00 | 0.00 |
| ATOM | 4045 | C    | ARG | X | 270 | 44.562 | 69.265 | 42.600 | 0.00 | 0.00 |
| ATOM | 4046 | O    | ARG | X | 270 | 44.220 | 69.230 | 41.369 | 0.00 | 0.00 |
| ATOM | 4047 | N    | THR | X | 271 | 45.173 | 70.311 | 43.107 | 0.00 | 0.00 |
| ATOM | 4048 | H    | THR | X | 271 | 45.088 | 70.452 | 44.103 | 0.00 | 0.00 |
| ATOM | 4049 | CA   | THR | X | 271 | 45.829 | 71.323 | 42.265 | 0.00 | 0.00 |
| ATOM | 4050 | HA   | THR | X | 271 | 45.214 | 71.719 | 41.457 | 0.00 | 0.00 |
| ATOM | 4051 | CB   | THR | X | 271 | 46.113 | 72.557 | 43.142 | 0.00 | 0.00 |
| ATOM | 4052 | HB   | THR | X | 271 | 46.831 | 72.230 | 43.894 | 0.00 | 0.00 |
| ATOM | 4053 | CG2  | THR | X | 271 | 46.562 | 73.798 | 42.502 | 0.00 | 0.00 |
| ATOM | 4054 | HG21 | THR | X | 271 | 46.682 | 74.635 | 43.190 | 0.00 | 0.00 |
| ATOM | 4055 | HG22 | THR | X | 271 | 45.839 | 74.035 | 41.721 | 0.00 | 0.00 |
| ATOM | 4056 | HG23 | THR | X | 271 | 47.553 | 73.629 | 42.080 | 0.00 | 0.00 |
| ATOM | 4057 | OG1  | THR | X | 271 | 44.896 | 72.970 | 43.653 | 0.00 | 0.00 |
| ATOM | 4058 | HG1  | THR | X | 271 | 45.113 | 73.758 | 44.157 | 0.00 | 0.00 |
| ATOM | 4059 | C    | THR | X | 271 | 47.122 | 70.819 | 41.619 | 0.00 | 0.00 |
| ATOM | 4060 | O    | THR | X | 271 | 47.185 | 70.808 | 40.384 | 0.00 | 0.00 |
| ATOM | 4061 | N    | ARG | X | 272 | 48.113 | 70.355 | 42.371 | 0.00 | 0.00 |
| ATOM | 4062 | H    | ARG | X | 272 | 48.134 | 70.515 | 43.368 | 0.00 | 0.00 |
| ATOM | 4063 | CA   | ARG | X | 272 | 49.374 | 69.808 | 41.826 | 0.00 | 0.00 |
| ATOM | 4064 | HA   | ARG | X | 272 | 49.806 | 70.672 | 41.321 | 0.00 | 0.00 |
| ATOM | 4065 | CB   | ARG | X | 272 | 50.329 | 69.440 | 42.963 | 0.00 | 0.00 |
| ATOM | 4066 | HB2  | ARG | X | 272 | 49.946 | 68.641 | 43.599 | 0.00 | 0.00 |
| ATOM | 4067 | HB3  | ARG | X | 272 | 51.242 | 69.034 | 42.529 | 0.00 | 0.00 |
| ATOM | 4068 | CG   | ARG | X | 272 | 50.661 | 70.655 | 43.843 | 0.00 | 0.00 |
| ATOM | 4069 | HG2  | ARG | X | 272 | 49.754 | 71.020 | 44.324 | 0.00 | 0.00 |
| ATOM | 4070 | HG3  | ARG | X | 272 | 51.105 | 70.134 | 44.692 | 0.00 | 0.00 |
| ATOM | 4071 | CD   | ARG | X | 272 | 51.625 | 71.757 | 43.340 | 0.00 | 0.00 |
| ATOM | 4072 | HD2  | ARG | X | 272 | 52.616 | 71.360 | 43.121 | 0.00 | 0.00 |
| ATOM | 4073 | HD3  | ARG | X | 272 | 51.266 | 72.225 | 42.423 | 0.00 | 0.00 |
| ATOM | 4074 | NE   | ARG | X | 272 | 51.648 | 72.825 | 44.398 | 0.00 | 0.00 |
| ATOM | 4075 | HE   | ARG | X | 272 | 50.971 | 73.552 | 44.216 | 0.00 | 0.00 |
| ATOM | 4076 | CZ   | ARG | X | 272 | 52.398 | 73.008 | 45.489 | 0.00 | 0.00 |
| ATOM | 4077 | NH1  | ARG | X | 272 | 53.394 | 72.204 | 45.821 | 0.00 | 0.00 |
| ATOM | 4078 | HH11 | ARG | X | 272 | 53.549 | 71.355 | 45.296 | 0.00 | 0.00 |
| ATOM | 4079 | HH12 | ARG | X | 272 | 54.037 | 72.434 | 46.566 | 0.00 | 0.00 |
| ATOM | 4080 | NH2  | ARG | X | 272 | 52.207 | 73.987 | 46.236 | 0.00 | 0.00 |
| ATOM | 4081 | HH21 | ARG | X | 272 | 51.659 | 74.703 | 45.781 | 0.00 | 0.00 |
| ATOM | 4082 | HH22 | ARG | X | 272 | 52.849 | 74.285 | 46.956 | 0.00 | 0.00 |
| ATOM | 4083 | C    | ARG | X | 272 | 49.164 | 68.657 | 40.744 | 0.00 | 0.00 |
| ATOM | 4084 | O    | ARG | X | 272 | 48.293 | 67.773 | 41.073 | 0.00 | 0.00 |
| ATOM | 4085 | N    | PRO | X | 273 | 49.728 | 68.591 | 39.586 | 0.00 | 0.00 |

|      |      |      |     |   |     |        |        |        |      |      |
|------|------|------|-----|---|-----|--------|--------|--------|------|------|
| ATOM | 4086 | CD   | PRO | X | 273 | 50.604 | 69.684 | 39.131 | 0.00 | 0.00 |
| ATOM | 4087 | HD2  | PRO | X | 273 | 51.582 | 69.372 | 39.500 | 0.00 | 0.00 |
| ATOM | 4088 | HD3  | PRO | X | 273 | 50.400 | 70.706 | 39.451 | 0.00 | 0.00 |
| ATOM | 4089 | CG   | PRO | X | 273 | 50.562 | 69.525 | 37.599 | 0.00 | 0.00 |
| ATOM | 4090 | HG2  | PRO | X | 273 | 51.486 | 69.884 | 37.147 | 0.00 | 0.00 |
| ATOM | 4091 | HG3  | PRO | X | 273 | 49.691 | 70.052 | 37.209 | 0.00 | 0.00 |
| ATOM | 4092 | CB   | PRO | X | 273 | 50.430 | 68.014 | 37.360 | 0.00 | 0.00 |
| ATOM | 4093 | HB2  | PRO | X | 273 | 51.398 | 67.516 | 37.413 | 0.00 | 0.00 |
| ATOM | 4094 | HB3  | PRO | X | 273 | 50.027 | 67.817 | 36.367 | 0.00 | 0.00 |
| ATOM | 4095 | CA   | PRO | X | 273 | 49.501 | 67.628 | 38.548 | 0.00 | 0.00 |
| ATOM | 4096 | HA   | PRO | X | 273 | 48.458 | 67.689 | 38.235 | 0.00 | 0.00 |
| ATOM | 4097 | C    | PRO | X | 273 | 49.777 | 66.187 | 38.986 | 0.00 | 0.00 |
| ATOM | 4098 | O    | PRO | X | 273 | 50.876 | 65.865 | 39.500 | 0.00 | 0.00 |
| ATOM | 4099 | N    | ALA | X | 274 | 48.844 | 65.261 | 38.601 | 0.00 | 0.00 |
| ATOM | 4100 | H    | ALA | X | 274 | 47.988 | 65.633 | 38.214 | 0.00 | 0.00 |
| ATOM | 4101 | CA   | ALA | X | 274 | 49.016 | 63.823 | 38.914 | 0.00 | 0.00 |
| ATOM | 4102 | HA   | ALA | X | 274 | 48.953 | 63.682 | 39.993 | 0.00 | 0.00 |
| ATOM | 4103 | CB   | ALA | X | 274 | 47.765 | 63.146 | 38.311 | 0.00 | 0.00 |
| ATOM | 4104 | HB1  | ALA | X | 274 | 47.915 | 62.085 | 38.511 | 0.00 | 0.00 |
| ATOM | 4105 | HB2  | ALA | X | 274 | 47.690 | 63.404 | 37.255 | 0.00 | 0.00 |
| ATOM | 4106 | HB3  | ALA | X | 274 | 46.807 | 63.372 | 38.780 | 0.00 | 0.00 |
| ATOM | 4107 | C    | ALA | X | 274 | 50.347 | 63.138 | 38.372 | 0.00 | 0.00 |
| ATOM | 4108 | O    | ALA | X | 274 | 50.940 | 62.399 | 39.137 | 0.00 | 0.00 |
| ATOM | 4109 | N    | GLN | X | 275 | 50.876 | 63.563 | 37.214 | 0.00 | 0.00 |
| ATOM | 4110 | H    | GLN | X | 275 | 50.405 | 64.271 | 36.669 | 0.00 | 0.00 |
| ATOM | 4111 | CA   | GLN | X | 275 | 52.246 | 63.215 | 36.741 | 0.00 | 0.00 |
| ATOM | 4112 | HA   | GLN | X | 275 | 52.302 | 62.136 | 36.595 | 0.00 | 0.00 |
| ATOM | 4113 | CB   | GLN | X | 275 | 52.461 | 64.051 | 35.406 | 0.00 | 0.00 |
| ATOM | 4114 | HB2  | GLN | X | 275 | 51.568 | 63.877 | 34.806 | 0.00 | 0.00 |
| ATOM | 4115 | HB3  | GLN | X | 275 | 52.617 | 65.114 | 35.588 | 0.00 | 0.00 |
| ATOM | 4116 | CG   | GLN | X | 275 | 53.571 | 63.510 | 34.573 | 0.00 | 0.00 |
| ATOM | 4117 | HG2  | GLN | X | 275 | 54.396 | 63.225 | 35.226 | 0.00 | 0.00 |
| ATOM | 4118 | HG3  | GLN | X | 275 | 53.261 | 62.578 | 34.100 | 0.00 | 0.00 |
| ATOM | 4119 | CD   | GLN | X | 275 | 53.967 | 64.533 | 33.524 | 0.00 | 0.00 |
| ATOM | 4120 | OE1  | GLN | X | 275 | 54.044 | 65.752 | 33.744 | 0.00 | 0.00 |
| ATOM | 4121 | NE2  | GLN | X | 275 | 54.040 | 64.140 | 32.269 | 0.00 | 0.00 |
| ATOM | 4122 | HE21 | GLN | X | 275 | 54.246 | 64.818 | 31.548 | 0.00 | 0.00 |
| ATOM | 4123 | HE22 | GLN | X | 275 | 53.865 | 63.176 | 32.024 | 0.00 | 0.00 |
| ATOM | 4124 | C    | GLN | X | 275 | 53.356 | 63.522 | 37.793 | 0.00 | 0.00 |
| ATOM | 4125 | O    | GLN | X | 275 | 54.277 | 62.719 | 37.957 | 0.00 | 0.00 |
| ATOM | 4126 | N    | VAL | X | 276 | 53.251 | 64.622 | 38.613 | 0.00 | 0.00 |
| ATOM | 4127 | H    | VAL | X | 276 | 52.502 | 65.291 | 38.509 | 0.00 | 0.00 |
| ATOM | 4128 | CA   | VAL | X | 276 | 54.149 | 64.920 | 39.739 | 0.00 | 0.00 |
| ATOM | 4129 | HA   | VAL | X | 276 | 55.156 | 64.719 | 39.373 | 0.00 | 0.00 |
| ATOM | 4130 | CB   | VAL | X | 276 | 53.949 | 66.350 | 40.292 | 0.00 | 0.00 |
| ATOM | 4131 | HB   | VAL | X | 276 | 52.924 | 66.555 | 40.602 | 0.00 | 0.00 |
| ATOM | 4132 | CG1  | VAL | X | 276 | 54.963 | 66.587 | 41.450 | 0.00 | 0.00 |
| ATOM | 4133 | HG11 | VAL | X | 276 | 55.869 | 66.070 | 41.136 | 0.00 | 0.00 |
| ATOM | 4134 | HG12 | VAL | X | 276 | 55.134 | 67.643 | 41.662 | 0.00 | 0.00 |
| ATOM | 4135 | HG13 | VAL | X | 276 | 54.534 | 66.209 | 42.377 | 0.00 | 0.00 |
| ATOM | 4136 | CG2  | VAL | X | 276 | 54.254 | 67.346 | 39.170 | 0.00 | 0.00 |
| ATOM | 4137 | HG21 | VAL | X | 276 | 54.040 | 68.359 | 39.511 | 0.00 | 0.00 |
| ATOM | 4138 | HG22 | VAL | X | 276 | 53.718 | 67.242 | 38.227 | 0.00 | 0.00 |
| ATOM | 4139 | HG23 | VAL | X | 276 | 55.266 | 67.363 | 38.766 | 0.00 | 0.00 |
| ATOM | 4140 | C    | VAL | X | 276 | 53.882 | 63.919 | 40.900 | 0.00 | 0.00 |
| ATOM | 4141 | O    | VAL | X | 276 | 54.788 | 63.281 | 41.402 | 0.00 | 0.00 |
| ATOM | 4142 | N    | LEU | X | 277 | 52.572 | 63.667 | 41.196 | 0.00 | 0.00 |
| ATOM | 4143 | H    | LEU | X | 277 | 51.890 | 64.030 | 40.547 | 0.00 | 0.00 |
| ATOM | 4144 | CA   | LEU | X | 277 | 52.133 | 62.833 | 42.303 | 0.00 | 0.00 |
| ATOM | 4145 | HA   | LEU | X | 277 | 52.650 | 63.184 | 43.196 | 0.00 | 0.00 |
| ATOM | 4146 | CB   | LEU | X | 277 | 50.598 | 62.912 | 42.491 | 0.00 | 0.00 |
| ATOM | 4147 | HB2  | LEU | X | 277 | 50.156 | 62.403 | 41.634 | 0.00 | 0.00 |
| ATOM | 4148 | HB3  | LEU | X | 277 | 50.312 | 62.323 | 43.362 | 0.00 | 0.00 |
| ATOM | 4149 | CG   | LEU | X | 277 | 49.919 | 64.352 | 42.528 | 0.00 | 0.00 |
| ATOM | 4150 | HG   | LEU | X | 277 | 50.203 | 64.982 | 41.686 | 0.00 | 0.00 |
| ATOM | 4151 | CD1  | LEU | X | 277 | 48.394 | 64.128 | 42.689 | 0.00 | 0.00 |
| ATOM | 4152 | HD11 | LEU | X | 277 | 47.899 | 65.098 | 42.673 | 0.00 | 0.00 |

|      |      |      |     |   |     |        |        |        |      |      |
|------|------|------|-----|---|-----|--------|--------|--------|------|------|
| ATOM | 4153 | HD12 | LEU | X | 277 | 48.250 | 63.531 | 43.589 | 0.00 | 0.00 |
| ATOM | 4154 | HD13 | LEU | X | 277 | 47.912 | 63.610 | 41.859 | 0.00 | 0.00 |
| ATOM | 4155 | CD2  | LEU | X | 277 | 50.486 | 65.031 | 43.812 | 0.00 | 0.00 |
| ATOM | 4156 | HD21 | LEU | X | 277 | 50.341 | 64.336 | 44.638 | 0.00 | 0.00 |
| ATOM | 4157 | HD22 | LEU | X | 277 | 51.549 | 65.239 | 43.682 | 0.00 | 0.00 |
| ATOM | 4158 | HD23 | LEU | X | 277 | 49.886 | 65.921 | 44.002 | 0.00 | 0.00 |
| ATOM | 4159 | C    | LEU | X | 277 | 52.541 | 61.359 | 42.083 | 0.00 | 0.00 |
| ATOM | 4160 | O    | LEU | X | 277 | 52.959 | 60.703 | 43.046 | 0.00 | 0.00 |
| ATOM | 4161 | N    | VAL | X | 278 | 52.554 | 60.789 | 40.920 | 0.00 | 0.00 |
| ATOM | 4162 | H    | VAL | X | 278 | 52.251 | 61.339 | 40.128 | 0.00 | 0.00 |
| ATOM | 4163 | CA   | VAL | X | 278 | 52.979 | 59.453 | 40.574 | 0.00 | 0.00 |
| ATOM | 4164 | HA   | VAL | X | 278 | 52.719 | 58.946 | 41.503 | 0.00 | 0.00 |
| ATOM | 4165 | CB   | VAL | X | 278 | 52.135 | 58.743 | 39.400 | 0.00 | 0.00 |
| ATOM | 4166 | HB   | VAL | X | 278 | 52.485 | 57.721 | 39.252 | 0.00 | 0.00 |
| ATOM | 4167 | CG1  | VAL | X | 278 | 50.662 | 58.553 | 39.804 | 0.00 | 0.00 |
| ATOM | 4168 | HG11 | VAL | X | 278 | 50.081 | 57.988 | 39.074 | 0.00 | 0.00 |
| ATOM | 4169 | HG12 | VAL | X | 278 | 50.711 | 58.097 | 40.793 | 0.00 | 0.00 |
| ATOM | 4170 | HG13 | VAL | X | 278 | 50.149 | 59.500 | 39.967 | 0.00 | 0.00 |
| ATOM | 4171 | CG2  | VAL | X | 278 | 52.371 | 59.475 | 38.102 | 0.00 | 0.00 |
| ATOM | 4172 | HG21 | VAL | X | 278 | 51.749 | 59.074 | 37.302 | 0.00 | 0.00 |
| ATOM | 4173 | HG22 | VAL | X | 278 | 53.448 | 59.471 | 37.931 | 0.00 | 0.00 |
| ATOM | 4174 | HG23 | VAL | X | 278 | 52.102 | 60.529 | 38.169 | 0.00 | 0.00 |
| ATOM | 4175 | C    | VAL | X | 278 | 54.533 | 59.271 | 40.402 | 0.00 | 0.00 |
| ATOM | 4176 | O    | VAL | X | 278 | 55.059 | 58.184 | 40.595 | 0.00 | 0.00 |
| ATOM | 4177 | N    | ASN | X | 279 | 55.207 | 60.348 | 39.962 | 0.00 | 0.00 |
| ATOM | 4178 | H    | ASN | X | 279 | 54.590 | 61.145 | 39.896 | 0.00 | 0.00 |
| ATOM | 4179 | CA   | ASN | X | 279 | 56.685 | 60.493 | 40.009 | 0.00 | 0.00 |
| ATOM | 4180 | HA   | ASN | X | 279 | 57.161 | 59.676 | 39.468 | 0.00 | 0.00 |
| ATOM | 4181 | CB   | ASN | X | 279 | 57.170 | 61.832 | 39.314 | 0.00 | 0.00 |
| ATOM | 4182 | HB2  | ASN | X | 279 | 56.557 | 62.014 | 38.432 | 0.00 | 0.00 |
| ATOM | 4183 | HB3  | ASN | X | 279 | 57.078 | 62.663 | 40.013 | 0.00 | 0.00 |
| ATOM | 4184 | CG   | ASN | X | 279 | 58.661 | 61.738 | 38.858 | 0.00 | 0.00 |
| ATOM | 4185 | OD1  | ASN | X | 279 | 59.468 | 60.957 | 39.347 | 0.00 | 0.00 |
| ATOM | 4186 | ND2  | ASN | X | 279 | 58.997 | 62.693 | 38.005 | 0.00 | 0.00 |
| ATOM | 4187 | HD21 | ASN | X | 279 | 59.920 | 62.680 | 37.597 | 0.00 | 0.00 |
| ATOM | 4188 | HD22 | ASN | X | 279 | 58.231 | 63.302 | 37.752 | 0.00 | 0.00 |
| ATOM | 4189 | C    | ASN | X | 279 | 57.190 | 60.420 | 41.475 | 0.00 | 0.00 |
| ATOM | 4190 | O    | ASN | X | 279 | 58.210 | 59.838 | 41.832 | 0.00 | 0.00 |
| ATOM | 4191 | N    | HIE | X | 280 | 56.291 | 60.878 | 42.397 | 0.00 | 0.00 |
| ATOM | 4192 | H    | HIE | X | 280 | 55.420 | 61.272 | 42.069 | 0.00 | 0.00 |
| ATOM | 4193 | CA   | HIE | X | 280 | 56.575 | 61.035 | 43.819 | 0.00 | 0.00 |
| ATOM | 4194 | HA   | HIE | X | 280 | 57.648 | 60.859 | 43.903 | 0.00 | 0.00 |
| ATOM | 4195 | CB   | HIE | X | 280 | 56.193 | 62.454 | 44.149 | 0.00 | 0.00 |
| ATOM | 4196 | HB2  | HIE | X | 280 | 55.150 | 62.571 | 43.855 | 0.00 | 0.00 |
| ATOM | 4197 | HB3  | HIE | X | 280 | 56.153 | 62.536 | 45.235 | 0.00 | 0.00 |
| ATOM | 4198 | CG   | HIE | X | 280 | 57.075 | 63.588 | 43.624 | 0.00 | 0.00 |
| ATOM | 4199 | ND1  | HIE | X | 280 | 57.839 | 63.633 | 42.454 | 0.00 | 0.00 |
| ATOM | 4200 | CE1  | HIE | X | 280 | 58.570 | 64.724 | 42.467 | 0.00 | 0.00 |
| ATOM | 4201 | HE1  | HIE | X | 280 | 59.351 | 64.911 | 41.745 | 0.00 | 0.00 |
| ATOM | 4202 | NE2  | HIE | X | 280 | 58.356 | 65.331 | 43.643 | 0.00 | 0.00 |
| ATOM | 4203 | HE2  | HIE | X | 280 | 58.918 | 66.117 | 43.938 | 0.00 | 0.00 |
| ATOM | 4204 | CD2  | HIE | X | 280 | 57.347 | 64.721 | 44.323 | 0.00 | 0.00 |
| ATOM | 4205 | HD2  | HIE | X | 280 | 56.964 | 64.989 | 45.297 | 0.00 | 0.00 |
| ATOM | 4206 | C    | HIE | X | 280 | 55.894 | 59.934 | 44.718 | 0.00 | 0.00 |
| ATOM | 4207 | O    | HIE | X | 280 | 56.296 | 59.833 | 45.880 | 0.00 | 0.00 |
| ATOM | 4208 | N    | GLU | X | 281 | 55.034 | 59.053 | 44.198 | 0.00 | 0.00 |
| ATOM | 4209 | H    | GLU | X | 281 | 54.603 | 59.233 | 43.302 | 0.00 | 0.00 |
| ATOM | 4210 | CA   | GLU | X | 281 | 54.463 | 58.056 | 45.037 | 0.00 | 0.00 |
| ATOM | 4211 | HA   | GLU | X | 281 | 54.033 | 58.545 | 45.911 | 0.00 | 0.00 |
| ATOM | 4212 | CB   | GLU | X | 281 | 53.427 | 57.428 | 44.122 | 0.00 | 0.00 |
| ATOM | 4213 | HB2  | GLU | X | 281 | 53.094 | 58.192 | 43.419 | 0.00 | 0.00 |
| ATOM | 4214 | HB3  | GLU | X | 281 | 54.012 | 56.706 | 43.553 | 0.00 | 0.00 |
| ATOM | 4215 | CG   | GLU | X | 281 | 52.272 | 56.675 | 44.885 | 0.00 | 0.00 |
| ATOM | 4216 | HG2  | GLU | X | 281 | 52.708 | 55.899 | 45.514 | 0.00 | 0.00 |
| ATOM | 4217 | HG3  | GLU | X | 281 | 51.743 | 57.431 | 45.466 | 0.00 | 0.00 |
| ATOM | 4218 | CD   | GLU | X | 281 | 51.212 | 56.047 | 43.919 | 0.00 | 0.00 |
| ATOM | 4219 | OE1  | GLU | X | 281 | 50.337 | 56.797 | 43.502 | 0.00 | 0.00 |

|      |      |      |     |   |     |        |        |        |      |      |
|------|------|------|-----|---|-----|--------|--------|--------|------|------|
| ATOM | 4220 | OE2  | GLU | X | 281 | 51.456 | 54.906 | 43.448 | 0.00 | 0.00 |
| ATOM | 4221 | C    | GLU | X | 281 | 55.511 | 56.982 | 45.528 | 0.00 | 0.00 |
| ATOM | 4222 | O    | GLU | X | 281 | 55.485 | 56.622 | 46.683 | 0.00 | 0.00 |
| ATOM | 4223 | N    | TRP | X | 282 | 56.408 | 56.571 | 44.619 | 0.00 | 0.00 |
| ATOM | 4224 | H    | TRP | X | 282 | 56.291 | 56.908 | 43.674 | 0.00 | 0.00 |
| ATOM | 4225 | CA   | TRP | X | 282 | 57.594 | 55.733 | 44.884 | 0.00 | 0.00 |
| ATOM | 4226 | HA   | TRP | X | 282 | 57.295 | 54.687 | 44.948 | 0.00 | 0.00 |
| ATOM | 4227 | CB   | TRP | X | 282 | 58.533 | 55.842 | 43.742 | 0.00 | 0.00 |
| ATOM | 4228 | HB2  | TRP | X | 282 | 57.951 | 55.654 | 42.840 | 0.00 | 0.00 |
| ATOM | 4229 | HB3  | TRP | X | 282 | 58.892 | 56.832 | 43.463 | 0.00 | 0.00 |
| ATOM | 4230 | CG   | TRP | X | 282 | 59.704 | 54.915 | 43.855 | 0.00 | 0.00 |
| ATOM | 4231 | CD1  | TRP | X | 282 | 59.760 | 53.610 | 43.617 | 0.00 | 0.00 |
| ATOM | 4232 | HD1  | TRP | X | 282 | 58.955 | 53.044 | 43.173 | 0.00 | 0.00 |
| ATOM | 4233 | NE1  | TRP | X | 282 | 60.992 | 53.135 | 43.808 | 0.00 | 0.00 |
| ATOM | 4234 | HE1  | TRP | X | 282 | 61.229 | 52.154 | 43.768 | 0.00 | 0.00 |
| ATOM | 4235 | CE2  | TRP | X | 282 | 61.876 | 54.091 | 44.273 | 0.00 | 0.00 |
| ATOM | 4236 | CZ2  | TRP | X | 282 | 63.256 | 54.116 | 44.602 | 0.00 | 0.00 |
| ATOM | 4237 | HZ2  | TRP | X | 282 | 63.780 | 53.177 | 44.499 | 0.00 | 0.00 |
| ATOM | 4238 | CH2  | TRP | X | 282 | 63.835 | 55.220 | 45.114 | 0.00 | 0.00 |
| ATOM | 4239 | HH2  | TRP | X | 282 | 64.853 | 55.079 | 45.447 | 0.00 | 0.00 |
| ATOM | 4240 | CZ3  | TRP | X | 282 | 63.082 | 56.412 | 45.165 | 0.00 | 0.00 |
| ATOM | 4241 | HZ3  | TRP | X | 282 | 63.458 | 57.382 | 45.456 | 0.00 | 0.00 |
| ATOM | 4242 | CE3  | TRP | X | 282 | 61.751 | 56.435 | 44.622 | 0.00 | 0.00 |
| ATOM | 4243 | HE3  | TRP | X | 282 | 61.244 | 57.387 | 44.579 | 0.00 | 0.00 |
| ATOM | 4244 | CD2  | TRP | X | 282 | 61.069 | 55.259 | 44.244 | 0.00 | 0.00 |
| ATOM | 4245 | C    | TRP | X | 282 | 58.370 | 56.030 | 46.113 | 0.00 | 0.00 |
| ATOM | 4246 | O    | TRP | X | 282 | 58.906 | 55.189 | 46.815 | 0.00 | 0.00 |
| ATOM | 4247 | N    | HIE | X | 283 | 58.250 | 57.225 | 46.647 | 0.00 | 0.00 |
| ATOM | 4248 | H    | HIE | X | 283 | 57.733 | 57.949 | 46.169 | 0.00 | 0.00 |
| ATOM | 4249 | CA   | HIE | X | 283 | 58.762 | 57.568 | 48.000 | 0.00 | 0.00 |
| ATOM | 4250 | HA   | HIE | X | 283 | 59.837 | 57.390 | 47.977 | 0.00 | 0.00 |
| ATOM | 4251 | CB   | HIE | X | 283 | 58.601 | 59.101 | 48.037 | 0.00 | 0.00 |
| ATOM | 4252 | HB2  | HIE | X | 283 | 59.286 | 59.490 | 47.283 | 0.00 | 0.00 |
| ATOM | 4253 | HB3  | HIE | X | 283 | 57.565 | 59.421 | 47.926 | 0.00 | 0.00 |
| ATOM | 4254 | CG   | HIE | X | 283 | 59.114 | 59.684 | 49.280 | 0.00 | 0.00 |
| ATOM | 4255 | ND1  | HIE | X | 283 | 60.510 | 59.835 | 49.585 | 0.00 | 0.00 |
| ATOM | 4256 | CE1  | HIE | X | 283 | 60.535 | 60.517 | 50.750 | 0.00 | 0.00 |
| ATOM | 4257 | HE1  | HIE | X | 283 | 61.352 | 60.856 | 51.370 | 0.00 | 0.00 |
| ATOM | 4258 | NE2  | HIE | X | 283 | 59.332 | 60.789 | 51.126 | 0.00 | 0.00 |
| ATOM | 4259 | HE2  | HIE | X | 283 | 59.220 | 61.497 | 51.837 | 0.00 | 0.00 |
| ATOM | 4260 | CD2  | HIE | X | 283 | 58.417 | 60.304 | 50.244 | 0.00 | 0.00 |
| ATOM | 4261 | HD2  | HIE | X | 283 | 57.347 | 60.385 | 50.359 | 0.00 | 0.00 |
| ATOM | 4262 | C    | HIE | X | 283 | 58.094 | 56.890 | 49.136 | 0.00 | 0.00 |
| ATOM | 4263 | O    | HIE | X | 283 | 58.741 | 56.791 | 50.209 | 0.00 | 0.00 |
| ATOM | 4264 | N    | VAL | X | 284 | 56.994 | 56.189 | 48.987 | 0.00 | 0.00 |
| ATOM | 4265 | H    | VAL | X | 284 | 56.445 | 56.502 | 48.199 | 0.00 | 0.00 |
| ATOM | 4266 | CA   | VAL | X | 284 | 56.328 | 55.382 | 50.031 | 0.00 | 0.00 |
| ATOM | 4267 | HA   | VAL | X | 284 | 57.088 | 55.073 | 50.748 | 0.00 | 0.00 |
| ATOM | 4268 | CB   | VAL | X | 284 | 55.174 | 56.095 | 50.841 | 0.00 | 0.00 |
| ATOM | 4269 | HB   | VAL | X | 284 | 54.762 | 55.401 | 51.573 | 0.00 | 0.00 |
| ATOM | 4270 | CG1  | VAL | X | 284 | 55.751 | 57.415 | 51.526 | 0.00 | 0.00 |
| ATOM | 4271 | HG11 | VAL | X | 284 | 56.666 | 57.069 | 52.007 | 0.00 | 0.00 |
| ATOM | 4272 | HG12 | VAL | X | 284 | 56.103 | 58.205 | 50.863 | 0.00 | 0.00 |
| ATOM | 4273 | HG13 | VAL | X | 284 | 55.072 | 57.739 | 52.314 | 0.00 | 0.00 |
| ATOM | 4274 | CG2  | VAL | X | 284 | 53.992 | 56.589 | 49.895 | 0.00 | 0.00 |
| ATOM | 4275 | HG21 | VAL | X | 284 | 53.514 | 55.660 | 49.588 | 0.00 | 0.00 |
| ATOM | 4276 | HG22 | VAL | X | 284 | 54.415 | 57.151 | 49.063 | 0.00 | 0.00 |
| ATOM | 4277 | HG23 | VAL | X | 284 | 53.316 | 57.194 | 50.499 | 0.00 | 0.00 |
| ATOM | 4278 | C    | VAL | X | 284 | 55.912 | 53.968 | 49.531 | 0.00 | 0.00 |
| ATOM | 4279 | O    | VAL | X | 284 | 55.195 | 53.217 | 50.207 | 0.00 | 0.00 |
| ATOM | 4280 | N    | LEU | X | 285 | 56.460 | 53.551 | 48.370 | 0.00 | 0.00 |
| ATOM | 4281 | H    | LEU | X | 285 | 57.121 | 54.200 | 47.968 | 0.00 | 0.00 |
| ATOM | 4282 | CA   | LEU | X | 285 | 56.361 | 52.218 | 47.834 | 0.00 | 0.00 |
| ATOM | 4283 | HA   | LEU | X | 285 | 55.361 | 51.837 | 48.043 | 0.00 | 0.00 |
| ATOM | 4284 | CB   | LEU | X | 285 | 56.714 | 52.235 | 46.302 | 0.00 | 0.00 |
| ATOM | 4285 | HB2  | LEU | X | 285 | 56.066 | 53.010 | 45.895 | 0.00 | 0.00 |
| ATOM | 4286 | HB3  | LEU | X | 285 | 57.709 | 52.659 | 46.166 | 0.00 | 0.00 |

|      |      |      |     |   |     |        |        |        |      |      |
|------|------|------|-----|---|-----|--------|--------|--------|------|------|
| ATOM | 4287 | CG   | LEU | X | 285 | 56.521 | 50.893 | 45.621 | 0.00 | 0.00 |
| ATOM | 4288 | HG   | LEU | X | 285 | 57.164 | 50.187 | 46.148 | 0.00 | 0.00 |
| ATOM | 4289 | CD1  | LEU | X | 285 | 55.114 | 50.414 | 45.570 | 0.00 | 0.00 |
| ATOM | 4290 | HD11 | LEU | X | 285 | 54.507 | 51.265 | 45.263 | 0.00 | 0.00 |
| ATOM | 4291 | HD12 | LEU | X | 285 | 54.746 | 50.001 | 46.510 | 0.00 | 0.00 |
| ATOM | 4292 | HD13 | LEU | X | 285 | 55.000 | 49.583 | 44.874 | 0.00 | 0.00 |
| ATOM | 4293 | CD2  | LEU | X | 285 | 57.041 | 51.054 | 44.190 | 0.00 | 0.00 |
| ATOM | 4294 | HD21 | LEU | X | 285 | 56.919 | 50.127 | 43.630 | 0.00 | 0.00 |
| ATOM | 4295 | HD22 | LEU | X | 285 | 56.584 | 51.942 | 43.753 | 0.00 | 0.00 |
| ATOM | 4296 | HD23 | LEU | X | 285 | 58.107 | 51.242 | 44.315 | 0.00 | 0.00 |
| ATOM | 4297 | C    | LEU | X | 285 | 57.388 | 51.392 | 48.643 | 0.00 | 0.00 |
| ATOM | 4298 | O    | LEU | X | 285 | 58.573 | 51.794 | 48.591 | 0.00 | 0.00 |
| ATOM | 4299 | N    | PRO | X | 286 | 57.024 | 50.273 | 49.361 | 0.00 | 0.00 |
| ATOM | 4300 | CD   | PRO | X | 286 | 55.676 | 49.751 | 49.393 | 0.00 | 0.00 |
| ATOM | 4301 | HD2  | PRO | X | 286 | 55.348 | 49.231 | 48.493 | 0.00 | 0.00 |
| ATOM | 4302 | HD3  | PRO | X | 286 | 55.079 | 50.653 | 49.531 | 0.00 | 0.00 |
| ATOM | 4303 | CG   | PRO | X | 286 | 55.605 | 48.868 | 50.629 | 0.00 | 0.00 |
| ATOM | 4304 | HG2  | PRO | X | 286 | 54.958 | 47.996 | 50.533 | 0.00 | 0.00 |
| ATOM | 4305 | HG3  | PRO | X | 286 | 55.156 | 49.505 | 51.391 | 0.00 | 0.00 |
| ATOM | 4306 | CB   | PRO | X | 286 | 57.005 | 48.464 | 50.815 | 0.00 | 0.00 |
| ATOM | 4307 | HB2  | PRO | X | 286 | 57.190 | 47.627 | 50.142 | 0.00 | 0.00 |
| ATOM | 4308 | HB3  | PRO | X | 286 | 57.193 | 48.211 | 51.858 | 0.00 | 0.00 |
| ATOM | 4309 | CA   | PRO | X | 286 | 57.839 | 49.679 | 50.359 | 0.00 | 0.00 |
| ATOM | 4310 | HA   | PRO | X | 286 | 57.935 | 50.455 | 51.118 | 0.00 | 0.00 |
| ATOM | 4311 | C    | PRO | X | 286 | 59.248 | 49.230 | 49.840 | 0.00 | 0.00 |
| ATOM | 4312 | O    | PRO | X | 286 | 59.374 | 48.661 | 48.781 | 0.00 | 0.00 |
| ATOM | 4313 | N    | GLN | X | 287 | 60.250 | 49.362 | 50.673 | 0.00 | 0.00 |
| ATOM | 4314 | H    | GLN | X | 287 | 60.039 | 49.986 | 51.439 | 0.00 | 0.00 |
| ATOM | 4315 | CA   | GLN | X | 287 | 61.576 | 48.682 | 50.643 | 0.00 | 0.00 |
| ATOM | 4316 | HA   | GLN | X | 287 | 61.865 | 48.132 | 49.748 | 0.00 | 0.00 |
| ATOM | 4317 | CB   | GLN | X | 287 | 62.648 | 49.747 | 50.811 | 0.00 | 0.00 |
| ATOM | 4318 | HB2  | GLN | X | 287 | 62.684 | 50.079 | 51.848 | 0.00 | 0.00 |
| ATOM | 4319 | HB3  | GLN | X | 287 | 63.607 | 49.294 | 50.559 | 0.00 | 0.00 |
| ATOM | 4320 | CG   | GLN | X | 287 | 62.418 | 50.952 | 49.845 | 0.00 | 0.00 |
| ATOM | 4321 | HG2  | GLN | X | 287 | 62.354 | 50.661 | 48.797 | 0.00 | 0.00 |
| ATOM | 4322 | HG3  | GLN | X | 287 | 61.503 | 51.496 | 50.082 | 0.00 | 0.00 |
| ATOM | 4323 | CD   | GLN | X | 287 | 63.488 | 52.030 | 50.013 | 0.00 | 0.00 |
| ATOM | 4324 | OE1  | GLN | X | 287 | 64.560 | 51.773 | 50.601 | 0.00 | 0.00 |
| ATOM | 4325 | NE2  | GLN | X | 287 | 63.386 | 53.138 | 49.354 | 0.00 | 0.00 |
| ATOM | 4326 | HE21 | GLN | X | 287 | 64.189 | 53.749 | 49.310 | 0.00 | 0.00 |
| ATOM | 4327 | HE22 | GLN | X | 287 | 62.670 | 53.190 | 48.644 | 0.00 | 0.00 |
| ATOM | 4328 | C    | GLN | X | 287 | 61.695 | 47.638 | 51.782 | 0.00 | 0.00 |
| ATOM | 4329 | O    | GLN | X | 287 | 60.858 | 47.560 | 52.645 | 0.00 | 0.00 |
| ATOM | 4330 | N    | GLU | X | 288 | 62.731 | 46.766 | 51.803 | 0.00 | 0.00 |
| ATOM | 4331 | H    | GLU | X | 288 | 63.390 | 46.818 | 51.040 | 0.00 | 0.00 |
| ATOM | 4332 | CA   | GLU | X | 288 | 62.945 | 45.795 | 52.879 | 0.00 | 0.00 |
| ATOM | 4333 | HA   | GLU | X | 288 | 63.730 | 45.114 | 52.551 | 0.00 | 0.00 |
| ATOM | 4334 | CB   | GLU | X | 288 | 63.295 | 46.481 | 54.219 | 0.00 | 0.00 |
| ATOM | 4335 | HB2  | GLU | X | 288 | 62.380 | 46.834 | 54.696 | 0.00 | 0.00 |
| ATOM | 4336 | HB3  | GLU | X | 288 | 63.790 | 45.652 | 54.723 | 0.00 | 0.00 |
| ATOM | 4337 | CG   | GLU | X | 288 | 64.394 | 47.588 | 54.185 | 0.00 | 0.00 |
| ATOM | 4338 | HG2  | GLU | X | 288 | 65.260 | 47.188 | 53.659 | 0.00 | 0.00 |
| ATOM | 4339 | HG3  | GLU | X | 288 | 64.061 | 48.436 | 53.587 | 0.00 | 0.00 |
| ATOM | 4340 | CD   | GLU | X | 288 | 64.715 | 48.076 | 55.567 | 0.00 | 0.00 |
| ATOM | 4341 | OE1  | GLU | X | 288 | 65.796 | 47.887 | 56.208 | 0.00 | 0.00 |
| ATOM | 4342 | OE2  | GLU | X | 288 | 63.830 | 48.813 | 56.104 | 0.00 | 0.00 |
| ATOM | 4343 | C    | GLU | X | 288 | 61.672 | 44.902 | 53.007 | 0.00 | 0.00 |
| ATOM | 4344 | O    | GLU | X | 288 | 61.287 | 44.587 | 54.174 | 0.00 | 0.00 |
| ATOM | 4345 | N    | SER | X | 289 | 61.080 | 44.612 | 51.876 | 0.00 | 0.00 |
| ATOM | 4346 | H    | SER | X | 289 | 61.450 | 45.009 | 51.024 | 0.00 | 0.00 |
| ATOM | 4347 | CA   | SER | X | 289 | 59.697 | 44.156 | 51.856 | 0.00 | 0.00 |
| ATOM | 4348 | HA   | SER | X | 289 | 59.577 | 43.352 | 52.583 | 0.00 | 0.00 |
| ATOM | 4349 | CB   | SER | X | 289 | 58.675 | 45.280 | 52.284 | 0.00 | 0.00 |
| ATOM | 4350 | HB2  | SER | X | 289 | 58.929 | 46.171 | 51.711 | 0.00 | 0.00 |
| ATOM | 4351 | HB3  | SER | X | 289 | 57.680 | 44.840 | 52.214 | 0.00 | 0.00 |
| ATOM | 4352 | OG   | SER | X | 289 | 58.766 | 45.498 | 53.640 | 0.00 | 0.00 |
| ATOM | 4353 | HG   | SER | X | 289 | 59.699 | 45.691 | 53.754 | 0.00 | 0.00 |

|      |      |      |     |   |     |        |        |        |      |      |
|------|------|------|-----|---|-----|--------|--------|--------|------|------|
| ATOM | 4354 | C    | SER | X | 289 | 59.264 | 43.689 | 50.417 | 0.00 | 0.00 |
| ATOM | 4355 | O    | SER | X | 289 | 59.007 | 44.527 | 49.568 | 0.00 | 0.00 |
| ATOM | 4356 | N    | VAL | X | 290 | 59.052 | 42.416 | 50.229 | 0.00 | 0.00 |
| ATOM | 4357 | H    | VAL | X | 290 | 59.114 | 41.835 | 51.053 | 0.00 | 0.00 |
| ATOM | 4358 | CA   | VAL | X | 290 | 58.609 | 41.738 | 48.958 | 0.00 | 0.00 |
| ATOM | 4359 | HA   | VAL | X | 290 | 58.716 | 42.482 | 48.168 | 0.00 | 0.00 |
| ATOM | 4360 | CB   | VAL | X | 290 | 59.552 | 40.561 | 48.513 | 0.00 | 0.00 |
| ATOM | 4361 | HB   | VAL | X | 290 | 59.152 | 40.067 | 47.627 | 0.00 | 0.00 |
| ATOM | 4362 | CG1  | VAL | X | 290 | 60.920 | 41.185 | 48.115 | 0.00 | 0.00 |
| ATOM | 4363 | HG11 | VAL | X | 290 | 61.436 | 41.684 | 48.935 | 0.00 | 0.00 |
| ATOM | 4364 | HG12 | VAL | X | 290 | 61.599 | 40.441 | 47.698 | 0.00 | 0.00 |
| ATOM | 4365 | HG13 | VAL | X | 290 | 60.725 | 41.987 | 47.403 | 0.00 | 0.00 |
| ATOM | 4366 | CG2  | VAL | X | 290 | 59.794 | 39.392 | 49.408 | 0.00 | 0.00 |
| ATOM | 4367 | HG21 | VAL | X | 290 | 60.054 | 39.677 | 50.428 | 0.00 | 0.00 |
| ATOM | 4368 | HG22 | VAL | X | 290 | 60.613 | 38.774 | 49.039 | 0.00 | 0.00 |
| ATOM | 4369 | HG23 | VAL | X | 290 | 58.882 | 38.813 | 49.547 | 0.00 | 0.00 |
| ATOM | 4370 | C    | VAL | X | 290 | 57.081 | 41.376 | 49.125 | 0.00 | 0.00 |
| ATOM | 4371 | O    | VAL | X | 290 | 56.660 | 40.915 | 50.174 | 0.00 | 0.00 |
| ATOM | 4372 | N    | PHE | X | 291 | 56.287 | 41.496 | 48.045 | 0.00 | 0.00 |
| ATOM | 4373 | H    | PHE | X | 291 | 56.673 | 41.782 | 47.156 | 0.00 | 0.00 |
| ATOM | 4374 | CA   | PHE | X | 291 | 54.856 | 41.124 | 47.933 | 0.00 | 0.00 |
| ATOM | 4375 | HA   | PHE | X | 291 | 54.479 | 41.290 | 46.923 | 0.00 | 0.00 |
| ATOM | 4376 | CB   | PHE | X | 291 | 54.735 | 39.705 | 48.335 | 0.00 | 0.00 |
| ATOM | 4377 | HB2  | PHE | X | 291 | 55.647 | 39.188 | 48.036 | 0.00 | 0.00 |
| ATOM | 4378 | HB3  | PHE | X | 291 | 54.533 | 39.732 | 49.405 | 0.00 | 0.00 |
| ATOM | 4379 | CG   | PHE | X | 291 | 53.532 | 38.915 | 47.783 | 0.00 | 0.00 |
| ATOM | 4380 | CD1  | PHE | X | 291 | 52.290 | 39.553 | 47.415 | 0.00 | 0.00 |
| ATOM | 4381 | HD1  | PHE | X | 291 | 52.096 | 40.569 | 47.728 | 0.00 | 0.00 |
| ATOM | 4382 | CE1  | PHE | X | 291 | 51.346 | 38.740 | 46.756 | 0.00 | 0.00 |
| ATOM | 4383 | HE1  | PHE | X | 291 | 50.341 | 39.075 | 46.545 | 0.00 | 0.00 |
| ATOM | 4384 | CZ   | PHE | X | 291 | 51.554 | 37.330 | 46.498 | 0.00 | 0.00 |
| ATOM | 4385 | HZ   | PHE | X | 291 | 50.798 | 36.703 | 46.049 | 0.00 | 0.00 |
| ATOM | 4386 | CE2  | PHE | X | 291 | 52.768 | 36.747 | 46.867 | 0.00 | 0.00 |
| ATOM | 4387 | HE2  | PHE | X | 291 | 53.067 | 35.732 | 46.650 | 0.00 | 0.00 |
| ATOM | 4388 | CD2  | PHE | X | 291 | 53.745 | 37.516 | 47.522 | 0.00 | 0.00 |
| ATOM | 4389 | HD2  | PHE | X | 291 | 54.635 | 36.992 | 47.840 | 0.00 | 0.00 |
| ATOM | 4390 | C    | PHE | X | 291 | 54.109 | 42.081 | 48.829 | 0.00 | 0.00 |
| ATOM | 4391 | O    | PHE | X | 291 | 53.255 | 41.720 | 49.619 | 0.00 | 0.00 |
| ATOM | 4392 | N    | ARG | X | 292 | 54.453 | 43.413 | 48.823 | 0.00 | 0.00 |
| ATOM | 4393 | H    | ARG | X | 292 | 55.066 | 43.716 | 48.079 | 0.00 | 0.00 |
| ATOM | 4394 | CA   | ARG | X | 292 | 53.958 | 44.470 | 49.755 | 0.00 | 0.00 |
| ATOM | 4395 | HA   | ARG | X | 292 | 52.960 | 44.088 | 49.972 | 0.00 | 0.00 |
| ATOM | 4396 | CB   | ARG | X | 292 | 54.891 | 44.614 | 50.968 | 0.00 | 0.00 |
| ATOM | 4397 | HB2  | ARG | X | 292 | 55.103 | 43.560 | 51.147 | 0.00 | 0.00 |
| ATOM | 4398 | HB3  | ARG | X | 292 | 55.841 | 45.104 | 50.755 | 0.00 | 0.00 |
| ATOM | 4399 | CG   | ARG | X | 292 | 54.184 | 45.168 | 52.219 | 0.00 | 0.00 |
| ATOM | 4400 | HG2  | ARG | X | 292 | 55.011 | 45.384 | 52.896 | 0.00 | 0.00 |
| ATOM | 4401 | HG3  | ARG | X | 292 | 53.876 | 46.194 | 52.016 | 0.00 | 0.00 |
| ATOM | 4402 | CD   | ARG | X | 292 | 53.248 | 44.240 | 53.025 | 0.00 | 0.00 |
| ATOM | 4403 | HD2  | ARG | X | 292 | 52.631 | 43.718 | 52.293 | 0.00 | 0.00 |
| ATOM | 4404 | HD3  | ARG | X | 292 | 53.703 | 43.470 | 53.649 | 0.00 | 0.00 |
| ATOM | 4405 | NE   | ARG | X | 292 | 52.319 | 44.978 | 53.892 | 0.00 | 0.00 |
| ATOM | 4406 | HE   | ARG | X | 292 | 52.411 | 45.979 | 53.989 | 0.00 | 0.00 |
| ATOM | 4407 | CZ   | ARG | X | 292 | 51.463 | 44.462 | 54.780 | 0.00 | 0.00 |
| ATOM | 4408 | NH1  | ARG | X | 292 | 51.149 | 43.197 | 54.698 | 0.00 | 0.00 |
| ATOM | 4409 | HH11 | ARG | X | 292 | 51.482 | 42.511 | 54.035 | 0.00 | 0.00 |
| ATOM | 4410 | HH12 | ARG | X | 292 | 50.487 | 42.945 | 55.418 | 0.00 | 0.00 |
| ATOM | 4411 | NH2  | ARG | X | 292 | 50.874 | 45.200 | 55.723 | 0.00 | 0.00 |
| ATOM | 4412 | HH21 | ARG | X | 292 | 50.969 | 46.188 | 55.908 | 0.00 | 0.00 |
| ATOM | 4413 | HH22 | ARG | X | 292 | 50.356 | 44.741 | 56.459 | 0.00 | 0.00 |
| ATOM | 4414 | C    | ARG | X | 292 | 53.865 | 45.730 | 48.937 | 0.00 | 0.00 |
| ATOM | 4415 | O    | ARG | X | 292 | 54.795 | 46.096 | 48.131 | 0.00 | 0.00 |
| ATOM | 4416 | N    | PHE | X | 293 | 52.811 | 46.472 | 49.081 | 0.00 | 0.00 |
| ATOM | 4417 | H    | PHE | X | 293 | 52.082 | 46.211 | 49.730 | 0.00 | 0.00 |
| ATOM | 4418 | CA   | PHE | X | 293 | 52.584 | 47.693 | 48.265 | 0.00 | 0.00 |
| ATOM | 4419 | HA   | PHE | X | 293 | 53.508 | 48.026 | 47.793 | 0.00 | 0.00 |
| ATOM | 4420 | CB   | PHE | X | 293 | 51.651 | 47.384 | 47.094 | 0.00 | 0.00 |

|      |      |      |     |   |     |        |        |        |      |      |
|------|------|------|-----|---|-----|--------|--------|--------|------|------|
| ATOM | 4421 | HB2  | PHE | X | 293 | 50.669 | 47.386 | 47.567 | 0.00 | 0.00 |
| ATOM | 4422 | HB3  | PHE | X | 293 | 51.791 | 48.237 | 46.430 | 0.00 | 0.00 |
| ATOM | 4423 | CG   | PHE | X | 293 | 51.912 | 46.041 | 46.354 | 0.00 | 0.00 |
| ATOM | 4424 | CD1  | PHE | X | 293 | 53.129 | 45.869 | 45.649 | 0.00 | 0.00 |
| ATOM | 4425 | HD1  | PHE | X | 293 | 53.829 | 46.659 | 45.421 | 0.00 | 0.00 |
| ATOM | 4426 | CE1  | PHE | X | 293 | 53.426 | 44.563 | 45.342 | 0.00 | 0.00 |
| ATOM | 4427 | HE1  | PHE | X | 293 | 54.377 | 44.541 | 44.830 | 0.00 | 0.00 |
| ATOM | 4428 | CZ   | PHE | X | 293 | 52.638 | 43.430 | 45.701 | 0.00 | 0.00 |
| ATOM | 4429 | HZ   | PHE | X | 293 | 52.904 | 42.384 | 45.654 | 0.00 | 0.00 |
| ATOM | 4430 | CE2  | PHE | X | 293 | 51.432 | 43.688 | 46.329 | 0.00 | 0.00 |
| ATOM | 4431 | HE2  | PHE | X | 293 | 50.759 | 42.855 | 46.470 | 0.00 | 0.00 |
| ATOM | 4432 | CD2  | PHE | X | 293 | 51.005 | 45.006 | 46.623 | 0.00 | 0.00 |
| ATOM | 4433 | HD2  | PHE | X | 293 | 50.112 | 45.041 | 47.229 | 0.00 | 0.00 |
| ATOM | 4434 | C    | PHE | X | 293 | 52.163 | 48.919 | 49.045 | 0.00 | 0.00 |
| ATOM | 4435 | O    | PHE | X | 293 | 52.075 | 48.952 | 50.283 | 0.00 | 0.00 |
| ATOM | 4436 | N    | SER | X | 294 | 51.786 | 49.932 | 48.314 | 0.00 | 0.00 |
| ATOM | 4437 | H    | SER | X | 294 | 51.678 | 49.859 | 47.313 | 0.00 | 0.00 |
| ATOM | 4438 | CA   | SER | X | 294 | 51.540 | 51.320 | 48.766 | 0.00 | 0.00 |
| ATOM | 4439 | HA   | SER | X | 294 | 52.062 | 51.480 | 49.709 | 0.00 | 0.00 |
| ATOM | 4440 | CB   | SER | X | 294 | 52.211 | 52.249 | 47.729 | 0.00 | 0.00 |
| ATOM | 4441 | HB2  | SER | X | 294 | 52.008 | 53.268 | 48.059 | 0.00 | 0.00 |
| ATOM | 4442 | HB3  | SER | X | 294 | 53.283 | 52.080 | 47.830 | 0.00 | 0.00 |
| ATOM | 4443 | OG   | SER | X | 294 | 51.937 | 52.111 | 46.360 | 0.00 | 0.00 |
| ATOM | 4444 | HG   | SER | X | 294 | 52.548 | 52.663 | 45.866 | 0.00 | 0.00 |
| ATOM | 4445 | C    | SER | X | 294 | 50.094 | 51.689 | 48.938 | 0.00 | 0.00 |
| ATOM | 4446 | O    | SER | X | 294 | 49.583 | 51.647 | 50.073 | 0.00 | 0.00 |
| ATOM | 4447 | N    | PHE | X | 295 | 49.444 | 52.171 | 47.867 | 0.00 | 0.00 |
| ATOM | 4448 | H    | PHE | X | 295 | 49.945 | 52.181 | 46.990 | 0.00 | 0.00 |
| ATOM | 4449 | CA   | PHE | X | 295 | 48.124 | 52.837 | 47.992 | 0.00 | 0.00 |
| ATOM | 4450 | HA   | PHE | X | 295 | 47.997 | 53.171 | 49.022 | 0.00 | 0.00 |
| ATOM | 4451 | CB   | PHE | X | 295 | 48.096 | 54.158 | 47.185 | 0.00 | 0.00 |
| ATOM | 4452 | HB2  | PHE | X | 295 | 48.628 | 53.983 | 46.250 | 0.00 | 0.00 |
| ATOM | 4453 | HB3  | PHE | X | 295 | 47.076 | 54.518 | 47.053 | 0.00 | 0.00 |
| ATOM | 4454 | CG   | PHE | X | 295 | 48.686 | 55.393 | 47.831 | 0.00 | 0.00 |
| ATOM | 4455 | CD1  | PHE | X | 295 | 48.072 | 55.928 | 48.958 | 0.00 | 0.00 |
| ATOM | 4456 | HD1  | PHE | X | 295 | 47.211 | 55.436 | 49.386 | 0.00 | 0.00 |
| ATOM | 4457 | CE1  | PHE | X | 295 | 48.511 | 57.055 | 49.579 | 0.00 | 0.00 |
| ATOM | 4458 | HE1  | PHE | X | 295 | 48.029 | 57.338 | 50.503 | 0.00 | 0.00 |
| ATOM | 4459 | CZ   | PHE | X | 295 | 49.776 | 57.526 | 49.170 | 0.00 | 0.00 |
| ATOM | 4460 | HZ   | PHE | X | 295 | 50.327 | 58.301 | 49.682 | 0.00 | 0.00 |
| ATOM | 4461 | CE2  | PHE | X | 295 | 50.480 | 57.035 | 48.027 | 0.00 | 0.00 |
| ATOM | 4462 | HE2  | PHE | X | 295 | 51.449 | 57.409 | 47.730 | 0.00 | 0.00 |
| ATOM | 4463 | CD2  | PHE | X | 295 | 49.828 | 55.940 | 47.305 | 0.00 | 0.00 |
| ATOM | 4464 | HD2  | PHE | X | 295 | 50.318 | 55.358 | 46.538 | 0.00 | 0.00 |
| ATOM | 4465 | C    | PHE | X | 295 | 47.123 | 51.720 | 47.504 | 0.00 | 0.00 |
| ATOM | 4466 | O    | PHE | X | 295 | 46.971 | 51.447 | 46.340 | 0.00 | 0.00 |
| ATOM | 4467 | N    | VAL | X | 296 | 46.453 | 51.135 | 48.530 | 0.00 | 0.00 |
| ATOM | 4468 | H    | VAL | X | 296 | 46.624 | 51.521 | 49.448 | 0.00 | 0.00 |
| ATOM | 4469 | CA   | VAL | X | 296 | 45.690 | 49.905 | 48.460 | 0.00 | 0.00 |
| ATOM | 4470 | HA   | VAL | X | 296 | 45.609 | 49.555 | 47.431 | 0.00 | 0.00 |
| ATOM | 4471 | CB   | VAL | X | 296 | 46.440 | 48.651 | 49.169 | 0.00 | 0.00 |
| ATOM | 4472 | HB   | VAL | X | 296 | 45.790 | 47.787 | 49.310 | 0.00 | 0.00 |
| ATOM | 4473 | CG1  | VAL | X | 296 | 47.732 | 48.299 | 48.426 | 0.00 | 0.00 |
| ATOM | 4474 | HG11 | VAL | X | 296 | 48.491 | 47.699 | 48.929 | 0.00 | 0.00 |
| ATOM | 4475 | HG12 | VAL | X | 296 | 47.504 | 47.735 | 47.522 | 0.00 | 0.00 |
| ATOM | 4476 | HG13 | VAL | X | 296 | 48.215 | 49.249 | 48.196 | 0.00 | 0.00 |
| ATOM | 4477 | CG2  | VAL | X | 296 | 46.876 | 48.926 | 50.627 | 0.00 | 0.00 |
| ATOM | 4478 | HG21 | VAL | X | 296 | 47.572 | 48.127 | 50.886 | 0.00 | 0.00 |
| ATOM | 4479 | HG22 | VAL | X | 296 | 45.986 | 48.946 | 51.256 | 0.00 | 0.00 |
| ATOM | 4480 | HG23 | VAL | X | 296 | 47.287 | 49.934 | 50.679 | 0.00 | 0.00 |
| ATOM | 4481 | C    | VAL | X | 296 | 44.313 | 50.152 | 49.115 | 0.00 | 0.00 |
| ATOM | 4482 | O    | VAL | X | 296 | 44.204 | 51.061 | 49.876 | 0.00 | 0.00 |
| ATOM | 4483 | N    | PRO | X | 297 | 43.266 | 49.360 | 48.828 | 0.00 | 0.00 |
| ATOM | 4484 | CD   | PRO | X | 297 | 43.144 | 48.333 | 47.772 | 0.00 | 0.00 |
| ATOM | 4485 | HD2  | PRO | X | 297 | 43.592 | 47.394 | 48.095 | 0.00 | 0.00 |
| ATOM | 4486 | HD3  | PRO | X | 297 | 43.490 | 48.706 | 46.808 | 0.00 | 0.00 |
| ATOM | 4487 | CG   | PRO | X | 297 | 41.641 | 48.178 | 47.577 | 0.00 | 0.00 |

|      |      |      |     |   |     |        |        |        |      |      |
|------|------|------|-----|---|-----|--------|--------|--------|------|------|
| ATOM | 4488 | HG2  | PRO | X | 297 | 41.363 | 47.141 | 47.385 | 0.00 | 0.00 |
| ATOM | 4489 | HG3  | PRO | X | 297 | 41.317 | 48.931 | 46.860 | 0.00 | 0.00 |
| ATOM | 4490 | CB   | PRO | X | 297 | 40.976 | 48.579 | 48.859 | 0.00 | 0.00 |
| ATOM | 4491 | HB2  | PRO | X | 297 | 40.983 | 47.765 | 49.584 | 0.00 | 0.00 |
| ATOM | 4492 | HB3  | PRO | X | 297 | 39.967 | 48.935 | 48.649 | 0.00 | 0.00 |
| ATOM | 4493 | CA   | PRO | X | 297 | 41.944 | 49.649 | 49.341 | 0.00 | 0.00 |
| ATOM | 4494 | HA   | PRO | X | 297 | 41.654 | 50.658 | 49.049 | 0.00 | 0.00 |
| ATOM | 4495 | C    | PRO | X | 297 | 41.943 | 49.644 | 50.845 | 0.00 | 0.00 |
| ATOM | 4496 | O    | PRO | X | 297 | 42.878 | 49.164 | 51.531 | 0.00 | 0.00 |
| ATOM | 4497 | N    | VAL | X | 298 | 40.962 | 50.311 | 51.472 | 0.00 | 0.00 |
| ATOM | 4498 | H    | VAL | X | 298 | 40.194 | 50.764 | 50.997 | 0.00 | 0.00 |
| ATOM | 4499 | CA   | VAL | X | 298 | 40.996 | 50.863 | 52.873 | 0.00 | 0.00 |
| ATOM | 4500 | HA   | VAL | X | 298 | 41.777 | 50.346 | 53.431 | 0.00 | 0.00 |
| ATOM | 4501 | CB   | VAL | X | 298 | 41.314 | 52.396 | 52.912 | 0.00 | 0.00 |
| ATOM | 4502 | HB   | VAL | X | 298 | 40.469 | 52.922 | 52.468 | 0.00 | 0.00 |
| ATOM | 4503 | CG1  | VAL | X | 298 | 41.519 | 52.850 | 54.390 | 0.00 | 0.00 |
| ATOM | 4504 | HG11 | VAL | X | 298 | 40.528 | 52.958 | 54.830 | 0.00 | 0.00 |
| ATOM | 4505 | HG12 | VAL | X | 298 | 42.084 | 52.167 | 55.024 | 0.00 | 0.00 |
| ATOM | 4506 | HG13 | VAL | X | 298 | 41.917 | 53.861 | 54.487 | 0.00 | 0.00 |
| ATOM | 4507 | CG2  | VAL | X | 298 | 42.667 | 52.610 | 52.091 | 0.00 | 0.00 |
| ATOM | 4508 | HG21 | VAL | X | 298 | 43.348 | 51.807 | 52.372 | 0.00 | 0.00 |
| ATOM | 4509 | HG22 | VAL | X | 298 | 43.178 | 53.571 | 52.143 | 0.00 | 0.00 |
| ATOM | 4510 | HG23 | VAL | X | 298 | 42.302 | 52.508 | 51.069 | 0.00 | 0.00 |
| ATOM | 4511 | C    | VAL | X | 298 | 39.705 | 50.615 | 53.658 | 0.00 | 0.00 |
| ATOM | 4512 | O    | VAL | X | 298 | 38.637 | 50.770 | 53.055 | 0.00 | 0.00 |
| ATOM | 4513 | N    | VAL | X | 299 | 39.830 | 50.228 | 54.921 | 0.00 | 0.00 |
| ATOM | 4514 | H    | VAL | X | 299 | 40.721 | 50.195 | 55.396 | 0.00 | 0.00 |
| ATOM | 4515 | CA   | VAL | X | 299 | 38.715 | 50.119 | 55.848 | 0.00 | 0.00 |
| ATOM | 4516 | HA   | VAL | X | 299 | 37.890 | 49.679 | 55.288 | 0.00 | 0.00 |
| ATOM | 4517 | CB   | VAL | X | 299 | 39.057 | 49.318 | 57.155 | 0.00 | 0.00 |
| ATOM | 4518 | HB   | VAL | X | 299 | 39.864 | 49.831 | 57.679 | 0.00 | 0.00 |
| ATOM | 4519 | CG1  | VAL | X | 299 | 37.871 | 49.308 | 58.121 | 0.00 | 0.00 |
| ATOM | 4520 | HG11 | VAL | X | 299 | 36.991 | 48.899 | 57.625 | 0.00 | 0.00 |
| ATOM | 4521 | HG12 | VAL | X | 299 | 38.108 | 48.778 | 59.044 | 0.00 | 0.00 |
| ATOM | 4522 | HG13 | VAL | X | 299 | 37.698 | 50.301 | 58.537 | 0.00 | 0.00 |
| ATOM | 4523 | CG2  | VAL | X | 299 | 39.518 | 47.890 | 56.955 | 0.00 | 0.00 |
| ATOM | 4524 | HG21 | VAL | X | 299 | 40.395 | 47.883 | 56.309 | 0.00 | 0.00 |
| ATOM | 4525 | HG22 | VAL | X | 299 | 38.742 | 47.354 | 56.408 | 0.00 | 0.00 |
| ATOM | 4526 | HG23 | VAL | X | 299 | 39.784 | 47.416 | 57.900 | 0.00 | 0.00 |
| ATOM | 4527 | C    | VAL | X | 299 | 38.267 | 51.591 | 56.125 | 0.00 | 0.00 |
| ATOM | 4528 | O    | VAL | X | 299 | 38.855 | 52.263 | 56.928 | 0.00 | 0.00 |
| ATOM | 4529 | N    | ASP | X | 300 | 37.260 | 52.102 | 55.420 | 0.00 | 0.00 |
| ATOM | 4530 | H    | ASP | X | 300 | 36.700 | 51.381 | 54.989 | 0.00 | 0.00 |
| ATOM | 4531 | CA   | ASP | X | 300 | 36.832 | 53.490 | 55.488 | 0.00 | 0.00 |
| ATOM | 4532 | HA   | ASP | X | 300 | 37.576 | 54.161 | 55.916 | 0.00 | 0.00 |
| ATOM | 4533 | CB   | ASP | X | 300 | 36.519 | 53.854 | 54.010 | 0.00 | 0.00 |
| ATOM | 4534 | HB2  | ASP | X | 300 | 36.461 | 54.942 | 53.986 | 0.00 | 0.00 |
| ATOM | 4535 | HB3  | ASP | X | 300 | 37.259 | 53.592 | 53.255 | 0.00 | 0.00 |
| ATOM | 4536 | CG   | ASP | X | 300 | 35.207 | 53.237 | 53.457 | 0.00 | 0.00 |
| ATOM | 4537 | OD1  | ASP | X | 300 | 34.349 | 53.898 | 52.848 | 0.00 | 0.00 |
| ATOM | 4538 | OD2  | ASP | X | 300 | 35.015 | 52.001 | 53.614 | 0.00 | 0.00 |
| ATOM | 4539 | C    | ASP | X | 300 | 35.572 | 53.671 | 56.379 | 0.00 | 0.00 |
| ATOM | 4540 | O    | ASP | X | 300 | 35.037 | 54.727 | 56.375 | 0.00 | 0.00 |
| ATOM | 4541 | N    | GLY | X | 301 | 35.003 | 52.580 | 56.931 | 0.00 | 0.00 |
| ATOM | 4542 | H    | GLY | X | 301 | 35.454 | 51.712 | 56.678 | 0.00 | 0.00 |
| ATOM | 4543 | CA   | GLY | X | 301 | 33.746 | 52.566 | 57.632 | 0.00 | 0.00 |
| ATOM | 4544 | HA2  | GLY | X | 301 | 33.612 | 51.584 | 58.086 | 0.00 | 0.00 |
| ATOM | 4545 | HA3  | GLY | X | 301 | 33.740 | 53.346 | 58.393 | 0.00 | 0.00 |
| ATOM | 4546 | C    | GLY | X | 301 | 32.418 | 52.696 | 56.958 | 0.00 | 0.00 |
| ATOM | 4547 | O    | GLY | X | 301 | 31.371 | 53.049 | 57.528 | 0.00 | 0.00 |
| ATOM | 4548 | N    | ASP | X | 302 | 32.482 | 52.456 | 55.672 | 0.00 | 0.00 |
| ATOM | 4549 | H    | ASP | X | 302 | 33.413 | 52.292 | 55.316 | 0.00 | 0.00 |
| ATOM | 4550 | CA   | ASP | X | 302 | 31.204 | 52.363 | 54.886 | 0.00 | 0.00 |
| ATOM | 4551 | HA   | ASP | X | 302 | 30.366 | 52.044 | 55.506 | 0.00 | 0.00 |
| ATOM | 4552 | CB   | ASP | X | 302 | 30.859 | 53.753 | 54.418 | 0.00 | 0.00 |
| ATOM | 4553 | HB2  | ASP | X | 302 | 30.791 | 54.534 | 55.175 | 0.00 | 0.00 |
| ATOM | 4554 | HB3  | ASP | X | 302 | 31.651 | 54.137 | 53.775 | 0.00 | 0.00 |



|      |      |      |     |   |     |        |        |        |      |      |
|------|------|------|-----|---|-----|--------|--------|--------|------|------|
| ATOM | 4555 | CG   | ASP | X | 302 | 29.502 | 53.822 | 53.665 | 0.00 | 0.00 |
| ATOM | 4556 | OD1  | ASP | X | 302 | 29.599 | 54.050 | 52.440 | 0.00 | 0.00 |
| ATOM | 4557 | OD2  | ASP | X | 302 | 28.391 | 53.727 | 54.224 | 0.00 | 0.00 |
| ATOM | 4558 | C    | ASP | X | 302 | 31.266 | 51.383 | 53.671 | 0.00 | 0.00 |
| ATOM | 4559 | O    | ASP | X | 302 | 30.292 | 50.689 | 53.365 | 0.00 | 0.00 |
| ATOM | 4560 | N    | PHE | X | 303 | 32.352 | 51.329 | 52.955 | 0.00 | 0.00 |
| ATOM | 4561 | H    | PHE | X | 303 | 33.117 | 51.915 | 53.261 | 0.00 | 0.00 |
| ATOM | 4562 | CA   | PHE | X | 303 | 32.630 | 50.407 | 51.803 | 0.00 | 0.00 |
| ATOM | 4563 | HA   | PHE | X | 303 | 31.708 | 50.077 | 51.323 | 0.00 | 0.00 |
| ATOM | 4564 | CB   | PHE | X | 303 | 33.565 | 51.093 | 50.713 | 0.00 | 0.00 |
| ATOM | 4565 | HB2  | PHE | X | 303 | 33.117 | 52.065 | 50.506 | 0.00 | 0.00 |
| ATOM | 4566 | HB3  | PHE | X | 303 | 34.551 | 51.302 | 51.127 | 0.00 | 0.00 |
| ATOM | 4567 | CG   | PHE | X | 303 | 33.740 | 50.377 | 49.421 | 0.00 | 0.00 |
| ATOM | 4568 | CD1  | PHE | X | 303 | 34.465 | 49.171 | 49.294 | 0.00 | 0.00 |
| ATOM | 4569 | HD1  | PHE | X | 303 | 34.962 | 48.718 | 50.139 | 0.00 | 0.00 |
| ATOM | 4570 | CE1  | PHE | X | 303 | 34.383 | 48.433 | 48.109 | 0.00 | 0.00 |
| ATOM | 4571 | HE1  | PHE | X | 303 | 34.983 | 47.546 | 47.968 | 0.00 | 0.00 |
| ATOM | 4572 | CZ   | PHE | X | 303 | 33.758 | 48.971 | 46.958 | 0.00 | 0.00 |
| ATOM | 4573 | HZ   | PHE | X | 303 | 33.789 | 48.420 | 46.029 | 0.00 | 0.00 |
| ATOM | 4574 | CE2  | PHE | X | 303 | 33.077 | 50.236 | 47.012 | 0.00 | 0.00 |
| ATOM | 4575 | HE2  | PHE | X | 303 | 32.624 | 50.513 | 46.072 | 0.00 | 0.00 |
| ATOM | 4576 | CD2  | PHE | X | 303 | 33.061 | 50.859 | 48.249 | 0.00 | 0.00 |
| ATOM | 4577 | HD2  | PHE | X | 303 | 32.467 | 51.749 | 48.387 | 0.00 | 0.00 |
| ATOM | 4578 | C    | PHE | X | 303 | 33.263 | 49.083 | 52.291 | 0.00 | 0.00 |
| ATOM | 4579 | O    | PHE | X | 303 | 32.755 | 48.000 | 51.940 | 0.00 | 0.00 |
| ATOM | 4580 | N    | LEU | X | 304 | 34.184 | 49.231 | 53.281 | 0.00 | 0.00 |
| ATOM | 4581 | H    | LEU | X | 304 | 34.387 | 50.203 | 53.465 | 0.00 | 0.00 |
| ATOM | 4582 | CA   | LEU | X | 304 | 34.856 | 48.141 | 54.037 | 0.00 | 0.00 |
| ATOM | 4583 | HA   | LEU | X | 304 | 34.395 | 47.177 | 53.822 | 0.00 | 0.00 |
| ATOM | 4584 | CB   | LEU | X | 304 | 36.346 | 48.050 | 53.644 | 0.00 | 0.00 |
| ATOM | 4585 | HB2  | LEU | X | 304 | 36.844 | 49.016 | 53.564 | 0.00 | 0.00 |
| ATOM | 4586 | HB3  | LEU | X | 304 | 36.837 | 47.390 | 54.359 | 0.00 | 0.00 |
| ATOM | 4587 | CG   | LEU | X | 304 | 36.617 | 47.302 | 52.310 | 0.00 | 0.00 |
| ATOM | 4588 | HG   | LEU | X | 304 | 36.004 | 47.784 | 51.548 | 0.00 | 0.00 |
| ATOM | 4589 | CD1  | LEU | X | 304 | 38.029 | 47.560 | 51.906 | 0.00 | 0.00 |
| ATOM | 4590 | HD11 | LEU | X | 304 | 38.356 | 46.775 | 51.224 | 0.00 | 0.00 |
| ATOM | 4591 | HD12 | LEU | X | 304 | 38.743 | 47.542 | 52.730 | 0.00 | 0.00 |
| ATOM | 4592 | HD13 | LEU | X | 304 | 38.100 | 48.439 | 51.266 | 0.00 | 0.00 |
| ATOM | 4593 | CD2  | LEU | X | 304 | 36.387 | 45.752 | 52.219 | 0.00 | 0.00 |
| ATOM | 4594 | HD21 | LEU | X | 304 | 35.378 | 45.534 | 52.571 | 0.00 | 0.00 |
| ATOM | 4595 | HD22 | LEU | X | 304 | 36.419 | 45.436 | 51.177 | 0.00 | 0.00 |
| ATOM | 4596 | HD23 | LEU | X | 304 | 37.046 | 45.269 | 52.940 | 0.00 | 0.00 |
| ATOM | 4597 | C    | LEU | X | 304 | 34.759 | 48.470 | 55.578 | 0.00 | 0.00 |
| ATOM | 4598 | O    | LEU | X | 304 | 35.326 | 49.517 | 56.026 | 0.00 | 0.00 |
| ATOM | 4599 | N    | SER | X | 305 | 33.991 | 47.616 | 56.374 | 0.00 | 0.00 |
| ATOM | 4600 | H    | SER | X | 305 | 33.679 | 46.778 | 55.905 | 0.00 | 0.00 |
| ATOM | 4601 | CA   | SER | X | 305 | 33.720 | 47.821 | 57.762 | 0.00 | 0.00 |
| ATOM | 4602 | HA   | SER | X | 305 | 33.643 | 48.868 | 58.057 | 0.00 | 0.00 |
| ATOM | 4603 | CB   | SER | X | 305 | 32.369 | 47.165 | 58.183 | 0.00 | 0.00 |
| ATOM | 4604 | HB2  | SER | X | 305 | 32.550 | 46.090 | 58.180 | 0.00 | 0.00 |
| ATOM | 4605 | HB3  | SER | X | 305 | 32.187 | 47.482 | 59.210 | 0.00 | 0.00 |
| ATOM | 4606 | OG   | SER | X | 305 | 31.229 | 47.480 | 57.335 | 0.00 | 0.00 |
| ATOM | 4607 | HG   | SER | X | 305 | 30.472 | 47.573 | 57.917 | 0.00 | 0.00 |
| ATOM | 4608 | C    | SER | X | 305 | 34.873 | 47.224 | 58.631 | 0.00 | 0.00 |
| ATOM | 4609 | O    | SER | X | 305 | 34.988 | 47.603 | 59.858 | 0.00 | 0.00 |
| ATOM | 4610 | N    | ASP | X | 306 | 35.727 | 46.388 | 58.068 | 0.00 | 0.00 |
| ATOM | 4611 | H    | ASP | X | 306 | 35.669 | 46.251 | 57.069 | 0.00 | 0.00 |
| ATOM | 4612 | CA   | ASP | X | 306 | 36.889 | 45.720 | 58.643 | 0.00 | 0.00 |
| ATOM | 4613 | HA   | ASP | X | 306 | 37.631 | 46.333 | 59.154 | 0.00 | 0.00 |
| ATOM | 4614 | CB   | ASP | X | 306 | 36.366 | 44.648 | 59.631 | 0.00 | 0.00 |
| ATOM | 4615 | HB2  | ASP | X | 306 | 35.499 | 45.130 | 60.085 | 0.00 | 0.00 |
| ATOM | 4616 | HB3  | ASP | X | 306 | 35.992 | 43.829 | 59.017 | 0.00 | 0.00 |
| ATOM | 4617 | CG   | ASP | X | 306 | 37.361 | 44.206 | 60.741 | 0.00 | 0.00 |
| ATOM | 4618 | OD1  | ASP | X | 306 | 38.457 | 43.783 | 60.438 | 0.00 | 0.00 |
| ATOM | 4619 | OD2  | ASP | X | 306 | 36.966 | 44.094 | 61.880 | 0.00 | 0.00 |
| ATOM | 4620 | C    | ASP | X | 306 | 37.688 | 45.043 | 57.534 | 0.00 | 0.00 |
| ATOM | 4621 | O    | ASP | X | 306 | 37.249 | 45.134 | 56.367 | 0.00 | 0.00 |

|      |      |      |     |   |     |        |        |        |      |      |
|------|------|------|-----|---|-----|--------|--------|--------|------|------|
| ATOM | 4622 | N    | THR | X | 307 | 38.858 | 44.423 | 57.840 | 0.00 | 0.00 |
| ATOM | 4623 | H    | THR | X | 307 | 39.211 | 44.207 | 58.761 | 0.00 | 0.00 |
| ATOM | 4624 | CA   | THR | X | 307 | 39.685 | 43.839 | 56.763 | 0.00 | 0.00 |
| ATOM | 4625 | HA   | THR | X | 307 | 39.760 | 44.564 | 55.953 | 0.00 | 0.00 |
| ATOM | 4626 | CB   | THR | X | 307 | 41.031 | 43.525 | 57.216 | 0.00 | 0.00 |
| ATOM | 4627 | HB   | THR | X | 307 | 41.646 | 42.962 | 56.514 | 0.00 | 0.00 |
| ATOM | 4628 | CG2  | THR | X | 307 | 41.831 | 44.862 | 57.449 | 0.00 | 0.00 |
| ATOM | 4629 | HG21 | THR | X | 307 | 41.262 | 45.493 | 58.132 | 0.00 | 0.00 |
| ATOM | 4630 | HG22 | THR | X | 307 | 41.827 | 45.452 | 56.532 | 0.00 | 0.00 |
| ATOM | 4631 | HG23 | THR | X | 307 | 42.836 | 44.575 | 57.757 | 0.00 | 0.00 |
| ATOM | 4632 | OG1  | THR | X | 307 | 41.065 | 42.733 | 58.388 | 0.00 | 0.00 |
| ATOM | 4633 | HG1  | THR | X | 307 | 41.970 | 42.833 | 58.691 | 0.00 | 0.00 |
| ATOM | 4634 | C    | THR | X | 307 | 38.925 | 42.648 | 56.125 | 0.00 | 0.00 |
| ATOM | 4635 | O    | THR | X | 307 | 38.322 | 41.915 | 56.873 | 0.00 | 0.00 |
| ATOM | 4636 | N    | PRO | X | 308 | 39.171 | 42.304 | 54.818 | 0.00 | 0.00 |
| ATOM | 4637 | CD   | PRO | X | 308 | 39.834 | 43.058 | 53.862 | 0.00 | 0.00 |
| ATOM | 4638 | HD2  | PRO | X | 308 | 40.908 | 43.103 | 54.043 | 0.00 | 0.00 |
| ATOM | 4639 | HD3  | PRO | X | 308 | 39.607 | 44.122 | 53.938 | 0.00 | 0.00 |
| ATOM | 4640 | CG   | PRO | X | 308 | 39.374 | 42.589 | 52.543 | 0.00 | 0.00 |
| ATOM | 4641 | HG2  | PRO | X | 308 | 40.193 | 42.692 | 51.831 | 0.00 | 0.00 |
| ATOM | 4642 | HG3  | PRO | X | 308 | 38.508 | 43.188 | 52.260 | 0.00 | 0.00 |
| ATOM | 4643 | CB   | PRO | X | 308 | 38.989 | 41.186 | 52.809 | 0.00 | 0.00 |
| ATOM | 4644 | HB2  | PRO | X | 308 | 39.946 | 40.666 | 52.856 | 0.00 | 0.00 |
| ATOM | 4645 | HB3  | PRO | X | 308 | 38.255 | 40.717 | 52.154 | 0.00 | 0.00 |
| ATOM | 4646 | CA   | PRO | X | 308 | 38.402 | 41.287 | 54.186 | 0.00 | 0.00 |
| ATOM | 4647 | HA   | PRO | X | 308 | 37.358 | 41.595 | 54.132 | 0.00 | 0.00 |
| ATOM | 4648 | C    | PRO | X | 308 | 38.388 | 39.872 | 54.757 | 0.00 | 0.00 |
| ATOM | 4649 | O    | PRO | X | 308 | 37.343 | 39.192 | 54.640 | 0.00 | 0.00 |
| ATOM | 4650 | N    | GLU | X | 309 | 39.464 | 39.442 | 55.509 | 0.00 | 0.00 |
| ATOM | 4651 | H    | GLU | X | 309 | 40.327 | 39.953 | 55.392 | 0.00 | 0.00 |
| ATOM | 4652 | CA   | GLU | X | 309 | 39.452 | 38.205 | 56.323 | 0.00 | 0.00 |
| ATOM | 4653 | HA   | GLU | X | 309 | 39.219 | 37.373 | 55.659 | 0.00 | 0.00 |
| ATOM | 4654 | CB   | GLU | X | 309 | 40.873 | 37.945 | 56.872 | 0.00 | 0.00 |
| ATOM | 4655 | HB2  | GLU | X | 309 | 40.863 | 36.957 | 57.332 | 0.00 | 0.00 |
| ATOM | 4656 | HB3  | GLU | X | 309 | 41.641 | 37.904 | 56.100 | 0.00 | 0.00 |
| ATOM | 4657 | CG   | GLU | X | 309 | 41.293 | 38.939 | 57.962 | 0.00 | 0.00 |
| ATOM | 4658 | HG2  | GLU | X | 309 | 41.521 | 39.877 | 57.455 | 0.00 | 0.00 |
| ATOM | 4659 | HG3  | GLU | X | 309 | 40.502 | 39.212 | 58.661 | 0.00 | 0.00 |
| ATOM | 4660 | CD   | GLU | X | 309 | 42.519 | 38.442 | 58.677 | 0.00 | 0.00 |
| ATOM | 4661 | OE1  | GLU | X | 309 | 43.622 | 38.635 | 58.075 | 0.00 | 0.00 |
| ATOM | 4662 | OE2  | GLU | X | 309 | 42.462 | 37.799 | 59.713 | 0.00 | 0.00 |
| ATOM | 4663 | C    | GLU | X | 309 | 38.466 | 38.182 | 57.446 | 0.00 | 0.00 |
| ATOM | 4664 | O    | GLU | X | 309 | 38.010 | 37.091 | 57.814 | 0.00 | 0.00 |
| ATOM | 4665 | N    | ALA | X | 310 | 38.181 | 39.400 | 58.047 | 0.00 | 0.00 |
| ATOM | 4666 | H    | ALA | X | 310 | 38.483 | 40.229 | 57.556 | 0.00 | 0.00 |
| ATOM | 4667 | CA   | ALA | X | 310 | 37.171 | 39.556 | 59.013 | 0.00 | 0.00 |
| ATOM | 4668 | HA   | ALA | X | 310 | 37.289 | 38.807 | 59.796 | 0.00 | 0.00 |
| ATOM | 4669 | CB   | ALA | X | 310 | 37.427 | 40.950 | 59.673 | 0.00 | 0.00 |
| ATOM | 4670 | HB1  | ALA | X | 310 | 37.285 | 41.771 | 58.970 | 0.00 | 0.00 |
| ATOM | 4671 | HB2  | ALA | X | 310 | 38.407 | 41.034 | 60.141 | 0.00 | 0.00 |
| ATOM | 4672 | HB3  | ALA | X | 310 | 36.638 | 41.046 | 60.419 | 0.00 | 0.00 |
| ATOM | 4673 | C    | ALA | X | 310 | 35.806 | 39.448 | 58.336 | 0.00 | 0.00 |
| ATOM | 4674 | O    | ALA | X | 310 | 34.898 | 38.931 | 58.937 | 0.00 | 0.00 |
| ATOM | 4675 | N    | LEU | X | 311 | 35.702 | 40.008 | 57.151 | 0.00 | 0.00 |
| ATOM | 4676 | H    | LEU | X | 311 | 36.560 | 40.292 | 56.701 | 0.00 | 0.00 |
| ATOM | 4677 | CA   | LEU | X | 311 | 34.428 | 40.217 | 56.435 | 0.00 | 0.00 |
| ATOM | 4678 | HA   | LEU | X | 311 | 33.764 | 40.462 | 57.264 | 0.00 | 0.00 |
| ATOM | 4679 | CB   | LEU | X | 311 | 34.474 | 41.345 | 55.373 | 0.00 | 0.00 |
| ATOM | 4680 | HB2  | LEU | X | 311 | 35.395 | 41.149 | 54.822 | 0.00 | 0.00 |
| ATOM | 4681 | HB3  | LEU | X | 311 | 33.641 | 41.309 | 54.671 | 0.00 | 0.00 |
| ATOM | 4682 | CG   | LEU | X | 311 | 34.747 | 42.692 | 55.961 | 0.00 | 0.00 |
| ATOM | 4683 | HG   | LEU | X | 311 | 35.716 | 42.599 | 56.452 | 0.00 | 0.00 |
| ATOM | 4684 | CD1  | LEU | X | 311 | 34.755 | 43.702 | 54.761 | 0.00 | 0.00 |
| ATOM | 4685 | HD11 | LEU | X | 311 | 35.124 | 44.679 | 55.070 | 0.00 | 0.00 |
| ATOM | 4686 | HD12 | LEU | X | 311 | 33.843 | 43.723 | 54.164 | 0.00 | 0.00 |
| ATOM | 4687 | HD13 | LEU | X | 311 | 35.454 | 43.343 | 54.005 | 0.00 | 0.00 |
| ATOM | 4688 | CD2  | LEU | X | 311 | 33.714 | 43.203 | 57.008 | 0.00 | 0.00 |

|      |      |      |     |   |     |        |        |        |      |      |
|------|------|------|-----|---|-----|--------|--------|--------|------|------|
| ATOM | 4689 | HD21 | LEU | X | 311 | 32.853 | 43.652 | 56.514 | 0.00 | 0.00 |
| ATOM | 4690 | HD22 | LEU | X | 311 | 33.530 | 42.480 | 57.802 | 0.00 | 0.00 |
| ATOM | 4691 | HD23 | LEU | X | 311 | 34.234 | 44.040 | 57.475 | 0.00 | 0.00 |
| ATOM | 4692 | C    | LEU | X | 311 | 33.872 | 38.959 | 55.664 | 0.00 | 0.00 |
| ATOM | 4693 | O    | LEU | X | 311 | 32.623 | 38.815 | 55.595 | 0.00 | 0.00 |
| ATOM | 4694 | N    | ILE | X | 312 | 34.752 | 38.087 | 55.200 | 0.00 | 0.00 |
| ATOM | 4695 | H    | ILE | X | 312 | 35.721 | 38.367 | 55.246 | 0.00 | 0.00 |
| ATOM | 4696 | CA   | ILE | X | 312 | 34.374 | 36.777 | 54.721 | 0.00 | 0.00 |
| ATOM | 4697 | HA   | ILE | X | 312 | 33.537 | 36.981 | 54.053 | 0.00 | 0.00 |
| ATOM | 4698 | CB   | ILE | X | 312 | 35.704 | 36.321 | 54.031 | 0.00 | 0.00 |
| ATOM | 4699 | HB   | ILE | X | 312 | 35.969 | 37.088 | 53.304 | 0.00 | 0.00 |
| ATOM | 4700 | CG2  | ILE | X | 312 | 36.847 | 36.025 | 55.000 | 0.00 | 0.00 |
| ATOM | 4701 | HG21 | ILE | X | 312 | 37.707 | 35.681 | 54.426 | 0.00 | 0.00 |
| ATOM | 4702 | HG22 | ILE | X | 312 | 36.684 | 35.151 | 55.630 | 0.00 | 0.00 |
| ATOM | 4703 | HG23 | ILE | X | 312 | 37.131 | 36.928 | 55.540 | 0.00 | 0.00 |
| ATOM | 4704 | CG1  | ILE | X | 312 | 35.565 | 34.999 | 53.195 | 0.00 | 0.00 |
| ATOM | 4705 | HG12 | ILE | X | 312 | 36.534 | 34.937 | 52.699 | 0.00 | 0.00 |
| ATOM | 4706 | HG13 | ILE | X | 312 | 35.588 | 34.140 | 53.865 | 0.00 | 0.00 |
| ATOM | 4707 | CD1  | ILE | X | 312 | 34.385 | 35.008 | 52.192 | 0.00 | 0.00 |
| ATOM | 4708 | HD11 | ILE | X | 312 | 33.391 | 34.889 | 52.622 | 0.00 | 0.00 |
| ATOM | 4709 | HD12 | ILE | X | 312 | 34.548 | 34.252 | 51.423 | 0.00 | 0.00 |
| ATOM | 4710 | HD13 | ILE | X | 312 | 34.454 | 35.913 | 51.589 | 0.00 | 0.00 |
| ATOM | 4711 | C    | ILE | X | 312 | 33.860 | 35.881 | 55.883 | 0.00 | 0.00 |
| ATOM | 4712 | O    | ILE | X | 312 | 33.080 | 34.926 | 55.614 | 0.00 | 0.00 |
| ATOM | 4713 | N    | ASN | X | 313 | 34.121 | 36.170 | 57.143 | 0.00 | 0.00 |
| ATOM | 4714 | H    | ASN | X | 313 | 34.773 | 36.927 | 57.294 | 0.00 | 0.00 |
| ATOM | 4715 | CA   | ASN | X | 313 | 33.614 | 35.484 | 58.373 | 0.00 | 0.00 |
| ATOM | 4716 | HA   | ASN | X | 313 | 33.330 | 34.446 | 58.202 | 0.00 | 0.00 |
| ATOM | 4717 | CB   | ASN | X | 313 | 34.756 | 35.340 | 59.340 | 0.00 | 0.00 |
| ATOM | 4718 | HB2  | ASN | X | 313 | 35.425 | 36.195 | 59.434 | 0.00 | 0.00 |
| ATOM | 4719 | HB3  | ASN | X | 313 | 34.319 | 35.133 | 60.317 | 0.00 | 0.00 |
| ATOM | 4720 | CG   | ASN | X | 313 | 35.646 | 34.170 | 59.012 | 0.00 | 0.00 |
| ATOM | 4721 | OD1  | ASN | X | 313 | 35.388 | 33.031 | 59.320 | 0.00 | 0.00 |
| ATOM | 4722 | ND2  | ASN | X | 313 | 36.725 | 34.380 | 58.279 | 0.00 | 0.00 |
| ATOM | 4723 | HD21 | ASN | X | 313 | 37.293 | 33.586 | 58.016 | 0.00 | 0.00 |
| ATOM | 4724 | HD22 | ASN | X | 313 | 37.002 | 35.315 | 58.016 | 0.00 | 0.00 |
| ATOM | 4725 | C    | ASN | X | 313 | 32.456 | 36.317 | 58.993 | 0.00 | 0.00 |
| ATOM | 4726 | O    | ASN | X | 313 | 31.665 | 35.783 | 59.775 | 0.00 | 0.00 |
| ATOM | 4727 | N    | ALA | X | 314 | 32.360 | 37.608 | 58.589 | 0.00 | 0.00 |
| ATOM | 4728 | H    | ALA | X | 314 | 33.056 | 38.080 | 58.029 | 0.00 | 0.00 |
| ATOM | 4729 | CA   | ALA | X | 314 | 31.193 | 38.424 | 59.096 | 0.00 | 0.00 |
| ATOM | 4730 | HA   | ALA | X | 314 | 30.928 | 38.179 | 60.124 | 0.00 | 0.00 |
| ATOM | 4731 | CB   | ALA | X | 314 | 31.557 | 39.892 | 59.034 | 0.00 | 0.00 |
| ATOM | 4732 | HB1  | ALA | X | 314 | 31.582 | 40.191 | 57.986 | 0.00 | 0.00 |
| ATOM | 4733 | HB2  | ALA | X | 314 | 32.503 | 40.061 | 59.548 | 0.00 | 0.00 |
| ATOM | 4734 | HB3  | ALA | X | 314 | 30.847 | 40.577 | 59.497 | 0.00 | 0.00 |
| ATOM | 4735 | C    | ALA | X | 314 | 29.867 | 38.298 | 58.352 | 0.00 | 0.00 |
| ATOM | 4736 | O    | ALA | X | 314 | 28.796 | 38.541 | 58.939 | 0.00 | 0.00 |
| ATOM | 4737 | N    | GLY | X | 315 | 29.946 | 37.748 | 57.181 | 0.00 | 0.00 |
| ATOM | 4738 | H    | GLY | X | 315 | 30.841 | 37.664 | 56.720 | 0.00 | 0.00 |
| ATOM | 4739 | CA   | GLY | X | 315 | 28.723 | 37.575 | 56.267 | 0.00 | 0.00 |
| ATOM | 4740 | HA2  | GLY | X | 315 | 27.924 | 38.247 | 56.580 | 0.00 | 0.00 |
| ATOM | 4741 | HA3  | GLY | X | 315 | 28.894 | 37.964 | 55.263 | 0.00 | 0.00 |
| ATOM | 4742 | C    | GLY | X | 315 | 28.272 | 36.031 | 56.149 | 0.00 | 0.00 |
| ATOM | 4743 | O    | GLY | X | 315 | 28.645 | 35.230 | 56.991 | 0.00 | 0.00 |
| ATOM | 4744 | N    | ASP | X | 316 | 27.429 | 35.736 | 55.147 | 0.00 | 0.00 |
| ATOM | 4745 | H    | ASP | X | 316 | 27.161 | 36.535 | 54.591 | 0.00 | 0.00 |
| ATOM | 4746 | CA   | ASP | X | 316 | 27.012 | 34.399 | 54.716 | 0.00 | 0.00 |
| ATOM | 4747 | HA   | ASP | X | 316 | 27.757 | 33.665 | 55.022 | 0.00 | 0.00 |
| ATOM | 4748 | CB   | ASP | X | 316 | 25.723 | 34.158 | 55.502 | 0.00 | 0.00 |
| ATOM | 4749 | HB2  | ASP | X | 316 | 25.911 | 34.204 | 56.575 | 0.00 | 0.00 |
| ATOM | 4750 | HB3  | ASP | X | 316 | 24.937 | 34.908 | 55.412 | 0.00 | 0.00 |
| ATOM | 4751 | CG   | ASP | X | 316 | 25.153 | 32.824 | 55.113 | 0.00 | 0.00 |
| ATOM | 4752 | OD1  | ASP | X | 316 | 23.942 | 32.620 | 55.200 | 0.00 | 0.00 |
| ATOM | 4753 | OD2  | ASP | X | 316 | 25.963 | 31.893 | 54.805 | 0.00 | 0.00 |
| ATOM | 4754 | C    | ASP | X | 316 | 26.783 | 34.385 | 53.191 | 0.00 | 0.00 |
| ATOM | 4755 | O    | ASP | X | 316 | 26.351 | 35.386 | 52.594 | 0.00 | 0.00 |

|      |      |      |     |   |     |        |        |        |      |      |
|------|------|------|-----|---|-----|--------|--------|--------|------|------|
| ATOM | 4756 | N    | PHE | X | 317 | 27.100 | 33.239 | 52.546 | 0.00 | 0.00 |
| ATOM | 4757 | H    | PHE | X | 317 | 27.095 | 32.366 | 53.055 | 0.00 | 0.00 |
| ATOM | 4758 | CA   | PHE | X | 317 | 27.502 | 33.172 | 51.140 | 0.00 | 0.00 |
| ATOM | 4759 | HA   | PHE | X | 317 | 27.203 | 34.140 | 50.738 | 0.00 | 0.00 |
| ATOM | 4760 | CB   | PHE | X | 317 | 29.057 | 33.260 | 51.109 | 0.00 | 0.00 |
| ATOM | 4761 | HB2  | PHE | X | 317 | 29.442 | 32.340 | 51.549 | 0.00 | 0.00 |
| ATOM | 4762 | HB3  | PHE | X | 317 | 29.200 | 33.211 | 50.030 | 0.00 | 0.00 |
| ATOM | 4763 | CG   | PHE | X | 317 | 29.694 | 34.507 | 51.693 | 0.00 | 0.00 |
| ATOM | 4764 | CD1  | PHE | X | 317 | 29.940 | 35.554 | 50.823 | 0.00 | 0.00 |
| ATOM | 4765 | HD1  | PHE | X | 317 | 29.861 | 35.471 | 49.749 | 0.00 | 0.00 |
| ATOM | 4766 | CE1  | PHE | X | 317 | 30.434 | 36.797 | 51.405 | 0.00 | 0.00 |
| ATOM | 4767 | HE1  | PHE | X | 317 | 30.742 | 37.556 | 50.702 | 0.00 | 0.00 |
| ATOM | 4768 | CZ   | PHE | X | 317 | 30.721 | 36.948 | 52.778 | 0.00 | 0.00 |
| ATOM | 4769 | HZ   | PHE | X | 317 | 31.091 | 37.903 | 53.121 | 0.00 | 0.00 |
| ATOM | 4770 | CE2  | PHE | X | 317 | 30.431 | 35.871 | 53.674 | 0.00 | 0.00 |
| ATOM | 4771 | HE2  | PHE | X | 317 | 30.450 | 35.929 | 54.752 | 0.00 | 0.00 |
| ATOM | 4772 | CD2  | PHE | X | 317 | 30.025 | 34.646 | 53.088 | 0.00 | 0.00 |
| ATOM | 4773 | HD2  | PHE | X | 317 | 29.827 | 33.785 | 53.709 | 0.00 | 0.00 |
| ATOM | 4774 | C    | PHE | X | 317 | 26.977 | 31.937 | 50.382 | 0.00 | 0.00 |
| ATOM | 4775 | O    | PHE | X | 317 | 27.480 | 31.482 | 49.347 | 0.00 | 0.00 |
| ATOM | 4776 | N    | HIE | X | 318 | 25.963 | 31.283 | 50.999 | 0.00 | 0.00 |
| ATOM | 4777 | H    | HIE | X | 318 | 25.581 | 31.602 | 51.878 | 0.00 | 0.00 |
| ATOM | 4778 | CA   | HIE | X | 318 | 25.101 | 30.319 | 50.325 | 0.00 | 0.00 |
| ATOM | 4779 | HA   | HIE | X | 318 | 25.573 | 29.337 | 50.312 | 0.00 | 0.00 |
| ATOM | 4780 | CB   | HIE | X | 318 | 23.772 | 30.227 | 51.094 | 0.00 | 0.00 |
| ATOM | 4781 | HB2  | HIE | X | 318 | 23.891 | 30.025 | 52.158 | 0.00 | 0.00 |
| ATOM | 4782 | HB3  | HIE | X | 318 | 23.242 | 31.137 | 50.811 | 0.00 | 0.00 |
| ATOM | 4783 | CG   | HIE | X | 318 | 22.981 | 29.010 | 50.651 | 0.00 | 0.00 |
| ATOM | 4784 | ND1  | HIE | X | 318 | 23.526 | 27.872 | 49.989 | 0.00 | 0.00 |
| ATOM | 4785 | CE1  | HIE | X | 318 | 22.439 | 27.092 | 49.652 | 0.00 | 0.00 |
| ATOM | 4786 | HE1  | HIE | X | 318 | 22.463 | 26.172 | 49.087 | 0.00 | 0.00 |
| ATOM | 4787 | NE2  | HIE | X | 318 | 21.353 | 27.701 | 50.079 | 0.00 | 0.00 |
| ATOM | 4788 | HE2  | HIE | X | 318 | 20.441 | 27.273 | 50.005 | 0.00 | 0.00 |
| ATOM | 4789 | CD2  | HIE | X | 318 | 21.635 | 28.930 | 50.693 | 0.00 | 0.00 |
| ATOM | 4790 | HD2  | HIE | X | 318 | 20.940 | 29.713 | 50.959 | 0.00 | 0.00 |
| ATOM | 4791 | C    | HIE | X | 318 | 24.880 | 30.649 | 48.841 | 0.00 | 0.00 |
| ATOM | 4792 | O    | HIE | X | 318 | 24.697 | 31.801 | 48.486 | 0.00 | 0.00 |
| ATOM | 4793 | N    | GLY | X | 319 | 24.802 | 29.642 | 47.951 | 0.00 | 0.00 |
| ATOM | 4794 | H    | GLY | X | 319 | 25.011 | 28.719 | 48.304 | 0.00 | 0.00 |
| ATOM | 4795 | CA   | GLY | X | 319 | 24.382 | 29.761 | 46.574 | 0.00 | 0.00 |
| ATOM | 4796 | HA2  | GLY | X | 319 | 24.560 | 28.766 | 46.165 | 0.00 | 0.00 |
| ATOM | 4797 | HA3  | GLY | X | 319 | 23.326 | 30.028 | 46.523 | 0.00 | 0.00 |
| ATOM | 4798 | C    | GLY | X | 319 | 25.198 | 30.702 | 45.641 | 0.00 | 0.00 |
| ATOM | 4799 | O    | GLY | X | 319 | 24.789 | 30.904 | 44.532 | 0.00 | 0.00 |
| ATOM | 4800 | N    | LEU | X | 320 | 26.320 | 31.230 | 46.084 | 0.00 | 0.00 |
| ATOM | 4801 | H    | LEU | X | 320 | 26.585 | 31.075 | 47.046 | 0.00 | 0.00 |
| ATOM | 4802 | CA   | LEU | X | 320 | 27.206 | 31.842 | 45.130 | 0.00 | 0.00 |
| ATOM | 4803 | HA   | LEU | X | 320 | 26.684 | 32.368 | 44.331 | 0.00 | 0.00 |
| ATOM | 4804 | CB   | LEU | X | 320 | 28.046 | 32.884 | 45.928 | 0.00 | 0.00 |
| ATOM | 4805 | HB2  | LEU | X | 320 | 28.704 | 32.272 | 46.546 | 0.00 | 0.00 |
| ATOM | 4806 | HB3  | LEU | X | 320 | 28.719 | 33.400 | 45.243 | 0.00 | 0.00 |
| ATOM | 4807 | CG   | LEU | X | 320 | 27.256 | 33.907 | 46.761 | 0.00 | 0.00 |
| ATOM | 4808 | HG   | LEU | X | 320 | 26.683 | 33.318 | 47.477 | 0.00 | 0.00 |
| ATOM | 4809 | CD1  | LEU | X | 320 | 28.170 | 34.780 | 47.604 | 0.00 | 0.00 |
| ATOM | 4810 | HD11 | LEU | X | 320 | 27.504 | 35.179 | 48.370 | 0.00 | 0.00 |
| ATOM | 4811 | HD12 | LEU | X | 320 | 28.752 | 35.414 | 46.936 | 0.00 | 0.00 |
| ATOM | 4812 | HD13 | LEU | X | 320 | 28.966 | 34.185 | 48.052 | 0.00 | 0.00 |
| ATOM | 4813 | CD2  | LEU | X | 320 | 26.249 | 34.785 | 45.920 | 0.00 | 0.00 |
| ATOM | 4814 | HD21 | LEU | X | 320 | 25.493 | 34.114 | 45.511 | 0.00 | 0.00 |
| ATOM | 4815 | HD22 | LEU | X | 320 | 25.744 | 35.502 | 46.567 | 0.00 | 0.00 |
| ATOM | 4816 | HD23 | LEU | X | 320 | 26.688 | 35.308 | 45.070 | 0.00 | 0.00 |
| ATOM | 4817 | C    | LEU | X | 320 | 28.127 | 30.772 | 44.532 | 0.00 | 0.00 |
| ATOM | 4818 | O    | LEU | X | 320 | 28.307 | 29.705 | 45.103 | 0.00 | 0.00 |
| ATOM | 4819 | N    | GLN | X | 321 | 28.522 | 30.875 | 43.292 | 0.00 | 0.00 |
| ATOM | 4820 | H    | GLN | X | 321 | 28.452 | 31.797 | 42.885 | 0.00 | 0.00 |
| ATOM | 4821 | CA   | GLN | X | 321 | 29.402 | 29.902 | 42.640 | 0.00 | 0.00 |
| ATOM | 4822 | HA   | GLN | X | 321 | 29.528 | 29.029 | 43.281 | 0.00 | 0.00 |

|      |      |      |     |   |     |        |        |        |      |      |
|------|------|------|-----|---|-----|--------|--------|--------|------|------|
| ATOM | 4823 | CB   | GLN | X | 321 | 28.622 | 29.508 | 41.401 | 0.00 | 0.00 |
| ATOM | 4824 | HB2  | GLN | X | 321 | 28.283 | 30.429 | 40.926 | 0.00 | 0.00 |
| ATOM | 4825 | HB3  | GLN | X | 321 | 29.352 | 29.043 | 40.738 | 0.00 | 0.00 |
| ATOM | 4826 | CG   | GLN | X | 321 | 27.454 | 28.552 | 41.642 | 0.00 | 0.00 |
| ATOM | 4827 | HG2  | GLN | X | 321 | 27.917 | 27.586 | 41.842 | 0.00 | 0.00 |
| ATOM | 4828 | HG3  | GLN | X | 321 | 26.869 | 28.942 | 42.474 | 0.00 | 0.00 |
| ATOM | 4829 | CD   | GLN | X | 321 | 26.413 | 28.270 | 40.496 | 0.00 | 0.00 |
| ATOM | 4830 | OE1  | GLN | X | 321 | 26.574 | 28.458 | 39.314 | 0.00 | 0.00 |
| ATOM | 4831 | NE2  | GLN | X | 321 | 25.257 | 27.701 | 40.932 | 0.00 | 0.00 |
| ATOM | 4832 | HE21 | GLN | X | 321 | 24.595 | 27.643 | 40.171 | 0.00 | 0.00 |
| ATOM | 4833 | HE22 | GLN | X | 321 | 25.038 | 27.640 | 41.916 | 0.00 | 0.00 |
| ATOM | 4834 | C    | GLN | X | 321 | 30.691 | 30.561 | 42.246 | 0.00 | 0.00 |
| ATOM | 4835 | O    | GLN | X | 321 | 30.538 | 31.606 | 41.523 | 0.00 | 0.00 |
| ATOM | 4836 | N    | VAL | X | 322 | 31.827 | 30.039 | 42.657 | 0.00 | 0.00 |
| ATOM | 4837 | H    | VAL | X | 322 | 31.757 | 29.249 | 43.282 | 0.00 | 0.00 |
| ATOM | 4838 | CA   | VAL | X | 322 | 33.141 | 30.621 | 42.570 | 0.00 | 0.00 |
| ATOM | 4839 | HA   | VAL | X | 322 | 33.160 | 31.473 | 41.891 | 0.00 | 0.00 |
| ATOM | 4840 | CB   | VAL | X | 322 | 33.622 | 31.217 | 43.900 | 0.00 | 0.00 |
| ATOM | 4841 | HB   | VAL | X | 322 | 34.567 | 31.719 | 43.694 | 0.00 | 0.00 |
| ATOM | 4842 | CG1  | VAL | X | 322 | 32.689 | 32.307 | 44.520 | 0.00 | 0.00 |
| ATOM | 4843 | HG11 | VAL | X | 322 | 33.103 | 32.817 | 45.390 | 0.00 | 0.00 |
| ATOM | 4844 | HG12 | VAL | X | 322 | 32.413 | 33.084 | 43.806 | 0.00 | 0.00 |
| ATOM | 4845 | HG13 | VAL | X | 322 | 31.761 | 31.845 | 44.857 | 0.00 | 0.00 |
| ATOM | 4846 | CG2  | VAL | X | 322 | 33.976 | 30.301 | 45.041 | 0.00 | 0.00 |
| ATOM | 4847 | HG21 | VAL | X | 322 | 34.639 | 29.525 | 44.658 | 0.00 | 0.00 |
| ATOM | 4848 | HG22 | VAL | X | 322 | 33.101 | 29.804 | 45.459 | 0.00 | 0.00 |
| ATOM | 4849 | HG23 | VAL | X | 322 | 34.510 | 30.878 | 45.796 | 0.00 | 0.00 |
| ATOM | 4850 | C    | VAL | X | 322 | 34.207 | 29.597 | 42.147 | 0.00 | 0.00 |
| ATOM | 4851 | O    | VAL | X | 322 | 34.018 | 28.405 | 42.484 | 0.00 | 0.00 |
| ATOM | 4852 | N    | LEU | X | 323 | 35.264 | 29.965 | 41.410 | 0.00 | 0.00 |
| ATOM | 4853 | H    | LEU | X | 323 | 35.312 | 30.949 | 41.183 | 0.00 | 0.00 |
| ATOM | 4854 | CA   | LEU | X | 323 | 36.427 | 29.050 | 41.142 | 0.00 | 0.00 |
| ATOM | 4855 | HA   | LEU | X | 323 | 36.263 | 28.150 | 41.734 | 0.00 | 0.00 |
| ATOM | 4856 | CB   | LEU | X | 323 | 36.191 | 28.583 | 39.710 | 0.00 | 0.00 |
| ATOM | 4857 | HB2  | LEU | X | 323 | 35.222 | 28.083 | 39.717 | 0.00 | 0.00 |
| ATOM | 4858 | HB3  | LEU | X | 323 | 36.206 | 29.472 | 39.081 | 0.00 | 0.00 |
| ATOM | 4859 | CG   | LEU | X | 323 | 37.085 | 27.524 | 39.059 | 0.00 | 0.00 |
| ATOM | 4860 | HG   | LEU | X | 323 | 37.432 | 26.842 | 39.836 | 0.00 | 0.00 |
| ATOM | 4861 | CD1  | LEU | X | 323 | 36.272 | 26.759 | 37.943 | 0.00 | 0.00 |
| ATOM | 4862 | HD11 | LEU | X | 323 | 35.509 | 26.247 | 38.530 | 0.00 | 0.00 |
| ATOM | 4863 | HD12 | LEU | X | 323 | 36.916 | 26.147 | 37.311 | 0.00 | 0.00 |
| ATOM | 4864 | HD13 | LEU | X | 323 | 35.790 | 27.491 | 37.294 | 0.00 | 0.00 |
| ATOM | 4865 | CD2  | LEU | X | 323 | 38.339 | 28.199 | 38.485 | 0.00 | 0.00 |
| ATOM | 4866 | HD21 | LEU | X | 323 | 39.020 | 28.659 | 39.201 | 0.00 | 0.00 |
| ATOM | 4867 | HD22 | LEU | X | 323 | 38.858 | 27.375 | 37.994 | 0.00 | 0.00 |
| ATOM | 4868 | HD23 | LEU | X | 323 | 38.036 | 29.077 | 37.916 | 0.00 | 0.00 |
| ATOM | 4869 | C    | LEU | X | 323 | 37.771 | 29.685 | 41.541 | 0.00 | 0.00 |
| ATOM | 4870 | O    | LEU | X | 323 | 38.076 | 30.851 | 41.199 | 0.00 | 0.00 |
| ATOM | 4871 | N    | VAL | X | 324 | 38.565 | 29.089 | 42.424 | 0.00 | 0.00 |
| ATOM | 4872 | H    | VAL | X | 324 | 38.352 | 28.173 | 42.791 | 0.00 | 0.00 |
| ATOM | 4873 | CA   | VAL | X | 324 | 39.789 | 29.682 | 43.139 | 0.00 | 0.00 |
| ATOM | 4874 | HA   | VAL | X | 324 | 39.935 | 30.701 | 42.779 | 0.00 | 0.00 |
| ATOM | 4875 | CB   | VAL | X | 324 | 39.674 | 29.640 | 44.691 | 0.00 | 0.00 |
| ATOM | 4876 | HB   | VAL | X | 324 | 40.654 | 29.765 | 45.152 | 0.00 | 0.00 |
| ATOM | 4877 | CG1  | VAL | X | 324 | 38.656 | 30.687 | 45.152 | 0.00 | 0.00 |
| ATOM | 4878 | HG11 | VAL | X | 324 | 39.017 | 31.676 | 44.869 | 0.00 | 0.00 |
| ATOM | 4879 | HG12 | VAL | X | 324 | 37.686 | 30.536 | 44.680 | 0.00 | 0.00 |
| ATOM | 4880 | HG13 | VAL | X | 324 | 38.602 | 30.601 | 46.237 | 0.00 | 0.00 |
| ATOM | 4881 | CG2  | VAL | X | 324 | 39.224 | 28.270 | 45.275 | 0.00 | 0.00 |
| ATOM | 4882 | HG21 | VAL | X | 324 | 39.225 | 28.325 | 46.363 | 0.00 | 0.00 |
| ATOM | 4883 | HG22 | VAL | X | 324 | 39.854 | 27.511 | 44.811 | 0.00 | 0.00 |
| ATOM | 4884 | HG23 | VAL | X | 324 | 38.194 | 28.205 | 44.925 | 0.00 | 0.00 |
| ATOM | 4885 | C    | VAL | X | 324 | 41.081 | 28.984 | 42.639 | 0.00 | 0.00 |
| ATOM | 4886 | O    | VAL | X | 324 | 40.981 | 27.868 | 42.201 | 0.00 | 0.00 |
| ATOM | 4887 | N    | GLY | X | 325 | 42.333 | 29.472 | 42.913 | 0.00 | 0.00 |
| ATOM | 4888 | H    | GLY | X | 325 | 42.473 | 30.415 | 43.245 | 0.00 | 0.00 |
| ATOM | 4889 | CA   | GLY | X | 325 | 43.608 | 28.703 | 42.738 | 0.00 | 0.00 |

|      |      |      |     |   |     |        |        |        |      |      |
|------|------|------|-----|---|-----|--------|--------|--------|------|------|
| ATOM | 4890 | HA2  | GLY | X | 325 | 43.762 | 28.140 | 43.659 | 0.00 | 0.00 |
| ATOM | 4891 | HA3  | GLY | X | 325 | 43.507 | 27.998 | 41.913 | 0.00 | 0.00 |
| ATOM | 4892 | C    | GLY | X | 325 | 44.783 | 29.591 | 42.554 | 0.00 | 0.00 |
| ATOM | 4893 | O    | GLY | X | 325 | 44.683 | 30.749 | 42.823 | 0.00 | 0.00 |
| ATOM | 4894 | N    | VAL | X | 326 | 45.898 | 28.963 | 42.280 | 0.00 | 0.00 |
| ATOM | 4895 | H    | VAL | X | 326 | 45.923 | 27.954 | 42.246 | 0.00 | 0.00 |
| ATOM | 4896 | CA   | VAL | X | 326 | 47.224 | 29.516 | 42.649 | 0.00 | 0.00 |
| ATOM | 4897 | HA   | VAL | X | 326 | 47.142 | 30.595 | 42.511 | 0.00 | 0.00 |
| ATOM | 4898 | CB   | VAL | X | 326 | 47.774 | 29.296 | 44.159 | 0.00 | 0.00 |
| ATOM | 4899 | HB   | VAL | X | 326 | 48.772 | 29.706 | 44.314 | 0.00 | 0.00 |
| ATOM | 4900 | CG1  | VAL | X | 326 | 46.936 | 30.121 | 45.107 | 0.00 | 0.00 |
| ATOM | 4901 | HG11 | VAL | X | 326 | 45.930 | 29.772 | 45.341 | 0.00 | 0.00 |
| ATOM | 4902 | HG12 | VAL | X | 326 | 47.499 | 30.252 | 46.031 | 0.00 | 0.00 |
| ATOM | 4903 | HG13 | VAL | X | 326 | 46.955 | 31.123 | 44.678 | 0.00 | 0.00 |
| ATOM | 4904 | CG2  | VAL | X | 326 | 47.691 | 27.808 | 44.643 | 0.00 | 0.00 |
| ATOM | 4905 | HG21 | VAL | X | 326 | 46.648 | 27.519 | 44.514 | 0.00 | 0.00 |
| ATOM | 4906 | HG22 | VAL | X | 326 | 47.909 | 27.625 | 45.695 | 0.00 | 0.00 |
| ATOM | 4907 | HG23 | VAL | X | 326 | 48.210 | 27.167 | 43.930 | 0.00 | 0.00 |
| ATOM | 4908 | C    | VAL | X | 326 | 48.242 | 28.940 | 41.720 | 0.00 | 0.00 |
| ATOM | 4909 | O    | VAL | X | 326 | 48.009 | 28.006 | 41.019 | 0.00 | 0.00 |
| ATOM | 4910 | N    | VAL | X | 327 | 49.405 | 29.580 | 41.541 | 0.00 | 0.00 |
| ATOM | 4911 | H    | VAL | X | 327 | 49.562 | 30.340 | 42.187 | 0.00 | 0.00 |
| ATOM | 4912 | CA   | VAL | X | 327 | 50.562 | 28.954 | 40.829 | 0.00 | 0.00 |
| ATOM | 4913 | HA   | VAL | X | 327 | 50.178 | 28.145 | 40.206 | 0.00 | 0.00 |
| ATOM | 4914 | CB   | VAL | X | 327 | 51.389 | 29.973 | 39.932 | 0.00 | 0.00 |
| ATOM | 4915 | HB   | VAL | X | 327 | 52.072 | 29.419 | 39.288 | 0.00 | 0.00 |
| ATOM | 4916 | CG1  | VAL | X | 327 | 50.351 | 30.576 | 38.950 | 0.00 | 0.00 |
| ATOM | 4917 | HG11 | VAL | X | 327 | 50.864 | 31.148 | 38.177 | 0.00 | 0.00 |
| ATOM | 4918 | HG12 | VAL | X | 327 | 49.769 | 29.755 | 38.531 | 0.00 | 0.00 |
| ATOM | 4919 | HG13 | VAL | X | 327 | 49.642 | 31.206 | 39.488 | 0.00 | 0.00 |
| ATOM | 4920 | CG2  | VAL | X | 327 | 52.160 | 30.951 | 40.775 | 0.00 | 0.00 |
| ATOM | 4921 | HG21 | VAL | X | 327 | 52.662 | 30.460 | 41.609 | 0.00 | 0.00 |
| ATOM | 4922 | HG22 | VAL | X | 327 | 51.430 | 31.608 | 41.247 | 0.00 | 0.00 |
| ATOM | 4923 | HG23 | VAL | X | 327 | 52.811 | 31.509 | 40.102 | 0.00 | 0.00 |
| ATOM | 4924 | C    | VAL | X | 327 | 51.387 | 28.146 | 41.831 | 0.00 | 0.00 |
| ATOM | 4925 | O    | VAL | X | 327 | 51.391 | 28.450 | 42.984 | 0.00 | 0.00 |
| ATOM | 4926 | N    | LYS | X | 328 | 52.276 | 27.200 | 41.331 | 0.00 | 0.00 |
| ATOM | 4927 | H    | LYS | X | 328 | 52.306 | 27.156 | 40.322 | 0.00 | 0.00 |
| ATOM | 4928 | CA   | LYS | X | 328 | 53.096 | 26.445 | 42.163 | 0.00 | 0.00 |
| ATOM | 4929 | HA   | LYS | X | 328 | 52.504 | 25.880 | 42.883 | 0.00 | 0.00 |
| ATOM | 4930 | CB   | LYS | X | 328 | 53.813 | 25.494 | 41.371 | 0.00 | 0.00 |
| ATOM | 4931 | HB2  | LYS | X | 328 | 53.140 | 24.936 | 40.720 | 0.00 | 0.00 |
| ATOM | 4932 | HB3  | LYS | X | 328 | 54.556 | 26.035 | 40.785 | 0.00 | 0.00 |
| ATOM | 4933 | CG   | LYS | X | 328 | 54.551 | 24.301 | 42.180 | 0.00 | 0.00 |
| ATOM | 4934 | HG2  | LYS | X | 328 | 55.475 | 24.720 | 42.579 | 0.00 | 0.00 |
| ATOM | 4935 | HG3  | LYS | X | 328 | 53.838 | 23.985 | 42.942 | 0.00 | 0.00 |
| ATOM | 4936 | CD   | LYS | X | 328 | 54.956 | 23.152 | 41.269 | 0.00 | 0.00 |
| ATOM | 4937 | HD2  | LYS | X | 328 | 55.599 | 22.480 | 41.838 | 0.00 | 0.00 |
| ATOM | 4938 | HD3  | LYS | X | 328 | 54.076 | 22.700 | 40.812 | 0.00 | 0.00 |
| ATOM | 4939 | CE   | LYS | X | 328 | 55.896 | 23.641 | 40.121 | 0.00 | 0.00 |
| ATOM | 4940 | HE2  | LYS | X | 328 | 56.020 | 22.849 | 39.382 | 0.00 | 0.00 |
| ATOM | 4941 | HE3  | LYS | X | 328 | 55.428 | 24.515 | 39.668 | 0.00 | 0.00 |
| ATOM | 4942 | NZ   | LYS | X | 328 | 57.256 | 24.074 | 40.583 | 0.00 | 0.00 |
| ATOM | 4943 | HZ1  | LYS | X | 328 | 57.869 | 23.399 | 41.018 | 0.00 | 0.00 |
| ATOM | 4944 | HZ2  | LYS | X | 328 | 57.776 | 24.307 | 39.750 | 0.00 | 0.00 |
| ATOM | 4945 | HZ3  | LYS | X | 328 | 57.268 | 24.979 | 41.032 | 0.00 | 0.00 |
| ATOM | 4946 | C    | LYS | X | 328 | 54.031 | 27.241 | 43.052 | 0.00 | 0.00 |
| ATOM | 4947 | O    | LYS | X | 328 | 54.090 | 26.958 | 44.262 | 0.00 | 0.00 |
| ATOM | 4948 | N    | ASP | X | 329 | 54.858 | 28.171 | 42.581 | 0.00 | 0.00 |
| ATOM | 4949 | H    | ASP | X | 329 | 54.830 | 28.304 | 41.580 | 0.00 | 0.00 |
| ATOM | 4950 | CA   | ASP | X | 329 | 55.961 | 28.735 | 43.376 | 0.00 | 0.00 |
| ATOM | 4951 | HA   | ASP | X | 329 | 56.238 | 28.119 | 44.231 | 0.00 | 0.00 |
| ATOM | 4952 | CB   | ASP | X | 329 | 57.200 | 28.841 | 42.400 | 0.00 | 0.00 |
| ATOM | 4953 | HB2  | ASP | X | 329 | 57.103 | 29.534 | 41.565 | 0.00 | 0.00 |
| ATOM | 4954 | HB3  | ASP | X | 329 | 58.072 | 29.102 | 42.999 | 0.00 | 0.00 |
| ATOM | 4955 | CG   | ASP | X | 329 | 57.548 | 27.435 | 41.809 | 0.00 | 0.00 |
| ATOM | 4956 | OD1  | ASP | X | 329 | 58.242 | 26.658 | 42.515 | 0.00 | 0.00 |

|      |      |     |     |   |     |        |        |        |      |      |
|------|------|-----|-----|---|-----|--------|--------|--------|------|------|
| ATOM | 4957 | OD2 | ASP | X | 329 | 57.220 | 27.153 | 40.645 | 0.00 | 0.00 |
| ATOM | 4958 | C   | ASP | X | 329 | 55.709 | 30.167 | 43.984 | 0.00 | 0.00 |
| ATOM | 4959 | O   | ASP | X | 329 | 56.638 | 30.656 | 44.643 | 0.00 | 0.00 |
| ATOM | 4960 | N   | GLU | X | 330 | 54.529 | 30.731 | 43.732 | 0.00 | 0.00 |
| ATOM | 4961 | H   | GLU | X | 330 | 53.938 | 30.126 | 43.180 | 0.00 | 0.00 |
| ATOM | 4962 | CA  | GLU | X | 330 | 54.083 | 32.105 | 44.022 | 0.00 | 0.00 |
| ATOM | 4963 | HA  | GLU | X | 330 | 53.494 | 32.388 | 43.149 | 0.00 | 0.00 |
| ATOM | 4964 | CB  | GLU | X | 330 | 52.979 | 32.091 | 45.094 | 0.00 | 0.00 |
| ATOM | 4965 | HB2 | GLU | X | 330 | 53.357 | 31.721 | 46.047 | 0.00 | 0.00 |
| ATOM | 4966 | HB3 | GLU | X | 330 | 52.694 | 33.107 | 45.365 | 0.00 | 0.00 |
| ATOM | 4967 | CG  | GLU | X | 330 | 51.681 | 31.394 | 44.595 | 0.00 | 0.00 |
| ATOM | 4968 | HG2 | GLU | X | 330 | 51.905 | 30.445 | 44.106 | 0.00 | 0.00 |
| ATOM | 4969 | HG3 | GLU | X | 330 | 51.129 | 30.970 | 45.434 | 0.00 | 0.00 |
| ATOM | 4970 | CD  | GLU | X | 330 | 50.700 | 32.268 | 43.721 | 0.00 | 0.00 |
| ATOM | 4971 | OE1 | GLU | X | 330 | 51.269 | 33.291 | 43.248 | 0.00 | 0.00 |
| ATOM | 4972 | OE2 | GLU | X | 330 | 49.699 | 31.788 | 43.197 | 0.00 | 0.00 |
| ATOM | 4973 | C   | GLU | X | 330 | 55.051 | 33.259 | 44.374 | 0.00 | 0.00 |
| ATOM | 4974 | O   | GLU | X | 330 | 55.110 | 34.266 | 43.678 | 0.00 | 0.00 |
| ATOM | 4975 | N   | GLY | X | 331 | 55.650 | 33.114 | 45.508 | 0.00 | 0.00 |
| ATOM | 4976 | H   | GLY | X | 331 | 55.546 | 32.223 | 45.972 | 0.00 | 0.00 |
| ATOM | 4977 | CA  | GLY | X | 331 | 56.529 | 34.066 | 46.235 | 0.00 | 0.00 |
| ATOM | 4978 | HA2 | GLY | X | 331 | 56.165 | 35.083 | 46.087 | 0.00 | 0.00 |
| ATOM | 4979 | HA3 | GLY | X | 331 | 56.532 | 33.757 | 47.280 | 0.00 | 0.00 |
| ATOM | 4980 | C   | GLY | X | 331 | 57.976 | 34.036 | 45.695 | 0.00 | 0.00 |
| ATOM | 4981 | O   | GLY | X | 331 | 58.836 | 34.839 | 46.065 | 0.00 | 0.00 |
| ATOM | 4982 | N   | SER | X | 332 | 58.310 | 33.052 | 44.819 | 0.00 | 0.00 |
| ATOM | 4983 | H   | SER | X | 332 | 57.607 | 32.349 | 44.639 | 0.00 | 0.00 |
| ATOM | 4984 | CA  | SER | X | 332 | 59.488 | 33.005 | 44.013 | 0.00 | 0.00 |
| ATOM | 4985 | HA  | SER | X | 332 | 60.354 | 33.022 | 44.674 | 0.00 | 0.00 |
| ATOM | 4986 | CB  | SER | X | 332 | 59.633 | 31.688 | 43.298 | 0.00 | 0.00 |
| ATOM | 4987 | HB2 | SER | X | 332 | 60.575 | 31.763 | 42.755 | 0.00 | 0.00 |
| ATOM | 4988 | HB3 | SER | X | 332 | 59.650 | 30.812 | 43.948 | 0.00 | 0.00 |
| ATOM | 4989 | OG  | SER | X | 332 | 58.644 | 31.514 | 42.310 | 0.00 | 0.00 |
| ATOM | 4990 | HG  | SER | X | 332 | 58.715 | 30.645 | 41.908 | 0.00 | 0.00 |
| ATOM | 4991 | C   | SER | X | 332 | 59.563 | 34.213 | 43.115 | 0.00 | 0.00 |
| ATOM | 4992 | O   | SER | X | 332 | 60.695 | 34.714 | 42.788 | 0.00 | 0.00 |
| ATOM | 4993 | N   | TYR | X | 333 | 58.421 | 34.793 | 42.723 | 0.00 | 0.00 |
| ATOM | 4994 | H   | TYR | X | 333 | 57.542 | 34.362 | 42.973 | 0.00 | 0.00 |
| ATOM | 4995 | CA  | TYR | X | 333 | 58.358 | 35.845 | 41.705 | 0.00 | 0.00 |
| ATOM | 4996 | HA  | TYR | X | 333 | 59.029 | 35.624 | 40.875 | 0.00 | 0.00 |
| ATOM | 4997 | CB  | TYR | X | 333 | 56.941 | 35.810 | 41.160 | 0.00 | 0.00 |
| ATOM | 4998 | HB2 | TYR | X | 333 | 56.702 | 34.910 | 40.592 | 0.00 | 0.00 |
| ATOM | 4999 | HB3 | TYR | X | 333 | 56.406 | 35.857 | 42.108 | 0.00 | 0.00 |
| ATOM | 5000 | CG  | TYR | X | 333 | 56.619 | 37.039 | 40.214 | 0.00 | 0.00 |
| ATOM | 5001 | CD1 | TYR | X | 333 | 57.152 | 37.181 | 38.892 | 0.00 | 0.00 |
| ATOM | 5002 | HD1 | TYR | X | 333 | 57.822 | 36.413 | 38.534 | 0.00 | 0.00 |
| ATOM | 5003 | CE1 | TYR | X | 333 | 56.907 | 38.392 | 38.183 | 0.00 | 0.00 |
| ATOM | 5004 | HE1 | TYR | X | 333 | 57.245 | 38.537 | 37.168 | 0.00 | 0.00 |
| ATOM | 5005 | CZ  | TYR | X | 333 | 56.093 | 39.421 | 38.797 | 0.00 | 0.00 |
| ATOM | 5006 | OH  | TYR | X | 333 | 55.932 | 40.650 | 38.245 | 0.00 | 0.00 |
| ATOM | 5007 | HH  | TYR | X | 333 | 56.282 | 40.783 | 37.360 | 0.00 | 0.00 |
| ATOM | 5008 | CE2 | TYR | X | 333 | 55.482 | 39.179 | 40.020 | 0.00 | 0.00 |
| ATOM | 5009 | HE2 | TYR | X | 333 | 54.780 | 39.916 | 40.383 | 0.00 | 0.00 |
| ATOM | 5010 | CD2 | TYR | X | 333 | 55.851 | 38.066 | 40.813 | 0.00 | 0.00 |
| ATOM | 5011 | HD2 | TYR | X | 333 | 55.530 | 37.950 | 41.838 | 0.00 | 0.00 |
| ATOM | 5012 | C   | TYR | X | 333 | 58.605 | 37.230 | 42.257 | 0.00 | 0.00 |
| ATOM | 5013 | O   | TYR | X | 333 | 58.962 | 38.217 | 41.575 | 0.00 | 0.00 |
| ATOM | 5014 | N   | PHE | X | 334 | 58.477 | 37.397 | 43.561 | 0.00 | 0.00 |
| ATOM | 5015 | H   | PHE | X | 334 | 58.337 | 36.587 | 44.149 | 0.00 | 0.00 |
| ATOM | 5016 | CA  | PHE | X | 334 | 58.707 | 38.649 | 44.159 | 0.00 | 0.00 |
| ATOM | 5017 | HA  | PHE | X | 334 | 58.505 | 39.479 | 43.482 | 0.00 | 0.00 |
| ATOM | 5018 | CB  | PHE | X | 334 | 57.720 | 38.765 | 45.307 | 0.00 | 0.00 |
| ATOM | 5019 | HB2 | PHE | X | 334 | 57.768 | 37.953 | 46.032 | 0.00 | 0.00 |
| ATOM | 5020 | HB3 | PHE | X | 334 | 57.919 | 39.591 | 45.991 | 0.00 | 0.00 |
| ATOM | 5021 | CG  | PHE | X | 334 | 56.308 | 39.041 | 44.865 | 0.00 | 0.00 |
| ATOM | 5022 | CD1 | PHE | X | 334 | 55.245 | 38.074 | 44.910 | 0.00 | 0.00 |
| ATOM | 5023 | HD1 | PHE | X | 334 | 55.456 | 37.129 | 45.388 | 0.00 | 0.00 |

|      |      |      |     |   |     |        |        |        |      |      |
|------|------|------|-----|---|-----|--------|--------|--------|------|------|
| ATOM | 5024 | CE1  | PHE | X | 334 | 54.020 | 38.333 | 44.363 | 0.00 | 0.00 |
| ATOM | 5025 | HE1  | PHE | X | 334 | 53.274 | 37.554 | 44.416 | 0.00 | 0.00 |
| ATOM | 5026 | CZ   | PHE | X | 334 | 53.837 | 39.590 | 43.770 | 0.00 | 0.00 |
| ATOM | 5027 | HZ   | PHE | X | 334 | 52.881 | 39.910 | 43.380 | 0.00 | 0.00 |
| ATOM | 5028 | CE2  | PHE | X | 334 | 54.824 | 40.545 | 43.723 | 0.00 | 0.00 |
| ATOM | 5029 | HE2  | PHE | X | 334 | 54.648 | 41.466 | 43.186 | 0.00 | 0.00 |
| ATOM | 5030 | CD2  | PHE | X | 334 | 56.087 | 40.300 | 44.208 | 0.00 | 0.00 |
| ATOM | 5031 | HD2  | PHE | X | 334 | 56.798 | 41.106 | 44.105 | 0.00 | 0.00 |
| ATOM | 5032 | C    | PHE | X | 334 | 60.163 | 38.880 | 44.628 | 0.00 | 0.00 |
| ATOM | 5033 | O    | PHE | X | 334 | 60.518 | 40.048 | 44.977 | 0.00 | 0.00 |
| ATOM | 5034 | N    | LEU | X | 335 | 61.026 | 37.868 | 44.667 | 0.00 | 0.00 |
| ATOM | 5035 | H    | LEU | X | 335 | 60.701 | 36.982 | 44.306 | 0.00 | 0.00 |
| ATOM | 5036 | CA   | LEU | X | 335 | 62.275 | 37.901 | 45.335 | 0.00 | 0.00 |
| ATOM | 5037 | HA   | LEU | X | 335 | 62.059 | 38.184 | 46.365 | 0.00 | 0.00 |
| ATOM | 5038 | CB   | LEU | X | 335 | 63.007 | 36.570 | 45.442 | 0.00 | 0.00 |
| ATOM | 5039 | HB2  | LEU | X | 335 | 63.178 | 36.282 | 44.404 | 0.00 | 0.00 |
| ATOM | 5040 | HB3  | LEU | X | 335 | 63.952 | 36.764 | 45.948 | 0.00 | 0.00 |
| ATOM | 5041 | CG   | LEU | X | 335 | 62.324 | 35.467 | 46.345 | 0.00 | 0.00 |
| ATOM | 5042 | HG   | LEU | X | 335 | 61.407 | 35.323 | 45.775 | 0.00 | 0.00 |
| ATOM | 5043 | CD1  | LEU | X | 335 | 63.208 | 34.178 | 46.303 | 0.00 | 0.00 |
| ATOM | 5044 | HD11 | LEU | X | 335 | 62.727 | 33.389 | 46.881 | 0.00 | 0.00 |
| ATOM | 5045 | HD12 | LEU | X | 335 | 64.111 | 34.383 | 46.877 | 0.00 | 0.00 |
| ATOM | 5046 | HD13 | LEU | X | 335 | 63.306 | 33.907 | 45.251 | 0.00 | 0.00 |
| ATOM | 5047 | CD2  | LEU | X | 335 | 61.971 | 35.909 | 47.787 | 0.00 | 0.00 |
| ATOM | 5048 | HD21 | LEU | X | 335 | 61.596 | 35.072 | 48.377 | 0.00 | 0.00 |
| ATOM | 5049 | HD22 | LEU | X | 335 | 62.901 | 36.353 | 48.143 | 0.00 | 0.00 |
| ATOM | 5050 | HD23 | LEU | X | 335 | 61.109 | 36.571 | 47.717 | 0.00 | 0.00 |
| ATOM | 5051 | C    | LEU | X | 335 | 63.235 | 39.064 | 44.840 | 0.00 | 0.00 |
| ATOM | 5052 | O    | LEU | X | 335 | 63.913 | 39.753 | 45.594 | 0.00 | 0.00 |
| ATOM | 5053 | N    | VAL | X | 336 | 63.174 | 39.508 | 43.600 | 0.00 | 0.00 |
| ATOM | 5054 | H    | VAL | X | 336 | 62.473 | 39.048 | 43.036 | 0.00 | 0.00 |
| ATOM | 5055 | CA   | VAL | X | 336 | 64.008 | 40.576 | 43.037 | 0.00 | 0.00 |
| ATOM | 5056 | HA   | VAL | X | 336 | 65.020 | 40.394 | 43.400 | 0.00 | 0.00 |
| ATOM | 5057 | CB   | VAL | X | 336 | 64.134 | 40.560 | 41.466 | 0.00 | 0.00 |
| ATOM | 5058 | HB   | VAL | X | 336 | 64.711 | 41.432 | 41.158 | 0.00 | 0.00 |
| ATOM | 5059 | CG1  | VAL | X | 336 | 64.959 | 39.414 | 40.916 | 0.00 | 0.00 |
| ATOM | 5060 | HG11 | VAL | X | 336 | 65.874 | 39.180 | 41.460 | 0.00 | 0.00 |
| ATOM | 5061 | HG12 | VAL | X | 336 | 64.388 | 38.488 | 40.987 | 0.00 | 0.00 |
| ATOM | 5062 | HG13 | VAL | X | 336 | 65.066 | 39.464 | 39.833 | 0.00 | 0.00 |
| ATOM | 5063 | CG2  | VAL | X | 336 | 62.693 | 40.523 | 40.788 | 0.00 | 0.00 |
| ATOM | 5064 | HG21 | VAL | X | 336 | 62.205 | 39.560 | 40.935 | 0.00 | 0.00 |
| ATOM | 5065 | HG22 | VAL | X | 336 | 62.821 | 40.689 | 39.719 | 0.00 | 0.00 |
| ATOM | 5066 | HG23 | VAL | X | 336 | 62.176 | 41.340 | 41.292 | 0.00 | 0.00 |
| ATOM | 5067 | C    | VAL | X | 336 | 63.599 | 41.948 | 43.506 | 0.00 | 0.00 |
| ATOM | 5068 | O    | VAL | X | 336 | 64.413 | 42.931 | 43.403 | 0.00 | 0.00 |
| ATOM | 5069 | N    | TYR | X | 337 | 62.397 | 42.041 | 44.019 | 0.00 | 0.00 |
| ATOM | 5070 | H    | TYR | X | 337 | 61.851 | 41.236 | 44.292 | 0.00 | 0.00 |
| ATOM | 5071 | CA   | TYR | X | 337 | 61.880 | 43.291 | 44.537 | 0.00 | 0.00 |
| ATOM | 5072 | HA   | TYR | X | 337 | 62.237 | 44.055 | 43.846 | 0.00 | 0.00 |
| ATOM | 5073 | CB   | TYR | X | 337 | 60.309 | 43.376 | 44.451 | 0.00 | 0.00 |
| ATOM | 5074 | HB2  | TYR | X | 337 | 59.799 | 42.506 | 44.865 | 0.00 | 0.00 |
| ATOM | 5075 | HB3  | TYR | X | 337 | 60.027 | 44.189 | 45.120 | 0.00 | 0.00 |
| ATOM | 5076 | CG   | TYR | X | 337 | 59.787 | 43.481 | 42.963 | 0.00 | 0.00 |
| ATOM | 5077 | CD1  | TYR | X | 337 | 59.741 | 44.722 | 42.303 | 0.00 | 0.00 |
| ATOM | 5078 | HD1  | TYR | X | 337 | 59.877 | 45.686 | 42.770 | 0.00 | 0.00 |
| ATOM | 5079 | CE1  | TYR | X | 337 | 59.426 | 44.884 | 40.911 | 0.00 | 0.00 |
| ATOM | 5080 | HE1  | TYR | X | 337 | 59.576 | 45.810 | 40.376 | 0.00 | 0.00 |
| ATOM | 5081 | CZ   | TYR | X | 337 | 58.896 | 43.708 | 40.348 | 0.00 | 0.00 |
| ATOM | 5082 | OH   | TYR | X | 337 | 58.480 | 43.938 | 39.044 | 0.00 | 0.00 |
| ATOM | 5083 | HH   | TYR | X | 337 | 58.808 | 44.744 | 38.639 | 0.00 | 0.00 |
| ATOM | 5084 | CE2  | TYR | X | 337 | 58.993 | 42.434 | 40.997 | 0.00 | 0.00 |
| ATOM | 5085 | HE2  | TYR | X | 337 | 58.692 | 41.535 | 40.479 | 0.00 | 0.00 |
| ATOM | 5086 | CD2  | TYR | X | 337 | 59.464 | 42.289 | 42.304 | 0.00 | 0.00 |
| ATOM | 5087 | HD2  | TYR | X | 337 | 59.538 | 41.280 | 42.682 | 0.00 | 0.00 |
| ATOM | 5088 | C    | TYR | X | 337 | 62.442 | 43.680 | 45.950 | 0.00 | 0.00 |
| ATOM | 5089 | O    | TYR | X | 337 | 62.038 | 44.713 | 46.503 | 0.00 | 0.00 |
| ATOM | 5090 | N    | GLY | X | 338 | 63.430 | 42.980 | 46.375 | 0.00 | 0.00 |



|      |      |     |     |   |     |        |        |        |      |      |
|------|------|-----|-----|---|-----|--------|--------|--------|------|------|
| ATOM | 5091 | H   | GLY | X | 338 | 63.468 | 42.091 | 45.897 | 0.00 | 0.00 |
| ATOM | 5092 | CA  | GLY | X | 338 | 64.404 | 43.433 | 47.435 | 0.00 | 0.00 |
| ATOM | 5093 | HA2 | GLY | X | 338 | 65.243 | 43.891 | 46.911 | 0.00 | 0.00 |
| ATOM | 5094 | HA3 | GLY | X | 338 | 63.796 | 44.160 | 47.974 | 0.00 | 0.00 |
| ATOM | 5095 | C   | GLY | X | 338 | 64.972 | 42.448 | 48.426 | 0.00 | 0.00 |
| ATOM | 5096 | O   | GLY | X | 338 | 65.377 | 42.839 | 49.539 | 0.00 | 0.00 |
| ATOM | 5097 | N   | ALA | X | 339 | 65.024 | 41.145 | 48.099 | 0.00 | 0.00 |
| ATOM | 5098 | H   | ALA | X | 339 | 64.770 | 40.876 | 47.159 | 0.00 | 0.00 |
| ATOM | 5099 | CA  | ALA | X | 339 | 65.753 | 40.144 | 48.888 | 0.00 | 0.00 |
| ATOM | 5100 | HA  | ALA | X | 339 | 65.758 | 40.460 | 49.931 | 0.00 | 0.00 |
| ATOM | 5101 | CB  | ALA | X | 339 | 64.969 | 38.798 | 48.886 | 0.00 | 0.00 |
| ATOM | 5102 | HB1 | ALA | X | 339 | 63.918 | 39.007 | 49.085 | 0.00 | 0.00 |
| ATOM | 5103 | HB2 | ALA | X | 339 | 65.374 | 38.114 | 49.631 | 0.00 | 0.00 |
| ATOM | 5104 | HB3 | ALA | X | 339 | 65.057 | 38.358 | 47.893 | 0.00 | 0.00 |
| ATOM | 5105 | C   | ALA | X | 339 | 67.252 | 40.003 | 48.460 | 0.00 | 0.00 |
| ATOM | 5106 | O   | ALA | X | 339 | 67.565 | 40.451 | 47.376 | 0.00 | 0.00 |
| ATOM | 5107 | N   | PRO | X | 340 | 68.198 | 39.523 | 49.292 | 0.00 | 0.00 |
| ATOM | 5108 | CD  | PRO | X | 340 | 67.955 | 38.790 | 50.522 | 0.00 | 0.00 |
| ATOM | 5109 | HD2 | PRO | X | 340 | 67.245 | 38.004 | 50.262 | 0.00 | 0.00 |
| ATOM | 5110 | HD3 | PRO | X | 340 | 67.548 | 39.433 | 51.302 | 0.00 | 0.00 |
| ATOM | 5111 | CG  | PRO | X | 340 | 69.225 | 38.354 | 51.027 | 0.00 | 0.00 |
| ATOM | 5112 | HG2 | PRO | X | 340 | 69.533 | 37.481 | 50.453 | 0.00 | 0.00 |
| ATOM | 5113 | HG3 | PRO | X | 340 | 69.160 | 38.168 | 52.100 | 0.00 | 0.00 |
| ATOM | 5114 | CB  | PRO | X | 340 | 70.226 | 39.441 | 50.593 | 0.00 | 0.00 |
| ATOM | 5115 | HB2 | PRO | X | 340 | 71.277 | 39.156 | 50.553 | 0.00 | 0.00 |
| ATOM | 5116 | HB3 | PRO | X | 340 | 70.149 | 40.328 | 51.222 | 0.00 | 0.00 |
| ATOM | 5117 | CA  | PRO | X | 340 | 69.629 | 39.796 | 49.173 | 0.00 | 0.00 |
| ATOM | 5118 | HA  | PRO | X | 340 | 69.750 | 40.874 | 49.062 | 0.00 | 0.00 |
| ATOM | 5119 | C   | PRO | X | 340 | 70.189 | 39.035 | 48.049 | 0.00 | 0.00 |
| ATOM | 5120 | O   | PRO | X | 340 | 70.247 | 37.780 | 48.029 | 0.00 | 0.00 |
| ATOM | 5121 | N   | GLY | X | 341 | 70.742 | 39.872 | 47.140 | 0.00 | 0.00 |
| ATOM | 5122 | H   | GLY | X | 341 | 70.605 | 40.867 | 47.249 | 0.00 | 0.00 |
| ATOM | 5123 | CA  | GLY | X | 341 | 71.323 | 39.457 | 45.902 | 0.00 | 0.00 |
| ATOM | 5124 | HA2 | GLY | X | 341 | 72.083 | 40.184 | 45.617 | 0.00 | 0.00 |
| ATOM | 5125 | HA3 | GLY | X | 341 | 71.955 | 38.660 | 46.293 | 0.00 | 0.00 |
| ATOM | 5126 | C   | GLY | X | 341 | 70.504 | 38.879 | 44.706 | 0.00 | 0.00 |
| ATOM | 5127 | O   | GLY | X | 341 | 71.130 | 38.454 | 43.718 | 0.00 | 0.00 |
| ATOM | 5128 | N   | PHE | X | 342 | 69.188 | 38.662 | 44.844 | 0.00 | 0.00 |
| ATOM | 5129 | H   | PHE | X | 342 | 68.753 | 38.766 | 45.750 | 0.00 | 0.00 |
| ATOM | 5130 | CA  | PHE | X | 342 | 68.363 | 38.445 | 43.710 | 0.00 | 0.00 |
| ATOM | 5131 | HA  | PHE | X | 342 | 68.514 | 37.543 | 43.116 | 0.00 | 0.00 |
| ATOM | 5132 | CB  | PHE | X | 342 | 66.963 | 38.222 | 44.246 | 0.00 | 0.00 |
| ATOM | 5133 | HB2 | PHE | X | 342 | 66.655 | 39.122 | 44.778 | 0.00 | 0.00 |
| ATOM | 5134 | HB3 | PHE | X | 342 | 66.261 | 38.040 | 43.432 | 0.00 | 0.00 |
| ATOM | 5135 | CG  | PHE | X | 342 | 66.832 | 36.977 | 45.062 | 0.00 | 0.00 |
| ATOM | 5136 | CD1 | PHE | X | 342 | 66.289 | 35.780 | 44.544 | 0.00 | 0.00 |
| ATOM | 5137 | HD1 | PHE | X | 342 | 65.882 | 35.667 | 43.550 | 0.00 | 0.00 |
| ATOM | 5138 | CE1 | PHE | X | 342 | 66.289 | 34.547 | 45.331 | 0.00 | 0.00 |
| ATOM | 5139 | HE1 | PHE | X | 342 | 65.840 | 33.665 | 44.899 | 0.00 | 0.00 |
| ATOM | 5140 | CZ  | PHE | X | 342 | 66.707 | 34.684 | 46.734 | 0.00 | 0.00 |
| ATOM | 5141 | HZ  | PHE | X | 342 | 66.655 | 33.761 | 47.292 | 0.00 | 0.00 |
| ATOM | 5142 | CE2 | PHE | X | 342 | 67.292 | 35.896 | 47.257 | 0.00 | 0.00 |
| ATOM | 5143 | HE2 | PHE | X | 342 | 67.747 | 35.981 | 48.233 | 0.00 | 0.00 |
| ATOM | 5144 | CD2 | PHE | X | 342 | 67.301 | 37.058 | 46.457 | 0.00 | 0.00 |
| ATOM | 5145 | HD2 | PHE | X | 342 | 67.717 | 37.960 | 46.881 | 0.00 | 0.00 |
| ATOM | 5146 | C   | PHE | X | 342 | 68.509 | 39.587 | 42.745 | 0.00 | 0.00 |
| ATOM | 5147 | O   | PHE | X | 342 | 68.601 | 40.738 | 43.203 | 0.00 | 0.00 |
| ATOM | 5148 | N   | SER | X | 343 | 68.424 | 39.346 | 41.456 | 0.00 | 0.00 |
| ATOM | 5149 | H   | SER | X | 343 | 68.231 | 38.413 | 41.119 | 0.00 | 0.00 |
| ATOM | 5150 | CA  | SER | X | 343 | 68.501 | 40.318 | 40.398 | 0.00 | 0.00 |
| ATOM | 5151 | HA  | SER | X | 343 | 68.064 | 41.302 | 40.571 | 0.00 | 0.00 |
| ATOM | 5152 | CB  | SER | X | 343 | 69.978 | 40.678 | 40.126 | 0.00 | 0.00 |
| ATOM | 5153 | HB2 | SER | X | 343 | 69.981 | 41.656 | 39.644 | 0.00 | 0.00 |
| ATOM | 5154 | HB3 | SER | X | 343 | 70.564 | 40.769 | 41.040 | 0.00 | 0.00 |
| ATOM | 5155 | OG  | SER | X | 343 | 70.566 | 39.678 | 39.372 | 0.00 | 0.00 |
| ATOM | 5156 | HG  | SER | X | 343 | 71.401 | 40.048 | 39.077 | 0.00 | 0.00 |
| ATOM | 5157 | C   | SER | X | 343 | 67.866 | 39.694 | 39.130 | 0.00 | 0.00 |

|      |      |      |     |   |     |        |        |        |      |      |
|------|------|------|-----|---|-----|--------|--------|--------|------|------|
| ATOM | 5158 | O    | SER | X | 343 | 67.445 | 38.556 | 39.149 | 0.00 | 0.00 |
| ATOM | 5159 | N    | LYS | X | 344 | 67.956 | 40.458 | 38.030 | 0.00 | 0.00 |
| ATOM | 5160 | H    | LYS | X | 344 | 68.534 | 41.282 | 37.946 | 0.00 | 0.00 |
| ATOM | 5161 | CA   | LYS | X | 344 | 67.392 | 39.991 | 36.747 | 0.00 | 0.00 |
| ATOM | 5162 | HA   | LYS | X | 344 | 66.419 | 39.522 | 36.895 | 0.00 | 0.00 |
| ATOM | 5163 | CB   | LYS | X | 344 | 67.128 | 41.210 | 35.853 | 0.00 | 0.00 |
| ATOM | 5164 | HB2  | LYS | X | 344 | 66.666 | 40.836 | 34.940 | 0.00 | 0.00 |
| ATOM | 5165 | HB3  | LYS | X | 344 | 66.487 | 41.944 | 36.342 | 0.00 | 0.00 |
| ATOM | 5166 | CG   | LYS | X | 344 | 68.396 | 42.011 | 35.480 | 0.00 | 0.00 |
| ATOM | 5167 | HG2  | LYS | X | 344 | 68.688 | 42.668 | 36.299 | 0.00 | 0.00 |
| ATOM | 5168 | HG3  | LYS | X | 344 | 69.320 | 41.442 | 35.389 | 0.00 | 0.00 |
| ATOM | 5169 | CD   | LYS | X | 344 | 68.191 | 42.799 | 34.176 | 0.00 | 0.00 |
| ATOM | 5170 | HD2  | LYS | X | 344 | 68.333 | 42.093 | 33.357 | 0.00 | 0.00 |
| ATOM | 5171 | HD3  | LYS | X | 344 | 67.181 | 43.209 | 34.179 | 0.00 | 0.00 |
| ATOM | 5172 | CE   | LYS | X | 344 | 69.426 | 43.808 | 34.127 | 0.00 | 0.00 |
| ATOM | 5173 | HE2  | LYS | X | 344 | 69.260 | 44.534 | 34.923 | 0.00 | 0.00 |
| ATOM | 5174 | HE3  | LYS | X | 344 | 70.355 | 43.279 | 34.338 | 0.00 | 0.00 |
| ATOM | 5175 | NZ   | LYS | X | 344 | 69.490 | 44.511 | 32.862 | 0.00 | 0.00 |
| ATOM | 5176 | HZ1  | LYS | X | 344 | 70.253 | 45.172 | 32.868 | 0.00 | 0.00 |
| ATOM | 5177 | HZ2  | LYS | X | 344 | 69.701 | 43.853 | 32.125 | 0.00 | 0.00 |
| ATOM | 5178 | HZ3  | LYS | X | 344 | 68.576 | 44.873 | 32.629 | 0.00 | 0.00 |
| ATOM | 5179 | C    | LYS | X | 344 | 68.197 | 38.927 | 36.015 | 0.00 | 0.00 |
| ATOM | 5180 | O    | LYS | X | 344 | 67.988 | 38.499 | 34.869 | 0.00 | 0.00 |
| ATOM | 5181 | N    | ASP | X | 345 | 69.302 | 38.451 | 36.634 | 0.00 | 0.00 |
| ATOM | 5182 | H    | ASP | X | 345 | 69.490 | 38.843 | 37.546 | 0.00 | 0.00 |
| ATOM | 5183 | CA   | ASP | X | 345 | 70.258 | 37.514 | 36.087 | 0.00 | 0.00 |
| ATOM | 5184 | HA   | ASP | X | 345 | 69.706 | 36.808 | 35.466 | 0.00 | 0.00 |
| ATOM | 5185 | CB   | ASP | X | 345 | 71.324 | 38.330 | 35.292 | 0.00 | 0.00 |
| ATOM | 5186 | HB2  | ASP | X | 345 | 72.064 | 37.629 | 34.907 | 0.00 | 0.00 |
| ATOM | 5187 | HB3  | ASP | X | 345 | 70.817 | 38.770 | 34.433 | 0.00 | 0.00 |
| ATOM | 5188 | CG   | ASP | X | 345 | 72.032 | 39.309 | 36.264 | 0.00 | 0.00 |
| ATOM | 5189 | OD1  | ASP | X | 345 | 71.486 | 40.373 | 36.597 | 0.00 | 0.00 |
| ATOM | 5190 | OD2  | ASP | X | 345 | 73.150 | 38.971 | 36.778 | 0.00 | 0.00 |
| ATOM | 5191 | C    | ASP | X | 345 | 70.844 | 36.533 | 37.186 | 0.00 | 0.00 |
| ATOM | 5192 | O    | ASP | X | 345 | 70.978 | 35.377 | 36.925 | 0.00 | 0.00 |
| ATOM | 5193 | N    | ASN | X | 346 | 71.241 | 37.037 | 38.349 | 0.00 | 0.00 |
| ATOM | 5194 | H    | ASN | X | 346 | 70.955 | 37.964 | 38.630 | 0.00 | 0.00 |
| ATOM | 5195 | CA   | ASN | X | 346 | 72.021 | 36.267 | 39.343 | 0.00 | 0.00 |
| ATOM | 5196 | HA   | ASN | X | 346 | 72.978 | 35.999 | 38.894 | 0.00 | 0.00 |
| ATOM | 5197 | CB   | ASN | X | 346 | 72.509 | 37.189 | 40.466 | 0.00 | 0.00 |
| ATOM | 5198 | HB2  | ASN | X | 346 | 73.222 | 37.862 | 39.989 | 0.00 | 0.00 |
| ATOM | 5199 | HB3  | ASN | X | 346 | 71.655 | 37.776 | 40.802 | 0.00 | 0.00 |
| ATOM | 5200 | CG   | ASN | X | 346 | 73.207 | 36.426 | 41.560 | 0.00 | 0.00 |
| ATOM | 5201 | OD1  | ASN | X | 346 | 74.334 | 36.039 | 41.345 | 0.00 | 0.00 |
| ATOM | 5202 | ND2  | ASN | X | 346 | 72.605 | 36.207 | 42.710 | 0.00 | 0.00 |
| ATOM | 5203 | HD21 | ASN | X | 346 | 73.103 | 35.942 | 43.547 | 0.00 | 0.00 |
| ATOM | 5204 | HD22 | ASN | X | 346 | 71.781 | 36.772 | 42.858 | 0.00 | 0.00 |
| ATOM | 5205 | C    | ASN | X | 346 | 71.354 | 34.998 | 39.785 | 0.00 | 0.00 |
| ATOM | 5206 | O    | ASN | X | 346 | 70.213 | 35.053 | 40.255 | 0.00 | 0.00 |
| ATOM | 5207 | N    | GLU | X | 347 | 72.077 | 33.873 | 39.807 | 0.00 | 0.00 |
| ATOM | 5208 | H    | GLU | X | 347 | 73.021 | 33.894 | 39.448 | 0.00 | 0.00 |
| ATOM | 5209 | CA   | GLU | X | 347 | 71.496 | 32.579 | 40.292 | 0.00 | 0.00 |
| ATOM | 5210 | HA   | GLU | X | 347 | 70.636 | 32.309 | 39.679 | 0.00 | 0.00 |
| ATOM | 5211 | CB   | GLU | X | 347 | 72.543 | 31.472 | 40.011 | 0.00 | 0.00 |
| ATOM | 5212 | HB2  | GLU | X | 347 | 73.095 | 31.819 | 39.137 | 0.00 | 0.00 |
| ATOM | 5213 | HB3  | GLU | X | 347 | 73.339 | 31.494 | 40.755 | 0.00 | 0.00 |
| ATOM | 5214 | CG   | GLU | X | 347 | 71.830 | 30.184 | 39.697 | 0.00 | 0.00 |
| ATOM | 5215 | HG2  | GLU | X | 347 | 71.476 | 29.739 | 40.626 | 0.00 | 0.00 |
| ATOM | 5216 | HG3  | GLU | X | 347 | 71.051 | 30.310 | 38.944 | 0.00 | 0.00 |
| ATOM | 5217 | CD   | GLU | X | 347 | 72.804 | 29.178 | 39.092 | 0.00 | 0.00 |
| ATOM | 5218 | OE1  | GLU | X | 347 | 73.096 | 29.416 | 37.877 | 0.00 | 0.00 |
| ATOM | 5219 | OE2  | GLU | X | 347 | 73.135 | 28.160 | 39.699 | 0.00 | 0.00 |
| ATOM | 5220 | C    | GLU | X | 347 | 70.974 | 32.513 | 41.745 | 0.00 | 0.00 |
| ATOM | 5221 | O    | GLU | X | 347 | 70.011 | 31.807 | 42.035 | 0.00 | 0.00 |
| ATOM | 5222 | N    | SER | X | 348 | 71.310 | 33.408 | 42.696 | 0.00 | 0.00 |
| ATOM | 5223 | H    | SER | X | 348 | 72.180 | 33.890 | 42.523 | 0.00 | 0.00 |
| ATOM | 5224 | CA   | SER | X | 348 | 70.594 | 33.657 | 43.974 | 0.00 | 0.00 |

|      |      |      |     |   |     |        |        |        |      |      |
|------|------|------|-----|---|-----|--------|--------|--------|------|------|
| ATOM | 5225 | HA   | SER | X | 348 | 71.150 | 34.452 | 44.471 | 0.00 | 0.00 |
| ATOM | 5226 | CB   | SER | X | 348 | 69.171 | 34.194 | 43.756 | 0.00 | 0.00 |
| ATOM | 5227 | HB2  | SER | X | 348 | 68.581 | 33.377 | 43.342 | 0.00 | 0.00 |
| ATOM | 5228 | HB3  | SER | X | 348 | 68.795 | 34.593 | 44.698 | 0.00 | 0.00 |
| ATOM | 5229 | OG   | SER | X | 348 | 69.069 | 35.179 | 42.703 | 0.00 | 0.00 |
| ATOM | 5230 | HG   | SER | X | 348 | 69.389 | 34.798 | 41.882 | 0.00 | 0.00 |
| ATOM | 5231 | C    | SER | X | 348 | 70.656 | 32.467 | 44.941 | 0.00 | 0.00 |
| ATOM | 5232 | O    | SER | X | 348 | 69.621 | 32.003 | 45.455 | 0.00 | 0.00 |
| ATOM | 5233 | N    | LEU | X | 349 | 71.867 | 31.887 | 45.048 | 0.00 | 0.00 |
| ATOM | 5234 | H    | LEU | X | 349 | 72.675 | 32.311 | 44.615 | 0.00 | 0.00 |
| ATOM | 5235 | CA   | LEU | X | 349 | 72.202 | 30.710 | 45.919 | 0.00 | 0.00 |
| ATOM | 5236 | HA   | LEU | X | 349 | 71.380 | 30.005 | 46.039 | 0.00 | 0.00 |
| ATOM | 5237 | CB   | LEU | X | 349 | 73.433 | 29.976 | 45.319 | 0.00 | 0.00 |
| ATOM | 5238 | HB2  | LEU | X | 349 | 74.174 | 30.737 | 45.075 | 0.00 | 0.00 |
| ATOM | 5239 | HB3  | LEU | X | 349 | 73.765 | 29.326 | 46.129 | 0.00 | 0.00 |
| ATOM | 5240 | CG   | LEU | X | 349 | 72.946 | 29.276 | 43.984 | 0.00 | 0.00 |
| ATOM | 5241 | HG   | LEU | X | 349 | 72.307 | 29.926 | 43.388 | 0.00 | 0.00 |
| ATOM | 5242 | CD1  | LEU | X | 349 | 74.086 | 29.027 | 43.022 | 0.00 | 0.00 |
| ATOM | 5243 | HD11 | LEU | X | 349 | 74.579 | 29.937 | 42.680 | 0.00 | 0.00 |
| ATOM | 5244 | HD12 | LEU | X | 349 | 73.714 | 28.590 | 42.096 | 0.00 | 0.00 |
| ATOM | 5245 | HD13 | LEU | X | 349 | 74.730 | 28.268 | 43.466 | 0.00 | 0.00 |
| ATOM | 5246 | CD2  | LEU | X | 349 | 72.269 | 27.978 | 44.356 | 0.00 | 0.00 |
| ATOM | 5247 | HD21 | LEU | X | 349 | 72.912 | 27.304 | 44.922 | 0.00 | 0.00 |
| ATOM | 5248 | HD22 | LEU | X | 349 | 71.532 | 28.147 | 45.141 | 0.00 | 0.00 |
| ATOM | 5249 | HD23 | LEU | X | 349 | 71.811 | 27.397 | 43.556 | 0.00 | 0.00 |
| ATOM | 5250 | C    | LEU | X | 349 | 72.489 | 31.248 | 47.348 | 0.00 | 0.00 |
| ATOM | 5251 | O    | LEU | X | 349 | 73.605 | 31.562 | 47.809 | 0.00 | 0.00 |
| ATOM | 5252 | N    | ILE | X | 350 | 71.443 | 31.470 | 48.128 | 0.00 | 0.00 |
| ATOM | 5253 | H    | ILE | X | 350 | 70.544 | 31.328 | 47.690 | 0.00 | 0.00 |
| ATOM | 5254 | CA   | ILE | X | 350 | 71.347 | 31.979 | 49.546 | 0.00 | 0.00 |
| ATOM | 5255 | HA   | ILE | X | 350 | 71.989 | 32.848 | 49.696 | 0.00 | 0.00 |
| ATOM | 5256 | CB   | ILE | X | 350 | 69.875 | 32.434 | 49.912 | 0.00 | 0.00 |
| ATOM | 5257 | HB   | ILE | X | 350 | 69.939 | 33.040 | 50.816 | 0.00 | 0.00 |
| ATOM | 5258 | CG2  | ILE | X | 350 | 69.519 | 33.369 | 48.815 | 0.00 | 0.00 |
| ATOM | 5259 | HG21 | ILE | X | 350 | 68.673 | 33.957 | 49.171 | 0.00 | 0.00 |
| ATOM | 5260 | HG22 | ILE | X | 350 | 69.243 | 32.934 | 47.854 | 0.00 | 0.00 |
| ATOM | 5261 | HG23 | ILE | X | 350 | 70.273 | 34.141 | 48.658 | 0.00 | 0.00 |
| ATOM | 5262 | CG1  | ILE | X | 350 | 68.793 | 31.306 | 49.988 | 0.00 | 0.00 |
| ATOM | 5263 | HG12 | ILE | X | 350 | 68.704 | 30.951 | 48.961 | 0.00 | 0.00 |
| ATOM | 5264 | HG13 | ILE | X | 350 | 69.006 | 30.363 | 50.492 | 0.00 | 0.00 |
| ATOM | 5265 | CD1  | ILE | X | 350 | 67.436 | 31.790 | 50.398 | 0.00 | 0.00 |
| ATOM | 5266 | HD11 | ILE | X | 350 | 66.916 | 32.246 | 49.555 | 0.00 | 0.00 |
| ATOM | 5267 | HD12 | ILE | X | 350 | 67.595 | 32.402 | 51.286 | 0.00 | 0.00 |
| ATOM | 5268 | HD13 | ILE | X | 350 | 66.888 | 31.005 | 50.919 | 0.00 | 0.00 |
| ATOM | 5269 | C    | ILE | X | 350 | 71.918 | 30.984 | 50.540 | 0.00 | 0.00 |
| ATOM | 5270 | O    | ILE | X | 350 | 71.524 | 29.832 | 50.648 | 0.00 | 0.00 |
| ATOM | 5271 | N    | SER | X | 351 | 73.003 | 31.401 | 51.258 | 0.00 | 0.00 |
| ATOM | 5272 | H    | SER | X | 351 | 73.302 | 32.359 | 51.141 | 0.00 | 0.00 |
| ATOM | 5273 | CA   | SER | X | 351 | 73.356 | 30.791 | 52.528 | 0.00 | 0.00 |
| ATOM | 5274 | HA   | SER | X | 351 | 73.550 | 29.733 | 52.352 | 0.00 | 0.00 |
| ATOM | 5275 | CB   | SER | X | 351 | 74.816 | 31.143 | 52.887 | 0.00 | 0.00 |
| ATOM | 5276 | HB2  | SER | X | 351 | 75.053 | 30.587 | 53.794 | 0.00 | 0.00 |
| ATOM | 5277 | HB3  | SER | X | 351 | 75.563 | 30.805 | 52.168 | 0.00 | 0.00 |
| ATOM | 5278 | OG   | SER | X | 351 | 75.054 | 32.537 | 53.072 | 0.00 | 0.00 |
| ATOM | 5279 | HG   | SER | X | 351 | 75.045 | 32.962 | 52.212 | 0.00 | 0.00 |
| ATOM | 5280 | C    | SER | X | 351 | 72.340 | 30.997 | 53.680 | 0.00 | 0.00 |
| ATOM | 5281 | O    | SER | X | 351 | 71.583 | 31.998 | 53.644 | 0.00 | 0.00 |
| ATOM | 5282 | N    | ARG | X | 352 | 72.468 | 30.305 | 54.828 | 0.00 | 0.00 |
| ATOM | 5283 | H    | ARG | X | 352 | 73.268 | 29.690 | 54.785 | 0.00 | 0.00 |
| ATOM | 5284 | CA   | ARG | X | 352 | 71.639 | 30.437 | 56.026 | 0.00 | 0.00 |
| ATOM | 5285 | HA   | ARG | X | 352 | 70.605 | 30.288 | 55.715 | 0.00 | 0.00 |
| ATOM | 5286 | CB   | ARG | X | 352 | 72.029 | 29.554 | 57.237 | 0.00 | 0.00 |
| ATOM | 5287 | HB2  | ARG | X | 352 | 73.118 | 29.560 | 57.289 | 0.00 | 0.00 |
| ATOM | 5288 | HB3  | ARG | X | 352 | 71.565 | 29.997 | 58.118 | 0.00 | 0.00 |
| ATOM | 5289 | CG   | ARG | X | 352 | 71.504 | 28.146 | 56.830 | 0.00 | 0.00 |
| ATOM | 5290 | HG2  | ARG | X | 352 | 70.490 | 28.184 | 56.432 | 0.00 | 0.00 |
| ATOM | 5291 | HG3  | ARG | X | 352 | 72.066 | 27.625 | 56.056 | 0.00 | 0.00 |

|      |      |      |     |   |     |        |        |        |      |      |
|------|------|------|-----|---|-----|--------|--------|--------|------|------|
| ATOM | 5292 | CD   | ARG | X | 352 | 71.622 | 27.251 | 58.039 | 0.00 | 0.00 |
| ATOM | 5293 | HD2  | ARG | X | 352 | 71.704 | 26.215 | 57.709 | 0.00 | 0.00 |
| ATOM | 5294 | HD3  | ARG | X | 352 | 72.622 | 27.384 | 58.452 | 0.00 | 0.00 |
| ATOM | 5295 | NE   | ARG | X | 352 | 70.584 | 27.482 | 59.069 | 0.00 | 0.00 |
| ATOM | 5296 | HE   | ARG | X | 352 | 70.900 | 28.092 | 59.809 | 0.00 | 0.00 |
| ATOM | 5297 | CZ   | ARG | X | 352 | 69.424 | 26.755 | 59.273 | 0.00 | 0.00 |
| ATOM | 5298 | NH1  | ARG | X | 352 | 69.078 | 25.887 | 58.362 | 0.00 | 0.00 |
| ATOM | 5299 | HH11 | ARG | X | 352 | 69.634 | 25.639 | 57.556 | 0.00 | 0.00 |
| ATOM | 5300 | HH12 | ARG | X | 352 | 68.232 | 25.369 | 58.551 | 0.00 | 0.00 |
| ATOM | 5301 | NH2  | ARG | X | 352 | 68.568 | 27.054 | 60.213 | 0.00 | 0.00 |
| ATOM | 5302 | HH21 | ARG | X | 352 | 68.780 | 27.723 | 60.939 | 0.00 | 0.00 |
| ATOM | 5303 | HH22 | ARG | X | 352 | 67.695 | 26.549 | 60.273 | 0.00 | 0.00 |
| ATOM | 5304 | C    | ARG | X | 352 | 71.564 | 31.841 | 56.557 | 0.00 | 0.00 |
| ATOM | 5305 | O    | ARG | X | 352 | 70.490 | 32.368 | 56.947 | 0.00 | 0.00 |
| ATOM | 5306 | N    | ALA | X | 353 | 72.621 | 32.610 | 56.509 | 0.00 | 0.00 |
| ATOM | 5307 | H    | ALA | X | 353 | 73.513 | 32.196 | 56.281 | 0.00 | 0.00 |
| ATOM | 5308 | CA   | ALA | X | 353 | 72.541 | 34.016 | 56.854 | 0.00 | 0.00 |
| ATOM | 5309 | HA   | ALA | X | 353 | 72.092 | 34.146 | 57.839 | 0.00 | 0.00 |
| ATOM | 5310 | CB   | ALA | X | 353 | 73.951 | 34.636 | 57.009 | 0.00 | 0.00 |
| ATOM | 5311 | HB1  | ALA | X | 353 | 73.902 | 35.724 | 57.009 | 0.00 | 0.00 |
| ATOM | 5312 | HB2  | ALA | X | 353 | 74.558 | 34.360 | 56.147 | 0.00 | 0.00 |
| ATOM | 5313 | HB3  | ALA | X | 353 | 74.327 | 34.386 | 58.001 | 0.00 | 0.00 |
| ATOM | 5314 | C    | ALA | X | 353 | 71.673 | 34.854 | 55.947 | 0.00 | 0.00 |
| ATOM | 5315 | O    | ALA | X | 353 | 70.926 | 35.723 | 56.417 | 0.00 | 0.00 |
| ATOM | 5316 | N    | GLU | X | 354 | 71.785 | 34.622 | 54.651 | 0.00 | 0.00 |
| ATOM | 5317 | H    | GLU | X | 354 | 72.041 | 33.682 | 54.386 | 0.00 | 0.00 |
| ATOM | 5318 | CA   | GLU | X | 354 | 71.087 | 35.392 | 53.555 | 0.00 | 0.00 |
| ATOM | 5319 | HA   | GLU | X | 354 | 71.134 | 36.446 | 53.828 | 0.00 | 0.00 |
| ATOM | 5320 | CB   | GLU | X | 354 | 71.751 | 35.164 | 52.161 | 0.00 | 0.00 |
| ATOM | 5321 | HB2  | GLU | X | 354 | 71.584 | 34.096 | 52.026 | 0.00 | 0.00 |
| ATOM | 5322 | HB3  | GLU | X | 354 | 71.143 | 35.740 | 51.463 | 0.00 | 0.00 |
| ATOM | 5323 | CG   | GLU | X | 354 | 73.233 | 35.526 | 51.951 | 0.00 | 0.00 |
| ATOM | 5324 | HG2  | GLU | X | 354 | 73.300 | 36.609 | 51.840 | 0.00 | 0.00 |
| ATOM | 5325 | HG3  | GLU | X | 354 | 73.853 | 35.215 | 52.791 | 0.00 | 0.00 |
| ATOM | 5326 | CD   | GLU | X | 354 | 73.840 | 34.959 | 50.688 | 0.00 | 0.00 |
| ATOM | 5327 | OE1  | GLU | X | 354 | 73.721 | 35.628 | 49.593 | 0.00 | 0.00 |
| ATOM | 5328 | OE2  | GLU | X | 354 | 74.342 | 33.851 | 50.750 | 0.00 | 0.00 |
| ATOM | 5329 | C    | GLU | X | 354 | 69.541 | 35.020 | 53.602 | 0.00 | 0.00 |
| ATOM | 5330 | O    | GLU | X | 354 | 68.620 | 35.817 | 53.441 | 0.00 | 0.00 |
| ATOM | 5331 | N    | PHE | X | 355 | 69.292 | 33.753 | 54.020 | 0.00 | 0.00 |
| ATOM | 5332 | H    | PHE | X | 355 | 70.110 | 33.163 | 53.972 | 0.00 | 0.00 |
| ATOM | 5333 | CA   | PHE | X | 355 | 67.909 | 33.268 | 54.239 | 0.00 | 0.00 |
| ATOM | 5334 | HA   | PHE | X | 355 | 67.294 | 33.422 | 53.352 | 0.00 | 0.00 |
| ATOM | 5335 | CB   | PHE | X | 355 | 67.885 | 31.751 | 54.354 | 0.00 | 0.00 |
| ATOM | 5336 | HB2  | PHE | X | 355 | 68.116 | 31.409 | 53.345 | 0.00 | 0.00 |
| ATOM | 5337 | HB3  | PHE | X | 355 | 68.696 | 31.443 | 55.014 | 0.00 | 0.00 |
| ATOM | 5338 | CG   | PHE | X | 355 | 66.593 | 31.117 | 54.890 | 0.00 | 0.00 |
| ATOM | 5339 | CD1  | PHE | X | 355 | 65.441 | 31.516 | 54.306 | 0.00 | 0.00 |
| ATOM | 5340 | HD1  | PHE | X | 355 | 65.545 | 32.197 | 53.474 | 0.00 | 0.00 |
| ATOM | 5341 | CE1  | PHE | X | 355 | 64.207 | 31.145 | 54.697 | 0.00 | 0.00 |
| ATOM | 5342 | HE1  | PHE | X | 355 | 63.357 | 31.596 | 54.207 | 0.00 | 0.00 |
| ATOM | 5343 | CZ   | PHE | X | 355 | 64.123 | 30.146 | 55.769 | 0.00 | 0.00 |
| ATOM | 5344 | HZ   | PHE | X | 355 | 63.120 | 29.805 | 55.982 | 0.00 | 0.00 |
| ATOM | 5345 | CE2  | PHE | X | 355 | 65.301 | 29.663 | 56.349 | 0.00 | 0.00 |
| ATOM | 5346 | HE2  | PHE | X | 355 | 65.279 | 28.931 | 57.142 | 0.00 | 0.00 |
| ATOM | 5347 | CD2  | PHE | X | 355 | 66.551 | 30.158 | 55.913 | 0.00 | 0.00 |
| ATOM | 5348 | HD2  | PHE | X | 355 | 67.429 | 29.872 | 56.472 | 0.00 | 0.00 |
| ATOM | 5349 | C    | PHE | X | 355 | 67.242 | 33.912 | 55.508 | 0.00 | 0.00 |
| ATOM | 5350 | O    | PHE | X | 355 | 66.120 | 34.401 | 55.425 | 0.00 | 0.00 |
| ATOM | 5351 | N    | LEU | X | 356 | 67.981 | 34.054 | 56.611 | 0.00 | 0.00 |
| ATOM | 5352 | H    | LEU | X | 356 | 68.787 | 33.454 | 56.717 | 0.00 | 0.00 |
| ATOM | 5353 | CA   | LEU | X | 356 | 67.687 | 34.900 | 57.737 | 0.00 | 0.00 |
| ATOM | 5354 | HA   | LEU | X | 356 | 66.852 | 34.402 | 58.229 | 0.00 | 0.00 |
| ATOM | 5355 | CB   | LEU | X | 356 | 68.808 | 34.897 | 58.761 | 0.00 | 0.00 |
| ATOM | 5356 | HB2  | LEU | X | 356 | 69.346 | 33.949 | 58.765 | 0.00 | 0.00 |
| ATOM | 5357 | HB3  | LEU | X | 356 | 69.481 | 35.682 | 58.416 | 0.00 | 0.00 |
| ATOM | 5358 | CG   | LEU | X | 356 | 68.451 | 35.270 | 60.188 | 0.00 | 0.00 |

|      |      |      |     |   |     |        |        |        |      |      |
|------|------|------|-----|---|-----|--------|--------|--------|------|------|
| ATOM | 5359 | HG   | LEU | X | 356 | 67.919 | 36.218 | 60.108 | 0.00 | 0.00 |
| ATOM | 5360 | CD1  | LEU | X | 356 | 67.470 | 34.257 | 60.922 | 0.00 | 0.00 |
| ATOM | 5361 | HD11 | LEU | X | 356 | 67.906 | 33.261 | 61.008 | 0.00 | 0.00 |
| ATOM | 5362 | HD12 | LEU | X | 356 | 66.513 | 34.281 | 60.401 | 0.00 | 0.00 |
| ATOM | 5363 | HD13 | LEU | X | 356 | 67.283 | 34.759 | 61.871 | 0.00 | 0.00 |
| ATOM | 5364 | CD2  | LEU | X | 356 | 69.807 | 35.452 | 60.835 | 0.00 | 0.00 |
| ATOM | 5365 | HD21 | LEU | X | 356 | 70.416 | 36.252 | 60.412 | 0.00 | 0.00 |
| ATOM | 5366 | HD22 | LEU | X | 356 | 69.681 | 35.648 | 61.900 | 0.00 | 0.00 |
| ATOM | 5367 | HD23 | LEU | X | 356 | 70.311 | 34.502 | 60.657 | 0.00 | 0.00 |
| ATOM | 5368 | C    | LEU | X | 356 | 67.115 | 36.296 | 57.378 | 0.00 | 0.00 |
| ATOM | 5369 | O    | LEU | X | 356 | 66.164 | 36.788 | 57.977 | 0.00 | 0.00 |
| ATOM | 5370 | N    | ALA | X | 357 | 67.901 | 36.966 | 56.562 | 0.00 | 0.00 |
| ATOM | 5371 | H    | ALA | X | 357 | 68.531 | 36.444 | 55.971 | 0.00 | 0.00 |
| ATOM | 5372 | CA   | ALA | X | 357 | 67.650 | 38.316 | 56.121 | 0.00 | 0.00 |
| ATOM | 5373 | HA   | ALA | X | 357 | 67.446 | 38.950 | 56.984 | 0.00 | 0.00 |
| ATOM | 5374 | CB   | ALA | X | 357 | 68.961 | 38.722 | 55.459 | 0.00 | 0.00 |
| ATOM | 5375 | HB1  | ALA | X | 357 | 69.255 | 38.096 | 54.618 | 0.00 | 0.00 |
| ATOM | 5376 | HB2  | ALA | X | 357 | 69.824 | 38.713 | 56.124 | 0.00 | 0.00 |
| ATOM | 5377 | HB3  | ALA | X | 357 | 68.823 | 39.697 | 54.991 | 0.00 | 0.00 |
| ATOM | 5378 | C    | ALA | X | 357 | 66.345 | 38.233 | 55.155 | 0.00 | 0.00 |
| ATOM | 5379 | O    | ALA | X | 357 | 65.486 | 39.073 | 55.274 | 0.00 | 0.00 |
| ATOM | 5380 | N    | GLY | X | 358 | 66.231 | 37.142 | 54.366 | 0.00 | 0.00 |
| ATOM | 5381 | H    | GLY | X | 358 | 67.072 | 36.617 | 54.171 | 0.00 | 0.00 |
| ATOM | 5382 | CA   | GLY | X | 358 | 65.122 | 36.698 | 53.558 | 0.00 | 0.00 |
| ATOM | 5383 | HA2  | GLY | X | 358 | 65.008 | 37.223 | 52.609 | 0.00 | 0.00 |
| ATOM | 5384 | HA3  | GLY | X | 358 | 65.299 | 35.660 | 53.277 | 0.00 | 0.00 |
| ATOM | 5385 | C    | GLY | X | 358 | 63.917 | 36.766 | 54.407 | 0.00 | 0.00 |
| ATOM | 5386 | O    | GLY | X | 358 | 63.064 | 37.613 | 54.051 | 0.00 | 0.00 |
| ATOM | 5387 | N    | VAL | X | 359 | 63.792 | 35.884 | 55.399 | 0.00 | 0.00 |
| ATOM | 5388 | H    | VAL | X | 359 | 64.581 | 35.300 | 55.637 | 0.00 | 0.00 |
| ATOM | 5389 | CA   | VAL | X | 359 | 62.578 | 35.930 | 56.226 | 0.00 | 0.00 |
| ATOM | 5390 | HA   | VAL | X | 359 | 61.828 | 35.558 | 55.527 | 0.00 | 0.00 |
| ATOM | 5391 | CB   | VAL | X | 359 | 62.611 | 34.994 | 57.454 | 0.00 | 0.00 |
| ATOM | 5392 | HB   | VAL | X | 359 | 63.603 | 34.982 | 57.906 | 0.00 | 0.00 |
| ATOM | 5393 | CG1  | VAL | X | 359 | 61.681 | 35.413 | 58.553 | 0.00 | 0.00 |
| ATOM | 5394 | HG11 | VAL | X | 359 | 61.820 | 36.394 | 59.006 | 0.00 | 0.00 |
| ATOM | 5395 | HG12 | VAL | X | 359 | 60.622 | 35.433 | 58.295 | 0.00 | 0.00 |
| ATOM | 5396 | HG13 | VAL | X | 359 | 61.827 | 34.715 | 59.378 | 0.00 | 0.00 |
| ATOM | 5397 | CG2  | VAL | X | 359 | 62.318 | 33.497 | 56.986 | 0.00 | 0.00 |
| ATOM | 5398 | HG21 | VAL | X | 359 | 61.339 | 33.390 | 56.518 | 0.00 | 0.00 |
| ATOM | 5399 | HG22 | VAL | X | 359 | 62.182 | 32.890 | 57.881 | 0.00 | 0.00 |
| ATOM | 5400 | HG23 | VAL | X | 359 | 63.168 | 33.075 | 56.449 | 0.00 | 0.00 |
| ATOM | 5401 | C    | VAL | X | 359 | 62.188 | 37.394 | 56.727 | 0.00 | 0.00 |
| ATOM | 5402 | O    | VAL | X | 359 | 61.065 | 37.790 | 56.460 | 0.00 | 0.00 |
| ATOM | 5403 | N    | ARG | X | 360 | 63.195 | 38.165 | 57.283 | 0.00 | 0.00 |
| ATOM | 5404 | H    | ARG | X | 360 | 64.065 | 37.682 | 57.453 | 0.00 | 0.00 |
| ATOM | 5405 | CA   | ARG | X | 360 | 63.051 | 39.604 | 57.683 | 0.00 | 0.00 |
| ATOM | 5406 | HA   | ARG | X | 360 | 62.390 | 39.630 | 58.550 | 0.00 | 0.00 |
| ATOM | 5407 | CB   | ARG | X | 360 | 64.426 | 40.119 | 58.184 | 0.00 | 0.00 |
| ATOM | 5408 | HB2  | ARG | X | 360 | 64.849 | 39.364 | 58.846 | 0.00 | 0.00 |
| ATOM | 5409 | HB3  | ARG | X | 360 | 65.105 | 40.392 | 57.377 | 0.00 | 0.00 |
| ATOM | 5410 | CG   | ARG | X | 360 | 64.255 | 41.445 | 58.917 | 0.00 | 0.00 |
| ATOM | 5411 | HG2  | ARG | X | 360 | 63.727 | 42.242 | 58.394 | 0.00 | 0.00 |
| ATOM | 5412 | HG3  | ARG | X | 360 | 63.585 | 41.261 | 59.756 | 0.00 | 0.00 |
| ATOM | 5413 | CD   | ARG | X | 360 | 65.592 | 41.956 | 59.441 | 0.00 | 0.00 |
| ATOM | 5414 | HD2  | ARG | X | 360 | 65.298 | 42.683 | 60.197 | 0.00 | 0.00 |
| ATOM | 5415 | HD3  | ARG | X | 360 | 66.161 | 41.140 | 59.887 | 0.00 | 0.00 |
| ATOM | 5416 | NE   | ARG | X | 360 | 66.341 | 42.670 | 58.384 | 0.00 | 0.00 |
| ATOM | 5417 | HE   | ARG | X | 360 | 66.155 | 43.646 | 58.202 | 0.00 | 0.00 |
| ATOM | 5418 | CZ   | ARG | X | 360 | 67.401 | 42.230 | 57.725 | 0.00 | 0.00 |
| ATOM | 5419 | NH1  | ARG | X | 360 | 68.062 | 41.109 | 58.078 | 0.00 | 0.00 |
| ATOM | 5420 | HH11 | ARG | X | 360 | 67.772 | 40.540 | 58.860 | 0.00 | 0.00 |
| ATOM | 5421 | HH12 | ARG | X | 360 | 68.918 | 40.840 | 57.614 | 0.00 | 0.00 |
| ATOM | 5422 | NH2  | ARG | X | 360 | 67.973 | 42.981 | 56.830 | 0.00 | 0.00 |
| ATOM | 5423 | HH21 | ARG | X | 360 | 67.594 | 43.896 | 56.635 | 0.00 | 0.00 |
| ATOM | 5424 | HH22 | ARG | X | 360 | 68.911 | 42.792 | 56.507 | 0.00 | 0.00 |
| ATOM | 5425 | C    | ARG | X | 360 | 62.455 | 40.472 | 56.577 | 0.00 | 0.00 |

|      |      |      |     |   |     |        |        |        |      |      |
|------|------|------|-----|---|-----|--------|--------|--------|------|------|
| ATOM | 5426 | O    | ARG | X | 360 | 61.514 | 41.238 | 56.869 | 0.00 | 0.00 |
| ATOM | 5427 | N    | VAL | X | 361 | 62.777 | 40.223 | 55.287 | 0.00 | 0.00 |
| ATOM | 5428 | H    | VAL | X | 361 | 63.597 | 39.638 | 55.212 | 0.00 | 0.00 |
| ATOM | 5429 | CA   | VAL | X | 361 | 62.140 | 41.006 | 54.137 | 0.00 | 0.00 |
| ATOM | 5430 | HA   | VAL | X | 361 | 61.769 | 41.913 | 54.614 | 0.00 | 0.00 |
| ATOM | 5431 | CB   | VAL | X | 361 | 63.266 | 41.510 | 53.215 | 0.00 | 0.00 |
| ATOM | 5432 | HB   | VAL | X | 361 | 62.853 | 42.198 | 52.477 | 0.00 | 0.00 |
| ATOM | 5433 | CG1  | VAL | X | 361 | 64.253 | 42.329 | 54.030 | 0.00 | 0.00 |
| ATOM | 5434 | HG11 | VAL | X | 361 | 63.670 | 43.122 | 54.500 | 0.00 | 0.00 |
| ATOM | 5435 | HG12 | VAL | X | 361 | 64.852 | 41.681 | 54.670 | 0.00 | 0.00 |
| ATOM | 5436 | HG13 | VAL | X | 361 | 64.867 | 42.905 | 53.338 | 0.00 | 0.00 |
| ATOM | 5437 | CG2  | VAL | X | 361 | 64.001 | 40.491 | 52.336 | 0.00 | 0.00 |
| ATOM | 5438 | HG21 | VAL | X | 361 | 64.777 | 40.939 | 51.716 | 0.00 | 0.00 |
| ATOM | 5439 | HG22 | VAL | X | 361 | 63.303 | 39.940 | 51.705 | 0.00 | 0.00 |
| ATOM | 5440 | HG23 | VAL | X | 361 | 64.477 | 39.764 | 52.994 | 0.00 | 0.00 |
| ATOM | 5441 | C    | VAL | X | 361 | 60.923 | 40.399 | 53.456 | 0.00 | 0.00 |
| ATOM | 5442 | O    | VAL | X | 361 | 60.109 | 41.056 | 52.796 | 0.00 | 0.00 |
| ATOM | 5443 | N    | GLY | X | 362 | 60.718 | 39.072 | 53.685 | 0.00 | 0.00 |
| ATOM | 5444 | H    | GLY | X | 362 | 61.443 | 38.580 | 54.186 | 0.00 | 0.00 |
| ATOM | 5445 | CA   | GLY | X | 362 | 59.506 | 38.260 | 53.292 | 0.00 | 0.00 |
| ATOM | 5446 | HA2  | GLY | X | 362 | 59.127 | 38.864 | 52.467 | 0.00 | 0.00 |
| ATOM | 5447 | HA3  | GLY | X | 362 | 59.622 | 37.232 | 52.950 | 0.00 | 0.00 |
| ATOM | 5448 | C    | GLY | X | 362 | 58.271 | 38.220 | 54.209 | 0.00 | 0.00 |
| ATOM | 5449 | O    | GLY | X | 362 | 57.182 | 38.328 | 53.763 | 0.00 | 0.00 |
| ATOM | 5450 | N    | VAL | X | 363 | 58.493 | 38.391 | 55.501 | 0.00 | 0.00 |
| ATOM | 5451 | H    | VAL | X | 363 | 59.430 | 38.339 | 55.873 | 0.00 | 0.00 |
| ATOM | 5452 | CA   | VAL | X | 363 | 57.411 | 38.532 | 56.513 | 0.00 | 0.00 |
| ATOM | 5453 | HA   | VAL | X | 363 | 56.484 | 38.329 | 55.976 | 0.00 | 0.00 |
| ATOM | 5454 | CB   | VAL | X | 363 | 57.492 | 37.442 | 57.624 | 0.00 | 0.00 |
| ATOM | 5455 | HB   | VAL | X | 363 | 58.383 | 37.668 | 58.210 | 0.00 | 0.00 |
| ATOM | 5456 | CG1  | VAL | X | 363 | 56.266 | 37.607 | 58.490 | 0.00 | 0.00 |
| ATOM | 5457 | HG11 | VAL | X | 363 | 56.307 | 36.875 | 59.297 | 0.00 | 0.00 |
| ATOM | 5458 | HG12 | VAL | X | 363 | 56.391 | 38.546 | 59.028 | 0.00 | 0.00 |
| ATOM | 5459 | HG13 | VAL | X | 363 | 55.317 | 37.445 | 57.980 | 0.00 | 0.00 |
| ATOM | 5460 | CG2  | VAL | X | 363 | 57.628 | 35.969 | 57.072 | 0.00 | 0.00 |
| ATOM | 5461 | HG21 | VAL | X | 363 | 56.710 | 35.659 | 56.572 | 0.00 | 0.00 |
| ATOM | 5462 | HG22 | VAL | X | 363 | 57.734 | 35.361 | 57.971 | 0.00 | 0.00 |
| ATOM | 5463 | HG23 | VAL | X | 363 | 58.585 | 35.856 | 56.564 | 0.00 | 0.00 |
| ATOM | 5464 | C    | VAL | X | 363 | 57.453 | 39.984 | 57.066 | 0.00 | 0.00 |
| ATOM | 5465 | O    | VAL | X | 363 | 58.470 | 40.376 | 57.700 | 0.00 | 0.00 |
| ATOM | 5466 | N    | PRO | X | 364 | 56.401 | 40.838 | 56.873 | 0.00 | 0.00 |
| ATOM | 5467 | CD   | PRO | X | 364 | 55.173 | 40.493 | 56.053 | 0.00 | 0.00 |
| ATOM | 5468 | HD2  | PRO | X | 364 | 54.621 | 39.623 | 56.411 | 0.00 | 0.00 |
| ATOM | 5469 | HD3  | PRO | X | 364 | 55.433 | 40.421 | 54.997 | 0.00 | 0.00 |
| ATOM | 5470 | CG   | PRO | X | 364 | 54.299 | 41.666 | 56.378 | 0.00 | 0.00 |
| ATOM | 5471 | HG2  | PRO | X | 364 | 53.674 | 41.500 | 57.256 | 0.00 | 0.00 |
| ATOM | 5472 | HG3  | PRO | X | 364 | 53.746 | 41.972 | 55.490 | 0.00 | 0.00 |
| ATOM | 5473 | CB   | PRO | X | 364 | 55.239 | 42.825 | 56.701 | 0.00 | 0.00 |
| ATOM | 5474 | HB2  | PRO | X | 364 | 54.714 | 43.572 | 57.296 | 0.00 | 0.00 |
| ATOM | 5475 | HB3  | PRO | X | 364 | 55.580 | 43.220 | 55.744 | 0.00 | 0.00 |
| ATOM | 5476 | CA   | PRO | X | 364 | 56.355 | 42.179 | 57.454 | 0.00 | 0.00 |
| ATOM | 5477 | HA   | PRO | X | 364 | 57.200 | 42.813 | 57.183 | 0.00 | 0.00 |
| ATOM | 5478 | C    | PRO | X | 364 | 56.164 | 42.013 | 58.922 | 0.00 | 0.00 |
| ATOM | 5479 | O    | PRO | X | 364 | 55.603 | 41.041 | 59.432 | 0.00 | 0.00 |
| ATOM | 5480 | N    | GLN | X | 365 | 56.624 | 43.078 | 59.573 | 0.00 | 0.00 |
| ATOM | 5481 | H    | GLN | X | 365 | 57.020 | 43.826 | 59.022 | 0.00 | 0.00 |
| ATOM | 5482 | CA   | GLN | X | 365 | 56.725 | 43.400 | 61.006 | 0.00 | 0.00 |
| ATOM | 5483 | HA   | GLN | X | 365 | 56.922 | 44.466 | 61.121 | 0.00 | 0.00 |
| ATOM | 5484 | CB   | GLN | X | 365 | 55.379 | 43.066 | 61.597 | 0.00 | 0.00 |
| ATOM | 5485 | HB2  | GLN | X | 365 | 54.694 | 43.261 | 60.772 | 0.00 | 0.00 |
| ATOM | 5486 | HB3  | GLN | X | 365 | 55.168 | 42.021 | 61.826 | 0.00 | 0.00 |
| ATOM | 5487 | CG   | GLN | X | 365 | 55.078 | 43.986 | 62.809 | 0.00 | 0.00 |
| ATOM | 5488 | HG2  | GLN | X | 365 | 55.917 | 43.952 | 63.504 | 0.00 | 0.00 |
| ATOM | 5489 | HG3  | GLN | X | 365 | 54.908 | 44.978 | 62.391 | 0.00 | 0.00 |
| ATOM | 5490 | CD   | GLN | X | 365 | 53.813 | 43.621 | 63.633 | 0.00 | 0.00 |
| ATOM | 5491 | OE1  | GLN | X | 365 | 53.062 | 42.660 | 63.353 | 0.00 | 0.00 |
| ATOM | 5492 | NE2  | GLN | X | 365 | 53.428 | 44.344 | 64.678 | 0.00 | 0.00 |

|      |      |      |     |   |     |        |        |        |      |      |
|------|------|------|-----|---|-----|--------|--------|--------|------|------|
| ATOM | 5493 | HE21 | GLN | X | 365 | 52.568 | 44.042 | 65.113 | 0.00 | 0.00 |
| ATOM | 5494 | HE22 | GLN | X | 365 | 54.198 | 44.894 | 65.031 | 0.00 | 0.00 |
| ATOM | 5495 | C    | GLN | X | 365 | 57.854 | 42.595 | 61.695 | 0.00 | 0.00 |
| ATOM | 5496 | O    | GLN | X | 365 | 58.370 | 43.030 | 62.734 | 0.00 | 0.00 |
| ATOM | 5497 | N    | VAL | X | 366 | 58.200 | 41.395 | 61.178 | 0.00 | 0.00 |
| ATOM | 5498 | H    | VAL | X | 366 | 57.735 | 41.151 | 60.316 | 0.00 | 0.00 |
| ATOM | 5499 | CA   | VAL | X | 366 | 59.149 | 40.418 | 61.759 | 0.00 | 0.00 |
| ATOM | 5500 | HA   | VAL | X | 366 | 58.968 | 40.306 | 62.828 | 0.00 | 0.00 |
| ATOM | 5501 | CB   | VAL | X | 366 | 58.994 | 39.044 | 61.006 | 0.00 | 0.00 |
| ATOM | 5502 | HB   | VAL | X | 366 | 58.614 | 39.270 | 60.009 | 0.00 | 0.00 |
| ATOM | 5503 | CG1  | VAL | X | 366 | 60.227 | 38.193 | 60.779 | 0.00 | 0.00 |
| ATOM | 5504 | HG11 | VAL | X | 366 | 60.636 | 37.974 | 61.765 | 0.00 | 0.00 |
| ATOM | 5505 | HG12 | VAL | X | 366 | 59.908 | 37.245 | 60.347 | 0.00 | 0.00 |
| ATOM | 5506 | HG13 | VAL | X | 366 | 60.910 | 38.649 | 60.062 | 0.00 | 0.00 |
| ATOM | 5507 | CG2  | VAL | X | 366 | 57.957 | 37.976 | 61.473 | 0.00 | 0.00 |
| ATOM | 5508 | HG21 | VAL | X | 366 | 57.819 | 37.172 | 60.750 | 0.00 | 0.00 |
| ATOM | 5509 | HG22 | VAL | X | 366 | 57.016 | 38.453 | 61.749 | 0.00 | 0.00 |
| ATOM | 5510 | HG23 | VAL | X | 366 | 58.315 | 37.527 | 62.400 | 0.00 | 0.00 |
| ATOM | 5511 | C    | VAL | X | 366 | 60.550 | 40.866 | 61.576 | 0.00 | 0.00 |
| ATOM | 5512 | O    | VAL | X | 366 | 61.048 | 41.227 | 60.476 | 0.00 | 0.00 |
| ATOM | 5513 | N    | SER | X | 367 | 61.108 | 41.031 | 62.739 | 0.00 | 0.00 |
| ATOM | 5514 | H    | SER | X | 367 | 60.461 | 40.988 | 63.513 | 0.00 | 0.00 |
| ATOM | 5515 | CA   | SER | X | 367 | 62.483 | 41.366 | 63.108 | 0.00 | 0.00 |
| ATOM | 5516 | HA   | SER | X | 367 | 62.816 | 42.151 | 62.429 | 0.00 | 0.00 |
| ATOM | 5517 | CB   | SER | X | 367 | 62.503 | 41.854 | 64.527 | 0.00 | 0.00 |
| ATOM | 5518 | HB2  | SER | X | 367 | 63.548 | 41.958 | 64.821 | 0.00 | 0.00 |
| ATOM | 5519 | HB3  | SER | X | 367 | 61.982 | 42.809 | 64.593 | 0.00 | 0.00 |
| ATOM | 5520 | OG   | SER | X | 367 | 61.846 | 40.959 | 65.333 | 0.00 | 0.00 |
| ATOM | 5521 | HG   | SER | X | 367 | 60.911 | 41.138 | 65.207 | 0.00 | 0.00 |
| ATOM | 5522 | C    | SER | X | 367 | 63.415 | 40.187 | 62.970 | 0.00 | 0.00 |
| ATOM | 5523 | O    | SER | X | 367 | 63.047 | 39.135 | 62.533 | 0.00 | 0.00 |
| ATOM | 5524 | N    | ASP | X | 368 | 64.741 | 40.453 | 63.256 | 0.00 | 0.00 |
| ATOM | 5525 | H    | ASP | X | 368 | 64.980 | 41.417 | 63.441 | 0.00 | 0.00 |
| ATOM | 5526 | CA   | ASP | X | 368 | 65.883 | 39.486 | 62.989 | 0.00 | 0.00 |
| ATOM | 5527 | HA   | ASP | X | 368 | 65.833 | 39.001 | 62.014 | 0.00 | 0.00 |
| ATOM | 5528 | CB   | ASP | X | 368 | 67.191 | 40.249 | 63.003 | 0.00 | 0.00 |
| ATOM | 5529 | HB2  | ASP | X | 368 | 67.264 | 40.910 | 62.140 | 0.00 | 0.00 |
| ATOM | 5530 | HB3  | ASP | X | 368 | 67.251 | 40.923 | 63.857 | 0.00 | 0.00 |
| ATOM | 5531 | CG   | ASP | X | 368 | 68.469 | 39.440 | 62.995 | 0.00 | 0.00 |
| ATOM | 5532 | OD1  | ASP | X | 368 | 69.182 | 39.464 | 64.028 | 0.00 | 0.00 |
| ATOM | 5533 | OD2  | ASP | X | 368 | 68.767 | 38.813 | 61.944 | 0.00 | 0.00 |
| ATOM | 5534 | C    | ASP | X | 368 | 65.895 | 38.455 | 64.133 | 0.00 | 0.00 |
| ATOM | 5535 | O    | ASP | X | 368 | 66.341 | 37.327 | 63.921 | 0.00 | 0.00 |
| ATOM | 5536 | N    | LEU | X | 369 | 65.361 | 38.727 | 65.321 | 0.00 | 0.00 |
| ATOM | 5537 | H    | LEU | X | 369 | 65.031 | 39.666 | 65.496 | 0.00 | 0.00 |
| ATOM | 5538 | CA   | LEU | X | 369 | 65.293 | 37.740 | 66.468 | 0.00 | 0.00 |
| ATOM | 5539 | HA   | LEU | X | 369 | 66.177 | 37.106 | 66.402 | 0.00 | 0.00 |
| ATOM | 5540 | CB   | LEU | X | 369 | 65.128 | 38.384 | 67.944 | 0.00 | 0.00 |
| ATOM | 5541 | HB2  | LEU | X | 369 | 65.958 | 39.030 | 68.230 | 0.00 | 0.00 |
| ATOM | 5542 | HB3  | LEU | X | 369 | 64.233 | 39.006 | 67.927 | 0.00 | 0.00 |
| ATOM | 5543 | CG   | LEU | X | 369 | 65.013 | 37.376 | 69.092 | 0.00 | 0.00 |
| ATOM | 5544 | HG   | LEU | X | 369 | 64.089 | 36.802 | 69.024 | 0.00 | 0.00 |
| ATOM | 5545 | CD1  | LEU | X | 369 | 66.209 | 36.407 | 69.193 | 0.00 | 0.00 |
| ATOM | 5546 | HD11 | LEU | X | 369 | 66.211 | 35.783 | 70.086 | 0.00 | 0.00 |
| ATOM | 5547 | HD12 | LEU | X | 369 | 67.121 | 37.004 | 69.155 | 0.00 | 0.00 |
| ATOM | 5548 | HD13 | LEU | X | 369 | 66.210 | 35.781 | 68.301 | 0.00 | 0.00 |
| ATOM | 5549 | CD2  | LEU | X | 369 | 64.740 | 38.028 | 70.462 | 0.00 | 0.00 |
| ATOM | 5550 | HD21 | LEU | X | 369 | 65.608 | 38.639 | 70.709 | 0.00 | 0.00 |
| ATOM | 5551 | HD22 | LEU | X | 369 | 63.836 | 38.631 | 70.378 | 0.00 | 0.00 |
| ATOM | 5552 | HD23 | LEU | X | 369 | 64.590 | 37.211 | 71.168 | 0.00 | 0.00 |
| ATOM | 5553 | C    | LEU | X | 369 | 64.080 | 36.852 | 66.249 | 0.00 | 0.00 |
| ATOM | 5554 | O    | LEU | X | 369 | 64.230 | 35.618 | 66.291 | 0.00 | 0.00 |
| ATOM | 5555 | N    | ALA | X | 370 | 63.000 | 37.428 | 65.856 | 0.00 | 0.00 |
| ATOM | 5556 | H    | ALA | X | 370 | 63.133 | 38.366 | 65.508 | 0.00 | 0.00 |
| ATOM | 5557 | CA   | ALA | X | 370 | 61.907 | 36.722 | 65.236 | 0.00 | 0.00 |
| ATOM | 5558 | HA   | ALA | X | 370 | 61.495 | 35.955 | 65.892 | 0.00 | 0.00 |
| ATOM | 5559 | CB   | ALA | X | 370 | 60.776 | 37.704 | 64.869 | 0.00 | 0.00 |

|      |      |      |     |   |     |        |        |        |      |      |
|------|------|------|-----|---|-----|--------|--------|--------|------|------|
| ATOM | 5560 | HB1  | ALA | X | 370 | 59.861 | 37.243 | 64.496 | 0.00 | 0.00 |
| ATOM | 5561 | HB2  | ALA | X | 370 | 61.213 | 38.489 | 64.252 | 0.00 | 0.00 |
| ATOM | 5562 | HB3  | ALA | X | 370 | 60.478 | 38.159 | 65.814 | 0.00 | 0.00 |
| ATOM | 5563 | C    | ALA | X | 370 | 62.279 | 35.888 | 63.996 | 0.00 | 0.00 |
| ATOM | 5564 | O    | ALA | X | 370 | 61.830 | 34.773 | 63.914 | 0.00 | 0.00 |
| ATOM | 5565 | N    | ALA | X | 371 | 62.970 | 36.459 | 63.045 | 0.00 | 0.00 |
| ATOM | 5566 | H    | ALA | X | 371 | 63.091 | 37.456 | 63.148 | 0.00 | 0.00 |
| ATOM | 5567 | CA   | ALA | X | 371 | 63.559 | 35.780 | 61.919 | 0.00 | 0.00 |
| ATOM | 5568 | HA   | ALA | X | 371 | 62.722 | 35.363 | 61.360 | 0.00 | 0.00 |
| ATOM | 5569 | CB   | ALA | X | 371 | 64.377 | 36.636 | 60.926 | 0.00 | 0.00 |
| ATOM | 5570 | HB1  | ALA | X | 371 | 65.252 | 36.963 | 61.489 | 0.00 | 0.00 |
| ATOM | 5571 | HB2  | ALA | X | 371 | 63.759 | 37.487 | 60.642 | 0.00 | 0.00 |
| ATOM | 5572 | HB3  | ALA | X | 371 | 64.651 | 36.123 | 60.004 | 0.00 | 0.00 |
| ATOM | 5573 | C    | ALA | X | 371 | 64.368 | 34.579 | 62.358 | 0.00 | 0.00 |
| ATOM | 5574 | O    | ALA | X | 371 | 64.033 | 33.408 | 62.069 | 0.00 | 0.00 |
| ATOM | 5575 | N    | GLU | X | 372 | 65.241 | 34.705 | 63.349 | 0.00 | 0.00 |
| ATOM | 5576 | H    | GLU | X | 372 | 65.487 | 35.634 | 63.657 | 0.00 | 0.00 |
| ATOM | 5577 | CA   | GLU | X | 372 | 65.940 | 33.547 | 64.014 | 0.00 | 0.00 |
| ATOM | 5578 | HA   | GLU | X | 372 | 66.428 | 33.005 | 63.204 | 0.00 | 0.00 |
| ATOM | 5579 | CB   | GLU | X | 372 | 67.008 | 33.765 | 65.066 | 0.00 | 0.00 |
| ATOM | 5580 | HB2  | GLU | X | 372 | 66.438 | 34.357 | 65.782 | 0.00 | 0.00 |
| ATOM | 5581 | HB3  | GLU | X | 372 | 67.172 | 32.795 | 65.534 | 0.00 | 0.00 |
| ATOM | 5582 | CG   | GLU | X | 372 | 68.341 | 34.382 | 64.642 | 0.00 | 0.00 |
| ATOM | 5583 | HG2  | GLU | X | 372 | 68.824 | 33.680 | 63.963 | 0.00 | 0.00 |
| ATOM | 5584 | HG3  | GLU | X | 372 | 68.167 | 35.252 | 64.009 | 0.00 | 0.00 |
| ATOM | 5585 | CD   | GLU | X | 372 | 69.204 | 34.627 | 65.824 | 0.00 | 0.00 |
| ATOM | 5586 | OE1  | GLU | X | 372 | 69.456 | 35.796 | 66.181 | 0.00 | 0.00 |
| ATOM | 5587 | OE2  | GLU | X | 372 | 69.663 | 33.720 | 66.453 | 0.00 | 0.00 |
| ATOM | 5588 | C    | GLU | X | 372 | 64.936 | 32.468 | 64.506 | 0.00 | 0.00 |
| ATOM | 5589 | O    | GLU | X | 372 | 65.189 | 31.265 | 64.314 | 0.00 | 0.00 |
| ATOM | 5590 | N    | ALA | X | 373 | 63.794 | 32.837 | 65.101 | 0.00 | 0.00 |
| ATOM | 5591 | H    | ALA | X | 373 | 63.619 | 33.821 | 65.241 | 0.00 | 0.00 |
| ATOM | 5592 | CA   | ALA | X | 373 | 62.818 | 31.859 | 65.425 | 0.00 | 0.00 |
| ATOM | 5593 | HA   | ALA | X | 373 | 63.318 | 31.104 | 66.033 | 0.00 | 0.00 |
| ATOM | 5594 | CB   | ALA | X | 373 | 61.786 | 32.548 | 66.392 | 0.00 | 0.00 |
| ATOM | 5595 | HB1  | ALA | X | 373 | 62.226 | 32.762 | 67.366 | 0.00 | 0.00 |
| ATOM | 5596 | HB2  | ALA | X | 373 | 60.905 | 31.929 | 66.566 | 0.00 | 0.00 |
| ATOM | 5597 | HB3  | ALA | X | 373 | 61.481 | 33.469 | 65.895 | 0.00 | 0.00 |
| ATOM | 5598 | C    | ALA | X | 373 | 62.034 | 31.254 | 64.251 | 0.00 | 0.00 |
| ATOM | 5599 | O    | ALA | X | 373 | 61.922 | 30.016 | 64.212 | 0.00 | 0.00 |
| ATOM | 5600 | N    | VAL | X | 374 | 61.595 | 32.026 | 63.264 | 0.00 | 0.00 |
| ATOM | 5601 | H    | VAL | X | 374 | 61.779 | 33.009 | 63.412 | 0.00 | 0.00 |
| ATOM | 5602 | CA   | VAL | X | 374 | 60.939 | 31.494 | 62.037 | 0.00 | 0.00 |
| ATOM | 5603 | HA   | VAL | X | 374 | 60.083 | 30.907 | 62.368 | 0.00 | 0.00 |
| ATOM | 5604 | CB   | VAL | X | 374 | 60.398 | 32.599 | 61.089 | 0.00 | 0.00 |
| ATOM | 5605 | HB   | VAL | X | 374 | 61.114 | 33.410 | 60.952 | 0.00 | 0.00 |
| ATOM | 5606 | CG1  | VAL | X | 374 | 59.925 | 32.101 | 59.704 | 0.00 | 0.00 |
| ATOM | 5607 | HG11 | VAL | X | 374 | 60.849 | 31.850 | 59.184 | 0.00 | 0.00 |
| ATOM | 5608 | HG12 | VAL | X | 374 | 59.217 | 31.274 | 59.661 | 0.00 | 0.00 |
| ATOM | 5609 | HG13 | VAL | X | 374 | 59.697 | 32.950 | 59.059 | 0.00 | 0.00 |
| ATOM | 5610 | CG2  | VAL | X | 374 | 59.256 | 33.357 | 61.797 | 0.00 | 0.00 |
| ATOM | 5611 | HG21 | VAL | X | 374 | 58.792 | 34.082 | 61.129 | 0.00 | 0.00 |
| ATOM | 5612 | HG22 | VAL | X | 374 | 59.681 | 33.949 | 62.608 | 0.00 | 0.00 |
| ATOM | 5613 | HG23 | VAL | X | 374 | 58.498 | 32.682 | 62.195 | 0.00 | 0.00 |
| ATOM | 5614 | C    | VAL | X | 374 | 61.790 | 30.484 | 61.260 | 0.00 | 0.00 |
| ATOM | 5615 | O    | VAL | X | 374 | 61.246 | 29.502 | 60.726 | 0.00 | 0.00 |
| ATOM | 5616 | N    | VAL | X | 375 | 63.136 | 30.677 | 61.168 | 0.00 | 0.00 |
| ATOM | 5617 | H    | VAL | X | 375 | 63.426 | 31.580 | 61.514 | 0.00 | 0.00 |
| ATOM | 5618 | CA   | VAL | X | 375 | 64.049 | 29.965 | 60.340 | 0.00 | 0.00 |
| ATOM | 5619 | HA   | VAL | X | 375 | 63.576 | 29.724 | 59.389 | 0.00 | 0.00 |
| ATOM | 5620 | CB   | VAL | X | 375 | 65.345 | 30.745 | 60.157 | 0.00 | 0.00 |
| ATOM | 5621 | HB   | VAL | X | 375 | 65.563 | 31.207 | 61.120 | 0.00 | 0.00 |
| ATOM | 5622 | CG1  | VAL | X | 375 | 66.638 | 29.977 | 59.680 | 0.00 | 0.00 |
| ATOM | 5623 | HG11 | VAL | X | 375 | 66.797 | 29.343 | 60.552 | 0.00 | 0.00 |
| ATOM | 5624 | HG12 | VAL | X | 375 | 66.435 | 29.272 | 58.875 | 0.00 | 0.00 |
| ATOM | 5625 | HG13 | VAL | X | 375 | 67.512 | 30.606 | 59.507 | 0.00 | 0.00 |
| ATOM | 5626 | CG2  | VAL | X | 375 | 65.126 | 31.879 | 59.203 | 0.00 | 0.00 |



|      |      |      |     |   |     |        |        |        |      |      |
|------|------|------|-----|---|-----|--------|--------|--------|------|------|
| ATOM | 5627 | HG21 | VAL | X | 375 | 66.072 | 32.387 | 59.017 | 0.00 | 0.00 |
| ATOM | 5628 | HG22 | VAL | X | 375 | 64.424 | 32.611 | 59.601 | 0.00 | 0.00 |
| ATOM | 5629 | HG23 | VAL | X | 375 | 64.683 | 31.603 | 58.246 | 0.00 | 0.00 |
| ATOM | 5630 | C    | VAL | X | 375 | 64.270 | 28.541 | 60.906 | 0.00 | 0.00 |
| ATOM | 5631 | O    | VAL | X | 375 | 64.668 | 27.733 | 60.135 | 0.00 | 0.00 |
| ATOM | 5632 | N    | LEU | X | 376 | 64.008 | 28.228 | 62.194 | 0.00 | 0.00 |
| ATOM | 5633 | H    | LEU | X | 376 | 63.528 | 28.862 | 62.817 | 0.00 | 0.00 |
| ATOM | 5634 | CA   | LEU | X | 376 | 64.286 | 26.935 | 62.765 | 0.00 | 0.00 |
| ATOM | 5635 | HA   | LEU | X | 376 | 65.155 | 26.423 | 62.352 | 0.00 | 0.00 |
| ATOM | 5636 | CB   | LEU | X | 376 | 64.594 | 27.160 | 64.208 | 0.00 | 0.00 |
| ATOM | 5637 | HB2  | LEU | X | 376 | 65.397 | 27.883 | 64.066 | 0.00 | 0.00 |
| ATOM | 5638 | HB3  | LEU | X | 376 | 63.781 | 27.654 | 64.739 | 0.00 | 0.00 |
| ATOM | 5639 | CG   | LEU | X | 376 | 65.051 | 25.934 | 65.014 | 0.00 | 0.00 |
| ATOM | 5640 | HG   | LEU | X | 376 | 65.199 | 26.366 | 66.004 | 0.00 | 0.00 |
| ATOM | 5641 | CD1  | LEU | X | 376 | 64.175 | 24.638 | 65.121 | 0.00 | 0.00 |
| ATOM | 5642 | HD11 | LEU | X | 376 | 64.692 | 24.017 | 65.852 | 0.00 | 0.00 |
| ATOM | 5643 | HD12 | LEU | X | 376 | 64.236 | 24.144 | 64.151 | 0.00 | 0.00 |
| ATOM | 5644 | HD13 | LEU | X | 376 | 63.187 | 24.675 | 65.580 | 0.00 | 0.00 |
| ATOM | 5645 | CD2  | LEU | X | 376 | 66.497 | 25.492 | 64.556 | 0.00 | 0.00 |
| ATOM | 5646 | HD21 | LEU | X | 376 | 66.551 | 25.168 | 63.516 | 0.00 | 0.00 |
| ATOM | 5647 | HD22 | LEU | X | 376 | 67.124 | 26.373 | 64.689 | 0.00 | 0.00 |
| ATOM | 5648 | HD23 | LEU | X | 376 | 66.730 | 24.695 | 65.262 | 0.00 | 0.00 |
| ATOM | 5649 | C    | LEU | X | 376 | 63.116 | 26.084 | 62.423 | 0.00 | 0.00 |
| ATOM | 5650 | O    | LEU | X | 376 | 63.415 | 25.006 | 61.928 | 0.00 | 0.00 |
| ATOM | 5651 | N    | HIE | X | 377 | 61.843 | 26.534 | 62.558 | 0.00 | 0.00 |
| ATOM | 5652 | H    | HIE | X | 377 | 61.692 | 27.305 | 63.192 | 0.00 | 0.00 |
| ATOM | 5653 | CA   | HIE | X | 377 | 60.694 | 25.959 | 61.865 | 0.00 | 0.00 |
| ATOM | 5654 | HA   | HIE | X | 377 | 60.346 | 24.989 | 62.221 | 0.00 | 0.00 |
| ATOM | 5655 | CB   | HIE | X | 377 | 59.403 | 26.903 | 62.007 | 0.00 | 0.00 |
| ATOM | 5656 | HB2  | HIE | X | 377 | 59.306 | 27.248 | 63.037 | 0.00 | 0.00 |
| ATOM | 5657 | HB3  | HIE | X | 377 | 59.561 | 27.802 | 61.412 | 0.00 | 0.00 |
| ATOM | 5658 | CG   | HIE | X | 377 | 58.197 | 26.260 | 61.522 | 0.00 | 0.00 |
| ATOM | 5659 | ND1  | HIE | X | 377 | 57.264 | 25.590 | 62.378 | 0.00 | 0.00 |
| ATOM | 5660 | CE1  | HIE | X | 377 | 56.197 | 25.335 | 61.589 | 0.00 | 0.00 |
| ATOM | 5661 | HE1  | HIE | X | 377 | 55.246 | 24.947 | 61.922 | 0.00 | 0.00 |
| ATOM | 5662 | NE2  | HIE | X | 377 | 56.530 | 25.647 | 60.316 | 0.00 | 0.00 |
| ATOM | 5663 | HE2  | HIE | X | 377 | 55.875 | 25.708 | 59.550 | 0.00 | 0.00 |
| ATOM | 5664 | CD2  | HIE | X | 377 | 57.800 | 26.231 | 60.294 | 0.00 | 0.00 |
| ATOM | 5665 | HD2  | HIE | X | 377 | 58.305 | 26.716 | 59.472 | 0.00 | 0.00 |
| ATOM | 5666 | C    | HIE | X | 377 | 61.027 | 25.642 | 60.359 | 0.00 | 0.00 |
| ATOM | 5667 | O    | HIE | X | 377 | 60.642 | 24.553 | 59.910 | 0.00 | 0.00 |
| ATOM | 5668 | N    | TYR | X | 378 | 61.671 | 26.521 | 59.555 | 0.00 | 0.00 |
| ATOM | 5669 | H    | TYR | X | 378 | 61.803 | 27.476 | 59.858 | 0.00 | 0.00 |
| ATOM | 5670 | CA   | TYR | X | 378 | 61.689 | 26.287 | 58.076 | 0.00 | 0.00 |
| ATOM | 5671 | HA   | TYR | X | 378 | 60.864 | 25.611 | 57.853 | 0.00 | 0.00 |
| ATOM | 5672 | CB   | TYR | X | 378 | 61.381 | 27.590 | 57.327 | 0.00 | 0.00 |
| ATOM | 5673 | HB2  | TYR | X | 378 | 61.760 | 28.484 | 57.822 | 0.00 | 0.00 |
| ATOM | 5674 | HB3  | TYR | X | 378 | 61.808 | 27.531 | 56.326 | 0.00 | 0.00 |
| ATOM | 5675 | CG   | TYR | X | 378 | 59.879 | 27.791 | 57.248 | 0.00 | 0.00 |
| ATOM | 5676 | CD1  | TYR | X | 378 | 59.129 | 26.888 | 56.433 | 0.00 | 0.00 |
| ATOM | 5677 | HD1  | TYR | X | 378 | 59.580 | 26.014 | 55.986 | 0.00 | 0.00 |
| ATOM | 5678 | CE1  | TYR | X | 378 | 57.680 | 26.977 | 56.425 | 0.00 | 0.00 |
| ATOM | 5679 | HE1  | TYR | X | 378 | 57.037 | 26.350 | 55.826 | 0.00 | 0.00 |
| ATOM | 5680 | CZ   | TYR | X | 378 | 57.034 | 28.016 | 57.176 | 0.00 | 0.00 |
| ATOM | 5681 | OH   | TYR | X | 378 | 55.683 | 28.174 | 57.031 | 0.00 | 0.00 |
| ATOM | 5682 | HH   | TYR | X | 378 | 55.233 | 27.905 | 56.227 | 0.00 | 0.00 |
| ATOM | 5683 | CE2  | TYR | X | 378 | 57.853 | 28.890 | 57.881 | 0.00 | 0.00 |
| ATOM | 5684 | HE2  | TYR | X | 378 | 57.308 | 29.674 | 58.387 | 0.00 | 0.00 |
| ATOM | 5685 | CD2  | TYR | X | 378 | 59.242 | 28.799 | 57.974 | 0.00 | 0.00 |
| ATOM | 5686 | HD2  | TYR | X | 378 | 59.804 | 29.512 | 58.560 | 0.00 | 0.00 |
| ATOM | 5687 | C    | TYR | X | 378 | 63.017 | 25.556 | 57.713 | 0.00 | 0.00 |
| ATOM | 5688 | O    | TYR | X | 378 | 63.465 | 25.898 | 56.591 | 0.00 | 0.00 |
| ATOM | 5689 | N    | THR | X | 379 | 63.632 | 24.837 | 58.637 | 0.00 | 0.00 |
| ATOM | 5690 | H    | THR | X | 379 | 63.235 | 24.977 | 59.555 | 0.00 | 0.00 |
| ATOM | 5691 | CA   | THR | X | 379 | 64.935 | 24.124 | 58.440 | 0.00 | 0.00 |
| ATOM | 5692 | HA   | THR | X | 379 | 65.516 | 24.581 | 57.639 | 0.00 | 0.00 |
| ATOM | 5693 | CB   | THR | X | 379 | 65.789 | 24.215 | 59.720 | 0.00 | 0.00 |

|      |      |      |     |   |     |        |        |        |      |      |
|------|------|------|-----|---|-----|--------|--------|--------|------|------|
| ATOM | 5694 | HB   | THR | X | 379 | 65.314 | 23.914 | 60.653 | 0.00 | 0.00 |
| ATOM | 5695 | CG2  | THR | X | 379 | 67.059 | 23.411 | 59.577 | 0.00 | 0.00 |
| ATOM | 5696 | HG21 | THR | X | 379 | 66.934 | 22.334 | 59.466 | 0.00 | 0.00 |
| ATOM | 5697 | HG22 | THR | X | 379 | 67.710 | 23.648 | 60.419 | 0.00 | 0.00 |
| ATOM | 5698 | HG23 | THR | X | 379 | 67.557 | 23.676 | 58.644 | 0.00 | 0.00 |
| ATOM | 5699 | OG1  | THR | X | 379 | 66.241 | 25.542 | 59.712 | 0.00 | 0.00 |
| ATOM | 5700 | HG1  | THR | X | 379 | 65.486 | 26.134 | 59.730 | 0.00 | 0.00 |
| ATOM | 5701 | C    | THR | X | 379 | 64.803 | 22.695 | 58.033 | 0.00 | 0.00 |
| ATOM | 5702 | O    | THR | X | 379 | 64.070 | 22.019 | 58.750 | 0.00 | 0.00 |
| ATOM | 5703 | N    | ASP | X | 380 | 65.387 | 22.285 | 56.876 | 0.00 | 0.00 |
| ATOM | 5704 | H    | ASP | X | 380 | 65.948 | 22.902 | 56.306 | 0.00 | 0.00 |
| ATOM | 5705 | CA   | ASP | X | 380 | 65.354 | 20.884 | 56.385 | 0.00 | 0.00 |
| ATOM | 5706 | HA   | ASP | X | 380 | 64.400 | 20.403 | 56.597 | 0.00 | 0.00 |
| ATOM | 5707 | CB   | ASP | X | 380 | 65.409 | 20.914 | 54.801 | 0.00 | 0.00 |
| ATOM | 5708 | HB2  | ASP | X | 380 | 64.654 | 21.544 | 54.330 | 0.00 | 0.00 |
| ATOM | 5709 | HB3  | ASP | X | 380 | 66.379 | 21.302 | 54.488 | 0.00 | 0.00 |
| ATOM | 5710 | CG   | ASP | X | 380 | 65.288 | 19.531 | 54.175 | 0.00 | 0.00 |
| ATOM | 5711 | OD1  | ASP | X | 380 | 64.118 | 19.114 | 53.963 | 0.00 | 0.00 |
| ATOM | 5712 | OD2  | ASP | X | 380 | 66.351 | 18.929 | 53.819 | 0.00 | 0.00 |
| ATOM | 5713 | C    | ASP | X | 380 | 66.533 | 20.115 | 57.067 | 0.00 | 0.00 |
| ATOM | 5714 | O    | ASP | X | 380 | 67.663 | 20.206 | 56.647 | 0.00 | 0.00 |
| ATOM | 5715 | N    | TRP | X | 381 | 66.368 | 19.196 | 58.060 | 0.00 | 0.00 |
| ATOM | 5716 | H    | TRP | X | 381 | 65.431 | 19.242 | 58.433 | 0.00 | 0.00 |
| ATOM | 5717 | CA   | TRP | X | 381 | 67.400 | 18.540 | 58.903 | 0.00 | 0.00 |
| ATOM | 5718 | HA   | TRP | X | 381 | 68.145 | 19.273 | 59.214 | 0.00 | 0.00 |
| ATOM | 5719 | CB   | TRP | X | 381 | 66.732 | 18.130 | 60.250 | 0.00 | 0.00 |
| ATOM | 5720 | HB2  | TRP | X | 381 | 65.842 | 17.639 | 59.858 | 0.00 | 0.00 |
| ATOM | 5721 | HB3  | TRP | X | 381 | 67.314 | 17.370 | 60.772 | 0.00 | 0.00 |
| ATOM | 5722 | CG   | TRP | X | 381 | 66.475 | 19.239 | 61.226 | 0.00 | 0.00 |
| ATOM | 5723 | CD1  | TRP | X | 381 | 65.303 | 19.993 | 61.389 | 0.00 | 0.00 |
| ATOM | 5724 | HD1  | TRP | X | 381 | 64.412 | 19.779 | 60.817 | 0.00 | 0.00 |
| ATOM | 5725 | NE1  | TRP | X | 381 | 65.471 | 20.923 | 62.335 | 0.00 | 0.00 |
| ATOM | 5726 | HE1  | TRP | X | 381 | 64.789 | 21.631 | 62.567 | 0.00 | 0.00 |
| ATOM | 5727 | CE2  | TRP | X | 381 | 66.844 | 21.004 | 62.652 | 0.00 | 0.00 |
| ATOM | 5728 | CZ2  | TRP | X | 381 | 67.527 | 21.911 | 63.408 | 0.00 | 0.00 |
| ATOM | 5729 | HZ2  | TRP | X | 381 | 66.995 | 22.706 | 63.910 | 0.00 | 0.00 |
| ATOM | 5730 | CH2  | TRP | X | 381 | 68.956 | 21.851 | 63.487 | 0.00 | 0.00 |
| ATOM | 5731 | HH2  | TRP | X | 381 | 69.604 | 22.526 | 64.027 | 0.00 | 0.00 |
| ATOM | 5732 | CZ3  | TRP | X | 381 | 69.639 | 20.804 | 62.790 | 0.00 | 0.00 |
| ATOM | 5733 | HZ3  | TRP | X | 381 | 70.715 | 20.714 | 62.764 | 0.00 | 0.00 |
| ATOM | 5734 | CE3  | TRP | X | 381 | 68.920 | 19.886 | 62.087 | 0.00 | 0.00 |
| ATOM | 5735 | HE3  | TRP | X | 381 | 69.330 | 19.053 | 61.536 | 0.00 | 0.00 |
| ATOM | 5736 | CD2  | TRP | X | 381 | 67.499 | 19.957 | 62.001 | 0.00 | 0.00 |
| ATOM | 5737 | C    | TRP | X | 381 | 68.183 | 17.477 | 58.157 | 0.00 | 0.00 |
| ATOM | 5738 | O    | TRP | X | 381 | 69.245 | 17.027 | 58.640 | 0.00 | 0.00 |
| ATOM | 5739 | N    | LEU | X | 382 | 67.789 | 17.056 | 56.978 | 0.00 | 0.00 |
| ATOM | 5740 | H    | LEU | X | 382 | 66.984 | 17.501 | 56.562 | 0.00 | 0.00 |
| ATOM | 5741 | CA   | LEU | X | 382 | 68.516 | 16.180 | 56.081 | 0.00 | 0.00 |
| ATOM | 5742 | HA   | LEU | X | 382 | 68.945 | 15.333 | 56.616 | 0.00 | 0.00 |
| ATOM | 5743 | CB   | LEU | X | 382 | 67.669 | 15.604 | 54.943 | 0.00 | 0.00 |
| ATOM | 5744 | HB2  | LEU | X | 382 | 67.098 | 16.417 | 54.495 | 0.00 | 0.00 |
| ATOM | 5745 | HB3  | LEU | X | 382 | 68.218 | 15.093 | 54.151 | 0.00 | 0.00 |
| ATOM | 5746 | CG   | LEU | X | 382 | 66.564 | 14.731 | 55.469 | 0.00 | 0.00 |
| ATOM | 5747 | HG   | LEU | X | 382 | 66.093 | 15.226 | 56.318 | 0.00 | 0.00 |
| ATOM | 5748 | CD1  | LEU | X | 382 | 65.606 | 14.503 | 54.338 | 0.00 | 0.00 |
| ATOM | 5749 | HD11 | LEU | X | 382 | 64.818 | 13.822 | 54.661 | 0.00 | 0.00 |
| ATOM | 5750 | HD12 | LEU | X | 382 | 66.179 | 14.044 | 53.532 | 0.00 | 0.00 |
| ATOM | 5751 | HD13 | LEU | X | 382 | 65.143 | 15.406 | 53.938 | 0.00 | 0.00 |
| ATOM | 5752 | CD2  | LEU | X | 382 | 66.892 | 13.387 | 56.087 | 0.00 | 0.00 |
| ATOM | 5753 | HD21 | LEU | X | 382 | 67.487 | 12.753 | 55.430 | 0.00 | 0.00 |
| ATOM | 5754 | HD22 | LEU | X | 382 | 67.218 | 13.393 | 57.127 | 0.00 | 0.00 |
| ATOM | 5755 | HD23 | LEU | X | 382 | 65.945 | 12.866 | 56.222 | 0.00 | 0.00 |
| ATOM | 5756 | C    | LEU | X | 382 | 69.771 | 16.840 | 55.477 | 0.00 | 0.00 |
| ATOM | 5757 | O    | LEU | X | 382 | 70.870 | 16.235 | 55.590 | 0.00 | 0.00 |
| ATOM | 5758 | N    | HIE | X | 383 | 69.647 | 18.156 | 55.240 | 0.00 | 0.00 |
| ATOM | 5759 | H    | HIE | X | 383 | 68.746 | 18.605 | 55.321 | 0.00 | 0.00 |
| ATOM | 5760 | CA   | HIE | X | 383 | 70.776 | 18.949 | 54.851 | 0.00 | 0.00 |

|      |      |     |     |   |     |        |        |        |      |      |
|------|------|-----|-----|---|-----|--------|--------|--------|------|------|
| ATOM | 5761 | HA  | HIE | X | 383 | 71.545 | 18.753 | 55.599 | 0.00 | 0.00 |
| ATOM | 5762 | CB  | HIE | X | 383 | 71.323 | 18.610 | 53.439 | 0.00 | 0.00 |
| ATOM | 5763 | HB2 | HIE | X | 383 | 71.704 | 17.589 | 53.475 | 0.00 | 0.00 |
| ATOM | 5764 | HB3 | HIE | X | 383 | 70.582 | 18.627 | 52.641 | 0.00 | 0.00 |
| ATOM | 5765 | CG  | HIE | X | 383 | 72.553 | 19.472 | 53.044 | 0.00 | 0.00 |
| ATOM | 5766 | ND1 | HIE | X | 383 | 73.270 | 20.388 | 53.842 | 0.00 | 0.00 |
| ATOM | 5767 | CE1 | HIE | X | 383 | 74.230 | 20.787 | 52.994 | 0.00 | 0.00 |
| ATOM | 5768 | HE1 | HIE | X | 383 | 74.983 | 21.537 | 53.188 | 0.00 | 0.00 |
| ATOM | 5769 | NE2 | HIE | X | 383 | 74.029 | 20.352 | 51.748 | 0.00 | 0.00 |
| ATOM | 5770 | HE2 | HIE | X | 383 | 74.612 | 20.665 | 50.985 | 0.00 | 0.00 |
| ATOM | 5771 | CD2 | HIE | X | 383 | 73.070 | 19.430 | 51.791 | 0.00 | 0.00 |
| ATOM | 5772 | HD2 | HIE | X | 383 | 72.552 | 18.882 | 51.017 | 0.00 | 0.00 |
| ATOM | 5773 | C   | HIE | X | 383 | 70.401 | 20.417 | 54.936 | 0.00 | 0.00 |
| ATOM | 5774 | O   | HIE | X | 383 | 69.886 | 20.985 | 53.971 | 0.00 | 0.00 |
| ATOM | 5775 | N   | PRO | X | 384 | 70.810 | 21.060 | 56.020 | 0.00 | 0.00 |
| ATOM | 5776 | CD  | PRO | X | 384 | 71.413 | 20.496 | 57.247 | 0.00 | 0.00 |
| ATOM | 5777 | HD2 | PRO | X | 384 | 72.251 | 19.825 | 57.056 | 0.00 | 0.00 |
| ATOM | 5778 | HD3 | PRO | X | 384 | 70.665 | 19.919 | 57.791 | 0.00 | 0.00 |
| ATOM | 5779 | CG  | PRO | X | 384 | 71.671 | 21.663 | 58.239 | 0.00 | 0.00 |
| ATOM | 5780 | HG2 | PRO | X | 384 | 72.602 | 22.198 | 58.052 | 0.00 | 0.00 |
| ATOM | 5781 | HG3 | PRO | X | 384 | 71.799 | 21.150 | 59.192 | 0.00 | 0.00 |
| ATOM | 5782 | CB  | PRO | X | 384 | 70.392 | 22.487 | 57.952 | 0.00 | 0.00 |
| ATOM | 5783 | HB2 | PRO | X | 384 | 70.519 | 23.509 | 58.309 | 0.00 | 0.00 |
| ATOM | 5784 | HB3 | PRO | X | 384 | 69.527 | 22.107 | 58.497 | 0.00 | 0.00 |
| ATOM | 5785 | CA  | PRO | X | 384 | 70.311 | 22.414 | 56.393 | 0.00 | 0.00 |
| ATOM | 5786 | HA  | PRO | X | 384 | 69.281 | 22.587 | 56.081 | 0.00 | 0.00 |
| ATOM | 5787 | C   | PRO | X | 384 | 71.011 | 23.607 | 55.719 | 0.00 | 0.00 |
| ATOM | 5788 | O   | PRO | X | 384 | 70.495 | 24.735 | 55.892 | 0.00 | 0.00 |
| ATOM | 5789 | N   | GLU | X | 385 | 72.052 | 23.433 | 54.956 | 0.00 | 0.00 |
| ATOM | 5790 | H   | GLU | X | 385 | 72.431 | 22.498 | 54.911 | 0.00 | 0.00 |
| ATOM | 5791 | CA  | GLU | X | 385 | 72.844 | 24.491 | 54.406 | 0.00 | 0.00 |
| ATOM | 5792 | HA  | GLU | X | 385 | 72.409 | 25.415 | 54.786 | 0.00 | 0.00 |
| ATOM | 5793 | CB  | GLU | X | 385 | 74.310 | 24.386 | 54.864 | 0.00 | 0.00 |
| ATOM | 5794 | HB2 | GLU | X | 385 | 74.612 | 23.349 | 54.721 | 0.00 | 0.00 |
| ATOM | 5795 | HB3 | GLU | X | 385 | 75.063 | 24.992 | 54.359 | 0.00 | 0.00 |
| ATOM | 5796 | CG  | GLU | X | 385 | 74.500 | 24.652 | 56.366 | 0.00 | 0.00 |
| ATOM | 5797 | HG2 | GLU | X | 385 | 74.055 | 25.630 | 56.551 | 0.00 | 0.00 |
| ATOM | 5798 | HG3 | GLU | X | 385 | 73.975 | 23.856 | 56.893 | 0.00 | 0.00 |
| ATOM | 5799 | CD  | GLU | X | 385 | 75.909 | 24.581 | 56.823 | 0.00 | 0.00 |
| ATOM | 5800 | OE1 | GLU | X | 385 | 76.795 | 25.346 | 56.338 | 0.00 | 0.00 |
| ATOM | 5801 | OE2 | GLU | X | 385 | 76.189 | 23.596 | 57.472 | 0.00 | 0.00 |
| ATOM | 5802 | C   | GLU | X | 385 | 72.746 | 24.404 | 52.820 | 0.00 | 0.00 |
| ATOM | 5803 | O   | GLU | X | 385 | 73.474 | 25.091 | 52.109 | 0.00 | 0.00 |
| ATOM | 5804 | N   | ASP | X | 386 | 71.928 | 23.529 | 52.354 | 0.00 | 0.00 |
| ATOM | 5805 | H   | ASP | X | 386 | 71.597 | 22.922 | 53.090 | 0.00 | 0.00 |
| ATOM | 5806 | CA  | ASP | X | 386 | 71.657 | 23.456 | 50.906 | 0.00 | 0.00 |
| ATOM | 5807 | HA  | ASP | X | 386 | 72.615 | 23.409 | 50.386 | 0.00 | 0.00 |
| ATOM | 5808 | CB  | ASP | X | 386 | 70.863 | 22.188 | 50.579 | 0.00 | 0.00 |
| ATOM | 5809 | HB2 | ASP | X | 386 | 71.372 | 21.303 | 50.962 | 0.00 | 0.00 |
| ATOM | 5810 | HB3 | ASP | X | 386 | 69.860 | 22.070 | 50.988 | 0.00 | 0.00 |
| ATOM | 5811 | CG  | ASP | X | 386 | 70.774 | 21.992 | 49.103 | 0.00 | 0.00 |
| ATOM | 5812 | OD1 | ASP | X | 386 | 70.143 | 22.844 | 48.426 | 0.00 | 0.00 |
| ATOM | 5813 | OD2 | ASP | X | 386 | 70.909 | 20.874 | 48.621 | 0.00 | 0.00 |
| ATOM | 5814 | C   | ASP | X | 386 | 71.006 | 24.730 | 50.352 | 0.00 | 0.00 |
| ATOM | 5815 | O   | ASP | X | 386 | 69.908 | 24.991 | 50.766 | 0.00 | 0.00 |
| ATOM | 5816 | N   | PRO | X | 387 | 71.613 | 25.471 | 49.462 | 0.00 | 0.00 |
| ATOM | 5817 | CD  | PRO | X | 387 | 72.902 | 25.251 | 48.782 | 0.00 | 0.00 |
| ATOM | 5818 | HD2 | PRO | X | 387 | 72.909 | 24.284 | 48.279 | 0.00 | 0.00 |
| ATOM | 5819 | HD3 | PRO | X | 387 | 73.653 | 25.189 | 49.569 | 0.00 | 0.00 |
| ATOM | 5820 | CG  | PRO | X | 387 | 73.024 | 26.409 | 47.818 | 0.00 | 0.00 |
| ATOM | 5821 | HG2 | PRO | X | 387 | 72.536 | 26.223 | 46.861 | 0.00 | 0.00 |
| ATOM | 5822 | HG3 | PRO | X | 387 | 74.080 | 26.634 | 47.667 | 0.00 | 0.00 |
| ATOM | 5823 | CB  | PRO | X | 387 | 72.240 | 27.511 | 48.539 | 0.00 | 0.00 |
| ATOM | 5824 | HB2 | PRO | X | 387 | 71.839 | 28.324 | 47.934 | 0.00 | 0.00 |
| ATOM | 5825 | HB3 | PRO | X | 387 | 72.784 | 27.915 | 49.392 | 0.00 | 0.00 |
| ATOM | 5826 | CA  | PRO | X | 387 | 71.075 | 26.766 | 49.108 | 0.00 | 0.00 |
| ATOM | 5827 | HA  | PRO | X | 387 | 70.703 | 27.192 | 50.040 | 0.00 | 0.00 |

|      |      |      |     |   |     |        |        |        |      |      |
|------|------|------|-----|---|-----|--------|--------|--------|------|------|
| ATOM | 5828 | C    | PRO | X | 387 | 69.929 | 26.731 | 48.132 | 0.00 | 0.00 |
| ATOM | 5829 | O    | PRO | X | 387 | 69.039 | 27.607 | 48.199 | 0.00 | 0.00 |
| ATOM | 5830 | N    | ALA | X | 388 | 69.726 | 25.718 | 47.294 | 0.00 | 0.00 |
| ATOM | 5831 | H    | ALA | X | 388 | 70.329 | 24.915 | 47.406 | 0.00 | 0.00 |
| ATOM | 5832 | CA   | ALA | X | 388 | 68.461 | 25.564 | 46.588 | 0.00 | 0.00 |
| ATOM | 5833 | HA   | ALA | X | 388 | 68.167 | 26.467 | 46.053 | 0.00 | 0.00 |
| ATOM | 5834 | CB   | ALA | X | 388 | 68.613 | 24.608 | 45.365 | 0.00 | 0.00 |
| ATOM | 5835 | HB1  | ALA | X | 388 | 67.687 | 24.445 | 44.814 | 0.00 | 0.00 |
| ATOM | 5836 | HB2  | ALA | X | 388 | 68.929 | 23.658 | 45.796 | 0.00 | 0.00 |
| ATOM | 5837 | HB3  | ALA | X | 388 | 69.371 | 24.910 | 44.642 | 0.00 | 0.00 |
| ATOM | 5838 | C    | ALA | X | 388 | 67.229 | 25.222 | 47.481 | 0.00 | 0.00 |
| ATOM | 5839 | O    | ALA | X | 388 | 66.159 | 25.781 | 47.233 | 0.00 | 0.00 |
| ATOM | 5840 | N    | ARG | X | 389 | 67.428 | 24.332 | 48.485 | 0.00 | 0.00 |
| ATOM | 5841 | H    | ARG | X | 389 | 68.348 | 23.962 | 48.676 | 0.00 | 0.00 |
| ATOM | 5842 | CA   | ARG | X | 389 | 66.404 | 24.072 | 49.524 | 0.00 | 0.00 |
| ATOM | 5843 | HA   | ARG | X | 389 | 65.532 | 23.756 | 48.951 | 0.00 | 0.00 |
| ATOM | 5844 | CB   | ARG | X | 389 | 66.786 | 22.923 | 50.452 | 0.00 | 0.00 |
| ATOM | 5845 | HB2  | ARG | X | 389 | 67.796 | 23.126 | 50.808 | 0.00 | 0.00 |
| ATOM | 5846 | HB3  | ARG | X | 389 | 66.053 | 22.938 | 51.258 | 0.00 | 0.00 |
| ATOM | 5847 | CG   | ARG | X | 389 | 66.656 | 21.561 | 49.748 | 0.00 | 0.00 |
| ATOM | 5848 | HG2  | ARG | X | 389 | 65.603 | 21.466 | 49.483 | 0.00 | 0.00 |
| ATOM | 5849 | HG3  | ARG | X | 389 | 67.322 | 21.613 | 48.888 | 0.00 | 0.00 |
| ATOM | 5850 | CD   | ARG | X | 389 | 67.154 | 20.466 | 50.764 | 0.00 | 0.00 |
| ATOM | 5851 | HD2  | ARG | X | 389 | 67.612 | 20.834 | 51.682 | 0.00 | 0.00 |
| ATOM | 5852 | HD3  | ARG | X | 389 | 66.348 | 19.750 | 50.925 | 0.00 | 0.00 |
| ATOM | 5853 | NE   | ARG | X | 389 | 68.205 | 19.613 | 50.175 | 0.00 | 0.00 |
| ATOM | 5854 | HE   | ARG | X | 389 | 68.463 | 19.789 | 49.214 | 0.00 | 0.00 |
| ATOM | 5855 | CZ   | ARG | X | 389 | 68.783 | 18.602 | 50.793 | 0.00 | 0.00 |
| ATOM | 5856 | NH1  | ARG | X | 389 | 68.284 | 18.249 | 51.965 | 0.00 | 0.00 |
| ATOM | 5857 | HH11 | ARG | X | 389 | 67.504 | 18.787 | 52.314 | 0.00 | 0.00 |
| ATOM | 5858 | HH12 | ARG | X | 389 | 68.637 | 17.428 | 52.436 | 0.00 | 0.00 |
| ATOM | 5859 | NH2  | ARG | X | 389 | 69.769 | 17.906 | 50.269 | 0.00 | 0.00 |
| ATOM | 5860 | HH21 | ARG | X | 389 | 70.006 | 18.011 | 49.292 | 0.00 | 0.00 |
| ATOM | 5861 | HH22 | ARG | X | 389 | 70.087 | 17.071 | 50.740 | 0.00 | 0.00 |
| ATOM | 5862 | C    | ARG | X | 389 | 65.979 | 25.259 | 50.358 | 0.00 | 0.00 |
| ATOM | 5863 | O    | ARG | X | 389 | 64.764 | 25.485 | 50.603 | 0.00 | 0.00 |
| ATOM | 5864 | N    | LEU | X | 390 | 66.932 | 26.143 | 50.688 | 0.00 | 0.00 |
| ATOM | 5865 | H    | LEU | X | 390 | 67.897 | 25.904 | 50.508 | 0.00 | 0.00 |
| ATOM | 5866 | CA   | LEU | X | 390 | 66.698 | 27.456 | 51.346 | 0.00 | 0.00 |
| ATOM | 5867 | HA   | LEU | X | 390 | 66.169 | 27.210 | 52.266 | 0.00 | 0.00 |
| ATOM | 5868 | CB   | LEU | X | 390 | 68.023 | 28.100 | 51.851 | 0.00 | 0.00 |
| ATOM | 5869 | HB2  | LEU | X | 390 | 68.665 | 28.353 | 51.007 | 0.00 | 0.00 |
| ATOM | 5870 | HB3  | LEU | X | 390 | 67.853 | 29.070 | 52.318 | 0.00 | 0.00 |
| ATOM | 5871 | CG   | LEU | X | 390 | 68.675 | 27.165 | 52.906 | 0.00 | 0.00 |
| ATOM | 5872 | HG   | LEU | X | 390 | 68.508 | 26.122 | 52.638 | 0.00 | 0.00 |
| ATOM | 5873 | CD1  | LEU | X | 390 | 70.149 | 27.559 | 53.003 | 0.00 | 0.00 |
| ATOM | 5874 | HD11 | LEU | X | 390 | 70.599 | 27.538 | 52.011 | 0.00 | 0.00 |
| ATOM | 5875 | HD12 | LEU | X | 390 | 70.751 | 26.983 | 53.706 | 0.00 | 0.00 |
| ATOM | 5876 | HD13 | LEU | X | 390 | 70.206 | 28.596 | 53.334 | 0.00 | 0.00 |
| ATOM | 5877 | CD2  | LEU | X | 390 | 68.113 | 27.479 | 54.323 | 0.00 | 0.00 |
| ATOM | 5878 | HD21 | LEU | X | 390 | 68.358 | 26.654 | 54.993 | 0.00 | 0.00 |
| ATOM | 5879 | HD22 | LEU | X | 390 | 68.403 | 28.476 | 54.653 | 0.00 | 0.00 |
| ATOM | 5880 | HD23 | LEU | X | 390 | 67.024 | 27.434 | 54.319 | 0.00 | 0.00 |
| ATOM | 5881 | C    | LEU | X | 390 | 65.990 | 28.397 | 50.407 | 0.00 | 0.00 |
| ATOM | 5882 | O    | LEU | X | 390 | 64.968 | 28.863 | 50.791 | 0.00 | 0.00 |
| ATOM | 5883 | N    | ARG | X | 391 | 66.455 | 28.600 | 49.226 | 0.00 | 0.00 |
| ATOM | 5884 | H    | ARG | X | 391 | 67.370 | 28.185 | 49.118 | 0.00 | 0.00 |
| ATOM | 5885 | CA   | ARG | X | 391 | 65.785 | 29.516 | 48.257 | 0.00 | 0.00 |
| ATOM | 5886 | HA   | ARG | X | 391 | 65.639 | 30.513 | 48.674 | 0.00 | 0.00 |
| ATOM | 5887 | CB   | ARG | X | 391 | 66.621 | 29.691 | 47.000 | 0.00 | 0.00 |
| ATOM | 5888 | HB2  | ARG | X | 391 | 67.630 | 30.053 | 47.203 | 0.00 | 0.00 |
| ATOM | 5889 | HB3  | ARG | X | 391 | 66.615 | 28.691 | 46.567 | 0.00 | 0.00 |
| ATOM | 5890 | CG   | ARG | X | 391 | 66.089 | 30.769 | 46.041 | 0.00 | 0.00 |
| ATOM | 5891 | HG2  | ARG | X | 391 | 65.013 | 30.931 | 46.102 | 0.00 | 0.00 |
| ATOM | 5892 | HG3  | ARG | X | 391 | 66.538 | 31.673 | 46.452 | 0.00 | 0.00 |
| ATOM | 5893 | CD   | ARG | X | 391 | 66.389 | 30.498 | 44.591 | 0.00 | 0.00 |
| ATOM | 5894 | HD2  | ARG | X | 391 | 65.781 | 29.668 | 44.232 | 0.00 | 0.00 |

|      |      |      |     |   |     |        |        |        |      |      |
|------|------|------|-----|---|-----|--------|--------|--------|------|------|
| ATOM | 5895 | HD3  | ARG | X | 391 | 66.135 | 31.385 | 44.010 | 0.00 | 0.00 |
| ATOM | 5896 | NE   | ARG | X | 391 | 67.763 | 30.266 | 44.338 | 0.00 | 0.00 |
| ATOM | 5897 | HE   | ARG | X | 391 | 68.341 | 31.095 | 44.331 | 0.00 | 0.00 |
| ATOM | 5898 | CZ   | ARG | X | 391 | 68.239 | 29.146 | 43.793 | 0.00 | 0.00 |
| ATOM | 5899 | NH1  | ARG | X | 391 | 67.569 | 27.970 | 43.720 | 0.00 | 0.00 |
| ATOM | 5900 | HH11 | ARG | X | 391 | 66.650 | 27.881 | 44.129 | 0.00 | 0.00 |
| ATOM | 5901 | HH12 | ARG | X | 391 | 68.081 | 27.238 | 43.249 | 0.00 | 0.00 |
| ATOM | 5902 | NH2  | ARG | X | 391 | 69.455 | 29.127 | 43.233 | 0.00 | 0.00 |
| ATOM | 5903 | HH21 | ARG | X | 391 | 69.807 | 30.035 | 42.968 | 0.00 | 0.00 |
| ATOM | 5904 | HH22 | ARG | X | 391 | 69.786 | 28.331 | 42.707 | 0.00 | 0.00 |
| ATOM | 5905 | C    | ARG | X | 391 | 64.374 | 28.994 | 47.961 | 0.00 | 0.00 |
| ATOM | 5906 | O    | ARG | X | 391 | 63.465 | 29.771 | 47.869 | 0.00 | 0.00 |
| ATOM | 5907 | N    | GLU | X | 392 | 64.119 | 27.715 | 47.820 | 0.00 | 0.00 |
| ATOM | 5908 | H    | GLU | X | 392 | 64.865 | 27.038 | 47.744 | 0.00 | 0.00 |
| ATOM | 5909 | CA   | GLU | X | 392 | 62.779 | 27.111 | 47.793 | 0.00 | 0.00 |
| ATOM | 5910 | HA   | GLU | X | 392 | 62.312 | 27.582 | 46.929 | 0.00 | 0.00 |
| ATOM | 5911 | CB   | GLU | X | 392 | 62.853 | 25.512 | 47.602 | 0.00 | 0.00 |
| ATOM | 5912 | HB2  | GLU | X | 392 | 63.287 | 25.229 | 46.643 | 0.00 | 0.00 |
| ATOM | 5913 | HB3  | GLU | X | 392 | 63.533 | 25.042 | 48.313 | 0.00 | 0.00 |
| ATOM | 5914 | CG   | GLU | X | 392 | 61.415 | 24.898 | 47.782 | 0.00 | 0.00 |
| ATOM | 5915 | HG2  | GLU | X | 392 | 61.139 | 24.948 | 48.835 | 0.00 | 0.00 |
| ATOM | 5916 | HG3  | GLU | X | 392 | 60.683 | 25.426 | 47.170 | 0.00 | 0.00 |
| ATOM | 5917 | CD   | GLU | X | 392 | 61.281 | 23.500 | 47.294 | 0.00 | 0.00 |
| ATOM | 5918 | OE1  | GLU | X | 392 | 61.440 | 23.119 | 46.131 | 0.00 | 0.00 |
| ATOM | 5919 | OE2  | GLU | X | 392 | 61.123 | 22.583 | 48.081 | 0.00 | 0.00 |
| ATOM | 5920 | C    | GLU | X | 392 | 61.903 | 27.447 | 48.998 | 0.00 | 0.00 |
| ATOM | 5921 | O    | GLU | X | 392 | 60.894 | 28.094 | 48.916 | 0.00 | 0.00 |
| ATOM | 5922 | N    | ALA | X | 393 | 62.344 | 27.017 | 50.251 | 0.00 | 0.00 |
| ATOM | 5923 | H    | ALA | X | 393 | 63.214 | 26.509 | 50.316 | 0.00 | 0.00 |
| ATOM | 5924 | CA   | ALA | X | 393 | 61.640 | 27.467 | 51.461 | 0.00 | 0.00 |
| ATOM | 5925 | HA   | ALA | X | 393 | 60.733 | 26.866 | 51.522 | 0.00 | 0.00 |
| ATOM | 5926 | CB   | ALA | X | 393 | 62.550 | 27.104 | 52.599 | 0.00 | 0.00 |
| ATOM | 5927 | HB1  | ALA | X | 393 | 62.531 | 26.022 | 52.724 | 0.00 | 0.00 |
| ATOM | 5928 | HB2  | ALA | X | 393 | 62.141 | 27.558 | 53.501 | 0.00 | 0.00 |
| ATOM | 5929 | HB3  | ALA | X | 393 | 63.571 | 27.466 | 52.477 | 0.00 | 0.00 |
| ATOM | 5930 | C    | ALA | X | 393 | 61.286 | 29.003 | 51.476 | 0.00 | 0.00 |
| ATOM | 5931 | O    | ALA | X | 393 | 60.148 | 29.393 | 51.877 | 0.00 | 0.00 |
| ATOM | 5932 | N    | LEU | X | 394 | 62.209 | 29.883 | 51.013 | 0.00 | 0.00 |
| ATOM | 5933 | H    | LEU | X | 394 | 63.069 | 29.489 | 50.656 | 0.00 | 0.00 |
| ATOM | 5934 | CA   | LEU | X | 394 | 62.033 | 31.355 | 51.078 | 0.00 | 0.00 |
| ATOM | 5935 | HA   | LEU | X | 394 | 61.665 | 31.564 | 52.082 | 0.00 | 0.00 |
| ATOM | 5936 | CB   | LEU | X | 394 | 63.362 | 31.957 | 50.836 | 0.00 | 0.00 |
| ATOM | 5937 | HB2  | LEU | X | 394 | 64.120 | 31.681 | 51.569 | 0.00 | 0.00 |
| ATOM | 5938 | HB3  | LEU | X | 394 | 63.738 | 31.635 | 49.865 | 0.00 | 0.00 |
| ATOM | 5939 | CG   | LEU | X | 394 | 63.196 | 33.503 | 50.756 | 0.00 | 0.00 |
| ATOM | 5940 | HG   | LEU | X | 394 | 62.349 | 33.882 | 50.184 | 0.00 | 0.00 |
| ATOM | 5941 | CD1  | LEU | X | 394 | 62.933 | 34.081 | 52.140 | 0.00 | 0.00 |
| ATOM | 5942 | HD11 | LEU | X | 394 | 61.919 | 33.870 | 52.479 | 0.00 | 0.00 |
| ATOM | 5943 | HD12 | LEU | X | 394 | 63.051 | 35.163 | 52.087 | 0.00 | 0.00 |
| ATOM | 5944 | HD13 | LEU | X | 394 | 63.590 | 33.814 | 52.968 | 0.00 | 0.00 |
| ATOM | 5945 | CD2  | LEU | X | 394 | 64.530 | 34.112 | 50.275 | 0.00 | 0.00 |
| ATOM | 5946 | HD21 | LEU | X | 394 | 64.560 | 35.200 | 50.229 | 0.00 | 0.00 |
| ATOM | 5947 | HD22 | LEU | X | 394 | 65.405 | 33.836 | 50.863 | 0.00 | 0.00 |
| ATOM | 5948 | HD23 | LEU | X | 394 | 64.742 | 33.692 | 49.292 | 0.00 | 0.00 |
| ATOM | 5949 | C    | LEU | X | 394 | 60.923 | 31.768 | 50.099 | 0.00 | 0.00 |
| ATOM | 5950 | O    | LEU | X | 394 | 60.161 | 32.666 | 50.447 | 0.00 | 0.00 |
| ATOM | 5951 | N    | SER | X | 395 | 60.855 | 31.209 | 48.882 | 0.00 | 0.00 |
| ATOM | 5952 | H    | SER | X | 395 | 61.633 | 30.581 | 48.742 | 0.00 | 0.00 |
| ATOM | 5953 | CA   | SER | X | 395 | 59.838 | 31.409 | 47.868 | 0.00 | 0.00 |
| ATOM | 5954 | HA   | SER | X | 395 | 59.735 | 32.431 | 47.504 | 0.00 | 0.00 |
| ATOM | 5955 | CB   | SER | X | 395 | 60.333 | 30.556 | 46.671 | 0.00 | 0.00 |
| ATOM | 5956 | HB2  | SER | X | 395 | 60.471 | 29.519 | 46.979 | 0.00 | 0.00 |
| ATOM | 5957 | HB3  | SER | X | 395 | 59.449 | 30.499 | 46.036 | 0.00 | 0.00 |
| ATOM | 5958 | OG   | SER | X | 395 | 61.426 | 31.106 | 46.046 | 0.00 | 0.00 |
| ATOM | 5959 | HG   | SER | X | 395 | 62.021 | 30.376 | 45.860 | 0.00 | 0.00 |
| ATOM | 5960 | C    | SER | X | 395 | 58.466 | 30.899 | 48.490 | 0.00 | 0.00 |
| ATOM | 5961 | O    | SER | X | 395 | 57.457 | 31.484 | 48.320 | 0.00 | 0.00 |

|      |      |      |     |   |     |        |        |        |      |      |
|------|------|------|-----|---|-----|--------|--------|--------|------|------|
| ATOM | 5962 | N    | ASP | X | 396 | 58.481 | 29.844 | 49.306 | 0.00 | 0.00 |
| ATOM | 5963 | H    | ASP | X | 396 | 59.358 | 29.353 | 49.408 | 0.00 | 0.00 |
| ATOM | 5964 | CA   | ASP | X | 396 | 57.376 | 29.101 | 49.770 | 0.00 | 0.00 |
| ATOM | 5965 | HA   | ASP | X | 396 | 56.644 | 28.999 | 48.968 | 0.00 | 0.00 |
| ATOM | 5966 | CB   | ASP | X | 396 | 57.746 | 27.704 | 50.174 | 0.00 | 0.00 |
| ATOM | 5967 | HB2  | ASP | X | 396 | 58.371 | 27.272 | 49.393 | 0.00 | 0.00 |
| ATOM | 5968 | HB3  | ASP | X | 396 | 58.324 | 27.759 | 51.096 | 0.00 | 0.00 |
| ATOM | 5969 | CG   | ASP | X | 396 | 56.605 | 26.753 | 50.559 | 0.00 | 0.00 |
| ATOM | 5970 | OD1  | ASP | X | 396 | 56.034 | 26.305 | 49.530 | 0.00 | 0.00 |
| ATOM | 5971 | OD2  | ASP | X | 396 | 56.329 | 26.448 | 51.747 | 0.00 | 0.00 |
| ATOM | 5972 | C    | ASP | X | 396 | 56.801 | 29.940 | 50.897 | 0.00 | 0.00 |
| ATOM | 5973 | O    | ASP | X | 396 | 55.573 | 30.115 | 50.864 | 0.00 | 0.00 |
| ATOM | 5974 | N    | VAL | X | 397 | 57.611 | 30.515 | 51.799 | 0.00 | 0.00 |
| ATOM | 5975 | H    | VAL | X | 397 | 58.586 | 30.266 | 51.719 | 0.00 | 0.00 |
| ATOM | 5976 | CA   | VAL | X | 397 | 57.300 | 31.526 | 52.746 | 0.00 | 0.00 |
| ATOM | 5977 | HA   | VAL | X | 397 | 56.545 | 31.151 | 53.437 | 0.00 | 0.00 |
| ATOM | 5978 | CB   | VAL | X | 397 | 58.584 | 31.820 | 53.641 | 0.00 | 0.00 |
| ATOM | 5979 | HB   | VAL | X | 397 | 59.539 | 31.856 | 53.117 | 0.00 | 0.00 |
| ATOM | 5980 | CG1  | VAL | X | 397 | 58.477 | 33.204 | 54.331 | 0.00 | 0.00 |
| ATOM | 5981 | HG11 | VAL | X | 397 | 58.604 | 33.975 | 53.572 | 0.00 | 0.00 |
| ATOM | 5982 | HG12 | VAL | X | 397 | 57.507 | 33.385 | 54.794 | 0.00 | 0.00 |
| ATOM | 5983 | HG13 | VAL | X | 397 | 59.347 | 33.361 | 54.970 | 0.00 | 0.00 |
| ATOM | 5984 | CG2  | VAL | X | 397 | 58.822 | 30.739 | 54.637 | 0.00 | 0.00 |
| ATOM | 5985 | HG21 | VAL | X | 397 | 59.837 | 30.757 | 55.035 | 0.00 | 0.00 |
| ATOM | 5986 | HG22 | VAL | X | 397 | 58.551 | 29.739 | 54.298 | 0.00 | 0.00 |
| ATOM | 5987 | HG23 | VAL | X | 397 | 58.247 | 31.004 | 55.524 | 0.00 | 0.00 |
| ATOM | 5988 | C    | VAL | X | 397 | 56.643 | 32.861 | 52.160 | 0.00 | 0.00 |
| ATOM | 5989 | O    | VAL | X | 397 | 55.675 | 33.404 | 52.714 | 0.00 | 0.00 |
| ATOM | 5990 | N    | VAL | X | 398 | 57.236 | 33.342 | 51.059 | 0.00 | 0.00 |
| ATOM | 5991 | H    | VAL | X | 398 | 58.136 | 32.997 | 50.759 | 0.00 | 0.00 |
| ATOM | 5992 | CA   | VAL | X | 398 | 56.813 | 34.572 | 50.346 | 0.00 | 0.00 |
| ATOM | 5993 | HA   | VAL | X | 398 | 56.590 | 35.209 | 51.202 | 0.00 | 0.00 |
| ATOM | 5994 | CB   | VAL | X | 398 | 57.903 | 35.257 | 49.522 | 0.00 | 0.00 |
| ATOM | 5995 | HB   | VAL | X | 398 | 58.292 | 34.584 | 48.757 | 0.00 | 0.00 |
| ATOM | 5996 | CG1  | VAL | X | 398 | 57.402 | 36.606 | 48.880 | 0.00 | 0.00 |
| ATOM | 5997 | HG11 | VAL | X | 398 | 57.021 | 37.242 | 49.678 | 0.00 | 0.00 |
| ATOM | 5998 | HG12 | VAL | X | 398 | 58.236 | 36.986 | 48.290 | 0.00 | 0.00 |
| ATOM | 5999 | HG13 | VAL | X | 398 | 56.567 | 36.404 | 48.209 | 0.00 | 0.00 |
| ATOM | 6000 | CG2  | VAL | X | 398 | 59.125 | 35.618 | 50.447 | 0.00 | 0.00 |
| ATOM | 6001 | HG21 | VAL | X | 398 | 59.383 | 34.844 | 51.170 | 0.00 | 0.00 |
| ATOM | 6002 | HG22 | VAL | X | 398 | 58.905 | 36.497 | 51.053 | 0.00 | 0.00 |
| ATOM | 6003 | HG23 | VAL | X | 398 | 59.979 | 35.752 | 49.784 | 0.00 | 0.00 |
| ATOM | 6004 | C    | VAL | X | 398 | 55.499 | 34.315 | 49.650 | 0.00 | 0.00 |
| ATOM | 6005 | O    | VAL | X | 398 | 54.700 | 35.238 | 49.647 | 0.00 | 0.00 |
| ATOM | 6006 | N    | GLY | X | 399 | 55.105 | 33.041 | 49.345 | 0.00 | 0.00 |
| ATOM | 6007 | H    | GLY | X | 399 | 55.744 | 32.272 | 49.489 | 0.00 | 0.00 |
| ATOM | 6008 | CA   | GLY | X | 399 | 53.745 | 32.748 | 48.857 | 0.00 | 0.00 |
| ATOM | 6009 | HA2  | GLY | X | 399 | 53.407 | 33.565 | 48.220 | 0.00 | 0.00 |
| ATOM | 6010 | HA3  | GLY | X | 399 | 53.638 | 31.794 | 48.340 | 0.00 | 0.00 |
| ATOM | 6011 | C    | GLY | X | 399 | 52.737 | 32.520 | 50.015 | 0.00 | 0.00 |
| ATOM | 6012 | O    | GLY | X | 399 | 51.567 | 32.797 | 49.779 | 0.00 | 0.00 |
| ATOM | 6013 | N    | ASP | X | 400 | 53.093 | 31.946 | 51.163 | 0.00 | 0.00 |
| ATOM | 6014 | H    | ASP | X | 400 | 54.062 | 31.799 | 51.407 | 0.00 | 0.00 |
| ATOM | 6015 | CA   | ASP | X | 400 | 52.191 | 31.162 | 52.016 | 0.00 | 0.00 |
| ATOM | 6016 | HA   | ASP | X | 400 | 51.624 | 30.483 | 51.380 | 0.00 | 0.00 |
| ATOM | 6017 | CB   | ASP | X | 400 | 53.070 | 30.307 | 52.988 | 0.00 | 0.00 |
| ATOM | 6018 | HB2  | ASP | X | 400 | 54.036 | 30.073 | 52.540 | 0.00 | 0.00 |
| ATOM | 6019 | HB3  | ASP | X | 400 | 53.199 | 30.880 | 53.906 | 0.00 | 0.00 |
| ATOM | 6020 | CG   | ASP | X | 400 | 52.333 | 29.009 | 53.363 | 0.00 | 0.00 |
| ATOM | 6021 | OD1  | ASP | X | 400 | 52.410 | 28.582 | 54.539 | 0.00 | 0.00 |
| ATOM | 6022 | OD2  | ASP | X | 400 | 51.928 | 28.310 | 52.385 | 0.00 | 0.00 |
| ATOM | 6023 | C    | ASP | X | 400 | 51.082 | 32.017 | 52.697 | 0.00 | 0.00 |
| ATOM | 6024 | O    | ASP | X | 400 | 49.939 | 32.103 | 52.301 | 0.00 | 0.00 |
| ATOM | 6025 | N    | HIE | X | 401 | 51.472 | 32.738 | 53.729 | 0.00 | 0.00 |
| ATOM | 6026 | H    | HIE | X | 401 | 52.418 | 32.637 | 54.070 | 0.00 | 0.00 |
| ATOM | 6027 | CA   | HIE | X | 401 | 50.724 | 33.837 | 54.401 | 0.00 | 0.00 |
| ATOM | 6028 | HA   | HIE | X | 401 | 49.855 | 33.448 | 54.932 | 0.00 | 0.00 |

|      |      |      |     |   |     |        |        |        |      |      |
|------|------|------|-----|---|-----|--------|--------|--------|------|------|
| ATOM | 6029 | CB   | HIE | X | 401 | 51.662 | 34.385 | 55.548 | 0.00 | 0.00 |
| ATOM | 6030 | HB2  | HIE | X | 401 | 51.030 | 34.771 | 56.348 | 0.00 | 0.00 |
| ATOM | 6031 | HB3  | HIE | X | 401 | 52.339 | 33.633 | 55.953 | 0.00 | 0.00 |
| ATOM | 6032 | CG   | HIE | X | 401 | 52.584 | 35.508 | 55.183 | 0.00 | 0.00 |
| ATOM | 6033 | ND1  | HIE | X | 401 | 52.276 | 36.829 | 55.217 | 0.00 | 0.00 |
| ATOM | 6034 | CE1  | HIE | X | 401 | 53.359 | 37.470 | 54.766 | 0.00 | 0.00 |
| ATOM | 6035 | HE1  | HIE | X | 401 | 53.481 | 38.529 | 54.597 | 0.00 | 0.00 |
| ATOM | 6036 | NE2  | HIE | X | 401 | 54.308 | 36.661 | 54.436 | 0.00 | 0.00 |
| ATOM | 6037 | HE2  | HIE | X | 401 | 55.175 | 36.962 | 54.016 | 0.00 | 0.00 |
| ATOM | 6038 | CD2  | HIE | X | 401 | 53.841 | 35.401 | 54.755 | 0.00 | 0.00 |
| ATOM | 6039 | HD2  | HIE | X | 401 | 54.433 | 34.515 | 54.580 | 0.00 | 0.00 |
| ATOM | 6040 | C    | HIE | X | 401 | 50.251 | 34.931 | 53.446 | 0.00 | 0.00 |
| ATOM | 6041 | O    | HIE | X | 401 | 49.249 | 35.547 | 53.745 | 0.00 | 0.00 |
| ATOM | 6042 | N    | ASN | X | 402 | 50.857 | 35.158 | 52.244 | 0.00 | 0.00 |
| ATOM | 6043 | H    | ASN | X | 402 | 51.637 | 34.581 | 51.965 | 0.00 | 0.00 |
| ATOM | 6044 | CA   | ASN | X | 402 | 50.357 | 36.162 | 51.274 | 0.00 | 0.00 |
| ATOM | 6045 | HA   | ASN | X | 402 | 49.970 | 36.997 | 51.858 | 0.00 | 0.00 |
| ATOM | 6046 | CB   | ASN | X | 402 | 51.549 | 36.770 | 50.477 | 0.00 | 0.00 |
| ATOM | 6047 | HB2  | ASN | X | 402 | 52.128 | 35.947 | 50.058 | 0.00 | 0.00 |
| ATOM | 6048 | HB3  | ASN | X | 402 | 51.139 | 37.310 | 49.623 | 0.00 | 0.00 |
| ATOM | 6049 | CG   | ASN | X | 402 | 52.420 | 37.663 | 51.330 | 0.00 | 0.00 |
| ATOM | 6050 | OD1  | ASN | X | 402 | 51.933 | 38.379 | 52.153 | 0.00 | 0.00 |
| ATOM | 6051 | ND2  | ASN | X | 402 | 53.750 | 37.624 | 51.110 | 0.00 | 0.00 |
| ATOM | 6052 | HD21 | ASN | X | 402 | 54.352 | 37.961 | 51.847 | 0.00 | 0.00 |
| ATOM | 6053 | HD22 | ASN | X | 402 | 54.183 | 37.069 | 50.385 | 0.00 | 0.00 |
| ATOM | 6054 | C    | ASN | X | 402 | 49.307 | 35.695 | 50.308 | 0.00 | 0.00 |
| ATOM | 6055 | O    | ASN | X | 402 | 48.450 | 36.455 | 49.904 | 0.00 | 0.00 |
| ATOM | 6056 | N    | VAL | X | 403 | 49.266 | 34.459 | 49.959 | 0.00 | 0.00 |
| ATOM | 6057 | H    | VAL | X | 403 | 50.126 | 33.930 | 49.948 | 0.00 | 0.00 |
| ATOM | 6058 | CA   | VAL | X | 403 | 48.173 | 33.914 | 49.164 | 0.00 | 0.00 |
| ATOM | 6059 | HA   | VAL | X | 403 | 47.332 | 34.516 | 49.507 | 0.00 | 0.00 |
| ATOM | 6060 | CB   | VAL | X | 403 | 48.265 | 34.341 | 47.652 | 0.00 | 0.00 |
| ATOM | 6061 | HB   | VAL | X | 403 | 48.265 | 35.431 | 47.664 | 0.00 | 0.00 |
| ATOM | 6062 | CG1  | VAL | X | 403 | 49.506 | 33.901 | 46.853 | 0.00 | 0.00 |
| ATOM | 6063 | HG11 | VAL | X | 403 | 49.454 | 34.186 | 45.802 | 0.00 | 0.00 |
| ATOM | 6064 | HG12 | VAL | X | 403 | 50.391 | 34.371 | 47.281 | 0.00 | 0.00 |
| ATOM | 6065 | HG13 | VAL | X | 403 | 49.713 | 32.834 | 46.927 | 0.00 | 0.00 |
| ATOM | 6066 | CG2  | VAL | X | 403 | 47.022 | 33.847 | 46.929 | 0.00 | 0.00 |
| ATOM | 6067 | HG21 | VAL | X | 403 | 46.071 | 34.010 | 47.436 | 0.00 | 0.00 |
| ATOM | 6068 | HG22 | VAL | X | 403 | 47.089 | 32.774 | 46.749 | 0.00 | 0.00 |
| ATOM | 6069 | HG23 | VAL | X | 403 | 46.756 | 34.228 | 45.943 | 0.00 | 0.00 |
| ATOM | 6070 | C    | VAL | X | 403 | 47.787 | 32.449 | 49.435 | 0.00 | 0.00 |
| ATOM | 6071 | O    | VAL | X | 403 | 46.573 | 32.308 | 49.519 | 0.00 | 0.00 |
| ATOM | 6072 | N    | VAL | X | 404 | 48.703 | 31.519 | 49.550 | 0.00 | 0.00 |
| ATOM | 6073 | H    | VAL | X | 404 | 49.647 | 31.758 | 49.282 | 0.00 | 0.00 |
| ATOM | 6074 | CA   | VAL | X | 404 | 48.276 | 30.064 | 49.506 | 0.00 | 0.00 |
| ATOM | 6075 | HA   | VAL | X | 404 | 47.551 | 29.959 | 48.699 | 0.00 | 0.00 |
| ATOM | 6076 | CB   | VAL | X | 404 | 49.499 | 29.027 | 49.377 | 0.00 | 0.00 |
| ATOM | 6077 | HB   | VAL | X | 404 | 50.064 | 29.110 | 50.306 | 0.00 | 0.00 |
| ATOM | 6078 | CG1  | VAL | X | 404 | 48.933 | 27.624 | 49.203 | 0.00 | 0.00 |
| ATOM | 6079 | HG11 | VAL | X | 404 | 48.362 | 27.645 | 48.275 | 0.00 | 0.00 |
| ATOM | 6080 | HG12 | VAL | X | 404 | 49.769 | 26.925 | 49.176 | 0.00 | 0.00 |
| ATOM | 6081 | HG13 | VAL | X | 404 | 48.192 | 27.345 | 49.951 | 0.00 | 0.00 |
| ATOM | 6082 | CG2  | VAL | X | 404 | 50.475 | 29.416 | 48.222 | 0.00 | 0.00 |
| ATOM | 6083 | HG21 | VAL | X | 404 | 50.883 | 30.419 | 48.351 | 0.00 | 0.00 |
| ATOM | 6084 | HG22 | VAL | X | 404 | 49.913 | 29.259 | 47.302 | 0.00 | 0.00 |
| ATOM | 6085 | HG23 | VAL | X | 404 | 51.368 | 28.791 | 48.251 | 0.00 | 0.00 |
| ATOM | 6086 | C    | VAL | X | 404 | 47.493 | 29.719 | 50.743 | 0.00 | 0.00 |
| ATOM | 6087 | O    | VAL | X | 404 | 46.442 | 29.129 | 50.583 | 0.00 | 0.00 |
| ATOM | 6088 | N    | CYX | X | 405 | 47.854 | 30.107 | 51.932 | 0.00 | 0.00 |
| ATOM | 6089 | H    | CYX | X | 405 | 48.699 | 30.659 | 51.951 | 0.00 | 0.00 |
| ATOM | 6090 | CA   | CYX | X | 405 | 47.043 | 29.871 | 53.125 | 0.00 | 0.00 |
| ATOM | 6091 | HA   | CYX | X | 405 | 46.756 | 28.819 | 53.116 | 0.00 | 0.00 |
| ATOM | 6092 | CB   | CYX | X | 405 | 47.830 | 30.150 | 54.381 | 0.00 | 0.00 |
| ATOM | 6093 | HB2  | CYX | X | 405 | 48.462 | 31.032 | 54.276 | 0.00 | 0.00 |
| ATOM | 6094 | HB3  | CYX | X | 405 | 47.133 | 30.201 | 55.217 | 0.00 | 0.00 |
| ATOM | 6095 | SG   | CYX | X | 405 | 48.908 | 28.817 | 54.986 | 0.00 | 0.00 |

|      |      |      |     |   |     |        |        |        |      |      |
|------|------|------|-----|---|-----|--------|--------|--------|------|------|
| ATOM | 6096 | C    | CYX | X | 405 | 45.716 | 30.659 | 53.136 | 0.00 | 0.00 |
| ATOM | 6097 | O    | CYX | X | 405 | 44.690 | 30.085 | 53.501 | 0.00 | 0.00 |
| ATOM | 6098 | N    | PRO | X | 406 | 45.713 | 31.979 | 52.741 | 0.00 | 0.00 |
| ATOM | 6099 | CD   | PRO | X | 406 | 46.820 | 32.869 | 52.658 | 0.00 | 0.00 |
| ATOM | 6100 | HD2  | PRO | X | 406 | 47.469 | 32.658 | 51.808 | 0.00 | 0.00 |
| ATOM | 6101 | HD3  | PRO | X | 406 | 47.396 | 32.797 | 53.581 | 0.00 | 0.00 |
| ATOM | 6102 | CG   | PRO | X | 406 | 46.311 | 34.295 | 52.553 | 0.00 | 0.00 |
| ATOM | 6103 | HG2  | PRO | X | 406 | 46.959 | 34.996 | 52.027 | 0.00 | 0.00 |
| ATOM | 6104 | HG3  | PRO | X | 406 | 46.210 | 34.601 | 53.594 | 0.00 | 0.00 |
| ATOM | 6105 | CB   | PRO | X | 406 | 44.979 | 34.049 | 51.908 | 0.00 | 0.00 |
| ATOM | 6106 | HB2  | PRO | X | 406 | 45.215 | 33.947 | 50.849 | 0.00 | 0.00 |
| ATOM | 6107 | HB3  | PRO | X | 406 | 44.343 | 34.910 | 52.112 | 0.00 | 0.00 |
| ATOM | 6108 | CA   | PRO | X | 406 | 44.500 | 32.727 | 52.443 | 0.00 | 0.00 |
| ATOM | 6109 | HA   | PRO | X | 406 | 43.956 | 32.904 | 53.371 | 0.00 | 0.00 |
| ATOM | 6110 | C    | PRO | X | 406 | 43.530 | 32.022 | 51.500 | 0.00 | 0.00 |
| ATOM | 6111 | O    | PRO | X | 406 | 42.286 | 32.157 | 51.749 | 0.00 | 0.00 |
| ATOM | 6112 | N    | VAL | X | 407 | 43.992 | 31.309 | 50.440 | 0.00 | 0.00 |
| ATOM | 6113 | H    | VAL | X | 407 | 44.986 | 31.410 | 50.293 | 0.00 | 0.00 |
| ATOM | 6114 | CA   | VAL | X | 407 | 43.145 | 30.568 | 49.554 | 0.00 | 0.00 |
| ATOM | 6115 | HA   | VAL | X | 407 | 42.238 | 31.124 | 49.315 | 0.00 | 0.00 |
| ATOM | 6116 | CB   | VAL | X | 407 | 43.837 | 30.232 | 48.223 | 0.00 | 0.00 |
| ATOM | 6117 | HB   | VAL | X | 407 | 44.863 | 29.982 | 48.496 | 0.00 | 0.00 |
| ATOM | 6118 | CG1  | VAL | X | 407 | 43.132 | 29.190 | 47.377 | 0.00 | 0.00 |
| ATOM | 6119 | HG11 | VAL | X | 407 | 43.101 | 28.255 | 47.936 | 0.00 | 0.00 |
| ATOM | 6120 | HG12 | VAL | X | 407 | 42.142 | 29.619 | 47.225 | 0.00 | 0.00 |
| ATOM | 6121 | HG13 | VAL | X | 407 | 43.617 | 28.957 | 46.429 | 0.00 | 0.00 |
| ATOM | 6122 | CG2  | VAL | X | 407 | 44.077 | 31.505 | 47.384 | 0.00 | 0.00 |
| ATOM | 6123 | HG21 | VAL | X | 407 | 44.806 | 31.317 | 46.596 | 0.00 | 0.00 |
| ATOM | 6124 | HG22 | VAL | X | 407 | 44.428 | 32.321 | 48.017 | 0.00 | 0.00 |
| ATOM | 6125 | HG23 | VAL | X | 407 | 43.201 | 31.865 | 46.845 | 0.00 | 0.00 |
| ATOM | 6126 | C    | VAL | X | 407 | 42.583 | 29.323 | 50.268 | 0.00 | 0.00 |
| ATOM | 6127 | O    | VAL | X | 407 | 41.417 | 29.078 | 50.139 | 0.00 | 0.00 |
| ATOM | 6128 | N    | ALA | X | 408 | 43.328 | 28.566 | 51.060 | 0.00 | 0.00 |
| ATOM | 6129 | H    | ALA | X | 408 | 44.256 | 28.888 | 51.295 | 0.00 | 0.00 |
| ATOM | 6130 | CA   | ALA | X | 408 | 42.849 | 27.362 | 51.931 | 0.00 | 0.00 |
| ATOM | 6131 | HA   | ALA | X | 408 | 42.383 | 26.636 | 51.264 | 0.00 | 0.00 |
| ATOM | 6132 | CB   | ALA | X | 408 | 43.988 | 26.698 | 52.579 | 0.00 | 0.00 |
| ATOM | 6133 | HB1  | ALA | X | 408 | 44.450 | 27.479 | 53.182 | 0.00 | 0.00 |
| ATOM | 6134 | HB2  | ALA | X | 408 | 44.621 | 26.286 | 51.792 | 0.00 | 0.00 |
| ATOM | 6135 | HB3  | ALA | X | 408 | 43.653 | 25.955 | 53.303 | 0.00 | 0.00 |
| ATOM | 6136 | C    | ALA | X | 408 | 41.738 | 27.772 | 52.963 | 0.00 | 0.00 |
| ATOM | 6137 | O    | ALA | X | 408 | 40.795 | 27.023 | 53.173 | 0.00 | 0.00 |
| ATOM | 6138 | N    | GLN | X | 409 | 41.893 | 28.961 | 53.606 | 0.00 | 0.00 |
| ATOM | 6139 | H    | GLN | X | 409 | 42.822 | 29.343 | 53.507 | 0.00 | 0.00 |
| ATOM | 6140 | CA   | GLN | X | 409 | 40.950 | 29.670 | 54.416 | 0.00 | 0.00 |
| ATOM | 6141 | HA   | GLN | X | 409 | 40.586 | 29.065 | 55.246 | 0.00 | 0.00 |
| ATOM | 6142 | CB   | GLN | X | 409 | 41.584 | 30.900 | 55.068 | 0.00 | 0.00 |
| ATOM | 6143 | HB2  | GLN | X | 409 | 42.090 | 31.401 | 54.243 | 0.00 | 0.00 |
| ATOM | 6144 | HB3  | GLN | X | 409 | 40.746 | 31.435 | 55.513 | 0.00 | 0.00 |
| ATOM | 6145 | CG   | GLN | X | 409 | 42.514 | 30.448 | 56.191 | 0.00 | 0.00 |
| ATOM | 6146 | HG2  | GLN | X | 409 | 41.900 | 30.074 | 57.010 | 0.00 | 0.00 |
| ATOM | 6147 | HG3  | GLN | X | 409 | 43.275 | 29.729 | 55.889 | 0.00 | 0.00 |
| ATOM | 6148 | CD   | GLN | X | 409 | 43.395 | 31.617 | 56.742 | 0.00 | 0.00 |
| ATOM | 6149 | OE1  | GLN | X | 409 | 43.866 | 32.467 | 55.985 | 0.00 | 0.00 |
| ATOM | 6150 | NE2  | GLN | X | 409 | 43.759 | 31.569 | 58.007 | 0.00 | 0.00 |
| ATOM | 6151 | HE21 | GLN | X | 409 | 44.321 | 32.306 | 58.408 | 0.00 | 0.00 |
| ATOM | 6152 | HE22 | GLN | X | 409 | 43.436 | 30.711 | 58.431 | 0.00 | 0.00 |
| ATOM | 6153 | C    | GLN | X | 409 | 39.651 | 30.063 | 53.600 | 0.00 | 0.00 |
| ATOM | 6154 | O    | GLN | X | 409 | 38.483 | 29.741 | 53.919 | 0.00 | 0.00 |
| ATOM | 6155 | N    | LEU | X | 410 | 39.782 | 30.804 | 52.514 | 0.00 | 0.00 |
| ATOM | 6156 | H    | LEU | X | 410 | 40.731 | 31.103 | 52.346 | 0.00 | 0.00 |
| ATOM | 6157 | CA   | LEU | X | 410 | 38.685 | 31.355 | 51.630 | 0.00 | 0.00 |
| ATOM | 6158 | HA   | LEU | X | 410 | 38.003 | 31.984 | 52.202 | 0.00 | 0.00 |
| ATOM | 6159 | CB   | LEU | X | 410 | 39.347 | 32.252 | 50.614 | 0.00 | 0.00 |
| ATOM | 6160 | HB2  | LEU | X | 410 | 39.784 | 33.078 | 51.175 | 0.00 | 0.00 |
| ATOM | 6161 | HB3  | LEU | X | 410 | 40.195 | 31.687 | 50.228 | 0.00 | 0.00 |
| ATOM | 6162 | CG   | LEU | X | 410 | 38.360 | 32.826 | 49.607 | 0.00 | 0.00 |



|      |      |      |     |   |     |        |        |        |      |      |
|------|------|------|-----|---|-----|--------|--------|--------|------|------|
| ATOM | 6163 | HG   | LEU | X | 410 | 37.791 | 32.064 | 49.074 | 0.00 | 0.00 |
| ATOM | 6164 | CD1  | LEU | X | 410 | 37.429 | 33.804 | 50.342 | 0.00 | 0.00 |
| ATOM | 6165 | HD11 | LEU | X | 410 | 38.128 | 34.389 | 50.940 | 0.00 | 0.00 |
| ATOM | 6166 | HD12 | LEU | X | 410 | 36.653 | 33.269 | 50.889 | 0.00 | 0.00 |
| ATOM | 6167 | HD13 | LEU | X | 410 | 36.941 | 34.478 | 49.637 | 0.00 | 0.00 |
| ATOM | 6168 | CD2  | LEU | X | 410 | 39.213 | 33.496 | 48.479 | 0.00 | 0.00 |
| ATOM | 6169 | HD21 | LEU | X | 410 | 39.972 | 32.901 | 47.970 | 0.00 | 0.00 |
| ATOM | 6170 | HD22 | LEU | X | 410 | 38.546 | 33.802 | 47.673 | 0.00 | 0.00 |
| ATOM | 6171 | HD23 | LEU | X | 410 | 39.742 | 34.337 | 48.928 | 0.00 | 0.00 |
| ATOM | 6172 | C    | LEU | X | 410 | 37.812 | 30.313 | 50.972 | 0.00 | 0.00 |
| ATOM | 6173 | O    | LEU | X | 410 | 36.593 | 30.459 | 51.090 | 0.00 | 0.00 |
| ATOM | 6174 | N    | ALA | X | 411 | 38.487 | 29.365 | 50.361 | 0.00 | 0.00 |
| ATOM | 6175 | H    | ALA | X | 411 | 39.476 | 29.487 | 50.194 | 0.00 | 0.00 |
| ATOM | 6176 | CA   | ALA | X | 411 | 37.929 | 28.088 | 49.784 | 0.00 | 0.00 |
| ATOM | 6177 | HA   | ALA | X | 411 | 37.267 | 28.565 | 49.061 | 0.00 | 0.00 |
| ATOM | 6178 | CB   | ALA | X | 411 | 39.060 | 27.235 | 49.252 | 0.00 | 0.00 |
| ATOM | 6179 | HB1  | ALA | X | 411 | 39.682 | 26.965 | 50.105 | 0.00 | 0.00 |
| ATOM | 6180 | HB2  | ALA | X | 411 | 39.738 | 27.852 | 48.662 | 0.00 | 0.00 |
| ATOM | 6181 | HB3  | ALA | X | 411 | 38.618 | 26.378 | 48.742 | 0.00 | 0.00 |
| ATOM | 6182 | C    | ALA | X | 411 | 37.150 | 27.331 | 50.860 | 0.00 | 0.00 |
| ATOM | 6183 | O    | ALA | X | 411 | 35.969 | 26.931 | 50.672 | 0.00 | 0.00 |
| ATOM | 6184 | N    | GLY | X | 412 | 37.685 | 27.230 | 52.065 | 0.00 | 0.00 |
| ATOM | 6185 | H    | GLY | X | 412 | 38.513 | 27.764 | 52.286 | 0.00 | 0.00 |
| ATOM | 6186 | CA   | GLY | X | 412 | 37.050 | 26.568 | 53.175 | 0.00 | 0.00 |
| ATOM | 6187 | HA2  | GLY | X | 412 | 36.838 | 25.509 | 53.033 | 0.00 | 0.00 |
| ATOM | 6188 | HA3  | GLY | X | 412 | 37.819 | 26.668 | 53.941 | 0.00 | 0.00 |
| ATOM | 6189 | C    | GLY | X | 412 | 35.786 | 27.240 | 53.625 | 0.00 | 0.00 |
| ATOM | 6190 | O    | GLY | X | 412 | 34.775 | 26.545 | 53.793 | 0.00 | 0.00 |
| ATOM | 6191 | N    | ARG | X | 413 | 35.867 | 28.520 | 53.919 | 0.00 | 0.00 |
| ATOM | 6192 | H    | ARG | X | 413 | 36.728 | 28.931 | 53.587 | 0.00 | 0.00 |
| ATOM | 6193 | CA   | ARG | X | 413 | 34.791 | 29.348 | 54.296 | 0.00 | 0.00 |
| ATOM | 6194 | HA   | ARG | X | 413 | 34.360 | 28.840 | 55.159 | 0.00 | 0.00 |
| ATOM | 6195 | CB   | ARG | X | 413 | 35.253 | 30.782 | 54.616 | 0.00 | 0.00 |
| ATOM | 6196 | HB2  | ARG | X | 413 | 35.840 | 30.677 | 55.528 | 0.00 | 0.00 |
| ATOM | 6197 | HB3  | ARG | X | 413 | 35.896 | 31.150 | 53.816 | 0.00 | 0.00 |
| ATOM | 6198 | CG   | ARG | X | 413 | 34.115 | 31.693 | 54.928 | 0.00 | 0.00 |
| ATOM | 6199 | HG2  | ARG | X | 413 | 34.462 | 32.702 | 55.147 | 0.00 | 0.00 |
| ATOM | 6200 | HG3  | ARG | X | 413 | 33.480 | 31.834 | 54.053 | 0.00 | 0.00 |
| ATOM | 6201 | CD   | ARG | X | 413 | 33.263 | 31.194 | 56.062 | 0.00 | 0.00 |
| ATOM | 6202 | HD2  | ARG | X | 413 | 32.742 | 30.277 | 55.785 | 0.00 | 0.00 |
| ATOM | 6203 | HD3  | ARG | X | 413 | 33.887 | 31.017 | 56.938 | 0.00 | 0.00 |
| ATOM | 6204 | NE   | ARG | X | 413 | 32.252 | 32.216 | 56.308 | 0.00 | 0.00 |
| ATOM | 6205 | HE   | ARG | X | 413 | 32.248 | 32.911 | 55.575 | 0.00 | 0.00 |
| ATOM | 6206 | CZ   | ARG | X | 413 | 31.619 | 32.434 | 57.428 | 0.00 | 0.00 |
| ATOM | 6207 | NH1  | ARG | X | 413 | 31.819 | 31.625 | 58.426 | 0.00 | 0.00 |
| ATOM | 6208 | HH11 | ARG | X | 413 | 32.148 | 30.681 | 58.286 | 0.00 | 0.00 |
| ATOM | 6209 | HH12 | ARG | X | 413 | 31.708 | 31.889 | 59.394 | 0.00 | 0.00 |
| ATOM | 6210 | NH2  | ARG | X | 413 | 30.671 | 33.358 | 57.527 | 0.00 | 0.00 |
| ATOM | 6211 | HH21 | ARG | X | 413 | 30.595 | 33.981 | 56.735 | 0.00 | 0.00 |
| ATOM | 6212 | HH22 | ARG | X | 413 | 30.242 | 33.557 | 58.419 | 0.00 | 0.00 |
| ATOM | 6213 | C    | ARG | X | 413 | 33.673 | 29.297 | 53.256 | 0.00 | 0.00 |
| ATOM | 6214 | O    | ARG | X | 413 | 32.545 | 28.880 | 53.546 | 0.00 | 0.00 |
| ATOM | 6215 | N    | LEU | X | 414 | 33.948 | 29.506 | 51.928 | 0.00 | 0.00 |
| ATOM | 6216 | H    | LEU | X | 414 | 34.811 | 29.938 | 51.630 | 0.00 | 0.00 |
| ATOM | 6217 | CA   | LEU | X | 414 | 32.823 | 29.545 | 50.958 | 0.00 | 0.00 |
| ATOM | 6218 | HA   | LEU | X | 414 | 32.133 | 30.216 | 51.470 | 0.00 | 0.00 |
| ATOM | 6219 | CB   | LEU | X | 414 | 33.356 | 30.147 | 49.613 | 0.00 | 0.00 |
| ATOM | 6220 | HB2  | LEU | X | 414 | 34.303 | 29.691 | 49.320 | 0.00 | 0.00 |
| ATOM | 6221 | HB3  | LEU | X | 414 | 32.589 | 30.078 | 48.842 | 0.00 | 0.00 |
| ATOM | 6222 | CG   | LEU | X | 414 | 33.703 | 31.619 | 49.766 | 0.00 | 0.00 |
| ATOM | 6223 | HG   | LEU | X | 414 | 34.528 | 31.614 | 50.479 | 0.00 | 0.00 |
| ATOM | 6224 | CD1  | LEU | X | 414 | 34.178 | 32.122 | 48.410 | 0.00 | 0.00 |
| ATOM | 6225 | HD11 | LEU | X | 414 | 34.514 | 33.157 | 48.472 | 0.00 | 0.00 |
| ATOM | 6226 | HD12 | LEU | X | 414 | 33.436 | 31.889 | 47.646 | 0.00 | 0.00 |
| ATOM | 6227 | HD13 | LEU | X | 414 | 34.986 | 31.426 | 48.183 | 0.00 | 0.00 |
| ATOM | 6228 | CD2  | LEU | X | 414 | 32.550 | 32.541 | 50.166 | 0.00 | 0.00 |
| ATOM | 6229 | HD21 | LEU | X | 414 | 32.594 | 33.592 | 49.883 | 0.00 | 0.00 |

|      |      |      |     |   |     |        |        |        |      |      |
|------|------|------|-----|---|-----|--------|--------|--------|------|------|
| ATOM | 6230 | HD22 | LEU | X | 414 | 31.635 | 32.224 | 49.664 | 0.00 | 0.00 |
| ATOM | 6231 | HD23 | LEU | X | 414 | 32.345 | 32.499 | 51.236 | 0.00 | 0.00 |
| ATOM | 6232 | C    | LEU | X | 414 | 32.184 | 28.178 | 50.804 | 0.00 | 0.00 |
| ATOM | 6233 | O    | LEU | X | 414 | 30.963 | 28.091 | 50.714 | 0.00 | 0.00 |
| ATOM | 6234 | N    | ALA | X | 415 | 33.058 | 27.175 | 50.838 | 0.00 | 0.00 |
| ATOM | 6235 | H    | ALA | X | 415 | 34.033 | 27.373 | 51.014 | 0.00 | 0.00 |
| ATOM | 6236 | CA   | ALA | X | 415 | 32.569 | 25.772 | 50.777 | 0.00 | 0.00 |
| ATOM | 6237 | HA   | ALA | X | 415 | 32.017 | 25.730 | 49.837 | 0.00 | 0.00 |
| ATOM | 6238 | CB   | ALA | X | 415 | 33.721 | 24.845 | 50.784 | 0.00 | 0.00 |
| ATOM | 6239 | HB1  | ALA | X | 415 | 34.285 | 24.963 | 49.859 | 0.00 | 0.00 |
| ATOM | 6240 | HB2  | ALA | X | 415 | 33.453 | 23.815 | 51.020 | 0.00 | 0.00 |
| ATOM | 6241 | HB3  | ALA | X | 415 | 34.425 | 25.138 | 51.564 | 0.00 | 0.00 |
| ATOM | 6242 | C    | ALA | X | 415 | 31.589 | 25.533 | 51.974 | 0.00 | 0.00 |
| ATOM | 6243 | O    | ALA | X | 415 | 30.467 | 25.050 | 51.724 | 0.00 | 0.00 |
| ATOM | 6244 | N    | ALA | X | 416 | 32.020 | 25.787 | 53.187 | 0.00 | 0.00 |
| ATOM | 6245 | H    | ALA | X | 416 | 32.934 | 26.187 | 53.345 | 0.00 | 0.00 |
| ATOM | 6246 | CA   | ALA | X | 416 | 31.203 | 25.506 | 54.443 | 0.00 | 0.00 |
| ATOM | 6247 | HA   | ALA | X | 416 | 31.009 | 24.436 | 54.372 | 0.00 | 0.00 |
| ATOM | 6248 | CB   | ALA | X | 416 | 32.159 | 25.774 | 55.579 | 0.00 | 0.00 |
| ATOM | 6249 | HB1  | ALA | X | 416 | 32.401 | 26.836 | 55.523 | 0.00 | 0.00 |
| ATOM | 6250 | HB2  | ALA | X | 416 | 33.065 | 25.192 | 55.413 | 0.00 | 0.00 |
| ATOM | 6251 | HB3  | ALA | X | 416 | 31.728 | 25.331 | 56.476 | 0.00 | 0.00 |
| ATOM | 6252 | C    | ALA | X | 416 | 29.836 | 26.238 | 54.480 | 0.00 | 0.00 |
| ATOM | 6253 | O    | ALA | X | 416 | 28.851 | 25.629 | 54.929 | 0.00 | 0.00 |
| ATOM | 6254 | N    | GLN | X | 417 | 29.770 | 27.402 | 53.879 | 0.00 | 0.00 |
| ATOM | 6255 | H    | GLN | X | 417 | 30.642 | 27.806 | 53.566 | 0.00 | 0.00 |
| ATOM | 6256 | CA   | GLN | X | 417 | 28.691 | 28.327 | 53.841 | 0.00 | 0.00 |
| ATOM | 6257 | HA   | GLN | X | 417 | 28.196 | 28.166 | 54.799 | 0.00 | 0.00 |
| ATOM | 6258 | CB   | GLN | X | 417 | 29.136 | 29.770 | 53.595 | 0.00 | 0.00 |
| ATOM | 6259 | HB2  | GLN | X | 417 | 29.674 | 29.969 | 52.668 | 0.00 | 0.00 |
| ATOM | 6260 | HB3  | GLN | X | 417 | 28.183 | 30.264 | 53.403 | 0.00 | 0.00 |
| ATOM | 6261 | CG   | GLN | X | 417 | 29.810 | 30.510 | 54.779 | 0.00 | 0.00 |
| ATOM | 6262 | HG2  | GLN | X | 417 | 30.853 | 30.226 | 54.918 | 0.00 | 0.00 |
| ATOM | 6263 | HG3  | GLN | X | 417 | 29.795 | 31.592 | 54.651 | 0.00 | 0.00 |
| ATOM | 6264 | CD   | GLN | X | 417 | 29.170 | 30.227 | 56.140 | 0.00 | 0.00 |
| ATOM | 6265 | OE1  | GLN | X | 417 | 29.701 | 29.473 | 56.959 | 0.00 | 0.00 |
| ATOM | 6266 | NE2  | GLN | X | 417 | 28.063 | 30.839 | 56.444 | 0.00 | 0.00 |
| ATOM | 6267 | HE21 | GLN | X | 417 | 27.669 | 30.599 | 57.342 | 0.00 | 0.00 |
| ATOM | 6268 | HE22 | GLN | X | 417 | 27.403 | 31.222 | 55.781 | 0.00 | 0.00 |
| ATOM | 6269 | C    | GLN | X | 417 | 27.673 | 27.976 | 52.749 | 0.00 | 0.00 |
| ATOM | 6270 | O    | GLN | X | 417 | 26.547 | 28.561 | 52.718 | 0.00 | 0.00 |
| ATOM | 6271 | N    | GLY | X | 418 | 27.967 | 27.041 | 51.840 | 0.00 | 0.00 |
| ATOM | 6272 | H    | GLY | X | 418 | 28.847 | 26.552 | 51.917 | 0.00 | 0.00 |
| ATOM | 6273 | CA   | GLY | X | 418 | 27.022 | 26.583 | 50.775 | 0.00 | 0.00 |
| ATOM | 6274 | HA2  | GLY | X | 418 | 27.243 | 25.594 | 50.376 | 0.00 | 0.00 |
| ATOM | 6275 | HA3  | GLY | X | 418 | 25.996 | 26.742 | 51.107 | 0.00 | 0.00 |
| ATOM | 6276 | C    | GLY | X | 418 | 27.113 | 27.337 | 49.453 | 0.00 | 0.00 |
| ATOM | 6277 | O    | GLY | X | 418 | 26.162 | 27.285 | 48.620 | 0.00 | 0.00 |
| ATOM | 6278 | N    | ALA | X | 419 | 28.262 | 28.026 | 49.312 | 0.00 | 0.00 |
| ATOM | 6279 | H    | ALA | X | 419 | 29.052 | 27.977 | 49.939 | 0.00 | 0.00 |
| ATOM | 6280 | CA   | ALA | X | 419 | 28.673 | 28.376 | 47.945 | 0.00 | 0.00 |
| ATOM | 6281 | HA   | ALA | X | 419 | 27.909 | 28.861 | 47.338 | 0.00 | 0.00 |
| ATOM | 6282 | CB   | ALA | X | 419 | 29.795 | 29.415 | 48.010 | 0.00 | 0.00 |
| ATOM | 6283 | HB1  | ALA | X | 419 | 30.807 | 29.099 | 48.266 | 0.00 | 0.00 |
| ATOM | 6284 | HB2  | ALA | X | 419 | 29.499 | 30.125 | 48.782 | 0.00 | 0.00 |
| ATOM | 6285 | HB3  | ALA | X | 419 | 29.821 | 29.928 | 47.049 | 0.00 | 0.00 |
| ATOM | 6286 | C    | ALA | X | 419 | 29.196 | 27.054 | 47.194 | 0.00 | 0.00 |
| ATOM | 6287 | O    | ALA | X | 419 | 29.573 | 26.087 | 47.865 | 0.00 | 0.00 |
| ATOM | 6288 | N    | ARG | X | 420 | 29.199 | 27.142 | 45.894 | 0.00 | 0.00 |
| ATOM | 6289 | H    | ARG | X | 420 | 29.028 | 28.072 | 45.540 | 0.00 | 0.00 |
| ATOM | 6290 | CA   | ARG | X | 420 | 29.924 | 26.186 | 45.079 | 0.00 | 0.00 |
| ATOM | 6291 | HA   | ARG | X | 420 | 29.994 | 25.299 | 45.708 | 0.00 | 0.00 |
| ATOM | 6292 | CB   | ARG | X | 420 | 29.235 | 25.731 | 43.811 | 0.00 | 0.00 |
| ATOM | 6293 | HB2  | ARG | X | 420 | 28.153 | 25.779 | 43.939 | 0.00 | 0.00 |
| ATOM | 6294 | HB3  | ARG | X | 420 | 29.515 | 26.472 | 43.063 | 0.00 | 0.00 |
| ATOM | 6295 | CG   | ARG | X | 420 | 29.623 | 24.360 | 43.248 | 0.00 | 0.00 |
| ATOM | 6296 | HG2  | ARG | X | 420 | 29.265 | 24.284 | 42.221 | 0.00 | 0.00 |

|      |      |      |     |   |     |        |        |        |      |      |
|------|------|------|-----|---|-----|--------|--------|--------|------|------|
| ATOM | 6297 | HG3  | ARG | X | 420 | 30.706 | 24.250 | 43.205 | 0.00 | 0.00 |
| ATOM | 6298 | CD   | ARG | X | 420 | 29.044 | 23.130 | 44.028 | 0.00 | 0.00 |
| ATOM | 6299 | HD2  | ARG | X | 420 | 29.333 | 22.239 | 43.471 | 0.00 | 0.00 |
| ATOM | 6300 | HD3  | ARG | X | 420 | 29.611 | 23.048 | 44.955 | 0.00 | 0.00 |
| ATOM | 6301 | NE   | ARG | X | 420 | 27.581 | 23.269 | 44.107 | 0.00 | 0.00 |
| ATOM | 6302 | HE   | ARG | X | 420 | 27.124 | 23.112 | 43.220 | 0.00 | 0.00 |
| ATOM | 6303 | CZ   | ARG | X | 420 | 26.935 | 23.737 | 45.153 | 0.00 | 0.00 |
| ATOM | 6304 | NH1  | ARG | X | 420 | 27.619 | 23.897 | 46.307 | 0.00 | 0.00 |
| ATOM | 6305 | HH11 | ARG | X | 420 | 28.514 | 23.433 | 46.375 | 0.00 | 0.00 |
| ATOM | 6306 | HH12 | ARG | X | 420 | 27.175 | 24.311 | 47.114 | 0.00 | 0.00 |
| ATOM | 6307 | NH2  | ARG | X | 420 | 25.717 | 24.190 | 45.112 | 0.00 | 0.00 |
| ATOM | 6308 | HH21 | ARG | X | 420 | 25.129 | 24.018 | 44.309 | 0.00 | 0.00 |
| ATOM | 6309 | HH22 | ARG | X | 420 | 25.380 | 24.735 | 45.893 | 0.00 | 0.00 |
| ATOM | 6310 | C    | ARG | X | 420 | 31.304 | 26.742 | 44.757 | 0.00 | 0.00 |
| ATOM | 6311 | O    | ARG | X | 420 | 31.389 | 27.880 | 44.291 | 0.00 | 0.00 |
| ATOM | 6312 | N    | VAL | X | 421 | 32.313 | 25.984 | 45.183 | 0.00 | 0.00 |
| ATOM | 6313 | H    | VAL | X | 421 | 32.051 | 25.178 | 45.733 | 0.00 | 0.00 |
| ATOM | 6314 | CA   | VAL | X | 421 | 33.724 | 26.275 | 45.103 | 0.00 | 0.00 |
| ATOM | 6315 | HA   | VAL | X | 421 | 33.930 | 27.238 | 44.636 | 0.00 | 0.00 |
| ATOM | 6316 | CB   | VAL | X | 421 | 34.378 | 26.344 | 46.503 | 0.00 | 0.00 |
| ATOM | 6317 | HB   | VAL | X | 421 | 34.378 | 25.335 | 46.914 | 0.00 | 0.00 |
| ATOM | 6318 | CG1  | VAL | X | 421 | 35.827 | 26.913 | 46.499 | 0.00 | 0.00 |
| ATOM | 6319 | HG11 | VAL | X | 421 | 36.166 | 27.175 | 47.501 | 0.00 | 0.00 |
| ATOM | 6320 | HG12 | VAL | X | 421 | 36.549 | 26.177 | 46.144 | 0.00 | 0.00 |
| ATOM | 6321 | HG13 | VAL | X | 421 | 35.839 | 27.743 | 45.793 | 0.00 | 0.00 |
| ATOM | 6322 | CG2  | VAL | X | 421 | 33.568 | 27.158 | 47.478 | 0.00 | 0.00 |
| ATOM | 6323 | HG21 | VAL | X | 421 | 32.546 | 26.782 | 47.522 | 0.00 | 0.00 |
| ATOM | 6324 | HG22 | VAL | X | 421 | 33.465 | 28.187 | 47.133 | 0.00 | 0.00 |
| ATOM | 6325 | HG23 | VAL | X | 421 | 34.086 | 27.055 | 48.431 | 0.00 | 0.00 |
| ATOM | 6326 | C    | VAL | X | 421 | 34.398 | 25.178 | 44.249 | 0.00 | 0.00 |
| ATOM | 6327 | O    | VAL | X | 421 | 34.115 | 24.026 | 44.387 | 0.00 | 0.00 |
| ATOM | 6328 | N    | TYR | X | 422 | 35.520 | 25.544 | 43.647 | 0.00 | 0.00 |
| ATOM | 6329 | H    | TYR | X | 422 | 35.834 | 26.503 | 43.635 | 0.00 | 0.00 |
| ATOM | 6330 | CA   | TYR | X | 422 | 36.463 | 24.646 | 42.950 | 0.00 | 0.00 |
| ATOM | 6331 | HA   | TYR | X | 422 | 36.261 | 23.627 | 43.279 | 0.00 | 0.00 |
| ATOM | 6332 | CB   | TYR | X | 422 | 35.975 | 24.681 | 41.467 | 0.00 | 0.00 |
| ATOM | 6333 | HB2  | TYR | X | 422 | 35.965 | 25.720 | 41.138 | 0.00 | 0.00 |
| ATOM | 6334 | HB3  | TYR | X | 422 | 36.744 | 24.249 | 40.826 | 0.00 | 0.00 |
| ATOM | 6335 | CG   | TYR | X | 422 | 34.571 | 24.244 | 41.187 | 0.00 | 0.00 |
| ATOM | 6336 | CD1  | TYR | X | 422 | 34.308 | 22.897 | 40.878 | 0.00 | 0.00 |
| ATOM | 6337 | HD1  | TYR | X | 422 | 35.071 | 22.141 | 40.989 | 0.00 | 0.00 |
| ATOM | 6338 | CE1  | TYR | X | 422 | 33.041 | 22.443 | 40.457 | 0.00 | 0.00 |
| ATOM | 6339 | HE1  | TYR | X | 422 | 32.765 | 21.408 | 40.320 | 0.00 | 0.00 |
| ATOM | 6340 | CZ   | TYR | X | 422 | 31.996 | 23.414 | 40.300 | 0.00 | 0.00 |
| ATOM | 6341 | OH   | TYR | X | 422 | 30.750 | 22.999 | 40.036 | 0.00 | 0.00 |
| ATOM | 6342 | HH   | TYR | X | 422 | 30.699 | 22.048 | 39.912 | 0.00 | 0.00 |
| ATOM | 6343 | CE2  | TYR | X | 422 | 32.267 | 24.778 | 40.436 | 0.00 | 0.00 |
| ATOM | 6344 | HE2  | TYR | X | 422 | 31.475 | 25.501 | 40.303 | 0.00 | 0.00 |
| ATOM | 6345 | CD2  | TYR | X | 422 | 33.574 | 25.243 | 40.826 | 0.00 | 0.00 |
| ATOM | 6346 | HD2  | TYR | X | 422 | 33.707 | 26.302 | 40.995 | 0.00 | 0.00 |
| ATOM | 6347 | C    | TYR | X | 422 | 37.971 | 25.200 | 42.994 | 0.00 | 0.00 |
| ATOM | 6348 | O    | TYR | X | 422 | 38.051 | 26.440 | 42.797 | 0.00 | 0.00 |
| ATOM | 6349 | N    | ALA | X | 423 | 38.965 | 24.468 | 43.408 | 0.00 | 0.00 |
| ATOM | 6350 | H    | ALA | X | 423 | 38.771 | 23.482 | 43.514 | 0.00 | 0.00 |
| ATOM | 6351 | CA   | ALA | X | 423 | 40.343 | 24.883 | 43.584 | 0.00 | 0.00 |
| ATOM | 6352 | HA   | ALA | X | 423 | 40.428 | 25.932 | 43.298 | 0.00 | 0.00 |
| ATOM | 6353 | CB   | ALA | X | 423 | 40.841 | 24.583 | 45.024 | 0.00 | 0.00 |
| ATOM | 6354 | HB1  | ALA | X | 423 | 40.249 | 25.133 | 45.755 | 0.00 | 0.00 |
| ATOM | 6355 | HB2  | ALA | X | 423 | 41.897 | 24.781 | 45.205 | 0.00 | 0.00 |
| ATOM | 6356 | HB3  | ALA | X | 423 | 40.639 | 23.529 | 45.217 | 0.00 | 0.00 |
| ATOM | 6357 | C    | ALA | X | 423 | 41.337 | 24.211 | 42.600 | 0.00 | 0.00 |
| ATOM | 6358 | O    | ALA | X | 423 | 41.279 | 23.010 | 42.307 | 0.00 | 0.00 |
| ATOM | 6359 | N    | TYR | X | 424 | 42.339 | 24.946 | 42.156 | 0.00 | 0.00 |
| ATOM | 6360 | H    | TYR | X | 424 | 42.392 | 25.914 | 42.442 | 0.00 | 0.00 |
| ATOM | 6361 | CA   | TYR | X | 424 | 43.481 | 24.452 | 41.391 | 0.00 | 0.00 |
| ATOM | 6362 | HA   | TYR | X | 424 | 43.537 | 23.365 | 41.445 | 0.00 | 0.00 |
| ATOM | 6363 | CB   | TYR | X | 424 | 43.302 | 24.791 | 39.921 | 0.00 | 0.00 |

|      |      |      |     |   |     |        |        |        |      |      |
|------|------|------|-----|---|-----|--------|--------|--------|------|------|
| ATOM | 6364 | HB2  | TYR | X | 424 | 44.015 | 24.151 | 39.403 | 0.00 | 0.00 |
| ATOM | 6365 | HB3  | TYR | X | 424 | 42.302 | 24.522 | 39.579 | 0.00 | 0.00 |
| ATOM | 6366 | CG   | TYR | X | 424 | 43.570 | 26.283 | 39.575 | 0.00 | 0.00 |
| ATOM | 6367 | CD1  | TYR | X | 424 | 44.924 | 26.675 | 39.395 | 0.00 | 0.00 |
| ATOM | 6368 | HD1  | TYR | X | 424 | 45.675 | 25.915 | 39.236 | 0.00 | 0.00 |
| ATOM | 6369 | CE1  | TYR | X | 424 | 45.199 | 28.084 | 39.212 | 0.00 | 0.00 |
| ATOM | 6370 | HE1  | TYR | X | 424 | 46.210 | 28.428 | 39.050 | 0.00 | 0.00 |
| ATOM | 6371 | CZ   | TYR | X | 424 | 44.126 | 28.973 | 39.157 | 0.00 | 0.00 |
| ATOM | 6372 | OH   | TYR | X | 424 | 44.362 | 30.273 | 38.807 | 0.00 | 0.00 |
| ATOM | 6373 | HH   | TYR | X | 424 | 45.237 | 30.489 | 38.479 | 0.00 | 0.00 |
| ATOM | 6374 | CE2  | TYR | X | 424 | 42.798 | 28.526 | 39.307 | 0.00 | 0.00 |
| ATOM | 6375 | HE2  | TYR | X | 424 | 41.992 | 29.243 | 39.355 | 0.00 | 0.00 |
| ATOM | 6376 | CD2  | TYR | X | 424 | 42.513 | 27.210 | 39.533 | 0.00 | 0.00 |
| ATOM | 6377 | HD2  | TYR | X | 424 | 41.487 | 26.958 | 39.760 | 0.00 | 0.00 |
| ATOM | 6378 | C    | TYR | X | 424 | 44.890 | 24.904 | 41.947 | 0.00 | 0.00 |
| ATOM | 6379 | O    | TYR | X | 424 | 45.003 | 25.884 | 42.715 | 0.00 | 0.00 |
| ATOM | 6380 | N    | VAL | X | 425 | 45.950 | 24.217 | 41.546 | 0.00 | 0.00 |
| ATOM | 6381 | H    | VAL | X | 425 | 45.883 | 23.353 | 41.028 | 0.00 | 0.00 |
| ATOM | 6382 | CA   | VAL | X | 425 | 47.316 | 24.753 | 41.587 | 0.00 | 0.00 |
| ATOM | 6383 | HA   | VAL | X | 425 | 47.285 | 25.773 | 41.969 | 0.00 | 0.00 |
| ATOM | 6384 | CB   | VAL | X | 425 | 48.369 | 24.041 | 42.556 | 0.00 | 0.00 |
| ATOM | 6385 | HB   | VAL | X | 425 | 48.031 | 24.215 | 43.577 | 0.00 | 0.00 |
| ATOM | 6386 | CG1  | VAL | X | 425 | 48.150 | 22.429 | 42.335 | 0.00 | 0.00 |
| ATOM | 6387 | HG11 | VAL | X | 425 | 48.222 | 22.141 | 41.286 | 0.00 | 0.00 |
| ATOM | 6388 | HG12 | VAL | X | 425 | 48.831 | 21.789 | 42.897 | 0.00 | 0.00 |
| ATOM | 6389 | HG13 | VAL | X | 425 | 47.147 | 22.211 | 42.700 | 0.00 | 0.00 |
| ATOM | 6390 | CG2  | VAL | X | 425 | 49.776 | 24.678 | 42.565 | 0.00 | 0.00 |
| ATOM | 6391 | HG21 | VAL | X | 425 | 50.185 | 24.676 | 41.555 | 0.00 | 0.00 |
| ATOM | 6392 | HG22 | VAL | X | 425 | 50.481 | 24.041 | 43.100 | 0.00 | 0.00 |
| ATOM | 6393 | HG23 | VAL | X | 425 | 49.890 | 25.718 | 42.871 | 0.00 | 0.00 |
| ATOM | 6394 | C    | VAL | X | 425 | 47.851 | 24.597 | 40.100 | 0.00 | 0.00 |
| ATOM | 6395 | O    | VAL | X | 425 | 47.561 | 23.591 | 39.443 | 0.00 | 0.00 |
| ATOM | 6396 | N    | PHE | X | 426 | 48.558 | 25.529 | 39.562 | 0.00 | 0.00 |
| ATOM | 6397 | H    | PHE | X | 426 | 48.556 | 26.473 | 39.921 | 0.00 | 0.00 |
| ATOM | 6398 | CA   | PHE | X | 426 | 49.213 | 25.397 | 38.262 | 0.00 | 0.00 |
| ATOM | 6399 | HA   | PHE | X | 426 | 48.723 | 24.667 | 37.619 | 0.00 | 0.00 |
| ATOM | 6400 | CB   | PHE | X | 426 | 48.936 | 26.758 | 37.617 | 0.00 | 0.00 |
| ATOM | 6401 | HB2  | PHE | X | 426 | 47.875 | 27.002 | 37.561 | 0.00 | 0.00 |
| ATOM | 6402 | HB3  | PHE | X | 426 | 49.493 | 27.470 | 38.226 | 0.00 | 0.00 |
| ATOM | 6403 | CG   | PHE | X | 426 | 49.383 | 26.835 | 36.193 | 0.00 | 0.00 |
| ATOM | 6404 | CD1  | PHE | X | 426 | 48.632 | 26.399 | 35.122 | 0.00 | 0.00 |
| ATOM | 6405 | HD1  | PHE | X | 426 | 47.645 | 26.039 | 35.369 | 0.00 | 0.00 |
| ATOM | 6406 | CE1  | PHE | X | 426 | 49.097 | 26.471 | 33.802 | 0.00 | 0.00 |
| ATOM | 6407 | HE1  | PHE | X | 426 | 48.482 | 26.099 | 32.996 | 0.00 | 0.00 |
| ATOM | 6408 | CZ   | PHE | X | 426 | 50.366 | 27.022 | 33.537 | 0.00 | 0.00 |
| ATOM | 6409 | HZ   | PHE | X | 426 | 50.760 | 26.977 | 32.533 | 0.00 | 0.00 |
| ATOM | 6410 | CE2  | PHE | X | 426 | 51.130 | 27.497 | 34.597 | 0.00 | 0.00 |
| ATOM | 6411 | HE2  | PHE | X | 426 | 52.048 | 28.041 | 34.427 | 0.00 | 0.00 |
| ATOM | 6412 | CD2  | PHE | X | 426 | 50.673 | 27.343 | 35.916 | 0.00 | 0.00 |
| ATOM | 6413 | HD2  | PHE | X | 426 | 51.310 | 27.699 | 36.712 | 0.00 | 0.00 |
| ATOM | 6414 | C    | PHE | X | 426 | 50.733 | 25.106 | 38.280 | 0.00 | 0.00 |
| ATOM | 6415 | O    | PHE | X | 426 | 51.478 | 25.789 | 38.975 | 0.00 | 0.00 |
| ATOM | 6416 | N    | GLU | X | 427 | 51.283 | 24.138 | 37.461 | 0.00 | 0.00 |
| ATOM | 6417 | H    | GLU | X | 427 | 50.659 | 23.612 | 36.866 | 0.00 | 0.00 |
| ATOM | 6418 | CA   | GLU | X | 427 | 52.622 | 23.548 | 37.657 | 0.00 | 0.00 |
| ATOM | 6419 | HA   | GLU | X | 427 | 53.103 | 23.970 | 38.539 | 0.00 | 0.00 |
| ATOM | 6420 | CB   | GLU | X | 427 | 52.342 | 21.998 | 37.918 | 0.00 | 0.00 |
| ATOM | 6421 | HB2  | GLU | X | 427 | 51.964 | 21.534 | 37.007 | 0.00 | 0.00 |
| ATOM | 6422 | HB3  | GLU | X | 427 | 53.339 | 21.592 | 38.085 | 0.00 | 0.00 |
| ATOM | 6423 | CG   | GLU | X | 427 | 51.432 | 21.703 | 39.074 | 0.00 | 0.00 |
| ATOM | 6424 | HG2  | GLU | X | 427 | 51.641 | 22.243 | 39.997 | 0.00 | 0.00 |
| ATOM | 6425 | HG3  | GLU | X | 427 | 50.385 | 21.871 | 38.824 | 0.00 | 0.00 |
| ATOM | 6426 | CD   | GLU | X | 427 | 51.513 | 20.184 | 39.421 | 0.00 | 0.00 |
| ATOM | 6427 | OE1  | GLU | X | 427 | 52.523 | 19.790 | 40.055 | 0.00 | 0.00 |
| ATOM | 6428 | OE2  | GLU | X | 427 | 50.569 | 19.434 | 39.103 | 0.00 | 0.00 |
| ATOM | 6429 | C    | GLU | X | 427 | 53.573 | 23.671 | 36.432 | 0.00 | 0.00 |
| ATOM | 6430 | O    | GLU | X | 427 | 54.719 | 23.273 | 36.605 | 0.00 | 0.00 |

|      |      |      |     |   |     |        |        |        |      |      |
|------|------|------|-----|---|-----|--------|--------|--------|------|------|
| ATOM | 6431 | N    | HIE | X | 428 | 53.095 | 24.099 | 35.265 | 0.00 | 0.00 |
| ATOM | 6432 | H    | HIE | X | 428 | 52.120 | 24.354 | 35.201 | 0.00 | 0.00 |
| ATOM | 6433 | CA   | HIE | X | 428 | 53.863 | 24.238 | 34.003 | 0.00 | 0.00 |
| ATOM | 6434 | HA   | HIE | X | 428 | 54.566 | 23.407 | 34.051 | 0.00 | 0.00 |
| ATOM | 6435 | CB   | HIE | X | 428 | 52.868 | 23.986 | 32.856 | 0.00 | 0.00 |
| ATOM | 6436 | HB2  | HIE | X | 428 | 52.340 | 23.042 | 32.990 | 0.00 | 0.00 |
| ATOM | 6437 | HB3  | HIE | X | 428 | 52.123 | 24.780 | 32.804 | 0.00 | 0.00 |
| ATOM | 6438 | CG   | HIE | X | 428 | 53.595 | 23.775 | 31.560 | 0.00 | 0.00 |
| ATOM | 6439 | ND1  | HIE | X | 428 | 54.694 | 22.948 | 31.433 | 0.00 | 0.00 |
| ATOM | 6440 | CE1  | HIE | X | 428 | 55.249 | 23.118 | 30.212 | 0.00 | 0.00 |
| ATOM | 6441 | HE1  | HIE | X | 428 | 56.168 | 22.660 | 29.876 | 0.00 | 0.00 |
| ATOM | 6442 | NE2  | HIE | X | 428 | 54.580 | 24.066 | 29.564 | 0.00 | 0.00 |
| ATOM | 6443 | HE2  | HIE | X | 428 | 54.874 | 24.495 | 28.698 | 0.00 | 0.00 |
| ATOM | 6444 | CD2  | HIE | X | 428 | 53.515 | 24.419 | 30.386 | 0.00 | 0.00 |
| ATOM | 6445 | HD2  | HIE | X | 428 | 52.962 | 25.319 | 30.160 | 0.00 | 0.00 |
| ATOM | 6446 | C    | HIE | X | 428 | 54.604 | 25.538 | 33.854 | 0.00 | 0.00 |
| ATOM | 6447 | O    | HIE | X | 428 | 54.084 | 26.617 | 33.977 | 0.00 | 0.00 |
| ATOM | 6448 | N    | ARG | X | 429 | 55.894 | 25.433 | 33.398 | 0.00 | 0.00 |
| ATOM | 6449 | H    | ARG | X | 429 | 56.190 | 24.482 | 33.229 | 0.00 | 0.00 |
| ATOM | 6450 | CA   | ARG | X | 429 | 56.781 | 26.546 | 32.978 | 0.00 | 0.00 |
| ATOM | 6451 | HA   | ARG | X | 429 | 56.254 | 27.469 | 33.219 | 0.00 | 0.00 |
| ATOM | 6452 | CB   | ARG | X | 429 | 58.085 | 26.484 | 33.734 | 0.00 | 0.00 |
| ATOM | 6453 | HB2  | ARG | X | 429 | 57.902 | 26.501 | 34.808 | 0.00 | 0.00 |
| ATOM | 6454 | HB3  | ARG | X | 429 | 58.426 | 25.477 | 33.491 | 0.00 | 0.00 |
| ATOM | 6455 | CG   | ARG | X | 429 | 59.122 | 27.541 | 33.491 | 0.00 | 0.00 |
| ATOM | 6456 | HG2  | ARG | X | 429 | 59.267 | 27.577 | 32.411 | 0.00 | 0.00 |
| ATOM | 6457 | HG3  | ARG | X | 429 | 58.818 | 28.527 | 33.844 | 0.00 | 0.00 |
| ATOM | 6458 | CD   | ARG | X | 429 | 60.460 | 27.143 | 34.083 | 0.00 | 0.00 |
| ATOM | 6459 | HD2  | ARG | X | 429 | 60.370 | 27.176 | 35.169 | 0.00 | 0.00 |
| ATOM | 6460 | HD3  | ARG | X | 429 | 60.715 | 26.147 | 33.720 | 0.00 | 0.00 |
| ATOM | 6461 | NE   | ARG | X | 429 | 61.573 | 28.083 | 33.686 | 0.00 | 0.00 |
| ATOM | 6462 | HE   | ARG | X | 429 | 61.693 | 28.867 | 34.312 | 0.00 | 0.00 |
| ATOM | 6463 | CZ   | ARG | X | 429 | 62.485 | 27.865 | 32.722 | 0.00 | 0.00 |
| ATOM | 6464 | NH1  | ARG | X | 429 | 62.487 | 26.870 | 31.860 | 0.00 | 0.00 |
| ATOM | 6465 | HH11 | ARG | X | 429 | 61.760 | 26.169 | 31.846 | 0.00 | 0.00 |
| ATOM | 6466 | HH12 | ARG | X | 429 | 63.213 | 26.885 | 31.157 | 0.00 | 0.00 |
| ATOM | 6467 | NH2  | ARG | X | 429 | 63.440 | 28.698 | 32.516 | 0.00 | 0.00 |
| ATOM | 6468 | HH21 | ARG | X | 429 | 63.415 | 29.588 | 32.992 | 0.00 | 0.00 |
| ATOM | 6469 | HH22 | ARG | X | 429 | 64.136 | 28.427 | 31.835 | 0.00 | 0.00 |
| ATOM | 6470 | C    | ARG | X | 429 | 56.949 | 26.449 | 31.457 | 0.00 | 0.00 |
| ATOM | 6471 | O    | ARG | X | 429 | 57.295 | 25.415 | 30.913 | 0.00 | 0.00 |
| ATOM | 6472 | N    | ALA | X | 430 | 56.565 | 27.537 | 30.769 | 0.00 | 0.00 |
| ATOM | 6473 | H    | ALA | X | 430 | 56.293 | 28.378 | 31.258 | 0.00 | 0.00 |
| ATOM | 6474 | CA   | ALA | X | 430 | 56.459 | 27.554 | 29.325 | 0.00 | 0.00 |
| ATOM | 6475 | HA   | ALA | X | 430 | 55.854 | 26.777 | 28.858 | 0.00 | 0.00 |
| ATOM | 6476 | CB   | ALA | X | 430 | 55.696 | 28.801 | 29.061 | 0.00 | 0.00 |
| ATOM | 6477 | HB1  | ALA | X | 430 | 54.634 | 28.597 | 29.192 | 0.00 | 0.00 |
| ATOM | 6478 | HB2  | ALA | X | 430 | 55.737 | 29.047 | 28.000 | 0.00 | 0.00 |
| ATOM | 6479 | HB3  | ALA | X | 430 | 55.990 | 29.687 | 29.624 | 0.00 | 0.00 |
| ATOM | 6480 | C    | ALA | X | 430 | 57.803 | 27.679 | 28.687 | 0.00 | 0.00 |
| ATOM | 6481 | O    | ALA | X | 430 | 58.657 | 28.372 | 29.205 | 0.00 | 0.00 |
| ATOM | 6482 | N    | SER | X | 431 | 57.948 | 27.249 | 27.464 | 0.00 | 0.00 |
| ATOM | 6483 | H    | SER | X | 431 | 57.185 | 26.762 | 27.016 | 0.00 | 0.00 |
| ATOM | 6484 | CA   | SER | X | 431 | 59.167 | 27.229 | 26.644 | 0.00 | 0.00 |
| ATOM | 6485 | HA   | SER | X | 431 | 59.949 | 26.702 | 27.190 | 0.00 | 0.00 |
| ATOM | 6486 | CB   | SER | X | 431 | 58.823 | 26.381 | 25.410 | 0.00 | 0.00 |
| ATOM | 6487 | HB2  | SER | X | 431 | 59.624 | 26.155 | 24.706 | 0.00 | 0.00 |
| ATOM | 6488 | HB3  | SER | X | 431 | 58.556 | 25.336 | 25.570 | 0.00 | 0.00 |
| ATOM | 6489 | OG   | SER | X | 431 | 57.767 | 27.073 | 24.662 | 0.00 | 0.00 |
| ATOM | 6490 | HG   | SER | X | 431 | 56.941 | 26.625 | 24.860 | 0.00 | 0.00 |
| ATOM | 6491 | C    | SER | X | 431 | 59.699 | 28.552 | 26.110 | 0.00 | 0.00 |
| ATOM | 6492 | O    | SER | X | 431 | 60.834 | 28.609 | 25.687 | 0.00 | 0.00 |
| ATOM | 6493 | N    | THR | X | 432 | 58.863 | 29.587 | 26.219 | 0.00 | 0.00 |
| ATOM | 6494 | H    | THR | X | 432 | 57.993 | 29.396 | 26.697 | 0.00 | 0.00 |
| ATOM | 6495 | CA   | THR | X | 432 | 59.165 | 31.031 | 25.895 | 0.00 | 0.00 |
| ATOM | 6496 | HA   | THR | X | 432 | 60.100 | 31.143 | 25.347 | 0.00 | 0.00 |
| ATOM | 6497 | CB   | THR | X | 432 | 58.033 | 31.478 | 25.063 | 0.00 | 0.00 |

|      |      |      |     |   |     |        |        |        |      |      |
|------|------|------|-----|---|-----|--------|--------|--------|------|------|
| ATOM | 6498 | HB   | THR | X | 432 | 58.270 | 32.489 | 24.731 | 0.00 | 0.00 |
| ATOM | 6499 | CG2  | THR | X | 432 | 57.937 | 30.647 | 23.721 | 0.00 | 0.00 |
| ATOM | 6500 | HG21 | THR | X | 432 | 58.864 | 30.741 | 23.155 | 0.00 | 0.00 |
| ATOM | 6501 | HG22 | THR | X | 432 | 57.124 | 30.956 | 23.065 | 0.00 | 0.00 |
| ATOM | 6502 | HG23 | THR | X | 432 | 57.685 | 29.604 | 23.910 | 0.00 | 0.00 |
| ATOM | 6503 | OG1  | THR | X | 432 | 56.863 | 31.319 | 25.918 | 0.00 | 0.00 |
| ATOM | 6504 | HG1  | THR | X | 432 | 56.184 | 31.791 | 25.430 | 0.00 | 0.00 |
| ATOM | 6505 | C    | THR | X | 432 | 59.390 | 31.906 | 27.123 | 0.00 | 0.00 |
| ATOM | 6506 | O    | THR | X | 432 | 59.825 | 33.045 | 26.972 | 0.00 | 0.00 |
| ATOM | 6507 | N    | LEU | X | 433 | 59.194 | 31.398 | 28.366 | 0.00 | 0.00 |
| ATOM | 6508 | H    | LEU | X | 433 | 58.953 | 30.426 | 28.498 | 0.00 | 0.00 |
| ATOM | 6509 | CA   | LEU | X | 433 | 59.263 | 32.202 | 29.628 | 0.00 | 0.00 |
| ATOM | 6510 | HA   | LEU | X | 433 | 58.593 | 33.041 | 29.441 | 0.00 | 0.00 |
| ATOM | 6511 | CB   | LEU | X | 433 | 58.698 | 31.471 | 30.903 | 0.00 | 0.00 |
| ATOM | 6512 | HB2  | LEU | X | 433 | 57.829 | 30.886 | 30.602 | 0.00 | 0.00 |
| ATOM | 6513 | HB3  | LEU | X | 433 | 59.404 | 30.693 | 31.192 | 0.00 | 0.00 |
| ATOM | 6514 | CG   | LEU | X | 433 | 58.268 | 32.275 | 32.172 | 0.00 | 0.00 |
| ATOM | 6515 | HG   | LEU | X | 433 | 59.079 | 32.970 | 32.390 | 0.00 | 0.00 |
| ATOM | 6516 | CD1  | LEU | X | 433 | 57.066 | 33.106 | 31.883 | 0.00 | 0.00 |
| ATOM | 6517 | HD11 | LEU | X | 433 | 56.908 | 33.810 | 32.700 | 0.00 | 0.00 |
| ATOM | 6518 | HD12 | LEU | X | 433 | 56.158 | 32.523 | 31.730 | 0.00 | 0.00 |
| ATOM | 6519 | HD13 | LEU | X | 433 | 57.195 | 33.858 | 31.104 | 0.00 | 0.00 |
| ATOM | 6520 | CD2  | LEU | X | 433 | 58.105 | 31.375 | 33.386 | 0.00 | 0.00 |
| ATOM | 6521 | HD21 | LEU | X | 433 | 57.552 | 31.934 | 34.141 | 0.00 | 0.00 |
| ATOM | 6522 | HD22 | LEU | X | 433 | 57.468 | 30.558 | 33.045 | 0.00 | 0.00 |
| ATOM | 6523 | HD23 | LEU | X | 433 | 59.063 | 31.019 | 33.766 | 0.00 | 0.00 |
| ATOM | 6524 | C    | LEU | X | 433 | 60.656 | 32.680 | 29.990 | 0.00 | 0.00 |
| ATOM | 6525 | O    | LEU | X | 433 | 61.595 | 31.838 | 29.935 | 0.00 | 0.00 |
| ATOM | 6526 | N    | SER | X | 434 | 60.783 | 33.916 | 30.316 | 0.00 | 0.00 |
| ATOM | 6527 | H    | SER | X | 434 | 59.925 | 34.441 | 30.410 | 0.00 | 0.00 |
| ATOM | 6528 | CA   | SER | X | 434 | 62.081 | 34.549 | 30.617 | 0.00 | 0.00 |
| ATOM | 6529 | HA   | SER | X | 434 | 62.885 | 34.162 | 29.991 | 0.00 | 0.00 |
| ATOM | 6530 | CB   | SER | X | 434 | 62.024 | 36.072 | 30.320 | 0.00 | 0.00 |
| ATOM | 6531 | HB2  | SER | X | 434 | 61.177 | 36.445 | 30.896 | 0.00 | 0.00 |
| ATOM | 6532 | HB3  | SER | X | 434 | 62.896 | 36.569 | 30.744 | 0.00 | 0.00 |
| ATOM | 6533 | OG   | SER | X | 434 | 61.850 | 36.242 | 28.939 | 0.00 | 0.00 |
| ATOM | 6534 | HG   | SER | X | 434 | 60.952 | 36.526 | 28.751 | 0.00 | 0.00 |
| ATOM | 6535 | C    | SER | X | 434 | 62.651 | 34.274 | 32.067 | 0.00 | 0.00 |
| ATOM | 6536 | O    | SER | X | 434 | 63.836 | 34.473 | 32.329 | 0.00 | 0.00 |
| ATOM | 6537 | N    | TRP | X | 435 | 61.829 | 33.811 | 32.955 | 0.00 | 0.00 |
| ATOM | 6538 | H    | TRP | X | 435 | 60.872 | 33.557 | 32.751 | 0.00 | 0.00 |
| ATOM | 6539 | CA   | TRP | X | 435 | 62.207 | 33.584 | 34.435 | 0.00 | 0.00 |
| ATOM | 6540 | HA   | TRP | X | 435 | 62.858 | 34.387 | 34.779 | 0.00 | 0.00 |
| ATOM | 6541 | CB   | TRP | X | 435 | 60.930 | 33.637 | 35.404 | 0.00 | 0.00 |
| ATOM | 6542 | HB2  | TRP | X | 435 | 60.203 | 32.840 | 35.248 | 0.00 | 0.00 |
| ATOM | 6543 | HB3  | TRP | X | 435 | 61.127 | 33.454 | 36.460 | 0.00 | 0.00 |
| ATOM | 6544 | CG   | TRP | X | 435 | 60.244 | 35.024 | 35.311 | 0.00 | 0.00 |
| ATOM | 6545 | CD1  | TRP | X | 435 | 59.230 | 35.346 | 34.458 | 0.00 | 0.00 |
| ATOM | 6546 | HD1  | TRP | X | 435 | 58.745 | 34.642 | 33.798 | 0.00 | 0.00 |
| ATOM | 6547 | NE1  | TRP | X | 435 | 58.834 | 36.655 | 34.587 | 0.00 | 0.00 |
| ATOM | 6548 | HE1  | TRP | X | 435 | 58.133 | 37.115 | 34.023 | 0.00 | 0.00 |
| ATOM | 6549 | CE2  | TRP | X | 435 | 59.585 | 37.277 | 35.567 | 0.00 | 0.00 |
| ATOM | 6550 | CZ2  | TRP | X | 435 | 59.618 | 38.547 | 36.190 | 0.00 | 0.00 |
| ATOM | 6551 | HZ2  | TRP | X | 435 | 58.859 | 39.236 | 35.850 | 0.00 | 0.00 |
| ATOM | 6552 | CH2  | TRP | X | 435 | 60.485 | 38.856 | 37.274 | 0.00 | 0.00 |
| ATOM | 6553 | HH2  | TRP | X | 435 | 60.481 | 39.742 | 37.892 | 0.00 | 0.00 |
| ATOM | 6554 | CZ3  | TRP | X | 435 | 61.494 | 37.935 | 37.526 | 0.00 | 0.00 |
| ATOM | 6555 | HZ3  | TRP | X | 435 | 62.199 | 38.053 | 38.335 | 0.00 | 0.00 |
| ATOM | 6556 | CE3  | TRP | X | 435 | 61.500 | 36.683 | 36.887 | 0.00 | 0.00 |
| ATOM | 6557 | HE3  | TRP | X | 435 | 62.286 | 35.994 | 37.156 | 0.00 | 0.00 |
| ATOM | 6558 | CD2  | TRP | X | 435 | 60.496 | 36.259 | 36.013 | 0.00 | 0.00 |
| ATOM | 6559 | C    | TRP | X | 435 | 62.935 | 32.269 | 34.672 | 0.00 | 0.00 |
| ATOM | 6560 | O    | TRP | X | 435 | 62.779 | 31.274 | 33.922 | 0.00 | 0.00 |
| ATOM | 6561 | N    | PRO | X | 436 | 63.833 | 32.235 | 35.709 | 0.00 | 0.00 |
| ATOM | 6562 | CD   | PRO | X | 436 | 63.941 | 33.211 | 36.792 | 0.00 | 0.00 |
| ATOM | 6563 | HD2  | PRO | X | 436 | 63.263 | 32.865 | 37.572 | 0.00 | 0.00 |
| ATOM | 6564 | HD3  | PRO | X | 436 | 63.649 | 34.217 | 36.494 | 0.00 | 0.00 |

|      |      |      |     |   |     |        |        |        |      |      |
|------|------|------|-----|---|-----|--------|--------|--------|------|------|
| ATOM | 6565 | CG   | PRO | X | 436 | 65.352 | 33.025 | 37.328 | 0.00 | 0.00 |
| ATOM | 6566 | HG2  | PRO | X | 436 | 65.503 | 33.467 | 38.313 | 0.00 | 0.00 |
| ATOM | 6567 | HG3  | PRO | X | 436 | 65.955 | 33.431 | 36.517 | 0.00 | 0.00 |
| ATOM | 6568 | CB   | PRO | X | 436 | 65.354 | 31.488 | 37.350 | 0.00 | 0.00 |
| ATOM | 6569 | HB2  | PRO | X | 436 | 64.753 | 31.204 | 38.214 | 0.00 | 0.00 |
| ATOM | 6570 | HB3  | PRO | X | 436 | 66.384 | 31.132 | 37.352 | 0.00 | 0.00 |
| ATOM | 6571 | CA   | PRO | X | 436 | 64.704 | 31.108 | 36.053 | 0.00 | 0.00 |
| ATOM | 6572 | HA   | PRO | X | 436 | 65.427 | 31.004 | 35.244 | 0.00 | 0.00 |
| ATOM | 6573 | C    | PRO | X | 436 | 63.998 | 29.780 | 36.176 | 0.00 | 0.00 |
| ATOM | 6574 | O    | PRO | X | 436 | 62.867 | 29.781 | 36.520 | 0.00 | 0.00 |
| ATOM | 6575 | N    | LEU | X | 437 | 64.759 | 28.673 | 35.922 | 0.00 | 0.00 |
| ATOM | 6576 | H    | LEU | X | 437 | 65.714 | 28.784 | 35.612 | 0.00 | 0.00 |
| ATOM | 6577 | CA   | LEU | X | 437 | 64.308 | 27.270 | 36.173 | 0.00 | 0.00 |
| ATOM | 6578 | HA   | LEU | X | 437 | 63.392 | 27.244 | 35.583 | 0.00 | 0.00 |
| ATOM | 6579 | CB   | LEU | X | 437 | 65.370 | 26.391 | 35.547 | 0.00 | 0.00 |
| ATOM | 6580 | HB2  | LEU | X | 437 | 65.652 | 26.794 | 34.575 | 0.00 | 0.00 |
| ATOM | 6581 | HB3  | LEU | X | 437 | 66.219 | 26.421 | 36.229 | 0.00 | 0.00 |
| ATOM | 6582 | CG   | LEU | X | 437 | 64.880 | 24.912 | 35.453 | 0.00 | 0.00 |
| ATOM | 6583 | HG   | LEU | X | 437 | 64.386 | 24.609 | 36.376 | 0.00 | 0.00 |
| ATOM | 6584 | CD1  | LEU | X | 437 | 63.783 | 24.742 | 34.298 | 0.00 | 0.00 |
| ATOM | 6585 | HD11 | LEU | X | 437 | 63.499 | 23.692 | 34.221 | 0.00 | 0.00 |
| ATOM | 6586 | HD12 | LEU | X | 437 | 64.202 | 25.005 | 33.327 | 0.00 | 0.00 |
| ATOM | 6587 | HD13 | LEU | X | 437 | 62.842 | 25.252 | 34.506 | 0.00 | 0.00 |
| ATOM | 6588 | CD2  | LEU | X | 437 | 65.939 | 23.809 | 35.191 | 0.00 | 0.00 |
| ATOM | 6589 | HD21 | LEU | X | 437 | 65.490 | 22.817 | 35.165 | 0.00 | 0.00 |
| ATOM | 6590 | HD22 | LEU | X | 437 | 66.533 | 23.949 | 34.288 | 0.00 | 0.00 |
| ATOM | 6591 | HD23 | LEU | X | 437 | 66.630 | 23.806 | 36.034 | 0.00 | 0.00 |
| ATOM | 6592 | C    | LEU | X | 437 | 63.963 | 27.055 | 37.663 | 0.00 | 0.00 |
| ATOM | 6593 | O    | LEU | X | 437 | 62.883 | 26.555 | 38.001 | 0.00 | 0.00 |
| ATOM | 6594 | N    | TRP | X | 438 | 64.832 | 27.505 | 38.587 | 0.00 | 0.00 |
| ATOM | 6595 | H    | TRP | X | 438 | 65.729 | 27.874 | 38.304 | 0.00 | 0.00 |
| ATOM | 6596 | CA   | TRP | X | 438 | 64.540 | 27.485 | 40.113 | 0.00 | 0.00 |
| ATOM | 6597 | HA   | TRP | X | 438 | 64.240 | 26.451 | 40.281 | 0.00 | 0.00 |
| ATOM | 6598 | CB   | TRP | X | 438 | 65.744 | 27.739 | 40.909 | 0.00 | 0.00 |
| ATOM | 6599 | HB2  | TRP | X | 438 | 65.627 | 27.538 | 41.974 | 0.00 | 0.00 |
| ATOM | 6600 | HB3  | TRP | X | 438 | 66.499 | 26.998 | 40.646 | 0.00 | 0.00 |
| ATOM | 6601 | CG   | TRP | X | 438 | 66.426 | 29.012 | 40.554 | 0.00 | 0.00 |
| ATOM | 6602 | CD1  | TRP | X | 438 | 67.508 | 29.086 | 39.681 | 0.00 | 0.00 |
| ATOM | 6603 | HD1  | TRP | X | 438 | 68.078 | 28.298 | 39.213 | 0.00 | 0.00 |
| ATOM | 6604 | NE1  | TRP | X | 438 | 67.819 | 30.417 | 39.535 | 0.00 | 0.00 |
| ATOM | 6605 | HE1  | TRP | X | 438 | 68.610 | 30.800 | 39.037 | 0.00 | 0.00 |
| ATOM | 6606 | CE2  | TRP | X | 438 | 66.971 | 31.238 | 40.279 | 0.00 | 0.00 |
| ATOM | 6607 | CZ2  | TRP | X | 438 | 66.929 | 32.609 | 40.376 | 0.00 | 0.00 |
| ATOM | 6608 | HZ2  | TRP | X | 438 | 67.575 | 33.240 | 39.784 | 0.00 | 0.00 |
| ATOM | 6609 | CH2  | TRP | X | 438 | 65.974 | 33.167 | 41.212 | 0.00 | 0.00 |
| ATOM | 6610 | HH2  | TRP | X | 438 | 65.845 | 34.239 | 41.193 | 0.00 | 0.00 |
| ATOM | 6611 | CZ3  | TRP | X | 438 | 64.950 | 32.346 | 41.846 | 0.00 | 0.00 |
| ATOM | 6612 | HZ3  | TRP | X | 438 | 64.133 | 32.842 | 42.349 | 0.00 | 0.00 |
| ATOM | 6613 | CE3  | TRP | X | 438 | 64.864 | 30.983 | 41.554 | 0.00 | 0.00 |
| ATOM | 6614 | HE3  | TRP | X | 438 | 64.011 | 30.385 | 41.842 | 0.00 | 0.00 |
| ATOM | 6615 | CD2  | TRP | X | 438 | 66.014 | 30.347 | 40.906 | 0.00 | 0.00 |
| ATOM | 6616 | C    | TRP | X | 438 | 63.264 | 28.250 | 40.612 | 0.00 | 0.00 |
| ATOM | 6617 | O    | TRP | X | 438 | 62.733 | 27.927 | 41.624 | 0.00 | 0.00 |
| ATOM | 6618 | N    | MET | X | 439 | 62.835 | 29.214 | 39.778 | 0.00 | 0.00 |
| ATOM | 6619 | H    | MET | X | 439 | 63.324 | 29.394 | 38.913 | 0.00 | 0.00 |
| ATOM | 6620 | CA   | MET | X | 439 | 61.592 | 30.014 | 39.951 | 0.00 | 0.00 |
| ATOM | 6621 | HA   | MET | X | 439 | 61.587 | 30.323 | 40.996 | 0.00 | 0.00 |
| ATOM | 6622 | CB   | MET | X | 439 | 61.701 | 31.367 | 39.138 | 0.00 | 0.00 |
| ATOM | 6623 | HB2  | MET | X | 439 | 62.757 | 31.584 | 38.978 | 0.00 | 0.00 |
| ATOM | 6624 | HB3  | MET | X | 439 | 61.247 | 31.349 | 38.147 | 0.00 | 0.00 |
| ATOM | 6625 | CG   | MET | X | 439 | 60.977 | 32.496 | 39.910 | 0.00 | 0.00 |
| ATOM | 6626 | HG2  | MET | X | 439 | 60.003 | 32.026 | 40.042 | 0.00 | 0.00 |
| ATOM | 6627 | HG3  | MET | X | 439 | 61.372 | 32.593 | 40.922 | 0.00 | 0.00 |
| ATOM | 6628 | SD   | MET | X | 439 | 60.876 | 34.168 | 39.303 | 0.00 | 0.00 |
| ATOM | 6629 | CE   | MET | X | 439 | 62.515 | 34.634 | 39.817 | 0.00 | 0.00 |
| ATOM | 6630 | HE1  | MET | X | 439 | 63.253 | 34.032 | 39.287 | 0.00 | 0.00 |
| ATOM | 6631 | HE2  | MET | X | 439 | 62.742 | 35.659 | 39.526 | 0.00 | 0.00 |

|      |      |      |     |   |     |        |        |        |      |      |
|------|------|------|-----|---|-----|--------|--------|--------|------|------|
| ATOM | 6632 | HE3  | MET | X | 439 | 62.615 | 34.470 | 40.890 | 0.00 | 0.00 |
| ATOM | 6633 | C    | MET | X | 439 | 60.364 | 29.204 | 39.637 | 0.00 | 0.00 |
| ATOM | 6634 | O    | MET | X | 439 | 59.239 | 29.503 | 40.115 | 0.00 | 0.00 |
| ATOM | 6635 | N    | GLY | X | 440 | 60.507 | 28.234 | 38.818 | 0.00 | 0.00 |
| ATOM | 6636 | H    | GLY | X | 440 | 61.469 | 28.172 | 38.518 | 0.00 | 0.00 |
| ATOM | 6637 | CA   | GLY | X | 440 | 59.502 | 27.349 | 38.292 | 0.00 | 0.00 |
| ATOM | 6638 | HA2  | GLY | X | 440 | 59.894 | 26.553 | 37.659 | 0.00 | 0.00 |
| ATOM | 6639 | HA3  | GLY | X | 440 | 58.973 | 26.994 | 39.176 | 0.00 | 0.00 |
| ATOM | 6640 | C    | GLY | X | 440 | 58.491 | 28.315 | 37.538 | 0.00 | 0.00 |
| ATOM | 6641 | O    | GLY | X | 440 | 58.733 | 28.795 | 36.471 | 0.00 | 0.00 |
| ATOM | 6642 | N    | VAL | X | 441 | 57.270 | 28.374 | 38.095 | 0.00 | 0.00 |
| ATOM | 6643 | H    | VAL | X | 441 | 57.292 | 27.950 | 39.011 | 0.00 | 0.00 |
| ATOM | 6644 | CA   | VAL | X | 441 | 56.155 | 29.224 | 37.653 | 0.00 | 0.00 |
| ATOM | 6645 | HA   | VAL | X | 441 | 56.346 | 29.422 | 36.598 | 0.00 | 0.00 |
| ATOM | 6646 | CB   | VAL | X | 441 | 54.773 | 28.464 | 37.712 | 0.00 | 0.00 |
| ATOM | 6647 | HB   | VAL | X | 441 | 54.335 | 28.677 | 38.687 | 0.00 | 0.00 |
| ATOM | 6648 | CG1  | VAL | X | 441 | 53.802 | 29.185 | 36.727 | 0.00 | 0.00 |
| ATOM | 6649 | HG11 | VAL | X | 441 | 52.809 | 29.091 | 37.168 | 0.00 | 0.00 |
| ATOM | 6650 | HG12 | VAL | X | 441 | 54.192 | 30.195 | 36.598 | 0.00 | 0.00 |
| ATOM | 6651 | HG13 | VAL | X | 441 | 53.804 | 28.670 | 35.767 | 0.00 | 0.00 |
| ATOM | 6652 | CG2  | VAL | X | 441 | 54.932 | 26.932 | 37.433 | 0.00 | 0.00 |
| ATOM | 6653 | HG21 | VAL | X | 441 | 55.581 | 26.879 | 36.559 | 0.00 | 0.00 |
| ATOM | 6654 | HG22 | VAL | X | 441 | 53.989 | 26.386 | 37.416 | 0.00 | 0.00 |
| ATOM | 6655 | HG23 | VAL | X | 441 | 55.452 | 26.595 | 38.330 | 0.00 | 0.00 |
| ATOM | 6656 | C    | VAL | X | 441 | 56.068 | 30.520 | 38.535 | 0.00 | 0.00 |
| ATOM | 6657 | O    | VAL | X | 441 | 55.681 | 30.460 | 39.710 | 0.00 | 0.00 |
| ATOM | 6658 | N    | PRO | X | 442 | 56.248 | 31.709 | 37.913 | 0.00 | 0.00 |
| ATOM | 6659 | CD   | PRO | X | 442 | 56.914 | 31.813 | 36.614 | 0.00 | 0.00 |
| ATOM | 6660 | HD2  | PRO | X | 442 | 56.427 | 31.210 | 35.847 | 0.00 | 0.00 |
| ATOM | 6661 | HD3  | PRO | X | 442 | 57.917 | 31.440 | 36.820 | 0.00 | 0.00 |
| ATOM | 6662 | CG   | PRO | X | 442 | 56.785 | 33.364 | 36.436 | 0.00 | 0.00 |
| ATOM | 6663 | HG2  | PRO | X | 442 | 55.847 | 33.665 | 35.970 | 0.00 | 0.00 |
| ATOM | 6664 | HG3  | PRO | X | 442 | 57.640 | 33.765 | 35.890 | 0.00 | 0.00 |
| ATOM | 6665 | CB   | PRO | X | 442 | 56.762 | 33.973 | 37.828 | 0.00 | 0.00 |
| ATOM | 6666 | HB2  | PRO | X | 442 | 56.302 | 34.961 | 37.820 | 0.00 | 0.00 |
| ATOM | 6667 | HB3  | PRO | X | 442 | 57.774 | 34.008 | 38.231 | 0.00 | 0.00 |
| ATOM | 6668 | CA   | PRO | X | 442 | 56.056 | 32.963 | 38.577 | 0.00 | 0.00 |
| ATOM | 6669 | HA   | PRO | X | 442 | 56.444 | 32.889 | 39.593 | 0.00 | 0.00 |
| ATOM | 6670 | C    | PRO | X | 442 | 54.603 | 33.307 | 38.673 | 0.00 | 0.00 |
| ATOM | 6671 | O    | PRO | X | 442 | 53.840 | 33.088 | 37.794 | 0.00 | 0.00 |
| ATOM | 6672 | N    | HIP | X | 443 | 54.203 | 33.956 | 39.815 | 0.00 | 0.00 |
| ATOM | 6673 | H    | HIP | X | 443 | 54.913 | 34.121 | 40.514 | 0.00 | 0.00 |
| ATOM | 6674 | CA   | HIP | X | 443 | 52.882 | 34.434 | 40.211 | 0.00 | 0.00 |
| ATOM | 6675 | HA   | HIP | X | 443 | 52.286 | 33.603 | 40.589 | 0.00 | 0.00 |
| ATOM | 6676 | CB   | HIP | X | 443 | 53.207 | 35.385 | 41.296 | 0.00 | 0.00 |
| ATOM | 6677 | HB2  | HIP | X | 443 | 53.619 | 34.778 | 42.103 | 0.00 | 0.00 |
| ATOM | 6678 | HB3  | HIP | X | 443 | 53.989 | 36.118 | 41.098 | 0.00 | 0.00 |
| ATOM | 6679 | CG   | HIP | X | 443 | 52.131 | 36.320 | 41.731 | 0.00 | 0.00 |
| ATOM | 6680 | ND1  | HIP | X | 443 | 51.117 | 35.976 | 42.531 | 0.00 | 0.00 |
| ATOM | 6681 | HD1  | HIP | X | 443 | 50.881 | 35.031 | 42.799 | 0.00 | 0.00 |
| ATOM | 6682 | CE1  | HIP | X | 443 | 50.351 | 37.036 | 42.772 | 0.00 | 0.00 |
| ATOM | 6683 | HE1  | HIP | X | 443 | 49.507 | 36.963 | 43.441 | 0.00 | 0.00 |
| ATOM | 6684 | NE2  | HIP | X | 443 | 50.944 | 38.115 | 42.264 | 0.00 | 0.00 |
| ATOM | 6685 | HE2  | HIP | X | 443 | 50.572 | 39.054 | 42.256 | 0.00 | 0.00 |
| ATOM | 6686 | CD2  | HIP | X | 443 | 52.002 | 37.669 | 41.478 | 0.00 | 0.00 |
| ATOM | 6687 | HD2  | HIP | X | 443 | 52.642 | 38.241 | 40.823 | 0.00 | 0.00 |
| ATOM | 6688 | C    | HIP | X | 443 | 51.871 | 35.082 | 39.162 | 0.00 | 0.00 |
| ATOM | 6689 | O    | HIP | X | 443 | 52.178 | 36.126 | 38.624 | 0.00 | 0.00 |
| ATOM | 6690 | N    | GLY | X | 444 | 50.759 | 34.447 | 38.975 | 0.00 | 0.00 |
| ATOM | 6691 | H    | GLY | X | 444 | 50.620 | 33.642 | 39.569 | 0.00 | 0.00 |
| ATOM | 6692 | CA   | GLY | X | 444 | 49.731 | 34.855 | 37.979 | 0.00 | 0.00 |
| ATOM | 6693 | HA2  | GLY | X | 444 | 48.867 | 34.201 | 38.098 | 0.00 | 0.00 |
| ATOM | 6694 | HA3  | GLY | X | 444 | 49.238 | 35.779 | 38.282 | 0.00 | 0.00 |
| ATOM | 6695 | C    | GLY | X | 444 | 50.169 | 34.974 | 36.538 | 0.00 | 0.00 |
| ATOM | 6696 | O    | GLY | X | 444 | 49.764 | 35.927 | 35.864 | 0.00 | 0.00 |
| ATOM | 6697 | N    | TYR | X | 445 | 51.000 | 34.020 | 36.021 | 0.00 | 0.00 |
| ATOM | 6698 | H    | TYR | X | 445 | 51.391 | 33.376 | 36.694 | 0.00 | 0.00 |



|      |      |      |     |   |     |        |        |        |      |      |
|------|------|------|-----|---|-----|--------|--------|--------|------|------|
| ATOM | 6699 | CA   | TYR | X | 445 | 51.420 | 34.034 | 34.577 | 0.00 | 0.00 |
| ATOM | 6700 | HA   | TYR | X | 445 | 51.248 | 35.000 | 34.104 | 0.00 | 0.00 |
| ATOM | 6701 | CB   | TYR | X | 445 | 52.902 | 33.746 | 34.408 | 0.00 | 0.00 |
| ATOM | 6702 | HB2  | TYR | X | 445 | 53.365 | 33.105 | 35.158 | 0.00 | 0.00 |
| ATOM | 6703 | HB3  | TYR | X | 445 | 53.093 | 33.224 | 33.470 | 0.00 | 0.00 |
| ATOM | 6704 | CG   | TYR | X | 445 | 53.746 | 35.005 | 34.373 | 0.00 | 0.00 |
| ATOM | 6705 | CD1  | TYR | X | 445 | 54.335 | 35.576 | 33.219 | 0.00 | 0.00 |
| ATOM | 6706 | HD1  | TYR | X | 445 | 54.146 | 35.143 | 32.248 | 0.00 | 0.00 |
| ATOM | 6707 | CE1  | TYR | X | 445 | 55.170 | 36.679 | 33.307 | 0.00 | 0.00 |
| ATOM | 6708 | HE1  | TYR | X | 445 | 55.700 | 37.024 | 32.432 | 0.00 | 0.00 |
| ATOM | 6709 | CZ   | TYR | X | 445 | 55.368 | 37.401 | 34.535 | 0.00 | 0.00 |
| ATOM | 6710 | OH   | TYR | X | 445 | 56.236 | 38.468 | 34.609 | 0.00 | 0.00 |
| ATOM | 6711 | HH   | TYR | X | 445 | 56.698 | 38.672 | 33.792 | 0.00 | 0.00 |
| ATOM | 6712 | CE2  | TYR | X | 445 | 54.750 | 36.848 | 35.627 | 0.00 | 0.00 |
| ATOM | 6713 | HE2  | TYR | X | 445 | 54.945 | 37.157 | 36.643 | 0.00 | 0.00 |
| ATOM | 6714 | CD2  | TYR | X | 445 | 53.864 | 35.751 | 35.534 | 0.00 | 0.00 |
| ATOM | 6715 | HD2  | TYR | X | 445 | 53.411 | 35.429 | 36.460 | 0.00 | 0.00 |
| ATOM | 6716 | C    | TYR | X | 445 | 50.624 | 33.014 | 33.732 | 0.00 | 0.00 |
| ATOM | 6717 | O    | TYR | X | 445 | 50.715 | 33.063 | 32.470 | 0.00 | 0.00 |
| ATOM | 6718 | N    | GLU | X | 446 | 49.799 | 32.176 | 34.329 | 0.00 | 0.00 |
| ATOM | 6719 | H    | GLU | X | 446 | 49.722 | 32.115 | 35.334 | 0.00 | 0.00 |
| ATOM | 6720 | CA   | GLU | X | 446 | 49.114 | 31.109 | 33.621 | 0.00 | 0.00 |
| ATOM | 6721 | HA   | GLU | X | 446 | 49.836 | 30.596 | 32.985 | 0.00 | 0.00 |
| ATOM | 6722 | CB   | GLU | X | 446 | 48.584 | 30.048 | 34.664 | 0.00 | 0.00 |
| ATOM | 6723 | HB2  | GLU | X | 446 | 48.638 | 29.047 | 34.236 | 0.00 | 0.00 |
| ATOM | 6724 | HB3  | GLU | X | 446 | 49.280 | 30.003 | 35.502 | 0.00 | 0.00 |
| ATOM | 6725 | CG   | GLU | X | 446 | 47.168 | 30.201 | 35.250 | 0.00 | 0.00 |
| ATOM | 6726 | HG2  | GLU | X | 446 | 46.505 | 30.268 | 34.386 | 0.00 | 0.00 |
| ATOM | 6727 | HG3  | GLU | X | 446 | 47.039 | 29.289 | 35.832 | 0.00 | 0.00 |
| ATOM | 6728 | CD   | GLU | X | 446 | 47.077 | 31.360 | 36.308 | 0.00 | 0.00 |
| ATOM | 6729 | OE1  | GLU | X | 446 | 47.787 | 32.364 | 36.207 | 0.00 | 0.00 |
| ATOM | 6730 | OE2  | GLU | X | 446 | 46.227 | 31.190 | 37.202 | 0.00 | 0.00 |
| ATOM | 6731 | C    | GLU | X | 446 | 47.984 | 31.738 | 32.745 | 0.00 | 0.00 |
| ATOM | 6732 | O    | GLU | X | 446 | 47.468 | 31.129 | 31.773 | 0.00 | 0.00 |
| ATOM | 6733 | N    | ILE | X | 447 | 47.588 | 33.000 | 33.004 | 0.00 | 0.00 |
| ATOM | 6734 | H    | ILE | X | 447 | 48.003 | 33.495 | 33.780 | 0.00 | 0.00 |
| ATOM | 6735 | CA   | ILE | X | 447 | 46.662 | 33.785 | 32.092 | 0.00 | 0.00 |
| ATOM | 6736 | HA   | ILE | X | 447 | 45.622 | 33.459 | 32.072 | 0.00 | 0.00 |
| ATOM | 6737 | CB   | ILE | X | 447 | 46.696 | 35.224 | 32.568 | 0.00 | 0.00 |
| ATOM | 6738 | HB   | ILE | X | 447 | 46.193 | 35.857 | 31.837 | 0.00 | 0.00 |
| ATOM | 6739 | CG2  | ILE | X | 447 | 45.902 | 35.345 | 33.840 | 0.00 | 0.00 |
| ATOM | 6740 | HG21 | ILE | X | 447 | 44.827 | 35.174 | 33.777 | 0.00 | 0.00 |
| ATOM | 6741 | HG22 | ILE | X | 447 | 46.002 | 36.325 | 34.306 | 0.00 | 0.00 |
| ATOM | 6742 | HG23 | ILE | X | 447 | 46.229 | 34.575 | 34.539 | 0.00 | 0.00 |
| ATOM | 6743 | CG1  | ILE | X | 447 | 48.090 | 35.769 | 32.748 | 0.00 | 0.00 |
| ATOM | 6744 | HG12 | ILE | X | 447 | 48.536 | 35.400 | 33.671 | 0.00 | 0.00 |
| ATOM | 6745 | HG13 | ILE | X | 447 | 48.813 | 35.504 | 31.976 | 0.00 | 0.00 |
| ATOM | 6746 | CD1  | ILE | X | 447 | 48.076 | 37.267 | 32.685 | 0.00 | 0.00 |
| ATOM | 6747 | HD11 | ILE | X | 447 | 47.478 | 37.533 | 31.814 | 0.00 | 0.00 |
| ATOM | 6748 | HD12 | ILE | X | 447 | 49.036 | 37.771 | 32.572 | 0.00 | 0.00 |
| ATOM | 6749 | HD13 | ILE | X | 447 | 47.733 | 37.585 | 33.669 | 0.00 | 0.00 |
| ATOM | 6750 | C    | ILE | X | 447 | 47.035 | 33.833 | 30.588 | 0.00 | 0.00 |
| ATOM | 6751 | O    | ILE | X | 447 | 46.162 | 34.154 | 29.756 | 0.00 | 0.00 |
| ATOM | 6752 | N    | GLU | X | 448 | 48.338 | 33.582 | 30.301 | 0.00 | 0.00 |
| ATOM | 6753 | H    | GLU | X | 448 | 48.921 | 33.280 | 31.069 | 0.00 | 0.00 |
| ATOM | 6754 | CA   | GLU | X | 448 | 48.839 | 33.563 | 28.910 | 0.00 | 0.00 |
| ATOM | 6755 | HA   | GLU | X | 448 | 48.685 | 34.532 | 28.436 | 0.00 | 0.00 |
| ATOM | 6756 | CB   | GLU | X | 448 | 50.356 | 33.303 | 28.731 | 0.00 | 0.00 |
| ATOM | 6757 | HB2  | GLU | X | 448 | 50.624 | 32.383 | 29.250 | 0.00 | 0.00 |
| ATOM | 6758 | HB3  | GLU | X | 448 | 50.633 | 33.222 | 27.680 | 0.00 | 0.00 |
| ATOM | 6759 | CG   | GLU | X | 448 | 51.224 | 34.495 | 29.172 | 0.00 | 0.00 |
| ATOM | 6760 | HG2  | GLU | X | 448 | 50.796 | 35.405 | 28.752 | 0.00 | 0.00 |
| ATOM | 6761 | HG3  | GLU | X | 448 | 51.212 | 34.601 | 30.257 | 0.00 | 0.00 |
| ATOM | 6762 | CD   | GLU | X | 448 | 52.666 | 34.215 | 28.657 | 0.00 | 0.00 |
| ATOM | 6763 | OE1  | GLU | X | 448 | 53.198 | 35.115 | 27.982 | 0.00 | 0.00 |
| ATOM | 6764 | OE2  | GLU | X | 448 | 53.323 | 33.211 | 29.027 | 0.00 | 0.00 |
| ATOM | 6765 | C    | GLU | X | 448 | 48.212 | 32.416 | 28.053 | 0.00 | 0.00 |

|      |      |      |     |   |     |        |        |        |      |      |
|------|------|------|-----|---|-----|--------|--------|--------|------|------|
| ATOM | 6766 | O    | GLU | X | 448 | 48.053 | 32.517 | 26.846 | 0.00 | 0.00 |
| ATOM | 6767 | N    | PHE | X | 449 | 47.836 | 31.251 | 28.726 | 0.00 | 0.00 |
| ATOM | 6768 | H    | PHE | X | 449 | 48.223 | 31.235 | 29.659 | 0.00 | 0.00 |
| ATOM | 6769 | CA   | PHE | X | 449 | 47.134 | 30.179 | 28.174 | 0.00 | 0.00 |
| ATOM | 6770 | HA   | PHE | X | 449 | 47.484 | 29.915 | 27.176 | 0.00 | 0.00 |
| ATOM | 6771 | CB   | PHE | X | 449 | 47.617 | 29.002 | 29.101 | 0.00 | 0.00 |
| ATOM | 6772 | HB2  | PHE | X | 449 | 47.361 | 29.211 | 30.139 | 0.00 | 0.00 |
| ATOM | 6773 | HB3  | PHE | X | 449 | 46.982 | 28.150 | 28.859 | 0.00 | 0.00 |
| ATOM | 6774 | CG   | PHE | X | 449 | 49.071 | 28.573 | 28.959 | 0.00 | 0.00 |
| ATOM | 6775 | CD1  | PHE | X | 449 | 50.098 | 29.142 | 29.635 | 0.00 | 0.00 |
| ATOM | 6776 | HD1  | PHE | X | 449 | 49.954 | 30.017 | 30.252 | 0.00 | 0.00 |
| ATOM | 6777 | CE1  | PHE | X | 449 | 51.404 | 28.726 | 29.485 | 0.00 | 0.00 |
| ATOM | 6778 | HE1  | PHE | X | 449 | 52.217 | 29.229 | 29.987 | 0.00 | 0.00 |
| ATOM | 6779 | CZ   | PHE | X | 449 | 51.735 | 27.645 | 28.637 | 0.00 | 0.00 |
| ATOM | 6780 | HZ   | PHE | X | 449 | 52.755 | 27.291 | 28.616 | 0.00 | 0.00 |
| ATOM | 6781 | CE2  | PHE | X | 449 | 50.724 | 27.040 | 27.923 | 0.00 | 0.00 |
| ATOM | 6782 | HE2  | PHE | X | 449 | 50.955 | 26.155 | 27.347 | 0.00 | 0.00 |
| ATOM | 6783 | CD2  | PHE | X | 449 | 49.419 | 27.496 | 28.058 | 0.00 | 0.00 |
| ATOM | 6784 | HD2  | PHE | X | 449 | 48.593 | 26.974 | 27.597 | 0.00 | 0.00 |
| ATOM | 6785 | C    | PHE | X | 449 | 45.586 | 30.354 | 28.074 | 0.00 | 0.00 |
| ATOM | 6786 | O    | PHE | X | 449 | 44.922 | 29.718 | 27.302 | 0.00 | 0.00 |
| ATOM | 6787 | N    | ILE | X | 450 | 45.057 | 31.320 | 28.775 | 0.00 | 0.00 |
| ATOM | 6788 | H    | ILE | X | 450 | 45.660 | 31.736 | 29.470 | 0.00 | 0.00 |
| ATOM | 6789 | CA   | ILE | X | 450 | 43.633 | 31.798 | 28.716 | 0.00 | 0.00 |
| ATOM | 6790 | HA   | ILE | X | 450 | 43.030 | 30.955 | 28.380 | 0.00 | 0.00 |
| ATOM | 6791 | CB   | ILE | X | 450 | 43.175 | 32.288 | 30.091 | 0.00 | 0.00 |
| ATOM | 6792 | HB   | ILE | X | 450 | 43.864 | 33.099 | 30.328 | 0.00 | 0.00 |
| ATOM | 6793 | CG2  | ILE | X | 450 | 41.744 | 32.838 | 30.033 | 0.00 | 0.00 |
| ATOM | 6794 | HG21 | ILE | X | 450 | 41.761 | 33.726 | 29.400 | 0.00 | 0.00 |
| ATOM | 6795 | HG22 | ILE | X | 450 | 41.385 | 33.201 | 30.996 | 0.00 | 0.00 |
| ATOM | 6796 | HG23 | ILE | X | 450 | 41.148 | 32.140 | 29.446 | 0.00 | 0.00 |
| ATOM | 6797 | CG1  | ILE | X | 450 | 43.323 | 31.308 | 31.330 | 0.00 | 0.00 |
| ATOM | 6798 | HG12 | ILE | X | 450 | 44.403 | 31.198 | 31.422 | 0.00 | 0.00 |
| ATOM | 6799 | HG13 | ILE | X | 450 | 42.844 | 31.705 | 32.225 | 0.00 | 0.00 |
| ATOM | 6800 | CD1  | ILE | X | 450 | 42.644 | 29.951 | 31.132 | 0.00 | 0.00 |
| ATOM | 6801 | HD11 | ILE | X | 450 | 41.594 | 30.025 | 30.849 | 0.00 | 0.00 |
| ATOM | 6802 | HD12 | ILE | X | 450 | 42.722 | 29.508 | 32.125 | 0.00 | 0.00 |
| ATOM | 6803 | HD13 | ILE | X | 450 | 43.065 | 29.363 | 30.316 | 0.00 | 0.00 |
| ATOM | 6804 | C    | ILE | X | 450 | 43.475 | 32.878 | 27.633 | 0.00 | 0.00 |
| ATOM | 6805 | O    | ILE | X | 450 | 42.575 | 32.736 | 26.810 | 0.00 | 0.00 |
| ATOM | 6806 | N    | PHE | X | 451 | 44.332 | 33.852 | 27.549 | 0.00 | 0.00 |
| ATOM | 6807 | H    | PHE | X | 451 | 44.921 | 33.930 | 28.366 | 0.00 | 0.00 |
| ATOM | 6808 | CA   | PHE | X | 451 | 44.396 | 34.874 | 26.478 | 0.00 | 0.00 |
| ATOM | 6809 | HA   | PHE | X | 451 | 43.347 | 35.035 | 26.232 | 0.00 | 0.00 |
| ATOM | 6810 | CB   | PHE | X | 451 | 44.971 | 36.123 | 27.071 | 0.00 | 0.00 |
| ATOM | 6811 | HB2  | PHE | X | 451 | 45.959 | 35.959 | 27.502 | 0.00 | 0.00 |
| ATOM | 6812 | HB3  | PHE | X | 451 | 45.126 | 36.769 | 26.206 | 0.00 | 0.00 |
| ATOM | 6813 | CG   | PHE | X | 451 | 44.073 | 36.794 | 28.092 | 0.00 | 0.00 |
| ATOM | 6814 | CD1  | PHE | X | 451 | 44.586 | 37.080 | 29.363 | 0.00 | 0.00 |
| ATOM | 6815 | HD1  | PHE | X | 451 | 45.639 | 36.884 | 29.497 | 0.00 | 0.00 |
| ATOM | 6816 | CE1  | PHE | X | 451 | 43.787 | 37.694 | 30.409 | 0.00 | 0.00 |
| ATOM | 6817 | HE1  | PHE | X | 451 | 44.138 | 37.924 | 31.404 | 0.00 | 0.00 |
| ATOM | 6818 | CZ   | PHE | X | 451 | 42.453 | 38.055 | 30.079 | 0.00 | 0.00 |
| ATOM | 6819 | HZ   | PHE | X | 451 | 41.906 | 38.529 | 30.880 | 0.00 | 0.00 |
| ATOM | 6820 | CE2  | PHE | X | 451 | 41.940 | 37.802 | 28.786 | 0.00 | 0.00 |
| ATOM | 6821 | HE2  | PHE | X | 451 | 40.943 | 38.114 | 28.512 | 0.00 | 0.00 |
| ATOM | 6822 | CD2  | PHE | X | 451 | 42.682 | 37.110 | 27.755 | 0.00 | 0.00 |
| ATOM | 6823 | HD2  | PHE | X | 451 | 42.227 | 36.849 | 26.811 | 0.00 | 0.00 |
| ATOM | 6824 | C    | PHE | X | 451 | 45.105 | 34.421 | 25.191 | 0.00 | 0.00 |
| ATOM | 6825 | O    | PHE | X | 451 | 45.075 | 35.240 | 24.238 | 0.00 | 0.00 |
| ATOM | 6826 | N    | GLY | X | 452 | 45.594 | 33.124 | 25.067 | 0.00 | 0.00 |
| ATOM | 6827 | H    | GLY | X | 452 | 45.354 | 32.475 | 25.803 | 0.00 | 0.00 |
| ATOM | 6828 | CA   | GLY | X | 452 | 45.852 | 32.442 | 23.828 | 0.00 | 0.00 |
| ATOM | 6829 | HA2  | GLY | X | 452 | 45.907 | 31.382 | 24.077 | 0.00 | 0.00 |
| ATOM | 6830 | HA3  | GLY | X | 452 | 44.976 | 32.631 | 23.207 | 0.00 | 0.00 |
| ATOM | 6831 | C    | GLY | X | 452 | 47.163 | 32.768 | 23.180 | 0.00 | 0.00 |
| ATOM | 6832 | O    | GLY | X | 452 | 47.405 | 32.443 | 22.021 | 0.00 | 0.00 |

|      |      |      |     |   |     |        |        |        |      |      |
|------|------|------|-----|---|-----|--------|--------|--------|------|------|
| ATOM | 6833 | N    | ILE | X | 453 | 48.116 | 33.285 | 23.933 | 0.00 | 0.00 |
| ATOM | 6834 | H    | ILE | X | 453 | 47.986 | 33.182 | 24.929 | 0.00 | 0.00 |
| ATOM | 6835 | CA   | ILE | X | 453 | 49.428 | 33.730 | 23.494 | 0.00 | 0.00 |
| ATOM | 6836 | HA   | ILE | X | 453 | 49.233 | 34.365 | 22.630 | 0.00 | 0.00 |
| ATOM | 6837 | CB   | ILE | X | 453 | 50.051 | 34.586 | 24.597 | 0.00 | 0.00 |
| ATOM | 6838 | HB   | ILE | X | 453 | 50.228 | 33.936 | 25.454 | 0.00 | 0.00 |
| ATOM | 6839 | CG2  | ILE | X | 453 | 51.353 | 35.202 | 24.078 | 0.00 | 0.00 |
| ATOM | 6840 | HG21 | ILE | X | 453 | 51.565 | 36.084 | 24.683 | 0.00 | 0.00 |
| ATOM | 6841 | HG22 | ILE | X | 453 | 51.259 | 35.454 | 23.021 | 0.00 | 0.00 |
| ATOM | 6842 | HG23 | ILE | X | 453 | 52.138 | 34.449 | 24.148 | 0.00 | 0.00 |
| ATOM | 6843 | CG1  | ILE | X | 453 | 49.128 | 35.758 | 24.985 | 0.00 | 0.00 |
| ATOM | 6844 | HG12 | ILE | X | 453 | 48.201 | 35.277 | 25.299 | 0.00 | 0.00 |
| ATOM | 6845 | HG13 | ILE | X | 453 | 49.520 | 36.278 | 25.859 | 0.00 | 0.00 |
| ATOM | 6846 | CD1  | ILE | X | 453 | 48.901 | 36.768 | 23.859 | 0.00 | 0.00 |
| ATOM | 6847 | HD11 | ILE | X | 453 | 48.294 | 37.635 | 24.121 | 0.00 | 0.00 |
| ATOM | 6848 | HD12 | ILE | X | 453 | 48.320 | 36.333 | 23.046 | 0.00 | 0.00 |
| ATOM | 6849 | HD13 | ILE | X | 453 | 49.795 | 37.121 | 23.344 | 0.00 | 0.00 |
| ATOM | 6850 | C    | ILE | X | 453 | 50.326 | 32.553 | 23.018 | 0.00 | 0.00 |
| ATOM | 6851 | O    | ILE | X | 453 | 50.990 | 32.782 | 22.039 | 0.00 | 0.00 |
| ATOM | 6852 | N    | PRO | X | 454 | 50.291 | 31.266 | 23.508 | 0.00 | 0.00 |
| ATOM | 6853 | CD   | PRO | X | 454 | 49.777 | 30.953 | 24.805 | 0.00 | 0.00 |
| ATOM | 6854 | HD2  | PRO | X | 454 | 48.689 | 31.006 | 24.813 | 0.00 | 0.00 |
| ATOM | 6855 | HD3  | PRO | X | 454 | 50.289 | 31.561 | 25.551 | 0.00 | 0.00 |
| ATOM | 6856 | CG   | PRO | X | 454 | 50.236 | 29.524 | 25.129 | 0.00 | 0.00 |
| ATOM | 6857 | HG2  | PRO | X | 454 | 49.586 | 29.042 | 25.859 | 0.00 | 0.00 |
| ATOM | 6858 | HG3  | PRO | X | 454 | 51.236 | 29.641 | 25.547 | 0.00 | 0.00 |
| ATOM | 6859 | CB   | PRO | X | 454 | 50.279 | 28.869 | 23.784 | 0.00 | 0.00 |
| ATOM | 6860 | HB2  | PRO | X | 454 | 49.254 | 28.625 | 23.508 | 0.00 | 0.00 |
| ATOM | 6861 | HB3  | PRO | X | 454 | 50.919 | 27.989 | 23.723 | 0.00 | 0.00 |
| ATOM | 6862 | CA   | PRO | X | 454 | 50.838 | 30.075 | 22.899 | 0.00 | 0.00 |
| ATOM | 6863 | HA   | PRO | X | 454 | 51.875 | 30.076 | 23.234 | 0.00 | 0.00 |
| ATOM | 6864 | C    | PRO | X | 454 | 50.510 | 29.809 | 21.394 | 0.00 | 0.00 |
| ATOM | 6865 | O    | PRO | X | 454 | 51.204 | 29.098 | 20.678 | 0.00 | 0.00 |
| ATOM | 6866 | N    | LEU | X | 455 | 49.492 | 30.495 | 20.907 | 0.00 | 0.00 |
| ATOM | 6867 | H    | LEU | X | 455 | 48.966 | 31.129 | 21.492 | 0.00 | 0.00 |
| ATOM | 6868 | CA   | LEU | X | 455 | 48.973 | 30.267 | 19.553 | 0.00 | 0.00 |
| ATOM | 6869 | HA   | LEU | X | 455 | 49.146 | 29.267 | 19.156 | 0.00 | 0.00 |
| ATOM | 6870 | CB   | LEU | X | 455 | 47.451 | 30.487 | 19.424 | 0.00 | 0.00 |
| ATOM | 6871 | HB2  | LEU | X | 455 | 47.208 | 31.525 | 19.651 | 0.00 | 0.00 |
| ATOM | 6872 | HB3  | LEU | X | 455 | 47.254 | 30.169 | 18.400 | 0.00 | 0.00 |
| ATOM | 6873 | CG   | LEU | X | 455 | 46.628 | 29.529 | 20.301 | 0.00 | 0.00 |
| ATOM | 6874 | HG   | LEU | X | 455 | 47.060 | 29.401 | 21.294 | 0.00 | 0.00 |
| ATOM | 6875 | CD1  | LEU | X | 455 | 45.183 | 29.933 | 20.490 | 0.00 | 0.00 |
| ATOM | 6876 | HD11 | LEU | X | 455 | 44.597 | 29.808 | 19.580 | 0.00 | 0.00 |
| ATOM | 6877 | HD12 | LEU | X | 455 | 45.133 | 30.964 | 20.839 | 0.00 | 0.00 |
| ATOM | 6878 | HD13 | LEU | X | 455 | 44.766 | 29.336 | 21.301 | 0.00 | 0.00 |
| ATOM | 6879 | CD2  | LEU | X | 455 | 46.599 | 28.097 | 19.685 | 0.00 | 0.00 |
| ATOM | 6880 | HD21 | LEU | X | 455 | 45.988 | 27.419 | 20.281 | 0.00 | 0.00 |
| ATOM | 6881 | HD22 | LEU | X | 455 | 46.131 | 28.215 | 18.708 | 0.00 | 0.00 |
| ATOM | 6882 | HD23 | LEU | X | 455 | 47.602 | 27.675 | 19.740 | 0.00 | 0.00 |
| ATOM | 6883 | C    | LEU | X | 455 | 49.653 | 31.309 | 18.566 | 0.00 | 0.00 |
| ATOM | 6884 | O    | LEU | X | 455 | 49.786 | 31.024 | 17.365 | 0.00 | 0.00 |
| ATOM | 6885 | N    | ASP | X | 456 | 50.129 | 32.449 | 19.099 | 0.00 | 0.00 |
| ATOM | 6886 | H    | ASP | X | 456 | 50.140 | 32.589 | 20.100 | 0.00 | 0.00 |
| ATOM | 6887 | CA   | ASP | X | 456 | 50.668 | 33.495 | 18.286 | 0.00 | 0.00 |
| ATOM | 6888 | HA   | ASP | X | 456 | 50.020 | 33.746 | 17.446 | 0.00 | 0.00 |
| ATOM | 6889 | CB   | ASP | X | 456 | 50.685 | 34.745 | 19.241 | 0.00 | 0.00 |
| ATOM | 6890 | HB2  | ASP | X | 456 | 49.627 | 34.924 | 19.433 | 0.00 | 0.00 |
| ATOM | 6891 | HB3  | ASP | X | 456 | 51.178 | 34.508 | 20.184 | 0.00 | 0.00 |
| ATOM | 6892 | CG   | ASP | X | 456 | 51.129 | 36.051 | 18.628 | 0.00 | 0.00 |
| ATOM | 6893 | OD1  | ASP | X | 456 | 51.524 | 36.097 | 17.452 | 0.00 | 0.00 |
| ATOM | 6894 | OD2  | ASP | X | 456 | 51.213 | 37.029 | 19.374 | 0.00 | 0.00 |
| ATOM | 6895 | C    | ASP | X | 456 | 52.156 | 33.193 | 17.873 | 0.00 | 0.00 |
| ATOM | 6896 | O    | ASP | X | 456 | 52.948 | 32.917 | 18.781 | 0.00 | 0.00 |
| ATOM | 6897 | N    | PRO | X | 457 | 52.493 | 33.361 | 16.547 | 0.00 | 0.00 |
| ATOM | 6898 | CD   | PRO | X | 457 | 51.477 | 33.367 | 15.457 | 0.00 | 0.00 |
| ATOM | 6899 | HD2  | PRO | X | 457 | 50.935 | 34.303 | 15.320 | 0.00 | 0.00 |

|      |      |      |     |   |     |        |        |        |      |      |
|------|------|------|-----|---|-----|--------|--------|--------|------|------|
| ATOM | 6900 | HD3  | PRO | X | 457 | 50.850 | 32.500 | 15.661 | 0.00 | 0.00 |
| ATOM | 6901 | CG   | PRO | X | 457 | 52.241 | 33.141 | 14.129 | 0.00 | 0.00 |
| ATOM | 6902 | HG2  | PRO | X | 457 | 51.898 | 33.706 | 13.263 | 0.00 | 0.00 |
| ATOM | 6903 | HG3  | PRO | X | 457 | 52.355 | 32.064 | 14.002 | 0.00 | 0.00 |
| ATOM | 6904 | CB   | PRO | X | 457 | 53.609 | 33.784 | 14.611 | 0.00 | 0.00 |
| ATOM | 6905 | HB2  | PRO | X | 457 | 53.668 | 34.865 | 14.487 | 0.00 | 0.00 |
| ATOM | 6906 | HB3  | PRO | X | 457 | 54.403 | 33.319 | 14.026 | 0.00 | 0.00 |
| ATOM | 6907 | CA   | PRO | X | 457 | 53.868 | 33.296 | 16.031 | 0.00 | 0.00 |
| ATOM | 6908 | HA   | PRO | X | 457 | 54.191 | 32.260 | 16.131 | 0.00 | 0.00 |
| ATOM | 6909 | C    | PRO | X | 457 | 54.872 | 34.187 | 16.743 | 0.00 | 0.00 |
| ATOM | 6910 | O    | PRO | X | 457 | 56.056 | 34.085 | 16.486 | 0.00 | 0.00 |
| ATOM | 6911 | N    | SER | X | 458 | 54.426 | 35.201 | 17.558 | 0.00 | 0.00 |
| ATOM | 6912 | H    | SER | X | 458 | 53.439 | 35.387 | 17.663 | 0.00 | 0.00 |
| ATOM | 6913 | CA   | SER | X | 458 | 55.462 | 36.132 | 18.160 | 0.00 | 0.00 |
| ATOM | 6914 | HA   | SER | X | 458 | 56.091 | 36.530 | 17.364 | 0.00 | 0.00 |
| ATOM | 6915 | CB   | SER | X | 458 | 54.686 | 37.382 | 18.789 | 0.00 | 0.00 |
| ATOM | 6916 | HB2  | SER | X | 458 | 55.424 | 38.085 | 19.176 | 0.00 | 0.00 |
| ATOM | 6917 | HB3  | SER | X | 458 | 54.120 | 37.948 | 18.050 | 0.00 | 0.00 |
| ATOM | 6918 | OG   | SER | X | 458 | 53.840 | 36.875 | 19.818 | 0.00 | 0.00 |
| ATOM | 6919 | HG   | SER | X | 458 | 52.933 | 37.180 | 19.746 | 0.00 | 0.00 |
| ATOM | 6920 | C    | SER | X | 458 | 56.493 | 35.507 | 19.161 | 0.00 | 0.00 |
| ATOM | 6921 | O    | SER | X | 458 | 57.578 | 36.010 | 19.258 | 0.00 | 0.00 |
| ATOM | 6922 | N    | ARG | X | 459 | 56.214 | 34.409 | 19.798 | 0.00 | 0.00 |
| ATOM | 6923 | H    | ARG | X | 459 | 55.383 | 33.924 | 19.492 | 0.00 | 0.00 |
| ATOM | 6924 | CA   | ARG | X | 459 | 57.129 | 33.513 | 20.451 | 0.00 | 0.00 |
| ATOM | 6925 | HA   | ARG | X | 459 | 58.160 | 33.593 | 20.105 | 0.00 | 0.00 |
| ATOM | 6926 | CB   | ARG | X | 459 | 57.156 | 33.775 | 21.949 | 0.00 | 0.00 |
| ATOM | 6927 | HB2  | ARG | X | 459 | 56.131 | 33.731 | 22.317 | 0.00 | 0.00 |
| ATOM | 6928 | HB3  | ARG | X | 459 | 57.830 | 33.049 | 22.403 | 0.00 | 0.00 |
| ATOM | 6929 | CG   | ARG | X | 459 | 57.767 | 35.124 | 22.332 | 0.00 | 0.00 |
| ATOM | 6930 | HG2  | ARG | X | 459 | 58.764 | 35.250 | 21.910 | 0.00 | 0.00 |
| ATOM | 6931 | HG3  | ARG | X | 459 | 57.169 | 35.896 | 21.848 | 0.00 | 0.00 |
| ATOM | 6932 | CD   | ARG | X | 459 | 57.828 | 35.314 | 23.862 | 0.00 | 0.00 |
| ATOM | 6933 | HD2  | ARG | X | 459 | 58.522 | 34.602 | 24.309 | 0.00 | 0.00 |
| ATOM | 6934 | HD3  | ARG | X | 459 | 58.161 | 36.348 | 23.944 | 0.00 | 0.00 |
| ATOM | 6935 | NE   | ARG | X | 459 | 56.536 | 35.238 | 24.457 | 0.00 | 0.00 |
| ATOM | 6936 | HE   | ARG | X | 459 | 55.791 | 35.690 | 23.946 | 0.00 | 0.00 |
| ATOM | 6937 | CZ   | ARG | X | 459 | 56.206 | 34.906 | 25.718 | 0.00 | 0.00 |
| ATOM | 6938 | NH1  | ARG | X | 459 | 57.032 | 34.656 | 26.677 | 0.00 | 0.00 |
| ATOM | 6939 | HH11 | ARG | X | 459 | 57.988 | 34.471 | 26.411 | 0.00 | 0.00 |
| ATOM | 6940 | HH12 | ARG | X | 459 | 56.752 | 34.448 | 27.625 | 0.00 | 0.00 |
| ATOM | 6941 | NH2  | ARG | X | 459 | 54.919 | 35.104 | 25.957 | 0.00 | 0.00 |
| ATOM | 6942 | HH21 | ARG | X | 459 | 54.333 | 35.394 | 25.188 | 0.00 | 0.00 |
| ATOM | 6943 | HH22 | ARG | X | 459 | 54.452 | 34.826 | 26.809 | 0.00 | 0.00 |
| ATOM | 6944 | C    | ARG | X | 459 | 56.683 | 32.118 | 20.160 | 0.00 | 0.00 |
| ATOM | 6945 | O    | ARG | X | 459 | 55.565 | 31.736 | 20.248 | 0.00 | 0.00 |
| ATOM | 6946 | N    | ASN | X | 460 | 57.679 | 31.275 | 19.804 | 0.00 | 0.00 |
| ATOM | 6947 | H    | ASN | X | 460 | 58.638 | 31.586 | 19.869 | 0.00 | 0.00 |
| ATOM | 6948 | CA   | ASN | X | 460 | 57.375 | 29.894 | 19.375 | 0.00 | 0.00 |
| ATOM | 6949 | HA   | ASN | X | 460 | 56.411 | 29.926 | 18.869 | 0.00 | 0.00 |
| ATOM | 6950 | CB   | ASN | X | 460 | 58.474 | 29.411 | 18.389 | 0.00 | 0.00 |
| ATOM | 6951 | HB2  | ASN | X | 460 | 58.590 | 30.072 | 17.530 | 0.00 | 0.00 |
| ATOM | 6952 | HB3  | ASN | X | 460 | 59.402 | 29.392 | 18.960 | 0.00 | 0.00 |
| ATOM | 6953 | CG   | ASN | X | 460 | 58.302 | 28.096 | 17.701 | 0.00 | 0.00 |
| ATOM | 6954 | OD1  | ASN | X | 460 | 59.270 | 27.383 | 17.672 | 0.00 | 0.00 |
| ATOM | 6955 | ND2  | ASN | X | 460 | 57.186 | 27.731 | 17.068 | 0.00 | 0.00 |
| ATOM | 6956 | HD21 | ASN | X | 460 | 57.066 | 26.823 | 16.642 | 0.00 | 0.00 |
| ATOM | 6957 | HD22 | ASN | X | 460 | 56.418 | 28.386 | 17.105 | 0.00 | 0.00 |
| ATOM | 6958 | C    | ASN | X | 460 | 57.203 | 28.992 | 20.599 | 0.00 | 0.00 |
| ATOM | 6959 | O    | ASN | X | 460 | 58.140 | 28.348 | 21.135 | 0.00 | 0.00 |
| ATOM | 6960 | N    | TYR | X | 461 | 56.028 | 28.911 | 21.101 | 0.00 | 0.00 |
| ATOM | 6961 | H    | TYR | X | 461 | 55.316 | 29.408 | 20.585 | 0.00 | 0.00 |
| ATOM | 6962 | CA   | TYR | X | 461 | 55.448 | 27.867 | 22.051 | 0.00 | 0.00 |
| ATOM | 6963 | HA   | TYR | X | 461 | 56.179 | 27.766 | 22.853 | 0.00 | 0.00 |
| ATOM | 6964 | CB   | TYR | X | 461 | 54.074 | 28.289 | 22.654 | 0.00 | 0.00 |
| ATOM | 6965 | HB2  | TYR | X | 461 | 53.364 | 28.578 | 21.879 | 0.00 | 0.00 |
| ATOM | 6966 | HB3  | TYR | X | 461 | 53.577 | 27.472 | 23.178 | 0.00 | 0.00 |

|      |      |      |     |   |     |        |        |        |      |      |
|------|------|------|-----|---|-----|--------|--------|--------|------|------|
| ATOM | 6967 | CG   | TYR | X | 461 | 54.132 | 29.374 | 23.679 | 0.00 | 0.00 |
| ATOM | 6968 | CD1  | TYR | X | 461 | 54.153 | 30.705 | 23.252 | 0.00 | 0.00 |
| ATOM | 6969 | HD1  | TYR | X | 461 | 54.219 | 30.922 | 22.196 | 0.00 | 0.00 |
| ATOM | 6970 | CE1  | TYR | X | 461 | 53.993 | 31.678 | 24.228 | 0.00 | 0.00 |
| ATOM | 6971 | HE1  | TYR | X | 461 | 53.817 | 32.693 | 23.904 | 0.00 | 0.00 |
| ATOM | 6972 | CZ   | TYR | X | 461 | 53.904 | 31.389 | 25.612 | 0.00 | 0.00 |
| ATOM | 6973 | OH   | TYR | X | 461 | 53.733 | 32.408 | 26.518 | 0.00 | 0.00 |
| ATOM | 6974 | HH   | TYR | X | 461 | 53.549 | 32.121 | 27.415 | 0.00 | 0.00 |
| ATOM | 6975 | CE2  | TYR | X | 461 | 53.916 | 30.034 | 25.940 | 0.00 | 0.00 |
| ATOM | 6976 | HE2  | TYR | X | 461 | 53.686 | 29.791 | 26.967 | 0.00 | 0.00 |
| ATOM | 6977 | CD2  | TYR | X | 461 | 54.145 | 29.030 | 25.038 | 0.00 | 0.00 |
| ATOM | 6978 | HD2  | TYR | X | 461 | 54.088 | 28.017 | 25.409 | 0.00 | 0.00 |
| ATOM | 6979 | C    | TYR | X | 461 | 55.320 | 26.500 | 21.338 | 0.00 | 0.00 |
| ATOM | 6980 | O    | TYR | X | 461 | 54.826 | 26.497 | 20.217 | 0.00 | 0.00 |
| ATOM | 6981 | N    | THR | X | 462 | 55.701 | 25.373 | 21.854 | 0.00 | 0.00 |
| ATOM | 6982 | H    | THR | X | 462 | 55.899 | 25.452 | 22.842 | 0.00 | 0.00 |
| ATOM | 6983 | CA   | THR | X | 462 | 55.619 | 23.982 | 21.392 | 0.00 | 0.00 |
| ATOM | 6984 | HA   | THR | X | 462 | 56.140 | 23.906 | 20.437 | 0.00 | 0.00 |
| ATOM | 6985 | CB   | THR | X | 462 | 56.439 | 23.053 | 22.232 | 0.00 | 0.00 |
| ATOM | 6986 | HB   | THR | X | 462 | 56.407 | 22.017 | 21.895 | 0.00 | 0.00 |
| ATOM | 6987 | CG2  | THR | X | 462 | 57.910 | 23.431 | 22.525 | 0.00 | 0.00 |
| ATOM | 6988 | HG21 | THR | X | 462 | 58.392 | 22.555 | 22.959 | 0.00 | 0.00 |
| ATOM | 6989 | HG22 | THR | X | 462 | 57.997 | 24.285 | 23.197 | 0.00 | 0.00 |
| ATOM | 6990 | HG23 | THR | X | 462 | 58.348 | 23.666 | 21.555 | 0.00 | 0.00 |
| ATOM | 6991 | OG1  | THR | X | 462 | 55.839 | 23.045 | 23.472 | 0.00 | 0.00 |
| ATOM | 6992 | HG1  | THR | X | 462 | 55.681 | 23.971 | 23.670 | 0.00 | 0.00 |
| ATOM | 6993 | C    | THR | X | 462 | 54.163 | 23.607 | 21.162 | 0.00 | 0.00 |
| ATOM | 6994 | O    | THR | X | 462 | 53.297 | 24.056 | 21.930 | 0.00 | 0.00 |
| ATOM | 6995 | N    | ALA | X | 463 | 53.964 | 22.668 | 20.265 | 0.00 | 0.00 |
| ATOM | 6996 | H    | ALA | X | 463 | 54.811 | 22.382 | 19.796 | 0.00 | 0.00 |
| ATOM | 6997 | CA   | ALA | X | 463 | 52.645 | 22.141 | 19.898 | 0.00 | 0.00 |
| ATOM | 6998 | HA   | ALA | X | 463 | 52.150 | 23.084 | 19.665 | 0.00 | 0.00 |
| ATOM | 6999 | CB   | ALA | X | 463 | 52.716 | 21.287 | 18.613 | 0.00 | 0.00 |
| ATOM | 7000 | HB1  | ALA | X | 463 | 51.766 | 21.443 | 18.102 | 0.00 | 0.00 |
| ATOM | 7001 | HB2  | ALA | X | 463 | 52.774 | 20.218 | 18.816 | 0.00 | 0.00 |
| ATOM | 7002 | HB3  | ALA | X | 463 | 53.467 | 21.669 | 17.921 | 0.00 | 0.00 |
| ATOM | 7003 | C    | ALA | X | 463 | 51.886 | 21.507 | 21.074 | 0.00 | 0.00 |
| ATOM | 7004 | O    | ALA | X | 463 | 50.697 | 21.629 | 21.143 | 0.00 | 0.00 |
| ATOM | 7005 | N    | GLU | X | 464 | 52.604 | 20.890 | 22.059 | 0.00 | 0.00 |
| ATOM | 7006 | H    | GLU | X | 464 | 53.592 | 20.755 | 21.897 | 0.00 | 0.00 |
| ATOM | 7007 | CA   | GLU | X | 464 | 52.092 | 20.431 | 23.359 | 0.00 | 0.00 |
| ATOM | 7008 | HA   | GLU | X | 464 | 51.374 | 19.656 | 23.090 | 0.00 | 0.00 |
| ATOM | 7009 | CB   | GLU | X | 464 | 53.232 | 19.783 | 24.162 | 0.00 | 0.00 |
| ATOM | 7010 | HB2  | GLU | X | 464 | 53.632 | 19.149 | 23.371 | 0.00 | 0.00 |
| ATOM | 7011 | HB3  | GLU | X | 464 | 53.881 | 20.533 | 24.614 | 0.00 | 0.00 |
| ATOM | 7012 | CG   | GLU | X | 464 | 52.793 | 18.789 | 25.253 | 0.00 | 0.00 |
| ATOM | 7013 | HG2  | GLU | X | 464 | 53.686 | 18.501 | 25.807 | 0.00 | 0.00 |
| ATOM | 7014 | HG3  | GLU | X | 464 | 52.151 | 19.267 | 25.993 | 0.00 | 0.00 |
| ATOM | 7015 | CD   | GLU | X | 464 | 52.023 | 17.567 | 24.902 | 0.00 | 0.00 |
| ATOM | 7016 | OE1  | GLU | X | 464 | 52.445 | 16.826 | 24.016 | 0.00 | 0.00 |
| ATOM | 7017 | OE2  | GLU | X | 464 | 51.003 | 17.317 | 25.482 | 0.00 | 0.00 |
| ATOM | 7018 | C    | GLU | X | 464 | 51.480 | 21.523 | 24.307 | 0.00 | 0.00 |
| ATOM | 7019 | O    | GLU | X | 464 | 50.552 | 21.224 | 25.013 | 0.00 | 0.00 |
| ATOM | 7020 | N    | GLU | X | 465 | 52.077 | 22.749 | 24.253 | 0.00 | 0.00 |
| ATOM | 7021 | H    | GLU | X | 465 | 52.864 | 22.768 | 23.622 | 0.00 | 0.00 |
| ATOM | 7022 | CA   | GLU | X | 465 | 51.665 | 23.931 | 24.971 | 0.00 | 0.00 |
| ATOM | 7023 | HA   | GLU | X | 465 | 51.249 | 23.625 | 25.931 | 0.00 | 0.00 |
| ATOM | 7024 | CB   | GLU | X | 465 | 52.849 | 24.924 | 25.148 | 0.00 | 0.00 |
| ATOM | 7025 | HB2  | GLU | X | 465 | 53.248 | 25.110 | 24.151 | 0.00 | 0.00 |
| ATOM | 7026 | HB3  | GLU | X | 465 | 52.552 | 25.850 | 25.641 | 0.00 | 0.00 |
| ATOM | 7027 | CG   | GLU | X | 465 | 54.001 | 24.333 | 25.927 | 0.00 | 0.00 |
| ATOM | 7028 | HG2  | GLU | X | 465 | 53.654 | 24.300 | 26.960 | 0.00 | 0.00 |
| ATOM | 7029 | HG3  | GLU | X | 465 | 54.274 | 23.350 | 25.544 | 0.00 | 0.00 |
| ATOM | 7030 | CD   | GLU | X | 465 | 55.280 | 25.255 | 25.827 | 0.00 | 0.00 |
| ATOM | 7031 | OE1  | GLU | X | 465 | 55.707 | 25.399 | 24.647 | 0.00 | 0.00 |
| ATOM | 7032 | OE2  | GLU | X | 465 | 55.877 | 25.647 | 26.875 | 0.00 | 0.00 |
| ATOM | 7033 | C    | GLU | X | 465 | 50.518 | 24.587 | 24.239 | 0.00 | 0.00 |

|      |      |      |     |   |     |        |        |        |      |      |
|------|------|------|-----|---|-----|--------|--------|--------|------|------|
| ATOM | 7034 | O    | GLU | X | 465 | 49.875 | 25.476 | 24.821 | 0.00 | 0.00 |
| ATOM | 7035 | N    | LYS | X | 466 | 50.251 | 24.318 | 22.939 | 0.00 | 0.00 |
| ATOM | 7036 | H    | LYS | X | 466 | 50.807 | 23.668 | 22.402 | 0.00 | 0.00 |
| ATOM | 7037 | CA   | LYS | X | 466 | 49.110 | 24.851 | 22.178 | 0.00 | 0.00 |
| ATOM | 7038 | HA   | LYS | X | 466 | 48.990 | 25.882 | 22.510 | 0.00 | 0.00 |
| ATOM | 7039 | CB   | LYS | X | 466 | 49.502 | 24.824 | 20.728 | 0.00 | 0.00 |
| ATOM | 7040 | HB2  | LYS | X | 466 | 49.801 | 23.795 | 20.529 | 0.00 | 0.00 |
| ATOM | 7041 | HB3  | LYS | X | 466 | 48.670 | 25.091 | 20.076 | 0.00 | 0.00 |
| ATOM | 7042 | CG   | LYS | X | 466 | 50.667 | 25.776 | 20.441 | 0.00 | 0.00 |
| ATOM | 7043 | HG2  | LYS | X | 466 | 50.420 | 26.807 | 20.691 | 0.00 | 0.00 |
| ATOM | 7044 | HG3  | LYS | X | 466 | 51.597 | 25.558 | 20.965 | 0.00 | 0.00 |
| ATOM | 7045 | CD   | LYS | X | 466 | 50.979 | 25.859 | 18.959 | 0.00 | 0.00 |
| ATOM | 7046 | HD2  | LYS | X | 466 | 51.352 | 24.877 | 18.666 | 0.00 | 0.00 |
| ATOM | 7047 | HD3  | LYS | X | 466 | 50.081 | 26.033 | 18.366 | 0.00 | 0.00 |
| ATOM | 7048 | CE   | LYS | X | 466 | 51.992 | 26.976 | 18.602 | 0.00 | 0.00 |
| ATOM | 7049 | HE2  | LYS | X | 466 | 51.586 | 27.983 | 18.694 | 0.00 | 0.00 |
| ATOM | 7050 | HE3  | LYS | X | 466 | 52.808 | 26.861 | 19.314 | 0.00 | 0.00 |
| ATOM | 7051 | NZ   | LYS | X | 466 | 52.458 | 26.790 | 17.179 | 0.00 | 0.00 |
| ATOM | 7052 | HZ1  | LYS | X | 466 | 53.316 | 27.315 | 17.084 | 0.00 | 0.00 |
| ATOM | 7053 | HZ2  | LYS | X | 466 | 52.604 | 25.838 | 16.878 | 0.00 | 0.00 |
| ATOM | 7054 | HZ3  | LYS | X | 466 | 51.738 | 27.186 | 16.592 | 0.00 | 0.00 |
| ATOM | 7055 | C    | LYS | X | 466 | 47.850 | 24.126 | 22.403 | 0.00 | 0.00 |
| ATOM | 7056 | O    | LYS | X | 466 | 46.826 | 24.709 | 22.690 | 0.00 | 0.00 |
| ATOM | 7057 | N    | ILE | X | 467 | 48.026 | 22.822 | 22.489 | 0.00 | 0.00 |
| ATOM | 7058 | H    | ILE | X | 467 | 48.902 | 22.357 | 22.302 | 0.00 | 0.00 |
| ATOM | 7059 | CA   | ILE | X | 467 | 46.831 | 21.928 | 22.880 | 0.00 | 0.00 |
| ATOM | 7060 | HA   | ILE | X | 467 | 45.951 | 22.308 | 22.362 | 0.00 | 0.00 |
| ATOM | 7061 | CB   | ILE | X | 467 | 46.990 | 20.403 | 22.609 | 0.00 | 0.00 |
| ATOM | 7062 | HB   | ILE | X | 467 | 46.067 | 19.869 | 22.835 | 0.00 | 0.00 |
| ATOM | 7063 | CG2  | ILE | X | 467 | 47.219 | 20.232 | 21.096 | 0.00 | 0.00 |
| ATOM | 7064 | HG21 | ILE | X | 467 | 46.604 | 20.981 | 20.597 | 0.00 | 0.00 |
| ATOM | 7065 | HG22 | ILE | X | 467 | 46.880 | 19.260 | 20.737 | 0.00 | 0.00 |
| ATOM | 7066 | HG23 | ILE | X | 467 | 48.262 | 20.335 | 20.798 | 0.00 | 0.00 |
| ATOM | 7067 | CG1  | ILE | X | 467 | 48.176 | 19.805 | 23.269 | 0.00 | 0.00 |
| ATOM | 7068 | HG12 | ILE | X | 467 | 49.081 | 20.319 | 22.944 | 0.00 | 0.00 |
| ATOM | 7069 | HG13 | ILE | X | 467 | 48.056 | 19.942 | 24.343 | 0.00 | 0.00 |
| ATOM | 7070 | CD1  | ILE | X | 467 | 48.287 | 18.276 | 23.103 | 0.00 | 0.00 |
| ATOM | 7071 | HD11 | ILE | X | 467 | 48.781 | 18.031 | 22.162 | 0.00 | 0.00 |
| ATOM | 7072 | HD12 | ILE | X | 467 | 47.250 | 17.941 | 23.147 | 0.00 | 0.00 |
| ATOM | 7073 | HD13 | ILE | X | 467 | 48.882 | 17.907 | 23.938 | 0.00 | 0.00 |
| ATOM | 7074 | C    | ILE | X | 467 | 46.411 | 22.113 | 24.271 | 0.00 | 0.00 |
| ATOM | 7075 | O    | ILE | X | 467 | 45.244 | 21.966 | 24.591 | 0.00 | 0.00 |
| ATOM | 7076 | N    | PHE | X | 468 | 47.377 | 22.371 | 25.197 | 0.00 | 0.00 |
| ATOM | 7077 | H    | PHE | X | 468 | 48.325 | 22.257 | 24.868 | 0.00 | 0.00 |
| ATOM | 7078 | CA   | PHE | X | 468 | 47.179 | 22.810 | 26.549 | 0.00 | 0.00 |
| ATOM | 7079 | HA   | PHE | X | 468 | 46.360 | 22.186 | 26.907 | 0.00 | 0.00 |
| ATOM | 7080 | CB   | PHE | X | 468 | 48.384 | 22.715 | 27.525 | 0.00 | 0.00 |
| ATOM | 7081 | HB2  | PHE | X | 468 | 48.895 | 21.752 | 27.522 | 0.00 | 0.00 |
| ATOM | 7082 | HB3  | PHE | X | 468 | 49.126 | 23.386 | 27.092 | 0.00 | 0.00 |
| ATOM | 7083 | CG   | PHE | X | 468 | 48.149 | 23.176 | 28.929 | 0.00 | 0.00 |
| ATOM | 7084 | CD1  | PHE | X | 468 | 47.136 | 22.473 | 29.574 | 0.00 | 0.00 |
| ATOM | 7085 | HD1  | PHE | X | 468 | 46.665 | 21.646 | 29.063 | 0.00 | 0.00 |
| ATOM | 7086 | CE1  | PHE | X | 468 | 46.908 | 22.726 | 30.981 | 0.00 | 0.00 |
| ATOM | 7087 | HE1  | PHE | X | 468 | 46.276 | 22.086 | 31.578 | 0.00 | 0.00 |
| ATOM | 7088 | CZ   | PHE | X | 468 | 47.712 | 23.695 | 31.674 | 0.00 | 0.00 |
| ATOM | 7089 | HZ   | PHE | X | 468 | 47.553 | 23.990 | 32.701 | 0.00 | 0.00 |
| ATOM | 7090 | CE2  | PHE | X | 468 | 48.709 | 24.382 | 30.898 | 0.00 | 0.00 |
| ATOM | 7091 | HE2  | PHE | X | 468 | 49.321 | 25.077 | 31.454 | 0.00 | 0.00 |
| ATOM | 7092 | CD2  | PHE | X | 468 | 48.904 | 24.151 | 29.584 | 0.00 | 0.00 |
| ATOM | 7093 | HD2  | PHE | X | 468 | 49.732 | 24.705 | 29.169 | 0.00 | 0.00 |
| ATOM | 7094 | C    | PHE | X | 468 | 46.515 | 24.181 | 26.681 | 0.00 | 0.00 |
| ATOM | 7095 | O    | PHE | X | 468 | 45.721 | 24.266 | 27.596 | 0.00 | 0.00 |
| ATOM | 7096 | N    | ALA | X | 469 | 46.821 | 25.250 | 25.857 | 0.00 | 0.00 |
| ATOM | 7097 | H    | ALA | X | 469 | 47.659 | 25.104 | 25.313 | 0.00 | 0.00 |
| ATOM | 7098 | CA   | ALA | X | 469 | 46.036 | 26.484 | 25.878 | 0.00 | 0.00 |
| ATOM | 7099 | HA   | ALA | X | 469 | 46.148 | 26.950 | 26.857 | 0.00 | 0.00 |
| ATOM | 7100 | CB   | ALA | X | 469 | 46.655 | 27.502 | 24.944 | 0.00 | 0.00 |

|      |      |      |     |   |     |        |        |        |      |      |
|------|------|------|-----|---|-----|--------|--------|--------|------|------|
| ATOM | 7101 | HB1  | ALA | X | 469 | 46.224 | 28.484 | 25.140 | 0.00 | 0.00 |
| ATOM | 7102 | HB2  | ALA | X | 469 | 46.401 | 27.116 | 23.957 | 0.00 | 0.00 |
| ATOM | 7103 | HB3  | ALA | X | 469 | 47.741 | 27.517 | 25.035 | 0.00 | 0.00 |
| ATOM | 7104 | C    | ALA | X | 469 | 44.528 | 26.228 | 25.751 | 0.00 | 0.00 |
| ATOM | 7105 | O    | ALA | X | 469 | 43.730 | 26.529 | 26.643 | 0.00 | 0.00 |
| ATOM | 7106 | N    | GLN | X | 470 | 44.209 | 25.570 | 24.674 | 0.00 | 0.00 |
| ATOM | 7107 | H    | GLN | X | 470 | 44.983 | 25.290 | 24.089 | 0.00 | 0.00 |
| ATOM | 7108 | CA   | GLN | X | 470 | 42.817 | 25.088 | 24.516 | 0.00 | 0.00 |
| ATOM | 7109 | HA   | GLN | X | 470 | 42.188 | 25.965 | 24.661 | 0.00 | 0.00 |
| ATOM | 7110 | CB   | GLN | X | 470 | 42.654 | 24.413 | 23.110 | 0.00 | 0.00 |
| ATOM | 7111 | HB2  | GLN | X | 470 | 43.490 | 23.720 | 23.008 | 0.00 | 0.00 |
| ATOM | 7112 | HB3  | GLN | X | 470 | 41.694 | 23.899 | 23.141 | 0.00 | 0.00 |
| ATOM | 7113 | CG   | GLN | X | 470 | 42.698 | 25.270 | 21.854 | 0.00 | 0.00 |
| ATOM | 7114 | HG2  | GLN | X | 470 | 41.737 | 25.770 | 21.729 | 0.00 | 0.00 |
| ATOM | 7115 | HG3  | GLN | X | 470 | 43.421 | 26.069 | 22.017 | 0.00 | 0.00 |
| ATOM | 7116 | CD   | GLN | X | 470 | 43.030 | 24.516 | 20.624 | 0.00 | 0.00 |
| ATOM | 7117 | OE1  | GLN | X | 470 | 44.039 | 24.589 | 19.973 | 0.00 | 0.00 |
| ATOM | 7118 | NE2  | GLN | X | 470 | 42.141 | 23.585 | 20.361 | 0.00 | 0.00 |
| ATOM | 7119 | HE21 | GLN | X | 470 | 42.380 | 22.847 | 19.714 | 0.00 | 0.00 |
| ATOM | 7120 | HE22 | GLN | X | 470 | 41.212 | 23.514 | 20.751 | 0.00 | 0.00 |
| ATOM | 7121 | C    | GLN | X | 470 | 42.319 | 24.114 | 25.664 | 0.00 | 0.00 |
| ATOM | 7122 | O    | GLN | X | 470 | 41.099 | 24.017 | 25.845 | 0.00 | 0.00 |
| ATOM | 7123 | N    | ARG | X | 471 | 43.204 | 23.434 | 26.362 | 0.00 | 0.00 |
| ATOM | 7124 | H    | ARG | X | 471 | 44.192 | 23.602 | 26.239 | 0.00 | 0.00 |
| ATOM | 7125 | CA   | ARG | X | 471 | 42.736 | 22.604 | 27.479 | 0.00 | 0.00 |
| ATOM | 7126 | HA   | ARG | X | 471 | 41.813 | 22.152 | 27.115 | 0.00 | 0.00 |
| ATOM | 7127 | CB   | ARG | X | 471 | 43.568 | 21.354 | 27.559 | 0.00 | 0.00 |
| ATOM | 7128 | HB2  | ARG | X | 471 | 43.499 | 20.697 | 26.691 | 0.00 | 0.00 |
| ATOM | 7129 | HB3  | ARG | X | 471 | 44.627 | 21.612 | 27.568 | 0.00 | 0.00 |
| ATOM | 7130 | CG   | ARG | X | 471 | 43.394 | 20.570 | 28.882 | 0.00 | 0.00 |
| ATOM | 7131 | HG2  | ARG | X | 471 | 43.667 | 21.128 | 29.777 | 0.00 | 0.00 |
| ATOM | 7132 | HG3  | ARG | X | 471 | 42.331 | 20.404 | 29.055 | 0.00 | 0.00 |
| ATOM | 7133 | CD   | ARG | X | 471 | 44.150 | 19.305 | 28.678 | 0.00 | 0.00 |
| ATOM | 7134 | HD2  | ARG | X | 471 | 43.913 | 18.758 | 27.765 | 0.00 | 0.00 |
| ATOM | 7135 | HD3  | ARG | X | 471 | 45.209 | 19.550 | 28.600 | 0.00 | 0.00 |
| ATOM | 7136 | NE   | ARG | X | 471 | 43.983 | 18.503 | 29.903 | 0.00 | 0.00 |
| ATOM | 7137 | HE   | ARG | X | 471 | 43.078 | 18.057 | 29.946 | 0.00 | 0.00 |
| ATOM | 7138 | CZ   | ARG | X | 471 | 44.755 | 18.643 | 30.960 | 0.00 | 0.00 |
| ATOM | 7139 | NH1  | ARG | X | 471 | 45.903 | 19.245 | 30.872 | 0.00 | 0.00 |
| ATOM | 7140 | HH11 | ARG | X | 471 | 46.259 | 19.566 | 29.982 | 0.00 | 0.00 |
| ATOM | 7141 | HH12 | ARG | X | 471 | 46.533 | 19.207 | 31.660 | 0.00 | 0.00 |
| ATOM | 7142 | NH2  | ARG | X | 471 | 44.363 | 18.177 | 32.085 | 0.00 | 0.00 |
| ATOM | 7143 | HH21 | ARG | X | 471 | 43.590 | 17.527 | 32.077 | 0.00 | 0.00 |
| ATOM | 7144 | HH22 | ARG | X | 471 | 44.854 | 18.470 | 32.918 | 0.00 | 0.00 |
| ATOM | 7145 | C    | ARG | X | 471 | 42.462 | 23.341 | 28.725 | 0.00 | 0.00 |
| ATOM | 7146 | O    | ARG | X | 471 | 41.472 | 22.961 | 29.304 | 0.00 | 0.00 |
| ATOM | 7147 | N    | LEU | X | 472 | 43.179 | 24.397 | 29.025 | 0.00 | 0.00 |
| ATOM | 7148 | H    | LEU | X | 472 | 44.048 | 24.550 | 28.534 | 0.00 | 0.00 |
| ATOM | 7149 | CA   | LEU | X | 472 | 42.969 | 25.375 | 30.086 | 0.00 | 0.00 |
| ATOM | 7150 | HA   | LEU | X | 472 | 42.859 | 24.807 | 31.010 | 0.00 | 0.00 |
| ATOM | 7151 | CB   | LEU | X | 472 | 44.251 | 26.188 | 30.372 | 0.00 | 0.00 |
| ATOM | 7152 | HB2  | LEU | X | 472 | 45.065 | 25.462 | 30.373 | 0.00 | 0.00 |
| ATOM | 7153 | HB3  | LEU | X | 472 | 44.332 | 26.948 | 29.595 | 0.00 | 0.00 |
| ATOM | 7154 | CG   | LEU | X | 472 | 44.280 | 26.890 | 31.726 | 0.00 | 0.00 |
| ATOM | 7155 | HG   | LEU | X | 472 | 43.319 | 27.331 | 31.994 | 0.00 | 0.00 |
| ATOM | 7156 | CD1  | LEU | X | 472 | 44.659 | 25.854 | 32.860 | 0.00 | 0.00 |
| ATOM | 7157 | HD11 | LEU | X | 472 | 45.518 | 25.267 | 32.534 | 0.00 | 0.00 |
| ATOM | 7158 | HD12 | LEU | X | 472 | 43.792 | 25.217 | 33.035 | 0.00 | 0.00 |
| ATOM | 7159 | HD13 | LEU | X | 472 | 44.839 | 26.436 | 33.764 | 0.00 | 0.00 |
| ATOM | 7160 | CD2  | LEU | X | 472 | 45.267 | 28.008 | 31.829 | 0.00 | 0.00 |
| ATOM | 7161 | HD21 | LEU | X | 472 | 45.053 | 28.656 | 32.679 | 0.00 | 0.00 |
| ATOM | 7162 | HD22 | LEU | X | 472 | 46.257 | 27.566 | 31.940 | 0.00 | 0.00 |
| ATOM | 7163 | HD23 | LEU | X | 472 | 45.086 | 28.566 | 30.910 | 0.00 | 0.00 |
| ATOM | 7164 | C    | LEU | X | 472 | 41.748 | 26.311 | 29.736 | 0.00 | 0.00 |
| ATOM | 7165 | O    | LEU | X | 472 | 40.910 | 26.549 | 30.541 | 0.00 | 0.00 |
| ATOM | 7166 | N    | MET | X | 473 | 41.670 | 26.907 | 28.526 | 0.00 | 0.00 |
| ATOM | 7167 | H    | MET | X | 473 | 42.349 | 26.586 | 27.851 | 0.00 | 0.00 |

|      |      |      |     |   |     |        |        |        |      |      |
|------|------|------|-----|---|-----|--------|--------|--------|------|------|
| ATOM | 7168 | CA   | MET | X | 473 | 40.486 | 27.697 | 28.075 | 0.00 | 0.00 |
| ATOM | 7169 | HA   | MET | X | 473 | 40.395 | 28.652 | 28.593 | 0.00 | 0.00 |
| ATOM | 7170 | CB   | MET | X | 473 | 40.545 | 28.040 | 26.584 | 0.00 | 0.00 |
| ATOM | 7171 | HB2  | MET | X | 473 | 40.669 | 27.127 | 26.001 | 0.00 | 0.00 |
| ATOM | 7172 | HB3  | MET | X | 473 | 39.602 | 28.496 | 26.282 | 0.00 | 0.00 |
| ATOM | 7173 | CG   | MET | X | 473 | 41.596 | 28.960 | 26.148 | 0.00 | 0.00 |
| ATOM | 7174 | HG2  | MET | X | 473 | 41.361 | 29.997 | 26.390 | 0.00 | 0.00 |
| ATOM | 7175 | HG3  | MET | X | 473 | 42.546 | 28.711 | 26.621 | 0.00 | 0.00 |
| ATOM | 7176 | SD   | MET | X | 473 | 41.907 | 28.835 | 24.360 | 0.00 | 0.00 |
| ATOM | 7177 | CE   | MET | X | 473 | 43.244 | 30.071 | 24.198 | 0.00 | 0.00 |
| ATOM | 7178 | HE1  | MET | X | 473 | 43.123 | 30.818 | 24.982 | 0.00 | 0.00 |
| ATOM | 7179 | HE2  | MET | X | 473 | 44.179 | 29.555 | 24.417 | 0.00 | 0.00 |
| ATOM | 7180 | HE3  | MET | X | 473 | 43.172 | 30.549 | 23.220 | 0.00 | 0.00 |
| ATOM | 7181 | C    | MET | X | 473 | 39.131 | 26.947 | 28.360 | 0.00 | 0.00 |
| ATOM | 7182 | O    | MET | X | 473 | 38.103 | 27.605 | 28.625 | 0.00 | 0.00 |
| ATOM | 7183 | N    | ARG | X | 474 | 39.026 | 25.653 | 28.115 | 0.00 | 0.00 |
| ATOM | 7184 | H    | ARG | X | 474 | 39.867 | 25.094 | 28.082 | 0.00 | 0.00 |
| ATOM | 7185 | CA   | ARG | X | 474 | 37.765 | 24.891 | 28.214 | 0.00 | 0.00 |
| ATOM | 7186 | HA   | ARG | X | 474 | 37.049 | 25.445 | 27.606 | 0.00 | 0.00 |
| ATOM | 7187 | CB   | ARG | X | 474 | 37.941 | 23.503 | 27.692 | 0.00 | 0.00 |
| ATOM | 7188 | HB2  | ARG | X | 474 | 38.473 | 23.544 | 26.742 | 0.00 | 0.00 |
| ATOM | 7189 | HB3  | ARG | X | 474 | 38.570 | 22.933 | 28.376 | 0.00 | 0.00 |
| ATOM | 7190 | CG   | ARG | X | 474 | 36.641 | 22.635 | 27.385 | 0.00 | 0.00 |
| ATOM | 7191 | HG2  | ARG | X | 474 | 37.016 | 21.635 | 27.167 | 0.00 | 0.00 |
| ATOM | 7192 | HG3  | ARG | X | 474 | 36.024 | 22.509 | 28.275 | 0.00 | 0.00 |
| ATOM | 7193 | CD   | ARG | X | 474 | 35.756 | 23.290 | 26.270 | 0.00 | 0.00 |
| ATOM | 7194 | HD2  | ARG | X | 474 | 35.606 | 24.336 | 26.538 | 0.00 | 0.00 |
| ATOM | 7195 | HD3  | ARG | X | 474 | 36.190 | 23.153 | 25.279 | 0.00 | 0.00 |
| ATOM | 7196 | NE   | ARG | X | 474 | 34.439 | 22.637 | 26.122 | 0.00 | 0.00 |
| ATOM | 7197 | HE   | ARG | X | 474 | 34.428 | 21.710 | 26.523 | 0.00 | 0.00 |
| ATOM | 7198 | CZ   | ARG | X | 474 | 33.517 | 23.015 | 25.203 | 0.00 | 0.00 |
| ATOM | 7199 | NH1  | ARG | X | 474 | 33.641 | 24.172 | 24.629 | 0.00 | 0.00 |
| ATOM | 7200 | HH11 | ARG | X | 474 | 34.353 | 24.857 | 24.841 | 0.00 | 0.00 |
| ATOM | 7201 | HH12 | ARG | X | 474 | 32.909 | 24.390 | 23.969 | 0.00 | 0.00 |
| ATOM | 7202 | NH2  | ARG | X | 474 | 32.526 | 22.247 | 24.859 | 0.00 | 0.00 |
| ATOM | 7203 | HH21 | ARG | X | 474 | 32.430 | 21.366 | 25.342 | 0.00 | 0.00 |
| ATOM | 7204 | HH22 | ARG | X | 474 | 31.989 | 22.424 | 24.021 | 0.00 | 0.00 |
| ATOM | 7205 | C    | ARG | X | 474 | 37.141 | 24.744 | 29.587 | 0.00 | 0.00 |
| ATOM | 7206 | O    | ARG | X | 474 | 35.993 | 25.021 | 29.701 | 0.00 | 0.00 |
| ATOM | 7207 | N    | TYR | X | 475 | 37.830 | 24.477 | 30.741 | 0.00 | 0.00 |
| ATOM | 7208 | H    | TYR | X | 475 | 38.823 | 24.298 | 30.689 | 0.00 | 0.00 |
| ATOM | 7209 | CA   | TYR | X | 475 | 37.297 | 24.495 | 32.140 | 0.00 | 0.00 |
| ATOM | 7210 | HA   | TYR | X | 475 | 36.473 | 23.799 | 32.298 | 0.00 | 0.00 |
| ATOM | 7211 | CB   | TYR | X | 475 | 38.398 | 24.095 | 33.092 | 0.00 | 0.00 |
| ATOM | 7212 | HB2  | TYR | X | 475 | 39.083 | 24.943 | 33.111 | 0.00 | 0.00 |
| ATOM | 7213 | HB3  | TYR | X | 475 | 38.214 | 24.099 | 34.166 | 0.00 | 0.00 |
| ATOM | 7214 | CG   | TYR | X | 475 | 39.217 | 22.858 | 32.739 | 0.00 | 0.00 |
| ATOM | 7215 | CD1  | TYR | X | 475 | 38.713 | 21.609 | 32.932 | 0.00 | 0.00 |
| ATOM | 7216 | HD1  | TYR | X | 475 | 37.659 | 21.410 | 33.063 | 0.00 | 0.00 |
| ATOM | 7217 | CE1  | TYR | X | 475 | 39.516 | 20.465 | 32.646 | 0.00 | 0.00 |
| ATOM | 7218 | HE1  | TYR | X | 475 | 39.093 | 19.476 | 32.738 | 0.00 | 0.00 |
| ATOM | 7219 | CZ   | TYR | X | 475 | 40.877 | 20.687 | 32.242 | 0.00 | 0.00 |
| ATOM | 7220 | OH   | TYR | X | 475 | 41.602 | 19.616 | 31.862 | 0.00 | 0.00 |
| ATOM | 7221 | HH   | TYR | X | 475 | 41.075 | 18.814 | 31.839 | 0.00 | 0.00 |
| ATOM | 7222 | CE2  | TYR | X | 475 | 41.360 | 21.968 | 32.076 | 0.00 | 0.00 |
| ATOM | 7223 | HE2  | TYR | X | 475 | 42.375 | 22.173 | 31.770 | 0.00 | 0.00 |
| ATOM | 7224 | CD2  | TYR | X | 475 | 40.545 | 23.110 | 32.276 | 0.00 | 0.00 |
| ATOM | 7225 | HD2  | TYR | X | 475 | 40.868 | 24.135 | 32.175 | 0.00 | 0.00 |
| ATOM | 7226 | C    | TYR | X | 475 | 36.833 | 26.003 | 32.514 | 0.00 | 0.00 |
| ATOM | 7227 | O    | TYR | X | 475 | 35.740 | 26.168 | 33.071 | 0.00 | 0.00 |
| ATOM | 7228 | N    | TRP | X | 476 | 37.555 | 27.007 | 32.097 | 0.00 | 0.00 |
| ATOM | 7229 | H    | TRP | X | 476 | 38.400 | 26.997 | 31.544 | 0.00 | 0.00 |
| ATOM | 7230 | CA   | TRP | X | 476 | 37.183 | 28.437 | 32.368 | 0.00 | 0.00 |
| ATOM | 7231 | HA   | TRP | X | 476 | 36.991 | 28.492 | 33.439 | 0.00 | 0.00 |
| ATOM | 7232 | CB   | TRP | X | 476 | 38.294 | 29.389 | 31.900 | 0.00 | 0.00 |
| ATOM | 7233 | HB2  | TRP | X | 476 | 38.732 | 29.024 | 30.971 | 0.00 | 0.00 |
| ATOM | 7234 | HB3  | TRP | X | 476 | 37.736 | 30.263 | 31.566 | 0.00 | 0.00 |



|      |      |      |     |   |     |        |        |        |      |      |
|------|------|------|-----|---|-----|--------|--------|--------|------|------|
| ATOM | 7235 | CG   | TRP | X | 476 | 39.377 | 29.800 | 32.867 | 0.00 | 0.00 |
| ATOM | 7236 | CD1  | TRP | X | 476 | 39.680 | 31.057 | 33.234 | 0.00 | 0.00 |
| ATOM | 7237 | HD1  | TRP | X | 476 | 39.301 | 31.979 | 32.818 | 0.00 | 0.00 |
| ATOM | 7238 | NE1  | TRP | X | 476 | 40.653 | 30.949 | 34.236 | 0.00 | 0.00 |
| ATOM | 7239 | HE1  | TRP | X | 476 | 41.043 | 31.733 | 34.740 | 0.00 | 0.00 |
| ATOM | 7240 | CE2  | TRP | X | 476 | 40.803 | 29.644 | 34.725 | 0.00 | 0.00 |
| ATOM | 7241 | CZ2  | TRP | X | 476 | 41.527 | 29.056 | 35.778 | 0.00 | 0.00 |
| ATOM | 7242 | HZ2  | TRP | X | 476 | 42.070 | 29.688 | 36.464 | 0.00 | 0.00 |
| ATOM | 7243 | CH2  | TRP | X | 476 | 41.627 | 27.675 | 35.826 | 0.00 | 0.00 |
| ATOM | 7244 | HH2  | TRP | X | 476 | 42.216 | 27.224 | 36.611 | 0.00 | 0.00 |
| ATOM | 7245 | CZ3  | TRP | X | 476 | 41.036 | 26.873 | 34.902 | 0.00 | 0.00 |
| ATOM | 7246 | HZ3  | TRP | X | 476 | 40.909 | 25.805 | 34.997 | 0.00 | 0.00 |
| ATOM | 7247 | CE3  | TRP | X | 476 | 40.328 | 27.437 | 33.795 | 0.00 | 0.00 |
| ATOM | 7248 | HE3  | TRP | X | 476 | 39.879 | 26.798 | 33.048 | 0.00 | 0.00 |
| ATOM | 7249 | CD2  | TRP | X | 476 | 40.137 | 28.869 | 33.710 | 0.00 | 0.00 |
| ATOM | 7250 | C    | TRP | X | 476 | 35.818 | 28.726 | 31.709 | 0.00 | 0.00 |
| ATOM | 7251 | O    | TRP | X | 476 | 34.882 | 29.389 | 32.193 | 0.00 | 0.00 |
| ATOM | 7252 | N    | ALA | X | 477 | 35.740 | 28.286 | 30.426 | 0.00 | 0.00 |
| ATOM | 7253 | H    | ALA | X | 477 | 36.421 | 27.781 | 29.876 | 0.00 | 0.00 |
| ATOM | 7254 | CA   | ALA | X | 477 | 34.515 | 28.645 | 29.687 | 0.00 | 0.00 |
| ATOM | 7255 | HA   | ALA | X | 477 | 34.248 | 29.695 | 29.812 | 0.00 | 0.00 |
| ATOM | 7256 | CB   | ALA | X | 477 | 34.813 | 28.391 | 28.157 | 0.00 | 0.00 |
| ATOM | 7257 | HB1  | ALA | X | 477 | 35.671 | 28.977 | 27.825 | 0.00 | 0.00 |
| ATOM | 7258 | HB2  | ALA | X | 477 | 33.944 | 28.706 | 27.581 | 0.00 | 0.00 |
| ATOM | 7259 | HB3  | ALA | X | 477 | 34.972 | 27.324 | 28.006 | 0.00 | 0.00 |
| ATOM | 7260 | C    | ALA | X | 477 | 33.336 | 27.806 | 30.043 | 0.00 | 0.00 |
| ATOM | 7261 | O    | ALA | X | 477 | 32.156 | 28.289 | 30.112 | 0.00 | 0.00 |
| ATOM | 7262 | N    | ASN | X | 478 | 33.613 | 26.565 | 30.494 | 0.00 | 0.00 |
| ATOM | 7263 | H    | ASN | X | 478 | 34.539 | 26.172 | 30.590 | 0.00 | 0.00 |
| ATOM | 7264 | CA   | ASN | X | 478 | 32.464 | 25.749 | 31.040 | 0.00 | 0.00 |
| ATOM | 7265 | HA   | ASN | X | 478 | 31.616 | 25.702 | 30.356 | 0.00 | 0.00 |
| ATOM | 7266 | CB   | ASN | X | 478 | 33.005 | 24.270 | 31.227 | 0.00 | 0.00 |
| ATOM | 7267 | HB2  | ASN | X | 478 | 34.048 | 24.268 | 31.542 | 0.00 | 0.00 |
| ATOM | 7268 | HB3  | ASN | X | 478 | 32.461 | 23.722 | 31.997 | 0.00 | 0.00 |
| ATOM | 7269 | CG   | ASN | X | 478 | 33.008 | 23.377 | 29.953 | 0.00 | 0.00 |
| ATOM | 7270 | OD1  | ASN | X | 478 | 32.566 | 23.794 | 28.911 | 0.00 | 0.00 |
| ATOM | 7271 | ND2  | ASN | X | 478 | 33.359 | 22.079 | 30.038 | 0.00 | 0.00 |
| ATOM | 7272 | HD21 | ASN | X | 478 | 33.325 | 21.675 | 29.113 | 0.00 | 0.00 |
| ATOM | 7273 | HD22 | ASN | X | 478 | 33.900 | 21.695 | 30.799 | 0.00 | 0.00 |
| ATOM | 7274 | C    | ASN | X | 478 | 31.833 | 26.297 | 32.333 | 0.00 | 0.00 |
| ATOM | 7275 | O    | ASN | X | 478 | 30.669 | 26.242 | 32.559 | 0.00 | 0.00 |
| ATOM | 7276 | N    | PHE | X | 479 | 32.622 | 26.930 | 33.187 | 0.00 | 0.00 |
| ATOM | 7277 | H    | PHE | X | 479 | 33.598 | 27.010 | 32.937 | 0.00 | 0.00 |
| ATOM | 7278 | CA   | PHE | X | 479 | 32.171 | 27.564 | 34.406 | 0.00 | 0.00 |
| ATOM | 7279 | HA   | PHE | X | 479 | 31.482 | 26.891 | 34.917 | 0.00 | 0.00 |
| ATOM | 7280 | CB   | PHE | X | 479 | 33.352 | 27.904 | 35.336 | 0.00 | 0.00 |
| ATOM | 7281 | HB2  | PHE | X | 479 | 33.795 | 26.971 | 35.682 | 0.00 | 0.00 |
| ATOM | 7282 | HB3  | PHE | X | 479 | 34.155 | 28.230 | 34.676 | 0.00 | 0.00 |
| ATOM | 7283 | CG   | PHE | X | 479 | 33.056 | 28.760 | 36.526 | 0.00 | 0.00 |
| ATOM | 7284 | CD1  | PHE | X | 479 | 32.327 | 28.212 | 37.610 | 0.00 | 0.00 |
| ATOM | 7285 | HD1  | PHE | X | 479 | 31.870 | 27.261 | 37.380 | 0.00 | 0.00 |
| ATOM | 7286 | CE1  | PHE | X | 479 | 31.888 | 29.017 | 38.707 | 0.00 | 0.00 |
| ATOM | 7287 | HE1  | PHE | X | 479 | 31.042 | 28.746 | 39.320 | 0.00 | 0.00 |
| ATOM | 7288 | CZ   | PHE | X | 479 | 32.419 | 30.274 | 38.893 | 0.00 | 0.00 |
| ATOM | 7289 | HZ   | PHE | X | 479 | 32.053 | 30.903 | 39.691 | 0.00 | 0.00 |
| ATOM | 7290 | CE2  | PHE | X | 479 | 33.238 | 30.791 | 37.870 | 0.00 | 0.00 |
| ATOM | 7291 | HE2  | PHE | X | 479 | 33.505 | 31.838 | 37.877 | 0.00 | 0.00 |
| ATOM | 7292 | CD2  | PHE | X | 479 | 33.598 | 30.077 | 36.719 | 0.00 | 0.00 |
| ATOM | 7293 | HD2  | PHE | X | 479 | 34.226 | 30.582 | 36.000 | 0.00 | 0.00 |
| ATOM | 7294 | C    | PHE | X | 479 | 31.258 | 28.793 | 34.194 | 0.00 | 0.00 |
| ATOM | 7295 | O    | PHE | X | 479 | 30.161 | 28.936 | 34.713 | 0.00 | 0.00 |
| ATOM | 7296 | N    | ALA | X | 480 | 31.655 | 29.600 | 33.137 | 0.00 | 0.00 |
| ATOM | 7297 | H    | ALA | X | 480 | 32.500 | 29.441 | 32.608 | 0.00 | 0.00 |
| ATOM | 7298 | CA   | ALA | X | 480 | 30.906 | 30.745 | 32.681 | 0.00 | 0.00 |
| ATOM | 7299 | HA   | ALA | X | 480 | 30.726 | 31.312 | 33.594 | 0.00 | 0.00 |
| ATOM | 7300 | CB   | ALA | X | 480 | 31.806 | 31.611 | 31.798 | 0.00 | 0.00 |
| ATOM | 7301 | HB1  | ALA | X | 480 | 31.361 | 32.548 | 31.464 | 0.00 | 0.00 |

|      |      |      |     |   |     |        |        |        |      |      |
|------|------|------|-----|---|-----|--------|--------|--------|------|------|
| ATOM | 7302 | HB2  | ALA | X | 480 | 32.125 | 31.045 | 30.923 | 0.00 | 0.00 |
| ATOM | 7303 | HB3  | ALA | X | 480 | 32.668 | 31.911 | 32.394 | 0.00 | 0.00 |
| ATOM | 7304 | C    | ALA | X | 480 | 29.539 | 30.474 | 32.102 | 0.00 | 0.00 |
| ATOM | 7305 | O    | ALA | X | 480 | 28.578 | 31.062 | 32.617 | 0.00 | 0.00 |
| ATOM | 7306 | N    | ARG | X | 481 | 29.400 | 29.399 | 31.318 | 0.00 | 0.00 |
| ATOM | 7307 | H    | ARG | X | 481 | 30.191 | 29.210 | 30.719 | 0.00 | 0.00 |
| ATOM | 7308 | CA   | ARG | X | 481 | 28.143 | 28.737 | 30.854 | 0.00 | 0.00 |
| ATOM | 7309 | HA   | ARG | X | 481 | 27.542 | 29.497 | 30.356 | 0.00 | 0.00 |
| ATOM | 7310 | CB   | ARG | X | 481 | 28.590 | 27.635 | 29.879 | 0.00 | 0.00 |
| ATOM | 7311 | HB2  | ARG | X | 481 | 29.355 | 27.005 | 30.333 | 0.00 | 0.00 |
| ATOM | 7312 | HB3  | ARG | X | 481 | 27.733 | 27.004 | 29.647 | 0.00 | 0.00 |
| ATOM | 7313 | CG   | ARG | X | 481 | 29.257 | 28.070 | 28.587 | 0.00 | 0.00 |
| ATOM | 7314 | HG2  | ARG | X | 481 | 28.502 | 28.663 | 28.070 | 0.00 | 0.00 |
| ATOM | 7315 | HG3  | ARG | X | 481 | 30.152 | 28.675 | 28.735 | 0.00 | 0.00 |
| ATOM | 7316 | CD   | ARG | X | 481 | 29.557 | 26.913 | 27.674 | 0.00 | 0.00 |
| ATOM | 7317 | HD2  | ARG | X | 481 | 29.980 | 26.073 | 28.225 | 0.00 | 0.00 |
| ATOM | 7318 | HD3  | ARG | X | 481 | 28.639 | 26.542 | 27.219 | 0.00 | 0.00 |
| ATOM | 7319 | NE   | ARG | X | 481 | 30.448 | 27.368 | 26.678 | 0.00 | 0.00 |
| ATOM | 7320 | HE   | ARG | X | 481 | 30.038 | 28.002 | 26.007 | 0.00 | 0.00 |
| ATOM | 7321 | CZ   | ARG | X | 481 | 31.667 | 26.984 | 26.515 | 0.00 | 0.00 |
| ATOM | 7322 | NH1  | ARG | X | 481 | 32.319 | 26.148 | 27.191 | 0.00 | 0.00 |
| ATOM | 7323 | HH11 | ARG | X | 481 | 31.939 | 25.574 | 27.931 | 0.00 | 0.00 |
| ATOM | 7324 | HH12 | ARG | X | 481 | 33.220 | 25.959 | 26.775 | 0.00 | 0.00 |
| ATOM | 7325 | NH2  | ARG | X | 481 | 32.341 | 27.594 | 25.550 | 0.00 | 0.00 |
| ATOM | 7326 | HH21 | ARG | X | 481 | 31.959 | 28.373 | 25.032 | 0.00 | 0.00 |
| ATOM | 7327 | HH22 | ARG | X | 481 | 33.300 | 27.309 | 25.411 | 0.00 | 0.00 |
| ATOM | 7328 | C    | ARG | X | 481 | 27.327 | 28.203 | 32.054 | 0.00 | 0.00 |
| ATOM | 7329 | O    | ARG | X | 481 | 26.155 | 28.621 | 32.280 | 0.00 | 0.00 |
| ATOM | 7330 | N    | THR | X | 482 | 27.904 | 27.245 | 32.826 | 0.00 | 0.00 |
| ATOM | 7331 | H    | THR | X | 482 | 28.878 | 27.067 | 32.623 | 0.00 | 0.00 |
| ATOM | 7332 | CA   | THR | X | 482 | 27.128 | 26.204 | 33.579 | 0.00 | 0.00 |
| ATOM | 7333 | HA   | THR | X | 482 | 26.060 | 26.313 | 33.392 | 0.00 | 0.00 |
| ATOM | 7334 | CB   | THR | X | 482 | 27.465 | 24.766 | 33.035 | 0.00 | 0.00 |
| ATOM | 7335 | HB   | THR | X | 482 | 28.535 | 24.650 | 33.206 | 0.00 | 0.00 |
| ATOM | 7336 | CG2  | THR | X | 482 | 26.922 | 23.545 | 33.740 | 0.00 | 0.00 |
| ATOM | 7337 | HG21 | THR | X | 482 | 25.843 | 23.611 | 33.880 | 0.00 | 0.00 |
| ATOM | 7338 | HG22 | THR | X | 482 | 27.267 | 23.513 | 34.774 | 0.00 | 0.00 |
| ATOM | 7339 | HG23 | THR | X | 482 | 27.084 | 22.619 | 33.189 | 0.00 | 0.00 |
| ATOM | 7340 | OG1  | THR | X | 482 | 27.051 | 24.650 | 31.734 | 0.00 | 0.00 |
| ATOM | 7341 | HG1  | THR | X | 482 | 26.094 | 24.719 | 31.727 | 0.00 | 0.00 |
| ATOM | 7342 | C    | THR | X | 482 | 27.214 | 26.223 | 35.153 | 0.00 | 0.00 |
| ATOM | 7343 | O    | THR | X | 482 | 26.508 | 25.434 | 35.849 | 0.00 | 0.00 |
| ATOM | 7344 | N    | GLY | X | 483 | 28.187 | 27.022 | 35.627 | 0.00 | 0.00 |
| ATOM | 7345 | H    | GLY | X | 483 | 28.693 | 27.589 | 34.961 | 0.00 | 0.00 |
| ATOM | 7346 | CA   | GLY | X | 483 | 28.654 | 27.070 | 37.062 | 0.00 | 0.00 |
| ATOM | 7347 | HA2  | GLY | X | 483 | 29.191 | 28.011 | 37.180 | 0.00 | 0.00 |
| ATOM | 7348 | HA3  | GLY | X | 483 | 27.809 | 27.183 | 37.741 | 0.00 | 0.00 |
| ATOM | 7349 | C    | GLY | X | 483 | 29.515 | 25.928 | 37.401 | 0.00 | 0.00 |
| ATOM | 7350 | O    | GLY | X | 483 | 29.514 | 25.441 | 38.544 | 0.00 | 0.00 |
| ATOM | 7351 | N    | ASP | X | 484 | 30.140 | 25.215 | 36.425 | 0.00 | 0.00 |
| ATOM | 7352 | H    | ASP | X | 484 | 29.978 | 25.491 | 35.467 | 0.00 | 0.00 |
| ATOM | 7353 | CA   | ASP | X | 484 | 30.824 | 23.937 | 36.533 | 0.00 | 0.00 |
| ATOM | 7354 | HA   | ASP | X | 484 | 31.321 | 24.032 | 37.499 | 0.00 | 0.00 |
| ATOM | 7355 | CB   | ASP | X | 484 | 29.754 | 22.869 | 36.586 | 0.00 | 0.00 |
| ATOM | 7356 | HB2  | ASP | X | 484 | 28.941 | 23.131 | 37.262 | 0.00 | 0.00 |
| ATOM | 7357 | HB3  | ASP | X | 484 | 29.320 | 22.763 | 35.592 | 0.00 | 0.00 |
| ATOM | 7358 | CG   | ASP | X | 484 | 30.128 | 21.479 | 37.110 | 0.00 | 0.00 |
| ATOM | 7359 | OD1  | ASP | X | 484 | 29.191 | 20.611 | 37.295 | 0.00 | 0.00 |
| ATOM | 7360 | OD2  | ASP | X | 484 | 31.362 | 21.233 | 37.305 | 0.00 | 0.00 |
| ATOM | 7361 | C    | ASP | X | 484 | 31.900 | 23.781 | 35.492 | 0.00 | 0.00 |
| ATOM | 7362 | O    | ASP | X | 484 | 31.540 | 23.944 | 34.310 | 0.00 | 0.00 |
| ATOM | 7363 | N    | PRO | X | 485 | 33.151 | 23.328 | 35.784 | 0.00 | 0.00 |
| ATOM | 7364 | CD   | PRO | X | 485 | 33.796 | 23.420 | 37.084 | 0.00 | 0.00 |
| ATOM | 7365 | HD2  | PRO | X | 485 | 33.395 | 22.749 | 37.843 | 0.00 | 0.00 |
| ATOM | 7366 | HD3  | PRO | X | 485 | 33.712 | 24.456 | 37.412 | 0.00 | 0.00 |
| ATOM | 7367 | CG   | PRO | X | 485 | 35.245 | 23.018 | 36.842 | 0.00 | 0.00 |
| ATOM | 7368 | HG2  | PRO | X | 485 | 35.304 | 21.931 | 36.804 | 0.00 | 0.00 |

|      |      |      |     |   |     |        |        |        |      |      |
|------|------|------|-----|---|-----|--------|--------|--------|------|------|
| ATOM | 7369 | HG3  | PRO | X | 485 | 35.873 | 23.491 | 37.597 | 0.00 | 0.00 |
| ATOM | 7370 | CB   | PRO | X | 485 | 35.466 | 23.540 | 35.436 | 0.00 | 0.00 |
| ATOM | 7371 | HB2  | PRO | X | 485 | 36.370 | 23.233 | 34.910 | 0.00 | 0.00 |
| ATOM | 7372 | HB3  | PRO | X | 485 | 35.532 | 24.628 | 35.478 | 0.00 | 0.00 |
| ATOM | 7373 | CA   | PRO | X | 485 | 34.133 | 23.240 | 34.755 | 0.00 | 0.00 |
| ATOM | 7374 | HA   | PRO | X | 485 | 34.012 | 24.029 | 34.013 | 0.00 | 0.00 |
| ATOM | 7375 | C    | PRO | X | 485 | 34.125 | 21.793 | 34.122 | 0.00 | 0.00 |
| ATOM | 7376 | O    | PRO | X | 485 | 34.840 | 21.566 | 33.155 | 0.00 | 0.00 |
| ATOM | 7377 | N    | ASN | X | 486 | 33.277 | 20.874 | 34.599 | 0.00 | 0.00 |
| ATOM | 7378 | H    | ASN | X | 486 | 32.651 | 21.205 | 35.319 | 0.00 | 0.00 |
| ATOM | 7379 | CA   | ASN | X | 486 | 33.170 | 19.407 | 34.183 | 0.00 | 0.00 |
| ATOM | 7380 | HA   | ASN | X | 486 | 34.100 | 18.847 | 34.285 | 0.00 | 0.00 |
| ATOM | 7381 | CB   | ASN | X | 486 | 32.236 | 18.671 | 35.171 | 0.00 | 0.00 |
| ATOM | 7382 | HB2  | ASN | X | 486 | 32.434 | 18.886 | 36.221 | 0.00 | 0.00 |
| ATOM | 7383 | HB3  | ASN | X | 486 | 31.242 | 19.112 | 35.095 | 0.00 | 0.00 |
| ATOM | 7384 | CG   | ASN | X | 486 | 31.988 | 17.235 | 34.870 | 0.00 | 0.00 |
| ATOM | 7385 | OD1  | ASN | X | 486 | 32.972 | 16.488 | 35.042 | 0.00 | 0.00 |
| ATOM | 7386 | ND2  | ASN | X | 486 | 30.877 | 16.682 | 34.361 | 0.00 | 0.00 |
| ATOM | 7387 | HD21 | ASN | X | 486 | 30.943 | 15.706 | 34.109 | 0.00 | 0.00 |
| ATOM | 7388 | HD22 | ASN | X | 486 | 30.088 | 17.217 | 34.028 | 0.00 | 0.00 |
| ATOM | 7389 | C    | ASN | X | 486 | 32.713 | 19.312 | 32.756 | 0.00 | 0.00 |
| ATOM | 7390 | O    | ASN | X | 486 | 31.562 | 19.617 | 32.486 | 0.00 | 0.00 |
| ATOM | 7391 | N    | GLU | X | 487 | 33.561 | 18.851 | 31.797 | 0.00 | 0.00 |
| ATOM | 7392 | H    | GLU | X | 487 | 34.523 | 18.790 | 32.098 | 0.00 | 0.00 |
| ATOM | 7393 | CA   | GLU | X | 487 | 33.115 | 18.391 | 30.490 | 0.00 | 0.00 |
| ATOM | 7394 | HA   | GLU | X | 487 | 32.600 | 19.257 | 30.075 | 0.00 | 0.00 |
| ATOM | 7395 | CB   | GLU | X | 487 | 34.286 | 18.008 | 29.519 | 0.00 | 0.00 |
| ATOM | 7396 | HB2  | GLU | X | 487 | 34.974 | 17.415 | 30.122 | 0.00 | 0.00 |
| ATOM | 7397 | HB3  | GLU | X | 487 | 33.936 | 17.382 | 28.699 | 0.00 | 0.00 |
| ATOM | 7398 | CG   | GLU | X | 487 | 35.106 | 19.182 | 29.052 | 0.00 | 0.00 |
| ATOM | 7399 | HG2  | GLU | X | 487 | 35.189 | 19.929 | 29.841 | 0.00 | 0.00 |
| ATOM | 7400 | HG3  | GLU | X | 487 | 36.109 | 18.862 | 28.768 | 0.00 | 0.00 |
| ATOM | 7401 | CD   | GLU | X | 487 | 34.484 | 19.821 | 27.774 | 0.00 | 0.00 |
| ATOM | 7402 | OE1  | GLU | X | 487 | 35.041 | 19.644 | 26.642 | 0.00 | 0.00 |
| ATOM | 7403 | OE2  | GLU | X | 487 | 33.454 | 20.501 | 27.824 | 0.00 | 0.00 |
| ATOM | 7404 | C    | GLU | X | 487 | 32.193 | 17.147 | 30.635 | 0.00 | 0.00 |
| ATOM | 7405 | O    | GLU | X | 487 | 32.648 | 15.984 | 30.876 | 0.00 | 0.00 |
| ATOM | 7406 | N    | PRO | X | 488 | 30.864 | 17.247 | 30.340 | 0.00 | 0.00 |
| ATOM | 7407 | CD   | PRO | X | 488 | 30.261 | 18.446 | 29.723 | 0.00 | 0.00 |
| ATOM | 7408 | HD2  | PRO | X | 488 | 30.764 | 18.663 | 28.781 | 0.00 | 0.00 |
| ATOM | 7409 | HD3  | PRO | X | 488 | 30.371 | 19.317 | 30.369 | 0.00 | 0.00 |
| ATOM | 7410 | CG   | PRO | X | 488 | 28.750 | 18.071 | 29.650 | 0.00 | 0.00 |
| ATOM | 7411 | HG2  | PRO | X | 488 | 28.563 | 17.732 | 28.631 | 0.00 | 0.00 |
| ATOM | 7412 | HG3  | PRO | X | 488 | 28.149 | 18.963 | 29.824 | 0.00 | 0.00 |
| ATOM | 7413 | CB   | PRO | X | 488 | 28.630 | 16.934 | 30.663 | 0.00 | 0.00 |
| ATOM | 7414 | HB2  | PRO | X | 488 | 27.751 | 16.315 | 30.484 | 0.00 | 0.00 |
| ATOM | 7415 | HB3  | PRO | X | 488 | 28.577 | 17.416 | 31.639 | 0.00 | 0.00 |
| ATOM | 7416 | CA   | PRO | X | 488 | 29.883 | 16.158 | 30.549 | 0.00 | 0.00 |
| ATOM | 7417 | HA   | PRO | X | 488 | 29.972 | 15.629 | 31.498 | 0.00 | 0.00 |
| ATOM | 7418 | C    | PRO | X | 488 | 29.749 | 15.128 | 29.381 | 0.00 | 0.00 |
| ATOM | 7419 | O    | PRO | X | 488 | 28.933 | 14.178 | 29.430 | 0.00 | 0.00 |
| ATOM | 7420 | N    | ARG | X | 489 | 30.482 | 15.203 | 28.307 | 0.00 | 0.00 |
| ATOM | 7421 | H    | ARG | X | 489 | 31.281 | 15.818 | 28.364 | 0.00 | 0.00 |
| ATOM | 7422 | CA   | ARG | X | 489 | 30.276 | 14.607 | 27.023 | 0.00 | 0.00 |
| ATOM | 7423 | HA   | ARG | X | 489 | 29.213 | 14.390 | 26.924 | 0.00 | 0.00 |
| ATOM | 7424 | CB   | ARG | X | 489 | 30.623 | 15.621 | 25.851 | 0.00 | 0.00 |
| ATOM | 7425 | HB2  | ARG | X | 489 | 30.302 | 15.130 | 24.933 | 0.00 | 0.00 |
| ATOM | 7426 | HB3  | ARG | X | 489 | 29.932 | 16.449 | 26.008 | 0.00 | 0.00 |
| ATOM | 7427 | CG   | ARG | X | 489 | 32.080 | 16.087 | 25.725 | 0.00 | 0.00 |
| ATOM | 7428 | HG2  | ARG | X | 489 | 32.537 | 16.306 | 26.690 | 0.00 | 0.00 |
| ATOM | 7429 | HG3  | ARG | X | 489 | 32.654 | 15.258 | 25.309 | 0.00 | 0.00 |
| ATOM | 7430 | CD   | ARG | X | 489 | 32.187 | 17.307 | 24.761 | 0.00 | 0.00 |
| ATOM | 7431 | HD2  | ARG | X | 489 | 31.768 | 17.065 | 23.784 | 0.00 | 0.00 |
| ATOM | 7432 | HD3  | ARG | X | 489 | 31.540 | 18.111 | 25.110 | 0.00 | 0.00 |
| ATOM | 7433 | NE   | ARG | X | 489 | 33.480 | 17.976 | 24.835 | 0.00 | 0.00 |
| ATOM | 7434 | HE   | ARG | X | 489 | 33.766 | 18.508 | 25.644 | 0.00 | 0.00 |
| ATOM | 7435 | CZ   | ARG | X | 489 | 34.275 | 18.194 | 23.777 | 0.00 | 0.00 |

|      |      |      |     |   |     |        |        |        |      |      |
|------|------|------|-----|---|-----|--------|--------|--------|------|------|
| ATOM | 7436 | NH1  | ARG | X | 489 | 35.375 | 18.901 | 24.023 | 0.00 | 0.00 |
| ATOM | 7437 | HH11 | ARG | X | 489 | 35.536 | 19.313 | 24.931 | 0.00 | 0.00 |
| ATOM | 7438 | HH12 | ARG | X | 489 | 36.032 | 19.104 | 23.283 | 0.00 | 0.00 |
| ATOM | 7439 | NH2  | ARG | X | 489 | 34.059 | 17.710 | 22.556 | 0.00 | 0.00 |
| ATOM | 7440 | HH21 | ARG | X | 489 | 33.203 | 17.265 | 22.257 | 0.00 | 0.00 |
| ATOM | 7441 | HH22 | ARG | X | 489 | 34.646 | 17.989 | 21.783 | 0.00 | 0.00 |
| ATOM | 7442 | C    | ARG | X | 489 | 31.011 | 13.303 | 26.826 | 0.00 | 0.00 |
| ATOM | 7443 | O    | ARG | X | 489 | 31.444 | 12.906 | 25.700 | 0.00 | 0.00 |
| ATOM | 7444 | N    | ASP | X | 490 | 31.347 | 12.642 | 27.941 | 0.00 | 0.00 |
| ATOM | 7445 | H    | ASP | X | 490 | 31.091 | 13.076 | 28.816 | 0.00 | 0.00 |
| ATOM | 7446 | CA   | ASP | X | 490 | 31.728 | 11.177 | 28.083 | 0.00 | 0.00 |
| ATOM | 7447 | HA   | ASP | X | 490 | 31.414 | 10.809 | 29.060 | 0.00 | 0.00 |
| ATOM | 7448 | CB   | ASP | X | 490 | 30.940 | 10.225 | 27.175 | 0.00 | 0.00 |
| ATOM | 7449 | HB2  | ASP | X | 490 | 29.900 | 10.538 | 27.086 | 0.00 | 0.00 |
| ATOM | 7450 | HB3  | ASP | X | 490 | 31.296 | 10.259 | 26.146 | 0.00 | 0.00 |
| ATOM | 7451 | CG   | ASP | X | 490 | 30.847 | 8.828  | 27.764 | 0.00 | 0.00 |
| ATOM | 7452 | OD1  | ASP | X | 490 | 30.821 | 7.822  | 27.003 | 0.00 | 0.00 |
| ATOM | 7453 | OD2  | ASP | X | 490 | 30.792 | 8.720  | 28.977 | 0.00 | 0.00 |
| ATOM | 7454 | C    | ASP | X | 490 | 33.239 | 10.931 | 27.951 | 0.00 | 0.00 |
| ATOM | 7455 | O    | ASP | X | 490 | 33.618 | 9.834  | 27.549 | 0.00 | 0.00 |
| ATOM | 7456 | N    | PRO | X | 491 | 34.104 | 11.909 | 28.265 | 0.00 | 0.00 |
| ATOM | 7457 | CD   | PRO | X | 491 | 33.983 | 13.180 | 28.960 | 0.00 | 0.00 |
| ATOM | 7458 | HD2  | PRO | X | 491 | 33.568 | 13.018 | 29.955 | 0.00 | 0.00 |
| ATOM | 7459 | HD3  | PRO | X | 491 | 33.420 | 13.845 | 28.306 | 0.00 | 0.00 |
| ATOM | 7460 | CG   | PRO | X | 491 | 35.362 | 13.822 | 29.280 | 0.00 | 0.00 |
| ATOM | 7461 | HG2  | PRO | X | 491 | 35.646 | 13.481 | 30.275 | 0.00 | 0.00 |
| ATOM | 7462 | HG3  | PRO | X | 491 | 35.382 | 14.910 | 29.217 | 0.00 | 0.00 |
| ATOM | 7463 | CB   | PRO | X | 491 | 36.224 | 13.145 | 28.201 | 0.00 | 0.00 |
| ATOM | 7464 | HB2  | PRO | X | 491 | 37.262 | 13.111 | 28.532 | 0.00 | 0.00 |
| ATOM | 7465 | HB3  | PRO | X | 491 | 36.054 | 13.731 | 27.298 | 0.00 | 0.00 |
| ATOM | 7466 | CA   | PRO | X | 491 | 35.553 | 11.753 | 28.001 | 0.00 | 0.00 |
| ATOM | 7467 | HA   | PRO | X | 491 | 35.731 | 11.536 | 26.948 | 0.00 | 0.00 |
| ATOM | 7468 | C    | PRO | X | 491 | 36.239 | 10.754 | 28.948 | 0.00 | 0.00 |
| ATOM | 7469 | O    | PRO | X | 491 | 35.732 | 10.440 | 30.062 | 0.00 | 0.00 |
| ATOM | 7470 | N    | LYS | X | 492 | 37.443 | 10.155 | 28.532 | 0.00 | 0.00 |
| ATOM | 7471 | H    | LYS | X | 492 | 37.694 | 10.346 | 27.573 | 0.00 | 0.00 |
| ATOM | 7472 | CA   | LYS | X | 492 | 38.217 | 9.346  | 29.530 | 0.00 | 0.00 |
| ATOM | 7473 | HA   | LYS | X | 492 | 37.606 | 8.984  | 30.357 | 0.00 | 0.00 |
| ATOM | 7474 | CB   | LYS | X | 492 | 38.983 | 8.198  | 28.856 | 0.00 | 0.00 |
| ATOM | 7475 | HB2  | LYS | X | 492 | 39.740 | 8.654  | 28.217 | 0.00 | 0.00 |
| ATOM | 7476 | HB3  | LYS | X | 492 | 39.389 | 7.574  | 29.652 | 0.00 | 0.00 |
| ATOM | 7477 | CG   | LYS | X | 492 | 37.988 | 7.248  | 28.082 | 0.00 | 0.00 |
| ATOM | 7478 | HG2  | LYS | X | 492 | 37.919 | 7.700  | 27.092 | 0.00 | 0.00 |
| ATOM | 7479 | HG3  | LYS | X | 492 | 38.453 | 6.264  | 28.026 | 0.00 | 0.00 |
| ATOM | 7480 | CD   | LYS | X | 492 | 36.527 | 6.968  | 28.679 | 0.00 | 0.00 |
| ATOM | 7481 | HD2  | LYS | X | 492 | 35.970 | 7.902  | 28.751 | 0.00 | 0.00 |
| ATOM | 7482 | HD3  | LYS | X | 492 | 35.935 | 6.458  | 27.919 | 0.00 | 0.00 |
| ATOM | 7483 | CE   | LYS | X | 492 | 36.557 | 6.272  | 30.106 | 0.00 | 0.00 |
| ATOM | 7484 | HE2  | LYS | X | 492 | 37.260 | 5.440  | 30.071 | 0.00 | 0.00 |
| ATOM | 7485 | HE3  | LYS | X | 492 | 37.024 | 6.994  | 30.776 | 0.00 | 0.00 |
| ATOM | 7486 | NZ   | LYS | X | 492 | 35.179 | 5.996  | 30.489 | 0.00 | 0.00 |
| ATOM | 7487 | HZ1  | LYS | X | 492 | 35.055 | 6.025  | 31.491 | 0.00 | 0.00 |
| ATOM | 7488 | HZ2  | LYS | X | 492 | 34.486 | 6.679  | 30.219 | 0.00 | 0.00 |
| ATOM | 7489 | HZ3  | LYS | X | 492 | 34.839 | 5.141  | 30.072 | 0.00 | 0.00 |
| ATOM | 7490 | C    | LYS | X | 492 | 39.303 | 10.176 | 30.235 | 0.00 | 0.00 |
| ATOM | 7491 | O    | LYS | X | 492 | 39.745 | 9.867  | 31.338 | 0.00 | 0.00 |
| ATOM | 7492 | N    | ALA | X | 493 | 39.651 | 11.383 | 29.714 | 0.00 | 0.00 |
| ATOM | 7493 | H    | ALA | X | 493 | 39.484 | 11.561 | 28.734 | 0.00 | 0.00 |
| ATOM | 7494 | CA   | ALA | X | 493 | 40.461 | 12.428 | 30.336 | 0.00 | 0.00 |
| ATOM | 7495 | HA   | ALA | X | 493 | 41.451 | 12.020 | 30.542 | 0.00 | 0.00 |
| ATOM | 7496 | CB   | ALA | X | 493 | 40.611 | 13.631 | 29.476 | 0.00 | 0.00 |
| ATOM | 7497 | HB1  | ALA | X | 493 | 41.205 | 13.308 | 28.621 | 0.00 | 0.00 |
| ATOM | 7498 | HB2  | ALA | X | 493 | 41.160 | 14.408 | 30.008 | 0.00 | 0.00 |
| ATOM | 7499 | HB3  | ALA | X | 493 | 39.737 | 14.157 | 29.093 | 0.00 | 0.00 |
| ATOM | 7500 | C    | ALA | X | 493 | 39.736 | 12.861 | 31.557 | 0.00 | 0.00 |
| ATOM | 7501 | O    | ALA | X | 493 | 38.566 | 13.209 | 31.430 | 0.00 | 0.00 |
| ATOM | 7502 | N    | PRO | X | 494 | 40.416 | 12.796 | 32.733 | 0.00 | 0.00 |

|      |      |      |     |   |     |        |        |        |      |      |
|------|------|------|-----|---|-----|--------|--------|--------|------|------|
| ATOM | 7503 | CD   | PRO | X | 494 | 41.753 | 12.317 | 32.962 | 0.00 | 0.00 |
| ATOM | 7504 | HD2  | PRO | X | 494 | 42.420 | 12.776 | 32.232 | 0.00 | 0.00 |
| ATOM | 7505 | HD3  | PRO | X | 494 | 41.791 | 11.228 | 32.931 | 0.00 | 0.00 |
| ATOM | 7506 | CG   | PRO | X | 494 | 42.138 | 12.727 | 34.360 | 0.00 | 0.00 |
| ATOM | 7507 | HG2  | PRO | X | 494 | 42.568 | 13.708 | 34.558 | 0.00 | 0.00 |
| ATOM | 7508 | HG3  | PRO | X | 494 | 42.821 | 12.116 | 34.950 | 0.00 | 0.00 |
| ATOM | 7509 | CB   | PRO | X | 494 | 40.772 | 12.678 | 35.067 | 0.00 | 0.00 |
| ATOM | 7510 | HB2  | PRO | X | 494 | 40.635 | 13.269 | 35.973 | 0.00 | 0.00 |
| ATOM | 7511 | HB3  | PRO | X | 494 | 40.682 | 11.630 | 35.353 | 0.00 | 0.00 |
| ATOM | 7512 | CA   | PRO | X | 494 | 39.773 | 13.037 | 34.024 | 0.00 | 0.00 |
| ATOM | 7513 | HA   | PRO | X | 494 | 38.942 | 12.395 | 34.315 | 0.00 | 0.00 |
| ATOM | 7514 | C    | PRO | X | 494 | 39.181 | 14.429 | 34.127 | 0.00 | 0.00 |
| ATOM | 7515 | O    | PRO | X | 494 | 39.327 | 15.286 | 33.239 | 0.00 | 0.00 |
| ATOM | 7516 | N    | GLN | X | 495 | 38.344 | 14.653 | 35.177 | 0.00 | 0.00 |
| ATOM | 7517 | H    | GLN | X | 495 | 38.314 | 13.953 | 35.905 | 0.00 | 0.00 |
| ATOM | 7518 | CA   | GLN | X | 495 | 37.526 | 15.870 | 35.371 | 0.00 | 0.00 |
| ATOM | 7519 | HA   | GLN | X | 495 | 37.860 | 16.629 | 34.664 | 0.00 | 0.00 |
| ATOM | 7520 | CB   | GLN | X | 495 | 36.063 | 15.573 | 34.939 | 0.00 | 0.00 |
| ATOM | 7521 | HB2  | GLN | X | 495 | 35.706 | 14.685 | 35.460 | 0.00 | 0.00 |
| ATOM | 7522 | HB3  | GLN | X | 495 | 35.457 | 16.431 | 35.230 | 0.00 | 0.00 |
| ATOM | 7523 | CG   | GLN | X | 495 | 35.958 | 15.190 | 33.444 | 0.00 | 0.00 |
| ATOM | 7524 | HG2  | GLN | X | 495 | 36.520 | 14.286 | 33.209 | 0.00 | 0.00 |
| ATOM | 7525 | HG3  | GLN | X | 495 | 34.903 | 14.934 | 33.354 | 0.00 | 0.00 |
| ATOM | 7526 | CD   | GLN | X | 495 | 36.362 | 16.337 | 32.528 | 0.00 | 0.00 |
| ATOM | 7527 | OE1  | GLN | X | 495 | 36.033 | 17.499 | 32.740 | 0.00 | 0.00 |
| ATOM | 7528 | NE2  | GLN | X | 495 | 37.078 | 16.071 | 31.460 | 0.00 | 0.00 |
| ATOM | 7529 | HE21 | GLN | X | 495 | 37.298 | 16.870 | 30.882 | 0.00 | 0.00 |
| ATOM | 7530 | HE22 | GLN | X | 495 | 37.351 | 15.120 | 31.257 | 0.00 | 0.00 |
| ATOM | 7531 | C    | GLN | X | 495 | 37.588 | 16.338 | 36.799 | 0.00 | 0.00 |
| ATOM | 7532 | O    | GLN | X | 495 | 38.181 | 15.676 | 37.662 | 0.00 | 0.00 |
| ATOM | 7533 | N    | TRP | X | 496 | 37.143 | 17.559 | 37.053 | 0.00 | 0.00 |
| ATOM | 7534 | H    | TRP | X | 496 | 36.943 | 18.114 | 36.233 | 0.00 | 0.00 |
| ATOM | 7535 | CA   | TRP | X | 496 | 37.278 | 18.390 | 38.357 | 0.00 | 0.00 |
| ATOM | 7536 | HA   | TRP | X | 496 | 38.245 | 18.171 | 38.810 | 0.00 | 0.00 |
| ATOM | 7537 | CB   | TRP | X | 496 | 37.158 | 19.860 | 37.919 | 0.00 | 0.00 |
| ATOM | 7538 | HB2  | TRP | X | 496 | 37.742 | 19.865 | 36.998 | 0.00 | 0.00 |
| ATOM | 7539 | HB3  | TRP | X | 496 | 36.101 | 20.116 | 37.837 | 0.00 | 0.00 |
| ATOM | 7540 | CG   | TRP | X | 496 | 37.777 | 21.009 | 38.708 | 0.00 | 0.00 |
| ATOM | 7541 | CD1  | TRP | X | 496 | 37.764 | 21.132 | 40.058 | 0.00 | 0.00 |
| ATOM | 7542 | HD1  | TRP | X | 496 | 37.191 | 20.563 | 40.775 | 0.00 | 0.00 |
| ATOM | 7543 | NE1  | TRP | X | 496 | 38.530 | 22.238 | 40.343 | 0.00 | 0.00 |
| ATOM | 7544 | HE1  | TRP | X | 496 | 38.578 | 22.486 | 41.321 | 0.00 | 0.00 |
| ATOM | 7545 | CE2  | TRP | X | 496 | 39.033 | 22.917 | 39.241 | 0.00 | 0.00 |
| ATOM | 7546 | CZ2  | TRP | X | 496 | 39.776 | 24.136 | 39.058 | 0.00 | 0.00 |
| ATOM | 7547 | HZ2  | TRP | X | 496 | 40.112 | 24.745 | 39.884 | 0.00 | 0.00 |
| ATOM | 7548 | CH2  | TRP | X | 496 | 40.127 | 24.437 | 37.801 | 0.00 | 0.00 |
| ATOM | 7549 | HH2  | TRP | X | 496 | 40.828 | 25.242 | 37.635 | 0.00 | 0.00 |
| ATOM | 7550 | CZ3  | TRP | X | 496 | 39.831 | 23.548 | 36.687 | 0.00 | 0.00 |
| ATOM | 7551 | HZ3  | TRP | X | 496 | 40.212 | 23.760 | 35.699 | 0.00 | 0.00 |
| ATOM | 7552 | CE3  | TRP | X | 496 | 38.997 | 22.455 | 36.822 | 0.00 | 0.00 |
| ATOM | 7553 | HE3  | TRP | X | 496 | 38.746 | 21.911 | 35.924 | 0.00 | 0.00 |
| ATOM | 7554 | CD2  | TRP | X | 496 | 38.614 | 22.109 | 38.138 | 0.00 | 0.00 |
| ATOM | 7555 | C    | TRP | X | 496 | 36.122 | 18.087 | 39.337 | 0.00 | 0.00 |
| ATOM | 7556 | O    | TRP | X | 496 | 34.948 | 18.275 | 38.991 | 0.00 | 0.00 |
| ATOM | 7557 | N    | PRO | X | 497 | 36.325 | 17.736 | 40.651 | 0.00 | 0.00 |
| ATOM | 7558 | CD   | PRO | X | 497 | 37.671 | 17.472 | 41.237 | 0.00 | 0.00 |
| ATOM | 7559 | HD2  | PRO | X | 497 | 38.154 | 18.447 | 41.161 | 0.00 | 0.00 |
| ATOM | 7560 | HD3  | PRO | X | 497 | 38.308 | 16.774 | 40.694 | 0.00 | 0.00 |
| ATOM | 7561 | CG   | PRO | X | 497 | 37.358 | 16.971 | 42.593 | 0.00 | 0.00 |
| ATOM | 7562 | HG2  | PRO | X | 497 | 37.630 | 17.741 | 43.315 | 0.00 | 0.00 |
| ATOM | 7563 | HG3  | PRO | X | 497 | 37.896 | 16.035 | 42.744 | 0.00 | 0.00 |
| ATOM | 7564 | CB   | PRO | X | 497 | 35.797 | 16.648 | 42.674 | 0.00 | 0.00 |
| ATOM | 7565 | HB2  | PRO | X | 497 | 35.400 | 16.765 | 43.682 | 0.00 | 0.00 |
| ATOM | 7566 | HB3  | PRO | X | 497 | 35.523 | 15.648 | 42.335 | 0.00 | 0.00 |
| ATOM | 7567 | CA   | PRO | X | 497 | 35.274 | 17.663 | 41.655 | 0.00 | 0.00 |
| ATOM | 7568 | HA   | PRO | X | 497 | 34.331 | 17.355 | 41.202 | 0.00 | 0.00 |
| ATOM | 7569 | C    | PRO | X | 497 | 35.148 | 18.995 | 42.398 | 0.00 | 0.00 |

|      |      |      |     |   |     |        |        |        |      |      |
|------|------|------|-----|---|-----|--------|--------|--------|------|------|
| ATOM | 7570 | O    | PRO | X | 497 | 36.145 | 19.750 | 42.637 | 0.00 | 0.00 |
| ATOM | 7571 | N    | PRO | X | 498 | 33.933 | 19.298 | 42.940 | 0.00 | 0.00 |
| ATOM | 7572 | CD   | PRO | X | 498 | 32.696 | 18.597 | 42.881 | 0.00 | 0.00 |
| ATOM | 7573 | HD2  | PRO | X | 498 | 32.728 | 17.507 | 42.904 | 0.00 | 0.00 |
| ATOM | 7574 | HD3  | PRO | X | 498 | 32.245 | 18.937 | 41.949 | 0.00 | 0.00 |
| ATOM | 7575 | CG   | PRO | X | 498 | 31.851 | 19.188 | 43.971 | 0.00 | 0.00 |
| ATOM | 7576 | HG2  | PRO | X | 498 | 32.000 | 18.683 | 44.925 | 0.00 | 0.00 |
| ATOM | 7577 | HG3  | PRO | X | 498 | 30.816 | 19.015 | 43.675 | 0.00 | 0.00 |
| ATOM | 7578 | CB   | PRO | X | 498 | 32.310 | 20.623 | 44.144 | 0.00 | 0.00 |
| ATOM | 7579 | HB2  | PRO | X | 498 | 32.248 | 20.929 | 45.188 | 0.00 | 0.00 |
| ATOM | 7580 | HB3  | PRO | X | 498 | 31.808 | 21.309 | 43.462 | 0.00 | 0.00 |
| ATOM | 7581 | CA   | PRO | X | 498 | 33.804 | 20.420 | 43.823 | 0.00 | 0.00 |
| ATOM | 7582 | HA   | PRO | X | 498 | 34.066 | 21.303 | 43.239 | 0.00 | 0.00 |
| ATOM | 7583 | C    | PRO | X | 498 | 34.588 | 20.418 | 45.136 | 0.00 | 0.00 |
| ATOM | 7584 | O    | PRO | X | 498 | 34.638 | 19.487 | 45.935 | 0.00 | 0.00 |
| ATOM | 7585 | N    | TYR | X | 499 | 35.229 | 21.562 | 45.481 | 0.00 | 0.00 |
| ATOM | 7586 | H    | TYR | X | 499 | 35.240 | 22.321 | 44.815 | 0.00 | 0.00 |
| ATOM | 7587 | CA   | TYR | X | 499 | 35.907 | 21.592 | 46.752 | 0.00 | 0.00 |
| ATOM | 7588 | HA   | TYR | X | 499 | 36.449 | 20.678 | 46.994 | 0.00 | 0.00 |
| ATOM | 7589 | CB   | TYR | X | 499 | 36.852 | 22.810 | 46.805 | 0.00 | 0.00 |
| ATOM | 7590 | HB2  | TYR | X | 499 | 37.445 | 22.751 | 45.893 | 0.00 | 0.00 |
| ATOM | 7591 | HB3  | TYR | X | 499 | 36.204 | 23.686 | 46.823 | 0.00 | 0.00 |
| ATOM | 7592 | CG   | TYR | X | 499 | 37.758 | 23.030 | 48.012 | 0.00 | 0.00 |
| ATOM | 7593 | CD1  | TYR | X | 499 | 37.229 | 23.585 | 49.172 | 0.00 | 0.00 |
| ATOM | 7594 | HD1  | TYR | X | 499 | 36.173 | 23.814 | 49.160 | 0.00 | 0.00 |
| ATOM | 7595 | CE1  | TYR | X | 499 | 37.974 | 23.933 | 50.298 | 0.00 | 0.00 |
| ATOM | 7596 | HE1  | TYR | X | 499 | 37.467 | 24.382 | 51.140 | 0.00 | 0.00 |
| ATOM | 7597 | CZ   | TYR | X | 499 | 39.373 | 23.760 | 50.267 | 0.00 | 0.00 |
| ATOM | 7598 | OH   | TYR | X | 499 | 40.246 | 24.232 | 51.200 | 0.00 | 0.00 |
| ATOM | 7599 | HH   | TYR | X | 499 | 39.785 | 24.528 | 51.989 | 0.00 | 0.00 |
| ATOM | 7600 | CE2  | TYR | X | 499 | 39.913 | 23.220 | 49.070 | 0.00 | 0.00 |
| ATOM | 7601 | HE2  | TYR | X | 499 | 40.982 | 23.080 | 49.001 | 0.00 | 0.00 |
| ATOM | 7602 | CD2  | TYR | X | 499 | 39.153 | 22.853 | 47.945 | 0.00 | 0.00 |
| ATOM | 7603 | HD2  | TYR | X | 499 | 39.672 | 22.435 | 47.096 | 0.00 | 0.00 |
| ATOM | 7604 | C    | TYR | X | 499 | 34.831 | 21.716 | 47.859 | 0.00 | 0.00 |
| ATOM | 7605 | O    | TYR | X | 499 | 33.837 | 22.479 | 47.699 | 0.00 | 0.00 |
| ATOM | 7606 | N    | THR | X | 500 | 35.088 | 21.042 | 48.987 | 0.00 | 0.00 |
| ATOM | 7607 | H    | THR | X | 500 | 35.900 | 20.442 | 48.988 | 0.00 | 0.00 |
| ATOM | 7608 | CA   | THR | X | 500 | 34.335 | 20.963 | 50.282 | 0.00 | 0.00 |
| ATOM | 7609 | HA   | THR | X | 500 | 33.459 | 21.610 | 50.249 | 0.00 | 0.00 |
| ATOM | 7610 | CB   | THR | X | 500 | 33.681 | 19.556 | 50.471 | 0.00 | 0.00 |
| ATOM | 7611 | HB   | THR | X | 500 | 33.067 | 19.570 | 51.372 | 0.00 | 0.00 |
| ATOM | 7612 | CG2  | THR | X | 500 | 32.688 | 19.123 | 49.442 | 0.00 | 0.00 |
| ATOM | 7613 | HG21 | THR | X | 500 | 33.212 | 18.946 | 48.503 | 0.00 | 0.00 |
| ATOM | 7614 | HG22 | THR | X | 500 | 31.990 | 19.941 | 49.264 | 0.00 | 0.00 |
| ATOM | 7615 | HG23 | THR | X | 500 | 32.130 | 18.266 | 49.821 | 0.00 | 0.00 |
| ATOM | 7616 | OG1  | THR | X | 500 | 34.600 | 18.541 | 50.525 | 0.00 | 0.00 |
| ATOM | 7617 | HG1  | THR | X | 500 | 34.139 | 17.757 | 50.832 | 0.00 | 0.00 |
| ATOM | 7618 | C    | THR | X | 500 | 35.124 | 21.297 | 51.451 | 0.00 | 0.00 |
| ATOM | 7619 | O    | THR | X | 500 | 36.377 | 21.250 | 51.401 | 0.00 | 0.00 |
| ATOM | 7620 | N    | ALA | X | 501 | 34.518 | 21.719 | 52.550 | 0.00 | 0.00 |
| ATOM | 7621 | H    | ALA | X | 501 | 33.508 | 21.727 | 52.532 | 0.00 | 0.00 |
| ATOM | 7622 | CA   | ALA | X | 501 | 35.190 | 21.976 | 53.808 | 0.00 | 0.00 |
| ATOM | 7623 | HA   | ALA | X | 501 | 36.157 | 22.464 | 53.691 | 0.00 | 0.00 |
| ATOM | 7624 | CB   | ALA | X | 501 | 34.273 | 22.871 | 54.626 | 0.00 | 0.00 |
| ATOM | 7625 | HB1  | ALA | X | 501 | 34.453 | 23.889 | 54.278 | 0.00 | 0.00 |
| ATOM | 7626 | HB2  | ALA | X | 501 | 34.643 | 22.833 | 55.651 | 0.00 | 0.00 |
| ATOM | 7627 | HB3  | ALA | X | 501 | 33.223 | 22.608 | 54.498 | 0.00 | 0.00 |
| ATOM | 7628 | C    | ALA | X | 501 | 35.742 | 20.739 | 54.560 | 0.00 | 0.00 |
| ATOM | 7629 | O    | ALA | X | 501 | 36.574 | 20.776 | 55.438 | 0.00 | 0.00 |
| ATOM | 7630 | N    | GLY | X | 502 | 35.273 | 19.528 | 54.104 | 0.00 | 0.00 |
| ATOM | 7631 | H    | GLY | X | 502 | 34.417 | 19.470 | 53.570 | 0.00 | 0.00 |
| ATOM | 7632 | CA   | GLY | X | 502 | 35.682 | 18.189 | 54.603 | 0.00 | 0.00 |
| ATOM | 7633 | HA2  | GLY | X | 502 | 35.889 | 18.208 | 55.673 | 0.00 | 0.00 |
| ATOM | 7634 | HA3  | GLY | X | 502 | 34.871 | 17.496 | 54.379 | 0.00 | 0.00 |
| ATOM | 7635 | C    | GLY | X | 502 | 36.955 | 17.751 | 53.825 | 0.00 | 0.00 |
| ATOM | 7636 | O    | GLY | X | 502 | 38.063 | 17.788 | 54.358 | 0.00 | 0.00 |

|      |      |      |     |   |     |        |        |        |      |      |
|------|------|------|-----|---|-----|--------|--------|--------|------|------|
| ATOM | 7637 | N    | ALA | X | 503 | 36.838 | 17.432 | 52.548 | 0.00 | 0.00 |
| ATOM | 7638 | H    | ALA | X | 503 | 35.913 | 17.490 | 52.147 | 0.00 | 0.00 |
| ATOM | 7639 | CA   | ALA | X | 503 | 37.885 | 16.782 | 51.763 | 0.00 | 0.00 |
| ATOM | 7640 | HA   | ALA | X | 503 | 38.429 | 16.039 | 52.346 | 0.00 | 0.00 |
| ATOM | 7641 | CB   | ALA | X | 503 | 37.085 | 16.005 | 50.719 | 0.00 | 0.00 |
| ATOM | 7642 | HB1  | ALA | X | 503 | 37.763 | 15.229 | 50.363 | 0.00 | 0.00 |
| ATOM | 7643 | HB2  | ALA | X | 503 | 36.916 | 16.611 | 49.830 | 0.00 | 0.00 |
| ATOM | 7644 | HB3  | ALA | X | 503 | 36.128 | 15.634 | 51.085 | 0.00 | 0.00 |
| ATOM | 7645 | C    | ALA | X | 503 | 38.899 | 17.756 | 51.100 | 0.00 | 0.00 |
| ATOM | 7646 | O    | ALA | X | 503 | 39.991 | 17.285 | 50.754 | 0.00 | 0.00 |
| ATOM | 7647 | N    | GLN | X | 504 | 38.453 | 19.025 | 50.893 | 0.00 | 0.00 |
| ATOM | 7648 | H    | GLN | X | 504 | 37.578 | 19.419 | 51.209 | 0.00 | 0.00 |
| ATOM | 7649 | CA   | GLN | X | 504 | 39.333 | 20.132 | 50.404 | 0.00 | 0.00 |
| ATOM | 7650 | HA   | GLN | X | 504 | 38.730 | 20.991 | 50.108 | 0.00 | 0.00 |
| ATOM | 7651 | CB   | GLN | X | 504 | 40.216 | 20.548 | 51.581 | 0.00 | 0.00 |
| ATOM | 7652 | HB2  | GLN | X | 504 | 40.746 | 19.624 | 51.814 | 0.00 | 0.00 |
| ATOM | 7653 | HB3  | GLN | X | 504 | 40.965 | 21.311 | 51.371 | 0.00 | 0.00 |
| ATOM | 7654 | CG   | GLN | X | 504 | 39.426 | 20.947 | 52.817 | 0.00 | 0.00 |
| ATOM | 7655 | HG2  | GLN | X | 504 | 39.120 | 21.935 | 52.474 | 0.00 | 0.00 |
| ATOM | 7656 | HG3  | GLN | X | 504 | 38.622 | 20.273 | 53.111 | 0.00 | 0.00 |
| ATOM | 7657 | CD   | GLN | X | 504 | 40.330 | 21.068 | 53.980 | 0.00 | 0.00 |
| ATOM | 7658 | OE1  | GLN | X | 504 | 41.529 | 21.159 | 53.888 | 0.00 | 0.00 |
| ATOM | 7659 | NE2  | GLN | X | 504 | 39.803 | 21.128 | 55.185 | 0.00 | 0.00 |
| ATOM | 7660 | HE21 | GLN | X | 504 | 40.535 | 21.188 | 55.878 | 0.00 | 0.00 |
| ATOM | 7661 | HE22 | GLN | X | 504 | 38.810 | 21.026 | 55.338 | 0.00 | 0.00 |
| ATOM | 7662 | C    | GLN | X | 504 | 40.150 | 19.860 | 49.098 | 0.00 | 0.00 |
| ATOM | 7663 | O    | GLN | X | 504 | 41.331 | 20.282 | 49.000 | 0.00 | 0.00 |
| ATOM | 7664 | N    | GLN | X | 505 | 39.626 | 19.244 | 48.092 | 0.00 | 0.00 |
| ATOM | 7665 | H    | GLN | X | 505 | 38.646 | 19.027 | 48.201 | 0.00 | 0.00 |
| ATOM | 7666 | CA   | GLN | X | 505 | 40.200 | 18.778 | 46.902 | 0.00 | 0.00 |
| ATOM | 7667 | HA   | GLN | X | 505 | 41.192 | 18.333 | 46.976 | 0.00 | 0.00 |
| ATOM | 7668 | CB   | GLN | X | 505 | 39.280 | 17.826 | 46.163 | 0.00 | 0.00 |
| ATOM | 7669 | HB2  | GLN | X | 505 | 38.295 | 18.254 | 45.975 | 0.00 | 0.00 |
| ATOM | 7670 | HB3  | GLN | X | 505 | 39.619 | 17.692 | 45.136 | 0.00 | 0.00 |
| ATOM | 7671 | CG   | GLN | X | 505 | 39.089 | 16.512 | 46.889 | 0.00 | 0.00 |
| ATOM | 7672 | HG2  | GLN | X | 505 | 39.991 | 15.903 | 46.827 | 0.00 | 0.00 |
| ATOM | 7673 | HG3  | GLN | X | 505 | 38.903 | 16.664 | 47.952 | 0.00 | 0.00 |
| ATOM | 7674 | CD   | GLN | X | 505 | 38.007 | 15.750 | 46.172 | 0.00 | 0.00 |
| ATOM | 7675 | OE1  | GLN | X | 505 | 36.818 | 15.982 | 46.317 | 0.00 | 0.00 |
| ATOM | 7676 | NE2  | GLN | X | 505 | 38.357 | 14.756 | 45.417 | 0.00 | 0.00 |
| ATOM | 7677 | HE21 | GLN | X | 505 | 37.694 | 14.132 | 44.980 | 0.00 | 0.00 |
| ATOM | 7678 | HE22 | GLN | X | 505 | 39.308 | 14.415 | 45.423 | 0.00 | 0.00 |
| ATOM | 7679 | C    | GLN | X | 505 | 40.519 | 19.861 | 45.931 | 0.00 | 0.00 |
| ATOM | 7680 | O    | GLN | X | 505 | 39.636 | 20.630 | 45.510 | 0.00 | 0.00 |
| ATOM | 7681 | N    | TYR | X | 506 | 41.780 | 19.906 | 45.461 | 0.00 | 0.00 |
| ATOM | 7682 | H    | TYR | X | 506 | 42.480 | 19.235 | 45.743 | 0.00 | 0.00 |
| ATOM | 7683 | CA   | TYR | X | 506 | 42.251 | 20.896 | 44.488 | 0.00 | 0.00 |
| ATOM | 7684 | HA   | TYR | X | 506 | 41.363 | 21.392 | 44.097 | 0.00 | 0.00 |
| ATOM | 7685 | CB   | TYR | X | 506 | 43.151 | 21.992 | 45.126 | 0.00 | 0.00 |
| ATOM | 7686 | HB2  | TYR | X | 506 | 43.310 | 22.680 | 44.296 | 0.00 | 0.00 |
| ATOM | 7687 | HB3  | TYR | X | 506 | 42.539 | 22.505 | 45.868 | 0.00 | 0.00 |
| ATOM | 7688 | CG   | TYR | X | 506 | 44.422 | 21.602 | 45.727 | 0.00 | 0.00 |
| ATOM | 7689 | CD1  | TYR | X | 506 | 44.503 | 20.734 | 46.903 | 0.00 | 0.00 |
| ATOM | 7690 | HD1  | TYR | X | 506 | 43.579 | 20.344 | 47.303 | 0.00 | 0.00 |
| ATOM | 7691 | CE1  | TYR | X | 506 | 45.785 | 20.257 | 47.320 | 0.00 | 0.00 |
| ATOM | 7692 | HE1  | TYR | X | 506 | 45.958 | 19.491 | 48.061 | 0.00 | 0.00 |
| ATOM | 7693 | CZ   | TYR | X | 506 | 46.944 | 20.705 | 46.618 | 0.00 | 0.00 |
| ATOM | 7694 | OH   | TYR | X | 506 | 48.145 | 20.355 | 47.118 | 0.00 | 0.00 |
| ATOM | 7695 | HH   | TYR | X | 506 | 48.032 | 19.716 | 47.826 | 0.00 | 0.00 |
| ATOM | 7696 | CE2  | TYR | X | 506 | 46.845 | 21.745 | 45.654 | 0.00 | 0.00 |
| ATOM | 7697 | HE2  | TYR | X | 506 | 47.795 | 22.116 | 45.300 | 0.00 | 0.00 |
| ATOM | 7698 | CD2  | TYR | X | 506 | 45.587 | 22.138 | 45.118 | 0.00 | 0.00 |
| ATOM | 7699 | HD2  | TYR | X | 506 | 45.517 | 22.824 | 44.287 | 0.00 | 0.00 |
| ATOM | 7700 | C    | TYR | X | 506 | 42.990 | 20.125 | 43.356 | 0.00 | 0.00 |
| ATOM | 7701 | O    | TYR | X | 506 | 43.864 | 19.296 | 43.600 | 0.00 | 0.00 |
| ATOM | 7702 | N    | VAL | X | 507 | 42.721 | 20.571 | 42.101 | 0.00 | 0.00 |
| ATOM | 7703 | H    | VAL | X | 507 | 42.147 | 21.400 | 42.054 | 0.00 | 0.00 |

|      |      |      |     |   |     |        |        |        |      |      |
|------|------|------|-----|---|-----|--------|--------|--------|------|------|
| ATOM | 7704 | CA   | VAL | X | 507 | 43.174 | 19.978 | 40.848 | 0.00 | 0.00 |
| ATOM | 7705 | HA   | VAL | X | 507 | 43.180 | 18.898 | 40.992 | 0.00 | 0.00 |
| ATOM | 7706 | CB   | VAL | X | 507 | 42.244 | 20.249 | 39.607 | 0.00 | 0.00 |
| ATOM | 7707 | HB   | VAL | X | 507 | 42.679 | 19.626 | 38.825 | 0.00 | 0.00 |
| ATOM | 7708 | CG1  | VAL | X | 507 | 40.857 | 19.772 | 39.824 | 0.00 | 0.00 |
| ATOM | 7709 | HG11 | VAL | X | 507 | 40.227 | 19.908 | 38.944 | 0.00 | 0.00 |
| ATOM | 7710 | HG12 | VAL | X | 507 | 40.792 | 18.719 | 40.096 | 0.00 | 0.00 |
| ATOM | 7711 | HG13 | VAL | X | 507 | 40.402 | 20.334 | 40.640 | 0.00 | 0.00 |
| ATOM | 7712 | CG2  | VAL | X | 507 | 42.316 | 21.696 | 39.160 | 0.00 | 0.00 |
| ATOM | 7713 | HG21 | VAL | X | 507 | 41.878 | 21.818 | 38.170 | 0.00 | 0.00 |
| ATOM | 7714 | HG22 | VAL | X | 507 | 43.347 | 21.996 | 38.969 | 0.00 | 0.00 |
| ATOM | 7715 | HG23 | VAL | X | 507 | 41.741 | 22.375 | 39.789 | 0.00 | 0.00 |
| ATOM | 7716 | C    | VAL | X | 507 | 44.620 | 20.473 | 40.482 | 0.00 | 0.00 |
| ATOM | 7717 | O    | VAL | X | 507 | 45.106 | 21.510 | 40.932 | 0.00 | 0.00 |
| ATOM | 7718 | N    | SER | X | 508 | 45.407 | 19.672 | 39.787 | 0.00 | 0.00 |
| ATOM | 7719 | H    | SER | X | 508 | 45.068 | 18.727 | 39.673 | 0.00 | 0.00 |
| ATOM | 7720 | CA   | SER | X | 508 | 46.763 | 20.032 | 39.246 | 0.00 | 0.00 |
| ATOM | 7721 | HA   | SER | X | 508 | 47.090 | 20.927 | 39.776 | 0.00 | 0.00 |
| ATOM | 7722 | CB   | SER | X | 508 | 47.690 | 18.881 | 39.433 | 0.00 | 0.00 |
| ATOM | 7723 | HB2  | SER | X | 508 | 47.083 | 18.000 | 39.644 | 0.00 | 0.00 |
| ATOM | 7724 | HB3  | SER | X | 508 | 48.231 | 18.635 | 38.520 | 0.00 | 0.00 |
| ATOM | 7725 | OG   | SER | X | 508 | 48.453 | 19.077 | 40.591 | 0.00 | 0.00 |
| ATOM | 7726 | HG   | SER | X | 508 | 49.328 | 19.225 | 40.224 | 0.00 | 0.00 |
| ATOM | 7727 | C    | SER | X | 508 | 46.708 | 20.350 | 37.731 | 0.00 | 0.00 |
| ATOM | 7728 | O    | SER | X | 508 | 46.434 | 19.466 | 36.882 | 0.00 | 0.00 |
| ATOM | 7729 | N    | LEU | X | 509 | 47.059 | 21.575 | 37.333 | 0.00 | 0.00 |
| ATOM | 7730 | H    | LEU | X | 509 | 47.420 | 22.117 | 38.105 | 0.00 | 0.00 |
| ATOM | 7731 | CA   | LEU | X | 509 | 47.085 | 22.074 | 35.888 | 0.00 | 0.00 |
| ATOM | 7732 | HA   | LEU | X | 509 | 46.676 | 21.309 | 35.228 | 0.00 | 0.00 |
| ATOM | 7733 | CB   | LEU | X | 509 | 46.205 | 23.347 | 35.747 | 0.00 | 0.00 |
| ATOM | 7734 | HB2  | LEU | X | 509 | 46.550 | 24.062 | 36.494 | 0.00 | 0.00 |
| ATOM | 7735 | HB3  | LEU | X | 509 | 46.485 | 23.769 | 34.782 | 0.00 | 0.00 |
| ATOM | 7736 | CG   | LEU | X | 509 | 44.703 | 23.058 | 35.880 | 0.00 | 0.00 |
| ATOM | 7737 | HG   | LEU | X | 509 | 44.595 | 22.423 | 36.759 | 0.00 | 0.00 |
| ATOM | 7738 | CD1  | LEU | X | 509 | 43.950 | 24.347 | 36.307 | 0.00 | 0.00 |
| ATOM | 7739 | HD11 | LEU | X | 509 | 44.329 | 24.793 | 37.226 | 0.00 | 0.00 |
| ATOM | 7740 | HD12 | LEU | X | 509 | 42.899 | 24.144 | 36.514 | 0.00 | 0.00 |
| ATOM | 7741 | HD13 | LEU | X | 509 | 44.021 | 25.036 | 35.466 | 0.00 | 0.00 |
| ATOM | 7742 | CD2  | LEU | X | 509 | 44.033 | 22.390 | 34.632 | 0.00 | 0.00 |
| ATOM | 7743 | HD21 | LEU | X | 509 | 44.449 | 21.405 | 34.421 | 0.00 | 0.00 |
| ATOM | 7744 | HD22 | LEU | X | 509 | 42.958 | 22.330 | 34.802 | 0.00 | 0.00 |
| ATOM | 7745 | HD23 | LEU | X | 509 | 44.269 | 23.004 | 33.762 | 0.00 | 0.00 |
| ATOM | 7746 | C    | LEU | X | 509 | 48.517 | 22.156 | 35.277 | 0.00 | 0.00 |
| ATOM | 7747 | O    | LEU | X | 509 | 49.418 | 22.703 | 35.912 | 0.00 | 0.00 |
| ATOM | 7748 | N    | ASP | X | 510 | 48.729 | 21.385 | 34.174 | 0.00 | 0.00 |
| ATOM | 7749 | H    | ASP | X | 510 | 47.911 | 20.915 | 33.812 | 0.00 | 0.00 |
| ATOM | 7750 | CA   | ASP | X | 510 | 50.002 | 21.043 | 33.522 | 0.00 | 0.00 |
| ATOM | 7751 | HA   | ASP | X | 510 | 50.651 | 21.914 | 33.433 | 0.00 | 0.00 |
| ATOM | 7752 | CB   | ASP | X | 510 | 50.642 | 19.980 | 34.446 | 0.00 | 0.00 |
| ATOM | 7753 | HB2  | ASP | X | 510 | 50.499 | 20.306 | 35.476 | 0.00 | 0.00 |
| ATOM | 7754 | HB3  | ASP | X | 510 | 50.042 | 19.103 | 34.204 | 0.00 | 0.00 |
| ATOM | 7755 | CG   | ASP | X | 510 | 52.093 | 19.617 | 34.090 | 0.00 | 0.00 |
| ATOM | 7756 | OD1  | ASP | X | 510 | 52.327 | 18.389 | 33.916 | 0.00 | 0.00 |
| ATOM | 7757 | OD2  | ASP | X | 510 | 52.837 | 20.552 | 33.961 | 0.00 | 0.00 |
| ATOM | 7758 | C    | ASP | X | 510 | 49.678 | 20.544 | 32.104 | 0.00 | 0.00 |
| ATOM | 7759 | O    | ASP | X | 510 | 48.547 | 20.248 | 31.784 | 0.00 | 0.00 |
| ATOM | 7760 | N    | LEU | X | 511 | 50.712 | 20.271 | 31.285 | 0.00 | 0.00 |
| ATOM | 7761 | H    | LEU | X | 511 | 51.623 | 20.404 | 31.700 | 0.00 | 0.00 |
| ATOM | 7762 | CA   | LEU | X | 511 | 50.600 | 19.440 | 30.088 | 0.00 | 0.00 |
| ATOM | 7763 | HA   | LEU | X | 511 | 49.764 | 19.861 | 29.528 | 0.00 | 0.00 |
| ATOM | 7764 | CB   | LEU | X | 511 | 51.951 | 19.493 | 29.303 | 0.00 | 0.00 |
| ATOM | 7765 | HB2  | LEU | X | 511 | 52.650 | 18.832 | 29.816 | 0.00 | 0.00 |
| ATOM | 7766 | HB3  | LEU | X | 511 | 51.824 | 19.042 | 28.318 | 0.00 | 0.00 |
| ATOM | 7767 | CG   | LEU | X | 511 | 52.576 | 20.858 | 29.112 | 0.00 | 0.00 |
| ATOM | 7768 | HG   | LEU | X | 511 | 52.943 | 21.316 | 30.030 | 0.00 | 0.00 |
| ATOM | 7769 | CD1  | LEU | X | 511 | 53.954 | 20.672 | 28.461 | 0.00 | 0.00 |
| ATOM | 7770 | HD11 | LEU | X | 511 | 53.812 | 20.018 | 27.600 | 0.00 | 0.00 |



|      |      |      |     |   |     |        |        |        |      |      |
|------|------|------|-----|---|-----|--------|--------|--------|------|------|
| ATOM | 7771 | HD12 | LEU | X | 511 | 54.574 | 20.139 | 29.182 | 0.00 | 0.00 |
| ATOM | 7772 | HD13 | LEU | X | 511 | 54.542 | 21.545 | 28.179 | 0.00 | 0.00 |
| ATOM | 7773 | CD2  | LEU | X | 511 | 51.665 | 21.874 | 28.290 | 0.00 | 0.00 |
| ATOM | 7774 | HD21 | LEU | X | 511 | 51.475 | 21.413 | 27.321 | 0.00 | 0.00 |
| ATOM | 7775 | HD22 | LEU | X | 511 | 50.713 | 21.905 | 28.819 | 0.00 | 0.00 |
| ATOM | 7776 | HD23 | LEU | X | 511 | 52.083 | 22.878 | 28.219 | 0.00 | 0.00 |
| ATOM | 7777 | C    | LEU | X | 511 | 50.200 | 17.951 | 30.348 | 0.00 | 0.00 |
| ATOM | 7778 | O    | LEU | X | 511 | 49.588 | 17.357 | 29.456 | 0.00 | 0.00 |
| ATOM | 7779 | N    | ARG | X | 512 | 50.434 | 17.298 | 31.538 | 0.00 | 0.00 |
| ATOM | 7780 | H    | ARG | X | 512 | 50.998 | 17.854 | 32.165 | 0.00 | 0.00 |
| ATOM | 7781 | CA   | ARG | X | 512 | 49.958 | 15.891 | 31.858 | 0.00 | 0.00 |
| ATOM | 7782 | HA   | ARG | X | 512 | 50.122 | 15.213 | 31.021 | 0.00 | 0.00 |
| ATOM | 7783 | CB   | ARG | X | 512 | 50.852 | 15.288 | 32.900 | 0.00 | 0.00 |
| ATOM | 7784 | HB2  | ARG | X | 512 | 50.848 | 14.199 | 32.850 | 0.00 | 0.00 |
| ATOM | 7785 | HB3  | ARG | X | 512 | 51.875 | 15.635 | 32.755 | 0.00 | 0.00 |
| ATOM | 7786 | CG   | ARG | X | 512 | 50.400 | 15.683 | 34.324 | 0.00 | 0.00 |
| ATOM | 7787 | HG2  | ARG | X | 512 | 50.362 | 16.772 | 34.324 | 0.00 | 0.00 |
| ATOM | 7788 | HG3  | ARG | X | 512 | 49.468 | 15.203 | 34.623 | 0.00 | 0.00 |
| ATOM | 7789 | CD   | ARG | X | 512 | 51.519 | 15.321 | 35.350 | 0.00 | 0.00 |
| ATOM | 7790 | HD2  | ARG | X | 512 | 51.739 | 14.275 | 35.135 | 0.00 | 0.00 |
| ATOM | 7791 | HD3  | ARG | X | 512 | 52.424 | 15.861 | 35.073 | 0.00 | 0.00 |
| ATOM | 7792 | NE   | ARG | X | 512 | 51.174 | 15.565 | 36.725 | 0.00 | 0.00 |
| ATOM | 7793 | HE   | ARG | X | 512 | 50.821 | 14.814 | 37.301 | 0.00 | 0.00 |
| ATOM | 7794 | CZ   | ARG | X | 512 | 51.046 | 16.663 | 37.417 | 0.00 | 0.00 |
| ATOM | 7795 | NH1  | ARG | X | 512 | 51.459 | 17.842 | 36.892 | 0.00 | 0.00 |
| ATOM | 7796 | HH11 | ARG | X | 512 | 51.757 | 17.721 | 35.934 | 0.00 | 0.00 |
| ATOM | 7797 | HH12 | ARG | X | 512 | 51.373 | 18.666 | 37.468 | 0.00 | 0.00 |
| ATOM | 7798 | NH2  | ARG | X | 512 | 50.494 | 16.641 | 38.589 | 0.00 | 0.00 |
| ATOM | 7799 | HH21 | ARG | X | 512 | 50.060 | 15.773 | 38.868 | 0.00 | 0.00 |
| ATOM | 7800 | HH22 | ARG | X | 512 | 50.485 | 17.452 | 39.190 | 0.00 | 0.00 |
| ATOM | 7801 | C    | ARG | X | 512 | 48.455 | 15.940 | 32.212 | 0.00 | 0.00 |
| ATOM | 7802 | O    | ARG | X | 512 | 47.858 | 17.003 | 32.184 | 0.00 | 0.00 |
| ATOM | 7803 | N    | PRO | X | 513 | 47.769 | 14.800 | 32.491 | 0.00 | 0.00 |
| ATOM | 7804 | CD   | PRO | X | 513 | 48.147 | 13.384 | 32.076 | 0.00 | 0.00 |
| ATOM | 7805 | HD2  | PRO | X | 513 | 48.739 | 12.921 | 32.865 | 0.00 | 0.00 |
| ATOM | 7806 | HD3  | PRO | X | 513 | 48.628 | 13.268 | 31.105 | 0.00 | 0.00 |
| ATOM | 7807 | CG   | PRO | X | 513 | 46.779 | 12.659 | 31.897 | 0.00 | 0.00 |
| ATOM | 7808 | HG2  | PRO | X | 513 | 46.926 | 11.583 | 31.988 | 0.00 | 0.00 |
| ATOM | 7809 | HG3  | PRO | X | 513 | 46.317 | 12.887 | 30.936 | 0.00 | 0.00 |
| ATOM | 7810 | CB   | PRO | X | 513 | 46.045 | 13.295 | 33.043 | 0.00 | 0.00 |
| ATOM | 7811 | HB2  | PRO | X | 513 | 46.328 | 12.807 | 33.975 | 0.00 | 0.00 |
| ATOM | 7812 | HB3  | PRO | X | 513 | 44.963 | 13.219 | 32.937 | 0.00 | 0.00 |
| ATOM | 7813 | CA   | PRO | X | 513 | 46.347 | 14.766 | 32.921 | 0.00 | 0.00 |
| ATOM | 7814 | HA   | PRO | X | 513 | 45.851 | 15.309 | 32.117 | 0.00 | 0.00 |
| ATOM | 7815 | C    | PRO | X | 513 | 45.912 | 15.446 | 34.172 | 0.00 | 0.00 |
| ATOM | 7816 | O    | PRO | X | 513 | 46.727 | 15.926 | 34.945 | 0.00 | 0.00 |
| ATOM | 7817 | N    | LEU | X | 514 | 44.589 | 15.582 | 34.417 | 0.00 | 0.00 |
| ATOM | 7818 | H    | LEU | X | 514 | 43.917 | 15.193 | 33.771 | 0.00 | 0.00 |
| ATOM | 7819 | CA   | LEU | X | 514 | 44.054 | 16.376 | 35.517 | 0.00 | 0.00 |
| ATOM | 7820 | HA   | LEU | X | 514 | 44.722 | 17.213 | 35.722 | 0.00 | 0.00 |
| ATOM | 7821 | CB   | LEU | X | 514 | 42.656 | 16.919 | 35.126 | 0.00 | 0.00 |
| ATOM | 7822 | HB2  | LEU | X | 514 | 42.678 | 17.241 | 34.085 | 0.00 | 0.00 |
| ATOM | 7823 | HB3  | LEU | X | 514 | 41.971 | 16.072 | 35.102 | 0.00 | 0.00 |
| ATOM | 7824 | CG   | LEU | X | 514 | 42.177 | 18.062 | 36.013 | 0.00 | 0.00 |
| ATOM | 7825 | HG   | LEU | X | 514 | 42.252 | 17.642 | 37.017 | 0.00 | 0.00 |
| ATOM | 7826 | CD1  | LEU | X | 514 | 42.908 | 19.390 | 35.798 | 0.00 | 0.00 |
| ATOM | 7827 | HD11 | LEU | X | 514 | 42.875 | 19.669 | 34.745 | 0.00 | 0.00 |
| ATOM | 7828 | HD12 | LEU | X | 514 | 43.943 | 19.302 | 36.130 | 0.00 | 0.00 |
| ATOM | 7829 | HD13 | LEU | X | 514 | 42.543 | 20.253 | 36.354 | 0.00 | 0.00 |
| ATOM | 7830 | CD2  | LEU | X | 514 | 40.677 | 18.414 | 35.684 | 0.00 | 0.00 |
| ATOM | 7831 | HD21 | LEU | X | 514 | 40.183 | 19.049 | 36.420 | 0.00 | 0.00 |
| ATOM | 7832 | HD22 | LEU | X | 514 | 40.625 | 18.854 | 34.688 | 0.00 | 0.00 |
| ATOM | 7833 | HD23 | LEU | X | 514 | 40.153 | 17.468 | 35.551 | 0.00 | 0.00 |
| ATOM | 7834 | C    | LEU | X | 514 | 44.066 | 15.486 | 36.767 | 0.00 | 0.00 |
| ATOM | 7835 | O    | LEU | X | 514 | 43.105 | 14.845 | 37.153 | 0.00 | 0.00 |
| ATOM | 7836 | N    | GLU | X | 515 | 45.197 | 15.476 | 37.450 | 0.00 | 0.00 |
| ATOM | 7837 | H    | GLU | X | 515 | 46.088 | 15.800 | 37.101 | 0.00 | 0.00 |

|      |      |      |     |   |     |        |        |        |      |      |
|------|------|------|-----|---|-----|--------|--------|--------|------|------|
| ATOM | 7838 | CA   | GLU | X | 515 | 45.289 | 14.964 | 38.838 | 0.00 | 0.00 |
| ATOM | 7839 | HA   | GLU | X | 515 | 44.723 | 14.046 | 38.995 | 0.00 | 0.00 |
| ATOM | 7840 | CB   | GLU | X | 515 | 46.690 | 14.737 | 39.324 | 0.00 | 0.00 |
| ATOM | 7841 | HB2  | GLU | X | 515 | 47.227 | 15.683 | 39.258 | 0.00 | 0.00 |
| ATOM | 7842 | HB3  | GLU | X | 515 | 46.864 | 14.340 | 40.324 | 0.00 | 0.00 |
| ATOM | 7843 | CG   | GLU | X | 515 | 47.348 | 13.724 | 38.395 | 0.00 | 0.00 |
| ATOM | 7844 | HG2  | GLU | X | 515 | 46.714 | 12.838 | 38.363 | 0.00 | 0.00 |
| ATOM | 7845 | HG3  | GLU | X | 515 | 47.501 | 14.146 | 37.402 | 0.00 | 0.00 |
| ATOM | 7846 | CD   | GLU | X | 515 | 48.752 | 13.375 | 38.895 | 0.00 | 0.00 |
| ATOM | 7847 | OE1  | GLU | X | 515 | 48.862 | 12.520 | 39.766 | 0.00 | 0.00 |
| ATOM | 7848 | OE2  | GLU | X | 515 | 49.760 | 13.906 | 38.319 | 0.00 | 0.00 |
| ATOM | 7849 | C    | GLU | X | 515 | 44.642 | 15.950 | 39.874 | 0.00 | 0.00 |
| ATOM | 7850 | O    | GLU | X | 515 | 44.357 | 17.082 | 39.583 | 0.00 | 0.00 |
| ATOM | 7851 | N    | VAL | X | 516 | 44.390 | 15.393 | 41.101 | 0.00 | 0.00 |
| ATOM | 7852 | H    | VAL | X | 516 | 44.564 | 14.403 | 41.201 | 0.00 | 0.00 |
| ATOM | 7853 | CA   | VAL | X | 516 | 43.677 | 16.039 | 42.230 | 0.00 | 0.00 |
| ATOM | 7854 | HA   | VAL | X | 516 | 43.828 | 17.112 | 42.113 | 0.00 | 0.00 |
| ATOM | 7855 | CB   | VAL | X | 516 | 42.125 | 15.791 | 42.229 | 0.00 | 0.00 |
| ATOM | 7856 | HB   | VAL | X | 516 | 42.113 | 14.706 | 42.334 | 0.00 | 0.00 |
| ATOM | 7857 | CG1  | VAL | X | 516 | 41.452 | 16.368 | 43.442 | 0.00 | 0.00 |
| ATOM | 7858 | HG11 | VAL | X | 516 | 41.800 | 17.372 | 43.685 | 0.00 | 0.00 |
| ATOM | 7859 | HG12 | VAL | X | 516 | 40.447 | 16.616 | 43.104 | 0.00 | 0.00 |
| ATOM | 7860 | HG13 | VAL | X | 516 | 41.487 | 15.687 | 44.293 | 0.00 | 0.00 |
| ATOM | 7861 | CG2  | VAL | X | 516 | 41.403 | 16.000 | 40.871 | 0.00 | 0.00 |
| ATOM | 7862 | HG21 | VAL | X | 516 | 40.314 | 16.046 | 40.832 | 0.00 | 0.00 |
| ATOM | 7863 | HG22 | VAL | X | 516 | 41.637 | 15.161 | 40.215 | 0.00 | 0.00 |
| ATOM | 7864 | HG23 | VAL | X | 516 | 41.815 | 16.897 | 40.409 | 0.00 | 0.00 |
| ATOM | 7865 | C    | VAL | X | 516 | 44.279 | 15.548 | 43.497 | 0.00 | 0.00 |
| ATOM | 7866 | O    | VAL | X | 516 | 44.472 | 14.354 | 43.710 | 0.00 | 0.00 |
| ATOM | 7867 | N    | ARG | X | 517 | 44.582 | 16.532 | 44.302 | 0.00 | 0.00 |
| ATOM | 7868 | H    | ARG | X | 517 | 44.226 | 17.444 | 44.054 | 0.00 | 0.00 |
| ATOM | 7869 | CA   | ARG | X | 517 | 45.164 | 16.282 | 45.680 | 0.00 | 0.00 |
| ATOM | 7870 | HA   | ARG | X | 517 | 45.386 | 15.215 | 45.658 | 0.00 | 0.00 |
| ATOM | 7871 | CB   | ARG | X | 517 | 46.445 | 17.155 | 45.852 | 0.00 | 0.00 |
| ATOM | 7872 | HB2  | ARG | X | 517 | 46.285 | 18.037 | 45.233 | 0.00 | 0.00 |
| ATOM | 7873 | HB3  | ARG | X | 517 | 46.670 | 17.311 | 46.907 | 0.00 | 0.00 |
| ATOM | 7874 | CG   | ARG | X | 517 | 47.644 | 16.304 | 45.326 | 0.00 | 0.00 |
| ATOM | 7875 | HG2  | ARG | X | 517 | 48.555 | 16.821 | 45.627 | 0.00 | 0.00 |
| ATOM | 7876 | HG3  | ARG | X | 517 | 47.668 | 15.295 | 45.737 | 0.00 | 0.00 |
| ATOM | 7877 | CD   | ARG | X | 517 | 47.639 | 16.094 | 43.837 | 0.00 | 0.00 |
| ATOM | 7878 | HD2  | ARG | X | 517 | 46.703 | 15.611 | 43.558 | 0.00 | 0.00 |
| ATOM | 7879 | HD3  | ARG | X | 517 | 47.561 | 17.038 | 43.298 | 0.00 | 0.00 |
| ATOM | 7880 | NE   | ARG | X | 517 | 48.875 | 15.412 | 43.290 | 0.00 | 0.00 |
| ATOM | 7881 | HE   | ARG | X | 517 | 48.730 | 14.531 | 42.819 | 0.00 | 0.00 |
| ATOM | 7882 | CZ   | ARG | X | 517 | 50.049 | 15.974 | 42.940 | 0.00 | 0.00 |
| ATOM | 7883 | NH1  | ARG | X | 517 | 50.337 | 17.262 | 43.107 | 0.00 | 0.00 |
| ATOM | 7884 | HH11 | ARG | X | 517 | 49.763 | 17.901 | 43.638 | 0.00 | 0.00 |
| ATOM | 7885 | HH12 | ARG | X | 517 | 51.270 | 17.517 | 42.817 | 0.00 | 0.00 |
| ATOM | 7886 | NH2  | ARG | X | 517 | 50.924 | 15.265 | 42.270 | 0.00 | 0.00 |
| ATOM | 7887 | HH21 | ARG | X | 517 | 50.745 | 14.337 | 41.915 | 0.00 | 0.00 |
| ATOM | 7888 | HH22 | ARG | X | 517 | 51.732 | 15.708 | 41.857 | 0.00 | 0.00 |
| ATOM | 7889 | C    | ARG | X | 517 | 44.184 | 16.746 | 46.787 | 0.00 | 0.00 |
| ATOM | 7890 | O    | ARG | X | 517 | 43.434 | 17.732 | 46.627 | 0.00 | 0.00 |
| ATOM | 7891 | N    | ARG | X | 518 | 44.199 | 15.952 | 47.873 | 0.00 | 0.00 |
| ATOM | 7892 | H    | ARG | X | 518 | 44.900 | 15.229 | 47.795 | 0.00 | 0.00 |
| ATOM | 7893 | CA   | ARG | X | 518 | 43.340 | 16.148 | 49.023 | 0.00 | 0.00 |
| ATOM | 7894 | HA   | ARG | X | 518 | 42.513 | 16.665 | 48.535 | 0.00 | 0.00 |
| ATOM | 7895 | CB   | ARG | X | 518 | 42.795 | 14.827 | 49.694 | 0.00 | 0.00 |
| ATOM | 7896 | HB2  | ARG | X | 518 | 41.978 | 15.135 | 50.346 | 0.00 | 0.00 |
| ATOM | 7897 | HB3  | ARG | X | 518 | 42.437 | 14.089 | 48.977 | 0.00 | 0.00 |
| ATOM | 7898 | CG   | ARG | X | 518 | 43.828 | 14.017 | 50.556 | 0.00 | 0.00 |
| ATOM | 7899 | HG2  | ARG | X | 518 | 44.699 | 13.778 | 49.947 | 0.00 | 0.00 |
| ATOM | 7900 | HG3  | ARG | X | 518 | 44.122 | 14.691 | 51.361 | 0.00 | 0.00 |
| ATOM | 7901 | CD   | ARG | X | 518 | 43.263 | 12.669 | 51.281 | 0.00 | 0.00 |
| ATOM | 7902 | HD2  | ARG | X | 518 | 43.727 | 12.584 | 52.264 | 0.00 | 0.00 |
| ATOM | 7903 | HD3  | ARG | X | 518 | 42.189 | 12.771 | 51.434 | 0.00 | 0.00 |
| ATOM | 7904 | NE   | ARG | X | 518 | 43.657 | 11.521 | 50.486 | 0.00 | 0.00 |

|      |      |      |     |   |     |        |        |        |      |      |
|------|------|------|-----|---|-----|--------|--------|--------|------|------|
| ATOM | 7905 | HE   | ARG | X | 518 | 44.191 | 11.715 | 49.651 | 0.00 | 0.00 |
| ATOM | 7906 | CZ   | ARG | X | 518 | 43.255 | 10.193 | 50.608 | 0.00 | 0.00 |
| ATOM | 7907 | NH1  | ARG | X | 518 | 42.306 | 9.806  | 51.425 | 0.00 | 0.00 |
| ATOM | 7908 | HH11 | ARG | X | 518 | 41.876 | 10.553 | 51.952 | 0.00 | 0.00 |
| ATOM | 7909 | HH12 | ARG | X | 518 | 41.986 | 8.857  | 51.561 | 0.00 | 0.00 |
| ATOM | 7910 | NH2  | ARG | X | 518 | 43.891 | 9.269  | 49.964 | 0.00 | 0.00 |
| ATOM | 7911 | HH21 | ARG | X | 518 | 44.781 | 9.426  | 49.512 | 0.00 | 0.00 |
| ATOM | 7912 | HH22 | ARG | X | 518 | 43.505 | 8.343  | 50.078 | 0.00 | 0.00 |
| ATOM | 7913 | C    | ARG | X | 518 | 44.003 | 17.171 | 49.974 | 0.00 | 0.00 |
| ATOM | 7914 | O    | ARG | X | 518 | 45.215 | 17.376 | 50.047 | 0.00 | 0.00 |
| ATOM | 7915 | N    | GLY | X | 519 | 43.134 | 17.817 | 50.791 | 0.00 | 0.00 |
| ATOM | 7916 | H    | GLY | X | 519 | 42.160 | 17.766 | 50.530 | 0.00 | 0.00 |
| ATOM | 7917 | CA   | GLY | X | 519 | 43.607 | 18.702 | 51.860 | 0.00 | 0.00 |
| ATOM | 7918 | HA2  | GLY | X | 519 | 42.773 | 19.118 | 52.426 | 0.00 | 0.00 |
| ATOM | 7919 | HA3  | GLY | X | 519 | 44.216 | 18.050 | 52.486 | 0.00 | 0.00 |
| ATOM | 7920 | C    | GLY | X | 519 | 44.597 | 19.858 | 51.407 | 0.00 | 0.00 |
| ATOM | 7921 | O    | GLY | X | 519 | 45.684 | 20.029 | 52.040 | 0.00 | 0.00 |
| ATOM | 7922 | N    | LEU | X | 520 | 44.061 | 20.920 | 50.698 | 0.00 | 0.00 |
| ATOM | 7923 | H    | LEU | X | 520 | 43.158 | 20.767 | 50.273 | 0.00 | 0.00 |
| ATOM | 7924 | CA   | LEU | X | 520 | 44.847 | 22.109 | 50.465 | 0.00 | 0.00 |
| ATOM | 7925 | HA   | LEU | X | 520 | 45.755 | 21.945 | 49.884 | 0.00 | 0.00 |
| ATOM | 7926 | CB   | LEU | X | 520 | 43.974 | 23.012 | 49.592 | 0.00 | 0.00 |
| ATOM | 7927 | HB2  | LEU | X | 520 | 43.646 | 22.465 | 48.708 | 0.00 | 0.00 |
| ATOM | 7928 | HB3  | LEU | X | 520 | 43.049 | 23.199 | 50.137 | 0.00 | 0.00 |
| ATOM | 7929 | CG   | LEU | X | 520 | 44.512 | 24.324 | 48.937 | 0.00 | 0.00 |
| ATOM | 7930 | HG   | LEU | X | 520 | 44.395 | 25.157 | 49.630 | 0.00 | 0.00 |
| ATOM | 7931 | CD1  | LEU | X | 520 | 45.901 | 24.347 | 48.374 | 0.00 | 0.00 |
| ATOM | 7932 | HD11 | LEU | X | 520 | 46.637 | 24.170 | 49.159 | 0.00 | 0.00 |
| ATOM | 7933 | HD12 | LEU | X | 520 | 46.075 | 25.352 | 47.989 | 0.00 | 0.00 |
| ATOM | 7934 | HD13 | LEU | X | 520 | 46.068 | 23.567 | 47.631 | 0.00 | 0.00 |
| ATOM | 7935 | CD2  | LEU | X | 520 | 43.585 | 24.806 | 47.849 | 0.00 | 0.00 |
| ATOM | 7936 | HD21 | LEU | X | 520 | 42.589 | 24.887 | 48.285 | 0.00 | 0.00 |
| ATOM | 7937 | HD22 | LEU | X | 520 | 43.815 | 25.833 | 47.564 | 0.00 | 0.00 |
| ATOM | 7938 | HD23 | LEU | X | 520 | 43.648 | 24.258 | 46.909 | 0.00 | 0.00 |
| ATOM | 7939 | C    | LEU | X | 520 | 45.361 | 22.784 | 51.737 | 0.00 | 0.00 |
| ATOM | 7940 | O    | LEU | X | 520 | 44.557 | 23.439 | 52.428 | 0.00 | 0.00 |
| ATOM | 7941 | N    | ARG | X | 521 | 46.669 | 22.724 | 52.002 | 0.00 | 0.00 |
| ATOM | 7942 | H    | ARG | X | 521 | 47.390 | 22.367 | 51.391 | 0.00 | 0.00 |
| ATOM | 7943 | CA   | ARG | X | 521 | 47.269 | 23.468 | 53.136 | 0.00 | 0.00 |
| ATOM | 7944 | HA   | ARG | X | 521 | 48.248 | 22.991 | 53.195 | 0.00 | 0.00 |
| ATOM | 7945 | CB   | ARG | X | 521 | 47.466 | 25.014 | 52.815 | 0.00 | 0.00 |
| ATOM | 7946 | HB2  | ARG | X | 521 | 47.065 | 25.217 | 51.823 | 0.00 | 0.00 |
| ATOM | 7947 | HB3  | ARG | X | 521 | 46.842 | 25.654 | 53.439 | 0.00 | 0.00 |
| ATOM | 7948 | CG   | ARG | X | 521 | 48.908 | 25.551 | 52.827 | 0.00 | 0.00 |
| ATOM | 7949 | HG2  | ARG | X | 521 | 49.002 | 26.632 | 52.725 | 0.00 | 0.00 |
| ATOM | 7950 | HG3  | ARG | X | 521 | 49.214 | 25.309 | 53.845 | 0.00 | 0.00 |
| ATOM | 7951 | CD   | ARG | X | 521 | 49.925 | 24.887 | 51.948 | 0.00 | 0.00 |
| ATOM | 7952 | HD2  | ARG | X | 521 | 50.042 | 23.845 | 52.243 | 0.00 | 0.00 |
| ATOM | 7953 | HD3  | ARG | X | 521 | 49.569 | 24.812 | 50.920 | 0.00 | 0.00 |
| ATOM | 7954 | NE   | ARG | X | 521 | 51.181 | 25.641 | 51.990 | 0.00 | 0.00 |
| ATOM | 7955 | HE   | ARG | X | 521 | 51.122 | 26.574 | 52.373 | 0.00 | 0.00 |
| ATOM | 7956 | CZ   | ARG | X | 521 | 52.343 | 25.237 | 51.579 | 0.00 | 0.00 |
| ATOM | 7957 | NH1  | ARG | X | 521 | 52.581 | 24.117 | 50.884 | 0.00 | 0.00 |
| ATOM | 7958 | HH11 | ARG | X | 521 | 51.792 | 23.600 | 50.524 | 0.00 | 0.00 |
| ATOM | 7959 | HH12 | ARG | X | 521 | 53.519 | 23.753 | 50.795 | 0.00 | 0.00 |
| ATOM | 7960 | NH2  | ARG | X | 521 | 53.315 | 26.071 | 52.009 | 0.00 | 0.00 |
| ATOM | 7961 | HH21 | ARG | X | 521 | 52.982 | 26.885 | 52.506 | 0.00 | 0.00 |
| ATOM | 7962 | HH22 | ARG | X | 521 | 54.301 | 25.900 | 51.868 | 0.00 | 0.00 |
| ATOM | 7963 | C    | ARG | X | 521 | 46.495 | 23.207 | 54.450 | 0.00 | 0.00 |
| ATOM | 7964 | O    | ARG | X | 521 | 46.355 | 24.044 | 55.295 | 0.00 | 0.00 |
| ATOM | 7965 | N    | ALA | X | 522 | 46.004 | 21.981 | 54.600 | 0.00 | 0.00 |
| ATOM | 7966 | H    | ALA | X | 522 | 46.224 | 21.273 | 53.914 | 0.00 | 0.00 |
| ATOM | 7967 | CA   | ALA | X | 522 | 45.120 | 21.685 | 55.718 | 0.00 | 0.00 |
| ATOM | 7968 | HA   | ALA | X | 522 | 44.221 | 22.282 | 55.565 | 0.00 | 0.00 |
| ATOM | 7969 | CB   | ALA | X | 522 | 44.750 | 20.186 | 55.547 | 0.00 | 0.00 |
| ATOM | 7970 | HB1  | ALA | X | 522 | 45.683 | 19.633 | 55.430 | 0.00 | 0.00 |
| ATOM | 7971 | HB2  | ALA | X | 522 | 44.265 | 20.044 | 54.581 | 0.00 | 0.00 |

|      |      |      |     |   |     |        |        |        |      |      |
|------|------|------|-----|---|-----|--------|--------|--------|------|------|
| ATOM | 7972 | HB3  | ALA | X | 522 | 44.160 | 19.895 | 56.417 | 0.00 | 0.00 |
| ATOM | 7973 | C    | ALA | X | 522 | 45.624 | 21.944 | 57.143 | 0.00 | 0.00 |
| ATOM | 7974 | O    | ALA | X | 522 | 44.842 | 21.900 | 58.145 | 0.00 | 0.00 |
| ATOM | 7975 | N    | GLN | X | 523 | 46.886 | 22.361 | 57.386 | 0.00 | 0.00 |
| ATOM | 7976 | H    | GLN | X | 523 | 47.457 | 22.419 | 56.554 | 0.00 | 0.00 |
| ATOM | 7977 | CA   | GLN | X | 523 | 47.601 | 22.063 | 58.601 | 0.00 | 0.00 |
| ATOM | 7978 | HA   | GLN | X | 523 | 46.894 | 22.306 | 59.395 | 0.00 | 0.00 |
| ATOM | 7979 | CB   | GLN | X | 523 | 47.846 | 20.597 | 58.713 | 0.00 | 0.00 |
| ATOM | 7980 | HB2  | GLN | X | 523 | 46.853 | 20.193 | 58.913 | 0.00 | 0.00 |
| ATOM | 7981 | HB3  | GLN | X | 523 | 48.229 | 20.204 | 57.771 | 0.00 | 0.00 |
| ATOM | 7982 | CG   | GLN | X | 523 | 48.718 | 20.123 | 59.887 | 0.00 | 0.00 |
| ATOM | 7983 | HG2  | GLN | X | 523 | 49.700 | 20.573 | 59.743 | 0.00 | 0.00 |
| ATOM | 7984 | HG3  | GLN | X | 523 | 48.337 | 20.358 | 60.881 | 0.00 | 0.00 |
| ATOM | 7985 | CD   | GLN | X | 523 | 48.999 | 18.615 | 59.991 | 0.00 | 0.00 |
| ATOM | 7986 | OE1  | GLN | X | 523 | 48.050 | 17.818 | 60.167 | 0.00 | 0.00 |
| ATOM | 7987 | NE2  | GLN | X | 523 | 50.202 | 18.170 | 59.920 | 0.00 | 0.00 |
| ATOM | 7988 | HE21 | GLN | X | 523 | 50.400 | 17.182 | 59.853 | 0.00 | 0.00 |
| ATOM | 7989 | HE22 | GLN | X | 523 | 50.901 | 18.891 | 59.816 | 0.00 | 0.00 |
| ATOM | 7990 | C    | GLN | X | 523 | 48.841 | 22.935 | 58.813 | 0.00 | 0.00 |
| ATOM | 7991 | O    | GLN | X | 523 | 49.142 | 23.411 | 59.872 | 0.00 | 0.00 |
| ATOM | 7992 | N    | ALA | X | 524 | 49.593 | 23.195 | 57.704 | 0.00 | 0.00 |
| ATOM | 7993 | H    | ALA | X | 524 | 49.440 | 22.667 | 56.857 | 0.00 | 0.00 |
| ATOM | 7994 | CA   | ALA | X | 524 | 50.859 | 23.943 | 57.795 | 0.00 | 0.00 |
| ATOM | 7995 | HA   | ALA | X | 524 | 51.458 | 23.492 | 58.587 | 0.00 | 0.00 |
| ATOM | 7996 | CB   | ALA | X | 524 | 51.504 | 23.780 | 56.433 | 0.00 | 0.00 |
| ATOM | 7997 | HB1  | ALA | X | 524 | 51.800 | 22.753 | 56.219 | 0.00 | 0.00 |
| ATOM | 7998 | HB2  | ALA | X | 524 | 52.347 | 24.465 | 56.342 | 0.00 | 0.00 |
| ATOM | 7999 | HB3  | ALA | X | 524 | 50.830 | 23.921 | 55.588 | 0.00 | 0.00 |
| ATOM | 8000 | C    | ALA | X | 524 | 50.581 | 25.474 | 58.025 | 0.00 | 0.00 |
| ATOM | 8001 | O    | ALA | X | 524 | 51.392 | 26.199 | 58.664 | 0.00 | 0.00 |
| ATOM | 8002 | N    | CYX | X | 525 | 49.445 | 26.070 | 57.675 | 0.00 | 0.00 |
| ATOM | 8003 | H    | CYX | X | 525 | 48.855 | 25.548 | 57.043 | 0.00 | 0.00 |
| ATOM | 8004 | CA   | CYX | X | 525 | 48.927 | 27.397 | 58.053 | 0.00 | 0.00 |
| ATOM | 8005 | HA   | CYX | X | 525 | 49.602 | 28.162 | 57.672 | 0.00 | 0.00 |
| ATOM | 8006 | CB   | CYX | X | 525 | 47.538 | 27.538 | 57.412 | 0.00 | 0.00 |
| ATOM | 8007 | HB2  | CYX | X | 525 | 46.899 | 26.752 | 57.814 | 0.00 | 0.00 |
| ATOM | 8008 | HB3  | CYX | X | 525 | 47.137 | 28.511 | 57.698 | 0.00 | 0.00 |
| ATOM | 8009 | SG   | CYX | X | 525 | 47.540 | 27.398 | 55.636 | 0.00 | 0.00 |
| ATOM | 8010 | C    | CYX | X | 525 | 48.838 | 27.607 | 59.593 | 0.00 | 0.00 |
| ATOM | 8011 | O    | CYX | X | 525 | 48.834 | 28.751 | 60.008 | 0.00 | 0.00 |
| ATOM | 8012 | N    | ALA | X | 526 | 48.639 | 26.637 | 60.510 | 0.00 | 0.00 |
| ATOM | 8013 | H    | ALA | X | 526 | 48.677 | 25.669 | 60.222 | 0.00 | 0.00 |
| ATOM | 8014 | CA   | ALA | X | 526 | 48.775 | 26.819 | 61.977 | 0.00 | 0.00 |
| ATOM | 8015 | HA   | ALA | X | 526 | 47.926 | 27.421 | 62.300 | 0.00 | 0.00 |
| ATOM | 8016 | CB   | ALA | X | 526 | 48.643 | 25.444 | 62.677 | 0.00 | 0.00 |
| ATOM | 8017 | HB1  | ALA | X | 526 | 48.383 | 25.704 | 63.702 | 0.00 | 0.00 |
| ATOM | 8018 | HB2  | ALA | X | 526 | 49.564 | 24.902 | 62.459 | 0.00 | 0.00 |
| ATOM | 8019 | HB3  | ALA | X | 526 | 47.734 | 24.951 | 62.332 | 0.00 | 0.00 |
| ATOM | 8020 | C    | ALA | X | 526 | 49.931 | 27.639 | 62.462 | 0.00 | 0.00 |
| ATOM | 8021 | O    | ALA | X | 526 | 49.758 | 28.433 | 63.400 | 0.00 | 0.00 |
| ATOM | 8022 | N    | PHE | X | 527 | 51.151 | 27.518 | 61.928 | 0.00 | 0.00 |
| ATOM | 8023 | H    | PHE | X | 527 | 51.316 | 26.695 | 61.367 | 0.00 | 0.00 |
| ATOM | 8024 | CA   | PHE | X | 527 | 52.338 | 28.388 | 62.203 | 0.00 | 0.00 |
| ATOM | 8025 | HA   | PHE | X | 527 | 52.610 | 28.253 | 63.250 | 0.00 | 0.00 |
| ATOM | 8026 | CB   | PHE | X | 527 | 53.533 | 27.939 | 61.365 | 0.00 | 0.00 |
| ATOM | 8027 | HB2  | PHE | X | 527 | 53.745 | 26.892 | 61.581 | 0.00 | 0.00 |
| ATOM | 8028 | HB3  | PHE | X | 527 | 53.188 | 27.890 | 60.332 | 0.00 | 0.00 |
| ATOM | 8029 | CG   | PHE | X | 527 | 54.895 | 28.667 | 61.638 | 0.00 | 0.00 |
| ATOM | 8030 | CD1  | PHE | X | 527 | 55.679 | 28.275 | 62.693 | 0.00 | 0.00 |
| ATOM | 8031 | HD1  | PHE | X | 527 | 55.393 | 27.439 | 63.314 | 0.00 | 0.00 |
| ATOM | 8032 | CE1  | PHE | X | 527 | 56.931 | 28.871 | 63.032 | 0.00 | 0.00 |
| ATOM | 8033 | HE1  | PHE | X | 527 | 57.580 | 28.558 | 63.836 | 0.00 | 0.00 |
| ATOM | 8034 | CZ   | PHE | X | 527 | 57.443 | 29.710 | 62.003 | 0.00 | 0.00 |
| ATOM | 8035 | HZ   | PHE | X | 527 | 58.466 | 30.020 | 62.155 | 0.00 | 0.00 |
| ATOM | 8036 | CE2  | PHE | X | 527 | 56.568 | 30.152 | 60.994 | 0.00 | 0.00 |
| ATOM | 8037 | HE2  | PHE | X | 527 | 56.982 | 30.937 | 60.378 | 0.00 | 0.00 |
| ATOM | 8038 | CD2  | PHE | X | 527 | 55.272 | 29.685 | 60.797 | 0.00 | 0.00 |

|      |      |      |     |   |     |        |        |        |      |      |
|------|------|------|-----|---|-----|--------|--------|--------|------|------|
| ATOM | 8039 | HD2  | PHE | X | 527 | 54.655 | 29.909 | 59.940 | 0.00 | 0.00 |
| ATOM | 8040 | C    | PHE | X | 527 | 52.104 | 29.823 | 61.966 | 0.00 | 0.00 |
| ATOM | 8041 | O    | PHE | X | 527 | 52.399 | 30.634 | 62.850 | 0.00 | 0.00 |
| ATOM | 8042 | N    | TRP | X | 528 | 51.444 | 30.111 | 60.853 | 0.00 | 0.00 |
| ATOM | 8043 | H    | TRP | X | 528 | 51.231 | 29.339 | 60.238 | 0.00 | 0.00 |
| ATOM | 8044 | CA   | TRP | X | 528 | 51.059 | 31.460 | 60.435 | 0.00 | 0.00 |
| ATOM | 8045 | HA   | TRP | X | 528 | 51.920 | 32.066 | 60.717 | 0.00 | 0.00 |
| ATOM | 8046 | CB   | TRP | X | 528 | 50.713 | 31.535 | 58.917 | 0.00 | 0.00 |
| ATOM | 8047 | HB2  | TRP | X | 528 | 49.913 | 30.807 | 58.785 | 0.00 | 0.00 |
| ATOM | 8048 | HB3  | TRP | X | 528 | 50.475 | 32.560 | 58.632 | 0.00 | 0.00 |
| ATOM | 8049 | CG   | TRP | X | 528 | 51.862 | 31.303 | 58.011 | 0.00 | 0.00 |
| ATOM | 8050 | CD1  | TRP | X | 528 | 51.908 | 30.227 | 57.157 | 0.00 | 0.00 |
| ATOM | 8051 | HD1  | TRP | X | 528 | 51.092 | 29.526 | 57.064 | 0.00 | 0.00 |
| ATOM | 8052 | NE1  | TRP | X | 528 | 53.156 | 30.274 | 56.527 | 0.00 | 0.00 |
| ATOM | 8053 | HE1  | TRP | X | 528 | 53.463 | 29.618 | 55.823 | 0.00 | 0.00 |
| ATOM | 8054 | CE2  | TRP | X | 528 | 53.889 | 31.321 | 56.926 | 0.00 | 0.00 |
| ATOM | 8055 | CZ2  | TRP | X | 528 | 55.253 | 31.665 | 56.607 | 0.00 | 0.00 |
| ATOM | 8056 | HZ2  | TRP | X | 528 | 55.813 | 31.094 | 55.880 | 0.00 | 0.00 |
| ATOM | 8057 | CH2  | TRP | X | 528 | 55.809 | 32.827 | 57.104 | 0.00 | 0.00 |
| ATOM | 8058 | HH2  | TRP | X | 528 | 56.865 | 33.023 | 56.994 | 0.00 | 0.00 |
| ATOM | 8059 | CZ3  | TRP | X | 528 | 55.089 | 33.619 | 57.983 | 0.00 | 0.00 |
| ATOM | 8060 | HZ3  | TRP | X | 528 | 55.525 | 34.479 | 58.469 | 0.00 | 0.00 |
| ATOM | 8061 | CE3  | TRP | X | 528 | 53.704 | 33.275 | 58.239 | 0.00 | 0.00 |
| ATOM | 8062 | HE3  | TRP | X | 528 | 53.125 | 33.729 | 59.030 | 0.00 | 0.00 |
| ATOM | 8063 | CD2  | TRP | X | 528 | 53.101 | 32.066 | 57.781 | 0.00 | 0.00 |
| ATOM | 8064 | C    | TRP | X | 528 | 49.886 | 32.029 | 61.243 | 0.00 | 0.00 |
| ATOM | 8065 | O    | TRP | X | 528 | 49.907 | 33.189 | 61.612 | 0.00 | 0.00 |
| ATOM | 8066 | N    | ASN | X | 529 | 48.818 | 31.257 | 61.399 | 0.00 | 0.00 |
| ATOM | 8067 | H    | ASN | X | 529 | 48.770 | 30.337 | 60.985 | 0.00 | 0.00 |
| ATOM | 8068 | CA   | ASN | X | 529 | 47.652 | 31.667 | 62.071 | 0.00 | 0.00 |
| ATOM | 8069 | HA   | ASN | X | 529 | 47.315 | 32.620 | 61.664 | 0.00 | 0.00 |
| ATOM | 8070 | CB   | ASN | X | 529 | 46.530 | 30.635 | 61.692 | 0.00 | 0.00 |
| ATOM | 8071 | HB2  | ASN | X | 529 | 46.376 | 30.327 | 60.658 | 0.00 | 0.00 |
| ATOM | 8072 | HB3  | ASN | X | 529 | 46.784 | 29.789 | 62.331 | 0.00 | 0.00 |
| ATOM | 8073 | CG   | ASN | X | 529 | 45.222 | 31.189 | 62.249 | 0.00 | 0.00 |
| ATOM | 8074 | OD1  | ASN | X | 529 | 45.013 | 32.364 | 62.297 | 0.00 | 0.00 |
| ATOM | 8075 | ND2  | ASN | X | 529 | 44.346 | 30.250 | 62.687 | 0.00 | 0.00 |
| ATOM | 8076 | HD21 | ASN | X | 529 | 43.502 | 30.645 | 63.076 | 0.00 | 0.00 |
| ATOM | 8077 | HD22 | ASN | X | 529 | 44.433 | 29.247 | 62.607 | 0.00 | 0.00 |
| ATOM | 8078 | C    | ASN | X | 529 | 47.858 | 31.793 | 63.596 | 0.00 | 0.00 |
| ATOM | 8079 | O    | ASN | X | 529 | 47.375 | 32.717 | 64.211 | 0.00 | 0.00 |
| ATOM | 8080 | N    | ARG | X | 530 | 48.609 | 30.893 | 64.173 | 0.00 | 0.00 |
| ATOM | 8081 | H    | ARG | X | 530 | 49.017 | 30.130 | 63.651 | 0.00 | 0.00 |
| ATOM | 8082 | CA   | ARG | X | 530 | 48.720 | 30.795 | 65.671 | 0.00 | 0.00 |
| ATOM | 8083 | HA   | ARG | X | 530 | 48.291 | 31.689 | 66.125 | 0.00 | 0.00 |
| ATOM | 8084 | CB   | ARG | X | 530 | 47.759 | 29.698 | 66.166 | 0.00 | 0.00 |
| ATOM | 8085 | HB2  | ARG | X | 530 | 48.015 | 28.727 | 65.742 | 0.00 | 0.00 |
| ATOM | 8086 | HB3  | ARG | X | 530 | 47.980 | 29.514 | 67.217 | 0.00 | 0.00 |
| ATOM | 8087 | CG   | ARG | X | 530 | 46.288 | 30.104 | 65.952 | 0.00 | 0.00 |
| ATOM | 8088 | HG2  | ARG | X | 530 | 46.138 | 31.051 | 66.469 | 0.00 | 0.00 |
| ATOM | 8089 | HG3  | ARG | X | 530 | 46.058 | 30.154 | 64.887 | 0.00 | 0.00 |
| ATOM | 8090 | CD   | ARG | X | 530 | 45.232 | 29.185 | 66.561 | 0.00 | 0.00 |
| ATOM | 8091 | HD2  | ARG | X | 530 | 45.117 | 28.276 | 65.970 | 0.00 | 0.00 |
| ATOM | 8092 | HD3  | ARG | X | 530 | 45.391 | 29.005 | 67.624 | 0.00 | 0.00 |
| ATOM | 8093 | NE   | ARG | X | 530 | 43.958 | 29.951 | 66.512 | 0.00 | 0.00 |
| ATOM | 8094 | HE   | ARG | X | 530 | 43.936 | 30.797 | 65.961 | 0.00 | 0.00 |
| ATOM | 8095 | CZ   | ARG | X | 530 | 42.904 | 29.815 | 67.314 | 0.00 | 0.00 |
| ATOM | 8096 | NH1  | ARG | X | 530 | 42.762 | 28.814 | 68.206 | 0.00 | 0.00 |
| ATOM | 8097 | HH11 | ARG | X | 530 | 43.453 | 28.078 | 68.185 | 0.00 | 0.00 |
| ATOM | 8098 | HH12 | ARG | X | 530 | 41.980 | 28.846 | 68.844 | 0.00 | 0.00 |
| ATOM | 8099 | NH2  | ARG | X | 530 | 41.955 | 30.664 | 67.235 | 0.00 | 0.00 |
| ATOM | 8100 | HH21 | ARG | X | 530 | 42.060 | 31.452 | 66.612 | 0.00 | 0.00 |
| ATOM | 8101 | HH22 | ARG | X | 530 | 41.017 | 30.399 | 67.502 | 0.00 | 0.00 |
| ATOM | 8102 | C    | ARG | X | 530 | 50.099 | 30.646 | 66.331 | 0.00 | 0.00 |
| ATOM | 8103 | O    | ARG | X | 530 | 50.157 | 30.776 | 67.496 | 0.00 | 0.00 |
| ATOM | 8104 | N    | PHE | X | 531 | 51.263 | 30.627 | 65.605 | 0.00 | 0.00 |
| ATOM | 8105 | H    | PHE | X | 531 | 51.186 | 30.696 | 64.600 | 0.00 | 0.00 |

|      |      |      |     |   |     |        |        |        |      |      |
|------|------|------|-----|---|-----|--------|--------|--------|------|------|
| ATOM | 8106 | CA   | PHE | X | 531 | 52.587 | 30.864 | 66.257 | 0.00 | 0.00 |
| ATOM | 8107 | HA   | PHE | X | 531 | 52.564 | 30.801 | 67.345 | 0.00 | 0.00 |
| ATOM | 8108 | CB   | PHE | X | 531 | 53.603 | 29.842 | 65.813 | 0.00 | 0.00 |
| ATOM | 8109 | HB2  | PHE | X | 531 | 53.429 | 28.910 | 66.351 | 0.00 | 0.00 |
| ATOM | 8110 | HB3  | PHE | X | 531 | 53.590 | 29.621 | 64.746 | 0.00 | 0.00 |
| ATOM | 8111 | CG   | PHE | X | 531 | 54.975 | 30.313 | 66.281 | 0.00 | 0.00 |
| ATOM | 8112 | CD1  | PHE | X | 531 | 56.044 | 30.802 | 65.465 | 0.00 | 0.00 |
| ATOM | 8113 | HD1  | PHE | X | 531 | 55.799 | 30.985 | 64.429 | 0.00 | 0.00 |
| ATOM | 8114 | CE1  | PHE | X | 531 | 57.296 | 31.062 | 66.008 | 0.00 | 0.00 |
| ATOM | 8115 | HE1  | PHE | X | 531 | 58.020 | 31.520 | 65.351 | 0.00 | 0.00 |
| ATOM | 8116 | CZ   | PHE | X | 531 | 57.623 | 30.817 | 67.334 | 0.00 | 0.00 |
| ATOM | 8117 | HZ   | PHE | X | 531 | 58.602 | 30.973 | 67.762 | 0.00 | 0.00 |
| ATOM | 8118 | CE2  | PHE | X | 531 | 56.625 | 30.307 | 68.190 | 0.00 | 0.00 |
| ATOM | 8119 | HE2  | PHE | X | 531 | 56.834 | 29.906 | 69.170 | 0.00 | 0.00 |
| ATOM | 8120 | CD2  | PHE | X | 531 | 55.288 | 30.150 | 67.658 | 0.00 | 0.00 |
| ATOM | 8121 | HD2  | PHE | X | 531 | 54.525 | 29.786 | 68.329 | 0.00 | 0.00 |
| ATOM | 8122 | C    | PHE | X | 531 | 53.015 | 32.303 | 65.919 | 0.00 | 0.00 |
| ATOM | 8123 | O    | PHE | X | 531 | 53.429 | 33.043 | 66.870 | 0.00 | 0.00 |
| ATOM | 8124 | N    | LEU | X | 532 | 53.010 | 32.732 | 64.676 | 0.00 | 0.00 |
| ATOM | 8125 | H    | LEU | X | 532 | 52.914 | 32.008 | 63.979 | 0.00 | 0.00 |
| ATOM | 8126 | CA   | LEU | X | 532 | 53.514 | 34.093 | 64.314 | 0.00 | 0.00 |
| ATOM | 8127 | HA   | LEU | X | 532 | 54.558 | 34.063 | 64.624 | 0.00 | 0.00 |
| ATOM | 8128 | CB   | LEU | X | 532 | 53.324 | 34.282 | 62.770 | 0.00 | 0.00 |
| ATOM | 8129 | HB2  | LEU | X | 532 | 52.716 | 33.440 | 62.438 | 0.00 | 0.00 |
| ATOM | 8130 | HB3  | LEU | X | 532 | 52.855 | 35.222 | 62.479 | 0.00 | 0.00 |
| ATOM | 8131 | CG   | LEU | X | 532 | 54.632 | 34.233 | 62.011 | 0.00 | 0.00 |
| ATOM | 8132 | HG   | LEU | X | 532 | 54.385 | 34.389 | 60.961 | 0.00 | 0.00 |
| ATOM | 8133 | CD1  | LEU | X | 532 | 55.629 | 35.308 | 62.541 | 0.00 | 0.00 |
| ATOM | 8134 | HD11 | LEU | X | 532 | 56.544 | 35.274 | 61.949 | 0.00 | 0.00 |
| ATOM | 8135 | HD12 | LEU | X | 532 | 55.889 | 35.119 | 63.583 | 0.00 | 0.00 |
| ATOM | 8136 | HD13 | LEU | X | 532 | 55.276 | 36.334 | 62.438 | 0.00 | 0.00 |
| ATOM | 8137 | CD2  | LEU | X | 532 | 55.353 | 32.846 | 62.085 | 0.00 | 0.00 |
| ATOM | 8138 | HD21 | LEU | X | 532 | 56.146 | 32.875 | 61.337 | 0.00 | 0.00 |
| ATOM | 8139 | HD22 | LEU | X | 532 | 55.788 | 32.742 | 63.078 | 0.00 | 0.00 |
| ATOM | 8140 | HD23 | LEU | X | 532 | 54.668 | 32.021 | 61.893 | 0.00 | 0.00 |
| ATOM | 8141 | C    | LEU | X | 532 | 52.803 | 35.200 | 65.091 | 0.00 | 0.00 |
| ATOM | 8142 | O    | LEU | X | 532 | 53.632 | 35.958 | 65.545 | 0.00 | 0.00 |
| ATOM | 8143 | N    | PRO | X | 533 | 51.513 | 35.403 | 65.286 | 0.00 | 0.00 |
| ATOM | 8144 | CD   | PRO | X | 533 | 50.363 | 34.634 | 64.735 | 0.00 | 0.00 |
| ATOM | 8145 | HD2  | PRO | X | 533 | 50.427 | 33.591 | 65.044 | 0.00 | 0.00 |
| ATOM | 8146 | HD3  | PRO | X | 533 | 50.242 | 34.696 | 63.653 | 0.00 | 0.00 |
| ATOM | 8147 | CG   | PRO | X | 533 | 49.079 | 35.183 | 65.481 | 0.00 | 0.00 |
| ATOM | 8148 | HG2  | PRO | X | 533 | 48.846 | 34.447 | 66.251 | 0.00 | 0.00 |
| ATOM | 8149 | HG3  | PRO | X | 533 | 48.294 | 35.278 | 64.731 | 0.00 | 0.00 |
| ATOM | 8150 | CB   | PRO | X | 533 | 49.573 | 36.473 | 66.101 | 0.00 | 0.00 |
| ATOM | 8151 | HB2  | PRO | X | 533 | 49.135 | 36.613 | 67.089 | 0.00 | 0.00 |
| ATOM | 8152 | HB3  | PRO | X | 533 | 49.127 | 37.174 | 65.396 | 0.00 | 0.00 |
| ATOM | 8153 | CA   | PRO | X | 533 | 51.074 | 36.440 | 66.175 | 0.00 | 0.00 |
| ATOM | 8154 | HA   | PRO | X | 533 | 51.432 | 37.390 | 65.779 | 0.00 | 0.00 |
| ATOM | 8155 | C    | PRO | X | 533 | 51.711 | 36.299 | 67.557 | 0.00 | 0.00 |
| ATOM | 8156 | O    | PRO | X | 533 | 52.029 | 37.374 | 68.118 | 0.00 | 0.00 |
| ATOM | 8157 | N    | LYS | X | 534 | 51.827 | 35.077 | 68.137 | 0.00 | 0.00 |
| ATOM | 8158 | H    | LYS | X | 534 | 51.539 | 34.226 | 67.676 | 0.00 | 0.00 |
| ATOM | 8159 | CA   | LYS | X | 534 | 52.305 | 34.906 | 69.518 | 0.00 | 0.00 |
| ATOM | 8160 | HA   | LYS | X | 534 | 51.668 | 35.533 | 70.143 | 0.00 | 0.00 |
| ATOM | 8161 | CB   | LYS | X | 534 | 51.931 | 33.495 | 70.052 | 0.00 | 0.00 |
| ATOM | 8162 | HB2  | LYS | X | 534 | 50.999 | 33.048 | 69.705 | 0.00 | 0.00 |
| ATOM | 8163 | HB3  | LYS | X | 534 | 52.770 | 32.836 | 69.829 | 0.00 | 0.00 |
| ATOM | 8164 | CG   | LYS | X | 534 | 51.779 | 33.602 | 71.617 | 0.00 | 0.00 |
| ATOM | 8165 | HG2  | LYS | X | 534 | 52.621 | 34.093 | 72.104 | 0.00 | 0.00 |
| ATOM | 8166 | HG3  | LYS | X | 534 | 50.864 | 34.154 | 71.831 | 0.00 | 0.00 |
| ATOM | 8167 | CD   | LYS | X | 534 | 51.769 | 32.215 | 72.359 | 0.00 | 0.00 |
| ATOM | 8168 | HD2  | LYS | X | 534 | 50.805 | 31.707 | 72.359 | 0.00 | 0.00 |
| ATOM | 8169 | HD3  | LYS | X | 534 | 52.500 | 31.572 | 71.870 | 0.00 | 0.00 |
| ATOM | 8170 | CE   | LYS | X | 534 | 52.160 | 32.375 | 73.850 | 0.00 | 0.00 |
| ATOM | 8171 | HE2  | LYS | X | 534 | 53.155 | 32.805 | 73.965 | 0.00 | 0.00 |
| ATOM | 8172 | HE3  | LYS | X | 534 | 51.437 | 32.962 | 74.417 | 0.00 | 0.00 |

|      |      |      |     |   |     |        |        |        |      |      |
|------|------|------|-----|---|-----|--------|--------|--------|------|------|
| ATOM | 8173 | NZ   | LYS | X | 534 | 52.307 | 31.028 | 74.541 | 0.00 | 0.00 |
| ATOM | 8174 | HZ1  | LYS | X | 534 | 53.231 | 30.622 | 74.505 | 0.00 | 0.00 |
| ATOM | 8175 | HZ2  | LYS | X | 534 | 52.223 | 31.088 | 75.546 | 0.00 | 0.00 |
| ATOM | 8176 | HZ3  | LYS | X | 534 | 51.665 | 30.345 | 74.165 | 0.00 | 0.00 |
| ATOM | 8177 | C    | LYS | X | 534 | 53.819 | 35.300 | 69.696 | 0.00 | 0.00 |
| ATOM | 8178 | O    | LYS | X | 534 | 54.248 | 35.951 | 70.667 | 0.00 | 0.00 |
| ATOM | 8179 | N    | LEU | X | 535 | 54.666 | 34.920 | 68.738 | 0.00 | 0.00 |
| ATOM | 8180 | H    | LEU | X | 535 | 54.382 | 34.317 | 67.979 | 0.00 | 0.00 |
| ATOM | 8181 | CA   | LEU | X | 535 | 56.072 | 35.438 | 68.638 | 0.00 | 0.00 |
| ATOM | 8182 | HA   | LEU | X | 535 | 56.532 | 35.099 | 69.566 | 0.00 | 0.00 |
| ATOM | 8183 | CB   | LEU | X | 535 | 56.748 | 34.869 | 67.392 | 0.00 | 0.00 |
| ATOM | 8184 | HB2  | LEU | X | 535 | 56.536 | 33.802 | 67.331 | 0.00 | 0.00 |
| ATOM | 8185 | HB3  | LEU | X | 535 | 56.161 | 35.346 | 66.607 | 0.00 | 0.00 |
| ATOM | 8186 | CG   | LEU | X | 535 | 58.218 | 35.224 | 67.284 | 0.00 | 0.00 |
| ATOM | 8187 | HG   | LEU | X | 535 | 58.258 | 36.312 | 67.236 | 0.00 | 0.00 |
| ATOM | 8188 | CD1  | LEU | X | 535 | 58.996 | 34.481 | 68.450 | 0.00 | 0.00 |
| ATOM | 8189 | HD11 | LEU | X | 535 | 58.753 | 34.945 | 69.406 | 0.00 | 0.00 |
| ATOM | 8190 | HD12 | LEU | X | 535 | 60.073 | 34.473 | 68.279 | 0.00 | 0.00 |
| ATOM | 8191 | HD13 | LEU | X | 535 | 58.585 | 33.481 | 68.587 | 0.00 | 0.00 |
| ATOM | 8192 | CD2  | LEU | X | 535 | 58.680 | 34.783 | 65.877 | 0.00 | 0.00 |
| ATOM | 8193 | HD21 | LEU | X | 535 | 58.834 | 33.706 | 65.804 | 0.00 | 0.00 |
| ATOM | 8194 | HD22 | LEU | X | 535 | 57.948 | 35.091 | 65.131 | 0.00 | 0.00 |
| ATOM | 8195 | HD23 | LEU | X | 535 | 59.531 | 35.417 | 65.630 | 0.00 | 0.00 |
| ATOM | 8196 | C    | LEU | X | 535 | 56.220 | 36.916 | 68.621 | 0.00 | 0.00 |
| ATOM | 8197 | O    | LEU | X | 535 | 57.109 | 37.418 | 69.311 | 0.00 | 0.00 |
| ATOM | 8198 | N    | LEU | X | 536 | 55.283 | 37.640 | 68.002 | 0.00 | 0.00 |
| ATOM | 8199 | H    | LEU | X | 536 | 54.637 | 37.079 | 67.464 | 0.00 | 0.00 |
| ATOM | 8200 | CA   | LEU | X | 536 | 55.315 | 39.133 | 67.980 | 0.00 | 0.00 |
| ATOM | 8201 | HA   | LEU | X | 536 | 56.275 | 39.638 | 67.872 | 0.00 | 0.00 |
| ATOM | 8202 | CB   | LEU | X | 536 | 54.518 | 39.589 | 66.732 | 0.00 | 0.00 |
| ATOM | 8203 | HB2  | LEU | X | 536 | 53.803 | 38.816 | 66.452 | 0.00 | 0.00 |
| ATOM | 8204 | HB3  | LEU | X | 536 | 54.062 | 40.553 | 66.957 | 0.00 | 0.00 |
| ATOM | 8205 | CG   | LEU | X | 536 | 55.405 | 39.802 | 65.480 | 0.00 | 0.00 |
| ATOM | 8206 | HG   | LEU | X | 536 | 54.659 | 39.743 | 64.688 | 0.00 | 0.00 |
| ATOM | 8207 | CD1  | LEU | X | 536 | 56.024 | 41.175 | 65.365 | 0.00 | 0.00 |
| ATOM | 8208 | HD11 | LEU | X | 536 | 56.620 | 41.328 | 64.466 | 0.00 | 0.00 |
| ATOM | 8209 | HD12 | LEU | X | 536 | 56.643 | 41.332 | 66.248 | 0.00 | 0.00 |
| ATOM | 8210 | HD13 | LEU | X | 536 | 55.236 | 41.928 | 65.401 | 0.00 | 0.00 |
| ATOM | 8211 | CD2  | LEU | X | 536 | 56.399 | 38.588 | 65.189 | 0.00 | 0.00 |
| ATOM | 8212 | HD21 | LEU | X | 536 | 56.758 | 38.680 | 64.164 | 0.00 | 0.00 |
| ATOM | 8213 | HD22 | LEU | X | 536 | 57.318 | 38.689 | 65.766 | 0.00 | 0.00 |
| ATOM | 8214 | HD23 | LEU | X | 536 | 55.969 | 37.609 | 65.399 | 0.00 | 0.00 |
| ATOM | 8215 | C    | LEU | X | 536 | 54.781 | 39.756 | 69.281 | 0.00 | 0.00 |
| ATOM | 8216 | O    | LEU | X | 536 | 55.128 | 40.825 | 69.622 | 0.00 | 0.00 |
| ATOM | 8217 | N    | SER | X | 537 | 53.854 | 39.152 | 70.040 | 0.00 | 0.00 |
| ATOM | 8218 | H    | SER | X | 537 | 53.394 | 38.299 | 69.757 | 0.00 | 0.00 |
| ATOM | 8219 | CA   | SER | X | 537 | 53.505 | 39.687 | 71.355 | 0.00 | 0.00 |
| ATOM | 8220 | HA   | SER | X | 537 | 53.278 | 40.751 | 71.295 | 0.00 | 0.00 |
| ATOM | 8221 | CB   | SER | X | 537 | 52.170 | 39.117 | 71.780 | 0.00 | 0.00 |
| ATOM | 8222 | HB2  | SER | X | 537 | 51.976 | 39.566 | 72.754 | 0.00 | 0.00 |
| ATOM | 8223 | HB3  | SER | X | 537 | 51.365 | 39.364 | 71.087 | 0.00 | 0.00 |
| ATOM | 8224 | OG   | SER | X | 537 | 52.264 | 37.681 | 71.788 | 0.00 | 0.00 |
| ATOM | 8225 | HG   | SER | X | 537 | 51.423 | 37.335 | 72.098 | 0.00 | 0.00 |
| ATOM | 8226 | C    | SER | X | 537 | 54.563 | 39.618 | 72.516 | 0.00 | 0.00 |
| ATOM | 8227 | O    | SER | X | 537 | 54.509 | 40.377 | 73.442 | 0.00 | 0.00 |
| ATOM | 8228 | N    | ALA | X | 538 | 55.542 | 38.758 | 72.292 | 0.00 | 0.00 |
| ATOM | 8229 | H    | ALA | X | 538 | 55.398 | 38.202 | 71.461 | 0.00 | 0.00 |
| ATOM | 8230 | CA   | ALA | X | 538 | 56.778 | 38.558 | 73.082 | 0.00 | 0.00 |
| ATOM | 8231 | HA   | ALA | X | 538 | 56.588 | 38.885 | 74.104 | 0.00 | 0.00 |
| ATOM | 8232 | CB   | ALA | X | 538 | 56.929 | 37.068 | 72.993 | 0.00 | 0.00 |
| ATOM | 8233 | HB1  | ALA | X | 538 | 57.006 | 36.777 | 71.946 | 0.00 | 0.00 |
| ATOM | 8234 | HB2  | ALA | X | 538 | 55.954 | 36.617 | 73.180 | 0.00 | 0.00 |
| ATOM | 8235 | HB3  | ALA | X | 538 | 57.761 | 36.686 | 73.586 | 0.00 | 0.00 |
| ATOM | 8236 | C    | ALA | X | 538 | 58.087 | 39.225 | 72.648 | 0.00 | 0.00 |
| ATOM | 8237 | O    | ALA | X | 538 | 58.923 | 39.497 | 73.463 | 0.00 | 0.00 |
| ATOM | 8238 | N    | THR | X | 539 | 58.330 | 39.502 | 71.368 | 0.00 | 0.00 |
| ATOM | 8239 | H    | THR | X | 539 | 57.626 | 39.215 | 70.704 | 0.00 | 0.00 |

|      |      |      |     |   |     |        |        |        |      |      |
|------|------|------|-----|---|-----|--------|--------|--------|------|------|
| ATOM | 8240 | CA   | THR | X | 539 | 59.627 | 39.989 | 70.806 | 0.00 | 0.00 |
| ATOM | 8241 | HA   | THR | X | 539 | 60.495 | 39.587 | 71.329 | 0.00 | 0.00 |
| ATOM | 8242 | CB   | THR | X | 539 | 59.650 | 39.667 | 69.311 | 0.00 | 0.00 |
| ATOM | 8243 | HB   | THR | X | 539 | 58.747 | 40.081 | 68.863 | 0.00 | 0.00 |
| ATOM | 8244 | CG2  | THR | X | 539 | 60.895 | 40.243 | 68.569 | 0.00 | 0.00 |
| ATOM | 8245 | HG21 | THR | X | 539 | 60.856 | 40.202 | 67.480 | 0.00 | 0.00 |
| ATOM | 8246 | HG22 | THR | X | 539 | 61.755 | 39.643 | 68.867 | 0.00 | 0.00 |
| ATOM | 8247 | HG23 | THR | X | 539 | 61.052 | 41.290 | 68.832 | 0.00 | 0.00 |
| ATOM | 8248 | OG1  | THR | X | 539 | 59.819 | 38.290 | 69.296 | 0.00 | 0.00 |
| ATOM | 8249 | HG1  | THR | X | 539 | 58.936 | 37.925 | 69.206 | 0.00 | 0.00 |
| ATOM | 8250 | C    | THR | X | 539 | 59.690 | 41.477 | 71.117 | 0.00 | 0.00 |
| ATOM | 8251 | O    | THR | X | 539 | 58.889 | 42.279 | 70.553 | 0.00 | 0.00 |
| ATOM | 8252 | OXT  | THR | X | 539 | 60.507 | 41.942 | 71.891 | 0.00 | 0.00 |

END

#-----  
# 1B41 Production MD Frame 2200  
#-----

| CRYST1 | 82.037 | 82.037 | 82.037 | 90.00 | 90.00 | 90.00  | P 1    |        | 1    |      |
|--------|--------|--------|--------|-------|-------|--------|--------|--------|------|------|
| ATOM   | 1      | N      | ASP    | X     | 1     | 27.343 | 51.105 | 7.374  | 0.00 | 0.00 |
| ATOM   | 2      | H1     | ASP    | X     | 1     | 28.001 | 50.397 | 7.666  | 0.00 | 0.00 |
| ATOM   | 3      | H2     | ASP    | X     | 1     | 27.154 | 51.017 | 6.385  | 0.00 | 0.00 |
| ATOM   | 4      | H3     | ASP    | X     | 1     | 26.507 | 50.740 | 7.807  | 0.00 | 0.00 |
| ATOM   | 5      | CA     | ASP    | X     | 1     | 27.732 | 52.489 | 7.818  | 0.00 | 0.00 |
| ATOM   | 6      | HA     | ASP    | X     | 1     | 28.662 | 52.699 | 7.291  | 0.00 | 0.00 |
| ATOM   | 7      | CB     | ASP    | X     | 1     | 26.590 | 53.408 | 7.449  | 0.00 | 0.00 |
| ATOM   | 8      | HB2    | ASP    | X     | 1     | 26.154 | 53.070 | 6.509  | 0.00 | 0.00 |
| ATOM   | 9      | HB3    | ASP    | X     | 1     | 25.839 | 53.405 | 8.239  | 0.00 | 0.00 |
| ATOM   | 10     | CG     | ASP    | X     | 1     | 27.025 | 54.897 | 7.174  | 0.00 | 0.00 |
| ATOM   | 11     | OD1    | ASP    | X     | 1     | 27.942 | 55.079 | 6.317  | 0.00 | 0.00 |
| ATOM   | 12     | OD2    | ASP    | X     | 1     | 26.479 | 55.877 | 7.712  | 0.00 | 0.00 |
| ATOM   | 13     | C      | ASP    | X     | 1     | 28.110 | 52.595 | 9.280  | 0.00 | 0.00 |
| ATOM   | 14     | O      | ASP    | X     | 1     | 29.079 | 53.169 | 9.640  | 0.00 | 0.00 |
| ATOM   | 15     | N      | ALA    | X     | 2     | 27.275 | 52.082 | 10.173 | 0.00 | 0.00 |
| ATOM   | 16     | H      | ALA    | X     | 2     | 26.389 | 51.684 | 9.898  | 0.00 | 0.00 |
| ATOM   | 17     | CA     | ALA    | X     | 2     | 27.489 | 52.173 | 11.632 | 0.00 | 0.00 |
| ATOM   | 18     | HA     | ALA    | X     | 2     | 28.020 | 53.101 | 11.847 | 0.00 | 0.00 |
| ATOM   | 19     | CB     | ALA    | X     | 2     | 26.193 | 52.201 | 12.461 | 0.00 | 0.00 |
| ATOM   | 20     | HB1    | ALA    | X     | 2     | 26.319 | 52.581 | 13.475 | 0.00 | 0.00 |
| ATOM   | 21     | HB2    | ALA    | X     | 2     | 25.770 | 51.200 | 12.384 | 0.00 | 0.00 |
| ATOM   | 22     | HB3    | ALA    | X     | 2     | 25.460 | 52.827 | 11.953 | 0.00 | 0.00 |
| ATOM   | 23     | C      | ALA    | X     | 2     | 28.471 | 51.009 | 12.103 | 0.00 | 0.00 |
| ATOM   | 24     | O      | ALA    | X     | 2     | 28.397 | 50.418 | 13.187 | 0.00 | 0.00 |
| ATOM   | 25     | N      | GLU    | X     | 3     | 29.504 | 50.757 | 11.318 | 0.00 | 0.00 |
| ATOM   | 26     | H      | GLU    | X     | 3     | 29.820 | 51.409 | 10.614 | 0.00 | 0.00 |
| ATOM   | 27     | CA     | GLU    | X     | 3     | 30.416 | 49.615 | 11.609 | 0.00 | 0.00 |
| ATOM   | 28     | HA     | GLU    | X     | 3     | 29.699 | 48.839 | 11.877 | 0.00 | 0.00 |
| ATOM   | 29     | CB     | GLU    | X     | 3     | 31.206 | 49.199 | 10.319 | 0.00 | 0.00 |
| ATOM   | 30     | HB2    | GLU    | X     | 3     | 31.545 | 50.067 | 9.753  | 0.00 | 0.00 |
| ATOM   | 31     | HB3    | GLU    | X     | 3     | 32.126 | 48.687 | 10.603 | 0.00 | 0.00 |
| ATOM   | 32     | CG     | GLU    | X     | 3     | 30.318 | 48.191 | 9.460  | 0.00 | 0.00 |
| ATOM   | 33     | HG2    | GLU    | X     | 3     | 30.925 | 47.621 | 8.757  | 0.00 | 0.00 |
| ATOM   | 34     | HG3    | GLU    | X     | 3     | 29.716 | 47.528 | 10.081 | 0.00 | 0.00 |
| ATOM   | 35     | CD     | GLU    | X     | 3     | 29.357 | 49.053 | 8.595  | 0.00 | 0.00 |
| ATOM   | 36     | OE1    | GLU    | X     | 3     | 29.880 | 49.906 | 7.794  | 0.00 | 0.00 |
| ATOM   | 37     | OE2    | GLU    | X     | 3     | 28.148 | 49.017 | 8.803  | 0.00 | 0.00 |
| ATOM   | 38     | C      | GLU    | X     | 3     | 31.345 | 49.887 | 12.820 | 0.00 | 0.00 |
| ATOM   | 39     | O      | GLU    | X     | 3     | 31.669 | 49.001 | 13.592 | 0.00 | 0.00 |
| ATOM   | 40     | N      | LEU    | X     | 4     | 31.758 | 51.148 | 12.984 | 0.00 | 0.00 |
| ATOM   | 41     | H      | LEU    | X     | 4     | 31.506 | 51.809 | 12.263 | 0.00 | 0.00 |
| ATOM   | 42     | CA     | LEU    | X     | 4     | 32.626 | 51.682 | 14.107 | 0.00 | 0.00 |
| ATOM   | 43     | HA     | LEU    | X     | 4     | 32.754 | 50.893 | 14.848 | 0.00 | 0.00 |
| ATOM   | 44     | CB     | LEU    | X     | 4     | 33.930 | 52.182 | 13.464 | 0.00 | 0.00 |
| ATOM   | 45     | HB2    | LEU    | X     | 4     | 33.624 | 52.978 | 12.785 | 0.00 | 0.00 |



|      |     |      |     |   |   |        |        |        |      |      |
|------|-----|------|-----|---|---|--------|--------|--------|------|------|
| ATOM | 46  | HB3  | LEU | X | 4 | 34.531 | 52.743 | 14.180 | 0.00 | 0.00 |
| ATOM | 47  | CG   | LEU | X | 4 | 34.759 | 51.101 | 12.743 | 0.00 | 0.00 |
| ATOM | 48  | HG   | LEU | X | 4 | 34.208 | 50.619 | 11.935 | 0.00 | 0.00 |
| ATOM | 49  | CD1  | LEU | X | 4 | 36.055 | 51.671 | 12.040 | 0.00 | 0.00 |
| ATOM | 50  | HD11 | LEU | X | 4 | 36.452 | 50.934 | 11.342 | 0.00 | 0.00 |
| ATOM | 51  | HD12 | LEU | X | 4 | 36.816 | 51.774 | 12.814 | 0.00 | 0.00 |
| ATOM | 52  | HD13 | LEU | X | 4 | 35.845 | 52.576 | 11.470 | 0.00 | 0.00 |
| ATOM | 53  | CD2  | LEU | X | 4 | 35.255 | 50.024 | 13.757 | 0.00 | 0.00 |
| ATOM | 54  | HD21 | LEU | X | 4 | 34.412 | 49.394 | 14.040 | 0.00 | 0.00 |
| ATOM | 55  | HD22 | LEU | X | 4 | 35.892 | 49.353 | 13.181 | 0.00 | 0.00 |
| ATOM | 56  | HD23 | LEU | X | 4 | 35.816 | 50.441 | 14.593 | 0.00 | 0.00 |
| ATOM | 57  | C    | LEU | X | 4 | 31.986 | 52.858 | 14.853 | 0.00 | 0.00 |
| ATOM | 58  | O    | LEU | X | 4 | 32.559 | 53.224 | 15.850 | 0.00 | 0.00 |
| ATOM | 59  | N    | LEU | X | 5 | 30.829 | 53.362 | 14.388 | 0.00 | 0.00 |
| ATOM | 60  | H    | LEU | X | 5 | 30.346 | 52.985 | 13.585 | 0.00 | 0.00 |
| ATOM | 61  | CA   | LEU | X | 5 | 29.955 | 54.180 | 15.252 | 0.00 | 0.00 |
| ATOM | 62  | HA   | LEU | X | 5 | 30.674 | 54.696 | 15.889 | 0.00 | 0.00 |
| ATOM | 63  | CB   | LEU | X | 5 | 29.094 | 55.194 | 14.513 | 0.00 | 0.00 |
| ATOM | 64  | HB2  | LEU | X | 5 | 28.410 | 54.595 | 13.911 | 0.00 | 0.00 |
| ATOM | 65  | HB3  | LEU | X | 5 | 28.538 | 55.805 | 15.224 | 0.00 | 0.00 |
| ATOM | 66  | CG   | LEU | X | 5 | 29.853 | 56.293 | 13.663 | 0.00 | 0.00 |
| ATOM | 67  | HG   | LEU | X | 5 | 30.504 | 55.711 | 13.010 | 0.00 | 0.00 |
| ATOM | 68  | CD1  | LEU | X | 5 | 29.063 | 57.045 | 12.661 | 0.00 | 0.00 |
| ATOM | 69  | HD11 | LEU | X | 5 | 29.783 | 57.659 | 12.120 | 0.00 | 0.00 |
| ATOM | 70  | HD12 | LEU | X | 5 | 28.340 | 57.688 | 13.163 | 0.00 | 0.00 |
| ATOM | 71  | HD13 | LEU | X | 5 | 28.454 | 56.411 | 12.016 | 0.00 | 0.00 |
| ATOM | 72  | CD2  | LEU | X | 5 | 30.728 | 57.297 | 14.492 | 0.00 | 0.00 |
| ATOM | 73  | HD21 | LEU | X | 5 | 31.240 | 58.072 | 13.922 | 0.00 | 0.00 |
| ATOM | 74  | HD22 | LEU | X | 5 | 29.992 | 57.797 | 15.121 | 0.00 | 0.00 |
| ATOM | 75  | HD23 | LEU | X | 5 | 31.319 | 56.720 | 15.204 | 0.00 | 0.00 |
| ATOM | 76  | C    | LEU | X | 5 | 29.111 | 53.437 | 16.270 | 0.00 | 0.00 |
| ATOM | 77  | O    | LEU | X | 5 | 28.657 | 52.301 | 15.979 | 0.00 | 0.00 |
| ATOM | 78  | N    | VAL | X | 6 | 28.879 | 54.009 | 17.467 | 0.00 | 0.00 |
| ATOM | 79  | H    | VAL | X | 6 | 29.454 | 54.824 | 17.624 | 0.00 | 0.00 |
| ATOM | 80  | CA   | VAL | X | 6 | 28.042 | 53.538 | 18.548 | 0.00 | 0.00 |
| ATOM | 81  | HA   | VAL | X | 6 | 27.166 | 53.084 | 18.084 | 0.00 | 0.00 |
| ATOM | 82  | CB   | VAL | X | 6 | 28.783 | 52.457 | 19.284 | 0.00 | 0.00 |
| ATOM | 83  | HB   | VAL | X | 6 | 29.387 | 51.889 | 18.576 | 0.00 | 0.00 |
| ATOM | 84  | CG1  | VAL | X | 6 | 29.761 | 52.895 | 20.388 | 0.00 | 0.00 |
| ATOM | 85  | HG11 | VAL | X | 6 | 30.226 | 51.995 | 20.790 | 0.00 | 0.00 |
| ATOM | 86  | HG12 | VAL | X | 6 | 30.464 | 53.627 | 19.993 | 0.00 | 0.00 |
| ATOM | 87  | HG13 | VAL | X | 6 | 29.117 | 53.289 | 21.175 | 0.00 | 0.00 |
| ATOM | 88  | CG2  | VAL | X | 6 | 27.848 | 51.420 | 19.877 | 0.00 | 0.00 |
| ATOM | 89  | HG21 | VAL | X | 6 | 27.428 | 51.651 | 20.856 | 0.00 | 0.00 |
| ATOM | 90  | HG22 | VAL | X | 6 | 28.431 | 50.522 | 20.083 | 0.00 | 0.00 |
| ATOM | 91  | HG23 | VAL | X | 6 | 27.083 | 51.162 | 19.144 | 0.00 | 0.00 |
| ATOM | 92  | C    | VAL | X | 6 | 27.557 | 54.615 | 19.501 | 0.00 | 0.00 |
| ATOM | 93  | O    | VAL | X | 6 | 28.267 | 55.589 | 19.783 | 0.00 | 0.00 |
| ATOM | 94  | N    | THR | X | 7 | 26.250 | 54.581 | 19.784 | 0.00 | 0.00 |
| ATOM | 95  | H    | THR | X | 7 | 25.812 | 53.694 | 19.577 | 0.00 | 0.00 |
| ATOM | 96  | CA   | THR | X | 7 | 25.501 | 55.580 | 20.632 | 0.00 | 0.00 |
| ATOM | 97  | HA   | THR | X | 7 | 25.964 | 56.548 | 20.444 | 0.00 | 0.00 |
| ATOM | 98  | CB   | THR | X | 7 | 24.083 | 55.690 | 19.875 | 0.00 | 0.00 |
| ATOM | 99  | HB   | THR | X | 7 | 23.588 | 54.720 | 19.919 | 0.00 | 0.00 |
| ATOM | 100 | CG2  | THR | X | 7 | 23.286 | 56.741 | 20.716 | 0.00 | 0.00 |
| ATOM | 101 | HG21 | THR | X | 7 | 22.322 | 56.984 | 20.269 | 0.00 | 0.00 |
| ATOM | 102 | HG22 | THR | X | 7 | 23.768 | 57.719 | 20.710 | 0.00 | 0.00 |
| ATOM | 103 | HG23 | THR | X | 7 | 23.155 | 56.323 | 21.714 | 0.00 | 0.00 |
| ATOM | 104 | OG1  | THR | X | 7 | 24.253 | 56.231 | 18.583 | 0.00 | 0.00 |
| ATOM | 105 | HG1  | THR | X | 7 | 23.480 | 55.984 | 18.070 | 0.00 | 0.00 |
| ATOM | 106 | C    | THR | X | 7 | 25.388 | 54.981 | 22.089 | 0.00 | 0.00 |
| ATOM | 107 | O    | THR | X | 7 | 25.309 | 53.816 | 22.250 | 0.00 | 0.00 |
| ATOM | 108 | N    | VAL | X | 8 | 25.360 | 55.884 | 23.090 | 0.00 | 0.00 |
| ATOM | 109 | H    | VAL | X | 8 | 25.602 | 56.838 | 22.861 | 0.00 | 0.00 |
| ATOM | 110 | CA   | VAL | X | 8 | 25.359 | 55.650 | 24.556 | 0.00 | 0.00 |
| ATOM | 111 | HA   | VAL | X | 8 | 24.792 | 54.720 | 24.594 | 0.00 | 0.00 |
| ATOM | 112 | CB   | VAL | X | 8 | 26.813 | 55.454 | 25.120 | 0.00 | 0.00 |

|      |     |      |     |   |    |        |        |        |      |      |
|------|-----|------|-----|---|----|--------|--------|--------|------|------|
| ATOM | 113 | HB   | VAL | X | 8  | 26.717 | 55.325 | 26.198 | 0.00 | 0.00 |
| ATOM | 114 | CG1  | VAL | X | 8  | 27.603 | 54.218 | 24.540 | 0.00 | 0.00 |
| ATOM | 115 | HG11 | VAL | X | 8  | 27.119 | 53.242 | 24.518 | 0.00 | 0.00 |
| ATOM | 116 | HG12 | VAL | X | 8  | 27.786 | 54.374 | 23.477 | 0.00 | 0.00 |
| ATOM | 117 | HG13 | VAL | X | 8  | 28.549 | 54.129 | 25.074 | 0.00 | 0.00 |
| ATOM | 118 | CG2  | VAL | X | 8  | 27.636 | 56.715 | 24.852 | 0.00 | 0.00 |
| ATOM | 119 | HG21 | VAL | X | 8  | 27.149 | 57.632 | 25.183 | 0.00 | 0.00 |
| ATOM | 120 | HG22 | VAL | X | 8  | 27.763 | 56.890 | 23.784 | 0.00 | 0.00 |
| ATOM | 121 | HG23 | VAL | X | 8  | 28.669 | 56.683 | 25.198 | 0.00 | 0.00 |
| ATOM | 122 | C    | VAL | X | 8  | 24.592 | 56.806 | 25.229 | 0.00 | 0.00 |
| ATOM | 123 | O    | VAL | X | 8  | 24.219 | 57.800 | 24.587 | 0.00 | 0.00 |
| ATOM | 124 | N    | ARG | X | 9  | 24.408 | 56.602 | 26.541 | 0.00 | 0.00 |
| ATOM | 125 | H    | ARG | X | 9  | 24.537 | 55.683 | 26.940 | 0.00 | 0.00 |
| ATOM | 126 | CA   | ARG | X | 9  | 23.913 | 57.601 | 27.441 | 0.00 | 0.00 |
| ATOM | 127 | HA   | ARG | X | 9  | 22.891 | 57.863 | 27.170 | 0.00 | 0.00 |
| ATOM | 128 | CB   | ARG | X | 9  | 23.901 | 57.219 | 28.928 | 0.00 | 0.00 |
| ATOM | 129 | HB2  | ARG | X | 9  | 23.257 | 56.342 | 28.985 | 0.00 | 0.00 |
| ATOM | 130 | HB3  | ARG | X | 9  | 24.883 | 56.854 | 29.229 | 0.00 | 0.00 |
| ATOM | 131 | CG   | ARG | X | 9  | 23.410 | 58.301 | 29.916 | 0.00 | 0.00 |
| ATOM | 132 | HG2  | ARG | X | 9  | 24.140 | 59.091 | 30.093 | 0.00 | 0.00 |
| ATOM | 133 | HG3  | ARG | X | 9  | 22.504 | 58.781 | 29.546 | 0.00 | 0.00 |
| ATOM | 134 | CD   | ARG | X | 9  | 23.127 | 57.571 | 31.304 | 0.00 | 0.00 |
| ATOM | 135 | HD2  | ARG | X | 9  | 22.282 | 56.904 | 31.134 | 0.00 | 0.00 |
| ATOM | 136 | HD3  | ARG | X | 9  | 23.927 | 57.001 | 31.776 | 0.00 | 0.00 |
| ATOM | 137 | NE   | ARG | X | 9  | 22.740 | 58.533 | 32.316 | 0.00 | 0.00 |
| ATOM | 138 | HE   | ARG | X | 9  | 22.739 | 59.488 | 31.986 | 0.00 | 0.00 |
| ATOM | 139 | CZ   | ARG | X | 9  | 22.540 | 58.300 | 33.628 | 0.00 | 0.00 |
| ATOM | 140 | NH1  | ARG | X | 9  | 22.345 | 57.066 | 34.087 | 0.00 | 0.00 |
| ATOM | 141 | HH11 | ARG | X | 9  | 22.343 | 56.284 | 33.448 | 0.00 | 0.00 |
| ATOM | 142 | HH12 | ARG | X | 9  | 22.203 | 56.905 | 35.074 | 0.00 | 0.00 |
| ATOM | 143 | NH2  | ARG | X | 9  | 22.329 | 59.392 | 34.418 | 0.00 | 0.00 |
| ATOM | 144 | HH21 | ARG | X | 9  | 22.414 | 60.292 | 33.967 | 0.00 | 0.00 |
| ATOM | 145 | HH22 | ARG | X | 9  | 22.237 | 59.281 | 35.418 | 0.00 | 0.00 |
| ATOM | 146 | C    | ARG | X | 9  | 24.524 | 59.024 | 27.159 | 0.00 | 0.00 |
| ATOM | 147 | O    | ARG | X | 9  | 23.823 | 60.070 | 27.236 | 0.00 | 0.00 |
| ATOM | 148 | N    | GLY | X | 10 | 25.873 | 59.162 | 26.954 | 0.00 | 0.00 |
| ATOM | 149 | H    | GLY | X | 10 | 26.448 | 58.368 | 27.197 | 0.00 | 0.00 |
| ATOM | 150 | CA   | GLY | X | 10 | 26.630 | 60.431 | 26.739 | 0.00 | 0.00 |
| ATOM | 151 | HA2  | GLY | X | 10 | 26.273 | 61.195 | 27.430 | 0.00 | 0.00 |
| ATOM | 152 | HA3  | GLY | X | 10 | 27.647 | 60.108 | 26.961 | 0.00 | 0.00 |
| ATOM | 153 | C    | GLY | X | 10 | 26.595 | 61.155 | 25.435 | 0.00 | 0.00 |
| ATOM | 154 | O    | GLY | X | 10 | 26.850 | 62.332 | 25.332 | 0.00 | 0.00 |
| ATOM | 155 | N    | GLY | X | 11 | 26.206 | 60.465 | 24.384 | 0.00 | 0.00 |
| ATOM | 156 | H    | GLY | X | 11 | 25.915 | 59.508 | 24.523 | 0.00 | 0.00 |
| ATOM | 157 | CA   | GLY | X | 11 | 26.012 | 60.924 | 22.979 | 0.00 | 0.00 |
| ATOM | 158 | HA2  | GLY | X | 11 | 24.988 | 61.219 | 22.751 | 0.00 | 0.00 |
| ATOM | 159 | HA3  | GLY | X | 11 | 26.706 | 61.744 | 22.795 | 0.00 | 0.00 |
| ATOM | 160 | C    | GLY | X | 11 | 26.460 | 59.843 | 21.941 | 0.00 | 0.00 |
| ATOM | 161 | O    | GLY | X | 11 | 26.229 | 58.624 | 22.060 | 0.00 | 0.00 |
| ATOM | 162 | N    | ARG | X | 12 | 27.149 | 60.286 | 20.913 | 0.00 | 0.00 |
| ATOM | 163 | H    | ARG | X | 12 | 27.424 | 61.251 | 21.032 | 0.00 | 0.00 |
| ATOM | 164 | CA   | ARG | X | 12 | 27.744 | 59.330 | 19.930 | 0.00 | 0.00 |
| ATOM | 165 | HA   | ARG | X | 12 | 27.259 | 58.357 | 20.004 | 0.00 | 0.00 |
| ATOM | 166 | CB   | ARG | X | 12 | 27.379 | 59.737 | 18.503 | 0.00 | 0.00 |
| ATOM | 167 | HB2  | ARG | X | 12 | 27.870 | 60.624 | 18.105 | 0.00 | 0.00 |
| ATOM | 168 | HB3  | ARG | X | 12 | 27.652 | 58.905 | 17.853 | 0.00 | 0.00 |
| ATOM | 169 | CG   | ARG | X | 12 | 25.870 | 59.855 | 18.340 | 0.00 | 0.00 |
| ATOM | 170 | HG2  | ARG | X | 12 | 25.368 | 58.917 | 18.580 | 0.00 | 0.00 |
| ATOM | 171 | HG3  | ARG | X | 12 | 25.472 | 60.573 | 19.056 | 0.00 | 0.00 |
| ATOM | 172 | CD   | ARG | X | 12 | 25.446 | 60.163 | 16.920 | 0.00 | 0.00 |
| ATOM | 173 | HD2  | ARG | X | 12 | 24.373 | 60.352 | 16.886 | 0.00 | 0.00 |
| ATOM | 174 | HD3  | ARG | X | 12 | 25.870 | 61.108 | 16.579 | 0.00 | 0.00 |
| ATOM | 175 | NE   | ARG | X | 12 | 25.771 | 59.146 | 15.951 | 0.00 | 0.00 |
| ATOM | 176 | HE   | ARG | X | 12 | 25.768 | 58.198 | 16.298 | 0.00 | 0.00 |
| ATOM | 177 | CZ   | ARG | X | 12 | 26.044 | 59.342 | 14.641 | 0.00 | 0.00 |
| ATOM | 178 | NH1  | ARG | X | 12 | 26.302 | 60.500 | 14.099 | 0.00 | 0.00 |
| ATOM | 179 | HH11 | ARG | X | 12 | 26.492 | 61.287 | 14.703 | 0.00 | 0.00 |

|      |     |      |     |   |    |        |        |        |      |      |
|------|-----|------|-----|---|----|--------|--------|--------|------|------|
| ATOM | 180 | HH12 | ARG | X | 12 | 26.531 | 60.517 | 13.116 | 0.00 | 0.00 |
| ATOM | 181 | NH2  | ARG | X | 12 | 25.960 | 58.294 | 13.864 | 0.00 | 0.00 |
| ATOM | 182 | HH21 | ARG | X | 12 | 25.633 | 57.406 | 14.215 | 0.00 | 0.00 |
| ATOM | 183 | HH22 | ARG | X | 12 | 25.985 | 58.492 | 12.874 | 0.00 | 0.00 |
| ATOM | 184 | C    | ARG | X | 12 | 29.348 | 59.065 | 20.157 | 0.00 | 0.00 |
| ATOM | 185 | O    | ARG | X | 12 | 30.040 | 59.951 | 20.501 | 0.00 | 0.00 |
| ATOM | 186 | N    | LEU | X | 13 | 29.869 | 57.899 | 19.846 | 0.00 | 0.00 |
| ATOM | 187 | H    | LEU | X | 13 | 29.146 | 57.200 | 19.759 | 0.00 | 0.00 |
| ATOM | 188 | CA   | LEU | X | 13 | 31.268 | 57.416 | 19.958 | 0.00 | 0.00 |
| ATOM | 189 | HA   | LEU | X | 13 | 31.881 | 58.313 | 20.046 | 0.00 | 0.00 |
| ATOM | 190 | CB   | LEU | X | 13 | 31.550 | 56.460 | 21.159 | 0.00 | 0.00 |
| ATOM | 191 | HB2  | LEU | X | 13 | 31.119 | 55.502 | 20.869 | 0.00 | 0.00 |
| ATOM | 192 | HB3  | LEU | X | 13 | 32.604 | 56.193 | 21.081 | 0.00 | 0.00 |
| ATOM | 193 | CG   | LEU | X | 13 | 31.089 | 56.792 | 22.594 | 0.00 | 0.00 |
| ATOM | 194 | HG   | LEU | X | 13 | 30.082 | 57.208 | 22.575 | 0.00 | 0.00 |
| ATOM | 195 | CD1  | LEU | X | 13 | 31.063 | 55.495 | 23.409 | 0.00 | 0.00 |
| ATOM | 196 | HD11 | LEU | X | 13 | 30.582 | 55.583 | 24.384 | 0.00 | 0.00 |
| ATOM | 197 | HD12 | LEU | X | 13 | 32.121 | 55.241 | 23.483 | 0.00 | 0.00 |
| ATOM | 198 | HD13 | LEU | X | 13 | 30.572 | 54.690 | 22.862 | 0.00 | 0.00 |
| ATOM | 199 | CD2  | LEU | X | 13 | 32.104 | 57.787 | 23.122 | 0.00 | 0.00 |
| ATOM | 200 | HD21 | LEU | X | 13 | 33.058 | 57.264 | 23.179 | 0.00 | 0.00 |
| ATOM | 201 | HD22 | LEU | X | 13 | 32.198 | 58.631 | 22.439 | 0.00 | 0.00 |
| ATOM | 202 | HD23 | LEU | X | 13 | 32.060 | 58.172 | 24.141 | 0.00 | 0.00 |
| ATOM | 203 | C    | LEU | X | 13 | 31.726 | 56.714 | 18.605 | 0.00 | 0.00 |
| ATOM | 204 | O    | LEU | X | 13 | 30.920 | 55.964 | 18.046 | 0.00 | 0.00 |
| ATOM | 205 | N    | ARG | X | 14 | 32.918 | 57.032 | 18.094 | 0.00 | 0.00 |
| ATOM | 206 | H    | ARG | X | 14 | 33.516 | 57.596 | 18.682 | 0.00 | 0.00 |
| ATOM | 207 | CA   | ARG | X | 14 | 33.600 | 56.308 | 16.966 | 0.00 | 0.00 |
| ATOM | 208 | HA   | ARG | X | 14 | 32.836 | 55.649 | 16.554 | 0.00 | 0.00 |
| ATOM | 209 | CB   | ARG | X | 14 | 34.051 | 57.295 | 15.831 | 0.00 | 0.00 |
| ATOM | 210 | HB2  | ARG | X | 14 | 33.235 | 57.990 | 15.638 | 0.00 | 0.00 |
| ATOM | 211 | HB3  | ARG | X | 14 | 34.985 | 57.797 | 16.083 | 0.00 | 0.00 |
| ATOM | 212 | CG   | ARG | X | 14 | 34.380 | 56.570 | 14.541 | 0.00 | 0.00 |
| ATOM | 213 | HG2  | ARG | X | 14 | 35.089 | 55.772 | 14.762 | 0.00 | 0.00 |
| ATOM | 214 | HG3  | ARG | X | 14 | 33.491 | 56.160 | 14.062 | 0.00 | 0.00 |
| ATOM | 215 | CD   | ARG | X | 14 | 35.089 | 57.406 | 13.514 | 0.00 | 0.00 |
| ATOM | 216 | HD2  | ARG | X | 14 | 36.090 | 57.629 | 13.883 | 0.00 | 0.00 |
| ATOM | 217 | HD3  | ARG | X | 14 | 35.221 | 56.801 | 12.616 | 0.00 | 0.00 |
| ATOM | 218 | NE   | ARG | X | 14 | 34.260 | 58.591 | 13.104 | 0.00 | 0.00 |
| ATOM | 219 | HE   | ARG | X | 14 | 33.521 | 58.382 | 12.448 | 0.00 | 0.00 |
| ATOM | 220 | CZ   | ARG | X | 14 | 34.305 | 59.796 | 13.655 | 0.00 | 0.00 |
| ATOM | 221 | NH1  | ARG | X | 14 | 35.189 | 60.123 | 14.582 | 0.00 | 0.00 |
| ATOM | 222 | HH11 | ARG | X | 14 | 35.887 | 59.472 | 14.911 | 0.00 | 0.00 |
| ATOM | 223 | HH12 | ARG | X | 14 | 35.261 | 61.097 | 14.838 | 0.00 | 0.00 |
| ATOM | 224 | NH2  | ARG | X | 14 | 33.412 | 60.713 | 13.255 | 0.00 | 0.00 |
| ATOM | 225 | HH21 | ARG | X | 14 | 32.752 | 60.477 | 12.529 | 0.00 | 0.00 |
| ATOM | 226 | HH22 | ARG | X | 14 | 33.589 | 61.670 | 13.526 | 0.00 | 0.00 |
| ATOM | 227 | C    | ARG | X | 14 | 34.706 | 55.425 | 17.562 | 0.00 | 0.00 |
| ATOM | 228 | O    | ARG | X | 14 | 35.356 | 55.919 | 18.446 | 0.00 | 0.00 |
| ATOM | 229 | N    | GLY | X | 15 | 34.950 | 54.151 | 17.150 | 0.00 | 0.00 |
| ATOM | 230 | H    | GLY | X | 15 | 34.356 | 53.948 | 16.359 | 0.00 | 0.00 |
| ATOM | 231 | CA   | GLY | X | 15 | 36.070 | 53.243 | 17.473 | 0.00 | 0.00 |
| ATOM | 232 | HA2  | GLY | X | 15 | 36.679 | 53.707 | 18.248 | 0.00 | 0.00 |
| ATOM | 233 | HA3  | GLY | X | 15 | 35.603 | 52.317 | 17.808 | 0.00 | 0.00 |
| ATOM | 234 | C    | GLY | X | 15 | 36.959 | 52.810 | 16.319 | 0.00 | 0.00 |
| ATOM | 235 | O    | GLY | X | 15 | 36.933 | 53.352 | 15.236 | 0.00 | 0.00 |
| ATOM | 236 | N    | ILE | X | 16 | 37.769 | 51.723 | 16.529 | 0.00 | 0.00 |
| ATOM | 237 | H    | ILE | X | 16 | 37.650 | 51.340 | 17.456 | 0.00 | 0.00 |
| ATOM | 238 | CA   | ILE | X | 16 | 38.712 | 51.087 | 15.575 | 0.00 | 0.00 |
| ATOM | 239 | HA   | ILE | X | 16 | 38.607 | 51.513 | 14.577 | 0.00 | 0.00 |
| ATOM | 240 | CB   | ILE | X | 16 | 40.285 | 51.228 | 15.981 | 0.00 | 0.00 |
| ATOM | 241 | HB   | ILE | X | 16 | 40.829 | 50.479 | 15.405 | 0.00 | 0.00 |
| ATOM | 242 | CG2  | ILE | X | 16 | 40.748 | 52.638 | 15.468 | 0.00 | 0.00 |
| ATOM | 243 | HG21 | ILE | X | 16 | 40.406 | 52.810 | 14.447 | 0.00 | 0.00 |
| ATOM | 244 | HG22 | ILE | X | 16 | 41.825 | 52.804 | 15.502 | 0.00 | 0.00 |
| ATOM | 245 | HG23 | ILE | X | 16 | 40.267 | 53.384 | 16.101 | 0.00 | 0.00 |
| ATOM | 246 | CG1  | ILE | X | 16 | 40.812 | 50.973 | 17.406 | 0.00 | 0.00 |

|      |     |      |     |   |    |        |        |        |      |      |
|------|-----|------|-----|---|----|--------|--------|--------|------|------|
| ATOM | 247 | HG12 | ILE | X | 16 | 40.512 | 51.884 | 17.925 | 0.00 | 0.00 |
| ATOM | 248 | HG13 | ILE | X | 16 | 40.203 | 50.160 | 17.800 | 0.00 | 0.00 |
| ATOM | 249 | CD1  | ILE | X | 16 | 42.308 | 50.519 | 17.427 | 0.00 | 0.00 |
| ATOM | 250 | HD11 | ILE | X | 16 | 42.978 | 51.115 | 16.807 | 0.00 | 0.00 |
| ATOM | 251 | HD12 | ILE | X | 16 | 42.391 | 49.489 | 17.079 | 0.00 | 0.00 |
| ATOM | 252 | HD13 | ILE | X | 16 | 42.719 | 50.432 | 18.432 | 0.00 | 0.00 |
| ATOM | 253 | C    | ILE | X | 16 | 38.445 | 49.564 | 15.267 | 0.00 | 0.00 |
| ATOM | 254 | O    | ILE | X | 16 | 38.059 | 48.810 | 16.131 | 0.00 | 0.00 |
| ATOM | 255 | N    | ARG | X | 17 | 38.850 | 49.240 | 14.016 | 0.00 | 0.00 |
| ATOM | 256 | H    | ARG | X | 17 | 39.033 | 49.962 | 13.334 | 0.00 | 0.00 |
| ATOM | 257 | CA   | ARG | X | 17 | 38.927 | 47.817 | 13.570 | 0.00 | 0.00 |
| ATOM | 258 | HA   | ARG | X | 17 | 38.210 | 47.217 | 14.131 | 0.00 | 0.00 |
| ATOM | 259 | CB   | ARG | X | 17 | 38.601 | 47.828 | 12.070 | 0.00 | 0.00 |
| ATOM | 260 | HB2  | ARG | X | 17 | 37.622 | 48.302 | 12.001 | 0.00 | 0.00 |
| ATOM | 261 | HB3  | ARG | X | 17 | 39.337 | 48.407 | 11.514 | 0.00 | 0.00 |
| ATOM | 262 | CG   | ARG | X | 17 | 38.422 | 46.395 | 11.528 | 0.00 | 0.00 |
| ATOM | 263 | HG2  | ARG | X | 17 | 39.271 | 45.776 | 11.818 | 0.00 | 0.00 |
| ATOM | 264 | HG3  | ARG | X | 17 | 37.559 | 46.032 | 12.085 | 0.00 | 0.00 |
| ATOM | 265 | CD   | ARG | X | 17 | 38.208 | 46.570 | 9.949  | 0.00 | 0.00 |
| ATOM | 266 | HD2  | ARG | X | 17 | 37.279 | 47.104 | 9.746  | 0.00 | 0.00 |
| ATOM | 267 | HD3  | ARG | X | 17 | 38.988 | 47.157 | 9.466  | 0.00 | 0.00 |
| ATOM | 268 | NE   | ARG | X | 17 | 38.291 | 45.214 | 9.426  | 0.00 | 0.00 |
| ATOM | 269 | HE   | ARG | X | 17 | 37.424 | 44.751 | 9.197  | 0.00 | 0.00 |
| ATOM | 270 | CZ   | ARG | X | 17 | 39.386 | 44.643 | 8.888  | 0.00 | 0.00 |
| ATOM | 271 | NH1  | ARG | X | 17 | 40.612 | 45.098 | 9.068  | 0.00 | 0.00 |
| ATOM | 272 | HH11 | ARG | X | 17 | 40.753 | 45.919 | 9.639  | 0.00 | 0.00 |
| ATOM | 273 | HH12 | ARG | X | 17 | 41.380 | 44.759 | 8.507  | 0.00 | 0.00 |
| ATOM | 274 | NH2  | ARG | X | 17 | 39.173 | 43.595 | 8.120  | 0.00 | 0.00 |
| ATOM | 275 | HH21 | ARG | X | 17 | 38.227 | 43.347 | 7.866  | 0.00 | 0.00 |
| ATOM | 276 | HH22 | ARG | X | 17 | 40.003 | 43.143 | 7.762  | 0.00 | 0.00 |
| ATOM | 277 | C    | ARG | X | 17 | 40.330 | 47.292 | 13.828 | 0.00 | 0.00 |
| ATOM | 278 | O    | ARG | X | 17 | 41.297 | 48.086 | 13.854 | 0.00 | 0.00 |
| ATOM | 279 | N    | LEU | X | 18 | 40.373 | 45.982 | 14.088 | 0.00 | 0.00 |
| ATOM | 280 | H    | LEU | X | 18 | 39.634 | 45.350 | 13.815 | 0.00 | 0.00 |
| ATOM | 281 | CA   | LEU | X | 18 | 41.540 | 45.206 | 14.492 | 0.00 | 0.00 |
| ATOM | 282 | HA   | LEU | X | 18 | 42.447 | 45.799 | 14.375 | 0.00 | 0.00 |
| ATOM | 283 | CB   | LEU | X | 18 | 41.558 | 44.806 | 15.936 | 0.00 | 0.00 |
| ATOM | 284 | HB2  | LEU | X | 18 | 40.651 | 44.245 | 16.160 | 0.00 | 0.00 |
| ATOM | 285 | HB3  | LEU | X | 18 | 42.458 | 44.198 | 16.020 | 0.00 | 0.00 |
| ATOM | 286 | CG   | LEU | X | 18 | 41.767 | 45.980 | 16.957 | 0.00 | 0.00 |
| ATOM | 287 | HG   | LEU | X | 18 | 40.825 | 46.528 | 16.933 | 0.00 | 0.00 |
| ATOM | 288 | CD1  | LEU | X | 18 | 41.930 | 45.505 | 18.366 | 0.00 | 0.00 |
| ATOM | 289 | HD11 | LEU | X | 18 | 41.792 | 46.308 | 19.089 | 0.00 | 0.00 |
| ATOM | 290 | HD12 | LEU | X | 18 | 42.887 | 45.047 | 18.615 | 0.00 | 0.00 |
| ATOM | 291 | HD13 | LEU | X | 18 | 41.224 | 44.699 | 18.565 | 0.00 | 0.00 |
| ATOM | 292 | CD2  | LEU | X | 18 | 42.934 | 46.942 | 16.620 | 0.00 | 0.00 |
| ATOM | 293 | HD21 | LEU | X | 18 | 42.913 | 47.665 | 17.435 | 0.00 | 0.00 |
| ATOM | 294 | HD22 | LEU | X | 18 | 43.898 | 46.433 | 16.626 | 0.00 | 0.00 |
| ATOM | 295 | HD23 | LEU | X | 18 | 42.810 | 47.374 | 15.627 | 0.00 | 0.00 |
| ATOM | 296 | C    | LEU | X | 18 | 41.655 | 43.952 | 13.618 | 0.00 | 0.00 |
| ATOM | 297 | O    | LEU | X | 18 | 40.596 | 43.372 | 13.378 | 0.00 | 0.00 |
| ATOM | 298 | N    | LYS | X | 19 | 42.890 | 43.444 | 13.349 | 0.00 | 0.00 |
| ATOM | 299 | H    | LYS | X | 19 | 43.689 | 44.051 | 13.463 | 0.00 | 0.00 |
| ATOM | 300 | CA   | LYS | X | 19 | 43.220 | 42.166 | 12.738 | 0.00 | 0.00 |
| ATOM | 301 | HA   | LYS | X | 19 | 42.396 | 41.760 | 12.151 | 0.00 | 0.00 |
| ATOM | 302 | CB   | LYS | X | 19 | 44.310 | 42.332 | 11.622 | 0.00 | 0.00 |
| ATOM | 303 | HB2  | LYS | X | 19 | 45.280 | 42.539 | 12.074 | 0.00 | 0.00 |
| ATOM | 304 | HB3  | LYS | X | 19 | 44.349 | 41.336 | 11.182 | 0.00 | 0.00 |
| ATOM | 305 | CG   | LYS | X | 19 | 43.938 | 43.356 | 10.510 | 0.00 | 0.00 |
| ATOM | 306 | HG2  | LYS | X | 19 | 43.138 | 42.934 | 9.902  | 0.00 | 0.00 |
| ATOM | 307 | HG3  | LYS | X | 19 | 43.673 | 44.292 | 11.003 | 0.00 | 0.00 |
| ATOM | 308 | CD   | LYS | X | 19 | 45.031 | 43.608 | 9.525  | 0.00 | 0.00 |
| ATOM | 309 | HD2  | LYS | X | 19 | 45.129 | 42.826 | 8.772  | 0.00 | 0.00 |
| ATOM | 310 | HD3  | LYS | X | 19 | 44.677 | 44.564 | 9.142  | 0.00 | 0.00 |
| ATOM | 311 | CE   | LYS | X | 19 | 46.493 | 43.831 | 10.048 | 0.00 | 0.00 |
| ATOM | 312 | HE2  | LYS | X | 19 | 46.416 | 44.134 | 11.092 | 0.00 | 0.00 |
| ATOM | 313 | HE3  | LYS | X | 19 | 47.047 | 42.901 | 9.916  | 0.00 | 0.00 |

|      |     |      |     |   |    |        |        |        |      |      |
|------|-----|------|-----|---|----|--------|--------|--------|------|------|
| ATOM | 314 | NZ   | LYS | X | 19 | 47.305 | 44.851 | 9.366  | 0.00 | 0.00 |
| ATOM | 315 | HZ1  | LYS | X | 19 | 48.184 | 44.933 | 9.856  | 0.00 | 0.00 |
| ATOM | 316 | HZ2  | LYS | X | 19 | 47.398 | 44.672 | 8.377  | 0.00 | 0.00 |
| ATOM | 317 | HZ3  | LYS | X | 19 | 46.996 | 45.802 | 9.507  | 0.00 | 0.00 |
| ATOM | 318 | C    | LYS | X | 19 | 43.585 | 41.088 | 13.824 | 0.00 | 0.00 |
| ATOM | 319 | O    | LYS | X | 19 | 43.913 | 41.369 | 14.981 | 0.00 | 0.00 |
| ATOM | 320 | N    | THR | X | 20 | 43.514 | 39.743 | 13.505 | 0.00 | 0.00 |
| ATOM | 321 | H    | THR | X | 20 | 43.375 | 39.582 | 12.517 | 0.00 | 0.00 |
| ATOM | 322 | CA   | THR | X | 20 | 43.397 | 38.625 | 14.485 | 0.00 | 0.00 |
| ATOM | 323 | HA   | THR | X | 20 | 44.304 | 38.649 | 15.090 | 0.00 | 0.00 |
| ATOM | 324 | CB   | THR | X | 20 | 42.227 | 38.778 | 15.456 | 0.00 | 0.00 |
| ATOM | 325 | HB   | THR | X | 20 | 41.717 | 37.840 | 15.672 | 0.00 | 0.00 |
| ATOM | 326 | CG2  | THR | X | 20 | 42.642 | 39.244 | 16.863 | 0.00 | 0.00 |
| ATOM | 327 | HG21 | THR | X | 20 | 41.920 | 39.014 | 17.647 | 0.00 | 0.00 |
| ATOM | 328 | HG22 | THR | X | 20 | 42.865 | 40.310 | 16.832 | 0.00 | 0.00 |
| ATOM | 329 | HG23 | THR | X | 20 | 43.601 | 38.766 | 17.062 | 0.00 | 0.00 |
| ATOM | 330 | OG1  | THR | X | 20 | 41.286 | 39.695 | 15.021 | 0.00 | 0.00 |
| ATOM | 331 | HG1  | THR | X | 20 | 40.769 | 39.331 | 14.298 | 0.00 | 0.00 |
| ATOM | 332 | C    | THR | X | 20 | 43.342 | 37.277 | 13.657 | 0.00 | 0.00 |
| ATOM | 333 | O    | THR | X | 20 | 43.194 | 37.264 | 12.438 | 0.00 | 0.00 |
| ATOM | 334 | N    | PRO | X | 21 | 43.787 | 36.157 | 14.288 | 0.00 | 0.00 |
| ATOM | 335 | CD   | PRO | X | 21 | 44.091 | 36.122 | 15.707 | 0.00 | 0.00 |
| ATOM | 336 | HD2  | PRO | X | 21 | 43.214 | 36.439 | 16.272 | 0.00 | 0.00 |
| ATOM | 337 | HD3  | PRO | X | 21 | 44.891 | 36.856 | 15.800 | 0.00 | 0.00 |
| ATOM | 338 | CG   | PRO | X | 21 | 44.550 | 34.683 | 15.962 | 0.00 | 0.00 |
| ATOM | 339 | HG2  | PRO | X | 21 | 43.749 | 34.044 | 16.333 | 0.00 | 0.00 |
| ATOM | 340 | HG3  | PRO | X | 21 | 45.337 | 34.624 | 16.713 | 0.00 | 0.00 |
| ATOM | 341 | CB   | PRO | X | 21 | 44.948 | 34.040 | 14.584 | 0.00 | 0.00 |
| ATOM | 342 | HB2  | PRO | X | 21 | 44.635 | 33.002 | 14.469 | 0.00 | 0.00 |
| ATOM | 343 | HB3  | PRO | X | 21 | 46.018 | 34.141 | 14.402 | 0.00 | 0.00 |
| ATOM | 344 | CA   | PRO | X | 21 | 44.234 | 34.909 | 13.575 | 0.00 | 0.00 |
| ATOM | 345 | HA   | PRO | X | 21 | 44.990 | 35.214 | 12.852 | 0.00 | 0.00 |
| ATOM | 346 | C    | PRO | X | 21 | 43.117 | 34.114 | 12.887 | 0.00 | 0.00 |
| ATOM | 347 | O    | PRO | X | 21 | 43.525 | 33.332 | 12.025 | 0.00 | 0.00 |
| ATOM | 348 | N    | GLY | X | 22 | 41.814 | 34.363 | 13.179 | 0.00 | 0.00 |
| ATOM | 349 | H    | GLY | X | 22 | 41.610 | 34.907 | 14.005 | 0.00 | 0.00 |
| ATOM | 350 | CA   | GLY | X | 22 | 40.658 | 33.778 | 12.543 | 0.00 | 0.00 |
| ATOM | 351 | HA2  | GLY | X | 22 | 40.933 | 32.957 | 11.881 | 0.00 | 0.00 |
| ATOM | 352 | HA3  | GLY | X | 22 | 40.131 | 33.280 | 13.357 | 0.00 | 0.00 |
| ATOM | 353 | C    | GLY | X | 22 | 39.797 | 34.828 | 11.867 | 0.00 | 0.00 |
| ATOM | 354 | O    | GLY | X | 22 | 38.573 | 34.722 | 11.730 | 0.00 | 0.00 |
| ATOM | 355 | N    | GLY | X | 23 | 40.468 | 35.977 | 11.559 | 0.00 | 0.00 |
| ATOM | 356 | H    | GLY | X | 23 | 41.419 | 35.977 | 11.899 | 0.00 | 0.00 |
| ATOM | 357 | CA   | GLY | X | 23 | 39.806 | 37.219 | 10.965 | 0.00 | 0.00 |
| ATOM | 358 | HA2  | GLY | X | 23 | 40.350 | 37.679 | 10.141 | 0.00 | 0.00 |
| ATOM | 359 | HA3  | GLY | X | 23 | 38.806 | 36.929 | 10.640 | 0.00 | 0.00 |
| ATOM | 360 | C    | GLY | X | 23 | 39.624 | 38.382 | 11.985 | 0.00 | 0.00 |
| ATOM | 361 | O    | GLY | X | 23 | 40.043 | 38.301 | 13.143 | 0.00 | 0.00 |
| ATOM | 362 | N    | PRO | X | 24 | 39.074 | 39.558 | 11.546 | 0.00 | 0.00 |
| ATOM | 363 | CD   | PRO | X | 24 | 38.595 | 39.817 | 10.212 | 0.00 | 0.00 |
| ATOM | 364 | HD2  | PRO | X | 24 | 37.788 | 39.144 | 9.922  | 0.00 | 0.00 |
| ATOM | 365 | HD3  | PRO | X | 24 | 39.407 | 39.777 | 9.486  | 0.00 | 0.00 |
| ATOM | 366 | CG   | PRO | X | 24 | 37.859 | 41.152 | 10.392 | 0.00 | 0.00 |
| ATOM | 367 | HG2  | PRO | X | 24 | 36.956 | 41.120 | 11.002 | 0.00 | 0.00 |
| ATOM | 368 | HG3  | PRO | X | 24 | 37.720 | 41.579 | 9.399  | 0.00 | 0.00 |
| ATOM | 369 | CB   | PRO | X | 24 | 38.786 | 41.998 | 11.273 | 0.00 | 0.00 |
| ATOM | 370 | HB2  | PRO | X | 24 | 38.220 | 42.865 | 11.612 | 0.00 | 0.00 |
| ATOM | 371 | HB3  | PRO | X | 24 | 39.694 | 42.297 | 10.748 | 0.00 | 0.00 |
| ATOM | 372 | CA   | PRO | X | 24 | 39.156 | 40.844 | 12.221 | 0.00 | 0.00 |
| ATOM | 373 | HA   | PRO | X | 24 | 40.187 | 40.924 | 12.568 | 0.00 | 0.00 |
| ATOM | 374 | C    | PRO | X | 24 | 38.247 | 40.778 | 13.454 | 0.00 | 0.00 |
| ATOM | 375 | O    | PRO | X | 24 | 37.282 | 40.013 | 13.517 | 0.00 | 0.00 |
| ATOM | 376 | N    | VAL | X | 25 | 38.526 | 41.730 | 14.396 | 0.00 | 0.00 |
| ATOM | 377 | H    | VAL | X | 25 | 39.291 | 42.375 | 14.253 | 0.00 | 0.00 |
| ATOM | 378 | CA   | VAL | X | 25 | 37.577 | 42.271 | 15.430 | 0.00 | 0.00 |
| ATOM | 379 | HA   | VAL | X | 25 | 36.594 | 41.919 | 15.116 | 0.00 | 0.00 |
| ATOM | 380 | CB   | VAL | X | 25 | 37.988 | 41.569 | 16.749 | 0.00 | 0.00 |

|      |     |      |     |   |    |        |        |        |      |      |
|------|-----|------|-----|---|----|--------|--------|--------|------|------|
| ATOM | 381 | HB   | VAL | X | 25 | 37.236 | 41.845 | 17.488 | 0.00 | 0.00 |
| ATOM | 382 | CG1  | VAL | X | 25 | 38.042 | 40.051 | 16.588 | 0.00 | 0.00 |
| ATOM | 383 | HG11 | VAL | X | 25 | 38.252 | 39.607 | 17.561 | 0.00 | 0.00 |
| ATOM | 384 | HG12 | VAL | X | 25 | 37.030 | 39.791 | 16.277 | 0.00 | 0.00 |
| ATOM | 385 | HG13 | VAL | X | 25 | 38.781 | 39.742 | 15.849 | 0.00 | 0.00 |
| ATOM | 386 | CG2  | VAL | X | 25 | 39.360 | 42.038 | 17.240 | 0.00 | 0.00 |
| ATOM | 387 | HG21 | VAL | X | 25 | 39.225 | 43.072 | 17.556 | 0.00 | 0.00 |
| ATOM | 388 | HG22 | VAL | X | 25 | 40.165 | 41.984 | 16.507 | 0.00 | 0.00 |
| ATOM | 389 | HG23 | VAL | X | 25 | 39.757 | 41.591 | 18.153 | 0.00 | 0.00 |
| ATOM | 390 | C    | VAL | X | 25 | 37.587 | 43.777 | 15.602 | 0.00 | 0.00 |
| ATOM | 391 | O    | VAL | X | 25 | 37.912 | 44.487 | 14.647 | 0.00 | 0.00 |
| ATOM | 392 | N    | SER | X | 26 | 37.166 | 44.432 | 16.688 | 0.00 | 0.00 |
| ATOM | 393 | H    | SER | X | 26 | 36.931 | 43.902 | 17.515 | 0.00 | 0.00 |
| ATOM | 394 | CA   | SER | X | 26 | 37.198 | 45.892 | 16.925 | 0.00 | 0.00 |
| ATOM | 395 | HA   | SER | X | 26 | 38.156 | 46.204 | 16.508 | 0.00 | 0.00 |
| ATOM | 396 | CB   | SER | X | 26 | 35.938 | 46.514 | 16.188 | 0.00 | 0.00 |
| ATOM | 397 | HB2  | SER | X | 26 | 36.046 | 47.597 | 16.247 | 0.00 | 0.00 |
| ATOM | 398 | HB3  | SER | X | 26 | 36.007 | 46.269 | 15.129 | 0.00 | 0.00 |
| ATOM | 399 | OG   | SER | X | 26 | 34.657 | 46.124 | 16.650 | 0.00 | 0.00 |
| ATOM | 400 | HG   | SER | X | 26 | 34.660 | 45.259 | 17.066 | 0.00 | 0.00 |
| ATOM | 401 | C    | SER | X | 26 | 37.310 | 46.282 | 18.389 | 0.00 | 0.00 |
| ATOM | 402 | O    | SER | X | 26 | 37.184 | 45.487 | 19.324 | 0.00 | 0.00 |
| ATOM | 403 | N    | ALA | X | 27 | 37.380 | 47.557 | 18.656 | 0.00 | 0.00 |
| ATOM | 404 | H    | ALA | X | 27 | 37.440 | 48.214 | 17.891 | 0.00 | 0.00 |
| ATOM | 405 | CA   | ALA | X | 27 | 37.661 | 48.115 | 19.985 | 0.00 | 0.00 |
| ATOM | 406 | HA   | ALA | X | 27 | 37.034 | 47.579 | 20.697 | 0.00 | 0.00 |
| ATOM | 407 | CB   | ALA | X | 27 | 39.104 | 47.804 | 20.355 | 0.00 | 0.00 |
| ATOM | 408 | HB1  | ALA | X | 27 | 39.300 | 46.743 | 20.503 | 0.00 | 0.00 |
| ATOM | 409 | HB2  | ALA | X | 27 | 39.217 | 48.239 | 21.348 | 0.00 | 0.00 |
| ATOM | 410 | HB3  | ALA | X | 27 | 39.804 | 48.271 | 19.662 | 0.00 | 0.00 |
| ATOM | 411 | C    | ALA | X | 27 | 37.372 | 49.619 | 19.988 | 0.00 | 0.00 |
| ATOM | 412 | O    | ALA | X | 27 | 37.506 | 50.362 | 19.011 | 0.00 | 0.00 |
| ATOM | 413 | N    | PHE | X | 28 | 36.959 | 50.120 | 21.231 | 0.00 | 0.00 |
| ATOM | 414 | H    | PHE | X | 28 | 36.588 | 49.455 | 21.895 | 0.00 | 0.00 |
| ATOM | 415 | CA   | PHE | X | 28 | 36.882 | 51.513 | 21.642 | 0.00 | 0.00 |
| ATOM | 416 | HA   | PHE | X | 28 | 37.361 | 52.115 | 20.870 | 0.00 | 0.00 |
| ATOM | 417 | CB   | PHE | X | 28 | 35.416 | 51.845 | 21.736 | 0.00 | 0.00 |
| ATOM | 418 | HB2  | PHE | X | 28 | 34.953 | 51.286 | 22.549 | 0.00 | 0.00 |
| ATOM | 419 | HB3  | PHE | X | 28 | 35.431 | 52.902 | 22.001 | 0.00 | 0.00 |
| ATOM | 420 | CG   | PHE | X | 28 | 34.467 | 51.729 | 20.517 | 0.00 | 0.00 |
| ATOM | 421 | CD1  | PHE | X | 28 | 34.109 | 50.439 | 20.045 | 0.00 | 0.00 |
| ATOM | 422 | HD1  | PHE | X | 28 | 34.502 | 49.483 | 20.356 | 0.00 | 0.00 |
| ATOM | 423 | CE1  | PHE | X | 28 | 33.216 | 50.305 | 18.992 | 0.00 | 0.00 |
| ATOM | 424 | HE1  | PHE | X | 28 | 33.044 | 49.334 | 18.551 | 0.00 | 0.00 |
| ATOM | 425 | CZ   | PHE | X | 28 | 32.677 | 51.404 | 18.352 | 0.00 | 0.00 |
| ATOM | 426 | HZ   | PHE | X | 28 | 31.875 | 51.231 | 17.649 | 0.00 | 0.00 |
| ATOM | 427 | CE2  | PHE | X | 28 | 32.909 | 52.673 | 18.890 | 0.00 | 0.00 |
| ATOM | 428 | HE2  | PHE | X | 28 | 32.459 | 53.580 | 18.514 | 0.00 | 0.00 |
| ATOM | 429 | CD2  | PHE | X | 28 | 33.814 | 52.833 | 19.908 | 0.00 | 0.00 |
| ATOM | 430 | HD2  | PHE | X | 28 | 34.171 | 53.788 | 20.265 | 0.00 | 0.00 |
| ATOM | 431 | C    | PHE | X | 28 | 37.568 | 51.797 | 23.051 | 0.00 | 0.00 |
| ATOM | 432 | O    | PHE | X | 28 | 37.477 | 50.908 | 23.916 | 0.00 | 0.00 |
| ATOM | 433 | N    | LEU | X | 29 | 38.346 | 52.905 | 23.130 | 0.00 | 0.00 |
| ATOM | 434 | H    | LEU | X | 29 | 38.284 | 53.626 | 22.425 | 0.00 | 0.00 |
| ATOM | 435 | CA   | LEU | X | 29 | 39.389 | 53.142 | 24.204 | 0.00 | 0.00 |
| ATOM | 436 | HA   | LEU | X | 29 | 39.130 | 52.543 | 25.077 | 0.00 | 0.00 |
| ATOM | 437 | CB   | LEU | X | 29 | 40.787 | 52.642 | 23.727 | 0.00 | 0.00 |
| ATOM | 438 | HB2  | LEU | X | 29 | 40.910 | 53.222 | 22.812 | 0.00 | 0.00 |
| ATOM | 439 | HB3  | LEU | X | 29 | 41.531 | 52.948 | 24.462 | 0.00 | 0.00 |
| ATOM | 440 | CG   | LEU | X | 29 | 40.883 | 51.116 | 23.483 | 0.00 | 0.00 |
| ATOM | 441 | HG   | LEU | X | 29 | 39.995 | 50.599 | 23.846 | 0.00 | 0.00 |
| ATOM | 442 | CD1  | LEU | X | 29 | 41.028 | 50.816 | 21.934 | 0.00 | 0.00 |
| ATOM | 443 | HD11 | LEU | X | 29 | 41.576 | 51.656 | 21.507 | 0.00 | 0.00 |
| ATOM | 444 | HD12 | LEU | X | 29 | 40.045 | 50.946 | 21.481 | 0.00 | 0.00 |
| ATOM | 445 | HD13 | LEU | X | 29 | 41.446 | 49.851 | 21.645 | 0.00 | 0.00 |
| ATOM | 446 | CD2  | LEU | X | 29 | 42.117 | 50.536 | 24.127 | 0.00 | 0.00 |
| ATOM | 447 | HD21 | LEU | X | 29 | 42.950 | 51.068 | 23.667 | 0.00 | 0.00 |

|      |     |      |     |   |    |        |        |        |      |      |
|------|-----|------|-----|---|----|--------|--------|--------|------|------|
| ATOM | 448 | HD22 | LEU | X | 29 | 42.012 | 50.598 | 25.211 | 0.00 | 0.00 |
| ATOM | 449 | HD23 | LEU | X | 29 | 42.179 | 49.486 | 23.841 | 0.00 | 0.00 |
| ATOM | 450 | C    | LEU | X | 29 | 39.419 | 54.581 | 24.612 | 0.00 | 0.00 |
| ATOM | 451 | O    | LEU | X | 29 | 39.199 | 55.410 | 23.708 | 0.00 | 0.00 |
| ATOM | 452 | N    | GLY | X | 30 | 39.770 | 54.887 | 25.862 | 0.00 | 0.00 |
| ATOM | 453 | H    | GLY | X | 30 | 39.985 | 54.155 | 26.523 | 0.00 | 0.00 |
| ATOM | 454 | CA   | GLY | X | 30 | 39.781 | 56.251 | 26.397 | 0.00 | 0.00 |
| ATOM | 455 | HA2  | GLY | X | 30 | 40.159 | 56.289 | 27.419 | 0.00 | 0.00 |
| ATOM | 456 | HA3  | GLY | X | 30 | 40.458 | 56.883 | 25.822 | 0.00 | 0.00 |
| ATOM | 457 | C    | GLY | X | 30 | 38.404 | 56.942 | 26.406 | 0.00 | 0.00 |
| ATOM | 458 | O    | GLY | X | 30 | 38.288 | 58.171 | 26.208 | 0.00 | 0.00 |
| ATOM | 459 | N    | ILE | X | 31 | 37.374 | 56.111 | 26.498 | 0.00 | 0.00 |
| ATOM | 460 | H    | ILE | X | 31 | 37.580 | 55.131 | 26.628 | 0.00 | 0.00 |
| ATOM | 461 | CA   | ILE | X | 31 | 35.992 | 56.451 | 26.607 | 0.00 | 0.00 |
| ATOM | 462 | HA   | ILE | X | 31 | 35.883 | 57.120 | 25.754 | 0.00 | 0.00 |
| ATOM | 463 | CB   | ILE | X | 31 | 35.078 | 55.211 | 26.563 | 0.00 | 0.00 |
| ATOM | 464 | HB   | ILE | X | 31 | 35.286 | 54.684 | 27.494 | 0.00 | 0.00 |
| ATOM | 465 | CG2  | ILE | X | 31 | 33.659 | 55.720 | 26.666 | 0.00 | 0.00 |
| ATOM | 466 | HG21 | ILE | X | 31 | 33.010 | 55.020 | 26.140 | 0.00 | 0.00 |
| ATOM | 467 | HG22 | ILE | X | 31 | 33.598 | 56.653 | 26.106 | 0.00 | 0.00 |
| ATOM | 468 | HG23 | ILE | X | 31 | 33.337 | 55.806 | 27.704 | 0.00 | 0.00 |
| ATOM | 469 | CG1  | ILE | X | 31 | 35.398 | 54.300 | 25.335 | 0.00 | 0.00 |
| ATOM | 470 | HG12 | ILE | X | 31 | 34.953 | 54.748 | 24.446 | 0.00 | 0.00 |
| ATOM | 471 | HG13 | ILE | X | 31 | 36.469 | 54.250 | 25.134 | 0.00 | 0.00 |
| ATOM | 472 | CD1  | ILE | X | 31 | 34.843 | 52.901 | 25.576 | 0.00 | 0.00 |
| ATOM | 473 | HD11 | ILE | X | 31 | 33.753 | 52.913 | 25.564 | 0.00 | 0.00 |
| ATOM | 474 | HD12 | ILE | X | 31 | 35.176 | 52.365 | 26.465 | 0.00 | 0.00 |
| ATOM | 475 | HD13 | ILE | X | 31 | 35.157 | 52.261 | 24.751 | 0.00 | 0.00 |
| ATOM | 476 | C    | ILE | X | 31 | 35.796 | 57.180 | 27.902 | 0.00 | 0.00 |
| ATOM | 477 | O    | ILE | X | 31 | 36.140 | 56.528 | 28.924 | 0.00 | 0.00 |
| ATOM | 478 | N    | PRO | X | 32 | 35.413 | 58.459 | 27.941 | 0.00 | 0.00 |
| ATOM | 479 | CD   | PRO | X | 32 | 35.283 | 59.514 | 26.907 | 0.00 | 0.00 |
| ATOM | 480 | HD2  | PRO | X | 32 | 34.635 | 59.190 | 26.092 | 0.00 | 0.00 |
| ATOM | 481 | HD3  | PRO | X | 32 | 36.266 | 59.765 | 26.509 | 0.00 | 0.00 |
| ATOM | 482 | CG   | PRO | X | 32 | 34.750 | 60.862 | 27.464 | 0.00 | 0.00 |
| ATOM | 483 | HG2  | PRO | X | 32 | 33.677 | 60.905 | 27.277 | 0.00 | 0.00 |
| ATOM | 484 | HG3  | PRO | X | 32 | 35.231 | 61.736 | 27.023 | 0.00 | 0.00 |
| ATOM | 485 | CB   | PRO | X | 32 | 35.162 | 60.681 | 28.874 | 0.00 | 0.00 |
| ATOM | 486 | HB2  | PRO | X | 32 | 34.493 | 61.261 | 29.511 | 0.00 | 0.00 |
| ATOM | 487 | HB3  | PRO | X | 32 | 36.179 | 61.014 | 29.078 | 0.00 | 0.00 |
| ATOM | 488 | CA   | PRO | X | 32 | 35.120 | 59.166 | 29.154 | 0.00 | 0.00 |
| ATOM | 489 | HA   | PRO | X | 32 | 35.841 | 58.821 | 29.894 | 0.00 | 0.00 |
| ATOM | 490 | C    | PRO | X | 32 | 33.701 | 58.803 | 29.722 | 0.00 | 0.00 |
| ATOM | 491 | O    | PRO | X | 32 | 32.673 | 59.278 | 29.198 | 0.00 | 0.00 |
| ATOM | 492 | N    | PHE | X | 33 | 33.680 | 58.010 | 30.785 | 0.00 | 0.00 |
| ATOM | 493 | H    | PHE | X | 33 | 34.556 | 57.650 | 31.136 | 0.00 | 0.00 |
| ATOM | 494 | CA   | PHE | X | 33 | 32.498 | 57.727 | 31.640 | 0.00 | 0.00 |
| ATOM | 495 | HA   | PHE | X | 33 | 31.633 | 57.736 | 30.976 | 0.00 | 0.00 |
| ATOM | 496 | CB   | PHE | X | 33 | 32.586 | 56.322 | 32.196 | 0.00 | 0.00 |
| ATOM | 497 | HB2  | PHE | X | 33 | 31.608 | 56.032 | 32.579 | 0.00 | 0.00 |
| ATOM | 498 | HB3  | PHE | X | 33 | 32.667 | 55.720 | 31.291 | 0.00 | 0.00 |
| ATOM | 499 | CG   | PHE | X | 33 | 33.614 | 56.046 | 33.291 | 0.00 | 0.00 |
| ATOM | 500 | CD1  | PHE | X | 33 | 33.184 | 56.134 | 34.659 | 0.00 | 0.00 |
| ATOM | 501 | HD1  | PHE | X | 33 | 32.128 | 56.303 | 34.808 | 0.00 | 0.00 |
| ATOM | 502 | CE1  | PHE | X | 33 | 34.068 | 56.031 | 35.792 | 0.00 | 0.00 |
| ATOM | 503 | HE1  | PHE | X | 33 | 33.712 | 56.103 | 36.809 | 0.00 | 0.00 |
| ATOM | 504 | CZ   | PHE | X | 33 | 35.385 | 55.694 | 35.564 | 0.00 | 0.00 |
| ATOM | 505 | HZ   | PHE | X | 33 | 36.009 | 55.445 | 36.409 | 0.00 | 0.00 |
| ATOM | 506 | CE2  | PHE | X | 33 | 35.849 | 55.414 | 34.296 | 0.00 | 0.00 |
| ATOM | 507 | HE2  | PHE | X | 33 | 36.859 | 55.065 | 34.144 | 0.00 | 0.00 |
| ATOM | 508 | CD2  | PHE | X | 33 | 34.997 | 55.765 | 33.126 | 0.00 | 0.00 |
| ATOM | 509 | HD2  | PHE | X | 33 | 35.408 | 55.843 | 32.131 | 0.00 | 0.00 |
| ATOM | 510 | C    | PHE | X | 33 | 32.214 | 58.726 | 32.810 | 0.00 | 0.00 |
| ATOM | 511 | O    | PHE | X | 33 | 31.164 | 58.853 | 33.334 | 0.00 | 0.00 |
| ATOM | 512 | N    | ALA | X | 34 | 33.290 | 59.390 | 33.244 | 0.00 | 0.00 |
| ATOM | 513 | H    | ALA | X | 34 | 34.166 | 59.160 | 32.796 | 0.00 | 0.00 |
| ATOM | 514 | CA   | ALA | X | 34 | 33.449 | 60.259 | 34.439 | 0.00 | 0.00 |

|      |     |     |     |   |    |        |        |        |      |      |
|------|-----|-----|-----|---|----|--------|--------|--------|------|------|
| ATOM | 515 | HA  | ALA | X | 34 | 32.499 | 60.522 | 34.905 | 0.00 | 0.00 |
| ATOM | 516 | CB  | ALA | X | 34 | 34.070 | 59.444 | 35.551 | 0.00 | 0.00 |
| ATOM | 517 | HB1 | ALA | X | 34 | 33.390 | 58.607 | 35.709 | 0.00 | 0.00 |
| ATOM | 518 | HB2 | ALA | X | 34 | 34.147 | 59.981 | 36.497 | 0.00 | 0.00 |
| ATOM | 519 | HB3 | ALA | X | 34 | 35.021 | 59.081 | 35.162 | 0.00 | 0.00 |
| ATOM | 520 | C   | ALA | X | 34 | 34.337 | 61.487 | 34.078 | 0.00 | 0.00 |
| ATOM | 521 | O   | ALA | X | 34 | 35.194 | 61.394 | 33.224 | 0.00 | 0.00 |
| ATOM | 522 | N   | GLU | X | 35 | 34.237 | 62.543 | 34.915 | 0.00 | 0.00 |
| ATOM | 523 | H   | GLU | X | 35 | 33.816 | 62.315 | 35.804 | 0.00 | 0.00 |
| ATOM | 524 | CA  | GLU | X | 35 | 35.031 | 63.797 | 34.798 | 0.00 | 0.00 |
| ATOM | 525 | HA  | GLU | X | 35 | 34.913 | 64.252 | 33.814 | 0.00 | 0.00 |
| ATOM | 526 | CB  | GLU | X | 35 | 34.451 | 64.859 | 35.824 | 0.00 | 0.00 |
| ATOM | 527 | HB2 | GLU | X | 35 | 34.534 | 64.357 | 36.788 | 0.00 | 0.00 |
| ATOM | 528 | HB3 | GLU | X | 35 | 35.045 | 65.773 | 35.840 | 0.00 | 0.00 |
| ATOM | 529 | CG  | GLU | X | 35 | 32.944 | 65.154 | 35.685 | 0.00 | 0.00 |
| ATOM | 530 | HG2 | GLU | X | 35 | 32.284 | 64.333 | 35.402 | 0.00 | 0.00 |
| ATOM | 531 | HG3 | GLU | X | 35 | 32.563 | 65.609 | 36.599 | 0.00 | 0.00 |
| ATOM | 532 | CD  | GLU | X | 35 | 32.685 | 66.204 | 34.596 | 0.00 | 0.00 |
| ATOM | 533 | OE1 | GLU | X | 35 | 32.522 | 65.844 | 33.420 | 0.00 | 0.00 |
| ATOM | 534 | OE2 | GLU | X | 35 | 32.650 | 67.368 | 34.936 | 0.00 | 0.00 |
| ATOM | 535 | C   | GLU | X | 35 | 36.507 | 63.480 | 35.178 | 0.00 | 0.00 |
| ATOM | 536 | O   | GLU | X | 35 | 36.801 | 62.518 | 35.876 | 0.00 | 0.00 |
| ATOM | 537 | N   | PRO | X | 36 | 37.472 | 64.366 | 34.846 | 0.00 | 0.00 |
| ATOM | 538 | CD  | PRO | X | 36 | 37.447 | 65.352 | 33.761 | 0.00 | 0.00 |
| ATOM | 539 | HD2 | PRO | X | 36 | 36.508 | 65.904 | 33.728 | 0.00 | 0.00 |
| ATOM | 540 | HD3 | PRO | X | 36 | 37.655 | 64.872 | 32.804 | 0.00 | 0.00 |
| ATOM | 541 | CG  | PRO | X | 36 | 38.614 | 66.312 | 34.025 | 0.00 | 0.00 |
| ATOM | 542 | HG2 | PRO | X | 36 | 38.218 | 67.036 | 34.737 | 0.00 | 0.00 |
| ATOM | 543 | HG3 | PRO | X | 36 | 38.821 | 66.912 | 33.139 | 0.00 | 0.00 |
| ATOM | 544 | CB  | PRO | X | 36 | 39.623 | 65.297 | 34.484 | 0.00 | 0.00 |
| ATOM | 545 | HB2 | PRO | X | 36 | 40.486 | 65.758 | 34.964 | 0.00 | 0.00 |
| ATOM | 546 | HB3 | PRO | X | 36 | 39.965 | 64.642 | 33.683 | 0.00 | 0.00 |
| ATOM | 547 | CA  | PRO | X | 36 | 38.835 | 64.452 | 35.441 | 0.00 | 0.00 |
| ATOM | 548 | HA  | PRO | X | 36 | 39.291 | 63.463 | 35.469 | 0.00 | 0.00 |
| ATOM | 549 | C   | PRO | X | 36 | 38.830 | 64.934 | 36.950 | 0.00 | 0.00 |
| ATOM | 550 | O   | PRO | X | 36 | 38.298 | 66.017 | 37.230 | 0.00 | 0.00 |
| ATOM | 551 | N   | PRO | X | 37 | 39.237 | 64.081 | 37.915 | 0.00 | 0.00 |
| ATOM | 552 | CD  | PRO | X | 37 | 39.565 | 62.662 | 37.747 | 0.00 | 0.00 |
| ATOM | 553 | HD2 | PRO | X | 37 | 40.464 | 62.447 | 37.169 | 0.00 | 0.00 |
| ATOM | 554 | HD3 | PRO | X | 37 | 38.740 | 62.201 | 37.204 | 0.00 | 0.00 |
| ATOM | 555 | CG  | PRO | X | 37 | 39.666 | 62.052 | 39.137 | 0.00 | 0.00 |
| ATOM | 556 | HG2 | PRO | X | 37 | 40.694 | 62.099 | 39.498 | 0.00 | 0.00 |
| ATOM | 557 | HG3 | PRO | X | 37 | 39.366 | 61.006 | 39.204 | 0.00 | 0.00 |
| ATOM | 558 | CB  | PRO | X | 37 | 38.753 | 63.027 | 39.882 | 0.00 | 0.00 |
| ATOM | 559 | HB2 | PRO | X | 37 | 39.071 | 62.860 | 40.911 | 0.00 | 0.00 |
| ATOM | 560 | HB3 | PRO | X | 37 | 37.708 | 62.796 | 39.675 | 0.00 | 0.00 |
| ATOM | 561 | CA  | PRO | X | 37 | 39.072 | 64.385 | 39.312 | 0.00 | 0.00 |
| ATOM | 562 | HA  | PRO | X | 37 | 38.207 | 65.009 | 39.540 | 0.00 | 0.00 |
| ATOM | 563 | C   | PRO | X | 37 | 40.305 | 65.056 | 39.829 | 0.00 | 0.00 |
| ATOM | 564 | O   | PRO | X | 37 | 40.831 | 64.680 | 40.852 | 0.00 | 0.00 |
| ATOM | 565 | N   | MET | X | 38 | 40.795 | 66.125 | 39.137 | 0.00 | 0.00 |
| ATOM | 566 | H   | MET | X | 38 | 40.191 | 66.633 | 38.507 | 0.00 | 0.00 |
| ATOM | 567 | CA  | MET | X | 38 | 42.047 | 66.777 | 39.515 | 0.00 | 0.00 |
| ATOM | 568 | HA  | MET | X | 38 | 42.782 | 66.026 | 39.806 | 0.00 | 0.00 |
| ATOM | 569 | CB  | MET | X | 38 | 42.689 | 67.339 | 38.206 | 0.00 | 0.00 |
| ATOM | 570 | HB2 | MET | X | 38 | 43.571 | 67.941 | 38.430 | 0.00 | 0.00 |
| ATOM | 571 | HB3 | MET | X | 38 | 43.024 | 66.559 | 37.523 | 0.00 | 0.00 |
| ATOM | 572 | CG  | MET | X | 38 | 41.710 | 68.156 | 37.368 | 0.00 | 0.00 |
| ATOM | 573 | HG2 | MET | X | 38 | 40.960 | 67.438 | 37.035 | 0.00 | 0.00 |
| ATOM | 574 | HG3 | MET | X | 38 | 41.234 | 68.972 | 37.912 | 0.00 | 0.00 |
| ATOM | 575 | SD  | MET | X | 38 | 42.400 | 68.765 | 35.829 | 0.00 | 0.00 |
| ATOM | 576 | CE  | MET | X | 38 | 40.948 | 69.578 | 35.250 | 0.00 | 0.00 |
| ATOM | 577 | HE1 | MET | X | 38 | 40.532 | 70.291 | 35.962 | 0.00 | 0.00 |
| ATOM | 578 | HE2 | MET | X | 38 | 41.263 | 70.170 | 34.390 | 0.00 | 0.00 |
| ATOM | 579 | HE3 | MET | X | 38 | 40.155 | 68.877 | 34.992 | 0.00 | 0.00 |
| ATOM | 580 | C   | MET | X | 38 | 41.976 | 67.925 | 40.600 | 0.00 | 0.00 |
| ATOM | 581 | O   | MET | X | 38 | 40.962 | 68.498 | 40.843 | 0.00 | 0.00 |



|      |     |      |     |   |    |        |        |        |      |      |
|------|-----|------|-----|---|----|--------|--------|--------|------|------|
| ATOM | 582 | N    | GLY | X | 39 | 43.101 | 68.316 | 41.174 | 0.00 | 0.00 |
| ATOM | 583 | H    | GLY | X | 39 | 43.850 | 67.639 | 41.162 | 0.00 | 0.00 |
| ATOM | 584 | CA   | GLY | X | 39 | 43.215 | 69.658 | 41.833 | 0.00 | 0.00 |
| ATOM | 585 | HA2  | GLY | X | 39 | 44.254 | 69.909 | 42.048 | 0.00 | 0.00 |
| ATOM | 586 | HA3  | GLY | X | 39 | 42.898 | 70.427 | 41.128 | 0.00 | 0.00 |
| ATOM | 587 | C    | GLY | X | 39 | 42.298 | 69.737 | 43.050 | 0.00 | 0.00 |
| ATOM | 588 | O    | GLY | X | 39 | 42.570 | 68.913 | 43.951 | 0.00 | 0.00 |
| ATOM | 589 | N    | PRO | X | 40 | 41.218 | 70.607 | 43.003 | 0.00 | 0.00 |
| ATOM | 590 | CD   | PRO | X | 40 | 41.001 | 71.675 | 42.069 | 0.00 | 0.00 |
| ATOM | 591 | HD2  | PRO | X | 40 | 40.843 | 71.325 | 41.049 | 0.00 | 0.00 |
| ATOM | 592 | HD3  | PRO | X | 40 | 41.890 | 72.303 | 42.120 | 0.00 | 0.00 |
| ATOM | 593 | CG   | PRO | X | 40 | 39.802 | 72.537 | 42.505 | 0.00 | 0.00 |
| ATOM | 594 | HG2  | PRO | X | 40 | 39.250 | 72.789 | 41.600 | 0.00 | 0.00 |
| ATOM | 595 | HG3  | PRO | X | 40 | 40.038 | 73.464 | 43.028 | 0.00 | 0.00 |
| ATOM | 596 | CB   | PRO | X | 40 | 39.075 | 71.525 | 43.419 | 0.00 | 0.00 |
| ATOM | 597 | HB2  | PRO | X | 40 | 38.285 | 71.037 | 42.848 | 0.00 | 0.00 |
| ATOM | 598 | HB3  | PRO | X | 40 | 38.542 | 71.946 | 44.272 | 0.00 | 0.00 |
| ATOM | 599 | CA   | PRO | X | 40 | 40.093 | 70.504 | 43.979 | 0.00 | 0.00 |
| ATOM | 600 | HA   | PRO | X | 40 | 40.438 | 70.999 | 44.887 | 0.00 | 0.00 |
| ATOM | 601 | C    | PRO | X | 40 | 39.498 | 69.120 | 44.332 | 0.00 | 0.00 |
| ATOM | 602 | O    | PRO | X | 40 | 39.106 | 68.898 | 45.483 | 0.00 | 0.00 |
| ATOM | 603 | N    | ARG | X | 41 | 39.577 | 68.181 | 43.396 | 0.00 | 0.00 |
| ATOM | 604 | H    | ARG | X | 41 | 39.889 | 68.523 | 42.498 | 0.00 | 0.00 |
| ATOM | 605 | CA   | ARG | X | 41 | 38.930 | 66.838 | 43.439 | 0.00 | 0.00 |
| ATOM | 606 | HA   | ARG | X | 41 | 38.249 | 66.809 | 44.289 | 0.00 | 0.00 |
| ATOM | 607 | CB   | ARG | X | 41 | 38.160 | 66.403 | 42.154 | 0.00 | 0.00 |
| ATOM | 608 | HB2  | ARG | X | 41 | 38.704 | 66.713 | 41.262 | 0.00 | 0.00 |
| ATOM | 609 | HB3  | ARG | X | 41 | 37.940 | 65.338 | 42.076 | 0.00 | 0.00 |
| ATOM | 610 | CG   | ARG | X | 41 | 36.927 | 67.303 | 42.177 | 0.00 | 0.00 |
| ATOM | 611 | HG2  | ARG | X | 41 | 36.466 | 67.257 | 43.164 | 0.00 | 0.00 |
| ATOM | 612 | HG3  | ARG | X | 41 | 37.194 | 68.340 | 41.974 | 0.00 | 0.00 |
| ATOM | 613 | CD   | ARG | X | 41 | 35.851 | 66.910 | 41.180 | 0.00 | 0.00 |
| ATOM | 614 | HD2  | ARG | X | 41 | 35.688 | 65.832 | 41.197 | 0.00 | 0.00 |
| ATOM | 615 | HD3  | ARG | X | 41 | 34.912 | 67.398 | 41.441 | 0.00 | 0.00 |
| ATOM | 616 | NE   | ARG | X | 41 | 36.276 | 67.363 | 39.883 | 0.00 | 0.00 |
| ATOM | 617 | HE   | ARG | X | 41 | 37.267 | 67.516 | 39.764 | 0.00 | 0.00 |
| ATOM | 618 | CZ   | ARG | X | 41 | 35.485 | 67.645 | 38.921 | 0.00 | 0.00 |
| ATOM | 619 | NH1  | ARG | X | 41 | 34.174 | 67.628 | 39.045 | 0.00 | 0.00 |
| ATOM | 620 | HH11 | ARG | X | 41 | 33.704 | 67.249 | 39.854 | 0.00 | 0.00 |
| ATOM | 621 | HH12 | ARG | X | 41 | 33.582 | 68.096 | 38.374 | 0.00 | 0.00 |
| ATOM | 622 | NH2  | ARG | X | 41 | 36.015 | 67.924 | 37.771 | 0.00 | 0.00 |
| ATOM | 623 | HH21 | ARG | X | 41 | 37.000 | 68.103 | 37.637 | 0.00 | 0.00 |
| ATOM | 624 | HH22 | ARG | X | 41 | 35.472 | 68.156 | 36.951 | 0.00 | 0.00 |
| ATOM | 625 | C    | ARG | X | 41 | 39.890 | 65.689 | 43.773 | 0.00 | 0.00 |
| ATOM | 626 | O    | ARG | X | 41 | 39.431 | 64.531 | 44.011 | 0.00 | 0.00 |
| ATOM | 627 | N    | ARG | X | 42 | 41.138 | 66.014 | 43.963 | 0.00 | 0.00 |
| ATOM | 628 | H    | ARG | X | 42 | 41.488 | 66.897 | 43.621 | 0.00 | 0.00 |
| ATOM | 629 | CA   | ARG | X | 42 | 42.177 | 65.119 | 44.459 | 0.00 | 0.00 |
| ATOM | 630 | HA   | ARG | X | 42 | 42.140 | 64.338 | 43.699 | 0.00 | 0.00 |
| ATOM | 631 | CB   | ARG | X | 42 | 43.574 | 65.765 | 44.311 | 0.00 | 0.00 |
| ATOM | 632 | HB2  | ARG | X | 42 | 43.662 | 66.216 | 43.323 | 0.00 | 0.00 |
| ATOM | 633 | HB3  | ARG | X | 42 | 43.639 | 66.530 | 45.084 | 0.00 | 0.00 |
| ATOM | 634 | CG   | ARG | X | 42 | 44.809 | 64.791 | 44.497 | 0.00 | 0.00 |
| ATOM | 635 | HG2  | ARG | X | 42 | 44.605 | 64.112 | 45.325 | 0.00 | 0.00 |
| ATOM | 636 | HG3  | ARG | X | 42 | 44.844 | 64.213 | 43.573 | 0.00 | 0.00 |
| ATOM | 637 | CD   | ARG | X | 42 | 46.117 | 65.541 | 44.811 | 0.00 | 0.00 |
| ATOM | 638 | HD2  | ARG | X | 42 | 45.891 | 66.107 | 45.714 | 0.00 | 0.00 |
| ATOM | 639 | HD3  | ARG | X | 42 | 46.931 | 64.843 | 45.007 | 0.00 | 0.00 |
| ATOM | 640 | NE   | ARG | X | 42 | 46.494 | 66.352 | 43.647 | 0.00 | 0.00 |
| ATOM | 641 | HE   | ARG | X | 42 | 45.971 | 66.276 | 42.786 | 0.00 | 0.00 |
| ATOM | 642 | CZ   | ARG | X | 42 | 47.297 | 67.410 | 43.703 | 0.00 | 0.00 |
| ATOM | 643 | NH1  | ARG | X | 42 | 48.043 | 67.765 | 44.760 | 0.00 | 0.00 |
| ATOM | 644 | HH11 | ARG | X | 42 | 48.152 | 67.195 | 45.586 | 0.00 | 0.00 |
| ATOM | 645 | HH12 | ARG | X | 42 | 48.774 | 68.429 | 44.550 | 0.00 | 0.00 |
| ATOM | 646 | NH2  | ARG | X | 42 | 47.411 | 68.244 | 42.711 | 0.00 | 0.00 |
| ATOM | 647 | HH21 | ARG | X | 42 | 46.832 | 68.154 | 41.888 | 0.00 | 0.00 |
| ATOM | 648 | HH22 | ARG | X | 42 | 47.979 | 69.078 | 42.745 | 0.00 | 0.00 |

|      |     |      |     |   |    |        |        |        |      |      |
|------|-----|------|-----|---|----|--------|--------|--------|------|------|
| ATOM | 649 | C    | ARG | X | 42 | 41.878 | 64.526 | 45.822 | 0.00 | 0.00 |
| ATOM | 650 | O    | ARG | X | 42 | 41.371 | 65.295 | 46.679 | 0.00 | 0.00 |
| ATOM | 651 | N    | PHE | X | 43 | 41.915 | 63.210 | 45.862 | 0.00 | 0.00 |
| ATOM | 652 | H    | PHE | X | 43 | 42.250 | 62.649 | 45.092 | 0.00 | 0.00 |
| ATOM | 653 | CA   | PHE | X | 43 | 41.531 | 62.398 | 47.052 | 0.00 | 0.00 |
| ATOM | 654 | HA   | PHE | X | 43 | 41.842 | 61.379 | 46.822 | 0.00 | 0.00 |
| ATOM | 655 | CB   | PHE | X | 43 | 42.259 | 62.857 | 48.350 | 0.00 | 0.00 |
| ATOM | 656 | HB2  | PHE | X | 43 | 41.768 | 63.725 | 48.791 | 0.00 | 0.00 |
| ATOM | 657 | HB3  | PHE | X | 43 | 42.227 | 62.092 | 49.126 | 0.00 | 0.00 |
| ATOM | 658 | CG   | PHE | X | 43 | 43.746 | 63.140 | 48.161 | 0.00 | 0.00 |
| ATOM | 659 | CD1  | PHE | X | 43 | 44.667 | 62.126 | 47.936 | 0.00 | 0.00 |
| ATOM | 660 | HD1  | PHE | X | 43 | 44.344 | 61.098 | 48.007 | 0.00 | 0.00 |
| ATOM | 661 | CE1  | PHE | X | 43 | 46.099 | 62.380 | 47.890 | 0.00 | 0.00 |
| ATOM | 662 | HE1  | PHE | X | 43 | 46.823 | 61.582 | 47.801 | 0.00 | 0.00 |
| ATOM | 663 | CZ   | PHE | X | 43 | 46.512 | 63.696 | 48.064 | 0.00 | 0.00 |
| ATOM | 664 | HZ   | PHE | X | 43 | 47.574 | 63.844 | 48.196 | 0.00 | 0.00 |
| ATOM | 665 | CE2  | PHE | X | 43 | 45.599 | 64.770 | 48.173 | 0.00 | 0.00 |
| ATOM | 666 | HE2  | PHE | X | 43 | 45.893 | 65.805 | 48.269 | 0.00 | 0.00 |
| ATOM | 667 | CD2  | PHE | X | 43 | 44.195 | 64.508 | 48.219 | 0.00 | 0.00 |
| ATOM | 668 | HD2  | PHE | X | 43 | 43.485 | 65.304 | 48.392 | 0.00 | 0.00 |
| ATOM | 669 | C    | PHE | X | 43 | 39.998 | 62.404 | 47.420 | 0.00 | 0.00 |
| ATOM | 670 | O    | PHE | X | 43 | 39.736 | 61.983 | 48.464 | 0.00 | 0.00 |
| ATOM | 671 | N    | LEU | X | 44 | 39.082 | 62.843 | 46.540 | 0.00 | 0.00 |
| ATOM | 672 | H    | LEU | X | 44 | 39.474 | 63.197 | 45.678 | 0.00 | 0.00 |
| ATOM | 673 | CA   | LEU | X | 44 | 37.681 | 62.800 | 46.823 | 0.00 | 0.00 |
| ATOM | 674 | HA   | LEU | X | 44 | 37.476 | 62.483 | 47.845 | 0.00 | 0.00 |
| ATOM | 675 | CB   | LEU | X | 44 | 37.216 | 64.271 | 46.592 | 0.00 | 0.00 |
| ATOM | 676 | HB2  | LEU | X | 44 | 37.349 | 64.648 | 45.578 | 0.00 | 0.00 |
| ATOM | 677 | HB3  | LEU | X | 44 | 36.149 | 64.397 | 46.776 | 0.00 | 0.00 |
| ATOM | 678 | CG   | LEU | X | 44 | 37.818 | 65.383 | 47.433 | 0.00 | 0.00 |
| ATOM | 679 | HG   | LEU | X | 44 | 38.820 | 65.549 | 47.038 | 0.00 | 0.00 |
| ATOM | 680 | CD1  | LEU | X | 44 | 37.052 | 66.707 | 47.262 | 0.00 | 0.00 |
| ATOM | 681 | HD11 | LEU | X | 44 | 37.670 | 67.565 | 47.526 | 0.00 | 0.00 |
| ATOM | 682 | HD12 | LEU | X | 44 | 36.102 | 66.685 | 47.796 | 0.00 | 0.00 |
| ATOM | 683 | HD13 | LEU | X | 44 | 36.862 | 66.945 | 46.216 | 0.00 | 0.00 |
| ATOM | 684 | CD2  | LEU | X | 44 | 37.806 | 65.035 | 48.961 | 0.00 | 0.00 |
| ATOM | 685 | HD21 | LEU | X | 44 | 38.481 | 64.225 | 49.239 | 0.00 | 0.00 |
| ATOM | 686 | HD22 | LEU | X | 44 | 37.994 | 65.934 | 49.547 | 0.00 | 0.00 |
| ATOM | 687 | HD23 | LEU | X | 44 | 36.823 | 64.640 | 49.221 | 0.00 | 0.00 |
| ATOM | 688 | C    | LEU | X | 44 | 36.934 | 61.843 | 45.791 | 0.00 | 0.00 |
| ATOM | 689 | O    | LEU | X | 44 | 37.467 | 61.462 | 44.749 | 0.00 | 0.00 |
| ATOM | 690 | N    | PRO | X | 45 | 35.634 | 61.487 | 46.051 | 0.00 | 0.00 |
| ATOM | 691 | CD   | PRO | X | 45 | 34.887 | 61.776 | 47.234 | 0.00 | 0.00 |
| ATOM | 692 | HD2  | PRO | X | 45 | 34.503 | 62.794 | 47.178 | 0.00 | 0.00 |
| ATOM | 693 | HD3  | PRO | X | 45 | 35.493 | 61.731 | 48.139 | 0.00 | 0.00 |
| ATOM | 694 | CG   | PRO | X | 45 | 33.760 | 60.752 | 47.277 | 0.00 | 0.00 |
| ATOM | 695 | HG2  | PRO | X | 45 | 32.891 | 61.223 | 47.736 | 0.00 | 0.00 |
| ATOM | 696 | HG3  | PRO | X | 45 | 34.035 | 59.798 | 47.727 | 0.00 | 0.00 |
| ATOM | 697 | CB   | PRO | X | 45 | 33.508 | 60.532 | 45.767 | 0.00 | 0.00 |
| ATOM | 698 | HB2  | PRO | X | 45 | 32.758 | 61.259 | 45.455 | 0.00 | 0.00 |
| ATOM | 699 | HB3  | PRO | X | 45 | 33.014 | 59.581 | 45.564 | 0.00 | 0.00 |
| ATOM | 700 | CA   | PRO | X | 45 | 34.867 | 60.658 | 45.125 | 0.00 | 0.00 |
| ATOM | 701 | HA   | PRO | X | 45 | 35.260 | 59.642 | 45.162 | 0.00 | 0.00 |
| ATOM | 702 | C    | PRO | X | 45 | 34.647 | 61.234 | 43.725 | 0.00 | 0.00 |
| ATOM | 703 | O    | PRO | X | 45 | 34.498 | 62.442 | 43.466 | 0.00 | 0.00 |
| ATOM | 704 | N    | PRO | X | 46 | 34.542 | 60.338 | 42.748 | 0.00 | 0.00 |
| ATOM | 705 | CD   | PRO | X | 46 | 34.693 | 58.864 | 42.937 | 0.00 | 0.00 |
| ATOM | 706 | HD2  | PRO | X | 46 | 34.017 | 58.551 | 43.733 | 0.00 | 0.00 |
| ATOM | 707 | HD3  | PRO | X | 46 | 35.703 | 58.534 | 43.178 | 0.00 | 0.00 |
| ATOM | 708 | CG   | PRO | X | 46 | 34.305 | 58.313 | 41.563 | 0.00 | 0.00 |
| ATOM | 709 | HG2  | PRO | X | 46 | 33.249 | 58.099 | 41.396 | 0.00 | 0.00 |
| ATOM | 710 | HG3  | PRO | X | 46 | 34.820 | 57.370 | 41.378 | 0.00 | 0.00 |
| ATOM | 711 | CB   | PRO | X | 46 | 34.842 | 59.337 | 40.645 | 0.00 | 0.00 |
| ATOM | 712 | HB2  | PRO | X | 46 | 34.411 | 59.266 | 39.646 | 0.00 | 0.00 |
| ATOM | 713 | HB3  | PRO | X | 46 | 35.927 | 59.253 | 40.586 | 0.00 | 0.00 |
| ATOM | 714 | CA   | PRO | X | 46 | 34.504 | 60.657 | 41.326 | 0.00 | 0.00 |
| ATOM | 715 | HA   | PRO | X | 46 | 35.326 | 61.339 | 41.111 | 0.00 | 0.00 |

|      |     |      |     |   |    |        |        |        |      |      |
|------|-----|------|-----|---|----|--------|--------|--------|------|------|
| ATOM | 716 | C    | PRO | X | 46 | 33.128 | 61.148 | 40.843 | 0.00 | 0.00 |
| ATOM | 717 | O    | PRO | X | 46 | 32.090 | 60.910 | 41.495 | 0.00 | 0.00 |
| ATOM | 718 | N    | GLU | X | 47 | 33.000 | 61.689 | 39.674 | 0.00 | 0.00 |
| ATOM | 719 | H    | GLU | X | 47 | 33.743 | 61.645 | 38.991 | 0.00 | 0.00 |
| ATOM | 720 | CA   | GLU | X | 47 | 31.760 | 62.442 | 39.230 | 0.00 | 0.00 |
| ATOM | 721 | HA   | GLU | X | 47 | 30.963 | 62.076 | 39.878 | 0.00 | 0.00 |
| ATOM | 722 | CB   | GLU | X | 47 | 32.101 | 63.931 | 39.364 | 0.00 | 0.00 |
| ATOM | 723 | HB2  | GLU | X | 47 | 32.324 | 64.094 | 40.418 | 0.00 | 0.00 |
| ATOM | 724 | HB3  | GLU | X | 47 | 32.918 | 64.204 | 38.696 | 0.00 | 0.00 |
| ATOM | 725 | CG   | GLU | X | 47 | 30.964 | 64.880 | 39.062 | 0.00 | 0.00 |
| ATOM | 726 | HG2  | GLU | X | 47 | 31.320 | 65.908 | 39.125 | 0.00 | 0.00 |
| ATOM | 727 | HG3  | GLU | X | 47 | 30.673 | 64.640 | 38.040 | 0.00 | 0.00 |
| ATOM | 728 | CD   | GLU | X | 47 | 29.722 | 64.725 | 39.836 | 0.00 | 0.00 |
| ATOM | 729 | OE1  | GLU | X | 47 | 28.715 | 65.390 | 39.464 | 0.00 | 0.00 |
| ATOM | 730 | OE2  | GLU | X | 47 | 29.658 | 64.021 | 40.864 | 0.00 | 0.00 |
| ATOM | 731 | C    | GLU | X | 47 | 31.497 | 62.000 | 37.728 | 0.00 | 0.00 |
| ATOM | 732 | O    | GLU | X | 47 | 32.447 | 61.910 | 36.965 | 0.00 | 0.00 |
| ATOM | 733 | N    | PRO | X | 48 | 30.264 | 61.682 | 37.318 | 0.00 | 0.00 |
| ATOM | 734 | CD   | PRO | X | 48 | 29.122 | 61.627 | 38.167 | 0.00 | 0.00 |
| ATOM | 735 | HD2  | PRO | X | 48 | 28.995 | 62.420 | 38.904 | 0.00 | 0.00 |
| ATOM | 736 | HD3  | PRO | X | 48 | 29.082 | 60.659 | 38.667 | 0.00 | 0.00 |
| ATOM | 737 | CG   | PRO | X | 48 | 27.961 | 61.617 | 37.138 | 0.00 | 0.00 |
| ATOM | 738 | HG2  | PRO | X | 48 | 27.692 | 62.621 | 36.809 | 0.00 | 0.00 |
| ATOM | 739 | HG3  | PRO | X | 48 | 27.091 | 61.212 | 37.656 | 0.00 | 0.00 |
| ATOM | 740 | CB   | PRO | X | 48 | 28.578 | 60.702 | 36.097 | 0.00 | 0.00 |
| ATOM | 741 | HB2  | PRO | X | 48 | 28.027 | 60.807 | 35.163 | 0.00 | 0.00 |
| ATOM | 742 | HB3  | PRO | X | 48 | 28.569 | 59.654 | 36.397 | 0.00 | 0.00 |
| ATOM | 743 | CA   | PRO | X | 48 | 30.001 | 61.172 | 35.986 | 0.00 | 0.00 |
| ATOM | 744 | HA   | PRO | X | 48 | 30.643 | 60.307 | 35.815 | 0.00 | 0.00 |
| ATOM | 745 | C    | PRO | X | 48 | 30.226 | 62.260 | 34.847 | 0.00 | 0.00 |
| ATOM | 746 | O    | PRO | X | 48 | 30.025 | 63.439 | 35.039 | 0.00 | 0.00 |
| ATOM | 747 | N    | LYS | X | 49 | 30.711 | 61.806 | 33.669 | 0.00 | 0.00 |
| ATOM | 748 | H    | LYS | X | 49 | 30.774 | 60.811 | 33.510 | 0.00 | 0.00 |
| ATOM | 749 | CA   | LYS | X | 49 | 31.052 | 62.720 | 32.620 | 0.00 | 0.00 |
| ATOM | 750 | HA   | LYS | X | 49 | 31.687 | 63.393 | 33.196 | 0.00 | 0.00 |
| ATOM | 751 | CB   | LYS | X | 49 | 31.741 | 62.012 | 31.466 | 0.00 | 0.00 |
| ATOM | 752 | HB2  | LYS | X | 49 | 32.664 | 61.575 | 31.849 | 0.00 | 0.00 |
| ATOM | 753 | HB3  | LYS | X | 49 | 31.088 | 61.207 | 31.128 | 0.00 | 0.00 |
| ATOM | 754 | CG   | LYS | X | 49 | 32.211 | 62.895 | 30.273 | 0.00 | 0.00 |
| ATOM | 755 | HG2  | LYS | X | 49 | 32.599 | 62.261 | 29.475 | 0.00 | 0.00 |
| ATOM | 756 | HG3  | LYS | X | 49 | 31.370 | 63.414 | 29.812 | 0.00 | 0.00 |
| ATOM | 757 | CD   | LYS | X | 49 | 33.262 | 63.949 | 30.741 | 0.00 | 0.00 |
| ATOM | 758 | HD2  | LYS | X | 49 | 32.765 | 64.776 | 31.249 | 0.00 | 0.00 |
| ATOM | 759 | HD3  | LYS | X | 49 | 34.030 | 63.387 | 31.273 | 0.00 | 0.00 |
| ATOM | 760 | CE   | LYS | X | 49 | 34.011 | 64.460 | 29.459 | 0.00 | 0.00 |
| ATOM | 761 | HE2  | LYS | X | 49 | 33.973 | 63.736 | 28.645 | 0.00 | 0.00 |
| ATOM | 762 | HE3  | LYS | X | 49 | 33.482 | 65.352 | 29.124 | 0.00 | 0.00 |
| ATOM | 763 | NZ   | LYS | X | 49 | 35.395 | 64.828 | 29.714 | 0.00 | 0.00 |
| ATOM | 764 | HZ1  | LYS | X | 49 | 36.002 | 64.237 | 30.263 | 0.00 | 0.00 |
| ATOM | 765 | HZ2  | LYS | X | 49 | 35.934 | 65.187 | 28.939 | 0.00 | 0.00 |
| ATOM | 766 | HZ3  | LYS | X | 49 | 35.390 | 65.631 | 30.328 | 0.00 | 0.00 |
| ATOM | 767 | C    | LYS | X | 49 | 29.843 | 63.626 | 32.136 | 0.00 | 0.00 |
| ATOM | 768 | O    | LYS | X | 49 | 28.741 | 63.167 | 31.896 | 0.00 | 0.00 |
| ATOM | 769 | N    | GLN | X | 50 | 30.114 | 64.936 | 31.951 | 0.00 | 0.00 |
| ATOM | 770 | H    | GLN | X | 50 | 31.020 | 65.175 | 32.328 | 0.00 | 0.00 |
| ATOM | 771 | CA   | GLN | X | 50 | 29.390 | 66.023 | 31.298 | 0.00 | 0.00 |
| ATOM | 772 | HA   | GLN | X | 50 | 28.400 | 65.884 | 31.732 | 0.00 | 0.00 |
| ATOM | 773 | CB   | GLN | X | 50 | 29.905 | 67.444 | 31.667 | 0.00 | 0.00 |
| ATOM | 774 | HB2  | GLN | X | 50 | 29.217 | 68.227 | 31.347 | 0.00 | 0.00 |
| ATOM | 775 | HB3  | GLN | X | 50 | 30.009 | 67.459 | 32.752 | 0.00 | 0.00 |
| ATOM | 776 | CG   | GLN | X | 50 | 31.323 | 67.697 | 31.035 | 0.00 | 0.00 |
| ATOM | 777 | HG2  | GLN | X | 50 | 31.979 | 66.855 | 31.258 | 0.00 | 0.00 |
| ATOM | 778 | HG3  | GLN | X | 50 | 31.259 | 67.778 | 29.950 | 0.00 | 0.00 |
| ATOM | 779 | CD   | GLN | X | 50 | 32.016 | 68.957 | 31.519 | 0.00 | 0.00 |
| ATOM | 780 | OE1  | GLN | X | 50 | 31.938 | 69.996 | 30.852 | 0.00 | 0.00 |
| ATOM | 781 | NE2  | GLN | X | 50 | 32.728 | 68.893 | 32.643 | 0.00 | 0.00 |
| ATOM | 782 | HE21 | GLN | X | 50 | 32.922 | 69.765 | 33.115 | 0.00 | 0.00 |

|      |     |      |     |   |    |        |        |        |      |      |
|------|-----|------|-----|---|----|--------|--------|--------|------|------|
| ATOM | 783 | HE22 | GLN | X | 50 | 32.449 | 68.186 | 33.308 | 0.00 | 0.00 |
| ATOM | 784 | C    | GLN | X | 50 | 29.244 | 65.730 | 29.808 | 0.00 | 0.00 |
| ATOM | 785 | O    | GLN | X | 50 | 30.282 | 65.622 | 29.066 | 0.00 | 0.00 |
| ATOM | 786 | N    | PRO | X | 51 | 27.987 | 65.621 | 29.320 | 0.00 | 0.00 |
| ATOM | 787 | CD   | PRO | X | 51 | 26.732 | 66.100 | 29.801 | 0.00 | 0.00 |
| ATOM | 788 | HD2  | PRO | X | 51 | 26.757 | 67.146 | 29.494 | 0.00 | 0.00 |
| ATOM | 789 | HD3  | PRO | X | 51 | 26.568 | 65.959 | 30.869 | 0.00 | 0.00 |
| ATOM | 790 | CG   | PRO | X | 51 | 25.664 | 65.323 | 29.048 | 0.00 | 0.00 |
| ATOM | 791 | HG2  | PRO | X | 51 | 24.935 | 66.048 | 28.686 | 0.00 | 0.00 |
| ATOM | 792 | HG3  | PRO | X | 51 | 25.189 | 64.648 | 29.759 | 0.00 | 0.00 |
| ATOM | 793 | CB   | PRO | X | 51 | 26.333 | 64.627 | 27.828 | 0.00 | 0.00 |
| ATOM | 794 | HB2  | PRO | X | 51 | 25.802 | 64.858 | 26.905 | 0.00 | 0.00 |
| ATOM | 795 | HB3  | PRO | X | 51 | 26.422 | 63.551 | 27.980 | 0.00 | 0.00 |
| ATOM | 796 | CA   | PRO | X | 51 | 27.711 | 65.138 | 27.916 | 0.00 | 0.00 |
| ATOM | 797 | HA   | PRO | X | 51 | 28.364 | 64.280 | 27.760 | 0.00 | 0.00 |
| ATOM | 798 | C    | PRO | X | 51 | 28.008 | 66.176 | 26.784 | 0.00 | 0.00 |
| ATOM | 799 | O    | PRO | X | 51 | 27.992 | 67.396 | 27.092 | 0.00 | 0.00 |
| ATOM | 800 | N    | TRP | X | 52 | 28.293 | 65.690 | 25.621 | 0.00 | 0.00 |
| ATOM | 801 | H    | TRP | X | 52 | 28.420 | 64.692 | 25.534 | 0.00 | 0.00 |
| ATOM | 802 | CA   | TRP | X | 52 | 28.940 | 66.430 | 24.454 | 0.00 | 0.00 |
| ATOM | 803 | HA   | TRP | X | 52 | 29.164 | 67.424 | 24.842 | 0.00 | 0.00 |
| ATOM | 804 | CB   | TRP | X | 52 | 30.193 | 65.652 | 24.077 | 0.00 | 0.00 |
| ATOM | 805 | HB2  | TRP | X | 52 | 30.656 | 66.096 | 23.197 | 0.00 | 0.00 |
| ATOM | 806 | HB3  | TRP | X | 52 | 30.801 | 65.817 | 24.967 | 0.00 | 0.00 |
| ATOM | 807 | CG   | TRP | X | 52 | 29.975 | 64.162 | 23.878 | 0.00 | 0.00 |
| ATOM | 808 | CD1  | TRP | X | 52 | 29.799 | 63.649 | 22.643 | 0.00 | 0.00 |
| ATOM | 809 | HD1  | TRP | X | 52 | 29.746 | 64.218 | 21.726 | 0.00 | 0.00 |
| ATOM | 810 | NE1  | TRP | X | 52 | 29.826 | 62.256 | 22.717 | 0.00 | 0.00 |
| ATOM | 811 | HE1  | TRP | X | 52 | 29.881 | 61.632 | 21.925 | 0.00 | 0.00 |
| ATOM | 812 | CE2  | TRP | X | 52 | 29.892 | 61.839 | 23.989 | 0.00 | 0.00 |
| ATOM | 813 | CZ2  | TRP | X | 52 | 29.912 | 60.587 | 24.546 | 0.00 | 0.00 |
| ATOM | 814 | HZ2  | TRP | X | 52 | 29.704 | 59.709 | 23.953 | 0.00 | 0.00 |
| ATOM | 815 | CH2  | TRP | X | 52 | 30.224 | 60.372 | 25.911 | 0.00 | 0.00 |
| ATOM | 816 | HH2  | TRP | X | 52 | 30.354 | 59.386 | 26.331 | 0.00 | 0.00 |
| ATOM | 817 | CZ3  | TRP | X | 52 | 30.407 | 61.493 | 26.750 | 0.00 | 0.00 |
| ATOM | 818 | HZ3  | TRP | X | 52 | 30.484 | 61.462 | 27.827 | 0.00 | 0.00 |
| ATOM | 819 | CE3  | TRP | X | 52 | 30.187 | 62.818 | 26.199 | 0.00 | 0.00 |
| ATOM | 820 | HE3  | TRP | X | 52 | 30.298 | 63.600 | 26.934 | 0.00 | 0.00 |
| ATOM | 821 | CD2  | TRP | X | 52 | 30.037 | 63.002 | 24.817 | 0.00 | 0.00 |
| ATOM | 822 | C    | TRP | X | 52 | 28.048 | 66.643 | 23.221 | 0.00 | 0.00 |
| ATOM | 823 | O    | TRP | X | 52 | 27.203 | 65.774 | 22.997 | 0.00 | 0.00 |
| ATOM | 824 | N    | SER | X | 53 | 28.406 | 67.572 | 22.389 | 0.00 | 0.00 |
| ATOM | 825 | H    | SER | X | 53 | 29.028 | 68.296 | 22.720 | 0.00 | 0.00 |
| ATOM | 826 | CA   | SER | X | 53 | 28.000 | 67.714 | 20.897 | 0.00 | 0.00 |
| ATOM | 827 | HA   | SER | X | 53 | 26.989 | 67.314 | 20.817 | 0.00 | 0.00 |
| ATOM | 828 | CB   | SER | X | 53 | 28.140 | 69.164 | 20.480 | 0.00 | 0.00 |
| ATOM | 829 | HB2  | SER | X | 53 | 29.166 | 69.468 | 20.689 | 0.00 | 0.00 |
| ATOM | 830 | HB3  | SER | X | 53 | 28.013 | 69.082 | 19.401 | 0.00 | 0.00 |
| ATOM | 831 | OG   | SER | X | 53 | 27.299 | 70.042 | 21.212 | 0.00 | 0.00 |
| ATOM | 832 | HG   | SER | X | 53 | 26.427 | 70.078 | 20.811 | 0.00 | 0.00 |
| ATOM | 833 | C    | SER | X | 53 | 28.806 | 66.792 | 20.000 | 0.00 | 0.00 |
| ATOM | 834 | O    | SER | X | 53 | 29.953 | 66.458 | 20.137 | 0.00 | 0.00 |
| ATOM | 835 | N    | GLY | X | 54 | 28.178 | 66.295 | 18.957 | 0.00 | 0.00 |
| ATOM | 836 | H    | GLY | X | 54 | 27.171 | 66.372 | 18.942 | 0.00 | 0.00 |
| ATOM | 837 | CA   | GLY | X | 54 | 28.837 | 65.446 | 17.985 | 0.00 | 0.00 |
| ATOM | 838 | HA2  | GLY | X | 54 | 28.308 | 65.450 | 17.032 | 0.00 | 0.00 |
| ATOM | 839 | HA3  | GLY | X | 54 | 29.769 | 66.003 | 17.887 | 0.00 | 0.00 |
| ATOM | 840 | C    | GLY | X | 54 | 29.324 | 64.066 | 18.423 | 0.00 | 0.00 |
| ATOM | 841 | O    | GLY | X | 54 | 28.754 | 63.515 | 19.373 | 0.00 | 0.00 |
| ATOM | 842 | N    | VAL | X | 55 | 30.372 | 63.597 | 17.768 | 0.00 | 0.00 |
| ATOM | 843 | H    | VAL | X | 55 | 30.677 | 64.089 | 16.941 | 0.00 | 0.00 |
| ATOM | 844 | CA   | VAL | X | 55 | 30.927 | 62.353 | 18.065 | 0.00 | 0.00 |
| ATOM | 845 | HA   | VAL | X | 55 | 30.288 | 61.831 | 18.777 | 0.00 | 0.00 |
| ATOM | 846 | CB   | VAL | X | 55 | 31.254 | 61.465 | 16.759 | 0.00 | 0.00 |
| ATOM | 847 | HB   | VAL | X | 55 | 31.890 | 62.090 | 16.132 | 0.00 | 0.00 |
| ATOM | 848 | CG1  | VAL | X | 55 | 31.934 | 60.109 | 17.059 | 0.00 | 0.00 |
| ATOM | 849 | HG11 | VAL | X | 55 | 32.910 | 60.118 | 17.545 | 0.00 | 0.00 |

|      |     |      |     |   |    |        |        |        |      |      |
|------|-----|------|-----|---|----|--------|--------|--------|------|------|
| ATOM | 850 | HG12 | VAL | X | 55 | 31.289 | 59.426 | 17.611 | 0.00 | 0.00 |
| ATOM | 851 | HG13 | VAL | X | 55 | 31.998 | 59.571 | 16.113 | 0.00 | 0.00 |
| ATOM | 852 | CG2  | VAL | X | 55 | 29.945 | 61.245 | 15.948 | 0.00 | 0.00 |
| ATOM | 853 | HG21 | VAL | X | 55 | 29.367 | 60.410 | 16.344 | 0.00 | 0.00 |
| ATOM | 854 | HG22 | VAL | X | 55 | 30.190 | 61.103 | 14.895 | 0.00 | 0.00 |
| ATOM | 855 | HG23 | VAL | X | 55 | 29.368 | 62.169 | 15.964 | 0.00 | 0.00 |
| ATOM | 856 | C    | VAL | X | 55 | 32.264 | 62.465 | 18.808 | 0.00 | 0.00 |
| ATOM | 857 | O    | VAL | X | 55 | 33.081 | 63.265 | 18.381 | 0.00 | 0.00 |
| ATOM | 858 | N    | VAL | X | 56 | 32.376 | 61.700 | 19.881 | 0.00 | 0.00 |
| ATOM | 859 | H    | VAL | X | 56 | 31.558 | 61.144 | 20.084 | 0.00 | 0.00 |
| ATOM | 860 | CA   | VAL | X | 56 | 33.653 | 61.476 | 20.552 | 0.00 | 0.00 |
| ATOM | 861 | HA   | VAL | X | 56 | 34.277 | 62.370 | 20.561 | 0.00 | 0.00 |
| ATOM | 862 | CB   | VAL | X | 56 | 33.357 | 61.220 | 22.009 | 0.00 | 0.00 |
| ATOM | 863 | HB   | VAL | X | 56 | 32.383 | 60.745 | 22.127 | 0.00 | 0.00 |
| ATOM | 864 | CG1  | VAL | X | 56 | 34.356 | 60.505 | 22.892 | 0.00 | 0.00 |
| ATOM | 865 | HG11 | VAL | X | 56 | 35.333 | 60.975 | 22.783 | 0.00 | 0.00 |
| ATOM | 866 | HG12 | VAL | X | 56 | 33.978 | 60.443 | 23.913 | 0.00 | 0.00 |
| ATOM | 867 | HG13 | VAL | X | 56 | 34.586 | 59.537 | 22.447 | 0.00 | 0.00 |
| ATOM | 868 | CG2  | VAL | X | 56 | 33.153 | 62.619 | 22.630 | 0.00 | 0.00 |
| ATOM | 869 | HG21 | VAL | X | 56 | 32.929 | 62.465 | 23.685 | 0.00 | 0.00 |
| ATOM | 870 | HG22 | VAL | X | 56 | 32.344 | 63.176 | 22.157 | 0.00 | 0.00 |
| ATOM | 871 | HG23 | VAL | X | 56 | 34.014 | 63.279 | 22.521 | 0.00 | 0.00 |
| ATOM | 872 | C    | VAL | X | 56 | 34.578 | 60.448 | 19.871 | 0.00 | 0.00 |
| ATOM | 873 | O    | VAL | X | 56 | 34.094 | 59.355 | 19.691 | 0.00 | 0.00 |
| ATOM | 874 | N    | ASP | X | 57 | 35.845 | 60.723 | 19.733 | 0.00 | 0.00 |
| ATOM | 875 | H    | ASP | X | 57 | 36.160 | 61.571 | 20.182 | 0.00 | 0.00 |
| ATOM | 876 | CA   | ASP | X | 57 | 36.796 | 59.701 | 19.192 | 0.00 | 0.00 |
| ATOM | 877 | HA   | ASP | X | 57 | 36.379 | 59.119 | 18.370 | 0.00 | 0.00 |
| ATOM | 878 | CB   | ASP | X | 57 | 38.048 | 60.493 | 18.615 | 0.00 | 0.00 |
| ATOM | 879 | HB2  | ASP | X | 57 | 37.729 | 61.115 | 17.778 | 0.00 | 0.00 |
| ATOM | 880 | HB3  | ASP | X | 57 | 38.414 | 61.145 | 19.408 | 0.00 | 0.00 |
| ATOM | 881 | CG   | ASP | X | 57 | 39.243 | 59.704 | 18.133 | 0.00 | 0.00 |
| ATOM | 882 | OD1  | ASP | X | 57 | 38.950 | 58.690 | 17.489 | 0.00 | 0.00 |
| ATOM | 883 | OD2  | ASP | X | 57 | 40.362 | 60.030 | 18.472 | 0.00 | 0.00 |
| ATOM | 884 | C    | ASP | X | 57 | 37.215 | 58.793 | 20.373 | 0.00 | 0.00 |
| ATOM | 885 | O    | ASP | X | 57 | 37.902 | 59.243 | 21.307 | 0.00 | 0.00 |
| ATOM | 886 | N    | ALA | X | 58 | 36.931 | 57.483 | 20.285 | 0.00 | 0.00 |
| ATOM | 887 | H    | ALA | X | 58 | 36.415 | 57.178 | 19.472 | 0.00 | 0.00 |
| ATOM | 888 | CA   | ALA | X | 58 | 37.374 | 56.580 | 21.302 | 0.00 | 0.00 |
| ATOM | 889 | HA   | ALA | X | 58 | 37.833 | 57.148 | 22.111 | 0.00 | 0.00 |
| ATOM | 890 | CB   | ALA | X | 58 | 36.171 | 56.023 | 21.950 | 0.00 | 0.00 |
| ATOM | 891 | HB1  | ALA | X | 58 | 35.455 | 56.830 | 22.106 | 0.00 | 0.00 |
| ATOM | 892 | HB2  | ALA | X | 58 | 36.455 | 55.619 | 22.922 | 0.00 | 0.00 |
| ATOM | 893 | HB3  | ALA | X | 58 | 35.675 | 55.217 | 21.410 | 0.00 | 0.00 |
| ATOM | 894 | C    | ALA | X | 58 | 38.427 | 55.545 | 20.812 | 0.00 | 0.00 |
| ATOM | 895 | O    | ALA | X | 58 | 38.004 | 54.397 | 20.644 | 0.00 | 0.00 |
| ATOM | 896 | N    | THR | X | 59 | 39.713 | 55.890 | 20.578 | 0.00 | 0.00 |
| ATOM | 897 | H    | THR | X | 59 | 39.987 | 56.845 | 20.762 | 0.00 | 0.00 |
| ATOM | 898 | CA   | THR | X | 59 | 40.716 | 55.116 | 19.745 | 0.00 | 0.00 |
| ATOM | 899 | HA   | THR | X | 59 | 40.376 | 54.085 | 19.645 | 0.00 | 0.00 |
| ATOM | 900 | CB   | THR | X | 59 | 40.771 | 55.721 | 18.373 | 0.00 | 0.00 |
| ATOM | 901 | HB   | THR | X | 59 | 41.532 | 55.212 | 17.781 | 0.00 | 0.00 |
| ATOM | 902 | CG2  | THR | X | 59 | 39.464 | 55.496 | 17.724 | 0.00 | 0.00 |
| ATOM | 903 | HG21 | THR | X | 59 | 38.693 | 56.106 | 18.195 | 0.00 | 0.00 |
| ATOM | 904 | HG22 | THR | X | 59 | 39.170 | 54.446 | 17.711 | 0.00 | 0.00 |
| ATOM | 905 | HG23 | THR | X | 59 | 39.625 | 55.758 | 16.679 | 0.00 | 0.00 |
| ATOM | 906 | OG1  | THR | X | 59 | 40.945 | 57.101 | 18.460 | 0.00 | 0.00 |
| ATOM | 907 | HG1  | THR | X | 59 | 40.110 | 57.466 | 18.159 | 0.00 | 0.00 |
| ATOM | 908 | C    | THR | X | 59 | 42.068 | 55.009 | 20.433 | 0.00 | 0.00 |
| ATOM | 909 | O    | THR | X | 59 | 42.901 | 54.386 | 19.840 | 0.00 | 0.00 |
| ATOM | 910 | N    | THR | X | 60 | 42.278 | 55.584 | 21.638 | 0.00 | 0.00 |
| ATOM | 911 | H    | THR | X | 60 | 41.568 | 56.115 | 22.123 | 0.00 | 0.00 |
| ATOM | 912 | CA   | THR | X | 60 | 43.549 | 55.461 | 22.393 | 0.00 | 0.00 |
| ATOM | 913 | HA   | THR | X | 60 | 43.799 | 54.400 | 22.391 | 0.00 | 0.00 |
| ATOM | 914 | CB   | THR | X | 60 | 44.690 | 56.233 | 21.781 | 0.00 | 0.00 |
| ATOM | 915 | HB   | THR | X | 60 | 44.782 | 55.972 | 20.727 | 0.00 | 0.00 |
| ATOM | 916 | CG2  | THR | X | 60 | 44.550 | 57.750 | 21.902 | 0.00 | 0.00 |

|      |     |      |     |   |    |        |        |        |      |      |
|------|-----|------|-----|---|----|--------|--------|--------|------|------|
| ATOM | 917 | HG21 | THR | X | 60 | 44.548 | 58.216 | 22.888 | 0.00 | 0.00 |
| ATOM | 918 | HG22 | THR | X | 60 | 43.585 | 58.064 | 21.506 | 0.00 | 0.00 |
| ATOM | 919 | HG23 | THR | X | 60 | 45.302 | 58.244 | 21.286 | 0.00 | 0.00 |
| ATOM | 920 | OG1  | THR | X | 60 | 45.869 | 55.945 | 22.496 | 0.00 | 0.00 |
| ATOM | 921 | HG1  | THR | X | 60 | 46.529 | 56.057 | 21.808 | 0.00 | 0.00 |
| ATOM | 922 | C    | THR | X | 60 | 43.380 | 55.836 | 23.871 | 0.00 | 0.00 |
| ATOM | 923 | O    | THR | X | 60 | 42.578 | 56.675 | 24.239 | 0.00 | 0.00 |
| ATOM | 924 | N    | PHE | X | 61 | 44.137 | 55.256 | 24.745 | 0.00 | 0.00 |
| ATOM | 925 | H    | PHE | X | 61 | 44.933 | 54.753 | 24.378 | 0.00 | 0.00 |
| ATOM | 926 | CA   | PHE | X | 61 | 44.363 | 55.665 | 26.125 | 0.00 | 0.00 |
| ATOM | 927 | HA   | PHE | X | 61 | 43.384 | 55.629 | 26.605 | 0.00 | 0.00 |
| ATOM | 928 | CB   | PHE | X | 61 | 45.351 | 54.646 | 26.741 | 0.00 | 0.00 |
| ATOM | 929 | HB2  | PHE | X | 61 | 46.308 | 54.701 | 26.223 | 0.00 | 0.00 |
| ATOM | 930 | HB3  | PHE | X | 61 | 45.457 | 54.926 | 27.789 | 0.00 | 0.00 |
| ATOM | 931 | CG   | PHE | X | 61 | 45.009 | 53.156 | 26.946 | 0.00 | 0.00 |
| ATOM | 932 | CD1  | PHE | X | 61 | 44.037 | 52.691 | 27.829 | 0.00 | 0.00 |
| ATOM | 933 | HD1  | PHE | X | 61 | 43.578 | 53.383 | 28.520 | 0.00 | 0.00 |
| ATOM | 934 | CE1  | PHE | X | 61 | 43.636 | 51.355 | 27.892 | 0.00 | 0.00 |
| ATOM | 935 | HE1  | PHE | X | 61 | 42.886 | 51.057 | 28.610 | 0.00 | 0.00 |
| ATOM | 936 | CZ   | PHE | X | 61 | 44.205 | 50.541 | 26.961 | 0.00 | 0.00 |
| ATOM | 937 | HZ   | PHE | X | 61 | 43.884 | 49.511 | 27.016 | 0.00 | 0.00 |
| ATOM | 938 | CE2  | PHE | X | 61 | 45.145 | 50.936 | 25.956 | 0.00 | 0.00 |
| ATOM | 939 | HE2  | PHE | X | 61 | 45.461 | 50.237 | 25.195 | 0.00 | 0.00 |
| ATOM | 940 | CD2  | PHE | X | 61 | 45.474 | 52.308 | 25.968 | 0.00 | 0.00 |
| ATOM | 941 | HD2  | PHE | X | 61 | 46.144 | 52.656 | 25.195 | 0.00 | 0.00 |
| ATOM | 942 | C    | PHE | X | 61 | 44.884 | 57.038 | 26.224 | 0.00 | 0.00 |
| ATOM | 943 | O    | PHE | X | 61 | 45.732 | 57.312 | 25.367 | 0.00 | 0.00 |
| ATOM | 944 | N    | GLN | X | 62 | 44.512 | 57.981 | 27.091 | 0.00 | 0.00 |
| ATOM | 945 | H    | GLN | X | 62 | 44.000 | 57.717 | 27.921 | 0.00 | 0.00 |
| ATOM | 946 | CA   | GLN | X | 62 | 44.901 | 59.403 | 27.040 | 0.00 | 0.00 |
| ATOM | 947 | HA   | GLN | X | 62 | 45.393 | 59.658 | 26.101 | 0.00 | 0.00 |
| ATOM | 948 | CB   | GLN | X | 62 | 43.615 | 60.227 | 27.072 | 0.00 | 0.00 |
| ATOM | 949 | HB2  | GLN | X | 62 | 43.132 | 59.888 | 27.989 | 0.00 | 0.00 |
| ATOM | 950 | HB3  | GLN | X | 62 | 43.838 | 61.288 | 27.180 | 0.00 | 0.00 |
| ATOM | 951 | CG   | GLN | X | 62 | 42.712 | 60.025 | 25.845 | 0.00 | 0.00 |
| ATOM | 952 | HG2  | GLN | X | 62 | 42.488 | 58.975 | 25.656 | 0.00 | 0.00 |
| ATOM | 953 | HG3  | GLN | X | 62 | 41.770 | 60.491 | 26.133 | 0.00 | 0.00 |
| ATOM | 954 | CD   | GLN | X | 62 | 43.218 | 60.753 | 24.573 | 0.00 | 0.00 |
| ATOM | 955 | OE1  | GLN | X | 62 | 44.380 | 61.161 | 24.361 | 0.00 | 0.00 |
| ATOM | 956 | NE2  | GLN | X | 62 | 42.322 | 60.811 | 23.592 | 0.00 | 0.00 |
| ATOM | 957 | HE21 | GLN | X | 62 | 42.537 | 61.254 | 22.710 | 0.00 | 0.00 |
| ATOM | 958 | HE22 | GLN | X | 62 | 41.426 | 60.369 | 23.745 | 0.00 | 0.00 |
| ATOM | 959 | C    | GLN | X | 62 | 45.803 | 59.762 | 28.200 | 0.00 | 0.00 |
| ATOM | 960 | O    | GLN | X | 62 | 46.564 | 60.674 | 28.102 | 0.00 | 0.00 |
| ATOM | 961 | N    | SER | X | 63 | 45.746 | 59.075 | 29.365 | 0.00 | 0.00 |
| ATOM | 962 | H    | SER | X | 63 | 45.141 | 58.284 | 29.537 | 0.00 | 0.00 |
| ATOM | 963 | CA   | SER | X | 63 | 46.715 | 59.376 | 30.452 | 0.00 | 0.00 |
| ATOM | 964 | HA   | SER | X | 63 | 47.716 | 59.247 | 30.042 | 0.00 | 0.00 |
| ATOM | 965 | CB   | SER | X | 63 | 46.391 | 60.812 | 31.026 | 0.00 | 0.00 |
| ATOM | 966 | HB2  | SER | X | 63 | 47.229 | 61.099 | 31.661 | 0.00 | 0.00 |
| ATOM | 967 | HB3  | SER | X | 63 | 46.323 | 61.512 | 30.194 | 0.00 | 0.00 |
| ATOM | 968 | OG   | SER | X | 63 | 45.158 | 60.772 | 31.721 | 0.00 | 0.00 |
| ATOM | 969 | HG   | SER | X | 63 | 44.937 | 61.655 | 32.029 | 0.00 | 0.00 |
| ATOM | 970 | C    | SER | X | 63 | 46.698 | 58.283 | 31.584 | 0.00 | 0.00 |
| ATOM | 971 | O    | SER | X | 63 | 45.811 | 57.381 | 31.537 | 0.00 | 0.00 |
| ATOM | 972 | N    | VAL | X | 64 | 47.657 | 58.234 | 32.543 | 0.00 | 0.00 |
| ATOM | 973 | H    | VAL | X | 64 | 48.338 | 58.976 | 32.463 | 0.00 | 0.00 |
| ATOM | 974 | CA   | VAL | X | 64 | 47.711 | 57.251 | 33.622 | 0.00 | 0.00 |
| ATOM | 975 | HA   | VAL | X | 64 | 46.969 | 56.465 | 33.483 | 0.00 | 0.00 |
| ATOM | 976 | CB   | VAL | X | 64 | 49.021 | 56.442 | 33.506 | 0.00 | 0.00 |
| ATOM | 977 | HB   | VAL | X | 64 | 49.895 | 57.018 | 33.203 | 0.00 | 0.00 |
| ATOM | 978 | CG1  | VAL | X | 64 | 49.475 | 55.731 | 34.779 | 0.00 | 0.00 |
| ATOM | 979 | HG11 | VAL | X | 64 | 48.699 | 54.999 | 35.004 | 0.00 | 0.00 |
| ATOM | 980 | HG12 | VAL | X | 64 | 50.390 | 55.167 | 34.602 | 0.00 | 0.00 |
| ATOM | 981 | HG13 | VAL | X | 64 | 49.518 | 56.495 | 35.555 | 0.00 | 0.00 |
| ATOM | 982 | CG2  | VAL | X | 64 | 48.732 | 55.362 | 32.466 | 0.00 | 0.00 |
| ATOM | 983 | HG21 | VAL | X | 64 | 49.698 | 54.957 | 32.165 | 0.00 | 0.00 |

|      |      |      |     |   |    |        |        |        |      |      |
|------|------|------|-----|---|----|--------|--------|--------|------|------|
| ATOM | 984  | HG22 | VAL | X | 64 | 48.178 | 55.712 | 31.595 | 0.00 | 0.00 |
| ATOM | 985  | HG23 | VAL | X | 64 | 48.055 | 54.598 | 32.848 | 0.00 | 0.00 |
| ATOM | 986  | C    | VAL | X | 64 | 47.569 | 57.910 | 34.933 | 0.00 | 0.00 |
| ATOM | 987  | O    | VAL | X | 64 | 48.002 | 59.017 | 35.154 | 0.00 | 0.00 |
| ATOM | 988  | N    | CYX | X | 65 | 46.898 | 57.250 | 35.915 | 0.00 | 0.00 |
| ATOM | 989  | H    | CYX | X | 65 | 46.556 | 56.306 | 35.806 | 0.00 | 0.00 |
| ATOM | 990  | CA   | CYX | X | 65 | 46.572 | 57.867 | 37.211 | 0.00 | 0.00 |
| ATOM | 991  | HA   | CYX | X | 65 | 46.287 | 58.895 | 36.988 | 0.00 | 0.00 |
| ATOM | 992  | CB   | CYX | X | 65 | 45.396 | 57.133 | 37.939 | 0.00 | 0.00 |
| ATOM | 993  | HB2  | CYX | X | 65 | 45.520 | 56.095 | 38.249 | 0.00 | 0.00 |
| ATOM | 994  | HB3  | CYX | X | 65 | 45.356 | 57.531 | 38.953 | 0.00 | 0.00 |
| ATOM | 995  | SG   | CYX | X | 65 | 43.791 | 56.999 | 37.164 | 0.00 | 0.00 |
| ATOM | 996  | C    | CYX | X | 65 | 47.797 | 57.884 | 38.121 | 0.00 | 0.00 |
| ATOM | 997  | O    | CYX | X | 65 | 48.440 | 56.824 | 38.421 | 0.00 | 0.00 |
| ATOM | 998  | N    | TYR | X | 66 | 47.981 | 59.077 | 38.689 | 0.00 | 0.00 |
| ATOM | 999  | H    | TYR | X | 66 | 47.355 | 59.819 | 38.410 | 0.00 | 0.00 |
| ATOM | 1000 | CA   | TYR | X | 66 | 49.219 | 59.447 | 39.379 | 0.00 | 0.00 |
| ATOM | 1001 | HA   | TYR | X | 66 | 49.903 | 59.431 | 38.532 | 0.00 | 0.00 |
| ATOM | 1002 | CB   | TYR | X | 66 | 49.169 | 60.857 | 40.014 | 0.00 | 0.00 |
| ATOM | 1003 | HB2  | TYR | X | 66 | 48.118 | 61.147 | 40.037 | 0.00 | 0.00 |
| ATOM | 1004 | HB3  | TYR | X | 66 | 49.403 | 60.751 | 41.073 | 0.00 | 0.00 |
| ATOM | 1005 | CG   | TYR | X | 66 | 50.060 | 61.912 | 39.343 | 0.00 | 0.00 |
| ATOM | 1006 | CD1  | TYR | X | 66 | 49.449 | 63.110 | 38.935 | 0.00 | 0.00 |
| ATOM | 1007 | HD1  | TYR | X | 66 | 48.437 | 63.217 | 39.295 | 0.00 | 0.00 |
| ATOM | 1008 | CE1  | TYR | X | 66 | 50.152 | 64.017 | 38.170 | 0.00 | 0.00 |
| ATOM | 1009 | HE1  | TYR | X | 66 | 49.700 | 64.946 | 37.854 | 0.00 | 0.00 |
| ATOM | 1010 | CZ   | TYR | X | 66 | 51.524 | 63.811 | 37.879 | 0.00 | 0.00 |
| ATOM | 1011 | OH   | TYR | X | 66 | 52.372 | 64.716 | 37.243 | 0.00 | 0.00 |
| ATOM | 1012 | HH   | TYR | X | 66 | 51.905 | 65.530 | 37.041 | 0.00 | 0.00 |
| ATOM | 1013 | CE2  | TYR | X | 66 | 52.164 | 62.602 | 38.251 | 0.00 | 0.00 |
| ATOM | 1014 | HE2  | TYR | X | 66 | 53.168 | 62.376 | 37.924 | 0.00 | 0.00 |
| ATOM | 1015 | CD2  | TYR | X | 66 | 51.428 | 61.623 | 38.962 | 0.00 | 0.00 |
| ATOM | 1016 | HD2  | TYR | X | 66 | 51.800 | 60.612 | 39.043 | 0.00 | 0.00 |
| ATOM | 1017 | C    | TYR | X | 66 | 49.670 | 58.427 | 40.411 | 0.00 | 0.00 |
| ATOM | 1018 | O    | TYR | X | 66 | 48.928 | 58.107 | 41.317 | 0.00 | 0.00 |
| ATOM | 1019 | N    | GLN | X | 67 | 50.885 | 57.846 | 40.336 | 0.00 | 0.00 |
| ATOM | 1020 | H    | GLN | X | 67 | 51.517 | 58.121 | 39.597 | 0.00 | 0.00 |
| ATOM | 1021 | CA   | GLN | X | 67 | 51.295 | 56.659 | 41.169 | 0.00 | 0.00 |
| ATOM | 1022 | HA   | GLN | X | 67 | 50.995 | 56.935 | 42.180 | 0.00 | 0.00 |
| ATOM | 1023 | CB   | GLN | X | 67 | 50.561 | 55.426 | 40.627 | 0.00 | 0.00 |
| ATOM | 1024 | HB2  | GLN | X | 67 | 50.605 | 54.572 | 41.303 | 0.00 | 0.00 |
| ATOM | 1025 | HB3  | GLN | X | 67 | 49.502 | 55.669 | 40.534 | 0.00 | 0.00 |
| ATOM | 1026 | CG   | GLN | X | 67 | 51.116 | 54.972 | 39.261 | 0.00 | 0.00 |
| ATOM | 1027 | HG2  | GLN | X | 67 | 50.957 | 55.676 | 38.445 | 0.00 | 0.00 |
| ATOM | 1028 | HG3  | GLN | X | 67 | 52.168 | 54.693 | 39.330 | 0.00 | 0.00 |
| ATOM | 1029 | CD   | GLN | X | 67 | 50.394 | 53.678 | 38.810 | 0.00 | 0.00 |
| ATOM | 1030 | OE1  | GLN | X | 67 | 50.899 | 52.570 | 38.766 | 0.00 | 0.00 |
| ATOM | 1031 | NE2  | GLN | X | 67 | 49.203 | 53.902 | 38.262 | 0.00 | 0.00 |
| ATOM | 1032 | HE21 | GLN | X | 67 | 48.700 | 53.068 | 37.991 | 0.00 | 0.00 |
| ATOM | 1033 | HE22 | GLN | X | 67 | 48.894 | 54.863 | 38.261 | 0.00 | 0.00 |
| ATOM | 1034 | C    | GLN | X | 67 | 52.800 | 56.591 | 41.251 | 0.00 | 0.00 |
| ATOM | 1035 | O    | GLN | X | 67 | 53.494 | 57.145 | 40.402 | 0.00 | 0.00 |
| ATOM | 1036 | N    | TYR | X | 68 | 53.245 | 55.858 | 42.289 | 0.00 | 0.00 |
| ATOM | 1037 | H    | TYR | X | 68 | 52.668 | 55.629 | 43.086 | 0.00 | 0.00 |
| ATOM | 1038 | CA   | TYR | X | 68 | 54.701 | 55.415 | 42.282 | 0.00 | 0.00 |
| ATOM | 1039 | HA   | TYR | X | 68 | 55.288 | 56.334 | 42.284 | 0.00 | 0.00 |
| ATOM | 1040 | CB   | TYR | X | 68 | 55.044 | 54.594 | 43.510 | 0.00 | 0.00 |
| ATOM | 1041 | HB2  | TYR | X | 68 | 54.705 | 55.113 | 44.407 | 0.00 | 0.00 |
| ATOM | 1042 | HB3  | TYR | X | 68 | 54.397 | 53.718 | 43.477 | 0.00 | 0.00 |
| ATOM | 1043 | CG   | TYR | X | 68 | 56.519 | 54.075 | 43.617 | 0.00 | 0.00 |
| ATOM | 1044 | CD1  | TYR | X | 68 | 57.549 | 54.940 | 44.055 | 0.00 | 0.00 |
| ATOM | 1045 | HD1  | TYR | X | 68 | 57.347 | 55.935 | 44.424 | 0.00 | 0.00 |
| ATOM | 1046 | CE1  | TYR | X | 68 | 58.897 | 54.527 | 43.996 | 0.00 | 0.00 |
| ATOM | 1047 | HE1  | TYR | X | 68 | 59.673 | 55.262 | 44.149 | 0.00 | 0.00 |
| ATOM | 1048 | CZ   | TYR | X | 68 | 59.148 | 53.219 | 43.558 | 0.00 | 0.00 |
| ATOM | 1049 | OH   | TYR | X | 68 | 60.413 | 52.763 | 43.319 | 0.00 | 0.00 |
| ATOM | 1050 | HH   | TYR | X | 68 | 61.158 | 53.369 | 43.320 | 0.00 | 0.00 |

|      |      |      |     |   |    |        |        |        |      |      |
|------|------|------|-----|---|----|--------|--------|--------|------|------|
| ATOM | 1051 | CE2  | TYR | X | 68 | 58.087 | 52.361 | 43.234 | 0.00 | 0.00 |
| ATOM | 1052 | HE2  | TYR | X | 68 | 58.177 | 51.326 | 42.941 | 0.00 | 0.00 |
| ATOM | 1053 | CD2  | TYR | X | 68 | 56.787 | 52.811 | 43.159 | 0.00 | 0.00 |
| ATOM | 1054 | HD2  | TYR | X | 68 | 55.997 | 52.215 | 42.727 | 0.00 | 0.00 |
| ATOM | 1055 | C    | TYR | X | 68 | 55.005 | 54.606 | 41.019 | 0.00 | 0.00 |
| ATOM | 1056 | O    | TYR | X | 68 | 54.305 | 53.657 | 40.704 | 0.00 | 0.00 |
| ATOM | 1057 | N    | VAL | X | 69 | 56.031 | 54.987 | 40.309 | 0.00 | 0.00 |
| ATOM | 1058 | H    | VAL | X | 69 | 56.622 | 55.632 | 40.815 | 0.00 | 0.00 |
| ATOM | 1059 | CA   | VAL | X | 69 | 56.687 | 54.235 | 39.236 | 0.00 | 0.00 |
| ATOM | 1060 | HA   | VAL | X | 69 | 56.059 | 53.406 | 38.910 | 0.00 | 0.00 |
| ATOM | 1061 | CB   | VAL | X | 69 | 56.891 | 55.026 | 37.870 | 0.00 | 0.00 |
| ATOM | 1062 | HB   | VAL | X | 69 | 57.263 | 54.301 | 37.146 | 0.00 | 0.00 |
| ATOM | 1063 | CG1  | VAL | X | 69 | 55.492 | 55.560 | 37.474 | 0.00 | 0.00 |
| ATOM | 1064 | HG11 | VAL | X | 69 | 54.897 | 54.720 | 37.113 | 0.00 | 0.00 |
| ATOM | 1065 | HG12 | VAL | X | 69 | 55.016 | 56.126 | 38.274 | 0.00 | 0.00 |
| ATOM | 1066 | HG13 | VAL | X | 69 | 55.604 | 56.315 | 36.696 | 0.00 | 0.00 |
| ATOM | 1067 | CG2  | VAL | X | 69 | 57.815 | 56.314 | 38.015 | 0.00 | 0.00 |
| ATOM | 1068 | HG21 | VAL | X | 69 | 58.710 | 56.114 | 38.605 | 0.00 | 0.00 |
| ATOM | 1069 | HG22 | VAL | X | 69 | 57.215 | 57.070 | 38.520 | 0.00 | 0.00 |
| ATOM | 1070 | HG23 | VAL | X | 69 | 58.115 | 56.674 | 37.031 | 0.00 | 0.00 |
| ATOM | 1071 | C    | VAL | X | 69 | 58.012 | 53.730 | 39.812 | 0.00 | 0.00 |
| ATOM | 1072 | O    | VAL | X | 69 | 58.658 | 54.494 | 40.499 | 0.00 | 0.00 |
| ATOM | 1073 | N    | ASP | X | 70 | 58.424 | 52.486 | 39.395 | 0.00 | 0.00 |
| ATOM | 1074 | H    | ASP | X | 70 | 57.794 | 51.896 | 38.870 | 0.00 | 0.00 |
| ATOM | 1075 | CA   | ASP | X | 70 | 59.623 | 51.759 | 39.865 | 0.00 | 0.00 |
| ATOM | 1076 | HA   | ASP | X | 70 | 59.653 | 51.601 | 40.943 | 0.00 | 0.00 |
| ATOM | 1077 | CB   | ASP | X | 70 | 59.630 | 50.377 | 39.206 | 0.00 | 0.00 |
| ATOM | 1078 | HB2  | ASP | X | 70 | 58.737 | 49.804 | 39.455 | 0.00 | 0.00 |
| ATOM | 1079 | HB3  | ASP | X | 70 | 59.583 | 50.630 | 38.147 | 0.00 | 0.00 |
| ATOM | 1080 | CG   | ASP | X | 70 | 60.904 | 49.612 | 39.583 | 0.00 | 0.00 |
| ATOM | 1081 | OD1  | ASP | X | 70 | 61.837 | 49.523 | 38.697 | 0.00 | 0.00 |
| ATOM | 1082 | OD2  | ASP | X | 70 | 61.055 | 49.153 | 40.717 | 0.00 | 0.00 |
| ATOM | 1083 | C    | ASP | X | 70 | 60.961 | 52.503 | 39.588 | 0.00 | 0.00 |
| ATOM | 1084 | O    | ASP | X | 70 | 61.145 | 53.128 | 38.567 | 0.00 | 0.00 |
| ATOM | 1085 | N    | THR | X | 71 | 62.005 | 52.255 | 40.472 | 0.00 | 0.00 |
| ATOM | 1086 | H    | THR | X | 71 | 61.848 | 51.762 | 41.340 | 0.00 | 0.00 |
| ATOM | 1087 | CA   | THR | X | 71 | 63.429 | 52.615 | 40.105 | 0.00 | 0.00 |
| ATOM | 1088 | HA   | THR | X | 71 | 63.448 | 52.800 | 39.031 | 0.00 | 0.00 |
| ATOM | 1089 | CB   | THR | X | 71 | 63.718 | 53.935 | 40.827 | 0.00 | 0.00 |
| ATOM | 1090 | HB   | THR | X | 71 | 64.796 | 54.067 | 40.735 | 0.00 | 0.00 |
| ATOM | 1091 | CG2  | THR | X | 71 | 62.967 | 55.091 | 40.102 | 0.00 | 0.00 |
| ATOM | 1092 | HG21 | THR | X | 71 | 61.921 | 55.064 | 40.405 | 0.00 | 0.00 |
| ATOM | 1093 | HG22 | THR | X | 71 | 63.037 | 55.044 | 39.015 | 0.00 | 0.00 |
| ATOM | 1094 | HG23 | THR | X | 71 | 63.349 | 56.026 | 40.513 | 0.00 | 0.00 |
| ATOM | 1095 | OG1  | THR | X | 71 | 63.347 | 54.074 | 42.218 | 0.00 | 0.00 |
| ATOM | 1096 | HG1  | THR | X | 71 | 64.067 | 53.707 | 42.736 | 0.00 | 0.00 |
| ATOM | 1097 | C    | THR | X | 71 | 64.451 | 51.528 | 40.481 | 0.00 | 0.00 |
| ATOM | 1098 | O    | THR | X | 71 | 65.572 | 51.773 | 40.770 | 0.00 | 0.00 |
| ATOM | 1099 | N    | LEU | X | 72 | 64.016 | 50.261 | 40.623 | 0.00 | 0.00 |
| ATOM | 1100 | H    | LEU | X | 72 | 63.082 | 50.013 | 40.328 | 0.00 | 0.00 |
| ATOM | 1101 | CA   | LEU | X | 72 | 64.793 | 49.305 | 41.517 | 0.00 | 0.00 |
| ATOM | 1102 | HA   | LEU | X | 72 | 65.540 | 49.853 | 42.091 | 0.00 | 0.00 |
| ATOM | 1103 | CB   | LEU | X | 72 | 63.914 | 48.692 | 42.596 | 0.00 | 0.00 |
| ATOM | 1104 | HB2  | LEU | X | 72 | 63.438 | 49.545 | 43.080 | 0.00 | 0.00 |
| ATOM | 1105 | HB3  | LEU | X | 72 | 63.150 | 48.079 | 42.119 | 0.00 | 0.00 |
| ATOM | 1106 | CG   | LEU | X | 72 | 64.521 | 47.845 | 43.744 | 0.00 | 0.00 |
| ATOM | 1107 | HG   | LEU | X | 72 | 64.757 | 46.897 | 43.259 | 0.00 | 0.00 |
| ATOM | 1108 | CD1  | LEU | X | 72 | 65.784 | 48.277 | 44.475 | 0.00 | 0.00 |
| ATOM | 1109 | HD11 | LEU | X | 72 | 66.522 | 48.625 | 43.753 | 0.00 | 0.00 |
| ATOM | 1110 | HD12 | LEU | X | 72 | 66.194 | 47.436 | 45.035 | 0.00 | 0.00 |
| ATOM | 1111 | HD13 | LEU | X | 72 | 65.557 | 48.989 | 45.268 | 0.00 | 0.00 |
| ATOM | 1112 | CD2  | LEU | X | 72 | 63.414 | 47.576 | 44.770 | 0.00 | 0.00 |
| ATOM | 1113 | HD21 | LEU | X | 72 | 63.431 | 48.384 | 45.501 | 0.00 | 0.00 |
| ATOM | 1114 | HD22 | LEU | X | 72 | 62.442 | 47.406 | 44.306 | 0.00 | 0.00 |
| ATOM | 1115 | HD23 | LEU | X | 72 | 63.528 | 46.623 | 45.286 | 0.00 | 0.00 |
| ATOM | 1116 | C    | LEU | X | 72 | 65.521 | 48.303 | 40.661 | 0.00 | 0.00 |
| ATOM | 1117 | O    | LEU | X | 72 | 66.733 | 48.079 | 40.880 | 0.00 | 0.00 |



|      |      |     |     |   |    |        |        |        |      |      |
|------|------|-----|-----|---|----|--------|--------|--------|------|------|
| ATOM | 1118 | N   | TYR | X | 73 | 64.894 | 47.820 | 39.596 | 0.00 | 0.00 |
| ATOM | 1119 | H   | TYR | X | 73 | 63.887 | 47.891 | 39.606 | 0.00 | 0.00 |
| ATOM | 1120 | CA  | TYR | X | 73 | 65.506 | 47.027 | 38.588 | 0.00 | 0.00 |
| ATOM | 1121 | HA  | TYR | X | 73 | 66.594 | 47.084 | 38.626 | 0.00 | 0.00 |
| ATOM | 1122 | CB  | TYR | X | 73 | 65.125 | 45.555 | 38.760 | 0.00 | 0.00 |
| ATOM | 1123 | HB2 | TYR | X | 73 | 64.048 | 45.465 | 38.625 | 0.00 | 0.00 |
| ATOM | 1124 | HB3 | TYR | X | 73 | 65.533 | 44.929 | 37.967 | 0.00 | 0.00 |
| ATOM | 1125 | CG  | TYR | X | 73 | 65.606 | 44.939 | 40.119 | 0.00 | 0.00 |
| ATOM | 1126 | CD1 | TYR | X | 73 | 66.962 | 44.913 | 40.437 | 0.00 | 0.00 |
| ATOM | 1127 | HD1 | TYR | X | 73 | 67.642 | 45.233 | 39.661 | 0.00 | 0.00 |
| ATOM | 1128 | CE1 | TYR | X | 73 | 67.376 | 44.404 | 41.647 | 0.00 | 0.00 |
| ATOM | 1129 | HE1 | TYR | X | 73 | 68.420 | 44.384 | 41.924 | 0.00 | 0.00 |
| ATOM | 1130 | CZ  | TYR | X | 73 | 66.464 | 43.981 | 42.645 | 0.00 | 0.00 |
| ATOM | 1131 | OH  | TYR | X | 73 | 66.823 | 43.415 | 43.797 | 0.00 | 0.00 |
| ATOM | 1132 | HH  | TYR | X | 73 | 66.148 | 43.016 | 44.350 | 0.00 | 0.00 |
| ATOM | 1133 | CE2 | TYR | X | 73 | 65.119 | 44.060 | 42.295 | 0.00 | 0.00 |
| ATOM | 1134 | HE2 | TYR | X | 73 | 64.376 | 43.796 | 43.034 | 0.00 | 0.00 |
| ATOM | 1135 | CD2 | TYR | X | 73 | 64.644 | 44.607 | 41.135 | 0.00 | 0.00 |
| ATOM | 1136 | HD2 | TYR | X | 73 | 63.575 | 44.661 | 40.995 | 0.00 | 0.00 |
| ATOM | 1137 | C   | TYR | X | 73 | 65.250 | 47.584 | 37.148 | 0.00 | 0.00 |
| ATOM | 1138 | O   | TYR | X | 73 | 64.566 | 46.882 | 36.332 | 0.00 | 0.00 |
| ATOM | 1139 | N   | PRO | X | 74 | 65.664 | 48.814 | 36.863 | 0.00 | 0.00 |
| ATOM | 1140 | CD  | PRO | X | 74 | 66.590 | 49.620 | 37.671 | 0.00 | 0.00 |
| ATOM | 1141 | HD2 | PRO | X | 74 | 67.458 | 49.071 | 38.036 | 0.00 | 0.00 |
| ATOM | 1142 | HD3 | PRO | X | 74 | 66.020 | 50.125 | 38.451 | 0.00 | 0.00 |
| ATOM | 1143 | CG  | PRO | X | 74 | 67.118 | 50.689 | 36.653 | 0.00 | 0.00 |
| ATOM | 1144 | HG2 | PRO | X | 74 | 67.844 | 50.256 | 35.965 | 0.00 | 0.00 |
| ATOM | 1145 | HG3 | PRO | X | 74 | 67.486 | 51.547 | 37.216 | 0.00 | 0.00 |
| ATOM | 1146 | CB  | PRO | X | 74 | 65.897 | 50.956 | 35.887 | 0.00 | 0.00 |
| ATOM | 1147 | HB2 | PRO | X | 74 | 66.026 | 51.453 | 34.925 | 0.00 | 0.00 |
| ATOM | 1148 | HB3 | PRO | X | 74 | 65.190 | 51.494 | 36.518 | 0.00 | 0.00 |
| ATOM | 1149 | CA  | PRO | X | 74 | 65.268 | 49.596 | 35.670 | 0.00 | 0.00 |
| ATOM | 1150 | HA  | PRO | X | 74 | 64.206 | 49.836 | 35.633 | 0.00 | 0.00 |
| ATOM | 1151 | C   | PRO | X | 74 | 65.796 | 48.850 | 34.490 | 0.00 | 0.00 |
| ATOM | 1152 | O   | PRO | X | 74 | 66.884 | 48.242 | 34.470 | 0.00 | 0.00 |
| ATOM | 1153 | N   | GLY | X | 75 | 65.021 | 49.021 | 33.407 | 0.00 | 0.00 |
| ATOM | 1154 | H   | GLY | X | 75 | 64.186 | 49.572 | 33.544 | 0.00 | 0.00 |
| ATOM | 1155 | CA  | GLY | X | 75 | 65.352 | 48.549 | 32.065 | 0.00 | 0.00 |
| ATOM | 1156 | HA2 | GLY | X | 75 | 64.488 | 48.768 | 31.438 | 0.00 | 0.00 |
| ATOM | 1157 | HA3 | GLY | X | 75 | 66.274 | 48.935 | 31.631 | 0.00 | 0.00 |
| ATOM | 1158 | C   | GLY | X | 75 | 65.509 | 47.031 | 32.047 | 0.00 | 0.00 |
| ATOM | 1159 | O   | GLY | X | 75 | 65.912 | 46.502 | 30.993 | 0.00 | 0.00 |
| ATOM | 1160 | N   | PHE | X | 76 | 65.050 | 46.237 | 33.047 | 0.00 | 0.00 |
| ATOM | 1161 | H   | PHE | X | 76 | 64.977 | 46.744 | 33.917 | 0.00 | 0.00 |
| ATOM | 1162 | CA  | PHE | X | 76 | 64.787 | 44.816 | 33.028 | 0.00 | 0.00 |
| ATOM | 1163 | HA  | PHE | X | 76 | 65.703 | 44.393 | 32.615 | 0.00 | 0.00 |
| ATOM | 1164 | CB  | PHE | X | 76 | 64.575 | 44.336 | 34.479 | 0.00 | 0.00 |
| ATOM | 1165 | HB2 | PHE | X | 76 | 65.504 | 44.713 | 34.907 | 0.00 | 0.00 |
| ATOM | 1166 | HB3 | PHE | X | 76 | 63.692 | 44.855 | 34.853 | 0.00 | 0.00 |
| ATOM | 1167 | CG  | PHE | X | 76 | 64.458 | 42.856 | 34.598 | 0.00 | 0.00 |
| ATOM | 1168 | CD1 | PHE | X | 76 | 65.224 | 41.939 | 33.813 | 0.00 | 0.00 |
| ATOM | 1169 | HD1 | PHE | X | 76 | 66.017 | 42.281 | 33.166 | 0.00 | 0.00 |
| ATOM | 1170 | CE1 | PHE | X | 76 | 64.907 | 40.603 | 33.760 | 0.00 | 0.00 |
| ATOM | 1171 | HE1 | PHE | X | 76 | 65.442 | 40.011 | 33.032 | 0.00 | 0.00 |
| ATOM | 1172 | CZ  | PHE | X | 76 | 64.030 | 40.039 | 34.612 | 0.00 | 0.00 |
| ATOM | 1173 | HZ  | PHE | X | 76 | 63.920 | 38.970 | 34.714 | 0.00 | 0.00 |
| ATOM | 1174 | CE2 | PHE | X | 76 | 63.283 | 40.850 | 35.458 | 0.00 | 0.00 |
| ATOM | 1175 | HE2 | PHE | X | 76 | 62.520 | 40.465 | 36.117 | 0.00 | 0.00 |
| ATOM | 1176 | CD2 | PHE | X | 76 | 63.500 | 42.261 | 35.470 | 0.00 | 0.00 |
| ATOM | 1177 | HD2 | PHE | X | 76 | 62.856 | 42.779 | 36.165 | 0.00 | 0.00 |
| ATOM | 1178 | C   | PHE | X | 76 | 63.526 | 44.476 | 32.158 | 0.00 | 0.00 |
| ATOM | 1179 | O   | PHE | X | 76 | 62.415 | 44.902 | 32.404 | 0.00 | 0.00 |
| ATOM | 1180 | N   | GLU | X | 77 | 63.644 | 43.418 | 31.371 | 0.00 | 0.00 |
| ATOM | 1181 | H   | GLU | X | 77 | 64.593 | 43.103 | 31.230 | 0.00 | 0.00 |
| ATOM | 1182 | CA  | GLU | X | 77 | 62.537 | 42.746 | 30.579 | 0.00 | 0.00 |
| ATOM | 1183 | HA  | GLU | X | 77 | 62.304 | 43.554 | 29.887 | 0.00 | 0.00 |
| ATOM | 1184 | CB  | GLU | X | 77 | 63.124 | 41.522 | 29.790 | 0.00 | 0.00 |

|      |      |      |     |   |    |        |        |        |      |      |
|------|------|------|-----|---|----|--------|--------|--------|------|------|
| ATOM | 1185 | HB2  | GLU | X | 77 | 63.464 | 40.812 | 30.544 | 0.00 | 0.00 |
| ATOM | 1186 | HB3  | GLU | X | 77 | 62.365 | 40.909 | 29.304 | 0.00 | 0.00 |
| ATOM | 1187 | CG   | GLU | X | 77 | 64.229 | 41.816 | 28.792 | 0.00 | 0.00 |
| ATOM | 1188 | HG2  | GLU | X | 77 | 64.226 | 41.049 | 28.017 | 0.00 | 0.00 |
| ATOM | 1189 | HG3  | GLU | X | 77 | 64.027 | 42.778 | 28.321 | 0.00 | 0.00 |
| ATOM | 1190 | CD   | GLU | X | 77 | 65.537 | 41.837 | 29.522 | 0.00 | 0.00 |
| ATOM | 1191 | OE1  | GLU | X | 77 | 65.968 | 42.989 | 29.742 | 0.00 | 0.00 |
| ATOM | 1192 | OE2  | GLU | X | 77 | 66.160 | 40.765 | 29.684 | 0.00 | 0.00 |
| ATOM | 1193 | C    | GLU | X | 77 | 61.417 | 42.277 | 31.516 | 0.00 | 0.00 |
| ATOM | 1194 | O    | GLU | X | 77 | 60.314 | 42.679 | 31.165 | 0.00 | 0.00 |
| ATOM | 1195 | N    | GLY | X | 78 | 61.683 | 41.587 | 32.644 | 0.00 | 0.00 |
| ATOM | 1196 | H    | GLY | X | 78 | 62.632 | 41.602 | 32.989 | 0.00 | 0.00 |
| ATOM | 1197 | CA   | GLY | X | 78 | 60.627 | 41.015 | 33.499 | 0.00 | 0.00 |
| ATOM | 1198 | HA2  | GLY | X | 78 | 59.874 | 40.610 | 32.823 | 0.00 | 0.00 |
| ATOM | 1199 | HA3  | GLY | X | 78 | 60.969 | 40.253 | 34.199 | 0.00 | 0.00 |
| ATOM | 1200 | C    | GLY | X | 78 | 59.824 | 41.951 | 34.331 | 0.00 | 0.00 |
| ATOM | 1201 | O    | GLY | X | 78 | 59.024 | 41.493 | 35.088 | 0.00 | 0.00 |
| ATOM | 1202 | N    | THR | X | 79 | 60.028 | 43.264 | 34.168 | 0.00 | 0.00 |
| ATOM | 1203 | H    | THR | X | 79 | 60.862 | 43.421 | 33.621 | 0.00 | 0.00 |
| ATOM | 1204 | CA   | THR | X | 79 | 59.237 | 44.375 | 34.752 | 0.00 | 0.00 |
| ATOM | 1205 | HA   | THR | X | 79 | 58.297 | 43.934 | 35.086 | 0.00 | 0.00 |
| ATOM | 1206 | CB   | THR | X | 79 | 59.965 | 45.085 | 35.899 | 0.00 | 0.00 |
| ATOM | 1207 | HB   | THR | X | 79 | 59.569 | 46.065 | 36.164 | 0.00 | 0.00 |
| ATOM | 1208 | CG2  | THR | X | 79 | 59.980 | 44.262 | 37.163 | 0.00 | 0.00 |
| ATOM | 1209 | HG21 | THR | X | 79 | 60.298 | 44.855 | 38.021 | 0.00 | 0.00 |
| ATOM | 1210 | HG22 | THR | X | 79 | 60.577 | 43.367 | 36.988 | 0.00 | 0.00 |
| ATOM | 1211 | HG23 | THR | X | 79 | 58.941 | 44.020 | 37.388 | 0.00 | 0.00 |
| ATOM | 1212 | OG1  | THR | X | 79 | 61.284 | 45.314 | 35.443 | 0.00 | 0.00 |
| ATOM | 1213 | HG1  | THR | X | 79 | 61.793 | 45.721 | 36.148 | 0.00 | 0.00 |
| ATOM | 1214 | C    | THR | X | 79 | 58.701 | 45.441 | 33.732 | 0.00 | 0.00 |
| ATOM | 1215 | O    | THR | X | 79 | 57.858 | 46.263 | 34.066 | 0.00 | 0.00 |
| ATOM | 1216 | N    | GLU | X | 80 | 59.270 | 45.331 | 32.469 | 0.00 | 0.00 |
| ATOM | 1217 | H    | GLU | X | 80 | 59.914 | 44.568 | 32.315 | 0.00 | 0.00 |
| ATOM | 1218 | CA   | GLU | X | 80 | 58.794 | 46.138 | 31.378 | 0.00 | 0.00 |
| ATOM | 1219 | HA   | GLU | X | 80 | 58.969 | 47.165 | 31.699 | 0.00 | 0.00 |
| ATOM | 1220 | CB   | GLU | X | 80 | 59.545 | 45.739 | 30.048 | 0.00 | 0.00 |
| ATOM | 1221 | HB2  | GLU | X | 80 | 60.540 | 45.393 | 30.327 | 0.00 | 0.00 |
| ATOM | 1222 | HB3  | GLU | X | 80 | 59.040 | 44.909 | 29.555 | 0.00 | 0.00 |
| ATOM | 1223 | CG   | GLU | X | 80 | 59.666 | 46.982 | 29.005 | 0.00 | 0.00 |
| ATOM | 1224 | HG2  | GLU | X | 80 | 60.158 | 46.734 | 28.065 | 0.00 | 0.00 |
| ATOM | 1225 | HG3  | GLU | X | 80 | 58.617 | 47.216 | 28.823 | 0.00 | 0.00 |
| ATOM | 1226 | CD   | GLU | X | 80 | 60.400 | 48.182 | 29.571 | 0.00 | 0.00 |
| ATOM | 1227 | OE1  | GLU | X | 80 | 59.844 | 49.286 | 29.460 | 0.00 | 0.00 |
| ATOM | 1228 | OE2  | GLU | X | 80 | 61.478 | 48.089 | 30.227 | 0.00 | 0.00 |
| ATOM | 1229 | C    | GLU | X | 80 | 57.268 | 46.130 | 31.071 | 0.00 | 0.00 |
| ATOM | 1230 | O    | GLU | X | 80 | 56.700 | 47.154 | 30.622 | 0.00 | 0.00 |
| ATOM | 1231 | N    | MET | X | 81 | 56.644 | 44.961 | 31.219 | 0.00 | 0.00 |
| ATOM | 1232 | H    | MET | X | 81 | 57.081 | 44.149 | 31.630 | 0.00 | 0.00 |
| ATOM | 1233 | CA   | MET | X | 81 | 55.170 | 44.953 | 31.091 | 0.00 | 0.00 |
| ATOM | 1234 | HA   | MET | X | 81 | 54.814 | 45.393 | 30.159 | 0.00 | 0.00 |
| ATOM | 1235 | CB   | MET | X | 81 | 54.680 | 43.518 | 31.226 | 0.00 | 0.00 |
| ATOM | 1236 | HB2  | MET | X | 81 | 53.613 | 43.584 | 31.442 | 0.00 | 0.00 |
| ATOM | 1237 | HB3  | MET | X | 81 | 54.829 | 42.894 | 30.345 | 0.00 | 0.00 |
| ATOM | 1238 | CG   | MET | X | 81 | 55.107 | 42.799 | 32.513 | 0.00 | 0.00 |
| ATOM | 1239 | HG2  | MET | X | 81 | 54.782 | 43.520 | 33.264 | 0.00 | 0.00 |
| ATOM | 1240 | HG3  | MET | X | 81 | 54.513 | 41.913 | 32.736 | 0.00 | 0.00 |
| ATOM | 1241 | SD   | MET | X | 81 | 56.821 | 42.351 | 32.779 | 0.00 | 0.00 |
| ATOM | 1242 | CE   | MET | X | 81 | 57.131 | 41.436 | 31.215 | 0.00 | 0.00 |
| ATOM | 1243 | HE1  | MET | X | 81 | 56.484 | 40.626 | 30.880 | 0.00 | 0.00 |
| ATOM | 1244 | HE2  | MET | X | 81 | 57.017 | 42.184 | 30.431 | 0.00 | 0.00 |
| ATOM | 1245 | HE3  | MET | X | 81 | 58.145 | 41.035 | 31.211 | 0.00 | 0.00 |
| ATOM | 1246 | C    | MET | X | 81 | 54.402 | 45.831 | 32.171 | 0.00 | 0.00 |
| ATOM | 1247 | O    | MET | X | 81 | 53.316 | 46.272 | 31.822 | 0.00 | 0.00 |
| ATOM | 1248 | N    | TRP | X | 82 | 55.061 | 46.171 | 33.293 | 0.00 | 0.00 |
| ATOM | 1249 | H    | TRP | X | 82 | 55.993 | 45.800 | 33.411 | 0.00 | 0.00 |
| ATOM | 1250 | CA   | TRP | X | 82 | 54.418 | 47.071 | 34.359 | 0.00 | 0.00 |
| ATOM | 1251 | HA   | TRP | X | 82 | 53.347 | 46.880 | 34.293 | 0.00 | 0.00 |

|      |      |      |     |   |    |        |        |        |      |      |
|------|------|------|-----|---|----|--------|--------|--------|------|------|
| ATOM | 1252 | CB   | TRP | X | 82 | 54.787 | 46.584 | 35.780 | 0.00 | 0.00 |
| ATOM | 1253 | HB2  | TRP | X | 82 | 55.809 | 46.902 | 35.988 | 0.00 | 0.00 |
| ATOM | 1254 | HB3  | TRP | X | 82 | 54.161 | 47.075 | 36.525 | 0.00 | 0.00 |
| ATOM | 1255 | CG   | TRP | X | 82 | 54.668 | 45.099 | 35.926 | 0.00 | 0.00 |
| ATOM | 1256 | CD1  | TRP | X | 82 | 55.708 | 44.257 | 36.204 | 0.00 | 0.00 |
| ATOM | 1257 | HD1  | TRP | X | 82 | 56.722 | 44.535 | 36.455 | 0.00 | 0.00 |
| ATOM | 1258 | NE1  | TRP | X | 82 | 55.264 | 42.932 | 36.201 | 0.00 | 0.00 |
| ATOM | 1259 | HE1  | TRP | X | 82 | 55.833 | 42.136 | 36.450 | 0.00 | 0.00 |
| ATOM | 1260 | CE2  | TRP | X | 82 | 54.033 | 42.900 | 35.650 | 0.00 | 0.00 |
| ATOM | 1261 | CZ2  | TRP | X | 82 | 53.137 | 41.855 | 35.384 | 0.00 | 0.00 |
| ATOM | 1262 | HZ2  | TRP | X | 82 | 53.490 | 40.839 | 35.482 | 0.00 | 0.00 |
| ATOM | 1263 | CH2  | TRP | X | 82 | 51.824 | 42.113 | 34.959 | 0.00 | 0.00 |
| ATOM | 1264 | HH2  | TRP | X | 82 | 51.170 | 41.292 | 34.704 | 0.00 | 0.00 |
| ATOM | 1265 | CZ3  | TRP | X | 82 | 51.350 | 43.491 | 34.830 | 0.00 | 0.00 |
| ATOM | 1266 | HZ3  | TRP | X | 82 | 50.357 | 43.698 | 34.460 | 0.00 | 0.00 |
| ATOM | 1267 | CE3  | TRP | X | 82 | 52.256 | 44.567 | 35.039 | 0.00 | 0.00 |
| ATOM | 1268 | HE3  | TRP | X | 82 | 51.920 | 45.579 | 34.868 | 0.00 | 0.00 |
| ATOM | 1269 | CD2  | TRP | X | 82 | 53.537 | 44.254 | 35.572 | 0.00 | 0.00 |
| ATOM | 1270 | C    | TRP | X | 82 | 54.732 | 48.520 | 34.091 | 0.00 | 0.00 |
| ATOM | 1271 | O    | TRP | X | 82 | 54.304 | 49.337 | 34.862 | 0.00 | 0.00 |
| ATOM | 1272 | N    | ASN | X | 83 | 55.620 | 48.820 | 33.151 | 0.00 | 0.00 |
| ATOM | 1273 | H    | ASN | X | 83 | 55.953 | 48.074 | 32.558 | 0.00 | 0.00 |
| ATOM | 1274 | CA   | ASN | X | 83 | 56.165 | 50.186 | 32.987 | 0.00 | 0.00 |
| ATOM | 1275 | HA   | ASN | X | 83 | 56.233 | 50.553 | 34.012 | 0.00 | 0.00 |
| ATOM | 1276 | CB   | ASN | X | 83 | 57.621 | 50.159 | 32.536 | 0.00 | 0.00 |
| ATOM | 1277 | HB2  | ASN | X | 83 | 58.292 | 49.724 | 33.277 | 0.00 | 0.00 |
| ATOM | 1278 | HB3  | ASN | X | 83 | 57.791 | 49.500 | 31.685 | 0.00 | 0.00 |
| ATOM | 1279 | CG   | ASN | X | 83 | 58.302 | 51.467 | 32.176 | 0.00 | 0.00 |
| ATOM | 1280 | OD1  | ASN | X | 83 | 57.947 | 52.536 | 32.673 | 0.00 | 0.00 |
| ATOM | 1281 | ND2  | ASN | X | 83 | 59.283 | 51.466 | 31.291 | 0.00 | 0.00 |
| ATOM | 1282 | HD21 | ASN | X | 83 | 59.773 | 52.321 | 31.068 | 0.00 | 0.00 |
| ATOM | 1283 | HD22 | ASN | X | 83 | 59.651 | 50.622 | 30.875 | 0.00 | 0.00 |
| ATOM | 1284 | C    | ASN | X | 83 | 55.240 | 50.991 | 32.059 | 0.00 | 0.00 |
| ATOM | 1285 | O    | ASN | X | 83 | 55.016 | 50.574 | 30.928 | 0.00 | 0.00 |
| ATOM | 1286 | N    | PRO | X | 84 | 54.611 | 52.054 | 32.516 | 0.00 | 0.00 |
| ATOM | 1287 | CD   | PRO | X | 84 | 54.786 | 52.510 | 33.868 | 0.00 | 0.00 |
| ATOM | 1288 | HD2  | PRO | X | 84 | 55.824 | 52.613 | 34.183 | 0.00 | 0.00 |
| ATOM | 1289 | HD3  | PRO | X | 84 | 54.190 | 51.962 | 34.598 | 0.00 | 0.00 |
| ATOM | 1290 | CG   | PRO | X | 84 | 54.097 | 53.847 | 33.858 | 0.00 | 0.00 |
| ATOM | 1291 | HG2  | PRO | X | 84 | 54.732 | 54.642 | 33.468 | 0.00 | 0.00 |
| ATOM | 1292 | HG3  | PRO | X | 84 | 53.757 | 54.118 | 34.857 | 0.00 | 0.00 |
| ATOM | 1293 | CB   | PRO | X | 84 | 52.936 | 53.599 | 32.928 | 0.00 | 0.00 |
| ATOM | 1294 | HB2  | PRO | X | 84 | 52.565 | 54.539 | 32.517 | 0.00 | 0.00 |
| ATOM | 1295 | HB3  | PRO | X | 84 | 52.150 | 53.036 | 33.430 | 0.00 | 0.00 |
| ATOM | 1296 | CA   | PRO | X | 84 | 53.611 | 52.817 | 31.862 | 0.00 | 0.00 |
| ATOM | 1297 | HA   | PRO | X | 84 | 52.807 | 52.210 | 31.447 | 0.00 | 0.00 |
| ATOM | 1298 | C    | PRO | X | 84 | 54.263 | 53.673 | 30.740 | 0.00 | 0.00 |
| ATOM | 1299 | O    | PRO | X | 84 | 55.152 | 54.528 | 31.036 | 0.00 | 0.00 |
| ATOM | 1300 | N    | ASN | X | 85 | 53.919 | 53.381 | 29.471 | 0.00 | 0.00 |
| ATOM | 1301 | H    | ASN | X | 85 | 53.363 | 52.570 | 29.241 | 0.00 | 0.00 |
| ATOM | 1302 | CA   | ASN | X | 85 | 54.309 | 54.341 | 28.427 | 0.00 | 0.00 |
| ATOM | 1303 | HA   | ASN | X | 85 | 55.311 | 54.708 | 28.647 | 0.00 | 0.00 |
| ATOM | 1304 | CB   | ASN | X | 85 | 54.619 | 53.580 | 27.059 | 0.00 | 0.00 |
| ATOM | 1305 | HB2  | ASN | X | 85 | 55.283 | 54.086 | 26.358 | 0.00 | 0.00 |
| ATOM | 1306 | HB3  | ASN | X | 85 | 55.207 | 52.689 | 27.280 | 0.00 | 0.00 |
| ATOM | 1307 | CG   | ASN | X | 85 | 53.331 | 53.087 | 26.344 | 0.00 | 0.00 |
| ATOM | 1308 | OD1  | ASN | X | 85 | 52.208 | 53.343 | 26.798 | 0.00 | 0.00 |
| ATOM | 1309 | ND2  | ASN | X | 85 | 53.407 | 52.529 | 25.196 | 0.00 | 0.00 |
| ATOM | 1310 | HD21 | ASN | X | 85 | 52.599 | 52.155 | 24.719 | 0.00 | 0.00 |
| ATOM | 1311 | HD22 | ASN | X | 85 | 54.254 | 52.443 | 24.653 | 0.00 | 0.00 |
| ATOM | 1312 | C    | ASN | X | 85 | 53.405 | 55.580 | 28.286 | 0.00 | 0.00 |
| ATOM | 1313 | O    | ASN | X | 85 | 53.795 | 56.583 | 27.689 | 0.00 | 0.00 |
| ATOM | 1314 | N    | ARG | X | 86 | 52.224 | 55.610 | 28.848 | 0.00 | 0.00 |
| ATOM | 1315 | H    | ARG | X | 86 | 51.923 | 54.687 | 29.129 | 0.00 | 0.00 |
| ATOM | 1316 | CA   | ARG | X | 86 | 51.276 | 56.798 | 28.861 | 0.00 | 0.00 |
| ATOM | 1317 | HA   | ARG | X | 86 | 51.291 | 57.266 | 27.876 | 0.00 | 0.00 |
| ATOM | 1318 | CB   | ARG | X | 86 | 49.860 | 56.384 | 29.063 | 0.00 | 0.00 |

|      |      |      |     |   |    |        |        |        |      |      |
|------|------|------|-----|---|----|--------|--------|--------|------|------|
| ATOM | 1319 | HB2  | ARG | X | 86 | 49.723 | 55.375 | 29.452 | 0.00 | 0.00 |
| ATOM | 1320 | HB3  | ARG | X | 86 | 49.321 | 57.080 | 29.707 | 0.00 | 0.00 |
| ATOM | 1321 | CG   | ARG | X | 86 | 49.102 | 56.317 | 27.725 | 0.00 | 0.00 |
| ATOM | 1322 | HG2  | ARG | X | 86 | 48.072 | 56.084 | 27.996 | 0.00 | 0.00 |
| ATOM | 1323 | HG3  | ARG | X | 86 | 49.135 | 57.338 | 27.345 | 0.00 | 0.00 |
| ATOM | 1324 | CD   | ARG | X | 86 | 49.683 | 55.223 | 26.725 | 0.00 | 0.00 |
| ATOM | 1325 | HD2  | ARG | X | 86 | 50.056 | 54.378 | 27.304 | 0.00 | 0.00 |
| ATOM | 1326 | HD3  | ARG | X | 86 | 48.923 | 54.857 | 26.036 | 0.00 | 0.00 |
| ATOM | 1327 | NE   | ARG | X | 86 | 50.713 | 55.642 | 25.881 | 0.00 | 0.00 |
| ATOM | 1328 | HE   | ARG | X | 86 | 51.148 | 56.526 | 26.104 | 0.00 | 0.00 |
| ATOM | 1329 | CZ   | ARG | X | 86 | 51.030 | 55.063 | 24.731 | 0.00 | 0.00 |
| ATOM | 1330 | NH1  | ARG | X | 86 | 50.530 | 53.868 | 24.435 | 0.00 | 0.00 |
| ATOM | 1331 | HH11 | ARG | X | 86 | 49.876 | 53.389 | 25.037 | 0.00 | 0.00 |
| ATOM | 1332 | HH12 | ARG | X | 86 | 50.875 | 53.391 | 23.614 | 0.00 | 0.00 |
| ATOM | 1333 | NH2  | ARG | X | 86 | 51.774 | 55.724 | 23.879 | 0.00 | 0.00 |
| ATOM | 1334 | HH21 | ARG | X | 86 | 51.932 | 56.713 | 24.011 | 0.00 | 0.00 |
| ATOM | 1335 | HH22 | ARG | X | 86 | 51.835 | 55.360 | 22.938 | 0.00 | 0.00 |
| ATOM | 1336 | C    | ARG | X | 86 | 51.784 | 57.860 | 29.808 | 0.00 | 0.00 |
| ATOM | 1337 | O    | ARG | X | 86 | 52.589 | 57.535 | 30.681 | 0.00 | 0.00 |
| ATOM | 1338 | N    | GLU | X | 87 | 51.364 | 59.085 | 29.619 | 0.00 | 0.00 |
| ATOM | 1339 | H    | GLU | X | 87 | 50.617 | 59.288 | 28.971 | 0.00 | 0.00 |
| ATOM | 1340 | CA   | GLU | X | 87 | 51.782 | 60.178 | 30.523 | 0.00 | 0.00 |
| ATOM | 1341 | HA   | GLU | X | 87 | 52.855 | 60.125 | 30.710 | 0.00 | 0.00 |
| ATOM | 1342 | CB   | GLU | X | 87 | 51.645 | 61.633 | 30.014 | 0.00 | 0.00 |
| ATOM | 1343 | HB2  | GLU | X | 87 | 50.603 | 61.839 | 29.771 | 0.00 | 0.00 |
| ATOM | 1344 | HB3  | GLU | X | 87 | 51.916 | 62.349 | 30.790 | 0.00 | 0.00 |
| ATOM | 1345 | CG   | GLU | X | 87 | 52.409 | 61.857 | 28.683 | 0.00 | 0.00 |
| ATOM | 1346 | HG2  | GLU | X | 87 | 53.476 | 61.691 | 28.830 | 0.00 | 0.00 |
| ATOM | 1347 | HG3  | GLU | X | 87 | 52.148 | 61.036 | 28.014 | 0.00 | 0.00 |
| ATOM | 1348 | CD   | GLU | X | 87 | 52.226 | 63.270 | 28.037 | 0.00 | 0.00 |
| ATOM | 1349 | OE1  | GLU | X | 87 | 51.720 | 63.504 | 26.871 | 0.00 | 0.00 |
| ATOM | 1350 | OE2  | GLU | X | 87 | 52.536 | 64.204 | 28.837 | 0.00 | 0.00 |
| ATOM | 1351 | C    | GLU | X | 87 | 50.924 | 60.000 | 31.776 | 0.00 | 0.00 |
| ATOM | 1352 | O    | GLU | X | 87 | 49.704 | 59.750 | 31.679 | 0.00 | 0.00 |
| ATOM | 1353 | N    | LEU | X | 88 | 51.534 | 60.105 | 32.948 | 0.00 | 0.00 |
| ATOM | 1354 | H    | LEU | X | 88 | 52.482 | 60.449 | 32.897 | 0.00 | 0.00 |
| ATOM | 1355 | CA   | LEU | X | 88 | 50.864 | 60.131 | 34.237 | 0.00 | 0.00 |
| ATOM | 1356 | HA   | LEU | X | 88 | 50.165 | 59.298 | 34.307 | 0.00 | 0.00 |
| ATOM | 1357 | CB   | LEU | X | 88 | 51.883 | 59.872 | 35.466 | 0.00 | 0.00 |
| ATOM | 1358 | HB2  | LEU | X | 88 | 52.839 | 60.343 | 35.233 | 0.00 | 0.00 |
| ATOM | 1359 | HB3  | LEU | X | 88 | 51.535 | 60.509 | 36.279 | 0.00 | 0.00 |
| ATOM | 1360 | CG   | LEU | X | 88 | 52.010 | 58.460 | 35.954 | 0.00 | 0.00 |
| ATOM | 1361 | HG   | LEU | X | 88 | 50.994 | 58.262 | 36.296 | 0.00 | 0.00 |
| ATOM | 1362 | CD1  | LEU | X | 88 | 52.532 | 57.499 | 34.888 | 0.00 | 0.00 |
| ATOM | 1363 | HD11 | LEU | X | 88 | 53.581 | 57.767 | 34.761 | 0.00 | 0.00 |
| ATOM | 1364 | HD12 | LEU | X | 88 | 51.989 | 57.685 | 33.962 | 0.00 | 0.00 |
| ATOM | 1365 | HD13 | LEU | X | 88 | 52.336 | 56.501 | 35.280 | 0.00 | 0.00 |
| ATOM | 1366 | CD2  | LEU | X | 88 | 52.871 | 58.220 | 37.208 | 0.00 | 0.00 |
| ATOM | 1367 | HD21 | LEU | X | 88 | 53.839 | 58.711 | 37.102 | 0.00 | 0.00 |
| ATOM | 1368 | HD22 | LEU | X | 88 | 52.431 | 58.730 | 38.066 | 0.00 | 0.00 |
| ATOM | 1369 | HD23 | LEU | X | 88 | 52.878 | 57.142 | 37.370 | 0.00 | 0.00 |
| ATOM | 1370 | C    | LEU | X | 88 | 50.210 | 61.532 | 34.421 | 0.00 | 0.00 |
| ATOM | 1371 | O    | LEU | X | 88 | 50.786 | 62.505 | 33.907 | 0.00 | 0.00 |
| ATOM | 1372 | N    | SER | X | 89 | 49.169 | 61.566 | 35.177 | 0.00 | 0.00 |
| ATOM | 1373 | H    | SER | X | 89 | 48.760 | 60.736 | 35.582 | 0.00 | 0.00 |
| ATOM | 1374 | CA   | SER | X | 89 | 48.286 | 62.773 | 35.315 | 0.00 | 0.00 |
| ATOM | 1375 | HA   | SER | X | 89 | 48.871 | 63.547 | 35.812 | 0.00 | 0.00 |
| ATOM | 1376 | CB   | SER | X | 89 | 47.749 | 63.267 | 33.931 | 0.00 | 0.00 |
| ATOM | 1377 | HB2  | SER | X | 89 | 48.568 | 63.292 | 33.211 | 0.00 | 0.00 |
| ATOM | 1378 | HB3  | SER | X | 89 | 47.039 | 62.523 | 33.572 | 0.00 | 0.00 |
| ATOM | 1379 | OG   | SER | X | 89 | 47.187 | 64.479 | 33.954 | 0.00 | 0.00 |
| ATOM | 1380 | HG   | SER | X | 89 | 46.830 | 64.719 | 33.096 | 0.00 | 0.00 |
| ATOM | 1381 | C    | SER | X | 89 | 47.135 | 62.532 | 36.241 | 0.00 | 0.00 |
| ATOM | 1382 | O    | SER | X | 89 | 46.881 | 61.398 | 36.633 | 0.00 | 0.00 |
| ATOM | 1383 | N    | GLU | X | 90 | 46.441 | 63.639 | 36.620 | 0.00 | 0.00 |
| ATOM | 1384 | H    | GLU | X | 90 | 46.755 | 64.548 | 36.311 | 0.00 | 0.00 |
| ATOM | 1385 | CA   | GLU | X | 90 | 45.256 | 63.554 | 37.489 | 0.00 | 0.00 |

|      |      |      |     |   |    |        |        |        |      |      |
|------|------|------|-----|---|----|--------|--------|--------|------|------|
| ATOM | 1386 | HA   | GLU | X | 90 | 45.278 | 62.769 | 38.245 | 0.00 | 0.00 |
| ATOM | 1387 | CB   | GLU | X | 90 | 45.215 | 64.790 | 38.440 | 0.00 | 0.00 |
| ATOM | 1388 | HB2  | GLU | X | 90 | 45.091 | 65.719 | 37.884 | 0.00 | 0.00 |
| ATOM | 1389 | HB3  | GLU | X | 90 | 44.357 | 64.707 | 39.107 | 0.00 | 0.00 |
| ATOM | 1390 | CG   | GLU | X | 90 | 46.389 | 64.939 | 39.373 | 0.00 | 0.00 |
| ATOM | 1391 | HG2  | GLU | X | 90 | 46.653 | 64.153 | 40.080 | 0.00 | 0.00 |
| ATOM | 1392 | HG3  | GLU | X | 90 | 47.262 | 65.118 | 38.745 | 0.00 | 0.00 |
| ATOM | 1393 | CD   | GLU | X | 90 | 46.210 | 66.231 | 40.249 | 0.00 | 0.00 |
| ATOM | 1394 | OE1  | GLU | X | 90 | 45.225 | 66.315 | 41.007 | 0.00 | 0.00 |
| ATOM | 1395 | OE2  | GLU | X | 90 | 47.033 | 67.190 | 40.095 | 0.00 | 0.00 |
| ATOM | 1396 | C    | GLU | X | 90 | 43.886 | 63.341 | 36.841 | 0.00 | 0.00 |
| ATOM | 1397 | O    | GLU | X | 90 | 42.903 | 62.723 | 37.304 | 0.00 | 0.00 |
| ATOM | 1398 | N    | ASP | X | 91 | 43.862 | 63.773 | 35.584 | 0.00 | 0.00 |
| ATOM | 1399 | H    | ASP | X | 91 | 44.712 | 64.186 | 35.228 | 0.00 | 0.00 |
| ATOM | 1400 | CA   | ASP | X | 91 | 42.689 | 63.776 | 34.661 | 0.00 | 0.00 |
| ATOM | 1401 | HA   | ASP | X | 91 | 41.965 | 64.405 | 35.180 | 0.00 | 0.00 |
| ATOM | 1402 | CB   | ASP | X | 91 | 43.208 | 64.761 | 33.496 | 0.00 | 0.00 |
| ATOM | 1403 | HB2  | ASP | X | 91 | 42.259 | 65.199 | 33.187 | 0.00 | 0.00 |
| ATOM | 1404 | HB3  | ASP | X | 91 | 43.851 | 65.550 | 33.886 | 0.00 | 0.00 |
| ATOM | 1405 | CG   | ASP | X | 91 | 43.845 | 64.075 | 32.306 | 0.00 | 0.00 |
| ATOM | 1406 | OD1  | ASP | X | 91 | 44.479 | 63.094 | 32.490 | 0.00 | 0.00 |
| ATOM | 1407 | OD2  | ASP | X | 91 | 43.644 | 64.577 | 31.166 | 0.00 | 0.00 |
| ATOM | 1408 | C    | ASP | X | 91 | 42.130 | 62.399 | 34.106 | 0.00 | 0.00 |
| ATOM | 1409 | O    | ASP | X | 91 | 41.325 | 62.302 | 33.134 | 0.00 | 0.00 |
| ATOM | 1410 | N    | CYX | X | 92 | 42.516 | 61.308 | 34.712 | 0.00 | 0.00 |
| ATOM | 1411 | H    | CYX | X | 92 | 42.970 | 61.513 | 35.591 | 0.00 | 0.00 |
| ATOM | 1412 | CA   | CYX | X | 92 | 42.819 | 59.937 | 34.097 | 0.00 | 0.00 |
| ATOM | 1413 | HA   | CYX | X | 92 | 43.306 | 60.040 | 33.128 | 0.00 | 0.00 |
| ATOM | 1414 | CB   | CYX | X | 92 | 43.836 | 59.371 | 35.086 | 0.00 | 0.00 |
| ATOM | 1415 | HB2  | CYX | X | 92 | 44.196 | 58.432 | 34.665 | 0.00 | 0.00 |
| ATOM | 1416 | HB3  | CYX | X | 92 | 44.648 | 60.095 | 35.157 | 0.00 | 0.00 |
| ATOM | 1417 | SG   | CYX | X | 92 | 43.184 | 58.967 | 36.739 | 0.00 | 0.00 |
| ATOM | 1418 | C    | CYX | X | 92 | 41.704 | 58.949 | 33.933 | 0.00 | 0.00 |
| ATOM | 1419 | O    | CYX | X | 92 | 41.992 | 57.841 | 33.425 | 0.00 | 0.00 |
| ATOM | 1420 | N    | LEU | X | 93 | 40.465 | 59.221 | 34.446 | 0.00 | 0.00 |
| ATOM | 1421 | H    | LEU | X | 93 | 40.231 | 60.101 | 34.883 | 0.00 | 0.00 |
| ATOM | 1422 | CA   | LEU | X | 93 | 39.442 | 58.170 | 34.446 | 0.00 | 0.00 |
| ATOM | 1423 | HA   | LEU | X | 93 | 39.917 | 57.241 | 34.761 | 0.00 | 0.00 |
| ATOM | 1424 | CB   | LEU | X | 93 | 38.312 | 58.626 | 35.456 | 0.00 | 0.00 |
| ATOM | 1425 | HB2  | LEU | X | 93 | 37.832 | 59.528 | 35.077 | 0.00 | 0.00 |
| ATOM | 1426 | HB3  | LEU | X | 93 | 37.484 | 57.918 | 35.419 | 0.00 | 0.00 |
| ATOM | 1427 | CG   | LEU | X | 93 | 38.762 | 58.730 | 36.933 | 0.00 | 0.00 |
| ATOM | 1428 | HG   | LEU | X | 93 | 39.546 | 59.468 | 37.103 | 0.00 | 0.00 |
| ATOM | 1429 | CD1  | LEU | X | 93 | 37.581 | 59.147 | 37.813 | 0.00 | 0.00 |
| ATOM | 1430 | HD11 | LEU | X | 93 | 36.719 | 58.508 | 37.619 | 0.00 | 0.00 |
| ATOM | 1431 | HD12 | LEU | X | 93 | 37.284 | 60.112 | 37.402 | 0.00 | 0.00 |
| ATOM | 1432 | HD13 | LEU | X | 93 | 37.908 | 59.261 | 38.847 | 0.00 | 0.00 |
| ATOM | 1433 | CD2  | LEU | X | 93 | 39.344 | 57.402 | 37.483 | 0.00 | 0.00 |
| ATOM | 1434 | HD21 | LEU | X | 93 | 38.698 | 56.527 | 37.406 | 0.00 | 0.00 |
| ATOM | 1435 | HD22 | LEU | X | 93 | 40.237 | 57.159 | 36.907 | 0.00 | 0.00 |
| ATOM | 1436 | HD23 | LEU | X | 93 | 39.661 | 57.621 | 38.503 | 0.00 | 0.00 |
| ATOM | 1437 | C    | LEU | X | 93 | 38.911 | 57.851 | 32.977 | 0.00 | 0.00 |
| ATOM | 1438 | O    | LEU | X | 93 | 38.606 | 58.847 | 32.326 | 0.00 | 0.00 |
| ATOM | 1439 | N    | TYR | X | 94 | 38.873 | 56.562 | 32.582 | 0.00 | 0.00 |
| ATOM | 1440 | H    | TYR | X | 94 | 39.182 | 55.819 | 33.193 | 0.00 | 0.00 |
| ATOM | 1441 | CA   | TYR | X | 94 | 38.311 | 56.128 | 31.333 | 0.00 | 0.00 |
| ATOM | 1442 | HA   | TYR | X | 94 | 37.482 | 56.797 | 31.102 | 0.00 | 0.00 |
| ATOM | 1443 | CB   | TYR | X | 94 | 39.429 | 56.330 | 30.300 | 0.00 | 0.00 |
| ATOM | 1444 | HB2  | TYR | X | 94 | 40.312 | 55.758 | 30.585 | 0.00 | 0.00 |
| ATOM | 1445 | HB3  | TYR | X | 94 | 39.092 | 55.902 | 29.357 | 0.00 | 0.00 |
| ATOM | 1446 | CG   | TYR | X | 94 | 39.842 | 57.718 | 30.047 | 0.00 | 0.00 |
| ATOM | 1447 | CD1  | TYR | X | 94 | 38.993 | 58.520 | 29.295 | 0.00 | 0.00 |
| ATOM | 1448 | HD1  | TYR | X | 94 | 38.006 | 58.188 | 29.009 | 0.00 | 0.00 |
| ATOM | 1449 | CE1  | TYR | X | 94 | 39.266 | 59.850 | 29.022 | 0.00 | 0.00 |
| ATOM | 1450 | HE1  | TYR | X | 94 | 38.533 | 60.487 | 28.550 | 0.00 | 0.00 |
| ATOM | 1451 | CZ   | TYR | X | 94 | 40.504 | 60.366 | 29.460 | 0.00 | 0.00 |
| ATOM | 1452 | OH   | TYR | X | 94 | 40.744 | 61.681 | 29.171 | 0.00 | 0.00 |

|      |      |      |     |   |    |        |        |        |      |      |
|------|------|------|-----|---|----|--------|--------|--------|------|------|
| ATOM | 1453 | HH   | TYR | X | 94 | 41.676 | 61.845 | 29.330 | 0.00 | 0.00 |
| ATOM | 1454 | CE2  | TYR | X | 94 | 41.484 | 59.530 | 30.083 | 0.00 | 0.00 |
| ATOM | 1455 | HE2  | TYR | X | 94 | 42.457 | 59.912 | 30.354 | 0.00 | 0.00 |
| ATOM | 1456 | CD2  | TYR | X | 94 | 41.101 | 58.231 | 30.447 | 0.00 | 0.00 |
| ATOM | 1457 | HD2  | TYR | X | 94 | 41.758 | 57.700 | 31.120 | 0.00 | 0.00 |
| ATOM | 1458 | C    | TYR | X | 94 | 37.901 | 54.711 | 31.390 | 0.00 | 0.00 |
| ATOM | 1459 | O    | TYR | X | 94 | 38.432 | 53.844 | 32.118 | 0.00 | 0.00 |
| ATOM | 1460 | N    | LEU | X | 95 | 36.973 | 54.382 | 30.473 | 0.00 | 0.00 |
| ATOM | 1461 | H    | LEU | X | 95 | 36.618 | 55.043 | 29.797 | 0.00 | 0.00 |
| ATOM | 1462 | CA   | LEU | X | 95 | 36.539 | 52.991 | 30.165 | 0.00 | 0.00 |
| ATOM | 1463 | HA   | LEU | X | 95 | 37.076 | 52.368 | 30.880 | 0.00 | 0.00 |
| ATOM | 1464 | CB   | LEU | X | 95 | 34.965 | 52.830 | 30.269 | 0.00 | 0.00 |
| ATOM | 1465 | HB2  | LEU | X | 95 | 34.510 | 53.817 | 30.349 | 0.00 | 0.00 |
| ATOM | 1466 | HB3  | LEU | X | 95 | 34.571 | 52.276 | 29.417 | 0.00 | 0.00 |
| ATOM | 1467 | CG   | LEU | X | 95 | 34.468 | 52.128 | 31.547 | 0.00 | 0.00 |
| ATOM | 1468 | HG   | LEU | X | 95 | 34.988 | 52.380 | 32.471 | 0.00 | 0.00 |
| ATOM | 1469 | CD1  | LEU | X | 95 | 32.994 | 52.315 | 31.774 | 0.00 | 0.00 |
| ATOM | 1470 | HD11 | LEU | X | 95 | 32.738 | 53.373 | 31.830 | 0.00 | 0.00 |
| ATOM | 1471 | HD12 | LEU | X | 95 | 32.671 | 51.673 | 32.594 | 0.00 | 0.00 |
| ATOM | 1472 | HD13 | LEU | X | 95 | 32.541 | 51.989 | 30.838 | 0.00 | 0.00 |
| ATOM | 1473 | CD2  | LEU | X | 95 | 34.727 | 50.642 | 31.497 | 0.00 | 0.00 |
| ATOM | 1474 | HD21 | LEU | X | 95 | 34.325 | 50.124 | 32.368 | 0.00 | 0.00 |
| ATOM | 1475 | HD22 | LEU | X | 95 | 34.205 | 50.241 | 30.628 | 0.00 | 0.00 |
| ATOM | 1476 | HD23 | LEU | X | 95 | 35.802 | 50.468 | 31.473 | 0.00 | 0.00 |
| ATOM | 1477 | C    | LEU | X | 95 | 37.021 | 52.635 | 28.726 | 0.00 | 0.00 |
| ATOM | 1478 | O    | LEU | X | 95 | 37.315 | 53.464 | 27.909 | 0.00 | 0.00 |
| ATOM | 1479 | N    | ASN | X | 96 | 37.098 | 51.331 | 28.437 | 0.00 | 0.00 |
| ATOM | 1480 | H    | ASN | X | 96 | 37.079 | 50.662 | 29.193 | 0.00 | 0.00 |
| ATOM | 1481 | CA   | ASN | X | 96 | 37.664 | 50.751 | 27.178 | 0.00 | 0.00 |
| ATOM | 1482 | HA   | ASN | X | 96 | 37.443 | 51.409 | 26.338 | 0.00 | 0.00 |
| ATOM | 1483 | CB   | ASN | X | 96 | 39.183 | 50.442 | 27.348 | 0.00 | 0.00 |
| ATOM | 1484 | HB2  | ASN | X | 96 | 39.234 | 49.556 | 27.981 | 0.00 | 0.00 |
| ATOM | 1485 | HB3  | ASN | X | 96 | 39.598 | 50.057 | 26.417 | 0.00 | 0.00 |
| ATOM | 1486 | CG   | ASN | X | 96 | 40.085 | 51.617 | 27.886 | 0.00 | 0.00 |
| ATOM | 1487 | OD1  | ASN | X | 96 | 40.468 | 52.535 | 27.245 | 0.00 | 0.00 |
| ATOM | 1488 | ND2  | ASN | X | 96 | 40.254 | 51.710 | 29.182 | 0.00 | 0.00 |
| ATOM | 1489 | HD21 | ASN | X | 96 | 40.930 | 52.335 | 29.598 | 0.00 | 0.00 |
| ATOM | 1490 | HD22 | ASN | X | 96 | 39.671 | 51.105 | 29.742 | 0.00 | 0.00 |
| ATOM | 1491 | C    | ASN | X | 96 | 36.908 | 49.359 | 26.856 | 0.00 | 0.00 |
| ATOM | 1492 | O    | ASN | X | 96 | 36.432 | 48.749 | 27.809 | 0.00 | 0.00 |
| ATOM | 1493 | N    | VAL | X | 97 | 36.641 | 49.081 | 25.596 | 0.00 | 0.00 |
| ATOM | 1494 | H    | VAL | X | 97 | 37.000 | 49.595 | 24.804 | 0.00 | 0.00 |
| ATOM | 1495 | CA   | VAL | X | 97 | 35.701 | 48.039 | 25.167 | 0.00 | 0.00 |
| ATOM | 1496 | HA   | VAL | X | 97 | 35.727 | 47.273 | 25.942 | 0.00 | 0.00 |
| ATOM | 1497 | CB   | VAL | X | 97 | 34.242 | 48.608 | 25.040 | 0.00 | 0.00 |
| ATOM | 1498 | HB   | VAL | X | 97 | 34.191 | 49.390 | 24.282 | 0.00 | 0.00 |
| ATOM | 1499 | CG1  | VAL | X | 97 | 33.272 | 47.428 | 24.686 | 0.00 | 0.00 |
| ATOM | 1500 | HG11 | VAL | X | 97 | 33.558 | 46.705 | 25.449 | 0.00 | 0.00 |
| ATOM | 1501 | HG12 | VAL | X | 97 | 32.265 | 47.844 | 24.700 | 0.00 | 0.00 |
| ATOM | 1502 | HG13 | VAL | X | 97 | 33.538 | 47.189 | 23.656 | 0.00 | 0.00 |
| ATOM | 1503 | CG2  | VAL | X | 97 | 33.648 | 49.218 | 26.312 | 0.00 | 0.00 |
| ATOM | 1504 | HG21 | VAL | X | 97 | 33.986 | 48.828 | 27.272 | 0.00 | 0.00 |
| ATOM | 1505 | HG22 | VAL | X | 97 | 32.562 | 49.209 | 26.396 | 0.00 | 0.00 |
| ATOM | 1506 | HG23 | VAL | X | 97 | 33.867 | 50.283 | 26.239 | 0.00 | 0.00 |
| ATOM | 1507 | C    | VAL | X | 97 | 36.240 | 47.425 | 23.894 | 0.00 | 0.00 |
| ATOM | 1508 | O    | VAL | X | 97 | 36.306 | 48.112 | 22.863 | 0.00 | 0.00 |
| ATOM | 1509 | N    | TRP | X | 98 | 36.331 | 46.082 | 23.922 | 0.00 | 0.00 |
| ATOM | 1510 | H    | TRP | X | 98 | 36.039 | 45.655 | 24.790 | 0.00 | 0.00 |
| ATOM | 1511 | CA   | TRP | X | 98 | 36.626 | 45.144 | 22.801 | 0.00 | 0.00 |
| ATOM | 1512 | HA   | TRP | X | 98 | 36.889 | 45.748 | 21.933 | 0.00 | 0.00 |
| ATOM | 1513 | CB   | TRP | X | 98 | 37.830 | 44.279 | 23.112 | 0.00 | 0.00 |
| ATOM | 1514 | HB2  | TRP | X | 98 | 37.446 | 43.817 | 24.021 | 0.00 | 0.00 |
| ATOM | 1515 | HB3  | TRP | X | 98 | 37.994 | 43.549 | 22.319 | 0.00 | 0.00 |
| ATOM | 1516 | CG   | TRP | X | 98 | 39.190 | 44.954 | 23.285 | 0.00 | 0.00 |
| ATOM | 1517 | CD1  | TRP | X | 98 | 40.324 | 44.704 | 22.488 | 0.00 | 0.00 |
| ATOM | 1518 | HD1  | TRP | X | 98 | 40.389 | 44.156 | 21.560 | 0.00 | 0.00 |
| ATOM | 1519 | NE1  | TRP | X | 98 | 41.377 | 45.368 | 23.040 | 0.00 | 0.00 |

|      |      |      |     |   |     |        |        |        |      |      |
|------|------|------|-----|---|-----|--------|--------|--------|------|------|
| ATOM | 1520 | HE1  | TRP | X | 98  | 42.296 | 45.455 | 22.630 | 0.00 | 0.00 |
| ATOM | 1521 | CE2  | TRP | X | 98  | 41.106 | 45.874 | 24.264 | 0.00 | 0.00 |
| ATOM | 1522 | CZ2  | TRP | X | 98  | 41.882 | 46.417 | 25.243 | 0.00 | 0.00 |
| ATOM | 1523 | HZ2  | TRP | X | 98  | 42.917 | 46.517 | 24.952 | 0.00 | 0.00 |
| ATOM | 1524 | CH2  | TRP | X | 98  | 41.196 | 46.969 | 26.363 | 0.00 | 0.00 |
| ATOM | 1525 | HH2  | TRP | X | 98  | 41.703 | 47.527 | 27.137 | 0.00 | 0.00 |
| ATOM | 1526 | CZ3  | TRP | X | 98  | 39.840 | 46.735 | 26.589 | 0.00 | 0.00 |
| ATOM | 1527 | HZ3  | TRP | X | 98  | 39.242 | 47.124 | 27.400 | 0.00 | 0.00 |
| ATOM | 1528 | CE3  | TRP | X | 98  | 39.037 | 46.199 | 25.562 | 0.00 | 0.00 |
| ATOM | 1529 | HE3  | TRP | X | 98  | 37.977 | 46.037 | 25.689 | 0.00 | 0.00 |
| ATOM | 1530 | CD2  | TRP | X | 98  | 39.700 | 45.735 | 24.404 | 0.00 | 0.00 |
| ATOM | 1531 | C    | TRP | X | 98  | 35.431 | 44.108 | 22.447 | 0.00 | 0.00 |
| ATOM | 1532 | O    | TRP | X | 98  | 34.902 | 43.374 | 23.324 | 0.00 | 0.00 |
| ATOM | 1533 | N    | THR | X | 99  | 35.122 | 44.056 | 21.155 | 0.00 | 0.00 |
| ATOM | 1534 | H    | THR | X | 99  | 35.597 | 44.544 | 20.408 | 0.00 | 0.00 |
| ATOM | 1535 | CA   | THR | X | 99  | 33.937 | 43.464 | 20.560 | 0.00 | 0.00 |
| ATOM | 1536 | HA   | THR | X | 99  | 33.701 | 42.537 | 21.082 | 0.00 | 0.00 |
| ATOM | 1537 | CB   | THR | X | 99  | 32.765 | 44.418 | 20.738 | 0.00 | 0.00 |
| ATOM | 1538 | HB   | THR | X | 99  | 32.683 | 44.688 | 21.791 | 0.00 | 0.00 |
| ATOM | 1539 | CG2  | THR | X | 99  | 32.899 | 45.727 | 19.896 | 0.00 | 0.00 |
| ATOM | 1540 | HG21 | THR | X | 99  | 32.117 | 46.463 | 20.081 | 0.00 | 0.00 |
| ATOM | 1541 | HG22 | THR | X | 99  | 32.813 | 45.496 | 18.834 | 0.00 | 0.00 |
| ATOM | 1542 | HG23 | THR | X | 99  | 33.868 | 46.158 | 20.146 | 0.00 | 0.00 |
| ATOM | 1543 | OG1  | THR | X | 99  | 31.588 | 43.791 | 20.415 | 0.00 | 0.00 |
| ATOM | 1544 | HG1  | THR | X | 99  | 30.867 | 44.268 | 20.833 | 0.00 | 0.00 |
| ATOM | 1545 | C    | THR | X | 99  | 34.180 | 43.028 | 19.084 | 0.00 | 0.00 |
| ATOM | 1546 | O    | THR | X | 99  | 35.047 | 43.642 | 18.429 | 0.00 | 0.00 |
| ATOM | 1547 | N    | PRO | X | 100 | 33.538 | 41.985 | 18.541 | 0.00 | 0.00 |
| ATOM | 1548 | CD   | PRO | X | 100 | 32.770 | 40.937 | 19.286 | 0.00 | 0.00 |
| ATOM | 1549 | HD2  | PRO | X | 100 | 31.940 | 41.346 | 19.862 | 0.00 | 0.00 |
| ATOM | 1550 | HD3  | PRO | X | 100 | 33.503 | 40.479 | 19.950 | 0.00 | 0.00 |
| ATOM | 1551 | CG   | PRO | X | 100 | 32.347 | 39.904 | 18.224 | 0.00 | 0.00 |
| ATOM | 1552 | HG2  | PRO | X | 100 | 31.411 | 40.108 | 17.704 | 0.00 | 0.00 |
| ATOM | 1553 | HG3  | PRO | X | 100 | 32.177 | 38.929 | 18.681 | 0.00 | 0.00 |
| ATOM | 1554 | CB   | PRO | X | 100 | 33.467 | 39.986 | 17.199 | 0.00 | 0.00 |
| ATOM | 1555 | HB2  | PRO | X | 100 | 33.069 | 39.843 | 16.194 | 0.00 | 0.00 |
| ATOM | 1556 | HB3  | PRO | X | 100 | 34.287 | 39.344 | 17.522 | 0.00 | 0.00 |
| ATOM | 1557 | CA   | PRO | X | 100 | 33.965 | 41.457 | 17.226 | 0.00 | 0.00 |
| ATOM | 1558 | HA   | PRO | X | 100 | 35.050 | 41.347 | 17.245 | 0.00 | 0.00 |
| ATOM | 1559 | C    | PRO | X | 100 | 33.531 | 42.330 | 16.029 | 0.00 | 0.00 |
| ATOM | 1560 | O    | PRO | X | 100 | 32.752 | 43.205 | 16.198 | 0.00 | 0.00 |
| ATOM | 1561 | N    | TYR | X | 101 | 34.149 | 42.035 | 14.878 | 0.00 | 0.00 |
| ATOM | 1562 | H    | TYR | X | 101 | 34.824 | 41.290 | 14.781 | 0.00 | 0.00 |
| ATOM | 1563 | CA   | TYR | X | 101 | 33.849 | 42.798 | 13.703 | 0.00 | 0.00 |
| ATOM | 1564 | HA   | TYR | X | 101 | 33.020 | 43.499 | 13.800 | 0.00 | 0.00 |
| ATOM | 1565 | CB   | TYR | X | 101 | 35.022 | 43.703 | 13.362 | 0.00 | 0.00 |
| ATOM | 1566 | HB2  | TYR | X | 101 | 35.162 | 44.323 | 14.248 | 0.00 | 0.00 |
| ATOM | 1567 | HB3  | TYR | X | 101 | 35.882 | 43.139 | 13.000 | 0.00 | 0.00 |
| ATOM | 1568 | CG   | TYR | X | 101 | 34.725 | 44.606 | 12.219 | 0.00 | 0.00 |
| ATOM | 1569 | CD1  | TYR | X | 101 | 34.657 | 44.116 | 10.920 | 0.00 | 0.00 |
| ATOM | 1570 | HD1  | TYR | X | 101 | 34.748 | 43.060 | 10.716 | 0.00 | 0.00 |
| ATOM | 1571 | CE1  | TYR | X | 101 | 34.422 | 45.038 | 9.895  | 0.00 | 0.00 |
| ATOM | 1572 | HE1  | TYR | X | 101 | 34.351 | 44.679 | 8.879  | 0.00 | 0.00 |
| ATOM | 1573 | CZ   | TYR | X | 101 | 34.115 | 46.406 | 10.157 | 0.00 | 0.00 |
| ATOM | 1574 | OH   | TYR | X | 101 | 33.645 | 47.269 | 9.129  | 0.00 | 0.00 |
| ATOM | 1575 | HH   | TYR | X | 101 | 33.541 | 46.836 | 8.278  | 0.00 | 0.00 |
| ATOM | 1576 | CE2  | TYR | X | 101 | 34.145 | 46.915 | 11.486 | 0.00 | 0.00 |
| ATOM | 1577 | HE2  | TYR | X | 101 | 33.813 | 47.919 | 11.702 | 0.00 | 0.00 |
| ATOM | 1578 | CD2  | TYR | X | 101 | 34.478 | 46.013 | 12.540 | 0.00 | 0.00 |
| ATOM | 1579 | HD2  | TYR | X | 101 | 34.632 | 46.328 | 13.561 | 0.00 | 0.00 |
| ATOM | 1580 | C    | TYR | X | 101 | 33.486 | 41.870 | 12.594 | 0.00 | 0.00 |
| ATOM | 1581 | O    | TYR | X | 101 | 34.269 | 40.950 | 12.317 | 0.00 | 0.00 |
| ATOM | 1582 | N    | PRO | X | 102 | 32.337 | 41.943 | 11.982 | 0.00 | 0.00 |
| ATOM | 1583 | CD   | PRO | X | 102 | 32.090 | 41.229 | 10.744 | 0.00 | 0.00 |
| ATOM | 1584 | HD2  | PRO | X | 102 | 31.975 | 40.166 | 10.957 | 0.00 | 0.00 |
| ATOM | 1585 | HD3  | PRO | X | 102 | 32.874 | 41.459 | 10.022 | 0.00 | 0.00 |
| ATOM | 1586 | CG   | PRO | X | 102 | 30.744 | 41.692 | 10.197 | 0.00 | 0.00 |

|      |      |      |     |   |     |        |        |        |      |      |
|------|------|------|-----|---|-----|--------|--------|--------|------|------|
| ATOM | 1587 | HG2  | PRO | X | 102 | 30.007 | 40.924 | 10.429 | 0.00 | 0.00 |
| ATOM | 1588 | HG3  | PRO | X | 102 | 30.773 | 41.872 | 9.122  | 0.00 | 0.00 |
| ATOM | 1589 | CB   | PRO | X | 102 | 30.455 | 42.998 | 10.847 | 0.00 | 0.00 |
| ATOM | 1590 | HB2  | PRO | X | 102 | 29.389 | 43.045 | 11.072 | 0.00 | 0.00 |
| ATOM | 1591 | HB3  | PRO | X | 102 | 30.703 | 43.926 | 10.332 | 0.00 | 0.00 |
| ATOM | 1592 | CA   | PRO | X | 102 | 31.300 | 42.976 | 12.156 | 0.00 | 0.00 |
| ATOM | 1593 | HA   | PRO | X | 102 | 31.780 | 43.932 | 12.366 | 0.00 | 0.00 |
| ATOM | 1594 | C    | PRO | X | 102 | 30.340 | 42.648 | 13.393 | 0.00 | 0.00 |
| ATOM | 1595 | O    | PRO | X | 102 | 29.933 | 41.427 | 13.605 | 0.00 | 0.00 |
| ATOM | 1596 | N    | ARG | X | 103 | 30.153 | 43.556 | 14.257 | 0.00 | 0.00 |
| ATOM | 1597 | H    | ARG | X | 103 | 30.620 | 44.408 | 13.982 | 0.00 | 0.00 |
| ATOM | 1598 | CA   | ARG | X | 103 | 29.620 | 43.458 | 15.628 | 0.00 | 0.00 |
| ATOM | 1599 | HA   | ARG | X | 103 | 30.218 | 42.711 | 16.149 | 0.00 | 0.00 |
| ATOM | 1600 | CB   | ARG | X | 103 | 29.808 | 44.887 | 16.179 | 0.00 | 0.00 |
| ATOM | 1601 | HB2  | ARG | X | 103 | 30.731 | 45.325 | 15.800 | 0.00 | 0.00 |
| ATOM | 1602 | HB3  | ARG | X | 103 | 29.068 | 45.606 | 15.826 | 0.00 | 0.00 |
| ATOM | 1603 | CG   | ARG | X | 103 | 29.885 | 44.914 | 17.682 | 0.00 | 0.00 |
| ATOM | 1604 | HG2  | ARG | X | 103 | 29.098 | 44.337 | 18.168 | 0.00 | 0.00 |
| ATOM | 1605 | HG3  | ARG | X | 103 | 30.785 | 44.371 | 17.970 | 0.00 | 0.00 |
| ATOM | 1606 | CD   | ARG | X | 103 | 29.926 | 46.364 | 18.347 | 0.00 | 0.00 |
| ATOM | 1607 | HD2  | ARG | X | 103 | 30.104 | 46.112 | 19.392 | 0.00 | 0.00 |
| ATOM | 1608 | HD3  | ARG | X | 103 | 30.743 | 46.877 | 17.840 | 0.00 | 0.00 |
| ATOM | 1609 | NE   | ARG | X | 103 | 28.668 | 47.115 | 18.123 | 0.00 | 0.00 |
| ATOM | 1610 | HE   | ARG | X | 103 | 27.913 | 46.931 | 18.769 | 0.00 | 0.00 |
| ATOM | 1611 | CZ   | ARG | X | 103 | 28.500 | 48.220 | 17.360 | 0.00 | 0.00 |
| ATOM | 1612 | NH1  | ARG | X | 103 | 29.499 | 48.821 | 16.765 | 0.00 | 0.00 |
| ATOM | 1613 | HH11 | ARG | X | 103 | 30.316 | 48.262 | 16.564 | 0.00 | 0.00 |
| ATOM | 1614 | HH12 | ARG | X | 103 | 29.411 | 49.765 | 16.417 | 0.00 | 0.00 |
| ATOM | 1615 | NH2  | ARG | X | 103 | 27.261 | 48.686 | 17.250 | 0.00 | 0.00 |
| ATOM | 1616 | HH21 | ARG | X | 103 | 26.464 | 48.126 | 17.513 | 0.00 | 0.00 |
| ATOM | 1617 | HH22 | ARG | X | 103 | 27.060 | 49.429 | 16.596 | 0.00 | 0.00 |
| ATOM | 1618 | C    | ARG | X | 103 | 28.205 | 42.925 | 15.761 | 0.00 | 0.00 |
| ATOM | 1619 | O    | ARG | X | 103 | 27.427 | 43.516 | 15.041 | 0.00 | 0.00 |
| ATOM | 1620 | N    | PRO | X | 104 | 28.043 | 41.880 | 16.555 | 0.00 | 0.00 |
| ATOM | 1621 | CD   | PRO | X | 104 | 29.051 | 41.122 | 17.298 | 0.00 | 0.00 |
| ATOM | 1622 | HD2  | PRO | X | 104 | 29.691 | 41.816 | 17.842 | 0.00 | 0.00 |
| ATOM | 1623 | HD3  | PRO | X | 104 | 29.583 | 40.456 | 16.619 | 0.00 | 0.00 |
| ATOM | 1624 | CG   | PRO | X | 104 | 28.291 | 40.363 | 18.387 | 0.00 | 0.00 |
| ATOM | 1625 | HG2  | PRO | X | 104 | 28.211 | 41.054 | 19.226 | 0.00 | 0.00 |
| ATOM | 1626 | HG3  | PRO | X | 104 | 28.911 | 39.491 | 18.593 | 0.00 | 0.00 |
| ATOM | 1627 | CB   | PRO | X | 104 | 27.015 | 40.073 | 17.604 | 0.00 | 0.00 |
| ATOM | 1628 | HB2  | PRO | X | 104 | 26.166 | 39.706 | 18.180 | 0.00 | 0.00 |
| ATOM | 1629 | HB3  | PRO | X | 104 | 27.173 | 39.248 | 16.910 | 0.00 | 0.00 |
| ATOM | 1630 | CA   | PRO | X | 104 | 26.759 | 41.306 | 16.747 | 0.00 | 0.00 |
| ATOM | 1631 | HA   | PRO | X | 104 | 26.415 | 41.103 | 15.733 | 0.00 | 0.00 |
| ATOM | 1632 | C    | PRO | X | 104 | 25.835 | 42.351 | 17.442 | 0.00 | 0.00 |
| ATOM | 1633 | O    | PRO | X | 104 | 26.224 | 43.043 | 18.377 | 0.00 | 0.00 |
| ATOM | 1634 | N    | THR | X | 105 | 24.554 | 42.234 | 17.182 | 0.00 | 0.00 |
| ATOM | 1635 | H    | THR | X | 105 | 24.280 | 41.384 | 16.711 | 0.00 | 0.00 |
| ATOM | 1636 | CA   | THR | X | 105 | 23.449 | 43.080 | 17.720 | 0.00 | 0.00 |
| ATOM | 1637 | HA   | THR | X | 105 | 23.808 | 44.013 | 18.153 | 0.00 | 0.00 |
| ATOM | 1638 | CB   | THR | X | 105 | 22.592 | 43.571 | 16.591 | 0.00 | 0.00 |
| ATOM | 1639 | HB   | THR | X | 105 | 21.842 | 44.280 | 16.942 | 0.00 | 0.00 |
| ATOM | 1640 | CG2  | THR | X | 105 | 23.368 | 44.297 | 15.538 | 0.00 | 0.00 |
| ATOM | 1641 | HG21 | THR | X | 105 | 24.154 | 43.697 | 15.080 | 0.00 | 0.00 |
| ATOM | 1642 | HG22 | THR | X | 105 | 23.788 | 45.103 | 16.139 | 0.00 | 0.00 |
| ATOM | 1643 | HG23 | THR | X | 105 | 22.592 | 44.734 | 14.908 | 0.00 | 0.00 |
| ATOM | 1644 | OG1  | THR | X | 105 | 21.947 | 42.498 | 15.966 | 0.00 | 0.00 |
| ATOM | 1645 | HG1  | THR | X | 105 | 21.497 | 42.822 | 15.183 | 0.00 | 0.00 |
| ATOM | 1646 | C    | THR | X | 105 | 22.620 | 42.403 | 18.741 | 0.00 | 0.00 |
| ATOM | 1647 | O    | THR | X | 105 | 21.784 | 43.060 | 19.347 | 0.00 | 0.00 |
| ATOM | 1648 | N    | SER | X | 106 | 22.792 | 41.139 | 18.978 | 0.00 | 0.00 |
| ATOM | 1649 | H    | SER | X | 106 | 23.436 | 40.629 | 18.390 | 0.00 | 0.00 |
| ATOM | 1650 | CA   | SER | X | 106 | 22.140 | 40.305 | 19.981 | 0.00 | 0.00 |
| ATOM | 1651 | HA   | SER | X | 106 | 21.110 | 40.649 | 20.075 | 0.00 | 0.00 |
| ATOM | 1652 | CB   | SER | X | 106 | 22.237 | 38.800 | 19.430 | 0.00 | 0.00 |
| ATOM | 1653 | HB2  | SER | X | 106 | 23.288 | 38.514 | 19.456 | 0.00 | 0.00 |



|      |      |      |     |   |     |        |        |        |      |      |
|------|------|------|-----|---|-----|--------|--------|--------|------|------|
| ATOM | 1654 | HB3  | SER | X | 106 | 21.677 | 38.152 | 20.104 | 0.00 | 0.00 |
| ATOM | 1655 | OG   | SER | X | 106 | 21.687 | 38.765 | 18.144 | 0.00 | 0.00 |
| ATOM | 1656 | HG   | SER | X | 106 | 22.390 | 38.716 | 17.493 | 0.00 | 0.00 |
| ATOM | 1657 | C    | SER | X | 106 | 22.763 | 40.422 | 21.382 | 0.00 | 0.00 |
| ATOM | 1658 | O    | SER | X | 106 | 23.827 | 41.015 | 21.533 | 0.00 | 0.00 |
| ATOM | 1659 | N    | PRO | X | 107 | 22.229 | 39.953 | 22.515 | 0.00 | 0.00 |
| ATOM | 1660 | CD   | PRO | X | 107 | 20.880 | 39.404 | 22.581 | 0.00 | 0.00 |
| ATOM | 1661 | HD2  | PRO | X | 107 | 20.729 | 38.786 | 21.696 | 0.00 | 0.00 |
| ATOM | 1662 | HD3  | PRO | X | 107 | 20.114 | 40.179 | 22.579 | 0.00 | 0.00 |
| ATOM | 1663 | CG   | PRO | X | 107 | 20.680 | 38.754 | 24.012 | 0.00 | 0.00 |
| ATOM | 1664 | HG2  | PRO | X | 107 | 20.911 | 37.689 | 24.009 | 0.00 | 0.00 |
| ATOM | 1665 | HG3  | PRO | X | 107 | 19.647 | 38.876 | 24.338 | 0.00 | 0.00 |
| ATOM | 1666 | CB   | PRO | X | 107 | 21.761 | 39.558 | 24.824 | 0.00 | 0.00 |
| ATOM | 1667 | HB2  | PRO | X | 107 | 22.134 | 39.030 | 25.702 | 0.00 | 0.00 |
| ATOM | 1668 | HB3  | PRO | X | 107 | 21.248 | 40.501 | 25.016 | 0.00 | 0.00 |
| ATOM | 1669 | CA   | PRO | X | 107 | 22.863 | 39.865 | 23.797 | 0.00 | 0.00 |
| ATOM | 1670 | HA   | PRO | X | 107 | 23.255 | 40.855 | 24.026 | 0.00 | 0.00 |
| ATOM | 1671 | C    | PRO | X | 107 | 24.023 | 38.867 | 23.852 | 0.00 | 0.00 |
| ATOM | 1672 | O    | PRO | X | 107 | 23.965 | 37.853 | 23.171 | 0.00 | 0.00 |
| ATOM | 1673 | N    | THR | X | 108 | 25.025 | 39.126 | 24.654 | 0.00 | 0.00 |
| ATOM | 1674 | H    | THR | X | 108 | 25.029 | 40.060 | 25.039 | 0.00 | 0.00 |
| ATOM | 1675 | CA   | THR | X | 108 | 26.062 | 38.166 | 24.954 | 0.00 | 0.00 |
| ATOM | 1676 | HA   | THR | X | 108 | 25.574 | 37.199 | 25.078 | 0.00 | 0.00 |
| ATOM | 1677 | CB   | THR | X | 108 | 26.958 | 38.156 | 23.676 | 0.00 | 0.00 |
| ATOM | 1678 | HB   | THR | X | 108 | 26.812 | 39.157 | 23.271 | 0.00 | 0.00 |
| ATOM | 1679 | CG2  | THR | X | 108 | 28.463 | 38.016 | 24.011 | 0.00 | 0.00 |
| ATOM | 1680 | HG21 | THR | X | 108 | 28.704 | 37.103 | 24.556 | 0.00 | 0.00 |
| ATOM | 1681 | HG22 | THR | X | 108 | 28.842 | 38.874 | 24.565 | 0.00 | 0.00 |
| ATOM | 1682 | HG23 | THR | X | 108 | 29.045 | 38.072 | 23.091 | 0.00 | 0.00 |
| ATOM | 1683 | OG1  | THR | X | 108 | 26.518 | 37.238 | 22.750 | 0.00 | 0.00 |
| ATOM | 1684 | HG1  | THR | X | 108 | 25.574 | 37.375 | 22.637 | 0.00 | 0.00 |
| ATOM | 1685 | C    | THR | X | 108 | 26.643 | 38.522 | 26.288 | 0.00 | 0.00 |
| ATOM | 1686 | O    | THR | X | 108 | 26.931 | 39.713 | 26.506 | 0.00 | 0.00 |
| ATOM | 1687 | N    | PRO | X | 109 | 27.148 | 37.551 | 27.094 | 0.00 | 0.00 |
| ATOM | 1688 | CD   | PRO | X | 109 | 27.057 | 36.108 | 26.822 | 0.00 | 0.00 |
| ATOM | 1689 | HD2  | PRO | X | 109 | 27.437 | 35.858 | 25.831 | 0.00 | 0.00 |
| ATOM | 1690 | HD3  | PRO | X | 109 | 26.051 | 35.739 | 27.023 | 0.00 | 0.00 |
| ATOM | 1691 | CG   | PRO | X | 109 | 28.029 | 35.463 | 27.796 | 0.00 | 0.00 |
| ATOM | 1692 | HG2  | PRO | X | 109 | 29.005 | 35.559 | 27.321 | 0.00 | 0.00 |
| ATOM | 1693 | HG3  | PRO | X | 109 | 27.754 | 34.479 | 28.174 | 0.00 | 0.00 |
| ATOM | 1694 | CB   | PRO | X | 109 | 27.944 | 36.338 | 28.974 | 0.00 | 0.00 |
| ATOM | 1695 | HB2  | PRO | X | 109 | 28.822 | 36.271 | 29.617 | 0.00 | 0.00 |
| ATOM | 1696 | HB3  | PRO | X | 109 | 27.117 | 36.079 | 29.635 | 0.00 | 0.00 |
| ATOM | 1697 | CA   | PRO | X | 109 | 27.767 | 37.775 | 28.405 | 0.00 | 0.00 |
| ATOM | 1698 | HA   | PRO | X | 109 | 27.043 | 38.277 | 29.047 | 0.00 | 0.00 |
| ATOM | 1699 | C    | PRO | X | 109 | 29.085 | 38.604 | 28.350 | 0.00 | 0.00 |
| ATOM | 1700 | O    | PRO | X | 109 | 29.760 | 38.427 | 27.383 | 0.00 | 0.00 |
| ATOM | 1701 | N    | VAL | X | 110 | 29.355 | 39.451 | 29.341 | 0.00 | 0.00 |
| ATOM | 1702 | H    | VAL | X | 110 | 28.729 | 39.432 | 30.134 | 0.00 | 0.00 |
| ATOM | 1703 | CA   | VAL | X | 110 | 30.392 | 40.426 | 29.316 | 0.00 | 0.00 |
| ATOM | 1704 | HA   | VAL | X | 110 | 30.876 | 40.307 | 28.347 | 0.00 | 0.00 |
| ATOM | 1705 | CB   | VAL | X | 110 | 29.806 | 41.876 | 29.588 | 0.00 | 0.00 |
| ATOM | 1706 | HB   | VAL | X | 110 | 29.461 | 41.893 | 30.622 | 0.00 | 0.00 |
| ATOM | 1707 | CG1  | VAL | X | 110 | 30.852 | 42.968 | 29.459 | 0.00 | 0.00 |
| ATOM | 1708 | HG11 | VAL | X | 110 | 30.462 | 43.970 | 29.638 | 0.00 | 0.00 |
| ATOM | 1709 | HG12 | VAL | X | 110 | 31.634 | 42.704 | 30.171 | 0.00 | 0.00 |
| ATOM | 1710 | HG13 | VAL | X | 110 | 31.341 | 42.948 | 28.485 | 0.00 | 0.00 |
| ATOM | 1711 | CG2  | VAL | X | 110 | 28.624 | 42.260 | 28.633 | 0.00 | 0.00 |
| ATOM | 1712 | HG21 | VAL | X | 110 | 28.346 | 43.282 | 28.890 | 0.00 | 0.00 |
| ATOM | 1713 | HG22 | VAL | X | 110 | 27.697 | 41.687 | 28.667 | 0.00 | 0.00 |
| ATOM | 1714 | HG23 | VAL | X | 110 | 29.087 | 42.279 | 27.646 | 0.00 | 0.00 |
| ATOM | 1715 | C    | VAL | X | 110 | 31.435 | 40.102 | 30.410 | 0.00 | 0.00 |
| ATOM | 1716 | O    | VAL | X | 110 | 31.067 | 39.787 | 31.529 | 0.00 | 0.00 |
| ATOM | 1717 | N    | LEU | X | 111 | 32.698 | 40.291 | 30.080 | 0.00 | 0.00 |
| ATOM | 1718 | H    | LEU | X | 111 | 32.771 | 40.572 | 29.113 | 0.00 | 0.00 |
| ATOM | 1719 | CA   | LEU | X | 111 | 33.839 | 40.125 | 30.868 | 0.00 | 0.00 |
| ATOM | 1720 | HA   | LEU | X | 111 | 33.626 | 39.687 | 31.842 | 0.00 | 0.00 |

|      |      |      |     |   |     |        |        |        |      |      |
|------|------|------|-----|---|-----|--------|--------|--------|------|------|
| ATOM | 1721 | CB   | LEU | X | 111 | 34.871 | 39.255 | 30.027 | 0.00 | 0.00 |
| ATOM | 1722 | HB2  | LEU | X | 111 | 34.679 | 39.575 | 29.003 | 0.00 | 0.00 |
| ATOM | 1723 | HB3  | LEU | X | 111 | 35.893 | 39.464 | 30.344 | 0.00 | 0.00 |
| ATOM | 1724 | CG   | LEU | X | 111 | 34.618 | 37.711 | 30.237 | 0.00 | 0.00 |
| ATOM | 1725 | HG   | LEU | X | 111 | 33.574 | 37.430 | 30.104 | 0.00 | 0.00 |
| ATOM | 1726 | CD1  | LEU | X | 111 | 35.337 | 36.979 | 29.103 | 0.00 | 0.00 |
| ATOM | 1727 | HD11 | LEU | X | 111 | 34.873 | 35.994 | 29.048 | 0.00 | 0.00 |
| ATOM | 1728 | HD12 | LEU | X | 111 | 36.364 | 36.718 | 29.359 | 0.00 | 0.00 |
| ATOM | 1729 | HD13 | LEU | X | 111 | 34.998 | 37.448 | 28.179 | 0.00 | 0.00 |
| ATOM | 1730 | CD2  | LEU | X | 111 | 35.092 | 37.189 | 31.621 | 0.00 | 0.00 |
| ATOM | 1731 | HD21 | LEU | X | 111 | 34.659 | 37.832 | 32.387 | 0.00 | 0.00 |
| ATOM | 1732 | HD22 | LEU | X | 111 | 34.855 | 36.131 | 31.735 | 0.00 | 0.00 |
| ATOM | 1733 | HD23 | LEU | X | 111 | 36.169 | 37.290 | 31.761 | 0.00 | 0.00 |
| ATOM | 1734 | C    | LEU | X | 111 | 34.334 | 41.561 | 31.156 | 0.00 | 0.00 |
| ATOM | 1735 | O    | LEU | X | 111 | 34.999 | 42.172 | 30.371 | 0.00 | 0.00 |
| ATOM | 1736 | N    | VAL | X | 112 | 34.201 | 41.972 | 32.405 | 0.00 | 0.00 |
| ATOM | 1737 | H    | VAL | X | 112 | 33.742 | 41.344 | 33.050 | 0.00 | 0.00 |
| ATOM | 1738 | CA   | VAL | X | 112 | 34.684 | 43.270 | 32.979 | 0.00 | 0.00 |
| ATOM | 1739 | HA   | VAL | X | 112 | 35.087 | 43.772 | 32.100 | 0.00 | 0.00 |
| ATOM | 1740 | CB   | VAL | X | 112 | 33.536 | 44.029 | 33.678 | 0.00 | 0.00 |
| ATOM | 1741 | HB   | VAL | X | 112 | 33.222 | 43.372 | 34.489 | 0.00 | 0.00 |
| ATOM | 1742 | CG1  | VAL | X | 112 | 34.135 | 45.280 | 34.299 | 0.00 | 0.00 |
| ATOM | 1743 | HG11 | VAL | X | 112 | 34.947 | 45.057 | 34.990 | 0.00 | 0.00 |
| ATOM | 1744 | HG12 | VAL | X | 112 | 34.511 | 45.880 | 33.470 | 0.00 | 0.00 |
| ATOM | 1745 | HG13 | VAL | X | 112 | 33.359 | 45.880 | 34.775 | 0.00 | 0.00 |
| ATOM | 1746 | CG2  | VAL | X | 112 | 32.290 | 44.453 | 32.853 | 0.00 | 0.00 |
| ATOM | 1747 | HG21 | VAL | X | 112 | 32.610 | 45.369 | 32.356 | 0.00 | 0.00 |
| ATOM | 1748 | HG22 | VAL | X | 112 | 31.470 | 44.693 | 33.531 | 0.00 | 0.00 |
| ATOM | 1749 | HG23 | VAL | X | 112 | 32.098 | 43.662 | 32.129 | 0.00 | 0.00 |
| ATOM | 1750 | C    | VAL | X | 112 | 35.923 | 43.099 | 33.861 | 0.00 | 0.00 |
| ATOM | 1751 | O    | VAL | X | 112 | 35.866 | 42.536 | 34.938 | 0.00 | 0.00 |
| ATOM | 1752 | N    | TRP | X | 113 | 37.030 | 43.642 | 33.297 | 0.00 | 0.00 |
| ATOM | 1753 | H    | TRP | X | 113 | 36.889 | 44.027 | 32.374 | 0.00 | 0.00 |
| ATOM | 1754 | CA   | TRP | X | 113 | 38.471 | 43.625 | 33.784 | 0.00 | 0.00 |
| ATOM | 1755 | HA   | TRP | X | 113 | 38.736 | 42.673 | 34.244 | 0.00 | 0.00 |
| ATOM | 1756 | CB   | TRP | X | 113 | 39.437 | 43.659 | 32.627 | 0.00 | 0.00 |
| ATOM | 1757 | HB2  | TRP | X | 113 | 39.284 | 42.806 | 31.966 | 0.00 | 0.00 |
| ATOM | 1758 | HB3  | TRP | X | 113 | 39.268 | 44.589 | 32.085 | 0.00 | 0.00 |
| ATOM | 1759 | CG   | TRP | X | 113 | 40.841 | 43.572 | 33.067 | 0.00 | 0.00 |
| ATOM | 1760 | CD1  | TRP | X | 113 | 41.768 | 44.581 | 33.129 | 0.00 | 0.00 |
| ATOM | 1761 | HD1  | TRP | X | 113 | 41.611 | 45.618 | 32.873 | 0.00 | 0.00 |
| ATOM | 1762 | NE1  | TRP | X | 113 | 42.912 | 44.060 | 33.658 | 0.00 | 0.00 |
| ATOM | 1763 | HE1  | TRP | X | 113 | 43.735 | 44.643 | 33.712 | 0.00 | 0.00 |
| ATOM | 1764 | CE2  | TRP | X | 113 | 42.820 | 42.788 | 34.031 | 0.00 | 0.00 |
| ATOM | 1765 | CZ2  | TRP | X | 113 | 43.736 | 41.932 | 34.669 | 0.00 | 0.00 |
| ATOM | 1766 | HZ2  | TRP | X | 113 | 44.736 | 42.200 | 34.974 | 0.00 | 0.00 |
| ATOM | 1767 | CH2  | TRP | X | 113 | 43.345 | 40.604 | 34.921 | 0.00 | 0.00 |
| ATOM | 1768 | HH2  | TRP | X | 113 | 44.043 | 39.943 | 35.412 | 0.00 | 0.00 |
| ATOM | 1769 | CZ3  | TRP | X | 113 | 42.069 | 40.163 | 34.475 | 0.00 | 0.00 |
| ATOM | 1770 | HZ3  | TRP | X | 113 | 41.606 | 39.247 | 34.809 | 0.00 | 0.00 |
| ATOM | 1771 | CE3  | TRP | X | 113 | 41.171 | 41.089 | 33.953 | 0.00 | 0.00 |
| ATOM | 1772 | HE3  | TRP | X | 113 | 40.216 | 40.756 | 33.575 | 0.00 | 0.00 |
| ATOM | 1773 | CD2  | TRP | X | 113 | 41.496 | 42.414 | 33.668 | 0.00 | 0.00 |
| ATOM | 1774 | C    | TRP | X | 113 | 38.817 | 44.683 | 34.865 | 0.00 | 0.00 |
| ATOM | 1775 | O    | TRP | X | 113 | 38.522 | 45.852 | 34.746 | 0.00 | 0.00 |
| ATOM | 1776 | N    | ILE | X | 114 | 39.422 | 44.231 | 35.948 | 0.00 | 0.00 |
| ATOM | 1777 | H    | ILE | X | 114 | 39.691 | 43.261 | 36.023 | 0.00 | 0.00 |
| ATOM | 1778 | CA   | ILE | X | 114 | 39.997 | 44.989 | 37.051 | 0.00 | 0.00 |
| ATOM | 1779 | HA   | ILE | X | 114 | 39.987 | 46.060 | 36.851 | 0.00 | 0.00 |
| ATOM | 1780 | CB   | ILE | X | 114 | 39.051 | 44.872 | 38.267 | 0.00 | 0.00 |
| ATOM | 1781 | HB   | ILE | X | 114 | 38.850 | 43.816 | 38.446 | 0.00 | 0.00 |
| ATOM | 1782 | CG2  | ILE | X | 114 | 39.695 | 45.536 | 39.475 | 0.00 | 0.00 |
| ATOM | 1783 | HG21 | ILE | X | 114 | 39.316 | 45.144 | 40.418 | 0.00 | 0.00 |
| ATOM | 1784 | HG22 | ILE | X | 114 | 39.591 | 46.621 | 39.445 | 0.00 | 0.00 |
| ATOM | 1785 | HG23 | ILE | X | 114 | 40.741 | 45.227 | 39.478 | 0.00 | 0.00 |
| ATOM | 1786 | CG1  | ILE | X | 114 | 37.737 | 45.634 | 37.919 | 0.00 | 0.00 |
| ATOM | 1787 | HG12 | ILE | X | 114 | 37.950 | 46.701 | 37.854 | 0.00 | 0.00 |

|      |      |      |     |   |     |        |        |        |      |      |
|------|------|------|-----|---|-----|--------|--------|--------|------|------|
| ATOM | 1788 | HG13 | ILE | X | 114 | 37.410 | 45.323 | 36.927 | 0.00 | 0.00 |
| ATOM | 1789 | CD1  | ILE | X | 114 | 36.609 | 45.303 | 38.928 | 0.00 | 0.00 |
| ATOM | 1790 | HD11 | ILE | X | 114 | 36.823 | 45.504 | 39.978 | 0.00 | 0.00 |
| ATOM | 1791 | HD12 | ILE | X | 114 | 36.282 | 44.263 | 38.898 | 0.00 | 0.00 |
| ATOM | 1792 | HD13 | ILE | X | 114 | 35.834 | 45.979 | 38.568 | 0.00 | 0.00 |
| ATOM | 1793 | C    | ILE | X | 114 | 41.488 | 44.423 | 37.248 | 0.00 | 0.00 |
| ATOM | 1794 | O    | ILE | X | 114 | 41.632 | 43.220 | 37.464 | 0.00 | 0.00 |
| ATOM | 1795 | N    | TYR | X | 115 | 42.565 | 45.197 | 37.337 | 0.00 | 0.00 |
| ATOM | 1796 | H    | TYR | X | 115 | 42.388 | 46.187 | 37.244 | 0.00 | 0.00 |
| ATOM | 1797 | CA   | TYR | X | 115 | 43.960 | 44.839 | 37.522 | 0.00 | 0.00 |
| ATOM | 1798 | HA   | TYR | X | 115 | 44.198 | 43.868 | 37.088 | 0.00 | 0.00 |
| ATOM | 1799 | CB   | TYR | X | 115 | 44.752 | 45.719 | 36.497 | 0.00 | 0.00 |
| ATOM | 1800 | HB2  | TYR | X | 115 | 45.796 | 45.407 | 36.515 | 0.00 | 0.00 |
| ATOM | 1801 | HB3  | TYR | X | 115 | 44.359 | 45.604 | 35.487 | 0.00 | 0.00 |
| ATOM | 1802 | CG   | TYR | X | 115 | 44.629 | 47.197 | 36.720 | 0.00 | 0.00 |
| ATOM | 1803 | CD1  | TYR | X | 115 | 45.033 | 47.808 | 37.867 | 0.00 | 0.00 |
| ATOM | 1804 | HD1  | TYR | X | 115 | 45.583 | 47.298 | 38.644 | 0.00 | 0.00 |
| ATOM | 1805 | CE1  | TYR | X | 115 | 45.031 | 49.193 | 38.093 | 0.00 | 0.00 |
| ATOM | 1806 | HE1  | TYR | X | 115 | 45.366 | 49.642 | 39.017 | 0.00 | 0.00 |
| ATOM | 1807 | CZ   | TYR | X | 115 | 44.319 | 49.987 | 37.139 | 0.00 | 0.00 |
| ATOM | 1808 | OH   | TYR | X | 115 | 44.131 | 51.248 | 37.512 | 0.00 | 0.00 |
| ATOM | 1809 | HH   | TYR | X | 115 | 44.703 | 51.381 | 38.271 | 0.00 | 0.00 |
| ATOM | 1810 | CE2  | TYR | X | 115 | 43.688 | 49.378 | 35.970 | 0.00 | 0.00 |
| ATOM | 1811 | HE2  | TYR | X | 115 | 43.014 | 49.925 | 35.328 | 0.00 | 0.00 |
| ATOM | 1812 | CD2  | TYR | X | 115 | 43.826 | 47.952 | 35.773 | 0.00 | 0.00 |
| ATOM | 1813 | HD2  | TYR | X | 115 | 43.353 | 47.492 | 34.918 | 0.00 | 0.00 |
| ATOM | 1814 | C    | TYR | X | 115 | 44.586 | 44.908 | 38.896 | 0.00 | 0.00 |
| ATOM | 1815 | O    | TYR | X | 115 | 44.050 | 45.479 | 39.879 | 0.00 | 0.00 |
| ATOM | 1816 | N    | GLY | X | 116 | 45.764 | 44.321 | 39.057 | 0.00 | 0.00 |
| ATOM | 1817 | H    | GLY | X | 116 | 46.168 | 43.775 | 38.309 | 0.00 | 0.00 |
| ATOM | 1818 | CA   | GLY | X | 116 | 46.552 | 44.259 | 40.329 | 0.00 | 0.00 |
| ATOM | 1819 | HA2  | GLY | X | 116 | 45.923 | 44.477 | 41.192 | 0.00 | 0.00 |
| ATOM | 1820 | HA3  | GLY | X | 116 | 47.028 | 43.309 | 40.571 | 0.00 | 0.00 |
| ATOM | 1821 | C    | GLY | X | 116 | 47.566 | 45.324 | 40.317 | 0.00 | 0.00 |
| ATOM | 1822 | O    | GLY | X | 116 | 47.543 | 46.215 | 39.484 | 0.00 | 0.00 |
| ATOM | 1823 | N    | GLY | X | 117 | 48.497 | 45.257 | 41.340 | 0.00 | 0.00 |
| ATOM | 1824 | H    | GLY | X | 117 | 48.356 | 44.526 | 42.022 | 0.00 | 0.00 |
| ATOM | 1825 | CA   | GLY | X | 117 | 49.586 | 46.192 | 41.453 | 0.00 | 0.00 |
| ATOM | 1826 | HA2  | GLY | X | 117 | 50.528 | 45.659 | 41.327 | 0.00 | 0.00 |
| ATOM | 1827 | HA3  | GLY | X | 117 | 49.628 | 47.008 | 40.731 | 0.00 | 0.00 |
| ATOM | 1828 | C    | GLY | X | 117 | 49.733 | 46.794 | 42.857 | 0.00 | 0.00 |
| ATOM | 1829 | O    | GLY | X | 117 | 50.253 | 47.926 | 42.985 | 0.00 | 0.00 |
| ATOM | 1830 | N    | GLY | X | 118 | 49.215 | 46.029 | 43.806 | 0.00 | 0.00 |
| ATOM | 1831 | H    | GLY | X | 118 | 48.786 | 45.157 | 43.528 | 0.00 | 0.00 |
| ATOM | 1832 | CA   | GLY | X | 118 | 49.351 | 46.248 | 45.253 | 0.00 | 0.00 |
| ATOM | 1833 | HA2  | GLY | X | 118 | 49.042 | 45.373 | 45.825 | 0.00 | 0.00 |
| ATOM | 1834 | HA3  | GLY | X | 118 | 50.427 | 46.233 | 45.430 | 0.00 | 0.00 |
| ATOM | 1835 | C    | GLY | X | 118 | 48.611 | 47.485 | 45.886 | 0.00 | 0.00 |
| ATOM | 1836 | O    | GLY | X | 118 | 48.910 | 47.892 | 46.979 | 0.00 | 0.00 |
| ATOM | 1837 | N    | PHE | X | 119 | 47.649 | 48.091 | 45.051 | 0.00 | 0.00 |
| ATOM | 1838 | H    | PHE | X | 119 | 47.348 | 47.489 | 44.298 | 0.00 | 0.00 |
| ATOM | 1839 | CA   | PHE | X | 119 | 46.918 | 49.312 | 45.217 | 0.00 | 0.00 |
| ATOM | 1840 | HA   | PHE | X | 119 | 46.312 | 49.289 | 44.311 | 0.00 | 0.00 |
| ATOM | 1841 | CB   | PHE | X | 119 | 45.973 | 49.189 | 46.445 | 0.00 | 0.00 |
| ATOM | 1842 | HB2  | PHE | X | 119 | 46.616 | 49.121 | 47.323 | 0.00 | 0.00 |
| ATOM | 1843 | HB3  | PHE | X | 119 | 45.445 | 50.126 | 46.620 | 0.00 | 0.00 |
| ATOM | 1844 | CG   | PHE | X | 119 | 45.024 | 48.026 | 46.351 | 0.00 | 0.00 |
| ATOM | 1845 | CD1  | PHE | X | 119 | 43.784 | 48.350 | 45.730 | 0.00 | 0.00 |
| ATOM | 1846 | HD1  | PHE | X | 119 | 43.667 | 49.272 | 45.179 | 0.00 | 0.00 |
| ATOM | 1847 | CE1  | PHE | X | 119 | 42.739 | 47.455 | 45.801 | 0.00 | 0.00 |
| ATOM | 1848 | HE1  | PHE | X | 119 | 41.805 | 47.659 | 45.298 | 0.00 | 0.00 |
| ATOM | 1849 | CZ   | PHE | X | 119 | 42.863 | 46.218 | 46.510 | 0.00 | 0.00 |
| ATOM | 1850 | HZ   | PHE | X | 119 | 42.038 | 45.543 | 46.682 | 0.00 | 0.00 |
| ATOM | 1851 | CE2  | PHE | X | 119 | 44.097 | 45.885 | 47.107 | 0.00 | 0.00 |
| ATOM | 1852 | HE2  | PHE | X | 119 | 44.122 | 44.985 | 47.703 | 0.00 | 0.00 |
| ATOM | 1853 | CD2  | PHE | X | 119 | 45.101 | 46.800 | 47.011 | 0.00 | 0.00 |
| ATOM | 1854 | HD2  | PHE | X | 119 | 46.035 | 46.642 | 47.529 | 0.00 | 0.00 |

|      |      |     |     |   |     |        |        |        |      |      |
|------|------|-----|-----|---|-----|--------|--------|--------|------|------|
| ATOM | 1855 | C   | PHE | X | 119 | 47.801 | 50.522 | 45.320 | 0.00 | 0.00 |
| ATOM | 1856 | O   | PHE | X | 119 | 47.273 | 51.630 | 45.212 | 0.00 | 0.00 |
| ATOM | 1857 | N   | TYR | X | 120 | 49.141 | 50.364 | 45.506 | 0.00 | 0.00 |
| ATOM | 1858 | H   | TYR | X | 120 | 49.464 | 49.425 | 45.691 | 0.00 | 0.00 |
| ATOM | 1859 | CA  | TYR | X | 120 | 50.073 | 51.475 | 45.271 | 0.00 | 0.00 |
| ATOM | 1860 | HA  | TYR | X | 120 | 49.581 | 52.338 | 45.719 | 0.00 | 0.00 |
| ATOM | 1861 | CB  | TYR | X | 120 | 51.424 | 51.079 | 45.944 | 0.00 | 0.00 |
| ATOM | 1862 | HB2 | TYR | X | 120 | 52.012 | 51.980 | 46.121 | 0.00 | 0.00 |
| ATOM | 1863 | HB3 | TYR | X | 120 | 51.346 | 50.737 | 46.976 | 0.00 | 0.00 |
| ATOM | 1864 | CG  | TYR | X | 120 | 52.422 | 50.161 | 45.249 | 0.00 | 0.00 |
| ATOM | 1865 | CD1 | TYR | X | 120 | 53.607 | 50.702 | 44.705 | 0.00 | 0.00 |
| ATOM | 1866 | HD1 | TYR | X | 120 | 53.863 | 51.743 | 44.835 | 0.00 | 0.00 |
| ATOM | 1867 | CE1 | TYR | X | 120 | 54.575 | 49.896 | 44.118 | 0.00 | 0.00 |
| ATOM | 1868 | HE1 | TYR | X | 120 | 55.524 | 50.294 | 43.789 | 0.00 | 0.00 |
| ATOM | 1869 | CZ  | TYR | X | 120 | 54.282 | 48.502 | 43.901 | 0.00 | 0.00 |
| ATOM | 1870 | OH  | TYR | X | 120 | 55.218 | 47.690 | 43.280 | 0.00 | 0.00 |
| ATOM | 1871 | HH  | TYR | X | 120 | 55.022 | 46.751 | 43.322 | 0.00 | 0.00 |
| ATOM | 1872 | CE2 | TYR | X | 120 | 53.055 | 47.969 | 44.430 | 0.00 | 0.00 |
| ATOM | 1873 | HE2 | TYR | X | 120 | 52.856 | 46.915 | 44.299 | 0.00 | 0.00 |
| ATOM | 1874 | CD2 | TYR | X | 120 | 52.217 | 48.760 | 45.174 | 0.00 | 0.00 |
| ATOM | 1875 | HD2 | TYR | X | 120 | 51.312 | 48.346 | 45.594 | 0.00 | 0.00 |
| ATOM | 1876 | C   | TYR | X | 120 | 50.341 | 51.828 | 43.854 | 0.00 | 0.00 |
| ATOM | 1877 | O   | TYR | X | 120 | 50.958 | 52.884 | 43.554 | 0.00 | 0.00 |
| ATOM | 1878 | N   | SER | X | 121 | 50.002 | 50.876 | 42.937 | 0.00 | 0.00 |
| ATOM | 1879 | H   | SER | X | 121 | 49.518 | 50.074 | 43.315 | 0.00 | 0.00 |
| ATOM | 1880 | CA  | SER | X | 121 | 50.219 | 50.962 | 41.449 | 0.00 | 0.00 |
| ATOM | 1881 | HA  | SER | X | 121 | 49.975 | 51.983 | 41.154 | 0.00 | 0.00 |
| ATOM | 1882 | CB  | SER | X | 121 | 51.694 | 50.739 | 41.133 | 0.00 | 0.00 |
| ATOM | 1883 | HB2 | SER | X | 121 | 51.753 | 50.817 | 40.047 | 0.00 | 0.00 |
| ATOM | 1884 | HB3 | SER | X | 121 | 52.235 | 51.502 | 41.693 | 0.00 | 0.00 |
| ATOM | 1885 | OG  | SER | X | 121 | 52.232 | 49.477 | 41.500 | 0.00 | 0.00 |
| ATOM | 1886 | HG  | SER | X | 121 | 51.891 | 49.325 | 42.385 | 0.00 | 0.00 |
| ATOM | 1887 | C   | SER | X | 121 | 49.236 | 50.069 | 40.645 | 0.00 | 0.00 |
| ATOM | 1888 | O   | SER | X | 121 | 48.253 | 49.586 | 41.184 | 0.00 | 0.00 |
| ATOM | 1889 | N   | GLY | X | 122 | 49.461 | 49.780 | 39.345 | 0.00 | 0.00 |
| ATOM | 1890 | H   | GLY | X | 122 | 50.160 | 50.352 | 38.894 | 0.00 | 0.00 |
| ATOM | 1891 | CA  | GLY | X | 122 | 48.378 | 49.384 | 38.429 | 0.00 | 0.00 |
| ATOM | 1892 | HA2 | GLY | X | 122 | 48.883 | 48.601 | 37.863 | 0.00 | 0.00 |
| ATOM | 1893 | HA3 | GLY | X | 122 | 47.467 | 49.018 | 38.903 | 0.00 | 0.00 |
| ATOM | 1894 | C   | GLY | X | 122 | 47.846 | 50.529 | 37.485 | 0.00 | 0.00 |
| ATOM | 1895 | O   | GLY | X | 122 | 47.398 | 51.548 | 37.950 | 0.00 | 0.00 |
| ATOM | 1896 | N   | ALA | X | 123 | 47.620 | 50.243 | 36.209 | 0.00 | 0.00 |
| ATOM | 1897 | H   | ALA | X | 123 | 47.942 | 49.351 | 35.863 | 0.00 | 0.00 |
| ATOM | 1898 | CA  | ALA | X | 123 | 46.973 | 51.143 | 35.233 | 0.00 | 0.00 |
| ATOM | 1899 | HA  | ALA | X | 123 | 46.137 | 51.738 | 35.602 | 0.00 | 0.00 |
| ATOM | 1900 | CB  | ALA | X | 123 | 48.009 | 52.149 | 34.798 | 0.00 | 0.00 |
| ATOM | 1901 | HB1 | ALA | X | 123 | 48.933 | 51.639 | 34.527 | 0.00 | 0.00 |
| ATOM | 1902 | HB2 | ALA | X | 123 | 48.110 | 52.846 | 35.630 | 0.00 | 0.00 |
| ATOM | 1903 | HB3 | ALA | X | 123 | 47.699 | 52.822 | 33.999 | 0.00 | 0.00 |
| ATOM | 1904 | C   | ALA | X | 123 | 46.460 | 50.271 | 34.069 | 0.00 | 0.00 |
| ATOM | 1905 | O   | ALA | X | 123 | 47.102 | 49.287 | 33.702 | 0.00 | 0.00 |
| ATOM | 1906 | N   | SER | X | 124 | 45.335 | 50.626 | 33.469 | 0.00 | 0.00 |
| ATOM | 1907 | H   | SER | X | 124 | 44.911 | 51.481 | 33.800 | 0.00 | 0.00 |
| ATOM | 1908 | CA  | SER | X | 124 | 44.681 | 50.041 | 32.311 | 0.00 | 0.00 |
| ATOM | 1909 | HA  | SER | X | 124 | 44.293 | 49.047 | 32.536 | 0.00 | 0.00 |
| ATOM | 1910 | CB  | SER | X | 124 | 43.477 | 50.910 | 31.897 | 0.00 | 0.00 |
| ATOM | 1911 | HB2 | SER | X | 124 | 43.136 | 50.479 | 30.956 | 0.00 | 0.00 |
| ATOM | 1912 | HB3 | SER | X | 124 | 42.709 | 50.897 | 32.671 | 0.00 | 0.00 |
| ATOM | 1913 | OG  | SER | X | 124 | 43.930 | 52.246 | 31.640 | 0.00 | 0.00 |
| ATOM | 1914 | HG  | SER | X | 124 | 44.031 | 52.671 | 32.495 | 0.00 | 0.00 |
| ATOM | 1915 | C   | SER | X | 124 | 45.434 | 49.900 | 30.955 | 0.00 | 0.00 |
| ATOM | 1916 | O   | SER | X | 124 | 45.095 | 49.096 | 30.076 | 0.00 | 0.00 |
| ATOM | 1917 | N   | SER | X | 125 | 46.458 | 50.737 | 30.663 | 0.00 | 0.00 |
| ATOM | 1918 | H   | SER | X | 125 | 46.635 | 51.439 | 31.368 | 0.00 | 0.00 |
| ATOM | 1919 | CA  | SER | X | 125 | 47.125 | 50.935 | 29.360 | 0.00 | 0.00 |
| ATOM | 1920 | HA  | SER | X | 125 | 46.458 | 50.678 | 28.537 | 0.00 | 0.00 |
| ATOM | 1921 | CB  | SER | X | 125 | 47.352 | 52.409 | 29.174 | 0.00 | 0.00 |

|      |      |      |     |   |     |        |        |        |      |      |
|------|------|------|-----|---|-----|--------|--------|--------|------|------|
| ATOM | 1922 | HB2  | SER | X | 125 | 47.751 | 52.585 | 28.176 | 0.00 | 0.00 |
| ATOM | 1923 | HB3  | SER | X | 125 | 46.406 | 52.951 | 29.165 | 0.00 | 0.00 |
| ATOM | 1924 | OG   | SER | X | 125 | 48.216 | 53.018 | 30.174 | 0.00 | 0.00 |
| ATOM | 1925 | HG   | SER | X | 125 | 49.107 | 52.970 | 29.821 | 0.00 | 0.00 |
| ATOM | 1926 | C    | SER | X | 125 | 48.400 | 50.099 | 29.206 | 0.00 | 0.00 |
| ATOM | 1927 | O    | SER | X | 125 | 49.246 | 50.438 | 28.383 | 0.00 | 0.00 |
| ATOM | 1928 | N    | LEU | X | 126 | 48.664 | 49.219 | 30.131 | 0.00 | 0.00 |
| ATOM | 1929 | H    | LEU | X | 126 | 47.931 | 49.199 | 30.824 | 0.00 | 0.00 |
| ATOM | 1930 | CA   | LEU | X | 126 | 49.903 | 48.434 | 30.261 | 0.00 | 0.00 |
| ATOM | 1931 | HA   | LEU | X | 126 | 50.769 | 49.018 | 29.949 | 0.00 | 0.00 |
| ATOM | 1932 | CB   | LEU | X | 126 | 50.055 | 47.983 | 31.670 | 0.00 | 0.00 |
| ATOM | 1933 | HB2  | LEU | X | 126 | 49.176 | 47.413 | 31.971 | 0.00 | 0.00 |
| ATOM | 1934 | HB3  | LEU | X | 126 | 50.819 | 47.207 | 31.722 | 0.00 | 0.00 |
| ATOM | 1935 | CG   | LEU | X | 126 | 50.383 | 49.058 | 32.704 | 0.00 | 0.00 |
| ATOM | 1936 | HG   | LEU | X | 126 | 49.682 | 49.893 | 32.705 | 0.00 | 0.00 |
| ATOM | 1937 | CD1  | LEU | X | 126 | 50.406 | 48.546 | 34.194 | 0.00 | 0.00 |
| ATOM | 1938 | HD11 | LEU | X | 126 | 50.446 | 49.346 | 34.933 | 0.00 | 0.00 |
| ATOM | 1939 | HD12 | LEU | X | 126 | 51.316 | 47.967 | 34.353 | 0.00 | 0.00 |
| ATOM | 1940 | HD13 | LEU | X | 126 | 49.484 | 48.004 | 34.404 | 0.00 | 0.00 |
| ATOM | 1941 | CD2  | LEU | X | 126 | 51.775 | 49.735 | 32.471 | 0.00 | 0.00 |
| ATOM | 1942 | HD21 | LEU | X | 126 | 52.559 | 48.981 | 32.536 | 0.00 | 0.00 |
| ATOM | 1943 | HD22 | LEU | X | 126 | 51.729 | 50.108 | 31.448 | 0.00 | 0.00 |
| ATOM | 1944 | HD23 | LEU | X | 126 | 51.879 | 50.492 | 33.249 | 0.00 | 0.00 |
| ATOM | 1945 | C    | LEU | X | 126 | 49.841 | 47.267 | 29.279 | 0.00 | 0.00 |
| ATOM | 1946 | O    | LEU | X | 126 | 48.808 | 46.562 | 29.212 | 0.00 | 0.00 |
| ATOM | 1947 | N    | ASP | X | 127 | 50.945 | 46.890 | 28.573 | 0.00 | 0.00 |
| ATOM | 1948 | H    | ASP | X | 127 | 51.804 | 47.356 | 28.830 | 0.00 | 0.00 |
| ATOM | 1949 | CA   | ASP | X | 127 | 51.113 | 45.855 | 27.499 | 0.00 | 0.00 |
| ATOM | 1950 | HA   | ASP | X | 127 | 50.448 | 46.036 | 26.655 | 0.00 | 0.00 |
| ATOM | 1951 | CB   | ASP | X | 127 | 52.412 | 46.147 | 26.799 | 0.00 | 0.00 |
| ATOM | 1952 | HB2  | ASP | X | 127 | 52.347 | 47.207 | 26.557 | 0.00 | 0.00 |
| ATOM | 1953 | HB3  | ASP | X | 127 | 53.245 | 46.147 | 27.501 | 0.00 | 0.00 |
| ATOM | 1954 | CG   | ASP | X | 127 | 52.770 | 45.237 | 25.548 | 0.00 | 0.00 |
| ATOM | 1955 | OD1  | ASP | X | 127 | 51.873 | 44.812 | 24.759 | 0.00 | 0.00 |
| ATOM | 1956 | OD2  | ASP | X | 127 | 53.948 | 44.922 | 25.260 | 0.00 | 0.00 |
| ATOM | 1957 | C    | ASP | X | 127 | 50.836 | 44.377 | 27.870 | 0.00 | 0.00 |
| ATOM | 1958 | O    | ASP | X | 127 | 51.766 | 43.594 | 27.952 | 0.00 | 0.00 |
| ATOM | 1959 | N    | VAL | X | 128 | 49.613 | 44.003 | 28.234 | 0.00 | 0.00 |
| ATOM | 1960 | H    | VAL | X | 128 | 48.839 | 44.652 | 28.211 | 0.00 | 0.00 |
| ATOM | 1961 | CA   | VAL | X | 128 | 49.352 | 42.676 | 28.784 | 0.00 | 0.00 |
| ATOM | 1962 | HA   | VAL | X | 128 | 49.669 | 41.884 | 28.105 | 0.00 | 0.00 |
| ATOM | 1963 | CB   | VAL | X | 128 | 50.107 | 42.417 | 30.168 | 0.00 | 0.00 |
| ATOM | 1964 | HB   | VAL | X | 128 | 51.183 | 42.488 | 30.007 | 0.00 | 0.00 |
| ATOM | 1965 | CG1  | VAL | X | 128 | 49.876 | 43.394 | 31.313 | 0.00 | 0.00 |
| ATOM | 1966 | HG11 | VAL | X | 128 | 50.681 | 43.324 | 32.045 | 0.00 | 0.00 |
| ATOM | 1967 | HG12 | VAL | X | 128 | 49.849 | 44.358 | 30.805 | 0.00 | 0.00 |
| ATOM | 1968 | HG13 | VAL | X | 128 | 48.881 | 43.358 | 31.757 | 0.00 | 0.00 |
| ATOM | 1969 | CG2  | VAL | X | 128 | 49.751 | 40.970 | 30.714 | 0.00 | 0.00 |
| ATOM | 1970 | HG21 | VAL | X | 128 | 48.721 | 40.930 | 31.069 | 0.00 | 0.00 |
| ATOM | 1971 | HG22 | VAL | X | 128 | 50.443 | 40.699 | 31.511 | 0.00 | 0.00 |
| ATOM | 1972 | HG23 | VAL | X | 128 | 49.905 | 40.222 | 29.936 | 0.00 | 0.00 |
| ATOM | 1973 | C    | VAL | X | 128 | 47.844 | 42.539 | 28.998 | 0.00 | 0.00 |
| ATOM | 1974 | O    | VAL | X | 128 | 47.190 | 41.529 | 28.658 | 0.00 | 0.00 |
| ATOM | 1975 | N    | TYR | X | 129 | 47.164 | 43.600 | 29.317 | 0.00 | 0.00 |
| ATOM | 1976 | H    | TYR | X | 129 | 47.660 | 44.343 | 29.788 | 0.00 | 0.00 |
| ATOM | 1977 | CA   | TYR | X | 129 | 45.747 | 43.630 | 29.390 | 0.00 | 0.00 |
| ATOM | 1978 | HA   | TYR | X | 129 | 45.417 | 42.638 | 29.700 | 0.00 | 0.00 |
| ATOM | 1979 | CB   | TYR | X | 129 | 45.291 | 44.626 | 30.520 | 0.00 | 0.00 |
| ATOM | 1980 | HB2  | TYR | X | 129 | 45.529 | 45.577 | 30.044 | 0.00 | 0.00 |
| ATOM | 1981 | HB3  | TYR | X | 129 | 44.212 | 44.562 | 30.661 | 0.00 | 0.00 |
| ATOM | 1982 | CG   | TYR | X | 129 | 46.043 | 44.602 | 31.827 | 0.00 | 0.00 |
| ATOM | 1983 | CD1  | TYR | X | 129 | 46.181 | 43.416 | 32.591 | 0.00 | 0.00 |
| ATOM | 1984 | HD1  | TYR | X | 129 | 45.663 | 42.554 | 32.199 | 0.00 | 0.00 |
| ATOM | 1985 | CE1  | TYR | X | 129 | 46.889 | 43.391 | 33.829 | 0.00 | 0.00 |
| ATOM | 1986 | HE1  | TYR | X | 129 | 46.998 | 42.536 | 34.480 | 0.00 | 0.00 |
| ATOM | 1987 | CZ   | TYR | X | 129 | 47.517 | 44.630 | 34.273 | 0.00 | 0.00 |
| ATOM | 1988 | OH   | TYR | X | 129 | 48.204 | 44.632 | 35.413 | 0.00 | 0.00 |

|      |      |      |     |   |     |        |        |        |      |      |
|------|------|------|-----|---|-----|--------|--------|--------|------|------|
| ATOM | 1989 | HH   | TYR | X | 129 | 47.864 | 43.921 | 35.962 | 0.00 | 0.00 |
| ATOM | 1990 | CE2  | TYR | X | 129 | 47.356 | 45.768 | 33.487 | 0.00 | 0.00 |
| ATOM | 1991 | HE2  | TYR | X | 129 | 47.787 | 46.685 | 33.861 | 0.00 | 0.00 |
| ATOM | 1992 | CD2  | TYR | X | 129 | 46.543 | 45.865 | 32.318 | 0.00 | 0.00 |
| ATOM | 1993 | HD2  | TYR | X | 129 | 46.320 | 46.810 | 31.845 | 0.00 | 0.00 |
| ATOM | 1994 | C    | TYR | X | 129 | 45.098 | 43.940 | 27.992 | 0.00 | 0.00 |
| ATOM | 1995 | O    | TYR | X | 129 | 44.700 | 45.115 | 27.840 | 0.00 | 0.00 |
| ATOM | 1996 | N    | ASP | X | 130 | 44.819 | 43.013 | 27.095 | 0.00 | 0.00 |
| ATOM | 1997 | H    | ASP | X | 130 | 45.119 | 42.073 | 27.313 | 0.00 | 0.00 |
| ATOM | 1998 | CA   | ASP | X | 130 | 43.996 | 43.308 | 25.866 | 0.00 | 0.00 |
| ATOM | 1999 | HA   | ASP | X | 130 | 43.347 | 44.151 | 26.103 | 0.00 | 0.00 |
| ATOM | 2000 | CB   | ASP | X | 130 | 44.892 | 43.661 | 24.757 | 0.00 | 0.00 |
| ATOM | 2001 | HB2  | ASP | X | 130 | 45.535 | 44.461 | 25.124 | 0.00 | 0.00 |
| ATOM | 2002 | HB3  | ASP | X | 130 | 45.468 | 42.762 | 24.534 | 0.00 | 0.00 |
| ATOM | 2003 | CG   | ASP | X | 130 | 44.239 | 44.113 | 23.417 | 0.00 | 0.00 |
| ATOM | 2004 | OD1  | ASP | X | 130 | 43.909 | 43.220 | 22.586 | 0.00 | 0.00 |
| ATOM | 2005 | OD2  | ASP | X | 130 | 44.214 | 45.280 | 22.975 | 0.00 | 0.00 |
| ATOM | 2006 | C    | ASP | X | 130 | 42.989 | 42.114 | 25.380 | 0.00 | 0.00 |
| ATOM | 2007 | O    | ASP | X | 130 | 43.298 | 40.926 | 25.402 | 0.00 | 0.00 |
| ATOM | 2008 | N    | GLY | X | 131 | 41.830 | 42.522 | 24.849 | 0.00 | 0.00 |
| ATOM | 2009 | H    | GLY | X | 131 | 41.699 | 43.493 | 24.604 | 0.00 | 0.00 |
| ATOM | 2010 | CA   | GLY | X | 131 | 40.731 | 41.661 | 24.522 | 0.00 | 0.00 |
| ATOM | 2011 | HA2  | GLY | X | 131 | 40.528 | 40.977 | 25.347 | 0.00 | 0.00 |
| ATOM | 2012 | HA3  | GLY | X | 131 | 39.844 | 42.291 | 24.454 | 0.00 | 0.00 |
| ATOM | 2013 | C    | GLY | X | 131 | 40.848 | 40.820 | 23.179 | 0.00 | 0.00 |
| ATOM | 2014 | O    | GLY | X | 131 | 40.042 | 39.906 | 23.025 | 0.00 | 0.00 |
| ATOM | 2015 | N    | ARG | X | 132 | 41.764 | 41.194 | 22.140 | 0.00 | 0.00 |
| ATOM | 2016 | H    | ARG | X | 132 | 42.370 | 41.985 | 22.302 | 0.00 | 0.00 |
| ATOM | 2017 | CA   | ARG | X | 132 | 41.434 | 40.972 | 20.765 | 0.00 | 0.00 |
| ATOM | 2018 | HA   | ARG | X | 132 | 40.400 | 41.316 | 20.794 | 0.00 | 0.00 |
| ATOM | 2019 | CB   | ARG | X | 132 | 42.275 | 41.765 | 19.785 | 0.00 | 0.00 |
| ATOM | 2020 | HB2  | ARG | X | 132 | 41.787 | 41.731 | 18.811 | 0.00 | 0.00 |
| ATOM | 2021 | HB3  | ARG | X | 132 | 42.207 | 42.809 | 20.090 | 0.00 | 0.00 |
| ATOM | 2022 | CG   | ARG | X | 132 | 43.737 | 41.345 | 19.707 | 0.00 | 0.00 |
| ATOM | 2023 | HG2  | ARG | X | 132 | 44.150 | 41.387 | 20.715 | 0.00 | 0.00 |
| ATOM | 2024 | HG3  | ARG | X | 132 | 43.829 | 40.347 | 19.279 | 0.00 | 0.00 |
| ATOM | 2025 | CD   | ARG | X | 132 | 44.586 | 42.342 | 18.958 | 0.00 | 0.00 |
| ATOM | 2026 | HD2  | ARG | X | 132 | 45.546 | 41.877 | 18.733 | 0.00 | 0.00 |
| ATOM | 2027 | HD3  | ARG | X | 132 | 44.052 | 42.645 | 18.058 | 0.00 | 0.00 |
| ATOM | 2028 | NE   | ARG | X | 132 | 44.804 | 43.474 | 19.841 | 0.00 | 0.00 |
| ATOM | 2029 | HE   | ARG | X | 132 | 44.472 | 43.392 | 20.791 | 0.00 | 0.00 |
| ATOM | 2030 | CZ   | ARG | X | 132 | 45.357 | 44.623 | 19.500 | 0.00 | 0.00 |
| ATOM | 2031 | NH1  | ARG | X | 132 | 45.856 | 44.900 | 18.329 | 0.00 | 0.00 |
| ATOM | 2032 | HH11 | ARG | X | 132 | 45.785 | 44.217 | 17.588 | 0.00 | 0.00 |
| ATOM | 2033 | HH12 | ARG | X | 132 | 46.100 | 45.859 | 18.128 | 0.00 | 0.00 |
| ATOM | 2034 | NH2  | ARG | X | 132 | 45.431 | 45.544 | 20.461 | 0.00 | 0.00 |
| ATOM | 2035 | HH21 | ARG | X | 132 | 44.947 | 45.312 | 21.317 | 0.00 | 0.00 |
| ATOM | 2036 | HH22 | ARG | X | 132 | 45.676 | 46.503 | 20.260 | 0.00 | 0.00 |
| ATOM | 2037 | C    | ARG | X | 132 | 41.279 | 39.451 | 20.411 | 0.00 | 0.00 |
| ATOM | 2038 | O    | ARG | X | 132 | 40.326 | 38.983 | 19.850 | 0.00 | 0.00 |
| ATOM | 2039 | N    | PHE | X | 133 | 42.163 | 38.639 | 20.923 | 0.00 | 0.00 |
| ATOM | 2040 | H    | PHE | X | 133 | 42.799 | 38.908 | 21.659 | 0.00 | 0.00 |
| ATOM | 2041 | CA   | PHE | X | 133 | 42.144 | 37.203 | 20.542 | 0.00 | 0.00 |
| ATOM | 2042 | HA   | PHE | X | 133 | 41.918 | 37.092 | 19.482 | 0.00 | 0.00 |
| ATOM | 2043 | CB   | PHE | X | 133 | 43.484 | 36.557 | 20.815 | 0.00 | 0.00 |
| ATOM | 2044 | HB2  | PHE | X | 133 | 43.654 | 36.471 | 21.888 | 0.00 | 0.00 |
| ATOM | 2045 | HB3  | PHE | X | 133 | 43.538 | 35.577 | 20.340 | 0.00 | 0.00 |
| ATOM | 2046 | CG   | PHE | X | 133 | 44.686 | 37.344 | 20.297 | 0.00 | 0.00 |
| ATOM | 2047 | CD1  | PHE | X | 133 | 45.215 | 38.378 | 21.102 | 0.00 | 0.00 |
| ATOM | 2048 | HD1  | PHE | X | 133 | 44.908 | 38.444 | 22.135 | 0.00 | 0.00 |
| ATOM | 2049 | CE1  | PHE | X | 133 | 46.247 | 39.197 | 20.609 | 0.00 | 0.00 |
| ATOM | 2050 | HE1  | PHE | X | 133 | 46.561 | 39.928 | 21.339 | 0.00 | 0.00 |
| ATOM | 2051 | CZ   | PHE | X | 133 | 46.785 | 38.941 | 19.371 | 0.00 | 0.00 |
| ATOM | 2052 | HZ   | PHE | X | 133 | 47.698 | 39.459 | 19.119 | 0.00 | 0.00 |
| ATOM | 2053 | CE2  | PHE | X | 133 | 46.260 | 37.976 | 18.511 | 0.00 | 0.00 |
| ATOM | 2054 | HE2  | PHE | X | 133 | 46.658 | 37.658 | 17.558 | 0.00 | 0.00 |
| ATOM | 2055 | CD2  | PHE | X | 133 | 45.166 | 37.217 | 18.960 | 0.00 | 0.00 |

|      |      |      |     |   |     |        |        |        |      |      |
|------|------|------|-----|---|-----|--------|--------|--------|------|------|
| ATOM | 2056 | HD2  | PHE | X | 133 | 44.812 | 36.460 | 18.275 | 0.00 | 0.00 |
| ATOM | 2057 | C    | PHE | X | 133 | 41.015 | 36.483 | 21.313 | 0.00 | 0.00 |
| ATOM | 2058 | O    | PHE | X | 133 | 40.450 | 35.544 | 20.811 | 0.00 | 0.00 |
| ATOM | 2059 | N    | LEU | X | 134 | 40.790 | 36.850 | 22.545 | 0.00 | 0.00 |
| ATOM | 2060 | H    | LEU | X | 134 | 41.306 | 37.644 | 22.897 | 0.00 | 0.00 |
| ATOM | 2061 | CA   | LEU | X | 134 | 39.699 | 36.270 | 23.431 | 0.00 | 0.00 |
| ATOM | 2062 | HA   | LEU | X | 134 | 39.825 | 35.188 | 23.419 | 0.00 | 0.00 |
| ATOM | 2063 | CB   | LEU | X | 134 | 39.978 | 36.828 | 24.852 | 0.00 | 0.00 |
| ATOM | 2064 | HB2  | LEU | X | 134 | 41.025 | 36.627 | 25.076 | 0.00 | 0.00 |
| ATOM | 2065 | HB3  | LEU | X | 134 | 39.854 | 37.910 | 24.893 | 0.00 | 0.00 |
| ATOM | 2066 | CG   | LEU | X | 134 | 39.091 | 36.122 | 25.868 | 0.00 | 0.00 |
| ATOM | 2067 | HG   | LEU | X | 134 | 38.040 | 36.152 | 25.583 | 0.00 | 0.00 |
| ATOM | 2068 | CD1  | LEU | X | 134 | 39.419 | 34.579 | 25.990 | 0.00 | 0.00 |
| ATOM | 2069 | HD11 | LEU | X | 134 | 38.789 | 34.161 | 26.775 | 0.00 | 0.00 |
| ATOM | 2070 | HD12 | LEU | X | 134 | 40.448 | 34.310 | 26.232 | 0.00 | 0.00 |
| ATOM | 2071 | HD13 | LEU | X | 134 | 39.168 | 34.042 | 25.075 | 0.00 | 0.00 |
| ATOM | 2072 | CD2  | LEU | X | 134 | 39.336 | 36.794 | 27.197 | 0.00 | 0.00 |
| ATOM | 2073 | HD21 | LEU | X | 134 | 38.471 | 36.504 | 27.792 | 0.00 | 0.00 |
| ATOM | 2074 | HD22 | LEU | X | 134 | 40.171 | 36.450 | 27.808 | 0.00 | 0.00 |
| ATOM | 2075 | HD23 | LEU | X | 134 | 39.364 | 37.877 | 27.072 | 0.00 | 0.00 |
| ATOM | 2076 | C    | LEU | X | 134 | 38.255 | 36.518 | 22.922 | 0.00 | 0.00 |
| ATOM | 2077 | O    | LEU | X | 134 | 37.451 | 35.634 | 22.803 | 0.00 | 0.00 |
| ATOM | 2078 | N    | VAL | X | 135 | 38.079 | 37.730 | 22.445 | 0.00 | 0.00 |
| ATOM | 2079 | H    | VAL | X | 135 | 38.793 | 38.411 | 22.659 | 0.00 | 0.00 |
| ATOM | 2080 | CA   | VAL | X | 135 | 36.888 | 38.285 | 21.680 | 0.00 | 0.00 |
| ATOM | 2081 | HA   | VAL | X | 135 | 36.014 | 38.070 | 22.295 | 0.00 | 0.00 |
| ATOM | 2082 | CB   | VAL | X | 135 | 37.031 | 39.787 | 21.548 | 0.00 | 0.00 |
| ATOM | 2083 | HB   | VAL | X | 135 | 37.947 | 40.038 | 21.014 | 0.00 | 0.00 |
| ATOM | 2084 | CG1  | VAL | X | 135 | 35.879 | 40.316 | 20.745 | 0.00 | 0.00 |
| ATOM | 2085 | HG11 | VAL | X | 135 | 35.976 | 41.391 | 20.591 | 0.00 | 0.00 |
| ATOM | 2086 | HG12 | VAL | X | 135 | 35.741 | 39.909 | 19.744 | 0.00 | 0.00 |
| ATOM | 2087 | HG13 | VAL | X | 135 | 34.966 | 40.120 | 21.307 | 0.00 | 0.00 |
| ATOM | 2088 | CG2  | VAL | X | 135 | 37.091 | 40.509 | 22.924 | 0.00 | 0.00 |
| ATOM | 2089 | HG21 | VAL | X | 135 | 37.335 | 41.542 | 22.677 | 0.00 | 0.00 |
| ATOM | 2090 | HG22 | VAL | X | 135 | 37.585 | 40.046 | 23.778 | 0.00 | 0.00 |
| ATOM | 2091 | HG23 | VAL | X | 135 | 36.073 | 40.680 | 23.274 | 0.00 | 0.00 |
| ATOM | 2092 | C    | VAL | X | 135 | 36.771 | 37.493 | 20.289 | 0.00 | 0.00 |
| ATOM | 2093 | O    | VAL | X | 135 | 35.648 | 37.108 | 19.934 | 0.00 | 0.00 |
| ATOM | 2094 | N    | GLN | X | 136 | 37.888 | 37.352 | 19.511 | 0.00 | 0.00 |
| ATOM | 2095 | H    | GLN | X | 136 | 38.714 | 37.898 | 19.710 | 0.00 | 0.00 |
| ATOM | 2096 | CA   | GLN | X | 136 | 37.826 | 36.736 | 18.217 | 0.00 | 0.00 |
| ATOM | 2097 | HA   | GLN | X | 136 | 37.119 | 37.251 | 17.567 | 0.00 | 0.00 |
| ATOM | 2098 | CB   | GLN | X | 136 | 39.138 | 36.967 | 17.515 | 0.00 | 0.00 |
| ATOM | 2099 | HB2  | GLN | X | 136 | 39.501 | 37.980 | 17.691 | 0.00 | 0.00 |
| ATOM | 2100 | HB3  | GLN | X | 136 | 39.847 | 36.302 | 18.008 | 0.00 | 0.00 |
| ATOM | 2101 | CG   | GLN | X | 136 | 39.075 | 36.568 | 16.015 | 0.00 | 0.00 |
| ATOM | 2102 | HG2  | GLN | X | 136 | 38.036 | 36.473 | 15.700 | 0.00 | 0.00 |
| ATOM | 2103 | HG3  | GLN | X | 136 | 39.513 | 37.302 | 15.338 | 0.00 | 0.00 |
| ATOM | 2104 | CD   | GLN | X | 136 | 39.794 | 35.282 | 15.748 | 0.00 | 0.00 |
| ATOM | 2105 | OE1  | GLN | X | 136 | 41.015 | 35.189 | 15.797 | 0.00 | 0.00 |
| ATOM | 2106 | NE2  | GLN | X | 136 | 39.028 | 34.265 | 15.406 | 0.00 | 0.00 |
| ATOM | 2107 | HE21 | GLN | X | 136 | 39.411 | 33.356 | 15.189 | 0.00 | 0.00 |
| ATOM | 2108 | HE22 | GLN | X | 136 | 38.041 | 34.448 | 15.520 | 0.00 | 0.00 |
| ATOM | 2109 | C    | GLN | X | 136 | 37.448 | 35.265 | 18.302 | 0.00 | 0.00 |
| ATOM | 2110 | O    | GLN | X | 136 | 36.853 | 34.847 | 17.350 | 0.00 | 0.00 |
| ATOM | 2111 | N    | ALA | X | 137 | 37.783 | 34.553 | 19.413 | 0.00 | 0.00 |
| ATOM | 2112 | H    | ALA | X | 137 | 38.126 | 35.054 | 20.220 | 0.00 | 0.00 |
| ATOM | 2113 | CA   | ALA | X | 137 | 37.458 | 33.186 | 19.629 | 0.00 | 0.00 |
| ATOM | 2114 | HA   | ALA | X | 137 | 37.299 | 32.788 | 18.626 | 0.00 | 0.00 |
| ATOM | 2115 | CB   | ALA | X | 137 | 38.693 | 32.453 | 20.195 | 0.00 | 0.00 |
| ATOM | 2116 | HB1  | ALA | X | 137 | 39.482 | 32.491 | 19.445 | 0.00 | 0.00 |
| ATOM | 2117 | HB2  | ALA | X | 137 | 38.273 | 31.458 | 20.342 | 0.00 | 0.00 |
| ATOM | 2118 | HB3  | ALA | X | 137 | 39.046 | 32.859 | 21.143 | 0.00 | 0.00 |
| ATOM | 2119 | C    | ALA | X | 137 | 36.170 | 32.899 | 20.430 | 0.00 | 0.00 |
| ATOM | 2120 | O    | ALA | X | 137 | 35.289 | 32.101 | 20.032 | 0.00 | 0.00 |
| ATOM | 2121 | N    | GLU | X | 138 | 35.969 | 33.630 | 21.533 | 0.00 | 0.00 |
| ATOM | 2122 | H    | GLU | X | 138 | 36.695 | 34.279 | 21.803 | 0.00 | 0.00 |

|      |      |      |     |   |     |        |        |        |      |      |
|------|------|------|-----|---|-----|--------|--------|--------|------|------|
| ATOM | 2123 | CA   | GLU | X | 138 | 34.879 | 33.282 | 22.540 | 0.00 | 0.00 |
| ATOM | 2124 | HA   | GLU | X | 138 | 34.599 | 32.255 | 22.304 | 0.00 | 0.00 |
| ATOM | 2125 | CB   | GLU | X | 138 | 35.397 | 33.208 | 24.012 | 0.00 | 0.00 |
| ATOM | 2126 | HB2  | GLU | X | 138 | 35.847 | 34.180 | 24.209 | 0.00 | 0.00 |
| ATOM | 2127 | HB3  | GLU | X | 138 | 34.579 | 33.072 | 24.720 | 0.00 | 0.00 |
| ATOM | 2128 | CG   | GLU | X | 138 | 36.451 | 32.101 | 24.226 | 0.00 | 0.00 |
| ATOM | 2129 | HG2  | GLU | X | 138 | 37.397 | 32.425 | 23.791 | 0.00 | 0.00 |
| ATOM | 2130 | HG3  | GLU | X | 138 | 36.491 | 32.050 | 25.314 | 0.00 | 0.00 |
| ATOM | 2131 | CD   | GLU | X | 138 | 36.023 | 30.705 | 23.734 | 0.00 | 0.00 |
| ATOM | 2132 | OE1  | GLU | X | 138 | 35.071 | 30.085 | 24.283 | 0.00 | 0.00 |
| ATOM | 2133 | OE2  | GLU | X | 138 | 36.567 | 30.240 | 22.703 | 0.00 | 0.00 |
| ATOM | 2134 | C    | GLU | X | 138 | 33.681 | 34.198 | 22.375 | 0.00 | 0.00 |
| ATOM | 2135 | O    | GLU | X | 138 | 32.616 | 33.812 | 22.776 | 0.00 | 0.00 |
| ATOM | 2136 | N    | ARG | X | 139 | 33.814 | 35.383 | 21.659 | 0.00 | 0.00 |
| ATOM | 2137 | H    | ARG | X | 139 | 34.733 | 35.513 | 21.261 | 0.00 | 0.00 |
| ATOM | 2138 | CA   | ARG | X | 139 | 32.744 | 36.329 | 21.151 | 0.00 | 0.00 |
| ATOM | 2139 | HA   | ARG | X | 139 | 33.161 | 37.166 | 20.590 | 0.00 | 0.00 |
| ATOM | 2140 | CB   | ARG | X | 139 | 31.807 | 35.527 | 20.252 | 0.00 | 0.00 |
| ATOM | 2141 | HB2  | ARG | X | 139 | 31.340 | 34.692 | 20.775 | 0.00 | 0.00 |
| ATOM | 2142 | HB3  | ARG | X | 139 | 30.964 | 36.160 | 19.977 | 0.00 | 0.00 |
| ATOM | 2143 | CG   | ARG | X | 139 | 32.592 | 35.111 | 19.021 | 0.00 | 0.00 |
| ATOM | 2144 | HG2  | ARG | X | 139 | 33.224 | 35.911 | 18.635 | 0.00 | 0.00 |
| ATOM | 2145 | HG3  | ARG | X | 139 | 33.287 | 34.303 | 19.251 | 0.00 | 0.00 |
| ATOM | 2146 | CD   | ARG | X | 139 | 31.739 | 34.576 | 17.820 | 0.00 | 0.00 |
| ATOM | 2147 | HD2  | ARG | X | 139 | 32.357 | 34.427 | 16.935 | 0.00 | 0.00 |
| ATOM | 2148 | HD3  | ARG | X | 139 | 31.273 | 33.623 | 18.074 | 0.00 | 0.00 |
| ATOM | 2149 | NE   | ARG | X | 139 | 30.591 | 35.459 | 17.487 | 0.00 | 0.00 |
| ATOM | 2150 | HE   | ARG | X | 139 | 29.704 | 35.133 | 17.844 | 0.00 | 0.00 |
| ATOM | 2151 | CZ   | ARG | X | 139 | 30.532 | 36.542 | 16.700 | 0.00 | 0.00 |
| ATOM | 2152 | NH1  | ARG | X | 139 | 31.553 | 36.826 | 15.929 | 0.00 | 0.00 |
| ATOM | 2153 | HH11 | ARG | X | 139 | 32.311 | 36.160 | 15.876 | 0.00 | 0.00 |
| ATOM | 2154 | HH12 | ARG | X | 139 | 31.493 | 37.534 | 15.212 | 0.00 | 0.00 |
| ATOM | 2155 | NH2  | ARG | X | 139 | 29.488 | 37.378 | 16.731 | 0.00 | 0.00 |
| ATOM | 2156 | HH21 | ARG | X | 139 | 28.652 | 37.141 | 17.246 | 0.00 | 0.00 |
| ATOM | 2157 | HH22 | ARG | X | 139 | 29.501 | 38.182 | 16.121 | 0.00 | 0.00 |
| ATOM | 2158 | C    | ARG | X | 139 | 31.978 | 36.968 | 22.357 | 0.00 | 0.00 |
| ATOM | 2159 | O    | ARG | X | 139 | 31.172 | 37.870 | 22.053 | 0.00 | 0.00 |
| ATOM | 2160 | N    | THR | X | 140 | 32.259 | 36.576 | 23.605 | 0.00 | 0.00 |
| ATOM | 2161 | H    | THR | X | 140 | 32.838 | 35.758 | 23.730 | 0.00 | 0.00 |
| ATOM | 2162 | CA   | THR | X | 140 | 31.874 | 37.230 | 24.840 | 0.00 | 0.00 |
| ATOM | 2163 | HA   | THR | X | 140 | 30.811 | 37.471 | 24.873 | 0.00 | 0.00 |
| ATOM | 2164 | CB   | THR | X | 140 | 32.268 | 36.361 | 26.057 | 0.00 | 0.00 |
| ATOM | 2165 | HB   | THR | X | 140 | 32.112 | 36.982 | 26.940 | 0.00 | 0.00 |
| ATOM | 2166 | CG2  | THR | X | 140 | 31.480 | 35.067 | 26.116 | 0.00 | 0.00 |
| ATOM | 2167 | HG21 | THR | X | 140 | 30.428 | 35.207 | 25.866 | 0.00 | 0.00 |
| ATOM | 2168 | HG22 | THR | X | 140 | 31.679 | 34.549 | 27.055 | 0.00 | 0.00 |
| ATOM | 2169 | HG23 | THR | X | 140 | 31.967 | 34.455 | 25.358 | 0.00 | 0.00 |
| ATOM | 2170 | OG1  | THR | X | 140 | 33.599 | 36.071 | 25.936 | 0.00 | 0.00 |
| ATOM | 2171 | HG1  | THR | X | 140 | 34.043 | 36.809 | 25.512 | 0.00 | 0.00 |
| ATOM | 2172 | C    | THR | X | 140 | 32.597 | 38.576 | 24.853 | 0.00 | 0.00 |
| ATOM | 2173 | O    | THR | X | 140 | 33.837 | 38.515 | 24.634 | 0.00 | 0.00 |
| ATOM | 2174 | N    | VAL | X | 141 | 31.859 | 39.651 | 25.118 | 0.00 | 0.00 |
| ATOM | 2175 | H    | VAL | X | 141 | 31.024 | 39.465 | 25.655 | 0.00 | 0.00 |
| ATOM | 2176 | CA   | VAL | X | 141 | 32.243 | 41.026 | 25.025 | 0.00 | 0.00 |
| ATOM | 2177 | HA   | VAL | X | 141 | 32.762 | 41.172 | 24.077 | 0.00 | 0.00 |
| ATOM | 2178 | CB   | VAL | X | 141 | 31.067 | 41.998 | 24.894 | 0.00 | 0.00 |
| ATOM | 2179 | HB   | VAL | X | 141 | 30.352 | 41.698 | 25.660 | 0.00 | 0.00 |
| ATOM | 2180 | CG1  | VAL | X | 141 | 31.302 | 43.481 | 25.096 | 0.00 | 0.00 |
| ATOM | 2181 | HG11 | VAL | X | 141 | 31.925 | 43.985 | 24.358 | 0.00 | 0.00 |
| ATOM | 2182 | HG12 | VAL | X | 141 | 30.387 | 44.072 | 25.145 | 0.00 | 0.00 |
| ATOM | 2183 | HG13 | VAL | X | 141 | 31.693 | 43.732 | 26.082 | 0.00 | 0.00 |
| ATOM | 2184 | CG2  | VAL | X | 141 | 30.419 | 41.735 | 23.504 | 0.00 | 0.00 |
| ATOM | 2185 | HG21 | VAL | X | 141 | 29.396 | 42.081 | 23.360 | 0.00 | 0.00 |
| ATOM | 2186 | HG22 | VAL | X | 141 | 30.346 | 40.649 | 23.437 | 0.00 | 0.00 |
| ATOM | 2187 | HG23 | VAL | X | 141 | 31.131 | 41.919 | 22.699 | 0.00 | 0.00 |
| ATOM | 2188 | C    | VAL | X | 141 | 33.219 | 41.400 | 26.208 | 0.00 | 0.00 |
| ATOM | 2189 | O    | VAL | X | 141 | 32.952 | 40.959 | 27.298 | 0.00 | 0.00 |



|      |      |      |     |   |     |        |        |        |      |      |
|------|------|------|-----|---|-----|--------|--------|--------|------|------|
| ATOM | 2190 | N    | LEU | X | 142 | 34.138 | 42.314 | 25.966 | 0.00 | 0.00 |
| ATOM | 2191 | H    | LEU | X | 142 | 34.369 | 42.637 | 25.037 | 0.00 | 0.00 |
| ATOM | 2192 | CA   | LEU | X | 142 | 35.167 | 42.624 | 26.982 | 0.00 | 0.00 |
| ATOM | 2193 | HA   | LEU | X | 142 | 34.825 | 42.178 | 27.916 | 0.00 | 0.00 |
| ATOM | 2194 | CB   | LEU | X | 142 | 36.458 | 41.842 | 26.634 | 0.00 | 0.00 |
| ATOM | 2195 | HB2  | LEU | X | 142 | 36.142 | 40.836 | 26.357 | 0.00 | 0.00 |
| ATOM | 2196 | HB3  | LEU | X | 142 | 36.958 | 42.229 | 25.746 | 0.00 | 0.00 |
| ATOM | 2197 | CG   | LEU | X | 142 | 37.556 | 41.787 | 27.770 | 0.00 | 0.00 |
| ATOM | 2198 | HG   | LEU | X | 142 | 37.065 | 41.853 | 28.741 | 0.00 | 0.00 |
| ATOM | 2199 | CD1  | LEU | X | 142 | 38.351 | 40.447 | 27.684 | 0.00 | 0.00 |
| ATOM | 2200 | HD11 | LEU | X | 142 | 38.696 | 40.318 | 26.658 | 0.00 | 0.00 |
| ATOM | 2201 | HD12 | LEU | X | 142 | 37.659 | 39.623 | 27.860 | 0.00 | 0.00 |
| ATOM | 2202 | HD13 | LEU | X | 142 | 39.203 | 40.453 | 28.364 | 0.00 | 0.00 |
| ATOM | 2203 | CD2  | LEU | X | 142 | 38.484 | 42.915 | 27.723 | 0.00 | 0.00 |
| ATOM | 2204 | HD21 | LEU | X | 142 | 38.934 | 43.022 | 26.736 | 0.00 | 0.00 |
| ATOM | 2205 | HD22 | LEU | X | 142 | 37.975 | 43.859 | 27.917 | 0.00 | 0.00 |
| ATOM | 2206 | HD23 | LEU | X | 142 | 39.256 | 42.844 | 28.490 | 0.00 | 0.00 |
| ATOM | 2207 | C    | LEU | X | 142 | 35.430 | 44.087 | 27.284 | 0.00 | 0.00 |
| ATOM | 2208 | O    | LEU | X | 142 | 35.687 | 44.842 | 26.320 | 0.00 | 0.00 |
| ATOM | 2209 | N    | VAL | X | 143 | 35.454 | 44.321 | 28.548 | 0.00 | 0.00 |
| ATOM | 2210 | H    | VAL | X | 143 | 35.201 | 43.555 | 29.157 | 0.00 | 0.00 |
| ATOM | 2211 | CA   | VAL | X | 143 | 35.546 | 45.684 | 29.143 | 0.00 | 0.00 |
| ATOM | 2212 | HA   | VAL | X | 143 | 35.608 | 46.419 | 28.340 | 0.00 | 0.00 |
| ATOM | 2213 | CB   | VAL | X | 143 | 34.215 | 46.015 | 29.928 | 0.00 | 0.00 |
| ATOM | 2214 | HB   | VAL | X | 143 | 33.954 | 45.317 | 30.723 | 0.00 | 0.00 |
| ATOM | 2215 | CG1  | VAL | X | 143 | 34.164 | 47.416 | 30.438 | 0.00 | 0.00 |
| ATOM | 2216 | HG11 | VAL | X | 143 | 34.343 | 48.136 | 29.641 | 0.00 | 0.00 |
| ATOM | 2217 | HG12 | VAL | X | 143 | 33.169 | 47.587 | 30.848 | 0.00 | 0.00 |
| ATOM | 2218 | HG13 | VAL | X | 143 | 34.908 | 47.502 | 31.231 | 0.00 | 0.00 |
| ATOM | 2219 | CG2  | VAL | X | 143 | 32.985 | 45.851 | 28.992 | 0.00 | 0.00 |
| ATOM | 2220 | HG21 | VAL | X | 143 | 32.899 | 44.787 | 28.773 | 0.00 | 0.00 |
| ATOM | 2221 | HG22 | VAL | X | 143 | 33.131 | 46.339 | 28.029 | 0.00 | 0.00 |
| ATOM | 2222 | HG23 | VAL | X | 143 | 32.004 | 46.142 | 29.368 | 0.00 | 0.00 |
| ATOM | 2223 | C    | VAL | X | 143 | 36.854 | 45.794 | 29.971 | 0.00 | 0.00 |
| ATOM | 2224 | O    | VAL | X | 143 | 37.256 | 44.819 | 30.548 | 0.00 | 0.00 |
| ATOM | 2225 | N    | SER | X | 144 | 37.378 | 47.052 | 30.076 | 0.00 | 0.00 |
| ATOM | 2226 | H    | SER | X | 144 | 37.081 | 47.811 | 29.479 | 0.00 | 0.00 |
| ATOM | 2227 | CA   | SER | X | 144 | 38.396 | 47.491 | 31.068 | 0.00 | 0.00 |
| ATOM | 2228 | HA   | SER | X | 144 | 38.264 | 46.851 | 31.940 | 0.00 | 0.00 |
| ATOM | 2229 | CB   | SER | X | 144 | 39.818 | 47.181 | 30.489 | 0.00 | 0.00 |
| ATOM | 2230 | HB2  | SER | X | 144 | 39.970 | 46.105 | 30.408 | 0.00 | 0.00 |
| ATOM | 2231 | HB3  | SER | X | 144 | 40.006 | 47.429 | 29.444 | 0.00 | 0.00 |
| ATOM | 2232 | OG   | SER | X | 144 | 40.867 | 47.577 | 31.324 | 0.00 | 0.00 |
| ATOM | 2233 | HG   | SER | X | 144 | 41.624 | 47.172 | 30.894 | 0.00 | 0.00 |
| ATOM | 2234 | C    | SER | X | 144 | 38.332 | 49.017 | 31.457 | 0.00 | 0.00 |
| ATOM | 2235 | O    | SER | X | 144 | 38.151 | 49.871 | 30.584 | 0.00 | 0.00 |
| ATOM | 2236 | N    | MET | X | 145 | 38.642 | 49.397 | 32.676 | 0.00 | 0.00 |
| ATOM | 2237 | H    | MET | X | 145 | 38.899 | 48.660 | 33.317 | 0.00 | 0.00 |
| ATOM | 2238 | CA   | MET | X | 145 | 38.524 | 50.706 | 33.389 | 0.00 | 0.00 |
| ATOM | 2239 | HA   | MET | X | 145 | 38.169 | 51.495 | 32.726 | 0.00 | 0.00 |
| ATOM | 2240 | CB   | MET | X | 145 | 37.512 | 50.554 | 34.506 | 0.00 | 0.00 |
| ATOM | 2241 | HB2  | MET | X | 145 | 37.667 | 51.374 | 35.208 | 0.00 | 0.00 |
| ATOM | 2242 | HB3  | MET | X | 145 | 36.528 | 50.529 | 34.038 | 0.00 | 0.00 |
| ATOM | 2243 | CG   | MET | X | 145 | 37.755 | 49.155 | 35.140 | 0.00 | 0.00 |
| ATOM | 2244 | HG2  | MET | X | 145 | 37.427 | 48.304 | 34.544 | 0.00 | 0.00 |
| ATOM | 2245 | HG3  | MET | X | 145 | 38.820 | 49.025 | 35.330 | 0.00 | 0.00 |
| ATOM | 2246 | SD   | MET | X | 145 | 36.826 | 48.853 | 36.651 | 0.00 | 0.00 |
| ATOM | 2247 | CE   | MET | X | 145 | 35.337 | 48.065 | 36.121 | 0.00 | 0.00 |
| ATOM | 2248 | HE1  | MET | X | 145 | 35.547 | 46.997 | 36.182 | 0.00 | 0.00 |
| ATOM | 2249 | HE2  | MET | X | 145 | 34.520 | 48.310 | 36.800 | 0.00 | 0.00 |
| ATOM | 2250 | HE3  | MET | X | 145 | 35.103 | 48.320 | 35.088 | 0.00 | 0.00 |
| ATOM | 2251 | C    | MET | X | 145 | 39.901 | 51.219 | 33.786 | 0.00 | 0.00 |
| ATOM | 2252 | O    | MET | X | 145 | 40.695 | 50.419 | 34.186 | 0.00 | 0.00 |
| ATOM | 2253 | N    | ASN | X | 146 | 40.046 | 52.537 | 33.865 | 0.00 | 0.00 |
| ATOM | 2254 | H    | ASN | X | 146 | 39.254 | 53.089 | 33.568 | 0.00 | 0.00 |
| ATOM | 2255 | CA   | ASN | X | 146 | 41.207 | 53.180 | 34.602 | 0.00 | 0.00 |
| ATOM | 2256 | HA   | ASN | X | 146 | 41.964 | 52.417 | 34.784 | 0.00 | 0.00 |

|      |      |      |     |   |     |        |        |        |      |      |
|------|------|------|-----|---|-----|--------|--------|--------|------|------|
| ATOM | 2257 | CB   | ASN | X | 146 | 41.866 | 54.267 | 33.742 | 0.00 | 0.00 |
| ATOM | 2258 | HB2  | ASN | X | 146 | 41.697 | 54.052 | 32.687 | 0.00 | 0.00 |
| ATOM | 2259 | HB3  | ASN | X | 146 | 41.299 | 55.185 | 33.899 | 0.00 | 0.00 |
| ATOM | 2260 | CG   | ASN | X | 146 | 43.378 | 54.338 | 33.900 | 0.00 | 0.00 |
| ATOM | 2261 | OD1  | ASN | X | 146 | 44.107 | 53.348 | 33.981 | 0.00 | 0.00 |
| ATOM | 2262 | ND2  | ASN | X | 146 | 43.969 | 55.501 | 33.760 | 0.00 | 0.00 |
| ATOM | 2263 | HD21 | ASN | X | 146 | 44.971 | 55.620 | 33.741 | 0.00 | 0.00 |
| ATOM | 2264 | HD22 | ASN | X | 146 | 43.428 | 56.347 | 33.868 | 0.00 | 0.00 |
| ATOM | 2265 | C    | ASN | X | 146 | 40.688 | 53.672 | 36.002 | 0.00 | 0.00 |
| ATOM | 2266 | O    | ASN | X | 146 | 39.493 | 53.915 | 36.110 | 0.00 | 0.00 |
| ATOM | 2267 | N    | TYR | X | 147 | 41.525 | 53.709 | 37.065 | 0.00 | 0.00 |
| ATOM | 2268 | H    | TYR | X | 147 | 42.410 | 53.236 | 36.950 | 0.00 | 0.00 |
| ATOM | 2269 | CA   | TYR | X | 147 | 41.195 | 54.027 | 38.476 | 0.00 | 0.00 |
| ATOM | 2270 | HA   | TYR | X | 147 | 40.695 | 54.996 | 38.491 | 0.00 | 0.00 |
| ATOM | 2271 | CB   | TYR | X | 147 | 40.210 | 53.074 | 39.210 | 0.00 | 0.00 |
| ATOM | 2272 | HB2  | TYR | X | 147 | 40.129 | 53.453 | 40.229 | 0.00 | 0.00 |
| ATOM | 2273 | HB3  | TYR | X | 147 | 39.233 | 53.031 | 38.728 | 0.00 | 0.00 |
| ATOM | 2274 | CG   | TYR | X | 147 | 40.709 | 51.648 | 39.212 | 0.00 | 0.00 |
| ATOM | 2275 | CD1  | TYR | X | 147 | 40.290 | 50.808 | 38.257 | 0.00 | 0.00 |
| ATOM | 2276 | HD1  | TYR | X | 147 | 39.557 | 51.100 | 37.520 | 0.00 | 0.00 |
| ATOM | 2277 | CE1  | TYR | X | 147 | 40.693 | 49.452 | 38.212 | 0.00 | 0.00 |
| ATOM | 2278 | HE1  | TYR | X | 147 | 40.222 | 48.837 | 37.458 | 0.00 | 0.00 |
| ATOM | 2279 | CZ   | TYR | X | 147 | 41.711 | 48.996 | 39.045 | 0.00 | 0.00 |
| ATOM | 2280 | OH   | TYR | X | 147 | 42.015 | 47.688 | 38.938 | 0.00 | 0.00 |
| ATOM | 2281 | HH   | TYR | X | 147 | 42.766 | 47.452 | 39.488 | 0.00 | 0.00 |
| ATOM | 2282 | CE2  | TYR | X | 147 | 42.227 | 49.886 | 40.028 | 0.00 | 0.00 |
| ATOM | 2283 | HE2  | TYR | X | 147 | 42.969 | 49.536 | 40.730 | 0.00 | 0.00 |
| ATOM | 2284 | CD2  | TYR | X | 147 | 41.711 | 51.190 | 40.124 | 0.00 | 0.00 |
| ATOM | 2285 | HD2  | TYR | X | 147 | 42.021 | 51.875 | 40.900 | 0.00 | 0.00 |
| ATOM | 2286 | C    | TYR | X | 147 | 42.400 | 54.363 | 39.349 | 0.00 | 0.00 |
| ATOM | 2287 | O    | TYR | X | 147 | 43.563 | 53.974 | 39.091 | 0.00 | 0.00 |
| ATOM | 2288 | N    | ARG | X | 148 | 42.141 | 55.210 | 40.331 | 0.00 | 0.00 |
| ATOM | 2289 | H    | ARG | X | 148 | 41.176 | 55.389 | 40.571 | 0.00 | 0.00 |
| ATOM | 2290 | CA   | ARG | X | 148 | 43.265 | 55.880 | 41.107 | 0.00 | 0.00 |
| ATOM | 2291 | HA   | ARG | X | 148 | 44.056 | 56.285 | 40.475 | 0.00 | 0.00 |
| ATOM | 2292 | CB   | ARG | X | 148 | 42.635 | 57.188 | 41.662 | 0.00 | 0.00 |
| ATOM | 2293 | HB2  | ARG | X | 148 | 41.818 | 56.905 | 42.326 | 0.00 | 0.00 |
| ATOM | 2294 | HB3  | ARG | X | 148 | 43.467 | 57.630 | 42.210 | 0.00 | 0.00 |
| ATOM | 2295 | CG   | ARG | X | 148 | 42.113 | 58.144 | 40.511 | 0.00 | 0.00 |
| ATOM | 2296 | HG2  | ARG | X | 148 | 43.022 | 58.468 | 40.004 | 0.00 | 0.00 |
| ATOM | 2297 | HG3  | ARG | X | 148 | 41.428 | 57.593 | 39.867 | 0.00 | 0.00 |
| ATOM | 2298 | CD   | ARG | X | 148 | 41.410 | 59.297 | 41.109 | 0.00 | 0.00 |
| ATOM | 2299 | HD2  | ARG | X | 148 | 42.066 | 59.640 | 41.909 | 0.00 | 0.00 |
| ATOM | 2300 | HD3  | ARG | X | 148 | 41.206 | 60.059 | 40.357 | 0.00 | 0.00 |
| ATOM | 2301 | NE   | ARG | X | 148 | 40.114 | 58.898 | 41.660 | 0.00 | 0.00 |
| ATOM | 2302 | HE   | ARG | X | 148 | 39.698 | 58.003 | 41.446 | 0.00 | 0.00 |
| ATOM | 2303 | CZ   | ARG | X | 148 | 39.434 | 59.664 | 42.508 | 0.00 | 0.00 |
| ATOM | 2304 | NH1  | ARG | X | 148 | 39.785 | 60.835 | 42.990 | 0.00 | 0.00 |
| ATOM | 2305 | HH11 | ARG | X | 148 | 40.676 | 61.174 | 42.657 | 0.00 | 0.00 |
| ATOM | 2306 | HH12 | ARG | X | 148 | 39.179 | 61.347 | 43.615 | 0.00 | 0.00 |
| ATOM | 2307 | NH2  | ARG | X | 148 | 38.287 | 59.244 | 42.842 | 0.00 | 0.00 |
| ATOM | 2308 | HH21 | ARG | X | 148 | 38.017 | 58.358 | 42.439 | 0.00 | 0.00 |
| ATOM | 2309 | HH22 | ARG | X | 148 | 37.655 | 59.782 | 43.418 | 0.00 | 0.00 |
| ATOM | 2310 | C    | ARG | X | 148 | 43.833 | 54.928 | 42.138 | 0.00 | 0.00 |
| ATOM | 2311 | O    | ARG | X | 148 | 43.240 | 54.003 | 42.567 | 0.00 | 0.00 |
| ATOM | 2312 | N    | VAL | X | 149 | 45.056 | 55.111 | 42.489 | 0.00 | 0.00 |
| ATOM | 2313 | H    | VAL | X | 149 | 45.610 | 55.782 | 41.976 | 0.00 | 0.00 |
| ATOM | 2314 | CA   | VAL | X | 149 | 45.883 | 54.168 | 43.294 | 0.00 | 0.00 |
| ATOM | 2315 | HA   | VAL | X | 149 | 45.156 | 53.701 | 43.958 | 0.00 | 0.00 |
| ATOM | 2316 | CB   | VAL | X | 149 | 46.660 | 53.084 | 42.517 | 0.00 | 0.00 |
| ATOM | 2317 | HB   | VAL | X | 149 | 47.573 | 52.715 | 42.986 | 0.00 | 0.00 |
| ATOM | 2318 | CG1  | VAL | X | 149 | 45.805 | 51.904 | 42.113 | 0.00 | 0.00 |
| ATOM | 2319 | HG11 | VAL | X | 149 | 44.848 | 52.240 | 41.714 | 0.00 | 0.00 |
| ATOM | 2320 | HG12 | VAL | X | 149 | 46.263 | 51.247 | 41.374 | 0.00 | 0.00 |
| ATOM | 2321 | HG13 | VAL | X | 149 | 45.604 | 51.273 | 42.979 | 0.00 | 0.00 |
| ATOM | 2322 | CG2  | VAL | X | 149 | 47.201 | 53.681 | 41.199 | 0.00 | 0.00 |
| ATOM | 2323 | HG21 | VAL | X | 149 | 46.377 | 54.068 | 40.599 | 0.00 | 0.00 |

|      |      |      |     |   |     |        |        |        |      |      |
|------|------|------|-----|---|-----|--------|--------|--------|------|------|
| ATOM | 2324 | HG22 | VAL | X | 149 | 47.803 | 53.021 | 40.574 | 0.00 | 0.00 |
| ATOM | 2325 | HG23 | VAL | X | 149 | 47.794 | 54.562 | 41.442 | 0.00 | 0.00 |
| ATOM | 2326 | C    | VAL | X | 149 | 46.859 | 55.040 | 44.113 | 0.00 | 0.00 |
| ATOM | 2327 | O    | VAL | X | 149 | 47.163 | 56.169 | 43.797 | 0.00 | 0.00 |
| ATOM | 2328 | N    | GLY | X | 150 | 47.427 | 54.418 | 45.117 | 0.00 | 0.00 |
| ATOM | 2329 | H    | GLY | X | 150 | 47.123 | 53.485 | 45.353 | 0.00 | 0.00 |
| ATOM | 2330 | CA   | GLY | X | 150 | 48.388 | 55.148 | 45.963 | 0.00 | 0.00 |
| ATOM | 2331 | HA2  | GLY | X | 150 | 48.758 | 54.511 | 46.766 | 0.00 | 0.00 |
| ATOM | 2332 | HA3  | GLY | X | 150 | 49.221 | 55.520 | 45.365 | 0.00 | 0.00 |
| ATOM | 2333 | C    | GLY | X | 150 | 47.643 | 56.243 | 46.765 | 0.00 | 0.00 |
| ATOM | 2334 | O    | GLY | X | 150 | 46.458 | 56.072 | 47.086 | 0.00 | 0.00 |
| ATOM | 2335 | N    | ALA | X | 151 | 48.320 | 57.376 | 47.070 | 0.00 | 0.00 |
| ATOM | 2336 | H    | ALA | X | 151 | 49.270 | 57.505 | 46.753 | 0.00 | 0.00 |
| ATOM | 2337 | CA   | ALA | X | 151 | 47.605 | 58.442 | 47.875 | 0.00 | 0.00 |
| ATOM | 2338 | HA   | ALA | X | 151 | 47.106 | 58.069 | 48.770 | 0.00 | 0.00 |
| ATOM | 2339 | CB   | ALA | X | 151 | 48.720 | 59.481 | 48.224 | 0.00 | 0.00 |
| ATOM | 2340 | HB1  | ALA | X | 151 | 49.066 | 60.028 | 47.347 | 0.00 | 0.00 |
| ATOM | 2341 | HB2  | ALA | X | 151 | 49.476 | 58.965 | 48.816 | 0.00 | 0.00 |
| ATOM | 2342 | HB3  | ALA | X | 151 | 48.280 | 60.278 | 48.825 | 0.00 | 0.00 |
| ATOM | 2343 | C    | ALA | X | 151 | 46.397 | 58.967 | 47.087 | 0.00 | 0.00 |
| ATOM | 2344 | O    | ALA | X | 151 | 45.300 | 58.930 | 47.693 | 0.00 | 0.00 |
| ATOM | 2345 | N    | PHE | X | 152 | 46.533 | 59.232 | 45.789 | 0.00 | 0.00 |
| ATOM | 2346 | H    | PHE | X | 152 | 47.430 | 59.178 | 45.329 | 0.00 | 0.00 |
| ATOM | 2347 | CA   | PHE | X | 152 | 45.484 | 59.637 | 44.892 | 0.00 | 0.00 |
| ATOM | 2348 | HA   | PHE | X | 152 | 45.067 | 60.598 | 45.192 | 0.00 | 0.00 |
| ATOM | 2349 | CB   | PHE | X | 152 | 46.138 | 59.849 | 43.456 | 0.00 | 0.00 |
| ATOM | 2350 | HB2  | PHE | X | 152 | 47.078 | 60.400 | 43.493 | 0.00 | 0.00 |
| ATOM | 2351 | HB3  | PHE | X | 152 | 46.450 | 58.893 | 43.034 | 0.00 | 0.00 |
| ATOM | 2352 | CG   | PHE | X | 152 | 45.219 | 60.501 | 42.453 | 0.00 | 0.00 |
| ATOM | 2353 | CD1  | PHE | X | 152 | 45.409 | 60.117 | 41.086 | 0.00 | 0.00 |
| ATOM | 2354 | HD1  | PHE | X | 152 | 46.109 | 59.320 | 40.887 | 0.00 | 0.00 |
| ATOM | 2355 | CE1  | PHE | X | 152 | 44.609 | 60.750 | 40.127 | 0.00 | 0.00 |
| ATOM | 2356 | HE1  | PHE | X | 152 | 44.810 | 60.526 | 39.089 | 0.00 | 0.00 |
| ATOM | 2357 | CZ   | PHE | X | 152 | 43.770 | 61.778 | 40.543 | 0.00 | 0.00 |
| ATOM | 2358 | HZ   | PHE | X | 152 | 43.291 | 62.373 | 39.780 | 0.00 | 0.00 |
| ATOM | 2359 | CE2  | PHE | X | 152 | 43.725 | 62.279 | 41.861 | 0.00 | 0.00 |
| ATOM | 2360 | HE2  | PHE | X | 152 | 43.226 | 63.234 | 41.931 | 0.00 | 0.00 |
| ATOM | 2361 | CD2  | PHE | X | 152 | 44.559 | 61.668 | 42.797 | 0.00 | 0.00 |
| ATOM | 2362 | HD2  | PHE | X | 152 | 44.677 | 62.121 | 43.771 | 0.00 | 0.00 |
| ATOM | 2363 | C    | PHE | X | 152 | 44.238 | 58.700 | 44.816 | 0.00 | 0.00 |
| ATOM | 2364 | O    | PHE | X | 152 | 43.129 | 59.084 | 44.410 | 0.00 | 0.00 |
| ATOM | 2365 | N    | GLY | X | 153 | 44.382 | 57.425 | 45.335 | 0.00 | 0.00 |
| ATOM | 2366 | H    | GLY | X | 153 | 45.278 | 57.026 | 45.576 | 0.00 | 0.00 |
| ATOM | 2367 | CA   | GLY | X | 153 | 43.293 | 56.455 | 45.471 | 0.00 | 0.00 |
| ATOM | 2368 | HA2  | GLY | X | 153 | 42.359 | 56.764 | 45.000 | 0.00 | 0.00 |
| ATOM | 2369 | HA3  | GLY | X | 153 | 43.523 | 55.471 | 45.063 | 0.00 | 0.00 |
| ATOM | 2370 | C    | GLY | X | 153 | 42.797 | 56.079 | 46.910 | 0.00 | 0.00 |
| ATOM | 2371 | O    | GLY | X | 153 | 41.783 | 55.399 | 46.988 | 0.00 | 0.00 |
| ATOM | 2372 | N    | PHE | X | 154 | 43.571 | 56.363 | 47.880 | 0.00 | 0.00 |
| ATOM | 2373 | H    | PHE | X | 154 | 44.489 | 56.716 | 47.649 | 0.00 | 0.00 |
| ATOM | 2374 | CA   | PHE | X | 154 | 43.499 | 55.558 | 49.101 | 0.00 | 0.00 |
| ATOM | 2375 | HA   | PHE | X | 154 | 42.458 | 55.316 | 49.317 | 0.00 | 0.00 |
| ATOM | 2376 | CB   | PHE | X | 154 | 44.265 | 54.233 | 48.963 | 0.00 | 0.00 |
| ATOM | 2377 | HB2  | PHE | X | 154 | 45.287 | 54.308 | 48.591 | 0.00 | 0.00 |
| ATOM | 2378 | HB3  | PHE | X | 154 | 44.252 | 53.666 | 49.894 | 0.00 | 0.00 |
| ATOM | 2379 | CG   | PHE | X | 154 | 43.553 | 53.216 | 48.072 | 0.00 | 0.00 |
| ATOM | 2380 | CD1  | PHE | X | 154 | 44.125 | 52.845 | 46.780 | 0.00 | 0.00 |
| ATOM | 2381 | HD1  | PHE | X | 154 | 45.081 | 53.200 | 46.425 | 0.00 | 0.00 |
| ATOM | 2382 | CE1  | PHE | X | 154 | 43.386 | 52.035 | 45.944 | 0.00 | 0.00 |
| ATOM | 2383 | HE1  | PHE | X | 154 | 43.711 | 51.631 | 44.997 | 0.00 | 0.00 |
| ATOM | 2384 | CZ   | PHE | X | 154 | 42.071 | 51.658 | 46.291 | 0.00 | 0.00 |
| ATOM | 2385 | HZ   | PHE | X | 154 | 41.537 | 50.939 | 45.687 | 0.00 | 0.00 |
| ATOM | 2386 | CE2  | PHE | X | 154 | 41.538 | 52.000 | 47.538 | 0.00 | 0.00 |
| ATOM | 2387 | HE2  | PHE | X | 154 | 40.598 | 51.543 | 47.812 | 0.00 | 0.00 |
| ATOM | 2388 | CD2  | PHE | X | 154 | 42.328 | 52.692 | 48.520 | 0.00 | 0.00 |
| ATOM | 2389 | HD2  | PHE | X | 154 | 41.933 | 52.950 | 49.491 | 0.00 | 0.00 |
| ATOM | 2390 | C    | PHE | X | 154 | 43.906 | 56.287 | 50.418 | 0.00 | 0.00 |

|      |      |      |     |   |     |        |        |        |      |      |
|------|------|------|-----|---|-----|--------|--------|--------|------|------|
| ATOM | 2391 | O    | PHE | X | 154 | 43.963 | 55.684 | 51.514 | 0.00 | 0.00 |
| ATOM | 2392 | N    | LEU | X | 155 | 44.240 | 57.588 | 50.304 | 0.00 | 0.00 |
| ATOM | 2393 | H    | LEU | X | 155 | 44.130 | 58.143 | 49.467 | 0.00 | 0.00 |
| ATOM | 2394 | CA   | LEU | X | 155 | 44.668 | 58.299 | 51.546 | 0.00 | 0.00 |
| ATOM | 2395 | HA   | LEU | X | 155 | 45.369 | 57.756 | 52.179 | 0.00 | 0.00 |
| ATOM | 2396 | CB   | LEU | X | 155 | 45.370 | 59.608 | 51.051 | 0.00 | 0.00 |
| ATOM | 2397 | HB2  | LEU | X | 155 | 46.050 | 59.322 | 50.249 | 0.00 | 0.00 |
| ATOM | 2398 | HB3  | LEU | X | 155 | 44.649 | 60.202 | 50.488 | 0.00 | 0.00 |
| ATOM | 2399 | CG   | LEU | X | 155 | 46.163 | 60.525 | 52.073 | 0.00 | 0.00 |
| ATOM | 2400 | HG   | LEU | X | 155 | 46.595 | 59.949 | 52.892 | 0.00 | 0.00 |
| ATOM | 2401 | CD1  | LEU | X | 155 | 47.324 | 61.130 | 51.340 | 0.00 | 0.00 |
| ATOM | 2402 | HD11 | LEU | X | 155 | 47.766 | 61.793 | 52.084 | 0.00 | 0.00 |
| ATOM | 2403 | HD12 | LEU | X | 155 | 47.019 | 61.770 | 50.511 | 0.00 | 0.00 |
| ATOM | 2404 | HD13 | LEU | X | 155 | 48.168 | 60.468 | 51.148 | 0.00 | 0.00 |
| ATOM | 2405 | CD2  | LEU | X | 155 | 45.209 | 61.604 | 52.712 | 0.00 | 0.00 |
| ATOM | 2406 | HD21 | LEU | X | 155 | 44.864 | 62.275 | 51.926 | 0.00 | 0.00 |
| ATOM | 2407 | HD22 | LEU | X | 155 | 44.328 | 61.182 | 53.195 | 0.00 | 0.00 |
| ATOM | 2408 | HD23 | LEU | X | 155 | 45.717 | 62.235 | 53.441 | 0.00 | 0.00 |
| ATOM | 2409 | C    | LEU | X | 155 | 43.452 | 58.720 | 52.334 | 0.00 | 0.00 |
| ATOM | 2410 | O    | LEU | X | 155 | 42.502 | 59.347 | 51.785 | 0.00 | 0.00 |
| ATOM | 2411 | N    | ALA | X | 156 | 43.429 | 58.420 | 53.636 | 0.00 | 0.00 |
| ATOM | 2412 | H    | ALA | X | 156 | 44.193 | 57.872 | 54.006 | 0.00 | 0.00 |
| ATOM | 2413 | CA   | ALA | X | 156 | 42.328 | 58.757 | 54.525 | 0.00 | 0.00 |
| ATOM | 2414 | HA   | ALA | X | 156 | 41.608 | 59.307 | 53.919 | 0.00 | 0.00 |
| ATOM | 2415 | CB   | ALA | X | 156 | 41.799 | 57.516 | 55.118 | 0.00 | 0.00 |
| ATOM | 2416 | HB1  | ALA | X | 156 | 40.936 | 57.765 | 55.735 | 0.00 | 0.00 |
| ATOM | 2417 | HB2  | ALA | X | 156 | 42.519 | 57.064 | 55.800 | 0.00 | 0.00 |
| ATOM | 2418 | HB3  | ALA | X | 156 | 41.631 | 56.687 | 54.432 | 0.00 | 0.00 |
| ATOM | 2419 | C    | ALA | X | 156 | 42.851 | 59.737 | 55.671 | 0.00 | 0.00 |
| ATOM | 2420 | O    | ALA | X | 156 | 44.033 | 59.701 | 56.050 | 0.00 | 0.00 |
| ATOM | 2421 | N    | LEU | X | 157 | 41.940 | 60.524 | 56.210 | 0.00 | 0.00 |
| ATOM | 2422 | H    | LEU | X | 157 | 41.040 | 60.569 | 55.754 | 0.00 | 0.00 |
| ATOM | 2423 | CA   | LEU | X | 157 | 42.032 | 61.331 | 57.459 | 0.00 | 0.00 |
| ATOM | 2424 | HA   | LEU | X | 157 | 42.749 | 60.847 | 58.123 | 0.00 | 0.00 |
| ATOM | 2425 | CB   | LEU | X | 157 | 42.387 | 62.795 | 57.066 | 0.00 | 0.00 |
| ATOM | 2426 | HB2  | LEU | X | 157 | 41.543 | 63.171 | 56.487 | 0.00 | 0.00 |
| ATOM | 2427 | HB3  | LEU | X | 157 | 42.403 | 63.454 | 57.934 | 0.00 | 0.00 |
| ATOM | 2428 | CG   | LEU | X | 157 | 43.641 | 63.001 | 56.236 | 0.00 | 0.00 |
| ATOM | 2429 | HG   | LEU | X | 157 | 43.754 | 62.210 | 55.495 | 0.00 | 0.00 |
| ATOM | 2430 | CD1  | LEU | X | 157 | 43.702 | 64.380 | 55.515 | 0.00 | 0.00 |
| ATOM | 2431 | HD11 | LEU | X | 157 | 43.501 | 65.141 | 56.269 | 0.00 | 0.00 |
| ATOM | 2432 | HD12 | LEU | X | 157 | 42.821 | 64.587 | 54.906 | 0.00 | 0.00 |
| ATOM | 2433 | HD13 | LEU | X | 157 | 44.692 | 64.503 | 55.076 | 0.00 | 0.00 |
| ATOM | 2434 | CD2  | LEU | X | 157 | 44.875 | 63.042 | 57.159 | 0.00 | 0.00 |
| ATOM | 2435 | HD21 | LEU | X | 157 | 44.907 | 63.858 | 57.880 | 0.00 | 0.00 |
| ATOM | 2436 | HD22 | LEU | X | 157 | 44.943 | 62.125 | 57.745 | 0.00 | 0.00 |
| ATOM | 2437 | HD23 | LEU | X | 157 | 45.770 | 63.072 | 56.537 | 0.00 | 0.00 |
| ATOM | 2438 | C    | LEU | X | 157 | 40.690 | 61.264 | 58.187 | 0.00 | 0.00 |
| ATOM | 2439 | O    | LEU | X | 157 | 39.673 | 61.213 | 57.493 | 0.00 | 0.00 |
| ATOM | 2440 | N    | PRO | X | 158 | 40.609 | 61.370 | 59.506 | 0.00 | 0.00 |
| ATOM | 2441 | CD   | PRO | X | 158 | 41.766 | 61.596 | 60.429 | 0.00 | 0.00 |
| ATOM | 2442 | HD2  | PRO | X | 158 | 42.302 | 62.532 | 60.277 | 0.00 | 0.00 |
| ATOM | 2443 | HD3  | PRO | X | 158 | 42.458 | 60.772 | 60.254 | 0.00 | 0.00 |
| ATOM | 2444 | CG   | PRO | X | 158 | 41.169 | 61.607 | 61.850 | 0.00 | 0.00 |
| ATOM | 2445 | HG2  | PRO | X | 158 | 40.773 | 62.591 | 62.102 | 0.00 | 0.00 |
| ATOM | 2446 | HG3  | PRO | X | 158 | 41.840 | 61.252 | 62.631 | 0.00 | 0.00 |
| ATOM | 2447 | CB   | PRO | X | 158 | 40.026 | 60.602 | 61.665 | 0.00 | 0.00 |
| ATOM | 2448 | HB2  | PRO | X | 158 | 39.336 | 60.615 | 62.509 | 0.00 | 0.00 |
| ATOM | 2449 | HB3  | PRO | X | 158 | 40.299 | 59.550 | 61.582 | 0.00 | 0.00 |
| ATOM | 2450 | CA   | PRO | X | 158 | 39.466 | 61.015 | 60.356 | 0.00 | 0.00 |
| ATOM | 2451 | HA   | PRO | X | 158 | 39.021 | 60.119 | 59.923 | 0.00 | 0.00 |
| ATOM | 2452 | C    | PRO | X | 158 | 38.428 | 62.099 | 60.460 | 0.00 | 0.00 |
| ATOM | 2453 | O    | PRO | X | 158 | 38.728 | 63.308 | 60.337 | 0.00 | 0.00 |
| ATOM | 2454 | N    | GLY | X | 159 | 37.167 | 61.692 | 60.793 | 0.00 | 0.00 |
| ATOM | 2455 | H    | GLY | X | 159 | 37.078 | 60.686 | 60.825 | 0.00 | 0.00 |
| ATOM | 2456 | CA   | GLY | X | 159 | 36.060 | 62.506 | 61.288 | 0.00 | 0.00 |
| ATOM | 2457 | HA2  | GLY | X | 159 | 35.291 | 61.851 | 61.697 | 0.00 | 0.00 |

|      |      |      |     |   |     |        |        |        |      |      |
|------|------|------|-----|---|-----|--------|--------|--------|------|------|
| ATOM | 2458 | HA3  | GLY | X | 159 | 36.508 | 63.157 | 62.038 | 0.00 | 0.00 |
| ATOM | 2459 | C    | GLY | X | 159 | 35.343 | 63.303 | 60.230 | 0.00 | 0.00 |
| ATOM | 2460 | O    | GLY | X | 159 | 34.381 | 64.019 | 60.568 | 0.00 | 0.00 |
| ATOM | 2461 | N    | SER | X | 160 | 35.791 | 63.335 | 58.955 | 0.00 | 0.00 |
| ATOM | 2462 | H    | SER | X | 160 | 36.549 | 62.734 | 58.664 | 0.00 | 0.00 |
| ATOM | 2463 | CA   | SER | X | 160 | 35.038 | 64.026 | 57.967 | 0.00 | 0.00 |
| ATOM | 2464 | HA   | SER | X | 160 | 34.003 | 64.210 | 58.254 | 0.00 | 0.00 |
| ATOM | 2465 | CB   | SER | X | 160 | 35.588 | 65.515 | 57.936 | 0.00 | 0.00 |
| ATOM | 2466 | HB2  | SER | X | 160 | 34.919 | 66.047 | 57.259 | 0.00 | 0.00 |
| ATOM | 2467 | HB3  | SER | X | 160 | 35.596 | 65.999 | 58.913 | 0.00 | 0.00 |
| ATOM | 2468 | OG   | SER | X | 160 | 36.831 | 65.694 | 57.258 | 0.00 | 0.00 |
| ATOM | 2469 | HG   | SER | X | 160 | 37.308 | 66.386 | 57.722 | 0.00 | 0.00 |
| ATOM | 2470 | C    | SER | X | 160 | 35.091 | 63.288 | 56.565 | 0.00 | 0.00 |
| ATOM | 2471 | O    | SER | X | 160 | 35.311 | 62.068 | 56.527 | 0.00 | 0.00 |
| ATOM | 2472 | N    | ARG | X | 161 | 35.045 | 64.003 | 55.444 | 0.00 | 0.00 |
| ATOM | 2473 | H    | ARG | X | 161 | 35.061 | 65.009 | 55.536 | 0.00 | 0.00 |
| ATOM | 2474 | CA   | ARG | X | 161 | 35.285 | 63.449 | 54.089 | 0.00 | 0.00 |
| ATOM | 2475 | HA   | ARG | X | 161 | 35.734 | 62.471 | 54.259 | 0.00 | 0.00 |
| ATOM | 2476 | CB   | ARG | X | 161 | 33.903 | 63.166 | 53.383 | 0.00 | 0.00 |
| ATOM | 2477 | HB2  | ARG | X | 161 | 33.324 | 64.053 | 53.130 | 0.00 | 0.00 |
| ATOM | 2478 | HB3  | ARG | X | 161 | 34.231 | 62.694 | 52.457 | 0.00 | 0.00 |
| ATOM | 2479 | CG   | ARG | X | 161 | 32.838 | 62.250 | 54.035 | 0.00 | 0.00 |
| ATOM | 2480 | HG2  | ARG | X | 161 | 32.717 | 62.512 | 55.086 | 0.00 | 0.00 |
| ATOM | 2481 | HG3  | ARG | X | 161 | 31.853 | 62.471 | 53.623 | 0.00 | 0.00 |
| ATOM | 2482 | CD   | ARG | X | 161 | 33.135 | 60.772 | 53.858 | 0.00 | 0.00 |
| ATOM | 2483 | HD2  | ARG | X | 161 | 32.204 | 60.205 | 53.880 | 0.00 | 0.00 |
| ATOM | 2484 | HD3  | ARG | X | 161 | 33.605 | 60.595 | 52.891 | 0.00 | 0.00 |
| ATOM | 2485 | NE   | ARG | X | 161 | 33.915 | 60.160 | 54.930 | 0.00 | 0.00 |
| ATOM | 2486 | HE   | ARG | X | 161 | 34.502 | 60.740 | 55.512 | 0.00 | 0.00 |
| ATOM | 2487 | CZ   | ARG | X | 161 | 34.045 | 58.856 | 55.149 | 0.00 | 0.00 |
| ATOM | 2488 | NH1  | ARG | X | 161 | 33.437 | 57.875 | 54.515 | 0.00 | 0.00 |
| ATOM | 2489 | HH11 | ARG | X | 161 | 32.676 | 58.157 | 53.914 | 0.00 | 0.00 |
| ATOM | 2490 | HH12 | ARG | X | 161 | 33.843 | 56.950 | 54.530 | 0.00 | 0.00 |
| ATOM | 2491 | NH2  | ARG | X | 161 | 34.916 | 58.490 | 56.097 | 0.00 | 0.00 |
| ATOM | 2492 | HH21 | ARG | X | 161 | 35.674 | 59.104 | 56.358 | 0.00 | 0.00 |
| ATOM | 2493 | HH22 | ARG | X | 161 | 34.964 | 57.490 | 56.231 | 0.00 | 0.00 |
| ATOM | 2494 | C    | ARG | X | 161 | 36.263 | 64.163 | 53.138 | 0.00 | 0.00 |
| ATOM | 2495 | O    | ARG | X | 161 | 36.349 | 63.792 | 51.932 | 0.00 | 0.00 |
| ATOM | 2496 | N    | GLU | X | 162 | 37.100 | 65.142 | 53.662 | 0.00 | 0.00 |
| ATOM | 2497 | H    | GLU | X | 162 | 37.018 | 65.349 | 54.647 | 0.00 | 0.00 |
| ATOM | 2498 | CA   | GLU | X | 162 | 38.217 | 65.788 | 52.930 | 0.00 | 0.00 |
| ATOM | 2499 | HA   | GLU | X | 162 | 37.675 | 66.295 | 52.132 | 0.00 | 0.00 |
| ATOM | 2500 | CB   | GLU | X | 162 | 38.820 | 66.849 | 53.791 | 0.00 | 0.00 |
| ATOM | 2501 | HB2  | GLU | X | 162 | 38.938 | 66.340 | 54.748 | 0.00 | 0.00 |
| ATOM | 2502 | HB3  | GLU | X | 162 | 39.778 | 67.198 | 53.405 | 0.00 | 0.00 |
| ATOM | 2503 | CG   | GLU | X | 162 | 37.918 | 68.103 | 53.991 | 0.00 | 0.00 |
| ATOM | 2504 | HG2  | GLU | X | 162 | 36.901 | 67.830 | 54.273 | 0.00 | 0.00 |
| ATOM | 2505 | HG3  | GLU | X | 162 | 38.373 | 68.703 | 54.779 | 0.00 | 0.00 |
| ATOM | 2506 | CD   | GLU | X | 162 | 37.958 | 68.942 | 52.727 | 0.00 | 0.00 |
| ATOM | 2507 | OE1  | GLU | X | 162 | 38.943 | 69.657 | 52.440 | 0.00 | 0.00 |
| ATOM | 2508 | OE2  | GLU | X | 162 | 36.957 | 68.817 | 52.014 | 0.00 | 0.00 |
| ATOM | 2509 | C    | GLU | X | 162 | 39.259 | 64.803 | 52.276 | 0.00 | 0.00 |
| ATOM | 2510 | O    | GLU | X | 162 | 39.900 | 65.126 | 51.274 | 0.00 | 0.00 |
| ATOM | 2511 | N    | ALA | X | 163 | 39.609 | 63.745 | 53.017 | 0.00 | 0.00 |
| ATOM | 2512 | H    | ALA | X | 163 | 39.188 | 63.607 | 53.924 | 0.00 | 0.00 |
| ATOM | 2513 | CA   | ALA | X | 163 | 40.143 | 62.506 | 52.374 | 0.00 | 0.00 |
| ATOM | 2514 | HA   | ALA | X | 163 | 39.910 | 62.492 | 51.309 | 0.00 | 0.00 |
| ATOM | 2515 | CB   | ALA | X | 163 | 41.680 | 62.580 | 52.414 | 0.00 | 0.00 |
| ATOM | 2516 | HB1  | ALA | X | 163 | 41.975 | 62.282 | 53.420 | 0.00 | 0.00 |
| ATOM | 2517 | HB2  | ALA | X | 163 | 42.013 | 63.575 | 52.121 | 0.00 | 0.00 |
| ATOM | 2518 | HB3  | ALA | X | 163 | 42.096 | 61.875 | 51.693 | 0.00 | 0.00 |
| ATOM | 2519 | C    | ALA | X | 163 | 39.598 | 61.293 | 53.104 | 0.00 | 0.00 |
| ATOM | 2520 | O    | ALA | X | 163 | 39.942 | 61.111 | 54.275 | 0.00 | 0.00 |
| ATOM | 2521 | N    | PRO | X | 164 | 38.642 | 60.505 | 52.522 | 0.00 | 0.00 |
| ATOM | 2522 | CD   | PRO | X | 164 | 38.142 | 60.686 | 51.185 | 0.00 | 0.00 |
| ATOM | 2523 | HD2  | PRO | X | 164 | 38.819 | 60.611 | 50.334 | 0.00 | 0.00 |
| ATOM | 2524 | HD3  | PRO | X | 164 | 37.631 | 61.635 | 51.345 | 0.00 | 0.00 |

|      |      |      |     |   |     |        |        |        |      |      |
|------|------|------|-----|---|-----|--------|--------|--------|------|------|
| ATOM | 2525 | CG   | PRO | X | 164 | 37.109 | 59.609 | 51.008 | 0.00 | 0.00 |
| ATOM | 2526 | HG2  | PRO | X | 164 | 37.561 | 58.678 | 50.665 | 0.00 | 0.00 |
| ATOM | 2527 | HG3  | PRO | X | 164 | 36.246 | 59.951 | 50.438 | 0.00 | 0.00 |
| ATOM | 2528 | CB   | PRO | X | 164 | 36.628 | 59.377 | 52.441 | 0.00 | 0.00 |
| ATOM | 2529 | HB2  | PRO | X | 164 | 36.055 | 58.454 | 52.530 | 0.00 | 0.00 |
| ATOM | 2530 | HB3  | PRO | X | 164 | 36.038 | 60.212 | 52.819 | 0.00 | 0.00 |
| ATOM | 2531 | CA   | PRO | X | 164 | 37.981 | 59.380 | 53.235 | 0.00 | 0.00 |
| ATOM | 2532 | HA   | PRO | X | 164 | 37.836 | 59.574 | 54.298 | 0.00 | 0.00 |
| ATOM | 2533 | C    | PRO | X | 164 | 38.808 | 58.045 | 53.086 | 0.00 | 0.00 |
| ATOM | 2534 | O    | PRO | X | 164 | 38.392 | 57.075 | 53.655 | 0.00 | 0.00 |
| ATOM | 2535 | N    | GLY | X | 165 | 39.894 | 57.998 | 52.287 | 0.00 | 0.00 |
| ATOM | 2536 | H    | GLY | X | 165 | 40.246 | 58.820 | 51.819 | 0.00 | 0.00 |
| ATOM | 2537 | CA   | GLY | X | 165 | 40.545 | 56.718 | 51.950 | 0.00 | 0.00 |
| ATOM | 2538 | HA2  | GLY | X | 165 | 41.628 | 56.807 | 52.029 | 0.00 | 0.00 |
| ATOM | 2539 | HA3  | GLY | X | 165 | 40.235 | 55.940 | 52.648 | 0.00 | 0.00 |
| ATOM | 2540 | C    | GLY | X | 165 | 40.025 | 56.226 | 50.565 | 0.00 | 0.00 |
| ATOM | 2541 | O    | GLY | X | 165 | 40.527 | 56.716 | 49.576 | 0.00 | 0.00 |
| ATOM | 2542 | N    | ASN | X | 166 | 39.185 | 55.195 | 50.497 | 0.00 | 0.00 |
| ATOM | 2543 | H    | ASN | X | 166 | 38.880 | 54.850 | 51.396 | 0.00 | 0.00 |
| ATOM | 2544 | CA   | ASN | X | 166 | 38.893 | 54.262 | 49.333 | 0.00 | 0.00 |
| ATOM | 2545 | HA   | ASN | X | 166 | 39.822 | 53.708 | 49.201 | 0.00 | 0.00 |
| ATOM | 2546 | CB   | ASN | X | 166 | 37.871 | 53.192 | 49.831 | 0.00 | 0.00 |
| ATOM | 2547 | HB2  | ASN | X | 166 | 36.946 | 53.733 | 50.033 | 0.00 | 0.00 |
| ATOM | 2548 | HB3  | ASN | X | 166 | 37.739 | 52.377 | 49.120 | 0.00 | 0.00 |
| ATOM | 2549 | CG   | ASN | X | 166 | 38.291 | 52.565 | 51.149 | 0.00 | 0.00 |
| ATOM | 2550 | OD1  | ASN | X | 166 | 39.102 | 51.691 | 51.116 | 0.00 | 0.00 |
| ATOM | 2551 | ND2  | ASN | X | 166 | 37.862 | 53.046 | 52.266 | 0.00 | 0.00 |
| ATOM | 2552 | HD21 | ASN | X | 166 | 38.062 | 52.551 | 53.124 | 0.00 | 0.00 |
| ATOM | 2553 | HD22 | ASN | X | 166 | 37.095 | 53.694 | 52.367 | 0.00 | 0.00 |
| ATOM | 2554 | C    | ASN | X | 166 | 38.418 | 54.873 | 47.972 | 0.00 | 0.00 |
| ATOM | 2555 | O    | ASN | X | 166 | 37.729 | 54.146 | 47.247 | 0.00 | 0.00 |
| ATOM | 2556 | N    | VAL | X | 167 | 38.844 | 56.027 | 47.532 | 0.00 | 0.00 |
| ATOM | 2557 | H    | VAL | X | 167 | 39.490 | 56.560 | 48.097 | 0.00 | 0.00 |
| ATOM | 2558 | CA   | VAL | X | 167 | 38.233 | 56.686 | 46.326 | 0.00 | 0.00 |
| ATOM | 2559 | HA   | VAL | X | 167 | 37.166 | 56.546 | 46.500 | 0.00 | 0.00 |
| ATOM | 2560 | CB   | VAL | X | 167 | 38.527 | 58.212 | 46.143 | 0.00 | 0.00 |
| ATOM | 2561 | HB   | VAL | X | 167 | 37.833 | 58.517 | 45.360 | 0.00 | 0.00 |
| ATOM | 2562 | CG1  | VAL | X | 167 | 38.061 | 58.995 | 47.440 | 0.00 | 0.00 |
| ATOM | 2563 | HG11 | VAL | X | 167 | 38.386 | 58.551 | 48.381 | 0.00 | 0.00 |
| ATOM | 2564 | HG12 | VAL | X | 167 | 38.424 | 60.020 | 47.356 | 0.00 | 0.00 |
| ATOM | 2565 | HG13 | VAL | X | 167 | 36.973 | 58.945 | 47.473 | 0.00 | 0.00 |
| ATOM | 2566 | CG2  | VAL | X | 167 | 39.926 | 58.582 | 45.755 | 0.00 | 0.00 |
| ATOM | 2567 | HG21 | VAL | X | 167 | 40.116 | 59.647 | 45.625 | 0.00 | 0.00 |
| ATOM | 2568 | HG22 | VAL | X | 167 | 40.126 | 58.099 | 44.798 | 0.00 | 0.00 |
| ATOM | 2569 | HG23 | VAL | X | 167 | 40.513 | 58.259 | 46.615 | 0.00 | 0.00 |
| ATOM | 2570 | C    | VAL | X | 167 | 38.671 | 55.887 | 45.039 | 0.00 | 0.00 |
| ATOM | 2571 | O    | VAL | X | 167 | 38.130 | 56.067 | 44.001 | 0.00 | 0.00 |
| ATOM | 2572 | N    | GLY | X | 168 | 39.728 | 55.035 | 45.132 | 0.00 | 0.00 |
| ATOM | 2573 | H    | GLY | X | 168 | 40.129 | 54.973 | 46.057 | 0.00 | 0.00 |
| ATOM | 2574 | CA   | GLY | X | 168 | 40.153 | 54.178 | 43.921 | 0.00 | 0.00 |
| ATOM | 2575 | HA2  | GLY | X | 168 | 39.939 | 54.669 | 42.972 | 0.00 | 0.00 |
| ATOM | 2576 | HA3  | GLY | X | 168 | 41.193 | 53.884 | 44.058 | 0.00 | 0.00 |
| ATOM | 2577 | C    | GLY | X | 168 | 39.293 | 52.919 | 43.770 | 0.00 | 0.00 |
| ATOM | 2578 | O    | GLY | X | 168 | 39.362 | 52.327 | 42.719 | 0.00 | 0.00 |
| ATOM | 2579 | N    | LEU | X | 169 | 38.508 | 52.480 | 44.762 | 0.00 | 0.00 |
| ATOM | 2580 | H    | LEU | X | 169 | 38.538 | 52.970 | 45.644 | 0.00 | 0.00 |
| ATOM | 2581 | CA   | LEU | X | 169 | 37.398 | 51.565 | 44.579 | 0.00 | 0.00 |
| ATOM | 2582 | HA   | LEU | X | 169 | 37.692 | 50.758 | 43.908 | 0.00 | 0.00 |
| ATOM | 2583 | CB   | LEU | X | 169 | 37.190 | 50.801 | 45.917 | 0.00 | 0.00 |
| ATOM | 2584 | HB2  | LEU | X | 169 | 36.769 | 51.506 | 46.633 | 0.00 | 0.00 |
| ATOM | 2585 | HB3  | LEU | X | 169 | 36.386 | 50.096 | 45.705 | 0.00 | 0.00 |
| ATOM | 2586 | CG   | LEU | X | 169 | 38.334 | 49.991 | 46.569 | 0.00 | 0.00 |
| ATOM | 2587 | HG   | LEU | X | 169 | 39.069 | 50.685 | 46.976 | 0.00 | 0.00 |
| ATOM | 2588 | CD1  | LEU | X | 169 | 37.896 | 49.064 | 47.750 | 0.00 | 0.00 |
| ATOM | 2589 | HD11 | LEU | X | 169 | 38.694 | 48.424 | 48.128 | 0.00 | 0.00 |
| ATOM | 2590 | HD12 | LEU | X | 169 | 37.046 | 48.464 | 47.425 | 0.00 | 0.00 |
| ATOM | 2591 | HD13 | LEU | X | 169 | 37.588 | 49.795 | 48.498 | 0.00 | 0.00 |

|      |      |      |     |   |     |        |        |        |      |      |
|------|------|------|-----|---|-----|--------|--------|--------|------|------|
| ATOM | 2592 | CD2  | LEU | X | 169 | 39.190 | 49.121 | 45.626 | 0.00 | 0.00 |
| ATOM | 2593 | HD21 | LEU | X | 169 | 40.190 | 48.973 | 46.034 | 0.00 | 0.00 |
| ATOM | 2594 | HD22 | LEU | X | 169 | 38.807 | 48.113 | 45.466 | 0.00 | 0.00 |
| ATOM | 2595 | HD23 | LEU | X | 169 | 39.272 | 49.525 | 44.616 | 0.00 | 0.00 |
| ATOM | 2596 | C    | LEU | X | 169 | 36.130 | 52.331 | 44.157 | 0.00 | 0.00 |
| ATOM | 2597 | O    | LEU | X | 169 | 35.413 | 51.650 | 43.366 | 0.00 | 0.00 |
| ATOM | 2598 | N    | LEU | X | 170 | 35.921 | 53.581 | 44.505 | 0.00 | 0.00 |
| ATOM | 2599 | H    | LEU | X | 170 | 36.518 | 53.997 | 45.205 | 0.00 | 0.00 |
| ATOM | 2600 | CA   | LEU | X | 170 | 34.728 | 54.365 | 44.072 | 0.00 | 0.00 |
| ATOM | 2601 | HA   | LEU | X | 170 | 33.822 | 53.811 | 44.318 | 0.00 | 0.00 |
| ATOM | 2602 | CB   | LEU | X | 170 | 34.675 | 55.673 | 44.777 | 0.00 | 0.00 |
| ATOM | 2603 | HB2  | LEU | X | 170 | 35.621 | 56.181 | 44.587 | 0.00 | 0.00 |
| ATOM | 2604 | HB3  | LEU | X | 170 | 33.794 | 56.206 | 44.419 | 0.00 | 0.00 |
| ATOM | 2605 | CG   | LEU | X | 170 | 34.594 | 55.645 | 46.280 | 0.00 | 0.00 |
| ATOM | 2606 | HG   | LEU | X | 170 | 35.511 | 55.224 | 46.695 | 0.00 | 0.00 |
| ATOM | 2607 | CD1  | LEU | X | 170 | 34.445 | 57.040 | 46.829 | 0.00 | 0.00 |
| ATOM | 2608 | HD11 | LEU | X | 170 | 33.583 | 57.483 | 46.331 | 0.00 | 0.00 |
| ATOM | 2609 | HD12 | LEU | X | 170 | 35.340 | 57.659 | 46.757 | 0.00 | 0.00 |
| ATOM | 2610 | HD13 | LEU | X | 170 | 34.189 | 57.017 | 47.889 | 0.00 | 0.00 |
| ATOM | 2611 | CD2  | LEU | X | 170 | 33.441 | 54.757 | 46.832 | 0.00 | 0.00 |
| ATOM | 2612 | HD21 | LEU | X | 170 | 32.470 | 55.113 | 46.488 | 0.00 | 0.00 |
| ATOM | 2613 | HD22 | LEU | X | 170 | 33.462 | 53.709 | 46.535 | 0.00 | 0.00 |
| ATOM | 2614 | HD23 | LEU | X | 170 | 33.499 | 54.928 | 47.907 | 0.00 | 0.00 |
| ATOM | 2615 | C    | LEU | X | 170 | 34.649 | 54.555 | 42.557 | 0.00 | 0.00 |
| ATOM | 2616 | O    | LEU | X | 170 | 33.537 | 54.411 | 42.062 | 0.00 | 0.00 |
| ATOM | 2617 | N    | ASP | X | 171 | 35.770 | 54.639 | 41.835 | 0.00 | 0.00 |
| ATOM | 2618 | H    | ASP | X | 171 | 36.596 | 54.705 | 42.412 | 0.00 | 0.00 |
| ATOM | 2619 | CA   | ASP | X | 171 | 35.942 | 54.875 | 40.375 | 0.00 | 0.00 |
| ATOM | 2620 | HA   | ASP | X | 171 | 35.359 | 55.729 | 40.034 | 0.00 | 0.00 |
| ATOM | 2621 | CB   | ASP | X | 171 | 37.472 | 55.092 | 40.109 | 0.00 | 0.00 |
| ATOM | 2622 | HB2  | ASP | X | 171 | 37.882 | 54.135 | 40.430 | 0.00 | 0.00 |
| ATOM | 2623 | HB3  | ASP | X | 171 | 37.639 | 54.992 | 39.036 | 0.00 | 0.00 |
| ATOM | 2624 | CG   | ASP | X | 171 | 38.251 | 56.259 | 40.759 | 0.00 | 0.00 |
| ATOM | 2625 | OD1  | ASP | X | 171 | 37.544 | 57.178 | 41.226 | 0.00 | 0.00 |
| ATOM | 2626 | OD2  | ASP | X | 171 | 39.480 | 56.240 | 40.869 | 0.00 | 0.00 |
| ATOM | 2627 | C    | ASP | X | 171 | 35.449 | 53.594 | 39.553 | 0.00 | 0.00 |
| ATOM | 2628 | O    | ASP | X | 171 | 34.849 | 53.782 | 38.555 | 0.00 | 0.00 |
| ATOM | 2629 | N    | GLN | X | 172 | 35.587 | 52.331 | 40.091 | 0.00 | 0.00 |
| ATOM | 2630 | H    | GLN | X | 172 | 35.986 | 52.286 | 41.018 | 0.00 | 0.00 |
| ATOM | 2631 | CA   | GLN | X | 172 | 35.214 | 51.089 | 39.410 | 0.00 | 0.00 |
| ATOM | 2632 | HA   | GLN | X | 172 | 35.439 | 51.181 | 38.347 | 0.00 | 0.00 |
| ATOM | 2633 | CB   | GLN | X | 172 | 36.015 | 49.868 | 39.980 | 0.00 | 0.00 |
| ATOM | 2634 | HB2  | GLN | X | 172 | 35.557 | 49.574 | 40.924 | 0.00 | 0.00 |
| ATOM | 2635 | HB3  | GLN | X | 172 | 36.033 | 49.036 | 39.275 | 0.00 | 0.00 |
| ATOM | 2636 | CG   | GLN | X | 172 | 37.473 | 50.147 | 40.321 | 0.00 | 0.00 |
| ATOM | 2637 | HG2  | GLN | X | 172 | 38.051 | 50.199 | 39.398 | 0.00 | 0.00 |
| ATOM | 2638 | HG3  | GLN | X | 172 | 37.654 | 51.131 | 40.755 | 0.00 | 0.00 |
| ATOM | 2639 | CD   | GLN | X | 172 | 38.215 | 49.011 | 41.013 | 0.00 | 0.00 |
| ATOM | 2640 | OE1  | GLN | X | 172 | 37.744 | 47.919 | 41.231 | 0.00 | 0.00 |
| ATOM | 2641 | NE2  | GLN | X | 172 | 39.239 | 49.372 | 41.718 | 0.00 | 0.00 |
| ATOM | 2642 | HE21 | GLN | X | 172 | 39.742 | 48.652 | 42.218 | 0.00 | 0.00 |
| ATOM | 2643 | HE22 | GLN | X | 172 | 39.586 | 50.320 | 41.696 | 0.00 | 0.00 |
| ATOM | 2644 | C    | GLN | X | 172 | 33.753 | 50.785 | 39.537 | 0.00 | 0.00 |
| ATOM | 2645 | O    | GLN | X | 172 | 33.216 | 50.457 | 38.475 | 0.00 | 0.00 |
| ATOM | 2646 | N    | ARG | X | 173 | 33.079 | 50.826 | 40.643 | 0.00 | 0.00 |
| ATOM | 2647 | H    | ARG | X | 173 | 33.611 | 51.204 | 41.414 | 0.00 | 0.00 |
| ATOM | 2648 | CA   | ARG | X | 173 | 31.662 | 50.789 | 40.871 | 0.00 | 0.00 |
| ATOM | 2649 | HA   | ARG | X | 173 | 31.196 | 49.861 | 40.538 | 0.00 | 0.00 |
| ATOM | 2650 | CB   | ARG | X | 173 | 31.348 | 51.003 | 42.383 | 0.00 | 0.00 |
| ATOM | 2651 | HB2  | ARG | X | 173 | 31.913 | 50.220 | 42.889 | 0.00 | 0.00 |
| ATOM | 2652 | HB3  | ARG | X | 173 | 31.754 | 51.939 | 42.767 | 0.00 | 0.00 |
| ATOM | 2653 | CG   | ARG | X | 173 | 29.852 | 50.760 | 42.786 | 0.00 | 0.00 |
| ATOM | 2654 | HG2  | ARG | X | 173 | 29.142 | 51.274 | 42.137 | 0.00 | 0.00 |
| ATOM | 2655 | HG3  | ARG | X | 173 | 29.507 | 49.729 | 42.872 | 0.00 | 0.00 |
| ATOM | 2656 | CD   | ARG | X | 173 | 29.563 | 51.227 | 44.204 | 0.00 | 0.00 |
| ATOM | 2657 | HD2  | ARG | X | 173 | 30.027 | 52.213 | 44.245 | 0.00 | 0.00 |
| ATOM | 2658 | HD3  | ARG | X | 173 | 28.511 | 51.491 | 44.305 | 0.00 | 0.00 |

|      |      |      |     |   |     |        |        |        |      |      |
|------|------|------|-----|---|-----|--------|--------|--------|------|------|
| ATOM | 2659 | NE   | ARG | X | 173 | 30.136 | 50.346 | 45.241 | 0.00 | 0.00 |
| ATOM | 2660 | HE   | ARG | X | 173 | 30.273 | 49.382 | 44.972 | 0.00 | 0.00 |
| ATOM | 2661 | CZ   | ARG | X | 173 | 30.372 | 50.602 | 46.516 | 0.00 | 0.00 |
| ATOM | 2662 | NH1  | ARG | X | 173 | 30.194 | 51.866 | 46.893 | 0.00 | 0.00 |
| ATOM | 2663 | HH11 | ARG | X | 173 | 29.977 | 52.585 | 46.217 | 0.00 | 0.00 |
| ATOM | 2664 | HH12 | ARG | X | 173 | 30.578 | 52.222 | 47.756 | 0.00 | 0.00 |
| ATOM | 2665 | NH2  | ARG | X | 173 | 30.796 | 49.759 | 47.381 | 0.00 | 0.00 |
| ATOM | 2666 | HH21 | ARG | X | 173 | 31.028 | 48.809 | 47.128 | 0.00 | 0.00 |
| ATOM | 2667 | HH22 | ARG | X | 173 | 30.959 | 50.040 | 48.337 | 0.00 | 0.00 |
| ATOM | 2668 | C    | ARG | X | 173 | 30.948 | 51.864 | 40.001 | 0.00 | 0.00 |
| ATOM | 2669 | O    | ARG | X | 173 | 29.931 | 51.531 | 39.435 | 0.00 | 0.00 |
| ATOM | 2670 | N    | LEU | X | 174 | 31.524 | 53.066 | 39.895 | 0.00 | 0.00 |
| ATOM | 2671 | H    | LEU | X | 174 | 32.319 | 53.250 | 40.489 | 0.00 | 0.00 |
| ATOM | 2672 | CA   | LEU | X | 174 | 31.044 | 54.044 | 38.930 | 0.00 | 0.00 |
| ATOM | 2673 | HA   | LEU | X | 174 | 29.992 | 54.198 | 39.171 | 0.00 | 0.00 |
| ATOM | 2674 | CB   | LEU | X | 174 | 31.722 | 55.412 | 39.126 | 0.00 | 0.00 |
| ATOM | 2675 | HB2  | LEU | X | 174 | 31.581 | 55.722 | 40.161 | 0.00 | 0.00 |
| ATOM | 2676 | HB3  | LEU | X | 174 | 32.766 | 55.384 | 38.816 | 0.00 | 0.00 |
| ATOM | 2677 | CG   | LEU | X | 174 | 30.963 | 56.572 | 38.370 | 0.00 | 0.00 |
| ATOM | 2678 | HG   | LEU | X | 174 | 30.849 | 56.238 | 37.339 | 0.00 | 0.00 |
| ATOM | 2679 | CD1  | LEU | X | 174 | 29.565 | 56.834 | 38.885 | 0.00 | 0.00 |
| ATOM | 2680 | HD11 | LEU | X | 174 | 29.606 | 57.185 | 39.916 | 0.00 | 0.00 |
| ATOM | 2681 | HD12 | LEU | X | 174 | 28.875 | 55.992 | 38.941 | 0.00 | 0.00 |
| ATOM | 2682 | HD13 | LEU | X | 174 | 29.124 | 57.600 | 38.248 | 0.00 | 0.00 |
| ATOM | 2683 | CD2  | LEU | X | 174 | 31.707 | 57.991 | 38.434 | 0.00 | 0.00 |
| ATOM | 2684 | HD21 | LEU | X | 174 | 32.775 | 57.842 | 38.282 | 0.00 | 0.00 |
| ATOM | 2685 | HD22 | LEU | X | 174 | 31.361 | 58.688 | 37.671 | 0.00 | 0.00 |
| ATOM | 2686 | HD23 | LEU | X | 174 | 31.534 | 58.463 | 39.402 | 0.00 | 0.00 |
| ATOM | 2687 | C    | LEU | X | 174 | 31.175 | 53.606 | 37.474 | 0.00 | 0.00 |
| ATOM | 2688 | O    | LEU | X | 174 | 30.280 | 53.885 | 36.690 | 0.00 | 0.00 |
| ATOM | 2689 | N    | ALA | X | 175 | 32.260 | 52.860 | 37.116 | 0.00 | 0.00 |
| ATOM | 2690 | H    | ALA | X | 175 | 32.958 | 52.664 | 37.819 | 0.00 | 0.00 |
| ATOM | 2691 | CA   | ALA | X | 175 | 32.385 | 52.290 | 35.830 | 0.00 | 0.00 |
| ATOM | 2692 | HA   | ALA | X | 175 | 32.062 | 52.974 | 35.044 | 0.00 | 0.00 |
| ATOM | 2693 | CB   | ALA | X | 175 | 33.849 | 51.814 | 35.534 | 0.00 | 0.00 |
| ATOM | 2694 | HB1  | ALA | X | 175 | 34.481 | 52.684 | 35.710 | 0.00 | 0.00 |
| ATOM | 2695 | HB2  | ALA | X | 175 | 33.827 | 51.503 | 34.490 | 0.00 | 0.00 |
| ATOM | 2696 | HB3  | ALA | X | 175 | 34.187 | 51.109 | 36.294 | 0.00 | 0.00 |
| ATOM | 2697 | C    | ALA | X | 175 | 31.377 | 51.080 | 35.558 | 0.00 | 0.00 |
| ATOM | 2698 | O    | ALA | X | 175 | 30.780 | 51.069 | 34.503 | 0.00 | 0.00 |
| ATOM | 2699 | N    | LEU | X | 176 | 31.164 | 50.205 | 36.535 | 0.00 | 0.00 |
| ATOM | 2700 | H    | LEU | X | 176 | 31.798 | 50.207 | 37.321 | 0.00 | 0.00 |
| ATOM | 2701 | CA   | LEU | X | 176 | 30.097 | 49.286 | 36.520 | 0.00 | 0.00 |
| ATOM | 2702 | HA   | LEU | X | 176 | 30.293 | 48.641 | 35.664 | 0.00 | 0.00 |
| ATOM | 2703 | CB   | LEU | X | 176 | 30.167 | 48.319 | 37.681 | 0.00 | 0.00 |
| ATOM | 2704 | HB2  | LEU | X | 176 | 30.040 | 48.890 | 38.601 | 0.00 | 0.00 |
| ATOM | 2705 | HB3  | LEU | X | 176 | 29.454 | 47.495 | 37.707 | 0.00 | 0.00 |
| ATOM | 2706 | CG   | LEU | X | 176 | 31.491 | 47.716 | 38.018 | 0.00 | 0.00 |
| ATOM | 2707 | HG   | LEU | X | 176 | 32.249 | 48.411 | 38.377 | 0.00 | 0.00 |
| ATOM | 2708 | CD1  | LEU | X | 176 | 31.406 | 46.767 | 39.242 | 0.00 | 0.00 |
| ATOM | 2709 | HD11 | LEU | X | 176 | 32.395 | 46.479 | 39.600 | 0.00 | 0.00 |
| ATOM | 2710 | HD12 | LEU | X | 176 | 30.707 | 45.932 | 39.276 | 0.00 | 0.00 |
| ATOM | 2711 | HD13 | LEU | X | 176 | 30.988 | 47.326 | 40.078 | 0.00 | 0.00 |
| ATOM | 2712 | CD2  | LEU | X | 176 | 31.934 | 46.842 | 36.874 | 0.00 | 0.00 |
| ATOM | 2713 | HD21 | LEU | X | 176 | 32.740 | 46.152 | 37.123 | 0.00 | 0.00 |
| ATOM | 2714 | HD22 | LEU | X | 176 | 31.071 | 46.356 | 36.418 | 0.00 | 0.00 |
| ATOM | 2715 | HD23 | LEU | X | 176 | 32.119 | 47.570 | 36.084 | 0.00 | 0.00 |
| ATOM | 2716 | C    | LEU | X | 176 | 28.662 | 49.826 | 36.448 | 0.00 | 0.00 |
| ATOM | 2717 | O    | LEU | X | 176 | 27.728 | 49.217 | 35.932 | 0.00 | 0.00 |
| ATOM | 2718 | N    | GLN | X | 177 | 28.387 | 51.023 | 36.990 | 0.00 | 0.00 |
| ATOM | 2719 | H    | GLN | X | 177 | 29.021 | 51.546 | 37.577 | 0.00 | 0.00 |
| ATOM | 2720 | CA   | GLN | X | 177 | 27.093 | 51.740 | 36.673 | 0.00 | 0.00 |
| ATOM | 2721 | HA   | GLN | X | 177 | 26.217 | 51.107 | 36.811 | 0.00 | 0.00 |
| ATOM | 2722 | CB   | GLN | X | 177 | 26.987 | 52.942 | 37.629 | 0.00 | 0.00 |
| ATOM | 2723 | HB2  | GLN | X | 177 | 28.013 | 53.286 | 37.756 | 0.00 | 0.00 |
| ATOM | 2724 | HB3  | GLN | X | 177 | 26.341 | 53.668 | 37.135 | 0.00 | 0.00 |
| ATOM | 2725 | CG   | GLN | X | 177 | 26.463 | 52.553 | 39.064 | 0.00 | 0.00 |



|      |      |      |     |   |     |        |        |        |      |      |
|------|------|------|-----|---|-----|--------|--------|--------|------|------|
| ATOM | 2726 | HG2  | GLN | X | 177 | 25.521 | 52.008 | 39.014 | 0.00 | 0.00 |
| ATOM | 2727 | HG3  | GLN | X | 177 | 27.152 | 51.823 | 39.489 | 0.00 | 0.00 |
| ATOM | 2728 | CD   | GLN | X | 177 | 26.450 | 53.732 | 40.003 | 0.00 | 0.00 |
| ATOM | 2729 | OE1  | GLN | X | 177 | 27.448 | 54.388 | 40.140 | 0.00 | 0.00 |
| ATOM | 2730 | NE2  | GLN | X | 177 | 25.421 | 54.103 | 40.756 | 0.00 | 0.00 |
| ATOM | 2731 | HE21 | GLN | X | 177 | 25.509 | 54.986 | 41.238 | 0.00 | 0.00 |
| ATOM | 2732 | HE22 | GLN | X | 177 | 24.500 | 53.702 | 40.649 | 0.00 | 0.00 |
| ATOM | 2733 | C    | GLN | X | 177 | 27.011 | 52.051 | 35.139 | 0.00 | 0.00 |
| ATOM | 2734 | O    | GLN | X | 177 | 25.961 | 51.773 | 34.648 | 0.00 | 0.00 |
| ATOM | 2735 | N    | TRP | X | 178 | 28.085 | 52.505 | 34.382 | 0.00 | 0.00 |
| ATOM | 2736 | H    | TRP | X | 178 | 28.923 | 52.726 | 34.901 | 0.00 | 0.00 |
| ATOM | 2737 | CA   | TRP | X | 178 | 28.034 | 52.877 | 32.930 | 0.00 | 0.00 |
| ATOM | 2738 | HA   | TRP | X | 178 | 27.182 | 53.489 | 32.635 | 0.00 | 0.00 |
| ATOM | 2739 | CB   | TRP | X | 178 | 29.330 | 53.614 | 32.619 | 0.00 | 0.00 |
| ATOM | 2740 | HB2  | TRP | X | 178 | 29.487 | 54.284 | 33.464 | 0.00 | 0.00 |
| ATOM | 2741 | HB3  | TRP | X | 178 | 30.121 | 52.865 | 32.630 | 0.00 | 0.00 |
| ATOM | 2742 | CG   | TRP | X | 178 | 29.589 | 54.295 | 31.335 | 0.00 | 0.00 |
| ATOM | 2743 | CD1  | TRP | X | 178 | 29.339 | 55.606 | 31.082 | 0.00 | 0.00 |
| ATOM | 2744 | HD1  | TRP | X | 178 | 28.940 | 56.341 | 31.765 | 0.00 | 0.00 |
| ATOM | 2745 | NE1  | TRP | X | 178 | 29.802 | 55.876 | 29.777 | 0.00 | 0.00 |
| ATOM | 2746 | HE1  | TRP | X | 178 | 29.865 | 56.828 | 29.447 | 0.00 | 0.00 |
| ATOM | 2747 | CE2  | TRP | X | 178 | 30.052 | 54.794 | 29.035 | 0.00 | 0.00 |
| ATOM | 2748 | CZ2  | TRP | X | 178 | 30.230 | 54.658 | 27.701 | 0.00 | 0.00 |
| ATOM | 2749 | HZ2  | TRP | X | 178 | 30.026 | 55.544 | 27.117 | 0.00 | 0.00 |
| ATOM | 2750 | CH2  | TRP | X | 178 | 30.471 | 53.341 | 27.190 | 0.00 | 0.00 |
| ATOM | 2751 | HH2  | TRP | X | 178 | 30.389 | 53.218 | 26.120 | 0.00 | 0.00 |
| ATOM | 2752 | CZ3  | TRP | X | 178 | 30.359 | 52.220 | 28.038 | 0.00 | 0.00 |
| ATOM | 2753 | HZ3  | TRP | X | 178 | 30.502 | 51.211 | 27.680 | 0.00 | 0.00 |
| ATOM | 2754 | CE3  | TRP | X | 178 | 30.006 | 52.455 | 29.374 | 0.00 | 0.00 |
| ATOM | 2755 | HE3  | TRP | X | 178 | 29.812 | 51.626 | 30.038 | 0.00 | 0.00 |
| ATOM | 2756 | CD2  | TRP | X | 178 | 29.885 | 53.740 | 29.964 | 0.00 | 0.00 |
| ATOM | 2757 | C    | TRP | X | 178 | 28.045 | 51.604 | 32.069 | 0.00 | 0.00 |
| ATOM | 2758 | O    | TRP | X | 178 | 27.469 | 51.593 | 30.952 | 0.00 | 0.00 |
| ATOM | 2759 | N    | VAL | X | 179 | 28.703 | 50.556 | 32.585 | 0.00 | 0.00 |
| ATOM | 2760 | H    | VAL | X | 179 | 29.115 | 50.641 | 33.504 | 0.00 | 0.00 |
| ATOM | 2761 | CA   | VAL | X | 179 | 28.521 | 49.223 | 31.938 | 0.00 | 0.00 |
| ATOM | 2762 | HA   | VAL | X | 179 | 28.781 | 49.465 | 30.908 | 0.00 | 0.00 |
| ATOM | 2763 | CB   | VAL | X | 179 | 29.480 | 48.238 | 32.525 | 0.00 | 0.00 |
| ATOM | 2764 | HB   | VAL | X | 179 | 29.335 | 48.301 | 33.604 | 0.00 | 0.00 |
| ATOM | 2765 | CG1  | VAL | X | 179 | 29.262 | 46.784 | 32.099 | 0.00 | 0.00 |
| ATOM | 2766 | HG11 | VAL | X | 179 | 28.219 | 46.522 | 32.277 | 0.00 | 0.00 |
| ATOM | 2767 | HG12 | VAL | X | 179 | 29.486 | 46.703 | 31.036 | 0.00 | 0.00 |
| ATOM | 2768 | HG13 | VAL | X | 179 | 29.936 | 46.055 | 32.549 | 0.00 | 0.00 |
| ATOM | 2769 | CG2  | VAL | X | 179 | 30.931 | 48.499 | 32.229 | 0.00 | 0.00 |
| ATOM | 2770 | HG21 | VAL | X | 179 | 31.233 | 48.520 | 31.182 | 0.00 | 0.00 |
| ATOM | 2771 | HG22 | VAL | X | 179 | 31.460 | 47.798 | 32.874 | 0.00 | 0.00 |
| ATOM | 2772 | HG23 | VAL | X | 179 | 31.196 | 49.508 | 32.546 | 0.00 | 0.00 |
| ATOM | 2773 | C    | VAL | X | 179 | 27.014 | 48.893 | 31.987 | 0.00 | 0.00 |
| ATOM | 2774 | O    | VAL | X | 179 | 26.492 | 48.501 | 30.878 | 0.00 | 0.00 |
| ATOM | 2775 | N    | GLN | X | 180 | 26.335 | 48.911 | 33.138 | 0.00 | 0.00 |
| ATOM | 2776 | H    | GLN | X | 180 | 26.829 | 49.246 | 33.953 | 0.00 | 0.00 |
| ATOM | 2777 | CA   | GLN | X | 180 | 24.876 | 48.616 | 33.286 | 0.00 | 0.00 |
| ATOM | 2778 | HA   | GLN | X | 180 | 24.634 | 47.638 | 32.870 | 0.00 | 0.00 |
| ATOM | 2779 | CB   | GLN | X | 180 | 24.473 | 48.632 | 34.755 | 0.00 | 0.00 |
| ATOM | 2780 | HB2  | GLN | X | 180 | 24.997 | 49.488 | 35.180 | 0.00 | 0.00 |
| ATOM | 2781 | HB3  | GLN | X | 180 | 23.385 | 48.696 | 34.734 | 0.00 | 0.00 |
| ATOM | 2782 | CG   | GLN | X | 180 | 24.835 | 47.313 | 35.550 | 0.00 | 0.00 |
| ATOM | 2783 | HG2  | GLN | X | 180 | 25.863 | 46.960 | 35.468 | 0.00 | 0.00 |
| ATOM | 2784 | HG3  | GLN | X | 180 | 24.597 | 47.609 | 36.572 | 0.00 | 0.00 |
| ATOM | 2785 | CD   | GLN | X | 180 | 23.967 | 46.104 | 35.137 | 0.00 | 0.00 |
| ATOM | 2786 | OE1  | GLN | X | 180 | 22.857 | 46.273 | 34.525 | 0.00 | 0.00 |
| ATOM | 2787 | NE2  | GLN | X | 180 | 24.276 | 44.864 | 35.388 | 0.00 | 0.00 |
| ATOM | 2788 | HE21 | GLN | X | 180 | 23.589 | 44.134 | 35.270 | 0.00 | 0.00 |
| ATOM | 2789 | HE22 | GLN | X | 180 | 25.105 | 44.777 | 35.957 | 0.00 | 0.00 |
| ATOM | 2790 | C    | GLN | X | 180 | 23.880 | 49.594 | 32.484 | 0.00 | 0.00 |
| ATOM | 2791 | O    | GLN | X | 180 | 22.706 | 49.277 | 32.264 | 0.00 | 0.00 |
| ATOM | 2792 | N    | GLU | X | 181 | 24.376 | 50.779 | 32.095 | 0.00 | 0.00 |

|      |      |      |     |   |     |        |        |        |      |      |
|------|------|------|-----|---|-----|--------|--------|--------|------|------|
| ATOM | 2793 | H    | GLU | X | 181 | 25.256 | 51.065 | 32.500 | 0.00 | 0.00 |
| ATOM | 2794 | CA   | GLU | X | 181 | 23.605 | 51.670 | 31.234 | 0.00 | 0.00 |
| ATOM | 2795 | HA   | GLU | X | 181 | 22.557 | 51.591 | 31.522 | 0.00 | 0.00 |
| ATOM | 2796 | CB   | GLU | X | 181 | 24.038 | 53.153 | 31.421 | 0.00 | 0.00 |
| ATOM | 2797 | HB2  | GLU | X | 181 | 25.127 | 53.181 | 31.404 | 0.00 | 0.00 |
| ATOM | 2798 | HB3  | GLU | X | 181 | 23.556 | 53.704 | 30.614 | 0.00 | 0.00 |
| ATOM | 2799 | CG   | GLU | X | 181 | 23.622 | 53.646 | 32.810 | 0.00 | 0.00 |
| ATOM | 2800 | HG2  | GLU | X | 181 | 23.820 | 52.924 | 33.603 | 0.00 | 0.00 |
| ATOM | 2801 | HG3  | GLU | X | 181 | 24.206 | 54.530 | 33.068 | 0.00 | 0.00 |
| ATOM | 2802 | CD   | GLU | X | 181 | 22.137 | 53.986 | 32.809 | 0.00 | 0.00 |
| ATOM | 2803 | OE1  | GLU | X | 181 | 21.769 | 54.969 | 32.189 | 0.00 | 0.00 |
| ATOM | 2804 | OE2  | GLU | X | 181 | 21.373 | 53.101 | 33.307 | 0.00 | 0.00 |
| ATOM | 2805 | C    | GLU | X | 181 | 23.853 | 51.262 | 29.759 | 0.00 | 0.00 |
| ATOM | 2806 | O    | GLU | X | 181 | 22.893 | 51.168 | 28.977 | 0.00 | 0.00 |
| ATOM | 2807 | N    | ASN | X | 182 | 25.110 | 51.085 | 29.334 | 0.00 | 0.00 |
| ATOM | 2808 | H    | ASN | X | 182 | 25.845 | 51.141 | 30.025 | 0.00 | 0.00 |
| ATOM | 2809 | CA   | ASN | X | 182 | 25.476 | 51.266 | 27.901 | 0.00 | 0.00 |
| ATOM | 2810 | HA   | ASN | X | 182 | 24.579 | 51.606 | 27.385 | 0.00 | 0.00 |
| ATOM | 2811 | CB   | ASN | X | 182 | 26.620 | 52.347 | 27.897 | 0.00 | 0.00 |
| ATOM | 2812 | HB2  | ASN | X | 182 | 27.383 | 52.051 | 28.616 | 0.00 | 0.00 |
| ATOM | 2813 | HB3  | ASN | X | 182 | 26.982 | 52.580 | 26.895 | 0.00 | 0.00 |
| ATOM | 2814 | CG   | ASN | X | 182 | 26.173 | 53.707 | 28.327 | 0.00 | 0.00 |
| ATOM | 2815 | OD1  | ASN | X | 182 | 25.165 | 54.169 | 27.881 | 0.00 | 0.00 |
| ATOM | 2816 | ND2  | ASN | X | 182 | 26.817 | 54.343 | 29.259 | 0.00 | 0.00 |
| ATOM | 2817 | HD21 | ASN | X | 182 | 26.512 | 55.271 | 29.517 | 0.00 | 0.00 |
| ATOM | 2818 | HD22 | ASN | X | 182 | 27.654 | 53.899 | 29.608 | 0.00 | 0.00 |
| ATOM | 2819 | C    | ASN | X | 182 | 25.882 | 49.981 | 27.124 | 0.00 | 0.00 |
| ATOM | 2820 | O    | ASN | X | 182 | 26.079 | 50.042 | 25.909 | 0.00 | 0.00 |
| ATOM | 2821 | N    | VAL | X | 183 | 26.117 | 48.909 | 27.809 | 0.00 | 0.00 |
| ATOM | 2822 | H    | VAL | X | 183 | 25.625 | 48.940 | 28.690 | 0.00 | 0.00 |
| ATOM | 2823 | CA   | VAL | X | 183 | 26.987 | 47.815 | 27.332 | 0.00 | 0.00 |
| ATOM | 2824 | HA   | VAL | X | 183 | 27.863 | 48.235 | 26.838 | 0.00 | 0.00 |
| ATOM | 2825 | CB   | VAL | X | 183 | 27.582 | 46.909 | 28.424 | 0.00 | 0.00 |
| ATOM | 2826 | HB   | VAL | X | 183 | 27.958 | 47.548 | 29.224 | 0.00 | 0.00 |
| ATOM | 2827 | CG1  | VAL | X | 183 | 26.497 | 46.038 | 29.011 | 0.00 | 0.00 |
| ATOM | 2828 | HG11 | VAL | X | 183 | 26.840 | 45.455 | 29.866 | 0.00 | 0.00 |
| ATOM | 2829 | HG12 | VAL | X | 183 | 25.743 | 46.729 | 29.389 | 0.00 | 0.00 |
| ATOM | 2830 | HG13 | VAL | X | 183 | 26.174 | 45.350 | 28.230 | 0.00 | 0.00 |
| ATOM | 2831 | CG2  | VAL | X | 183 | 28.726 | 45.942 | 27.918 | 0.00 | 0.00 |
| ATOM | 2832 | HG21 | VAL | X | 183 | 28.401 | 45.004 | 27.469 | 0.00 | 0.00 |
| ATOM | 2833 | HG22 | VAL | X | 183 | 29.277 | 45.733 | 28.835 | 0.00 | 0.00 |
| ATOM | 2834 | HG23 | VAL | X | 183 | 29.428 | 46.458 | 27.263 | 0.00 | 0.00 |
| ATOM | 2835 | C    | VAL | X | 183 | 26.257 | 46.985 | 26.167 | 0.00 | 0.00 |
| ATOM | 2836 | O    | VAL | X | 183 | 26.988 | 46.446 | 25.350 | 0.00 | 0.00 |
| ATOM | 2837 | N    | ALA | X | 184 | 24.928 | 46.911 | 26.200 | 0.00 | 0.00 |
| ATOM | 2838 | H    | ALA | X | 184 | 24.479 | 47.395 | 26.965 | 0.00 | 0.00 |
| ATOM | 2839 | CA   | ALA | X | 184 | 24.217 | 46.285 | 25.061 | 0.00 | 0.00 |
| ATOM | 2840 | HA   | ALA | X | 184 | 24.596 | 45.263 | 25.083 | 0.00 | 0.00 |
| ATOM | 2841 | CB   | ALA | X | 184 | 22.679 | 46.251 | 25.368 | 0.00 | 0.00 |
| ATOM | 2842 | HB1  | ALA | X | 184 | 22.351 | 47.273 | 25.556 | 0.00 | 0.00 |
| ATOM | 2843 | HB2  | ALA | X | 184 | 22.388 | 45.611 | 26.201 | 0.00 | 0.00 |
| ATOM | 2844 | HB3  | ALA | X | 184 | 22.204 | 45.712 | 24.548 | 0.00 | 0.00 |
| ATOM | 2845 | C    | ALA | X | 184 | 24.407 | 47.032 | 23.707 | 0.00 | 0.00 |
| ATOM | 2846 | O    | ALA | X | 184 | 24.274 | 46.487 | 22.627 | 0.00 | 0.00 |
| ATOM | 2847 | N    | ALA | X | 185 | 24.896 | 48.248 | 23.685 | 0.00 | 0.00 |
| ATOM | 2848 | H    | ALA | X | 185 | 25.177 | 48.717 | 24.534 | 0.00 | 0.00 |
| ATOM | 2849 | CA   | ALA | X | 185 | 25.155 | 48.976 | 22.440 | 0.00 | 0.00 |
| ATOM | 2850 | HA   | ALA | X | 185 | 24.287 | 48.821 | 21.798 | 0.00 | 0.00 |
| ATOM | 2851 | CB   | ALA | X | 185 | 25.329 | 50.466 | 22.689 | 0.00 | 0.00 |
| ATOM | 2852 | HB1  | ALA | X | 185 | 25.248 | 50.997 | 21.741 | 0.00 | 0.00 |
| ATOM | 2853 | HB2  | ALA | X | 185 | 26.320 | 50.654 | 23.104 | 0.00 | 0.00 |
| ATOM | 2854 | HB3  | ALA | X | 185 | 24.527 | 50.784 | 23.355 | 0.00 | 0.00 |
| ATOM | 2855 | C    | ALA | X | 185 | 26.408 | 48.392 | 21.663 | 0.00 | 0.00 |
| ATOM | 2856 | O    | ALA | X | 185 | 26.423 | 48.298 | 20.421 | 0.00 | 0.00 |
| ATOM | 2857 | N    | PHE | X | 186 | 27.307 | 47.806 | 22.447 | 0.00 | 0.00 |
| ATOM | 2858 | H    | PHE | X | 186 | 27.321 | 47.939 | 23.448 | 0.00 | 0.00 |
| ATOM | 2859 | CA   | PHE | X | 186 | 28.454 | 46.992 | 21.995 | 0.00 | 0.00 |

|      |      |      |     |   |     |        |        |        |      |      |
|------|------|------|-----|---|-----|--------|--------|--------|------|------|
| ATOM | 2860 | HA   | PHE | X | 186 | 28.812 | 47.377 | 21.040 | 0.00 | 0.00 |
| ATOM | 2861 | CB   | PHE | X | 186 | 29.683 | 47.043 | 22.866 | 0.00 | 0.00 |
| ATOM | 2862 | HB2  | PHE | X | 186 | 29.485 | 46.509 | 23.796 | 0.00 | 0.00 |
| ATOM | 2863 | HB3  | PHE | X | 186 | 30.534 | 46.552 | 22.394 | 0.00 | 0.00 |
| ATOM | 2864 | CG   | PHE | X | 186 | 30.106 | 48.456 | 23.143 | 0.00 | 0.00 |
| ATOM | 2865 | CD1  | PHE | X | 186 | 29.632 | 49.159 | 24.274 | 0.00 | 0.00 |
| ATOM | 2866 | HD1  | PHE | X | 186 | 28.904 | 48.718 | 24.939 | 0.00 | 0.00 |
| ATOM | 2867 | CE1  | PHE | X | 186 | 30.103 | 50.443 | 24.615 | 0.00 | 0.00 |
| ATOM | 2868 | HE1  | PHE | X | 186 | 29.652 | 50.936 | 25.463 | 0.00 | 0.00 |
| ATOM | 2869 | CZ   | PHE | X | 186 | 31.182 | 50.939 | 23.875 | 0.00 | 0.00 |
| ATOM | 2870 | HZ   | PHE | X | 186 | 31.541 | 51.916 | 24.163 | 0.00 | 0.00 |
| ATOM | 2871 | CE2  | PHE | X | 186 | 31.675 | 50.251 | 22.749 | 0.00 | 0.00 |
| ATOM | 2872 | HE2  | PHE | X | 186 | 32.430 | 50.786 | 22.193 | 0.00 | 0.00 |
| ATOM | 2873 | CD2  | PHE | X | 186 | 31.151 | 49.028 | 22.348 | 0.00 | 0.00 |
| ATOM | 2874 | HD2  | PHE | X | 186 | 31.657 | 48.511 | 21.546 | 0.00 | 0.00 |
| ATOM | 2875 | C    | PHE | X | 186 | 28.203 | 45.518 | 21.747 | 0.00 | 0.00 |
| ATOM | 2876 | O    | PHE | X | 186 | 29.153 | 44.775 | 21.436 | 0.00 | 0.00 |
| ATOM | 2877 | N    | GLY | X | 187 | 27.029 | 45.006 | 21.989 | 0.00 | 0.00 |
| ATOM | 2878 | H    | GLY | X | 187 | 26.236 | 45.603 | 22.177 | 0.00 | 0.00 |
| ATOM | 2879 | CA   | GLY | X | 187 | 26.724 | 43.587 | 21.756 | 0.00 | 0.00 |
| ATOM | 2880 | HA2  | GLY | X | 187 | 25.690 | 43.673 | 21.422 | 0.00 | 0.00 |
| ATOM | 2881 | HA3  | GLY | X | 187 | 27.352 | 43.124 | 20.995 | 0.00 | 0.00 |
| ATOM | 2882 | C    | GLY | X | 187 | 26.698 | 42.765 | 23.045 | 0.00 | 0.00 |
| ATOM | 2883 | O    | GLY | X | 187 | 26.718 | 41.545 | 22.950 | 0.00 | 0.00 |
| ATOM | 2884 | N    | GLY | X | 188 | 26.820 | 43.456 | 24.178 | 0.00 | 0.00 |
| ATOM | 2885 | H    | GLY | X | 188 | 27.060 | 44.437 | 24.200 | 0.00 | 0.00 |
| ATOM | 2886 | CA   | GLY | X | 188 | 26.887 | 42.812 | 25.484 | 0.00 | 0.00 |
| ATOM | 2887 | HA2  | GLY | X | 188 | 27.365 | 41.844 | 25.333 | 0.00 | 0.00 |
| ATOM | 2888 | HA3  | GLY | X | 188 | 27.456 | 43.434 | 26.174 | 0.00 | 0.00 |
| ATOM | 2889 | C    | GLY | X | 188 | 25.511 | 42.604 | 26.134 | 0.00 | 0.00 |
| ATOM | 2890 | O    | GLY | X | 188 | 24.458 | 42.842 | 25.463 | 0.00 | 0.00 |
| ATOM | 2891 | N    | ASP | X | 189 | 25.547 | 42.246 | 27.433 | 0.00 | 0.00 |
| ATOM | 2892 | H    | ASP | X | 189 | 26.385 | 42.225 | 27.997 | 0.00 | 0.00 |
| ATOM | 2893 | CA   | ASP | X | 189 | 24.387 | 41.907 | 28.135 | 0.00 | 0.00 |
| ATOM | 2894 | HA   | ASP | X | 189 | 23.574 | 42.509 | 27.731 | 0.00 | 0.00 |
| ATOM | 2895 | CB   | ASP | X | 189 | 23.931 | 40.502 | 27.838 | 0.00 | 0.00 |
| ATOM | 2896 | HB2  | ASP | X | 189 | 23.794 | 40.257 | 26.785 | 0.00 | 0.00 |
| ATOM | 2897 | HB3  | ASP | X | 189 | 24.839 | 39.955 | 28.089 | 0.00 | 0.00 |
| ATOM | 2898 | CG   | ASP | X | 189 | 22.810 | 40.030 | 28.731 | 0.00 | 0.00 |
| ATOM | 2899 | OD1  | ASP | X | 189 | 21.937 | 40.883 | 29.073 | 0.00 | 0.00 |
| ATOM | 2900 | OD2  | ASP | X | 189 | 22.909 | 38.861 | 29.167 | 0.00 | 0.00 |
| ATOM | 2901 | C    | ASP | X | 189 | 24.517 | 42.339 | 29.621 | 0.00 | 0.00 |
| ATOM | 2902 | O    | ASP | X | 189 | 25.294 | 41.683 | 30.358 | 0.00 | 0.00 |
| ATOM | 2903 | N    | PRO | X | 190 | 23.692 | 43.263 | 30.073 | 0.00 | 0.00 |
| ATOM | 2904 | CD   | PRO | X | 190 | 22.888 | 44.199 | 29.239 | 0.00 | 0.00 |
| ATOM | 2905 | HD2  | PRO | X | 190 | 22.059 | 43.713 | 28.724 | 0.00 | 0.00 |
| ATOM | 2906 | HD3  | PRO | X | 190 | 23.460 | 44.749 | 28.491 | 0.00 | 0.00 |
| ATOM | 2907 | CG   | PRO | X | 190 | 22.116 | 45.067 | 30.190 | 0.00 | 0.00 |
| ATOM | 2908 | HG2  | PRO | X | 190 | 21.150 | 44.610 | 30.403 | 0.00 | 0.00 |
| ATOM | 2909 | HG3  | PRO | X | 190 | 22.060 | 46.105 | 29.861 | 0.00 | 0.00 |
| ATOM | 2910 | CB   | PRO | X | 190 | 22.897 | 44.994 | 31.488 | 0.00 | 0.00 |
| ATOM | 2911 | HB2  | PRO | X | 190 | 22.198 | 45.027 | 32.324 | 0.00 | 0.00 |
| ATOM | 2912 | HB3  | PRO | X | 190 | 23.554 | 45.863 | 31.528 | 0.00 | 0.00 |
| ATOM | 2913 | CA   | PRO | X | 190 | 23.609 | 43.663 | 31.466 | 0.00 | 0.00 |
| ATOM | 2914 | HA   | PRO | X | 190 | 24.639 | 43.818 | 31.787 | 0.00 | 0.00 |
| ATOM | 2915 | C    | PRO | X | 190 | 22.955 | 42.671 | 32.416 | 0.00 | 0.00 |
| ATOM | 2916 | O    | PRO | X | 190 | 22.949 | 42.882 | 33.646 | 0.00 | 0.00 |
| ATOM | 2917 | N    | THR | X | 191 | 22.359 | 41.559 | 31.894 | 0.00 | 0.00 |
| ATOM | 2918 | H    | THR | X | 191 | 22.408 | 41.409 | 30.896 | 0.00 | 0.00 |
| ATOM | 2919 | CA   | THR | X | 191 | 21.933 | 40.379 | 32.733 | 0.00 | 0.00 |
| ATOM | 2920 | HA   | THR | X | 191 | 21.852 | 40.791 | 33.738 | 0.00 | 0.00 |
| ATOM | 2921 | CB   | THR | X | 191 | 20.510 | 39.969 | 32.235 | 0.00 | 0.00 |
| ATOM | 2922 | HB   | THR | X | 191 | 20.052 | 39.277 | 32.942 | 0.00 | 0.00 |
| ATOM | 2923 | CG2  | THR | X | 191 | 19.517 | 41.184 | 32.082 | 0.00 | 0.00 |
| ATOM | 2924 | HG21 | THR | X | 191 | 19.934 | 41.910 | 31.384 | 0.00 | 0.00 |
| ATOM | 2925 | HG22 | THR | X | 191 | 19.225 | 41.611 | 33.041 | 0.00 | 0.00 |
| ATOM | 2926 | HG23 | THR | X | 191 | 18.575 | 40.974 | 31.575 | 0.00 | 0.00 |

|      |      |      |     |   |     |        |        |        |      |      |
|------|------|------|-----|---|-----|--------|--------|--------|------|------|
| ATOM | 2927 | OG1  | THR | X | 191 | 20.547 | 39.444 | 30.909 | 0.00 | 0.00 |
| ATOM | 2928 | HG1  | THR | X | 191 | 21.303 | 39.778 | 30.422 | 0.00 | 0.00 |
| ATOM | 2929 | C    | THR | X | 191 | 23.006 | 39.214 | 32.813 | 0.00 | 0.00 |
| ATOM | 2930 | O    | THR | X | 191 | 22.744 | 38.201 | 33.436 | 0.00 | 0.00 |
| ATOM | 2931 | N    | SER | X | 192 | 24.148 | 39.424 | 32.168 | 0.00 | 0.00 |
| ATOM | 2932 | H    | SER | X | 192 | 24.210 | 40.304 | 31.677 | 0.00 | 0.00 |
| ATOM | 2933 | CA   | SER | X | 192 | 25.287 | 38.542 | 32.268 | 0.00 | 0.00 |
| ATOM | 2934 | HA   | SER | X | 192 | 25.259 | 38.019 | 33.224 | 0.00 | 0.00 |
| ATOM | 2935 | CB   | SER | X | 192 | 25.267 | 37.592 | 31.038 | 0.00 | 0.00 |
| ATOM | 2936 | HB2  | SER | X | 192 | 25.409 | 38.303 | 30.224 | 0.00 | 0.00 |
| ATOM | 2937 | HB3  | SER | X | 192 | 25.917 | 36.734 | 31.213 | 0.00 | 0.00 |
| ATOM | 2938 | OG   | SER | X | 192 | 23.980 | 36.990 | 30.738 | 0.00 | 0.00 |
| ATOM | 2939 | HG   | SER | X | 192 | 23.386 | 37.723 | 30.562 | 0.00 | 0.00 |
| ATOM | 2940 | C    | SER | X | 192 | 26.647 | 39.264 | 32.410 | 0.00 | 0.00 |
| ATOM | 2941 | O    | SER | X | 192 | 27.591 | 38.950 | 31.709 | 0.00 | 0.00 |
| ATOM | 2942 | N    | VAL | X | 193 | 26.879 | 40.054 | 33.471 | 0.00 | 0.00 |
| ATOM | 2943 | H    | VAL | X | 193 | 26.127 | 40.136 | 34.141 | 0.00 | 0.00 |
| ATOM | 2944 | CA   | VAL | X | 193 | 28.226 | 40.678 | 33.630 | 0.00 | 0.00 |
| ATOM | 2945 | HA   | VAL | X | 193 | 28.621 | 40.726 | 32.616 | 0.00 | 0.00 |
| ATOM | 2946 | CB   | VAL | X | 193 | 28.017 | 42.139 | 34.244 | 0.00 | 0.00 |
| ATOM | 2947 | HB   | VAL | X | 193 | 27.353 | 42.035 | 35.102 | 0.00 | 0.00 |
| ATOM | 2948 | CG1  | VAL | X | 193 | 29.290 | 42.696 | 34.797 | 0.00 | 0.00 |
| ATOM | 2949 | HG11 | VAL | X | 193 | 29.557 | 42.225 | 35.743 | 0.00 | 0.00 |
| ATOM | 2950 | HG12 | VAL | X | 193 | 30.034 | 42.577 | 34.010 | 0.00 | 0.00 |
| ATOM | 2951 | HG13 | VAL | X | 193 | 29.083 | 43.728 | 35.078 | 0.00 | 0.00 |
| ATOM | 2952 | CG2  | VAL | X | 193 | 27.456 | 43.034 | 33.102 | 0.00 | 0.00 |
| ATOM | 2953 | HG21 | VAL | X | 193 | 27.410 | 44.056 | 33.477 | 0.00 | 0.00 |
| ATOM | 2954 | HG22 | VAL | X | 193 | 26.393 | 42.882 | 32.917 | 0.00 | 0.00 |
| ATOM | 2955 | HG23 | VAL | X | 193 | 27.942 | 42.954 | 32.130 | 0.00 | 0.00 |
| ATOM | 2956 | C    | VAL | X | 193 | 29.102 | 39.851 | 34.625 | 0.00 | 0.00 |
| ATOM | 2957 | O    | VAL | X | 193 | 28.757 | 39.429 | 35.773 | 0.00 | 0.00 |
| ATOM | 2958 | N    | THR | X | 194 | 30.292 | 39.483 | 34.119 | 0.00 | 0.00 |
| ATOM | 2959 | H    | THR | X | 194 | 30.532 | 39.946 | 33.254 | 0.00 | 0.00 |
| ATOM | 2960 | CA   | THR | X | 194 | 31.334 | 38.815 | 34.906 | 0.00 | 0.00 |
| ATOM | 2961 | HA   | THR | X | 194 | 30.896 | 38.563 | 35.872 | 0.00 | 0.00 |
| ATOM | 2962 | CB   | THR | X | 194 | 31.837 | 37.590 | 34.028 | 0.00 | 0.00 |
| ATOM | 2963 | HB   | THR | X | 194 | 32.086 | 37.937 | 33.025 | 0.00 | 0.00 |
| ATOM | 2964 | CG2  | THR | X | 194 | 32.887 | 36.617 | 34.703 | 0.00 | 0.00 |
| ATOM | 2965 | HG21 | THR | X | 194 | 33.841 | 37.112 | 34.881 | 0.00 | 0.00 |
| ATOM | 2966 | HG22 | THR | X | 194 | 33.105 | 35.786 | 34.032 | 0.00 | 0.00 |
| ATOM | 2967 | HG23 | THR | X | 194 | 32.448 | 36.324 | 35.657 | 0.00 | 0.00 |
| ATOM | 2968 | OG1  | THR | X | 194 | 30.695 | 36.790 | 33.852 | 0.00 | 0.00 |
| ATOM | 2969 | HG1  | THR | X | 194 | 30.148 | 37.231 | 33.198 | 0.00 | 0.00 |
| ATOM | 2970 | C    | THR | X | 194 | 32.594 | 39.706 | 35.234 | 0.00 | 0.00 |
| ATOM | 2971 | O    | THR | X | 194 | 33.225 | 40.229 | 34.337 | 0.00 | 0.00 |
| ATOM | 2972 | N    | LEU | X | 195 | 32.812 | 39.864 | 36.536 | 0.00 | 0.00 |
| ATOM | 2973 | H    | LEU | X | 195 | 32.163 | 39.426 | 37.173 | 0.00 | 0.00 |
| ATOM | 2974 | CA   | LEU | X | 195 | 34.120 | 40.396 | 37.041 | 0.00 | 0.00 |
| ATOM | 2975 | HA   | LEU | X | 195 | 34.509 | 41.168 | 36.376 | 0.00 | 0.00 |
| ATOM | 2976 | CB   | LEU | X | 195 | 33.889 | 41.056 | 38.455 | 0.00 | 0.00 |
| ATOM | 2977 | HB2  | LEU | X | 195 | 33.616 | 40.296 | 39.187 | 0.00 | 0.00 |
| ATOM | 2978 | HB3  | LEU | X | 195 | 34.880 | 41.429 | 38.714 | 0.00 | 0.00 |
| ATOM | 2979 | CG   | LEU | X | 195 | 32.799 | 42.141 | 38.519 | 0.00 | 0.00 |
| ATOM | 2980 | HG   | LEU | X | 195 | 31.889 | 41.547 | 38.426 | 0.00 | 0.00 |
| ATOM | 2981 | CD1  | LEU | X | 195 | 32.898 | 42.712 | 39.960 | 0.00 | 0.00 |
| ATOM | 2982 | HD11 | LEU | X | 195 | 32.013 | 43.321 | 40.145 | 0.00 | 0.00 |
| ATOM | 2983 | HD12 | LEU | X | 195 | 33.755 | 43.347 | 40.183 | 0.00 | 0.00 |
| ATOM | 2984 | HD13 | LEU | X | 195 | 32.823 | 41.856 | 40.631 | 0.00 | 0.00 |
| ATOM | 2985 | CD2  | LEU | X | 195 | 32.984 | 43.198 | 37.469 | 0.00 | 0.00 |
| ATOM | 2986 | HD21 | LEU | X | 195 | 32.386 | 44.058 | 37.771 | 0.00 | 0.00 |
| ATOM | 2987 | HD22 | LEU | X | 195 | 34.044 | 43.435 | 37.377 | 0.00 | 0.00 |
| ATOM | 2988 | HD23 | LEU | X | 195 | 32.533 | 42.751 | 36.583 | 0.00 | 0.00 |
| ATOM | 2989 | C    | LEU | X | 195 | 35.252 | 39.394 | 37.137 | 0.00 | 0.00 |
| ATOM | 2990 | O    | LEU | X | 195 | 35.087 | 38.351 | 37.777 | 0.00 | 0.00 |
| ATOM | 2991 | N    | PHE | X | 196 | 36.407 | 39.727 | 36.544 | 0.00 | 0.00 |
| ATOM | 2992 | H    | PHE | X | 196 | 36.480 | 40.714 | 36.343 | 0.00 | 0.00 |
| ATOM | 2993 | CA   | PHE | X | 196 | 37.608 | 38.934 | 36.575 | 0.00 | 0.00 |

|      |      |     |     |   |     |        |        |        |      |      |
|------|------|-----|-----|---|-----|--------|--------|--------|------|------|
| ATOM | 2994 | HA  | PHE | X | 196 | 37.544 | 38.208 | 37.385 | 0.00 | 0.00 |
| ATOM | 2995 | CB  | PHE | X | 196 | 37.781 | 38.086 | 35.291 | 0.00 | 0.00 |
| ATOM | 2996 | HB2 | PHE | X | 196 | 38.561 | 37.347 | 35.474 | 0.00 | 0.00 |
| ATOM | 2997 | HB3 | PHE | X | 196 | 36.855 | 37.532 | 35.139 | 0.00 | 0.00 |
| ATOM | 2998 | CG  | PHE | X | 196 | 38.074 | 38.705 | 33.900 | 0.00 | 0.00 |
| ATOM | 2999 | CD1 | PHE | X | 196 | 37.203 | 39.679 | 33.348 | 0.00 | 0.00 |
| ATOM | 3000 | HD1 | PHE | X | 196 | 36.299 | 39.836 | 33.918 | 0.00 | 0.00 |
| ATOM | 3001 | CE1 | PHE | X | 196 | 37.454 | 40.329 | 32.145 | 0.00 | 0.00 |
| ATOM | 3002 | HE1 | PHE | X | 196 | 36.779 | 40.993 | 31.626 | 0.00 | 0.00 |
| ATOM | 3003 | CZ  | PHE | X | 196 | 38.488 | 39.807 | 31.350 | 0.00 | 0.00 |
| ATOM | 3004 | HZ  | PHE | X | 196 | 38.769 | 40.216 | 30.391 | 0.00 | 0.00 |
| ATOM | 3005 | CE2 | PHE | X | 196 | 39.320 | 38.773 | 31.846 | 0.00 | 0.00 |
| ATOM | 3006 | HE2 | PHE | X | 196 | 40.152 | 38.385 | 31.277 | 0.00 | 0.00 |
| ATOM | 3007 | CD2 | PHE | X | 196 | 39.114 | 38.253 | 33.120 | 0.00 | 0.00 |
| ATOM | 3008 | HD2 | PHE | X | 196 | 39.791 | 37.458 | 33.396 | 0.00 | 0.00 |
| ATOM | 3009 | C   | PHE | X | 196 | 38.761 | 39.986 | 36.883 | 0.00 | 0.00 |
| ATOM | 3010 | O   | PHE | X | 196 | 38.658 | 41.177 | 36.513 | 0.00 | 0.00 |
| ATOM | 3011 | N   | GLY | X | 197 | 39.723 | 39.528 | 37.701 | 0.00 | 0.00 |
| ATOM | 3012 | H   | GLY | X | 197 | 39.692 | 38.575 | 38.033 | 0.00 | 0.00 |
| ATOM | 3013 | CA  | GLY | X | 197 | 40.876 | 40.415 | 38.048 | 0.00 | 0.00 |
| ATOM | 3014 | HA2 | GLY | X | 197 | 41.276 | 40.859 | 37.137 | 0.00 | 0.00 |
| ATOM | 3015 | HA3 | GLY | X | 197 | 40.647 | 41.211 | 38.756 | 0.00 | 0.00 |
| ATOM | 3016 | C   | GLY | X | 197 | 42.028 | 39.694 | 38.748 | 0.00 | 0.00 |
| ATOM | 3017 | O   | GLY | X | 197 | 41.819 | 38.585 | 39.286 | 0.00 | 0.00 |
| ATOM | 3018 | N   | GLU | X | 198 | 43.267 | 40.297 | 38.771 | 0.00 | 0.00 |
| ATOM | 3019 | H   | GLU | X | 198 | 43.413 | 41.274 | 38.563 | 0.00 | 0.00 |
| ATOM | 3020 | CA  | GLU | X | 198 | 44.438 | 39.708 | 39.373 | 0.00 | 0.00 |
| ATOM | 3021 | HA  | GLU | X | 198 | 44.202 | 38.716 | 39.757 | 0.00 | 0.00 |
| ATOM | 3022 | CB  | GLU | X | 198 | 45.502 | 39.559 | 38.266 | 0.00 | 0.00 |
| ATOM | 3023 | HB2 | GLU | X | 198 | 46.383 | 39.137 | 38.751 | 0.00 | 0.00 |
| ATOM | 3024 | HB3 | GLU | X | 198 | 45.247 | 38.887 | 37.446 | 0.00 | 0.00 |
| ATOM | 3025 | CG  | GLU | X | 198 | 45.844 | 40.837 | 37.520 | 0.00 | 0.00 |
| ATOM | 3026 | HG2 | GLU | X | 198 | 46.178 | 40.576 | 36.515 | 0.00 | 0.00 |
| ATOM | 3027 | HG3 | GLU | X | 198 | 44.957 | 41.416 | 37.265 | 0.00 | 0.00 |
| ATOM | 3028 | CD  | GLU | X | 198 | 47.007 | 41.624 | 38.083 | 0.00 | 0.00 |
| ATOM | 3029 | OE1 | GLU | X | 198 | 47.338 | 42.580 | 37.336 | 0.00 | 0.00 |
| ATOM | 3030 | OE2 | GLU | X | 198 | 47.698 | 41.119 | 38.942 | 0.00 | 0.00 |
| ATOM | 3031 | C   | GLU | X | 198 | 44.916 | 40.465 | 40.640 | 0.00 | 0.00 |
| ATOM | 3032 | O   | GLU | X | 198 | 44.940 | 41.661 | 40.693 | 0.00 | 0.00 |
| ATOM | 3033 | N   | XA1 | X | 199 | 45.283 | 39.762 | 41.699 | 0.00 | 0.00 |
| ATOM | 3034 | CA  | XA1 | X | 199 | 46.050 | 40.242 | 42.862 | 0.00 | 0.00 |
| ATOM | 3035 | C   | XA1 | X | 199 | 45.255 | 41.270 | 43.745 | 0.00 | 0.00 |
| ATOM | 3036 | O   | XA1 | X | 199 | 44.240 | 40.925 | 44.287 | 0.00 | 0.00 |
| ATOM | 3037 | CB  | XA1 | X | 199 | 47.483 | 40.763 | 42.544 | 0.00 | 0.00 |
| ATOM | 3038 | OG  | XA1 | X | 199 | 48.309 | 40.959 | 43.766 | 0.00 | 0.00 |
| ATOM | 3039 | P1  | XA1 | X | 199 | 49.243 | 42.259 | 43.872 | 0.00 | 0.00 |
| ATOM | 3040 | O1  | XA1 | X | 199 | 48.583 | 43.400 | 43.314 | 0.00 | 0.00 |
| ATOM | 3041 | O2  | XA1 | X | 199 | 50.628 | 42.086 | 43.292 | 0.00 | 0.00 |
| ATOM | 3042 | C1  | XA1 | X | 199 | 49.388 | 42.365 | 45.613 | 0.00 | 0.00 |
| ATOM | 3043 | H   | XA1 | X | 199 | 45.221 | 38.754 | 41.667 | 0.00 | 0.00 |
| ATOM | 3044 | HA  | XA1 | X | 199 | 46.245 | 39.319 | 43.408 | 0.00 | 0.00 |
| ATOM | 3045 | HB2 | XA1 | X | 199 | 48.021 | 40.038 | 41.927 | 0.00 | 0.00 |
| ATOM | 3046 | HB3 | XA1 | X | 199 | 47.397 | 41.710 | 42.006 | 0.00 | 0.00 |
| ATOM | 3047 | H11 | XA1 | X | 199 | 48.439 | 42.000 | 46.011 | 0.00 | 0.00 |
| ATOM | 3048 | H12 | XA1 | X | 199 | 50.258 | 41.785 | 45.925 | 0.00 | 0.00 |
| ATOM | 3049 | H13 | XA1 | X | 199 | 49.584 | 43.398 | 45.908 | 0.00 | 0.00 |
| ATOM | 3050 | N   | ALA | X | 200 | 45.668 | 42.585 | 43.696 | 0.00 | 0.00 |
| ATOM | 3051 | H   | ALA | X | 200 | 46.594 | 42.827 | 43.374 | 0.00 | 0.00 |
| ATOM | 3052 | CA  | ALA | X | 200 | 44.872 | 43.761 | 44.180 | 0.00 | 0.00 |
| ATOM | 3053 | HA  | ALA | X | 200 | 44.617 | 43.611 | 45.229 | 0.00 | 0.00 |
| ATOM | 3054 | CB  | ALA | X | 200 | 45.724 | 45.060 | 44.022 | 0.00 | 0.00 |
| ATOM | 3055 | HB1 | ALA | X | 200 | 46.556 | 44.969 | 44.720 | 0.00 | 0.00 |
| ATOM | 3056 | HB2 | ALA | X | 200 | 45.182 | 45.926 | 44.403 | 0.00 | 0.00 |
| ATOM | 3057 | HB3 | ALA | X | 200 | 46.021 | 45.094 | 42.974 | 0.00 | 0.00 |
| ATOM | 3058 | C   | ALA | X | 200 | 43.526 | 43.792 | 43.386 | 0.00 | 0.00 |
| ATOM | 3059 | O   | ALA | X | 200 | 42.517 | 44.193 | 44.014 | 0.00 | 0.00 |
| ATOM | 3060 | N   | GLY | X | 201 | 43.457 | 43.437 | 42.106 | 0.00 | 0.00 |

|      |      |      |     |   |     |        |        |        |      |      |
|------|------|------|-----|---|-----|--------|--------|--------|------|------|
| ATOM | 3061 | H    | GLY | X | 201 | 44.324 | 43.179 | 41.656 | 0.00 | 0.00 |
| ATOM | 3062 | CA   | GLY | X | 201 | 42.162 | 43.222 | 41.537 | 0.00 | 0.00 |
| ATOM | 3063 | HA2  | GLY | X | 201 | 41.548 | 44.121 | 41.493 | 0.00 | 0.00 |
| ATOM | 3064 | HA3  | GLY | X | 201 | 42.312 | 42.922 | 40.500 | 0.00 | 0.00 |
| ATOM | 3065 | C    | GLY | X | 201 | 41.349 | 41.988 | 41.985 | 0.00 | 0.00 |
| ATOM | 3066 | O    | GLY | X | 201 | 40.083 | 42.177 | 42.108 | 0.00 | 0.00 |
| ATOM | 3067 | N    | ALA | X | 202 | 41.917 | 40.851 | 42.316 | 0.00 | 0.00 |
| ATOM | 3068 | H    | ALA | X | 202 | 42.919 | 40.888 | 42.192 | 0.00 | 0.00 |
| ATOM | 3069 | CA   | ALA | X | 202 | 41.245 | 39.684 | 42.947 | 0.00 | 0.00 |
| ATOM | 3070 | HA   | ALA | X | 202 | 40.389 | 39.282 | 42.405 | 0.00 | 0.00 |
| ATOM | 3071 | CB   | ALA | X | 202 | 42.212 | 38.546 | 43.016 | 0.00 | 0.00 |
| ATOM | 3072 | HB1  | ALA | X | 202 | 41.860 | 37.814 | 43.742 | 0.00 | 0.00 |
| ATOM | 3073 | HB2  | ALA | X | 202 | 43.116 | 38.869 | 43.533 | 0.00 | 0.00 |
| ATOM | 3074 | HB3  | ALA | X | 202 | 42.609 | 38.291 | 42.033 | 0.00 | 0.00 |
| ATOM | 3075 | C    | ALA | X | 202 | 40.722 | 40.124 | 44.435 | 0.00 | 0.00 |
| ATOM | 3076 | O    | ALA | X | 202 | 39.502 | 40.050 | 44.722 | 0.00 | 0.00 |
| ATOM | 3077 | N    | ALA | X | 203 | 41.537 | 40.818 | 45.228 | 0.00 | 0.00 |
| ATOM | 3078 | H    | ALA | X | 203 | 42.468 | 40.980 | 44.873 | 0.00 | 0.00 |
| ATOM | 3079 | CA   | ALA | X | 203 | 41.013 | 41.538 | 46.422 | 0.00 | 0.00 |
| ATOM | 3080 | HA   | ALA | X | 203 | 40.595 | 40.756 | 47.056 | 0.00 | 0.00 |
| ATOM | 3081 | CB   | ALA | X | 203 | 42.146 | 42.239 | 47.050 | 0.00 | 0.00 |
| ATOM | 3082 | HB1  | ALA | X | 203 | 42.605 | 42.870 | 46.289 | 0.00 | 0.00 |
| ATOM | 3083 | HB2  | ALA | X | 203 | 42.881 | 41.485 | 47.329 | 0.00 | 0.00 |
| ATOM | 3084 | HB3  | ALA | X | 203 | 41.851 | 42.837 | 47.913 | 0.00 | 0.00 |
| ATOM | 3085 | C    | ALA | X | 203 | 39.815 | 42.473 | 46.121 | 0.00 | 0.00 |
| ATOM | 3086 | O    | ALA | X | 203 | 38.833 | 42.380 | 46.742 | 0.00 | 0.00 |
| ATOM | 3087 | N    | SER | X | 204 | 39.909 | 43.246 | 45.036 | 0.00 | 0.00 |
| ATOM | 3088 | H    | SER | X | 204 | 40.882 | 43.388 | 44.804 | 0.00 | 0.00 |
| ATOM | 3089 | CA   | SER | X | 204 | 38.801 | 44.168 | 44.690 | 0.00 | 0.00 |
| ATOM | 3090 | HA   | SER | X | 204 | 38.508 | 44.768 | 45.552 | 0.00 | 0.00 |
| ATOM | 3091 | CB   | SER | X | 204 | 39.246 | 45.040 | 43.542 | 0.00 | 0.00 |
| ATOM | 3092 | HB2  | SER | X | 204 | 39.313 | 44.491 | 42.603 | 0.00 | 0.00 |
| ATOM | 3093 | HB3  | SER | X | 204 | 38.643 | 45.936 | 43.392 | 0.00 | 0.00 |
| ATOM | 3094 | OG   | SER | X | 204 | 40.395 | 45.692 | 43.977 | 0.00 | 0.00 |
| ATOM | 3095 | HG   | SER | X | 204 | 41.105 | 45.049 | 44.035 | 0.00 | 0.00 |
| ATOM | 3096 | C    | SER | X | 204 | 37.522 | 43.417 | 44.309 | 0.00 | 0.00 |
| ATOM | 3097 | O    | SER | X | 204 | 36.480 | 43.885 | 44.801 | 0.00 | 0.00 |
| ATOM | 3098 | N    | VAL | X | 205 | 37.531 | 42.358 | 43.540 | 0.00 | 0.00 |
| ATOM | 3099 | H    | VAL | X | 205 | 38.457 | 42.047 | 43.282 | 0.00 | 0.00 |
| ATOM | 3100 | CA   | VAL | X | 205 | 36.287 | 41.620 | 43.134 | 0.00 | 0.00 |
| ATOM | 3101 | HA   | VAL | X | 205 | 35.467 | 42.244 | 42.779 | 0.00 | 0.00 |
| ATOM | 3102 | CB   | VAL | X | 205 | 36.568 | 40.694 | 41.902 | 0.00 | 0.00 |
| ATOM | 3103 | HB   | VAL | X | 205 | 37.332 | 39.981 | 42.211 | 0.00 | 0.00 |
| ATOM | 3104 | CG1  | VAL | X | 205 | 35.342 | 39.892 | 41.450 | 0.00 | 0.00 |
| ATOM | 3105 | HG11 | VAL | X | 205 | 34.404 | 40.446 | 41.493 | 0.00 | 0.00 |
| ATOM | 3106 | HG12 | VAL | X | 205 | 35.525 | 39.286 | 40.563 | 0.00 | 0.00 |
| ATOM | 3107 | HG13 | VAL | X | 205 | 35.245 | 39.127 | 42.220 | 0.00 | 0.00 |
| ATOM | 3108 | CG2  | VAL | X | 205 | 37.048 | 41.487 | 40.677 | 0.00 | 0.00 |
| ATOM | 3109 | HG21 | VAL | X | 205 | 37.341 | 40.802 | 39.881 | 0.00 | 0.00 |
| ATOM | 3110 | HG22 | VAL | X | 205 | 37.957 | 42.027 | 40.940 | 0.00 | 0.00 |
| ATOM | 3111 | HG23 | VAL | X | 205 | 36.291 | 42.112 | 40.203 | 0.00 | 0.00 |
| ATOM | 3112 | C    | VAL | X | 205 | 35.621 | 40.946 | 44.262 | 0.00 | 0.00 |
| ATOM | 3113 | O    | VAL | X | 205 | 34.384 | 40.784 | 44.439 | 0.00 | 0.00 |
| ATOM | 3114 | N    | GLY | X | 206 | 36.443 | 40.493 | 45.195 | 0.00 | 0.00 |
| ATOM | 3115 | H    | GLY | X | 206 | 37.444 | 40.545 | 45.072 | 0.00 | 0.00 |
| ATOM | 3116 | CA   | GLY | X | 206 | 35.981 | 40.148 | 46.586 | 0.00 | 0.00 |
| ATOM | 3117 | HA2  | GLY | X | 206 | 35.133 | 39.471 | 46.490 | 0.00 | 0.00 |
| ATOM | 3118 | HA3  | GLY | X | 206 | 36.845 | 39.668 | 47.045 | 0.00 | 0.00 |
| ATOM | 3119 | C    | GLY | X | 206 | 35.465 | 41.267 | 47.495 | 0.00 | 0.00 |
| ATOM | 3120 | O    | GLY | X | 206 | 34.530 | 41.035 | 48.210 | 0.00 | 0.00 |
| ATOM | 3121 | N    | MET | X | 207 | 35.938 | 42.507 | 47.443 | 0.00 | 0.00 |
| ATOM | 3122 | H    | MET | X | 207 | 36.710 | 42.715 | 46.826 | 0.00 | 0.00 |
| ATOM | 3123 | CA   | MET | X | 207 | 35.245 | 43.704 | 48.049 | 0.00 | 0.00 |
| ATOM | 3124 | HA   | MET | X | 207 | 34.978 | 43.498 | 49.085 | 0.00 | 0.00 |
| ATOM | 3125 | CB   | MET | X | 207 | 36.217 | 44.876 | 48.168 | 0.00 | 0.00 |
| ATOM | 3126 | HB2  | MET | X | 207 | 36.637 | 45.124 | 47.193 | 0.00 | 0.00 |
| ATOM | 3127 | HB3  | MET | X | 207 | 35.697 | 45.709 | 48.642 | 0.00 | 0.00 |

|      |      |      |     |   |     |        |        |        |      |      |
|------|------|------|-----|---|-----|--------|--------|--------|------|------|
| ATOM | 3128 | CG   | MET | X | 207 | 37.292 | 44.613 | 49.251 | 0.00 | 0.00 |
| ATOM | 3129 | HG2  | MET | X | 207 | 36.761 | 44.452 | 50.190 | 0.00 | 0.00 |
| ATOM | 3130 | HG3  | MET | X | 207 | 37.519 | 43.569 | 49.038 | 0.00 | 0.00 |
| ATOM | 3131 | SD   | MET | X | 207 | 38.861 | 45.532 | 49.098 | 0.00 | 0.00 |
| ATOM | 3132 | CE   | MET | X | 207 | 39.983 | 44.514 | 50.105 | 0.00 | 0.00 |
| ATOM | 3133 | HE1  | MET | X | 207 | 39.573 | 44.429 | 51.111 | 0.00 | 0.00 |
| ATOM | 3134 | HE2  | MET | X | 207 | 40.054 | 43.504 | 49.702 | 0.00 | 0.00 |
| ATOM | 3135 | HE3  | MET | X | 207 | 40.946 | 45.025 | 50.138 | 0.00 | 0.00 |
| ATOM | 3136 | C    | MET | X | 207 | 33.945 | 44.106 | 47.323 | 0.00 | 0.00 |
| ATOM | 3137 | O    | MET | X | 207 | 32.975 | 44.526 | 47.942 | 0.00 | 0.00 |
| ATOM | 3138 | N    | HIE | X | 208 | 33.955 | 44.028 | 45.978 | 0.00 | 0.00 |
| ATOM | 3139 | H    | HIE | X | 208 | 34.852 | 43.759 | 45.600 | 0.00 | 0.00 |
| ATOM | 3140 | CA   | HIE | X | 208 | 32.683 | 44.170 | 45.189 | 0.00 | 0.00 |
| ATOM | 3141 | HA   | HIE | X | 208 | 32.172 | 45.126 | 45.302 | 0.00 | 0.00 |
| ATOM | 3142 | CB   | HIE | X | 208 | 32.960 | 44.176 | 43.683 | 0.00 | 0.00 |
| ATOM | 3143 | HB2  | HIE | X | 208 | 33.407 | 43.201 | 43.492 | 0.00 | 0.00 |
| ATOM | 3144 | HB3  | HIE | X | 208 | 32.067 | 44.214 | 43.058 | 0.00 | 0.00 |
| ATOM | 3145 | CG   | HIE | X | 208 | 33.909 | 45.333 | 43.227 | 0.00 | 0.00 |
| ATOM | 3146 | ND1  | HIE | X | 208 | 33.551 | 46.659 | 43.552 | 0.00 | 0.00 |
| ATOM | 3147 | CE1  | HIE | X | 208 | 34.461 | 47.443 | 42.979 | 0.00 | 0.00 |
| ATOM | 3148 | HE1  | HIE | X | 208 | 34.576 | 48.517 | 42.982 | 0.00 | 0.00 |
| ATOM | 3149 | NE2  | HIE | X | 208 | 35.381 | 46.699 | 42.332 | 0.00 | 0.00 |
| ATOM | 3150 | HE2  | HIE | X | 208 | 36.265 | 47.083 | 42.031 | 0.00 | 0.00 |
| ATOM | 3151 | CD2  | HIE | X | 208 | 35.036 | 45.366 | 42.477 | 0.00 | 0.00 |
| ATOM | 3152 | HD2  | HIE | X | 208 | 35.495 | 44.486 | 42.050 | 0.00 | 0.00 |
| ATOM | 3153 | C    | HIE | X | 208 | 31.664 | 43.034 | 45.494 | 0.00 | 0.00 |
| ATOM | 3154 | O    | HIE | X | 208 | 30.485 | 43.276 | 45.448 | 0.00 | 0.00 |
| ATOM | 3155 | N    | LEU | X | 209 | 32.058 | 41.917 | 46.088 | 0.00 | 0.00 |
| ATOM | 3156 | H    | LEU | X | 209 | 33.052 | 41.764 | 46.177 | 0.00 | 0.00 |
| ATOM | 3157 | CA   | LEU | X | 209 | 31.250 | 40.816 | 46.508 | 0.00 | 0.00 |
| ATOM | 3158 | HA   | LEU | X | 209 | 30.367 | 40.739 | 45.872 | 0.00 | 0.00 |
| ATOM | 3159 | CB   | LEU | X | 209 | 32.001 | 39.524 | 46.582 | 0.00 | 0.00 |
| ATOM | 3160 | HB2  | LEU | X | 209 | 32.424 | 39.300 | 45.603 | 0.00 | 0.00 |
| ATOM | 3161 | HB3  | LEU | X | 209 | 32.911 | 39.666 | 47.164 | 0.00 | 0.00 |
| ATOM | 3162 | CG   | LEU | X | 209 | 31.346 | 38.184 | 47.083 | 0.00 | 0.00 |
| ATOM | 3163 | HG   | LEU | X | 209 | 31.062 | 38.383 | 48.117 | 0.00 | 0.00 |
| ATOM | 3164 | CD1  | LEU | X | 209 | 30.099 | 37.880 | 46.285 | 0.00 | 0.00 |
| ATOM | 3165 | HD11 | LEU | X | 209 | 29.695 | 36.955 | 46.698 | 0.00 | 0.00 |
| ATOM | 3166 | HD12 | LEU | X | 209 | 30.345 | 37.862 | 45.224 | 0.00 | 0.00 |
| ATOM | 3167 | HD13 | LEU | X | 209 | 29.365 | 38.657 | 46.500 | 0.00 | 0.00 |
| ATOM | 3168 | CD2  | LEU | X | 209 | 32.282 | 37.000 | 47.198 | 0.00 | 0.00 |
| ATOM | 3169 | HD21 | LEU | X | 209 | 33.022 | 36.886 | 46.407 | 0.00 | 0.00 |
| ATOM | 3170 | HD22 | LEU | X | 209 | 32.887 | 37.098 | 48.099 | 0.00 | 0.00 |
| ATOM | 3171 | HD23 | LEU | X | 209 | 31.724 | 36.065 | 47.260 | 0.00 | 0.00 |
| ATOM | 3172 | C    | LEU | X | 209 | 30.733 | 41.200 | 47.897 | 0.00 | 0.00 |
| ATOM | 3173 | O    | LEU | X | 209 | 29.525 | 41.007 | 48.123 | 0.00 | 0.00 |
| ATOM | 3174 | N    | LEU | X | 210 | 31.556 | 41.666 | 48.822 | 0.00 | 0.00 |
| ATOM | 3175 | H    | LEU | X | 210 | 32.526 | 41.791 | 48.573 | 0.00 | 0.00 |
| ATOM | 3176 | CA   | LEU | X | 210 | 31.249 | 42.043 | 50.119 | 0.00 | 0.00 |
| ATOM | 3177 | HA   | LEU | X | 210 | 30.616 | 41.220 | 50.452 | 0.00 | 0.00 |
| ATOM | 3178 | CB   | LEU | X | 210 | 32.473 | 42.153 | 51.100 | 0.00 | 0.00 |
| ATOM | 3179 | HB2  | LEU | X | 210 | 33.112 | 42.932 | 50.684 | 0.00 | 0.00 |
| ATOM | 3180 | HB3  | LEU | X | 210 | 32.173 | 42.459 | 52.102 | 0.00 | 0.00 |
| ATOM | 3181 | CG   | LEU | X | 210 | 33.312 | 40.841 | 51.272 | 0.00 | 0.00 |
| ATOM | 3182 | HG   | LEU | X | 210 | 33.403 | 40.348 | 50.305 | 0.00 | 0.00 |
| ATOM | 3183 | CD1  | LEU | X | 210 | 34.713 | 41.201 | 51.740 | 0.00 | 0.00 |
| ATOM | 3184 | HD11 | LEU | X | 210 | 35.344 | 40.318 | 51.639 | 0.00 | 0.00 |
| ATOM | 3185 | HD12 | LEU | X | 210 | 34.714 | 41.443 | 52.803 | 0.00 | 0.00 |
| ATOM | 3186 | HD13 | LEU | X | 210 | 35.051 | 41.919 | 50.993 | 0.00 | 0.00 |
| ATOM | 3187 | CD2  | LEU | X | 210 | 32.480 | 39.948 | 52.224 | 0.00 | 0.00 |
| ATOM | 3188 | HD21 | LEU | X | 210 | 32.978 | 38.980 | 52.162 | 0.00 | 0.00 |
| ATOM | 3189 | HD22 | LEU | X | 210 | 32.459 | 40.348 | 53.238 | 0.00 | 0.00 |
| ATOM | 3190 | HD23 | LEU | X | 210 | 31.470 | 39.775 | 51.853 | 0.00 | 0.00 |
| ATOM | 3191 | C    | LEU | X | 210 | 30.459 | 43.380 | 50.205 | 0.00 | 0.00 |
| ATOM | 3192 | O    | LEU | X | 210 | 29.679 | 43.544 | 51.166 | 0.00 | 0.00 |
| ATOM | 3193 | N    | SER | X | 211 | 30.520 | 44.297 | 49.253 | 0.00 | 0.00 |
| ATOM | 3194 | H    | SER | X | 211 | 31.194 | 44.165 | 48.513 | 0.00 | 0.00 |

|      |      |      |     |   |     |        |        |        |      |      |
|------|------|------|-----|---|-----|--------|--------|--------|------|------|
| ATOM | 3195 | CA   | SER | X | 211 | 29.787 | 45.530 | 49.232 | 0.00 | 0.00 |
| ATOM | 3196 | HA   | SER | X | 211 | 29.387 | 45.704 | 50.231 | 0.00 | 0.00 |
| ATOM | 3197 | CB   | SER | X | 211 | 30.668 | 46.751 | 48.893 | 0.00 | 0.00 |
| ATOM | 3198 | HB2  | SER | X | 211 | 30.010 | 47.620 | 48.903 | 0.00 | 0.00 |
| ATOM | 3199 | HB3  | SER | X | 211 | 31.416 | 46.796 | 49.684 | 0.00 | 0.00 |
| ATOM | 3200 | OG   | SER | X | 211 | 31.234 | 46.570 | 47.599 | 0.00 | 0.00 |
| ATOM | 3201 | HG   | SER | X | 211 | 31.951 | 45.967 | 47.814 | 0.00 | 0.00 |
| ATOM | 3202 | C    | SER | X | 211 | 28.515 | 45.461 | 48.302 | 0.00 | 0.00 |
| ATOM | 3203 | O    | SER | X | 211 | 28.609 | 45.555 | 47.063 | 0.00 | 0.00 |
| ATOM | 3204 | N    | PRO | X | 212 | 27.322 | 45.339 | 48.925 | 0.00 | 0.00 |
| ATOM | 3205 | CD   | PRO | X | 212 | 27.058 | 45.214 | 50.380 | 0.00 | 0.00 |
| ATOM | 3206 | HD2  | PRO | X | 212 | 27.370 | 46.173 | 50.794 | 0.00 | 0.00 |
| ATOM | 3207 | HD3  | PRO | X | 212 | 27.505 | 44.314 | 50.801 | 0.00 | 0.00 |
| ATOM | 3208 | CG   | PRO | X | 212 | 25.595 | 44.908 | 50.490 | 0.00 | 0.00 |
| ATOM | 3209 | HG2  | PRO | X | 212 | 25.142 | 45.283 | 51.407 | 0.00 | 0.00 |
| ATOM | 3210 | HG3  | PRO | X | 212 | 25.384 | 43.839 | 50.474 | 0.00 | 0.00 |
| ATOM | 3211 | CB   | PRO | X | 212 | 25.009 | 45.519 | 49.263 | 0.00 | 0.00 |
| ATOM | 3212 | HB2  | PRO | X | 212 | 24.747 | 46.566 | 49.418 | 0.00 | 0.00 |
| ATOM | 3213 | HB3  | PRO | X | 212 | 24.084 | 44.982 | 49.051 | 0.00 | 0.00 |
| ATOM | 3214 | CA   | PRO | X | 212 | 26.066 | 45.328 | 48.190 | 0.00 | 0.00 |
| ATOM | 3215 | HA   | PRO | X | 212 | 25.965 | 44.290 | 47.874 | 0.00 | 0.00 |
| ATOM | 3216 | C    | PRO | X | 212 | 25.930 | 46.347 | 47.028 | 0.00 | 0.00 |
| ATOM | 3217 | O    | PRO | X | 212 | 25.464 | 45.799 | 45.996 | 0.00 | 0.00 |
| ATOM | 3218 | N    | PRO | X | 213 | 26.308 | 47.626 | 47.020 | 0.00 | 0.00 |
| ATOM | 3219 | CD   | PRO | X | 213 | 26.894 | 48.368 | 48.121 | 0.00 | 0.00 |
| ATOM | 3220 | HD2  | PRO | X | 213 | 27.959 | 48.138 | 48.117 | 0.00 | 0.00 |
| ATOM | 3221 | HD3  | PRO | X | 213 | 26.425 | 47.937 | 49.005 | 0.00 | 0.00 |
| ATOM | 3222 | CG   | PRO | X | 213 | 26.501 | 49.849 | 47.864 | 0.00 | 0.00 |
| ATOM | 3223 | HG2  | PRO | X | 213 | 27.152 | 50.628 | 48.262 | 0.00 | 0.00 |
| ATOM | 3224 | HG3  | PRO | X | 213 | 25.524 | 49.969 | 48.333 | 0.00 | 0.00 |
| ATOM | 3225 | CB   | PRO | X | 213 | 26.445 | 49.982 | 46.342 | 0.00 | 0.00 |
| ATOM | 3226 | HB2  | PRO | X | 213 | 27.409 | 50.365 | 46.006 | 0.00 | 0.00 |
| ATOM | 3227 | HB3  | PRO | X | 213 | 25.669 | 50.694 | 46.061 | 0.00 | 0.00 |
| ATOM | 3228 | CA   | PRO | X | 213 | 26.156 | 48.489 | 45.855 | 0.00 | 0.00 |
| ATOM | 3229 | HA   | PRO | X | 213 | 25.115 | 48.303 | 45.590 | 0.00 | 0.00 |
| ATOM | 3230 | C    | PRO | X | 213 | 27.051 | 48.185 | 44.586 | 0.00 | 0.00 |
| ATOM | 3231 | O    | PRO | X | 213 | 26.661 | 48.649 | 43.510 | 0.00 | 0.00 |
| ATOM | 3232 | N    | SER | X | 214 | 28.126 | 47.423 | 44.687 | 0.00 | 0.00 |
| ATOM | 3233 | H    | SER | X | 214 | 28.355 | 47.123 | 45.623 | 0.00 | 0.00 |
| ATOM | 3234 | CA   | SER | X | 214 | 28.834 | 46.808 | 43.558 | 0.00 | 0.00 |
| ATOM | 3235 | HA   | SER | X | 214 | 28.854 | 47.436 | 42.668 | 0.00 | 0.00 |
| ATOM | 3236 | CB   | SER | X | 214 | 30.339 | 46.555 | 43.778 | 0.00 | 0.00 |
| ATOM | 3237 | HB2  | SER | X | 214 | 30.379 | 45.825 | 44.586 | 0.00 | 0.00 |
| ATOM | 3238 | HB3  | SER | X | 214 | 30.697 | 46.113 | 42.848 | 0.00 | 0.00 |
| ATOM | 3239 | OG   | SER | X | 214 | 31.018 | 47.777 | 44.011 | 0.00 | 0.00 |
| ATOM | 3240 | HG   | SER | X | 214 | 31.920 | 47.448 | 44.018 | 0.00 | 0.00 |
| ATOM | 3241 | C    | SER | X | 214 | 28.124 | 45.459 | 43.224 | 0.00 | 0.00 |
| ATOM | 3242 | O    | SER | X | 214 | 27.920 | 45.143 | 42.075 | 0.00 | 0.00 |
| ATOM | 3243 | N    | ARG | X | 215 | 27.775 | 44.645 | 44.282 | 0.00 | 0.00 |
| ATOM | 3244 | H    | ARG | X | 215 | 28.004 | 44.862 | 45.241 | 0.00 | 0.00 |
| ATOM | 3245 | CA   | ARG | X | 215 | 27.292 | 43.323 | 44.040 | 0.00 | 0.00 |
| ATOM | 3246 | HA   | ARG | X | 215 | 28.025 | 42.720 | 43.503 | 0.00 | 0.00 |
| ATOM | 3247 | CB   | ARG | X | 215 | 26.914 | 42.517 | 45.373 | 0.00 | 0.00 |
| ATOM | 3248 | HB2  | ARG | X | 215 | 27.726 | 42.672 | 46.084 | 0.00 | 0.00 |
| ATOM | 3249 | HB3  | ARG | X | 215 | 26.017 | 42.908 | 45.852 | 0.00 | 0.00 |
| ATOM | 3250 | CG   | ARG | X | 215 | 26.720 | 41.045 | 45.028 | 0.00 | 0.00 |
| ATOM | 3251 | HG2  | ARG | X | 215 | 25.790 | 40.961 | 44.466 | 0.00 | 0.00 |
| ATOM | 3252 | HG3  | ARG | X | 215 | 27.649 | 40.748 | 44.541 | 0.00 | 0.00 |
| ATOM | 3253 | CD   | ARG | X | 215 | 26.673 | 40.182 | 46.293 | 0.00 | 0.00 |
| ATOM | 3254 | HD2  | ARG | X | 215 | 26.463 | 39.177 | 45.927 | 0.00 | 0.00 |
| ATOM | 3255 | HD3  | ARG | X | 215 | 27.577 | 40.099 | 46.897 | 0.00 | 0.00 |
| ATOM | 3256 | NE   | ARG | X | 215 | 25.519 | 40.527 | 47.205 | 0.00 | 0.00 |
| ATOM | 3257 | HE   | ARG | X | 215 | 24.584 | 40.274 | 46.919 | 0.00 | 0.00 |
| ATOM | 3258 | CZ   | ARG | X | 215 | 25.658 | 40.868 | 48.494 | 0.00 | 0.00 |
| ATOM | 3259 | NH1  | ARG | X | 215 | 26.795 | 40.992 | 49.131 | 0.00 | 0.00 |
| ATOM | 3260 | HH11 | ARG | X | 215 | 27.709 | 40.874 | 48.719 | 0.00 | 0.00 |
| ATOM | 3261 | HH12 | ARG | X | 215 | 26.757 | 41.195 | 50.120 | 0.00 | 0.00 |



|      |      |      |     |   |     |        |        |        |      |      |
|------|------|------|-----|---|-----|--------|--------|--------|------|------|
| ATOM | 3262 | NH2  | ARG | X | 215 | 24.516 | 41.151 | 49.085 | 0.00 | 0.00 |
| ATOM | 3263 | HH21 | ARG | X | 215 | 23.642 | 41.241 | 48.587 | 0.00 | 0.00 |
| ATOM | 3264 | HH22 | ARG | X | 215 | 24.514 | 41.311 | 50.082 | 0.00 | 0.00 |
| ATOM | 3265 | C    | ARG | X | 215 | 26.074 | 43.358 | 43.146 | 0.00 | 0.00 |
| ATOM | 3266 | O    | ARG | X | 215 | 25.844 | 42.449 | 42.306 | 0.00 | 0.00 |
| ATOM | 3267 | N    | GLY | X | 216 | 25.177 | 44.349 | 43.329 | 0.00 | 0.00 |
| ATOM | 3268 | H    | GLY | X | 216 | 25.355 | 45.094 | 43.988 | 0.00 | 0.00 |
| ATOM | 3269 | CA   | GLY | X | 216 | 23.968 | 44.499 | 42.511 | 0.00 | 0.00 |
| ATOM | 3270 | HA2  | GLY | X | 216 | 23.424 | 43.582 | 42.739 | 0.00 | 0.00 |
| ATOM | 3271 | HA3  | GLY | X | 216 | 23.403 | 45.330 | 42.934 | 0.00 | 0.00 |
| ATOM | 3272 | C    | GLY | X | 216 | 24.188 | 44.618 | 40.951 | 0.00 | 0.00 |
| ATOM | 3273 | O    | GLY | X | 216 | 23.270 | 44.588 | 40.128 | 0.00 | 0.00 |
| ATOM | 3274 | N    | LEU | X | 217 | 25.475 | 44.821 | 40.525 | 0.00 | 0.00 |
| ATOM | 3275 | H    | LEU | X | 217 | 26.304 | 44.714 | 41.092 | 0.00 | 0.00 |
| ATOM | 3276 | CA   | LEU | X | 217 | 25.910 | 45.275 | 39.227 | 0.00 | 0.00 |
| ATOM | 3277 | HA   | LEU | X | 217 | 24.962 | 45.562 | 38.772 | 0.00 | 0.00 |
| ATOM | 3278 | CB   | LEU | X | 217 | 26.743 | 46.558 | 39.202 | 0.00 | 0.00 |
| ATOM | 3279 | HB2  | LEU | X | 217 | 27.756 | 46.347 | 39.545 | 0.00 | 0.00 |
| ATOM | 3280 | HB3  | LEU | X | 217 | 26.756 | 47.030 | 38.220 | 0.00 | 0.00 |
| ATOM | 3281 | CG   | LEU | X | 217 | 26.248 | 47.662 | 40.191 | 0.00 | 0.00 |
| ATOM | 3282 | HG   | LEU | X | 217 | 26.404 | 47.354 | 41.225 | 0.00 | 0.00 |
| ATOM | 3283 | CD1  | LEU | X | 217 | 27.191 | 48.807 | 40.071 | 0.00 | 0.00 |
| ATOM | 3284 | HD11 | LEU | X | 217 | 26.896 | 49.597 | 40.761 | 0.00 | 0.00 |
| ATOM | 3285 | HD12 | LEU | X | 217 | 27.186 | 49.294 | 39.096 | 0.00 | 0.00 |
| ATOM | 3286 | HD13 | LEU | X | 217 | 28.153 | 48.358 | 40.321 | 0.00 | 0.00 |
| ATOM | 3287 | CD2  | LEU | X | 217 | 24.768 | 48.111 | 39.879 | 0.00 | 0.00 |
| ATOM | 3288 | HD21 | LEU | X | 217 | 24.681 | 49.120 | 40.281 | 0.00 | 0.00 |
| ATOM | 3289 | HD22 | LEU | X | 217 | 24.516 | 48.257 | 38.828 | 0.00 | 0.00 |
| ATOM | 3290 | HD23 | LEU | X | 217 | 24.128 | 47.419 | 40.427 | 0.00 | 0.00 |
| ATOM | 3291 | C    | LEU | X | 217 | 26.409 | 44.169 | 38.298 | 0.00 | 0.00 |
| ATOM | 3292 | O    | LEU | X | 217 | 26.599 | 44.322 | 37.053 | 0.00 | 0.00 |
| ATOM | 3293 | N    | PHE | X | 218 | 26.855 | 43.056 | 38.866 | 0.00 | 0.00 |
| ATOM | 3294 | H    | PHE | X | 218 | 26.605 | 42.861 | 39.825 | 0.00 | 0.00 |
| ATOM | 3295 | CA   | PHE | X | 218 | 27.474 | 41.940 | 38.223 | 0.00 | 0.00 |
| ATOM | 3296 | HA   | PHE | X | 218 | 27.255 | 41.925 | 37.156 | 0.00 | 0.00 |
| ATOM | 3297 | CB   | PHE | X | 218 | 28.991 | 42.057 | 38.472 | 0.00 | 0.00 |
| ATOM | 3298 | HB2  | PHE | X | 218 | 29.413 | 41.288 | 37.824 | 0.00 | 0.00 |
| ATOM | 3299 | HB3  | PHE | X | 218 | 29.444 | 43.002 | 38.173 | 0.00 | 0.00 |
| ATOM | 3300 | CG   | PHE | X | 218 | 29.556 | 41.743 | 39.810 | 0.00 | 0.00 |
| ATOM | 3301 | CD1  | PHE | X | 218 | 29.594 | 42.747 | 40.748 | 0.00 | 0.00 |
| ATOM | 3302 | HD1  | PHE | X | 218 | 29.042 | 43.638 | 40.486 | 0.00 | 0.00 |
| ATOM | 3303 | CE1  | PHE | X | 218 | 30.183 | 42.555 | 42.004 | 0.00 | 0.00 |
| ATOM | 3304 | HE1  | PHE | X | 218 | 30.184 | 43.295 | 42.790 | 0.00 | 0.00 |
| ATOM | 3305 | CZ   | PHE | X | 218 | 30.821 | 41.366 | 42.263 | 0.00 | 0.00 |
| ATOM | 3306 | HZ   | PHE | X | 218 | 31.084 | 41.163 | 43.291 | 0.00 | 0.00 |
| ATOM | 3307 | CE2  | PHE | X | 218 | 30.665 | 40.267 | 41.410 | 0.00 | 0.00 |
| ATOM | 3308 | HE2  | PHE | X | 218 | 31.267 | 39.406 | 41.658 | 0.00 | 0.00 |
| ATOM | 3309 | CD2  | PHE | X | 218 | 30.003 | 40.441 | 40.126 | 0.00 | 0.00 |
| ATOM | 3310 | HD2  | PHE | X | 218 | 29.975 | 39.648 | 39.394 | 0.00 | 0.00 |
| ATOM | 3311 | C    | PHE | X | 218 | 26.957 | 40.553 | 38.753 | 0.00 | 0.00 |
| ATOM | 3312 | O    | PHE | X | 218 | 26.120 | 40.474 | 39.617 | 0.00 | 0.00 |
| ATOM | 3313 | N    | HIE | X | 219 | 27.253 | 39.445 | 38.055 | 0.00 | 0.00 |
| ATOM | 3314 | H    | HIE | X | 219 | 27.777 | 39.636 | 37.212 | 0.00 | 0.00 |
| ATOM | 3315 | CA   | HIE | X | 219 | 26.605 | 38.168 | 38.174 | 0.00 | 0.00 |
| ATOM | 3316 | HA   | HIE | X | 219 | 25.859 | 38.133 | 38.969 | 0.00 | 0.00 |
| ATOM | 3317 | CB   | HIE | X | 219 | 25.956 | 37.780 | 36.858 | 0.00 | 0.00 |
| ATOM | 3318 | HB2  | HIE | X | 219 | 26.651 | 37.756 | 36.019 | 0.00 | 0.00 |
| ATOM | 3319 | HB3  | HIE | X | 219 | 25.638 | 36.738 | 36.874 | 0.00 | 0.00 |
| ATOM | 3320 | CG   | HIE | X | 219 | 24.777 | 38.672 | 36.463 | 0.00 | 0.00 |
| ATOM | 3321 | ND1  | HIE | X | 219 | 24.913 | 39.894 | 35.843 | 0.00 | 0.00 |
| ATOM | 3322 | CE1  | HIE | X | 219 | 23.771 | 40.561 | 36.034 | 0.00 | 0.00 |
| ATOM | 3323 | HE1  | HIE | X | 219 | 23.550 | 41.544 | 35.645 | 0.00 | 0.00 |
| ATOM | 3324 | NE2  | HIE | X | 219 | 22.846 | 39.710 | 36.531 | 0.00 | 0.00 |
| ATOM | 3325 | HE2  | HIE | X | 219 | 21.954 | 40.015 | 36.894 | 0.00 | 0.00 |
| ATOM | 3326 | CD2  | HIE | X | 219 | 23.487 | 38.557 | 36.950 | 0.00 | 0.00 |
| ATOM | 3327 | HD2  | HIE | X | 219 | 23.092 | 37.803 | 37.615 | 0.00 | 0.00 |
| ATOM | 3328 | C    | HIE | X | 219 | 27.563 | 37.016 | 38.521 | 0.00 | 0.00 |

|      |      |      |     |   |     |        |        |        |      |      |
|------|------|------|-----|---|-----|--------|--------|--------|------|------|
| ATOM | 3329 | O    | HIE | X | 219 | 27.140 | 36.077 | 39.201 | 0.00 | 0.00 |
| ATOM | 3330 | N    | ARG | X | 220 | 28.814 | 37.145 | 38.092 | 0.00 | 0.00 |
| ATOM | 3331 | H    | ARG | X | 220 | 29.091 | 38.012 | 37.655 | 0.00 | 0.00 |
| ATOM | 3332 | CA   | ARG | X | 220 | 29.885 | 36.068 | 38.229 | 0.00 | 0.00 |
| ATOM | 3333 | HA   | ARG | X | 220 | 29.725 | 35.311 | 38.997 | 0.00 | 0.00 |
| ATOM | 3334 | CB   | ARG | X | 220 | 29.903 | 35.177 | 36.962 | 0.00 | 0.00 |
| ATOM | 3335 | HB2  | ARG | X | 220 | 29.906 | 35.807 | 36.073 | 0.00 | 0.00 |
| ATOM | 3336 | HB3  | ARG | X | 220 | 30.813 | 34.577 | 36.938 | 0.00 | 0.00 |
| ATOM | 3337 | CG   | ARG | X | 220 | 28.613 | 34.291 | 36.735 | 0.00 | 0.00 |
| ATOM | 3338 | HG2  | ARG | X | 220 | 28.386 | 33.635 | 37.575 | 0.00 | 0.00 |
| ATOM | 3339 | HG3  | ARG | X | 220 | 27.833 | 35.049 | 36.663 | 0.00 | 0.00 |
| ATOM | 3340 | CD   | ARG | X | 220 | 28.703 | 33.461 | 35.468 | 0.00 | 0.00 |
| ATOM | 3341 | HD2  | ARG | X | 220 | 28.983 | 34.169 | 34.687 | 0.00 | 0.00 |
| ATOM | 3342 | HD3  | ARG | X | 220 | 29.475 | 32.714 | 35.650 | 0.00 | 0.00 |
| ATOM | 3343 | NE   | ARG | X | 220 | 27.438 | 32.816 | 35.188 | 0.00 | 0.00 |
| ATOM | 3344 | HE   | ARG | X | 220 | 27.139 | 32.140 | 35.875 | 0.00 | 0.00 |
| ATOM | 3345 | CZ   | ARG | X | 220 | 26.575 | 33.181 | 34.258 | 0.00 | 0.00 |
| ATOM | 3346 | NH1  | ARG | X | 220 | 26.843 | 33.956 | 33.274 | 0.00 | 0.00 |
| ATOM | 3347 | HH11 | ARG | X | 220 | 27.696 | 34.448 | 33.049 | 0.00 | 0.00 |
| ATOM | 3348 | HH12 | ARG | X | 220 | 26.048 | 34.133 | 32.677 | 0.00 | 0.00 |
| ATOM | 3349 | NH2  | ARG | X | 220 | 25.350 | 32.765 | 34.286 | 0.00 | 0.00 |
| ATOM | 3350 | HH21 | ARG | X | 220 | 25.060 | 32.199 | 35.071 | 0.00 | 0.00 |
| ATOM | 3351 | HH22 | ARG | X | 220 | 24.722 | 32.922 | 33.511 | 0.00 | 0.00 |
| ATOM | 3352 | C    | ARG | X | 220 | 31.254 | 36.747 | 38.603 | 0.00 | 0.00 |
| ATOM | 3353 | O    | ARG | X | 220 | 31.607 | 37.824 | 38.131 | 0.00 | 0.00 |
| ATOM | 3354 | N    | ALA | X | 221 | 31.952 | 36.146 | 39.570 | 0.00 | 0.00 |
| ATOM | 3355 | H    | ALA | X | 221 | 31.611 | 35.255 | 39.901 | 0.00 | 0.00 |
| ATOM | 3356 | CA   | ALA | X | 221 | 33.279 | 36.598 | 40.065 | 0.00 | 0.00 |
| ATOM | 3357 | HA   | ALA | X | 221 | 33.665 | 37.568 | 39.751 | 0.00 | 0.00 |
| ATOM | 3358 | CB   | ALA | X | 221 | 33.052 | 36.625 | 41.660 | 0.00 | 0.00 |
| ATOM | 3359 | HB1  | ALA | X | 221 | 32.706 | 35.682 | 42.085 | 0.00 | 0.00 |
| ATOM | 3360 | HB2  | ALA | X | 221 | 32.350 | 37.381 | 42.012 | 0.00 | 0.00 |
| ATOM | 3361 | HB3  | ALA | X | 221 | 33.983 | 36.802 | 42.199 | 0.00 | 0.00 |
| ATOM | 3362 | C    | ALA | X | 221 | 34.399 | 35.593 | 39.835 | 0.00 | 0.00 |
| ATOM | 3363 | O    | ALA | X | 221 | 34.281 | 34.461 | 40.209 | 0.00 | 0.00 |
| ATOM | 3364 | N    | VAL | X | 222 | 35.487 | 36.035 | 39.185 | 0.00 | 0.00 |
| ATOM | 3365 | H    | VAL | X | 222 | 35.462 | 36.929 | 38.716 | 0.00 | 0.00 |
| ATOM | 3366 | CA   | VAL | X | 222 | 36.740 | 35.355 | 39.044 | 0.00 | 0.00 |
| ATOM | 3367 | HA   | VAL | X | 222 | 36.586 | 34.366 | 39.476 | 0.00 | 0.00 |
| ATOM | 3368 | CB   | VAL | X | 222 | 37.222 | 35.221 | 37.577 | 0.00 | 0.00 |
| ATOM | 3369 | HB   | VAL | X | 222 | 37.291 | 36.222 | 37.152 | 0.00 | 0.00 |
| ATOM | 3370 | CG1  | VAL | X | 222 | 38.585 | 34.591 | 37.505 | 0.00 | 0.00 |
| ATOM | 3371 | HG11 | VAL | X | 222 | 38.734 | 34.348 | 36.453 | 0.00 | 0.00 |
| ATOM | 3372 | HG12 | VAL | X | 222 | 39.387 | 35.236 | 37.864 | 0.00 | 0.00 |
| ATOM | 3373 | HG13 | VAL | X | 222 | 38.530 | 33.646 | 38.045 | 0.00 | 0.00 |
| ATOM | 3374 | CG2  | VAL | X | 222 | 36.330 | 34.482 | 36.585 | 0.00 | 0.00 |
| ATOM | 3375 | HG21 | VAL | X | 222 | 36.818 | 34.338 | 35.620 | 0.00 | 0.00 |
| ATOM | 3376 | HG22 | VAL | X | 222 | 35.468 | 35.130 | 36.429 | 0.00 | 0.00 |
| ATOM | 3377 | HG23 | VAL | X | 222 | 36.038 | 33.518 | 37.001 | 0.00 | 0.00 |
| ATOM | 3378 | C    | VAL | X | 222 | 37.730 | 36.194 | 39.770 | 0.00 | 0.00 |
| ATOM | 3379 | O    | VAL | X | 222 | 37.825 | 37.452 | 39.572 | 0.00 | 0.00 |
| ATOM | 3380 | N    | LEU | X | 223 | 38.515 | 35.491 | 40.549 | 0.00 | 0.00 |
| ATOM | 3381 | H    | LEU | X | 223 | 38.369 | 34.496 | 40.649 | 0.00 | 0.00 |
| ATOM | 3382 | CA   | LEU | X | 223 | 39.635 | 36.053 | 41.255 | 0.00 | 0.00 |
| ATOM | 3383 | HA   | LEU | X | 223 | 39.707 | 37.091 | 40.931 | 0.00 | 0.00 |
| ATOM | 3384 | CB   | LEU | X | 223 | 39.439 | 35.908 | 42.778 | 0.00 | 0.00 |
| ATOM | 3385 | HB2  | LEU | X | 223 | 39.234 | 34.845 | 42.901 | 0.00 | 0.00 |
| ATOM | 3386 | HB3  | LEU | X | 223 | 40.377 | 36.008 | 43.325 | 0.00 | 0.00 |
| ATOM | 3387 | CG   | LEU | X | 223 | 38.384 | 36.924 | 43.360 | 0.00 | 0.00 |
| ATOM | 3388 | HG   | LEU | X | 223 | 38.748 | 37.918 | 43.102 | 0.00 | 0.00 |
| ATOM | 3389 | CD1  | LEU | X | 223 | 36.923 | 36.725 | 42.962 | 0.00 | 0.00 |
| ATOM | 3390 | HD11 | LEU | X | 223 | 36.711 | 37.119 | 41.968 | 0.00 | 0.00 |
| ATOM | 3391 | HD12 | LEU | X | 223 | 36.334 | 37.394 | 43.588 | 0.00 | 0.00 |
| ATOM | 3392 | HD13 | LEU | X | 223 | 36.626 | 35.676 | 42.982 | 0.00 | 0.00 |
| ATOM | 3393 | CD2  | LEU | X | 223 | 38.419 | 36.796 | 44.901 | 0.00 | 0.00 |
| ATOM | 3394 | HD21 | LEU | X | 223 | 37.751 | 37.564 | 45.290 | 0.00 | 0.00 |
| ATOM | 3395 | HD22 | LEU | X | 223 | 38.033 | 35.896 | 45.379 | 0.00 | 0.00 |

|      |      |      |     |   |     |        |        |        |      |      |
|------|------|------|-----|---|-----|--------|--------|--------|------|------|
| ATOM | 3396 | HD23 | LEU | X | 223 | 39.407 | 37.013 | 45.308 | 0.00 | 0.00 |
| ATOM | 3397 | C    | LEU | X | 223 | 40.886 | 35.305 | 40.855 | 0.00 | 0.00 |
| ATOM | 3398 | O    | LEU | X | 223 | 40.867 | 34.120 | 40.593 | 0.00 | 0.00 |
| ATOM | 3399 | N    | GLN | X | 224 | 41.996 | 35.955 | 40.704 | 0.00 | 0.00 |
| ATOM | 3400 | H    | GLN | X | 224 | 41.940 | 36.963 | 40.735 | 0.00 | 0.00 |
| ATOM | 3401 | CA   | GLN | X | 224 | 43.257 | 35.294 | 40.360 | 0.00 | 0.00 |
| ATOM | 3402 | HA   | GLN | X | 224 | 43.232 | 34.205 | 40.341 | 0.00 | 0.00 |
| ATOM | 3403 | CB   | GLN | X | 224 | 43.561 | 35.614 | 38.912 | 0.00 | 0.00 |
| ATOM | 3404 | HB2  | GLN | X | 224 | 43.395 | 36.659 | 38.651 | 0.00 | 0.00 |
| ATOM | 3405 | HB3  | GLN | X | 224 | 44.607 | 35.387 | 38.709 | 0.00 | 0.00 |
| ATOM | 3406 | CG   | GLN | X | 224 | 42.683 | 34.726 | 37.963 | 0.00 | 0.00 |
| ATOM | 3407 | HG2  | GLN | X | 224 | 42.636 | 33.672 | 38.238 | 0.00 | 0.00 |
| ATOM | 3408 | HG3  | GLN | X | 224 | 41.710 | 35.200 | 38.094 | 0.00 | 0.00 |
| ATOM | 3409 | CD   | GLN | X | 224 | 43.050 | 35.022 | 36.537 | 0.00 | 0.00 |
| ATOM | 3410 | OE1  | GLN | X | 224 | 42.281 | 35.698 | 35.790 | 0.00 | 0.00 |
| ATOM | 3411 | NE2  | GLN | X | 224 | 44.330 | 34.925 | 36.141 | 0.00 | 0.00 |
| ATOM | 3412 | HE21 | GLN | X | 224 | 44.460 | 35.365 | 35.241 | 0.00 | 0.00 |
| ATOM | 3413 | HE22 | GLN | X | 224 | 45.046 | 34.702 | 36.818 | 0.00 | 0.00 |
| ATOM | 3414 | C    | GLN | X | 224 | 44.458 | 35.815 | 41.165 | 0.00 | 0.00 |
| ATOM | 3415 | O    | GLN | X | 224 | 44.720 | 37.036 | 41.276 | 0.00 | 0.00 |
| ATOM | 3416 | N    | SER | X | 225 | 45.198 | 34.877 | 41.739 | 0.00 | 0.00 |
| ATOM | 3417 | H    | SER | X | 225 | 45.050 | 33.889 | 41.588 | 0.00 | 0.00 |
| ATOM | 3418 | CA   | SER | X | 225 | 46.471 | 35.096 | 42.469 | 0.00 | 0.00 |
| ATOM | 3419 | HA   | SER | X | 225 | 46.735 | 34.235 | 43.083 | 0.00 | 0.00 |
| ATOM | 3420 | CB   | SER | X | 225 | 47.502 | 35.533 | 41.423 | 0.00 | 0.00 |
| ATOM | 3421 | HB2  | SER | X | 225 | 47.359 | 34.950 | 40.513 | 0.00 | 0.00 |
| ATOM | 3422 | HB3  | SER | X | 225 | 47.452 | 36.590 | 41.162 | 0.00 | 0.00 |
| ATOM | 3423 | OG   | SER | X | 225 | 48.848 | 35.295 | 41.718 | 0.00 | 0.00 |
| ATOM | 3424 | HG   | SER | X | 225 | 49.110 | 34.428 | 42.036 | 0.00 | 0.00 |
| ATOM | 3425 | C    | SER | X | 225 | 46.296 | 36.154 | 43.624 | 0.00 | 0.00 |
| ATOM | 3426 | O    | SER | X | 225 | 47.157 | 37.013 | 43.797 | 0.00 | 0.00 |
| ATOM | 3427 | N    | GLY | X | 226 | 45.102 | 36.156 | 44.226 | 0.00 | 0.00 |
| ATOM | 3428 | H    | GLY | X | 226 | 44.437 | 35.454 | 43.933 | 0.00 | 0.00 |
| ATOM | 3429 | CA   | GLY | X | 226 | 44.749 | 37.098 | 45.338 | 0.00 | 0.00 |
| ATOM | 3430 | HA2  | GLY | X | 226 | 45.503 | 36.958 | 46.112 | 0.00 | 0.00 |
| ATOM | 3431 | HA3  | GLY | X | 226 | 44.683 | 38.145 | 45.042 | 0.00 | 0.00 |
| ATOM | 3432 | C    | GLY | X | 226 | 43.414 | 36.744 | 45.971 | 0.00 | 0.00 |
| ATOM | 3433 | O    | GLY | X | 226 | 42.671 | 35.952 | 45.354 | 0.00 | 0.00 |
| ATOM | 3434 | N    | ALA | X | 227 | 43.185 | 37.403 | 47.116 | 0.00 | 0.00 |
| ATOM | 3435 | H    | ALA | X | 227 | 43.978 | 37.893 | 47.507 | 0.00 | 0.00 |
| ATOM | 3436 | CA   | ALA | X | 227 | 41.968 | 37.371 | 47.866 | 0.00 | 0.00 |
| ATOM | 3437 | HA   | ALA | X | 227 | 41.115 | 37.111 | 47.239 | 0.00 | 0.00 |
| ATOM | 3438 | CB   | ALA | X | 227 | 42.102 | 36.159 | 48.798 | 0.00 | 0.00 |
| ATOM | 3439 | HB1  | ALA | X | 227 | 42.278 | 35.210 | 48.292 | 0.00 | 0.00 |
| ATOM | 3440 | HB2  | ALA | X | 227 | 41.313 | 36.155 | 49.550 | 0.00 | 0.00 |
| ATOM | 3441 | HB3  | ALA | X | 227 | 43.018 | 36.161 | 49.390 | 0.00 | 0.00 |
| ATOM | 3442 | C    | ALA | X | 227 | 41.791 | 38.688 | 48.675 | 0.00 | 0.00 |
| ATOM | 3443 | O    | ALA | X | 227 | 42.745 | 39.386 | 48.993 | 0.00 | 0.00 |
| ATOM | 3444 | N    | PRO | X | 228 | 40.549 | 39.024 | 49.137 | 0.00 | 0.00 |
| ATOM | 3445 | CD   | PRO | X | 228 | 39.351 | 38.235 | 48.905 | 0.00 | 0.00 |
| ATOM | 3446 | HD2  | PRO | X | 228 | 39.630 | 37.207 | 49.133 | 0.00 | 0.00 |
| ATOM | 3447 | HD3  | PRO | X | 228 | 39.203 | 38.310 | 47.827 | 0.00 | 0.00 |
| ATOM | 3448 | CG   | PRO | X | 228 | 38.250 | 38.916 | 49.736 | 0.00 | 0.00 |
| ATOM | 3449 | HG2  | PRO | X | 228 | 38.252 | 38.593 | 50.777 | 0.00 | 0.00 |
| ATOM | 3450 | HG3  | PRO | X | 228 | 37.236 | 38.814 | 49.349 | 0.00 | 0.00 |
| ATOM | 3451 | CB   | PRO | X | 228 | 38.668 | 40.403 | 49.668 | 0.00 | 0.00 |
| ATOM | 3452 | HB2  | PRO | X | 228 | 38.382 | 40.984 | 50.545 | 0.00 | 0.00 |
| ATOM | 3453 | HB3  | PRO | X | 228 | 38.338 | 40.757 | 48.692 | 0.00 | 0.00 |
| ATOM | 3454 | CA   | PRO | X | 228 | 40.188 | 40.307 | 49.745 | 0.00 | 0.00 |
| ATOM | 3455 | HA   | PRO | X | 228 | 40.661 | 41.157 | 49.253 | 0.00 | 0.00 |
| ATOM | 3456 | C    | PRO | X | 228 | 40.717 | 40.278 | 51.246 | 0.00 | 0.00 |
| ATOM | 3457 | O    | PRO | X | 228 | 41.220 | 41.252 | 51.708 | 0.00 | 0.00 |
| ATOM | 3458 | N    | ASN | X | 229 | 40.664 | 39.126 | 51.930 | 0.00 | 0.00 |
| ATOM | 3459 | H    | ASN | X | 229 | 40.195 | 38.407 | 51.399 | 0.00 | 0.00 |
| ATOM | 3460 | CA   | ASN | X | 229 | 41.112 | 38.786 | 53.261 | 0.00 | 0.00 |
| ATOM | 3461 | HA   | ASN | X | 229 | 40.973 | 39.590 | 53.984 | 0.00 | 0.00 |
| ATOM | 3462 | CB   | ASN | X | 229 | 40.361 | 37.588 | 53.814 | 0.00 | 0.00 |

|      |      |      |     |   |     |        |        |        |      |      |
|------|------|------|-----|---|-----|--------|--------|--------|------|------|
| ATOM | 3463 | HB2  | ASN | X | 229 | 40.812 | 37.209 | 54.731 | 0.00 | 0.00 |
| ATOM | 3464 | HB3  | ASN | X | 229 | 39.407 | 38.011 | 54.131 | 0.00 | 0.00 |
| ATOM | 3465 | CG   | ASN | X | 229 | 40.108 | 36.423 | 52.803 | 0.00 | 0.00 |
| ATOM | 3466 | OD1  | ASN | X | 229 | 39.434 | 36.522 | 51.753 | 0.00 | 0.00 |
| ATOM | 3467 | ND2  | ASN | X | 229 | 40.647 | 35.267 | 53.179 | 0.00 | 0.00 |
| ATOM | 3468 | HD21 | ASN | X | 229 | 40.757 | 34.469 | 52.570 | 0.00 | 0.00 |
| ATOM | 3469 | HD22 | ASN | X | 229 | 41.229 | 35.335 | 54.001 | 0.00 | 0.00 |
| ATOM | 3470 | C    | ASN | X | 229 | 42.675 | 38.590 | 53.366 | 0.00 | 0.00 |
| ATOM | 3471 | O    | ASN | X | 229 | 43.109 | 38.159 | 54.411 | 0.00 | 0.00 |
| ATOM | 3472 | N    | GLY | X | 230 | 43.503 | 39.013 | 52.403 | 0.00 | 0.00 |
| ATOM | 3473 | H    | GLY | X | 230 | 43.044 | 39.240 | 51.533 | 0.00 | 0.00 |
| ATOM | 3474 | CA   | GLY | X | 230 | 44.960 | 39.005 | 52.477 | 0.00 | 0.00 |
| ATOM | 3475 | HA2  | GLY | X | 230 | 45.227 | 38.047 | 52.924 | 0.00 | 0.00 |
| ATOM | 3476 | HA3  | GLY | X | 230 | 45.340 | 39.057 | 51.457 | 0.00 | 0.00 |
| ATOM | 3477 | C    | GLY | X | 230 | 45.524 | 40.215 | 53.250 | 0.00 | 0.00 |
| ATOM | 3478 | O    | GLY | X | 230 | 44.925 | 41.279 | 53.347 | 0.00 | 0.00 |
| ATOM | 3479 | N    | PRO | X | 231 | 46.632 | 40.002 | 53.911 | 0.00 | 0.00 |
| ATOM | 3480 | CD   | PRO | X | 231 | 47.585 | 38.949 | 53.698 | 0.00 | 0.00 |
| ATOM | 3481 | HD2  | PRO | X | 231 | 47.862 | 38.759 | 52.662 | 0.00 | 0.00 |
| ATOM | 3482 | HD3  | PRO | X | 231 | 47.091 | 38.059 | 54.089 | 0.00 | 0.00 |
| ATOM | 3483 | CG   | PRO | X | 231 | 48.847 | 39.259 | 54.422 | 0.00 | 0.00 |
| ATOM | 3484 | HG2  | PRO | X | 231 | 49.476 | 39.989 | 53.912 | 0.00 | 0.00 |
| ATOM | 3485 | HG3  | PRO | X | 231 | 49.463 | 38.401 | 54.693 | 0.00 | 0.00 |
| ATOM | 3486 | CB   | PRO | X | 231 | 48.241 | 39.969 | 55.623 | 0.00 | 0.00 |
| ATOM | 3487 | HB2  | PRO | X | 231 | 48.969 | 40.606 | 56.125 | 0.00 | 0.00 |
| ATOM | 3488 | HB3  | PRO | X | 231 | 47.744 | 39.273 | 56.298 | 0.00 | 0.00 |
| ATOM | 3489 | CA   | PRO | X | 231 | 47.193 | 40.875 | 54.967 | 0.00 | 0.00 |
| ATOM | 3490 | HA   | PRO | X | 231 | 46.422 | 41.121 | 55.697 | 0.00 | 0.00 |
| ATOM | 3491 | C    | PRO | X | 231 | 47.715 | 42.242 | 54.437 | 0.00 | 0.00 |
| ATOM | 3492 | O    | PRO | X | 231 | 47.964 | 43.143 | 55.273 | 0.00 | 0.00 |
| ATOM | 3493 | N    | TRP | X | 232 | 47.937 | 42.377 | 53.141 | 0.00 | 0.00 |
| ATOM | 3494 | H    | TRP | X | 232 | 47.665 | 41.580 | 52.582 | 0.00 | 0.00 |
| ATOM | 3495 | CA   | TRP | X | 232 | 48.358 | 43.501 | 52.396 | 0.00 | 0.00 |
| ATOM | 3496 | HA   | TRP | X | 232 | 48.868 | 44.298 | 52.937 | 0.00 | 0.00 |
| ATOM | 3497 | CB   | TRP | X | 232 | 49.219 | 43.035 | 51.192 | 0.00 | 0.00 |
| ATOM | 3498 | HB2  | TRP | X | 232 | 49.408 | 43.836 | 50.478 | 0.00 | 0.00 |
| ATOM | 3499 | HB3  | TRP | X | 232 | 50.217 | 42.774 | 51.544 | 0.00 | 0.00 |
| ATOM | 3500 | CG   | TRP | X | 232 | 48.596 | 41.871 | 50.470 | 0.00 | 0.00 |
| ATOM | 3501 | CD1  | TRP | X | 232 | 48.959 | 40.530 | 50.786 | 0.00 | 0.00 |
| ATOM | 3502 | HD1  | TRP | X | 232 | 49.766 | 40.180 | 51.412 | 0.00 | 0.00 |
| ATOM | 3503 | NE1  | TRP | X | 232 | 48.186 | 39.653 | 50.015 | 0.00 | 0.00 |
| ATOM | 3504 | HE1  | TRP | X | 232 | 48.338 | 38.655 | 50.040 | 0.00 | 0.00 |
| ATOM | 3505 | CE2  | TRP | X | 232 | 47.320 | 40.364 | 49.224 | 0.00 | 0.00 |
| ATOM | 3506 | CZ2  | TRP | X | 232 | 46.388 | 39.915 | 48.246 | 0.00 | 0.00 |
| ATOM | 3507 | HZ2  | TRP | X | 232 | 46.246 | 38.855 | 48.098 | 0.00 | 0.00 |
| ATOM | 3508 | CH2  | TRP | X | 232 | 45.701 | 40.817 | 47.418 | 0.00 | 0.00 |
| ATOM | 3509 | HH2  | TRP | X | 232 | 45.045 | 40.456 | 46.640 | 0.00 | 0.00 |
| ATOM | 3510 | CZ3  | TRP | X | 232 | 46.090 | 42.188 | 47.547 | 0.00 | 0.00 |
| ATOM | 3511 | HZ3  | TRP | X | 232 | 45.507 | 42.886 | 46.965 | 0.00 | 0.00 |
| ATOM | 3512 | CE3  | TRP | X | 232 | 47.048 | 42.667 | 48.474 | 0.00 | 0.00 |
| ATOM | 3513 | HE3  | TRP | X | 232 | 47.197 | 43.730 | 48.589 | 0.00 | 0.00 |
| ATOM | 3514 | CD2  | TRP | X | 232 | 47.632 | 41.773 | 49.378 | 0.00 | 0.00 |
| ATOM | 3515 | C    | TRP | X | 232 | 47.104 | 44.237 | 51.824 | 0.00 | 0.00 |
| ATOM | 3516 | O    | TRP | X | 232 | 47.323 | 45.306 | 51.318 | 0.00 | 0.00 |
| ATOM | 3517 | N    | ALA | X | 233 | 45.930 | 43.693 | 51.873 | 0.00 | 0.00 |
| ATOM | 3518 | H    | ALA | X | 233 | 45.854 | 42.760 | 52.253 | 0.00 | 0.00 |
| ATOM | 3519 | CA   | ALA | X | 233 | 44.826 | 44.137 | 51.001 | 0.00 | 0.00 |
| ATOM | 3520 | HA   | ALA | X | 233 | 45.178 | 44.540 | 50.052 | 0.00 | 0.00 |
| ATOM | 3521 | CB   | ALA | X | 233 | 43.960 | 42.907 | 50.670 | 0.00 | 0.00 |
| ATOM | 3522 | HB1  | ALA | X | 233 | 43.682 | 42.493 | 51.638 | 0.00 | 0.00 |
| ATOM | 3523 | HB2  | ALA | X | 233 | 44.577 | 42.197 | 50.118 | 0.00 | 0.00 |
| ATOM | 3524 | HB3  | ALA | X | 233 | 43.189 | 43.144 | 49.936 | 0.00 | 0.00 |
| ATOM | 3525 | C    | ALA | X | 233 | 43.969 | 45.188 | 51.623 | 0.00 | 0.00 |
| ATOM | 3526 | O    | ALA | X | 233 | 43.161 | 45.862 | 50.963 | 0.00 | 0.00 |
| ATOM | 3527 | N    | THR | X | 234 | 44.152 | 45.443 | 52.885 | 0.00 | 0.00 |
| ATOM | 3528 | H    | THR | X | 234 | 44.854 | 44.819 | 53.256 | 0.00 | 0.00 |
| ATOM | 3529 | CA   | THR | X | 234 | 43.459 | 46.397 | 53.726 | 0.00 | 0.00 |

|      |      |      |     |   |     |        |        |        |      |      |
|------|------|------|-----|---|-----|--------|--------|--------|------|------|
| ATOM | 3530 | HA   | THR | X | 234 | 43.088 | 47.082 | 52.963 | 0.00 | 0.00 |
| ATOM | 3531 | CB   | THR | X | 234 | 42.242 | 45.837 | 54.449 | 0.00 | 0.00 |
| ATOM | 3532 | HB   | THR | X | 234 | 41.874 | 46.647 | 55.079 | 0.00 | 0.00 |
| ATOM | 3533 | CG2  | THR | X | 234 | 41.161 | 45.357 | 53.583 | 0.00 | 0.00 |
| ATOM | 3534 | HG21 | THR | X | 234 | 40.857 | 46.075 | 52.821 | 0.00 | 0.00 |
| ATOM | 3535 | HG22 | THR | X | 234 | 40.262 | 45.185 | 54.173 | 0.00 | 0.00 |
| ATOM | 3536 | HG23 | THR | X | 234 | 41.477 | 44.508 | 52.976 | 0.00 | 0.00 |
| ATOM | 3537 | OG1  | THR | X | 234 | 42.595 | 44.884 | 55.367 | 0.00 | 0.00 |
| ATOM | 3538 | HG1  | THR | X | 234 | 42.613 | 44.099 | 54.813 | 0.00 | 0.00 |
| ATOM | 3539 | C    | THR | X | 234 | 44.392 | 47.061 | 54.776 | 0.00 | 0.00 |
| ATOM | 3540 | O    | THR | X | 234 | 45.452 | 46.454 | 55.165 | 0.00 | 0.00 |
| ATOM | 3541 | N    | VAL | X | 235 | 44.002 | 48.234 | 55.270 | 0.00 | 0.00 |
| ATOM | 3542 | H    | VAL | X | 235 | 43.184 | 48.662 | 54.861 | 0.00 | 0.00 |
| ATOM | 3543 | CA   | VAL | X | 235 | 44.585 | 48.961 | 56.346 | 0.00 | 0.00 |
| ATOM | 3544 | HA   | VAL | X | 235 | 45.208 | 48.258 | 56.898 | 0.00 | 0.00 |
| ATOM | 3545 | CB   | VAL | X | 235 | 45.586 | 50.088 | 55.884 | 0.00 | 0.00 |
| ATOM | 3546 | HB   | VAL | X | 235 | 46.004 | 49.709 | 54.951 | 0.00 | 0.00 |
| ATOM | 3547 | CG1  | VAL | X | 235 | 45.065 | 51.508 | 55.450 | 0.00 | 0.00 |
| ATOM | 3548 | HG11 | VAL | X | 235 | 44.130 | 51.592 | 54.896 | 0.00 | 0.00 |
| ATOM | 3549 | HG12 | VAL | X | 235 | 44.899 | 52.027 | 56.394 | 0.00 | 0.00 |
| ATOM | 3550 | HG13 | VAL | X | 235 | 45.811 | 52.104 | 54.923 | 0.00 | 0.00 |
| ATOM | 3551 | CG2  | VAL | X | 235 | 46.742 | 50.325 | 56.836 | 0.00 | 0.00 |
| ATOM | 3552 | HG21 | VAL | X | 235 | 47.358 | 51.169 | 56.526 | 0.00 | 0.00 |
| ATOM | 3553 | HG22 | VAL | X | 235 | 47.209 | 49.351 | 56.987 | 0.00 | 0.00 |
| ATOM | 3554 | HG23 | VAL | X | 235 | 46.213 | 50.501 | 57.772 | 0.00 | 0.00 |
| ATOM | 3555 | C    | VAL | X | 235 | 43.461 | 49.601 | 57.277 | 0.00 | 0.00 |
| ATOM | 3556 | O    | VAL | X | 235 | 42.376 | 49.815 | 56.812 | 0.00 | 0.00 |
| ATOM | 3557 | N    | GLY | X | 236 | 43.833 | 50.043 | 58.460 | 0.00 | 0.00 |
| ATOM | 3558 | H    | GLY | X | 236 | 44.827 | 49.940 | 58.610 | 0.00 | 0.00 |
| ATOM | 3559 | CA   | GLY | X | 236 | 43.033 | 50.878 | 59.400 | 0.00 | 0.00 |
| ATOM | 3560 | HA2  | GLY | X | 236 | 41.991 | 50.574 | 59.498 | 0.00 | 0.00 |
| ATOM | 3561 | HA3  | GLY | X | 236 | 43.398 | 50.729 | 60.416 | 0.00 | 0.00 |
| ATOM | 3562 | C    | GLY | X | 236 | 43.018 | 52.415 | 59.124 | 0.00 | 0.00 |
| ATOM | 3563 | O    | GLY | X | 236 | 44.037 | 53.005 | 58.720 | 0.00 | 0.00 |
| ATOM | 3564 | N    | MET | X | 237 | 41.969 | 53.135 | 59.572 | 0.00 | 0.00 |
| ATOM | 3565 | H    | MET | X | 237 | 41.255 | 52.618 | 60.065 | 0.00 | 0.00 |
| ATOM | 3566 | CA   | MET | X | 237 | 41.918 | 54.634 | 59.462 | 0.00 | 0.00 |
| ATOM | 3567 | HA   | MET | X | 237 | 41.852 | 54.866 | 58.399 | 0.00 | 0.00 |
| ATOM | 3568 | CB   | MET | X | 237 | 40.626 | 55.106 | 60.104 | 0.00 | 0.00 |
| ATOM | 3569 | HB2  | MET | X | 237 | 39.749 | 54.690 | 59.608 | 0.00 | 0.00 |
| ATOM | 3570 | HB3  | MET | X | 237 | 40.613 | 54.740 | 61.130 | 0.00 | 0.00 |
| ATOM | 3571 | CG   | MET | X | 237 | 40.512 | 56.644 | 60.160 | 0.00 | 0.00 |
| ATOM | 3572 | HG2  | MET | X | 237 | 39.624 | 56.969 | 60.703 | 0.00 | 0.00 |
| ATOM | 3573 | HG3  | MET | X | 237 | 41.369 | 57.016 | 60.721 | 0.00 | 0.00 |
| ATOM | 3574 | SD   | MET | X | 237 | 40.530 | 57.649 | 58.699 | 0.00 | 0.00 |
| ATOM | 3575 | CE   | MET | X | 237 | 38.811 | 57.408 | 58.181 | 0.00 | 0.00 |
| ATOM | 3576 | HE1  | MET | X | 237 | 38.145 | 57.335 | 59.041 | 0.00 | 0.00 |
| ATOM | 3577 | HE2  | MET | X | 237 | 38.483 | 58.306 | 57.658 | 0.00 | 0.00 |
| ATOM | 3578 | HE3  | MET | X | 237 | 38.718 | 56.522 | 57.554 | 0.00 | 0.00 |
| ATOM | 3579 | C    | MET | X | 237 | 43.108 | 55.316 | 60.067 | 0.00 | 0.00 |
| ATOM | 3580 | O    | MET | X | 237 | 43.765 | 56.130 | 59.389 | 0.00 | 0.00 |
| ATOM | 3581 | N    | GLY | X | 238 | 43.437 | 54.924 | 61.265 | 0.00 | 0.00 |
| ATOM | 3582 | H    | GLY | X | 238 | 42.847 | 54.283 | 61.776 | 0.00 | 0.00 |
| ATOM | 3583 | CA   | GLY | X | 238 | 44.595 | 55.422 | 61.997 | 0.00 | 0.00 |
| ATOM | 3584 | HA2  | GLY | X | 238 | 44.457 | 56.488 | 62.177 | 0.00 | 0.00 |
| ATOM | 3585 | HA3  | GLY | X | 238 | 44.652 | 54.879 | 62.940 | 0.00 | 0.00 |
| ATOM | 3586 | C    | GLY | X | 238 | 45.881 | 55.224 | 61.267 | 0.00 | 0.00 |
| ATOM | 3587 | O    | GLY | X | 238 | 46.703 | 56.151 | 61.296 | 0.00 | 0.00 |
| ATOM | 3588 | N    | GLU | X | 239 | 46.089 | 54.165 | 60.518 | 0.00 | 0.00 |
| ATOM | 3589 | H    | GLU | X | 239 | 45.383 | 53.447 | 60.432 | 0.00 | 0.00 |
| ATOM | 3590 | CA   | GLU | X | 239 | 47.382 | 53.892 | 59.804 | 0.00 | 0.00 |
| ATOM | 3591 | HA   | GLU | X | 239 | 48.163 | 54.146 | 60.521 | 0.00 | 0.00 |
| ATOM | 3592 | CB   | GLU | X | 239 | 47.491 | 52.411 | 59.394 | 0.00 | 0.00 |
| ATOM | 3593 | HB2  | GLU | X | 239 | 46.532 | 51.894 | 59.359 | 0.00 | 0.00 |
| ATOM | 3594 | HB3  | GLU | X | 239 | 48.060 | 52.326 | 58.469 | 0.00 | 0.00 |
| ATOM | 3595 | CG   | GLU | X | 239 | 48.407 | 51.665 | 60.427 | 0.00 | 0.00 |
| ATOM | 3596 | HG2  | GLU | X | 239 | 47.955 | 51.627 | 61.418 | 0.00 | 0.00 |

|      |      |      |     |   |     |        |        |        |      |      |
|------|------|------|-----|---|-----|--------|--------|--------|------|------|
| ATOM | 3597 | HG3  | GLU | X | 239 | 48.537 | 50.644 | 60.068 | 0.00 | 0.00 |
| ATOM | 3598 | CD   | GLU | X | 239 | 49.774 | 52.244 | 60.457 | 0.00 | 0.00 |
| ATOM | 3599 | OE1  | GLU | X | 239 | 50.135 | 52.970 | 61.426 | 0.00 | 0.00 |
| ATOM | 3600 | OE2  | GLU | X | 239 | 50.530 | 52.043 | 59.477 | 0.00 | 0.00 |
| ATOM | 3601 | C    | GLU | X | 239 | 47.486 | 54.858 | 58.559 | 0.00 | 0.00 |
| ATOM | 3602 | O    | GLU | X | 239 | 48.589 | 55.405 | 58.401 | 0.00 | 0.00 |
| ATOM | 3603 | N    | ALA | X | 240 | 46.406 | 54.978 | 57.731 | 0.00 | 0.00 |
| ATOM | 3604 | H    | ALA | X | 240 | 45.657 | 54.329 | 57.930 | 0.00 | 0.00 |
| ATOM | 3605 | CA   | ALA | X | 240 | 46.460 | 55.743 | 56.506 | 0.00 | 0.00 |
| ATOM | 3606 | HA   | ALA | X | 240 | 47.313 | 55.462 | 55.888 | 0.00 | 0.00 |
| ATOM | 3607 | CB   | ALA | X | 240 | 45.274 | 55.471 | 55.654 | 0.00 | 0.00 |
| ATOM | 3608 | HB1  | ALA | X | 240 | 45.185 | 54.424 | 55.364 | 0.00 | 0.00 |
| ATOM | 3609 | HB2  | ALA | X | 240 | 45.408 | 56.229 | 54.882 | 0.00 | 0.00 |
| ATOM | 3610 | HB3  | ALA | X | 240 | 44.368 | 55.750 | 56.192 | 0.00 | 0.00 |
| ATOM | 3611 | C    | ALA | X | 240 | 46.566 | 57.225 | 56.756 | 0.00 | 0.00 |
| ATOM | 3612 | O    | ALA | X | 240 | 47.287 | 57.974 | 56.083 | 0.00 | 0.00 |
| ATOM | 3613 | N    | ARG | X | 241 | 45.955 | 57.606 | 57.917 | 0.00 | 0.00 |
| ATOM | 3614 | H    | ARG | X | 241 | 45.277 | 57.008 | 58.366 | 0.00 | 0.00 |
| ATOM | 3615 | CA   | ARG | X | 241 | 46.138 | 58.957 | 58.404 | 0.00 | 0.00 |
| ATOM | 3616 | HA   | ARG | X | 241 | 45.903 | 59.719 | 57.660 | 0.00 | 0.00 |
| ATOM | 3617 | CB   | ARG | X | 241 | 45.129 | 59.140 | 59.580 | 0.00 | 0.00 |
| ATOM | 3618 | HB2  | ARG | X | 241 | 44.109 | 58.984 | 59.229 | 0.00 | 0.00 |
| ATOM | 3619 | HB3  | ARG | X | 241 | 45.239 | 58.316 | 60.284 | 0.00 | 0.00 |
| ATOM | 3620 | CG   | ARG | X | 241 | 45.243 | 60.432 | 60.278 | 0.00 | 0.00 |
| ATOM | 3621 | HG2  | ARG | X | 241 | 46.234 | 60.878 | 60.197 | 0.00 | 0.00 |
| ATOM | 3622 | HG3  | ARG | X | 241 | 44.524 | 61.069 | 59.763 | 0.00 | 0.00 |
| ATOM | 3623 | CD   | ARG | X | 241 | 44.995 | 60.513 | 61.795 | 0.00 | 0.00 |
| ATOM | 3624 | HD2  | ARG | X | 241 | 44.125 | 59.904 | 62.042 | 0.00 | 0.00 |
| ATOM | 3625 | HD3  | ARG | X | 241 | 45.854 | 60.170 | 62.372 | 0.00 | 0.00 |
| ATOM | 3626 | NE   | ARG | X | 241 | 44.661 | 61.881 | 62.173 | 0.00 | 0.00 |
| ATOM | 3627 | HE   | ARG | X | 241 | 44.560 | 62.506 | 61.386 | 0.00 | 0.00 |
| ATOM | 3628 | CZ   | ARG | X | 241 | 44.151 | 62.356 | 63.304 | 0.00 | 0.00 |
| ATOM | 3629 | NH1  | ARG | X | 241 | 44.049 | 61.532 | 64.318 | 0.00 | 0.00 |
| ATOM | 3630 | HH11 | ARG | X | 241 | 44.307 | 60.565 | 64.177 | 0.00 | 0.00 |
| ATOM | 3631 | HH12 | ARG | X | 241 | 43.649 | 61.847 | 65.190 | 0.00 | 0.00 |
| ATOM | 3632 | NH2  | ARG | X | 241 | 43.711 | 63.575 | 63.379 | 0.00 | 0.00 |
| ATOM | 3633 | HH21 | ARG | X | 241 | 43.904 | 64.250 | 62.652 | 0.00 | 0.00 |
| ATOM | 3634 | HH22 | ARG | X | 241 | 43.140 | 63.921 | 64.137 | 0.00 | 0.00 |
| ATOM | 3635 | C    | ARG | X | 241 | 47.595 | 59.115 | 58.893 | 0.00 | 0.00 |
| ATOM | 3636 | O    | ARG | X | 241 | 48.244 | 60.096 | 58.569 | 0.00 | 0.00 |
| ATOM | 3637 | N    | ARG | X | 242 | 48.254 | 58.154 | 59.621 | 0.00 | 0.00 |
| ATOM | 3638 | H    | ARG | X | 242 | 47.675 | 57.334 | 59.728 | 0.00 | 0.00 |
| ATOM | 3639 | CA   | ARG | X | 242 | 49.681 | 58.164 | 59.983 | 0.00 | 0.00 |
| ATOM | 3640 | HA   | ARG | X | 242 | 49.833 | 58.971 | 60.699 | 0.00 | 0.00 |
| ATOM | 3641 | CB   | ARG | X | 242 | 50.130 | 56.946 | 60.800 | 0.00 | 0.00 |
| ATOM | 3642 | HB2  | ARG | X | 242 | 49.386 | 56.842 | 61.590 | 0.00 | 0.00 |
| ATOM | 3643 | HB3  | ARG | X | 242 | 49.999 | 56.004 | 60.267 | 0.00 | 0.00 |
| ATOM | 3644 | CG   | ARG | X | 242 | 51.510 | 56.990 | 61.436 | 0.00 | 0.00 |
| ATOM | 3645 | HG2  | ARG | X | 242 | 52.210 | 57.400 | 60.707 | 0.00 | 0.00 |
| ATOM | 3646 | HG3  | ARG | X | 242 | 51.370 | 57.578 | 62.343 | 0.00 | 0.00 |
| ATOM | 3647 | CD   | ARG | X | 242 | 52.021 | 55.631 | 61.922 | 0.00 | 0.00 |
| ATOM | 3648 | HD2  | ARG | X | 242 | 52.934 | 55.838 | 62.480 | 0.00 | 0.00 |
| ATOM | 3649 | HD3  | ARG | X | 242 | 51.276 | 55.241 | 62.615 | 0.00 | 0.00 |
| ATOM | 3650 | NE   | ARG | X | 242 | 52.211 | 54.671 | 60.856 | 0.00 | 0.00 |
| ATOM | 3651 | HE   | ARG | X | 242 | 51.443 | 54.027 | 60.732 | 0.00 | 0.00 |
| ATOM | 3652 | CZ   | ARG | X | 242 | 53.143 | 54.690 | 59.931 | 0.00 | 0.00 |
| ATOM | 3653 | NH1  | ARG | X | 242 | 54.021 | 55.600 | 59.816 | 0.00 | 0.00 |
| ATOM | 3654 | HH11 | ARG | X | 242 | 54.234 | 56.252 | 60.558 | 0.00 | 0.00 |
| ATOM | 3655 | HH12 | ARG | X | 242 | 54.651 | 55.655 | 59.028 | 0.00 | 0.00 |
| ATOM | 3656 | NH2  | ARG | X | 242 | 53.031 | 53.720 | 58.997 | 0.00 | 0.00 |
| ATOM | 3657 | HH21 | ARG | X | 242 | 52.326 | 52.999 | 59.059 | 0.00 | 0.00 |
| ATOM | 3658 | HH22 | ARG | X | 242 | 53.703 | 53.650 | 58.247 | 0.00 | 0.00 |
| ATOM | 3659 | C    | ARG | X | 242 | 50.478 | 58.423 | 58.728 | 0.00 | 0.00 |
| ATOM | 3660 | O    | ARG | X | 242 | 51.376 | 59.271 | 58.679 | 0.00 | 0.00 |
| ATOM | 3661 | N    | ARG | X | 243 | 50.235 | 57.583 | 57.710 | 0.00 | 0.00 |
| ATOM | 3662 | H    | ARG | X | 243 | 49.510 | 56.892 | 57.842 | 0.00 | 0.00 |
| ATOM | 3663 | CA   | ARG | X | 243 | 50.976 | 57.543 | 56.380 | 0.00 | 0.00 |

|      |      |      |     |   |     |        |        |        |      |      |
|------|------|------|-----|---|-----|--------|--------|--------|------|------|
| ATOM | 3664 | HA   | ARG | X | 243 | 52.057 | 57.563 | 56.518 | 0.00 | 0.00 |
| ATOM | 3665 | CB   | ARG | X | 243 | 50.442 | 56.351 | 55.594 | 0.00 | 0.00 |
| ATOM | 3666 | HB2  | ARG | X | 243 | 49.373 | 56.388 | 55.387 | 0.00 | 0.00 |
| ATOM | 3667 | HB3  | ARG | X | 243 | 50.838 | 56.258 | 54.582 | 0.00 | 0.00 |
| ATOM | 3668 | CG   | ARG | X | 243 | 50.859 | 55.139 | 56.345 | 0.00 | 0.00 |
| ATOM | 3669 | HG2  | ARG | X | 243 | 51.944 | 55.140 | 56.237 | 0.00 | 0.00 |
| ATOM | 3670 | HG3  | ARG | X | 243 | 50.665 | 55.236 | 57.413 | 0.00 | 0.00 |
| ATOM | 3671 | CD   | ARG | X | 243 | 50.167 | 53.867 | 55.730 | 0.00 | 0.00 |
| ATOM | 3672 | HD2  | ARG | X | 243 | 49.104 | 54.057 | 55.581 | 0.00 | 0.00 |
| ATOM | 3673 | HD3  | ARG | X | 243 | 50.597 | 53.678 | 54.747 | 0.00 | 0.00 |
| ATOM | 3674 | NE   | ARG | X | 243 | 50.319 | 52.723 | 56.603 | 0.00 | 0.00 |
| ATOM | 3675 | HE   | ARG | X | 243 | 50.403 | 52.815 | 57.606 | 0.00 | 0.00 |
| ATOM | 3676 | CZ   | ARG | X | 243 | 50.320 | 51.472 | 56.289 | 0.00 | 0.00 |
| ATOM | 3677 | NH1  | ARG | X | 243 | 50.192 | 51.122 | 55.017 | 0.00 | 0.00 |
| ATOM | 3678 | HH11 | ARG | X | 243 | 50.164 | 51.873 | 54.342 | 0.00 | 0.00 |
| ATOM | 3679 | HH12 | ARG | X | 243 | 50.189 | 50.152 | 54.736 | 0.00 | 0.00 |
| ATOM | 3680 | NH2  | ARG | X | 243 | 50.435 | 50.557 | 57.190 | 0.00 | 0.00 |
| ATOM | 3681 | HH21 | ARG | X | 243 | 50.507 | 50.746 | 58.179 | 0.00 | 0.00 |
| ATOM | 3682 | HH22 | ARG | X | 243 | 50.547 | 49.559 | 57.088 | 0.00 | 0.00 |
| ATOM | 3683 | C    | ARG | X | 243 | 50.746 | 58.910 | 55.640 | 0.00 | 0.00 |
| ATOM | 3684 | O    | ARG | X | 243 | 51.749 | 59.468 | 55.105 | 0.00 | 0.00 |
| ATOM | 3685 | N    | ALA | X | 244 | 49.582 | 59.568 | 55.854 | 0.00 | 0.00 |
| ATOM | 3686 | H    | ALA | X | 244 | 48.811 | 59.264 | 56.431 | 0.00 | 0.00 |
| ATOM | 3687 | CA   | ALA | X | 244 | 49.316 | 60.966 | 55.441 | 0.00 | 0.00 |
| ATOM | 3688 | HA   | ALA | X | 244 | 49.545 | 61.128 | 54.387 | 0.00 | 0.00 |
| ATOM | 3689 | CB   | ALA | X | 244 | 47.816 | 61.344 | 55.795 | 0.00 | 0.00 |
| ATOM | 3690 | HB1  | ALA | X | 244 | 47.698 | 62.379 | 55.475 | 0.00 | 0.00 |
| ATOM | 3691 | HB2  | ALA | X | 244 | 47.533 | 61.122 | 56.824 | 0.00 | 0.00 |
| ATOM | 3692 | HB3  | ALA | X | 244 | 47.236 | 60.597 | 55.254 | 0.00 | 0.00 |
| ATOM | 3693 | C    | ALA | X | 244 | 50.295 | 61.912 | 56.181 | 0.00 | 0.00 |
| ATOM | 3694 | O    | ALA | X | 244 | 51.028 | 62.598 | 55.544 | 0.00 | 0.00 |
| ATOM | 3695 | N    | THR | X | 245 | 50.390 | 61.970 | 57.519 | 0.00 | 0.00 |
| ATOM | 3696 | H    | THR | X | 245 | 49.605 | 61.554 | 57.999 | 0.00 | 0.00 |
| ATOM | 3697 | CA   | THR | X | 245 | 51.200 | 62.877 | 58.318 | 0.00 | 0.00 |
| ATOM | 3698 | HA   | THR | X | 245 | 50.962 | 63.912 | 58.070 | 0.00 | 0.00 |
| ATOM | 3699 | CB   | THR | X | 245 | 50.765 | 62.697 | 59.813 | 0.00 | 0.00 |
| ATOM | 3700 | HB   | THR | X | 245 | 51.028 | 61.734 | 60.250 | 0.00 | 0.00 |
| ATOM | 3701 | CG2  | THR | X | 245 | 51.059 | 63.799 | 60.788 | 0.00 | 0.00 |
| ATOM | 3702 | HG21 | THR | X | 245 | 52.137 | 63.961 | 60.818 | 0.00 | 0.00 |
| ATOM | 3703 | HG22 | THR | X | 245 | 50.686 | 63.567 | 61.786 | 0.00 | 0.00 |
| ATOM | 3704 | HG23 | THR | X | 245 | 50.602 | 64.750 | 60.514 | 0.00 | 0.00 |
| ATOM | 3705 | OG1  | THR | X | 245 | 49.362 | 62.724 | 59.885 | 0.00 | 0.00 |
| ATOM | 3706 | HG1  | THR | X | 245 | 49.193 | 62.447 | 60.788 | 0.00 | 0.00 |
| ATOM | 3707 | C    | THR | X | 245 | 52.727 | 62.678 | 58.281 | 0.00 | 0.00 |
| ATOM | 3708 | O    | THR | X | 245 | 53.394 | 63.684 | 58.198 | 0.00 | 0.00 |
| ATOM | 3709 | N    | GLN | X | 246 | 53.167 | 61.446 | 58.251 | 0.00 | 0.00 |
| ATOM | 3710 | H    | GLN | X | 246 | 52.561 | 60.640 | 58.302 | 0.00 | 0.00 |
| ATOM | 3711 | CA   | GLN | X | 246 | 54.577 | 61.175 | 57.973 | 0.00 | 0.00 |
| ATOM | 3712 | HA   | GLN | X | 246 | 55.215 | 61.758 | 58.637 | 0.00 | 0.00 |
| ATOM | 3713 | CB   | GLN | X | 246 | 54.769 | 59.586 | 58.263 | 0.00 | 0.00 |
| ATOM | 3714 | HB2  | GLN | X | 246 | 54.690 | 59.433 | 59.339 | 0.00 | 0.00 |
| ATOM | 3715 | HB3  | GLN | X | 246 | 53.986 | 59.021 | 57.756 | 0.00 | 0.00 |
| ATOM | 3716 | CG   | GLN | X | 246 | 56.137 | 59.053 | 57.787 | 0.00 | 0.00 |
| ATOM | 3717 | HG2  | GLN | X | 246 | 56.201 | 59.126 | 56.701 | 0.00 | 0.00 |
| ATOM | 3718 | HG3  | GLN | X | 246 | 56.902 | 59.587 | 58.350 | 0.00 | 0.00 |
| ATOM | 3719 | CD   | GLN | X | 246 | 56.269 | 57.573 | 58.208 | 0.00 | 0.00 |
| ATOM | 3720 | OE1  | GLN | X | 246 | 55.540 | 56.738 | 57.693 | 0.00 | 0.00 |
| ATOM | 3721 | NE2  | GLN | X | 246 | 57.052 | 57.170 | 59.138 | 0.00 | 0.00 |
| ATOM | 3722 | HE21 | GLN | X | 246 | 57.045 | 56.220 | 59.482 | 0.00 | 0.00 |
| ATOM | 3723 | HE22 | GLN | X | 246 | 57.784 | 57.810 | 59.408 | 0.00 | 0.00 |
| ATOM | 3724 | C    | GLN | X | 246 | 54.904 | 61.657 | 56.547 | 0.00 | 0.00 |
| ATOM | 3725 | O    | GLN | X | 246 | 55.726 | 62.569 | 56.369 | 0.00 | 0.00 |
| ATOM | 3726 | N    | LEU | X | 247 | 54.217 | 61.186 | 55.442 | 0.00 | 0.00 |
| ATOM | 3727 | H    | LEU | X | 247 | 53.552 | 60.434 | 55.552 | 0.00 | 0.00 |
| ATOM | 3728 | CA   | LEU | X | 247 | 54.311 | 61.910 | 54.069 | 0.00 | 0.00 |
| ATOM | 3729 | HA   | LEU | X | 247 | 55.281 | 61.657 | 53.640 | 0.00 | 0.00 |
| ATOM | 3730 | CB   | LEU | X | 247 | 53.256 | 61.328 | 53.070 | 0.00 | 0.00 |

|      |      |      |     |   |     |        |        |        |      |      |
|------|------|------|-----|---|-----|--------|--------|--------|------|------|
| ATOM | 3731 | HB2  | LEU | X | 247 | 53.496 | 60.266 | 53.122 | 0.00 | 0.00 |
| ATOM | 3732 | HB3  | LEU | X | 247 | 52.285 | 61.430 | 53.555 | 0.00 | 0.00 |
| ATOM | 3733 | CG   | LEU | X | 247 | 53.194 | 61.867 | 51.645 | 0.00 | 0.00 |
| ATOM | 3734 | HG   | LEU | X | 247 | 52.991 | 62.923 | 51.823 | 0.00 | 0.00 |
| ATOM | 3735 | CD1  | LEU | X | 247 | 54.494 | 61.608 | 50.887 | 0.00 | 0.00 |
| ATOM | 3736 | HD11 | LEU | X | 247 | 55.285 | 61.876 | 51.586 | 0.00 | 0.00 |
| ATOM | 3737 | HD12 | LEU | X | 247 | 54.528 | 62.223 | 49.987 | 0.00 | 0.00 |
| ATOM | 3738 | HD13 | LEU | X | 247 | 54.631 | 60.569 | 50.585 | 0.00 | 0.00 |
| ATOM | 3739 | CD2  | LEU | X | 247 | 51.961 | 61.204 | 50.969 | 0.00 | 0.00 |
| ATOM | 3740 | HD21 | LEU | X | 247 | 51.047 | 61.742 | 51.221 | 0.00 | 0.00 |
| ATOM | 3741 | HD22 | LEU | X | 247 | 52.077 | 61.255 | 49.886 | 0.00 | 0.00 |
| ATOM | 3742 | HD23 | LEU | X | 247 | 51.854 | 60.146 | 51.206 | 0.00 | 0.00 |
| ATOM | 3743 | C    | LEU | X | 247 | 54.296 | 63.468 | 54.165 | 0.00 | 0.00 |
| ATOM | 3744 | O    | LEU | X | 247 | 55.207 | 64.068 | 53.551 | 0.00 | 0.00 |
| ATOM | 3745 | N    | ALA | X | 248 | 53.309 | 64.105 | 54.818 | 0.00 | 0.00 |
| ATOM | 3746 | H    | ALA | X | 248 | 52.588 | 63.538 | 55.240 | 0.00 | 0.00 |
| ATOM | 3747 | CA   | ALA | X | 248 | 53.211 | 65.536 | 54.919 | 0.00 | 0.00 |
| ATOM | 3748 | HA   | ALA | X | 248 | 53.190 | 65.914 | 53.897 | 0.00 | 0.00 |
| ATOM | 3749 | CB   | ALA | X | 248 | 51.884 | 65.885 | 55.623 | 0.00 | 0.00 |
| ATOM | 3750 | HB1  | ALA | X | 248 | 51.103 | 65.341 | 55.091 | 0.00 | 0.00 |
| ATOM | 3751 | HB2  | ALA | X | 248 | 51.676 | 66.955 | 55.620 | 0.00 | 0.00 |
| ATOM | 3752 | HB3  | ALA | X | 248 | 51.943 | 65.613 | 56.677 | 0.00 | 0.00 |
| ATOM | 3753 | C    | ALA | X | 248 | 54.473 | 66.137 | 55.577 | 0.00 | 0.00 |
| ATOM | 3754 | O    | ALA | X | 248 | 54.834 | 67.212 | 55.089 | 0.00 | 0.00 |
| ATOM | 3755 | N    | HIE | X | 249 | 55.160 | 65.574 | 56.549 | 0.00 | 0.00 |
| ATOM | 3756 | H    | HIE | X | 249 | 54.856 | 64.640 | 56.781 | 0.00 | 0.00 |
| ATOM | 3757 | CA   | HIE | X | 249 | 56.422 | 66.059 | 57.093 | 0.00 | 0.00 |
| ATOM | 3758 | HA   | HIE | X | 249 | 56.297 | 67.080 | 57.452 | 0.00 | 0.00 |
| ATOM | 3759 | CB   | HIE | X | 249 | 56.882 | 65.211 | 58.355 | 0.00 | 0.00 |
| ATOM | 3760 | HB2  | HIE | X | 249 | 56.249 | 65.665 | 59.118 | 0.00 | 0.00 |
| ATOM | 3761 | HB3  | HIE | X | 249 | 56.642 | 64.195 | 58.040 | 0.00 | 0.00 |
| ATOM | 3762 | CG   | HIE | X | 249 | 58.269 | 65.434 | 58.863 | 0.00 | 0.00 |
| ATOM | 3763 | ND1  | HIE | X | 249 | 58.565 | 65.616 | 60.253 | 0.00 | 0.00 |
| ATOM | 3764 | CE1  | HIE | X | 249 | 59.913 | 65.681 | 60.388 | 0.00 | 0.00 |
| ATOM | 3765 | HE1  | HIE | X | 249 | 60.498 | 65.809 | 61.287 | 0.00 | 0.00 |
| ATOM | 3766 | NE2  | HIE | X | 249 | 60.472 | 65.518 | 59.187 | 0.00 | 0.00 |
| ATOM | 3767 | HE2  | HIE | X | 249 | 61.475 | 65.499 | 59.072 | 0.00 | 0.00 |
| ATOM | 3768 | CD2  | HIE | X | 249 | 59.501 | 65.310 | 58.272 | 0.00 | 0.00 |
| ATOM | 3769 | HD2  | HIE | X | 249 | 59.679 | 65.185 | 57.214 | 0.00 | 0.00 |
| ATOM | 3770 | C    | HIE | X | 249 | 57.576 | 66.244 | 56.076 | 0.00 | 0.00 |
| ATOM | 3771 | O    | HIE | X | 249 | 58.312 | 67.237 | 56.068 | 0.00 | 0.00 |
| ATOM | 3772 | N    | LEU | X | 250 | 57.726 | 65.270 | 55.237 | 0.00 | 0.00 |
| ATOM | 3773 | H    | LEU | X | 250 | 57.036 | 64.533 | 55.228 | 0.00 | 0.00 |
| ATOM | 3774 | CA   | LEU | X | 250 | 58.696 | 65.277 | 54.106 | 0.00 | 0.00 |
| ATOM | 3775 | HA   | LEU | X | 250 | 59.695 | 65.619 | 54.379 | 0.00 | 0.00 |
| ATOM | 3776 | CB   | LEU | X | 250 | 58.949 | 63.779 | 53.641 | 0.00 | 0.00 |
| ATOM | 3777 | HB2  | LEU | X | 250 | 59.521 | 63.297 | 54.435 | 0.00 | 0.00 |
| ATOM | 3778 | HB3  | LEU | X | 250 | 57.992 | 63.259 | 53.675 | 0.00 | 0.00 |
| ATOM | 3779 | CG   | LEU | X | 250 | 59.825 | 63.562 | 52.327 | 0.00 | 0.00 |
| ATOM | 3780 | HG   | LEU | X | 250 | 59.441 | 64.084 | 51.451 | 0.00 | 0.00 |
| ATOM | 3781 | CD1  | LEU | X | 250 | 61.205 | 64.229 | 52.588 | 0.00 | 0.00 |
| ATOM | 3782 | HD11 | LEU | X | 250 | 61.852 | 64.028 | 51.734 | 0.00 | 0.00 |
| ATOM | 3783 | HD12 | LEU | X | 250 | 61.636 | 63.817 | 53.501 | 0.00 | 0.00 |
| ATOM | 3784 | HD13 | LEU | X | 250 | 61.161 | 65.301 | 52.779 | 0.00 | 0.00 |
| ATOM | 3785 | CD2  | LEU | X | 250 | 59.885 | 62.029 | 52.054 | 0.00 | 0.00 |
| ATOM | 3786 | HD21 | LEU | X | 250 | 58.886 | 61.596 | 52.106 | 0.00 | 0.00 |
| ATOM | 3787 | HD22 | LEU | X | 250 | 60.297 | 61.905 | 51.053 | 0.00 | 0.00 |
| ATOM | 3788 | HD23 | LEU | X | 250 | 60.595 | 61.518 | 52.704 | 0.00 | 0.00 |
| ATOM | 3789 | C    | LEU | X | 250 | 58.220 | 66.037 | 52.894 | 0.00 | 0.00 |
| ATOM | 3790 | O    | LEU | X | 250 | 59.061 | 66.712 | 52.326 | 0.00 | 0.00 |
| ATOM | 3791 | N    | VAL | X | 251 | 56.931 | 65.969 | 52.584 | 0.00 | 0.00 |
| ATOM | 3792 | H    | VAL | X | 251 | 56.343 | 65.258 | 52.994 | 0.00 | 0.00 |
| ATOM | 3793 | CA   | VAL | X | 251 | 56.397 | 66.810 | 51.512 | 0.00 | 0.00 |
| ATOM | 3794 | HA   | VAL | X | 251 | 56.922 | 66.553 | 50.592 | 0.00 | 0.00 |
| ATOM | 3795 | CB   | VAL | X | 251 | 54.908 | 66.468 | 51.180 | 0.00 | 0.00 |
| ATOM | 3796 | HB   | VAL | X | 251 | 54.306 | 66.239 | 52.059 | 0.00 | 0.00 |
| ATOM | 3797 | CG1  | VAL | X | 251 | 54.198 | 67.635 | 50.375 | 0.00 | 0.00 |



|      |      |      |     |   |     |        |        |        |      |      |
|------|------|------|-----|---|-----|--------|--------|--------|------|------|
| ATOM | 3798 | HG11 | VAL | X | 251 | 53.183 | 67.330 | 50.118 | 0.00 | 0.00 |
| ATOM | 3799 | HG12 | VAL | X | 251 | 54.058 | 68.539 | 50.968 | 0.00 | 0.00 |
| ATOM | 3800 | HG13 | VAL | X | 251 | 54.746 | 67.903 | 49.471 | 0.00 | 0.00 |
| ATOM | 3801 | CG2  | VAL | X | 251 | 54.660 | 65.193 | 50.233 | 0.00 | 0.00 |
| ATOM | 3802 | HG21 | VAL | X | 251 | 55.302 | 64.403 | 50.622 | 0.00 | 0.00 |
| ATOM | 3803 | HG22 | VAL | X | 251 | 55.099 | 65.392 | 49.255 | 0.00 | 0.00 |
| ATOM | 3804 | HG23 | VAL | X | 251 | 53.635 | 64.825 | 50.180 | 0.00 | 0.00 |
| ATOM | 3805 | C    | VAL | X | 251 | 56.538 | 68.340 | 51.770 | 0.00 | 0.00 |
| ATOM | 3806 | O    | VAL | X | 251 | 56.762 | 69.127 | 50.835 | 0.00 | 0.00 |
| ATOM | 3807 | N    | GLY | X | 252 | 56.345 | 68.751 | 53.033 | 0.00 | 0.00 |
| ATOM | 3808 | H    | GLY | X | 252 | 56.086 | 68.035 | 53.696 | 0.00 | 0.00 |
| ATOM | 3809 | CA   | GLY | X | 252 | 56.288 | 70.141 | 53.471 | 0.00 | 0.00 |
| ATOM | 3810 | HA2  | GLY | X | 252 | 56.660 | 70.205 | 54.494 | 0.00 | 0.00 |
| ATOM | 3811 | HA3  | GLY | X | 252 | 56.770 | 70.706 | 52.674 | 0.00 | 0.00 |
| ATOM | 3812 | C    | GLY | X | 252 | 54.814 | 70.605 | 53.623 | 0.00 | 0.00 |
| ATOM | 3813 | O    | GLY | X | 252 | 54.386 | 71.669 | 53.071 | 0.00 | 0.00 |
| ATOM | 3814 | N    | CYX | X | 253 | 53.905 | 69.846 | 54.295 | 0.00 | 0.00 |
| ATOM | 3815 | H    | CYX | X | 253 | 54.223 | 68.950 | 54.636 | 0.00 | 0.00 |
| ATOM | 3816 | CA   | CYX | X | 253 | 52.447 | 70.265 | 54.536 | 0.00 | 0.00 |
| ATOM | 3817 | HA   | CYX | X | 253 | 52.341 | 71.322 | 54.293 | 0.00 | 0.00 |
| ATOM | 3818 | CB   | CYX | X | 253 | 51.562 | 69.491 | 53.547 | 0.00 | 0.00 |
| ATOM | 3819 | HB2  | CYX | X | 253 | 51.792 | 68.426 | 53.574 | 0.00 | 0.00 |
| ATOM | 3820 | HB3  | CYX | X | 253 | 50.512 | 69.548 | 53.836 | 0.00 | 0.00 |
| ATOM | 3821 | SG   | CYX | X | 253 | 51.560 | 70.141 | 51.813 | 0.00 | 0.00 |
| ATOM | 3822 | C    | CYX | X | 253 | 52.012 | 70.085 | 56.027 | 0.00 | 0.00 |
| ATOM | 3823 | O    | CYX | X | 253 | 52.247 | 69.089 | 56.668 | 0.00 | 0.00 |
| ATOM | 3824 | N    | PRO | X | 254 | 51.259 | 71.093 | 56.574 | 0.00 | 0.00 |
| ATOM | 3825 | CD   | PRO | X | 254 | 50.483 | 70.860 | 57.722 | 0.00 | 0.00 |
| ATOM | 3826 | HD2  | PRO | X | 254 | 51.214 | 70.737 | 58.521 | 0.00 | 0.00 |
| ATOM | 3827 | HD3  | PRO | X | 254 | 49.823 | 70.008 | 57.562 | 0.00 | 0.00 |
| ATOM | 3828 | CG   | PRO | X | 254 | 49.653 | 72.049 | 58.026 | 0.00 | 0.00 |
| ATOM | 3829 | HG2  | PRO | X | 254 | 49.616 | 72.248 | 59.098 | 0.00 | 0.00 |
| ATOM | 3830 | HG3  | PRO | X | 254 | 48.611 | 71.861 | 57.766 | 0.00 | 0.00 |
| ATOM | 3831 | CB   | PRO | X | 254 | 50.197 | 73.121 | 57.182 | 0.00 | 0.00 |
| ATOM | 3832 | HB2  | PRO | X | 254 | 50.779 | 73.712 | 57.889 | 0.00 | 0.00 |
| ATOM | 3833 | HB3  | PRO | X | 254 | 49.415 | 73.673 | 56.660 | 0.00 | 0.00 |
| ATOM | 3834 | CA   | PRO | X | 254 | 51.118 | 72.478 | 56.087 | 0.00 | 0.00 |
| ATOM | 3835 | HA   | PRO | X | 254 | 50.615 | 72.447 | 55.120 | 0.00 | 0.00 |
| ATOM | 3836 | C    | PRO | X | 254 | 52.439 | 73.198 | 55.876 | 0.00 | 0.00 |
| ATOM | 3837 | O    | PRO | X | 254 | 53.451 | 72.683 | 56.286 | 0.00 | 0.00 |
| ATOM | 3838 | N    | PRO | X | 255 | 52.417 | 74.285 | 55.154 | 0.00 | 0.00 |
| ATOM | 3839 | CD   | PRO | X | 255 | 51.231 | 75.124 | 54.742 | 0.00 | 0.00 |
| ATOM | 3840 | HD2  | PRO | X | 255 | 50.521 | 75.134 | 55.569 | 0.00 | 0.00 |
| ATOM | 3841 | HD3  | PRO | X | 255 | 50.817 | 74.650 | 53.852 | 0.00 | 0.00 |
| ATOM | 3842 | CG   | PRO | X | 255 | 51.730 | 76.553 | 54.350 | 0.00 | 0.00 |
| ATOM | 3843 | HG2  | PRO | X | 255 | 51.747 | 77.157 | 55.257 | 0.00 | 0.00 |
| ATOM | 3844 | HG3  | PRO | X | 255 | 51.161 | 76.979 | 53.524 | 0.00 | 0.00 |
| ATOM | 3845 | CB   | PRO | X | 255 | 53.145 | 76.155 | 53.891 | 0.00 | 0.00 |
| ATOM | 3846 | HB2  | PRO | X | 255 | 53.899 | 76.941 | 53.921 | 0.00 | 0.00 |
| ATOM | 3847 | HB3  | PRO | X | 255 | 53.152 | 75.570 | 52.971 | 0.00 | 0.00 |
| ATOM | 3848 | CA   | PRO | X | 255 | 53.654 | 75.121 | 54.915 | 0.00 | 0.00 |
| ATOM | 3849 | HA   | PRO | X | 255 | 54.368 | 74.436 | 54.458 | 0.00 | 0.00 |
| ATOM | 3850 | C    | PRO | X | 255 | 54.228 | 75.734 | 56.241 | 0.00 | 0.00 |
| ATOM | 3851 | O    | PRO | X | 255 | 53.386 | 76.194 | 57.078 | 0.00 | 0.00 |
| ATOM | 3852 | N    | GLY | X | 256 | 55.575 | 75.665 | 56.414 | 0.00 | 0.00 |
| ATOM | 3853 | H    | GLY | X | 256 | 56.164 | 75.342 | 55.661 | 0.00 | 0.00 |
| ATOM | 3854 | CA   | GLY | X | 256 | 56.263 | 75.974 | 57.677 | 0.00 | 0.00 |
| ATOM | 3855 | HA2  | GLY | X | 256 | 57.336 | 76.012 | 57.487 | 0.00 | 0.00 |
| ATOM | 3856 | HA3  | GLY | X | 256 | 55.895 | 76.907 | 58.104 | 0.00 | 0.00 |
| ATOM | 3857 | C    | GLY | X | 256 | 56.113 | 74.892 | 58.800 | 0.00 | 0.00 |
| ATOM | 3858 | O    | GLY | X | 256 | 56.810 | 73.878 | 58.797 | 0.00 | 0.00 |
| ATOM | 3859 | N    | GLY | X | 257 | 55.133 | 75.069 | 59.698 | 0.00 | 0.00 |
| ATOM | 3860 | H    | GLY | X | 257 | 54.459 | 75.818 | 59.630 | 0.00 | 0.00 |
| ATOM | 3861 | CA   | GLY | X | 257 | 54.831 | 74.077 | 60.709 | 0.00 | 0.00 |
| ATOM | 3862 | HA2  | GLY | X | 257 | 55.730 | 73.710 | 61.203 | 0.00 | 0.00 |
| ATOM | 3863 | HA3  | GLY | X | 257 | 54.156 | 74.530 | 61.436 | 0.00 | 0.00 |
| ATOM | 3864 | C    | GLY | X | 257 | 54.198 | 72.879 | 60.081 | 0.00 | 0.00 |

|      |      |      |     |   |     |        |        |        |      |      |
|------|------|------|-----|---|-----|--------|--------|--------|------|------|
| ATOM | 3865 | O    | GLY | X | 257 | 53.013 | 72.903 | 59.917 | 0.00 | 0.00 |
| ATOM | 3866 | N    | THR | X | 258 | 54.934 | 71.808 | 59.740 | 0.00 | 0.00 |
| ATOM | 3867 | H    | THR | X | 258 | 55.926 | 71.894 | 59.913 | 0.00 | 0.00 |
| ATOM | 3868 | CA   | THR | X | 258 | 54.387 | 70.509 | 59.187 | 0.00 | 0.00 |
| ATOM | 3869 | HA   | THR | X | 258 | 53.835 | 70.722 | 58.271 | 0.00 | 0.00 |
| ATOM | 3870 | CB   | THR | X | 258 | 55.510 | 69.532 | 58.788 | 0.00 | 0.00 |
| ATOM | 3871 | HB   | THR | X | 258 | 55.024 | 68.626 | 58.426 | 0.00 | 0.00 |
| ATOM | 3872 | CG2  | THR | X | 258 | 56.283 | 70.000 | 57.590 | 0.00 | 0.00 |
| ATOM | 3873 | HG21 | THR | X | 258 | 55.929 | 69.665 | 56.616 | 0.00 | 0.00 |
| ATOM | 3874 | HG22 | THR | X | 258 | 57.277 | 69.553 | 57.631 | 0.00 | 0.00 |
| ATOM | 3875 | HG23 | THR | X | 258 | 56.369 | 71.085 | 57.643 | 0.00 | 0.00 |
| ATOM | 3876 | OG1  | THR | X | 258 | 56.406 | 69.270 | 59.855 | 0.00 | 0.00 |
| ATOM | 3877 | HG1  | THR | X | 258 | 56.996 | 70.027 | 59.862 | 0.00 | 0.00 |
| ATOM | 3878 | C    | THR | X | 258 | 53.509 | 69.675 | 60.139 | 0.00 | 0.00 |
| ATOM | 3879 | O    | THR | X | 258 | 53.464 | 69.883 | 61.363 | 0.00 | 0.00 |
| ATOM | 3880 | N    | GLY | X | 259 | 52.919 | 68.669 | 59.566 | 0.00 | 0.00 |
| ATOM | 3881 | H    | GLY | X | 259 | 52.831 | 68.712 | 58.561 | 0.00 | 0.00 |
| ATOM | 3882 | CA   | GLY | X | 259 | 52.148 | 67.661 | 60.211 | 0.00 | 0.00 |
| ATOM | 3883 | HA2  | GLY | X | 259 | 51.870 | 66.844 | 59.546 | 0.00 | 0.00 |
| ATOM | 3884 | HA3  | GLY | X | 259 | 52.666 | 67.383 | 61.129 | 0.00 | 0.00 |
| ATOM | 3885 | C    | GLY | X | 259 | 50.820 | 68.300 | 60.566 | 0.00 | 0.00 |
| ATOM | 3886 | O    | GLY | X | 259 | 50.022 | 68.618 | 59.683 | 0.00 | 0.00 |
| ATOM | 3887 | N    | GLY | X | 260 | 50.518 | 68.556 | 61.840 | 0.00 | 0.00 |
| ATOM | 3888 | H    | GLY | X | 260 | 51.127 | 68.103 | 62.506 | 0.00 | 0.00 |
| ATOM | 3889 | CA   | GLY | X | 260 | 49.478 | 69.533 | 62.229 | 0.00 | 0.00 |
| ATOM | 3890 | HA2  | GLY | X | 260 | 49.393 | 69.684 | 63.305 | 0.00 | 0.00 |
| ATOM | 3891 | HA3  | GLY | X | 260 | 49.724 | 70.451 | 61.695 | 0.00 | 0.00 |
| ATOM | 3892 | C    | GLY | X | 260 | 48.042 | 69.140 | 61.889 | 0.00 | 0.00 |
| ATOM | 3893 | O    | GLY | X | 260 | 47.614 | 67.957 | 61.948 | 0.00 | 0.00 |
| ATOM | 3894 | N    | ASN | X | 261 | 47.286 | 70.092 | 61.440 | 0.00 | 0.00 |
| ATOM | 3895 | H    | ASN | X | 261 | 47.668 | 71.027 | 61.408 | 0.00 | 0.00 |
| ATOM | 3896 | CA   | ASN | X | 261 | 45.896 | 69.861 | 61.248 | 0.00 | 0.00 |
| ATOM | 3897 | HA   | ASN | X | 261 | 45.568 | 69.144 | 62.001 | 0.00 | 0.00 |
| ATOM | 3898 | CB   | ASN | X | 261 | 45.217 | 71.247 | 61.439 | 0.00 | 0.00 |
| ATOM | 3899 | HB2  | ASN | X | 261 | 45.414 | 71.799 | 62.359 | 0.00 | 0.00 |
| ATOM | 3900 | HB3  | ASN | X | 261 | 45.404 | 71.840 | 60.544 | 0.00 | 0.00 |
| ATOM | 3901 | CG   | ASN | X | 261 | 43.706 | 71.046 | 61.434 | 0.00 | 0.00 |
| ATOM | 3902 | OD1  | ASN | X | 261 | 43.123 | 71.416 | 60.433 | 0.00 | 0.00 |
| ATOM | 3903 | ND2  | ASN | X | 261 | 43.023 | 70.360 | 62.337 | 0.00 | 0.00 |
| ATOM | 3904 | HD21 | ASN | X | 261 | 42.016 | 70.276 | 62.349 | 0.00 | 0.00 |
| ATOM | 3905 | HD22 | ASN | X | 261 | 43.473 | 69.793 | 63.042 | 0.00 | 0.00 |
| ATOM | 3906 | C    | ASN | X | 261 | 45.640 | 69.191 | 59.926 | 0.00 | 0.00 |
| ATOM | 3907 | O    | ASN | X | 261 | 46.084 | 69.734 | 58.895 | 0.00 | 0.00 |
| ATOM | 3908 | N    | ASP | X | 262 | 44.864 | 68.119 | 59.902 | 0.00 | 0.00 |
| ATOM | 3909 | H    | ASP | X | 262 | 44.623 | 67.738 | 60.806 | 0.00 | 0.00 |
| ATOM | 3910 | CA   | ASP | X | 262 | 44.408 | 67.334 | 58.806 | 0.00 | 0.00 |
| ATOM | 3911 | HA   | ASP | X | 262 | 45.198 | 66.729 | 58.362 | 0.00 | 0.00 |
| ATOM | 3912 | CB   | ASP | X | 262 | 43.469 | 66.222 | 59.319 | 0.00 | 0.00 |
| ATOM | 3913 | HB2  | ASP | X | 262 | 42.562 | 66.754 | 59.604 | 0.00 | 0.00 |
| ATOM | 3914 | HB3  | ASP | X | 262 | 43.237 | 65.572 | 58.475 | 0.00 | 0.00 |
| ATOM | 3915 | CG   | ASP | X | 262 | 43.975 | 65.384 | 60.526 | 0.00 | 0.00 |
| ATOM | 3916 | OD1  | ASP | X | 262 | 44.608 | 64.365 | 60.405 | 0.00 | 0.00 |
| ATOM | 3917 | OD2  | ASP | X | 262 | 43.758 | 65.807 | 61.717 | 0.00 | 0.00 |
| ATOM | 3918 | C    | ASP | X | 262 | 43.719 | 68.124 | 57.711 | 0.00 | 0.00 |
| ATOM | 3919 | O    | ASP | X | 262 | 44.030 | 67.820 | 56.551 | 0.00 | 0.00 |
| ATOM | 3920 | N    | THR | X | 263 | 42.916 | 69.208 | 58.026 | 0.00 | 0.00 |
| ATOM | 3921 | H    | THR | X | 263 | 42.789 | 69.387 | 59.012 | 0.00 | 0.00 |
| ATOM | 3922 | CA   | THR | X | 263 | 42.294 | 70.081 | 56.976 | 0.00 | 0.00 |
| ATOM | 3923 | HA   | THR | X | 263 | 41.729 | 69.540 | 56.216 | 0.00 | 0.00 |
| ATOM | 3924 | CB   | THR | X | 263 | 41.184 | 70.980 | 57.604 | 0.00 | 0.00 |
| ATOM | 3925 | HB   | THR | X | 263 | 41.718 | 71.650 | 58.278 | 0.00 | 0.00 |
| ATOM | 3926 | CG2  | THR | X | 263 | 40.276 | 71.785 | 56.684 | 0.00 | 0.00 |
| ATOM | 3927 | HG21 | THR | X | 263 | 40.824 | 72.538 | 56.117 | 0.00 | 0.00 |
| ATOM | 3928 | HG22 | THR | X | 263 | 39.508 | 72.234 | 57.314 | 0.00 | 0.00 |
| ATOM | 3929 | HG23 | THR | X | 263 | 39.964 | 71.054 | 55.937 | 0.00 | 0.00 |
| ATOM | 3930 | OG1  | THR | X | 263 | 40.299 | 70.101 | 58.303 | 0.00 | 0.00 |
| ATOM | 3931 | HG1  | THR | X | 263 | 40.218 | 70.551 | 59.148 | 0.00 | 0.00 |

|      |      |      |     |   |     |        |        |        |      |      |
|------|------|------|-----|---|-----|--------|--------|--------|------|------|
| ATOM | 3932 | C    | THR | X | 263 | 43.286 | 70.903 | 56.132 | 0.00 | 0.00 |
| ATOM | 3933 | O    | THR | X | 263 | 43.298 | 70.950 | 54.896 | 0.00 | 0.00 |
| ATOM | 3934 | N    | GLU | X | 264 | 44.106 | 71.547 | 56.968 | 0.00 | 0.00 |
| ATOM | 3935 | H    | GLU | X | 264 | 44.014 | 71.467 | 57.970 | 0.00 | 0.00 |
| ATOM | 3936 | CA   | GLU | X | 264 | 45.247 | 72.308 | 56.505 | 0.00 | 0.00 |
| ATOM | 3937 | HA   | GLU | X | 264 | 45.003 | 73.208 | 55.940 | 0.00 | 0.00 |
| ATOM | 3938 | CB   | GLU | X | 264 | 45.947 | 72.951 | 57.681 | 0.00 | 0.00 |
| ATOM | 3939 | HB2  | GLU | X | 264 | 46.258 | 72.178 | 58.384 | 0.00 | 0.00 |
| ATOM | 3940 | HB3  | GLU | X | 264 | 46.717 | 73.611 | 57.284 | 0.00 | 0.00 |
| ATOM | 3941 | CG   | GLU | X | 264 | 45.182 | 74.039 | 58.450 | 0.00 | 0.00 |
| ATOM | 3942 | HG2  | GLU | X | 264 | 44.366 | 73.483 | 58.911 | 0.00 | 0.00 |
| ATOM | 3943 | HG3  | GLU | X | 264 | 45.749 | 74.500 | 59.259 | 0.00 | 0.00 |
| ATOM | 3944 | CD   | GLU | X | 264 | 44.674 | 75.156 | 57.587 | 0.00 | 0.00 |
| ATOM | 3945 | OE1  | GLU | X | 264 | 43.607 | 75.054 | 56.932 | 0.00 | 0.00 |
| ATOM | 3946 | OE2  | GLU | X | 264 | 45.435 | 76.142 | 57.609 | 0.00 | 0.00 |
| ATOM | 3947 | C    | GLU | X | 264 | 46.258 | 71.484 | 55.677 | 0.00 | 0.00 |
| ATOM | 3948 | O    | GLU | X | 264 | 46.558 | 71.813 | 54.548 | 0.00 | 0.00 |
| ATOM | 3949 | N    | LEU | X | 265 | 46.768 | 70.364 | 56.247 | 0.00 | 0.00 |
| ATOM | 3950 | H    | LEU | X | 265 | 46.623 | 70.266 | 57.242 | 0.00 | 0.00 |
| ATOM | 3951 | CA   | LEU | X | 265 | 47.581 | 69.335 | 55.672 | 0.00 | 0.00 |
| ATOM | 3952 | HA   | LEU | X | 265 | 48.596 | 69.695 | 55.507 | 0.00 | 0.00 |
| ATOM | 3953 | CB   | LEU | X | 265 | 47.627 | 68.164 | 56.677 | 0.00 | 0.00 |
| ATOM | 3954 | HB2  | LEU | X | 265 | 47.885 | 68.414 | 57.706 | 0.00 | 0.00 |
| ATOM | 3955 | HB3  | LEU | X | 265 | 46.614 | 67.769 | 56.599 | 0.00 | 0.00 |
| ATOM | 3956 | CG   | LEU | X | 265 | 48.520 | 66.937 | 56.350 | 0.00 | 0.00 |
| ATOM | 3957 | HG   | LEU | X | 265 | 49.535 | 67.268 | 56.130 | 0.00 | 0.00 |
| ATOM | 3958 | CD1  | LEU | X | 265 | 48.643 | 66.022 | 57.510 | 0.00 | 0.00 |
| ATOM | 3959 | HD11 | LEU | X | 265 | 48.917 | 66.664 | 58.347 | 0.00 | 0.00 |
| ATOM | 3960 | HD12 | LEU | X | 265 | 49.380 | 65.235 | 57.351 | 0.00 | 0.00 |
| ATOM | 3961 | HD13 | LEU | X | 265 | 47.676 | 65.539 | 57.654 | 0.00 | 0.00 |
| ATOM | 3962 | CD2  | LEU | X | 265 | 48.073 | 66.007 | 55.154 | 0.00 | 0.00 |
| ATOM | 3963 | HD21 | LEU | X | 265 | 48.062 | 66.579 | 54.226 | 0.00 | 0.00 |
| ATOM | 3964 | HD22 | LEU | X | 265 | 48.790 | 65.194 | 55.040 | 0.00 | 0.00 |
| ATOM | 3965 | HD23 | LEU | X | 265 | 47.126 | 65.575 | 55.477 | 0.00 | 0.00 |
| ATOM | 3966 | C    | LEU | X | 265 | 47.074 | 69.038 | 54.261 | 0.00 | 0.00 |
| ATOM | 3967 | O    | LEU | X | 265 | 47.859 | 69.211 | 53.341 | 0.00 | 0.00 |
| ATOM | 3968 | N    | VAL | X | 266 | 45.797 | 68.593 | 54.180 | 0.00 | 0.00 |
| ATOM | 3969 | H    | VAL | X | 266 | 45.268 | 68.586 | 55.040 | 0.00 | 0.00 |
| ATOM | 3970 | CA   | VAL | X | 266 | 45.286 | 68.082 | 52.898 | 0.00 | 0.00 |
| ATOM | 3971 | HA   | VAL | X | 266 | 46.086 | 67.484 | 52.462 | 0.00 | 0.00 |
| ATOM | 3972 | CB   | VAL | X | 266 | 44.202 | 67.051 | 53.145 | 0.00 | 0.00 |
| ATOM | 3973 | HB   | VAL | X | 266 | 44.576 | 66.528 | 54.025 | 0.00 | 0.00 |
| ATOM | 3974 | CG1  | VAL | X | 266 | 42.872 | 67.639 | 53.425 | 0.00 | 0.00 |
| ATOM | 3975 | HG11 | VAL | X | 266 | 42.273 | 67.963 | 52.574 | 0.00 | 0.00 |
| ATOM | 3976 | HG12 | VAL | X | 266 | 42.295 | 66.944 | 54.035 | 0.00 | 0.00 |
| ATOM | 3977 | HG13 | VAL | X | 266 | 42.906 | 68.579 | 53.977 | 0.00 | 0.00 |
| ATOM | 3978 | CG2  | VAL | X | 266 | 44.093 | 66.061 | 52.030 | 0.00 | 0.00 |
| ATOM | 3979 | HG21 | VAL | X | 266 | 43.413 | 65.239 | 52.258 | 0.00 | 0.00 |
| ATOM | 3980 | HG22 | VAL | X | 266 | 45.066 | 65.596 | 51.873 | 0.00 | 0.00 |
| ATOM | 3981 | HG23 | VAL | X | 266 | 43.788 | 66.530 | 51.094 | 0.00 | 0.00 |
| ATOM | 3982 | C    | VAL | X | 266 | 44.823 | 69.177 | 51.925 | 0.00 | 0.00 |
| ATOM | 3983 | O    | VAL | X | 266 | 44.749 | 68.867 | 50.722 | 0.00 | 0.00 |
| ATOM | 3984 | N    | ALA | X | 267 | 44.479 | 70.413 | 52.354 | 0.00 | 0.00 |
| ATOM | 3985 | H    | ALA | X | 267 | 44.464 | 70.570 | 53.352 | 0.00 | 0.00 |
| ATOM | 3986 | CA   | ALA | X | 267 | 44.415 | 71.586 | 51.529 | 0.00 | 0.00 |
| ATOM | 3987 | HA   | ALA | X | 267 | 43.772 | 71.442 | 50.661 | 0.00 | 0.00 |
| ATOM | 3988 | CB   | ALA | X | 267 | 44.036 | 72.793 | 52.394 | 0.00 | 0.00 |
| ATOM | 3989 | HB1  | ALA | X | 267 | 44.826 | 73.055 | 53.098 | 0.00 | 0.00 |
| ATOM | 3990 | HB2  | ALA | X | 267 | 43.095 | 72.610 | 52.912 | 0.00 | 0.00 |
| ATOM | 3991 | HB3  | ALA | X | 267 | 43.897 | 73.663 | 51.752 | 0.00 | 0.00 |
| ATOM | 3992 | C    | ALA | X | 267 | 45.773 | 71.853 | 50.839 | 0.00 | 0.00 |
| ATOM | 3993 | O    | ALA | X | 267 | 45.904 | 72.010 | 49.618 | 0.00 | 0.00 |
| ATOM | 3994 | N    | CYX | X | 268 | 46.903 | 71.803 | 51.593 | 0.00 | 0.00 |
| ATOM | 3995 | H    | CYX | X | 268 | 46.783 | 71.841 | 52.595 | 0.00 | 0.00 |
| ATOM | 3996 | CA   | CYX | X | 268 | 48.286 | 71.726 | 51.078 | 0.00 | 0.00 |
| ATOM | 3997 | HA   | CYX | X | 268 | 48.413 | 72.585 | 50.419 | 0.00 | 0.00 |
| ATOM | 3998 | CB   | CYX | X | 268 | 49.264 | 72.038 | 52.224 | 0.00 | 0.00 |

|      |      |      |     |   |     |        |        |        |      |      |
|------|------|------|-----|---|-----|--------|--------|--------|------|------|
| ATOM | 3999 | HB2  | CYX | X | 268 | 48.910 | 72.993 | 52.612 | 0.00 | 0.00 |
| ATOM | 4000 | HB3  | CYX | X | 268 | 49.153 | 71.262 | 52.981 | 0.00 | 0.00 |
| ATOM | 4001 | SG   | CYX | X | 268 | 51.078 | 72.087 | 51.966 | 0.00 | 0.00 |
| ATOM | 4002 | C    | CYX | X | 268 | 48.629 | 70.504 | 50.225 | 0.00 | 0.00 |
| ATOM | 4003 | O    | CYX | X | 268 | 49.067 | 70.750 | 49.135 | 0.00 | 0.00 |
| ATOM | 4004 | N    | LEU | X | 269 | 48.204 | 69.303 | 50.585 | 0.00 | 0.00 |
| ATOM | 4005 | H    | LEU | X | 269 | 47.769 | 69.143 | 51.482 | 0.00 | 0.00 |
| ATOM | 4006 | CA   | LEU | X | 269 | 48.428 | 68.105 | 49.743 | 0.00 | 0.00 |
| ATOM | 4007 | HA   | LEU | X | 269 | 49.443 | 68.187 | 49.355 | 0.00 | 0.00 |
| ATOM | 4008 | CB   | LEU | X | 269 | 48.138 | 66.799 | 50.615 | 0.00 | 0.00 |
| ATOM | 4009 | HB2  | LEU | X | 269 | 48.017 | 67.028 | 51.674 | 0.00 | 0.00 |
| ATOM | 4010 | HB3  | LEU | X | 269 | 47.163 | 66.332 | 50.477 | 0.00 | 0.00 |
| ATOM | 4011 | CG   | LEU | X | 269 | 49.199 | 65.728 | 50.463 | 0.00 | 0.00 |
| ATOM | 4012 | HG   | LEU | X | 269 | 49.403 | 65.437 | 49.432 | 0.00 | 0.00 |
| ATOM | 4013 | CD1  | LEU | X | 269 | 50.518 | 66.268 | 51.172 | 0.00 | 0.00 |
| ATOM | 4014 | HD11 | LEU | X | 269 | 50.673 | 67.347 | 51.190 | 0.00 | 0.00 |
| ATOM | 4015 | HD12 | LEU | X | 269 | 51.379 | 65.663 | 50.888 | 0.00 | 0.00 |
| ATOM | 4016 | HD13 | LEU | X | 269 | 50.427 | 66.109 | 52.247 | 0.00 | 0.00 |
| ATOM | 4017 | CD2  | LEU | X | 269 | 48.816 | 64.456 | 51.323 | 0.00 | 0.00 |
| ATOM | 4018 | HD21 | LEU | X | 269 | 48.838 | 64.676 | 52.391 | 0.00 | 0.00 |
| ATOM | 4019 | HD22 | LEU | X | 269 | 47.851 | 64.054 | 51.014 | 0.00 | 0.00 |
| ATOM | 4020 | HD23 | LEU | X | 269 | 49.522 | 63.669 | 51.060 | 0.00 | 0.00 |
| ATOM | 4021 | C    | LEU | X | 269 | 47.617 | 68.053 | 48.438 | 0.00 | 0.00 |
| ATOM | 4022 | O    | LEU | X | 269 | 47.995 | 67.390 | 47.463 | 0.00 | 0.00 |
| ATOM | 4023 | N    | ARG | X | 270 | 46.588 | 68.990 | 48.401 | 0.00 | 0.00 |
| ATOM | 4024 | H    | ARG | X | 270 | 46.353 | 69.434 | 49.277 | 0.00 | 0.00 |
| ATOM | 4025 | CA   | ARG | X | 270 | 45.918 | 69.415 | 47.234 | 0.00 | 0.00 |
| ATOM | 4026 | HA   | ARG | X | 270 | 45.881 | 68.568 | 46.550 | 0.00 | 0.00 |
| ATOM | 4027 | CB   | ARG | X | 270 | 44.337 | 69.615 | 47.539 | 0.00 | 0.00 |
| ATOM | 4028 | HB2  | ARG | X | 270 | 44.305 | 69.900 | 48.591 | 0.00 | 0.00 |
| ATOM | 4029 | HB3  | ARG | X | 270 | 43.968 | 70.412 | 46.894 | 0.00 | 0.00 |
| ATOM | 4030 | CG   | ARG | X | 270 | 43.491 | 68.378 | 47.172 | 0.00 | 0.00 |
| ATOM | 4031 | HG2  | ARG | X | 270 | 43.725 | 68.187 | 46.125 | 0.00 | 0.00 |
| ATOM | 4032 | HG3  | ARG | X | 270 | 43.788 | 67.519 | 47.774 | 0.00 | 0.00 |
| ATOM | 4033 | CD   | ARG | X | 270 | 42.000 | 68.564 | 47.256 | 0.00 | 0.00 |
| ATOM | 4034 | HD2  | ARG | X | 270 | 41.673 | 69.433 | 46.686 | 0.00 | 0.00 |
| ATOM | 4035 | HD3  | ARG | X | 270 | 41.446 | 67.738 | 46.811 | 0.00 | 0.00 |
| ATOM | 4036 | NE   | ARG | X | 270 | 41.575 | 68.655 | 48.701 | 0.00 | 0.00 |
| ATOM | 4037 | HE   | ARG | X | 270 | 41.400 | 69.576 | 49.076 | 0.00 | 0.00 |
| ATOM | 4038 | CZ   | ARG | X | 270 | 41.038 | 67.706 | 49.426 | 0.00 | 0.00 |
| ATOM | 4039 | NH1  | ARG | X | 270 | 40.951 | 66.466 | 49.085 | 0.00 | 0.00 |
| ATOM | 4040 | HH11 | ARG | X | 270 | 41.230 | 66.177 | 48.158 | 0.00 | 0.00 |
| ATOM | 4041 | HH12 | ARG | X | 270 | 40.427 | 65.847 | 49.687 | 0.00 | 0.00 |
| ATOM | 4042 | NH2  | ARG | X | 270 | 40.632 | 67.965 | 50.657 | 0.00 | 0.00 |
| ATOM | 4043 | HH21 | ARG | X | 270 | 40.797 | 68.838 | 51.138 | 0.00 | 0.00 |
| ATOM | 4044 | HH22 | ARG | X | 270 | 40.307 | 67.316 | 51.360 | 0.00 | 0.00 |
| ATOM | 4045 | C    | ARG | X | 270 | 46.551 | 70.582 | 46.400 | 0.00 | 0.00 |
| ATOM | 4046 | O    | ARG | X | 270 | 46.278 | 70.844 | 45.203 | 0.00 | 0.00 |
| ATOM | 4047 | N    | THR | X | 271 | 47.437 | 71.305 | 47.115 | 0.00 | 0.00 |
| ATOM | 4048 | H    | THR | X | 271 | 47.425 | 71.134 | 48.111 | 0.00 | 0.00 |
| ATOM | 4049 | CA   | THR | X | 271 | 48.003 | 72.590 | 46.658 | 0.00 | 0.00 |
| ATOM | 4050 | HA   | THR | X | 271 | 47.525 | 72.976 | 45.757 | 0.00 | 0.00 |
| ATOM | 4051 | CB   | THR | X | 271 | 48.079 | 73.669 | 47.707 | 0.00 | 0.00 |
| ATOM | 4052 | HB   | THR | X | 271 | 48.574 | 73.396 | 48.639 | 0.00 | 0.00 |
| ATOM | 4053 | CG2  | THR | X | 271 | 48.552 | 75.027 | 47.175 | 0.00 | 0.00 |
| ATOM | 4054 | HG21 | THR | X | 271 | 48.114 | 75.326 | 46.223 | 0.00 | 0.00 |
| ATOM | 4055 | HG22 | THR | X | 271 | 49.638 | 75.045 | 47.078 | 0.00 | 0.00 |
| ATOM | 4056 | HG23 | THR | X | 271 | 48.236 | 75.769 | 47.908 | 0.00 | 0.00 |
| ATOM | 4057 | OG1  | THR | X | 271 | 46.743 | 73.882 | 48.061 | 0.00 | 0.00 |
| ATOM | 4058 | HG1  | THR | X | 271 | 46.466 | 73.119 | 48.573 | 0.00 | 0.00 |
| ATOM | 4059 | C    | THR | X | 271 | 49.505 | 72.401 | 46.153 | 0.00 | 0.00 |
| ATOM | 4060 | O    | THR | X | 271 | 49.931 | 73.114 | 45.285 | 0.00 | 0.00 |
| ATOM | 4061 | N    | ARG | X | 272 | 50.240 | 71.455 | 46.702 | 0.00 | 0.00 |
| ATOM | 4062 | H    | ARG | X | 272 | 49.909 | 71.058 | 47.569 | 0.00 | 0.00 |
| ATOM | 4063 | CA   | ARG | X | 272 | 51.385 | 70.997 | 46.040 | 0.00 | 0.00 |
| ATOM | 4064 | HA   | ARG | X | 272 | 51.997 | 71.844 | 45.729 | 0.00 | 0.00 |
| ATOM | 4065 | CB   | ARG | X | 272 | 52.269 | 70.104 | 46.925 | 0.00 | 0.00 |

|      |      |      |     |   |     |        |        |        |      |      |
|------|------|------|-----|---|-----|--------|--------|--------|------|------|
| ATOM | 4066 | HB2  | ARG | X | 272 | 51.688 | 69.201 | 47.112 | 0.00 | 0.00 |
| ATOM | 4067 | HB3  | ARG | X | 272 | 53.184 | 69.925 | 46.360 | 0.00 | 0.00 |
| ATOM | 4068 | CG   | ARG | X | 272 | 52.735 | 70.781 | 48.218 | 0.00 | 0.00 |
| ATOM | 4069 | HG2  | ARG | X | 272 | 51.890 | 70.629 | 48.891 | 0.00 | 0.00 |
| ATOM | 4070 | HG3  | ARG | X | 272 | 53.594 | 70.225 | 48.594 | 0.00 | 0.00 |
| ATOM | 4071 | CD   | ARG | X | 272 | 53.143 | 72.273 | 48.160 | 0.00 | 0.00 |
| ATOM | 4072 | HD2  | ARG | X | 272 | 54.017 | 72.420 | 47.525 | 0.00 | 0.00 |
| ATOM | 4073 | HD3  | ARG | X | 272 | 52.302 | 72.811 | 47.723 | 0.00 | 0.00 |
| ATOM | 4074 | NE   | ARG | X | 272 | 53.426 | 72.698 | 49.536 | 0.00 | 0.00 |
| ATOM | 4075 | HE   | ARG | X | 272 | 53.476 | 71.989 | 50.253 | 0.00 | 0.00 |
| ATOM | 4076 | CZ   | ARG | X | 272 | 53.822 | 73.902 | 49.915 | 0.00 | 0.00 |
| ATOM | 4077 | NH1  | ARG | X | 272 | 53.991 | 74.904 | 49.083 | 0.00 | 0.00 |
| ATOM | 4078 | HH11 | ARG | X | 272 | 53.550 | 74.820 | 48.178 | 0.00 | 0.00 |
| ATOM | 4079 | HH12 | ARG | X | 272 | 54.286 | 75.797 | 49.449 | 0.00 | 0.00 |
| ATOM | 4080 | NH2  | ARG | X | 272 | 54.139 | 74.077 | 51.163 | 0.00 | 0.00 |
| ATOM | 4081 | HH21 | ARG | X | 272 | 54.144 | 73.292 | 51.798 | 0.00 | 0.00 |
| ATOM | 4082 | HH22 | ARG | X | 272 | 54.662 | 74.905 | 51.407 | 0.00 | 0.00 |
| ATOM | 4083 | C    | ARG | X | 272 | 51.143 | 70.261 | 44.715 | 0.00 | 0.00 |
| ATOM | 4084 | O    | ARG | X | 272 | 50.145 | 69.572 | 44.668 | 0.00 | 0.00 |
| ATOM | 4085 | N    | PRO | X | 273 | 52.078 | 70.293 | 43.715 | 0.00 | 0.00 |
| ATOM | 4086 | CD   | PRO | X | 273 | 53.191 | 71.223 | 43.512 | 0.00 | 0.00 |
| ATOM | 4087 | HD2  | PRO | X | 273 | 54.026 | 70.890 | 44.129 | 0.00 | 0.00 |
| ATOM | 4088 | HD3  | PRO | X | 273 | 52.879 | 72.253 | 43.681 | 0.00 | 0.00 |
| ATOM | 4089 | CG   | PRO | X | 273 | 53.623 | 71.122 | 42.067 | 0.00 | 0.00 |
| ATOM | 4090 | HG2  | PRO | X | 273 | 54.680 | 71.316 | 41.886 | 0.00 | 0.00 |
| ATOM | 4091 | HG3  | PRO | X | 273 | 52.963 | 71.689 | 41.410 | 0.00 | 0.00 |
| ATOM | 4092 | CB   | PRO | X | 273 | 53.297 | 69.654 | 41.753 | 0.00 | 0.00 |
| ATOM | 4093 | HB2  | PRO | X | 273 | 54.109 | 69.024 | 42.117 | 0.00 | 0.00 |
| ATOM | 4094 | HB3  | PRO | X | 273 | 53.237 | 69.496 | 40.676 | 0.00 | 0.00 |
| ATOM | 4095 | CA   | PRO | X | 273 | 52.002 | 69.378 | 42.550 | 0.00 | 0.00 |
| ATOM | 4096 | HA   | PRO | X | 273 | 51.279 | 69.708 | 41.804 | 0.00 | 0.00 |
| ATOM | 4097 | C    | PRO | X | 273 | 51.868 | 67.827 | 42.968 | 0.00 | 0.00 |
| ATOM | 4098 | O    | PRO | X | 273 | 52.493 | 67.403 | 43.928 | 0.00 | 0.00 |
| ATOM | 4099 | N    | ALA | X | 274 | 51.165 | 67.057 | 42.165 | 0.00 | 0.00 |
| ATOM | 4100 | H    | ALA | X | 274 | 50.721 | 67.387 | 41.320 | 0.00 | 0.00 |
| ATOM | 4101 | CA   | ALA | X | 274 | 51.063 | 65.631 | 42.483 | 0.00 | 0.00 |
| ATOM | 4102 | HA   | ALA | X | 274 | 50.906 | 65.303 | 43.511 | 0.00 | 0.00 |
| ATOM | 4103 | CB   | ALA | X | 274 | 49.878 | 65.152 | 41.643 | 0.00 | 0.00 |
| ATOM | 4104 | HB1  | ALA | X | 274 | 49.091 | 65.898 | 41.763 | 0.00 | 0.00 |
| ATOM | 4105 | HB2  | ALA | X | 274 | 49.549 | 64.158 | 41.944 | 0.00 | 0.00 |
| ATOM | 4106 | HB3  | ALA | X | 274 | 50.023 | 65.244 | 40.567 | 0.00 | 0.00 |
| ATOM | 4107 | C    | ALA | X | 274 | 52.413 | 64.925 | 42.096 | 0.00 | 0.00 |
| ATOM | 4108 | O    | ALA | X | 274 | 52.753 | 63.916 | 42.735 | 0.00 | 0.00 |
| ATOM | 4109 | N    | GLN | X | 275 | 53.257 | 65.479 | 41.171 | 0.00 | 0.00 |
| ATOM | 4110 | H    | GLN | X | 275 | 52.929 | 66.252 | 40.611 | 0.00 | 0.00 |
| ATOM | 4111 | CA   | GLN | X | 275 | 54.632 | 64.953 | 40.902 | 0.00 | 0.00 |
| ATOM | 4112 | HA   | GLN | X | 275 | 54.620 | 63.994 | 40.383 | 0.00 | 0.00 |
| ATOM | 4113 | CB   | GLN | X | 275 | 55.384 | 65.827 | 39.914 | 0.00 | 0.00 |
| ATOM | 4114 | HB2  | GLN | X | 275 | 54.760 | 65.907 | 39.024 | 0.00 | 0.00 |
| ATOM | 4115 | HB3  | GLN | X | 275 | 55.551 | 66.759 | 40.454 | 0.00 | 0.00 |
| ATOM | 4116 | CG   | GLN | X | 275 | 56.729 | 65.227 | 39.337 | 0.00 | 0.00 |
| ATOM | 4117 | HG2  | GLN | X | 275 | 57.299 | 64.875 | 40.198 | 0.00 | 0.00 |
| ATOM | 4118 | HG3  | GLN | X | 275 | 56.481 | 64.367 | 38.714 | 0.00 | 0.00 |
| ATOM | 4119 | CD   | GLN | X | 275 | 57.478 | 66.358 | 38.529 | 0.00 | 0.00 |
| ATOM | 4120 | OE1  | GLN | X | 275 | 57.305 | 66.468 | 37.322 | 0.00 | 0.00 |
| ATOM | 4121 | NE2  | GLN | X | 275 | 58.305 | 67.069 | 39.287 | 0.00 | 0.00 |
| ATOM | 4122 | HE21 | GLN | X | 275 | 58.928 | 67.723 | 38.834 | 0.00 | 0.00 |
| ATOM | 4123 | HE22 | GLN | X | 275 | 58.524 | 66.710 | 40.205 | 0.00 | 0.00 |
| ATOM | 4124 | C    | GLN | X | 275 | 55.469 | 64.872 | 42.227 | 0.00 | 0.00 |
| ATOM | 4125 | O    | GLN | X | 275 | 56.334 | 64.010 | 42.383 | 0.00 | 0.00 |
| ATOM | 4126 | N    | VAL | X | 276 | 55.354 | 65.771 | 43.176 | 0.00 | 0.00 |
| ATOM | 4127 | H    | VAL | X | 276 | 54.512 | 66.313 | 43.047 | 0.00 | 0.00 |
| ATOM | 4128 | CA   | VAL | X | 276 | 56.007 | 65.827 | 44.446 | 0.00 | 0.00 |
| ATOM | 4129 | HA   | VAL | X | 276 | 57.068 | 65.659 | 44.262 | 0.00 | 0.00 |
| ATOM | 4130 | CB   | VAL | X | 276 | 55.835 | 67.195 | 45.182 | 0.00 | 0.00 |
| ATOM | 4131 | HB   | VAL | X | 276 | 54.760 | 67.222 | 45.361 | 0.00 | 0.00 |
| ATOM | 4132 | CG1  | VAL | X | 276 | 56.399 | 67.204 | 46.622 | 0.00 | 0.00 |

|      |      |      |     |   |     |        |        |        |      |      |
|------|------|------|-----|---|-----|--------|--------|--------|------|------|
| ATOM | 4133 | HG11 | VAL | X | 276 | 57.453 | 66.978 | 46.459 | 0.00 | 0.00 |
| ATOM | 4134 | HG12 | VAL | X | 276 | 56.221 | 68.179 | 47.076 | 0.00 | 0.00 |
| ATOM | 4135 | HG13 | VAL | X | 276 | 56.079 | 66.396 | 47.280 | 0.00 | 0.00 |
| ATOM | 4136 | CG2  | VAL | X | 276 | 56.266 | 68.377 | 44.336 | 0.00 | 0.00 |
| ATOM | 4137 | HG21 | VAL | X | 276 | 57.305 | 68.292 | 44.016 | 0.00 | 0.00 |
| ATOM | 4138 | HG22 | VAL | X | 276 | 56.041 | 69.323 | 44.829 | 0.00 | 0.00 |
| ATOM | 4139 | HG23 | VAL | X | 276 | 55.582 | 68.358 | 43.487 | 0.00 | 0.00 |
| ATOM | 4140 | C    | VAL | X | 276 | 55.501 | 64.722 | 45.381 | 0.00 | 0.00 |
| ATOM | 4141 | O    | VAL | X | 276 | 56.231 | 64.211 | 46.207 | 0.00 | 0.00 |
| ATOM | 4142 | N    | LEU | X | 277 | 54.168 | 64.480 | 45.253 | 0.00 | 0.00 |
| ATOM | 4143 | H    | LEU | X | 277 | 53.573 | 65.092 | 44.713 | 0.00 | 0.00 |
| ATOM | 4144 | CA   | LEU | X | 277 | 53.485 | 63.447 | 46.092 | 0.00 | 0.00 |
| ATOM | 4145 | HA   | LEU | X | 277 | 53.728 | 63.421 | 47.155 | 0.00 | 0.00 |
| ATOM | 4146 | CB   | LEU | X | 277 | 51.986 | 63.650 | 45.871 | 0.00 | 0.00 |
| ATOM | 4147 | HB2  | LEU | X | 277 | 51.632 | 63.338 | 44.889 | 0.00 | 0.00 |
| ATOM | 4148 | HB3  | LEU | X | 277 | 51.603 | 62.989 | 46.648 | 0.00 | 0.00 |
| ATOM | 4149 | CG   | LEU | X | 277 | 51.387 | 65.045 | 46.328 | 0.00 | 0.00 |
| ATOM | 4150 | HG   | LEU | X | 277 | 51.699 | 65.845 | 45.657 | 0.00 | 0.00 |
| ATOM | 4151 | CD1  | LEU | X | 277 | 49.844 | 64.907 | 46.268 | 0.00 | 0.00 |
| ATOM | 4152 | HD11 | LEU | X | 277 | 49.319 | 65.393 | 47.089 | 0.00 | 0.00 |
| ATOM | 4153 | HD12 | LEU | X | 277 | 49.621 | 63.843 | 46.189 | 0.00 | 0.00 |
| ATOM | 4154 | HD13 | LEU | X | 277 | 49.596 | 65.302 | 45.283 | 0.00 | 0.00 |
| ATOM | 4155 | CD2  | LEU | X | 277 | 52.042 | 65.442 | 47.700 | 0.00 | 0.00 |
| ATOM | 4156 | HD21 | LEU | X | 277 | 51.482 | 66.255 | 48.162 | 0.00 | 0.00 |
| ATOM | 4157 | HD22 | LEU | X | 277 | 51.853 | 64.648 | 48.421 | 0.00 | 0.00 |
| ATOM | 4158 | HD23 | LEU | X | 277 | 53.106 | 65.676 | 47.716 | 0.00 | 0.00 |
| ATOM | 4159 | C    | LEU | X | 277 | 53.912 | 62.040 | 45.648 | 0.00 | 0.00 |
| ATOM | 4160 | O    | LEU | X | 277 | 54.296 | 61.224 | 46.467 | 0.00 | 0.00 |
| ATOM | 4161 | N    | VAL | X | 278 | 54.053 | 61.793 | 44.346 | 0.00 | 0.00 |
| ATOM | 4162 | H    | VAL | X | 278 | 53.750 | 62.526 | 43.720 | 0.00 | 0.00 |
| ATOM | 4163 | CA   | VAL | X | 278 | 54.523 | 60.498 | 43.762 | 0.00 | 0.00 |
| ATOM | 4164 | HA   | VAL | X | 278 | 54.102 | 59.660 | 44.318 | 0.00 | 0.00 |
| ATOM | 4165 | CB   | VAL | X | 278 | 54.054 | 60.298 | 42.343 | 0.00 | 0.00 |
| ATOM | 4166 | HB   | VAL | X | 278 | 54.268 | 59.293 | 41.979 | 0.00 | 0.00 |
| ATOM | 4167 | CG1  | VAL | X | 278 | 52.554 | 60.240 | 42.394 | 0.00 | 0.00 |
| ATOM | 4168 | HG11 | VAL | X | 278 | 52.232 | 59.614 | 43.226 | 0.00 | 0.00 |
| ATOM | 4169 | HG12 | VAL | X | 278 | 52.091 | 61.224 | 42.456 | 0.00 | 0.00 |
| ATOM | 4170 | HG13 | VAL | X | 278 | 52.135 | 59.800 | 41.489 | 0.00 | 0.00 |
| ATOM | 4171 | CG2  | VAL | X | 278 | 54.572 | 61.296 | 41.323 | 0.00 | 0.00 |
| ATOM | 4172 | HG21 | VAL | X | 278 | 54.178 | 62.286 | 41.553 | 0.00 | 0.00 |
| ATOM | 4173 | HG22 | VAL | X | 278 | 54.189 | 60.964 | 40.358 | 0.00 | 0.00 |
| ATOM | 4174 | HG23 | VAL | X | 278 | 55.651 | 61.448 | 41.352 | 0.00 | 0.00 |
| ATOM | 4175 | C    | VAL | X | 278 | 56.015 | 60.206 | 43.907 | 0.00 | 0.00 |
| ATOM | 4176 | O    | VAL | X | 278 | 56.451 | 59.040 | 43.851 | 0.00 | 0.00 |
| ATOM | 4177 | N    | ASN | X | 279 | 56.819 | 61.251 | 44.104 | 0.00 | 0.00 |
| ATOM | 4178 | H    | ASN | X | 279 | 56.442 | 62.188 | 44.104 | 0.00 | 0.00 |
| ATOM | 4179 | CA   | ASN | X | 279 | 58.274 | 61.108 | 44.396 | 0.00 | 0.00 |
| ATOM | 4180 | HA   | ASN | X | 279 | 58.718 | 60.311 | 43.799 | 0.00 | 0.00 |
| ATOM | 4181 | CB   | ASN | X | 279 | 59.078 | 62.319 | 43.868 | 0.00 | 0.00 |
| ATOM | 4182 | HB2  | ASN | X | 279 | 58.390 | 63.146 | 44.040 | 0.00 | 0.00 |
| ATOM | 4183 | HB3  | ASN | X | 279 | 59.964 | 62.361 | 44.502 | 0.00 | 0.00 |
| ATOM | 4184 | CG   | ASN | X | 279 | 59.515 | 62.165 | 42.375 | 0.00 | 0.00 |
| ATOM | 4185 | OD1  | ASN | X | 279 | 60.643 | 61.934 | 42.018 | 0.00 | 0.00 |
| ATOM | 4186 | ND2  | ASN | X | 279 | 58.514 | 62.161 | 41.495 | 0.00 | 0.00 |
| ATOM | 4187 | HD21 | ASN | X | 279 | 58.697 | 61.966 | 40.521 | 0.00 | 0.00 |
| ATOM | 4188 | HD22 | ASN | X | 279 | 57.586 | 62.450 | 41.770 | 0.00 | 0.00 |
| ATOM | 4189 | C    | ASN | X | 279 | 58.601 | 60.847 | 45.805 | 0.00 | 0.00 |
| ATOM | 4190 | O    | ASN | X | 279 | 59.473 | 59.971 | 45.969 | 0.00 | 0.00 |
| ATOM | 4191 | N    | HIE | X | 280 | 57.931 | 61.530 | 46.777 | 0.00 | 0.00 |
| ATOM | 4192 | H    | HIE | X | 280 | 57.318 | 62.319 | 46.631 | 0.00 | 0.00 |
| ATOM | 4193 | CA   | HIE | X | 280 | 58.080 | 61.285 | 48.192 | 0.00 | 0.00 |
| ATOM | 4194 | HA   | HIE | X | 280 | 59.108 | 61.064 | 48.480 | 0.00 | 0.00 |
| ATOM | 4195 | CB   | HIE | X | 280 | 57.752 | 62.549 | 48.933 | 0.00 | 0.00 |
| ATOM | 4196 | HB2  | HIE | X | 280 | 56.739 | 62.888 | 48.719 | 0.00 | 0.00 |
| ATOM | 4197 | HB3  | HIE | X | 280 | 57.779 | 62.345 | 50.004 | 0.00 | 0.00 |
| ATOM | 4198 | CG   | HIE | X | 280 | 58.749 | 63.697 | 48.740 | 0.00 | 0.00 |
| ATOM | 4199 | ND1  | HIE | X | 280 | 60.138 | 63.497 | 48.728 | 0.00 | 0.00 |

|      |      |     |     |   |     |        |        |        |      |      |
|------|------|-----|-----|---|-----|--------|--------|--------|------|------|
| ATOM | 4200 | CE1 | HIE | X | 280 | 60.655 | 64.691 | 48.486 | 0.00 | 0.00 |
| ATOM | 4201 | HE1 | HIE | X | 280 | 61.715 | 64.843 | 48.344 | 0.00 | 0.00 |
| ATOM | 4202 | NE2 | HIE | X | 280 | 59.702 | 65.609 | 48.588 | 0.00 | 0.00 |
| ATOM | 4203 | HE2 | HIE | X | 280 | 59.839 | 66.563 | 48.285 | 0.00 | 0.00 |
| ATOM | 4204 | CD2 | HIE | X | 280 | 58.517 | 65.002 | 48.652 | 0.00 | 0.00 |
| ATOM | 4205 | HD2 | HIE | X | 280 | 57.580 | 65.511 | 48.821 | 0.00 | 0.00 |
| ATOM | 4206 | C   | HIE | X | 280 | 57.288 | 60.046 | 48.664 | 0.00 | 0.00 |
| ATOM | 4207 | O   | HIE | X | 280 | 57.456 | 59.638 | 49.823 | 0.00 | 0.00 |
| ATOM | 4208 | N   | GLU | X | 281 | 56.325 | 59.530 | 47.871 | 0.00 | 0.00 |
| ATOM | 4209 | H   | GLU | X | 281 | 56.129 | 59.996 | 46.997 | 0.00 | 0.00 |
| ATOM | 4210 | CA  | GLU | X | 281 | 55.560 | 58.332 | 48.322 | 0.00 | 0.00 |
| ATOM | 4211 | HA  | GLU | X | 281 | 55.114 | 58.706 | 49.244 | 0.00 | 0.00 |
| ATOM | 4212 | CB  | GLU | X | 281 | 54.420 | 57.929 | 47.417 | 0.00 | 0.00 |
| ATOM | 4213 | HB2 | GLU | X | 281 | 54.265 | 58.767 | 46.738 | 0.00 | 0.00 |
| ATOM | 4214 | HB3 | GLU | X | 281 | 54.724 | 57.028 | 46.884 | 0.00 | 0.00 |
| ATOM | 4215 | CG  | GLU | X | 281 | 53.203 | 57.558 | 48.278 | 0.00 | 0.00 |
| ATOM | 4216 | HG2 | GLU | X | 281 | 53.527 | 56.820 | 49.012 | 0.00 | 0.00 |
| ATOM | 4217 | HG3 | GLU | X | 281 | 52.851 | 58.454 | 48.789 | 0.00 | 0.00 |
| ATOM | 4218 | CD  | GLU | X | 281 | 52.002 | 56.992 | 47.506 | 0.00 | 0.00 |
| ATOM | 4219 | OE1 | GLU | X | 281 | 51.147 | 57.779 | 47.072 | 0.00 | 0.00 |
| ATOM | 4220 | OE2 | GLU | X | 281 | 51.944 | 55.739 | 47.321 | 0.00 | 0.00 |
| ATOM | 4221 | C   | GLU | X | 281 | 56.489 | 57.126 | 48.789 | 0.00 | 0.00 |
| ATOM | 4222 | O   | GLU | X | 281 | 56.247 | 56.465 | 49.845 | 0.00 | 0.00 |
| ATOM | 4223 | N   | TRP | X | 282 | 57.655 | 57.088 | 48.137 | 0.00 | 0.00 |
| ATOM | 4224 | H   | TRP | X | 282 | 57.889 | 57.754 | 47.415 | 0.00 | 0.00 |
| ATOM | 4225 | CA  | TRP | X | 282 | 58.674 | 56.005 | 48.235 | 0.00 | 0.00 |
| ATOM | 4226 | HA  | TRP | X | 282 | 58.216 | 55.101 | 47.835 | 0.00 | 0.00 |
| ATOM | 4227 | CB  | TRP | X | 282 | 59.833 | 56.397 | 47.295 | 0.00 | 0.00 |
| ATOM | 4228 | HB2 | TRP | X | 282 | 59.535 | 56.368 | 46.247 | 0.00 | 0.00 |
| ATOM | 4229 | HB3 | TRP | X | 282 | 60.194 | 57.395 | 47.542 | 0.00 | 0.00 |
| ATOM | 4230 | CG  | TRP | X | 282 | 61.054 | 55.471 | 47.410 | 0.00 | 0.00 |
| ATOM | 4231 | CD1 | TRP | X | 282 | 61.266 | 54.387 | 46.575 | 0.00 | 0.00 |
| ATOM | 4232 | HD1 | TRP | X | 282 | 60.593 | 54.093 | 45.783 | 0.00 | 0.00 |
| ATOM | 4233 | NE1 | TRP | X | 282 | 62.454 | 53.753 | 46.938 | 0.00 | 0.00 |
| ATOM | 4234 | HE1 | TRP | X | 282 | 62.781 | 52.911 | 46.486 | 0.00 | 0.00 |
| ATOM | 4235 | CE2 | TRP | X | 282 | 63.043 | 54.426 | 47.978 | 0.00 | 0.00 |
| ATOM | 4236 | CZ2 | TRP | X | 282 | 64.283 | 54.197 | 48.603 | 0.00 | 0.00 |
| ATOM | 4237 | HZ2 | TRP | X | 282 | 64.948 | 53.419 | 48.257 | 0.00 | 0.00 |
| ATOM | 4238 | CH2 | TRP | X | 282 | 64.595 | 55.023 | 49.664 | 0.00 | 0.00 |
| ATOM | 4239 | HH2 | TRP | X | 282 | 65.492 | 54.711 | 50.179 | 0.00 | 0.00 |
| ATOM | 4240 | CZ3 | TRP | X | 282 | 63.705 | 56.045 | 50.118 | 0.00 | 0.00 |
| ATOM | 4241 | HZ3 | TRP | X | 282 | 63.973 | 56.692 | 50.941 | 0.00 | 0.00 |
| ATOM | 4242 | CE3 | TRP | X | 282 | 62.552 | 56.341 | 49.384 | 0.00 | 0.00 |
| ATOM | 4243 | HE3 | TRP | X | 282 | 61.845 | 57.134 | 49.579 | 0.00 | 0.00 |
| ATOM | 4244 | CD2 | TRP | X | 282 | 62.171 | 55.516 | 48.340 | 0.00 | 0.00 |
| ATOM | 4245 | C   | TRP | X | 282 | 59.134 | 55.786 | 49.764 | 0.00 | 0.00 |
| ATOM | 4246 | O   | TRP | X | 282 | 59.378 | 54.653 | 50.144 | 0.00 | 0.00 |
| ATOM | 4247 | N   | HIE | X | 283 | 59.118 | 56.828 | 50.576 | 0.00 | 0.00 |
| ATOM | 4248 | H   | HIE | X | 283 | 58.882 | 57.711 | 50.146 | 0.00 | 0.00 |
| ATOM | 4249 | CA  | HIE | X | 283 | 59.342 | 56.803 | 52.093 | 0.00 | 0.00 |
| ATOM | 4250 | HA  | HIE | X | 283 | 60.376 | 56.590 | 52.362 | 0.00 | 0.00 |
| ATOM | 4251 | CB  | HIE | X | 283 | 59.147 | 58.292 | 52.583 | 0.00 | 0.00 |
| ATOM | 4252 | HB2 | HIE | X | 283 | 59.676 | 59.025 | 51.974 | 0.00 | 0.00 |
| ATOM | 4253 | HB3 | HIE | X | 283 | 58.106 | 58.514 | 52.348 | 0.00 | 0.00 |
| ATOM | 4254 | CG  | HIE | X | 283 | 59.502 | 58.517 | 54.043 | 0.00 | 0.00 |
| ATOM | 4255 | ND1 | HIE | X | 283 | 60.561 | 57.891 | 54.686 | 0.00 | 0.00 |
| ATOM | 4256 | CE1 | HIE | X | 283 | 60.529 | 58.346 | 55.901 | 0.00 | 0.00 |
| ATOM | 4257 | HE1 | HIE | X | 283 | 61.324 | 58.149 | 56.605 | 0.00 | 0.00 |
| ATOM | 4258 | NE2 | HIE | X | 283 | 59.635 | 59.323 | 56.070 | 0.00 | 0.00 |
| ATOM | 4259 | HE2 | HIE | X | 283 | 59.462 | 59.751 | 56.969 | 0.00 | 0.00 |
| ATOM | 4260 | CD2 | HIE | X | 283 | 58.874 | 59.373 | 54.944 | 0.00 | 0.00 |
| ATOM | 4261 | HD2 | HIE | X | 283 | 57.977 | 59.950 | 54.771 | 0.00 | 0.00 |
| ATOM | 4262 | C   | HIE | X | 283 | 58.360 | 55.932 | 52.892 | 0.00 | 0.00 |
| ATOM | 4263 | O   | HIE | X | 283 | 58.720 | 55.362 | 53.946 | 0.00 | 0.00 |
| ATOM | 4264 | N   | VAL | X | 284 | 57.100 | 56.017 | 52.453 | 0.00 | 0.00 |
| ATOM | 4265 | H   | VAL | X | 284 | 56.851 | 56.457 | 51.578 | 0.00 | 0.00 |
| ATOM | 4266 | CA  | VAL | X | 284 | 55.940 | 55.258 | 53.021 | 0.00 | 0.00 |

|      |      |      |     |   |     |        |        |        |      |      |
|------|------|------|-----|---|-----|--------|--------|--------|------|------|
| ATOM | 4267 | HA   | VAL | X | 284 | 56.297 | 54.821 | 53.954 | 0.00 | 0.00 |
| ATOM | 4268 | CB   | VAL | X | 284 | 54.758 | 56.189 | 53.453 | 0.00 | 0.00 |
| ATOM | 4269 | HB   | VAL | X | 284 | 54.134 | 55.704 | 54.203 | 0.00 | 0.00 |
| ATOM | 4270 | CG1  | VAL | X | 284 | 55.325 | 57.353 | 54.254 | 0.00 | 0.00 |
| ATOM | 4271 | HG11 | VAL | X | 284 | 55.931 | 56.845 | 55.004 | 0.00 | 0.00 |
| ATOM | 4272 | HG12 | VAL | X | 284 | 56.003 | 57.992 | 53.688 | 0.00 | 0.00 |
| ATOM | 4273 | HG13 | VAL | X | 284 | 54.516 | 57.952 | 54.672 | 0.00 | 0.00 |
| ATOM | 4274 | CG2  | VAL | X | 284 | 53.858 | 56.752 | 52.363 | 0.00 | 0.00 |
| ATOM | 4275 | HG21 | VAL | X | 284 | 54.494 | 57.371 | 51.731 | 0.00 | 0.00 |
| ATOM | 4276 | HG22 | VAL | X | 284 | 53.015 | 57.306 | 52.777 | 0.00 | 0.00 |
| ATOM | 4277 | HG23 | VAL | X | 284 | 53.538 | 55.957 | 51.690 | 0.00 | 0.00 |
| ATOM | 4278 | C    | VAL | X | 284 | 55.466 | 54.034 | 52.316 | 0.00 | 0.00 |
| ATOM | 4279 | O    | VAL | X | 284 | 54.844 | 53.170 | 52.917 | 0.00 | 0.00 |
| ATOM | 4280 | N    | LEU | X | 285 | 55.964 | 53.867 | 51.113 | 0.00 | 0.00 |
| ATOM | 4281 | H    | LEU | X | 285 | 56.548 | 54.583 | 50.706 | 0.00 | 0.00 |
| ATOM | 4282 | CA   | LEU | X | 285 | 56.106 | 52.632 | 50.474 | 0.00 | 0.00 |
| ATOM | 4283 | HA   | LEU | X | 285 | 55.098 | 52.217 | 50.503 | 0.00 | 0.00 |
| ATOM | 4284 | CB   | LEU | X | 285 | 56.409 | 52.793 | 48.994 | 0.00 | 0.00 |
| ATOM | 4285 | HB2  | LEU | X | 285 | 55.934 | 53.677 | 48.567 | 0.00 | 0.00 |
| ATOM | 4286 | HB3  | LEU | X | 285 | 57.473 | 53.008 | 48.894 | 0.00 | 0.00 |
| ATOM | 4287 | CG   | LEU | X | 285 | 56.062 | 51.527 | 48.139 | 0.00 | 0.00 |
| ATOM | 4288 | HG   | LEU | X | 285 | 56.668 | 50.760 | 48.621 | 0.00 | 0.00 |
| ATOM | 4289 | CD1  | LEU | X | 285 | 54.650 | 51.002 | 48.091 | 0.00 | 0.00 |
| ATOM | 4290 | HD11 | LEU | X | 285 | 54.350 | 50.646 | 49.077 | 0.00 | 0.00 |
| ATOM | 4291 | HD12 | LEU | X | 285 | 54.538 | 50.219 | 47.340 | 0.00 | 0.00 |
| ATOM | 4292 | HD13 | LEU | X | 285 | 54.018 | 51.803 | 47.710 | 0.00 | 0.00 |
| ATOM | 4293 | CD2  | LEU | X | 285 | 56.671 | 51.652 | 46.740 | 0.00 | 0.00 |
| ATOM | 4294 | HD21 | LEU | X | 285 | 57.566 | 52.258 | 46.878 | 0.00 | 0.00 |
| ATOM | 4295 | HD22 | LEU | X | 285 | 57.098 | 50.700 | 46.426 | 0.00 | 0.00 |
| ATOM | 4296 | HD23 | LEU | X | 285 | 55.997 | 52.089 | 46.004 | 0.00 | 0.00 |
| ATOM | 4297 | C    | LEU | X | 285 | 57.132 | 51.700 | 51.219 | 0.00 | 0.00 |
| ATOM | 4298 | O    | LEU | X | 285 | 58.281 | 52.070 | 51.244 | 0.00 | 0.00 |
| ATOM | 4299 | N    | PRO | X | 286 | 56.766 | 50.531 | 51.766 | 0.00 | 0.00 |
| ATOM | 4300 | CD   | PRO | X | 286 | 55.434 | 49.949 | 51.658 | 0.00 | 0.00 |
| ATOM | 4301 | HD2  | PRO | X | 286 | 55.514 | 49.151 | 50.920 | 0.00 | 0.00 |
| ATOM | 4302 | HD3  | PRO | X | 286 | 54.620 | 50.645 | 51.456 | 0.00 | 0.00 |
| ATOM | 4303 | CG   | PRO | X | 286 | 55.183 | 49.299 | 53.034 | 0.00 | 0.00 |
| ATOM | 4304 | HG2  | PRO | X | 286 | 54.341 | 48.608 | 52.989 | 0.00 | 0.00 |
| ATOM | 4305 | HG3  | PRO | X | 286 | 54.772 | 49.999 | 53.762 | 0.00 | 0.00 |
| ATOM | 4306 | CB   | PRO | X | 286 | 56.516 | 48.715 | 53.332 | 0.00 | 0.00 |
| ATOM | 4307 | HB2  | PRO | X | 286 | 56.467 | 47.750 | 52.827 | 0.00 | 0.00 |
| ATOM | 4308 | HB3  | PRO | X | 286 | 56.671 | 48.599 | 54.404 | 0.00 | 0.00 |
| ATOM | 4309 | CA   | PRO | X | 286 | 57.549 | 49.787 | 52.773 | 0.00 | 0.00 |
| ATOM | 4310 | HA   | PRO | X | 286 | 57.800 | 50.454 | 53.597 | 0.00 | 0.00 |
| ATOM | 4311 | C    | PRO | X | 286 | 58.808 | 49.096 | 52.307 | 0.00 | 0.00 |
| ATOM | 4312 | O    | PRO | X | 286 | 58.791 | 48.470 | 51.226 | 0.00 | 0.00 |
| ATOM | 4313 | N    | GLN | X | 287 | 59.725 | 49.092 | 53.217 | 0.00 | 0.00 |
| ATOM | 4314 | H    | GLN | X | 287 | 59.607 | 49.503 | 54.132 | 0.00 | 0.00 |
| ATOM | 4315 | CA   | GLN | X | 287 | 61.017 | 48.380 | 52.938 | 0.00 | 0.00 |
| ATOM | 4316 | HA   | GLN | X | 287 | 61.006 | 47.784 | 52.026 | 0.00 | 0.00 |
| ATOM | 4317 | CB   | GLN | X | 287 | 62.154 | 49.387 | 52.943 | 0.00 | 0.00 |
| ATOM | 4318 | HB2  | GLN | X | 287 | 62.010 | 49.887 | 53.901 | 0.00 | 0.00 |
| ATOM | 4319 | HB3  | GLN | X | 287 | 63.059 | 48.815 | 52.737 | 0.00 | 0.00 |
| ATOM | 4320 | CG   | GLN | X | 287 | 62.067 | 50.360 | 51.802 | 0.00 | 0.00 |
| ATOM | 4321 | HG2  | GLN | X | 287 | 61.752 | 49.879 | 50.876 | 0.00 | 0.00 |
| ATOM | 4322 | HG3  | GLN | X | 287 | 61.188 | 50.949 | 52.065 | 0.00 | 0.00 |
| ATOM | 4323 | CD   | GLN | X | 287 | 63.215 | 51.255 | 51.551 | 0.00 | 0.00 |
| ATOM | 4324 | OE1  | GLN | X | 287 | 64.364 | 50.892 | 51.267 | 0.00 | 0.00 |
| ATOM | 4325 | NE2  | GLN | X | 287 | 63.043 | 52.537 | 51.554 | 0.00 | 0.00 |
| ATOM | 4326 | HE21 | GLN | X | 287 | 63.835 | 53.030 | 51.166 | 0.00 | 0.00 |
| ATOM | 4327 | HE22 | GLN | X | 287 | 62.120 | 52.872 | 51.788 | 0.00 | 0.00 |
| ATOM | 4328 | C    | GLN | X | 287 | 61.259 | 47.271 | 54.029 | 0.00 | 0.00 |
| ATOM | 4329 | O    | GLN | X | 287 | 60.630 | 47.435 | 55.121 | 0.00 | 0.00 |
| ATOM | 4330 | N    | GLU | X | 288 | 62.115 | 46.317 | 53.775 | 0.00 | 0.00 |
| ATOM | 4331 | H    | GLU | X | 288 | 62.376 | 46.201 | 52.806 | 0.00 | 0.00 |
| ATOM | 4332 | CA   | GLU | X | 288 | 62.388 | 45.161 | 54.666 | 0.00 | 0.00 |
| ATOM | 4333 | HA   | GLU | X | 288 | 62.919 | 44.324 | 54.212 | 0.00 | 0.00 |



|      |      |      |     |   |     |        |        |        |      |      |
|------|------|------|-----|---|-----|--------|--------|--------|------|------|
| ATOM | 4334 | CB   | GLU | X | 288 | 63.236 | 45.554 | 55.928 | 0.00 | 0.00 |
| ATOM | 4335 | HB2  | GLU | X | 288 | 62.860 | 46.500 | 56.317 | 0.00 | 0.00 |
| ATOM | 4336 | HB3  | GLU | X | 288 | 63.133 | 44.770 | 56.678 | 0.00 | 0.00 |
| ATOM | 4337 | CG   | GLU | X | 288 | 64.735 | 45.730 | 55.589 | 0.00 | 0.00 |
| ATOM | 4338 | HG2  | GLU | X | 288 | 65.036 | 44.870 | 54.991 | 0.00 | 0.00 |
| ATOM | 4339 | HG3  | GLU | X | 288 | 64.877 | 46.567 | 54.905 | 0.00 | 0.00 |
| ATOM | 4340 | CD   | GLU | X | 288 | 65.522 | 45.880 | 56.894 | 0.00 | 0.00 |
| ATOM | 4341 | OE1  | GLU | X | 288 | 66.529 | 45.200 | 57.105 | 0.00 | 0.00 |
| ATOM | 4342 | OE2  | GLU | X | 288 | 65.171 | 46.785 | 57.685 | 0.00 | 0.00 |
| ATOM | 4343 | C    | GLU | X | 288 | 61.040 | 44.523 | 55.157 | 0.00 | 0.00 |
| ATOM | 4344 | O    | GLU | X | 288 | 60.822 | 44.081 | 56.289 | 0.00 | 0.00 |
| ATOM | 4345 | N    | SER | X | 289 | 60.110 | 44.400 | 54.233 | 0.00 | 0.00 |
| ATOM | 4346 | H    | SER | X | 289 | 60.399 | 44.636 | 53.294 | 0.00 | 0.00 |
| ATOM | 4347 | CA   | SER | X | 289 | 58.669 | 44.270 | 54.400 | 0.00 | 0.00 |
| ATOM | 4348 | HA   | SER | X | 289 | 58.432 | 43.604 | 55.229 | 0.00 | 0.00 |
| ATOM | 4349 | CB   | SER | X | 289 | 58.056 | 45.722 | 54.639 | 0.00 | 0.00 |
| ATOM | 4350 | HB2  | SER | X | 289 | 58.496 | 46.458 | 53.967 | 0.00 | 0.00 |
| ATOM | 4351 | HB3  | SER | X | 289 | 56.971 | 45.665 | 54.550 | 0.00 | 0.00 |
| ATOM | 4352 | OG   | SER | X | 289 | 58.335 | 46.109 | 55.998 | 0.00 | 0.00 |
| ATOM | 4353 | HG   | SER | X | 289 | 59.245 | 46.400 | 55.908 | 0.00 | 0.00 |
| ATOM | 4354 | C    | SER | X | 289 | 57.979 | 43.691 | 53.133 | 0.00 | 0.00 |
| ATOM | 4355 | O    | SER | X | 289 | 57.337 | 44.403 | 52.401 | 0.00 | 0.00 |
| ATOM | 4356 | N    | VAL | X | 290 | 58.268 | 42.425 | 52.669 | 0.00 | 0.00 |
| ATOM | 4357 | H    | VAL | X | 290 | 58.923 | 41.894 | 53.225 | 0.00 | 0.00 |
| ATOM | 4358 | CA   | VAL | X | 290 | 57.908 | 41.984 | 51.352 | 0.00 | 0.00 |
| ATOM | 4359 | HA   | VAL | X | 290 | 58.058 | 42.802 | 50.648 | 0.00 | 0.00 |
| ATOM | 4360 | CB   | VAL | X | 290 | 58.636 | 40.686 | 50.855 | 0.00 | 0.00 |
| ATOM | 4361 | HB   | VAL | X | 290 | 58.454 | 40.631 | 49.782 | 0.00 | 0.00 |
| ATOM | 4362 | CG1  | VAL | X | 290 | 60.109 | 40.683 | 51.143 | 0.00 | 0.00 |
| ATOM | 4363 | HG11 | VAL | X | 290 | 60.465 | 40.348 | 52.117 | 0.00 | 0.00 |
| ATOM | 4364 | HG12 | VAL | X | 290 | 60.674 | 39.972 | 50.541 | 0.00 | 0.00 |
| ATOM | 4365 | HG13 | VAL | X | 290 | 60.332 | 41.738 | 50.982 | 0.00 | 0.00 |
| ATOM | 4366 | CG2  | VAL | X | 290 | 57.936 | 39.384 | 51.459 | 0.00 | 0.00 |
| ATOM | 4367 | HG21 | VAL | X | 290 | 58.583 | 38.507 | 51.492 | 0.00 | 0.00 |
| ATOM | 4368 | HG22 | VAL | X | 290 | 57.056 | 39.200 | 50.842 | 0.00 | 0.00 |
| ATOM | 4369 | HG23 | VAL | X | 290 | 57.723 | 39.711 | 52.477 | 0.00 | 0.00 |
| ATOM | 4370 | C    | VAL | X | 290 | 56.437 | 41.752 | 51.254 | 0.00 | 0.00 |
| ATOM | 4371 | O    | VAL | X | 290 | 55.729 | 41.382 | 52.203 | 0.00 | 0.00 |
| ATOM | 4372 | N    | PHE | X | 291 | 55.867 | 41.898 | 50.009 | 0.00 | 0.00 |
| ATOM | 4373 | H    | PHE | X | 291 | 56.451 | 42.012 | 49.193 | 0.00 | 0.00 |
| ATOM | 4374 | CA   | PHE | X | 291 | 54.413 | 41.663 | 49.779 | 0.00 | 0.00 |
| ATOM | 4375 | HA   | PHE | X | 291 | 54.387 | 41.833 | 48.703 | 0.00 | 0.00 |
| ATOM | 4376 | CB   | PHE | X | 291 | 54.087 | 40.178 | 50.206 | 0.00 | 0.00 |
| ATOM | 4377 | HB2  | PHE | X | 291 | 54.995 | 39.576 | 50.245 | 0.00 | 0.00 |
| ATOM | 4378 | HB3  | PHE | X | 291 | 53.807 | 40.203 | 51.258 | 0.00 | 0.00 |
| ATOM | 4379 | CG   | PHE | X | 291 | 53.032 | 39.497 | 49.338 | 0.00 | 0.00 |
| ATOM | 4380 | CD1  | PHE | X | 291 | 51.906 | 40.185 | 48.760 | 0.00 | 0.00 |
| ATOM | 4381 | HD1  | PHE | X | 291 | 51.787 | 41.247 | 48.916 | 0.00 | 0.00 |
| ATOM | 4382 | CE1  | PHE | X | 291 | 50.897 | 39.417 | 48.120 | 0.00 | 0.00 |
| ATOM | 4383 | HE1  | PHE | X | 291 | 50.054 | 39.892 | 47.639 | 0.00 | 0.00 |
| ATOM | 4384 | CZ   | PHE | X | 291 | 51.135 | 38.015 | 47.910 | 0.00 | 0.00 |
| ATOM | 4385 | HZ   | PHE | X | 291 | 50.471 | 37.424 | 47.298 | 0.00 | 0.00 |
| ATOM | 4386 | CE2  | PHE | X | 291 | 52.281 | 37.381 | 48.369 | 0.00 | 0.00 |
| ATOM | 4387 | HE2  | PHE | X | 291 | 52.372 | 36.355 | 48.043 | 0.00 | 0.00 |
| ATOM | 4388 | CD2  | PHE | X | 291 | 53.186 | 38.096 | 49.111 | 0.00 | 0.00 |
| ATOM | 4389 | HD2  | PHE | X | 291 | 54.114 | 37.624 | 49.399 | 0.00 | 0.00 |
| ATOM | 4390 | C    | PHE | X | 291 | 53.488 | 42.736 | 50.461 | 0.00 | 0.00 |
| ATOM | 4391 | O    | PHE | X | 291 | 52.385 | 42.429 | 50.899 | 0.00 | 0.00 |
| ATOM | 4392 | N    | ARG | X | 292 | 53.895 | 44.038 | 50.573 | 0.00 | 0.00 |
| ATOM | 4393 | H    | ARG | X | 292 | 54.788 | 44.327 | 50.199 | 0.00 | 0.00 |
| ATOM | 4394 | CA   | ARG | X | 292 | 53.174 | 45.033 | 51.459 | 0.00 | 0.00 |
| ATOM | 4395 | HA   | ARG | X | 292 | 52.113 | 44.789 | 51.506 | 0.00 | 0.00 |
| ATOM | 4396 | CB   | ARG | X | 292 | 53.737 | 44.967 | 52.864 | 0.00 | 0.00 |
| ATOM | 4397 | HB2  | ARG | X | 292 | 53.835 | 43.919 | 53.150 | 0.00 | 0.00 |
| ATOM | 4398 | HB3  | ARG | X | 292 | 54.812 | 45.113 | 52.757 | 0.00 | 0.00 |
| ATOM | 4399 | CG   | ARG | X | 292 | 53.119 | 45.812 | 54.046 | 0.00 | 0.00 |
| ATOM | 4400 | HG2  | ARG | X | 292 | 53.319 | 46.858 | 53.812 | 0.00 | 0.00 |

|      |      |      |     |   |     |        |        |        |      |      |
|------|------|------|-----|---|-----|--------|--------|--------|------|------|
| ATOM | 4401 | HG3  | ARG | X | 292 | 52.049 | 45.698 | 54.217 | 0.00 | 0.00 |
| ATOM | 4402 | CD   | ARG | X | 292 | 53.911 | 45.524 | 55.336 | 0.00 | 0.00 |
| ATOM | 4403 | HD2  | ARG | X | 292 | 53.959 | 44.445 | 55.479 | 0.00 | 0.00 |
| ATOM | 4404 | HD3  | ARG | X | 292 | 54.911 | 45.921 | 55.161 | 0.00 | 0.00 |
| ATOM | 4405 | NE   | ARG | X | 292 | 53.353 | 46.297 | 56.434 | 0.00 | 0.00 |
| ATOM | 4406 | HE   | ARG | X | 292 | 53.830 | 47.167 | 56.623 | 0.00 | 0.00 |
| ATOM | 4407 | CZ   | ARG | X | 292 | 52.376 | 46.076 | 57.262 | 0.00 | 0.00 |
| ATOM | 4408 | NH1  | ARG | X | 292 | 51.522 | 45.190 | 57.059 | 0.00 | 0.00 |
| ATOM | 4409 | HH11 | ARG | X | 292 | 51.673 | 44.513 | 56.326 | 0.00 | 0.00 |
| ATOM | 4410 | HH12 | ARG | X | 292 | 50.820 | 45.015 | 57.765 | 0.00 | 0.00 |
| ATOM | 4411 | NH2  | ARG | X | 292 | 52.210 | 46.920 | 58.252 | 0.00 | 0.00 |
| ATOM | 4412 | HH21 | ARG | X | 292 | 52.806 | 47.686 | 58.532 | 0.00 | 0.00 |
| ATOM | 4413 | HH22 | ARG | X | 292 | 51.563 | 46.589 | 58.953 | 0.00 | 0.00 |
| ATOM | 4414 | C    | ARG | X | 292 | 53.424 | 46.439 | 50.901 | 0.00 | 0.00 |
| ATOM | 4415 | O    | ARG | X | 292 | 54.557 | 46.762 | 50.439 | 0.00 | 0.00 |
| ATOM | 4416 | N    | PHE | X | 293 | 52.357 | 47.246 | 50.997 | 0.00 | 0.00 |
| ATOM | 4417 | H    | PHE | X | 293 | 51.489 | 47.041 | 51.471 | 0.00 | 0.00 |
| ATOM | 4418 | CA   | PHE | X | 293 | 52.314 | 48.502 | 50.161 | 0.00 | 0.00 |
| ATOM | 4419 | HA   | PHE | X | 293 | 53.284 | 48.582 | 49.671 | 0.00 | 0.00 |
| ATOM | 4420 | CB   | PHE | X | 293 | 51.238 | 48.259 | 49.044 | 0.00 | 0.00 |
| ATOM | 4421 | HB2  | PHE | X | 293 | 50.241 | 48.188 | 49.478 | 0.00 | 0.00 |
| ATOM | 4422 | HB3  | PHE | X | 293 | 51.339 | 49.046 | 48.296 | 0.00 | 0.00 |
| ATOM | 4423 | CG   | PHE | X | 293 | 51.435 | 46.890 | 48.437 | 0.00 | 0.00 |
| ATOM | 4424 | CD1  | PHE | X | 293 | 52.550 | 46.578 | 47.653 | 0.00 | 0.00 |
| ATOM | 4425 | HD1  | PHE | X | 293 | 53.303 | 47.318 | 47.425 | 0.00 | 0.00 |
| ATOM | 4426 | CE1  | PHE | X | 293 | 52.670 | 45.276 | 47.034 | 0.00 | 0.00 |
| ATOM | 4427 | HE1  | PHE | X | 293 | 53.575 | 45.148 | 46.459 | 0.00 | 0.00 |
| ATOM | 4428 | CZ   | PHE | X | 293 | 51.686 | 44.344 | 47.304 | 0.00 | 0.00 |
| ATOM | 4429 | HZ   | PHE | X | 293 | 51.862 | 43.406 | 46.799 | 0.00 | 0.00 |
| ATOM | 4430 | CE2  | PHE | X | 293 | 50.634 | 44.622 | 48.234 | 0.00 | 0.00 |
| ATOM | 4431 | HE2  | PHE | X | 293 | 49.871 | 43.861 | 48.304 | 0.00 | 0.00 |
| ATOM | 4432 | CD2  | PHE | X | 293 | 50.488 | 45.882 | 48.761 | 0.00 | 0.00 |
| ATOM | 4433 | HD2  | PHE | X | 293 | 49.637 | 46.189 | 49.351 | 0.00 | 0.00 |
| ATOM | 4434 | C    | PHE | X | 293 | 52.125 | 49.835 | 50.837 | 0.00 | 0.00 |
| ATOM | 4435 | O    | PHE | X | 293 | 52.023 | 49.790 | 52.083 | 0.00 | 0.00 |
| ATOM | 4436 | N    | SER | X | 294 | 52.140 | 50.950 | 50.098 | 0.00 | 0.00 |
| ATOM | 4437 | H    | SER | X | 294 | 52.034 | 50.856 | 49.098 | 0.00 | 0.00 |
| ATOM | 4438 | CA   | SER | X | 294 | 52.027 | 52.291 | 50.715 | 0.00 | 0.00 |
| ATOM | 4439 | HA   | SER | X | 294 | 52.674 | 52.280 | 51.593 | 0.00 | 0.00 |
| ATOM | 4440 | CB   | SER | X | 294 | 52.483 | 53.405 | 49.783 | 0.00 | 0.00 |
| ATOM | 4441 | HB2  | SER | X | 294 | 52.156 | 54.362 | 50.190 | 0.00 | 0.00 |
| ATOM | 4442 | HB3  | SER | X | 294 | 53.567 | 53.355 | 49.686 | 0.00 | 0.00 |
| ATOM | 4443 | OG   | SER | X | 294 | 52.006 | 53.184 | 48.437 | 0.00 | 0.00 |
| ATOM | 4444 | HG   | SER | X | 294 | 51.976 | 54.067 | 48.061 | 0.00 | 0.00 |
| ATOM | 4445 | C    | SER | X | 294 | 50.583 | 52.613 | 51.235 | 0.00 | 0.00 |
| ATOM | 4446 | O    | SER | X | 294 | 50.323 | 52.617 | 52.455 | 0.00 | 0.00 |
| ATOM | 4447 | N    | PHE | X | 295 | 49.601 | 52.944 | 50.383 | 0.00 | 0.00 |
| ATOM | 4448 | H    | PHE | X | 295 | 49.912 | 52.977 | 49.423 | 0.00 | 0.00 |
| ATOM | 4449 | CA   | PHE | X | 295 | 48.250 | 53.109 | 50.700 | 0.00 | 0.00 |
| ATOM | 4450 | HA   | PHE | X | 295 | 48.130 | 53.125 | 51.783 | 0.00 | 0.00 |
| ATOM | 4451 | CB   | PHE | X | 295 | 47.785 | 54.477 | 50.170 | 0.00 | 0.00 |
| ATOM | 4452 | HB2  | PHE | X | 295 | 47.972 | 54.572 | 49.100 | 0.00 | 0.00 |
| ATOM | 4453 | HB3  | PHE | X | 295 | 46.709 | 54.527 | 50.341 | 0.00 | 0.00 |
| ATOM | 4454 | CG   | PHE | X | 295 | 48.462 | 55.648 | 50.866 | 0.00 | 0.00 |
| ATOM | 4455 | CD1  | PHE | X | 295 | 47.911 | 56.191 | 52.011 | 0.00 | 0.00 |
| ATOM | 4456 | HD1  | PHE | X | 295 | 46.945 | 55.900 | 52.395 | 0.00 | 0.00 |
| ATOM | 4457 | CE1  | PHE | X | 295 | 48.568 | 57.169 | 52.713 | 0.00 | 0.00 |
| ATOM | 4458 | HE1  | PHE | X | 295 | 48.167 | 57.688 | 53.570 | 0.00 | 0.00 |
| ATOM | 4459 | CZ   | PHE | X | 295 | 49.788 | 57.717 | 52.233 | 0.00 | 0.00 |
| ATOM | 4460 | HZ   | PHE | X | 295 | 50.263 | 58.534 | 52.756 | 0.00 | 0.00 |
| ATOM | 4461 | CE2  | PHE | X | 295 | 50.327 | 57.197 | 51.057 | 0.00 | 0.00 |
| ATOM | 4462 | HE2  | PHE | X | 295 | 51.267 | 57.542 | 50.654 | 0.00 | 0.00 |
| ATOM | 4463 | CD2  | PHE | X | 295 | 49.709 | 56.136 | 50.416 | 0.00 | 0.00 |
| ATOM | 4464 | HD2  | PHE | X | 295 | 50.084 | 55.818 | 49.454 | 0.00 | 0.00 |
| ATOM | 4465 | C    | PHE | X | 295 | 47.335 | 52.043 | 50.061 | 0.00 | 0.00 |
| ATOM | 4466 | O    | PHE | X | 295 | 47.499 | 51.686 | 48.867 | 0.00 | 0.00 |
| ATOM | 4467 | N    | VAL | X | 296 | 46.485 | 51.440 | 50.878 | 0.00 | 0.00 |

|      |      |      |     |   |     |        |        |        |      |      |
|------|------|------|-----|---|-----|--------|--------|--------|------|------|
| ATOM | 4468 | H    | VAL | X | 296 | 46.292 | 51.966 | 51.718 | 0.00 | 0.00 |
| ATOM | 4469 | CA   | VAL | X | 296 | 45.635 | 50.272 | 50.456 | 0.00 | 0.00 |
| ATOM | 4470 | HA   | VAL | X | 296 | 45.458 | 50.267 | 49.381 | 0.00 | 0.00 |
| ATOM | 4471 | CB   | VAL | X | 296 | 46.270 | 48.876 | 50.791 | 0.00 | 0.00 |
| ATOM | 4472 | HB   | VAL | X | 296 | 45.674 | 48.019 | 50.475 | 0.00 | 0.00 |
| ATOM | 4473 | CG1  | VAL | X | 296 | 47.606 | 48.874 | 50.074 | 0.00 | 0.00 |
| ATOM | 4474 | HG11 | VAL | X | 296 | 48.051 | 47.882 | 50.149 | 0.00 | 0.00 |
| ATOM | 4475 | HG12 | VAL | X | 296 | 47.630 | 49.125 | 49.013 | 0.00 | 0.00 |
| ATOM | 4476 | HG13 | VAL | X | 296 | 48.407 | 49.474 | 50.507 | 0.00 | 0.00 |
| ATOM | 4477 | CG2  | VAL | X | 296 | 46.525 | 48.501 | 52.240 | 0.00 | 0.00 |
| ATOM | 4478 | HG21 | VAL | X | 296 | 46.868 | 47.467 | 52.249 | 0.00 | 0.00 |
| ATOM | 4479 | HG22 | VAL | X | 296 | 45.580 | 48.601 | 52.775 | 0.00 | 0.00 |
| ATOM | 4480 | HG23 | VAL | X | 296 | 47.229 | 49.178 | 52.724 | 0.00 | 0.00 |
| ATOM | 4481 | C    | VAL | X | 296 | 44.243 | 50.367 | 51.184 | 0.00 | 0.00 |
| ATOM | 4482 | O    | VAL | X | 296 | 44.177 | 51.136 | 52.173 | 0.00 | 0.00 |
| ATOM | 4483 | N    | PRO | X | 297 | 43.197 | 49.620 | 50.779 | 0.00 | 0.00 |
| ATOM | 4484 | CD   | PRO | X | 297 | 43.223 | 48.813 | 49.554 | 0.00 | 0.00 |
| ATOM | 4485 | HD2  | PRO | X | 297 | 43.715 | 47.841 | 49.570 | 0.00 | 0.00 |
| ATOM | 4486 | HD3  | PRO | X | 297 | 43.683 | 49.314 | 48.702 | 0.00 | 0.00 |
| ATOM | 4487 | CG   | PRO | X | 297 | 41.765 | 48.623 | 49.284 | 0.00 | 0.00 |
| ATOM | 4488 | HG2  | PRO | X | 297 | 41.626 | 47.733 | 48.670 | 0.00 | 0.00 |
| ATOM | 4489 | HG3  | PRO | X | 297 | 41.450 | 49.487 | 48.699 | 0.00 | 0.00 |
| ATOM | 4490 | CB   | PRO | X | 297 | 41.017 | 48.647 | 50.650 | 0.00 | 0.00 |
| ATOM | 4491 | HB2  | PRO | X | 297 | 41.271 | 47.741 | 51.201 | 0.00 | 0.00 |
| ATOM | 4492 | HB3  | PRO | X | 297 | 39.942 | 48.827 | 50.655 | 0.00 | 0.00 |
| ATOM | 4493 | CA   | PRO | X | 297 | 41.802 | 49.785 | 51.280 | 0.00 | 0.00 |
| ATOM | 4494 | HA   | PRO | X | 297 | 41.383 | 50.645 | 50.759 | 0.00 | 0.00 |
| ATOM | 4495 | C    | PRO | X | 297 | 41.629 | 49.970 | 52.782 | 0.00 | 0.00 |
| ATOM | 4496 | O    | PRO | X | 297 | 42.200 | 49.209 | 53.527 | 0.00 | 0.00 |
| ATOM | 4497 | N    | VAL | X | 298 | 40.847 | 50.971 | 53.104 | 0.00 | 0.00 |
| ATOM | 4498 | H    | VAL | X | 298 | 40.284 | 51.331 | 52.346 | 0.00 | 0.00 |
| ATOM | 4499 | CA   | VAL | X | 298 | 40.799 | 51.656 | 54.401 | 0.00 | 0.00 |
| ATOM | 4500 | HA   | VAL | X | 298 | 41.750 | 51.449 | 54.891 | 0.00 | 0.00 |
| ATOM | 4501 | CB   | VAL | X | 298 | 40.871 | 53.211 | 54.242 | 0.00 | 0.00 |
| ATOM | 4502 | HB   | VAL | X | 298 | 39.928 | 53.576 | 53.835 | 0.00 | 0.00 |
| ATOM | 4503 | CG1  | VAL | X | 298 | 41.338 | 53.772 | 55.649 | 0.00 | 0.00 |
| ATOM | 4504 | HG11 | VAL | X | 298 | 42.367 | 53.480 | 55.858 | 0.00 | 0.00 |
| ATOM | 4505 | HG12 | VAL | X | 298 | 41.277 | 54.858 | 55.578 | 0.00 | 0.00 |
| ATOM | 4506 | HG13 | VAL | X | 298 | 40.717 | 53.407 | 56.467 | 0.00 | 0.00 |
| ATOM | 4507 | CG2  | VAL | X | 298 | 41.996 | 53.686 | 53.284 | 0.00 | 0.00 |
| ATOM | 4508 | HG21 | VAL | X | 298 | 42.833 | 53.015 | 53.477 | 0.00 | 0.00 |
| ATOM | 4509 | HG22 | VAL | X | 298 | 42.134 | 54.749 | 53.479 | 0.00 | 0.00 |
| ATOM | 4510 | HG23 | VAL | X | 298 | 41.532 | 53.699 | 52.297 | 0.00 | 0.00 |
| ATOM | 4511 | C    | VAL | X | 298 | 39.503 | 51.307 | 55.158 | 0.00 | 0.00 |
| ATOM | 4512 | O    | VAL | X | 298 | 38.435 | 51.541 | 54.729 | 0.00 | 0.00 |
| ATOM | 4513 | N    | VAL | X | 299 | 39.723 | 50.586 | 56.231 | 0.00 | 0.00 |
| ATOM | 4514 | H    | VAL | X | 299 | 40.698 | 50.338 | 56.325 | 0.00 | 0.00 |
| ATOM | 4515 | CA   | VAL | X | 299 | 38.712 | 50.134 | 57.196 | 0.00 | 0.00 |
| ATOM | 4516 | HA   | VAL | X | 299 | 37.773 | 49.785 | 56.766 | 0.00 | 0.00 |
| ATOM | 4517 | CB   | VAL | X | 299 | 39.062 | 48.968 | 58.227 | 0.00 | 0.00 |
| ATOM | 4518 | HB   | VAL | X | 299 | 40.061 | 49.136 | 58.629 | 0.00 | 0.00 |
| ATOM | 4519 | CG1  | VAL | X | 299 | 38.193 | 48.920 | 59.451 | 0.00 | 0.00 |
| ATOM | 4520 | HG11 | VAL | X | 299 | 38.511 | 48.061 | 60.042 | 0.00 | 0.00 |
| ATOM | 4521 | HG12 | VAL | X | 299 | 38.414 | 49.761 | 60.108 | 0.00 | 0.00 |
| ATOM | 4522 | HG13 | VAL | X | 299 | 37.147 | 48.920 | 59.142 | 0.00 | 0.00 |
| ATOM | 4523 | CG2  | VAL | X | 299 | 38.977 | 47.648 | 57.490 | 0.00 | 0.00 |
| ATOM | 4524 | HG21 | VAL | X | 299 | 39.410 | 47.769 | 56.497 | 0.00 | 0.00 |
| ATOM | 4525 | HG22 | VAL | X | 299 | 37.924 | 47.444 | 57.299 | 0.00 | 0.00 |
| ATOM | 4526 | HG23 | VAL | X | 299 | 39.484 | 46.825 | 57.994 | 0.00 | 0.00 |
| ATOM | 4527 | C    | VAL | X | 299 | 38.330 | 51.419 | 57.994 | 0.00 | 0.00 |
| ATOM | 4528 | O    | VAL | X | 299 | 39.148 | 51.960 | 58.805 | 0.00 | 0.00 |
| ATOM | 4529 | N    | ASP | X | 300 | 37.147 | 51.851 | 57.703 | 0.00 | 0.00 |
| ATOM | 4530 | H    | ASP | X | 300 | 36.659 | 51.302 | 57.011 | 0.00 | 0.00 |
| ATOM | 4531 | CA   | ASP | X | 300 | 36.680 | 53.213 | 57.970 | 0.00 | 0.00 |
| ATOM | 4532 | HA   | ASP | X | 300 | 37.313 | 53.603 | 58.767 | 0.00 | 0.00 |
| ATOM | 4533 | CB   | ASP | X | 300 | 36.933 | 54.079 | 56.702 | 0.00 | 0.00 |
| ATOM | 4534 | HB2  | ASP | X | 300 | 37.895 | 54.584 | 56.800 | 0.00 | 0.00 |

|      |      |      |     |   |     |        |        |        |      |      |
|------|------|------|-----|---|-----|--------|--------|--------|------|------|
| ATOM | 4535 | HB3  | ASP | X | 300 | 36.844 | 53.467 | 55.805 | 0.00 | 0.00 |
| ATOM | 4536 | CG   | ASP | X | 300 | 35.924 | 55.187 | 56.632 | 0.00 | 0.00 |
| ATOM | 4537 | OD1  | ASP | X | 300 | 35.899 | 56.121 | 57.449 | 0.00 | 0.00 |
| ATOM | 4538 | OD2  | ASP | X | 300 | 35.125 | 55.154 | 55.648 | 0.00 | 0.00 |
| ATOM | 4539 | C    | ASP | X | 300 | 35.231 | 53.143 | 58.448 | 0.00 | 0.00 |
| ATOM | 4540 | O    | ASP | X | 300 | 34.970 | 53.574 | 59.557 | 0.00 | 0.00 |
| ATOM | 4541 | N    | GLY | X | 301 | 34.328 | 52.499 | 57.706 | 0.00 | 0.00 |
| ATOM | 4542 | H    | GLY | X | 301 | 34.688 | 52.039 | 56.882 | 0.00 | 0.00 |
| ATOM | 4543 | CA   | GLY | X | 301 | 32.865 | 52.498 | 57.891 | 0.00 | 0.00 |
| ATOM | 4544 | HA2  | GLY | X | 301 | 32.560 | 51.580 | 58.394 | 0.00 | 0.00 |
| ATOM | 4545 | HA3  | GLY | X | 301 | 32.629 | 53.447 | 58.372 | 0.00 | 0.00 |
| ATOM | 4546 | C    | GLY | X | 301 | 32.053 | 52.449 | 56.587 | 0.00 | 0.00 |
| ATOM | 4547 | O    | GLY | X | 301 | 30.942 | 52.086 | 56.596 | 0.00 | 0.00 |
| ATOM | 4548 | N    | ASP | X | 302 | 32.622 | 53.037 | 55.538 | 0.00 | 0.00 |
| ATOM | 4549 | H    | ASP | X | 302 | 33.533 | 53.451 | 55.673 | 0.00 | 0.00 |
| ATOM | 4550 | CA   | ASP | X | 302 | 32.019 | 53.243 | 54.236 | 0.00 | 0.00 |
| ATOM | 4551 | HA   | ASP | X | 302 | 30.936 | 53.321 | 54.335 | 0.00 | 0.00 |
| ATOM | 4552 | CB   | ASP | X | 302 | 32.516 | 54.537 | 53.597 | 0.00 | 0.00 |
| ATOM | 4553 | HB2  | ASP | X | 302 | 32.236 | 55.363 | 54.250 | 0.00 | 0.00 |
| ATOM | 4554 | HB3  | ASP | X | 302 | 33.603 | 54.480 | 53.557 | 0.00 | 0.00 |
| ATOM | 4555 | CG   | ASP | X | 302 | 31.875 | 54.875 | 52.194 | 0.00 | 0.00 |
| ATOM | 4556 | OD1  | ASP | X | 302 | 30.957 | 55.737 | 52.169 | 0.00 | 0.00 |
| ATOM | 4557 | OD2  | ASP | X | 302 | 32.353 | 54.403 | 51.140 | 0.00 | 0.00 |
| ATOM | 4558 | C    | ASP | X | 302 | 32.307 | 52.031 | 53.401 | 0.00 | 0.00 |
| ATOM | 4559 | O    | ASP | X | 302 | 31.470 | 51.100 | 53.330 | 0.00 | 0.00 |
| ATOM | 4560 | N    | PHE | X | 303 | 33.449 | 51.912 | 52.687 | 0.00 | 0.00 |
| ATOM | 4561 | H    | PHE | X | 303 | 34.111 | 52.668 | 52.582 | 0.00 | 0.00 |
| ATOM | 4562 | CA   | PHE | X | 303 | 33.548 | 50.701 | 51.843 | 0.00 | 0.00 |
| ATOM | 4563 | HA   | PHE | X | 303 | 32.612 | 50.474 | 51.334 | 0.00 | 0.00 |
| ATOM | 4564 | CB   | PHE | X | 303 | 34.755 | 50.901 | 50.846 | 0.00 | 0.00 |
| ATOM | 4565 | HB2  | PHE | X | 303 | 34.935 | 51.968 | 50.716 | 0.00 | 0.00 |
| ATOM | 4566 | HB3  | PHE | X | 303 | 35.632 | 50.367 | 51.212 | 0.00 | 0.00 |
| ATOM | 4567 | CG   | PHE | X | 303 | 34.427 | 50.303 | 49.426 | 0.00 | 0.00 |
| ATOM | 4568 | CD1  | PHE | X | 303 | 34.348 | 48.934 | 49.214 | 0.00 | 0.00 |
| ATOM | 4569 | HD1  | PHE | X | 303 | 34.675 | 48.246 | 49.979 | 0.00 | 0.00 |
| ATOM | 4570 | CE1  | PHE | X | 303 | 34.063 | 48.401 | 47.975 | 0.00 | 0.00 |
| ATOM | 4571 | HE1  | PHE | X | 303 | 34.108 | 47.334 | 47.810 | 0.00 | 0.00 |
| ATOM | 4572 | CZ   | PHE | X | 303 | 33.839 | 49.274 | 46.866 | 0.00 | 0.00 |
| ATOM | 4573 | HZ   | PHE | X | 303 | 33.622 | 48.868 | 45.889 | 0.00 | 0.00 |
| ATOM | 4574 | CE2  | PHE | X | 303 | 33.949 | 50.640 | 47.075 | 0.00 | 0.00 |
| ATOM | 4575 | HE2  | PHE | X | 303 | 34.016 | 51.323 | 46.241 | 0.00 | 0.00 |
| ATOM | 4576 | CD2  | PHE | X | 303 | 34.317 | 51.132 | 48.323 | 0.00 | 0.00 |
| ATOM | 4577 | HD2  | PHE | X | 303 | 34.522 | 52.185 | 48.444 | 0.00 | 0.00 |
| ATOM | 4578 | C    | PHE | X | 303 | 33.734 | 49.415 | 52.632 | 0.00 | 0.00 |
| ATOM | 4579 | O    | PHE | X | 303 | 32.951 | 48.493 | 52.459 | 0.00 | 0.00 |
| ATOM | 4580 | N    | LEU | X | 304 | 34.681 | 49.447 | 53.556 | 0.00 | 0.00 |
| ATOM | 4581 | H    | LEU | X | 304 | 35.297 | 50.247 | 53.553 | 0.00 | 0.00 |
| ATOM | 4582 | CA   | LEU | X | 304 | 34.979 | 48.327 | 54.547 | 0.00 | 0.00 |
| ATOM | 4583 | HA   | LEU | X | 304 | 34.396 | 47.469 | 54.212 | 0.00 | 0.00 |
| ATOM | 4584 | CB   | LEU | X | 304 | 36.452 | 47.854 | 54.324 | 0.00 | 0.00 |
| ATOM | 4585 | HB2  | LEU | X | 304 | 37.148 | 48.692 | 54.306 | 0.00 | 0.00 |
| ATOM | 4586 | HB3  | LEU | X | 304 | 36.815 | 47.298 | 55.188 | 0.00 | 0.00 |
| ATOM | 4587 | CG   | LEU | X | 304 | 36.685 | 47.051 | 52.989 | 0.00 | 0.00 |
| ATOM | 4588 | HG   | LEU | X | 304 | 36.360 | 47.688 | 52.166 | 0.00 | 0.00 |
| ATOM | 4589 | CD1  | LEU | X | 304 | 38.194 | 46.957 | 52.826 | 0.00 | 0.00 |
| ATOM | 4590 | HD11 | LEU | X | 304 | 38.436 | 46.492 | 51.870 | 0.00 | 0.00 |
| ATOM | 4591 | HD12 | LEU | X | 304 | 38.616 | 46.367 | 53.640 | 0.00 | 0.00 |
| ATOM | 4592 | HD13 | LEU | X | 304 | 38.629 | 47.955 | 52.877 | 0.00 | 0.00 |
| ATOM | 4593 | CD2  | LEU | X | 304 | 36.141 | 45.646 | 52.917 | 0.00 | 0.00 |
| ATOM | 4594 | HD21 | LEU | X | 304 | 35.155 | 45.627 | 52.452 | 0.00 | 0.00 |
| ATOM | 4595 | HD22 | LEU | X | 304 | 36.794 | 44.962 | 52.375 | 0.00 | 0.00 |
| ATOM | 4596 | HD23 | LEU | X | 304 | 36.141 | 45.151 | 53.888 | 0.00 | 0.00 |
| ATOM | 4597 | C    | LEU | X | 304 | 34.728 | 48.907 | 55.935 | 0.00 | 0.00 |
| ATOM | 4598 | O    | LEU | X | 304 | 35.225 | 49.988 | 56.214 | 0.00 | 0.00 |
| ATOM | 4599 | N    | SER | X | 305 | 34.073 | 48.204 | 56.794 | 0.00 | 0.00 |
| ATOM | 4600 | H    | SER | X | 305 | 33.748 | 47.274 | 56.572 | 0.00 | 0.00 |
| ATOM | 4601 | CA   | SER | X | 305 | 33.790 | 48.690 | 58.150 | 0.00 | 0.00 |

|      |      |      |     |   |     |        |        |        |      |      |
|------|------|------|-----|---|-----|--------|--------|--------|------|------|
| ATOM | 4602 | HA   | SER | X | 305 | 34.215 | 49.693 | 58.190 | 0.00 | 0.00 |
| ATOM | 4603 | CB   | SER | X | 305 | 32.271 | 48.645 | 58.335 | 0.00 | 0.00 |
| ATOM | 4604 | HB2  | SER | X | 305 | 31.973 | 47.639 | 58.041 | 0.00 | 0.00 |
| ATOM | 4605 | HB3  | SER | X | 305 | 32.042 | 48.772 | 59.393 | 0.00 | 0.00 |
| ATOM | 4606 | OG   | SER | X | 305 | 31.573 | 49.673 | 57.657 | 0.00 | 0.00 |
| ATOM | 4607 | HG   | SER | X | 305 | 31.604 | 49.523 | 56.710 | 0.00 | 0.00 |
| ATOM | 4608 | C    | SER | X | 305 | 34.427 | 47.873 | 59.248 | 0.00 | 0.00 |
| ATOM | 4609 | O    | SER | X | 305 | 34.378 | 48.232 | 60.424 | 0.00 | 0.00 |
| ATOM | 4610 | N    | ASP | X | 306 | 34.871 | 46.689 | 58.906 | 0.00 | 0.00 |
| ATOM | 4611 | H    | ASP | X | 306 | 34.782 | 46.323 | 57.969 | 0.00 | 0.00 |
| ATOM | 4612 | CA   | ASP | X | 306 | 35.701 | 45.776 | 59.631 | 0.00 | 0.00 |
| ATOM | 4613 | HA   | ASP | X | 306 | 36.345 | 46.268 | 60.360 | 0.00 | 0.00 |
| ATOM | 4614 | CB   | ASP | X | 306 | 34.843 | 44.860 | 60.504 | 0.00 | 0.00 |
| ATOM | 4615 | HB2  | ASP | X | 306 | 34.095 | 45.531 | 60.927 | 0.00 | 0.00 |
| ATOM | 4616 | HB3  | ASP | X | 306 | 34.391 | 44.026 | 59.967 | 0.00 | 0.00 |
| ATOM | 4617 | CG   | ASP | X | 306 | 35.570 | 44.244 | 61.759 | 0.00 | 0.00 |
| ATOM | 4618 | OD1  | ASP | X | 306 | 36.790 | 44.537 | 61.972 | 0.00 | 0.00 |
| ATOM | 4619 | OD2  | ASP | X | 306 | 34.865 | 43.451 | 62.426 | 0.00 | 0.00 |
| ATOM | 4620 | C    | ASP | X | 306 | 36.409 | 45.019 | 58.493 | 0.00 | 0.00 |
| ATOM | 4621 | O    | ASP | X | 306 | 36.204 | 45.226 | 57.326 | 0.00 | 0.00 |
| ATOM | 4622 | N    | THR | X | 307 | 37.341 | 44.182 | 58.862 | 0.00 | 0.00 |
| ATOM | 4623 | H    | THR | X | 307 | 37.495 | 43.995 | 59.843 | 0.00 | 0.00 |
| ATOM | 4624 | CA   | THR | X | 307 | 38.221 | 43.631 | 57.977 | 0.00 | 0.00 |
| ATOM | 4625 | HA   | THR | X | 307 | 38.649 | 44.322 | 57.251 | 0.00 | 0.00 |
| ATOM | 4626 | CB   | THR | X | 307 | 39.377 | 43.131 | 58.862 | 0.00 | 0.00 |
| ATOM | 4627 | HB   | THR | X | 307 | 39.633 | 42.177 | 58.401 | 0.00 | 0.00 |
| ATOM | 4628 | CG2  | THR | X | 307 | 40.635 | 44.052 | 58.784 | 0.00 | 0.00 |
| ATOM | 4629 | HG21 | THR | X | 307 | 40.562 | 44.934 | 59.419 | 0.00 | 0.00 |
| ATOM | 4630 | HG22 | THR | X | 307 | 40.743 | 44.466 | 57.782 | 0.00 | 0.00 |
| ATOM | 4631 | HG23 | THR | X | 307 | 41.461 | 43.410 | 59.088 | 0.00 | 0.00 |
| ATOM | 4632 | OG1  | THR | X | 307 | 39.012 | 42.858 | 60.203 | 0.00 | 0.00 |
| ATOM | 4633 | HG1  | THR | X | 307 | 39.791 | 42.724 | 60.747 | 0.00 | 0.00 |
| ATOM | 4634 | C    | THR | X | 307 | 37.501 | 42.554 | 57.215 | 0.00 | 0.00 |
| ATOM | 4635 | O    | THR | X | 307 | 36.657 | 41.812 | 57.793 | 0.00 | 0.00 |
| ATOM | 4636 | N    | PRO | X | 308 | 37.884 | 42.189 | 55.968 | 0.00 | 0.00 |
| ATOM | 4637 | CD   | PRO | X | 308 | 38.823 | 42.926 | 55.203 | 0.00 | 0.00 |
| ATOM | 4638 | HD2  | PRO | X | 308 | 39.804 | 43.042 | 55.665 | 0.00 | 0.00 |
| ATOM | 4639 | HD3  | PRO | X | 308 | 38.402 | 43.926 | 55.101 | 0.00 | 0.00 |
| ATOM | 4640 | CG   | PRO | X | 308 | 38.937 | 42.182 | 53.890 | 0.00 | 0.00 |
| ATOM | 4641 | HG2  | PRO | X | 308 | 39.749 | 41.483 | 54.090 | 0.00 | 0.00 |
| ATOM | 4642 | HG3  | PRO | X | 308 | 39.147 | 42.747 | 52.982 | 0.00 | 0.00 |
| ATOM | 4643 | CB   | PRO | X | 308 | 37.477 | 41.549 | 53.691 | 0.00 | 0.00 |
| ATOM | 4644 | HB2  | PRO | X | 308 | 37.492 | 40.620 | 53.121 | 0.00 | 0.00 |
| ATOM | 4645 | HB3  | PRO | X | 308 | 36.753 | 42.272 | 53.316 | 0.00 | 0.00 |
| ATOM | 4646 | CA   | PRO | X | 308 | 37.111 | 41.292 | 55.137 | 0.00 | 0.00 |
| ATOM | 4647 | HA   | PRO | X | 308 | 36.057 | 41.554 | 55.234 | 0.00 | 0.00 |
| ATOM | 4648 | C    | PRO | X | 308 | 37.199 | 39.830 | 55.632 | 0.00 | 0.00 |
| ATOM | 4649 | O    | PRO | X | 308 | 36.256 | 39.105 | 55.361 | 0.00 | 0.00 |
| ATOM | 4650 | N    | GLU | X | 309 | 38.215 | 39.377 | 56.409 | 0.00 | 0.00 |
| ATOM | 4651 | H    | GLU | X | 309 | 38.969 | 40.004 | 56.653 | 0.00 | 0.00 |
| ATOM | 4652 | CA   | GLU | X | 309 | 38.240 | 38.129 | 57.158 | 0.00 | 0.00 |
| ATOM | 4653 | HA   | GLU | X | 309 | 38.034 | 37.312 | 56.467 | 0.00 | 0.00 |
| ATOM | 4654 | CB   | GLU | X | 309 | 39.561 | 37.926 | 57.925 | 0.00 | 0.00 |
| ATOM | 4655 | HB2  | GLU | X | 309 | 39.507 | 36.910 | 58.317 | 0.00 | 0.00 |
| ATOM | 4656 | HB3  | GLU | X | 309 | 40.270 | 37.890 | 57.098 | 0.00 | 0.00 |
| ATOM | 4657 | CG   | GLU | X | 309 | 39.811 | 38.918 | 59.018 | 0.00 | 0.00 |
| ATOM | 4658 | HG2  | GLU | X | 309 | 40.136 | 39.872 | 58.602 | 0.00 | 0.00 |
| ATOM | 4659 | HG3  | GLU | X | 309 | 38.976 | 39.016 | 59.712 | 0.00 | 0.00 |
| ATOM | 4660 | CD   | GLU | X | 309 | 41.121 | 38.570 | 59.753 | 0.00 | 0.00 |
| ATOM | 4661 | OE1  | GLU | X | 309 | 41.047 | 38.200 | 60.959 | 0.00 | 0.00 |
| ATOM | 4662 | OE2  | GLU | X | 309 | 42.192 | 38.708 | 59.070 | 0.00 | 0.00 |
| ATOM | 4663 | C    | GLU | X | 309 | 37.202 | 38.036 | 58.261 | 0.00 | 0.00 |
| ATOM | 4664 | O    | GLU | X | 309 | 36.902 | 36.948 | 58.675 | 0.00 | 0.00 |
| ATOM | 4665 | N    | ALA | X | 310 | 36.659 | 39.122 | 58.758 | 0.00 | 0.00 |
| ATOM | 4666 | H    | ALA | X | 310 | 36.983 | 39.973 | 58.321 | 0.00 | 0.00 |
| ATOM | 4667 | CA   | ALA | X | 310 | 35.458 | 39.199 | 59.659 | 0.00 | 0.00 |
| ATOM | 4668 | HA   | ALA | X | 310 | 35.539 | 38.300 | 60.271 | 0.00 | 0.00 |

|      |      |      |     |   |     |        |        |        |      |      |
|------|------|------|-----|---|-----|--------|--------|--------|------|------|
| ATOM | 4669 | CB   | ALA | X | 310 | 35.520 | 40.459 | 60.587 | 0.00 | 0.00 |
| ATOM | 4670 | HB1  | ALA | X | 310 | 35.489 | 41.353 | 59.965 | 0.00 | 0.00 |
| ATOM | 4671 | HB2  | ALA | X | 310 | 36.445 | 40.447 | 61.163 | 0.00 | 0.00 |
| ATOM | 4672 | HB3  | ALA | X | 310 | 34.607 | 40.510 | 61.181 | 0.00 | 0.00 |
| ATOM | 4673 | C    | ALA | X | 310 | 34.175 | 39.117 | 58.854 | 0.00 | 0.00 |
| ATOM | 4674 | O    | ALA | X | 310 | 33.374 | 38.176 | 59.049 | 0.00 | 0.00 |
| ATOM | 4675 | N    | LEU | X | 311 | 34.056 | 40.061 | 57.894 | 0.00 | 0.00 |
| ATOM | 4676 | H    | LEU | X | 311 | 34.814 | 40.727 | 57.860 | 0.00 | 0.00 |
| ATOM | 4677 | CA   | LEU | X | 311 | 32.888 | 40.228 | 57.047 | 0.00 | 0.00 |
| ATOM | 4678 | HA   | LEU | X | 311 | 32.090 | 40.443 | 57.758 | 0.00 | 0.00 |
| ATOM | 4679 | CB   | LEU | X | 311 | 33.054 | 41.277 | 55.949 | 0.00 | 0.00 |
| ATOM | 4680 | HB2  | LEU | X | 311 | 33.869 | 40.833 | 55.378 | 0.00 | 0.00 |
| ATOM | 4681 | HB3  | LEU | X | 311 | 32.168 | 41.290 | 55.314 | 0.00 | 0.00 |
| ATOM | 4682 | CG   | LEU | X | 311 | 33.311 | 42.704 | 56.429 | 0.00 | 0.00 |
| ATOM | 4683 | HG   | LEU | X | 311 | 34.297 | 42.781 | 56.887 | 0.00 | 0.00 |
| ATOM | 4684 | CD1  | LEU | X | 311 | 33.431 | 43.508 | 55.131 | 0.00 | 0.00 |
| ATOM | 4685 | HD11 | LEU | X | 311 | 32.508 | 43.446 | 54.555 | 0.00 | 0.00 |
| ATOM | 4686 | HD12 | LEU | X | 311 | 34.225 | 43.068 | 54.527 | 0.00 | 0.00 |
| ATOM | 4687 | HD13 | LEU | X | 311 | 33.746 | 44.531 | 55.339 | 0.00 | 0.00 |
| ATOM | 4688 | CD2  | LEU | X | 311 | 32.334 | 43.308 | 57.404 | 0.00 | 0.00 |
| ATOM | 4689 | HD21 | LEU | X | 311 | 32.350 | 42.815 | 58.377 | 0.00 | 0.00 |
| ATOM | 4690 | HD22 | LEU | X | 311 | 32.681 | 44.296 | 57.707 | 0.00 | 0.00 |
| ATOM | 4691 | HD23 | LEU | X | 311 | 31.305 | 43.274 | 57.047 | 0.00 | 0.00 |
| ATOM | 4692 | C    | LEU | X | 311 | 32.501 | 38.894 | 56.418 | 0.00 | 0.00 |
| ATOM | 4693 | O    | LEU | X | 311 | 31.310 | 38.488 | 56.383 | 0.00 | 0.00 |
| ATOM | 4694 | N    | ILE | X | 312 | 33.417 | 38.157 | 55.751 | 0.00 | 0.00 |
| ATOM | 4695 | H    | ILE | X | 312 | 34.329 | 38.559 | 55.588 | 0.00 | 0.00 |
| ATOM | 4696 | CA   | ILE | X | 312 | 33.114 | 36.863 | 55.015 | 0.00 | 0.00 |
| ATOM | 4697 | HA   | ILE | X | 312 | 32.245 | 36.933 | 54.361 | 0.00 | 0.00 |
| ATOM | 4698 | CB   | ILE | X | 312 | 34.424 | 36.440 | 54.194 | 0.00 | 0.00 |
| ATOM | 4699 | HB   | ILE | X | 312 | 34.780 | 37.296 | 53.620 | 0.00 | 0.00 |
| ATOM | 4700 | CG2  | ILE | X | 312 | 35.510 | 35.971 | 55.167 | 0.00 | 0.00 |
| ATOM | 4701 | HG21 | ILE | X | 312 | 35.454 | 34.910 | 55.409 | 0.00 | 0.00 |
| ATOM | 4702 | HG22 | ILE | X | 312 | 35.468 | 36.605 | 56.053 | 0.00 | 0.00 |
| ATOM | 4703 | HG23 | ILE | X | 312 | 36.398 | 36.183 | 54.571 | 0.00 | 0.00 |
| ATOM | 4704 | CG1  | ILE | X | 312 | 34.048 | 35.346 | 53.065 | 0.00 | 0.00 |
| ATOM | 4705 | HG12 | ILE | X | 312 | 34.835 | 34.628 | 52.832 | 0.00 | 0.00 |
| ATOM | 4706 | HG13 | ILE | X | 312 | 33.240 | 34.734 | 53.466 | 0.00 | 0.00 |
| ATOM | 4707 | CD1  | ILE | X | 312 | 33.682 | 35.995 | 51.639 | 0.00 | 0.00 |
| ATOM | 4708 | HD11 | ILE | X | 312 | 34.469 | 36.731 | 51.474 | 0.00 | 0.00 |
| ATOM | 4709 | HD12 | ILE | X | 312 | 32.733 | 36.524 | 51.731 | 0.00 | 0.00 |
| ATOM | 4710 | HD13 | ILE | X | 312 | 33.547 | 35.336 | 50.781 | 0.00 | 0.00 |
| ATOM | 4711 | C    | ILE | X | 312 | 32.634 | 35.706 | 55.912 | 0.00 | 0.00 |
| ATOM | 4712 | O    | ILE | X | 312 | 31.724 | 34.945 | 55.549 | 0.00 | 0.00 |
| ATOM | 4713 | N    | ASN | X | 313 | 33.018 | 35.712 | 57.222 | 0.00 | 0.00 |
| ATOM | 4714 | H    | ASN | X | 313 | 33.516 | 36.540 | 57.517 | 0.00 | 0.00 |
| ATOM | 4715 | CA   | ASN | X | 313 | 32.517 | 34.905 | 58.276 | 0.00 | 0.00 |
| ATOM | 4716 | HA   | ASN | X | 313 | 32.240 | 33.966 | 57.797 | 0.00 | 0.00 |
| ATOM | 4717 | CB   | ASN | X | 313 | 33.673 | 34.607 | 59.306 | 0.00 | 0.00 |
| ATOM | 4718 | HB2  | ASN | X | 313 | 34.286 | 33.867 | 58.792 | 0.00 | 0.00 |
| ATOM | 4719 | HB3  | ASN | X | 313 | 34.195 | 35.501 | 59.648 | 0.00 | 0.00 |
| ATOM | 4720 | CG   | ASN | X | 313 | 33.123 | 33.946 | 60.568 | 0.00 | 0.00 |
| ATOM | 4721 | OD1  | ASN | X | 313 | 33.151 | 32.695 | 60.665 | 0.00 | 0.00 |
| ATOM | 4722 | ND2  | ASN | X | 313 | 32.795 | 34.655 | 61.650 | 0.00 | 0.00 |
| ATOM | 4723 | HD21 | ASN | X | 313 | 32.744 | 34.241 | 62.570 | 0.00 | 0.00 |
| ATOM | 4724 | HD22 | ASN | X | 313 | 32.901 | 35.659 | 61.620 | 0.00 | 0.00 |
| ATOM | 4725 | C    | ASN | X | 313 | 31.206 | 35.440 | 58.889 | 0.00 | 0.00 |
| ATOM | 4726 | O    | ASN | X | 313 | 30.484 | 34.681 | 59.527 | 0.00 | 0.00 |
| ATOM | 4727 | N    | ALA | X | 314 | 30.831 | 36.693 | 58.643 | 0.00 | 0.00 |
| ATOM | 4728 | H    | ALA | X | 314 | 31.412 | 37.370 | 58.170 | 0.00 | 0.00 |
| ATOM | 4729 | CA   | ALA | X | 314 | 29.502 | 37.129 | 59.007 | 0.00 | 0.00 |
| ATOM | 4730 | HA   | ALA | X | 314 | 29.063 | 36.526 | 59.802 | 0.00 | 0.00 |
| ATOM | 4731 | CB   | ALA | X | 314 | 29.683 | 38.521 | 59.591 | 0.00 | 0.00 |
| ATOM | 4732 | HB1  | ALA | X | 314 | 30.172 | 39.231 | 58.925 | 0.00 | 0.00 |
| ATOM | 4733 | HB2  | ALA | X | 314 | 30.272 | 38.397 | 60.500 | 0.00 | 0.00 |
| ATOM | 4734 | HB3  | ALA | X | 314 | 28.727 | 38.964 | 59.870 | 0.00 | 0.00 |
| ATOM | 4735 | C    | ALA | X | 314 | 28.538 | 37.061 | 57.776 | 0.00 | 0.00 |

|      |      |     |     |   |     |        |        |        |      |      |
|------|------|-----|-----|---|-----|--------|--------|--------|------|------|
| ATOM | 4736 | O   | ALA | X | 314 | 27.312 | 37.254 | 57.910 | 0.00 | 0.00 |
| ATOM | 4737 | N   | GLY | X | 315 | 28.960 | 36.750 | 56.555 | 0.00 | 0.00 |
| ATOM | 4738 | H   | GLY | X | 315 | 29.955 | 36.610 | 56.455 | 0.00 | 0.00 |
| ATOM | 4739 | CA  | GLY | X | 315 | 28.114 | 36.764 | 55.311 | 0.00 | 0.00 |
| ATOM | 4740 | HA2 | GLY | X | 315 | 27.403 | 37.586 | 55.402 | 0.00 | 0.00 |
| ATOM | 4741 | HA3 | GLY | X | 315 | 28.571 | 37.070 | 54.370 | 0.00 | 0.00 |
| ATOM | 4742 | C   | GLY | X | 315 | 27.410 | 35.439 | 55.014 | 0.00 | 0.00 |
| ATOM | 4743 | O   | GLY | X | 315 | 28.120 | 34.447 | 55.153 | 0.00 | 0.00 |
| ATOM | 4744 | N   | ASP | X | 316 | 26.171 | 35.296 | 54.512 | 0.00 | 0.00 |
| ATOM | 4745 | H   | ASP | X | 316 | 25.763 | 36.186 | 54.265 | 0.00 | 0.00 |
| ATOM | 4746 | CA  | ASP | X | 316 | 25.823 | 34.143 | 53.693 | 0.00 | 0.00 |
| ATOM | 4747 | HA  | ASP | X | 316 | 26.418 | 33.259 | 53.919 | 0.00 | 0.00 |
| ATOM | 4748 | CB  | ASP | X | 316 | 24.410 | 33.797 | 54.001 | 0.00 | 0.00 |
| ATOM | 4749 | HB2 | ASP | X | 316 | 24.348 | 33.824 | 55.089 | 0.00 | 0.00 |
| ATOM | 4750 | HB3 | ASP | X | 316 | 23.703 | 34.557 | 53.669 | 0.00 | 0.00 |
| ATOM | 4751 | CG  | ASP | X | 316 | 24.021 | 32.366 | 53.609 | 0.00 | 0.00 |
| ATOM | 4752 | OD1 | ASP | X | 316 | 24.933 | 31.526 | 53.757 | 0.00 | 0.00 |
| ATOM | 4753 | OD2 | ASP | X | 316 | 22.931 | 32.038 | 53.147 | 0.00 | 0.00 |
| ATOM | 4754 | C   | ASP | X | 316 | 25.913 | 34.365 | 52.159 | 0.00 | 0.00 |
| ATOM | 4755 | O   | ASP | X | 316 | 25.537 | 35.382 | 51.635 | 0.00 | 0.00 |
| ATOM | 4756 | N   | PHE | X | 317 | 26.300 | 33.379 | 51.394 | 0.00 | 0.00 |
| ATOM | 4757 | H   | PHE | X | 317 | 26.470 | 32.478 | 51.817 | 0.00 | 0.00 |
| ATOM | 4758 | CA  | PHE | X | 317 | 26.512 | 33.447 | 49.947 | 0.00 | 0.00 |
| ATOM | 4759 | HA  | PHE | X | 317 | 26.216 | 34.445 | 49.623 | 0.00 | 0.00 |
| ATOM | 4760 | CB  | PHE | X | 317 | 28.003 | 33.234 | 49.669 | 0.00 | 0.00 |
| ATOM | 4761 | HB2 | PHE | X | 317 | 28.346 | 32.244 | 49.969 | 0.00 | 0.00 |
| ATOM | 4762 | HB3 | PHE | X | 317 | 28.224 | 33.335 | 48.606 | 0.00 | 0.00 |
| ATOM | 4763 | CG  | PHE | X | 317 | 28.754 | 34.254 | 50.384 | 0.00 | 0.00 |
| ATOM | 4764 | CD1 | PHE | X | 317 | 28.799 | 35.567 | 49.858 | 0.00 | 0.00 |
| ATOM | 4765 | HD1 | PHE | X | 317 | 28.303 | 35.789 | 48.925 | 0.00 | 0.00 |
| ATOM | 4766 | CE1 | PHE | X | 317 | 29.393 | 36.645 | 50.569 | 0.00 | 0.00 |
| ATOM | 4767 | HE1 | PHE | X | 317 | 29.432 | 37.662 | 50.207 | 0.00 | 0.00 |
| ATOM | 4768 | CZ  | PHE | X | 317 | 30.041 | 36.426 | 51.783 | 0.00 | 0.00 |
| ATOM | 4769 | HZ  | PHE | X | 317 | 30.504 | 37.271 | 52.269 | 0.00 | 0.00 |
| ATOM | 4770 | CE2 | PHE | X | 317 | 30.013 | 35.184 | 52.333 | 0.00 | 0.00 |
| ATOM | 4771 | HE2 | PHE | X | 317 | 30.411 | 35.003 | 53.320 | 0.00 | 0.00 |
| ATOM | 4772 | CD2 | PHE | X | 317 | 29.395 | 34.095 | 51.681 | 0.00 | 0.00 |
| ATOM | 4773 | HD2 | PHE | X | 317 | 29.325 | 33.167 | 52.228 | 0.00 | 0.00 |
| ATOM | 4774 | C   | PHE | X | 317 | 25.749 | 32.383 | 49.105 | 0.00 | 0.00 |
| ATOM | 4775 | O   | PHE | X | 317 | 26.021 | 32.277 | 47.923 | 0.00 | 0.00 |
| ATOM | 4776 | N   | HIE | X | 318 | 24.893 | 31.586 | 49.654 | 0.00 | 0.00 |
| ATOM | 4777 | H   | HIE | X | 318 | 24.793 | 31.620 | 50.659 | 0.00 | 0.00 |
| ATOM | 4778 | CA  | HIE | X | 318 | 23.904 | 30.644 | 49.015 | 0.00 | 0.00 |
| ATOM | 4779 | HA  | HIE | X | 318 | 24.452 | 29.703 | 48.966 | 0.00 | 0.00 |
| ATOM | 4780 | CB  | HIE | X | 318 | 22.586 | 30.644 | 49.860 | 0.00 | 0.00 |
| ATOM | 4781 | HB2 | HIE | X | 318 | 22.777 | 30.606 | 50.932 | 0.00 | 0.00 |
| ATOM | 4782 | HB3 | HIE | X | 318 | 22.070 | 31.583 | 49.660 | 0.00 | 0.00 |
| ATOM | 4783 | CG  | HIE | X | 318 | 21.615 | 29.457 | 49.599 | 0.00 | 0.00 |
| ATOM | 4784 | ND1 | HIE | X | 318 | 21.996 | 28.241 | 49.085 | 0.00 | 0.00 |
| ATOM | 4785 | CE1 | HIE | X | 318 | 20.918 | 27.418 | 49.057 | 0.00 | 0.00 |
| ATOM | 4786 | HE1 | HIE | X | 318 | 20.934 | 26.349 | 48.904 | 0.00 | 0.00 |
| ATOM | 4787 | NE2 | HIE | X | 318 | 19.868 | 28.059 | 49.541 | 0.00 | 0.00 |
| ATOM | 4788 | HE2 | HIE | X | 318 | 18.934 | 27.724 | 49.726 | 0.00 | 0.00 |
| ATOM | 4789 | CD2 | HIE | X | 318 | 20.237 | 29.340 | 49.832 | 0.00 | 0.00 |
| ATOM | 4790 | HD2 | HIE | X | 318 | 19.553 | 30.055 | 50.264 | 0.00 | 0.00 |
| ATOM | 4791 | C   | HIE | X | 318 | 23.612 | 30.731 | 47.475 | 0.00 | 0.00 |
| ATOM | 4792 | O   | HIE | X | 318 | 23.003 | 31.677 | 46.971 | 0.00 | 0.00 |
| ATOM | 4793 | N   | GLY | X | 319 | 24.124 | 29.810 | 46.686 | 0.00 | 0.00 |
| ATOM | 4794 | H   | GLY | X | 319 | 24.535 | 28.980 | 47.088 | 0.00 | 0.00 |
| ATOM | 4795 | CA  | GLY | X | 319 | 23.897 | 29.638 | 45.230 | 0.00 | 0.00 |
| ATOM | 4796 | HA2 | GLY | X | 319 | 24.167 | 28.646 | 44.870 | 0.00 | 0.00 |
| ATOM | 4797 | HA3 | GLY | X | 319 | 22.837 | 29.888 | 45.173 | 0.00 | 0.00 |
| ATOM | 4798 | C   | GLY | X | 319 | 24.665 | 30.667 | 44.396 | 0.00 | 0.00 |
| ATOM | 4799 | O   | GLY | X | 319 | 24.507 | 30.663 | 43.153 | 0.00 | 0.00 |
| ATOM | 4800 | N   | LEU | X | 320 | 25.527 | 31.534 | 44.943 | 0.00 | 0.00 |
| ATOM | 4801 | H   | LEU | X | 320 | 25.548 | 31.571 | 45.952 | 0.00 | 0.00 |
| ATOM | 4802 | CA  | LEU | X | 320 | 26.310 | 32.443 | 44.179 | 0.00 | 0.00 |

|      |      |      |     |   |     |        |        |        |      |      |
|------|------|------|-----|---|-----|--------|--------|--------|------|------|
| ATOM | 4803 | HA   | LEU | X | 320 | 25.655 | 32.831 | 43.399 | 0.00 | 0.00 |
| ATOM | 4804 | CB   | LEU | X | 320 | 26.844 | 33.641 | 45.012 | 0.00 | 0.00 |
| ATOM | 4805 | HB2  | LEU | X | 320 | 27.310 | 33.098 | 45.835 | 0.00 | 0.00 |
| ATOM | 4806 | HB3  | LEU | X | 320 | 27.601 | 34.244 | 44.512 | 0.00 | 0.00 |
| ATOM | 4807 | CG   | LEU | X | 320 | 25.722 | 34.565 | 45.587 | 0.00 | 0.00 |
| ATOM | 4808 | HG   | LEU | X | 320 | 25.209 | 34.046 | 46.397 | 0.00 | 0.00 |
| ATOM | 4809 | CD1  | LEU | X | 320 | 26.224 | 35.969 | 45.992 | 0.00 | 0.00 |
| ATOM | 4810 | HD11 | LEU | X | 320 | 26.683 | 35.911 | 46.979 | 0.00 | 0.00 |
| ATOM | 4811 | HD12 | LEU | X | 320 | 25.384 | 36.660 | 46.058 | 0.00 | 0.00 |
| ATOM | 4812 | HD13 | LEU | X | 320 | 26.826 | 36.395 | 45.189 | 0.00 | 0.00 |
| ATOM | 4813 | CD2  | LEU | X | 320 | 24.596 | 34.824 | 44.584 | 0.00 | 0.00 |
| ATOM | 4814 | HD21 | LEU | X | 320 | 25.000 | 35.152 | 43.627 | 0.00 | 0.00 |
| ATOM | 4815 | HD22 | LEU | X | 320 | 24.094 | 33.870 | 44.422 | 0.00 | 0.00 |
| ATOM | 4816 | HD23 | LEU | X | 320 | 23.874 | 35.580 | 44.892 | 0.00 | 0.00 |
| ATOM | 4817 | C    | LEU | X | 320 | 27.507 | 31.722 | 43.471 | 0.00 | 0.00 |
| ATOM | 4818 | O    | LEU | X | 320 | 28.160 | 30.828 | 43.955 | 0.00 | 0.00 |
| ATOM | 4819 | N    | GLN | X | 321 | 27.923 | 32.272 | 42.256 | 0.00 | 0.00 |
| ATOM | 4820 | H    | GLN | X | 321 | 27.369 | 33.048 | 41.924 | 0.00 | 0.00 |
| ATOM | 4821 | CA   | GLN | X | 321 | 28.852 | 31.595 | 41.339 | 0.00 | 0.00 |
| ATOM | 4822 | HA   | GLN | X | 321 | 29.033 | 30.604 | 41.754 | 0.00 | 0.00 |
| ATOM | 4823 | CB   | GLN | X | 321 | 28.310 | 31.471 | 39.958 | 0.00 | 0.00 |
| ATOM | 4824 | HB2  | GLN | X | 321 | 28.121 | 32.475 | 39.579 | 0.00 | 0.00 |
| ATOM | 4825 | HB3  | GLN | X | 321 | 28.958 | 30.866 | 39.325 | 0.00 | 0.00 |
| ATOM | 4826 | CG   | GLN | X | 321 | 26.922 | 30.890 | 39.877 | 0.00 | 0.00 |
| ATOM | 4827 | HG2  | GLN | X | 321 | 26.905 | 29.963 | 40.449 | 0.00 | 0.00 |
| ATOM | 4828 | HG3  | GLN | X | 321 | 26.290 | 31.629 | 40.370 | 0.00 | 0.00 |
| ATOM | 4829 | CD   | GLN | X | 321 | 26.422 | 30.633 | 38.479 | 0.00 | 0.00 |
| ATOM | 4830 | OE1  | GLN | X | 321 | 26.694 | 31.391 | 37.516 | 0.00 | 0.00 |
| ATOM | 4831 | NE2  | GLN | X | 321 | 25.906 | 29.472 | 38.175 | 0.00 | 0.00 |
| ATOM | 4832 | HE21 | GLN | X | 321 | 25.803 | 29.187 | 37.212 | 0.00 | 0.00 |
| ATOM | 4833 | HE22 | GLN | X | 321 | 25.689 | 28.724 | 38.818 | 0.00 | 0.00 |
| ATOM | 4834 | C    | GLN | X | 321 | 30.232 | 32.286 | 41.313 | 0.00 | 0.00 |
| ATOM | 4835 | O    | GLN | X | 321 | 30.319 | 33.417 | 40.815 | 0.00 | 0.00 |
| ATOM | 4836 | N    | VAL | X | 322 | 31.277 | 31.655 | 41.774 | 0.00 | 0.00 |
| ATOM | 4837 | H    | VAL | X | 322 | 31.090 | 30.772 | 42.229 | 0.00 | 0.00 |
| ATOM | 4838 | CA   | VAL | X | 322 | 32.642 | 32.232 | 42.095 | 0.00 | 0.00 |
| ATOM | 4839 | HA   | VAL | X | 322 | 32.695 | 33.148 | 41.507 | 0.00 | 0.00 |
| ATOM | 4840 | CB   | VAL | X | 322 | 32.803 | 32.485 | 43.660 | 0.00 | 0.00 |
| ATOM | 4841 | HB   | VAL | X | 322 | 33.124 | 31.571 | 44.161 | 0.00 | 0.00 |
| ATOM | 4842 | CG1  | VAL | X | 322 | 33.961 | 33.478 | 43.830 | 0.00 | 0.00 |
| ATOM | 4843 | HG11 | VAL | X | 322 | 34.913 | 32.986 | 43.632 | 0.00 | 0.00 |
| ATOM | 4844 | HG12 | VAL | X | 322 | 33.777 | 34.402 | 43.281 | 0.00 | 0.00 |
| ATOM | 4845 | HG13 | VAL | X | 322 | 34.030 | 33.884 | 44.840 | 0.00 | 0.00 |
| ATOM | 4846 | CG2  | VAL | X | 322 | 31.544 | 33.082 | 44.346 | 0.00 | 0.00 |
| ATOM | 4847 | HG21 | VAL | X | 322 | 31.248 | 33.926 | 43.724 | 0.00 | 0.00 |
| ATOM | 4848 | HG22 | VAL | X | 322 | 31.933 | 33.376 | 45.321 | 0.00 | 0.00 |
| ATOM | 4849 | HG23 | VAL | X | 322 | 30.753 | 32.351 | 44.510 | 0.00 | 0.00 |
| ATOM | 4850 | C    | VAL | X | 322 | 33.751 | 31.300 | 41.687 | 0.00 | 0.00 |
| ATOM | 4851 | O    | VAL | X | 322 | 33.595 | 30.087 | 41.874 | 0.00 | 0.00 |
| ATOM | 4852 | N    | LEU | X | 323 | 34.867 | 31.805 | 41.119 | 0.00 | 0.00 |
| ATOM | 4853 | H    | LEU | X | 323 | 34.900 | 32.771 | 40.826 | 0.00 | 0.00 |
| ATOM | 4854 | CA   | LEU | X | 323 | 36.096 | 31.047 | 40.689 | 0.00 | 0.00 |
| ATOM | 4855 | HA   | LEU | X | 323 | 35.931 | 30.007 | 40.971 | 0.00 | 0.00 |
| ATOM | 4856 | CB   | LEU | X | 323 | 36.277 | 31.297 | 39.167 | 0.00 | 0.00 |
| ATOM | 4857 | HB2  | LEU | X | 323 | 35.337 | 31.113 | 38.647 | 0.00 | 0.00 |
| ATOM | 4858 | HB3  | LEU | X | 323 | 36.545 | 32.330 | 38.947 | 0.00 | 0.00 |
| ATOM | 4859 | CG   | LEU | X | 323 | 37.340 | 30.450 | 38.483 | 0.00 | 0.00 |
| ATOM | 4860 | HG   | LEU | X | 323 | 36.988 | 29.422 | 38.567 | 0.00 | 0.00 |
| ATOM | 4861 | CD1  | LEU | X | 323 | 37.244 | 30.771 | 36.957 | 0.00 | 0.00 |
| ATOM | 4862 | HD11 | LEU | X | 323 | 36.237 | 30.558 | 36.598 | 0.00 | 0.00 |
| ATOM | 4863 | HD12 | LEU | X | 323 | 37.875 | 30.154 | 36.318 | 0.00 | 0.00 |
| ATOM | 4864 | HD13 | LEU | X | 323 | 37.439 | 31.831 | 36.793 | 0.00 | 0.00 |
| ATOM | 4865 | CD2  | LEU | X | 323 | 38.730 | 30.718 | 38.971 | 0.00 | 0.00 |
| ATOM | 4866 | HD21 | LEU | X | 323 | 38.974 | 30.030 | 39.780 | 0.00 | 0.00 |
| ATOM | 4867 | HD22 | LEU | X | 323 | 39.462 | 30.652 | 38.166 | 0.00 | 0.00 |
| ATOM | 4868 | HD23 | LEU | X | 323 | 38.764 | 31.731 | 39.372 | 0.00 | 0.00 |
| ATOM | 4869 | C    | LEU | X | 323 | 37.248 | 31.671 | 41.505 | 0.00 | 0.00 |



|      |      |      |     |   |     |        |        |        |      |      |
|------|------|------|-----|---|-----|--------|--------|--------|------|------|
| ATOM | 4870 | O    | LEU | X | 323 | 37.364 | 32.924 | 41.529 | 0.00 | 0.00 |
| ATOM | 4871 | N    | VAL | X | 324 | 38.188 | 30.896 | 42.025 | 0.00 | 0.00 |
| ATOM | 4872 | H    | VAL | X | 324 | 38.208 | 29.922 | 41.760 | 0.00 | 0.00 |
| ATOM | 4873 | CA   | VAL | X | 324 | 39.334 | 31.412 | 42.755 | 0.00 | 0.00 |
| ATOM | 4874 | HA   | VAL | X | 324 | 39.549 | 32.444 | 42.476 | 0.00 | 0.00 |
| ATOM | 4875 | CB   | VAL | X | 324 | 39.025 | 31.549 | 44.271 | 0.00 | 0.00 |
| ATOM | 4876 | HB   | VAL | X | 324 | 39.895 | 32.071 | 44.670 | 0.00 | 0.00 |
| ATOM | 4877 | CG1  | VAL | X | 324 | 37.828 | 32.437 | 44.645 | 0.00 | 0.00 |
| ATOM | 4878 | HG11 | VAL | X | 324 | 37.943 | 32.758 | 45.681 | 0.00 | 0.00 |
| ATOM | 4879 | HG12 | VAL | X | 324 | 37.674 | 33.252 | 43.938 | 0.00 | 0.00 |
| ATOM | 4880 | HG13 | VAL | X | 324 | 36.911 | 31.854 | 44.556 | 0.00 | 0.00 |
| ATOM | 4881 | CG2  | VAL | X | 324 | 38.750 | 30.184 | 44.972 | 0.00 | 0.00 |
| ATOM | 4882 | HG21 | VAL | X | 324 | 37.975 | 29.670 | 44.404 | 0.00 | 0.00 |
| ATOM | 4883 | HG22 | VAL | X | 324 | 38.554 | 30.318 | 46.035 | 0.00 | 0.00 |
| ATOM | 4884 | HG23 | VAL | X | 324 | 39.672 | 29.611 | 44.866 | 0.00 | 0.00 |
| ATOM | 4885 | C    | VAL | X | 324 | 40.529 | 30.569 | 42.604 | 0.00 | 0.00 |
| ATOM | 4886 | O    | VAL | X | 324 | 40.445 | 29.319 | 42.448 | 0.00 | 0.00 |
| ATOM | 4887 | N    | GLY | X | 325 | 41.727 | 31.188 | 42.714 | 0.00 | 0.00 |
| ATOM | 4888 | H    | GLY | X | 325 | 41.759 | 32.172 | 42.938 | 0.00 | 0.00 |
| ATOM | 4889 | CA   | GLY | X | 325 | 42.956 | 30.388 | 42.594 | 0.00 | 0.00 |
| ATOM | 4890 | HA2  | GLY | X | 325 | 42.951 | 29.586 | 43.333 | 0.00 | 0.00 |
| ATOM | 4891 | HA3  | GLY | X | 325 | 42.846 | 29.622 | 41.826 | 0.00 | 0.00 |
| ATOM | 4892 | C    | GLY | X | 325 | 44.257 | 31.198 | 42.578 | 0.00 | 0.00 |
| ATOM | 4893 | O    | GLY | X | 325 | 44.283 | 32.466 | 42.590 | 0.00 | 0.00 |
| ATOM | 4894 | N    | VAL | X | 326 | 45.388 | 30.414 | 42.575 | 0.00 | 0.00 |
| ATOM | 4895 | H    | VAL | X | 326 | 45.249 | 29.453 | 42.297 | 0.00 | 0.00 |
| ATOM | 4896 | CA   | VAL | X | 326 | 46.764 | 30.871 | 42.706 | 0.00 | 0.00 |
| ATOM | 4897 | HA   | VAL | X | 326 | 46.744 | 31.943 | 42.507 | 0.00 | 0.00 |
| ATOM | 4898 | CB   | VAL | X | 326 | 47.281 | 30.639 | 44.124 | 0.00 | 0.00 |
| ATOM | 4899 | HB   | VAL | X | 326 | 48.292 | 31.041 | 44.192 | 0.00 | 0.00 |
| ATOM | 4900 | CG1  | VAL | X | 326 | 46.327 | 31.401 | 45.069 | 0.00 | 0.00 |
| ATOM | 4901 | HG11 | VAL | X | 326 | 46.179 | 32.374 | 44.599 | 0.00 | 0.00 |
| ATOM | 4902 | HG12 | VAL | X | 326 | 45.370 | 30.887 | 45.163 | 0.00 | 0.00 |
| ATOM | 4903 | HG13 | VAL | X | 326 | 46.773 | 31.517 | 46.057 | 0.00 | 0.00 |
| ATOM | 4904 | CG2  | VAL | X | 326 | 47.353 | 29.163 | 44.521 | 0.00 | 0.00 |
| ATOM | 4905 | HG21 | VAL | X | 326 | 46.474 | 28.625 | 44.166 | 0.00 | 0.00 |
| ATOM | 4906 | HG22 | VAL | X | 326 | 47.633 | 29.072 | 45.571 | 0.00 | 0.00 |
| ATOM | 4907 | HG23 | VAL | X | 326 | 48.152 | 28.823 | 43.863 | 0.00 | 0.00 |
| ATOM | 4908 | C    | VAL | X | 326 | 47.651 | 30.175 | 41.715 | 0.00 | 0.00 |
| ATOM | 4909 | O    | VAL | X | 326 | 47.293 | 29.135 | 41.128 | 0.00 | 0.00 |
| ATOM | 4910 | N    | VAL | X | 327 | 48.908 | 30.609 | 41.586 | 0.00 | 0.00 |
| ATOM | 4911 | H    | VAL | X | 327 | 49.096 | 31.498 | 42.028 | 0.00 | 0.00 |
| ATOM | 4912 | CA   | VAL | X | 327 | 49.970 | 29.841 | 40.898 | 0.00 | 0.00 |
| ATOM | 4913 | HA   | VAL | X | 327 | 49.521 | 29.206 | 40.135 | 0.00 | 0.00 |
| ATOM | 4914 | CB   | VAL | X | 327 | 50.899 | 30.874 | 40.124 | 0.00 | 0.00 |
| ATOM | 4915 | HB   | VAL | X | 327 | 51.312 | 30.246 | 39.334 | 0.00 | 0.00 |
| ATOM | 4916 | CG1  | VAL | X | 327 | 50.189 | 32.034 | 39.346 | 0.00 | 0.00 |
| ATOM | 4917 | HG11 | VAL | X | 327 | 49.614 | 32.709 | 39.979 | 0.00 | 0.00 |
| ATOM | 4918 | HG12 | VAL | X | 327 | 50.887 | 32.592 | 38.722 | 0.00 | 0.00 |
| ATOM | 4919 | HG13 | VAL | X | 327 | 49.473 | 31.547 | 38.683 | 0.00 | 0.00 |
| ATOM | 4920 | CG2  | VAL | X | 327 | 52.074 | 31.589 | 40.883 | 0.00 | 0.00 |
| ATOM | 4921 | HG21 | VAL | X | 327 | 52.477 | 30.956 | 41.674 | 0.00 | 0.00 |
| ATOM | 4922 | HG22 | VAL | X | 327 | 51.807 | 32.578 | 41.256 | 0.00 | 0.00 |
| ATOM | 4923 | HG23 | VAL | X | 327 | 52.875 | 31.843 | 40.189 | 0.00 | 0.00 |
| ATOM | 4924 | C    | VAL | X | 327 | 50.858 | 28.938 | 41.714 | 0.00 | 0.00 |
| ATOM | 4925 | O    | VAL | X | 327 | 50.784 | 29.018 | 43.001 | 0.00 | 0.00 |
| ATOM | 4926 | N    | LYS | X | 328 | 51.766 | 28.131 | 41.136 | 0.00 | 0.00 |
| ATOM | 4927 | H    | LYS | X | 328 | 51.841 | 27.967 | 40.143 | 0.00 | 0.00 |
| ATOM | 4928 | CA   | LYS | X | 328 | 52.497 | 27.085 | 41.866 | 0.00 | 0.00 |
| ATOM | 4929 | HA   | LYS | X | 328 | 51.824 | 26.419 | 42.406 | 0.00 | 0.00 |
| ATOM | 4930 | CB   | LYS | X | 328 | 53.290 | 26.320 | 40.789 | 0.00 | 0.00 |
| ATOM | 4931 | HB2  | LYS | X | 328 | 52.597 | 26.145 | 39.966 | 0.00 | 0.00 |
| ATOM | 4932 | HB3  | LYS | X | 328 | 54.069 | 26.988 | 40.422 | 0.00 | 0.00 |
| ATOM | 4933 | CG   | LYS | X | 328 | 53.839 | 25.035 | 41.377 | 0.00 | 0.00 |
| ATOM | 4934 | HG2  | LYS | X | 328 | 54.400 | 25.248 | 42.287 | 0.00 | 0.00 |
| ATOM | 4935 | HG3  | LYS | X | 328 | 53.041 | 24.375 | 41.716 | 0.00 | 0.00 |
| ATOM | 4936 | CD   | LYS | X | 328 | 54.572 | 24.242 | 40.296 | 0.00 | 0.00 |

|      |      |     |     |   |     |        |        |        |      |      |
|------|------|-----|-----|---|-----|--------|--------|--------|------|------|
| ATOM | 4937 | HD2 | LYS | X | 328 | 54.836 | 23.250 | 40.665 | 0.00 | 0.00 |
| ATOM | 4938 | HD3 | LYS | X | 328 | 54.037 | 24.147 | 39.351 | 0.00 | 0.00 |
| ATOM | 4939 | CE  | LYS | X | 328 | 55.913 | 24.936 | 39.914 | 0.00 | 0.00 |
| ATOM | 4940 | HE2 | LYS | X | 328 | 56.443 | 24.348 | 39.164 | 0.00 | 0.00 |
| ATOM | 4941 | HE3 | LYS | X | 328 | 55.790 | 25.983 | 39.636 | 0.00 | 0.00 |
| ATOM | 4942 | NZ  | LYS | X | 328 | 56.793 | 24.946 | 41.092 | 0.00 | 0.00 |
| ATOM | 4943 | HZ1 | LYS | X | 328 | 56.491 | 24.410 | 41.892 | 0.00 | 0.00 |
| ATOM | 4944 | HZ2 | LYS | X | 328 | 57.760 | 24.769 | 40.861 | 0.00 | 0.00 |
| ATOM | 4945 | HZ3 | LYS | X | 328 | 56.813 | 25.846 | 41.550 | 0.00 | 0.00 |
| ATOM | 4946 | C   | LYS | X | 328 | 53.556 | 27.647 | 42.881 | 0.00 | 0.00 |
| ATOM | 4947 | O   | LYS | X | 328 | 53.710 | 27.000 | 43.960 | 0.00 | 0.00 |
| ATOM | 4948 | N   | ASP | X | 329 | 54.115 | 28.883 | 42.630 | 0.00 | 0.00 |
| ATOM | 4949 | H   | ASP | X | 329 | 53.900 | 29.357 | 41.765 | 0.00 | 0.00 |
| ATOM | 4950 | CA  | ASP | X | 329 | 55.069 | 29.472 | 43.638 | 0.00 | 0.00 |
| ATOM | 4951 | HA  | ASP | X | 329 | 55.114 | 28.809 | 44.502 | 0.00 | 0.00 |
| ATOM | 4952 | CB  | ASP | X | 329 | 56.540 | 29.400 | 43.061 | 0.00 | 0.00 |
| ATOM | 4953 | HB2 | ASP | X | 329 | 56.696 | 30.252 | 42.400 | 0.00 | 0.00 |
| ATOM | 4954 | HB3 | ASP | X | 329 | 57.216 | 29.494 | 43.910 | 0.00 | 0.00 |
| ATOM | 4955 | CG  | ASP | X | 329 | 56.784 | 28.041 | 42.488 | 0.00 | 0.00 |
| ATOM | 4956 | OD1 | ASP | X | 329 | 57.218 | 27.135 | 43.208 | 0.00 | 0.00 |
| ATOM | 4957 | OD2 | ASP | X | 329 | 56.542 | 27.840 | 41.269 | 0.00 | 0.00 |
| ATOM | 4958 | C   | ASP | X | 329 | 54.719 | 30.859 | 44.192 | 0.00 | 0.00 |
| ATOM | 4959 | O   | ASP | X | 329 | 55.506 | 31.322 | 45.046 | 0.00 | 0.00 |
| ATOM | 4960 | N   | GLU | X | 330 | 53.642 | 31.451 | 43.808 | 0.00 | 0.00 |
| ATOM | 4961 | H   | GLU | X | 330 | 52.941 | 30.859 | 43.385 | 0.00 | 0.00 |
| ATOM | 4962 | CA  | GLU | X | 330 | 53.219 | 32.784 | 44.234 | 0.00 | 0.00 |
| ATOM | 4963 | HA  | GLU | X | 330 | 52.787 | 33.218 | 43.333 | 0.00 | 0.00 |
| ATOM | 4964 | CB  | GLU | X | 330 | 52.111 | 32.573 | 45.251 | 0.00 | 0.00 |
| ATOM | 4965 | HB2 | GLU | X | 330 | 52.491 | 31.757 | 45.866 | 0.00 | 0.00 |
| ATOM | 4966 | HB3 | GLU | X | 330 | 51.966 | 33.477 | 45.842 | 0.00 | 0.00 |
| ATOM | 4967 | CG  | GLU | X | 330 | 50.716 | 32.280 | 44.644 | 0.00 | 0.00 |
| ATOM | 4968 | HG2 | GLU | X | 330 | 50.708 | 31.312 | 44.144 | 0.00 | 0.00 |
| ATOM | 4969 | HG3 | GLU | X | 330 | 49.993 | 32.163 | 45.451 | 0.00 | 0.00 |
| ATOM | 4970 | CD  | GLU | X | 330 | 50.178 | 33.400 | 43.677 | 0.00 | 0.00 |
| ATOM | 4971 | OE1 | GLU | X | 330 | 50.356 | 34.570 | 44.005 | 0.00 | 0.00 |
| ATOM | 4972 | OE2 | GLU | X | 330 | 49.538 | 33.002 | 42.636 | 0.00 | 0.00 |
| ATOM | 4973 | C   | GLU | X | 330 | 54.287 | 33.791 | 44.798 | 0.00 | 0.00 |
| ATOM | 4974 | O   | GLU | X | 330 | 54.978 | 34.560 | 44.028 | 0.00 | 0.00 |
| ATOM | 4975 | N   | GLY | X | 331 | 54.379 | 33.833 | 46.141 | 0.00 | 0.00 |
| ATOM | 4976 | H   | GLY | X | 331 | 53.821 | 33.139 | 46.618 | 0.00 | 0.00 |
| ATOM | 4977 | CA  | GLY | X | 331 | 55.240 | 34.805 | 46.888 | 0.00 | 0.00 |
| ATOM | 4978 | HA2 | GLY | X | 331 | 54.948 | 35.803 | 46.561 | 0.00 | 0.00 |
| ATOM | 4979 | HA3 | GLY | X | 331 | 54.971 | 34.647 | 47.933 | 0.00 | 0.00 |
| ATOM | 4980 | C   | GLY | X | 331 | 56.740 | 34.700 | 46.647 | 0.00 | 0.00 |
| ATOM | 4981 | O   | GLY | X | 331 | 57.497 | 35.622 | 47.051 | 0.00 | 0.00 |
| ATOM | 4982 | N   | SER | X | 332 | 57.218 | 33.709 | 45.917 | 0.00 | 0.00 |
| ATOM | 4983 | H   | SER | X | 332 | 56.585 | 33.023 | 45.530 | 0.00 | 0.00 |
| ATOM | 4984 | CA  | SER | X | 332 | 58.589 | 33.657 | 45.387 | 0.00 | 0.00 |
| ATOM | 4985 | HA  | SER | X | 332 | 59.310 | 33.526 | 46.193 | 0.00 | 0.00 |
| ATOM | 4986 | CB  | SER | X | 332 | 58.727 | 32.377 | 44.526 | 0.00 | 0.00 |
| ATOM | 4987 | HB2 | SER | X | 332 | 59.710 | 32.387 | 44.055 | 0.00 | 0.00 |
| ATOM | 4988 | HB3 | SER | X | 332 | 58.539 | 31.418 | 45.009 | 0.00 | 0.00 |
| ATOM | 4989 | OG  | SER | X | 332 | 57.853 | 32.507 | 43.381 | 0.00 | 0.00 |
| ATOM | 4990 | HG  | SER | X | 332 | 58.154 | 31.942 | 42.665 | 0.00 | 0.00 |
| ATOM | 4991 | C   | SER | X | 332 | 58.909 | 34.922 | 44.559 | 0.00 | 0.00 |
| ATOM | 4992 | O   | SER | X | 332 | 60.025 | 35.392 | 44.512 | 0.00 | 0.00 |
| ATOM | 4993 | N   | TYR | X | 333 | 57.939 | 35.518 | 43.841 | 0.00 | 0.00 |
| ATOM | 4994 | H   | TYR | X | 333 | 57.013 | 35.115 | 43.815 | 0.00 | 0.00 |
| ATOM | 4995 | CA  | TYR | X | 333 | 58.050 | 36.775 | 43.009 | 0.00 | 0.00 |
| ATOM | 4996 | HA  | TYR | X | 333 | 58.797 | 36.508 | 42.260 | 0.00 | 0.00 |
| ATOM | 4997 | CB  | TYR | X | 333 | 56.765 | 37.146 | 42.232 | 0.00 | 0.00 |
| ATOM | 4998 | HB2 | TYR | X | 333 | 56.764 | 36.510 | 41.346 | 0.00 | 0.00 |
| ATOM | 4999 | HB3 | TYR | X | 333 | 55.894 | 36.827 | 42.805 | 0.00 | 0.00 |
| ATOM | 5000 | CG  | TYR | X | 333 | 56.583 | 38.628 | 41.984 | 0.00 | 0.00 |
| ATOM | 5001 | CD1 | TYR | X | 333 | 56.985 | 39.231 | 40.831 | 0.00 | 0.00 |
| ATOM | 5002 | HD1 | TYR | X | 333 | 57.619 | 38.715 | 40.125 | 0.00 | 0.00 |
| ATOM | 5003 | CE1 | TYR | X | 333 | 56.788 | 40.590 | 40.566 | 0.00 | 0.00 |

|      |      |      |     |   |     |        |        |        |      |      |
|------|------|------|-----|---|-----|--------|--------|--------|------|------|
| ATOM | 5004 | HE1  | TYR | X | 333 | 57.210 | 41.014 | 39.667 | 0.00 | 0.00 |
| ATOM | 5005 | CZ   | TYR | X | 333 | 56.197 | 41.402 | 41.565 | 0.00 | 0.00 |
| ATOM | 5006 | OH   | TYR | X | 333 | 55.984 | 42.708 | 41.473 | 0.00 | 0.00 |
| ATOM | 5007 | HH   | TYR | X | 333 | 56.318 | 43.196 | 40.717 | 0.00 | 0.00 |
| ATOM | 5008 | CE2  | TYR | X | 333 | 55.566 | 40.732 | 42.677 | 0.00 | 0.00 |
| ATOM | 5009 | HE2  | TYR | X | 333 | 54.897 | 41.269 | 43.333 | 0.00 | 0.00 |
| ATOM | 5010 | CD2  | TYR | X | 333 | 55.755 | 39.339 | 42.898 | 0.00 | 0.00 |
| ATOM | 5011 | HD2  | TYR | X | 333 | 55.298 | 38.865 | 43.754 | 0.00 | 0.00 |
| ATOM | 5012 | C    | TYR | X | 333 | 58.517 | 37.991 | 43.823 | 0.00 | 0.00 |
| ATOM | 5013 | O    | TYR | X | 333 | 59.118 | 38.830 | 43.181 | 0.00 | 0.00 |
| ATOM | 5014 | N    | PHE | X | 334 | 58.178 | 38.021 | 45.137 | 0.00 | 0.00 |
| ATOM | 5015 | H    | PHE | X | 334 | 57.561 | 37.279 | 45.434 | 0.00 | 0.00 |
| ATOM | 5016 | CA   | PHE | X | 334 | 58.350 | 39.165 | 45.943 | 0.00 | 0.00 |
| ATOM | 5017 | HA   | PHE | X | 334 | 58.241 | 40.027 | 45.285 | 0.00 | 0.00 |
| ATOM | 5018 | CB   | PHE | X | 334 | 57.275 | 39.218 | 47.085 | 0.00 | 0.00 |
| ATOM | 5019 | HB2  | PHE | X | 334 | 57.077 | 38.220 | 47.478 | 0.00 | 0.00 |
| ATOM | 5020 | HB3  | PHE | X | 334 | 57.749 | 39.885 | 47.805 | 0.00 | 0.00 |
| ATOM | 5021 | CG   | PHE | X | 334 | 56.032 | 39.966 | 46.551 | 0.00 | 0.00 |
| ATOM | 5022 | CD1  | PHE | X | 334 | 54.809 | 39.315 | 46.315 | 0.00 | 0.00 |
| ATOM | 5023 | HD1  | PHE | X | 334 | 54.740 | 38.243 | 46.208 | 0.00 | 0.00 |
| ATOM | 5024 | CE1  | PHE | X | 334 | 53.688 | 40.110 | 45.934 | 0.00 | 0.00 |
| ATOM | 5025 | HE1  | PHE | X | 334 | 52.746 | 39.621 | 45.730 | 0.00 | 0.00 |
| ATOM | 5026 | CZ   | PHE | X | 334 | 53.794 | 41.454 | 45.615 | 0.00 | 0.00 |
| ATOM | 5027 | HZ   | PHE | X | 334 | 52.981 | 41.977 | 45.133 | 0.00 | 0.00 |
| ATOM | 5028 | CE2  | PHE | X | 334 | 54.967 | 42.101 | 46.028 | 0.00 | 0.00 |
| ATOM | 5029 | HE2  | PHE | X | 334 | 55.174 | 43.129 | 45.768 | 0.00 | 0.00 |
| ATOM | 5030 | CD2  | PHE | X | 334 | 56.118 | 41.348 | 46.423 | 0.00 | 0.00 |
| ATOM | 5031 | HD2  | PHE | X | 334 | 57.037 | 41.885 | 46.608 | 0.00 | 0.00 |
| ATOM | 5032 | C    | PHE | X | 334 | 59.780 | 39.231 | 46.563 | 0.00 | 0.00 |
| ATOM | 5033 | O    | PHE | X | 334 | 60.267 | 40.265 | 47.044 | 0.00 | 0.00 |
| ATOM | 5034 | N    | LEU | X | 335 | 60.546 | 38.109 | 46.541 | 0.00 | 0.00 |
| ATOM | 5035 | H    | LEU | X | 335 | 60.153 | 37.315 | 46.057 | 0.00 | 0.00 |
| ATOM | 5036 | CA   | LEU | X | 335 | 61.828 | 37.924 | 47.217 | 0.00 | 0.00 |
| ATOM | 5037 | HA   | LEU | X | 335 | 61.770 | 38.093 | 48.292 | 0.00 | 0.00 |
| ATOM | 5038 | CB   | LEU | X | 335 | 62.285 | 36.431 | 47.079 | 0.00 | 0.00 |
| ATOM | 5039 | HB2  | LEU | X | 335 | 62.372 | 36.248 | 46.008 | 0.00 | 0.00 |
| ATOM | 5040 | HB3  | LEU | X | 335 | 63.275 | 36.282 | 47.508 | 0.00 | 0.00 |
| ATOM | 5041 | CG   | LEU | X | 335 | 61.233 | 35.439 | 47.681 | 0.00 | 0.00 |
| ATOM | 5042 | HG   | LEU | X | 335 | 60.322 | 35.448 | 47.083 | 0.00 | 0.00 |
| ATOM | 5043 | CD1  | LEU | X | 335 | 61.765 | 33.966 | 47.616 | 0.00 | 0.00 |
| ATOM | 5044 | HD11 | LEU | X | 335 | 61.648 | 33.517 | 46.629 | 0.00 | 0.00 |
| ATOM | 5045 | HD12 | LEU | X | 335 | 61.311 | 33.258 | 48.309 | 0.00 | 0.00 |
| ATOM | 5046 | HD13 | LEU | X | 335 | 62.825 | 34.112 | 47.826 | 0.00 | 0.00 |
| ATOM | 5047 | CD2  | LEU | X | 335 | 60.748 | 35.786 | 49.136 | 0.00 | 0.00 |
| ATOM | 5048 | HD21 | LEU | X | 335 | 60.022 | 35.053 | 49.487 | 0.00 | 0.00 |
| ATOM | 5049 | HD22 | LEU | X | 335 | 61.623 | 35.751 | 49.784 | 0.00 | 0.00 |
| ATOM | 5050 | HD23 | LEU | X | 335 | 60.304 | 36.772 | 49.276 | 0.00 | 0.00 |
| ATOM | 5051 | C    | LEU | X | 335 | 62.940 | 38.977 | 46.848 | 0.00 | 0.00 |
| ATOM | 5052 | O    | LEU | X | 335 | 63.725 | 39.391 | 47.702 | 0.00 | 0.00 |
| ATOM | 5053 | N    | VAL | X | 336 | 62.948 | 39.383 | 45.564 | 0.00 | 0.00 |
| ATOM | 5054 | H    | VAL | X | 336 | 62.313 | 38.868 | 44.971 | 0.00 | 0.00 |
| ATOM | 5055 | CA   | VAL | X | 336 | 63.809 | 40.474 | 45.048 | 0.00 | 0.00 |
| ATOM | 5056 | HA   | VAL | X | 336 | 64.753 | 40.066 | 45.412 | 0.00 | 0.00 |
| ATOM | 5057 | CB   | VAL | X | 336 | 63.879 | 40.628 | 43.514 | 0.00 | 0.00 |
| ATOM | 5058 | HB   | VAL | X | 336 | 64.716 | 41.322 | 43.430 | 0.00 | 0.00 |
| ATOM | 5059 | CG1  | VAL | X | 336 | 64.364 | 39.451 | 42.741 | 0.00 | 0.00 |
| ATOM | 5060 | HG11 | VAL | X | 336 | 64.370 | 39.678 | 41.675 | 0.00 | 0.00 |
| ATOM | 5061 | HG12 | VAL | X | 336 | 65.399 | 39.149 | 42.905 | 0.00 | 0.00 |
| ATOM | 5062 | HG13 | VAL | X | 336 | 63.705 | 38.584 | 42.699 | 0.00 | 0.00 |
| ATOM | 5063 | CG2  | VAL | X | 336 | 62.538 | 41.128 | 42.888 | 0.00 | 0.00 |
| ATOM | 5064 | HG21 | VAL | X | 336 | 62.624 | 41.372 | 41.829 | 0.00 | 0.00 |
| ATOM | 5065 | HG22 | VAL | X | 336 | 62.268 | 42.084 | 43.337 | 0.00 | 0.00 |
| ATOM | 5066 | HG23 | VAL | X | 336 | 61.703 | 40.433 | 42.969 | 0.00 | 0.00 |
| ATOM | 5067 | C    | VAL | X | 336 | 63.636 | 41.875 | 45.722 | 0.00 | 0.00 |
| ATOM | 5068 | O    | VAL | X | 336 | 64.481 | 42.692 | 45.567 | 0.00 | 0.00 |
| ATOM | 5069 | N    | TYR | X | 337 | 62.456 | 42.123 | 46.368 | 0.00 | 0.00 |
| ATOM | 5070 | H    | TYR | X | 337 | 61.874 | 41.298 | 46.349 | 0.00 | 0.00 |

|      |      |     |     |   |     |        |        |        |      |      |
|------|------|-----|-----|---|-----|--------|--------|--------|------|------|
| ATOM | 5071 | CA  | TYR | X | 337 | 62.046 | 43.348 | 47.036 | 0.00 | 0.00 |
| ATOM | 5072 | HA  | TYR | X | 337 | 62.653 | 44.127 | 46.574 | 0.00 | 0.00 |
| ATOM | 5073 | CB  | TYR | X | 337 | 60.529 | 43.525 | 46.713 | 0.00 | 0.00 |
| ATOM | 5074 | HB2 | TYR | X | 337 | 59.970 | 42.673 | 47.098 | 0.00 | 0.00 |
| ATOM | 5075 | HB3 | TYR | X | 337 | 60.225 | 44.422 | 47.254 | 0.00 | 0.00 |
| ATOM | 5076 | CG  | TYR | X | 337 | 60.242 | 43.740 | 45.221 | 0.00 | 0.00 |
| ATOM | 5077 | CD1 | TYR | X | 337 | 60.919 | 44.811 | 44.551 | 0.00 | 0.00 |
| ATOM | 5078 | HD1 | TYR | X | 337 | 61.565 | 45.436 | 45.150 | 0.00 | 0.00 |
| ATOM | 5079 | CE1 | TYR | X | 337 | 60.840 | 44.953 | 43.161 | 0.00 | 0.00 |
| ATOM | 5080 | HE1 | TYR | X | 337 | 61.207 | 45.845 | 42.674 | 0.00 | 0.00 |
| ATOM | 5081 | CZ  | TYR | X | 337 | 60.083 | 44.089 | 42.367 | 0.00 | 0.00 |
| ATOM | 5082 | OH  | TYR | X | 337 | 59.833 | 44.429 | 41.026 | 0.00 | 0.00 |
| ATOM | 5083 | HH  | TYR | X | 337 | 60.516 | 45.044 | 40.750 | 0.00 | 0.00 |
| ATOM | 5084 | CE2 | TYR | X | 337 | 59.412 | 43.027 | 43.006 | 0.00 | 0.00 |
| ATOM | 5085 | HE2 | TYR | X | 337 | 58.688 | 42.379 | 42.534 | 0.00 | 0.00 |
| ATOM | 5086 | CD2 | TYR | X | 337 | 59.515 | 42.840 | 44.382 | 0.00 | 0.00 |
| ATOM | 5087 | HD2 | TYR | X | 337 | 58.884 | 42.098 | 44.849 | 0.00 | 0.00 |
| ATOM | 5088 | C   | TYR | X | 337 | 62.373 | 43.426 | 48.539 | 0.00 | 0.00 |
| ATOM | 5089 | O   | TYR | X | 337 | 61.958 | 44.429 | 49.153 | 0.00 | 0.00 |
| ATOM | 5090 | N   | GLY | X | 338 | 63.229 | 42.574 | 49.055 | 0.00 | 0.00 |
| ATOM | 5091 | H   | GLY | X | 338 | 63.762 | 41.990 | 48.426 | 0.00 | 0.00 |
| ATOM | 5092 | CA  | GLY | X | 338 | 63.606 | 42.641 | 50.500 | 0.00 | 0.00 |
| ATOM | 5093 | HA2 | GLY | X | 338 | 64.087 | 43.612 | 50.625 | 0.00 | 0.00 |
| ATOM | 5094 | HA3 | GLY | X | 338 | 62.658 | 42.653 | 51.037 | 0.00 | 0.00 |
| ATOM | 5095 | C   | GLY | X | 338 | 64.327 | 41.480 | 51.069 | 0.00 | 0.00 |
| ATOM | 5096 | O   | GLY | X | 338 | 64.863 | 41.588 | 52.162 | 0.00 | 0.00 |
| ATOM | 5097 | N   | ALA | X | 339 | 64.562 | 40.345 | 50.358 | 0.00 | 0.00 |
| ATOM | 5098 | H   | ALA | X | 339 | 64.258 | 40.306 | 49.395 | 0.00 | 0.00 |
| ATOM | 5099 | CA  | ALA | X | 339 | 65.125 | 39.117 | 50.906 | 0.00 | 0.00 |
| ATOM | 5100 | HA  | ALA | X | 339 | 64.857 | 39.096 | 51.962 | 0.00 | 0.00 |
| ATOM | 5101 | CB  | ALA | X | 339 | 64.377 | 37.847 | 50.419 | 0.00 | 0.00 |
| ATOM | 5102 | HB1 | ALA | X | 339 | 64.852 | 36.972 | 50.862 | 0.00 | 0.00 |
| ATOM | 5103 | HB2 | ALA | X | 339 | 64.541 | 37.786 | 49.343 | 0.00 | 0.00 |
| ATOM | 5104 | HB3 | ALA | X | 339 | 63.318 | 37.969 | 50.647 | 0.00 | 0.00 |
| ATOM | 5105 | C   | ALA | X | 339 | 66.635 | 39.058 | 50.795 | 0.00 | 0.00 |
| ATOM | 5106 | O   | ALA | X | 339 | 67.194 | 39.518 | 49.781 | 0.00 | 0.00 |
| ATOM | 5107 | N   | PRO | X | 340 | 67.350 | 38.579 | 51.810 | 0.00 | 0.00 |
| ATOM | 5108 | CD  | PRO | X | 340 | 66.781 | 37.739 | 52.880 | 0.00 | 0.00 |
| ATOM | 5109 | HD2 | PRO | X | 340 | 66.401 | 36.782 | 52.522 | 0.00 | 0.00 |
| ATOM | 5110 | HD3 | PRO | X | 340 | 66.000 | 38.238 | 53.453 | 0.00 | 0.00 |
| ATOM | 5111 | CG  | PRO | X | 340 | 67.980 | 37.354 | 53.758 | 0.00 | 0.00 |
| ATOM | 5112 | HG2 | PRO | X | 340 | 68.458 | 36.488 | 53.299 | 0.00 | 0.00 |
| ATOM | 5113 | HG3 | PRO | X | 340 | 67.722 | 37.209 | 54.807 | 0.00 | 0.00 |
| ATOM | 5114 | CB  | PRO | X | 340 | 68.931 | 38.565 | 53.516 | 0.00 | 0.00 |
| ATOM | 5115 | HB2 | PRO | X | 340 | 69.959 | 38.244 | 53.686 | 0.00 | 0.00 |
| ATOM | 5116 | HB3 | PRO | X | 340 | 68.780 | 39.349 | 54.259 | 0.00 | 0.00 |
| ATOM | 5117 | CA  | PRO | X | 340 | 68.737 | 38.953 | 52.024 | 0.00 | 0.00 |
| ATOM | 5118 | HA  | PRO | X | 340 | 68.989 | 40.003 | 51.875 | 0.00 | 0.00 |
| ATOM | 5119 | C   | PRO | X | 340 | 69.550 | 38.103 | 51.060 | 0.00 | 0.00 |
| ATOM | 5120 | O   | PRO | X | 340 | 69.366 | 36.860 | 51.016 | 0.00 | 0.00 |
| ATOM | 5121 | N   | GLY | X | 341 | 70.193 | 38.776 | 50.143 | 0.00 | 0.00 |
| ATOM | 5122 | H   | GLY | X | 341 | 70.037 | 39.767 | 50.024 | 0.00 | 0.00 |
| ATOM | 5123 | CA  | GLY | X | 341 | 71.074 | 38.115 | 49.120 | 0.00 | 0.00 |
| ATOM | 5124 | HA2 | GLY | X | 341 | 71.992 | 38.688 | 48.991 | 0.00 | 0.00 |
| ATOM | 5125 | HA3 | GLY | X | 341 | 71.294 | 37.116 | 49.496 | 0.00 | 0.00 |
| ATOM | 5126 | C   | GLY | X | 341 | 70.425 | 37.965 | 47.794 | 0.00 | 0.00 |
| ATOM | 5127 | O   | GLY | X | 341 | 71.078 | 37.540 | 46.850 | 0.00 | 0.00 |
| ATOM | 5128 | N   | PHE | X | 342 | 69.135 | 38.266 | 47.614 | 0.00 | 0.00 |
| ATOM | 5129 | H   | PHE | X | 342 | 68.601 | 38.558 | 48.420 | 0.00 | 0.00 |
| ATOM | 5130 | CA  | PHE | X | 342 | 68.457 | 38.168 | 46.323 | 0.00 | 0.00 |
| ATOM | 5131 | HA  | PHE | X | 342 | 68.777 | 37.360 | 45.665 | 0.00 | 0.00 |
| ATOM | 5132 | CB  | PHE | X | 342 | 66.967 | 37.882 | 46.633 | 0.00 | 0.00 |
| ATOM | 5133 | HB2 | PHE | X | 342 | 66.536 | 38.679 | 47.239 | 0.00 | 0.00 |
| ATOM | 5134 | HB3 | PHE | X | 342 | 66.406 | 38.053 | 45.714 | 0.00 | 0.00 |
| ATOM | 5135 | CG  | PHE | X | 342 | 66.589 | 36.532 | 47.248 | 0.00 | 0.00 |
| ATOM | 5136 | CD1 | PHE | X | 342 | 65.960 | 35.479 | 46.556 | 0.00 | 0.00 |
| ATOM | 5137 | HD1 | PHE | X | 342 | 65.751 | 35.612 | 45.505 | 0.00 | 0.00 |

|      |      |      |     |   |     |        |        |        |      |      |
|------|------|------|-----|---|-----|--------|--------|--------|------|------|
| ATOM | 5138 | CE1  | PHE | X | 342 | 65.443 | 34.393 | 47.207 | 0.00 | 0.00 |
| ATOM | 5139 | HE1  | PHE | X | 342 | 64.896 | 33.657 | 46.636 | 0.00 | 0.00 |
| ATOM | 5140 | CZ   | PHE | X | 342 | 65.701 | 34.230 | 48.558 | 0.00 | 0.00 |
| ATOM | 5141 | HZ   | PHE | X | 342 | 65.327 | 33.315 | 48.992 | 0.00 | 0.00 |
| ATOM | 5142 | CE2  | PHE | X | 342 | 66.516 | 35.089 | 49.220 | 0.00 | 0.00 |
| ATOM | 5143 | HE2  | PHE | X | 342 | 66.931 | 34.908 | 50.200 | 0.00 | 0.00 |
| ATOM | 5144 | CD2  | PHE | X | 342 | 66.951 | 36.241 | 48.570 | 0.00 | 0.00 |
| ATOM | 5145 | HD2  | PHE | X | 342 | 67.595 | 36.934 | 49.090 | 0.00 | 0.00 |
| ATOM | 5146 | C    | PHE | X | 342 | 68.562 | 39.440 | 45.464 | 0.00 | 0.00 |
| ATOM | 5147 | O    | PHE | X | 342 | 68.587 | 40.589 | 45.923 | 0.00 | 0.00 |
| ATOM | 5148 | N    | SER | X | 343 | 68.471 | 39.291 | 44.182 | 0.00 | 0.00 |
| ATOM | 5149 | H    | SER | X | 343 | 68.685 | 38.382 | 43.798 | 0.00 | 0.00 |
| ATOM | 5150 | CA   | SER | X | 343 | 68.212 | 40.234 | 43.106 | 0.00 | 0.00 |
| ATOM | 5151 | HA   | SER | X | 343 | 67.404 | 40.906 | 43.396 | 0.00 | 0.00 |
| ATOM | 5152 | CB   | SER | X | 343 | 69.450 | 41.130 | 42.789 | 0.00 | 0.00 |
| ATOM | 5153 | HB2  | SER | X | 343 | 69.005 | 41.888 | 42.146 | 0.00 | 0.00 |
| ATOM | 5154 | HB3  | SER | X | 343 | 69.906 | 41.591 | 43.666 | 0.00 | 0.00 |
| ATOM | 5155 | OG   | SER | X | 343 | 70.402 | 40.504 | 42.022 | 0.00 | 0.00 |
| ATOM | 5156 | HG   | SER | X | 343 | 71.179 | 41.010 | 41.776 | 0.00 | 0.00 |
| ATOM | 5157 | C    | SER | X | 343 | 67.773 | 39.397 | 41.930 | 0.00 | 0.00 |
| ATOM | 5158 | O    | SER | X | 343 | 67.821 | 38.179 | 42.035 | 0.00 | 0.00 |
| ATOM | 5159 | N    | LYS | X | 344 | 67.585 | 40.048 | 40.780 | 0.00 | 0.00 |
| ATOM | 5160 | H    | LYS | X | 344 | 67.834 | 41.027 | 40.768 | 0.00 | 0.00 |
| ATOM | 5161 | CA   | LYS | X | 344 | 66.967 | 39.454 | 39.629 | 0.00 | 0.00 |
| ATOM | 5162 | HA   | LYS | X | 344 | 66.107 | 38.874 | 39.964 | 0.00 | 0.00 |
| ATOM | 5163 | CB   | LYS | X | 344 | 66.638 | 40.552 | 38.588 | 0.00 | 0.00 |
| ATOM | 5164 | HB2  | LYS | X | 344 | 66.259 | 39.969 | 37.749 | 0.00 | 0.00 |
| ATOM | 5165 | HB3  | LYS | X | 344 | 65.969 | 41.361 | 38.880 | 0.00 | 0.00 |
| ATOM | 5166 | CG   | LYS | X | 344 | 67.916 | 41.162 | 37.917 | 0.00 | 0.00 |
| ATOM | 5167 | HG2  | LYS | X | 344 | 68.564 | 41.494 | 38.728 | 0.00 | 0.00 |
| ATOM | 5168 | HG3  | LYS | X | 344 | 68.389 | 40.468 | 37.222 | 0.00 | 0.00 |
| ATOM | 5169 | CD   | LYS | X | 344 | 67.525 | 42.372 | 37.066 | 0.00 | 0.00 |
| ATOM | 5170 | HD2  | LYS | X | 344 | 66.870 | 42.037 | 36.262 | 0.00 | 0.00 |
| ATOM | 5171 | HD3  | LYS | X | 344 | 66.975 | 43.126 | 37.629 | 0.00 | 0.00 |
| ATOM | 5172 | CE   | LYS | X | 344 | 68.720 | 43.100 | 36.426 | 0.00 | 0.00 |
| ATOM | 5173 | HE2  | LYS | X | 344 | 69.396 | 42.311 | 36.096 | 0.00 | 0.00 |
| ATOM | 5174 | HE3  | LYS | X | 344 | 68.421 | 43.778 | 35.627 | 0.00 | 0.00 |
| ATOM | 5175 | NZ   | LYS | X | 344 | 69.509 | 43.904 | 37.424 | 0.00 | 0.00 |
| ATOM | 5176 | HZ1  | LYS | X | 344 | 69.667 | 43.452 | 38.314 | 0.00 | 0.00 |
| ATOM | 5177 | HZ2  | LYS | X | 344 | 70.400 | 44.189 | 37.044 | 0.00 | 0.00 |
| ATOM | 5178 | HZ3  | LYS | X | 344 | 69.083 | 44.807 | 37.579 | 0.00 | 0.00 |
| ATOM | 5179 | C    | LYS | X | 344 | 67.905 | 38.352 | 38.950 | 0.00 | 0.00 |
| ATOM | 5180 | O    | LYS | X | 344 | 67.453 | 37.703 | 37.974 | 0.00 | 0.00 |
| ATOM | 5181 | N    | ASP | X | 345 | 69.138 | 38.172 | 39.389 | 0.00 | 0.00 |
| ATOM | 5182 | H    | ASP | X | 345 | 69.215 | 38.842 | 40.140 | 0.00 | 0.00 |
| ATOM | 5183 | CA   | ASP | X | 345 | 70.247 | 37.498 | 38.795 | 0.00 | 0.00 |
| ATOM | 5184 | HA   | ASP | X | 345 | 69.897 | 36.559 | 38.365 | 0.00 | 0.00 |
| ATOM | 5185 | CB   | ASP | X | 345 | 71.081 | 38.334 | 37.773 | 0.00 | 0.00 |
| ATOM | 5186 | HB2  | ASP | X | 345 | 72.019 | 37.865 | 37.477 | 0.00 | 0.00 |
| ATOM | 5187 | HB3  | ASP | X | 345 | 70.477 | 38.415 | 36.869 | 0.00 | 0.00 |
| ATOM | 5188 | CG   | ASP | X | 345 | 71.378 | 39.692 | 38.274 | 0.00 | 0.00 |
| ATOM | 5189 | OD1  | ASP | X | 345 | 71.114 | 40.749 | 37.706 | 0.00 | 0.00 |
| ATOM | 5190 | OD2  | ASP | X | 345 | 72.066 | 39.746 | 39.349 | 0.00 | 0.00 |
| ATOM | 5191 | C    | ASP | X | 345 | 71.098 | 36.831 | 39.915 | 0.00 | 0.00 |
| ATOM | 5192 | O    | ASP | X | 345 | 72.078 | 36.154 | 39.543 | 0.00 | 0.00 |
| ATOM | 5193 | N    | ASN | X | 346 | 70.816 | 36.928 | 41.201 | 0.00 | 0.00 |
| ATOM | 5194 | H    | ASN | X | 346 | 70.012 | 37.477 | 41.470 | 0.00 | 0.00 |
| ATOM | 5195 | CA   | ASN | X | 346 | 71.673 | 36.252 | 42.191 | 0.00 | 0.00 |
| ATOM | 5196 | HA   | ASN | X | 346 | 72.722 | 36.285 | 41.898 | 0.00 | 0.00 |
| ATOM | 5197 | CB   | ASN | X | 346 | 71.568 | 36.869 | 43.582 | 0.00 | 0.00 |
| ATOM | 5198 | HB2  | ASN | X | 346 | 71.256 | 37.910 | 43.504 | 0.00 | 0.00 |
| ATOM | 5199 | HB3  | ASN | X | 346 | 70.770 | 36.446 | 44.192 | 0.00 | 0.00 |
| ATOM | 5200 | CG   | ASN | X | 346 | 72.865 | 36.599 | 44.336 | 0.00 | 0.00 |
| ATOM | 5201 | OD1  | ASN | X | 346 | 73.036 | 35.522 | 44.949 | 0.00 | 0.00 |
| ATOM | 5202 | ND2  | ASN | X | 346 | 73.729 | 37.604 | 44.223 | 0.00 | 0.00 |
| ATOM | 5203 | HD21 | ASN | X | 346 | 74.679 | 37.345 | 44.451 | 0.00 | 0.00 |
| ATOM | 5204 | HD22 | ASN | X | 346 | 73.481 | 38.305 | 43.540 | 0.00 | 0.00 |

|      |      |      |     |   |     |        |        |        |      |      |
|------|------|------|-----|---|-----|--------|--------|--------|------|------|
| ATOM | 5205 | C    | ASN | X | 346 | 71.414 | 34.754 | 42.134 | 0.00 | 0.00 |
| ATOM | 5206 | O    | ASN | X | 346 | 70.319 | 34.447 | 41.808 | 0.00 | 0.00 |
| ATOM | 5207 | N    | GLU | X | 347 | 72.335 | 33.911 | 42.428 | 0.00 | 0.00 |
| ATOM | 5208 | H    | GLU | X | 347 | 73.275 | 34.251 | 42.574 | 0.00 | 0.00 |
| ATOM | 5209 | CA   | GLU | X | 347 | 72.103 | 32.527 | 42.786 | 0.00 | 0.00 |
| ATOM | 5210 | HA   | GLU | X | 347 | 71.556 | 31.998 | 42.005 | 0.00 | 0.00 |
| ATOM | 5211 | CB   | GLU | X | 347 | 73.536 | 31.899 | 42.952 | 0.00 | 0.00 |
| ATOM | 5212 | HB2  | GLU | X | 347 | 74.180 | 32.132 | 42.103 | 0.00 | 0.00 |
| ATOM | 5213 | HB3  | GLU | X | 347 | 74.036 | 32.205 | 43.871 | 0.00 | 0.00 |
| ATOM | 5214 | CG   | GLU | X | 347 | 73.502 | 30.333 | 42.854 | 0.00 | 0.00 |
| ATOM | 5215 | HG2  | GLU | X | 347 | 74.445 | 29.865 | 43.137 | 0.00 | 0.00 |
| ATOM | 5216 | HG3  | GLU | X | 347 | 72.812 | 29.914 | 43.586 | 0.00 | 0.00 |
| ATOM | 5217 | CD   | GLU | X | 347 | 73.256 | 29.893 | 41.422 | 0.00 | 0.00 |
| ATOM | 5218 | OE1  | GLU | X | 347 | 72.114 | 29.460 | 41.129 | 0.00 | 0.00 |
| ATOM | 5219 | OE2  | GLU | X | 347 | 74.102 | 29.886 | 40.507 | 0.00 | 0.00 |
| ATOM | 5220 | C    | GLU | X | 347 | 71.308 | 32.234 | 44.068 | 0.00 | 0.00 |
| ATOM | 5221 | O    | GLU | X | 347 | 70.742 | 31.193 | 44.307 | 0.00 | 0.00 |
| ATOM | 5222 | N    | SER | X | 348 | 71.346 | 33.201 | 45.045 | 0.00 | 0.00 |
| ATOM | 5223 | H    | SER | X | 348 | 71.871 | 34.037 | 44.832 | 0.00 | 0.00 |
| ATOM | 5224 | CA   | SER | X | 348 | 70.416 | 33.465 | 46.152 | 0.00 | 0.00 |
| ATOM | 5225 | HA   | SER | X | 348 | 70.650 | 34.388 | 46.684 | 0.00 | 0.00 |
| ATOM | 5226 | CB   | SER | X | 348 | 68.964 | 33.682 | 45.732 | 0.00 | 0.00 |
| ATOM | 5227 | HB2  | SER | X | 348 | 68.484 | 32.858 | 45.204 | 0.00 | 0.00 |
| ATOM | 5228 | HB3  | SER | X | 348 | 68.376 | 33.894 | 46.626 | 0.00 | 0.00 |
| ATOM | 5229 | OG   | SER | X | 348 | 68.842 | 34.788 | 44.882 | 0.00 | 0.00 |
| ATOM | 5230 | HG   | SER | X | 348 | 68.208 | 34.680 | 44.169 | 0.00 | 0.00 |
| ATOM | 5231 | C    | SER | X | 348 | 70.480 | 32.310 | 47.191 | 0.00 | 0.00 |
| ATOM | 5232 | O    | SER | X | 348 | 69.456 | 31.613 | 47.508 | 0.00 | 0.00 |
| ATOM | 5233 | N    | LEU | X | 349 | 71.699 | 32.079 | 47.635 | 0.00 | 0.00 |
| ATOM | 5234 | H    | LEU | X | 349 | 72.419 | 32.596 | 47.151 | 0.00 | 0.00 |
| ATOM | 5235 | CA   | LEU | X | 349 | 72.107 | 31.051 | 48.567 | 0.00 | 0.00 |
| ATOM | 5236 | HA   | LEU | X | 349 | 71.422 | 30.226 | 48.370 | 0.00 | 0.00 |
| ATOM | 5237 | CB   | LEU | X | 349 | 73.597 | 30.750 | 48.354 | 0.00 | 0.00 |
| ATOM | 5238 | HB2  | LEU | X | 349 | 74.308 | 31.567 | 48.479 | 0.00 | 0.00 |
| ATOM | 5239 | HB3  | LEU | X | 349 | 73.851 | 29.946 | 49.045 | 0.00 | 0.00 |
| ATOM | 5240 | CG   | LEU | X | 349 | 73.821 | 30.321 | 46.829 | 0.00 | 0.00 |
| ATOM | 5241 | HG   | LEU | X | 349 | 73.450 | 31.113 | 46.179 | 0.00 | 0.00 |
| ATOM | 5242 | CD1  | LEU | X | 349 | 75.338 | 30.189 | 46.548 | 0.00 | 0.00 |
| ATOM | 5243 | HD11 | LEU | X | 349 | 76.077 | 30.864 | 46.978 | 0.00 | 0.00 |
| ATOM | 5244 | HD12 | LEU | X | 349 | 75.419 | 30.359 | 45.475 | 0.00 | 0.00 |
| ATOM | 5245 | HD13 | LEU | X | 349 | 75.627 | 29.161 | 46.767 | 0.00 | 0.00 |
| ATOM | 5246 | CD2  | LEU | X | 349 | 72.999 | 29.083 | 46.355 | 0.00 | 0.00 |
| ATOM | 5247 | HD21 | LEU | X | 349 | 71.937 | 29.323 | 46.408 | 0.00 | 0.00 |
| ATOM | 5248 | HD22 | LEU | X | 349 | 73.236 | 28.657 | 45.380 | 0.00 | 0.00 |
| ATOM | 5249 | HD23 | LEU | X | 349 | 73.135 | 28.252 | 47.046 | 0.00 | 0.00 |
| ATOM | 5250 | C    | LEU | X | 349 | 71.867 | 31.612 | 49.974 | 0.00 | 0.00 |
| ATOM | 5251 | O    | LEU | X | 349 | 72.428 | 32.712 | 50.304 | 0.00 | 0.00 |
| ATOM | 5252 | N    | ILE | X | 350 | 71.148 | 30.917 | 50.914 | 0.00 | 0.00 |
| ATOM | 5253 | H    | ILE | X | 350 | 70.846 | 29.983 | 50.677 | 0.00 | 0.00 |
| ATOM | 5254 | CA   | ILE | X | 350 | 70.889 | 31.479 | 52.288 | 0.00 | 0.00 |
| ATOM | 5255 | HA   | ILE | X | 350 | 71.535 | 32.350 | 52.401 | 0.00 | 0.00 |
| ATOM | 5256 | CB   | ILE | X | 350 | 69.475 | 32.112 | 52.385 | 0.00 | 0.00 |
| ATOM | 5257 | HB   | ILE | X | 350 | 69.217 | 32.377 | 53.410 | 0.00 | 0.00 |
| ATOM | 5258 | CG2  | ILE | X | 350 | 69.430 | 33.379 | 51.519 | 0.00 | 0.00 |
| ATOM | 5259 | HG21 | ILE | X | 350 | 70.240 | 33.948 | 51.976 | 0.00 | 0.00 |
| ATOM | 5260 | HG22 | ILE | X | 350 | 68.589 | 34.052 | 51.685 | 0.00 | 0.00 |
| ATOM | 5261 | HG23 | ILE | X | 350 | 69.427 | 33.183 | 50.447 | 0.00 | 0.00 |
| ATOM | 5262 | CG1  | ILE | X | 350 | 68.367 | 31.084 | 52.015 | 0.00 | 0.00 |
| ATOM | 5263 | HG12 | ILE | X | 350 | 68.258 | 30.873 | 50.951 | 0.00 | 0.00 |
| ATOM | 5264 | HG13 | ILE | X | 350 | 68.525 | 30.119 | 52.497 | 0.00 | 0.00 |
| ATOM | 5265 | CD1  | ILE | X | 350 | 66.953 | 31.630 | 52.320 | 0.00 | 0.00 |
| ATOM | 5266 | HD11 | ILE | X | 350 | 66.880 | 32.611 | 51.849 | 0.00 | 0.00 |
| ATOM | 5267 | HD12 | ILE | X | 350 | 66.908 | 31.732 | 53.404 | 0.00 | 0.00 |
| ATOM | 5268 | HD13 | ILE | X | 350 | 66.132 | 30.955 | 52.077 | 0.00 | 0.00 |
| ATOM | 5269 | C    | ILE | X | 350 | 71.148 | 30.418 | 53.335 | 0.00 | 0.00 |
| ATOM | 5270 | O    | ILE | X | 350 | 70.964 | 29.214 | 53.149 | 0.00 | 0.00 |
| ATOM | 5271 | N    | SER | X | 351 | 71.553 | 30.949 | 54.536 | 0.00 | 0.00 |

|      |      |      |     |   |     |        |        |        |      |      |
|------|------|------|-----|---|-----|--------|--------|--------|------|------|
| ATOM | 5272 | H    | SER | X | 351 | 71.836 | 31.917 | 54.600 | 0.00 | 0.00 |
| ATOM | 5273 | CA   | SER | X | 351 | 71.708 | 30.144 | 55.742 | 0.00 | 0.00 |
| ATOM | 5274 | HA   | SER | X | 351 | 71.877 | 29.103 | 55.466 | 0.00 | 0.00 |
| ATOM | 5275 | CB   | SER | X | 351 | 72.941 | 30.645 | 56.545 | 0.00 | 0.00 |
| ATOM | 5276 | HB2  | SER | X | 351 | 73.048 | 29.965 | 57.390 | 0.00 | 0.00 |
| ATOM | 5277 | HB3  | SER | X | 351 | 73.698 | 30.569 | 55.764 | 0.00 | 0.00 |
| ATOM | 5278 | OG   | SER | X | 351 | 72.801 | 31.979 | 57.085 | 0.00 | 0.00 |
| ATOM | 5279 | HG   | SER | X | 351 | 73.631 | 32.274 | 57.466 | 0.00 | 0.00 |
| ATOM | 5280 | C    | SER | X | 351 | 70.467 | 30.078 | 56.638 | 0.00 | 0.00 |
| ATOM | 5281 | O    | SER | X | 351 | 69.547 | 30.853 | 56.384 | 0.00 | 0.00 |
| ATOM | 5282 | N    | ARG | X | 352 | 70.468 | 29.235 | 57.687 | 0.00 | 0.00 |
| ATOM | 5283 | H    | ARG | X | 352 | 71.184 | 28.525 | 57.751 | 0.00 | 0.00 |
| ATOM | 5284 | CA   | ARG | X | 352 | 69.346 | 29.274 | 58.661 | 0.00 | 0.00 |
| ATOM | 5285 | HA   | ARG | X | 352 | 68.411 | 29.120 | 58.123 | 0.00 | 0.00 |
| ATOM | 5286 | CB   | ARG | X | 352 | 69.555 | 28.219 | 59.700 | 0.00 | 0.00 |
| ATOM | 5287 | HB2  | ARG | X | 352 | 70.536 | 28.254 | 60.175 | 0.00 | 0.00 |
| ATOM | 5288 | HB3  | ARG | X | 352 | 68.891 | 28.357 | 60.553 | 0.00 | 0.00 |
| ATOM | 5289 | CG   | ARG | X | 352 | 69.341 | 26.817 | 59.057 | 0.00 | 0.00 |
| ATOM | 5290 | HG2  | ARG | X | 352 | 68.362 | 26.961 | 58.599 | 0.00 | 0.00 |
| ATOM | 5291 | HG3  | ARG | X | 352 | 70.045 | 26.616 | 58.250 | 0.00 | 0.00 |
| ATOM | 5292 | CD   | ARG | X | 352 | 69.401 | 25.683 | 60.065 | 0.00 | 0.00 |
| ATOM | 5293 | HD2  | ARG | X | 352 | 69.311 | 24.775 | 59.469 | 0.00 | 0.00 |
| ATOM | 5294 | HD3  | ARG | X | 352 | 70.356 | 25.619 | 60.586 | 0.00 | 0.00 |
| ATOM | 5295 | NE   | ARG | X | 352 | 68.351 | 25.777 | 61.083 | 0.00 | 0.00 |
| ATOM | 5296 | HE   | ARG | X | 352 | 68.718 | 26.104 | 61.965 | 0.00 | 0.00 |
| ATOM | 5297 | CZ   | ARG | X | 352 | 67.151 | 25.317 | 60.925 | 0.00 | 0.00 |
| ATOM | 5298 | NH1  | ARG | X | 352 | 66.620 | 25.051 | 59.768 | 0.00 | 0.00 |
| ATOM | 5299 | HH11 | ARG | X | 352 | 67.188 | 25.339 | 58.985 | 0.00 | 0.00 |
| ATOM | 5300 | HH12 | ARG | X | 352 | 65.630 | 24.890 | 59.644 | 0.00 | 0.00 |
| ATOM | 5301 | NH2  | ARG | X | 352 | 66.471 | 25.050 | 62.015 | 0.00 | 0.00 |
| ATOM | 5302 | HH21 | ARG | X | 352 | 66.948 | 25.178 | 62.896 | 0.00 | 0.00 |
| ATOM | 5303 | HH22 | ARG | X | 352 | 65.524 | 24.717 | 61.906 | 0.00 | 0.00 |
| ATOM | 5304 | C    | ARG | X | 352 | 69.228 | 30.616 | 59.397 | 0.00 | 0.00 |
| ATOM | 5305 | O    | ARG | X | 352 | 68.085 | 30.829 | 59.828 | 0.00 | 0.00 |
| ATOM | 5306 | N    | ALA | X | 353 | 70.335 | 31.383 | 59.550 | 0.00 | 0.00 |
| ATOM | 5307 | H    | ALA | X | 353 | 71.230 | 30.958 | 59.357 | 0.00 | 0.00 |
| ATOM | 5308 | CA   | ALA | X | 353 | 70.297 | 32.738 | 60.115 | 0.00 | 0.00 |
| ATOM | 5309 | HA   | ALA | X | 353 | 69.778 | 32.820 | 61.070 | 0.00 | 0.00 |
| ATOM | 5310 | CB   | ALA | X | 353 | 71.747 | 33.108 | 60.422 | 0.00 | 0.00 |
| ATOM | 5311 | HB1  | ALA | X | 353 | 71.977 | 32.541 | 61.324 | 0.00 | 0.00 |
| ATOM | 5312 | HB2  | ALA | X | 353 | 71.890 | 34.136 | 60.754 | 0.00 | 0.00 |
| ATOM | 5313 | HB3  | ALA | X | 353 | 72.414 | 32.872 | 59.593 | 0.00 | 0.00 |
| ATOM | 5314 | C    | ALA | X | 353 | 69.719 | 33.822 | 59.136 | 0.00 | 0.00 |
| ATOM | 5315 | O    | ALA | X | 353 | 68.888 | 34.620 | 59.466 | 0.00 | 0.00 |
| ATOM | 5316 | N    | GLU | X | 354 | 70.137 | 33.761 | 57.850 | 0.00 | 0.00 |
| ATOM | 5317 | H    | GLU | X | 354 | 70.862 | 33.079 | 57.677 | 0.00 | 0.00 |
| ATOM | 5318 | CA   | GLU | X | 354 | 69.555 | 34.519 | 56.762 | 0.00 | 0.00 |
| ATOM | 5319 | HA   | GLU | X | 354 | 69.593 | 35.588 | 56.971 | 0.00 | 0.00 |
| ATOM | 5320 | CB   | GLU | X | 354 | 70.429 | 34.299 | 55.517 | 0.00 | 0.00 |
| ATOM | 5321 | HB2  | GLU | X | 354 | 70.592 | 33.228 | 55.400 | 0.00 | 0.00 |
| ATOM | 5322 | HB3  | GLU | X | 354 | 69.949 | 34.648 | 54.603 | 0.00 | 0.00 |
| ATOM | 5323 | CG   | GLU | X | 354 | 71.848 | 34.910 | 55.676 | 0.00 | 0.00 |
| ATOM | 5324 | HG2  | GLU | X | 354 | 71.637 | 35.946 | 55.943 | 0.00 | 0.00 |
| ATOM | 5325 | HG3  | GLU | X | 354 | 72.351 | 34.494 | 56.549 | 0.00 | 0.00 |
| ATOM | 5326 | CD   | GLU | X | 354 | 72.729 | 34.729 | 54.503 | 0.00 | 0.00 |
| ATOM | 5327 | OE1  | GLU | X | 354 | 73.021 | 35.695 | 53.821 | 0.00 | 0.00 |
| ATOM | 5328 | OE2  | GLU | X | 354 | 73.095 | 33.596 | 54.211 | 0.00 | 0.00 |
| ATOM | 5329 | C    | GLU | X | 354 | 68.134 | 34.095 | 56.441 | 0.00 | 0.00 |
| ATOM | 5330 | O    | GLU | X | 354 | 67.366 | 35.025 | 56.165 | 0.00 | 0.00 |
| ATOM | 5331 | N    | PHE | X | 355 | 67.708 | 32.821 | 56.673 | 0.00 | 0.00 |
| ATOM | 5332 | H    | PHE | X | 355 | 68.434 | 32.133 | 56.811 | 0.00 | 0.00 |
| ATOM | 5333 | CA   | PHE | X | 355 | 66.284 | 32.532 | 56.572 | 0.00 | 0.00 |
| ATOM | 5334 | HA   | PHE | X | 355 | 65.864 | 32.811 | 55.605 | 0.00 | 0.00 |
| ATOM | 5335 | CB   | PHE | X | 355 | 66.104 | 31.003 | 56.690 | 0.00 | 0.00 |
| ATOM | 5336 | HB2  | PHE | X | 355 | 66.521 | 30.588 | 55.772 | 0.00 | 0.00 |
| ATOM | 5337 | HB3  | PHE | X | 355 | 66.656 | 30.618 | 57.547 | 0.00 | 0.00 |
| ATOM | 5338 | CG   | PHE | X | 355 | 64.717 | 30.396 | 56.772 | 0.00 | 0.00 |

|      |      |      |     |   |     |        |        |        |      |      |
|------|------|------|-----|---|-----|--------|--------|--------|------|------|
| ATOM | 5339 | CD1  | PHE | X | 355 | 63.652 | 30.866 | 55.977 | 0.00 | 0.00 |
| ATOM | 5340 | HD1  | PHE | X | 355 | 63.750 | 31.751 | 55.366 | 0.00 | 0.00 |
| ATOM | 5341 | CE1  | PHE | X | 355 | 62.384 | 30.266 | 55.945 | 0.00 | 0.00 |
| ATOM | 5342 | HE1  | PHE | X | 355 | 61.567 | 30.609 | 55.327 | 0.00 | 0.00 |
| ATOM | 5343 | CZ   | PHE | X | 355 | 62.223 | 29.133 | 56.768 | 0.00 | 0.00 |
| ATOM | 5344 | HZ   | PHE | X | 355 | 61.280 | 28.622 | 56.641 | 0.00 | 0.00 |
| ATOM | 5345 | CE2  | PHE | X | 355 | 63.284 | 28.676 | 57.687 | 0.00 | 0.00 |
| ATOM | 5346 | HE2  | PHE | X | 355 | 63.127 | 27.738 | 58.198 | 0.00 | 0.00 |
| ATOM | 5347 | CD2  | PHE | X | 355 | 64.470 | 29.299 | 57.603 | 0.00 | 0.00 |
| ATOM | 5348 | HD2  | PHE | X | 355 | 65.308 | 28.891 | 58.149 | 0.00 | 0.00 |
| ATOM | 5349 | C    | PHE | X | 355 | 65.485 | 33.166 | 57.691 | 0.00 | 0.00 |
| ATOM | 5350 | O    | PHE | X | 355 | 64.309 | 33.467 | 57.588 | 0.00 | 0.00 |
| ATOM | 5351 | N    | LEU | X | 356 | 66.056 | 33.239 | 58.918 | 0.00 | 0.00 |
| ATOM | 5352 | H    | LEU | X | 356 | 66.938 | 32.773 | 59.076 | 0.00 | 0.00 |
| ATOM | 5353 | CA   | LEU | X | 356 | 65.358 | 33.845 | 60.079 | 0.00 | 0.00 |
| ATOM | 5354 | HA   | LEU | X | 356 | 64.347 | 33.470 | 60.240 | 0.00 | 0.00 |
| ATOM | 5355 | CB   | LEU | X | 356 | 66.277 | 33.611 | 61.328 | 0.00 | 0.00 |
| ATOM | 5356 | HB2  | LEU | X | 356 | 66.335 | 32.576 | 61.662 | 0.00 | 0.00 |
| ATOM | 5357 | HB3  | LEU | X | 356 | 67.311 | 33.844 | 61.074 | 0.00 | 0.00 |
| ATOM | 5358 | CG   | LEU | X | 356 | 65.819 | 34.395 | 62.593 | 0.00 | 0.00 |
| ATOM | 5359 | HG   | LEU | X | 356 | 65.832 | 35.465 | 62.384 | 0.00 | 0.00 |
| ATOM | 5360 | CD1  | LEU | X | 356 | 64.447 | 34.139 | 63.251 | 0.00 | 0.00 |
| ATOM | 5361 | HD11 | LEU | X | 356 | 64.361 | 34.668 | 64.200 | 0.00 | 0.00 |
| ATOM | 5362 | HD12 | LEU | X | 356 | 64.413 | 33.072 | 63.473 | 0.00 | 0.00 |
| ATOM | 5363 | HD13 | LEU | X | 356 | 63.618 | 34.289 | 62.559 | 0.00 | 0.00 |
| ATOM | 5364 | CD2  | LEU | X | 356 | 66.959 | 34.083 | 63.527 | 0.00 | 0.00 |
| ATOM | 5365 | HD21 | LEU | X | 356 | 67.003 | 34.695 | 64.428 | 0.00 | 0.00 |
| ATOM | 5366 | HD22 | LEU | X | 356 | 67.008 | 33.041 | 63.841 | 0.00 | 0.00 |
| ATOM | 5367 | HD23 | LEU | X | 356 | 67.931 | 34.312 | 63.089 | 0.00 | 0.00 |
| ATOM | 5368 | C    | LEU | X | 356 | 65.102 | 35.370 | 59.896 | 0.00 | 0.00 |
| ATOM | 5369 | O    | LEU | X | 356 | 64.020 | 35.891 | 60.171 | 0.00 | 0.00 |
| ATOM | 5370 | N    | ALA | X | 357 | 66.018 | 36.077 | 59.178 | 0.00 | 0.00 |
| ATOM | 5371 | H    | ALA | X | 357 | 66.937 | 35.694 | 59.007 | 0.00 | 0.00 |
| ATOM | 5372 | CA   | ALA | X | 357 | 65.740 | 37.450 | 58.651 | 0.00 | 0.00 |
| ATOM | 5373 | HA   | ALA | X | 357 | 65.310 | 37.991 | 59.494 | 0.00 | 0.00 |
| ATOM | 5374 | CB   | ALA | X | 357 | 67.016 | 38.088 | 58.314 | 0.00 | 0.00 |
| ATOM | 5375 | HB1  | ALA | X | 357 | 66.828 | 39.129 | 58.576 | 0.00 | 0.00 |
| ATOM | 5376 | HB2  | ALA | X | 357 | 67.299 | 38.005 | 57.265 | 0.00 | 0.00 |
| ATOM | 5377 | HB3  | ALA | X | 357 | 67.821 | 37.677 | 58.923 | 0.00 | 0.00 |
| ATOM | 5378 | C    | ALA | X | 357 | 64.734 | 37.532 | 57.470 | 0.00 | 0.00 |
| ATOM | 5379 | O    | ALA | X | 357 | 63.918 | 38.371 | 57.363 | 0.00 | 0.00 |
| ATOM | 5380 | N    | GLY | X | 358 | 64.779 | 36.428 | 56.729 | 0.00 | 0.00 |
| ATOM | 5381 | H    | GLY | X | 358 | 65.579 | 35.834 | 56.896 | 0.00 | 0.00 |
| ATOM | 5382 | CA   | GLY | X | 358 | 63.873 | 35.918 | 55.705 | 0.00 | 0.00 |
| ATOM | 5383 | HA2  | GLY | X | 358 | 63.966 | 36.597 | 54.858 | 0.00 | 0.00 |
| ATOM | 5384 | HA3  | GLY | X | 358 | 64.277 | 34.926 | 55.501 | 0.00 | 0.00 |
| ATOM | 5385 | C    | GLY | X | 358 | 62.427 | 35.808 | 56.158 | 0.00 | 0.00 |
| ATOM | 5386 | O    | GLY | X | 358 | 61.561 | 36.469 | 55.556 | 0.00 | 0.00 |
| ATOM | 5387 | N    | VAL | X | 359 | 62.128 | 34.919 | 57.122 | 0.00 | 0.00 |
| ATOM | 5388 | H    | VAL | X | 359 | 62.822 | 34.259 | 57.443 | 0.00 | 0.00 |
| ATOM | 5389 | CA   | VAL | X | 359 | 60.927 | 35.032 | 58.020 | 0.00 | 0.00 |
| ATOM | 5390 | HA   | VAL | X | 359 | 60.031 | 34.745 | 57.469 | 0.00 | 0.00 |
| ATOM | 5391 | CB   | VAL | X | 359 | 60.984 | 34.076 | 59.238 | 0.00 | 0.00 |
| ATOM | 5392 | HB   | VAL | X | 359 | 61.916 | 34.209 | 59.786 | 0.00 | 0.00 |
| ATOM | 5393 | CG1  | VAL | X | 359 | 59.790 | 34.237 | 60.208 | 0.00 | 0.00 |
| ATOM | 5394 | HG11 | VAL | X | 359 | 58.856 | 33.982 | 59.707 | 0.00 | 0.00 |
| ATOM | 5395 | HG12 | VAL | X | 359 | 60.051 | 33.545 | 61.008 | 0.00 | 0.00 |
| ATOM | 5396 | HG13 | VAL | X | 359 | 59.679 | 35.228 | 60.647 | 0.00 | 0.00 |
| ATOM | 5397 | CG2  | VAL | X | 359 | 60.970 | 32.659 | 58.751 | 0.00 | 0.00 |
| ATOM | 5398 | HG21 | VAL | X | 359 | 61.822 | 32.424 | 58.112 | 0.00 | 0.00 |
| ATOM | 5399 | HG22 | VAL | X | 359 | 60.054 | 32.432 | 58.205 | 0.00 | 0.00 |
| ATOM | 5400 | HG23 | VAL | X | 359 | 61.034 | 31.988 | 59.607 | 0.00 | 0.00 |
| ATOM | 5401 | C    | VAL | X | 359 | 60.643 | 36.462 | 58.408 | 0.00 | 0.00 |
| ATOM | 5402 | O    | VAL | X | 359 | 59.537 | 36.916 | 58.196 | 0.00 | 0.00 |
| ATOM | 5403 | N    | ARG | X | 360 | 61.583 | 37.209 | 59.000 | 0.00 | 0.00 |
| ATOM | 5404 | H    | ARG | X | 360 | 62.510 | 36.858 | 59.195 | 0.00 | 0.00 |
| ATOM | 5405 | CA   | ARG | X | 360 | 61.327 | 38.545 | 59.465 | 0.00 | 0.00 |



|      |      |      |     |   |     |        |        |        |      |      |
|------|------|------|-----|---|-----|--------|--------|--------|------|------|
| ATOM | 5406 | HA   | ARG | X | 360 | 60.497 | 38.585 | 60.170 | 0.00 | 0.00 |
| ATOM | 5407 | CB   | ARG | X | 360 | 62.424 | 39.124 | 60.320 | 0.00 | 0.00 |
| ATOM | 5408 | HB2  | ARG | X | 360 | 63.451 | 39.008 | 59.973 | 0.00 | 0.00 |
| ATOM | 5409 | HB3  | ARG | X | 360 | 62.359 | 40.207 | 60.420 | 0.00 | 0.00 |
| ATOM | 5410 | CG   | ARG | X | 360 | 62.459 | 38.429 | 61.723 | 0.00 | 0.00 |
| ATOM | 5411 | HG2  | ARG | X | 360 | 61.472 | 38.174 | 62.110 | 0.00 | 0.00 |
| ATOM | 5412 | HG3  | ARG | X | 360 | 62.951 | 37.473 | 61.543 | 0.00 | 0.00 |
| ATOM | 5413 | CD   | ARG | X | 360 | 63.146 | 39.246 | 62.827 | 0.00 | 0.00 |
| ATOM | 5414 | HD2  | ARG | X | 360 | 63.406 | 38.561 | 63.632 | 0.00 | 0.00 |
| ATOM | 5415 | HD3  | ARG | X | 360 | 64.128 | 39.617 | 62.533 | 0.00 | 0.00 |
| ATOM | 5416 | NE   | ARG | X | 360 | 62.320 | 40.401 | 63.189 | 0.00 | 0.00 |
| ATOM | 5417 | HE   | ARG | X | 360 | 61.809 | 40.827 | 62.428 | 0.00 | 0.00 |
| ATOM | 5418 | CZ   | ARG | X | 360 | 61.919 | 40.785 | 64.394 | 0.00 | 0.00 |
| ATOM | 5419 | NH1  | ARG | X | 360 | 62.523 | 40.339 | 65.490 | 0.00 | 0.00 |
| ATOM | 5420 | HH11 | ARG | X | 360 | 63.385 | 39.813 | 65.443 | 0.00 | 0.00 |
| ATOM | 5421 | HH12 | ARG | X | 360 | 62.087 | 40.378 | 66.400 | 0.00 | 0.00 |
| ATOM | 5422 | NH2  | ARG | X | 360 | 60.976 | 41.708 | 64.435 | 0.00 | 0.00 |
| ATOM | 5423 | HH21 | ARG | X | 360 | 60.608 | 42.069 | 63.566 | 0.00 | 0.00 |
| ATOM | 5424 | HH22 | ARG | X | 360 | 60.606 | 41.856 | 65.363 | 0.00 | 0.00 |
| ATOM | 5425 | C    | ARG | X | 360 | 60.988 | 39.610 | 58.397 | 0.00 | 0.00 |
| ATOM | 5426 | O    | ARG | X | 360 | 60.205 | 40.493 | 58.686 | 0.00 | 0.00 |
| ATOM | 5427 | N    | VAL | X | 361 | 61.443 | 39.413 | 57.149 | 0.00 | 0.00 |
| ATOM | 5428 | H    | VAL | X | 361 | 62.225 | 38.794 | 56.990 | 0.00 | 0.00 |
| ATOM | 5429 | CA   | VAL | X | 361 | 61.005 | 40.322 | 56.059 | 0.00 | 0.00 |
| ATOM | 5430 | HA   | VAL | X | 361 | 60.794 | 41.257 | 56.579 | 0.00 | 0.00 |
| ATOM | 5431 | CB   | VAL | X | 361 | 62.084 | 40.648 | 55.045 | 0.00 | 0.00 |
| ATOM | 5432 | HB   | VAL | X | 361 | 61.771 | 41.385 | 54.305 | 0.00 | 0.00 |
| ATOM | 5433 | CG1  | VAL | X | 361 | 63.376 | 41.253 | 55.661 | 0.00 | 0.00 |
| ATOM | 5434 | HG11 | VAL | X | 361 | 63.945 | 40.498 | 56.203 | 0.00 | 0.00 |
| ATOM | 5435 | HG12 | VAL | X | 361 | 63.997 | 41.708 | 54.888 | 0.00 | 0.00 |
| ATOM | 5436 | HG13 | VAL | X | 361 | 63.078 | 42.037 | 56.357 | 0.00 | 0.00 |
| ATOM | 5437 | CG2  | VAL | X | 361 | 62.626 | 39.479 | 54.237 | 0.00 | 0.00 |
| ATOM | 5438 | HG21 | VAL | X | 361 | 63.365 | 39.791 | 53.499 | 0.00 | 0.00 |
| ATOM | 5439 | HG22 | VAL | X | 361 | 61.755 | 39.044 | 53.747 | 0.00 | 0.00 |
| ATOM | 5440 | HG23 | VAL | X | 361 | 63.001 | 38.802 | 55.005 | 0.00 | 0.00 |
| ATOM | 5441 | C    | VAL | X | 361 | 59.633 | 39.868 | 55.468 | 0.00 | 0.00 |
| ATOM | 5442 | O    | VAL | X | 361 | 59.058 | 40.551 | 54.626 | 0.00 | 0.00 |
| ATOM | 5443 | N    | GLY | X | 362 | 59.302 | 38.616 | 55.747 | 0.00 | 0.00 |
| ATOM | 5444 | H    | GLY | X | 362 | 59.882 | 38.090 | 56.384 | 0.00 | 0.00 |
| ATOM | 5445 | CA   | GLY | X | 362 | 58.315 | 37.765 | 55.058 | 0.00 | 0.00 |
| ATOM | 5446 | HA2  | GLY | X | 362 | 58.171 | 38.294 | 54.115 | 0.00 | 0.00 |
| ATOM | 5447 | HA3  | GLY | X | 362 | 58.745 | 36.791 | 54.826 | 0.00 | 0.00 |
| ATOM | 5448 | C    | GLY | X | 362 | 57.008 | 37.460 | 55.732 | 0.00 | 0.00 |
| ATOM | 5449 | O    | GLY | X | 362 | 56.054 | 36.979 | 55.134 | 0.00 | 0.00 |
| ATOM | 5450 | N    | VAL | X | 363 | 56.895 | 37.915 | 56.961 | 0.00 | 0.00 |
| ATOM | 5451 | H    | VAL | X | 363 | 57.715 | 38.381 | 57.321 | 0.00 | 0.00 |
| ATOM | 5452 | CA   | VAL | X | 363 | 55.668 | 37.844 | 57.800 | 0.00 | 0.00 |
| ATOM | 5453 | HA   | VAL | X | 363 | 54.878 | 37.651 | 57.074 | 0.00 | 0.00 |
| ATOM | 5454 | CB   | VAL | X | 363 | 55.593 | 36.623 | 58.775 | 0.00 | 0.00 |
| ATOM | 5455 | HB   | VAL | X | 363 | 56.043 | 36.874 | 59.736 | 0.00 | 0.00 |
| ATOM | 5456 | CG1  | VAL | X | 363 | 54.098 | 36.417 | 59.193 | 0.00 | 0.00 |
| ATOM | 5457 | HG11 | VAL | X | 363 | 54.005 | 35.558 | 59.858 | 0.00 | 0.00 |
| ATOM | 5458 | HG12 | VAL | X | 363 | 53.782 | 37.302 | 59.746 | 0.00 | 0.00 |
| ATOM | 5459 | HG13 | VAL | X | 363 | 53.428 | 36.272 | 58.346 | 0.00 | 0.00 |
| ATOM | 5460 | CG2  | VAL | X | 363 | 56.168 | 35.285 | 58.322 | 0.00 | 0.00 |
| ATOM | 5461 | HG21 | VAL | X | 363 | 57.181 | 35.434 | 57.950 | 0.00 | 0.00 |
| ATOM | 5462 | HG22 | VAL | X | 363 | 55.498 | 34.784 | 57.623 | 0.00 | 0.00 |
| ATOM | 5463 | HG23 | VAL | X | 363 | 56.373 | 34.608 | 59.151 | 0.00 | 0.00 |
| ATOM | 5464 | C    | VAL | X | 363 | 55.385 | 39.242 | 58.450 | 0.00 | 0.00 |
| ATOM | 5465 | O    | VAL | X | 363 | 56.298 | 39.686 | 59.123 | 0.00 | 0.00 |
| ATOM | 5466 | N    | PRO | X | 364 | 54.180 | 39.869 | 58.401 | 0.00 | 0.00 |
| ATOM | 5467 | CD   | PRO | X | 364 | 53.034 | 39.561 | 57.537 | 0.00 | 0.00 |
| ATOM | 5468 | HD2  | PRO | X | 364 | 52.725 | 38.523 | 57.661 | 0.00 | 0.00 |
| ATOM | 5469 | HD3  | PRO | X | 364 | 53.314 | 39.844 | 56.523 | 0.00 | 0.00 |
| ATOM | 5470 | CG   | PRO | X | 364 | 51.887 | 40.534 | 57.877 | 0.00 | 0.00 |
| ATOM | 5471 | HG2  | PRO | X | 364 | 51.137 | 40.100 | 58.537 | 0.00 | 0.00 |
| ATOM | 5472 | HG3  | PRO | X | 364 | 51.360 | 40.953 | 57.019 | 0.00 | 0.00 |

|      |      |      |     |   |     |        |        |        |      |      |
|------|------|------|-----|---|-----|--------|--------|--------|------|------|
| ATOM | 5473 | CB   | PRO | X | 364 | 52.560 | 41.659 | 58.655 | 0.00 | 0.00 |
| ATOM | 5474 | HB2  | PRO | X | 364 | 51.881 | 42.113 | 59.377 | 0.00 | 0.00 |
| ATOM | 5475 | HB3  | PRO | X | 364 | 52.917 | 42.386 | 57.925 | 0.00 | 0.00 |
| ATOM | 5476 | CA   | PRO | X | 364 | 53.858 | 41.052 | 59.163 | 0.00 | 0.00 |
| ATOM | 5477 | HA   | PRO | X | 364 | 54.587 | 41.838 | 58.966 | 0.00 | 0.00 |
| ATOM | 5478 | C    | PRO | X | 364 | 53.678 | 40.771 | 60.649 | 0.00 | 0.00 |
| ATOM | 5479 | O    | PRO | X | 364 | 53.497 | 39.613 | 61.045 | 0.00 | 0.00 |
| ATOM | 5480 | N    | GLN | X | 365 | 54.031 | 41.838 | 61.454 | 0.00 | 0.00 |
| ATOM | 5481 | H    | GLN | X | 365 | 54.088 | 42.722 | 60.969 | 0.00 | 0.00 |
| ATOM | 5482 | CA   | GLN | X | 365 | 53.958 | 41.924 | 62.900 | 0.00 | 0.00 |
| ATOM | 5483 | HA   | GLN | X | 365 | 54.108 | 42.980 | 63.122 | 0.00 | 0.00 |
| ATOM | 5484 | CB   | GLN | X | 365 | 52.571 | 41.541 | 63.517 | 0.00 | 0.00 |
| ATOM | 5485 | HB2  | GLN | X | 365 | 51.738 | 41.856 | 62.888 | 0.00 | 0.00 |
| ATOM | 5486 | HB3  | GLN | X | 365 | 52.499 | 40.453 | 63.543 | 0.00 | 0.00 |
| ATOM | 5487 | CG   | GLN | X | 365 | 52.372 | 42.064 | 64.948 | 0.00 | 0.00 |
| ATOM | 5488 | HG2  | GLN | X | 365 | 53.034 | 41.470 | 65.578 | 0.00 | 0.00 |
| ATOM | 5489 | HG3  | GLN | X | 365 | 52.694 | 43.106 | 64.945 | 0.00 | 0.00 |
| ATOM | 5490 | CD   | GLN | X | 365 | 50.988 | 41.847 | 65.508 | 0.00 | 0.00 |
| ATOM | 5491 | OE1  | GLN | X | 365 | 50.457 | 40.764 | 65.562 | 0.00 | 0.00 |
| ATOM | 5492 | NE2  | GLN | X | 365 | 50.311 | 42.905 | 66.022 | 0.00 | 0.00 |
| ATOM | 5493 | HE21 | GLN | X | 365 | 49.466 | 42.701 | 66.537 | 0.00 | 0.00 |
| ATOM | 5494 | HE22 | GLN | X | 365 | 50.684 | 43.836 | 66.142 | 0.00 | 0.00 |
| ATOM | 5495 | C    | GLN | X | 365 | 55.040 | 41.095 | 63.511 | 0.00 | 0.00 |
| ATOM | 5496 | O    | GLN | X | 365 | 55.458 | 41.433 | 64.614 | 0.00 | 0.00 |
| ATOM | 5497 | N    | VAL | X | 366 | 55.457 | 40.005 | 62.867 | 0.00 | 0.00 |
| ATOM | 5498 | H    | VAL | X | 366 | 55.066 | 39.734 | 61.976 | 0.00 | 0.00 |
| ATOM | 5499 | CA   | VAL | X | 366 | 56.211 | 38.901 | 63.594 | 0.00 | 0.00 |
| ATOM | 5500 | HA   | VAL | X | 366 | 55.411 | 38.452 | 64.183 | 0.00 | 0.00 |
| ATOM | 5501 | CB   | VAL | X | 366 | 56.618 | 37.777 | 62.538 | 0.00 | 0.00 |
| ATOM | 5502 | HB   | VAL | X | 366 | 55.792 | 37.675 | 61.834 | 0.00 | 0.00 |
| ATOM | 5503 | CG1  | VAL | X | 366 | 57.904 | 38.059 | 61.813 | 0.00 | 0.00 |
| ATOM | 5504 | HG11 | VAL | X | 366 | 58.797 | 37.888 | 62.414 | 0.00 | 0.00 |
| ATOM | 5505 | HG12 | VAL | X | 366 | 58.044 | 37.526 | 60.873 | 0.00 | 0.00 |
| ATOM | 5506 | HG13 | VAL | X | 366 | 57.901 | 39.072 | 61.412 | 0.00 | 0.00 |
| ATOM | 5507 | CG2  | VAL | X | 366 | 56.745 | 36.285 | 63.098 | 0.00 | 0.00 |
| ATOM | 5508 | HG21 | VAL | X | 366 | 55.741 | 35.893 | 63.262 | 0.00 | 0.00 |
| ATOM | 5509 | HG22 | VAL | X | 366 | 57.347 | 36.179 | 64.000 | 0.00 | 0.00 |
| ATOM | 5510 | HG23 | VAL | X | 366 | 57.214 | 35.705 | 62.303 | 0.00 | 0.00 |
| ATOM | 5511 | C    | VAL | X | 366 | 57.387 | 39.253 | 64.604 | 0.00 | 0.00 |
| ATOM | 5512 | O    | VAL | X | 366 | 58.305 | 40.052 | 64.276 | 0.00 | 0.00 |
| ATOM | 5513 | N    | SER | X | 367 | 57.396 | 38.781 | 65.848 | 0.00 | 0.00 |
| ATOM | 5514 | H    | SER | X | 367 | 56.755 | 38.044 | 66.106 | 0.00 | 0.00 |
| ATOM | 5515 | CA   | SER | X | 367 | 58.336 | 39.080 | 66.941 | 0.00 | 0.00 |
| ATOM | 5516 | HA   | SER | X | 367 | 58.602 | 40.135 | 66.884 | 0.00 | 0.00 |
| ATOM | 5517 | CB   | SER | X | 367 | 57.673 | 38.944 | 68.317 | 0.00 | 0.00 |
| ATOM | 5518 | HB2  | SER | X | 367 | 58.375 | 39.186 | 69.115 | 0.00 | 0.00 |
| ATOM | 5519 | HB3  | SER | X | 367 | 56.792 | 39.581 | 68.245 | 0.00 | 0.00 |
| ATOM | 5520 | OG   | SER | X | 367 | 57.264 | 37.576 | 68.541 | 0.00 | 0.00 |
| ATOM | 5521 | HG   | SER | X | 367 | 56.580 | 37.488 | 69.209 | 0.00 | 0.00 |
| ATOM | 5522 | C    | SER | X | 367 | 59.608 | 38.243 | 66.877 | 0.00 | 0.00 |
| ATOM | 5523 | O    | SER | X | 367 | 59.602 | 37.179 | 66.183 | 0.00 | 0.00 |
| ATOM | 5524 | N    | ASP | X | 368 | 60.615 | 38.681 | 67.662 | 0.00 | 0.00 |
| ATOM | 5525 | H    | ASP | X | 368 | 60.415 | 39.462 | 68.271 | 0.00 | 0.00 |
| ATOM | 5526 | CA   | ASP | X | 368 | 61.763 | 37.813 | 67.887 | 0.00 | 0.00 |
| ATOM | 5527 | HA   | ASP | X | 368 | 62.249 | 37.685 | 66.921 | 0.00 | 0.00 |
| ATOM | 5528 | CB   | ASP | X | 368 | 62.795 | 38.485 | 68.788 | 0.00 | 0.00 |
| ATOM | 5529 | HB2  | ASP | X | 368 | 63.122 | 39.376 | 68.252 | 0.00 | 0.00 |
| ATOM | 5530 | HB3  | ASP | X | 368 | 62.295 | 38.845 | 69.687 | 0.00 | 0.00 |
| ATOM | 5531 | CG   | ASP | X | 368 | 63.996 | 37.677 | 69.204 | 0.00 | 0.00 |
| ATOM | 5532 | OD1  | ASP | X | 368 | 64.994 | 37.616 | 68.480 | 0.00 | 0.00 |
| ATOM | 5533 | OD2  | ASP | X | 368 | 63.962 | 37.164 | 70.335 | 0.00 | 0.00 |
| ATOM | 5534 | C    | ASP | X | 368 | 61.426 | 36.375 | 68.345 | 0.00 | 0.00 |
| ATOM | 5535 | O    | ASP | X | 368 | 61.969 | 35.377 | 67.782 | 0.00 | 0.00 |
| ATOM | 5536 | N    | LEU | X | 369 | 60.551 | 36.158 | 69.310 | 0.00 | 0.00 |
| ATOM | 5537 | H    | LEU | X | 369 | 60.064 | 36.915 | 69.769 | 0.00 | 0.00 |
| ATOM | 5538 | CA   | LEU | X | 369 | 60.205 | 34.792 | 69.753 | 0.00 | 0.00 |
| ATOM | 5539 | HA   | LEU | X | 369 | 61.177 | 34.314 | 69.883 | 0.00 | 0.00 |

|      |      |      |     |   |     |        |        |        |      |      |
|------|------|------|-----|---|-----|--------|--------|--------|------|------|
| ATOM | 5540 | CB   | LEU | X | 369 | 59.386 | 34.877 | 71.092 | 0.00 | 0.00 |
| ATOM | 5541 | HB2  | LEU | X | 369 | 59.888 | 35.588 | 71.749 | 0.00 | 0.00 |
| ATOM | 5542 | HB3  | LEU | X | 369 | 58.411 | 35.362 | 71.040 | 0.00 | 0.00 |
| ATOM | 5543 | CG   | LEU | X | 369 | 59.149 | 33.493 | 71.773 | 0.00 | 0.00 |
| ATOM | 5544 | HG   | LEU | X | 369 | 58.721 | 32.870 | 70.987 | 0.00 | 0.00 |
| ATOM | 5545 | CD1  | LEU | X | 369 | 60.395 | 32.837 | 72.292 | 0.00 | 0.00 |
| ATOM | 5546 | HD11 | LEU | X | 369 | 60.926 | 33.554 | 72.919 | 0.00 | 0.00 |
| ATOM | 5547 | HD12 | LEU | X | 369 | 61.064 | 32.463 | 71.517 | 0.00 | 0.00 |
| ATOM | 5548 | HD13 | LEU | X | 369 | 60.047 | 32.100 | 73.016 | 0.00 | 0.00 |
| ATOM | 5549 | CD2  | LEU | X | 369 | 58.226 | 33.668 | 73.017 | 0.00 | 0.00 |
| ATOM | 5550 | HD21 | LEU | X | 369 | 57.230 | 33.975 | 72.700 | 0.00 | 0.00 |
| ATOM | 5551 | HD22 | LEU | X | 369 | 58.080 | 32.752 | 73.590 | 0.00 | 0.00 |
| ATOM | 5552 | HD23 | LEU | X | 369 | 58.579 | 34.551 | 73.549 | 0.00 | 0.00 |
| ATOM | 5553 | C    | LEU | X | 369 | 59.365 | 34.061 | 68.674 | 0.00 | 0.00 |
| ATOM | 5554 | O    | LEU | X | 369 | 59.578 | 32.918 | 68.457 | 0.00 | 0.00 |
| ATOM | 5555 | N    | ALA | X | 370 | 58.419 | 34.728 | 68.037 | 0.00 | 0.00 |
| ATOM | 5556 | H    | ALA | X | 370 | 58.311 | 35.722 | 68.183 | 0.00 | 0.00 |
| ATOM | 5557 | CA   | ALA | X | 370 | 57.514 | 34.169 | 66.942 | 0.00 | 0.00 |
| ATOM | 5558 | HA   | ALA | X | 370 | 57.097 | 33.219 | 67.274 | 0.00 | 0.00 |
| ATOM | 5559 | CB   | ALA | X | 370 | 56.347 | 35.124 | 66.828 | 0.00 | 0.00 |
| ATOM | 5560 | HB1  | ALA | X | 370 | 55.834 | 35.240 | 67.782 | 0.00 | 0.00 |
| ATOM | 5561 | HB2  | ALA | X | 370 | 55.627 | 34.660 | 66.154 | 0.00 | 0.00 |
| ATOM | 5562 | HB3  | ALA | X | 370 | 56.748 | 36.051 | 66.418 | 0.00 | 0.00 |
| ATOM | 5563 | C    | ALA | X | 370 | 58.241 | 33.911 | 65.645 | 0.00 | 0.00 |
| ATOM | 5564 | O    | ALA | X | 370 | 58.039 | 32.780 | 65.058 | 0.00 | 0.00 |
| ATOM | 5565 | N    | ALA | X | 371 | 59.138 | 34.725 | 65.111 | 0.00 | 0.00 |
| ATOM | 5566 | H    | ALA | X | 371 | 59.343 | 35.607 | 65.558 | 0.00 | 0.00 |
| ATOM | 5567 | CA   | ALA | X | 371 | 59.886 | 34.390 | 63.874 | 0.00 | 0.00 |
| ATOM | 5568 | HA   | ALA | X | 371 | 59.247 | 34.009 | 63.078 | 0.00 | 0.00 |
| ATOM | 5569 | CB   | ALA | X | 371 | 60.684 | 35.611 | 63.533 | 0.00 | 0.00 |
| ATOM | 5570 | HB1  | ALA | X | 371 | 60.102 | 36.533 | 63.570 | 0.00 | 0.00 |
| ATOM | 5571 | HB2  | ALA | X | 371 | 61.166 | 35.498 | 62.563 | 0.00 | 0.00 |
| ATOM | 5572 | HB3  | ALA | X | 371 | 61.375 | 35.837 | 64.345 | 0.00 | 0.00 |
| ATOM | 5573 | C    | ALA | X | 371 | 60.741 | 33.119 | 64.110 | 0.00 | 0.00 |
| ATOM | 5574 | O    | ALA | X | 371 | 60.711 | 32.231 | 63.320 | 0.00 | 0.00 |
| ATOM | 5575 | N    | GLU | X | 372 | 61.294 | 32.952 | 65.316 | 0.00 | 0.00 |
| ATOM | 5576 | H    | GLU | X | 372 | 61.183 | 33.607 | 66.077 | 0.00 | 0.00 |
| ATOM | 5577 | CA   | GLU | X | 372 | 62.124 | 31.792 | 65.674 | 0.00 | 0.00 |
| ATOM | 5578 | HA   | GLU | X | 372 | 62.927 | 31.633 | 64.954 | 0.00 | 0.00 |
| ATOM | 5579 | CB   | GLU | X | 372 | 62.748 | 32.087 | 67.061 | 0.00 | 0.00 |
| ATOM | 5580 | HB2  | GLU | X | 372 | 63.180 | 33.087 | 67.076 | 0.00 | 0.00 |
| ATOM | 5581 | HB3  | GLU | X | 372 | 61.820 | 32.133 | 67.630 | 0.00 | 0.00 |
| ATOM | 5582 | CG   | GLU | X | 372 | 63.692 | 31.057 | 67.658 | 0.00 | 0.00 |
| ATOM | 5583 | HG2  | GLU | X | 372 | 63.308 | 30.044 | 67.778 | 0.00 | 0.00 |
| ATOM | 5584 | HG3  | GLU | X | 372 | 64.552 | 31.083 | 66.990 | 0.00 | 0.00 |
| ATOM | 5585 | CD   | GLU | X | 372 | 64.063 | 31.539 | 69.058 | 0.00 | 0.00 |
| ATOM | 5586 | OE1  | GLU | X | 372 | 65.072 | 32.250 | 69.197 | 0.00 | 0.00 |
| ATOM | 5587 | OE2  | GLU | X | 372 | 63.339 | 31.208 | 70.040 | 0.00 | 0.00 |
| ATOM | 5588 | C    | GLU | X | 372 | 61.265 | 30.540 | 65.663 | 0.00 | 0.00 |
| ATOM | 5589 | O    | GLU | X | 372 | 61.740 | 29.491 | 65.228 | 0.00 | 0.00 |
| ATOM | 5590 | N    | ALA | X | 373 | 59.995 | 30.692 | 66.038 | 0.00 | 0.00 |
| ATOM | 5591 | H    | ALA | X | 373 | 59.755 | 31.587 | 66.440 | 0.00 | 0.00 |
| ATOM | 5592 | CA   | ALA | X | 373 | 58.971 | 29.581 | 66.116 | 0.00 | 0.00 |
| ATOM | 5593 | HA   | ALA | X | 373 | 59.358 | 28.693 | 66.615 | 0.00 | 0.00 |
| ATOM | 5594 | CB   | ALA | X | 373 | 57.877 | 30.015 | 67.067 | 0.00 | 0.00 |
| ATOM | 5595 | HB1  | ALA | X | 373 | 57.134 | 30.613 | 66.538 | 0.00 | 0.00 |
| ATOM | 5596 | HB2  | ALA | X | 373 | 58.278 | 30.674 | 67.837 | 0.00 | 0.00 |
| ATOM | 5597 | HB3  | ALA | X | 373 | 57.440 | 29.110 | 67.490 | 0.00 | 0.00 |
| ATOM | 5598 | C    | ALA | X | 373 | 58.414 | 29.191 | 64.745 | 0.00 | 0.00 |
| ATOM | 5599 | O    | ALA | X | 373 | 58.012 | 28.045 | 64.417 | 0.00 | 0.00 |
| ATOM | 5600 | N    | VAL | X | 374 | 58.315 | 30.146 | 63.826 | 0.00 | 0.00 |
| ATOM | 5601 | H    | VAL | X | 374 | 58.460 | 31.065 | 64.220 | 0.00 | 0.00 |
| ATOM | 5602 | CA   | VAL | X | 374 | 58.032 | 29.892 | 62.430 | 0.00 | 0.00 |
| ATOM | 5603 | HA   | VAL | X | 374 | 57.260 | 29.126 | 62.352 | 0.00 | 0.00 |
| ATOM | 5604 | CB   | VAL | X | 374 | 57.653 | 31.199 | 61.639 | 0.00 | 0.00 |
| ATOM | 5605 | HB   | VAL | X | 374 | 58.493 | 31.888 | 61.723 | 0.00 | 0.00 |
| ATOM | 5606 | CG1  | VAL | X | 374 | 57.427 | 30.817 | 60.171 | 0.00 | 0.00 |

|      |      |      |     |   |     |        |        |        |      |      |
|------|------|------|-----|---|-----|--------|--------|--------|------|------|
| ATOM | 5607 | HG11 | VAL | X | 374 | 58.352 | 30.559 | 59.654 | 0.00 | 0.00 |
| ATOM | 5608 | HG12 | VAL | X | 374 | 56.673 | 30.032 | 60.105 | 0.00 | 0.00 |
| ATOM | 5609 | HG13 | VAL | X | 374 | 57.080 | 31.686 | 59.611 | 0.00 | 0.00 |
| ATOM | 5610 | CG2  | VAL | X | 374 | 56.464 | 31.985 | 62.167 | 0.00 | 0.00 |
| ATOM | 5611 | HG21 | VAL | X | 374 | 56.743 | 32.879 | 62.724 | 0.00 | 0.00 |
| ATOM | 5612 | HG22 | VAL | X | 374 | 55.908 | 31.312 | 62.819 | 0.00 | 0.00 |
| ATOM | 5613 | HG23 | VAL | X | 374 | 55.749 | 32.429 | 61.474 | 0.00 | 0.00 |
| ATOM | 5614 | C    | VAL | X | 374 | 59.172 | 29.169 | 61.718 | 0.00 | 0.00 |
| ATOM | 5615 | O    | VAL | X | 374 | 58.969 | 28.170 | 61.069 | 0.00 | 0.00 |
| ATOM | 5616 | N    | VAL | X | 375 | 60.427 | 29.570 | 61.899 | 0.00 | 0.00 |
| ATOM | 5617 | H    | VAL | X | 375 | 60.545 | 30.275 | 62.612 | 0.00 | 0.00 |
| ATOM | 5618 | CA   | VAL | X | 375 | 61.677 | 28.942 | 61.435 | 0.00 | 0.00 |
| ATOM | 5619 | HA   | VAL | X | 375 | 61.477 | 28.932 | 60.364 | 0.00 | 0.00 |
| ATOM | 5620 | CB   | VAL | X | 375 | 63.015 | 29.671 | 61.896 | 0.00 | 0.00 |
| ATOM | 5621 | HB   | VAL | X | 375 | 62.883 | 29.883 | 62.957 | 0.00 | 0.00 |
| ATOM | 5622 | CG1  | VAL | X | 375 | 64.299 | 28.889 | 61.593 | 0.00 | 0.00 |
| ATOM | 5623 | HG11 | VAL | X | 375 | 65.187 | 29.520 | 61.575 | 0.00 | 0.00 |
| ATOM | 5624 | HG12 | VAL | X | 375 | 64.417 | 28.115 | 62.352 | 0.00 | 0.00 |
| ATOM | 5625 | HG13 | VAL | X | 375 | 64.203 | 28.447 | 60.602 | 0.00 | 0.00 |
| ATOM | 5626 | CG2  | VAL | X | 375 | 63.158 | 30.961 | 61.163 | 0.00 | 0.00 |
| ATOM | 5627 | HG21 | VAL | X | 375 | 64.072 | 31.499 | 61.414 | 0.00 | 0.00 |
| ATOM | 5628 | HG22 | VAL | X | 375 | 62.352 | 31.664 | 61.376 | 0.00 | 0.00 |
| ATOM | 5629 | HG23 | VAL | X | 375 | 63.123 | 30.864 | 60.078 | 0.00 | 0.00 |
| ATOM | 5630 | C    | VAL | X | 375 | 61.687 | 27.479 | 62.027 | 0.00 | 0.00 |
| ATOM | 5631 | O    | VAL | X | 375 | 61.964 | 26.470 | 61.295 | 0.00 | 0.00 |
| ATOM | 5632 | N    | LEU | X | 376 | 61.389 | 27.314 | 63.286 | 0.00 | 0.00 |
| ATOM | 5633 | H    | LEU | X | 376 | 61.235 | 28.063 | 63.946 | 0.00 | 0.00 |
| ATOM | 5634 | CA   | LEU | X | 376 | 61.260 | 25.966 | 63.787 | 0.00 | 0.00 |
| ATOM | 5635 | HA   | LEU | X | 376 | 62.205 | 25.463 | 63.586 | 0.00 | 0.00 |
| ATOM | 5636 | CB   | LEU | X | 376 | 61.147 | 26.133 | 65.353 | 0.00 | 0.00 |
| ATOM | 5637 | HB2  | LEU | X | 376 | 62.013 | 26.743 | 65.610 | 0.00 | 0.00 |
| ATOM | 5638 | HB3  | LEU | X | 376 | 60.220 | 26.563 | 65.732 | 0.00 | 0.00 |
| ATOM | 5639 | CG   | LEU | X | 376 | 61.409 | 24.836 | 66.177 | 0.00 | 0.00 |
| ATOM | 5640 | HG   | LEU | X | 376 | 61.233 | 25.087 | 67.223 | 0.00 | 0.00 |
| ATOM | 5641 | CD1  | LEU | X | 376 | 60.379 | 23.711 | 65.842 | 0.00 | 0.00 |
| ATOM | 5642 | HD11 | LEU | X | 376 | 59.347 | 24.058 | 65.800 | 0.00 | 0.00 |
| ATOM | 5643 | HD12 | LEU | X | 376 | 60.501 | 22.958 | 66.620 | 0.00 | 0.00 |
| ATOM | 5644 | HD13 | LEU | X | 376 | 60.519 | 23.341 | 64.826 | 0.00 | 0.00 |
| ATOM | 5645 | CD2  | LEU | X | 376 | 62.788 | 24.233 | 65.826 | 0.00 | 0.00 |
| ATOM | 5646 | HD21 | LEU | X | 376 | 63.532 | 25.003 | 66.027 | 0.00 | 0.00 |
| ATOM | 5647 | HD22 | LEU | X | 376 | 62.981 | 23.430 | 66.537 | 0.00 | 0.00 |
| ATOM | 5648 | HD23 | LEU | X | 376 | 62.697 | 23.865 | 64.804 | 0.00 | 0.00 |
| ATOM | 5649 | C    | LEU | X | 376 | 60.118 | 25.176 | 63.159 | 0.00 | 0.00 |
| ATOM | 5650 | O    | LEU | X | 376 | 60.452 | 24.165 | 62.546 | 0.00 | 0.00 |
| ATOM | 5651 | N    | HIE | X | 377 | 58.831 | 25.577 | 63.029 | 0.00 | 0.00 |
| ATOM | 5652 | H    | HIE | X | 377 | 58.593 | 26.339 | 63.648 | 0.00 | 0.00 |
| ATOM | 5653 | CA   | HIE | X | 377 | 57.781 | 24.800 | 62.406 | 0.00 | 0.00 |
| ATOM | 5654 | HA   | HIE | X | 377 | 57.766 | 23.828 | 62.900 | 0.00 | 0.00 |
| ATOM | 5655 | CB   | HIE | X | 377 | 56.455 | 25.573 | 62.656 | 0.00 | 0.00 |
| ATOM | 5656 | HB2  | HIE | X | 377 | 56.321 | 25.647 | 63.735 | 0.00 | 0.00 |
| ATOM | 5657 | HB3  | HIE | X | 377 | 56.499 | 26.620 | 62.353 | 0.00 | 0.00 |
| ATOM | 5658 | CG   | HIE | X | 377 | 55.240 | 24.868 | 62.144 | 0.00 | 0.00 |
| ATOM | 5659 | ND1  | HIE | X | 377 | 54.627 | 23.767 | 62.760 | 0.00 | 0.00 |
| ATOM | 5660 | CE1  | HIE | X | 377 | 53.695 | 23.317 | 61.849 | 0.00 | 0.00 |
| ATOM | 5661 | HE1  | HIE | X | 377 | 52.870 | 22.670 | 62.108 | 0.00 | 0.00 |
| ATOM | 5662 | NE2  | HIE | X | 377 | 53.615 | 24.133 | 60.767 | 0.00 | 0.00 |
| ATOM | 5663 | HE2  | HIE | X | 377 | 52.916 | 24.170 | 60.040 | 0.00 | 0.00 |
| ATOM | 5664 | CD2  | HIE | X | 377 | 54.632 | 25.057 | 61.008 | 0.00 | 0.00 |
| ATOM | 5665 | HD2  | HIE | X | 377 | 54.785 | 25.917 | 60.372 | 0.00 | 0.00 |
| ATOM | 5666 | C    | HIE | X | 377 | 58.008 | 24.584 | 60.903 | 0.00 | 0.00 |
| ATOM | 5667 | O    | HIE | X | 377 | 57.555 | 23.623 | 60.334 | 0.00 | 0.00 |
| ATOM | 5668 | N    | TYR | X | 378 | 58.813 | 25.412 | 60.179 | 0.00 | 0.00 |
| ATOM | 5669 | H    | TYR | X | 378 | 59.213 | 26.154 | 60.736 | 0.00 | 0.00 |
| ATOM | 5670 | CA   | TYR | X | 378 | 59.158 | 25.229 | 58.767 | 0.00 | 0.00 |
| ATOM | 5671 | HA   | TYR | X | 378 | 58.332 | 24.729 | 58.261 | 0.00 | 0.00 |
| ATOM | 5672 | CB   | TYR | X | 378 | 59.345 | 26.578 | 58.088 | 0.00 | 0.00 |
| ATOM | 5673 | HB2  | TYR | X | 378 | 59.654 | 27.343 | 58.800 | 0.00 | 0.00 |

|      |      |      |     |   |     |        |        |        |      |      |
|------|------|------|-----|---|-----|--------|--------|--------|------|------|
| ATOM | 5674 | HB3  | TYR | X | 378 | 60.112 | 26.451 | 57.324 | 0.00 | 0.00 |
| ATOM | 5675 | CG   | TYR | X | 378 | 58.032 | 27.014 | 57.445 | 0.00 | 0.00 |
| ATOM | 5676 | CD1  | TYR | X | 378 | 57.796 | 26.863 | 56.033 | 0.00 | 0.00 |
| ATOM | 5677 | HD1  | TYR | X | 378 | 58.518 | 26.377 | 55.392 | 0.00 | 0.00 |
| ATOM | 5678 | CE1  | TYR | X | 378 | 56.555 | 27.304 | 55.461 | 0.00 | 0.00 |
| ATOM | 5679 | HE1  | TYR | X | 378 | 56.415 | 27.201 | 54.395 | 0.00 | 0.00 |
| ATOM | 5680 | CZ   | TYR | X | 378 | 55.578 | 27.999 | 56.238 | 0.00 | 0.00 |
| ATOM | 5681 | OH   | TYR | X | 378 | 54.520 | 28.549 | 55.569 | 0.00 | 0.00 |
| ATOM | 5682 | HH   | TYR | X | 378 | 54.815 | 28.612 | 54.657 | 0.00 | 0.00 |
| ATOM | 5683 | CE2  | TYR | X | 378 | 55.778 | 28.153 | 57.665 | 0.00 | 0.00 |
| ATOM | 5684 | HE2  | TYR | X | 378 | 55.105 | 28.660 | 58.340 | 0.00 | 0.00 |
| ATOM | 5685 | CD2  | TYR | X | 378 | 56.980 | 27.603 | 58.250 | 0.00 | 0.00 |
| ATOM | 5686 | HD2  | TYR | X | 378 | 57.068 | 27.542 | 59.325 | 0.00 | 0.00 |
| ATOM | 5687 | C    | TYR | X | 378 | 60.336 | 24.229 | 58.625 | 0.00 | 0.00 |
| ATOM | 5688 | O    | TYR | X | 378 | 60.567 | 23.725 | 57.551 | 0.00 | 0.00 |
| ATOM | 5689 | N    | THR | X | 379 | 61.126 | 23.966 | 59.645 | 0.00 | 0.00 |
| ATOM | 5690 | H    | THR | X | 379 | 60.867 | 24.474 | 60.479 | 0.00 | 0.00 |
| ATOM | 5691 | CA   | THR | X | 379 | 62.438 | 23.207 | 59.519 | 0.00 | 0.00 |
| ATOM | 5692 | HA   | THR | X | 379 | 63.096 | 23.701 | 58.803 | 0.00 | 0.00 |
| ATOM | 5693 | CB   | THR | X | 379 | 63.107 | 23.228 | 60.863 | 0.00 | 0.00 |
| ATOM | 5694 | HB   | THR | X | 379 | 62.386 | 23.037 | 61.657 | 0.00 | 0.00 |
| ATOM | 5695 | CG2  | THR | X | 379 | 64.265 | 22.271 | 61.052 | 0.00 | 0.00 |
| ATOM | 5696 | HG21 | THR | X | 379 | 64.895 | 22.281 | 60.163 | 0.00 | 0.00 |
| ATOM | 5697 | HG22 | THR | X | 379 | 63.964 | 21.226 | 61.125 | 0.00 | 0.00 |
| ATOM | 5698 | HG23 | THR | X | 379 | 64.818 | 22.419 | 61.979 | 0.00 | 0.00 |
| ATOM | 5699 | OG1  | THR | X | 379 | 63.686 | 24.420 | 61.115 | 0.00 | 0.00 |
| ATOM | 5700 | HG1  | THR | X | 379 | 62.901 | 24.969 | 61.170 | 0.00 | 0.00 |
| ATOM | 5701 | C    | THR | X | 379 | 62.260 | 21.862 | 58.878 | 0.00 | 0.00 |
| ATOM | 5702 | O    | THR | X | 379 | 61.366 | 21.140 | 59.271 | 0.00 | 0.00 |
| ATOM | 5703 | N    | ASP | X | 380 | 63.135 | 21.455 | 57.907 | 0.00 | 0.00 |
| ATOM | 5704 | H    | ASP | X | 380 | 63.922 | 22.063 | 57.728 | 0.00 | 0.00 |
| ATOM | 5705 | CA   | ASP | X | 380 | 63.188 | 20.098 | 57.420 | 0.00 | 0.00 |
| ATOM | 5706 | HA   | ASP | X | 380 | 62.224 | 19.590 | 57.382 | 0.00 | 0.00 |
| ATOM | 5707 | CB   | ASP | X | 380 | 63.712 | 20.148 | 55.983 | 0.00 | 0.00 |
| ATOM | 5708 | HB2  | ASP | X | 380 | 62.965 | 20.673 | 55.389 | 0.00 | 0.00 |
| ATOM | 5709 | HB3  | ASP | X | 380 | 64.652 | 20.700 | 56.007 | 0.00 | 0.00 |
| ATOM | 5710 | CG   | ASP | X | 380 | 63.907 | 18.773 | 55.415 | 0.00 | 0.00 |
| ATOM | 5711 | OD1  | ASP | X | 380 | 65.013 | 18.579 | 54.862 | 0.00 | 0.00 |
| ATOM | 5712 | OD2  | ASP | X | 380 | 63.172 | 17.784 | 55.643 | 0.00 | 0.00 |
| ATOM | 5713 | C    | ASP | X | 380 | 64.122 | 19.233 | 58.231 | 0.00 | 0.00 |
| ATOM | 5714 | O    | ASP | X | 380 | 65.290 | 19.676 | 58.431 | 0.00 | 0.00 |
| ATOM | 5715 | N    | TRP | X | 381 | 63.628 | 18.084 | 58.725 | 0.00 | 0.00 |
| ATOM | 5716 | H    | TRP | X | 381 | 62.621 | 18.025 | 58.677 | 0.00 | 0.00 |
| ATOM | 5717 | CA   | TRP | X | 381 | 64.402 | 17.266 | 59.636 | 0.00 | 0.00 |
| ATOM | 5718 | HA   | TRP | X | 381 | 65.044 | 17.859 | 60.287 | 0.00 | 0.00 |
| ATOM | 5719 | CB   | TRP | X | 381 | 63.371 | 16.613 | 60.570 | 0.00 | 0.00 |
| ATOM | 5720 | HB2  | TRP | X | 381 | 62.621 | 16.206 | 59.892 | 0.00 | 0.00 |
| ATOM | 5721 | HB3  | TRP | X | 381 | 63.802 | 15.796 | 61.149 | 0.00 | 0.00 |
| ATOM | 5722 | CG   | TRP | X | 381 | 62.732 | 17.609 | 61.491 | 0.00 | 0.00 |
| ATOM | 5723 | CD1  | TRP | X | 381 | 61.464 | 18.075 | 61.334 | 0.00 | 0.00 |
| ATOM | 5724 | HD1  | TRP | X | 381 | 60.730 | 17.795 | 60.594 | 0.00 | 0.00 |
| ATOM | 5725 | NE1  | TRP | X | 381 | 61.205 | 19.138 | 62.167 | 0.00 | 0.00 |
| ATOM | 5726 | HE1  | TRP | X | 381 | 60.403 | 19.753 | 62.169 | 0.00 | 0.00 |
| ATOM | 5727 | CE2  | TRP | X | 381 | 62.325 | 19.323 | 63.000 | 0.00 | 0.00 |
| ATOM | 5728 | CZ2  | TRP | X | 381 | 62.519 | 20.210 | 64.119 | 0.00 | 0.00 |
| ATOM | 5729 | HZ2  | TRP | X | 381 | 61.745 | 20.898 | 64.428 | 0.00 | 0.00 |
| ATOM | 5730 | CH2  | TRP | X | 381 | 63.676 | 20.052 | 64.882 | 0.00 | 0.00 |
| ATOM | 5731 | HH2  | TRP | X | 381 | 63.795 | 20.658 | 65.768 | 0.00 | 0.00 |
| ATOM | 5732 | CZ3  | TRP | X | 381 | 64.715 | 19.151 | 64.423 | 0.00 | 0.00 |
| ATOM | 5733 | HZ3  | TRP | X | 381 | 65.595 | 19.058 | 65.041 | 0.00 | 0.00 |
| ATOM | 5734 | CE3  | TRP | X | 381 | 64.512 | 18.370 | 63.280 | 0.00 | 0.00 |
| ATOM | 5735 | HE3  | TRP | X | 381 | 65.236 | 17.607 | 63.032 | 0.00 | 0.00 |
| ATOM | 5736 | CD2  | TRP | X | 381 | 63.290 | 18.367 | 62.592 | 0.00 | 0.00 |
| ATOM | 5737 | C    | TRP | X | 381 | 65.304 | 16.282 | 58.805 | 0.00 | 0.00 |
| ATOM | 5738 | O    | TRP | X | 381 | 66.056 | 15.552 | 59.423 | 0.00 | 0.00 |
| ATOM | 5739 | N    | LEU | X | 382 | 65.216 | 16.319 | 57.464 | 0.00 | 0.00 |
| ATOM | 5740 | H    | LEU | X | 382 | 64.676 | 16.990 | 56.937 | 0.00 | 0.00 |

|      |      |      |     |   |     |        |        |        |      |      |
|------|------|------|-----|---|-----|--------|--------|--------|------|------|
| ATOM | 5741 | CA   | LEU | X | 382 | 65.999 | 15.440 | 56.643 | 0.00 | 0.00 |
| ATOM | 5742 | HA   | LEU | X | 382 | 66.336 | 14.542 | 57.162 | 0.00 | 0.00 |
| ATOM | 5743 | CB   | LEU | X | 382 | 65.334 | 14.977 | 55.330 | 0.00 | 0.00 |
| ATOM | 5744 | HB2  | LEU | X | 382 | 64.981 | 15.778 | 54.681 | 0.00 | 0.00 |
| ATOM | 5745 | HB3  | LEU | X | 382 | 66.132 | 14.416 | 54.843 | 0.00 | 0.00 |
| ATOM | 5746 | CG   | LEU | X | 382 | 64.170 | 13.934 | 55.459 | 0.00 | 0.00 |
| ATOM | 5747 | HG   | LEU | X | 382 | 63.304 | 14.387 | 55.941 | 0.00 | 0.00 |
| ATOM | 5748 | CD1  | LEU | X | 382 | 63.692 | 13.471 | 54.047 | 0.00 | 0.00 |
| ATOM | 5749 | HD11 | LEU | X | 382 | 63.150 | 14.314 | 53.618 | 0.00 | 0.00 |
| ATOM | 5750 | HD12 | LEU | X | 382 | 63.012 | 12.619 | 54.075 | 0.00 | 0.00 |
| ATOM | 5751 | HD13 | LEU | X | 382 | 64.591 | 13.235 | 53.479 | 0.00 | 0.00 |
| ATOM | 5752 | CD2  | LEU | X | 382 | 64.588 | 12.698 | 56.302 | 0.00 | 0.00 |
| ATOM | 5753 | HD21 | LEU | X | 382 | 65.309 | 12.247 | 55.619 | 0.00 | 0.00 |
| ATOM | 5754 | HD22 | LEU | X | 382 | 64.997 | 12.905 | 57.291 | 0.00 | 0.00 |
| ATOM | 5755 | HD23 | LEU | X | 382 | 63.728 | 12.029 | 56.341 | 0.00 | 0.00 |
| ATOM | 5756 | C    | LEU | X | 382 | 67.377 | 16.052 | 56.289 | 0.00 | 0.00 |
| ATOM | 5757 | O    | LEU | X | 382 | 68.392 | 15.335 | 56.437 | 0.00 | 0.00 |
| ATOM | 5758 | N    | HIE | X | 383 | 67.497 | 17.363 | 55.986 | 0.00 | 0.00 |
| ATOM | 5759 | H    | HIE | X | 383 | 66.558 | 17.732 | 55.947 | 0.00 | 0.00 |
| ATOM | 5760 | CA   | HIE | X | 383 | 68.606 | 18.303 | 55.933 | 0.00 | 0.00 |
| ATOM | 5761 | HA   | HIE | X | 383 | 69.360 | 18.014 | 56.665 | 0.00 | 0.00 |
| ATOM | 5762 | CB   | HIE | X | 383 | 69.203 | 18.292 | 54.528 | 0.00 | 0.00 |
| ATOM | 5763 | HB2  | HIE | X | 383 | 69.292 | 17.294 | 54.099 | 0.00 | 0.00 |
| ATOM | 5764 | HB3  | HIE | X | 383 | 68.542 | 18.932 | 53.944 | 0.00 | 0.00 |
| ATOM | 5765 | CG   | HIE | X | 383 | 70.611 | 18.896 | 54.485 | 0.00 | 0.00 |
| ATOM | 5766 | ND1  | HIE | X | 383 | 71.096 | 19.803 | 55.450 | 0.00 | 0.00 |
| ATOM | 5767 | CE1  | HIE | X | 383 | 72.285 | 20.243 | 55.032 | 0.00 | 0.00 |
| ATOM | 5768 | HE1  | HIE | X | 383 | 72.940 | 20.956 | 55.510 | 0.00 | 0.00 |
| ATOM | 5769 | NE2  | HIE | X | 383 | 72.587 | 19.568 | 53.893 | 0.00 | 0.00 |
| ATOM | 5770 | HE2  | HIE | X | 383 | 73.429 | 19.713 | 53.354 | 0.00 | 0.00 |
| ATOM | 5771 | CD2  | HIE | X | 383 | 71.512 | 18.832 | 53.536 | 0.00 | 0.00 |
| ATOM | 5772 | HD2  | HIE | X | 383 | 71.299 | 18.323 | 52.607 | 0.00 | 0.00 |
| ATOM | 5773 | C    | HIE | X | 383 | 68.174 | 19.770 | 56.308 | 0.00 | 0.00 |
| ATOM | 5774 | O    | HIE | X | 383 | 67.621 | 20.434 | 55.412 | 0.00 | 0.00 |
| ATOM | 5775 | N    | PRO | X | 384 | 68.278 | 20.270 | 57.579 | 0.00 | 0.00 |
| ATOM | 5776 | CD   | PRO | X | 384 | 68.727 | 19.544 | 58.803 | 0.00 | 0.00 |
| ATOM | 5777 | HD2  | PRO | X | 384 | 69.648 | 18.984 | 58.643 | 0.00 | 0.00 |
| ATOM | 5778 | HD3  | PRO | X | 384 | 68.031 | 18.769 | 59.125 | 0.00 | 0.00 |
| ATOM | 5779 | CG   | PRO | X | 384 | 69.003 | 20.544 | 59.894 | 0.00 | 0.00 |
| ATOM | 5780 | HG2  | PRO | X | 384 | 70.021 | 20.909 | 60.029 | 0.00 | 0.00 |
| ATOM | 5781 | HG3  | PRO | X | 384 | 68.570 | 20.066 | 60.773 | 0.00 | 0.00 |
| ATOM | 5782 | CB   | PRO | X | 384 | 68.113 | 21.709 | 59.452 | 0.00 | 0.00 |
| ATOM | 5783 | HB2  | PRO | X | 384 | 68.692 | 22.604 | 59.680 | 0.00 | 0.00 |
| ATOM | 5784 | HB3  | PRO | X | 384 | 67.129 | 21.657 | 59.919 | 0.00 | 0.00 |
| ATOM | 5785 | CA   | PRO | X | 384 | 67.824 | 21.638 | 57.971 | 0.00 | 0.00 |
| ATOM | 5786 | HA   | PRO | X | 384 | 66.748 | 21.747 | 57.830 | 0.00 | 0.00 |
| ATOM | 5787 | C    | PRO | X | 384 | 68.636 | 22.762 | 57.269 | 0.00 | 0.00 |
| ATOM | 5788 | O    | PRO | X | 384 | 68.205 | 23.946 | 57.245 | 0.00 | 0.00 |
| ATOM | 5789 | N    | GLU | X | 385 | 69.795 | 22.510 | 56.718 | 0.00 | 0.00 |
| ATOM | 5790 | H    | GLU | X | 385 | 70.235 | 21.608 | 56.830 | 0.00 | 0.00 |
| ATOM | 5791 | CA   | GLU | X | 385 | 70.771 | 23.525 | 56.339 | 0.00 | 0.00 |
| ATOM | 5792 | HA   | GLU | X | 385 | 70.356 | 24.490 | 56.633 | 0.00 | 0.00 |
| ATOM | 5793 | CB   | GLU | X | 385 | 72.147 | 23.420 | 57.144 | 0.00 | 0.00 |
| ATOM | 5794 | HB2  | GLU | X | 385 | 72.666 | 22.478 | 56.969 | 0.00 | 0.00 |
| ATOM | 5795 | HB3  | GLU | X | 385 | 72.841 | 24.137 | 56.705 | 0.00 | 0.00 |
| ATOM | 5796 | CG   | GLU | X | 385 | 72.081 | 23.633 | 58.649 | 0.00 | 0.00 |
| ATOM | 5797 | HG2  | GLU | X | 385 | 71.678 | 24.627 | 58.841 | 0.00 | 0.00 |
| ATOM | 5798 | HG3  | GLU | X | 385 | 71.520 | 22.736 | 58.912 | 0.00 | 0.00 |
| ATOM | 5799 | CD   | GLU | X | 385 | 73.487 | 23.544 | 59.270 | 0.00 | 0.00 |
| ATOM | 5800 | OE1  | GLU | X | 385 | 73.889 | 22.420 | 59.707 | 0.00 | 0.00 |
| ATOM | 5801 | OE2  | GLU | X | 385 | 74.093 | 24.554 | 59.594 | 0.00 | 0.00 |
| ATOM | 5802 | C    | GLU | X | 385 | 71.051 | 23.642 | 54.814 | 0.00 | 0.00 |
| ATOM | 5803 | O    | GLU | X | 385 | 71.702 | 24.614 | 54.318 | 0.00 | 0.00 |
| ATOM | 5804 | N    | ASP | X | 386 | 70.389 | 22.792 | 53.979 | 0.00 | 0.00 |
| ATOM | 5805 | H    | ASP | X | 386 | 69.820 | 22.022 | 54.301 | 0.00 | 0.00 |
| ATOM | 5806 | CA   | ASP | X | 386 | 70.391 | 22.947 | 52.525 | 0.00 | 0.00 |
| ATOM | 5807 | HA   | ASP | X | 386 | 71.419 | 22.743 | 52.227 | 0.00 | 0.00 |

|      |      |      |     |   |     |        |        |        |      |      |
|------|------|------|-----|---|-----|--------|--------|--------|------|------|
| ATOM | 5808 | CB   | ASP | X | 386 | 69.582 | 21.929 | 51.884 | 0.00 | 0.00 |
| ATOM | 5809 | HB2  | ASP | X | 386 | 69.960 | 20.967 | 52.229 | 0.00 | 0.00 |
| ATOM | 5810 | HB3  | ASP | X | 386 | 68.521 | 22.023 | 52.113 | 0.00 | 0.00 |
| ATOM | 5811 | CG   | ASP | X | 386 | 69.820 | 21.785 | 50.377 | 0.00 | 0.00 |
| ATOM | 5812 | OD1  | ASP | X | 386 | 70.543 | 20.862 | 49.892 | 0.00 | 0.00 |
| ATOM | 5813 | OD2  | ASP | X | 386 | 69.193 | 22.553 | 49.599 | 0.00 | 0.00 |
| ATOM | 5814 | C    | ASP | X | 386 | 69.946 | 24.365 | 52.103 | 0.00 | 0.00 |
| ATOM | 5815 | O    | ASP | X | 386 | 68.789 | 24.751 | 52.408 | 0.00 | 0.00 |
| ATOM | 5816 | N    | PRO | X | 387 | 70.691 | 25.104 | 51.255 | 0.00 | 0.00 |
| ATOM | 5817 | CD   | PRO | X | 387 | 71.987 | 24.813 | 50.720 | 0.00 | 0.00 |
| ATOM | 5818 | HD2  | PRO | X | 387 | 71.966 | 23.959 | 50.043 | 0.00 | 0.00 |
| ATOM | 5819 | HD3  | PRO | X | 387 | 72.705 | 24.531 | 51.491 | 0.00 | 0.00 |
| ATOM | 5820 | CG   | PRO | X | 387 | 72.409 | 26.026 | 49.956 | 0.00 | 0.00 |
| ATOM | 5821 | HG2  | PRO | X | 387 | 72.420 | 25.883 | 48.875 | 0.00 | 0.00 |
| ATOM | 5822 | HG3  | PRO | X | 387 | 73.399 | 26.403 | 50.212 | 0.00 | 0.00 |
| ATOM | 5823 | CB   | PRO | X | 387 | 71.458 | 27.102 | 50.294 | 0.00 | 0.00 |
| ATOM | 5824 | HB2  | PRO | X | 387 | 71.210 | 27.827 | 49.519 | 0.00 | 0.00 |
| ATOM | 5825 | HB3  | PRO | X | 387 | 71.837 | 27.763 | 51.073 | 0.00 | 0.00 |
| ATOM | 5826 | CA   | PRO | X | 387 | 70.213 | 26.428 | 50.887 | 0.00 | 0.00 |
| ATOM | 5827 | HA   | PRO | X | 387 | 69.900 | 26.904 | 51.817 | 0.00 | 0.00 |
| ATOM | 5828 | C    | PRO | X | 387 | 69.057 | 26.503 | 49.878 | 0.00 | 0.00 |
| ATOM | 5829 | O    | PRO | X | 387 | 68.450 | 27.546 | 49.685 | 0.00 | 0.00 |
| ATOM | 5830 | N    | ALA | X | 388 | 68.674 | 25.401 | 49.212 | 0.00 | 0.00 |
| ATOM | 5831 | H    | ALA | X | 388 | 69.103 | 24.486 | 49.197 | 0.00 | 0.00 |
| ATOM | 5832 | CA   | ALA | X | 388 | 67.598 | 25.504 | 48.267 | 0.00 | 0.00 |
| ATOM | 5833 | HA   | ALA | X | 388 | 67.463 | 26.495 | 47.835 | 0.00 | 0.00 |
| ATOM | 5834 | CB   | ALA | X | 388 | 68.027 | 24.604 | 47.121 | 0.00 | 0.00 |
| ATOM | 5835 | HB1  | ALA | X | 388 | 68.252 | 23.647 | 47.592 | 0.00 | 0.00 |
| ATOM | 5836 | HB2  | ALA | X | 388 | 68.859 | 25.024 | 46.556 | 0.00 | 0.00 |
| ATOM | 5837 | HB3  | ALA | X | 388 | 67.157 | 24.482 | 46.476 | 0.00 | 0.00 |
| ATOM | 5838 | C    | ALA | X | 388 | 66.296 | 25.066 | 48.943 | 0.00 | 0.00 |
| ATOM | 5839 | O    | ALA | X | 388 | 65.315 | 25.792 | 48.754 | 0.00 | 0.00 |
| ATOM | 5840 | N    | ARG | X | 389 | 66.354 | 24.048 | 49.842 | 0.00 | 0.00 |
| ATOM | 5841 | H    | ARG | X | 389 | 67.159 | 23.437 | 49.832 | 0.00 | 0.00 |
| ATOM | 5842 | CA   | ARG | X | 389 | 65.193 | 23.706 | 50.722 | 0.00 | 0.00 |
| ATOM | 5843 | HA   | ARG | X | 389 | 64.371 | 23.548 | 50.023 | 0.00 | 0.00 |
| ATOM | 5844 | CB   | ARG | X | 389 | 65.455 | 22.455 | 51.629 | 0.00 | 0.00 |
| ATOM | 5845 | HB2  | ARG | X | 389 | 66.404 | 22.595 | 52.146 | 0.00 | 0.00 |
| ATOM | 5846 | HB3  | ARG | X | 389 | 64.696 | 22.338 | 52.403 | 0.00 | 0.00 |
| ATOM | 5847 | CG   | ARG | X | 389 | 65.579 | 21.079 | 50.870 | 0.00 | 0.00 |
| ATOM | 5848 | HG2  | ARG | X | 389 | 64.741 | 20.952 | 50.184 | 0.00 | 0.00 |
| ATOM | 5849 | HG3  | ARG | X | 389 | 66.421 | 21.022 | 50.181 | 0.00 | 0.00 |
| ATOM | 5850 | CD   | ARG | X | 389 | 65.690 | 19.839 | 51.760 | 0.00 | 0.00 |
| ATOM | 5851 | HD2  | ARG | X | 389 | 66.441 | 20.071 | 52.515 | 0.00 | 0.00 |
| ATOM | 5852 | HD3  | ARG | X | 389 | 64.715 | 19.583 | 52.174 | 0.00 | 0.00 |
| ATOM | 5853 | NE   | ARG | X | 389 | 66.067 | 18.735 | 50.874 | 0.00 | 0.00 |
| ATOM | 5854 | HE   | ARG | X | 389 | 65.898 | 18.863 | 49.886 | 0.00 | 0.00 |
| ATOM | 5855 | CZ   | ARG | X | 389 | 66.167 | 17.492 | 51.247 | 0.00 | 0.00 |
| ATOM | 5856 | NH1  | ARG | X | 389 | 65.925 | 17.072 | 52.456 | 0.00 | 0.00 |
| ATOM | 5857 | HH11 | ARG | X | 389 | 65.510 | 17.680 | 53.147 | 0.00 | 0.00 |
| ATOM | 5858 | HH12 | ARG | X | 389 | 65.874 | 16.107 | 52.749 | 0.00 | 0.00 |
| ATOM | 5859 | NH2  | ARG | X | 389 | 66.504 | 16.583 | 50.335 | 0.00 | 0.00 |
| ATOM | 5860 | HH21 | ARG | X | 389 | 66.952 | 16.943 | 49.505 | 0.00 | 0.00 |
| ATOM | 5861 | HH22 | ARG | X | 389 | 66.720 | 15.624 | 50.568 | 0.00 | 0.00 |
| ATOM | 5862 | C    | ARG | X | 389 | 64.838 | 24.846 | 51.668 | 0.00 | 0.00 |
| ATOM | 5863 | O    | ARG | X | 389 | 63.603 | 25.045 | 51.935 | 0.00 | 0.00 |
| ATOM | 5864 | N    | LEU | X | 390 | 65.799 | 25.679 | 52.085 | 0.00 | 0.00 |
| ATOM | 5865 | H    | LEU | X | 390 | 66.716 | 25.441 | 51.735 | 0.00 | 0.00 |
| ATOM | 5866 | CA   | LEU | X | 390 | 65.597 | 26.929 | 52.854 | 0.00 | 0.00 |
| ATOM | 5867 | HA   | LEU | X | 390 | 64.802 | 26.762 | 53.581 | 0.00 | 0.00 |
| ATOM | 5868 | CB   | LEU | X | 390 | 66.872 | 27.474 | 53.468 | 0.00 | 0.00 |
| ATOM | 5869 | HB2  | LEU | X | 390 | 67.596 | 27.576 | 52.660 | 0.00 | 0.00 |
| ATOM | 5870 | HB3  | LEU | X | 390 | 66.550 | 28.373 | 53.993 | 0.00 | 0.00 |
| ATOM | 5871 | CG   | LEU | X | 390 | 67.388 | 26.567 | 54.626 | 0.00 | 0.00 |
| ATOM | 5872 | HG   | LEU | X | 390 | 67.341 | 25.534 | 54.280 | 0.00 | 0.00 |
| ATOM | 5873 | CD1  | LEU | X | 390 | 68.753 | 27.028 | 55.002 | 0.00 | 0.00 |
| ATOM | 5874 | HD11 | LEU | X | 390 | 69.237 | 26.409 | 55.757 | 0.00 | 0.00 |

|      |      |      |     |   |     |        |        |        |      |      |
|------|------|------|-----|---|-----|--------|--------|--------|------|------|
| ATOM | 5875 | HD12 | LEU | X | 390 | 68.690 | 28.022 | 55.445 | 0.00 | 0.00 |
| ATOM | 5876 | HD13 | LEU | X | 390 | 69.377 | 26.934 | 54.113 | 0.00 | 0.00 |
| ATOM | 5877 | CD2  | LEU | X | 390 | 66.593 | 26.629 | 55.945 | 0.00 | 0.00 |
| ATOM | 5878 | HD21 | LEU | X | 390 | 66.402 | 27.682 | 56.150 | 0.00 | 0.00 |
| ATOM | 5879 | HD22 | LEU | X | 390 | 65.633 | 26.125 | 55.839 | 0.00 | 0.00 |
| ATOM | 5880 | HD23 | LEU | X | 390 | 67.096 | 26.201 | 56.813 | 0.00 | 0.00 |
| ATOM | 5881 | C    | LEU | X | 390 | 65.100 | 28.115 | 51.949 | 0.00 | 0.00 |
| ATOM | 5882 | O    | LEU | X | 390 | 64.213 | 28.905 | 52.292 | 0.00 | 0.00 |
| ATOM | 5883 | N    | ARG | X | 391 | 65.577 | 28.105 | 50.704 | 0.00 | 0.00 |
| ATOM | 5884 | H    | ARG | X | 391 | 66.293 | 27.459 | 50.403 | 0.00 | 0.00 |
| ATOM | 5885 | CA   | ARG | X | 391 | 65.049 | 29.002 | 49.774 | 0.00 | 0.00 |
| ATOM | 5886 | HA   | ARG | X | 391 | 65.228 | 29.978 | 50.225 | 0.00 | 0.00 |
| ATOM | 5887 | CB   | ARG | X | 391 | 65.828 | 29.025 | 48.498 | 0.00 | 0.00 |
| ATOM | 5888 | HB2  | ARG | X | 391 | 66.889 | 29.032 | 48.748 | 0.00 | 0.00 |
| ATOM | 5889 | HB3  | ARG | X | 391 | 65.549 | 28.118 | 47.961 | 0.00 | 0.00 |
| ATOM | 5890 | CG   | ARG | X | 391 | 65.473 | 30.283 | 47.588 | 0.00 | 0.00 |
| ATOM | 5891 | HG2  | ARG | X | 391 | 64.398 | 30.460 | 47.547 | 0.00 | 0.00 |
| ATOM | 5892 | HG3  | ARG | X | 391 | 65.913 | 31.174 | 48.034 | 0.00 | 0.00 |
| ATOM | 5893 | CD   | ARG | X | 391 | 66.030 | 30.153 | 46.137 | 0.00 | 0.00 |
| ATOM | 5894 | HD2  | ARG | X | 391 | 65.498 | 29.413 | 45.540 | 0.00 | 0.00 |
| ATOM | 5895 | HD3  | ARG | X | 391 | 65.823 | 31.145 | 45.735 | 0.00 | 0.00 |
| ATOM | 5896 | NE   | ARG | X | 391 | 67.530 | 30.014 | 46.025 | 0.00 | 0.00 |
| ATOM | 5897 | HE   | ARG | X | 391 | 68.114 | 30.705 | 46.474 | 0.00 | 0.00 |
| ATOM | 5898 | CZ   | ARG | X | 391 | 68.187 | 28.944 | 45.542 | 0.00 | 0.00 |
| ATOM | 5899 | NH1  | ARG | X | 391 | 67.530 | 27.832 | 45.117 | 0.00 | 0.00 |
| ATOM | 5900 | HH11 | ARG | X | 391 | 66.520 | 27.815 | 45.122 | 0.00 | 0.00 |
| ATOM | 5901 | HH12 | ARG | X | 391 | 68.149 | 27.114 | 44.769 | 0.00 | 0.00 |
| ATOM | 5902 | NH2  | ARG | X | 391 | 69.466 | 28.897 | 45.524 | 0.00 | 0.00 |
| ATOM | 5903 | HH21 | ARG | X | 391 | 70.048 | 29.707 | 45.683 | 0.00 | 0.00 |
| ATOM | 5904 | HH22 | ARG | X | 391 | 69.891 | 28.066 | 45.137 | 0.00 | 0.00 |
| ATOM | 5905 | C    | ARG | X | 391 | 63.523 | 28.709 | 49.468 | 0.00 | 0.00 |
| ATOM | 5906 | O    | ARG | X | 391 | 62.796 | 29.652 | 49.457 | 0.00 | 0.00 |
| ATOM | 5907 | N    | GLU | X | 392 | 63.173 | 27.486 | 49.180 | 0.00 | 0.00 |
| ATOM | 5908 | H    | GLU | X | 392 | 63.824 | 26.725 | 49.051 | 0.00 | 0.00 |
| ATOM | 5909 | CA   | GLU | X | 392 | 61.746 | 27.114 | 48.857 | 0.00 | 0.00 |
| ATOM | 5910 | HA   | GLU | X | 392 | 61.519 | 27.745 | 47.997 | 0.00 | 0.00 |
| ATOM | 5911 | CB   | GLU | X | 392 | 61.760 | 25.663 | 48.480 | 0.00 | 0.00 |
| ATOM | 5912 | HB2  | GLU | X | 392 | 62.183 | 24.962 | 49.200 | 0.00 | 0.00 |
| ATOM | 5913 | HB3  | GLU | X | 392 | 60.695 | 25.427 | 48.484 | 0.00 | 0.00 |
| ATOM | 5914 | CG   | GLU | X | 392 | 62.370 | 25.386 | 47.083 | 0.00 | 0.00 |
| ATOM | 5915 | HG2  | GLU | X | 392 | 61.759 | 25.805 | 46.284 | 0.00 | 0.00 |
| ATOM | 5916 | HG3  | GLU | X | 392 | 63.376 | 25.797 | 46.996 | 0.00 | 0.00 |
| ATOM | 5917 | CD   | GLU | X | 392 | 62.376 | 23.901 | 46.733 | 0.00 | 0.00 |
| ATOM | 5918 | OE1  | GLU | X | 392 | 62.934 | 23.042 | 47.487 | 0.00 | 0.00 |
| ATOM | 5919 | OE2  | GLU | X | 392 | 61.944 | 23.540 | 45.649 | 0.00 | 0.00 |
| ATOM | 5920 | C    | GLU | X | 392 | 60.821 | 27.322 | 50.036 | 0.00 | 0.00 |
| ATOM | 5921 | O    | GLU | X | 392 | 59.831 | 27.981 | 49.831 | 0.00 | 0.00 |
| ATOM | 5922 | N    | ALA | X | 393 | 61.308 | 27.109 | 51.268 | 0.00 | 0.00 |
| ATOM | 5923 | H    | ALA | X | 393 | 62.199 | 26.646 | 51.382 | 0.00 | 0.00 |
| ATOM | 5924 | CA   | ALA | X | 393 | 60.654 | 27.436 | 52.582 | 0.00 | 0.00 |
| ATOM | 5925 | HA   | ALA | X | 393 | 59.661 | 26.993 | 52.648 | 0.00 | 0.00 |
| ATOM | 5926 | CB   | ALA | X | 393 | 61.514 | 26.990 | 53.768 | 0.00 | 0.00 |
| ATOM | 5927 | HB1  | ALA | X | 393 | 61.030 | 27.170 | 54.727 | 0.00 | 0.00 |
| ATOM | 5928 | HB2  | ALA | X | 393 | 62.446 | 27.542 | 53.889 | 0.00 | 0.00 |
| ATOM | 5929 | HB3  | ALA | X | 393 | 61.692 | 25.917 | 53.704 | 0.00 | 0.00 |
| ATOM | 5930 | C    | ALA | X | 393 | 60.371 | 28.945 | 52.656 | 0.00 | 0.00 |
| ATOM | 5931 | O    | ALA | X | 393 | 59.284 | 29.348 | 53.075 | 0.00 | 0.00 |
| ATOM | 5932 | N    | LEU | X | 394 | 61.381 | 29.801 | 52.318 | 0.00 | 0.00 |
| ATOM | 5933 | H    | LEU | X | 394 | 62.247 | 29.436 | 51.948 | 0.00 | 0.00 |
| ATOM | 5934 | CA   | LEU | X | 394 | 61.254 | 31.289 | 52.295 | 0.00 | 0.00 |
| ATOM | 5935 | HA   | LEU | X | 394 | 61.021 | 31.538 | 53.331 | 0.00 | 0.00 |
| ATOM | 5936 | CB   | LEU | X | 394 | 62.596 | 31.873 | 51.887 | 0.00 | 0.00 |
| ATOM | 5937 | HB2  | LEU | X | 394 | 63.338 | 31.510 | 52.598 | 0.00 | 0.00 |
| ATOM | 5938 | HB3  | LEU | X | 394 | 62.993 | 31.613 | 50.905 | 0.00 | 0.00 |
| ATOM | 5939 | CG   | LEU | X | 394 | 62.708 | 33.420 | 52.028 | 0.00 | 0.00 |
| ATOM | 5940 | HG   | LEU | X | 394 | 62.347 | 33.907 | 51.122 | 0.00 | 0.00 |
| ATOM | 5941 | CD1  | LEU | X | 394 | 62.083 | 33.978 | 53.291 | 0.00 | 0.00 |



|      |      |      |     |   |     |        |        |        |      |      |
|------|------|------|-----|---|-----|--------|--------|--------|------|------|
| ATOM | 5942 | HD11 | LEU | X | 394 | 61.002 | 34.009 | 53.155 | 0.00 | 0.00 |
| ATOM | 5943 | HD12 | LEU | X | 394 | 62.390 | 35.014 | 53.436 | 0.00 | 0.00 |
| ATOM | 5944 | HD13 | LEU | X | 394 | 62.322 | 33.284 | 54.097 | 0.00 | 0.00 |
| ATOM | 5945 | CD2  | LEU | X | 394 | 64.179 | 33.767 | 51.957 | 0.00 | 0.00 |
| ATOM | 5946 | HD21 | LEU | X | 394 | 64.205 | 34.856 | 51.910 | 0.00 | 0.00 |
| ATOM | 5947 | HD22 | LEU | X | 394 | 64.669 | 33.279 | 52.799 | 0.00 | 0.00 |
| ATOM | 5948 | HD23 | LEU | X | 394 | 64.655 | 33.415 | 51.042 | 0.00 | 0.00 |
| ATOM | 5949 | C    | LEU | X | 394 | 60.143 | 31.746 | 51.348 | 0.00 | 0.00 |
| ATOM | 5950 | O    | LEU | X | 394 | 59.288 | 32.564 | 51.668 | 0.00 | 0.00 |
| ATOM | 5951 | N    | SER | X | 395 | 60.083 | 31.124 | 50.158 | 0.00 | 0.00 |
| ATOM | 5952 | H    | SER | X | 395 | 60.894 | 30.621 | 49.827 | 0.00 | 0.00 |
| ATOM | 5953 | CA   | SER | X | 395 | 58.986 | 31.288 | 49.227 | 0.00 | 0.00 |
| ATOM | 5954 | HA   | SER | X | 395 | 58.832 | 32.361 | 49.111 | 0.00 | 0.00 |
| ATOM | 5955 | CB   | SER | X | 395 | 59.200 | 30.684 | 47.803 | 0.00 | 0.00 |
| ATOM | 5956 | HB2  | SER | X | 395 | 59.091 | 29.599 | 47.800 | 0.00 | 0.00 |
| ATOM | 5957 | HB3  | SER | X | 395 | 58.333 | 30.984 | 47.215 | 0.00 | 0.00 |
| ATOM | 5958 | OG   | SER | X | 395 | 60.405 | 31.102 | 47.241 | 0.00 | 0.00 |
| ATOM | 5959 | HG   | SER | X | 395 | 60.487 | 30.689 | 46.378 | 0.00 | 0.00 |
| ATOM | 5960 | C    | SER | X | 395 | 57.590 | 30.773 | 49.706 | 0.00 | 0.00 |
| ATOM | 5961 | O    | SER | X | 395 | 56.605 | 31.442 | 49.424 | 0.00 | 0.00 |
| ATOM | 5962 | N    | ASP | X | 396 | 57.553 | 29.622 | 50.380 | 0.00 | 0.00 |
| ATOM | 5963 | H    | ASP | X | 396 | 58.412 | 29.094 | 50.434 | 0.00 | 0.00 |
| ATOM | 5964 | CA   | ASP | X | 396 | 56.352 | 29.150 | 50.991 | 0.00 | 0.00 |
| ATOM | 5965 | HA   | ASP | X | 396 | 55.545 | 29.168 | 50.258 | 0.00 | 0.00 |
| ATOM | 5966 | CB   | ASP | X | 396 | 56.350 | 27.704 | 51.528 | 0.00 | 0.00 |
| ATOM | 5967 | HB2  | ASP | X | 396 | 56.924 | 27.766 | 52.452 | 0.00 | 0.00 |
| ATOM | 5968 | HB3  | ASP | X | 396 | 55.356 | 27.409 | 51.863 | 0.00 | 0.00 |
| ATOM | 5969 | CG   | ASP | X | 396 | 56.854 | 26.632 | 50.596 | 0.00 | 0.00 |
| ATOM | 5970 | OD1  | ASP | X | 396 | 56.472 | 26.600 | 49.406 | 0.00 | 0.00 |
| ATOM | 5971 | OD2  | ASP | X | 396 | 57.535 | 25.676 | 51.081 | 0.00 | 0.00 |
| ATOM | 5972 | C    | ASP | X | 396 | 55.842 | 30.092 | 52.094 | 0.00 | 0.00 |
| ATOM | 5973 | O    | ASP | X | 396 | 54.705 | 30.570 | 52.038 | 0.00 | 0.00 |
| ATOM | 5974 | N    | VAL | X | 397 | 56.806 | 30.408 | 53.030 | 0.00 | 0.00 |
| ATOM | 5975 | H    | VAL | X | 397 | 57.688 | 29.934 | 52.897 | 0.00 | 0.00 |
| ATOM | 5976 | CA   | VAL | X | 397 | 56.410 | 31.309 | 54.177 | 0.00 | 0.00 |
| ATOM | 5977 | HA   | VAL | X | 397 | 55.688 | 30.761 | 54.783 | 0.00 | 0.00 |
| ATOM | 5978 | CB   | VAL | X | 397 | 57.664 | 31.757 | 55.018 | 0.00 | 0.00 |
| ATOM | 5979 | HB   | VAL | X | 397 | 58.499 | 31.897 | 54.332 | 0.00 | 0.00 |
| ATOM | 5980 | CG1  | VAL | X | 397 | 57.488 | 33.018 | 55.876 | 0.00 | 0.00 |
| ATOM | 5981 | HG11 | VAL | X | 397 | 58.474 | 33.262 | 56.271 | 0.00 | 0.00 |
| ATOM | 5982 | HG12 | VAL | X | 397 | 57.208 | 33.903 | 55.306 | 0.00 | 0.00 |
| ATOM | 5983 | HG13 | VAL | X | 397 | 56.795 | 32.717 | 56.662 | 0.00 | 0.00 |
| ATOM | 5984 | CG2  | VAL | X | 397 | 58.026 | 30.581 | 55.914 | 0.00 | 0.00 |
| ATOM | 5985 | HG21 | VAL | X | 397 | 57.290 | 30.511 | 56.715 | 0.00 | 0.00 |
| ATOM | 5986 | HG22 | VAL | X | 397 | 58.992 | 30.820 | 56.358 | 0.00 | 0.00 |
| ATOM | 5987 | HG23 | VAL | X | 397 | 58.027 | 29.655 | 55.339 | 0.00 | 0.00 |
| ATOM | 5988 | C    | VAL | X | 397 | 55.690 | 32.524 | 53.605 | 0.00 | 0.00 |
| ATOM | 5989 | O    | VAL | X | 397 | 54.572 | 32.864 | 53.944 | 0.00 | 0.00 |
| ATOM | 5990 | N    | VAL | X | 398 | 56.326 | 33.200 | 52.560 | 0.00 | 0.00 |
| ATOM | 5991 | H    | VAL | X | 398 | 57.211 | 32.826 | 52.248 | 0.00 | 0.00 |
| ATOM | 5992 | CA   | VAL | X | 398 | 55.846 | 34.448 | 51.954 | 0.00 | 0.00 |
| ATOM | 5993 | HA   | VAL | X | 398 | 55.527 | 35.127 | 52.744 | 0.00 | 0.00 |
| ATOM | 5994 | CB   | VAL | X | 398 | 57.023 | 35.119 | 51.178 | 0.00 | 0.00 |
| ATOM | 5995 | HB   | VAL | X | 398 | 57.549 | 34.315 | 50.663 | 0.00 | 0.00 |
| ATOM | 5996 | CG1  | VAL | X | 398 | 56.604 | 36.172 | 50.286 | 0.00 | 0.00 |
| ATOM | 5997 | HG11 | VAL | X | 398 | 56.166 | 36.987 | 50.863 | 0.00 | 0.00 |
| ATOM | 5998 | HG12 | VAL | X | 398 | 57.521 | 36.502 | 49.798 | 0.00 | 0.00 |
| ATOM | 5999 | HG13 | VAL | X | 398 | 55.900 | 35.856 | 49.516 | 0.00 | 0.00 |
| ATOM | 6000 | CG2  | VAL | X | 398 | 57.983 | 35.721 | 52.179 | 0.00 | 0.00 |
| ATOM | 6001 | HG21 | VAL | X | 398 | 57.422 | 36.365 | 52.856 | 0.00 | 0.00 |
| ATOM | 6002 | HG22 | VAL | X | 398 | 58.807 | 36.251 | 51.701 | 0.00 | 0.00 |
| ATOM | 6003 | HG23 | VAL | X | 398 | 58.363 | 34.882 | 52.762 | 0.00 | 0.00 |
| ATOM | 6004 | C    | VAL | X | 398 | 54.524 | 34.212 | 51.122 | 0.00 | 0.00 |
| ATOM | 6005 | O    | VAL | X | 398 | 53.694 | 35.074 | 51.056 | 0.00 | 0.00 |
| ATOM | 6006 | N    | GLY | X | 399 | 54.304 | 33.004 | 50.610 | 0.00 | 0.00 |
| ATOM | 6007 | H    | GLY | X | 399 | 54.960 | 32.276 | 50.854 | 0.00 | 0.00 |
| ATOM | 6008 | CA   | GLY | X | 399 | 53.195 | 32.647 | 49.710 | 0.00 | 0.00 |

|      |      |      |     |   |     |        |        |        |      |      |
|------|------|------|-----|---|-----|--------|--------|--------|------|------|
| ATOM | 6009 | HA2  | GLY | X | 399 | 52.925 | 33.366 | 48.936 | 0.00 | 0.00 |
| ATOM | 6010 | HA3  | GLY | X | 399 | 53.438 | 31.691 | 49.247 | 0.00 | 0.00 |
| ATOM | 6011 | C    | GLY | X | 399 | 51.923 | 32.381 | 50.510 | 0.00 | 0.00 |
| ATOM | 6012 | O    | GLY | X | 399 | 50.797 | 32.722 | 50.197 | 0.00 | 0.00 |
| ATOM | 6013 | N    | ASP | X | 400 | 52.071 | 31.760 | 51.658 | 0.00 | 0.00 |
| ATOM | 6014 | H    | ASP | X | 400 | 52.987 | 31.384 | 51.857 | 0.00 | 0.00 |
| ATOM | 6015 | CA   | ASP | X | 400 | 51.013 | 31.111 | 52.387 | 0.00 | 0.00 |
| ATOM | 6016 | HA   | ASP | X | 400 | 50.398 | 30.408 | 51.826 | 0.00 | 0.00 |
| ATOM | 6017 | CB   | ASP | X | 400 | 51.546 | 30.242 | 53.469 | 0.00 | 0.00 |
| ATOM | 6018 | HB2  | ASP | X | 400 | 52.344 | 30.818 | 53.937 | 0.00 | 0.00 |
| ATOM | 6019 | HB3  | ASP | X | 400 | 50.807 | 30.135 | 54.263 | 0.00 | 0.00 |
| ATOM | 6020 | CG   | ASP | X | 400 | 51.969 | 28.836 | 53.092 | 0.00 | 0.00 |
| ATOM | 6021 | OD1  | ASP | X | 400 | 51.829 | 28.505 | 51.898 | 0.00 | 0.00 |
| ATOM | 6022 | OD2  | ASP | X | 400 | 52.394 | 28.018 | 53.908 | 0.00 | 0.00 |
| ATOM | 6023 | C    | ASP | X | 400 | 50.055 | 32.198 | 52.952 | 0.00 | 0.00 |
| ATOM | 6024 | O    | ASP | X | 400 | 49.063 | 32.525 | 52.346 | 0.00 | 0.00 |
| ATOM | 6025 | N    | HIE | X | 401 | 50.391 | 32.697 | 54.160 | 0.00 | 0.00 |
| ATOM | 6026 | H    | HIE | X | 401 | 51.175 | 32.297 | 54.657 | 0.00 | 0.00 |
| ATOM | 6027 | CA   | HIE | X | 401 | 49.545 | 33.638 | 54.855 | 0.00 | 0.00 |
| ATOM | 6028 | HA   | HIE | X | 401 | 48.578 | 33.177 | 55.057 | 0.00 | 0.00 |
| ATOM | 6029 | CB   | HIE | X | 401 | 50.207 | 33.987 | 56.183 | 0.00 | 0.00 |
| ATOM | 6030 | HB2  | HIE | X | 401 | 49.420 | 34.443 | 56.783 | 0.00 | 0.00 |
| ATOM | 6031 | HB3  | HIE | X | 401 | 50.470 | 33.041 | 56.656 | 0.00 | 0.00 |
| ATOM | 6032 | CG   | HIE | X | 401 | 51.396 | 34.925 | 56.053 | 0.00 | 0.00 |
| ATOM | 6033 | ND1  | HIE | X | 401 | 51.547 | 36.344 | 56.180 | 0.00 | 0.00 |
| ATOM | 6034 | CE1  | HIE | X | 401 | 52.739 | 36.681 | 55.767 | 0.00 | 0.00 |
| ATOM | 6035 | HE1  | HIE | X | 401 | 53.056 | 37.693 | 55.567 | 0.00 | 0.00 |
| ATOM | 6036 | NE2  | HIE | X | 401 | 53.362 | 35.631 | 55.231 | 0.00 | 0.00 |
| ATOM | 6037 | HE2  | HIE | X | 401 | 54.233 | 35.643 | 54.719 | 0.00 | 0.00 |
| ATOM | 6038 | CD2  | HIE | X | 401 | 52.541 | 34.551 | 55.489 | 0.00 | 0.00 |
| ATOM | 6039 | HD2  | HIE | X | 401 | 52.798 | 33.528 | 55.255 | 0.00 | 0.00 |
| ATOM | 6040 | C    | HIE | X | 401 | 49.180 | 34.939 | 54.065 | 0.00 | 0.00 |
| ATOM | 6041 | O    | HIE | X | 401 | 48.075 | 35.461 | 54.155 | 0.00 | 0.00 |
| ATOM | 6042 | N    | ASN | X | 402 | 49.943 | 35.338 | 53.050 | 0.00 | 0.00 |
| ATOM | 6043 | H    | ASN | X | 402 | 50.805 | 34.825 | 52.926 | 0.00 | 0.00 |
| ATOM | 6044 | CA   | ASN | X | 402 | 49.747 | 36.417 | 52.123 | 0.00 | 0.00 |
| ATOM | 6045 | HA   | ASN | X | 402 | 49.346 | 37.332 | 52.561 | 0.00 | 0.00 |
| ATOM | 6046 | CB   | ASN | X | 402 | 51.038 | 36.887 | 51.461 | 0.00 | 0.00 |
| ATOM | 6047 | HB2  | ASN | X | 402 | 51.532 | 36.054 | 50.962 | 0.00 | 0.00 |
| ATOM | 6048 | HB3  | ASN | X | 402 | 50.915 | 37.577 | 50.626 | 0.00 | 0.00 |
| ATOM | 6049 | CG   | ASN | X | 402 | 51.928 | 37.661 | 52.440 | 0.00 | 0.00 |
| ATOM | 6050 | OD1  | ASN | X | 402 | 51.445 | 38.614 | 52.993 | 0.00 | 0.00 |
| ATOM | 6051 | ND2  | ASN | X | 402 | 53.237 | 37.469 | 52.378 | 0.00 | 0.00 |
| ATOM | 6052 | HD21 | ASN | X | 402 | 53.804 | 38.140 | 52.874 | 0.00 | 0.00 |
| ATOM | 6053 | HD22 | ASN | X | 402 | 53.585 | 36.698 | 51.826 | 0.00 | 0.00 |
| ATOM | 6054 | C    | ASN | X | 402 | 48.753 | 36.048 | 50.975 | 0.00 | 0.00 |
| ATOM | 6055 | O    | ASN | X | 402 | 48.079 | 36.982 | 50.553 | 0.00 | 0.00 |
| ATOM | 6056 | N    | VAL | X | 403 | 48.712 | 34.845 | 50.407 | 0.00 | 0.00 |
| ATOM | 6057 | H    | VAL | X | 403 | 49.350 | 34.178 | 50.817 | 0.00 | 0.00 |
| ATOM | 6058 | CA   | VAL | X | 403 | 47.749 | 34.650 | 49.271 | 0.00 | 0.00 |
| ATOM | 6059 | HA   | VAL | X | 403 | 46.845 | 35.208 | 49.514 | 0.00 | 0.00 |
| ATOM | 6060 | CB   | VAL | X | 403 | 48.337 | 35.236 | 47.993 | 0.00 | 0.00 |
| ATOM | 6061 | HB   | VAL | X | 403 | 48.491 | 36.310 | 48.100 | 0.00 | 0.00 |
| ATOM | 6062 | CG1  | VAL | X | 403 | 49.648 | 34.486 | 47.619 | 0.00 | 0.00 |
| ATOM | 6063 | HG11 | VAL | X | 403 | 49.507 | 33.431 | 47.386 | 0.00 | 0.00 |
| ATOM | 6064 | HG12 | VAL | X | 403 | 50.111 | 34.957 | 46.752 | 0.00 | 0.00 |
| ATOM | 6065 | HG13 | VAL | X | 403 | 50.489 | 34.651 | 48.293 | 0.00 | 0.00 |
| ATOM | 6066 | CG2  | VAL | X | 403 | 47.374 | 34.872 | 46.857 | 0.00 | 0.00 |
| ATOM | 6067 | HG21 | VAL | X | 403 | 47.750 | 35.444 | 46.009 | 0.00 | 0.00 |
| ATOM | 6068 | HG22 | VAL | X | 403 | 46.361 | 35.173 | 47.121 | 0.00 | 0.00 |
| ATOM | 6069 | HG23 | VAL | X | 403 | 47.367 | 33.806 | 46.630 | 0.00 | 0.00 |
| ATOM | 6070 | C    | VAL | X | 403 | 47.277 | 33.183 | 49.121 | 0.00 | 0.00 |
| ATOM | 6071 | O    | VAL | X | 403 | 46.068 | 32.987 | 49.054 | 0.00 | 0.00 |
| ATOM | 6072 | N    | VAL | X | 404 | 48.043 | 32.121 | 49.332 | 0.00 | 0.00 |
| ATOM | 6073 | H    | VAL | X | 404 | 49.042 | 32.230 | 49.430 | 0.00 | 0.00 |
| ATOM | 6074 | CA   | VAL | X | 404 | 47.521 | 30.680 | 49.200 | 0.00 | 0.00 |
| ATOM | 6075 | HA   | VAL | X | 404 | 46.958 | 30.727 | 48.268 | 0.00 | 0.00 |

|      |      |      |     |   |     |        |        |        |      |      |
|------|------|------|-----|---|-----|--------|--------|--------|------|------|
| ATOM | 6076 | CB   | VAL | X | 404 | 48.614 | 29.607 | 49.044 | 0.00 | 0.00 |
| ATOM | 6077 | HB   | VAL | X | 404 | 49.203 | 29.495 | 49.954 | 0.00 | 0.00 |
| ATOM | 6078 | CG1  | VAL | X | 404 | 48.103 | 28.229 | 48.798 | 0.00 | 0.00 |
| ATOM | 6079 | HG11 | VAL | X | 404 | 47.412 | 28.190 | 47.956 | 0.00 | 0.00 |
| ATOM | 6080 | HG12 | VAL | X | 404 | 48.889 | 27.478 | 48.708 | 0.00 | 0.00 |
| ATOM | 6081 | HG13 | VAL | X | 404 | 47.420 | 27.978 | 49.609 | 0.00 | 0.00 |
| ATOM | 6082 | CG2  | VAL | X | 404 | 49.623 | 30.005 | 47.948 | 0.00 | 0.00 |
| ATOM | 6083 | HG21 | VAL | X | 404 | 49.142 | 30.273 | 47.008 | 0.00 | 0.00 |
| ATOM | 6084 | HG22 | VAL | X | 404 | 50.272 | 29.181 | 47.651 | 0.00 | 0.00 |
| ATOM | 6085 | HG23 | VAL | X | 404 | 50.194 | 30.916 | 48.130 | 0.00 | 0.00 |
| ATOM | 6086 | C    | VAL | X | 404 | 46.618 | 30.333 | 50.326 | 0.00 | 0.00 |
| ATOM | 6087 | O    | VAL | X | 404 | 45.614 | 29.654 | 50.199 | 0.00 | 0.00 |
| ATOM | 6088 | N    | CYX | X | 405 | 46.922 | 30.849 | 51.557 | 0.00 | 0.00 |
| ATOM | 6089 | H    | CYX | X | 405 | 47.716 | 31.469 | 51.628 | 0.00 | 0.00 |
| ATOM | 6090 | CA   | CYX | X | 405 | 46.090 | 30.721 | 52.772 | 0.00 | 0.00 |
| ATOM | 6091 | HA   | CYX | X | 405 | 45.769 | 29.683 | 52.859 | 0.00 | 0.00 |
| ATOM | 6092 | CB   | CYX | X | 405 | 46.821 | 30.850 | 54.117 | 0.00 | 0.00 |
| ATOM | 6093 | HB2  | CYX | X | 405 | 47.396 | 31.775 | 54.066 | 0.00 | 0.00 |
| ATOM | 6094 | HB3  | CYX | X | 405 | 46.167 | 30.959 | 54.983 | 0.00 | 0.00 |
| ATOM | 6095 | SG   | CYX | X | 405 | 48.040 | 29.487 | 54.498 | 0.00 | 0.00 |
| ATOM | 6096 | C    | CYX | X | 405 | 44.864 | 31.536 | 52.692 | 0.00 | 0.00 |
| ATOM | 6097 | O    | CYX | X | 405 | 43.825 | 30.906 | 52.721 | 0.00 | 0.00 |
| ATOM | 6098 | N    | PRO | X | 406 | 44.911 | 32.851 | 52.461 | 0.00 | 0.00 |
| ATOM | 6099 | CD   | PRO | X | 406 | 46.042 | 33.732 | 52.576 | 0.00 | 0.00 |
| ATOM | 6100 | HD2  | PRO | X | 406 | 46.702 | 33.447 | 51.757 | 0.00 | 0.00 |
| ATOM | 6101 | HD3  | PRO | X | 406 | 46.558 | 33.602 | 53.527 | 0.00 | 0.00 |
| ATOM | 6102 | CG   | PRO | X | 406 | 45.495 | 35.174 | 52.604 | 0.00 | 0.00 |
| ATOM | 6103 | HG2  | PRO | X | 406 | 46.237 | 35.887 | 52.244 | 0.00 | 0.00 |
| ATOM | 6104 | HB3  | PRO | X | 406 | 45.203 | 35.473 | 53.611 | 0.00 | 0.00 |
| ATOM | 6105 | CB   | PRO | X | 406 | 44.210 | 35.067 | 51.772 | 0.00 | 0.00 |
| ATOM | 6106 | HB2  | PRO | X | 406 | 44.303 | 35.195 | 50.694 | 0.00 | 0.00 |
| ATOM | 6107 | HB3  | PRO | X | 406 | 43.566 | 35.873 | 52.124 | 0.00 | 0.00 |
| ATOM | 6108 | CA   | PRO | X | 406 | 43.726 | 33.662 | 52.079 | 0.00 | 0.00 |
| ATOM | 6109 | HA   | PRO | X | 406 | 43.152 | 33.806 | 52.994 | 0.00 | 0.00 |
| ATOM | 6110 | C    | PRO | X | 406 | 42.762 | 33.105 | 51.043 | 0.00 | 0.00 |
| ATOM | 6111 | O    | PRO | X | 406 | 41.637 | 32.914 | 51.461 | 0.00 | 0.00 |
| ATOM | 6112 | N    | VAL | X | 407 | 43.255 | 32.571 | 49.920 | 0.00 | 0.00 |
| ATOM | 6113 | H    | VAL | X | 407 | 44.215 | 32.809 | 49.715 | 0.00 | 0.00 |
| ATOM | 6114 | CA   | VAL | X | 407 | 42.465 | 31.874 | 48.875 | 0.00 | 0.00 |
| ATOM | 6115 | HA   | VAL | X | 407 | 41.678 | 32.541 | 48.525 | 0.00 | 0.00 |
| ATOM | 6116 | CB   | VAL | X | 407 | 43.342 | 31.539 | 47.721 | 0.00 | 0.00 |
| ATOM | 6117 | HB   | VAL | X | 407 | 44.331 | 31.217 | 48.047 | 0.00 | 0.00 |
| ATOM | 6118 | CG1  | VAL | X | 407 | 42.841 | 30.475 | 46.795 | 0.00 | 0.00 |
| ATOM | 6119 | HG11 | VAL | X | 407 | 41.883 | 30.770 | 46.368 | 0.00 | 0.00 |
| ATOM | 6120 | HG12 | VAL | X | 407 | 43.496 | 30.182 | 45.975 | 0.00 | 0.00 |
| ATOM | 6121 | HG13 | VAL | X | 407 | 42.777 | 29.543 | 47.357 | 0.00 | 0.00 |
| ATOM | 6122 | CG2  | VAL | X | 407 | 43.433 | 32.752 | 46.729 | 0.00 | 0.00 |
| ATOM | 6123 | HG21 | VAL | X | 407 | 42.463 | 32.995 | 46.294 | 0.00 | 0.00 |
| ATOM | 6124 | HG22 | VAL | X | 407 | 44.024 | 32.433 | 45.870 | 0.00 | 0.00 |
| ATOM | 6125 | HG23 | VAL | X | 407 | 43.863 | 33.661 | 47.148 | 0.00 | 0.00 |
| ATOM | 6126 | C    | VAL | X | 407 | 41.774 | 30.603 | 49.402 | 0.00 | 0.00 |
| ATOM | 6127 | O    | VAL | X | 407 | 40.605 | 30.418 | 49.095 | 0.00 | 0.00 |
| ATOM | 6128 | N    | ALA | X | 408 | 42.393 | 29.740 | 50.188 | 0.00 | 0.00 |
| ATOM | 6129 | H    | ALA | X | 408 | 43.325 | 30.063 | 50.406 | 0.00 | 0.00 |
| ATOM | 6130 | CA   | ALA | X | 408 | 41.849 | 28.503 | 50.805 | 0.00 | 0.00 |
| ATOM | 6131 | HA   | ALA | X | 408 | 41.410 | 27.955 | 49.971 | 0.00 | 0.00 |
| ATOM | 6132 | CB   | ALA | X | 408 | 43.030 | 27.777 | 51.481 | 0.00 | 0.00 |
| ATOM | 6133 | HB1  | ALA | X | 408 | 42.611 | 26.794 | 51.694 | 0.00 | 0.00 |
| ATOM | 6134 | HB2  | ALA | X | 408 | 43.283 | 28.317 | 52.393 | 0.00 | 0.00 |
| ATOM | 6135 | HB3  | ALA | X | 408 | 43.929 | 27.727 | 50.867 | 0.00 | 0.00 |
| ATOM | 6136 | C    | ALA | X | 408 | 40.680 | 28.826 | 51.722 | 0.00 | 0.00 |
| ATOM | 6137 | O    | ALA | X | 408 | 39.696 | 28.061 | 51.785 | 0.00 | 0.00 |
| ATOM | 6138 | N    | GLN | X | 409 | 40.850 | 29.834 | 52.548 | 0.00 | 0.00 |
| ATOM | 6139 | H    | GLN | X | 409 | 41.687 | 30.392 | 52.462 | 0.00 | 0.00 |
| ATOM | 6140 | CA   | GLN | X | 409 | 40.008 | 30.188 | 53.658 | 0.00 | 0.00 |
| ATOM | 6141 | HA   | GLN | X | 409 | 39.692 | 29.255 | 54.126 | 0.00 | 0.00 |
| ATOM | 6142 | CB   | GLN | X | 409 | 40.666 | 31.106 | 54.684 | 0.00 | 0.00 |

|      |      |      |     |   |     |        |        |        |      |      |
|------|------|------|-----|---|-----|--------|--------|--------|------|------|
| ATOM | 6143 | HB2  | GLN | X | 409 | 40.987 | 32.025 | 54.194 | 0.00 | 0.00 |
| ATOM | 6144 | HB3  | GLN | X | 409 | 39.815 | 31.348 | 55.319 | 0.00 | 0.00 |
| ATOM | 6145 | CG   | GLN | X | 409 | 41.791 | 30.529 | 55.516 | 0.00 | 0.00 |
| ATOM | 6146 | HG2  | GLN | X | 409 | 41.419 | 29.687 | 56.100 | 0.00 | 0.00 |
| ATOM | 6147 | HG3  | GLN | X | 409 | 42.591 | 30.157 | 54.877 | 0.00 | 0.00 |
| ATOM | 6148 | CD   | GLN | X | 409 | 42.474 | 31.638 | 56.277 | 0.00 | 0.00 |
| ATOM | 6149 | OE1  | GLN | X | 409 | 43.247 | 32.404 | 55.789 | 0.00 | 0.00 |
| ATOM | 6150 | NE2  | GLN | X | 409 | 42.171 | 31.819 | 57.510 | 0.00 | 0.00 |
| ATOM | 6151 | HE21 | GLN | X | 409 | 42.565 | 32.595 | 58.023 | 0.00 | 0.00 |
| ATOM | 6152 | HE22 | GLN | X | 409 | 41.513 | 31.185 | 57.942 | 0.00 | 0.00 |
| ATOM | 6153 | C    | GLN | X | 409 | 38.801 | 30.798 | 53.068 | 0.00 | 0.00 |
| ATOM | 6154 | O    | GLN | X | 409 | 37.725 | 30.524 | 53.608 | 0.00 | 0.00 |
| ATOM | 6155 | N    | LEU | X | 410 | 38.901 | 31.608 | 51.984 | 0.00 | 0.00 |
| ATOM | 6156 | H    | LEU | X | 410 | 39.811 | 31.870 | 51.633 | 0.00 | 0.00 |
| ATOM | 6157 | CA   | LEU | X | 410 | 37.871 | 32.166 | 51.150 | 0.00 | 0.00 |
| ATOM | 6158 | HA   | LEU | X | 410 | 37.125 | 32.628 | 51.797 | 0.00 | 0.00 |
| ATOM | 6159 | CB   | LEU | X | 410 | 38.520 | 33.188 | 50.196 | 0.00 | 0.00 |
| ATOM | 6160 | HB2  | LEU | X | 410 | 38.899 | 34.071 | 50.709 | 0.00 | 0.00 |
| ATOM | 6161 | HB3  | LEU | X | 410 | 39.316 | 32.598 | 49.741 | 0.00 | 0.00 |
| ATOM | 6162 | CG   | LEU | X | 410 | 37.508 | 33.627 | 49.086 | 0.00 | 0.00 |
| ATOM | 6163 | HG   | LEU | X | 410 | 37.159 | 32.739 | 48.559 | 0.00 | 0.00 |
| ATOM | 6164 | CD1  | LEU | X | 410 | 36.293 | 34.497 | 49.637 | 0.00 | 0.00 |
| ATOM | 6165 | HD11 | LEU | X | 410 | 36.551 | 35.503 | 49.969 | 0.00 | 0.00 |
| ATOM | 6166 | HD12 | LEU | X | 410 | 35.721 | 33.951 | 50.387 | 0.00 | 0.00 |
| ATOM | 6167 | HD13 | LEU | X | 410 | 35.522 | 34.653 | 48.882 | 0.00 | 0.00 |
| ATOM | 6168 | CD2  | LEU | X | 410 | 38.290 | 34.466 | 47.978 | 0.00 | 0.00 |
| ATOM | 6169 | HD21 | LEU | X | 410 | 38.791 | 35.358 | 48.353 | 0.00 | 0.00 |
| ATOM | 6170 | HD22 | LEU | X | 410 | 38.984 | 33.770 | 47.507 | 0.00 | 0.00 |
| ATOM | 6171 | HD23 | LEU | X | 410 | 37.619 | 34.831 | 47.201 | 0.00 | 0.00 |
| ATOM | 6172 | C    | LEU | X | 410 | 37.041 | 31.042 | 50.490 | 0.00 | 0.00 |
| ATOM | 6173 | O    | LEU | X | 410 | 35.884 | 30.958 | 50.812 | 0.00 | 0.00 |
| ATOM | 6174 | N    | ALA | X | 411 | 37.670 | 30.182 | 49.667 | 0.00 | 0.00 |
| ATOM | 6175 | H    | ALA | X | 411 | 38.659 | 30.265 | 49.479 | 0.00 | 0.00 |
| ATOM | 6176 | CA   | ALA | X | 411 | 36.974 | 29.000 | 49.141 | 0.00 | 0.00 |
| ATOM | 6177 | HA   | ALA | X | 411 | 36.156 | 29.349 | 48.512 | 0.00 | 0.00 |
| ATOM | 6178 | CB   | ALA | X | 411 | 38.063 | 28.178 | 48.368 | 0.00 | 0.00 |
| ATOM | 6179 | HB1  | ALA | X | 411 | 38.303 | 28.899 | 47.587 | 0.00 | 0.00 |
| ATOM | 6180 | HB2  | ALA | X | 411 | 37.460 | 27.383 | 47.928 | 0.00 | 0.00 |
| ATOM | 6181 | HB3  | ALA | X | 411 | 38.989 | 27.778 | 48.782 | 0.00 | 0.00 |
| ATOM | 6182 | C    | ALA | X | 411 | 36.242 | 28.179 | 50.237 | 0.00 | 0.00 |
| ATOM | 6183 | O    | ALA | X | 411 | 35.097 | 27.782 | 50.105 | 0.00 | 0.00 |
| ATOM | 6184 | N    | GLY | X | 412 | 36.908 | 28.001 | 51.363 | 0.00 | 0.00 |
| ATOM | 6185 | H    | GLY | X | 412 | 37.800 | 28.455 | 51.497 | 0.00 | 0.00 |
| ATOM | 6186 | CA   | GLY | X | 412 | 36.363 | 27.258 | 52.505 | 0.00 | 0.00 |
| ATOM | 6187 | HA2  | GLY | X | 412 | 36.113 | 26.206 | 52.371 | 0.00 | 0.00 |
| ATOM | 6188 | HA3  | GLY | X | 412 | 37.072 | 27.300 | 53.333 | 0.00 | 0.00 |
| ATOM | 6189 | C    | GLY | X | 412 | 35.053 | 27.899 | 53.055 | 0.00 | 0.00 |
| ATOM | 6190 | O    | GLY | X | 412 | 33.966 | 27.356 | 53.156 | 0.00 | 0.00 |
| ATOM | 6191 | N    | ARG | X | 413 | 35.106 | 29.215 | 53.325 | 0.00 | 0.00 |
| ATOM | 6192 | H    | ARG | X | 413 | 35.926 | 29.695 | 52.983 | 0.00 | 0.00 |
| ATOM | 6193 | CA   | ARG | X | 413 | 33.976 | 29.999 | 53.835 | 0.00 | 0.00 |
| ATOM | 6194 | HA   | ARG | X | 413 | 33.605 | 29.509 | 54.734 | 0.00 | 0.00 |
| ATOM | 6195 | CB   | ARG | X | 413 | 34.452 | 31.424 | 54.132 | 0.00 | 0.00 |
| ATOM | 6196 | HB2  | ARG | X | 413 | 35.221 | 31.261 | 54.886 | 0.00 | 0.00 |
| ATOM | 6197 | HB3  | ARG | X | 413 | 34.781 | 31.912 | 53.215 | 0.00 | 0.00 |
| ATOM | 6198 | CG   | ARG | X | 413 | 33.202 | 32.230 | 54.630 | 0.00 | 0.00 |
| ATOM | 6199 | HG2  | ARG | X | 413 | 33.617 | 33.218 | 54.825 | 0.00 | 0.00 |
| ATOM | 6200 | HG3  | ARG | X | 413 | 32.507 | 32.418 | 53.812 | 0.00 | 0.00 |
| ATOM | 6201 | CD   | ARG | X | 413 | 32.448 | 31.579 | 55.818 | 0.00 | 0.00 |
| ATOM | 6202 | HD2  | ARG | X | 413 | 32.076 | 30.601 | 55.512 | 0.00 | 0.00 |
| ATOM | 6203 | HD3  | ARG | X | 413 | 33.135 | 31.471 | 56.657 | 0.00 | 0.00 |
| ATOM | 6204 | NE   | ARG | X | 413 | 31.280 | 32.359 | 56.208 | 0.00 | 0.00 |
| ATOM | 6205 | HE   | ARG | X | 413 | 31.074 | 33.249 | 55.776 | 0.00 | 0.00 |
| ATOM | 6206 | CZ   | ARG | X | 413 | 30.472 | 31.993 | 57.181 | 0.00 | 0.00 |
| ATOM | 6207 | NH1  | ARG | X | 413 | 30.547 | 30.853 | 57.827 | 0.00 | 0.00 |
| ATOM | 6208 | HH11 | ARG | X | 413 | 31.315 | 30.223 | 57.643 | 0.00 | 0.00 |
| ATOM | 6209 | HH12 | ARG | X | 413 | 29.913 | 30.593 | 58.569 | 0.00 | 0.00 |

|      |      |      |     |   |     |        |        |        |      |      |
|------|------|------|-----|---|-----|--------|--------|--------|------|------|
| ATOM | 6210 | NH2  | ARG | X | 413 | 29.404 | 32.839 | 57.338 | 0.00 | 0.00 |
| ATOM | 6211 | HH21 | ARG | X | 413 | 29.204 | 33.563 | 56.663 | 0.00 | 0.00 |
| ATOM | 6212 | HH22 | ARG | X | 413 | 28.621 | 32.529 | 57.895 | 0.00 | 0.00 |
| ATOM | 6213 | C    | ARG | X | 413 | 32.819 | 30.041 | 52.798 | 0.00 | 0.00 |
| ATOM | 6214 | O    | ARG | X | 413 | 31.646 | 29.758 | 53.211 | 0.00 | 0.00 |
| ATOM | 6215 | N    | LEU | X | 414 | 33.161 | 30.282 | 51.523 | 0.00 | 0.00 |
| ATOM | 6216 | H    | LEU | X | 414 | 34.144 | 30.308 | 51.293 | 0.00 | 0.00 |
| ATOM | 6217 | CA   | LEU | X | 414 | 32.260 | 30.231 | 50.369 | 0.00 | 0.00 |
| ATOM | 6218 | HA   | LEU | X | 414 | 31.415 | 30.916 | 50.428 | 0.00 | 0.00 |
| ATOM | 6219 | CB   | LEU | X | 414 | 33.027 | 30.539 | 49.058 | 0.00 | 0.00 |
| ATOM | 6220 | HB2  | LEU | X | 414 | 33.896 | 29.887 | 48.973 | 0.00 | 0.00 |
| ATOM | 6221 | HB3  | LEU | X | 414 | 32.302 | 30.173 | 48.330 | 0.00 | 0.00 |
| ATOM | 6222 | CG   | LEU | X | 414 | 33.415 | 32.008 | 48.818 | 0.00 | 0.00 |
| ATOM | 6223 | HG   | LEU | X | 414 | 33.920 | 32.357 | 49.718 | 0.00 | 0.00 |
| ATOM | 6224 | CD1  | LEU | X | 414 | 34.360 | 32.120 | 47.609 | 0.00 | 0.00 |
| ATOM | 6225 | HD11 | LEU | X | 414 | 33.836 | 31.949 | 46.669 | 0.00 | 0.00 |
| ATOM | 6226 | HD12 | LEU | X | 414 | 35.143 | 31.372 | 47.738 | 0.00 | 0.00 |
| ATOM | 6227 | HD13 | LEU | X | 414 | 34.871 | 33.083 | 47.597 | 0.00 | 0.00 |
| ATOM | 6228 | CD2  | LEU | X | 414 | 32.168 | 32.905 | 48.649 | 0.00 | 0.00 |
| ATOM | 6229 | HD21 | LEU | X | 414 | 31.357 | 32.422 | 48.104 | 0.00 | 0.00 |
| ATOM | 6230 | HD22 | LEU | X | 414 | 31.725 | 33.140 | 49.617 | 0.00 | 0.00 |
| ATOM | 6231 | HD23 | LEU | X | 414 | 32.369 | 33.893 | 48.236 | 0.00 | 0.00 |
| ATOM | 6232 | C    | LEU | X | 414 | 31.525 | 28.881 | 50.299 | 0.00 | 0.00 |
| ATOM | 6233 | O    | LEU | X | 414 | 30.328 | 28.921 | 50.248 | 0.00 | 0.00 |
| ATOM | 6234 | N    | ALA | X | 415 | 32.257 | 27.785 | 50.312 | 0.00 | 0.00 |
| ATOM | 6235 | H    | ALA | X | 415 | 33.262 | 27.872 | 50.362 | 0.00 | 0.00 |
| ATOM | 6236 | CA   | ALA | X | 415 | 31.636 | 26.448 | 50.266 | 0.00 | 0.00 |
| ATOM | 6237 | HA   | ALA | X | 415 | 30.862 | 26.309 | 49.512 | 0.00 | 0.00 |
| ATOM | 6238 | CB   | ALA | X | 415 | 32.701 | 25.402 | 49.911 | 0.00 | 0.00 |
| ATOM | 6239 | HB1  | ALA | X | 415 | 32.184 | 24.442 | 49.912 | 0.00 | 0.00 |
| ATOM | 6240 | HB2  | ALA | X | 415 | 33.498 | 25.289 | 50.646 | 0.00 | 0.00 |
| ATOM | 6241 | HB3  | ALA | X | 415 | 33.103 | 25.716 | 48.948 | 0.00 | 0.00 |
| ATOM | 6242 | C    | ALA | X | 415 | 30.846 | 26.064 | 51.537 | 0.00 | 0.00 |
| ATOM | 6243 | O    | ALA | X | 415 | 29.826 | 25.357 | 51.412 | 0.00 | 0.00 |
| ATOM | 6244 | N    | ALA | X | 416 | 31.207 | 26.478 | 52.763 | 0.00 | 0.00 |
| ATOM | 6245 | H    | ALA | X | 416 | 32.163 | 26.806 | 52.768 | 0.00 | 0.00 |
| ATOM | 6246 | CA   | ALA | X | 416 | 30.422 | 26.185 | 53.939 | 0.00 | 0.00 |
| ATOM | 6247 | HA   | ALA | X | 416 | 30.143 | 25.137 | 54.044 | 0.00 | 0.00 |
| ATOM | 6248 | CB   | ALA | X | 416 | 31.103 | 26.662 | 55.181 | 0.00 | 0.00 |
| ATOM | 6249 | HB1  | ALA | X | 416 | 32.100 | 26.224 | 55.232 | 0.00 | 0.00 |
| ATOM | 6250 | HB2  | ALA | X | 416 | 30.522 | 26.397 | 56.065 | 0.00 | 0.00 |
| ATOM | 6251 | HB3  | ALA | X | 416 | 31.101 | 27.751 | 55.230 | 0.00 | 0.00 |
| ATOM | 6252 | C    | ALA | X | 416 | 29.021 | 26.954 | 53.826 | 0.00 | 0.00 |
| ATOM | 6253 | O    | ALA | X | 416 | 28.011 | 26.424 | 54.335 | 0.00 | 0.00 |
| ATOM | 6254 | N    | GLN | X | 417 | 28.996 | 28.093 | 53.168 | 0.00 | 0.00 |
| ATOM | 6255 | H    | GLN | X | 417 | 29.875 | 28.458 | 52.830 | 0.00 | 0.00 |
| ATOM | 6256 | CA   | GLN | X | 417 | 27.711 | 28.873 | 52.906 | 0.00 | 0.00 |
| ATOM | 6257 | HA   | GLN | X | 417 | 27.047 | 28.480 | 53.676 | 0.00 | 0.00 |
| ATOM | 6258 | CB   | GLN | X | 417 | 27.939 | 30.367 | 53.060 | 0.00 | 0.00 |
| ATOM | 6259 | HB2  | GLN | X | 417 | 28.521 | 30.795 | 52.244 | 0.00 | 0.00 |
| ATOM | 6260 | HB3  | GLN | X | 417 | 27.020 | 30.919 | 52.865 | 0.00 | 0.00 |
| ATOM | 6261 | CG   | GLN | X | 417 | 28.461 | 30.810 | 54.432 | 0.00 | 0.00 |
| ATOM | 6262 | HG2  | GLN | X | 417 | 29.547 | 30.719 | 54.427 | 0.00 | 0.00 |
| ATOM | 6263 | HG3  | GLN | X | 417 | 28.224 | 31.858 | 54.612 | 0.00 | 0.00 |
| ATOM | 6264 | CD   | GLN | X | 417 | 27.764 | 30.007 | 55.509 | 0.00 | 0.00 |
| ATOM | 6265 | OE1  | GLN | X | 417 | 28.335 | 29.280 | 56.281 | 0.00 | 0.00 |
| ATOM | 6266 | NE2  | GLN | X | 417 | 26.480 | 30.242 | 55.662 | 0.00 | 0.00 |
| ATOM | 6267 | HE21 | GLN | X | 417 | 25.963 | 29.726 | 56.360 | 0.00 | 0.00 |
| ATOM | 6268 | HE22 | GLN | X | 417 | 26.012 | 30.758 | 54.930 | 0.00 | 0.00 |
| ATOM | 6269 | C    | GLN | X | 417 | 26.992 | 28.480 | 51.567 | 0.00 | 0.00 |
| ATOM | 6270 | O    | GLN | X | 417 | 25.921 | 28.982 | 51.259 | 0.00 | 0.00 |
| ATOM | 6271 | N    | GLY | X | 418 | 27.632 | 27.645 | 50.783 | 0.00 | 0.00 |
| ATOM | 6272 | H    | GLY | X | 418 | 28.490 | 27.234 | 51.122 | 0.00 | 0.00 |
| ATOM | 6273 | CA   | GLY | X | 418 | 26.932 | 27.000 | 49.643 | 0.00 | 0.00 |
| ATOM | 6274 | HA2  | GLY | X | 418 | 27.405 | 26.058 | 49.366 | 0.00 | 0.00 |
| ATOM | 6275 | HA3  | GLY | X | 418 | 25.913 | 26.753 | 49.940 | 0.00 | 0.00 |
| ATOM | 6276 | C    | GLY | X | 418 | 27.033 | 27.853 | 48.450 | 0.00 | 0.00 |

|      |      |      |     |   |     |        |        |        |      |      |
|------|------|------|-----|---|-----|--------|--------|--------|------|------|
| ATOM | 6277 | O    | GLY | X | 418 | 26.134 | 27.890 | 47.558 | 0.00 | 0.00 |
| ATOM | 6278 | N    | ALA | X | 419 | 28.018 | 28.755 | 48.291 | 0.00 | 0.00 |
| ATOM | 6279 | H    | ALA | X | 419 | 28.692 | 28.905 | 49.028 | 0.00 | 0.00 |
| ATOM | 6280 | CA   | ALA | X | 419 | 28.409 | 29.242 | 46.998 | 0.00 | 0.00 |
| ATOM | 6281 | HA   | ALA | X | 419 | 27.599 | 29.707 | 46.435 | 0.00 | 0.00 |
| ATOM | 6282 | CB   | ALA | X | 419 | 29.557 | 30.242 | 46.988 | 0.00 | 0.00 |
| ATOM | 6283 | HB1  | ALA | X | 419 | 29.609 | 30.806 | 47.919 | 0.00 | 0.00 |
| ATOM | 6284 | HB2  | ALA | X | 419 | 29.451 | 31.040 | 46.253 | 0.00 | 0.00 |
| ATOM | 6285 | HB3  | ALA | X | 419 | 30.465 | 29.683 | 46.761 | 0.00 | 0.00 |
| ATOM | 6286 | C    | ALA | X | 419 | 28.855 | 28.086 | 46.051 | 0.00 | 0.00 |
| ATOM | 6287 | O    | ALA | X | 419 | 29.185 | 26.951 | 46.522 | 0.00 | 0.00 |
| ATOM | 6288 | N    | ARG | X | 420 | 28.857 | 28.350 | 44.741 | 0.00 | 0.00 |
| ATOM | 6289 | H    | ARG | X | 420 | 28.570 | 29.210 | 44.297 | 0.00 | 0.00 |
| ATOM | 6290 | CA   | ARG | X | 420 | 29.439 | 27.398 | 43.733 | 0.00 | 0.00 |
| ATOM | 6291 | HA   | ARG | X | 420 | 29.327 | 26.409 | 44.175 | 0.00 | 0.00 |
| ATOM | 6292 | CB   | ARG | X | 420 | 28.480 | 27.470 | 42.563 | 0.00 | 0.00 |
| ATOM | 6293 | HB2  | ARG | X | 420 | 27.547 | 27.155 | 43.030 | 0.00 | 0.00 |
| ATOM | 6294 | HB3  | ARG | X | 420 | 28.384 | 28.481 | 42.167 | 0.00 | 0.00 |
| ATOM | 6295 | CG   | ARG | X | 420 | 28.890 | 26.408 | 41.537 | 0.00 | 0.00 |
| ATOM | 6296 | HG2  | ARG | X | 420 | 28.361 | 26.641 | 40.613 | 0.00 | 0.00 |
| ATOM | 6297 | HG3  | ARG | X | 420 | 29.961 | 26.392 | 41.338 | 0.00 | 0.00 |
| ATOM | 6298 | CD   | ARG | X | 420 | 28.475 | 24.976 | 41.870 | 0.00 | 0.00 |
| ATOM | 6299 | HD2  | ARG | X | 420 | 28.984 | 24.676 | 42.787 | 0.00 | 0.00 |
| ATOM | 6300 | HD3  | ARG | X | 420 | 27.417 | 25.073 | 42.114 | 0.00 | 0.00 |
| ATOM | 6301 | NE   | ARG | X | 420 | 28.563 | 24.132 | 40.662 | 0.00 | 0.00 |
| ATOM | 6302 | HE   | ARG | X | 420 | 28.757 | 24.540 | 39.759 | 0.00 | 0.00 |
| ATOM | 6303 | CZ   | ARG | X | 420 | 28.390 | 22.827 | 40.682 | 0.00 | 0.00 |
| ATOM | 6304 | NH1  | ARG | X | 420 | 28.187 | 22.075 | 41.767 | 0.00 | 0.00 |
| ATOM | 6305 | HH11 | ARG | X | 420 | 28.249 | 22.471 | 42.694 | 0.00 | 0.00 |
| ATOM | 6306 | HH12 | ARG | X | 420 | 28.103 | 21.071 | 41.695 | 0.00 | 0.00 |
| ATOM | 6307 | NH2  | ARG | X | 420 | 28.445 | 22.259 | 39.536 | 0.00 | 0.00 |
| ATOM | 6308 | HH21 | ARG | X | 420 | 28.426 | 22.878 | 38.738 | 0.00 | 0.00 |
| ATOM | 6309 | HH22 | ARG | X | 420 | 28.239 | 21.272 | 39.473 | 0.00 | 0.00 |
| ATOM | 6310 | C    | ARG | X | 420 | 30.843 | 27.817 | 43.393 | 0.00 | 0.00 |
| ATOM | 6311 | O    | ARG | X | 420 | 31.058 | 28.858 | 42.761 | 0.00 | 0.00 |
| ATOM | 6312 | N    | VAL | X | 421 | 31.827 | 26.997 | 43.832 | 0.00 | 0.00 |
| ATOM | 6313 | H    | VAL | X | 421 | 31.645 | 26.180 | 44.398 | 0.00 | 0.00 |
| ATOM | 6314 | CA   | VAL | X | 421 | 33.220 | 27.423 | 43.911 | 0.00 | 0.00 |
| ATOM | 6315 | HA   | VAL | X | 421 | 33.357 | 28.411 | 43.472 | 0.00 | 0.00 |
| ATOM | 6316 | CB   | VAL | X | 421 | 33.867 | 27.364 | 45.344 | 0.00 | 0.00 |
| ATOM | 6317 | HB   | VAL | X | 421 | 33.864 | 26.316 | 45.642 | 0.00 | 0.00 |
| ATOM | 6318 | CG1  | VAL | X | 421 | 35.341 | 27.806 | 45.329 | 0.00 | 0.00 |
| ATOM | 6319 | HG11 | VAL | X | 421 | 35.990 | 27.376 | 44.566 | 0.00 | 0.00 |
| ATOM | 6320 | HG12 | VAL | X | 421 | 35.364 | 28.883 | 45.163 | 0.00 | 0.00 |
| ATOM | 6321 | HG13 | VAL | X | 421 | 35.772 | 27.574 | 46.303 | 0.00 | 0.00 |
| ATOM | 6322 | CG2  | VAL | X | 421 | 33.111 | 28.270 | 46.324 | 0.00 | 0.00 |
| ATOM | 6323 | HG21 | VAL | X | 421 | 32.133 | 27.809 | 46.465 | 0.00 | 0.00 |
| ATOM | 6324 | HG22 | VAL | X | 421 | 33.068 | 29.279 | 45.915 | 0.00 | 0.00 |
| ATOM | 6325 | HG23 | VAL | X | 421 | 33.595 | 28.340 | 47.299 | 0.00 | 0.00 |
| ATOM | 6326 | C    | VAL | X | 421 | 33.957 | 26.469 | 42.963 | 0.00 | 0.00 |
| ATOM | 6327 | O    | VAL | X | 421 | 33.549 | 25.292 | 42.791 | 0.00 | 0.00 |
| ATOM | 6328 | N    | TYR | X | 422 | 34.991 | 26.981 | 42.249 | 0.00 | 0.00 |
| ATOM | 6329 | H    | TYR | X | 422 | 35.238 | 27.934 | 42.473 | 0.00 | 0.00 |
| ATOM | 6330 | CA   | TYR | X | 422 | 35.910 | 26.237 | 41.350 | 0.00 | 0.00 |
| ATOM | 6331 | HA   | TYR | X | 422 | 35.859 | 25.175 | 41.589 | 0.00 | 0.00 |
| ATOM | 6332 | CB   | TYR | X | 422 | 35.405 | 26.410 | 39.881 | 0.00 | 0.00 |
| ATOM | 6333 | HB2  | TYR | X | 422 | 35.364 | 27.484 | 39.702 | 0.00 | 0.00 |
| ATOM | 6334 | HB3  | TYR | X | 422 | 36.176 | 26.155 | 39.154 | 0.00 | 0.00 |
| ATOM | 6335 | CG   | TYR | X | 422 | 34.096 | 25.745 | 39.572 | 0.00 | 0.00 |
| ATOM | 6336 | CD1  | TYR | X | 422 | 34.156 | 24.477 | 38.941 | 0.00 | 0.00 |
| ATOM | 6337 | HD1  | TYR | X | 422 | 35.073 | 23.960 | 38.699 | 0.00 | 0.00 |
| ATOM | 6338 | CE1  | TYR | X | 422 | 32.936 | 23.994 | 38.520 | 0.00 | 0.00 |
| ATOM | 6339 | HE1  | TYR | X | 422 | 32.970 | 23.039 | 38.016 | 0.00 | 0.00 |
| ATOM | 6340 | CZ   | TYR | X | 422 | 31.699 | 24.569 | 38.825 | 0.00 | 0.00 |
| ATOM | 6341 | OH   | TYR | X | 422 | 30.551 | 24.077 | 38.231 | 0.00 | 0.00 |
| ATOM | 6342 | HH   | TYR | X | 422 | 30.744 | 23.513 | 37.479 | 0.00 | 0.00 |
| ATOM | 6343 | CE2  | TYR | X | 422 | 31.659 | 25.834 | 39.431 | 0.00 | 0.00 |

|      |      |      |     |   |     |        |        |        |      |      |
|------|------|------|-----|---|-----|--------|--------|--------|------|------|
| ATOM | 6344 | HE2  | TYR | X | 422 | 30.734 | 26.387 | 39.487 | 0.00 | 0.00 |
| ATOM | 6345 | CD2  | TYR | X | 422 | 32.873 | 26.427 | 39.802 | 0.00 | 0.00 |
| ATOM | 6346 | HD2  | TYR | X | 422 | 32.843 | 27.375 | 40.319 | 0.00 | 0.00 |
| ATOM | 6347 | C    | TYR | X | 422 | 37.287 | 26.780 | 41.380 | 0.00 | 0.00 |
| ATOM | 6348 | O    | TYR | X | 422 | 37.548 | 27.955 | 41.205 | 0.00 | 0.00 |
| ATOM | 6349 | N    | ALA | X | 423 | 38.293 | 25.869 | 41.585 | 0.00 | 0.00 |
| ATOM | 6350 | H    | ALA | X | 423 | 38.116 | 24.875 | 41.617 | 0.00 | 0.00 |
| ATOM | 6351 | CA   | ALA | X | 423 | 39.616 | 26.286 | 41.978 | 0.00 | 0.00 |
| ATOM | 6352 | HA   | ALA | X | 423 | 39.571 | 27.369 | 41.861 | 0.00 | 0.00 |
| ATOM | 6353 | CB   | ALA | X | 423 | 39.740 | 26.035 | 43.528 | 0.00 | 0.00 |
| ATOM | 6354 | HB1  | ALA | X | 423 | 40.702 | 26.454 | 43.826 | 0.00 | 0.00 |
| ATOM | 6355 | HB2  | ALA | X | 423 | 39.714 | 24.967 | 43.748 | 0.00 | 0.00 |
| ATOM | 6356 | HB3  | ALA | X | 423 | 39.089 | 26.600 | 44.195 | 0.00 | 0.00 |
| ATOM | 6357 | C    | ALA | X | 423 | 40.847 | 25.707 | 41.208 | 0.00 | 0.00 |
| ATOM | 6358 | O    | ALA | X | 423 | 40.839 | 24.595 | 40.672 | 0.00 | 0.00 |
| ATOM | 6359 | N    | TYR | X | 424 | 41.921 | 26.493 | 41.099 | 0.00 | 0.00 |
| ATOM | 6360 | H    | TYR | X | 424 | 41.768 | 27.365 | 41.585 | 0.00 | 0.00 |
| ATOM | 6361 | CA   | TYR | X | 424 | 43.069 | 26.277 | 40.279 | 0.00 | 0.00 |
| ATOM | 6362 | HA   | TYR | X | 424 | 43.084 | 25.220 | 40.013 | 0.00 | 0.00 |
| ATOM | 6363 | CB   | TYR | X | 424 | 42.902 | 27.033 | 38.965 | 0.00 | 0.00 |
| ATOM | 6364 | HB2  | TYR | X | 424 | 43.552 | 26.740 | 38.141 | 0.00 | 0.00 |
| ATOM | 6365 | HB3  | TYR | X | 424 | 41.865 | 26.941 | 38.644 | 0.00 | 0.00 |
| ATOM | 6366 | CG   | TYR | X | 424 | 43.298 | 28.494 | 39.009 | 0.00 | 0.00 |
| ATOM | 6367 | CD1  | TYR | X | 424 | 44.623 | 28.887 | 38.663 | 0.00 | 0.00 |
| ATOM | 6368 | HD1  | TYR | X | 424 | 45.380 | 28.166 | 38.392 | 0.00 | 0.00 |
| ATOM | 6369 | CE1  | TYR | X | 424 | 44.979 | 30.232 | 38.732 | 0.00 | 0.00 |
| ATOM | 6370 | HE1  | TYR | X | 424 | 45.881 | 30.599 | 38.266 | 0.00 | 0.00 |
| ATOM | 6371 | CZ   | TYR | X | 424 | 44.084 | 31.242 | 39.108 | 0.00 | 0.00 |
| ATOM | 6372 | OH   | TYR | X | 424 | 44.458 | 32.523 | 39.271 | 0.00 | 0.00 |
| ATOM | 6373 | HH   | TYR | X | 424 | 45.273 | 32.757 | 38.822 | 0.00 | 0.00 |
| ATOM | 6374 | CE2  | TYR | X | 424 | 42.790 | 30.873 | 39.511 | 0.00 | 0.00 |
| ATOM | 6375 | HE2  | TYR | X | 424 | 42.101 | 31.583 | 39.944 | 0.00 | 0.00 |
| ATOM | 6376 | CD2  | TYR | X | 424 | 42.409 | 29.555 | 39.375 | 0.00 | 0.00 |
| ATOM | 6377 | HD2  | TYR | X | 424 | 41.414 | 29.231 | 39.641 | 0.00 | 0.00 |
| ATOM | 6378 | C    | TYR | X | 424 | 44.407 | 26.543 | 40.905 | 0.00 | 0.00 |
| ATOM | 6379 | O    | TYR | X | 424 | 44.543 | 27.608 | 41.506 | 0.00 | 0.00 |
| ATOM | 6380 | N    | VAL | X | 425 | 45.394 | 25.633 | 40.684 | 0.00 | 0.00 |
| ATOM | 6381 | H    | VAL | X | 425 | 45.119 | 24.870 | 40.082 | 0.00 | 0.00 |
| ATOM | 6382 | CA   | VAL | X | 425 | 46.840 | 25.923 | 40.822 | 0.00 | 0.00 |
| ATOM | 6383 | HA   | VAL | X | 425 | 47.027 | 26.922 | 41.214 | 0.00 | 0.00 |
| ATOM | 6384 | CB   | VAL | X | 425 | 47.538 | 24.951 | 41.820 | 0.00 | 0.00 |
| ATOM | 6385 | HB   | VAL | X | 425 | 47.301 | 25.262 | 42.837 | 0.00 | 0.00 |
| ATOM | 6386 | CG1  | VAL | X | 425 | 47.283 | 23.393 | 41.657 | 0.00 | 0.00 |
| ATOM | 6387 | HG11 | VAL | X | 425 | 47.566 | 23.069 | 40.656 | 0.00 | 0.00 |
| ATOM | 6388 | HG12 | VAL | X | 425 | 47.882 | 22.795 | 42.344 | 0.00 | 0.00 |
| ATOM | 6389 | HG13 | VAL | X | 425 | 46.245 | 23.149 | 41.884 | 0.00 | 0.00 |
| ATOM | 6390 | CG2  | VAL | X | 425 | 49.066 | 25.263 | 42.022 | 0.00 | 0.00 |
| ATOM | 6391 | HG21 | VAL | X | 425 | 49.160 | 26.260 | 42.454 | 0.00 | 0.00 |
| ATOM | 6392 | HG22 | VAL | X | 425 | 49.636 | 24.983 | 41.136 | 0.00 | 0.00 |
| ATOM | 6393 | HG23 | VAL | X | 425 | 49.448 | 24.621 | 42.816 | 0.00 | 0.00 |
| ATOM | 6394 | C    | VAL | X | 425 | 47.408 | 25.894 | 39.393 | 0.00 | 0.00 |
| ATOM | 6395 | O    | VAL | X | 425 | 47.151 | 24.953 | 38.681 | 0.00 | 0.00 |
| ATOM | 6396 | N    | PHE | X | 426 | 48.059 | 26.983 | 38.980 | 0.00 | 0.00 |
| ATOM | 6397 | H    | PHE | X | 426 | 48.061 | 27.787 | 39.592 | 0.00 | 0.00 |
| ATOM | 6398 | CA   | PHE | X | 426 | 48.581 | 27.210 | 37.600 | 0.00 | 0.00 |
| ATOM | 6399 | HA   | PHE | X | 426 | 48.013 | 26.567 | 36.928 | 0.00 | 0.00 |
| ATOM | 6400 | CB   | PHE | X | 426 | 48.267 | 28.702 | 37.185 | 0.00 | 0.00 |
| ATOM | 6401 | HB2  | PHE | X | 426 | 47.214 | 28.844 | 36.939 | 0.00 | 0.00 |
| ATOM | 6402 | HB3  | PHE | X | 426 | 48.569 | 29.360 | 37.999 | 0.00 | 0.00 |
| ATOM | 6403 | CG   | PHE | X | 426 | 49.107 | 29.056 | 35.976 | 0.00 | 0.00 |
| ATOM | 6404 | CD1  | PHE | X | 426 | 48.658 | 28.751 | 34.718 | 0.00 | 0.00 |
| ATOM | 6405 | HD1  | PHE | X | 426 | 47.775 | 28.160 | 34.528 | 0.00 | 0.00 |
| ATOM | 6406 | CE1  | PHE | X | 426 | 49.398 | 29.243 | 33.616 | 0.00 | 0.00 |
| ATOM | 6407 | HE1  | PHE | X | 426 | 49.172 | 28.961 | 32.598 | 0.00 | 0.00 |
| ATOM | 6408 | CZ   | PHE | X | 426 | 50.680 | 29.831 | 33.826 | 0.00 | 0.00 |
| ATOM | 6409 | HZ   | PHE | X | 426 | 51.286 | 29.942 | 32.939 | 0.00 | 0.00 |
| ATOM | 6410 | CE2  | PHE | X | 426 | 51.103 | 30.111 | 35.085 | 0.00 | 0.00 |

|      |      |      |     |   |     |        |        |        |      |      |
|------|------|------|-----|---|-----|--------|--------|--------|------|------|
| ATOM | 6411 | HE2  | PHE | X | 426 | 52.106 | 30.483 | 35.233 | 0.00 | 0.00 |
| ATOM | 6412 | CD2  | PHE | X | 426 | 50.333 | 29.747 | 36.170 | 0.00 | 0.00 |
| ATOM | 6413 | HD2  | PHE | X | 426 | 50.692 | 29.838 | 37.185 | 0.00 | 0.00 |
| ATOM | 6414 | C    | PHE | X | 426 | 50.077 | 26.821 | 37.646 | 0.00 | 0.00 |
| ATOM | 6415 | O    | PHE | X | 426 | 50.705 | 27.263 | 38.642 | 0.00 | 0.00 |
| ATOM | 6416 | N    | GLU | X | 427 | 50.649 | 25.947 | 36.784 | 0.00 | 0.00 |
| ATOM | 6417 | H    | GLU | X | 427 | 50.104 | 25.545 | 36.035 | 0.00 | 0.00 |
| ATOM | 6418 | CA   | GLU | X | 427 | 51.887 | 25.285 | 37.057 | 0.00 | 0.00 |
| ATOM | 6419 | HA   | GLU | X | 427 | 52.383 | 25.710 | 37.930 | 0.00 | 0.00 |
| ATOM | 6420 | CB   | GLU | X | 427 | 51.724 | 23.801 | 37.218 | 0.00 | 0.00 |
| ATOM | 6421 | HB2  | GLU | X | 427 | 51.389 | 23.383 | 36.269 | 0.00 | 0.00 |
| ATOM | 6422 | HB3  | GLU | X | 427 | 52.713 | 23.381 | 37.406 | 0.00 | 0.00 |
| ATOM | 6423 | CG   | GLU | X | 427 | 50.687 | 23.409 | 38.246 | 0.00 | 0.00 |
| ATOM | 6424 | HG2  | GLU | X | 427 | 50.990 | 23.891 | 39.176 | 0.00 | 0.00 |
| ATOM | 6425 | HG3  | GLU | X | 427 | 49.678 | 23.656 | 37.915 | 0.00 | 0.00 |
| ATOM | 6426 | CD   | GLU | X | 427 | 50.691 | 21.923 | 38.574 | 0.00 | 0.00 |
| ATOM | 6427 | OE1  | GLU | X | 427 | 50.201 | 21.665 | 39.712 | 0.00 | 0.00 |
| ATOM | 6428 | OE2  | GLU | X | 427 | 51.214 | 21.079 | 37.787 | 0.00 | 0.00 |
| ATOM | 6429 | C    | GLU | X | 427 | 52.890 | 25.497 | 35.839 | 0.00 | 0.00 |
| ATOM | 6430 | O    | GLU | X | 427 | 53.986 | 24.971 | 35.921 | 0.00 | 0.00 |
| ATOM | 6431 | N    | HIE | X | 428 | 52.485 | 26.024 | 34.637 | 0.00 | 0.00 |
| ATOM | 6432 | H    | HIE | X | 428 | 51.527 | 26.332 | 34.549 | 0.00 | 0.00 |
| ATOM | 6433 | CA   | HIE | X | 428 | 53.405 | 26.194 | 33.461 | 0.00 | 0.00 |
| ATOM | 6434 | HA   | HIE | X | 428 | 54.019 | 25.307 | 33.300 | 0.00 | 0.00 |
| ATOM | 6435 | CB   | HIE | X | 428 | 52.569 | 26.222 | 32.218 | 0.00 | 0.00 |
| ATOM | 6436 | HB2  | HIE | X | 428 | 51.916 | 25.360 | 32.082 | 0.00 | 0.00 |
| ATOM | 6437 | HB3  | HIE | X | 428 | 51.803 | 26.997 | 32.261 | 0.00 | 0.00 |
| ATOM | 6438 | CG   | HIE | X | 428 | 53.492 | 26.472 | 31.050 | 0.00 | 0.00 |
| ATOM | 6439 | ND1  | HIE | X | 428 | 54.621 | 25.696 | 30.733 | 0.00 | 0.00 |
| ATOM | 6440 | CE1  | HIE | X | 428 | 55.039 | 26.207 | 29.542 | 0.00 | 0.00 |
| ATOM | 6441 | HE1  | HIE | X | 428 | 55.835 | 25.829 | 28.919 | 0.00 | 0.00 |
| ATOM | 6442 | NE2  | HIE | X | 428 | 54.283 | 27.229 | 29.189 | 0.00 | 0.00 |
| ATOM | 6443 | HE2  | HIE | X | 428 | 54.333 | 27.797 | 28.355 | 0.00 | 0.00 |
| ATOM | 6444 | CD2  | HIE | X | 428 | 53.305 | 27.384 | 30.058 | 0.00 | 0.00 |
| ATOM | 6445 | HD2  | HIE | X | 428 | 52.507 | 28.102 | 29.940 | 0.00 | 0.00 |
| ATOM | 6446 | C    | HIE | X | 428 | 54.271 | 27.474 | 33.473 | 0.00 | 0.00 |
| ATOM | 6447 | O    | HIE | X | 428 | 53.868 | 28.613 | 33.580 | 0.00 | 0.00 |
| ATOM | 6448 | N    | ARG | X | 429 | 55.557 | 27.293 | 33.208 | 0.00 | 0.00 |
| ATOM | 6449 | H    | ARG | X | 429 | 55.828 | 26.345 | 32.987 | 0.00 | 0.00 |
| ATOM | 6450 | CA   | ARG | X | 429 | 56.639 | 28.278 | 33.418 | 0.00 | 0.00 |
| ATOM | 6451 | HA   | ARG | X | 429 | 56.210 | 29.153 | 33.905 | 0.00 | 0.00 |
| ATOM | 6452 | CB   | ARG | X | 429 | 57.773 | 27.603 | 34.309 | 0.00 | 0.00 |
| ATOM | 6453 | HB2  | ARG | X | 429 | 57.242 | 26.930 | 34.983 | 0.00 | 0.00 |
| ATOM | 6454 | HB3  | ARG | X | 429 | 58.418 | 27.027 | 33.645 | 0.00 | 0.00 |
| ATOM | 6455 | CG   | ARG | X | 429 | 58.392 | 28.781 | 35.056 | 0.00 | 0.00 |
| ATOM | 6456 | HG2  | ARG | X | 429 | 58.506 | 29.601 | 34.348 | 0.00 | 0.00 |
| ATOM | 6457 | HG3  | ARG | X | 429 | 57.626 | 29.178 | 35.722 | 0.00 | 0.00 |
| ATOM | 6458 | CD   | ARG | X | 429 | 59.665 | 28.441 | 35.857 | 0.00 | 0.00 |
| ATOM | 6459 | HD2  | ARG | X | 429 | 59.331 | 27.997 | 36.794 | 0.00 | 0.00 |
| ATOM | 6460 | HD3  | ARG | X | 429 | 60.296 | 27.750 | 35.298 | 0.00 | 0.00 |
| ATOM | 6461 | NE   | ARG | X | 429 | 60.500 | 29.594 | 36.084 | 0.00 | 0.00 |
| ATOM | 6462 | HE   | ARG | X | 429 | 60.198 | 30.288 | 36.754 | 0.00 | 0.00 |
| ATOM | 6463 | CZ   | ARG | X | 429 | 61.461 | 30.088 | 35.325 | 0.00 | 0.00 |
| ATOM | 6464 | NH1  | ARG | X | 429 | 61.685 | 29.597 | 34.113 | 0.00 | 0.00 |
| ATOM | 6465 | HH11 | ARG | X | 429 | 60.947 | 29.018 | 33.736 | 0.00 | 0.00 |
| ATOM | 6466 | HH12 | ARG | X | 429 | 62.371 | 29.906 | 33.440 | 0.00 | 0.00 |
| ATOM | 6467 | NH2  | ARG | X | 429 | 62.263 | 31.043 | 35.776 | 0.00 | 0.00 |
| ATOM | 6468 | HH21 | ARG | X | 429 | 62.136 | 31.421 | 36.704 | 0.00 | 0.00 |
| ATOM | 6469 | HH22 | ARG | X | 429 | 63.060 | 31.334 | 35.229 | 0.00 | 0.00 |
| ATOM | 6470 | C    | ARG | X | 429 | 57.016 | 28.755 | 32.041 | 0.00 | 0.00 |
| ATOM | 6471 | O    | ARG | X | 429 | 57.648 | 28.042 | 31.280 | 0.00 | 0.00 |
| ATOM | 6472 | N    | ALA | X | 430 | 56.446 | 29.874 | 31.586 | 0.00 | 0.00 |
| ATOM | 6473 | H    | ALA | X | 430 | 55.857 | 30.374 | 32.237 | 0.00 | 0.00 |
| ATOM | 6474 | CA   | ALA | X | 430 | 56.396 | 30.297 | 30.150 | 0.00 | 0.00 |
| ATOM | 6475 | HA   | ALA | X | 430 | 55.802 | 29.578 | 29.586 | 0.00 | 0.00 |
| ATOM | 6476 | CB   | ALA | X | 430 | 55.636 | 31.645 | 30.194 | 0.00 | 0.00 |
| ATOM | 6477 | HB1  | ALA | X | 430 | 55.454 | 32.166 | 29.254 | 0.00 | 0.00 |



|      |      |      |     |   |     |        |        |        |      |      |
|------|------|------|-----|---|-----|--------|--------|--------|------|------|
| ATOM | 6478 | HB2  | ALA | X | 430 | 56.145 | 32.371 | 30.828 | 0.00 | 0.00 |
| ATOM | 6479 | HB3  | ALA | X | 430 | 54.659 | 31.347 | 30.575 | 0.00 | 0.00 |
| ATOM | 6480 | C    | ALA | X | 430 | 57.759 | 30.367 | 29.446 | 0.00 | 0.00 |
| ATOM | 6481 | O    | ALA | X | 430 | 58.765 | 30.571 | 30.085 | 0.00 | 0.00 |
| ATOM | 6482 | N    | SER | X | 431 | 57.819 | 30.066 | 28.213 | 0.00 | 0.00 |
| ATOM | 6483 | H    | SER | X | 431 | 57.068 | 29.519 | 27.816 | 0.00 | 0.00 |
| ATOM | 6484 | CA   | SER | X | 431 | 59.060 | 30.077 | 27.446 | 0.00 | 0.00 |
| ATOM | 6485 | HA   | SER | X | 431 | 59.842 | 29.595 | 28.033 | 0.00 | 0.00 |
| ATOM | 6486 | CB   | SER | X | 431 | 59.048 | 29.257 | 26.211 | 0.00 | 0.00 |
| ATOM | 6487 | HB2  | SER | X | 431 | 60.065 | 28.981 | 25.932 | 0.00 | 0.00 |
| ATOM | 6488 | HB3  | SER | X | 431 | 58.671 | 28.258 | 26.433 | 0.00 | 0.00 |
| ATOM | 6489 | OG   | SER | X | 431 | 58.214 | 29.723 | 25.206 | 0.00 | 0.00 |
| ATOM | 6490 | HG   | SER | X | 431 | 57.345 | 29.361 | 25.394 | 0.00 | 0.00 |
| ATOM | 6491 | C    | SER | X | 431 | 59.570 | 31.477 | 27.006 | 0.00 | 0.00 |
| ATOM | 6492 | O    | SER | X | 431 | 60.583 | 31.612 | 26.273 | 0.00 | 0.00 |
| ATOM | 6493 | N    | THR | X | 432 | 58.823 | 32.488 | 27.477 | 0.00 | 0.00 |
| ATOM | 6494 | H    | THR | X | 432 | 57.958 | 32.290 | 27.960 | 0.00 | 0.00 |
| ATOM | 6495 | CA   | THR | X | 432 | 59.083 | 33.914 | 27.451 | 0.00 | 0.00 |
| ATOM | 6496 | HA   | THR | X | 432 | 59.903 | 34.154 | 26.774 | 0.00 | 0.00 |
| ATOM | 6497 | CB   | THR | X | 432 | 57.918 | 34.693 | 26.981 | 0.00 | 0.00 |
| ATOM | 6498 | HB   | THR | X | 432 | 58.066 | 35.767 | 27.096 | 0.00 | 0.00 |
| ATOM | 6499 | CG2  | THR | X | 432 | 57.515 | 34.479 | 25.433 | 0.00 | 0.00 |
| ATOM | 6500 | HG21 | THR | X | 432 | 56.804 | 35.284 | 25.246 | 0.00 | 0.00 |
| ATOM | 6501 | HG22 | THR | X | 432 | 57.052 | 33.508 | 25.261 | 0.00 | 0.00 |
| ATOM | 6502 | HG23 | THR | X | 432 | 58.456 | 34.596 | 24.894 | 0.00 | 0.00 |
| ATOM | 6503 | OG1  | THR | X | 432 | 56.726 | 34.405 | 27.676 | 0.00 | 0.00 |
| ATOM | 6504 | HG1  | THR | X | 432 | 56.112 | 35.098 | 27.422 | 0.00 | 0.00 |
| ATOM | 6505 | C    | THR | X | 432 | 59.471 | 34.428 | 28.891 | 0.00 | 0.00 |
| ATOM | 6506 | O    | THR | X | 432 | 59.805 | 35.627 | 28.980 | 0.00 | 0.00 |
| ATOM | 6507 | N    | LEU | X | 433 | 59.340 | 33.627 | 29.961 | 0.00 | 0.00 |
| ATOM | 6508 | H    | LEU | X | 433 | 59.163 | 32.642 | 29.821 | 0.00 | 0.00 |
| ATOM | 6509 | CA   | LEU | X | 433 | 59.403 | 34.143 | 31.337 | 0.00 | 0.00 |
| ATOM | 6510 | HA   | LEU | X | 433 | 58.875 | 35.086 | 31.474 | 0.00 | 0.00 |
| ATOM | 6511 | CB   | LEU | X | 433 | 58.914 | 33.002 | 32.307 | 0.00 | 0.00 |
| ATOM | 6512 | HB2  | LEU | X | 433 | 58.046 | 32.504 | 31.874 | 0.00 | 0.00 |
| ATOM | 6513 | HB3  | LEU | X | 433 | 59.764 | 32.329 | 32.411 | 0.00 | 0.00 |
| ATOM | 6514 | CG   | LEU | X | 433 | 58.635 | 33.763 | 33.697 | 0.00 | 0.00 |
| ATOM | 6515 | HG   | LEU | X | 433 | 59.316 | 34.614 | 33.723 | 0.00 | 0.00 |
| ATOM | 6516 | CD1  | LEU | X | 433 | 57.149 | 34.312 | 33.632 | 0.00 | 0.00 |
| ATOM | 6517 | HD11 | LEU | X | 433 | 57.032 | 35.052 | 32.841 | 0.00 | 0.00 |
| ATOM | 6518 | HD12 | LEU | X | 433 | 56.937 | 34.685 | 34.634 | 0.00 | 0.00 |
| ATOM | 6519 | HD13 | LEU | X | 433 | 56.410 | 33.565 | 33.341 | 0.00 | 0.00 |
| ATOM | 6520 | CD2  | LEU | X | 433 | 58.874 | 32.861 | 34.915 | 0.00 | 0.00 |
| ATOM | 6521 | HD21 | LEU | X | 433 | 59.941 | 32.795 | 35.127 | 0.00 | 0.00 |
| ATOM | 6522 | HD22 | LEU | X | 433 | 58.376 | 33.287 | 35.786 | 0.00 | 0.00 |
| ATOM | 6523 | HD23 | LEU | X | 433 | 58.682 | 31.800 | 34.757 | 0.00 | 0.00 |
| ATOM | 6524 | C    | LEU | X | 433 | 60.839 | 34.667 | 31.694 | 0.00 | 0.00 |
| ATOM | 6525 | O    | LEU | X | 433 | 61.793 | 33.895 | 31.594 | 0.00 | 0.00 |
| ATOM | 6526 | N    | SER | X | 434 | 60.933 | 36.017 | 31.888 | 0.00 | 0.00 |
| ATOM | 6527 | H    | SER | X | 434 | 60.079 | 36.543 | 31.766 | 0.00 | 0.00 |
| ATOM | 6528 | CA   | SER | X | 434 | 62.220 | 36.636 | 32.059 | 0.00 | 0.00 |
| ATOM | 6529 | HA   | SER | X | 434 | 62.942 | 36.288 | 31.320 | 0.00 | 0.00 |
| ATOM | 6530 | CB   | SER | X | 434 | 62.043 | 38.084 | 31.754 | 0.00 | 0.00 |
| ATOM | 6531 | HB2  | SER | X | 434 | 61.372 | 38.551 | 32.476 | 0.00 | 0.00 |
| ATOM | 6532 | HB3  | SER | X | 434 | 63.041 | 38.523 | 31.738 | 0.00 | 0.00 |
| ATOM | 6533 | OG   | SER | X | 434 | 61.659 | 38.309 | 30.396 | 0.00 | 0.00 |
| ATOM | 6534 | HG   | SER | X | 434 | 62.435 | 38.224 | 29.838 | 0.00 | 0.00 |
| ATOM | 6535 | C    | SER | X | 434 | 62.828 | 36.496 | 33.424 | 0.00 | 0.00 |
| ATOM | 6536 | O    | SER | X | 434 | 63.996 | 36.557 | 33.647 | 0.00 | 0.00 |
| ATOM | 6537 | N    | TRP | X | 435 | 62.017 | 36.122 | 34.410 | 0.00 | 0.00 |
| ATOM | 6538 | H    | TRP | X | 435 | 61.071 | 35.866 | 34.169 | 0.00 | 0.00 |
| ATOM | 6539 | CA   | TRP | X | 435 | 62.513 | 35.994 | 35.805 | 0.00 | 0.00 |
| ATOM | 6540 | HA   | TRP | X | 435 | 63.077 | 36.878 | 36.102 | 0.00 | 0.00 |
| ATOM | 6541 | CB   | TRP | X | 435 | 61.271 | 35.835 | 36.673 | 0.00 | 0.00 |
| ATOM | 6542 | HB2  | TRP | X | 435 | 60.698 | 35.080 | 36.135 | 0.00 | 0.00 |
| ATOM | 6543 | HB3  | TRP | X | 435 | 61.521 | 35.592 | 37.706 | 0.00 | 0.00 |
| ATOM | 6544 | CG   | TRP | X | 435 | 60.511 | 37.104 | 36.747 | 0.00 | 0.00 |

|      |      |      |     |   |     |        |        |        |      |      |
|------|------|------|-----|---|-----|--------|--------|--------|------|------|
| ATOM | 6545 | CD1  | TRP | X | 435 | 59.363 | 37.464 | 36.104 | 0.00 | 0.00 |
| ATOM | 6546 | HD1  | TRP | X | 435 | 58.869 | 36.888 | 35.336 | 0.00 | 0.00 |
| ATOM | 6547 | NE1  | TRP | X | 435 | 58.989 | 38.732 | 36.542 | 0.00 | 0.00 |
| ATOM | 6548 | HE1  | TRP | X | 435 | 58.267 | 39.256 | 36.070 | 0.00 | 0.00 |
| ATOM | 6549 | CE2  | TRP | X | 435 | 59.968 | 39.278 | 37.379 | 0.00 | 0.00 |
| ATOM | 6550 | CZ2  | TRP | X | 435 | 60.017 | 40.557 | 37.993 | 0.00 | 0.00 |
| ATOM | 6551 | HZ2  | TRP | X | 435 | 59.150 | 41.193 | 37.892 | 0.00 | 0.00 |
| ATOM | 6552 | CH2  | TRP | X | 435 | 61.087 | 40.840 | 38.909 | 0.00 | 0.00 |
| ATOM | 6553 | HH2  | TRP | X | 435 | 61.087 | 41.699 | 39.564 | 0.00 | 0.00 |
| ATOM | 6554 | CZ3  | TRP | X | 435 | 62.133 | 39.879 | 39.034 | 0.00 | 0.00 |
| ATOM | 6555 | HZ3  | TRP | X | 435 | 62.960 | 40.040 | 39.710 | 0.00 | 0.00 |
| ATOM | 6556 | CE3  | TRP | X | 435 | 62.054 | 38.593 | 38.396 | 0.00 | 0.00 |
| ATOM | 6557 | HE3  | TRP | X | 435 | 62.884 | 37.927 | 38.579 | 0.00 | 0.00 |
| ATOM | 6558 | CD2  | TRP | X | 435 | 60.964 | 38.259 | 37.554 | 0.00 | 0.00 |
| ATOM | 6559 | C    | TRP | X | 435 | 63.395 | 34.666 | 35.991 | 0.00 | 0.00 |
| ATOM | 6560 | O    | TRP | X | 435 | 63.303 | 33.702 | 35.231 | 0.00 | 0.00 |
| ATOM | 6561 | N    | PRO | X | 436 | 64.271 | 34.630 | 37.052 | 0.00 | 0.00 |
| ATOM | 6562 | CD   | PRO | X | 436 | 64.353 | 35.623 | 38.078 | 0.00 | 0.00 |
| ATOM | 6563 | HD2  | PRO | X | 436 | 63.426 | 35.727 | 38.643 | 0.00 | 0.00 |
| ATOM | 6564 | HD3  | PRO | X | 436 | 64.633 | 36.570 | 37.618 | 0.00 | 0.00 |
| ATOM | 6565 | CG   | PRO | X | 436 | 65.507 | 35.202 | 39.019 | 0.00 | 0.00 |
| ATOM | 6566 | HG2  | PRO | X | 436 | 64.967 | 34.828 | 39.889 | 0.00 | 0.00 |
| ATOM | 6567 | HG3  | PRO | X | 436 | 66.031 | 36.080 | 39.396 | 0.00 | 0.00 |
| ATOM | 6568 | CB   | PRO | X | 436 | 66.352 | 34.186 | 38.220 | 0.00 | 0.00 |
| ATOM | 6569 | HB2  | PRO | X | 436 | 66.692 | 33.404 | 38.899 | 0.00 | 0.00 |
| ATOM | 6570 | HB3  | PRO | X | 436 | 67.136 | 34.761 | 37.728 | 0.00 | 0.00 |
| ATOM | 6571 | CA   | PRO | X | 436 | 65.336 | 33.632 | 37.181 | 0.00 | 0.00 |
| ATOM | 6572 | HA   | PRO | X | 436 | 65.777 | 33.517 | 36.191 | 0.00 | 0.00 |
| ATOM | 6573 | C    | PRO | X | 436 | 64.693 | 32.325 | 37.661 | 0.00 | 0.00 |
| ATOM | 6574 | O    | PRO | X | 436 | 63.545 | 32.205 | 38.154 | 0.00 | 0.00 |
| ATOM | 6575 | N    | LEU | X | 437 | 65.498 | 31.353 | 37.489 | 0.00 | 0.00 |
| ATOM | 6576 | H    | LEU | X | 437 | 66.415 | 31.601 | 37.145 | 0.00 | 0.00 |
| ATOM | 6577 | CA   | LEU | X | 437 | 65.142 | 29.886 | 37.558 | 0.00 | 0.00 |
| ATOM | 6578 | HA   | LEU | X | 437 | 64.384 | 29.588 | 36.834 | 0.00 | 0.00 |
| ATOM | 6579 | CB   | LEU | X | 437 | 66.381 | 29.044 | 37.239 | 0.00 | 0.00 |
| ATOM | 6580 | HB2  | LEU | X | 437 | 66.636 | 29.392 | 36.238 | 0.00 | 0.00 |
| ATOM | 6581 | HB3  | LEU | X | 437 | 67.170 | 29.214 | 37.972 | 0.00 | 0.00 |
| ATOM | 6582 | CG   | LEU | X | 437 | 66.202 | 27.548 | 37.118 | 0.00 | 0.00 |
| ATOM | 6583 | HG   | LEU | X | 437 | 65.885 | 27.039 | 38.028 | 0.00 | 0.00 |
| ATOM | 6584 | CD1  | LEU | X | 437 | 65.192 | 27.074 | 36.058 | 0.00 | 0.00 |
| ATOM | 6585 | HD11 | LEU | X | 437 | 64.216 | 27.555 | 36.130 | 0.00 | 0.00 |
| ATOM | 6586 | HD12 | LEU | X | 437 | 65.122 | 25.991 | 35.962 | 0.00 | 0.00 |
| ATOM | 6587 | HD13 | LEU | X | 437 | 65.642 | 27.390 | 35.117 | 0.00 | 0.00 |
| ATOM | 6588 | CD2  | LEU | X | 437 | 67.533 | 26.835 | 36.800 | 0.00 | 0.00 |
| ATOM | 6589 | HD21 | LEU | X | 437 | 67.972 | 26.919 | 35.806 | 0.00 | 0.00 |
| ATOM | 6590 | HD22 | LEU | X | 437 | 68.274 | 27.212 | 37.505 | 0.00 | 0.00 |
| ATOM | 6591 | HD23 | LEU | X | 437 | 67.301 | 25.771 | 36.860 | 0.00 | 0.00 |
| ATOM | 6592 | C    | LEU | X | 437 | 64.627 | 29.470 | 38.914 | 0.00 | 0.00 |
| ATOM | 6593 | O    | LEU | X | 437 | 63.819 | 28.551 | 38.984 | 0.00 | 0.00 |
| ATOM | 6594 | N    | TRP | X | 438 | 65.098 | 30.055 | 40.050 | 0.00 | 0.00 |
| ATOM | 6595 | H    | TRP | X | 438 | 65.977 | 30.543 | 39.954 | 0.00 | 0.00 |
| ATOM | 6596 | CA   | TRP | X | 438 | 64.796 | 29.650 | 41.438 | 0.00 | 0.00 |
| ATOM | 6597 | HA   | TRP | X | 438 | 64.735 | 28.561 | 41.451 | 0.00 | 0.00 |
| ATOM | 6598 | CB   | TRP | X | 438 | 66.085 | 30.064 | 42.176 | 0.00 | 0.00 |
| ATOM | 6599 | HB2  | TRP | X | 438 | 66.045 | 29.833 | 43.241 | 0.00 | 0.00 |
| ATOM | 6600 | HB3  | TRP | X | 438 | 66.865 | 29.482 | 41.685 | 0.00 | 0.00 |
| ATOM | 6601 | CG   | TRP | X | 438 | 66.434 | 31.486 | 42.124 | 0.00 | 0.00 |
| ATOM | 6602 | CD1  | TRP | X | 438 | 67.563 | 31.998 | 41.551 | 0.00 | 0.00 |
| ATOM | 6603 | HD1  | TRP | X | 438 | 68.375 | 31.517 | 41.026 | 0.00 | 0.00 |
| ATOM | 6604 | NE1  | TRP | X | 438 | 67.593 | 33.365 | 41.854 | 0.00 | 0.00 |
| ATOM | 6605 | HE1  | TRP | X | 438 | 68.407 | 33.925 | 41.642 | 0.00 | 0.00 |
| ATOM | 6606 | CE2  | TRP | X | 438 | 66.462 | 33.823 | 42.528 | 0.00 | 0.00 |
| ATOM | 6607 | CZ2  | TRP | X | 438 | 65.924 | 35.067 | 42.768 | 0.00 | 0.00 |
| ATOM | 6608 | HZ2  | TRP | X | 438 | 66.505 | 35.934 | 42.490 | 0.00 | 0.00 |
| ATOM | 6609 | CH2  | TRP | X | 438 | 64.692 | 35.249 | 43.397 | 0.00 | 0.00 |
| ATOM | 6610 | HH2  | TRP | X | 438 | 64.328 | 36.255 | 43.546 | 0.00 | 0.00 |
| ATOM | 6611 | CZ3  | TRP | X | 438 | 64.011 | 34.088 | 43.802 | 0.00 | 0.00 |

|      |      |      |     |   |     |        |        |        |      |      |
|------|------|------|-----|---|-----|--------|--------|--------|------|------|
| ATOM | 6612 | HZ3  | TRP | X | 438 | 63.039 | 34.149 | 44.268 | 0.00 | 0.00 |
| ATOM | 6613 | CE3  | TRP | X | 438 | 64.538 | 32.823 | 43.485 | 0.00 | 0.00 |
| ATOM | 6614 | HE3  | TRP | X | 438 | 63.948 | 31.970 | 43.788 | 0.00 | 0.00 |
| ATOM | 6615 | CD2  | TRP | X | 438 | 65.716 | 32.649 | 42.721 | 0.00 | 0.00 |
| ATOM | 6616 | C    | TRP | X | 438 | 63.452 | 30.130 | 41.999 | 0.00 | 0.00 |
| ATOM | 6617 | O    | TRP | X | 438 | 62.970 | 29.612 | 42.995 | 0.00 | 0.00 |
| ATOM | 6618 | N    | MET | X | 439 | 62.850 | 31.076 | 41.270 | 0.00 | 0.00 |
| ATOM | 6619 | H    | MET | X | 439 | 63.298 | 31.234 | 40.378 | 0.00 | 0.00 |
| ATOM | 6620 | CA   | MET | X | 439 | 61.502 | 31.669 | 41.513 | 0.00 | 0.00 |
| ATOM | 6621 | HA   | MET | X | 439 | 61.335 | 31.967 | 42.548 | 0.00 | 0.00 |
| ATOM | 6622 | CB   | MET | X | 439 | 61.424 | 32.960 | 40.691 | 0.00 | 0.00 |
| ATOM | 6623 | HB2  | MET | X | 439 | 62.307 | 33.569 | 40.886 | 0.00 | 0.00 |
| ATOM | 6624 | HB3  | MET | X | 439 | 61.766 | 32.740 | 39.680 | 0.00 | 0.00 |
| ATOM | 6625 | CG   | MET | X | 439 | 60.195 | 33.786 | 40.782 | 0.00 | 0.00 |
| ATOM | 6626 | HG2  | MET | X | 439 | 59.420 | 33.244 | 40.239 | 0.00 | 0.00 |
| ATOM | 6627 | HG3  | MET | X | 439 | 59.755 | 33.744 | 41.778 | 0.00 | 0.00 |
| ATOM | 6628 | SD   | MET | X | 439 | 60.246 | 35.435 | 40.055 | 0.00 | 0.00 |
| ATOM | 6629 | CE   | MET | X | 439 | 61.193 | 36.334 | 41.231 | 0.00 | 0.00 |
| ATOM | 6630 | HE1  | MET | X | 439 | 62.233 | 36.382 | 40.908 | 0.00 | 0.00 |
| ATOM | 6631 | HE2  | MET | X | 439 | 60.795 | 37.349 | 41.256 | 0.00 | 0.00 |
| ATOM | 6632 | HE3  | MET | X | 439 | 61.041 | 35.800 | 42.169 | 0.00 | 0.00 |
| ATOM | 6633 | C    | MET | X | 439 | 60.351 | 30.759 | 41.115 | 0.00 | 0.00 |
| ATOM | 6634 | O    | MET | X | 439 | 59.250 | 31.000 | 41.692 | 0.00 | 0.00 |
| ATOM | 6635 | N    | GLY | X | 440 | 60.564 | 29.701 | 40.288 | 0.00 | 0.00 |
| ATOM | 6636 | H    | GLY | X | 440 | 61.534 | 29.479 | 40.116 | 0.00 | 0.00 |
| ATOM | 6637 | CA   | GLY | X | 440 | 59.469 | 28.888 | 39.717 | 0.00 | 0.00 |
| ATOM | 6638 | HA2  | GLY | X | 440 | 59.904 | 28.133 | 39.062 | 0.00 | 0.00 |
| ATOM | 6639 | HA3  | GLY | X | 440 | 58.970 | 28.470 | 40.591 | 0.00 | 0.00 |
| ATOM | 6640 | C    | GLY | X | 440 | 58.395 | 29.667 | 38.927 | 0.00 | 0.00 |
| ATOM | 6641 | O    | GLY | X | 440 | 58.839 | 30.629 | 38.275 | 0.00 | 0.00 |
| ATOM | 6642 | N    | VAL | X | 441 | 57.122 | 29.332 | 39.017 | 0.00 | 0.00 |
| ATOM | 6643 | H    | VAL | X | 441 | 56.926 | 28.469 | 39.503 | 0.00 | 0.00 |
| ATOM | 6644 | CA   | VAL | X | 441 | 56.031 | 30.094 | 38.336 | 0.00 | 0.00 |
| ATOM | 6645 | HA   | VAL | X | 441 | 56.287 | 30.480 | 37.350 | 0.00 | 0.00 |
| ATOM | 6646 | CB   | VAL | X | 441 | 54.742 | 29.262 | 38.185 | 0.00 | 0.00 |
| ATOM | 6647 | HB   | VAL | X | 441 | 54.373 | 29.038 | 39.186 | 0.00 | 0.00 |
| ATOM | 6648 | CG1  | VAL | X | 441 | 53.616 | 29.949 | 37.393 | 0.00 | 0.00 |
| ATOM | 6649 | HG11 | VAL | X | 441 | 54.003 | 30.173 | 36.399 | 0.00 | 0.00 |
| ATOM | 6650 | HG12 | VAL | X | 441 | 52.894 | 29.140 | 37.287 | 0.00 | 0.00 |
| ATOM | 6651 | HG13 | VAL | X | 441 | 53.284 | 30.892 | 37.828 | 0.00 | 0.00 |
| ATOM | 6652 | CG2  | VAL | X | 441 | 55.123 | 27.982 | 37.481 | 0.00 | 0.00 |
| ATOM | 6653 | HG21 | VAL | X | 441 | 54.242 | 27.390 | 37.235 | 0.00 | 0.00 |
| ATOM | 6654 | HG22 | VAL | X | 441 | 55.798 | 27.376 | 38.086 | 0.00 | 0.00 |
| ATOM | 6655 | HG23 | VAL | X | 441 | 55.467 | 28.214 | 36.473 | 0.00 | 0.00 |
| ATOM | 6656 | C    | VAL | X | 441 | 55.684 | 31.236 | 39.264 | 0.00 | 0.00 |
| ATOM | 6657 | O    | VAL | X | 441 | 55.172 | 30.976 | 40.349 | 0.00 | 0.00 |
| ATOM | 6658 | N    | PRO | X | 442 | 55.557 | 32.487 | 38.875 | 0.00 | 0.00 |
| ATOM | 6659 | CD   | PRO | X | 442 | 56.081 | 32.964 | 37.579 | 0.00 | 0.00 |
| ATOM | 6660 | HD2  | PRO | X | 442 | 55.411 | 32.930 | 36.720 | 0.00 | 0.00 |
| ATOM | 6661 | HD3  | PRO | X | 442 | 57.050 | 32.480 | 37.459 | 0.00 | 0.00 |
| ATOM | 6662 | CG   | PRO | X | 442 | 56.371 | 34.472 | 37.755 | 0.00 | 0.00 |
| ATOM | 6663 | HG2  | PRO | X | 442 | 55.615 | 35.054 | 37.229 | 0.00 | 0.00 |
| ATOM | 6664 | HB3  | PRO | X | 442 | 57.339 | 34.767 | 37.350 | 0.00 | 0.00 |
| ATOM | 6665 | CB   | PRO | X | 442 | 56.406 | 34.648 | 39.255 | 0.00 | 0.00 |
| ATOM | 6666 | HB2  | PRO | X | 442 | 56.090 | 35.668 | 39.472 | 0.00 | 0.00 |
| ATOM | 6667 | HB3  | PRO | X | 442 | 57.394 | 34.531 | 39.700 | 0.00 | 0.00 |
| ATOM | 6668 | CA   | PRO | X | 442 | 55.388 | 33.593 | 39.798 | 0.00 | 0.00 |
| ATOM | 6669 | HA   | PRO | X | 442 | 55.603 | 33.256 | 40.812 | 0.00 | 0.00 |
| ATOM | 6670 | C    | PRO | X | 442 | 54.066 | 34.328 | 39.755 | 0.00 | 0.00 |
| ATOM | 6671 | O    | PRO | X | 442 | 53.355 | 34.294 | 38.756 | 0.00 | 0.00 |
| ATOM | 6672 | N    | HIP | X | 443 | 53.660 | 34.957 | 40.866 | 0.00 | 0.00 |
| ATOM | 6673 | H    | HIP | X | 443 | 54.243 | 34.867 | 41.686 | 0.00 | 0.00 |
| ATOM | 6674 | CA   | HIP | X | 443 | 52.435 | 35.689 | 41.109 | 0.00 | 0.00 |
| ATOM | 6675 | HA   | HIP | X | 443 | 51.558 | 35.046 | 41.174 | 0.00 | 0.00 |
| ATOM | 6676 | CB   | HIP | X | 443 | 52.689 | 36.350 | 42.505 | 0.00 | 0.00 |
| ATOM | 6677 | HB2  | HIP | X | 443 | 52.590 | 35.591 | 43.281 | 0.00 | 0.00 |
| ATOM | 6678 | HB3  | HIP | X | 443 | 53.616 | 36.920 | 42.440 | 0.00 | 0.00 |

|      |      |      |     |   |     |        |        |        |      |      |
|------|------|------|-----|---|-----|--------|--------|--------|------|------|
| ATOM | 6679 | CG   | HIP | X | 443 | 51.652 | 37.393 | 42.887 | 0.00 | 0.00 |
| ATOM | 6680 | ND1  | HIP | X | 443 | 50.358 | 37.161 | 43.034 | 0.00 | 0.00 |
| ATOM | 6681 | HD1  | HIP | X | 443 | 49.951 | 36.238 | 42.984 | 0.00 | 0.00 |
| ATOM | 6682 | CE1  | HIP | X | 443 | 49.784 | 38.364 | 43.436 | 0.00 | 0.00 |
| ATOM | 6683 | HE1  | HIP | X | 443 | 48.728 | 38.490 | 43.626 | 0.00 | 0.00 |
| ATOM | 6684 | NE2  | HIP | X | 443 | 50.677 | 39.332 | 43.310 | 0.00 | 0.00 |
| ATOM | 6685 | HE2  | HIP | X | 443 | 50.645 | 40.332 | 43.450 | 0.00 | 0.00 |
| ATOM | 6686 | CD2  | HIP | X | 443 | 51.891 | 38.728 | 43.071 | 0.00 | 0.00 |
| ATOM | 6687 | HD2  | HIP | X | 443 | 52.808 | 39.273 | 42.899 | 0.00 | 0.00 |
| ATOM | 6688 | C    | HIP | X | 443 | 52.144 | 36.720 | 39.984 | 0.00 | 0.00 |
| ATOM | 6689 | O    | HIP | X | 443 | 52.805 | 37.763 | 39.962 | 0.00 | 0.00 |
| ATOM | 6690 | N    | GLY | X | 444 | 51.078 | 36.497 | 39.248 | 0.00 | 0.00 |
| ATOM | 6691 | H    | GLY | X | 444 | 50.632 | 35.603 | 39.395 | 0.00 | 0.00 |
| ATOM | 6692 | CA   | GLY | X | 444 | 50.412 | 37.390 | 38.293 | 0.00 | 0.00 |
| ATOM | 6693 | HA2  | GLY | X | 444 | 49.348 | 37.175 | 38.201 | 0.00 | 0.00 |
| ATOM | 6694 | HA3  | GLY | X | 444 | 50.492 | 38.447 | 38.549 | 0.00 | 0.00 |
| ATOM | 6695 | C    | GLY | X | 444 | 50.959 | 37.199 | 36.878 | 0.00 | 0.00 |
| ATOM | 6696 | O    | GLY | X | 444 | 51.112 | 38.191 | 36.143 | 0.00 | 0.00 |
| ATOM | 6697 | N    | TYR | X | 445 | 51.263 | 35.941 | 36.454 | 0.00 | 0.00 |
| ATOM | 6698 | H    | TYR | X | 445 | 51.148 | 35.262 | 37.193 | 0.00 | 0.00 |
| ATOM | 6699 | CA   | TYR | X | 445 | 51.819 | 35.637 | 35.161 | 0.00 | 0.00 |
| ATOM | 6700 | HA   | TYR | X | 445 | 51.909 | 36.507 | 34.510 | 0.00 | 0.00 |
| ATOM | 6701 | CB   | TYR | X | 445 | 53.280 | 35.252 | 35.335 | 0.00 | 0.00 |
| ATOM | 6702 | HB2  | TYR | X | 445 | 53.260 | 34.768 | 36.312 | 0.00 | 0.00 |
| ATOM | 6703 | HB3  | TYR | X | 445 | 53.635 | 34.612 | 34.527 | 0.00 | 0.00 |
| ATOM | 6704 | CG   | TYR | X | 445 | 54.195 | 36.478 | 35.346 | 0.00 | 0.00 |
| ATOM | 6705 | CD1  | TYR | X | 445 | 54.682 | 37.033 | 34.120 | 0.00 | 0.00 |
| ATOM | 6706 | HD1  | TYR | X | 445 | 54.541 | 36.500 | 33.191 | 0.00 | 0.00 |
| ATOM | 6707 | CE1  | TYR | X | 445 | 55.413 | 38.238 | 34.086 | 0.00 | 0.00 |
| ATOM | 6708 | HE1  | TYR | X | 445 | 55.994 | 38.496 | 33.213 | 0.00 | 0.00 |
| ATOM | 6709 | CZ   | TYR | X | 445 | 55.626 | 38.982 | 35.285 | 0.00 | 0.00 |
| ATOM | 6710 | OH   | TYR | X | 445 | 56.335 | 40.119 | 35.390 | 0.00 | 0.00 |
| ATOM | 6711 | HH   | TYR | X | 445 | 56.457 | 40.567 | 34.550 | 0.00 | 0.00 |
| ATOM | 6712 | CE2  | TYR | X | 445 | 55.216 | 38.395 | 36.494 | 0.00 | 0.00 |
| ATOM | 6713 | HE2  | TYR | X | 445 | 55.331 | 38.901 | 37.442 | 0.00 | 0.00 |
| ATOM | 6714 | CD2  | TYR | X | 445 | 54.460 | 37.194 | 36.518 | 0.00 | 0.00 |
| ATOM | 6715 | HD2  | TYR | X | 445 | 54.029 | 36.829 | 37.439 | 0.00 | 0.00 |
| ATOM | 6716 | C    | TYR | X | 445 | 51.020 | 34.516 | 34.419 | 0.00 | 0.00 |
| ATOM | 6717 | O    | TYR | X | 445 | 51.393 | 34.079 | 33.371 | 0.00 | 0.00 |
| ATOM | 6718 | N    | GLU | X | 446 | 49.810 | 34.155 | 34.854 | 0.00 | 0.00 |
| ATOM | 6719 | H    | GLU | X | 446 | 49.580 | 34.400 | 35.806 | 0.00 | 0.00 |
| ATOM | 6720 | CA   | GLU | X | 446 | 48.898 | 33.265 | 34.134 | 0.00 | 0.00 |
| ATOM | 6721 | HA   | GLU | X | 446 | 49.568 | 32.635 | 33.549 | 0.00 | 0.00 |
| ATOM | 6722 | CB   | GLU | X | 446 | 48.111 | 32.364 | 35.023 | 0.00 | 0.00 |
| ATOM | 6723 | HB2  | GLU | X | 446 | 47.946 | 31.442 | 34.467 | 0.00 | 0.00 |
| ATOM | 6724 | HB3  | GLU | X | 446 | 48.801 | 31.969 | 35.769 | 0.00 | 0.00 |
| ATOM | 6725 | CG   | GLU | X | 446 | 46.880 | 32.973 | 35.719 | 0.00 | 0.00 |
| ATOM | 6726 | HG2  | GLU | X | 446 | 46.240 | 33.553 | 35.053 | 0.00 | 0.00 |
| ATOM | 6727 | HG3  | GLU | X | 446 | 46.241 | 32.189 | 36.125 | 0.00 | 0.00 |
| ATOM | 6728 | CD   | GLU | X | 446 | 47.126 | 33.932 | 36.891 | 0.00 | 0.00 |
| ATOM | 6729 | OE1  | GLU | X | 446 | 48.026 | 34.752 | 36.756 | 0.00 | 0.00 |
| ATOM | 6730 | OE2  | GLU | X | 446 | 46.434 | 33.851 | 37.928 | 0.00 | 0.00 |
| ATOM | 6731 | C    | GLU | X | 446 | 48.016 | 34.054 | 33.252 | 0.00 | 0.00 |
| ATOM | 6732 | O    | GLU | X | 446 | 47.638 | 33.607 | 32.187 | 0.00 | 0.00 |
| ATOM | 6733 | N    | ILE | X | 447 | 47.797 | 35.351 | 33.574 | 0.00 | 0.00 |
| ATOM | 6734 | H    | ILE | X | 447 | 47.907 | 35.547 | 34.559 | 0.00 | 0.00 |
| ATOM | 6735 | CA   | ILE | X | 447 | 46.977 | 36.326 | 32.796 | 0.00 | 0.00 |
| ATOM | 6736 | HA   | ILE | X | 447 | 45.948 | 35.975 | 32.861 | 0.00 | 0.00 |
| ATOM | 6737 | CB   | ILE | X | 447 | 46.963 | 37.673 | 33.462 | 0.00 | 0.00 |
| ATOM | 6738 | HB   | ILE | X | 447 | 46.282 | 38.307 | 32.894 | 0.00 | 0.00 |
| ATOM | 6739 | CG2  | ILE | X | 447 | 46.203 | 37.549 | 34.799 | 0.00 | 0.00 |
| ATOM | 6740 | HG21 | ILE | X | 447 | 45.384 | 36.839 | 34.685 | 0.00 | 0.00 |
| ATOM | 6741 | HG22 | ILE | X | 447 | 45.829 | 38.489 | 35.204 | 0.00 | 0.00 |
| ATOM | 6742 | HG23 | ILE | X | 447 | 46.895 | 37.133 | 35.531 | 0.00 | 0.00 |
| ATOM | 6743 | CG1  | ILE | X | 447 | 48.319 | 38.373 | 33.400 | 0.00 | 0.00 |
| ATOM | 6744 | HG12 | ILE | X | 447 | 49.066 | 37.638 | 33.700 | 0.00 | 0.00 |
| ATOM | 6745 | HG13 | ILE | X | 447 | 48.515 | 38.541 | 32.341 | 0.00 | 0.00 |

|      |      |      |     |   |     |        |        |        |      |      |
|------|------|------|-----|---|-----|--------|--------|--------|------|------|
| ATOM | 6746 | CD1  | ILE | X | 447 | 48.449 | 39.750 | 34.020 | 0.00 | 0.00 |
| ATOM | 6747 | HD11 | ILE | X | 447 | 48.321 | 39.641 | 35.097 | 0.00 | 0.00 |
| ATOM | 6748 | HD12 | ILE | X | 447 | 47.607 | 40.283 | 33.576 | 0.00 | 0.00 |
| ATOM | 6749 | HD13 | ILE | X | 447 | 49.411 | 40.217 | 33.808 | 0.00 | 0.00 |
| ATOM | 6750 | C    | ILE | X | 447 | 47.266 | 36.271 | 31.272 | 0.00 | 0.00 |
| ATOM | 6751 | O    | ILE | X | 447 | 46.411 | 36.380 | 30.384 | 0.00 | 0.00 |
| ATOM | 6752 | N    | GLU | X | 448 | 48.578 | 36.017 | 30.941 | 0.00 | 0.00 |
| ATOM | 6753 | H    | GLU | X | 448 | 49.195 | 35.994 | 31.740 | 0.00 | 0.00 |
| ATOM | 6754 | CA   | GLU | X | 448 | 49.190 | 35.996 | 29.589 | 0.00 | 0.00 |
| ATOM | 6755 | HA   | GLU | X | 448 | 49.076 | 36.920 | 29.022 | 0.00 | 0.00 |
| ATOM | 6756 | CB   | GLU | X | 448 | 50.731 | 35.665 | 29.661 | 0.00 | 0.00 |
| ATOM | 6757 | HB2  | GLU | X | 448 | 50.912 | 34.762 | 30.244 | 0.00 | 0.00 |
| ATOM | 6758 | HB3  | GLU | X | 448 | 51.129 | 35.526 | 28.656 | 0.00 | 0.00 |
| ATOM | 6759 | CG   | GLU | X | 448 | 51.535 | 36.727 | 30.388 | 0.00 | 0.00 |
| ATOM | 6760 | HG2  | GLU | X | 448 | 51.086 | 37.699 | 30.186 | 0.00 | 0.00 |
| ATOM | 6761 | HG3  | GLU | X | 448 | 51.326 | 36.539 | 31.441 | 0.00 | 0.00 |
| ATOM | 6762 | CD   | GLU | X | 448 | 52.983 | 36.615 | 30.093 | 0.00 | 0.00 |
| ATOM | 6763 | OE1  | GLU | X | 448 | 53.580 | 37.649 | 29.645 | 0.00 | 0.00 |
| ATOM | 6764 | OE2  | GLU | X | 448 | 53.578 | 35.485 | 30.185 | 0.00 | 0.00 |
| ATOM | 6765 | C    | GLU | X | 448 | 48.416 | 35.021 | 28.684 | 0.00 | 0.00 |
| ATOM | 6766 | O    | GLU | X | 448 | 48.155 | 35.210 | 27.515 | 0.00 | 0.00 |
| ATOM | 6767 | N    | PHE | X | 449 | 48.012 | 33.848 | 29.220 | 0.00 | 0.00 |
| ATOM | 6768 | H    | PHE | X | 449 | 48.163 | 33.763 | 30.215 | 0.00 | 0.00 |
| ATOM | 6769 | CA   | PHE | X | 449 | 47.425 | 32.679 | 28.628 | 0.00 | 0.00 |
| ATOM | 6770 | HA   | PHE | X | 449 | 47.796 | 32.555 | 27.611 | 0.00 | 0.00 |
| ATOM | 6771 | CB   | PHE | X | 449 | 47.730 | 31.425 | 29.488 | 0.00 | 0.00 |
| ATOM | 6772 | HB2  | PHE | X | 449 | 47.512 | 31.757 | 30.503 | 0.00 | 0.00 |
| ATOM | 6773 | HB3  | PHE | X | 449 | 46.995 | 30.655 | 29.249 | 0.00 | 0.00 |
| ATOM | 6774 | CG   | PHE | X | 449 | 49.126 | 30.890 | 29.294 | 0.00 | 0.00 |
| ATOM | 6775 | CD1  | PHE | X | 449 | 50.122 | 31.251 | 30.231 | 0.00 | 0.00 |
| ATOM | 6776 | HD1  | PHE | X | 449 | 49.900 | 31.820 | 31.121 | 0.00 | 0.00 |
| ATOM | 6777 | CE1  | PHE | X | 449 | 51.462 | 30.991 | 29.965 | 0.00 | 0.00 |
| ATOM | 6778 | HE1  | PHE | X | 449 | 52.176 | 31.532 | 30.567 | 0.00 | 0.00 |
| ATOM | 6779 | CZ   | PHE | X | 449 | 51.816 | 30.380 | 28.783 | 0.00 | 0.00 |
| ATOM | 6780 | HZ   | PHE | X | 449 | 52.864 | 30.178 | 28.620 | 0.00 | 0.00 |
| ATOM | 6781 | CE2  | PHE | X | 449 | 50.783 | 29.866 | 28.009 | 0.00 | 0.00 |
| ATOM | 6782 | HE2  | PHE | X | 449 | 51.070 | 29.385 | 27.086 | 0.00 | 0.00 |
| ATOM | 6783 | CD2  | PHE | X | 449 | 49.434 | 30.147 | 28.123 | 0.00 | 0.00 |
| ATOM | 6784 | HD2  | PHE | X | 449 | 48.664 | 29.855 | 27.425 | 0.00 | 0.00 |
| ATOM | 6785 | C    | PHE | X | 449 | 45.851 | 32.894 | 28.495 | 0.00 | 0.00 |
| ATOM | 6786 | O    | PHE | X | 449 | 45.190 | 32.229 | 27.666 | 0.00 | 0.00 |
| ATOM | 6787 | N    | ILE | X | 450 | 45.304 | 33.828 | 29.235 | 0.00 | 0.00 |
| ATOM | 6788 | H    | ILE | X | 450 | 45.978 | 34.428 | 29.689 | 0.00 | 0.00 |
| ATOM | 6789 | CA   | ILE | X | 450 | 43.860 | 34.176 | 29.273 | 0.00 | 0.00 |
| ATOM | 6790 | HA   | ILE | X | 450 | 43.309 | 33.351 | 28.821 | 0.00 | 0.00 |
| ATOM | 6791 | CB   | ILE | X | 450 | 43.402 | 34.433 | 30.738 | 0.00 | 0.00 |
| ATOM | 6792 | HB   | ILE | X | 450 | 44.095 | 35.200 | 31.083 | 0.00 | 0.00 |
| ATOM | 6793 | CG2  | ILE | X | 450 | 41.970 | 35.017 | 30.971 | 0.00 | 0.00 |
| ATOM | 6794 | HG21 | ILE | X | 450 | 41.841 | 35.924 | 30.382 | 0.00 | 0.00 |
| ATOM | 6795 | HG22 | ILE | X | 450 | 41.864 | 35.229 | 32.035 | 0.00 | 0.00 |
| ATOM | 6796 | HG23 | ILE | X | 450 | 41.244 | 34.307 | 30.575 | 0.00 | 0.00 |
| ATOM | 6797 | CG1  | ILE | X | 450 | 43.476 | 33.117 | 31.599 | 0.00 | 0.00 |
| ATOM | 6798 | HG12 | ILE | X | 450 | 42.650 | 32.418 | 31.467 | 0.00 | 0.00 |
| ATOM | 6799 | HG13 | ILE | X | 450 | 44.296 | 32.480 | 31.269 | 0.00 | 0.00 |
| ATOM | 6800 | CD1  | ILE | X | 450 | 43.791 | 33.378 | 33.034 | 0.00 | 0.00 |
| ATOM | 6801 | HD11 | ILE | X | 450 | 42.870 | 33.701 | 33.518 | 0.00 | 0.00 |
| ATOM | 6802 | HD12 | ILE | X | 450 | 44.734 | 33.910 | 33.160 | 0.00 | 0.00 |
| ATOM | 6803 | HD13 | ILE | X | 450 | 43.955 | 32.427 | 33.541 | 0.00 | 0.00 |
| ATOM | 6804 | C    | ILE | X | 450 | 43.511 | 35.354 | 28.367 | 0.00 | 0.00 |
| ATOM | 6805 | O    | ILE | X | 450 | 42.518 | 35.319 | 27.671 | 0.00 | 0.00 |
| ATOM | 6806 | N    | PHE | X | 451 | 44.457 | 36.280 | 28.255 | 0.00 | 0.00 |
| ATOM | 6807 | H    | PHE | X | 451 | 45.311 | 36.197 | 28.788 | 0.00 | 0.00 |
| ATOM | 6808 | CA   | PHE | X | 451 | 44.460 | 37.372 | 27.288 | 0.00 | 0.00 |
| ATOM | 6809 | HA   | PHE | X | 451 | 43.437 | 37.626 | 27.010 | 0.00 | 0.00 |
| ATOM | 6810 | CB   | PHE | X | 451 | 45.263 | 38.596 | 27.931 | 0.00 | 0.00 |
| ATOM | 6811 | HB2  | PHE | X | 451 | 46.183 | 38.122 | 28.273 | 0.00 | 0.00 |
| ATOM | 6812 | HB3  | PHE | X | 451 | 45.419 | 39.303 | 27.117 | 0.00 | 0.00 |

|      |      |      |     |   |     |        |        |        |      |      |
|------|------|------|-----|---|-----|--------|--------|--------|------|------|
| ATOM | 6813 | CG   | PHE | X | 451 | 44.495 | 39.348 | 28.976 | 0.00 | 0.00 |
| ATOM | 6814 | CD1  | PHE | X | 451 | 45.006 | 39.514 | 30.228 | 0.00 | 0.00 |
| ATOM | 6815 | HD1  | PHE | X | 451 | 45.907 | 38.953 | 30.428 | 0.00 | 0.00 |
| ATOM | 6816 | CE1  | PHE | X | 451 | 44.399 | 40.198 | 31.257 | 0.00 | 0.00 |
| ATOM | 6817 | HE1  | PHE | X | 451 | 44.816 | 40.279 | 32.249 | 0.00 | 0.00 |
| ATOM | 6818 | CZ   | PHE | X | 451 | 43.189 | 40.771 | 30.999 | 0.00 | 0.00 |
| ATOM | 6819 | HZ   | PHE | X | 451 | 42.577 | 41.178 | 31.790 | 0.00 | 0.00 |
| ATOM | 6820 | CE2  | PHE | X | 451 | 42.631 | 40.722 | 29.708 | 0.00 | 0.00 |
| ATOM | 6821 | HE2  | PHE | X | 451 | 41.671 | 41.182 | 29.529 | 0.00 | 0.00 |
| ATOM | 6822 | CD2  | PHE | X | 451 | 43.291 | 39.980 | 28.692 | 0.00 | 0.00 |
| ATOM | 6823 | HD2  | PHE | X | 451 | 42.932 | 39.927 | 27.675 | 0.00 | 0.00 |
| ATOM | 6824 | C    | PHE | X | 451 | 45.176 | 36.857 | 25.968 | 0.00 | 0.00 |
| ATOM | 6825 | O    | PHE | X | 451 | 45.063 | 37.572 | 24.937 | 0.00 | 0.00 |
| ATOM | 6826 | N    | GLY | X | 452 | 45.707 | 35.592 | 25.827 | 0.00 | 0.00 |
| ATOM | 6827 | H    | GLY | X | 452 | 45.878 | 35.062 | 26.669 | 0.00 | 0.00 |
| ATOM | 6828 | CA   | GLY | X | 452 | 45.884 | 34.957 | 24.552 | 0.00 | 0.00 |
| ATOM | 6829 | HA2  | GLY | X | 452 | 46.060 | 33.887 | 24.661 | 0.00 | 0.00 |
| ATOM | 6830 | HA3  | GLY | X | 452 | 44.985 | 35.162 | 23.972 | 0.00 | 0.00 |
| ATOM | 6831 | C    | GLY | X | 452 | 47.144 | 35.465 | 23.887 | 0.00 | 0.00 |
| ATOM | 6832 | O    | GLY | X | 452 | 47.408 | 35.273 | 22.686 | 0.00 | 0.00 |
| ATOM | 6833 | N    | ILE | X | 453 | 48.045 | 35.954 | 24.699 | 0.00 | 0.00 |
| ATOM | 6834 | H    | ILE | X | 453 | 47.916 | 35.890 | 25.698 | 0.00 | 0.00 |
| ATOM | 6835 | CA   | ILE | X | 453 | 49.313 | 36.616 | 24.329 | 0.00 | 0.00 |
| ATOM | 6836 | HA   | ILE | X | 453 | 49.070 | 37.425 | 23.640 | 0.00 | 0.00 |
| ATOM | 6837 | CB   | ILE | X | 453 | 50.031 | 37.280 | 25.556 | 0.00 | 0.00 |
| ATOM | 6838 | HB   | ILE | X | 453 | 50.342 | 36.628 | 26.372 | 0.00 | 0.00 |
| ATOM | 6839 | CG2  | ILE | X | 453 | 51.206 | 38.110 | 25.116 | 0.00 | 0.00 |
| ATOM | 6840 | HG21 | ILE | X | 453 | 52.041 | 37.454 | 24.871 | 0.00 | 0.00 |
| ATOM | 6841 | HG22 | ILE | X | 453 | 51.478 | 38.724 | 25.975 | 0.00 | 0.00 |
| ATOM | 6842 | HG23 | ILE | X | 453 | 50.942 | 38.837 | 24.348 | 0.00 | 0.00 |
| ATOM | 6843 | CG1  | ILE | X | 453 | 49.041 | 38.182 | 26.413 | 0.00 | 0.00 |
| ATOM | 6844 | HG12 | ILE | X | 453 | 48.236 | 37.599 | 26.861 | 0.00 | 0.00 |
| ATOM | 6845 | HG13 | ILE | X | 453 | 49.605 | 38.628 | 27.232 | 0.00 | 0.00 |
| ATOM | 6846 | CD1  | ILE | X | 453 | 48.435 | 39.347 | 25.588 | 0.00 | 0.00 |
| ATOM | 6847 | HD11 | ILE | X | 453 | 49.273 | 39.925 | 25.199 | 0.00 | 0.00 |
| ATOM | 6848 | HD12 | ILE | X | 453 | 47.759 | 39.876 | 26.259 | 0.00 | 0.00 |
| ATOM | 6849 | HD13 | ILE | X | 453 | 47.908 | 38.969 | 24.712 | 0.00 | 0.00 |
| ATOM | 6850 | C    | ILE | X | 453 | 50.327 | 35.728 | 23.504 | 0.00 | 0.00 |
| ATOM | 6851 | O    | ILE | X | 453 | 51.098 | 36.280 | 22.743 | 0.00 | 0.00 |
| ATOM | 6852 | N    | PRO | X | 454 | 50.318 | 34.431 | 23.690 | 0.00 | 0.00 |
| ATOM | 6853 | CD   | PRO | X | 454 | 49.744 | 33.688 | 24.801 | 0.00 | 0.00 |
| ATOM | 6854 | HD2  | PRO | X | 454 | 48.686 | 33.473 | 24.653 | 0.00 | 0.00 |
| ATOM | 6855 | HD3  | PRO | X | 454 | 50.030 | 34.201 | 25.719 | 0.00 | 0.00 |
| ATOM | 6856 | CG   | PRO | X | 454 | 50.571 | 32.325 | 24.769 | 0.00 | 0.00 |
| ATOM | 6857 | HG2  | PRO | X | 454 | 49.962 | 31.532 | 25.204 | 0.00 | 0.00 |
| ATOM | 6858 | HG3  | PRO | X | 454 | 51.568 | 32.398 | 25.202 | 0.00 | 0.00 |
| ATOM | 6859 | CB   | PRO | X | 454 | 50.773 | 32.064 | 23.295 | 0.00 | 0.00 |
| ATOM | 6860 | HB2  | PRO | X | 454 | 49.829 | 31.769 | 22.837 | 0.00 | 0.00 |
| ATOM | 6861 | HB3  | PRO | X | 454 | 51.575 | 31.359 | 23.076 | 0.00 | 0.00 |
| ATOM | 6862 | CA   | PRO | X | 454 | 50.972 | 33.480 | 22.756 | 0.00 | 0.00 |
| ATOM | 6863 | HA   | PRO | X | 454 | 51.997 | 33.845 | 22.817 | 0.00 | 0.00 |
| ATOM | 6864 | C    | PRO | X | 454 | 50.634 | 33.687 | 21.324 | 0.00 | 0.00 |
| ATOM | 6865 | O    | PRO | X | 454 | 51.470 | 33.383 | 20.513 | 0.00 | 0.00 |
| ATOM | 6866 | N    | LEU | X | 455 | 49.399 | 34.002 | 20.917 | 0.00 | 0.00 |
| ATOM | 6867 | H    | LEU | X | 455 | 48.851 | 34.478 | 21.620 | 0.00 | 0.00 |
| ATOM | 6868 | CA   | LEU | X | 455 | 49.018 | 34.079 | 19.536 | 0.00 | 0.00 |
| ATOM | 6869 | HA   | LEU | X | 455 | 49.409 | 33.155 | 19.109 | 0.00 | 0.00 |
| ATOM | 6870 | CB   | LEU | X | 455 | 47.477 | 34.144 | 19.526 | 0.00 | 0.00 |
| ATOM | 6871 | HB2  | LEU | X | 455 | 47.194 | 35.182 | 19.704 | 0.00 | 0.00 |
| ATOM | 6872 | HB3  | LEU | X | 455 | 47.179 | 34.113 | 18.478 | 0.00 | 0.00 |
| ATOM | 6873 | CG   | LEU | X | 455 | 46.727 | 33.060 | 20.301 | 0.00 | 0.00 |
| ATOM | 6874 | HG   | LEU | X | 455 | 46.774 | 33.265 | 21.371 | 0.00 | 0.00 |
| ATOM | 6875 | CD1  | LEU | X | 455 | 45.262 | 32.990 | 19.824 | 0.00 | 0.00 |
| ATOM | 6876 | HD11 | LEU | X | 455 | 44.840 | 33.889 | 19.375 | 0.00 | 0.00 |
| ATOM | 6877 | HD12 | LEU | X | 455 | 44.536 | 32.705 | 20.585 | 0.00 | 0.00 |
| ATOM | 6878 | HD13 | LEU | X | 455 | 45.301 | 32.332 | 18.956 | 0.00 | 0.00 |
| ATOM | 6879 | CD2  | LEU | X | 455 | 47.227 | 31.602 | 19.991 | 0.00 | 0.00 |

|      |      |      |     |   |     |        |        |        |      |      |
|------|------|------|-----|---|-----|--------|--------|--------|------|------|
| ATOM | 6880 | HD21 | LEU | X | 455 | 48.255 | 31.571 | 20.354 | 0.00 | 0.00 |
| ATOM | 6881 | HD22 | LEU | X | 455 | 46.625 | 30.792 | 20.402 | 0.00 | 0.00 |
| ATOM | 6882 | HD23 | LEU | X | 455 | 47.274 | 31.414 | 18.918 | 0.00 | 0.00 |
| ATOM | 6883 | C    | LEU | X | 455 | 49.624 | 35.333 | 18.779 | 0.00 | 0.00 |
| ATOM | 6884 | O    | LEU | X | 455 | 49.581 | 35.388 | 17.549 | 0.00 | 0.00 |
| ATOM | 6885 | N    | ASP | X | 456 | 50.183 | 36.328 | 19.523 | 0.00 | 0.00 |
| ATOM | 6886 | H    | ASP | X | 456 | 50.295 | 36.168 | 20.514 | 0.00 | 0.00 |
| ATOM | 6887 | CA   | ASP | X | 456 | 50.665 | 37.583 | 18.908 | 0.00 | 0.00 |
| ATOM | 6888 | HA   | ASP | X | 456 | 49.961 | 37.900 | 18.139 | 0.00 | 0.00 |
| ATOM | 6889 | CB   | ASP | X | 456 | 50.713 | 38.616 | 20.087 | 0.00 | 0.00 |
| ATOM | 6890 | HB2  | ASP | X | 456 | 49.705 | 38.619 | 20.502 | 0.00 | 0.00 |
| ATOM | 6891 | HB3  | ASP | X | 456 | 51.345 | 38.229 | 20.887 | 0.00 | 0.00 |
| ATOM | 6892 | CG   | ASP | X | 456 | 51.101 | 40.006 | 19.731 | 0.00 | 0.00 |
| ATOM | 6893 | OD1  | ASP | X | 456 | 52.320 | 40.264 | 19.493 | 0.00 | 0.00 |
| ATOM | 6894 | OD2  | ASP | X | 456 | 50.284 | 40.927 | 19.869 | 0.00 | 0.00 |
| ATOM | 6895 | C    | ASP | X | 456 | 52.103 | 37.320 | 18.400 | 0.00 | 0.00 |
| ATOM | 6896 | O    | ASP | X | 456 | 52.760 | 36.366 | 18.868 | 0.00 | 0.00 |
| ATOM | 6897 | N    | PRO | X | 457 | 52.669 | 38.139 | 17.435 | 0.00 | 0.00 |
| ATOM | 6898 | CD   | PRO | X | 457 | 51.982 | 39.052 | 16.587 | 0.00 | 0.00 |
| ATOM | 6899 | HD2  | PRO | X | 457 | 51.665 | 39.994 | 17.035 | 0.00 | 0.00 |
| ATOM | 6900 | HD3  | PRO | X | 457 | 51.063 | 38.658 | 16.154 | 0.00 | 0.00 |
| ATOM | 6901 | CG   | PRO | X | 457 | 53.012 | 39.478 | 15.492 | 0.00 | 0.00 |
| ATOM | 6902 | HG2  | PRO | X | 457 | 53.419 | 40.419 | 15.861 | 0.00 | 0.00 |
| ATOM | 6903 | HG3  | PRO | X | 457 | 52.532 | 39.621 | 14.523 | 0.00 | 0.00 |
| ATOM | 6904 | CB   | PRO | X | 457 | 53.962 | 38.295 | 15.505 | 0.00 | 0.00 |
| ATOM | 6905 | HB2  | PRO | X | 457 | 54.958 | 38.661 | 15.254 | 0.00 | 0.00 |
| ATOM | 6906 | HB3  | PRO | X | 457 | 53.520 | 37.526 | 14.871 | 0.00 | 0.00 |
| ATOM | 6907 | CA   | PRO | X | 457 | 54.023 | 37.851 | 16.945 | 0.00 | 0.00 |
| ATOM | 6908 | HA   | PRO | X | 457 | 54.183 | 36.773 | 16.960 | 0.00 | 0.00 |
| ATOM | 6909 | C    | PRO | X | 457 | 55.131 | 38.546 | 17.668 | 0.00 | 0.00 |
| ATOM | 6910 | O    | PRO | X | 457 | 56.276 | 38.191 | 17.366 | 0.00 | 0.00 |
| ATOM | 6911 | N    | SER | X | 458 | 54.879 | 39.506 | 18.596 | 0.00 | 0.00 |
| ATOM | 6912 | H    | SER | X | 458 | 53.928 | 39.715 | 18.867 | 0.00 | 0.00 |
| ATOM | 6913 | CA   | SER | X | 458 | 55.913 | 40.356 | 19.267 | 0.00 | 0.00 |
| ATOM | 6914 | HA   | SER | X | 458 | 56.538 | 40.869 | 18.535 | 0.00 | 0.00 |
| ATOM | 6915 | CB   | SER | X | 458 | 55.266 | 41.418 | 20.214 | 0.00 | 0.00 |
| ATOM | 6916 | HB2  | SER | X | 458 | 56.100 | 42.040 | 20.542 | 0.00 | 0.00 |
| ATOM | 6917 | HB3  | SER | X | 458 | 54.584 | 41.997 | 19.592 | 0.00 | 0.00 |
| ATOM | 6918 | OG   | SER | X | 458 | 54.463 | 40.788 | 21.260 | 0.00 | 0.00 |
| ATOM | 6919 | HG   | SER | X | 458 | 53.584 | 40.749 | 20.876 | 0.00 | 0.00 |
| ATOM | 6920 | C    | SER | X | 458 | 56.916 | 39.481 | 20.071 | 0.00 | 0.00 |
| ATOM | 6921 | O    | SER | X | 458 | 58.122 | 39.758 | 20.105 | 0.00 | 0.00 |
| ATOM | 6922 | N    | ARG | X | 459 | 56.478 | 38.293 | 20.534 | 0.00 | 0.00 |
| ATOM | 6923 | H    | ARG | X | 459 | 55.473 | 38.263 | 20.636 | 0.00 | 0.00 |
| ATOM | 6924 | CA   | ARG | X | 459 | 57.284 | 37.235 | 21.165 | 0.00 | 0.00 |
| ATOM | 6925 | HA   | ARG | X | 459 | 58.329 | 37.457 | 20.946 | 0.00 | 0.00 |
| ATOM | 6926 | CB   | ARG | X | 459 | 57.156 | 37.285 | 22.669 | 0.00 | 0.00 |
| ATOM | 6927 | HB2  | ARG | X | 459 | 56.129 | 37.095 | 22.983 | 0.00 | 0.00 |
| ATOM | 6928 | HB3  | ARG | X | 459 | 57.860 | 36.507 | 22.965 | 0.00 | 0.00 |
| ATOM | 6929 | CG   | ARG | X | 459 | 57.637 | 38.616 | 23.272 | 0.00 | 0.00 |
| ATOM | 6930 | HG2  | ARG | X | 459 | 58.714 | 38.718 | 23.140 | 0.00 | 0.00 |
| ATOM | 6931 | HG3  | ARG | X | 459 | 57.221 | 39.490 | 22.771 | 0.00 | 0.00 |
| ATOM | 6932 | CD   | ARG | X | 459 | 57.468 | 38.699 | 24.791 | 0.00 | 0.00 |
| ATOM | 6933 | HD2  | ARG | X | 459 | 57.956 | 37.842 | 25.256 | 0.00 | 0.00 |
| ATOM | 6934 | HD3  | ARG | X | 459 | 58.114 | 39.526 | 25.085 | 0.00 | 0.00 |
| ATOM | 6935 | NE   | ARG | X | 459 | 56.136 | 38.753 | 25.349 | 0.00 | 0.00 |
| ATOM | 6936 | HE   | ARG | X | 459 | 55.363 | 38.883 | 24.711 | 0.00 | 0.00 |
| ATOM | 6937 | CZ   | ARG | X | 459 | 55.863 | 38.566 | 26.619 | 0.00 | 0.00 |
| ATOM | 6938 | NH1  | ARG | X | 459 | 56.795 | 38.510 | 27.620 | 0.00 | 0.00 |
| ATOM | 6939 | HH11 | ARG | X | 459 | 57.792 | 38.675 | 27.607 | 0.00 | 0.00 |
| ATOM | 6940 | HH12 | ARG | X | 459 | 56.538 | 38.193 | 28.544 | 0.00 | 0.00 |
| ATOM | 6941 | NH2  | ARG | X | 459 | 54.572 | 38.563 | 26.928 | 0.00 | 0.00 |
| ATOM | 6942 | HH21 | ARG | X | 459 | 53.821 | 38.748 | 26.278 | 0.00 | 0.00 |
| ATOM | 6943 | HH22 | ARG | X | 459 | 54.331 | 38.369 | 27.889 | 0.00 | 0.00 |
| ATOM | 6944 | C    | ARG | X | 459 | 57.050 | 35.802 | 20.601 | 0.00 | 0.00 |
| ATOM | 6945 | O    | ARG | X | 459 | 55.941 | 35.286 | 20.488 | 0.00 | 0.00 |
| ATOM | 6946 | N    | ASN | X | 460 | 58.086 | 35.011 | 20.375 | 0.00 | 0.00 |

|      |      |      |     |   |     |        |        |        |      |      |
|------|------|------|-----|---|-----|--------|--------|--------|------|------|
| ATOM | 6947 | H    | ASN | X | 460 | 59.010 | 35.414 | 20.443 | 0.00 | 0.00 |
| ATOM | 6948 | CA   | ASN | X | 460 | 58.081 | 33.603 | 19.893 | 0.00 | 0.00 |
| ATOM | 6949 | HA   | ASN | X | 460 | 57.271 | 33.474 | 19.175 | 0.00 | 0.00 |
| ATOM | 6950 | CB   | ASN | X | 460 | 59.371 | 33.268 | 19.132 | 0.00 | 0.00 |
| ATOM | 6951 | HB2  | ASN | X | 460 | 59.421 | 33.927 | 18.265 | 0.00 | 0.00 |
| ATOM | 6952 | HB3  | ASN | X | 460 | 60.242 | 33.426 | 19.768 | 0.00 | 0.00 |
| ATOM | 6953 | CG   | ASN | X | 460 | 59.328 | 31.855 | 18.523 | 0.00 | 0.00 |
| ATOM | 6954 | OD1  | ASN | X | 460 | 58.479 | 31.053 | 18.882 | 0.00 | 0.00 |
| ATOM | 6955 | ND2  | ASN | X | 460 | 60.179 | 31.577 | 17.525 | 0.00 | 0.00 |
| ATOM | 6956 | HD21 | ASN | X | 460 | 60.169 | 30.638 | 17.153 | 0.00 | 0.00 |
| ATOM | 6957 | HD22 | ASN | X | 460 | 60.730 | 32.322 | 17.123 | 0.00 | 0.00 |
| ATOM | 6958 | C    | ASN | X | 460 | 57.789 | 32.604 | 21.129 | 0.00 | 0.00 |
| ATOM | 6959 | O    | ASN | X | 460 | 58.700 | 32.241 | 21.828 | 0.00 | 0.00 |
| ATOM | 6960 | N    | TYR | X | 461 | 56.529 | 32.373 | 21.398 | 0.00 | 0.00 |
| ATOM | 6961 | H    | TYR | X | 461 | 55.813 | 32.939 | 20.966 | 0.00 | 0.00 |
| ATOM | 6962 | CA   | TYR | X | 461 | 56.105 | 31.233 | 22.175 | 0.00 | 0.00 |
| ATOM | 6963 | HA   | TYR | X | 461 | 56.827 | 31.097 | 22.980 | 0.00 | 0.00 |
| ATOM | 6964 | CB   | TYR | X | 461 | 54.735 | 31.573 | 22.813 | 0.00 | 0.00 |
| ATOM | 6965 | HB2  | TYR | X | 461 | 53.892 | 31.883 | 22.196 | 0.00 | 0.00 |
| ATOM | 6966 | HB3  | TYR | X | 461 | 54.328 | 30.659 | 23.245 | 0.00 | 0.00 |
| ATOM | 6967 | CG   | TYR | X | 461 | 54.759 | 32.605 | 23.920 | 0.00 | 0.00 |
| ATOM | 6968 | CD1  | TYR | X | 461 | 54.458 | 33.951 | 23.568 | 0.00 | 0.00 |
| ATOM | 6969 | HD1  | TYR | X | 461 | 54.489 | 34.245 | 22.530 | 0.00 | 0.00 |
| ATOM | 6970 | CE1  | TYR | X | 461 | 54.104 | 34.840 | 24.591 | 0.00 | 0.00 |
| ATOM | 6971 | HE1  | TYR | X | 461 | 53.958 | 35.889 | 24.380 | 0.00 | 0.00 |
| ATOM | 6972 | CZ   | TYR | X | 461 | 54.079 | 34.426 | 25.935 | 0.00 | 0.00 |
| ATOM | 6973 | OH   | TYR | X | 461 | 53.552 | 35.323 | 26.842 | 0.00 | 0.00 |
| ATOM | 6974 | HH   | TYR | X | 461 | 53.550 | 34.939 | 27.722 | 0.00 | 0.00 |
| ATOM | 6975 | CE2  | TYR | X | 461 | 54.321 | 33.101 | 26.245 | 0.00 | 0.00 |
| ATOM | 6976 | HE2  | TYR | X | 461 | 54.132 | 32.830 | 27.274 | 0.00 | 0.00 |
| ATOM | 6977 | CD2  | TYR | X | 461 | 54.686 | 32.208 | 25.238 | 0.00 | 0.00 |
| ATOM | 6978 | HD2  | TYR | X | 461 | 54.755 | 31.162 | 25.501 | 0.00 | 0.00 |
| ATOM | 6979 | C    | TYR | X | 461 | 56.064 | 29.904 | 21.348 | 0.00 | 0.00 |
| ATOM | 6980 | O    | TYR | X | 461 | 55.971 | 29.919 | 20.142 | 0.00 | 0.00 |
| ATOM | 6981 | N    | THR | X | 462 | 55.917 | 28.792 | 22.074 | 0.00 | 0.00 |
| ATOM | 6982 | H    | THR | X | 462 | 55.930 | 28.878 | 23.080 | 0.00 | 0.00 |
| ATOM | 6983 | CA   | THR | X | 462 | 55.845 | 27.421 | 21.561 | 0.00 | 0.00 |
| ATOM | 6984 | HA   | THR | X | 462 | 56.575 | 27.431 | 20.751 | 0.00 | 0.00 |
| ATOM | 6985 | CB   | THR | X | 462 | 56.362 | 26.381 | 22.594 | 0.00 | 0.00 |
| ATOM | 6986 | HB   | THR | X | 462 | 56.350 | 25.374 | 22.178 | 0.00 | 0.00 |
| ATOM | 6987 | CG2  | THR | X | 462 | 57.798 | 26.739 | 23.082 | 0.00 | 0.00 |
| ATOM | 6988 | HG21 | THR | X | 462 | 58.632 | 26.365 | 22.487 | 0.00 | 0.00 |
| ATOM | 6989 | HG22 | THR | X | 462 | 57.980 | 26.316 | 24.070 | 0.00 | 0.00 |
| ATOM | 6990 | HG23 | THR | X | 462 | 57.946 | 27.818 | 23.035 | 0.00 | 0.00 |
| ATOM | 6991 | OG1  | THR | X | 462 | 55.558 | 26.467 | 23.731 | 0.00 | 0.00 |
| ATOM | 6992 | HG1  | THR | X | 462 | 55.607 | 27.354 | 24.093 | 0.00 | 0.00 |
| ATOM | 6993 | C    | THR | X | 462 | 54.548 | 27.049 | 20.893 | 0.00 | 0.00 |
| ATOM | 6994 | O    | THR | X | 462 | 53.500 | 27.505 | 21.392 | 0.00 | 0.00 |
| ATOM | 6995 | N    | ALA | X | 463 | 54.445 | 26.128 | 19.924 | 0.00 | 0.00 |
| ATOM | 6996 | H    | ALA | X | 463 | 55.321 | 25.774 | 19.568 | 0.00 | 0.00 |
| ATOM | 6997 | CA   | ALA | X | 463 | 53.133 | 25.554 | 19.491 | 0.00 | 0.00 |
| ATOM | 6998 | HA   | ALA | X | 463 | 52.527 | 26.405 | 19.178 | 0.00 | 0.00 |
| ATOM | 6999 | CB   | ALA | X | 463 | 53.409 | 24.555 | 18.321 | 0.00 | 0.00 |
| ATOM | 7000 | HB1  | ALA | X | 463 | 54.004 | 23.697 | 18.635 | 0.00 | 0.00 |
| ATOM | 7001 | HB2  | ALA | X | 463 | 53.873 | 25.000 | 17.440 | 0.00 | 0.00 |
| ATOM | 7002 | HB3  | ALA | X | 463 | 52.430 | 24.214 | 17.984 | 0.00 | 0.00 |
| ATOM | 7003 | C    | ALA | X | 463 | 52.203 | 24.929 | 20.610 | 0.00 | 0.00 |
| ATOM | 7004 | O    | ALA | X | 463 | 51.023 | 25.181 | 20.609 | 0.00 | 0.00 |
| ATOM | 7005 | N    | GLU | X | 464 | 52.818 | 24.072 | 21.426 | 0.00 | 0.00 |
| ATOM | 7006 | H    | GLU | X | 464 | 53.716 | 23.677 | 21.184 | 0.00 | 0.00 |
| ATOM | 7007 | CA   | GLU | X | 464 | 52.247 | 23.461 | 22.568 | 0.00 | 0.00 |
| ATOM | 7008 | HA   | GLU | X | 464 | 51.372 | 22.920 | 22.207 | 0.00 | 0.00 |
| ATOM | 7009 | CB   | GLU | X | 464 | 53.314 | 22.644 | 23.238 | 0.00 | 0.00 |
| ATOM | 7010 | HB2  | GLU | X | 464 | 53.836 | 22.170 | 22.407 | 0.00 | 0.00 |
| ATOM | 7011 | HB3  | GLU | X | 464 | 53.937 | 23.303 | 23.843 | 0.00 | 0.00 |
| ATOM | 7012 | CG   | GLU | X | 464 | 52.724 | 21.498 | 24.090 | 0.00 | 0.00 |
| ATOM | 7013 | HG2  | GLU | X | 464 | 53.482 | 20.786 | 24.418 | 0.00 | 0.00 |



|      |      |      |     |   |     |        |        |        |      |      |
|------|------|------|-----|---|-----|--------|--------|--------|------|------|
| ATOM | 7014 | HG3  | GLU | X | 464 | 52.315 | 22.101 | 24.901 | 0.00 | 0.00 |
| ATOM | 7015 | CD   | GLU | X | 464 | 51.773 | 20.607 | 23.282 | 0.00 | 0.00 |
| ATOM | 7016 | OE1  | GLU | X | 464 | 50.667 | 20.416 | 23.770 | 0.00 | 0.00 |
| ATOM | 7017 | OE2  | GLU | X | 464 | 52.144 | 20.193 | 22.156 | 0.00 | 0.00 |
| ATOM | 7018 | C    | GLU | X | 464 | 51.698 | 24.579 | 23.543 | 0.00 | 0.00 |
| ATOM | 7019 | O    | GLU | X | 464 | 50.664 | 24.357 | 24.200 | 0.00 | 0.00 |
| ATOM | 7020 | N    | GLU | X | 465 | 52.310 | 25.770 | 23.654 | 0.00 | 0.00 |
| ATOM | 7021 | H    | GLU | X | 465 | 53.117 | 25.993 | 23.088 | 0.00 | 0.00 |
| ATOM | 7022 | CA   | GLU | X | 465 | 51.825 | 26.886 | 24.445 | 0.00 | 0.00 |
| ATOM | 7023 | HA   | GLU | X | 465 | 51.500 | 26.583 | 25.440 | 0.00 | 0.00 |
| ATOM | 7024 | CB   | GLU | X | 465 | 52.935 | 27.956 | 24.669 | 0.00 | 0.00 |
| ATOM | 7025 | HB2  | GLU | X | 465 | 53.570 | 28.118 | 23.799 | 0.00 | 0.00 |
| ATOM | 7026 | HB3  | GLU | X | 465 | 52.488 | 28.924 | 24.895 | 0.00 | 0.00 |
| ATOM | 7027 | CG   | GLU | X | 465 | 53.741 | 27.637 | 25.887 | 0.00 | 0.00 |
| ATOM | 7028 | HG2  | GLU | X | 465 | 53.135 | 27.901 | 26.754 | 0.00 | 0.00 |
| ATOM | 7029 | HG3  | GLU | X | 465 | 54.012 | 26.581 | 25.861 | 0.00 | 0.00 |
| ATOM | 7030 | CD   | GLU | X | 465 | 55.089 | 28.477 | 26.038 | 0.00 | 0.00 |
| ATOM | 7031 | OE1  | GLU | X | 465 | 55.731 | 28.729 | 24.965 | 0.00 | 0.00 |
| ATOM | 7032 | OE2  | GLU | X | 465 | 55.456 | 28.899 | 27.168 | 0.00 | 0.00 |
| ATOM | 7033 | C    | GLU | X | 465 | 50.547 | 27.549 | 23.879 | 0.00 | 0.00 |
| ATOM | 7034 | O    | GLU | X | 465 | 49.574 | 27.883 | 24.559 | 0.00 | 0.00 |
| ATOM | 7035 | N    | LYS | X | 466 | 50.480 | 27.741 | 22.537 | 0.00 | 0.00 |
| ATOM | 7036 | H    | LYS | X | 466 | 51.191 | 27.340 | 21.941 | 0.00 | 0.00 |
| ATOM | 7037 | CA   | LYS | X | 466 | 49.319 | 28.409 | 21.873 | 0.00 | 0.00 |
| ATOM | 7038 | HA   | LYS | X | 466 | 49.234 | 29.434 | 22.233 | 0.00 | 0.00 |
| ATOM | 7039 | CB   | LYS | X | 466 | 49.661 | 28.583 | 20.357 | 0.00 | 0.00 |
| ATOM | 7040 | HB2  | LYS | X | 466 | 49.937 | 27.669 | 19.830 | 0.00 | 0.00 |
| ATOM | 7041 | HB3  | LYS | X | 466 | 48.825 | 29.012 | 19.804 | 0.00 | 0.00 |
| ATOM | 7042 | CG   | LYS | X | 466 | 50.832 | 29.572 | 20.350 | 0.00 | 0.00 |
| ATOM | 7043 | HG2  | LYS | X | 466 | 50.399 | 30.568 | 20.444 | 0.00 | 0.00 |
| ATOM | 7044 | HG3  | LYS | X | 466 | 51.540 | 29.390 | 21.158 | 0.00 | 0.00 |
| ATOM | 7045 | CD   | LYS | X | 466 | 51.543 | 29.492 | 18.976 | 0.00 | 0.00 |
| ATOM | 7046 | HD2  | LYS | X | 466 | 51.883 | 28.489 | 18.718 | 0.00 | 0.00 |
| ATOM | 7047 | HD3  | LYS | X | 466 | 50.775 | 29.720 | 18.237 | 0.00 | 0.00 |
| ATOM | 7048 | CE   | LYS | X | 466 | 52.732 | 30.366 | 18.971 | 0.00 | 0.00 |
| ATOM | 7049 | HE2  | LYS | X | 466 | 52.380 | 31.383 | 19.140 | 0.00 | 0.00 |
| ATOM | 7050 | HE3  | LYS | X | 466 | 53.334 | 30.009 | 19.807 | 0.00 | 0.00 |
| ATOM | 7051 | NZ   | LYS | X | 466 | 53.430 | 30.225 | 17.710 | 0.00 | 0.00 |
| ATOM | 7052 | HZ1  | LYS | X | 466 | 52.810 | 30.702 | 17.071 | 0.00 | 0.00 |
| ATOM | 7053 | HZ2  | LYS | X | 466 | 54.370 | 30.589 | 17.647 | 0.00 | 0.00 |
| ATOM | 7054 | HZ3  | LYS | X | 466 | 53.456 | 29.270 | 17.379 | 0.00 | 0.00 |
| ATOM | 7055 | C    | LYS | X | 466 | 47.964 | 27.670 | 22.233 | 0.00 | 0.00 |
| ATOM | 7056 | O    | LYS | X | 466 | 46.908 | 28.291 | 22.484 | 0.00 | 0.00 |
| ATOM | 7057 | N    | ILE | X | 467 | 47.994 | 26.357 | 22.028 | 0.00 | 0.00 |
| ATOM | 7058 | H    | ILE | X | 467 | 48.837 | 25.898 | 21.713 | 0.00 | 0.00 |
| ATOM | 7059 | CA   | ILE | X | 467 | 46.783 | 25.533 | 22.227 | 0.00 | 0.00 |
| ATOM | 7060 | HA   | ILE | X | 467 | 45.933 | 25.992 | 21.722 | 0.00 | 0.00 |
| ATOM | 7061 | CB   | ILE | X | 467 | 46.913 | 24.200 | 21.503 | 0.00 | 0.00 |
| ATOM | 7062 | HB   | ILE | X | 467 | 45.927 | 23.747 | 21.611 | 0.00 | 0.00 |
| ATOM | 7063 | CG2  | ILE | X | 467 | 47.110 | 24.382 | 20.007 | 0.00 | 0.00 |
| ATOM | 7064 | HG21 | ILE | X | 467 | 47.148 | 23.388 | 19.560 | 0.00 | 0.00 |
| ATOM | 7065 | HG22 | ILE | X | 467 | 47.929 | 25.062 | 19.773 | 0.00 | 0.00 |
| ATOM | 7066 | HG23 | ILE | X | 467 | 46.238 | 24.911 | 19.622 | 0.00 | 0.00 |
| ATOM | 7067 | CG1  | ILE | X | 467 | 48.039 | 23.273 | 22.110 | 0.00 | 0.00 |
| ATOM | 7068 | HG12 | ILE | X | 467 | 48.999 | 23.720 | 21.850 | 0.00 | 0.00 |
| ATOM | 7069 | HG13 | ILE | X | 467 | 47.784 | 23.224 | 23.169 | 0.00 | 0.00 |
| ATOM | 7070 | CD1  | ILE | X | 467 | 48.141 | 21.884 | 21.510 | 0.00 | 0.00 |
| ATOM | 7071 | HD11 | ILE | X | 467 | 47.141 | 21.454 | 21.443 | 0.00 | 0.00 |
| ATOM | 7072 | HD12 | ILE | X | 467 | 48.821 | 21.259 | 22.089 | 0.00 | 0.00 |
| ATOM | 7073 | HD13 | ILE | X | 467 | 48.577 | 21.985 | 20.517 | 0.00 | 0.00 |
| ATOM | 7074 | C    | ILE | X | 467 | 46.382 | 25.368 | 23.750 | 0.00 | 0.00 |
| ATOM | 7075 | O    | ILE | X | 467 | 45.184 | 25.412 | 24.091 | 0.00 | 0.00 |
| ATOM | 7076 | N    | PHE | X | 468 | 47.437 | 25.461 | 24.576 | 0.00 | 0.00 |
| ATOM | 7077 | H    | PHE | X | 468 | 48.360 | 25.422 | 24.170 | 0.00 | 0.00 |
| ATOM | 7078 | CA   | PHE | X | 468 | 47.269 | 25.611 | 26.026 | 0.00 | 0.00 |
| ATOM | 7079 | HA   | PHE | X | 468 | 46.575 | 24.821 | 26.313 | 0.00 | 0.00 |
| ATOM | 7080 | CB   | PHE | X | 468 | 48.582 | 25.295 | 26.725 | 0.00 | 0.00 |

|      |      |      |     |   |     |        |        |        |      |      |
|------|------|------|-----|---|-----|--------|--------|--------|------|------|
| ATOM | 7081 | HB2  | PHE | X | 468 | 48.844 | 24.238 | 26.682 | 0.00 | 0.00 |
| ATOM | 7082 | HB3  | PHE | X | 468 | 49.315 | 25.937 | 26.237 | 0.00 | 0.00 |
| ATOM | 7083 | CG   | PHE | X | 468 | 48.493 | 25.635 | 28.204 | 0.00 | 0.00 |
| ATOM | 7084 | CD1  | PHE | X | 468 | 47.787 | 24.810 | 29.010 | 0.00 | 0.00 |
| ATOM | 7085 | HD1  | PHE | X | 468 | 47.189 | 23.989 | 28.642 | 0.00 | 0.00 |
| ATOM | 7086 | CE1  | PHE | X | 468 | 47.702 | 25.028 | 30.327 | 0.00 | 0.00 |
| ATOM | 7087 | HE1  | PHE | X | 468 | 47.096 | 24.359 | 30.921 | 0.00 | 0.00 |
| ATOM | 7088 | CZ   | PHE | X | 468 | 48.341 | 26.134 | 30.934 | 0.00 | 0.00 |
| ATOM | 7089 | HZ   | PHE | X | 468 | 48.236 | 26.388 | 31.979 | 0.00 | 0.00 |
| ATOM | 7090 | CE2  | PHE | X | 468 | 49.162 | 26.927 | 30.192 | 0.00 | 0.00 |
| ATOM | 7091 | HE2  | PHE | X | 468 | 49.661 | 27.827 | 30.521 | 0.00 | 0.00 |
| ATOM | 7092 | CD2  | PHE | X | 468 | 49.271 | 26.669 | 28.792 | 0.00 | 0.00 |
| ATOM | 7093 | HD2  | PHE | X | 468 | 50.016 | 27.237 | 28.254 | 0.00 | 0.00 |
| ATOM | 7094 | C    | PHE | X | 468 | 46.567 | 26.999 | 26.411 | 0.00 | 0.00 |
| ATOM | 7095 | O    | PHE | X | 468 | 45.670 | 27.053 | 27.209 | 0.00 | 0.00 |
| ATOM | 7096 | N    | ALA | X | 469 | 47.056 | 28.096 | 25.868 | 0.00 | 0.00 |
| ATOM | 7097 | H    | ALA | X | 469 | 47.885 | 28.044 | 25.293 | 0.00 | 0.00 |
| ATOM | 7098 | CA   | ALA | X | 469 | 46.381 | 29.468 | 25.974 | 0.00 | 0.00 |
| ATOM | 7099 | HA   | ALA | X | 469 | 46.510 | 29.808 | 27.002 | 0.00 | 0.00 |
| ATOM | 7100 | CB   | ALA | X | 469 | 46.974 | 30.378 | 24.973 | 0.00 | 0.00 |
| ATOM | 7101 | HB1  | ALA | X | 469 | 48.052 | 30.432 | 25.120 | 0.00 | 0.00 |
| ATOM | 7102 | HB2  | ALA | X | 469 | 46.464 | 31.338 | 25.046 | 0.00 | 0.00 |
| ATOM | 7103 | HB3  | ALA | X | 469 | 46.874 | 30.041 | 23.941 | 0.00 | 0.00 |
| ATOM | 7104 | C    | ALA | X | 469 | 44.880 | 29.301 | 25.659 | 0.00 | 0.00 |
| ATOM | 7105 | O    | ALA | X | 469 | 44.000 | 29.656 | 26.429 | 0.00 | 0.00 |
| ATOM | 7106 | N    | GLN | X | 470 | 44.519 | 28.544 | 24.606 | 0.00 | 0.00 |
| ATOM | 7107 | H    | GLN | X | 470 | 45.258 | 28.253 | 23.983 | 0.00 | 0.00 |
| ATOM | 7108 | CA   | GLN | X | 470 | 43.100 | 28.329 | 24.179 | 0.00 | 0.00 |
| ATOM | 7109 | HA   | GLN | X | 470 | 42.546 | 29.268 | 24.173 | 0.00 | 0.00 |
| ATOM | 7110 | CB   | GLN | X | 470 | 43.076 | 27.792 | 22.754 | 0.00 | 0.00 |
| ATOM | 7111 | HB2  | GLN | X | 470 | 43.641 | 26.872 | 22.606 | 0.00 | 0.00 |
| ATOM | 7112 | HB3  | GLN | X | 470 | 42.061 | 27.438 | 22.572 | 0.00 | 0.00 |
| ATOM | 7113 | CG   | GLN | X | 470 | 43.569 | 28.753 | 21.656 | 0.00 | 0.00 |
| ATOM | 7114 | HG2  | GLN | X | 470 | 42.972 | 29.656 | 21.533 | 0.00 | 0.00 |
| ATOM | 7115 | HG3  | GLN | X | 470 | 44.572 | 29.109 | 21.890 | 0.00 | 0.00 |
| ATOM | 7116 | CD   | GLN | X | 470 | 43.765 | 28.056 | 20.285 | 0.00 | 0.00 |
| ATOM | 7117 | OE1  | GLN | X | 470 | 44.107 | 26.893 | 20.133 | 0.00 | 0.00 |
| ATOM | 7118 | NE2  | GLN | X | 470 | 43.705 | 28.782 | 19.173 | 0.00 | 0.00 |
| ATOM | 7119 | HE21 | GLN | X | 470 | 43.938 | 28.230 | 18.360 | 0.00 | 0.00 |
| ATOM | 7120 | HE22 | GLN | X | 470 | 43.313 | 29.713 | 19.158 | 0.00 | 0.00 |
| ATOM | 7121 | C    | GLN | X | 470 | 42.390 | 27.481 | 25.187 | 0.00 | 0.00 |
| ATOM | 7122 | O    | GLN | X | 470 | 41.189 | 27.699 | 25.275 | 0.00 | 0.00 |
| ATOM | 7123 | N    | ARG | X | 471 | 42.970 | 26.482 | 25.931 | 0.00 | 0.00 |
| ATOM | 7124 | H    | ARG | X | 471 | 43.938 | 26.262 | 25.741 | 0.00 | 0.00 |
| ATOM | 7125 | CA   | ARG | X | 471 | 42.372 | 25.830 | 27.119 | 0.00 | 0.00 |
| ATOM | 7126 | HA   | ARG | X | 471 | 41.481 | 25.302 | 26.780 | 0.00 | 0.00 |
| ATOM | 7127 | CB   | ARG | X | 471 | 43.334 | 24.801 | 27.674 | 0.00 | 0.00 |
| ATOM | 7128 | HB2  | ARG | X | 471 | 44.329 | 25.244 | 27.686 | 0.00 | 0.00 |
| ATOM | 7129 | HB3  | ARG | X | 471 | 43.189 | 24.660 | 28.746 | 0.00 | 0.00 |
| ATOM | 7130 | CG   | ARG | X | 471 | 43.373 | 23.441 | 27.019 | 0.00 | 0.00 |
| ATOM | 7131 | HG2  | ARG | X | 471 | 42.456 | 22.864 | 27.142 | 0.00 | 0.00 |
| ATOM | 7132 | HG3  | ARG | X | 471 | 43.560 | 23.625 | 25.961 | 0.00 | 0.00 |
| ATOM | 7133 | CD   | ARG | X | 471 | 44.433 | 22.551 | 27.706 | 0.00 | 0.00 |
| ATOM | 7134 | HD2  | ARG | X | 471 | 44.524 | 21.671 | 27.070 | 0.00 | 0.00 |
| ATOM | 7135 | HD3  | ARG | X | 471 | 45.399 | 23.057 | 27.687 | 0.00 | 0.00 |
| ATOM | 7136 | NE   | ARG | X | 471 | 44.082 | 22.223 | 29.074 | 0.00 | 0.00 |
| ATOM | 7137 | HE   | ARG | X | 471 | 43.097 | 22.168 | 29.289 | 0.00 | 0.00 |
| ATOM | 7138 | CZ   | ARG | X | 471 | 44.761 | 21.625 | 30.011 | 0.00 | 0.00 |
| ATOM | 7139 | NH1  | ARG | X | 471 | 45.944 | 21.160 | 29.716 | 0.00 | 0.00 |
| ATOM | 7140 | HH11 | ARG | X | 471 | 46.280 | 21.129 | 28.764 | 0.00 | 0.00 |
| ATOM | 7141 | HH12 | ARG | X | 471 | 46.586 | 21.023 | 30.483 | 0.00 | 0.00 |
| ATOM | 7142 | NH2  | ARG | X | 471 | 44.339 | 21.538 | 31.205 | 0.00 | 0.00 |
| ATOM | 7143 | HH21 | ARG | X | 471 | 43.423 | 21.900 | 31.427 | 0.00 | 0.00 |
| ATOM | 7144 | HH22 | ARG | X | 471 | 44.880 | 21.169 | 31.974 | 0.00 | 0.00 |
| ATOM | 7145 | C    | ARG | X | 471 | 41.951 | 26.840 | 28.147 | 0.00 | 0.00 |
| ATOM | 7146 | O    | ARG | X | 471 | 40.769 | 26.891 | 28.490 | 0.00 | 0.00 |
| ATOM | 7147 | N    | LEU | X | 472 | 42.834 | 27.718 | 28.440 | 0.00 | 0.00 |

|      |      |      |     |   |     |        |        |        |      |      |
|------|------|------|-----|---|-----|--------|--------|--------|------|------|
| ATOM | 7148 | H    | LEU | X | 472 | 43.720 | 27.474 | 28.022 | 0.00 | 0.00 |
| ATOM | 7149 | CA   | LEU | X | 472 | 42.687 | 28.805 | 29.465 | 0.00 | 0.00 |
| ATOM | 7150 | HA   | LEU | X | 472 | 42.211 | 28.336 | 30.326 | 0.00 | 0.00 |
| ATOM | 7151 | CB   | LEU | X | 472 | 44.058 | 29.387 | 29.906 | 0.00 | 0.00 |
| ATOM | 7152 | HB2  | LEU | X | 472 | 44.726 | 29.288 | 29.051 | 0.00 | 0.00 |
| ATOM | 7153 | HB3  | LEU | X | 472 | 43.905 | 30.457 | 30.049 | 0.00 | 0.00 |
| ATOM | 7154 | CG   | LEU | X | 472 | 44.718 | 28.730 | 31.171 | 0.00 | 0.00 |
| ATOM | 7155 | HG   | LEU | X | 472 | 44.024 | 28.804 | 32.007 | 0.00 | 0.00 |
| ATOM | 7156 | CD1  | LEU | X | 472 | 45.040 | 27.241 | 30.938 | 0.00 | 0.00 |
| ATOM | 7157 | HD11 | LEU | X | 472 | 45.413 | 26.745 | 31.833 | 0.00 | 0.00 |
| ATOM | 7158 | HD12 | LEU | X | 472 | 45.823 | 27.097 | 30.194 | 0.00 | 0.00 |
| ATOM | 7159 | HD13 | LEU | X | 472 | 44.109 | 26.730 | 30.691 | 0.00 | 0.00 |
| ATOM | 7160 | CD2  | LEU | X | 472 | 45.911 | 29.541 | 31.681 | 0.00 | 0.00 |
| ATOM | 7161 | HD21 | LEU | X | 472 | 45.598 | 30.581 | 31.772 | 0.00 | 0.00 |
| ATOM | 7162 | HD22 | LEU | X | 472 | 46.424 | 29.155 | 32.562 | 0.00 | 0.00 |
| ATOM | 7163 | HD23 | LEU | X | 472 | 46.672 | 29.513 | 30.901 | 0.00 | 0.00 |
| ATOM | 7164 | C    | LEU | X | 472 | 41.620 | 29.897 | 29.085 | 0.00 | 0.00 |
| ATOM | 7165 | O    | LEU | X | 472 | 40.946 | 30.450 | 29.969 | 0.00 | 0.00 |
| ATOM | 7166 | N    | MET | X | 473 | 41.571 | 30.324 | 27.779 | 0.00 | 0.00 |
| ATOM | 7167 | H    | MET | X | 473 | 42.326 | 30.122 | 27.139 | 0.00 | 0.00 |
| ATOM | 7168 | CA   | MET | X | 473 | 40.609 | 31.294 | 27.132 | 0.00 | 0.00 |
| ATOM | 7169 | HA   | MET | X | 473 | 40.411 | 32.197 | 27.710 | 0.00 | 0.00 |
| ATOM | 7170 | CB   | MET | X | 473 | 41.123 | 31.650 | 25.713 | 0.00 | 0.00 |
| ATOM | 7171 | HB2  | MET | X | 473 | 41.284 | 30.723 | 25.163 | 0.00 | 0.00 |
| ATOM | 7172 | HB3  | MET | X | 473 | 40.340 | 32.171 | 25.163 | 0.00 | 0.00 |
| ATOM | 7173 | CG   | MET | X | 473 | 42.444 | 32.482 | 25.675 | 0.00 | 0.00 |
| ATOM | 7174 | HG2  | MET | X | 473 | 42.259 | 33.524 | 25.938 | 0.00 | 0.00 |
| ATOM | 7175 | HG3  | MET | X | 473 | 43.092 | 32.068 | 26.448 | 0.00 | 0.00 |
| ATOM | 7176 | SD   | MET | X | 473 | 43.317 | 32.394 | 24.048 | 0.00 | 0.00 |
| ATOM | 7177 | CE   | MET | X | 473 | 42.073 | 32.962 | 22.859 | 0.00 | 0.00 |
| ATOM | 7178 | HE1  | MET | X | 473 | 41.078 | 32.582 | 23.092 | 0.00 | 0.00 |
| ATOM | 7179 | HE2  | MET | X | 473 | 42.082 | 34.038 | 22.689 | 0.00 | 0.00 |
| ATOM | 7180 | HE3  | MET | X | 473 | 42.325 | 32.549 | 21.882 | 0.00 | 0.00 |
| ATOM | 7181 | C    | MET | X | 473 | 39.195 | 30.655 | 27.194 | 0.00 | 0.00 |
| ATOM | 7182 | O    | MET | X | 473 | 38.258 | 31.366 | 27.494 | 0.00 | 0.00 |
| ATOM | 7183 | N    | ARG | X | 474 | 39.163 | 29.369 | 26.941 | 0.00 | 0.00 |
| ATOM | 7184 | H    | ARG | X | 474 | 40.016 | 28.862 | 26.753 | 0.00 | 0.00 |
| ATOM | 7185 | CA   | ARG | X | 474 | 37.933 | 28.539 | 27.072 | 0.00 | 0.00 |
| ATOM | 7186 | HA   | ARG | X | 474 | 37.137 | 29.081 | 26.561 | 0.00 | 0.00 |
| ATOM | 7187 | CB   | ARG | X | 474 | 38.186 | 27.176 | 26.322 | 0.00 | 0.00 |
| ATOM | 7188 | HB2  | ARG | X | 474 | 38.573 | 27.381 | 25.324 | 0.00 | 0.00 |
| ATOM | 7189 | HB3  | ARG | X | 474 | 38.944 | 26.556 | 26.801 | 0.00 | 0.00 |
| ATOM | 7190 | CG   | ARG | X | 474 | 36.934 | 26.231 | 26.113 | 0.00 | 0.00 |
| ATOM | 7191 | HG2  | ARG | X | 474 | 37.202 | 25.481 | 25.368 | 0.00 | 0.00 |
| ATOM | 7192 | HG3  | ARG | X | 474 | 36.707 | 25.772 | 27.075 | 0.00 | 0.00 |
| ATOM | 7193 | CD   | ARG | X | 474 | 35.773 | 27.035 | 25.523 | 0.00 | 0.00 |
| ATOM | 7194 | HD2  | ARG | X | 474 | 35.411 | 27.744 | 26.267 | 0.00 | 0.00 |
| ATOM | 7195 | HD3  | ARG | X | 474 | 36.023 | 27.612 | 24.633 | 0.00 | 0.00 |
| ATOM | 7196 | NE   | ARG | X | 474 | 34.672 | 26.194 | 25.066 | 0.00 | 0.00 |
| ATOM | 7197 | HE   | ARG | X | 474 | 34.565 | 25.304 | 25.532 | 0.00 | 0.00 |
| ATOM | 7198 | CZ   | ARG | X | 474 | 33.710 | 26.600 | 24.349 | 0.00 | 0.00 |
| ATOM | 7199 | NH1  | ARG | X | 474 | 33.551 | 27.815 | 23.858 | 0.00 | 0.00 |
| ATOM | 7200 | HH11 | ARG | X | 474 | 34.254 | 28.527 | 23.993 | 0.00 | 0.00 |
| ATOM | 7201 | HH12 | ARG | X | 474 | 32.854 | 27.882 | 23.130 | 0.00 | 0.00 |
| ATOM | 7202 | NH2  | ARG | X | 474 | 32.754 | 25.757 | 24.067 | 0.00 | 0.00 |
| ATOM | 7203 | HH21 | ARG | X | 474 | 32.722 | 24.809 | 24.412 | 0.00 | 0.00 |
| ATOM | 7204 | HH22 | ARG | X | 474 | 31.957 | 26.067 | 23.529 | 0.00 | 0.00 |
| ATOM | 7205 | C    | ARG | X | 474 | 37.484 | 28.357 | 28.509 | 0.00 | 0.00 |
| ATOM | 7206 | O    | ARG | X | 474 | 36.306 | 28.705 | 28.724 | 0.00 | 0.00 |
| ATOM | 7207 | N    | TYR | X | 475 | 38.283 | 27.952 | 29.454 | 0.00 | 0.00 |
| ATOM | 7208 | H    | TYR | X | 475 | 39.232 | 27.690 | 29.227 | 0.00 | 0.00 |
| ATOM | 7209 | CA   | TYR | X | 475 | 37.882 | 27.632 | 30.810 | 0.00 | 0.00 |
| ATOM | 7210 | HA   | TYR | X | 475 | 37.082 | 26.897 | 30.903 | 0.00 | 0.00 |
| ATOM | 7211 | CB   | TYR | X | 475 | 39.110 | 27.200 | 31.640 | 0.00 | 0.00 |
| ATOM | 7212 | HB2  | TYR | X | 475 | 39.950 | 27.881 | 31.497 | 0.00 | 0.00 |
| ATOM | 7213 | HB3  | TYR | X | 475 | 38.856 | 27.232 | 32.700 | 0.00 | 0.00 |
| ATOM | 7214 | CG   | TYR | X | 475 | 39.772 | 25.817 | 31.293 | 0.00 | 0.00 |

|      |      |      |     |   |     |        |        |        |      |      |
|------|------|------|-----|---|-----|--------|--------|--------|------|------|
| ATOM | 7215 | CD1  | TYR | X | 475 | 38.961 | 24.786 | 30.798 | 0.00 | 0.00 |
| ATOM | 7216 | HD1  | TYR | X | 475 | 37.902 | 24.893 | 30.615 | 0.00 | 0.00 |
| ATOM | 7217 | CE1  | TYR | X | 475 | 39.525 | 23.523 | 30.594 | 0.00 | 0.00 |
| ATOM | 7218 | HE1  | TYR | X | 475 | 38.900 | 22.745 | 30.183 | 0.00 | 0.00 |
| ATOM | 7219 | CZ   | TYR | X | 475 | 40.902 | 23.294 | 30.876 | 0.00 | 0.00 |
| ATOM | 7220 | OH   | TYR | X | 475 | 41.442 | 22.080 | 30.661 | 0.00 | 0.00 |
| ATOM | 7221 | HH   | TYR | X | 475 | 40.859 | 21.500 | 30.165 | 0.00 | 0.00 |
| ATOM | 7222 | CE2  | TYR | X | 475 | 41.636 | 24.299 | 31.439 | 0.00 | 0.00 |
| ATOM | 7223 | HE2  | TYR | X | 475 | 42.654 | 24.122 | 31.751 | 0.00 | 0.00 |
| ATOM | 7224 | CD2  | TYR | X | 475 | 41.109 | 25.596 | 31.604 | 0.00 | 0.00 |
| ATOM | 7225 | HD2  | TYR | X | 475 | 41.653 | 26.398 | 32.081 | 0.00 | 0.00 |
| ATOM | 7226 | C    | TYR | X | 475 | 37.334 | 28.984 | 31.466 | 0.00 | 0.00 |
| ATOM | 7227 | O    | TYR | X | 475 | 36.231 | 28.894 | 32.029 | 0.00 | 0.00 |
| ATOM | 7228 | N    | TRP | X | 476 | 37.992 | 30.161 | 31.375 | 0.00 | 0.00 |
| ATOM | 7229 | H    | TRP | X | 476 | 38.895 | 30.177 | 30.922 | 0.00 | 0.00 |
| ATOM | 7230 | CA   | TRP | X | 476 | 37.430 | 31.467 | 31.909 | 0.00 | 0.00 |
| ATOM | 7231 | HA   | TRP | X | 476 | 37.044 | 31.317 | 32.917 | 0.00 | 0.00 |
| ATOM | 7232 | CB   | TRP | X | 476 | 38.587 | 32.503 | 31.782 | 0.00 | 0.00 |
| ATOM | 7233 | HB2  | TRP | X | 476 | 39.150 | 32.363 | 30.859 | 0.00 | 0.00 |
| ATOM | 7234 | HB3  | TRP | X | 476 | 38.093 | 33.472 | 31.723 | 0.00 | 0.00 |
| ATOM | 7235 | CG   | TRP | X | 476 | 39.448 | 32.576 | 32.960 | 0.00 | 0.00 |
| ATOM | 7236 | CD1  | TRP | X | 476 | 39.629 | 33.717 | 33.668 | 0.00 | 0.00 |
| ATOM | 7237 | HD1  | TRP | X | 476 | 39.112 | 34.637 | 33.439 | 0.00 | 0.00 |
| ATOM | 7238 | NE1  | TRP | X | 476 | 40.676 | 33.572 | 34.552 | 0.00 | 0.00 |
| ATOM | 7239 | HE1  | TRP | X | 476 | 40.961 | 34.313 | 35.176 | 0.00 | 0.00 |
| ATOM | 7240 | CE2  | TRP | X | 476 | 41.016 | 32.227 | 34.599 | 0.00 | 0.00 |
| ATOM | 7241 | CZ2  | TRP | X | 476 | 41.939 | 31.566 | 35.427 | 0.00 | 0.00 |
| ATOM | 7242 | HZ2  | TRP | X | 476 | 42.525 | 32.075 | 36.178 | 0.00 | 0.00 |
| ATOM | 7243 | CH2  | TRP | X | 476 | 42.226 | 30.225 | 35.113 | 0.00 | 0.00 |
| ATOM | 7244 | HH2  | TRP | X | 476 | 42.954 | 29.681 | 35.697 | 0.00 | 0.00 |
| ATOM | 7245 | CZ3  | TRP | X | 476 | 41.582 | 29.539 | 34.060 | 0.00 | 0.00 |
| ATOM | 7246 | HZ3  | TRP | X | 476 | 41.815 | 28.545 | 33.706 | 0.00 | 0.00 |
| ATOM | 7247 | CE3  | TRP | X | 476 | 40.670 | 30.281 | 33.303 | 0.00 | 0.00 |
| ATOM | 7248 | HE3  | TRP | X | 476 | 40.245 | 29.880 | 32.395 | 0.00 | 0.00 |
| ATOM | 7249 | CD2  | TRP | X | 476 | 40.253 | 31.575 | 33.588 | 0.00 | 0.00 |
| ATOM | 7250 | C    | TRP | X | 476 | 36.208 | 31.965 | 31.129 | 0.00 | 0.00 |
| ATOM | 7251 | O    | TRP | X | 476 | 35.303 | 32.556 | 31.716 | 0.00 | 0.00 |
| ATOM | 7252 | N    | ALA | X | 477 | 36.057 | 31.579 | 29.879 | 0.00 | 0.00 |
| ATOM | 7253 | H    | ALA | X | 477 | 36.905 | 31.247 | 29.442 | 0.00 | 0.00 |
| ATOM | 7254 | CA   | ALA | X | 477 | 34.889 | 32.087 | 29.070 | 0.00 | 0.00 |
| ATOM | 7255 | HA   | ALA | X | 477 | 34.745 | 33.111 | 29.417 | 0.00 | 0.00 |
| ATOM | 7256 | CB   | ALA | X | 477 | 35.241 | 32.068 | 27.571 | 0.00 | 0.00 |
| ATOM | 7257 | HB1  | ALA | X | 477 | 35.984 | 32.842 | 27.380 | 0.00 | 0.00 |
| ATOM | 7258 | HB2  | ALA | X | 477 | 34.413 | 32.377 | 26.933 | 0.00 | 0.00 |
| ATOM | 7259 | HB3  | ALA | X | 477 | 35.517 | 31.047 | 27.309 | 0.00 | 0.00 |
| ATOM | 7260 | C    | ALA | X | 477 | 33.680 | 31.169 | 29.354 | 0.00 | 0.00 |
| ATOM | 7261 | O    | ALA | X | 477 | 32.545 | 31.640 | 29.313 | 0.00 | 0.00 |
| ATOM | 7262 | N    | ASN | X | 478 | 33.892 | 29.844 | 29.582 | 0.00 | 0.00 |
| ATOM | 7263 | H    | ASN | X | 478 | 34.808 | 29.485 | 29.355 | 0.00 | 0.00 |
| ATOM | 7264 | CA   | ASN | X | 478 | 32.813 | 28.877 | 29.997 | 0.00 | 0.00 |
| ATOM | 7265 | HA   | ASN | X | 478 | 32.013 | 28.862 | 29.258 | 0.00 | 0.00 |
| ATOM | 7266 | CB   | ASN | X | 478 | 33.385 | 27.471 | 30.172 | 0.00 | 0.00 |
| ATOM | 7267 | HB2  | ASN | X | 478 | 34.246 | 27.633 | 30.820 | 0.00 | 0.00 |
| ATOM | 7268 | HB3  | ASN | X | 478 | 32.598 | 26.870 | 30.628 | 0.00 | 0.00 |
| ATOM | 7269 | CG   | ASN | X | 478 | 33.773 | 26.825 | 28.911 | 0.00 | 0.00 |
| ATOM | 7270 | OD1  | ASN | X | 478 | 33.517 | 27.387 | 27.823 | 0.00 | 0.00 |
| ATOM | 7271 | ND2  | ASN | X | 478 | 34.508 | 25.727 | 28.893 | 0.00 | 0.00 |
| ATOM | 7272 | HD21 | ASN | X | 478 | 34.755 | 25.183 | 28.079 | 0.00 | 0.00 |
| ATOM | 7273 | HD22 | ASN | X | 478 | 34.738 | 25.304 | 29.780 | 0.00 | 0.00 |
| ATOM | 7274 | C    | ASN | X | 478 | 32.184 | 29.344 | 31.311 | 0.00 | 0.00 |
| ATOM | 7275 | O    | ASN | X | 478 | 30.997 | 29.668 | 31.388 | 0.00 | 0.00 |
| ATOM | 7276 | N    | PHE | X | 479 | 32.993 | 29.748 | 32.295 | 0.00 | 0.00 |
| ATOM | 7277 | H    | PHE | X | 479 | 33.997 | 29.705 | 32.198 | 0.00 | 0.00 |
| ATOM | 7278 | CA   | PHE | X | 479 | 32.549 | 30.297 | 33.530 | 0.00 | 0.00 |
| ATOM | 7279 | HA   | PHE | X | 479 | 31.960 | 29.569 | 34.087 | 0.00 | 0.00 |
| ATOM | 7280 | CB   | PHE | X | 479 | 33.780 | 30.717 | 34.486 | 0.00 | 0.00 |
| ATOM | 7281 | HB2  | PHE | X | 479 | 34.278 | 29.803 | 34.811 | 0.00 | 0.00 |

|      |      |      |     |   |     |        |        |        |      |      |
|------|------|------|-----|---|-----|--------|--------|--------|------|------|
| ATOM | 7282 | HB3  | PHE | X | 479 | 34.405 | 31.297 | 33.807 | 0.00 | 0.00 |
| ATOM | 7283 | CG   | PHE | X | 479 | 33.357 | 31.468 | 35.761 | 0.00 | 0.00 |
| ATOM | 7284 | CD1  | PHE | X | 479 | 33.010 | 30.779 | 36.947 | 0.00 | 0.00 |
| ATOM | 7285 | HD1  | PHE | X | 479 | 33.126 | 29.707 | 37.015 | 0.00 | 0.00 |
| ATOM | 7286 | CE1  | PHE | X | 479 | 32.629 | 31.437 | 38.120 | 0.00 | 0.00 |
| ATOM | 7287 | HE1  | PHE | X | 479 | 32.237 | 30.949 | 38.999 | 0.00 | 0.00 |
| ATOM | 7288 | CZ   | PHE | X | 479 | 32.709 | 32.834 | 38.154 | 0.00 | 0.00 |
| ATOM | 7289 | HZ   | PHE | X | 479 | 32.457 | 33.320 | 39.085 | 0.00 | 0.00 |
| ATOM | 7290 | CE2  | PHE | X | 479 | 33.124 | 33.615 | 37.057 | 0.00 | 0.00 |
| ATOM | 7291 | HE2  | PHE | X | 479 | 33.192 | 34.688 | 37.153 | 0.00 | 0.00 |
| ATOM | 7292 | CD2  | PHE | X | 479 | 33.342 | 32.900 | 35.798 | 0.00 | 0.00 |
| ATOM | 7293 | HD2  | PHE | X | 479 | 33.351 | 33.454 | 34.870 | 0.00 | 0.00 |
| ATOM | 7294 | C    | PHE | X | 479 | 31.786 | 31.601 | 33.216 | 0.00 | 0.00 |
| ATOM | 7295 | O    | PHE | X | 479 | 30.710 | 31.777 | 33.788 | 0.00 | 0.00 |
| ATOM | 7296 | N    | ALA | X | 480 | 32.204 | 32.491 | 32.297 | 0.00 | 0.00 |
| ATOM | 7297 | H    | ALA | X | 480 | 33.062 | 32.262 | 31.815 | 0.00 | 0.00 |
| ATOM | 7298 | CA   | ALA | X | 480 | 31.486 | 33.745 | 32.008 | 0.00 | 0.00 |
| ATOM | 7299 | HA   | ALA | X | 480 | 31.439 | 34.373 | 32.898 | 0.00 | 0.00 |
| ATOM | 7300 | CB   | ALA | X | 480 | 32.263 | 34.523 | 30.929 | 0.00 | 0.00 |
| ATOM | 7301 | HB1  | ALA | X | 480 | 33.326 | 34.574 | 31.165 | 0.00 | 0.00 |
| ATOM | 7302 | HB2  | ALA | X | 480 | 31.814 | 35.516 | 30.945 | 0.00 | 0.00 |
| ATOM | 7303 | HB3  | ALA | X | 480 | 32.277 | 34.065 | 29.940 | 0.00 | 0.00 |
| ATOM | 7304 | C    | ALA | X | 480 | 30.038 | 33.520 | 31.432 | 0.00 | 0.00 |
| ATOM | 7305 | O    | ALA | X | 480 | 29.284 | 34.506 | 31.456 | 0.00 | 0.00 |
| ATOM | 7306 | N    | ARG | X | 481 | 29.741 | 32.298 | 30.869 | 0.00 | 0.00 |
| ATOM | 7307 | H    | ARG | X | 481 | 30.542 | 31.685 | 30.822 | 0.00 | 0.00 |
| ATOM | 7308 | CA   | ARG | X | 481 | 28.421 | 31.962 | 30.301 | 0.00 | 0.00 |
| ATOM | 7309 | HA   | ARG | X | 481 | 27.982 | 32.942 | 30.108 | 0.00 | 0.00 |
| ATOM | 7310 | CB   | ARG | X | 481 | 28.651 | 31.031 | 29.052 | 0.00 | 0.00 |
| ATOM | 7311 | HB2  | ARG | X | 481 | 29.128 | 30.096 | 29.345 | 0.00 | 0.00 |
| ATOM | 7312 | HB3  | ARG | X | 481 | 27.666 | 30.828 | 28.630 | 0.00 | 0.00 |
| ATOM | 7313 | CG   | ARG | X | 481 | 29.492 | 31.751 | 27.954 | 0.00 | 0.00 |
| ATOM | 7314 | HG2  | ARG | X | 481 | 28.835 | 32.482 | 27.483 | 0.00 | 0.00 |
| ATOM | 7315 | HG3  | ARG | X | 481 | 30.398 | 32.272 | 28.261 | 0.00 | 0.00 |
| ATOM | 7316 | CD   | ARG | X | 481 | 30.043 | 30.627 | 27.063 | 0.00 | 0.00 |
| ATOM | 7317 | HD2  | ARG | X | 481 | 30.611 | 29.970 | 27.722 | 0.00 | 0.00 |
| ATOM | 7318 | HD3  | ARG | X | 481 | 29.204 | 30.071 | 26.646 | 0.00 | 0.00 |
| ATOM | 7319 | NE   | ARG | X | 481 | 30.825 | 31.153 | 25.964 | 0.00 | 0.00 |
| ATOM | 7320 | HE   | ARG | X | 481 | 30.234 | 31.681 | 25.338 | 0.00 | 0.00 |
| ATOM | 7321 | CZ   | ARG | X | 481 | 32.073 | 30.872 | 25.685 | 0.00 | 0.00 |
| ATOM | 7322 | NH1  | ARG | X | 481 | 32.895 | 30.071 | 26.301 | 0.00 | 0.00 |
| ATOM | 7323 | HH11 | ARG | X | 481 | 32.562 | 29.601 | 27.131 | 0.00 | 0.00 |
| ATOM | 7324 | HH12 | ARG | X | 481 | 33.791 | 29.816 | 25.911 | 0.00 | 0.00 |
| ATOM | 7325 | NH2  | ARG | X | 481 | 32.594 | 31.399 | 24.608 | 0.00 | 0.00 |
| ATOM | 7326 | HH21 | ARG | X | 481 | 31.955 | 31.964 | 24.067 | 0.00 | 0.00 |
| ATOM | 7327 | HH22 | ARG | X | 481 | 33.472 | 31.029 | 24.272 | 0.00 | 0.00 |
| ATOM | 7328 | C    | ARG | X | 481 | 27.423 | 31.243 | 31.243 | 0.00 | 0.00 |
| ATOM | 7329 | O    | ARG | X | 481 | 26.222 | 31.610 | 31.233 | 0.00 | 0.00 |
| ATOM | 7330 | N    | THR | X | 482 | 27.856 | 30.283 | 32.075 | 0.00 | 0.00 |
| ATOM | 7331 | H    | THR | X | 482 | 28.766 | 29.929 | 31.817 | 0.00 | 0.00 |
| ATOM | 7332 | CA   | THR | X | 482 | 26.930 | 29.504 | 32.948 | 0.00 | 0.00 |
| ATOM | 7333 | HA   | THR | X | 482 | 25.904 | 29.870 | 32.997 | 0.00 | 0.00 |
| ATOM | 7334 | CB   | THR | X | 482 | 26.897 | 28.031 | 32.495 | 0.00 | 0.00 |
| ATOM | 7335 | HB   | THR | X | 482 | 26.439 | 27.398 | 33.254 | 0.00 | 0.00 |
| ATOM | 7336 | CG2  | THR | X | 482 | 26.005 | 28.005 | 31.209 | 0.00 | 0.00 |
| ATOM | 7337 | HG21 | THR | X | 482 | 25.734 | 26.952 | 31.134 | 0.00 | 0.00 |
| ATOM | 7338 | HG22 | THR | X | 482 | 26.544 | 28.296 | 30.307 | 0.00 | 0.00 |
| ATOM | 7339 | HG23 | THR | X | 482 | 25.093 | 28.545 | 31.462 | 0.00 | 0.00 |
| ATOM | 7340 | OG1  | THR | X | 482 | 28.235 | 27.581 | 32.258 | 0.00 | 0.00 |
| ATOM | 7341 | HG1  | THR | X | 482 | 28.361 | 26.866 | 31.631 | 0.00 | 0.00 |
| ATOM | 7342 | C    | THR | X | 482 | 27.335 | 29.474 | 34.466 | 0.00 | 0.00 |
| ATOM | 7343 | O    | THR | X | 482 | 26.584 | 28.887 | 35.296 | 0.00 | 0.00 |
| ATOM | 7344 | N    | GLY | X | 483 | 28.544 | 29.852 | 34.796 | 0.00 | 0.00 |
| ATOM | 7345 | H    | GLY | X | 483 | 29.124 | 30.183 | 34.039 | 0.00 | 0.00 |
| ATOM | 7346 | CA   | GLY | X | 483 | 29.135 | 29.672 | 36.129 | 0.00 | 0.00 |
| ATOM | 7347 | HA2  | GLY | X | 483 | 29.667 | 30.597 | 36.351 | 0.00 | 0.00 |
| ATOM | 7348 | HA3  | GLY | X | 483 | 28.425 | 29.481 | 36.934 | 0.00 | 0.00 |

|      |      |      |     |   |     |        |        |        |      |      |
|------|------|------|-----|---|-----|--------|--------|--------|------|------|
| ATOM | 7349 | C    | GLY | X | 483 | 30.149 | 28.525 | 36.121 | 0.00 | 0.00 |
| ATOM | 7350 | O    | GLY | X | 483 | 30.884 | 28.356 | 37.092 | 0.00 | 0.00 |
| ATOM | 7351 | N    | ASP | X | 484 | 30.200 | 27.749 | 35.007 | 0.00 | 0.00 |
| ATOM | 7352 | H    | ASP | X | 484 | 29.680 | 28.093 | 34.212 | 0.00 | 0.00 |
| ATOM | 7353 | CA   | ASP | X | 484 | 30.848 | 26.448 | 35.005 | 0.00 | 0.00 |
| ATOM | 7354 | HA   | ASP | X | 484 | 31.223 | 26.152 | 35.985 | 0.00 | 0.00 |
| ATOM | 7355 | CB   | ASP | X | 484 | 29.678 | 25.486 | 34.707 | 0.00 | 0.00 |
| ATOM | 7356 | HB2  | ASP | X | 484 | 28.905 | 25.862 | 35.378 | 0.00 | 0.00 |
| ATOM | 7357 | HB3  | ASP | X | 484 | 29.154 | 25.644 | 33.765 | 0.00 | 0.00 |
| ATOM | 7358 | CG   | ASP | X | 484 | 29.952 | 23.971 | 34.958 | 0.00 | 0.00 |
| ATOM | 7359 | OD1  | ASP | X | 484 | 29.033 | 23.158 | 34.747 | 0.00 | 0.00 |
| ATOM | 7360 | OD2  | ASP | X | 484 | 31.023 | 23.576 | 35.413 | 0.00 | 0.00 |
| ATOM | 7361 | C    | ASP | X | 484 | 32.021 | 26.358 | 33.937 | 0.00 | 0.00 |
| ATOM | 7362 | O    | ASP | X | 484 | 31.672 | 26.405 | 32.768 | 0.00 | 0.00 |
| ATOM | 7363 | N    | PRO | X | 485 | 33.290 | 26.215 | 34.358 | 0.00 | 0.00 |
| ATOM | 7364 | CD   | PRO | X | 485 | 33.762 | 26.234 | 35.720 | 0.00 | 0.00 |
| ATOM | 7365 | HD2  | PRO | X | 485 | 33.505 | 25.248 | 36.106 | 0.00 | 0.00 |
| ATOM | 7366 | HD3  | PRO | X | 485 | 33.307 | 27.115 | 36.174 | 0.00 | 0.00 |
| ATOM | 7367 | CG   | PRO | X | 485 | 35.250 | 26.469 | 35.638 | 0.00 | 0.00 |
| ATOM | 7368 | HG2  | PRO | X | 485 | 35.822 | 26.125 | 36.500 | 0.00 | 0.00 |
| ATOM | 7369 | HG3  | PRO | X | 485 | 35.520 | 27.523 | 35.562 | 0.00 | 0.00 |
| ATOM | 7370 | CB   | PRO | X | 485 | 35.675 | 25.858 | 34.299 | 0.00 | 0.00 |
| ATOM | 7371 | HB2  | PRO | X | 485 | 35.857 | 24.805 | 34.514 | 0.00 | 0.00 |
| ATOM | 7372 | HB3  | PRO | X | 485 | 36.494 | 26.437 | 33.873 | 0.00 | 0.00 |
| ATOM | 7373 | CA   | PRO | X | 485 | 34.449 | 25.910 | 33.501 | 0.00 | 0.00 |
| ATOM | 7374 | HA   | PRO | X | 485 | 34.474 | 26.806 | 32.881 | 0.00 | 0.00 |
| ATOM | 7375 | C    | PRO | X | 485 | 34.240 | 24.686 | 32.562 | 0.00 | 0.00 |
| ATOM | 7376 | O    | PRO | X | 485 | 34.867 | 24.706 | 31.532 | 0.00 | 0.00 |
| ATOM | 7377 | N    | ASN | X | 486 | 33.360 | 23.735 | 32.843 | 0.00 | 0.00 |
| ATOM | 7378 | H    | ASN | X | 486 | 32.792 | 23.902 | 33.662 | 0.00 | 0.00 |
| ATOM | 7379 | CA   | ASN | X | 486 | 33.117 | 22.500 | 32.118 | 0.00 | 0.00 |
| ATOM | 7380 | HA   | ASN | X | 486 | 34.044 | 21.989 | 31.857 | 0.00 | 0.00 |
| ATOM | 7381 | CB   | ASN | X | 486 | 32.168 | 21.582 | 32.999 | 0.00 | 0.00 |
| ATOM | 7382 | HB2  | ASN | X | 486 | 32.561 | 21.585 | 34.015 | 0.00 | 0.00 |
| ATOM | 7383 | HB3  | ASN | X | 486 | 31.196 | 22.065 | 32.904 | 0.00 | 0.00 |
| ATOM | 7384 | CG   | ASN | X | 486 | 32.078 | 20.103 | 32.646 | 0.00 | 0.00 |
| ATOM | 7385 | OD1  | ASN | X | 486 | 32.243 | 19.802 | 31.457 | 0.00 | 0.00 |
| ATOM | 7386 | ND2  | ASN | X | 486 | 31.984 | 19.223 | 33.598 | 0.00 | 0.00 |
| ATOM | 7387 | HD21 | ASN | X | 486 | 32.140 | 18.234 | 33.465 | 0.00 | 0.00 |
| ATOM | 7388 | HD22 | ASN | X | 486 | 31.456 | 19.542 | 34.398 | 0.00 | 0.00 |
| ATOM | 7389 | C    | ASN | X | 486 | 32.389 | 22.842 | 30.762 | 0.00 | 0.00 |
| ATOM | 7390 | O    | ASN | X | 486 | 31.725 | 23.873 | 30.618 | 0.00 | 0.00 |
| ATOM | 7391 | N    | GLU | X | 487 | 32.585 | 21.974 | 29.756 | 0.00 | 0.00 |
| ATOM | 7392 | H    | GLU | X | 487 | 32.913 | 21.053 | 30.010 | 0.00 | 0.00 |
| ATOM | 7393 | CA   | GLU | X | 487 | 31.934 | 22.308 | 28.395 | 0.00 | 0.00 |
| ATOM | 7394 | HA   | GLU | X | 487 | 32.032 | 23.365 | 28.146 | 0.00 | 0.00 |
| ATOM | 7395 | CB   | GLU | X | 487 | 32.604 | 21.451 | 27.304 | 0.00 | 0.00 |
| ATOM | 7396 | HB2  | GLU | X | 487 | 32.371 | 20.425 | 27.592 | 0.00 | 0.00 |
| ATOM | 7397 | HB3  | GLU | X | 487 | 32.027 | 21.586 | 26.388 | 0.00 | 0.00 |
| ATOM | 7398 | CG   | GLU | X | 487 | 34.049 | 21.765 | 26.977 | 0.00 | 0.00 |
| ATOM | 7399 | HG2  | GLU | X | 487 | 34.654 | 21.835 | 27.881 | 0.00 | 0.00 |
| ATOM | 7400 | HG3  | GLU | X | 487 | 34.351 | 20.969 | 26.297 | 0.00 | 0.00 |
| ATOM | 7401 | CD   | GLU | X | 487 | 34.158 | 23.046 | 26.188 | 0.00 | 0.00 |
| ATOM | 7402 | OE1  | GLU | X | 487 | 33.639 | 23.215 | 25.024 | 0.00 | 0.00 |
| ATOM | 7403 | OE2  | GLU | X | 487 | 34.881 | 23.955 | 26.694 | 0.00 | 0.00 |
| ATOM | 7404 | C    | GLU | X | 487 | 30.446 | 21.944 | 28.449 | 0.00 | 0.00 |
| ATOM | 7405 | O    | GLU | X | 487 | 30.157 | 20.893 | 29.013 | 0.00 | 0.00 |
| ATOM | 7406 | N    | PRO | X | 488 | 29.516 | 22.740 | 27.916 | 0.00 | 0.00 |
| ATOM | 7407 | CD   | PRO | X | 488 | 29.791 | 24.017 | 27.203 | 0.00 | 0.00 |
| ATOM | 7408 | HD2  | PRO | X | 488 | 30.606 | 24.097 | 26.484 | 0.00 | 0.00 |
| ATOM | 7409 | HD3  | PRO | X | 488 | 29.932 | 24.734 | 28.012 | 0.00 | 0.00 |
| ATOM | 7410 | CG   | PRO | X | 488 | 28.443 | 24.299 | 26.517 | 0.00 | 0.00 |
| ATOM | 7411 | HG2  | PRO | X | 488 | 28.387 | 23.750 | 25.578 | 0.00 | 0.00 |
| ATOM | 7412 | HG3  | PRO | X | 488 | 28.255 | 25.371 | 26.452 | 0.00 | 0.00 |
| ATOM | 7413 | CB   | PRO | X | 488 | 27.483 | 23.760 | 27.494 | 0.00 | 0.00 |
| ATOM | 7414 | HB2  | PRO | X | 488 | 26.457 | 23.729 | 27.130 | 0.00 | 0.00 |
| ATOM | 7415 | HB3  | PRO | X | 488 | 27.569 | 24.355 | 28.404 | 0.00 | 0.00 |

|      |      |      |     |   |     |        |        |        |      |      |
|------|------|------|-----|---|-----|--------|--------|--------|------|------|
| ATOM | 7416 | CA   | PRO | X | 488 | 28.103 | 22.388 | 27.861 | 0.00 | 0.00 |
| ATOM | 7417 | HA   | PRO | X | 488 | 27.766 | 22.109 | 28.859 | 0.00 | 0.00 |
| ATOM | 7418 | C    | PRO | X | 488 | 27.716 | 21.181 | 26.901 | 0.00 | 0.00 |
| ATOM | 7419 | O    | PRO | X | 488 | 26.686 | 21.268 | 26.212 | 0.00 | 0.00 |
| ATOM | 7420 | N    | ARG | X | 489 | 28.593 | 20.196 | 26.776 | 0.00 | 0.00 |
| ATOM | 7421 | H    | ARG | X | 489 | 29.450 | 20.218 | 27.310 | 0.00 | 0.00 |
| ATOM | 7422 | CA   | ARG | X | 489 | 28.495 | 19.143 | 25.761 | 0.00 | 0.00 |
| ATOM | 7423 | HA   | ARG | X | 489 | 27.527 | 18.649 | 25.846 | 0.00 | 0.00 |
| ATOM | 7424 | CB   | ARG | X | 489 | 28.658 | 19.699 | 24.303 | 0.00 | 0.00 |
| ATOM | 7425 | HB2  | ARG | X | 489 | 28.572 | 18.813 | 23.675 | 0.00 | 0.00 |
| ATOM | 7426 | HB3  | ARG | X | 489 | 27.763 | 20.277 | 24.073 | 0.00 | 0.00 |
| ATOM | 7427 | CG   | ARG | X | 489 | 29.975 | 20.442 | 23.998 | 0.00 | 0.00 |
| ATOM | 7428 | HG2  | ARG | X | 489 | 30.907 | 20.153 | 24.482 | 0.00 | 0.00 |
| ATOM | 7429 | HG3  | ARG | X | 489 | 30.183 | 20.234 | 22.949 | 0.00 | 0.00 |
| ATOM | 7430 | CD   | ARG | X | 489 | 30.008 | 21.947 | 24.160 | 0.00 | 0.00 |
| ATOM | 7431 | HD2  | ARG | X | 489 | 29.103 | 22.364 | 23.718 | 0.00 | 0.00 |
| ATOM | 7432 | HD3  | ARG | X | 489 | 29.845 | 22.189 | 25.210 | 0.00 | 0.00 |
| ATOM | 7433 | NE   | ARG | X | 489 | 31.327 | 22.477 | 23.650 | 0.00 | 0.00 |
| ATOM | 7434 | HE   | ARG | X | 489 | 32.167 | 22.517 | 24.210 | 0.00 | 0.00 |
| ATOM | 7435 | CZ   | ARG | X | 489 | 31.494 | 23.110 | 22.504 | 0.00 | 0.00 |
| ATOM | 7436 | NH1  | ARG | X | 489 | 32.709 | 23.429 | 22.209 | 0.00 | 0.00 |
| ATOM | 7437 | HH11 | ARG | X | 489 | 33.421 | 22.911 | 22.703 | 0.00 | 0.00 |
| ATOM | 7438 | HH12 | ARG | X | 489 | 32.942 | 23.788 | 21.295 | 0.00 | 0.00 |
| ATOM | 7439 | NH2  | ARG | X | 489 | 30.509 | 23.390 | 21.671 | 0.00 | 0.00 |
| ATOM | 7440 | HH21 | ARG | X | 489 | 29.574 | 23.496 | 22.038 | 0.00 | 0.00 |
| ATOM | 7441 | HH22 | ARG | X | 489 | 30.658 | 23.597 | 20.694 | 0.00 | 0.00 |
| ATOM | 7442 | C    | ARG | X | 489 | 29.549 | 18.207 | 26.017 | 0.00 | 0.00 |
| ATOM | 7443 | O    | ARG | X | 489 | 30.591 | 18.532 | 26.510 | 0.00 | 0.00 |
| ATOM | 7444 | N    | ASP | X | 490 | 29.346 | 16.947 | 25.624 | 0.00 | 0.00 |
| ATOM | 7445 | H    | ASP | X | 490 | 28.452 | 16.819 | 25.172 | 0.00 | 0.00 |
| ATOM | 7446 | CA   | ASP | X | 490 | 30.254 | 15.804 | 25.938 | 0.00 | 0.00 |
| ATOM | 7447 | HA   | ASP | X | 490 | 30.408 | 15.704 | 27.013 | 0.00 | 0.00 |
| ATOM | 7448 | CB   | ASP | X | 490 | 29.580 | 14.492 | 25.558 | 0.00 | 0.00 |
| ATOM | 7449 | HB2  | ASP | X | 490 | 28.586 | 14.466 | 26.003 | 0.00 | 0.00 |
| ATOM | 7450 | HB3  | ASP | X | 490 | 29.483 | 14.599 | 24.477 | 0.00 | 0.00 |
| ATOM | 7451 | CG   | ASP | X | 490 | 30.334 | 13.210 | 26.039 | 0.00 | 0.00 |
| ATOM | 7452 | OD1  | ASP | X | 490 | 30.638 | 12.263 | 25.242 | 0.00 | 0.00 |
| ATOM | 7453 | OD2  | ASP | X | 490 | 30.537 | 13.210 | 27.320 | 0.00 | 0.00 |
| ATOM | 7454 | C    | ASP | X | 490 | 31.678 | 15.949 | 25.152 | 0.00 | 0.00 |
| ATOM | 7455 | O    | ASP | X | 490 | 31.705 | 16.054 | 23.914 | 0.00 | 0.00 |
| ATOM | 7456 | N    | PRO | X | 491 | 32.759 | 16.151 | 25.923 | 0.00 | 0.00 |
| ATOM | 7457 | CD   | PRO | X | 491 | 32.925 | 16.050 | 27.352 | 0.00 | 0.00 |
| ATOM | 7458 | HD2  | PRO | X | 491 | 32.893 | 15.044 | 27.770 | 0.00 | 0.00 |
| ATOM | 7459 | HD3  | PRO | X | 491 | 32.146 | 16.684 | 27.776 | 0.00 | 0.00 |
| ATOM | 7460 | CG   | PRO | X | 491 | 34.245 | 16.563 | 27.743 | 0.00 | 0.00 |
| ATOM | 7461 | HG2  | PRO | X | 491 | 35.003 | 15.787 | 27.849 | 0.00 | 0.00 |
| ATOM | 7462 | HG3  | PRO | X | 491 | 34.145 | 17.115 | 28.677 | 0.00 | 0.00 |
| ATOM | 7463 | CB   | PRO | X | 491 | 34.646 | 17.397 | 26.571 | 0.00 | 0.00 |
| ATOM | 7464 | HB2  | PRO | X | 491 | 35.716 | 17.501 | 26.392 | 0.00 | 0.00 |
| ATOM | 7465 | HB3  | PRO | X | 491 | 34.194 | 18.386 | 26.648 | 0.00 | 0.00 |
| ATOM | 7466 | CA   | PRO | X | 491 | 34.027 | 16.591 | 25.451 | 0.00 | 0.00 |
| ATOM | 7467 | HA   | PRO | X | 491 | 33.876 | 17.249 | 24.595 | 0.00 | 0.00 |
| ATOM | 7468 | C    | PRO | X | 491 | 34.867 | 15.423 | 25.090 | 0.00 | 0.00 |
| ATOM | 7469 | O    | PRO | X | 491 | 34.610 | 14.252 | 25.406 | 0.00 | 0.00 |
| ATOM | 7470 | N    | LYS | X | 492 | 35.996 | 15.754 | 24.494 | 0.00 | 0.00 |
| ATOM | 7471 | H    | LYS | X | 492 | 36.267 | 16.718 | 24.361 | 0.00 | 0.00 |
| ATOM | 7472 | CA   | LYS | X | 492 | 37.042 | 14.836 | 24.129 | 0.00 | 0.00 |
| ATOM | 7473 | HA   | LYS | X | 492 | 36.746 | 13.818 | 24.382 | 0.00 | 0.00 |
| ATOM | 7474 | CB   | LYS | X | 492 | 37.325 | 14.892 | 22.585 | 0.00 | 0.00 |
| ATOM | 7475 | HB2  | LYS | X | 492 | 37.837 | 15.849 | 22.478 | 0.00 | 0.00 |
| ATOM | 7476 | HB3  | LYS | X | 492 | 38.035 | 14.188 | 22.151 | 0.00 | 0.00 |
| ATOM | 7477 | CG   | LYS | X | 492 | 36.024 | 15.015 | 21.748 | 0.00 | 0.00 |
| ATOM | 7478 | HG2  | LYS | X | 492 | 35.488 | 14.069 | 21.827 | 0.00 | 0.00 |
| ATOM | 7479 | HG3  | LYS | X | 492 | 35.309 | 15.709 | 22.191 | 0.00 | 0.00 |
| ATOM | 7480 | CD   | LYS | X | 492 | 36.218 | 15.102 | 20.186 | 0.00 | 0.00 |
| ATOM | 7481 | HD2  | LYS | X | 492 | 36.956 | 15.901 | 20.109 | 0.00 | 0.00 |
| ATOM | 7482 | HD3  | LYS | X | 492 | 36.661 | 14.192 | 19.783 | 0.00 | 0.00 |

|      |      |      |     |   |     |        |        |        |      |      |
|------|------|------|-----|---|-----|--------|--------|--------|------|------|
| ATOM | 7483 | CE   | LYS | X | 492 | 34.883 | 15.374 | 19.470 | 0.00 | 0.00 |
| ATOM | 7484 | HE2  | LYS | X | 492 | 34.435 | 16.243 | 19.953 | 0.00 | 0.00 |
| ATOM | 7485 | HE3  | LYS | X | 492 | 35.002 | 15.678 | 18.430 | 0.00 | 0.00 |
| ATOM | 7486 | NZ   | LYS | X | 492 | 33.962 | 14.195 | 19.442 | 0.00 | 0.00 |
| ATOM | 7487 | HZ1  | LYS | X | 492 | 34.456 | 13.428 | 19.010 | 0.00 | 0.00 |
| ATOM | 7488 | HZ2  | LYS | X | 492 | 33.680 | 13.842 | 20.345 | 0.00 | 0.00 |
| ATOM | 7489 | HZ3  | LYS | X | 492 | 33.158 | 14.335 | 18.846 | 0.00 | 0.00 |
| ATOM | 7490 | C    | LYS | X | 492 | 38.252 | 15.046 | 24.970 | 0.00 | 0.00 |
| ATOM | 7491 | O    | LYS | X | 492 | 39.358 | 14.710 | 24.564 | 0.00 | 0.00 |
| ATOM | 7492 | N    | ALA | X | 493 | 38.056 | 15.574 | 26.213 | 0.00 | 0.00 |
| ATOM | 7493 | H    | ALA | X | 493 | 37.084 | 15.767 | 26.410 | 0.00 | 0.00 |
| ATOM | 7494 | CA   | ALA | X | 493 | 39.121 | 15.994 | 27.150 | 0.00 | 0.00 |
| ATOM | 7495 | HA   | ALA | X | 493 | 40.009 | 15.363 | 27.196 | 0.00 | 0.00 |
| ATOM | 7496 | CB   | ALA | X | 493 | 39.520 | 17.402 | 26.718 | 0.00 | 0.00 |
| ATOM | 7497 | HB1  | ALA | X | 493 | 40.363 | 17.760 | 27.310 | 0.00 | 0.00 |
| ATOM | 7498 | HB2  | ALA | X | 493 | 38.654 | 18.060 | 26.793 | 0.00 | 0.00 |
| ATOM | 7499 | HB3  | ALA | X | 493 | 39.903 | 17.490 | 25.702 | 0.00 | 0.00 |
| ATOM | 7500 | C    | ALA | X | 493 | 38.505 | 16.106 | 28.590 | 0.00 | 0.00 |
| ATOM | 7501 | O    | ALA | X | 493 | 37.381 | 16.429 | 28.693 | 0.00 | 0.00 |
| ATOM | 7502 | N    | PRO | X | 494 | 39.323 | 15.855 | 29.666 | 0.00 | 0.00 |
| ATOM | 7503 | CD   | PRO | X | 494 | 40.743 | 15.464 | 29.633 | 0.00 | 0.00 |
| ATOM | 7504 | HD2  | PRO | X | 494 | 41.286 | 16.092 | 28.927 | 0.00 | 0.00 |
| ATOM | 7505 | HD3  | PRO | X | 494 | 40.877 | 14.421 | 29.345 | 0.00 | 0.00 |
| ATOM | 7506 | CG   | PRO | X | 494 | 41.307 | 15.752 | 31.040 | 0.00 | 0.00 |
| ATOM | 7507 | HG2  | PRO | X | 494 | 41.454 | 16.822 | 31.188 | 0.00 | 0.00 |
| ATOM | 7508 | HG3  | PRO | X | 494 | 42.212 | 15.216 | 31.326 | 0.00 | 0.00 |
| ATOM | 7509 | CB   | PRO | X | 494 | 40.016 | 15.384 | 31.847 | 0.00 | 0.00 |
| ATOM | 7510 | HB2  | PRO | X | 494 | 40.112 | 15.860 | 32.822 | 0.00 | 0.00 |
| ATOM | 7511 | HB3  | PRO | X | 494 | 39.896 | 14.301 | 31.894 | 0.00 | 0.00 |
| ATOM | 7512 | CA   | PRO | X | 494 | 38.843 | 15.920 | 31.025 | 0.00 | 0.00 |
| ATOM | 7513 | HA   | PRO | X | 494 | 38.069 | 15.165 | 31.164 | 0.00 | 0.00 |
| ATOM | 7514 | C    | PRO | X | 494 | 38.324 | 17.343 | 31.414 | 0.00 | 0.00 |
| ATOM | 7515 | O    | PRO | X | 494 | 38.606 | 18.349 | 30.817 | 0.00 | 0.00 |
| ATOM | 7516 | N    | GLN | X | 495 | 37.476 | 17.357 | 32.438 | 0.00 | 0.00 |
| ATOM | 7517 | H    | GLN | X | 495 | 37.239 | 16.475 | 32.869 | 0.00 | 0.00 |
| ATOM | 7518 | CA   | GLN | X | 495 | 36.828 | 18.552 | 32.947 | 0.00 | 0.00 |
| ATOM | 7519 | HA   | GLN | X | 495 | 37.284 | 19.387 | 32.416 | 0.00 | 0.00 |
| ATOM | 7520 | CB   | GLN | X | 495 | 35.269 | 18.379 | 32.595 | 0.00 | 0.00 |
| ATOM | 7521 | HB2  | GLN | X | 495 | 34.981 | 17.482 | 33.144 | 0.00 | 0.00 |
| ATOM | 7522 | HB3  | GLN | X | 495 | 34.760 | 19.226 | 33.055 | 0.00 | 0.00 |
| ATOM | 7523 | CG   | GLN | X | 495 | 35.069 | 18.188 | 31.092 | 0.00 | 0.00 |
| ATOM | 7524 | HG2  | GLN | X | 495 | 35.336 | 17.203 | 30.710 | 0.00 | 0.00 |
| ATOM | 7525 | HG3  | GLN | X | 495 | 33.995 | 18.099 | 30.933 | 0.00 | 0.00 |
| ATOM | 7526 | CD   | GLN | X | 495 | 35.461 | 19.319 | 30.206 | 0.00 | 0.00 |
| ATOM | 7527 | OE1  | GLN | X | 495 | 35.397 | 20.510 | 30.529 | 0.00 | 0.00 |
| ATOM | 7528 | NE2  | GLN | X | 495 | 36.123 | 18.991 | 29.107 | 0.00 | 0.00 |
| ATOM | 7529 | HE21 | GLN | X | 495 | 36.455 | 19.719 | 28.490 | 0.00 | 0.00 |
| ATOM | 7530 | HE22 | GLN | X | 495 | 36.363 | 18.035 | 28.887 | 0.00 | 0.00 |
| ATOM | 7531 | C    | GLN | X | 495 | 36.988 | 18.898 | 34.416 | 0.00 | 0.00 |
| ATOM | 7532 | O    | GLN | X | 495 | 37.341 | 17.998 | 35.230 | 0.00 | 0.00 |
| ATOM | 7533 | N    | TRP | X | 496 | 36.809 | 20.212 | 34.661 | 0.00 | 0.00 |
| ATOM | 7534 | H    | TRP | X | 496 | 36.568 | 20.902 | 33.964 | 0.00 | 0.00 |
| ATOM | 7535 | CA   | TRP | X | 496 | 37.179 | 20.820 | 35.929 | 0.00 | 0.00 |
| ATOM | 7536 | HA   | TRP | X | 496 | 38.037 | 20.296 | 36.352 | 0.00 | 0.00 |
| ATOM | 7537 | CB   | TRP | X | 496 | 37.563 | 22.326 | 35.732 | 0.00 | 0.00 |
| ATOM | 7538 | HB2  | TRP | X | 496 | 38.412 | 22.242 | 35.055 | 0.00 | 0.00 |
| ATOM | 7539 | HB3  | TRP | X | 496 | 36.690 | 22.735 | 35.224 | 0.00 | 0.00 |
| ATOM | 7540 | CG   | TRP | X | 496 | 37.997 | 23.331 | 36.802 | 0.00 | 0.00 |
| ATOM | 7541 | CD1  | TRP | X | 496 | 37.936 | 23.125 | 38.107 | 0.00 | 0.00 |
| ATOM | 7542 | HD1  | TRP | X | 496 | 37.703 | 22.126 | 38.443 | 0.00 | 0.00 |
| ATOM | 7543 | NE1  | TRP | X | 496 | 38.588 | 24.139 | 38.769 | 0.00 | 0.00 |
| ATOM | 7544 | HE1  | TRP | X | 496 | 38.691 | 24.128 | 39.774 | 0.00 | 0.00 |
| ATOM | 7545 | CE2  | TRP | X | 496 | 38.933 | 25.171 | 37.947 | 0.00 | 0.00 |
| ATOM | 7546 | CZ2  | TRP | X | 496 | 39.318 | 26.497 | 38.210 | 0.00 | 0.00 |
| ATOM | 7547 | HZ2  | TRP | X | 496 | 39.539 | 26.780 | 39.228 | 0.00 | 0.00 |
| ATOM | 7548 | CH2  | TRP | X | 496 | 39.544 | 27.296 | 37.122 | 0.00 | 0.00 |
| ATOM | 7549 | HH2  | TRP | X | 496 | 39.738 | 28.349 | 37.259 | 0.00 | 0.00 |



|      |      |      |     |   |     |        |        |        |      |      |
|------|------|------|-----|---|-----|--------|--------|--------|------|------|
| ATOM | 7550 | CZ3  | TRP | X | 496 | 39.378 | 26.815 | 35.781 | 0.00 | 0.00 |
| ATOM | 7551 | HZ3  | TRP | X | 496 | 39.634 | 27.508 | 34.993 | 0.00 | 0.00 |
| ATOM | 7552 | CE3  | TRP | X | 496 | 38.826 | 25.530 | 35.573 | 0.00 | 0.00 |
| ATOM | 7553 | HE3  | TRP | X | 496 | 38.630 | 25.359 | 34.525 | 0.00 | 0.00 |
| ATOM | 7554 | CD2  | TRP | X | 496 | 38.504 | 24.689 | 36.691 | 0.00 | 0.00 |
| ATOM | 7555 | C    | TRP | X | 496 | 35.919 | 20.738 | 36.851 | 0.00 | 0.00 |
| ATOM | 7556 | O    | TRP | X | 496 | 34.905 | 21.439 | 36.601 | 0.00 | 0.00 |
| ATOM | 7557 | N    | PRO | X | 497 | 35.951 | 19.964 | 37.954 | 0.00 | 0.00 |
| ATOM | 7558 | CD   | PRO | X | 497 | 37.097 | 19.234 | 38.401 | 0.00 | 0.00 |
| ATOM | 7559 | HD2  | PRO | X | 497 | 38.039 | 19.781 | 38.358 | 0.00 | 0.00 |
| ATOM | 7560 | HD3  | PRO | X | 497 | 37.146 | 18.363 | 37.748 | 0.00 | 0.00 |
| ATOM | 7561 | CG   | PRO | X | 497 | 36.852 | 18.832 | 39.874 | 0.00 | 0.00 |
| ATOM | 7562 | HG2  | PRO | X | 497 | 37.069 | 19.625 | 40.589 | 0.00 | 0.00 |
| ATOM | 7563 | HG3  | PRO | X | 497 | 37.200 | 17.838 | 40.155 | 0.00 | 0.00 |
| ATOM | 7564 | CB   | PRO | X | 497 | 35.321 | 18.654 | 39.690 | 0.00 | 0.00 |
| ATOM | 7565 | HB2  | PRO | X | 497 | 34.730 | 18.585 | 40.603 | 0.00 | 0.00 |
| ATOM | 7566 | HB3  | PRO | X | 497 | 35.200 | 17.813 | 39.007 | 0.00 | 0.00 |
| ATOM | 7567 | CA   | PRO | X | 497 | 34.934 | 19.927 | 38.951 | 0.00 | 0.00 |
| ATOM | 7568 | HA   | PRO | X | 497 | 33.987 | 19.847 | 38.417 | 0.00 | 0.00 |
| ATOM | 7569 | C    | PRO | X | 497 | 34.781 | 21.116 | 39.928 | 0.00 | 0.00 |
| ATOM | 7570 | O    | PRO | X | 497 | 35.751 | 21.838 | 40.167 | 0.00 | 0.00 |
| ATOM | 7571 | N    | PRO | X | 498 | 33.594 | 21.382 | 40.476 | 0.00 | 0.00 |
| ATOM | 7572 | CD   | PRO | X | 498 | 32.367 | 20.629 | 40.298 | 0.00 | 0.00 |
| ATOM | 7573 | HD2  | PRO | X | 498 | 32.600 | 19.570 | 40.184 | 0.00 | 0.00 |
| ATOM | 7574 | HD3  | PRO | X | 498 | 31.797 | 21.005 | 39.448 | 0.00 | 0.00 |
| ATOM | 7575 | CG   | PRO | X | 498 | 31.560 | 20.807 | 41.618 | 0.00 | 0.00 |
| ATOM | 7576 | HG2  | PRO | X | 498 | 31.748 | 20.019 | 42.348 | 0.00 | 0.00 |
| ATOM | 7577 | HG3  | PRO | X | 498 | 30.488 | 20.817 | 41.421 | 0.00 | 0.00 |
| ATOM | 7578 | CB   | PRO | X | 498 | 32.026 | 22.157 | 42.123 | 0.00 | 0.00 |
| ATOM | 7579 | HB2  | PRO | X | 498 | 31.921 | 22.103 | 43.207 | 0.00 | 0.00 |
| ATOM | 7580 | HB3  | PRO | X | 498 | 31.413 | 22.923 | 41.649 | 0.00 | 0.00 |
| ATOM | 7581 | CA   | PRO | X | 498 | 33.528 | 22.246 | 41.648 | 0.00 | 0.00 |
| ATOM | 7582 | HA   | PRO | X | 498 | 33.792 | 23.210 | 41.211 | 0.00 | 0.00 |
| ATOM | 7583 | C    | PRO | X | 498 | 34.528 | 21.906 | 42.818 | 0.00 | 0.00 |
| ATOM | 7584 | O    | PRO | X | 498 | 34.721 | 20.742 | 43.111 | 0.00 | 0.00 |
| ATOM | 7585 | N    | TYR | X | 499 | 34.951 | 22.970 | 43.464 | 0.00 | 0.00 |
| ATOM | 7586 | H    | TYR | X | 499 | 34.645 | 23.869 | 43.120 | 0.00 | 0.00 |
| ATOM | 7587 | CA   | TYR | X | 499 | 35.497 | 22.936 | 44.794 | 0.00 | 0.00 |
| ATOM | 7588 | HA   | TYR | X | 499 | 36.191 | 22.114 | 44.966 | 0.00 | 0.00 |
| ATOM | 7589 | CB   | TYR | X | 499 | 36.262 | 24.261 | 44.975 | 0.00 | 0.00 |
| ATOM | 7590 | HB2  | TYR | X | 499 | 37.022 | 24.298 | 44.195 | 0.00 | 0.00 |
| ATOM | 7591 | HB3  | TYR | X | 499 | 35.544 | 25.069 | 44.844 | 0.00 | 0.00 |
| ATOM | 7592 | CG   | TYR | X | 499 | 36.881 | 24.360 | 46.372 | 0.00 | 0.00 |
| ATOM | 7593 | CD1  | TYR | X | 499 | 36.173 | 24.821 | 47.513 | 0.00 | 0.00 |
| ATOM | 7594 | HD1  | TYR | X | 499 | 35.137 | 25.105 | 47.407 | 0.00 | 0.00 |
| ATOM | 7595 | CE1  | TYR | X | 499 | 36.787 | 24.913 | 48.790 | 0.00 | 0.00 |
| ATOM | 7596 | HE1  | TYR | X | 499 | 36.156 | 25.252 | 49.599 | 0.00 | 0.00 |
| ATOM | 7597 | CZ   | TYR | X | 499 | 38.193 | 24.737 | 48.893 | 0.00 | 0.00 |
| ATOM | 7598 | OH   | TYR | X | 499 | 38.918 | 25.144 | 49.971 | 0.00 | 0.00 |
| ATOM | 7599 | HH   | TYR | X | 499 | 38.380 | 25.652 | 50.583 | 0.00 | 0.00 |
| ATOM | 7600 | CE2  | TYR | X | 499 | 38.913 | 24.282 | 47.783 | 0.00 | 0.00 |
| ATOM | 7601 | HE2  | TYR | X | 499 | 39.977 | 24.133 | 47.890 | 0.00 | 0.00 |
| ATOM | 7602 | CD2  | TYR | X | 499 | 38.201 | 23.996 | 46.575 | 0.00 | 0.00 |
| ATOM | 7603 | HD2  | TYR | X | 499 | 38.803 | 23.633 | 45.754 | 0.00 | 0.00 |
| ATOM | 7604 | C    | TYR | X | 499 | 34.342 | 22.866 | 45.781 | 0.00 | 0.00 |
| ATOM | 7605 | O    | TYR | X | 499 | 33.389 | 23.631 | 45.668 | 0.00 | 0.00 |
| ATOM | 7606 | N    | THR | X | 500 | 34.461 | 22.170 | 46.874 | 0.00 | 0.00 |
| ATOM | 7607 | H    | THR | X | 500 | 35.323 | 21.692 | 47.090 | 0.00 | 0.00 |
| ATOM | 7608 | CA   | THR | X | 500 | 33.537 | 21.978 | 47.976 | 0.00 | 0.00 |
| ATOM | 7609 | HA   | THR | X | 500 | 32.878 | 22.841 | 48.068 | 0.00 | 0.00 |
| ATOM | 7610 | CB   | THR | X | 500 | 32.625 | 20.739 | 47.790 | 0.00 | 0.00 |
| ATOM | 7611 | HB   | THR | X | 500 | 32.071 | 20.511 | 48.701 | 0.00 | 0.00 |
| ATOM | 7612 | CG2  | THR | X | 500 | 31.659 | 21.003 | 46.593 | 0.00 | 0.00 |
| ATOM | 7613 | HG21 | THR | X | 500 | 30.952 | 20.177 | 46.663 | 0.00 | 0.00 |
| ATOM | 7614 | HG22 | THR | X | 500 | 32.212 | 20.888 | 45.661 | 0.00 | 0.00 |
| ATOM | 7615 | HG23 | THR | X | 500 | 31.213 | 21.996 | 46.642 | 0.00 | 0.00 |
| ATOM | 7616 | OG1  | THR | X | 500 | 33.403 | 19.602 | 47.333 | 0.00 | 0.00 |

|      |      |      |     |   |     |        |        |        |      |      |
|------|------|------|-----|---|-----|--------|--------|--------|------|------|
| ATOM | 7617 | HG1  | THR | X | 500 | 32.905 | 18.810 | 47.547 | 0.00 | 0.00 |
| ATOM | 7618 | C    | THR | X | 500 | 34.219 | 21.755 | 49.273 | 0.00 | 0.00 |
| ATOM | 7619 | O    | THR | X | 500 | 35.380 | 21.298 | 49.307 | 0.00 | 0.00 |
| ATOM | 7620 | N    | ALA | X | 501 | 33.656 | 22.136 | 50.445 | 0.00 | 0.00 |
| ATOM | 7621 | H    | ALA | X | 501 | 32.712 | 22.484 | 50.359 | 0.00 | 0.00 |
| ATOM | 7622 | CA   | ALA | X | 501 | 34.333 | 22.333 | 51.786 | 0.00 | 0.00 |
| ATOM | 7623 | HA   | ALA | X | 501 | 35.164 | 23.018 | 51.620 | 0.00 | 0.00 |
| ATOM | 7624 | CB   | ALA | X | 501 | 33.246 | 22.985 | 52.655 | 0.00 | 0.00 |
| ATOM | 7625 | HB1  | ALA | X | 501 | 33.049 | 23.961 | 52.211 | 0.00 | 0.00 |
| ATOM | 7626 | HB2  | ALA | X | 501 | 33.693 | 23.069 | 53.646 | 0.00 | 0.00 |
| ATOM | 7627 | HB3  | ALA | X | 501 | 32.299 | 22.446 | 52.651 | 0.00 | 0.00 |
| ATOM | 7628 | C    | ALA | X | 501 | 34.998 | 21.143 | 52.528 | 0.00 | 0.00 |
| ATOM | 7629 | O    | ALA | X | 501 | 35.651 | 21.329 | 53.542 | 0.00 | 0.00 |
| ATOM | 7630 | N    | GLY | X | 502 | 34.795 | 19.911 | 51.952 | 0.00 | 0.00 |
| ATOM | 7631 | H    | GLY | X | 502 | 34.174 | 19.946 | 51.156 | 0.00 | 0.00 |
| ATOM | 7632 | CA   | GLY | X | 502 | 35.205 | 18.645 | 52.471 | 0.00 | 0.00 |
| ATOM | 7633 | HA2  | GLY | X | 502 | 35.563 | 18.775 | 53.493 | 0.00 | 0.00 |
| ATOM | 7634 | HA3  | GLY | X | 502 | 34.424 | 17.898 | 52.329 | 0.00 | 0.00 |
| ATOM | 7635 | C    | GLY | X | 502 | 36.247 | 18.084 | 51.575 | 0.00 | 0.00 |
| ATOM | 7636 | O    | GLY | X | 502 | 37.441 | 17.979 | 51.931 | 0.00 | 0.00 |
| ATOM | 7637 | N    | ALA | X | 503 | 35.839 | 17.687 | 50.382 | 0.00 | 0.00 |
| ATOM | 7638 | H    | ALA | X | 503 | 34.840 | 17.712 | 50.241 | 0.00 | 0.00 |
| ATOM | 7639 | CA   | ALA | X | 503 | 36.719 | 17.177 | 49.326 | 0.00 | 0.00 |
| ATOM | 7640 | HA   | ALA | X | 503 | 37.009 | 16.193 | 49.697 | 0.00 | 0.00 |
| ATOM | 7641 | CB   | ALA | X | 503 | 35.795 | 16.853 | 48.094 | 0.00 | 0.00 |
| ATOM | 7642 | HB1  | ALA | X | 503 | 35.196 | 15.953 | 48.235 | 0.00 | 0.00 |
| ATOM | 7643 | HB2  | ALA | X | 503 | 36.405 | 16.829 | 47.191 | 0.00 | 0.00 |
| ATOM | 7644 | HB3  | ALA | X | 503 | 35.013 | 17.607 | 48.010 | 0.00 | 0.00 |
| ATOM | 7645 | C    | ALA | X | 503 | 37.889 | 18.165 | 48.990 | 0.00 | 0.00 |
| ATOM | 7646 | O    | ALA | X | 503 | 39.056 | 17.738 | 48.743 | 0.00 | 0.00 |
| ATOM | 7647 | N    | GLN | X | 504 | 37.582 | 19.459 | 48.730 | 0.00 | 0.00 |
| ATOM | 7648 | H    | GLN | X | 504 | 36.587 | 19.601 | 48.831 | 0.00 | 0.00 |
| ATOM | 7649 | CA   | GLN | X | 504 | 38.470 | 20.584 | 48.658 | 0.00 | 0.00 |
| ATOM | 7650 | HA   | GLN | X | 504 | 37.819 | 21.451 | 48.543 | 0.00 | 0.00 |
| ATOM | 7651 | CB   | GLN | X | 504 | 39.297 | 20.717 | 50.026 | 0.00 | 0.00 |
| ATOM | 7652 | HB2  | GLN | X | 504 | 39.840 | 19.776 | 50.109 | 0.00 | 0.00 |
| ATOM | 7653 | HB3  | GLN | X | 504 | 40.023 | 21.525 | 49.928 | 0.00 | 0.00 |
| ATOM | 7654 | CG   | GLN | X | 504 | 38.507 | 21.185 | 51.260 | 0.00 | 0.00 |
| ATOM | 7655 | HG2  | GLN | X | 504 | 38.234 | 22.213 | 51.020 | 0.00 | 0.00 |
| ATOM | 7656 | HG3  | GLN | X | 504 | 37.623 | 20.578 | 51.456 | 0.00 | 0.00 |
| ATOM | 7657 | CD   | GLN | X | 504 | 39.286 | 21.238 | 52.574 | 0.00 | 0.00 |
| ATOM | 7658 | OE1  | GLN | X | 504 | 40.522 | 21.307 | 52.673 | 0.00 | 0.00 |
| ATOM | 7659 | NE2  | GLN | X | 504 | 38.614 | 21.342 | 53.656 | 0.00 | 0.00 |
| ATOM | 7660 | HE21 | GLN | X | 504 | 39.048 | 21.068 | 54.526 | 0.00 | 0.00 |
| ATOM | 7661 | HE22 | GLN | X | 504 | 37.621 | 21.519 | 53.697 | 0.00 | 0.00 |
| ATOM | 7662 | C    | GLN | X | 504 | 39.314 | 20.511 | 47.396 | 0.00 | 0.00 |
| ATOM | 7663 | O    | GLN | X | 504 | 40.560 | 20.552 | 47.437 | 0.00 | 0.00 |
| ATOM | 7664 | N    | GLN | X | 505 | 38.660 | 20.271 | 46.225 | 0.00 | 0.00 |
| ATOM | 7665 | H    | GLN | X | 505 | 37.650 | 20.260 | 46.219 | 0.00 | 0.00 |
| ATOM | 7666 | CA   | GLN | X | 505 | 39.384 | 19.988 | 44.970 | 0.00 | 0.00 |
| ATOM | 7667 | HA   | GLN | X | 505 | 40.305 | 19.489 | 45.271 | 0.00 | 0.00 |
| ATOM | 7668 | CB   | GLN | X | 505 | 38.528 | 18.908 | 44.204 | 0.00 | 0.00 |
| ATOM | 7669 | HB2  | GLN | X | 505 | 37.484 | 19.206 | 44.108 | 0.00 | 0.00 |
| ATOM | 7670 | HB3  | GLN | X | 505 | 38.948 | 18.954 | 43.200 | 0.00 | 0.00 |
| ATOM | 7671 | CG   | GLN | X | 505 | 38.647 | 17.466 | 44.675 | 0.00 | 0.00 |
| ATOM | 7672 | HG2  | GLN | X | 505 | 39.662 | 17.200 | 44.380 | 0.00 | 0.00 |
| ATOM | 7673 | HG3  | GLN | X | 505 | 38.449 | 17.448 | 45.747 | 0.00 | 0.00 |
| ATOM | 7674 | CD   | GLN | X | 505 | 37.507 | 16.576 | 44.148 | 0.00 | 0.00 |
| ATOM | 7675 | OE1  | GLN | X | 505 | 36.282 | 16.731 | 44.320 | 0.00 | 0.00 |
| ATOM | 7676 | NE2  | GLN | X | 505 | 37.945 | 15.577 | 43.403 | 0.00 | 0.00 |
| ATOM | 7677 | HE21 | GLN | X | 505 | 37.137 | 15.086 | 43.049 | 0.00 | 0.00 |
| ATOM | 7678 | HE22 | GLN | X | 505 | 38.930 | 15.368 | 43.317 | 0.00 | 0.00 |
| ATOM | 7679 | C    | GLN | X | 505 | 39.777 | 21.129 | 44.013 | 0.00 | 0.00 |
| ATOM | 7680 | O    | GLN | X | 505 | 38.925 | 21.992 | 43.776 | 0.00 | 0.00 |
| ATOM | 7681 | N    | TYR | X | 506 | 41.017 | 21.173 | 43.521 | 0.00 | 0.00 |
| ATOM | 7682 | H    | TYR | X | 506 | 41.594 | 20.380 | 43.762 | 0.00 | 0.00 |
| ATOM | 7683 | CA   | TYR | X | 506 | 41.615 | 22.283 | 42.814 | 0.00 | 0.00 |

|      |      |      |     |   |     |        |        |        |      |      |
|------|------|------|-----|---|-----|--------|--------|--------|------|------|
| ATOM | 7684 | HA   | TYR | X | 506 | 40.762 | 22.817 | 42.396 | 0.00 | 0.00 |
| ATOM | 7685 | CB   | TYR | X | 506 | 42.301 | 23.240 | 43.798 | 0.00 | 0.00 |
| ATOM | 7686 | HB2  | TYR | X | 506 | 42.496 | 24.208 | 43.337 | 0.00 | 0.00 |
| ATOM | 7687 | HB3  | TYR | X | 506 | 41.602 | 23.400 | 44.619 | 0.00 | 0.00 |
| ATOM | 7688 | CG   | TYR | X | 506 | 43.629 | 22.747 | 44.376 | 0.00 | 0.00 |
| ATOM | 7689 | CD1  | TYR | X | 506 | 43.641 | 21.700 | 45.339 | 0.00 | 0.00 |
| ATOM | 7690 | HD1  | TYR | X | 506 | 42.690 | 21.248 | 45.579 | 0.00 | 0.00 |
| ATOM | 7691 | CE1  | TYR | X | 506 | 44.834 | 21.342 | 45.947 | 0.00 | 0.00 |
| ATOM | 7692 | HE1  | TYR | X | 506 | 44.875 | 20.602 | 46.733 | 0.00 | 0.00 |
| ATOM | 7693 | CZ   | TYR | X | 506 | 46.079 | 21.936 | 45.580 | 0.00 | 0.00 |
| ATOM | 7694 | OH   | TYR | X | 506 | 47.242 | 21.382 | 45.993 | 0.00 | 0.00 |
| ATOM | 7695 | HH   | TYR | X | 506 | 47.012 | 20.584 | 46.476 | 0.00 | 0.00 |
| ATOM | 7696 | CE2  | TYR | X | 506 | 46.046 | 22.958 | 44.620 | 0.00 | 0.00 |
| ATOM | 7697 | HE2  | TYR | X | 506 | 47.020 | 23.261 | 44.265 | 0.00 | 0.00 |
| ATOM | 7698 | CD2  | TYR | X | 506 | 44.844 | 23.390 | 44.072 | 0.00 | 0.00 |
| ATOM | 7699 | HD2  | TYR | X | 506 | 44.927 | 24.186 | 43.346 | 0.00 | 0.00 |
| ATOM | 7700 | C    | TYR | X | 506 | 42.478 | 21.754 | 41.674 | 0.00 | 0.00 |
| ATOM | 7701 | O    | TYR | X | 506 | 43.284 | 20.873 | 41.868 | 0.00 | 0.00 |
| ATOM | 7702 | N    | VAL | X | 507 | 42.454 | 22.368 | 40.466 | 0.00 | 0.00 |
| ATOM | 7703 | H    | VAL | X | 507 | 41.786 | 23.069 | 40.178 | 0.00 | 0.00 |
| ATOM | 7704 | CA   | VAL | X | 507 | 42.970 | 21.650 | 39.254 | 0.00 | 0.00 |
| ATOM | 7705 | HA   | VAL | X | 507 | 42.986 | 20.584 | 39.483 | 0.00 | 0.00 |
| ATOM | 7706 | CB   | VAL | X | 507 | 42.110 | 21.883 | 37.999 | 0.00 | 0.00 |
| ATOM | 7707 | HB   | VAL | X | 507 | 42.553 | 21.285 | 37.202 | 0.00 | 0.00 |
| ATOM | 7708 | CG1  | VAL | X | 507 | 40.724 | 21.344 | 38.209 | 0.00 | 0.00 |
| ATOM | 7709 | HG11 | VAL | X | 507 | 40.104 | 21.415 | 37.316 | 0.00 | 0.00 |
| ATOM | 7710 | HG12 | VAL | X | 507 | 40.510 | 20.308 | 38.473 | 0.00 | 0.00 |
| ATOM | 7711 | HG13 | VAL | X | 507 | 40.098 | 21.933 | 38.880 | 0.00 | 0.00 |
| ATOM | 7712 | CG2  | VAL | X | 507 | 42.135 | 23.353 | 37.531 | 0.00 | 0.00 |
| ATOM | 7713 | HG21 | VAL | X | 507 | 43.130 | 23.686 | 37.236 | 0.00 | 0.00 |
| ATOM | 7714 | HG22 | VAL | X | 507 | 41.851 | 23.993 | 38.366 | 0.00 | 0.00 |
| ATOM | 7715 | HG23 | VAL | X | 507 | 41.452 | 23.509 | 36.696 | 0.00 | 0.00 |
| ATOM | 7716 | C    | VAL | X | 507 | 44.370 | 22.073 | 39.051 | 0.00 | 0.00 |
| ATOM | 7717 | O    | VAL | X | 507 | 44.871 | 23.129 | 39.494 | 0.00 | 0.00 |
| ATOM | 7718 | N    | SER | X | 508 | 45.107 | 21.204 | 38.383 | 0.00 | 0.00 |
| ATOM | 7719 | H    | SER | X | 508 | 44.610 | 20.427 | 37.973 | 0.00 | 0.00 |
| ATOM | 7720 | CA   | SER | X | 508 | 46.399 | 21.569 | 37.654 | 0.00 | 0.00 |
| ATOM | 7721 | HA   | SER | X | 508 | 46.988 | 22.344 | 38.144 | 0.00 | 0.00 |
| ATOM | 7722 | CB   | SER | X | 508 | 47.419 | 20.395 | 37.540 | 0.00 | 0.00 |
| ATOM | 7723 | HB2  | SER | X | 508 | 46.861 | 19.570 | 37.096 | 0.00 | 0.00 |
| ATOM | 7724 | HB3  | SER | X | 508 | 48.234 | 20.844 | 36.971 | 0.00 | 0.00 |
| ATOM | 7725 | OG   | SER | X | 508 | 48.025 | 20.068 | 38.761 | 0.00 | 0.00 |
| ATOM | 7726 | HG   | SER | X | 508 | 48.621 | 20.745 | 39.089 | 0.00 | 0.00 |
| ATOM | 7727 | C    | SER | X | 508 | 46.211 | 22.271 | 36.317 | 0.00 | 0.00 |
| ATOM | 7728 | O    | SER | X | 508 | 45.410 | 21.840 | 35.493 | 0.00 | 0.00 |
| ATOM | 7729 | N    | LEU | X | 509 | 46.813 | 23.434 | 36.023 | 0.00 | 0.00 |
| ATOM | 7730 | H    | LEU | X | 509 | 47.342 | 23.958 | 36.706 | 0.00 | 0.00 |
| ATOM | 7731 | CA   | LEU | X | 509 | 46.726 | 24.042 | 34.699 | 0.00 | 0.00 |
| ATOM | 7732 | HA   | LEU | X | 509 | 46.211 | 23.336 | 34.047 | 0.00 | 0.00 |
| ATOM | 7733 | CB   | LEU | X | 509 | 46.044 | 25.412 | 34.640 | 0.00 | 0.00 |
| ATOM | 7734 | HB2  | LEU | X | 509 | 46.731 | 26.081 | 35.159 | 0.00 | 0.00 |
| ATOM | 7735 | HB3  | LEU | X | 509 | 46.057 | 25.740 | 33.601 | 0.00 | 0.00 |
| ATOM | 7736 | CG   | LEU | X | 509 | 44.610 | 25.524 | 35.124 | 0.00 | 0.00 |
| ATOM | 7737 | HG   | LEU | X | 509 | 44.668 | 25.243 | 36.175 | 0.00 | 0.00 |
| ATOM | 7738 | CD1  | LEU | X | 509 | 44.090 | 26.993 | 35.126 | 0.00 | 0.00 |
| ATOM | 7739 | HD11 | LEU | X | 509 | 44.898 | 27.590 | 35.549 | 0.00 | 0.00 |
| ATOM | 7740 | HD12 | LEU | X | 509 | 43.177 | 27.073 | 35.717 | 0.00 | 0.00 |
| ATOM | 7741 | HD13 | LEU | X | 509 | 43.985 | 27.277 | 34.079 | 0.00 | 0.00 |
| ATOM | 7742 | CD2  | LEU | X | 509 | 43.632 | 24.554 | 34.380 | 0.00 | 0.00 |
| ATOM | 7743 | HD21 | LEU | X | 509 | 43.950 | 24.272 | 33.376 | 0.00 | 0.00 |
| ATOM | 7744 | HD22 | LEU | X | 509 | 43.686 | 23.589 | 34.885 | 0.00 | 0.00 |
| ATOM | 7745 | HD23 | LEU | X | 509 | 42.627 | 24.918 | 34.594 | 0.00 | 0.00 |
| ATOM | 7746 | C    | LEU | X | 509 | 48.131 | 24.094 | 34.144 | 0.00 | 0.00 |
| ATOM | 7747 | O    | LEU | X | 509 | 48.984 | 24.747 | 34.772 | 0.00 | 0.00 |
| ATOM | 7748 | N    | ASP | X | 510 | 48.326 | 23.388 | 33.067 | 0.00 | 0.00 |
| ATOM | 7749 | H    | ASP | X | 510 | 47.523 | 22.939 | 32.651 | 0.00 | 0.00 |
| ATOM | 7750 | CA   | ASP | X | 510 | 49.647 | 23.059 | 32.524 | 0.00 | 0.00 |

|      |      |      |     |   |     |        |        |        |      |      |
|------|------|------|-----|---|-----|--------|--------|--------|------|------|
| ATOM | 7751 | HA   | ASP | X | 510 | 50.270 | 23.944 | 32.398 | 0.00 | 0.00 |
| ATOM | 7752 | CB   | ASP | X | 510 | 50.274 | 22.033 | 33.449 | 0.00 | 0.00 |
| ATOM | 7753 | HB2  | ASP | X | 510 | 50.251 | 22.404 | 34.474 | 0.00 | 0.00 |
| ATOM | 7754 | HB3  | ASP | X | 510 | 49.615 | 21.178 | 33.297 | 0.00 | 0.00 |
| ATOM | 7755 | CG   | ASP | X | 510 | 51.646 | 21.495 | 33.109 | 0.00 | 0.00 |
| ATOM | 7756 | OD1  | ASP | X | 510 | 51.787 | 20.228 | 33.100 | 0.00 | 0.00 |
| ATOM | 7757 | OD2  | ASP | X | 510 | 52.503 | 22.268 | 32.563 | 0.00 | 0.00 |
| ATOM | 7758 | C    | ASP | X | 510 | 49.570 | 22.383 | 31.152 | 0.00 | 0.00 |
| ATOM | 7759 | O    | ASP | X | 510 | 48.513 | 21.915 | 30.767 | 0.00 | 0.00 |
| ATOM | 7760 | N    | LEU | X | 511 | 50.616 | 22.122 | 30.413 | 0.00 | 0.00 |
| ATOM | 7761 | H    | LEU | X | 511 | 51.480 | 22.512 | 30.761 | 0.00 | 0.00 |
| ATOM | 7762 | CA   | LEU | X | 511 | 50.620 | 21.536 | 29.086 | 0.00 | 0.00 |
| ATOM | 7763 | HA   | LEU | X | 511 | 49.930 | 22.159 | 28.516 | 0.00 | 0.00 |
| ATOM | 7764 | CB   | LEU | X | 511 | 52.060 | 21.675 | 28.546 | 0.00 | 0.00 |
| ATOM | 7765 | HB2  | LEU | X | 511 | 52.739 | 21.129 | 29.202 | 0.00 | 0.00 |
| ATOM | 7766 | HB3  | LEU | X | 511 | 52.192 | 21.214 | 27.567 | 0.00 | 0.00 |
| ATOM | 7767 | CG   | LEU | X | 511 | 52.637 | 23.118 | 28.460 | 0.00 | 0.00 |
| ATOM | 7768 | HG   | LEU | X | 511 | 52.570 | 23.595 | 29.437 | 0.00 | 0.00 |
| ATOM | 7769 | CD1  | LEU | X | 511 | 54.102 | 23.034 | 28.009 | 0.00 | 0.00 |
| ATOM | 7770 | HD11 | LEU | X | 511 | 54.607 | 23.996 | 28.089 | 0.00 | 0.00 |
| ATOM | 7771 | HD12 | LEU | X | 511 | 54.089 | 22.732 | 26.961 | 0.00 | 0.00 |
| ATOM | 7772 | HD13 | LEU | X | 511 | 54.779 | 22.325 | 28.487 | 0.00 | 0.00 |
| ATOM | 7773 | CD2  | LEU | X | 511 | 51.805 | 23.975 | 27.581 | 0.00 | 0.00 |
| ATOM | 7774 | HD21 | LEU | X | 511 | 50.955 | 24.351 | 28.150 | 0.00 | 0.00 |
| ATOM | 7775 | HD22 | LEU | X | 511 | 52.465 | 24.776 | 27.247 | 0.00 | 0.00 |
| ATOM | 7776 | HD23 | LEU | X | 511 | 51.459 | 23.477 | 26.675 | 0.00 | 0.00 |
| ATOM | 7777 | C    | LEU | X | 511 | 50.218 | 20.149 | 29.017 | 0.00 | 0.00 |
| ATOM | 7778 | O    | LEU | X | 511 | 49.745 | 19.778 | 27.961 | 0.00 | 0.00 |
| ATOM | 7779 | N    | ARG | X | 512 | 50.283 | 19.365 | 30.149 | 0.00 | 0.00 |
| ATOM | 7780 | H    | ARG | X | 512 | 50.614 | 19.784 | 31.007 | 0.00 | 0.00 |
| ATOM | 7781 | CA   | ARG | X | 512 | 49.600 | 18.015 | 30.249 | 0.00 | 0.00 |
| ATOM | 7782 | HA   | ARG | X | 512 | 49.772 | 17.567 | 29.270 | 0.00 | 0.00 |
| ATOM | 7783 | CB   | ARG | X | 512 | 50.176 | 17.125 | 31.392 | 0.00 | 0.00 |
| ATOM | 7784 | HB2  | ARG | X | 512 | 49.957 | 16.081 | 31.168 | 0.00 | 0.00 |
| ATOM | 7785 | HB3  | ARG | X | 512 | 51.245 | 17.315 | 31.492 | 0.00 | 0.00 |
| ATOM | 7786 | CG   | ARG | X | 512 | 49.565 | 17.365 | 32.783 | 0.00 | 0.00 |
| ATOM | 7787 | HG2  | ARG | X | 512 | 49.290 | 18.417 | 32.855 | 0.00 | 0.00 |
| ATOM | 7788 | HG3  | ARG | X | 512 | 48.750 | 16.649 | 32.888 | 0.00 | 0.00 |
| ATOM | 7789 | CD   | ARG | X | 512 | 50.662 | 17.063 | 33.851 | 0.00 | 0.00 |
| ATOM | 7790 | HD2  | ARG | X | 512 | 50.998 | 16.047 | 33.645 | 0.00 | 0.00 |
| ATOM | 7791 | HD3  | ARG | X | 512 | 51.542 | 17.663 | 33.622 | 0.00 | 0.00 |
| ATOM | 7792 | NE   | ARG | X | 512 | 50.197 | 17.177 | 35.247 | 0.00 | 0.00 |
| ATOM | 7793 | HE   | ARG | X | 512 | 50.100 | 16.309 | 35.755 | 0.00 | 0.00 |
| ATOM | 7794 | CZ   | ARG | X | 512 | 50.244 | 18.256 | 36.030 | 0.00 | 0.00 |
| ATOM | 7795 | NH1  | ARG | X | 512 | 50.754 | 19.430 | 35.695 | 0.00 | 0.00 |
| ATOM | 7796 | HH11 | ARG | X | 512 | 51.173 | 19.603 | 34.792 | 0.00 | 0.00 |
| ATOM | 7797 | HH12 | ARG | X | 512 | 50.823 | 20.174 | 36.374 | 0.00 | 0.00 |
| ATOM | 7798 | NH2  | ARG | X | 512 | 49.805 | 18.059 | 37.238 | 0.00 | 0.00 |
| ATOM | 7799 | HH21 | ARG | X | 512 | 49.419 | 17.149 | 37.443 | 0.00 | 0.00 |
| ATOM | 7800 | HH22 | ARG | X | 512 | 49.735 | 18.817 | 37.901 | 0.00 | 0.00 |
| ATOM | 7801 | C    | ARG | X | 512 | 48.041 | 18.067 | 30.387 | 0.00 | 0.00 |
| ATOM | 7802 | O    | ARG | X | 512 | 47.664 | 19.040 | 30.989 | 0.00 | 0.00 |
| ATOM | 7803 | N    | PRO | X | 513 | 47.172 | 17.119 | 29.980 | 0.00 | 0.00 |
| ATOM | 7804 | CD   | PRO | X | 513 | 47.430 | 16.132 | 28.980 | 0.00 | 0.00 |
| ATOM | 7805 | HD2  | PRO | X | 513 | 47.893 | 15.248 | 29.418 | 0.00 | 0.00 |
| ATOM | 7806 | HD3  | PRO | X | 513 | 48.007 | 16.564 | 28.162 | 0.00 | 0.00 |
| ATOM | 7807 | CG   | PRO | X | 513 | 46.063 | 15.627 | 28.501 | 0.00 | 0.00 |
| ATOM | 7808 | HG2  | PRO | X | 513 | 45.901 | 14.558 | 28.363 | 0.00 | 0.00 |
| ATOM | 7809 | HG3  | PRO | X | 513 | 45.827 | 15.970 | 27.493 | 0.00 | 0.00 |
| ATOM | 7810 | CB   | PRO | X | 513 | 45.014 | 16.154 | 29.435 | 0.00 | 0.00 |
| ATOM | 7811 | HB2  | PRO | X | 513 | 44.645 | 15.386 | 30.115 | 0.00 | 0.00 |
| ATOM | 7812 | HB3  | PRO | X | 513 | 44.140 | 16.462 | 28.860 | 0.00 | 0.00 |
| ATOM | 7813 | CA   | PRO | X | 513 | 45.704 | 17.228 | 30.213 | 0.00 | 0.00 |
| ATOM | 7814 | HA   | PRO | X | 513 | 45.354 | 18.135 | 29.719 | 0.00 | 0.00 |
| ATOM | 7815 | C    | PRO | X | 513 | 45.331 | 17.329 | 31.689 | 0.00 | 0.00 |
| ATOM | 7816 | O    | PRO | X | 513 | 46.158 | 17.060 | 32.567 | 0.00 | 0.00 |
| ATOM | 7817 | N    | LEU | X | 514 | 44.098 | 17.816 | 31.917 | 0.00 | 0.00 |

|      |      |      |     |   |     |        |        |        |      |      |
|------|------|------|-----|---|-----|--------|--------|--------|------|------|
| ATOM | 7818 | H    | LEU | X | 514 | 43.571 | 18.057 | 31.090 | 0.00 | 0.00 |
| ATOM | 7819 | CA   | LEU | X | 514 | 43.681 | 18.420 | 33.148 | 0.00 | 0.00 |
| ATOM | 7820 | HA   | LEU | X | 514 | 44.306 | 19.244 | 33.489 | 0.00 | 0.00 |
| ATOM | 7821 | CB   | LEU | X | 514 | 42.315 | 18.986 | 33.053 | 0.00 | 0.00 |
| ATOM | 7822 | HB2  | LEU | X | 514 | 42.250 | 19.627 | 32.174 | 0.00 | 0.00 |
| ATOM | 7823 | HB3  | LEU | X | 514 | 41.721 | 18.109 | 32.797 | 0.00 | 0.00 |
| ATOM | 7824 | CG   | LEU | X | 514 | 41.699 | 19.762 | 34.205 | 0.00 | 0.00 |
| ATOM | 7825 | HG   | LEU | X | 514 | 42.068 | 19.325 | 35.133 | 0.00 | 0.00 |
| ATOM | 7826 | CD1  | LEU | X | 514 | 42.215 | 21.172 | 34.169 | 0.00 | 0.00 |
| ATOM | 7827 | HD11 | LEU | X | 514 | 43.299 | 21.091 | 34.260 | 0.00 | 0.00 |
| ATOM | 7828 | HD12 | LEU | X | 514 | 41.743 | 21.678 | 35.011 | 0.00 | 0.00 |
| ATOM | 7829 | HD13 | LEU | X | 514 | 41.980 | 21.682 | 33.236 | 0.00 | 0.00 |
| ATOM | 7830 | CD2  | LEU | X | 514 | 40.155 | 19.719 | 34.261 | 0.00 | 0.00 |
| ATOM | 7831 | HD21 | LEU | X | 514 | 39.725 | 20.420 | 34.976 | 0.00 | 0.00 |
| ATOM | 7832 | HD22 | LEU | X | 514 | 39.745 | 19.808 | 33.255 | 0.00 | 0.00 |
| ATOM | 7833 | HD23 | LEU | X | 514 | 39.772 | 18.782 | 34.664 | 0.00 | 0.00 |
| ATOM | 7834 | C    | LEU | X | 514 | 43.798 | 17.269 | 34.226 | 0.00 | 0.00 |
| ATOM | 7835 | O    | LEU | X | 514 | 43.286 | 16.132 | 34.105 | 0.00 | 0.00 |
| ATOM | 7836 | N    | GLU | X | 515 | 44.590 | 17.646 | 35.289 | 0.00 | 0.00 |
| ATOM | 7837 | H    | GLU | X | 515 | 44.923 | 18.599 | 35.326 | 0.00 | 0.00 |
| ATOM | 7838 | CA   | GLU | X | 515 | 44.568 | 16.908 | 36.549 | 0.00 | 0.00 |
| ATOM | 7839 | HA   | GLU | X | 515 | 43.973 | 16.003 | 36.425 | 0.00 | 0.00 |
| ATOM | 7840 | CB   | GLU | X | 515 | 45.984 | 16.386 | 36.917 | 0.00 | 0.00 |
| ATOM | 7841 | HB2  | GLU | X | 515 | 46.673 | 17.214 | 37.082 | 0.00 | 0.00 |
| ATOM | 7842 | HB3  | GLU | X | 515 | 45.788 | 15.937 | 37.891 | 0.00 | 0.00 |
| ATOM | 7843 | CG   | GLU | X | 515 | 46.515 | 15.420 | 35.822 | 0.00 | 0.00 |
| ATOM | 7844 | HG2  | GLU | X | 515 | 45.775 | 14.626 | 35.721 | 0.00 | 0.00 |
| ATOM | 7845 | HG3  | GLU | X | 515 | 46.670 | 16.052 | 34.948 | 0.00 | 0.00 |
| ATOM | 7846 | CD   | GLU | X | 515 | 47.751 | 14.810 | 36.277 | 0.00 | 0.00 |
| ATOM | 7847 | OE1  | GLU | X | 515 | 48.056 | 13.755 | 35.768 | 0.00 | 0.00 |
| ATOM | 7848 | OE2  | GLU | X | 515 | 48.577 | 15.480 | 36.919 | 0.00 | 0.00 |
| ATOM | 7849 | C    | GLU | X | 515 | 43.797 | 17.704 | 37.691 | 0.00 | 0.00 |
| ATOM | 7850 | O    | GLU | X | 515 | 43.692 | 18.865 | 37.620 | 0.00 | 0.00 |
| ATOM | 7851 | N    | VAL | X | 516 | 43.316 | 16.973 | 38.688 | 0.00 | 0.00 |
| ATOM | 7852 | H    | VAL | X | 516 | 43.374 | 15.965 | 38.696 | 0.00 | 0.00 |
| ATOM | 7853 | CA   | VAL | X | 516 | 42.509 | 17.409 | 39.826 | 0.00 | 0.00 |
| ATOM | 7854 | HA   | VAL | X | 516 | 42.441 | 18.495 | 39.891 | 0.00 | 0.00 |
| ATOM | 7855 | CB   | VAL | X | 516 | 41.116 | 16.747 | 39.848 | 0.00 | 0.00 |
| ATOM | 7856 | HB   | VAL | X | 516 | 41.364 | 15.698 | 40.003 | 0.00 | 0.00 |
| ATOM | 7857 | CG1  | VAL | X | 516 | 40.338 | 17.265 | 41.028 | 0.00 | 0.00 |
| ATOM | 7858 | HG11 | VAL | X | 516 | 40.394 | 18.337 | 40.837 | 0.00 | 0.00 |
| ATOM | 7859 | HG12 | VAL | X | 516 | 39.286 | 17.074 | 40.817 | 0.00 | 0.00 |
| ATOM | 7860 | HG13 | VAL | X | 516 | 40.694 | 16.920 | 41.999 | 0.00 | 0.00 |
| ATOM | 7861 | CG2  | VAL | X | 516 | 40.399 | 16.991 | 38.468 | 0.00 | 0.00 |
| ATOM | 7862 | HG21 | VAL | X | 516 | 40.848 | 16.462 | 37.627 | 0.00 | 0.00 |
| ATOM | 7863 | HG22 | VAL | X | 516 | 40.319 | 18.061 | 38.272 | 0.00 | 0.00 |
| ATOM | 7864 | HG23 | VAL | X | 516 | 39.396 | 16.582 | 38.582 | 0.00 | 0.00 |
| ATOM | 7865 | C    | VAL | X | 516 | 43.248 | 17.033 | 41.141 | 0.00 | 0.00 |
| ATOM | 7866 | O    | VAL | X | 516 | 43.644 | 15.879 | 41.414 | 0.00 | 0.00 |
| ATOM | 7867 | N    | ARG | X | 517 | 43.488 | 18.071 | 42.028 | 0.00 | 0.00 |
| ATOM | 7868 | H    | ARG | X | 517 | 43.120 | 18.975 | 41.768 | 0.00 | 0.00 |
| ATOM | 7869 | CA   | ARG | X | 517 | 44.126 | 17.870 | 43.386 | 0.00 | 0.00 |
| ATOM | 7870 | HA   | ARG | X | 517 | 44.474 | 16.838 | 43.365 | 0.00 | 0.00 |
| ATOM | 7871 | CB   | ARG | X | 517 | 45.225 | 18.933 | 43.523 | 0.00 | 0.00 |
| ATOM | 7872 | HB2  | ARG | X | 517 | 44.826 | 19.930 | 43.334 | 0.00 | 0.00 |
| ATOM | 7873 | HB3  | ARG | X | 517 | 45.697 | 18.880 | 44.504 | 0.00 | 0.00 |
| ATOM | 7874 | CG   | ARG | X | 517 | 46.415 | 18.809 | 42.526 | 0.00 | 0.00 |
| ATOM | 7875 | HG2  | ARG | X | 517 | 46.772 | 17.784 | 42.630 | 0.00 | 0.00 |
| ATOM | 7876 | HG3  | ARG | X | 517 | 46.111 | 18.995 | 41.496 | 0.00 | 0.00 |
| ATOM | 7877 | CD   | ARG | X | 517 | 47.482 | 19.875 | 42.893 | 0.00 | 0.00 |
| ATOM | 7878 | HD2  | ARG | X | 517 | 47.045 | 20.865 | 43.026 | 0.00 | 0.00 |
| ATOM | 7879 | HD3  | ARG | X | 517 | 47.954 | 19.653 | 43.850 | 0.00 | 0.00 |
| ATOM | 7880 | NE   | ARG | X | 517 | 48.569 | 19.941 | 41.848 | 0.00 | 0.00 |
| ATOM | 7881 | HE   | ARG | X | 517 | 48.676 | 20.808 | 41.341 | 0.00 | 0.00 |
| ATOM | 7882 | CZ   | ARG | X | 517 | 49.611 | 19.098 | 41.730 | 0.00 | 0.00 |
| ATOM | 7883 | NH1  | ARG | X | 517 | 49.687 | 17.984 | 42.452 | 0.00 | 0.00 |
| ATOM | 7884 | HH11 | ARG | X | 517 | 48.927 | 17.578 | 42.978 | 0.00 | 0.00 |

|      |      |      |     |   |     |        |        |        |      |      |
|------|------|------|-----|---|-----|--------|--------|--------|------|------|
| ATOM | 7885 | HH12 | ARG | X | 517 | 50.426 | 17.315 | 42.286 | 0.00 | 0.00 |
| ATOM | 7886 | NH2  | ARG | X | 517 | 50.629 | 19.297 | 40.992 | 0.00 | 0.00 |
| ATOM | 7887 | HH21 | ARG | X | 517 | 50.562 | 20.120 | 40.412 | 0.00 | 0.00 |
| ATOM | 7888 | HH22 | ARG | X | 517 | 51.396 | 18.647 | 40.893 | 0.00 | 0.00 |
| ATOM | 7889 | C    | ARG | X | 517 | 43.087 | 18.068 | 44.491 | 0.00 | 0.00 |
| ATOM | 7890 | O    | ARG | X | 517 | 42.056 | 18.614 | 44.208 | 0.00 | 0.00 |
| ATOM | 7891 | N    | ARG | X | 518 | 43.416 | 17.511 | 45.712 | 0.00 | 0.00 |
| ATOM | 7892 | H    | ARG | X | 518 | 44.350 | 17.221 | 45.964 | 0.00 | 0.00 |
| ATOM | 7893 | CA   | ARG | X | 518 | 42.499 | 17.714 | 46.908 | 0.00 | 0.00 |
| ATOM | 7894 | HA   | ARG | X | 518 | 41.670 | 18.371 | 46.645 | 0.00 | 0.00 |
| ATOM | 7895 | CB   | ARG | X | 518 | 41.944 | 16.312 | 47.330 | 0.00 | 0.00 |
| ATOM | 7896 | HB2  | ARG | X | 518 | 42.723 | 15.842 | 47.931 | 0.00 | 0.00 |
| ATOM | 7897 | HB3  | ARG | X | 518 | 41.078 | 16.502 | 47.964 | 0.00 | 0.00 |
| ATOM | 7898 | CG   | ARG | X | 518 | 41.424 | 15.309 | 46.301 | 0.00 | 0.00 |
| ATOM | 7899 | HG2  | ARG | X | 518 | 40.447 | 15.746 | 46.095 | 0.00 | 0.00 |
| ATOM | 7900 | HG3  | ARG | X | 518 | 41.931 | 15.220 | 45.340 | 0.00 | 0.00 |
| ATOM | 7901 | CD   | ARG | X | 518 | 41.111 | 13.962 | 46.823 | 0.00 | 0.00 |
| ATOM | 7902 | HD2  | ARG | X | 518 | 40.492 | 14.059 | 47.715 | 0.00 | 0.00 |
| ATOM | 7903 | HD3  | ARG | X | 518 | 40.574 | 13.383 | 46.072 | 0.00 | 0.00 |
| ATOM | 7904 | NE   | ARG | X | 518 | 42.280 | 13.136 | 47.235 | 0.00 | 0.00 |
| ATOM | 7905 | HE   | ARG | X | 518 | 43.173 | 13.385 | 46.836 | 0.00 | 0.00 |
| ATOM | 7906 | CZ   | ARG | X | 518 | 42.284 | 12.113 | 48.124 | 0.00 | 0.00 |
| ATOM | 7907 | NH1  | ARG | X | 518 | 41.119 | 11.556 | 48.587 | 0.00 | 0.00 |
| ATOM | 7908 | HH11 | ARG | X | 518 | 40.269 | 11.942 | 48.201 | 0.00 | 0.00 |
| ATOM | 7909 | HH12 | ARG | X | 518 | 41.169 | 10.653 | 49.036 | 0.00 | 0.00 |
| ATOM | 7910 | NH2  | ARG | X | 518 | 43.443 | 11.630 | 48.501 | 0.00 | 0.00 |
| ATOM | 7911 | HH21 | ARG | X | 518 | 44.285 | 11.970 | 48.061 | 0.00 | 0.00 |
| ATOM | 7912 | HH22 | ARG | X | 518 | 43.601 | 11.060 | 49.320 | 0.00 | 0.00 |
| ATOM | 7913 | C    | ARG | X | 518 | 43.225 | 18.326 | 48.150 | 0.00 | 0.00 |
| ATOM | 7914 | O    | ARG | X | 518 | 44.467 | 18.223 | 48.269 | 0.00 | 0.00 |
| ATOM | 7915 | N    | GLY | X | 519 | 42.545 | 19.001 | 49.046 | 0.00 | 0.00 |
| ATOM | 7916 | H    | GLY | X | 519 | 41.551 | 18.999 | 48.865 | 0.00 | 0.00 |
| ATOM | 7917 | CA   | GLY | X | 519 | 43.065 | 19.347 | 50.361 | 0.00 | 0.00 |
| ATOM | 7918 | HA2  | GLY | X | 519 | 42.263 | 19.383 | 51.099 | 0.00 | 0.00 |
| ATOM | 7919 | HA3  | GLY | X | 519 | 43.746 | 18.574 | 50.716 | 0.00 | 0.00 |
| ATOM | 7920 | C    | GLY | X | 519 | 43.730 | 20.706 | 50.478 | 0.00 | 0.00 |
| ATOM | 7921 | O    | GLY | X | 519 | 44.730 | 20.834 | 51.178 | 0.00 | 0.00 |
| ATOM | 7922 | N    | LEU | X | 520 | 43.274 | 21.734 | 49.700 | 0.00 | 0.00 |
| ATOM | 7923 | H    | LEU | X | 520 | 42.476 | 21.549 | 49.109 | 0.00 | 0.00 |
| ATOM | 7924 | CA   | LEU | X | 520 | 43.919 | 22.996 | 49.361 | 0.00 | 0.00 |
| ATOM | 7925 | HA   | LEU | X | 520 | 44.728 | 22.882 | 48.640 | 0.00 | 0.00 |
| ATOM | 7926 | CB   | LEU | X | 520 | 42.798 | 23.907 | 48.669 | 0.00 | 0.00 |
| ATOM | 7927 | HB2  | LEU | X | 520 | 42.361 | 23.355 | 47.836 | 0.00 | 0.00 |
| ATOM | 7928 | HB3  | LEU | X | 520 | 41.900 | 24.037 | 49.272 | 0.00 | 0.00 |
| ATOM | 7929 | CG   | LEU | X | 520 | 43.310 | 25.307 | 48.221 | 0.00 | 0.00 |
| ATOM | 7930 | HG   | LEU | X | 520 | 43.687 | 25.852 | 49.087 | 0.00 | 0.00 |
| ATOM | 7931 | CD1  | LEU | X | 520 | 44.431 | 25.218 | 47.211 | 0.00 | 0.00 |
| ATOM | 7932 | HD11 | LEU | X | 520 | 45.291 | 24.928 | 47.815 | 0.00 | 0.00 |
| ATOM | 7933 | HD12 | LEU | X | 520 | 44.649 | 26.197 | 46.785 | 0.00 | 0.00 |
| ATOM | 7934 | HD13 | LEU | X | 520 | 44.354 | 24.659 | 46.279 | 0.00 | 0.00 |
| ATOM | 7935 | CD2  | LEU | X | 520 | 42.320 | 26.083 | 47.447 | 0.00 | 0.00 |
| ATOM | 7936 | HD21 | LEU | X | 520 | 41.350 | 26.177 | 47.935 | 0.00 | 0.00 |
| ATOM | 7937 | HD22 | LEU | X | 520 | 42.563 | 27.099 | 47.137 | 0.00 | 0.00 |
| ATOM | 7938 | HD23 | LEU | X | 520 | 42.057 | 25.501 | 46.563 | 0.00 | 0.00 |
| ATOM | 7939 | C    | LEU | X | 520 | 44.509 | 23.757 | 50.608 | 0.00 | 0.00 |
| ATOM | 7940 | O    | LEU | X | 520 | 43.780 | 24.386 | 51.347 | 0.00 | 0.00 |
| ATOM | 7941 | N    | ARG | X | 521 | 45.796 | 23.472 | 50.859 | 0.00 | 0.00 |
| ATOM | 7942 | H    | ARG | X | 521 | 46.250 | 22.748 | 50.321 | 0.00 | 0.00 |
| ATOM | 7943 | CA   | ARG | X | 521 | 46.734 | 24.013 | 51.805 | 0.00 | 0.00 |
| ATOM | 7944 | HA   | ARG | X | 521 | 47.708 | 23.562 | 51.617 | 0.00 | 0.00 |
| ATOM | 7945 | CB   | ARG | X | 521 | 47.162 | 25.428 | 51.299 | 0.00 | 0.00 |
| ATOM | 7946 | HB2  | ARG | X | 521 | 47.252 | 25.569 | 50.222 | 0.00 | 0.00 |
| ATOM | 7947 | HB3  | ARG | X | 521 | 46.461 | 26.181 | 51.657 | 0.00 | 0.00 |
| ATOM | 7948 | CG   | ARG | X | 521 | 48.545 | 25.820 | 51.789 | 0.00 | 0.00 |
| ATOM | 7949 | HG2  | ARG | X | 521 | 48.596 | 26.867 | 51.489 | 0.00 | 0.00 |
| ATOM | 7950 | HG3  | ARG | X | 521 | 48.636 | 25.759 | 52.873 | 0.00 | 0.00 |
| ATOM | 7951 | CD   | ARG | X | 521 | 49.754 | 25.149 | 51.092 | 0.00 | 0.00 |

|      |      |      |     |   |     |        |        |        |      |      |
|------|------|------|-----|---|-----|--------|--------|--------|------|------|
| ATOM | 7952 | HD2  | ARG | X | 521 | 49.646 | 24.071 | 51.207 | 0.00 | 0.00 |
| ATOM | 7953 | HD3  | ARG | X | 521 | 49.730 | 25.392 | 50.030 | 0.00 | 0.00 |
| ATOM | 7954 | NE   | ARG | X | 521 | 50.984 | 25.553 | 51.696 | 0.00 | 0.00 |
| ATOM | 7955 | HE   | ARG | X | 521 | 50.981 | 26.533 | 51.938 | 0.00 | 0.00 |
| ATOM | 7956 | CZ   | ARG | X | 521 | 52.120 | 24.887 | 52.051 | 0.00 | 0.00 |
| ATOM | 7957 | NH1  | ARG | X | 521 | 52.388 | 23.663 | 51.788 | 0.00 | 0.00 |
| ATOM | 7958 | HH11 | ARG | X | 521 | 51.917 | 23.232 | 51.005 | 0.00 | 0.00 |
| ATOM | 7959 | HH12 | ARG | X | 521 | 53.151 | 23.121 | 52.167 | 0.00 | 0.00 |
| ATOM | 7960 | NH2  | ARG | X | 521 | 53.113 | 25.524 | 52.743 | 0.00 | 0.00 |
| ATOM | 7961 | HH21 | ARG | X | 521 | 52.968 | 26.404 | 53.218 | 0.00 | 0.00 |
| ATOM | 7962 | HH22 | ARG | X | 521 | 53.971 | 25.047 | 52.984 | 0.00 | 0.00 |
| ATOM | 7963 | C    | ARG | X | 521 | 46.356 | 23.782 | 53.292 | 0.00 | 0.00 |
| ATOM | 7964 | O    | ARG | X | 521 | 47.058 | 24.308 | 54.104 | 0.00 | 0.00 |
| ATOM | 7965 | N    | ALA | X | 522 | 45.216 | 23.245 | 53.602 | 0.00 | 0.00 |
| ATOM | 7966 | H    | ALA | X | 522 | 44.739 | 22.683 | 52.911 | 0.00 | 0.00 |
| ATOM | 7967 | CA   | ALA | X | 522 | 44.543 | 23.305 | 54.962 | 0.00 | 0.00 |
| ATOM | 7968 | HA   | ALA | X | 522 | 44.229 | 24.329 | 55.163 | 0.00 | 0.00 |
| ATOM | 7969 | CB   | ALA | X | 522 | 43.337 | 22.484 | 54.909 | 0.00 | 0.00 |
| ATOM | 7970 | HB1  | ALA | X | 522 | 42.700 | 22.618 | 55.784 | 0.00 | 0.00 |
| ATOM | 7971 | HB2  | ALA | X | 522 | 43.546 | 21.434 | 54.708 | 0.00 | 0.00 |
| ATOM | 7972 | HB3  | ALA | X | 522 | 42.713 | 22.769 | 54.062 | 0.00 | 0.00 |
| ATOM | 7973 | C    | ALA | X | 522 | 45.519 | 22.905 | 56.188 | 0.00 | 0.00 |
| ATOM | 7974 | O    | ALA | X | 522 | 45.563 | 23.713 | 57.139 | 0.00 | 0.00 |
| ATOM | 7975 | N    | GLN | X | 523 | 46.240 | 21.767 | 56.012 | 0.00 | 0.00 |
| ATOM | 7976 | H    | GLN | X | 523 | 46.110 | 21.273 | 55.141 | 0.00 | 0.00 |
| ATOM | 7977 | CA   | GLN | X | 523 | 47.102 | 21.265 | 57.039 | 0.00 | 0.00 |
| ATOM | 7978 | HA   | GLN | X | 523 | 46.479 | 21.121 | 57.922 | 0.00 | 0.00 |
| ATOM | 7979 | CB   | GLN | X | 523 | 47.555 | 19.778 | 56.558 | 0.00 | 0.00 |
| ATOM | 7980 | HB2  | GLN | X | 523 | 46.695 | 19.133 | 56.375 | 0.00 | 0.00 |
| ATOM | 7981 | HB3  | GLN | X | 523 | 48.002 | 19.716 | 55.566 | 0.00 | 0.00 |
| ATOM | 7982 | CG   | GLN | X | 523 | 48.452 | 19.137 | 57.607 | 0.00 | 0.00 |
| ATOM | 7983 | HG2  | GLN | X | 523 | 49.368 | 19.716 | 57.721 | 0.00 | 0.00 |
| ATOM | 7984 | HG3  | GLN | X | 523 | 47.886 | 19.199 | 58.536 | 0.00 | 0.00 |
| ATOM | 7985 | CD   | GLN | X | 523 | 48.837 | 17.615 | 57.504 | 0.00 | 0.00 |
| ATOM | 7986 | OE1  | GLN | X | 523 | 48.117 | 16.668 | 57.296 | 0.00 | 0.00 |
| ATOM | 7987 | NE2  | GLN | X | 523 | 50.114 | 17.396 | 57.736 | 0.00 | 0.00 |
| ATOM | 7988 | HE21 | GLN | X | 523 | 50.532 | 16.485 | 57.615 | 0.00 | 0.00 |
| ATOM | 7989 | HE22 | GLN | X | 523 | 50.695 | 18.186 | 57.980 | 0.00 | 0.00 |
| ATOM | 7990 | C    | GLN | X | 523 | 48.358 | 22.139 | 57.321 | 0.00 | 0.00 |
| ATOM | 7991 | O    | GLN | X | 523 | 48.828 | 22.159 | 58.460 | 0.00 | 0.00 |
| ATOM | 7992 | N    | ALA | X | 524 | 48.816 | 22.919 | 56.410 | 0.00 | 0.00 |
| ATOM | 7993 | H    | ALA | X | 524 | 48.317 | 22.871 | 55.533 | 0.00 | 0.00 |
| ATOM | 7994 | CA   | ALA | X | 524 | 49.794 | 23.941 | 56.653 | 0.00 | 0.00 |
| ATOM | 7995 | HA   | ALA | X | 524 | 50.400 | 23.472 | 57.429 | 0.00 | 0.00 |
| ATOM | 7996 | CB   | ALA | X | 524 | 50.703 | 24.204 | 55.373 | 0.00 | 0.00 |
| ATOM | 7997 | HB1  | ALA | X | 524 | 50.095 | 24.377 | 54.485 | 0.00 | 0.00 |
| ATOM | 7998 | HB2  | ALA | X | 524 | 51.236 | 23.333 | 54.991 | 0.00 | 0.00 |
| ATOM | 7999 | HB3  | ALA | X | 524 | 51.336 | 25.082 | 55.503 | 0.00 | 0.00 |
| ATOM | 8000 | C    | ALA | X | 524 | 49.207 | 25.232 | 57.277 | 0.00 | 0.00 |
| ATOM | 8001 | O    | ALA | X | 524 | 49.674 | 25.705 | 58.288 | 0.00 | 0.00 |
| ATOM | 8002 | N    | CYX | X | 525 | 48.163 | 25.864 | 56.687 | 0.00 | 0.00 |
| ATOM | 8003 | H    | CYX | X | 525 | 47.874 | 25.420 | 55.827 | 0.00 | 0.00 |
| ATOM | 8004 | CA   | CYX | X | 525 | 47.495 | 27.106 | 57.225 | 0.00 | 0.00 |
| ATOM | 8005 | HA   | CYX | X | 525 | 48.118 | 27.999 | 57.168 | 0.00 | 0.00 |
| ATOM | 8006 | CB   | CYX | X | 525 | 46.381 | 27.463 | 56.250 | 0.00 | 0.00 |
| ATOM | 8007 | HB2  | CYX | X | 525 | 45.576 | 26.731 | 56.321 | 0.00 | 0.00 |
| ATOM | 8008 | HB3  | CYX | X | 525 | 45.940 | 28.420 | 56.529 | 0.00 | 0.00 |
| ATOM | 8009 | SG   | CYX | X | 525 | 47.007 | 27.748 | 54.520 | 0.00 | 0.00 |
| ATOM | 8010 | C    | CYX | X | 525 | 46.947 | 26.983 | 58.648 | 0.00 | 0.00 |
| ATOM | 8011 | O    | CYX | X | 525 | 46.528 | 27.965 | 59.176 | 0.00 | 0.00 |
| ATOM | 8012 | N    | ALA | X | 526 | 46.724 | 25.777 | 59.217 | 0.00 | 0.00 |
| ATOM | 8013 | H    | ALA | X | 526 | 46.980 | 24.949 | 58.698 | 0.00 | 0.00 |
| ATOM | 8014 | CA   | ALA | X | 526 | 46.321 | 25.562 | 60.600 | 0.00 | 0.00 |
| ATOM | 8015 | HA   | ALA | X | 526 | 45.367 | 25.986 | 60.911 | 0.00 | 0.00 |
| ATOM | 8016 | CB   | ALA | X | 526 | 46.211 | 24.034 | 60.736 | 0.00 | 0.00 |
| ATOM | 8017 | HB1  | ALA | X | 526 | 45.605 | 23.688 | 59.899 | 0.00 | 0.00 |
| ATOM | 8018 | HB2  | ALA | X | 526 | 45.658 | 23.823 | 61.651 | 0.00 | 0.00 |

|      |      |      |     |   |     |        |        |        |      |      |
|------|------|------|-----|---|-----|--------|--------|--------|------|------|
| ATOM | 8019 | HB3  | ALA | X | 526 | 47.206 | 23.592 | 60.683 | 0.00 | 0.00 |
| ATOM | 8020 | C    | ALA | X | 526 | 47.344 | 26.173 | 61.563 | 0.00 | 0.00 |
| ATOM | 8021 | O    | ALA | X | 526 | 46.897 | 26.835 | 62.445 | 0.00 | 0.00 |
| ATOM | 8022 | N    | PHE | X | 527 | 48.671 | 26.066 | 61.432 | 0.00 | 0.00 |
| ATOM | 8023 | H    | PHE | X | 527 | 49.040 | 25.446 | 60.725 | 0.00 | 0.00 |
| ATOM | 8024 | CA   | PHE | X | 527 | 49.645 | 26.864 | 62.176 | 0.00 | 0.00 |
| ATOM | 8025 | HA   | PHE | X | 527 | 49.680 | 26.559 | 63.222 | 0.00 | 0.00 |
| ATOM | 8026 | CB   | PHE | X | 527 | 51.007 | 26.606 | 61.512 | 0.00 | 0.00 |
| ATOM | 8027 | HB2  | PHE | X | 527 | 51.162 | 25.535 | 61.647 | 0.00 | 0.00 |
| ATOM | 8028 | HB3  | PHE | X | 527 | 50.979 | 26.754 | 60.432 | 0.00 | 0.00 |
| ATOM | 8029 | CG   | PHE | X | 527 | 52.256 | 27.378 | 62.085 | 0.00 | 0.00 |
| ATOM | 8030 | CD1  | PHE | X | 527 | 52.765 | 27.040 | 63.328 | 0.00 | 0.00 |
| ATOM | 8031 | HD1  | PHE | X | 527 | 52.277 | 26.252 | 63.882 | 0.00 | 0.00 |
| ATOM | 8032 | CE1  | PHE | X | 527 | 53.727 | 27.751 | 64.015 | 0.00 | 0.00 |
| ATOM | 8033 | HE1  | PHE | X | 527 | 54.126 | 27.571 | 65.002 | 0.00 | 0.00 |
| ATOM | 8034 | CZ   | PHE | X | 527 | 54.433 | 28.712 | 63.278 | 0.00 | 0.00 |
| ATOM | 8035 | HZ   | PHE | X | 527 | 55.235 | 29.289 | 63.715 | 0.00 | 0.00 |
| ATOM | 8036 | CE2  | PHE | X | 527 | 54.042 | 29.032 | 61.944 | 0.00 | 0.00 |
| ATOM | 8037 | HE2  | PHE | X | 527 | 54.482 | 29.824 | 61.357 | 0.00 | 0.00 |
| ATOM | 8038 | CD2  | PHE | X | 527 | 52.882 | 28.392 | 61.396 | 0.00 | 0.00 |
| ATOM | 8039 | HD2  | PHE | X | 527 | 52.648 | 28.710 | 60.390 | 0.00 | 0.00 |
| ATOM | 8040 | C    | PHE | X | 527 | 49.298 | 28.368 | 62.009 | 0.00 | 0.00 |
| ATOM | 8041 | O    | PHE | X | 527 | 49.177 | 29.126 | 62.967 | 0.00 | 0.00 |
| ATOM | 8042 | N    | TRP | X | 528 | 49.214 | 28.881 | 60.760 | 0.00 | 0.00 |
| ATOM | 8043 | H    | TRP | X | 528 | 49.518 | 28.259 | 60.025 | 0.00 | 0.00 |
| ATOM | 8044 | CA   | TRP | X | 528 | 49.069 | 30.301 | 60.440 | 0.00 | 0.00 |
| ATOM | 8045 | HA   | TRP | X | 528 | 49.839 | 30.894 | 60.933 | 0.00 | 0.00 |
| ATOM | 8046 | CB   | TRP | X | 528 | 49.141 | 30.606 | 59.004 | 0.00 | 0.00 |
| ATOM | 8047 | HB2  | TRP | X | 528 | 48.370 | 30.072 | 58.448 | 0.00 | 0.00 |
| ATOM | 8048 | HB3  | TRP | X | 528 | 48.944 | 31.665 | 58.838 | 0.00 | 0.00 |
| ATOM | 8049 | CG   | TRP | X | 528 | 50.462 | 30.325 | 58.242 | 0.00 | 0.00 |
| ATOM | 8050 | CD1  | TRP | X | 528 | 50.692 | 29.500 | 57.168 | 0.00 | 0.00 |
| ATOM | 8051 | HD1  | TRP | X | 528 | 49.938 | 28.906 | 56.672 | 0.00 | 0.00 |
| ATOM | 8052 | NE1  | TRP | X | 528 | 51.970 | 29.651 | 56.791 | 0.00 | 0.00 |
| ATOM | 8053 | HE1  | TRP | X | 528 | 52.287 | 29.213 | 55.938 | 0.00 | 0.00 |
| ATOM | 8054 | CE2  | TRP | X | 528 | 52.676 | 30.579 | 57.498 | 0.00 | 0.00 |
| ATOM | 8055 | CZ2  | TRP | X | 528 | 54.016 | 31.044 | 57.471 | 0.00 | 0.00 |
| ATOM | 8056 | HZ2  | TRP | X | 528 | 54.622 | 30.666 | 56.660 | 0.00 | 0.00 |
| ATOM | 8057 | CH2  | TRP | X | 528 | 54.451 | 31.923 | 58.452 | 0.00 | 0.00 |
| ATOM | 8058 | HH2  | TRP | X | 528 | 55.440 | 32.356 | 58.424 | 0.00 | 0.00 |
| ATOM | 8059 | CZ3  | TRP | X | 528 | 53.540 | 32.459 | 59.358 | 0.00 | 0.00 |
| ATOM | 8060 | HZ3  | TRP | X | 528 | 53.924 | 33.122 | 60.120 | 0.00 | 0.00 |
| ATOM | 8061 | CE3  | TRP | X | 528 | 52.266 | 31.900 | 59.544 | 0.00 | 0.00 |
| ATOM | 8062 | HE3  | TRP | X | 528 | 51.656 | 32.309 | 60.335 | 0.00 | 0.00 |
| ATOM | 8063 | CD2  | TRP | X | 528 | 51.737 | 30.987 | 58.496 | 0.00 | 0.00 |
| ATOM | 8064 | C    | TRP | X | 528 | 47.769 | 30.943 | 61.082 | 0.00 | 0.00 |
| ATOM | 8065 | O    | TRP | X | 528 | 47.646 | 32.141 | 61.306 | 0.00 | 0.00 |
| ATOM | 8066 | N    | ASN | X | 529 | 46.741 | 30.060 | 61.263 | 0.00 | 0.00 |
| ATOM | 8067 | H    | ASN | X | 529 | 46.897 | 29.081 | 61.071 | 0.00 | 0.00 |
| ATOM | 8068 | CA   | ASN | X | 529 | 45.457 | 30.496 | 61.765 | 0.00 | 0.00 |
| ATOM | 8069 | HA   | ASN | X | 529 | 45.305 | 31.542 | 61.498 | 0.00 | 0.00 |
| ATOM | 8070 | CB   | ASN | X | 529 | 44.285 | 29.592 | 61.207 | 0.00 | 0.00 |
| ATOM | 8071 | HB2  | ASN | X | 529 | 44.121 | 29.815 | 60.153 | 0.00 | 0.00 |
| ATOM | 8072 | HB3  | ASN | X | 529 | 44.532 | 28.550 | 61.412 | 0.00 | 0.00 |
| ATOM | 8073 | CG   | ASN | X | 529 | 42.996 | 29.982 | 61.993 | 0.00 | 0.00 |
| ATOM | 8074 | OD1  | ASN | X | 529 | 42.446 | 29.227 | 62.764 | 0.00 | 0.00 |
| ATOM | 8075 | ND2  | ASN | X | 529 | 42.465 | 31.105 | 61.669 | 0.00 | 0.00 |
| ATOM | 8076 | HD21 | ASN | X | 529 | 41.565 | 31.282 | 62.091 | 0.00 | 0.00 |
| ATOM | 8077 | HD22 | ASN | X | 529 | 42.705 | 31.776 | 60.954 | 0.00 | 0.00 |
| ATOM | 8078 | C    | ASN | X | 529 | 45.575 | 30.352 | 63.287 | 0.00 | 0.00 |
| ATOM | 8079 | O    | ASN | X | 529 | 45.001 | 31.291 | 63.972 | 0.00 | 0.00 |
| ATOM | 8080 | N    | ARG | X | 530 | 46.096 | 29.282 | 63.819 | 0.00 | 0.00 |
| ATOM | 8081 | H    | ARG | X | 530 | 46.409 | 28.546 | 63.203 | 0.00 | 0.00 |
| ATOM | 8082 | CA   | ARG | X | 530 | 46.040 | 28.950 | 65.213 | 0.00 | 0.00 |
| ATOM | 8083 | HA   | ARG | X | 530 | 45.105 | 29.287 | 65.660 | 0.00 | 0.00 |
| ATOM | 8084 | CB   | ARG | X | 530 | 45.917 | 27.462 | 65.426 | 0.00 | 0.00 |
| ATOM | 8085 | HB2  | ARG | X | 530 | 46.729 | 26.950 | 64.909 | 0.00 | 0.00 |



|      |      |      |     |   |     |        |        |        |      |      |
|------|------|------|-----|---|-----|--------|--------|--------|------|------|
| ATOM | 8086 | HB3  | ARG | X | 530 | 46.052 | 27.199 | 66.475 | 0.00 | 0.00 |
| ATOM | 8087 | CG   | ARG | X | 530 | 44.565 | 26.997 | 64.957 | 0.00 | 0.00 |
| ATOM | 8088 | HG2  | ARG | X | 530 | 43.739 | 27.046 | 65.666 | 0.00 | 0.00 |
| ATOM | 8089 | HG3  | ARG | X | 530 | 44.242 | 27.567 | 64.086 | 0.00 | 0.00 |
| ATOM | 8090 | CD   | ARG | X | 530 | 44.701 | 25.516 | 64.543 | 0.00 | 0.00 |
| ATOM | 8091 | HD2  | ARG | X | 530 | 45.415 | 25.360 | 63.735 | 0.00 | 0.00 |
| ATOM | 8092 | HD3  | ARG | X | 530 | 45.057 | 24.969 | 65.416 | 0.00 | 0.00 |
| ATOM | 8093 | NE   | ARG | X | 530 | 43.442 | 25.020 | 64.039 | 0.00 | 0.00 |
| ATOM | 8094 | HE   | ARG | X | 530 | 42.642 | 25.637 | 64.038 | 0.00 | 0.00 |
| ATOM | 8095 | CZ   | ARG | X | 530 | 43.253 | 23.764 | 63.607 | 0.00 | 0.00 |
| ATOM | 8096 | NH1  | ARG | X | 530 | 44.130 | 22.848 | 63.618 | 0.00 | 0.00 |
| ATOM | 8097 | HH11 | ARG | X | 530 | 44.954 | 23.056 | 64.163 | 0.00 | 0.00 |
| ATOM | 8098 | HH12 | ARG | X | 530 | 43.843 | 21.897 | 63.432 | 0.00 | 0.00 |
| ATOM | 8099 | NH2  | ARG | X | 530 | 42.098 | 23.363 | 63.232 | 0.00 | 0.00 |
| ATOM | 8100 | HH21 | ARG | X | 530 | 41.292 | 23.971 | 63.263 | 0.00 | 0.00 |
| ATOM | 8101 | HH22 | ARG | X | 530 | 41.978 | 22.376 | 63.053 | 0.00 | 0.00 |
| ATOM | 8102 | C    | ARG | X | 530 | 47.234 | 29.576 | 66.005 | 0.00 | 0.00 |
| ATOM | 8103 | O    | ARG | X | 530 | 47.186 | 30.616 | 66.565 | 0.00 | 0.00 |
| ATOM | 8104 | N    | PHE | X | 531 | 48.364 | 28.892 | 65.988 | 0.00 | 0.00 |
| ATOM | 8105 | H    | PHE | X | 531 | 48.442 | 27.986 | 65.547 | 0.00 | 0.00 |
| ATOM | 8106 | CA   | PHE | X | 531 | 49.510 | 29.060 | 66.927 | 0.00 | 0.00 |
| ATOM | 8107 | HA   | PHE | X | 531 | 49.117 | 28.899 | 67.931 | 0.00 | 0.00 |
| ATOM | 8108 | CB   | PHE | X | 531 | 50.477 | 27.876 | 66.677 | 0.00 | 0.00 |
| ATOM | 8109 | HB2  | PHE | X | 531 | 49.889 | 26.987 | 66.907 | 0.00 | 0.00 |
| ATOM | 8110 | HB3  | PHE | X | 531 | 50.771 | 27.864 | 65.627 | 0.00 | 0.00 |
| ATOM | 8111 | CG   | PHE | X | 531 | 51.672 | 27.884 | 67.637 | 0.00 | 0.00 |
| ATOM | 8112 | CD1  | PHE | X | 531 | 52.830 | 28.603 | 67.329 | 0.00 | 0.00 |
| ATOM | 8113 | HD1  | PHE | X | 531 | 52.977 | 29.059 | 66.361 | 0.00 | 0.00 |
| ATOM | 8114 | CE1  | PHE | X | 531 | 53.866 | 28.786 | 68.246 | 0.00 | 0.00 |
| ATOM | 8115 | HE1  | PHE | X | 531 | 54.721 | 29.354 | 67.909 | 0.00 | 0.00 |
| ATOM | 8116 | CZ   | PHE | X | 531 | 53.854 | 28.247 | 69.523 | 0.00 | 0.00 |
| ATOM | 8117 | HZ   | PHE | X | 531 | 54.660 | 28.369 | 70.232 | 0.00 | 0.00 |
| ATOM | 8118 | CE2  | PHE | X | 531 | 52.629 | 27.679 | 69.924 | 0.00 | 0.00 |
| ATOM | 8119 | HE2  | PHE | X | 531 | 52.504 | 27.345 | 70.944 | 0.00 | 0.00 |
| ATOM | 8120 | CD2  | PHE | X | 531 | 51.555 | 27.496 | 69.005 | 0.00 | 0.00 |
| ATOM | 8121 | HD2  | PHE | X | 531 | 50.671 | 27.032 | 69.416 | 0.00 | 0.00 |
| ATOM | 8122 | C    | PHE | X | 531 | 50.247 | 30.382 | 66.866 | 0.00 | 0.00 |
| ATOM | 8123 | O    | PHE | X | 531 | 50.639 | 30.921 | 67.906 | 0.00 | 0.00 |
| ATOM | 8124 | N    | LEU | X | 532 | 50.515 | 30.852 | 65.651 | 0.00 | 0.00 |
| ATOM | 8125 | H    | LEU | X | 532 | 50.060 | 30.389 | 64.878 | 0.00 | 0.00 |
| ATOM | 8126 | CA   | LEU | X | 532 | 51.403 | 31.971 | 65.358 | 0.00 | 0.00 |
| ATOM | 8127 | HA   | LEU | X | 532 | 52.252 | 31.891 | 66.037 | 0.00 | 0.00 |
| ATOM | 8128 | CB   | LEU | X | 532 | 51.969 | 31.838 | 63.890 | 0.00 | 0.00 |
| ATOM | 8129 | HB2  | LEU | X | 532 | 52.354 | 30.820 | 63.839 | 0.00 | 0.00 |
| ATOM | 8130 | HB3  | LEU | X | 532 | 51.155 | 31.815 | 63.166 | 0.00 | 0.00 |
| ATOM | 8131 | CG   | LEU | X | 532 | 53.052 | 32.801 | 63.376 | 0.00 | 0.00 |
| ATOM | 8132 | HG   | LEU | X | 532 | 53.570 | 32.257 | 62.585 | 0.00 | 0.00 |
| ATOM | 8133 | CD1  | LEU | X | 532 | 52.585 | 34.174 | 62.854 | 0.00 | 0.00 |
| ATOM | 8134 | HD11 | LEU | X | 532 | 53.453 | 34.717 | 62.481 | 0.00 | 0.00 |
| ATOM | 8135 | HD12 | LEU | X | 532 | 52.165 | 34.745 | 63.681 | 0.00 | 0.00 |
| ATOM | 8136 | HD13 | LEU | X | 532 | 51.858 | 34.059 | 62.050 | 0.00 | 0.00 |
| ATOM | 8137 | CD2  | LEU | X | 532 | 54.183 | 33.001 | 64.330 | 0.00 | 0.00 |
| ATOM | 8138 | HD21 | LEU | X | 532 | 54.940 | 33.720 | 64.018 | 0.00 | 0.00 |
| ATOM | 8139 | HD22 | LEU | X | 532 | 53.795 | 33.397 | 65.268 | 0.00 | 0.00 |
| ATOM | 8140 | HD23 | LEU | X | 532 | 54.544 | 31.995 | 64.542 | 0.00 | 0.00 |
| ATOM | 8141 | C    | LEU | X | 532 | 50.742 | 33.332 | 65.738 | 0.00 | 0.00 |
| ATOM | 8142 | O    | LEU | X | 532 | 51.332 | 34.076 | 66.481 | 0.00 | 0.00 |
| ATOM | 8143 | N    | PRO | X | 533 | 49.489 | 33.619 | 65.290 | 0.00 | 0.00 |
| ATOM | 8144 | CD   | PRO | X | 533 | 48.798 | 32.884 | 64.231 | 0.00 | 0.00 |
| ATOM | 8145 | HD2  | PRO | X | 533 | 48.751 | 31.821 | 64.467 | 0.00 | 0.00 |
| ATOM | 8146 | HD3  | PRO | X | 533 | 49.257 | 33.095 | 63.265 | 0.00 | 0.00 |
| ATOM | 8147 | CG   | PRO | X | 533 | 47.421 | 33.531 | 64.346 | 0.00 | 0.00 |
| ATOM | 8148 | HG2  | PRO | X | 533 | 46.817 | 33.153 | 65.172 | 0.00 | 0.00 |
| ATOM | 8149 | HG3  | PRO | X | 533 | 46.689 | 33.314 | 63.568 | 0.00 | 0.00 |
| ATOM | 8150 | CB   | PRO | X | 533 | 47.654 | 35.004 | 64.700 | 0.00 | 0.00 |
| ATOM | 8151 | HB2  | PRO | X | 533 | 46.752 | 35.361 | 65.198 | 0.00 | 0.00 |
| ATOM | 8152 | HB3  | PRO | X | 533 | 47.836 | 35.570 | 63.786 | 0.00 | 0.00 |

|      |      |      |     |   |     |        |        |        |      |      |
|------|------|------|-----|---|-----|--------|--------|--------|------|------|
| ATOM | 8153 | CA   | PRO | X | 533 | 48.824 | 34.886 | 65.636 | 0.00 | 0.00 |
| ATOM | 8154 | HA   | PRO | X | 533 | 49.474 | 35.743 | 65.458 | 0.00 | 0.00 |
| ATOM | 8155 | C    | PRO | X | 533 | 48.443 | 34.936 | 67.054 | 0.00 | 0.00 |
| ATOM | 8156 | O    | PRO | X | 533 | 48.656 | 35.908 | 67.703 | 0.00 | 0.00 |
| ATOM | 8157 | N    | LYS | X | 534 | 48.209 | 33.770 | 67.683 | 0.00 | 0.00 |
| ATOM | 8158 | H    | LYS | X | 534 | 48.118 | 32.959 | 67.087 | 0.00 | 0.00 |
| ATOM | 8159 | CA   | LYS | X | 534 | 47.961 | 33.684 | 69.099 | 0.00 | 0.00 |
| ATOM | 8160 | HA   | LYS | X | 534 | 47.254 | 34.500 | 69.251 | 0.00 | 0.00 |
| ATOM | 8161 | CB   | LYS | X | 534 | 47.247 | 32.387 | 69.263 | 0.00 | 0.00 |
| ATOM | 8162 | HB2  | LYS | X | 534 | 46.367 | 32.349 | 68.620 | 0.00 | 0.00 |
| ATOM | 8163 | HB3  | LYS | X | 534 | 47.912 | 31.550 | 69.048 | 0.00 | 0.00 |
| ATOM | 8164 | CG   | LYS | X | 534 | 46.628 | 32.140 | 70.673 | 0.00 | 0.00 |
| ATOM | 8165 | HG2  | LYS | X | 534 | 47.413 | 32.078 | 71.427 | 0.00 | 0.00 |
| ATOM | 8166 | HG3  | LYS | X | 534 | 46.036 | 33.007 | 70.967 | 0.00 | 0.00 |
| ATOM | 8167 | CD   | LYS | X | 534 | 45.753 | 30.889 | 70.599 | 0.00 | 0.00 |
| ATOM | 8168 | HD2  | LYS | X | 534 | 45.272 | 30.652 | 71.548 | 0.00 | 0.00 |
| ATOM | 8169 | HD3  | LYS | X | 534 | 44.982 | 31.000 | 69.836 | 0.00 | 0.00 |
| ATOM | 8170 | CE   | LYS | X | 534 | 46.451 | 29.583 | 70.116 | 0.00 | 0.00 |
| ATOM | 8171 | HE2  | LYS | X | 534 | 46.680 | 29.838 | 69.081 | 0.00 | 0.00 |
| ATOM | 8172 | HE3  | LYS | X | 534 | 47.347 | 29.312 | 70.675 | 0.00 | 0.00 |
| ATOM | 8173 | NZ   | LYS | X | 534 | 45.586 | 28.382 | 70.140 | 0.00 | 0.00 |
| ATOM | 8174 | HZ1  | LYS | X | 534 | 45.116 | 28.136 | 71.000 | 0.00 | 0.00 |
| ATOM | 8175 | HZ2  | LYS | X | 534 | 44.850 | 28.469 | 69.454 | 0.00 | 0.00 |
| ATOM | 8176 | HZ3  | LYS | X | 534 | 46.180 | 27.596 | 69.915 | 0.00 | 0.00 |
| ATOM | 8177 | C    | LYS | X | 534 | 49.168 | 33.986 | 70.013 | 0.00 | 0.00 |
| ATOM | 8178 | O    | LYS | X | 534 | 48.977 | 34.333 | 71.149 | 0.00 | 0.00 |
| ATOM | 8179 | N    | LEU | X | 535 | 50.408 | 33.685 | 69.535 | 0.00 | 0.00 |
| ATOM | 8180 | H    | LEU | X | 535 | 50.446 | 33.309 | 68.598 | 0.00 | 0.00 |
| ATOM | 8181 | CA   | LEU | X | 535 | 51.666 | 33.964 | 70.151 | 0.00 | 0.00 |
| ATOM | 8182 | HA   | LEU | X | 535 | 51.577 | 33.691 | 71.203 | 0.00 | 0.00 |
| ATOM | 8183 | CB   | LEU | X | 535 | 52.758 | 33.065 | 69.443 | 0.00 | 0.00 |
| ATOM | 8184 | HB2  | LEU | X | 535 | 52.352 | 32.055 | 69.501 | 0.00 | 0.00 |
| ATOM | 8185 | HB3  | LEU | X | 535 | 52.740 | 33.330 | 68.386 | 0.00 | 0.00 |
| ATOM | 8186 | CG   | LEU | X | 535 | 54.178 | 33.121 | 70.121 | 0.00 | 0.00 |
| ATOM | 8187 | HG   | LEU | X | 535 | 54.468 | 34.146 | 70.352 | 0.00 | 0.00 |
| ATOM | 8188 | CD1  | LEU | X | 535 | 54.266 | 32.318 | 71.393 | 0.00 | 0.00 |
| ATOM | 8189 | HD11 | LEU | X | 535 | 55.257 | 32.439 | 71.830 | 0.00 | 0.00 |
| ATOM | 8190 | HD12 | LEU | X | 535 | 53.916 | 31.305 | 71.192 | 0.00 | 0.00 |
| ATOM | 8191 | HD13 | LEU | X | 535 | 53.665 | 32.879 | 72.108 | 0.00 | 0.00 |
| ATOM | 8192 | CD2  | LEU | X | 535 | 55.242 | 32.598 | 69.139 | 0.00 | 0.00 |
| ATOM | 8193 | HD21 | LEU | X | 535 | 55.266 | 31.512 | 69.051 | 0.00 | 0.00 |
| ATOM | 8194 | HD22 | LEU | X | 535 | 55.153 | 33.012 | 68.134 | 0.00 | 0.00 |
| ATOM | 8195 | HD23 | LEU | X | 535 | 56.220 | 32.911 | 69.504 | 0.00 | 0.00 |
| ATOM | 8196 | C    | LEU | X | 535 | 52.016 | 35.493 | 70.114 | 0.00 | 0.00 |
| ATOM | 8197 | O    | LEU | X | 535 | 52.420 | 36.084 | 71.159 | 0.00 | 0.00 |
| ATOM | 8198 | N    | LEU | X | 536 | 51.691 | 36.125 | 68.974 | 0.00 | 0.00 |
| ATOM | 8199 | H    | LEU | X | 536 | 51.375 | 35.545 | 68.210 | 0.00 | 0.00 |
| ATOM | 8200 | CA   | LEU | X | 536 | 51.732 | 37.567 | 68.712 | 0.00 | 0.00 |
| ATOM | 8201 | HA   | LEU | X | 536 | 52.676 | 38.024 | 69.008 | 0.00 | 0.00 |
| ATOM | 8202 | CB   | LEU | X | 536 | 51.512 | 37.722 | 67.230 | 0.00 | 0.00 |
| ATOM | 8203 | HB2  | LEU | X | 536 | 50.679 | 37.165 | 66.802 | 0.00 | 0.00 |
| ATOM | 8204 | HB3  | LEU | X | 536 | 51.359 | 38.775 | 66.993 | 0.00 | 0.00 |
| ATOM | 8205 | CG   | LEU | X | 536 | 52.714 | 37.228 | 66.426 | 0.00 | 0.00 |
| ATOM | 8206 | HG   | LEU | X | 536 | 52.897 | 36.173 | 66.632 | 0.00 | 0.00 |
| ATOM | 8207 | CD1  | LEU | X | 536 | 52.555 | 37.415 | 64.897 | 0.00 | 0.00 |
| ATOM | 8208 | HD11 | LEU | X | 536 | 52.509 | 38.446 | 64.547 | 0.00 | 0.00 |
| ATOM | 8209 | HD12 | LEU | X | 536 | 51.622 | 36.993 | 64.522 | 0.00 | 0.00 |
| ATOM | 8210 | HD13 | LEU | X | 536 | 53.341 | 36.860 | 64.385 | 0.00 | 0.00 |
| ATOM | 8211 | CD2  | LEU | X | 536 | 54.018 | 37.852 | 66.761 | 0.00 | 0.00 |
| ATOM | 8212 | HD21 | LEU | X | 536 | 54.815 | 37.654 | 66.045 | 0.00 | 0.00 |
| ATOM | 8213 | HD22 | LEU | X | 536 | 53.782 | 38.898 | 66.960 | 0.00 | 0.00 |
| ATOM | 8214 | HD23 | LEU | X | 536 | 54.428 | 37.428 | 67.678 | 0.00 | 0.00 |
| ATOM | 8215 | C    | LEU | X | 536 | 50.683 | 38.313 | 69.507 | 0.00 | 0.00 |
| ATOM | 8216 | O    | LEU | X | 536 | 50.937 | 39.448 | 69.973 | 0.00 | 0.00 |
| ATOM | 8217 | N    | SER | X | 537 | 49.525 | 37.773 | 69.747 | 0.00 | 0.00 |
| ATOM | 8218 | H    | SER | X | 537 | 49.323 | 36.922 | 69.243 | 0.00 | 0.00 |
| ATOM | 8219 | CA   | SER | X | 537 | 48.506 | 38.404 | 70.610 | 0.00 | 0.00 |

|      |      |      |     |   |     |        |        |        |      |      |
|------|------|------|-----|---|-----|--------|--------|--------|------|------|
| ATOM | 8220 | HA   | SER | X | 537 | 48.662 | 39.477 | 70.726 | 0.00 | 0.00 |
| ATOM | 8221 | CB   | SER | X | 537 | 47.142 | 38.179 | 70.046 | 0.00 | 0.00 |
| ATOM | 8222 | HB2  | SER | X | 537 | 46.585 | 38.592 | 70.887 | 0.00 | 0.00 |
| ATOM | 8223 | HB3  | SER | X | 537 | 46.996 | 38.847 | 69.198 | 0.00 | 0.00 |
| ATOM | 8224 | OG   | SER | X | 537 | 46.795 | 36.858 | 69.761 | 0.00 | 0.00 |
| ATOM | 8225 | HG   | SER | X | 537 | 46.178 | 36.923 | 69.029 | 0.00 | 0.00 |
| ATOM | 8226 | C    | SER | X | 537 | 48.787 | 37.929 | 72.067 | 0.00 | 0.00 |
| ATOM | 8227 | O    | SER | X | 537 | 48.037 | 38.362 | 72.946 | 0.00 | 0.00 |
| ATOM | 8228 | N    | ALA | X | 538 | 49.860 | 37.178 | 72.404 | 0.00 | 0.00 |
| ATOM | 8229 | H    | ALA | X | 538 | 50.511 | 36.829 | 71.716 | 0.00 | 0.00 |
| ATOM | 8230 | CA   | ALA | X | 538 | 50.108 | 36.723 | 73.786 | 0.00 | 0.00 |
| ATOM | 8231 | HA   | ALA | X | 538 | 49.375 | 37.100 | 74.499 | 0.00 | 0.00 |
| ATOM | 8232 | CB   | ALA | X | 538 | 50.306 | 35.227 | 73.849 | 0.00 | 0.00 |
| ATOM | 8233 | HB1  | ALA | X | 538 | 51.153 | 35.057 | 73.184 | 0.00 | 0.00 |
| ATOM | 8234 | HB2  | ALA | X | 538 | 49.336 | 34.783 | 73.625 | 0.00 | 0.00 |
| ATOM | 8235 | HB3  | ALA | X | 538 | 50.540 | 34.823 | 74.834 | 0.00 | 0.00 |
| ATOM | 8236 | C    | ALA | X | 538 | 51.309 | 37.553 | 74.341 | 0.00 | 0.00 |
| ATOM | 8237 | O    | ALA | X | 538 | 51.483 | 37.518 | 75.578 | 0.00 | 0.00 |
| ATOM | 8238 | N    | THR | X | 539 | 51.942 | 38.378 | 73.507 | 0.00 | 0.00 |
| ATOM | 8239 | H    | THR | X | 539 | 51.668 | 38.382 | 72.534 | 0.00 | 0.00 |
| ATOM | 8240 | CA   | THR | X | 539 | 52.963 | 39.337 | 73.869 | 0.00 | 0.00 |
| ATOM | 8241 | HA   | THR | X | 539 | 53.850 | 38.847 | 74.269 | 0.00 | 0.00 |
| ATOM | 8242 | CB   | THR | X | 539 | 53.348 | 40.295 | 72.643 | 0.00 | 0.00 |
| ATOM | 8243 | HB   | THR | X | 539 | 52.617 | 41.082 | 72.453 | 0.00 | 0.00 |
| ATOM | 8244 | CG2  | THR | X | 539 | 54.704 | 40.930 | 72.781 | 0.00 | 0.00 |
| ATOM | 8245 | HG21 | THR | X | 539 | 55.479 | 40.182 | 72.944 | 0.00 | 0.00 |
| ATOM | 8246 | HG22 | THR | X | 539 | 54.705 | 41.545 | 73.681 | 0.00 | 0.00 |
| ATOM | 8247 | HG23 | THR | X | 539 | 54.990 | 41.496 | 71.895 | 0.00 | 0.00 |
| ATOM | 8248 | OG1  | THR | X | 539 | 53.402 | 39.462 | 71.510 | 0.00 | 0.00 |
| ATOM | 8249 | HG1  | THR | X | 539 | 52.807 | 39.893 | 70.891 | 0.00 | 0.00 |
| ATOM | 8250 | C    | THR | X | 539 | 52.473 | 40.194 | 74.931 | 0.00 | 0.00 |
| ATOM | 8251 | O    | THR | X | 539 | 51.526 | 40.984 | 74.723 | 0.00 | 0.00 |
| ATOM | 8252 | OXT  | THR | X | 539 | 53.153 | 40.320 | 75.986 | 0.00 | 0.00 |

END

#-----  
# 1B41 Production MD Frame 2400  
#-----

| CRYST1 | 82.066 | 82.066 | 82.066 | 90.00 | 90.00 | 90.00  | P 1    | 1      |      |      |
|--------|--------|--------|--------|-------|-------|--------|--------|--------|------|------|
| ATOM   | 1      | N      | ASP    | X     | 1     | 32.124 | 46.291 | 8.533  | 0.00 | 0.00 |
| ATOM   | 2      | H1     | ASP    | X     | 1     | 31.766 | 45.590 | 9.166  | 0.00 | 0.00 |
| ATOM   | 3      | H2     | ASP    | X     | 1     | 33.048 | 46.475 | 8.897  | 0.00 | 0.00 |
| ATOM   | 4      | H3     | ASP    | X     | 1     | 32.023 | 45.952 | 7.587  | 0.00 | 0.00 |
| ATOM   | 5      | CA     | ASP    | X     | 1     | 31.295 | 47.537 | 8.597  | 0.00 | 0.00 |
| ATOM   | 6      | HA     | ASP    | X     | 1     | 31.836 | 48.260 | 7.987  | 0.00 | 0.00 |
| ATOM   | 7      | CB     | ASP    | X     | 1     | 29.958 | 47.327 | 8.006  | 0.00 | 0.00 |
| ATOM   | 8      | HB2    | ASP    | X     | 1     | 30.108 | 46.878 | 7.023  | 0.00 | 0.00 |
| ATOM   | 9      | HB3    | ASP    | X     | 1     | 29.397 | 46.553 | 8.530  | 0.00 | 0.00 |
| ATOM   | 10     | CG     | ASP    | X     | 1     | 29.039 | 48.478 | 7.789  | 0.00 | 0.00 |
| ATOM   | 11     | OD1    | ASP    | X     | 1     | 29.280 | 49.246 | 6.830  | 0.00 | 0.00 |
| ATOM   | 12     | OD2    | ASP    | X     | 1     | 28.027 | 48.504 | 8.470  | 0.00 | 0.00 |
| ATOM   | 13     | C      | ASP    | X     | 1     | 31.097 | 48.104 | 10.074 | 0.00 | 0.00 |
| ATOM   | 14     | O      | ASP    | X     | 1     | 31.789 | 49.041 | 10.360 | 0.00 | 0.00 |
| ATOM   | 15     | N      | ALA    | X     | 2     | 30.340 | 47.501 | 10.972 | 0.00 | 0.00 |
| ATOM   | 16     | H      | ALA    | X     | 2     | 29.787 | 46.692 | 10.728 | 0.00 | 0.00 |
| ATOM   | 17     | CA     | ALA    | X     | 2     | 30.001 | 48.098 | 12.290 | 0.00 | 0.00 |
| ATOM   | 18     | HA     | ALA    | X     | 2     | 30.440 | 49.086 | 12.427 | 0.00 | 0.00 |
| ATOM   | 19     | CB     | ALA    | X     | 2     | 28.470 | 48.363 | 12.247 | 0.00 | 0.00 |
| ATOM   | 20     | HB1    | ALA    | X     | 2     | 28.175 | 48.752 | 11.272 | 0.00 | 0.00 |
| ATOM   | 21     | HB2    | ALA    | X     | 2     | 28.124 | 49.020 | 13.045 | 0.00 | 0.00 |
| ATOM   | 22     | HB3    | ALA    | X     | 2     | 27.961 | 47.420 | 12.446 | 0.00 | 0.00 |
| ATOM   | 23     | C      | ALA    | X     | 2     | 30.394 | 47.296 | 13.569 | 0.00 | 0.00 |
| ATOM   | 24     | O      | ALA    | X     | 2     | 30.118 | 47.577 | 14.808 | 0.00 | 0.00 |
| ATOM   | 25     | N      | GLU    | X     | 3     | 31.187 | 46.261 | 13.340 | 0.00 | 0.00 |

|      |    |      |     |   |   |        |        |        |      |      |
|------|----|------|-----|---|---|--------|--------|--------|------|------|
| ATOM | 26 | H    | GLU | X | 3 | 31.276 | 46.019 | 12.364 | 0.00 | 0.00 |
| ATOM | 27 | CA   | GLU | X | 3 | 31.595 | 45.284 | 14.379 | 0.00 | 0.00 |
| ATOM | 28 | HA   | GLU | X | 3 | 30.705 | 44.842 | 14.829 | 0.00 | 0.00 |
| ATOM | 29 | CB   | GLU | X | 3 | 32.492 | 44.305 | 13.629 | 0.00 | 0.00 |
| ATOM | 30 | HB2  | GLU | X | 3 | 33.360 | 44.740 | 13.135 | 0.00 | 0.00 |
| ATOM | 31 | HB3  | GLU | X | 3 | 32.768 | 43.502 | 14.312 | 0.00 | 0.00 |
| ATOM | 32 | CG   | GLU | X | 3 | 31.754 | 43.468 | 12.599 | 0.00 | 0.00 |
| ATOM | 33 | HG2  | GLU | X | 3 | 32.171 | 42.463 | 12.658 | 0.00 | 0.00 |
| ATOM | 34 | HG3  | GLU | X | 3 | 30.701 | 43.440 | 12.879 | 0.00 | 0.00 |
| ATOM | 35 | CD   | GLU | X | 3 | 31.738 | 43.940 | 11.141 | 0.00 | 0.00 |
| ATOM | 36 | OE1  | GLU | X | 3 | 31.201 | 43.320 | 10.167 | 0.00 | 0.00 |
| ATOM | 37 | OE2  | GLU | X | 3 | 32.214 | 45.040 | 10.889 | 0.00 | 0.00 |
| ATOM | 38 | C    | GLU | X | 3 | 32.460 | 45.883 | 15.517 | 0.00 | 0.00 |
| ATOM | 39 | O    | GLU | X | 3 | 32.515 | 45.489 | 16.703 | 0.00 | 0.00 |
| ATOM | 40 | N    | LEU | X | 4 | 33.137 | 47.069 | 15.259 | 0.00 | 0.00 |
| ATOM | 41 | H    | LEU | X | 4 | 33.240 | 47.454 | 14.331 | 0.00 | 0.00 |
| ATOM | 42 | CA   | LEU | X | 4 | 33.990 | 47.803 | 16.172 | 0.00 | 0.00 |
| ATOM | 43 | HA   | LEU | X | 4 | 34.309 | 47.172 | 17.002 | 0.00 | 0.00 |
| ATOM | 44 | CB   | LEU | X | 4 | 35.393 | 48.054 | 15.465 | 0.00 | 0.00 |
| ATOM | 45 | HB2  | LEU | X | 4 | 35.183 | 48.604 | 14.548 | 0.00 | 0.00 |
| ATOM | 46 | HB3  | LEU | X | 4 | 36.017 | 48.547 | 16.211 | 0.00 | 0.00 |
| ATOM | 47 | CG   | LEU | X | 4 | 36.113 | 46.868 | 14.877 | 0.00 | 0.00 |
| ATOM | 48 | HG   | LEU | X | 4 | 35.529 | 46.380 | 14.096 | 0.00 | 0.00 |
| ATOM | 49 | CD1  | LEU | X | 4 | 37.318 | 47.501 | 14.123 | 0.00 | 0.00 |
| ATOM | 50 | HD11 | LEU | X | 4 | 38.098 | 47.792 | 14.827 | 0.00 | 0.00 |
| ATOM | 51 | HD12 | LEU | X | 4 | 36.945 | 48.332 | 13.524 | 0.00 | 0.00 |
| ATOM | 52 | HD13 | LEU | X | 4 | 37.820 | 46.770 | 13.490 | 0.00 | 0.00 |
| ATOM | 53 | CD2  | LEU | X | 4 | 36.503 | 45.861 | 15.983 | 0.00 | 0.00 |
| ATOM | 54 | HD21 | LEU | X | 4 | 37.099 | 46.282 | 16.793 | 0.00 | 0.00 |
| ATOM | 55 | HD22 | LEU | X | 4 | 35.639 | 45.284 | 16.310 | 0.00 | 0.00 |
| ATOM | 56 | HD23 | LEU | X | 4 | 36.893 | 45.037 | 15.386 | 0.00 | 0.00 |
| ATOM | 57 | C    | LEU | X | 4 | 33.396 | 49.086 | 16.719 | 0.00 | 0.00 |
| ATOM | 58 | O    | LEU | X | 4 | 34.037 | 49.880 | 17.396 | 0.00 | 0.00 |
| ATOM | 59 | N    | LEU | X | 5 | 32.169 | 49.429 | 16.265 | 0.00 | 0.00 |
| ATOM | 60 | H    | LEU | X | 5 | 31.714 | 48.716 | 15.713 | 0.00 | 0.00 |
| ATOM | 61 | CA   | LEU | X | 5 | 31.372 | 50.587 | 16.581 | 0.00 | 0.00 |
| ATOM | 62 | HA   | LEU | X | 5 | 32.028 | 51.330 | 17.034 | 0.00 | 0.00 |
| ATOM | 63 | CB   | LEU | X | 5 | 30.675 | 51.094 | 15.300 | 0.00 | 0.00 |
| ATOM | 64 | HB2  | LEU | X | 5 | 30.152 | 50.267 | 14.820 | 0.00 | 0.00 |
| ATOM | 65 | HB3  | LEU | X | 5 | 30.113 | 52.025 | 15.376 | 0.00 | 0.00 |
| ATOM | 66 | CG   | LEU | X | 5 | 31.850 | 51.572 | 14.438 | 0.00 | 0.00 |
| ATOM | 67 | HG   | LEU | X | 5 | 32.525 | 50.770 | 14.140 | 0.00 | 0.00 |
| ATOM | 68 | CD1  | LEU | X | 5 | 31.287 | 52.080 | 13.141 | 0.00 | 0.00 |
| ATOM | 69 | HD11 | LEU | X | 5 | 30.471 | 51.427 | 12.831 | 0.00 | 0.00 |
| ATOM | 70 | HD12 | LEU | X | 5 | 32.048 | 52.159 | 12.365 | 0.00 | 0.00 |
| ATOM | 71 | HD13 | LEU | X | 5 | 30.796 | 53.037 | 13.316 | 0.00 | 0.00 |
| ATOM | 72 | CD2  | LEU | X | 5 | 32.692 | 52.738 | 15.037 | 0.00 | 0.00 |
| ATOM | 73 | HD21 | LEU | X | 5 | 33.476 | 52.827 | 14.286 | 0.00 | 0.00 |
| ATOM | 74 | HD22 | LEU | X | 5 | 32.228 | 53.725 | 15.031 | 0.00 | 0.00 |
| ATOM | 75 | HD23 | LEU | X | 5 | 33.261 | 52.592 | 15.955 | 0.00 | 0.00 |
| ATOM | 76 | C    | LEU | X | 5 | 30.432 | 50.189 | 17.627 | 0.00 | 0.00 |
| ATOM | 77 | O    | LEU | X | 5 | 29.908 | 49.050 | 17.620 | 0.00 | 0.00 |
| ATOM | 78 | N    | VAL | X | 6 | 30.088 | 51.063 | 18.597 | 0.00 | 0.00 |
| ATOM | 79 | H    | VAL | X | 6 | 30.348 | 52.029 | 18.454 | 0.00 | 0.00 |
| ATOM | 80 | CA   | VAL | X | 6 | 29.193 | 50.730 | 19.735 | 0.00 | 0.00 |
| ATOM | 81 | HA   | VAL | X | 6 | 28.271 | 50.356 | 19.290 | 0.00 | 0.00 |
| ATOM | 82 | CB   | VAL | X | 6 | 29.880 | 49.710 | 20.629 | 0.00 | 0.00 |
| ATOM | 83 | HB   | VAL | X | 6 | 30.275 | 48.910 | 20.003 | 0.00 | 0.00 |
| ATOM | 84 | CG1  | VAL | X | 6 | 31.089 | 50.393 | 21.292 | 0.00 | 0.00 |
| ATOM | 85 | HG11 | VAL | X | 6 | 31.796 | 50.826 | 20.586 | 0.00 | 0.00 |
| ATOM | 86 | HG12 | VAL | X | 6 | 30.857 | 51.150 | 22.042 | 0.00 | 0.00 |
| ATOM | 87 | HG13 | VAL | X | 6 | 31.681 | 49.660 | 21.839 | 0.00 | 0.00 |
| ATOM | 88 | CG2  | VAL | X | 6 | 28.985 | 49.083 | 21.663 | 0.00 | 0.00 |
| ATOM | 89 | HG21 | VAL | X | 6 | 28.823 | 49.728 | 22.527 | 0.00 | 0.00 |
| ATOM | 90 | HG22 | VAL | X | 6 | 29.402 | 48.132 | 21.994 | 0.00 | 0.00 |
| ATOM | 91 | HG23 | VAL | X | 6 | 28.040 | 48.785 | 21.210 | 0.00 | 0.00 |
| ATOM | 92 | C    | VAL | X | 6 | 28.775 | 51.993 | 20.576 | 0.00 | 0.00 |

|      |     |      |     |   |    |        |        |        |      |      |
|------|-----|------|-----|---|----|--------|--------|--------|------|------|
| ATOM | 93  | O    | VAL | X | 6  | 29.438 | 53.047 | 20.397 | 0.00 | 0.00 |
| ATOM | 94  | N    | THR | X | 7  | 27.614 | 51.958 | 21.269 | 0.00 | 0.00 |
| ATOM | 95  | H    | THR | X | 7  | 27.142 | 51.066 | 21.295 | 0.00 | 0.00 |
| ATOM | 96  | CA   | THR | X | 7  | 27.071 | 53.019 | 22.093 | 0.00 | 0.00 |
| ATOM | 97  | HA   | THR | X | 7  | 27.761 | 53.856 | 21.988 | 0.00 | 0.00 |
| ATOM | 98  | CB   | THR | X | 7  | 25.643 | 53.410 | 21.720 | 0.00 | 0.00 |
| ATOM | 99  | HB   | THR | X | 7  | 24.897 | 52.721 | 22.115 | 0.00 | 0.00 |
| ATOM | 100 | CG2  | THR | X | 7  | 25.355 | 54.798 | 22.199 | 0.00 | 0.00 |
| ATOM | 101 | HG21 | THR | X | 7  | 24.295 | 55.052 | 22.232 | 0.00 | 0.00 |
| ATOM | 102 | HG22 | THR | X | 7  | 25.862 | 55.624 | 21.700 | 0.00 | 0.00 |
| ATOM | 103 | HG23 | THR | X | 7  | 25.676 | 54.865 | 23.239 | 0.00 | 0.00 |
| ATOM | 104 | OG1  | THR | X | 7  | 25.506 | 53.480 | 20.334 | 0.00 | 0.00 |
| ATOM | 105 | HG1  | THR | X | 7  | 24.603 | 53.782 | 20.215 | 0.00 | 0.00 |
| ATOM | 106 | C    | THR | X | 7  | 27.143 | 52.619 | 23.545 | 0.00 | 0.00 |
| ATOM | 107 | O    | THR | X | 7  | 26.510 | 51.645 | 23.934 | 0.00 | 0.00 |
| ATOM | 108 | N    | VAL | X | 8  | 27.730 | 53.495 | 24.373 | 0.00 | 0.00 |
| ATOM | 109 | H    | VAL | X | 8  | 28.204 | 54.357 | 24.145 | 0.00 | 0.00 |
| ATOM | 110 | CA   | VAL | X | 8  | 27.662 | 53.432 | 25.909 | 0.00 | 0.00 |
| ATOM | 111 | HA   | VAL | X | 8  | 27.026 | 52.597 | 26.203 | 0.00 | 0.00 |
| ATOM | 112 | CB   | VAL | X | 8  | 28.994 | 53.048 | 26.559 | 0.00 | 0.00 |
| ATOM | 113 | HB   | VAL | X | 8  | 28.914 | 52.958 | 27.642 | 0.00 | 0.00 |
| ATOM | 114 | CG1  | VAL | X | 8  | 29.593 | 51.708 | 25.995 | 0.00 | 0.00 |
| ATOM | 115 | HG11 | VAL | X | 8  | 28.938 | 50.871 | 26.237 | 0.00 | 0.00 |
| ATOM | 116 | HG12 | VAL | X | 8  | 29.776 | 51.696 | 24.921 | 0.00 | 0.00 |
| ATOM | 117 | HG13 | VAL | X | 8  | 30.529 | 51.597 | 26.543 | 0.00 | 0.00 |
| ATOM | 118 | CG2  | VAL | X | 8  | 29.941 | 54.148 | 26.287 | 0.00 | 0.00 |
| ATOM | 119 | HG21 | VAL | X | 8  | 30.938 | 53.843 | 26.605 | 0.00 | 0.00 |
| ATOM | 120 | HG22 | VAL | X | 8  | 29.694 | 54.964 | 26.965 | 0.00 | 0.00 |
| ATOM | 121 | HG23 | VAL | X | 8  | 30.069 | 54.348 | 25.223 | 0.00 | 0.00 |
| ATOM | 122 | C    | VAL | X | 8  | 26.983 | 54.661 | 26.459 | 0.00 | 0.00 |
| ATOM | 123 | O    | VAL | X | 8  | 26.558 | 55.531 | 25.727 | 0.00 | 0.00 |
| ATOM | 124 | N    | ARG | X | 9  | 26.670 | 54.671 | 27.752 | 0.00 | 0.00 |
| ATOM | 125 | H    | ARG | X | 9  | 26.845 | 53.885 | 28.362 | 0.00 | 0.00 |
| ATOM | 126 | CA   | ARG | X | 9  | 25.958 | 55.750 | 28.451 | 0.00 | 0.00 |
| ATOM | 127 | HA   | ARG | X | 9  | 25.004 | 55.834 | 27.931 | 0.00 | 0.00 |
| ATOM | 128 | CB   | ARG | X | 9  | 25.717 | 55.357 | 29.873 | 0.00 | 0.00 |
| ATOM | 129 | HB2  | ARG | X | 9  | 25.211 | 54.397 | 29.780 | 0.00 | 0.00 |
| ATOM | 130 | HB3  | ARG | X | 9  | 26.592 | 55.081 | 30.462 | 0.00 | 0.00 |
| ATOM | 131 | CG   | ARG | X | 9  | 24.879 | 56.382 | 30.663 | 0.00 | 0.00 |
| ATOM | 132 | HG2  | ARG | X | 9  | 25.552 | 57.239 | 30.706 | 0.00 | 0.00 |
| ATOM | 133 | HG3  | ARG | X | 9  | 23.997 | 56.730 | 30.126 | 0.00 | 0.00 |
| ATOM | 134 | CD   | ARG | X | 9  | 24.499 | 55.901 | 31.995 | 0.00 | 0.00 |
| ATOM | 135 | HD2  | ARG | X | 9  | 23.952 | 54.969 | 31.850 | 0.00 | 0.00 |
| ATOM | 136 | HD3  | ARG | X | 9  | 25.440 | 55.684 | 32.501 | 0.00 | 0.00 |
| ATOM | 137 | NE   | ARG | X | 9  | 23.530 | 56.737 | 32.716 | 0.00 | 0.00 |
| ATOM | 138 | HE   | ARG | X | 9  | 22.807 | 57.180 | 32.167 | 0.00 | 0.00 |
| ATOM | 139 | CZ   | ARG | X | 9  | 23.513 | 57.061 | 33.983 | 0.00 | 0.00 |
| ATOM | 140 | NH1  | ARG | X | 9  | 24.310 | 56.521 | 34.942 | 0.00 | 0.00 |
| ATOM | 141 | HH11 | ARG | X | 9  | 24.736 | 55.616 | 34.799 | 0.00 | 0.00 |
| ATOM | 142 | HH12 | ARG | X | 9  | 24.144 | 56.807 | 35.896 | 0.00 | 0.00 |
| ATOM | 143 | NH2  | ARG | X | 9  | 22.779 | 58.066 | 34.418 | 0.00 | 0.00 |
| ATOM | 144 | HH21 | ARG | X | 9  | 22.201 | 58.638 | 33.819 | 0.00 | 0.00 |
| ATOM | 145 | HH22 | ARG | X | 9  | 22.901 | 58.471 | 35.335 | 0.00 | 0.00 |
| ATOM | 146 | C    | ARG | X | 9  | 26.611 | 57.124 | 28.252 | 0.00 | 0.00 |
| ATOM | 147 | O    | ARG | X | 9  | 25.913 | 58.132 | 28.163 | 0.00 | 0.00 |
| ATOM | 148 | N    | GLY | X | 10 | 27.946 | 57.148 | 28.121 | 0.00 | 0.00 |
| ATOM | 149 | H    | GLY | X | 10 | 28.463 | 56.325 | 28.395 | 0.00 | 0.00 |
| ATOM | 150 | CA   | GLY | X | 10 | 28.740 | 58.358 | 27.688 | 0.00 | 0.00 |
| ATOM | 151 | HA2  | GLY | X | 10 | 28.321 | 59.173 | 28.277 | 0.00 | 0.00 |
| ATOM | 152 | HA3  | GLY | X | 10 | 29.799 | 58.246 | 27.917 | 0.00 | 0.00 |
| ATOM | 153 | C    | GLY | X | 10 | 28.539 | 58.749 | 26.221 | 0.00 | 0.00 |
| ATOM | 154 | O    | GLY | X | 10 | 28.525 | 59.940 | 25.950 | 0.00 | 0.00 |
| ATOM | 155 | N    | GLY | X | 11 | 28.285 | 57.821 | 25.349 | 0.00 | 0.00 |
| ATOM | 156 | H    | GLY | X | 11 | 28.259 | 56.875 | 25.700 | 0.00 | 0.00 |
| ATOM | 157 | CA   | GLY | X | 11 | 28.068 | 58.030 | 23.924 | 0.00 | 0.00 |
| ATOM | 158 | HA2  | GLY | X | 11 | 27.034 | 58.288 | 23.695 | 0.00 | 0.00 |
| ATOM | 159 | HA3  | GLY | X | 11 | 28.687 | 58.878 | 23.632 | 0.00 | 0.00 |

|      |     |      |     |   |    |        |        |        |      |      |
|------|-----|------|-----|---|----|--------|--------|--------|------|------|
| ATOM | 160 | C    | GLY | X | 11 | 28.657 | 56.954 | 22.995 | 0.00 | 0.00 |
| ATOM | 161 | O    | GLY | X | 11 | 28.841 | 55.797 | 23.465 | 0.00 | 0.00 |
| ATOM | 162 | N    | ARG | X | 12 | 28.923 | 57.312 | 21.732 | 0.00 | 0.00 |
| ATOM | 163 | H    | ARG | X | 12 | 28.632 | 58.222 | 21.407 | 0.00 | 0.00 |
| ATOM | 164 | CA   | ARG | X | 12 | 29.443 | 56.371 | 20.718 | 0.00 | 0.00 |
| ATOM | 165 | HA   | ARG | X | 12 | 29.104 | 55.365 | 20.962 | 0.00 | 0.00 |
| ATOM | 166 | CB   | ARG | X | 12 | 29.007 | 56.810 | 19.326 | 0.00 | 0.00 |
| ATOM | 167 | HB2  | ARG | X | 12 | 29.451 | 57.755 | 19.013 | 0.00 | 0.00 |
| ATOM | 168 | HB3  | ARG | X | 12 | 29.444 | 56.040 | 18.690 | 0.00 | 0.00 |
| ATOM | 169 | CG   | ARG | X | 12 | 27.495 | 56.738 | 19.013 | 0.00 | 0.00 |
| ATOM | 170 | HG2  | ARG | X | 12 | 27.109 | 55.719 | 19.042 | 0.00 | 0.00 |
| ATOM | 171 | HG3  | ARG | X | 12 | 26.919 | 57.416 | 19.643 | 0.00 | 0.00 |
| ATOM | 172 | CD   | ARG | X | 12 | 27.368 | 57.197 | 17.566 | 0.00 | 0.00 |
| ATOM | 173 | HD2  | ARG | X | 12 | 28.295 | 56.973 | 17.038 | 0.00 | 0.00 |
| ATOM | 174 | HD3  | ARG | X | 12 | 26.586 | 56.644 | 17.044 | 0.00 | 0.00 |
| ATOM | 175 | NE   | ARG | X | 12 | 27.142 | 58.664 | 17.327 | 0.00 | 0.00 |
| ATOM | 176 | HE   | ARG | X | 12 | 27.856 | 59.089 | 16.754 | 0.00 | 0.00 |
| ATOM | 177 | CZ   | ARG | X | 12 | 26.104 | 59.403 | 17.591 | 0.00 | 0.00 |
| ATOM | 178 | NH1  | ARG | X | 12 | 25.156 | 58.925 | 18.365 | 0.00 | 0.00 |
| ATOM | 179 | HH11 | ARG | X | 12 | 25.149 | 57.944 | 18.607 | 0.00 | 0.00 |
| ATOM | 180 | HH12 | ARG | X | 12 | 24.448 | 59.544 | 18.734 | 0.00 | 0.00 |
| ATOM | 181 | NH2  | ARG | X | 12 | 25.948 | 60.544 | 17.022 | 0.00 | 0.00 |
| ATOM | 182 | HH21 | ARG | X | 12 | 26.661 | 60.915 | 16.411 | 0.00 | 0.00 |
| ATOM | 183 | HH22 | ARG | X | 12 | 25.006 | 60.905 | 16.976 | 0.00 | 0.00 |
| ATOM | 184 | C    | ARG | X | 12 | 30.966 | 56.241 | 20.814 | 0.00 | 0.00 |
| ATOM | 185 | O    | ARG | X | 12 | 31.694 | 57.051 | 21.370 | 0.00 | 0.00 |
| ATOM | 186 | N    | LEU | X | 13 | 31.474 | 55.100 | 20.315 | 0.00 | 0.00 |
| ATOM | 187 | H    | LEU | X | 13 | 30.839 | 54.432 | 19.903 | 0.00 | 0.00 |
| ATOM | 188 | CA   | LEU | X | 13 | 32.866 | 54.676 | 20.572 | 0.00 | 0.00 |
| ATOM | 189 | HA   | LEU | X | 13 | 33.440 | 55.579 | 20.780 | 0.00 | 0.00 |
| ATOM | 190 | CB   | LEU | X | 13 | 32.916 | 53.728 | 21.802 | 0.00 | 0.00 |
| ATOM | 191 | HB2  | LEU | X | 13 | 32.083 | 53.032 | 21.710 | 0.00 | 0.00 |
| ATOM | 192 | HB3  | LEU | X | 13 | 33.826 | 53.128 | 21.771 | 0.00 | 0.00 |
| ATOM | 193 | CG   | LEU | X | 13 | 32.685 | 54.281 | 23.172 | 0.00 | 0.00 |
| ATOM | 194 | HG   | LEU | X | 13 | 31.764 | 54.843 | 23.325 | 0.00 | 0.00 |
| ATOM | 195 | CD1  | LEU | X | 13 | 32.676 | 53.138 | 24.222 | 0.00 | 0.00 |
| ATOM | 196 | HD11 | LEU | X | 13 | 33.677 | 52.720 | 24.330 | 0.00 | 0.00 |
| ATOM | 197 | HD12 | LEU | X | 13 | 31.875 | 52.444 | 23.967 | 0.00 | 0.00 |
| ATOM | 198 | HD13 | LEU | X | 13 | 32.485 | 53.564 | 25.207 | 0.00 | 0.00 |
| ATOM | 199 | CD2  | LEU | X | 13 | 33.823 | 55.303 | 23.486 | 0.00 | 0.00 |
| ATOM | 200 | HD21 | LEU | X | 13 | 33.803 | 55.713 | 24.496 | 0.00 | 0.00 |
| ATOM | 201 | HD22 | LEU | X | 13 | 34.845 | 54.932 | 23.420 | 0.00 | 0.00 |
| ATOM | 202 | HD23 | LEU | X | 13 | 33.658 | 56.151 | 22.821 | 0.00 | 0.00 |
| ATOM | 203 | C    | LEU | X | 13 | 33.502 | 53.948 | 19.391 | 0.00 | 0.00 |
| ATOM | 204 | O    | LEU | X | 13 | 32.830 | 53.106 | 18.842 | 0.00 | 0.00 |
| ATOM | 205 | N    | ARG | X | 14 | 34.799 | 54.103 | 19.121 | 0.00 | 0.00 |
| ATOM | 206 | H    | ARG | X | 14 | 35.288 | 54.796 | 19.668 | 0.00 | 0.00 |
| ATOM | 207 | CA   | ARG | X | 14 | 35.511 | 53.433 | 17.985 | 0.00 | 0.00 |
| ATOM | 208 | HA   | ARG | X | 14 | 34.891 | 52.677 | 17.502 | 0.00 | 0.00 |
| ATOM | 209 | CB   | ARG | X | 14 | 35.914 | 54.436 | 16.841 | 0.00 | 0.00 |
| ATOM | 210 | HB2  | ARG | X | 14 | 34.966 | 54.919 | 16.605 | 0.00 | 0.00 |
| ATOM | 211 | HB3  | ARG | X | 14 | 36.607 | 55.203 | 17.188 | 0.00 | 0.00 |
| ATOM | 212 | CG   | ARG | X | 14 | 36.439 | 53.670 | 15.575 | 0.00 | 0.00 |
| ATOM | 213 | HG2  | ARG | X | 14 | 37.427 | 53.274 | 15.809 | 0.00 | 0.00 |
| ATOM | 214 | HG3  | ARG | X | 14 | 35.847 | 52.837 | 15.194 | 0.00 | 0.00 |
| ATOM | 215 | CD   | ARG | X | 14 | 36.588 | 54.682 | 14.395 | 0.00 | 0.00 |
| ATOM | 216 | HD2  | ARG | X | 14 | 35.683 | 55.281 | 14.292 | 0.00 | 0.00 |
| ATOM | 217 | HD3  | ARG | X | 14 | 37.402 | 55.355 | 14.666 | 0.00 | 0.00 |
| ATOM | 218 | NE   | ARG | X | 14 | 36.758 | 54.030 | 13.103 | 0.00 | 0.00 |
| ATOM | 219 | HE   | ARG | X | 14 | 37.664 | 53.630 | 12.907 | 0.00 | 0.00 |
| ATOM | 220 | CZ   | ARG | X | 14 | 35.997 | 54.110 | 12.007 | 0.00 | 0.00 |
| ATOM | 221 | NH1  | ARG | X | 14 | 34.886 | 54.800 | 11.853 | 0.00 | 0.00 |
| ATOM | 222 | HH11 | ARG | X | 14 | 34.734 | 55.553 | 12.508 | 0.00 | 0.00 |
| ATOM | 223 | HH12 | ARG | X | 14 | 34.228 | 54.594 | 11.115 | 0.00 | 0.00 |
| ATOM | 224 | NH2  | ARG | X | 14 | 36.434 | 53.443 | 10.983 | 0.00 | 0.00 |
| ATOM | 225 | HH21 | ARG | X | 14 | 37.356 | 53.031 | 10.962 | 0.00 | 0.00 |
| ATOM | 226 | HH22 | ARG | X | 14 | 35.845 | 53.331 | 10.170 | 0.00 | 0.00 |

|      |     |      |     |   |    |        |        |        |      |      |
|------|-----|------|-----|---|----|--------|--------|--------|------|------|
| ATOM | 227 | C    | ARG | X | 14 | 36.668 | 52.670 | 18.593 | 0.00 | 0.00 |
| ATOM | 228 | O    | ARG | X | 14 | 37.685 | 53.249 | 18.918 | 0.00 | 0.00 |
| ATOM | 229 | N    | GLY | X | 15 | 36.552 | 51.373 | 18.530 | 0.00 | 0.00 |
| ATOM | 230 | H    | GLY | X | 15 | 35.821 | 51.020 | 17.929 | 0.00 | 0.00 |
| ATOM | 231 | CA   | GLY | X | 15 | 37.582 | 50.358 | 18.877 | 0.00 | 0.00 |
| ATOM | 232 | HA2  | GLY | X | 15 | 38.359 | 50.903 | 19.413 | 0.00 | 0.00 |
| ATOM | 233 | HA3  | GLY | X | 15 | 37.117 | 49.556 | 19.451 | 0.00 | 0.00 |
| ATOM | 234 | C    | GLY | X | 15 | 38.355 | 49.675 | 17.697 | 0.00 | 0.00 |
| ATOM | 235 | O    | GLY | X | 15 | 38.204 | 50.237 | 16.660 | 0.00 | 0.00 |
| ATOM | 236 | N    | ILE | X | 16 | 39.149 | 48.652 | 18.010 | 0.00 | 0.00 |
| ATOM | 237 | H    | ILE | X | 16 | 39.082 | 48.279 | 18.946 | 0.00 | 0.00 |
| ATOM | 238 | CA   | ILE | X | 16 | 40.090 | 48.008 | 17.106 | 0.00 | 0.00 |
| ATOM | 239 | HA   | ILE | X | 16 | 39.856 | 48.302 | 16.083 | 0.00 | 0.00 |
| ATOM | 240 | CB   | ILE | X | 16 | 41.587 | 48.308 | 17.502 | 0.00 | 0.00 |
| ATOM | 241 | HB   | ILE | X | 16 | 42.227 | 47.559 | 17.036 | 0.00 | 0.00 |
| ATOM | 242 | CG2  | ILE | X | 16 | 41.979 | 49.631 | 16.890 | 0.00 | 0.00 |
| ATOM | 243 | HG21 | ILE | X | 16 | 41.611 | 49.600 | 15.865 | 0.00 | 0.00 |
| ATOM | 244 | HG22 | ILE | X | 16 | 43.054 | 49.745 | 16.757 | 0.00 | 0.00 |
| ATOM | 245 | HG23 | ILE | X | 16 | 41.705 | 50.483 | 17.513 | 0.00 | 0.00 |
| ATOM | 246 | CG1  | ILE | X | 16 | 41.868 | 48.252 | 19.045 | 0.00 | 0.00 |
| ATOM | 247 | HG12 | ILE | X | 16 | 41.708 | 49.263 | 19.420 | 0.00 | 0.00 |
| ATOM | 248 | HG13 | ILE | X | 16 | 41.229 | 47.474 | 19.463 | 0.00 | 0.00 |
| ATOM | 249 | CD1  | ILE | X | 16 | 43.287 | 47.825 | 19.339 | 0.00 | 0.00 |
| ATOM | 250 | HD11 | ILE | X | 16 | 43.463 | 46.799 | 19.018 | 0.00 | 0.00 |
| ATOM | 251 | HD12 | ILE | X | 16 | 43.491 | 47.947 | 20.403 | 0.00 | 0.00 |
| ATOM | 252 | HD13 | ILE | X | 16 | 44.087 | 48.312 | 18.781 | 0.00 | 0.00 |
| ATOM | 253 | C    | ILE | X | 16 | 39.959 | 46.455 | 17.017 | 0.00 | 0.00 |
| ATOM | 254 | O    | ILE | X | 16 | 39.587 | 45.718 | 17.966 | 0.00 | 0.00 |
| ATOM | 255 | N    | ARG | X | 17 | 40.326 | 45.893 | 15.833 | 0.00 | 0.00 |
| ATOM | 256 | H    | ARG | X | 17 | 40.794 | 46.466 | 15.145 | 0.00 | 0.00 |
| ATOM | 257 | CA   | ARG | X | 17 | 40.316 | 44.433 | 15.544 | 0.00 | 0.00 |
| ATOM | 258 | HA   | ARG | X | 17 | 39.565 | 43.912 | 16.137 | 0.00 | 0.00 |
| ATOM | 259 | CB   | ARG | X | 17 | 39.924 | 44.209 | 14.025 | 0.00 | 0.00 |
| ATOM | 260 | HB2  | ARG | X | 17 | 39.111 | 44.881 | 13.750 | 0.00 | 0.00 |
| ATOM | 261 | HB3  | ARG | X | 17 | 40.749 | 44.704 | 13.512 | 0.00 | 0.00 |
| ATOM | 262 | CG   | ARG | X | 17 | 39.733 | 42.782 | 13.592 | 0.00 | 0.00 |
| ATOM | 263 | HG2  | ARG | X | 17 | 40.599 | 42.190 | 13.889 | 0.00 | 0.00 |
| ATOM | 264 | HG3  | ARG | X | 17 | 38.778 | 42.414 | 13.967 | 0.00 | 0.00 |
| ATOM | 265 | CD   | ARG | X | 17 | 39.615 | 42.771 | 12.051 | 0.00 | 0.00 |
| ATOM | 266 | HD2  | ARG | X | 17 | 38.976 | 43.614 | 11.790 | 0.00 | 0.00 |
| ATOM | 267 | HD3  | ARG | X | 17 | 40.592 | 42.965 | 11.609 | 0.00 | 0.00 |
| ATOM | 268 | NE   | ARG | X | 17 | 39.074 | 41.474 | 11.501 | 0.00 | 0.00 |
| ATOM | 269 | HE   | ARG | X | 17 | 38.082 | 41.368 | 11.343 | 0.00 | 0.00 |
| ATOM | 270 | CZ   | ARG | X | 17 | 39.844 | 40.451 | 11.082 | 0.00 | 0.00 |
| ATOM | 271 | NH1  | ARG | X | 17 | 41.163 | 40.494 | 11.153 | 0.00 | 0.00 |
| ATOM | 272 | HH11 | ARG | X | 17 | 41.658 | 41.270 | 11.567 | 0.00 | 0.00 |
| ATOM | 273 | HH12 | ARG | X | 17 | 41.618 | 39.783 | 10.599 | 0.00 | 0.00 |
| ATOM | 274 | NH2  | ARG | X | 17 | 39.267 | 39.533 | 10.490 | 0.00 | 0.00 |
| ATOM | 275 | HH21 | ARG | X | 17 | 38.288 | 39.615 | 10.255 | 0.00 | 0.00 |
| ATOM | 276 | HH22 | ARG | X | 17 | 39.782 | 38.696 | 10.257 | 0.00 | 0.00 |
| ATOM | 277 | C    | ARG | X | 17 | 41.661 | 43.806 | 15.796 | 0.00 | 0.00 |
| ATOM | 278 | O    | ARG | X | 17 | 42.706 | 44.488 | 15.587 | 0.00 | 0.00 |
| ATOM | 279 | N    | LEU | X | 18 | 41.759 | 42.562 | 16.199 | 0.00 | 0.00 |
| ATOM | 280 | H    | LEU | X | 18 | 40.900 | 42.061 | 16.376 | 0.00 | 0.00 |
| ATOM | 281 | CA   | LEU | X | 18 | 42.946 | 41.876 | 16.639 | 0.00 | 0.00 |
| ATOM | 282 | HA   | LEU | X | 18 | 43.842 | 42.462 | 16.436 | 0.00 | 0.00 |
| ATOM | 283 | CB   | LEU | X | 18 | 42.806 | 41.645 | 18.108 | 0.00 | 0.00 |
| ATOM | 284 | HB2  | LEU | X | 18 | 41.747 | 41.634 | 18.367 | 0.00 | 0.00 |
| ATOM | 285 | HB3  | LEU | X | 18 | 43.260 | 40.731 | 18.492 | 0.00 | 0.00 |
| ATOM | 286 | CG   | LEU | X | 18 | 43.292 | 42.852 | 18.944 | 0.00 | 0.00 |
| ATOM | 287 | HG   | LEU | X | 18 | 42.733 | 43.723 | 18.604 | 0.00 | 0.00 |
| ATOM | 288 | CD1  | LEU | X | 18 | 42.894 | 42.509 | 20.414 | 0.00 | 0.00 |
| ATOM | 289 | HD11 | LEU | X | 18 | 43.313 | 43.320 | 21.011 | 0.00 | 0.00 |
| ATOM | 290 | HD12 | LEU | X | 18 | 43.275 | 41.517 | 20.655 | 0.00 | 0.00 |
| ATOM | 291 | HD13 | LEU | X | 18 | 41.810 | 42.540 | 20.531 | 0.00 | 0.00 |
| ATOM | 292 | CD2  | LEU | X | 18 | 44.798 | 43.122 | 18.722 | 0.00 | 0.00 |
| ATOM | 293 | HD21 | LEU | X | 18 | 45.158 | 43.996 | 19.265 | 0.00 | 0.00 |

|      |     |      |     |   |    |        |        |        |      |      |
|------|-----|------|-----|---|----|--------|--------|--------|------|------|
| ATOM | 294 | HD22 | LEU | X | 18 | 45.328 | 42.216 | 19.017 | 0.00 | 0.00 |
| ATOM | 295 | HD23 | LEU | X | 18 | 45.057 | 43.390 | 17.698 | 0.00 | 0.00 |
| ATOM | 296 | C    | LEU | X | 18 | 42.979 | 40.497 | 15.991 | 0.00 | 0.00 |
| ATOM | 297 | O    | LEU | X | 18 | 42.167 | 39.655 | 16.414 | 0.00 | 0.00 |
| ATOM | 298 | N    | LYS | X | 19 | 44.031 | 40.230 | 15.167 | 0.00 | 0.00 |
| ATOM | 299 | H    | LYS | X | 19 | 44.610 | 40.999 | 14.862 | 0.00 | 0.00 |
| ATOM | 300 | CA   | LYS | X | 19 | 44.509 | 38.893 | 14.846 | 0.00 | 0.00 |
| ATOM | 301 | HA   | LYS | X | 19 | 43.709 | 38.276 | 14.437 | 0.00 | 0.00 |
| ATOM | 302 | CB   | LYS | X | 19 | 45.579 | 39.047 | 13.753 | 0.00 | 0.00 |
| ATOM | 303 | HB2  | LYS | X | 19 | 46.337 | 39.743 | 14.114 | 0.00 | 0.00 |
| ATOM | 304 | HB3  | LYS | X | 19 | 46.081 | 38.099 | 13.560 | 0.00 | 0.00 |
| ATOM | 305 | CG   | LYS | X | 19 | 45.152 | 39.576 | 12.391 | 0.00 | 0.00 |
| ATOM | 306 | HG2  | LYS | X | 19 | 44.406 | 38.854 | 12.058 | 0.00 | 0.00 |
| ATOM | 307 | HG3  | LYS | X | 19 | 44.687 | 40.549 | 12.552 | 0.00 | 0.00 |
| ATOM | 308 | CD   | LYS | X | 19 | 46.305 | 39.734 | 11.408 | 0.00 | 0.00 |
| ATOM | 309 | HD2  | LYS | X | 19 | 47.026 | 40.395 | 11.890 | 0.00 | 0.00 |
| ATOM | 310 | HD3  | LYS | X | 19 | 46.843 | 38.797 | 11.264 | 0.00 | 0.00 |
| ATOM | 311 | CE   | LYS | X | 19 | 45.859 | 40.399 | 10.042 | 0.00 | 0.00 |
| ATOM | 312 | HE2  | LYS | X | 19 | 45.313 | 39.666 | 9.449  | 0.00 | 0.00 |
| ATOM | 313 | HE3  | LYS | X | 19 | 45.267 | 41.272 | 10.317 | 0.00 | 0.00 |
| ATOM | 314 | NZ   | LYS | X | 19 | 47.000 | 40.780 | 9.118  | 0.00 | 0.00 |
| ATOM | 315 | HZ1  | LYS | X | 19 | 46.597 | 41.218 | 8.302  | 0.00 | 0.00 |
| ATOM | 316 | HZ2  | LYS | X | 19 | 47.518 | 41.565 | 9.485  | 0.00 | 0.00 |
| ATOM | 317 | HZ3  | LYS | X | 19 | 47.554 | 39.998 | 8.799  | 0.00 | 0.00 |
| ATOM | 318 | C    | LYS | X | 19 | 44.935 | 38.075 | 16.071 | 0.00 | 0.00 |
| ATOM | 319 | O    | LYS | X | 19 | 45.671 | 38.595 | 16.901 | 0.00 | 0.00 |
| ATOM | 320 | N    | THR | X | 20 | 44.438 | 36.785 | 16.082 | 0.00 | 0.00 |
| ATOM | 321 | H    | THR | X | 20 | 43.771 | 36.511 | 15.374 | 0.00 | 0.00 |
| ATOM | 322 | CA   | THR | X | 20 | 44.928 | 35.655 | 16.962 | 0.00 | 0.00 |
| ATOM | 323 | HA   | THR | X | 20 | 45.984 | 35.876 | 17.112 | 0.00 | 0.00 |
| ATOM | 324 | CB   | THR | X | 20 | 44.274 | 35.537 | 18.289 | 0.00 | 0.00 |
| ATOM | 325 | HB   | THR | X | 20 | 44.244 | 34.482 | 18.561 | 0.00 | 0.00 |
| ATOM | 326 | CG2  | THR | X | 20 | 45.108 | 36.248 | 19.276 | 0.00 | 0.00 |
| ATOM | 327 | HG21 | THR | X | 20 | 46.134 | 35.891 | 19.187 | 0.00 | 0.00 |
| ATOM | 328 | HG22 | THR | X | 20 | 44.706 | 36.062 | 20.271 | 0.00 | 0.00 |
| ATOM | 329 | HG23 | THR | X | 20 | 45.094 | 37.326 | 19.115 | 0.00 | 0.00 |
| ATOM | 330 | OG1  | THR | X | 20 | 42.991 | 36.070 | 18.282 | 0.00 | 0.00 |
| ATOM | 331 | HG1  | THR | X | 20 | 42.350 | 35.599 | 17.745 | 0.00 | 0.00 |
| ATOM | 332 | C    | THR | X | 20 | 45.066 | 34.322 | 16.197 | 0.00 | 0.00 |
| ATOM | 333 | O    | THR | X | 20 | 44.172 | 34.090 | 15.381 | 0.00 | 0.00 |
| ATOM | 334 | N    | PRO | X | 21 | 46.044 | 33.392 | 16.510 | 0.00 | 0.00 |
| ATOM | 335 | CD   | PRO | X | 21 | 47.088 | 33.388 | 17.554 | 0.00 | 0.00 |
| ATOM | 336 | HD2  | PRO | X | 21 | 46.628 | 33.450 | 18.540 | 0.00 | 0.00 |
| ATOM | 337 | HD3  | PRO | X | 21 | 47.695 | 34.266 | 17.332 | 0.00 | 0.00 |
| ATOM | 338 | CG   | PRO | X | 21 | 47.983 | 32.179 | 17.355 | 0.00 | 0.00 |
| ATOM | 339 | HG2  | PRO | X | 21 | 48.462 | 31.784 | 18.250 | 0.00 | 0.00 |
| ATOM | 340 | HG3  | PRO | X | 21 | 48.732 | 32.420 | 16.600 | 0.00 | 0.00 |
| ATOM | 341 | CB   | PRO | X | 21 | 47.198 | 31.184 | 16.525 | 0.00 | 0.00 |
| ATOM | 342 | HB2  | PRO | X | 21 | 46.519 | 30.555 | 17.100 | 0.00 | 0.00 |
| ATOM | 343 | HB3  | PRO | X | 21 | 47.893 | 30.581 | 15.940 | 0.00 | 0.00 |
| ATOM | 344 | CA   | PRO | X | 21 | 46.348 | 32.206 | 15.689 | 0.00 | 0.00 |
| ATOM | 345 | HA   | PRO | X | 21 | 47.009 | 32.544 | 14.890 | 0.00 | 0.00 |
| ATOM | 346 | C    | PRO | X | 21 | 45.264 | 31.509 | 14.977 | 0.00 | 0.00 |
| ATOM | 347 | O    | PRO | X | 21 | 45.363 | 31.347 | 13.728 | 0.00 | 0.00 |
| ATOM | 348 | N    | GLY | X | 22 | 44.182 | 31.133 | 15.717 | 0.00 | 0.00 |
| ATOM | 349 | H    | GLY | X | 22 | 44.243 | 31.338 | 16.704 | 0.00 | 0.00 |
| ATOM | 350 | CA   | GLY | X | 22 | 43.008 | 30.367 | 15.245 | 0.00 | 0.00 |
| ATOM | 351 | HA2  | GLY | X | 22 | 43.455 | 29.794 | 14.432 | 0.00 | 0.00 |
| ATOM | 352 | HA3  | GLY | X | 22 | 42.615 | 29.655 | 15.971 | 0.00 | 0.00 |
| ATOM | 353 | C    | GLY | X | 22 | 41.773 | 31.178 | 14.689 | 0.00 | 0.00 |
| ATOM | 354 | O    | GLY | X | 22 | 40.930 | 30.540 | 14.060 | 0.00 | 0.00 |
| ATOM | 355 | N    | GLY | X | 23 | 41.692 | 32.447 | 15.065 | 0.00 | 0.00 |
| ATOM | 356 | H    | GLY | X | 23 | 42.388 | 32.629 | 15.774 | 0.00 | 0.00 |
| ATOM | 357 | CA   | GLY | X | 23 | 40.619 | 33.340 | 14.706 | 0.00 | 0.00 |
| ATOM | 358 | HA2  | GLY | X | 23 | 40.616 | 33.428 | 13.620 | 0.00 | 0.00 |
| ATOM | 359 | HA3  | GLY | X | 23 | 39.724 | 32.832 | 15.065 | 0.00 | 0.00 |
| ATOM | 360 | C    | GLY | X | 23 | 40.823 | 34.745 | 15.328 | 0.00 | 0.00 |



|      |     |      |     |   |    |        |        |        |      |      |
|------|-----|------|-----|---|----|--------|--------|--------|------|------|
| ATOM | 361 | O    | GLY | X | 23 | 41.639 | 34.918 | 16.230 | 0.00 | 0.00 |
| ATOM | 362 | N    | PRO | X | 24 | 40.161 | 35.779 | 14.771 | 0.00 | 0.00 |
| ATOM | 363 | CD   | PRO | X | 24 | 39.347 | 35.814 | 13.503 | 0.00 | 0.00 |
| ATOM | 364 | HD2  | PRO | X | 24 | 38.416 | 35.249 | 13.539 | 0.00 | 0.00 |
| ATOM | 365 | HD3  | PRO | X | 24 | 39.867 | 35.351 | 12.665 | 0.00 | 0.00 |
| ATOM | 366 | CG   | PRO | X | 24 | 39.009 | 37.291 | 13.291 | 0.00 | 0.00 |
| ATOM | 367 | HG2  | PRO | X | 24 | 38.132 | 37.554 | 13.882 | 0.00 | 0.00 |
| ATOM | 368 | HG3  | PRO | X | 24 | 38.945 | 37.530 | 12.229 | 0.00 | 0.00 |
| ATOM | 369 | CB   | PRO | X | 24 | 40.120 | 38.048 | 14.039 | 0.00 | 0.00 |
| ATOM | 370 | HB2  | PRO | X | 24 | 39.918 | 39.093 | 14.272 | 0.00 | 0.00 |
| ATOM | 371 | HB3  | PRO | X | 24 | 40.961 | 38.099 | 13.346 | 0.00 | 0.00 |
| ATOM | 372 | CA   | PRO | X | 24 | 40.309 | 37.128 | 15.266 | 0.00 | 0.00 |
| ATOM | 373 | HA   | PRO | X | 24 | 41.333 | 37.289 | 15.600 | 0.00 | 0.00 |
| ATOM | 374 | C    | PRO | X | 24 | 39.310 | 37.565 | 16.323 | 0.00 | 0.00 |
| ATOM | 375 | O    | PRO | X | 24 | 38.216 | 37.000 | 16.386 | 0.00 | 0.00 |
| ATOM | 376 | N    | VAL | X | 25 | 39.602 | 38.581 | 17.080 | 0.00 | 0.00 |
| ATOM | 377 | H    | VAL | X | 25 | 40.441 | 39.098 | 16.861 | 0.00 | 0.00 |
| ATOM | 378 | CA   | VAL | X | 25 | 38.765 | 39.265 | 18.078 | 0.00 | 0.00 |
| ATOM | 379 | HA   | VAL | X | 25 | 37.758 | 38.974 | 17.779 | 0.00 | 0.00 |
| ATOM | 380 | CB   | VAL | X | 25 | 39.164 | 38.875 | 19.538 | 0.00 | 0.00 |
| ATOM | 381 | HB   | VAL | X | 25 | 38.377 | 39.264 | 20.183 | 0.00 | 0.00 |
| ATOM | 382 | CG1  | VAL | X | 25 | 39.146 | 37.356 | 19.822 | 0.00 | 0.00 |
| ATOM | 383 | HG11 | VAL | X | 25 | 39.596 | 37.170 | 20.797 | 0.00 | 0.00 |
| ATOM | 384 | HG12 | VAL | X | 25 | 38.169 | 36.908 | 19.642 | 0.00 | 0.00 |
| ATOM | 385 | HG13 | VAL | X | 25 | 39.807 | 36.863 | 19.108 | 0.00 | 0.00 |
| ATOM | 386 | CG2  | VAL | X | 25 | 40.548 | 39.343 | 20.057 | 0.00 | 0.00 |
| ATOM | 387 | HG21 | VAL | X | 25 | 40.522 | 39.163 | 21.131 | 0.00 | 0.00 |
| ATOM | 388 | HG22 | VAL | X | 25 | 40.581 | 40.432 | 20.015 | 0.00 | 0.00 |
| ATOM | 389 | HG23 | VAL | X | 25 | 41.376 | 38.976 | 19.450 | 0.00 | 0.00 |
| ATOM | 390 | C    | VAL | X | 25 | 38.804 | 40.816 | 17.864 | 0.00 | 0.00 |
| ATOM | 391 | O    | VAL | X | 25 | 39.426 | 41.334 | 16.954 | 0.00 | 0.00 |
| ATOM | 392 | N    | SER | X | 26 | 38.146 | 41.517 | 18.844 | 0.00 | 0.00 |
| ATOM | 393 | H    | SER | X | 26 | 37.628 | 40.942 | 19.494 | 0.00 | 0.00 |
| ATOM | 394 | CA   | SER | X | 26 | 38.335 | 42.950 | 19.052 | 0.00 | 0.00 |
| ATOM | 395 | HA   | SER | X | 26 | 39.111 | 43.311 | 18.377 | 0.00 | 0.00 |
| ATOM | 396 | CB   | SER | X | 26 | 37.081 | 43.668 | 18.526 | 0.00 | 0.00 |
| ATOM | 397 | HB2  | SER | X | 26 | 37.063 | 44.715 | 18.831 | 0.00 | 0.00 |
| ATOM | 398 | HB3  | SER | X | 26 | 36.999 | 43.564 | 17.445 | 0.00 | 0.00 |
| ATOM | 399 | OG   | SER | X | 26 | 35.879 | 43.285 | 19.120 | 0.00 | 0.00 |
| ATOM | 400 | HG   | SER | X | 26 | 36.101 | 42.402 | 19.425 | 0.00 | 0.00 |
| ATOM | 401 | C    | SER | X | 26 | 38.747 | 43.434 | 20.484 | 0.00 | 0.00 |
| ATOM | 402 | O    | SER | X | 26 | 38.494 | 42.755 | 21.443 | 0.00 | 0.00 |
| ATOM | 403 | N    | ALA | X | 27 | 39.169 | 44.712 | 20.564 | 0.00 | 0.00 |
| ATOM | 404 | H    | ALA | X | 27 | 39.204 | 45.248 | 19.708 | 0.00 | 0.00 |
| ATOM | 405 | CA   | ALA | X | 27 | 39.429 | 45.382 | 21.881 | 0.00 | 0.00 |
| ATOM | 406 | HA   | ALA | X | 27 | 38.884 | 44.882 | 22.682 | 0.00 | 0.00 |
| ATOM | 407 | CB   | ALA | X | 27 | 40.983 | 45.239 | 22.083 | 0.00 | 0.00 |
| ATOM | 408 | HB1  | ALA | X | 27 | 41.517 | 45.708 | 21.257 | 0.00 | 0.00 |
| ATOM | 409 | HB2  | ALA | X | 27 | 41.210 | 44.173 | 22.103 | 0.00 | 0.00 |
| ATOM | 410 | HB3  | ALA | X | 27 | 41.261 | 45.654 | 23.051 | 0.00 | 0.00 |
| ATOM | 411 | C    | ALA | X | 27 | 38.998 | 46.853 | 21.841 | 0.00 | 0.00 |
| ATOM | 412 | O    | ALA | X | 27 | 38.964 | 47.409 | 20.754 | 0.00 | 0.00 |
| ATOM | 413 | N    | PHE | X | 28 | 38.706 | 47.471 | 23.026 | 0.00 | 0.00 |
| ATOM | 414 | H    | PHE | X | 28 | 38.812 | 46.871 | 23.832 | 0.00 | 0.00 |
| ATOM | 415 | CA   | PHE | X | 28 | 38.158 | 48.798 | 23.128 | 0.00 | 0.00 |
| ATOM | 416 | HA   | PHE | X | 28 | 38.366 | 49.544 | 22.361 | 0.00 | 0.00 |
| ATOM | 417 | CB   | PHE | X | 28 | 36.673 | 48.760 | 23.397 | 0.00 | 0.00 |
| ATOM | 418 | HB2  | PHE | X | 28 | 36.483 | 48.110 | 24.251 | 0.00 | 0.00 |
| ATOM | 419 | HB3  | PHE | X | 28 | 36.472 | 49.788 | 23.699 | 0.00 | 0.00 |
| ATOM | 420 | CG   | PHE | X | 28 | 35.765 | 48.408 | 22.221 | 0.00 | 0.00 |
| ATOM | 421 | CD1  | PHE | X | 28 | 35.609 | 47.042 | 21.947 | 0.00 | 0.00 |
| ATOM | 422 | HD1  | PHE | X | 28 | 36.028 | 46.323 | 22.635 | 0.00 | 0.00 |
| ATOM | 423 | CE1  | PHE | X | 28 | 34.836 | 46.525 | 20.899 | 0.00 | 0.00 |
| ATOM | 424 | HE1  | PHE | X | 28 | 34.910 | 45.472 | 20.670 | 0.00 | 0.00 |
| ATOM | 425 | CZ   | PHE | X | 28 | 34.154 | 47.404 | 20.071 | 0.00 | 0.00 |
| ATOM | 426 | HZ   | PHE | X | 28 | 33.559 | 46.924 | 19.308 | 0.00 | 0.00 |
| ATOM | 427 | CE2  | PHE | X | 28 | 34.213 | 48.852 | 20.347 | 0.00 | 0.00 |

|      |     |      |     |   |    |        |        |        |      |      |
|------|-----|------|-----|---|----|--------|--------|--------|------|------|
| ATOM | 428 | HE2  | PHE | X | 28 | 33.682 | 49.533 | 19.699 | 0.00 | 0.00 |
| ATOM | 429 | CD2  | PHE | X | 28 | 35.009 | 49.309 | 21.441 | 0.00 | 0.00 |
| ATOM | 430 | HD2  | PHE | X | 28 | 35.056 | 50.380 | 21.572 | 0.00 | 0.00 |
| ATOM | 431 | C    | PHE | X | 28 | 38.968 | 49.320 | 24.344 | 0.00 | 0.00 |
| ATOM | 432 | O    | PHE | X | 28 | 38.654 | 49.069 | 25.556 | 0.00 | 0.00 |
| ATOM | 433 | N    | LEU | X | 29 | 40.146 | 49.960 | 24.059 | 0.00 | 0.00 |
| ATOM | 434 | H    | LEU | X | 29 | 40.292 | 50.372 | 23.149 | 0.00 | 0.00 |
| ATOM | 435 | CA   | LEU | X | 29 | 41.160 | 50.422 | 25.097 | 0.00 | 0.00 |
| ATOM | 436 | HA   | LEU | X | 29 | 40.923 | 49.883 | 26.014 | 0.00 | 0.00 |
| ATOM | 437 | CB   | LEU | X | 29 | 42.650 | 50.067 | 24.636 | 0.00 | 0.00 |
| ATOM | 438 | HB2  | LEU | X | 29 | 42.998 | 50.773 | 23.882 | 0.00 | 0.00 |
| ATOM | 439 | HB3  | LEU | X | 29 | 43.186 | 50.252 | 25.567 | 0.00 | 0.00 |
| ATOM | 440 | CG   | LEU | X | 29 | 42.873 | 48.624 | 24.173 | 0.00 | 0.00 |
| ATOM | 441 | HG   | LEU | X | 29 | 42.145 | 48.538 | 23.366 | 0.00 | 0.00 |
| ATOM | 442 | CD1  | LEU | X | 29 | 44.253 | 48.389 | 23.541 | 0.00 | 0.00 |
| ATOM | 443 | HD11 | LEU | X | 29 | 44.393 | 49.029 | 22.670 | 0.00 | 0.00 |
| ATOM | 444 | HD12 | LEU | X | 29 | 44.363 | 47.375 | 23.156 | 0.00 | 0.00 |
| ATOM | 445 | HD13 | LEU | X | 29 | 45.009 | 48.574 | 24.304 | 0.00 | 0.00 |
| ATOM | 446 | CD2  | LEU | X | 29 | 42.691 | 47.550 | 25.256 | 0.00 | 0.00 |
| ATOM | 447 | HD21 | LEU | X | 29 | 43.432 | 47.707 | 26.040 | 0.00 | 0.00 |
| ATOM | 448 | HD22 | LEU | X | 29 | 41.676 | 47.489 | 25.649 | 0.00 | 0.00 |
| ATOM | 449 | HD23 | LEU | X | 29 | 42.959 | 46.616 | 24.764 | 0.00 | 0.00 |
| ATOM | 450 | C    | LEU | X | 29 | 41.201 | 51.990 | 25.306 | 0.00 | 0.00 |
| ATOM | 451 | O    | LEU | X | 29 | 40.983 | 52.755 | 24.370 | 0.00 | 0.00 |
| ATOM | 452 | N    | GLY | X | 30 | 41.592 | 52.464 | 26.491 | 0.00 | 0.00 |
| ATOM | 453 | H    | GLY | X | 30 | 41.913 | 51.865 | 27.239 | 0.00 | 0.00 |
| ATOM | 454 | CA   | GLY | X | 30 | 41.537 | 53.843 | 26.760 | 0.00 | 0.00 |
| ATOM | 455 | HA2  | GLY | X | 30 | 42.185 | 54.167 | 27.575 | 0.00 | 0.00 |
| ATOM | 456 | HA3  | GLY | X | 30 | 41.890 | 54.401 | 25.893 | 0.00 | 0.00 |
| ATOM | 457 | C    | GLY | X | 30 | 40.123 | 54.423 | 26.972 | 0.00 | 0.00 |
| ATOM | 458 | O    | GLY | X | 30 | 39.963 | 55.614 | 26.787 | 0.00 | 0.00 |
| ATOM | 459 | N    | ILE | X | 31 | 39.151 | 53.548 | 27.256 | 0.00 | 0.00 |
| ATOM | 460 | H    | ILE | X | 31 | 39.278 | 52.621 | 27.635 | 0.00 | 0.00 |
| ATOM | 461 | CA   | ILE | X | 31 | 37.753 | 54.047 | 27.392 | 0.00 | 0.00 |
| ATOM | 462 | HA   | ILE | X | 31 | 37.613 | 54.657 | 26.499 | 0.00 | 0.00 |
| ATOM | 463 | CB   | ILE | X | 31 | 36.644 | 52.874 | 27.351 | 0.00 | 0.00 |
| ATOM | 464 | HB   | ILE | X | 31 | 36.425 | 52.523 | 28.359 | 0.00 | 0.00 |
| ATOM | 465 | CG2  | ILE | X | 31 | 35.350 | 53.595 | 26.860 | 0.00 | 0.00 |
| ATOM | 466 | HG21 | ILE | X | 31 | 34.476 | 52.959 | 27.004 | 0.00 | 0.00 |
| ATOM | 467 | HG22 | ILE | X | 31 | 35.395 | 54.013 | 25.855 | 0.00 | 0.00 |
| ATOM | 468 | HG23 | ILE | X | 31 | 35.162 | 54.362 | 27.612 | 0.00 | 0.00 |
| ATOM | 469 | CG1  | ILE | X | 31 | 36.833 | 51.573 | 26.496 | 0.00 | 0.00 |
| ATOM | 470 | HG12 | ILE | X | 31 | 36.925 | 51.932 | 25.471 | 0.00 | 0.00 |
| ATOM | 471 | HG13 | ILE | X | 31 | 37.792 | 51.135 | 26.773 | 0.00 | 0.00 |
| ATOM | 472 | CD1  | ILE | X | 31 | 35.737 | 50.482 | 26.636 | 0.00 | 0.00 |
| ATOM | 473 | HD11 | ILE | X | 31 | 36.028 | 49.541 | 26.169 | 0.00 | 0.00 |
| ATOM | 474 | HD12 | ILE | X | 31 | 34.842 | 50.805 | 26.106 | 0.00 | 0.00 |
| ATOM | 475 | HD13 | ILE | X | 31 | 35.493 | 50.405 | 27.695 | 0.00 | 0.00 |
| ATOM | 476 | C    | ILE | X | 31 | 37.603 | 54.805 | 28.707 | 0.00 | 0.00 |
| ATOM | 477 | O    | ILE | X | 31 | 37.762 | 54.205 | 29.785 | 0.00 | 0.00 |
| ATOM | 478 | N    | PRO | X | 32 | 37.329 | 56.113 | 28.694 | 0.00 | 0.00 |
| ATOM | 479 | CD   | PRO | X | 32 | 37.196 | 57.034 | 27.508 | 0.00 | 0.00 |
| ATOM | 480 | HD2  | PRO | X | 32 | 36.824 | 56.589 | 26.585 | 0.00 | 0.00 |
| ATOM | 481 | HD3  | PRO | X | 32 | 38.203 | 57.406 | 27.316 | 0.00 | 0.00 |
| ATOM | 482 | CG   | PRO | X | 32 | 36.444 | 58.252 | 27.979 | 0.00 | 0.00 |
| ATOM | 483 | HG2  | PRO | X | 32 | 35.404 | 57.931 | 27.924 | 0.00 | 0.00 |
| ATOM | 484 | HG3  | PRO | X | 32 | 36.719 | 59.077 | 27.322 | 0.00 | 0.00 |
| ATOM | 485 | CB   | PRO | X | 32 | 36.946 | 58.397 | 29.416 | 0.00 | 0.00 |
| ATOM | 486 | HB2  | PRO | X | 32 | 36.232 | 58.947 | 30.028 | 0.00 | 0.00 |
| ATOM | 487 | HB3  | PRO | X | 32 | 37.928 | 58.869 | 29.405 | 0.00 | 0.00 |
| ATOM | 488 | CA   | PRO | X | 32 | 37.125 | 56.910 | 29.868 | 0.00 | 0.00 |
| ATOM | 489 | HA   | PRO | X | 32 | 37.978 | 56.810 | 30.539 | 0.00 | 0.00 |
| ATOM | 490 | C    | PRO | X | 32 | 35.880 | 56.461 | 30.666 | 0.00 | 0.00 |
| ATOM | 491 | O    | PRO | X | 32 | 34.842 | 56.268 | 30.105 | 0.00 | 0.00 |
| ATOM | 492 | N    | PHE | X | 33 | 36.011 | 56.246 | 31.967 | 0.00 | 0.00 |
| ATOM | 493 | H    | PHE | X | 33 | 36.874 | 56.426 | 32.461 | 0.00 | 0.00 |
| ATOM | 494 | CA   | PHE | X | 33 | 35.042 | 55.730 | 32.961 | 0.00 | 0.00 |

|      |     |     |     |   |    |        |        |        |      |      |
|------|-----|-----|-----|---|----|--------|--------|--------|------|------|
| ATOM | 495 | HA  | PHE | X | 33 | 34.091 | 55.610 | 32.443 | 0.00 | 0.00 |
| ATOM | 496 | CB  | PHE | X | 33 | 35.411 | 54.353 | 33.392 | 0.00 | 0.00 |
| ATOM | 497 | HB2 | PHE | X | 33 | 34.474 | 53.871 | 33.671 | 0.00 | 0.00 |
| ATOM | 498 | HB3 | PHE | X | 33 | 35.806 | 53.841 | 32.515 | 0.00 | 0.00 |
| ATOM | 499 | CG  | PHE | X | 33 | 36.374 | 54.235 | 34.591 | 0.00 | 0.00 |
| ATOM | 500 | CD1 | PHE | X | 33 | 35.945 | 54.228 | 35.900 | 0.00 | 0.00 |
| ATOM | 501 | HD1 | PHE | X | 33 | 34.882 | 54.363 | 36.034 | 0.00 | 0.00 |
| ATOM | 502 | CE1 | PHE | X | 33 | 36.888 | 54.058 | 36.908 | 0.00 | 0.00 |
| ATOM | 503 | HE1 | PHE | X | 33 | 36.613 | 54.207 | 37.941 | 0.00 | 0.00 |
| ATOM | 504 | CZ  | PHE | X | 33 | 38.216 | 53.665 | 36.611 | 0.00 | 0.00 |
| ATOM | 505 | HZ  | PHE | X | 33 | 38.958 | 53.553 | 37.388 | 0.00 | 0.00 |
| ATOM | 506 | CE2 | PHE | X | 33 | 38.698 | 53.649 | 35.278 | 0.00 | 0.00 |
| ATOM | 507 | HE2 | PHE | X | 33 | 39.719 | 53.417 | 35.013 | 0.00 | 0.00 |
| ATOM | 508 | CD2 | PHE | X | 33 | 37.704 | 53.947 | 34.300 | 0.00 | 0.00 |
| ATOM | 509 | HD2 | PHE | X | 33 | 37.966 | 53.995 | 33.254 | 0.00 | 0.00 |
| ATOM | 510 | C   | PHE | X | 33 | 34.701 | 56.624 | 34.133 | 0.00 | 0.00 |
| ATOM | 511 | O   | PHE | X | 33 | 33.545 | 56.807 | 34.502 | 0.00 | 0.00 |
| ATOM | 512 | N   | ALA | X | 34 | 35.718 | 57.449 | 34.555 | 0.00 | 0.00 |
| ATOM | 513 | H   | ALA | X | 34 | 36.641 | 57.374 | 34.152 | 0.00 | 0.00 |
| ATOM | 514 | CA  | ALA | X | 34 | 35.545 | 58.533 | 35.530 | 0.00 | 0.00 |
| ATOM | 515 | HA  | ALA | X | 34 | 34.474 | 58.483 | 35.725 | 0.00 | 0.00 |
| ATOM | 516 | CB  | ALA | X | 34 | 36.382 | 58.226 | 36.795 | 0.00 | 0.00 |
| ATOM | 517 | HB1 | ALA | X | 34 | 35.965 | 58.860 | 37.577 | 0.00 | 0.00 |
| ATOM | 518 | HB2 | ALA | X | 34 | 37.410 | 58.376 | 36.465 | 0.00 | 0.00 |
| ATOM | 519 | HB3 | ALA | X | 34 | 36.363 | 57.180 | 37.099 | 0.00 | 0.00 |
| ATOM | 520 | C   | ALA | X | 34 | 35.901 | 59.941 | 34.911 | 0.00 | 0.00 |
| ATOM | 521 | O   | ALA | X | 34 | 36.502 | 60.043 | 33.807 | 0.00 | 0.00 |
| ATOM | 522 | N   | GLU | X | 35 | 35.645 | 60.962 | 35.709 | 0.00 | 0.00 |
| ATOM | 523 | H   | GLU | X | 35 | 35.308 | 60.740 | 36.635 | 0.00 | 0.00 |
| ATOM | 524 | CA  | GLU | X | 35 | 36.047 | 62.309 | 35.496 | 0.00 | 0.00 |
| ATOM | 525 | HA  | GLU | X | 35 | 36.101 | 62.618 | 34.452 | 0.00 | 0.00 |
| ATOM | 526 | CB  | GLU | X | 35 | 35.180 | 63.340 | 36.221 | 0.00 | 0.00 |
| ATOM | 527 | HB2 | GLU | X | 35 | 35.063 | 63.048 | 37.264 | 0.00 | 0.00 |
| ATOM | 528 | HB3 | GLU | X | 35 | 35.743 | 64.274 | 36.217 | 0.00 | 0.00 |
| ATOM | 529 | CG  | GLU | X | 35 | 33.798 | 63.590 | 35.626 | 0.00 | 0.00 |
| ATOM | 530 | HG2 | GLU | X | 35 | 33.211 | 62.674 | 35.689 | 0.00 | 0.00 |
| ATOM | 531 | HG3 | GLU | X | 35 | 33.373 | 64.340 | 36.293 | 0.00 | 0.00 |
| ATOM | 532 | CD  | GLU | X | 35 | 33.959 | 64.072 | 34.200 | 0.00 | 0.00 |
| ATOM | 533 | OE1 | GLU | X | 35 | 33.877 | 63.243 | 33.270 | 0.00 | 0.00 |
| ATOM | 534 | OE2 | GLU | X | 35 | 34.074 | 65.324 | 34.050 | 0.00 | 0.00 |
| ATOM | 535 | C   | GLU | X | 35 | 37.556 | 62.295 | 35.987 | 0.00 | 0.00 |
| ATOM | 536 | O   | GLU | X | 35 | 37.775 | 61.821 | 37.134 | 0.00 | 0.00 |
| ATOM | 537 | N   | PRO | X | 36 | 38.464 | 62.969 | 35.325 | 0.00 | 0.00 |
| ATOM | 538 | CD  | PRO | X | 36 | 38.245 | 63.844 | 34.182 | 0.00 | 0.00 |
| ATOM | 539 | HD2 | PRO | X | 36 | 37.471 | 64.565 | 34.446 | 0.00 | 0.00 |
| ATOM | 540 | HD3 | PRO | X | 36 | 37.938 | 63.244 | 33.325 | 0.00 | 0.00 |
| ATOM | 541 | CG  | PRO | X | 36 | 39.500 | 64.737 | 34.081 | 0.00 | 0.00 |
| ATOM | 542 | HG2 | PRO | X | 36 | 39.460 | 65.450 | 34.905 | 0.00 | 0.00 |
| ATOM | 543 | HG3 | PRO | X | 36 | 39.623 | 65.084 | 33.055 | 0.00 | 0.00 |
| ATOM | 544 | CB  | PRO | X | 36 | 40.552 | 63.759 | 34.505 | 0.00 | 0.00 |
| ATOM | 545 | HB2 | PRO | X | 36 | 41.407 | 64.281 | 34.936 | 0.00 | 0.00 |
| ATOM | 546 | HB3 | PRO | X | 36 | 40.897 | 63.096 | 33.711 | 0.00 | 0.00 |
| ATOM | 547 | CA  | PRO | X | 36 | 39.884 | 62.929 | 35.662 | 0.00 | 0.00 |
| ATOM | 548 | HA  | PRO | X | 36 | 40.265 | 61.917 | 35.527 | 0.00 | 0.00 |
| ATOM | 549 | C   | PRO | X | 36 | 40.268 | 63.530 | 36.980 | 0.00 | 0.00 |
| ATOM | 550 | O   | PRO | X | 36 | 39.989 | 64.711 | 37.246 | 0.00 | 0.00 |
| ATOM | 551 | N   | PRO | X | 37 | 40.943 | 62.763 | 37.890 | 0.00 | 0.00 |
| ATOM | 552 | CD  | PRO | X | 37 | 41.393 | 61.368 | 37.754 | 0.00 | 0.00 |
| ATOM | 553 | HD2 | PRO | X | 37 | 42.070 | 61.179 | 36.920 | 0.00 | 0.00 |
| ATOM | 554 | HD3 | PRO | X | 37 | 40.547 | 60.709 | 37.558 | 0.00 | 0.00 |
| ATOM | 555 | CG  | PRO | X | 37 | 41.973 | 60.889 | 39.052 | 0.00 | 0.00 |
| ATOM | 556 | HG2 | PRO | X | 37 | 43.051 | 61.050 | 39.051 | 0.00 | 0.00 |
| ATOM | 557 | HG3 | PRO | X | 37 | 41.731 | 59.834 | 39.184 | 0.00 | 0.00 |
| ATOM | 558 | CB  | PRO | X | 37 | 41.174 | 61.731 | 40.059 | 0.00 | 0.00 |
| ATOM | 559 | HB2 | PRO | X | 37 | 41.727 | 61.790 | 40.996 | 0.00 | 0.00 |
| ATOM | 560 | HB3 | PRO | X | 37 | 40.185 | 61.281 | 40.141 | 0.00 | 0.00 |
| ATOM | 561 | CA  | PRO | X | 37 | 41.076 | 63.020 | 39.337 | 0.00 | 0.00 |

|      |     |      |     |   |    |        |        |        |      |      |
|------|-----|------|-----|---|----|--------|--------|--------|------|------|
| ATOM | 562 | HA   | PRO | X | 37 | 40.160 | 63.382 | 39.803 | 0.00 | 0.00 |
| ATOM | 563 | C    | PRO | X | 37 | 42.187 | 64.095 | 39.708 | 0.00 | 0.00 |
| ATOM | 564 | O    | PRO | X | 37 | 42.777 | 64.031 | 40.806 | 0.00 | 0.00 |
| ATOM | 565 | N    | MET | X | 38 | 42.414 | 65.026 | 38.823 | 0.00 | 0.00 |
| ATOM | 566 | H    | MET | X | 38 | 41.707 | 64.994 | 38.102 | 0.00 | 0.00 |
| ATOM | 567 | CA   | MET | X | 38 | 43.353 | 66.110 | 38.937 | 0.00 | 0.00 |
| ATOM | 568 | HA   | MET | X | 38 | 44.322 | 65.627 | 39.059 | 0.00 | 0.00 |
| ATOM | 569 | CB   | MET | X | 38 | 43.408 | 66.844 | 37.550 | 0.00 | 0.00 |
| ATOM | 570 | HB2  | MET | X | 38 | 42.598 | 67.573 | 37.509 | 0.00 | 0.00 |
| ATOM | 571 | HB3  | MET | X | 38 | 44.363 | 67.364 | 37.479 | 0.00 | 0.00 |
| ATOM | 572 | CG   | MET | X | 38 | 43.305 | 65.956 | 36.321 | 0.00 | 0.00 |
| ATOM | 573 | HG2  | MET | X | 38 | 44.184 | 65.314 | 36.253 | 0.00 | 0.00 |
| ATOM | 574 | HD3  | MET | X | 38 | 42.395 | 65.362 | 36.407 | 0.00 | 0.00 |
| ATOM | 575 | SD   | MET | X | 38 | 43.011 | 66.946 | 34.797 | 0.00 | 0.00 |
| ATOM | 576 | CE   | MET | X | 38 | 44.641 | 67.889 | 34.674 | 0.00 | 0.00 |
| ATOM | 577 | HE1  | MET | X | 38 | 45.400 | 67.107 | 34.639 | 0.00 | 0.00 |
| ATOM | 578 | HE2  | MET | X | 38 | 44.618 | 68.532 | 33.794 | 0.00 | 0.00 |
| ATOM | 579 | HE3  | MET | X | 38 | 44.759 | 68.411 | 35.623 | 0.00 | 0.00 |
| ATOM | 580 | C    | MET | X | 38 | 43.199 | 67.032 | 40.134 | 0.00 | 0.00 |
| ATOM | 581 | O    | MET | X | 38 | 42.112 | 67.304 | 40.642 | 0.00 | 0.00 |
| ATOM | 582 | N    | GLY | X | 39 | 44.283 | 67.733 | 40.495 | 0.00 | 0.00 |
| ATOM | 583 | H    | GLY | X | 39 | 45.176 | 67.340 | 40.233 | 0.00 | 0.00 |
| ATOM | 584 | CA   | GLY | X | 39 | 44.195 | 69.006 | 41.225 | 0.00 | 0.00 |
| ATOM | 585 | HA2  | GLY | X | 39 | 45.230 | 69.286 | 41.420 | 0.00 | 0.00 |
| ATOM | 586 | HA3  | GLY | X | 39 | 43.789 | 69.803 | 40.602 | 0.00 | 0.00 |
| ATOM | 587 | C    | GLY | X | 39 | 43.370 | 68.975 | 42.522 | 0.00 | 0.00 |
| ATOM | 588 | O    | GLY | X | 39 | 43.701 | 68.179 | 43.414 | 0.00 | 0.00 |
| ATOM | 589 | N    | PRO | X | 40 | 42.194 | 69.695 | 42.659 | 0.00 | 0.00 |
| ATOM | 590 | CD   | PRO | X | 40 | 41.809 | 70.813 | 41.736 | 0.00 | 0.00 |
| ATOM | 591 | HD2  | PRO | X | 40 | 41.769 | 70.398 | 40.729 | 0.00 | 0.00 |
| ATOM | 592 | HD3  | PRO | X | 40 | 42.497 | 71.656 | 41.797 | 0.00 | 0.00 |
| ATOM | 593 | CG   | PRO | X | 40 | 40.418 | 71.254 | 42.184 | 0.00 | 0.00 |
| ATOM | 594 | HG2  | PRO | X | 40 | 39.751 | 71.575 | 41.384 | 0.00 | 0.00 |
| ATOM | 595 | HG3  | PRO | X | 40 | 40.609 | 72.041 | 42.914 | 0.00 | 0.00 |
| ATOM | 596 | CB   | PRO | X | 40 | 39.877 | 70.061 | 43.024 | 0.00 | 0.00 |
| ATOM | 597 | HB2  | PRO | X | 40 | 39.382 | 69.426 | 42.290 | 0.00 | 0.00 |
| ATOM | 598 | HB3  | PRO | X | 40 | 39.169 | 70.408 | 43.777 | 0.00 | 0.00 |
| ATOM | 599 | CA   | PRO | X | 40 | 41.109 | 69.436 | 43.656 | 0.00 | 0.00 |
| ATOM | 600 | HA   | PRO | X | 40 | 41.337 | 69.995 | 44.564 | 0.00 | 0.00 |
| ATOM | 601 | C    | PRO | X | 40 | 40.797 | 67.942 | 43.971 | 0.00 | 0.00 |
| ATOM | 602 | O    | PRO | X | 40 | 40.861 | 67.572 | 45.177 | 0.00 | 0.00 |
| ATOM | 603 | N    | ARG | X | 41 | 40.526 | 67.117 | 42.923 | 0.00 | 0.00 |
| ATOM | 604 | H    | ARG | X | 41 | 40.688 | 67.450 | 41.983 | 0.00 | 0.00 |
| ATOM | 605 | CA   | ARG | X | 41 | 40.132 | 65.703 | 43.124 | 0.00 | 0.00 |
| ATOM | 606 | HA   | ARG | X | 41 | 39.404 | 65.660 | 43.934 | 0.00 | 0.00 |
| ATOM | 607 | CB   | ARG | X | 41 | 39.188 | 65.175 | 41.904 | 0.00 | 0.00 |
| ATOM | 608 | HB2  | ARG | X | 41 | 39.790 | 65.191 | 40.995 | 0.00 | 0.00 |
| ATOM | 609 | HB3  | ARG | X | 41 | 38.769 | 64.218 | 42.215 | 0.00 | 0.00 |
| ATOM | 610 | CG   | ARG | X | 41 | 37.987 | 66.126 | 41.742 | 0.00 | 0.00 |
| ATOM | 611 | HG2  | ARG | X | 41 | 37.504 | 66.146 | 42.719 | 0.00 | 0.00 |
| ATOM | 612 | HG3  | ARG | X | 41 | 38.322 | 67.138 | 41.514 | 0.00 | 0.00 |
| ATOM | 613 | CD   | ARG | X | 41 | 37.038 | 65.524 | 40.704 | 0.00 | 0.00 |
| ATOM | 614 | HD2  | ARG | X | 41 | 36.925 | 64.454 | 40.881 | 0.00 | 0.00 |
| ATOM | 615 | HD3  | ARG | X | 41 | 36.055 | 65.989 | 40.784 | 0.00 | 0.00 |
| ATOM | 616 | NE   | ARG | X | 41 | 37.545 | 65.763 | 39.332 | 0.00 | 0.00 |
| ATOM | 617 | HE   | ARG | X | 41 | 38.551 | 65.845 | 39.285 | 0.00 | 0.00 |
| ATOM | 618 | CZ   | ARG | X | 41 | 36.769 | 66.065 | 38.271 | 0.00 | 0.00 |
| ATOM | 619 | NH1  | ARG | X | 41 | 35.457 | 66.128 | 38.333 | 0.00 | 0.00 |
| ATOM | 620 | HH11 | ARG | X | 41 | 35.069 | 65.882 | 39.232 | 0.00 | 0.00 |
| ATOM | 621 | HH12 | ARG | X | 41 | 34.873 | 66.446 | 37.573 | 0.00 | 0.00 |
| ATOM | 622 | NH2  | ARG | X | 41 | 37.389 | 66.389 | 37.157 | 0.00 | 0.00 |
| ATOM | 623 | HH21 | ARG | X | 41 | 38.389 | 66.253 | 37.118 | 0.00 | 0.00 |
| ATOM | 624 | HH22 | ARG | X | 41 | 36.854 | 66.455 | 36.303 | 0.00 | 0.00 |
| ATOM | 625 | C    | ARG | X | 41 | 41.293 | 64.667 | 43.459 | 0.00 | 0.00 |
| ATOM | 626 | O    | ARG | X | 41 | 41.105 | 63.522 | 43.663 | 0.00 | 0.00 |
| ATOM | 627 | N    | ARG | X | 42 | 42.570 | 65.125 | 43.486 | 0.00 | 0.00 |
| ATOM | 628 | H    | ARG | X | 42 | 42.803 | 66.062 | 43.189 | 0.00 | 0.00 |

|      |     |      |     |   |    |        |        |        |      |      |
|------|-----|------|-----|---|----|--------|--------|--------|------|------|
| ATOM | 629 | CA   | ARG | X | 42 | 43.692 | 64.264 | 43.947 | 0.00 | 0.00 |
| ATOM | 630 | HA   | ARG | X | 42 | 43.683 | 63.320 | 43.403 | 0.00 | 0.00 |
| ATOM | 631 | CB   | ARG | X | 42 | 44.981 | 65.064 | 43.636 | 0.00 | 0.00 |
| ATOM | 632 | HB2  | ARG | X | 42 | 44.952 | 65.434 | 42.611 | 0.00 | 0.00 |
| ATOM | 633 | HB3  | ARG | X | 42 | 45.059 | 65.915 | 44.312 | 0.00 | 0.00 |
| ATOM | 634 | CG   | ARG | X | 42 | 46.253 | 64.245 | 44.018 | 0.00 | 0.00 |
| ATOM | 635 | HG2  | ARG | X | 42 | 46.189 | 63.826 | 45.022 | 0.00 | 0.00 |
| ATOM | 636 | HG3  | ARG | X | 42 | 46.357 | 63.445 | 43.284 | 0.00 | 0.00 |
| ATOM | 637 | CD   | ARG | X | 42 | 47.444 | 65.172 | 44.158 | 0.00 | 0.00 |
| ATOM | 638 | HD2  | ARG | X | 42 | 47.217 | 65.928 | 44.909 | 0.00 | 0.00 |
| ATOM | 639 | HD3  | ARG | X | 42 | 48.313 | 64.567 | 44.419 | 0.00 | 0.00 |
| ATOM | 640 | NE   | ARG | X | 42 | 47.747 | 65.860 | 42.909 | 0.00 | 0.00 |
| ATOM | 641 | HE   | ARG | X | 42 | 47.431 | 65.385 | 42.076 | 0.00 | 0.00 |
| ATOM | 642 | CZ   | ARG | X | 42 | 48.450 | 66.908 | 42.699 | 0.00 | 0.00 |
| ATOM | 643 | NH1  | ARG | X | 42 | 49.242 | 67.527 | 43.570 | 0.00 | 0.00 |
| ATOM | 644 | HH11 | ARG | X | 42 | 49.316 | 67.214 | 44.528 | 0.00 | 0.00 |
| ATOM | 645 | HH12 | ARG | X | 42 | 49.848 | 68.244 | 43.197 | 0.00 | 0.00 |
| ATOM | 646 | NH2  | ARG | X | 42 | 48.278 | 67.489 | 41.505 | 0.00 | 0.00 |
| ATOM | 647 | HH21 | ARG | X | 42 | 47.718 | 67.058 | 40.783 | 0.00 | 0.00 |
| ATOM | 648 | HH22 | ARG | X | 42 | 48.731 | 68.344 | 41.216 | 0.00 | 0.00 |
| ATOM | 649 | C    | ARG | X | 42 | 43.569 | 63.869 | 45.522 | 0.00 | 0.00 |
| ATOM | 650 | O    | ARG | X | 42 | 43.233 | 64.757 | 46.318 | 0.00 | 0.00 |
| ATOM | 651 | N    | PHE | X | 43 | 43.561 | 62.580 | 45.877 | 0.00 | 0.00 |
| ATOM | 652 | H    | PHE | X | 43 | 43.810 | 61.924 | 45.151 | 0.00 | 0.00 |
| ATOM | 653 | CA   | PHE | X | 43 | 43.270 | 61.997 | 47.193 | 0.00 | 0.00 |
| ATOM | 654 | HA   | PHE | X | 43 | 43.597 | 60.961 | 47.110 | 0.00 | 0.00 |
| ATOM | 655 | CB   | PHE | X | 43 | 44.143 | 62.749 | 48.273 | 0.00 | 0.00 |
| ATOM | 656 | HB2  | PHE | X | 43 | 43.575 | 63.634 | 48.563 | 0.00 | 0.00 |
| ATOM | 657 | HB3  | PHE | X | 43 | 44.104 | 62.056 | 49.113 | 0.00 | 0.00 |
| ATOM | 658 | CG   | PHE | X | 43 | 45.587 | 63.128 | 47.955 | 0.00 | 0.00 |
| ATOM | 659 | CD1  | PHE | X | 43 | 46.457 | 62.148 | 47.402 | 0.00 | 0.00 |
| ATOM | 660 | HD1  | PHE | X | 43 | 46.054 | 61.148 | 47.338 | 0.00 | 0.00 |
| ATOM | 661 | CE1  | PHE | X | 43 | 47.738 | 62.638 | 46.957 | 0.00 | 0.00 |
| ATOM | 662 | HE1  | PHE | X | 43 | 48.389 | 61.889 | 46.532 | 0.00 | 0.00 |
| ATOM | 663 | CZ   | PHE | X | 43 | 48.126 | 63.996 | 47.180 | 0.00 | 0.00 |
| ATOM | 664 | HZ   | PHE | X | 43 | 49.153 | 64.274 | 46.995 | 0.00 | 0.00 |
| ATOM | 665 | CE2  | PHE | X | 43 | 47.257 | 64.939 | 47.814 | 0.00 | 0.00 |
| ATOM | 666 | HE2  | PHE | X | 43 | 47.570 | 65.962 | 47.966 | 0.00 | 0.00 |
| ATOM | 667 | CD2  | PHE | X | 43 | 45.979 | 64.501 | 48.159 | 0.00 | 0.00 |
| ATOM | 668 | HD2  | PHE | X | 43 | 45.306 | 65.157 | 48.692 | 0.00 | 0.00 |
| ATOM | 669 | C    | PHE | X | 43 | 41.780 | 61.965 | 47.573 | 0.00 | 0.00 |
| ATOM | 670 | O    | PHE | X | 43 | 41.394 | 61.638 | 48.707 | 0.00 | 0.00 |
| ATOM | 671 | N    | LEU | X | 44 | 40.807 | 62.269 | 46.686 | 0.00 | 0.00 |
| ATOM | 672 | H    | LEU | X | 44 | 41.166 | 62.466 | 45.763 | 0.00 | 0.00 |
| ATOM | 673 | CA   | LEU | X | 44 | 39.381 | 62.337 | 46.928 | 0.00 | 0.00 |
| ATOM | 674 | HA   | LEU | X | 44 | 39.248 | 62.134 | 47.991 | 0.00 | 0.00 |
| ATOM | 675 | CB   | LEU | X | 44 | 38.849 | 63.714 | 46.474 | 0.00 | 0.00 |
| ATOM | 676 | HB2  | LEU | X | 44 | 39.182 | 63.923 | 45.457 | 0.00 | 0.00 |
| ATOM | 677 | HB3  | LEU | X | 44 | 37.762 | 63.661 | 46.524 | 0.00 | 0.00 |
| ATOM | 678 | CG   | LEU | X | 44 | 39.330 | 64.918 | 47.337 | 0.00 | 0.00 |
| ATOM | 679 | HG   | LEU | X | 44 | 40.395 | 65.099 | 47.194 | 0.00 | 0.00 |
| ATOM | 680 | CD1  | LEU | X | 44 | 38.540 | 66.170 | 46.940 | 0.00 | 0.00 |
| ATOM | 681 | HD11 | LEU | X | 44 | 39.061 | 66.944 | 47.505 | 0.00 | 0.00 |
| ATOM | 682 | HD12 | LEU | X | 44 | 37.531 | 66.101 | 47.348 | 0.00 | 0.00 |
| ATOM | 683 | HD13 | LEU | X | 44 | 38.686 | 66.327 | 45.872 | 0.00 | 0.00 |
| ATOM | 684 | CD2  | LEU | X | 44 | 39.093 | 64.621 | 48.826 | 0.00 | 0.00 |
| ATOM | 685 | HD21 | LEU | X | 44 | 39.736 | 63.822 | 49.195 | 0.00 | 0.00 |
| ATOM | 686 | HD22 | LEU | X | 44 | 39.284 | 65.545 | 49.374 | 0.00 | 0.00 |
| ATOM | 687 | HD23 | LEU | X | 44 | 38.049 | 64.307 | 48.824 | 0.00 | 0.00 |
| ATOM | 688 | C    | LEU | X | 44 | 38.673 | 61.145 | 46.250 | 0.00 | 0.00 |
| ATOM | 689 | O    | LEU | X | 44 | 39.240 | 60.685 | 45.255 | 0.00 | 0.00 |
| ATOM | 690 | N    | PRO | X | 45 | 37.441 | 60.646 | 46.696 | 0.00 | 0.00 |
| ATOM | 691 | CD   | PRO | X | 45 | 36.823 | 60.864 | 47.990 | 0.00 | 0.00 |
| ATOM | 692 | HD2  | PRO | X | 45 | 36.855 | 61.923 | 48.246 | 0.00 | 0.00 |
| ATOM | 693 | HD3  | PRO | X | 45 | 37.456 | 60.429 | 48.763 | 0.00 | 0.00 |
| ATOM | 694 | CG   | PRO | X | 45 | 35.475 | 60.377 | 47.935 | 0.00 | 0.00 |
| ATOM | 695 | HG2  | PRO | X | 45 | 34.840 | 61.167 | 47.535 | 0.00 | 0.00 |

|      |     |     |     |   |    |        |        |        |      |      |
|------|-----|-----|-----|---|----|--------|--------|--------|------|------|
| ATOM | 696 | HG3 | PRO | X | 45 | 35.148 | 60.049 | 48.922 | 0.00 | 0.00 |
| ATOM | 697 | CB  | PRO | X | 45 | 35.571 | 59.217 | 46.921 | 0.00 | 0.00 |
| ATOM | 698 | HB2 | PRO | X | 45 | 34.582 | 59.094 | 46.479 | 0.00 | 0.00 |
| ATOM | 699 | HB3 | PRO | X | 45 | 35.882 | 58.277 | 47.378 | 0.00 | 0.00 |
| ATOM | 700 | CA  | PRO | X | 45 | 36.755 | 59.617 | 45.977 | 0.00 | 0.00 |
| ATOM | 701 | HA  | PRO | X | 45 | 37.431 | 58.772 | 45.848 | 0.00 | 0.00 |
| ATOM | 702 | C   | PRO | X | 45 | 36.198 | 60.176 | 44.655 | 0.00 | 0.00 |
| ATOM | 703 | O   | PRO | X | 45 | 36.048 | 61.426 | 44.631 | 0.00 | 0.00 |
| ATOM | 704 | N   | PRO | X | 46 | 36.185 | 59.438 | 43.577 | 0.00 | 0.00 |
| ATOM | 705 | CD  | PRO | X | 46 | 36.364 | 57.980 | 43.534 | 0.00 | 0.00 |
| ATOM | 706 | HD2 | PRO | X | 46 | 35.538 | 57.446 | 44.005 | 0.00 | 0.00 |
| ATOM | 707 | HD3 | PRO | X | 46 | 37.345 | 57.731 | 43.940 | 0.00 | 0.00 |
| ATOM | 708 | CG  | PRO | X | 46 | 36.379 | 57.675 | 41.988 | 0.00 | 0.00 |
| ATOM | 709 | HG2 | PRO | X | 46 | 35.405 | 57.360 | 41.615 | 0.00 | 0.00 |
| ATOM | 710 | HG3 | PRO | X | 46 | 37.184 | 57.025 | 41.644 | 0.00 | 0.00 |
| ATOM | 711 | CB  | PRO | X | 46 | 36.767 | 59.002 | 41.366 | 0.00 | 0.00 |
| ATOM | 712 | HB2 | PRO | X | 46 | 36.532 | 59.055 | 40.303 | 0.00 | 0.00 |
| ATOM | 713 | HB3 | PRO | X | 46 | 37.835 | 59.215 | 41.317 | 0.00 | 0.00 |
| ATOM | 714 | CA  | PRO | X | 46 | 35.975 | 60.004 | 42.251 | 0.00 | 0.00 |
| ATOM | 715 | HA  | PRO | X | 46 | 36.324 | 61.034 | 42.330 | 0.00 | 0.00 |
| ATOM | 716 | C   | PRO | X | 46 | 34.456 | 60.043 | 41.893 | 0.00 | 0.00 |
| ATOM | 717 | O   | PRO | X | 46 | 33.616 | 59.747 | 42.750 | 0.00 | 0.00 |
| ATOM | 718 | N   | GLU | X | 47 | 34.205 | 60.284 | 40.532 | 0.00 | 0.00 |
| ATOM | 719 | H   | GLU | X | 47 | 34.992 | 60.481 | 39.930 | 0.00 | 0.00 |
| ATOM | 720 | CA  | GLU | X | 47 | 32.823 | 60.341 | 40.028 | 0.00 | 0.00 |
| ATOM | 721 | HA  | GLU | X | 47 | 32.273 | 59.627 | 40.642 | 0.00 | 0.00 |
| ATOM | 722 | CB  | GLU | X | 47 | 32.229 | 61.729 | 40.280 | 0.00 | 0.00 |
| ATOM | 723 | HB2 | GLU | X | 47 | 31.165 | 61.754 | 40.046 | 0.00 | 0.00 |
| ATOM | 724 | HB3 | GLU | X | 47 | 32.302 | 61.893 | 41.355 | 0.00 | 0.00 |
| ATOM | 725 | CG  | GLU | X | 47 | 32.856 | 62.797 | 39.462 | 0.00 | 0.00 |
| ATOM | 726 | HG2 | GLU | X | 47 | 33.939 | 62.693 | 39.513 | 0.00 | 0.00 |
| ATOM | 727 | HG3 | GLU | X | 47 | 32.567 | 62.569 | 38.436 | 0.00 | 0.00 |
| ATOM | 728 | CD  | GLU | X | 47 | 32.441 | 64.202 | 39.929 | 0.00 | 0.00 |
| ATOM | 729 | OE1 | GLU | X | 47 | 33.315 | 64.924 | 40.422 | 0.00 | 0.00 |
| ATOM | 730 | OE2 | GLU | X | 47 | 31.235 | 64.542 | 39.835 | 0.00 | 0.00 |
| ATOM | 731 | C   | GLU | X | 47 | 32.755 | 59.969 | 38.512 | 0.00 | 0.00 |
| ATOM | 732 | O   | GLU | X | 47 | 33.714 | 60.331 | 37.816 | 0.00 | 0.00 |
| ATOM | 733 | N   | PRO | X | 48 | 31.641 | 59.416 | 37.948 | 0.00 | 0.00 |
| ATOM | 734 | CD  | PRO | X | 48 | 30.318 | 59.276 | 38.687 | 0.00 | 0.00 |
| ATOM | 735 | HD2 | PRO | X | 48 | 29.888 | 60.227 | 39.001 | 0.00 | 0.00 |
| ATOM | 736 | HD3 | PRO | X | 48 | 30.525 | 58.461 | 39.380 | 0.00 | 0.00 |
| ATOM | 737 | CG  | PRO | X | 48 | 29.342 | 58.767 | 37.577 | 0.00 | 0.00 |
| ATOM | 738 | HG2 | PRO | X | 48 | 28.920 | 59.689 | 37.179 | 0.00 | 0.00 |
| ATOM | 739 | HG3 | PRO | X | 48 | 28.620 | 58.014 | 37.894 | 0.00 | 0.00 |
| ATOM | 740 | CB  | PRO | X | 48 | 30.316 | 58.143 | 36.577 | 0.00 | 0.00 |
| ATOM | 741 | HB2 | PRO | X | 48 | 29.849 | 58.032 | 35.598 | 0.00 | 0.00 |
| ATOM | 742 | HB3 | PRO | X | 48 | 30.464 | 57.082 | 36.777 | 0.00 | 0.00 |
| ATOM | 743 | CA  | PRO | X | 48 | 31.637 | 58.865 | 36.589 | 0.00 | 0.00 |
| ATOM | 744 | HA  | PRO | X | 48 | 32.528 | 58.249 | 36.462 | 0.00 | 0.00 |
| ATOM | 745 | C   | PRO | X | 48 | 31.652 | 59.928 | 35.453 | 0.00 | 0.00 |
| ATOM | 746 | O   | PRO | X | 48 | 31.249 | 61.106 | 35.555 | 0.00 | 0.00 |
| ATOM | 747 | N   | LYS | X | 49 | 32.304 | 59.538 | 34.346 | 0.00 | 0.00 |
| ATOM | 748 | H   | LYS | X | 49 | 32.636 | 58.584 | 34.329 | 0.00 | 0.00 |
| ATOM | 749 | CA  | LYS | X | 49 | 32.632 | 60.250 | 33.105 | 0.00 | 0.00 |
| ATOM | 750 | HA  | LYS | X | 49 | 33.341 | 60.992 | 33.474 | 0.00 | 0.00 |
| ATOM | 751 | CB  | LYS | X | 49 | 33.214 | 59.233 | 32.112 | 0.00 | 0.00 |
| ATOM | 752 | HB2 | LYS | X | 49 | 34.264 | 59.127 | 32.388 | 0.00 | 0.00 |
| ATOM | 753 | HB3 | LYS | X | 49 | 32.603 | 58.332 | 32.168 | 0.00 | 0.00 |
| ATOM | 754 | CG  | LYS | X | 49 | 33.411 | 59.796 | 30.644 | 0.00 | 0.00 |
| ATOM | 755 | HG2 | LYS | X | 49 | 33.816 | 59.000 | 30.018 | 0.00 | 0.00 |
| ATOM | 756 | HG3 | LYS | X | 49 | 32.449 | 60.097 | 30.228 | 0.00 | 0.00 |
| ATOM | 757 | CD  | LYS | X | 49 | 34.358 | 60.961 | 30.571 | 0.00 | 0.00 |
| ATOM | 758 | HD2 | LYS | X | 49 | 33.932 | 61.705 | 31.244 | 0.00 | 0.00 |
| ATOM | 759 | HD3 | LYS | X | 49 | 35.363 | 60.733 | 30.927 | 0.00 | 0.00 |
| ATOM | 760 | CE  | LYS | X | 49 | 34.382 | 61.489 | 29.184 | 0.00 | 0.00 |
| ATOM | 761 | HE2 | LYS | X | 49 | 35.016 | 60.887 | 28.533 | 0.00 | 0.00 |
| ATOM | 762 | HE3 | LYS | X | 49 | 33.386 | 61.641 | 28.769 | 0.00 | 0.00 |

|      |     |      |     |   |    |        |        |        |      |      |
|------|-----|------|-----|---|----|--------|--------|--------|------|------|
| ATOM | 763 | NZ   | LYS | X | 49 | 35.023 | 62.790 | 29.119 | 0.00 | 0.00 |
| ATOM | 764 | HZ1  | LYS | X | 49 | 35.990 | 62.740 | 28.833 | 0.00 | 0.00 |
| ATOM | 765 | HZ2  | LYS | X | 49 | 34.702 | 63.425 | 28.402 | 0.00 | 0.00 |
| ATOM | 766 | HZ3  | LYS | X | 49 | 34.888 | 63.159 | 30.050 | 0.00 | 0.00 |
| ATOM | 767 | C    | LYS | X | 49 | 31.348 | 61.007 | 32.590 | 0.00 | 0.00 |
| ATOM | 768 | O    | LYS | X | 49 | 30.341 | 60.350 | 32.282 | 0.00 | 0.00 |
| ATOM | 769 | N    | GLN | X | 50 | 31.455 | 62.372 | 32.333 | 0.00 | 0.00 |
| ATOM | 770 | H    | GLN | X | 50 | 32.344 | 62.838 | 32.445 | 0.00 | 0.00 |
| ATOM | 771 | CA   | GLN | X | 50 | 30.323 | 63.112 | 31.774 | 0.00 | 0.00 |
| ATOM | 772 | HA   | GLN | X | 50 | 29.455 | 62.667 | 32.260 | 0.00 | 0.00 |
| ATOM | 773 | CB   | GLN | X | 50 | 30.421 | 64.695 | 32.102 | 0.00 | 0.00 |
| ATOM | 774 | HB2  | GLN | X | 50 | 29.478 | 65.124 | 31.762 | 0.00 | 0.00 |
| ATOM | 775 | HB3  | GLN | X | 50 | 30.529 | 64.761 | 33.185 | 0.00 | 0.00 |
| ATOM | 776 | CG   | GLN | X | 50 | 31.586 | 65.437 | 31.441 | 0.00 | 0.00 |
| ATOM | 777 | HG2  | GLN | X | 50 | 32.504 | 64.872 | 31.599 | 0.00 | 0.00 |
| ATOM | 778 | HG3  | GLN | X | 50 | 31.513 | 65.484 | 30.354 | 0.00 | 0.00 |
| ATOM | 779 | CD   | GLN | X | 50 | 31.767 | 66.909 | 31.948 | 0.00 | 0.00 |
| ATOM | 780 | OE1  | GLN | X | 50 | 30.912 | 67.761 | 31.780 | 0.00 | 0.00 |
| ATOM | 781 | NE2  | GLN | X | 50 | 32.886 | 67.229 | 32.599 | 0.00 | 0.00 |
| ATOM | 782 | HE21 | GLN | X | 50 | 33.078 | 68.213 | 32.721 | 0.00 | 0.00 |
| ATOM | 783 | HE22 | GLN | X | 50 | 33.501 | 66.540 | 33.007 | 0.00 | 0.00 |
| ATOM | 784 | C    | GLN | X | 50 | 30.149 | 62.823 | 30.246 | 0.00 | 0.00 |
| ATOM | 785 | O    | GLN | X | 50 | 31.125 | 62.514 | 29.663 | 0.00 | 0.00 |
| ATOM | 786 | N    | PRO | X | 51 | 28.910 | 62.704 | 29.645 | 0.00 | 0.00 |
| ATOM | 787 | CD   | PRO | X | 51 | 27.659 | 63.181 | 30.187 | 0.00 | 0.00 |
| ATOM | 788 | HD2  | PRO | X | 51 | 27.750 | 64.165 | 30.647 | 0.00 | 0.00 |
| ATOM | 789 | HD3  | PRO | X | 51 | 27.226 | 62.511 | 30.930 | 0.00 | 0.00 |
| ATOM | 790 | CG   | PRO | X | 51 | 26.664 | 63.271 | 29.031 | 0.00 | 0.00 |
| ATOM | 791 | HG2  | PRO | X | 51 | 26.621 | 64.222 | 28.499 | 0.00 | 0.00 |
| ATOM | 792 | HG3  | PRO | X | 51 | 25.636 | 63.163 | 29.379 | 0.00 | 0.00 |
| ATOM | 793 | CB   | PRO | X | 51 | 27.142 | 62.083 | 28.135 | 0.00 | 0.00 |
| ATOM | 794 | HB2  | PRO | X | 51 | 26.804 | 62.297 | 27.121 | 0.00 | 0.00 |
| ATOM | 795 | HB3  | PRO | X | 51 | 26.722 | 61.129 | 28.453 | 0.00 | 0.00 |
| ATOM | 796 | CA   | PRO | X | 51 | 28.670 | 62.194 | 28.319 | 0.00 | 0.00 |
| ATOM | 797 | HA   | PRO | X | 51 | 29.165 | 61.229 | 28.206 | 0.00 | 0.00 |
| ATOM | 798 | C    | PRO | X | 51 | 29.273 | 63.137 | 27.283 | 0.00 | 0.00 |
| ATOM | 799 | O    | PRO | X | 51 | 29.505 | 64.345 | 27.595 | 0.00 | 0.00 |
| ATOM | 800 | N    | TRP | X | 52 | 29.438 | 62.632 | 26.073 | 0.00 | 0.00 |
| ATOM | 801 | H    | TRP | X | 52 | 29.298 | 61.634 | 26.014 | 0.00 | 0.00 |
| ATOM | 802 | CA   | TRP | X | 52 | 29.804 | 63.372 | 24.838 | 0.00 | 0.00 |
| ATOM | 803 | HA   | TRP | X | 52 | 29.941 | 64.425 | 25.086 | 0.00 | 0.00 |
| ATOM | 804 | CB   | TRP | X | 52 | 31.115 | 62.818 | 24.304 | 0.00 | 0.00 |
| ATOM | 805 | HB2  | TRP | X | 52 | 31.299 | 63.311 | 23.349 | 0.00 | 0.00 |
| ATOM | 806 | HB3  | TRP | X | 52 | 31.911 | 63.169 | 24.961 | 0.00 | 0.00 |
| ATOM | 807 | CG   | TRP | X | 52 | 31.292 | 61.384 | 24.123 | 0.00 | 0.00 |
| ATOM | 808 | CD1  | TRP | X | 52 | 31.243 | 60.755 | 22.881 | 0.00 | 0.00 |
| ATOM | 809 | HD1  | TRP | X | 52 | 31.155 | 61.321 | 21.965 | 0.00 | 0.00 |
| ATOM | 810 | NE1  | TRP | X | 52 | 31.221 | 59.390 | 23.087 | 0.00 | 0.00 |
| ATOM | 811 | HE1  | TRP | X | 52 | 31.239 | 58.682 | 22.367 | 0.00 | 0.00 |
| ATOM | 812 | CE2  | TRP | X | 52 | 31.358 | 59.084 | 24.407 | 0.00 | 0.00 |
| ATOM | 813 | CZ2  | TRP | X | 52 | 31.492 | 57.800 | 24.973 | 0.00 | 0.00 |
| ATOM | 814 | HZ2  | TRP | X | 52 | 31.341 | 56.915 | 24.373 | 0.00 | 0.00 |
| ATOM | 815 | CH2  | TRP | X | 52 | 31.847 | 57.771 | 26.324 | 0.00 | 0.00 |
| ATOM | 816 | HH2  | TRP | X | 52 | 32.014 | 56.761 | 26.667 | 0.00 | 0.00 |
| ATOM | 817 | CZ3  | TRP | X | 52 | 31.991 | 58.923 | 27.097 | 0.00 | 0.00 |
| ATOM | 818 | HZ3  | TRP | X | 52 | 32.224 | 58.743 | 28.136 | 0.00 | 0.00 |
| ATOM | 819 | CE3  | TRP | X | 52 | 31.866 | 60.216 | 26.548 | 0.00 | 0.00 |
| ATOM | 820 | HE3  | TRP | X | 52 | 32.016 | 61.155 | 27.059 | 0.00 | 0.00 |
| ATOM | 821 | CD2  | TRP | X | 52 | 31.471 | 60.329 | 25.153 | 0.00 | 0.00 |
| ATOM | 822 | C    | TRP | X | 52 | 28.808 | 63.361 | 23.621 | 0.00 | 0.00 |
| ATOM | 823 | O    | TRP | X | 52 | 28.324 | 62.289 | 23.240 | 0.00 | 0.00 |
| ATOM | 824 | N    | SER | X | 53 | 28.886 | 64.473 | 22.885 | 0.00 | 0.00 |
| ATOM | 825 | H    | SER | X | 53 | 29.370 | 65.284 | 23.243 | 0.00 | 0.00 |
| ATOM | 826 | CA   | SER | X | 53 | 28.403 | 64.588 | 21.410 | 0.00 | 0.00 |
| ATOM | 827 | HA   | SER | X | 53 | 27.369 | 64.244 | 21.427 | 0.00 | 0.00 |
| ATOM | 828 | CB   | SER | X | 53 | 28.321 | 65.999 | 20.824 | 0.00 | 0.00 |
| ATOM | 829 | HB2  | SER | X | 53 | 29.383 | 66.241 | 20.784 | 0.00 | 0.00 |

|      |     |      |     |   |    |        |        |        |      |      |
|------|-----|------|-----|---|----|--------|--------|--------|------|------|
| ATOM | 830 | HB3  | SER | X | 53 | 28.134 | 65.831 | 19.764 | 0.00 | 0.00 |
| ATOM | 831 | OG   | SER | X | 53 | 27.411 | 66.857 | 21.546 | 0.00 | 0.00 |
| ATOM | 832 | HG   | SER | X | 53 | 26.745 | 67.269 | 20.991 | 0.00 | 0.00 |
| ATOM | 833 | C    | SER | X | 53 | 29.173 | 63.601 | 20.445 | 0.00 | 0.00 |
| ATOM | 834 | O    | SER | X | 53 | 30.383 | 63.645 | 20.507 | 0.00 | 0.00 |
| ATOM | 835 | N    | GLY | X | 54 | 28.655 | 62.775 | 19.528 | 0.00 | 0.00 |
| ATOM | 836 | H    | GLY | X | 54 | 27.648 | 62.776 | 19.455 | 0.00 | 0.00 |
| ATOM | 837 | CA   | GLY | X | 54 | 29.442 | 62.149 | 18.540 | 0.00 | 0.00 |
| ATOM | 838 | HA2  | GLY | X | 54 | 28.715 | 61.929 | 17.758 | 0.00 | 0.00 |
| ATOM | 839 | HA3  | GLY | X | 54 | 30.146 | 62.820 | 18.049 | 0.00 | 0.00 |
| ATOM | 840 | C    | GLY | X | 54 | 30.149 | 60.923 | 19.105 | 0.00 | 0.00 |
| ATOM | 841 | O    | GLY | X | 54 | 29.518 | 60.103 | 19.790 | 0.00 | 0.00 |
| ATOM | 842 | N    | VAL | X | 55 | 31.357 | 60.615 | 18.714 | 0.00 | 0.00 |
| ATOM | 843 | H    | VAL | X | 55 | 31.743 | 61.253 | 18.033 | 0.00 | 0.00 |
| ATOM | 844 | CA   | VAL | X | 55 | 32.109 | 59.428 | 19.007 | 0.00 | 0.00 |
| ATOM | 845 | HA   | VAL | X | 55 | 31.433 | 58.796 | 19.583 | 0.00 | 0.00 |
| ATOM | 846 | CB   | VAL | X | 55 | 32.485 | 58.830 | 17.621 | 0.00 | 0.00 |
| ATOM | 847 | HB   | VAL | X | 55 | 33.073 | 59.602 | 17.124 | 0.00 | 0.00 |
| ATOM | 848 | CG1  | VAL | X | 55 | 33.435 | 57.612 | 17.751 | 0.00 | 0.00 |
| ATOM | 849 | HG11 | VAL | X | 55 | 34.423 | 57.899 | 18.112 | 0.00 | 0.00 |
| ATOM | 850 | HG12 | VAL | X | 55 | 33.030 | 56.780 | 18.327 | 0.00 | 0.00 |
| ATOM | 851 | HG13 | VAL | X | 55 | 33.564 | 57.236 | 16.736 | 0.00 | 0.00 |
| ATOM | 852 | CG2  | VAL | X | 55 | 31.332 | 58.454 | 16.728 | 0.00 | 0.00 |
| ATOM | 853 | HG21 | VAL | X | 55 | 30.754 | 59.374 | 16.641 | 0.00 | 0.00 |
| ATOM | 854 | HG22 | VAL | X | 55 | 30.696 | 57.678 | 17.155 | 0.00 | 0.00 |
| ATOM | 855 | HG23 | VAL | X | 55 | 31.681 | 58.137 | 15.745 | 0.00 | 0.00 |
| ATOM | 856 | C    | VAL | X | 55 | 33.387 | 59.847 | 19.859 | 0.00 | 0.00 |
| ATOM | 857 | O    | VAL | X | 55 | 33.916 | 60.959 | 19.708 | 0.00 | 0.00 |
| ATOM | 858 | N    | VAL | X | 56 | 33.826 | 59.046 | 20.769 | 0.00 | 0.00 |
| ATOM | 859 | H    | VAL | X | 56 | 33.291 | 58.211 | 20.959 | 0.00 | 0.00 |
| ATOM | 860 | CA   | VAL | X | 56 | 35.201 | 59.028 | 21.387 | 0.00 | 0.00 |
| ATOM | 861 | HA   | VAL | X | 56 | 35.671 | 59.914 | 20.961 | 0.00 | 0.00 |
| ATOM | 862 | CB   | VAL | X | 56 | 35.045 | 59.179 | 22.906 | 0.00 | 0.00 |
| ATOM | 863 | HB   | VAL | X | 56 | 34.179 | 58.608 | 23.242 | 0.00 | 0.00 |
| ATOM | 864 | CG1  | VAL | X | 56 | 36.147 | 58.475 | 23.792 | 0.00 | 0.00 |
| ATOM | 865 | HG11 | VAL | X | 56 | 36.005 | 58.690 | 24.851 | 0.00 | 0.00 |
| ATOM | 866 | HG12 | VAL | X | 56 | 36.068 | 57.392 | 23.695 | 0.00 | 0.00 |
| ATOM | 867 | HG13 | VAL | X | 56 | 37.147 | 58.867 | 23.604 | 0.00 | 0.00 |
| ATOM | 868 | CG2  | VAL | X | 56 | 35.037 | 60.652 | 23.366 | 0.00 | 0.00 |
| ATOM | 869 | HG21 | VAL | X | 56 | 34.087 | 61.061 | 23.020 | 0.00 | 0.00 |
| ATOM | 870 | HG22 | VAL | X | 56 | 35.880 | 61.116 | 22.854 | 0.00 | 0.00 |
| ATOM | 871 | HG23 | VAL | X | 56 | 35.119 | 60.725 | 24.450 | 0.00 | 0.00 |
| ATOM | 872 | C    | VAL | X | 56 | 35.949 | 57.758 | 20.896 | 0.00 | 0.00 |
| ATOM | 873 | O    | VAL | X | 56 | 35.370 | 56.763 | 20.541 | 0.00 | 0.00 |
| ATOM | 874 | N    | ASP | X | 57 | 37.279 | 57.913 | 20.886 | 0.00 | 0.00 |
| ATOM | 875 | H    | ASP | X | 57 | 37.649 | 58.757 | 21.300 | 0.00 | 0.00 |
| ATOM | 876 | CA   | ASP | X | 57 | 38.291 | 56.877 | 20.424 | 0.00 | 0.00 |
| ATOM | 877 | HA   | ASP | X | 57 | 37.940 | 56.426 | 19.496 | 0.00 | 0.00 |
| ATOM | 878 | CB   | ASP | X | 57 | 39.526 | 57.632 | 19.959 | 0.00 | 0.00 |
| ATOM | 879 | HB2  | ASP | X | 57 | 39.278 | 58.298 | 19.133 | 0.00 | 0.00 |
| ATOM | 880 | HB3  | ASP | X | 57 | 39.843 | 58.357 | 20.709 | 0.00 | 0.00 |
| ATOM | 881 | CG   | ASP | X | 57 | 40.785 | 56.871 | 19.589 | 0.00 | 0.00 |
| ATOM | 882 | OD1  | ASP | X | 57 | 41.290 | 56.963 | 18.462 | 0.00 | 0.00 |
| ATOM | 883 | OD2  | ASP | X | 57 | 41.275 | 56.003 | 20.316 | 0.00 | 0.00 |
| ATOM | 884 | C    | ASP | X | 57 | 38.563 | 55.812 | 21.518 | 0.00 | 0.00 |
| ATOM | 885 | O    | ASP | X | 57 | 38.839 | 56.140 | 22.652 | 0.00 | 0.00 |
| ATOM | 886 | N    | ALA | X | 58 | 38.594 | 54.512 | 21.206 | 0.00 | 0.00 |
| ATOM | 887 | H    | ALA | X | 58 | 38.325 | 54.173 | 20.293 | 0.00 | 0.00 |
| ATOM | 888 | CA   | ALA | X | 58 | 38.761 | 53.411 | 22.174 | 0.00 | 0.00 |
| ATOM | 889 | HA   | ALA | X | 58 | 39.244 | 53.726 | 23.099 | 0.00 | 0.00 |
| ATOM | 890 | CB   | ALA | X | 58 | 37.456 | 52.701 | 22.412 | 0.00 | 0.00 |
| ATOM | 891 | HB1  | ALA | X | 58 | 36.743 | 53.429 | 22.798 | 0.00 | 0.00 |
| ATOM | 892 | HB2  | ALA | X | 58 | 37.539 | 51.963 | 23.210 | 0.00 | 0.00 |
| ATOM | 893 | HB3  | ALA | X | 58 | 37.143 | 52.151 | 21.525 | 0.00 | 0.00 |
| ATOM | 894 | C    | ALA | X | 58 | 39.879 | 52.439 | 21.619 | 0.00 | 0.00 |
| ATOM | 895 | O    | ALA | X | 58 | 39.781 | 51.198 | 21.754 | 0.00 | 0.00 |
| ATOM | 896 | N    | THR | X | 59 | 40.901 | 53.019 | 20.970 | 0.00 | 0.00 |



|      |     |      |     |   |    |        |        |        |      |      |
|------|-----|------|-----|---|----|--------|--------|--------|------|------|
| ATOM | 897 | H    | THR | X | 59 | 40.910 | 54.027 | 20.922 | 0.00 | 0.00 |
| ATOM | 898 | CA   | THR | X | 59 | 41.817 | 52.350 | 20.111 | 0.00 | 0.00 |
| ATOM | 899 | HA   | THR | X | 59 | 41.441 | 51.341 | 19.944 | 0.00 | 0.00 |
| ATOM | 900 | CB   | THR | X | 59 | 41.957 | 53.122 | 18.797 | 0.00 | 0.00 |
| ATOM | 901 | HB   | THR | X | 59 | 42.585 | 52.624 | 18.058 | 0.00 | 0.00 |
| ATOM | 902 | CG2  | THR | X | 59 | 40.698 | 53.557 | 18.045 | 0.00 | 0.00 |
| ATOM | 903 | HG21 | THR | X | 59 | 40.827 | 53.983 | 17.050 | 0.00 | 0.00 |
| ATOM | 904 | HG22 | THR | X | 59 | 40.183 | 54.329 | 18.619 | 0.00 | 0.00 |
| ATOM | 905 | HG23 | THR | X | 59 | 40.104 | 52.651 | 17.926 | 0.00 | 0.00 |
| ATOM | 906 | OG1  | THR | X | 59 | 42.766 | 54.268 | 19.014 | 0.00 | 0.00 |
| ATOM | 907 | HG1  | THR | X | 59 | 42.209 | 54.868 | 19.515 | 0.00 | 0.00 |
| ATOM | 908 | C    | THR | X | 59 | 43.142 | 51.970 | 20.809 | 0.00 | 0.00 |
| ATOM | 909 | O    | THR | X | 59 | 43.864 | 51.126 | 20.319 | 0.00 | 0.00 |
| ATOM | 910 | N    | THR | X | 60 | 43.483 | 52.552 | 21.952 | 0.00 | 0.00 |
| ATOM | 911 | H    | THR | X | 60 | 42.778 | 53.115 | 22.406 | 0.00 | 0.00 |
| ATOM | 912 | CA   | THR | X | 60 | 44.798 | 52.528 | 22.657 | 0.00 | 0.00 |
| ATOM | 913 | HA   | THR | X | 60 | 45.065 | 51.476 | 22.758 | 0.00 | 0.00 |
| ATOM | 914 | CB   | THR | X | 60 | 45.843 | 53.180 | 21.766 | 0.00 | 0.00 |
| ATOM | 915 | HB   | THR | X | 60 | 45.696 | 52.934 | 20.714 | 0.00 | 0.00 |
| ATOM | 916 | CG2  | THR | X | 60 | 45.973 | 54.641 | 21.954 | 0.00 | 0.00 |
| ATOM | 917 | HG21 | THR | X | 60 | 46.487 | 54.981 | 21.055 | 0.00 | 0.00 |
| ATOM | 918 | HG22 | THR | X | 60 | 46.594 | 54.960 | 22.790 | 0.00 | 0.00 |
| ATOM | 919 | HG23 | THR | X | 60 | 44.968 | 55.064 | 21.973 | 0.00 | 0.00 |
| ATOM | 920 | OG1  | THR | X | 60 | 47.088 | 52.650 | 22.116 | 0.00 | 0.00 |
| ATOM | 921 | HG1  | THR | X | 60 | 47.712 | 52.790 | 21.400 | 0.00 | 0.00 |
| ATOM | 922 | C    | THR | X | 60 | 44.830 | 52.999 | 24.134 | 0.00 | 0.00 |
| ATOM | 923 | O    | THR | X | 60 | 43.931 | 53.709 | 24.539 | 0.00 | 0.00 |
| ATOM | 924 | N    | PHE | X | 61 | 45.743 | 52.472 | 24.930 | 0.00 | 0.00 |
| ATOM | 925 | H    | PHE | X | 61 | 46.280 | 51.686 | 24.591 | 0.00 | 0.00 |
| ATOM | 926 | CA   | PHE | X | 61 | 46.000 | 52.971 | 26.274 | 0.00 | 0.00 |
| ATOM | 927 | HA   | PHE | X | 61 | 45.146 | 52.919 | 26.950 | 0.00 | 0.00 |
| ATOM | 928 | CB   | PHE | X | 61 | 47.071 | 52.099 | 26.916 | 0.00 | 0.00 |
| ATOM | 929 | HB2  | PHE | X | 61 | 47.966 | 52.103 | 26.294 | 0.00 | 0.00 |
| ATOM | 930 | HB3  | PHE | X | 61 | 47.503 | 52.508 | 27.830 | 0.00 | 0.00 |
| ATOM | 931 | CG   | PHE | X | 61 | 46.634 | 50.683 | 27.053 | 0.00 | 0.00 |
| ATOM | 932 | CD1  | PHE | X | 61 | 45.678 | 50.317 | 27.965 | 0.00 | 0.00 |
| ATOM | 933 | HD1  | PHE | X | 61 | 45.124 | 51.042 | 28.542 | 0.00 | 0.00 |
| ATOM | 934 | CE1  | PHE | X | 61 | 45.442 | 48.959 | 28.180 | 0.00 | 0.00 |
| ATOM | 935 | HE1  | PHE | X | 61 | 44.814 | 48.644 | 29.000 | 0.00 | 0.00 |
| ATOM | 936 | CZ   | PHE | X | 61 | 46.120 | 47.962 | 27.470 | 0.00 | 0.00 |
| ATOM | 937 | HZ   | PHE | X | 61 | 45.975 | 46.898 | 27.586 | 0.00 | 0.00 |
| ATOM | 938 | CE2  | PHE | X | 61 | 47.032 | 48.336 | 26.452 | 0.00 | 0.00 |
| ATOM | 939 | HE2  | PHE | X | 61 | 47.598 | 47.607 | 25.892 | 0.00 | 0.00 |
| ATOM | 940 | CD2  | PHE | X | 61 | 47.183 | 49.743 | 26.231 | 0.00 | 0.00 |
| ATOM | 941 | HD2  | PHE | X | 61 | 47.761 | 50.022 | 25.362 | 0.00 | 0.00 |
| ATOM | 942 | C    | PHE | X | 61 | 46.469 | 54.393 | 26.193 | 0.00 | 0.00 |
| ATOM | 943 | O    | PHE | X | 61 | 47.211 | 54.766 | 25.323 | 0.00 | 0.00 |
| ATOM | 944 | N    | GLN | X | 62 | 45.941 | 55.264 | 27.077 | 0.00 | 0.00 |
| ATOM | 945 | H    | GLN | X | 62 | 45.431 | 54.943 | 27.889 | 0.00 | 0.00 |
| ATOM | 946 | CA   | GLN | X | 62 | 45.954 | 56.714 | 26.924 | 0.00 | 0.00 |
| ATOM | 947 | HA   | GLN | X | 62 | 46.192 | 56.959 | 25.889 | 0.00 | 0.00 |
| ATOM | 948 | CB   | GLN | X | 62 | 44.626 | 57.404 | 27.268 | 0.00 | 0.00 |
| ATOM | 949 | HB2  | GLN | X | 62 | 44.427 | 57.160 | 28.312 | 0.00 | 0.00 |
| ATOM | 950 | HB3  | GLN | X | 62 | 44.645 | 58.493 | 27.232 | 0.00 | 0.00 |
| ATOM | 951 | CG   | GLN | X | 62 | 43.428 | 56.887 | 26.510 | 0.00 | 0.00 |
| ATOM | 952 | HG2  | GLN | X | 62 | 43.340 | 55.801 | 26.536 | 0.00 | 0.00 |
| ATOM | 953 | HG3  | GLN | X | 62 | 42.509 | 57.254 | 26.969 | 0.00 | 0.00 |
| ATOM | 954 | CD   | GLN | X | 62 | 43.515 | 57.393 | 25.127 | 0.00 | 0.00 |
| ATOM | 955 | OE1  | GLN | X | 62 | 43.629 | 58.592 | 24.971 | 0.00 | 0.00 |
| ATOM | 956 | NE2  | GLN | X | 62 | 43.510 | 56.597 | 24.062 | 0.00 | 0.00 |
| ATOM | 957 | HE21 | GLN | X | 62 | 43.440 | 56.944 | 23.116 | 0.00 | 0.00 |
| ATOM | 958 | HE22 | GLN | X | 62 | 43.420 | 55.603 | 24.220 | 0.00 | 0.00 |
| ATOM | 959 | C    | GLN | X | 62 | 46.991 | 57.414 | 27.786 | 0.00 | 0.00 |
| ATOM | 960 | O    | GLN | X | 62 | 47.934 | 58.008 | 27.249 | 0.00 | 0.00 |
| ATOM | 961 | N    | SER | X | 63 | 46.950 | 57.261 | 29.120 | 0.00 | 0.00 |
| ATOM | 962 | H    | SER | X | 63 | 46.201 | 56.748 | 29.562 | 0.00 | 0.00 |
| ATOM | 963 | CA   | SER | X | 63 | 48.033 | 57.616 | 30.067 | 0.00 | 0.00 |

|      |      |      |     |   |    |        |        |        |      |      |
|------|------|------|-----|---|----|--------|--------|--------|------|------|
| ATOM | 964  | HA   | SER | X | 63 | 48.961 | 57.600 | 29.496 | 0.00 | 0.00 |
| ATOM | 965  | CB   | SER | X | 63 | 47.892 | 59.032 | 30.678 | 0.00 | 0.00 |
| ATOM | 966  | HB2  | SER | X | 63 | 48.858 | 59.477 | 30.919 | 0.00 | 0.00 |
| ATOM | 967  | HB3  | SER | X | 63 | 47.583 | 59.650 | 29.836 | 0.00 | 0.00 |
| ATOM | 968  | OG   | SER | X | 63 | 46.923 | 59.095 | 31.695 | 0.00 | 0.00 |
| ATOM | 969  | HG   | SER | X | 63 | 46.432 | 59.917 | 31.630 | 0.00 | 0.00 |
| ATOM | 970  | C    | SER | X | 63 | 48.112 | 56.528 | 31.252 | 0.00 | 0.00 |
| ATOM | 971  | O    | SER | X | 63 | 47.388 | 55.501 | 31.183 | 0.00 | 0.00 |
| ATOM | 972  | N    | VAL | X | 64 | 48.934 | 56.642 | 32.279 | 0.00 | 0.00 |
| ATOM | 973  | H    | VAL | X | 64 | 49.495 | 57.482 | 32.261 | 0.00 | 0.00 |
| ATOM | 974  | CA   | VAL | X | 64 | 48.970 | 55.754 | 33.514 | 0.00 | 0.00 |
| ATOM | 975  | HA   | VAL | X | 64 | 48.197 | 54.991 | 33.613 | 0.00 | 0.00 |
| ATOM | 976  | CB   | VAL | X | 64 | 50.406 | 55.054 | 33.473 | 0.00 | 0.00 |
| ATOM | 977  | HB   | VAL | X | 64 | 51.177 | 55.823 | 33.448 | 0.00 | 0.00 |
| ATOM | 978  | CG1  | VAL | X | 64 | 50.572 | 54.212 | 34.721 | 0.00 | 0.00 |
| ATOM | 979  | HG11 | VAL | X | 64 | 50.623 | 54.766 | 35.658 | 0.00 | 0.00 |
| ATOM | 980  | HG12 | VAL | X | 64 | 49.717 | 53.550 | 34.857 | 0.00 | 0.00 |
| ATOM | 981  | HG13 | VAL | X | 64 | 51.391 | 53.496 | 34.653 | 0.00 | 0.00 |
| ATOM | 982  | CG2  | VAL | X | 64 | 50.578 | 54.238 | 32.174 | 0.00 | 0.00 |
| ATOM | 983  | HG21 | VAL | X | 64 | 50.553 | 54.768 | 31.222 | 0.00 | 0.00 |
| ATOM | 984  | HG22 | VAL | X | 64 | 49.884 | 53.400 | 32.106 | 0.00 | 0.00 |
| ATOM | 985  | HG23 | VAL | X | 64 | 51.538 | 53.733 | 32.074 | 0.00 | 0.00 |
| ATOM | 986  | C    | VAL | X | 64 | 48.886 | 56.699 | 34.694 | 0.00 | 0.00 |
| ATOM | 987  | O    | VAL | X | 64 | 49.457 | 57.790 | 34.676 | 0.00 | 0.00 |
| ATOM | 988  | N    | CYX | X | 65 | 48.139 | 56.382 | 35.792 | 0.00 | 0.00 |
| ATOM | 989  | H    | CYX | X | 65 | 47.653 | 55.501 | 35.706 | 0.00 | 0.00 |
| ATOM | 990  | CA   | CYX | X | 65 | 48.094 | 57.113 | 37.057 | 0.00 | 0.00 |
| ATOM | 991  | HA   | CYX | X | 65 | 47.641 | 58.084 | 36.855 | 0.00 | 0.00 |
| ATOM | 992  | CB   | CYX | X | 65 | 47.195 | 56.386 | 37.997 | 0.00 | 0.00 |
| ATOM | 993  | HB2  | CYX | X | 65 | 47.497 | 55.352 | 38.165 | 0.00 | 0.00 |
| ATOM | 994  | HB3  | CYX | X | 65 | 47.198 | 56.906 | 38.954 | 0.00 | 0.00 |
| ATOM | 995  | SG   | CYX | X | 65 | 45.539 | 56.175 | 37.330 | 0.00 | 0.00 |
| ATOM | 996  | C    | CYX | X | 65 | 49.473 | 57.356 | 37.602 | 0.00 | 0.00 |
| ATOM | 997  | O    | CYX | X | 65 | 50.168 | 56.342 | 37.846 | 0.00 | 0.00 |
| ATOM | 998  | N    | TYR | X | 66 | 49.948 | 58.608 | 37.784 | 0.00 | 0.00 |
| ATOM | 999  | H    | TYR | X | 66 | 49.442 | 59.348 | 37.318 | 0.00 | 0.00 |
| ATOM | 1000 | CA   | TYR | X | 66 | 51.217 | 59.036 | 38.402 | 0.00 | 0.00 |
| ATOM | 1001 | HA   | TYR | X | 66 | 52.002 | 58.845 | 37.670 | 0.00 | 0.00 |
| ATOM | 1002 | CB   | TYR | X | 66 | 51.170 | 60.565 | 38.806 | 0.00 | 0.00 |
| ATOM | 1003 | HB2  | TYR | X | 66 | 50.123 | 60.868 | 38.786 | 0.00 | 0.00 |
| ATOM | 1004 | HB3  | TYR | X | 66 | 51.507 | 60.694 | 39.834 | 0.00 | 0.00 |
| ATOM | 1005 | CG   | TYR | X | 66 | 51.998 | 61.494 | 37.952 | 0.00 | 0.00 |
| ATOM | 1006 | CD1  | TYR | X | 66 | 51.345 | 62.529 | 37.313 | 0.00 | 0.00 |
| ATOM | 1007 | HD1  | TYR | X | 66 | 50.295 | 62.670 | 37.520 | 0.00 | 0.00 |
| ATOM | 1008 | CE1  | TYR | X | 66 | 51.989 | 63.500 | 36.481 | 0.00 | 0.00 |
| ATOM | 1009 | HE1  | TYR | X | 66 | 51.482 | 64.356 | 36.061 | 0.00 | 0.00 |
| ATOM | 1010 | CZ   | TYR | X | 66 | 53.346 | 63.280 | 36.247 | 0.00 | 0.00 |
| ATOM | 1011 | OH   | TYR | X | 66 | 54.000 | 64.204 | 35.461 | 0.00 | 0.00 |
| ATOM | 1012 | HH   | TYR | X | 66 | 53.385 | 64.776 | 34.996 | 0.00 | 0.00 |
| ATOM | 1013 | CE2  | TYR | X | 66 | 54.023 | 62.137 | 36.804 | 0.00 | 0.00 |
| ATOM | 1014 | HE2  | TYR | X | 66 | 55.093 | 62.019 | 36.723 | 0.00 | 0.00 |
| ATOM | 1015 | CD2  | TYR | X | 66 | 53.338 | 61.288 | 37.691 | 0.00 | 0.00 |
| ATOM | 1016 | HD2  | TYR | X | 66 | 53.828 | 60.420 | 38.105 | 0.00 | 0.00 |
| ATOM | 1017 | C    | TYR | X | 66 | 51.704 | 58.140 | 39.586 | 0.00 | 0.00 |
| ATOM | 1018 | O    | TYR | X | 66 | 51.017 | 57.907 | 40.605 | 0.00 | 0.00 |
| ATOM | 1019 | N    | GLN | X | 67 | 53.008 | 57.683 | 39.469 | 0.00 | 0.00 |
| ATOM | 1020 | H    | GLN | X | 67 | 53.658 | 58.051 | 38.789 | 0.00 | 0.00 |
| ATOM | 1021 | CA   | GLN | X | 67 | 53.640 | 56.761 | 40.347 | 0.00 | 0.00 |
| ATOM | 1022 | HA   | GLN | X | 67 | 53.394 | 56.940 | 41.393 | 0.00 | 0.00 |
| ATOM | 1023 | CB   | GLN | X | 67 | 53.130 | 55.344 | 40.089 | 0.00 | 0.00 |
| ATOM | 1024 | HB2  | GLN | X | 67 | 53.578 | 54.798 | 40.920 | 0.00 | 0.00 |
| ATOM | 1025 | HB3  | GLN | X | 67 | 52.067 | 55.351 | 40.331 | 0.00 | 0.00 |
| ATOM | 1026 | CG   | GLN | X | 67 | 53.421 | 54.748 | 38.644 | 0.00 | 0.00 |
| ATOM | 1027 | HG2  | GLN | X | 67 | 53.081 | 55.562 | 38.003 | 0.00 | 0.00 |
| ATOM | 1028 | HG3  | GLN | X | 67 | 54.480 | 54.590 | 38.441 | 0.00 | 0.00 |
| ATOM | 1029 | CD   | GLN | X | 67 | 52.470 | 53.511 | 38.390 | 0.00 | 0.00 |
| ATOM | 1030 | OE1  | GLN | X | 67 | 52.900 | 52.344 | 38.449 | 0.00 | 0.00 |

|      |      |      |     |   |    |        |        |        |      |      |
|------|------|------|-----|---|----|--------|--------|--------|------|------|
| ATOM | 1031 | NE2  | GLN | X | 67 | 51.212 | 53.763 | 38.288 | 0.00 | 0.00 |
| ATOM | 1032 | HE21 | GLN | X | 67 | 50.507 | 53.070 | 38.081 | 0.00 | 0.00 |
| ATOM | 1033 | HE22 | GLN | X | 67 | 50.929 | 54.731 | 38.223 | 0.00 | 0.00 |
| ATOM | 1034 | C    | GLN | X | 67 | 55.200 | 56.810 | 40.229 | 0.00 | 0.00 |
| ATOM | 1035 | O    | GLN | X | 67 | 55.627 | 57.290 | 39.204 | 0.00 | 0.00 |
| ATOM | 1036 | N    | TYR | X | 68 | 56.000 | 56.309 | 41.198 | 0.00 | 0.00 |
| ATOM | 1037 | H    | TYR | X | 68 | 55.520 | 55.935 | 42.004 | 0.00 | 0.00 |
| ATOM | 1038 | CA   | TYR | X | 68 | 57.417 | 55.832 | 40.995 | 0.00 | 0.00 |
| ATOM | 1039 | HA   | TYR | X | 68 | 58.009 | 56.715 | 40.756 | 0.00 | 0.00 |
| ATOM | 1040 | CB   | TYR | X | 68 | 57.965 | 55.380 | 42.386 | 0.00 | 0.00 |
| ATOM | 1041 | HB2  | TYR | X | 68 | 57.983 | 56.287 | 42.989 | 0.00 | 0.00 |
| ATOM | 1042 | HB3  | TYR | X | 68 | 57.318 | 54.639 | 42.856 | 0.00 | 0.00 |
| ATOM | 1043 | CG   | TYR | X | 68 | 59.325 | 54.787 | 42.482 | 0.00 | 0.00 |
| ATOM | 1044 | CD1  | TYR | X | 68 | 60.400 | 55.633 | 42.710 | 0.00 | 0.00 |
| ATOM | 1045 | HD1  | TYR | X | 68 | 60.255 | 56.700 | 42.793 | 0.00 | 0.00 |
| ATOM | 1046 | CE1  | TYR | X | 68 | 61.677 | 55.086 | 42.752 | 0.00 | 0.00 |
| ATOM | 1047 | HE1  | TYR | X | 68 | 62.606 | 55.636 | 42.800 | 0.00 | 0.00 |
| ATOM | 1048 | CZ   | TYR | X | 68 | 61.890 | 53.682 | 42.576 | 0.00 | 0.00 |
| ATOM | 1049 | OH   | TYR | X | 68 | 63.173 | 53.144 | 42.518 | 0.00 | 0.00 |
| ATOM | 1050 | HH   | TYR | X | 68 | 63.933 | 53.715 | 42.380 | 0.00 | 0.00 |
| ATOM | 1051 | CE2  | TYR | X | 68 | 60.744 | 52.801 | 42.399 | 0.00 | 0.00 |
| ATOM | 1052 | HE2  | TYR | X | 68 | 60.871 | 51.736 | 42.278 | 0.00 | 0.00 |
| ATOM | 1053 | CD2  | TYR | X | 68 | 59.480 | 53.422 | 42.360 | 0.00 | 0.00 |
| ATOM | 1054 | HD2  | TYR | X | 68 | 58.578 | 52.829 | 42.362 | 0.00 | 0.00 |
| ATOM | 1055 | C    | TYR | X | 68 | 57.643 | 54.679 | 39.931 | 0.00 | 0.00 |
| ATOM | 1056 | O    | TYR | X | 68 | 56.752 | 53.846 | 39.698 | 0.00 | 0.00 |
| ATOM | 1057 | N    | VAL | X | 69 | 58.811 | 54.692 | 39.289 | 0.00 | 0.00 |
| ATOM | 1058 | H    | VAL | X | 69 | 59.528 | 55.295 | 39.665 | 0.00 | 0.00 |
| ATOM | 1059 | CA   | VAL | X | 69 | 59.329 | 53.688 | 38.351 | 0.00 | 0.00 |
| ATOM | 1060 | HA   | VAL | X | 69 | 58.725 | 52.786 | 38.451 | 0.00 | 0.00 |
| ATOM | 1061 | CB   | VAL | X | 69 | 59.201 | 54.336 | 36.906 | 0.00 | 0.00 |
| ATOM | 1062 | HB   | VAL | X | 69 | 59.803 | 53.659 | 36.300 | 0.00 | 0.00 |
| ATOM | 1063 | CG1  | VAL | X | 69 | 57.723 | 54.163 | 36.475 | 0.00 | 0.00 |
| ATOM | 1064 | HG11 | VAL | X | 69 | 57.103 | 54.529 | 37.293 | 0.00 | 0.00 |
| ATOM | 1065 | HG12 | VAL | X | 69 | 57.494 | 54.785 | 35.610 | 0.00 | 0.00 |
| ATOM | 1066 | HG13 | VAL | X | 69 | 57.404 | 53.170 | 36.156 | 0.00 | 0.00 |
| ATOM | 1067 | CG2  | VAL | X | 69 | 59.640 | 55.779 | 36.634 | 0.00 | 0.00 |
| ATOM | 1068 | HG21 | VAL | X | 69 | 58.997 | 56.412 | 37.244 | 0.00 | 0.00 |
| ATOM | 1069 | HG22 | VAL | X | 69 | 59.470 | 56.060 | 35.594 | 0.00 | 0.00 |
| ATOM | 1070 | HG23 | VAL | X | 69 | 60.681 | 56.008 | 36.866 | 0.00 | 0.00 |
| ATOM | 1071 | C    | VAL | X | 69 | 60.774 | 53.370 | 38.622 | 0.00 | 0.00 |
| ATOM | 1072 | O    | VAL | X | 69 | 61.541 | 54.189 | 39.122 | 0.00 | 0.00 |
| ATOM | 1073 | N    | ASP | X | 70 | 61.110 | 52.136 | 38.331 | 0.00 | 0.00 |
| ATOM | 1074 | H    | ASP | X | 70 | 60.445 | 51.548 | 37.850 | 0.00 | 0.00 |
| ATOM | 1075 | CA   | ASP | X | 70 | 62.206 | 51.446 | 39.048 | 0.00 | 0.00 |
| ATOM | 1076 | HA   | ASP | X | 70 | 62.069 | 51.728 | 40.091 | 0.00 | 0.00 |
| ATOM | 1077 | CB   | ASP | X | 70 | 61.956 | 49.939 | 38.946 | 0.00 | 0.00 |
| ATOM | 1078 | HB2  | ASP | X | 70 | 60.964 | 49.782 | 39.370 | 0.00 | 0.00 |
| ATOM | 1079 | HB3  | ASP | X | 70 | 61.975 | 49.628 | 37.902 | 0.00 | 0.00 |
| ATOM | 1080 | CG   | ASP | X | 70 | 62.888 | 49.028 | 39.830 | 0.00 | 0.00 |
| ATOM | 1081 | OD1  | ASP | X | 70 | 63.965 | 48.702 | 39.316 | 0.00 | 0.00 |
| ATOM | 1082 | OD2  | ASP | X | 70 | 62.616 | 48.790 | 41.046 | 0.00 | 0.00 |
| ATOM | 1083 | C    | ASP | X | 70 | 63.595 | 51.897 | 38.627 | 0.00 | 0.00 |
| ATOM | 1084 | O    | ASP | X | 70 | 63.926 | 51.879 | 37.436 | 0.00 | 0.00 |
| ATOM | 1085 | N    | THR | X | 71 | 64.365 | 52.334 | 39.587 | 0.00 | 0.00 |
| ATOM | 1086 | H    | THR | X | 71 | 63.961 | 52.407 | 40.510 | 0.00 | 0.00 |
| ATOM | 1087 | CA   | THR | X | 71 | 65.685 | 52.982 | 39.310 | 0.00 | 0.00 |
| ATOM | 1088 | HA   | THR | X | 71 | 65.602 | 53.443 | 38.326 | 0.00 | 0.00 |
| ATOM | 1089 | CB   | THR | X | 71 | 65.810 | 54.227 | 40.272 | 0.00 | 0.00 |
| ATOM | 1090 | HB   | THR | X | 71 | 66.751 | 54.723 | 40.035 | 0.00 | 0.00 |
| ATOM | 1091 | CG2  | THR | X | 71 | 64.686 | 55.175 | 39.979 | 0.00 | 0.00 |
| ATOM | 1092 | HG21 | THR | X | 71 | 63.726 | 54.783 | 40.312 | 0.00 | 0.00 |
| ATOM | 1093 | HG22 | THR | X | 71 | 64.405 | 55.202 | 38.926 | 0.00 | 0.00 |
| ATOM | 1094 | HG23 | THR | X | 71 | 64.941 | 56.085 | 40.523 | 0.00 | 0.00 |
| ATOM | 1095 | OG1  | THR | X | 71 | 65.772 | 53.888 | 41.581 | 0.00 | 0.00 |
| ATOM | 1096 | HG1  | THR | X | 71 | 65.916 | 54.719 | 42.041 | 0.00 | 0.00 |
| ATOM | 1097 | C    | THR | X | 71 | 66.872 | 51.977 | 39.501 | 0.00 | 0.00 |

|      |      |      |     |   |    |        |        |        |      |      |
|------|------|------|-----|---|----|--------|--------|--------|------|------|
| ATOM | 1098 | O    | THR | X | 71 | 67.972 | 52.253 | 39.109 | 0.00 | 0.00 |
| ATOM | 1099 | N    | LEU | X | 72 | 66.526 | 50.777 | 40.049 | 0.00 | 0.00 |
| ATOM | 1100 | H    | LEU | X | 72 | 65.557 | 50.673 | 40.314 | 0.00 | 0.00 |
| ATOM | 1101 | CA   | LEU | X | 72 | 67.465 | 49.785 | 40.429 | 0.00 | 0.00 |
| ATOM | 1102 | HA   | LEU | X | 72 | 68.444 | 50.194 | 40.678 | 0.00 | 0.00 |
| ATOM | 1103 | CB   | LEU | X | 72 | 66.957 | 49.099 | 41.743 | 0.00 | 0.00 |
| ATOM | 1104 | HB2  | LEU | X | 72 | 66.650 | 49.882 | 42.437 | 0.00 | 0.00 |
| ATOM | 1105 | HB3  | LEU | X | 72 | 66.023 | 48.573 | 41.543 | 0.00 | 0.00 |
| ATOM | 1106 | CG   | LEU | X | 72 | 67.810 | 48.103 | 42.508 | 0.00 | 0.00 |
| ATOM | 1107 | HG   | LEU | X | 72 | 68.102 | 47.364 | 41.762 | 0.00 | 0.00 |
| ATOM | 1108 | CD1  | LEU | X | 72 | 68.993 | 48.872 | 43.029 | 0.00 | 0.00 |
| ATOM | 1109 | HD11 | LEU | X | 72 | 69.476 | 49.420 | 42.219 | 0.00 | 0.00 |
| ATOM | 1110 | HD12 | LEU | X | 72 | 69.729 | 48.142 | 43.364 | 0.00 | 0.00 |
| ATOM | 1111 | HD13 | LEU | X | 72 | 68.760 | 49.496 | 43.892 | 0.00 | 0.00 |
| ATOM | 1112 | CD2  | LEU | X | 72 | 66.943 | 47.456 | 43.572 | 0.00 | 0.00 |
| ATOM | 1113 | HD21 | LEU | X | 72 | 66.154 | 48.103 | 43.955 | 0.00 | 0.00 |
| ATOM | 1114 | HD22 | LEU | X | 72 | 66.380 | 46.633 | 43.132 | 0.00 | 0.00 |
| ATOM | 1115 | HD23 | LEU | X | 72 | 67.656 | 47.099 | 44.315 | 0.00 | 0.00 |
| ATOM | 1116 | C    | LEU | X | 72 | 67.723 | 48.649 | 39.418 | 0.00 | 0.00 |
| ATOM | 1117 | O    | LEU | X | 72 | 68.884 | 48.278 | 39.259 | 0.00 | 0.00 |
| ATOM | 1118 | N    | TYR | X | 73 | 66.755 | 48.097 | 38.654 | 0.00 | 0.00 |
| ATOM | 1119 | H    | TYR | X | 73 | 65.817 | 48.362 | 38.919 | 0.00 | 0.00 |
| ATOM | 1120 | CA   | TYR | X | 73 | 67.068 | 47.160 | 37.628 | 0.00 | 0.00 |
| ATOM | 1121 | HA   | TYR | X | 73 | 68.152 | 47.158 | 37.517 | 0.00 | 0.00 |
| ATOM | 1122 | CB   | TYR | X | 73 | 66.615 | 45.810 | 38.160 | 0.00 | 0.00 |
| ATOM | 1123 | HB2  | TYR | X | 73 | 65.541 | 45.883 | 38.333 | 0.00 | 0.00 |
| ATOM | 1124 | HB3  | TYR | X | 73 | 66.783 | 45.013 | 37.435 | 0.00 | 0.00 |
| ATOM | 1125 | CG   | TYR | X | 73 | 67.266 | 45.299 | 39.463 | 0.00 | 0.00 |
| ATOM | 1126 | CD1  | TYR | X | 73 | 68.706 | 45.405 | 39.677 | 0.00 | 0.00 |
| ATOM | 1127 | HD1  | TYR | X | 73 | 69.288 | 45.870 | 38.896 | 0.00 | 0.00 |
| ATOM | 1128 | CE1  | TYR | X | 73 | 69.219 | 45.100 | 40.918 | 0.00 | 0.00 |
| ATOM | 1129 | HE1  | TYR | X | 73 | 70.270 | 45.258 | 41.108 | 0.00 | 0.00 |
| ATOM | 1130 | CZ   | TYR | X | 73 | 68.425 | 44.513 | 41.944 | 0.00 | 0.00 |
| ATOM | 1131 | OH   | TYR | X | 73 | 68.954 | 44.200 | 43.163 | 0.00 | 0.00 |
| ATOM | 1132 | HH   | TYR | X | 73 | 68.380 | 43.769 | 43.801 | 0.00 | 0.00 |
| ATOM | 1133 | CE2  | TYR | X | 73 | 67.055 | 44.232 | 41.661 | 0.00 | 0.00 |
| ATOM | 1134 | HE2  | TYR | X | 73 | 66.414 | 43.869 | 42.450 | 0.00 | 0.00 |
| ATOM | 1135 | CD2  | TYR | X | 73 | 66.526 | 44.606 | 40.435 | 0.00 | 0.00 |
| ATOM | 1136 | HD2  | TYR | X | 73 | 65.453 | 44.603 | 40.305 | 0.00 | 0.00 |
| ATOM | 1137 | C    | TYR | X | 73 | 66.307 | 47.520 | 36.337 | 0.00 | 0.00 |
| ATOM | 1138 | O    | TYR | X | 73 | 65.340 | 46.767 | 35.999 | 0.00 | 0.00 |
| ATOM | 1139 | N    | PRO | X | 74 | 66.585 | 48.673 | 35.729 | 0.00 | 0.00 |
| ATOM | 1140 | CD   | PRO | X | 74 | 67.557 | 49.667 | 36.262 | 0.00 | 0.00 |
| ATOM | 1141 | HD2  | PRO | X | 74 | 68.572 | 49.419 | 36.571 | 0.00 | 0.00 |
| ATOM | 1142 | HD3  | PRO | X | 74 | 67.057 | 50.091 | 37.133 | 0.00 | 0.00 |
| ATOM | 1143 | CG   | PRO | X | 74 | 67.708 | 50.737 | 35.209 | 0.00 | 0.00 |
| ATOM | 1144 | HG2  | PRO | X | 74 | 68.491 | 50.586 | 34.466 | 0.00 | 0.00 |
| ATOM | 1145 | HG3  | PRO | X | 74 | 67.771 | 51.784 | 35.506 | 0.00 | 0.00 |
| ATOM | 1146 | CB   | PRO | X | 74 | 66.396 | 50.528 | 34.406 | 0.00 | 0.00 |
| ATOM | 1147 | HB2  | PRO | X | 74 | 66.589 | 51.003 | 33.444 | 0.00 | 0.00 |
| ATOM | 1148 | HB3  | PRO | X | 74 | 65.643 | 51.148 | 34.893 | 0.00 | 0.00 |
| ATOM | 1149 | CA   | PRO | X | 74 | 65.973 | 49.068 | 34.473 | 0.00 | 0.00 |
| ATOM | 1150 | HA   | PRO | X | 74 | 64.888 | 48.962 | 34.509 | 0.00 | 0.00 |
| ATOM | 1151 | C    | PRO | X | 74 | 66.464 | 48.280 | 33.299 | 0.00 | 0.00 |
| ATOM | 1152 | O    | PRO | X | 74 | 67.681 | 48.163 | 33.103 | 0.00 | 0.00 |
| ATOM | 1153 | N    | GLY | X | 75 | 65.569 | 47.745 | 32.472 | 0.00 | 0.00 |
| ATOM | 1154 | H    | GLY | X | 75 | 64.595 | 47.797 | 32.734 | 0.00 | 0.00 |
| ATOM | 1155 | CA   | GLY | X | 75 | 65.876 | 47.037 | 31.193 | 0.00 | 0.00 |
| ATOM | 1156 | HA2  | GLY | X | 75 | 65.100 | 47.065 | 30.428 | 0.00 | 0.00 |
| ATOM | 1157 | HA3  | GLY | X | 75 | 66.733 | 47.551 | 30.757 | 0.00 | 0.00 |
| ATOM | 1158 | C    | GLY | X | 75 | 66.233 | 45.576 | 31.407 | 0.00 | 0.00 |
| ATOM | 1159 | O    | GLY | X | 75 | 66.663 | 44.954 | 30.491 | 0.00 | 0.00 |
| ATOM | 1160 | N    | PHE | X | 76 | 66.033 | 45.082 | 32.600 | 0.00 | 0.00 |
| ATOM | 1161 | H    | PHE | X | 76 | 65.584 | 45.766 | 33.192 | 0.00 | 0.00 |
| ATOM | 1162 | CA   | PHE | X | 76 | 66.065 | 43.681 | 32.931 | 0.00 | 0.00 |
| ATOM | 1163 | HA   | PHE | X | 76 | 66.956 | 43.241 | 32.484 | 0.00 | 0.00 |
| ATOM | 1164 | CB   | PHE | X | 76 | 66.309 | 43.610 | 34.526 | 0.00 | 0.00 |

|      |      |      |     |   |    |        |        |        |      |      |
|------|------|------|-----|---|----|--------|--------|--------|------|------|
| ATOM | 1165 | HB2  | PHE | X | 76 | 67.191 | 44.196 | 34.787 | 0.00 | 0.00 |
| ATOM | 1166 | HB3  | PHE | X | 76 | 65.529 | 44.186 | 35.022 | 0.00 | 0.00 |
| ATOM | 1167 | CG   | PHE | X | 76 | 66.261 | 42.210 | 35.156 | 0.00 | 0.00 |
| ATOM | 1168 | CD1  | PHE | X | 76 | 66.877 | 41.047 | 34.588 | 0.00 | 0.00 |
| ATOM | 1169 | HD1  | PHE | X | 76 | 67.524 | 41.206 | 33.738 | 0.00 | 0.00 |
| ATOM | 1170 | CE1  | PHE | X | 76 | 66.658 | 39.833 | 35.247 | 0.00 | 0.00 |
| ATOM | 1171 | HE1  | PHE | X | 76 | 67.139 | 38.978 | 34.795 | 0.00 | 0.00 |
| ATOM | 1172 | CZ   | PHE | X | 76 | 65.932 | 39.755 | 36.499 | 0.00 | 0.00 |
| ATOM | 1173 | HZ   | PHE | X | 76 | 65.810 | 38.747 | 36.866 | 0.00 | 0.00 |
| ATOM | 1174 | CE2  | PHE | X | 76 | 65.322 | 40.923 | 36.992 | 0.00 | 0.00 |
| ATOM | 1175 | HE2  | PHE | X | 76 | 64.650 | 40.810 | 37.830 | 0.00 | 0.00 |
| ATOM | 1176 | CD2  | PHE | X | 76 | 65.450 | 42.127 | 36.274 | 0.00 | 0.00 |
| ATOM | 1177 | HD2  | PHE | X | 76 | 64.972 | 42.989 | 36.716 | 0.00 | 0.00 |
| ATOM | 1178 | C    | PHE | X | 76 | 64.829 | 42.990 | 32.462 | 0.00 | 0.00 |
| ATOM | 1179 | O    | PHE | X | 76 | 63.751 | 43.386 | 32.736 | 0.00 | 0.00 |
| ATOM | 1180 | N    | GLU | X | 77 | 65.085 | 41.841 | 31.841 | 0.00 | 0.00 |
| ATOM | 1181 | H    | GLU | X | 77 | 66.055 | 41.560 | 31.840 | 0.00 | 0.00 |
| ATOM | 1182 | CA   | GLU | X | 77 | 64.093 | 40.995 | 31.218 | 0.00 | 0.00 |
| ATOM | 1183 | HA   | GLU | X | 77 | 63.697 | 41.616 | 30.414 | 0.00 | 0.00 |
| ATOM | 1184 | CB   | GLU | X | 77 | 64.946 | 39.814 | 30.594 | 0.00 | 0.00 |
| ATOM | 1185 | HB2  | GLU | X | 77 | 65.444 | 39.299 | 31.416 | 0.00 | 0.00 |
| ATOM | 1186 | HB3  | GLU | X | 77 | 64.252 | 39.008 | 30.354 | 0.00 | 0.00 |
| ATOM | 1187 | CG   | GLU | X | 77 | 65.966 | 40.089 | 29.499 | 0.00 | 0.00 |
| ATOM | 1188 | HG2  | GLU | X | 77 | 66.423 | 39.141 | 29.216 | 0.00 | 0.00 |
| ATOM | 1189 | HG3  | GLU | X | 77 | 65.589 | 40.630 | 28.630 | 0.00 | 0.00 |
| ATOM | 1190 | CD   | GLU | X | 77 | 67.225 | 40.853 | 30.029 | 0.00 | 0.00 |
| ATOM | 1191 | OE1  | GLU | X | 77 | 67.509 | 40.747 | 31.258 | 0.00 | 0.00 |
| ATOM | 1192 | OE2  | GLU | X | 77 | 67.857 | 41.708 | 29.348 | 0.00 | 0.00 |
| ATOM | 1193 | C    | GLU | X | 77 | 62.975 | 40.511 | 32.219 | 0.00 | 0.00 |
| ATOM | 1194 | O    | GLU | X | 77 | 61.902 | 40.113 | 31.779 | 0.00 | 0.00 |
| ATOM | 1195 | N    | GLY | X | 78 | 63.335 | 40.374 | 33.487 | 0.00 | 0.00 |
| ATOM | 1196 | H    | GLY | X | 78 | 64.333 | 40.391 | 33.644 | 0.00 | 0.00 |
| ATOM | 1197 | CA   | GLY | X | 78 | 62.471 | 39.767 | 34.525 | 0.00 | 0.00 |
| ATOM | 1198 | HA2  | GLY | X | 78 | 61.876 | 38.971 | 34.075 | 0.00 | 0.00 |
| ATOM | 1199 | HA3  | GLY | X | 78 | 62.955 | 39.320 | 35.394 | 0.00 | 0.00 |
| ATOM | 1200 | C    | GLY | X | 78 | 61.484 | 40.831 | 35.107 | 0.00 | 0.00 |
| ATOM | 1201 | O    | GLY | X | 78 | 60.562 | 40.366 | 35.827 | 0.00 | 0.00 |
| ATOM | 1202 | N    | THR | X | 79 | 61.710 | 42.170 | 34.972 | 0.00 | 0.00 |
| ATOM | 1203 | H    | THR | X | 79 | 62.490 | 42.498 | 34.420 | 0.00 | 0.00 |
| ATOM | 1204 | CA   | THR | X | 79 | 60.767 | 43.118 | 35.377 | 0.00 | 0.00 |
| ATOM | 1205 | HA   | THR | X | 79 | 59.857 | 42.567 | 35.617 | 0.00 | 0.00 |
| ATOM | 1206 | CB   | THR | X | 79 | 61.258 | 43.869 | 36.642 | 0.00 | 0.00 |
| ATOM | 1207 | HB   | THR | X | 79 | 60.468 | 44.509 | 37.037 | 0.00 | 0.00 |
| ATOM | 1208 | CG2  | THR | X | 79 | 61.566 | 42.834 | 37.805 | 0.00 | 0.00 |
| ATOM | 1209 | HG21 | THR | X | 79 | 60.596 | 42.647 | 38.266 | 0.00 | 0.00 |
| ATOM | 1210 | HG22 | THR | X | 79 | 62.309 | 43.206 | 38.510 | 0.00 | 0.00 |
| ATOM | 1211 | HG23 | THR | X | 79 | 62.059 | 41.902 | 37.531 | 0.00 | 0.00 |
| ATOM | 1212 | OG1  | THR | X | 79 | 62.520 | 44.500 | 36.461 | 0.00 | 0.00 |
| ATOM | 1213 | HG1  | THR | X | 79 | 62.788 | 44.981 | 37.247 | 0.00 | 0.00 |
| ATOM | 1214 | C    | THR | X | 79 | 60.339 | 43.943 | 34.176 | 0.00 | 0.00 |
| ATOM | 1215 | O    | THR | X | 79 | 59.604 | 44.879 | 34.279 | 0.00 | 0.00 |
| ATOM | 1216 | N    | GLU | X | 80 | 60.931 | 43.737 | 32.945 | 0.00 | 0.00 |
| ATOM | 1217 | H    | GLU | X | 80 | 61.609 | 42.989 | 32.909 | 0.00 | 0.00 |
| ATOM | 1218 | CA   | GLU | X | 80 | 60.765 | 44.441 | 31.687 | 0.00 | 0.00 |
| ATOM | 1219 | HA   | GLU | X | 80 | 61.133 | 45.452 | 31.859 | 0.00 | 0.00 |
| ATOM | 1220 | CB   | GLU | X | 80 | 61.434 | 43.755 | 30.523 | 0.00 | 0.00 |
| ATOM | 1221 | HB2  | GLU | X | 80 | 62.448 | 43.527 | 30.853 | 0.00 | 0.00 |
| ATOM | 1222 | HB3  | GLU | X | 80 | 60.970 | 42.780 | 30.369 | 0.00 | 0.00 |
| ATOM | 1223 | CG   | GLU | X | 80 | 61.532 | 44.465 | 29.199 | 0.00 | 0.00 |
| ATOM | 1224 | HG2  | GLU | X | 80 | 61.708 | 43.801 | 28.352 | 0.00 | 0.00 |
| ATOM | 1225 | HG3  | GLU | X | 80 | 60.578 | 44.950 | 28.995 | 0.00 | 0.00 |
| ATOM | 1226 | CD   | GLU | X | 80 | 62.630 | 45.513 | 29.181 | 0.00 | 0.00 |
| ATOM | 1227 | OE1  | GLU | X | 80 | 63.661 | 45.301 | 28.576 | 0.00 | 0.00 |
| ATOM | 1228 | OE2  | GLU | X | 80 | 62.512 | 46.612 | 29.772 | 0.00 | 0.00 |
| ATOM | 1229 | C    | GLU | X | 80 | 59.270 | 44.772 | 31.335 | 0.00 | 0.00 |
| ATOM | 1230 | O    | GLU | X | 80 | 58.871 | 45.842 | 30.854 | 0.00 | 0.00 |
| ATOM | 1231 | N    | MET | X | 81 | 58.426 | 43.718 | 31.613 | 0.00 | 0.00 |

|      |      |      |     |   |    |        |        |        |      |      |
|------|------|------|-----|---|----|--------|--------|--------|------|------|
| ATOM | 1232 | H    | MET | X | 81 | 58.826 | 42.984 | 32.179 | 0.00 | 0.00 |
| ATOM | 1233 | CA   | MET | X | 81 | 57.008 | 43.793 | 31.366 | 0.00 | 0.00 |
| ATOM | 1234 | HA   | MET | X | 81 | 56.807 | 44.092 | 30.337 | 0.00 | 0.00 |
| ATOM | 1235 | CB   | MET | X | 81 | 56.453 | 42.367 | 31.493 | 0.00 | 0.00 |
| ATOM | 1236 | HB2  | MET | X | 81 | 55.507 | 42.323 | 30.954 | 0.00 | 0.00 |
| ATOM | 1237 | HB3  | MET | X | 81 | 57.090 | 41.700 | 30.910 | 0.00 | 0.00 |
| ATOM | 1238 | CG   | MET | X | 81 | 56.516 | 41.869 | 32.958 | 0.00 | 0.00 |
| ATOM | 1239 | HG2  | MET | X | 81 | 55.979 | 42.596 | 33.567 | 0.00 | 0.00 |
| ATOM | 1240 | HG3  | MET | X | 81 | 55.930 | 40.954 | 32.885 | 0.00 | 0.00 |
| ATOM | 1241 | SD   | MET | X | 81 | 58.103 | 41.537 | 33.729 | 0.00 | 0.00 |
| ATOM | 1242 | CE   | MET | X | 81 | 58.696 | 40.169 | 32.689 | 0.00 | 0.00 |
| ATOM | 1243 | HE1  | MET | X | 81 | 59.181 | 40.574 | 31.801 | 0.00 | 0.00 |
| ATOM | 1244 | HE2  | MET | X | 81 | 59.533 | 39.705 | 33.213 | 0.00 | 0.00 |
| ATOM | 1245 | HE3  | MET | X | 81 | 57.944 | 39.414 | 32.460 | 0.00 | 0.00 |
| ATOM | 1246 | C    | MET | X | 81 | 56.314 | 44.770 | 32.343 | 0.00 | 0.00 |
| ATOM | 1247 | O    | MET | X | 81 | 55.207 | 45.248 | 32.038 | 0.00 | 0.00 |
| ATOM | 1248 | N    | TRP | X | 82 | 56.938 | 45.057 | 33.477 | 0.00 | 0.00 |
| ATOM | 1249 | H    | TRP | X | 82 | 57.835 | 44.632 | 33.668 | 0.00 | 0.00 |
| ATOM | 1250 | CA   | TRP | X | 82 | 56.390 | 45.931 | 34.570 | 0.00 | 0.00 |
| ATOM | 1251 | HA   | TRP | X | 82 | 55.302 | 45.993 | 34.577 | 0.00 | 0.00 |
| ATOM | 1252 | CB   | TRP | X | 82 | 56.861 | 45.351 | 35.933 | 0.00 | 0.00 |
| ATOM | 1253 | HB2  | TRP | X | 82 | 57.942 | 45.487 | 35.929 | 0.00 | 0.00 |
| ATOM | 1254 | HB3  | TRP | X | 82 | 56.491 | 45.966 | 36.753 | 0.00 | 0.00 |
| ATOM | 1255 | CG   | TRP | X | 82 | 56.649 | 43.960 | 36.359 | 0.00 | 0.00 |
| ATOM | 1256 | CD1  | TRP | X | 82 | 57.643 | 43.255 | 36.946 | 0.00 | 0.00 |
| ATOM | 1257 | HD1  | TRP | X | 82 | 58.638 | 43.571 | 37.223 | 0.00 | 0.00 |
| ATOM | 1258 | NE1  | TRP | X | 82 | 57.225 | 41.923 | 37.189 | 0.00 | 0.00 |
| ATOM | 1259 | HE1  | TRP | X | 82 | 57.817 | 41.148 | 37.451 | 0.00 | 0.00 |
| ATOM | 1260 | CE2  | TRP | X | 82 | 55.948 | 41.745 | 36.905 | 0.00 | 0.00 |
| ATOM | 1261 | CZ2  | TRP | X | 82 | 55.002 | 40.703 | 37.066 | 0.00 | 0.00 |
| ATOM | 1262 | HZ2  | TRP | X | 82 | 55.263 | 39.802 | 37.602 | 0.00 | 0.00 |
| ATOM | 1263 | CH2  | TRP | X | 82 | 53.678 | 40.908 | 36.659 | 0.00 | 0.00 |
| ATOM | 1264 | HH2  | TRP | X | 82 | 52.935 | 40.124 | 36.635 | 0.00 | 0.00 |
| ATOM | 1265 | CZ3  | TRP | X | 82 | 53.257 | 42.124 | 35.998 | 0.00 | 0.00 |
| ATOM | 1266 | HZ3  | TRP | X | 82 | 52.275 | 42.175 | 35.551 | 0.00 | 0.00 |
| ATOM | 1267 | CE3  | TRP | X | 82 | 54.213 | 43.167 | 35.917 | 0.00 | 0.00 |
| ATOM | 1268 | HE3  | TRP | X | 82 | 53.866 | 44.064 | 35.426 | 0.00 | 0.00 |
| ATOM | 1269 | CD2  | TRP | X | 82 | 55.520 | 43.002 | 36.387 | 0.00 | 0.00 |
| ATOM | 1270 | C    | TRP | X | 82 | 56.771 | 47.405 | 34.502 | 0.00 | 0.00 |
| ATOM | 1271 | O    | TRP | X | 82 | 56.268 | 48.171 | 35.341 | 0.00 | 0.00 |
| ATOM | 1272 | N    | ASN | X | 83 | 57.592 | 47.836 | 33.562 | 0.00 | 0.00 |
| ATOM | 1273 | H    | ASN | X | 83 | 58.278 | 47.194 | 33.190 | 0.00 | 0.00 |
| ATOM | 1274 | CA   | ASN | X | 83 | 57.729 | 49.291 | 33.211 | 0.00 | 0.00 |
| ATOM | 1275 | HA   | ASN | X | 83 | 58.099 | 49.830 | 34.083 | 0.00 | 0.00 |
| ATOM | 1276 | CB   | ASN | X | 83 | 58.910 | 49.383 | 32.213 | 0.00 | 0.00 |
| ATOM | 1277 | HB2  | ASN | X | 83 | 59.775 | 48.861 | 32.622 | 0.00 | 0.00 |
| ATOM | 1278 | HB3  | ASN | X | 83 | 58.623 | 48.937 | 31.261 | 0.00 | 0.00 |
| ATOM | 1279 | CG   | ASN | X | 83 | 59.104 | 50.850 | 31.866 | 0.00 | 0.00 |
| ATOM | 1280 | OD1  | ASN | X | 83 | 59.737 | 51.527 | 32.690 | 0.00 | 0.00 |
| ATOM | 1281 | ND2  | ASN | X | 83 | 58.914 | 51.291 | 30.665 | 0.00 | 0.00 |
| ATOM | 1282 | HD21 | ASN | X | 83 | 58.979 | 52.277 | 30.456 | 0.00 | 0.00 |
| ATOM | 1283 | HD22 | ASN | X | 83 | 58.460 | 50.672 | 30.009 | 0.00 | 0.00 |
| ATOM | 1284 | C    | ASN | X | 83 | 56.515 | 49.916 | 32.528 | 0.00 | 0.00 |
| ATOM | 1285 | O    | ASN | X | 83 | 56.037 | 49.345 | 31.537 | 0.00 | 0.00 |
| ATOM | 1286 | N    | PRO | X | 84 | 55.940 | 51.006 | 33.007 | 0.00 | 0.00 |
| ATOM | 1287 | CD   | PRO | X | 84 | 56.164 | 51.507 | 34.328 | 0.00 | 0.00 |
| ATOM | 1288 | HD2  | PRO | X | 84 | 57.174 | 51.818 | 34.595 | 0.00 | 0.00 |
| ATOM | 1289 | HD3  | PRO | X | 84 | 55.858 | 50.653 | 34.932 | 0.00 | 0.00 |
| ATOM | 1290 | CG   | PRO | X | 84 | 55.132 | 52.667 | 34.503 | 0.00 | 0.00 |
| ATOM | 1291 | HG2  | PRO | X | 84 | 55.638 | 53.631 | 34.444 | 0.00 | 0.00 |
| ATOM | 1292 | HG3  | PRO | X | 84 | 54.661 | 52.546 | 35.478 | 0.00 | 0.00 |
| ATOM | 1293 | CB   | PRO | X | 84 | 54.193 | 52.563 | 33.329 | 0.00 | 0.00 |
| ATOM | 1294 | HB2  | PRO | X | 84 | 54.020 | 53.535 | 32.868 | 0.00 | 0.00 |
| ATOM | 1295 | HB3  | PRO | X | 84 | 53.177 | 52.287 | 33.610 | 0.00 | 0.00 |
| ATOM | 1296 | CA   | PRO | X | 84 | 54.856 | 51.639 | 32.313 | 0.00 | 0.00 |
| ATOM | 1297 | HA   | PRO | X | 84 | 54.183 | 50.889 | 31.898 | 0.00 | 0.00 |
| ATOM | 1298 | C    | PRO | X | 84 | 55.367 | 52.473 | 31.157 | 0.00 | 0.00 |

|      |      |      |     |   |    |        |        |        |      |      |
|------|------|------|-----|---|----|--------|--------|--------|------|------|
| ATOM | 1299 | O    | PRO | X | 84 | 56.020 | 53.529 | 31.378 | 0.00 | 0.00 |
| ATOM | 1300 | N    | ASN | X | 85 | 54.942 | 52.036 | 29.957 | 0.00 | 0.00 |
| ATOM | 1301 | H    | ASN | X | 85 | 54.366 | 51.209 | 29.883 | 0.00 | 0.00 |
| ATOM | 1302 | CA   | ASN | X | 85 | 55.413 | 52.640 | 28.701 | 0.00 | 0.00 |
| ATOM | 1303 | HA   | ASN | X | 85 | 56.467 | 52.891 | 28.817 | 0.00 | 0.00 |
| ATOM | 1304 | CB   | ASN | X | 85 | 55.501 | 51.644 | 27.559 | 0.00 | 0.00 |
| ATOM | 1305 | HB2  | ASN | X | 85 | 56.088 | 52.053 | 26.737 | 0.00 | 0.00 |
| ATOM | 1306 | HB3  | ASN | X | 85 | 55.989 | 50.750 | 27.949 | 0.00 | 0.00 |
| ATOM | 1307 | CG   | ASN | X | 85 | 54.330 | 51.231 | 26.680 | 0.00 | 0.00 |
| ATOM | 1308 | OD1  | ASN | X | 85 | 53.249 | 50.869 | 27.136 | 0.00 | 0.00 |
| ATOM | 1309 | ND2  | ASN | X | 85 | 54.432 | 51.150 | 25.379 | 0.00 | 0.00 |
| ATOM | 1310 | HD21 | ASN | X | 85 | 53.678 | 50.739 | 24.847 | 0.00 | 0.00 |
| ATOM | 1311 | HD22 | ASN | X | 85 | 55.309 | 51.447 | 24.976 | 0.00 | 0.00 |
| ATOM | 1312 | C    | ASN | X | 85 | 54.518 | 53.799 | 28.166 | 0.00 | 0.00 |
| ATOM | 1313 | O    | ASN | X | 85 | 54.983 | 54.580 | 27.323 | 0.00 | 0.00 |
| ATOM | 1314 | N    | ARG | X | 86 | 53.225 | 53.925 | 28.566 | 0.00 | 0.00 |
| ATOM | 1315 | H    | ARG | X | 86 | 52.806 | 53.206 | 29.139 | 0.00 | 0.00 |
| ATOM | 1316 | CA   | ARG | X | 86 | 52.493 | 55.150 | 28.369 | 0.00 | 0.00 |
| ATOM | 1317 | HA   | ARG | X | 86 | 52.842 | 55.670 | 27.476 | 0.00 | 0.00 |
| ATOM | 1318 | CB   | ARG | X | 86 | 51.010 | 54.816 | 28.261 | 0.00 | 0.00 |
| ATOM | 1319 | HB2  | ARG | X | 86 | 50.779 | 53.992 | 28.937 | 0.00 | 0.00 |
| ATOM | 1320 | HB3  | ARG | X | 86 | 50.396 | 55.695 | 28.457 | 0.00 | 0.00 |
| ATOM | 1321 | CG   | ARG | X | 86 | 50.649 | 54.325 | 26.821 | 0.00 | 0.00 |
| ATOM | 1322 | HG2  | ARG | X | 86 | 51.474 | 53.735 | 26.423 | 0.00 | 0.00 |
| ATOM | 1323 | HG3  | ARG | X | 86 | 49.790 | 53.662 | 26.924 | 0.00 | 0.00 |
| ATOM | 1324 | CD   | ARG | X | 86 | 50.328 | 55.569 | 26.009 | 0.00 | 0.00 |
| ATOM | 1325 | HD2  | ARG | X | 86 | 49.518 | 56.101 | 26.507 | 0.00 | 0.00 |
| ATOM | 1326 | HD3  | ARG | X | 86 | 51.065 | 56.360 | 26.153 | 0.00 | 0.00 |
| ATOM | 1327 | NE   | ARG | X | 86 | 50.074 | 55.411 | 24.509 | 0.00 | 0.00 |
| ATOM | 1328 | HE   | ARG | X | 86 | 50.029 | 54.431 | 24.269 | 0.00 | 0.00 |
| ATOM | 1329 | CZ   | ARG | X | 86 | 49.646 | 56.303 | 23.725 | 0.00 | 0.00 |
| ATOM | 1330 | NH1  | ARG | X | 86 | 49.594 | 57.583 | 24.017 | 0.00 | 0.00 |
| ATOM | 1331 | HH11 | ARG | X | 86 | 49.701 | 57.859 | 24.983 | 0.00 | 0.00 |
| ATOM | 1332 | HH12 | ARG | X | 86 | 49.480 | 58.270 | 23.285 | 0.00 | 0.00 |
| ATOM | 1333 | NH2  | ARG | X | 86 | 49.290 | 55.975 | 22.555 | 0.00 | 0.00 |
| ATOM | 1334 | HH21 | ARG | X | 86 | 49.504 | 55.014 | 22.326 | 0.00 | 0.00 |
| ATOM | 1335 | HH22 | ARG | X | 86 | 49.099 | 56.666 | 21.843 | 0.00 | 0.00 |
| ATOM | 1336 | C    | ARG | X | 86 | 52.816 | 56.112 | 29.449 | 0.00 | 0.00 |
| ATOM | 1337 | O    | ARG | X | 86 | 53.352 | 55.711 | 30.463 | 0.00 | 0.00 |
| ATOM | 1338 | N    | GLU | X | 87 | 52.595 | 57.401 | 29.162 | 0.00 | 0.00 |
| ATOM | 1339 | H    | GLU | X | 87 | 52.208 | 57.536 | 28.239 | 0.00 | 0.00 |
| ATOM | 1340 | CA   | GLU | X | 87 | 52.992 | 58.518 | 29.906 | 0.00 | 0.00 |
| ATOM | 1341 | HA   | GLU | X | 87 | 54.019 | 58.448 | 30.264 | 0.00 | 0.00 |
| ATOM | 1342 | CB   | GLU | X | 87 | 52.739 | 59.798 | 29.098 | 0.00 | 0.00 |
| ATOM | 1343 | HB2  | GLU | X | 87 | 53.057 | 59.651 | 28.066 | 0.00 | 0.00 |
| ATOM | 1344 | HB3  | GLU | X | 87 | 51.670 | 59.988 | 29.006 | 0.00 | 0.00 |
| ATOM | 1345 | CG   | GLU | X | 87 | 53.445 | 61.001 | 29.757 | 0.00 | 0.00 |
| ATOM | 1346 | HG2  | GLU | X | 87 | 53.327 | 61.870 | 29.111 | 0.00 | 0.00 |
| ATOM | 1347 | HG3  | GLU | X | 87 | 52.898 | 61.255 | 30.665 | 0.00 | 0.00 |
| ATOM | 1348 | CD   | GLU | X | 87 | 54.928 | 60.880 | 30.058 | 0.00 | 0.00 |
| ATOM | 1349 | OE1  | GLU | X | 87 | 55.200 | 60.799 | 31.265 | 0.00 | 0.00 |
| ATOM | 1350 | OE2  | GLU | X | 87 | 55.819 | 61.025 | 29.199 | 0.00 | 0.00 |
| ATOM | 1351 | C    | GLU | X | 87 | 52.133 | 58.600 | 31.161 | 0.00 | 0.00 |
| ATOM | 1352 | O    | GLU | X | 87 | 50.919 | 58.352 | 31.128 | 0.00 | 0.00 |
| ATOM | 1353 | N    | LEU | X | 88 | 52.799 | 58.973 | 32.259 | 0.00 | 0.00 |
| ATOM | 1354 | H    | LEU | X | 88 | 53.706 | 59.405 | 32.154 | 0.00 | 0.00 |
| ATOM | 1355 | CA   | LEU | X | 88 | 52.168 | 59.049 | 33.584 | 0.00 | 0.00 |
| ATOM | 1356 | HA   | LEU | X | 88 | 51.447 | 58.247 | 33.741 | 0.00 | 0.00 |
| ATOM | 1357 | CB   | LEU | X | 88 | 53.352 | 58.854 | 34.498 | 0.00 | 0.00 |
| ATOM | 1358 | HB2  | LEU | X | 88 | 54.300 | 59.119 | 34.031 | 0.00 | 0.00 |
| ATOM | 1359 | HB3  | LEU | X | 88 | 53.324 | 59.582 | 35.309 | 0.00 | 0.00 |
| ATOM | 1360 | CG   | LEU | X | 88 | 53.496 | 57.353 | 34.956 | 0.00 | 0.00 |
| ATOM | 1361 | HG   | LEU | X | 88 | 52.557 | 56.919 | 35.300 | 0.00 | 0.00 |
| ATOM | 1362 | CD1  | LEU | X | 88 | 53.866 | 56.461 | 33.762 | 0.00 | 0.00 |
| ATOM | 1363 | HD11 | LEU | X | 88 | 53.058 | 56.641 | 33.053 | 0.00 | 0.00 |
| ATOM | 1364 | HD12 | LEU | X | 88 | 53.861 | 55.403 | 34.026 | 0.00 | 0.00 |
| ATOM | 1365 | HD13 | LEU | X | 88 | 54.798 | 56.802 | 33.311 | 0.00 | 0.00 |

|      |      |      |     |   |    |        |        |        |      |      |
|------|------|------|-----|---|----|--------|--------|--------|------|------|
| ATOM | 1366 | CD2  | LEU | X | 88 | 54.501 | 57.211 | 36.104 | 0.00 | 0.00 |
| ATOM | 1367 | HD21 | LEU | X | 88 | 55.443 | 57.643 | 35.766 | 0.00 | 0.00 |
| ATOM | 1368 | HD22 | LEU | X | 88 | 54.178 | 57.838 | 36.934 | 0.00 | 0.00 |
| ATOM | 1369 | HD23 | LEU | X | 88 | 54.757 | 56.252 | 36.555 | 0.00 | 0.00 |
| ATOM | 1370 | C    | LEU | X | 88 | 51.476 | 60.420 | 33.728 | 0.00 | 0.00 |
| ATOM | 1371 | O    | LEU | X | 88 | 52.072 | 61.467 | 33.538 | 0.00 | 0.00 |
| ATOM | 1372 | N    | SER | X | 89 | 50.222 | 60.449 | 34.190 | 0.00 | 0.00 |
| ATOM | 1373 | H    | SER | X | 89 | 49.874 | 59.552 | 34.496 | 0.00 | 0.00 |
| ATOM | 1374 | CA   | SER | X | 89 | 49.476 | 61.733 | 34.574 | 0.00 | 0.00 |
| ATOM | 1375 | HA   | SER | X | 89 | 50.215 | 62.445 | 34.943 | 0.00 | 0.00 |
| ATOM | 1376 | CB   | SER | X | 89 | 48.858 | 62.170 | 33.261 | 0.00 | 0.00 |
| ATOM | 1377 | HB2  | SER | X | 89 | 49.650 | 62.243 | 32.515 | 0.00 | 0.00 |
| ATOM | 1378 | HB3  | SER | X | 89 | 48.087 | 61.445 | 33.002 | 0.00 | 0.00 |
| ATOM | 1379 | OG   | SER | X | 89 | 48.369 | 63.476 | 33.324 | 0.00 | 0.00 |
| ATOM | 1380 | HG   | SER | X | 89 | 47.969 | 63.723 | 32.488 | 0.00 | 0.00 |
| ATOM | 1381 | C    | SER | X | 89 | 48.417 | 61.494 | 35.676 | 0.00 | 0.00 |
| ATOM | 1382 | O    | SER | X | 89 | 48.353 | 60.450 | 36.255 | 0.00 | 0.00 |
| ATOM | 1383 | N    | GLU | X | 90 | 47.546 | 62.514 | 35.937 | 0.00 | 0.00 |
| ATOM | 1384 | H    | GLU | X | 90 | 47.741 | 63.390 | 35.473 | 0.00 | 0.00 |
| ATOM | 1385 | CA   | GLU | X | 90 | 46.442 | 62.430 | 36.831 | 0.00 | 0.00 |
| ATOM | 1386 | HA   | GLU | X | 90 | 46.385 | 61.510 | 37.412 | 0.00 | 0.00 |
| ATOM | 1387 | CB   | GLU | X | 90 | 46.330 | 63.691 | 37.726 | 0.00 | 0.00 |
| ATOM | 1388 | HB2  | GLU | X | 90 | 46.340 | 64.539 | 37.040 | 0.00 | 0.00 |
| ATOM | 1389 | HB3  | GLU | X | 90 | 45.395 | 63.657 | 38.285 | 0.00 | 0.00 |
| ATOM | 1390 | CG   | GLU | X | 90 | 47.473 | 63.988 | 38.788 | 0.00 | 0.00 |
| ATOM | 1391 | HG2  | GLU | X | 90 | 47.207 | 63.227 | 39.522 | 0.00 | 0.00 |
| ATOM | 1392 | HG3  | GLU | X | 90 | 48.496 | 63.947 | 38.413 | 0.00 | 0.00 |
| ATOM | 1393 | CD   | GLU | X | 90 | 47.325 | 65.387 | 39.296 | 0.00 | 0.00 |
| ATOM | 1394 | OE1  | GLU | X | 90 | 46.583 | 65.526 | 40.323 | 0.00 | 0.00 |
| ATOM | 1395 | OE2  | GLU | X | 90 | 47.943 | 66.372 | 38.750 | 0.00 | 0.00 |
| ATOM | 1396 | C    | GLU | X | 90 | 45.109 | 62.368 | 36.107 | 0.00 | 0.00 |
| ATOM | 1397 | O    | GLU | X | 90 | 44.094 | 62.228 | 36.810 | 0.00 | 0.00 |
| ATOM | 1398 | N    | ASP | X | 91 | 45.074 | 62.379 | 34.752 | 0.00 | 0.00 |
| ATOM | 1399 | H    | ASP | X | 91 | 45.978 | 62.291 | 34.310 | 0.00 | 0.00 |
| ATOM | 1400 | CA   | ASP | X | 91 | 43.889 | 62.344 | 33.932 | 0.00 | 0.00 |
| ATOM | 1401 | HA   | ASP | X | 91 | 43.167 | 62.991 | 34.430 | 0.00 | 0.00 |
| ATOM | 1402 | CB   | ASP | X | 91 | 44.209 | 62.985 | 32.535 | 0.00 | 0.00 |
| ATOM | 1403 | HB2  | ASP | X | 91 | 43.252 | 63.361 | 32.171 | 0.00 | 0.00 |
| ATOM | 1404 | HB3  | ASP | X | 91 | 44.884 | 63.817 | 32.734 | 0.00 | 0.00 |
| ATOM | 1405 | CG   | ASP | X | 91 | 44.843 | 61.962 | 31.471 | 0.00 | 0.00 |
| ATOM | 1406 | OD1  | ASP | X | 91 | 45.746 | 61.245 | 31.882 | 0.00 | 0.00 |
| ATOM | 1407 | OD2  | ASP | X | 91 | 44.418 | 61.935 | 30.305 | 0.00 | 0.00 |
| ATOM | 1408 | C    | ASP | X | 91 | 43.195 | 60.939 | 33.851 | 0.00 | 0.00 |
| ATOM | 1409 | O    | ASP | X | 91 | 42.456 | 60.583 | 32.930 | 0.00 | 0.00 |
| ATOM | 1410 | N    | CYX | X | 92 | 43.597 | 60.057 | 34.778 | 0.00 | 0.00 |
| ATOM | 1411 | H    | CYX | X | 92 | 43.882 | 60.545 | 35.615 | 0.00 | 0.00 |
| ATOM | 1412 | CA   | CYX | X | 92 | 44.008 | 58.674 | 34.442 | 0.00 | 0.00 |
| ATOM | 1413 | HA   | CYX | X | 92 | 44.318 | 58.784 | 33.403 | 0.00 | 0.00 |
| ATOM | 1414 | CB   | CYX | X | 92 | 45.106 | 58.397 | 35.359 | 0.00 | 0.00 |
| ATOM | 1415 | HB2  | CYX | X | 92 | 45.675 | 57.530 | 35.020 | 0.00 | 0.00 |
| ATOM | 1416 | HB3  | CYX | X | 92 | 45.794 | 59.227 | 35.197 | 0.00 | 0.00 |
| ATOM | 1417 | SG   | CYX | X | 92 | 44.726 | 58.085 | 37.074 | 0.00 | 0.00 |
| ATOM | 1418 | C    | CYX | X | 92 | 43.025 | 57.510 | 34.473 | 0.00 | 0.00 |
| ATOM | 1419 | O    | CYX | X | 92 | 43.439 | 56.358 | 34.658 | 0.00 | 0.00 |
| ATOM | 1420 | N    | LEU | X | 93 | 41.703 | 57.813 | 34.578 | 0.00 | 0.00 |
| ATOM | 1421 | H    | LEU | X | 93 | 41.364 | 58.695 | 34.220 | 0.00 | 0.00 |
| ATOM | 1422 | CA   | LEU | X | 93 | 40.765 | 56.693 | 34.931 | 0.00 | 0.00 |
| ATOM | 1423 | HA   | LEU | X | 93 | 41.380 | 55.879 | 35.316 | 0.00 | 0.00 |
| ATOM | 1424 | CB   | LEU | X | 93 | 39.839 | 57.064 | 36.060 | 0.00 | 0.00 |
| ATOM | 1425 | HB2  | LEU | X | 93 | 39.398 | 57.985 | 35.679 | 0.00 | 0.00 |
| ATOM | 1426 | HB3  | LEU | X | 93 | 39.058 | 56.318 | 36.203 | 0.00 | 0.00 |
| ATOM | 1427 | CG   | LEU | X | 93 | 40.490 | 57.384 | 37.397 | 0.00 | 0.00 |
| ATOM | 1428 | HG   | LEU | X | 93 | 41.256 | 58.094 | 37.083 | 0.00 | 0.00 |
| ATOM | 1429 | CD1  | LEU | X | 93 | 39.586 | 58.070 | 38.458 | 0.00 | 0.00 |
| ATOM | 1430 | HD11 | LEU | X | 93 | 38.640 | 57.562 | 38.642 | 0.00 | 0.00 |
| ATOM | 1431 | HD12 | LEU | X | 93 | 39.182 | 58.982 | 38.019 | 0.00 | 0.00 |
| ATOM | 1432 | HD13 | LEU | X | 93 | 40.080 | 58.282 | 39.406 | 0.00 | 0.00 |



|      |      |      |     |   |    |        |        |        |      |      |
|------|------|------|-----|---|----|--------|--------|--------|------|------|
| ATOM | 1433 | CD2  | LEU | X | 93 | 41.127 | 56.166 | 38.032 | 0.00 | 0.00 |
| ATOM | 1434 | HD21 | LEU | X | 93 | 40.341 | 55.510 | 38.404 | 0.00 | 0.00 |
| ATOM | 1435 | HD22 | LEU | X | 93 | 41.738 | 55.649 | 37.291 | 0.00 | 0.00 |
| ATOM | 1436 | HD23 | LEU | X | 93 | 41.705 | 56.495 | 38.895 | 0.00 | 0.00 |
| ATOM | 1437 | C    | LEU | X | 93 | 40.107 | 56.215 | 33.635 | 0.00 | 0.00 |
| ATOM | 1438 | O    | LEU | X | 93 | 39.063 | 56.676 | 33.184 | 0.00 | 0.00 |
| ATOM | 1439 | N    | TYR | X | 94 | 40.814 | 55.229 | 32.991 | 0.00 | 0.00 |
| ATOM | 1440 | H    | TYR | X | 94 | 41.692 | 55.016 | 33.441 | 0.00 | 0.00 |
| ATOM | 1441 | CA   | TYR | X | 94 | 40.542 | 54.521 | 31.751 | 0.00 | 0.00 |
| ATOM | 1442 | HA   | TYR | X | 94 | 39.641 | 55.047 | 31.437 | 0.00 | 0.00 |
| ATOM | 1443 | CB   | TYR | X | 94 | 41.697 | 54.837 | 30.774 | 0.00 | 0.00 |
| ATOM | 1444 | HB2  | TYR | X | 94 | 42.564 | 54.353 | 31.225 | 0.00 | 0.00 |
| ATOM | 1445 | HB3  | TYR | X | 94 | 41.494 | 54.358 | 29.816 | 0.00 | 0.00 |
| ATOM | 1446 | CG   | TYR | X | 94 | 41.954 | 56.295 | 30.594 | 0.00 | 0.00 |
| ATOM | 1447 | CD1  | TYR | X | 94 | 40.958 | 57.020 | 29.930 | 0.00 | 0.00 |
| ATOM | 1448 | HD1  | TYR | X | 94 | 40.057 | 56.524 | 29.601 | 0.00 | 0.00 |
| ATOM | 1449 | CE1  | TYR | X | 94 | 41.094 | 58.391 | 29.674 | 0.00 | 0.00 |
| ATOM | 1450 | HE1  | TYR | X | 94 | 40.362 | 58.917 | 29.078 | 0.00 | 0.00 |
| ATOM | 1451 | CZ   | TYR | X | 94 | 42.330 | 59.050 | 29.975 | 0.00 | 0.00 |
| ATOM | 1452 | OH   | TYR | X | 94 | 42.386 | 60.349 | 29.582 | 0.00 | 0.00 |
| ATOM | 1453 | HH   | TYR | X | 94 | 43.265 | 60.673 | 29.792 | 0.00 | 0.00 |
| ATOM | 1454 | CE2  | TYR | X | 94 | 43.267 | 58.371 | 30.824 | 0.00 | 0.00 |
| ATOM | 1455 | HE2  | TYR | X | 94 | 44.201 | 58.873 | 31.032 | 0.00 | 0.00 |
| ATOM | 1456 | CD2  | TYR | X | 94 | 43.114 | 57.035 | 31.092 | 0.00 | 0.00 |
| ATOM | 1457 | HD2  | TYR | X | 94 | 43.837 | 56.509 | 31.697 | 0.00 | 0.00 |
| ATOM | 1458 | C    | TYR | X | 94 | 40.360 | 53.026 | 31.897 | 0.00 | 0.00 |
| ATOM | 1459 | O    | TYR | X | 94 | 41.003 | 52.269 | 32.669 | 0.00 | 0.00 |
| ATOM | 1460 | N    | LEU | X | 95 | 39.508 | 52.494 | 31.000 | 0.00 | 0.00 |
| ATOM | 1461 | H    | LEU | X | 95 | 39.082 | 53.167 | 30.379 | 0.00 | 0.00 |
| ATOM | 1462 | CA   | LEU | X | 95 | 38.863 | 51.104 | 31.066 | 0.00 | 0.00 |
| ATOM | 1463 | HA   | LEU | X | 95 | 39.496 | 50.527 | 31.740 | 0.00 | 0.00 |
| ATOM | 1464 | CB   | LEU | X | 95 | 37.422 | 51.107 | 31.585 | 0.00 | 0.00 |
| ATOM | 1465 | HB2  | LEU | X | 95 | 37.443 | 51.677 | 32.514 | 0.00 | 0.00 |
| ATOM | 1466 | HB3  | LEU | X | 95 | 36.828 | 51.693 | 30.884 | 0.00 | 0.00 |
| ATOM | 1467 | CG   | LEU | X | 95 | 36.680 | 49.825 | 31.747 | 0.00 | 0.00 |
| ATOM | 1468 | HG   | LEU | X | 95 | 37.439 | 49.065 | 31.932 | 0.00 | 0.00 |
| ATOM | 1469 | CD1  | LEU | X | 95 | 35.759 | 49.752 | 32.942 | 0.00 | 0.00 |
| ATOM | 1470 | HD11 | LEU | X | 95 | 35.229 | 48.800 | 32.907 | 0.00 | 0.00 |
| ATOM | 1471 | HD12 | LEU | X | 95 | 35.026 | 50.559 | 32.947 | 0.00 | 0.00 |
| ATOM | 1472 | HD13 | LEU | X | 95 | 36.354 | 49.772 | 33.855 | 0.00 | 0.00 |
| ATOM | 1473 | CD2  | LEU | X | 95 | 35.886 | 49.525 | 30.458 | 0.00 | 0.00 |
| ATOM | 1474 | HD21 | LEU | X | 95 | 36.575 | 49.170 | 29.692 | 0.00 | 0.00 |
| ATOM | 1475 | HD22 | LEU | X | 95 | 35.157 | 48.741 | 30.664 | 0.00 | 0.00 |
| ATOM | 1476 | HD23 | LEU | X | 95 | 35.302 | 50.371 | 30.095 | 0.00 | 0.00 |
| ATOM | 1477 | C    | LEU | X | 95 | 39.108 | 50.520 | 29.725 | 0.00 | 0.00 |
| ATOM | 1478 | O    | LEU | X | 95 | 39.173 | 51.163 | 28.690 | 0.00 | 0.00 |
| ATOM | 1479 | N    | ASN | X | 96 | 39.248 | 49.211 | 29.670 | 0.00 | 0.00 |
| ATOM | 1480 | H    | ASN | X | 96 | 39.121 | 48.625 | 30.483 | 0.00 | 0.00 |
| ATOM | 1481 | CA   | ASN | X | 96 | 39.774 | 48.481 | 28.486 | 0.00 | 0.00 |
| ATOM | 1482 | HA   | ASN | X | 96 | 39.742 | 49.134 | 27.614 | 0.00 | 0.00 |
| ATOM | 1483 | CB   | ASN | X | 96 | 41.272 | 48.235 | 28.838 | 0.00 | 0.00 |
| ATOM | 1484 | HB2  | ASN | X | 96 | 41.215 | 47.592 | 29.716 | 0.00 | 0.00 |
| ATOM | 1485 | HB3  | ASN | X | 96 | 41.806 | 47.864 | 27.963 | 0.00 | 0.00 |
| ATOM | 1486 | CG   | ASN | X | 96 | 42.113 | 49.455 | 29.225 | 0.00 | 0.00 |
| ATOM | 1487 | OD1  | ASN | X | 96 | 42.388 | 50.476 | 28.525 | 0.00 | 0.00 |
| ATOM | 1488 | ND2  | ASN | X | 96 | 42.556 | 49.401 | 30.506 | 0.00 | 0.00 |
| ATOM | 1489 | HD21 | ASN | X | 96 | 43.156 | 50.165 | 30.783 | 0.00 | 0.00 |
| ATOM | 1490 | HD22 | ASN | X | 96 | 42.359 | 48.654 | 31.156 | 0.00 | 0.00 |
| ATOM | 1491 | C    | ASN | X | 96 | 38.937 | 47.117 | 28.463 | 0.00 | 0.00 |
| ATOM | 1492 | O    | ASN | X | 96 | 38.773 | 46.583 | 29.545 | 0.00 | 0.00 |
| ATOM | 1493 | N    | VAL | X | 97 | 38.456 | 46.678 | 27.332 | 0.00 | 0.00 |
| ATOM | 1494 | H    | VAL | X | 97 | 38.651 | 47.325 | 26.582 | 0.00 | 0.00 |
| ATOM | 1495 | CA   | VAL | X | 97 | 37.557 | 45.557 | 27.013 | 0.00 | 0.00 |
| ATOM | 1496 | HA   | VAL | X | 97 | 37.535 | 44.976 | 27.935 | 0.00 | 0.00 |
| ATOM | 1497 | CB   | VAL | X | 97 | 36.114 | 46.031 | 26.748 | 0.00 | 0.00 |
| ATOM | 1498 | HB   | VAL | X | 97 | 36.019 | 46.593 | 25.819 | 0.00 | 0.00 |
| ATOM | 1499 | CG1  | VAL | X | 97 | 35.257 | 44.711 | 26.734 | 0.00 | 0.00 |

|      |      |      |     |   |     |        |        |        |      |      |
|------|------|------|-----|---|-----|--------|--------|--------|------|------|
| ATOM | 1500 | HG11 | VAL | X | 97  | 35.637 | 43.908 | 26.102 | 0.00 | 0.00 |
| ATOM | 1501 | HG12 | VAL | X | 97  | 35.072 | 44.384 | 27.756 | 0.00 | 0.00 |
| ATOM | 1502 | HG13 | VAL | X | 97  | 34.304 | 45.059 | 26.336 | 0.00 | 0.00 |
| ATOM | 1503 | CG2  | VAL | X | 97  | 35.616 | 46.922 | 27.873 | 0.00 | 0.00 |
| ATOM | 1504 | HG21 | VAL | X | 97  | 36.069 | 46.633 | 28.821 | 0.00 | 0.00 |
| ATOM | 1505 | HG22 | VAL | X | 97  | 34.531 | 46.848 | 27.956 | 0.00 | 0.00 |
| ATOM | 1506 | HG23 | VAL | X | 97  | 35.903 | 47.973 | 27.863 | 0.00 | 0.00 |
| ATOM | 1507 | C    | VAL | X | 97  | 38.140 | 44.775 | 25.860 | 0.00 | 0.00 |
| ATOM | 1508 | O    | VAL | X | 97  | 38.819 | 45.305 | 24.989 | 0.00 | 0.00 |
| ATOM | 1509 | N    | TRP | X | 98  | 38.038 | 43.449 | 25.951 | 0.00 | 0.00 |
| ATOM | 1510 | H    | TRP | X | 98  | 37.507 | 42.981 | 26.671 | 0.00 | 0.00 |
| ATOM | 1511 | CA   | TRP | X | 98  | 38.314 | 42.430 | 24.960 | 0.00 | 0.00 |
| ATOM | 1512 | HA   | TRP | X | 98  | 38.504 | 42.923 | 24.007 | 0.00 | 0.00 |
| ATOM | 1513 | CB   | TRP | X | 98  | 39.611 | 41.749 | 25.410 | 0.00 | 0.00 |
| ATOM | 1514 | HB2  | TRP | X | 98  | 39.408 | 41.425 | 26.431 | 0.00 | 0.00 |
| ATOM | 1515 | HB3  | TRP | X | 98  | 39.836 | 40.940 | 24.716 | 0.00 | 0.00 |
| ATOM | 1516 | CG   | TRP | X | 98  | 40.868 | 42.579 | 25.477 | 0.00 | 0.00 |
| ATOM | 1517 | CD1  | TRP | X | 98  | 41.906 | 42.527 | 24.609 | 0.00 | 0.00 |
| ATOM | 1518 | HD1  | TRP | X | 98  | 41.988 | 42.052 | 23.643 | 0.00 | 0.00 |
| ATOM | 1519 | NE1  | TRP | X | 98  | 42.930 | 43.395 | 25.110 | 0.00 | 0.00 |
| ATOM | 1520 | HE1  | TRP | X | 98  | 43.744 | 43.554 | 24.533 | 0.00 | 0.00 |
| ATOM | 1521 | CE2  | TRP | X | 98  | 42.636 | 43.886 | 26.353 | 0.00 | 0.00 |
| ATOM | 1522 | CZ2  | TRP | X | 98  | 43.384 | 44.763 | 27.187 | 0.00 | 0.00 |
| ATOM | 1523 | HZ2  | TRP | X | 98  | 44.308 | 45.159 | 26.792 | 0.00 | 0.00 |
| ATOM | 1524 | CH2  | TRP | X | 98  | 42.894 | 45.149 | 28.427 | 0.00 | 0.00 |
| ATOM | 1525 | HH2  | TRP | X | 98  | 43.392 | 45.953 | 28.948 | 0.00 | 0.00 |
| ATOM | 1526 | CZ3  | TRP | X | 98  | 41.707 | 44.556 | 28.800 | 0.00 | 0.00 |
| ATOM | 1527 | HZ3  | TRP | X | 98  | 41.253 | 44.801 | 29.749 | 0.00 | 0.00 |
| ATOM | 1528 | CE3  | TRP | X | 98  | 40.883 | 43.663 | 27.976 | 0.00 | 0.00 |
| ATOM | 1529 | HE3  | TRP | X | 98  | 39.925 | 43.305 | 28.323 | 0.00 | 0.00 |
| ATOM | 1530 | CD2  | TRP | X | 98  | 41.380 | 43.308 | 26.678 | 0.00 | 0.00 |
| ATOM | 1531 | C    | TRP | X | 98  | 37.107 | 41.476 | 24.755 | 0.00 | 0.00 |
| ATOM | 1532 | O    | TRP | X | 98  | 36.565 | 40.840 | 25.714 | 0.00 | 0.00 |
| ATOM | 1533 | N    | THR | X | 99  | 36.625 | 41.519 | 23.513 | 0.00 | 0.00 |
| ATOM | 1534 | H    | THR | X | 99  | 37.181 | 41.989 | 22.813 | 0.00 | 0.00 |
| ATOM | 1535 | CA   | THR | X | 99  | 35.387 | 40.915 | 23.064 | 0.00 | 0.00 |
| ATOM | 1536 | HA   | THR | X | 99  | 34.975 | 40.254 | 23.827 | 0.00 | 0.00 |
| ATOM | 1537 | CB   | THR | X | 99  | 34.295 | 41.929 | 23.094 | 0.00 | 0.00 |
| ATOM | 1538 | HB   | THR | X | 99  | 34.241 | 42.297 | 24.119 | 0.00 | 0.00 |
| ATOM | 1539 | CG2  | THR | X | 99  | 34.514 | 43.112 | 22.106 | 0.00 | 0.00 |
| ATOM | 1540 | HG21 | THR | X | 99  | 35.541 | 43.465 | 22.198 | 0.00 | 0.00 |
| ATOM | 1541 | HG22 | THR | X | 99  | 33.931 | 43.967 | 22.447 | 0.00 | 0.00 |
| ATOM | 1542 | HG23 | THR | X | 99  | 34.292 | 42.703 | 21.121 | 0.00 | 0.00 |
| ATOM | 1543 | OG1  | THR | X | 99  | 33.040 | 41.294 | 22.818 | 0.00 | 0.00 |
| ATOM | 1544 | HG1  | THR | X | 99  | 32.364 | 41.897 | 23.137 | 0.00 | 0.00 |
| ATOM | 1545 | C    | THR | X | 99  | 35.539 | 40.171 | 21.719 | 0.00 | 0.00 |
| ATOM | 1546 | O    | THR | X | 99  | 36.183 | 40.712 | 20.866 | 0.00 | 0.00 |
| ATOM | 1547 | N    | PRO | X | 100 | 35.019 | 38.979 | 21.497 | 0.00 | 0.00 |
| ATOM | 1548 | CD   | PRO | X | 100 | 34.364 | 38.133 | 22.447 | 0.00 | 0.00 |
| ATOM | 1549 | HD2  | PRO | X | 100 | 33.291 | 38.326 | 22.464 | 0.00 | 0.00 |
| ATOM | 1550 | HD3  | PRO | X | 100 | 34.889 | 38.215 | 23.399 | 0.00 | 0.00 |
| ATOM | 1551 | CG   | PRO | X | 100 | 34.510 | 36.665 | 21.917 | 0.00 | 0.00 |
| ATOM | 1552 | HG2  | PRO | X | 100 | 33.647 | 36.084 | 22.243 | 0.00 | 0.00 |
| ATOM | 1553 | HG3  | PRO | X | 100 | 35.444 | 36.155 | 22.151 | 0.00 | 0.00 |
| ATOM | 1554 | CB   | PRO | X | 100 | 34.511 | 36.858 | 20.394 | 0.00 | 0.00 |
| ATOM | 1555 | HB2  | PRO | X | 100 | 33.512 | 36.992 | 19.980 | 0.00 | 0.00 |
| ATOM | 1556 | HB3  | PRO | X | 100 | 35.100 | 36.091 | 19.891 | 0.00 | 0.00 |
| ATOM | 1557 | CA   | PRO | X | 100 | 35.311 | 38.225 | 20.247 | 0.00 | 0.00 |
| ATOM | 1558 | HA   | PRO | X | 100 | 36.392 | 38.084 | 20.239 | 0.00 | 0.00 |
| ATOM | 1559 | C    | PRO | X | 100 | 34.698 | 38.899 | 19.002 | 0.00 | 0.00 |
| ATOM | 1560 | O    | PRO | X | 100 | 33.937 | 39.889 | 19.075 | 0.00 | 0.00 |
| ATOM | 1561 | N    | TYR | X | 101 | 35.141 | 38.471 | 17.812 | 0.00 | 0.00 |
| ATOM | 1562 | H    | TYR | X | 101 | 35.801 | 37.707 | 17.817 | 0.00 | 0.00 |
| ATOM | 1563 | CA   | TYR | X | 101 | 34.779 | 39.062 | 16.518 | 0.00 | 0.00 |
| ATOM | 1564 | HA   | TYR | X | 101 | 34.113 | 39.911 | 16.675 | 0.00 | 0.00 |
| ATOM | 1565 | CB   | TYR | X | 101 | 36.068 | 39.521 | 15.765 | 0.00 | 0.00 |
| ATOM | 1566 | HB2  | TYR | X | 101 | 36.515 | 40.132 | 16.549 | 0.00 | 0.00 |

|      |      |      |     |   |     |        |        |        |      |      |
|------|------|------|-----|---|-----|--------|--------|--------|------|------|
| ATOM | 1567 | HB3  | TYR | X | 101 | 36.794 | 38.724 | 15.600 | 0.00 | 0.00 |
| ATOM | 1568 | CG   | TYR | X | 101 | 35.830 | 40.306 | 14.505 | 0.00 | 0.00 |
| ATOM | 1569 | CD1  | TYR | X | 101 | 35.911 | 39.603 | 13.263 | 0.00 | 0.00 |
| ATOM | 1570 | HD1  | TYR | X | 101 | 36.322 | 38.624 | 13.065 | 0.00 | 0.00 |
| ATOM | 1571 | CE1  | TYR | X | 101 | 35.582 | 40.312 | 12.077 | 0.00 | 0.00 |
| ATOM | 1572 | HE1  | TYR | X | 101 | 35.721 | 39.808 | 11.132 | 0.00 | 0.00 |
| ATOM | 1573 | CZ   | TYR | X | 101 | 35.343 | 41.664 | 12.111 | 0.00 | 0.00 |
| ATOM | 1574 | OH   | TYR | X | 101 | 35.069 | 42.412 | 11.020 | 0.00 | 0.00 |
| ATOM | 1575 | HH   | TYR | X | 101 | 34.933 | 41.939 | 10.196 | 0.00 | 0.00 |
| ATOM | 1576 | CE2  | TYR | X | 101 | 35.288 | 42.313 | 13.385 | 0.00 | 0.00 |
| ATOM | 1577 | HE2  | TYR | X | 101 | 35.000 | 43.353 | 13.407 | 0.00 | 0.00 |
| ATOM | 1578 | CD2  | TYR | X | 101 | 35.574 | 41.695 | 14.555 | 0.00 | 0.00 |
| ATOM | 1579 | HD2  | TYR | X | 101 | 35.500 | 42.216 | 15.498 | 0.00 | 0.00 |
| ATOM | 1580 | C    | TYR | X | 101 | 33.991 | 38.103 | 15.576 | 0.00 | 0.00 |
| ATOM | 1581 | O    | TYR | X | 101 | 34.447 | 36.978 | 15.485 | 0.00 | 0.00 |
| ATOM | 1582 | N    | PRO | X | 102 | 32.866 | 38.568 | 14.969 | 0.00 | 0.00 |
| ATOM | 1583 | CD   | PRO | X | 102 | 32.126 | 37.639 | 14.050 | 0.00 | 0.00 |
| ATOM | 1584 | HD2  | PRO | X | 102 | 31.873 | 36.675 | 14.491 | 0.00 | 0.00 |
| ATOM | 1585 | HD3  | PRO | X | 102 | 32.670 | 37.448 | 13.125 | 0.00 | 0.00 |
| ATOM | 1586 | CG   | PRO | X | 102 | 30.867 | 38.373 | 13.655 | 0.00 | 0.00 |
| ATOM | 1587 | HG2  | PRO | X | 102 | 29.984 | 38.103 | 14.234 | 0.00 | 0.00 |
| ATOM | 1588 | HG3  | PRO | X | 102 | 30.668 | 38.064 | 12.628 | 0.00 | 0.00 |
| ATOM | 1589 | CB   | PRO | X | 102 | 31.147 | 39.835 | 13.980 | 0.00 | 0.00 |
| ATOM | 1590 | HB2  | PRO | X | 102 | 30.284 | 40.471 | 14.178 | 0.00 | 0.00 |
| ATOM | 1591 | HB3  | PRO | X | 102 | 31.772 | 40.243 | 13.186 | 0.00 | 0.00 |
| ATOM | 1592 | CA   | PRO | X | 102 | 32.125 | 39.694 | 15.182 | 0.00 | 0.00 |
| ATOM | 1593 | HA   | PRO | X | 102 | 32.794 | 40.551 | 15.110 | 0.00 | 0.00 |
| ATOM | 1594 | C    | PRO | X | 102 | 31.434 | 39.624 | 16.553 | 0.00 | 0.00 |
| ATOM | 1595 | O    | PRO | X | 102 | 31.296 | 38.562 | 17.232 | 0.00 | 0.00 |
| ATOM | 1596 | N    | ARG | X | 103 | 31.010 | 40.738 | 17.083 | 0.00 | 0.00 |
| ATOM | 1597 | H    | ARG | X | 103 | 31.095 | 41.599 | 16.561 | 0.00 | 0.00 |
| ATOM | 1598 | CA   | ARG | X | 103 | 30.746 | 40.874 | 18.560 | 0.00 | 0.00 |
| ATOM | 1599 | HA   | ARG | X | 103 | 31.641 | 40.561 | 19.098 | 0.00 | 0.00 |
| ATOM | 1600 | CB   | ARG | X | 103 | 30.488 | 42.384 | 18.891 | 0.00 | 0.00 |
| ATOM | 1601 | HB2  | ARG | X | 103 | 31.131 | 42.999 | 18.261 | 0.00 | 0.00 |
| ATOM | 1602 | HB3  | ARG | X | 103 | 29.436 | 42.606 | 18.712 | 0.00 | 0.00 |
| ATOM | 1603 | CG   | ARG | X | 103 | 30.892 | 42.712 | 20.352 | 0.00 | 0.00 |
| ATOM | 1604 | HG2  | ARG | X | 103 | 30.150 | 42.339 | 21.059 | 0.00 | 0.00 |
| ATOM | 1605 | HG3  | ARG | X | 103 | 31.807 | 42.126 | 20.438 | 0.00 | 0.00 |
| ATOM | 1606 | CD   | ARG | X | 103 | 31.192 | 44.224 | 20.572 | 0.00 | 0.00 |
| ATOM | 1607 | HD2  | ARG | X | 103 | 31.536 | 44.226 | 21.606 | 0.00 | 0.00 |
| ATOM | 1608 | HD3  | ARG | X | 103 | 32.002 | 44.622 | 19.960 | 0.00 | 0.00 |
| ATOM | 1609 | NE   | ARG | X | 103 | 29.941 | 44.996 | 20.368 | 0.00 | 0.00 |
| ATOM | 1610 | HE   | ARG | X | 103 | 29.161 | 44.824 | 20.987 | 0.00 | 0.00 |
| ATOM | 1611 | CZ   | ARG | X | 103 | 29.735 | 45.833 | 19.374 | 0.00 | 0.00 |
| ATOM | 1612 | NH1  | ARG | X | 103 | 30.677 | 46.226 | 18.523 | 0.00 | 0.00 |
| ATOM | 1613 | HH11 | ARG | X | 103 | 31.531 | 45.710 | 18.364 | 0.00 | 0.00 |
| ATOM | 1614 | HH12 | ARG | X | 103 | 30.397 | 47.000 | 17.936 | 0.00 | 0.00 |
| ATOM | 1615 | NH2  | ARG | X | 103 | 28.516 | 46.385 | 19.296 | 0.00 | 0.00 |
| ATOM | 1616 | HH21 | ARG | X | 103 | 27.744 | 46.186 | 19.917 | 0.00 | 0.00 |
| ATOM | 1617 | HH22 | ARG | X | 103 | 28.182 | 46.982 | 18.553 | 0.00 | 0.00 |
| ATOM | 1618 | C    | ARG | X | 103 | 29.504 | 39.986 | 18.985 | 0.00 | 0.00 |
| ATOM | 1619 | O    | ARG | X | 103 | 28.431 | 40.085 | 18.355 | 0.00 | 0.00 |
| ATOM | 1620 | N    | PRO | X | 104 | 29.515 | 39.393 | 20.209 | 0.00 | 0.00 |
| ATOM | 1621 | CD   | PRO | X | 104 | 30.742 | 39.074 | 20.951 | 0.00 | 0.00 |
| ATOM | 1622 | HD2  | PRO | X | 104 | 31.226 | 39.942 | 21.399 | 0.00 | 0.00 |
| ATOM | 1623 | HD3  | PRO | X | 104 | 31.508 | 38.666 | 20.293 | 0.00 | 0.00 |
| ATOM | 1624 | CG   | PRO | X | 104 | 30.397 | 38.096 | 22.043 | 0.00 | 0.00 |
| ATOM | 1625 | HG2  | PRO | X | 104 | 30.889 | 38.362 | 22.979 | 0.00 | 0.00 |
| ATOM | 1626 | HG3  | PRO | X | 104 | 30.684 | 37.075 | 21.794 | 0.00 | 0.00 |
| ATOM | 1627 | CB   | PRO | X | 104 | 28.851 | 38.095 | 22.125 | 0.00 | 0.00 |
| ATOM | 1628 | HB2  | PRO | X | 104 | 28.562 | 38.847 | 22.859 | 0.00 | 0.00 |
| ATOM | 1629 | HB3  | PRO | X | 104 | 28.422 | 37.119 | 22.353 | 0.00 | 0.00 |
| ATOM | 1630 | CA   | PRO | X | 104 | 28.365 | 38.723 | 20.823 | 0.00 | 0.00 |
| ATOM | 1631 | HA   | PRO | X | 104 | 28.112 | 37.866 | 20.198 | 0.00 | 0.00 |
| ATOM | 1632 | C    | PRO | X | 104 | 27.183 | 39.606 | 20.971 | 0.00 | 0.00 |
| ATOM | 1633 | O    | PRO | X | 104 | 27.339 | 40.771 | 21.302 | 0.00 | 0.00 |

|      |      |      |     |   |     |        |        |        |      |      |
|------|------|------|-----|---|-----|--------|--------|--------|------|------|
| ATOM | 1634 | N    | THR | X | 105 | 26.029 | 39.043 | 20.759 | 0.00 | 0.00 |
| ATOM | 1635 | H    | THR | X | 105 | 26.027 | 38.058 | 20.537 | 0.00 | 0.00 |
| ATOM | 1636 | CA   | THR | X | 105 | 24.753 | 39.602 | 20.811 | 0.00 | 0.00 |
| ATOM | 1637 | HA   | THR | X | 105 | 24.815 | 40.687 | 20.900 | 0.00 | 0.00 |
| ATOM | 1638 | CB   | THR | X | 105 | 24.085 | 39.436 | 19.484 | 0.00 | 0.00 |
| ATOM | 1639 | HB   | THR | X | 105 | 23.669 | 38.432 | 19.397 | 0.00 | 0.00 |
| ATOM | 1640 | CG2  | THR | X | 105 | 22.944 | 40.574 | 19.322 | 0.00 | 0.00 |
| ATOM | 1641 | HG21 | THR | X | 105 | 23.404 | 41.562 | 19.356 | 0.00 | 0.00 |
| ATOM | 1642 | HG22 | THR | X | 105 | 22.080 | 40.505 | 19.983 | 0.00 | 0.00 |
| ATOM | 1643 | HG23 | THR | X | 105 | 22.515 | 40.583 | 18.319 | 0.00 | 0.00 |
| ATOM | 1644 | OG1  | THR | X | 105 | 24.925 | 39.589 | 18.322 | 0.00 | 0.00 |
| ATOM | 1645 | HG1  | THR | X | 105 | 25.650 | 38.965 | 18.392 | 0.00 | 0.00 |
| ATOM | 1646 | C    | THR | X | 105 | 23.912 | 39.116 | 21.988 | 0.00 | 0.00 |
| ATOM | 1647 | O    | THR | X | 105 | 23.276 | 39.898 | 22.679 | 0.00 | 0.00 |
| ATOM | 1648 | N    | SER | X | 106 | 24.118 | 37.854 | 22.410 | 0.00 | 0.00 |
| ATOM | 1649 | H    | SER | X | 106 | 24.810 | 37.274 | 21.957 | 0.00 | 0.00 |
| ATOM | 1650 | CA   | SER | X | 106 | 23.409 | 37.398 | 23.556 | 0.00 | 0.00 |
| ATOM | 1651 | HA   | SER | X | 106 | 22.503 | 37.974 | 23.742 | 0.00 | 0.00 |
| ATOM | 1652 | CB   | SER | X | 106 | 22.989 | 35.921 | 23.263 | 0.00 | 0.00 |
| ATOM | 1653 | HB2  | SER | X | 106 | 22.295 | 35.528 | 24.007 | 0.00 | 0.00 |
| ATOM | 1654 | HB3  | SER | X | 106 | 22.452 | 35.825 | 22.319 | 0.00 | 0.00 |
| ATOM | 1655 | OG   | SER | X | 106 | 24.099 | 35.038 | 23.263 | 0.00 | 0.00 |
| ATOM | 1656 | HG   | SER | X | 106 | 24.646 | 35.083 | 22.476 | 0.00 | 0.00 |
| ATOM | 1657 | C    | SER | X | 106 | 24.359 | 37.429 | 24.757 | 0.00 | 0.00 |
| ATOM | 1658 | O    | SER | X | 106 | 25.573 | 37.452 | 24.574 | 0.00 | 0.00 |
| ATOM | 1659 | N    | PRO | X | 107 | 23.797 | 37.526 | 26.052 | 0.00 | 0.00 |
| ATOM | 1660 | CD   | PRO | X | 107 | 22.396 | 37.349 | 26.328 | 0.00 | 0.00 |
| ATOM | 1661 | HD2  | PRO | X | 107 | 22.180 | 36.292 | 26.174 | 0.00 | 0.00 |
| ATOM | 1662 | HD3  | PRO | X | 107 | 21.668 | 37.934 | 25.766 | 0.00 | 0.00 |
| ATOM | 1663 | CG   | PRO | X | 107 | 22.148 | 37.682 | 27.854 | 0.00 | 0.00 |
| ATOM | 1664 | HG2  | PRO | X | 107 | 21.346 | 37.099 | 28.306 | 0.00 | 0.00 |
| ATOM | 1665 | HG3  | PRO | X | 107 | 21.956 | 38.747 | 27.982 | 0.00 | 0.00 |
| ATOM | 1666 | CB   | PRO | X | 107 | 23.497 | 37.401 | 28.406 | 0.00 | 0.00 |
| ATOM | 1667 | HB2  | PRO | X | 107 | 23.496 | 36.369 | 28.757 | 0.00 | 0.00 |
| ATOM | 1668 | HB3  | PRO | X | 107 | 23.654 | 38.078 | 29.246 | 0.00 | 0.00 |
| ATOM | 1669 | CA   | PRO | X | 107 | 24.521 | 37.721 | 27.285 | 0.00 | 0.00 |
| ATOM | 1670 | HA   | PRO | X | 107 | 24.918 | 38.736 | 27.292 | 0.00 | 0.00 |
| ATOM | 1671 | C    | PRO | X | 107 | 25.750 | 36.725 | 27.414 | 0.00 | 0.00 |
| ATOM | 1672 | O    | PRO | X | 107 | 25.597 | 35.493 | 27.342 | 0.00 | 0.00 |
| ATOM | 1673 | N    | THR | X | 108 | 26.961 | 37.312 | 27.499 | 0.00 | 0.00 |
| ATOM | 1674 | H    | THR | X | 108 | 27.033 | 38.305 | 27.668 | 0.00 | 0.00 |
| ATOM | 1675 | CA   | THR | X | 108 | 28.195 | 36.614 | 27.530 | 0.00 | 0.00 |
| ATOM | 1676 | HA   | THR | X | 108 | 27.942 | 35.554 | 27.563 | 0.00 | 0.00 |
| ATOM | 1677 | CB   | THR | X | 108 | 29.078 | 36.968 | 26.361 | 0.00 | 0.00 |
| ATOM | 1678 | HB   | THR | X | 108 | 29.365 | 38.014 | 26.466 | 0.00 | 0.00 |
| ATOM | 1679 | CG2  | THR | X | 108 | 30.356 | 36.155 | 26.260 | 0.00 | 0.00 |
| ATOM | 1680 | HG21 | THR | X | 108 | 30.206 | 35.084 | 26.389 | 0.00 | 0.00 |
| ATOM | 1681 | HG22 | THR | X | 108 | 31.079 | 36.449 | 27.021 | 0.00 | 0.00 |
| ATOM | 1682 | HG23 | THR | X | 108 | 30.837 | 36.333 | 25.298 | 0.00 | 0.00 |
| ATOM | 1683 | OG1  | THR | X | 108 | 28.351 | 36.841 | 25.192 | 0.00 | 0.00 |
| ATOM | 1684 | HG1  | THR | X | 108 | 27.636 | 37.481 | 25.218 | 0.00 | 0.00 |
| ATOM | 1685 | C    | THR | X | 108 | 28.864 | 36.862 | 28.844 | 0.00 | 0.00 |
| ATOM | 1686 | O    | THR | X | 108 | 29.355 | 37.970 | 28.958 | 0.00 | 0.00 |
| ATOM | 1687 | N    | PRO | X | 109 | 29.042 | 35.838 | 29.765 | 0.00 | 0.00 |
| ATOM | 1688 | CD   | PRO | X | 109 | 28.719 | 34.447 | 29.648 | 0.00 | 0.00 |
| ATOM | 1689 | HD2  | PRO | X | 109 | 28.924 | 33.983 | 28.683 | 0.00 | 0.00 |
| ATOM | 1690 | HD3  | PRO | X | 109 | 27.659 | 34.283 | 29.845 | 0.00 | 0.00 |
| ATOM | 1691 | CG   | PRO | X | 109 | 29.723 | 33.797 | 30.583 | 0.00 | 0.00 |
| ATOM | 1692 | HG2  | PRO | X | 109 | 30.719 | 33.837 | 30.141 | 0.00 | 0.00 |
| ATOM | 1693 | HG3  | PRO | X | 109 | 29.454 | 32.773 | 30.844 | 0.00 | 0.00 |
| ATOM | 1694 | CB   | PRO | X | 109 | 29.877 | 34.699 | 31.849 | 0.00 | 0.00 |
| ATOM | 1695 | HB2  | PRO | X | 109 | 30.867 | 34.611 | 32.297 | 0.00 | 0.00 |
| ATOM | 1696 | HB3  | PRO | X | 109 | 29.033 | 34.496 | 32.507 | 0.00 | 0.00 |
| ATOM | 1697 | CA   | PRO | X | 109 | 29.710 | 36.056 | 31.090 | 0.00 | 0.00 |
| ATOM | 1698 | HA   | PRO | X | 109 | 29.124 | 36.761 | 31.681 | 0.00 | 0.00 |
| ATOM | 1699 | C    | PRO | X | 109 | 31.049 | 36.757 | 31.024 | 0.00 | 0.00 |
| ATOM | 1700 | O    | PRO | X | 109 | 31.812 | 36.612 | 30.021 | 0.00 | 0.00 |

|      |      |      |     |   |     |        |        |        |      |      |
|------|------|------|-----|---|-----|--------|--------|--------|------|------|
| ATOM | 1701 | N    | VAL | X | 110 | 31.340 | 37.496 | 32.137 | 0.00 | 0.00 |
| ATOM | 1702 | H    | VAL | X | 110 | 30.734 | 37.565 | 32.942 | 0.00 | 0.00 |
| ATOM | 1703 | CA   | VAL | X | 110 | 32.326 | 38.563 | 32.001 | 0.00 | 0.00 |
| ATOM | 1704 | HA   | VAL | X | 110 | 32.810 | 38.486 | 31.028 | 0.00 | 0.00 |
| ATOM | 1705 | CB   | VAL | X | 110 | 31.655 | 39.940 | 32.269 | 0.00 | 0.00 |
| ATOM | 1706 | HB   | VAL | X | 110 | 31.389 | 39.959 | 33.326 | 0.00 | 0.00 |
| ATOM | 1707 | CG1  | VAL | X | 110 | 32.688 | 41.085 | 31.988 | 0.00 | 0.00 |
| ATOM | 1708 | HG11 | VAL | X | 110 | 32.867 | 41.239 | 30.924 | 0.00 | 0.00 |
| ATOM | 1709 | HG12 | VAL | X | 110 | 32.315 | 42.044 | 32.349 | 0.00 | 0.00 |
| ATOM | 1710 | HG13 | VAL | X | 110 | 33.665 | 41.012 | 32.466 | 0.00 | 0.00 |
| ATOM | 1711 | CG2  | VAL | X | 110 | 30.335 | 40.233 | 31.516 | 0.00 | 0.00 |
| ATOM | 1712 | HG21 | VAL | X | 110 | 30.710 | 40.269 | 30.493 | 0.00 | 0.00 |
| ATOM | 1713 | HG22 | VAL | X | 110 | 29.887 | 41.163 | 31.867 | 0.00 | 0.00 |
| ATOM | 1714 | HG23 | VAL | X | 110 | 29.683 | 39.411 | 31.811 | 0.00 | 0.00 |
| ATOM | 1715 | C    | VAL | X | 110 | 33.316 | 38.370 | 33.064 | 0.00 | 0.00 |
| ATOM | 1716 | O    | VAL | X | 110 | 32.947 | 38.135 | 34.228 | 0.00 | 0.00 |
| ATOM | 1717 | N    | LEU | X | 111 | 34.581 | 38.673 | 32.753 | 0.00 | 0.00 |
| ATOM | 1718 | H    | LEU | X | 111 | 34.755 | 38.809 | 31.768 | 0.00 | 0.00 |
| ATOM | 1719 | CA   | LEU | X | 111 | 35.723 | 38.678 | 33.707 | 0.00 | 0.00 |
| ATOM | 1720 | HA   | LEU | X | 111 | 35.454 | 38.278 | 34.685 | 0.00 | 0.00 |
| ATOM | 1721 | CB   | LEU | X | 111 | 36.880 | 37.863 | 33.123 | 0.00 | 0.00 |
| ATOM | 1722 | HB2  | LEU | X | 111 | 37.051 | 38.220 | 32.107 | 0.00 | 0.00 |
| ATOM | 1723 | HB3  | LEU | X | 111 | 37.724 | 38.158 | 33.746 | 0.00 | 0.00 |
| ATOM | 1724 | CG   | LEU | X | 111 | 36.715 | 36.314 | 33.036 | 0.00 | 0.00 |
| ATOM | 1725 | HG   | LEU | X | 111 | 35.715 | 36.096 | 32.661 | 0.00 | 0.00 |
| ATOM | 1726 | CD1  | LEU | X | 111 | 37.611 | 35.679 | 31.969 | 0.00 | 0.00 |
| ATOM | 1727 | HD11 | LEU | X | 111 | 37.342 | 34.625 | 31.888 | 0.00 | 0.00 |
| ATOM | 1728 | HD12 | LEU | X | 111 | 38.654 | 35.966 | 32.099 | 0.00 | 0.00 |
| ATOM | 1729 | HD13 | LEU | X | 111 | 37.179 | 36.165 | 31.095 | 0.00 | 0.00 |
| ATOM | 1730 | CD2  | LEU | X | 111 | 36.838 | 35.765 | 34.460 | 0.00 | 0.00 |
| ATOM | 1731 | HD21 | LEU | X | 111 | 35.840 | 35.883 | 34.881 | 0.00 | 0.00 |
| ATOM | 1732 | HD22 | LEU | X | 111 | 37.113 | 34.710 | 34.494 | 0.00 | 0.00 |
| ATOM | 1733 | HD23 | LEU | X | 111 | 37.488 | 36.402 | 35.059 | 0.00 | 0.00 |
| ATOM | 1734 | C    | LEU | X | 111 | 36.246 | 40.172 | 33.795 | 0.00 | 0.00 |
| ATOM | 1735 | O    | LEU | X | 111 | 36.472 | 40.700 | 32.765 | 0.00 | 0.00 |
| ATOM | 1736 | N    | VAL | X | 112 | 36.590 | 40.636 | 35.014 | 0.00 | 0.00 |
| ATOM | 1737 | H    | VAL | X | 112 | 36.457 | 40.044 | 35.822 | 0.00 | 0.00 |
| ATOM | 1738 | CA   | VAL | X | 112 | 37.226 | 41.955 | 35.181 | 0.00 | 0.00 |
| ATOM | 1739 | HA   | VAL | X | 112 | 37.342 | 42.483 | 34.235 | 0.00 | 0.00 |
| ATOM | 1740 | CB   | VAL | X | 112 | 36.307 | 42.931 | 35.890 | 0.00 | 0.00 |
| ATOM | 1741 | HB   | VAL | X | 112 | 36.212 | 42.560 | 36.911 | 0.00 | 0.00 |
| ATOM | 1742 | CG1  | VAL | X | 112 | 36.864 | 44.385 | 35.734 | 0.00 | 0.00 |
| ATOM | 1743 | HG11 | VAL | X | 112 | 37.924 | 44.344 | 35.982 | 0.00 | 0.00 |
| ATOM | 1744 | HG12 | VAL | X | 112 | 36.740 | 44.631 | 34.679 | 0.00 | 0.00 |
| ATOM | 1745 | HG13 | VAL | X | 112 | 36.263 | 45.078 | 36.323 | 0.00 | 0.00 |
| ATOM | 1746 | CG2  | VAL | X | 112 | 34.894 | 43.036 | 35.327 | 0.00 | 0.00 |
| ATOM | 1747 | HG21 | VAL | X | 112 | 34.285 | 42.132 | 35.300 | 0.00 | 0.00 |
| ATOM | 1748 | HG22 | VAL | X | 112 | 34.892 | 43.457 | 34.322 | 0.00 | 0.00 |
| ATOM | 1749 | HG23 | VAL | X | 112 | 34.377 | 43.655 | 36.060 | 0.00 | 0.00 |
| ATOM | 1750 | C    | VAL | X | 112 | 38.546 | 41.903 | 35.990 | 0.00 | 0.00 |
| ATOM | 1751 | O    | VAL | X | 112 | 38.544 | 41.429 | 37.101 | 0.00 | 0.00 |
| ATOM | 1752 | N    | TRP | X | 113 | 39.609 | 42.469 | 35.384 | 0.00 | 0.00 |
| ATOM | 1753 | H    | TRP | X | 113 | 39.354 | 42.879 | 34.497 | 0.00 | 0.00 |
| ATOM | 1754 | CA   | TRP | X | 113 | 40.945 | 42.461 | 35.903 | 0.00 | 0.00 |
| ATOM | 1755 | HA   | TRP | X | 113 | 41.034 | 41.547 | 36.491 | 0.00 | 0.00 |
| ATOM | 1756 | CB   | TRP | X | 113 | 41.944 | 42.529 | 34.701 | 0.00 | 0.00 |
| ATOM | 1757 | HB2  | TRP | X | 113 | 41.691 | 41.622 | 34.152 | 0.00 | 0.00 |
| ATOM | 1758 | HB3  | TRP | X | 113 | 41.808 | 43.389 | 34.044 | 0.00 | 0.00 |
| ATOM | 1759 | CG   | TRP | X | 113 | 43.360 | 42.396 | 35.233 | 0.00 | 0.00 |
| ATOM | 1760 | CD1  | TRP | X | 113 | 44.273 | 43.432 | 35.322 | 0.00 | 0.00 |
| ATOM | 1761 | HD1  | TRP | X | 113 | 44.072 | 44.450 | 35.022 | 0.00 | 0.00 |
| ATOM | 1762 | NE1  | TRP | X | 113 | 45.417 | 42.953 | 35.895 | 0.00 | 0.00 |
| ATOM | 1763 | HE1  | TRP | X | 113 | 46.302 | 43.414 | 36.051 | 0.00 | 0.00 |
| ATOM | 1764 | CE2  | TRP | X | 113 | 45.257 | 41.649 | 36.304 | 0.00 | 0.00 |
| ATOM | 1765 | CZ2  | TRP | X | 113 | 46.133 | 40.846 | 37.065 | 0.00 | 0.00 |
| ATOM | 1766 | HZ2  | TRP | X | 113 | 47.092 | 41.154 | 37.455 | 0.00 | 0.00 |
| ATOM | 1767 | CH2  | TRP | X | 113 | 45.780 | 39.453 | 37.148 | 0.00 | 0.00 |

|      |      |      |     |   |     |        |        |        |      |      |
|------|------|------|-----|---|-----|--------|--------|--------|------|------|
| ATOM | 1768 | HH2  | TRP | X | 113 | 46.481 | 38.813 | 37.665 | 0.00 | 0.00 |
| ATOM | 1769 | CZ3  | TRP | X | 113 | 44.525 | 38.968 | 36.613 | 0.00 | 0.00 |
| ATOM | 1770 | HZ3  | TRP | X | 113 | 44.225 | 37.937 | 36.728 | 0.00 | 0.00 |
| ATOM | 1771 | CE3  | TRP | X | 113 | 43.606 | 39.834 | 36.038 | 0.00 | 0.00 |
| ATOM | 1772 | HE3  | TRP | X | 113 | 42.641 | 39.494 | 35.693 | 0.00 | 0.00 |
| ATOM | 1773 | CD2  | TRP | X | 113 | 43.969 | 41.230 | 35.836 | 0.00 | 0.00 |
| ATOM | 1774 | C    | TRP | X | 113 | 41.247 | 43.643 | 36.857 | 0.00 | 0.00 |
| ATOM | 1775 | O    | TRP | X | 113 | 41.046 | 44.810 | 36.552 | 0.00 | 0.00 |
| ATOM | 1776 | N    | ILE | X | 114 | 41.867 | 43.302 | 37.971 | 0.00 | 0.00 |
| ATOM | 1777 | H    | ILE | X | 114 | 42.105 | 42.321 | 37.988 | 0.00 | 0.00 |
| ATOM | 1778 | CA   | ILE | X | 114 | 42.498 | 44.217 | 38.918 | 0.00 | 0.00 |
| ATOM | 1779 | HA   | ILE | X | 114 | 42.427 | 45.236 | 38.537 | 0.00 | 0.00 |
| ATOM | 1780 | CB   | ILE | X | 114 | 41.720 | 44.238 | 40.235 | 0.00 | 0.00 |
| ATOM | 1781 | HB   | ILE | X | 114 | 41.927 | 43.317 | 40.780 | 0.00 | 0.00 |
| ATOM | 1782 | CG2  | ILE | X | 114 | 42.196 | 45.423 | 41.110 | 0.00 | 0.00 |
| ATOM | 1783 | HG21 | ILE | X | 114 | 41.626 | 45.308 | 42.032 | 0.00 | 0.00 |
| ATOM | 1784 | HG22 | ILE | X | 114 | 42.019 | 46.395 | 40.649 | 0.00 | 0.00 |
| ATOM | 1785 | HG23 | ILE | X | 114 | 43.246 | 45.378 | 41.401 | 0.00 | 0.00 |
| ATOM | 1786 | CG1  | ILE | X | 114 | 40.172 | 44.148 | 40.039 | 0.00 | 0.00 |
| ATOM | 1787 | HG12 | ILE | X | 114 | 39.955 | 45.110 | 39.574 | 0.00 | 0.00 |
| ATOM | 1788 | HG13 | ILE | X | 114 | 39.895 | 43.303 | 39.409 | 0.00 | 0.00 |
| ATOM | 1789 | CD1  | ILE | X | 114 | 39.372 | 44.122 | 41.316 | 0.00 | 0.00 |
| ATOM | 1790 | HD11 | ILE | X | 114 | 39.160 | 45.141 | 41.639 | 0.00 | 0.00 |
| ATOM | 1791 | HD12 | ILE | X | 114 | 39.895 | 43.519 | 42.059 | 0.00 | 0.00 |
| ATOM | 1792 | HD13 | ILE | X | 114 | 38.519 | 43.477 | 41.107 | 0.00 | 0.00 |
| ATOM | 1793 | C    | ILE | X | 114 | 43.992 | 43.856 | 39.160 | 0.00 | 0.00 |
| ATOM | 1794 | O    | ILE | X | 114 | 44.321 | 42.711 | 39.299 | 0.00 | 0.00 |
| ATOM | 1795 | N    | TYR | X | 115 | 44.866 | 44.820 | 38.980 | 0.00 | 0.00 |
| ATOM | 1796 | H    | TYR | X | 115 | 44.519 | 45.754 | 38.813 | 0.00 | 0.00 |
| ATOM | 1797 | CA   | TYR | X | 115 | 46.353 | 44.605 | 39.000 | 0.00 | 0.00 |
| ATOM | 1798 | HA   | TYR | X | 115 | 46.553 | 43.557 | 38.777 | 0.00 | 0.00 |
| ATOM | 1799 | CB   | TYR | X | 115 | 46.985 | 45.493 | 37.942 | 0.00 | 0.00 |
| ATOM | 1800 | HB2  | TYR | X | 115 | 48.060 | 45.317 | 37.886 | 0.00 | 0.00 |
| ATOM | 1801 | HB3  | TYR | X | 115 | 46.645 | 45.102 | 36.983 | 0.00 | 0.00 |
| ATOM | 1802 | CG   | TYR | X | 115 | 46.618 | 47.016 | 37.837 | 0.00 | 0.00 |
| ATOM | 1803 | CD1  | TYR | X | 115 | 47.108 | 47.896 | 38.784 | 0.00 | 0.00 |
| ATOM | 1804 | HD1  | TYR | X | 115 | 47.715 | 47.546 | 39.606 | 0.00 | 0.00 |
| ATOM | 1805 | CE1  | TYR | X | 115 | 46.884 | 49.246 | 38.649 | 0.00 | 0.00 |
| ATOM | 1806 | HE1  | TYR | X | 115 | 47.317 | 49.900 | 39.391 | 0.00 | 0.00 |
| ATOM | 1807 | CZ   | TYR | X | 115 | 46.137 | 49.834 | 37.627 | 0.00 | 0.00 |
| ATOM | 1808 | OH   | TYR | X | 115 | 45.889 | 51.170 | 37.539 | 0.00 | 0.00 |
| ATOM | 1809 | HH   | TYR | X | 115 | 46.072 | 51.676 | 38.335 | 0.00 | 0.00 |
| ATOM | 1810 | CE2  | TYR | X | 115 | 45.589 | 48.916 | 36.669 | 0.00 | 0.00 |
| ATOM | 1811 | HE2  | TYR | X | 115 | 45.005 | 49.324 | 35.857 | 0.00 | 0.00 |
| ATOM | 1812 | CD2  | TYR | X | 115 | 45.842 | 47.522 | 36.772 | 0.00 | 0.00 |
| ATOM | 1813 | HD2  | TYR | X | 115 | 45.453 | 46.824 | 36.046 | 0.00 | 0.00 |
| ATOM | 1814 | C    | TYR | X | 115 | 47.009 | 44.696 | 40.407 | 0.00 | 0.00 |
| ATOM | 1815 | O    | TYR | X | 115 | 46.606 | 45.529 | 41.219 | 0.00 | 0.00 |
| ATOM | 1816 | N    | GLY | X | 116 | 48.134 | 43.976 | 40.605 | 0.00 | 0.00 |
| ATOM | 1817 | H    | GLY | X | 116 | 48.374 | 43.319 | 39.877 | 0.00 | 0.00 |
| ATOM | 1818 | CA   | GLY | X | 116 | 49.107 | 44.072 | 41.728 | 0.00 | 0.00 |
| ATOM | 1819 | HA2  | GLY | X | 116 | 48.691 | 44.398 | 42.681 | 0.00 | 0.00 |
| ATOM | 1820 | HA3  | GLY | X | 116 | 49.527 | 43.089 | 41.939 | 0.00 | 0.00 |
| ATOM | 1821 | C    | GLY | X | 116 | 50.247 | 45.089 | 41.424 | 0.00 | 0.00 |
| ATOM | 1822 | O    | GLY | X | 116 | 50.172 | 45.834 | 40.393 | 0.00 | 0.00 |
| ATOM | 1823 | N    | GLY | X | 117 | 51.268 | 45.192 | 42.306 | 0.00 | 0.00 |
| ATOM | 1824 | H    | GLY | X | 117 | 51.400 | 44.462 | 42.990 | 0.00 | 0.00 |
| ATOM | 1825 | CA   | GLY | X | 117 | 52.341 | 46.206 | 42.364 | 0.00 | 0.00 |
| ATOM | 1826 | HA2  | GLY | X | 117 | 53.279 | 45.654 | 42.311 | 0.00 | 0.00 |
| ATOM | 1827 | HA3  | GLY | X | 117 | 52.197 | 46.879 | 41.519 | 0.00 | 0.00 |
| ATOM | 1828 | C    | GLY | X | 117 | 52.524 | 46.922 | 43.673 | 0.00 | 0.00 |
| ATOM | 1829 | O    | GLY | X | 117 | 53.070 | 48.008 | 43.718 | 0.00 | 0.00 |
| ATOM | 1830 | N    | GLY | X | 118 | 52.156 | 46.217 | 44.776 | 0.00 | 0.00 |
| ATOM | 1831 | H    | GLY | X | 118 | 52.033 | 45.221 | 44.664 | 0.00 | 0.00 |
| ATOM | 1832 | CA   | GLY | X | 118 | 52.354 | 46.673 | 46.175 | 0.00 | 0.00 |
| ATOM | 1833 | HA2  | GLY | X | 118 | 52.489 | 45.840 | 46.866 | 0.00 | 0.00 |
| ATOM | 1834 | HA3  | GLY | X | 118 | 53.379 | 47.030 | 46.268 | 0.00 | 0.00 |

|      |      |     |     |   |     |        |        |        |      |      |
|------|------|-----|-----|---|-----|--------|--------|--------|------|------|
| ATOM | 1835 | C   | GLY | X | 118 | 51.465 | 47.803 | 46.831 | 0.00 | 0.00 |
| ATOM | 1836 | O   | GLY | X | 118 | 51.776 | 48.275 | 47.895 | 0.00 | 0.00 |
| ATOM | 1837 | N   | PHE | X | 119 | 50.394 | 48.113 | 46.109 | 0.00 | 0.00 |
| ATOM | 1838 | H   | PHE | X | 119 | 50.167 | 47.490 | 45.348 | 0.00 | 0.00 |
| ATOM | 1839 | CA  | PHE | X | 119 | 49.535 | 49.293 | 46.220 | 0.00 | 0.00 |
| ATOM | 1840 | HA  | PHE | X | 119 | 48.789 | 49.109 | 45.447 | 0.00 | 0.00 |
| ATOM | 1841 | CB  | PHE | X | 119 | 48.937 | 49.464 | 47.625 | 0.00 | 0.00 |
| ATOM | 1842 | HB2 | PHE | X | 119 | 49.742 | 49.504 | 48.359 | 0.00 | 0.00 |
| ATOM | 1843 | HB3 | PHE | X | 119 | 48.493 | 50.448 | 47.775 | 0.00 | 0.00 |
| ATOM | 1844 | CG  | PHE | X | 119 | 47.965 | 48.349 | 47.968 | 0.00 | 0.00 |
| ATOM | 1845 | CD1 | PHE | X | 119 | 46.718 | 48.347 | 47.306 | 0.00 | 0.00 |
| ATOM | 1846 | HD1 | PHE | X | 119 | 46.535 | 49.194 | 46.661 | 0.00 | 0.00 |
| ATOM | 1847 | CE1 | PHE | X | 119 | 45.678 | 47.400 | 47.604 | 0.00 | 0.00 |
| ATOM | 1848 | HE1 | PHE | X | 119 | 44.712 | 47.514 | 47.135 | 0.00 | 0.00 |
| ATOM | 1849 | CZ  | PHE | X | 119 | 46.023 | 46.366 | 48.477 | 0.00 | 0.00 |
| ATOM | 1850 | HZ  | PHE | X | 119 | 45.293 | 45.682 | 48.884 | 0.00 | 0.00 |
| ATOM | 1851 | CE2 | PHE | X | 119 | 47.242 | 46.298 | 49.072 | 0.00 | 0.00 |
| ATOM | 1852 | HE2 | PHE | X | 119 | 47.500 | 45.480 | 49.727 | 0.00 | 0.00 |
| ATOM | 1853 | CD2 | PHE | X | 119 | 48.219 | 47.255 | 48.789 | 0.00 | 0.00 |
| ATOM | 1854 | HD2 | PHE | X | 119 | 49.241 | 47.217 | 49.135 | 0.00 | 0.00 |
| ATOM | 1855 | C   | PHE | X | 119 | 50.287 | 50.589 | 45.790 | 0.00 | 0.00 |
| ATOM | 1856 | O   | PHE | X | 119 | 49.740 | 51.607 | 45.621 | 0.00 | 0.00 |
| ATOM | 1857 | N   | TYR | X | 120 | 51.600 | 50.632 | 45.741 | 0.00 | 0.00 |
| ATOM | 1858 | H   | TYR | X | 120 | 52.101 | 49.828 | 46.092 | 0.00 | 0.00 |
| ATOM | 1859 | CA  | TYR | X | 120 | 52.354 | 51.844 | 45.447 | 0.00 | 0.00 |
| ATOM | 1860 | HA  | TYR | X | 120 | 51.834 | 52.722 | 45.829 | 0.00 | 0.00 |
| ATOM | 1861 | CB  | TYR | X | 120 | 53.709 | 51.855 | 46.128 | 0.00 | 0.00 |
| ATOM | 1862 | HB2 | TYR | X | 120 | 54.202 | 52.806 | 45.931 | 0.00 | 0.00 |
| ATOM | 1863 | HB3 | TYR | X | 120 | 53.451 | 51.641 | 47.165 | 0.00 | 0.00 |
| ATOM | 1864 | CG  | TYR | X | 120 | 54.811 | 50.886 | 45.601 | 0.00 | 0.00 |
| ATOM | 1865 | CD1 | TYR | X | 120 | 55.928 | 51.359 | 44.777 | 0.00 | 0.00 |
| ATOM | 1866 | HD1 | TYR | X | 120 | 55.777 | 52.316 | 44.300 | 0.00 | 0.00 |
| ATOM | 1867 | CE1 | TYR | X | 120 | 57.058 | 50.565 | 44.537 | 0.00 | 0.00 |
| ATOM | 1868 | HE1 | TYR | X | 120 | 57.861 | 50.815 | 43.860 | 0.00 | 0.00 |
| ATOM | 1869 | CZ  | TYR | X | 120 | 57.146 | 49.284 | 45.126 | 0.00 | 0.00 |
| ATOM | 1870 | OH  | TYR | X | 120 | 58.229 | 48.456 | 44.799 | 0.00 | 0.00 |
| ATOM | 1871 | HH  | TYR | X | 120 | 58.106 | 47.597 | 45.210 | 0.00 | 0.00 |
| ATOM | 1872 | CE2 | TYR | X | 120 | 56.040 | 48.760 | 45.899 | 0.00 | 0.00 |
| ATOM | 1873 | HE2 | TYR | X | 120 | 56.120 | 47.783 | 46.353 | 0.00 | 0.00 |
| ATOM | 1874 | CD2 | TYR | X | 120 | 54.932 | 49.581 | 46.198 | 0.00 | 0.00 |
| ATOM | 1875 | HD2 | TYR | X | 120 | 54.024 | 49.215 | 46.654 | 0.00 | 0.00 |
| ATOM | 1876 | C   | TYR | X | 120 | 52.675 | 51.997 | 43.995 | 0.00 | 0.00 |
| ATOM | 1877 | O   | TYR | X | 120 | 53.053 | 53.080 | 43.568 | 0.00 | 0.00 |
| ATOM | 1878 | N   | SER | X | 121 | 52.592 | 50.887 | 43.235 | 0.00 | 0.00 |
| ATOM | 1879 | H   | SER | X | 121 | 51.973 | 50.211 | 43.660 | 0.00 | 0.00 |
| ATOM | 1880 | CA  | SER | X | 121 | 52.775 | 50.866 | 41.740 | 0.00 | 0.00 |
| ATOM | 1881 | HA  | SER | X | 121 | 52.593 | 51.845 | 41.296 | 0.00 | 0.00 |
| ATOM | 1882 | CB  | SER | X | 121 | 54.196 | 50.283 | 41.407 | 0.00 | 0.00 |
| ATOM | 1883 | HB2 | SER | X | 121 | 54.415 | 50.656 | 40.407 | 0.00 | 0.00 |
| ATOM | 1884 | HB3 | SER | X | 121 | 54.929 | 50.724 | 42.083 | 0.00 | 0.00 |
| ATOM | 1885 | OG  | SER | X | 121 | 54.211 | 48.894 | 41.530 | 0.00 | 0.00 |
| ATOM | 1886 | HG  | SER | X | 121 | 53.620 | 48.563 | 42.210 | 0.00 | 0.00 |
| ATOM | 1887 | C   | SER | X | 121 | 51.722 | 49.944 | 41.103 | 0.00 | 0.00 |
| ATOM | 1888 | O   | SER | X | 121 | 51.014 | 49.218 | 41.814 | 0.00 | 0.00 |
| ATOM | 1889 | N   | GLY | X | 122 | 51.718 | 49.912 | 39.766 | 0.00 | 0.00 |
| ATOM | 1890 | H   | GLY | X | 122 | 52.258 | 50.572 | 39.225 | 0.00 | 0.00 |
| ATOM | 1891 | CA  | GLY | X | 122 | 50.880 | 49.031 | 38.960 | 0.00 | 0.00 |
| ATOM | 1892 | HA2 | GLY | X | 122 | 51.532 | 48.401 | 38.356 | 0.00 | 0.00 |
| ATOM | 1893 | HA3 | GLY | X | 122 | 50.146 | 48.471 | 39.540 | 0.00 | 0.00 |
| ATOM | 1894 | C   | GLY | X | 122 | 50.043 | 49.817 | 38.006 | 0.00 | 0.00 |
| ATOM | 1895 | O   | GLY | X | 122 | 49.608 | 50.924 | 38.357 | 0.00 | 0.00 |
| ATOM | 1896 | N   | ALA | X | 123 | 49.656 | 49.106 | 36.896 | 0.00 | 0.00 |
| ATOM | 1897 | H   | ALA | X | 123 | 49.751 | 48.102 | 36.844 | 0.00 | 0.00 |
| ATOM | 1898 | CA  | ALA | X | 123 | 49.095 | 49.824 | 35.818 | 0.00 | 0.00 |
| ATOM | 1899 | HA  | ALA | X | 123 | 48.293 | 50.503 | 36.107 | 0.00 | 0.00 |
| ATOM | 1900 | CB  | ALA | X | 123 | 50.132 | 50.738 | 35.144 | 0.00 | 0.00 |
| ATOM | 1901 | HB1 | ALA | X | 123 | 50.454 | 51.526 | 35.825 | 0.00 | 0.00 |

|      |      |      |     |   |     |        |        |        |      |      |
|------|------|------|-----|---|-----|--------|--------|--------|------|------|
| ATOM | 1902 | HB2  | ALA | X | 123 | 49.773 | 51.088 | 34.176 | 0.00 | 0.00 |
| ATOM | 1903 | HB3  | ALA | X | 123 | 50.954 | 50.038 | 34.993 | 0.00 | 0.00 |
| ATOM | 1904 | C    | ALA | X | 123 | 48.339 | 48.865 | 34.778 | 0.00 | 0.00 |
| ATOM | 1905 | O    | ALA | X | 123 | 48.709 | 47.686 | 34.682 | 0.00 | 0.00 |
| ATOM | 1906 | N    | SER | X | 124 | 47.356 | 49.338 | 34.009 | 0.00 | 0.00 |
| ATOM | 1907 | H    | SER | X | 124 | 47.038 | 50.293 | 34.092 | 0.00 | 0.00 |
| ATOM | 1908 | CA   | SER | X | 124 | 46.620 | 48.449 | 33.047 | 0.00 | 0.00 |
| ATOM | 1909 | HA   | SER | X | 124 | 46.267 | 47.569 | 33.585 | 0.00 | 0.00 |
| ATOM | 1910 | CB   | SER | X | 124 | 45.366 | 49.185 | 32.516 | 0.00 | 0.00 |
| ATOM | 1911 | HB2  | SER | X | 124 | 45.134 | 48.626 | 31.609 | 0.00 | 0.00 |
| ATOM | 1912 | HB3  | SER | X | 124 | 44.612 | 49.013 | 33.283 | 0.00 | 0.00 |
| ATOM | 1913 | OG   | SER | X | 124 | 45.616 | 50.559 | 32.165 | 0.00 | 0.00 |
| ATOM | 1914 | HG   | SER | X | 124 | 45.462 | 51.022 | 32.992 | 0.00 | 0.00 |
| ATOM | 1915 | C    | SER | X | 124 | 47.452 | 47.994 | 31.788 | 0.00 | 0.00 |
| ATOM | 1916 | O    | SER | X | 124 | 47.235 | 46.869 | 31.303 | 0.00 | 0.00 |
| ATOM | 1917 | N    | SER | X | 125 | 48.317 | 48.809 | 31.211 | 0.00 | 0.00 |
| ATOM | 1918 | H    | SER | X | 125 | 48.566 | 49.656 | 31.701 | 0.00 | 0.00 |
| ATOM | 1919 | CA   | SER | X | 125 | 48.937 | 48.765 | 29.893 | 0.00 | 0.00 |
| ATOM | 1920 | HA   | SER | X | 125 | 48.237 | 48.373 | 29.155 | 0.00 | 0.00 |
| ATOM | 1921 | CB   | SER | X | 125 | 49.353 | 50.160 | 29.312 | 0.00 | 0.00 |
| ATOM | 1922 | HB2  | SER | X | 125 | 49.712 | 50.068 | 28.287 | 0.00 | 0.00 |
| ATOM | 1923 | HB3  | SER | X | 125 | 48.493 | 50.827 | 29.366 | 0.00 | 0.00 |
| ATOM | 1924 | OG   | SER | X | 125 | 50.356 | 50.834 | 30.157 | 0.00 | 0.00 |
| ATOM | 1925 | HG   | SER | X | 125 | 51.241 | 50.520 | 29.959 | 0.00 | 0.00 |
| ATOM | 1926 | C    | SER | X | 125 | 50.084 | 47.745 | 29.931 | 0.00 | 0.00 |
| ATOM | 1927 | O    | SER | X | 125 | 50.624 | 47.543 | 28.931 | 0.00 | 0.00 |
| ATOM | 1928 | N    | LEU | X | 126 | 50.388 | 47.225 | 31.099 | 0.00 | 0.00 |
| ATOM | 1929 | H    | LEU | X | 126 | 49.734 | 47.407 | 31.847 | 0.00 | 0.00 |
| ATOM | 1930 | CA   | LEU | X | 126 | 51.556 | 46.376 | 31.328 | 0.00 | 0.00 |
| ATOM | 1931 | HA   | LEU | X | 126 | 52.381 | 46.983 | 30.955 | 0.00 | 0.00 |
| ATOM | 1932 | CB   | LEU | X | 126 | 51.824 | 46.084 | 32.826 | 0.00 | 0.00 |
| ATOM | 1933 | HB2  | LEU | X | 126 | 50.995 | 45.506 | 33.235 | 0.00 | 0.00 |
| ATOM | 1934 | HB3  | LEU | X | 126 | 52.762 | 45.537 | 32.918 | 0.00 | 0.00 |
| ATOM | 1935 | CG   | LEU | X | 126 | 51.998 | 47.413 | 33.605 | 0.00 | 0.00 |
| ATOM | 1936 | HG   | LEU | X | 126 | 51.026 | 47.903 | 33.549 | 0.00 | 0.00 |
| ATOM | 1937 | CD1  | LEU | X | 126 | 52.204 | 47.093 | 35.118 | 0.00 | 0.00 |
| ATOM | 1938 | HD11 | LEU | X | 126 | 53.173 | 46.595 | 35.163 | 0.00 | 0.00 |
| ATOM | 1939 | HD12 | LEU | X | 126 | 51.428 | 46.430 | 35.500 | 0.00 | 0.00 |
| ATOM | 1940 | HD13 | LEU | X | 126 | 52.229 | 48.097 | 35.541 | 0.00 | 0.00 |
| ATOM | 1941 | CD2  | LEU | X | 126 | 53.281 | 48.237 | 33.137 | 0.00 | 0.00 |
| ATOM | 1942 | HD21 | LEU | X | 126 | 53.505 | 49.091 | 33.777 | 0.00 | 0.00 |
| ATOM | 1943 | HD22 | LEU | X | 126 | 54.117 | 47.550 | 33.005 | 0.00 | 0.00 |
| ATOM | 1944 | HD23 | LEU | X | 126 | 53.092 | 48.539 | 32.107 | 0.00 | 0.00 |
| ATOM | 1945 | C    | LEU | X | 126 | 51.570 | 45.145 | 30.505 | 0.00 | 0.00 |
| ATOM | 1946 | O    | LEU | X | 126 | 50.489 | 44.597 | 30.220 | 0.00 | 0.00 |
| ATOM | 1947 | N    | ASP | X | 127 | 52.802 | 44.623 | 30.191 | 0.00 | 0.00 |
| ATOM | 1948 | H    | ASP | X | 127 | 53.575 | 44.972 | 30.739 | 0.00 | 0.00 |
| ATOM | 1949 | CA   | ASP | X | 127 | 53.058 | 43.742 | 29.001 | 0.00 | 0.00 |
| ATOM | 1950 | HA   | ASP | X | 127 | 52.329 | 43.987 | 28.228 | 0.00 | 0.00 |
| ATOM | 1951 | CB   | ASP | X | 127 | 54.437 | 43.962 | 28.380 | 0.00 | 0.00 |
| ATOM | 1952 | HB2  | ASP | X | 127 | 54.717 | 45.016 | 28.377 | 0.00 | 0.00 |
| ATOM | 1953 | HB3  | ASP | X | 127 | 55.186 | 43.476 | 29.005 | 0.00 | 0.00 |
| ATOM | 1954 | CG   | ASP | X | 127 | 54.628 | 43.443 | 27.025 | 0.00 | 0.00 |
| ATOM | 1955 | OD1  | ASP | X | 127 | 53.735 | 43.718 | 26.178 | 0.00 | 0.00 |
| ATOM | 1956 | OD2  | ASP | X | 127 | 55.649 | 42.863 | 26.724 | 0.00 | 0.00 |
| ATOM | 1957 | C    | ASP | X | 127 | 52.816 | 42.310 | 29.320 | 0.00 | 0.00 |
| ATOM | 1958 | O    | ASP | X | 127 | 53.639 | 41.468 | 28.992 | 0.00 | 0.00 |
| ATOM | 1959 | N    | VAL | X | 128 | 51.730 | 42.097 | 30.081 | 0.00 | 0.00 |
| ATOM | 1960 | H    | VAL | X | 128 | 51.126 | 42.897 | 30.204 | 0.00 | 0.00 |
| ATOM | 1961 | CA   | VAL | X | 128 | 51.242 | 40.771 | 30.403 | 0.00 | 0.00 |
| ATOM | 1962 | HA   | VAL | X | 128 | 51.425 | 40.064 | 29.594 | 0.00 | 0.00 |
| ATOM | 1963 | CB   | VAL | X | 128 | 51.845 | 40.235 | 31.687 | 0.00 | 0.00 |
| ATOM | 1964 | HB   | VAL | X | 128 | 52.934 | 40.237 | 31.643 | 0.00 | 0.00 |
| ATOM | 1965 | CG1  | VAL | X | 128 | 51.555 | 41.109 | 32.912 | 0.00 | 0.00 |
| ATOM | 1966 | HG11 | VAL | X | 128 | 51.811 | 42.148 | 32.704 | 0.00 | 0.00 |
| ATOM | 1967 | HG12 | VAL | X | 128 | 50.519 | 40.867 | 33.149 | 0.00 | 0.00 |
| ATOM | 1968 | HG13 | VAL | X | 128 | 52.236 | 40.788 | 33.701 | 0.00 | 0.00 |



|      |      |      |     |   |     |        |        |        |      |      |
|------|------|------|-----|---|-----|--------|--------|--------|------|------|
| ATOM | 1969 | CG2  | VAL | X | 128 | 51.495 | 38.778 | 32.184 | 0.00 | 0.00 |
| ATOM | 1970 | HG21 | VAL | X | 128 | 50.430 | 38.734 | 32.410 | 0.00 | 0.00 |
| ATOM | 1971 | HG22 | VAL | X | 128 | 52.158 | 38.494 | 33.001 | 0.00 | 0.00 |
| ATOM | 1972 | HG23 | VAL | X | 128 | 51.751 | 38.115 | 31.358 | 0.00 | 0.00 |
| ATOM | 1973 | C    | VAL | X | 128 | 49.774 | 40.826 | 30.497 | 0.00 | 0.00 |
| ATOM | 1974 | O    | VAL | X | 128 | 49.154 | 39.817 | 30.238 | 0.00 | 0.00 |
| ATOM | 1975 | N    | TYR | X | 129 | 49.146 | 42.004 | 30.713 | 0.00 | 0.00 |
| ATOM | 1976 | H    | TYR | X | 129 | 49.761 | 42.796 | 30.834 | 0.00 | 0.00 |
| ATOM | 1977 | CA   | TYR | X | 129 | 47.631 | 42.151 | 30.876 | 0.00 | 0.00 |
| ATOM | 1978 | HA   | TYR | X | 129 | 47.155 | 41.253 | 31.269 | 0.00 | 0.00 |
| ATOM | 1979 | CB   | TYR | X | 129 | 47.384 | 43.240 | 31.941 | 0.00 | 0.00 |
| ATOM | 1980 | HB2  | TYR | X | 129 | 47.558 | 44.233 | 31.525 | 0.00 | 0.00 |
| ATOM | 1981 | HB3  | TYR | X | 129 | 46.313 | 43.302 | 32.134 | 0.00 | 0.00 |
| ATOM | 1982 | CG   | TYR | X | 129 | 47.986 | 43.087 | 33.267 | 0.00 | 0.00 |
| ATOM | 1983 | CD1  | TYR | X | 129 | 48.098 | 41.856 | 33.936 | 0.00 | 0.00 |
| ATOM | 1984 | HD1  | TYR | X | 129 | 47.690 | 40.958 | 33.497 | 0.00 | 0.00 |
| ATOM | 1985 | CE1  | TYR | X | 129 | 48.706 | 41.825 | 35.214 | 0.00 | 0.00 |
| ATOM | 1986 | HE1  | TYR | X | 129 | 48.821 | 40.869 | 35.703 | 0.00 | 0.00 |
| ATOM | 1987 | CZ   | TYR | X | 129 | 49.085 | 43.025 | 35.816 | 0.00 | 0.00 |
| ATOM | 1988 | OH   | TYR | X | 129 | 49.554 | 43.014 | 37.111 | 0.00 | 0.00 |
| ATOM | 1989 | HH   | TYR | X | 129 | 49.761 | 42.149 | 37.470 | 0.00 | 0.00 |
| ATOM | 1990 | CE2  | TYR | X | 129 | 48.968 | 44.252 | 35.155 | 0.00 | 0.00 |
| ATOM | 1991 | HE2  | TYR | X | 129 | 49.238 | 45.101 | 35.765 | 0.00 | 0.00 |
| ATOM | 1992 | CD2  | TYR | X | 129 | 48.457 | 44.311 | 33.899 | 0.00 | 0.00 |
| ATOM | 1993 | HD2  | TYR | X | 129 | 48.381 | 45.274 | 33.416 | 0.00 | 0.00 |
| ATOM | 1994 | C    | TYR | X | 129 | 47.025 | 42.410 | 29.438 | 0.00 | 0.00 |
| ATOM | 1995 | O    | TYR | X | 129 | 46.618 | 43.562 | 29.222 | 0.00 | 0.00 |
| ATOM | 1996 | N    | ASP | X | 130 | 46.787 | 41.419 | 28.611 | 0.00 | 0.00 |
| ATOM | 1997 | H    | ASP | X | 130 | 47.040 | 40.490 | 28.915 | 0.00 | 0.00 |
| ATOM | 1998 | CA   | ASP | X | 130 | 45.963 | 41.525 | 27.403 | 0.00 | 0.00 |
| ATOM | 1999 | HA   | ASP | X | 130 | 45.415 | 42.466 | 27.448 | 0.00 | 0.00 |
| ATOM | 2000 | CB   | ASP | X | 130 | 46.849 | 41.908 | 26.176 | 0.00 | 0.00 |
| ATOM | 2001 | HB2  | ASP | X | 130 | 47.580 | 42.693 | 26.370 | 0.00 | 0.00 |
| ATOM | 2002 | HB3  | ASP | X | 130 | 47.533 | 41.072 | 26.028 | 0.00 | 0.00 |
| ATOM | 2003 | CG   | ASP | X | 130 | 45.891 | 42.168 | 24.917 | 0.00 | 0.00 |
| ATOM | 2004 | OD1  | ASP | X | 130 | 45.102 | 41.265 | 24.456 | 0.00 | 0.00 |
| ATOM | 2005 | OD2  | ASP | X | 130 | 45.923 | 43.345 | 24.391 | 0.00 | 0.00 |
| ATOM | 2006 | C    | ASP | X | 130 | 44.999 | 40.329 | 27.206 | 0.00 | 0.00 |
| ATOM | 2007 | O    | ASP | X | 130 | 45.396 | 39.165 | 27.069 | 0.00 | 0.00 |
| ATOM | 2008 | N    | GLY | X | 131 | 43.700 | 40.544 | 27.034 | 0.00 | 0.00 |
| ATOM | 2009 | H    | GLY | X | 131 | 43.420 | 41.514 | 27.068 | 0.00 | 0.00 |
| ATOM | 2010 | CA   | GLY | X | 131 | 42.725 | 39.490 | 26.945 | 0.00 | 0.00 |
| ATOM | 2011 | HA2  | GLY | X | 131 | 42.981 | 38.790 | 27.741 | 0.00 | 0.00 |
| ATOM | 2012 | HA3  | GLY | X | 131 | 41.745 | 39.907 | 27.177 | 0.00 | 0.00 |
| ATOM | 2013 | C    | GLY | X | 131 | 42.516 | 38.699 | 25.677 | 0.00 | 0.00 |
| ATOM | 2014 | O    | GLY | X | 131 | 41.667 | 37.852 | 25.744 | 0.00 | 0.00 |
| ATOM | 2015 | N    | ARG | X | 132 | 43.199 | 39.049 | 24.634 | 0.00 | 0.00 |
| ATOM | 2016 | H    | ARG | X | 132 | 43.785 | 39.858 | 24.787 | 0.00 | 0.00 |
| ATOM | 2017 | CA   | ARG | X | 132 | 42.997 | 38.476 | 23.287 | 0.00 | 0.00 |
| ATOM | 2018 | HA   | ARG | X | 132 | 42.000 | 38.824 | 23.019 | 0.00 | 0.00 |
| ATOM | 2019 | CB   | ARG | X | 132 | 43.858 | 39.132 | 22.213 | 0.00 | 0.00 |
| ATOM | 2020 | HB2  | ARG | X | 132 | 43.536 | 38.707 | 21.262 | 0.00 | 0.00 |
| ATOM | 2021 | HB3  | ARG | X | 132 | 43.623 | 40.195 | 22.263 | 0.00 | 0.00 |
| ATOM | 2022 | CG   | ARG | X | 132 | 45.431 | 38.878 | 22.344 | 0.00 | 0.00 |
| ATOM | 2023 | HG2  | ARG | X | 132 | 45.669 | 38.991 | 23.402 | 0.00 | 0.00 |
| ATOM | 2024 | HG3  | ARG | X | 132 | 45.564 | 37.820 | 22.119 | 0.00 | 0.00 |
| ATOM | 2025 | CD   | ARG | X | 132 | 46.368 | 39.691 | 21.441 | 0.00 | 0.00 |
| ATOM | 2026 | HD2  | ARG | X | 132 | 47.286 | 39.116 | 21.316 | 0.00 | 0.00 |
| ATOM | 2027 | HD3  | ARG | X | 132 | 45.955 | 39.784 | 20.436 | 0.00 | 0.00 |
| ATOM | 2028 | NE   | ARG | X | 132 | 46.532 | 41.031 | 22.003 | 0.00 | 0.00 |
| ATOM | 2029 | HE   | ARG | X | 132 | 46.053 | 41.204 | 22.875 | 0.00 | 0.00 |
| ATOM | 2030 | CZ   | ARG | X | 132 | 47.136 | 42.066 | 21.343 | 0.00 | 0.00 |
| ATOM | 2031 | NH1  | ARG | X | 132 | 47.752 | 41.912 | 20.168 | 0.00 | 0.00 |
| ATOM | 2032 | HH11 | ARG | X | 132 | 47.584 | 41.083 | 19.617 | 0.00 | 0.00 |
| ATOM | 2033 | HH12 | ARG | X | 132 | 48.274 | 42.636 | 19.694 | 0.00 | 0.00 |
| ATOM | 2034 | NH2  | ARG | X | 132 | 47.253 | 43.254 | 21.897 | 0.00 | 0.00 |
| ATOM | 2035 | HH21 | ARG | X | 132 | 46.879 | 43.420 | 22.821 | 0.00 | 0.00 |

|      |      |      |     |   |     |        |        |        |      |      |
|------|------|------|-----|---|-----|--------|--------|--------|------|------|
| ATOM | 2036 | HH22 | ARG | X | 132 | 47.905 | 43.928 | 21.522 | 0.00 | 0.00 |
| ATOM | 2037 | C    | ARG | X | 132 | 42.909 | 36.932 | 23.206 | 0.00 | 0.00 |
| ATOM | 2038 | O    | ARG | X | 132 | 41.898 | 36.370 | 22.820 | 0.00 | 0.00 |
| ATOM | 2039 | N    | PHE | X | 133 | 43.997 | 36.215 | 23.634 | 0.00 | 0.00 |
| ATOM | 2040 | H    | PHE | X | 133 | 44.766 | 36.707 | 24.066 | 0.00 | 0.00 |
| ATOM | 2041 | CA   | PHE | X | 133 | 44.028 | 34.744 | 23.329 | 0.00 | 0.00 |
| ATOM | 2042 | HA   | PHE | X | 133 | 43.886 | 34.587 | 22.260 | 0.00 | 0.00 |
| ATOM | 2043 | CB   | PHE | X | 133 | 45.374 | 34.204 | 23.804 | 0.00 | 0.00 |
| ATOM | 2044 | HB2  | PHE | X | 133 | 45.562 | 34.307 | 24.873 | 0.00 | 0.00 |
| ATOM | 2045 | HB3  | PHE | X | 133 | 45.317 | 33.123 | 23.684 | 0.00 | 0.00 |
| ATOM | 2046 | CG   | PHE | X | 133 | 46.568 | 34.668 | 22.966 | 0.00 | 0.00 |
| ATOM | 2047 | CD1  | PHE | X | 133 | 47.493 | 35.437 | 23.564 | 0.00 | 0.00 |
| ATOM | 2048 | HD1  | PHE | X | 133 | 47.391 | 35.775 | 24.584 | 0.00 | 0.00 |
| ATOM | 2049 | CE1  | PHE | X | 133 | 48.640 | 35.815 | 22.865 | 0.00 | 0.00 |
| ATOM | 2050 | HE1  | PHE | X | 133 | 49.288 | 36.516 | 23.372 | 0.00 | 0.00 |
| ATOM | 2051 | CZ   | PHE | X | 133 | 48.897 | 35.340 | 21.537 | 0.00 | 0.00 |
| ATOM | 2052 | HZ   | PHE | X | 133 | 49.804 | 35.597 | 21.010 | 0.00 | 0.00 |
| ATOM | 2053 | CE2  | PHE | X | 133 | 47.941 | 34.482 | 20.927 | 0.00 | 0.00 |
| ATOM | 2054 | HE2  | PHE | X | 133 | 48.164 | 34.090 | 19.946 | 0.00 | 0.00 |
| ATOM | 2055 | CD2  | PHE | X | 133 | 46.765 | 34.177 | 21.653 | 0.00 | 0.00 |
| ATOM | 2056 | HD2  | PHE | X | 133 | 46.076 | 33.494 | 21.179 | 0.00 | 0.00 |
| ATOM | 2057 | C    | PHE | X | 133 | 42.993 | 33.986 | 24.138 | 0.00 | 0.00 |
| ATOM | 2058 | O    | PHE | X | 133 | 42.396 | 33.128 | 23.553 | 0.00 | 0.00 |
| ATOM | 2059 | N    | LEU | X | 134 | 42.683 | 34.345 | 25.416 | 0.00 | 0.00 |
| ATOM | 2060 | H    | LEU | X | 134 | 43.298 | 35.014 | 25.856 | 0.00 | 0.00 |
| ATOM | 2061 | CA   | LEU | X | 134 | 41.526 | 33.825 | 26.230 | 0.00 | 0.00 |
| ATOM | 2062 | HA   | LEU | X | 134 | 41.911 | 32.810 | 26.331 | 0.00 | 0.00 |
| ATOM | 2063 | CB   | LEU | X | 134 | 41.576 | 34.463 | 27.661 | 0.00 | 0.00 |
| ATOM | 2064 | HB2  | LEU | X | 134 | 42.498 | 34.276 | 28.212 | 0.00 | 0.00 |
| ATOM | 2065 | HB3  | LEU | X | 134 | 41.508 | 35.538 | 27.498 | 0.00 | 0.00 |
| ATOM | 2066 | CG   | LEU | X | 134 | 40.593 | 33.869 | 28.755 | 0.00 | 0.00 |
| ATOM | 2067 | HG   | LEU | X | 134 | 40.716 | 32.796 | 28.607 | 0.00 | 0.00 |
| ATOM | 2068 | CD1  | LEU | X | 134 | 40.979 | 34.190 | 30.212 | 0.00 | 0.00 |
| ATOM | 2069 | HD11 | LEU | X | 134 | 41.012 | 35.279 | 30.253 | 0.00 | 0.00 |
| ATOM | 2070 | HD12 | LEU | X | 134 | 41.986 | 33.884 | 30.497 | 0.00 | 0.00 |
| ATOM | 2071 | HD13 | LEU | X | 134 | 40.363 | 33.772 | 31.007 | 0.00 | 0.00 |
| ATOM | 2072 | CD2  | LEU | X | 134 | 39.130 | 34.324 | 28.512 | 0.00 | 0.00 |
| ATOM | 2073 | HD21 | LEU | X | 134 | 38.761 | 33.667 | 27.725 | 0.00 | 0.00 |
| ATOM | 2074 | HD22 | LEU | X | 134 | 38.569 | 34.286 | 29.446 | 0.00 | 0.00 |
| ATOM | 2075 | HD23 | LEU | X | 134 | 39.064 | 35.337 | 28.114 | 0.00 | 0.00 |
| ATOM | 2076 | C    | LEU | X | 134 | 40.185 | 33.940 | 25.402 | 0.00 | 0.00 |
| ATOM | 2077 | O    | LEU | X | 134 | 39.322 | 33.028 | 25.224 | 0.00 | 0.00 |
| ATOM | 2078 | N    | VAL | X | 135 | 39.913 | 35.188 | 25.003 | 0.00 | 0.00 |
| ATOM | 2079 | H    | VAL | X | 135 | 40.601 | 35.857 | 25.318 | 0.00 | 0.00 |
| ATOM | 2080 | CA   | VAL | X | 135 | 38.728 | 35.661 | 24.255 | 0.00 | 0.00 |
| ATOM | 2081 | HA   | VAL | X | 135 | 37.841 | 35.373 | 24.819 | 0.00 | 0.00 |
| ATOM | 2082 | CB   | VAL | X | 135 | 38.825 | 37.228 | 24.145 | 0.00 | 0.00 |
| ATOM | 2083 | HB   | VAL | X | 135 | 39.823 | 37.474 | 23.783 | 0.00 | 0.00 |
| ATOM | 2084 | CG1  | VAL | X | 135 | 37.798 | 37.662 | 23.062 | 0.00 | 0.00 |
| ATOM | 2085 | HG11 | VAL | X | 135 | 37.861 | 37.145 | 22.105 | 0.00 | 0.00 |
| ATOM | 2086 | HG12 | VAL | X | 135 | 36.780 | 37.392 | 23.344 | 0.00 | 0.00 |
| ATOM | 2087 | HG13 | VAL | X | 135 | 37.800 | 38.750 | 22.982 | 0.00 | 0.00 |
| ATOM | 2088 | CG2  | VAL | X | 135 | 38.558 | 37.872 | 25.551 | 0.00 | 0.00 |
| ATOM | 2089 | HG21 | VAL | X | 135 | 39.217 | 37.584 | 26.370 | 0.00 | 0.00 |
| ATOM | 2090 | HG22 | VAL | X | 135 | 37.506 | 37.736 | 25.803 | 0.00 | 0.00 |
| ATOM | 2091 | HG23 | VAL | X | 135 | 38.684 | 38.944 | 25.400 | 0.00 | 0.00 |
| ATOM | 2092 | C    | VAL | X | 135 | 38.507 | 34.889 | 22.929 | 0.00 | 0.00 |
| ATOM | 2093 | O    | VAL | X | 135 | 37.378 | 34.619 | 22.477 | 0.00 | 0.00 |
| ATOM | 2094 | N    | GLN | X | 136 | 39.626 | 34.516 | 22.252 | 0.00 | 0.00 |
| ATOM | 2095 | H    | GLN | X | 136 | 40.450 | 34.918 | 22.675 | 0.00 | 0.00 |
| ATOM | 2096 | CA   | GLN | X | 136 | 39.654 | 33.751 | 21.000 | 0.00 | 0.00 |
| ATOM | 2097 | HA   | GLN | X | 136 | 38.797 | 34.061 | 20.402 | 0.00 | 0.00 |
| ATOM | 2098 | CB   | GLN | X | 136 | 41.031 | 33.913 | 20.346 | 0.00 | 0.00 |
| ATOM | 2099 | HB2  | GLN | X | 136 | 41.281 | 34.968 | 20.461 | 0.00 | 0.00 |
| ATOM | 2100 | HB3  | GLN | X | 136 | 41.791 | 33.376 | 20.914 | 0.00 | 0.00 |
| ATOM | 2101 | CG   | GLN | X | 136 | 41.026 | 33.402 | 18.954 | 0.00 | 0.00 |
| ATOM | 2102 | HG2  | GLN | X | 136 | 40.081 | 33.734 | 18.526 | 0.00 | 0.00 |

|      |      |      |     |   |     |        |        |        |      |      |
|------|------|------|-----|---|-----|--------|--------|--------|------|------|
| ATOM | 2103 | HG3  | GLN | X | 136 | 41.922 | 33.785 | 18.466 | 0.00 | 0.00 |
| ATOM | 2104 | CD   | GLN | X | 136 | 41.188 | 31.855 | 18.798 | 0.00 | 0.00 |
| ATOM | 2105 | OE1  | GLN | X | 136 | 41.938 | 31.178 | 19.498 | 0.00 | 0.00 |
| ATOM | 2106 | NE2  | GLN | X | 136 | 40.490 | 31.239 | 17.852 | 0.00 | 0.00 |
| ATOM | 2107 | HE21 | GLN | X | 136 | 40.699 | 30.258 | 17.736 | 0.00 | 0.00 |
| ATOM | 2108 | HE22 | GLN | X | 136 | 39.733 | 31.740 | 17.410 | 0.00 | 0.00 |
| ATOM | 2109 | C    | GLN | X | 136 | 39.389 | 32.255 | 21.274 | 0.00 | 0.00 |
| ATOM | 2110 | O    | GLN | X | 136 | 38.801 | 31.540 | 20.489 | 0.00 | 0.00 |
| ATOM | 2111 | N    | ALA | X | 137 | 39.989 | 31.617 | 22.304 | 0.00 | 0.00 |
| ATOM | 2112 | H    | ALA | X | 137 | 40.590 | 32.224 | 22.843 | 0.00 | 0.00 |
| ATOM | 2113 | CA   | ALA | X | 137 | 39.831 | 30.233 | 22.722 | 0.00 | 0.00 |
| ATOM | 2114 | HA   | ALA | X | 137 | 40.022 | 29.572 | 21.877 | 0.00 | 0.00 |
| ATOM | 2115 | CB   | ALA | X | 137 | 40.894 | 29.924 | 23.808 | 0.00 | 0.00 |
| ATOM | 2116 | HB1  | ALA | X | 137 | 40.924 | 28.843 | 23.947 | 0.00 | 0.00 |
| ATOM | 2117 | HB2  | ALA | X | 137 | 40.573 | 30.436 | 24.714 | 0.00 | 0.00 |
| ATOM | 2118 | HB3  | ALA | X | 137 | 41.850 | 30.348 | 23.500 | 0.00 | 0.00 |
| ATOM | 2119 | C    | ALA | X | 137 | 38.419 | 29.965 | 23.345 | 0.00 | 0.00 |
| ATOM | 2120 | O    | ALA | X | 137 | 37.714 | 29.009 | 23.038 | 0.00 | 0.00 |
| ATOM | 2121 | N    | GLU | X | 138 | 37.893 | 30.929 | 24.153 | 0.00 | 0.00 |
| ATOM | 2122 | H    | GLU | X | 138 | 38.542 | 31.665 | 24.391 | 0.00 | 0.00 |
| ATOM | 2123 | CA   | GLU | X | 138 | 36.719 | 30.744 | 25.024 | 0.00 | 0.00 |
| ATOM | 2124 | HA   | GLU | X | 138 | 36.390 | 29.712 | 24.905 | 0.00 | 0.00 |
| ATOM | 2125 | CB   | GLU | X | 138 | 37.244 | 30.987 | 26.439 | 0.00 | 0.00 |
| ATOM | 2126 | HB2  | GLU | X | 138 | 37.572 | 32.026 | 26.402 | 0.00 | 0.00 |
| ATOM | 2127 | HB3  | GLU | X | 138 | 36.453 | 30.896 | 27.183 | 0.00 | 0.00 |
| ATOM | 2128 | CG   | GLU | X | 138 | 38.430 | 30.091 | 26.850 | 0.00 | 0.00 |
| ATOM | 2129 | HG2  | GLU | X | 138 | 39.430 | 30.339 | 26.496 | 0.00 | 0.00 |
| ATOM | 2130 | HG3  | GLU | X | 138 | 38.523 | 30.139 | 27.935 | 0.00 | 0.00 |
| ATOM | 2131 | CD   | GLU | X | 138 | 38.108 | 28.609 | 26.768 | 0.00 | 0.00 |
| ATOM | 2132 | OE1  | GLU | X | 138 | 37.031 | 28.243 | 27.333 | 0.00 | 0.00 |
| ATOM | 2133 | OE2  | GLU | X | 138 | 38.707 | 27.758 | 26.101 | 0.00 | 0.00 |
| ATOM | 2134 | C    | GLU | X | 138 | 35.505 | 31.536 | 24.749 | 0.00 | 0.00 |
| ATOM | 2135 | O    | GLU | X | 138 | 34.405 | 31.190 | 25.179 | 0.00 | 0.00 |
| ATOM | 2136 | N    | ARG | X | 139 | 35.639 | 32.672 | 24.054 | 0.00 | 0.00 |
| ATOM | 2137 | H    | ARG | X | 139 | 36.579 | 32.852 | 23.732 | 0.00 | 0.00 |
| ATOM | 2138 | CA   | ARG | X | 139 | 34.514 | 33.632 | 23.690 | 0.00 | 0.00 |
| ATOM | 2139 | HA   | ARG | X | 139 | 35.051 | 34.543 | 23.427 | 0.00 | 0.00 |
| ATOM | 2140 | CB   | ARG | X | 139 | 33.662 | 33.068 | 22.544 | 0.00 | 0.00 |
| ATOM | 2141 | HB2  | ARG | X | 139 | 33.057 | 32.242 | 22.918 | 0.00 | 0.00 |
| ATOM | 2142 | HB3  | ARG | X | 139 | 32.936 | 33.770 | 22.134 | 0.00 | 0.00 |
| ATOM | 2143 | CG   | ARG | X | 139 | 34.455 | 32.434 | 21.316 | 0.00 | 0.00 |
| ATOM | 2144 | HG2  | ARG | X | 139 | 35.161 | 33.178 | 20.947 | 0.00 | 0.00 |
| ATOM | 2145 | HG3  | ARG | X | 139 | 34.981 | 31.537 | 21.643 | 0.00 | 0.00 |
| ATOM | 2146 | CD   | ARG | X | 139 | 33.552 | 32.077 | 20.112 | 0.00 | 0.00 |
| ATOM | 2147 | HD2  | ARG | X | 139 | 34.113 | 31.502 | 19.375 | 0.00 | 0.00 |
| ATOM | 2148 | HD3  | ARG | X | 139 | 32.670 | 31.516 | 20.418 | 0.00 | 0.00 |
| ATOM | 2149 | NE   | ARG | X | 139 | 32.974 | 33.207 | 19.333 | 0.00 | 0.00 |
| ATOM | 2150 | HE   | ARG | X | 139 | 31.976 | 33.350 | 19.389 | 0.00 | 0.00 |
| ATOM | 2151 | CZ   | ARG | X | 139 | 33.596 | 33.875 | 18.391 | 0.00 | 0.00 |
| ATOM | 2152 | NH1  | ARG | X | 139 | 34.849 | 33.693 | 18.093 | 0.00 | 0.00 |
| ATOM | 2153 | HH11 | ARG | X | 139 | 35.293 | 32.865 | 18.464 | 0.00 | 0.00 |
| ATOM | 2154 | HH12 | ARG | X | 139 | 35.309 | 34.180 | 17.336 | 0.00 | 0.00 |
| ATOM | 2155 | NH2  | ARG | X | 139 | 33.060 | 34.771 | 17.675 | 0.00 | 0.00 |
| ATOM | 2156 | HH21 | ARG | X | 139 | 32.088 | 34.972 | 17.862 | 0.00 | 0.00 |
| ATOM | 2157 | HH22 | ARG | X | 139 | 33.534 | 35.155 | 16.871 | 0.00 | 0.00 |
| ATOM | 2158 | C    | ARG | X | 139 | 33.765 | 34.083 | 25.010 | 0.00 | 0.00 |
| ATOM | 2159 | O    | ARG | X | 139 | 32.538 | 34.178 | 24.963 | 0.00 | 0.00 |
| ATOM | 2160 | N    | THR | X | 140 | 34.466 | 34.231 | 26.142 | 0.00 | 0.00 |
| ATOM | 2161 | H    | THR | X | 140 | 35.472 | 34.170 | 26.089 | 0.00 | 0.00 |
| ATOM | 2162 | CA   | THR | X | 140 | 33.964 | 35.174 | 27.229 | 0.00 | 0.00 |
| ATOM | 2163 | HA   | THR | X | 140 | 32.895 | 34.992 | 27.339 | 0.00 | 0.00 |
| ATOM | 2164 | CB   | THR | X | 140 | 34.524 | 34.886 | 28.610 | 0.00 | 0.00 |
| ATOM | 2165 | HB   | THR | X | 140 | 34.453 | 35.691 | 29.342 | 0.00 | 0.00 |
| ATOM | 2166 | CG2  | THR | X | 140 | 33.995 | 33.576 | 29.103 | 0.00 | 0.00 |
| ATOM | 2167 | HG21 | THR | X | 140 | 34.381 | 33.417 | 30.110 | 0.00 | 0.00 |
| ATOM | 2168 | HG22 | THR | X | 140 | 34.196 | 32.817 | 28.348 | 0.00 | 0.00 |
| ATOM | 2169 | HG23 | THR | X | 140 | 32.910 | 33.677 | 29.122 | 0.00 | 0.00 |

|      |      |      |     |   |     |        |        |        |      |      |
|------|------|------|-----|---|-----|--------|--------|--------|------|------|
| ATOM | 2170 | OG1  | THR | X | 140 | 35.912 | 34.729 | 28.486 | 0.00 | 0.00 |
| ATOM | 2171 | HG1  | THR | X | 140 | 36.305 | 35.594 | 28.628 | 0.00 | 0.00 |
| ATOM | 2172 | C    | THR | X | 140 | 34.287 | 36.523 | 26.886 | 0.00 | 0.00 |
| ATOM | 2173 | O    | THR | X | 140 | 34.984 | 36.773 | 25.918 | 0.00 | 0.00 |
| ATOM | 2174 | N    | VAL | X | 141 | 33.717 | 37.492 | 27.629 | 0.00 | 0.00 |
| ATOM | 2175 | H    | VAL | X | 141 | 33.156 | 37.192 | 28.413 | 0.00 | 0.00 |
| ATOM | 2176 | CA   | VAL | X | 141 | 34.117 | 38.867 | 27.646 | 0.00 | 0.00 |
| ATOM | 2177 | HA   | VAL | X | 141 | 34.688 | 39.133 | 26.757 | 0.00 | 0.00 |
| ATOM | 2178 | CB   | VAL | X | 141 | 32.949 | 39.885 | 27.726 | 0.00 | 0.00 |
| ATOM | 2179 | HB   | VAL | X | 141 | 32.305 | 39.628 | 28.567 | 0.00 | 0.00 |
| ATOM | 2180 | CG1  | VAL | X | 141 | 33.361 | 41.353 | 27.724 | 0.00 | 0.00 |
| ATOM | 2181 | HG11 | VAL | X | 141 | 33.875 | 41.518 | 28.670 | 0.00 | 0.00 |
| ATOM | 2182 | HG12 | VAL | X | 141 | 34.074 | 41.564 | 26.927 | 0.00 | 0.00 |
| ATOM | 2183 | HG13 | VAL | X | 141 | 32.501 | 41.997 | 27.542 | 0.00 | 0.00 |
| ATOM | 2184 | CG2  | VAL | X | 141 | 32.122 | 39.716 | 26.457 | 0.00 | 0.00 |
| ATOM | 2185 | HG21 | VAL | X | 141 | 31.353 | 40.489 | 26.457 | 0.00 | 0.00 |
| ATOM | 2186 | HG22 | VAL | X | 141 | 31.664 | 38.727 | 26.450 | 0.00 | 0.00 |
| ATOM | 2187 | HG23 | VAL | X | 141 | 32.828 | 39.889 | 25.645 | 0.00 | 0.00 |
| ATOM | 2188 | C    | VAL | X | 141 | 35.126 | 39.058 | 28.771 | 0.00 | 0.00 |
| ATOM | 2189 | O    | VAL | X | 141 | 34.920 | 38.507 | 29.838 | 0.00 | 0.00 |
| ATOM | 2190 | N    | LEU | X | 142 | 36.184 | 39.848 | 28.624 | 0.00 | 0.00 |
| ATOM | 2191 | H    | LEU | X | 142 | 36.287 | 40.336 | 27.746 | 0.00 | 0.00 |
| ATOM | 2192 | CA   | LEU | X | 142 | 37.233 | 40.154 | 29.581 | 0.00 | 0.00 |
| ATOM | 2193 | HA   | LEU | X | 142 | 36.985 | 39.884 | 30.608 | 0.00 | 0.00 |
| ATOM | 2194 | CB   | LEU | X | 142 | 38.479 | 39.299 | 29.159 | 0.00 | 0.00 |
| ATOM | 2195 | HB2  | LEU | X | 142 | 38.093 | 38.310 | 28.915 | 0.00 | 0.00 |
| ATOM | 2196 | HB3  | LEU | X | 142 | 38.812 | 39.728 | 28.214 | 0.00 | 0.00 |
| ATOM | 2197 | CG   | LEU | X | 142 | 39.658 | 39.361 | 30.138 | 0.00 | 0.00 |
| ATOM | 2198 | HG   | LEU | X | 142 | 39.316 | 39.303 | 31.171 | 0.00 | 0.00 |
| ATOM | 2199 | CD1  | LEU | X | 142 | 40.376 | 37.992 | 29.868 | 0.00 | 0.00 |
| ATOM | 2200 | HD11 | LEU | X | 142 | 39.597 | 37.230 | 29.880 | 0.00 | 0.00 |
| ATOM | 2201 | HD12 | LEU | X | 142 | 41.187 | 37.901 | 30.591 | 0.00 | 0.00 |
| ATOM | 2202 | HD13 | LEU | X | 142 | 40.968 | 37.961 | 28.953 | 0.00 | 0.00 |
| ATOM | 2203 | CD2  | LEU | X | 142 | 40.604 | 40.589 | 29.894 | 0.00 | 0.00 |
| ATOM | 2204 | HD21 | LEU | X | 142 | 40.971 | 40.740 | 28.879 | 0.00 | 0.00 |
| ATOM | 2205 | HD22 | LEU | X | 142 | 40.083 | 41.425 | 30.362 | 0.00 | 0.00 |
| ATOM | 2206 | HD23 | LEU | X | 142 | 41.534 | 40.429 | 30.439 | 0.00 | 0.00 |
| ATOM | 2207 | C    | LEU | X | 142 | 37.380 | 41.673 | 29.630 | 0.00 | 0.00 |
| ATOM | 2208 | O    | LEU | X | 142 | 37.297 | 42.289 | 28.591 | 0.00 | 0.00 |
| ATOM | 2209 | N    | VAL | X | 143 | 37.563 | 42.292 | 30.832 | 0.00 | 0.00 |
| ATOM | 2210 | H    | VAL | X | 143 | 37.603 | 41.784 | 31.704 | 0.00 | 0.00 |
| ATOM | 2211 | CA   | VAL | X | 143 | 37.683 | 43.711 | 31.029 | 0.00 | 0.00 |
| ATOM | 2212 | HA   | VAL | X | 143 | 37.879 | 44.232 | 30.091 | 0.00 | 0.00 |
| ATOM | 2213 | CB   | VAL | X | 143 | 36.468 | 44.210 | 31.766 | 0.00 | 0.00 |
| ATOM | 2214 | HB   | VAL | X | 143 | 36.389 | 43.657 | 32.702 | 0.00 | 0.00 |
| ATOM | 2215 | CG1  | VAL | X | 143 | 36.427 | 45.691 | 32.120 | 0.00 | 0.00 |
| ATOM | 2216 | HG11 | VAL | X | 143 | 35.624 | 45.972 | 32.802 | 0.00 | 0.00 |
| ATOM | 2217 | HG12 | VAL | X | 143 | 37.250 | 46.113 | 32.698 | 0.00 | 0.00 |
| ATOM | 2218 | HG13 | VAL | X | 143 | 36.312 | 46.251 | 31.192 | 0.00 | 0.00 |
| ATOM | 2219 | CG2  | VAL | X | 143 | 35.143 | 43.863 | 30.993 | 0.00 | 0.00 |
| ATOM | 2220 | HG21 | VAL | X | 143 | 35.166 | 44.117 | 29.933 | 0.00 | 0.00 |
| ATOM | 2221 | HG22 | VAL | X | 143 | 34.347 | 44.404 | 31.504 | 0.00 | 0.00 |
| ATOM | 2222 | HG23 | VAL | X | 143 | 34.980 | 42.785 | 31.022 | 0.00 | 0.00 |
| ATOM | 2223 | C    | VAL | X | 143 | 38.925 | 43.918 | 31.907 | 0.00 | 0.00 |
| ATOM | 2224 | O    | VAL | X | 143 | 39.412 | 42.982 | 32.586 | 0.00 | 0.00 |
| ATOM | 2225 | N    | SER | X | 144 | 39.534 | 45.070 | 31.775 | 0.00 | 0.00 |
| ATOM | 2226 | H    | SER | X | 144 | 39.067 | 45.678 | 31.118 | 0.00 | 0.00 |
| ATOM | 2227 | CA   | SER | X | 144 | 40.509 | 45.649 | 32.706 | 0.00 | 0.00 |
| ATOM | 2228 | HA   | SER | X | 144 | 40.622 | 45.031 | 33.596 | 0.00 | 0.00 |
| ATOM | 2229 | CB   | SER | X | 144 | 41.902 | 45.564 | 32.037 | 0.00 | 0.00 |
| ATOM | 2230 | HB2  | SER | X | 144 | 41.890 | 44.561 | 31.610 | 0.00 | 0.00 |
| ATOM | 2231 | HB3  | SER | X | 144 | 41.931 | 46.317 | 31.250 | 0.00 | 0.00 |
| ATOM | 2232 | OG   | SER | X | 144 | 43.033 | 45.763 | 32.851 | 0.00 | 0.00 |
| ATOM | 2233 | HG   | SER | X | 144 | 43.842 | 45.441 | 32.448 | 0.00 | 0.00 |
| ATOM | 2234 | C    | SER | X | 144 | 40.325 | 47.132 | 33.048 | 0.00 | 0.00 |
| ATOM | 2235 | O    | SER | X | 144 | 39.873 | 47.936 | 32.198 | 0.00 | 0.00 |
| ATOM | 2236 | N    | MET | X | 145 | 40.569 | 47.507 | 34.243 | 0.00 | 0.00 |

|      |      |      |     |   |     |        |        |        |      |      |
|------|------|------|-----|---|-----|--------|--------|--------|------|------|
| ATOM | 2237 | H    | MET | X | 145 | 40.966 | 46.786 | 34.829 | 0.00 | 0.00 |
| ATOM | 2238 | CA   | MET | X | 145 | 40.381 | 48.856 | 34.786 | 0.00 | 0.00 |
| ATOM | 2239 | HA   | MET | X | 145 | 39.848 | 49.404 | 34.009 | 0.00 | 0.00 |
| ATOM | 2240 | CB   | MET | X | 145 | 39.581 | 48.800 | 36.084 | 0.00 | 0.00 |
| ATOM | 2241 | HB2  | MET | X | 145 | 39.226 | 49.756 | 36.469 | 0.00 | 0.00 |
| ATOM | 2242 | HB3  | MET | X | 145 | 38.658 | 48.250 | 35.903 | 0.00 | 0.00 |
| ATOM | 2243 | CG   | MET | X | 145 | 40.260 | 48.017 | 37.192 | 0.00 | 0.00 |
| ATOM | 2244 | HG2  | MET | X | 145 | 40.271 | 46.982 | 36.851 | 0.00 | 0.00 |
| ATOM | 2245 | HG3  | MET | X | 145 | 41.328 | 48.056 | 37.408 | 0.00 | 0.00 |
| ATOM | 2246 | SD   | MET | X | 145 | 39.217 | 47.796 | 38.669 | 0.00 | 0.00 |
| ATOM | 2247 | CE   | MET | X | 145 | 37.746 | 46.862 | 38.144 | 0.00 | 0.00 |
| ATOM | 2248 | HE1  | MET | X | 145 | 37.275 | 47.389 | 37.314 | 0.00 | 0.00 |
| ATOM | 2249 | HE2  | MET | X | 145 | 38.039 | 45.871 | 37.798 | 0.00 | 0.00 |
| ATOM | 2250 | HE3  | MET | X | 145 | 37.003 | 46.790 | 38.938 | 0.00 | 0.00 |
| ATOM | 2251 | C    | MET | X | 145 | 41.728 | 49.549 | 35.078 | 0.00 | 0.00 |
| ATOM | 2252 | O    | MET | X | 145 | 42.814 | 48.939 | 34.990 | 0.00 | 0.00 |
| ATOM | 2253 | N    | ASN | X | 146 | 41.670 | 50.797 | 35.526 | 0.00 | 0.00 |
| ATOM | 2254 | H    | ASN | X | 146 | 40.778 | 51.268 | 35.582 | 0.00 | 0.00 |
| ATOM | 2255 | CA   | ASN | X | 146 | 42.908 | 51.605 | 35.868 | 0.00 | 0.00 |
| ATOM | 2256 | HA   | ASN | X | 146 | 43.625 | 50.841 | 36.171 | 0.00 | 0.00 |
| ATOM | 2257 | CB   | ASN | X | 146 | 43.352 | 52.332 | 34.617 | 0.00 | 0.00 |
| ATOM | 2258 | HB2  | ASN | X | 146 | 43.163 | 51.647 | 33.792 | 0.00 | 0.00 |
| ATOM | 2259 | HB3  | ASN | X | 146 | 42.792 | 53.260 | 34.500 | 0.00 | 0.00 |
| ATOM | 2260 | CG   | ASN | X | 146 | 44.795 | 52.716 | 34.672 | 0.00 | 0.00 |
| ATOM | 2261 | OD1  | ASN | X | 146 | 45.621 | 51.826 | 34.542 | 0.00 | 0.00 |
| ATOM | 2262 | ND2  | ASN | X | 146 | 45.078 | 54.018 | 34.748 | 0.00 | 0.00 |
| ATOM | 2263 | HD21 | ASN | X | 146 | 45.985 | 54.444 | 34.869 | 0.00 | 0.00 |
| ATOM | 2264 | HD22 | ASN | X | 146 | 44.309 | 54.661 | 34.872 | 0.00 | 0.00 |
| ATOM | 2265 | C    | ASN | X | 146 | 42.574 | 52.590 | 37.038 | 0.00 | 0.00 |
| ATOM | 2266 | O    | ASN | X | 146 | 41.438 | 53.124 | 37.087 | 0.00 | 0.00 |
| ATOM | 2267 | N    | TYR | X | 147 | 43.537 | 52.815 | 37.919 | 0.00 | 0.00 |
| ATOM | 2268 | H    | TYR | X | 147 | 44.445 | 52.414 | 37.732 | 0.00 | 0.00 |
| ATOM | 2269 | CA   | TYR | X | 147 | 43.372 | 53.478 | 39.200 | 0.00 | 0.00 |
| ATOM | 2270 | HA   | TYR | X | 147 | 42.766 | 54.372 | 39.054 | 0.00 | 0.00 |
| ATOM | 2271 | CB   | TYR | X | 147 | 42.603 | 52.521 | 40.154 | 0.00 | 0.00 |
| ATOM | 2272 | HB2  | TYR | X | 147 | 42.580 | 52.957 | 41.153 | 0.00 | 0.00 |
| ATOM | 2273 | HB3  | TYR | X | 147 | 41.560 | 52.428 | 39.852 | 0.00 | 0.00 |
| ATOM | 2274 | CG   | TYR | X | 147 | 43.137 | 51.128 | 40.305 | 0.00 | 0.00 |
| ATOM | 2275 | CD1  | TYR | X | 147 | 42.734 | 50.136 | 39.315 | 0.00 | 0.00 |
| ATOM | 2276 | HD1  | TYR | X | 147 | 42.085 | 50.324 | 38.473 | 0.00 | 0.00 |
| ATOM | 2277 | CE1  | TYR | X | 147 | 43.245 | 48.845 | 39.478 | 0.00 | 0.00 |
| ATOM | 2278 | HE1  | TYR | X | 147 | 42.957 | 48.122 | 38.729 | 0.00 | 0.00 |
| ATOM | 2279 | CZ   | TYR | X | 147 | 44.055 | 48.538 | 40.647 | 0.00 | 0.00 |
| ATOM | 2280 | OH   | TYR | X | 147 | 44.578 | 47.272 | 40.724 | 0.00 | 0.00 |
| ATOM | 2281 | HH   | TYR | X | 147 | 45.329 | 47.181 | 41.316 | 0.00 | 0.00 |
| ATOM | 2282 | CE2  | TYR | X | 147 | 44.477 | 49.512 | 41.597 | 0.00 | 0.00 |
| ATOM | 2283 | HE2  | TYR | X | 147 | 45.220 | 49.363 | 42.366 | 0.00 | 0.00 |
| ATOM | 2284 | CD2  | TYR | X | 147 | 43.988 | 50.804 | 41.415 | 0.00 | 0.00 |
| ATOM | 2285 | HD2  | TYR | X | 147 | 44.294 | 51.557 | 42.126 | 0.00 | 0.00 |
| ATOM | 2286 | C    | TYR | X | 147 | 44.666 | 53.881 | 39.957 | 0.00 | 0.00 |
| ATOM | 2287 | O    | TYR | X | 147 | 45.722 | 53.312 | 39.639 | 0.00 | 0.00 |
| ATOM | 2288 | N    | ARG | X | 148 | 44.454 | 54.825 | 40.869 | 0.00 | 0.00 |
| ATOM | 2289 | H    | ARG | X | 148 | 43.500 | 55.110 | 41.036 | 0.00 | 0.00 |
| ATOM | 2290 | CA   | ARG | X | 148 | 45.432 | 55.505 | 41.627 | 0.00 | 0.00 |
| ATOM | 2291 | HA   | ARG | X | 148 | 46.203 | 55.910 | 40.970 | 0.00 | 0.00 |
| ATOM | 2292 | CB   | ARG | X | 148 | 44.733 | 56.703 | 42.359 | 0.00 | 0.00 |
| ATOM | 2293 | HB2  | ARG | X | 148 | 43.954 | 56.509 | 43.096 | 0.00 | 0.00 |
| ATOM | 2294 | HB3  | ARG | X | 148 | 45.503 | 57.281 | 42.870 | 0.00 | 0.00 |
| ATOM | 2295 | CG   | ARG | X | 148 | 44.147 | 57.718 | 41.279 | 0.00 | 0.00 |
| ATOM | 2296 | HG2  | ARG | X | 148 | 44.947 | 58.208 | 40.726 | 0.00 | 0.00 |
| ATOM | 2297 | HG3  | ARG | X | 148 | 43.453 | 57.164 | 40.647 | 0.00 | 0.00 |
| ATOM | 2298 | CD   | ARG | X | 148 | 43.245 | 58.802 | 41.865 | 0.00 | 0.00 |
| ATOM | 2299 | HD2  | ARG | X | 148 | 43.874 | 59.410 | 42.515 | 0.00 | 0.00 |
| ATOM | 2300 | HD3  | ARG | X | 148 | 42.835 | 59.387 | 41.042 | 0.00 | 0.00 |
| ATOM | 2301 | NE   | ARG | X | 148 | 42.104 | 58.239 | 42.487 | 0.00 | 0.00 |
| ATOM | 2302 | HE   | ARG | X | 148 | 41.884 | 57.272 | 42.294 | 0.00 | 0.00 |
| ATOM | 2303 | CZ   | ARG | X | 148 | 41.213 | 58.915 | 43.220 | 0.00 | 0.00 |

|      |      |      |     |   |     |        |        |        |      |      |
|------|------|------|-----|---|-----|--------|--------|--------|------|------|
| ATOM | 2304 | NH1  | ARG | X | 148 | 41.394 | 60.125 | 43.579 | 0.00 | 0.00 |
| ATOM | 2305 | HH11 | ARG | X | 148 | 42.198 | 60.615 | 43.215 | 0.00 | 0.00 |
| ATOM | 2306 | HH12 | ARG | X | 148 | 40.610 | 60.589 | 44.016 | 0.00 | 0.00 |
| ATOM | 2307 | NH2  | ARG | X | 148 | 40.133 | 58.331 | 43.664 | 0.00 | 0.00 |
| ATOM | 2308 | HH21 | ARG | X | 148 | 39.955 | 57.360 | 43.450 | 0.00 | 0.00 |
| ATOM | 2309 | HH22 | ARG | X | 148 | 39.513 | 58.876 | 44.245 | 0.00 | 0.00 |
| ATOM | 2310 | C    | ARG | X | 148 | 46.127 | 54.592 | 42.613 | 0.00 | 0.00 |
| ATOM | 2311 | O    | ARG | X | 148 | 45.445 | 54.100 | 43.491 | 0.00 | 0.00 |
| ATOM | 2312 | N    | VAL | X | 149 | 47.423 | 54.458 | 42.452 | 0.00 | 0.00 |
| ATOM | 2313 | H    | VAL | X | 149 | 47.815 | 54.902 | 41.634 | 0.00 | 0.00 |
| ATOM | 2314 | CA   | VAL | X | 149 | 48.326 | 53.716 | 43.349 | 0.00 | 0.00 |
| ATOM | 2315 | HA   | VAL | X | 149 | 47.792 | 53.119 | 44.088 | 0.00 | 0.00 |
| ATOM | 2316 | CB   | VAL | X | 149 | 49.175 | 52.745 | 42.573 | 0.00 | 0.00 |
| ATOM | 2317 | HB   | VAL | X | 149 | 49.985 | 52.367 | 43.198 | 0.00 | 0.00 |
| ATOM | 2318 | CG1  | VAL | X | 149 | 48.284 | 51.548 | 42.172 | 0.00 | 0.00 |
| ATOM | 2319 | HG11 | VAL | X | 149 | 48.856 | 50.683 | 41.836 | 0.00 | 0.00 |
| ATOM | 2320 | HG12 | VAL | X | 149 | 47.616 | 51.275 | 42.989 | 0.00 | 0.00 |
| ATOM | 2321 | HG13 | VAL | X | 149 | 47.644 | 51.757 | 41.315 | 0.00 | 0.00 |
| ATOM | 2322 | CG2  | VAL | X | 149 | 49.911 | 53.309 | 41.299 | 0.00 | 0.00 |
| ATOM | 2323 | HG21 | VAL | X | 149 | 49.168 | 53.724 | 40.618 | 0.00 | 0.00 |
| ATOM | 2324 | HG22 | VAL | X | 149 | 50.348 | 52.511 | 40.699 | 0.00 | 0.00 |
| ATOM | 2325 | HG23 | VAL | X | 149 | 50.794 | 53.914 | 41.502 | 0.00 | 0.00 |
| ATOM | 2326 | C    | VAL | X | 149 | 49.220 | 54.762 | 44.098 | 0.00 | 0.00 |
| ATOM | 2327 | O    | VAL | X | 149 | 49.434 | 55.865 | 43.655 | 0.00 | 0.00 |
| ATOM | 2328 | N    | GLY | X | 150 | 49.801 | 54.365 | 45.165 | 0.00 | 0.00 |
| ATOM | 2329 | H    | GLY | X | 150 | 49.750 | 53.400 | 45.458 | 0.00 | 0.00 |
| ATOM | 2330 | CA   | GLY | X | 150 | 50.740 | 55.187 | 45.933 | 0.00 | 0.00 |
| ATOM | 2331 | HA2  | GLY | X | 150 | 51.317 | 54.523 | 46.577 | 0.00 | 0.00 |
| ATOM | 2332 | HA3  | GLY | X | 150 | 51.438 | 55.719 | 45.287 | 0.00 | 0.00 |
| ATOM | 2333 | C    | GLY | X | 150 | 49.914 | 56.207 | 46.792 | 0.00 | 0.00 |
| ATOM | 2334 | O    | GLY | X | 150 | 48.721 | 55.956 | 46.978 | 0.00 | 0.00 |
| ATOM | 2335 | N    | ALA | X | 151 | 50.456 | 57.344 | 47.199 | 0.00 | 0.00 |
| ATOM | 2336 | H    | ALA | X | 151 | 51.396 | 57.548 | 46.892 | 0.00 | 0.00 |
| ATOM | 2337 | CA   | ALA | X | 151 | 49.667 | 58.452 | 47.757 | 0.00 | 0.00 |
| ATOM | 2338 | HA   | ALA | X | 151 | 49.251 | 58.183 | 48.728 | 0.00 | 0.00 |
| ATOM | 2339 | CB   | ALA | X | 151 | 50.507 | 59.711 | 48.205 | 0.00 | 0.00 |
| ATOM | 2340 | HB1  | ALA | X | 151 | 51.347 | 59.952 | 47.554 | 0.00 | 0.00 |
| ATOM | 2341 | HB2  | ALA | X | 151 | 50.729 | 59.582 | 49.265 | 0.00 | 0.00 |
| ATOM | 2342 | HB3  | ALA | X | 151 | 49.943 | 60.639 | 48.295 | 0.00 | 0.00 |
| ATOM | 2343 | C    | ALA | X | 151 | 48.458 | 58.831 | 46.930 | 0.00 | 0.00 |
| ATOM | 2344 | O    | ALA | X | 151 | 47.431 | 59.028 | 47.598 | 0.00 | 0.00 |
| ATOM | 2345 | N    | PHE | X | 152 | 48.451 | 58.731 | 45.631 | 0.00 | 0.00 |
| ATOM | 2346 | H    | PHE | X | 152 | 49.316 | 58.584 | 45.131 | 0.00 | 0.00 |
| ATOM | 2347 | CA   | PHE | X | 152 | 47.324 | 59.306 | 44.884 | 0.00 | 0.00 |
| ATOM | 2348 | HA   | PHE | X | 152 | 47.149 | 60.357 | 45.113 | 0.00 | 0.00 |
| ATOM | 2349 | CB   | PHE | X | 152 | 47.722 | 59.246 | 43.349 | 0.00 | 0.00 |
| ATOM | 2350 | HB2  | PHE | X | 152 | 48.600 | 59.888 | 43.425 | 0.00 | 0.00 |
| ATOM | 2351 | HB3  | PHE | X | 152 | 47.961 | 58.230 | 43.035 | 0.00 | 0.00 |
| ATOM | 2352 | CG   | PHE | X | 152 | 46.925 | 59.827 | 42.220 | 0.00 | 0.00 |
| ATOM | 2353 | CD1  | PHE | X | 152 | 47.278 | 59.518 | 40.879 | 0.00 | 0.00 |
| ATOM | 2354 | HD1  | PHE | X | 152 | 47.959 | 58.788 | 40.467 | 0.00 | 0.00 |
| ATOM | 2355 | CE1  | PHE | X | 152 | 46.619 | 60.245 | 39.816 | 0.00 | 0.00 |
| ATOM | 2356 | HE1  | PHE | X | 152 | 46.948 | 60.021 | 38.812 | 0.00 | 0.00 |
| ATOM | 2357 | CZ   | PHE | X | 152 | 45.599 | 61.189 | 40.075 | 0.00 | 0.00 |
| ATOM | 2358 | HZ   | PHE | X | 152 | 45.069 | 61.703 | 39.287 | 0.00 | 0.00 |
| ATOM | 2359 | CE2  | PHE | X | 152 | 45.175 | 61.389 | 41.384 | 0.00 | 0.00 |
| ATOM | 2360 | HE2  | PHE | X | 152 | 44.364 | 62.062 | 41.620 | 0.00 | 0.00 |
| ATOM | 2361 | CD2  | PHE | X | 152 | 45.902 | 60.777 | 42.436 | 0.00 | 0.00 |
| ATOM | 2362 | HD2  | PHE | X | 152 | 45.695 | 61.024 | 43.467 | 0.00 | 0.00 |
| ATOM | 2363 | C    | PHE | X | 152 | 46.040 | 58.498 | 45.076 | 0.00 | 0.00 |
| ATOM | 2364 | O    | PHE | X | 152 | 44.977 | 59.048 | 44.864 | 0.00 | 0.00 |
| ATOM | 2365 | N    | GLY | X | 153 | 46.197 | 57.289 | 45.627 | 0.00 | 0.00 |
| ATOM | 2366 | H    | GLY | X | 153 | 47.115 | 56.961 | 45.891 | 0.00 | 0.00 |
| ATOM | 2367 | CA   | GLY | X | 153 | 45.045 | 56.397 | 46.016 | 0.00 | 0.00 |
| ATOM | 2368 | HA2  | GLY | X | 153 | 44.153 | 56.846 | 45.577 | 0.00 | 0.00 |
| ATOM | 2369 | HA3  | GLY | X | 153 | 45.279 | 55.435 | 45.560 | 0.00 | 0.00 |
| ATOM | 2370 | C    | GLY | X | 153 | 44.986 | 56.156 | 47.510 | 0.00 | 0.00 |

|      |      |      |     |   |     |        |        |        |      |      |
|------|------|------|-----|---|-----|--------|--------|--------|------|------|
| ATOM | 2371 | O    | GLY | X | 153 | 43.912 | 55.717 | 47.833 | 0.00 | 0.00 |
| ATOM | 2372 | N    | PHE | X | 154 | 45.981 | 56.418 | 48.376 | 0.00 | 0.00 |
| ATOM | 2373 | H    | PHE | X | 154 | 46.714 | 57.053 | 48.095 | 0.00 | 0.00 |
| ATOM | 2374 | CA   | PHE | X | 154 | 46.118 | 55.781 | 49.643 | 0.00 | 0.00 |
| ATOM | 2375 | HA   | PHE | X | 154 | 45.125 | 55.644 | 50.071 | 0.00 | 0.00 |
| ATOM | 2376 | CB   | PHE | X | 154 | 46.755 | 54.416 | 49.481 | 0.00 | 0.00 |
| ATOM | 2377 | HB2  | PHE | X | 154 | 47.791 | 54.546 | 49.168 | 0.00 | 0.00 |
| ATOM | 2378 | HB3  | PHE | X | 154 | 46.812 | 53.998 | 50.486 | 0.00 | 0.00 |
| ATOM | 2379 | CG   | PHE | X | 154 | 46.035 | 53.453 | 48.536 | 0.00 | 0.00 |
| ATOM | 2380 | CD1  | PHE | X | 154 | 46.464 | 53.145 | 47.246 | 0.00 | 0.00 |
| ATOM | 2381 | HD1  | PHE | X | 154 | 47.357 | 53.587 | 46.829 | 0.00 | 0.00 |
| ATOM | 2382 | CE1  | PHE | X | 154 | 45.680 | 52.295 | 46.389 | 0.00 | 0.00 |
| ATOM | 2383 | HE1  | PHE | X | 154 | 46.066 | 52.055 | 45.410 | 0.00 | 0.00 |
| ATOM | 2384 | CZ   | PHE | X | 154 | 44.554 | 51.678 | 46.821 | 0.00 | 0.00 |
| ATOM | 2385 | HZ   | PHE | X | 154 | 44.071 | 50.951 | 46.185 | 0.00 | 0.00 |
| ATOM | 2386 | CE2  | PHE | X | 154 | 44.132 | 51.977 | 48.169 | 0.00 | 0.00 |
| ATOM | 2387 | HE2  | PHE | X | 154 | 43.260 | 51.477 | 48.564 | 0.00 | 0.00 |
| ATOM | 2388 | CD2  | PHE | X | 154 | 44.876 | 52.915 | 48.982 | 0.00 | 0.00 |
| ATOM | 2389 | HD2  | PHE | X | 154 | 44.549 | 53.183 | 49.976 | 0.00 | 0.00 |
| ATOM | 2390 | C    | PHE | X | 154 | 46.609 | 56.749 | 50.717 | 0.00 | 0.00 |
| ATOM | 2391 | O    | PHE | X | 154 | 46.921 | 56.228 | 51.806 | 0.00 | 0.00 |
| ATOM | 2392 | N    | LEU | X | 155 | 46.614 | 58.061 | 50.472 | 0.00 | 0.00 |
| ATOM | 2393 | H    | LEU | X | 155 | 46.514 | 58.353 | 49.511 | 0.00 | 0.00 |
| ATOM | 2394 | CA   | LEU | X | 155 | 46.985 | 59.071 | 51.469 | 0.00 | 0.00 |
| ATOM | 2395 | HA   | LEU | X | 155 | 47.737 | 58.528 | 52.042 | 0.00 | 0.00 |
| ATOM | 2396 | CB   | LEU | X | 155 | 47.512 | 60.360 | 50.739 | 0.00 | 0.00 |
| ATOM | 2397 | HB2  | LEU | X | 155 | 48.282 | 60.058 | 50.029 | 0.00 | 0.00 |
| ATOM | 2398 | HB3  | LEU | X | 155 | 46.730 | 60.888 | 50.193 | 0.00 | 0.00 |
| ATOM | 2399 | CG   | LEU | X | 155 | 48.108 | 61.258 | 51.785 | 0.00 | 0.00 |
| ATOM | 2400 | HG   | LEU | X | 155 | 48.350 | 60.726 | 52.705 | 0.00 | 0.00 |
| ATOM | 2401 | CD1  | LEU | X | 155 | 49.440 | 61.789 | 51.172 | 0.00 | 0.00 |
| ATOM | 2402 | HD11 | LEU | X | 155 | 49.295 | 62.289 | 50.215 | 0.00 | 0.00 |
| ATOM | 2403 | HD12 | LEU | X | 155 | 50.248 | 61.067 | 51.058 | 0.00 | 0.00 |
| ATOM | 2404 | HD13 | LEU | X | 155 | 49.844 | 62.538 | 51.854 | 0.00 | 0.00 |
| ATOM | 2405 | CD2  | LEU | X | 155 | 47.108 | 62.383 | 52.175 | 0.00 | 0.00 |
| ATOM | 2406 | HD21 | LEU | X | 155 | 46.838 | 62.823 | 51.215 | 0.00 | 0.00 |
| ATOM | 2407 | HD22 | LEU | X | 155 | 46.229 | 61.963 | 52.662 | 0.00 | 0.00 |
| ATOM | 2408 | HD23 | LEU | X | 155 | 47.463 | 63.013 | 52.991 | 0.00 | 0.00 |
| ATOM | 2409 | C    | LEU | X | 155 | 45.740 | 59.243 | 52.299 | 0.00 | 0.00 |
| ATOM | 2410 | O    | LEU | X | 155 | 44.689 | 59.658 | 51.736 | 0.00 | 0.00 |
| ATOM | 2411 | N    | ALA | X | 156 | 45.800 | 59.153 | 53.639 | 0.00 | 0.00 |
| ATOM | 2412 | H    | ALA | X | 156 | 46.665 | 58.973 | 54.128 | 0.00 | 0.00 |
| ATOM | 2413 | CA   | ALA | X | 156 | 44.668 | 59.463 | 54.513 | 0.00 | 0.00 |
| ATOM | 2414 | HA   | ALA | X | 156 | 43.874 | 59.878 | 53.893 | 0.00 | 0.00 |
| ATOM | 2415 | CB   | ALA | X | 156 | 44.235 | 58.211 | 55.200 | 0.00 | 0.00 |
| ATOM | 2416 | HB1  | ALA | X | 156 | 44.099 | 57.296 | 54.624 | 0.00 | 0.00 |
| ATOM | 2417 | HB2  | ALA | X | 156 | 43.279 | 58.405 | 55.686 | 0.00 | 0.00 |
| ATOM | 2418 | HB3  | ALA | X | 156 | 44.917 | 58.016 | 56.028 | 0.00 | 0.00 |
| ATOM | 2419 | C    | ALA | X | 156 | 44.928 | 60.500 | 55.613 | 0.00 | 0.00 |
| ATOM | 2420 | O    | ALA | X | 156 | 46.069 | 60.660 | 56.117 | 0.00 | 0.00 |
| ATOM | 2421 | N    | LEU | X | 157 | 43.906 | 61.351 | 56.002 | 0.00 | 0.00 |
| ATOM | 2422 | H    | LEU | X | 157 | 42.992 | 61.174 | 55.609 | 0.00 | 0.00 |
| ATOM | 2423 | CA   | LEU | X | 157 | 43.904 | 62.307 | 57.182 | 0.00 | 0.00 |
| ATOM | 2424 | HA   | LEU | X | 157 | 44.825 | 62.247 | 57.762 | 0.00 | 0.00 |
| ATOM | 2425 | CB   | LEU | X | 157 | 43.740 | 63.807 | 56.735 | 0.00 | 0.00 |
| ATOM | 2426 | HB2  | LEU | X | 157 | 42.927 | 63.825 | 56.009 | 0.00 | 0.00 |
| ATOM | 2427 | HB3  | LEU | X | 157 | 43.494 | 64.457 | 57.574 | 0.00 | 0.00 |
| ATOM | 2428 | CG   | LEU | X | 157 | 45.001 | 64.244 | 56.005 | 0.00 | 0.00 |
| ATOM | 2429 | HG   | LEU | X | 157 | 45.201 | 63.597 | 55.151 | 0.00 | 0.00 |
| ATOM | 2430 | CD1  | LEU | X | 157 | 44.775 | 65.647 | 55.472 | 0.00 | 0.00 |
| ATOM | 2431 | HD11 | LEU | X | 157 | 44.791 | 66.418 | 56.242 | 0.00 | 0.00 |
| ATOM | 2432 | HD12 | LEU | X | 157 | 43.753 | 65.641 | 55.095 | 0.00 | 0.00 |
| ATOM | 2433 | HD13 | LEU | X | 157 | 45.552 | 65.854 | 54.737 | 0.00 | 0.00 |
| ATOM | 2434 | CD2  | LEU | X | 157 | 46.306 | 64.147 | 56.852 | 0.00 | 0.00 |
| ATOM | 2435 | HD21 | LEU | X | 157 | 46.088 | 64.449 | 57.877 | 0.00 | 0.00 |
| ATOM | 2436 | HD22 | LEU | X | 157 | 46.607 | 63.101 | 56.798 | 0.00 | 0.00 |
| ATOM | 2437 | HD23 | LEU | X | 157 | 46.961 | 64.869 | 56.364 | 0.00 | 0.00 |

|      |      |      |     |   |     |        |        |        |      |      |
|------|------|------|-----|---|-----|--------|--------|--------|------|------|
| ATOM | 2438 | C    | LEU | X | 157 | 42.676 | 61.852 | 58.073 | 0.00 | 0.00 |
| ATOM | 2439 | O    | LEU | X | 157 | 41.607 | 61.535 | 57.504 | 0.00 | 0.00 |
| ATOM | 2440 | N    | PRO | X | 158 | 42.837 | 61.775 | 59.415 | 0.00 | 0.00 |
| ATOM | 2441 | CD   | PRO | X | 158 | 44.074 | 61.872 | 60.186 | 0.00 | 0.00 |
| ATOM | 2442 | HD2  | PRO | X | 158 | 44.658 | 62.775 | 60.008 | 0.00 | 0.00 |
| ATOM | 2443 | HD3  | PRO | X | 158 | 44.617 | 60.936 | 60.317 | 0.00 | 0.00 |
| ATOM | 2444 | CG   | PRO | X | 158 | 43.669 | 62.083 | 61.663 | 0.00 | 0.00 |
| ATOM | 2445 | HG2  | PRO | X | 158 | 43.396 | 63.109 | 61.910 | 0.00 | 0.00 |
| ATOM | 2446 | HG3  | PRO | X | 158 | 44.380 | 61.682 | 62.386 | 0.00 | 0.00 |
| ATOM | 2447 | CB   | PRO | X | 158 | 42.349 | 61.212 | 61.604 | 0.00 | 0.00 |
| ATOM | 2448 | HB2  | PRO | X | 158 | 41.622 | 61.347 | 62.404 | 0.00 | 0.00 |
| ATOM | 2449 | HB3  | PRO | X | 158 | 42.586 | 60.150 | 61.663 | 0.00 | 0.00 |
| ATOM | 2450 | CA   | PRO | X | 158 | 41.712 | 61.532 | 60.286 | 0.00 | 0.00 |
| ATOM | 2451 | HA   | PRO | X | 158 | 41.193 | 60.640 | 59.932 | 0.00 | 0.00 |
| ATOM | 2452 | C    | PRO | X | 158 | 40.686 | 62.670 | 60.494 | 0.00 | 0.00 |
| ATOM | 2453 | O    | PRO | X | 158 | 40.960 | 63.872 | 60.499 | 0.00 | 0.00 |
| ATOM | 2454 | N    | GLY | X | 159 | 39.423 | 62.297 | 60.694 | 0.00 | 0.00 |
| ATOM | 2455 | H    | GLY | X | 159 | 39.163 | 61.324 | 60.781 | 0.00 | 0.00 |
| ATOM | 2456 | CA   | GLY | X | 159 | 38.280 | 63.223 | 61.050 | 0.00 | 0.00 |
| ATOM | 2457 | HA2  | GLY | X | 159 | 37.442 | 62.663 | 61.465 | 0.00 | 0.00 |
| ATOM | 2458 | HA3  | GLY | X | 159 | 38.687 | 63.880 | 61.820 | 0.00 | 0.00 |
| ATOM | 2459 | C    | GLY | X | 159 | 37.658 | 64.051 | 59.975 | 0.00 | 0.00 |
| ATOM | 2460 | O    | GLY | X | 159 | 36.617 | 64.685 | 60.103 | 0.00 | 0.00 |
| ATOM | 2461 | N    | SER | X | 160 | 38.190 | 64.075 | 58.720 | 0.00 | 0.00 |
| ATOM | 2462 | H    | SER | X | 160 | 39.176 | 63.874 | 58.632 | 0.00 | 0.00 |
| ATOM | 2463 | CA   | SER | X | 160 | 37.629 | 64.924 | 57.652 | 0.00 | 0.00 |
| ATOM | 2464 | HA   | SER | X | 160 | 36.726 | 65.482 | 57.897 | 0.00 | 0.00 |
| ATOM | 2465 | CB   | SER | X | 160 | 38.569 | 66.145 | 57.496 | 0.00 | 0.00 |
| ATOM | 2466 | HB2  | SER | X | 160 | 38.273 | 66.815 | 56.689 | 0.00 | 0.00 |
| ATOM | 2467 | HB3  | SER | X | 160 | 38.530 | 66.719 | 58.422 | 0.00 | 0.00 |
| ATOM | 2468 | OG   | SER | X | 160 | 39.930 | 65.821 | 57.264 | 0.00 | 0.00 |
| ATOM | 2469 | HG   | SER | X | 160 | 40.477 | 66.610 | 57.241 | 0.00 | 0.00 |
| ATOM | 2470 | C    | SER | X | 160 | 37.417 | 64.211 | 56.363 | 0.00 | 0.00 |
| ATOM | 2471 | O    | SER | X | 160 | 37.649 | 62.991 | 56.224 | 0.00 | 0.00 |
| ATOM | 2472 | N    | ARG | X | 161 | 36.980 | 64.914 | 55.322 | 0.00 | 0.00 |
| ATOM | 2473 | H    | ARG | X | 161 | 36.771 | 65.896 | 55.437 | 0.00 | 0.00 |
| ATOM | 2474 | CA   | ARG | X | 161 | 36.717 | 64.282 | 53.962 | 0.00 | 0.00 |
| ATOM | 2475 | HA   | ARG | X | 161 | 36.810 | 63.205 | 54.102 | 0.00 | 0.00 |
| ATOM | 2476 | CB   | ARG | X | 161 | 35.302 | 64.673 | 53.531 | 0.00 | 0.00 |
| ATOM | 2477 | HB2  | ARG | X | 161 | 35.234 | 65.760 | 53.487 | 0.00 | 0.00 |
| ATOM | 2478 | HB3  | ARG | X | 161 | 35.101 | 64.285 | 52.533 | 0.00 | 0.00 |
| ATOM | 2479 | CG   | ARG | X | 161 | 34.156 | 64.098 | 54.399 | 0.00 | 0.00 |
| ATOM | 2480 | HG2  | ARG | X | 161 | 34.459 | 64.182 | 55.443 | 0.00 | 0.00 |
| ATOM | 2481 | HG3  | ARG | X | 161 | 33.232 | 64.623 | 54.157 | 0.00 | 0.00 |
| ATOM | 2482 | CD   | ARG | X | 161 | 33.942 | 62.555 | 54.093 | 0.00 | 0.00 |
| ATOM | 2483 | HD2  | ARG | X | 161 | 32.965 | 62.376 | 54.542 | 0.00 | 0.00 |
| ATOM | 2484 | HD3  | ARG | X | 161 | 33.862 | 62.449 | 53.011 | 0.00 | 0.00 |
| ATOM | 2485 | NE   | ARG | X | 161 | 34.924 | 61.629 | 54.663 | 0.00 | 0.00 |
| ATOM | 2486 | HE   | ARG | X | 161 | 35.389 | 61.949 | 55.501 | 0.00 | 0.00 |
| ATOM | 2487 | CZ   | ARG | X | 161 | 34.977 | 60.319 | 54.386 | 0.00 | 0.00 |
| ATOM | 2488 | NH1  | ARG | X | 161 | 34.662 | 59.766 | 53.169 | 0.00 | 0.00 |
| ATOM | 2489 | HH11 | ARG | X | 161 | 34.268 | 60.333 | 52.433 | 0.00 | 0.00 |
| ATOM | 2490 | HH12 | ARG | X | 161 | 34.686 | 58.761 | 53.067 | 0.00 | 0.00 |
| ATOM | 2491 | NH2  | ARG | X | 161 | 35.301 | 59.414 | 55.374 | 0.00 | 0.00 |
| ATOM | 2492 | HH21 | ARG | X | 161 | 35.674 | 59.713 | 56.263 | 0.00 | 0.00 |
| ATOM | 2493 | HH22 | ARG | X | 161 | 35.212 | 58.440 | 55.118 | 0.00 | 0.00 |
| ATOM | 2494 | C    | ARG | X | 161 | 37.791 | 64.678 | 52.936 | 0.00 | 0.00 |
| ATOM | 2495 | O    | ARG | X | 161 | 37.608 | 64.516 | 51.748 | 0.00 | 0.00 |
| ATOM | 2496 | N    | GLU | X | 162 | 38.889 | 65.281 | 53.423 | 0.00 | 0.00 |
| ATOM | 2497 | H    | GLU | X | 162 | 38.918 | 65.263 | 54.432 | 0.00 | 0.00 |
| ATOM | 2498 | CA   | GLU | X | 162 | 39.970 | 65.958 | 52.650 | 0.00 | 0.00 |
| ATOM | 2499 | HA   | GLU | X | 162 | 39.456 | 66.445 | 51.821 | 0.00 | 0.00 |
| ATOM | 2500 | CB   | GLU | X | 162 | 40.624 | 67.040 | 53.606 | 0.00 | 0.00 |
| ATOM | 2501 | HB2  | GLU | X | 162 | 40.983 | 66.604 | 54.538 | 0.00 | 0.00 |
| ATOM | 2502 | HB3  | GLU | X | 162 | 41.479 | 67.367 | 53.015 | 0.00 | 0.00 |
| ATOM | 2503 | CG   | GLU | X | 162 | 39.939 | 68.319 | 53.987 | 0.00 | 0.00 |
| ATOM | 2504 | HG2  | GLU | X | 162 | 39.000 | 68.090 | 54.492 | 0.00 | 0.00 |



|      |      |      |     |   |     |        |        |        |      |      |
|------|------|------|-----|---|-----|--------|--------|--------|------|------|
| ATOM | 2505 | HG3  | GLU | X | 162 | 40.621 | 68.824 | 54.672 | 0.00 | 0.00 |
| ATOM | 2506 | CD   | GLU | X | 162 | 39.692 | 69.118 | 52.682 | 0.00 | 0.00 |
| ATOM | 2507 | OE1  | GLU | X | 162 | 40.633 | 69.775 | 52.235 | 0.00 | 0.00 |
| ATOM | 2508 | OE2  | GLU | X | 162 | 38.531 | 69.130 | 52.174 | 0.00 | 0.00 |
| ATOM | 2509 | C    | GLU | X | 162 | 41.039 | 65.017 | 52.106 | 0.00 | 0.00 |
| ATOM | 2510 | O    | GLU | X | 162 | 41.697 | 65.293 | 51.093 | 0.00 | 0.00 |
| ATOM | 2511 | N    | ALA | X | 163 | 41.187 | 63.838 | 52.773 | 0.00 | 0.00 |
| ATOM | 2512 | H    | ALA | X | 163 | 40.634 | 63.751 | 53.613 | 0.00 | 0.00 |
| ATOM | 2513 | CA   | ALA | X | 163 | 41.764 | 62.611 | 52.132 | 0.00 | 0.00 |
| ATOM | 2514 | HA   | ALA | X | 163 | 41.396 | 62.595 | 51.107 | 0.00 | 0.00 |
| ATOM | 2515 | CB   | ALA | X | 163 | 43.306 | 62.712 | 51.951 | 0.00 | 0.00 |
| ATOM | 2516 | HB1  | ALA | X | 163 | 43.751 | 61.894 | 51.384 | 0.00 | 0.00 |
| ATOM | 2517 | HB2  | ALA | X | 163 | 43.760 | 62.822 | 52.936 | 0.00 | 0.00 |
| ATOM | 2518 | HB3  | ALA | X | 163 | 43.584 | 63.542 | 51.301 | 0.00 | 0.00 |
| ATOM | 2519 | C    | ALA | X | 163 | 41.324 | 61.408 | 52.898 | 0.00 | 0.00 |
| ATOM | 2520 | O    | ALA | X | 163 | 41.953 | 61.042 | 53.880 | 0.00 | 0.00 |
| ATOM | 2521 | N    | PRO | X | 164 | 40.207 | 60.760 | 52.539 | 0.00 | 0.00 |
| ATOM | 2522 | CD   | PRO | X | 164 | 39.274 | 61.004 | 51.465 | 0.00 | 0.00 |
| ATOM | 2523 | HD2  | PRO | X | 164 | 39.488 | 60.336 | 50.631 | 0.00 | 0.00 |
| ATOM | 2524 | HD3  | PRO | X | 164 | 39.406 | 62.045 | 51.172 | 0.00 | 0.00 |
| ATOM | 2525 | CG   | PRO | X | 164 | 37.924 | 60.641 | 51.987 | 0.00 | 0.00 |
| ATOM | 2526 | HG2  | PRO | X | 164 | 37.132 | 60.476 | 51.256 | 0.00 | 0.00 |
| ATOM | 2527 | HG3  | PRO | X | 164 | 37.639 | 61.303 | 52.805 | 0.00 | 0.00 |
| ATOM | 2528 | CB   | PRO | X | 164 | 38.278 | 59.315 | 52.668 | 0.00 | 0.00 |
| ATOM | 2529 | HB2  | PRO | X | 164 | 38.460 | 58.542 | 51.921 | 0.00 | 0.00 |
| ATOM | 2530 | HB3  | PRO | X | 164 | 37.457 | 58.955 | 53.288 | 0.00 | 0.00 |
| ATOM | 2531 | CA   | PRO | X | 164 | 39.642 | 59.659 | 53.306 | 0.00 | 0.00 |
| ATOM | 2532 | HA   | PRO | X | 164 | 39.531 | 60.198 | 54.247 | 0.00 | 0.00 |
| ATOM | 2533 | C    | PRO | X | 164 | 40.466 | 58.340 | 53.477 | 0.00 | 0.00 |
| ATOM | 2534 | O    | PRO | X | 164 | 39.870 | 57.479 | 54.118 | 0.00 | 0.00 |
| ATOM | 2535 | N    | GLY | X | 165 | 41.660 | 58.209 | 52.865 | 0.00 | 0.00 |
| ATOM | 2536 | H    | GLY | X | 165 | 42.059 | 58.968 | 52.332 | 0.00 | 0.00 |
| ATOM | 2537 | CA   | GLY | X | 165 | 42.340 | 56.936 | 52.664 | 0.00 | 0.00 |
| ATOM | 2538 | HA2  | GLY | X | 165 | 43.373 | 57.279 | 52.618 | 0.00 | 0.00 |
| ATOM | 2539 | HA3  | GLY | X | 165 | 42.241 | 56.215 | 53.475 | 0.00 | 0.00 |
| ATOM | 2540 | C    | GLY | X | 165 | 41.952 | 56.260 | 51.352 | 0.00 | 0.00 |
| ATOM | 2541 | O    | GLY | X | 165 | 42.528 | 56.582 | 50.298 | 0.00 | 0.00 |
| ATOM | 2542 | N    | ASN | X | 166 | 40.970 | 55.314 | 51.302 | 0.00 | 0.00 |
| ATOM | 2543 | H    | ASN | X | 166 | 40.289 | 55.445 | 52.037 | 0.00 | 0.00 |
| ATOM | 2544 | CA   | ASN | X | 166 | 40.955 | 54.148 | 50.332 | 0.00 | 0.00 |
| ATOM | 2545 | HA   | ASN | X | 166 | 41.999 | 53.901 | 50.136 | 0.00 | 0.00 |
| ATOM | 2546 | CB   | ASN | X | 166 | 40.203 | 52.956 | 50.973 | 0.00 | 0.00 |
| ATOM | 2547 | HB2  | ASN | X | 166 | 39.147 | 53.218 | 51.041 | 0.00 | 0.00 |
| ATOM | 2548 | HB3  | ASN | X | 166 | 40.268 | 52.092 | 50.311 | 0.00 | 0.00 |
| ATOM | 2549 | CG   | ASN | X | 166 | 40.946 | 52.571 | 52.223 | 0.00 | 0.00 |
| ATOM | 2550 | OD1  | ASN | X | 166 | 42.005 | 51.968 | 52.122 | 0.00 | 0.00 |
| ATOM | 2551 | ND2  | ASN | X | 166 | 40.375 | 52.781 | 53.398 | 0.00 | 0.00 |
| ATOM | 2552 | HD21 | ASN | X | 166 | 40.821 | 52.488 | 54.255 | 0.00 | 0.00 |
| ATOM | 2553 | HD22 | ASN | X | 166 | 39.499 | 53.271 | 53.514 | 0.00 | 0.00 |
| ATOM | 2554 | C    | ASN | X | 166 | 40.396 | 54.521 | 48.946 | 0.00 | 0.00 |
| ATOM | 2555 | O    | ASN | X | 166 | 39.706 | 53.705 | 48.361 | 0.00 | 0.00 |
| ATOM | 2556 | N    | VAL | X | 167 | 40.743 | 55.677 | 48.348 | 0.00 | 0.00 |
| ATOM | 2557 | H    | VAL | X | 167 | 41.542 | 56.048 | 48.842 | 0.00 | 0.00 |
| ATOM | 2558 | CA   | VAL | X | 167 | 40.128 | 56.193 | 47.182 | 0.00 | 0.00 |
| ATOM | 2559 | HA   | VAL | X | 167 | 39.062 | 55.982 | 47.263 | 0.00 | 0.00 |
| ATOM | 2560 | CB   | VAL | X | 167 | 40.251 | 57.735 | 46.986 | 0.00 | 0.00 |
| ATOM | 2561 | HB   | VAL | X | 167 | 39.542 | 58.064 | 46.226 | 0.00 | 0.00 |
| ATOM | 2562 | CG1  | VAL | X | 167 | 39.585 | 58.233 | 48.258 | 0.00 | 0.00 |
| ATOM | 2563 | HG11 | VAL | X | 167 | 38.566 | 57.854 | 48.337 | 0.00 | 0.00 |
| ATOM | 2564 | HG12 | VAL | X | 167 | 40.166 | 58.015 | 49.155 | 0.00 | 0.00 |
| ATOM | 2565 | HG13 | VAL | X | 167 | 39.480 | 59.317 | 48.210 | 0.00 | 0.00 |
| ATOM | 2566 | CG2  | VAL | X | 167 | 41.631 | 58.427 | 46.823 | 0.00 | 0.00 |
| ATOM | 2567 | HG21 | VAL | X | 167 | 41.460 | 59.501 | 46.745 | 0.00 | 0.00 |
| ATOM | 2568 | HG22 | VAL | X | 167 | 42.090 | 58.098 | 45.892 | 0.00 | 0.00 |
| ATOM | 2569 | HG23 | VAL | X | 167 | 42.261 | 58.214 | 47.687 | 0.00 | 0.00 |
| ATOM | 2570 | C    | VAL | X | 167 | 40.446 | 55.441 | 45.888 | 0.00 | 0.00 |
| ATOM | 2571 | O    | VAL | X | 167 | 39.545 | 55.268 | 45.130 | 0.00 | 0.00 |

|      |      |      |     |   |     |        |        |        |      |      |
|------|------|------|-----|---|-----|--------|--------|--------|------|------|
| ATOM | 2572 | N    | GLY | X | 168 | 41.625 | 54.764 | 45.792 | 0.00 | 0.00 |
| ATOM | 2573 | H    | GLY | X | 168 | 42.353 | 55.014 | 46.446 | 0.00 | 0.00 |
| ATOM | 2574 | CA   | GLY | X | 168 | 42.043 | 53.748 | 44.813 | 0.00 | 0.00 |
| ATOM | 2575 | HA2  | GLY | X | 168 | 42.157 | 54.148 | 43.806 | 0.00 | 0.00 |
| ATOM | 2576 | HA3  | GLY | X | 168 | 43.055 | 53.440 | 45.077 | 0.00 | 0.00 |
| ATOM | 2577 | C    | GLY | X | 168 | 41.222 | 52.475 | 44.695 | 0.00 | 0.00 |
| ATOM | 2578 | O    | GLY | X | 168 | 41.052 | 51.900 | 43.557 | 0.00 | 0.00 |
| ATOM | 2579 | N    | LEU | X | 169 | 40.560 | 52.058 | 45.776 | 0.00 | 0.00 |
| ATOM | 2580 | H    | LEU | X | 169 | 40.608 | 52.582 | 46.638 | 0.00 | 0.00 |
| ATOM | 2581 | CA   | LEU | X | 169 | 39.530 | 50.991 | 45.773 | 0.00 | 0.00 |
| ATOM | 2582 | HA   | LEU | X | 169 | 39.770 | 50.288 | 44.975 | 0.00 | 0.00 |
| ATOM | 2583 | CB   | LEU | X | 169 | 39.457 | 50.161 | 47.084 | 0.00 | 0.00 |
| ATOM | 2584 | HB2  | LEU | X | 169 | 39.026 | 50.777 | 47.874 | 0.00 | 0.00 |
| ATOM | 2585 | HB3  | LEU | X | 169 | 38.756 | 49.342 | 46.925 | 0.00 | 0.00 |
| ATOM | 2586 | CG   | LEU | X | 169 | 40.855 | 49.646 | 47.541 | 0.00 | 0.00 |
| ATOM | 2587 | HG   | LEU | X | 169 | 41.440 | 50.496 | 47.893 | 0.00 | 0.00 |
| ATOM | 2588 | CD1  | LEU | X | 169 | 40.562 | 48.692 | 48.686 | 0.00 | 0.00 |
| ATOM | 2589 | HD11 | LEU | X | 169 | 40.198 | 49.143 | 49.609 | 0.00 | 0.00 |
| ATOM | 2590 | HD12 | LEU | X | 169 | 41.491 | 48.144 | 48.844 | 0.00 | 0.00 |
| ATOM | 2591 | HD13 | LEU | X | 169 | 39.824 | 47.976 | 48.325 | 0.00 | 0.00 |
| ATOM | 2592 | CD2  | LEU | X | 169 | 41.723 | 48.891 | 46.527 | 0.00 | 0.00 |
| ATOM | 2593 | HD21 | LEU | X | 169 | 41.169 | 48.022 | 46.173 | 0.00 | 0.00 |
| ATOM | 2594 | HD22 | LEU | X | 169 | 41.953 | 49.610 | 45.740 | 0.00 | 0.00 |
| ATOM | 2595 | HD23 | LEU | X | 169 | 42.662 | 48.600 | 46.998 | 0.00 | 0.00 |
| ATOM | 2596 | C    | LEU | X | 169 | 38.106 | 51.484 | 45.302 | 0.00 | 0.00 |
| ATOM | 2597 | O    | LEU | X | 169 | 37.319 | 50.706 | 44.764 | 0.00 | 0.00 |
| ATOM | 2598 | N    | LEU | X | 170 | 37.861 | 52.778 | 45.548 | 0.00 | 0.00 |
| ATOM | 2599 | H    | LEU | X | 170 | 38.532 | 53.214 | 46.165 | 0.00 | 0.00 |
| ATOM | 2600 | CA   | LEU | X | 170 | 36.669 | 53.426 | 45.071 | 0.00 | 0.00 |
| ATOM | 2601 | HA   | LEU | X | 170 | 35.817 | 52.748 | 45.095 | 0.00 | 0.00 |
| ATOM | 2602 | CB   | LEU | X | 170 | 36.362 | 54.680 | 45.967 | 0.00 | 0.00 |
| ATOM | 2603 | HB2  | LEU | X | 170 | 37.219 | 55.342 | 46.089 | 0.00 | 0.00 |
| ATOM | 2604 | HB3  | LEU | X | 170 | 35.655 | 55.288 | 45.401 | 0.00 | 0.00 |
| ATOM | 2605 | CG   | LEU | X | 170 | 35.909 | 54.280 | 47.396 | 0.00 | 0.00 |
| ATOM | 2606 | HG   | LEU | X | 170 | 36.542 | 53.484 | 47.788 | 0.00 | 0.00 |
| ATOM | 2607 | CD1  | LEU | X | 170 | 36.020 | 55.406 | 48.400 | 0.00 | 0.00 |
| ATOM | 2608 | HD11 | LEU | X | 170 | 35.862 | 54.964 | 49.384 | 0.00 | 0.00 |
| ATOM | 2609 | HD12 | LEU | X | 170 | 35.181 | 56.078 | 48.221 | 0.00 | 0.00 |
| ATOM | 2610 | HD13 | LEU | X | 170 | 36.995 | 55.888 | 48.327 | 0.00 | 0.00 |
| ATOM | 2611 | CD2  | LEU | X | 170 | 34.507 | 53.681 | 47.488 | 0.00 | 0.00 |
| ATOM | 2612 | HD21 | LEU | X | 170 | 34.350 | 52.749 | 46.945 | 0.00 | 0.00 |
| ATOM | 2613 | HD22 | LEU | X | 170 | 34.391 | 53.488 | 48.554 | 0.00 | 0.00 |
| ATOM | 2614 | HD23 | LEU | X | 170 | 33.822 | 54.458 | 47.146 | 0.00 | 0.00 |
| ATOM | 2615 | C    | LEU | X | 170 | 36.819 | 53.887 | 43.626 | 0.00 | 0.00 |
| ATOM | 2616 | O    | LEU | X | 170 | 35.767 | 53.896 | 42.958 | 0.00 | 0.00 |
| ATOM | 2617 | N    | ASP | X | 171 | 38.026 | 53.916 | 43.106 | 0.00 | 0.00 |
| ATOM | 2618 | H    | ASP | X | 171 | 38.784 | 54.124 | 43.740 | 0.00 | 0.00 |
| ATOM | 2619 | CA   | ASP | X | 171 | 38.215 | 53.966 | 41.656 | 0.00 | 0.00 |
| ATOM | 2620 | HA   | ASP | X | 171 | 37.718 | 54.828 | 41.211 | 0.00 | 0.00 |
| ATOM | 2621 | CB   | ASP | X | 171 | 39.740 | 54.059 | 41.320 | 0.00 | 0.00 |
| ATOM | 2622 | HB2  | ASP | X | 171 | 40.310 | 53.161 | 41.560 | 0.00 | 0.00 |
| ATOM | 2623 | HB3  | ASP | X | 171 | 39.751 | 54.007 | 40.231 | 0.00 | 0.00 |
| ATOM | 2624 | CG   | ASP | X | 171 | 40.482 | 55.308 | 41.793 | 0.00 | 0.00 |
| ATOM | 2625 | OD1  | ASP | X | 171 | 39.731 | 56.197 | 42.368 | 0.00 | 0.00 |
| ATOM | 2626 | OD2  | ASP | X | 171 | 41.759 | 55.455 | 41.677 | 0.00 | 0.00 |
| ATOM | 2627 | C    | ASP | X | 171 | 37.693 | 52.664 | 41.023 | 0.00 | 0.00 |
| ATOM | 2628 | O    | ASP | X | 171 | 37.063 | 52.600 | 39.974 | 0.00 | 0.00 |
| ATOM | 2629 | N    | GLN | X | 172 | 38.096 | 51.591 | 41.611 | 0.00 | 0.00 |
| ATOM | 2630 | H    | GLN | X | 172 | 38.660 | 51.668 | 42.445 | 0.00 | 0.00 |
| ATOM | 2631 | CA   | GLN | X | 172 | 37.877 | 50.195 | 41.167 | 0.00 | 0.00 |
| ATOM | 2632 | HA   | GLN | X | 172 | 38.057 | 50.061 | 40.100 | 0.00 | 0.00 |
| ATOM | 2633 | CB   | GLN | X | 172 | 38.719 | 49.199 | 41.993 | 0.00 | 0.00 |
| ATOM | 2634 | HB2  | GLN | X | 172 | 38.414 | 49.256 | 43.038 | 0.00 | 0.00 |
| ATOM | 2635 | HB3  | GLN | X | 172 | 38.407 | 48.211 | 41.652 | 0.00 | 0.00 |
| ATOM | 2636 | CG   | GLN | X | 172 | 40.283 | 49.207 | 41.857 | 0.00 | 0.00 |
| ATOM | 2637 | HG2  | GLN | X | 172 | 40.512 | 48.785 | 40.879 | 0.00 | 0.00 |
| ATOM | 2638 | HG3  | GLN | X | 172 | 40.625 | 50.241 | 41.908 | 0.00 | 0.00 |

|      |      |      |     |   |     |        |        |        |      |      |
|------|------|------|-----|---|-----|--------|--------|--------|------|------|
| ATOM | 2639 | CD   | GLN | X | 172 | 40.876 | 48.416 | 43.031 | 0.00 | 0.00 |
| ATOM | 2640 | OE1  | GLN | X | 172 | 40.119 | 47.765 | 43.758 | 0.00 | 0.00 |
| ATOM | 2641 | NE2  | GLN | X | 172 | 42.138 | 48.384 | 43.280 | 0.00 | 0.00 |
| ATOM | 2642 | HE21 | GLN | X | 172 | 42.483 | 47.704 | 43.943 | 0.00 | 0.00 |
| ATOM | 2643 | HE22 | GLN | X | 172 | 42.752 | 48.882 | 42.652 | 0.00 | 0.00 |
| ATOM | 2644 | C    | GLN | X | 172 | 36.385 | 49.807 | 41.311 | 0.00 | 0.00 |
| ATOM | 2645 | O    | GLN | X | 172 | 35.788 | 49.145 | 40.506 | 0.00 | 0.00 |
| ATOM | 2646 | N    | ARG | X | 173 | 35.749 | 50.273 | 42.393 | 0.00 | 0.00 |
| ATOM | 2647 | H    | ARG | X | 173 | 36.236 | 50.905 | 43.012 | 0.00 | 0.00 |
| ATOM | 2648 | CA   | ARG | X | 173 | 34.297 | 50.219 | 42.567 | 0.00 | 0.00 |
| ATOM | 2649 | HA   | ARG | X | 173 | 33.965 | 49.203 | 42.353 | 0.00 | 0.00 |
| ATOM | 2650 | CB   | ARG | X | 173 | 33.873 | 50.511 | 44.018 | 0.00 | 0.00 |
| ATOM | 2651 | HB2  | ARG | X | 173 | 34.459 | 49.863 | 44.670 | 0.00 | 0.00 |
| ATOM | 2652 | HB3  | ARG | X | 173 | 34.180 | 51.520 | 44.293 | 0.00 | 0.00 |
| ATOM | 2653 | CG   | ARG | X | 173 | 32.337 | 50.267 | 44.369 | 0.00 | 0.00 |
| ATOM | 2654 | HG2  | ARG | X | 173 | 31.802 | 50.943 | 43.702 | 0.00 | 0.00 |
| ATOM | 2655 | HG3  | ARG | X | 173 | 32.048 | 49.217 | 44.315 | 0.00 | 0.00 |
| ATOM | 2656 | CD   | ARG | X | 173 | 31.988 | 50.738 | 45.781 | 0.00 | 0.00 |
| ATOM | 2657 | HD2  | ARG | X | 173 | 32.290 | 51.774 | 45.933 | 0.00 | 0.00 |
| ATOM | 2658 | HD3  | ARG | X | 173 | 30.910 | 50.729 | 45.944 | 0.00 | 0.00 |
| ATOM | 2659 | NE   | ARG | X | 173 | 32.589 | 49.846 | 46.818 | 0.00 | 0.00 |
| ATOM | 2660 | HE   | ARG | X | 173 | 32.895 | 48.948 | 46.471 | 0.00 | 0.00 |
| ATOM | 2661 | CZ   | ARG | X | 173 | 32.599 | 50.092 | 48.111 | 0.00 | 0.00 |
| ATOM | 2662 | NH1  | ARG | X | 173 | 32.262 | 51.235 | 48.716 | 0.00 | 0.00 |
| ATOM | 2663 | HH11 | ARG | X | 173 | 31.886 | 51.996 | 48.167 | 0.00 | 0.00 |
| ATOM | 2664 | HH12 | ARG | X | 173 | 32.539 | 51.378 | 49.677 | 0.00 | 0.00 |
| ATOM | 2665 | NH2  | ARG | X | 173 | 33.252 | 49.189 | 48.798 | 0.00 | 0.00 |
| ATOM | 2666 | HH21 | ARG | X | 173 | 33.689 | 48.401 | 48.342 | 0.00 | 0.00 |
| ATOM | 2667 | HH22 | ARG | X | 173 | 33.331 | 49.208 | 49.804 | 0.00 | 0.00 |
| ATOM | 2668 | C    | ARG | X | 173 | 33.576 | 51.042 | 41.498 | 0.00 | 0.00 |
| ATOM | 2669 | O    | ARG | X | 173 | 32.624 | 50.587 | 40.898 | 0.00 | 0.00 |
| ATOM | 2670 | N    | LEU | X | 174 | 33.930 | 52.328 | 41.304 | 0.00 | 0.00 |
| ATOM | 2671 | H    | LEU | X | 174 | 34.696 | 52.736 | 41.820 | 0.00 | 0.00 |
| ATOM | 2672 | CA   | LEU | X | 174 | 33.466 | 53.135 | 40.199 | 0.00 | 0.00 |
| ATOM | 2673 | HA   | LEU | X | 174 | 32.413 | 53.376 | 40.346 | 0.00 | 0.00 |
| ATOM | 2674 | CB   | LEU | X | 174 | 34.205 | 54.495 | 40.227 | 0.00 | 0.00 |
| ATOM | 2675 | HB2  | LEU | X | 174 | 33.923 | 54.906 | 41.197 | 0.00 | 0.00 |
| ATOM | 2676 | HB3  | LEU | X | 174 | 35.289 | 54.399 | 40.153 | 0.00 | 0.00 |
| ATOM | 2677 | CG   | LEU | X | 174 | 33.596 | 55.432 | 39.142 | 0.00 | 0.00 |
| ATOM | 2678 | HG   | LEU | X | 174 | 33.965 | 55.051 | 38.189 | 0.00 | 0.00 |
| ATOM | 2679 | CD1  | LEU | X | 174 | 32.091 | 55.631 | 39.264 | 0.00 | 0.00 |
| ATOM | 2680 | HD11 | LEU | X | 174 | 31.568 | 54.723 | 38.965 | 0.00 | 0.00 |
| ATOM | 2681 | HD12 | LEU | X | 174 | 31.644 | 56.392 | 38.624 | 0.00 | 0.00 |
| ATOM | 2682 | HD13 | LEU | X | 174 | 31.803 | 55.894 | 40.282 | 0.00 | 0.00 |
| ATOM | 2683 | CD2  | LEU | X | 174 | 34.082 | 56.845 | 39.056 | 0.00 | 0.00 |
| ATOM | 2684 | HD21 | LEU | X | 174 | 33.940 | 57.238 | 38.049 | 0.00 | 0.00 |
| ATOM | 2685 | HD22 | LEU | X | 174 | 33.459 | 57.461 | 39.704 | 0.00 | 0.00 |
| ATOM | 2686 | HD23 | LEU | X | 174 | 35.123 | 56.928 | 39.367 | 0.00 | 0.00 |
| ATOM | 2687 | C    | LEU | X | 174 | 33.594 | 52.464 | 38.818 | 0.00 | 0.00 |
| ATOM | 2688 | O    | LEU | X | 174 | 32.608 | 52.416 | 38.086 | 0.00 | 0.00 |
| ATOM | 2689 | N    | ALA | X | 175 | 34.731 | 51.875 | 38.552 | 0.00 | 0.00 |
| ATOM | 2690 | H    | ALA | X | 175 | 35.557 | 52.224 | 39.016 | 0.00 | 0.00 |
| ATOM | 2691 | CA   | ALA | X | 175 | 34.995 | 51.036 | 37.315 | 0.00 | 0.00 |
| ATOM | 2692 | HA   | ALA | X | 175 | 34.772 | 51.589 | 36.403 | 0.00 | 0.00 |
| ATOM | 2693 | CB   | ALA | X | 175 | 36.391 | 50.471 | 37.234 | 0.00 | 0.00 |
| ATOM | 2694 | HB1  | ALA | X | 175 | 36.487 | 49.781 | 36.396 | 0.00 | 0.00 |
| ATOM | 2695 | HB2  | ALA | X | 175 | 36.608 | 50.042 | 38.212 | 0.00 | 0.00 |
| ATOM | 2696 | HB3  | ALA | X | 175 | 37.092 | 51.278 | 37.021 | 0.00 | 0.00 |
| ATOM | 2697 | C    | ALA | X | 175 | 33.925 | 49.909 | 37.238 | 0.00 | 0.00 |
| ATOM | 2698 | O    | ALA | X | 175 | 33.221 | 49.815 | 36.287 | 0.00 | 0.00 |
| ATOM | 2699 | N    | LEU | X | 176 | 33.600 | 49.086 | 38.255 | 0.00 | 0.00 |
| ATOM | 2700 | H    | LEU | X | 176 | 34.153 | 49.070 | 39.099 | 0.00 | 0.00 |
| ATOM | 2701 | CA   | LEU | X | 176 | 32.458 | 48.150 | 38.385 | 0.00 | 0.00 |
| ATOM | 2702 | HA   | LEU | X | 176 | 32.566 | 47.399 | 37.602 | 0.00 | 0.00 |
| ATOM | 2703 | CB   | LEU | X | 176 | 32.432 | 47.267 | 39.684 | 0.00 | 0.00 |
| ATOM | 2704 | HB2  | LEU | X | 176 | 32.452 | 47.902 | 40.569 | 0.00 | 0.00 |
| ATOM | 2705 | HB3  | LEU | X | 176 | 31.545 | 46.640 | 39.591 | 0.00 | 0.00 |

|      |      |      |     |   |     |        |        |        |      |      |
|------|------|------|-----|---|-----|--------|--------|--------|------|------|
| ATOM | 2706 | CG   | LEU | X | 176 | 33.654 | 46.373 | 39.765 | 0.00 | 0.00 |
| ATOM | 2707 | HG   | LEU | X | 176 | 34.561 | 46.958 | 39.918 | 0.00 | 0.00 |
| ATOM | 2708 | CD1  | LEU | X | 176 | 33.456 | 45.548 | 41.068 | 0.00 | 0.00 |
| ATOM | 2709 | HD11 | LEU | X | 176 | 33.010 | 46.158 | 41.853 | 0.00 | 0.00 |
| ATOM | 2710 | HD12 | LEU | X | 176 | 34.455 | 45.278 | 41.411 | 0.00 | 0.00 |
| ATOM | 2711 | HD13 | LEU | X | 176 | 32.837 | 44.695 | 40.790 | 0.00 | 0.00 |
| ATOM | 2712 | CD2  | LEU | X | 176 | 33.991 | 45.468 | 38.536 | 0.00 | 0.00 |
| ATOM | 2713 | HD21 | LEU | X | 176 | 34.034 | 46.025 | 37.600 | 0.00 | 0.00 |
| ATOM | 2714 | HD22 | LEU | X | 176 | 34.985 | 45.072 | 38.742 | 0.00 | 0.00 |
| ATOM | 2715 | HD23 | LEU | X | 176 | 33.361 | 44.583 | 38.443 | 0.00 | 0.00 |
| ATOM | 2716 | C    | LEU | X | 176 | 31.113 | 48.849 | 38.164 | 0.00 | 0.00 |
| ATOM | 2717 | O    | LEU | X | 176 | 30.234 | 48.268 | 37.536 | 0.00 | 0.00 |
| ATOM | 2718 | N    | GLN | X | 177 | 30.858 | 50.057 | 38.654 | 0.00 | 0.00 |
| ATOM | 2719 | H    | GLN | X | 177 | 31.591 | 50.595 | 39.094 | 0.00 | 0.00 |
| ATOM | 2720 | CA   | GLN | X | 177 | 29.579 | 50.754 | 38.339 | 0.00 | 0.00 |
| ATOM | 2721 | HA   | GLN | X | 177 | 28.702 | 50.147 | 38.565 | 0.00 | 0.00 |
| ATOM | 2722 | CB   | GLN | X | 177 | 29.427 | 51.983 | 39.254 | 0.00 | 0.00 |
| ATOM | 2723 | HB2  | GLN | X | 177 | 30.323 | 52.601 | 39.212 | 0.00 | 0.00 |
| ATOM | 2724 | HB3  | GLN | X | 177 | 28.640 | 52.688 | 38.984 | 0.00 | 0.00 |
| ATOM | 2725 | CG   | GLN | X | 177 | 29.160 | 51.573 | 40.698 | 0.00 | 0.00 |
| ATOM | 2726 | HG2  | GLN | X | 177 | 28.308 | 50.901 | 40.807 | 0.00 | 0.00 |
| ATOM | 2727 | HG3  | GLN | X | 177 | 30.075 | 51.108 | 41.064 | 0.00 | 0.00 |
| ATOM | 2728 | CD   | GLN | X | 177 | 28.892 | 52.741 | 41.616 | 0.00 | 0.00 |
| ATOM | 2729 | OE1  | GLN | X | 177 | 29.460 | 53.821 | 41.474 | 0.00 | 0.00 |
| ATOM | 2730 | NE2  | GLN | X | 177 | 28.196 | 52.535 | 42.713 | 0.00 | 0.00 |
| ATOM | 2731 | HE21 | GLN | X | 177 | 27.818 | 53.306 | 43.246 | 0.00 | 0.00 |
| ATOM | 2732 | HE22 | GLN | X | 177 | 28.140 | 51.680 | 43.247 | 0.00 | 0.00 |
| ATOM | 2733 | C    | GLN | X | 177 | 29.553 | 51.076 | 36.865 | 0.00 | 0.00 |
| ATOM | 2734 | O    | GLN | X | 177 | 28.495 | 51.069 | 36.285 | 0.00 | 0.00 |
| ATOM | 2735 | N    | TRP | X | 178 | 30.706 | 51.336 | 36.258 | 0.00 | 0.00 |
| ATOM | 2736 | H    | TRP | X | 178 | 31.488 | 51.451 | 36.886 | 0.00 | 0.00 |
| ATOM | 2737 | CA   | TRP | X | 178 | 30.852 | 51.614 | 34.820 | 0.00 | 0.00 |
| ATOM | 2738 | HA   | TRP | X | 178 | 29.966 | 52.192 | 34.558 | 0.00 | 0.00 |
| ATOM | 2739 | CB   | TRP | X | 178 | 32.106 | 52.425 | 34.480 | 0.00 | 0.00 |
| ATOM | 2740 | HB2  | TRP | X | 178 | 32.095 | 53.113 | 35.325 | 0.00 | 0.00 |
| ATOM | 2741 | HB3  | TRP | X | 178 | 33.036 | 51.858 | 34.524 | 0.00 | 0.00 |
| ATOM | 2742 | CG   | TRP | X | 178 | 32.002 | 53.177 | 33.248 | 0.00 | 0.00 |
| ATOM | 2743 | CD1  | TRP | X | 178 | 31.783 | 54.534 | 33.100 | 0.00 | 0.00 |
| ATOM | 2744 | HD1  | TRP | X | 178 | 31.842 | 55.264 | 33.894 | 0.00 | 0.00 |
| ATOM | 2745 | NE1  | TRP | X | 178 | 31.858 | 54.816 | 31.750 | 0.00 | 0.00 |
| ATOM | 2746 | HE1  | TRP | X | 178 | 31.836 | 55.753 | 31.372 | 0.00 | 0.00 |
| ATOM | 2747 | CE2  | TRP | X | 178 | 31.953 | 53.742 | 30.928 | 0.00 | 0.00 |
| ATOM | 2748 | CZ2  | TRP | X | 178 | 32.135 | 53.486 | 29.502 | 0.00 | 0.00 |
| ATOM | 2749 | HZ2  | TRP | X | 178 | 32.021 | 54.257 | 28.755 | 0.00 | 0.00 |
| ATOM | 2750 | CH2  | TRP | X | 178 | 32.426 | 52.181 | 29.031 | 0.00 | 0.00 |
| ATOM | 2751 | HH2  | TRP | X | 178 | 32.410 | 52.076 | 27.956 | 0.00 | 0.00 |
| ATOM | 2752 | CZ3  | TRP | X | 178 | 32.556 | 51.142 | 29.902 | 0.00 | 0.00 |
| ATOM | 2753 | HZ3  | TRP | X | 178 | 32.745 | 50.131 | 29.571 | 0.00 | 0.00 |
| ATOM | 2754 | CE3  | TRP | X | 178 | 32.472 | 51.351 | 31.287 | 0.00 | 0.00 |
| ATOM | 2755 | HE3  | TRP | X | 178 | 32.565 | 50.499 | 31.943 | 0.00 | 0.00 |
| ATOM | 2756 | CD2  | TRP | X | 178 | 32.170 | 52.672 | 31.836 | 0.00 | 0.00 |
| ATOM | 2757 | C    | TRP | X | 178 | 30.736 | 50.313 | 34.074 | 0.00 | 0.00 |
| ATOM | 2758 | O    | TRP | X | 178 | 30.030 | 50.320 | 33.086 | 0.00 | 0.00 |
| ATOM | 2759 | N    | VAL | X | 179 | 31.259 | 49.210 | 34.523 | 0.00 | 0.00 |
| ATOM | 2760 | H    | VAL | X | 179 | 31.852 | 49.391 | 35.320 | 0.00 | 0.00 |
| ATOM | 2761 | CA   | VAL | X | 179 | 30.989 | 47.864 | 33.956 | 0.00 | 0.00 |
| ATOM | 2762 | HA   | VAL | X | 179 | 31.375 | 47.910 | 32.938 | 0.00 | 0.00 |
| ATOM | 2763 | CB   | VAL | X | 179 | 31.709 | 46.706 | 34.675 | 0.00 | 0.00 |
| ATOM | 2764 | HB   | VAL | X | 179 | 31.513 | 46.885 | 35.733 | 0.00 | 0.00 |
| ATOM | 2765 | CG1  | VAL | X | 179 | 31.232 | 45.329 | 34.348 | 0.00 | 0.00 |
| ATOM | 2766 | HG11 | VAL | X | 179 | 30.158 | 45.178 | 34.454 | 0.00 | 0.00 |
| ATOM | 2767 | HG12 | VAL | X | 179 | 31.642 | 45.025 | 33.385 | 0.00 | 0.00 |
| ATOM | 2768 | HG13 | VAL | X | 179 | 31.643 | 44.581 | 35.026 | 0.00 | 0.00 |
| ATOM | 2769 | CG2  | VAL | X | 179 | 33.323 | 46.838 | 34.629 | 0.00 | 0.00 |
| ATOM | 2770 | HG21 | VAL | X | 179 | 33.698 | 46.946 | 33.612 | 0.00 | 0.00 |
| ATOM | 2771 | HG22 | VAL | X | 179 | 33.758 | 45.987 | 35.153 | 0.00 | 0.00 |
| ATOM | 2772 | HG23 | VAL | X | 179 | 33.628 | 47.765 | 35.115 | 0.00 | 0.00 |

|      |      |      |     |   |     |        |        |        |      |      |
|------|------|------|-----|---|-----|--------|--------|--------|------|------|
| ATOM | 2773 | C    | VAL | X | 179 | 29.475 | 47.542 | 33.820 | 0.00 | 0.00 |
| ATOM | 2774 | O    | VAL | X | 179 | 28.951 | 47.215 | 32.792 | 0.00 | 0.00 |
| ATOM | 2775 | N    | GLN | X | 180 | 28.769 | 47.537 | 34.909 | 0.00 | 0.00 |
| ATOM | 2776 | H    | GLN | X | 180 | 29.298 | 47.887 | 35.695 | 0.00 | 0.00 |
| ATOM | 2777 | CA   | GLN | X | 180 | 27.328 | 47.091 | 35.015 | 0.00 | 0.00 |
| ATOM | 2778 | HA   | GLN | X | 180 | 27.317 | 46.061 | 34.660 | 0.00 | 0.00 |
| ATOM | 2779 | CB   | GLN | X | 180 | 26.911 | 47.259 | 36.438 | 0.00 | 0.00 |
| ATOM | 2780 | HB2  | GLN | X | 180 | 27.364 | 48.123 | 36.924 | 0.00 | 0.00 |
| ATOM | 2781 | HB3  | GLN | X | 180 | 25.844 | 47.457 | 36.548 | 0.00 | 0.00 |
| ATOM | 2782 | CG   | GLN | X | 180 | 27.171 | 45.998 | 37.371 | 0.00 | 0.00 |
| ATOM | 2783 | HG2  | GLN | X | 180 | 28.255 | 45.886 | 37.350 | 0.00 | 0.00 |
| ATOM | 2784 | HG3  | GLN | X | 180 | 26.980 | 46.153 | 38.433 | 0.00 | 0.00 |
| ATOM | 2785 | CD   | GLN | X | 180 | 26.505 | 44.726 | 36.874 | 0.00 | 0.00 |
| ATOM | 2786 | OE1  | GLN | X | 180 | 25.713 | 44.734 | 35.998 | 0.00 | 0.00 |
| ATOM | 2787 | NE2  | GLN | X | 180 | 26.750 | 43.519 | 37.322 | 0.00 | 0.00 |
| ATOM | 2788 | HE21 | GLN | X | 180 | 26.281 | 42.709 | 36.941 | 0.00 | 0.00 |
| ATOM | 2789 | HE22 | GLN | X | 180 | 27.500 | 43.376 | 37.983 | 0.00 | 0.00 |
| ATOM | 2790 | C    | GLN | X | 180 | 26.430 | 47.778 | 34.050 | 0.00 | 0.00 |
| ATOM | 2791 | O    | GLN | X | 180 | 25.547 | 47.180 | 33.459 | 0.00 | 0.00 |
| ATOM | 2792 | N    | GLU | X | 181 | 26.627 | 49.083 | 33.921 | 0.00 | 0.00 |
| ATOM | 2793 | H    | GLU | X | 181 | 27.332 | 49.454 | 34.541 | 0.00 | 0.00 |
| ATOM | 2794 | CA   | GLU | X | 181 | 25.815 | 49.899 | 33.021 | 0.00 | 0.00 |
| ATOM | 2795 | HA   | GLU | X | 181 | 24.812 | 49.487 | 33.130 | 0.00 | 0.00 |
| ATOM | 2796 | CB   | GLU | X | 181 | 25.949 | 51.369 | 33.312 | 0.00 | 0.00 |
| ATOM | 2797 | HB2  | GLU | X | 181 | 26.996 | 51.665 | 33.241 | 0.00 | 0.00 |
| ATOM | 2798 | HB3  | GLU | X | 181 | 25.446 | 52.013 | 32.591 | 0.00 | 0.00 |
| ATOM | 2799 | CG   | GLU | X | 181 | 25.549 | 51.876 | 34.697 | 0.00 | 0.00 |
| ATOM | 2800 | HG2  | GLU | X | 181 | 24.501 | 51.597 | 34.805 | 0.00 | 0.00 |
| ATOM | 2801 | HG3  | GLU | X | 181 | 26.117 | 51.298 | 35.426 | 0.00 | 0.00 |
| ATOM | 2802 | CD   | GLU | X | 181 | 25.628 | 53.366 | 34.843 | 0.00 | 0.00 |
| ATOM | 2803 | OE1  | GLU | X | 181 | 26.677 | 53.970 | 35.031 | 0.00 | 0.00 |
| ATOM | 2804 | OE2  | GLU | X | 181 | 24.522 | 53.877 | 35.080 | 0.00 | 0.00 |
| ATOM | 2805 | C    | GLU | X | 181 | 26.135 | 49.630 | 31.579 | 0.00 | 0.00 |
| ATOM | 2806 | O    | GLU | X | 181 | 25.200 | 49.636 | 30.762 | 0.00 | 0.00 |
| ATOM | 2807 | N    | ASN | X | 182 | 27.406 | 49.323 | 31.186 | 0.00 | 0.00 |
| ATOM | 2808 | H    | ASN | X | 182 | 28.048 | 49.147 | 31.946 | 0.00 | 0.00 |
| ATOM | 2809 | CA   | ASN | X | 182 | 27.795 | 49.296 | 29.777 | 0.00 | 0.00 |
| ATOM | 2810 | HA   | ASN | X | 182 | 26.888 | 49.421 | 29.186 | 0.00 | 0.00 |
| ATOM | 2811 | CB   | ASN | X | 182 | 28.570 | 50.579 | 29.496 | 0.00 | 0.00 |
| ATOM | 2812 | HB2  | ASN | X | 182 | 29.629 | 50.531 | 29.753 | 0.00 | 0.00 |
| ATOM | 2813 | HB3  | ASN | X | 182 | 28.701 | 50.675 | 28.418 | 0.00 | 0.00 |
| ATOM | 2814 | CG   | ASN | X | 182 | 28.083 | 51.883 | 30.067 | 0.00 | 0.00 |
| ATOM | 2815 | OD1  | ASN | X | 182 | 27.176 | 52.484 | 29.546 | 0.00 | 0.00 |
| ATOM | 2816 | ND2  | ASN | X | 182 | 28.499 | 52.368 | 31.250 | 0.00 | 0.00 |
| ATOM | 2817 | HD21 | ASN | X | 182 | 28.094 | 53.141 | 31.759 | 0.00 | 0.00 |
| ATOM | 2818 | HD22 | ASN | X | 182 | 29.204 | 51.943 | 31.836 | 0.00 | 0.00 |
| ATOM | 2819 | C    | ASN | X | 182 | 28.607 | 48.069 | 29.263 | 0.00 | 0.00 |
| ATOM | 2820 | O    | ASN | X | 182 | 29.040 | 48.112 | 28.103 | 0.00 | 0.00 |
| ATOM | 2821 | N    | VAL | X | 183 | 28.830 | 47.007 | 30.005 | 0.00 | 0.00 |
| ATOM | 2822 | H    | VAL | X | 183 | 28.662 | 47.020 | 31.001 | 0.00 | 0.00 |
| ATOM | 2823 | CA   | VAL | X | 183 | 29.557 | 45.818 | 29.488 | 0.00 | 0.00 |
| ATOM | 2824 | HA   | VAL | X | 183 | 30.340 | 46.182 | 28.823 | 0.00 | 0.00 |
| ATOM | 2825 | CB   | VAL | X | 183 | 30.276 | 45.070 | 30.586 | 0.00 | 0.00 |
| ATOM | 2826 | HB   | VAL | X | 183 | 30.666 | 45.881 | 31.201 | 0.00 | 0.00 |
| ATOM | 2827 | CG1  | VAL | X | 183 | 29.385 | 44.107 | 31.364 | 0.00 | 0.00 |
| ATOM | 2828 | HG11 | VAL | X | 183 | 28.592 | 44.697 | 31.824 | 0.00 | 0.00 |
| ATOM | 2829 | HG12 | VAL | X | 183 | 28.915 | 43.367 | 30.718 | 0.00 | 0.00 |
| ATOM | 2830 | HG13 | VAL | X | 183 | 29.964 | 43.622 | 32.150 | 0.00 | 0.00 |
| ATOM | 2831 | CG2  | VAL | X | 183 | 31.461 | 44.287 | 30.045 | 0.00 | 0.00 |
| ATOM | 2832 | HG21 | VAL | X | 183 | 32.182 | 45.059 | 29.779 | 0.00 | 0.00 |
| ATOM | 2833 | HG22 | VAL | X | 183 | 31.162 | 43.728 | 29.158 | 0.00 | 0.00 |
| ATOM | 2834 | HG23 | VAL | X | 183 | 31.861 | 43.545 | 30.736 | 0.00 | 0.00 |
| ATOM | 2835 | C    | VAL | X | 183 | 28.782 | 44.963 | 28.560 | 0.00 | 0.00 |
| ATOM | 2836 | O    | VAL | X | 183 | 29.391 | 44.479 | 27.615 | 0.00 | 0.00 |
| ATOM | 2837 | N    | ALA | X | 184 | 27.449 | 44.834 | 28.756 | 0.00 | 0.00 |
| ATOM | 2838 | H    | ALA | X | 184 | 27.142 | 45.253 | 29.621 | 0.00 | 0.00 |
| ATOM | 2839 | CA   | ALA | X | 184 | 26.486 | 44.258 | 27.803 | 0.00 | 0.00 |

|      |      |     |     |   |     |        |        |        |      |      |
|------|------|-----|-----|---|-----|--------|--------|--------|------|------|
| ATOM | 2840 | HA  | ALA | X | 184 | 26.797 | 43.214 | 27.755 | 0.00 | 0.00 |
| ATOM | 2841 | CB  | ALA | X | 184 | 25.025 | 44.288 | 28.419 | 0.00 | 0.00 |
| ATOM | 2842 | HB1 | ALA | X | 184 | 24.303 | 43.677 | 27.877 | 0.00 | 0.00 |
| ATOM | 2843 | HB2 | ALA | X | 184 | 24.601 | 45.293 | 28.409 | 0.00 | 0.00 |
| ATOM | 2844 | HB3 | ALA | X | 184 | 24.984 | 44.062 | 29.485 | 0.00 | 0.00 |
| ATOM | 2845 | C   | ALA | X | 184 | 26.485 | 44.851 | 26.415 | 0.00 | 0.00 |
| ATOM | 2846 | O   | ALA | X | 184 | 26.331 | 44.181 | 25.363 | 0.00 | 0.00 |
| ATOM | 2847 | N   | ALA | X | 185 | 26.713 | 46.151 | 26.344 | 0.00 | 0.00 |
| ATOM | 2848 | H   | ALA | X | 185 | 26.958 | 46.586 | 27.222 | 0.00 | 0.00 |
| ATOM | 2849 | CA  | ALA | X | 185 | 26.990 | 46.815 | 25.040 | 0.00 | 0.00 |
| ATOM | 2850 | HA  | ALA | X | 185 | 26.071 | 46.782 | 24.455 | 0.00 | 0.00 |
| ATOM | 2851 | CB  | ALA | X | 185 | 27.355 | 48.278 | 25.277 | 0.00 | 0.00 |
| ATOM | 2852 | HB1 | ALA | X | 185 | 28.348 | 48.430 | 25.699 | 0.00 | 0.00 |
| ATOM | 2853 | HB2 | ALA | X | 185 | 26.663 | 48.753 | 25.973 | 0.00 | 0.00 |
| ATOM | 2854 | HB3 | ALA | X | 185 | 27.326 | 48.786 | 24.313 | 0.00 | 0.00 |
| ATOM | 2855 | C   | ALA | X | 185 | 28.033 | 46.188 | 24.110 | 0.00 | 0.00 |
| ATOM | 2856 | O   | ALA | X | 185 | 27.872 | 46.262 | 22.900 | 0.00 | 0.00 |
| ATOM | 2857 | N   | PHE | X | 186 | 29.073 | 45.667 | 24.761 | 0.00 | 0.00 |
| ATOM | 2858 | H   | PHE | X | 186 | 29.005 | 45.806 | 25.759 | 0.00 | 0.00 |
| ATOM | 2859 | CA  | PHE | X | 186 | 30.226 | 44.955 | 24.149 | 0.00 | 0.00 |
| ATOM | 2860 | HA  | PHE | X | 186 | 30.243 | 45.359 | 23.137 | 0.00 | 0.00 |
| ATOM | 2861 | CB  | PHE | X | 186 | 31.587 | 45.281 | 24.808 | 0.00 | 0.00 |
| ATOM | 2862 | HB2 | PHE | X | 186 | 31.617 | 44.899 | 25.829 | 0.00 | 0.00 |
| ATOM | 2863 | HB3 | PHE | X | 186 | 32.425 | 44.785 | 24.317 | 0.00 | 0.00 |
| ATOM | 2864 | CG  | PHE | X | 186 | 31.950 | 46.702 | 25.097 | 0.00 | 0.00 |
| ATOM | 2865 | CD1 | PHE | X | 186 | 31.962 | 47.182 | 26.411 | 0.00 | 0.00 |
| ATOM | 2866 | HD1 | PHE | X | 186 | 31.632 | 46.603 | 27.260 | 0.00 | 0.00 |
| ATOM | 2867 | CE1 | PHE | X | 186 | 32.234 | 48.582 | 26.675 | 0.00 | 0.00 |
| ATOM | 2868 | HE1 | PHE | X | 186 | 32.196 | 48.924 | 27.699 | 0.00 | 0.00 |
| ATOM | 2869 | CZ  | PHE | X | 186 | 32.760 | 49.409 | 25.706 | 0.00 | 0.00 |
| ATOM | 2870 | HZ  | PHE | X | 186 | 32.982 | 50.425 | 25.999 | 0.00 | 0.00 |
| ATOM | 2871 | CE2 | PHE | X | 186 | 32.902 | 48.891 | 24.418 | 0.00 | 0.00 |
| ATOM | 2872 | HE2 | PHE | X | 186 | 33.469 | 49.434 | 23.676 | 0.00 | 0.00 |
| ATOM | 2873 | CD2 | PHE | X | 186 | 32.452 | 47.565 | 24.070 | 0.00 | 0.00 |
| ATOM | 2874 | HD2 | PHE | X | 186 | 32.455 | 47.294 | 23.025 | 0.00 | 0.00 |
| ATOM | 2875 | C   | PHE | X | 186 | 30.011 | 43.444 | 23.914 | 0.00 | 0.00 |
| ATOM | 2876 | O   | PHE | X | 186 | 30.937 | 42.714 | 23.499 | 0.00 | 0.00 |
| ATOM | 2877 | N   | GLY | X | 187 | 28.827 | 42.932 | 24.281 | 0.00 | 0.00 |
| ATOM | 2878 | H   | GLY | X | 187 | 28.191 | 43.619 | 24.658 | 0.00 | 0.00 |
| ATOM | 2879 | CA  | GLY | X | 187 | 28.382 | 41.539 | 24.225 | 0.00 | 0.00 |
| ATOM | 2880 | HA2 | GLY | X | 187 | 27.421 | 41.625 | 23.717 | 0.00 | 0.00 |
| ATOM | 2881 | HA3 | GLY | X | 187 | 29.074 | 40.892 | 23.686 | 0.00 | 0.00 |
| ATOM | 2882 | C   | GLY | X | 187 | 28.026 | 40.896 | 25.642 | 0.00 | 0.00 |
| ATOM | 2883 | O   | GLY | X | 187 | 27.295 | 39.909 | 25.679 | 0.00 | 0.00 |
| ATOM | 2884 | N   | GLY | X | 188 | 28.580 | 41.502 | 26.700 | 0.00 | 0.00 |
| ATOM | 2885 | H   | GLY | X | 188 | 29.120 | 42.341 | 26.545 | 0.00 | 0.00 |
| ATOM | 2886 | CA  | GLY | X | 188 | 28.709 | 40.865 | 28.019 | 0.00 | 0.00 |
| ATOM | 2887 | HA2 | GLY | X | 188 | 29.270 | 39.946 | 27.852 | 0.00 | 0.00 |
| ATOM | 2888 | HA3 | GLY | X | 188 | 29.247 | 41.440 | 28.773 | 0.00 | 0.00 |
| ATOM | 2889 | C   | GLY | X | 188 | 27.365 | 40.495 | 28.665 | 0.00 | 0.00 |
| ATOM | 2890 | O   | GLY | X | 188 | 26.318 | 40.734 | 28.078 | 0.00 | 0.00 |
| ATOM | 2891 | N   | ASP | X | 189 | 27.390 | 39.998 | 29.897 | 0.00 | 0.00 |
| ATOM | 2892 | H   | ASP | X | 189 | 28.286 | 39.681 | 30.241 | 0.00 | 0.00 |
| ATOM | 2893 | CA  | ASP | X | 189 | 26.259 | 39.568 | 30.632 | 0.00 | 0.00 |
| ATOM | 2894 | HA  | ASP | X | 189 | 25.295 | 39.696 | 30.139 | 0.00 | 0.00 |
| ATOM | 2895 | CB  | ASP | X | 189 | 26.461 | 38.046 | 30.877 | 0.00 | 0.00 |
| ATOM | 2896 | HB2 | ASP | X | 189 | 26.527 | 37.495 | 29.939 | 0.00 | 0.00 |
| ATOM | 2897 | HB3 | ASP | X | 189 | 27.368 | 37.929 | 31.470 | 0.00 | 0.00 |
| ATOM | 2898 | CG  | ASP | X | 189 | 25.239 | 37.441 | 31.660 | 0.00 | 0.00 |
| ATOM | 2899 | OD1 | ASP | X | 189 | 24.343 | 38.183 | 32.029 | 0.00 | 0.00 |
| ATOM | 2900 | OD2 | ASP | X | 189 | 25.309 | 36.256 | 32.054 | 0.00 | 0.00 |
| ATOM | 2901 | C   | ASP | X | 189 | 26.267 | 40.372 | 31.927 | 0.00 | 0.00 |
| ATOM | 2902 | O   | ASP | X | 189 | 27.193 | 40.096 | 32.755 | 0.00 | 0.00 |
| ATOM | 2903 | N   | PRO | X | 190 | 25.361 | 41.294 | 32.174 | 0.00 | 0.00 |
| ATOM | 2904 | CD  | PRO | X | 190 | 24.287 | 41.736 | 31.314 | 0.00 | 0.00 |
| ATOM | 2905 | HD2 | PRO | X | 190 | 23.526 | 40.999 | 31.054 | 0.00 | 0.00 |
| ATOM | 2906 | HD3 | PRO | X | 190 | 24.837 | 42.247 | 30.524 | 0.00 | 0.00 |

|      |      |      |     |   |     |        |        |        |      |      |
|------|------|------|-----|---|-----|--------|--------|--------|------|------|
| ATOM | 2907 | CG   | PRO | X | 190 | 23.486 | 42.704 | 32.150 | 0.00 | 0.00 |
| ATOM | 2908 | HG2  | PRO | X | 190 | 22.610 | 42.242 | 32.605 | 0.00 | 0.00 |
| ATOM | 2909 | HG3  | PRO | X | 190 | 23.106 | 43.511 | 31.522 | 0.00 | 0.00 |
| ATOM | 2910 | CB   | PRO | X | 190 | 24.357 | 43.178 | 33.280 | 0.00 | 0.00 |
| ATOM | 2911 | HB2  | PRO | X | 190 | 23.763 | 43.467 | 34.147 | 0.00 | 0.00 |
| ATOM | 2912 | HB3  | PRO | X | 190 | 24.952 | 43.986 | 32.855 | 0.00 | 0.00 |
| ATOM | 2913 | CA   | PRO | X | 190 | 25.294 | 41.991 | 33.449 | 0.00 | 0.00 |
| ATOM | 2914 | HA   | PRO | X | 190 | 26.259 | 42.471 | 33.611 | 0.00 | 0.00 |
| ATOM | 2915 | C    | PRO | X | 190 | 25.070 | 41.063 | 34.656 | 0.00 | 0.00 |
| ATOM | 2916 | O    | PRO | X | 190 | 25.435 | 41.370 | 35.777 | 0.00 | 0.00 |
| ATOM | 2917 | N    | THR | X | 191 | 24.442 | 39.898 | 34.469 | 0.00 | 0.00 |
| ATOM | 2918 | H    | THR | X | 191 | 24.148 | 39.644 | 33.537 | 0.00 | 0.00 |
| ATOM | 2919 | CA   | THR | X | 191 | 24.057 | 38.856 | 35.453 | 0.00 | 0.00 |
| ATOM | 2920 | HA   | THR | X | 191 | 23.791 | 39.469 | 36.314 | 0.00 | 0.00 |
| ATOM | 2921 | CB   | THR | X | 191 | 22.842 | 38.042 | 35.084 | 0.00 | 0.00 |
| ATOM | 2922 | HB   | THR | X | 191 | 22.621 | 37.414 | 35.948 | 0.00 | 0.00 |
| ATOM | 2923 | CG2  | THR | X | 191 | 21.547 | 38.883 | 34.590 | 0.00 | 0.00 |
| ATOM | 2924 | HG21 | THR | X | 191 | 21.702 | 39.146 | 33.543 | 0.00 | 0.00 |
| ATOM | 2925 | HG22 | THR | X | 191 | 21.422 | 39.870 | 35.034 | 0.00 | 0.00 |
| ATOM | 2926 | HG23 | THR | X | 191 | 20.605 | 38.399 | 34.847 | 0.00 | 0.00 |
| ATOM | 2927 | OG1  | THR | X | 191 | 23.095 | 37.179 | 34.035 | 0.00 | 0.00 |
| ATOM | 2928 | HG1  | THR | X | 191 | 23.553 | 37.603 | 33.305 | 0.00 | 0.00 |
| ATOM | 2929 | C    | THR | X | 191 | 25.215 | 37.876 | 35.751 | 0.00 | 0.00 |
| ATOM | 2930 | O    | THR | X | 191 | 25.049 | 36.975 | 36.573 | 0.00 | 0.00 |
| ATOM | 2931 | N    | SER | X | 192 | 26.355 | 38.126 | 35.127 | 0.00 | 0.00 |
| ATOM | 2932 | H    | SER | X | 192 | 26.360 | 38.881 | 34.456 | 0.00 | 0.00 |
| ATOM | 2933 | CA   | SER | X | 192 | 27.523 | 37.168 | 35.242 | 0.00 | 0.00 |
| ATOM | 2934 | HA   | SER | X | 192 | 27.489 | 36.699 | 36.225 | 0.00 | 0.00 |
| ATOM | 2935 | CB   | SER | X | 192 | 27.379 | 36.058 | 34.197 | 0.00 | 0.00 |
| ATOM | 2936 | HB2  | SER | X | 192 | 27.703 | 36.364 | 33.202 | 0.00 | 0.00 |
| ATOM | 2937 | HB3  | SER | X | 192 | 28.113 | 35.337 | 34.557 | 0.00 | 0.00 |
| ATOM | 2938 | OG   | SER | X | 192 | 26.096 | 35.363 | 34.263 | 0.00 | 0.00 |
| ATOM | 2939 | HG   | SER | X | 192 | 25.731 | 35.535 | 33.391 | 0.00 | 0.00 |
| ATOM | 2940 | C    | SER | X | 192 | 28.914 | 37.874 | 35.102 | 0.00 | 0.00 |
| ATOM | 2941 | O    | SER | X | 192 | 29.758 | 37.467 | 34.275 | 0.00 | 0.00 |
| ATOM | 2942 | N    | VAL | X | 193 | 29.097 | 38.954 | 35.928 | 0.00 | 0.00 |
| ATOM | 2943 | H    | VAL | X | 193 | 28.369 | 39.051 | 36.622 | 0.00 | 0.00 |
| ATOM | 2944 | CA   | VAL | X | 193 | 30.431 | 39.552 | 36.253 | 0.00 | 0.00 |
| ATOM | 2945 | HA   | VAL | X | 193 | 30.944 | 39.457 | 35.296 | 0.00 | 0.00 |
| ATOM | 2946 | CB   | VAL | X | 193 | 30.326 | 41.015 | 36.620 | 0.00 | 0.00 |
| ATOM | 2947 | HB   | VAL | X | 193 | 29.795 | 41.026 | 37.572 | 0.00 | 0.00 |
| ATOM | 2948 | CG1  | VAL | X | 193 | 31.727 | 41.679 | 36.820 | 0.00 | 0.00 |
| ATOM | 2949 | HG11 | VAL | X | 193 | 32.179 | 41.214 | 37.696 | 0.00 | 0.00 |
| ATOM | 2950 | HG12 | VAL | X | 193 | 32.362 | 41.522 | 35.948 | 0.00 | 0.00 |
| ATOM | 2951 | HG13 | VAL | X | 193 | 31.578 | 42.731 | 37.061 | 0.00 | 0.00 |
| ATOM | 2952 | CG2  | VAL | X | 193 | 29.591 | 41.816 | 35.610 | 0.00 | 0.00 |
| ATOM | 2953 | HG21 | VAL | X | 193 | 29.513 | 42.844 | 35.966 | 0.00 | 0.00 |
| ATOM | 2954 | HG22 | VAL | X | 193 | 28.613 | 41.365 | 35.440 | 0.00 | 0.00 |
| ATOM | 2955 | HG23 | VAL | X | 193 | 30.173 | 41.750 | 34.691 | 0.00 | 0.00 |
| ATOM | 2956 | C    | VAL | X | 193 | 31.238 | 38.709 | 37.210 | 0.00 | 0.00 |
| ATOM | 2957 | O    | VAL | X | 193 | 30.727 | 38.371 | 38.289 | 0.00 | 0.00 |
| ATOM | 2958 | N    | THR | X | 194 | 32.523 | 38.470 | 36.862 | 0.00 | 0.00 |
| ATOM | 2959 | H    | THR | X | 194 | 32.800 | 38.653 | 35.908 | 0.00 | 0.00 |
| ATOM | 2960 | CA   | THR | X | 194 | 33.534 | 37.730 | 37.715 | 0.00 | 0.00 |
| ATOM | 2961 | HA   | THR | X | 194 | 33.062 | 37.531 | 38.677 | 0.00 | 0.00 |
| ATOM | 2962 | CB   | THR | X | 194 | 33.976 | 36.393 | 37.067 | 0.00 | 0.00 |
| ATOM | 2963 | HB   | THR | X | 194 | 34.333 | 36.495 | 36.042 | 0.00 | 0.00 |
| ATOM | 2964 | CG2  | THR | X | 194 | 35.099 | 35.700 | 37.893 | 0.00 | 0.00 |
| ATOM | 2965 | HG21 | THR | X | 194 | 34.885 | 35.761 | 38.960 | 0.00 | 0.00 |
| ATOM | 2966 | HG22 | THR | X | 194 | 36.043 | 36.202 | 37.681 | 0.00 | 0.00 |
| ATOM | 2967 | HG23 | THR | X | 194 | 35.141 | 34.635 | 37.665 | 0.00 | 0.00 |
| ATOM | 2968 | OG1  | THR | X | 194 | 32.913 | 35.494 | 36.877 | 0.00 | 0.00 |
| ATOM | 2969 | HG1  | THR | X | 194 | 32.127 | 35.911 | 36.515 | 0.00 | 0.00 |
| ATOM | 2970 | C    | THR | X | 194 | 34.808 | 38.631 | 37.967 | 0.00 | 0.00 |
| ATOM | 2971 | O    | THR | X | 194 | 35.154 | 39.250 | 36.967 | 0.00 | 0.00 |
| ATOM | 2972 | N    | LEU | X | 195 | 35.445 | 38.649 | 39.150 | 0.00 | 0.00 |
| ATOM | 2973 | H    | LEU | X | 195 | 34.960 | 38.410 | 40.003 | 0.00 | 0.00 |

|      |      |      |     |   |     |        |        |        |      |      |
|------|------|------|-----|---|-----|--------|--------|--------|------|------|
| ATOM | 2974 | CA   | LEU | X | 195 | 36.704 | 39.469 | 39.294 | 0.00 | 0.00 |
| ATOM | 2975 | HA   | LEU | X | 195 | 36.895 | 40.126 | 38.446 | 0.00 | 0.00 |
| ATOM | 2976 | CB   | LEU | X | 195 | 36.659 | 40.277 | 40.628 | 0.00 | 0.00 |
| ATOM | 2977 | HB2  | LEU | X | 195 | 36.788 | 39.549 | 41.429 | 0.00 | 0.00 |
| ATOM | 2978 | HB3  | LEU | X | 195 | 37.497 | 40.935 | 40.855 | 0.00 | 0.00 |
| ATOM | 2979 | CG   | LEU | X | 195 | 35.413 | 41.184 | 40.848 | 0.00 | 0.00 |
| ATOM | 2980 | HG   | LEU | X | 195 | 34.556 | 40.514 | 40.792 | 0.00 | 0.00 |
| ATOM | 2981 | CD1  | LEU | X | 195 | 35.627 | 41.827 | 42.282 | 0.00 | 0.00 |
| ATOM | 2982 | HD11 | LEU | X | 195 | 35.569 | 41.094 | 43.087 | 0.00 | 0.00 |
| ATOM | 2983 | HD12 | LEU | X | 195 | 34.806 | 42.521 | 42.459 | 0.00 | 0.00 |
| ATOM | 2984 | HD13 | LEU | X | 195 | 36.594 | 42.329 | 42.315 | 0.00 | 0.00 |
| ATOM | 2985 | CD2  | LEU | X | 195 | 35.207 | 42.173 | 39.700 | 0.00 | 0.00 |
| ATOM | 2986 | HD21 | LEU | X | 195 | 35.103 | 41.694 | 38.727 | 0.00 | 0.00 |
| ATOM | 2987 | HD22 | LEU | X | 195 | 34.264 | 42.686 | 39.892 | 0.00 | 0.00 |
| ATOM | 2988 | HD23 | LEU | X | 195 | 35.923 | 42.986 | 39.812 | 0.00 | 0.00 |
| ATOM | 2989 | C    | LEU | X | 195 | 37.879 | 38.479 | 39.330 | 0.00 | 0.00 |
| ATOM | 2990 | O    | LEU | X | 195 | 37.805 | 37.447 | 39.965 | 0.00 | 0.00 |
| ATOM | 2991 | N    | PHE | X | 196 | 39.042 | 38.945 | 38.874 | 0.00 | 0.00 |
| ATOM | 2992 | H    | PHE | X | 196 | 39.137 | 39.859 | 38.455 | 0.00 | 0.00 |
| ATOM | 2993 | CA   | PHE | X | 196 | 40.329 | 38.238 | 38.920 | 0.00 | 0.00 |
| ATOM | 2994 | HA   | PHE | X | 196 | 40.369 | 37.762 | 39.900 | 0.00 | 0.00 |
| ATOM | 2995 | CB   | PHE | X | 196 | 40.412 | 37.078 | 37.913 | 0.00 | 0.00 |
| ATOM | 2996 | HB2  | PHE | X | 196 | 41.255 | 36.448 | 38.195 | 0.00 | 0.00 |
| ATOM | 2997 | HB3  | PHE | X | 196 | 39.607 | 36.366 | 38.100 | 0.00 | 0.00 |
| ATOM | 2998 | CG   | PHE | X | 196 | 40.516 | 37.469 | 36.408 | 0.00 | 0.00 |
| ATOM | 2999 | CD1  | PHE | X | 196 | 39.747 | 38.555 | 35.855 | 0.00 | 0.00 |
| ATOM | 3000 | HD1  | PHE | X | 196 | 38.932 | 39.017 | 36.392 | 0.00 | 0.00 |
| ATOM | 3001 | CE1  | PHE | X | 196 | 40.045 | 39.074 | 34.538 | 0.00 | 0.00 |
| ATOM | 3002 | HE1  | PHE | X | 196 | 39.450 | 39.910 | 34.201 | 0.00 | 0.00 |
| ATOM | 3003 | CZ   | PHE | X | 196 | 41.067 | 38.503 | 33.719 | 0.00 | 0.00 |
| ATOM | 3004 | HZ   | PHE | X | 196 | 41.189 | 38.814 | 32.692 | 0.00 | 0.00 |
| ATOM | 3005 | CE2  | PHE | X | 196 | 41.764 | 37.435 | 34.295 | 0.00 | 0.00 |
| ATOM | 3006 | HE2  | PHE | X | 196 | 42.542 | 36.959 | 33.717 | 0.00 | 0.00 |
| ATOM | 3007 | CD2  | PHE | X | 196 | 41.552 | 36.966 | 35.581 | 0.00 | 0.00 |
| ATOM | 3008 | HD2  | PHE | X | 196 | 42.274 | 36.233 | 35.908 | 0.00 | 0.00 |
| ATOM | 3009 | C    | PHE | X | 196 | 41.393 | 39.267 | 38.839 | 0.00 | 0.00 |
| ATOM | 3010 | O    | PHE | X | 196 | 41.292 | 40.417 | 38.420 | 0.00 | 0.00 |
| ATOM | 3011 | N    | GLY | X | 197 | 42.511 | 38.856 | 39.481 | 0.00 | 0.00 |
| ATOM | 3012 | H    | GLY | X | 197 | 42.550 | 37.947 | 39.919 | 0.00 | 0.00 |
| ATOM | 3013 | CA   | GLY | X | 197 | 43.703 | 39.711 | 39.630 | 0.00 | 0.00 |
| ATOM | 3014 | HA2  | GLY | X | 197 | 43.998 | 40.229 | 38.718 | 0.00 | 0.00 |
| ATOM | 3015 | HA3  | GLY | X | 197 | 43.431 | 40.495 | 40.337 | 0.00 | 0.00 |
| ATOM | 3016 | C    | GLY | X | 197 | 44.844 | 39.023 | 40.323 | 0.00 | 0.00 |
| ATOM | 3017 | O    | GLY | X | 197 | 44.721 | 37.823 | 40.518 | 0.00 | 0.00 |
| ATOM | 3018 | N    | GLU | X | 198 | 45.884 | 39.776 | 40.722 | 0.00 | 0.00 |
| ATOM | 3019 | H    | GLU | X | 198 | 45.978 | 40.759 | 40.507 | 0.00 | 0.00 |
| ATOM | 3020 | CA   | GLU | X | 198 | 47.018 | 39.232 | 41.522 | 0.00 | 0.00 |
| ATOM | 3021 | HA   | GLU | X | 198 | 46.685 | 38.271 | 41.915 | 0.00 | 0.00 |
| ATOM | 3022 | CB   | GLU | X | 198 | 48.095 | 38.519 | 40.740 | 0.00 | 0.00 |
| ATOM | 3023 | HB2  | GLU | X | 198 | 48.809 | 38.008 | 41.385 | 0.00 | 0.00 |
| ATOM | 3024 | HB3  | GLU | X | 198 | 47.694 | 37.681 | 40.169 | 0.00 | 0.00 |
| ATOM | 3025 | CG   | GLU | X | 198 | 48.983 | 39.367 | 39.733 | 0.00 | 0.00 |
| ATOM | 3026 | HG2  | GLU | X | 198 | 49.717 | 38.686 | 39.300 | 0.00 | 0.00 |
| ATOM | 3027 | HG3  | GLU | X | 198 | 48.291 | 39.579 | 38.918 | 0.00 | 0.00 |
| ATOM | 3028 | CD   | GLU | X | 198 | 49.589 | 40.564 | 40.345 | 0.00 | 0.00 |
| ATOM | 3029 | OE1  | GLU | X | 198 | 49.638 | 41.575 | 39.580 | 0.00 | 0.00 |
| ATOM | 3030 | OE2  | GLU | X | 198 | 50.193 | 40.527 | 41.383 | 0.00 | 0.00 |
| ATOM | 3031 | C    | GLU | X | 198 | 47.494 | 40.107 | 42.597 | 0.00 | 0.00 |
| ATOM | 3032 | O    | GLU | X | 198 | 47.225 | 41.312 | 42.584 | 0.00 | 0.00 |
| ATOM | 3033 | N    | XA1 | X | 199 | 48.106 | 39.556 | 43.652 | 0.00 | 0.00 |
| ATOM | 3034 | CA   | XA1 | X | 199 | 48.822 | 40.305 | 44.678 | 0.00 | 0.00 |
| ATOM | 3035 | C    | XA1 | X | 199 | 48.070 | 41.498 | 45.387 | 0.00 | 0.00 |
| ATOM | 3036 | O    | XA1 | X | 199 | 47.026 | 41.224 | 46.063 | 0.00 | 0.00 |
| ATOM | 3037 | CB   | XA1 | X | 199 | 50.218 | 40.846 | 44.213 | 0.00 | 0.00 |
| ATOM | 3038 | OG   | XA1 | X | 199 | 51.045 | 41.135 | 45.349 | 0.00 | 0.00 |
| ATOM | 3039 | P1   | XA1 | X | 199 | 51.864 | 42.425 | 45.308 | 0.00 | 0.00 |
| ATOM | 3040 | OL   | XA1 | X | 199 | 51.257 | 43.615 | 44.580 | 0.00 | 0.00 |



|      |      |      |     |   |     |        |        |        |      |      |
|------|------|------|-----|---|-----|--------|--------|--------|------|------|
| ATOM | 3041 | O2   | XA1 | X | 199 | 53.174 | 42.033 | 44.696 | 0.00 | 0.00 |
| ATOM | 3042 | C1   | XA1 | X | 199 | 52.269 | 42.770 | 47.019 | 0.00 | 0.00 |
| ATOM | 3043 | H    | XA1 | X | 199 | 47.921 | 38.585 | 43.862 | 0.00 | 0.00 |
| ATOM | 3044 | HA   | XA1 | X | 199 | 49.013 | 39.511 | 45.401 | 0.00 | 0.00 |
| ATOM | 3045 | HB2  | XA1 | X | 199 | 50.834 | 40.087 | 43.723 | 0.00 | 0.00 |
| ATOM | 3046 | HB3  | XA1 | X | 199 | 50.182 | 41.761 | 43.616 | 0.00 | 0.00 |
| ATOM | 3047 | H11  | XA1 | X | 199 | 52.216 | 41.877 | 47.644 | 0.00 | 0.00 |
| ATOM | 3048 | H12  | XA1 | X | 199 | 53.290 | 43.153 | 47.094 | 0.00 | 0.00 |
| ATOM | 3049 | H13  | XA1 | X | 199 | 51.552 | 43.540 | 47.312 | 0.00 | 0.00 |
| ATOM | 3050 | N    | ALA | X | 200 | 48.438 | 42.742 | 45.111 | 0.00 | 0.00 |
| ATOM | 3051 | H    | ALA | X | 200 | 49.340 | 43.041 | 44.767 | 0.00 | 0.00 |
| ATOM | 3052 | CA   | ALA | X | 200 | 47.610 | 43.854 | 45.627 | 0.00 | 0.00 |
| ATOM | 3053 | HA   | ALA | X | 200 | 47.578 | 43.878 | 46.716 | 0.00 | 0.00 |
| ATOM | 3054 | CB   | ALA | X | 200 | 48.531 | 45.007 | 45.443 | 0.00 | 0.00 |
| ATOM | 3055 | HB1  | ALA | X | 200 | 48.181 | 45.935 | 45.895 | 0.00 | 0.00 |
| ATOM | 3056 | HB2  | ALA | X | 200 | 48.611 | 45.287 | 44.392 | 0.00 | 0.00 |
| ATOM | 3057 | HB3  | ALA | X | 200 | 49.502 | 44.848 | 45.912 | 0.00 | 0.00 |
| ATOM | 3058 | C    | ALA | X | 200 | 46.206 | 43.948 | 44.953 | 0.00 | 0.00 |
| ATOM | 3059 | O    | ALA | X | 200 | 45.234 | 44.328 | 45.633 | 0.00 | 0.00 |
| ATOM | 3060 | N    | GLY | X | 201 | 46.051 | 43.464 | 43.708 | 0.00 | 0.00 |
| ATOM | 3061 | H    | GLY | X | 201 | 46.926 | 43.493 | 43.204 | 0.00 | 0.00 |
| ATOM | 3062 | CA   | GLY | X | 201 | 44.724 | 43.297 | 43.010 | 0.00 | 0.00 |
| ATOM | 3063 | HA2  | GLY | X | 201 | 44.166 | 44.228 | 43.109 | 0.00 | 0.00 |
| ATOM | 3064 | HA3  | GLY | X | 201 | 44.942 | 43.078 | 41.965 | 0.00 | 0.00 |
| ATOM | 3065 | C    | GLY | X | 201 | 43.932 | 42.162 | 43.620 | 0.00 | 0.00 |
| ATOM | 3066 | O    | GLY | X | 201 | 42.736 | 42.197 | 43.642 | 0.00 | 0.00 |
| ATOM | 3067 | N    | ALA | X | 202 | 44.639 | 41.154 | 44.030 | 0.00 | 0.00 |
| ATOM | 3068 | H    | ALA | X | 202 | 45.649 | 41.164 | 43.996 | 0.00 | 0.00 |
| ATOM | 3069 | CA   | ALA | X | 202 | 43.963 | 39.977 | 44.623 | 0.00 | 0.00 |
| ATOM | 3070 | HA   | ALA | X | 202 | 43.094 | 39.665 | 44.043 | 0.00 | 0.00 |
| ATOM | 3071 | CB   | ALA | X | 202 | 44.978 | 38.822 | 44.609 | 0.00 | 0.00 |
| ATOM | 3072 | HB1  | ALA | X | 202 | 44.578 | 37.874 | 44.970 | 0.00 | 0.00 |
| ATOM | 3073 | HB2  | ALA | X | 202 | 45.799 | 39.103 | 45.269 | 0.00 | 0.00 |
| ATOM | 3074 | HB3  | ALA | X | 202 | 45.337 | 38.630 | 43.598 | 0.00 | 0.00 |
| ATOM | 3075 | C    | ALA | X | 202 | 43.382 | 40.338 | 45.986 | 0.00 | 0.00 |
| ATOM | 3076 | O    | ALA | X | 202 | 42.207 | 40.055 | 46.322 | 0.00 | 0.00 |
| ATOM | 3077 | N    | ALA | X | 203 | 44.217 | 41.003 | 46.781 | 0.00 | 0.00 |
| ATOM | 3078 | H    | ALA | X | 203 | 45.178 | 41.146 | 46.506 | 0.00 | 0.00 |
| ATOM | 3079 | CA   | ALA | X | 203 | 43.790 | 41.600 | 48.015 | 0.00 | 0.00 |
| ATOM | 3080 | HA   | ALA | X | 203 | 43.452 | 40.841 | 48.720 | 0.00 | 0.00 |
| ATOM | 3081 | CB   | ALA | X | 203 | 44.981 | 42.377 | 48.498 | 0.00 | 0.00 |
| ATOM | 3082 | HB1  | ALA | X | 203 | 44.842 | 42.707 | 49.527 | 0.00 | 0.00 |
| ATOM | 3083 | HB2  | ALA | X | 203 | 45.123 | 43.274 | 47.895 | 0.00 | 0.00 |
| ATOM | 3084 | HB3  | ALA | X | 203 | 45.805 | 41.664 | 48.471 | 0.00 | 0.00 |
| ATOM | 3085 | C    | ALA | X | 203 | 42.620 | 42.585 | 47.762 | 0.00 | 0.00 |
| ATOM | 3086 | O    | ALA | X | 203 | 41.756 | 42.563 | 48.629 | 0.00 | 0.00 |
| ATOM | 3087 | N    | SER | X | 204 | 42.600 | 43.335 | 46.593 | 0.00 | 0.00 |
| ATOM | 3088 | H    | SER | X | 204 | 43.437 | 43.236 | 46.036 | 0.00 | 0.00 |
| ATOM | 3089 | CA   | SER | X | 204 | 41.493 | 44.203 | 46.202 | 0.00 | 0.00 |
| ATOM | 3090 | HA   | SER | X | 204 | 41.219 | 44.812 | 47.063 | 0.00 | 0.00 |
| ATOM | 3091 | CB   | SER | X | 204 | 41.979 | 45.135 | 45.118 | 0.00 | 0.00 |
| ATOM | 3092 | HB2  | SER | X | 204 | 42.189 | 44.543 | 44.226 | 0.00 | 0.00 |
| ATOM | 3093 | HB3  | SER | X | 204 | 41.209 | 45.859 | 44.854 | 0.00 | 0.00 |
| ATOM | 3094 | OG   | SER | X | 204 | 43.089 | 45.948 | 45.552 | 0.00 | 0.00 |
| ATOM | 3095 | HG   | SER | X | 204 | 43.892 | 45.431 | 45.454 | 0.00 | 0.00 |
| ATOM | 3096 | C    | SER | X | 204 | 40.258 | 43.409 | 45.888 | 0.00 | 0.00 |
| ATOM | 3097 | O    | SER | X | 204 | 39.173 | 43.690 | 46.482 | 0.00 | 0.00 |
| ATOM | 3098 | N    | VAL | X | 205 | 40.325 | 42.333 | 45.068 | 0.00 | 0.00 |
| ATOM | 3099 | H    | VAL | X | 205 | 41.208 | 42.010 | 44.700 | 0.00 | 0.00 |
| ATOM | 3100 | CA   | VAL | X | 205 | 39.209 | 41.404 | 44.783 | 0.00 | 0.00 |
| ATOM | 3101 | HA   | VAL | X | 205 | 38.476 | 42.019 | 44.262 | 0.00 | 0.00 |
| ATOM | 3102 | CB   | VAL | X | 205 | 39.638 | 40.203 | 43.911 | 0.00 | 0.00 |
| ATOM | 3103 | HB   | VAL | X | 205 | 40.534 | 39.673 | 44.233 | 0.00 | 0.00 |
| ATOM | 3104 | CG1  | VAL | X | 205 | 38.608 | 39.124 | 43.802 | 0.00 | 0.00 |
| ATOM | 3105 | HG11 | VAL | X | 205 | 37.738 | 39.512 | 43.272 | 0.00 | 0.00 |
| ATOM | 3106 | HG12 | VAL | X | 205 | 39.008 | 38.213 | 43.357 | 0.00 | 0.00 |
| ATOM | 3107 | HG13 | VAL | X | 205 | 38.273 | 38.760 | 44.774 | 0.00 | 0.00 |

|      |      |      |     |   |     |        |        |        |      |      |
|------|------|------|-----|---|-----|--------|--------|--------|------|------|
| ATOM | 3108 | CG2  | VAL | X | 205 | 39.943 | 40.569 | 42.474 | 0.00 | 0.00 |
| ATOM | 3109 | HG21 | VAL | X | 205 | 40.681 | 41.371 | 42.498 | 0.00 | 0.00 |
| ATOM | 3110 | HG22 | VAL | X | 205 | 39.112 | 41.114 | 42.027 | 0.00 | 0.00 |
| ATOM | 3111 | HG23 | VAL | X | 205 | 40.376 | 39.720 | 41.945 | 0.00 | 0.00 |
| ATOM | 3112 | C    | VAL | X | 205 | 38.580 | 40.887 | 46.043 | 0.00 | 0.00 |
| ATOM | 3113 | O    | VAL | X | 205 | 37.353 | 41.022 | 46.254 | 0.00 | 0.00 |
| ATOM | 3114 | N    | GLY | X | 206 | 39.460 | 40.477 | 46.987 | 0.00 | 0.00 |
| ATOM | 3115 | H    | GLY | X | 206 | 40.440 | 40.480 | 46.741 | 0.00 | 0.00 |
| ATOM | 3116 | CA   | GLY | X | 206 | 39.129 | 40.163 | 48.380 | 0.00 | 0.00 |
| ATOM | 3117 | HA2  | GLY | X | 206 | 38.371 | 39.385 | 48.473 | 0.00 | 0.00 |
| ATOM | 3118 | HA3  | GLY | X | 206 | 39.971 | 39.707 | 48.900 | 0.00 | 0.00 |
| ATOM | 3119 | C    | GLY | X | 206 | 38.483 | 41.340 | 49.187 | 0.00 | 0.00 |
| ATOM | 3120 | O    | GLY | X | 206 | 37.509 | 41.085 | 49.930 | 0.00 | 0.00 |
| ATOM | 3121 | N    | MET | X | 207 | 38.990 | 42.604 | 49.112 | 0.00 | 0.00 |
| ATOM | 3122 | H    | MET | X | 207 | 39.792 | 42.694 | 48.505 | 0.00 | 0.00 |
| ATOM | 3123 | CA   | MET | X | 207 | 38.425 | 43.784 | 49.724 | 0.00 | 0.00 |
| ATOM | 3124 | HA   | MET | X | 207 | 38.121 | 43.539 | 50.742 | 0.00 | 0.00 |
| ATOM | 3125 | CB   | MET | X | 207 | 39.292 | 45.110 | 49.568 | 0.00 | 0.00 |
| ATOM | 3126 | HB2  | MET | X | 207 | 40.212 | 44.786 | 49.082 | 0.00 | 0.00 |
| ATOM | 3127 | HB3  | MET | X | 207 | 38.841 | 45.757 | 48.816 | 0.00 | 0.00 |
| ATOM | 3128 | CG   | MET | X | 207 | 39.642 | 45.807 | 50.853 | 0.00 | 0.00 |
| ATOM | 3129 | HG2  | MET | X | 207 | 40.159 | 46.750 | 50.675 | 0.00 | 0.00 |
| ATOM | 3130 | HG3  | MET | X | 207 | 38.714 | 46.080 | 51.355 | 0.00 | 0.00 |
| ATOM | 3131 | SD   | MET | X | 207 | 40.619 | 44.872 | 52.025 | 0.00 | 0.00 |
| ATOM | 3132 | CE   | MET | X | 207 | 42.288 | 45.077 | 51.191 | 0.00 | 0.00 |
| ATOM | 3133 | HE1  | MET | X | 207 | 43.003 | 44.823 | 51.972 | 0.00 | 0.00 |
| ATOM | 3134 | HE2  | MET | X | 207 | 42.345 | 44.429 | 50.316 | 0.00 | 0.00 |
| ATOM | 3135 | HE3  | MET | X | 207 | 42.608 | 46.075 | 50.893 | 0.00 | 0.00 |
| ATOM | 3136 | C    | MET | X | 207 | 36.986 | 43.998 | 49.105 | 0.00 | 0.00 |
| ATOM | 3137 | O    | MET | X | 207 | 36.052 | 44.381 | 49.831 | 0.00 | 0.00 |
| ATOM | 3138 | N    | HIE | X | 208 | 36.724 | 43.689 | 47.828 | 0.00 | 0.00 |
| ATOM | 3139 | H    | HIE | X | 208 | 37.475 | 43.443 | 47.200 | 0.00 | 0.00 |
| ATOM | 3140 | CA   | HIE | X | 208 | 35.404 | 43.700 | 47.048 | 0.00 | 0.00 |
| ATOM | 3141 | HA   | HIE | X | 208 | 34.881 | 44.621 | 47.307 | 0.00 | 0.00 |
| ATOM | 3142 | CB   | HIE | X | 208 | 35.545 | 43.781 | 45.513 | 0.00 | 0.00 |
| ATOM | 3143 | HB2  | HIE | X | 208 | 36.091 | 42.894 | 45.192 | 0.00 | 0.00 |
| ATOM | 3144 | HB3  | HIE | X | 208 | 34.516 | 43.765 | 45.153 | 0.00 | 0.00 |
| ATOM | 3145 | CG   | HIE | X | 208 | 36.141 | 45.089 | 44.950 | 0.00 | 0.00 |
| ATOM | 3146 | ND1  | HIE | X | 208 | 35.619 | 46.332 | 45.290 | 0.00 | 0.00 |
| ATOM | 3147 | CE1  | HIE | X | 208 | 36.474 | 47.283 | 44.805 | 0.00 | 0.00 |
| ATOM | 3148 | HE1  | HIE | X | 208 | 36.338 | 48.348 | 44.919 | 0.00 | 0.00 |
| ATOM | 3149 | NE2  | HIE | X | 208 | 37.512 | 46.707 | 44.180 | 0.00 | 0.00 |
| ATOM | 3150 | HE2  | HIE | X | 208 | 38.350 | 47.159 | 43.846 | 0.00 | 0.00 |
| ATOM | 3151 | CD2  | HIE | X | 208 | 37.243 | 45.329 | 44.220 | 0.00 | 0.00 |
| ATOM | 3152 | HD2  | HIE | X | 208 | 37.909 | 44.534 | 43.919 | 0.00 | 0.00 |
| ATOM | 3153 | C    | HIE | X | 208 | 34.323 | 42.765 | 47.615 | 0.00 | 0.00 |
| ATOM | 3154 | O    | HIE | X | 208 | 33.147 | 43.000 | 47.572 | 0.00 | 0.00 |
| ATOM | 3155 | N    | LEU | X | 209 | 34.834 | 41.661 | 48.127 | 0.00 | 0.00 |
| ATOM | 3156 | H    | LEU | X | 209 | 35.842 | 41.629 | 48.183 | 0.00 | 0.00 |
| ATOM | 3157 | CA   | LEU | X | 209 | 34.081 | 40.621 | 48.801 | 0.00 | 0.00 |
| ATOM | 3158 | HA   | LEU | X | 209 | 33.111 | 40.485 | 48.322 | 0.00 | 0.00 |
| ATOM | 3159 | CB   | LEU | X | 209 | 34.832 | 39.326 | 48.566 | 0.00 | 0.00 |
| ATOM | 3160 | HB2  | LEU | X | 209 | 34.957 | 39.164 | 47.495 | 0.00 | 0.00 |
| ATOM | 3161 | HB3  | LEU | X | 209 | 35.790 | 39.356 | 49.084 | 0.00 | 0.00 |
| ATOM | 3162 | CG   | LEU | X | 209 | 34.127 | 38.045 | 49.088 | 0.00 | 0.00 |
| ATOM | 3163 | HG   | LEU | X | 209 | 33.788 | 38.227 | 50.108 | 0.00 | 0.00 |
| ATOM | 3164 | CD1  | LEU | X | 209 | 32.879 | 37.807 | 48.202 | 0.00 | 0.00 |
| ATOM | 3165 | HD11 | LEU | X | 209 | 32.420 | 36.829 | 48.342 | 0.00 | 0.00 |
| ATOM | 3166 | HD12 | LEU | X | 209 | 33.123 | 37.838 | 47.140 | 0.00 | 0.00 |
| ATOM | 3167 | HD13 | LEU | X | 209 | 32.129 | 38.574 | 48.399 | 0.00 | 0.00 |
| ATOM | 3168 | CD2  | LEU | X | 209 | 35.072 | 36.870 | 49.081 | 0.00 | 0.00 |
| ATOM | 3169 | HD21 | LEU | X | 209 | 35.179 | 36.635 | 48.023 | 0.00 | 0.00 |
| ATOM | 3170 | HD22 | LEU | X | 209 | 36.066 | 37.064 | 49.486 | 0.00 | 0.00 |
| ATOM | 3171 | HD23 | LEU | X | 209 | 34.651 | 36.043 | 49.652 | 0.00 | 0.00 |
| ATOM | 3172 | C    | LEU | X | 209 | 33.858 | 40.934 | 50.305 | 0.00 | 0.00 |
| ATOM | 3173 | O    | LEU | X | 209 | 33.024 | 40.271 | 50.943 | 0.00 | 0.00 |
| ATOM | 3174 | N    | LEU | X | 210 | 34.643 | 41.827 | 50.902 | 0.00 | 0.00 |

|      |      |      |     |   |     |        |        |        |      |      |
|------|------|------|-----|---|-----|--------|--------|--------|------|------|
| ATOM | 3175 | H    | LEU | X | 210 | 35.345 | 42.308 | 50.358 | 0.00 | 0.00 |
| ATOM | 3176 | CA   | LEU | X | 210 | 34.467 | 42.244 | 52.345 | 0.00 | 0.00 |
| ATOM | 3177 | HA   | LEU | X | 210 | 34.068 | 41.379 | 52.874 | 0.00 | 0.00 |
| ATOM | 3178 | CB   | LEU | X | 210 | 35.845 | 42.586 | 52.967 | 0.00 | 0.00 |
| ATOM | 3179 | HB2  | LEU | X | 210 | 36.388 | 43.114 | 52.182 | 0.00 | 0.00 |
| ATOM | 3180 | HB3  | LEU | X | 210 | 35.625 | 43.253 | 53.800 | 0.00 | 0.00 |
| ATOM | 3181 | CG   | LEU | X | 210 | 36.741 | 41.358 | 53.324 | 0.00 | 0.00 |
| ATOM | 3182 | HG   | LEU | X | 210 | 36.712 | 40.527 | 52.619 | 0.00 | 0.00 |
| ATOM | 3183 | CD1  | LEU | X | 210 | 38.154 | 41.784 | 53.526 | 0.00 | 0.00 |
| ATOM | 3184 | HD11 | LEU | X | 210 | 38.684 | 41.970 | 52.591 | 0.00 | 0.00 |
| ATOM | 3185 | HD12 | LEU | X | 210 | 38.632 | 40.929 | 54.004 | 0.00 | 0.00 |
| ATOM | 3186 | HD13 | LEU | X | 210 | 38.312 | 42.557 | 54.277 | 0.00 | 0.00 |
| ATOM | 3187 | CD2  | LEU | X | 210 | 36.109 | 40.624 | 54.491 | 0.00 | 0.00 |
| ATOM | 3188 | HD21 | LEU | X | 210 | 36.183 | 41.270 | 55.366 | 0.00 | 0.00 |
| ATOM | 3189 | HD22 | LEU | X | 210 | 35.075 | 40.405 | 54.227 | 0.00 | 0.00 |
| ATOM | 3190 | HD23 | LEU | X | 210 | 36.717 | 39.746 | 54.710 | 0.00 | 0.00 |
| ATOM | 3191 | C    | LEU | X | 210 | 33.453 | 43.357 | 52.457 | 0.00 | 0.00 |
| ATOM | 3192 | O    | LEU | X | 210 | 32.607 | 43.245 | 53.342 | 0.00 | 0.00 |
| ATOM | 3193 | N    | SER | X | 211 | 33.509 | 44.297 | 51.495 | 0.00 | 0.00 |
| ATOM | 3194 | H    | SER | X | 211 | 34.202 | 44.149 | 50.775 | 0.00 | 0.00 |
| ATOM | 3195 | CA   | SER | X | 211 | 32.709 | 45.566 | 51.417 | 0.00 | 0.00 |
| ATOM | 3196 | HA   | SER | X | 211 | 32.433 | 45.954 | 52.398 | 0.00 | 0.00 |
| ATOM | 3197 | CB   | SER | X | 211 | 33.578 | 46.689 | 50.905 | 0.00 | 0.00 |
| ATOM | 3198 | HB2  | SER | X | 211 | 32.939 | 47.555 | 50.732 | 0.00 | 0.00 |
| ATOM | 3199 | HB3  | SER | X | 211 | 34.280 | 47.033 | 51.665 | 0.00 | 0.00 |
| ATOM | 3200 | OG   | SER | X | 211 | 34.213 | 46.449 | 49.608 | 0.00 | 0.00 |
| ATOM | 3201 | HG   | SER | X | 211 | 34.783 | 45.677 | 49.603 | 0.00 | 0.00 |
| ATOM | 3202 | C    | SER | X | 211 | 31.361 | 45.357 | 50.719 | 0.00 | 0.00 |
| ATOM | 3203 | O    | SER | X | 211 | 31.319 | 45.274 | 49.493 | 0.00 | 0.00 |
| ATOM | 3204 | N    | PRO | X | 212 | 30.190 | 45.375 | 51.389 | 0.00 | 0.00 |
| ATOM | 3205 | CD   | PRO | X | 212 | 29.996 | 45.819 | 52.763 | 0.00 | 0.00 |
| ATOM | 3206 | HD2  | PRO | X | 212 | 30.160 | 46.895 | 52.821 | 0.00 | 0.00 |
| ATOM | 3207 | HD3  | PRO | X | 212 | 30.626 | 45.367 | 53.529 | 0.00 | 0.00 |
| ATOM | 3208 | CG   | PRO | X | 212 | 28.594 | 45.431 | 53.217 | 0.00 | 0.00 |
| ATOM | 3209 | HG2  | PRO | X | 212 | 28.255 | 46.144 | 53.969 | 0.00 | 0.00 |
| ATOM | 3210 | HG3  | PRO | X | 212 | 28.563 | 44.397 | 53.558 | 0.00 | 0.00 |
| ATOM | 3211 | CB   | PRO | X | 212 | 27.784 | 45.518 | 51.934 | 0.00 | 0.00 |
| ATOM | 3212 | HB2  | PRO | X | 212 | 27.248 | 46.450 | 51.754 | 0.00 | 0.00 |
| ATOM | 3213 | HB3  | PRO | X | 212 | 27.118 | 44.656 | 51.918 | 0.00 | 0.00 |
| ATOM | 3214 | CA   | PRO | X | 212 | 28.839 | 45.248 | 50.785 | 0.00 | 0.00 |
| ATOM | 3215 | HA   | PRO | X | 212 | 28.748 | 44.186 | 50.556 | 0.00 | 0.00 |
| ATOM | 3216 | C    | PRO | X | 212 | 28.680 | 46.148 | 49.519 | 0.00 | 0.00 |
| ATOM | 3217 | O    | PRO | X | 212 | 28.241 | 45.541 | 48.533 | 0.00 | 0.00 |
| ATOM | 3218 | N    | PRO | X | 213 | 28.874 | 47.461 | 49.499 | 0.00 | 0.00 |
| ATOM | 3219 | CD   | PRO | X | 213 | 28.934 | 48.326 | 50.650 | 0.00 | 0.00 |
| ATOM | 3220 | HD2  | PRO | X | 213 | 29.743 | 47.992 | 51.299 | 0.00 | 0.00 |
| ATOM | 3221 | HD3  | PRO | X | 213 | 27.929 | 48.189 | 51.051 | 0.00 | 0.00 |
| ATOM | 3222 | CG   | PRO | X | 213 | 29.181 | 49.694 | 50.230 | 0.00 | 0.00 |
| ATOM | 3223 | HG2  | PRO | X | 213 | 30.264 | 49.788 | 50.315 | 0.00 | 0.00 |
| ATOM | 3224 | HG3  | PRO | X | 213 | 28.741 | 50.493 | 50.827 | 0.00 | 0.00 |
| ATOM | 3225 | CB   | PRO | X | 213 | 28.785 | 49.696 | 48.766 | 0.00 | 0.00 |
| ATOM | 3226 | HB2  | PRO | X | 213 | 29.620 | 50.193 | 48.272 | 0.00 | 0.00 |
| ATOM | 3227 | HB3  | PRO | X | 213 | 27.892 | 50.299 | 48.601 | 0.00 | 0.00 |
| ATOM | 3228 | CA   | PRO | X | 213 | 28.586 | 48.225 | 48.285 | 0.00 | 0.00 |
| ATOM | 3229 | HA   | PRO | X | 213 | 27.560 | 48.173 | 47.922 | 0.00 | 0.00 |
| ATOM | 3230 | C    | PRO | X | 213 | 29.402 | 47.870 | 47.036 | 0.00 | 0.00 |
| ATOM | 3231 | O    | PRO | X | 213 | 28.814 | 48.018 | 45.973 | 0.00 | 0.00 |
| ATOM | 3232 | N    | SER | X | 214 | 30.522 | 47.096 | 47.126 | 0.00 | 0.00 |
| ATOM | 3233 | H    | SER | X | 214 | 30.828 | 46.747 | 48.023 | 0.00 | 0.00 |
| ATOM | 3234 | CA   | SER | X | 214 | 31.067 | 46.347 | 45.984 | 0.00 | 0.00 |
| ATOM | 3235 | HA   | SER | X | 214 | 31.035 | 46.971 | 45.091 | 0.00 | 0.00 |
| ATOM | 3236 | CB   | SER | X | 214 | 32.549 | 46.068 | 46.294 | 0.00 | 0.00 |
| ATOM | 3237 | HB2  | SER | X | 214 | 32.688 | 45.711 | 47.315 | 0.00 | 0.00 |
| ATOM | 3238 | HB3  | SER | X | 214 | 32.919 | 45.397 | 45.518 | 0.00 | 0.00 |
| ATOM | 3239 | OG   | SER | X | 214 | 33.302 | 47.181 | 46.190 | 0.00 | 0.00 |
| ATOM | 3240 | HG   | SER | X | 214 | 34.203 | 46.932 | 45.971 | 0.00 | 0.00 |
| ATOM | 3241 | C    | SER | X | 214 | 30.424 | 45.006 | 45.726 | 0.00 | 0.00 |

|      |      |      |     |   |     |        |        |        |      |      |
|------|------|------|-----|---|-----|--------|--------|--------|------|------|
| ATOM | 3242 | O    | SER | X | 214 | 30.121 | 44.623 | 44.568 | 0.00 | 0.00 |
| ATOM | 3243 | N    | ARG | X | 215 | 30.051 | 44.263 | 46.812 | 0.00 | 0.00 |
| ATOM | 3244 | H    | ARG | X | 215 | 30.370 | 44.639 | 47.693 | 0.00 | 0.00 |
| ATOM | 3245 | CA   | ARG | X | 215 | 29.451 | 42.928 | 46.756 | 0.00 | 0.00 |
| ATOM | 3246 | HA   | ARG | X | 215 | 30.167 | 42.293 | 46.233 | 0.00 | 0.00 |
| ATOM | 3247 | CB   | ARG | X | 215 | 29.502 | 42.349 | 48.241 | 0.00 | 0.00 |
| ATOM | 3248 | HB2  | ARG | X | 215 | 30.421 | 42.693 | 48.718 | 0.00 | 0.00 |
| ATOM | 3249 | HB3  | ARG | X | 215 | 28.825 | 42.823 | 48.952 | 0.00 | 0.00 |
| ATOM | 3250 | CG   | ARG | X | 215 | 29.371 | 40.827 | 48.346 | 0.00 | 0.00 |
| ATOM | 3251 | HG2  | ARG | X | 215 | 28.357 | 40.445 | 48.230 | 0.00 | 0.00 |
| ATOM | 3252 | HG3  | ARG | X | 215 | 29.991 | 40.453 | 47.531 | 0.00 | 0.00 |
| ATOM | 3253 | CD   | ARG | X | 215 | 29.842 | 40.215 | 49.722 | 0.00 | 0.00 |
| ATOM | 3254 | HD2  | ARG | X | 215 | 29.856 | 39.125 | 49.726 | 0.00 | 0.00 |
| ATOM | 3255 | HD3  | ARG | X | 215 | 30.886 | 40.514 | 49.810 | 0.00 | 0.00 |
| ATOM | 3256 | NE   | ARG | X | 215 | 29.051 | 40.657 | 50.833 | 0.00 | 0.00 |
| ATOM | 3257 | HE   | ARG | X | 215 | 28.096 | 40.897 | 50.608 | 0.00 | 0.00 |
| ATOM | 3258 | CZ   | ARG | X | 215 | 29.354 | 40.907 | 52.063 | 0.00 | 0.00 |
| ATOM | 3259 | NH1  | ARG | X | 215 | 30.495 | 40.567 | 52.525 | 0.00 | 0.00 |
| ATOM | 3260 | HH11 | ARG | X | 215 | 31.228 | 40.351 | 51.865 | 0.00 | 0.00 |
| ATOM | 3261 | HH12 | ARG | X | 215 | 30.717 | 40.994 | 53.412 | 0.00 | 0.00 |
| ATOM | 3262 | NH2  | ARG | X | 215 | 28.399 | 41.475 | 52.820 | 0.00 | 0.00 |
| ATOM | 3263 | HH21 | ARG | X | 215 | 27.472 | 41.743 | 52.522 | 0.00 | 0.00 |
| ATOM | 3264 | HH22 | ARG | X | 215 | 28.561 | 41.537 | 53.815 | 0.00 | 0.00 |
| ATOM | 3265 | C    | ARG | X | 215 | 28.032 | 42.843 | 46.128 | 0.00 | 0.00 |
| ATOM | 3266 | O    | ARG | X | 215 | 27.569 | 41.768 | 45.791 | 0.00 | 0.00 |
| ATOM | 3267 | N    | GLY | X | 216 | 27.328 | 43.977 | 45.886 | 0.00 | 0.00 |
| ATOM | 3268 | H    | GLY | X | 216 | 27.716 | 44.831 | 46.259 | 0.00 | 0.00 |
| ATOM | 3269 | CA   | GLY | X | 216 | 26.149 | 44.123 | 45.069 | 0.00 | 0.00 |
| ATOM | 3270 | HA2  | GLY | X | 216 | 25.461 | 43.289 | 45.208 | 0.00 | 0.00 |
| ATOM | 3271 | HA3  | GLY | X | 216 | 25.645 | 45.021 | 45.426 | 0.00 | 0.00 |
| ATOM | 3272 | C    | GLY | X | 216 | 26.377 | 44.341 | 43.560 | 0.00 | 0.00 |
| ATOM | 3273 | O    | GLY | X | 216 | 25.358 | 44.466 | 42.844 | 0.00 | 0.00 |
| ATOM | 3274 | N    | LEU | X | 217 | 27.589 | 44.376 | 43.074 | 0.00 | 0.00 |
| ATOM | 3275 | H    | LEU | X | 217 | 28.294 | 44.580 | 43.768 | 0.00 | 0.00 |
| ATOM | 3276 | CA   | LEU | X | 217 | 27.863 | 44.714 | 41.639 | 0.00 | 0.00 |
| ATOM | 3277 | HA   | LEU | X | 217 | 26.917 | 44.997 | 41.176 | 0.00 | 0.00 |
| ATOM | 3278 | CB   | LEU | X | 217 | 28.888 | 45.862 | 41.538 | 0.00 | 0.00 |
| ATOM | 3279 | HB2  | LEU | X | 217 | 29.789 | 45.414 | 41.957 | 0.00 | 0.00 |
| ATOM | 3280 | HB3  | LEU | X | 217 | 29.065 | 46.196 | 40.516 | 0.00 | 0.00 |
| ATOM | 3281 | CG   | LEU | X | 217 | 28.460 | 47.202 | 42.325 | 0.00 | 0.00 |
| ATOM | 3282 | HG   | LEU | X | 217 | 28.139 | 46.965 | 43.339 | 0.00 | 0.00 |
| ATOM | 3283 | CD1  | LEU | X | 217 | 29.594 | 48.254 | 42.409 | 0.00 | 0.00 |
| ATOM | 3284 | HD11 | LEU | X | 217 | 29.406 | 49.029 | 43.153 | 0.00 | 0.00 |
| ATOM | 3285 | HD12 | LEU | X | 217 | 29.793 | 48.433 | 41.353 | 0.00 | 0.00 |
| ATOM | 3286 | HD13 | LEU | X | 217 | 30.402 | 47.651 | 42.823 | 0.00 | 0.00 |
| ATOM | 3287 | CD2  | LEU | X | 217 | 27.286 | 47.768 | 41.511 | 0.00 | 0.00 |
| ATOM | 3288 | HD21 | LEU | X | 217 | 27.006 | 48.725 | 41.951 | 0.00 | 0.00 |
| ATOM | 3289 | HD22 | LEU | X | 217 | 27.516 | 47.840 | 40.448 | 0.00 | 0.00 |
| ATOM | 3290 | HD23 | LEU | X | 217 | 26.412 | 47.142 | 41.692 | 0.00 | 0.00 |
| ATOM | 3291 | C    | LEU | X | 217 | 28.315 | 43.472 | 40.776 | 0.00 | 0.00 |
| ATOM | 3292 | O    | LEU | X | 217 | 28.103 | 43.472 | 39.549 | 0.00 | 0.00 |
| ATOM | 3293 | N    | PHE | X | 218 | 28.895 | 42.468 | 41.405 | 0.00 | 0.00 |
| ATOM | 3294 | H    | PHE | X | 218 | 28.897 | 42.516 | 42.413 | 0.00 | 0.00 |
| ATOM | 3295 | CA   | PHE | X | 218 | 29.515 | 41.299 | 40.686 | 0.00 | 0.00 |
| ATOM | 3296 | HA   | PHE | X | 218 | 29.319 | 41.192 | 39.619 | 0.00 | 0.00 |
| ATOM | 3297 | CB   | PHE | X | 218 | 31.046 | 41.443 | 40.639 | 0.00 | 0.00 |
| ATOM | 3298 | HB2  | PHE | X | 218 | 31.440 | 40.653 | 39.999 | 0.00 | 0.00 |
| ATOM | 3299 | HB3  | PHE | X | 218 | 31.400 | 42.379 | 40.207 | 0.00 | 0.00 |
| ATOM | 3300 | CG   | PHE | X | 218 | 31.763 | 41.319 | 42.030 | 0.00 | 0.00 |
| ATOM | 3301 | CD1  | PHE | X | 218 | 31.859 | 42.426 | 42.784 | 0.00 | 0.00 |
| ATOM | 3302 | HD1  | PHE | X | 218 | 31.603 | 43.370 | 42.325 | 0.00 | 0.00 |
| ATOM | 3303 | CE1  | PHE | X | 218 | 32.397 | 42.423 | 44.046 | 0.00 | 0.00 |
| ATOM | 3304 | HE1  | PHE | X | 218 | 32.385 | 43.342 | 44.614 | 0.00 | 0.00 |
| ATOM | 3305 | CZ   | PHE | X | 218 | 32.719 | 41.210 | 44.632 | 0.00 | 0.00 |
| ATOM | 3306 | HZ   | PHE | X | 218 | 33.239 | 41.139 | 45.576 | 0.00 | 0.00 |
| ATOM | 3307 | CE2  | PHE | X | 218 | 32.699 | 40.005 | 43.838 | 0.00 | 0.00 |
| ATOM | 3308 | HE2  | PHE | X | 218 | 33.102 | 39.098 | 44.263 | 0.00 | 0.00 |

|      |      |      |     |   |     |        |        |        |      |      |
|------|------|------|-----|---|-----|--------|--------|--------|------|------|
| ATOM | 3309 | CD2  | PHE | X | 218 | 32.231 | 40.106 | 42.572 | 0.00 | 0.00 |
| ATOM | 3310 | HD2  | PHE | X | 218 | 32.354 | 39.233 | 41.949 | 0.00 | 0.00 |
| ATOM | 3311 | C    | PHE | X | 218 | 29.135 | 39.975 | 41.375 | 0.00 | 0.00 |
| ATOM | 3312 | O    | PHE | X | 218 | 28.727 | 39.985 | 42.559 | 0.00 | 0.00 |
| ATOM | 3313 | N    | HIE | X | 219 | 29.220 | 38.900 | 40.698 | 0.00 | 0.00 |
| ATOM | 3314 | H    | HIE | X | 219 | 29.430 | 39.011 | 39.716 | 0.00 | 0.00 |
| ATOM | 3315 | CA   | HIE | X | 219 | 28.701 | 37.571 | 41.066 | 0.00 | 0.00 |
| ATOM | 3316 | HA   | HIE | X | 219 | 27.919 | 37.586 | 41.825 | 0.00 | 0.00 |
| ATOM | 3317 | CB   | HIE | X | 219 | 28.045 | 37.112 | 39.766 | 0.00 | 0.00 |
| ATOM | 3318 | HB2  | HIE | X | 219 | 28.751 | 36.916 | 38.959 | 0.00 | 0.00 |
| ATOM | 3319 | HB3  | HIE | X | 219 | 27.492 | 36.244 | 40.127 | 0.00 | 0.00 |
| ATOM | 3320 | CG   | HIE | X | 219 | 27.013 | 38.057 | 39.238 | 0.00 | 0.00 |
| ATOM | 3321 | ND1  | HIE | X | 219 | 27.291 | 39.147 | 38.402 | 0.00 | 0.00 |
| ATOM | 3322 | CE1  | HIE | X | 219 | 26.134 | 39.855 | 38.379 | 0.00 | 0.00 |
| ATOM | 3323 | HE1  | HIE | X | 219 | 25.968 | 40.702 | 37.730 | 0.00 | 0.00 |
| ATOM | 3324 | NE2  | HIE | X | 219 | 25.194 | 39.252 | 39.120 | 0.00 | 0.00 |
| ATOM | 3325 | HE2  | HIE | X | 219 | 24.268 | 39.643 | 39.228 | 0.00 | 0.00 |
| ATOM | 3326 | CD2  | HIE | X | 219 | 25.720 | 38.053 | 39.598 | 0.00 | 0.00 |
| ATOM | 3327 | HD2  | HIE | X | 219 | 25.411 | 37.307 | 40.314 | 0.00 | 0.00 |
| ATOM | 3328 | C    | HIE | X | 219 | 29.793 | 36.525 | 41.507 | 0.00 | 0.00 |
| ATOM | 3329 | O    | HIE | X | 219 | 29.425 | 35.498 | 42.051 | 0.00 | 0.00 |
| ATOM | 3330 | N    | ARG | X | 220 | 31.159 | 36.736 | 41.246 | 0.00 | 0.00 |
| ATOM | 3331 | H    | ARG | X | 220 | 31.455 | 37.485 | 40.636 | 0.00 | 0.00 |
| ATOM | 3332 | CA   | ARG | X | 220 | 32.190 | 35.793 | 41.500 | 0.00 | 0.00 |
| ATOM | 3333 | HA   | ARG | X | 220 | 31.936 | 35.179 | 42.364 | 0.00 | 0.00 |
| ATOM | 3334 | CB   | ARG | X | 220 | 32.329 | 34.815 | 40.276 | 0.00 | 0.00 |
| ATOM | 3335 | HB2  | ARG | X | 220 | 32.640 | 35.334 | 39.369 | 0.00 | 0.00 |
| ATOM | 3336 | HB3  | ARG | X | 220 | 33.159 | 34.146 | 40.505 | 0.00 | 0.00 |
| ATOM | 3337 | CG   | ARG | X | 220 | 31.059 | 33.905 | 39.990 | 0.00 | 0.00 |
| ATOM | 3338 | HG2  | ARG | X | 220 | 30.808 | 33.260 | 40.832 | 0.00 | 0.00 |
| ATOM | 3339 | HG3  | ARG | X | 220 | 30.172 | 34.471 | 39.704 | 0.00 | 0.00 |
| ATOM | 3340 | CD   | ARG | X | 220 | 31.324 | 32.923 | 38.821 | 0.00 | 0.00 |
| ATOM | 3341 | HD2  | ARG | X | 220 | 31.693 | 33.382 | 37.904 | 0.00 | 0.00 |
| ATOM | 3342 | HD3  | ARG | X | 220 | 32.147 | 32.278 | 39.130 | 0.00 | 0.00 |
| ATOM | 3343 | NE   | ARG | X | 220 | 30.116 | 32.103 | 38.737 | 0.00 | 0.00 |
| ATOM | 3344 | HE   | ARG | X | 220 | 30.164 | 31.226 | 39.237 | 0.00 | 0.00 |
| ATOM | 3345 | CZ   | ARG | X | 220 | 28.894 | 32.383 | 38.327 | 0.00 | 0.00 |
| ATOM | 3346 | NH1  | ARG | X | 220 | 28.596 | 33.498 | 37.717 | 0.00 | 0.00 |
| ATOM | 3347 | HH11 | ARG | X | 220 | 29.259 | 34.189 | 37.397 | 0.00 | 0.00 |
| ATOM | 3348 | HH12 | ARG | X | 220 | 27.649 | 33.628 | 37.390 | 0.00 | 0.00 |
| ATOM | 3349 | NH2  | ARG | X | 220 | 27.953 | 31.485 | 38.396 | 0.00 | 0.00 |
| ATOM | 3350 | HH21 | ARG | X | 220 | 28.149 | 30.631 | 38.899 | 0.00 | 0.00 |
| ATOM | 3351 | HH22 | ARG | X | 220 | 26.997 | 31.573 | 38.080 | 0.00 | 0.00 |
| ATOM | 3352 | C    | ARG | X | 220 | 33.541 | 36.485 | 41.729 | 0.00 | 0.00 |
| ATOM | 3353 | O    | ARG | X | 220 | 33.719 | 37.627 | 41.196 | 0.00 | 0.00 |
| ATOM | 3354 | N    | ALA | X | 221 | 34.503 | 35.873 | 42.429 | 0.00 | 0.00 |
| ATOM | 3355 | H    | ALA | X | 221 | 34.207 | 35.024 | 42.890 | 0.00 | 0.00 |
| ATOM | 3356 | CA   | ALA | X | 221 | 35.801 | 36.491 | 42.733 | 0.00 | 0.00 |
| ATOM | 3357 | HA   | ALA | X | 221 | 35.922 | 37.272 | 41.982 | 0.00 | 0.00 |
| ATOM | 3358 | CB   | ALA | X | 221 | 35.755 | 37.091 | 44.154 | 0.00 | 0.00 |
| ATOM | 3359 | HB1  | ALA | X | 221 | 35.013 | 37.889 | 44.133 | 0.00 | 0.00 |
| ATOM | 3360 | HB2  | ALA | X | 221 | 36.747 | 37.393 | 44.492 | 0.00 | 0.00 |
| ATOM | 3361 | HB3  | ALA | X | 221 | 35.364 | 36.311 | 44.807 | 0.00 | 0.00 |
| ATOM | 3362 | C    | ALA | X | 221 | 36.914 | 35.452 | 42.621 | 0.00 | 0.00 |
| ATOM | 3363 | O    | ALA | X | 221 | 36.709 | 34.298 | 42.938 | 0.00 | 0.00 |
| ATOM | 3364 | N    | VAL | X | 222 | 38.093 | 35.880 | 42.203 | 0.00 | 0.00 |
| ATOM | 3365 | H    | VAL | X | 222 | 38.183 | 36.828 | 41.866 | 0.00 | 0.00 |
| ATOM | 3366 | CA   | VAL | X | 222 | 39.375 | 35.176 | 42.109 | 0.00 | 0.00 |
| ATOM | 3367 | HA   | VAL | X | 222 | 39.188 | 34.173 | 42.492 | 0.00 | 0.00 |
| ATOM | 3368 | CB   | VAL | X | 222 | 39.654 | 34.919 | 40.604 | 0.00 | 0.00 |
| ATOM | 3369 | HB   | VAL | X | 222 | 39.875 | 35.884 | 40.148 | 0.00 | 0.00 |
| ATOM | 3370 | CG1  | VAL | X | 222 | 40.923 | 34.078 | 40.512 | 0.00 | 0.00 |
| ATOM | 3371 | HG11 | VAL | X | 222 | 41.106 | 33.854 | 39.461 | 0.00 | 0.00 |
| ATOM | 3372 | HG12 | VAL | X | 222 | 41.897 | 34.496 | 40.767 | 0.00 | 0.00 |
| ATOM | 3373 | HG13 | VAL | X | 222 | 40.854 | 33.110 | 41.010 | 0.00 | 0.00 |
| ATOM | 3374 | CG2  | VAL | X | 222 | 38.511 | 34.285 | 39.682 | 0.00 | 0.00 |
| ATOM | 3375 | HG21 | VAL | X | 222 | 37.577 | 34.847 | 39.688 | 0.00 | 0.00 |

|      |      |      |     |   |     |        |        |        |      |      |
|------|------|------|-----|---|-----|--------|--------|--------|------|------|
| ATOM | 3376 | HG22 | VAL | X | 222 | 38.229 | 33.289 | 40.022 | 0.00 | 0.00 |
| ATOM | 3377 | HG23 | VAL | X | 222 | 38.991 | 34.260 | 38.703 | 0.00 | 0.00 |
| ATOM | 3378 | C    | VAL | X | 222 | 40.562 | 35.832 | 42.811 | 0.00 | 0.00 |
| ATOM | 3379 | O    | VAL | X | 222 | 40.919 | 36.981 | 42.464 | 0.00 | 0.00 |
| ATOM | 3380 | N    | LEU | X | 223 | 41.184 | 35.124 | 43.710 | 0.00 | 0.00 |
| ATOM | 3381 | H    | LEU | X | 223 | 40.951 | 34.152 | 43.858 | 0.00 | 0.00 |
| ATOM | 3382 | CA   | LEU | X | 223 | 42.431 | 35.556 | 44.384 | 0.00 | 0.00 |
| ATOM | 3383 | HA   | LEU | X | 223 | 42.655 | 36.556 | 44.013 | 0.00 | 0.00 |
| ATOM | 3384 | CB   | LEU | X | 223 | 42.340 | 35.432 | 45.883 | 0.00 | 0.00 |
| ATOM | 3385 | HB2  | LEU | X | 223 | 41.964 | 34.472 | 46.239 | 0.00 | 0.00 |
| ATOM | 3386 | HB3  | LEU | X | 223 | 43.316 | 35.452 | 46.367 | 0.00 | 0.00 |
| ATOM | 3387 | CG   | LEU | X | 223 | 41.470 | 36.533 | 46.530 | 0.00 | 0.00 |
| ATOM | 3388 | HG   | LEU | X | 223 | 41.565 | 37.467 | 45.977 | 0.00 | 0.00 |
| ATOM | 3389 | CD1  | LEU | X | 223 | 40.022 | 36.062 | 46.432 | 0.00 | 0.00 |
| ATOM | 3390 | HD11 | LEU | X | 223 | 39.915 | 34.978 | 46.466 | 0.00 | 0.00 |
| ATOM | 3391 | HD12 | LEU | X | 223 | 39.605 | 36.371 | 45.474 | 0.00 | 0.00 |
| ATOM | 3392 | HD13 | LEU | X | 223 | 39.413 | 36.681 | 47.091 | 0.00 | 0.00 |
| ATOM | 3393 | CD2  | LEU | X | 223 | 41.774 | 36.594 | 47.983 | 0.00 | 0.00 |
| ATOM | 3394 | HD21 | LEU | X | 223 | 41.117 | 37.253 | 48.550 | 0.00 | 0.00 |
| ATOM | 3395 | HD22 | LEU | X | 223 | 41.668 | 35.570 | 48.341 | 0.00 | 0.00 |
| ATOM | 3396 | HD23 | LEU | X | 223 | 42.820 | 36.876 | 48.107 | 0.00 | 0.00 |
| ATOM | 3397 | C    | LEU | X | 223 | 43.682 | 34.794 | 43.873 | 0.00 | 0.00 |
| ATOM | 3398 | O    | LEU | X | 223 | 43.708 | 33.535 | 43.953 | 0.00 | 0.00 |
| ATOM | 3399 | N    | GLN | X | 224 | 44.690 | 35.550 | 43.372 | 0.00 | 0.00 |
| ATOM | 3400 | H    | GLN | X | 224 | 44.485 | 36.527 | 43.214 | 0.00 | 0.00 |
| ATOM | 3401 | CA   | GLN | X | 224 | 45.945 | 34.927 | 42.938 | 0.00 | 0.00 |
| ATOM | 3402 | HA   | GLN | X | 224 | 45.795 | 33.905 | 43.287 | 0.00 | 0.00 |
| ATOM | 3403 | CB   | GLN | X | 224 | 46.042 | 34.935 | 41.407 | 0.00 | 0.00 |
| ATOM | 3404 | HB2  | GLN | X | 224 | 46.225 | 35.969 | 41.116 | 0.00 | 0.00 |
| ATOM | 3405 | HB3  | GLN | X | 224 | 46.974 | 34.450 | 41.116 | 0.00 | 0.00 |
| ATOM | 3406 | CG   | GLN | X | 224 | 44.799 | 34.599 | 40.655 | 0.00 | 0.00 |
| ATOM | 3407 | HG2  | GLN | X | 224 | 44.594 | 33.548 | 40.858 | 0.00 | 0.00 |
| ATOM | 3408 | HG3  | GLN | X | 224 | 43.955 | 35.221 | 40.952 | 0.00 | 0.00 |
| ATOM | 3409 | CD   | GLN | X | 224 | 45.004 | 34.750 | 39.142 | 0.00 | 0.00 |
| ATOM | 3410 | OE1  | GLN | X | 224 | 44.102 | 35.182 | 38.406 | 0.00 | 0.00 |
| ATOM | 3411 | NE2  | GLN | X | 224 | 46.123 | 34.164 | 38.595 | 0.00 | 0.00 |
| ATOM | 3412 | HE21 | GLN | X | 224 | 46.380 | 34.213 | 37.619 | 0.00 | 0.00 |
| ATOM | 3413 | HE22 | GLN | X | 224 | 46.892 | 33.853 | 39.171 | 0.00 | 0.00 |
| ATOM | 3414 | C    | GLN | X | 224 | 47.192 | 35.550 | 43.706 | 0.00 | 0.00 |
| ATOM | 3415 | O    | GLN | X | 224 | 47.292 | 36.767 | 43.685 | 0.00 | 0.00 |
| ATOM | 3416 | N    | SER | X | 225 | 48.039 | 34.771 | 44.360 | 0.00 | 0.00 |
| ATOM | 3417 | H    | SER | X | 225 | 47.850 | 33.781 | 44.425 | 0.00 | 0.00 |
| ATOM | 3418 | CA   | SER | X | 225 | 49.314 | 35.227 | 45.004 | 0.00 | 0.00 |
| ATOM | 3419 | HA   | SER | X | 225 | 49.651 | 34.361 | 45.574 | 0.00 | 0.00 |
| ATOM | 3420 | CB   | SER | X | 225 | 50.421 | 35.546 | 43.854 | 0.00 | 0.00 |
| ATOM | 3421 | HB2  | SER | X | 225 | 50.226 | 34.849 | 43.039 | 0.00 | 0.00 |
| ATOM | 3422 | HB3  | SER | X | 225 | 50.201 | 36.560 | 43.518 | 0.00 | 0.00 |
| ATOM | 3423 | OG   | SER | X | 225 | 51.766 | 35.317 | 44.298 | 0.00 | 0.00 |
| ATOM | 3424 | HG   | SER | X | 225 | 51.741 | 34.742 | 45.066 | 0.00 | 0.00 |
| ATOM | 3425 | C    | SER | X | 225 | 49.141 | 36.349 | 45.998 | 0.00 | 0.00 |
| ATOM | 3426 | O    | SER | X | 225 | 50.079 | 37.114 | 46.298 | 0.00 | 0.00 |
| ATOM | 3427 | N    | GLY | X | 226 | 47.954 | 36.617 | 46.521 | 0.00 | 0.00 |
| ATOM | 3428 | H    | GLY | X | 226 | 47.164 | 36.054 | 46.238 | 0.00 | 0.00 |
| ATOM | 3429 | CA   | GLY | X | 226 | 47.565 | 37.845 | 47.300 | 0.00 | 0.00 |
| ATOM | 3430 | HA2  | GLY | X | 226 | 48.255 | 38.011 | 48.128 | 0.00 | 0.00 |
| ATOM | 3431 | HA3  | GLY | X | 226 | 47.388 | 38.742 | 46.707 | 0.00 | 0.00 |
| ATOM | 3432 | C    | GLY | X | 226 | 46.245 | 37.585 | 48.005 | 0.00 | 0.00 |
| ATOM | 3433 | O    | GLY | X | 226 | 45.417 | 36.791 | 47.570 | 0.00 | 0.00 |
| ATOM | 3434 | N    | ALA | X | 227 | 45.986 | 38.270 | 49.130 | 0.00 | 0.00 |
| ATOM | 3435 | H    | ALA | X | 227 | 46.748 | 38.852 | 49.447 | 0.00 | 0.00 |
| ATOM | 3436 | CA   | ALA | X | 227 | 44.824 | 38.204 | 50.043 | 0.00 | 0.00 |
| ATOM | 3437 | HA   | ALA | X | 227 | 43.956 | 37.857 | 49.482 | 0.00 | 0.00 |
| ATOM | 3438 | CB   | ALA | X | 227 | 45.064 | 37.131 | 51.084 | 0.00 | 0.00 |
| ATOM | 3439 | HB1  | ALA | X | 227 | 44.232 | 36.888 | 51.745 | 0.00 | 0.00 |
| ATOM | 3440 | HB2  | ALA | X | 227 | 45.936 | 37.322 | 51.709 | 0.00 | 0.00 |
| ATOM | 3441 | HB3  | ALA | X | 227 | 45.147 | 36.159 | 50.598 | 0.00 | 0.00 |
| ATOM | 3442 | C    | ALA | X | 227 | 44.643 | 39.509 | 50.828 | 0.00 | 0.00 |

|      |      |      |     |   |     |        |        |        |      |      |
|------|------|------|-----|---|-----|--------|--------|--------|------|------|
| ATOM | 3443 | O    | ALA | X | 227 | 45.617 | 40.125 | 51.268 | 0.00 | 0.00 |
| ATOM | 3444 | N    | PRO | X | 228 | 43.442 | 40.015 | 51.080 | 0.00 | 0.00 |
| ATOM | 3445 | CD   | PRO | X | 228 | 42.121 | 39.411 | 50.845 | 0.00 | 0.00 |
| ATOM | 3446 | HD2  | PRO | X | 228 | 42.263 | 38.370 | 51.135 | 0.00 | 0.00 |
| ATOM | 3447 | HD3  | PRO | X | 228 | 41.850 | 39.613 | 49.809 | 0.00 | 0.00 |
| ATOM | 3448 | CG   | PRO | X | 228 | 41.129 | 40.181 | 51.753 | 0.00 | 0.00 |
| ATOM | 3449 | HG2  | PRO | X | 228 | 41.080 | 39.714 | 52.737 | 0.00 | 0.00 |
| ATOM | 3450 | HG3  | PRO | X | 228 | 40.077 | 40.223 | 51.468 | 0.00 | 0.00 |
| ATOM | 3451 | CB   | PRO | X | 228 | 41.746 | 41.572 | 51.853 | 0.00 | 0.00 |
| ATOM | 3452 | HB2  | PRO | X | 228 | 41.478 | 42.105 | 52.765 | 0.00 | 0.00 |
| ATOM | 3453 | HB3  | PRO | X | 228 | 41.432 | 42.158 | 50.989 | 0.00 | 0.00 |
| ATOM | 3454 | CA   | PRO | X | 228 | 43.263 | 41.293 | 51.905 | 0.00 | 0.00 |
| ATOM | 3455 | HA   | PRO | X | 228 | 43.866 | 42.084 | 51.460 | 0.00 | 0.00 |
| ATOM | 3456 | C    | PRO | X | 228 | 43.758 | 41.119 | 53.303 | 0.00 | 0.00 |
| ATOM | 3457 | O    | PRO | X | 228 | 44.312 | 42.069 | 53.898 | 0.00 | 0.00 |
| ATOM | 3458 | N    | ASN | X | 229 | 43.779 | 39.886 | 53.882 | 0.00 | 0.00 |
| ATOM | 3459 | H    | ASN | X | 229 | 43.313 | 39.105 | 53.444 | 0.00 | 0.00 |
| ATOM | 3460 | CA   | ASN | X | 229 | 44.248 | 39.705 | 55.250 | 0.00 | 0.00 |
| ATOM | 3461 | HA   | ASN | X | 229 | 43.884 | 40.545 | 55.841 | 0.00 | 0.00 |
| ATOM | 3462 | CB   | ASN | X | 229 | 43.609 | 38.442 | 55.988 | 0.00 | 0.00 |
| ATOM | 3463 | HB2  | ASN | X | 229 | 44.045 | 38.495 | 56.986 | 0.00 | 0.00 |
| ATOM | 3464 | HB3  | ASN | X | 229 | 42.526 | 38.559 | 55.941 | 0.00 | 0.00 |
| ATOM | 3465 | CG   | ASN | X | 229 | 43.784 | 37.059 | 55.368 | 0.00 | 0.00 |
| ATOM | 3466 | OD1  | ASN | X | 229 | 43.907 | 36.885 | 54.155 | 0.00 | 0.00 |
| ATOM | 3467 | ND2  | ASN | X | 229 | 43.819 | 36.072 | 56.208 | 0.00 | 0.00 |
| ATOM | 3468 | HD21 | ASN | X | 229 | 43.867 | 35.161 | 55.773 | 0.00 | 0.00 |
| ATOM | 3469 | HD22 | ASN | X | 229 | 43.764 | 36.129 | 57.215 | 0.00 | 0.00 |
| ATOM | 3470 | C    | ASN | X | 229 | 45.736 | 39.701 | 55.354 | 0.00 | 0.00 |
| ATOM | 3471 | O    | ASN | X | 229 | 46.395 | 39.591 | 56.372 | 0.00 | 0.00 |
| ATOM | 3472 | N    | GLY | X | 230 | 46.391 | 39.920 | 54.205 | 0.00 | 0.00 |
| ATOM | 3473 | H    | GLY | X | 230 | 45.835 | 39.973 | 53.364 | 0.00 | 0.00 |
| ATOM | 3474 | CA   | GLY | X | 230 | 47.871 | 40.145 | 54.108 | 0.00 | 0.00 |
| ATOM | 3475 | HA2  | GLY | X | 230 | 48.297 | 39.159 | 54.298 | 0.00 | 0.00 |
| ATOM | 3476 | HA3  | GLY | X | 230 | 48.256 | 40.422 | 53.126 | 0.00 | 0.00 |
| ATOM | 3477 | C    | GLY | X | 230 | 48.330 | 41.192 | 55.135 | 0.00 | 0.00 |
| ATOM | 3478 | O    | GLY | X | 230 | 47.642 | 42.196 | 55.294 | 0.00 | 0.00 |
| ATOM | 3479 | N    | PRO | X | 231 | 49.446 | 40.945 | 55.873 | 0.00 | 0.00 |
| ATOM | 3480 | CD   | PRO | X | 231 | 50.265 | 39.758 | 55.845 | 0.00 | 0.00 |
| ATOM | 3481 | HD2  | PRO | X | 231 | 50.985 | 39.981 | 55.058 | 0.00 | 0.00 |
| ATOM | 3482 | HD3  | PRO | X | 231 | 49.701 | 38.833 | 55.727 | 0.00 | 0.00 |
| ATOM | 3483 | CG   | PRO | X | 231 | 51.084 | 39.783 | 57.146 | 0.00 | 0.00 |
| ATOM | 3484 | HG2  | PRO | X | 231 | 52.075 | 39.358 | 56.987 | 0.00 | 0.00 |
| ATOM | 3485 | HG3  | PRO | X | 231 | 50.544 | 39.259 | 57.935 | 0.00 | 0.00 |
| ATOM | 3486 | CB   | PRO | X | 231 | 51.169 | 41.271 | 57.476 | 0.00 | 0.00 |
| ATOM | 3487 | HB2  | PRO | X | 231 | 52.143 | 41.660 | 57.178 | 0.00 | 0.00 |
| ATOM | 3488 | HB3  | PRO | X | 231 | 51.047 | 41.335 | 58.557 | 0.00 | 0.00 |
| ATOM | 3489 | CA   | PRO | X | 231 | 49.976 | 41.927 | 56.767 | 0.00 | 0.00 |
| ATOM | 3490 | HA   | PRO | X | 231 | 49.165 | 42.107 | 57.473 | 0.00 | 0.00 |
| ATOM | 3491 | C    | PRO | X | 231 | 50.358 | 43.239 | 56.159 | 0.00 | 0.00 |
| ATOM | 3492 | O    | PRO | X | 231 | 50.390 | 44.306 | 56.798 | 0.00 | 0.00 |
| ATOM | 3493 | N    | TRP | X | 232 | 50.853 | 43.221 | 54.906 | 0.00 | 0.00 |
| ATOM | 3494 | H    | TRP | X | 232 | 51.081 | 42.289 | 54.591 | 0.00 | 0.00 |
| ATOM | 3495 | CA   | TRP | X | 232 | 51.102 | 44.287 | 53.968 | 0.00 | 0.00 |
| ATOM | 3496 | HA   | TRP | X | 232 | 51.597 | 45.115 | 54.475 | 0.00 | 0.00 |
| ATOM | 3497 | CB   | TRP | X | 232 | 51.877 | 43.681 | 52.939 | 0.00 | 0.00 |
| ATOM | 3498 | HB2  | TRP | X | 232 | 51.966 | 44.510 | 52.238 | 0.00 | 0.00 |
| ATOM | 3499 | HB3  | TRP | X | 232 | 52.927 | 43.599 | 53.221 | 0.00 | 0.00 |
| ATOM | 3500 | CG   | TRP | X | 232 | 51.472 | 42.421 | 52.249 | 0.00 | 0.00 |
| ATOM | 3501 | CD1  | TRP | X | 232 | 51.975 | 41.168 | 52.483 | 0.00 | 0.00 |
| ATOM | 3502 | HD1  | TRP | X | 232 | 52.583 | 40.941 | 53.347 | 0.00 | 0.00 |
| ATOM | 3503 | NE1  | TRP | X | 232 | 51.243 | 40.292 | 51.721 | 0.00 | 0.00 |
| ATOM | 3504 | HE1  | TRP | X | 232 | 51.316 | 39.287 | 51.789 | 0.00 | 0.00 |
| ATOM | 3505 | CE2  | TRP | X | 232 | 50.394 | 40.857 | 50.879 | 0.00 | 0.00 |
| ATOM | 3506 | CZ2  | TRP | X | 232 | 49.529 | 40.367 | 49.791 | 0.00 | 0.00 |
| ATOM | 3507 | HZ2  | TRP | X | 232 | 49.479 | 39.327 | 49.504 | 0.00 | 0.00 |
| ATOM | 3508 | CH2  | TRP | X | 232 | 48.860 | 41.340 | 49.047 | 0.00 | 0.00 |
| ATOM | 3509 | HH2  | TRP | X | 232 | 48.198 | 40.994 | 48.267 | 0.00 | 0.00 |

|      |      |      |     |   |     |        |        |        |      |      |
|------|------|------|-----|---|-----|--------|--------|--------|------|------|
| ATOM | 3510 | CZ3  | TRP | X | 232 | 49.026 | 42.699 | 49.261 | 0.00 | 0.00 |
| ATOM | 3511 | HZ3  | TRP | X | 232 | 48.472 | 43.463 | 48.735 | 0.00 | 0.00 |
| ATOM | 3512 | CE3  | TRP | X | 232 | 49.834 | 43.142 | 50.347 | 0.00 | 0.00 |
| ATOM | 3513 | HE3  | TRP | X | 232 | 49.866 | 44.213 | 50.485 | 0.00 | 0.00 |
| ATOM | 3514 | CD2  | TRP | X | 232 | 50.527 | 42.251 | 51.159 | 0.00 | 0.00 |
| ATOM | 3515 | C    | TRP | X | 232 | 49.812 | 44.920 | 53.402 | 0.00 | 0.00 |
| ATOM | 3516 | O    | TRP | X | 232 | 49.925 | 46.042 | 52.938 | 0.00 | 0.00 |
| ATOM | 3517 | N    | ALA | X | 233 | 48.632 | 44.298 | 53.485 | 0.00 | 0.00 |
| ATOM | 3518 | H    | ALA | X | 233 | 48.672 | 43.465 | 54.055 | 0.00 | 0.00 |
| ATOM | 3519 | CA   | ALA | X | 233 | 47.452 | 44.806 | 52.738 | 0.00 | 0.00 |
| ATOM | 3520 | HA   | ALA | X | 233 | 47.863 | 45.559 | 52.065 | 0.00 | 0.00 |
| ATOM | 3521 | CB   | ALA | X | 233 | 46.833 | 43.576 | 52.000 | 0.00 | 0.00 |
| ATOM | 3522 | HB1  | ALA | X | 233 | 46.266 | 43.105 | 52.803 | 0.00 | 0.00 |
| ATOM | 3523 | HB2  | ALA | X | 233 | 47.580 | 42.994 | 51.459 | 0.00 | 0.00 |
| ATOM | 3524 | HB3  | ALA | X | 233 | 46.143 | 43.964 | 51.250 | 0.00 | 0.00 |
| ATOM | 3525 | C    | ALA | X | 233 | 46.439 | 45.596 | 53.616 | 0.00 | 0.00 |
| ATOM | 3526 | O    | ALA | X | 233 | 45.394 | 45.879 | 53.053 | 0.00 | 0.00 |
| ATOM | 3527 | N    | THR | X | 234 | 46.695 | 45.842 | 54.854 | 0.00 | 0.00 |
| ATOM | 3528 | H    | THR | X | 234 | 47.523 | 45.451 | 55.280 | 0.00 | 0.00 |
| ATOM | 3529 | CA   | THR | X | 234 | 46.296 | 47.120 | 55.547 | 0.00 | 0.00 |
| ATOM | 3530 | HA   | THR | X | 234 | 46.037 | 47.772 | 54.713 | 0.00 | 0.00 |
| ATOM | 3531 | CB   | THR | X | 234 | 45.025 | 46.981 | 56.397 | 0.00 | 0.00 |
| ATOM | 3532 | HB   | THR | X | 234 | 44.762 | 47.981 | 56.742 | 0.00 | 0.00 |
| ATOM | 3533 | CG2  | THR | X | 234 | 43.897 | 46.467 | 55.520 | 0.00 | 0.00 |
| ATOM | 3534 | HG21 | THR | X | 234 | 43.660 | 47.093 | 54.660 | 0.00 | 0.00 |
| ATOM | 3535 | HG22 | THR | X | 234 | 43.035 | 46.597 | 56.174 | 0.00 | 0.00 |
| ATOM | 3536 | HG23 | THR | X | 234 | 43.898 | 45.411 | 55.252 | 0.00 | 0.00 |
| ATOM | 3537 | OG1  | THR | X | 234 | 45.217 | 46.158 | 57.501 | 0.00 | 0.00 |
| ATOM | 3538 | HG1  | THR | X | 234 | 45.249 | 45.238 | 57.228 | 0.00 | 0.00 |
| ATOM | 3539 | C    | THR | X | 234 | 47.389 | 47.841 | 56.339 | 0.00 | 0.00 |
| ATOM | 3540 | O    | THR | X | 234 | 48.423 | 47.343 | 56.612 | 0.00 | 0.00 |
| ATOM | 3541 | N    | VAL | X | 235 | 47.036 | 49.038 | 56.707 | 0.00 | 0.00 |
| ATOM | 3542 | H    | VAL | X | 235 | 46.161 | 49.324 | 56.290 | 0.00 | 0.00 |
| ATOM | 3543 | CA   | VAL | X | 235 | 47.694 | 49.911 | 57.755 | 0.00 | 0.00 |
| ATOM | 3544 | HA   | VAL | X | 235 | 48.341 | 49.303 | 58.387 | 0.00 | 0.00 |
| ATOM | 3545 | CB   | VAL | X | 235 | 48.670 | 50.794 | 56.991 | 0.00 | 0.00 |
| ATOM | 3546 | HB   | VAL | X | 235 | 49.117 | 50.205 | 56.190 | 0.00 | 0.00 |
| ATOM | 3547 | CG1  | VAL | X | 235 | 48.096 | 52.108 | 56.446 | 0.00 | 0.00 |
| ATOM | 3548 | HG11 | VAL | X | 235 | 47.871 | 52.911 | 57.148 | 0.00 | 0.00 |
| ATOM | 3549 | HG12 | VAL | X | 235 | 48.859 | 52.548 | 55.803 | 0.00 | 0.00 |
| ATOM | 3550 | HG13 | VAL | X | 235 | 47.182 | 51.823 | 55.925 | 0.00 | 0.00 |
| ATOM | 3551 | CG2  | VAL | X | 235 | 49.867 | 51.133 | 57.796 | 0.00 | 0.00 |
| ATOM | 3552 | HG21 | VAL | X | 235 | 49.519 | 51.484 | 58.767 | 0.00 | 0.00 |
| ATOM | 3553 | HG22 | VAL | X | 235 | 50.485 | 51.906 | 57.340 | 0.00 | 0.00 |
| ATOM | 3554 | HG23 | VAL | X | 235 | 50.519 | 50.275 | 57.962 | 0.00 | 0.00 |
| ATOM | 3555 | C    | VAL | X | 235 | 46.651 | 50.742 | 58.537 | 0.00 | 0.00 |
| ATOM | 3556 | O    | VAL | X | 235 | 45.492 | 50.828 | 58.157 | 0.00 | 0.00 |
| ATOM | 3557 | N    | GLY | X | 236 | 47.056 | 51.330 | 59.650 | 0.00 | 0.00 |
| ATOM | 3558 | H    | GLY | X | 236 | 48.031 | 51.109 | 59.789 | 0.00 | 0.00 |
| ATOM | 3559 | CA   | GLY | X | 236 | 46.280 | 52.221 | 60.566 | 0.00 | 0.00 |
| ATOM | 3560 | HA2  | GLY | X | 236 | 45.252 | 51.863 | 60.515 | 0.00 | 0.00 |
| ATOM | 3561 | HA3  | GLY | X | 236 | 46.693 | 52.226 | 61.574 | 0.00 | 0.00 |
| ATOM | 3562 | C    | GLY | X | 236 | 46.359 | 53.711 | 60.041 | 0.00 | 0.00 |
| ATOM | 3563 | O    | GLY | X | 236 | 47.258 | 54.196 | 59.362 | 0.00 | 0.00 |
| ATOM | 3564 | N    | MET | X | 237 | 45.303 | 54.437 | 60.398 | 0.00 | 0.00 |
| ATOM | 3565 | H    | MET | X | 237 | 44.595 | 53.962 | 60.939 | 0.00 | 0.00 |
| ATOM | 3566 | CA   | MET | X | 237 | 45.152 | 55.839 | 60.118 | 0.00 | 0.00 |
| ATOM | 3567 | HA   | MET | X | 237 | 45.102 | 55.940 | 59.034 | 0.00 | 0.00 |
| ATOM | 3568 | CB   | MET | X | 237 | 43.830 | 56.361 | 60.736 | 0.00 | 0.00 |
| ATOM | 3569 | HB2  | MET | X | 237 | 42.940 | 55.841 | 60.384 | 0.00 | 0.00 |
| ATOM | 3570 | HB3  | MET | X | 237 | 43.872 | 56.208 | 61.814 | 0.00 | 0.00 |
| ATOM | 3571 | CG   | MET | X | 237 | 43.704 | 57.857 | 60.442 | 0.00 | 0.00 |
| ATOM | 3572 | HG2  | MET | X | 237 | 42.809 | 58.128 | 61.002 | 0.00 | 0.00 |
| ATOM | 3573 | HG3  | MET | X | 237 | 44.536 | 58.316 | 60.975 | 0.00 | 0.00 |
| ATOM | 3574 | SD   | MET | X | 237 | 43.690 | 58.502 | 58.716 | 0.00 | 0.00 |
| ATOM | 3575 | CE   | MET | X | 237 | 42.086 | 57.788 | 58.075 | 0.00 | 0.00 |
| ATOM | 3576 | HE1  | MET | X | 237 | 42.214 | 56.936 | 57.407 | 0.00 | 0.00 |



|      |      |      |     |   |     |        |        |        |      |      |
|------|------|------|-----|---|-----|--------|--------|--------|------|------|
| ATOM | 3577 | HE2  | MET | X | 237 | 41.475 | 57.503 | 58.931 | 0.00 | 0.00 |
| ATOM | 3578 | HE3  | MET | X | 237 | 41.533 | 58.556 | 57.533 | 0.00 | 0.00 |
| ATOM | 3579 | C    | MET | X | 237 | 46.368 | 56.644 | 60.578 | 0.00 | 0.00 |
| ATOM | 3580 | O    | MET | X | 237 | 46.882 | 57.484 | 59.819 | 0.00 | 0.00 |
| ATOM | 3581 | N    | GLY | X | 238 | 46.879 | 56.433 | 61.820 | 0.00 | 0.00 |
| ATOM | 3582 | H    | GLY | X | 238 | 46.420 | 55.830 | 62.487 | 0.00 | 0.00 |
| ATOM | 3583 | CA   | GLY | X | 238 | 48.033 | 57.232 | 62.313 | 0.00 | 0.00 |
| ATOM | 3584 | HA2  | GLY | X | 238 | 47.867 | 58.283 | 62.072 | 0.00 | 0.00 |
| ATOM | 3585 | HA3  | GLY | X | 238 | 48.148 | 57.064 | 63.383 | 0.00 | 0.00 |
| ATOM | 3586 | C    | GLY | X | 238 | 49.197 | 56.940 | 61.512 | 0.00 | 0.00 |
| ATOM | 3587 | O    | GLY | X | 238 | 50.000 | 57.820 | 61.326 | 0.00 | 0.00 |
| ATOM | 3588 | N    | GLU | X | 239 | 49.401 | 55.779 | 60.892 | 0.00 | 0.00 |
| ATOM | 3589 | H    | GLU | X | 239 | 48.713 | 55.042 | 60.950 | 0.00 | 0.00 |
| ATOM | 3590 | CA   | GLU | X | 239 | 50.534 | 55.595 | 59.950 | 0.00 | 0.00 |
| ATOM | 3591 | HA   | GLU | X | 239 | 51.405 | 56.040 | 60.432 | 0.00 | 0.00 |
| ATOM | 3592 | CB   | GLU | X | 239 | 50.814 | 54.136 | 59.481 | 0.00 | 0.00 |
| ATOM | 3593 | HB2  | GLU | X | 239 | 49.854 | 53.697 | 59.206 | 0.00 | 0.00 |
| ATOM | 3594 | HB3  | GLU | X | 239 | 51.497 | 54.004 | 58.642 | 0.00 | 0.00 |
| ATOM | 3595 | CG   | GLU | X | 239 | 51.490 | 53.404 | 60.684 | 0.00 | 0.00 |
| ATOM | 3596 | HG2  | GLU | X | 239 | 50.903 | 53.639 | 61.572 | 0.00 | 0.00 |
| ATOM | 3597 | HG3  | GLU | X | 239 | 51.450 | 52.334 | 60.481 | 0.00 | 0.00 |
| ATOM | 3598 | CD   | GLU | X | 239 | 52.985 | 53.840 | 60.772 | 0.00 | 0.00 |
| ATOM | 3599 | OE1  | GLU | X | 239 | 53.512 | 54.542 | 61.674 | 0.00 | 0.00 |
| ATOM | 3600 | OE2  | GLU | X | 239 | 53.727 | 53.381 | 59.852 | 0.00 | 0.00 |
| ATOM | 3601 | C    | GLU | X | 239 | 50.217 | 56.437 | 58.784 | 0.00 | 0.00 |
| ATOM | 3602 | O    | GLU | X | 239 | 51.077 | 57.181 | 58.310 | 0.00 | 0.00 |
| ATOM | 3603 | N    | ALA | X | 240 | 48.987 | 56.242 | 58.167 | 0.00 | 0.00 |
| ATOM | 3604 | H    | ALA | X | 240 | 48.302 | 55.549 | 58.431 | 0.00 | 0.00 |
| ATOM | 3605 | CA   | ALA | X | 240 | 48.725 | 56.910 | 56.875 | 0.00 | 0.00 |
| ATOM | 3606 | HA   | ALA | X | 240 | 49.588 | 56.691 | 56.246 | 0.00 | 0.00 |
| ATOM | 3607 | CB   | ALA | X | 240 | 47.443 | 56.480 | 56.184 | 0.00 | 0.00 |
| ATOM | 3608 | HB1  | ALA | X | 240 | 46.539 | 56.664 | 56.765 | 0.00 | 0.00 |
| ATOM | 3609 | HB2  | ALA | X | 240 | 47.553 | 55.404 | 56.052 | 0.00 | 0.00 |
| ATOM | 3610 | HB3  | ALA | X | 240 | 47.306 | 56.862 | 55.173 | 0.00 | 0.00 |
| ATOM | 3611 | C    | ALA | X | 240 | 48.887 | 58.426 | 57.118 | 0.00 | 0.00 |
| ATOM | 3612 | O    | ALA | X | 240 | 49.642 | 59.023 | 56.312 | 0.00 | 0.00 |
| ATOM | 3613 | N    | ARG | X | 241 | 48.547 | 58.986 | 58.286 | 0.00 | 0.00 |
| ATOM | 3614 | H    | ARG | X | 241 | 47.925 | 58.517 | 58.928 | 0.00 | 0.00 |
| ATOM | 3615 | CA   | ARG | X | 241 | 48.822 | 60.409 | 58.627 | 0.00 | 0.00 |
| ATOM | 3616 | HA   | ARG | X | 241 | 48.410 | 61.111 | 57.903 | 0.00 | 0.00 |
| ATOM | 3617 | CB   | ARG | X | 241 | 48.181 | 60.761 | 59.998 | 0.00 | 0.00 |
| ATOM | 3618 | HB2  | ARG | X | 241 | 47.190 | 60.309 | 60.024 | 0.00 | 0.00 |
| ATOM | 3619 | HB3  | ARG | X | 241 | 48.666 | 60.218 | 60.810 | 0.00 | 0.00 |
| ATOM | 3620 | CG   | ARG | X | 241 | 48.087 | 62.322 | 60.288 | 0.00 | 0.00 |
| ATOM | 3621 | HG2  | ARG | X | 241 | 48.999 | 62.747 | 59.867 | 0.00 | 0.00 |
| ATOM | 3622 | HG3  | ARG | X | 241 | 47.122 | 62.617 | 59.876 | 0.00 | 0.00 |
| ATOM | 3623 | CD   | ARG | X | 241 | 47.965 | 62.761 | 61.747 | 0.00 | 0.00 |
| ATOM | 3624 | HD2  | ARG | X | 241 | 47.009 | 62.451 | 62.170 | 0.00 | 0.00 |
| ATOM | 3625 | HD3  | ARG | X | 241 | 48.732 | 62.231 | 62.311 | 0.00 | 0.00 |
| ATOM | 3626 | NE   | ARG | X | 241 | 47.995 | 64.253 | 61.823 | 0.00 | 0.00 |
| ATOM | 3627 | HE   | ARG | X | 241 | 47.355 | 64.760 | 61.228 | 0.00 | 0.00 |
| ATOM | 3628 | CZ   | ARG | X | 241 | 48.829 | 65.029 | 62.556 | 0.00 | 0.00 |
| ATOM | 3629 | NH1  | ARG | X | 241 | 49.525 | 64.498 | 63.505 | 0.00 | 0.00 |
| ATOM | 3630 | HH11 | ARG | X | 241 | 49.403 | 63.556 | 63.848 | 0.00 | 0.00 |
| ATOM | 3631 | HH12 | ARG | X | 241 | 50.260 | 65.027 | 63.952 | 0.00 | 0.00 |
| ATOM | 3632 | NH2  | ARG | X | 241 | 48.899 | 66.293 | 62.280 | 0.00 | 0.00 |
| ATOM | 3633 | HH21 | ARG | X | 241 | 48.536 | 66.729 | 61.444 | 0.00 | 0.00 |
| ATOM | 3634 | HH22 | ARG | X | 241 | 49.520 | 66.891 | 62.805 | 0.00 | 0.00 |
| ATOM | 3635 | C    | ARG | X | 241 | 50.316 | 60.676 | 58.809 | 0.00 | 0.00 |
| ATOM | 3636 | O    | ARG | X | 241 | 50.809 | 61.657 | 58.235 | 0.00 | 0.00 |
| ATOM | 3637 | N    | ARG | X | 242 | 51.090 | 59.861 | 59.536 | 0.00 | 0.00 |
| ATOM | 3638 | H    | ARG | X | 242 | 50.613 | 59.098 | 59.994 | 0.00 | 0.00 |
| ATOM | 3639 | CA   | ARG | X | 242 | 52.537 | 60.070 | 59.815 | 0.00 | 0.00 |
| ATOM | 3640 | HA   | ARG | X | 242 | 52.702 | 61.033 | 60.299 | 0.00 | 0.00 |
| ATOM | 3641 | CB   | ARG | X | 242 | 53.043 | 58.957 | 60.784 | 0.00 | 0.00 |
| ATOM | 3642 | HB2  | ARG | X | 242 | 52.533 | 58.823 | 61.738 | 0.00 | 0.00 |
| ATOM | 3643 | HB3  | ARG | X | 242 | 53.035 | 58.013 | 60.240 | 0.00 | 0.00 |

|      |      |      |     |   |     |        |        |        |      |      |
|------|------|------|-----|---|-----|--------|--------|--------|------|------|
| ATOM | 3644 | CG   | ARG | X | 242 | 54.501 | 59.154 | 61.229 | 0.00 | 0.00 |
| ATOM | 3645 | HG2  | ARG | X | 242 | 55.196 | 59.450 | 60.443 | 0.00 | 0.00 |
| ATOM | 3646 | HG3  | ARG | X | 242 | 54.501 | 59.970 | 61.951 | 0.00 | 0.00 |
| ATOM | 3647 | CD   | ARG | X | 242 | 55.114 | 57.897 | 61.842 | 0.00 | 0.00 |
| ATOM | 3648 | HD2  | ARG | X | 242 | 56.106 | 58.176 | 62.198 | 0.00 | 0.00 |
| ATOM | 3649 | HD3  | ARG | X | 242 | 54.686 | 57.564 | 62.788 | 0.00 | 0.00 |
| ATOM | 3650 | NE   | ARG | X | 242 | 55.160 | 56.665 | 60.978 | 0.00 | 0.00 |
| ATOM | 3651 | HE   | ARG | X | 242 | 54.634 | 55.876 | 61.325 | 0.00 | 0.00 |
| ATOM | 3652 | CZ   | ARG | X | 242 | 55.974 | 56.389 | 59.980 | 0.00 | 0.00 |
| ATOM | 3653 | NH1  | ARG | X | 242 | 56.894 | 57.233 | 59.620 | 0.00 | 0.00 |
| ATOM | 3654 | HH11 | ARG | X | 242 | 57.284 | 57.864 | 60.306 | 0.00 | 0.00 |
| ATOM | 3655 | HH12 | ARG | X | 242 | 57.372 | 57.090 | 58.742 | 0.00 | 0.00 |
| ATOM | 3656 | NH2  | ARG | X | 242 | 55.840 | 55.206 | 59.379 | 0.00 | 0.00 |
| ATOM | 3657 | HH21 | ARG | X | 242 | 55.181 | 54.521 | 59.721 | 0.00 | 0.00 |
| ATOM | 3658 | HH22 | ARG | X | 242 | 56.633 | 54.823 | 58.884 | 0.00 | 0.00 |
| ATOM | 3659 | C    | ARG | X | 242 | 53.413 | 60.104 | 58.521 | 0.00 | 0.00 |
| ATOM | 3660 | O    | ARG | X | 242 | 54.312 | 60.861 | 58.392 | 0.00 | 0.00 |
| ATOM | 3661 | N    | ARG | X | 243 | 52.953 | 59.251 | 57.535 | 0.00 | 0.00 |
| ATOM | 3662 | H    | ARG | X | 243 | 52.171 | 58.665 | 57.788 | 0.00 | 0.00 |
| ATOM | 3663 | CA   | ARG | X | 243 | 53.565 | 59.089 | 56.163 | 0.00 | 0.00 |
| ATOM | 3664 | HA   | ARG | X | 243 | 54.639 | 59.036 | 56.338 | 0.00 | 0.00 |
| ATOM | 3665 | CB   | ARG | X | 243 | 53.184 | 57.730 | 55.573 | 0.00 | 0.00 |
| ATOM | 3666 | HB2  | ARG | X | 243 | 52.140 | 57.668 | 55.264 | 0.00 | 0.00 |
| ATOM | 3667 | HB3  | ARG | X | 243 | 53.836 | 57.681 | 54.701 | 0.00 | 0.00 |
| ATOM | 3668 | CG   | ARG | X | 243 | 53.784 | 56.498 | 56.402 | 0.00 | 0.00 |
| ATOM | 3669 | HG2  | ARG | X | 243 | 54.838 | 56.709 | 56.583 | 0.00 | 0.00 |
| ATOM | 3670 | HG3  | ARG | X | 243 | 53.299 | 56.556 | 57.376 | 0.00 | 0.00 |
| ATOM | 3671 | CD   | ARG | X | 243 | 53.506 | 55.191 | 55.750 | 0.00 | 0.00 |
| ATOM | 3672 | HD2  | ARG | X | 243 | 52.441 | 55.132 | 55.525 | 0.00 | 0.00 |
| ATOM | 3673 | HD3  | ARG | X | 243 | 54.133 | 55.047 | 54.870 | 0.00 | 0.00 |
| ATOM | 3674 | NE   | ARG | X | 243 | 53.667 | 54.100 | 56.738 | 0.00 | 0.00 |
| ATOM | 3675 | HE   | ARG | X | 243 | 53.442 | 54.378 | 57.683 | 0.00 | 0.00 |
| ATOM | 3676 | CZ   | ARG | X | 243 | 53.662 | 52.814 | 56.391 | 0.00 | 0.00 |
| ATOM | 3677 | NH1  | ARG | X | 243 | 53.511 | 52.352 | 55.175 | 0.00 | 0.00 |
| ATOM | 3678 | HH11 | ARG | X | 243 | 53.314 | 53.101 | 54.526 | 0.00 | 0.00 |
| ATOM | 3679 | HH12 | ARG | X | 243 | 53.416 | 51.437 | 54.759 | 0.00 | 0.00 |
| ATOM | 3680 | NH2  | ARG | X | 243 | 53.681 | 51.934 | 57.408 | 0.00 | 0.00 |
| ATOM | 3681 | HH21 | ARG | X | 243 | 53.790 | 52.295 | 58.345 | 0.00 | 0.00 |
| ATOM | 3682 | HH22 | ARG | X | 243 | 53.785 | 50.942 | 57.251 | 0.00 | 0.00 |
| ATOM | 3683 | C    | ARG | X | 243 | 53.224 | 60.334 | 55.329 | 0.00 | 0.00 |
| ATOM | 3684 | O    | ARG | X | 243 | 54.176 | 60.827 | 54.745 | 0.00 | 0.00 |
| ATOM | 3685 | N    | ALA | X | 244 | 52.006 | 60.807 | 55.348 | 0.00 | 0.00 |
| ATOM | 3686 | H    | ALA | X | 244 | 51.388 | 60.108 | 55.734 | 0.00 | 0.00 |
| ATOM | 3687 | CA   | ALA | X | 244 | 51.516 | 62.050 | 54.698 | 0.00 | 0.00 |
| ATOM | 3688 | HA   | ALA | X | 244 | 51.745 | 62.025 | 53.633 | 0.00 | 0.00 |
| ATOM | 3689 | CB   | ALA | X | 244 | 49.994 | 62.107 | 54.910 | 0.00 | 0.00 |
| ATOM | 3690 | HB1  | ALA | X | 244 | 49.803 | 62.464 | 55.922 | 0.00 | 0.00 |
| ATOM | 3691 | HB2  | ALA | X | 244 | 49.513 | 61.136 | 54.793 | 0.00 | 0.00 |
| ATOM | 3692 | HB3  | ALA | X | 244 | 49.514 | 62.824 | 54.244 | 0.00 | 0.00 |
| ATOM | 3693 | C    | ALA | X | 244 | 52.272 | 63.289 | 55.245 | 0.00 | 0.00 |
| ATOM | 3694 | O    | ALA | X | 244 | 52.704 | 64.128 | 54.404 | 0.00 | 0.00 |
| ATOM | 3695 | N    | THR | X | 245 | 52.616 | 63.368 | 56.539 | 0.00 | 0.00 |
| ATOM | 3696 | H    | THR | X | 245 | 52.162 | 62.731 | 57.179 | 0.00 | 0.00 |
| ATOM | 3697 | CA   | THR | X | 245 | 53.307 | 64.556 | 57.046 | 0.00 | 0.00 |
| ATOM | 3698 | HA   | THR | X | 245 | 52.872 | 65.498 | 56.710 | 0.00 | 0.00 |
| ATOM | 3699 | CB   | THR | X | 245 | 53.511 | 64.632 | 58.571 | 0.00 | 0.00 |
| ATOM | 3700 | HB   | THR | X | 245 | 54.219 | 63.823 | 58.756 | 0.00 | 0.00 |
| ATOM | 3701 | CG2  | THR | X | 245 | 53.961 | 65.988 | 59.104 | 0.00 | 0.00 |
| ATOM | 3702 | HG21 | THR | X | 245 | 53.169 | 66.699 | 59.338 | 0.00 | 0.00 |
| ATOM | 3703 | HG22 | THR | X | 245 | 54.654 | 66.428 | 58.386 | 0.00 | 0.00 |
| ATOM | 3704 | HG23 | THR | X | 245 | 54.362 | 65.725 | 60.083 | 0.00 | 0.00 |
| ATOM | 3705 | OG1  | THR | X | 245 | 52.329 | 64.299 | 59.219 | 0.00 | 0.00 |
| ATOM | 3706 | HG1  | THR | X | 245 | 51.647 | 64.811 | 58.777 | 0.00 | 0.00 |
| ATOM | 3707 | C    | THR | X | 245 | 54.741 | 64.566 | 56.300 | 0.00 | 0.00 |
| ATOM | 3708 | O    | THR | X | 245 | 55.208 | 65.639 | 55.834 | 0.00 | 0.00 |
| ATOM | 3709 | N    | GLN | X | 246 | 55.393 | 63.394 | 56.259 | 0.00 | 0.00 |
| ATOM | 3710 | H    | GLN | X | 246 | 55.036 | 62.714 | 56.916 | 0.00 | 0.00 |

|      |      |      |     |   |     |        |        |        |      |      |
|------|------|------|-----|---|-----|--------|--------|--------|------|------|
| ATOM | 3711 | CA   | GLN | X | 246 | 56.719 | 63.121 | 55.666 | 0.00 | 0.00 |
| ATOM | 3712 | HA   | GLN | X | 246 | 57.423 | 63.776 | 56.179 | 0.00 | 0.00 |
| ATOM | 3713 | CB   | GLN | X | 246 | 57.134 | 61.676 | 56.049 | 0.00 | 0.00 |
| ATOM | 3714 | HB2  | GLN | X | 246 | 57.067 | 61.591 | 57.134 | 0.00 | 0.00 |
| ATOM | 3715 | HB3  | GLN | X | 246 | 56.482 | 60.897 | 55.652 | 0.00 | 0.00 |
| ATOM | 3716 | CG   | GLN | X | 246 | 58.546 | 61.353 | 55.510 | 0.00 | 0.00 |
| ATOM | 3717 | HG2  | GLN | X | 246 | 58.511 | 61.430 | 54.423 | 0.00 | 0.00 |
| ATOM | 3718 | HG3  | GLN | X | 246 | 59.182 | 62.093 | 55.995 | 0.00 | 0.00 |
| ATOM | 3719 | CD   | GLN | X | 246 | 59.122 | 59.939 | 55.815 | 0.00 | 0.00 |
| ATOM | 3720 | OE1  | GLN | X | 246 | 58.474 | 59.013 | 56.357 | 0.00 | 0.00 |
| ATOM | 3721 | NE2  | GLN | X | 246 | 60.319 | 59.622 | 55.322 | 0.00 | 0.00 |
| ATOM | 3722 | HE21 | GLN | X | 246 | 60.695 | 58.714 | 55.559 | 0.00 | 0.00 |
| ATOM | 3723 | HE22 | GLN | X | 246 | 60.862 | 60.310 | 54.822 | 0.00 | 0.00 |
| ATOM | 3724 | C    | GLN | X | 246 | 56.786 | 63.341 | 54.123 | 0.00 | 0.00 |
| ATOM | 3725 | O    | GLN | X | 246 | 57.542 | 64.194 | 53.670 | 0.00 | 0.00 |
| ATOM | 3726 | N    | LEU | X | 247 | 55.854 | 62.765 | 53.330 | 0.00 | 0.00 |
| ATOM | 3727 | H    | LEU | X | 247 | 55.379 | 61.996 | 53.783 | 0.00 | 0.00 |
| ATOM | 3728 | CA   | LEU | X | 247 | 55.573 | 63.101 | 51.950 | 0.00 | 0.00 |
| ATOM | 3729 | HA   | LEU | X | 247 | 56.448 | 62.743 | 51.407 | 0.00 | 0.00 |
| ATOM | 3730 | CB   | LEU | X | 247 | 54.358 | 62.280 | 51.518 | 0.00 | 0.00 |
| ATOM | 3731 | HB2  | LEU | X | 247 | 54.418 | 61.220 | 51.766 | 0.00 | 0.00 |
| ATOM | 3732 | HB3  | LEU | X | 247 | 53.496 | 62.662 | 52.065 | 0.00 | 0.00 |
| ATOM | 3733 | CG   | LEU | X | 247 | 54.018 | 62.475 | 50.036 | 0.00 | 0.00 |
| ATOM | 3734 | HG   | LEU | X | 247 | 53.598 | 63.477 | 49.947 | 0.00 | 0.00 |
| ATOM | 3735 | CD1  | LEU | X | 247 | 55.197 | 62.360 | 49.047 | 0.00 | 0.00 |
| ATOM | 3736 | HD11 | LEU | X | 247 | 55.641 | 61.379 | 49.217 | 0.00 | 0.00 |
| ATOM | 3737 | HD12 | LEU | X | 247 | 55.915 | 63.176 | 49.124 | 0.00 | 0.00 |
| ATOM | 3738 | HD13 | LEU | X | 247 | 54.740 | 62.329 | 48.058 | 0.00 | 0.00 |
| ATOM | 3739 | CD2  | LEU | X | 247 | 52.950 | 61.579 | 49.491 | 0.00 | 0.00 |
| ATOM | 3740 | HD21 | LEU | X | 247 | 53.314 | 60.577 | 49.263 | 0.00 | 0.00 |
| ATOM | 3741 | HD22 | LEU | X | 247 | 52.112 | 61.503 | 50.183 | 0.00 | 0.00 |
| ATOM | 3742 | HD23 | LEU | X | 247 | 52.450 | 61.966 | 48.603 | 0.00 | 0.00 |
| ATOM | 3743 | C    | LEU | X | 247 | 55.549 | 64.614 | 51.738 | 0.00 | 0.00 |
| ATOM | 3744 | O    | LEU | X | 247 | 56.265 | 65.084 | 50.869 | 0.00 | 0.00 |
| ATOM | 3745 | N    | ALA | X | 248 | 54.806 | 65.320 | 52.615 | 0.00 | 0.00 |
| ATOM | 3746 | H    | ALA | X | 248 | 54.345 | 64.812 | 53.356 | 0.00 | 0.00 |
| ATOM | 3747 | CA   | ALA | X | 248 | 54.640 | 66.711 | 52.398 | 0.00 | 0.00 |
| ATOM | 3748 | HA   | ALA | X | 248 | 54.415 | 66.803 | 51.336 | 0.00 | 0.00 |
| ATOM | 3749 | CB   | ALA | X | 248 | 53.446 | 67.060 | 53.238 | 0.00 | 0.00 |
| ATOM | 3750 | HB1  | ALA | X | 248 | 52.583 | 66.477 | 52.916 | 0.00 | 0.00 |
| ATOM | 3751 | HB2  | ALA | X | 248 | 53.195 | 68.118 | 53.159 | 0.00 | 0.00 |
| ATOM | 3752 | HB3  | ALA | X | 248 | 53.627 | 66.947 | 54.307 | 0.00 | 0.00 |
| ATOM | 3753 | C    | ALA | X | 248 | 55.903 | 67.515 | 52.743 | 0.00 | 0.00 |
| ATOM | 3754 | O    | ALA | X | 248 | 56.459 | 68.309 | 52.062 | 0.00 | 0.00 |
| ATOM | 3755 | N    | HIE | X | 249 | 56.481 | 67.166 | 53.878 | 0.00 | 0.00 |
| ATOM | 3756 | H    | HIE | X | 249 | 56.058 | 66.428 | 54.423 | 0.00 | 0.00 |
| ATOM | 3757 | CA   | HIE | X | 249 | 57.783 | 67.760 | 54.248 | 0.00 | 0.00 |
| ATOM | 3758 | HA   | HIE | X | 249 | 57.613 | 68.826 | 54.399 | 0.00 | 0.00 |
| ATOM | 3759 | CB   | HIE | X | 249 | 58.218 | 67.092 | 55.538 | 0.00 | 0.00 |
| ATOM | 3760 | HB2  | HIE | X | 249 | 57.353 | 66.960 | 56.189 | 0.00 | 0.00 |
| ATOM | 3761 | HB3  | HIE | X | 249 | 58.503 | 66.067 | 55.303 | 0.00 | 0.00 |
| ATOM | 3762 | CG   | HIE | X | 249 | 59.291 | 67.834 | 56.391 | 0.00 | 0.00 |
| ATOM | 3763 | ND1  | HIE | X | 249 | 58.885 | 68.523 | 57.554 | 0.00 | 0.00 |
| ATOM | 3764 | CE1  | HIE | X | 249 | 60.016 | 69.007 | 58.214 | 0.00 | 0.00 |
| ATOM | 3765 | HE1  | HIE | X | 249 | 60.191 | 69.477 | 59.170 | 0.00 | 0.00 |
| ATOM | 3766 | NE2  | HIE | X | 249 | 61.064 | 68.540 | 57.545 | 0.00 | 0.00 |
| ATOM | 3767 | HE2  | HIE | X | 249 | 62.018 | 68.754 | 57.796 | 0.00 | 0.00 |
| ATOM | 3768 | CD2  | HIE | X | 249 | 60.608 | 67.878 | 56.332 | 0.00 | 0.00 |
| ATOM | 3769 | HD2  | HIE | X | 249 | 61.128 | 67.378 | 55.528 | 0.00 | 0.00 |
| ATOM | 3770 | C    | HIE | X | 249 | 58.926 | 67.636 | 53.102 | 0.00 | 0.00 |
| ATOM | 3771 | O    | HIE | X | 249 | 59.650 | 68.574 | 52.824 | 0.00 | 0.00 |
| ATOM | 3772 | N    | LEU | X | 250 | 59.059 | 66.479 | 52.489 | 0.00 | 0.00 |
| ATOM | 3773 | H    | LEU | X | 250 | 58.530 | 65.680 | 52.806 | 0.00 | 0.00 |
| ATOM | 3774 | CA   | LEU | X | 250 | 59.955 | 66.120 | 51.400 | 0.00 | 0.00 |
| ATOM | 3775 | HA   | LEU | X | 250 | 61.006 | 66.349 | 51.574 | 0.00 | 0.00 |
| ATOM | 3776 | CB   | LEU | X | 250 | 59.810 | 64.662 | 51.052 | 0.00 | 0.00 |
| ATOM | 3777 | HB2  | LEU | X | 250 | 58.746 | 64.434 | 51.105 | 0.00 | 0.00 |

|      |      |      |     |   |     |        |        |        |      |      |
|------|------|------|-----|---|-----|--------|--------|--------|------|------|
| ATOM | 3778 | HB3  | LEU | X | 250 | 60.188 | 64.481 | 50.046 | 0.00 | 0.00 |
| ATOM | 3779 | CG   | LEU | X | 250 | 60.515 | 63.579 | 51.940 | 0.00 | 0.00 |
| ATOM | 3780 | HG   | LEU | X | 250 | 60.422 | 63.750 | 53.013 | 0.00 | 0.00 |
| ATOM | 3781 | CD1  | LEU | X | 250 | 59.806 | 62.272 | 51.733 | 0.00 | 0.00 |
| ATOM | 3782 | HD11 | LEU | X | 250 | 60.280 | 61.579 | 52.428 | 0.00 | 0.00 |
| ATOM | 3783 | HD12 | LEU | X | 250 | 60.122 | 61.951 | 50.741 | 0.00 | 0.00 |
| ATOM | 3784 | HD13 | LEU | X | 250 | 58.721 | 62.304 | 51.838 | 0.00 | 0.00 |
| ATOM | 3785 | CD2  | LEU | X | 250 | 62.022 | 63.543 | 51.723 | 0.00 | 0.00 |
| ATOM | 3786 | HD21 | LEU | X | 250 | 62.538 | 64.433 | 52.083 | 0.00 | 0.00 |
| ATOM | 3787 | HD22 | LEU | X | 250 | 62.435 | 62.640 | 52.173 | 0.00 | 0.00 |
| ATOM | 3788 | HD23 | LEU | X | 250 | 62.141 | 63.551 | 50.639 | 0.00 | 0.00 |
| ATOM | 3789 | C    | LEU | X | 250 | 59.569 | 66.847 | 50.113 | 0.00 | 0.00 |
| ATOM | 3790 | O    | LEU | X | 250 | 60.421 | 67.431 | 49.391 | 0.00 | 0.00 |
| ATOM | 3791 | N    | VAL | X | 251 | 58.278 | 66.955 | 49.796 | 0.00 | 0.00 |
| ATOM | 3792 | H    | VAL | X | 251 | 57.674 | 66.314 | 50.291 | 0.00 | 0.00 |
| ATOM | 3793 | CA   | VAL | X | 251 | 57.730 | 67.654 | 48.669 | 0.00 | 0.00 |
| ATOM | 3794 | HA   | VAL | X | 251 | 58.136 | 67.284 | 47.727 | 0.00 | 0.00 |
| ATOM | 3795 | CB   | VAL | X | 251 | 56.142 | 67.325 | 48.646 | 0.00 | 0.00 |
| ATOM | 3796 | HB   | VAL | X | 251 | 55.965 | 67.318 | 49.722 | 0.00 | 0.00 |
| ATOM | 3797 | CG1  | VAL | X | 251 | 55.357 | 68.459 | 48.037 | 0.00 | 0.00 |
| ATOM | 3798 | HG11 | VAL | X | 251 | 54.300 | 68.229 | 47.905 | 0.00 | 0.00 |
| ATOM | 3799 | HG12 | VAL | X | 251 | 55.451 | 69.323 | 48.695 | 0.00 | 0.00 |
| ATOM | 3800 | HG13 | VAL | X | 251 | 55.894 | 68.785 | 47.146 | 0.00 | 0.00 |
| ATOM | 3801 | CG2  | VAL | X | 251 | 55.883 | 65.911 | 48.015 | 0.00 | 0.00 |
| ATOM | 3802 | HG21 | VAL | X | 251 | 56.524 | 65.109 | 48.384 | 0.00 | 0.00 |
| ATOM | 3803 | HG22 | VAL | X | 251 | 56.159 | 65.922 | 46.960 | 0.00 | 0.00 |
| ATOM | 3804 | HG23 | VAL | X | 251 | 54.807 | 65.824 | 48.166 | 0.00 | 0.00 |
| ATOM | 3805 | C    | VAL | X | 251 | 57.945 | 69.148 | 48.748 | 0.00 | 0.00 |
| ATOM | 3806 | O    | VAL | X | 251 | 58.092 | 69.713 | 47.634 | 0.00 | 0.00 |
| ATOM | 3807 | N    | GLY | X | 252 | 58.027 | 69.807 | 49.944 | 0.00 | 0.00 |
| ATOM | 3808 | H    | GLY | X | 252 | 57.856 | 69.236 | 50.760 | 0.00 | 0.00 |
| ATOM | 3809 | CA   | GLY | X | 252 | 58.122 | 71.230 | 50.153 | 0.00 | 0.00 |
| ATOM | 3810 | HA2  | GLY | X | 252 | 58.917 | 71.397 | 50.880 | 0.00 | 0.00 |
| ATOM | 3811 | HA3  | GLY | X | 252 | 58.428 | 71.693 | 49.215 | 0.00 | 0.00 |
| ATOM | 3812 | C    | GLY | X | 252 | 56.829 | 71.900 | 50.740 | 0.00 | 0.00 |
| ATOM | 3813 | O    | GLY | X | 252 | 56.606 | 73.096 | 50.642 | 0.00 | 0.00 |
| ATOM | 3814 | N    | CYX | X | 253 | 56.017 | 71.152 | 51.529 | 0.00 | 0.00 |
| ATOM | 3815 | H    | CYX | X | 253 | 56.282 | 70.190 | 51.684 | 0.00 | 0.00 |
| ATOM | 3816 | CA   | CYX | X | 253 | 54.725 | 71.469 | 52.107 | 0.00 | 0.00 |
| ATOM | 3817 | HA   | CYX | X | 253 | 54.371 | 72.466 | 51.845 | 0.00 | 0.00 |
| ATOM | 3818 | CB   | CYX | X | 253 | 53.674 | 70.554 | 51.417 | 0.00 | 0.00 |
| ATOM | 3819 | HB2  | CYX | X | 253 | 54.029 | 69.523 | 51.438 | 0.00 | 0.00 |
| ATOM | 3820 | HB3  | CYX | X | 253 | 52.785 | 70.506 | 52.046 | 0.00 | 0.00 |
| ATOM | 3821 | SG   | CYX | X | 253 | 53.128 | 71.044 | 49.737 | 0.00 | 0.00 |
| ATOM | 3822 | C    | CYX | X | 253 | 54.681 | 71.468 | 53.704 | 0.00 | 0.00 |
| ATOM | 3823 | O    | CYX | X | 253 | 55.086 | 70.461 | 54.332 | 0.00 | 0.00 |
| ATOM | 3824 | N    | PRO | X | 254 | 54.176 | 72.493 | 54.331 | 0.00 | 0.00 |
| ATOM | 3825 | CD   | PRO | X | 254 | 54.273 | 72.599 | 55.741 | 0.00 | 0.00 |
| ATOM | 3826 | HD2  | PRO | X | 254 | 55.150 | 72.040 | 56.071 | 0.00 | 0.00 |
| ATOM | 3827 | HD3  | PRO | X | 254 | 53.447 | 72.072 | 56.218 | 0.00 | 0.00 |
| ATOM | 3828 | CG   | PRO | X | 254 | 54.161 | 74.075 | 56.195 | 0.00 | 0.00 |
| ATOM | 3829 | HG2  | PRO | X | 254 | 55.110 | 74.527 | 55.905 | 0.00 | 0.00 |
| ATOM | 3830 | HG3  | PRO | X | 254 | 53.864 | 74.251 | 57.229 | 0.00 | 0.00 |
| ATOM | 3831 | CB   | PRO | X | 254 | 53.078 | 74.443 | 55.128 | 0.00 | 0.00 |
| ATOM | 3832 | HB2  | PRO | X | 254 | 53.101 | 75.530 | 55.040 | 0.00 | 0.00 |
| ATOM | 3833 | HB3  | PRO | X | 254 | 52.121 | 74.090 | 55.512 | 0.00 | 0.00 |
| ATOM | 3834 | CA   | PRO | X | 254 | 53.592 | 73.721 | 53.900 | 0.00 | 0.00 |
| ATOM | 3835 | HA   | PRO | X | 254 | 52.832 | 73.558 | 53.136 | 0.00 | 0.00 |
| ATOM | 3836 | C    | PRO | X | 254 | 54.742 | 74.602 | 53.238 | 0.00 | 0.00 |
| ATOM | 3837 | O    | PRO | X | 254 | 55.943 | 74.284 | 53.215 | 0.00 | 0.00 |
| ATOM | 3838 | N    | PRO | X | 255 | 54.318 | 75.736 | 52.633 | 0.00 | 0.00 |
| ATOM | 3839 | CD   | PRO | X | 255 | 53.003 | 76.265 | 52.554 | 0.00 | 0.00 |
| ATOM | 3840 | HD2  | PRO | X | 255 | 52.856 | 76.996 | 53.349 | 0.00 | 0.00 |
| ATOM | 3841 | HD3  | PRO | X | 255 | 52.216 | 75.514 | 52.628 | 0.00 | 0.00 |
| ATOM | 3842 | CG   | PRO | X | 255 | 52.831 | 76.976 | 51.317 | 0.00 | 0.00 |
| ATOM | 3843 | HG2  | PRO | X | 255 | 52.074 | 77.705 | 51.604 | 0.00 | 0.00 |
| ATOM | 3844 | HG3  | PRO | X | 255 | 52.603 | 76.238 | 50.548 | 0.00 | 0.00 |

|      |      |      |     |   |     |        |        |        |      |      |
|------|------|------|-----|---|-----|--------|--------|--------|------|------|
| ATOM | 3845 | CB   | PRO | X | 255 | 54.205 | 77.561 | 51.083 | 0.00 | 0.00 |
| ATOM | 3846 | HB2  | PRO | X | 255 | 54.306 | 78.529 | 51.573 | 0.00 | 0.00 |
| ATOM | 3847 | HB3  | PRO | X | 255 | 54.394 | 77.727 | 50.022 | 0.00 | 0.00 |
| ATOM | 3848 | CA   | PRO | X | 255 | 55.195 | 76.558 | 51.810 | 0.00 | 0.00 |
| ATOM | 3849 | HA   | PRO | X | 255 | 55.755 | 75.958 | 51.092 | 0.00 | 0.00 |
| ATOM | 3850 | C    | PRO | X | 255 | 56.119 | 77.347 | 52.629 | 0.00 | 0.00 |
| ATOM | 3851 | O    | PRO | X | 255 | 55.826 | 78.350 | 53.357 | 0.00 | 0.00 |
| ATOM | 3852 | N    | GLY | X | 256 | 57.404 | 76.878 | 52.531 | 0.00 | 0.00 |
| ATOM | 3853 | H    | GLY | X | 256 | 57.636 | 76.114 | 51.913 | 0.00 | 0.00 |
| ATOM | 3854 | CA   | GLY | X | 256 | 58.552 | 77.647 | 53.172 | 0.00 | 0.00 |
| ATOM | 3855 | HA2  | GLY | X | 256 | 59.444 | 77.390 | 52.601 | 0.00 | 0.00 |
| ATOM | 3856 | HA3  | GLY | X | 256 | 58.438 | 78.727 | 53.087 | 0.00 | 0.00 |
| ATOM | 3857 | C    | GLY | X | 256 | 58.750 | 77.333 | 54.692 | 0.00 | 0.00 |
| ATOM | 3858 | O    | GLY | X | 256 | 59.960 | 77.330 | 55.083 | 0.00 | 0.00 |
| ATOM | 3859 | N    | GLY | X | 257 | 57.700 | 76.973 | 55.398 | 0.00 | 0.00 |
| ATOM | 3860 | H    | GLY | X | 257 | 56.839 | 77.051 | 54.874 | 0.00 | 0.00 |
| ATOM | 3861 | CA   | GLY | X | 257 | 57.711 | 76.300 | 56.724 | 0.00 | 0.00 |
| ATOM | 3862 | HA2  | GLY | X | 257 | 58.583 | 76.583 | 57.314 | 0.00 | 0.00 |
| ATOM | 3863 | HA3  | GLY | X | 257 | 56.836 | 76.740 | 57.201 | 0.00 | 0.00 |
| ATOM | 3864 | C    | GLY | X | 257 | 57.589 | 74.769 | 56.802 | 0.00 | 0.00 |
| ATOM | 3865 | O    | GLY | X | 257 | 57.698 | 74.092 | 55.787 | 0.00 | 0.00 |
| ATOM | 3866 | N    | THR | X | 258 | 57.216 | 74.230 | 57.955 | 0.00 | 0.00 |
| ATOM | 3867 | H    | THR | X | 258 | 57.149 | 74.840 | 58.757 | 0.00 | 0.00 |
| ATOM | 3868 | CA   | THR | X | 258 | 57.050 | 72.842 | 58.176 | 0.00 | 0.00 |
| ATOM | 3869 | HA   | THR | X | 258 | 56.787 | 72.353 | 57.238 | 0.00 | 0.00 |
| ATOM | 3870 | CB   | THR | X | 258 | 58.304 | 72.168 | 58.740 | 0.00 | 0.00 |
| ATOM | 3871 | HB   | THR | X | 258 | 58.148 | 71.091 | 58.795 | 0.00 | 0.00 |
| ATOM | 3872 | CG2  | THR | X | 258 | 59.422 | 72.316 | 57.679 | 0.00 | 0.00 |
| ATOM | 3873 | HG21 | THR | X | 258 | 60.104 | 71.473 | 57.794 | 0.00 | 0.00 |
| ATOM | 3874 | HG22 | THR | X | 258 | 59.896 | 73.297 | 57.646 | 0.00 | 0.00 |
| ATOM | 3875 | HG23 | THR | X | 258 | 59.051 | 72.106 | 56.676 | 0.00 | 0.00 |
| ATOM | 3876 | OG1  | THR | X | 258 | 58.698 | 72.610 | 59.958 | 0.00 | 0.00 |
| ATOM | 3877 | HG1  | THR | X | 258 | 58.964 | 73.525 | 59.839 | 0.00 | 0.00 |
| ATOM | 3878 | C    | THR | X | 258 | 55.910 | 72.612 | 59.209 | 0.00 | 0.00 |
| ATOM | 3879 | O    | THR | X | 258 | 55.622 | 73.403 | 60.065 | 0.00 | 0.00 |
| ATOM | 3880 | N    | GLY | X | 259 | 55.244 | 71.451 | 59.051 | 0.00 | 0.00 |
| ATOM | 3881 | H    | GLY | X | 259 | 55.437 | 70.921 | 58.214 | 0.00 | 0.00 |
| ATOM | 3882 | CA   | GLY | X | 259 | 54.006 | 70.992 | 59.728 | 0.00 | 0.00 |
| ATOM | 3883 | HA2  | GLY | X | 259 | 53.768 | 70.035 | 59.263 | 0.00 | 0.00 |
| ATOM | 3884 | HA3  | GLY | X | 259 | 54.278 | 70.915 | 60.781 | 0.00 | 0.00 |
| ATOM | 3885 | C    | GLY | X | 259 | 52.633 | 71.825 | 59.588 | 0.00 | 0.00 |
| ATOM | 3886 | O    | GLY | X | 259 | 52.272 | 71.959 | 58.408 | 0.00 | 0.00 |
| ATOM | 3887 | N    | GLY | X | 260 | 52.077 | 72.346 | 60.651 | 0.00 | 0.00 |
| ATOM | 3888 | H    | GLY | X | 260 | 52.635 | 72.452 | 61.486 | 0.00 | 0.00 |
| ATOM | 3889 | CA   | GLY | X | 260 | 50.904 | 73.183 | 60.537 | 0.00 | 0.00 |
| ATOM | 3890 | HA2  | GLY | X | 260 | 50.751 | 73.816 | 61.412 | 0.00 | 0.00 |
| ATOM | 3891 | HA3  | GLY | X | 260 | 51.004 | 73.836 | 59.670 | 0.00 | 0.00 |
| ATOM | 3892 | C    | GLY | X | 260 | 49.583 | 72.469 | 60.313 | 0.00 | 0.00 |
| ATOM | 3893 | O    | GLY | X | 260 | 49.573 | 71.258 | 60.255 | 0.00 | 0.00 |
| ATOM | 3894 | N    | ASN | X | 261 | 48.477 | 73.221 | 60.215 | 0.00 | 0.00 |
| ATOM | 3895 | H    | ASN | X | 261 | 48.587 | 74.218 | 60.333 | 0.00 | 0.00 |
| ATOM | 3896 | CA   | ASN | X | 261 | 47.104 | 72.789 | 59.924 | 0.00 | 0.00 |
| ATOM | 3897 | HA   | ASN | X | 261 | 46.810 | 72.368 | 60.885 | 0.00 | 0.00 |
| ATOM | 3898 | CB   | ASN | X | 261 | 46.182 | 73.962 | 59.564 | 0.00 | 0.00 |
| ATOM | 3899 | HB2  | ASN | X | 261 | 46.139 | 74.774 | 60.290 | 0.00 | 0.00 |
| ATOM | 3900 | HB3  | ASN | X | 261 | 46.504 | 74.447 | 58.643 | 0.00 | 0.00 |
| ATOM | 3901 | CG   | ASN | X | 261 | 44.782 | 73.510 | 59.185 | 0.00 | 0.00 |
| ATOM | 3902 | OD1  | ASN | X | 261 | 44.570 | 73.413 | 58.013 | 0.00 | 0.00 |
| ATOM | 3903 | ND2  | ASN | X | 261 | 43.829 | 73.366 | 60.087 | 0.00 | 0.00 |
| ATOM | 3904 | HD21 | ASN | X | 261 | 42.909 | 73.171 | 59.720 | 0.00 | 0.00 |
| ATOM | 3905 | HD22 | ASN | X | 261 | 44.019 | 73.391 | 61.078 | 0.00 | 0.00 |
| ATOM | 3906 | C    | ASN | X | 261 | 47.138 | 71.720 | 58.762 | 0.00 | 0.00 |
| ATOM | 3907 | O    | ASN | X | 261 | 47.642 | 71.945 | 57.683 | 0.00 | 0.00 |
| ATOM | 3908 | N    | ASP | X | 262 | 46.498 | 70.555 | 59.003 | 0.00 | 0.00 |
| ATOM | 3909 | H    | ASP | X | 262 | 46.103 | 70.430 | 59.924 | 0.00 | 0.00 |
| ATOM | 3910 | CA   | ASP | X | 262 | 46.547 | 69.405 | 58.060 | 0.00 | 0.00 |
| ATOM | 3911 | HA   | ASP | X | 262 | 47.597 | 69.283 | 57.792 | 0.00 | 0.00 |

|      |      |      |     |   |     |        |        |        |      |      |
|------|------|------|-----|---|-----|--------|--------|--------|------|------|
| ATOM | 3912 | CB   | ASP | X | 262 | 46.047 | 68.088 | 58.689 | 0.00 | 0.00 |
| ATOM | 3913 | HB2  | ASP | X | 262 | 45.005 | 68.132 | 59.006 | 0.00 | 0.00 |
| ATOM | 3914 | HB3  | ASP | X | 262 | 46.089 | 67.257 | 57.984 | 0.00 | 0.00 |
| ATOM | 3915 | CG   | ASP | X | 262 | 46.753 | 67.551 | 59.866 | 0.00 | 0.00 |
| ATOM | 3916 | OD1  | ASP | X | 262 | 46.174 | 67.580 | 60.969 | 0.00 | 0.00 |
| ATOM | 3917 | OD2  | ASP | X | 262 | 47.929 | 67.278 | 59.676 | 0.00 | 0.00 |
| ATOM | 3918 | C    | ASP | X | 262 | 45.775 | 69.746 | 56.763 | 0.00 | 0.00 |
| ATOM | 3919 | O    | ASP | X | 262 | 45.997 | 69.252 | 55.630 | 0.00 | 0.00 |
| ATOM | 3920 | N    | THR | X | 263 | 44.837 | 70.687 | 56.913 | 0.00 | 0.00 |
| ATOM | 3921 | H    | THR | X | 263 | 44.873 | 71.275 | 57.733 | 0.00 | 0.00 |
| ATOM | 3922 | CA   | THR | X | 263 | 43.902 | 70.995 | 55.829 | 0.00 | 0.00 |
| ATOM | 3923 | HA   | THR | X | 263 | 43.637 | 70.100 | 55.266 | 0.00 | 0.00 |
| ATOM | 3924 | CB   | THR | X | 263 | 42.642 | 71.665 | 56.353 | 0.00 | 0.00 |
| ATOM | 3925 | HB   | THR | X | 263 | 42.777 | 72.676 | 56.738 | 0.00 | 0.00 |
| ATOM | 3926 | CG2  | THR | X | 263 | 41.485 | 71.702 | 55.423 | 0.00 | 0.00 |
| ATOM | 3927 | HG21 | THR | X | 263 | 40.724 | 72.159 | 56.056 | 0.00 | 0.00 |
| ATOM | 3928 | HG22 | THR | X | 263 | 41.402 | 70.702 | 54.998 | 0.00 | 0.00 |
| ATOM | 3929 | HG23 | THR | X | 263 | 41.786 | 72.384 | 54.628 | 0.00 | 0.00 |
| ATOM | 3930 | OG1  | THR | X | 263 | 42.338 | 70.929 | 57.508 | 0.00 | 0.00 |
| ATOM | 3931 | HG1  | THR | X | 263 | 41.803 | 71.540 | 58.020 | 0.00 | 0.00 |
| ATOM | 3932 | C    | THR | X | 263 | 44.695 | 71.919 | 54.882 | 0.00 | 0.00 |
| ATOM | 3933 | O    | THR | X | 263 | 44.845 | 71.511 | 53.763 | 0.00 | 0.00 |
| ATOM | 3934 | N    | GLU | X | 264 | 45.390 | 72.988 | 55.364 | 0.00 | 0.00 |
| ATOM | 3935 | H    | GLU | X | 264 | 45.174 | 73.286 | 56.305 | 0.00 | 0.00 |
| ATOM | 3936 | CA   | GLU | X | 264 | 46.366 | 73.822 | 54.578 | 0.00 | 0.00 |
| ATOM | 3937 | HA   | GLU | X | 264 | 45.845 | 74.260 | 53.727 | 0.00 | 0.00 |
| ATOM | 3938 | CB   | GLU | X | 264 | 46.941 | 74.929 | 55.490 | 0.00 | 0.00 |
| ATOM | 3939 | HB2  | GLU | X | 264 | 46.038 | 75.464 | 55.781 | 0.00 | 0.00 |
| ATOM | 3940 | HB3  | GLU | X | 264 | 47.408 | 74.458 | 56.355 | 0.00 | 0.00 |
| ATOM | 3941 | CG   | GLU | X | 264 | 47.997 | 75.911 | 54.845 | 0.00 | 0.00 |
| ATOM | 3942 | HG2  | GLU | X | 264 | 49.024 | 75.585 | 55.008 | 0.00 | 0.00 |
| ATOM | 3943 | HG3  | GLU | X | 264 | 47.677 | 76.041 | 53.812 | 0.00 | 0.00 |
| ATOM | 3944 | CD   | GLU | X | 264 | 47.871 | 77.252 | 55.534 | 0.00 | 0.00 |
| ATOM | 3945 | OE1  | GLU | X | 264 | 47.321 | 78.194 | 54.998 | 0.00 | 0.00 |
| ATOM | 3946 | OE2  | GLU | X | 264 | 48.268 | 77.389 | 56.730 | 0.00 | 0.00 |
| ATOM | 3947 | C    | GLU | X | 264 | 47.588 | 72.994 | 54.045 | 0.00 | 0.00 |
| ATOM | 3948 | O    | GLU | X | 264 | 48.275 | 73.437 | 53.128 | 0.00 | 0.00 |
| ATOM | 3949 | N    | LEU | X | 265 | 47.805 | 71.812 | 54.655 | 0.00 | 0.00 |
| ATOM | 3950 | H    | LEU | X | 265 | 47.130 | 71.611 | 55.379 | 0.00 | 0.00 |
| ATOM | 3951 | CA   | LEU | X | 265 | 48.950 | 70.927 | 54.347 | 0.00 | 0.00 |
| ATOM | 3952 | HA   | LEU | X | 265 | 49.758 | 71.577 | 54.012 | 0.00 | 0.00 |
| ATOM | 3953 | CB   | LEU | X | 265 | 49.299 | 70.209 | 55.642 | 0.00 | 0.00 |
| ATOM | 3954 | HB2  | LEU | X | 265 | 49.587 | 70.882 | 56.450 | 0.00 | 0.00 |
| ATOM | 3955 | HB3  | LEU | X | 265 | 48.557 | 69.480 | 55.967 | 0.00 | 0.00 |
| ATOM | 3956 | CG   | LEU | X | 265 | 50.490 | 69.233 | 55.451 | 0.00 | 0.00 |
| ATOM | 3957 | HG   | LEU | X | 265 | 50.312 | 68.432 | 54.734 | 0.00 | 0.00 |
| ATOM | 3958 | CD1  | LEU | X | 265 | 51.770 | 69.951 | 55.069 | 0.00 | 0.00 |
| ATOM | 3959 | HD11 | LEU | X | 265 | 51.777 | 70.666 | 54.246 | 0.00 | 0.00 |
| ATOM | 3960 | HD12 | LEU | X | 265 | 52.627 | 69.290 | 54.942 | 0.00 | 0.00 |
| ATOM | 3961 | HD13 | LEU | X | 265 | 51.990 | 70.553 | 55.951 | 0.00 | 0.00 |
| ATOM | 3962 | CD2  | LEU | X | 265 | 50.606 | 68.351 | 56.700 | 0.00 | 0.00 |
| ATOM | 3963 | HD21 | LEU | X | 265 | 50.412 | 68.961 | 57.583 | 0.00 | 0.00 |
| ATOM | 3964 | HD22 | LEU | X | 265 | 49.907 | 67.538 | 56.507 | 0.00 | 0.00 |
| ATOM | 3965 | HD23 | LEU | X | 265 | 51.581 | 67.877 | 56.820 | 0.00 | 0.00 |
| ATOM | 3966 | C    | LEU | X | 265 | 48.651 | 70.055 | 53.120 | 0.00 | 0.00 |
| ATOM | 3967 | O    | LEU | X | 265 | 49.442 | 70.077 | 52.187 | 0.00 | 0.00 |
| ATOM | 3968 | N    | VAL | X | 266 | 47.534 | 69.343 | 53.140 | 0.00 | 0.00 |
| ATOM | 3969 | H    | VAL | X | 266 | 46.969 | 69.359 | 53.977 | 0.00 | 0.00 |
| ATOM | 3970 | CA   | VAL | X | 266 | 46.972 | 68.570 | 51.970 | 0.00 | 0.00 |
| ATOM | 3971 | HA   | VAL | X | 266 | 47.826 | 68.040 | 51.546 | 0.00 | 0.00 |
| ATOM | 3972 | CB   | VAL | X | 266 | 45.991 | 67.462 | 52.313 | 0.00 | 0.00 |
| ATOM | 3973 | HB   | VAL | X | 266 | 46.508 | 66.873 | 53.069 | 0.00 | 0.00 |
| ATOM | 3974 | CG1  | VAL | X | 266 | 44.679 | 67.988 | 52.875 | 0.00 | 0.00 |
| ATOM | 3975 | HG11 | VAL | X | 266 | 44.142 | 68.660 | 52.205 | 0.00 | 0.00 |
| ATOM | 3976 | HG12 | VAL | X | 266 | 44.094 | 67.128 | 53.203 | 0.00 | 0.00 |
| ATOM | 3977 | HG13 | VAL | X | 266 | 44.758 | 68.594 | 53.778 | 0.00 | 0.00 |
| ATOM | 3978 | CG2  | VAL | X | 266 | 45.764 | 66.537 | 51.162 | 0.00 | 0.00 |

|      |      |      |     |   |     |        |        |        |      |      |
|------|------|------|-----|---|-----|--------|--------|--------|------|------|
| ATOM | 3979 | HG21 | VAL | X | 266 | 44.988 | 67.053 | 50.597 | 0.00 | 0.00 |
| ATOM | 3980 | HG22 | VAL | X | 266 | 45.395 | 65.567 | 51.496 | 0.00 | 0.00 |
| ATOM | 3981 | HG23 | VAL | X | 266 | 46.564 | 66.346 | 50.447 | 0.00 | 0.00 |
| ATOM | 3982 | C    | VAL | X | 266 | 46.540 | 69.539 | 50.909 | 0.00 | 0.00 |
| ATOM | 3983 | O    | VAL | X | 266 | 46.645 | 69.204 | 49.782 | 0.00 | 0.00 |
| ATOM | 3984 | N    | ALA | X | 267 | 46.311 | 70.820 | 51.197 | 0.00 | 0.00 |
| ATOM | 3985 | H    | ALA | X | 267 | 46.131 | 71.072 | 52.158 | 0.00 | 0.00 |
| ATOM | 3986 | CA   | ALA | X | 267 | 46.107 | 71.872 | 50.206 | 0.00 | 0.00 |
| ATOM | 3987 | HA   | ALA | X | 267 | 45.333 | 71.495 | 49.538 | 0.00 | 0.00 |
| ATOM | 3988 | CB   | ALA | X | 267 | 45.496 | 73.065 | 50.871 | 0.00 | 0.00 |
| ATOM | 3989 | HB1  | ALA | X | 267 | 44.747 | 72.633 | 51.534 | 0.00 | 0.00 |
| ATOM | 3990 | HB2  | ALA | X | 267 | 45.041 | 73.773 | 50.178 | 0.00 | 0.00 |
| ATOM | 3991 | HB3  | ALA | X | 267 | 46.244 | 73.604 | 51.452 | 0.00 | 0.00 |
| ATOM | 3992 | C    | ALA | X | 267 | 47.320 | 72.216 | 49.393 | 0.00 | 0.00 |
| ATOM | 3993 | O    | ALA | X | 267 | 47.303 | 72.120 | 48.174 | 0.00 | 0.00 |
| ATOM | 3994 | N    | CYX | X | 268 | 48.452 | 72.373 | 50.115 | 0.00 | 0.00 |
| ATOM | 3995 | H    | CYX | X | 268 | 48.264 | 72.570 | 51.087 | 0.00 | 0.00 |
| ATOM | 3996 | CA   | CYX | X | 268 | 49.724 | 72.526 | 49.475 | 0.00 | 0.00 |
| ATOM | 3997 | HA   | CYX | X | 268 | 49.794 | 73.429 | 48.868 | 0.00 | 0.00 |
| ATOM | 3998 | CB   | CYX | X | 268 | 50.732 | 72.735 | 50.566 | 0.00 | 0.00 |
| ATOM | 3999 | HB2  | CYX | X | 268 | 50.512 | 73.674 | 51.075 | 0.00 | 0.00 |
| ATOM | 4000 | HB3  | CYX | X | 268 | 50.692 | 71.907 | 51.273 | 0.00 | 0.00 |
| ATOM | 4001 | SG   | CYX | X | 268 | 52.531 | 72.954 | 50.075 | 0.00 | 0.00 |
| ATOM | 4002 | C    | CYX | X | 268 | 50.109 | 71.275 | 48.684 | 0.00 | 0.00 |
| ATOM | 4003 | O    | CYX | X | 268 | 50.570 | 71.333 | 47.529 | 0.00 | 0.00 |
| ATOM | 4004 | N    | LEU | X | 269 | 49.795 | 70.084 | 49.194 | 0.00 | 0.00 |
| ATOM | 4005 | H    | LEU | X | 269 | 49.386 | 70.058 | 50.118 | 0.00 | 0.00 |
| ATOM | 4006 | CA   | LEU | X | 269 | 50.134 | 68.783 | 48.545 | 0.00 | 0.00 |
| ATOM | 4007 | HA   | LEU | X | 269 | 51.168 | 68.769 | 48.203 | 0.00 | 0.00 |
| ATOM | 4008 | CB   | LEU | X | 269 | 49.957 | 67.763 | 49.642 | 0.00 | 0.00 |
| ATOM | 4009 | HB2  | LEU | X | 269 | 50.314 | 68.181 | 50.583 | 0.00 | 0.00 |
| ATOM | 4010 | HB3  | LEU | X | 269 | 48.903 | 67.598 | 49.863 | 0.00 | 0.00 |
| ATOM | 4011 | CG   | LEU | X | 269 | 50.437 | 66.383 | 49.346 | 0.00 | 0.00 |
| ATOM | 4012 | HG   | LEU | X | 269 | 49.983 | 65.893 | 48.484 | 0.00 | 0.00 |
| ATOM | 4013 | CD1  | LEU | X | 269 | 51.985 | 66.372 | 49.157 | 0.00 | 0.00 |
| ATOM | 4014 | HD11 | LEU | X | 269 | 52.313 | 65.340 | 49.282 | 0.00 | 0.00 |
| ATOM | 4015 | HD12 | LEU | X | 269 | 52.535 | 67.015 | 49.844 | 0.00 | 0.00 |
| ATOM | 4016 | HD13 | LEU | X | 269 | 52.095 | 66.680 | 48.117 | 0.00 | 0.00 |
| ATOM | 4017 | CD2  | LEU | X | 269 | 50.069 | 65.547 | 50.571 | 0.00 | 0.00 |
| ATOM | 4018 | HD21 | LEU | X | 269 | 50.218 | 64.475 | 50.447 | 0.00 | 0.00 |
| ATOM | 4019 | HD22 | LEU | X | 269 | 50.368 | 65.944 | 51.540 | 0.00 | 0.00 |
| ATOM | 4020 | HD23 | LEU | X | 269 | 48.992 | 65.633 | 50.718 | 0.00 | 0.00 |
| ATOM | 4021 | C    | LEU | X | 269 | 49.425 | 68.513 | 47.225 | 0.00 | 0.00 |
| ATOM | 4022 | O    | LEU | X | 269 | 49.915 | 67.931 | 46.278 | 0.00 | 0.00 |
| ATOM | 4023 | N    | ARG | X | 270 | 48.288 | 69.251 | 47.085 | 0.00 | 0.00 |
| ATOM | 4024 | H    | ARG | X | 270 | 47.967 | 69.899 | 47.789 | 0.00 | 0.00 |
| ATOM | 4025 | CA   | ARG | X | 270 | 47.497 | 69.336 | 45.812 | 0.00 | 0.00 |
| ATOM | 4026 | HA   | ARG | X | 270 | 47.600 | 68.411 | 45.244 | 0.00 | 0.00 |
| ATOM | 4027 | CB   | ARG | X | 270 | 46.021 | 69.476 | 46.081 | 0.00 | 0.00 |
| ATOM | 4028 | HB2  | ARG | X | 270 | 45.795 | 70.278 | 46.784 | 0.00 | 0.00 |
| ATOM | 4029 | HB3  | ARG | X | 270 | 45.542 | 69.643 | 45.116 | 0.00 | 0.00 |
| ATOM | 4030 | CG   | ARG | X | 270 | 45.475 | 68.165 | 46.674 | 0.00 | 0.00 |
| ATOM | 4031 | HG2  | ARG | X | 270 | 45.839 | 67.395 | 45.994 | 0.00 | 0.00 |
| ATOM | 4032 | HG3  | ARG | X | 270 | 45.862 | 67.965 | 47.673 | 0.00 | 0.00 |
| ATOM | 4033 | CD   | ARG | X | 270 | 43.912 | 68.309 | 46.641 | 0.00 | 0.00 |
| ATOM | 4034 | HD2  | ARG | X | 270 | 43.588 | 69.072 | 45.934 | 0.00 | 0.00 |
| ATOM | 4035 | HD3  | ARG | X | 270 | 43.537 | 67.335 | 46.327 | 0.00 | 0.00 |
| ATOM | 4036 | NE   | ARG | X | 270 | 43.260 | 68.616 | 47.942 | 0.00 | 0.00 |
| ATOM | 4037 | HE   | ARG | X | 270 | 43.214 | 69.608 | 48.128 | 0.00 | 0.00 |
| ATOM | 4038 | CZ   | ARG | X | 270 | 42.764 | 67.832 | 48.868 | 0.00 | 0.00 |
| ATOM | 4039 | NH1  | ARG | X | 270 | 42.586 | 66.560 | 48.655 | 0.00 | 0.00 |
| ATOM | 4040 | HH11 | ARG | X | 270 | 42.828 | 66.143 | 47.768 | 0.00 | 0.00 |
| ATOM | 4041 | HH12 | ARG | X | 270 | 42.234 | 65.998 | 49.417 | 0.00 | 0.00 |
| ATOM | 4042 | NH2  | ARG | X | 270 | 42.449 | 68.258 | 49.977 | 0.00 | 0.00 |
| ATOM | 4043 | HH21 | ARG | X | 270 | 42.648 | 69.213 | 50.239 | 0.00 | 0.00 |
| ATOM | 4044 | HH22 | ARG | X | 270 | 42.044 | 67.695 | 50.712 | 0.00 | 0.00 |
| ATOM | 4045 | C    | ARG | X | 270 | 48.070 | 70.470 | 44.876 | 0.00 | 0.00 |

|      |      |      |     |   |     |        |        |        |      |      |
|------|------|------|-----|---|-----|--------|--------|--------|------|------|
| ATOM | 4046 | O    | ARG | X | 270 | 48.119 | 70.187 | 43.667 | 0.00 | 0.00 |
| ATOM | 4047 | N    | THR | X | 271 | 48.530 | 71.596 | 45.467 | 0.00 | 0.00 |
| ATOM | 4048 | H    | THR | X | 271 | 48.607 | 71.651 | 46.472 | 0.00 | 0.00 |
| ATOM | 4049 | CA   | THR | X | 271 | 49.132 | 72.768 | 44.786 | 0.00 | 0.00 |
| ATOM | 4050 | HA   | THR | X | 271 | 48.499 | 73.322 | 44.092 | 0.00 | 0.00 |
| ATOM | 4051 | CB   | THR | X | 271 | 49.467 | 73.895 | 45.708 | 0.00 | 0.00 |
| ATOM | 4052 | HB   | THR | X | 271 | 50.328 | 73.594 | 46.305 | 0.00 | 0.00 |
| ATOM | 4053 | CG2  | THR | X | 271 | 49.771 | 75.307 | 44.985 | 0.00 | 0.00 |
| ATOM | 4054 | HG21 | THR | X | 271 | 50.144 | 76.123 | 45.603 | 0.00 | 0.00 |
| ATOM | 4055 | HG22 | THR | X | 271 | 48.831 | 75.644 | 44.547 | 0.00 | 0.00 |
| ATOM | 4056 | HG23 | THR | X | 271 | 50.530 | 75.119 | 44.226 | 0.00 | 0.00 |
| ATOM | 4057 | OG1  | THR | X | 271 | 48.405 | 74.221 | 46.525 | 0.00 | 0.00 |
| ATOM | 4058 | HG1  | THR | X | 271 | 48.612 | 74.823 | 47.243 | 0.00 | 0.00 |
| ATOM | 4059 | C    | THR | X | 271 | 50.411 | 72.358 | 43.991 | 0.00 | 0.00 |
| ATOM | 4060 | O    | THR | X | 271 | 50.547 | 72.762 | 42.833 | 0.00 | 0.00 |
| ATOM | 4061 | N    | ARG | X | 272 | 51.244 | 71.507 | 44.593 | 0.00 | 0.00 |
| ATOM | 4062 | H    | ARG | X | 272 | 51.037 | 71.259 | 45.550 | 0.00 | 0.00 |
| ATOM | 4063 | CA   | ARG | X | 272 | 52.509 | 71.035 | 43.925 | 0.00 | 0.00 |
| ATOM | 4064 | HA   | ARG | X | 272 | 53.005 | 71.874 | 43.437 | 0.00 | 0.00 |
| ATOM | 4065 | CB   | ARG | X | 272 | 53.602 | 70.583 | 44.990 | 0.00 | 0.00 |
| ATOM | 4066 | HB2  | ARG | X | 272 | 53.184 | 69.661 | 45.393 | 0.00 | 0.00 |
| ATOM | 4067 | HB3  | ARG | X | 272 | 54.550 | 70.305 | 44.528 | 0.00 | 0.00 |
| ATOM | 4068 | CG   | ARG | X | 272 | 53.857 | 71.448 | 46.216 | 0.00 | 0.00 |
| ATOM | 4069 | HG2  | ARG | X | 272 | 52.912 | 71.504 | 46.756 | 0.00 | 0.00 |
| ATOM | 4070 | HG3  | ARG | X | 272 | 54.625 | 71.062 | 46.887 | 0.00 | 0.00 |
| ATOM | 4071 | CD   | ARG | X | 272 | 54.393 | 72.835 | 45.714 | 0.00 | 0.00 |
| ATOM | 4072 | HD2  | ARG | X | 272 | 55.435 | 72.728 | 45.410 | 0.00 | 0.00 |
| ATOM | 4073 | HD3  | ARG | X | 272 | 53.713 | 73.057 | 44.892 | 0.00 | 0.00 |
| ATOM | 4074 | NE   | ARG | X | 272 | 54.156 | 73.875 | 46.746 | 0.00 | 0.00 |
| ATOM | 4075 | HE   | ARG | X | 272 | 53.262 | 74.341 | 46.792 | 0.00 | 0.00 |
| ATOM | 4076 | CZ   | ARG | X | 272 | 55.167 | 74.620 | 47.288 | 0.00 | 0.00 |
| ATOM | 4077 | NH1  | ARG | X | 272 | 56.429 | 74.271 | 47.160 | 0.00 | 0.00 |
| ATOM | 4078 | HH11 | ARG | X | 272 | 56.551 | 73.321 | 46.842 | 0.00 | 0.00 |
| ATOM | 4079 | HH12 | ARG | X | 272 | 57.219 | 74.846 | 47.417 | 0.00 | 0.00 |
| ATOM | 4080 | NH2  | ARG | X | 272 | 54.873 | 75.712 | 47.996 | 0.00 | 0.00 |
| ATOM | 4081 | HH21 | ARG | X | 272 | 53.880 | 75.838 | 48.125 | 0.00 | 0.00 |
| ATOM | 4082 | HH22 | ARG | X | 272 | 55.609 | 76.380 | 48.180 | 0.00 | 0.00 |
| ATOM | 4083 | C    | ARG | X | 272 | 52.219 | 70.024 | 42.805 | 0.00 | 0.00 |
| ATOM | 4084 | O    | ARG | X | 272 | 51.211 | 69.347 | 42.877 | 0.00 | 0.00 |
| ATOM | 4085 | N    | PRO | X | 273 | 53.181 | 69.840 | 41.842 | 0.00 | 0.00 |
| ATOM | 4086 | CD   | PRO | X | 273 | 54.224 | 70.808 | 41.495 | 0.00 | 0.00 |
| ATOM | 4087 | HD2  | PRO | X | 273 | 55.138 | 70.557 | 42.034 | 0.00 | 0.00 |
| ATOM | 4088 | HD3  | PRO | X | 273 | 53.911 | 71.818 | 41.759 | 0.00 | 0.00 |
| ATOM | 4089 | CG   | PRO | X | 273 | 54.459 | 70.668 | 39.982 | 0.00 | 0.00 |
| ATOM | 4090 | HG2  | PRO | X | 273 | 55.521 | 70.809 | 39.778 | 0.00 | 0.00 |
| ATOM | 4091 | HG3  | PRO | X | 273 | 53.825 | 71.365 | 39.435 | 0.00 | 0.00 |
| ATOM | 4092 | CB   | PRO | X | 273 | 54.105 | 69.237 | 39.716 | 0.00 | 0.00 |
| ATOM | 4093 | HB2  | PRO | X | 273 | 54.999 | 68.615 | 39.764 | 0.00 | 0.00 |
| ATOM | 4094 | HB3  | PRO | X | 273 | 53.679 | 69.136 | 38.718 | 0.00 | 0.00 |
| ATOM | 4095 | CA   | PRO | X | 273 | 53.081 | 68.895 | 40.774 | 0.00 | 0.00 |
| ATOM | 4096 | HA   | PRO | X | 273 | 52.092 | 68.892 | 40.315 | 0.00 | 0.00 |
| ATOM | 4097 | C    | PRO | X | 273 | 53.166 | 67.424 | 41.297 | 0.00 | 0.00 |
| ATOM | 4098 | O    | PRO | X | 273 | 54.045 | 67.237 | 42.172 | 0.00 | 0.00 |
| ATOM | 4099 | N    | ALA | X | 274 | 52.335 | 66.515 | 40.722 | 0.00 | 0.00 |
| ATOM | 4100 | H    | ALA | X | 274 | 51.655 | 66.813 | 40.036 | 0.00 | 0.00 |
| ATOM | 4101 | CA   | ALA | X | 274 | 52.371 | 65.140 | 41.108 | 0.00 | 0.00 |
| ATOM | 4102 | HA   | ALA | X | 274 | 52.114 | 65.097 | 42.167 | 0.00 | 0.00 |
| ATOM | 4103 | CB   | ALA | X | 274 | 51.141 | 64.521 | 40.293 | 0.00 | 0.00 |
| ATOM | 4104 | HB1  | ALA | X | 274 | 50.165 | 64.964 | 40.491 | 0.00 | 0.00 |
| ATOM | 4105 | HB2  | ALA | X | 274 | 51.087 | 63.452 | 40.496 | 0.00 | 0.00 |
| ATOM | 4106 | HB3  | ALA | X | 274 | 51.430 | 64.583 | 39.244 | 0.00 | 0.00 |
| ATOM | 4107 | C    | ALA | X | 274 | 53.751 | 64.479 | 40.880 | 0.00 | 0.00 |
| ATOM | 4108 | O    | ALA | X | 274 | 54.105 | 63.603 | 41.595 | 0.00 | 0.00 |
| ATOM | 4109 | N    | GLN | X | 275 | 54.530 | 65.030 | 39.866 | 0.00 | 0.00 |
| ATOM | 4110 | H    | GLN | X | 275 | 54.069 | 65.645 | 39.211 | 0.00 | 0.00 |
| ATOM | 4111 | CA   | GLN | X | 275 | 55.785 | 64.482 | 39.523 | 0.00 | 0.00 |
| ATOM | 4112 | HA   | GLN | X | 275 | 55.598 | 63.420 | 39.365 | 0.00 | 0.00 |



|      |      |      |     |   |     |        |        |        |      |      |
|------|------|------|-----|---|-----|--------|--------|--------|------|------|
| ATOM | 4113 | CB   | GLN | X | 275 | 56.249 | 65.214 | 38.287 | 0.00 | 0.00 |
| ATOM | 4114 | HB2  | GLN | X | 275 | 55.465 | 65.168 | 37.530 | 0.00 | 0.00 |
| ATOM | 4115 | HB3  | GLN | X | 275 | 56.506 | 66.237 | 38.561 | 0.00 | 0.00 |
| ATOM | 4116 | CG   | GLN | X | 275 | 57.463 | 64.622 | 37.566 | 0.00 | 0.00 |
| ATOM | 4117 | HG2  | GLN | X | 275 | 58.312 | 64.630 | 38.250 | 0.00 | 0.00 |
| ATOM | 4118 | HG3  | GLN | X | 275 | 57.263 | 63.561 | 37.413 | 0.00 | 0.00 |
| ATOM | 4119 | CD   | GLN | X | 275 | 57.676 | 65.361 | 36.274 | 0.00 | 0.00 |
| ATOM | 4120 | OE1  | GLN | X | 275 | 58.387 | 66.392 | 36.333 | 0.00 | 0.00 |
| ATOM | 4121 | NE2  | GLN | X | 275 | 57.241 | 64.919 | 35.123 | 0.00 | 0.00 |
| ATOM | 4122 | HE21 | GLN | X | 275 | 57.397 | 65.484 | 34.301 | 0.00 | 0.00 |
| ATOM | 4123 | HE22 | GLN | X | 275 | 56.608 | 64.145 | 34.976 | 0.00 | 0.00 |
| ATOM | 4124 | C    | GLN | X | 275 | 56.749 | 64.623 | 40.732 | 0.00 | 0.00 |
| ATOM | 4125 | O    | GLN | X | 275 | 57.443 | 63.633 | 40.940 | 0.00 | 0.00 |
| ATOM | 4126 | N    | VAL | X | 276 | 56.698 | 65.750 | 41.464 | 0.00 | 0.00 |
| ATOM | 4127 | H    | VAL | X | 276 | 56.096 | 66.493 | 41.142 | 0.00 | 0.00 |
| ATOM | 4128 | CA   | VAL | X | 276 | 57.398 | 65.986 | 42.711 | 0.00 | 0.00 |
| ATOM | 4129 | HA   | VAL | X | 276 | 58.464 | 65.919 | 42.492 | 0.00 | 0.00 |
| ATOM | 4130 | CB   | VAL | X | 276 | 57.076 | 67.314 | 43.390 | 0.00 | 0.00 |
| ATOM | 4131 | HB   | VAL | X | 276 | 56.006 | 67.384 | 43.586 | 0.00 | 0.00 |
| ATOM | 4132 | CG1  | VAL | X | 276 | 57.860 | 67.556 | 44.670 | 0.00 | 0.00 |
| ATOM | 4133 | HG11 | VAL | X | 276 | 57.612 | 68.552 | 45.038 | 0.00 | 0.00 |
| ATOM | 4134 | HG12 | VAL | X | 276 | 57.499 | 66.841 | 45.409 | 0.00 | 0.00 |
| ATOM | 4135 | HG13 | VAL | X | 276 | 58.930 | 67.423 | 44.511 | 0.00 | 0.00 |
| ATOM | 4136 | CG2  | VAL | X | 276 | 57.527 | 68.438 | 42.452 | 0.00 | 0.00 |
| ATOM | 4137 | HG21 | VAL | X | 276 | 58.576 | 68.725 | 42.528 | 0.00 | 0.00 |
| ATOM | 4138 | HG22 | VAL | X | 276 | 56.852 | 69.263 | 42.681 | 0.00 | 0.00 |
| ATOM | 4139 | HG23 | VAL | X | 276 | 57.277 | 68.176 | 41.424 | 0.00 | 0.00 |
| ATOM | 4140 | C    | VAL | X | 276 | 57.131 | 64.879 | 43.776 | 0.00 | 0.00 |
| ATOM | 4141 | O    | VAL | X | 276 | 58.037 | 64.154 | 44.154 | 0.00 | 0.00 |
| ATOM | 4142 | N    | LEU | X | 277 | 55.837 | 64.659 | 44.062 | 0.00 | 0.00 |
| ATOM | 4143 | H    | LEU | X | 277 | 55.290 | 65.335 | 43.549 | 0.00 | 0.00 |
| ATOM | 4144 | CA   | LEU | X | 277 | 55.180 | 63.712 | 44.962 | 0.00 | 0.00 |
| ATOM | 4145 | HA   | LEU | X | 277 | 55.367 | 64.082 | 45.970 | 0.00 | 0.00 |
| ATOM | 4146 | CB   | LEU | X | 277 | 53.612 | 63.672 | 44.829 | 0.00 | 0.00 |
| ATOM | 4147 | HB2  | LEU | X | 277 | 53.307 | 63.736 | 43.784 | 0.00 | 0.00 |
| ATOM | 4148 | HB3  | LEU | X | 277 | 53.220 | 62.798 | 45.348 | 0.00 | 0.00 |
| ATOM | 4149 | CG   | LEU | X | 277 | 52.841 | 64.864 | 45.532 | 0.00 | 0.00 |
| ATOM | 4150 | HG   | LEU | X | 277 | 53.266 | 64.828 | 46.535 | 0.00 | 0.00 |
| ATOM | 4151 | CD1  | LEU | X | 277 | 53.156 | 66.302 | 45.077 | 0.00 | 0.00 |
| ATOM | 4152 | HD11 | LEU | X | 277 | 52.513 | 67.014 | 45.595 | 0.00 | 0.00 |
| ATOM | 4153 | HD12 | LEU | X | 277 | 52.991 | 66.546 | 44.028 | 0.00 | 0.00 |
| ATOM | 4154 | HD13 | LEU | X | 277 | 54.147 | 66.624 | 45.397 | 0.00 | 0.00 |
| ATOM | 4155 | CD2  | LEU | X | 277 | 51.256 | 64.816 | 45.492 | 0.00 | 0.00 |
| ATOM | 4156 | HD21 | LEU | X | 277 | 50.973 | 64.911 | 44.444 | 0.00 | 0.00 |
| ATOM | 4157 | HD22 | LEU | X | 277 | 50.918 | 63.880 | 45.937 | 0.00 | 0.00 |
| ATOM | 4158 | HD23 | LEU | X | 277 | 50.823 | 65.622 | 46.084 | 0.00 | 0.00 |
| ATOM | 4159 | C    | LEU | X | 277 | 55.726 | 62.278 | 44.781 | 0.00 | 0.00 |
| ATOM | 4160 | O    | LEU | X | 277 | 56.290 | 61.706 | 45.688 | 0.00 | 0.00 |
| ATOM | 4161 | N    | VAL | X | 278 | 55.328 | 61.684 | 43.700 | 0.00 | 0.00 |
| ATOM | 4162 | H    | VAL | X | 278 | 54.951 | 62.256 | 42.958 | 0.00 | 0.00 |
| ATOM | 4163 | CA   | VAL | X | 278 | 55.557 | 60.273 | 43.403 | 0.00 | 0.00 |
| ATOM | 4164 | HA   | VAL | X | 278 | 55.081 | 59.648 | 44.159 | 0.00 | 0.00 |
| ATOM | 4165 | CB   | VAL | X | 278 | 54.814 | 59.841 | 42.179 | 0.00 | 0.00 |
| ATOM | 4166 | HB   | VAL | X | 278 | 54.900 | 58.758 | 42.091 | 0.00 | 0.00 |
| ATOM | 4167 | CG1  | VAL | X | 278 | 53.279 | 60.187 | 42.405 | 0.00 | 0.00 |
| ATOM | 4168 | HG11 | VAL | X | 278 | 53.027 | 61.217 | 42.152 | 0.00 | 0.00 |
| ATOM | 4169 | HG12 | VAL | X | 278 | 52.716 | 59.454 | 41.828 | 0.00 | 0.00 |
| ATOM | 4170 | HG13 | VAL | X | 278 | 52.995 | 60.151 | 43.457 | 0.00 | 0.00 |
| ATOM | 4171 | CG2  | VAL | X | 278 | 55.281 | 60.407 | 40.838 | 0.00 | 0.00 |
| ATOM | 4172 | HG21 | VAL | X | 278 | 56.225 | 59.923 | 40.587 | 0.00 | 0.00 |
| ATOM | 4173 | HG22 | VAL | X | 278 | 55.327 | 61.496 | 40.853 | 0.00 | 0.00 |
| ATOM | 4174 | HG23 | VAL | X | 278 | 54.606 | 60.019 | 40.075 | 0.00 | 0.00 |
| ATOM | 4175 | C    | VAL | X | 278 | 57.039 | 59.905 | 43.335 | 0.00 | 0.00 |
| ATOM | 4176 | O    | VAL | X | 278 | 57.433 | 58.940 | 43.965 | 0.00 | 0.00 |
| ATOM | 4177 | N    | ASN | X | 279 | 57.891 | 60.834 | 42.859 | 0.00 | 0.00 |
| ATOM | 4178 | H    | ASN | X | 279 | 57.502 | 61.707 | 42.533 | 0.00 | 0.00 |
| ATOM | 4179 | CA   | ASN | X | 279 | 59.352 | 60.592 | 42.864 | 0.00 | 0.00 |

|      |      |      |     |   |     |        |        |        |      |      |
|------|------|------|-----|---|-----|--------|--------|--------|------|------|
| ATOM | 4180 | HA   | ASN | X | 279 | 59.533 | 59.557 | 42.574 | 0.00 | 0.00 |
| ATOM | 4181 | CB   | ASN | X | 279 | 60.012 | 61.497 | 41.840 | 0.00 | 0.00 |
| ATOM | 4182 | HB2  | ASN | X | 279 | 59.431 | 62.413 | 41.736 | 0.00 | 0.00 |
| ATOM | 4183 | HB3  | ASN | X | 279 | 61.050 | 61.602 | 42.156 | 0.00 | 0.00 |
| ATOM | 4184 | CG   | ASN | X | 279 | 59.954 | 60.813 | 40.414 | 0.00 | 0.00 |
| ATOM | 4185 | OD1  | ASN | X | 279 | 60.731 | 59.898 | 40.189 | 0.00 | 0.00 |
| ATOM | 4186 | ND2  | ASN | X | 279 | 59.013 | 61.232 | 39.630 | 0.00 | 0.00 |
| ATOM | 4187 | HD21 | ASN | X | 279 | 58.878 | 60.874 | 38.695 | 0.00 | 0.00 |
| ATOM | 4188 | HD22 | ASN | X | 279 | 58.382 | 61.968 | 39.913 | 0.00 | 0.00 |
| ATOM | 4189 | C    | ASN | X | 279 | 59.971 | 60.749 | 44.327 | 0.00 | 0.00 |
| ATOM | 4190 | O    | ASN | X | 279 | 61.020 | 60.233 | 44.579 | 0.00 | 0.00 |
| ATOM | 4191 | N    | HIE | X | 280 | 59.302 | 61.481 | 45.233 | 0.00 | 0.00 |
| ATOM | 4192 | H    | HIE | X | 280 | 58.481 | 62.017 | 44.992 | 0.00 | 0.00 |
| ATOM | 4193 | CA   | HIE | X | 280 | 59.751 | 61.575 | 46.630 | 0.00 | 0.00 |
| ATOM | 4194 | HA   | HIE | X | 280 | 60.832 | 61.436 | 46.652 | 0.00 | 0.00 |
| ATOM | 4195 | CB   | HIE | X | 280 | 59.332 | 62.907 | 47.255 | 0.00 | 0.00 |
| ATOM | 4196 | HB2  | HIE | X | 280 | 58.380 | 63.223 | 46.829 | 0.00 | 0.00 |
| ATOM | 4197 | HB3  | HIE | X | 280 | 59.315 | 62.858 | 48.344 | 0.00 | 0.00 |
| ATOM | 4198 | CG   | HIE | X | 280 | 60.225 | 64.071 | 46.990 | 0.00 | 0.00 |
| ATOM | 4199 | ND1  | HIE | X | 280 | 59.806 | 65.275 | 46.352 | 0.00 | 0.00 |
| ATOM | 4200 | CE1  | HIE | X | 280 | 60.853 | 66.100 | 46.363 | 0.00 | 0.00 |
| ATOM | 4201 | HE1  | HIE | X | 280 | 61.000 | 67.050 | 45.871 | 0.00 | 0.00 |
| ATOM | 4202 | NE2  | HIE | X | 280 | 61.942 | 65.481 | 46.974 | 0.00 | 0.00 |
| ATOM | 4203 | HE2  | HIE | X | 280 | 62.867 | 65.886 | 47.015 | 0.00 | 0.00 |
| ATOM | 4204 | CD2  | HIE | X | 280 | 61.523 | 64.180 | 47.328 | 0.00 | 0.00 |
| ATOM | 4205 | HD2  | HIE | X | 280 | 62.179 | 63.414 | 47.715 | 0.00 | 0.00 |
| ATOM | 4206 | C    | HIE | X | 280 | 59.151 | 60.429 | 47.423 | 0.00 | 0.00 |
| ATOM | 4207 | O    | HIE | X | 280 | 59.474 | 60.235 | 48.604 | 0.00 | 0.00 |
| ATOM | 4208 | N    | GLU | X | 281 | 58.136 | 59.703 | 46.898 | 0.00 | 0.00 |
| ATOM | 4209 | H    | GLU | X | 281 | 57.795 | 59.947 | 45.979 | 0.00 | 0.00 |
| ATOM | 4210 | CA   | GLU | X | 281 | 57.375 | 58.673 | 47.601 | 0.00 | 0.00 |
| ATOM | 4211 | HA   | GLU | X | 281 | 57.046 | 59.021 | 48.580 | 0.00 | 0.00 |
| ATOM | 4212 | CB   | GLU | X | 281 | 56.187 | 58.284 | 46.790 | 0.00 | 0.00 |
| ATOM | 4213 | HB2  | GLU | X | 281 | 55.858 | 58.921 | 45.970 | 0.00 | 0.00 |
| ATOM | 4214 | HB3  | GLU | X | 281 | 56.548 | 57.486 | 46.141 | 0.00 | 0.00 |
| ATOM | 4215 | CG   | GLU | X | 281 | 54.998 | 57.780 | 47.662 | 0.00 | 0.00 |
| ATOM | 4216 | HG2  | GLU | X | 281 | 55.485 | 57.177 | 48.428 | 0.00 | 0.00 |
| ATOM | 4217 | HG3  | GLU | X | 281 | 54.390 | 58.556 | 48.128 | 0.00 | 0.00 |
| ATOM | 4218 | CD   | GLU | X | 281 | 54.145 | 56.878 | 46.765 | 0.00 | 0.00 |
| ATOM | 4219 | OE1  | GLU | X | 281 | 53.315 | 57.414 | 46.007 | 0.00 | 0.00 |
| ATOM | 4220 | OE2  | GLU | X | 281 | 54.174 | 55.679 | 46.950 | 0.00 | 0.00 |
| ATOM | 4221 | C    | GLU | X | 281 | 58.255 | 57.399 | 47.808 | 0.00 | 0.00 |
| ATOM | 4222 | O    | GLU | X | 281 | 58.079 | 56.848 | 48.863 | 0.00 | 0.00 |
| ATOM | 4223 | N    | TRP | X | 282 | 59.252 | 57.124 | 46.965 | 0.00 | 0.00 |
| ATOM | 4224 | H    | TRP | X | 282 | 59.441 | 57.783 | 46.224 | 0.00 | 0.00 |
| ATOM | 4225 | CA   | TRP | X | 282 | 60.334 | 56.210 | 47.299 | 0.00 | 0.00 |
| ATOM | 4226 | HA   | TRP | X | 282 | 60.117 | 55.142 | 47.315 | 0.00 | 0.00 |
| ATOM | 4227 | CB   | TRP | X | 282 | 61.441 | 56.431 | 46.241 | 0.00 | 0.00 |
| ATOM | 4228 | HB2  | TRP | X | 282 | 60.965 | 56.286 | 45.271 | 0.00 | 0.00 |
| ATOM | 4229 | HB3  | TRP | X | 282 | 61.736 | 57.480 | 46.250 | 0.00 | 0.00 |
| ATOM | 4230 | CG   | TRP | X | 282 | 62.683 | 55.480 | 46.382 | 0.00 | 0.00 |
| ATOM | 4231 | CD1  | TRP | X | 282 | 62.646 | 54.138 | 46.248 | 0.00 | 0.00 |
| ATOM | 4232 | HD1  | TRP | X | 282 | 61.720 | 53.593 | 46.132 | 0.00 | 0.00 |
| ATOM | 4233 | NE1  | TRP | X | 282 | 63.861 | 53.542 | 46.499 | 0.00 | 0.00 |
| ATOM | 4234 | HE1  | TRP | X | 282 | 64.010 | 52.549 | 46.606 | 0.00 | 0.00 |
| ATOM | 4235 | CE2  | TRP | X | 282 | 64.832 | 54.514 | 46.616 | 0.00 | 0.00 |
| ATOM | 4236 | CZ2  | TRP | X | 282 | 66.216 | 54.350 | 46.683 | 0.00 | 0.00 |
| ATOM | 4237 | HZ2  | TRP | X | 282 | 66.673 | 53.373 | 46.740 | 0.00 | 0.00 |
| ATOM | 4238 | CH2  | TRP | X | 282 | 66.962 | 55.525 | 46.768 | 0.00 | 0.00 |
| ATOM | 4239 | HH2  | TRP | X | 282 | 68.037 | 55.424 | 46.754 | 0.00 | 0.00 |
| ATOM | 4240 | CZ3  | TRP | X | 282 | 66.353 | 56.785 | 46.628 | 0.00 | 0.00 |
| ATOM | 4241 | HZ3  | TRP | X | 282 | 66.977 | 57.653 | 46.480 | 0.00 | 0.00 |
| ATOM | 4242 | CE3  | TRP | X | 282 | 64.902 | 56.893 | 46.617 | 0.00 | 0.00 |
| ATOM | 4243 | HE3  | TRP | X | 282 | 64.535 | 57.889 | 46.417 | 0.00 | 0.00 |
| ATOM | 4244 | CD2  | TRP | X | 282 | 64.104 | 55.786 | 46.584 | 0.00 | 0.00 |
| ATOM | 4245 | C    | TRP | X | 282 | 60.950 | 56.500 | 48.687 | 0.00 | 0.00 |
| ATOM | 4246 | O    | TRP | X | 282 | 61.184 | 55.605 | 49.456 | 0.00 | 0.00 |

|      |      |      |     |   |     |        |        |        |      |      |
|------|------|------|-----|---|-----|--------|--------|--------|------|------|
| ATOM | 4247 | N    | HIE | X | 283 | 61.163 | 57.741 | 49.018 | 0.00 | 0.00 |
| ATOM | 4248 | H    | HIE | X | 283 | 60.801 | 58.528 | 48.498 | 0.00 | 0.00 |
| ATOM | 4249 | CA   | HIE | X | 283 | 61.693 | 58.081 | 50.431 | 0.00 | 0.00 |
| ATOM | 4250 | HA   | HIE | X | 283 | 62.480 | 57.367 | 50.672 | 0.00 | 0.00 |
| ATOM | 4251 | CB   | HIE | X | 283 | 62.132 | 59.579 | 50.399 | 0.00 | 0.00 |
| ATOM | 4252 | HB2  | HIE | X | 283 | 61.217 | 60.160 | 50.282 | 0.00 | 0.00 |
| ATOM | 4253 | HB3  | HIE | X | 283 | 62.511 | 59.739 | 51.409 | 0.00 | 0.00 |
| ATOM | 4254 | CG   | HIE | X | 283 | 63.169 | 59.863 | 49.342 | 0.00 | 0.00 |
| ATOM | 4255 | ND1  | HIE | X | 283 | 62.946 | 60.526 | 48.126 | 0.00 | 0.00 |
| ATOM | 4256 | CE1  | HIE | X | 283 | 64.145 | 60.617 | 47.558 | 0.00 | 0.00 |
| ATOM | 4257 | HE1  | HIE | X | 283 | 64.302 | 61.064 | 46.588 | 0.00 | 0.00 |
| ATOM | 4258 | NE2  | HIE | X | 283 | 65.114 | 60.075 | 48.300 | 0.00 | 0.00 |
| ATOM | 4259 | HE2  | HIE | X | 283 | 66.107 | 60.182 | 48.155 | 0.00 | 0.00 |
| ATOM | 4260 | CD2  | HIE | X | 283 | 64.467 | 59.703 | 49.456 | 0.00 | 0.00 |
| ATOM | 4261 | HD2  | HIE | X | 283 | 65.086 | 59.459 | 50.308 | 0.00 | 0.00 |
| ATOM | 4262 | C    | HIE | X | 283 | 60.620 | 57.978 | 51.500 | 0.00 | 0.00 |
| ATOM | 4263 | O    | HIE | X | 283 | 60.915 | 58.242 | 52.638 | 0.00 | 0.00 |
| ATOM | 4264 | N    | VAL | X | 284 | 59.445 | 57.600 | 51.071 | 0.00 | 0.00 |
| ATOM | 4265 | H    | VAL | X | 284 | 59.202 | 57.617 | 50.090 | 0.00 | 0.00 |
| ATOM | 4266 | CA   | VAL | X | 284 | 58.344 | 57.228 | 51.973 | 0.00 | 0.00 |
| ATOM | 4267 | HA   | VAL | X | 284 | 58.562 | 57.345 | 53.035 | 0.00 | 0.00 |
| ATOM | 4268 | CB   | VAL | X | 284 | 57.084 | 58.084 | 51.684 | 0.00 | 0.00 |
| ATOM | 4269 | HB   | VAL | X | 284 | 56.755 | 57.837 | 50.675 | 0.00 | 0.00 |
| ATOM | 4270 | CG1  | VAL | X | 284 | 55.907 | 57.914 | 52.689 | 0.00 | 0.00 |
| ATOM | 4271 | HG11 | VAL | X | 284 | 55.249 | 58.783 | 52.691 | 0.00 | 0.00 |
| ATOM | 4272 | HG12 | VAL | X | 284 | 55.374 | 56.999 | 52.427 | 0.00 | 0.00 |
| ATOM | 4273 | HG13 | VAL | X | 284 | 56.202 | 57.928 | 53.738 | 0.00 | 0.00 |
| ATOM | 4274 | CG2  | VAL | X | 284 | 57.385 | 59.543 | 51.876 | 0.00 | 0.00 |
| ATOM | 4275 | HG21 | VAL | X | 284 | 57.618 | 59.865 | 52.891 | 0.00 | 0.00 |
| ATOM | 4276 | HG22 | VAL | X | 284 | 56.572 | 60.187 | 51.540 | 0.00 | 0.00 |
| ATOM | 4277 | HG23 | VAL | X | 284 | 58.200 | 59.809 | 51.204 | 0.00 | 0.00 |
| ATOM | 4278 | C    | VAL | X | 284 | 58.036 | 55.698 | 51.898 | 0.00 | 0.00 |
| ATOM | 4279 | O    | VAL | X | 284 | 57.232 | 55.279 | 52.657 | 0.00 | 0.00 |
| ATOM | 4280 | N    | LEU | X | 285 | 58.763 | 54.887 | 51.132 | 0.00 | 0.00 |
| ATOM | 4281 | H    | LEU | X | 285 | 59.367 | 55.325 | 50.451 | 0.00 | 0.00 |
| ATOM | 4282 | CA   | LEU | X | 285 | 58.734 | 53.425 | 51.352 | 0.00 | 0.00 |
| ATOM | 4283 | HA   | LEU | X | 285 | 57.689 | 53.119 | 51.295 | 0.00 | 0.00 |
| ATOM | 4284 | CB   | LEU | X | 285 | 59.312 | 52.781 | 50.109 | 0.00 | 0.00 |
| ATOM | 4285 | HB2  | LEU | X | 285 | 58.717 | 53.211 | 49.303 | 0.00 | 0.00 |
| ATOM | 4286 | HB3  | LEU | X | 285 | 60.335 | 53.135 | 49.987 | 0.00 | 0.00 |
| ATOM | 4287 | CG   | LEU | X | 285 | 59.319 | 51.243 | 50.011 | 0.00 | 0.00 |
| ATOM | 4288 | HG   | LEU | X | 285 | 58.353 | 50.856 | 50.337 | 0.00 | 0.00 |
| ATOM | 4289 | CD1  | LEU | X | 285 | 59.460 | 50.872 | 48.529 | 0.00 | 0.00 |
| ATOM | 4290 | HD11 | LEU | X | 285 | 60.429 | 51.231 | 48.181 | 0.00 | 0.00 |
| ATOM | 4291 | HD12 | LEU | X | 285 | 58.611 | 51.279 | 47.980 | 0.00 | 0.00 |
| ATOM | 4292 | HD13 | LEU | X | 285 | 59.565 | 49.792 | 48.429 | 0.00 | 0.00 |
| ATOM | 4293 | CD2  | LEU | X | 285 | 60.559 | 50.786 | 50.805 | 0.00 | 0.00 |
| ATOM | 4294 | HD21 | LEU | X | 285 | 60.559 | 49.714 | 51.000 | 0.00 | 0.00 |
| ATOM | 4295 | HD22 | LEU | X | 285 | 61.491 | 51.051 | 50.306 | 0.00 | 0.00 |
| ATOM | 4296 | HD23 | LEU | X | 285 | 60.596 | 51.174 | 51.823 | 0.00 | 0.00 |
| ATOM | 4297 | C    | LEU | X | 285 | 59.445 | 53.129 | 52.728 | 0.00 | 0.00 |
| ATOM | 4298 | O    | LEU | X | 285 | 60.561 | 53.529 | 52.839 | 0.00 | 0.00 |
| ATOM | 4299 | N    | PRO | X | 286 | 58.828 | 52.352 | 53.621 | 0.00 | 0.00 |
| ATOM | 4300 | CD   | PRO | X | 286 | 57.651 | 51.545 | 53.377 | 0.00 | 0.00 |
| ATOM | 4301 | HD2  | PRO | X | 286 | 57.725 | 51.022 | 52.423 | 0.00 | 0.00 |
| ATOM | 4302 | HD3  | PRO | X | 286 | 56.762 | 52.170 | 53.295 | 0.00 | 0.00 |
| ATOM | 4303 | CG   | PRO | X | 286 | 57.394 | 50.582 | 54.548 | 0.00 | 0.00 |
| ATOM | 4304 | HG2  | PRO | X | 286 | 57.884 | 49.664 | 54.222 | 0.00 | 0.00 |
| ATOM | 4305 | HG3  | PRO | X | 286 | 56.339 | 50.521 | 54.818 | 0.00 | 0.00 |
| ATOM | 4306 | CB   | PRO | X | 286 | 58.230 | 51.221 | 55.604 | 0.00 | 0.00 |
| ATOM | 4307 | HB2  | PRO | X | 286 | 58.614 | 50.577 | 56.396 | 0.00 | 0.00 |
| ATOM | 4308 | HB3  | PRO | X | 286 | 57.516 | 51.916 | 56.044 | 0.00 | 0.00 |
| ATOM | 4309 | CA   | PRO | X | 286 | 59.256 | 52.065 | 54.923 | 0.00 | 0.00 |
| ATOM | 4310 | HA   | PRO | X | 286 | 59.371 | 52.986 | 55.495 | 0.00 | 0.00 |
| ATOM | 4311 | C    | PRO | X | 286 | 60.565 | 51.266 | 54.889 | 0.00 | 0.00 |
| ATOM | 4312 | O    | PRO | X | 286 | 60.718 | 50.207 | 54.292 | 0.00 | 0.00 |
| ATOM | 4313 | N    | GLN | X | 287 | 61.506 | 51.795 | 55.625 | 0.00 | 0.00 |

|      |      |      |     |   |     |        |        |        |      |      |
|------|------|------|-----|---|-----|--------|--------|--------|------|------|
| ATOM | 4314 | H    | GLN | X | 287 | 61.384 | 52.678 | 56.099 | 0.00 | 0.00 |
| ATOM | 4315 | CA   | GLN | X | 287 | 62.821 | 51.093 | 55.813 | 0.00 | 0.00 |
| ATOM | 4316 | HA   | GLN | X | 287 | 62.998 | 50.605 | 54.855 | 0.00 | 0.00 |
| ATOM | 4317 | CB   | GLN | X | 287 | 63.969 | 52.114 | 55.970 | 0.00 | 0.00 |
| ATOM | 4318 | HB2  | GLN | X | 287 | 63.838 | 52.715 | 56.869 | 0.00 | 0.00 |
| ATOM | 4319 | HB3  | GLN | X | 287 | 64.837 | 51.526 | 56.270 | 0.00 | 0.00 |
| ATOM | 4320 | CG   | GLN | X | 287 | 64.337 | 52.914 | 54.749 | 0.00 | 0.00 |
| ATOM | 4321 | HG2  | GLN | X | 287 | 64.732 | 52.202 | 54.024 | 0.00 | 0.00 |
| ATOM | 4322 | HG3  | GLN | X | 287 | 63.451 | 53.365 | 54.302 | 0.00 | 0.00 |
| ATOM | 4323 | CD   | GLN | X | 287 | 65.377 | 54.110 | 54.803 | 0.00 | 0.00 |
| ATOM | 4324 | OE1  | GLN | X | 287 | 65.118 | 55.025 | 55.486 | 0.00 | 0.00 |
| ATOM | 4325 | NE2  | GLN | X | 287 | 66.450 | 54.052 | 54.040 | 0.00 | 0.00 |
| ATOM | 4326 | HE21 | GLN | X | 287 | 66.859 | 54.970 | 53.943 | 0.00 | 0.00 |
| ATOM | 4327 | HE22 | GLN | X | 287 | 66.674 | 53.203 | 53.540 | 0.00 | 0.00 |
| ATOM | 4328 | C    | GLN | X | 287 | 62.785 | 50.085 | 56.965 | 0.00 | 0.00 |
| ATOM | 4329 | O    | GLN | X | 287 | 61.921 | 50.217 | 57.840 | 0.00 | 0.00 |
| ATOM | 4330 | N    | GLU | X | 288 | 63.701 | 49.039 | 56.852 | 0.00 | 0.00 |
| ATOM | 4331 | H    | GLU | X | 288 | 64.209 | 48.892 | 55.992 | 0.00 | 0.00 |
| ATOM | 4332 | CA   | GLU | X | 288 | 64.032 | 48.052 | 57.863 | 0.00 | 0.00 |
| ATOM | 4333 | HA   | GLU | X | 288 | 65.083 | 47.831 | 57.681 | 0.00 | 0.00 |
| ATOM | 4334 | CB   | GLU | X | 288 | 64.091 | 48.635 | 59.329 | 0.00 | 0.00 |
| ATOM | 4335 | HB2  | GLU | X | 288 | 63.138 | 49.052 | 59.653 | 0.00 | 0.00 |
| ATOM | 4336 | HB3  | GLU | X | 288 | 64.237 | 47.901 | 60.122 | 0.00 | 0.00 |
| ATOM | 4337 | CG   | GLU | X | 288 | 65.228 | 49.697 | 59.424 | 0.00 | 0.00 |
| ATOM | 4338 | HG2  | GLU | X | 288 | 66.169 | 49.266 | 59.082 | 0.00 | 0.00 |
| ATOM | 4339 | HG3  | GLU | X | 288 | 65.010 | 50.502 | 58.723 | 0.00 | 0.00 |
| ATOM | 4340 | CD   | GLU | X | 288 | 65.521 | 50.362 | 60.795 | 0.00 | 0.00 |
| ATOM | 4341 | OE1  | GLU | X | 288 | 65.147 | 51.534 | 61.030 | 0.00 | 0.00 |
| ATOM | 4342 | OE2  | GLU | X | 288 | 66.004 | 49.695 | 61.742 | 0.00 | 0.00 |
| ATOM | 4343 | C    | GLU | X | 288 | 63.159 | 46.783 | 57.869 | 0.00 | 0.00 |
| ATOM | 4344 | O    | GLU | X | 288 | 62.920 | 46.060 | 58.806 | 0.00 | 0.00 |
| ATOM | 4345 | N    | SER | X | 289 | 62.594 | 46.569 | 56.667 | 0.00 | 0.00 |
| ATOM | 4346 | H    | SER | X | 289 | 62.878 | 47.181 | 55.915 | 0.00 | 0.00 |
| ATOM | 4347 | CA   | SER | X | 289 | 61.732 | 45.441 | 56.278 | 0.00 | 0.00 |
| ATOM | 4348 | HA   | SER | X | 289 | 62.049 | 44.555 | 56.828 | 0.00 | 0.00 |
| ATOM | 4349 | CB   | SER | X | 289 | 60.248 | 45.805 | 56.632 | 0.00 | 0.00 |
| ATOM | 4350 | HB2  | SER | X | 289 | 59.685 | 45.058 | 56.073 | 0.00 | 0.00 |
| ATOM | 4351 | HB3  | SER | X | 289 | 60.032 | 45.660 | 57.690 | 0.00 | 0.00 |
| ATOM | 4352 | OG   | SER | X | 289 | 60.050 | 47.063 | 56.106 | 0.00 | 0.00 |
| ATOM | 4353 | HG   | SER | X | 289 | 60.170 | 46.967 | 55.159 | 0.00 | 0.00 |
| ATOM | 4354 | C    | SER | X | 289 | 61.919 | 44.997 | 54.800 | 0.00 | 0.00 |
| ATOM | 4355 | O    | SER | X | 289 | 62.403 | 45.722 | 53.994 | 0.00 | 0.00 |
| ATOM | 4356 | N    | VAL | X | 290 | 61.390 | 43.813 | 54.496 | 0.00 | 0.00 |
| ATOM | 4357 | H    | VAL | X | 290 | 61.088 | 43.219 | 55.255 | 0.00 | 0.00 |
| ATOM | 4358 | CA   | VAL | X | 290 | 61.202 | 43.394 | 53.077 | 0.00 | 0.00 |
| ATOM | 4359 | HA   | VAL | X | 290 | 61.299 | 44.244 | 52.402 | 0.00 | 0.00 |
| ATOM | 4360 | CB   | VAL | X | 290 | 62.087 | 42.287 | 52.443 | 0.00 | 0.00 |
| ATOM | 4361 | HB   | VAL | X | 290 | 61.755 | 42.063 | 51.429 | 0.00 | 0.00 |
| ATOM | 4362 | CG1  | VAL | X | 290 | 63.471 | 42.876 | 52.213 | 0.00 | 0.00 |
| ATOM | 4363 | HG11 | VAL | X | 290 | 63.870 | 43.158 | 53.188 | 0.00 | 0.00 |
| ATOM | 4364 | HG12 | VAL | X | 290 | 64.095 | 42.076 | 51.816 | 0.00 | 0.00 |
| ATOM | 4365 | HG13 | VAL | X | 290 | 63.323 | 43.778 | 51.619 | 0.00 | 0.00 |
| ATOM | 4366 | CG2  | VAL | X | 290 | 62.229 | 40.933 | 53.248 | 0.00 | 0.00 |
| ATOM | 4367 | HG21 | VAL | X | 290 | 62.664 | 41.209 | 54.208 | 0.00 | 0.00 |
| ATOM | 4368 | HG22 | VAL | X | 290 | 63.002 | 40.338 | 52.763 | 0.00 | 0.00 |
| ATOM | 4369 | HG23 | VAL | X | 290 | 61.344 | 40.307 | 53.361 | 0.00 | 0.00 |
| ATOM | 4370 | C    | VAL | X | 290 | 59.737 | 42.887 | 52.974 | 0.00 | 0.00 |
| ATOM | 4371 | O    | VAL | X | 290 | 59.268 | 42.398 | 54.006 | 0.00 | 0.00 |
| ATOM | 4372 | N    | PHE | X | 291 | 59.104 | 42.972 | 51.782 | 0.00 | 0.00 |
| ATOM | 4373 | H    | PHE | X | 291 | 59.611 | 43.321 | 50.981 | 0.00 | 0.00 |
| ATOM | 4374 | CA   | PHE | X | 291 | 57.705 | 42.694 | 51.671 | 0.00 | 0.00 |
| ATOM | 4375 | HA   | PHE | X | 291 | 57.368 | 42.913 | 50.657 | 0.00 | 0.00 |
| ATOM | 4376 | CB   | PHE | X | 291 | 57.553 | 41.183 | 51.912 | 0.00 | 0.00 |
| ATOM | 4377 | HB2  | PHE | X | 291 | 58.416 | 40.771 | 51.389 | 0.00 | 0.00 |
| ATOM | 4378 | HB3  | PHE | X | 291 | 57.613 | 40.925 | 52.969 | 0.00 | 0.00 |
| ATOM | 4379 | CG   | PHE | X | 291 | 56.430 | 40.435 | 51.267 | 0.00 | 0.00 |
| ATOM | 4380 | CD1  | PHE | X | 291 | 55.163 | 40.979 | 51.022 | 0.00 | 0.00 |

|      |      |      |     |   |     |        |        |        |      |      |
|------|------|------|-----|---|-----|--------|--------|--------|------|------|
| ATOM | 4381 | HD1  | PHE | X | 291 | 54.919 | 41.969 | 51.379 | 0.00 | 0.00 |
| ATOM | 4382 | CE1  | PHE | X | 291 | 54.207 | 40.233 | 50.298 | 0.00 | 0.00 |
| ATOM | 4383 | HE1  | PHE | X | 291 | 53.274 | 40.705 | 50.028 | 0.00 | 0.00 |
| ATOM | 4384 | CZ   | PHE | X | 291 | 54.468 | 38.931 | 49.878 | 0.00 | 0.00 |
| ATOM | 4385 | HZ   | PHE | X | 291 | 53.833 | 38.367 | 49.211 | 0.00 | 0.00 |
| ATOM | 4386 | CE2  | PHE | X | 291 | 55.666 | 38.321 | 50.185 | 0.00 | 0.00 |
| ATOM | 4387 | HE2  | PHE | X | 291 | 55.908 | 37.335 | 49.819 | 0.00 | 0.00 |
| ATOM | 4388 | CD2  | PHE | X | 291 | 56.696 | 39.144 | 50.768 | 0.00 | 0.00 |
| ATOM | 4389 | HD2  | PHE | X | 291 | 57.626 | 38.621 | 50.936 | 0.00 | 0.00 |
| ATOM | 4390 | C    | PHE | X | 291 | 56.761 | 43.591 | 52.515 | 0.00 | 0.00 |
| ATOM | 4391 | O    | PHE | X | 291 | 56.077 | 43.178 | 53.449 | 0.00 | 0.00 |
| ATOM | 4392 | N    | ARG | X | 292 | 56.756 | 44.879 | 52.192 | 0.00 | 0.00 |
| ATOM | 4393 | H    | ARG | X | 292 | 57.324 | 45.125 | 51.394 | 0.00 | 0.00 |
| ATOM | 4394 | CA   | ARG | X | 292 | 56.095 | 46.020 | 52.887 | 0.00 | 0.00 |
| ATOM | 4395 | HA   | ARG | X | 292 | 55.048 | 45.762 | 53.046 | 0.00 | 0.00 |
| ATOM | 4396 | CB   | ARG | X | 292 | 56.634 | 46.132 | 54.378 | 0.00 | 0.00 |
| ATOM | 4397 | HB2  | ARG | X | 292 | 57.248 | 45.247 | 54.545 | 0.00 | 0.00 |
| ATOM | 4398 | HB3  | ARG | X | 292 | 57.313 | 46.962 | 54.576 | 0.00 | 0.00 |
| ATOM | 4399 | CG   | ARG | X | 292 | 55.441 | 46.186 | 55.335 | 0.00 | 0.00 |
| ATOM | 4400 | HG2  | ARG | X | 292 | 55.106 | 47.223 | 55.294 | 0.00 | 0.00 |
| ATOM | 4401 | HG3  | ARG | X | 292 | 54.609 | 45.568 | 55.000 | 0.00 | 0.00 |
| ATOM | 4402 | CD   | ARG | X | 292 | 56.006 | 45.916 | 56.803 | 0.00 | 0.00 |
| ATOM | 4403 | HD2  | ARG | X | 292 | 56.145 | 44.840 | 56.906 | 0.00 | 0.00 |
| ATOM | 4404 | HD3  | ARG | X | 292 | 56.982 | 46.365 | 56.992 | 0.00 | 0.00 |
| ATOM | 4405 | NE   | ARG | X | 292 | 55.068 | 46.330 | 57.824 | 0.00 | 0.00 |
| ATOM | 4406 | HE   | ARG | X | 292 | 55.144 | 47.232 | 58.272 | 0.00 | 0.00 |
| ATOM | 4407 | CZ   | ARG | X | 292 | 54.068 | 45.581 | 58.267 | 0.00 | 0.00 |
| ATOM | 4408 | NH1  | ARG | X | 292 | 53.609 | 44.524 | 57.688 | 0.00 | 0.00 |
| ATOM | 4409 | HH11 | ARG | X | 292 | 54.081 | 44.148 | 56.878 | 0.00 | 0.00 |
| ATOM | 4410 | HH12 | ARG | X | 292 | 52.879 | 43.967 | 58.109 | 0.00 | 0.00 |
| ATOM | 4411 | NH2  | ARG | X | 292 | 53.545 | 45.881 | 59.419 | 0.00 | 0.00 |
| ATOM | 4412 | HH21 | ARG | X | 292 | 53.612 | 46.765 | 59.903 | 0.00 | 0.00 |
| ATOM | 4413 | HH22 | ARG | X | 292 | 52.900 | 45.304 | 59.939 | 0.00 | 0.00 |
| ATOM | 4414 | C    | ARG | X | 292 | 56.336 | 47.340 | 52.106 | 0.00 | 0.00 |
| ATOM | 4415 | O    | ARG | X | 292 | 57.428 | 47.428 | 51.516 | 0.00 | 0.00 |
| ATOM | 4416 | N    | PHE | X | 293 | 55.413 | 48.358 | 52.052 | 0.00 | 0.00 |
| ATOM | 4417 | H    | PHE | X | 293 | 54.597 | 48.153 | 52.611 | 0.00 | 0.00 |
| ATOM | 4418 | CA   | PHE | X | 293 | 55.310 | 49.431 | 51.045 | 0.00 | 0.00 |
| ATOM | 4419 | HA   | PHE | X | 293 | 56.215 | 49.618 | 50.466 | 0.00 | 0.00 |
| ATOM | 4420 | CB   | PHE | X | 293 | 54.224 | 48.988 | 50.014 | 0.00 | 0.00 |
| ATOM | 4421 | HB2  | PHE | X | 293 | 53.226 | 49.003 | 50.451 | 0.00 | 0.00 |
| ATOM | 4422 | HB3  | PHE | X | 293 | 54.253 | 49.628 | 49.132 | 0.00 | 0.00 |
| ATOM | 4423 | CG   | PHE | X | 293 | 54.388 | 47.554 | 49.575 | 0.00 | 0.00 |
| ATOM | 4424 | CD1  | PHE | X | 293 | 55.582 | 47.171 | 48.947 | 0.00 | 0.00 |
| ATOM | 4425 | HD1  | PHE | X | 293 | 56.413 | 47.848 | 48.814 | 0.00 | 0.00 |
| ATOM | 4426 | CE1  | PHE | X | 293 | 55.805 | 45.806 | 48.738 | 0.00 | 0.00 |
| ATOM | 4427 | HE1  | PHE | X | 293 | 56.724 | 45.422 | 48.322 | 0.00 | 0.00 |
| ATOM | 4428 | CZ   | PHE | X | 293 | 54.914 | 44.818 | 49.247 | 0.00 | 0.00 |
| ATOM | 4429 | HZ   | PHE | X | 293 | 55.149 | 43.782 | 49.054 | 0.00 | 0.00 |
| ATOM | 4430 | CE2  | PHE | X | 293 | 53.708 | 45.210 | 49.816 | 0.00 | 0.00 |
| ATOM | 4431 | HE2  | PHE | X | 293 | 52.981 | 44.467 | 50.109 | 0.00 | 0.00 |
| ATOM | 4432 | CD2  | PHE | X | 293 | 53.421 | 46.581 | 49.916 | 0.00 | 0.00 |
| ATOM | 4433 | HD2  | PHE | X | 293 | 52.484 | 46.920 | 50.331 | 0.00 | 0.00 |
| ATOM | 4434 | C    | PHE | X | 293 | 54.899 | 50.746 | 51.654 | 0.00 | 0.00 |
| ATOM | 4435 | O    | PHE | X | 293 | 54.596 | 50.824 | 52.804 | 0.00 | 0.00 |
| ATOM | 4436 | N    | SER | X | 294 | 54.886 | 51.800 | 50.807 | 0.00 | 0.00 |
| ATOM | 4437 | H    | SER | X | 294 | 55.133 | 51.468 | 49.885 | 0.00 | 0.00 |
| ATOM | 4438 | CA   | SER | X | 294 | 54.723 | 53.249 | 51.236 | 0.00 | 0.00 |
| ATOM | 4439 | HA   | SER | X | 294 | 55.334 | 53.351 | 52.133 | 0.00 | 0.00 |
| ATOM | 4440 | CB   | SER | X | 294 | 55.245 | 54.152 | 50.115 | 0.00 | 0.00 |
| ATOM | 4441 | HB2  | SER | X | 294 | 55.107 | 55.197 | 50.391 | 0.00 | 0.00 |
| ATOM | 4442 | HB3  | SER | X | 294 | 56.304 | 54.034 | 49.887 | 0.00 | 0.00 |
| ATOM | 4443 | OG   | SER | X | 294 | 54.597 | 53.881 | 48.902 | 0.00 | 0.00 |
| ATOM | 4444 | HG   | SER | X | 294 | 54.608 | 54.595 | 48.260 | 0.00 | 0.00 |
| ATOM | 4445 | C    | SER | X | 294 | 53.319 | 53.692 | 51.667 | 0.00 | 0.00 |
| ATOM | 4446 | O    | SER | X | 294 | 53.094 | 53.976 | 52.826 | 0.00 | 0.00 |
| ATOM | 4447 | N    | PHE | X | 295 | 52.309 | 53.601 | 50.775 | 0.00 | 0.00 |

|      |      |      |     |   |     |        |        |        |      |      |
|------|------|------|-----|---|-----|--------|--------|--------|------|------|
| ATOM | 4448 | H    | PHE | X | 295 | 52.471 | 53.282 | 49.830 | 0.00 | 0.00 |
| ATOM | 4449 | CA   | PHE | X | 295 | 50.908 | 53.858 | 51.076 | 0.00 | 0.00 |
| ATOM | 4450 | HA   | PHE | X | 295 | 50.734 | 54.002 | 52.142 | 0.00 | 0.00 |
| ATOM | 4451 | CB   | PHE | X | 295 | 50.402 | 55.116 | 50.312 | 0.00 | 0.00 |
| ATOM | 4452 | HB2  | PHE | X | 295 | 50.459 | 54.985 | 49.232 | 0.00 | 0.00 |
| ATOM | 4453 | HB3  | PHE | X | 295 | 49.378 | 55.282 | 50.646 | 0.00 | 0.00 |
| ATOM | 4454 | CG   | PHE | X | 295 | 51.076 | 56.372 | 50.773 | 0.00 | 0.00 |
| ATOM | 4455 | CD1  | PHE | X | 295 | 50.681 | 57.142 | 51.908 | 0.00 | 0.00 |
| ATOM | 4456 | HD1  | PHE | X | 295 | 49.739 | 56.905 | 52.380 | 0.00 | 0.00 |
| ATOM | 4457 | CE1  | PHE | X | 295 | 51.398 | 58.271 | 52.364 | 0.00 | 0.00 |
| ATOM | 4458 | HE1  | PHE | X | 295 | 51.079 | 58.767 | 53.269 | 0.00 | 0.00 |
| ATOM | 4459 | CZ   | PHE | X | 295 | 52.570 | 58.625 | 51.764 | 0.00 | 0.00 |
| ATOM | 4460 | HZ   | PHE | X | 295 | 53.225 | 59.400 | 52.135 | 0.00 | 0.00 |
| ATOM | 4461 | CE2  | PHE | X | 295 | 52.993 | 57.811 | 50.722 | 0.00 | 0.00 |
| ATOM | 4462 | HE2  | PHE | X | 295 | 53.931 | 58.059 | 50.247 | 0.00 | 0.00 |
| ATOM | 4463 | CD2  | PHE | X | 295 | 52.298 | 56.759 | 50.202 | 0.00 | 0.00 |
| ATOM | 4464 | HD2  | PHE | X | 295 | 52.851 | 56.287 | 49.403 | 0.00 | 0.00 |
| ATOM | 4465 | C    | PHE | X | 295 | 50.161 | 52.638 | 50.593 | 0.00 | 0.00 |
| ATOM | 4466 | O    | PHE | X | 295 | 50.559 | 52.005 | 49.627 | 0.00 | 0.00 |
| ATOM | 4467 | N    | VAL | X | 296 | 49.013 | 52.384 | 51.198 | 0.00 | 0.00 |
| ATOM | 4468 | H    | VAL | X | 296 | 48.804 | 52.982 | 51.985 | 0.00 | 0.00 |
| ATOM | 4469 | CA   | VAL | X | 296 | 48.344 | 51.105 | 51.228 | 0.00 | 0.00 |
| ATOM | 4470 | HA   | VAL | X | 296 | 48.227 | 50.769 | 50.198 | 0.00 | 0.00 |
| ATOM | 4471 | CB   | VAL | X | 296 | 49.063 | 50.002 | 52.045 | 0.00 | 0.00 |
| ATOM | 4472 | HB   | VAL | X | 296 | 48.349 | 49.212 | 52.278 | 0.00 | 0.00 |
| ATOM | 4473 | CG1  | VAL | X | 296 | 50.305 | 49.195 | 51.471 | 0.00 | 0.00 |
| ATOM | 4474 | HG11 | VAL | X | 296 | 50.633 | 48.388 | 52.127 | 0.00 | 0.00 |
| ATOM | 4475 | HG12 | VAL | X | 296 | 50.168 | 48.650 | 50.536 | 0.00 | 0.00 |
| ATOM | 4476 | HG13 | VAL | X | 296 | 51.172 | 49.843 | 51.344 | 0.00 | 0.00 |
| ATOM | 4477 | CG2  | VAL | X | 296 | 49.512 | 50.632 | 53.320 | 0.00 | 0.00 |
| ATOM | 4478 | HG21 | VAL | X | 296 | 48.681 | 51.146 | 53.802 | 0.00 | 0.00 |
| ATOM | 4479 | HG22 | VAL | X | 296 | 50.338 | 51.326 | 53.164 | 0.00 | 0.00 |
| ATOM | 4480 | HG23 | VAL | X | 296 | 49.822 | 49.797 | 53.949 | 0.00 | 0.00 |
| ATOM | 4481 | C    | VAL | X | 296 | 46.893 | 51.301 | 51.833 | 0.00 | 0.00 |
| ATOM | 4482 | O    | VAL | X | 296 | 46.699 | 52.400 | 52.433 | 0.00 | 0.00 |
| ATOM | 4483 | N    | PRO | X | 297 | 45.930 | 50.394 | 51.648 | 0.00 | 0.00 |
| ATOM | 4484 | CD   | PRO | X | 297 | 45.973 | 49.315 | 50.686 | 0.00 | 0.00 |
| ATOM | 4485 | HD2  | PRO | X | 297 | 46.548 | 48.491 | 51.109 | 0.00 | 0.00 |
| ATOM | 4486 | HD3  | PRO | X | 297 | 46.310 | 49.617 | 49.695 | 0.00 | 0.00 |
| ATOM | 4487 | CG   | PRO | X | 297 | 44.567 | 48.721 | 50.620 | 0.00 | 0.00 |
| ATOM | 4488 | HG2  | PRO | X | 297 | 44.587 | 47.632 | 50.568 | 0.00 | 0.00 |
| ATOM | 4489 | HG3  | PRO | X | 297 | 44.095 | 49.121 | 49.723 | 0.00 | 0.00 |
| ATOM | 4490 | CB   | PRO | X | 297 | 43.874 | 49.149 | 51.914 | 0.00 | 0.00 |
| ATOM | 4491 | HB2  | PRO | X | 297 | 44.065 | 48.369 | 52.652 | 0.00 | 0.00 |
| ATOM | 4492 | HB3  | PRO | X | 297 | 42.803 | 49.194 | 51.716 | 0.00 | 0.00 |
| ATOM | 4493 | CA   | PRO | X | 297 | 44.597 | 50.457 | 52.208 | 0.00 | 0.00 |
| ATOM | 4494 | HA   | PRO | X | 297 | 44.083 | 51.286 | 51.723 | 0.00 | 0.00 |
| ATOM | 4495 | C    | PRO | X | 297 | 44.601 | 50.698 | 53.764 | 0.00 | 0.00 |
| ATOM | 4496 | O    | PRO | X | 297 | 45.313 | 50.076 | 54.509 | 0.00 | 0.00 |
| ATOM | 4497 | N    | VAL | X | 298 | 43.889 | 51.680 | 54.175 | 0.00 | 0.00 |
| ATOM | 4498 | H    | VAL | X | 298 | 43.272 | 52.156 | 53.534 | 0.00 | 0.00 |
| ATOM | 4499 | CA   | VAL | X | 298 | 43.833 | 52.274 | 55.492 | 0.00 | 0.00 |
| ATOM | 4500 | HA   | VAL | X | 298 | 44.706 | 51.954 | 56.061 | 0.00 | 0.00 |
| ATOM | 4501 | CB   | VAL | X | 298 | 43.964 | 53.752 | 55.338 | 0.00 | 0.00 |
| ATOM | 4502 | HB   | VAL | X | 298 | 43.003 | 54.031 | 54.906 | 0.00 | 0.00 |
| ATOM | 4503 | CG1  | VAL | X | 298 | 44.110 | 54.539 | 56.649 | 0.00 | 0.00 |
| ATOM | 4504 | HG11 | VAL | X | 298 | 43.935 | 55.595 | 56.440 | 0.00 | 0.00 |
| ATOM | 4505 | HG12 | VAL | X | 298 | 43.327 | 54.138 | 57.293 | 0.00 | 0.00 |
| ATOM | 4506 | HG13 | VAL | X | 298 | 45.094 | 54.348 | 57.077 | 0.00 | 0.00 |
| ATOM | 4507 | CG2  | VAL | X | 298 | 45.161 | 54.142 | 54.471 | 0.00 | 0.00 |
| ATOM | 4508 | HG21 | VAL | X | 298 | 46.068 | 53.588 | 54.715 | 0.00 | 0.00 |
| ATOM | 4509 | HG22 | VAL | X | 298 | 45.285 | 55.213 | 54.629 | 0.00 | 0.00 |
| ATOM | 4510 | HG23 | VAL | X | 298 | 44.882 | 53.823 | 53.467 | 0.00 | 0.00 |
| ATOM | 4511 | C    | VAL | X | 298 | 42.633 | 51.787 | 56.278 | 0.00 | 0.00 |
| ATOM | 4512 | O    | VAL | X | 298 | 41.497 | 52.129 | 55.931 | 0.00 | 0.00 |
| ATOM | 4513 | N    | VAL | X | 299 | 42.838 | 51.133 | 57.409 | 0.00 | 0.00 |
| ATOM | 4514 | H    | VAL | X | 299 | 43.762 | 50.917 | 57.755 | 0.00 | 0.00 |

|      |      |      |     |   |     |        |        |        |      |      |
|------|------|------|-----|---|-----|--------|--------|--------|------|------|
| ATOM | 4515 | CA   | VAL | X | 299 | 41.686 | 50.893 | 58.398 | 0.00 | 0.00 |
| ATOM | 4516 | HA   | VAL | X | 299 | 40.913 | 50.446 | 57.773 | 0.00 | 0.00 |
| ATOM | 4517 | CB   | VAL | X | 299 | 42.219 | 49.986 | 59.532 | 0.00 | 0.00 |
| ATOM | 4518 | HB   | VAL | X | 299 | 43.165 | 50.447 | 59.815 | 0.00 | 0.00 |
| ATOM | 4519 | CG1  | VAL | X | 299 | 41.231 | 49.871 | 60.649 | 0.00 | 0.00 |
| ATOM | 4520 | HG11 | VAL | X | 299 | 41.563 | 49.074 | 61.314 | 0.00 | 0.00 |
| ATOM | 4521 | HG12 | VAL | X | 299 | 41.154 | 50.802 | 61.211 | 0.00 | 0.00 |
| ATOM | 4522 | HG13 | VAL | X | 299 | 40.258 | 49.693 | 60.190 | 0.00 | 0.00 |
| ATOM | 4523 | CG2  | VAL | X | 299 | 42.500 | 48.543 | 59.089 | 0.00 | 0.00 |
| ATOM | 4524 | HG21 | VAL | X | 299 | 41.668 | 47.856 | 58.933 | 0.00 | 0.00 |
| ATOM | 4525 | HG22 | VAL | X | 299 | 42.986 | 47.872 | 59.797 | 0.00 | 0.00 |
| ATOM | 4526 | HG23 | VAL | X | 299 | 43.009 | 48.592 | 58.127 | 0.00 | 0.00 |
| ATOM | 4527 | C    | VAL | X | 299 | 41.284 | 52.275 | 58.969 | 0.00 | 0.00 |
| ATOM | 4528 | O    | VAL | X | 299 | 42.089 | 53.082 | 59.365 | 0.00 | 0.00 |
| ATOM | 4529 | N    | ASP | X | 300 | 39.939 | 52.491 | 59.020 | 0.00 | 0.00 |
| ATOM | 4530 | H    | ASP | X | 300 | 39.307 | 51.885 | 58.517 | 0.00 | 0.00 |
| ATOM | 4531 | CA   | ASP | X | 300 | 39.427 | 53.763 | 59.624 | 0.00 | 0.00 |
| ATOM | 4532 | HA   | ASP | X | 300 | 40.114 | 53.964 | 60.446 | 0.00 | 0.00 |
| ATOM | 4533 | CB   | ASP | X | 300 | 39.377 | 54.750 | 58.497 | 0.00 | 0.00 |
| ATOM | 4534 | HB2  | ASP | X | 300 | 40.393 | 55.035 | 58.224 | 0.00 | 0.00 |
| ATOM | 4535 | HB3  | ASP | X | 300 | 38.989 | 54.472 | 57.517 | 0.00 | 0.00 |
| ATOM | 4536 | CG   | ASP | X | 300 | 38.649 | 56.003 | 58.919 | 0.00 | 0.00 |
| ATOM | 4537 | OD1  | ASP | X | 300 | 39.190 | 56.672 | 59.810 | 0.00 | 0.00 |
| ATOM | 4538 | OD2  | ASP | X | 300 | 37.539 | 56.305 | 58.357 | 0.00 | 0.00 |
| ATOM | 4539 | C    | ASP | X | 300 | 38.129 | 53.533 | 60.348 | 0.00 | 0.00 |
| ATOM | 4540 | O    | ASP | X | 300 | 38.135 | 53.825 | 61.503 | 0.00 | 0.00 |
| ATOM | 4541 | N    | GLY | X | 301 | 37.114 | 53.193 | 59.611 | 0.00 | 0.00 |
| ATOM | 4542 | H    | GLY | X | 301 | 37.270 | 52.792 | 58.698 | 0.00 | 0.00 |
| ATOM | 4543 | CA   | GLY | X | 301 | 35.681 | 53.484 | 59.933 | 0.00 | 0.00 |
| ATOM | 4544 | HA2  | GLY | X | 301 | 35.189 | 52.601 | 60.340 | 0.00 | 0.00 |
| ATOM | 4545 | HA3  | GLY | X | 301 | 35.545 | 54.255 | 60.692 | 0.00 | 0.00 |
| ATOM | 4546 | C    | GLY | X | 301 | 34.900 | 53.761 | 58.639 | 0.00 | 0.00 |
| ATOM | 4547 | O    | GLY | X | 301 | 33.888 | 53.114 | 58.361 | 0.00 | 0.00 |
| ATOM | 4548 | N    | ASP | X | 302 | 35.454 | 54.519 | 57.634 | 0.00 | 0.00 |
| ATOM | 4549 | H    | ASP | X | 302 | 36.269 | 55.043 | 57.919 | 0.00 | 0.00 |
| ATOM | 4550 | CA   | ASP | X | 302 | 35.048 | 54.824 | 56.203 | 0.00 | 0.00 |
| ATOM | 4551 | HA   | ASP | X | 302 | 34.041 | 55.240 | 56.186 | 0.00 | 0.00 |
| ATOM | 4552 | CB   | ASP | X | 302 | 35.947 | 55.911 | 55.592 | 0.00 | 0.00 |
| ATOM | 4553 | HB2  | ASP | X | 302 | 35.894 | 56.872 | 56.105 | 0.00 | 0.00 |
| ATOM | 4554 | HB3  | ASP | X | 302 | 36.982 | 55.582 | 55.689 | 0.00 | 0.00 |
| ATOM | 4555 | CG   | ASP | X | 302 | 35.561 | 56.237 | 54.207 | 0.00 | 0.00 |
| ATOM | 4556 | OD1  | ASP | X | 302 | 34.725 | 57.108 | 53.947 | 0.00 | 0.00 |
| ATOM | 4557 | OD2  | ASP | X | 302 | 36.085 | 55.639 | 53.249 | 0.00 | 0.00 |
| ATOM | 4558 | C    | ASP | X | 302 | 34.908 | 53.523 | 55.383 | 0.00 | 0.00 |
| ATOM | 4559 | O    | ASP | X | 302 | 33.926 | 52.804 | 55.436 | 0.00 | 0.00 |
| ATOM | 4560 | N    | PHE | X | 303 | 35.917 | 53.096 | 54.608 | 0.00 | 0.00 |
| ATOM | 4561 | H    | PHE | X | 303 | 36.789 | 53.588 | 54.740 | 0.00 | 0.00 |
| ATOM | 4562 | CA   | PHE | X | 303 | 35.819 | 51.912 | 53.666 | 0.00 | 0.00 |
| ATOM | 4563 | HA   | PHE | X | 303 | 34.799 | 51.903 | 53.281 | 0.00 | 0.00 |
| ATOM | 4564 | CB   | PHE | X | 303 | 36.810 | 52.193 | 52.499 | 0.00 | 0.00 |
| ATOM | 4565 | HB2  | PHE | X | 303 | 36.472 | 53.174 | 52.164 | 0.00 | 0.00 |
| ATOM | 4566 | HB3  | PHE | X | 303 | 37.838 | 52.272 | 52.852 | 0.00 | 0.00 |
| ATOM | 4567 | CG   | PHE | X | 303 | 36.852 | 51.241 | 51.288 | 0.00 | 0.00 |
| ATOM | 4568 | CD1  | PHE | X | 303 | 37.521 | 49.958 | 51.419 | 0.00 | 0.00 |
| ATOM | 4569 | HD1  | PHE | X | 303 | 38.066 | 49.805 | 52.339 | 0.00 | 0.00 |
| ATOM | 4570 | CE1  | PHE | X | 303 | 37.339 | 48.928 | 50.430 | 0.00 | 0.00 |
| ATOM | 4571 | HE1  | PHE | X | 303 | 37.687 | 47.919 | 50.591 | 0.00 | 0.00 |
| ATOM | 4572 | CZ   | PHE | X | 303 | 36.749 | 49.320 | 49.206 | 0.00 | 0.00 |
| ATOM | 4573 | HZ   | PHE | X | 303 | 36.878 | 48.668 | 48.355 | 0.00 | 0.00 |
| ATOM | 4574 | CE2  | PHE | X | 303 | 36.120 | 50.600 | 49.052 | 0.00 | 0.00 |
| ATOM | 4575 | HE2  | PHE | X | 303 | 35.641 | 50.898 | 48.132 | 0.00 | 0.00 |
| ATOM | 4576 | CD2  | PHE | X | 303 | 36.235 | 51.523 | 50.065 | 0.00 | 0.00 |
| ATOM | 4577 | HD2  | PHE | X | 303 | 35.834 | 52.519 | 49.946 | 0.00 | 0.00 |
| ATOM | 4578 | C    | PHE | X | 303 | 36.073 | 50.623 | 54.370 | 0.00 | 0.00 |
| ATOM | 4579 | O    | PHE | X | 303 | 35.591 | 49.622 | 53.850 | 0.00 | 0.00 |
| ATOM | 4580 | N    | LEU | X | 304 | 36.763 | 50.638 | 55.548 | 0.00 | 0.00 |
| ATOM | 4581 | H    | LEU | X | 304 | 37.305 | 51.430 | 55.863 | 0.00 | 0.00 |

|      |      |      |     |   |     |        |        |        |      |      |
|------|------|------|-----|---|-----|--------|--------|--------|------|------|
| ATOM | 4582 | CA   | LEU | X | 304 | 36.761 | 49.477 | 56.431 | 0.00 | 0.00 |
| ATOM | 4583 | HA   | LEU | X | 304 | 35.711 | 49.193 | 56.498 | 0.00 | 0.00 |
| ATOM | 4584 | CB   | LEU | X | 304 | 37.711 | 48.328 | 55.923 | 0.00 | 0.00 |
| ATOM | 4585 | HB2  | LEU | X | 304 | 37.515 | 47.565 | 56.676 | 0.00 | 0.00 |
| ATOM | 4586 | HB3  | LEU | X | 304 | 37.459 | 48.017 | 54.909 | 0.00 | 0.00 |
| ATOM | 4587 | CG   | LEU | X | 304 | 39.290 | 48.424 | 56.062 | 0.00 | 0.00 |
| ATOM | 4588 | HG   | LEU | X | 304 | 39.594 | 48.788 | 57.044 | 0.00 | 0.00 |
| ATOM | 4589 | CD1  | LEU | X | 304 | 39.862 | 47.034 | 55.770 | 0.00 | 0.00 |
| ATOM | 4590 | HD11 | LEU | X | 304 | 40.934 | 47.163 | 55.622 | 0.00 | 0.00 |
| ATOM | 4591 | HD12 | LEU | X | 304 | 39.445 | 46.658 | 54.836 | 0.00 | 0.00 |
| ATOM | 4592 | HD13 | LEU | X | 304 | 39.674 | 46.337 | 56.588 | 0.00 | 0.00 |
| ATOM | 4593 | CD2  | LEU | X | 304 | 39.858 | 49.400 | 54.945 | 0.00 | 0.00 |
| ATOM | 4594 | HD21 | LEU | X | 304 | 40.901 | 49.641 | 55.153 | 0.00 | 0.00 |
| ATOM | 4595 | HD22 | LEU | X | 304 | 39.754 | 48.960 | 53.953 | 0.00 | 0.00 |
| ATOM | 4596 | HD23 | LEU | X | 304 | 39.328 | 50.351 | 55.006 | 0.00 | 0.00 |
| ATOM | 4597 | C    | LEU | X | 304 | 37.186 | 49.888 | 57.821 | 0.00 | 0.00 |
| ATOM | 4598 | O    | LEU | X | 304 | 37.799 | 50.940 | 57.994 | 0.00 | 0.00 |
| ATOM | 4599 | N    | SER | X | 305 | 36.575 | 49.234 | 58.816 | 0.00 | 0.00 |
| ATOM | 4600 | H    | SER | X | 305 | 35.897 | 48.533 | 58.553 | 0.00 | 0.00 |
| ATOM | 4601 | CA   | SER | X | 305 | 36.536 | 49.635 | 60.264 | 0.00 | 0.00 |
| ATOM | 4602 | HA   | SER | X | 305 | 36.707 | 50.703 | 60.399 | 0.00 | 0.00 |
| ATOM | 4603 | CB   | SER | X | 305 | 35.033 | 49.485 | 60.659 | 0.00 | 0.00 |
| ATOM | 4604 | HB2  | SER | X | 305 | 34.825 | 48.423 | 60.786 | 0.00 | 0.00 |
| ATOM | 4605 | HB3  | SER | X | 305 | 35.053 | 49.792 | 61.704 | 0.00 | 0.00 |
| ATOM | 4606 | OG   | SER | X | 305 | 34.084 | 50.276 | 59.913 | 0.00 | 0.00 |
| ATOM | 4607 | HG   | SER | X | 305 | 33.257 | 50.356 | 60.395 | 0.00 | 0.00 |
| ATOM | 4608 | C    | SER | X | 305 | 37.408 | 48.775 | 61.173 | 0.00 | 0.00 |
| ATOM | 4609 | O    | SER | X | 305 | 37.613 | 49.066 | 62.348 | 0.00 | 0.00 |
| ATOM | 4610 | N    | ASP | X | 306 | 37.941 | 47.677 | 60.672 | 0.00 | 0.00 |
| ATOM | 4611 | H    | ASP | X | 306 | 37.786 | 47.507 | 59.689 | 0.00 | 0.00 |
| ATOM | 4612 | CA   | ASP | X | 306 | 38.934 | 46.826 | 61.311 | 0.00 | 0.00 |
| ATOM | 4613 | HA   | ASP | X | 306 | 39.576 | 47.514 | 61.862 | 0.00 | 0.00 |
| ATOM | 4614 | CB   | ASP | X | 306 | 38.384 | 45.856 | 62.451 | 0.00 | 0.00 |
| ATOM | 4615 | HB2  | ASP | X | 306 | 37.455 | 46.257 | 62.855 | 0.00 | 0.00 |
| ATOM | 4616 | HB3  | ASP | X | 306 | 38.117 | 44.900 | 62.000 | 0.00 | 0.00 |
| ATOM | 4617 | CG   | ASP | X | 306 | 39.359 | 45.552 | 63.633 | 0.00 | 0.00 |
| ATOM | 4618 | OD1  | ASP | X | 306 | 40.107 | 44.552 | 63.461 | 0.00 | 0.00 |
| ATOM | 4619 | OD2  | ASP | X | 306 | 39.417 | 46.393 | 64.552 | 0.00 | 0.00 |
| ATOM | 4620 | C    | ASP | X | 306 | 39.784 | 46.084 | 60.319 | 0.00 | 0.00 |
| ATOM | 4621 | O    | ASP | X | 306 | 39.687 | 46.346 | 59.133 | 0.00 | 0.00 |
| ATOM | 4622 | N    | THR | X | 307 | 40.544 | 45.088 | 60.733 | 0.00 | 0.00 |
| ATOM | 4623 | H    | THR | X | 307 | 40.555 | 44.734 | 61.679 | 0.00 | 0.00 |
| ATOM | 4624 | CA   | THR | X | 307 | 41.449 | 44.378 | 59.859 | 0.00 | 0.00 |
| ATOM | 4625 | HA   | THR | X | 307 | 41.912 | 45.045 | 59.131 | 0.00 | 0.00 |
| ATOM | 4626 | CB   | THR | X | 307 | 42.599 | 43.887 | 60.670 | 0.00 | 0.00 |
| ATOM | 4627 | HB   | THR | X | 307 | 43.255 | 43.269 | 60.057 | 0.00 | 0.00 |
| ATOM | 4628 | CG2  | THR | X | 307 | 43.485 | 45.092 | 61.111 | 0.00 | 0.00 |
| ATOM | 4629 | HG21 | THR | X | 307 | 44.314 | 44.741 | 61.725 | 0.00 | 0.00 |
| ATOM | 4630 | HG22 | THR | X | 307 | 43.009 | 45.866 | 61.714 | 0.00 | 0.00 |
| ATOM | 4631 | HG23 | THR | X | 307 | 43.944 | 45.572 | 60.246 | 0.00 | 0.00 |
| ATOM | 4632 | OG1  | THR | X | 307 | 42.198 | 43.067 | 61.676 | 0.00 | 0.00 |
| ATOM | 4633 | HG1  | THR | X | 307 | 41.470 | 43.427 | 62.186 | 0.00 | 0.00 |
| ATOM | 4634 | C    | THR | X | 307 | 40.772 | 43.301 | 59.110 | 0.00 | 0.00 |
| ATOM | 4635 | O    | THR | X | 307 | 39.910 | 42.680 | 59.731 | 0.00 | 0.00 |
| ATOM | 4636 | N    | PRO | X | 308 | 41.028 | 42.987 | 57.781 | 0.00 | 0.00 |
| ATOM | 4637 | CD   | PRO | X | 308 | 41.839 | 43.834 | 56.934 | 0.00 | 0.00 |
| ATOM | 4638 | HD2  | PRO | X | 308 | 42.851 | 43.550 | 57.220 | 0.00 | 0.00 |
| ATOM | 4639 | HD3  | PRO | X | 308 | 41.666 | 44.895 | 57.114 | 0.00 | 0.00 |
| ATOM | 4640 | CG   | PRO | X | 308 | 41.568 | 43.406 | 55.505 | 0.00 | 0.00 |
| ATOM | 4641 | HG2  | PRO | X | 308 | 42.470 | 43.523 | 54.905 | 0.00 | 0.00 |
| ATOM | 4642 | HG3  | PRO | X | 308 | 40.707 | 43.912 | 55.069 | 0.00 | 0.00 |
| ATOM | 4643 | CB   | PRO | X | 308 | 41.080 | 41.955 | 55.732 | 0.00 | 0.00 |
| ATOM | 4644 | HB2  | PRO | X | 308 | 41.962 | 41.315 | 55.697 | 0.00 | 0.00 |
| ATOM | 4645 | HB3  | PRO | X | 308 | 40.461 | 41.414 | 55.017 | 0.00 | 0.00 |
| ATOM | 4646 | CA   | PRO | X | 308 | 40.435 | 41.873 | 57.047 | 0.00 | 0.00 |
| ATOM | 4647 | HA   | PRO | X | 308 | 39.413 | 42.178 | 56.823 | 0.00 | 0.00 |
| ATOM | 4648 | C    | PRO | X | 308 | 40.486 | 40.494 | 57.688 | 0.00 | 0.00 |



|      |      |      |     |   |     |        |        |        |      |      |
|------|------|------|-----|---|-----|--------|--------|--------|------|------|
| ATOM | 4649 | O    | PRO | X | 308 | 39.669 | 39.603 | 57.425 | 0.00 | 0.00 |
| ATOM | 4650 | N    | GLU | X | 309 | 41.524 | 40.237 | 58.458 | 0.00 | 0.00 |
| ATOM | 4651 | H    | GLU | X | 309 | 42.343 | 40.828 | 58.469 | 0.00 | 0.00 |
| ATOM | 4652 | CA   | GLU | X | 309 | 41.522 | 39.103 | 59.359 | 0.00 | 0.00 |
| ATOM | 4653 | HA   | GLU | X | 309 | 41.480 | 38.210 | 58.735 | 0.00 | 0.00 |
| ATOM | 4654 | CB   | GLU | X | 309 | 42.934 | 38.985 | 60.064 | 0.00 | 0.00 |
| ATOM | 4655 | HB2  | GLU | X | 309 | 43.013 | 38.080 | 60.666 | 0.00 | 0.00 |
| ATOM | 4656 | HB3  | GLU | X | 309 | 43.564 | 38.971 | 59.174 | 0.00 | 0.00 |
| ATOM | 4657 | CG   | GLU | X | 309 | 43.444 | 40.108 | 60.993 | 0.00 | 0.00 |
| ATOM | 4658 | HG2  | GLU | X | 309 | 43.388 | 41.106 | 60.558 | 0.00 | 0.00 |
| ATOM | 4659 | HG3  | GLU | X | 309 | 42.961 | 40.072 | 61.970 | 0.00 | 0.00 |
| ATOM | 4660 | CD   | GLU | X | 309 | 44.942 | 39.873 | 61.163 | 0.00 | 0.00 |
| ATOM | 4661 | OE1  | GLU | X | 309 | 45.728 | 40.305 | 60.268 | 0.00 | 0.00 |
| ATOM | 4662 | OE2  | GLU | X | 309 | 45.424 | 39.239 | 62.139 | 0.00 | 0.00 |
| ATOM | 4663 | C    | GLU | X | 309 | 40.322 | 38.943 | 60.415 | 0.00 | 0.00 |
| ATOM | 4664 | O    | GLU | X | 309 | 39.925 | 37.840 | 60.826 | 0.00 | 0.00 |
| ATOM | 4665 | N    | ALA | X | 310 | 39.976 | 40.063 | 60.979 | 0.00 | 0.00 |
| ATOM | 4666 | H    | ALA | X | 310 | 40.463 | 40.914 | 60.738 | 0.00 | 0.00 |
| ATOM | 4667 | CA   | ALA | X | 310 | 38.828 | 40.114 | 61.894 | 0.00 | 0.00 |
| ATOM | 4668 | HA   | ALA | X | 310 | 38.931 | 39.234 | 62.529 | 0.00 | 0.00 |
| ATOM | 4669 | CB   | ALA | X | 310 | 38.896 | 41.339 | 62.816 | 0.00 | 0.00 |
| ATOM | 4670 | HB1  | ALA | X | 310 | 39.741 | 41.439 | 63.498 | 0.00 | 0.00 |
| ATOM | 4671 | HB2  | ALA | X | 310 | 37.997 | 41.360 | 63.431 | 0.00 | 0.00 |
| ATOM | 4672 | HB3  | ALA | X | 310 | 38.871 | 42.256 | 62.227 | 0.00 | 0.00 |
| ATOM | 4673 | C    | ALA | X | 310 | 37.533 | 40.120 | 61.047 | 0.00 | 0.00 |
| ATOM | 4674 | O    | ALA | X | 310 | 36.598 | 39.352 | 61.321 | 0.00 | 0.00 |
| ATOM | 4675 | N    | LEU | X | 311 | 37.376 | 41.037 | 60.070 | 0.00 | 0.00 |
| ATOM | 4676 | H    | LEU | X | 311 | 38.208 | 41.568 | 59.858 | 0.00 | 0.00 |
| ATOM | 4677 | CA   | LEU | X | 311 | 36.186 | 41.302 | 59.270 | 0.00 | 0.00 |
| ATOM | 4678 | HA   | LEU | X | 311 | 35.409 | 41.514 | 60.005 | 0.00 | 0.00 |
| ATOM | 4679 | CB   | LEU | X | 311 | 36.502 | 42.404 | 58.223 | 0.00 | 0.00 |
| ATOM | 4680 | HB2  | LEU | X | 311 | 37.334 | 42.076 | 57.600 | 0.00 | 0.00 |
| ATOM | 4681 | HB3  | LEU | X | 311 | 35.573 | 42.579 | 57.679 | 0.00 | 0.00 |
| ATOM | 4682 | CG   | LEU | X | 311 | 36.821 | 43.759 | 58.887 | 0.00 | 0.00 |
| ATOM | 4683 | HG   | LEU | X | 311 | 37.715 | 43.751 | 59.511 | 0.00 | 0.00 |
| ATOM | 4684 | CD1  | LEU | X | 311 | 37.150 | 44.800 | 57.779 | 0.00 | 0.00 |
| ATOM | 4685 | HD11 | LEU | X | 311 | 37.354 | 45.773 | 58.227 | 0.00 | 0.00 |
| ATOM | 4686 | HD12 | LEU | X | 311 | 36.228 | 44.898 | 57.208 | 0.00 | 0.00 |
| ATOM | 4687 | HD13 | LEU | X | 311 | 38.053 | 44.531 | 57.230 | 0.00 | 0.00 |
| ATOM | 4688 | CD2  | LEU | X | 311 | 35.683 | 44.172 | 59.740 | 0.00 | 0.00 |
| ATOM | 4689 | HD21 | LEU | X | 311 | 35.795 | 43.705 | 60.718 | 0.00 | 0.00 |
| ATOM | 4690 | HD22 | LEU | X | 311 | 35.755 | 45.259 | 59.775 | 0.00 | 0.00 |
| ATOM | 4691 | HD23 | LEU | X | 311 | 34.767 | 43.813 | 59.271 | 0.00 | 0.00 |
| ATOM | 4692 | C    | LEU | X | 311 | 35.743 | 40.000 | 58.534 | 0.00 | 0.00 |
| ATOM | 4693 | O    | LEU | X | 311 | 34.530 | 39.755 | 58.542 | 0.00 | 0.00 |
| ATOM | 4694 | N    | ILE | X | 312 | 36.650 | 39.163 | 58.004 | 0.00 | 0.00 |
| ATOM | 4695 | H    | ILE | X | 312 | 37.620 | 39.436 | 58.057 | 0.00 | 0.00 |
| ATOM | 4696 | CA   | ILE | X | 312 | 36.205 | 37.914 | 57.382 | 0.00 | 0.00 |
| ATOM | 4697 | HA   | ILE | X | 312 | 35.499 | 38.209 | 56.606 | 0.00 | 0.00 |
| ATOM | 4698 | CB   | ILE | X | 312 | 37.418 | 37.256 | 56.578 | 0.00 | 0.00 |
| ATOM | 4699 | HB   | ILE | X | 312 | 37.983 | 37.985 | 55.997 | 0.00 | 0.00 |
| ATOM | 4700 | CG2  | ILE | X | 312 | 38.404 | 36.527 | 57.485 | 0.00 | 0.00 |
| ATOM | 4701 | HG21 | ILE | X | 312 | 39.356 | 36.452 | 56.959 | 0.00 | 0.00 |
| ATOM | 4702 | HG22 | ILE | X | 312 | 37.978 | 35.539 | 57.659 | 0.00 | 0.00 |
| ATOM | 4703 | HG23 | ILE | X | 312 | 38.621 | 36.980 | 58.453 | 0.00 | 0.00 |
| ATOM | 4704 | CG1  | ILE | X | 312 | 36.906 | 36.256 | 55.519 | 0.00 | 0.00 |
| ATOM | 4705 | HG12 | ILE | X | 312 | 37.729 | 35.569 | 55.322 | 0.00 | 0.00 |
| ATOM | 4706 | HG13 | ILE | X | 312 | 36.003 | 35.707 | 55.784 | 0.00 | 0.00 |
| ATOM | 4707 | CD1  | ILE | X | 312 | 36.612 | 36.880 | 54.174 | 0.00 | 0.00 |
| ATOM | 4708 | HD11 | ILE | X | 312 | 37.357 | 37.618 | 53.877 | 0.00 | 0.00 |
| ATOM | 4709 | HD12 | ILE | X | 312 | 35.660 | 37.405 | 54.259 | 0.00 | 0.00 |
| ATOM | 4710 | HD13 | ILE | X | 312 | 36.454 | 36.111 | 53.417 | 0.00 | 0.00 |
| ATOM | 4711 | C    | ILE | X | 312 | 35.706 | 36.936 | 58.466 | 0.00 | 0.00 |
| ATOM | 4712 | O    | ILE | X | 312 | 34.683 | 36.221 | 58.295 | 0.00 | 0.00 |
| ATOM | 4713 | N    | ASN | X | 313 | 36.295 | 36.874 | 59.635 | 0.00 | 0.00 |
| ATOM | 4714 | H    | ASN | X | 313 | 37.134 | 37.422 | 59.761 | 0.00 | 0.00 |
| ATOM | 4715 | CA   | ASN | X | 313 | 35.825 | 36.045 | 60.787 | 0.00 | 0.00 |

|      |      |      |     |   |     |        |        |        |      |      |
|------|------|------|-----|---|-----|--------|--------|--------|------|------|
| ATOM | 4716 | HA   | ASN | X | 313 | 35.581 | 35.063 | 60.380 | 0.00 | 0.00 |
| ATOM | 4717 | CB   | ASN | X | 313 | 36.883 | 35.824 | 61.853 | 0.00 | 0.00 |
| ATOM | 4718 | HB2  | ASN | X | 313 | 37.343 | 36.805 | 61.971 | 0.00 | 0.00 |
| ATOM | 4719 | HB3  | ASN | X | 313 | 36.471 | 35.452 | 62.791 | 0.00 | 0.00 |
| ATOM | 4720 | CG   | ASN | X | 313 | 37.952 | 34.856 | 61.466 | 0.00 | 0.00 |
| ATOM | 4721 | OD1  | ASN | X | 313 | 37.694 | 33.679 | 61.462 | 0.00 | 0.00 |
| ATOM | 4722 | ND2  | ASN | X | 313 | 39.178 | 35.263 | 61.104 | 0.00 | 0.00 |
| ATOM | 4723 | HD21 | ASN | X | 313 | 39.854 | 34.587 | 60.779 | 0.00 | 0.00 |
| ATOM | 4724 | HD22 | ASN | X | 313 | 39.376 | 36.252 | 61.053 | 0.00 | 0.00 |
| ATOM | 4725 | C    | ASN | X | 313 | 34.446 | 36.453 | 61.380 | 0.00 | 0.00 |
| ATOM | 4726 | O    | ASN | X | 313 | 33.748 | 35.577 | 61.881 | 0.00 | 0.00 |
| ATOM | 4727 | N    | ALA | X | 314 | 34.068 | 37.727 | 61.243 | 0.00 | 0.00 |
| ATOM | 4728 | H    | ALA | X | 314 | 34.842 | 38.258 | 60.871 | 0.00 | 0.00 |
| ATOM | 4729 | CA   | ALA | X | 314 | 32.804 | 38.332 | 61.634 | 0.00 | 0.00 |
| ATOM | 4730 | HA   | ALA | X | 314 | 32.523 | 38.088 | 62.659 | 0.00 | 0.00 |
| ATOM | 4731 | CB   | ALA | X | 314 | 32.931 | 39.818 | 61.499 | 0.00 | 0.00 |
| ATOM | 4732 | HB1  | ALA | X | 314 | 32.010 | 40.305 | 61.822 | 0.00 | 0.00 |
| ATOM | 4733 | HB2  | ALA | X | 314 | 33.004 | 40.105 | 60.450 | 0.00 | 0.00 |
| ATOM | 4734 | HB3  | ALA | X | 314 | 33.737 | 40.067 | 62.189 | 0.00 | 0.00 |
| ATOM | 4735 | C    | ALA | X | 314 | 31.625 | 37.889 | 60.750 | 0.00 | 0.00 |
| ATOM | 4736 | O    | ALA | X | 314 | 30.581 | 37.295 | 61.216 | 0.00 | 0.00 |
| ATOM | 4737 | N    | GLY | X | 315 | 31.779 | 38.091 | 59.473 | 0.00 | 0.00 |
| ATOM | 4738 | H    | GLY | X | 315 | 32.641 | 38.485 | 59.124 | 0.00 | 0.00 |
| ATOM | 4739 | CA   | GLY | X | 315 | 30.699 | 37.916 | 58.413 | 0.00 | 0.00 |
| ATOM | 4740 | HA2  | GLY | X | 315 | 29.743 | 38.278 | 58.791 | 0.00 | 0.00 |
| ATOM | 4741 | HA3  | GLY | X | 315 | 31.005 | 38.554 | 57.584 | 0.00 | 0.00 |
| ATOM | 4742 | C    | GLY | X | 315 | 30.384 | 36.497 | 57.973 | 0.00 | 0.00 |
| ATOM | 4743 | O    | GLY | X | 315 | 31.148 | 35.603 | 58.213 | 0.00 | 0.00 |
| ATOM | 4744 | N    | ASP | X | 316 | 29.244 | 36.355 | 57.282 | 0.00 | 0.00 |
| ATOM | 4745 | H    | ASP | X | 316 | 28.792 | 37.231 | 57.062 | 0.00 | 0.00 |
| ATOM | 4746 | CA   | ASP | X | 316 | 28.762 | 35.124 | 56.618 | 0.00 | 0.00 |
| ATOM | 4747 | HA   | ASP | X | 316 | 29.320 | 34.262 | 56.985 | 0.00 | 0.00 |
| ATOM | 4748 | CB   | ASP | X | 316 | 27.343 | 34.850 | 57.012 | 0.00 | 0.00 |
| ATOM | 4749 | HB2  | ASP | X | 316 | 27.171 | 35.016 | 58.075 | 0.00 | 0.00 |
| ATOM | 4750 | HB3  | ASP | X | 316 | 26.641 | 35.516 | 56.511 | 0.00 | 0.00 |
| ATOM | 4751 | CG   | ASP | X | 316 | 26.829 | 33.415 | 56.633 | 0.00 | 0.00 |
| ATOM | 4752 | OD1  | ASP | X | 316 | 27.561 | 32.475 | 56.854 | 0.00 | 0.00 |
| ATOM | 4753 | OD2  | ASP | X | 316 | 25.733 | 33.278 | 56.015 | 0.00 | 0.00 |
| ATOM | 4754 | C    | ASP | X | 316 | 29.011 | 35.217 | 55.106 | 0.00 | 0.00 |
| ATOM | 4755 | O    | ASP | X | 316 | 29.004 | 36.242 | 54.494 | 0.00 | 0.00 |
| ATOM | 4756 | N    | PHE | X | 317 | 29.139 | 34.050 | 54.410 | 0.00 | 0.00 |
| ATOM | 4757 | H    | PHE | X | 317 | 29.103 | 33.163 | 54.892 | 0.00 | 0.00 |
| ATOM | 4758 | CA   | PHE | X | 317 | 29.615 | 33.893 | 52.969 | 0.00 | 0.00 |
| ATOM | 4759 | HA   | PHE | X | 317 | 29.419 | 34.761 | 52.341 | 0.00 | 0.00 |
| ATOM | 4760 | CB   | PHE | X | 317 | 31.123 | 33.684 | 52.962 | 0.00 | 0.00 |
| ATOM | 4761 | HB2  | PHE | X | 317 | 31.260 | 32.750 | 53.507 | 0.00 | 0.00 |
| ATOM | 4762 | HB3  | PHE | X | 317 | 31.355 | 33.458 | 51.922 | 0.00 | 0.00 |
| ATOM | 4763 | CG   | PHE | X | 317 | 31.754 | 34.917 | 53.599 | 0.00 | 0.00 |
| ATOM | 4764 | CD1  | PHE | X | 317 | 31.710 | 36.170 | 52.898 | 0.00 | 0.00 |
| ATOM | 4765 | HD1  | PHE | X | 317 | 31.302 | 36.057 | 51.905 | 0.00 | 0.00 |
| ATOM | 4766 | CE1  | PHE | X | 317 | 32.233 | 37.295 | 53.471 | 0.00 | 0.00 |
| ATOM | 4767 | HE1  | PHE | X | 317 | 32.269 | 38.169 | 52.837 | 0.00 | 0.00 |
| ATOM | 4768 | CZ   | PHE | X | 317 | 32.782 | 37.236 | 54.707 | 0.00 | 0.00 |
| ATOM | 4769 | HZ   | PHE | X | 317 | 33.181 | 38.141 | 55.138 | 0.00 | 0.00 |
| ATOM | 4770 | CE2  | PHE | X | 317 | 32.695 | 36.108 | 55.501 | 0.00 | 0.00 |
| ATOM | 4771 | HE2  | PHE | X | 317 | 33.032 | 36.110 | 56.527 | 0.00 | 0.00 |
| ATOM | 4772 | CD2  | PHE | X | 317 | 32.286 | 34.961 | 54.879 | 0.00 | 0.00 |
| ATOM | 4773 | HD2  | PHE | X | 317 | 32.273 | 34.064 | 55.480 | 0.00 | 0.00 |
| ATOM | 4774 | C    | PHE | X | 317 | 28.915 | 32.710 | 52.272 | 0.00 | 0.00 |
| ATOM | 4775 | O    | PHE | X | 317 | 29.205 | 32.290 | 51.194 | 0.00 | 0.00 |
| ATOM | 4776 | N    | HIE | X | 318 | 27.931 | 32.194 | 52.990 | 0.00 | 0.00 |
| ATOM | 4777 | H    | HIE | X | 318 | 27.701 | 32.675 | 53.848 | 0.00 | 0.00 |
| ATOM | 4778 | CA   | HIE | X | 318 | 27.121 | 31.053 | 52.543 | 0.00 | 0.00 |
| ATOM | 4779 | HA   | HIE | X | 318 | 27.685 | 30.121 | 52.519 | 0.00 | 0.00 |
| ATOM | 4780 | CB   | HIE | X | 318 | 26.047 | 30.817 | 53.623 | 0.00 | 0.00 |
| ATOM | 4781 | HB2  | HIE | X | 318 | 26.649 | 30.701 | 54.524 | 0.00 | 0.00 |
| ATOM | 4782 | HB3  | HIE | X | 318 | 25.394 | 31.689 | 53.617 | 0.00 | 0.00 |

|      |      |      |     |   |     |        |        |        |      |      |
|------|------|------|-----|---|-----|--------|--------|--------|------|------|
| ATOM | 4783 | CG   | HIE | X | 318 | 25.247 | 29.600 | 53.300 | 0.00 | 0.00 |
| ATOM | 4784 | ND1  | HIE | X | 318 | 24.039 | 29.536 | 52.545 | 0.00 | 0.00 |
| ATOM | 4785 | CE1  | HIE | X | 318 | 23.693 | 28.253 | 52.464 | 0.00 | 0.00 |
| ATOM | 4786 | HE1  | HIE | X | 318 | 22.914 | 27.822 | 51.854 | 0.00 | 0.00 |
| ATOM | 4787 | NE2  | HIE | X | 318 | 24.638 | 27.453 | 53.004 | 0.00 | 0.00 |
| ATOM | 4788 | HE2  | HIE | X | 318 | 24.625 | 26.443 | 52.988 | 0.00 | 0.00 |
| ATOM | 4789 | CD2  | HIE | X | 318 | 25.575 | 28.284 | 53.606 | 0.00 | 0.00 |
| ATOM | 4790 | HD2  | HIE | X | 318 | 26.390 | 27.981 | 54.247 | 0.00 | 0.00 |
| ATOM | 4791 | C    | HIE | X | 318 | 26.420 | 31.272 | 51.215 | 0.00 | 0.00 |
| ATOM | 4792 | O    | HIE | X | 318 | 25.822 | 32.333 | 51.038 | 0.00 | 0.00 |
| ATOM | 4793 | N    | GLY | X | 319 | 26.622 | 30.318 | 50.266 | 0.00 | 0.00 |
| ATOM | 4794 | H    | GLY | X | 319 | 27.189 | 29.560 | 50.618 | 0.00 | 0.00 |
| ATOM | 4795 | CA   | GLY | X | 319 | 26.263 | 30.242 | 48.887 | 0.00 | 0.00 |
| ATOM | 4796 | HA2  | GLY | X | 319 | 26.070 | 29.214 | 48.580 | 0.00 | 0.00 |
| ATOM | 4797 | HA3  | GLY | X | 319 | 25.314 | 30.729 | 48.661 | 0.00 | 0.00 |
| ATOM | 4798 | C    | GLY | X | 319 | 27.166 | 30.883 | 47.802 | 0.00 | 0.00 |
| ATOM | 4799 | O    | GLY | X | 319 | 27.089 | 30.652 | 46.610 | 0.00 | 0.00 |
| ATOM | 4800 | N    | LEU | X | 320 | 28.156 | 31.634 | 48.320 | 0.00 | 0.00 |
| ATOM | 4801 | H    | LEU | X | 320 | 27.893 | 31.980 | 49.232 | 0.00 | 0.00 |
| ATOM | 4802 | CA   | LEU | X | 320 | 28.960 | 32.551 | 47.526 | 0.00 | 0.00 |
| ATOM | 4803 | HA   | LEU | X | 320 | 28.301 | 33.077 | 46.837 | 0.00 | 0.00 |
| ATOM | 4804 | CB   | LEU | X | 320 | 29.667 | 33.621 | 48.373 | 0.00 | 0.00 |
| ATOM | 4805 | HB2  | LEU | X | 320 | 30.423 | 33.179 | 49.021 | 0.00 | 0.00 |
| ATOM | 4806 | HB3  | LEU | X | 320 | 30.298 | 34.272 | 47.769 | 0.00 | 0.00 |
| ATOM | 4807 | CG   | LEU | X | 320 | 28.730 | 34.487 | 49.162 | 0.00 | 0.00 |
| ATOM | 4808 | HG   | LEU | X | 320 | 28.329 | 33.920 | 50.003 | 0.00 | 0.00 |
| ATOM | 4809 | CD1  | LEU | X | 320 | 29.590 | 35.596 | 49.710 | 0.00 | 0.00 |
| ATOM | 4810 | HD11 | LEU | X | 320 | 30.476 | 35.218 | 50.220 | 0.00 | 0.00 |
| ATOM | 4811 | HD12 | LEU | X | 320 | 28.971 | 36.205 | 50.369 | 0.00 | 0.00 |
| ATOM | 4812 | HD13 | LEU | X | 320 | 29.885 | 36.212 | 48.861 | 0.00 | 0.00 |
| ATOM | 4813 | CD2  | LEU | X | 320 | 27.509 | 35.093 | 48.368 | 0.00 | 0.00 |
| ATOM | 4814 | HD21 | LEU | X | 320 | 26.901 | 35.637 | 49.092 | 0.00 | 0.00 |
| ATOM | 4815 | HD22 | LEU | X | 320 | 27.960 | 35.848 | 47.725 | 0.00 | 0.00 |
| ATOM | 4816 | HD23 | LEU | X | 320 | 26.898 | 34.361 | 47.840 | 0.00 | 0.00 |
| ATOM | 4817 | C    | LEU | X | 320 | 30.029 | 31.745 | 46.742 | 0.00 | 0.00 |
| ATOM | 4818 | O    | LEU | X | 320 | 30.121 | 30.485 | 46.900 | 0.00 | 0.00 |
| ATOM | 4819 | N    | GLN | X | 321 | 30.863 | 32.384 | 45.878 | 0.00 | 0.00 |
| ATOM | 4820 | H    | GLN | X | 321 | 30.973 | 33.386 | 45.947 | 0.00 | 0.00 |
| ATOM | 4821 | CA   | GLN | X | 321 | 31.646 | 31.522 | 45.041 | 0.00 | 0.00 |
| ATOM | 4822 | HA   | GLN | X | 321 | 31.774 | 30.523 | 45.457 | 0.00 | 0.00 |
| ATOM | 4823 | CB   | GLN | X | 321 | 31.011 | 31.348 | 43.670 | 0.00 | 0.00 |
| ATOM | 4824 | HB2  | GLN | X | 321 | 30.815 | 32.273 | 43.128 | 0.00 | 0.00 |
| ATOM | 4825 | HB3  | GLN | X | 321 | 31.614 | 30.756 | 42.982 | 0.00 | 0.00 |
| ATOM | 4826 | CG   | GLN | X | 321 | 29.647 | 30.659 | 43.660 | 0.00 | 0.00 |
| ATOM | 4827 | HG2  | GLN | X | 321 | 29.674 | 29.848 | 44.387 | 0.00 | 0.00 |
| ATOM | 4828 | HG3  | GLN | X | 321 | 28.895 | 31.389 | 43.958 | 0.00 | 0.00 |
| ATOM | 4829 | CD   | GLN | X | 321 | 29.292 | 30.285 | 42.163 | 0.00 | 0.00 |
| ATOM | 4830 | OE1  | GLN | X | 321 | 29.299 | 31.128 | 41.299 | 0.00 | 0.00 |
| ATOM | 4831 | NE2  | GLN | X | 321 | 28.971 | 29.050 | 41.843 | 0.00 | 0.00 |
| ATOM | 4832 | HE21 | GLN | X | 321 | 28.944 | 29.018 | 40.834 | 0.00 | 0.00 |
| ATOM | 4833 | HE22 | GLN | X | 321 | 29.406 | 28.316 | 42.383 | 0.00 | 0.00 |
| ATOM | 4834 | C    | GLN | X | 321 | 33.045 | 32.151 | 44.748 | 0.00 | 0.00 |
| ATOM | 4835 | O    | GLN | X | 321 | 33.158 | 33.215 | 44.174 | 0.00 | 0.00 |
| ATOM | 4836 | N    | VAL | X | 322 | 34.155 | 31.447 | 45.078 | 0.00 | 0.00 |
| ATOM | 4837 | H    | VAL | X | 322 | 33.915 | 30.564 | 45.505 | 0.00 | 0.00 |
| ATOM | 4838 | CA   | VAL | X | 322 | 35.503 | 31.890 | 45.218 | 0.00 | 0.00 |
| ATOM | 4839 | HA   | VAL | X | 322 | 35.539 | 32.852 | 44.706 | 0.00 | 0.00 |
| ATOM | 4840 | CB   | VAL | X | 322 | 35.892 | 32.171 | 46.701 | 0.00 | 0.00 |
| ATOM | 4841 | HB   | VAL | X | 322 | 35.737 | 31.204 | 47.181 | 0.00 | 0.00 |
| ATOM | 4842 | CG1  | VAL | X | 322 | 37.313 | 32.725 | 46.957 | 0.00 | 0.00 |
| ATOM | 4843 | HG11 | VAL | X | 322 | 37.458 | 33.761 | 46.649 | 0.00 | 0.00 |
| ATOM | 4844 | HG12 | VAL | X | 322 | 37.391 | 32.778 | 48.043 | 0.00 | 0.00 |
| ATOM | 4845 | HG13 | VAL | X | 322 | 38.165 | 32.078 | 46.750 | 0.00 | 0.00 |
| ATOM | 4846 | CG2  | VAL | X | 322 | 34.892 | 33.172 | 47.309 | 0.00 | 0.00 |
| ATOM | 4847 | HG21 | VAL | X | 322 | 35.166 | 33.292 | 48.357 | 0.00 | 0.00 |
| ATOM | 4848 | HG22 | VAL | X | 322 | 33.882 | 32.767 | 47.248 | 0.00 | 0.00 |
| ATOM | 4849 | HG23 | VAL | X | 322 | 34.835 | 34.112 | 46.759 | 0.00 | 0.00 |

|      |      |      |     |   |     |        |        |        |      |      |
|------|------|------|-----|---|-----|--------|--------|--------|------|------|
| ATOM | 4850 | C    | VAL | X | 322 | 36.534 | 30.906 | 44.579 | 0.00 | 0.00 |
| ATOM | 4851 | O    | VAL | X | 322 | 36.416 | 29.709 | 44.649 | 0.00 | 0.00 |
| ATOM | 4852 | N    | LEU | X | 323 | 37.506 | 31.486 | 43.911 | 0.00 | 0.00 |
| ATOM | 4853 | H    | LEU | X | 323 | 37.455 | 32.489 | 43.803 | 0.00 | 0.00 |
| ATOM | 4854 | CA   | LEU | X | 323 | 38.790 | 30.795 | 43.645 | 0.00 | 0.00 |
| ATOM | 4855 | HA   | LEU | X | 323 | 38.644 | 29.781 | 44.018 | 0.00 | 0.00 |
| ATOM | 4856 | CB   | LEU | X | 323 | 39.075 | 30.995 | 42.137 | 0.00 | 0.00 |
| ATOM | 4857 | HB2  | LEU | X | 323 | 38.155 | 30.655 | 41.661 | 0.00 | 0.00 |
| ATOM | 4858 | HB3  | LEU | X | 323 | 39.290 | 32.057 | 42.020 | 0.00 | 0.00 |
| ATOM | 4859 | CG   | LEU | X | 323 | 40.291 | 30.145 | 41.468 | 0.00 | 0.00 |
| ATOM | 4860 | HG   | LEU | X | 323 | 41.256 | 30.536 | 41.792 | 0.00 | 0.00 |
| ATOM | 4861 | CD1  | LEU | X | 323 | 40.138 | 28.687 | 41.783 | 0.00 | 0.00 |
| ATOM | 4862 | HD11 | LEU | X | 323 | 40.453 | 28.043 | 40.963 | 0.00 | 0.00 |
| ATOM | 4863 | HD12 | LEU | X | 323 | 39.090 | 28.512 | 42.027 | 0.00 | 0.00 |
| ATOM | 4864 | HD13 | LEU | X | 323 | 40.871 | 28.485 | 42.564 | 0.00 | 0.00 |
| ATOM | 4865 | CD2  | LEU | X | 323 | 39.973 | 30.287 | 39.927 | 0.00 | 0.00 |
| ATOM | 4866 | HD21 | LEU | X | 323 | 39.017 | 29.823 | 39.688 | 0.00 | 0.00 |
| ATOM | 4867 | HD22 | LEU | X | 323 | 39.839 | 31.311 | 39.578 | 0.00 | 0.00 |
| ATOM | 4868 | HD23 | LEU | X | 323 | 40.713 | 29.807 | 39.286 | 0.00 | 0.00 |
| ATOM | 4869 | C    | LEU | X | 323 | 39.881 | 31.453 | 44.457 | 0.00 | 0.00 |
| ATOM | 4870 | O    | LEU | X | 323 | 39.889 | 32.674 | 44.714 | 0.00 | 0.00 |
| ATOM | 4871 | N    | VAL | X | 324 | 40.824 | 30.661 | 44.995 | 0.00 | 0.00 |
| ATOM | 4872 | H    | VAL | X | 324 | 40.876 | 29.739 | 44.585 | 0.00 | 0.00 |
| ATOM | 4873 | CA   | VAL | X | 324 | 42.051 | 31.162 | 45.597 | 0.00 | 0.00 |
| ATOM | 4874 | HA   | VAL | X | 324 | 42.130 | 32.241 | 45.463 | 0.00 | 0.00 |
| ATOM | 4875 | CB   | VAL | X | 324 | 42.123 | 30.889 | 47.094 | 0.00 | 0.00 |
| ATOM | 4876 | HB   | VAL | X | 324 | 42.927 | 31.438 | 47.583 | 0.00 | 0.00 |
| ATOM | 4877 | CG1  | VAL | X | 324 | 40.897 | 31.411 | 47.857 | 0.00 | 0.00 |
| ATOM | 4878 | HG11 | VAL | X | 324 | 41.100 | 31.395 | 48.928 | 0.00 | 0.00 |
| ATOM | 4879 | HG12 | VAL | X | 324 | 40.769 | 32.421 | 47.468 | 0.00 | 0.00 |
| ATOM | 4880 | HG13 | VAL | X | 324 | 40.058 | 30.751 | 47.638 | 0.00 | 0.00 |
| ATOM | 4881 | CG2  | VAL | X | 324 | 42.216 | 29.326 | 47.402 | 0.00 | 0.00 |
| ATOM | 4882 | HG21 | VAL | X | 324 | 43.250 | 28.982 | 47.403 | 0.00 | 0.00 |
| ATOM | 4883 | HG22 | VAL | X | 324 | 41.715 | 28.623 | 46.737 | 0.00 | 0.00 |
| ATOM | 4884 | HG23 | VAL | X | 324 | 41.797 | 28.989 | 48.350 | 0.00 | 0.00 |
| ATOM | 4885 | C    | VAL | X | 324 | 43.273 | 30.470 | 44.976 | 0.00 | 0.00 |
| ATOM | 4886 | O    | VAL | X | 324 | 42.994 | 29.456 | 44.325 | 0.00 | 0.00 |
| ATOM | 4887 | N    | GLY | X | 325 | 44.509 | 30.916 | 45.217 | 0.00 | 0.00 |
| ATOM | 4888 | H    | GLY | X | 325 | 44.600 | 31.886 | 45.485 | 0.00 | 0.00 |
| ATOM | 4889 | CA   | GLY | X | 325 | 45.671 | 30.036 | 44.842 | 0.00 | 0.00 |
| ATOM | 4890 | HA2  | GLY | X | 325 | 45.864 | 29.418 | 45.719 | 0.00 | 0.00 |
| ATOM | 4891 | HA3  | GLY | X | 325 | 45.526 | 29.492 | 43.908 | 0.00 | 0.00 |
| ATOM | 4892 | C    | GLY | X | 325 | 47.013 | 30.761 | 44.802 | 0.00 | 0.00 |
| ATOM | 4893 | O    | GLY | X | 325 | 47.025 | 31.953 | 44.478 | 0.00 | 0.00 |
| ATOM | 4894 | N    | VAL | X | 326 | 48.069 | 30.134 | 45.094 | 0.00 | 0.00 |
| ATOM | 4895 | H    | VAL | X | 326 | 48.139 | 29.128 | 45.164 | 0.00 | 0.00 |
| ATOM | 4896 | CA   | VAL | X | 326 | 49.479 | 30.657 | 45.192 | 0.00 | 0.00 |
| ATOM | 4897 | HA   | VAL | X | 326 | 49.410 | 31.741 | 45.095 | 0.00 | 0.00 |
| ATOM | 4898 | CB   | VAL | X | 326 | 50.081 | 30.361 | 46.579 | 0.00 | 0.00 |
| ATOM | 4899 | HB   | VAL | X | 326 | 51.113 | 30.681 | 46.438 | 0.00 | 0.00 |
| ATOM | 4900 | CG1  | VAL | X | 326 | 49.362 | 31.317 | 47.522 | 0.00 | 0.00 |
| ATOM | 4901 | HG11 | VAL | X | 326 | 48.316 | 31.078 | 47.712 | 0.00 | 0.00 |
| ATOM | 4902 | HG12 | VAL | X | 326 | 49.868 | 31.281 | 48.486 | 0.00 | 0.00 |
| ATOM | 4903 | HG13 | VAL | X | 326 | 49.428 | 32.358 | 47.204 | 0.00 | 0.00 |
| ATOM | 4904 | CG2  | VAL | X | 326 | 50.014 | 28.863 | 47.005 | 0.00 | 0.00 |
| ATOM | 4905 | HG21 | VAL | X | 326 | 50.275 | 28.363 | 46.072 | 0.00 | 0.00 |
| ATOM | 4906 | HG22 | VAL | X | 326 | 49.010 | 28.696 | 47.397 | 0.00 | 0.00 |
| ATOM | 4907 | HG23 | VAL | X | 326 | 50.727 | 28.559 | 47.771 | 0.00 | 0.00 |
| ATOM | 4908 | C    | VAL | X | 326 | 50.306 | 30.089 | 44.119 | 0.00 | 0.00 |
| ATOM | 4909 | O    | VAL | X | 326 | 49.983 | 29.036 | 43.515 | 0.00 | 0.00 |
| ATOM | 4910 | N    | VAL | X | 327 | 51.521 | 30.635 | 43.919 | 0.00 | 0.00 |
| ATOM | 4911 | H    | VAL | X | 327 | 51.759 | 31.477 | 44.423 | 0.00 | 0.00 |
| ATOM | 4912 | CA   | VAL | X | 327 | 52.660 | 29.949 | 43.264 | 0.00 | 0.00 |
| ATOM | 4913 | HA   | VAL | X | 327 | 52.218 | 29.374 | 42.450 | 0.00 | 0.00 |
| ATOM | 4914 | CB   | VAL | X | 327 | 53.658 | 30.915 | 42.540 | 0.00 | 0.00 |
| ATOM | 4915 | HB   | VAL | X | 327 | 54.378 | 30.311 | 41.988 | 0.00 | 0.00 |
| ATOM | 4916 | CG1  | VAL | X | 327 | 52.886 | 31.684 | 41.468 | 0.00 | 0.00 |

|      |      |      |     |   |     |        |        |        |      |      |
|------|------|------|-----|---|-----|--------|--------|--------|------|------|
| ATOM | 4917 | HG11 | VAL | X | 327 | 53.541 | 32.294 | 40.846 | 0.00 | 0.00 |
| ATOM | 4918 | HG12 | VAL | X | 327 | 52.426 | 30.944 | 40.813 | 0.00 | 0.00 |
| ATOM | 4919 | HG13 | VAL | X | 327 | 52.255 | 32.355 | 42.051 | 0.00 | 0.00 |
| ATOM | 4920 | CG2  | VAL | X | 327 | 54.433 | 31.832 | 43.513 | 0.00 | 0.00 |
| ATOM | 4921 | HG21 | VAL | X | 327 | 53.848 | 32.545 | 44.093 | 0.00 | 0.00 |
| ATOM | 4922 | HG22 | VAL | X | 327 | 55.211 | 32.320 | 42.926 | 0.00 | 0.00 |
| ATOM | 4923 | HG23 | VAL | X | 327 | 54.882 | 31.381 | 44.398 | 0.00 | 0.00 |
| ATOM | 4924 | C    | VAL | X | 327 | 53.448 | 29.032 | 44.221 | 0.00 | 0.00 |
| ATOM | 4925 | O    | VAL | X | 327 | 53.256 | 28.963 | 45.395 | 0.00 | 0.00 |
| ATOM | 4926 | N    | LYS | X | 328 | 54.442 | 28.317 | 43.640 | 0.00 | 0.00 |
| ATOM | 4927 | H    | LYS | X | 328 | 54.549 | 28.377 | 42.638 | 0.00 | 0.00 |
| ATOM | 4928 | CA   | LYS | X | 328 | 55.325 | 27.298 | 44.413 | 0.00 | 0.00 |
| ATOM | 4929 | HA   | LYS | X | 328 | 54.664 | 26.672 | 45.013 | 0.00 | 0.00 |
| ATOM | 4930 | CB   | LYS | X | 328 | 56.121 | 26.437 | 43.375 | 0.00 | 0.00 |
| ATOM | 4931 | HB2  | LYS | X | 328 | 55.452 | 26.164 | 42.559 | 0.00 | 0.00 |
| ATOM | 4932 | HB3  | LYS | X | 328 | 56.987 | 26.959 | 42.966 | 0.00 | 0.00 |
| ATOM | 4933 | CG   | LYS | X | 328 | 56.570 | 25.103 | 44.063 | 0.00 | 0.00 |
| ATOM | 4934 | HG2  | LYS | X | 328 | 57.015 | 25.338 | 45.030 | 0.00 | 0.00 |
| ATOM | 4935 | HG3  | LYS | X | 328 | 55.647 | 24.622 | 44.388 | 0.00 | 0.00 |
| ATOM | 4936 | CD   | LYS | X | 328 | 57.407 | 24.070 | 43.260 | 0.00 | 0.00 |
| ATOM | 4937 | HD2  | LYS | X | 328 | 57.331 | 23.090 | 43.732 | 0.00 | 0.00 |
| ATOM | 4938 | HD3  | LYS | X | 328 | 56.951 | 23.895 | 42.286 | 0.00 | 0.00 |
| ATOM | 4939 | CE   | LYS | X | 328 | 58.842 | 24.469 | 43.171 | 0.00 | 0.00 |
| ATOM | 4940 | HE2  | LYS | X | 328 | 59.384 | 23.793 | 42.509 | 0.00 | 0.00 |
| ATOM | 4941 | HE3  | LYS | X | 328 | 58.945 | 25.405 | 42.621 | 0.00 | 0.00 |
| ATOM | 4942 | NZ   | LYS | X | 328 | 59.401 | 24.657 | 44.506 | 0.00 | 0.00 |
| ATOM | 4943 | HZ1  | LYS | X | 328 | 58.917 | 24.083 | 45.182 | 0.00 | 0.00 |
| ATOM | 4944 | HZ2  | LYS | X | 328 | 60.399 | 24.533 | 44.415 | 0.00 | 0.00 |
| ATOM | 4945 | HZ3  | LYS | X | 328 | 59.214 | 25.579 | 44.876 | 0.00 | 0.00 |
| ATOM | 4946 | C    | LYS | X | 328 | 56.246 | 27.913 | 45.489 | 0.00 | 0.00 |
| ATOM | 4947 | O    | LYS | X | 328 | 56.533 | 27.232 | 46.455 | 0.00 | 0.00 |
| ATOM | 4948 | N    | ASP | X | 329 | 56.721 | 29.100 | 45.237 | 0.00 | 0.00 |
| ATOM | 4949 | H    | ASP | X | 329 | 56.403 | 29.499 | 44.365 | 0.00 | 0.00 |
| ATOM | 4950 | CA   | ASP | X | 329 | 57.752 | 29.848 | 45.949 | 0.00 | 0.00 |
| ATOM | 4951 | HA   | ASP | X | 329 | 57.940 | 29.404 | 46.926 | 0.00 | 0.00 |
| ATOM | 4952 | CB   | ASP | X | 329 | 59.096 | 29.658 | 45.174 | 0.00 | 0.00 |
| ATOM | 4953 | HB2  | ASP | X | 329 | 59.094 | 30.264 | 44.269 | 0.00 | 0.00 |
| ATOM | 4954 | HB3  | ASP | X | 329 | 59.899 | 30.031 | 45.810 | 0.00 | 0.00 |
| ATOM | 4955 | CG   | ASP | X | 329 | 59.402 | 28.202 | 44.818 | 0.00 | 0.00 |
| ATOM | 4956 | OD1  | ASP | X | 329 | 59.507 | 27.364 | 45.712 | 0.00 | 0.00 |
| ATOM | 4957 | OD2  | ASP | X | 329 | 59.292 | 27.825 | 43.670 | 0.00 | 0.00 |
| ATOM | 4958 | C    | ASP | X | 329 | 57.350 | 31.338 | 46.291 | 0.00 | 0.00 |
| ATOM | 4959 | O    | ASP | X | 329 | 58.047 | 32.221 | 45.820 | 0.00 | 0.00 |
| ATOM | 4960 | N    | GLU | X | 330 | 56.197 | 31.615 | 47.001 | 0.00 | 0.00 |
| ATOM | 4961 | H    | GLU | X | 330 | 55.743 | 30.783 | 47.351 | 0.00 | 0.00 |
| ATOM | 4962 | CA   | GLU | X | 330 | 55.685 | 32.978 | 47.304 | 0.00 | 0.00 |
| ATOM | 4963 | HA   | GLU | X | 330 | 55.420 | 33.451 | 46.358 | 0.00 | 0.00 |
| ATOM | 4964 | CB   | GLU | X | 330 | 54.377 | 32.866 | 48.202 | 0.00 | 0.00 |
| ATOM | 4965 | HB2  | GLU | X | 330 | 54.683 | 32.295 | 49.079 | 0.00 | 0.00 |
| ATOM | 4966 | HB3  | GLU | X | 330 | 54.170 | 33.815 | 48.697 | 0.00 | 0.00 |
| ATOM | 4967 | CG   | GLU | X | 330 | 53.096 | 32.293 | 47.546 | 0.00 | 0.00 |
| ATOM | 4968 | HG2  | GLU | X | 330 | 53.437 | 31.379 | 47.060 | 0.00 | 0.00 |
| ATOM | 4969 | HG3  | GLU | X | 330 | 52.364 | 32.221 | 48.350 | 0.00 | 0.00 |
| ATOM | 4970 | CD   | GLU | X | 330 | 52.416 | 33.218 | 46.548 | 0.00 | 0.00 |
| ATOM | 4971 | OE1  | GLU | X | 330 | 52.682 | 34.441 | 46.661 | 0.00 | 0.00 |
| ATOM | 4972 | OE2  | GLU | X | 330 | 51.717 | 32.794 | 45.523 | 0.00 | 0.00 |
| ATOM | 4973 | C    | GLU | X | 330 | 56.690 | 33.886 | 47.991 | 0.00 | 0.00 |
| ATOM | 4974 | O    | GLU | X | 330 | 56.749 | 35.082 | 47.748 | 0.00 | 0.00 |
| ATOM | 4975 | N    | GLY | X | 331 | 57.663 | 33.238 | 48.660 | 0.00 | 0.00 |
| ATOM | 4976 | H    | GLY | X | 331 | 57.791 | 32.237 | 48.628 | 0.00 | 0.00 |
| ATOM | 4977 | CA   | GLY | X | 331 | 58.622 | 34.083 | 49.445 | 0.00 | 0.00 |
| ATOM | 4978 | HA2  | GLY | X | 331 | 58.167 | 35.018 | 49.771 | 0.00 | 0.00 |
| ATOM | 4979 | HA3  | GLY | X | 331 | 58.991 | 33.460 | 50.260 | 0.00 | 0.00 |
| ATOM | 4980 | C    | GLY | X | 331 | 59.947 | 34.542 | 48.746 | 0.00 | 0.00 |
| ATOM | 4981 | O    | GLY | X | 331 | 60.555 | 35.480 | 49.274 | 0.00 | 0.00 |
| ATOM | 4982 | N    | SER | X | 332 | 60.283 | 33.794 | 47.687 | 0.00 | 0.00 |
| ATOM | 4983 | H    | SER | X | 332 | 59.627 | 33.070 | 47.432 | 0.00 | 0.00 |

|      |      |      |     |   |     |        |        |        |      |      |
|------|------|------|-----|---|-----|--------|--------|--------|------|------|
| ATOM | 4984 | CA   | SER | X | 332 | 61.546 | 33.880 | 46.908 | 0.00 | 0.00 |
| ATOM | 4985 | HA   | SER | X | 332 | 62.399 | 33.759 | 47.576 | 0.00 | 0.00 |
| ATOM | 4986 | CB   | SER | X | 332 | 61.677 | 32.630 | 45.967 | 0.00 | 0.00 |
| ATOM | 4987 | HB2  | SER | X | 332 | 62.688 | 32.596 | 45.562 | 0.00 | 0.00 |
| ATOM | 4988 | HB3  | SER | X | 332 | 61.542 | 31.796 | 46.656 | 0.00 | 0.00 |
| ATOM | 4989 | OG   | SER | X | 332 | 60.751 | 32.643 | 44.912 | 0.00 | 0.00 |
| ATOM | 4990 | HG   | SER | X | 332 | 60.749 | 31.853 | 44.367 | 0.00 | 0.00 |
| ATOM | 4991 | C    | SER | X | 332 | 61.711 | 35.213 | 46.144 | 0.00 | 0.00 |
| ATOM | 4992 | O    | SER | X | 332 | 62.831 | 35.715 | 46.018 | 0.00 | 0.00 |
| ATOM | 4993 | N    | TYR | X | 333 | 60.592 | 35.866 | 45.791 | 0.00 | 0.00 |
| ATOM | 4994 | H    | TYR | X | 333 | 59.740 | 35.374 | 46.019 | 0.00 | 0.00 |
| ATOM | 4995 | CA   | TYR | X | 333 | 60.533 | 37.059 | 45.010 | 0.00 | 0.00 |
| ATOM | 4996 | HA   | TYR | X | 333 | 61.295 | 37.025 | 44.232 | 0.00 | 0.00 |
| ATOM | 4997 | CB   | TYR | X | 333 | 59.182 | 37.135 | 44.291 | 0.00 | 0.00 |
| ATOM | 4998 | HB2  | TYR | X | 333 | 58.981 | 36.254 | 43.681 | 0.00 | 0.00 |
| ATOM | 4999 | HB3  | TYR | X | 333 | 58.407 | 37.221 | 45.052 | 0.00 | 0.00 |
| ATOM | 5000 | CG   | TYR | X | 333 | 59.022 | 38.394 | 43.461 | 0.00 | 0.00 |
| ATOM | 5001 | CD1  | TYR | X | 333 | 59.419 | 38.483 | 42.097 | 0.00 | 0.00 |
| ATOM | 5002 | HD1  | TYR | X | 333 | 59.853 | 37.665 | 41.542 | 0.00 | 0.00 |
| ATOM | 5003 | CE1  | TYR | X | 333 | 59.192 | 39.666 | 41.279 | 0.00 | 0.00 |
| ATOM | 5004 | HE1  | TYR | X | 333 | 59.445 | 39.600 | 40.231 | 0.00 | 0.00 |
| ATOM | 5005 | CZ   | TYR | X | 333 | 58.681 | 40.827 | 41.925 | 0.00 | 0.00 |
| ATOM | 5006 | OH   | TYR | X | 333 | 58.434 | 41.982 | 41.257 | 0.00 | 0.00 |
| ATOM | 5007 | HH   | TYR | X | 333 | 58.638 | 41.757 | 40.346 | 0.00 | 0.00 |
| ATOM | 5008 | CE2  | TYR | X | 333 | 58.140 | 40.707 | 43.251 | 0.00 | 0.00 |
| ATOM | 5009 | HE2  | TYR | X | 333 | 57.525 | 41.506 | 43.636 | 0.00 | 0.00 |
| ATOM | 5010 | CD2  | TYR | X | 333 | 58.293 | 39.473 | 43.932 | 0.00 | 0.00 |
| ATOM | 5011 | HD2  | TYR | X | 333 | 57.998 | 39.526 | 44.970 | 0.00 | 0.00 |
| ATOM | 5012 | C    | TYR | X | 333 | 60.915 | 38.392 | 45.691 | 0.00 | 0.00 |
| ATOM | 5013 | O    | TYR | X | 333 | 61.440 | 39.233 | 44.993 | 0.00 | 0.00 |
| ATOM | 5014 | N    | PHE | X | 334 | 60.728 | 38.659 | 46.963 | 0.00 | 0.00 |
| ATOM | 5015 | H    | PHE | X | 334 | 60.381 | 37.951 | 47.595 | 0.00 | 0.00 |
| ATOM | 5016 | CA   | PHE | X | 334 | 61.077 | 39.954 | 47.487 | 0.00 | 0.00 |
| ATOM | 5017 | HA   | PHE | X | 334 | 61.042 | 40.738 | 46.730 | 0.00 | 0.00 |
| ATOM | 5018 | CB   | PHE | X | 334 | 59.955 | 40.191 | 48.547 | 0.00 | 0.00 |
| ATOM | 5019 | HB2  | PHE | X | 334 | 59.807 | 39.323 | 49.190 | 0.00 | 0.00 |
| ATOM | 5020 | HB3  | PHE | X | 334 | 60.189 | 41.015 | 49.220 | 0.00 | 0.00 |
| ATOM | 5021 | CG   | PHE | X | 334 | 58.577 | 40.438 | 47.860 | 0.00 | 0.00 |
| ATOM | 5022 | CD1  | PHE | X | 334 | 57.659 | 39.389 | 47.533 | 0.00 | 0.00 |
| ATOM | 5023 | HD1  | PHE | X | 334 | 57.918 | 38.418 | 47.930 | 0.00 | 0.00 |
| ATOM | 5024 | CE1  | PHE | X | 334 | 56.385 | 39.745 | 47.178 | 0.00 | 0.00 |
| ATOM | 5025 | HE1  | PHE | X | 334 | 55.685 | 38.940 | 47.007 | 0.00 | 0.00 |
| ATOM | 5026 | CZ   | PHE | X | 334 | 56.096 | 41.057 | 46.767 | 0.00 | 0.00 |
| ATOM | 5027 | HZ   | PHE | X | 334 | 55.189 | 41.315 | 46.240 | 0.00 | 0.00 |
| ATOM | 5028 | CE2  | PHE | X | 334 | 57.073 | 42.045 | 46.900 | 0.00 | 0.00 |
| ATOM | 5029 | HE2  | PHE | X | 334 | 56.779 | 43.058 | 46.671 | 0.00 | 0.00 |
| ATOM | 5030 | CD2  | PHE | X | 334 | 58.263 | 41.774 | 47.625 | 0.00 | 0.00 |
| ATOM | 5031 | HD2  | PHE | X | 334 | 58.941 | 42.570 | 47.899 | 0.00 | 0.00 |
| ATOM | 5032 | C    | PHE | X | 334 | 62.483 | 39.988 | 48.090 | 0.00 | 0.00 |
| ATOM | 5033 | O    | PHE | X | 334 | 62.858 | 41.031 | 48.567 | 0.00 | 0.00 |
| ATOM | 5034 | N    | LEU | X | 335 | 63.321 | 38.946 | 48.022 | 0.00 | 0.00 |
| ATOM | 5035 | H    | LEU | X | 335 | 62.944 | 38.069 | 47.692 | 0.00 | 0.00 |
| ATOM | 5036 | CA   | LEU | X | 335 | 64.656 | 38.865 | 48.706 | 0.00 | 0.00 |
| ATOM | 5037 | HA   | LEU | X | 335 | 64.464 | 39.212 | 49.722 | 0.00 | 0.00 |
| ATOM | 5038 | CB   | LEU | X | 335 | 65.167 | 37.402 | 48.824 | 0.00 | 0.00 |
| ATOM | 5039 | HB2  | LEU | X | 335 | 65.079 | 37.061 | 47.793 | 0.00 | 0.00 |
| ATOM | 5040 | HB3  | LEU | X | 335 | 66.208 | 37.297 | 49.130 | 0.00 | 0.00 |
| ATOM | 5041 | CG   | LEU | X | 335 | 64.204 | 36.499 | 49.753 | 0.00 | 0.00 |
| ATOM | 5042 | HG   | LEU | X | 335 | 63.204 | 36.505 | 49.319 | 0.00 | 0.00 |
| ATOM | 5043 | CD1  | LEU | X | 335 | 64.445 | 34.972 | 49.597 | 0.00 | 0.00 |
| ATOM | 5044 | HD11 | LEU | X | 335 | 64.443 | 34.639 | 48.559 | 0.00 | 0.00 |
| ATOM | 5045 | HD12 | LEU | X | 335 | 63.641 | 34.489 | 50.151 | 0.00 | 0.00 |
| ATOM | 5046 | HD13 | LEU | X | 335 | 65.434 | 34.769 | 50.010 | 0.00 | 0.00 |
| ATOM | 5047 | CD2  | LEU | X | 335 | 64.239 | 36.768 | 51.247 | 0.00 | 0.00 |
| ATOM | 5048 | HD21 | LEU | X | 335 | 63.386 | 36.217 | 51.641 | 0.00 | 0.00 |
| ATOM | 5049 | HD22 | LEU | X | 335 | 65.199 | 36.547 | 51.713 | 0.00 | 0.00 |
| ATOM | 5050 | HD23 | LEU | X | 335 | 64.113 | 37.821 | 51.498 | 0.00 | 0.00 |

|      |      |      |     |   |     |        |        |        |      |      |
|------|------|------|-----|---|-----|--------|--------|--------|------|------|
| ATOM | 5051 | C    | LEU | X | 335 | 65.723 | 39.760 | 48.005 | 0.00 | 0.00 |
| ATOM | 5052 | O    | LEU | X | 335 | 66.499 | 40.458 | 48.689 | 0.00 | 0.00 |
| ATOM | 5053 | N    | VAL | X | 336 | 65.839 | 39.876 | 46.752 | 0.00 | 0.00 |
| ATOM | 5054 | H    | VAL | X | 336 | 65.156 | 39.312 | 46.266 | 0.00 | 0.00 |
| ATOM | 5055 | CA   | VAL | X | 336 | 66.813 | 40.614 | 45.940 | 0.00 | 0.00 |
| ATOM | 5056 | HA   | VAL | X | 336 | 67.800 | 40.291 | 46.271 | 0.00 | 0.00 |
| ATOM | 5057 | CB   | VAL | X | 336 | 66.893 | 40.212 | 44.463 | 0.00 | 0.00 |
| ATOM | 5058 | HB   | VAL | X | 336 | 67.789 | 40.701 | 44.080 | 0.00 | 0.00 |
| ATOM | 5059 | CG1  | VAL | X | 336 | 67.277 | 38.771 | 44.187 | 0.00 | 0.00 |
| ATOM | 5060 | HG11 | VAL | X | 336 | 67.596 | 38.438 | 43.199 | 0.00 | 0.00 |
| ATOM | 5061 | HG12 | VAL | X | 336 | 67.992 | 38.404 | 44.924 | 0.00 | 0.00 |
| ATOM | 5062 | HG13 | VAL | X | 336 | 66.290 | 38.335 | 44.338 | 0.00 | 0.00 |
| ATOM | 5063 | CG2  | VAL | X | 336 | 65.690 | 40.613 | 43.626 | 0.00 | 0.00 |
| ATOM | 5064 | HG21 | VAL | X | 336 | 65.874 | 40.916 | 42.595 | 0.00 | 0.00 |
| ATOM | 5065 | HG22 | VAL | X | 336 | 65.113 | 41.371 | 44.155 | 0.00 | 0.00 |
| ATOM | 5066 | HG23 | VAL | X | 336 | 64.948 | 39.815 | 43.643 | 0.00 | 0.00 |
| ATOM | 5067 | C    | VAL | X | 336 | 66.673 | 42.136 | 46.038 | 0.00 | 0.00 |
| ATOM | 5068 | O    | VAL | X | 336 | 67.269 | 42.941 | 45.315 | 0.00 | 0.00 |
| ATOM | 5069 | N    | TYR | X | 337 | 65.720 | 42.634 | 46.796 | 0.00 | 0.00 |
| ATOM | 5070 | H    | TYR | X | 337 | 65.124 | 41.976 | 47.277 | 0.00 | 0.00 |
| ATOM | 5071 | CA   | TYR | X | 337 | 65.366 | 44.069 | 46.904 | 0.00 | 0.00 |
| ATOM | 5072 | HA   | TYR | X | 337 | 65.817 | 44.711 | 46.148 | 0.00 | 0.00 |
| ATOM | 5073 | CB   | TYR | X | 337 | 63.865 | 44.180 | 46.570 | 0.00 | 0.00 |
| ATOM | 5074 | HB2  | TYR | X | 337 | 63.381 | 43.619 | 47.369 | 0.00 | 0.00 |
| ATOM | 5075 | HB3  | TYR | X | 337 | 63.595 | 45.224 | 46.730 | 0.00 | 0.00 |
| ATOM | 5076 | CG   | TYR | X | 337 | 63.356 | 43.856 | 45.161 | 0.00 | 0.00 |
| ATOM | 5077 | CD1  | TYR | X | 337 | 63.510 | 44.854 | 44.146 | 0.00 | 0.00 |
| ATOM | 5078 | HD1  | TYR | X | 337 | 64.086 | 45.729 | 44.409 | 0.00 | 0.00 |
| ATOM | 5079 | CE1  | TYR | X | 337 | 63.077 | 44.579 | 42.832 | 0.00 | 0.00 |
| ATOM | 5080 | HE1  | TYR | X | 337 | 63.238 | 45.293 | 42.039 | 0.00 | 0.00 |
| ATOM | 5081 | CZ   | TYR | X | 337 | 62.372 | 43.359 | 42.505 | 0.00 | 0.00 |
| ATOM | 5082 | OH   | TYR | X | 337 | 61.953 | 43.122 | 41.209 | 0.00 | 0.00 |
| ATOM | 5083 | HH   | TYR | X | 337 | 62.072 | 43.887 | 40.642 | 0.00 | 0.00 |
| ATOM | 5084 | CE2  | TYR | X | 337 | 62.190 | 42.437 | 43.593 | 0.00 | 0.00 |
| ATOM | 5085 | HE2  | TYR | X | 337 | 61.761 | 41.480 | 43.337 | 0.00 | 0.00 |
| ATOM | 5086 | CD2  | TYR | X | 337 | 62.590 | 42.794 | 44.908 | 0.00 | 0.00 |
| ATOM | 5087 | HD2  | TYR | X | 337 | 62.278 | 42.199 | 45.754 | 0.00 | 0.00 |
| ATOM | 5088 | C    | TYR | X | 337 | 65.638 | 44.659 | 48.239 | 0.00 | 0.00 |
| ATOM | 5089 | O    | TYR | X | 337 | 65.355 | 45.868 | 48.315 | 0.00 | 0.00 |
| ATOM | 5090 | N    | GLY | X | 338 | 66.049 | 43.881 | 49.225 | 0.00 | 0.00 |
| ATOM | 5091 | H    | GLY | X | 338 | 66.274 | 42.906 | 49.089 | 0.00 | 0.00 |
| ATOM | 5092 | CA   | GLY | X | 338 | 66.386 | 44.409 | 50.566 | 0.00 | 0.00 |
| ATOM | 5093 | HA2  | GLY | X | 338 | 67.201 | 45.133 | 50.571 | 0.00 | 0.00 |
| ATOM | 5094 | HA3  | GLY | X | 338 | 65.506 | 44.911 | 50.969 | 0.00 | 0.00 |
| ATOM | 5095 | C    | GLY | X | 338 | 66.726 | 43.395 | 51.680 | 0.00 | 0.00 |
| ATOM | 5096 | O    | GLY | X | 338 | 67.110 | 43.828 | 52.741 | 0.00 | 0.00 |
| ATOM | 5097 | N    | ALA | X | 339 | 66.673 | 42.078 | 51.441 | 0.00 | 0.00 |
| ATOM | 5098 | H    | ALA | X | 339 | 66.417 | 41.766 | 50.515 | 0.00 | 0.00 |
| ATOM | 5099 | CA   | ALA | X | 339 | 67.207 | 41.084 | 52.347 | 0.00 | 0.00 |
| ATOM | 5100 | HA   | ALA | X | 339 | 66.943 | 41.308 | 53.380 | 0.00 | 0.00 |
| ATOM | 5101 | CB   | ALA | X | 339 | 66.686 | 39.745 | 51.934 | 0.00 | 0.00 |
| ATOM | 5102 | HB1  | ALA | X | 339 | 65.606 | 39.864 | 51.845 | 0.00 | 0.00 |
| ATOM | 5103 | HB2  | ALA | X | 339 | 66.956 | 39.068 | 52.744 | 0.00 | 0.00 |
| ATOM | 5104 | HB3  | ALA | X | 339 | 67.052 | 39.459 | 50.948 | 0.00 | 0.00 |
| ATOM | 5105 | C    | ALA | X | 339 | 68.787 | 41.136 | 52.281 | 0.00 | 0.00 |
| ATOM | 5106 | O    | ALA | X | 339 | 69.359 | 41.250 | 51.209 | 0.00 | 0.00 |
| ATOM | 5107 | N    | PRO | X | 340 | 69.449 | 41.091 | 53.478 | 0.00 | 0.00 |
| ATOM | 5108 | CD   | PRO | X | 340 | 68.935 | 41.028 | 54.870 | 0.00 | 0.00 |
| ATOM | 5109 | HD2  | PRO | X | 340 | 68.162 | 40.266 | 54.974 | 0.00 | 0.00 |
| ATOM | 5110 | HD3  | PRO | X | 340 | 68.437 | 41.973 | 55.085 | 0.00 | 0.00 |
| ATOM | 5111 | CG   | PRO | X | 340 | 70.080 | 40.799 | 55.857 | 0.00 | 0.00 |
| ATOM | 5112 | HG2  | PRO | X | 340 | 70.172 | 39.734 | 56.074 | 0.00 | 0.00 |
| ATOM | 5113 | HG3  | PRO | X | 340 | 70.104 | 41.276 | 56.837 | 0.00 | 0.00 |
| ATOM | 5114 | CB   | PRO | X | 340 | 71.328 | 41.223 | 55.079 | 0.00 | 0.00 |
| ATOM | 5115 | HB2  | PRO | X | 340 | 72.165 | 40.570 | 55.327 | 0.00 | 0.00 |
| ATOM | 5116 | HB3  | PRO | X | 340 | 71.633 | 42.252 | 55.268 | 0.00 | 0.00 |
| ATOM | 5117 | CA   | PRO | X | 340 | 70.941 | 41.078 | 53.601 | 0.00 | 0.00 |

|      |      |     |     |   |     |        |        |        |      |      |
|------|------|-----|-----|---|-----|--------|--------|--------|------|------|
| ATOM | 5118 | HA  | PRO | X | 340 | 71.345 | 41.899 | 53.009 | 0.00 | 0.00 |
| ATOM | 5119 | C   | PRO | X | 340 | 71.553 | 39.789 | 53.029 | 0.00 | 0.00 |
| ATOM | 5120 | O   | PRO | X | 340 | 70.989 | 38.705 | 53.161 | 0.00 | 0.00 |
| ATOM | 5121 | N   | GLY | X | 341 | 72.559 | 39.953 | 52.218 | 0.00 | 0.00 |
| ATOM | 5122 | H   | GLY | X | 341 | 72.941 | 40.888 | 52.234 | 0.00 | 0.00 |
| ATOM | 5123 | CA  | GLY | X | 341 | 73.313 | 38.964 | 51.410 | 0.00 | 0.00 |
| ATOM | 5124 | HA2 | GLY | X | 341 | 74.398 | 39.062 | 51.449 | 0.00 | 0.00 |
| ATOM | 5125 | HA3 | GLY | X | 341 | 73.098 | 37.947 | 51.736 | 0.00 | 0.00 |
| ATOM | 5126 | C   | GLY | X | 341 | 72.933 | 38.930 | 49.889 | 0.00 | 0.00 |
| ATOM | 5127 | O   | GLY | X | 341 | 73.783 | 38.603 | 49.001 | 0.00 | 0.00 |
| ATOM | 5128 | N   | PHE | X | 342 | 71.664 | 39.255 | 49.569 | 0.00 | 0.00 |
| ATOM | 5129 | H   | PHE | X | 342 | 71.026 | 39.398 | 50.339 | 0.00 | 0.00 |
| ATOM | 5130 | CA  | PHE | X | 342 | 71.098 | 38.950 | 48.238 | 0.00 | 0.00 |
| ATOM | 5131 | HA  | PHE | X | 342 | 71.662 | 38.127 | 47.799 | 0.00 | 0.00 |
| ATOM | 5132 | CB  | PHE | X | 342 | 69.602 | 38.506 | 48.311 | 0.00 | 0.00 |
| ATOM | 5133 | HB2 | PHE | X | 342 | 69.045 | 39.348 | 48.723 | 0.00 | 0.00 |
| ATOM | 5134 | HB3 | PHE | X | 342 | 69.181 | 38.315 | 47.324 | 0.00 | 0.00 |
| ATOM | 5135 | CG  | PHE | X | 342 | 69.247 | 37.257 | 49.172 | 0.00 | 0.00 |
| ATOM | 5136 | CD1 | PHE | X | 342 | 68.678 | 36.192 | 48.430 | 0.00 | 0.00 |
| ATOM | 5137 | HD1 | PHE | X | 342 | 68.417 | 36.259 | 47.384 | 0.00 | 0.00 |
| ATOM | 5138 | CE1 | PHE | X | 342 | 68.227 | 35.045 | 49.130 | 0.00 | 0.00 |
| ATOM | 5139 | HE1 | PHE | X | 342 | 67.750 | 34.169 | 48.715 | 0.00 | 0.00 |
| ATOM | 5140 | CZ  | PHE | X | 342 | 68.251 | 35.069 | 50.529 | 0.00 | 0.00 |
| ATOM | 5141 | HZ  | PHE | X | 342 | 67.850 | 34.211 | 51.048 | 0.00 | 0.00 |
| ATOM | 5142 | CE2 | PHE | X | 342 | 68.835 | 36.127 | 51.298 | 0.00 | 0.00 |
| ATOM | 5143 | HE2 | PHE | X | 342 | 68.860 | 36.183 | 52.376 | 0.00 | 0.00 |
| ATOM | 5144 | CD2 | PHE | X | 342 | 69.333 | 37.252 | 50.541 | 0.00 | 0.00 |
| ATOM | 5145 | HD2 | PHE | X | 342 | 69.671 | 38.140 | 51.053 | 0.00 | 0.00 |
| ATOM | 5146 | C   | PHE | X | 342 | 71.289 | 40.004 | 47.159 | 0.00 | 0.00 |
| ATOM | 5147 | O   | PHE | X | 342 | 71.449 | 41.179 | 47.378 | 0.00 | 0.00 |
| ATOM | 5148 | N   | SER | X | 343 | 71.223 | 39.585 | 45.945 | 0.00 | 0.00 |
| ATOM | 5149 | H   | SER | X | 343 | 71.122 | 38.585 | 45.847 | 0.00 | 0.00 |
| ATOM | 5150 | CA  | SER | X | 343 | 70.935 | 40.415 | 44.716 | 0.00 | 0.00 |
| ATOM | 5151 | HA  | SER | X | 343 | 70.088 | 41.074 | 44.904 | 0.00 | 0.00 |
| ATOM | 5152 | CB  | SER | X | 343 | 72.139 | 41.234 | 44.178 | 0.00 | 0.00 |
| ATOM | 5153 | HB2 | SER | X | 343 | 72.472 | 41.819 | 45.036 | 0.00 | 0.00 |
| ATOM | 5154 | HB3 | SER | X | 343 | 72.981 | 40.572 | 43.976 | 0.00 | 0.00 |
| ATOM | 5155 | OG  | SER | X | 343 | 71.809 | 42.175 | 43.126 | 0.00 | 0.00 |
| ATOM | 5156 | HG  | SER | X | 343 | 72.549 | 42.180 | 42.514 | 0.00 | 0.00 |
| ATOM | 5157 | C   | SER | X | 343 | 70.468 | 39.533 | 43.555 | 0.00 | 0.00 |
| ATOM | 5158 | O   | SER | X | 343 | 70.550 | 38.327 | 43.713 | 0.00 | 0.00 |
| ATOM | 5159 | N   | LYS | X | 344 | 69.931 | 40.092 | 42.474 | 0.00 | 0.00 |
| ATOM | 5160 | H   | LYS | X | 344 | 69.899 | 41.097 | 42.379 | 0.00 | 0.00 |
| ATOM | 5161 | CA  | LYS | X | 344 | 69.607 | 39.260 | 41.302 | 0.00 | 0.00 |
| ATOM | 5162 | HA  | LYS | X | 344 | 69.026 | 38.393 | 41.616 | 0.00 | 0.00 |
| ATOM | 5163 | CB  | LYS | X | 344 | 68.653 | 40.135 | 40.426 | 0.00 | 0.00 |
| ATOM | 5164 | HB2 | LYS | X | 344 | 68.128 | 39.435 | 39.776 | 0.00 | 0.00 |
| ATOM | 5165 | HB3 | LYS | X | 344 | 67.890 | 40.637 | 41.021 | 0.00 | 0.00 |
| ATOM | 5166 | CG  | LYS | X | 344 | 69.352 | 41.141 | 39.529 | 0.00 | 0.00 |
| ATOM | 5167 | HG2 | LYS | X | 344 | 69.849 | 41.738 | 40.293 | 0.00 | 0.00 |
| ATOM | 5168 | HG3 | LYS | X | 344 | 70.072 | 40.670 | 38.860 | 0.00 | 0.00 |
| ATOM | 5169 | CD  | LYS | X | 344 | 68.381 | 41.943 | 38.689 | 0.00 | 0.00 |
| ATOM | 5170 | HD2 | LYS | X | 344 | 67.692 | 41.212 | 38.269 | 0.00 | 0.00 |
| ATOM | 5171 | HD3 | LYS | X | 344 | 67.792 | 42.493 | 39.423 | 0.00 | 0.00 |
| ATOM | 5172 | CE  | LYS | X | 344 | 69.029 | 42.892 | 37.720 | 0.00 | 0.00 |
| ATOM | 5173 | HE2 | LYS | X | 344 | 68.136 | 43.415 | 37.379 | 0.00 | 0.00 |
| ATOM | 5174 | HE3 | LYS | X | 344 | 69.730 | 43.644 | 38.082 | 0.00 | 0.00 |
| ATOM | 5175 | NZ  | LYS | X | 344 | 69.753 | 42.194 | 36.656 | 0.00 | 0.00 |
| ATOM | 5176 | HZ1 | LYS | X | 344 | 69.920 | 42.792 | 35.860 | 0.00 | 0.00 |
| ATOM | 5177 | HZ2 | LYS | X | 344 | 70.678 | 41.849 | 36.871 | 0.00 | 0.00 |
| ATOM | 5178 | HZ3 | LYS | X | 344 | 69.228 | 41.404 | 36.312 | 0.00 | 0.00 |
| ATOM | 5179 | C   | LYS | X | 344 | 70.822 | 38.714 | 40.565 | 0.00 | 0.00 |
| ATOM | 5180 | O   | LYS | X | 344 | 70.663 | 37.742 | 39.815 | 0.00 | 0.00 |
| ATOM | 5181 | N   | ASP | X | 345 | 71.987 | 39.387 | 40.703 | 0.00 | 0.00 |
| ATOM | 5182 | H   | ASP | X | 345 | 72.030 | 40.138 | 41.377 | 0.00 | 0.00 |
| ATOM | 5183 | CA  | ASP | X | 345 | 73.267 | 39.173 | 39.990 | 0.00 | 0.00 |
| ATOM | 5184 | HA  | ASP | X | 345 | 73.094 | 38.481 | 39.165 | 0.00 | 0.00 |



|      |      |      |     |   |     |        |        |        |      |      |
|------|------|------|-----|---|-----|--------|--------|--------|------|------|
| ATOM | 5185 | CB   | ASP | X | 345 | 73.871 | 40.511 | 39.438 | 0.00 | 0.00 |
| ATOM | 5186 | HB2  | ASP | X | 345 | 74.651 | 40.202 | 38.742 | 0.00 | 0.00 |
| ATOM | 5187 | HB3  | ASP | X | 345 | 73.086 | 41.029 | 38.888 | 0.00 | 0.00 |
| ATOM | 5188 | CG   | ASP | X | 345 | 74.474 | 41.379 | 40.534 | 0.00 | 0.00 |
| ATOM | 5189 | OD1  | ASP | X | 345 | 73.758 | 41.768 | 41.482 | 0.00 | 0.00 |
| ATOM | 5190 | OD2  | ASP | X | 345 | 75.639 | 41.822 | 40.399 | 0.00 | 0.00 |
| ATOM | 5191 | C    | ASP | X | 345 | 74.322 | 38.506 | 40.855 | 0.00 | 0.00 |
| ATOM | 5192 | O    | ASP | X | 345 | 75.439 | 38.276 | 40.441 | 0.00 | 0.00 |
| ATOM | 5193 | N    | ASN | X | 346 | 73.933 | 38.193 | 42.058 | 0.00 | 0.00 |
| ATOM | 5194 | H    | ASN | X | 346 | 72.959 | 38.399 | 42.227 | 0.00 | 0.00 |
| ATOM | 5195 | CA   | ASN | X | 346 | 74.807 | 37.635 | 43.105 | 0.00 | 0.00 |
| ATOM | 5196 | HA   | ASN | X | 346 | 75.795 | 37.441 | 42.686 | 0.00 | 0.00 |
| ATOM | 5197 | CB   | ASN | X | 346 | 74.935 | 38.534 | 44.303 | 0.00 | 0.00 |
| ATOM | 5198 | HB2  | ASN | X | 346 | 75.318 | 39.501 | 43.978 | 0.00 | 0.00 |
| ATOM | 5199 | HB3  | ASN | X | 346 | 73.909 | 38.713 | 44.626 | 0.00 | 0.00 |
| ATOM | 5200 | CG   | ASN | X | 346 | 75.873 | 38.055 | 45.333 | 0.00 | 0.00 |
| ATOM | 5201 | OD1  | ASN | X | 346 | 75.506 | 37.226 | 46.144 | 0.00 | 0.00 |
| ATOM | 5202 | ND2  | ASN | X | 346 | 77.086 | 38.643 | 45.451 | 0.00 | 0.00 |
| ATOM | 5203 | HD21 | ASN | X | 346 | 77.676 | 38.221 | 46.154 | 0.00 | 0.00 |
| ATOM | 5204 | HD22 | ASN | X | 346 | 77.350 | 39.484 | 44.958 | 0.00 | 0.00 |
| ATOM | 5205 | C    | ASN | X | 346 | 74.331 | 36.196 | 43.502 | 0.00 | 0.00 |
| ATOM | 5206 | O    | ASN | X | 346 | 73.141 | 35.958 | 43.757 | 0.00 | 0.00 |
| ATOM | 5207 | N    | GLU | X | 347 | 75.243 | 35.238 | 43.639 | 0.00 | 0.00 |
| ATOM | 5208 | H    | GLU | X | 347 | 76.203 | 35.491 | 43.451 | 0.00 | 0.00 |
| ATOM | 5209 | CA   | GLU | X | 347 | 74.950 | 33.769 | 43.898 | 0.00 | 0.00 |
| ATOM | 5210 | HA   | GLU | X | 347 | 74.265 | 33.493 | 43.096 | 0.00 | 0.00 |
| ATOM | 5211 | CB   | GLU | X | 347 | 76.265 | 32.877 | 43.861 | 0.00 | 0.00 |
| ATOM | 5212 | HB2  | GLU | X | 347 | 76.699 | 32.942 | 42.863 | 0.00 | 0.00 |
| ATOM | 5213 | HB3  | GLU | X | 347 | 77.101 | 33.154 | 44.503 | 0.00 | 0.00 |
| ATOM | 5214 | CG   | GLU | X | 347 | 76.084 | 31.413 | 44.147 | 0.00 | 0.00 |
| ATOM | 5215 | HG2  | GLU | X | 347 | 77.037 | 30.887 | 44.208 | 0.00 | 0.00 |
| ATOM | 5216 | HG3  | GLU | X | 347 | 75.613 | 31.467 | 45.129 | 0.00 | 0.00 |
| ATOM | 5217 | CD   | GLU | X | 347 | 75.258 | 30.667 | 43.101 | 0.00 | 0.00 |
| ATOM | 5218 | OE1  | GLU | X | 347 | 74.769 | 29.580 | 43.454 | 0.00 | 0.00 |
| ATOM | 5219 | OE2  | GLU | X | 347 | 75.156 | 31.080 | 41.941 | 0.00 | 0.00 |
| ATOM | 5220 | C    | GLU | X | 347 | 74.255 | 33.574 | 45.253 | 0.00 | 0.00 |
| ATOM | 5221 | O    | GLU | X | 347 | 73.574 | 32.537 | 45.397 | 0.00 | 0.00 |
| ATOM | 5222 | N    | SER | X | 348 | 74.461 | 34.465 | 46.185 | 0.00 | 0.00 |
| ATOM | 5223 | H    | SER | X | 348 | 75.059 | 35.245 | 45.953 | 0.00 | 0.00 |
| ATOM | 5224 | CA   | SER | X | 348 | 73.608 | 34.654 | 47.412 | 0.00 | 0.00 |
| ATOM | 5225 | HA   | SER | X | 348 | 73.850 | 35.625 | 47.845 | 0.00 | 0.00 |
| ATOM | 5226 | CB   | SER | X | 348 | 72.103 | 34.726 | 47.085 | 0.00 | 0.00 |
| ATOM | 5227 | HB2  | SER | X | 348 | 71.800 | 33.871 | 46.480 | 0.00 | 0.00 |
| ATOM | 5228 | HB3  | SER | X | 348 | 71.536 | 34.462 | 47.978 | 0.00 | 0.00 |
| ATOM | 5229 | OG   | SER | X | 348 | 71.663 | 35.966 | 46.440 | 0.00 | 0.00 |
| ATOM | 5230 | HG   | SER | X | 348 | 72.107 | 35.972 | 45.588 | 0.00 | 0.00 |
| ATOM | 5231 | C    | SER | X | 348 | 73.875 | 33.651 | 48.446 | 0.00 | 0.00 |
| ATOM | 5232 | O    | SER | X | 348 | 72.984 | 32.942 | 48.996 | 0.00 | 0.00 |
| ATOM | 5233 | N    | LEU | X | 349 | 75.150 | 33.511 | 48.828 | 0.00 | 0.00 |
| ATOM | 5234 | H    | LEU | X | 349 | 75.860 | 34.126 | 48.456 | 0.00 | 0.00 |
| ATOM | 5235 | CA   | LEU | X | 349 | 75.695 | 32.472 | 49.711 | 0.00 | 0.00 |
| ATOM | 5236 | HA   | LEU | X | 349 | 75.056 | 31.591 | 49.655 | 0.00 | 0.00 |
| ATOM | 5237 | CB   | LEU | X | 349 | 77.052 | 32.060 | 49.233 | 0.00 | 0.00 |
| ATOM | 5238 | HB2  | LEU | X | 349 | 77.849 | 32.795 | 49.340 | 0.00 | 0.00 |
| ATOM | 5239 | HB3  | LEU | X | 349 | 77.304 | 31.277 | 49.949 | 0.00 | 0.00 |
| ATOM | 5240 | CG   | LEU | X | 349 | 77.091 | 31.481 | 47.804 | 0.00 | 0.00 |
| ATOM | 5241 | HG   | LEU | X | 349 | 76.834 | 32.292 | 47.123 | 0.00 | 0.00 |
| ATOM | 5242 | CD1  | LEU | X | 349 | 78.465 | 31.012 | 47.213 | 0.00 | 0.00 |
| ATOM | 5243 | HD11 | LEU | X | 349 | 79.083 | 31.910 | 47.198 | 0.00 | 0.00 |
| ATOM | 5244 | HD12 | LEU | X | 349 | 78.313 | 30.586 | 46.222 | 0.00 | 0.00 |
| ATOM | 5245 | HD13 | LEU | X | 349 | 78.915 | 30.255 | 47.855 | 0.00 | 0.00 |
| ATOM | 5246 | CD2  | LEU | X | 349 | 76.194 | 30.213 | 47.609 | 0.00 | 0.00 |
| ATOM | 5247 | HD21 | LEU | X | 349 | 76.365 | 29.634 | 46.701 | 0.00 | 0.00 |
| ATOM | 5248 | HD22 | LEU | X | 349 | 76.453 | 29.542 | 48.427 | 0.00 | 0.00 |
| ATOM | 5249 | HD23 | LEU | X | 349 | 75.159 | 30.549 | 47.672 | 0.00 | 0.00 |
| ATOM | 5250 | C    | LEU | X | 349 | 75.592 | 32.939 | 51.195 | 0.00 | 0.00 |
| ATOM | 5251 | O    | LEU | X | 349 | 76.645 | 33.289 | 51.774 | 0.00 | 0.00 |

|      |      |      |     |   |     |        |        |        |      |      |
|------|------|------|-----|---|-----|--------|--------|--------|------|------|
| ATOM | 5252 | N    | ILE | X | 350 | 74.394 | 32.975 | 51.813 | 0.00 | 0.00 |
| ATOM | 5253 | H    | ILE | X | 350 | 73.535 | 32.811 | 51.307 | 0.00 | 0.00 |
| ATOM | 5254 | CA   | ILE | X | 350 | 74.257 | 33.393 | 53.214 | 0.00 | 0.00 |
| ATOM | 5255 | HA   | ILE | X | 350 | 74.858 | 34.295 | 53.320 | 0.00 | 0.00 |
| ATOM | 5256 | CB   | ILE | X | 350 | 72.757 | 33.831 | 53.493 | 0.00 | 0.00 |
| ATOM | 5257 | HB   | ILE | X | 350 | 72.812 | 34.273 | 54.488 | 0.00 | 0.00 |
| ATOM | 5258 | CG2  | ILE | X | 350 | 72.384 | 34.960 | 52.509 | 0.00 | 0.00 |
| ATOM | 5259 | HG21 | ILE | X | 350 | 72.327 | 34.525 | 51.511 | 0.00 | 0.00 |
| ATOM | 5260 | HG22 | ILE | X | 350 | 73.100 | 35.775 | 52.406 | 0.00 | 0.00 |
| ATOM | 5261 | HG23 | ILE | X | 350 | 71.395 | 35.345 | 52.760 | 0.00 | 0.00 |
| ATOM | 5262 | CG1  | ILE | X | 350 | 71.693 | 32.747 | 53.628 | 0.00 | 0.00 |
| ATOM | 5263 | HG12 | ILE | X | 350 | 71.872 | 32.187 | 52.711 | 0.00 | 0.00 |
| ATOM | 5264 | HG13 | ILE | X | 350 | 71.963 | 32.109 | 54.469 | 0.00 | 0.00 |
| ATOM | 5265 | CD1  | ILE | X | 350 | 70.282 | 33.234 | 53.876 | 0.00 | 0.00 |
| ATOM | 5266 | HD11 | ILE | X | 350 | 69.687 | 32.438 | 54.325 | 0.00 | 0.00 |
| ATOM | 5267 | HD12 | ILE | X | 350 | 69.818 | 33.756 | 53.039 | 0.00 | 0.00 |
| ATOM | 5268 | HD13 | ILE | X | 350 | 70.251 | 33.990 | 54.660 | 0.00 | 0.00 |
| ATOM | 5269 | C    | ILE | X | 350 | 74.845 | 32.467 | 54.301 | 0.00 | 0.00 |
| ATOM | 5270 | O    | ILE | X | 350 | 74.741 | 31.245 | 54.305 | 0.00 | 0.00 |
| ATOM | 5271 | N    | SER | X | 351 | 75.280 | 33.107 | 55.398 | 0.00 | 0.00 |
| ATOM | 5272 | H    | SER | X | 351 | 75.305 | 34.117 | 55.414 | 0.00 | 0.00 |
| ATOM | 5273 | CA   | SER | X | 351 | 75.458 | 32.478 | 56.749 | 0.00 | 0.00 |
| ATOM | 5274 | HA   | SER | X | 351 | 75.708 | 31.428 | 56.602 | 0.00 | 0.00 |
| ATOM | 5275 | CB   | SER | X | 351 | 76.567 | 33.185 | 57.474 | 0.00 | 0.00 |
| ATOM | 5276 | HB2  | SER | X | 351 | 76.971 | 32.651 | 58.334 | 0.00 | 0.00 |
| ATOM | 5277 | HB3  | SER | X | 351 | 77.436 | 33.276 | 56.823 | 0.00 | 0.00 |
| ATOM | 5278 | OG   | SER | X | 351 | 76.194 | 34.467 | 57.969 | 0.00 | 0.00 |
| ATOM | 5279 | HG   | SER | X | 351 | 76.961 | 34.796 | 58.443 | 0.00 | 0.00 |
| ATOM | 5280 | C    | SER | X | 351 | 74.175 | 32.503 | 57.560 | 0.00 | 0.00 |
| ATOM | 5281 | O    | SER | X | 351 | 73.179 | 33.203 | 57.284 | 0.00 | 0.00 |
| ATOM | 5282 | N    | ARG | X | 352 | 74.200 | 31.679 | 58.655 | 0.00 | 0.00 |
| ATOM | 5283 | H    | ARG | X | 352 | 74.999 | 31.091 | 58.843 | 0.00 | 0.00 |
| ATOM | 5284 | CA   | ARG | X | 352 | 73.059 | 31.680 | 59.588 | 0.00 | 0.00 |
| ATOM | 5285 | HA   | ARG | X | 352 | 72.209 | 31.507 | 58.928 | 0.00 | 0.00 |
| ATOM | 5286 | CB   | ARG | X | 352 | 73.222 | 30.495 | 60.516 | 0.00 | 0.00 |
| ATOM | 5287 | HB2  | ARG | X | 352 | 73.430 | 29.600 | 59.930 | 0.00 | 0.00 |
| ATOM | 5288 | HB3  | ARG | X | 352 | 74.106 | 30.671 | 61.130 | 0.00 | 0.00 |
| ATOM | 5289 | CG   | ARG | X | 352 | 71.972 | 30.267 | 61.320 | 0.00 | 0.00 |
| ATOM | 5290 | HG2  | ARG | X | 352 | 71.876 | 30.941 | 62.171 | 0.00 | 0.00 |
| ATOM | 5291 | HG3  | ARG | X | 352 | 71.070 | 30.398 | 60.723 | 0.00 | 0.00 |
| ATOM | 5292 | CD   | ARG | X | 352 | 71.769 | 28.794 | 61.778 | 0.00 | 0.00 |
| ATOM | 5293 | HD2  | ARG | X | 352 | 70.829 | 28.866 | 62.324 | 0.00 | 0.00 |
| ATOM | 5294 | HD3  | ARG | X | 352 | 71.685 | 28.143 | 60.908 | 0.00 | 0.00 |
| ATOM | 5295 | NE   | ARG | X | 352 | 72.838 | 28.281 | 62.662 | 0.00 | 0.00 |
| ATOM | 5296 | HE   | ARG | X | 352 | 73.302 | 29.051 | 63.122 | 0.00 | 0.00 |
| ATOM | 5297 | CZ   | ARG | X | 352 | 72.926 | 27.101 | 63.204 | 0.00 | 0.00 |
| ATOM | 5298 | NH1  | ARG | X | 352 | 71.990 | 26.114 | 62.954 | 0.00 | 0.00 |
| ATOM | 5299 | HH11 | ARG | X | 352 | 71.103 | 26.369 | 62.545 | 0.00 | 0.00 |
| ATOM | 5300 | HH12 | ARG | X | 352 | 72.150 | 25.138 | 63.159 | 0.00 | 0.00 |
| ATOM | 5301 | NH2  | ARG | X | 352 | 73.955 | 26.799 | 63.972 | 0.00 | 0.00 |
| ATOM | 5302 | HH21 | ARG | X | 352 | 74.854 | 27.252 | 63.898 | 0.00 | 0.00 |
| ATOM | 5303 | HH22 | ARG | X | 352 | 73.909 | 25.876 | 64.379 | 0.00 | 0.00 |
| ATOM | 5304 | C    | ARG | X | 352 | 72.898 | 33.014 | 60.369 | 0.00 | 0.00 |
| ATOM | 5305 | O    | ARG | X | 352 | 71.739 | 33.401 | 60.565 | 0.00 | 0.00 |
| ATOM | 5306 | N    | ALA | X | 353 | 73.956 | 33.742 | 60.692 | 0.00 | 0.00 |
| ATOM | 5307 | H    | ALA | X | 353 | 74.874 | 33.323 | 60.719 | 0.00 | 0.00 |
| ATOM | 5308 | CA   | ALA | X | 353 | 73.912 | 35.231 | 61.049 | 0.00 | 0.00 |
| ATOM | 5309 | HA   | ALA | X | 353 | 73.370 | 35.299 | 61.992 | 0.00 | 0.00 |
| ATOM | 5310 | CB   | ALA | X | 353 | 75.412 | 35.746 | 61.115 | 0.00 | 0.00 |
| ATOM | 5311 | HB1  | ALA | X | 353 | 75.939 | 35.143 | 61.854 | 0.00 | 0.00 |
| ATOM | 5312 | HB2  | ALA | X | 353 | 75.406 | 36.763 | 61.506 | 0.00 | 0.00 |
| ATOM | 5313 | HB3  | ALA | X | 353 | 75.925 | 35.736 | 60.154 | 0.00 | 0.00 |
| ATOM | 5314 | C    | ALA | X | 353 | 72.977 | 36.005 | 60.110 | 0.00 | 0.00 |
| ATOM | 5315 | O    | ALA | X | 353 | 72.125 | 36.759 | 60.479 | 0.00 | 0.00 |
| ATOM | 5316 | N    | GLU | X | 354 | 73.295 | 36.014 | 58.758 | 0.00 | 0.00 |
| ATOM | 5317 | H    | GLU | X | 354 | 73.953 | 35.310 | 58.455 | 0.00 | 0.00 |
| ATOM | 5318 | CA   | GLU | X | 354 | 72.515 | 36.739 | 57.745 | 0.00 | 0.00 |

|      |      |      |     |   |     |        |        |        |      |      |
|------|------|------|-----|---|-----|--------|--------|--------|------|------|
| ATOM | 5319 | HA   | GLU | X | 354 | 72.482 | 37.778 | 58.071 | 0.00 | 0.00 |
| ATOM | 5320 | CB   | GLU | X | 354 | 73.222 | 36.597 | 56.375 | 0.00 | 0.00 |
| ATOM | 5321 | HB2  | GLU | X | 354 | 73.387 | 35.533 | 56.199 | 0.00 | 0.00 |
| ATOM | 5322 | HB3  | GLU | X | 354 | 72.635 | 36.932 | 55.519 | 0.00 | 0.00 |
| ATOM | 5323 | CG   | GLU | X | 354 | 74.504 | 37.429 | 56.420 | 0.00 | 0.00 |
| ATOM | 5324 | HG2  | GLU | X | 354 | 74.296 | 38.499 | 56.409 | 0.00 | 0.00 |
| ATOM | 5325 | HG3  | GLU | X | 354 | 75.059 | 37.433 | 57.359 | 0.00 | 0.00 |
| ATOM | 5326 | CD   | GLU | X | 354 | 75.621 | 37.008 | 55.447 | 0.00 | 0.00 |
| ATOM | 5327 | OE1  | GLU | X | 354 | 76.544 | 37.847 | 55.326 | 0.00 | 0.00 |
| ATOM | 5328 | OE2  | GLU | X | 354 | 75.564 | 36.039 | 54.682 | 0.00 | 0.00 |
| ATOM | 5329 | C    | GLU | X | 354 | 71.123 | 36.128 | 57.677 | 0.00 | 0.00 |
| ATOM | 5330 | O    | GLU | X | 354 | 70.229 | 36.909 | 57.342 | 0.00 | 0.00 |
| ATOM | 5331 | N    | PHE | X | 355 | 70.870 | 34.811 | 57.863 | 0.00 | 0.00 |
| ATOM | 5332 | H    | PHE | X | 355 | 71.565 | 34.083 | 57.778 | 0.00 | 0.00 |
| ATOM | 5333 | CA   | PHE | X | 355 | 69.522 | 34.326 | 57.915 | 0.00 | 0.00 |
| ATOM | 5334 | HA   | PHE | X | 355 | 68.912 | 34.563 | 57.043 | 0.00 | 0.00 |
| ATOM | 5335 | CB   | PHE | X | 355 | 69.549 | 32.788 | 58.091 | 0.00 | 0.00 |
| ATOM | 5336 | HB2  | PHE | X | 355 | 70.103 | 32.481 | 57.204 | 0.00 | 0.00 |
| ATOM | 5337 | HB3  | PHE | X | 355 | 70.069 | 32.596 | 59.029 | 0.00 | 0.00 |
| ATOM | 5338 | CG   | PHE | X | 355 | 68.262 | 32.015 | 58.127 | 0.00 | 0.00 |
| ATOM | 5339 | CD1  | PHE | X | 355 | 67.051 | 32.426 | 57.615 | 0.00 | 0.00 |
| ATOM | 5340 | HD1  | PHE | X | 355 | 67.060 | 33.352 | 57.060 | 0.00 | 0.00 |
| ATOM | 5341 | CE1  | PHE | X | 355 | 65.882 | 31.661 | 57.726 | 0.00 | 0.00 |
| ATOM | 5342 | HE1  | PHE | X | 355 | 64.955 | 32.054 | 57.332 | 0.00 | 0.00 |
| ATOM | 5343 | CZ   | PHE | X | 355 | 65.938 | 30.402 | 58.346 | 0.00 | 0.00 |
| ATOM | 5344 | HZ   | PHE | X | 355 | 65.042 | 29.806 | 58.436 | 0.00 | 0.00 |
| ATOM | 5345 | CE2  | PHE | X | 355 | 67.169 | 29.864 | 58.792 | 0.00 | 0.00 |
| ATOM | 5346 | HE2  | PHE | X | 355 | 67.253 | 28.871 | 59.209 | 0.00 | 0.00 |
| ATOM | 5347 | CD2  | PHE | X | 355 | 68.270 | 30.766 | 58.716 | 0.00 | 0.00 |
| ATOM | 5348 | HD2  | PHE | X | 355 | 69.206 | 30.395 | 59.105 | 0.00 | 0.00 |
| ATOM | 5349 | C    | PHE | X | 355 | 68.691 | 34.917 | 59.065 | 0.00 | 0.00 |
| ATOM | 5350 | O    | PHE | X | 355 | 67.507 | 35.271 | 58.876 | 0.00 | 0.00 |
| ATOM | 5351 | N    | LEU | X | 356 | 69.283 | 35.066 | 60.230 | 0.00 | 0.00 |
| ATOM | 5352 | H    | LEU | X | 356 | 70.233 | 34.726 | 60.284 | 0.00 | 0.00 |
| ATOM | 5353 | CA   | LEU | X | 356 | 68.633 | 35.665 | 61.411 | 0.00 | 0.00 |
| ATOM | 5354 | HA   | LEU | X | 356 | 67.757 | 35.124 | 61.768 | 0.00 | 0.00 |
| ATOM | 5355 | CB   | LEU | X | 356 | 69.645 | 35.566 | 62.602 | 0.00 | 0.00 |
| ATOM | 5356 | HB2  | LEU | X | 356 | 69.888 | 34.521 | 62.792 | 0.00 | 0.00 |
| ATOM | 5357 | HB3  | LEU | X | 356 | 70.559 | 36.065 | 62.283 | 0.00 | 0.00 |
| ATOM | 5358 | CG   | LEU | X | 356 | 69.104 | 36.112 | 63.931 | 0.00 | 0.00 |
| ATOM | 5359 | HG   | LEU | X | 356 | 68.796 | 37.121 | 63.654 | 0.00 | 0.00 |
| ATOM | 5360 | CD1  | LEU | X | 356 | 67.890 | 35.371 | 64.493 | 0.00 | 0.00 |
| ATOM | 5361 | HD11 | LEU | X | 356 | 68.150 | 34.376 | 64.853 | 0.00 | 0.00 |
| ATOM | 5362 | HD12 | LEU | X | 356 | 67.079 | 35.299 | 63.768 | 0.00 | 0.00 |
| ATOM | 5363 | HD13 | LEU | X | 356 | 67.547 | 35.988 | 65.323 | 0.00 | 0.00 |
| ATOM | 5364 | CD2  | LEU | X | 356 | 70.125 | 36.183 | 65.042 | 0.00 | 0.00 |
| ATOM | 5365 | HD21 | LEU | X | 356 | 69.671 | 36.437 | 66.000 | 0.00 | 0.00 |
| ATOM | 5366 | HD22 | LEU | X | 356 | 70.637 | 35.228 | 65.155 | 0.00 | 0.00 |
| ATOM | 5367 | HD23 | LEU | X | 356 | 70.798 | 37.031 | 64.915 | 0.00 | 0.00 |
| ATOM | 5368 | C    | LEU | X | 356 | 68.205 | 37.092 | 61.070 | 0.00 | 0.00 |
| ATOM | 5369 | O    | LEU | X | 356 | 67.059 | 37.437 | 61.215 | 0.00 | 0.00 |
| ATOM | 5370 | N    | ALA | X | 357 | 69.135 | 37.830 | 60.533 | 0.00 | 0.00 |
| ATOM | 5371 | H    | ALA | X | 357 | 69.979 | 37.290 | 60.410 | 0.00 | 0.00 |
| ATOM | 5372 | CA   | ALA | X | 357 | 68.873 | 39.237 | 60.127 | 0.00 | 0.00 |
| ATOM | 5373 | HA   | ALA | X | 357 | 68.478 | 39.821 | 60.958 | 0.00 | 0.00 |
| ATOM | 5374 | CB   | ALA | X | 357 | 70.319 | 39.825 | 59.751 | 0.00 | 0.00 |
| ATOM | 5375 | HB1  | ALA | X | 357 | 70.114 | 40.842 | 59.416 | 0.00 | 0.00 |
| ATOM | 5376 | HB2  | ALA | X | 357 | 70.729 | 39.193 | 58.964 | 0.00 | 0.00 |
| ATOM | 5377 | HB3  | ALA | X | 357 | 70.909 | 39.801 | 60.667 | 0.00 | 0.00 |
| ATOM | 5378 | C    | ALA | X | 357 | 67.831 | 39.263 | 58.980 | 0.00 | 0.00 |
| ATOM | 5379 | O    | ALA | X | 357 | 67.072 | 40.211 | 58.956 | 0.00 | 0.00 |
| ATOM | 5380 | N    | GLY | X | 358 | 67.868 | 38.278 | 58.026 | 0.00 | 0.00 |
| ATOM | 5381 | H    | GLY | X | 358 | 68.593 | 37.597 | 58.201 | 0.00 | 0.00 |
| ATOM | 5382 | CA   | GLY | X | 358 | 66.951 | 38.050 | 56.999 | 0.00 | 0.00 |
| ATOM | 5383 | HA2  | GLY | X | 358 | 66.865 | 38.953 | 56.394 | 0.00 | 0.00 |
| ATOM | 5384 | HA3  | GLY | X | 358 | 67.202 | 37.242 | 56.311 | 0.00 | 0.00 |
| ATOM | 5385 | C    | GLY | X | 358 | 65.547 | 37.887 | 57.593 | 0.00 | 0.00 |

|      |      |      |     |   |     |        |        |        |      |      |
|------|------|------|-----|---|-----|--------|--------|--------|------|------|
| ATOM | 5386 | O    | GLY | X | 358 | 64.646 | 38.712 | 57.387 | 0.00 | 0.00 |
| ATOM | 5387 | N    | VAL | X | 359 | 65.367 | 36.953 | 58.520 | 0.00 | 0.00 |
| ATOM | 5388 | H    | VAL | X | 359 | 66.211 | 36.477 | 58.806 | 0.00 | 0.00 |
| ATOM | 5389 | CA   | VAL | X | 359 | 64.090 | 36.878 | 59.262 | 0.00 | 0.00 |
| ATOM | 5390 | HA   | VAL | X | 359 | 63.369 | 36.636 | 58.482 | 0.00 | 0.00 |
| ATOM | 5391 | CB   | VAL | X | 359 | 64.094 | 35.786 | 60.348 | 0.00 | 0.00 |
| ATOM | 5392 | HB   | VAL | X | 359 | 65.045 | 35.920 | 60.864 | 0.00 | 0.00 |
| ATOM | 5393 | CG1  | VAL | X | 359 | 63.000 | 35.897 | 61.435 | 0.00 | 0.00 |
| ATOM | 5394 | HG11 | VAL | X | 359 | 62.050 | 35.849 | 60.904 | 0.00 | 0.00 |
| ATOM | 5395 | HG12 | VAL | X | 359 | 63.209 | 35.002 | 62.021 | 0.00 | 0.00 |
| ATOM | 5396 | HG13 | VAL | X | 359 | 63.085 | 36.758 | 62.098 | 0.00 | 0.00 |
| ATOM | 5397 | CG2  | VAL | X | 359 | 64.246 | 34.369 | 59.786 | 0.00 | 0.00 |
| ATOM | 5398 | HG21 | VAL | X | 359 | 63.483 | 34.066 | 59.068 | 0.00 | 0.00 |
| ATOM | 5399 | HG22 | VAL | X | 359 | 64.250 | 33.688 | 60.637 | 0.00 | 0.00 |
| ATOM | 5400 | HG23 | VAL | X | 359 | 65.201 | 34.313 | 59.263 | 0.00 | 0.00 |
| ATOM | 5401 | C    | VAL | X | 359 | 63.613 | 38.215 | 59.886 | 0.00 | 0.00 |
| ATOM | 5402 | O    | VAL | X | 359 | 62.492 | 38.727 | 59.666 | 0.00 | 0.00 |
| ATOM | 5403 | N    | ARG | X | 360 | 64.565 | 38.912 | 60.556 | 0.00 | 0.00 |
| ATOM | 5404 | H    | ARG | X | 360 | 65.525 | 38.642 | 60.398 | 0.00 | 0.00 |
| ATOM | 5405 | CA   | ARG | X | 360 | 64.339 | 40.171 | 61.257 | 0.00 | 0.00 |
| ATOM | 5406 | HA   | ARG | X | 360 | 63.540 | 40.022 | 61.983 | 0.00 | 0.00 |
| ATOM | 5407 | CB   | ARG | X | 360 | 65.546 | 40.745 | 61.935 | 0.00 | 0.00 |
| ATOM | 5408 | HB2  | ARG | X | 360 | 66.405 | 40.509 | 61.308 | 0.00 | 0.00 |
| ATOM | 5409 | HB3  | ARG | X | 360 | 65.462 | 41.817 | 62.110 | 0.00 | 0.00 |
| ATOM | 5410 | CG   | ARG | X | 360 | 65.890 | 40.068 | 63.303 | 0.00 | 0.00 |
| ATOM | 5411 | HG2  | ARG | X | 360 | 64.930 | 40.106 | 63.819 | 0.00 | 0.00 |
| ATOM | 5412 | HG3  | ARG | X | 360 | 66.296 | 39.077 | 63.099 | 0.00 | 0.00 |
| ATOM | 5413 | CD   | ARG | X | 360 | 66.993 | 40.805 | 64.128 | 0.00 | 0.00 |
| ATOM | 5414 | HD2  | ARG | X | 360 | 66.723 | 41.861 | 64.126 | 0.00 | 0.00 |
| ATOM | 5415 | HD3  | ARG | X | 360 | 67.029 | 40.453 | 65.159 | 0.00 | 0.00 |
| ATOM | 5416 | NE   | ARG | X | 360 | 68.287 | 40.797 | 63.435 | 0.00 | 0.00 |
| ATOM | 5417 | HE   | ARG | X | 360 | 68.254 | 41.300 | 62.560 | 0.00 | 0.00 |
| ATOM | 5418 | CZ   | ARG | X | 360 | 69.458 | 40.651 | 64.015 | 0.00 | 0.00 |
| ATOM | 5419 | NH1  | ARG | X | 360 | 69.561 | 39.986 | 65.158 | 0.00 | 0.00 |
| ATOM | 5420 | HH11 | ARG | X | 360 | 68.778 | 39.742 | 65.748 | 0.00 | 0.00 |
| ATOM | 5421 | HH12 | ARG | X | 360 | 70.505 | 39.683 | 65.351 | 0.00 | 0.00 |
| ATOM | 5422 | NH2  | ARG | X | 360 | 70.599 | 40.974 | 63.419 | 0.00 | 0.00 |
| ATOM | 5423 | HH21 | ARG | X | 360 | 70.669 | 41.351 | 62.484 | 0.00 | 0.00 |
| ATOM | 5424 | HH22 | ARG | X | 360 | 71.445 | 40.922 | 63.967 | 0.00 | 0.00 |
| ATOM | 5425 | C    | ARG | X | 360 | 63.894 | 41.270 | 60.241 | 0.00 | 0.00 |
| ATOM | 5426 | O    | ARG | X | 360 | 63.216 | 42.211 | 60.655 | 0.00 | 0.00 |
| ATOM | 5427 | N    | VAL | X | 361 | 64.060 | 41.100 | 58.943 | 0.00 | 0.00 |
| ATOM | 5428 | H    | VAL | X | 361 | 64.763 | 40.430 | 58.665 | 0.00 | 0.00 |
| ATOM | 5429 | CA   | VAL | X | 361 | 63.501 | 42.041 | 57.973 | 0.00 | 0.00 |
| ATOM | 5430 | HA   | VAL | X | 361 | 63.140 | 42.946 | 58.462 | 0.00 | 0.00 |
| ATOM | 5431 | CB   | VAL | X | 361 | 64.487 | 42.633 | 56.999 | 0.00 | 0.00 |
| ATOM | 5432 | HB   | VAL | X | 361 | 63.916 | 43.336 | 56.393 | 0.00 | 0.00 |
| ATOM | 5433 | CG1  | VAL | X | 361 | 65.778 | 43.339 | 57.541 | 0.00 | 0.00 |
| ATOM | 5434 | HG11 | VAL | X | 361 | 66.114 | 42.671 | 58.334 | 0.00 | 0.00 |
| ATOM | 5435 | HG12 | VAL | X | 361 | 66.545 | 43.625 | 56.822 | 0.00 | 0.00 |
| ATOM | 5436 | HG13 | VAL | X | 361 | 65.412 | 44.232 | 58.048 | 0.00 | 0.00 |
| ATOM | 5437 | CG2  | VAL | X | 361 | 65.025 | 41.599 | 55.959 | 0.00 | 0.00 |
| ATOM | 5438 | HG21 | VAL | X | 361 | 65.841 | 41.025 | 56.398 | 0.00 | 0.00 |
| ATOM | 5439 | HG22 | VAL | X | 361 | 65.503 | 42.038 | 55.083 | 0.00 | 0.00 |
| ATOM | 5440 | HG23 | VAL | X | 361 | 64.257 | 41.068 | 55.397 | 0.00 | 0.00 |
| ATOM | 5441 | C    | VAL | X | 361 | 62.201 | 41.480 | 57.279 | 0.00 | 0.00 |
| ATOM | 5442 | O    | VAL | X | 361 | 61.237 | 42.211 | 57.001 | 0.00 | 0.00 |
| ATOM | 5443 | N    | GLY | X | 362 | 62.060 | 40.185 | 57.029 | 0.00 | 0.00 |
| ATOM | 5444 | H    | GLY | X | 362 | 62.659 | 39.526 | 57.506 | 0.00 | 0.00 |
| ATOM | 5445 | CA   | GLY | X | 362 | 60.973 | 39.653 | 56.207 | 0.00 | 0.00 |
| ATOM | 5446 | HA2  | GLY | X | 362 | 60.751 | 40.343 | 55.394 | 0.00 | 0.00 |
| ATOM | 5447 | HA3  | GLY | X | 362 | 61.221 | 38.703 | 55.734 | 0.00 | 0.00 |
| ATOM | 5448 | C    | GLY | X | 362 | 59.697 | 39.315 | 56.997 | 0.00 | 0.00 |
| ATOM | 5449 | O    | GLY | X | 362 | 58.596 | 39.227 | 56.430 | 0.00 | 0.00 |
| ATOM | 5450 | N    | VAL | X | 363 | 59.859 | 39.079 | 58.350 | 0.00 | 0.00 |
| ATOM | 5451 | H    | VAL | X | 363 | 60.811 | 39.105 | 58.685 | 0.00 | 0.00 |
| ATOM | 5452 | CA   | VAL | X | 363 | 58.674 | 38.842 | 59.229 | 0.00 | 0.00 |

|      |      |      |     |   |     |        |        |        |      |      |
|------|------|------|-----|---|-----|--------|--------|--------|------|------|
| ATOM | 5453 | HA   | VAL | X | 363 | 57.853 | 38.457 | 58.624 | 0.00 | 0.00 |
| ATOM | 5454 | CB   | VAL | X | 363 | 59.013 | 37.807 | 60.357 | 0.00 | 0.00 |
| ATOM | 5455 | HB   | VAL | X | 363 | 59.661 | 38.275 | 61.098 | 0.00 | 0.00 |
| ATOM | 5456 | CG1  | VAL | X | 363 | 57.770 | 37.482 | 61.197 | 0.00 | 0.00 |
| ATOM | 5457 | HG11 | VAL | X | 363 | 58.000 | 36.647 | 61.859 | 0.00 | 0.00 |
| ATOM | 5458 | HG12 | VAL | X | 363 | 57.423 | 38.319 | 61.803 | 0.00 | 0.00 |
| ATOM | 5459 | HG13 | VAL | X | 363 | 57.033 | 37.005 | 60.550 | 0.00 | 0.00 |
| ATOM | 5460 | CG2  | VAL | X | 363 | 59.499 | 36.430 | 59.811 | 0.00 | 0.00 |
| ATOM | 5461 | HG21 | VAL | X | 363 | 60.459 | 36.556 | 59.309 | 0.00 | 0.00 |
| ATOM | 5462 | HG22 | VAL | X | 363 | 58.737 | 36.006 | 59.158 | 0.00 | 0.00 |
| ATOM | 5463 | HG23 | VAL | X | 363 | 59.727 | 35.763 | 60.642 | 0.00 | 0.00 |
| ATOM | 5464 | C    | VAL | X | 363 | 58.157 | 40.116 | 59.833 | 0.00 | 0.00 |
| ATOM | 5465 | O    | VAL | X | 363 | 58.926 | 40.969 | 60.368 | 0.00 | 0.00 |
| ATOM | 5466 | N    | PRO | X | 364 | 56.845 | 40.472 | 59.646 | 0.00 | 0.00 |
| ATOM | 5467 | CD   | PRO | X | 364 | 55.830 | 39.782 | 58.903 | 0.00 | 0.00 |
| ATOM | 5468 | HD2  | PRO | X | 364 | 55.764 | 38.731 | 59.182 | 0.00 | 0.00 |
| ATOM | 5469 | HD3  | PRO | X | 364 | 56.041 | 39.891 | 57.839 | 0.00 | 0.00 |
| ATOM | 5470 | CG   | PRO | X | 364 | 54.512 | 40.346 | 59.305 | 0.00 | 0.00 |
| ATOM | 5471 | HG2  | PRO | X | 364 | 54.180 | 39.843 | 60.213 | 0.00 | 0.00 |
| ATOM | 5472 | HG3  | PRO | X | 364 | 53.711 | 40.297 | 58.567 | 0.00 | 0.00 |
| ATOM | 5473 | CB   | PRO | X | 364 | 54.792 | 41.766 | 59.609 | 0.00 | 0.00 |
| ATOM | 5474 | HB2  | PRO | X | 364 | 54.090 | 42.144 | 60.352 | 0.00 | 0.00 |
| ATOM | 5475 | HB3  | PRO | X | 364 | 54.728 | 42.408 | 58.731 | 0.00 | 0.00 |
| ATOM | 5476 | CA   | PRO | X | 364 | 56.196 | 41.605 | 60.234 | 0.00 | 0.00 |
| ATOM | 5477 | HA   | PRO | X | 364 | 56.775 | 42.515 | 60.075 | 0.00 | 0.00 |
| ATOM | 5478 | C    | PRO | X | 364 | 56.109 | 41.541 | 61.735 | 0.00 | 0.00 |
| ATOM | 5479 | O    | PRO | X | 364 | 55.603 | 40.564 | 62.323 | 0.00 | 0.00 |
| ATOM | 5480 | N    | GLN | X | 365 | 56.654 | 42.565 | 62.445 | 0.00 | 0.00 |
| ATOM | 5481 | H    | GLN | X | 365 | 57.137 | 43.324 | 61.987 | 0.00 | 0.00 |
| ATOM | 5482 | CA   | GLN | X | 365 | 56.505 | 42.780 | 63.916 | 0.00 | 0.00 |
| ATOM | 5483 | HA   | GLN | X | 365 | 57.012 | 43.733 | 64.063 | 0.00 | 0.00 |
| ATOM | 5484 | CB   | GLN | X | 365 | 55.068 | 42.996 | 64.323 | 0.00 | 0.00 |
| ATOM | 5485 | HB2  | GLN | X | 365 | 54.551 | 42.038 | 64.388 | 0.00 | 0.00 |
| ATOM | 5486 | HB3  | GLN | X | 365 | 55.088 | 43.589 | 65.237 | 0.00 | 0.00 |
| ATOM | 5487 | CG   | GLN | X | 365 | 54.220 | 43.821 | 63.326 | 0.00 | 0.00 |
| ATOM | 5488 | HG2  | GLN | X | 365 | 54.801 | 44.651 | 62.922 | 0.00 | 0.00 |
| ATOM | 5489 | HG3  | GLN | X | 365 | 54.032 | 43.116 | 62.516 | 0.00 | 0.00 |
| ATOM | 5490 | CD   | GLN | X | 365 | 52.910 | 44.218 | 63.877 | 0.00 | 0.00 |
| ATOM | 5491 | OE1  | GLN | X | 365 | 52.409 | 45.334 | 63.856 | 0.00 | 0.00 |
| ATOM | 5492 | NE2  | GLN | X | 365 | 52.122 | 43.277 | 64.374 | 0.00 | 0.00 |
| ATOM | 5493 | HE21 | GLN | X | 365 | 51.163 | 43.521 | 64.576 | 0.00 | 0.00 |
| ATOM | 5494 | HE22 | GLN | X | 365 | 52.363 | 42.302 | 64.270 | 0.00 | 0.00 |
| ATOM | 5495 | C    | GLN | X | 365 | 57.139 | 41.615 | 64.683 | 0.00 | 0.00 |
| ATOM | 5496 | O    | GLN | X | 365 | 56.649 | 40.887 | 65.515 | 0.00 | 0.00 |
| ATOM | 5497 | N    | VAL | X | 366 | 58.406 | 41.323 | 64.280 | 0.00 | 0.00 |
| ATOM | 5498 | H    | VAL | X | 366 | 58.718 | 41.810 | 63.452 | 0.00 | 0.00 |
| ATOM | 5499 | CA   | VAL | X | 366 | 59.318 | 40.255 | 64.849 | 0.00 | 0.00 |
| ATOM | 5500 | HA   | VAL | X | 366 | 58.769 | 39.603 | 65.528 | 0.00 | 0.00 |
| ATOM | 5501 | CB   | VAL | X | 366 | 60.043 | 39.370 | 63.787 | 0.00 | 0.00 |
| ATOM | 5502 | HB   | VAL | X | 366 | 59.329 | 39.246 | 62.974 | 0.00 | 0.00 |
| ATOM | 5503 | CG1  | VAL | X | 366 | 61.237 | 39.908 | 63.099 | 0.00 | 0.00 |
| ATOM | 5504 | HG11 | VAL | X | 366 | 62.147 | 39.853 | 63.696 | 0.00 | 0.00 |
| ATOM | 5505 | HG12 | VAL | X | 366 | 61.431 | 39.238 | 62.261 | 0.00 | 0.00 |
| ATOM | 5506 | HG13 | VAL | X | 366 | 61.136 | 40.957 | 62.821 | 0.00 | 0.00 |
| ATOM | 5507 | CG2  | VAL | X | 366 | 60.404 | 37.949 | 64.332 | 0.00 | 0.00 |
| ATOM | 5508 | HG21 | VAL | X | 366 | 59.781 | 37.700 | 65.192 | 0.00 | 0.00 |
| ATOM | 5509 | HG22 | VAL | X | 366 | 61.476 | 37.767 | 64.405 | 0.00 | 0.00 |
| ATOM | 5510 | HG23 | VAL | X | 366 | 60.154 | 37.291 | 63.500 | 0.00 | 0.00 |
| ATOM | 5511 | C    | VAL | X | 366 | 60.390 | 40.889 | 65.770 | 0.00 | 0.00 |
| ATOM | 5512 | O    | VAL | X | 366 | 61.180 | 41.707 | 65.349 | 0.00 | 0.00 |
| ATOM | 5513 | N    | SER | X | 367 | 60.427 | 40.355 | 66.939 | 0.00 | 0.00 |
| ATOM | 5514 | H    | SER | X | 367 | 59.599 | 39.881 | 67.271 | 0.00 | 0.00 |
| ATOM | 5515 | CA   | SER | X | 367 | 61.515 | 40.387 | 67.876 | 0.00 | 0.00 |
| ATOM | 5516 | HA   | SER | X | 367 | 61.882 | 41.413 | 67.846 | 0.00 | 0.00 |
| ATOM | 5517 | CB   | SER | X | 367 | 60.924 | 40.079 | 69.271 | 0.00 | 0.00 |
| ATOM | 5518 | HB2  | SER | X | 367 | 61.664 | 40.351 | 70.023 | 0.00 | 0.00 |
| ATOM | 5519 | HB3  | SER | X | 367 | 60.132 | 40.804 | 69.458 | 0.00 | 0.00 |

|      |      |      |     |   |     |        |        |        |      |      |
|------|------|------|-----|---|-----|--------|--------|--------|------|------|
| ATOM | 5520 | OG   | SER | X | 367 | 60.412 | 38.751 | 69.428 | 0.00 | 0.00 |
| ATOM | 5521 | HG   | SER | X | 367 | 60.039 | 38.717 | 70.312 | 0.00 | 0.00 |
| ATOM | 5522 | C    | SER | X | 367 | 62.678 | 39.541 | 67.665 | 0.00 | 0.00 |
| ATOM | 5523 | O    | SER | X | 367 | 62.637 | 38.681 | 66.811 | 0.00 | 0.00 |
| ATOM | 5524 | N    | ASP | X | 368 | 63.846 | 39.833 | 68.235 | 0.00 | 0.00 |
| ATOM | 5525 | H    | ASP | X | 368 | 63.927 | 40.596 | 68.892 | 0.00 | 0.00 |
| ATOM | 5526 | CA   | ASP | X | 368 | 65.060 | 39.001 | 68.074 | 0.00 | 0.00 |
| ATOM | 5527 | HA   | ASP | X | 368 | 65.258 | 38.782 | 67.025 | 0.00 | 0.00 |
| ATOM | 5528 | CB   | ASP | X | 368 | 66.295 | 39.851 | 68.608 | 0.00 | 0.00 |
| ATOM | 5529 | HB2  | ASP | X | 368 | 66.172 | 40.826 | 68.136 | 0.00 | 0.00 |
| ATOM | 5530 | HB3  | ASP | X | 368 | 66.192 | 40.043 | 69.676 | 0.00 | 0.00 |
| ATOM | 5531 | CG   | ASP | X | 368 | 67.653 | 39.309 | 68.444 | 0.00 | 0.00 |
| ATOM | 5532 | OD1  | ASP | X | 368 | 68.122 | 39.338 | 67.279 | 0.00 | 0.00 |
| ATOM | 5533 | OD2  | ASP | X | 368 | 68.287 | 39.045 | 69.536 | 0.00 | 0.00 |
| ATOM | 5534 | C    | ASP | X | 368 | 65.019 | 37.604 | 68.698 | 0.00 | 0.00 |
| ATOM | 5535 | O    | ASP | X | 368 | 65.590 | 36.651 | 68.222 | 0.00 | 0.00 |
| ATOM | 5536 | N    | LEU | X | 369 | 64.161 | 37.476 | 69.707 | 0.00 | 0.00 |
| ATOM | 5537 | H    | LEU | X | 369 | 63.663 | 38.324 | 69.935 | 0.00 | 0.00 |
| ATOM | 5538 | CA   | LEU | X | 369 | 63.843 | 36.266 | 70.591 | 0.00 | 0.00 |
| ATOM | 5539 | HA   | LEU | X | 369 | 64.685 | 35.590 | 70.738 | 0.00 | 0.00 |
| ATOM | 5540 | CB   | LEU | X | 369 | 63.219 | 36.684 | 71.830 | 0.00 | 0.00 |
| ATOM | 5541 | HB2  | LEU | X | 369 | 63.930 | 37.353 | 72.315 | 0.00 | 0.00 |
| ATOM | 5542 | HB3  | LEU | X | 369 | 62.317 | 37.242 | 71.579 | 0.00 | 0.00 |
| ATOM | 5543 | CG   | LEU | X | 369 | 62.817 | 35.499 | 72.862 | 0.00 | 0.00 |
| ATOM | 5544 | HG   | LEU | X | 369 | 62.161 | 34.796 | 72.349 | 0.00 | 0.00 |
| ATOM | 5545 | CD1  | LEU | X | 369 | 64.005 | 34.676 | 73.406 | 0.00 | 0.00 |
| ATOM | 5546 | HD11 | LEU | X | 369 | 64.630 | 34.363 | 72.570 | 0.00 | 0.00 |
| ATOM | 5547 | HD12 | LEU | X | 369 | 63.664 | 33.696 | 73.740 | 0.00 | 0.00 |
| ATOM | 5548 | HD13 | LEU | X | 369 | 64.611 | 35.160 | 74.171 | 0.00 | 0.00 |
| ATOM | 5549 | CD2  | LEU | X | 369 | 62.109 | 36.040 | 74.108 | 0.00 | 0.00 |
| ATOM | 5550 | HD21 | LEU | X | 369 | 61.698 | 35.314 | 74.810 | 0.00 | 0.00 |
| ATOM | 5551 | HD22 | LEU | X | 369 | 62.707 | 36.800 | 74.613 | 0.00 | 0.00 |
| ATOM | 5552 | HD23 | LEU | X | 369 | 61.218 | 36.585 | 73.798 | 0.00 | 0.00 |
| ATOM | 5553 | C    | LEU | X | 369 | 62.924 | 35.308 | 69.781 | 0.00 | 0.00 |
| ATOM | 5554 | O    | LEU | X | 369 | 63.085 | 34.090 | 69.715 | 0.00 | 0.00 |
| ATOM | 5555 | N    | ALA | X | 370 | 62.073 | 35.948 | 68.926 | 0.00 | 0.00 |
| ATOM | 5556 | H    | ALA | X | 370 | 62.070 | 36.947 | 69.075 | 0.00 | 0.00 |
| ATOM | 5557 | CA   | ALA | X | 370 | 61.301 | 35.322 | 67.883 | 0.00 | 0.00 |
| ATOM | 5558 | HA   | ALA | X | 370 | 60.765 | 34.483 | 68.326 | 0.00 | 0.00 |
| ATOM | 5559 | CB   | ALA | X | 370 | 60.133 | 36.295 | 67.572 | 0.00 | 0.00 |
| ATOM | 5560 | HB1  | ALA | X | 370 | 59.451 | 36.360 | 68.420 | 0.00 | 0.00 |
| ATOM | 5561 | HB2  | ALA | X | 370 | 59.572 | 35.991 | 66.688 | 0.00 | 0.00 |
| ATOM | 5562 | HB3  | ALA | X | 370 | 60.532 | 37.263 | 67.272 | 0.00 | 0.00 |
| ATOM | 5563 | C    | ALA | X | 370 | 62.129 | 34.913 | 66.608 | 0.00 | 0.00 |
| ATOM | 5564 | O    | ALA | X | 370 | 61.950 | 33.776 | 66.113 | 0.00 | 0.00 |
| ATOM | 5565 | N    | ALA | X | 371 | 63.093 | 35.753 | 66.226 | 0.00 | 0.00 |
| ATOM | 5566 | H    | ALA | X | 371 | 63.133 | 36.700 | 66.575 | 0.00 | 0.00 |
| ATOM | 5567 | CA   | ALA | X | 371 | 63.822 | 35.478 | 65.003 | 0.00 | 0.00 |
| ATOM | 5568 | HA   | ALA | X | 371 | 63.106 | 35.217 | 64.223 | 0.00 | 0.00 |
| ATOM | 5569 | CB   | ALA | X | 371 | 64.538 | 36.787 | 64.589 | 0.00 | 0.00 |
| ATOM | 5570 | HB1  | ALA | X | 371 | 65.232 | 37.168 | 65.338 | 0.00 | 0.00 |
| ATOM | 5571 | HB2  | ALA | X | 371 | 63.765 | 37.497 | 64.292 | 0.00 | 0.00 |
| ATOM | 5572 | HB3  | ALA | X | 371 | 65.091 | 36.490 | 63.698 | 0.00 | 0.00 |
| ATOM | 5573 | C    | ALA | X | 371 | 64.702 | 34.285 | 65.250 | 0.00 | 0.00 |
| ATOM | 5574 | O    | ALA | X | 371 | 64.712 | 33.327 | 64.470 | 0.00 | 0.00 |
| ATOM | 5575 | N    | GLU | X | 372 | 65.376 | 34.127 | 66.430 | 0.00 | 0.00 |
| ATOM | 5576 | H    | GLU | X | 372 | 65.390 | 34.907 | 67.072 | 0.00 | 0.00 |
| ATOM | 5577 | CA   | GLU | X | 372 | 66.144 | 32.987 | 66.841 | 0.00 | 0.00 |
| ATOM | 5578 | HA   | GLU | X | 372 | 66.934 | 32.796 | 66.115 | 0.00 | 0.00 |
| ATOM | 5579 | CB   | GLU | X | 372 | 66.769 | 33.218 | 68.216 | 0.00 | 0.00 |
| ATOM | 5580 | HB2  | GLU | X | 372 | 66.131 | 33.799 | 68.882 | 0.00 | 0.00 |
| ATOM | 5581 | HB3  | GLU | X | 372 | 66.963 | 32.249 | 68.677 | 0.00 | 0.00 |
| ATOM | 5582 | CG   | GLU | X | 372 | 68.077 | 33.909 | 68.114 | 0.00 | 0.00 |
| ATOM | 5583 | HG2  | GLU | X | 372 | 68.651 | 33.400 | 67.340 | 0.00 | 0.00 |
| ATOM | 5584 | HG3  | GLU | X | 372 | 68.002 | 34.961 | 67.838 | 0.00 | 0.00 |
| ATOM | 5585 | CD   | GLU | X | 372 | 68.897 | 33.858 | 69.355 | 0.00 | 0.00 |
| ATOM | 5586 | OE1  | GLU | X | 372 | 69.366 | 34.937 | 69.757 | 0.00 | 0.00 |

|      |      |      |     |   |     |        |        |        |      |      |
|------|------|------|-----|---|-----|--------|--------|--------|------|------|
| ATOM | 5587 | OE2  | GLU | X | 372 | 69.263 | 32.748 | 69.893 | 0.00 | 0.00 |
| ATOM | 5588 | C    | GLU | X | 372 | 65.208 | 31.794 | 66.982 | 0.00 | 0.00 |
| ATOM | 5589 | O    | GLU | X | 372 | 65.644 | 30.739 | 66.540 | 0.00 | 0.00 |
| ATOM | 5590 | N    | ALA | X | 373 | 63.959 | 31.842 | 67.409 | 0.00 | 0.00 |
| ATOM | 5591 | H    | ALA | X | 373 | 63.549 | 32.724 | 67.680 | 0.00 | 0.00 |
| ATOM | 5592 | CA   | ALA | X | 373 | 63.006 | 30.738 | 67.445 | 0.00 | 0.00 |
| ATOM | 5593 | HA   | ALA | X | 373 | 63.474 | 29.844 | 67.856 | 0.00 | 0.00 |
| ATOM | 5594 | CB   | ALA | X | 373 | 61.830 | 31.224 | 68.298 | 0.00 | 0.00 |
| ATOM | 5595 | HB1  | ALA | X | 373 | 61.333 | 32.147 | 68.001 | 0.00 | 0.00 |
| ATOM | 5596 | HB2  | ALA | X | 373 | 62.206 | 31.363 | 69.312 | 0.00 | 0.00 |
| ATOM | 5597 | HB3  | ALA | X | 373 | 61.059 | 30.454 | 68.329 | 0.00 | 0.00 |
| ATOM | 5598 | C    | ALA | X | 373 | 62.535 | 30.281 | 65.987 | 0.00 | 0.00 |
| ATOM | 5599 | O    | ALA | X | 373 | 62.459 | 29.064 | 65.713 | 0.00 | 0.00 |
| ATOM | 5600 | N    | VAL | X | 374 | 62.406 | 31.250 | 65.037 | 0.00 | 0.00 |
| ATOM | 5601 | H    | VAL | X | 374 | 62.341 | 32.211 | 65.340 | 0.00 | 0.00 |
| ATOM | 5602 | CA   | VAL | X | 374 | 62.093 | 30.928 | 63.625 | 0.00 | 0.00 |
| ATOM | 5603 | HA   | VAL | X | 374 | 61.207 | 30.296 | 63.564 | 0.00 | 0.00 |
| ATOM | 5604 | CB   | VAL | X | 374 | 61.693 | 32.190 | 62.837 | 0.00 | 0.00 |
| ATOM | 5605 | HB   | VAL | X | 374 | 62.482 | 32.925 | 62.997 | 0.00 | 0.00 |
| ATOM | 5606 | CG1  | VAL | X | 374 | 61.667 | 32.073 | 61.284 | 0.00 | 0.00 |
| ATOM | 5607 | HG11 | VAL | X | 374 | 62.523 | 31.536 | 60.876 | 0.00 | 0.00 |
| ATOM | 5608 | HG12 | VAL | X | 374 | 60.810 | 31.505 | 60.924 | 0.00 | 0.00 |
| ATOM | 5609 | HG13 | VAL | X | 374 | 61.487 | 33.070 | 60.881 | 0.00 | 0.00 |
| ATOM | 5610 | CG2  | VAL | X | 374 | 60.377 | 32.793 | 63.347 | 0.00 | 0.00 |
| ATOM | 5611 | HG21 | VAL | X | 374 | 60.185 | 33.695 | 62.767 | 0.00 | 0.00 |
| ATOM | 5612 | HG22 | VAL | X | 374 | 60.289 | 33.118 | 64.384 | 0.00 | 0.00 |
| ATOM | 5613 | HG23 | VAL | X | 374 | 59.596 | 32.048 | 63.195 | 0.00 | 0.00 |
| ATOM | 5614 | C    | VAL | X | 374 | 63.309 | 30.208 | 63.005 | 0.00 | 0.00 |
| ATOM | 5615 | O    | VAL | X | 374 | 63.154 | 29.178 | 62.375 | 0.00 | 0.00 |
| ATOM | 5616 | N    | VAL | X | 375 | 64.514 | 30.697 | 63.235 | 0.00 | 0.00 |
| ATOM | 5617 | H    | VAL | X | 375 | 64.576 | 31.590 | 63.703 | 0.00 | 0.00 |
| ATOM | 5618 | CA   | VAL | X | 375 | 65.826 | 30.127 | 62.781 | 0.00 | 0.00 |
| ATOM | 5619 | HA   | VAL | X | 375 | 65.732 | 29.881 | 61.723 | 0.00 | 0.00 |
| ATOM | 5620 | CB   | VAL | X | 375 | 67.018 | 31.035 | 62.947 | 0.00 | 0.00 |
| ATOM | 5621 | HB   | VAL | X | 375 | 67.156 | 31.355 | 63.980 | 0.00 | 0.00 |
| ATOM | 5622 | CG1  | VAL | X | 375 | 68.329 | 30.270 | 62.485 | 0.00 | 0.00 |
| ATOM | 5623 | HG11 | VAL | X | 375 | 68.277 | 30.028 | 61.424 | 0.00 | 0.00 |
| ATOM | 5624 | HG12 | VAL | X | 375 | 69.247 | 30.818 | 62.696 | 0.00 | 0.00 |
| ATOM | 5625 | HG13 | VAL | X | 375 | 68.460 | 29.313 | 62.990 | 0.00 | 0.00 |
| ATOM | 5626 | CG2  | VAL | X | 375 | 66.798 | 32.277 | 62.055 | 0.00 | 0.00 |
| ATOM | 5627 | HG21 | VAL | X | 375 | 66.768 | 32.045 | 60.991 | 0.00 | 0.00 |
| ATOM | 5628 | HG22 | VAL | X | 375 | 67.601 | 32.992 | 62.231 | 0.00 | 0.00 |
| ATOM | 5629 | HG23 | VAL | X | 375 | 65.858 | 32.760 | 62.324 | 0.00 | 0.00 |
| ATOM | 5630 | C    | VAL | X | 375 | 66.029 | 28.684 | 63.447 | 0.00 | 0.00 |
| ATOM | 5631 | O    | VAL | X | 375 | 66.532 | 27.762 | 62.757 | 0.00 | 0.00 |
| ATOM | 5632 | N    | LEU | X | 376 | 65.594 | 28.451 | 64.702 | 0.00 | 0.00 |
| ATOM | 5633 | H    | LEU | X | 376 | 65.439 | 29.215 | 65.343 | 0.00 | 0.00 |
| ATOM | 5634 | CA   | LEU | X | 376 | 65.577 | 27.146 | 65.277 | 0.00 | 0.00 |
| ATOM | 5635 | HA   | LEU | X | 376 | 66.611 | 26.820 | 65.166 | 0.00 | 0.00 |
| ATOM | 5636 | CB   | LEU | X | 376 | 65.383 | 27.335 | 66.794 | 0.00 | 0.00 |
| ATOM | 5637 | HB2  | LEU | X | 376 | 65.939 | 28.144 | 67.268 | 0.00 | 0.00 |
| ATOM | 5638 | HB3  | LEU | X | 376 | 64.332 | 27.528 | 67.011 | 0.00 | 0.00 |
| ATOM | 5639 | CG   | LEU | X | 376 | 65.703 | 26.115 | 67.707 | 0.00 | 0.00 |
| ATOM | 5640 | HG   | LEU | X | 376 | 65.121 | 25.263 | 67.357 | 0.00 | 0.00 |
| ATOM | 5641 | CD1  | LEU | X | 376 | 67.238 | 25.894 | 67.715 | 0.00 | 0.00 |
| ATOM | 5642 | HD11 | LEU | X | 376 | 67.471 | 24.961 | 68.228 | 0.00 | 0.00 |
| ATOM | 5643 | HD12 | LEU | X | 376 | 67.637 | 26.701 | 68.329 | 0.00 | 0.00 |
| ATOM | 5644 | HD13 | LEU | X | 376 | 67.606 | 25.842 | 66.690 | 0.00 | 0.00 |
| ATOM | 5645 | CD2  | LEU | X | 376 | 65.183 | 26.537 | 69.138 | 0.00 | 0.00 |
| ATOM | 5646 | HD21 | LEU | X | 376 | 65.803 | 27.325 | 69.567 | 0.00 | 0.00 |
| ATOM | 5647 | HD22 | LEU | X | 376 | 64.175 | 26.947 | 69.092 | 0.00 | 0.00 |
| ATOM | 5648 | HD23 | LEU | X | 376 | 65.339 | 25.724 | 69.847 | 0.00 | 0.00 |
| ATOM | 5649 | C    | LEU | X | 376 | 64.593 | 26.169 | 64.648 | 0.00 | 0.00 |
| ATOM | 5650 | O    | LEU | X | 376 | 64.956 | 25.017 | 64.458 | 0.00 | 0.00 |
| ATOM | 5651 | N    | HIE | X | 377 | 63.356 | 26.587 | 64.342 | 0.00 | 0.00 |
| ATOM | 5652 | H    | HIE | X | 377 | 63.117 | 27.483 | 64.743 | 0.00 | 0.00 |
| ATOM | 5653 | CA   | HIE | X | 377 | 62.311 | 25.790 | 63.697 | 0.00 | 0.00 |

|      |      |      |     |   |     |        |        |        |      |      |
|------|------|------|-----|---|-----|--------|--------|--------|------|------|
| ATOM | 5654 | HA   | HIE | X | 377 | 62.146 | 24.886 | 64.283 | 0.00 | 0.00 |
| ATOM | 5655 | CB   | HIE | X | 377 | 61.036 | 26.638 | 63.654 | 0.00 | 0.00 |
| ATOM | 5656 | HB2  | HIE | X | 377 | 60.776 | 26.847 | 64.692 | 0.00 | 0.00 |
| ATOM | 5657 | HB3  | HIE | X | 377 | 61.249 | 27.562 | 63.117 | 0.00 | 0.00 |
| ATOM | 5658 | CG   | HIE | X | 377 | 59.948 | 25.930 | 63.000 | 0.00 | 0.00 |
| ATOM | 5659 | ND1  | HIE | X | 377 | 59.334 | 24.821 | 63.451 | 0.00 | 0.00 |
| ATOM | 5660 | CE1  | HIE | X | 377 | 58.248 | 24.639 | 62.712 | 0.00 | 0.00 |
| ATOM | 5661 | HE1  | HIE | X | 377 | 57.593 | 23.782 | 62.755 | 0.00 | 0.00 |
| ATOM | 5662 | NE2  | HIE | X | 377 | 58.051 | 25.636 | 61.806 | 0.00 | 0.00 |
| ATOM | 5663 | HE2  | HIE | X | 377 | 57.258 | 25.771 | 61.195 | 0.00 | 0.00 |
| ATOM | 5664 | CD2  | HIE | X | 377 | 59.231 | 26.406 | 61.913 | 0.00 | 0.00 |
| ATOM | 5665 | HD2  | HIE | X | 377 | 59.351 | 27.373 | 61.446 | 0.00 | 0.00 |
| ATOM | 5666 | C    | HIE | X | 377 | 62.728 | 25.317 | 62.296 | 0.00 | 0.00 |
| ATOM | 5667 | O    | HIE | X | 377 | 62.228 | 24.301 | 61.802 | 0.00 | 0.00 |
| ATOM | 5668 | N    | TYR | X | 378 | 63.604 | 26.025 | 61.581 | 0.00 | 0.00 |
| ATOM | 5669 | H    | TYR | X | 378 | 64.011 | 26.822 | 62.050 | 0.00 | 0.00 |
| ATOM | 5670 | CA   | TYR | X | 378 | 64.250 | 25.732 | 60.308 | 0.00 | 0.00 |
| ATOM | 5671 | HA   | TYR | X | 378 | 63.674 | 24.983 | 59.765 | 0.00 | 0.00 |
| ATOM | 5672 | CB   | TYR | X | 378 | 64.166 | 27.002 | 59.416 | 0.00 | 0.00 |
| ATOM | 5673 | HB2  | TYR | X | 378 | 64.483 | 27.842 | 60.034 | 0.00 | 0.00 |
| ATOM | 5674 | HB3  | TYR | X | 378 | 64.911 | 26.871 | 58.631 | 0.00 | 0.00 |
| ATOM | 5675 | CG   | TYR | X | 378 | 62.784 | 27.183 | 58.812 | 0.00 | 0.00 |
| ATOM | 5676 | CD1  | TYR | X | 378 | 62.499 | 26.728 | 57.490 | 0.00 | 0.00 |
| ATOM | 5677 | HD1  | TYR | X | 378 | 63.206 | 26.053 | 57.032 | 0.00 | 0.00 |
| ATOM | 5678 | CE1  | TYR | X | 378 | 61.278 | 27.146 | 56.892 | 0.00 | 0.00 |
| ATOM | 5679 | HE1  | TYR | X | 378 | 61.084 | 26.796 | 55.889 | 0.00 | 0.00 |
| ATOM | 5680 | CZ   | TYR | X | 378 | 60.292 | 27.989 | 57.548 | 0.00 | 0.00 |
| ATOM | 5681 | OH   | TYR | X | 378 | 59.103 | 28.376 | 57.077 | 0.00 | 0.00 |
| ATOM | 5682 | HH   | TYR | X | 378 | 58.915 | 28.187 | 56.155 | 0.00 | 0.00 |
| ATOM | 5683 | CE2  | TYR | X | 378 | 60.614 | 28.315 | 58.929 | 0.00 | 0.00 |
| ATOM | 5684 | HE2  | TYR | X | 378 | 59.861 | 28.797 | 59.535 | 0.00 | 0.00 |
| ATOM | 5685 | CD2  | TYR | X | 378 | 61.773 | 27.843 | 59.531 | 0.00 | 0.00 |
| ATOM | 5686 | HD2  | TYR | X | 378 | 62.020 | 28.113 | 60.547 | 0.00 | 0.00 |
| ATOM | 5687 | C    | TYR | X | 378 | 65.632 | 25.138 | 60.502 | 0.00 | 0.00 |
| ATOM | 5688 | O    | TYR | X | 378 | 66.583 | 25.386 | 59.719 | 0.00 | 0.00 |
| ATOM | 5689 | N    | THR | X | 379 | 65.783 | 24.261 | 61.526 | 0.00 | 0.00 |
| ATOM | 5690 | H    | THR | X | 379 | 64.944 | 24.041 | 62.044 | 0.00 | 0.00 |
| ATOM | 5691 | CA   | THR | X | 379 | 66.962 | 23.357 | 61.609 | 0.00 | 0.00 |
| ATOM | 5692 | HA   | THR | X | 379 | 67.909 | 23.808 | 61.311 | 0.00 | 0.00 |
| ATOM | 5693 | CB   | THR | X | 379 | 67.194 | 22.765 | 63.050 | 0.00 | 0.00 |
| ATOM | 5694 | HB   | THR | X | 379 | 66.281 | 22.245 | 63.338 | 0.00 | 0.00 |
| ATOM | 5695 | CG2  | THR | X | 379 | 68.326 | 21.785 | 63.258 | 0.00 | 0.00 |
| ATOM | 5696 | HG21 | THR | X | 379 | 68.380 | 21.320 | 64.243 | 0.00 | 0.00 |
| ATOM | 5697 | HG22 | THR | X | 379 | 69.303 | 22.266 | 63.194 | 0.00 | 0.00 |
| ATOM | 5698 | HG23 | THR | X | 379 | 68.383 | 21.004 | 62.501 | 0.00 | 0.00 |
| ATOM | 5699 | OG1  | THR | X | 379 | 67.355 | 23.771 | 64.053 | 0.00 | 0.00 |
| ATOM | 5700 | HG1  | THR | X | 379 | 66.491 | 24.152 | 64.223 | 0.00 | 0.00 |
| ATOM | 5701 | C    | THR | X | 379 | 66.770 | 22.107 | 60.661 | 0.00 | 0.00 |
| ATOM | 5702 | O    | THR | X | 379 | 65.761 | 21.397 | 60.708 | 0.00 | 0.00 |
| ATOM | 5703 | N    | ASP | X | 380 | 67.791 | 21.911 | 59.806 | 0.00 | 0.00 |
| ATOM | 5704 | H    | ASP | X | 380 | 68.542 | 22.576 | 59.681 | 0.00 | 0.00 |
| ATOM | 5705 | CA   | ASP | X | 380 | 67.814 | 20.854 | 58.835 | 0.00 | 0.00 |
| ATOM | 5706 | HA   | ASP | X | 380 | 66.806 | 20.865 | 58.421 | 0.00 | 0.00 |
| ATOM | 5707 | CB   | ASP | X | 380 | 68.804 | 21.103 | 57.752 | 0.00 | 0.00 |
| ATOM | 5708 | HB2  | ASP | X | 380 | 68.787 | 22.188 | 57.648 | 0.00 | 0.00 |
| ATOM | 5709 | HB3  | ASP | X | 380 | 69.795 | 20.767 | 58.055 | 0.00 | 0.00 |
| ATOM | 5710 | CG   | ASP | X | 380 | 68.366 | 20.613 | 56.363 | 0.00 | 0.00 |
| ATOM | 5711 | OD1  | ASP | X | 380 | 68.929 | 19.583 | 55.973 | 0.00 | 0.00 |
| ATOM | 5712 | OD2  | ASP | X | 380 | 67.583 | 21.309 | 55.634 | 0.00 | 0.00 |
| ATOM | 5713 | C    | ASP | X | 380 | 67.913 | 19.405 | 59.361 | 0.00 | 0.00 |
| ATOM | 5714 | O    | ASP | X | 380 | 67.972 | 19.049 | 60.540 | 0.00 | 0.00 |
| ATOM | 5715 | N    | TRP | X | 381 | 67.745 | 18.440 | 58.436 | 0.00 | 0.00 |
| ATOM | 5716 | H    | TRP | X | 381 | 67.515 | 18.750 | 57.503 | 0.00 | 0.00 |
| ATOM | 5717 | CA   | TRP | X | 381 | 67.875 | 16.985 | 58.526 | 0.00 | 0.00 |
| ATOM | 5718 | HA   | TRP | X | 381 | 67.776 | 16.848 | 59.602 | 0.00 | 0.00 |
| ATOM | 5719 | CB   | TRP | X | 381 | 66.785 | 16.233 | 57.663 | 0.00 | 0.00 |
| ATOM | 5720 | HB2  | TRP | X | 381 | 66.776 | 15.158 | 57.842 | 0.00 | 0.00 |



|      |      |      |     |   |     |        |        |        |      |      |
|------|------|------|-----|---|-----|--------|--------|--------|------|------|
| ATOM | 5721 | HB3  | TRP | X | 381 | 65.784 | 16.555 | 57.951 | 0.00 | 0.00 |
| ATOM | 5722 | CG   | TRP | X | 381 | 67.013 | 16.403 | 56.164 | 0.00 | 0.00 |
| ATOM | 5723 | CD1  | TRP | X | 381 | 67.676 | 15.477 | 55.428 | 0.00 | 0.00 |
| ATOM | 5724 | HD1  | TRP | X | 381 | 68.115 | 14.599 | 55.880 | 0.00 | 0.00 |
| ATOM | 5725 | NE1  | TRP | X | 381 | 67.742 | 15.810 | 54.085 | 0.00 | 0.00 |
| ATOM | 5726 | HE1  | TRP | X | 381 | 68.207 | 15.310 | 53.340 | 0.00 | 0.00 |
| ATOM | 5727 | CE2  | TRP | X | 381 | 66.896 | 16.830 | 53.871 | 0.00 | 0.00 |
| ATOM | 5728 | CZ2  | TRP | X | 381 | 66.446 | 17.328 | 52.719 | 0.00 | 0.00 |
| ATOM | 5729 | HZ2  | TRP | X | 381 | 66.632 | 16.843 | 51.772 | 0.00 | 0.00 |
| ATOM | 5730 | CH2  | TRP | X | 381 | 65.696 | 18.535 | 52.737 | 0.00 | 0.00 |
| ATOM | 5731 | HH2  | TRP | X | 381 | 65.356 | 18.988 | 51.817 | 0.00 | 0.00 |
| ATOM | 5732 | CZ3  | TRP | X | 381 | 65.381 | 19.142 | 53.958 | 0.00 | 0.00 |
| ATOM | 5733 | HZ3  | TRP | X | 381 | 64.759 | 20.023 | 54.001 | 0.00 | 0.00 |
| ATOM | 5734 | CE3  | TRP | X | 381 | 65.802 | 18.541 | 55.168 | 0.00 | 0.00 |
| ATOM | 5735 | HE3  | TRP | X | 381 | 65.574 | 18.961 | 56.136 | 0.00 | 0.00 |
| ATOM | 5736 | CD2  | TRP | X | 381 | 66.597 | 17.342 | 55.173 | 0.00 | 0.00 |
| ATOM | 5737 | C    | TRP | X | 381 | 69.263 | 16.551 | 58.123 | 0.00 | 0.00 |
| ATOM | 5738 | O    | TRP | X | 381 | 69.764 | 15.663 | 58.773 | 0.00 | 0.00 |
| ATOM | 5739 | N    | LEU | X | 382 | 69.850 | 17.102 | 57.102 | 0.00 | 0.00 |
| ATOM | 5740 | H    | LEU | X | 382 | 69.327 | 17.774 | 56.559 | 0.00 | 0.00 |
| ATOM | 5741 | CA   | LEU | X | 382 | 71.334 | 16.924 | 56.634 | 0.00 | 0.00 |
| ATOM | 5742 | HA   | LEU | X | 382 | 71.737 | 16.002 | 57.055 | 0.00 | 0.00 |
| ATOM | 5743 | CB   | LEU | X | 382 | 71.392 | 16.955 | 55.121 | 0.00 | 0.00 |
| ATOM | 5744 | HB2  | LEU | X | 382 | 70.618 | 16.345 | 54.656 | 0.00 | 0.00 |
| ATOM | 5745 | HB3  | LEU | X | 382 | 71.258 | 17.981 | 54.781 | 0.00 | 0.00 |
| ATOM | 5746 | CG   | LEU | X | 382 | 72.731 | 16.587 | 54.491 | 0.00 | 0.00 |
| ATOM | 5747 | HG   | LEU | X | 382 | 73.586 | 17.062 | 54.972 | 0.00 | 0.00 |
| ATOM | 5748 | CD1  | LEU | X | 382 | 72.991 | 14.989 | 54.494 | 0.00 | 0.00 |
| ATOM | 5749 | HD11 | LEU | X | 382 | 73.995 | 14.739 | 54.152 | 0.00 | 0.00 |
| ATOM | 5750 | HD12 | LEU | X | 382 | 72.336 | 14.350 | 53.902 | 0.00 | 0.00 |
| ATOM | 5751 | HD13 | LEU | X | 382 | 72.963 | 14.545 | 55.489 | 0.00 | 0.00 |
| ATOM | 5752 | CD2  | LEU | X | 382 | 72.638 | 17.100 | 53.038 | 0.00 | 0.00 |
| ATOM | 5753 | HD21 | LEU | X | 382 | 72.752 | 18.184 | 53.009 | 0.00 | 0.00 |
| ATOM | 5754 | HD22 | LEU | X | 382 | 73.447 | 16.763 | 52.390 | 0.00 | 0.00 |
| ATOM | 5755 | HD23 | LEU | X | 382 | 71.698 | 16.802 | 52.575 | 0.00 | 0.00 |
| ATOM | 5756 | C    | LEU | X | 382 | 72.279 | 18.051 | 57.299 | 0.00 | 0.00 |
| ATOM | 5757 | O    | LEU | X | 382 | 73.279 | 17.695 | 57.923 | 0.00 | 0.00 |
| ATOM | 5758 | N    | HIE | X | 383 | 71.916 | 19.301 | 57.103 | 0.00 | 0.00 |
| ATOM | 5759 | H    | HIE | X | 383 | 71.035 | 19.514 | 56.657 | 0.00 | 0.00 |
| ATOM | 5760 | CA   | HIE | X | 383 | 72.818 | 20.416 | 57.551 | 0.00 | 0.00 |
| ATOM | 5761 | HA   | HIE | X | 383 | 73.272 | 20.272 | 58.531 | 0.00 | 0.00 |
| ATOM | 5762 | CB   | HIE | X | 383 | 73.934 | 20.493 | 56.559 | 0.00 | 0.00 |
| ATOM | 5763 | HB2  | HIE | X | 383 | 74.331 | 19.483 | 56.460 | 0.00 | 0.00 |
| ATOM | 5764 | HB3  | HIE | X | 383 | 73.541 | 20.654 | 55.555 | 0.00 | 0.00 |
| ATOM | 5765 | CG   | HIE | X | 383 | 75.035 | 21.390 | 56.867 | 0.00 | 0.00 |
| ATOM | 5766 | ND1  | HIE | X | 383 | 75.390 | 22.070 | 58.065 | 0.00 | 0.00 |
| ATOM | 5767 | CE1  | HIE | X | 383 | 76.363 | 22.942 | 57.829 | 0.00 | 0.00 |
| ATOM | 5768 | HE1  | HIE | X | 383 | 76.860 | 23.608 | 58.519 | 0.00 | 0.00 |
| ATOM | 5769 | NE2  | HIE | X | 383 | 76.802 | 22.795 | 56.569 | 0.00 | 0.00 |
| ATOM | 5770 | HE2  | HIE | X | 383 | 77.720 | 23.119 | 56.298 | 0.00 | 0.00 |
| ATOM | 5771 | CD2  | HIE | X | 383 | 76.031 | 21.818 | 55.987 | 0.00 | 0.00 |
| ATOM | 5772 | HD2  | HIE | X | 383 | 76.086 | 21.567 | 54.938 | 0.00 | 0.00 |
| ATOM | 5773 | C    | HIE | X | 383 | 72.085 | 21.755 | 57.707 | 0.00 | 0.00 |
| ATOM | 5774 | O    | HIE | X | 383 | 71.673 | 22.388 | 56.682 | 0.00 | 0.00 |
| ATOM | 5775 | N    | PRO | X | 384 | 71.914 | 22.296 | 58.955 | 0.00 | 0.00 |
| ATOM | 5776 | CD   | PRO | X | 384 | 72.610 | 22.013 | 60.169 | 0.00 | 0.00 |
| ATOM | 5777 | HD2  | PRO | X | 384 | 73.609 | 21.589 | 60.272 | 0.00 | 0.00 |
| ATOM | 5778 | HD3  | PRO | X | 384 | 72.042 | 21.157 | 60.534 | 0.00 | 0.00 |
| ATOM | 5779 | CG   | PRO | X | 384 | 72.416 | 23.237 | 61.177 | 0.00 | 0.00 |
| ATOM | 5780 | HG2  | PRO | X | 384 | 73.136 | 24.030 | 60.973 | 0.00 | 0.00 |
| ATOM | 5781 | HB3  | PRO | X | 384 | 72.291 | 22.983 | 62.229 | 0.00 | 0.00 |
| ATOM | 5782 | CB   | PRO | X | 384 | 71.155 | 23.817 | 60.626 | 0.00 | 0.00 |
| ATOM | 5783 | HB2  | PRO | X | 384 | 71.172 | 24.878 | 60.873 | 0.00 | 0.00 |
| ATOM | 5784 | HB3  | PRO | X | 384 | 70.310 | 23.296 | 61.076 | 0.00 | 0.00 |
| ATOM | 5785 | CA   | PRO | X | 384 | 71.240 | 23.585 | 59.128 | 0.00 | 0.00 |
| ATOM | 5786 | HA   | PRO | X | 384 | 70.210 | 23.533 | 58.773 | 0.00 | 0.00 |
| ATOM | 5787 | C    | PRO | X | 384 | 71.864 | 24.834 | 58.485 | 0.00 | 0.00 |

|      |      |     |     |   |     |        |        |        |      |      |
|------|------|-----|-----|---|-----|--------|--------|--------|------|------|
| ATOM | 5788 | O   | PRO | X | 384 | 71.153 | 25.707 | 57.985 | 0.00 | 0.00 |
| ATOM | 5789 | N   | GLU | X | 385 | 73.174 | 24.911 | 58.321 | 0.00 | 0.00 |
| ATOM | 5790 | H   | GLU | X | 385 | 73.678 | 24.040 | 58.402 | 0.00 | 0.00 |
| ATOM | 5791 | CA  | GLU | X | 385 | 73.976 | 26.153 | 58.001 | 0.00 | 0.00 |
| ATOM | 5792 | HA  | GLU | X | 385 | 73.300 | 26.950 | 58.310 | 0.00 | 0.00 |
| ATOM | 5793 | CB  | GLU | X | 385 | 75.140 | 26.105 | 58.971 | 0.00 | 0.00 |
| ATOM | 5794 | HB2 | GLU | X | 385 | 75.675 | 25.157 | 59.023 | 0.00 | 0.00 |
| ATOM | 5795 | HB3 | GLU | X | 385 | 75.897 | 26.803 | 58.613 | 0.00 | 0.00 |
| ATOM | 5796 | CG  | GLU | X | 385 | 74.650 | 26.488 | 60.426 | 0.00 | 0.00 |
| ATOM | 5797 | HG2 | GLU | X | 385 | 73.915 | 27.292 | 60.371 | 0.00 | 0.00 |
| ATOM | 5798 | HG3 | GLU | X | 385 | 74.180 | 25.592 | 60.831 | 0.00 | 0.00 |
| ATOM | 5799 | CD  | GLU | X | 385 | 75.792 | 27.030 | 61.298 | 0.00 | 0.00 |
| ATOM | 5800 | OE1 | GLU | X | 385 | 76.338 | 26.210 | 62.019 | 0.00 | 0.00 |
| ATOM | 5801 | OE2 | GLU | X | 385 | 76.123 | 28.215 | 61.196 | 0.00 | 0.00 |
| ATOM | 5802 | C   | GLU | X | 385 | 74.454 | 26.144 | 56.526 | 0.00 | 0.00 |
| ATOM | 5803 | O   | GLU | X | 385 | 75.455 | 26.790 | 56.178 | 0.00 | 0.00 |
| ATOM | 5804 | N   | ASP | X | 386 | 73.976 | 25.287 | 55.640 | 0.00 | 0.00 |
| ATOM | 5805 | H   | ASP | X | 386 | 73.081 | 24.889 | 55.887 | 0.00 | 0.00 |
| ATOM | 5806 | CA  | ASP | X | 386 | 74.406 | 25.280 | 54.216 | 0.00 | 0.00 |
| ATOM | 5807 | HA  | ASP | X | 386 | 75.495 | 25.292 | 54.161 | 0.00 | 0.00 |
| ATOM | 5808 | CB  | ASP | X | 386 | 73.999 | 23.869 | 53.655 | 0.00 | 0.00 |
| ATOM | 5809 | HB2 | ASP | X | 386 | 74.686 | 23.111 | 54.030 | 0.00 | 0.00 |
| ATOM | 5810 | HB3 | ASP | X | 386 | 73.021 | 23.514 | 53.979 | 0.00 | 0.00 |
| ATOM | 5811 | CG  | ASP | X | 386 | 74.119 | 23.807 | 52.124 | 0.00 | 0.00 |
| ATOM | 5812 | OD1 | ASP | X | 386 | 73.646 | 24.715 | 51.420 | 0.00 | 0.00 |
| ATOM | 5813 | OD2 | ASP | X | 386 | 74.744 | 22.812 | 51.673 | 0.00 | 0.00 |
| ATOM | 5814 | C   | ASP | X | 386 | 73.866 | 26.491 | 53.531 | 0.00 | 0.00 |
| ATOM | 5815 | O   | ASP | X | 386 | 72.687 | 26.795 | 53.803 | 0.00 | 0.00 |
| ATOM | 5816 | N   | PRO | X | 387 | 74.620 | 27.356 | 52.819 | 0.00 | 0.00 |
| ATOM | 5817 | CD  | PRO | X | 387 | 76.023 | 27.143 | 52.333 | 0.00 | 0.00 |
| ATOM | 5818 | HD2 | PRO | X | 387 | 76.318 | 26.109 | 52.154 | 0.00 | 0.00 |
| ATOM | 5819 | HD3 | PRO | X | 387 | 76.761 | 27.641 | 52.963 | 0.00 | 0.00 |
| ATOM | 5820 | CG  | PRO | X | 387 | 76.065 | 27.973 | 51.052 | 0.00 | 0.00 |
| ATOM | 5821 | HG2 | PRO | X | 387 | 75.492 | 27.544 | 50.230 | 0.00 | 0.00 |
| ATOM | 5822 | HG3 | PRO | X | 387 | 77.082 | 28.141 | 50.697 | 0.00 | 0.00 |
| ATOM | 5823 | CB  | PRO | X | 387 | 75.327 | 29.195 | 51.450 | 0.00 | 0.00 |
| ATOM | 5824 | HB2 | PRO | X | 387 | 74.862 | 29.598 | 50.550 | 0.00 | 0.00 |
| ATOM | 5825 | HB3 | PRO | X | 387 | 75.920 | 29.848 | 52.090 | 0.00 | 0.00 |
| ATOM | 5826 | CA  | PRO | X | 387 | 74.134 | 28.674 | 52.283 | 0.00 | 0.00 |
| ATOM | 5827 | HA  | PRO | X | 387 | 74.002 | 29.419 | 53.068 | 0.00 | 0.00 |
| ATOM | 5828 | C   | PRO | X | 387 | 72.909 | 28.570 | 51.363 | 0.00 | 0.00 |
| ATOM | 5829 | O   | PRO | X | 387 | 72.281 | 29.581 | 51.124 | 0.00 | 0.00 |
| ATOM | 5830 | N   | ALA | X | 388 | 72.647 | 27.428 | 50.710 | 0.00 | 0.00 |
| ATOM | 5831 | H   | ALA | X | 388 | 73.289 | 26.648 | 50.746 | 0.00 | 0.00 |
| ATOM | 5832 | CA  | ALA | X | 388 | 71.448 | 27.212 | 49.883 | 0.00 | 0.00 |
| ATOM | 5833 | HA  | ALA | X | 388 | 71.249 | 28.117 | 49.308 | 0.00 | 0.00 |
| ATOM | 5834 | CB  | ALA | X | 388 | 71.927 | 26.204 | 48.913 | 0.00 | 0.00 |
| ATOM | 5835 | HB1 | ALA | X | 388 | 72.275 | 25.299 | 49.411 | 0.00 | 0.00 |
| ATOM | 5836 | HB2 | ALA | X | 388 | 72.814 | 26.488 | 48.347 | 0.00 | 0.00 |
| ATOM | 5837 | HB3 | ALA | X | 388 | 71.099 | 25.877 | 48.285 | 0.00 | 0.00 |
| ATOM | 5838 | C   | ALA | X | 388 | 70.291 | 26.691 | 50.794 | 0.00 | 0.00 |
| ATOM | 5839 | O   | ALA | X | 388 | 69.226 | 27.317 | 50.737 | 0.00 | 0.00 |
| ATOM | 5840 | N   | ARG | X | 389 | 70.587 | 25.759 | 51.686 | 0.00 | 0.00 |
| ATOM | 5841 | H   | ARG | X | 389 | 71.516 | 25.362 | 51.659 | 0.00 | 0.00 |
| ATOM | 5842 | CA  | ARG | X | 389 | 69.562 | 25.331 | 52.697 | 0.00 | 0.00 |
| ATOM | 5843 | HA  | ARG | X | 389 | 68.790 | 24.831 | 52.112 | 0.00 | 0.00 |
| ATOM | 5844 | CB  | ARG | X | 389 | 70.200 | 24.243 | 53.619 | 0.00 | 0.00 |
| ATOM | 5845 | HB2 | ARG | X | 389 | 71.163 | 24.598 | 53.986 | 0.00 | 0.00 |
| ATOM | 5846 | HB3 | ARG | X | 389 | 69.634 | 24.140 | 54.545 | 0.00 | 0.00 |
| ATOM | 5847 | CG  | ARG | X | 389 | 70.380 | 22.880 | 52.848 | 0.00 | 0.00 |
| ATOM | 5848 | HG2 | ARG | X | 389 | 69.394 | 22.678 | 52.430 | 0.00 | 0.00 |
| ATOM | 5849 | HG3 | ARG | X | 389 | 71.120 | 23.014 | 52.059 | 0.00 | 0.00 |
| ATOM | 5850 | CD  | ARG | X | 389 | 70.757 | 21.663 | 53.658 | 0.00 | 0.00 |
| ATOM | 5851 | HD2 | ARG | X | 389 | 71.684 | 21.924 | 54.168 | 0.00 | 0.00 |
| ATOM | 5852 | HD3 | ARG | X | 389 | 69.876 | 21.572 | 54.293 | 0.00 | 0.00 |
| ATOM | 5853 | NE  | ARG | X | 389 | 70.847 | 20.459 | 52.824 | 0.00 | 0.00 |
| ATOM | 5854 | HE  | ARG | X | 389 | 71.786 | 20.336 | 52.474 | 0.00 | 0.00 |

|      |      |      |     |   |     |        |        |        |      |      |
|------|------|------|-----|---|-----|--------|--------|--------|------|------|
| ATOM | 5855 | CZ   | ARG | X | 389 | 69.919 | 19.594 | 52.491 | 0.00 | 0.00 |
| ATOM | 5856 | NH1  | ARG | X | 389 | 68.786 | 19.579 | 53.090 | 0.00 | 0.00 |
| ATOM | 5857 | HH11 | ARG | X | 389 | 68.702 | 19.914 | 54.039 | 0.00 | 0.00 |
| ATOM | 5858 | HH12 | ARG | X | 389 | 68.039 | 18.940 | 52.859 | 0.00 | 0.00 |
| ATOM | 5859 | NH2  | ARG | X | 389 | 70.077 | 18.724 | 51.510 | 0.00 | 0.00 |
| ATOM | 5860 | HH21 | ARG | X | 389 | 70.841 | 18.836 | 50.858 | 0.00 | 0.00 |
| ATOM | 5861 | HH22 | ARG | X | 389 | 69.353 | 18.035 | 51.360 | 0.00 | 0.00 |
| ATOM | 5862 | C    | ARG | X | 389 | 68.971 | 26.542 | 53.434 | 0.00 | 0.00 |
| ATOM | 5863 | O    | ARG | X | 389 | 67.774 | 26.668 | 53.516 | 0.00 | 0.00 |
| ATOM | 5864 | N    | LEU | X | 390 | 69.899 | 27.360 | 54.002 | 0.00 | 0.00 |
| ATOM | 5865 | H    | LEU | X | 390 | 70.883 | 27.144 | 53.939 | 0.00 | 0.00 |
| ATOM | 5866 | CA   | LEU | X | 390 | 69.521 | 28.617 | 54.648 | 0.00 | 0.00 |
| ATOM | 5867 | HA   | LEU | X | 390 | 68.912 | 28.374 | 55.519 | 0.00 | 0.00 |
| ATOM | 5868 | CB   | LEU | X | 390 | 70.741 | 29.449 | 55.145 | 0.00 | 0.00 |
| ATOM | 5869 | HB2  | LEU | X | 390 | 71.316 | 29.573 | 54.227 | 0.00 | 0.00 |
| ATOM | 5870 | HB3  | LEU | X | 390 | 70.488 | 30.415 | 55.583 | 0.00 | 0.00 |
| ATOM | 5871 | CG   | LEU | X | 390 | 71.634 | 28.747 | 56.226 | 0.00 | 0.00 |
| ATOM | 5872 | HG   | LEU | X | 390 | 71.781 | 27.678 | 56.076 | 0.00 | 0.00 |
| ATOM | 5873 | CD1  | LEU | X | 390 | 72.984 | 29.420 | 56.449 | 0.00 | 0.00 |
| ATOM | 5874 | HD11 | LEU | X | 390 | 73.497 | 29.389 | 55.488 | 0.00 | 0.00 |
| ATOM | 5875 | HD12 | LEU | X | 390 | 73.537 | 29.018 | 57.298 | 0.00 | 0.00 |
| ATOM | 5876 | HD13 | LEU | X | 390 | 72.833 | 30.469 | 56.705 | 0.00 | 0.00 |
| ATOM | 5877 | CD2  | LEU | X | 390 | 70.880 | 28.838 | 57.543 | 0.00 | 0.00 |
| ATOM | 5878 | HD21 | LEU | X | 390 | 70.747 | 29.847 | 57.935 | 0.00 | 0.00 |
| ATOM | 5879 | HD22 | LEU | X | 390 | 69.877 | 28.419 | 57.469 | 0.00 | 0.00 |
| ATOM | 5880 | HD23 | LEU | X | 390 | 71.397 | 28.189 | 58.250 | 0.00 | 0.00 |
| ATOM | 5881 | C    | LEU | X | 390 | 68.673 | 29.537 | 53.714 | 0.00 | 0.00 |
| ATOM | 5882 | O    | LEU | X | 390 | 67.597 | 29.928 | 54.184 | 0.00 | 0.00 |
| ATOM | 5883 | N    | ARG | X | 391 | 69.127 | 29.794 | 52.478 | 0.00 | 0.00 |
| ATOM | 5884 | H    | ARG | X | 391 | 69.951 | 29.325 | 52.130 | 0.00 | 0.00 |
| ATOM | 5885 | CA   | ARG | X | 391 | 68.449 | 30.673 | 51.565 | 0.00 | 0.00 |
| ATOM | 5886 | HA   | ARG | X | 391 | 68.514 | 31.679 | 51.980 | 0.00 | 0.00 |
| ATOM | 5887 | CB   | ARG | X | 391 | 69.288 | 30.717 | 50.321 | 0.00 | 0.00 |
| ATOM | 5888 | HB2  | ARG | X | 391 | 70.346 | 30.843 | 50.553 | 0.00 | 0.00 |
| ATOM | 5889 | HB3  | ARG | X | 391 | 69.196 | 29.712 | 49.910 | 0.00 | 0.00 |
| ATOM | 5890 | CG   | ARG | X | 391 | 68.706 | 31.723 | 49.240 | 0.00 | 0.00 |
| ATOM | 5891 | HG2  | ARG | X | 391 | 67.645 | 31.496 | 49.139 | 0.00 | 0.00 |
| ATOM | 5892 | HG3  | ARG | X | 391 | 68.973 | 32.744 | 49.512 | 0.00 | 0.00 |
| ATOM | 5893 | CD   | ARG | X | 391 | 69.294 | 31.557 | 47.818 | 0.00 | 0.00 |
| ATOM | 5894 | HD2  | ARG | X | 391 | 68.788 | 30.778 | 47.248 | 0.00 | 0.00 |
| ATOM | 5895 | HD3  | ARG | X | 391 | 69.100 | 32.506 | 47.318 | 0.00 | 0.00 |
| ATOM | 5896 | NE   | ARG | X | 391 | 70.799 | 31.309 | 48.009 | 0.00 | 0.00 |
| ATOM | 5897 | HE   | ARG | X | 391 | 71.427 | 31.919 | 48.514 | 0.00 | 0.00 |
| ATOM | 5898 | CZ   | ARG | X | 391 | 71.413 | 30.275 | 47.421 | 0.00 | 0.00 |
| ATOM | 5899 | NH1  | ARG | X | 391 | 70.793 | 29.196 | 46.957 | 0.00 | 0.00 |
| ATOM | 5900 | HH11 | ARG | X | 391 | 69.787 | 29.130 | 47.019 | 0.00 | 0.00 |
| ATOM | 5901 | HH12 | ARG | X | 391 | 71.329 | 28.529 | 46.421 | 0.00 | 0.00 |
| ATOM | 5902 | NH2  | ARG | X | 391 | 72.723 | 30.296 | 47.276 | 0.00 | 0.00 |
| ATOM | 5903 | HH21 | ARG | X | 391 | 73.177 | 31.186 | 47.425 | 0.00 | 0.00 |
| ATOM | 5904 | HH22 | ARG | X | 391 | 73.207 | 29.483 | 46.921 | 0.00 | 0.00 |
| ATOM | 5905 | C    | ARG | X | 391 | 67.046 | 30.112 | 51.311 | 0.00 | 0.00 |
| ATOM | 5906 | O    | ARG | X | 391 | 66.143 | 30.835 | 51.424 | 0.00 | 0.00 |
| ATOM | 5907 | N    | GLU | X | 392 | 66.869 | 28.833 | 51.006 | 0.00 | 0.00 |
| ATOM | 5908 | H    | GLU | X | 392 | 67.698 | 28.260 | 51.073 | 0.00 | 0.00 |
| ATOM | 5909 | CA   | GLU | X | 392 | 65.667 | 28.120 | 50.872 | 0.00 | 0.00 |
| ATOM | 5910 | HA   | GLU | X | 392 | 65.099 | 28.543 | 50.043 | 0.00 | 0.00 |
| ATOM | 5911 | CB   | GLU | X | 392 | 65.997 | 26.664 | 50.446 | 0.00 | 0.00 |
| ATOM | 5912 | HB2  | GLU | X | 392 | 66.759 | 26.661 | 49.666 | 0.00 | 0.00 |
| ATOM | 5913 | HB3  | GLU | X | 392 | 66.406 | 26.058 | 51.254 | 0.00 | 0.00 |
| ATOM | 5914 | CG   | GLU | X | 392 | 64.868 | 25.818 | 49.712 | 0.00 | 0.00 |
| ATOM | 5915 | HG2  | GLU | X | 392 | 64.112 | 25.507 | 50.433 | 0.00 | 0.00 |
| ATOM | 5916 | HG3  | GLU | X | 392 | 64.554 | 26.472 | 48.899 | 0.00 | 0.00 |
| ATOM | 5917 | CD   | GLU | X | 392 | 65.530 | 24.589 | 49.099 | 0.00 | 0.00 |
| ATOM | 5918 | OE1  | GLU | X | 392 | 65.309 | 23.533 | 49.668 | 0.00 | 0.00 |
| ATOM | 5919 | OE2  | GLU | X | 392 | 66.092 | 24.749 | 47.966 | 0.00 | 0.00 |
| ATOM | 5920 | C    | GLU | X | 392 | 64.784 | 28.087 | 52.133 | 0.00 | 0.00 |
| ATOM | 5921 | O    | GLU | X | 392 | 63.507 | 27.813 | 51.966 | 0.00 | 0.00 |

|      |      |      |     |   |     |        |        |        |      |      |
|------|------|------|-----|---|-----|--------|--------|--------|------|------|
| ATOM | 5922 | N    | ALA | X | 393 | 65.416 | 28.186 | 53.300 | 0.00 | 0.00 |
| ATOM | 5923 | H    | ALA | X | 393 | 66.414 | 28.333 | 53.354 | 0.00 | 0.00 |
| ATOM | 5924 | CA   | ALA | X | 393 | 64.520 | 28.379 | 54.484 | 0.00 | 0.00 |
| ATOM | 5925 | HA   | ALA | X | 393 | 63.706 | 27.656 | 54.427 | 0.00 | 0.00 |
| ATOM | 5926 | CB   | ALA | X | 393 | 65.322 | 27.943 | 55.686 | 0.00 | 0.00 |
| ATOM | 5927 | HB1  | ALA | X | 393 | 66.363 | 28.252 | 55.585 | 0.00 | 0.00 |
| ATOM | 5928 | HB2  | ALA | X | 393 | 65.321 | 26.853 | 55.649 | 0.00 | 0.00 |
| ATOM | 5929 | HB3  | ALA | X | 393 | 64.859 | 28.233 | 56.630 | 0.00 | 0.00 |
| ATOM | 5930 | C    | ALA | X | 393 | 63.970 | 29.807 | 54.486 | 0.00 | 0.00 |
| ATOM | 5931 | O    | ALA | X | 393 | 62.792 | 29.935 | 54.850 | 0.00 | 0.00 |
| ATOM | 5932 | N    | LEU | X | 394 | 64.593 | 30.845 | 54.052 | 0.00 | 0.00 |
| ATOM | 5933 | H    | LEU | X | 394 | 65.548 | 30.692 | 53.759 | 0.00 | 0.00 |
| ATOM | 5934 | CA   | LEU | X | 394 | 64.111 | 32.249 | 54.091 | 0.00 | 0.00 |
| ATOM | 5935 | HA   | LEU | X | 394 | 63.519 | 32.365 | 54.998 | 0.00 | 0.00 |
| ATOM | 5936 | CB   | LEU | X | 394 | 65.286 | 33.267 | 54.172 | 0.00 | 0.00 |
| ATOM | 5937 | HB2  | LEU | X | 394 | 65.775 | 33.051 | 55.122 | 0.00 | 0.00 |
| ATOM | 5938 | HB3  | LEU | X | 394 | 65.862 | 33.063 | 53.269 | 0.00 | 0.00 |
| ATOM | 5939 | CG   | LEU | X | 394 | 64.922 | 34.716 | 54.304 | 0.00 | 0.00 |
| ATOM | 5940 | HG   | LEU | X | 394 | 64.234 | 35.094 | 53.548 | 0.00 | 0.00 |
| ATOM | 5941 | CD1  | LEU | X | 394 | 64.335 | 35.165 | 55.644 | 0.00 | 0.00 |
| ATOM | 5942 | HD11 | LEU | X | 394 | 63.427 | 34.578 | 55.780 | 0.00 | 0.00 |
| ATOM | 5943 | HD12 | LEU | X | 394 | 64.062 | 36.215 | 55.540 | 0.00 | 0.00 |
| ATOM | 5944 | HD13 | LEU | X | 394 | 65.011 | 34.976 | 56.478 | 0.00 | 0.00 |
| ATOM | 5945 | CD2  | LEU | X | 394 | 66.154 | 35.583 | 54.145 | 0.00 | 0.00 |
| ATOM | 5946 | HD21 | LEU | X | 394 | 66.700 | 35.434 | 53.213 | 0.00 | 0.00 |
| ATOM | 5947 | HD22 | LEU | X | 394 | 65.883 | 36.638 | 54.118 | 0.00 | 0.00 |
| ATOM | 5948 | HD23 | LEU | X | 394 | 66.865 | 35.313 | 54.927 | 0.00 | 0.00 |
| ATOM | 5949 | C    | LEU | X | 394 | 63.069 | 32.507 | 53.001 | 0.00 | 0.00 |
| ATOM | 5950 | O    | LEU | X | 394 | 62.184 | 33.319 | 53.262 | 0.00 | 0.00 |
| ATOM | 5951 | N    | SER | X | 395 | 63.201 | 31.874 | 51.820 | 0.00 | 0.00 |
| ATOM | 5952 | H    | SER | X | 395 | 64.036 | 31.369 | 51.562 | 0.00 | 0.00 |
| ATOM | 5953 | CA   | SER | X | 395 | 62.092 | 31.886 | 50.956 | 0.00 | 0.00 |
| ATOM | 5954 | HA   | SER | X | 395 | 61.800 | 32.920 | 50.773 | 0.00 | 0.00 |
| ATOM | 5955 | CB   | SER | X | 395 | 62.405 | 31.222 | 49.615 | 0.00 | 0.00 |
| ATOM | 5956 | HB2  | SER | X | 395 | 62.815 | 30.237 | 49.836 | 0.00 | 0.00 |
| ATOM | 5957 | HB3  | SER | X | 395 | 61.505 | 30.871 | 49.112 | 0.00 | 0.00 |
| ATOM | 5958 | OG   | SER | X | 395 | 63.283 | 31.928 | 48.737 | 0.00 | 0.00 |
| ATOM | 5959 | HG   | SER | X | 395 | 63.563 | 31.247 | 48.122 | 0.00 | 0.00 |
| ATOM | 5960 | C    | SER | X | 395 | 60.913 | 31.227 | 51.596 | 0.00 | 0.00 |
| ATOM | 5961 | O    | SER | X | 395 | 59.802 | 31.828 | 51.499 | 0.00 | 0.00 |
| ATOM | 5962 | N    | ASP | X | 396 | 61.093 | 30.155 | 52.342 | 0.00 | 0.00 |
| ATOM | 5963 | H    | ASP | X | 396 | 62.014 | 29.773 | 52.502 | 0.00 | 0.00 |
| ATOM | 5964 | CA   | ASP | X | 396 | 59.951 | 29.379 | 52.962 | 0.00 | 0.00 |
| ATOM | 5965 | HA   | ASP | X | 396 | 59.095 | 29.284 | 52.294 | 0.00 | 0.00 |
| ATOM | 5966 | CB   | ASP | X | 396 | 60.482 | 27.942 | 53.199 | 0.00 | 0.00 |
| ATOM | 5967 | HB2  | ASP | X | 396 | 60.988 | 27.473 | 52.355 | 0.00 | 0.00 |
| ATOM | 5968 | HB3  | ASP | X | 396 | 61.310 | 28.032 | 53.902 | 0.00 | 0.00 |
| ATOM | 5969 | CG   | ASP | X | 396 | 59.388 | 26.938 | 53.504 | 0.00 | 0.00 |
| ATOM | 5970 | OD1  | ASP | X | 396 | 59.091 | 26.095 | 52.616 | 0.00 | 0.00 |
| ATOM | 5971 | OD2  | ASP | X | 396 | 58.938 | 26.818 | 54.580 | 0.00 | 0.00 |
| ATOM | 5972 | C    | ASP | X | 396 | 59.326 | 30.180 | 54.075 | 0.00 | 0.00 |
| ATOM | 5973 | O    | ASP | X | 396 | 58.112 | 30.308 | 54.163 | 0.00 | 0.00 |
| ATOM | 5974 | N    | VAL | X | 397 | 60.105 | 30.966 | 54.820 | 0.00 | 0.00 |
| ATOM | 5975 | H    | VAL | X | 397 | 61.076 | 30.697 | 54.741 | 0.00 | 0.00 |
| ATOM | 5976 | CA   | VAL | X | 397 | 59.633 | 32.103 | 55.778 | 0.00 | 0.00 |
| ATOM | 5977 | HA   | VAL | X | 397 | 58.957 | 31.641 | 56.497 | 0.00 | 0.00 |
| ATOM | 5978 | CB   | VAL | X | 397 | 60.783 | 32.535 | 56.636 | 0.00 | 0.00 |
| ATOM | 5979 | HB   | VAL | X | 397 | 61.612 | 32.781 | 55.973 | 0.00 | 0.00 |
| ATOM | 5980 | CG1  | VAL | X | 397 | 60.427 | 33.750 | 57.533 | 0.00 | 0.00 |
| ATOM | 5981 | HG11 | VAL | X | 397 | 59.601 | 33.593 | 58.227 | 0.00 | 0.00 |
| ATOM | 5982 | HG12 | VAL | X | 397 | 61.276 | 33.843 | 58.209 | 0.00 | 0.00 |
| ATOM | 5983 | HG13 | VAL | X | 397 | 60.236 | 34.640 | 56.933 | 0.00 | 0.00 |
| ATOM | 5984 | CG2  | VAL | X | 397 | 61.216 | 31.370 | 57.572 | 0.00 | 0.00 |
| ATOM | 5985 | HG21 | VAL | X | 397 | 60.439 | 31.103 | 58.289 | 0.00 | 0.00 |
| ATOM | 5986 | HG22 | VAL | X | 397 | 61.952 | 31.738 | 58.287 | 0.00 | 0.00 |
| ATOM | 5987 | HG23 | VAL | X | 397 | 61.581 | 30.568 | 56.930 | 0.00 | 0.00 |
| ATOM | 5988 | C    | VAL | X | 397 | 59.047 | 33.320 | 55.085 | 0.00 | 0.00 |

|      |      |      |     |   |     |        |        |        |      |      |
|------|------|------|-----|---|-----|--------|--------|--------|------|------|
| ATOM | 5989 | O    | VAL | X | 397 | 57.922 | 33.769 | 55.475 | 0.00 | 0.00 |
| ATOM | 5990 | N    | VAL | X | 398 | 59.669 | 33.895 | 54.082 | 0.00 | 0.00 |
| ATOM | 5991 | H    | VAL | X | 398 | 60.506 | 33.496 | 53.682 | 0.00 | 0.00 |
| ATOM | 5992 | CA   | VAL | X | 398 | 59.202 | 35.274 | 53.584 | 0.00 | 0.00 |
| ATOM | 5993 | HA   | VAL | X | 398 | 59.273 | 35.930 | 54.451 | 0.00 | 0.00 |
| ATOM | 5994 | CB   | VAL | X | 398 | 60.261 | 35.940 | 52.754 | 0.00 | 0.00 |
| ATOM | 5995 | HB   | VAL | X | 398 | 60.587 | 35.294 | 51.939 | 0.00 | 0.00 |
| ATOM | 5996 | CG1  | VAL | X | 398 | 59.811 | 37.210 | 52.023 | 0.00 | 0.00 |
| ATOM | 5997 | HG11 | VAL | X | 398 | 59.362 | 37.793 | 52.827 | 0.00 | 0.00 |
| ATOM | 5998 | HG12 | VAL | X | 398 | 60.601 | 37.718 | 51.470 | 0.00 | 0.00 |
| ATOM | 5999 | HG13 | VAL | X | 398 | 59.215 | 36.915 | 51.159 | 0.00 | 0.00 |
| ATOM | 6000 | CG2  | VAL | X | 398 | 61.383 | 36.484 | 53.734 | 0.00 | 0.00 |
| ATOM | 6001 | HG21 | VAL | X | 398 | 60.956 | 37.036 | 54.572 | 0.00 | 0.00 |
| ATOM | 6002 | HG22 | VAL | X | 398 | 62.175 | 37.048 | 53.242 | 0.00 | 0.00 |
| ATOM | 6003 | HG23 | VAL | X | 398 | 61.875 | 35.678 | 54.279 | 0.00 | 0.00 |
| ATOM | 6004 | C    | VAL | X | 398 | 57.719 | 35.298 | 52.979 | 0.00 | 0.00 |
| ATOM | 6005 | O    | VAL | X | 398 | 57.105 | 36.356 | 52.985 | 0.00 | 0.00 |
| ATOM | 6006 | N    | GLY | X | 399 | 57.212 | 34.118 | 52.517 | 0.00 | 0.00 |
| ATOM | 6007 | H    | GLY | X | 399 | 57.830 | 33.322 | 52.588 | 0.00 | 0.00 |
| ATOM | 6008 | CA   | GLY | X | 399 | 55.909 | 34.023 | 51.916 | 0.00 | 0.00 |
| ATOM | 6009 | HA2  | GLY | X | 399 | 55.578 | 35.002 | 51.569 | 0.00 | 0.00 |
| ATOM | 6010 | HA3  | GLY | X | 399 | 55.935 | 33.362 | 51.049 | 0.00 | 0.00 |
| ATOM | 6011 | C    | GLY | X | 399 | 54.781 | 33.547 | 52.809 | 0.00 | 0.00 |
| ATOM | 6012 | O    | GLY | X | 399 | 53.670 | 33.734 | 52.411 | 0.00 | 0.00 |
| ATOM | 6013 | N    | ASP | X | 400 | 55.030 | 32.891 | 53.918 | 0.00 | 0.00 |
| ATOM | 6014 | H    | ASP | X | 400 | 56.017 | 32.814 | 54.118 | 0.00 | 0.00 |
| ATOM | 6015 | CA   | ASP | X | 400 | 54.009 | 32.287 | 54.818 | 0.00 | 0.00 |
| ATOM | 6016 | HA   | ASP | X | 400 | 53.344 | 31.651 | 54.233 | 0.00 | 0.00 |
| ATOM | 6017 | CB   | ASP | X | 400 | 54.750 | 31.456 | 55.863 | 0.00 | 0.00 |
| ATOM | 6018 | HB2  | ASP | X | 400 | 55.751 | 31.797 | 56.128 | 0.00 | 0.00 |
| ATOM | 6019 | HB3  | ASP | X | 400 | 54.313 | 31.661 | 56.840 | 0.00 | 0.00 |
| ATOM | 6020 | CG   | ASP | X | 400 | 54.890 | 29.881 | 55.675 | 0.00 | 0.00 |
| ATOM | 6021 | OD1  | ASP | X | 400 | 54.631 | 29.372 | 54.544 | 0.00 | 0.00 |
| ATOM | 6022 | OD2  | ASP | X | 400 | 55.240 | 29.285 | 56.706 | 0.00 | 0.00 |
| ATOM | 6023 | C    | ASP | X | 400 | 53.013 | 33.255 | 55.333 | 0.00 | 0.00 |
| ATOM | 6024 | O    | ASP | X | 400 | 51.890 | 33.445 | 54.776 | 0.00 | 0.00 |
| ATOM | 6025 | N    | HIE | X | 401 | 53.358 | 33.897 | 56.452 | 0.00 | 0.00 |
| ATOM | 6026 | H    | HIE | X | 401 | 54.312 | 33.848 | 56.779 | 0.00 | 0.00 |
| ATOM | 6027 | CA   | HIE | X | 401 | 52.585 | 34.857 | 57.222 | 0.00 | 0.00 |
| ATOM | 6028 | HA   | HIE | X | 401 | 51.656 | 34.393 | 57.553 | 0.00 | 0.00 |
| ATOM | 6029 | CB   | HIE | X | 401 | 53.375 | 35.356 | 58.492 | 0.00 | 0.00 |
| ATOM | 6030 | HB2  | HIE | X | 401 | 52.948 | 36.260 | 58.927 | 0.00 | 0.00 |
| ATOM | 6031 | HB3  | HIE | X | 401 | 53.314 | 34.669 | 59.336 | 0.00 | 0.00 |
| ATOM | 6032 | CG   | HIE | X | 401 | 54.810 | 35.664 | 58.074 | 0.00 | 0.00 |
| ATOM | 6033 | ND1  | HIE | X | 401 | 55.155 | 36.771 | 57.337 | 0.00 | 0.00 |
| ATOM | 6034 | CE1  | HIE | X | 401 | 56.440 | 36.633 | 57.096 | 0.00 | 0.00 |
| ATOM | 6035 | HE1  | HIE | X | 401 | 57.103 | 37.233 | 56.489 | 0.00 | 0.00 |
| ATOM | 6036 | NE2  | HIE | X | 401 | 56.877 | 35.478 | 57.532 | 0.00 | 0.00 |
| ATOM | 6037 | HE2  | HIE | X | 401 | 57.849 | 35.235 | 57.406 | 0.00 | 0.00 |
| ATOM | 6038 | CD2  | HIE | X | 401 | 55.917 | 34.902 | 58.247 | 0.00 | 0.00 |
| ATOM | 6039 | HD2  | HIE | X | 401 | 55.884 | 33.896 | 58.638 | 0.00 | 0.00 |
| ATOM | 6040 | C    | HIE | X | 401 | 52.290 | 36.051 | 56.255 | 0.00 | 0.00 |
| ATOM | 6041 | O    | HIE | X | 401 | 51.337 | 36.764 | 56.567 | 0.00 | 0.00 |
| ATOM | 6042 | N    | ASN | X | 402 | 53.074 | 36.312 | 55.202 | 0.00 | 0.00 |
| ATOM | 6043 | H    | ASN | X | 402 | 53.983 | 35.879 | 55.118 | 0.00 | 0.00 |
| ATOM | 6044 | CA   | ASN | X | 402 | 52.794 | 37.376 | 54.183 | 0.00 | 0.00 |
| ATOM | 6045 | HA   | ASN | X | 402 | 52.485 | 38.244 | 54.765 | 0.00 | 0.00 |
| ATOM | 6046 | CB   | ASN | X | 402 | 54.051 | 37.883 | 53.449 | 0.00 | 0.00 |
| ATOM | 6047 | HB2  | ASN | X | 402 | 54.563 | 36.991 | 53.088 | 0.00 | 0.00 |
| ATOM | 6048 | HB3  | ASN | X | 402 | 53.704 | 38.394 | 52.551 | 0.00 | 0.00 |
| ATOM | 6049 | CG   | ASN | X | 402 | 54.882 | 38.913 | 54.283 | 0.00 | 0.00 |
| ATOM | 6050 | OD1  | ASN | X | 402 | 54.308 | 39.801 | 54.903 | 0.00 | 0.00 |
| ATOM | 6051 | ND2  | ASN | X | 402 | 56.193 | 38.815 | 54.234 | 0.00 | 0.00 |
| ATOM | 6052 | HD21 | ASN | X | 402 | 56.793 | 39.349 | 54.846 | 0.00 | 0.00 |
| ATOM | 6053 | HD22 | ASN | X | 402 | 56.674 | 38.088 | 53.723 | 0.00 | 0.00 |
| ATOM | 6054 | C    | ASN | X | 402 | 51.715 | 36.936 | 53.164 | 0.00 | 0.00 |
| ATOM | 6055 | O    | ASN | X | 402 | 51.022 | 37.829 | 52.754 | 0.00 | 0.00 |

|      |      |      |     |   |     |        |        |        |      |      |
|------|------|------|-----|---|-----|--------|--------|--------|------|------|
| ATOM | 6056 | N    | VAL | X | 403 | 51.622 | 35.619 | 52.843 | 0.00 | 0.00 |
| ATOM | 6057 | H    | VAL | X | 403 | 52.262 | 35.007 | 53.329 | 0.00 | 0.00 |
| ATOM | 6058 | CA   | VAL | X | 403 | 50.745 | 35.103 | 51.741 | 0.00 | 0.00 |
| ATOM | 6059 | HA   | VAL | X | 403 | 49.928 | 35.817 | 51.636 | 0.00 | 0.00 |
| ATOM | 6060 | CB   | VAL | X | 403 | 51.401 | 35.273 | 50.349 | 0.00 | 0.00 |
| ATOM | 6061 | HB   | VAL | X | 403 | 52.415 | 34.880 | 50.427 | 0.00 | 0.00 |
| ATOM | 6062 | CG1  | VAL | X | 403 | 50.486 | 34.636 | 49.267 | 0.00 | 0.00 |
| ATOM | 6063 | HG11 | VAL | X | 403 | 50.873 | 34.766 | 48.257 | 0.00 | 0.00 |
| ATOM | 6064 | HG12 | VAL | X | 403 | 50.442 | 33.560 | 49.435 | 0.00 | 0.00 |
| ATOM | 6065 | HG13 | VAL | X | 403 | 49.497 | 35.095 | 49.297 | 0.00 | 0.00 |
| ATOM | 6066 | CG2  | VAL | X | 403 | 51.510 | 36.695 | 49.861 | 0.00 | 0.00 |
| ATOM | 6067 | HG21 | VAL | X | 403 | 50.518 | 37.133 | 49.758 | 0.00 | 0.00 |
| ATOM | 6068 | HG22 | VAL | X | 403 | 51.930 | 36.704 | 48.855 | 0.00 | 0.00 |
| ATOM | 6069 | HG23 | VAL | X | 403 | 52.186 | 37.222 | 50.535 | 0.00 | 0.00 |
| ATOM | 6070 | C    | VAL | X | 403 | 50.046 | 33.804 | 51.971 | 0.00 | 0.00 |
| ATOM | 6071 | O    | VAL | X | 403 | 48.815 | 33.698 | 52.261 | 0.00 | 0.00 |
| ATOM | 6072 | N    | VAL | X | 404 | 50.861 | 32.739 | 52.004 | 0.00 | 0.00 |
| ATOM | 6073 | H    | VAL | X | 404 | 51.863 | 32.844 | 51.938 | 0.00 | 0.00 |
| ATOM | 6074 | CA   | VAL | X | 404 | 50.382 | 31.354 | 52.036 | 0.00 | 0.00 |
| ATOM | 6075 | HA   | VAL | X | 404 | 49.773 | 31.169 | 51.151 | 0.00 | 0.00 |
| ATOM | 6076 | CB   | VAL | X | 404 | 51.515 | 30.284 | 51.888 | 0.00 | 0.00 |
| ATOM | 6077 | HB   | VAL | X | 404 | 52.088 | 30.110 | 52.799 | 0.00 | 0.00 |
| ATOM | 6078 | CG1  | VAL | X | 404 | 50.875 | 28.947 | 51.396 | 0.00 | 0.00 |
| ATOM | 6079 | HG11 | VAL | X | 404 | 50.236 | 29.058 | 50.521 | 0.00 | 0.00 |
| ATOM | 6080 | HG12 | VAL | X | 404 | 51.654 | 28.239 | 51.111 | 0.00 | 0.00 |
| ATOM | 6081 | HG13 | VAL | X | 404 | 50.371 | 28.543 | 52.274 | 0.00 | 0.00 |
| ATOM | 6082 | CG2  | VAL | X | 404 | 52.436 | 30.694 | 50.729 | 0.00 | 0.00 |
| ATOM | 6083 | HG21 | VAL | X | 404 | 51.881 | 30.574 | 49.799 | 0.00 | 0.00 |
| ATOM | 6084 | HG22 | VAL | X | 404 | 53.327 | 30.077 | 50.612 | 0.00 | 0.00 |
| ATOM | 6085 | HG23 | VAL | X | 404 | 52.753 | 31.736 | 50.786 | 0.00 | 0.00 |
| ATOM | 6086 | C    | VAL | X | 404 | 49.518 | 30.995 | 53.278 | 0.00 | 0.00 |
| ATOM | 6087 | O    | VAL | X | 404 | 48.595 | 30.229 | 53.234 | 0.00 | 0.00 |
| ATOM | 6088 | N    | CYX | X | 405 | 49.766 | 31.533 | 54.491 | 0.00 | 0.00 |
| ATOM | 6089 | H    | CYX | X | 405 | 50.588 | 32.098 | 54.647 | 0.00 | 0.00 |
| ATOM | 6090 | CA   | CYX | X | 405 | 48.882 | 31.560 | 55.595 | 0.00 | 0.00 |
| ATOM | 6091 | HA   | CYX | X | 405 | 48.447 | 30.575 | 55.767 | 0.00 | 0.00 |
| ATOM | 6092 | CB   | CYX | X | 405 | 49.646 | 31.782 | 56.899 | 0.00 | 0.00 |
| ATOM | 6093 | HB2  | CYX | X | 405 | 50.179 | 32.731 | 56.844 | 0.00 | 0.00 |
| ATOM | 6094 | HB3  | CYX | X | 405 | 48.916 | 31.812 | 57.708 | 0.00 | 0.00 |
| ATOM | 6095 | SG   | CYX | X | 405 | 50.912 | 30.523 | 57.158 | 0.00 | 0.00 |
| ATOM | 6096 | C    | CYX | X | 405 | 47.694 | 32.504 | 55.505 | 0.00 | 0.00 |
| ATOM | 6097 | O    | CYX | X | 405 | 46.649 | 31.938 | 55.653 | 0.00 | 0.00 |
| ATOM | 6098 | N    | PRO | X | 406 | 47.728 | 33.785 | 55.132 | 0.00 | 0.00 |
| ATOM | 6099 | CD   | PRO | X | 406 | 48.896 | 34.637 | 55.314 | 0.00 | 0.00 |
| ATOM | 6100 | HD2  | PRO | X | 406 | 49.568 | 34.326 | 54.515 | 0.00 | 0.00 |
| ATOM | 6101 | HD3  | PRO | X | 406 | 49.356 | 34.523 | 56.295 | 0.00 | 0.00 |
| ATOM | 6102 | CG   | PRO | X | 406 | 48.404 | 36.070 | 55.136 | 0.00 | 0.00 |
| ATOM | 6103 | HG2  | PRO | X | 406 | 49.199 | 36.531 | 54.551 | 0.00 | 0.00 |
| ATOM | 6104 | HG3  | PRO | X | 406 | 48.291 | 36.495 | 56.133 | 0.00 | 0.00 |
| ATOM | 6105 | CB   | PRO | X | 406 | 47.182 | 35.968 | 54.338 | 0.00 | 0.00 |
| ATOM | 6106 | HB2  | PRO | X | 406 | 47.317 | 36.055 | 53.260 | 0.00 | 0.00 |
| ATOM | 6107 | HB3  | PRO | X | 406 | 46.435 | 36.728 | 54.569 | 0.00 | 0.00 |
| ATOM | 6108 | CA   | PRO | X | 406 | 46.655 | 34.607 | 54.769 | 0.00 | 0.00 |
| ATOM | 6109 | HA   | PRO | X | 406 | 46.107 | 34.884 | 55.669 | 0.00 | 0.00 |
| ATOM | 6110 | C    | PRO | X | 406 | 45.651 | 33.938 | 53.718 | 0.00 | 0.00 |
| ATOM | 6111 | O    | PRO | X | 406 | 44.431 | 33.929 | 53.933 | 0.00 | 0.00 |
| ATOM | 6112 | N    | VAL | X | 407 | 46.140 | 33.243 | 52.667 | 0.00 | 0.00 |
| ATOM | 6113 | H    | VAL | X | 407 | 47.125 | 33.315 | 52.457 | 0.00 | 0.00 |
| ATOM | 6114 | CA   | VAL | X | 407 | 45.300 | 32.462 | 51.696 | 0.00 | 0.00 |
| ATOM | 6115 | HA   | VAL | X | 407 | 44.386 | 32.960 | 51.374 | 0.00 | 0.00 |
| ATOM | 6116 | CB   | VAL | X | 407 | 46.155 | 32.102 | 50.395 | 0.00 | 0.00 |
| ATOM | 6117 | HB   | VAL | X | 407 | 47.057 | 31.592 | 50.733 | 0.00 | 0.00 |
| ATOM | 6118 | CG1  | VAL | X | 407 | 45.504 | 31.158 | 49.431 | 0.00 | 0.00 |
| ATOM | 6119 | HG11 | VAL | X | 407 | 44.527 | 31.556 | 49.160 | 0.00 | 0.00 |
| ATOM | 6120 | HG12 | VAL | X | 407 | 46.180 | 31.013 | 48.588 | 0.00 | 0.00 |
| ATOM | 6121 | HG13 | VAL | X | 407 | 45.297 | 30.214 | 49.935 | 0.00 | 0.00 |
| ATOM | 6122 | CG2  | VAL | X | 407 | 46.571 | 33.439 | 49.581 | 0.00 | 0.00 |

|      |      |      |     |   |     |        |        |        |      |      |
|------|------|------|-----|---|-----|--------|--------|--------|------|------|
| ATOM | 6123 | HG21 | VAL | X | 407 | 47.300 | 33.187 | 48.810 | 0.00 | 0.00 |
| ATOM | 6124 | HG22 | VAL | X | 407 | 46.995 | 34.229 | 50.201 | 0.00 | 0.00 |
| ATOM | 6125 | HG23 | VAL | X | 407 | 45.739 | 33.994 | 49.148 | 0.00 | 0.00 |
| ATOM | 6126 | C    | VAL | X | 407 | 44.740 | 31.207 | 52.394 | 0.00 | 0.00 |
| ATOM | 6127 | O    | VAL | X | 407 | 43.467 | 31.069 | 52.429 | 0.00 | 0.00 |
| ATOM | 6128 | N    | ALA | X | 408 | 45.568 | 30.386 | 53.095 | 0.00 | 0.00 |
| ATOM | 6129 | H    | ALA | X | 408 | 46.570 | 30.499 | 53.152 | 0.00 | 0.00 |
| ATOM | 6130 | CA   | ALA | X | 408 | 45.016 | 29.175 | 53.841 | 0.00 | 0.00 |
| ATOM | 6131 | HA   | ALA | X | 408 | 44.502 | 28.570 | 53.094 | 0.00 | 0.00 |
| ATOM | 6132 | CB   | ALA | X | 408 | 46.226 | 28.564 | 54.484 | 0.00 | 0.00 |
| ATOM | 6133 | HB1  | ALA | X | 408 | 45.940 | 27.794 | 55.200 | 0.00 | 0.00 |
| ATOM | 6134 | HB2  | ALA | X | 408 | 46.759 | 29.382 | 54.968 | 0.00 | 0.00 |
| ATOM | 6135 | HB3  | ALA | X | 408 | 46.988 | 28.276 | 53.760 | 0.00 | 0.00 |
| ATOM | 6136 | C    | ALA | X | 408 | 43.910 | 29.551 | 54.849 | 0.00 | 0.00 |
| ATOM | 6137 | O    | ALA | X | 408 | 42.878 | 28.855 | 54.932 | 0.00 | 0.00 |
| ATOM | 6138 | N    | GLN | X | 409 | 44.067 | 30.625 | 55.572 | 0.00 | 0.00 |
| ATOM | 6139 | H    | GLN | X | 409 | 44.901 | 31.194 | 55.527 | 0.00 | 0.00 |
| ATOM | 6140 | CA   | GLN | X | 409 | 43.110 | 30.872 | 56.661 | 0.00 | 0.00 |
| ATOM | 6141 | HA   | GLN | X | 409 | 42.710 | 29.960 | 57.104 | 0.00 | 0.00 |
| ATOM | 6142 | CB   | GLN | X | 409 | 43.679 | 31.744 | 57.742 | 0.00 | 0.00 |
| ATOM | 6143 | HB2  | GLN | X | 409 | 44.253 | 32.511 | 57.222 | 0.00 | 0.00 |
| ATOM | 6144 | HB3  | GLN | X | 409 | 42.893 | 32.260 | 58.293 | 0.00 | 0.00 |
| ATOM | 6145 | CG   | GLN | X | 409 | 44.702 | 31.000 | 58.640 | 0.00 | 0.00 |
| ATOM | 6146 | HG2  | GLN | X | 409 | 44.145 | 30.268 | 59.225 | 0.00 | 0.00 |
| ATOM | 6147 | HG3  | GLN | X | 409 | 45.462 | 30.484 | 58.052 | 0.00 | 0.00 |
| ATOM | 6148 | CD   | GLN | X | 409 | 45.326 | 31.953 | 59.587 | 0.00 | 0.00 |
| ATOM | 6149 | OE1  | GLN | X | 409 | 45.271 | 33.134 | 59.432 | 0.00 | 0.00 |
| ATOM | 6150 | NE2  | GLN | X | 409 | 46.030 | 31.525 | 60.630 | 0.00 | 0.00 |
| ATOM | 6151 | HE21 | GLN | X | 409 | 46.591 | 32.228 | 61.090 | 0.00 | 0.00 |
| ATOM | 6152 | HE22 | GLN | X | 409 | 46.149 | 30.540 | 60.822 | 0.00 | 0.00 |
| ATOM | 6153 | C    | GLN | X | 409 | 41.838 | 31.587 | 56.145 | 0.00 | 0.00 |
| ATOM | 6154 | O    | GLN | X | 409 | 40.782 | 31.382 | 56.738 | 0.00 | 0.00 |
| ATOM | 6155 | N    | LEU | X | 410 | 41.972 | 32.373 | 55.024 | 0.00 | 0.00 |
| ATOM | 6156 | H    | LEU | X | 410 | 42.885 | 32.281 | 54.602 | 0.00 | 0.00 |
| ATOM | 6157 | CA   | LEU | X | 410 | 40.850 | 33.176 | 54.402 | 0.00 | 0.00 |
| ATOM | 6158 | HA   | LEU | X | 410 | 40.243 | 33.724 | 55.123 | 0.00 | 0.00 |
| ATOM | 6159 | CB   | LEU | X | 410 | 41.428 | 34.030 | 53.305 | 0.00 | 0.00 |
| ATOM | 6160 | HB2  | LEU | X | 410 | 42.215 | 34.703 | 53.647 | 0.00 | 0.00 |
| ATOM | 6161 | HB3  | LEU | X | 410 | 41.828 | 33.512 | 52.433 | 0.00 | 0.00 |
| ATOM | 6162 | CG   | LEU | X | 410 | 40.273 | 34.913 | 52.794 | 0.00 | 0.00 |
| ATOM | 6163 | HG   | LEU | X | 410 | 39.331 | 34.365 | 52.836 | 0.00 | 0.00 |
| ATOM | 6164 | CD1  | LEU | X | 410 | 40.168 | 36.144 | 53.686 | 0.00 | 0.00 |
| ATOM | 6165 | HD11 | LEU | X | 410 | 39.377 | 36.792 | 53.308 | 0.00 | 0.00 |
| ATOM | 6166 | HD12 | LEU | X | 410 | 41.090 | 36.725 | 53.719 | 0.00 | 0.00 |
| ATOM | 6167 | HD13 | LEU | X | 410 | 39.953 | 35.915 | 54.730 | 0.00 | 0.00 |
| ATOM | 6168 | CD2  | LEU | X | 410 | 40.520 | 35.288 | 51.351 | 0.00 | 0.00 |
| ATOM | 6169 | HD21 | LEU | X | 410 | 41.412 | 35.907 | 51.251 | 0.00 | 0.00 |
| ATOM | 6170 | HD22 | LEU | X | 410 | 40.709 | 34.402 | 50.745 | 0.00 | 0.00 |
| ATOM | 6171 | HD23 | LEU | X | 410 | 39.725 | 35.898 | 50.921 | 0.00 | 0.00 |
| ATOM | 6172 | C    | LEU | X | 410 | 39.924 | 32.025 | 53.983 | 0.00 | 0.00 |
| ATOM | 6173 | O    | LEU | X | 410 | 38.728 | 31.983 | 54.346 | 0.00 | 0.00 |
| ATOM | 6174 | N    | ALA | X | 411 | 40.452 | 31.111 | 53.198 | 0.00 | 0.00 |
| ATOM | 6175 | H    | ALA | X | 411 | 41.430 | 31.229 | 52.976 | 0.00 | 0.00 |
| ATOM | 6176 | CA   | ALA | X | 411 | 39.811 | 29.934 | 52.632 | 0.00 | 0.00 |
| ATOM | 6177 | HA   | ALA | X | 411 | 38.963 | 30.296 | 52.050 | 0.00 | 0.00 |
| ATOM | 6178 | CB   | ALA | X | 411 | 40.807 | 29.264 | 51.639 | 0.00 | 0.00 |
| ATOM | 6179 | HB1  | ALA | X | 411 | 40.267 | 28.354 | 51.380 | 0.00 | 0.00 |
| ATOM | 6180 | HB2  | ALA | X | 411 | 41.827 | 29.063 | 51.967 | 0.00 | 0.00 |
| ATOM | 6181 | HB3  | ALA | X | 411 | 40.804 | 29.689 | 50.635 | 0.00 | 0.00 |
| ATOM | 6182 | C    | ALA | X | 411 | 39.250 | 28.896 | 53.654 | 0.00 | 0.00 |
| ATOM | 6183 | O    | ALA | X | 411 | 38.400 | 28.024 | 53.365 | 0.00 | 0.00 |
| ATOM | 6184 | N    | GLY | X | 412 | 39.561 | 29.184 | 54.907 | 0.00 | 0.00 |
| ATOM | 6185 | H    | GLY | X | 412 | 40.290 | 29.870 | 55.039 | 0.00 | 0.00 |
| ATOM | 6186 | CA   | GLY | X | 412 | 39.147 | 28.362 | 56.069 | 0.00 | 0.00 |
| ATOM | 6187 | HA2  | GLY | X | 412 | 39.135 | 27.320 | 55.751 | 0.00 | 0.00 |
| ATOM | 6188 | HA3  | GLY | X | 412 | 39.854 | 28.590 | 56.866 | 0.00 | 0.00 |
| ATOM | 6189 | C    | GLY | X | 412 | 37.770 | 28.794 | 56.445 | 0.00 | 0.00 |

|      |      |      |     |   |     |        |        |        |      |      |
|------|------|------|-----|---|-----|--------|--------|--------|------|------|
| ATOM | 6190 | O    | GLY | X | 412 | 36.757 | 28.197 | 56.121 | 0.00 | 0.00 |
| ATOM | 6191 | N    | ARG | X | 413 | 37.754 | 30.024 | 56.976 | 0.00 | 0.00 |
| ATOM | 6192 | H    | ARG | X | 413 | 38.604 | 30.550 | 56.829 | 0.00 | 0.00 |
| ATOM | 6193 | CA   | ARG | X | 413 | 36.486 | 30.760 | 57.078 | 0.00 | 0.00 |
| ATOM | 6194 | HA   | ARG | X | 413 | 36.061 | 30.224 | 57.927 | 0.00 | 0.00 |
| ATOM | 6195 | CB   | ARG | X | 413 | 36.780 | 32.195 | 57.423 | 0.00 | 0.00 |
| ATOM | 6196 | HB2  | ARG | X | 413 | 37.453 | 32.373 | 58.261 | 0.00 | 0.00 |
| ATOM | 6197 | HB3  | ARG | X | 413 | 37.107 | 32.740 | 56.537 | 0.00 | 0.00 |
| ATOM | 6198 | CG   | ARG | X | 413 | 35.553 | 32.918 | 58.020 | 0.00 | 0.00 |
| ATOM | 6199 | HG2  | ARG | X | 413 | 35.919 | 33.926 | 58.213 | 0.00 | 0.00 |
| ATOM | 6200 | HG3  | ARG | X | 413 | 34.862 | 32.955 | 57.178 | 0.00 | 0.00 |
| ATOM | 6201 | CD   | ARG | X | 413 | 34.920 | 32.480 | 59.303 | 0.00 | 0.00 |
| ATOM | 6202 | HD2  | ARG | X | 413 | 34.746 | 31.404 | 59.328 | 0.00 | 0.00 |
| ATOM | 6203 | HD3  | ARG | X | 413 | 35.582 | 32.834 | 60.093 | 0.00 | 0.00 |
| ATOM | 6204 | NE   | ARG | X | 413 | 33.707 | 33.345 | 59.451 | 0.00 | 0.00 |
| ATOM | 6205 | HE   | ARG | X | 413 | 33.591 | 34.139 | 58.838 | 0.00 | 0.00 |
| ATOM | 6206 | CZ   | ARG | X | 413 | 32.707 | 33.126 | 60.369 | 0.00 | 0.00 |
| ATOM | 6207 | NH1  | ARG | X | 413 | 32.790 | 32.236 | 61.373 | 0.00 | 0.00 |
| ATOM | 6208 | HH11 | ARG | X | 413 | 33.581 | 31.608 | 61.384 | 0.00 | 0.00 |
| ATOM | 6209 | HH12 | ARG | X | 413 | 32.128 | 32.106 | 62.124 | 0.00 | 0.00 |
| ATOM | 6210 | NH2  | ARG | X | 413 | 31.600 | 33.846 | 60.372 | 0.00 | 0.00 |
| ATOM | 6211 | HH21 | ARG | X | 413 | 31.498 | 34.587 | 59.693 | 0.00 | 0.00 |
| ATOM | 6212 | HH22 | ARG | X | 413 | 30.830 | 33.774 | 61.021 | 0.00 | 0.00 |
| ATOM | 6213 | C    | ARG | X | 413 | 35.394 | 30.729 | 55.950 | 0.00 | 0.00 |
| ATOM | 6214 | O    | ARG | X | 413 | 34.226 | 30.610 | 56.259 | 0.00 | 0.00 |
| ATOM | 6215 | N    | LEU | X | 414 | 35.873 | 30.836 | 54.737 | 0.00 | 0.00 |
| ATOM | 6216 | H    | LEU | X | 414 | 36.848 | 31.049 | 54.581 | 0.00 | 0.00 |
| ATOM | 6217 | CA   | LEU | X | 414 | 35.015 | 30.931 | 53.554 | 0.00 | 0.00 |
| ATOM | 6218 | HA   | LEU | X | 414 | 34.214 | 31.662 | 53.665 | 0.00 | 0.00 |
| ATOM | 6219 | CB   | LEU | X | 414 | 35.802 | 31.325 | 52.310 | 0.00 | 0.00 |
| ATOM | 6220 | HB2  | LEU | X | 414 | 36.653 | 30.645 | 52.331 | 0.00 | 0.00 |
| ATOM | 6221 | HB3  | LEU | X | 414 | 35.232 | 31.118 | 51.404 | 0.00 | 0.00 |
| ATOM | 6222 | CG   | LEU | X | 414 | 36.284 | 32.780 | 52.305 | 0.00 | 0.00 |
| ATOM | 6223 | HG   | LEU | X | 414 | 36.842 | 33.013 | 53.212 | 0.00 | 0.00 |
| ATOM | 6224 | CD1  | LEU | X | 414 | 37.216 | 33.073 | 51.134 | 0.00 | 0.00 |
| ATOM | 6225 | HD11 | LEU | X | 414 | 38.169 | 32.588 | 51.347 | 0.00 | 0.00 |
| ATOM | 6226 | HD12 | LEU | X | 414 | 37.534 | 34.113 | 51.067 | 0.00 | 0.00 |
| ATOM | 6227 | HD13 | LEU | X | 414 | 36.838 | 32.852 | 50.135 | 0.00 | 0.00 |
| ATOM | 6228 | CD2  | LEU | X | 414 | 35.072 | 33.684 | 52.156 | 0.00 | 0.00 |
| ATOM | 6229 | HD21 | LEU | X | 414 | 34.550 | 33.679 | 53.113 | 0.00 | 0.00 |
| ATOM | 6230 | HD22 | LEU | X | 414 | 35.305 | 34.708 | 51.862 | 0.00 | 0.00 |
| ATOM | 6231 | HD23 | LEU | X | 414 | 34.382 | 33.236 | 51.441 | 0.00 | 0.00 |
| ATOM | 6232 | C    | LEU | X | 414 | 34.305 | 29.580 | 53.329 | 0.00 | 0.00 |
| ATOM | 6233 | O    | LEU | X | 414 | 33.088 | 29.522 | 53.268 | 0.00 | 0.00 |
| ATOM | 6234 | N    | ALA | X | 415 | 34.980 | 28.411 | 53.424 | 0.00 | 0.00 |
| ATOM | 6235 | H    | ALA | X | 415 | 35.988 | 28.373 | 53.483 | 0.00 | 0.00 |
| ATOM | 6236 | CA   | ALA | X | 415 | 34.378 | 27.035 | 53.443 | 0.00 | 0.00 |
| ATOM | 6237 | HA   | ALA | X | 415 | 33.663 | 27.095 | 52.621 | 0.00 | 0.00 |
| ATOM | 6238 | CB   | ALA | X | 415 | 35.372 | 25.991 | 52.928 | 0.00 | 0.00 |
| ATOM | 6239 | HB1  | ALA | X | 415 | 36.006 | 25.613 | 53.731 | 0.00 | 0.00 |
| ATOM | 6240 | HB2  | ALA | X | 415 | 36.110 | 26.337 | 52.204 | 0.00 | 0.00 |
| ATOM | 6241 | HB3  | ALA | X | 415 | 34.872 | 25.147 | 52.452 | 0.00 | 0.00 |
| ATOM | 6242 | C    | ALA | X | 415 | 33.567 | 26.707 | 54.707 | 0.00 | 0.00 |
| ATOM | 6243 | O    | ALA | X | 415 | 32.586 | 26.010 | 54.560 | 0.00 | 0.00 |
| ATOM | 6244 | N    | ALA | X | 416 | 33.977 | 27.168 | 55.891 | 0.00 | 0.00 |
| ATOM | 6245 | H    | ALA | X | 416 | 34.835 | 27.678 | 56.042 | 0.00 | 0.00 |
| ATOM | 6246 | CA   | ALA | X | 416 | 33.188 | 26.920 | 57.126 | 0.00 | 0.00 |
| ATOM | 6247 | HA   | ALA | X | 416 | 32.981 | 25.873 | 57.347 | 0.00 | 0.00 |
| ATOM | 6248 | CB   | ALA | X | 416 | 34.068 | 27.362 | 58.324 | 0.00 | 0.00 |
| ATOM | 6249 | HB1  | ALA | X | 416 | 33.781 | 26.827 | 59.229 | 0.00 | 0.00 |
| ATOM | 6250 | HB2  | ALA | X | 416 | 34.063 | 28.430 | 58.541 | 0.00 | 0.00 |
| ATOM | 6251 | HB3  | ALA | X | 416 | 35.121 | 27.223 | 58.076 | 0.00 | 0.00 |
| ATOM | 6252 | C    | ALA | X | 416 | 31.803 | 27.650 | 57.094 | 0.00 | 0.00 |
| ATOM | 6253 | O    | ALA | X | 416 | 30.759 | 26.995 | 57.344 | 0.00 | 0.00 |
| ATOM | 6254 | N    | GLN | X | 417 | 31.854 | 28.827 | 56.474 | 0.00 | 0.00 |
| ATOM | 6255 | H    | GLN | X | 417 | 32.739 | 29.315 | 56.483 | 0.00 | 0.00 |
| ATOM | 6256 | CA   | GLN | X | 417 | 30.644 | 29.602 | 56.239 | 0.00 | 0.00 |



|      |      |      |     |   |     |        |        |        |      |      |
|------|------|------|-----|---|-----|--------|--------|--------|------|------|
| ATOM | 6257 | HA   | GLN | X | 417 | 30.026 | 29.467 | 57.127 | 0.00 | 0.00 |
| ATOM | 6258 | CB   | GLN | X | 417 | 30.833 | 31.122 | 56.093 | 0.00 | 0.00 |
| ATOM | 6259 | HB2  | GLN | X | 417 | 31.580 | 31.264 | 55.311 | 0.00 | 0.00 |
| ATOM | 6260 | HB3  | GLN | X | 417 | 29.912 | 31.668 | 55.888 | 0.00 | 0.00 |
| ATOM | 6261 | CG   | GLN | X | 417 | 31.412 | 31.686 | 57.436 | 0.00 | 0.00 |
| ATOM | 6262 | HG2  | GLN | X | 417 | 32.435 | 31.332 | 57.562 | 0.00 | 0.00 |
| ATOM | 6263 | HG3  | GLN | X | 417 | 31.410 | 32.773 | 57.362 | 0.00 | 0.00 |
| ATOM | 6264 | CD   | GLN | X | 417 | 30.646 | 31.216 | 58.738 | 0.00 | 0.00 |
| ATOM | 6265 | OE1  | GLN | X | 417 | 31.187 | 30.509 | 59.613 | 0.00 | 0.00 |
| ATOM | 6266 | NE2  | GLN | X | 417 | 29.333 | 31.394 | 58.923 | 0.00 | 0.00 |
| ATOM | 6267 | HE21 | GLN | X | 417 | 28.950 | 30.965 | 59.754 | 0.00 | 0.00 |
| ATOM | 6268 | HE22 | GLN | X | 417 | 28.729 | 31.904 | 58.295 | 0.00 | 0.00 |
| ATOM | 6269 | C    | GLN | X | 417 | 29.893 | 29.120 | 54.973 | 0.00 | 0.00 |
| ATOM | 6270 | O    | GLN | X | 417 | 28.736 | 29.554 | 54.751 | 0.00 | 0.00 |
| ATOM | 6271 | N    | GLY | X | 418 | 30.335 | 28.167 | 54.142 | 0.00 | 0.00 |
| ATOM | 6272 | H    | GLY | X | 418 | 31.183 | 27.722 | 54.463 | 0.00 | 0.00 |
| ATOM | 6273 | CA   | GLY | X | 418 | 29.581 | 27.645 | 53.006 | 0.00 | 0.00 |
| ATOM | 6274 | HA2  | GLY | X | 418 | 30.104 | 26.739 | 52.700 | 0.00 | 0.00 |
| ATOM | 6275 | HA3  | GLY | X | 418 | 28.559 | 27.490 | 53.354 | 0.00 | 0.00 |
| ATOM | 6276 | C    | GLY | X | 418 | 29.605 | 28.456 | 51.758 | 0.00 | 0.00 |
| ATOM | 6277 | O    | GLY | X | 418 | 28.651 | 28.330 | 50.951 | 0.00 | 0.00 |
| ATOM | 6278 | N    | ALA | X | 419 | 30.685 | 29.238 | 51.444 | 0.00 | 0.00 |
| ATOM | 6279 | H    | ALA | X | 419 | 31.386 | 29.267 | 52.170 | 0.00 | 0.00 |
| ATOM | 6280 | CA   | ALA | X | 419 | 31.050 | 29.527 | 50.095 | 0.00 | 0.00 |
| ATOM | 6281 | HA   | ALA | X | 419 | 30.193 | 29.947 | 49.568 | 0.00 | 0.00 |
| ATOM | 6282 | CB   | ALA | X | 419 | 32.042 | 30.682 | 50.156 | 0.00 | 0.00 |
| ATOM | 6283 | HB1  | ALA | X | 419 | 31.571 | 31.617 | 50.459 | 0.00 | 0.00 |
| ATOM | 6284 | HB2  | ALA | X | 419 | 32.504 | 30.796 | 49.175 | 0.00 | 0.00 |
| ATOM | 6285 | HB3  | ALA | X | 419 | 32.809 | 30.416 | 50.883 | 0.00 | 0.00 |
| ATOM | 6286 | C    | ALA | X | 419 | 31.553 | 28.337 | 49.312 | 0.00 | 0.00 |
| ATOM | 6287 | O    | ALA | X | 419 | 32.132 | 27.389 | 49.892 | 0.00 | 0.00 |
| ATOM | 6288 | N    | ARG | X | 420 | 31.382 | 28.330 | 47.942 | 0.00 | 0.00 |
| ATOM | 6289 | H    | ARG | X | 420 | 30.852 | 29.022 | 47.431 | 0.00 | 0.00 |
| ATOM | 6290 | CA   | ARG | X | 420 | 32.082 | 27.377 | 47.071 | 0.00 | 0.00 |
| ATOM | 6291 | HA   | ARG | X | 420 | 32.155 | 26.445 | 47.631 | 0.00 | 0.00 |
| ATOM | 6292 | CB   | ARG | X | 420 | 31.253 | 27.106 | 45.786 | 0.00 | 0.00 |
| ATOM | 6293 | HB2  | ARG | X | 420 | 30.213 | 26.884 | 46.023 | 0.00 | 0.00 |
| ATOM | 6294 | HB3  | ARG | X | 420 | 31.404 | 27.913 | 45.068 | 0.00 | 0.00 |
| ATOM | 6295 | CG   | ARG | X | 420 | 31.771 | 25.799 | 45.205 | 0.00 | 0.00 |
| ATOM | 6296 | HG2  | ARG | X | 420 | 31.571 | 25.768 | 44.134 | 0.00 | 0.00 |
| ATOM | 6297 | HG3  | ARG | X | 420 | 32.859 | 25.796 | 45.275 | 0.00 | 0.00 |
| ATOM | 6298 | CD   | ARG | X | 420 | 31.244 | 24.479 | 45.823 | 0.00 | 0.00 |
| ATOM | 6299 | HD2  | ARG | X | 420 | 31.770 | 23.626 | 45.394 | 0.00 | 0.00 |
| ATOM | 6300 | HD3  | ARG | X | 420 | 31.499 | 24.526 | 46.882 | 0.00 | 0.00 |
| ATOM | 6301 | NE   | ARG | X | 420 | 29.860 | 24.353 | 45.450 | 0.00 | 0.00 |
| ATOM | 6302 | HE   | ARG | X | 420 | 29.686 | 24.538 | 44.473 | 0.00 | 0.00 |
| ATOM | 6303 | CZ   | ARG | X | 420 | 28.891 | 23.903 | 46.255 | 0.00 | 0.00 |
| ATOM | 6304 | NH1  | ARG | X | 420 | 29.041 | 23.484 | 47.497 | 0.00 | 0.00 |
| ATOM | 6305 | HH11 | ARG | X | 420 | 29.915 | 23.321 | 47.976 | 0.00 | 0.00 |
| ATOM | 6306 | HH12 | ARG | X | 420 | 28.254 | 23.075 | 47.980 | 0.00 | 0.00 |
| ATOM | 6307 | NH2  | ARG | X | 420 | 27.722 | 23.866 | 45.791 | 0.00 | 0.00 |
| ATOM | 6308 | HH21 | ARG | X | 420 | 27.503 | 24.300 | 44.905 | 0.00 | 0.00 |
| ATOM | 6309 | HH22 | ARG | X | 420 | 27.033 | 23.484 | 46.422 | 0.00 | 0.00 |
| ATOM | 6310 | C    | ARG | X | 420 | 33.559 | 27.925 | 46.754 | 0.00 | 0.00 |
| ATOM | 6311 | O    | ARG | X | 420 | 33.617 | 29.060 | 46.338 | 0.00 | 0.00 |
| ATOM | 6312 | N    | VAL | X | 421 | 34.595 | 27.182 | 47.156 | 0.00 | 0.00 |
| ATOM | 6313 | H    | VAL | X | 421 | 34.383 | 26.298 | 47.597 | 0.00 | 0.00 |
| ATOM | 6314 | CA   | VAL | X | 421 | 35.950 | 27.686 | 47.171 | 0.00 | 0.00 |
| ATOM | 6315 | HA   | VAL | X | 421 | 35.995 | 28.660 | 46.683 | 0.00 | 0.00 |
| ATOM | 6316 | CB   | VAL | X | 421 | 36.540 | 27.844 | 48.614 | 0.00 | 0.00 |
| ATOM | 6317 | HB   | VAL | X | 421 | 36.934 | 26.872 | 48.911 | 0.00 | 0.00 |
| ATOM | 6318 | CG1  | VAL | X | 421 | 37.812 | 28.648 | 48.645 | 0.00 | 0.00 |
| ATOM | 6319 | HG11 | VAL | X | 421 | 38.111 | 28.889 | 49.664 | 0.00 | 0.00 |
| ATOM | 6320 | HG12 | VAL | X | 421 | 38.611 | 28.176 | 48.073 | 0.00 | 0.00 |
| ATOM | 6321 | HG13 | VAL | X | 421 | 37.661 | 29.629 | 48.196 | 0.00 | 0.00 |
| ATOM | 6322 | CG2  | VAL | X | 421 | 35.501 | 28.380 | 49.667 | 0.00 | 0.00 |
| ATOM | 6323 | HG21 | VAL | X | 421 | 35.208 | 29.365 | 49.301 | 0.00 | 0.00 |

|      |      |      |     |   |     |        |        |        |      |      |
|------|------|------|-----|---|-----|--------|--------|--------|------|------|
| ATOM | 6324 | HG22 | VAL | X | 421 | 36.010 | 28.506 | 50.622 | 0.00 | 0.00 |
| ATOM | 6325 | HG23 | VAL | X | 421 | 34.780 | 27.603 | 49.918 | 0.00 | 0.00 |
| ATOM | 6326 | C    | VAL | X | 421 | 36.772 | 26.624 | 46.407 | 0.00 | 0.00 |
| ATOM | 6327 | O    | VAL | X | 421 | 36.609 | 25.425 | 46.504 | 0.00 | 0.00 |
| ATOM | 6328 | N    | TYR | X | 422 | 37.738 | 27.050 | 45.631 | 0.00 | 0.00 |
| ATOM | 6329 | H    | TYR | X | 422 | 38.022 | 28.017 | 45.563 | 0.00 | 0.00 |
| ATOM | 6330 | CA   | TYR | X | 422 | 38.595 | 26.137 | 44.843 | 0.00 | 0.00 |
| ATOM | 6331 | HA   | TYR | X | 422 | 38.644 | 25.095 | 45.158 | 0.00 | 0.00 |
| ATOM | 6332 | CB   | TYR | X | 422 | 38.115 | 26.176 | 43.380 | 0.00 | 0.00 |
| ATOM | 6333 | HB2  | TYR | X | 422 | 37.977 | 27.201 | 43.034 | 0.00 | 0.00 |
| ATOM | 6334 | HB3  | TYR | X | 422 | 38.898 | 25.640 | 42.844 | 0.00 | 0.00 |
| ATOM | 6335 | CG   | TYR | X | 422 | 36.728 | 25.515 | 43.051 | 0.00 | 0.00 |
| ATOM | 6336 | CD1  | TYR | X | 422 | 36.675 | 24.227 | 42.597 | 0.00 | 0.00 |
| ATOM | 6337 | HD1  | TYR | X | 422 | 37.586 | 23.680 | 42.402 | 0.00 | 0.00 |
| ATOM | 6338 | CE1  | TYR | X | 422 | 35.430 | 23.591 | 42.358 | 0.00 | 0.00 |
| ATOM | 6339 | HE1  | TYR | X | 422 | 35.426 | 22.576 | 41.988 | 0.00 | 0.00 |
| ATOM | 6340 | CZ   | TYR | X | 422 | 34.265 | 24.315 | 42.524 | 0.00 | 0.00 |
| ATOM | 6341 | OH   | TYR | X | 422 | 33.044 | 23.677 | 42.451 | 0.00 | 0.00 |
| ATOM | 6342 | HH   | TYR | X | 422 | 33.087 | 22.785 | 42.098 | 0.00 | 0.00 |
| ATOM | 6343 | CE2  | TYR | X | 422 | 34.341 | 25.695 | 42.765 | 0.00 | 0.00 |
| ATOM | 6344 | HE2  | TYR | X | 422 | 33.407 | 26.224 | 42.881 | 0.00 | 0.00 |
| ATOM | 6345 | CD2  | TYR | X | 422 | 35.559 | 26.314 | 42.987 | 0.00 | 0.00 |
| ATOM | 6346 | HD2  | TYR | X | 422 | 35.517 | 27.326 | 43.360 | 0.00 | 0.00 |
| ATOM | 6347 | C    | TYR | X | 422 | 39.979 | 26.695 | 44.812 | 0.00 | 0.00 |
| ATOM | 6348 | O    | TYR | X | 422 | 40.140 | 27.885 | 44.713 | 0.00 | 0.00 |
| ATOM | 6349 | N    | ALA | X | 423 | 41.022 | 25.845 | 44.948 | 0.00 | 0.00 |
| ATOM | 6350 | H    | ALA | X | 423 | 40.824 | 24.854 | 44.962 | 0.00 | 0.00 |
| ATOM | 6351 | CA   | ALA | X | 423 | 42.382 | 26.181 | 45.309 | 0.00 | 0.00 |
| ATOM | 6352 | HA   | ALA | X | 423 | 42.462 | 27.255 | 45.138 | 0.00 | 0.00 |
| ATOM | 6353 | CB   | ALA | X | 423 | 42.669 | 26.126 | 46.819 | 0.00 | 0.00 |
| ATOM | 6354 | HB1  | ALA | X | 423 | 43.649 | 26.557 | 47.021 | 0.00 | 0.00 |
| ATOM | 6355 | HB2  | ALA | X | 423 | 42.542 | 25.103 | 47.172 | 0.00 | 0.00 |
| ATOM | 6356 | HB3  | ALA | X | 423 | 41.925 | 26.718 | 47.353 | 0.00 | 0.00 |
| ATOM | 6357 | C    | ALA | X | 423 | 43.551 | 25.512 | 44.480 | 0.00 | 0.00 |
| ATOM | 6358 | O    | ALA | X | 423 | 43.563 | 24.237 | 44.151 | 0.00 | 0.00 |
| ATOM | 6359 | N    | TYR | X | 424 | 44.589 | 26.355 | 44.261 | 0.00 | 0.00 |
| ATOM | 6360 | H    | TYR | X | 424 | 44.523 | 27.340 | 44.471 | 0.00 | 0.00 |
| ATOM | 6361 | CA   | TYR | X | 424 | 45.803 | 25.861 | 43.517 | 0.00 | 0.00 |
| ATOM | 6362 | HA   | TYR | X | 424 | 45.745 | 24.772 | 43.530 | 0.00 | 0.00 |
| ATOM | 6363 | CB   | TYR | X | 424 | 45.718 | 26.204 | 42.037 | 0.00 | 0.00 |
| ATOM | 6364 | HB2  | TYR | X | 424 | 46.470 | 25.697 | 41.431 | 0.00 | 0.00 |
| ATOM | 6365 | HB3  | TYR | X | 424 | 44.776 | 25.729 | 41.762 | 0.00 | 0.00 |
| ATOM | 6366 | CG   | TYR | X | 424 | 45.780 | 27.626 | 41.661 | 0.00 | 0.00 |
| ATOM | 6367 | CD1  | TYR | X | 424 | 47.048 | 28.229 | 41.300 | 0.00 | 0.00 |
| ATOM | 6368 | HD1  | TYR | X | 424 | 47.959 | 27.652 | 41.361 | 0.00 | 0.00 |
| ATOM | 6369 | CE1  | TYR | X | 424 | 47.122 | 29.583 | 41.029 | 0.00 | 0.00 |
| ATOM | 6370 | HE1  | TYR | X | 424 | 48.071 | 30.050 | 40.809 | 0.00 | 0.00 |
| ATOM | 6371 | CZ   | TYR | X | 424 | 46.023 | 30.418 | 41.211 | 0.00 | 0.00 |
| ATOM | 6372 | OH   | TYR | X | 424 | 46.184 | 31.758 | 40.843 | 0.00 | 0.00 |
| ATOM | 6373 | HH   | TYR | X | 424 | 47.095 | 31.992 | 40.653 | 0.00 | 0.00 |
| ATOM | 6374 | CE2  | TYR | X | 424 | 44.752 | 29.939 | 41.481 | 0.00 | 0.00 |
| ATOM | 6375 | HE2  | TYR | X | 424 | 43.930 | 30.602 | 41.706 | 0.00 | 0.00 |
| ATOM | 6376 | CD2  | TYR | X | 424 | 44.593 | 28.515 | 41.648 | 0.00 | 0.00 |
| ATOM | 6377 | HD2  | TYR | X | 424 | 43.629 | 28.143 | 41.962 | 0.00 | 0.00 |
| ATOM | 6378 | C    | TYR | X | 424 | 47.184 | 26.322 | 44.065 | 0.00 | 0.00 |
| ATOM | 6379 | O    | TYR | X | 424 | 47.334 | 27.366 | 44.724 | 0.00 | 0.00 |
| ATOM | 6380 | N    | VAL | X | 425 | 48.245 | 25.500 | 43.644 | 0.00 | 0.00 |
| ATOM | 6381 | H    | VAL | X | 425 | 48.012 | 24.731 | 43.033 | 0.00 | 0.00 |
| ATOM | 6382 | CA   | VAL | X | 425 | 49.679 | 25.902 | 43.672 | 0.00 | 0.00 |
| ATOM | 6383 | HA   | VAL | X | 425 | 49.826 | 26.936 | 43.985 | 0.00 | 0.00 |
| ATOM | 6384 | CB   | VAL | X | 425 | 50.596 | 24.991 | 44.481 | 0.00 | 0.00 |
| ATOM | 6385 | HB   | VAL | X | 425 | 50.388 | 25.250 | 45.519 | 0.00 | 0.00 |
| ATOM | 6386 | CG1  | VAL | X | 425 | 50.298 | 23.414 | 44.286 | 0.00 | 0.00 |
| ATOM | 6387 | HG11 | VAL | X | 425 | 50.485 | 23.160 | 43.243 | 0.00 | 0.00 |
| ATOM | 6388 | HG12 | VAL | X | 425 | 51.161 | 22.976 | 44.788 | 0.00 | 0.00 |
| ATOM | 6389 | HG13 | VAL | X | 425 | 49.385 | 22.910 | 44.603 | 0.00 | 0.00 |
| ATOM | 6390 | CG2  | VAL | X | 425 | 52.102 | 25.412 | 44.245 | 0.00 | 0.00 |

|      |      |      |     |   |     |        |        |        |      |      |
|------|------|------|-----|---|-----|--------|--------|--------|------|------|
| ATOM | 6391 | HG21 | VAL | X | 425 | 52.798 | 24.831 | 44.851 | 0.00 | 0.00 |
| ATOM | 6392 | HG22 | VAL | X | 425 | 52.310 | 26.461 | 44.456 | 0.00 | 0.00 |
| ATOM | 6393 | HG23 | VAL | X | 425 | 52.407 | 25.197 | 43.221 | 0.00 | 0.00 |
| ATOM | 6394 | C    | VAL | X | 425 | 50.079 | 25.776 | 42.145 | 0.00 | 0.00 |
| ATOM | 6395 | O    | VAL | X | 425 | 49.998 | 24.713 | 41.524 | 0.00 | 0.00 |
| ATOM | 6396 | N    | PHE | X | 426 | 50.626 | 26.855 | 41.631 | 0.00 | 0.00 |
| ATOM | 6397 | H    | PHE | X | 426 | 50.729 | 27.652 | 42.242 | 0.00 | 0.00 |
| ATOM | 6398 | CA   | PHE | X | 426 | 51.263 | 26.846 | 40.306 | 0.00 | 0.00 |
| ATOM | 6399 | HA   | PHE | X | 426 | 50.703 | 26.151 | 39.681 | 0.00 | 0.00 |
| ATOM | 6400 | CB   | PHE | X | 426 | 51.182 | 28.207 | 39.751 | 0.00 | 0.00 |
| ATOM | 6401 | HB2  | PHE | X | 426 | 50.145 | 28.524 | 39.646 | 0.00 | 0.00 |
| ATOM | 6402 | HB3  | PHE | X | 426 | 51.665 | 28.919 | 40.422 | 0.00 | 0.00 |
| ATOM | 6403 | CG   | PHE | X | 426 | 51.748 | 28.252 | 38.350 | 0.00 | 0.00 |
| ATOM | 6404 | CD1  | PHE | X | 426 | 51.007 | 27.861 | 37.194 | 0.00 | 0.00 |
| ATOM | 6405 | HD1  | PHE | X | 426 | 50.001 | 27.477 | 37.276 | 0.00 | 0.00 |
| ATOM | 6406 | CE1  | PHE | X | 426 | 51.550 | 27.961 | 35.898 | 0.00 | 0.00 |
| ATOM | 6407 | HE1  | PHE | X | 426 | 50.948 | 27.588 | 35.082 | 0.00 | 0.00 |
| ATOM | 6408 | CZ   | PHE | X | 426 | 52.832 | 28.493 | 35.775 | 0.00 | 0.00 |
| ATOM | 6409 | HZ   | PHE | X | 426 | 53.215 | 28.701 | 34.787 | 0.00 | 0.00 |
| ATOM | 6410 | CE2  | PHE | X | 426 | 53.577 | 28.820 | 36.859 | 0.00 | 0.00 |
| ATOM | 6411 | HE2  | PHE | X | 426 | 54.596 | 29.165 | 36.761 | 0.00 | 0.00 |
| ATOM | 6412 | CD2  | PHE | X | 426 | 53.067 | 28.688 | 38.196 | 0.00 | 0.00 |
| ATOM | 6413 | HD2  | PHE | X | 426 | 53.702 | 29.163 | 38.929 | 0.00 | 0.00 |
| ATOM | 6414 | C    | PHE | X | 426 | 52.728 | 26.416 | 40.433 | 0.00 | 0.00 |
| ATOM | 6415 | O    | PHE | X | 426 | 53.470 | 27.092 | 41.202 | 0.00 | 0.00 |
| ATOM | 6416 | N    | GLU | X | 427 | 53.160 | 25.328 | 39.802 | 0.00 | 0.00 |
| ATOM | 6417 | H    | GLU | X | 427 | 52.429 | 24.793 | 39.355 | 0.00 | 0.00 |
| ATOM | 6418 | CA   | GLU | X | 427 | 54.495 | 24.679 | 39.955 | 0.00 | 0.00 |
| ATOM | 6419 | HA   | GLU | X | 427 | 55.161 | 25.116 | 40.699 | 0.00 | 0.00 |
| ATOM | 6420 | CB   | GLU | X | 427 | 54.282 | 23.193 | 40.332 | 0.00 | 0.00 |
| ATOM | 6421 | HB2  | GLU | X | 427 | 53.856 | 22.690 | 39.463 | 0.00 | 0.00 |
| ATOM | 6422 | HB3  | GLU | X | 427 | 55.208 | 22.629 | 40.438 | 0.00 | 0.00 |
| ATOM | 6423 | CG   | GLU | X | 427 | 53.382 | 23.072 | 41.523 | 0.00 | 0.00 |
| ATOM | 6424 | HG2  | GLU | X | 427 | 53.752 | 23.591 | 42.407 | 0.00 | 0.00 |
| ATOM | 6425 | HG3  | GLU | X | 427 | 52.343 | 23.300 | 41.283 | 0.00 | 0.00 |
| ATOM | 6426 | CD   | GLU | X | 427 | 53.153 | 21.602 | 41.890 | 0.00 | 0.00 |
| ATOM | 6427 | OE1  | GLU | X | 427 | 53.613 | 20.622 | 41.310 | 0.00 | 0.00 |
| ATOM | 6428 | OE2  | GLU | X | 427 | 52.447 | 21.395 | 42.885 | 0.00 | 0.00 |
| ATOM | 6429 | C    | GLU | X | 427 | 55.359 | 24.682 | 38.685 | 0.00 | 0.00 |
| ATOM | 6430 | O    | GLU | X | 427 | 56.573 | 24.462 | 38.784 | 0.00 | 0.00 |
| ATOM | 6431 | N    | HIE | X | 428 | 54.805 | 25.030 | 37.565 | 0.00 | 0.00 |
| ATOM | 6432 | H    | HIE | X | 428 | 53.811 | 25.207 | 37.545 | 0.00 | 0.00 |
| ATOM | 6433 | CA   | HIE | X | 428 | 55.565 | 25.021 | 36.341 | 0.00 | 0.00 |
| ATOM | 6434 | HA   | HIE | X | 428 | 56.162 | 24.109 | 36.345 | 0.00 | 0.00 |
| ATOM | 6435 | CB   | HIE | X | 428 | 54.745 | 25.070 | 35.081 | 0.00 | 0.00 |
| ATOM | 6436 | HB2  | HIE | X | 428 | 54.224 | 24.132 | 34.894 | 0.00 | 0.00 |
| ATOM | 6437 | HB3  | HIE | X | 428 | 53.945 | 25.808 | 35.018 | 0.00 | 0.00 |
| ATOM | 6438 | CG   | HIE | X | 428 | 55.594 | 25.235 | 33.855 | 0.00 | 0.00 |
| ATOM | 6439 | ND1  | HIE | X | 428 | 56.439 | 24.254 | 33.407 | 0.00 | 0.00 |
| ATOM | 6440 | CE1  | HIE | X | 428 | 57.103 | 24.765 | 32.362 | 0.00 | 0.00 |
| ATOM | 6441 | HE1  | HIE | X | 428 | 57.978 | 24.286 | 31.947 | 0.00 | 0.00 |
| ATOM | 6442 | NE2  | HIE | X | 428 | 56.584 | 25.970 | 31.991 | 0.00 | 0.00 |
| ATOM | 6443 | HE2  | HIE | X | 428 | 56.958 | 26.624 | 31.318 | 0.00 | 0.00 |
| ATOM | 6444 | CD2  | HIE | X | 428 | 55.668 | 26.288 | 33.017 | 0.00 | 0.00 |
| ATOM | 6445 | HD2  | HIE | X | 428 | 55.087 | 27.199 | 33.031 | 0.00 | 0.00 |
| ATOM | 6446 | C    | HIE | X | 428 | 56.593 | 26.156 | 36.259 | 0.00 | 0.00 |
| ATOM | 6447 | O    | HIE | X | 428 | 56.201 | 27.321 | 36.345 | 0.00 | 0.00 |
| ATOM | 6448 | N    | ARG | X | 429 | 57.875 | 25.906 | 36.018 | 0.00 | 0.00 |
| ATOM | 6449 | H    | ARG | X | 429 | 58.093 | 24.928 | 35.893 | 0.00 | 0.00 |
| ATOM | 6450 | CA   | ARG | X | 429 | 58.875 | 26.917 | 35.876 | 0.00 | 0.00 |
| ATOM | 6451 | HA   | ARG | X | 429 | 58.651 | 27.836 | 36.418 | 0.00 | 0.00 |
| ATOM | 6452 | CB   | ARG | X | 429 | 60.217 | 26.460 | 36.570 | 0.00 | 0.00 |
| ATOM | 6453 | HB2  | ARG | X | 429 | 60.023 | 26.147 | 37.596 | 0.00 | 0.00 |
| ATOM | 6454 | HB3  | ARG | X | 429 | 60.743 | 25.670 | 36.034 | 0.00 | 0.00 |
| ATOM | 6455 | CG   | ARG | X | 429 | 61.092 | 27.717 | 36.751 | 0.00 | 0.00 |
| ATOM | 6456 | HG2  | ARG | X | 429 | 61.445 | 27.940 | 35.744 | 0.00 | 0.00 |
| ATOM | 6457 | HG3  | ARG | X | 429 | 60.697 | 28.580 | 37.287 | 0.00 | 0.00 |

|      |      |      |     |   |     |        |        |        |      |      |
|------|------|------|-----|---|-----|--------|--------|--------|------|------|
| ATOM | 6458 | CD   | ARG | X | 429 | 62.294 | 27.334 | 37.710 | 0.00 | 0.00 |
| ATOM | 6459 | HD2  | ARG | X | 429 | 61.913 | 26.961 | 38.660 | 0.00 | 0.00 |
| ATOM | 6460 | HD3  | ARG | X | 429 | 62.833 | 26.465 | 37.333 | 0.00 | 0.00 |
| ATOM | 6461 | NE   | ARG | X | 429 | 63.181 | 28.479 | 37.902 | 0.00 | 0.00 |
| ATOM | 6462 | HE   | ARG | X | 429 | 62.970 | 29.010 | 38.734 | 0.00 | 0.00 |
| ATOM | 6463 | CZ   | ARG | X | 429 | 64.121 | 28.990 | 37.113 | 0.00 | 0.00 |
| ATOM | 6464 | NH1  | ARG | X | 429 | 64.606 | 28.315 | 36.113 | 0.00 | 0.00 |
| ATOM | 6465 | HH11 | ARG | X | 429 | 64.160 | 27.439 | 35.879 | 0.00 | 0.00 |
| ATOM | 6466 | HH12 | ARG | X | 429 | 65.359 | 28.638 | 35.523 | 0.00 | 0.00 |
| ATOM | 6467 | NH2  | ARG | X | 429 | 64.568 | 30.224 | 37.282 | 0.00 | 0.00 |
| ATOM | 6468 | HH21 | ARG | X | 429 | 64.287 | 30.790 | 38.070 | 0.00 | 0.00 |
| ATOM | 6469 | HH22 | ARG | X | 429 | 65.192 | 30.561 | 36.563 | 0.00 | 0.00 |
| ATOM | 6470 | C    | ARG | X | 429 | 58.988 | 27.174 | 34.352 | 0.00 | 0.00 |
| ATOM | 6471 | O    | ARG | X | 429 | 59.457 | 26.297 | 33.603 | 0.00 | 0.00 |
| ATOM | 6472 | N    | ALA | X | 430 | 58.487 | 28.262 | 33.906 | 0.00 | 0.00 |
| ATOM | 6473 | H    | ALA | X | 430 | 57.987 | 28.883 | 34.526 | 0.00 | 0.00 |
| ATOM | 6474 | CA   | ALA | X | 430 | 58.402 | 28.767 | 32.531 | 0.00 | 0.00 |
| ATOM | 6475 | HA   | ALA | X | 430 | 57.832 | 28.121 | 31.863 | 0.00 | 0.00 |
| ATOM | 6476 | CB   | ALA | X | 430 | 57.736 | 30.165 | 32.453 | 0.00 | 0.00 |
| ATOM | 6477 | HB1  | ALA | X | 430 | 57.852 | 30.479 | 31.416 | 0.00 | 0.00 |
| ATOM | 6478 | HB2  | ALA | X | 430 | 58.238 | 30.840 | 33.147 | 0.00 | 0.00 |
| ATOM | 6479 | HB3  | ALA | X | 430 | 56.705 | 30.039 | 32.784 | 0.00 | 0.00 |
| ATOM | 6480 | C    | ALA | X | 430 | 59.775 | 28.743 | 31.923 | 0.00 | 0.00 |
| ATOM | 6481 | O    | ALA | X | 430 | 60.749 | 29.028 | 32.552 | 0.00 | 0.00 |
| ATOM | 6482 | N    | SER | X | 431 | 59.910 | 28.446 | 30.590 | 0.00 | 0.00 |
| ATOM | 6483 | H    | SER | X | 431 | 59.139 | 27.988 | 30.126 | 0.00 | 0.00 |
| ATOM | 6484 | CA   | SER | X | 431 | 61.158 | 28.467 | 29.819 | 0.00 | 0.00 |
| ATOM | 6485 | HA   | SER | X | 431 | 61.801 | 27.984 | 30.555 | 0.00 | 0.00 |
| ATOM | 6486 | CB   | SER | X | 431 | 61.221 | 27.460 | 28.678 | 0.00 | 0.00 |
| ATOM | 6487 | HB2  | SER | X | 431 | 62.239 | 27.445 | 28.291 | 0.00 | 0.00 |
| ATOM | 6488 | HB3  | SER | X | 431 | 61.037 | 26.429 | 28.981 | 0.00 | 0.00 |
| ATOM | 6489 | OG   | SER | X | 431 | 60.341 | 27.773 | 27.602 | 0.00 | 0.00 |
| ATOM | 6490 | HG   | SER | X | 431 | 59.506 | 27.345 | 27.804 | 0.00 | 0.00 |
| ATOM | 6491 | C    | SER | X | 431 | 61.669 | 29.861 | 29.557 | 0.00 | 0.00 |
| ATOM | 6492 | O    | SER | X | 431 | 62.878 | 30.005 | 29.199 | 0.00 | 0.00 |
| ATOM | 6493 | N    | THR | X | 432 | 60.798 | 30.909 | 29.661 | 0.00 | 0.00 |
| ATOM | 6494 | H    | THR | X | 432 | 59.823 | 30.690 | 29.809 | 0.00 | 0.00 |
| ATOM | 6495 | CA   | THR | X | 432 | 61.062 | 32.321 | 29.427 | 0.00 | 0.00 |
| ATOM | 6496 | HA   | THR | X | 432 | 61.903 | 32.351 | 28.735 | 0.00 | 0.00 |
| ATOM | 6497 | CB   | THR | X | 432 | 59.870 | 32.888 | 28.636 | 0.00 | 0.00 |
| ATOM | 6498 | HB   | THR | X | 432 | 60.002 | 33.970 | 28.613 | 0.00 | 0.00 |
| ATOM | 6499 | CG2  | THR | X | 432 | 59.845 | 32.234 | 27.214 | 0.00 | 0.00 |
| ATOM | 6500 | HG21 | THR | X | 432 | 59.701 | 31.156 | 27.290 | 0.00 | 0.00 |
| ATOM | 6501 | HG22 | THR | X | 432 | 60.755 | 32.546 | 26.701 | 0.00 | 0.00 |
| ATOM | 6502 | HG23 | THR | X | 432 | 58.984 | 32.592 | 26.651 | 0.00 | 0.00 |
| ATOM | 6503 | OG1  | THR | X | 432 | 58.714 | 32.532 | 29.335 | 0.00 | 0.00 |
| ATOM | 6504 | HG1  | THR | X | 432 | 58.441 | 31.641 | 29.107 | 0.00 | 0.00 |
| ATOM | 6505 | C    | THR | X | 432 | 61.272 | 33.117 | 30.700 | 0.00 | 0.00 |
| ATOM | 6506 | O    | THR | X | 432 | 61.530 | 34.291 | 30.583 | 0.00 | 0.00 |
| ATOM | 6507 | N    | LEU | X | 433 | 61.359 | 32.449 | 31.861 | 0.00 | 0.00 |
| ATOM | 6508 | H    | LEU | X | 433 | 61.317 | 31.442 | 31.923 | 0.00 | 0.00 |
| ATOM | 6509 | CA   | LEU | X | 433 | 61.659 | 33.025 | 33.135 | 0.00 | 0.00 |
| ATOM | 6510 | HA   | LEU | X | 433 | 60.975 | 33.849 | 33.336 | 0.00 | 0.00 |
| ATOM | 6511 | CB   | LEU | X | 433 | 61.327 | 32.076 | 34.284 | 0.00 | 0.00 |
| ATOM | 6512 | HB2  | LEU | X | 433 | 60.539 | 31.367 | 34.030 | 0.00 | 0.00 |
| ATOM | 6513 | HB3  | LEU | X | 433 | 62.187 | 31.423 | 34.432 | 0.00 | 0.00 |
| ATOM | 6514 | CG   | LEU | X | 433 | 60.861 | 32.750 | 35.602 | 0.00 | 0.00 |
| ATOM | 6515 | HG   | LEU | X | 433 | 61.464 | 33.646 | 35.749 | 0.00 | 0.00 |
| ATOM | 6516 | CD1  | LEU | X | 433 | 59.408 | 33.290 | 35.503 | 0.00 | 0.00 |
| ATOM | 6517 | HD11 | LEU | X | 433 | 58.755 | 32.491 | 35.153 | 0.00 | 0.00 |
| ATOM | 6518 | HD12 | LEU | X | 433 | 59.473 | 34.124 | 34.805 | 0.00 | 0.00 |
| ATOM | 6519 | HD13 | LEU | X | 433 | 58.997 | 33.624 | 36.456 | 0.00 | 0.00 |
| ATOM | 6520 | CD2  | LEU | X | 433 | 61.139 | 31.855 | 36.750 | 0.00 | 0.00 |
| ATOM | 6521 | HD21 | LEU | X | 433 | 60.836 | 30.829 | 36.543 | 0.00 | 0.00 |
| ATOM | 6522 | HD22 | LEU | X | 433 | 62.211 | 31.837 | 36.947 | 0.00 | 0.00 |
| ATOM | 6523 | HD23 | LEU | X | 433 | 60.623 | 32.140 | 37.667 | 0.00 | 0.00 |
| ATOM | 6524 | C    | LEU | X | 433 | 63.148 | 33.524 | 33.209 | 0.00 | 0.00 |

|      |      |      |     |   |     |        |        |        |      |      |
|------|------|------|-----|---|-----|--------|--------|--------|------|------|
| ATOM | 6525 | O    | LEU | X | 433 | 64.100 | 32.780 | 33.016 | 0.00 | 0.00 |
| ATOM | 6526 | N    | SER | X | 434 | 63.278 | 34.820 | 33.503 | 0.00 | 0.00 |
| ATOM | 6527 | H    | SER | X | 434 | 62.468 | 35.401 | 33.664 | 0.00 | 0.00 |
| ATOM | 6528 | CA   | SER | X | 434 | 64.577 | 35.479 | 33.604 | 0.00 | 0.00 |
| ATOM | 6529 | HA   | SER | X | 434 | 65.299 | 34.818 | 33.125 | 0.00 | 0.00 |
| ATOM | 6530 | CB   | SER | X | 434 | 64.614 | 36.818 | 32.795 | 0.00 | 0.00 |
| ATOM | 6531 | HB2  | SER | X | 434 | 63.756 | 37.367 | 33.184 | 0.00 | 0.00 |
| ATOM | 6532 | HB3  | SER | X | 434 | 65.546 | 37.340 | 33.011 | 0.00 | 0.00 |
| ATOM | 6533 | OG   | SER | X | 434 | 64.519 | 36.513 | 31.423 | 0.00 | 0.00 |
| ATOM | 6534 | HG   | SER | X | 434 | 63.617 | 36.408 | 31.112 | 0.00 | 0.00 |
| ATOM | 6535 | C    | SER | X | 434 | 65.042 | 35.794 | 35.010 | 0.00 | 0.00 |
| ATOM | 6536 | O    | SER | X | 434 | 66.108 | 36.346 | 35.248 | 0.00 | 0.00 |
| ATOM | 6537 | N    | TRP | X | 435 | 64.264 | 35.219 | 35.971 | 0.00 | 0.00 |
| ATOM | 6538 | H    | TRP | X | 435 | 63.426 | 34.757 | 35.647 | 0.00 | 0.00 |
| ATOM | 6539 | CA   | TRP | X | 435 | 64.723 | 35.044 | 37.301 | 0.00 | 0.00 |
| ATOM | 6540 | HA   | TRP | X | 435 | 65.244 | 35.951 | 37.605 | 0.00 | 0.00 |
| ATOM | 6541 | CB   | TRP | X | 435 | 63.538 | 34.914 | 38.266 | 0.00 | 0.00 |
| ATOM | 6542 | HB2  | TRP | X | 435 | 62.865 | 34.167 | 37.846 | 0.00 | 0.00 |
| ATOM | 6543 | HB3  | TRP | X | 435 | 63.815 | 34.552 | 39.257 | 0.00 | 0.00 |
| ATOM | 6544 | CG   | TRP | X | 435 | 62.865 | 36.231 | 38.513 | 0.00 | 0.00 |
| ATOM | 6545 | CD1  | TRP | X | 435 | 61.651 | 36.543 | 37.966 | 0.00 | 0.00 |
| ATOM | 6546 | HD1  | TRP | X | 435 | 61.049 | 35.932 | 37.308 | 0.00 | 0.00 |
| ATOM | 6547 | NE1  | TRP | X | 435 | 61.184 | 37.769 | 38.474 | 0.00 | 0.00 |
| ATOM | 6548 | HE1  | TRP | X | 435 | 60.342 | 38.246 | 38.184 | 0.00 | 0.00 |
| ATOM | 6549 | CE2  | TRP | X | 435 | 62.210 | 38.348 | 39.196 | 0.00 | 0.00 |
| ATOM | 6550 | CZ2  | TRP | X | 435 | 62.291 | 39.634 | 39.805 | 0.00 | 0.00 |
| ATOM | 6551 | HZ2  | TRP | X | 435 | 61.489 | 40.346 | 39.679 | 0.00 | 0.00 |
| ATOM | 6552 | CH2  | TRP | X | 435 | 63.508 | 39.991 | 40.431 | 0.00 | 0.00 |
| ATOM | 6553 | HH2  | TRP | X | 435 | 63.622 | 40.971 | 40.872 | 0.00 | 0.00 |
| ATOM | 6554 | CZ3  | TRP | X | 435 | 64.596 | 39.079 | 40.439 | 0.00 | 0.00 |
| ATOM | 6555 | HZ3  | TRP | X | 435 | 65.542 | 39.436 | 40.818 | 0.00 | 0.00 |
| ATOM | 6556 | CE3  | TRP | X | 435 | 64.413 | 37.741 | 39.999 | 0.00 | 0.00 |
| ATOM | 6557 | HE3  | TRP | X | 435 | 65.203 | 37.006 | 40.032 | 0.00 | 0.00 |
| ATOM | 6558 | CD2  | TRP | X | 435 | 63.261 | 37.368 | 39.236 | 0.00 | 0.00 |
| ATOM | 6559 | C    | TRP | X | 435 | 65.752 | 33.925 | 37.427 | 0.00 | 0.00 |
| ATOM | 6560 | O    | TRP | X | 435 | 65.660 | 32.913 | 36.715 | 0.00 | 0.00 |
| ATOM | 6561 | N    | PRO | X | 436 | 66.541 | 33.867 | 38.465 | 0.00 | 0.00 |
| ATOM | 6562 | CD   | PRO | X | 436 | 66.600 | 34.869 | 39.576 | 0.00 | 0.00 |
| ATOM | 6563 | HD2  | PRO | X | 436 | 65.753 | 34.749 | 40.253 | 0.00 | 0.00 |
| ATOM | 6564 | HD3  | PRO | X | 436 | 66.682 | 35.859 | 39.127 | 0.00 | 0.00 |
| ATOM | 6565 | CG   | PRO | X | 436 | 67.799 | 34.529 | 40.383 | 0.00 | 0.00 |
| ATOM | 6566 | HG2  | PRO | X | 436 | 67.543 | 34.467 | 41.441 | 0.00 | 0.00 |
| ATOM | 6567 | HG3  | PRO | X | 436 | 68.456 | 35.397 | 40.433 | 0.00 | 0.00 |
| ATOM | 6568 | CB   | PRO | X | 436 | 68.515 | 33.442 | 39.640 | 0.00 | 0.00 |
| ATOM | 6569 | HB2  | PRO | X | 436 | 68.882 | 32.748 | 40.395 | 0.00 | 0.00 |
| ATOM | 6570 | HB3  | PRO | X | 436 | 69.422 | 33.815 | 39.163 | 0.00 | 0.00 |
| ATOM | 6571 | CA   | PRO | X | 436 | 67.503 | 32.857 | 38.654 | 0.00 | 0.00 |
| ATOM | 6572 | HA   | PRO | X | 436 | 67.994 | 32.596 | 37.716 | 0.00 | 0.00 |
| ATOM | 6573 | C    | PRO | X | 436 | 66.892 | 31.484 | 39.168 | 0.00 | 0.00 |
| ATOM | 6574 | O    | PRO | X | 436 | 65.812 | 31.444 | 39.759 | 0.00 | 0.00 |
| ATOM | 6575 | N    | LEU | X | 437 | 67.668 | 30.435 | 38.895 | 0.00 | 0.00 |
| ATOM | 6576 | H    | LEU | X | 437 | 68.638 | 30.571 | 38.652 | 0.00 | 0.00 |
| ATOM | 6577 | CA   | LEU | X | 437 | 67.185 | 28.998 | 39.114 | 0.00 | 0.00 |
| ATOM | 6578 | HA   | LEU | X | 437 | 66.240 | 28.885 | 38.583 | 0.00 | 0.00 |
| ATOM | 6579 | CB   | LEU | X | 437 | 68.114 | 27.978 | 38.485 | 0.00 | 0.00 |
| ATOM | 6580 | HB2  | LEU | X | 437 | 68.777 | 28.531 | 37.819 | 0.00 | 0.00 |
| ATOM | 6581 | HB3  | LEU | X | 437 | 68.750 | 27.604 | 39.288 | 0.00 | 0.00 |
| ATOM | 6582 | CG   | LEU | X | 437 | 67.470 | 26.762 | 37.715 | 0.00 | 0.00 |
| ATOM | 6583 | HG   | LEU | X | 437 | 67.055 | 27.046 | 36.748 | 0.00 | 0.00 |
| ATOM | 6584 | CD1  | LEU | X | 437 | 68.608 | 25.698 | 37.412 | 0.00 | 0.00 |
| ATOM | 6585 | HD11 | LEU | X | 437 | 68.102 | 24.832 | 36.985 | 0.00 | 0.00 |
| ATOM | 6586 | HD12 | LEU | X | 437 | 69.236 | 25.484 | 38.276 | 0.00 | 0.00 |
| ATOM | 6587 | HD13 | LEU | X | 437 | 69.372 | 26.143 | 36.775 | 0.00 | 0.00 |
| ATOM | 6588 | CD2  | LEU | X | 437 | 66.320 | 26.143 | 38.475 | 0.00 | 0.00 |
| ATOM | 6589 | HD21 | LEU | X | 437 | 66.100 | 25.145 | 38.098 | 0.00 | 0.00 |
| ATOM | 6590 | HD22 | LEU | X | 437 | 66.525 | 25.919 | 39.522 | 0.00 | 0.00 |
| ATOM | 6591 | HD23 | LEU | X | 437 | 65.400 | 26.726 | 38.422 | 0.00 | 0.00 |

|      |      |      |     |   |     |        |        |        |      |      |
|------|------|------|-----|---|-----|--------|--------|--------|------|------|
| ATOM | 6592 | C    | LEU | X | 437 | 66.793 | 28.748 | 40.618 | 0.00 | 0.00 |
| ATOM | 6593 | O    | LEU | X | 437 | 65.715 | 28.191 | 40.868 | 0.00 | 0.00 |
| ATOM | 6594 | N    | TRP | X | 438 | 67.644 | 29.183 | 41.571 | 0.00 | 0.00 |
| ATOM | 6595 | H    | TRP | X | 438 | 68.538 | 29.550 | 41.276 | 0.00 | 0.00 |
| ATOM | 6596 | CA   | TRP | X | 438 | 67.339 | 29.110 | 43.000 | 0.00 | 0.00 |
| ATOM | 6597 | HA   | TRP | X | 438 | 67.365 | 28.072 | 43.334 | 0.00 | 0.00 |
| ATOM | 6598 | CB   | TRP | X | 438 | 68.575 | 29.764 | 43.730 | 0.00 | 0.00 |
| ATOM | 6599 | HB2  | TRP | X | 438 | 68.448 | 29.450 | 44.766 | 0.00 | 0.00 |
| ATOM | 6600 | HB3  | TRP | X | 438 | 69.555 | 29.459 | 43.360 | 0.00 | 0.00 |
| ATOM | 6601 | CG   | TRP | X | 438 | 68.541 | 31.250 | 43.739 | 0.00 | 0.00 |
| ATOM | 6602 | CD1  | TRP | X | 438 | 69.399 | 32.039 | 43.050 | 0.00 | 0.00 |
| ATOM | 6603 | HD1  | TRP | X | 438 | 70.180 | 31.738 | 42.367 | 0.00 | 0.00 |
| ATOM | 6604 | NE1  | TRP | X | 438 | 69.354 | 33.335 | 43.419 | 0.00 | 0.00 |
| ATOM | 6605 | HE1  | TRP | X | 438 | 69.813 | 34.113 | 42.966 | 0.00 | 0.00 |
| ATOM | 6606 | CE2  | TRP | X | 438 | 68.415 | 33.533 | 44.431 | 0.00 | 0.00 |
| ATOM | 6607 | CZ2  | TRP | X | 438 | 67.898 | 34.655 | 45.025 | 0.00 | 0.00 |
| ATOM | 6608 | HZ2  | TRP | X | 438 | 68.338 | 35.620 | 44.818 | 0.00 | 0.00 |
| ATOM | 6609 | CH2  | TRP | X | 438 | 66.675 | 34.556 | 45.737 | 0.00 | 0.00 |
| ATOM | 6610 | HH2  | TRP | X | 438 | 66.260 | 35.369 | 46.314 | 0.00 | 0.00 |
| ATOM | 6611 | CZ3  | TRP | X | 438 | 66.091 | 33.325 | 45.982 | 0.00 | 0.00 |
| ATOM | 6612 | HZ3  | TRP | X | 438 | 65.269 | 33.174 | 46.666 | 0.00 | 0.00 |
| ATOM | 6613 | CE3  | TRP | X | 438 | 66.706 | 32.164 | 45.451 | 0.00 | 0.00 |
| ATOM | 6614 | HE3  | TRP | X | 438 | 66.259 | 31.233 | 45.766 | 0.00 | 0.00 |
| ATOM | 6615 | CD2  | TRP | X | 438 | 67.747 | 32.244 | 44.518 | 0.00 | 0.00 |
| ATOM | 6616 | C    | TRP | X | 438 | 66.070 | 29.770 | 43.440 | 0.00 | 0.00 |
| ATOM | 6617 | O    | TRP | X | 438 | 65.502 | 29.265 | 44.436 | 0.00 | 0.00 |
| ATOM | 6618 | N    | MET | X | 439 | 65.592 | 30.839 | 42.709 | 0.00 | 0.00 |
| ATOM | 6619 | H    | MET | X | 439 | 65.935 | 31.020 | 41.776 | 0.00 | 0.00 |
| ATOM | 6620 | CA   | MET | X | 439 | 64.251 | 31.379 | 43.022 | 0.00 | 0.00 |
| ATOM | 6621 | HA   | MET | X | 439 | 64.380 | 31.867 | 43.988 | 0.00 | 0.00 |
| ATOM | 6622 | CB   | MET | X | 439 | 63.915 | 32.558 | 41.982 | 0.00 | 0.00 |
| ATOM | 6623 | HB2  | MET | X | 439 | 64.830 | 32.988 | 41.575 | 0.00 | 0.00 |
| ATOM | 6624 | HB3  | MET | X | 439 | 63.307 | 32.113 | 41.194 | 0.00 | 0.00 |
| ATOM | 6625 | CG   | MET | X | 439 | 63.083 | 33.635 | 42.772 | 0.00 | 0.00 |
| ATOM | 6626 | HG2  | MET | X | 439 | 62.018 | 33.405 | 42.735 | 0.00 | 0.00 |
| ATOM | 6627 | HG3  | MET | X | 439 | 63.466 | 33.601 | 43.792 | 0.00 | 0.00 |
| ATOM | 6628 | SD   | MET | X | 439 | 63.500 | 35.383 | 42.287 | 0.00 | 0.00 |
| ATOM | 6629 | CE   | MET | X | 439 | 65.080 | 35.720 | 43.298 | 0.00 | 0.00 |
| ATOM | 6630 | HE1  | MET | X | 439 | 64.777 | 35.505 | 44.323 | 0.00 | 0.00 |
| ATOM | 6631 | HE2  | MET | X | 439 | 65.976 | 35.153 | 43.044 | 0.00 | 0.00 |
| ATOM | 6632 | HE3  | MET | X | 439 | 65.423 | 36.746 | 43.164 | 0.00 | 0.00 |
| ATOM | 6633 | C    | MET | X | 439 | 63.062 | 30.344 | 42.908 | 0.00 | 0.00 |
| ATOM | 6634 | O    | MET | X | 439 | 61.999 | 30.525 | 43.472 | 0.00 | 0.00 |
| ATOM | 6635 | N    | GLY | X | 440 | 63.166 | 29.265 | 42.098 | 0.00 | 0.00 |
| ATOM | 6636 | H    | GLY | X | 440 | 64.071 | 29.087 | 41.686 | 0.00 | 0.00 |
| ATOM | 6637 | CA   | GLY | X | 440 | 61.967 | 28.498 | 41.717 | 0.00 | 0.00 |
| ATOM | 6638 | HA2  | GLY | X | 440 | 62.328 | 27.565 | 41.286 | 0.00 | 0.00 |
| ATOM | 6639 | HA3  | GLY | X | 440 | 61.476 | 28.162 | 42.631 | 0.00 | 0.00 |
| ATOM | 6640 | C    | GLY | X | 440 | 60.910 | 29.249 | 40.888 | 0.00 | 0.00 |
| ATOM | 6641 | O    | GLY | X | 440 | 61.246 | 29.793 | 39.788 | 0.00 | 0.00 |
| ATOM | 6642 | N    | VAL | X | 441 | 59.644 | 29.301 | 41.303 | 0.00 | 0.00 |
| ATOM | 6643 | H    | VAL | X | 441 | 59.429 | 28.817 | 42.163 | 0.00 | 0.00 |
| ATOM | 6644 | CA   | VAL | X | 441 | 58.599 | 30.137 | 40.612 | 0.00 | 0.00 |
| ATOM | 6645 | HA   | VAL | X | 441 | 59.037 | 30.531 | 39.695 | 0.00 | 0.00 |
| ATOM | 6646 | CB   | VAL | X | 441 | 57.287 | 29.320 | 40.287 | 0.00 | 0.00 |
| ATOM | 6647 | HB   | VAL | X | 441 | 56.739 | 29.113 | 41.206 | 0.00 | 0.00 |
| ATOM | 6648 | CG1  | VAL | X | 441 | 56.367 | 30.071 | 39.314 | 0.00 | 0.00 |
| ATOM | 6649 | HG11 | VAL | X | 441 | 57.052 | 30.700 | 38.745 | 0.00 | 0.00 |
| ATOM | 6650 | HG12 | VAL | X | 441 | 55.874 | 29.350 | 38.662 | 0.00 | 0.00 |
| ATOM | 6651 | HG13 | VAL | X | 441 | 55.676 | 30.690 | 39.888 | 0.00 | 0.00 |
| ATOM | 6652 | CG2  | VAL | X | 441 | 57.610 | 27.886 | 39.789 | 0.00 | 0.00 |
| ATOM | 6653 | HG21 | VAL | X | 441 | 56.699 | 27.439 | 39.390 | 0.00 | 0.00 |
| ATOM | 6654 | HG22 | VAL | X | 441 | 57.871 | 27.202 | 40.596 | 0.00 | 0.00 |
| ATOM | 6655 | HG23 | VAL | X | 441 | 58.447 | 28.023 | 39.104 | 0.00 | 0.00 |
| ATOM | 6656 | C    | VAL | X | 441 | 58.203 | 31.296 | 41.488 | 0.00 | 0.00 |
| ATOM | 6657 | O    | VAL | X | 441 | 57.743 | 31.094 | 42.554 | 0.00 | 0.00 |
| ATOM | 6658 | N    | PRO | X | 442 | 58.542 | 32.574 | 41.104 | 0.00 | 0.00 |

|      |      |     |     |   |     |        |        |        |      |      |
|------|------|-----|-----|---|-----|--------|--------|--------|------|------|
| ATOM | 6659 | CD  | PRO | X | 442 | 59.230 | 32.864 | 39.839 | 0.00 | 0.00 |
| ATOM | 6660 | HD2 | PRO | X | 442 | 58.655 | 32.461 | 39.005 | 0.00 | 0.00 |
| ATOM | 6661 | HD3 | PRO | X | 442 | 60.246 | 32.469 | 39.864 | 0.00 | 0.00 |
| ATOM | 6662 | CG  | PRO | X | 442 | 59.245 | 34.393 | 39.671 | 0.00 | 0.00 |
| ATOM | 6663 | HG2 | PRO | X | 442 | 58.457 | 34.876 | 39.094 | 0.00 | 0.00 |
| ATOM | 6664 | HG3 | PRO | X | 442 | 60.212 | 34.749 | 39.316 | 0.00 | 0.00 |
| ATOM | 6665 | CB  | PRO | X | 442 | 59.016 | 34.956 | 41.092 | 0.00 | 0.00 |
| ATOM | 6666 | HB2 | PRO | X | 442 | 58.539 | 35.936 | 41.102 | 0.00 | 0.00 |
| ATOM | 6667 | HB3 | PRO | X | 442 | 60.007 | 35.065 | 41.533 | 0.00 | 0.00 |
| ATOM | 6668 | CA  | PRO | X | 442 | 58.299 | 33.856 | 41.853 | 0.00 | 0.00 |
| ATOM | 6669 | HA  | PRO | X | 442 | 58.685 | 33.668 | 42.855 | 0.00 | 0.00 |
| ATOM | 6670 | C   | PRO | X | 442 | 56.775 | 34.244 | 41.899 | 0.00 | 0.00 |
| ATOM | 6671 | O   | PRO | X | 442 | 55.994 | 33.888 | 41.029 | 0.00 | 0.00 |
| ATOM | 6672 | N   | HIP | X | 443 | 56.437 | 34.793 | 43.077 | 0.00 | 0.00 |
| ATOM | 6673 | H   | HIP | X | 443 | 57.249 | 34.937 | 43.660 | 0.00 | 0.00 |
| ATOM | 6674 | CA  | HIP | X | 443 | 55.172 | 35.449 | 43.415 | 0.00 | 0.00 |
| ATOM | 6675 | HA  | HIP | X | 443 | 54.509 | 34.629 | 43.690 | 0.00 | 0.00 |
| ATOM | 6676 | CB  | HIP | X | 443 | 55.514 | 36.360 | 44.631 | 0.00 | 0.00 |
| ATOM | 6677 | HB2 | HIP | X | 443 | 55.563 | 35.655 | 45.462 | 0.00 | 0.00 |
| ATOM | 6678 | HB3 | HIP | X | 443 | 56.533 | 36.712 | 44.470 | 0.00 | 0.00 |
| ATOM | 6679 | CG  | HIP | X | 443 | 54.568 | 37.492 | 44.946 | 0.00 | 0.00 |
| ATOM | 6680 | ND1 | HIP | X | 443 | 53.434 | 37.294 | 45.670 | 0.00 | 0.00 |
| ATOM | 6681 | HD1 | HIP | X | 443 | 53.056 | 36.419 | 46.004 | 0.00 | 0.00 |
| ATOM | 6682 | CE1 | HIP | X | 443 | 52.778 | 38.446 | 45.630 | 0.00 | 0.00 |
| ATOM | 6683 | HE1 | HIP | X | 443 | 51.833 | 38.682 | 46.097 | 0.00 | 0.00 |
| ATOM | 6684 | NE2 | HIP | X | 443 | 53.475 | 39.357 | 44.983 | 0.00 | 0.00 |
| ATOM | 6685 | HE2 | HIP | X | 443 | 53.218 | 40.325 | 44.855 | 0.00 | 0.00 |
| ATOM | 6686 | CD2 | HIP | X | 443 | 54.714 | 38.825 | 44.549 | 0.00 | 0.00 |
| ATOM | 6687 | HD2 | HIP | X | 443 | 55.589 | 39.294 | 44.124 | 0.00 | 0.00 |
| ATOM | 6688 | C   | HIP | X | 443 | 54.511 | 36.261 | 42.229 | 0.00 | 0.00 |
| ATOM | 6689 | O   | HIP | X | 443 | 55.022 | 37.316 | 41.846 | 0.00 | 0.00 |
| ATOM | 6690 | N   | GLY | X | 444 | 53.336 | 35.856 | 41.702 | 0.00 | 0.00 |
| ATOM | 6691 | H   | GLY | X | 444 | 52.983 | 35.076 | 42.237 | 0.00 | 0.00 |
| ATOM | 6692 | CA  | GLY | X | 444 | 52.446 | 36.510 | 40.714 | 0.00 | 0.00 |
| ATOM | 6693 | HA2 | GLY | X | 444 | 51.404 | 36.251 | 40.904 | 0.00 | 0.00 |
| ATOM | 6694 | HA3 | GLY | X | 444 | 52.499 | 37.597 | 40.764 | 0.00 | 0.00 |
| ATOM | 6695 | C   | GLY | X | 444 | 52.791 | 36.373 | 39.292 | 0.00 | 0.00 |
| ATOM | 6696 | O   | GLY | X | 444 | 52.592 | 37.272 | 38.505 | 0.00 | 0.00 |
| ATOM | 6697 | N   | TYR | X | 445 | 53.509 | 35.260 | 38.947 | 0.00 | 0.00 |
| ATOM | 6698 | H   | TYR | X | 445 | 53.847 | 34.817 | 39.789 | 0.00 | 0.00 |
| ATOM | 6699 | CA  | TYR | X | 445 | 54.031 | 34.890 | 37.575 | 0.00 | 0.00 |
| ATOM | 6700 | HA  | TYR | X | 445 | 53.974 | 35.759 | 36.921 | 0.00 | 0.00 |
| ATOM | 6701 | CB  | TYR | X | 445 | 55.502 | 34.743 | 37.576 | 0.00 | 0.00 |
| ATOM | 6702 | HB2 | TYR | X | 445 | 55.749 | 34.212 | 38.495 | 0.00 | 0.00 |
| ATOM | 6703 | HB3 | TYR | X | 445 | 55.764 | 34.049 | 36.778 | 0.00 | 0.00 |
| ATOM | 6704 | CG  | TYR | X | 445 | 56.331 | 35.996 | 37.573 | 0.00 | 0.00 |
| ATOM | 6705 | CD1 | TYR | X | 445 | 56.948 | 36.549 | 36.402 | 0.00 | 0.00 |
| ATOM | 6706 | HD1 | TYR | X | 445 | 56.721 | 36.087 | 35.453 | 0.00 | 0.00 |
| ATOM | 6707 | CE1 | TYR | X | 445 | 57.783 | 37.658 | 36.488 | 0.00 | 0.00 |
| ATOM | 6708 | HE1 | TYR | X | 445 | 58.128 | 38.111 | 35.570 | 0.00 | 0.00 |
| ATOM | 6709 | CZ  | TYR | X | 445 | 57.990 | 38.300 | 37.737 | 0.00 | 0.00 |
| ATOM | 6710 | OH  | TYR | X | 445 | 58.758 | 39.453 | 37.701 | 0.00 | 0.00 |
| ATOM | 6711 | HH  | TYR | X | 445 | 59.235 | 39.478 | 36.869 | 0.00 | 0.00 |
| ATOM | 6712 | CE2 | TYR | X | 445 | 57.216 | 37.875 | 38.868 | 0.00 | 0.00 |
| ATOM | 6713 | HE2 | TYR | X | 445 | 57.171 | 38.500 | 39.748 | 0.00 | 0.00 |
| ATOM | 6714 | CD2 | TYR | X | 445 | 56.476 | 36.702 | 38.780 | 0.00 | 0.00 |
| ATOM | 6715 | HD2 | TYR | X | 445 | 55.896 | 36.349 | 39.620 | 0.00 | 0.00 |
| ATOM | 6716 | C   | TYR | X | 445 | 53.186 | 33.837 | 36.758 | 0.00 | 0.00 |
| ATOM | 6717 | O   | TYR | X | 445 | 53.426 | 33.773 | 35.567 | 0.00 | 0.00 |
| ATOM | 6718 | N   | GLU | X | 446 | 52.290 | 33.202 | 37.423 | 0.00 | 0.00 |
| ATOM | 6719 | H   | GLU | X | 446 | 52.039 | 33.496 | 38.356 | 0.00 | 0.00 |
| ATOM | 6720 | CA  | GLU | X | 446 | 51.489 | 32.140 | 36.757 | 0.00 | 0.00 |
| ATOM | 6721 | HA  | GLU | X | 446 | 52.186 | 31.525 | 36.189 | 0.00 | 0.00 |
| ATOM | 6722 | CB  | GLU | X | 446 | 50.825 | 31.339 | 37.785 | 0.00 | 0.00 |
| ATOM | 6723 | HB2 | GLU | X | 446 | 50.593 | 30.396 | 37.290 | 0.00 | 0.00 |
| ATOM | 6724 | HB3 | GLU | X | 446 | 51.569 | 31.165 | 38.562 | 0.00 | 0.00 |
| ATOM | 6725 | CG  | GLU | X | 446 | 49.487 | 31.744 | 38.414 | 0.00 | 0.00 |

|      |      |      |     |   |     |        |        |        |      |      |
|------|------|------|-----|---|-----|--------|--------|--------|------|------|
| ATOM | 6726 | HG2  | GLU | X | 446 | 48.650 | 31.808 | 37.720 | 0.00 | 0.00 |
| ATOM | 6727 | HG3  | GLU | X | 446 | 49.244 | 30.905 | 39.065 | 0.00 | 0.00 |
| ATOM | 6728 | CD   | GLU | X | 446 | 49.507 | 33.023 | 39.244 | 0.00 | 0.00 |
| ATOM | 6729 | OE1  | GLU | X | 446 | 50.453 | 33.813 | 39.264 | 0.00 | 0.00 |
| ATOM | 6730 | OE2  | GLU | X | 446 | 48.488 | 33.206 | 39.933 | 0.00 | 0.00 |
| ATOM | 6731 | C    | GLU | X | 446 | 50.606 | 32.771 | 35.657 | 0.00 | 0.00 |
| ATOM | 6732 | O    | GLU | X | 446 | 50.338 | 32.154 | 34.627 | 0.00 | 0.00 |
| ATOM | 6733 | N    | ILE | X | 447 | 50.244 | 34.047 | 35.800 | 0.00 | 0.00 |
| ATOM | 6734 | H    | ILE | X | 447 | 50.597 | 34.603 | 36.567 | 0.00 | 0.00 |
| ATOM | 6735 | CA   | ILE | X | 447 | 49.279 | 34.729 | 34.940 | 0.00 | 0.00 |
| ATOM | 6736 | HA   | ILE | X | 447 | 48.327 | 34.203 | 35.016 | 0.00 | 0.00 |
| ATOM | 6737 | CB   | ILE | X | 447 | 49.100 | 36.223 | 35.464 | 0.00 | 0.00 |
| ATOM | 6738 | HB   | ILE | X | 447 | 48.369 | 36.760 | 34.859 | 0.00 | 0.00 |
| ATOM | 6739 | CG2  | ILE | X | 447 | 48.526 | 36.043 | 36.927 | 0.00 | 0.00 |
| ATOM | 6740 | HG21 | ILE | X | 447 | 49.222 | 35.581 | 37.627 | 0.00 | 0.00 |
| ATOM | 6741 | HG22 | ILE | X | 447 | 47.654 | 35.389 | 36.909 | 0.00 | 0.00 |
| ATOM | 6742 | HG23 | ILE | X | 447 | 48.280 | 36.988 | 37.411 | 0.00 | 0.00 |
| ATOM | 6743 | CG1  | ILE | X | 447 | 50.395 | 37.051 | 35.513 | 0.00 | 0.00 |
| ATOM | 6744 | HG12 | ILE | X | 447 | 51.070 | 36.736 | 36.309 | 0.00 | 0.00 |
| ATOM | 6745 | HG13 | ILE | X | 447 | 50.885 | 37.049 | 34.539 | 0.00 | 0.00 |
| ATOM | 6746 | CD1  | ILE | X | 447 | 50.170 | 38.504 | 35.864 | 0.00 | 0.00 |
| ATOM | 6747 | HD11 | ILE | X | 447 | 49.602 | 38.951 | 35.048 | 0.00 | 0.00 |
| ATOM | 6748 | HD12 | ILE | X | 447 | 51.076 | 39.074 | 36.070 | 0.00 | 0.00 |
| ATOM | 6749 | HD13 | ILE | X | 447 | 49.586 | 38.533 | 36.784 | 0.00 | 0.00 |
| ATOM | 6750 | C    | ILE | X | 447 | 49.548 | 34.725 | 33.405 | 0.00 | 0.00 |
| ATOM | 6751 | O    | ILE | X | 447 | 48.613 | 34.719 | 32.632 | 0.00 | 0.00 |
| ATOM | 6752 | N    | GLU | X | 448 | 50.798 | 34.566 | 33.012 | 0.00 | 0.00 |
| ATOM | 6753 | H    | GLU | X | 448 | 51.543 | 34.515 | 33.692 | 0.00 | 0.00 |
| ATOM | 6754 | CA   | GLU | X | 448 | 51.239 | 34.303 | 31.654 | 0.00 | 0.00 |
| ATOM | 6755 | HA   | GLU | X | 448 | 51.133 | 35.186 | 31.024 | 0.00 | 0.00 |
| ATOM | 6756 | CB   | GLU | X | 448 | 52.670 | 33.890 | 31.796 | 0.00 | 0.00 |
| ATOM | 6757 | HB2  | GLU | X | 448 | 52.735 | 33.004 | 32.428 | 0.00 | 0.00 |
| ATOM | 6758 | HB3  | GLU | X | 448 | 53.032 | 33.572 | 30.819 | 0.00 | 0.00 |
| ATOM | 6759 | CG   | GLU | X | 448 | 53.612 | 34.968 | 32.219 | 0.00 | 0.00 |
| ATOM | 6760 | HG2  | GLU | X | 448 | 53.357 | 35.839 | 31.615 | 0.00 | 0.00 |
| ATOM | 6761 | HG3  | GLU | X | 448 | 53.348 | 35.099 | 33.268 | 0.00 | 0.00 |
| ATOM | 6762 | CD   | GLU | X | 448 | 55.085 | 34.618 | 32.269 | 0.00 | 0.00 |
| ATOM | 6763 | OE1  | GLU | X | 448 | 55.876 | 35.567 | 32.038 | 0.00 | 0.00 |
| ATOM | 6764 | OE2  | GLU | X | 448 | 55.475 | 33.410 | 32.271 | 0.00 | 0.00 |
| ATOM | 6765 | C    | GLU | X | 448 | 50.387 | 33.181 | 30.981 | 0.00 | 0.00 |
| ATOM | 6766 | O    | GLU | X | 448 | 50.094 | 33.269 | 29.790 | 0.00 | 0.00 |
| ATOM | 6767 | N    | PHE | X | 449 | 49.989 | 32.115 | 31.667 | 0.00 | 0.00 |
| ATOM | 6768 | H    | PHE | X | 449 | 50.148 | 32.007 | 32.658 | 0.00 | 0.00 |
| ATOM | 6769 | CA   | PHE | X | 449 | 49.206 | 30.978 | 31.201 | 0.00 | 0.00 |
| ATOM | 6770 | HA   | PHE | X | 449 | 49.525 | 30.891 | 30.162 | 0.00 | 0.00 |
| ATOM | 6771 | CB   | PHE | X | 449 | 49.634 | 29.738 | 32.117 | 0.00 | 0.00 |
| ATOM | 6772 | HB2  | PHE | X | 449 | 49.509 | 29.863 | 33.192 | 0.00 | 0.00 |
| ATOM | 6773 | HB3  | PHE | X | 449 | 49.087 | 28.866 | 31.758 | 0.00 | 0.00 |
| ATOM | 6774 | CG   | PHE | X | 449 | 51.101 | 29.397 | 31.851 | 0.00 | 0.00 |
| ATOM | 6775 | CD1  | PHE | X | 449 | 52.123 | 30.082 | 32.523 | 0.00 | 0.00 |
| ATOM | 6776 | HD1  | PHE | X | 449 | 51.861 | 30.767 | 33.316 | 0.00 | 0.00 |
| ATOM | 6777 | CE1  | PHE | X | 449 | 53.523 | 29.869 | 32.362 | 0.00 | 0.00 |
| ATOM | 6778 | HE1  | PHE | X | 449 | 54.274 | 30.447 | 32.879 | 0.00 | 0.00 |
| ATOM | 6779 | CZ   | PHE | X | 449 | 53.853 | 28.954 | 31.347 | 0.00 | 0.00 |
| ATOM | 6780 | HZ   | PHE | X | 449 | 54.886 | 28.653 | 31.256 | 0.00 | 0.00 |
| ATOM | 6781 | CE2  | PHE | X | 449 | 52.848 | 28.288 | 30.632 | 0.00 | 0.00 |
| ATOM | 6782 | HE2  | PHE | X | 449 | 53.175 | 27.648 | 29.826 | 0.00 | 0.00 |
| ATOM | 6783 | CD2  | PHE | X | 449 | 51.473 | 28.501 | 30.850 | 0.00 | 0.00 |
| ATOM | 6784 | HD2  | PHE | X | 449 | 50.737 | 28.063 | 30.192 | 0.00 | 0.00 |
| ATOM | 6785 | C    | PHE | X | 449 | 47.712 | 31.178 | 31.194 | 0.00 | 0.00 |
| ATOM | 6786 | O    | PHE | X | 449 | 46.931 | 30.496 | 30.579 | 0.00 | 0.00 |
| ATOM | 6787 | N    | ILE | X | 450 | 47.167 | 32.196 | 31.892 | 0.00 | 0.00 |
| ATOM | 6788 | H    | ILE | X | 450 | 47.887 | 32.805 | 32.253 | 0.00 | 0.00 |
| ATOM | 6789 | CA   | ILE | X | 450 | 45.745 | 32.651 | 32.025 | 0.00 | 0.00 |
| ATOM | 6790 | HA   | ILE | X | 450 | 45.079 | 31.850 | 31.701 | 0.00 | 0.00 |
| ATOM | 6791 | CB   | ILE | X | 450 | 45.332 | 33.018 | 33.545 | 0.00 | 0.00 |
| ATOM | 6792 | HB   | ILE | X | 450 | 45.962 | 33.859 | 33.837 | 0.00 | 0.00 |



|      |      |      |     |   |     |        |        |        |      |      |
|------|------|------|-----|---|-----|--------|--------|--------|------|------|
| ATOM | 6793 | CG2  | ILE | X | 450 | 43.896 | 33.509 | 33.602 | 0.00 | 0.00 |
| ATOM | 6794 | HG21 | ILE | X | 450 | 43.837 | 34.562 | 33.328 | 0.00 | 0.00 |
| ATOM | 6795 | HG22 | ILE | X | 450 | 43.510 | 33.503 | 34.621 | 0.00 | 0.00 |
| ATOM | 6796 | HG23 | ILE | X | 450 | 43.325 | 33.005 | 32.821 | 0.00 | 0.00 |
| ATOM | 6797 | CG1  | ILE | X | 450 | 45.479 | 31.884 | 34.547 | 0.00 | 0.00 |
| ATOM | 6798 | HG12 | ILE | X | 450 | 44.768 | 31.930 | 35.372 | 0.00 | 0.00 |
| ATOM | 6799 | HG13 | ILE | X | 450 | 45.155 | 31.000 | 33.999 | 0.00 | 0.00 |
| ATOM | 6800 | CD1  | ILE | X | 450 | 46.889 | 31.680 | 35.176 | 0.00 | 0.00 |
| ATOM | 6801 | HD11 | ILE | X | 450 | 47.576 | 31.417 | 34.372 | 0.00 | 0.00 |
| ATOM | 6802 | HD12 | ILE | X | 450 | 46.828 | 30.739 | 35.722 | 0.00 | 0.00 |
| ATOM | 6803 | HD13 | ILE | X | 450 | 47.148 | 32.513 | 35.830 | 0.00 | 0.00 |
| ATOM | 6804 | C    | ILE | X | 450 | 45.491 | 33.786 | 30.994 | 0.00 | 0.00 |
| ATOM | 6805 | O    | ILE | X | 450 | 44.490 | 33.841 | 30.303 | 0.00 | 0.00 |
| ATOM | 6806 | N    | PHE | X | 451 | 46.478 | 34.622 | 30.679 | 0.00 | 0.00 |
| ATOM | 6807 | H    | PHE | X | 451 | 47.332 | 34.504 | 31.205 | 0.00 | 0.00 |
| ATOM | 6808 | CA   | PHE | X | 451 | 46.512 | 35.586 | 29.603 | 0.00 | 0.00 |
| ATOM | 6809 | HA   | PHE | X | 451 | 45.505 | 35.800 | 29.247 | 0.00 | 0.00 |
| ATOM | 6810 | CB   | PHE | X | 451 | 47.251 | 36.823 | 30.089 | 0.00 | 0.00 |
| ATOM | 6811 | HB2  | PHE | X | 451 | 48.159 | 36.557 | 30.631 | 0.00 | 0.00 |
| ATOM | 6812 | HB3  | PHE | X | 451 | 47.522 | 37.537 | 29.312 | 0.00 | 0.00 |
| ATOM | 6813 | CG   | PHE | X | 451 | 46.310 | 37.715 | 31.019 | 0.00 | 0.00 |
| ATOM | 6814 | CD1  | PHE | X | 451 | 46.384 | 37.637 | 32.418 | 0.00 | 0.00 |
| ATOM | 6815 | HD1  | PHE | X | 451 | 47.045 | 36.877 | 32.805 | 0.00 | 0.00 |
| ATOM | 6816 | CE1  | PHE | X | 451 | 45.705 | 38.590 | 33.185 | 0.00 | 0.00 |
| ATOM | 6817 | HE1  | PHE | X | 451 | 45.690 | 38.570 | 34.265 | 0.00 | 0.00 |
| ATOM | 6818 | CZ   | PHE | X | 451 | 44.813 | 39.519 | 32.644 | 0.00 | 0.00 |
| ATOM | 6819 | HZ   | PHE | X | 451 | 44.268 | 40.234 | 33.244 | 0.00 | 0.00 |
| ATOM | 6820 | CE2  | PHE | X | 451 | 44.747 | 39.525 | 31.226 | 0.00 | 0.00 |
| ATOM | 6821 | HE2  | PHE | X | 451 | 44.095 | 40.242 | 30.750 | 0.00 | 0.00 |
| ATOM | 6822 | CD2  | PHE | X | 451 | 45.464 | 38.638 | 30.403 | 0.00 | 0.00 |
| ATOM | 6823 | HD2  | PHE | X | 451 | 45.291 | 38.581 | 29.338 | 0.00 | 0.00 |
| ATOM | 6824 | C    | PHE | X | 451 | 47.091 | 35.082 | 28.294 | 0.00 | 0.00 |
| ATOM | 6825 | O    | PHE | X | 451 | 47.053 | 35.833 | 27.274 | 0.00 | 0.00 |
| ATOM | 6826 | N    | GLY | X | 452 | 47.613 | 33.903 | 28.263 | 0.00 | 0.00 |
| ATOM | 6827 | H    | GLY | X | 452 | 47.526 | 33.430 | 29.151 | 0.00 | 0.00 |
| ATOM | 6828 | CA   | GLY | X | 452 | 47.969 | 33.152 | 27.060 | 0.00 | 0.00 |
| ATOM | 6829 | HA2  | GLY | X | 452 | 48.127 | 32.106 | 27.320 | 0.00 | 0.00 |
| ATOM | 6830 | HA3  | GLY | X | 452 | 47.212 | 33.226 | 26.278 | 0.00 | 0.00 |
| ATOM | 6831 | C    | GLY | X | 452 | 49.237 | 33.623 | 26.386 | 0.00 | 0.00 |
| ATOM | 6832 | O    | GLY | X | 452 | 49.508 | 33.228 | 25.248 | 0.00 | 0.00 |
| ATOM | 6833 | N    | ILE | X | 453 | 50.124 | 34.335 | 27.091 | 0.00 | 0.00 |
| ATOM | 6834 | H    | ILE | X | 453 | 49.925 | 34.426 | 28.077 | 0.00 | 0.00 |
| ATOM | 6835 | CA   | ILE | X | 453 | 51.399 | 34.833 | 26.642 | 0.00 | 0.00 |
| ATOM | 6836 | HA   | ILE | X | 453 | 51.276 | 35.514 | 25.799 | 0.00 | 0.00 |
| ATOM | 6837 | CB   | ILE | X | 453 | 52.027 | 35.587 | 27.826 | 0.00 | 0.00 |
| ATOM | 6838 | HB   | ILE | X | 453 | 51.989 | 35.037 | 28.765 | 0.00 | 0.00 |
| ATOM | 6839 | CG2  | ILE | X | 453 | 53.452 | 36.095 | 27.513 | 0.00 | 0.00 |
| ATOM | 6840 | HG21 | ILE | X | 453 | 54.210 | 35.318 | 27.609 | 0.00 | 0.00 |
| ATOM | 6841 | HG22 | ILE | X | 453 | 53.764 | 36.776 | 28.306 | 0.00 | 0.00 |
| ATOM | 6842 | HG23 | ILE | X | 453 | 53.581 | 36.665 | 26.593 | 0.00 | 0.00 |
| ATOM | 6843 | CG1  | ILE | X | 453 | 51.226 | 36.890 | 28.272 | 0.00 | 0.00 |
| ATOM | 6844 | HG12 | ILE | X | 453 | 50.178 | 36.656 | 28.459 | 0.00 | 0.00 |
| ATOM | 6845 | HG13 | ILE | X | 453 | 51.578 | 37.166 | 29.266 | 0.00 | 0.00 |
| ATOM | 6846 | CD1  | ILE | X | 453 | 51.256 | 38.093 | 27.375 | 0.00 | 0.00 |
| ATOM | 6847 | HD11 | ILE | X | 453 | 51.328 | 37.820 | 26.322 | 0.00 | 0.00 |
| ATOM | 6848 | HD12 | ILE | X | 453 | 52.246 | 38.534 | 27.493 | 0.00 | 0.00 |
| ATOM | 6849 | HD13 | ILE | X | 453 | 50.363 | 38.696 | 27.541 | 0.00 | 0.00 |
| ATOM | 6850 | C    | ILE | X | 453 | 52.435 | 33.841 | 25.988 | 0.00 | 0.00 |
| ATOM | 6851 | O    | ILE | X | 453 | 53.162 | 34.332 | 25.116 | 0.00 | 0.00 |
| ATOM | 6852 | N    | PRO | X | 454 | 52.356 | 32.523 | 26.199 | 0.00 | 0.00 |
| ATOM | 6853 | CD   | PRO | X | 454 | 51.841 | 31.886 | 27.348 | 0.00 | 0.00 |
| ATOM | 6854 | HD2  | PRO | X | 454 | 50.795 | 31.646 | 27.157 | 0.00 | 0.00 |
| ATOM | 6855 | HD3  | PRO | X | 454 | 51.882 | 32.444 | 28.284 | 0.00 | 0.00 |
| ATOM | 6856 | CG   | PRO | X | 454 | 52.503 | 30.437 | 27.397 | 0.00 | 0.00 |
| ATOM | 6857 | HG2  | PRO | X | 454 | 51.879 | 29.699 | 27.901 | 0.00 | 0.00 |
| ATOM | 6858 | HG3  | PRO | X | 454 | 53.468 | 30.613 | 27.873 | 0.00 | 0.00 |
| ATOM | 6859 | CB   | PRO | X | 454 | 52.618 | 30.218 | 25.911 | 0.00 | 0.00 |

|      |      |      |     |   |     |        |        |        |      |      |
|------|------|------|-----|---|-----|--------|--------|--------|------|------|
| ATOM | 6860 | HB2  | PRO | X | 454 | 51.643 | 29.851 | 25.588 | 0.00 | 0.00 |
| ATOM | 6861 | HB3  | PRO | X | 454 | 53.340 | 29.457 | 25.614 | 0.00 | 0.00 |
| ATOM | 6862 | CA   | PRO | X | 454 | 52.997 | 31.537 | 25.368 | 0.00 | 0.00 |
| ATOM | 6863 | HA   | PRO | X | 454 | 54.038 | 31.591 | 25.685 | 0.00 | 0.00 |
| ATOM | 6864 | C    | PRO | X | 454 | 52.823 | 31.572 | 23.839 | 0.00 | 0.00 |
| ATOM | 6865 | O    | PRO | X | 454 | 53.837 | 31.604 | 23.094 | 0.00 | 0.00 |
| ATOM | 6866 | N    | LEU | X | 455 | 51.544 | 31.804 | 23.364 | 0.00 | 0.00 |
| ATOM | 6867 | H    | LEU | X | 455 | 50.881 | 31.957 | 24.110 | 0.00 | 0.00 |
| ATOM | 6868 | CA   | LEU | X | 455 | 51.189 | 31.965 | 21.943 | 0.00 | 0.00 |
| ATOM | 6869 | HA   | LEU | X | 455 | 51.706 | 31.251 | 21.303 | 0.00 | 0.00 |
| ATOM | 6870 | CB   | LEU | X | 455 | 49.705 | 31.730 | 21.807 | 0.00 | 0.00 |
| ATOM | 6871 | HB2  | LEU | X | 455 | 49.181 | 32.182 | 22.650 | 0.00 | 0.00 |
| ATOM | 6872 | HB3  | LEU | X | 455 | 49.333 | 32.160 | 20.877 | 0.00 | 0.00 |
| ATOM | 6873 | CG   | LEU | X | 455 | 49.417 | 30.164 | 21.846 | 0.00 | 0.00 |
| ATOM | 6874 | HG   | LEU | X | 455 | 50.057 | 29.630 | 22.549 | 0.00 | 0.00 |
| ATOM | 6875 | CD1  | LEU | X | 455 | 47.993 | 29.850 | 22.266 | 0.00 | 0.00 |
| ATOM | 6876 | HD11 | LEU | X | 455 | 47.829 | 29.978 | 23.336 | 0.00 | 0.00 |
| ATOM | 6877 | HD12 | LEU | X | 455 | 47.747 | 28.817 | 22.018 | 0.00 | 0.00 |
| ATOM | 6878 | HD13 | LEU | X | 455 | 47.353 | 30.636 | 21.865 | 0.00 | 0.00 |
| ATOM | 6879 | CD2  | LEU | X | 455 | 49.673 | 29.576 | 20.529 | 0.00 | 0.00 |
| ATOM | 6880 | HD21 | LEU | X | 455 | 49.796 | 28.498 | 20.636 | 0.00 | 0.00 |
| ATOM | 6881 | HD22 | LEU | X | 455 | 48.815 | 29.748 | 19.879 | 0.00 | 0.00 |
| ATOM | 6882 | HD23 | LEU | X | 455 | 50.506 | 29.962 | 19.941 | 0.00 | 0.00 |
| ATOM | 6883 | C    | LEU | X | 455 | 51.595 | 33.312 | 21.397 | 0.00 | 0.00 |
| ATOM | 6884 | O    | LEU | X | 455 | 51.385 | 33.494 | 20.229 | 0.00 | 0.00 |
| ATOM | 6885 | N    | ASP | X | 456 | 52.300 | 34.175 | 22.142 | 0.00 | 0.00 |
| ATOM | 6886 | H    | ASP | X | 456 | 52.761 | 33.838 | 22.975 | 0.00 | 0.00 |
| ATOM | 6887 | CA   | ASP | X | 456 | 52.779 | 35.505 | 21.723 | 0.00 | 0.00 |
| ATOM | 6888 | HA   | ASP | X | 456 | 52.167 | 35.872 | 20.900 | 0.00 | 0.00 |
| ATOM | 6889 | CB   | ASP | X | 456 | 52.641 | 36.528 | 22.932 | 0.00 | 0.00 |
| ATOM | 6890 | HB2  | ASP | X | 456 | 51.623 | 36.466 | 23.317 | 0.00 | 0.00 |
| ATOM | 6891 | HB3  | ASP | X | 456 | 53.227 | 36.145 | 23.768 | 0.00 | 0.00 |
| ATOM | 6892 | CG   | ASP | X | 456 | 53.017 | 37.968 | 22.630 | 0.00 | 0.00 |
| ATOM | 6893 | OD1  | ASP | X | 456 | 54.249 | 38.242 | 22.505 | 0.00 | 0.00 |
| ATOM | 6894 | OD2  | ASP | X | 456 | 52.224 | 38.836 | 22.342 | 0.00 | 0.00 |
| ATOM | 6895 | C    | ASP | X | 456 | 54.199 | 35.417 | 21.273 | 0.00 | 0.00 |
| ATOM | 6896 | O    | ASP | X | 456 | 54.953 | 34.632 | 21.883 | 0.00 | 0.00 |
| ATOM | 6897 | N    | PRO | X | 457 | 54.508 | 36.139 | 20.191 | 0.00 | 0.00 |
| ATOM | 6898 | CD   | PRO | X | 457 | 53.662 | 37.055 | 19.345 | 0.00 | 0.00 |
| ATOM | 6899 | HD2  | PRO | X | 457 | 53.130 | 37.842 | 19.880 | 0.00 | 0.00 |
| ATOM | 6900 | HD3  | PRO | X | 457 | 52.975 | 36.493 | 18.713 | 0.00 | 0.00 |
| ATOM | 6901 | CG   | PRO | X | 457 | 54.645 | 37.771 | 18.472 | 0.00 | 0.00 |
| ATOM | 6902 | HG2  | PRO | X | 457 | 54.997 | 38.616 | 19.064 | 0.00 | 0.00 |
| ATOM | 6903 | HG3  | PRO | X | 457 | 54.214 | 38.007 | 17.499 | 0.00 | 0.00 |
| ATOM | 6904 | CB   | PRO | X | 457 | 55.753 | 36.703 | 18.272 | 0.00 | 0.00 |
| ATOM | 6905 | HB2  | PRO | X | 457 | 56.662 | 37.263 | 18.054 | 0.00 | 0.00 |
| ATOM | 6906 | HB3  | PRO | X | 457 | 55.474 | 35.944 | 17.541 | 0.00 | 0.00 |
| ATOM | 6907 | CA   | PRO | X | 457 | 55.883 | 36.112 | 19.651 | 0.00 | 0.00 |
| ATOM | 6908 | HA   | PRO | X | 457 | 56.123 | 35.050 | 19.601 | 0.00 | 0.00 |
| ATOM | 6909 | C    | PRO | X | 457 | 57.037 | 36.867 | 20.459 | 0.00 | 0.00 |
| ATOM | 6910 | O    | PRO | X | 457 | 58.228 | 36.711 | 20.159 | 0.00 | 0.00 |
| ATOM | 6911 | N    | SER | X | 458 | 56.757 | 37.722 | 21.451 | 0.00 | 0.00 |
| ATOM | 6912 | H    | SER | X | 458 | 55.810 | 37.661 | 21.797 | 0.00 | 0.00 |
| ATOM | 6913 | CA   | SER | X | 458 | 57.689 | 38.758 | 22.057 | 0.00 | 0.00 |
| ATOM | 6914 | HA   | SER | X | 458 | 58.156 | 39.365 | 21.280 | 0.00 | 0.00 |
| ATOM | 6915 | CB   | SER | X | 458 | 56.938 | 39.817 | 22.898 | 0.00 | 0.00 |
| ATOM | 6916 | HB2  | SER | X | 458 | 57.714 | 40.450 | 23.328 | 0.00 | 0.00 |
| ATOM | 6917 | HB3  | SER | X | 458 | 56.322 | 40.410 | 22.222 | 0.00 | 0.00 |
| ATOM | 6918 | OG   | SER | X | 458 | 56.156 | 39.296 | 23.935 | 0.00 | 0.00 |
| ATOM | 6919 | HG   | SER | X | 458 | 55.332 | 38.964 | 23.571 | 0.00 | 0.00 |
| ATOM | 6920 | C    | SER | X | 458 | 58.895 | 38.077 | 22.769 | 0.00 | 0.00 |
| ATOM | 6921 | O    | SER | X | 458 | 60.012 | 38.562 | 22.733 | 0.00 | 0.00 |
| ATOM | 6922 | N    | ARG | X | 459 | 58.530 | 37.094 | 23.565 | 0.00 | 0.00 |
| ATOM | 6923 | H    | ARG | X | 459 | 57.571 | 37.111 | 23.883 | 0.00 | 0.00 |
| ATOM | 6924 | CA   | ARG | X | 459 | 59.354 | 36.008 | 24.103 | 0.00 | 0.00 |
| ATOM | 6925 | HA   | ARG | X | 459 | 60.398 | 36.175 | 23.838 | 0.00 | 0.00 |
| ATOM | 6926 | CB   | ARG | X | 459 | 59.200 | 35.896 | 25.580 | 0.00 | 0.00 |

|      |      |      |     |   |     |        |        |        |      |      |
|------|------|------|-----|---|-----|--------|--------|--------|------|------|
| ATOM | 6927 | HB2  | ARG | X | 459 | 58.189 | 35.621 | 25.878 | 0.00 | 0.00 |
| ATOM | 6928 | HB3  | ARG | X | 459 | 59.841 | 35.118 | 25.995 | 0.00 | 0.00 |
| ATOM | 6929 | CG   | ARG | X | 459 | 59.619 | 37.273 | 26.136 | 0.00 | 0.00 |
| ATOM | 6930 | HG2  | ARG | X | 459 | 60.684 | 37.389 | 25.934 | 0.00 | 0.00 |
| ATOM | 6931 | HG3  | ARG | X | 459 | 59.045 | 38.140 | 25.809 | 0.00 | 0.00 |
| ATOM | 6932 | CD   | ARG | X | 459 | 59.600 | 37.322 | 27.668 | 0.00 | 0.00 |
| ATOM | 6933 | HD2  | ARG | X | 459 | 60.357 | 36.635 | 28.046 | 0.00 | 0.00 |
| ATOM | 6934 | HD3  | ARG | X | 459 | 59.877 | 38.313 | 28.027 | 0.00 | 0.00 |
| ATOM | 6935 | NE   | ARG | X | 459 | 58.293 | 37.131 | 28.213 | 0.00 | 0.00 |
| ATOM | 6936 | HE   | ARG | X | 459 | 57.483 | 37.523 | 27.755 | 0.00 | 0.00 |
| ATOM | 6937 | CZ   | ARG | X | 459 | 57.931 | 36.421 | 29.238 | 0.00 | 0.00 |
| ATOM | 6938 | NH1  | ARG | X | 459 | 58.761 | 35.948 | 30.106 | 0.00 | 0.00 |
| ATOM | 6939 | HH11 | ARG | X | 459 | 59.733 | 36.219 | 30.050 | 0.00 | 0.00 |
| ATOM | 6940 | HH12 | ARG | X | 459 | 58.430 | 35.249 | 30.755 | 0.00 | 0.00 |
| ATOM | 6941 | NH2  | ARG | X | 459 | 56.643 | 36.049 | 29.318 | 0.00 | 0.00 |
| ATOM | 6942 | HH21 | ARG | X | 459 | 55.907 | 36.442 | 28.749 | 0.00 | 0.00 |
| ATOM | 6943 | HH22 | ARG | X | 459 | 56.455 | 35.649 | 30.226 | 0.00 | 0.00 |
| ATOM | 6944 | C    | ARG | X | 459 | 58.997 | 34.618 | 23.559 | 0.00 | 0.00 |
| ATOM | 6945 | O    | ARG | X | 459 | 57.969 | 34.404 | 22.975 | 0.00 | 0.00 |
| ATOM | 6946 | N    | ASN | X | 460 | 59.913 | 33.652 | 23.643 | 0.00 | 0.00 |
| ATOM | 6947 | H    | ASN | X | 460 | 60.801 | 33.872 | 24.071 | 0.00 | 0.00 |
| ATOM | 6948 | CA   | ASN | X | 460 | 59.768 | 32.400 | 22.931 | 0.00 | 0.00 |
| ATOM | 6949 | HA   | ASN | X | 460 | 58.890 | 32.449 | 22.288 | 0.00 | 0.00 |
| ATOM | 6950 | CB   | ASN | X | 460 | 60.931 | 32.252 | 21.953 | 0.00 | 0.00 |
| ATOM | 6951 | HB2  | ASN | X | 460 | 61.144 | 33.230 | 21.521 | 0.00 | 0.00 |
| ATOM | 6952 | HB3  | ASN | X | 460 | 61.837 | 31.901 | 22.445 | 0.00 | 0.00 |
| ATOM | 6953 | CG   | ASN | X | 460 | 60.802 | 31.148 | 20.913 | 0.00 | 0.00 |
| ATOM | 6954 | OD1  | ASN | X | 460 | 61.521 | 30.181 | 20.859 | 0.00 | 0.00 |
| ATOM | 6955 | ND2  | ASN | X | 460 | 59.868 | 31.278 | 20.056 | 0.00 | 0.00 |
| ATOM | 6956 | HD21 | ASN | X | 460 | 59.832 | 30.700 | 19.229 | 0.00 | 0.00 |
| ATOM | 6957 | HD22 | ASN | X | 460 | 59.314 | 32.122 | 20.043 | 0.00 | 0.00 |
| ATOM | 6958 | C    | ASN | X | 460 | 59.629 | 31.093 | 23.758 | 0.00 | 0.00 |
| ATOM | 6959 | O    | ASN | X | 460 | 60.595 | 30.625 | 24.361 | 0.00 | 0.00 |
| ATOM | 6960 | N    | TYR | X | 461 | 58.436 | 30.502 | 23.967 | 0.00 | 0.00 |
| ATOM | 6961 | H    | TYR | X | 461 | 57.653 | 30.936 | 23.498 | 0.00 | 0.00 |
| ATOM | 6962 | CA   | TYR | X | 461 | 58.095 | 29.352 | 24.795 | 0.00 | 0.00 |
| ATOM | 6963 | HA   | TYR | X | 461 | 58.802 | 29.330 | 25.624 | 0.00 | 0.00 |
| ATOM | 6964 | CB   | TYR | X | 461 | 56.677 | 29.575 | 25.425 | 0.00 | 0.00 |
| ATOM | 6965 | HB2  | TYR | X | 461 | 56.182 | 29.857 | 24.496 | 0.00 | 0.00 |
| ATOM | 6966 | HB3  | TYR | X | 461 | 56.390 | 28.635 | 25.896 | 0.00 | 0.00 |
| ATOM | 6967 | CG   | TYR | X | 461 | 56.485 | 30.566 | 26.521 | 0.00 | 0.00 |
| ATOM | 6968 | CD1  | TYR | X | 461 | 56.406 | 31.941 | 26.143 | 0.00 | 0.00 |
| ATOM | 6969 | HD1  | TYR | X | 461 | 56.508 | 32.213 | 25.103 | 0.00 | 0.00 |
| ATOM | 6970 | CE1  | TYR | X | 461 | 55.997 | 32.878 | 27.039 | 0.00 | 0.00 |
| ATOM | 6971 | HE1  | TYR | X | 461 | 55.879 | 33.898 | 26.704 | 0.00 | 0.00 |
| ATOM | 6972 | CZ   | TYR | X | 461 | 55.703 | 32.540 | 28.357 | 0.00 | 0.00 |
| ATOM | 6973 | OH   | TYR | X | 461 | 55.246 | 33.405 | 29.302 | 0.00 | 0.00 |
| ATOM | 6974 | HH   | TYR | X | 461 | 55.062 | 33.037 | 30.170 | 0.00 | 0.00 |
| ATOM | 6975 | CE2  | TYR | X | 461 | 55.785 | 31.217 | 28.802 | 0.00 | 0.00 |
| ATOM | 6976 | HE2  | TYR | X | 461 | 55.539 | 30.934 | 29.815 | 0.00 | 0.00 |
| ATOM | 6977 | CD2  | TYR | X | 461 | 56.227 | 30.249 | 27.871 | 0.00 | 0.00 |
| ATOM | 6978 | HD2  | TYR | X | 461 | 56.249 | 29.230 | 28.229 | 0.00 | 0.00 |
| ATOM | 6979 | C    | TYR | X | 461 | 58.155 | 28.015 | 23.980 | 0.00 | 0.00 |
| ATOM | 6980 | O    | TYR | X | 461 | 58.530 | 28.022 | 22.794 | 0.00 | 0.00 |
| ATOM | 6981 | N    | THR | X | 462 | 57.651 | 26.876 | 24.524 | 0.00 | 0.00 |
| ATOM | 6982 | H    | THR | X | 462 | 57.395 | 26.918 | 25.500 | 0.00 | 0.00 |
| ATOM | 6983 | CA   | THR | X | 462 | 57.577 | 25.549 | 23.882 | 0.00 | 0.00 |
| ATOM | 6984 | HA   | THR | X | 462 | 58.125 | 25.446 | 22.946 | 0.00 | 0.00 |
| ATOM | 6985 | CB   | THR | X | 462 | 58.080 | 24.404 | 24.839 | 0.00 | 0.00 |
| ATOM | 6986 | HB   | THR | X | 462 | 57.966 | 23.467 | 24.294 | 0.00 | 0.00 |
| ATOM | 6987 | CG2  | THR | X | 462 | 59.505 | 24.673 | 25.161 | 0.00 | 0.00 |
| ATOM | 6988 | HG21 | THR | X | 462 | 59.954 | 23.764 | 25.564 | 0.00 | 0.00 |
| ATOM | 6989 | HG22 | THR | X | 462 | 59.678 | 25.591 | 25.721 | 0.00 | 0.00 |
| ATOM | 6990 | HG23 | THR | X | 462 | 59.943 | 24.827 | 24.175 | 0.00 | 0.00 |
| ATOM | 6991 | OG1  | THR | X | 462 | 57.311 | 24.439 | 26.002 | 0.00 | 0.00 |
| ATOM | 6992 | HG1  | THR | X | 462 | 57.695 | 25.216 | 26.414 | 0.00 | 0.00 |
| ATOM | 6993 | C    | THR | X | 462 | 56.094 | 25.235 | 23.432 | 0.00 | 0.00 |

|      |      |     |     |   |     |        |        |        |      |      |
|------|------|-----|-----|---|-----|--------|--------|--------|------|------|
| ATOM | 6994 | O   | THR | X | 462 | 55.160 | 25.914 | 23.767 | 0.00 | 0.00 |
| ATOM | 6995 | N   | ALA | X | 463 | 55.989 | 24.337 | 22.506 | 0.00 | 0.00 |
| ATOM | 6996 | H   | ALA | X | 463 | 56.740 | 23.717 | 22.235 | 0.00 | 0.00 |
| ATOM | 6997 | CA  | ALA | X | 463 | 54.617 | 23.921 | 22.128 | 0.00 | 0.00 |
| ATOM | 6998 | HA  | ALA | X | 463 | 54.043 | 24.765 | 21.746 | 0.00 | 0.00 |
| ATOM | 6999 | CB  | ALA | X | 463 | 54.680 | 22.857 | 20.988 | 0.00 | 0.00 |
| ATOM | 7000 | HB1 | ALA | X | 463 | 53.769 | 22.258 | 20.985 | 0.00 | 0.00 |
| ATOM | 7001 | HB2 | ALA | X | 463 | 55.538 | 22.193 | 21.096 | 0.00 | 0.00 |
| ATOM | 7002 | HB3 | ALA | X | 463 | 54.719 | 23.418 | 20.054 | 0.00 | 0.00 |
| ATOM | 7003 | C   | ALA | X | 463 | 53.817 | 23.414 | 23.361 | 0.00 | 0.00 |
| ATOM | 7004 | O   | ALA | X | 463 | 52.758 | 23.956 | 23.546 | 0.00 | 0.00 |
| ATOM | 7005 | N   | GLU | X | 464 | 54.446 | 22.622 | 24.296 | 0.00 | 0.00 |
| ATOM | 7006 | H   | GLU | X | 464 | 55.400 | 22.354 | 24.101 | 0.00 | 0.00 |
| ATOM | 7007 | CA  | GLU | X | 464 | 53.877 | 22.139 | 25.504 | 0.00 | 0.00 |
| ATOM | 7008 | HA  | GLU | X | 464 | 53.144 | 21.345 | 25.359 | 0.00 | 0.00 |
| ATOM | 7009 | CB  | GLU | X | 464 | 55.059 | 21.541 | 26.354 | 0.00 | 0.00 |
| ATOM | 7010 | HB2 | GLU | X | 464 | 55.755 | 20.973 | 25.737 | 0.00 | 0.00 |
| ATOM | 7011 | HB3 | GLU | X | 464 | 55.761 | 22.266 | 26.765 | 0.00 | 0.00 |
| ATOM | 7012 | CG  | GLU | X | 464 | 54.704 | 20.524 | 27.442 | 0.00 | 0.00 |
| ATOM | 7013 | HG2 | GLU | X | 464 | 55.611 | 20.347 | 28.019 | 0.00 | 0.00 |
| ATOM | 7014 | HD3 | GLU | X | 464 | 54.060 | 20.957 | 28.207 | 0.00 | 0.00 |
| ATOM | 7015 | CD  | GLU | X | 464 | 54.256 | 19.162 | 26.945 | 0.00 | 0.00 |
| ATOM | 7016 | OE1 | GLU | X | 464 | 53.289 | 18.522 | 27.450 | 0.00 | 0.00 |
| ATOM | 7017 | OE2 | GLU | X | 464 | 54.891 | 18.654 | 25.969 | 0.00 | 0.00 |
| ATOM | 7018 | C   | GLU | X | 464 | 53.299 | 23.228 | 26.438 | 0.00 | 0.00 |
| ATOM | 7019 | O   | GLU | X | 464 | 52.170 | 23.064 | 26.856 | 0.00 | 0.00 |
| ATOM | 7020 | N   | GLU | X | 465 | 54.077 | 24.311 | 26.699 | 0.00 | 0.00 |
| ATOM | 7021 | H   | GLU | X | 465 | 55.033 | 24.210 | 26.389 | 0.00 | 0.00 |
| ATOM | 7022 | CA  | GLU | X | 465 | 53.685 | 25.485 | 27.498 | 0.00 | 0.00 |
| ATOM | 7023 | HA  | GLU | X | 465 | 53.333 | 25.034 | 28.426 | 0.00 | 0.00 |
| ATOM | 7024 | CB  | GLU | X | 465 | 54.937 | 26.420 | 27.550 | 0.00 | 0.00 |
| ATOM | 7025 | HB2 | GLU | X | 465 | 55.422 | 26.446 | 26.574 | 0.00 | 0.00 |
| ATOM | 7026 | HB3 | GLU | X | 465 | 54.677 | 27.454 | 27.777 | 0.00 | 0.00 |
| ATOM | 7027 | CG  | GLU | X | 465 | 55.972 | 25.932 | 28.510 | 0.00 | 0.00 |
| ATOM | 7028 | HG2 | GLU | X | 465 | 55.561 | 26.018 | 29.516 | 0.00 | 0.00 |
| ATOM | 7029 | HG3 | GLU | X | 465 | 56.114 | 24.885 | 28.240 | 0.00 | 0.00 |
| ATOM | 7030 | CD  | GLU | X | 465 | 57.358 | 26.645 | 28.428 | 0.00 | 0.00 |
| ATOM | 7031 | OE1 | GLU | X | 465 | 58.039 | 26.501 | 27.380 | 0.00 | 0.00 |
| ATOM | 7032 | OE2 | GLU | X | 465 | 57.698 | 27.318 | 29.377 | 0.00 | 0.00 |
| ATOM | 7033 | C   | GLU | X | 465 | 52.485 | 26.220 | 26.885 | 0.00 | 0.00 |
| ATOM | 7034 | O   | GLU | X | 465 | 51.656 | 26.674 | 27.701 | 0.00 | 0.00 |
| ATOM | 7035 | N   | LYS | X | 466 | 52.412 | 26.275 | 25.547 | 0.00 | 0.00 |
| ATOM | 7036 | H   | LYS | X | 466 | 53.123 | 25.815 | 24.997 | 0.00 | 0.00 |
| ATOM | 7037 | CA  | LYS | X | 466 | 51.212 | 26.844 | 24.923 | 0.00 | 0.00 |
| ATOM | 7038 | HA  | LYS | X | 466 | 51.004 | 27.801 | 25.402 | 0.00 | 0.00 |
| ATOM | 7039 | CB  | LYS | X | 466 | 51.429 | 27.048 | 23.417 | 0.00 | 0.00 |
| ATOM | 7040 | HB2 | LYS | X | 466 | 51.732 | 26.173 | 22.840 | 0.00 | 0.00 |
| ATOM | 7041 | HB3 | LYS | X | 466 | 50.483 | 27.363 | 22.977 | 0.00 | 0.00 |
| ATOM | 7042 | CG  | LYS | X | 466 | 52.560 | 27.989 | 23.119 | 0.00 | 0.00 |
| ATOM | 7043 | HG2 | LYS | X | 466 | 52.231 | 28.978 | 23.437 | 0.00 | 0.00 |
| ATOM | 7044 | HG3 | LYS | X | 466 | 53.392 | 27.779 | 23.792 | 0.00 | 0.00 |
| ATOM | 7045 | CD  | LYS | X | 466 | 52.912 | 27.981 | 21.613 | 0.00 | 0.00 |
| ATOM | 7046 | HD2 | LYS | X | 466 | 53.415 | 27.062 | 21.313 | 0.00 | 0.00 |
| ATOM | 7047 | HD3 | LYS | X | 466 | 51.994 | 27.976 | 21.026 | 0.00 | 0.00 |
| ATOM | 7048 | CE  | LYS | X | 466 | 53.832 | 29.156 | 21.255 | 0.00 | 0.00 |
| ATOM | 7049 | HE2 | LYS | X | 466 | 53.226 | 30.040 | 21.451 | 0.00 | 0.00 |
| ATOM | 7050 | HE3 | LYS | X | 466 | 54.698 | 29.267 | 21.908 | 0.00 | 0.00 |
| ATOM | 7051 | NZ  | LYS | X | 466 | 54.037 | 29.090 | 19.805 | 0.00 | 0.00 |
| ATOM | 7052 | HZ1 | LYS | X | 466 | 54.577 | 28.258 | 19.617 | 0.00 | 0.00 |
| ATOM | 7053 | HZ2 | LYS | X | 466 | 53.133 | 29.057 | 19.355 | 0.00 | 0.00 |
| ATOM | 7054 | HZ3 | LYS | X | 466 | 54.406 | 29.970 | 19.474 | 0.00 | 0.00 |
| ATOM | 7055 | C   | LYS | X | 466 | 49.996 | 25.932 | 25.132 | 0.00 | 0.00 |
| ATOM | 7056 | O   | LYS | X | 466 | 48.901 | 26.468 | 25.389 | 0.00 | 0.00 |
| ATOM | 7057 | N   | ILE | X | 467 | 50.187 | 24.624 | 25.012 | 0.00 | 0.00 |
| ATOM | 7058 | H   | ILE | X | 467 | 51.086 | 24.298 | 24.688 | 0.00 | 0.00 |
| ATOM | 7059 | CA  | ILE | X | 467 | 49.101 | 23.708 | 25.323 | 0.00 | 0.00 |
| ATOM | 7060 | HA  | ILE | X | 467 | 48.267 | 24.070 | 24.722 | 0.00 | 0.00 |

|      |      |      |     |   |     |        |        |        |      |      |
|------|------|------|-----|---|-----|--------|--------|--------|------|------|
| ATOM | 7061 | CB   | ILE | X | 467 | 49.392 | 22.268 | 24.934 | 0.00 | 0.00 |
| ATOM | 7062 | HB   | ILE | X | 467 | 50.358 | 22.017 | 25.372 | 0.00 | 0.00 |
| ATOM | 7063 | CG2  | ILE | X | 467 | 48.344 | 21.318 | 25.470 | 0.00 | 0.00 |
| ATOM | 7064 | HG21 | ILE | X | 467 | 48.269 | 21.283 | 26.557 | 0.00 | 0.00 |
| ATOM | 7065 | HG22 | ILE | X | 467 | 48.591 | 20.293 | 25.193 | 0.00 | 0.00 |
| ATOM | 7066 | HG23 | ILE | X | 467 | 47.317 | 21.499 | 25.153 | 0.00 | 0.00 |
| ATOM | 7067 | CG1  | ILE | X | 467 | 49.424 | 22.227 | 23.376 | 0.00 | 0.00 |
| ATOM | 7068 | HG12 | ILE | X | 467 | 48.491 | 22.604 | 22.957 | 0.00 | 0.00 |
| ATOM | 7069 | HG13 | ILE | X | 467 | 50.200 | 22.916 | 23.042 | 0.00 | 0.00 |
| ATOM | 7070 | CD1  | ILE | X | 467 | 49.813 | 20.851 | 22.804 | 0.00 | 0.00 |
| ATOM | 7071 | HD11 | ILE | X | 467 | 50.731 | 20.714 | 23.375 | 0.00 | 0.00 |
| ATOM | 7072 | HD12 | ILE | X | 467 | 49.949 | 20.950 | 21.727 | 0.00 | 0.00 |
| ATOM | 7073 | HD13 | ILE | X | 467 | 49.038 | 20.103 | 22.967 | 0.00 | 0.00 |
| ATOM | 7074 | C    | ILE | X | 467 | 48.624 | 23.864 | 26.748 | 0.00 | 0.00 |
| ATOM | 7075 | O    | ILE | X | 467 | 47.415 | 23.785 | 27.018 | 0.00 | 0.00 |
| ATOM | 7076 | N    | PHE | X | 468 | 49.513 | 23.966 | 27.745 | 0.00 | 0.00 |
| ATOM | 7077 | H    | PHE | X | 468 | 50.488 | 23.794 | 27.544 | 0.00 | 0.00 |
| ATOM | 7078 | CA   | PHE | X | 468 | 49.098 | 24.210 | 29.085 | 0.00 | 0.00 |
| ATOM | 7079 | HA   | PHE | X | 468 | 48.489 | 23.357 | 29.384 | 0.00 | 0.00 |
| ATOM | 7080 | CB   | PHE | X | 468 | 50.324 | 24.013 | 29.903 | 0.00 | 0.00 |
| ATOM | 7081 | HB2  | PHE | X | 468 | 50.760 | 23.044 | 29.659 | 0.00 | 0.00 |
| ATOM | 7082 | HB3  | PHE | X | 468 | 51.028 | 24.715 | 29.456 | 0.00 | 0.00 |
| ATOM | 7083 | CG   | PHE | X | 468 | 50.310 | 24.274 | 31.392 | 0.00 | 0.00 |
| ATOM | 7084 | CD1  | PHE | X | 468 | 49.465 | 23.599 | 32.277 | 0.00 | 0.00 |
| ATOM | 7085 | HD1  | PHE | X | 468 | 48.689 | 22.925 | 31.946 | 0.00 | 0.00 |
| ATOM | 7086 | CE1  | PHE | X | 468 | 49.505 | 23.899 | 33.655 | 0.00 | 0.00 |
| ATOM | 7087 | HE1  | PHE | X | 468 | 48.866 | 23.446 | 34.398 | 0.00 | 0.00 |
| ATOM | 7088 | CZ   | PHE | X | 468 | 50.336 | 24.891 | 34.151 | 0.00 | 0.00 |
| ATOM | 7089 | HZ   | PHE | X | 468 | 50.556 | 25.073 | 35.192 | 0.00 | 0.00 |
| ATOM | 7090 | CE2  | PHE | X | 468 | 51.301 | 25.465 | 33.301 | 0.00 | 0.00 |
| ATOM | 7091 | HE2  | PHE | X | 468 | 52.071 | 26.144 | 33.636 | 0.00 | 0.00 |
| ATOM | 7092 | CD2  | PHE | X | 468 | 51.244 | 25.252 | 31.924 | 0.00 | 0.00 |
| ATOM | 7093 | HD2  | PHE | X | 468 | 51.933 | 25.802 | 31.301 | 0.00 | 0.00 |
| ATOM | 7094 | C    | PHE | X | 468 | 48.451 | 25.606 | 29.263 | 0.00 | 0.00 |
| ATOM | 7095 | O    | PHE | X | 468 | 47.529 | 25.837 | 30.061 | 0.00 | 0.00 |
| ATOM | 7096 | N    | ALA | X | 469 | 48.861 | 26.605 | 28.483 | 0.00 | 0.00 |
| ATOM | 7097 | H    | ALA | X | 469 | 49.815 | 26.575 | 28.151 | 0.00 | 0.00 |
| ATOM | 7098 | CA   | ALA | X | 469 | 48.132 | 27.913 | 28.430 | 0.00 | 0.00 |
| ATOM | 7099 | HA   | ALA | X | 469 | 47.947 | 28.199 | 29.466 | 0.00 | 0.00 |
| ATOM | 7100 | CB   | ALA | X | 469 | 48.862 | 29.042 | 27.642 | 0.00 | 0.00 |
| ATOM | 7101 | HB1  | ALA | X | 469 | 49.611 | 29.576 | 28.227 | 0.00 | 0.00 |
| ATOM | 7102 | HB2  | ALA | X | 469 | 48.179 | 29.876 | 27.480 | 0.00 | 0.00 |
| ATOM | 7103 | HB3  | ALA | X | 469 | 49.282 | 28.801 | 26.665 | 0.00 | 0.00 |
| ATOM | 7104 | C    | ALA | X | 469 | 46.685 | 27.854 | 27.991 | 0.00 | 0.00 |
| ATOM | 7105 | O    | ALA | X | 469 | 45.808 | 28.318 | 28.659 | 0.00 | 0.00 |
| ATOM | 7106 | N    | GLN | X | 470 | 46.480 | 27.010 | 27.008 | 0.00 | 0.00 |
| ATOM | 7107 | H    | GLN | X | 470 | 47.294 | 26.546 | 26.631 | 0.00 | 0.00 |
| ATOM | 7108 | CA   | GLN | X | 470 | 45.114 | 26.562 | 26.655 | 0.00 | 0.00 |
| ATOM | 7109 | HA   | GLN | X | 470 | 44.552 | 27.486 | 26.518 | 0.00 | 0.00 |
| ATOM | 7110 | CB   | GLN | X | 470 | 45.063 | 25.690 | 25.416 | 0.00 | 0.00 |
| ATOM | 7111 | HB2  | GLN | X | 470 | 45.857 | 24.965 | 25.595 | 0.00 | 0.00 |
| ATOM | 7112 | HB3  | GLN | X | 470 | 44.081 | 25.233 | 25.299 | 0.00 | 0.00 |
| ATOM | 7113 | CG   | GLN | X | 470 | 45.268 | 26.463 | 24.079 | 0.00 | 0.00 |
| ATOM | 7114 | HG2  | GLN | X | 470 | 44.401 | 27.115 | 23.971 | 0.00 | 0.00 |
| ATOM | 7115 | HG3  | GLN | X | 470 | 46.126 | 27.131 | 24.169 | 0.00 | 0.00 |
| ATOM | 7116 | CD   | GLN | X | 470 | 45.518 | 25.521 | 22.931 | 0.00 | 0.00 |
| ATOM | 7117 | OE1  | GLN | X | 470 | 46.397 | 24.697 | 22.774 | 0.00 | 0.00 |
| ATOM | 7118 | NE2  | GLN | X | 470 | 44.617 | 25.639 | 21.960 | 0.00 | 0.00 |
| ATOM | 7119 | HE21 | GLN | X | 470 | 44.756 | 25.113 | 21.110 | 0.00 | 0.00 |
| ATOM | 7120 | HE22 | GLN | X | 470 | 43.844 | 26.272 | 22.112 | 0.00 | 0.00 |
| ATOM | 7121 | C    | GLN | X | 470 | 44.301 | 25.784 | 27.726 | 0.00 | 0.00 |
| ATOM | 7122 | O    | GLN | X | 470 | 43.049 | 25.878 | 27.608 | 0.00 | 0.00 |
| ATOM | 7123 | N    | ARG | X | 471 | 44.967 | 25.031 | 28.663 | 0.00 | 0.00 |
| ATOM | 7124 | H    | ARG | X | 471 | 45.962 | 24.864 | 28.619 | 0.00 | 0.00 |
| ATOM | 7125 | CA   | ARG | X | 471 | 44.235 | 24.572 | 29.934 | 0.00 | 0.00 |
| ATOM | 7126 | HA   | ARG | X | 471 | 43.244 | 24.189 | 29.690 | 0.00 | 0.00 |
| ATOM | 7127 | CB   | ARG | X | 471 | 45.022 | 23.454 | 30.687 | 0.00 | 0.00 |

|      |      |      |     |   |     |        |        |        |      |      |
|------|------|------|-----|---|-----|--------|--------|--------|------|------|
| ATOM | 7128 | HB2  | ARG | X | 471 | 45.969 | 23.763 | 31.130 | 0.00 | 0.00 |
| ATOM | 7129 | HB3  | ARG | X | 471 | 44.394 | 23.175 | 31.533 | 0.00 | 0.00 |
| ATOM | 7130 | CG   | ARG | X | 471 | 45.286 | 22.234 | 29.773 | 0.00 | 0.00 |
| ATOM | 7131 | HG2  | ARG | X | 471 | 44.344 | 21.745 | 29.525 | 0.00 | 0.00 |
| ATOM | 7132 | HG3  | ARG | X | 471 | 45.868 | 22.655 | 28.952 | 0.00 | 0.00 |
| ATOM | 7133 | CD   | ARG | X | 471 | 46.185 | 21.101 | 30.333 | 0.00 | 0.00 |
| ATOM | 7134 | HD2  | ARG | X | 471 | 46.303 | 20.293 | 29.610 | 0.00 | 0.00 |
| ATOM | 7135 | HD3  | ARG | X | 471 | 47.225 | 21.423 | 30.360 | 0.00 | 0.00 |
| ATOM | 7136 | NE   | ARG | X | 471 | 45.855 | 20.679 | 31.670 | 0.00 | 0.00 |
| ATOM | 7137 | HE   | ARG | X | 471 | 44.851 | 20.605 | 31.750 | 0.00 | 0.00 |
| ATOM | 7138 | CZ   | ARG | X | 471 | 46.588 | 20.615 | 32.792 | 0.00 | 0.00 |
| ATOM | 7139 | NH1  | ARG | X | 471 | 47.892 | 20.570 | 32.671 | 0.00 | 0.00 |
| ATOM | 7140 | HH11 | ARG | X | 471 | 48.373 | 20.572 | 31.783 | 0.00 | 0.00 |
| ATOM | 7141 | HH12 | ARG | X | 471 | 48.533 | 20.559 | 33.451 | 0.00 | 0.00 |
| ATOM | 7142 | NH2  | ARG | X | 471 | 45.974 | 20.400 | 33.902 | 0.00 | 0.00 |
| ATOM | 7143 | HH21 | ARG | X | 471 | 44.966 | 20.341 | 33.888 | 0.00 | 0.00 |
| ATOM | 7144 | HH22 | ARG | X | 471 | 46.534 | 20.394 | 34.743 | 0.00 | 0.00 |
| ATOM | 7145 | C    | ARG | X | 471 | 43.952 | 25.688 | 30.890 | 0.00 | 0.00 |
| ATOM | 7146 | O    | ARG | X | 471 | 42.863 | 25.668 | 31.477 | 0.00 | 0.00 |
| ATOM | 7147 | N    | LEU | X | 472 | 44.826 | 26.682 | 30.994 | 0.00 | 0.00 |
| ATOM | 7148 | H    | LEU | X | 472 | 45.694 | 26.641 | 30.481 | 0.00 | 0.00 |
| ATOM | 7149 | CA   | LEU | X | 472 | 44.699 | 27.677 | 32.089 | 0.00 | 0.00 |
| ATOM | 7150 | HA   | LEU | X | 472 | 44.095 | 27.299 | 32.914 | 0.00 | 0.00 |
| ATOM | 7151 | CB   | LEU | X | 472 | 46.050 | 27.934 | 32.762 | 0.00 | 0.00 |
| ATOM | 7152 | HB2  | LEU | X | 472 | 46.778 | 28.073 | 31.962 | 0.00 | 0.00 |
| ATOM | 7153 | HB3  | LEU | X | 472 | 45.968 | 28.944 | 33.162 | 0.00 | 0.00 |
| ATOM | 7154 | CG   | LEU | X | 472 | 46.490 | 26.896 | 33.930 | 0.00 | 0.00 |
| ATOM | 7155 | HG   | LEU | X | 472 | 45.801 | 26.956 | 34.772 | 0.00 | 0.00 |
| ATOM | 7156 | CD1  | LEU | X | 472 | 46.584 | 25.410 | 33.524 | 0.00 | 0.00 |
| ATOM | 7157 | HD11 | LEU | X | 472 | 45.606 | 25.041 | 33.216 | 0.00 | 0.00 |
| ATOM | 7158 | HD12 | LEU | X | 472 | 47.009 | 24.764 | 34.293 | 0.00 | 0.00 |
| ATOM | 7159 | HD13 | LEU | X | 472 | 47.255 | 25.217 | 32.686 | 0.00 | 0.00 |
| ATOM | 7160 | CD2  | LEU | X | 472 | 47.834 | 27.251 | 34.491 | 0.00 | 0.00 |
| ATOM | 7161 | HD21 | LEU | X | 472 | 48.510 | 27.120 | 33.646 | 0.00 | 0.00 |
| ATOM | 7162 | HD22 | LEU | X | 472 | 47.781 | 28.238 | 34.950 | 0.00 | 0.00 |
| ATOM | 7163 | HD23 | LEU | X | 472 | 48.163 | 26.572 | 35.278 | 0.00 | 0.00 |
| ATOM | 7164 | C    | LEU | X | 472 | 43.989 | 28.980 | 31.674 | 0.00 | 0.00 |
| ATOM | 7165 | O    | LEU | X | 472 | 43.424 | 29.764 | 32.424 | 0.00 | 0.00 |
| ATOM | 7166 | N    | MET | X | 473 | 43.766 | 29.136 | 30.369 | 0.00 | 0.00 |
| ATOM | 7167 | H    | MET | X | 473 | 44.083 | 28.410 | 29.743 | 0.00 | 0.00 |
| ATOM | 7168 | CA   | MET | X | 473 | 42.731 | 30.075 | 29.824 | 0.00 | 0.00 |
| ATOM | 7169 | HA   | MET | X | 473 | 42.808 | 31.030 | 30.342 | 0.00 | 0.00 |
| ATOM | 7170 | CB   | MET | X | 473 | 43.064 | 30.403 | 28.331 | 0.00 | 0.00 |
| ATOM | 7171 | HB2  | MET | X | 473 | 43.129 | 29.521 | 27.694 | 0.00 | 0.00 |
| ATOM | 7172 | HB3  | MET | X | 473 | 42.216 | 30.878 | 27.838 | 0.00 | 0.00 |
| ATOM | 7173 | CG   | MET | X | 473 | 44.332 | 31.323 | 28.243 | 0.00 | 0.00 |
| ATOM | 7174 | HG2  | MET | X | 473 | 44.006 | 32.246 | 28.723 | 0.00 | 0.00 |
| ATOM | 7175 | HG3  | MET | X | 473 | 45.227 | 30.985 | 28.765 | 0.00 | 0.00 |
| ATOM | 7176 | SD   | MET | X | 473 | 44.531 | 31.900 | 26.492 | 0.00 | 0.00 |
| ATOM | 7177 | CE   | MET | X | 473 | 45.542 | 30.651 | 25.849 | 0.00 | 0.00 |
| ATOM | 7178 | HE1  | MET | X | 473 | 46.268 | 31.049 | 25.140 | 0.00 | 0.00 |
| ATOM | 7179 | HE2  | MET | X | 473 | 46.180 | 30.330 | 26.672 | 0.00 | 0.00 |
| ATOM | 7180 | HE3  | MET | X | 473 | 44.943 | 29.821 | 25.474 | 0.00 | 0.00 |
| ATOM | 7181 | C    | MET | X | 473 | 41.303 | 29.473 | 30.130 | 0.00 | 0.00 |
| ATOM | 7182 | O    | MET | X | 473 | 40.359 | 30.221 | 30.473 | 0.00 | 0.00 |
| ATOM | 7183 | N    | ARG | X | 474 | 41.146 | 28.133 | 30.002 | 0.00 | 0.00 |
| ATOM | 7184 | H    | ARG | X | 474 | 41.996 | 27.641 | 29.766 | 0.00 | 0.00 |
| ATOM | 7185 | CA   | ARG | X | 474 | 39.945 | 27.361 | 30.219 | 0.00 | 0.00 |
| ATOM | 7186 | HA   | ARG | X | 474 | 39.122 | 27.848 | 29.696 | 0.00 | 0.00 |
| ATOM | 7187 | CB   | ARG | X | 474 | 40.200 | 25.940 | 29.639 | 0.00 | 0.00 |
| ATOM | 7188 | HB2  | ARG | X | 474 | 40.667 | 25.934 | 28.654 | 0.00 | 0.00 |
| ATOM | 7189 | HB3  | ARG | X | 474 | 40.933 | 25.404 | 30.242 | 0.00 | 0.00 |
| ATOM | 7190 | CG   | ARG | X | 474 | 38.908 | 25.105 | 29.584 | 0.00 | 0.00 |
| ATOM | 7191 | HG2  | ARG | X | 474 | 39.211 | 24.100 | 29.290 | 0.00 | 0.00 |
| ATOM | 7192 | HG3  | ARG | X | 474 | 38.548 | 24.973 | 30.604 | 0.00 | 0.00 |
| ATOM | 7193 | CD   | ARG | X | 474 | 37.843 | 25.553 | 28.637 | 0.00 | 0.00 |
| ATOM | 7194 | HD2  | ARG | X | 474 | 37.572 | 26.553 | 28.973 | 0.00 | 0.00 |

|      |      |      |     |   |     |        |        |        |      |      |
|------|------|------|-----|---|-----|--------|--------|--------|------|------|
| ATOM | 7195 | HD3  | ARG | X | 474 | 38.315 | 25.505 | 27.656 | 0.00 | 0.00 |
| ATOM | 7196 | NE   | ARG | X | 474 | 36.745 | 24.587 | 28.741 | 0.00 | 0.00 |
| ATOM | 7197 | HE   | ARG | X | 474 | 36.905 | 23.742 | 29.271 | 0.00 | 0.00 |
| ATOM | 7198 | CZ   | ARG | X | 474 | 35.653 | 24.692 | 28.045 | 0.00 | 0.00 |
| ATOM | 7199 | NH1  | ARG | X | 474 | 35.331 | 25.831 | 27.415 | 0.00 | 0.00 |
| ATOM | 7200 | HH11 | ARG | X | 474 | 36.002 | 26.585 | 27.375 | 0.00 | 0.00 |
| ATOM | 7201 | HH12 | ARG | X | 474 | 34.432 | 25.921 | 26.963 | 0.00 | 0.00 |
| ATOM | 7202 | NH2  | ARG | X | 474 | 34.831 | 23.711 | 27.790 | 0.00 | 0.00 |
| ATOM | 7203 | HH21 | ARG | X | 474 | 35.173 | 22.858 | 28.209 | 0.00 | 0.00 |
| ATOM | 7204 | HH22 | ARG | X | 474 | 34.180 | 23.692 | 27.018 | 0.00 | 0.00 |
| ATOM | 7205 | C    | ARG | X | 474 | 39.436 | 27.359 | 31.627 | 0.00 | 0.00 |
| ATOM | 7206 | O    | ARG | X | 474 | 38.243 | 27.642 | 31.894 | 0.00 | 0.00 |
| ATOM | 7207 | N    | TYR | X | 475 | 40.259 | 27.026 | 32.590 | 0.00 | 0.00 |
| ATOM | 7208 | H    | TYR | X | 475 | 41.219 | 26.902 | 32.301 | 0.00 | 0.00 |
| ATOM | 7209 | CA   | TYR | X | 475 | 39.869 | 26.928 | 34.001 | 0.00 | 0.00 |
| ATOM | 7210 | HA   | TYR | X | 475 | 39.069 | 26.203 | 34.153 | 0.00 | 0.00 |
| ATOM | 7211 | CB   | TYR | X | 475 | 41.143 | 26.577 | 34.867 | 0.00 | 0.00 |
| ATOM | 7212 | HB2  | TYR | X | 475 | 41.903 | 27.345 | 34.725 | 0.00 | 0.00 |
| ATOM | 7213 | HB3  | TYR | X | 475 | 40.822 | 26.685 | 35.903 | 0.00 | 0.00 |
| ATOM | 7214 | CG   | TYR | X | 475 | 41.735 | 25.203 | 34.794 | 0.00 | 0.00 |
| ATOM | 7215 | CD1  | TYR | X | 475 | 40.835 | 24.074 | 34.902 | 0.00 | 0.00 |
| ATOM | 7216 | HD1  | TYR | X | 475 | 39.772 | 24.259 | 34.860 | 0.00 | 0.00 |
| ATOM | 7217 | CE1  | TYR | X | 475 | 41.338 | 22.774 | 34.943 | 0.00 | 0.00 |
| ATOM | 7218 | HE1  | TYR | X | 475 | 40.692 | 21.909 | 34.961 | 0.00 | 0.00 |
| ATOM | 7219 | CZ   | TYR | X | 475 | 42.741 | 22.518 | 35.000 | 0.00 | 0.00 |
| ATOM | 7220 | OH   | TYR | X | 475 | 43.211 | 21.320 | 35.021 | 0.00 | 0.00 |
| ATOM | 7221 | HH   | TYR | X | 475 | 42.491 | 20.698 | 35.149 | 0.00 | 0.00 |
| ATOM | 7222 | CE2  | TYR | X | 475 | 43.597 | 23.605 | 34.821 | 0.00 | 0.00 |
| ATOM | 7223 | HE2  | TYR | X | 475 | 44.658 | 23.427 | 34.727 | 0.00 | 0.00 |
| ATOM | 7224 | CD2  | TYR | X | 475 | 43.141 | 24.940 | 34.748 | 0.00 | 0.00 |
| ATOM | 7225 | HD2  | TYR | X | 475 | 43.815 | 25.771 | 34.600 | 0.00 | 0.00 |
| ATOM | 7226 | C    | TYR | X | 475 | 39.243 | 28.243 | 34.538 | 0.00 | 0.00 |
| ATOM | 7227 | O    | TYR | X | 475 | 38.127 | 28.191 | 35.087 | 0.00 | 0.00 |
| ATOM | 7228 | N    | TRP | X | 476 | 39.822 | 29.464 | 34.256 | 0.00 | 0.00 |
| ATOM | 7229 | H    | TRP | X | 476 | 40.675 | 29.412 | 33.716 | 0.00 | 0.00 |
| ATOM | 7230 | CA   | TRP | X | 476 | 39.272 | 30.749 | 34.631 | 0.00 | 0.00 |
| ATOM | 7231 | HA   | TRP | X | 476 | 38.952 | 30.617 | 35.665 | 0.00 | 0.00 |
| ATOM | 7232 | CB   | TRP | X | 476 | 40.403 | 31.795 | 34.497 | 0.00 | 0.00 |
| ATOM | 7233 | HB2  | TRP | X | 476 | 41.103 | 31.610 | 33.682 | 0.00 | 0.00 |
| ATOM | 7234 | HB3  | TRP | X | 476 | 39.909 | 32.759 | 34.380 | 0.00 | 0.00 |
| ATOM | 7235 | CG   | TRP | X | 476 | 41.225 | 31.978 | 35.778 | 0.00 | 0.00 |
| ATOM | 7236 | CD1  | TRP | X | 476 | 41.396 | 33.104 | 36.398 | 0.00 | 0.00 |
| ATOM | 7237 | HD1  | TRP | X | 476 | 40.944 | 34.039 | 36.098 | 0.00 | 0.00 |
| ATOM | 7238 | NE1  | TRP | X | 476 | 42.353 | 32.979 | 37.383 | 0.00 | 0.00 |
| ATOM | 7239 | HE1  | TRP | X | 476 | 42.766 | 33.767 | 37.861 | 0.00 | 0.00 |
| ATOM | 7240 | CE2  | TRP | X | 476 | 42.862 | 31.746 | 37.526 | 0.00 | 0.00 |
| ATOM | 7241 | CZ2  | TRP | X | 476 | 43.929 | 31.201 | 38.279 | 0.00 | 0.00 |
| ATOM | 7242 | HZ2  | TRP | X | 476 | 44.693 | 31.739 | 38.820 | 0.00 | 0.00 |
| ATOM | 7243 | CH2  | TRP | X | 476 | 44.193 | 29.796 | 38.177 | 0.00 | 0.00 |
| ATOM | 7244 | HH2  | TRP | X | 476 | 44.946 | 29.308 | 38.778 | 0.00 | 0.00 |
| ATOM | 7245 | CZ3  | TRP | X | 476 | 43.489 | 29.105 | 37.180 | 0.00 | 0.00 |
| ATOM | 7246 | HZ3  | TRP | X | 476 | 43.875 | 28.109 | 37.020 | 0.00 | 0.00 |
| ATOM | 7247 | CE3  | TRP | X | 476 | 42.427 | 29.627 | 36.445 | 0.00 | 0.00 |
| ATOM | 7248 | HE3  | TRP | X | 476 | 41.792 | 29.031 | 35.806 | 0.00 | 0.00 |
| ATOM | 7249 | CD2  | TRP | X | 476 | 42.133 | 31.011 | 36.543 | 0.00 | 0.00 |
| ATOM | 7250 | C    | TRP | X | 476 | 38.023 | 31.171 | 33.827 | 0.00 | 0.00 |
| ATOM | 7251 | O    | TRP | X | 476 | 37.088 | 31.704 | 34.469 | 0.00 | 0.00 |
| ATOM | 7252 | N    | ALA | X | 477 | 37.854 | 30.803 | 32.541 | 0.00 | 0.00 |
| ATOM | 7253 | H    | ALA | X | 477 | 38.718 | 30.587 | 32.065 | 0.00 | 0.00 |
| ATOM | 7254 | CA   | ALA | X | 477 | 36.617 | 30.998 | 31.816 | 0.00 | 0.00 |
| ATOM | 7255 | HA   | ALA | X | 477 | 36.167 | 31.952 | 32.089 | 0.00 | 0.00 |
| ATOM | 7256 | CB   | ALA | X | 477 | 36.748 | 30.964 | 30.356 | 0.00 | 0.00 |
| ATOM | 7257 | HB1  | ALA | X | 477 | 35.806 | 31.328 | 29.946 | 0.00 | 0.00 |
| ATOM | 7258 | HB2  | ALA | X | 477 | 36.859 | 29.948 | 29.977 | 0.00 | 0.00 |
| ATOM | 7259 | HB3  | ALA | X | 477 | 37.568 | 31.566 | 29.962 | 0.00 | 0.00 |
| ATOM | 7260 | C    | ALA | X | 477 | 35.448 | 30.011 | 32.222 | 0.00 | 0.00 |
| ATOM | 7261 | O    | ALA | X | 477 | 34.306 | 30.464 | 32.330 | 0.00 | 0.00 |

|      |      |      |     |   |     |        |        |        |      |      |
|------|------|------|-----|---|-----|--------|--------|--------|------|------|
| ATOM | 7262 | N    | ASN | X | 478 | 35.806 | 28.811 | 32.638 | 0.00 | 0.00 |
| ATOM | 7263 | H    | ASN | X | 478 | 36.771 | 28.514 | 32.599 | 0.00 | 0.00 |
| ATOM | 7264 | CA   | ASN | X | 478 | 34.803 | 27.919 | 33.206 | 0.00 | 0.00 |
| ATOM | 7265 | HA   | ASN | X | 478 | 33.994 | 27.854 | 32.478 | 0.00 | 0.00 |
| ATOM | 7266 | CB   | ASN | X | 478 | 35.479 | 26.522 | 33.347 | 0.00 | 0.00 |
| ATOM | 7267 | HB2  | ASN | X | 478 | 36.506 | 26.600 | 33.703 | 0.00 | 0.00 |
| ATOM | 7268 | HB3  | ASN | X | 478 | 35.007 | 25.953 | 34.148 | 0.00 | 0.00 |
| ATOM | 7269 | CG   | ASN | X | 478 | 35.421 | 25.644 | 32.110 | 0.00 | 0.00 |
| ATOM | 7270 | OD1  | ASN | X | 478 | 34.752 | 25.966 | 31.093 | 0.00 | 0.00 |
| ATOM | 7271 | ND2  | ASN | X | 478 | 36.107 | 24.489 | 32.142 | 0.00 | 0.00 |
| ATOM | 7272 | HD21 | ASN | X | 478 | 36.340 | 23.993 | 31.293 | 0.00 | 0.00 |
| ATOM | 7273 | HD22 | ASN | X | 478 | 36.630 | 24.301 | 32.985 | 0.00 | 0.00 |
| ATOM | 7274 | C    | ASN | X | 478 | 34.291 | 28.456 | 34.557 | 0.00 | 0.00 |
| ATOM | 7275 | O    | ASN | X | 478 | 33.117 | 28.502 | 34.881 | 0.00 | 0.00 |
| ATOM | 7276 | N    | PHE | X | 479 | 35.231 | 28.902 | 35.368 | 0.00 | 0.00 |
| ATOM | 7277 | H    | PHE | X | 479 | 36.156 | 28.785 | 34.979 | 0.00 | 0.00 |
| ATOM | 7278 | CA   | PHE | X | 479 | 34.976 | 29.665 | 36.599 | 0.00 | 0.00 |
| ATOM | 7279 | HA   | PHE | X | 479 | 34.405 | 28.969 | 37.214 | 0.00 | 0.00 |
| ATOM | 7280 | CB   | PHE | X | 479 | 36.308 | 29.933 | 37.312 | 0.00 | 0.00 |
| ATOM | 7281 | HB2  | PHE | X | 479 | 36.761 | 28.949 | 37.435 | 0.00 | 0.00 |
| ATOM | 7282 | HB3  | PHE | X | 479 | 36.970 | 30.492 | 36.651 | 0.00 | 0.00 |
| ATOM | 7283 | CG   | PHE | X | 479 | 35.970 | 30.516 | 38.651 | 0.00 | 0.00 |
| ATOM | 7284 | CD1  | PHE | X | 479 | 35.656 | 29.664 | 39.777 | 0.00 | 0.00 |
| ATOM | 7285 | HD1  | PHE | X | 479 | 35.590 | 28.611 | 39.548 | 0.00 | 0.00 |
| ATOM | 7286 | CE1  | PHE | X | 479 | 35.309 | 30.133 | 41.062 | 0.00 | 0.00 |
| ATOM | 7287 | HE1  | PHE | X | 479 | 34.908 | 29.460 | 41.805 | 0.00 | 0.00 |
| ATOM | 7288 | CZ   | PHE | X | 479 | 35.165 | 31.540 | 41.222 | 0.00 | 0.00 |
| ATOM | 7289 | HZ   | PHE | X | 479 | 34.818 | 31.868 | 42.190 | 0.00 | 0.00 |
| ATOM | 7290 | CE2  | PHE | X | 479 | 35.595 | 32.412 | 40.163 | 0.00 | 0.00 |
| ATOM | 7291 | HE2  | PHE | X | 479 | 35.604 | 33.480 | 40.324 | 0.00 | 0.00 |
| ATOM | 7292 | CD2  | PHE | X | 479 | 35.902 | 31.926 | 38.848 | 0.00 | 0.00 |
| ATOM | 7293 | HD2  | PHE | X | 479 | 36.136 | 32.654 | 38.086 | 0.00 | 0.00 |
| ATOM | 7294 | C    | PHE | X | 479 | 34.131 | 30.917 | 36.364 | 0.00 | 0.00 |
| ATOM | 7295 | O    | PHE | X | 479 | 33.279 | 31.308 | 37.153 | 0.00 | 0.00 |
| ATOM | 7296 | N    | ALA | X | 480 | 34.343 | 31.578 | 35.221 | 0.00 | 0.00 |
| ATOM | 7297 | H    | ALA | X | 480 | 35.088 | 31.274 | 34.612 | 0.00 | 0.00 |
| ATOM | 7298 | CA   | ALA | X | 480 | 33.499 | 32.817 | 34.850 | 0.00 | 0.00 |
| ATOM | 7299 | HA   | ALA | X | 480 | 33.405 | 33.344 | 35.800 | 0.00 | 0.00 |
| ATOM | 7300 | CB   | ALA | X | 480 | 34.120 | 33.607 | 33.688 | 0.00 | 0.00 |
| ATOM | 7301 | HB1  | ALA | X | 480 | 33.460 | 34.438 | 33.439 | 0.00 | 0.00 |
| ATOM | 7302 | HB2  | ALA | X | 480 | 34.316 | 32.994 | 32.809 | 0.00 | 0.00 |
| ATOM | 7303 | HB3  | ALA | X | 480 | 35.089 | 34.010 | 33.982 | 0.00 | 0.00 |
| ATOM | 7304 | C    | ALA | X | 480 | 32.053 | 32.487 | 34.383 | 0.00 | 0.00 |
| ATOM | 7305 | O    | ALA | X | 480 | 31.118 | 33.207 | 34.661 | 0.00 | 0.00 |
| ATOM | 7306 | N    | ARG | X | 481 | 31.979 | 31.333 | 33.691 | 0.00 | 0.00 |
| ATOM | 7307 | H    | ARG | X | 481 | 32.839 | 31.026 | 33.259 | 0.00 | 0.00 |
| ATOM | 7308 | CA   | ARG | X | 481 | 30.732 | 30.722 | 33.097 | 0.00 | 0.00 |
| ATOM | 7309 | HA   | ARG | X | 481 | 30.247 | 31.414 | 32.409 | 0.00 | 0.00 |
| ATOM | 7310 | CB   | ARG | X | 481 | 31.143 | 29.536 | 32.272 | 0.00 | 0.00 |
| ATOM | 7311 | HB2  | ARG | X | 481 | 31.989 | 29.009 | 32.714 | 0.00 | 0.00 |
| ATOM | 7312 | HB3  | ARG | X | 481 | 30.347 | 28.798 | 32.182 | 0.00 | 0.00 |
| ATOM | 7313 | CG   | ARG | X | 481 | 31.530 | 29.895 | 30.905 | 0.00 | 0.00 |
| ATOM | 7314 | HG2  | ARG | X | 481 | 30.611 | 30.281 | 30.462 | 0.00 | 0.00 |
| ATOM | 7315 | HG3  | ARG | X | 481 | 32.277 | 30.683 | 30.817 | 0.00 | 0.00 |
| ATOM | 7316 | CD   | ARG | X | 481 | 32.011 | 28.593 | 30.073 | 0.00 | 0.00 |
| ATOM | 7317 | HD2  | ARG | X | 481 | 32.759 | 28.228 | 30.778 | 0.00 | 0.00 |
| ATOM | 7318 | HD3  | ARG | X | 481 | 31.194 | 27.873 | 30.016 | 0.00 | 0.00 |
| ATOM | 7319 | NE   | ARG | X | 481 | 32.641 | 29.159 | 28.811 | 0.00 | 0.00 |
| ATOM | 7320 | HE   | ARG | X | 481 | 31.935 | 29.574 | 28.221 | 0.00 | 0.00 |
| ATOM | 7321 | CZ   | ARG | X | 481 | 33.874 | 29.020 | 28.384 | 0.00 | 0.00 |
| ATOM | 7322 | NH1  | ARG | X | 481 | 34.745 | 28.362 | 29.087 | 0.00 | 0.00 |
| ATOM | 7323 | HH11 | ARG | X | 481 | 34.583 | 28.060 | 30.037 | 0.00 | 0.00 |
| ATOM | 7324 | HH12 | ARG | X | 481 | 35.682 | 28.290 | 28.718 | 0.00 | 0.00 |
| ATOM | 7325 | NH2  | ARG | X | 481 | 34.095 | 29.241 | 27.133 | 0.00 | 0.00 |
| ATOM | 7326 | HH21 | ARG | X | 481 | 33.433 | 29.702 | 26.526 | 0.00 | 0.00 |
| ATOM | 7327 | HH22 | ARG | X | 481 | 34.999 | 28.950 | 26.787 | 0.00 | 0.00 |
| ATOM | 7328 | C    | ARG | X | 481 | 29.782 | 30.159 | 34.155 | 0.00 | 0.00 |



|      |      |      |     |   |     |        |        |        |      |      |
|------|------|------|-----|---|-----|--------|--------|--------|------|------|
| ATOM | 7329 | O    | ARG | X | 481 | 28.536 | 30.209 | 33.910 | 0.00 | 0.00 |
| ATOM | 7330 | N    | THR | X | 482 | 30.325 | 29.579 | 35.263 | 0.00 | 0.00 |
| ATOM | 7331 | H    | THR | X | 482 | 31.328 | 29.585 | 35.379 | 0.00 | 0.00 |
| ATOM | 7332 | CA   | THR | X | 482 | 29.488 | 28.872 | 36.240 | 0.00 | 0.00 |
| ATOM | 7333 | HA   | THR | X | 482 | 28.447 | 29.195 | 36.214 | 0.00 | 0.00 |
| ATOM | 7334 | CB   | THR | X | 482 | 29.450 | 27.389 | 35.966 | 0.00 | 0.00 |
| ATOM | 7335 | HB   | THR | X | 482 | 28.665 | 26.933 | 36.569 | 0.00 | 0.00 |
| ATOM | 7336 | CG2  | THR | X | 482 | 29.138 | 26.981 | 34.536 | 0.00 | 0.00 |
| ATOM | 7337 | HG21 | THR | X | 482 | 29.391 | 25.921 | 34.493 | 0.00 | 0.00 |
| ATOM | 7338 | HG22 | THR | X | 482 | 29.823 | 27.529 | 33.889 | 0.00 | 0.00 |
| ATOM | 7339 | HG23 | THR | X | 482 | 28.104 | 27.231 | 34.299 | 0.00 | 0.00 |
| ATOM | 7340 | OG1  | THR | X | 482 | 30.717 | 26.864 | 36.297 | 0.00 | 0.00 |
| ATOM | 7341 | HG1  | THR | X | 482 | 30.576 | 26.020 | 36.730 | 0.00 | 0.00 |
| ATOM | 7342 | C    | THR | X | 482 | 29.927 | 29.002 | 37.702 | 0.00 | 0.00 |
| ATOM | 7343 | O    | THR | X | 482 | 29.113 | 29.044 | 38.637 | 0.00 | 0.00 |
| ATOM | 7344 | N    | GLY | X | 483 | 31.193 | 29.155 | 37.979 | 0.00 | 0.00 |
| ATOM | 7345 | H    | GLY | X | 483 | 31.783 | 29.221 | 37.161 | 0.00 | 0.00 |
| ATOM | 7346 | CA   | GLY | X | 483 | 31.804 | 29.171 | 39.272 | 0.00 | 0.00 |
| ATOM | 7347 | HA2  | GLY | X | 483 | 32.341 | 30.119 | 39.307 | 0.00 | 0.00 |
| ATOM | 7348 | HA3  | GLY | X | 483 | 31.073 | 29.088 | 40.076 | 0.00 | 0.00 |
| ATOM | 7349 | C    | GLY | X | 483 | 32.715 | 28.031 | 39.533 | 0.00 | 0.00 |
| ATOM | 7350 | O    | GLY | X | 483 | 33.207 | 27.824 | 40.617 | 0.00 | 0.00 |
| ATOM | 7351 | N    | ASP | X | 484 | 32.829 | 27.096 | 38.586 | 0.00 | 0.00 |
| ATOM | 7352 | H    | ASP | X | 484 | 32.283 | 27.266 | 37.754 | 0.00 | 0.00 |
| ATOM | 7353 | CA   | ASP | X | 484 | 33.450 | 25.741 | 38.694 | 0.00 | 0.00 |
| ATOM | 7354 | HA   | ASP | X | 484 | 33.821 | 25.576 | 39.706 | 0.00 | 0.00 |
| ATOM | 7355 | CB   | ASP | X | 484 | 32.338 | 24.741 | 38.443 | 0.00 | 0.00 |
| ATOM | 7356 | HB2  | ASP | X | 484 | 31.434 | 25.102 | 38.933 | 0.00 | 0.00 |
| ATOM | 7357 | HB3  | ASP | X | 484 | 31.993 | 24.705 | 37.410 | 0.00 | 0.00 |
| ATOM | 7358 | CG   | ASP | X | 484 | 32.613 | 23.353 | 38.944 | 0.00 | 0.00 |
| ATOM | 7359 | OD1  | ASP | X | 484 | 31.665 | 22.531 | 38.963 | 0.00 | 0.00 |
| ATOM | 7360 | OD2  | ASP | X | 484 | 33.745 | 22.991 | 39.287 | 0.00 | 0.00 |
| ATOM | 7361 | C    | ASP | X | 484 | 34.562 | 25.593 | 37.608 | 0.00 | 0.00 |
| ATOM | 7362 | O    | ASP | X | 484 | 34.139 | 25.613 | 36.457 | 0.00 | 0.00 |
| ATOM | 7363 | N    | PRO | X | 485 | 35.849 | 25.394 | 37.935 | 0.00 | 0.00 |
| ATOM | 7364 | CD   | PRO | X | 485 | 36.488 | 25.646 | 39.228 | 0.00 | 0.00 |
| ATOM | 7365 | HD2  | PRO | X | 485 | 35.873 | 25.339 | 40.073 | 0.00 | 0.00 |
| ATOM | 7366 | HD3  | PRO | X | 485 | 36.744 | 26.699 | 39.345 | 0.00 | 0.00 |
| ATOM | 7367 | CG   | PRO | X | 485 | 37.693 | 24.731 | 39.113 | 0.00 | 0.00 |
| ATOM | 7368 | HG2  | PRO | X | 485 | 37.447 | 23.694 | 39.341 | 0.00 | 0.00 |
| ATOM | 7369 | HG3  | PRO | X | 485 | 38.434 | 25.115 | 39.814 | 0.00 | 0.00 |
| ATOM | 7370 | CB   | PRO | X | 485 | 38.127 | 24.939 | 37.696 | 0.00 | 0.00 |
| ATOM | 7371 | HB2  | PRO | X | 485 | 38.696 | 24.112 | 37.271 | 0.00 | 0.00 |
| ATOM | 7372 | HB3  | PRO | X | 485 | 38.610 | 25.912 | 37.786 | 0.00 | 0.00 |
| ATOM | 7373 | CA   | PRO | X | 485 | 36.878 | 24.912 | 36.974 | 0.00 | 0.00 |
| ATOM | 7374 | HA   | PRO | X | 485 | 36.989 | 25.621 | 36.153 | 0.00 | 0.00 |
| ATOM | 7375 | C    | PRO | X | 485 | 36.542 | 23.542 | 36.239 | 0.00 | 0.00 |
| ATOM | 7376 | O    | PRO | X | 485 | 37.234 | 23.266 | 35.259 | 0.00 | 0.00 |
| ATOM | 7377 | N    | ASN | X | 486 | 35.476 | 22.747 | 36.635 | 0.00 | 0.00 |
| ATOM | 7378 | H    | ASN | X | 486 | 34.964 | 23.067 | 37.444 | 0.00 | 0.00 |
| ATOM | 7379 | CA   | ASN | X | 486 | 34.882 | 21.718 | 35.763 | 0.00 | 0.00 |
| ATOM | 7380 | HA   | ASN | X | 486 | 35.721 | 21.028 | 35.674 | 0.00 | 0.00 |
| ATOM | 7381 | CB   | ASN | X | 486 | 33.667 | 21.091 | 36.464 | 0.00 | 0.00 |
| ATOM | 7382 | HB2  | ASN | X | 486 | 33.846 | 20.940 | 37.528 | 0.00 | 0.00 |
| ATOM | 7383 | HB3  | ASN | X | 486 | 32.787 | 21.720 | 36.327 | 0.00 | 0.00 |
| ATOM | 7384 | CG   | ASN | X | 486 | 33.418 | 19.669 | 35.925 | 0.00 | 0.00 |
| ATOM | 7385 | OD1  | ASN | X | 486 | 34.074 | 19.220 | 35.000 | 0.00 | 0.00 |
| ATOM | 7386 | ND2  | ASN | X | 486 | 32.374 | 19.067 | 36.548 | 0.00 | 0.00 |
| ATOM | 7387 | HD21 | ASN | X | 486 | 32.198 | 18.091 | 36.357 | 0.00 | 0.00 |
| ATOM | 7388 | HD22 | ASN | X | 486 | 31.837 | 19.520 | 37.272 | 0.00 | 0.00 |
| ATOM | 7389 | C    | ASN | X | 486 | 34.512 | 22.265 | 34.379 | 0.00 | 0.00 |
| ATOM | 7390 | O    | ASN | X | 486 | 34.015 | 23.355 | 34.170 | 0.00 | 0.00 |
| ATOM | 7391 | N    | GLU | X | 487 | 34.605 | 21.360 | 33.445 | 0.00 | 0.00 |
| ATOM | 7392 | H    | GLU | X | 487 | 34.741 | 20.430 | 33.817 | 0.00 | 0.00 |
| ATOM | 7393 | CA   | GLU | X | 487 | 34.002 | 21.502 | 32.139 | 0.00 | 0.00 |
| ATOM | 7394 | HA   | GLU | X | 487 | 34.489 | 22.309 | 31.590 | 0.00 | 0.00 |
| ATOM | 7395 | CB   | GLU | X | 487 | 34.322 | 20.291 | 31.247 | 0.00 | 0.00 |

|      |      |      |     |   |     |        |        |        |      |      |
|------|------|------|-----|---|-----|--------|--------|--------|------|------|
| ATOM | 7396 | HB2  | GLU | X | 487 | 34.124 | 19.420 | 31.873 | 0.00 | 0.00 |
| ATOM | 7397 | HB3  | GLU | X | 487 | 33.684 | 20.204 | 30.368 | 0.00 | 0.00 |
| ATOM | 7398 | CG   | GLU | X | 487 | 35.828 | 20.214 | 30.868 | 0.00 | 0.00 |
| ATOM | 7399 | HG2  | GLU | X | 487 | 36.438 | 20.398 | 31.753 | 0.00 | 0.00 |
| ATOM | 7400 | HG3  | GLU | X | 487 | 36.005 | 19.267 | 30.359 | 0.00 | 0.00 |
| ATOM | 7401 | CD   | GLU | X | 487 | 36.191 | 21.312 | 29.871 | 0.00 | 0.00 |
| ATOM | 7402 | OE1  | GLU | X | 487 | 35.851 | 21.316 | 28.693 | 0.00 | 0.00 |
| ATOM | 7403 | OE2  | GLU | X | 487 | 36.804 | 22.318 | 30.272 | 0.00 | 0.00 |
| ATOM | 7404 | C    | GLU | X | 487 | 32.484 | 21.653 | 32.097 | 0.00 | 0.00 |
| ATOM | 7405 | O    | GLU | X | 487 | 31.836 | 21.035 | 32.956 | 0.00 | 0.00 |
| ATOM | 7406 | N    | PRO | X | 488 | 31.957 | 22.386 | 31.108 | 0.00 | 0.00 |
| ATOM | 7407 | CD   | PRO | X | 488 | 32.567 | 23.522 | 30.380 | 0.00 | 0.00 |
| ATOM | 7408 | HD2  | PRO | X | 488 | 33.506 | 23.252 | 29.897 | 0.00 | 0.00 |
| ATOM | 7409 | HD3  | PRO | X | 488 | 32.879 | 24.242 | 31.136 | 0.00 | 0.00 |
| ATOM | 7410 | CG   | PRO | X | 488 | 31.571 | 24.068 | 29.346 | 0.00 | 0.00 |
| ATOM | 7411 | HG2  | PRO | X | 488 | 31.486 | 23.365 | 28.517 | 0.00 | 0.00 |
| ATOM | 7412 | HG3  | PRO | X | 488 | 31.719 | 25.069 | 28.942 | 0.00 | 0.00 |
| ATOM | 7413 | CB   | PRO | X | 488 | 30.210 | 23.914 | 30.160 | 0.00 | 0.00 |
| ATOM | 7414 | HB2  | PRO | X | 488 | 29.335 | 23.878 | 29.512 | 0.00 | 0.00 |
| ATOM | 7415 | HB3  | PRO | X | 488 | 30.217 | 24.813 | 30.776 | 0.00 | 0.00 |
| ATOM | 7416 | CA   | PRO | X | 488 | 30.519 | 22.540 | 30.898 | 0.00 | 0.00 |
| ATOM | 7417 | HA   | PRO | X | 488 | 30.034 | 22.532 | 31.875 | 0.00 | 0.00 |
| ATOM | 7418 | C    | PRO | X | 488 | 29.963 | 21.385 | 30.063 | 0.00 | 0.00 |
| ATOM | 7419 | O    | PRO | X | 488 | 29.027 | 21.504 | 29.273 | 0.00 | 0.00 |
| ATOM | 7420 | N    | ARG | X | 489 | 30.513 | 20.170 | 30.234 | 0.00 | 0.00 |
| ATOM | 7421 | H    | ARG | X | 489 | 31.100 | 20.084 | 31.052 | 0.00 | 0.00 |
| ATOM | 7422 | CA   | ARG | X | 489 | 30.428 | 19.060 | 29.336 | 0.00 | 0.00 |
| ATOM | 7423 | HA   | ARG | X | 489 | 29.384 | 18.750 | 29.297 | 0.00 | 0.00 |
| ATOM | 7424 | CB   | ARG | X | 489 | 30.821 | 19.465 | 27.856 | 0.00 | 0.00 |
| ATOM | 7425 | HB2  | ARG | X | 489 | 30.693 | 18.611 | 27.190 | 0.00 | 0.00 |
| ATOM | 7426 | HB3  | ARG | X | 489 | 30.181 | 20.228 | 27.411 | 0.00 | 0.00 |
| ATOM | 7427 | CG   | ARG | X | 489 | 32.298 | 19.836 | 27.839 | 0.00 | 0.00 |
| ATOM | 7428 | HG2  | ARG | X | 489 | 32.487 | 20.711 | 28.461 | 0.00 | 0.00 |
| ATOM | 7429 | HG3  | ARG | X | 489 | 32.899 | 19.024 | 28.250 | 0.00 | 0.00 |
| ATOM | 7430 | CD   | ARG | X | 489 | 32.826 | 20.038 | 26.425 | 0.00 | 0.00 |
| ATOM | 7431 | HD2  | ARG | X | 489 | 32.514 | 19.176 | 25.835 | 0.00 | 0.00 |
| ATOM | 7432 | HD3  | ARG | X | 489 | 32.369 | 20.948 | 26.034 | 0.00 | 0.00 |
| ATOM | 7433 | NE   | ARG | X | 489 | 34.236 | 20.297 | 26.457 | 0.00 | 0.00 |
| ATOM | 7434 | HE   | ARG | X | 489 | 34.684 | 20.595 | 27.312 | 0.00 | 0.00 |
| ATOM | 7435 | CZ   | ARG | X | 489 | 35.075 | 20.403 | 25.460 | 0.00 | 0.00 |
| ATOM | 7436 | NH1  | ARG | X | 489 | 36.299 | 20.835 | 25.743 | 0.00 | 0.00 |
| ATOM | 7437 | HH11 | ARG | X | 489 | 36.419 | 21.096 | 26.712 | 0.00 | 0.00 |
| ATOM | 7438 | HH12 | ARG | X | 489 | 36.996 | 20.970 | 25.026 | 0.00 | 0.00 |
| ATOM | 7439 | NH2  | ARG | X | 489 | 34.750 | 20.311 | 24.169 | 0.00 | 0.00 |
| ATOM | 7440 | HH21 | ARG | X | 489 | 33.799 | 20.196 | 23.851 | 0.00 | 0.00 |
| ATOM | 7441 | HH22 | ARG | X | 489 | 35.435 | 20.603 | 23.487 | 0.00 | 0.00 |
| ATOM | 7442 | C    | ARG | X | 489 | 31.093 | 17.817 | 29.857 | 0.00 | 0.00 |
| ATOM | 7443 | O    | ARG | X | 489 | 32.066 | 18.021 | 30.638 | 0.00 | 0.00 |
| ATOM | 7444 | N    | ASP | X | 490 | 30.705 | 16.646 | 29.394 | 0.00 | 0.00 |
| ATOM | 7445 | H    | ASP | X | 490 | 30.069 | 16.678 | 28.610 | 0.00 | 0.00 |
| ATOM | 7446 | CA   | ASP | X | 490 | 31.320 | 15.390 | 29.825 | 0.00 | 0.00 |
| ATOM | 7447 | HA   | ASP | X | 490 | 31.001 | 15.190 | 30.848 | 0.00 | 0.00 |
| ATOM | 7448 | CB   | ASP | X | 490 | 30.708 | 14.267 | 29.036 | 0.00 | 0.00 |
| ATOM | 7449 | HB2  | ASP | X | 490 | 29.642 | 14.138 | 29.222 | 0.00 | 0.00 |
| ATOM | 7450 | HB3  | ASP | X | 490 | 30.923 | 14.526 | 27.999 | 0.00 | 0.00 |
| ATOM | 7451 | CG   | ASP | X | 490 | 31.422 | 12.905 | 29.348 | 0.00 | 0.00 |
| ATOM | 7452 | OD1  | ASP | X | 490 | 31.286 | 12.653 | 30.530 | 0.00 | 0.00 |
| ATOM | 7453 | OD2  | ASP | X | 490 | 31.774 | 12.087 | 28.452 | 0.00 | 0.00 |
| ATOM | 7454 | C    | ASP | X | 490 | 32.870 | 15.439 | 29.759 | 0.00 | 0.00 |
| ATOM | 7455 | O    | ASP | X | 490 | 33.500 | 15.277 | 28.662 | 0.00 | 0.00 |
| ATOM | 7456 | N    | PRO | X | 491 | 33.544 | 15.578 | 30.934 | 0.00 | 0.00 |
| ATOM | 7457 | CD   | PRO | X | 491 | 33.022 | 15.481 | 32.315 | 0.00 | 0.00 |
| ATOM | 7458 | HD2  | PRO | X | 491 | 32.459 | 14.586 | 32.577 | 0.00 | 0.00 |
| ATOM | 7459 | HD3  | PRO | X | 491 | 32.405 | 16.366 | 32.471 | 0.00 | 0.00 |
| ATOM | 7460 | CG   | PRO | X | 491 | 34.207 | 15.616 | 33.281 | 0.00 | 0.00 |
| ATOM | 7461 | HG2  | PRO | X | 491 | 34.534 | 14.641 | 33.639 | 0.00 | 0.00 |
| ATOM | 7462 | HG3  | PRO | X | 491 | 33.925 | 16.256 | 34.118 | 0.00 | 0.00 |

|      |      |      |     |   |     |        |        |        |      |      |
|------|------|------|-----|---|-----|--------|--------|--------|------|------|
| ATOM | 7463 | CB   | PRO | X | 491 | 35.302 | 16.141 | 32.394 | 0.00 | 0.00 |
| ATOM | 7464 | HB2  | PRO | X | 491 | 36.279 | 15.745 | 32.671 | 0.00 | 0.00 |
| ATOM | 7465 | HB3  | PRO | X | 491 | 35.306 | 17.214 | 32.584 | 0.00 | 0.00 |
| ATOM | 7466 | CA   | PRO | X | 491 | 34.921 | 15.612 | 30.993 | 0.00 | 0.00 |
| ATOM | 7467 | HA   | PRO | X | 491 | 35.353 | 16.305 | 30.271 | 0.00 | 0.00 |
| ATOM | 7468 | C    | PRO | X | 491 | 35.539 | 14.252 | 30.746 | 0.00 | 0.00 |
| ATOM | 7469 | O    | PRO | X | 491 | 34.898 | 13.231 | 30.920 | 0.00 | 0.00 |
| ATOM | 7470 | N    | LYS | X | 492 | 36.785 | 14.196 | 30.263 | 0.00 | 0.00 |
| ATOM | 7471 | H    | LYS | X | 492 | 37.303 | 15.062 | 30.224 | 0.00 | 0.00 |
| ATOM | 7472 | CA   | LYS | X | 492 | 37.592 | 12.964 | 29.952 | 0.00 | 0.00 |
| ATOM | 7473 | HA   | LYS | X | 492 | 36.983 | 12.103 | 30.228 | 0.00 | 0.00 |
| ATOM | 7474 | CB   | LYS | X | 492 | 37.949 | 12.999 | 28.449 | 0.00 | 0.00 |
| ATOM | 7475 | HB2  | LYS | X | 492 | 38.730 | 13.755 | 28.357 | 0.00 | 0.00 |
| ATOM | 7476 | HB3  | LYS | X | 492 | 38.532 | 12.118 | 28.183 | 0.00 | 0.00 |
| ATOM | 7477 | CG   | LYS | X | 492 | 36.796 | 13.072 | 27.442 | 0.00 | 0.00 |
| ATOM | 7478 | HG2  | LYS | X | 492 | 36.306 | 14.030 | 27.614 | 0.00 | 0.00 |
| ATOM | 7479 | HG3  | LYS | X | 492 | 37.322 | 13.054 | 26.487 | 0.00 | 0.00 |
| ATOM | 7480 | CD   | LYS | X | 492 | 35.869 | 11.906 | 27.633 | 0.00 | 0.00 |
| ATOM | 7481 | HD2  | LYS | X | 492 | 36.446 | 10.989 | 27.522 | 0.00 | 0.00 |
| ATOM | 7482 | HD3  | LYS | X | 492 | 35.553 | 11.879 | 28.676 | 0.00 | 0.00 |
| ATOM | 7483 | CE   | LYS | X | 492 | 34.704 | 11.829 | 26.595 | 0.00 | 0.00 |
| ATOM | 7484 | HE2  | LYS | X | 492 | 35.094 | 11.742 | 25.581 | 0.00 | 0.00 |
| ATOM | 7485 | HE3  | LYS | X | 492 | 34.106 | 10.962 | 26.876 | 0.00 | 0.00 |
| ATOM | 7486 | NZ   | LYS | X | 492 | 33.771 | 12.960 | 26.720 | 0.00 | 0.00 |
| ATOM | 7487 | HZ1  | LYS | X | 492 | 33.150 | 12.894 | 25.926 | 0.00 | 0.00 |
| ATOM | 7488 | HZ2  | LYS | X | 492 | 33.310 | 12.768 | 27.598 | 0.00 | 0.00 |
| ATOM | 7489 | HZ3  | LYS | X | 492 | 34.263 | 13.838 | 26.642 | 0.00 | 0.00 |
| ATOM | 7490 | C    | LYS | X | 492 | 38.876 | 12.786 | 30.747 | 0.00 | 0.00 |
| ATOM | 7491 | O    | LYS | X | 492 | 39.479 | 11.706 | 30.613 | 0.00 | 0.00 |
| ATOM | 7492 | N    | ALA | X | 493 | 39.418 | 13.827 | 31.433 | 0.00 | 0.00 |
| ATOM | 7493 | H    | ALA | X | 493 | 39.081 | 14.772 | 31.317 | 0.00 | 0.00 |
| ATOM | 7494 | CA   | ALA | X | 493 | 40.515 | 13.808 | 32.403 | 0.00 | 0.00 |
| ATOM | 7495 | HA   | ALA | X | 493 | 40.975 | 12.820 | 32.378 | 0.00 | 0.00 |
| ATOM | 7496 | CB   | ALA | X | 493 | 41.509 | 14.968 | 31.933 | 0.00 | 0.00 |
| ATOM | 7497 | HB1  | ALA | X | 493 | 40.850 | 15.820 | 31.769 | 0.00 | 0.00 |
| ATOM | 7498 | HB2  | ALA | X | 493 | 42.092 | 14.699 | 31.051 | 0.00 | 0.00 |
| ATOM | 7499 | HB3  | ALA | X | 493 | 42.248 | 15.265 | 32.677 | 0.00 | 0.00 |
| ATOM | 7500 | C    | ALA | X | 493 | 40.169 | 14.107 | 33.856 | 0.00 | 0.00 |
| ATOM | 7501 | O    | ALA | X | 493 | 39.043 | 14.643 | 33.993 | 0.00 | 0.00 |
| ATOM | 7502 | N    | PRO | X | 494 | 41.053 | 13.850 | 34.869 | 0.00 | 0.00 |
| ATOM | 7503 | CD   | PRO | X | 494 | 42.401 | 13.192 | 34.830 | 0.00 | 0.00 |
| ATOM | 7504 | HD2  | PRO | X | 494 | 43.120 | 13.946 | 34.513 | 0.00 | 0.00 |
| ATOM | 7505 | HD3  | PRO | X | 494 | 42.256 | 12.295 | 34.227 | 0.00 | 0.00 |
| ATOM | 7506 | CG   | PRO | X | 494 | 42.764 | 12.850 | 36.284 | 0.00 | 0.00 |
| ATOM | 7507 | HG2  | PRO | X | 494 | 43.851 | 12.850 | 36.362 | 0.00 | 0.00 |
| ATOM | 7508 | HG3  | PRO | X | 494 | 42.345 | 11.874 | 36.528 | 0.00 | 0.00 |
| ATOM | 7509 | CB   | PRO | X | 494 | 42.026 | 13.925 | 37.054 | 0.00 | 0.00 |
| ATOM | 7510 | HB2  | PRO | X | 494 | 42.586 | 14.840 | 37.246 | 0.00 | 0.00 |
| ATOM | 7511 | HB3  | PRO | X | 494 | 41.727 | 13.620 | 38.057 | 0.00 | 0.00 |
| ATOM | 7512 | CA   | PRO | X | 494 | 40.711 | 14.133 | 36.232 | 0.00 | 0.00 |
| ATOM | 7513 | HA   | PRO | X | 494 | 39.858 | 13.587 | 36.635 | 0.00 | 0.00 |
| ATOM | 7514 | C    | PRO | X | 494 | 40.375 | 15.675 | 36.467 | 0.00 | 0.00 |
| ATOM | 7515 | O    | PRO | X | 494 | 41.033 | 16.550 | 35.786 | 0.00 | 0.00 |
| ATOM | 7516 | N    | GLN | X | 495 | 39.191 | 16.007 | 37.012 | 0.00 | 0.00 |
| ATOM | 7517 | H    | GLN | X | 495 | 38.502 | 15.316 | 37.275 | 0.00 | 0.00 |
| ATOM | 7518 | CA   | GLN | X | 495 | 38.754 | 17.371 | 37.166 | 0.00 | 0.00 |
| ATOM | 7519 | HA   | GLN | X | 495 | 39.278 | 18.031 | 36.474 | 0.00 | 0.00 |
| ATOM | 7520 | CB   | GLN | X | 495 | 37.319 | 17.628 | 36.691 | 0.00 | 0.00 |
| ATOM | 7521 | HB2  | GLN | X | 495 | 36.616 | 17.040 | 37.282 | 0.00 | 0.00 |
| ATOM | 7522 | HB3  | GLN | X | 495 | 37.046 | 18.682 | 36.747 | 0.00 | 0.00 |
| ATOM | 7523 | CG   | GLN | X | 495 | 37.050 | 17.218 | 35.270 | 0.00 | 0.00 |
| ATOM | 7524 | HG2  | GLN | X | 495 | 37.347 | 16.177 | 35.146 | 0.00 | 0.00 |
| ATOM | 7525 | HG3  | GLN | X | 495 | 35.979 | 17.342 | 35.105 | 0.00 | 0.00 |
| ATOM | 7526 | CD   | GLN | X | 495 | 37.741 | 18.017 | 34.135 | 0.00 | 0.00 |
| ATOM | 7527 | OE1  | GLN | X | 495 | 37.320 | 18.999 | 33.620 | 0.00 | 0.00 |
| ATOM | 7528 | NE2  | GLN | X | 495 | 38.835 | 17.603 | 33.690 | 0.00 | 0.00 |
| ATOM | 7529 | HE21 | GLN | X | 495 | 39.237 | 18.123 | 32.923 | 0.00 | 0.00 |

|      |      |      |     |   |     |        |        |        |      |      |
|------|------|------|-----|---|-----|--------|--------|--------|------|------|
| ATOM | 7530 | HE22 | GLN | X | 495 | 39.322 | 16.849 | 34.152 | 0.00 | 0.00 |
| ATOM | 7531 | C    | GLN | X | 495 | 38.949 | 18.038 | 38.604 | 0.00 | 0.00 |
| ATOM | 7532 | O    | GLN | X | 495 | 38.885 | 17.300 | 39.588 | 0.00 | 0.00 |
| ATOM | 7533 | N    | TRP | X | 496 | 39.198 | 19.363 | 38.679 | 0.00 | 0.00 |
| ATOM | 7534 | H    | TRP | X | 496 | 38.946 | 19.922 | 37.876 | 0.00 | 0.00 |
| ATOM | 7535 | CA   | TRP | X | 496 | 39.599 | 20.143 | 39.811 | 0.00 | 0.00 |
| ATOM | 7536 | HA   | TRP | X | 496 | 40.549 | 19.830 | 40.243 | 0.00 | 0.00 |
| ATOM | 7537 | CB   | TRP | X | 496 | 39.919 | 21.520 | 39.314 | 0.00 | 0.00 |
| ATOM | 7538 | HB2  | TRP | X | 496 | 40.646 | 21.392 | 38.513 | 0.00 | 0.00 |
| ATOM | 7539 | HB3  | TRP | X | 496 | 39.006 | 21.844 | 38.813 | 0.00 | 0.00 |
| ATOM | 7540 | CG   | TRP | X | 496 | 40.589 | 22.513 | 40.192 | 0.00 | 0.00 |
| ATOM | 7541 | CD1  | TRP | X | 496 | 40.720 | 22.397 | 41.533 | 0.00 | 0.00 |
| ATOM | 7542 | HD1  | TRP | X | 496 | 40.335 | 21.585 | 42.133 | 0.00 | 0.00 |
| ATOM | 7543 | NE1  | TRP | X | 496 | 41.342 | 23.504 | 42.059 | 0.00 | 0.00 |
| ATOM | 7544 | HE1  | TRP | X | 496 | 41.468 | 23.618 | 43.055 | 0.00 | 0.00 |
| ATOM | 7545 | CE2  | TRP | X | 496 | 41.616 | 24.422 | 41.057 | 0.00 | 0.00 |
| ATOM | 7546 | CZ2  | TRP | X | 496 | 42.258 | 25.675 | 41.070 | 0.00 | 0.00 |
| ATOM | 7547 | HZ2  | TRP | X | 496 | 42.607 | 26.092 | 42.003 | 0.00 | 0.00 |
| ATOM | 7548 | CH2  | TRP | X | 496 | 42.505 | 26.268 | 39.823 | 0.00 | 0.00 |
| ATOM | 7549 | HH2  | TRP | X | 496 | 43.023 | 27.213 | 39.746 | 0.00 | 0.00 |
| ATOM | 7550 | CZ3  | TRP | X | 496 | 42.130 | 25.738 | 38.547 | 0.00 | 0.00 |
| ATOM | 7551 | HZ3  | TRP | X | 496 | 42.282 | 26.319 | 37.650 | 0.00 | 0.00 |
| ATOM | 7552 | CE3  | TRP | X | 496 | 41.469 | 24.468 | 38.580 | 0.00 | 0.00 |
| ATOM | 7553 | HE3  | TRP | X | 496 | 41.082 | 23.940 | 37.721 | 0.00 | 0.00 |
| ATOM | 7554 | CD2  | TRP | X | 496 | 41.219 | 23.815 | 39.844 | 0.00 | 0.00 |
| ATOM | 7555 | C    | TRP | X | 496 | 38.554 | 20.087 | 40.948 | 0.00 | 0.00 |
| ATOM | 7556 | O    | TRP | X | 496 | 37.426 | 20.543 | 40.680 | 0.00 | 0.00 |
| ATOM | 7557 | N    | PRO | X | 497 | 38.772 | 19.524 | 42.142 | 0.00 | 0.00 |
| ATOM | 7558 | CD   | PRO | X | 497 | 40.034 | 18.896 | 42.597 | 0.00 | 0.00 |
| ATOM | 7559 | HD2  | PRO | X | 497 | 40.851 | 19.602 | 42.446 | 0.00 | 0.00 |
| ATOM | 7560 | HD3  | PRO | X | 497 | 40.209 | 17.921 | 42.143 | 0.00 | 0.00 |
| ATOM | 7561 | CG   | PRO | X | 497 | 39.747 | 18.540 | 44.071 | 0.00 | 0.00 |
| ATOM | 7562 | HG2  | PRO | X | 497 | 40.287 | 19.176 | 44.773 | 0.00 | 0.00 |
| ATOM | 7563 | HG3  | PRO | X | 497 | 40.142 | 17.542 | 44.260 | 0.00 | 0.00 |
| ATOM | 7564 | CB   | PRO | X | 497 | 38.253 | 18.617 | 44.291 | 0.00 | 0.00 |
| ATOM | 7565 | HB2  | PRO | X | 497 | 37.970 | 18.898 | 45.306 | 0.00 | 0.00 |
| ATOM | 7566 | HB3  | PRO | X | 497 | 37.860 | 17.618 | 44.101 | 0.00 | 0.00 |
| ATOM | 7567 | CA   | PRO | X | 497 | 37.735 | 19.458 | 43.200 | 0.00 | 0.00 |
| ATOM | 7568 | HA   | PRO | X | 497 | 36.737 | 19.097 | 42.951 | 0.00 | 0.00 |
| ATOM | 7569 | C    | PRO | X | 497 | 37.519 | 20.806 | 43.873 | 0.00 | 0.00 |
| ATOM | 7570 | O    | PRO | X | 497 | 38.312 | 21.669 | 43.730 | 0.00 | 0.00 |
| ATOM | 7571 | N    | PRO | X | 498 | 36.451 | 20.936 | 44.681 | 0.00 | 0.00 |
| ATOM | 7572 | CD   | PRO | X | 498 | 35.133 | 20.351 | 44.543 | 0.00 | 0.00 |
| ATOM | 7573 | HD2  | PRO | X | 498 | 35.192 | 19.379 | 45.032 | 0.00 | 0.00 |
| ATOM | 7574 | HD3  | PRO | X | 498 | 34.875 | 20.289 | 43.486 | 0.00 | 0.00 |
| ATOM | 7575 | CG   | PRO | X | 498 | 34.122 | 21.294 | 45.206 | 0.00 | 0.00 |
| ATOM | 7576 | HG2  | PRO | X | 498 | 33.267 | 20.710 | 45.546 | 0.00 | 0.00 |
| ATOM | 7577 | HG3  | PRO | X | 498 | 33.830 | 22.141 | 44.584 | 0.00 | 0.00 |
| ATOM | 7578 | CB   | PRO | X | 498 | 34.952 | 21.822 | 46.339 | 0.00 | 0.00 |
| ATOM | 7579 | HB2  | PRO | X | 498 | 34.854 | 21.019 | 47.070 | 0.00 | 0.00 |
| ATOM | 7580 | HB3  | PRO | X | 498 | 34.519 | 22.744 | 46.726 | 0.00 | 0.00 |
| ATOM | 7581 | CA   | PRO | X | 498 | 36.343 | 22.005 | 45.705 | 0.00 | 0.00 |
| ATOM | 7582 | HA   | PRO | X | 498 | 36.464 | 22.986 | 45.247 | 0.00 | 0.00 |
| ATOM | 7583 | C    | PRO | X | 498 | 37.391 | 21.880 | 46.875 | 0.00 | 0.00 |
| ATOM | 7584 | O    | PRO | X | 498 | 37.780 | 20.800 | 47.281 | 0.00 | 0.00 |
| ATOM | 7585 | N    | TYR | X | 499 | 37.700 | 23.001 | 47.466 | 0.00 | 0.00 |
| ATOM | 7586 | H    | TYR | X | 499 | 37.200 | 23.797 | 47.097 | 0.00 | 0.00 |
| ATOM | 7587 | CA   | TYR | X | 499 | 38.465 | 23.217 | 48.672 | 0.00 | 0.00 |
| ATOM | 7588 | HA   | TYR | X | 499 | 39.065 | 22.308 | 48.719 | 0.00 | 0.00 |
| ATOM | 7589 | CB   | TYR | X | 499 | 39.206 | 24.614 | 48.570 | 0.00 | 0.00 |
| ATOM | 7590 | HB2  | TYR | X | 499 | 39.785 | 24.688 | 47.649 | 0.00 | 0.00 |
| ATOM | 7591 | HB3  | TYR | X | 499 | 38.508 | 25.447 | 48.484 | 0.00 | 0.00 |
| ATOM | 7592 | CG   | TYR | X | 499 | 40.083 | 24.754 | 49.775 | 0.00 | 0.00 |
| ATOM | 7593 | CD1  | TYR | X | 499 | 39.557 | 25.441 | 50.918 | 0.00 | 0.00 |
| ATOM | 7594 | HD1  | TYR | X | 499 | 38.518 | 25.733 | 50.883 | 0.00 | 0.00 |
| ATOM | 7595 | CE1  | TYR | X | 499 | 40.399 | 25.711 | 51.967 | 0.00 | 0.00 |
| ATOM | 7596 | HE1  | TYR | X | 499 | 40.030 | 26.382 | 52.730 | 0.00 | 0.00 |

|      |      |      |     |   |     |        |        |        |      |      |
|------|------|------|-----|---|-----|--------|--------|--------|------|------|
| ATOM | 7597 | CZ   | TYR | X | 499 | 41.693 | 25.202 | 52.019 | 0.00 | 0.00 |
| ATOM | 7598 | OH   | TYR | X | 499 | 42.410 | 25.346 | 53.154 | 0.00 | 0.00 |
| ATOM | 7599 | HH   | TYR | X | 499 | 41.856 | 25.613 | 53.891 | 0.00 | 0.00 |
| ATOM | 7600 | CE2  | TYR | X | 499 | 42.163 | 24.431 | 50.926 | 0.00 | 0.00 |
| ATOM | 7601 | HE2  | TYR | X | 499 | 43.155 | 24.006 | 50.886 | 0.00 | 0.00 |
| ATOM | 7602 | CD2  | TYR | X | 499 | 41.347 | 24.185 | 49.827 | 0.00 | 0.00 |
| ATOM | 7603 | HD2  | TYR | X | 499 | 41.668 | 23.666 | 48.935 | 0.00 | 0.00 |
| ATOM | 7604 | C    | TYR | X | 499 | 37.435 | 23.215 | 49.851 | 0.00 | 0.00 |
| ATOM | 7605 | O    | TYR | X | 499 | 36.336 | 23.832 | 49.713 | 0.00 | 0.00 |
| ATOM | 7606 | N    | THR | X | 500 | 37.867 | 22.564 | 50.929 | 0.00 | 0.00 |
| ATOM | 7607 | H    | THR | X | 500 | 38.604 | 21.876 | 50.865 | 0.00 | 0.00 |
| ATOM | 7608 | CA   | THR | X | 500 | 37.162 | 22.688 | 52.248 | 0.00 | 0.00 |
| ATOM | 7609 | HA   | THR | X | 500 | 36.297 | 23.352 | 52.248 | 0.00 | 0.00 |
| ATOM | 7610 | CB   | THR | X | 500 | 36.674 | 21.312 | 52.614 | 0.00 | 0.00 |
| ATOM | 7611 | HB   | THR | X | 500 | 36.239 | 21.285 | 53.613 | 0.00 | 0.00 |
| ATOM | 7612 | CG2  | THR | X | 500 | 35.632 | 20.841 | 51.629 | 0.00 | 0.00 |
| ATOM | 7613 | HG21 | THR | X | 500 | 36.120 | 20.627 | 50.679 | 0.00 | 0.00 |
| ATOM | 7614 | HG22 | THR | X | 500 | 34.897 | 21.627 | 51.460 | 0.00 | 0.00 |
| ATOM | 7615 | HG23 | THR | X | 500 | 35.118 | 19.991 | 52.079 | 0.00 | 0.00 |
| ATOM | 7616 | OG1  | THR | X | 500 | 37.751 | 20.399 | 52.700 | 0.00 | 0.00 |
| ATOM | 7617 | HG1  | THR | X | 500 | 37.360 | 19.655 | 53.164 | 0.00 | 0.00 |
| ATOM | 7618 | C    | THR | X | 500 | 38.047 | 23.147 | 53.434 | 0.00 | 0.00 |
| ATOM | 7619 | O    | THR | X | 500 | 39.253 | 23.019 | 53.296 | 0.00 | 0.00 |
| ATOM | 7620 | N    | ALA | X | 501 | 37.550 | 23.578 | 54.602 | 0.00 | 0.00 |
| ATOM | 7621 | H    | ALA | X | 501 | 36.542 | 23.643 | 54.627 | 0.00 | 0.00 |
| ATOM | 7622 | CA   | ALA | X | 501 | 38.411 | 23.757 | 55.778 | 0.00 | 0.00 |
| ATOM | 7623 | HA   | ALA | X | 501 | 39.311 | 24.273 | 55.444 | 0.00 | 0.00 |
| ATOM | 7624 | CB   | ALA | X | 501 | 37.751 | 24.614 | 56.866 | 0.00 | 0.00 |
| ATOM | 7625 | HB1  | ALA | X | 501 | 36.736 | 24.252 | 57.031 | 0.00 | 0.00 |
| ATOM | 7626 | HB2  | ALA | X | 501 | 37.668 | 25.641 | 56.511 | 0.00 | 0.00 |
| ATOM | 7627 | HB3  | ALA | X | 501 | 38.379 | 24.488 | 57.748 | 0.00 | 0.00 |
| ATOM | 7628 | C    | ALA | X | 501 | 38.941 | 22.459 | 56.387 | 0.00 | 0.00 |
| ATOM | 7629 | O    | ALA | X | 501 | 39.820 | 22.543 | 57.298 | 0.00 | 0.00 |
| ATOM | 7630 | N    | GLY | X | 502 | 38.362 | 21.283 | 56.067 | 0.00 | 0.00 |
| ATOM | 7631 | H    | GLY | X | 502 | 37.640 | 21.316 | 55.362 | 0.00 | 0.00 |
| ATOM | 7632 | CA   | GLY | X | 502 | 38.646 | 19.978 | 56.629 | 0.00 | 0.00 |
| ATOM | 7633 | HA2  | GLY | X | 502 | 38.814 | 20.101 | 57.699 | 0.00 | 0.00 |
| ATOM | 7634 | HA3  | GLY | X | 502 | 37.839 | 19.275 | 56.418 | 0.00 | 0.00 |
| ATOM | 7635 | C    | GLY | X | 502 | 39.881 | 19.390 | 55.884 | 0.00 | 0.00 |
| ATOM | 7636 | O    | GLY | X | 502 | 41.031 | 19.517 | 56.349 | 0.00 | 0.00 |
| ATOM | 7637 | N    | ALA | X | 503 | 39.595 | 18.742 | 54.748 | 0.00 | 0.00 |
| ATOM | 7638 | H    | ALA | X | 503 | 38.597 | 18.640 | 54.631 | 0.00 | 0.00 |
| ATOM | 7639 | CA   | ALA | X | 503 | 40.582 | 18.095 | 53.917 | 0.00 | 0.00 |
| ATOM | 7640 | HA   | ALA | X | 503 | 41.290 | 17.583 | 54.569 | 0.00 | 0.00 |
| ATOM | 7641 | CB   | ALA | X | 503 | 39.883 | 17.331 | 52.863 | 0.00 | 0.00 |
| ATOM | 7642 | HB1  | ALA | X | 503 | 39.055 | 17.848 | 52.379 | 0.00 | 0.00 |
| ATOM | 7643 | HB2  | ALA | X | 503 | 39.367 | 16.478 | 53.302 | 0.00 | 0.00 |
| ATOM | 7644 | HB3  | ALA | X | 503 | 40.592 | 16.936 | 52.136 | 0.00 | 0.00 |
| ATOM | 7645 | C    | ALA | X | 503 | 41.475 | 19.083 | 53.169 | 0.00 | 0.00 |
| ATOM | 7646 | O    | ALA | X | 503 | 42.703 | 18.770 | 53.033 | 0.00 | 0.00 |
| ATOM | 7647 | N    | GLN | X | 504 | 40.986 | 20.136 | 52.514 | 0.00 | 0.00 |
| ATOM | 7648 | H    | GLN | X | 504 | 39.980 | 20.209 | 52.454 | 0.00 | 0.00 |
| ATOM | 7649 | CA   | GLN | X | 504 | 41.716 | 21.335 | 52.115 | 0.00 | 0.00 |
| ATOM | 7650 | HA   | GLN | X | 504 | 40.987 | 22.096 | 51.837 | 0.00 | 0.00 |
| ATOM | 7651 | CB   | GLN | X | 504 | 42.702 | 21.871 | 53.169 | 0.00 | 0.00 |
| ATOM | 7652 | HB2  | GLN | X | 504 | 43.360 | 21.062 | 53.485 | 0.00 | 0.00 |
| ATOM | 7653 | HB3  | GLN | X | 504 | 43.321 | 22.708 | 52.845 | 0.00 | 0.00 |
| ATOM | 7654 | CG   | GLN | X | 504 | 42.013 | 22.262 | 54.470 | 0.00 | 0.00 |
| ATOM | 7655 | HG2  | GLN | X | 504 | 41.421 | 23.127 | 54.169 | 0.00 | 0.00 |
| ATOM | 7656 | HG3  | GLN | X | 504 | 41.456 | 21.459 | 54.952 | 0.00 | 0.00 |
| ATOM | 7657 | CD   | GLN | X | 504 | 43.046 | 22.554 | 55.536 | 0.00 | 0.00 |
| ATOM | 7658 | OE1  | GLN | X | 504 | 44.218 | 22.537 | 55.291 | 0.00 | 0.00 |
| ATOM | 7659 | NE2  | GLN | X | 504 | 42.731 | 22.897 | 56.732 | 0.00 | 0.00 |
| ATOM | 7660 | HE21 | GLN | X | 504 | 43.499 | 23.025 | 57.375 | 0.00 | 0.00 |
| ATOM | 7661 | HE22 | GLN | X | 504 | 41.825 | 22.687 | 57.125 | 0.00 | 0.00 |
| ATOM | 7662 | C    | GLN | X | 504 | 42.371 | 20.937 | 50.787 | 0.00 | 0.00 |
| ATOM | 7663 | O    | GLN | X | 504 | 43.522 | 21.321 | 50.590 | 0.00 | 0.00 |

|      |      |      |     |   |     |        |        |        |      |      |
|------|------|------|-----|---|-----|--------|--------|--------|------|------|
| ATOM | 7664 | N    | GLN | X | 505 | 41.701 | 20.201 | 49.958 | 0.00 | 0.00 |
| ATOM | 7665 | H    | GLN | X | 505 | 40.820 | 19.830 | 50.285 | 0.00 | 0.00 |
| ATOM | 7666 | CA   | GLN | X | 505 | 42.221 | 19.728 | 48.683 | 0.00 | 0.00 |
| ATOM | 7667 | HA   | GLN | X | 505 | 43.082 | 19.081 | 48.851 | 0.00 | 0.00 |
| ATOM | 7668 | CB   | GLN | X | 505 | 41.082 | 18.931 | 48.069 | 0.00 | 0.00 |
| ATOM | 7669 | HB2  | GLN | X | 505 | 40.141 | 19.418 | 47.815 | 0.00 | 0.00 |
| ATOM | 7670 | HB3  | GLN | X | 505 | 41.521 | 18.741 | 47.090 | 0.00 | 0.00 |
| ATOM | 7671 | CG   | GLN | X | 505 | 40.754 | 17.499 | 48.676 | 0.00 | 0.00 |
| ATOM | 7672 | HG2  | GLN | X | 505 | 41.705 | 17.063 | 48.982 | 0.00 | 0.00 |
| ATOM | 7673 | HG3  | GLN | X | 505 | 40.141 | 17.507 | 49.577 | 0.00 | 0.00 |
| ATOM | 7674 | CD   | GLN | X | 505 | 40.124 | 16.616 | 47.645 | 0.00 | 0.00 |
| ATOM | 7675 | OE1  | GLN | X | 505 | 39.046 | 16.843 | 47.070 | 0.00 | 0.00 |
| ATOM | 7676 | NE2  | GLN | X | 505 | 40.764 | 15.519 | 47.281 | 0.00 | 0.00 |
| ATOM | 7677 | HE21 | GLN | X | 505 | 40.284 | 15.021 | 46.544 | 0.00 | 0.00 |
| ATOM | 7678 | HE22 | GLN | X | 505 | 41.613 | 15.163 | 47.697 | 0.00 | 0.00 |
| ATOM | 7679 | C    | GLN | X | 505 | 42.605 | 20.905 | 47.719 | 0.00 | 0.00 |
| ATOM | 7680 | O    | GLN | X | 505 | 41.714 | 21.670 | 47.282 | 0.00 | 0.00 |
| ATOM | 7681 | N    | TYR | X | 506 | 43.919 | 21.018 | 47.289 | 0.00 | 0.00 |
| ATOM | 7682 | H    | TYR | X | 506 | 44.502 | 20.230 | 47.534 | 0.00 | 0.00 |
| ATOM | 7683 | CA   | TYR | X | 506 | 44.403 | 22.113 | 46.509 | 0.00 | 0.00 |
| ATOM | 7684 | HA   | TYR | X | 506 | 43.600 | 22.671 | 46.027 | 0.00 | 0.00 |
| ATOM | 7685 | CB   | TYR | X | 506 | 45.099 | 23.087 | 47.434 | 0.00 | 0.00 |
| ATOM | 7686 | HB2  | TYR | X | 506 | 45.127 | 24.037 | 46.900 | 0.00 | 0.00 |
| ATOM | 7687 | HB3  | TYR | X | 506 | 44.506 | 23.284 | 48.327 | 0.00 | 0.00 |
| ATOM | 7688 | CG   | TYR | X | 506 | 46.485 | 22.739 | 47.964 | 0.00 | 0.00 |
| ATOM | 7689 | CD1  | TYR | X | 506 | 46.633 | 21.915 | 49.083 | 0.00 | 0.00 |
| ATOM | 7690 | HD1  | TYR | X | 506 | 45.744 | 21.503 | 49.538 | 0.00 | 0.00 |
| ATOM | 7691 | CE1  | TYR | X | 506 | 47.936 | 21.675 | 49.541 | 0.00 | 0.00 |
| ATOM | 7692 | HE1  | TYR | X | 506 | 48.062 | 21.025 | 50.395 | 0.00 | 0.00 |
| ATOM | 7693 | CZ   | TYR | X | 506 | 49.107 | 22.186 | 48.932 | 0.00 | 0.00 |
| ATOM | 7694 | OH   | TYR | X | 506 | 50.353 | 21.739 | 49.191 | 0.00 | 0.00 |
| ATOM | 7695 | HH   | TYR | X | 506 | 50.318 | 21.082 | 49.890 | 0.00 | 0.00 |
| ATOM | 7696 | CE2  | TYR | X | 506 | 48.961 | 23.040 | 47.814 | 0.00 | 0.00 |
| ATOM | 7697 | HE2  | TYR | X | 506 | 49.808 | 23.346 | 47.218 | 0.00 | 0.00 |
| ATOM | 7698 | CD2  | TYR | X | 506 | 47.630 | 23.249 | 47.332 | 0.00 | 0.00 |
| ATOM | 7699 | HD2  | TYR | X | 506 | 47.471 | 23.838 | 46.441 | 0.00 | 0.00 |
| ATOM | 7700 | C    | TYR | X | 506 | 45.291 | 21.544 | 45.361 | 0.00 | 0.00 |
| ATOM | 7701 | O    | TYR | X | 506 | 46.080 | 20.605 | 45.483 | 0.00 | 0.00 |
| ATOM | 7702 | N    | VAL | X | 507 | 45.174 | 21.993 | 44.119 | 0.00 | 0.00 |
| ATOM | 7703 | H    | VAL | X | 507 | 44.434 | 22.668 | 43.991 | 0.00 | 0.00 |
| ATOM | 7704 | CA   | VAL | X | 507 | 45.785 | 21.256 | 42.929 | 0.00 | 0.00 |
| ATOM | 7705 | HA   | VAL | X | 507 | 45.957 | 20.238 | 43.278 | 0.00 | 0.00 |
| ATOM | 7706 | CB   | VAL | X | 507 | 44.752 | 21.136 | 41.771 | 0.00 | 0.00 |
| ATOM | 7707 | HB   | VAL | X | 507 | 45.025 | 20.246 | 41.203 | 0.00 | 0.00 |
| ATOM | 7708 | CG1  | VAL | X | 507 | 43.347 | 20.722 | 42.184 | 0.00 | 0.00 |
| ATOM | 7709 | HG11 | VAL | X | 507 | 42.969 | 21.320 | 43.013 | 0.00 | 0.00 |
| ATOM | 7710 | HG12 | VAL | X | 507 | 42.689 | 20.724 | 41.315 | 0.00 | 0.00 |
| ATOM | 7711 | HG13 | VAL | X | 507 | 43.434 | 19.662 | 42.423 | 0.00 | 0.00 |
| ATOM | 7712 | CG2  | VAL | X | 507 | 44.614 | 22.496 | 41.096 | 0.00 | 0.00 |
| ATOM | 7713 | HG21 | VAL | X | 507 | 45.586 | 22.871 | 40.774 | 0.00 | 0.00 |
| ATOM | 7714 | HG22 | VAL | X | 507 | 44.199 | 23.339 | 41.648 | 0.00 | 0.00 |
| ATOM | 7715 | HG23 | VAL | X | 507 | 43.938 | 22.403 | 40.246 | 0.00 | 0.00 |
| ATOM | 7716 | C    | VAL | X | 507 | 47.168 | 21.796 | 42.485 | 0.00 | 0.00 |
| ATOM | 7717 | O    | VAL | X | 507 | 47.448 | 22.978 | 42.635 | 0.00 | 0.00 |
| ATOM | 7718 | N    | SER | X | 508 | 47.955 | 20.915 | 41.820 | 0.00 | 0.00 |
| ATOM | 7719 | H    | SER | X | 508 | 47.784 | 19.925 | 41.921 | 0.00 | 0.00 |
| ATOM | 7720 | CA   | SER | X | 508 | 49.066 | 21.365 | 41.028 | 0.00 | 0.00 |
| ATOM | 7721 | HA   | SER | X | 508 | 49.507 | 22.260 | 41.467 | 0.00 | 0.00 |
| ATOM | 7722 | CB   | SER | X | 508 | 50.055 | 20.178 | 40.931 | 0.00 | 0.00 |
| ATOM | 7723 | HB2  | SER | X | 508 | 49.526 | 19.372 | 40.422 | 0.00 | 0.00 |
| ATOM | 7724 | HB3  | SER | X | 508 | 50.860 | 20.624 | 40.347 | 0.00 | 0.00 |
| ATOM | 7725 | OG   | SER | X | 508 | 50.535 | 19.842 | 42.200 | 0.00 | 0.00 |
| ATOM | 7726 | HG   | SER | X | 508 | 51.195 | 20.509 | 42.404 | 0.00 | 0.00 |
| ATOM | 7727 | C    | SER | X | 508 | 48.794 | 21.788 | 39.582 | 0.00 | 0.00 |
| ATOM | 7728 | O    | SER | X | 508 | 48.507 | 21.009 | 38.678 | 0.00 | 0.00 |
| ATOM | 7729 | N    | LEU | X | 509 | 48.887 | 23.139 | 39.356 | 0.00 | 0.00 |
| ATOM | 7730 | H    | LEU | X | 509 | 49.382 | 23.741 | 39.999 | 0.00 | 0.00 |

|      |      |      |     |   |     |        |        |        |      |      |
|------|------|------|-----|---|-----|--------|--------|--------|------|------|
| ATOM | 7731 | CA   | LEU | X | 509 | 48.933 | 23.678 | 38.016 | 0.00 | 0.00 |
| ATOM | 7732 | HA   | LEU | X | 509 | 48.348 | 23.104 | 37.298 | 0.00 | 0.00 |
| ATOM | 7733 | CB   | LEU | X | 509 | 48.367 | 25.132 | 38.025 | 0.00 | 0.00 |
| ATOM | 7734 | HB2  | LEU | X | 509 | 48.986 | 25.746 | 38.679 | 0.00 | 0.00 |
| ATOM | 7735 | HB3  | LEU | X | 509 | 48.512 | 25.475 | 37.000 | 0.00 | 0.00 |
| ATOM | 7736 | CG   | LEU | X | 509 | 46.846 | 25.184 | 38.430 | 0.00 | 0.00 |
| ATOM | 7737 | HG   | LEU | X | 509 | 46.756 | 24.778 | 39.438 | 0.00 | 0.00 |
| ATOM | 7738 | CD1  | LEU | X | 509 | 46.446 | 26.658 | 38.361 | 0.00 | 0.00 |
| ATOM | 7739 | HD11 | LEU | X | 509 | 45.665 | 26.720 | 39.119 | 0.00 | 0.00 |
| ATOM | 7740 | HD12 | LEU | X | 509 | 46.052 | 26.883 | 37.370 | 0.00 | 0.00 |
| ATOM | 7741 | HD13 | LEU | X | 509 | 47.244 | 27.364 | 38.588 | 0.00 | 0.00 |
| ATOM | 7742 | CD2  | LEU | X | 509 | 45.923 | 24.333 | 37.543 | 0.00 | 0.00 |
| ATOM | 7743 | HD21 | LEU | X | 509 | 46.039 | 24.539 | 36.479 | 0.00 | 0.00 |
| ATOM | 7744 | HD22 | LEU | X | 509 | 46.145 | 23.281 | 37.725 | 0.00 | 0.00 |
| ATOM | 7745 | HD23 | LEU | X | 509 | 44.864 | 24.456 | 37.769 | 0.00 | 0.00 |
| ATOM | 7746 | C    | LEU | X | 509 | 50.316 | 23.567 | 37.508 | 0.00 | 0.00 |
| ATOM | 7747 | O    | LEU | X | 509 | 51.174 | 24.334 | 37.986 | 0.00 | 0.00 |
| ATOM | 7748 | N    | ASP | X | 510 | 50.463 | 22.621 | 36.605 | 0.00 | 0.00 |
| ATOM | 7749 | H    | ASP | X | 510 | 49.669 | 22.055 | 36.340 | 0.00 | 0.00 |
| ATOM | 7750 | CA   | ASP | X | 510 | 51.706 | 22.259 | 35.963 | 0.00 | 0.00 |
| ATOM | 7751 | HA   | ASP | X | 510 | 52.230 | 23.200 | 35.798 | 0.00 | 0.00 |
| ATOM | 7752 | CB   | ASP | X | 510 | 52.506 | 21.310 | 36.921 | 0.00 | 0.00 |
| ATOM | 7753 | HB2  | ASP | X | 510 | 52.738 | 21.937 | 37.782 | 0.00 | 0.00 |
| ATOM | 7754 | HB3  | ASP | X | 510 | 51.863 | 20.476 | 37.206 | 0.00 | 0.00 |
| ATOM | 7755 | CG   | ASP | X | 510 | 53.794 | 20.738 | 36.373 | 0.00 | 0.00 |
| ATOM | 7756 | OD1  | ASP | X | 510 | 53.876 | 19.521 | 36.343 | 0.00 | 0.00 |
| ATOM | 7757 | OD2  | ASP | X | 510 | 54.639 | 21.586 | 36.014 | 0.00 | 0.00 |
| ATOM | 7758 | C    | ASP | X | 510 | 51.475 | 21.627 | 34.520 | 0.00 | 0.00 |
| ATOM | 7759 | O    | ASP | X | 510 | 50.333 | 21.240 | 34.149 | 0.00 | 0.00 |
| ATOM | 7760 | N    | LEU | X | 511 | 52.508 | 21.272 | 33.815 | 0.00 | 0.00 |
| ATOM | 7761 | H    | LEU | X | 511 | 53.451 | 21.434 | 34.141 | 0.00 | 0.00 |
| ATOM | 7762 | CA   | LEU | X | 511 | 52.515 | 20.489 | 32.553 | 0.00 | 0.00 |
| ATOM | 7763 | HA   | LEU | X | 511 | 51.764 | 20.907 | 31.883 | 0.00 | 0.00 |
| ATOM | 7764 | CB   | LEU | X | 511 | 53.876 | 20.684 | 31.950 | 0.00 | 0.00 |
| ATOM | 7765 | HB2  | LEU | X | 511 | 54.604 | 20.077 | 32.487 | 0.00 | 0.00 |
| ATOM | 7766 | HB3  | LEU | X | 511 | 53.823 | 20.296 | 30.932 | 0.00 | 0.00 |
| ATOM | 7767 | CG   | LEU | X | 511 | 54.539 | 22.096 | 31.789 | 0.00 | 0.00 |
| ATOM | 7768 | HG   | LEU | X | 511 | 54.798 | 22.484 | 32.774 | 0.00 | 0.00 |
| ATOM | 7769 | CD1  | LEU | X | 511 | 55.781 | 21.951 | 31.011 | 0.00 | 0.00 |
| ATOM | 7770 | HD11 | LEU | X | 511 | 55.743 | 21.328 | 30.118 | 0.00 | 0.00 |
| ATOM | 7771 | HD12 | LEU | X | 511 | 56.538 | 21.470 | 31.631 | 0.00 | 0.00 |
| ATOM | 7772 | HD13 | LEU | X | 511 | 56.245 | 22.918 | 30.815 | 0.00 | 0.00 |
| ATOM | 7773 | CD2  | LEU | X | 511 | 53.612 | 23.054 | 30.956 | 0.00 | 0.00 |
| ATOM | 7774 | HD21 | LEU | X | 511 | 53.834 | 24.117 | 31.045 | 0.00 | 0.00 |
| ATOM | 7775 | HD22 | LEU | X | 511 | 53.670 | 22.765 | 29.907 | 0.00 | 0.00 |
| ATOM | 7776 | HD23 | LEU | X | 511 | 52.615 | 23.047 | 31.395 | 0.00 | 0.00 |
| ATOM | 7777 | C    | LEU | X | 511 | 52.219 | 18.984 | 32.637 | 0.00 | 0.00 |
| ATOM | 7778 | O    | LEU | X | 511 | 52.210 | 18.328 | 31.604 | 0.00 | 0.00 |
| ATOM | 7779 | N    | ARG | X | 512 | 51.969 | 18.458 | 33.811 | 0.00 | 0.00 |
| ATOM | 7780 | H    | ARG | X | 512 | 52.109 | 18.930 | 34.693 | 0.00 | 0.00 |
| ATOM | 7781 | CA   | ARG | X | 512 | 51.504 | 17.111 | 34.041 | 0.00 | 0.00 |
| ATOM | 7782 | HA   | ARG | X | 512 | 51.822 | 16.569 | 33.151 | 0.00 | 0.00 |
| ATOM | 7783 | CB   | ARG | X | 512 | 52.296 | 16.444 | 35.190 | 0.00 | 0.00 |
| ATOM | 7784 | HB2  | ARG | X | 512 | 52.147 | 15.368 | 35.097 | 0.00 | 0.00 |
| ATOM | 7785 | HB3  | ARG | X | 512 | 53.355 | 16.677 | 35.075 | 0.00 | 0.00 |
| ATOM | 7786 | CG   | ARG | X | 512 | 51.901 | 16.961 | 36.614 | 0.00 | 0.00 |
| ATOM | 7787 | HG2  | ARG | X | 512 | 51.910 | 18.051 | 36.606 | 0.00 | 0.00 |
| ATOM | 7788 | HG3  | ARG | X | 512 | 50.938 | 16.526 | 36.879 | 0.00 | 0.00 |
| ATOM | 7789 | CD   | ARG | X | 512 | 53.013 | 16.487 | 37.583 | 0.00 | 0.00 |
| ATOM | 7790 | HD2  | ARG | X | 512 | 53.097 | 15.404 | 37.493 | 0.00 | 0.00 |
| ATOM | 7791 | HD3  | ARG | X | 512 | 53.953 | 16.941 | 37.270 | 0.00 | 0.00 |
| ATOM | 7792 | NE   | ARG | X | 512 | 52.752 | 16.764 | 38.998 | 0.00 | 0.00 |
| ATOM | 7793 | HE   | ARG | X | 512 | 52.250 | 16.066 | 39.526 | 0.00 | 0.00 |
| ATOM | 7794 | CZ   | ARG | X | 512 | 53.013 | 17.829 | 39.768 | 0.00 | 0.00 |
| ATOM | 7795 | NH1  | ARG | X | 512 | 53.452 | 18.897 | 39.186 | 0.00 | 0.00 |
| ATOM | 7796 | HH11 | ARG | X | 512 | 53.569 | 19.058 | 38.195 | 0.00 | 0.00 |
| ATOM | 7797 | HH12 | ARG | X | 512 | 53.554 | 19.681 | 39.815 | 0.00 | 0.00 |

|      |      |      |     |   |     |        |        |        |      |      |
|------|------|------|-----|---|-----|--------|--------|--------|------|------|
| ATOM | 7798 | NH2  | ARG | X | 512 | 52.830 | 17.797 | 41.088 | 0.00 | 0.00 |
| ATOM | 7799 | HH21 | ARG | X | 512 | 52.495 | 16.993 | 41.601 | 0.00 | 0.00 |
| ATOM | 7800 | HH22 | ARG | X | 512 | 53.117 | 18.583 | 41.653 | 0.00 | 0.00 |
| ATOM | 7801 | C    | ARG | X | 512 | 49.985 | 17.090 | 34.263 | 0.00 | 0.00 |
| ATOM | 7802 | O    | ARG | X | 512 | 49.443 | 17.995 | 34.919 | 0.00 | 0.00 |
| ATOM | 7803 | N    | PRO | X | 513 | 49.405 | 15.932 | 33.839 | 0.00 | 0.00 |
| ATOM | 7804 | CD   | PRO | X | 513 | 49.983 | 14.781 | 33.063 | 0.00 | 0.00 |
| ATOM | 7805 | HD2  | PRO | X | 513 | 50.629 | 14.178 | 33.702 | 0.00 | 0.00 |
| ATOM | 7806 | HD3  | PRO | X | 513 | 50.637 | 15.071 | 32.240 | 0.00 | 0.00 |
| ATOM | 7807 | CG   | PRO | X | 513 | 48.837 | 13.978 | 32.630 | 0.00 | 0.00 |
| ATOM | 7808 | HG2  | PRO | X | 513 | 49.207 | 12.982 | 32.387 | 0.00 | 0.00 |
| ATOM | 7809 | HG3  | PRO | X | 513 | 48.483 | 14.497 | 31.739 | 0.00 | 0.00 |
| ATOM | 7810 | CB   | PRO | X | 513 | 47.869 | 14.056 | 33.846 | 0.00 | 0.00 |
| ATOM | 7811 | HB2  | PRO | X | 513 | 48.258 | 13.400 | 34.625 | 0.00 | 0.00 |
| ATOM | 7812 | HB3  | PRO | X | 513 | 46.870 | 13.697 | 33.599 | 0.00 | 0.00 |
| ATOM | 7813 | CA   | PRO | X | 513 | 48.053 | 15.487 | 34.240 | 0.00 | 0.00 |
| ATOM | 7814 | HA   | PRO | X | 513 | 47.397 | 16.173 | 33.705 | 0.00 | 0.00 |
| ATOM | 7815 | C    | PRO | X | 513 | 47.797 | 15.632 | 35.701 | 0.00 | 0.00 |
| ATOM | 7816 | O    | PRO | X | 513 | 48.673 | 15.383 | 36.576 | 0.00 | 0.00 |
| ATOM | 7817 | N    | LEU | X | 514 | 46.534 | 16.082 | 36.024 | 0.00 | 0.00 |
| ATOM | 7818 | H    | LEU | X | 514 | 45.877 | 16.005 | 35.261 | 0.00 | 0.00 |
| ATOM | 7819 | CA   | LEU | X | 514 | 46.189 | 16.891 | 37.222 | 0.00 | 0.00 |
| ATOM | 7820 | HA   | LEU | X | 514 | 46.934 | 17.681 | 37.321 | 0.00 | 0.00 |
| ATOM | 7821 | CB   | LEU | X | 514 | 44.804 | 17.487 | 37.095 | 0.00 | 0.00 |
| ATOM | 7822 | HB2  | LEU | X | 514 | 44.684 | 18.045 | 36.166 | 0.00 | 0.00 |
| ATOM | 7823 | HB3  | LEU | X | 514 | 44.080 | 16.677 | 37.181 | 0.00 | 0.00 |
| ATOM | 7824 | CG   | LEU | X | 514 | 44.495 | 18.456 | 38.229 | 0.00 | 0.00 |
| ATOM | 7825 | HG   | LEU | X | 514 | 45.388 | 18.772 | 38.768 | 0.00 | 0.00 |
| ATOM | 7826 | CD1  | LEU | X | 514 | 43.728 | 19.699 | 37.666 | 0.00 | 0.00 |
| ATOM | 7827 | HD11 | LEU | X | 514 | 43.392 | 20.327 | 38.491 | 0.00 | 0.00 |
| ATOM | 7828 | HD12 | LEU | X | 514 | 42.910 | 19.484 | 36.978 | 0.00 | 0.00 |
| ATOM | 7829 | HD13 | LEU | X | 514 | 44.433 | 20.314 | 37.108 | 0.00 | 0.00 |
| ATOM | 7830 | CD2  | LEU | X | 514 | 43.635 | 17.741 | 39.322 | 0.00 | 0.00 |
| ATOM | 7831 | HD21 | LEU | X | 514 | 42.609 | 17.782 | 38.955 | 0.00 | 0.00 |
| ATOM | 7832 | HD22 | LEU | X | 514 | 43.946 | 16.719 | 39.538 | 0.00 | 0.00 |
| ATOM | 7833 | HD23 | LEU | X | 514 | 43.866 | 18.249 | 40.258 | 0.00 | 0.00 |
| ATOM | 7834 | C    | LEU | X | 514 | 46.275 | 16.006 | 38.541 | 0.00 | 0.00 |
| ATOM | 7835 | O    | LEU | X | 514 | 45.648 | 14.935 | 38.656 | 0.00 | 0.00 |
| ATOM | 7836 | N    | GLU | X | 515 | 47.034 | 16.469 | 39.567 | 0.00 | 0.00 |
| ATOM | 7837 | H    | GLU | X | 515 | 47.525 | 17.311 | 39.303 | 0.00 | 0.00 |
| ATOM | 7838 | CA   | GLU | X | 515 | 47.239 | 15.878 | 40.873 | 0.00 | 0.00 |
| ATOM | 7839 | HA   | GLU | X | 515 | 46.634 | 14.978 | 40.986 | 0.00 | 0.00 |
| ATOM | 7840 | CB   | GLU | X | 515 | 48.750 | 15.447 | 40.988 | 0.00 | 0.00 |
| ATOM | 7841 | HB2  | GLU | X | 515 | 49.415 | 16.285 | 40.779 | 0.00 | 0.00 |
| ATOM | 7842 | HB3  | GLU | X | 515 | 48.903 | 15.061 | 41.996 | 0.00 | 0.00 |
| ATOM | 7843 | CG   | GLU | X | 515 | 49.089 | 14.351 | 40.088 | 0.00 | 0.00 |
| ATOM | 7844 | HG2  | GLU | X | 515 | 48.513 | 13.502 | 40.456 | 0.00 | 0.00 |
| ATOM | 7845 | HG3  | GLU | X | 515 | 48.952 | 14.580 | 39.031 | 0.00 | 0.00 |
| ATOM | 7846 | CD   | GLU | X | 515 | 50.544 | 13.947 | 40.351 | 0.00 | 0.00 |
| ATOM | 7847 | OE1  | GLU | X | 515 | 51.393 | 14.367 | 39.578 | 0.00 | 0.00 |
| ATOM | 7848 | OE2  | GLU | X | 515 | 50.903 | 13.334 | 41.345 | 0.00 | 0.00 |
| ATOM | 7849 | C    | GLU | X | 515 | 46.875 | 16.788 | 42.033 | 0.00 | 0.00 |
| ATOM | 7850 | O    | GLU | X | 515 | 47.127 | 18.005 | 41.970 | 0.00 | 0.00 |
| ATOM | 7851 | N    | VAL | X | 516 | 46.222 | 16.226 | 43.073 | 0.00 | 0.00 |
| ATOM | 7852 | H    | VAL | X | 516 | 45.994 | 15.243 | 43.038 | 0.00 | 0.00 |
| ATOM | 7853 | CA   | VAL | X | 516 | 45.639 | 17.018 | 44.175 | 0.00 | 0.00 |
| ATOM | 7854 | HA   | VAL | X | 516 | 45.735 | 18.056 | 43.854 | 0.00 | 0.00 |
| ATOM | 7855 | CB   | VAL | X | 516 | 44.115 | 16.681 | 44.335 | 0.00 | 0.00 |
| ATOM | 7856 | HB   | VAL | X | 516 | 44.065 | 15.825 | 45.008 | 0.00 | 0.00 |
| ATOM | 7857 | CG1  | VAL | X | 516 | 43.390 | 17.863 | 45.041 | 0.00 | 0.00 |
| ATOM | 7858 | HG11 | VAL | X | 516 | 43.475 | 18.869 | 44.630 | 0.00 | 0.00 |
| ATOM | 7859 | HG12 | VAL | X | 516 | 42.372 | 17.550 | 45.274 | 0.00 | 0.00 |
| ATOM | 7860 | HG13 | VAL | X | 516 | 43.921 | 17.935 | 45.990 | 0.00 | 0.00 |
| ATOM | 7861 | CG2  | VAL | X | 516 | 43.322 | 16.342 | 43.066 | 0.00 | 0.00 |
| ATOM | 7862 | HG21 | VAL | X | 516 | 43.366 | 17.180 | 42.371 | 0.00 | 0.00 |
| ATOM | 7863 | HG22 | VAL | X | 516 | 42.292 | 16.182 | 43.387 | 0.00 | 0.00 |
| ATOM | 7864 | HG23 | VAL | X | 516 | 43.740 | 15.459 | 42.583 | 0.00 | 0.00 |



|      |      |      |     |   |     |        |        |        |      |      |
|------|------|------|-----|---|-----|--------|--------|--------|------|------|
| ATOM | 7865 | C    | VAL | X | 516 | 46.470 | 16.809 | 45.466 | 0.00 | 0.00 |
| ATOM | 7866 | O    | VAL | X | 516 | 46.502 | 15.687 | 46.071 | 0.00 | 0.00 |
| ATOM | 7867 | N    | ARG | X | 517 | 47.058 | 17.860 | 45.966 | 0.00 | 0.00 |
| ATOM | 7868 | H    | ARG | X | 517 | 46.835 | 18.699 | 45.449 | 0.00 | 0.00 |
| ATOM | 7869 | CA   | ARG | X | 517 | 47.705 | 18.019 | 47.297 | 0.00 | 0.00 |
| ATOM | 7870 | HA   | ARG | X | 517 | 48.231 | 17.103 | 47.564 | 0.00 | 0.00 |
| ATOM | 7871 | CB   | ARG | X | 517 | 48.648 | 19.209 | 47.245 | 0.00 | 0.00 |
| ATOM | 7872 | HB2  | ARG | X | 517 | 48.081 | 20.110 | 47.010 | 0.00 | 0.00 |
| ATOM | 7873 | HB3  | ARG | X | 517 | 49.078 | 19.358 | 48.236 | 0.00 | 0.00 |
| ATOM | 7874 | CG   | ARG | X | 517 | 49.708 | 19.134 | 46.104 | 0.00 | 0.00 |
| ATOM | 7875 | HG2  | ARG | X | 517 | 50.077 | 18.109 | 46.127 | 0.00 | 0.00 |
| ATOM | 7876 | HG3  | ARG | X | 517 | 49.228 | 19.355 | 45.150 | 0.00 | 0.00 |
| ATOM | 7877 | CD   | ARG | X | 517 | 50.839 | 20.210 | 46.360 | 0.00 | 0.00 |
| ATOM | 7878 | HD2  | ARG | X | 517 | 50.399 | 21.181 | 46.135 | 0.00 | 0.00 |
| ATOM | 7879 | HD3  | ARG | X | 517 | 51.258 | 20.139 | 47.364 | 0.00 | 0.00 |
| ATOM | 7880 | NE   | ARG | X | 517 | 51.913 | 19.990 | 45.380 | 0.00 | 0.00 |
| ATOM | 7881 | HE   | ARG | X | 517 | 51.903 | 20.670 | 44.633 | 0.00 | 0.00 |
| ATOM | 7882 | CZ   | ARG | X | 517 | 52.857 | 19.074 | 45.450 | 0.00 | 0.00 |
| ATOM | 7883 | NH1  | ARG | X | 517 | 53.074 | 18.335 | 46.533 | 0.00 | 0.00 |
| ATOM | 7884 | HH11 | ARG | X | 517 | 52.613 | 18.488 | 47.418 | 0.00 | 0.00 |
| ATOM | 7885 | HH12 | ARG | X | 517 | 53.625 | 17.489 | 46.530 | 0.00 | 0.00 |
| ATOM | 7886 | NH2  | ARG | X | 517 | 53.573 | 18.970 | 44.349 | 0.00 | 0.00 |
| ATOM | 7887 | HH21 | ARG | X | 517 | 53.545 | 19.622 | 43.578 | 0.00 | 0.00 |
| ATOM | 7888 | HH22 | ARG | X | 517 | 54.359 | 18.343 | 44.445 | 0.00 | 0.00 |
| ATOM | 7889 | C    | ARG | X | 517 | 46.568 | 18.243 | 48.342 | 0.00 | 0.00 |
| ATOM | 7890 | O    | ARG | X | 517 | 45.503 | 18.843 | 48.059 | 0.00 | 0.00 |
| ATOM | 7891 | N    | ARG | X | 518 | 46.833 | 17.831 | 49.569 | 0.00 | 0.00 |
| ATOM | 7892 | H    | ARG | X | 518 | 47.693 | 17.341 | 49.773 | 0.00 | 0.00 |
| ATOM | 7893 | CA   | ARG | X | 518 | 45.927 | 17.968 | 50.793 | 0.00 | 0.00 |
| ATOM | 7894 | HA   | ARG | X | 518 | 45.032 | 18.522 | 50.510 | 0.00 | 0.00 |
| ATOM | 7895 | CB   | ARG | X | 518 | 45.404 | 16.576 | 51.257 | 0.00 | 0.00 |
| ATOM | 7896 | HB2  | ARG | X | 518 | 46.210 | 15.844 | 51.229 | 0.00 | 0.00 |
| ATOM | 7897 | HB3  | ARG | X | 518 | 45.006 | 16.738 | 52.258 | 0.00 | 0.00 |
| ATOM | 7898 | CG   | ARG | X | 518 | 44.237 | 16.048 | 50.395 | 0.00 | 0.00 |
| ATOM | 7899 | HG2  | ARG | X | 518 | 43.439 | 16.791 | 50.382 | 0.00 | 0.00 |
| ATOM | 7900 | HG3  | ARG | X | 518 | 44.609 | 15.783 | 49.405 | 0.00 | 0.00 |
| ATOM | 7901 | CD   | ARG | X | 518 | 43.555 | 14.868 | 51.124 | 0.00 | 0.00 |
| ATOM | 7902 | HD2  | ARG | X | 518 | 43.185 | 15.136 | 52.114 | 0.00 | 0.00 |
| ATOM | 7903 | HD3  | ARG | X | 518 | 42.614 | 14.664 | 50.614 | 0.00 | 0.00 |
| ATOM | 7904 | NE   | ARG | X | 518 | 44.313 | 13.620 | 51.149 | 0.00 | 0.00 |
| ATOM | 7905 | HE   | ARG | X | 518 | 44.104 | 12.950 | 50.423 | 0.00 | 0.00 |
| ATOM | 7906 | CZ   | ARG | X | 518 | 44.997 | 13.111 | 52.227 | 0.00 | 0.00 |
| ATOM | 7907 | NH1  | ARG | X | 518 | 45.041 | 13.690 | 53.406 | 0.00 | 0.00 |
| ATOM | 7908 | HH11 | ARG | X | 518 | 44.380 | 14.438 | 53.560 | 0.00 | 0.00 |
| ATOM | 7909 | HH12 | ARG | X | 518 | 45.433 | 13.248 | 54.226 | 0.00 | 0.00 |
| ATOM | 7910 | NH2  | ARG | X | 518 | 45.566 | 11.957 | 52.238 | 0.00 | 0.00 |
| ATOM | 7911 | HH21 | ARG | X | 518 | 45.615 | 11.387 | 51.405 | 0.00 | 0.00 |
| ATOM | 7912 | HH22 | ARG | X | 518 | 46.052 | 11.641 | 53.065 | 0.00 | 0.00 |
| ATOM | 7913 | C    | ARG | X | 518 | 46.521 | 18.662 | 52.046 | 0.00 | 0.00 |
| ATOM | 7914 | O    | ARG | X | 518 | 47.701 | 18.827 | 52.194 | 0.00 | 0.00 |
| ATOM | 7915 | N    | GLY | X | 519 | 45.652 | 19.193 | 52.924 | 0.00 | 0.00 |
| ATOM | 7916 | H    | GLY | X | 519 | 44.703 | 18.849 | 52.890 | 0.00 | 0.00 |
| ATOM | 7917 | CA   | GLY | X | 519 | 45.918 | 20.061 | 54.084 | 0.00 | 0.00 |
| ATOM | 7918 | HA2  | GLY | X | 519 | 44.985 | 20.428 | 54.510 | 0.00 | 0.00 |
| ATOM | 7919 | HA3  | GLY | X | 519 | 46.313 | 19.549 | 54.961 | 0.00 | 0.00 |
| ATOM | 7920 | C    | GLY | X | 519 | 46.763 | 21.321 | 53.836 | 0.00 | 0.00 |
| ATOM | 7921 | O    | GLY | X | 519 | 47.749 | 21.534 | 54.457 | 0.00 | 0.00 |
| ATOM | 7922 | N    | LEU | X | 520 | 46.370 | 22.212 | 52.879 | 0.00 | 0.00 |
| ATOM | 7923 | H    | LEU | X | 520 | 45.581 | 22.028 | 52.276 | 0.00 | 0.00 |
| ATOM | 7924 | CA   | LEU | X | 520 | 47.103 | 23.361 | 52.376 | 0.00 | 0.00 |
| ATOM | 7925 | HA   | LEU | X | 520 | 47.880 | 23.117 | 51.652 | 0.00 | 0.00 |
| ATOM | 7926 | CB   | LEU | X | 520 | 46.031 | 24.288 | 51.601 | 0.00 | 0.00 |
| ATOM | 7927 | HB2  | LEU | X | 520 | 45.697 | 23.720 | 50.733 | 0.00 | 0.00 |
| ATOM | 7928 | HB3  | LEU | X | 520 | 45.128 | 24.486 | 52.179 | 0.00 | 0.00 |
| ATOM | 7929 | CG   | LEU | X | 520 | 46.553 | 25.641 | 50.963 | 0.00 | 0.00 |
| ATOM | 7930 | HG   | LEU | X | 520 | 46.800 | 26.239 | 51.840 | 0.00 | 0.00 |
| ATOM | 7931 | CD1  | LEU | X | 520 | 47.861 | 25.650 | 50.132 | 0.00 | 0.00 |

|      |      |      |     |   |     |        |        |        |      |      |
|------|------|------|-----|---|-----|--------|--------|--------|------|------|
| ATOM | 7932 | HD11 | LEU | X | 520 | 47.603 | 25.201 | 49.173 | 0.00 | 0.00 |
| ATOM | 7933 | HD12 | LEU | X | 520 | 48.644 | 25.046 | 50.590 | 0.00 | 0.00 |
| ATOM | 7934 | HD13 | LEU | X | 520 | 48.157 | 26.657 | 49.838 | 0.00 | 0.00 |
| ATOM | 7935 | CD2  | LEU | X | 520 | 45.370 | 26.238 | 50.190 | 0.00 | 0.00 |
| ATOM | 7936 | HD21 | LEU | X | 520 | 45.739 | 27.176 | 49.775 | 0.00 | 0.00 |
| ATOM | 7937 | HD22 | LEU | X | 520 | 44.991 | 25.667 | 49.342 | 0.00 | 0.00 |
| ATOM | 7938 | HD23 | LEU | X | 520 | 44.638 | 26.456 | 50.967 | 0.00 | 0.00 |
| ATOM | 7939 | C    | LEU | X | 520 | 47.845 | 24.189 | 53.462 | 0.00 | 0.00 |
| ATOM | 7940 | O    | LEU | X | 520 | 47.283 | 24.971 | 54.219 | 0.00 | 0.00 |
| ATOM | 7941 | N    | ARG | X | 521 | 49.152 | 24.006 | 53.609 | 0.00 | 0.00 |
| ATOM | 7942 | H    | ARG | X | 521 | 49.602 | 23.490 | 52.867 | 0.00 | 0.00 |
| ATOM | 7943 | CA   | ARG | X | 521 | 50.087 | 24.718 | 54.545 | 0.00 | 0.00 |
| ATOM | 7944 | HA   | ARG | X | 521 | 51.034 | 24.184 | 54.465 | 0.00 | 0.00 |
| ATOM | 7945 | CB   | ARG | X | 521 | 50.248 | 26.222 | 54.062 | 0.00 | 0.00 |
| ATOM | 7946 | HB2  | ARG | X | 521 | 50.284 | 26.253 | 52.973 | 0.00 | 0.00 |
| ATOM | 7947 | HB3  | ARG | X | 521 | 49.439 | 26.868 | 54.404 | 0.00 | 0.00 |
| ATOM | 7948 | CG   | ARG | X | 521 | 51.584 | 26.846 | 54.503 | 0.00 | 0.00 |
| ATOM | 7949 | HG2  | ARG | X | 521 | 51.571 | 27.888 | 54.183 | 0.00 | 0.00 |
| ATOM | 7950 | HG3  | ARG | X | 521 | 51.577 | 26.883 | 55.592 | 0.00 | 0.00 |
| ATOM | 7951 | CD   | ARG | X | 521 | 52.758 | 26.129 | 53.874 | 0.00 | 0.00 |
| ATOM | 7952 | HD2  | ARG | X | 521 | 52.700 | 25.080 | 54.167 | 0.00 | 0.00 |
| ATOM | 7953 | HD3  | ARG | X | 521 | 52.692 | 26.317 | 52.802 | 0.00 | 0.00 |
| ATOM | 7954 | NE   | ARG | X | 521 | 53.988 | 26.729 | 54.333 | 0.00 | 0.00 |
| ATOM | 7955 | HE   | ARG | X | 521 | 53.954 | 27.708 | 54.578 | 0.00 | 0.00 |
| ATOM | 7956 | CZ   | ARG | X | 521 | 55.192 | 26.199 | 54.362 | 0.00 | 0.00 |
| ATOM | 7957 | NH1  | ARG | X | 521 | 55.561 | 24.953 | 54.079 | 0.00 | 0.00 |
| ATOM | 7958 | HH11 | ARG | X | 521 | 54.899 | 24.291 | 53.701 | 0.00 | 0.00 |
| ATOM | 7959 | HH12 | ARG | X | 521 | 56.477 | 24.547 | 54.205 | 0.00 | 0.00 |
| ATOM | 7960 | NH2  | ARG | X | 521 | 56.152 | 26.888 | 54.937 | 0.00 | 0.00 |
| ATOM | 7961 | HH21 | ARG | X | 521 | 55.930 | 27.745 | 55.422 | 0.00 | 0.00 |
| ATOM | 7962 | HH22 | ARG | X | 521 | 57.105 | 26.554 | 54.960 | 0.00 | 0.00 |
| ATOM | 7963 | C    | ARG | X | 521 | 49.684 | 24.693 | 56.027 | 0.00 | 0.00 |
| ATOM | 7964 | O    | ARG | X | 521 | 49.997 | 25.542 | 56.835 | 0.00 | 0.00 |
| ATOM | 7965 | N    | ALA | X | 522 | 48.851 | 23.727 | 56.431 | 0.00 | 0.00 |
| ATOM | 7966 | H    | ALA | X | 522 | 48.582 | 23.147 | 55.649 | 0.00 | 0.00 |
| ATOM | 7967 | CA   | ALA | X | 522 | 48.148 | 23.678 | 57.764 | 0.00 | 0.00 |
| ATOM | 7968 | HA   | ALA | X | 522 | 47.562 | 24.589 | 57.891 | 0.00 | 0.00 |
| ATOM | 7969 | CB   | ALA | X | 522 | 47.145 | 22.540 | 57.728 | 0.00 | 0.00 |
| ATOM | 7970 | HB1  | ALA | X | 522 | 46.548 | 22.554 | 56.816 | 0.00 | 0.00 |
| ATOM | 7971 | HB2  | ALA | X | 522 | 46.423 | 22.671 | 58.534 | 0.00 | 0.00 |
| ATOM | 7972 | HB3  | ALA | X | 522 | 47.699 | 21.607 | 57.625 | 0.00 | 0.00 |
| ATOM | 7973 | C    | ALA | X | 522 | 49.035 | 23.433 | 59.031 | 0.00 | 0.00 |
| ATOM | 7974 | O    | ALA | X | 522 | 48.976 | 24.231 | 59.993 | 0.00 | 0.00 |
| ATOM | 7975 | N    | GLN | X | 523 | 49.955 | 22.526 | 58.950 | 0.00 | 0.00 |
| ATOM | 7976 | H    | GLN | X | 523 | 49.946 | 22.085 | 58.041 | 0.00 | 0.00 |
| ATOM | 7977 | CA   | GLN | X | 523 | 51.013 | 22.299 | 59.972 | 0.00 | 0.00 |
| ATOM | 7978 | HA   | GLN | X | 523 | 50.532 | 22.090 | 60.927 | 0.00 | 0.00 |
| ATOM | 7979 | CB   | GLN | X | 523 | 51.807 | 21.045 | 59.575 | 0.00 | 0.00 |
| ATOM | 7980 | HB2  | GLN | X | 523 | 51.074 | 20.248 | 59.446 | 0.00 | 0.00 |
| ATOM | 7981 | HB3  | GLN | X | 523 | 52.278 | 21.180 | 58.601 | 0.00 | 0.00 |
| ATOM | 7982 | CG   | GLN | X | 523 | 52.887 | 20.488 | 60.528 | 0.00 | 0.00 |
| ATOM | 7983 | HG2  | GLN | X | 523 | 53.488 | 21.334 | 60.862 | 0.00 | 0.00 |
| ATOM | 7984 | HG3  | GLN | X | 523 | 52.382 | 20.133 | 61.427 | 0.00 | 0.00 |
| ATOM | 7985 | CD   | GLN | X | 523 | 53.769 | 19.381 | 59.900 | 0.00 | 0.00 |
| ATOM | 7986 | OE1  | GLN | X | 523 | 53.649 | 18.181 | 60.257 | 0.00 | 0.00 |
| ATOM | 7987 | NE2  | GLN | X | 523 | 54.629 | 19.683 | 58.949 | 0.00 | 0.00 |
| ATOM | 7988 | HE21 | GLN | X | 523 | 55.108 | 18.938 | 58.464 | 0.00 | 0.00 |
| ATOM | 7989 | HE22 | GLN | X | 523 | 54.783 | 20.659 | 58.742 | 0.00 | 0.00 |
| ATOM | 7990 | C    | GLN | X | 523 | 52.022 | 23.470 | 60.036 | 0.00 | 0.00 |
| ATOM | 7991 | O    | GLN | X | 523 | 52.470 | 23.925 | 61.082 | 0.00 | 0.00 |
| ATOM | 7992 | N    | ALA | X | 524 | 52.459 | 23.936 | 58.858 | 0.00 | 0.00 |
| ATOM | 7993 | H    | ALA | X | 524 | 52.223 | 23.620 | 57.928 | 0.00 | 0.00 |
| ATOM | 7994 | CA   | ALA | X | 524 | 53.301 | 25.072 | 58.684 | 0.00 | 0.00 |
| ATOM | 7995 | HA   | ALA | X | 524 | 54.206 | 24.866 | 59.255 | 0.00 | 0.00 |
| ATOM | 7996 | CB   | ALA | X | 524 | 53.699 | 25.135 | 57.141 | 0.00 | 0.00 |
| ATOM | 7997 | HB1  | ALA | X | 524 | 54.339 | 26.001 | 56.966 | 0.00 | 0.00 |
| ATOM | 7998 | HB2  | ALA | X | 524 | 52.804 | 25.378 | 56.569 | 0.00 | 0.00 |

|      |      |     |     |   |     |        |        |        |      |      |
|------|------|-----|-----|---|-----|--------|--------|--------|------|------|
| ATOM | 7999 | HB3 | ALA | X | 524 | 54.197 | 24.279 | 56.687 | 0.00 | 0.00 |
| ATOM | 8000 | C   | ALA | X | 524 | 52.781 | 26.397 | 59.277 | 0.00 | 0.00 |
| ATOM | 8001 | O   | ALA | X | 524 | 53.356 | 27.001 | 60.183 | 0.00 | 0.00 |
| ATOM | 8002 | N   | CYX | X | 525 | 51.546 | 26.786 | 58.887 | 0.00 | 0.00 |
| ATOM | 8003 | H   | CYX | X | 525 | 51.151 | 26.261 | 58.120 | 0.00 | 0.00 |
| ATOM | 8004 | CA  | CYX | X | 525 | 50.793 | 27.956 | 59.402 | 0.00 | 0.00 |
| ATOM | 8005 | HA  | CYX | X | 525 | 51.482 | 28.800 | 59.448 | 0.00 | 0.00 |
| ATOM | 8006 | CB  | CYX | X | 525 | 49.504 | 28.137 | 58.618 | 0.00 | 0.00 |
| ATOM | 8007 | HB2 | CYX | X | 525 | 49.031 | 27.155 | 58.590 | 0.00 | 0.00 |
| ATOM | 8008 | HB3 | CYX | X | 525 | 48.933 | 28.911 | 59.129 | 0.00 | 0.00 |
| ATOM | 8009 | SG  | CYX | X | 525 | 49.916 | 28.730 | 56.997 | 0.00 | 0.00 |
| ATOM | 8010 | C   | CYX | X | 525 | 50.313 | 27.783 | 60.885 | 0.00 | 0.00 |
| ATOM | 8011 | O   | CYX | X | 525 | 49.868 | 28.692 | 61.503 | 0.00 | 0.00 |
| ATOM | 8012 | N   | ALA | X | 526 | 50.292 | 26.611 | 61.588 | 0.00 | 0.00 |
| ATOM | 8013 | H   | ALA | X | 526 | 50.425 | 25.782 | 61.026 | 0.00 | 0.00 |
| ATOM | 8014 | CA  | ALA | X | 526 | 50.036 | 26.473 | 62.971 | 0.00 | 0.00 |
| ATOM | 8015 | HA  | ALA | X | 526 | 49.075 | 26.873 | 63.297 | 0.00 | 0.00 |
| ATOM | 8016 | CB  | ALA | X | 526 | 50.079 | 24.956 | 63.282 | 0.00 | 0.00 |
| ATOM | 8017 | HB1 | ALA | X | 526 | 51.060 | 24.559 | 63.545 | 0.00 | 0.00 |
| ATOM | 8018 | HB2 | ALA | X | 526 | 49.587 | 24.354 | 62.517 | 0.00 | 0.00 |
| ATOM | 8019 | HB3 | ALA | X | 526 | 49.516 | 24.828 | 64.206 | 0.00 | 0.00 |
| ATOM | 8020 | C   | ALA | X | 526 | 51.120 | 27.193 | 63.774 | 0.00 | 0.00 |
| ATOM | 8021 | O   | ALA | X | 526 | 50.877 | 27.691 | 64.882 | 0.00 | 0.00 |
| ATOM | 8022 | N   | PHE | X | 527 | 52.323 | 27.257 | 63.267 | 0.00 | 0.00 |
| ATOM | 8023 | H   | PHE | X | 527 | 52.515 | 26.914 | 62.336 | 0.00 | 0.00 |
| ATOM | 8024 | CA  | PHE | X | 527 | 53.507 | 27.855 | 63.919 | 0.00 | 0.00 |
| ATOM | 8025 | HA  | PHE | X | 527 | 53.540 | 27.330 | 64.874 | 0.00 | 0.00 |
| ATOM | 8026 | CB  | PHE | X | 527 | 54.755 | 27.480 | 63.122 | 0.00 | 0.00 |
| ATOM | 8027 | HB2 | PHE | X | 527 | 54.859 | 26.413 | 63.319 | 0.00 | 0.00 |
| ATOM | 8028 | HB3 | PHE | X | 527 | 54.588 | 27.639 | 62.057 | 0.00 | 0.00 |
| ATOM | 8029 | CG  | PHE | X | 527 | 56.089 | 28.084 | 63.591 | 0.00 | 0.00 |
| ATOM | 8030 | CD1 | PHE | X | 527 | 56.760 | 27.523 | 64.715 | 0.00 | 0.00 |
| ATOM | 8031 | HD1 | PHE | X | 527 | 56.351 | 26.778 | 65.382 | 0.00 | 0.00 |
| ATOM | 8032 | CE1 | PHE | X | 527 | 58.069 | 28.007 | 65.102 | 0.00 | 0.00 |
| ATOM | 8033 | HE1 | PHE | X | 527 | 58.602 | 27.693 | 65.987 | 0.00 | 0.00 |
| ATOM | 8034 | CZ  | PHE | X | 527 | 58.638 | 29.028 | 64.294 | 0.00 | 0.00 |
| ATOM | 8035 | HZ  | PHE | X | 527 | 59.677 | 29.238 | 64.499 | 0.00 | 0.00 |
| ATOM | 8036 | CE2 | PHE | X | 527 | 57.978 | 29.452 | 63.115 | 0.00 | 0.00 |
| ATOM | 8037 | HE2 | PHE | X | 527 | 58.590 | 30.053 | 62.458 | 0.00 | 0.00 |
| ATOM | 8038 | CD2 | PHE | X | 527 | 56.656 | 29.072 | 62.834 | 0.00 | 0.00 |
| ATOM | 8039 | HD2 | PHE | X | 527 | 56.111 | 29.455 | 61.984 | 0.00 | 0.00 |
| ATOM | 8040 | C   | PHE | X | 527 | 53.267 | 29.307 | 64.148 | 0.00 | 0.00 |
| ATOM | 8041 | O   | PHE | X | 527 | 53.388 | 29.882 | 65.226 | 0.00 | 0.00 |
| ATOM | 8042 | N   | TRP | X | 528 | 52.868 | 29.933 | 63.069 | 0.00 | 0.00 |
| ATOM | 8043 | H   | TRP | X | 528 | 52.785 | 29.467 | 62.176 | 0.00 | 0.00 |
| ATOM | 8044 | CA  | TRP | X | 528 | 52.543 | 31.346 | 63.035 | 0.00 | 0.00 |
| ATOM | 8045 | HA  | TRP | X | 528 | 53.400 | 31.900 | 63.418 | 0.00 | 0.00 |
| ATOM | 8046 | CB  | TRP | X | 528 | 52.439 | 31.781 | 61.575 | 0.00 | 0.00 |
| ATOM | 8047 | HB2 | TRP | X | 528 | 51.598 | 31.316 | 61.060 | 0.00 | 0.00 |
| ATOM | 8048 | HB3 | TRP | X | 528 | 52.229 | 32.849 | 61.630 | 0.00 | 0.00 |
| ATOM | 8049 | CG  | TRP | X | 528 | 53.724 | 31.626 | 60.806 | 0.00 | 0.00 |
| ATOM | 8050 | CD1 | TRP | X | 528 | 53.887 | 30.778 | 59.757 | 0.00 | 0.00 |
| ATOM | 8051 | HD1 | TRP | X | 528 | 53.078 | 30.233 | 59.294 | 0.00 | 0.00 |
| ATOM | 8052 | NE1 | TRP | X | 528 | 55.181 | 30.779 | 59.272 | 0.00 | 0.00 |
| ATOM | 8053 | HE1 | TRP | X | 528 | 55.371 | 30.396 | 58.357 | 0.00 | 0.00 |
| ATOM | 8054 | CE2 | TRP | X | 528 | 55.928 | 31.622 | 60.087 | 0.00 | 0.00 |
| ATOM | 8055 | CZ2 | TRP | X | 528 | 57.320 | 31.936 | 59.964 | 0.00 | 0.00 |
| ATOM | 8056 | HZ2 | TRP | X | 528 | 57.952 | 31.468 | 59.224 | 0.00 | 0.00 |
| ATOM | 8057 | CH2 | TRP | X | 528 | 57.843 | 32.819 | 60.942 | 0.00 | 0.00 |
| ATOM | 8058 | HH2 | TRP | X | 528 | 58.883 | 33.076 | 60.806 | 0.00 | 0.00 |
| ATOM | 8059 | CZ3 | TRP | X | 528 | 57.044 | 33.344 | 61.933 | 0.00 | 0.00 |
| ATOM | 8060 | HZ3 | TRP | X | 528 | 57.552 | 33.998 | 62.626 | 0.00 | 0.00 |
| ATOM | 8061 | CE3 | TRP | X | 528 | 55.646 | 33.013 | 62.016 | 0.00 | 0.00 |
| ATOM | 8062 | HE3 | TRP | X | 528 | 55.089 | 33.203 | 62.921 | 0.00 | 0.00 |
| ATOM | 8063 | CD2 | TRP | X | 528 | 55.066 | 32.187 | 61.022 | 0.00 | 0.00 |
| ATOM | 8064 | C   | TRP | X | 528 | 51.215 | 31.682 | 63.777 | 0.00 | 0.00 |
| ATOM | 8065 | O   | TRP | X | 528 | 51.114 | 32.739 | 64.384 | 0.00 | 0.00 |

|      |      |      |     |   |     |        |        |        |      |      |
|------|------|------|-----|---|-----|--------|--------|--------|------|------|
| ATOM | 8066 | N    | ASN | X | 529 | 50.230 | 30.776 | 63.733 | 0.00 | 0.00 |
| ATOM | 8067 | H    | ASN | X | 529 | 50.327 | 29.991 | 63.105 | 0.00 | 0.00 |
| ATOM | 8068 | CA   | ASN | X | 529 | 48.899 | 31.033 | 64.261 | 0.00 | 0.00 |
| ATOM | 8069 | HA   | ASN | X | 529 | 48.675 | 32.062 | 63.980 | 0.00 | 0.00 |
| ATOM | 8070 | CB   | ASN | X | 529 | 47.856 | 30.247 | 63.538 | 0.00 | 0.00 |
| ATOM | 8071 | HB2  | ASN | X | 529 | 47.909 | 30.643 | 62.524 | 0.00 | 0.00 |
| ATOM | 8072 | HB3  | ASN | X | 529 | 48.118 | 29.190 | 63.580 | 0.00 | 0.00 |
| ATOM | 8073 | CG   | ASN | X | 529 | 46.364 | 30.338 | 63.989 | 0.00 | 0.00 |
| ATOM | 8074 | OD1  | ASN | X | 529 | 45.864 | 31.312 | 64.553 | 0.00 | 0.00 |
| ATOM | 8075 | ND2  | ASN | X | 529 | 45.632 | 29.243 | 63.788 | 0.00 | 0.00 |
| ATOM | 8076 | HD21 | ASN | X | 529 | 44.631 | 29.235 | 63.924 | 0.00 | 0.00 |
| ATOM | 8077 | HD22 | ASN | X | 529 | 46.117 | 28.423 | 63.451 | 0.00 | 0.00 |
| ATOM | 8078 | C    | ASN | X | 529 | 48.880 | 30.852 | 65.808 | 0.00 | 0.00 |
| ATOM | 8079 | O    | ASN | X | 529 | 48.127 | 31.506 | 66.515 | 0.00 | 0.00 |
| ATOM | 8080 | N    | ARG | X | 530 | 49.538 | 29.814 | 66.294 | 0.00 | 0.00 |
| ATOM | 8081 | H    | ARG | X | 530 | 49.892 | 29.199 | 65.576 | 0.00 | 0.00 |
| ATOM | 8082 | CA   | ARG | X | 530 | 49.405 | 29.291 | 67.713 | 0.00 | 0.00 |
| ATOM | 8083 | HA   | ARG | X | 530 | 48.858 | 30.028 | 68.302 | 0.00 | 0.00 |
| ATOM | 8084 | CB   | ARG | X | 530 | 48.628 | 27.936 | 67.752 | 0.00 | 0.00 |
| ATOM | 8085 | HB2  | ARG | X | 530 | 49.212 | 27.198 | 67.204 | 0.00 | 0.00 |
| ATOM | 8086 | HB3  | ARG | X | 530 | 48.604 | 27.562 | 68.776 | 0.00 | 0.00 |
| ATOM | 8087 | CG   | ARG | X | 530 | 47.238 | 27.954 | 67.107 | 0.00 | 0.00 |
| ATOM | 8088 | HG2  | ARG | X | 530 | 47.259 | 28.002 | 66.019 | 0.00 | 0.00 |
| ATOM | 8089 | HG3  | ARG | X | 530 | 46.810 | 26.981 | 67.346 | 0.00 | 0.00 |
| ATOM | 8090 | CD   | ARG | X | 530 | 46.294 | 29.114 | 67.641 | 0.00 | 0.00 |
| ATOM | 8091 | HD2  | ARG | X | 530 | 46.570 | 29.416 | 68.652 | 0.00 | 0.00 |
| ATOM | 8092 | HD3  | ARG | X | 530 | 46.401 | 30.003 | 67.019 | 0.00 | 0.00 |
| ATOM | 8093 | NE   | ARG | X | 530 | 44.848 | 28.594 | 67.675 | 0.00 | 0.00 |
| ATOM | 8094 | HE   | ARG | X | 530 | 44.721 | 27.646 | 68.001 | 0.00 | 0.00 |
| ATOM | 8095 | CZ   | ARG | X | 530 | 43.781 | 29.171 | 67.157 | 0.00 | 0.00 |
| ATOM | 8096 | NH1  | ARG | X | 530 | 43.820 | 30.283 | 66.503 | 0.00 | 0.00 |
| ATOM | 8097 | HH11 | ARG | X | 530 | 44.716 | 30.739 | 66.402 | 0.00 | 0.00 |
| ATOM | 8098 | HH12 | ARG | X | 530 | 43.103 | 30.349 | 65.795 | 0.00 | 0.00 |
| ATOM | 8099 | NH2  | ARG | X | 530 | 42.542 | 28.610 | 67.208 | 0.00 | 0.00 |
| ATOM | 8100 | HH21 | ARG | X | 530 | 42.414 | 27.775 | 67.761 | 0.00 | 0.00 |
| ATOM | 8101 | HH22 | ARG | X | 530 | 41.790 | 29.070 | 66.715 | 0.00 | 0.00 |
| ATOM | 8102 | C    | ARG | X | 530 | 50.700 | 29.146 | 68.522 | 0.00 | 0.00 |
| ATOM | 8103 | O    | ARG | X | 530 | 50.546 | 29.194 | 69.723 | 0.00 | 0.00 |
| ATOM | 8104 | N    | PHE | X | 531 | 51.877 | 28.893 | 67.954 | 0.00 | 0.00 |
| ATOM | 8105 | H    | PHE | X | 531 | 51.936 | 28.620 | 66.983 | 0.00 | 0.00 |
| ATOM | 8106 | CA   | PHE | X | 531 | 53.122 | 28.769 | 68.727 | 0.00 | 0.00 |
| ATOM | 8107 | HA   | PHE | X | 531 | 52.901 | 28.415 | 69.734 | 0.00 | 0.00 |
| ATOM | 8108 | CB   | PHE | X | 531 | 54.092 | 27.749 | 68.112 | 0.00 | 0.00 |
| ATOM | 8109 | HB2  | PHE | X | 531 | 53.486 | 26.846 | 68.191 | 0.00 | 0.00 |
| ATOM | 8110 | HB3  | PHE | X | 531 | 54.227 | 27.896 | 67.040 | 0.00 | 0.00 |
| ATOM | 8111 | CG   | PHE | X | 531 | 55.450 | 27.550 | 68.797 | 0.00 | 0.00 |
| ATOM | 8112 | CD1  | PHE | X | 531 | 56.539 | 28.239 | 68.327 | 0.00 | 0.00 |
| ATOM | 8113 | HD1  | PHE | X | 531 | 56.357 | 28.770 | 67.404 | 0.00 | 0.00 |
| ATOM | 8114 | CE1  | PHE | X | 531 | 57.784 | 28.237 | 68.995 | 0.00 | 0.00 |
| ATOM | 8115 | HE1  | PHE | X | 531 | 58.673 | 28.710 | 68.606 | 0.00 | 0.00 |
| ATOM | 8116 | CZ   | PHE | X | 531 | 57.927 | 27.381 | 70.067 | 0.00 | 0.00 |
| ATOM | 8117 | HZ   | PHE | X | 531 | 58.919 | 27.300 | 70.487 | 0.00 | 0.00 |
| ATOM | 8118 | CE2  | PHE | X | 531 | 56.781 | 26.694 | 70.565 | 0.00 | 0.00 |
| ATOM | 8119 | HE2  | PHE | X | 531 | 56.834 | 26.021 | 71.408 | 0.00 | 0.00 |
| ATOM | 8120 | CD2  | PHE | X | 531 | 55.593 | 26.738 | 69.953 | 0.00 | 0.00 |
| ATOM | 8121 | HD2  | PHE | X | 531 | 54.708 | 26.213 | 70.280 | 0.00 | 0.00 |
| ATOM | 8122 | C    | PHE | X | 531 | 53.857 | 30.119 | 68.860 | 0.00 | 0.00 |
| ATOM | 8123 | O    | PHE | X | 531 | 54.261 | 30.470 | 69.971 | 0.00 | 0.00 |
| ATOM | 8124 | N    | LEU | X | 532 | 54.164 | 30.914 | 67.829 | 0.00 | 0.00 |
| ATOM | 8125 | H    | LEU | X | 532 | 53.927 | 30.600 | 66.899 | 0.00 | 0.00 |
| ATOM | 8126 | CA   | LEU | X | 532 | 54.806 | 32.249 | 67.988 | 0.00 | 0.00 |
| ATOM | 8127 | HA   | LEU | X | 532 | 55.771 | 32.172 | 68.489 | 0.00 | 0.00 |
| ATOM | 8128 | CB   | LEU | X | 532 | 55.021 | 32.861 | 66.610 | 0.00 | 0.00 |
| ATOM | 8129 | HB2  | LEU | X | 532 | 54.481 | 32.228 | 65.906 | 0.00 | 0.00 |
| ATOM | 8130 | HB3  | LEU | X | 532 | 54.512 | 33.824 | 66.557 | 0.00 | 0.00 |
| ATOM | 8131 | CG   | LEU | X | 532 | 56.404 | 32.978 | 66.070 | 0.00 | 0.00 |
| ATOM | 8132 | HG   | LEU | X | 532 | 56.329 | 33.556 | 65.149 | 0.00 | 0.00 |

|      |      |      |     |   |     |        |        |        |      |      |
|------|------|------|-----|---|-----|--------|--------|--------|------|------|
| ATOM | 8133 | CD1  | LEU | X | 532 | 57.256 | 33.893 | 66.814 | 0.00 | 0.00 |
| ATOM | 8134 | HD11 | LEU | X | 532 | 57.480 | 33.599 | 67.839 | 0.00 | 0.00 |
| ATOM | 8135 | HD12 | LEU | X | 532 | 56.837 | 34.899 | 66.827 | 0.00 | 0.00 |
| ATOM | 8136 | HD13 | LEU | X | 532 | 58.174 | 33.941 | 66.228 | 0.00 | 0.00 |
| ATOM | 8137 | CD2  | LEU | X | 532 | 57.139 | 31.646 | 65.840 | 0.00 | 0.00 |
| ATOM | 8138 | HD21 | LEU | X | 532 | 56.419 | 30.849 | 65.657 | 0.00 | 0.00 |
| ATOM | 8139 | HD22 | LEU | X | 532 | 57.830 | 31.762 | 65.005 | 0.00 | 0.00 |
| ATOM | 8140 | HD23 | LEU | X | 532 | 57.760 | 31.390 | 66.699 | 0.00 | 0.00 |
| ATOM | 8141 | C    | LEU | X | 532 | 53.974 | 33.173 | 68.872 | 0.00 | 0.00 |
| ATOM | 8142 | O    | LEU | X | 532 | 54.613 | 33.691 | 69.835 | 0.00 | 0.00 |
| ATOM | 8143 | N    | PRO | X | 533 | 52.678 | 33.456 | 68.625 | 0.00 | 0.00 |
| ATOM | 8144 | CD   | PRO | X | 533 | 51.869 | 32.850 | 67.504 | 0.00 | 0.00 |
| ATOM | 8145 | HD2  | PRO | X | 533 | 51.443 | 31.932 | 67.908 | 0.00 | 0.00 |
| ATOM | 8146 | HD3  | PRO | X | 533 | 52.378 | 32.839 | 66.540 | 0.00 | 0.00 |
| ATOM | 8147 | CG   | PRO | X | 533 | 50.735 | 33.833 | 67.286 | 0.00 | 0.00 |
| ATOM | 8148 | HG2  | PRO | X | 533 | 49.915 | 33.397 | 66.716 | 0.00 | 0.00 |
| ATOM | 8149 | HG3  | PRO | X | 533 | 51.016 | 34.770 | 66.805 | 0.00 | 0.00 |
| ATOM | 8150 | CB   | PRO | X | 533 | 50.450 | 34.127 | 68.804 | 0.00 | 0.00 |
| ATOM | 8151 | HB2  | PRO | X | 533 | 49.983 | 33.228 | 69.208 | 0.00 | 0.00 |
| ATOM | 8152 | HB3  | PRO | X | 533 | 49.852 | 35.035 | 68.880 | 0.00 | 0.00 |
| ATOM | 8153 | CA   | PRO | X | 533 | 51.836 | 34.352 | 69.427 | 0.00 | 0.00 |
| ATOM | 8154 | HA   | PRO | X | 533 | 52.099 | 35.377 | 69.167 | 0.00 | 0.00 |
| ATOM | 8155 | C    | PRO | X | 533 | 51.803 | 34.128 | 70.917 | 0.00 | 0.00 |
| ATOM | 8156 | O    | PRO | X | 533 | 51.556 | 35.046 | 71.638 | 0.00 | 0.00 |
| ATOM | 8157 | N    | LYS | X | 534 | 51.996 | 32.847 | 71.348 | 0.00 | 0.00 |
| ATOM | 8158 | H    | LYS | X | 534 | 51.821 | 32.063 | 70.736 | 0.00 | 0.00 |
| ATOM | 8159 | CA   | LYS | X | 534 | 52.212 | 32.533 | 72.788 | 0.00 | 0.00 |
| ATOM | 8160 | HA   | LYS | X | 534 | 51.503 | 33.108 | 73.383 | 0.00 | 0.00 |
| ATOM | 8161 | CB   | LYS | X | 534 | 52.011 | 31.034 | 73.034 | 0.00 | 0.00 |
| ATOM | 8162 | HB2  | LYS | X | 534 | 50.976 | 30.720 | 72.895 | 0.00 | 0.00 |
| ATOM | 8163 | HB3  | LYS | X | 534 | 52.583 | 30.437 | 72.324 | 0.00 | 0.00 |
| ATOM | 8164 | CG   | LYS | X | 534 | 52.252 | 30.596 | 74.499 | 0.00 | 0.00 |
| ATOM | 8165 | HG2  | LYS | X | 534 | 53.181 | 31.077 | 74.805 | 0.00 | 0.00 |
| ATOM | 8166 | HG3  | LYS | X | 534 | 51.415 | 30.882 | 75.136 | 0.00 | 0.00 |
| ATOM | 8167 | CD   | LYS | X | 534 | 52.426 | 29.068 | 74.493 | 0.00 | 0.00 |
| ATOM | 8168 | HD2  | LYS | X | 534 | 53.111 | 28.645 | 73.759 | 0.00 | 0.00 |
| ATOM | 8169 | HD3  | LYS | X | 534 | 52.891 | 28.875 | 75.460 | 0.00 | 0.00 |
| ATOM | 8170 | CE   | LYS | X | 534 | 51.070 | 28.257 | 74.194 | 0.00 | 0.00 |
| ATOM | 8171 | HE2  | LYS | X | 534 | 50.609 | 28.749 | 73.338 | 0.00 | 0.00 |
| ATOM | 8172 | HE3  | LYS | X | 534 | 51.274 | 27.212 | 73.960 | 0.00 | 0.00 |
| ATOM | 8173 | NZ   | LYS | X | 534 | 50.202 | 28.250 | 75.330 | 0.00 | 0.00 |
| ATOM | 8174 | HZ1  | LYS | X | 534 | 49.906 | 29.144 | 75.695 | 0.00 | 0.00 |
| ATOM | 8175 | HZ2  | LYS | X | 534 | 49.346 | 27.763 | 75.106 | 0.00 | 0.00 |
| ATOM | 8176 | HZ3  | LYS | X | 534 | 50.632 | 27.741 | 76.089 | 0.00 | 0.00 |
| ATOM | 8177 | C    | LYS | X | 534 | 53.612 | 32.974 | 73.253 | 0.00 | 0.00 |
| ATOM | 8178 | O    | LYS | X | 534 | 53.666 | 33.604 | 74.310 | 0.00 | 0.00 |
| ATOM | 8179 | N    | LEU | X | 535 | 54.707 | 32.732 | 72.518 | 0.00 | 0.00 |
| ATOM | 8180 | H    | LEU | X | 535 | 54.629 | 32.382 | 71.574 | 0.00 | 0.00 |
| ATOM | 8181 | CA   | LEU | X | 535 | 56.015 | 33.363 | 72.892 | 0.00 | 0.00 |
| ATOM | 8182 | HA   | LEU | X | 535 | 56.405 | 33.083 | 73.871 | 0.00 | 0.00 |
| ATOM | 8183 | CB   | LEU | X | 535 | 57.070 | 32.669 | 72.020 | 0.00 | 0.00 |
| ATOM | 8184 | HB2  | LEU | X | 535 | 57.035 | 31.594 | 72.196 | 0.00 | 0.00 |
| ATOM | 8185 | HB3  | LEU | X | 535 | 56.807 | 32.939 | 70.997 | 0.00 | 0.00 |
| ATOM | 8186 | CG   | LEU | X | 535 | 58.492 | 33.241 | 72.255 | 0.00 | 0.00 |
| ATOM | 8187 | HG   | LEU | X | 535 | 58.517 | 34.323 | 72.119 | 0.00 | 0.00 |
| ATOM | 8188 | CD1  | LEU | X | 535 | 59.049 | 32.948 | 73.615 | 0.00 | 0.00 |
| ATOM | 8189 | HD11 | LEU | X | 535 | 60.127 | 33.105 | 73.643 | 0.00 | 0.00 |
| ATOM | 8190 | HD12 | LEU | X | 535 | 58.722 | 31.949 | 73.907 | 0.00 | 0.00 |
| ATOM | 8191 | HD13 | LEU | X | 535 | 58.683 | 33.755 | 74.249 | 0.00 | 0.00 |
| ATOM | 8192 | CD2  | LEU | X | 535 | 59.443 | 32.645 | 71.174 | 0.00 | 0.00 |
| ATOM | 8193 | HD21 | LEU | X | 535 | 59.000 | 32.985 | 70.238 | 0.00 | 0.00 |
| ATOM | 8194 | HD22 | LEU | X | 535 | 60.452 | 33.032 | 71.314 | 0.00 | 0.00 |
| ATOM | 8195 | HD23 | LEU | X | 535 | 59.261 | 31.571 | 71.207 | 0.00 | 0.00 |
| ATOM | 8196 | C    | LEU | X | 535 | 56.016 | 34.899 | 72.851 | 0.00 | 0.00 |
| ATOM | 8197 | O    | LEU | X | 535 | 56.718 | 35.480 | 73.672 | 0.00 | 0.00 |
| ATOM | 8198 | N    | LEU | X | 536 | 55.319 | 35.521 | 71.845 | 0.00 | 0.00 |
| ATOM | 8199 | H    | LEU | X | 536 | 54.914 | 34.944 | 71.121 | 0.00 | 0.00 |

|      |      |      |     |   |     |        |        |        |      |      |
|------|------|------|-----|---|-----|--------|--------|--------|------|------|
| ATOM | 8200 | CA   | LEU | X | 536 | 55.381 | 36.979 | 71.720 | 0.00 | 0.00 |
| ATOM | 8201 | HA   | LEU | X | 536 | 56.423 | 37.300 | 71.721 | 0.00 | 0.00 |
| ATOM | 8202 | CB   | LEU | X | 536 | 54.774 | 37.243 | 70.331 | 0.00 | 0.00 |
| ATOM | 8203 | HB2  | LEU | X | 536 | 53.783 | 36.813 | 70.180 | 0.00 | 0.00 |
| ATOM | 8204 | HB3  | LEU | X | 536 | 54.570 | 38.314 | 70.350 | 0.00 | 0.00 |
| ATOM | 8205 | CG   | LEU | X | 536 | 55.715 | 36.991 | 69.040 | 0.00 | 0.00 |
| ATOM | 8206 | HG   | LEU | X | 536 | 56.219 | 36.039 | 69.202 | 0.00 | 0.00 |
| ATOM | 8207 | CD1  | LEU | X | 536 | 54.852 | 36.870 | 67.774 | 0.00 | 0.00 |
| ATOM | 8208 | HD11 | LEU | X | 536 | 54.553 | 37.835 | 67.364 | 0.00 | 0.00 |
| ATOM | 8209 | HD12 | LEU | X | 536 | 54.043 | 36.153 | 67.912 | 0.00 | 0.00 |
| ATOM | 8210 | HD13 | LEU | X | 536 | 55.489 | 36.523 | 66.961 | 0.00 | 0.00 |
| ATOM | 8211 | CD2  | LEU | X | 536 | 56.891 | 38.041 | 69.041 | 0.00 | 0.00 |
| ATOM | 8212 | HD21 | LEU | X | 536 | 56.407 | 39.007 | 68.893 | 0.00 | 0.00 |
| ATOM | 8213 | HD22 | LEU | X | 536 | 57.438 | 38.101 | 69.982 | 0.00 | 0.00 |
| ATOM | 8214 | HD23 | LEU | X | 536 | 57.602 | 37.872 | 68.233 | 0.00 | 0.00 |
| ATOM | 8215 | C    | LEU | X | 536 | 54.547 | 37.687 | 72.821 | 0.00 | 0.00 |
| ATOM | 8216 | O    | LEU | X | 536 | 54.875 | 38.837 | 73.092 | 0.00 | 0.00 |
| ATOM | 8217 | N    | SER | X | 537 | 53.542 | 37.095 | 73.410 | 0.00 | 0.00 |
| ATOM | 8218 | H    | SER | X | 537 | 53.015 | 36.275 | 73.147 | 0.00 | 0.00 |
| ATOM | 8219 | CA   | SER | X | 537 | 52.950 | 37.790 | 74.556 | 0.00 | 0.00 |
| ATOM | 8220 | HA   | SER | X | 537 | 53.113 | 38.866 | 74.492 | 0.00 | 0.00 |
| ATOM | 8221 | CB   | SER | X | 537 | 51.488 | 37.597 | 74.598 | 0.00 | 0.00 |
| ATOM | 8222 | HB2  | SER | X | 537 | 51.013 | 38.046 | 75.470 | 0.00 | 0.00 |
| ATOM | 8223 | HB3  | SER | X | 537 | 51.137 | 37.986 | 73.642 | 0.00 | 0.00 |
| ATOM | 8224 | OG   | SER | X | 537 | 51.157 | 36.293 | 74.841 | 0.00 | 0.00 |
| ATOM | 8225 | HG   | SER | X | 537 | 50.475 | 36.031 | 74.218 | 0.00 | 0.00 |
| ATOM | 8226 | C    | SER | X | 537 | 53.564 | 37.323 | 75.911 | 0.00 | 0.00 |
| ATOM | 8227 | O    | SER | X | 537 | 53.000 | 37.611 | 76.944 | 0.00 | 0.00 |
| ATOM | 8228 | N    | ALA | X | 538 | 54.707 | 36.571 | 75.903 | 0.00 | 0.00 |
| ATOM | 8229 | H    | ALA | X | 538 | 55.159 | 36.358 | 75.025 | 0.00 | 0.00 |
| ATOM | 8230 | CA   | ALA | X | 538 | 55.262 | 35.884 | 77.116 | 0.00 | 0.00 |
| ATOM | 8231 | HA   | ALA | X | 538 | 54.405 | 35.607 | 77.730 | 0.00 | 0.00 |
| ATOM | 8232 | CB   | ALA | X | 538 | 56.064 | 34.653 | 76.650 | 0.00 | 0.00 |
| ATOM | 8233 | HB1  | ALA | X | 538 | 56.266 | 34.029 | 77.520 | 0.00 | 0.00 |
| ATOM | 8234 | HB2  | ALA | X | 538 | 56.948 | 35.030 | 76.136 | 0.00 | 0.00 |
| ATOM | 8235 | HB3  | ALA | X | 538 | 55.524 | 34.071 | 75.902 | 0.00 | 0.00 |
| ATOM | 8236 | C    | ALA | X | 538 | 56.109 | 36.767 | 78.041 | 0.00 | 0.00 |
| ATOM | 8237 | O    | ALA | X | 538 | 56.614 | 36.328 | 79.087 | 0.00 | 0.00 |
| ATOM | 8238 | N    | THR | X | 539 | 56.276 | 38.025 | 77.614 | 0.00 | 0.00 |
| ATOM | 8239 | H    | THR | X | 539 | 55.931 | 38.315 | 76.709 | 0.00 | 0.00 |
| ATOM | 8240 | CA   | THR | X | 539 | 57.136 | 39.000 | 78.264 | 0.00 | 0.00 |
| ATOM | 8241 | HA   | THR | X | 539 | 57.164 | 38.794 | 79.334 | 0.00 | 0.00 |
| ATOM | 8242 | CB   | THR | X | 539 | 58.597 | 38.998 | 77.761 | 0.00 | 0.00 |
| ATOM | 8243 | HB   | THR | X | 539 | 58.643 | 39.165 | 76.685 | 0.00 | 0.00 |
| ATOM | 8244 | CG2  | THR | X | 539 | 59.392 | 40.061 | 78.419 | 0.00 | 0.00 |
| ATOM | 8245 | HG21 | THR | X | 539 | 59.194 | 40.042 | 79.490 | 0.00 | 0.00 |
| ATOM | 8246 | HG22 | THR | X | 539 | 59.121 | 41.061 | 78.077 | 0.00 | 0.00 |
| ATOM | 8247 | HG23 | THR | X | 539 | 60.453 | 39.853 | 78.283 | 0.00 | 0.00 |
| ATOM | 8248 | OG1  | THR | X | 539 | 59.294 | 37.873 | 78.157 | 0.00 | 0.00 |
| ATOM | 8249 | HG1  | THR | X | 539 | 59.421 | 37.287 | 77.408 | 0.00 | 0.00 |
| ATOM | 8250 | C    | THR | X | 539 | 56.574 | 40.371 | 78.252 | 0.00 | 0.00 |
| ATOM | 8251 | O    | THR | X | 539 | 56.624 | 41.024 | 77.177 | 0.00 | 0.00 |
| ATOM | 8252 | OXT  | THR | X | 539 | 55.929 | 40.797 | 79.288 | 0.00 | 0.00 |

END
